# Supplementary material
Source: PubMed Central journal article supplement (PMC3592360)
Supplement: NIHMS341489-supplement-1.pdf [file NIHMS341489-supplement-1.pdf]

**Analytical and Bioanalytical Chemistry**

**Electronic Supplementary Material**

**Increasing phosphoproteomic coverage through sequential digestion by complementary proteases**

Jason M. Gilmore, Arminja N. Kettenbach, and Scott A. Gerber

**Fig. S1** Distribution of detected phosphorylation sites across SCX fraction. Grey bars indicate the total count of unique phosphorylated residues detected by fraction. Red bars indicate the number of these which were not detected in the corresponding fraction of a trypsin based replicate analysis (TrypA). Results are shown for (a) Glu-C, (b) GSPT, (c) TrypB, (d) GPST, and (e) GPTS workflows

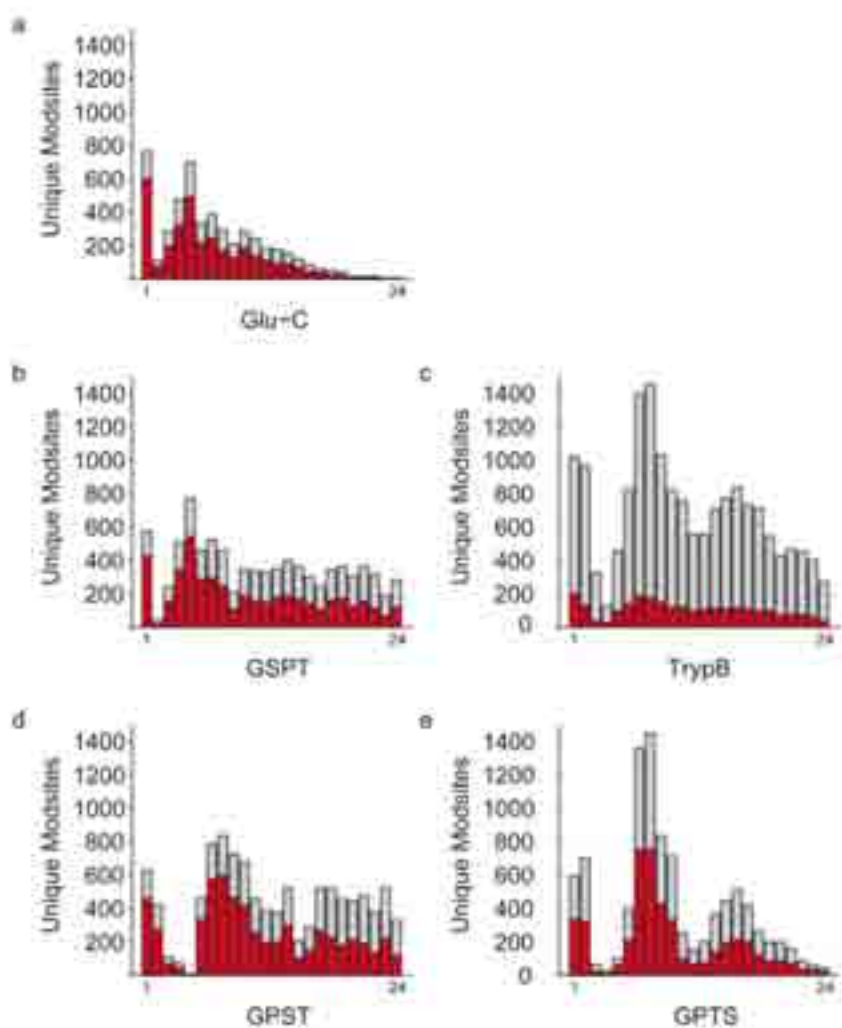

**Table S1:** Peptide identification information for Glu-C workflow. SCX fraction number, protein reference, peptide sequence, phosphorylation localization, charge state, and SEQUEST scoring metrics (cross correlation, delta correlation, and ppm) are provided. Reverse hits that pass filters are included and used to maintain <1% false positive rate.

| Fraction | Ref                | Sequence                              | ModSite        | Charge | XCorr  | dCn   | PPM    |
|----------|--------------------|---------------------------------------|----------------|--------|--------|-------|--------|
| 1        | Q14C86 GAPD1_HUMAN | E.LES#CSGLGST#SDDTDVRE.V              | S740:T747      | 2      | 6,1241 | 1     | 0,468  |
| 1        | Q9UHR4 BI2L1_HUMAN | E.IKT#PASTPVSGT#PQAS#PMIE.R           | T248:T257:S261 | 2      | 5,673  | 1     | 0,65   |
| 1        | Q96JS3 PGBD1_HUMAN | E.LLQGLSFS#GDS#DVEKDNEPE.I            | S360:S363      | 2      | 5,6707 | 0,486 | 0,626  |
| 1        | Q8WXI9 P66B_HUMAN  | R.GRLT#PS#PDIIVLS#DNE.A               | T120:S122:S129 | 2      | 5,6508 | 0,412 | 0,993  |
| 1        | Q8WXI9 P66B_HUMAN  | R.GRLT#PS#PDIIVLSDNE.A                | T120:S122      | 2      | 5,5097 | 0,404 | 0,388  |
| 1        | Q9Y6A5 TACC3_HUMAN | E.NQMVS#PGKVSGS#PEQAVEE.N             | S170:S177      | 2      | 5,4554 | 0,472 | 0,343  |
| 1        | Q9UQ35 SRRM2_HUMAN | E.MSTSNFES#S#PEVEERPAVSLTDQSQSQASLE.A | S1270:S1271    | 3      | 5,4439 | 1     | 1,105  |
| 1        | Q9NRM2 ZN277_HUMAN | E.NDTLLCTL#DSESDLTAEQNE.N             | S399           | 3      | 5,4099 | 0,373 | 0,428  |
| 1        | Q02952 AKA12_HUMAN | E.MVSAVSQLTDS#PDTTEEAT#PVQE.V         | S1012:T1020    | 3      | 5,2956 | 0,327 | 0,705  |
| 1        | P46821 MAP1B_HUMAN | E.VVS#PSQSVTGSAGHTPYQYQS#PTDE.K       | S1322:S1339    | 2      | 5,2766 | 1     | 1,195  |
| 1        | Q9UIF9 BAZ2A_HUMAN | E.SVLQDNSFDLNNGS#DAEQEE.M             | S363           | 2      | 5,2747 | 0,561 | 0,959  |
| 1        | P30622 CLIP1_HUMAN | E.AALNGNGDDLNNYDS#DDQE.K              | S1353          | 2      | 5,2577 | 0,57  | 0,345  |
| 1        | Q14671 PUM1_HUMAN  | E.VNSVLS#PRS#ESGGLGVSM*VE.Y           | S209:S212      | 2      | 5,2548 | 0,464 | 0,672  |
| 1        | Q92598 HS105_HUMAN | E.AGTQPQVQTDAQQTSQSPPS#PE.L           | S557           | 2      | 5,2539 | 0,549 | 0,207  |
| 1        | Q9Y6A5 TACC3_HUMAN | E.NQM*VS#PGKVSGS#PEQAVEE.N            | S170:S177      | 2      | 5,1923 | 0,444 | 0,795  |
| 1        | P22314 UBA1_HUMAN  | E.LQS#ANAS#VDDSRLEE.L                 | S816:S820      | 2      | 5,1869 | 0,549 | -0,068 |
| 1        | P49281 NRAM2_HUMAN | E.LYLLNTM*DADS#LVS#R.-                | S564:S567      | 2      | 5,1825 | 0,52  | 0,517  |
| 1        | Q6P0N0 CN106_HUMAN | E.SVDS#ADEQFQNTNAE.T                  | S275           | 2      | 5,1391 | 0,563 | 0      |
| 1        | P21127 CD2L1_HUMAN | E.GDYVPDS#PALS#PIELKQE.L              | S410:S414      | 2      | 5,113  | 0,51  | 0,691  |
| 1        | Q9UBL3 ASH2L_HUMAN | E.GAGDTSEVM*DTQAGS#VDEE.N             | S101           | 2      | 5,1069 | 0,528 | 0,122  |
| 1        | Q9ULW0 TPX2_HUMAN  | E.GLSGS#LVQEPFLATE.K                  | S654           | 2      | 5,0856 | 0,477 | 0,556  |
| 1        | Q14C86 GAPD1_HUMAN | E.LESCS#GLGS#TSDDTDVRE.V              | S742:S746      | 2      | 5,0664 | 1     | 0,234  |
| 1        | Q9Y3F4 STRAP_HUMAN | E.LEEIAS#ENS#DCIFPSAPDVKA.-           | S335:S338      | 3      | 5,0362 | 0,401 | 0,746  |
| 1        | Q9NRM2 ZN277_HUMAN | E.NDTLLCTL#DSESDLTAEQNE.N             | S399           | 2      | 5,0167 | 0,42  | 0,667  |
| 1        | Q12888 TP53B_HUMAN | E.TSVIS#IDS#PQKLAILDQE.L              | S724:S727      | 2      | 4,999  | 0,274 | 0,807  |
| 1        | Q8TB72 PUM2_HUMAN  | E.VNAILS#PRS#ESGGLGVSM*VE.Y           | S82:S85        | 2      | 4,9443 | 0,434 | 0,784  |
| 1        | Q9Y4E8 UBP15_HUMAN | E.NSQSEDSVGGDNDS#ENGLCTE.D            | S690           | 2      | 4,9304 | 0,452 | 0,319  |
| 1        | Q12888 TP53B_HUMAN | E.T#SVISIDS#PQKLAILDQE.L              | T720:S727      | 2      | 4,9269 | 0,385 | 0,461  |
| 1        | P12270 TPR_HUMAN   | E.SGGRS#VPTT#PLQVAAPVTVFTE.S          | S2196:T2200    | 2      | 4,9192 | 0,546 | 0,514  |
| 1        | O95155 UBE4B_HUMAN | E.TQSQSL#RSQS#MDIDGVSCE.K             | S101:S105      | 2      | 4,8934 | 1     | 0,206  |
| 1        | Q14C86 GAPD1_HUMAN | E.VSS#RPST#PGLSVVSGISATSE.D           | S758:T762      | 2      | 4,8894 | 1     | 0,672  |
| 1        | Q9H0H5 RGAP1_HUMAN | E.SGSILS#DIS#FDKTDE.S                 | S154:S157      | 2      | 4,8833 | 0,515 | 0,275  |
| 1        | Q6NZI2 PTRF_HUMAN  | E.ITEESDAVLVDKS#DS#D.-                | S387:S389      | 2      | 4,864  | 0,446 | 0,259  |
| 1        | Q02952 AKA12_HUMAN | E.M*VSAVSQLTDSPTTEEAT#PVQE.V          | T1020          | 3      | 4,8606 | 0,431 | 0,506  |
| 1        | Q15424 SAFB1_HUMAN | E.TINNLDTS#SDFILQE.I                  | S196           | 2      | 4,8503 | 0,445 | 0,925  |

|   |                     |                                   |                   |   |        |       |        |
|---|---------------------|-----------------------------------|-------------------|---|--------|-------|--------|
| 1 | Q9H6Z4 RANB3_HUMAN  | E.NAAAES#GSESS#SQEATPEKE.S        | S353:S358         | 2 | 4,7903 | 1     | 0,113  |
| 1 | Q9P2G1 AKIB1_HUMAN  | E.NILAGEAAS#QAGDSGNE.A            | S1053             | 2 | 4,7725 | 0,521 | 0,58   |
| 1 | Q7Z3K3 POGZ_HUMAN   | E.GAECLNVDDQDEGS#PVTQEPE.L        | S949              | 2 | 4,7609 | 0,568 | 0,824  |
| 1 | P19338 NUCL_HUMAN   | E.IEPAAMKAAAAAPAS#EDED.D          | S184              | 2 | 4,747  | 0,567 | 0,238  |
| 1 | Q9UQ35 SRRM2_HUMAN  | E.LSNS#PLRENS#FGS#PLEFRNSGPLGTE.M | S1320:S1326:S1329 | 3 | 4,7361 | 0,424 | 0,661  |
| 1 | O95155 UBE4B_HUMAN  | E.TQSQSLS#RSQS#M*DIRGVSCE.K       | S101:S105         | 2 | 4,7313 | 1     | 0,51   |
| 1 | Q96RT1 LAP2_HUMAN   | E.NFNSSLQNGDILNSS#TEE.K           | S715              | 2 | 4,7215 | 0,496 | 0,47   |
| 1 | Q96TA1 NIBL1_HUMAN  | E.VGLPFEASPES#PPPAS#PDGVTE.I      | S628:S633         | 3 | 4,7148 | 0,451 | 0,704  |
| 1 | Q14444 CAPR1_HUMAN  | E.AAS#APAVEDQVPEAEPEAE.Y          | S264              | 3 | 4,6983 | 0,396 | 0,826  |
| 1 | Q92598 HS105_HUMAN  | E.AGTQPQVQTDAQQTSQS#PPSPE.L       | S554              | 3 | 4,6845 | 0,458 | -0,077 |
| 1 | A4LAA3 A4LAA3_HUMAN | E.TVDQNS#DS#DEM*LAILKE.V          | S729:S731         | 2 | 4,6584 | 0,307 | 0,586  |
| 1 | O95835 LATS1_HUMAN  | E.YINSQGESEQS#DEDDQNTGSE.I        | S1111             | 2 | 4,6116 | 0,467 | 0,202  |
| 1 | Q9GZR1 SENP6_HUMAN  | E.SIS#PQPADSACSS#PAPSTGKVE.A      | S352:S362         | 2 | 4,582  | 1     | 0,314  |
| 1 | P19338 NUCL_HUMAN   | E.IEPAAM*KAAAAAPAS#EDED.D         | S184              | 2 | 4,5738 | 0,52  | 0,125  |
| 1 | P27816 MAP4_HUMAN   | E.SLQDVGQSAAPTFM*IS#PE.T          | S624              | 2 | 4,5727 | 0,536 | 0,804  |
| 1 | Q6PKG0 LARP1_HUMAN  | E.TES#APGS#PRAVT#PVPKTEE.V        | S517:S521:T526    | 3 | 4,5549 | 0,251 | 0,239  |
| 1 | P52597 HNRPF_HUMAN  | E.SQSVSGCYGAGYSGQNS#M*GGYD.-      | S410              | 2 | 4,5525 | 0,553 | 0,21   |
| 1 | P40425 PBX2_HUMAN   | E.AVTSSVTSPTTEGPGSVHS#DT#SN.-     | S426:T428         | 2 | 4,5378 | 1     | 0,72   |
| 1 | P38398 BRCA1_HUMAN  | E.LLGS#DDS#HDGESE.S               | S395:S398         | 2 | 4,4894 | 0,467 | 0,16   |
| 1 | P19338 NUCL_HUMAN   | E.IEPAAM*KAAAAAPAS#EDED.D         | S184              | 2 | 4,4766 | 0,524 | -0,118 |
| 1 | Q86W92 LIPB1_HUMAN  | D.FAARS#PSAS#ITDEDSNV.-           | S999:S1003        | 2 | 4,4438 | 0,479 | 1,013  |
| 1 | O43166 SI1L1_HUMAN  | E.YGS#TSS#IDKQGTSGE.S             | S208:S211         | 2 | 4,3865 | 1     | 0,073  |
| 1 | Q02952 AKA12_HUMAN  | E.M*VSAVSQLTDSPTD#TEEAT#PVQE.V    | T1015:T1020       | 2 | 4,3801 | 0,486 | 0,467  |
| 1 | P19338 NUCL_HUMAN   | E.IEPAAMKAAAAAPAS#EDE.D           | S184              | 2 | 4,3769 | 0,496 | 0,402  |
| 1 | P17661 DESM_HUMAN   | R.TNEKVELQELNDR.F                 | NA                | 3 | 4,3739 | 0,302 | 0,115  |
| 1 | Q6GYQ0 GRIPE_HUMAN  | E.VAS#LTTLHIDSETSS#LNQQAFSAE.V    | S958:S970         | 3 | 4,3724 | 1     | 0,54   |
| 1 | P12270 TPR_HUMAN    | E.SGGRS#VPTT#PLQVAAPVTVFTE.S      | S2196:T2200       | 3 | 4,3712 | 0,387 | 1,002  |
| 1 | Q9NQ55 SSF1_HUMAN   | E.LLATGAGLS#ES#EAEPDGDHNITE.L     | S238:S240         | 3 | 4,3565 | 0,345 | 0,957  |
| 1 | Q9Y4E8 UBP15_HUMAN  | E.NSQSEDSVGGDNDNS#ENGLCTE.D       | S690              | 3 | 4,3506 | 0,4   | 0,479  |
| 1 | Q9UQ35 SRRM2_HUMAN  | E.NS#FGS#PLEFRNSGPLGTE.M          | S1326:S1329       | 2 | 4,3394 | 0,477 | 0,59   |
| 1 | Q13426 XRCC4_HUMAN  | E.TLRNS#S#PEDLFDEI.-              | S327:S328         | 2 | 4,3369 | 0,292 | 0,544  |
| 1 | Q14C86 GAPD1_HUMAN  | E.LESCSGLGS#TS#DDTDVRE.V          | S746:S748         | 2 | 4,3217 | 1     | 0,584  |
| 1 | Q7Z3K3 POGZ_HUMAN   | E.GAECLNVDDQDEGS#PVTQEPE.L        | S949              | 3 | 4,2998 | 0,492 | 0,695  |
| 1 | P13693 TCTP_HUMAN   | E.GNIDDS#LIGGNASAEGPEGEGTE.S      | S46               | 2 | 4,2931 | 0,641 | 0,86   |
| 1 | P98175 RBM10_HUMAN  | E.LQS#PTHPSALPPATS#PTAQE.S        | S540:S553         | 2 | 4,2797 | 0,198 | 0,214  |
| 1 | Q14160 LAP4_HUMAN   | E.LRS#LEPS#PSPGPQEEDGE.V          | S1575:S1579       | 2 | 4,2696 | 0,313 | 0,468  |
| 1 | P49281 NRAM2_HUMAN  | E.LYLLNTM*DADS#LVS#R.-            | S564:S567         | 3 | 4,2571 | 0,266 | 0,194  |
| 1 | Q8IY92 BTBDC_HUMAN  | E.LFSIIDVDADQEPS#QS#PPRSE.A       | S521:S523         | 3 | 4,2571 | 0,32  | 0,22   |
| 1 | Q6XQN6 PNCB_HUMAN   | R.LQALVNSLCAGQS#P.-               | S537              | 2 | 4,2536 | 0,381 | 0,238  |
| 1 | Q8N163 K1967_HUMAN  | E.DSEVRSVAS#NQS#EM*E.F            | S678:S681         | 2 | 4,2447 | 0,605 | 0,132  |
| 1 | Q9Y6A5 TACC3_HUMAN  | E.SGPGALADLDCS#SSSS#QSPGSSE.N     | S155:S158         | 2 | 4,2321 | 1     | 0,757  |



|   |                     |                                    |                   |   |        |       |        |
|---|---------------------|------------------------------------|-------------------|---|--------|-------|--------|
| 1 | Q02952 AKA12_HUMAN  | E.MVSAVSQLTDS#PDT#TEEAT#PVQE.V     | S1012:T1015:T1020 | 2 | 4,2296 | 1     | 0,821  |
| 1 | Q01433 AMPD2_HUMAN  | E.MLETIPEEAGITMS#PGPQ.-            | S875              | 3 | 4,2289 | 0,337 | 0,092  |
| 1 | Q15154 PCM1_HUMAN   | E.SNSLTSSVYPYPTASLVSNES#ENE.G      | S478              | 3 | 4,226  | 0,215 | 0,628  |
| 1 | Q9UQ35 SRRM2_HUMAN  | E.FSAS#PMLKSGMS#PE.Q               | S1124:S1132       | 2 | 4,2061 | 0,356 | 0,375  |
| 1 | Q02952 AKA12_HUMAN  | E.MVSAVSQLTDS#PDT#TEEAT#PVQE.V     | T1015:T1020       | 2 | 4,2031 | 0,561 | 1,034  |
| 1 | P49792 RBP2_HUMAN   | E.VSS#TSET#TPKAVVS#PPKFVFGSE.S     | S2499:T2503:S2510 | 3 | 4,1718 | 1     | 0,489  |
| 1 | Q01433 AMPD2_HUMAN  | E.MLETIPEEAGITM*S#PGPQ.-           | S875              | 3 | 4,1619 | 0,435 | 0,366  |
| 1 | Q9UKM9 RALY_HUMAN   | E.LEHS#QDT#DADDGALQ.-              | S295:T298         | 2 | 4,1369 | 0,397 | 0,069  |
| 1 | Q8N163 K1967_HUMAN  | E.DSEVRS#VAS#NQS#EME.F             | S675:S678:S681    | 2 | 4,1306 | 0,5   | -0,128 |
| 1 | Q9UQ35 SRRM2_HUMAN  | E.FSAS#PM*LKSGMS#PE.Q              | S1124:S1132       | 2 | 4,1244 | 0,526 | 0,445  |
| 1 | Q96TA1 NIBL1_HUMAN  | E.VGLPFEASPES#PPPAS#PDGVTE.I       | S628:S633         | 2 | 4,1237 | 0,48  | 0,939  |
| 1 | Q9Y3F4 STRAP_HUMAN  | E.IAS#ENS#DCIFPSAPDVKA.-           | S335:S338         | 2 | 4,1183 | 0,502 | 0,352  |
| 1 | Q9H4L7 SMRCD_HUMAN  | E.ATPQPSQPGPSS#PISLS#AE.EE.N       | S34:S39           | 3 | 4,1079 | 0,397 | 0,403  |
| 1 | Q92598 HS105_HUMAN  | E.AGTQPQVQTDAQQTSSQSPS#PE.L        | S557              | 3 | 4,1065 | 0,357 | 0,232  |
| 1 | Q92797 SYMPK_HUMAN  | E.AALLDS#S#LEGPLKE.T               | S1221:S1222       | 2 | 4,0867 | 0,268 | 0,431  |
| 1 | Q9Y3F4 STRAP_HUMAN  | E.LEEIAS#ENS#DCIFPSAPDVKA.-        | S335:S338         | 2 | 4,0798 | 0,434 | 0,697  |
| 1 | P07199 CENPB_HUMAN  | E.AGGS#FGAYGAQEE.A                 | S486              | 2 | 4,0708 | 0,357 | 0,276  |
| 1 | A1L390 PKHG3_HUMAN  | E.SSGQGPPSS#PVALLGQVQDFQQSAE.C     | S1169             | 2 | 4,0688 | 0,491 | 0,88   |
| 1 | Q8N163 K1967_HUMAN  | E.DSEVRS#VAS#NQSEME.F              | S675:S678         | 2 | 4,04   | 0,506 | -0,267 |
| 1 | Q02952 AKA12_HUMAN  | E.M*VSAVSQLTDS#PDT#TEEAT#PVQE.V    | T1016:T1020       | 3 | 4,0307 | 0,333 | 0,701  |
| 1 | Q9H5N1 RABE2_HUMAN  | E.LLPLS#RDPS#PPLEPLEE.L            | S200:S204         | 2 | 4,0227 | 0,42  | 0,592  |
| 1 | P52597 HNRPF_HUMAN  | E.SQSVSGCYGAGYSGQNS#M*GGYD.-       | S410              | 3 | 4,0177 | 0,376 | 0,314  |
| 1 | Q9UHR4 BI2L1_HUMAN  | E.AVTVPPTS#PTPVRIS#TVNLSE.N        | S414:S422         | 2 | 4,0162 | 1     | 0,708  |
| 1 | P40425 PBX2_HUMAN   | E.AVTPSSVTSPTGPGSVHSDT#S#N.-       | T428:S429         | 3 | 3,993  | 0,389 | 0,462  |
| 1 | Q9BUR4 WDR79_HUMAN  | E.FGS#PSELS#PRIEEQE.L              | S85:S90           | 2 | 3,9899 | 0,409 | 0,327  |
| 1 | P12270 TPR_HUMAN    | E.TQVYNQDSQDS#IGE.G                | S1893             | 2 | 3,9878 | 0,473 | 0,22   |
| 1 | Q9UHY1 NRBP_HUMAN   | E.SQTVLS#S#GSDPKVE.S               | S11:S12           | 2 | 3,9656 | 0,339 | 0      |
| 1 | Q9NQX3 GEPH_HUMAN   | E.LEDLPS#PPPPLS#PPPTTS#PHKQTE.D    | S188:S194:S200    | 3 | 3,9619 | 0,372 | 0,653  |
| 1 | O15084 ANR28_HUMAN  | E.YLYTDVDELNDS#DSETY.-             | S1081             | 2 | 3,954  | 0,464 | 0,46   |
| 1 | Q02952 AKA12_HUMAN  | E.GS#PPPCLGQEE.A                   | S1395             | 2 | 3,9468 | 0,325 | 0,098  |
| 1 | P49006 MRP_HUMAN    | E.GGGDSSASS#PTEEEQEQGE.I           | S120              | 2 | 3,945  | 0,385 | -0,249 |
| 1 | P98175 RBM10_HUMAN  | E.LQSPT#HPSSALPPATS#PTAQE.S        | T542:S553         | 2 | 3,9402 | 1     | 0,429  |
| 1 | P38432 P80C_HUMAN   | E.LIDPRLIIES#PSNTS#STEPSA.-        | S566:S571         | 2 | 3,9372 | 1     | 0,53   |
| 1 | Q9BUR4 WDR79_HUMAN  | E.NTSLPAEEANGSL#EEE.A              | S114              | 2 | 3,9283 | 0,473 | 0,657  |
| 1 | Q01433 AMPD2_HUMAN  | E.TIPEEAGITM*S#PGPQ.-              | S875              | 2 | 3,9254 | 0,391 | 0,301  |
| 1 | Q7Z406 MYH14_HUMAN  | E.AQPSSGSPS#PEPEGS#PPAHPQ.-        | S1983:S1989       | 3 | 3,9242 | 0,388 | 0      |
| 1 | O15061 DMN_HUMAN    | E.VSS#PTGFAQSQVLE.D                | S1107             | 2 | 3,923  | 0,295 | 0,319  |
| 1 | P61978 HNRPK_HUMAN  | E.GLQLPS#PTATSQLPLESDAVE.C         | S116              | 2 | 3,9034 | 0,503 | 1,311  |
| 1 | P55265 DSRAD_HUMAN  | E.GM*ISES#LDNLE.S                  | S701              | 2 | 3,8928 | 0,3   | 0,187  |
| 1 | Q9BXJ9 NARG1_HUMAN  | E.DM*KITVNGDS#S#AEAE.E.L           | S855:S856         | 2 | 3,8662 | 0,326 | 0,196  |
| 1 | B2RP63 B2RP63_HUMAN | E.LQRTS#SISGPLS#PAYTGQVPYNYNQL.E.G | S7:S14            | 3 | 3,8578 | 1     | 0,815  |

|   |                    |                                |             |   |        |       |        |
|---|--------------------|--------------------------------|-------------|---|--------|-------|--------|
| 1 | Q96T58  MINT_HUMAN | E.LKT#PPS#VGPPSVTVVTL.S        | T1633:S1636 | 2 | 3,8548 | 0,458 | 0,37   |
| 1 | Q02952 AKA12_HUMAN | E.MVSAVSQLTDS#PD.T             | S1012       | 2 | 3,854  | 0,467 | 0,341  |
| 1 | P27816 MAP4_HUMAN  | E.SLQDVGQSAAPTFM*IS#PE.T       | S624        | 3 | 3,8426 | 0,319 | 0,185  |
| 1 | Q8N163 K1967_HUMAN | E.DSEVRS#VAS#NQSE.M            | S675:S678   | 2 | 3,84   | 0,399 | 0,078  |
| 1 | Q15185 TEBP_HUMAN  | D.S#QDS#DDEKM*PDLE.-           | S148:S151   | 2 | 3,8104 | 0,401 | 0      |
| 1 | P19338 NUCL_HUMAN  | E.IEPAAMKAAAAAPAS#EDED.D       | S184        | 2 | 3,808  | 0,457 | 0,378  |
| 1 | O95232 CROP_HUMAN  | E.VNGTSEDIKS#EGDTQS#N.-        | S425:S431   | 2 | 3,7938 | 0,514 | 0,126  |
| 1 | Q9UMS6 SYNP2_HUMAN | E.AS#SPVSASPVVGIPTS#PKQE.S     | S1041:S1056 | 3 | 3,7931 | 0,312 | 0,333  |
| 1 | Q8TDY2 RBCC1_HUMAN | E.NLS#SPNPISDPQSPE.M           | S746        | 2 | 3,7825 | 0,294 | 0,587  |
| 1 | P11388 TOP2A_HUMAN | E.NTEGS#PQEDGVELE.G            | S1247       | 2 | 3,779  | 0,368 | 0,693  |
| 1 | Q01433 AMPD2_HUMAN | E.M*LETIPEEAGITMS#PGPQ.-       | S875        | 3 | 3,7729 | 0,395 | 0      |
| 1 | Q15185 TEBP_HUMAN  | D.S#QDS#DDEKMPDLE.-            | S148:S151   | 2 | 3,7682 | 0,349 | 0,219  |
| 1 | O14686 MLL2_HUMAN  | E.LPTEPLAEPVPS#PLPLASS#PE.S    | S4673:S4680 | 3 | 3,7607 | 0,245 | 0,305  |
| 1 | Q01433 AMPD2_HUMAN | E.M*LETIPEEAGITM*S#PGPQ.-      | S875        | 3 | 3,7594 | 0,341 | 0,273  |
| 1 | Q02952 AKA12_HUMAN | E.M*VSAVSQLTDS#PDT#TEEATPVQE.V | S1012:T1015 | 2 | 3,7563 | 0,315 | 0,561  |
| 1 | Q96CW6 S7A6O_HUMAN | E.FGYDS#PHDLDS#D.-             | S302:S308   | 2 | 3,7546 | 0,463 | 0,399  |
| 1 | Q9NWF9 RN216_HUMAN | E.DQQLAS#DDEEPGPAFPM*QE.S      | S249        | 2 | 3,752  | 0,499 | 0,333  |
| 1 | Q9NRM2 ZN277_HUMAN | E.NDTLLCTLSDS#ESDLTAQE.QNE.N   | S401        | 2 | 3,7465 | 0,429 | 0,857  |
| 1 | P49792 RBP2_HUMAN  | E.LVGPPLAETVFT#PKTS#PENVD.R    | T1396:S1400 | 2 | 3,7327 | 0,363 | 1,074  |
| 1 | Q8WVT3 TTC15_HUMAN | E.T#ASEGSS#PLADKLE.H           | T50:S56     | 2 | 3,7202 | 0,424 | 0,218  |
| 1 | O75533 SF3B1_HUMAN | E.AQGVGLDS#TGYDQE.I            | S35         | 2 | 3,7147 | 0,343 | 0,435  |
| 1 | Q02952 AKA12_HUMAN | E.MVSAVSQLTDSPTTEEAT#PVQE.V    | T1020       | 3 | 3,7131 | 0,19  | 0,8    |
| 1 | Q9NVE7 PANK4_HUMAN | E.NYAGSSGLM*SAS#PE.L           | S393        | 2 | 3,7129 | 0,397 | 0,083  |
| 1 | Q9NQ57 INCE_HUMAN  | E.IANS#TPNPKPAASSPET#PSAGQQE.A | S411:T424   | 3 | 3,7073 | 0,345 | 0,144  |
| 1 | Q9NQW6 ANLN_HUMAN  | E.MDQALAES#SEEQE.D             | S594        | 2 | 3,7024 | 0,285 | 0,079  |
| 1 | Q15424 SAFB1_HUMAN | E.TLSGLGDSGAAGAAALSSASS#E.T    | S24         | 3 | 3,687  | 0,31  | 0,373  |
| 1 | Q8TEQ6 GEMI5_HUMAN | E.NSGPVENGVS#DQE.G             | S778        | 2 | 3,6764 | 0,409 | 0,086  |
| 1 | P19338 NUCL_HUMAN  | E.IEPAAMKAAAAAPAS#ED.E         | S184        | 2 | 3,6673 | 0,39  | 0,288  |
| 1 | P46100 ATRX_HUMAN  | E.VQSSVDHQGDGS#S#GTEQEVE.S     | S549:S550   | 2 | 3,6673 | 0,345 | -0,109 |
| 1 | Q8IZM8 ZN654_HUMAN | E.NGS#PNNS#LNNVFKPLTE.C        | S134:S138   | 2 | 3,6592 | 0,342 | 0,243  |
| 1 | O43379 WDR62_HUMAN | E.LSLPEGPSVPSSS#LPQT#PEQE.K    | S1049:T1053 | 2 | 3,65   | 0,487 | 0,73   |
| 1 | Q6NV74 CB055_HUMAN | E.GGVPGEDPSS#RPAT#PE.L         | S334:T338   | 2 | 3,6498 | 0,405 | 0      |
| 1 | Q9UQ35 SRRM2_HUMAN | E.LSNS#PLRENS#FGSPL.E.F        | S1320:S1326 | 2 | 3,6494 | 0,4   | 0,64   |
| 1 | Q9HC35 EMAL4_HUMAN | E.SVIQSNT#PT#PPSQPLNE.T        | T897:T899   | 2 | 3,649  | 0,384 | 0,591  |
| 1 | Q9ULU4 PKCB1_HUMAN | E.TDSPTVHLGLDS#DS#ESE.L        | S707:S709   | 2 | 3,6401 | 0,277 | 0,501  |
| 1 | Q8WVT3 TTC15_HUMAN | E.TIDLGGDEFGS#EENE.T           | S45         | 2 | 3,6353 | 0,357 | 0      |
| 1 | O60341 LSD1_HUMAN  | E.M*DESLANLS#EDE.Y             | S131        | 2 | 3,6313 | 0,302 | 0      |
| 1 | Q9NWF9 RN216_HUMAN | E.DQQLAS#DDEEPGPAFPMQE.S       | S249        | 2 | 3,6259 | 0,46  | 0,67   |
| 1 | Q13765 NACA_HUMAN  | E.LEEQDS#TQATTQQAQLAAAAE.I     | S43         | 2 | 3,6101 | 0,499 | 1,068  |
| 1 | Q9UIS9 MBD1_HUMAN  | E.GASS#PVQVPGPVAASTE.A         | S465        | 2 | 3,603  | 0,375 | 0,299  |
| 1 | Q66K74 MAP1S_HUMAN | E.SLPTLSDSPVPLAPGAADS#DEDTE.G  | S809        | 2 | 3,6003 | 0,476 | 1,041  |

|   |                    |                                    |                |   |        |       |        |
|---|--------------------|------------------------------------|----------------|---|--------|-------|--------|
| 1 | P49023 PAXI_HUMAN  | E.SSVPS#PVPAITVNQGE.M              | S230           | 2 | 3,5985 | 0,297 | 0,587  |
| 1 | Q12888 TP53B_HUMAN | E.DVCIDLTCDS#GSQAVPS#PATRSE.A      | S623:S630      | 3 | 3,5975 | 0,226 | 0,627  |
| 1 | Q9HC35 EMAL4_HUMAN | E.SVIQSNTPT#PPPSQPLNE.T            | T899           | 2 | 3,596  | 0,535 | 0,737  |
| 1 | Q6GYQ0 GRIPE_HUMAN | E.VAS#LTLTHIDS#E.T                 | S958:S966      | 2 | 3,585  | 0,444 | 0,253  |
| 1 | P51114 FXR1_HUMAN  | E.DAVLM*DGM*TES#DTASVNE.N          | S524           | 2 | 3,5837 | 0,478 | 0,367  |
| 1 | Q14157 UBP2L_HUMAN | E.SGYQS#GPIQSTTYTSQNNAQGPLYE.Q     | S573           | 3 | 3,573  | 0,351 | 0,528  |
| 1 | Q99700 ATX2_HUMAN  | E.NSSSNTSGS#SKPNS#PSISPSILSNT.E.H  | S855:S860      | 3 | 3,5691 | 1     | 0,82   |
| 1 | Q99700 ATX2_HUMAN  | E.AVAM*PIPAAS#PTPASPASNRAVT#PSSE.A | S727:T740      | 2 | 3,5681 | 1     | 0,798  |
| 1 | Q96TA1 NIBL1_HUMAN | E.VGLPFEASPESPPAS#PDGVTE.I         | S633           | 3 | 3,5677 | 0,27  | 0,567  |
| 1 | Q15042 RB3GP_HUMAN | E.FFECLS#DTEE.L                    | S590           | 2 | 3,5669 | 0,312 | 0      |
| 1 | Q5T457 UBR4_HUMAN  | E.TAENVNNGNPS#PLE.A                | S2788          | 2 | 3,5657 | 0,348 | 0      |
| 1 | Q7Z5K2 WAPL_HUMAN  | E.STGDPPFGFDS#DDE.S                | S77            | 2 | 3,5589 | 0,298 | 0,249  |
| 1 | P46100 ATRX_HUMAN  | E.VQSSVDHQDGS#S#GT#EQEVE.S         | S549:S550:T552 | 2 | 3,5582 | 0,405 | 0,105  |
| 1 | Q02952 AKA12_HUMAN | E.M*VSAVSQLTDSPTTEEAT#PVQE.V       | T1020          | 2 | 3,556  | 0,565 | 0,289  |
| 1 | P12270 TPR_HUMAN   | E.SGGRS#VPT#TPLQVAAPVTVFTE.S       | S2196:T2199    | 3 | 3,5546 | 0,331 | 0,848  |
| 1 | Q02952 AKA12_HUMAN | E.M*VSAVSQLTDS#PD.T                | S1012          | 2 | 3,5454 | 0,446 | -0,169 |
| 1 | Q14202 ZMYM3_HUMAN | E.GLLEPLAPDS#PITLQS#PHIEEEE.T      | S148:S154      | 2 | 3,5427 | 0,421 | 0,639  |
| 1 | Q95155 UBE4B_HUMAN | E.GVSSLS#PSNSLE.T                  | S88            | 2 | 3,54   | 0,424 | 0,085  |
| 1 | Q14444 CAPR1_HUMAN | E.AAS#APAVEDQVPEAEPEAE.E.Y         | S264           | 2 | 3,535  | 0,349 | 0,441  |
| 1 | Q9Y3T9 NOC2L_HUMAN | E.LEDLQLS#EDD.-                    | S746           | 2 | 3,5322 | 0,431 | -0,194 |
| 1 | Q8IX90 CM003_HUMAN | E.QEAINS#DPELSNCE.N                | S119           | 2 | 3,5248 | 0,346 | -0,724 |
| 1 | Q8N543 OGFD1_HUMAN | E.NNQM*AINNS#QQSNEQTDPEPEENE.T     | S410           | 3 | 3,5221 | 0,33  | 0,124  |
| 1 | Q08J23 NSUN2_HUMAN | E.SAAS#TGQPDNDVTE.G                | S724           | 2 | 3,5175 | 0,39  | 0,166  |
| 1 | Q7Z406 MYH14_HUMAN | E.AQPGSGPS#PEPEGS#PPAHPQ.-         | S1983:S1989    | 2 | 3,5171 | 0,328 | 0,117  |
| 1 | Q9H0H5 RGAP1_HUMAN | E.SGS#ILSDIS#FDKTDE.S              | S151:S157      | 2 | 3,5033 | 0,355 | 0,688  |
| 1 | Q9Y2D5 AKAP2_HUMAN | E.TLSNDFSM*DNIS#DSGASNE.T          | S501           | 2 | 3,4997 | 0,376 | 0,349  |
| 1 | Q8WUM0 NU133_HUMAN | E.NVS#ILAEDLE.G                    | S480           | 2 | 3,4991 | 0,212 | 0,206  |
| 1 | Q14676 MDC1_HUMAN  | E.NLTDLVVDTDT#LGE.S                | T654           | 2 | 3,4984 | 0,385 | 0,308  |
| 1 | Q96AC1 FERM2_HUMAN | E.GNPGILAVSQPITS#PE.I              | S229           | 2 | 3,4851 | 0,455 | 0,441  |
| 1 | Q60341 LSD1_HUMAN  | E.SLANLS#EDEYYS#EEE.R              | S131:S137      | 2 | 3,4798 | 0,452 | 0,63   |
| 1 | Q9NQX3 GEPH_HUMAN  | E.LEDLPS#PPPPLS#PPPT#TSPHKQTE.D    | S188:S194:T198 | 3 | 3,4776 | 0,24  | 0,784  |
| 1 | Q9UKA4 AKA11_HUMAN | E.FAPAT#PPS#TPHNSSVGSLSENE.Q       | T1136:S1139    | 3 | 3,4764 | 0,215 | 0,46   |
| 1 | P49711 CTCF_HUMAN  | E.AQPAATDAPNGDLT#PE.M              | T717           | 2 | 3,476  | 0,367 | 0,148  |
| 1 | Q14676 MDC1_HUMAN  | R.AQPFQFIDS#DTDAEEE.R              | S329           | 2 | 3,4739 | 0,302 | 0,461  |
| 1 | P49454 CENPF_HUMAN | E.GAVSANQCS#VDE.V                  | S1522          | 2 | 3,4681 | 0,491 | 0      |
| 1 | Q8WXI9 P66B_HUMAN  | R.GRLT#PS#PDIIVLSDNE.A             | T120:S122      | 3 | 3,4629 | 0,182 | 0,485  |
| 1 | Q9HC35 EMAL4_HUMAN | E.TAEES#RISS#PTLLE.N               | S914:S919      | 2 | 3,4622 | 1     | 0,831  |
| 1 | Q15127 SCAM2_HUMAN | R.AAS#SAAQGAQGN.-                  | S319           | 2 | 3,4544 | 0,297 | -0,194 |
| 1 | P05386 RLA1_HUMAN  | E.SEES#DDDM*GFGLFD.-               | S104           | 2 | 3,4527 | 0,49  | 0,515  |
| 1 | Q9UHR4 BI2L1_HUMAN | E.AVTVPTPSPT#PVRSIS#TVNLSE.N       | T416:S422      | 3 | 3,4524 | 1     | 0,531  |
| 1 | P85037 FOXK1_HUMAN | R.SGGLQT#PECLS#REGS#PIPHDPE.F      | T436:S441:S445 | 3 | 3,448  | 0,175 | 0,562  |

|   |                     |                                        |                   |   |        |       |        |
|---|---------------------|----------------------------------------|-------------------|---|--------|-------|--------|
| 1 | Q92598 HS105_HUMAN  | E.AGTQPQVQTDAQQTSQS#PPSPE.L            | S554              | 2 | 3,4439 | 0,418 | 0      |
| 1 | Q6PD74 P34_HUMAN    | E.IEGLS#S#DEEH.-                       | S310:S311         | 2 | 3,4298 | 0,377 | 0,287  |
| 1 | P19338 NUCL_HUMAN   | E.IEPAAM*KAAAAAPAS#EDE.D               | S184              | 2 | 3,4297 | 0,4   | 0,133  |
| 1 | P61978 HNRPK_HUMAN  | E.GLQLPS#PTATSQLPLE.S                  | S116              | 2 | 3,4262 | 0,424 | 0,493  |
| 1 | P21127 CD2L1_HUMAN  | D.S#PALS#PIELKQE.L                     | S410:S414         | 2 | 3,4205 | 0,286 | 0,166  |
| 1 | Q9BRT9 SLD5_HUMAN   | E.VDFLQGDS#DGGSEE.V                    | S12               | 2 | 3,4131 | 0,372 | 0,318  |
| 1 | Q15942 ZYX_HUMAN    | E.IFPS#PPPPPEEE.G                      | S116              | 2 | 3,41   | 0,341 | 0,259  |
| 1 | Q6PJG2 CN043_HUMAN  | E.LPPYT#PPPILS#PVRE.G                  | T655:S661         | 3 | 3,4056 | 0,217 | 0,399  |
| 1 | Q9P2R6 RERE_HUMAN   | E.IS#RPNS#PSEGESE.S                    | S675:S679         | 2 | 3,3977 | 0,392 | 0,241  |
| 1 | P11388 TOP2A_HUMAN  | E.GS#PQEDGVELE.G                       | S1247             | 2 | 3,3929 | 0,331 | 0      |
| 1 | Q13283 G3BP1_HUMAN  | E.TAPEDAQKS#S#SPAPADIAQTVQE.D          | S230:S231         | 3 | 3,3928 | 0,111 | 0,585  |
| 1 | P31749 AKT1_HUMAN   | E.MDFRSGS#PSDNS#GAEEM*E.V              | S124:S129         | 2 | 3,3849 | 0,349 | -0,115 |
| 1 | Q9BQ75 CC026_HUMAN  | E.NQPTGAGSSPEAS#DGEGEDTE.V             | S24               | 2 | 3,3844 | 0,494 | 0,112  |
| 1 | O75152 ZC11A_HUMAN  | K.KVEAPETNIDKT#PK.K                    | T321              | 3 | 3,3809 | 0,17  | 0,222  |
| 1 | Q9UMY1 NOL7_HUMAN   | E.GQLAS#EEEEAE.H                       | S26               | 2 | 3,3759 | 0,377 | 0,192  |
| 1 | Q9NQ88 CL005_HUMAN  | E.QFSQGS#PSNCLE.T                      | S157              | 2 | 3,3749 | 0,405 | 0,17   |
| 1 | Q02952 AKA12_HUMAN  | E.MVSAVS#QLT#DSPDTTEEAT#PVQE.V         | S1007:T1010:T1020 | 3 | 3,3739 | 0,132 | 0,342  |
| 1 | Q6NV74 CB055_HUMAN  | E.GGVPGEDPSS#RPAT#PELAEPE.S            | S334:T338         | 2 | 3,3736 | 0,157 | 0,65   |
| 1 | Q92547 TOPB1_HUMAN  | E.NLDVS#AFQAPE.D                       | S350              | 2 | 3,3582 | 0,291 | 0,192  |
| 1 | P04637 P53_HUMAN    | E.NNVLS#PLPSQAM*DD.L                   | S33               | 2 | 3,347  | 0,38  | 0,229  |
| 1 | Q6PKG0 LARP1_HUMAN  | E.T#ESAPGS#PRAVT#PVPTKTEE.V            | T515:S521:T526    | 2 | 3,3401 | 0,453 | 0,106  |
| 1 | Q9NUA8 ZBT40_HUMAN  | E.ACS#PSPAVQTFSE.A                     | S214              | 2 | 3,3331 | 0,343 | 0,251  |
| 1 | Q969R5 LMBL2_HUMAN  | E.AGELPTSPLHLLS#PGT#PRS#LDGSGSEPAVCE.M | S73:T76:S79       | 3 | 3,3309 | 1     | 0,76   |
| 1 | Q8IVF2 AHNK2_HUMAN  | E.VTS#PNLDVSLPSM*E.V                   | S4419             | 2 | 3,3302 | 0,215 | 0,308  |
| 1 | Q9BTT0 AN32E_HUMAN  | D.EAGS#ELGEGEEE.V                      | S207              | 2 | 3,3296 | 0,085 | 0      |
| 1 | P35251 RFC1_HUMAN   | E.LS#QNTDESGLNDE.A                     | S190              | 2 | 3,3278 | 0,422 | 0,244  |
| 1 | P46100 ATRX_HUMAN   | E.TNPVTSNS#DEECNE.T                    | S677              | 2 | 3,3246 | 0,406 | 0,073  |
| 1 | P07951 TPM2_HUMAN   | E.LDNALNDITS#L.-                       | S283              | 2 | 3,3215 | 0,368 | 0      |
| 1 | Q9UBL3 ASH2L_HUMAN  | E.GAGDTSEVMDTQAGS#VDEE.N               | S101              | 2 | 3,3212 | 0,486 | 0,247  |
| 1 | Q9NYY8 FAKD2_HUMAN  | E.ALPVAAVNVQS#TQ.-                     | S708              | 2 | 3,3183 | 0,376 | 0,089  |
| 1 | Q15061 WDR43_HUMAN  | E.LNGDSDLDPENES#E.E                    | S674              | 2 | 3,3182 | 0,431 | 0,68   |
| 1 | Q96TA1 NIBL1_HUMAN  | E.VGLPFEASPESPPAS#PDGVTE.I             | S633              | 2 | 3,3127 | 0,348 | 0,864  |
| 1 | Q9BTX1 NDC1_HUMAN   | E.FSNPS#PSTS#ISAE.G                    | S500:S504         | 2 | 3,3123 | 1     | -0,164 |
| 1 | Q8NB90 SPAT5_HUMAN  | E.LS#LQLSQLDLE.D                       | S232              | 2 | 3,3122 | 0,22  | 0,182  |
| 1 | Q8IWE2 NXP20_HUMAN  | E.DTLAECIDSVS#LE.A                     | S99               | 2 | 3,3048 | 0,319 | 0,239  |
| 1 | A6NK10 A6NK10_HUMAN | E.DSCSVLS#EPSQEE.L                     | S328              | 2 | 3,3045 | 0,247 | 0,158  |
| 1 | Q9UKV3 ACINU_HUMAN  | E.IEPM*EGPAPVLIQLS#PPNTDADT#RE.L       | S453:T461         | 3 | 3,3024 | 0,182 | 1,358  |
| 1 | P35658 NU214_HUMAN  | E.VS#STSS#VQSLE.S                      | S985:S989         | 2 | 3,3021 | 1     | -0,178 |
| 1 | P61978 HNRPK_HUMAN  | E.GLQLPS#PTATSQLPLESDAVE.C             | S116              | 3 | 3,2958 | 0,269 | 0,983  |
| 1 | Q5F1R6 DJC21_HUMAN  | E.FGDGS#DENEM*EE.H                     | S283              | 2 | 3,2916 | 0,308 | 0      |
| 1 | Q9NQG5 CT077_HUMAN  | E.DDDYPGSYS#PQDPSAGPLLTEE.L            | S166              | 3 | 3,2916 | 0,239 | 0,451  |

|   |                     |                                |           |   |        |       |        |
|---|---------------------|--------------------------------|-----------|---|--------|-------|--------|
| 1 | Q9UQ35 SRRM2_HUMAN  | E.M*STSNFESS#PEVE.E            | S1271     | 2 | 3,29   | 0,358 | -0,158 |
| 1 | Q9UHR4 BI2L1_HUMAN  | E.AVTVPT#PS#PTPVRISIVNLSE.N    | T412:S414 | 2 | 3,2883 | 0,298 | 0,809  |
| 1 | Q9UQ80 PA2G4_HUMAN  | E.NATSGET#LEENE.A              | T386      | 2 | 3,2875 | 0,32  | 0      |
| 1 | Q86WR0 CCD25_HUMAN  | E.NMSSNQDGNDS#DEFM*.-          | S204      | 2 | 3,2866 | 0,472 | 0,205  |
| 1 | Q9NQW6 ANLN_HUMAN   | E.M*DQALAES#SEEQE.D            | S594      | 2 | 3,2769 | 0,164 | 0      |
| 1 | P04792 HSPB1_HUMAN  | R.ALS#RQLS#SGVSE.I             | S78:S82   | 2 | 3,2745 | 0,364 | 0,175  |
| 1 | Q9NYF8 BCLF1_HUMAN  | K.KAEGEPQEES#PLKSK.S           | S177      | 3 | 3,2703 | 0,208 | 0      |
| 1 | Q96PM9 Z385A_HUMAN  | E.NGLGPAPGS#PEKQPGS#PSPPSIPE.T | S133:S140 | 2 | 3,2561 | 0,144 | 0,596  |
| 1 | P21127 CD2L1_HUMAN  | E.VGEGT#PQSSALTE.G             | T395      | 2 | 3,2522 | 0,496 | 0,09   |
| 1 | Q96JP5 ZFP91_HUMAN  | E.VLIEDSDS#AGP.-               | S567      | 2 | 3,2521 | 0,463 | 0,309  |
| 1 | Q12888 TP53B_HUMAN  | E.DVCIDLTCDS#GSQAVPS#PATRSE.A  | S623:S630 | 2 | 3,2433 | 0,401 | 0,465  |
| 1 | Q9Y4W2 LAS1L_HUMAN  | E.VGPFSTGQES#PTAE.N            | S617      | 2 | 3,2425 | 0,341 | 0,328  |
| 1 | Q8N163 K1967_HUMAN  | E.DSEVRS#VASNQS#EM*E.F         | S675:S681 | 2 | 3,2416 | 0,536 | -0,265 |
| 1 | A8K8B2 A8K8B2_HUMAN | E.SS#FLSSQNGDSSTSQE.T          | S396      | 2 | 3,2346 | 0,461 | 0,21   |
| 1 | Q8WWM7 ATX2L_HUMAN  | E.GGDSNS#DDYDLE.S              | S238      | 2 | 3,2341 | 0,392 | -0,179 |
| 1 | Q9Y5K6 CD2AP_HUMAN  | E.AQDDSETVLAGPTS#PIPSLGNVSE.T  | S189      | 3 | 3,2306 | 0,27  | 0,594  |
| 1 | Q86W50 MET10_HUMAN  | E.ASEQFGS#PVAE.R               | S498      | 2 | 3,2265 | 0,308 | 0,102  |
| 1 | Q8IY92 BTBDC_HUMAN  | E.VVEVGDS#DDEQE.V              | S715      | 2 | 3,2249 | 0,358 | 0      |
| 1 | Q9UHY1 NRBP_HUMAN   | E.VTS#PVVPPSVKTPT#PEPAEVE.T    | S422:T433 | 2 | 3,2099 | 0,272 | 0,526  |
| 1 | Q9H992 MARRH7_HUMAN | E.SLLEDS#EEEE.G                | S544      | 2 | 3,2064 | 0,312 | 0,178  |
| 1 | Q12888 TP53B_HUMAN  | E.TSVIS#IDS#PQKLAILDQE.L       | S724:S727 | 3 | 3,206  | 0,115 | 0,346  |
| 1 | Q96RS0 TGS1_HUMAN   | E.DDILAS#DDPSSIEQYE.N          | S154      | 2 | 3,2059 | 0,286 | 0,39   |
| 1 | Q6NZI2 PTRF_HUMAN   | E.LSS#DEAVEVEE.V               | S203      | 2 | 3,2034 | 0,265 | 0,379  |
| 1 | Q08J23 NSUN2_HUMAN  | E.STQLS#PADLTE.G               | S456      | 2 | 3,1999 | 0,346 | 0,295  |
| 1 | P12270 TPR_HUMAN    | E.GVQGPLNV#LSEE.G              | S1185     | 2 | 3,1882 | 0,405 | 0,346  |
| 1 | Q10570 CPSF1_HUMAN  | E.GLGSETS#PTVDDEEE.M           | S737      | 2 | 3,1864 | 0,22  | 0,074  |
| 1 | Q15742 NAB2_HUMAN   | E.AGS#PPFSPAGGGVPE.G           | S205      | 2 | 3,1863 | 0,482 | 0,325  |
| 1 | O43598 RCL_HUMAN    | E.ADPPGQVAAS#PDPTT.-           | S169      | 2 | 3,1851 | 0,488 | 0,162  |
| 1 | P08648 ITA5_HUMAN   | E.SSLSS#SEGEEPVE.Y             | S127      | 2 | 3,1846 | 0,256 | 0,086  |
| 1 | Q9BPX3 CND3_HUMAN   | E.GTEINS#DDEQE.S               | S674      | 2 | 3,1765 | 0,358 | 0,185  |
| 1 | Q9UHY1 NRBP_HUMAN   | E.VTS#PVVPPSVKT#PTPEPAEVE.T    | S422:T431 | 2 | 3,1761 | 0,323 | 0,736  |
| 1 | P05388 RLA0_HUMAN   | E.S#DEDM*GFGLFD.-              | S307      | 2 | 3,1749 | 0,406 | -0,092 |
| 1 | Q86VR2 F134C_HUMAN  | E.LAIT#DSEHS#DAE.V             | T283:S288 | 2 | 3,1664 | 0,358 | 0,169  |
| 1 | Q92900 RENT1_HUMAN  | E.LLGADTQGS#EFE.F              | S31       | 2 | 3,1649 | 0,422 | 0,181  |
| 1 | P21127 CD2L1_HUMAN  | E.VGEGT#PQS#SALTE.G            | T395:S398 | 2 | 3,1638 | 0,317 | 0,255  |
| 1 | Q01433 AMPD2_HUMAN  | E.EAGITM*S#PGPQ.-              | S875      | 2 | 3,1637 | 0,463 | 0      |
| 1 | Q15185 TEBP_HUMAN   | D.S#DDEKM*PDLE.-               | S151      | 2 | 3,1619 | 0,214 | 0,287  |
| 1 | O43379 WDR62_HUMAN  | E.LSLPEGSPVSSSLPQT#PEQE.K      | T1053     | 3 | 3,1566 | 0,295 | 0,243  |
| 1 | Q15154 PCM1_HUMAN   | E.TQALTNY#GSGEDENE.D           | Y1795     | 2 | 3,1524 | 0,329 | 0,071  |
| 1 | O95208 EPN2_HUMAN   | E.SVTSLSQNGGTT#PDPFE.S         | S487      | 2 | 3,15   | 0,386 | 0,593  |
| 1 | O60341 LSD1_HUMAN   | E.SLANLS#EDEYYSEEE.R           | S131      | 2 | 3,1468 | 0,388 | 0,657  |

|   |                    |                                     |             |   |        |       |        |
|---|--------------------|-------------------------------------|-------------|---|--------|-------|--------|
| 1 | Q9UBL3 ASH2L_HUMAN | E.VM*DTQAGS#VDEE.N                  | S101        | 2 | 3,1364 | 0,365 | 0,089  |
| 1 | Q8WVB6 CTF18_HUMAN | E.NSPQVDGS#PPGLE.G                  | S871        | 2 | 3,1345 | 0,358 | 0,266  |
| 1 | Q9HC35 EMAL4_HUMAN | E.TAEESRISS#S#PTLLE.N               | S918:S919   | 2 | 3,1345 | 0,436 | 0,384  |
| 1 | Q8WUA4 TF3C2_HUMAN | E.AGPVGNMTVVDS#PGQE.V               | S25         | 2 | 3,1339 | 0,321 | 0,745  |
| 1 | Q9UQ35 SRRM2_HUMAN | E.M*STSNFES#S#PE.V                  | S1270:S1271 | 2 | 3,1336 | 0,297 | -0,088 |
| 1 | Q7Z6Z7 HUWE1_HUMAN | E.LS#PAPTIT#SLSPERAEDSDALTAVSSQLE.G | S2826:T2832 | 3 | 3,1336 | 1     | 0,582  |
| 1 | Q9P244 LRFN1_HUMAN | E.VVLGRSLGGS#AT#SLCLLPSEE.T         | S646:T648   | 2 | 3,1319 | 0,307 | -0,635 |
| 1 | Q96EZ8 MCRS1_HUMAN | D.SSLM*ASGTAS#RS#EDEE.S             | S20:S22     | 2 | 3,131  | 0,461 | 0,2    |
| 1 | P25490 TYY1_HUMAN  | E.EQIIGENS#PPDYSE.Y                 | S247        | 2 | 3,1228 | 0,282 | 0,294  |
| 1 | O60271 JIP4_HUMAN  | E.LS#SAGS#GLIGDVDE.G                | S387:S391   | 2 | 3,1212 | 0,367 | 0,33   |
| 1 | Q9Y4W2 LAS1L_HUMAN | E.GS#EAS#PIGKSPYTL.D.S              | S520:S523   | 2 | 3,121  | 0,384 | 0,29   |
| 1 | Q9BUR4 WDR79_HUMAN | E.FGS#PSELS#PRIEE.Q                 | S85:S90     | 2 | 3,1209 | 0,319 | 0,607  |
| 1 | O94888 UBXD7_HUMAN | E.FIS#VCGS#DEEEE.V                  | S331:S335   | 2 | 3,1184 | 0,251 | 0,313  |
| 1 | O95163 ELP1_HUMAN  | E.SDLFSETSS#VVSQSE.M                | S1171       | 2 | 3,1154 | 0,338 | 0,757  |
| 1 | Q15398 DLG7_HUMAN  | E.LNS#SITSQDVLMSPEKNT#ASQNSILEE.G   | S756:T772   | 3 | 3,115  | 1     | 0,575  |
| 1 | Q6NZ12 PTRF_HUMAN  | E.LS#S#DEAVEVEE.V                   | S202:S203   | 2 | 3,1124 | 0,179 | 0,179  |
| 1 | Q00839 HNRPU_HUMAN | E.GIS#ALDGDQM*E.L                   | S97         | 2 | 3,1112 | 0,272 | 0,297  |
| 1 | Q13523 PRP4B_HUMAN | E.M*EDANS#EKS#INEE.N                | S20:S23     | 2 | 3,1101 | 0,278 | 0,073  |
| 1 | Q9UQ35 SRRM2_HUMAN | E.M*STSNFESS#PE.V                   | S1271       | 2 | 3,1086 | 0,162 | 0,093  |
| 1 | O43379 WDR62_HUMAN | E.LSLPEGSPVPS#SSLPQT#PEQE.K         | S1047:T1053 | 3 | 3,105  | 0,275 | 0,548  |
| 1 | Q9P206 K1522_HUMAN | E.SSTAEDALS#IRS#E.M                 | S127:S130   | 2 | 3,1031 | 0,457 | 0      |
| 1 | Q9UJM3 ERRFI_HUMAN | E.ALS#LDDTDCE.V                     | S163        | 2 | 3,098  | 0,443 | 0,1    |
| 1 | O75643 U520_HUMAN  | E.TYGVNVQFES#DEEE.G                 | S207        | 2 | 3,0879 | 0,439 | 0,707  |
| 1 | Q8WW11 LMO7_HUMAN  | E.IQLPSQS#PVVE.Q                    | S867        | 2 | 3,0875 | 0,36  | 0      |
| 1 | Q9Y3T9 NOC2L_HUMAN | E.LEDLQLS#ED.D                      | S746        | 2 | 3,0858 | 0,13  | 0,107  |
| 1 | P49792 RBP2_HUMAN  | E.TVFT#PKTS#PENVDQ.R                | T1396:S1400 | 2 | 3,0847 | 0,349 | 0,496  |
| 1 | Q92598 HS105_HUMAN | D.AQQTQSPPS#PELTSEE.N               | S557        | 2 | 3,0828 | 0,341 | 0,515  |
| 1 | P38432 P80C_HUMAN  | E.LIDPRLIIES#PS#NTSSTEP.A.-         | S566:S568   | 3 | 3,0788 | 0,278 | 0,636  |
| 1 | Q9Y3Y2 CA077_HUMAN | E.LDAYMAQT#DPETND.-                 | T242        | 2 | 3,078  | 0,328 | -0,293 |
| 1 | Q92619 HMHA1_HUMAN | E.VASGS#HSGS#EEQLE.A                | S1070:S1074 | 2 | 3,0774 | 0,245 | -0,851 |
| 1 | Q9P122 CACO1_HUMAN | E.AAVGLSCPAALT#DS#EDESPE.D          | T537:S539   | 2 | 3,0757 | 0,294 | 0      |
| 1 | O94916 NFAT5_HUMAN | E.ASQQQQQS#PLQE.Q                   | S744        | 2 | 3,0749 | 0,26  | 0      |
| 1 | Q03468 ERCC6_HUMAN | E.GAEADLS#GDGTDYE.L                 | S396        | 2 | 3,0738 | 0,372 | 0,165  |
| 1 | Q92598 HS105_HUMAN | E.AGTQPQVQTDAQTSQSPPS#PELTSEE.N     | S557        | 3 | 3,0726 | 0,218 | 1,065  |
| 1 | Q9UKV3 ACINU_HUMAN | E.AAELEEAS#AES#E.D                  | S166:S169   | 2 | 3,0715 | 0,374 | -0,087 |
| 1 | Q9Y3F4 STRAP_HUMAN | E.IAS#ENS#DCIFSPAPDVKA.-            | S335:S338   | 3 | 3,0704 | 0,251 | 0,088  |
| 1 | Q9BQ75 CC026_HUMAN | E.NQPTGAGS#S#PEAS#DGEGEGDTE.V       | S19:S20:S24 | 3 | 3,0691 | 0,149 | 0,235  |
| 1 | O95453 PARN_HUMAN  | E.AGLEGGVSGEIS#DTE.L                | S587        | 2 | 3,0684 | 0,444 | 0,078  |
| 1 | P27816 MAP4_HUMAN  | E.SLQDVGGQAAPTFMIS#PE.T             | S624        | 3 | 3,0674 | 0,242 | 0,467  |
| 1 | Q92900 RENT1_HUMAN | E.AELLGADTQGS#EFE.F                 | S31         | 2 | 3,0657 | 0,476 | 0,237  |
| 1 | Q9UHV7 MED13_HUMAN | E.MANS#PQPPLS#PHPCDVVDE.G           | S530:S537   | 2 | 3,0628 | 0,349 | 0,208  |

|   |                     |                                        |                   |   |        |       |        |
|---|---------------------|----------------------------------------|-------------------|---|--------|-------|--------|
| 1 | Q9H1P3 OSBL2_HUMAN  | E.FFDAVTGFDS#DNS#SGEFSE.A              | S16:S19           | 2 | 3,0571 | 0,391 | 0,88   |
| 1 | Q9NQG5 CT077_HUMAN  | E.DDDYPGYSY#PQDPSAGPLLTEE.L            | S166              | 2 | 3,056  | 0,402 | 1,003  |
| 1 | Q8IYA6 CKP2L_HUMAN  | E.ALPVTLGFQT#PES#.-                    | T742:S745         | 2 | 3,0527 | 0,491 | 0,241  |
| 1 | O14686 MLL2_HUMAN   | E.LGASSPSY#GPPNLGFVDS#PSSGTHLGGLE.L    | Y2024:S2034       | 3 | 3,0502 | 0,203 | 0,494  |
| 1 | Q8IW35 CEP97_HUMAN  | E.SSNNEQDNS#LLE.Q                      | S770              | 2 | 3,0469 | 0,247 | 0,256  |
| 1 | Q9UBB5 MBD2_HUMAN   | E.M*DIEMDS#GDEA.-                      | S407              | 2 | 3,0438 | 0,105 | 0,839  |
| 1 | Q9BVJ6 UT14A_HUMAN  | E.LSQDAEPAGS#QE.T                      | S445              | 2 | 3,0377 | 0,332 | 0,279  |
| 1 | Q6PJG2 CN043_HUMAN  | E.LPPYT#PPPILS#PVRE.G                  | T655:S661         | 2 | 3,034  | 0,269 | 0,665  |
| 1 | Q96JP5 ZFP91_HUMAN  | E.VLIEDS#DS#AGP.-                      | S565:S567         | 2 | 3,0288 | 0,307 | 0      |
| 1 | O94888 UBXD7_HUMAN  | E.SLIDASEDS#QLE.A                      | S288              | 2 | 3,0273 | 0,421 | 0,264  |
| 1 | Q7Z3T8 ZFY16_HUMAN  | E.IIQSPISQVPS#VE.K                     | S946              | 2 | 3,0255 | 0,102 | 0,33   |
| 1 | O43379 WDR62_HUMAN  | E.LSLPEGSPVSSSLPQT#PEQE.K              | T1053             | 2 | 3,0222 | 0,384 | 0,972  |
| 1 | Q6NV74 CB055_HUMAN  | E.SGPVGYS#EDELEE.S                     | S75               | 2 | 3,0211 | 0,238 | 0,152  |
| 1 | Q16643 DREB_HUMAN   | E.TQEPS#PILDSEE.T                      | S381              | 2 | 3,0185 | 0,433 | 0,343  |
| 1 | Q92598 HS105_HUMAN  | E.AGTQPQVQTDAQQTQS#PPS#PELTSEE.N       | S554:S557         | 3 | 3,0154 | 0,273 | 0,427  |
| 1 | Q8N3F8 MILK1_HUMAN  | E.VAQPS#PTAS#LE.S                      | S414:S418         | 2 | 3,0139 | 0,294 | 0      |
| 1 | Q96EV8 DTBP1_HUMAN  | E.GGESPVVQS#DEEE.V                     | S321              | 2 | 3,0136 | 0,227 | -0,254 |
| 1 | Q8NCE2 MTMRE_HUMAN  | E.SS#PGATGSFTYE.A                      | S453              | 2 | 3,0111 | 0,374 | 0      |
| 1 | Q96TA1 NIBL1_HUMAN  | E.YSNSGGGS#PSPSTPE.S                   | S588              | 2 | 3,0104 | 0,372 | -0,078 |
| 1 | Q9H4L4 SEN3_HUMAN   | E.LFQGS#DLGM*AEE.A                     | S288              | 2 | 3,0073 | 0,111 | 0,263  |
| 1 | Q9UHV7 MED13_HUMAN  | E.M*ANS#PQPPPLS#PHPCDVVDE.G            | S530:S537         | 3 | 3,0066 | 0,264 | 0,387  |
| 1 | Q9NRS6 SNX15_HUMAN  | E.LEVPVDPSS#PAQE.A                     | S180              | 2 | 3,0043 | 0,351 | -0,074 |
| 1 | Q9H4L7 SMRCD_HUMAN  | E.ATPQPSQPGPSS#PIS#LSAEEE.N            | S34:S37           | 2 | 3,0041 | 1     | 0,645  |
| 1 | P53618 COPB_HUMAN   | D.VLVVNQTS#DTLQNCTLE.L                 | S750              | 2 | 3,0007 | 0,396 | 1,03   |
| 1 | P29966 MARCS_HUMAN  | E.AAEPGS#PTAAEGE.A                     | S118              | 2 | 2,9969 | 0,496 | 0,096  |
| 1 | P06241 FYN_HUMAN    | E.DYFTATEPQY#QPGENL.-                  | Y531              | 2 | 2,9828 | 0,415 | 1      |
| 1 | Q8IVF2 AHNK2_HUMAN  | E.VT#SPNLDVS#LPSME.V                   | T4418:S4425       | 2 | 2,979  | 0,138 | 0,666  |
| 1 | Q16643 DREB_HUMAN   | E.GEPLAAPQT#PTLPSALEE.L                | T559              | 2 | 2,9784 | 0,418 | 0,706  |
| 1 | Q86WR7 CJ047_HUMAN  | E.ALS#PTS#PFRE.G                       | S212:S215         | 2 | 2,9776 | 0,342 | -0,289 |
| 1 | Q9NWZ3 IRAK4_HUMAN  | E.QSYM*PPDSSS#PE.N                     | S152              | 2 | 2,975  | 0,275 | 0,086  |
| 1 | Q5VWN6 CJ018_HUMAN  | E.VS#PAS#S#PEPPVPVKE.T                 | S1400:S1403:S1404 | 2 | 2,9696 | 0,388 | 1,179  |
| 1 | P27708 PYR1_HUMAN   | R.IHRAS#DPGLPAEEPKE                    | S1859             | 3 | 2,969  | 0,1   | -0,108 |
| 1 | Q68E09 Q68E09_HUMAN | E.VVFASAS#VTPPRT#PDSAPPSPAE.A          | S508:T514         | 3 | 2,9615 | 0,258 | 0,675  |
| 1 | Q02952 AKA12_HUMAN  | E.MVSAVSQLTDS#PDTTEE.A                 | S1012             | 2 | 2,9604 | 0,387 | 0,839  |
| 1 | P78364 PHC1_HUMAN   | E.NQSGGPLGVDS#PSAE.L                   | S786              | 2 | 2,9582 | 0,305 | 0      |
| 1 | Q9NTJ3 SMC4_HUMAN   | E.EGPPPS#PDGAS#SDAEPEPPSGRTES#PATAAE.T | S22:S27:S41       | 3 | 2,9538 | 1     | 0,66   |
| 1 | Q9GZN2 TGIF2_HUMAN  | E.AGSPTGGLFNT#PPPPT#PPEQDKE.D          | T182:T186         | 3 | 2,9515 | 0,206 | 0,229  |
| 1 | Q15742 NAB2_HUMAN   | E.AGS#PPFS#PPAGGGVPE.G                 | S205:S209         | 2 | 2,9438 | 0,344 | 0,231  |
| 1 | Q12756 KIF1A_HUMAN  | E.ALS#PAFSEDSE.S                       | S1413             | 2 | 2,9428 | 0,422 | 0      |
| 1 | Q02952 AKA12_HUMAN  | D.S#PDT#TEEAT#PVQE.V                   | S1012:T1015:T1020 | 2 | 2,9389 | 0,307 | -0,742 |
| 1 | Q9ULI0 ATD2B_HUMAN  | E.VLPLALPS#PPRQLSES#E.K                | S939:S947         | 2 | 2,9356 | 0,319 | 0,306  |

|   |                     |                               |             |   |        |       |        |
|---|---------------------|-------------------------------|-------------|---|--------|-------|--------|
| 1 | O75376 NCOR1_HUMAN  | E.SVETQVND#ISAE.T             | S787        | 2 | 2,9342 | 0,169 | -0,167 |
| 1 | P17029 ZKSC1_HUMAN  | E.ATGLS#PQAAQE.K              | S13         | 2 | 2,9293 | 0,283 | -0,106 |
| 1 | Q12800 TFCP2_HUMAN  | E.ITYVNN#PS#PGFNSSHSFSLGE.G   | S289:S291   | 3 | 2,9291 | 0,274 | 0,707  |
| 1 | Q9HAW4 CLSPN_HUMAN  | E.INDPNVISQEEADS#PSDSGQGSYE.T | S26         | 2 | 2,9289 | 0,365 | 0,559  |
| 1 | Q9Y3T9 NOC2L_HUMAN  | E.FLASGFDS#ES#ES#ESENSPQAE.T  | S26:S28:S30 | 2 | 2,928  | 0,12  | 0,883  |
| 1 | Q9NPQ8 RIC8A_HUMAN  | E.TM*EQQLSS#DPDS#DPD.-        | S523:S527   | 2 | 2,9269 | 0,498 | 0      |
| 1 | Q8N3P4 VPS8_HUMAN   | E.SILNET#DDEDE.S              | T75         | 2 | 2,9243 | 0,437 | 0,269  |
| 1 | P17661 DESM_HUMAN   | R.TNEKVELQELNDR.F             | NA          | 2 | 2,9235 | 0,412 | 0      |
| 1 | Q9BVS4 RIOK2_HUMAN  | E.GSEFS#DGEVAE.K              | S337        | 2 | 2,9193 | 0,335 | 0      |
| 1 | P52292 IMA2_HUMAN   | R.NVSSFPDDATS#PLQE.N          | S62         | 2 | 2,9147 | 0,399 | 0,579  |
| 1 | Q92900 RENT1_HUMAN  | E.AELLGADT#QGS#EFE.F          | T28:S31     | 2 | 2,9143 | 0,298 | 0,375  |
| 1 | P46821 MAP1B_HUMAN  | E.VAPVS#PEVTQEVVEE.H          | S1298       | 2 | 2,9106 | 0,333 | 0,649  |
| 1 | Q9UFW8 CGBP1_HUMAN  | E.NQLLNS#QDC.-                | S164        | 2 | 2,909  | 0,328 | 0,104  |
| 1 | Q15154 PCM1_HUMAN   | E.T#AGSLSGVS#ITSE.L           | T325:S333   | 2 | 2,9087 | 0,202 | 0,446  |
| 1 | Q6NZ12 PTRF_HUMAN   | E.SDAVLVDKS#DS#D.-            | S387:S389   | 2 | 2,9075 | 0,211 | -0,086 |
| 1 | Q8IX21 CJ006_HUMAN  | E.YGT#PTKS#PPAALE.V           | T551:S555   | 2 | 2,9073 | 0,294 | -0,164 |
| 1 | P61978 HNRPK_HUMAN  | E.EGLQLPS#PTATSQLPLESDAVE.C   | S116        | 2 | 2,9047 | 0,404 | 0,827  |
| 1 | Q9UBB5 MBD2_HUMAN   | E.MDIEM*DS#GDEA.-             | S407        | 2 | 2,899  | 0,314 | -0,093 |
| 1 | P98171 RHG04_HUMAN  | E.VVASDDGDVLDVSFQTS#PSTE.S    | S408        | 2 | 2,8969 | 0,343 | 0,681  |
| 1 | Q7Z6Z7 HUWE1_HUMAN  | E.GS#PM*DTSSLASCTLE.E         | S2855       | 2 | 2,8922 | 0,299 | 0,517  |
| 1 | P21127 CD2L1_HUMAN  | E.GT#PQSSALTE.G               | T395        | 2 | 2,889  | 0,228 | 0,228  |
| 1 | Q8IW35 CEP97_HUMAN  | E.DIQTDEDKLNCS#LLS#SE.S       | S397:S400   | 2 | 2,8877 | 0,473 | 0,344  |
| 1 | Q9Y4L1 HYOU1_HUMAN  | E.TLVEDS#AEFE.S               | S567        | 2 | 2,8866 | 0,197 | 0      |
| 1 | Q96TA1 NIBL1_HUMAN  | E.YSNSGGGS#PSPST#PE.S         | S588:T593   | 2 | 2,8862 | 0,202 | 0      |
| 1 | Q8N128 CN024_HUMAN  | E.TVISS#FVNVNFE.M             | S186        | 2 | 2,8852 | 0,182 | 0,08   |
| 1 | Q8TB72 PUM2_HUMAN   | E.VNAILS#PRS#ESGGLGVSM*VE.Y   | S82:S85     | 3 | 2,8693 | 0,085 | 0      |
| 1 | Q96SB4 SRPK1_HUMAN  | E.VINYTONS#NNE.T              | S540        | 2 | 2,8688 | 0,206 | 0,177  |
| 1 | Q8WVM7 STAG1_HUMAN  | E.TTAHS#DAGS#ELEE.T           | S20:S24     | 2 | 2,8675 | 0,218 | -0,081 |
| 1 | P27816 MAP4_HUMAN   | E.AQTLDSQIQETS#I.-            | S1151       | 2 | 2,8636 | 0,356 | 0,322  |
| 1 | P46821 MAP1B_HUMAN  | E.VAPVS#PEVTQE.V              | S1298       | 2 | 2,8626 | 0,299 | 0,099  |
| 1 | Q15276 RABE1_HUMAN  | E.SDFGPLVGADS#VSE.N           | S447        | 2 | 2,856  | 0,26  | 0,669  |
| 1 | Q9NXH9 TRM1_HUMAN   | E.TSNQT#PPGPGAAAGPGID.-       | T646        | 2 | 2,8557 | 0,25  | 0,361  |
| 1 | Q6S8J3 A26CA_HUMAN  | E.MATAASS#SSLE.K              | S933        | 2 | 2,8546 | 0,232 | 0,108  |
| 1 | Q02952 AKA12_HUMAN  | E.MVSAVSQLTDSPT#T#EEATPVQE.V  | T1015:T1016 | 3 | 2,8538 | 0,097 | 0,705  |
| 1 | Q9Y5Q8 TF3C5_HUMAN  | E.DFKPS#DGS#ENEM*E.T          | S504:S507   | 2 | 2,8522 | 0,226 | -0,147 |
| 1 | Q9ULI0 ATD2B_HUMAN  | E.VLPLALPS#PPRQLS#ESE.K       | S939:S945   | 2 | 2,8455 | 0,27  | 0,367  |
| 1 | P32519 ELF1_HUMAN   | E.ALLNM*DS#PGPM*LDE.K         | S110        | 2 | 2,8408 | 0,436 | 1,511  |
| 1 | O75044 FNBP2_HUMAN  | E.DFDVSDCFQYSNS#M*E.S         | S418        | 2 | 2,8397 | 0,488 | 0,126  |
| 1 | P25963 IKBA_HUMAN   | E.NLQMLPES#ELEE.S             | S283        | 2 | 2,8394 | 0,272 | 0,403  |
| 1 | B2RXH1 B2RXH1_HUMAN | E.SVANVNANT#PSSE.L            | T693        | 2 | 2,8368 | 0,298 | 0,891  |
| 1 | Q07666 KHDR1_HUMAN  | E.GYYSQS#QGDSE.Y              | S390        | 2 | 2,8354 | 0,392 | 0,094  |



|   |                    |                                |             |   |        |       |        |
|---|--------------------|--------------------------------|-------------|---|--------|-------|--------|
| 1 | P12931 SRC_HUMAN   | E.DYFTSTEPQY#QPGENL.-          | Y530        | 2 | 2,8353 | 0,363 | 0,868  |
| 1 | Q96C86 DCPS_HUMAN  | E.QVAQLLTGS#PE.L               | S101        | 2 | 2,8331 | 0,277 | 0,2    |
| 1 | Q9NYL9 TMOD3_HUMAN | E.DELGNLS#ETE.L                | S25         | 2 | 2,8306 | 0,208 | 0      |
| 1 | Q9UQ35 SRRM2_HUMAN | E.QNSALPT#SSQDEE.L             | T1231       | 2 | 2,8289 | 0,237 | 0      |
| 1 | P43358 MAGA4_HUMAN | E.AAVS#SSSPLVPGTLEEVPAAE.S     | S41         | 3 | 2,8261 | 0,321 | 0,437  |
| 1 | Q86WR7 CJ047_HUMAN | R.MAGNEALS#PTS#PFRE.G          | S212:S215   | 2 | 2,8227 | 0,338 | 0,552  |
| 1 | Q9H1P3 OSBL2_HUMAN | E.FFDAVTGFDS#DNSSGEFSE.A       | S16         | 2 | 2,8209 | 0,38  | 0,685  |
| 1 | Q8WUM0 NU133_HUMAN | E.GSLASS#VAGPNSE.S             | S493        | 2 | 2,8205 | 0,191 | -0,097 |
| 1 | Q96AE4 FUBP1_HUMAN | R.SCM*LTGT#PE.S                | T153        | 2 | 2,814  | 0,222 | 0      |
| 1 | P08069 IGF1R_HUMAN | R.ALPLPQSST#C.-                | T1366       | 2 | 2,8132 | 0,343 | 0,106  |
| 1 | Q96CX2 KCD12_HUMAN | E.GASAGAPS#PTLE.L              | S176        | 2 | 2,8113 | 0,281 | -0,107 |
| 1 | Q99661 KIF2C_HUMAN | E.LSSQM*SS#FNE.A               | S633        | 2 | 2,8097 | 0,265 | 0,398  |
| 1 | Q9C0C2 TB182_HUMAN | E.GVLQS#PSQDQE.K               | S435        | 2 | 2,8088 | 0,217 | -0,192 |
| 1 | Q9H6Z4 RANB3_HUMAN | E.NAAAES#GS#ESSSQEATPEKE.S     | S353:S355   | 3 | 2,8082 | 0,093 | 0,084  |
| 1 | Q16643 DREB_HUMAN  | E.GYFS#QSQEE.F                 | S599        | 2 | 2,8072 | 0,32  | 0,38   |
| 1 | P32004 L1CAM_HUMAN | E.AAGGND#SGATSPINPAVALE.-      | S1243       | 2 | 2,8053 | 0,269 | 0,432  |
| 1 | P12270 TPR_HUMAN   | E.VM*AEES#T#DGEVE.T            | S1876:T1877 | 2 | 2,8009 | 0,187 | 0      |
| 1 | Q66K74 MAP1S_HUMAN | E.SLPTLSDSDPVPLAPGAADS#DEDTE.G | S809        | 3 | 2,7985 | 0,141 | 0,851  |
| 1 | Q16643 DREB_HUMAN  | E.GEPLAAPQTPT#LPSALEE.L        | T561        | 2 | 2,7977 | 0,52  | 0,642  |
| 1 | Q9NRZ9 HELLS_HUMAN | E.NSEDS#SPECLF.-               | S832        | 2 | 2,7941 | 0,417 | 0,268  |
| 1 | Q9NYL9 TMOD3_HUMAN | E.LLGNLS#ETE.L                 | S25         | 2 | 2,793  | 0,102 | 0,231  |
| 1 | Q6S8J3 A26CA_HUMAN | E.MATAASSSSLE.K                | NA          | 2 | 2,7924 | 0,208 | 0      |
| 1 | Q15185 TEBP_HUMAN  | D.S#DDEKMPDLE.-                | S151        | 2 | 2,7919 | 0,266 | 0,194  |
| 1 | P31943 HNRH1_HUMAN | E.NSSDFQS#NIA.-                | S446        | 2 | 2,7917 | 0,493 | 0      |
| 1 | P49006 MRP_HUMAN   | E.QGEIGACS#DEGTAQE.G           | S135        | 2 | 2,7917 | 0,386 | 0,075  |
| 1 | Q02952 AKA12_HUMAN | E.IIEQIPSS#ESNLEE.L            | S152        | 2 | 2,7899 | 0,235 | 0,732  |
| 1 | P13693 TCTP_HUMAN  | E.GNIDDS#LIGGNASAEGPEGE.G      | S46         | 2 | 2,7879 | 0,387 | 0,554  |
| 1 | Q969F1 TF3C6_HUMAN | E.IEDSGPLIDIPS#ETE.G           | S199        | 2 | 2,7854 | 0,453 | 0,432  |
| 1 | Q96GE4 CCD45_HUMAN | E.TLS#QHS#DGIVE.Y              | S419:S422   | 2 | 2,7849 | 0,38  | 0,272  |
| 1 | Q8WUM0 NU133_HUMAN | E.GSLASSVAGPNS#E.S             | S499        | 2 | 2,7735 | 0,412 | 0      |
| 1 | Q9UJM3 ERRFI_HUMAN | E.ALSLDDT#DCE.V                | T167        | 2 | 2,7723 | 0,455 | 0,2    |
| 1 | P43358 MAGA4_HUMAN | E.AAVS#SSS#PLVPGTLEEVPAAE.S    | S41:S44     | 3 | 2,7703 | 0,112 | 0,337  |
| 1 | Q96T21 SEBP2_HUMAN | E.QAELS#GPEGM*DE.L             | S579        | 2 | 2,7595 | 0,206 | 0,09   |
| 1 | Q15398 DLG7_HUMAN  | E.MGIPQQTTS#PE.N               | S662        | 2 | 2,7566 | 0,119 | 0,192  |
| 1 | O15397 IPO8_HUMAN  | E.GFSTPLDLDNS#VDE.Y            | S954        | 2 | 2,7556 | 0,254 | 0,538  |
| 1 | P25490 TYY1_HUMAN  | E.QIIGENS#PPDYSE.Y             | S247        | 2 | 2,7534 | 0,413 | 0,16   |
| 1 | Q9NQ8 KI13B_HUMAN  | E.AQDGPPS#PLSE.A               | S1559       | 2 | 2,752  | 0,267 | 0      |
| 1 | Q92900 RENT1_HUMAN | E.AYGPSS#QTLTFLDTEE.A          | S10         | 2 | 2,7493 | 0,174 | 0,332  |
| 1 | Q13435 SF3B2_HUMAN | R.GS#DSPAADVEIE.Y              | S337        | 2 | 2,7489 | 0,281 | 0      |
| 1 | Q99547 MPH6_HUMAN  | E.TVELDVS#DEE.M                | S110        | 2 | 2,7456 | 0,288 | 0,401  |
| 1 | Q9BVS4 RIOK2_HUMAN | E.GS#EFDFS#DGEVAE.K            | S332:S337   | 2 | 2,7447 | 0,249 | 0,481  |

|   |                    |                                          |                |   |        |       |        |
|---|--------------------|------------------------------------------|----------------|---|--------|-------|--------|
| 1 | O14514 BAI1_HUMAN  | E.NVATLSVSS#LE.R                         | S1469          | 2 | 2,7431 | 0,296 | 0      |
| 1 | Q32MZ4 LRRF1_HUMAN | E.VPGS#PAGTEGNCQE.A                      | S521           | 2 | 2,7421 | 0,266 | 0,082  |
| 1 | Q7Z406 MYH14_HUMAN | E.GVAS#DEEAEE.A                          | S1969          | 2 | 2,7402 | 0,109 | -0,109 |
| 1 | Q9Y3T9 NOC2L_HUMAN | E.FLASGFDS#ES#ESESENSPQAE.T              | S26:S28        | 2 | 2,7393 | 0,225 | 0,608  |
| 1 | Q9UKA4 AKA11_HUMAN | E.FAPAT#PPST#PHNSSVGSLSENE.Q             | T1136:T1140    | 2 | 2,7372 | 0,234 | 1,227  |
| 1 | P04150 GCR_HUMAN   | E.NCLLS#PLAGEDD.S                        | S226           | 2 | 2,7357 | 0,458 | 0,265  |
| 1 | O15060 ZBT39_HUMAN | E.VIELS#DDS#EDE.L                        | S323:S326      | 2 | 2,733  | 0,316 | 0,086  |
| 1 | P49792 RBP2_HUMAN  | E.TVFT#PKT#SPENVQD.R                     | T1396:T1399    | 2 | 2,7301 | 0,187 | 0,212  |
| 1 | O43379 WDR62_HUMAN | E.LSLPEGPSVSS#SLPQT#PEQE.K               | S1048:T1053    | 3 | 2,7298 | 0,118 | 0,235  |
| 1 | O94909 K0819_HUMAN | R.GPSQATS#PIRS#PQE.S                     | S296:S300      | 2 | 2,723  | 0,229 | -0,151 |
| 1 | O94842 TOX4_HUMAN  | E.VES#PSQMDVE.L                          | S550           | 2 | 2,7228 | 0,203 | -0,102 |
| 1 | Q15185 TEBP_HUMAN  | E.M*M*NMMGGDEDVD.L                       | NA             | 2 | 2,7216 | 0,364 | 0      |
| 1 | P15407 FOSL1_HUMAN | E.GDTGSTSGTSS#PPAPCRPVPICISLS#PGPVLEPE.A | S191:S205      | 3 | 2,7212 | 0,25  | 0,317  |
| 1 | P46937 YAP1_HUMAN  | E.QDGGTQNPVSS#PGM*SQE.L                  | S317           | 2 | 2,721  | 0,327 | 0,067  |
| 1 | Q9H8M7 CARP_HUMAN  | E.TASISGS#PAESSCQVE.H                    | S125           | 2 | 2,7154 | 0,348 | -0,072 |
| 1 | Q8N3U4 STAG2_HUMAN | E.SETHFS#S#DTDFEDIE.G                    | S22:S23        | 2 | 2,7144 | 1     | 0,318  |
| 1 | Q9NZ53 PDXL2_HUMAN | E.LLPVNGS#QEE.A                          | S195           | 2 | 2,7131 | 0,151 | 0      |
| 1 | Q96EV8 DTBP1_HUMAN | E.NTVLS#PALGPE.S                         | S267           | 2 | 2,7076 | 0,357 | 0      |
| 1 | P50851 LRBA_HUMAN  | E.LQTTNTS#YEE.M                          | S1015          | 2 | 2,7067 | 0,238 | -0,193 |
| 1 | Q86WR0 CCD25_HUMAN | E.NM*SSNQDGNDS#DEFM.-                    | S204           | 2 | 2,7021 | 0,361 | 0,341  |
| 1 | Q9UQ35 SRRM2_HUMAN | E.MSTSNFES#S#PE.V                        | S1270:S1271    | 2 | 2,7006 | 0,433 | 0,177  |
| 1 | Q9H4A3 WNK1_HUMAN  | E.SSVLSSSS#PE.S                          | S1899          | 2 | 2,698  | 0,359 | 0      |
| 1 | Q9NQ92 CQ079_HUMAN | E.GFAM*DEEDS#DGE.L                       | S87            | 2 | 2,696  | 0,276 | 0,087  |
| 1 | Q7Z3C6 ATG9A_HUMAN | E.NALFTSIQS#LQSE.S                       | S610           | 2 | 2,6925 | 0,313 | 0,723  |
| 1 | O94888 UBXD7_HUMAN | E.FISVCGS#DEEEE.V                        | S335           | 2 | 2,6905 | 0,263 | 0,247  |
| 1 | Q15424 SAFB1_HUMAN | E.LAEAPTEAPS#PE.A                        | S344           | 2 | 2,6901 | 0,323 | 0,378  |
| 1 | Q9UBL3 ASH2L_HUMAN | E.VMDTQAGS#VDEE.N                        | S101           | 2 | 2,6868 | 0,247 | -0,628 |
| 1 | Q9BUW7 CI016_HUMAN | E.FQQQLGEAPSDAS#P.-                      | S82            | 2 | 2,6838 | 0,411 | 0,314  |
| 1 | P49454 CENPF_HUMAN | E.T#SNLQDMQSQE.I                         | T1247          | 2 | 2,6834 | 0,113 | -0,09  |
| 1 | P23396 RS3_HUMAN   | E.ILPTT#PISE.Q                           | T221           | 2 | 2,6827 | 0,237 | 0,232  |
| 1 | Q9UBW7 ZMYM2_HUMAN | E.LLTM*TDMM*S#EDE.G                      | S958           | 2 | 2,6767 | 0,081 | 0,24   |
| 1 | P55265 DSRAD_HUMAN | E.S#QTPTPSATSFSGKS#PVTTLLE.C             | S599:S614      | 2 | 2,6762 | 0,272 | 0,576  |
| 1 | Q5VWN6 CJ018_HUMAN | E.VS#PASS#PEPPVPVKE.T                    | S1400:S1404    | 2 | 2,6697 | 0,275 | 0,291  |
| 1 | Q7Z6Z7 HUWE1_HUMAN | E.SAQPPEDSS#PPASSE.S                     | S2918          | 2 | 2,668  | 0,394 | 0      |
| 1 | Q99618 CDCA3_HUMAN | E.SS#PQPGLPAGEQLE.G                      | S44            | 2 | 2,6676 | 0,389 | 0,328  |
| 1 | P49643 PRI2_HUMAN  | E.M*DMEGLEDYFS#EDS.-                     | S506           | 2 | 2,6655 | 0,444 | 0,623  |
| 1 | O60271 JIP4_HUMAN  | E.LSSAGS#GLIGDVDE.G                      | S391           | 2 | 2,6653 | 0,349 | 0,261  |
| 1 | Q8WUA4 TF3C2_HUMAN | E.AGPVGNM*TVVDS#PGQE.V                   | S25            | 2 | 2,664  | 0,198 | 0      |
| 1 | Q02952 AKA12_HUMAN | E.IIEQIPSES#NLEE.L                       | S154           | 2 | 2,6616 | 0,316 | 0,512  |
| 1 | Q6NZI2 PTRF_HUMAN  | E.ITEES#DAVLVDKS#DS#D.-                  | S379:S387:S389 | 2 | 2,657  | 0,255 | 0,622  |
| 1 | Q9P1Y6 K1542_HUMAN | E.AAGSFNS#DDDAE.S                        | S101           | 2 | 2,6563 | 0,222 | -0,095 |

|   |                     |                                     |                   |   |        |       |        |
|---|---------------------|-------------------------------------|-------------------|---|--------|-------|--------|
| 1 | A0MZ66 SHOT1_HUMAN  | E.ADS#SSPTGILATSE.S                 | S492              | 2 | 2,6559 | 0,276 | 0,172  |
| 1 | P46379 BAT3_HUMAN   | E.NAS#PAPGTTAEE.A                   | S973              | 2 | 2,6539 | 0,254 | 0,398  |
| 1 | Q9BUR4 WDR79_HUMAN  | E.FGS#PSELS#PRIE.E                  | S85:S90           | 2 | 2,6522 | 0,205 | 0,495  |
| 1 | Q6S8J3 A26CA_HUMAN  | E.M*ATAASSSLE.K                     | NA                | 2 | 2,6473 | 0,31  | 0      |
| 1 | Q9H7N4 SFR19_HUMAN  | E.VLYDS#EGLS#GEE.R                  | S734:S738         | 2 | 2,646  | 0,176 | 0,251  |
| 1 | P05114 HMG1_HUMAN   | R.KVS#SAEGAAKEEPK.R                 | S7                | 3 | 2,6418 | 0,157 | 0      |
| 1 | Q14247 SRC8_HUMAN   | E.ASS#QQGLAYATE.A                   | S458              | 2 | 2,6386 | 0,415 | 0,467  |
| 1 | Q29RF7 PDS5A_HUMAN  | R.AAVGQES#PGGLE.A                   | S1305             | 2 | 2,6379 | 0,285 | -0,204 |
| 1 | Q9C0C2 TB182_HUMAN  | E.SAAS#GLGGLLEEE.G                  | S1476             | 2 | 2,6366 | 0,368 | 0      |
| 1 | Q8NFC6 FA44A_HUMAN  | E.SAEGDS#QIGTVVE.H                  | S1906             | 2 | 2,6349 | 0,206 | 0,623  |
| 1 | P49792 RBP2_HUMAN   | E.T#VFTPKT#SPENVQD.R                | T1393:T1399       | 2 | 2,6332 | 0,309 | 0,567  |
| 1 | O75665 OFD1_HUMAN   | E.SS#FES#AGNMPRQLE.M                | S827:S830         | 2 | 2,6274 | 0,334 | 0,855  |
| 1 | Q8N655 CJ012_HUMAN  | E.SSTFTDENPS#ETESE.A                | S449              | 2 | 2,6273 | 0,267 | 0,131  |
| 1 | Q9NQW6 ANLN_HUMAN   | E.ASNQQPLS#GGEE.K                   | S54               | 2 | 2,622  | 0,347 | 0,188  |
| 1 | Q9BQ75 CC026_HUMAN  | E.NQPTGAGS#S#PEAS#DGEGEGDTE.V       | S19:S20:S24       | 2 | 2,6217 | 0,416 | 0,314  |
| 1 | Q12802 AKP13_HUMAN  | E.STQCCPGS#PVAQTE.S                 | S345              | 2 | 2,6155 | 0,333 | 0,076  |
| 1 | Q15398 DLG7_HUMAN   | E.LNS#SITSQDVLM*S#SPEKNTASQNSILEE.G | S756:S766         | 3 | 2,6141 | 0,253 | 0,801  |
| 1 | P05386 RLA1_HUMAN   | E.S#DDDM*GFGLFD.-                   | S104              | 2 | 2,6123 | 0,263 | 0      |
| 1 | P25490 TYY1_HUMAN   | E.TVVEEQIIGENS#PPDYSE.Y             | S247              | 2 | 2,602  | 0,312 | 0,117  |
| 1 | O75909 CCNK_HUMAN   | E.NSS#PSVTSANLD.H                   | S9                | 2 | 2,5989 | 0,193 | 0,192  |
| 1 | Q13009 TIAM1_HUMAN  | E.TDILS#DDDEFCE.S                   | S1506             | 2 | 2,5984 | 0,135 | 0,476  |
| 1 | Q6P9B2 Q6P9B2_HUMAN | E.LEDLQLS#EED.-                     | S739              | 2 | 2,5962 | 0,088 | -0,192 |
| 1 | Q7Z434 MAVS_HUMAN   | E.TQAPES#PGENSE.Q                   | S152              | 2 | 2,5927 | 0,226 | -0,184 |
| 1 | Q9UQR1 ZN148_HUMAN  | E.IS#FSVADTE.V                      | S559              | 2 | 2,5911 | 0,253 | -0,698 |
| 1 | P42166 LAP2A_HUMAN  | E.QGT#ES#RSSTPLPTISSAE.N            | T154:S156         | 3 | 2,5875 | 0,104 | 0,349  |
| 1 | Q9UJW0 DCTN4_HUMAN  | R.NY#M*PLAFS#D.K                    | Y173:S179         | 2 | 2,5872 | 0,29  | 0,791  |
| 1 | Q01433 AMPD2_HUMAN  | E.AGITM*S#PGPQ.-                    | S875              | 2 | 2,586  | 0,38  | 0      |
| 1 | Q96B23 CR025_HUMAN  | E.INIASS#DSEVE.I                    | S328              | 2 | 2,5859 | 0,274 | 0,392  |
| 1 | Q96G74 OTUD5_HUMAN  | E.VGAGYNS#EDEYE.A                   | S177              | 2 | 2,5832 | 0,256 | -0,086 |
| 1 | Q8IW35 CEP97_HUMAN  | E.STFMVVAS#GLSPLS#PTVE.L            | S410:S416         | 2 | 2,5782 | 0,363 | 0,616  |
| 1 | P52701 MSH6_HUMAN   | E.LAVCDEPS#EPEEEEE.M                | S200              | 2 | 2,5758 | 0,316 | 0,729  |
| 1 | Q14444 CAPR1_HUMAN  | E.YTEQSEVEST#E.Y                    | T292              | 2 | 2,573  | 0,189 | 0,177  |
| 1 | Q32MZ4 LRRF1_HUMAN  | E.SS#SLPENTVQVE.S                   | S379              | 2 | 2,5719 | 0,162 | 0,178  |
| 1 | Q9UHY1 NRBP_HUMAN   | E.VT#SPVVPPSVKT#PTPEPAEVE.T         | T421:T431         | 3 | 2,5688 | 0,215 | 0,473  |
| 1 | Q2TAL8 QRIC1_HUMAN  | E.VEPQSQPQPS#PE.L                   | S464              | 2 | 2,5686 | 0,297 | 0,174  |
| 1 | Q7Z3T8 ZFY16_HUMAN  | E.IIQS#PISQVPSVE.K                  | S939              | 2 | 2,5648 | 0,299 | 0,165  |
| 1 | Q5VU20 Q5VU20_HUMAN | E.LT#DLDQS#NVTEETPE.G               | T232:S237         | 2 | 2,5647 | 0,255 | 0,264  |
| 1 | Q9UQ35 SRRM2_HUMAN  | E.LSNS#PLRENSFGS#PLEFRNS#GPLGTE.M   | S1320:S1329:S1336 | 3 | 2,5646 | 0,225 | 0,781  |
| 1 | O75410 TACC1_HUMAN  | E.AGGPEGDPPEEEDS#QAE.T              | S44               | 2 | 2,5641 | 0,288 | 0,072  |
| 1 | O14524 TM194_HUMAN  | E.Y#GLGSIIAQDE.I                    | Y408              | 2 | 2,5636 | 0,158 | -0,098 |
| 1 | P49643 PRI2_HUMAN   | E.M*DM*EGLEDYFS#EDS.-               | S506              | 2 | 2,5634 | 0,298 | 0,617  |

|   |                     |                                |                |   |        |       |        |
|---|---------------------|--------------------------------|----------------|---|--------|-------|--------|
| 1 | P84157 MXRA7_HUMAN  | E.TFGEM*S#DGDVQE.Q             | S191           | 2 | 2,5597 | 0,139 | 0,259  |
| 1 | Q6GYQ0 GRIPE_HUMAN  | E.VASLTT#LHIDSET#S#SLNQAFSAE.V | T961:T968:S969 | 3 | 2,5545 | 1     | 1,312  |
| 1 | P13693 TCTP_HUMAN   | E.GNIDDSLIGGNAS#AEGPEGEGTE.S   | S53            | 2 | 2,5508 | 0,434 | 0,538  |
| 1 | P51610 HCFC1_HUMAN  | E.VDQLS#LPQELM*AE.A            | S1586          | 2 | 2,5507 | 0,254 | 0,544  |
| 1 | P49589 SYCC_HUMAN   | E.YLQM*AQNGS#FQ.-              | S746           | 2 | 2,5476 | 0,273 | -0,176 |
| 1 | Q15424 SAFB1_HUMAN  | E.LAEAPT#EAPS#PE.A             | T340:S344      | 2 | 2,5469 | 0,319 | -0,178 |
| 1 | Q6VY07 PACS1_HUMAN  | E.M*YNPSDS#GPEM*EE.T           | S381           | 2 | 2,5462 | 0,296 | 0      |
| 1 | Q09666 AHNK_HUMAN   | E.FSGPST#PTGT#LE.F             | T5794:T5798    | 2 | 2,5457 | 0,18  | 0,18   |
| 1 | P40763 STAT3_HUMAN  | E.LTSECATS#PM*.-               | S768           | 2 | 2,5422 | 0,206 | 0,307  |
| 1 | Q659A1 NARG2_HUMAN  | E.DTVLCCS#DTDEE.C              | S571           | 2 | 2,5396 | 0,219 | 0      |
| 1 | O15156 ZBT7B_HUMAN  | E.ILQGSGLAAPS#PDEDDCE.R        | S150           | 2 | 2,5345 | 0,292 | 0,728  |
| 1 | Q6UN15 FIP1_HUMAN   | E.NASANPPS#GIEDE.T             | S62            | 2 | 2,5317 | 0,197 | -0,177 |
| 1 | Q9GZR1 SENP6_HUMAN  | E.GTEQYVNSIS#D.-               | S1111          | 2 | 2,5316 | 0,26  | -0,472 |
| 1 | Q9UPS6 SET1B_HUMAN  | R.SGPLAS#PVLLE.T               | S1421          | 2 | 2,5281 | 0,235 | 0,21   |
| 1 | Q147X3 MAK3_HUMAN   | E.QQQLNGLIS#PE.L               | S89            | 2 | 2,5231 | 0,192 | 0,187  |
| 1 | Q9UQ35 SRRM2_HUMAN  | E.M*STSNFES#SPE.V              | S1270          | 2 | 2,5223 | 0,191 | -0,093 |
| 1 | P38432 P80C_HUMAN   | E.LIDPRLIES#PSNTSST#EPA.-      | S566:T573      | 3 | 2,522  | 1     | 0,318  |
| 1 | O75400 PR40A_HUMAN  | E.QAQLTST#PAIQDQSVE.V          | T345           | 2 | 2,5207 | 0,285 | 0,883  |
| 1 | Q9UN86 G3BP2_HUMAN  | E.DEVFGDS#EPE.L                | S141           | 2 | 2,5144 | 0,244 | 0,304  |
| 1 | Q6ULP2 AFTIN_HUMAN  | E.YNLDSVPS#PAEE.F              | S226           | 2 | 2,5141 | 0,265 | 0      |
| 1 | Q02952 AKA12_HUMAN  | E.M*VSAVSQLTDS#PDTTEEAT#PVQE.V | S1012:T1020    | 3 | 2,5021 | 0,148 | 0,771  |
| 1 | Q01433 AMPD2_HUMAN  | E.EAGITMS#PGPQ.-               | S875           | 2 | 2,5011 | 0,389 | 0      |
| 1 | Q96EV8 DTBP1_HUMAN  | E.ALDVFLNS#GGEE.N              | S258           | 2 | 2,4998 | 0,273 | 0      |
| 1 | A1L390 PKHG3_HUMAN  | E.SSGQGSS#PVALLGQVQD.F         | S1169          | 2 | 2,4974 | 0,243 | 0,743  |
| 1 | Q6UN15 FIP1_HUMAN   | E.NAS#ANPPSGIEDE.T             | S57            | 2 | 2,4938 | 0,156 | -0,177 |
| 1 | Q9HAW4 CLSPN_HUMAN  | E.TIGPLS#EGDS#DEE.I            | S42:S46        | 2 | 2,4895 | 0,191 | 0,243  |
| 1 | P27816 MAP4_HUMAN   | E.ALNS#PHSES#FVSPE.A           | S197:S202      | 2 | 2,4878 | 0,221 | 0,22   |
| 1 | O60341 LSD1_HUMAN   | E.SLANLS#EDE.Y                 | S131           | 2 | 2,4874 | 0,121 | 0,115  |
| 1 | Q12888 TP53B_HUMAN  | E.TSVIS#IDS#PQKLAILDQELE.H     | S724:S727      | 2 | 2,4862 | 0,166 | 0,207  |
| 1 | Q9H814 RNUXA_HUMAN  | E.ALASLDES#QE.G                | S368           | 2 | 2,486  | 0,394 | 0,32   |
| 1 | Q99755 PI51A_HUMAN  | E.GSPIPDPSFS#PLVGE.T           | S534           | 2 | 2,4855 | 0,318 | 0,309  |
| 1 | P35580 MYH10_HUMAN  | E.GASLELS#DDDTE.S              | S1956          | 2 | 2,4758 | 0,146 | 0,458  |
| 1 | Q9UJM3 ERRFI_HUMAN  | E.ALSLDDT#DCEVE.F              | T167           | 2 | 2,4734 | 0,301 | -0,084 |
| 1 | P55795 HNRH2_HUMAN  | E.NSS#DYQSNLA.-                | S442           | 2 | 2,4732 | 0,128 | 0      |
| 1 | P49792 RBP2_HUMAN   | E.TVFT#PKTS#PE.N               | T1396:S1400    | 2 | 2,4719 | 0,215 | -0,096 |
| 1 | Q5F1R6 DJC21_HUMAN  | E.DSPQENV#VTE.I                | S436           | 2 | 2,4685 | 0,152 | 0      |
| 1 | Q6VMQ6 MCAF1_HUMAN  | E.SS#FGS#PSKQE.S               | S474:S477      | 2 | 2,4613 | 0,144 | -0,101 |
| 1 | Q9UKV3 ACINU_HUMAN  | E.LEEASAES#EDE.M               | S169           | 2 | 2,4589 | 0,128 | -0,095 |
| 1 | P61978 HNRPK_HUMAN  | E.GLQLPS#PTAT#SQLPLESDAVE.C    | S116:T120      | 2 | 2,4543 | 0,248 | 0,95   |
| 1 | Q9NTJ3 SMC4_HUMAN   | E.IS#VLSPEDLE.A                | S1056          | 2 | 2,4536 | 0,105 | -0,103 |
| 1 | ##P12956 KU70_HUMAN | K.TDSPLLGGT#STNFTR.T           | T303           | 2 | 2,4484 | 0,109 | 0,624  |

|   |                     |                                      |             |   |        |       |        |
|---|---------------------|--------------------------------------|-------------|---|--------|-------|--------|
| 1 | Q5F1R6 DJC21_HUMAN  | E.FGDGS#DENEM*E.E                    | S283        | 2 | 2,445  | 0,143 | 0,92   |
| 1 | O94842 TOX4_HUMAN   | E.VES#PSQM*DVE.L                     | S550        | 2 | 2,4437 | 0,299 | 0,1    |
| 1 | Q92994 TF3B_HUMAN   | E.LLGGAPGSSEAAGS#PE.W                | S398        | 2 | 2,4426 | 0,186 | 0,082  |
| 1 | Q02952 AKA12_HUMAN  | E.M*VSAVSQ LTD.S                     | NA          | 2 | 2,4416 | 0,248 | 0,114  |
| 1 | Q658J3 A26CA_HUMAN  | E.LPDGQVITIGNE.R                     | NA          | 2 | 2,4365 | 0,244 | 0,291  |
| 1 | Q07666 KHDR1_HUMAN  | E.GYYS#QSQGDSE.Y                     | S388        | 2 | 2,4356 | 0,237 | 0,094  |
| 1 | Q96K76 UBP47_HUMAN  | E.TSDFENIES#PLNE.R                   | S910        | 2 | 2,432  | 0,108 | 0,31   |
| 1 | Q9UQ35 SRRM2_HUMAN  | E.NSFGS#PLE.F                        | S1329       | 2 | 2,4296 | 0,288 | 0      |
| 1 | Q9H009 NACA2_HUMAN  | E.NTQTPTVQEES#EEEE.V                 | S166        | 2 | 2,4286 | 0,381 | 0,4    |
| 1 | P49454 CENPF_HUMAN  | E.VFCSS#LQEE.N                       | S1626       | 2 | 2,427  | 0,156 | 0,207  |
| 1 | O60381 HBP1_HUMAN   | E.NLPSS#PGYNS#CDEHM*E.L              | S44:S49     | 2 | 2,4248 | 0,175 | 0,242  |
| 1 | P12270 TPR_HUMAN    | E.TQVYNQDS#QDS#IGE.G                 | S1890:S1893 | 2 | 2,4247 | 0,403 | -0,14  |
| 1 | P52701 MSH6_HUMAN   | E.DNEIES#EEE.V                       | S227        | 2 | 2,4235 | 0,17  | 0      |
| 1 | Q5T200 ZC3HD_HUMAN  | E.GYEPIS#DDELDE.I                    | S1465       | 2 | 2,4177 | 0,316 | 0,501  |
| 1 | Q9NZJ4 SACS_HUMAN   | R.Y#ASNVCFTTLGTE.F                   | Y2509       | 2 | 2,4159 | 0,243 | 0,554  |
| 1 | O60675 MAFK_HUMAN   | E.AGENAPVLS#DDE.L                    | S25         | 2 | 2,4108 | 0,305 | 0      |
| 1 | Q14568 HS902_HUMAN  | E.IEDVGS#DEEE.E                      | S263        | 2 | 2,409  | 0,253 | 0      |
| 1 | P46937 YAP1_HUMAN   | E.ALS#SDILNDM*E.S                    | S429        | 2 | 2,4049 | 0,272 | 0,187  |
| 1 | Q14444 CAPR1_HUMAN  | E.AAS#APAVEDQVPE.A                   | S264        | 2 | 2,4009 | 0,32  | 0,268  |
| 1 | O15056 SYNJ2_HUMAN  | E.NFDFTSLDYES#E.G                    | S1010       | 2 | 2,3999 | 0,298 | 0,158  |
| 1 | Q53F64 Q53F64_HUMAN | E.GES#PAGAGTGAAAGAGGATAAPPSGNQNGAE.G | S28         | 2 | 2,3985 | 0,347 | 0,469  |
| 1 | Q12888 TP53B_HUMAN  | E.LSQS#QDVEE.N                       | S178        | 2 | 2,3985 | 0,128 | 0,219  |
| 1 | P46821 MAP1B_HUMAN  | E.AEVAPVS#PEVTQE.V                   | S1298       | 2 | 2,3983 | 0,356 | 0      |
| 1 | P15336 ATF2_HUMAN   | E.LAS#PFENE.F                        | S72         | 2 | 2,3966 | 0,163 | 0,185  |
| 1 | Q13085 ACACA_HUMAN  | E.VMGCFSDS#PPQS#PTFPE.A              | S1259:S1263 | 2 | 2,3944 | 0,295 | 0,896  |
| 1 | P23528 COF1_HUMAN   | D.GVIKVFND.M                         | NA          | 2 | 2,3939 | 0,22  | 0      |
| 1 | Q92870 APBB2_HUMAN  | E.DGQVATVSSS#PE.T                    | S229        | 2 | 2,392  | 0,326 | 0,194  |
| 1 | Q9H910 HN1L_HUMAN   | E.SSNLFGS#PEE.A                      | S30         | 2 | 2,3908 | 0,314 | 0,213  |
| 1 | Q9P031 TAP26_HUMAN  | E.QCS#IDEPLFE.D                      | S129        | 2 | 2,3902 | 0,235 | 0,093  |
| 1 | Q12873 CHD3_HUMAN   | E.ADAPS#PAPSLGE.R                    | S1601       | 2 | 2,3871 | 0,327 | 0,102  |
| 1 | P49959 MRE11_HUMAN  | E.VIEVDES#DVEE.D                     | S649        | 2 | 2,3832 | 0,166 | 0,182  |
| 1 | P46013 KI67_HUMAN   | E.LFQT#PGT#DKPTTDE.K                 | T2325:T2328 | 2 | 2,3789 | 0,238 | 1,142  |
| 1 | Q8IWQ3 BRISK2_HUMAN | E.M*SNLT#PESS#PE.L                   | T509:S513   | 2 | 2,3695 | 0,233 | -0,357 |
| 1 | Q9UPS6 SET1B_HUMAN  | E.LDAVS#PIVNE.T                      | S211        | 2 | 2,3686 | 0,24  | 0      |
| 1 | Q9H6Z4 RANB3_HUMAN  | R.TSS#LTQFPPSQSEE.R                  | S126        | 2 | 2,363  | 0,134 | 0,452  |
| 1 | Q14202 ZMYM3_HUMAN  | E.SLLNSQS#PE.S                       | S774        | 2 | 2,3604 | 0,159 | 0      |
| 1 | Q9NQW6 ANLN_HUMAN   | E.M*DQALAES#SEEQED.A                 | S594        | 2 | 2,36   | 0,273 | 0,073  |
| 1 | P28290 SSFA2_HUMAN  | E.QS#YLKS#ELGLGLGE.M                 | S1079:S1083 | 2 | 2,3598 | 0,185 | 0,516  |
| 1 | O75821 EIF3G_HUMAN  | K.GIPLATGDTS#PEPE.L                  | S42         | 2 | 2,3594 | 0,413 | -0,667 |
| 1 | P35222 CTNB1_HUMAN  | E.QGFSQS#FTQE.Q                      | S73         | 2 | 2,3552 | 0,125 | -0,098 |
| 1 | Q9UDI5 Q9UDI5_HUMAN | -.PNS#EPASLLE.L                      | S3          | 2 | 2,3458 | 0,135 | 0      |

|   |                     |                               |                |   |        |       |        |
|---|---------------------|-------------------------------|----------------|---|--------|-------|--------|
| 1 | Q6UN15 FIP1_HUMAN   | E.NAS#ANPPSGIEDETAE.N         | S57            | 2 | 2,3455 | 0,322 | -0,145 |
| 1 | Q7KZ85 SPT6H_HUMAN  | E.STPMSIAGDAT#PLLDE.M         | T1718          | 2 | 2,3445 | 0,169 | 0,79   |
| 1 | Q8N3F8 MILK1_HUMAN  | E.VAQPS#PTASLE.S              | S414           | 2 | 2,3419 | 0,192 | 0,207  |
| 1 | Q5H964 Q5H964_HUMAN | E.SS#PGSSISM*E.H              | S102           | 2 | 2,3395 | 0,159 | 0      |
| 1 | Q03468 ERCC6_HUMAN  | E.GAEADLS#GDGT#DYE.L          | S396:T400      | 2 | 2,3391 | 0,179 | 0,235  |
| 1 | P17096 HMGA1_HUMAN  | E.GISQES#S#EEEEQ.-            | S102:S103      | 2 | 2,3364 | 0,244 | -0,088 |
| 1 | Q8TB99 Q8TB99_HUMAN | E.SLDSSS#QPGPVE.S             | S263           | 2 | 2,3337 | 0,229 | -0,19  |
| 1 | Q8TEQ0 SNX29_HUMAN  | E.AS#S#PGHGSPLSLLPSASVPE.S    | S59:S60        | 2 | 2,3303 | 0,204 | 0,571  |
| 1 | P10599 THIO_HUMAN   | E.VDVDDCCQDVAS#ECE.V          | S67            | 2 | 2,3287 | 0,169 | 0,213  |
| 1 | Q9UK61 CC063_HUMAN  | E.LQSS#PDVQNSLLE.D            | S1552          | 2 | 2,3256 | 0,169 | 0,404  |
| 1 | Q9H869 YYAP1_HUMAN  | E.SLNNSS#PGDLEE.V             | S773           | 2 | 2,3216 | 0,164 | 0      |
| 1 | Q03164 HRX_HUMAN    | E.SDPALLS#PGVDPTPE.G          | S2978          | 2 | 2,3155 | 0,115 | 0,852  |
| 1 | Q15185 TEBP_HUMAN   | D.DEKMPDLE.-                  | NA             | 2 | 2,3139 | 0,112 | -0,562 |
| 1 | P43243 MATR3_HUMAN  | E.AAALLES#GS#S#VGDE.T         | S671:S673:S674 | 2 | 2,3119 | 0,293 | 0,158  |
| 1 | Q15534 PER1_HUMAN   | E.SSNQDALS#GSS#DLLE.L         | S1037:S1040    | 2 | 2,3035 | 0,196 | 0,58   |
| 1 | Q15424 SAFB1_HUMAN  | E.IEEPS#LEPENE.K              | S209           | 2 | 2,2996 | 0,113 | 0,179  |
| 1 | Q9NZN5 ARHGC_HUMAN  | E.IQS#PSSCADSQQJM*E.Y         | S1492          | 2 | 2,2983 | 0,311 | 0,327  |
| 1 | Q8N954 CCD75_HUMAN  | E.DYMS#DSFINVQE.D             | S13            | 2 | 2,2974 | 0,3   | 0,559  |
| 1 | Q69YQ0 CYTSA_HUMAN  | E.GSAPGSVEDLLS#QDE.N          | S327           | 2 | 2,2963 | 0,299 | 0,616  |
| 1 | P24386 RAE1_HUMAN   | E.STNLGNLEES#SE.-             | S651           | 2 | 2,2959 | 0,245 | 0,179  |
| 1 | Q7Z6Z7 HUWE1_HUMAN  | E.T#DSVVIAGQPE.V              | T2325          | 2 | 2,2948 | 0,193 | 0,102  |
| 1 | Q16625 OCLN_HUMAN   | E.TDYTTGGES#CDE.L             | S408           | 2 | 2,2946 | 0,208 | 0,172  |
| 1 | P13056 NR2C1_HUMAN  | E.SLSNDDTS#LCE.F              | S307           | 2 | 2,2909 | 0,18  | -0,092 |
| 1 | Q6NV74 CB055_HUMAN  | E.SGPVGYDS#EDE.L              | S75            | 2 | 2,2905 | 0,387 | -0,099 |
| 1 | Q9Y5K6 CD2AP_HUMAN  | E.AQDDSETVLAGPT#SPIPSLGNVSE.T | T188           | 2 | 2,2808 | 0,114 | 0,693  |
| 1 | Q02952 AKA12_HUMAN  | E.VEMLS#QE.R                  | S505           | 2 | 2,2804 | 0,171 | 0,061  |
| 1 | P49454 CENPF_HUMAN  | E.TS#NLQDM*QSQE.I             | S1248          | 2 | 2,2798 | 0,343 | -0,266 |
| 1 | P18615 NELFE_HUMAN  | R.SLS#EQPVMDTATATE.Q          | S51            | 2 | 2,2783 | 0,201 | 0,588  |
| 1 | Q16643 DREB_HUMAN   | E.GYFSQS#QEEE.F               | S601           | 2 | 2,2757 | 0,255 | 0,19   |
| 1 | Q96N67 DOCK7_HUMAN  | R.SLSNSNPDIS#GTPTSPDDE.V      | S905           | 2 | 2,2749 | 0,201 | 0,485  |
| 1 | Q14676 MDC1_HUMAN   | E.SLTAIPEPAS#PQLLE.T          | S1775          | 2 | 2,2734 | 0,248 | 0,371  |
| 1 | Q96RT1 LAP2_HUMAN   | E.DVMFIS#DNE.S                | S440           | 2 | 2,2637 | 0,293 | -0,106 |
| 1 | P13056 NR2C1_HUMAN  | E.SLSNDDTS#LCEFQE.M           | S307           | 2 | 2,2592 | 0,249 | 0,566  |
| 1 | P55201 BRPF1_HUMAN  | E.GVS#PIPQEIFE.Y              | S238           | 2 | 2,2416 | 0,324 | 0,188  |
| 1 | Q8TDD1 DDX54_HUMAN  | E.AGES#VEDIFSE.V              | S644           | 2 | 2,2403 | 0,228 | -0,097 |
| 1 | Q9Y2D5 AKAP2_HUMAN  | E.LSNSS#PDPM*AE.A             | S121           | 2 | 2,2394 | 0,281 | 0,098  |
| 1 | Q43847 NRDC_HUMAN   | E.LEEDGTPSSEDSNS#SCE.V        | S1107          | 2 | 2,2357 | 0,288 | 0,127  |
| 1 | A8K8B2 A8K8B2_HUMAN | E.SSFLSS#QNGDSSTSQE.T         | S400           | 2 | 2,2352 | 0,251 | 0      |
| 1 | Q8IZL8 PELP1_HUMAN  | E.SDS#DDSVVIVPE.G             | S784           | 2 | 2,2338 | 0,108 | 0,091  |
| 1 | P46013 KI67_HUMAN   | E.LFQT#PGPSEE.S               | T1111          | 2 | 2,2336 | 0,197 | 0,309  |
| 1 | Q8TEQ6 GEMIS_HUMAN  | E.NSGPVENGVS#DQEGEE.Q         | S778           | 2 | 2,232  | 0,186 | 0,424  |

|   |                    |                           |                |   |        |       |        |
|---|--------------------|---------------------------|----------------|---|--------|-------|--------|
| 1 | Q9BTX1 NDC1_HUMAN  | E.FSNPS#PSTSISAE.G        | S500           | 2 | 2,2299 | 0,265 | 0,174  |
| 1 | Q9UP95 S12A4_HUMAN | E.SLYS#DEEDE.S            | S967           | 2 | 2,2294 | 0,097 | 0      |
| 1 | P38398 BRCA1_HUMAN | E.LQIDSCS#SSEE.I          | S645           | 2 | 2,2259 | 0,253 | 0,366  |
| 1 | Q9ULR0 ISY1_HUMAN  | E.INIYAVTEEES#DEE.G       | S222           | 2 | 2,2218 | 0,238 | 0,567  |
| 1 | Q5QJE6 TDIF2_HUMAN | E.SYTEEIVS#E.A            | S141           | 2 | 2,2076 | 0,081 | 0,215  |
| 1 | Q8IX90 CM003_HUMAN | E.NLTDPS#PTISSYE.N        | S346           | 2 | 2,2017 | 0,153 | 0,077  |
| 1 | Q8N3P4 VPS8_HUMAN  | E.FDIPQVDT#PPTLE.S        | T64            | 2 | 2,1989 | 0,24  | -0,157 |
| 1 | P05388 RLA0_HUMAN  | E.ES#DEDM*GFGLFD.-        | S307           | 2 | 2,1977 | 0,189 | 0,502  |
| 1 | Q02952 AKA12_HUMAN | E.GTEAS#AAEETTE.M         | S994           | 2 | 2,1977 | 0,246 | -0,191 |
| 1 | Q9BYP7 WNK3_HUMAN  | E.QVQINSTSTQTS#NE.S       | S858           | 2 | 2,1893 | 0,264 | 0,226  |
| 1 | P17096 HMGA1_HUMAN | E.EGISQESS#EEEEQ.-        | S103           | 2 | 2,1893 | 0,216 | 0      |
| 1 | Q9BW85 CCD94_HUMAN | E.ANPTPLTPGASSLSQLGAYLD.S | NA             | 2 | 2,1872 | 0,352 | 0,353  |
| 1 | O94842 TOX4_HUMAN  | E.M*ITDVVPEVES#PSQM*DVE.L | S550           | 2 | 2,1868 | 0,309 | 0,346  |
| 1 | P60709 ACTB_HUMAN  | E.ALFQPS#FLGM*E.S         | S265           | 2 | 2,1817 | 0,18  | 0,274  |
| 1 | P54725 RD23A_HUMAN | E.YLLTGIPGS#PEPE.H        | S205           | 2 | 2,1757 | 0,394 | 0,504  |
| 1 | Q96L73 NSD1_HUMAN  | E.NLGLNFISGDIS#DTQASNE.L  | S543           | 2 | 2,1695 | 0,189 | 0,706  |
| 1 | Q01433 AMPD2_HUMAN | E.TIPEEAGITMS#PGPQ.-      | S875           | 2 | 2,1665 | 0,194 | 0,911  |
| 1 | Q5SW79 CE170_HUMAN | R.LGS#LSARS#DSE.A         | S1160:S1165    | 2 | 2,1631 | 0,155 | -0,666 |
| 1 | Q8N5W9 F101B_HUMAN | E.AAELPGSDDL#DEC.-        | S211           | 2 | 2,1614 | 0,096 | 0,078  |
| 1 | Q02952 AKA12_HUMAN | E.VSS#LEGS#PPPCLGQEE.A    | S1391:S1395    | 2 | 2,1488 | 0,275 | 0,595  |
| 1 | Q96NT5 PCFT_HUMAN  | E.FQQFPQS#P.-             | S458           | 2 | 2,1483 | 0,171 | 0,115  |
| 1 | Q86WR0 CCD25_HUMAN | E.NMSSNQDGND#DEFM.-       | S204           | 2 | 2,1428 | 0,138 | 0,138  |
| 1 | O15446 RPA34_HUMAN | E.VDM*ALGS#PE.M           | S205           | 2 | 2,141  | 0,148 | -0,18  |
| 1 | O94842 TOX4_HUMAN  | E.LVSGS#PVALS#PQPR.C      | S562:S567      | 2 | 2,1398 | 0,095 | 0,623  |
| 1 | Q5H9R7 SAPS3_HUMAN | E.AAGSVAMEASS#DGEEDAE.S   | S777           | 2 | 2,1382 | 0,331 | 0,27   |
| 1 | Q96EQ0 SGTB_HUMAN  | E.VSSPT#GTGLSFD.M         | T207           | 2 | 2,136  | 0,091 | 0,293  |
| 1 | Q2KJY2 KI26B_HUMAN | E.VCS#PTKPAAPFS#PE.S      | S27:S36        | 2 | 2,1306 | 0,155 | 0,666  |
| 1 | Q7Z6Z7 HUWE1_HUMAN | E.VQAM*QS#FNSTQQNE.T      | S740           | 2 | 2,1263 | 0,31  | 0,143  |
| 1 | Q9UBB5 MBD2_HUMAN  | E.M*DIEM*DS#GDEA.-        | S407           | 2 | 2,124  | 0,287 | 0      |
| 1 | Q96RT1 LAP2_HUMAN  | E.DVM*FIS#DNE.S           | S440           | 2 | 2,1234 | 0,113 | 0      |
| 1 | Q9ULI0 ATD2B_HUMAN | E.TLILED#EDE.N            | S720           | 2 | 2,1174 | 0,129 | 0      |
| 1 | Q09666 AHNK_HUMAN  | E.FSGPST#PTGTLE.F         | T5794          | 2 | 2,1052 | 0,18  | 0,096  |
| 1 | Q15154 PCM1_HUMAN  | E.QAIAVM*DDS#VVAE.T       | S320           | 2 | 2,105  | 0,171 | 0,338  |
| 1 | Q14839 CHD4_HUMAN  | E.CTQAPAPAS#EDE.K         | S1602          | 2 | 2,0951 | 0,128 | 0,09   |
| 1 | P78536 ADA17_HUMAN | E.SLS#LFHPS#NVE.M         | S706:S711      | 2 | 2,0893 | 0,3   | -0,351 |
| 1 | Q9H5H4 ZN768_HUMAN | E.ISQQEGS#GDYE.V          | S46            | 2 | 2,085  | 0,202 | -0,094 |
| 1 | P38159 HNRPG_HUMAN | R.GLPPS#M*E.R             | S352           | 2 | 2,0725 | 0,164 | 0,221  |
| 1 | Q99618 CDCA3_HUMAN | E.LDLPLGTQLS#VEE.Q        | S131           | 2 | 2,0715 | 0,317 | 0,163  |
| 1 | Q9BTT0 AN32E_HUMAN | E.LLQKITLDGFDQED.N        | NA             | 2 | 2,0703 | 0,408 | 0,746  |
| 1 | Q8IYA6 CKP2L_HUMAN | E.ALPVTLGFQT#PES.-        | T742           | 2 | 2,0664 | 0,331 | 0,424  |
| 1 | P30414 NKTR_HUMAN  | K.S#PRKT#AS#QLSE.N        | S566:T570:S572 | 2 | 2,065  | 0,101 | 0,93   |

|   |                     |                                |             |   |        |       |        |
|---|---------------------|--------------------------------|-------------|---|--------|-------|--------|
| 1 | Q9H4A3 WNK1_HUMAN   | E.SSVLSSSS#S#PE.S              | S1898:S1899 | 2 | 2,0553 | 0,249 | 0,428  |
| 1 | Q9UHR4 BI2L1_HUMAN  | E.TEAVTVPTSPST#PVRSIST#VNLSE.N | T416:T423   | 2 | 2,0546 | 0,082 | 0,924  |
| 1 | Q15154 PCM1_HUMAN   | E.QAIAVMDDDS#VVAE.T            | S320        | 2 | 2,0501 | 0,213 | 0,171  |
| 1 | P55209 NP1L1_HUMAN  | R.LDGLVET#PTGYIE.S             | T62         | 2 | 2,0467 | 0,13  | 0,164  |
| 1 | O60307 MAST3_HUMAN  | E.AVQEVS#FDEPQEE.A             | S1273       | 2 | 2,0425 | 0,173 | 0,538  |
| 1 | Q14444 CAPR1_HUMAN  | E.ATQVPLVSS#TSE.G              | S437        | 2 | 2,0387 | 0,145 | 0      |
| 1 | P41227 ARD1A_HUMAN  | E.TTESTDVKDSS#EAS#DSAS.-       | S228:S231   | 2 | 2,0375 | 0,323 | 0,185  |
| 1 | Q5SR56 HIAL1_HUMAN  | E.LSS#FEEPGNQCTEL.-            | S474        | 2 | 2,0367 | 0,144 | 1,082  |
| 1 | Q9BPX3 CND3_HUMAN   | E.ADS#ES#DHEVPEPESE.M          | S973:S975   | 2 | 2,0366 | 0,201 | -0,067 |
| 1 | P16157 ANK1_HUMAN   | E.ILDVVS#EDEGEE.L              | S817        | 2 | 2,0265 | 0,16  | 0      |
| 1 | P61247 RS3A_HUMAN   | R.ADGYEPPVQES#V.-              | S263        | 2 | 2,025  | 0,261 | 0,178  |
| 1 | P49454 CENPF_HUMAN  | E.LEIINSS#FE.N                 | S2513       | 2 | 2,019  | 0,127 | 0,97   |
| 1 | Q92598 HS105_HUMAN  | D.AQQTSQSPPS#PE.L              | S557        | 2 | 2,0125 | 0,236 | -0,183 |
| 1 | P25963 IKBA_HUMAN   | E.NLQM*LPES#EDEE.S             | S283        | 2 | 2,0092 | 0,088 | 0,08   |
| 1 | Q9H8V3 ECT2_HUMAN   | E.NLLIGST#SYVEE.E              | T39         | 2 | 2,0036 | 0,2   | -0,174 |
| 1 | Q8N9M1 CS047_HUMAN  | E.SVPCSPS#PLAGE.I              | S126        | 2 | 2,0021 | 0,103 | -0,381 |
| 1 | O95453 PARN_HUMAN   | E.DGVSGEIS#DTELE.Q             | S587        | 2 | 1,9926 | 0,13  | 0,256  |
| 1 | Q14160 LAP4_HUMAN   | E.ACPCQPDSGS#PLPAEE.E          | S504        | 2 | 1,9916 | 0,118 | 0,476  |
| 1 | Q15276 RABE1_HUMAN  | E.T#ASLLSSVTQGM*E.S            | T486        | 2 | 1,9913 | 0,085 | 0,859  |
| 1 | Q15633 TRBP2_HUMAN  | E.LQPPVS#PQQSE.C               | S152        | 2 | 1,9905 | 0,279 | 0      |
| 1 | O75164 JHD3A_HUMAN  | E.IPQEV#QSE.L                  | S410        | 2 | 1,9895 | 0,097 | 0      |
| 1 | Q15424 SAFB1_HUMAN  | E.IEEPS#LEPE.N                 | S209        | 2 | 1,9811 | 0,182 | 0,217  |
| 1 | Q5T1V6 DDX59_HUMAN  | E.SCPFPS#PGGQLAE.V             | S64         | 2 | 1,966  | 0,253 | 0,257  |
| 1 | Q9Y3T9 NOC2L_HUMAN  | E.DLQLS#EDD.-                  | S746        | 2 | 1,9521 | 0,256 | 0,18   |
| 1 | Q13123 RED_HUMAN    | E.CYPATM*DDM*AVDS#DEE.V        | S460        | 2 | 1,948  | 0,186 | -0,062 |
| 1 | P54725 RD23A_HUMAN  | E.QFIQM*LNEPPGELADIS#DVEGE.V   | S295        | 2 | 1,9425 | 0,363 | 0,966  |
| 1 | P49023 PAXI_HUMAN   | E.ANS#SPPLPGALS#PLYGVPE.T      | S169:S178   | 2 | 1,9424 | 0,151 | 0,12   |
| 1 | Q07021 C1QBP_HUMAN  | E.VSFQS#TGESE.W                | S213        | 2 | 1,9391 | 0,174 | -0,106 |
| 1 | Q96TA1 NIBL1_HUMAN  | E.VGLPFEASPES#PPPAS#PD.G       | S628:S633   | 2 | 1,9384 | 0,175 | 1,311  |
| 1 | Q4LE39 ARI4B_HUMAN  | E.SLQTVAAEEES#CSPS#VE.L        | S977:S981   | 2 | 1,9351 | 0,282 | 1,021  |
| 1 | Q86UA1 PRP39_HUMAN  | -.M*EQS#PDDSPNVNASTEETE.M      | S4          | 2 | 1,9304 | 0,139 | -0,112 |
| 1 | Q16637 SMN_HUMAN    | E.EQNLSDLLS#PICE.V             | S143        | 2 | 1,9301 | 0,258 | 0,229  |
| 1 | Q02952 AKA12_HUMAN  | E.MVSAVSQLTDSPT#T#EEATPVQE.V   | T1015:T1016 | 2 | 1,9178 | 0,183 | 0,94   |
| 1 | Q8NEY8 PPHLN_HUMAN  | E.AGS#TAPLFTDQPEEPE.S          | S259        | 2 | 1,9153 | 0,19  | 0,483  |
| 1 | Q96SB3 NEB2_HUMAN   | E.DEELS#PTFPGGE.M              | S633        | 2 | 1,914  | 0,122 | 0,27   |
| 1 | P11137 MAP2_HUMAN   | E.TIVSEPAEQS#EEEE.I            | S1234       | 2 | 1,9112 | 0,21  | 0,483  |
| 1 | P55795 HNRH2_HUMAN  | E.NSSDYQS#NLA.-                | S446        | 2 | 1,9015 | 0,13  | 0,103  |
| 1 | Q9Y2W2 WBP11_HUMAN  | E.DM*LYS#PE.L                  | S237        | 2 | 1,9003 | 0,091 | -0,192 |
| 1 | Q7Z6Z7 HUWE1_HUMAN  | E.LS#PAPTITSLSPE.R             | S2826       | 2 | 1,8995 | 0,162 | 0      |
| 1 | Q5VU20 Q5VU20_HUMAN | E.LT#DLQSNVTEETPE.G            | T232        | 2 | 1,8962 | 0,223 | 0,482  |
| 1 | Q9BTX1 NDC1_HUMAN   | E.FSNPSPSTS#ISAE.G             | S504        | 2 | 1,8608 | 0,212 | -0,087 |



|   |                      |                              |                |   |        |       |        |
|---|----------------------|------------------------------|----------------|---|--------|-------|--------|
| 1 | Q96G28 CC104_HUMAN   | E.AAIMNNS#QGDGE.H            | S201           | 2 | 1,8545 | 0,163 | 0      |
| 1 | P49643 PRI2_HUMAN    | E.GLEDYFS#EDS.-              | S506           | 2 | 1,8479 | 0,302 | 0,098  |
| 1 | P60709 ACTB_HUMAN    | E.ALQPSFLGM*E.S              | NA             | 2 | 1,846  | 0,302 | -0,097 |
| 1 | Q12888 TP53B_HUMAN   | E.ALS#SVLDQEE.A              | S639           | 2 | 1,8446 | 0,147 | 0,208  |
| 1 | Q00839 HNRPU_HUMAN   | E.LGEENGAAGAAD.S             | NA             | 2 | 1,8445 | 0,102 | 0      |
| 1 | Q16543 CDC37_HUMAN   | D.HIEVS#DDEDE.T              | S13            | 2 | 1,8373 | 0,084 | -0,096 |
| 1 | Q969F1 TF3C6_HUMAN   | E.DSGPLIDIPS#ETE.G           | S199           | 2 | 1,8362 | 0,308 | 0,336  |
| 1 | Q9Y5K6 CD2AP_HUMAN   | E.TVLAGPTS#PIPSLGNVSE.T      | S189           | 2 | 1,8247 | 0,234 | 0,47   |
| 1 | Q96P22 F111A_HUMAN   | E.VFVNQQDQVEM*M*S#DEDL.-     | S607           | 2 | 1,8223 | 0,135 | 0,364  |
| 1 | Q92800 EZH1_HUMAN    | E.LVDALNQYS#DEEEE.G          | S187           | 2 | 1,7919 | 0,083 | 0,211  |
| 1 | Q99661 KIF2C_HUMAN   | E.LSS#QMS#SFNE.A             | S629:S632      | 2 | 1,7898 | 0,155 | 0,189  |
| 1 | P18583 SON_HUMAN     | E.LQGPPVT#PVLE.L             | T400           | 2 | 1,7738 | 0,081 | 0,397  |
| 1 | Q03164 HRX_HUMAN     | E.QFLGFGS#DEE.V              | S153           | 2 | 1,7717 | 0,295 | 0,202  |
| 1 | Q9BTT0 AN32E_HUMAN   | E.LLQQITYLD.G                | NA             | 2 | 1,7654 | 0,094 | 0,11   |
| 1 | Q2TAL8 QRIC1_HUMAN   | E.VEPQS#QPQPS#PE.L           | S459:S464      | 2 | 1,762  | 0,12  | -0,082 |
| 1 | Q14676 MDC1_HUMAN    | R.AQPFIDFS#DT#DAEEEE.R       | S329:T331      | 2 | 1,7554 | 0,225 | 0,632  |
| 1 | Q03468 ERCC6_HUMAN   | E.IDDDFFPS#S#GEEAE.A         | S429:S430      | 2 | 1,7476 | 0,166 | 0,426  |
| 1 | Q96D70 CS022_HUMAN   | E.DGDLAPPAS#PGIFAE.A         | S102           | 2 | 1,739  | 0,194 | 0,476  |
| 1 | P38159 HNRPG_HUMAN   | R.GLPPS#ME.R                 | S352           | 2 | 1,718  | 0,204 | 0,15   |
| 1 | Q96AC1 FERM2_HUMAN   | E.VDAALS#DLE.I               | S351           | 2 | 1,6993 | 0,108 | -0,12  |
| 1 | P62807 H2B1C_HUMAN   | R.KESYSVYVYK.V               | NA             | 2 | 1,6696 | 0,161 | -0,482 |
| 1 | Q9Y3F4 STRAP_HUMAN   | E.LEEIAS#ENS#D.C             | S335:S338      | 2 | 1,6586 | 0,112 | 0,193  |
| 1 | Q14247 SRC8_HUMAN    | K.TQT#PPVS#PAPQPTEE.R        | T401:S405      | 2 | 1,6507 | 0,154 | -0,14  |
| 1 | P49643 PRI2_HUMAN    | E.MDMEGLEDYFS#EDS.-          | S506           | 2 | 1,6323 | 0,238 | 0,768  |
| 1 | Q9UCN2 Q9UCN2_HUMAN  | -.PYQPALTPE.Q                | NA             | 2 | 1,6312 | 0,157 | 0,414  |
| 1 | Q15025 TNIP1_HUMAN   | E.VVTPEEQNS#PE.S             | S135           | 2 | 1,6144 | 0,097 | -0,186 |
| 1 | Q0ZGT2 NEXN_HUMAN    | E.GSIM*NGST#AEDEE.Q          | T570           | 2 | 1,6111 | 0,116 | 0,255  |
| 1 | ##Q9UP95 S12A4_HUMAN | E.EHEKAGQT#LNTY#S#VLK.G      | T993:Y997:S998 | 2 | 1,5991 | 0,211 | -1,304 |
| 1 | ##P01008 ANT3_HUMAN  | R.GAIVVAT#SAAAE.S            | T47            | 2 | 1,5989 | 0,134 | 0,214  |
| 1 | Q9Y3T9 NOC2L_HUMAN   | E.FLAS#GFSESESESE.N          | S22            | 2 | 1,5578 | 0,1   | 0,574  |
| 1 | Q8IVL5 P3H2_HUMAN    | D.SIDPAS#IEARE.D             | S361           | 2 | 1,5366 | 0,11  | 0      |
| 2 | Q02952 AKA12_HUMAN   | E.ARGDTVVS#EAELT#PEAVTAAE.T  | S967:T972      | 2 | 4,6041 | 0,531 | 0      |
| 2 | Q9UHR4 BI2L1_HUMAN   | E.IKT#PASTPVSGTPQAS#PM*IE.R  | T248:S261      | 2 | 4,4041 | 1     | 0,112  |
| 2 | P27816 MAP4_HUMAN    | E.VGLLKDM*S#PLS#ETE.M        | S507:S510      | 2 | 4,2279 | 0,429 | 0,288  |
| 2 | P52788 SPSY_HUMAN    | D.EVVYDEDSPTYQNIK.I          | NA             | 2 | 4,1847 | 0,496 | 0,287  |
| 2 | Q8WXI9 P66B_HUMAN    | R.GRLT#PS#PDIIVLSDNE.A       | T120:S122      | 2 | 4,1091 | 0,357 | 0      |
| 2 | Q9NRF2 SH2B1_HUMAN   | E.VARAS#GSLSPILAPLS#PGAE.I   | S84:S96        | 2 | 4,0401 | 0,458 | 0      |
| 2 | Q9BQY9 DBND2_HUMAN   | E.SQRPPIGSIS#S#M*EVNVDLTLE.Q | S153:S154      | 2 | 4,008  | 0,345 | 0,105  |
| 2 | Q9Y6A5 TACC3_HUMAN   | E.NQM*VS#PGKVSGS#PEQAVEE.N   | S170:S177      | 2 | 3,998  | 0,421 | 0      |
| 2 | Q8WXI9 P66B_HUMAN    | R.GRLT#PSPDIIVLS#DNE.A       | T120:S129      | 2 | 3,7364 | 0,364 | -0,194 |
| 2 | P49792 RBP2_HUMAN    | K.IIDSDSNLSVVK.K             | NA             | 2 | 3,693  | 0,417 | 0      |

|   |                    |                                    |                |   |        |       |        |
|---|--------------------|------------------------------------|----------------|---|--------|-------|--------|
| 2 | Q06210 GFPT1_HUMAN | K.GYDFESETDTETIAK.L                | NA             | 2 | 3,5908 | 0,465 | -0,072 |
| 2 | Q14C86 GAPD1_HUMAN | E.GISEGSPNRSNS#VSS#LDLE.G          | S585:S588      | 2 | 3,5021 | 0,249 | 0,116  |
| 2 | Q9HC35 EMAL4_HUMAN | E.TAEESRISS#S#PTLLE.N              | S918:S919      | 2 | 3,4757 | 0,416 | 0,256  |
| 2 | Q5SW79 CE170_HUMAN | E.SGM*TVRSTGS#ATS#LASQGE.R         | S630:S633      | 2 | 3,4486 | 1     | -0,122 |
| 2 | Q13263 TIF1B_HUMAN | E.GPGAEGPRLASPS#GS#TSSGLE.V        | S596:S598      | 2 | 3,43   | 1     | 0,118  |
| 2 | Q6NZI2 PTRF_HUMAN  | E.SDAVLVDKS#DS#D.-                 | S387:S389      | 2 | 3,357  | 0,263 | -0,086 |
| 2 | Q99700 ATX2_HUMAN  | E.NSSSNCTSGSSKPNSPS#ISPS#ILSNT.E.H | S862:S866      | 3 | 3,3553 | 1     | 0,252  |
| 2 | Q9NPI6 DCP1A_HUMAN | R.KASS#PSPLTIGT#PE.S               | S523:T531      | 2 | 3,3213 | 0,396 | 0,079  |
| 2 | Q15185 TEBP_HUMAN  | D.SQDS#DDEKM*PDLE.-                | S151           | 2 | 3,3089 | 0,321 | -0,152 |
| 2 | P12270 TPR_HUMAN   | E.SGGRS#VPTT#PLQVAAPVTVFTE.S       | S2196:T2200    | 2 | 3,307  | 0,445 | 0,206  |
| 2 | Q9H4A3 WNK1_HUMAN  | E.LSEPSHLNGPS#S#DPE.A              | S2011:S2012    | 2 | 3,2916 | 0,325 | 0      |
| 2 | Q02790 FKBP4_HUMAN | E.DLTEEDGGIIR.R                    | NA             | 2 | 3,2623 | 0,361 | -0,091 |
| 2 | Q9C0B0 UNK_HUMAN   | E.HFASGSFS#PGT#SPAFLSGPGAEE.L      | S631:T634      | 2 | 3,2296 | 1     | 0,104  |
| 2 | Q9UHR4 BI2L1_HUMAN | E.IKT#PASTPVSGTPQAS#PM*IE.R        | T248:S261      | 3 | 3,165  | 0,103 | 0,418  |
| 2 | P46821 MAP1B_HUMAN | E.ASPSTSSAHT#PSQIAS#PLQE.D         | T1737:S1743    | 2 | 3,1519 | 0,35  | 0,453  |
| 2 | Q13426 XRCC4_HUMAN | E.TLRNS#S#PEDLFDEI.-               | S327:S328      | 2 | 3,1425 | 0,375 | -0,136 |
| 2 | Q8N163 K1967_HUMAN | E.DSEVRSVAS#NQS#EM*E.F             | S678:S681      | 2 | 3,1225 | 0,373 | -0,066 |
| 2 | Q01105 SET_HUMAN   | D.FYFDENPYFENK.V                   | NA             | 2 | 3,0755 | 0,381 | -0,151 |
| 2 | Q9BVJ6 UT14A_HUMAN | E.LTQKLQVAS#ES#EEEE.G              | S341:S343      | 2 | 3,0684 | 0,304 | 0,13   |
| 2 | Q6NZI2 PTRF_HUMAN  | E.SDAVLVDKS#D.S                    | S387           | 2 | 3,0511 | 0,319 | 0      |
| 2 | Q6PD74 P34_HUMAN   | E.IEGLS#S#DEEH.-                   | S310:S311      | 2 | 3,0462 | 0,275 | -0,096 |
| 2 | Q9HC35 EMAL4_HUMAN | E.SRIS#SS#PTLLE.N                  | S917:S919      | 2 | 3,0427 | 0,255 | 0      |
| 2 | P30101 PDIA3_HUMAN | E.STAGEIPVVAIR.T                   | NA             | 2 | 3,0408 | 0,38  | -0,101 |
| 2 | Q9Y4B4 ARIP4_HUMAN | E.GLARPVS#PDS#PEIISE.L             | S1169:S1172    | 2 | 3,0384 | 0,429 | 0      |
| 2 | Q14160 LAP4_HUMAN  | E.LRSLEPS#PS#PGPQEEDGE.V           | S1579:S1581    | 2 | 2,9047 | 0,285 | 0      |
| 2 | P11021 GRP78_HUMAN | K.ELEEIVQPIISK.L                   | NA             | 2 | 2,9046 | 0,39  | -0,087 |
| 2 | Q15185 TEBP_HUMAN  | D.S#DDEKM*PDLE.-                   | S151           | 2 | 2,9044 | 0,22  | 0      |
| 2 | Q6NZI2 PTRF_HUMAN  | E.SDAVLVDKS#DSD.-                  | S387           | 2 | 2,8953 | 0,262 | 0      |
| 2 | Q6PKG0 LARP1_HUMAN | E.T#ESAPGS#PRAVT#PVPTKTEE.V        | T515:S521:T526 | 2 | 2,8953 | 0,334 | 0,106  |
| 2 | P08195 4F2_HUMAN   | D.LLQIDPNFGSKE.D                   | NA             | 2 | 2,8427 | 0,448 | -0,09  |
| 2 | Q96T60 PNKP_HUMAN  | E.TRTPES#QPDT#PPGTPLVSQDE.K        | S114:T118      | 2 | 2,8222 | 0,473 | 0,304  |
| 2 | P05787 K2C8_HUMAN  | R.TEM*ENEFVLIK.K                   | NA             | 2 | 2,8153 | 0,344 | -0,089 |
| 2 | Q9UBU9 NXF1_HUMAN  | E.IQRAFAM*PAPT#PS#SSPVPTLSPEQQE.M  | T554:S556      | 3 | 2,812  | 0,214 | 0,249  |
| 2 | P04792 HSPB1_HUMAN | R.ALS#RQLS#SGVSE.I                 | S78:S82        | 2 | 2,7864 | 0,195 | -0,088 |
| 2 | Q9HC35 EMAL4_HUMAN | E.SRISS#S#PTLLE.N                  | S918:S919      | 2 | 2,7676 | 0,158 | 0      |
| 2 | Q12830 BPTF_HUMAN  | E.SHT#PVS#IQEE.I                   | T600:S603      | 2 | 2,7485 | 0,168 | -0,19  |
| 2 | O75534 CSDE1_HUMAN | E.S#KSPAAPGQSPT#GSVCYE.R           | S114:T125      | 2 | 2,7185 | 0,23  | -0,062 |
| 2 | P27816 MAP4_HUMAN  | E.VGLLKDMS#PLS#ETE.M               | S507:S510      | 2 | 2,717  | 0,433 | -0,291 |
| 2 | Q8TB72 PUM2_HUMAN  | E.VNAILS#PRS#E.S                   | S82:S85        | 2 | 2,7103 | 0,18  | 0,098  |
| 2 | Q15185 TEBP_HUMAN  | D.SQDS#DDEKMPDLE.-                 | S151           | 2 | 2,7019 | 0,426 | -0,154 |
| 2 | Q09666 AHNK_HUMAN  | E.GPEVDVNLPKAD.V                   | NA             | 2 | 2,6841 | 0,13  | -0,097 |

|   |                    |                                          |                |   |        |       |        |
|---|--------------------|------------------------------------------|----------------|---|--------|-------|--------|
| 2 | Q9BUR4 WDR79_HUMAN | E.FGS#PSELS#PRIEEQE.L                    | S85:S90        | 2 | 2,6758 | 0,296 | 0,262  |
| 2 | Q01831 XPC_HUMAN   | E.AAAPHTDAGGGLS#S#DEEEGTSSQAE.A          | S883:S884      | 3 | 2,6628 | 0,254 | 0,144  |
| 2 | P31749 AKT1_HUMAN  | E.M*DFRSGS#PSDNS#GAEE.M                  | S124:S129      | 2 | 2,6438 | 0,431 | -0,066 |
| 2 | Q9BVJ6 UT14A_HUMAN | E.LTQKLQVAS#E.S                          | S341           | 2 | 2,6409 | 0,219 | -0,102 |
| 2 | P42166 LAP2A_HUMAN | E.SRS#ST#PLPTISSAE.N                     | S158:T160      | 2 | 2,6186 | 0,331 | 0,145  |
| 2 | Q09666 AHNK_HUMAN  | K.DIDISS#PEFK.I                          | S177           | 2 | 2,6144 | 0,216 | -0,297 |
| 2 | P40425 PBX2_HUMAN  | E.AVTPSSVTSPTEGPGSVHS#DT#SN.-            | S426:T428      | 2 | 2,5981 | 0,338 | 0,308  |
| 2 | Q8N1G0 ZN687_HUMAN | E.ASLKLS#PAT#PTSE.G                      | S374:T377      | 2 | 2,5853 | 0,339 | -0,077 |
| 2 | Q8WXI9 P66B_HUMAN  | R.GRLTPS#PDIIVLS#DNE.A                   | S122:S129      | 2 | 2,5828 | 0,304 | 0,065  |
| 2 | Q14247 SRC8_HUMAN  | R.AKTQT#PPVS#PAPQPTEE.R                  | T401:S405      | 2 | 2,5384 | 0,167 | -0,063 |
| 2 | Q6PKG0 LARP1_HUMAN | E.TES#APGS#PRAVT#PVPTKTEE.V              | S517:S521:T526 | 3 | 2,5276 | 0,267 | 0      |
| 2 | Q01813 K6PP_HUMAN  | R.NVIFQPVAELK.K                          | NA             | 2 | 2,5248 | 0,432 | 0      |
| 2 | Q6S8J3 A26CA_HUMAN | E.M*ATASSSSLE.K                          | NA             | 2 | 2,5222 | 0,303 | -0,228 |
| 2 | Q16576 RBBP7_HUMAN | E.M*FEDTVEERVINE.E                       | NA             | 2 | 2,5062 | 0,261 | 0,225  |
| 2 | Q09666 AHNK_HUMAN  | K.GDVDVSVPEVEGK.L                        | NA             | 2 | 2,4999 | 0,395 | -0,092 |
| 2 | Q15047 SET1A_HUMAN | E.RVAGS#PVT#PLPEQE.A                     | S1103:T1106    | 2 | 2,4758 | 0,28  | -0,149 |
| 2 | Q09666 AHNK_HUMAN  | E.GPEVDVNLPKADID.V                       | NA             | 2 | 2,4657 | 0,124 | -0,082 |
| 2 | Q9UHY1 NRBP_HUMAN  | E.SQTVLSS#GS#DPKVE.S                     | S12:S14        | 2 | 2,4517 | 0,123 | 0      |
| 2 | Q6NZI2 PTRF_HUMAN  | E.LGEGERPEED.A                           | NA             | 2 | 2,4478 | 0,274 | -0,216 |
| 2 | Q8IZT6 ASPM_HUMAN  | E.ENKIPIS#PIS#PAFNE.C                    | S222:S225      | 2 | 2,4436 | 0,278 | -0,202 |
| 2 | Q9NR48 ASH1L_HUMAN | E.LTSLKEAT#PS#PISE.S                     | T1184:S1186    | 2 | 2,4246 | 0,327 | 0,149  |
| 2 | Q9H307 PININ_HUMAN | E.TNRVES#VEPS#ENE.A                      | S413:S417      | 2 | 2,4244 | 0,293 | -0,222 |
| 2 | Q16881 TRXR1_HUMAN | K.QLDSTIGIHPVCAE.V                       | NA             | 2 | 2,4144 | 0,377 | -0,158 |
| 2 | Q8NHV4 NEDD1_HUMAN | E.S#GNLNTSPSSNQTRNS#E.K                  | S510:S525      | 2 | 2,4101 | 0,373 | -0,062 |
| 2 | Q9UMY1 NOL7_HUMAN  | E.GQLAS#EEEEAE.H                         | S26            | 2 | 2,3804 | 0,286 | 0      |
| 2 | Q9NWH9 SLTM_HUMAN  | E.VSKPLPS#EGS#LAE.A                      | S214:S217      | 2 | 2,3721 | 0,18  | 0,083  |
| 2 | Q15234 CASC3_HUMAN | E.QTSVRDPS#PEADAPVLGS#PE.K               | S363:S373      | 2 | 2,3715 | 0,319 | 0,11   |
| 2 | Q9BQY9 DBND2_HUMAN | E.SQRPPIGS#IS#SM*EVNVDTLE.Q              | S151:S153      | 2 | 2,3624 | 0,173 | 0,105  |
| 2 | Q14671 PUM1_HUMAN  | E.VNSVLS#PRS#E.S                         | S209:S212      | 2 | 2,361  | 0,256 | 0      |
| 2 | P81605 DCD_HUMAN   | D.AVEDLESVGK.G                           | NA             | 2 | 2,3458 | 0,262 | -0,117 |
| 2 | P05783 K1C18_HUMAN | E.STTVVTTQSAE.V                          | NA             | 2 | 2,3284 | 0,372 | -0,217 |
| 2 | Q9ULJ3 ZN295_HUMAN | E.HGS#PVS#EDNFEE.G                       | S504:S507      | 2 | 2,2901 | 0,251 | -0,081 |
| 2 | P25490 TYY1_HUMAN  | E.VVGGDDSDGLRAED.G                       | S118           | 2 | 2,279  | 0,466 | 0,247  |
| 2 | O94915 FRYL_HUMAN  | E.SRYS#SS#SGGSYEEE.K                     | S1533:S1535    | 2 | 2,2737 | 0,164 | -0,652 |
| 2 | Q9BZF3 OSBL6_HUMAN | E.SRLS#M*SES#VSE.F                       | S487:S491      | 2 | 2,2671 | 0,224 | -0,264 |
| 2 | Q13523 PRP4B_HUMAN | E.M*EDANS#EKS#INEE.N                     | S20:S23        | 2 | 2,2643 | 0,326 | -0,146 |
| 2 | Q9NPI6 DCP1A_HUMAN | R.KAS#S#PSPLTIGTPE.S                     | S522:S523      | 2 | 2,2626 | 0,258 | 0,237  |
| 2 | Q6NZI2 PTRF_HUMAN  | E.SDAVLVDK.S                             | NA             | 2 | 2,223  | 0,258 | 0,144  |
| 2 | P04792 HSPB1_HUMAN | R.QLS#SGVSEIR.H                          | S82            | 2 | 2,2169 | 0,096 | -0,106 |
| 2 | P55072 TERA_HUMAN  | K.DVDLEFLAK.M                            | NA             | 2 | 2,2153 | 0,177 | 0,116  |
| 3 | Q8IX01 SFR14_HUMAN | E.ASGPS#PKPAGVDISEAPQTSS#PCPSADIDMKTME.T | S757:S773      | 3 | 8,0162 | 1     | 1,011  |

|   |                     |                                            |                   |   |        |       |        |
|---|---------------------|--------------------------------------------|-------------------|---|--------|-------|--------|
| 3 | Q8IX01 SFR14_HUMAN  | E.ASGPS#PKPAGVDISEAPQTSS#PCPSADIDMKTM*E.T  | S757:S773         | 3 | 7,3484 | 1     | 0,806  |
| 3 | Q8IX01 SFR14_HUMAN  | E.ASGPS#PKPAGVDISEAPQTSS#PCPSADIDM*KTME.T  | S757:S773         | 3 | 7,2921 | 1     | 0,604  |
| 3 | Q13283 G3BP1_HUMAN  | E.TAPEDAQKSSS#PAPADIAQTVQE.D               | S232              | 2 | 6,243  | 0,548 | 0,202  |
| 3 | P46939 UTRO_HUMAN   | E.RTNGSFLTDSSS#TTGS#VEDE.H                 | S3217:S3221       | 2 | 5,9838 | 1     | 0,434  |
| 3 | Q96JM3 ZN828_HUMAN  | E.LQT#PLPS#PEPSKPASVSSPEPPKSVPVCE.S        | T169:S173         | 3 | 5,8681 | 1     | 0,343  |
| 3 | Q9UHR4 BI2L1_HUMAN  | E.IKTPASTPVSGT#PQAS#PM*IE.R                | T257:S261         | 2 | 5,8044 | 1     | 0,223  |
| 3 | Q9GZR1 SENP6_HUMAN  | E.SIS#PQPADSACSSPAPSTGKVE.A                | S352              | 2 | 5,6007 | 0,597 | 0,542  |
| 3 | Q15083 ERC2_HUMAN   | E.NIQSLNAAAYATSGPMYLS#DHE.G                | S65               | 2 | 5,5969 | 0,526 | 0,413  |
| 3 | Q9ULI2 RIMKB_HUMAN  | E.LGPPASTAVDNM*SASSSSVDS#DPESTERE.L        | S353              | 3 | 5,5606 | 0,468 | 0,242  |
| 3 | P38398 BRCA1_HUMAN  | E.SGISLFSDDPES#DPSEDRAPE.S                 | S1577             | 2 | 5,5136 | 0,478 | 0,209  |
| 3 | Q9UHR4 BI2L1_HUMAN  | E.IKTPASTPVVS#GTPQAS#PMIE.R                | S255:S261         | 2 | 5,3641 | 0,46  | 0,562  |
| 3 | Q9GZR1 SENP6_HUMAN  | E.S#ISPQPADSACSSPAPSTGKVE.A                | S350              | 3 | 5,2989 | 0,468 | 0,162  |
| 3 | Q8WWM7 ATX2L_HUMAN  | E.VDGLLTSEPM*GS#PVSSKTE.S                  | S594              | 2 | 5,276  | 0,504 | 0,541  |
| 3 | Q14839 CHD4_HUMAN   | E.VTAVDGYET#DHQDYCE.V                      | T367              | 2 | 5,2658 | 0,445 | 0,369  |
| 3 | Q14207 NPAT_HUMAN   | E.LTSAVSSINGENLPTIILS#SPTKS#PTKNAE.L       | S774:S779         | 3 | 5,0581 | 1     | 0,113  |
| 3 | Q9UBW7 ZMYM2_HUMAN  | E.LLTMTDMMS#EDEGKTE.T                      | S958              | 2 | 5,0452 | 0,494 | 0,128  |
| 3 | A8MVB1 A8MVB1_HUMAN | E.KLVSPASAAAASS#PSSS#PSPQPVSE.L            | S37:S41           | 2 | 5,044  | 1     | 0,773  |
| 3 | P46821 MAP1B_HUMAN  | E.VVSPS#QSVTGSAGHTPYQSPTE.K                | S1324             | 2 | 5,039  | 0,522 | 0,569  |
| 3 | Q96T60 PNKP_HUMAN   | E.TRTPESQPDT#PPGT#PLVSQDE.K                | T118:T122         | 2 | 5,0297 | 0,539 | 0,405  |
| 3 | P05783 K1C18_HUMAN  | R.ST#SFRGGM*GSGGLATGIAGGLAGM*GGIQNE.K      | T52               | 3 | 4,9793 | 0,318 | 0,324  |
| 3 | P13693 TCTP_HUMAN   | E.GNIDDSLIGGNASAEGPEGEGTE.S                | NA                | 2 | 4,9619 | 0,583 | -0,557 |
| 3 | Q8WWK9 CKAP2_HUMAN  | E.VS#IEDTGVDDVDPEKLE.M                     | S534              | 2 | 4,9231 | 0,505 | 0,201  |
| 3 | Q14974 IMB1_HUMAN   | E.AADVADDQEEPATYCLSSSFE.L                  | NA                | 2 | 4,9057 | 0,588 | 0,423  |
| 3 | Q13765 NACA_HUMAN   | E.LEEQDSTQATTQQAQLAAAE.I                   | NA                | 2 | 4,8883 | 0,428 | 0,443  |
| 3 | Q16186 ADRM1_HUMAN  | E.YLNNPPM*PGALGASGS#SGHE.L                 | S142              | 3 | 4,8816 | 0,456 | 0      |
| 3 | Q9UQ35 SRRM2_HUMAN  | E.AVEVPSMASSWGGPHFS#PE.H                   | S1311             | 2 | 4,8796 | 0,466 | -0,951 |
| 3 | P17275 JUNB_HUMAN   | E.ARS#RDAT#PPVS#PINMEDQE.R                 | S251:T255:S259    | 3 | 4,832  | 0,349 | 0,467  |
| 3 | O00629 IMA4_HUMAN   | E.DS#DIDGDYRVQNTSLE.A                      | S60               | 2 | 4,831  | 0,566 | 0,32   |
| 3 | P13693 TCTP_HUMAN   | E.GNIDDSLIGGNASAEGPEGEGTE.S                | NA                | 3 | 4,8279 | 0,419 | 0      |
| 3 | A8MVB1 A8MVB1_HUMAN | E.KLVSPASAAAASS#PSSS#PSPQPVSE.L            | S37:S41           | 3 | 4,7941 | 1     | 0,797  |
| 3 | Q9UKV3 ACINU_HUMAN  | E.IEPMEGPAPPVLIQLS#PPNTDADTRE.L            | S453              | 3 | 4,7543 | 0,521 | 0,447  |
| 3 | P08047 SP1_HUMAN    | E.SQPSPLALLAATCSRIES#PNENSNNSQGPSQSGGTGE.L | S73               | 3 | 4,742  | 0,509 | 0,192  |
| 3 | Q9UHR4 BI2L1_HUMAN  | E.AVTVPTPSPTPVRSIS#TVNLSE.N                | S422              | 2 | 4,7298 | 0,463 | 0,209  |
| 3 | Q8NG31 CASC5_HUMAN  | E.LSQRKS#LGT#PTVICT#PTEE.S                 | S1008:T1011:T1017 | 3 | 4,705  | 1     | 0,466  |
| 3 | O60749 SNX2_HUMAN   | E.VSLDS#PEREPILSSEPSPAVTPVPTT#LIAPRIE.S    | S85:T107          | 3 | 4,6992 | 1     | 0,292  |
| 3 | P49792 RBP2_HUMAN   | E.VSSTSET#TPKAVVS#PPKFVFGSE.S              | T2503:S2510       | 3 | 4,699  | 1     | 0,36   |
| 3 | Q04637 IF4G1_HUMAN  | E.SEFSSS#PLQAPTPLASHTVE.I                  | S343              | 2 | 4,663  | 0,549 | 0,564  |
| 3 | Q04637 IF4G1_HUMAN  | E.TGEPYRLS#PEPTPLAEPILV.V                  | S314              | 2 | 4,6524 | 0,465 | 0,32   |
| 3 | Q9UQ88 CD2L2_HUMAN  | E.GDYVPDS#PALLPIELKQE.L                    | S395              | 2 | 4,6444 | 0,489 | 0,236  |
| 3 | P10244 MYBB_HUMAN   | E.DNS#LLNQGFLQAKPE.K                       | S629              | 2 | 4,6333 | 0,352 | 0,487  |
| 3 | Q02952 AKA12_HUMAN  | E.TGTDGILAGS#QEHDPGQGSSSPE.Q               | S732              | 2 | 4,6237 | 0,524 | -0,635 |

|   |                     |                                           |           |   |        |       |        |
|---|---------------------|-------------------------------------------|-----------|---|--------|-------|--------|
| 3 | Q9UHR4 BI2L1_HUMAN  | E.IKTPASTPVSGT#PQAS#PMIE.R                | T257:S261 | 2 | 4,6231 | 0,484 | 0,674  |
| 3 | O43432 IF4G3_HUMAN  | E.LSS#PREDTIPIPSLTSCTE.T                  | S305      | 2 | 4,5792 | 0,535 | 0,447  |
| 3 | Q99996 AKAP9_HUMAN  | E.FGVDDSYSEQGAQDS#PTHLE.M                 | S165      | 2 | 4,5689 | 0,48  | 0,432  |
| 3 | P50402 EMD_HUMAN    | E.DALLYQS#KGYNDYYEE.S                     | S87       | 2 | 4,5622 | 0,527 | 0,789  |
| 3 | Q561V9 Q561V9_HUMAN | E.VEM*LVAGHEDS#NGCINYYE.L                 | S135      | 2 | 4,5584 | 0,501 | 0,647  |
| 3 | Q14247 SRC8_HUMAN   | E.LSY#RGPVSGTEPEPVYSM*E.A                 | Y433      | 2 | 4,5167 | 0,549 | 0,222  |
| 3 | Q16186 ADRM1_HUMAN  | E.YLNNPPM*PGALGASGS#SGHE.L                | S142      | 2 | 4,4875 | 0,527 | 0,357  |
| 3 | P21127 CD2L1_HUMAN  | E.GDYVPDS#PALSPIELKQE.L                   | S410      | 2 | 4,4816 | 0,45  | 0,599  |
| 3 | Q13283 G3BP1_HUMAN  | E.ETAPEDAQKSSS#PAPADIAQTVQE.D             | S232      | 2 | 4,481  | 0,509 | 0,957  |
| 3 | Q02952 AKA12_HUMAN  | E.TGTDGILAGSQEHDPGGSSS#PEQAGSPTEGE.G      | S743      | 3 | 4,47   | 0,422 | 0,463  |
| 3 | Q99996 AKAP9_HUMAN  | E.FGVDDSYSEQGAQDS#PTHLE.M                 | S165      | 3 | 4,4493 | 0,438 | 0,243  |
| 3 | Q9NYF8 BCLF1_HUMAN  | E.DQEALDYFS#DKE.S                         | S385      | 2 | 4,4343 | 0,239 | 0,317  |
| 3 | Q7Z309 F122B_HUMAN  | E.SLS#LSDSDFDKPE.K                        | S91       | 2 | 4,4283 | 0,366 | 0,241  |
| 3 | Q8IY81 RRMJ3_HUMAN  | E.IM*#PLYQDEAPKGT.E.A                     | S584      | 2 | 4,4062 | 0,412 | 0,275  |
| 3 | P13693 TCTP_HUMAN   | E.GNIDDSLIGGNASAEGPEGE.G                  | NA        | 2 | 4,3955 | 0,551 | 0,064  |
| 3 | Q92598 HS105_HUMAN  | E.AGTQPQVQTDAQTSQSPPSPE.L                 | NA        | 3 | 4,3918 | 0,372 | 0,481  |
| 3 | Q561V9 Q561V9_HUMAN | E.VEMLVAGHEDS#NGCINYYE.L                  | S135      | 2 | 4,3831 | 0,435 | 0,435  |
| 3 | P12270 TPR_HUMAN    | E.S#GGRSVPTPLQVAAPVTVFTE.S                | S2192     | 3 | 4,3775 | 0,242 | 0,159  |
| 3 | Q2NKX8 ERC6L_HUMAN  | E.IADDLSAS#HSALQDAQASE.A                  | S924      | 2 | 4,3756 | 0,313 | 0,668  |
| 3 | Q8NAF0 ZN579_HUMAN  | R.AAALQALQAQPTS#PPPPPPPLKAEQEEE.G         | S483      | 3 | 4,3643 | 0,362 | 1,078  |
| 3 | Q9BVJ6 UT14A_HUMAN  | E.LTQKLQVAS#ES#EEEE.G                     | S341:S343 | 2 | 4,3624 | 0,457 | -0,065 |
| 3 | Q12888 TP53B_HUMAN  | E.SVAS#PQKTM*SVLSCICE.A                   | S1028     | 2 | 4,3617 | 0,376 | 0,857  |
| 3 | P17252 KPCA_HUMAN   | E.GFS#YVNPQFVHPILQSAV.-                   | S657      | 2 | 4,3611 | 0,382 | -0,117 |
| 3 | Q13151 ROA0_HUMAN   | E.ADAAMAAS#PHAVDGNTVE.L                   | S68       | 2 | 4,3585 | 0,506 | 0,135  |
| 3 | P22102 PUR2_HUMAN   | E.GDGGPNTGGM*GAYCPAPQVSND.L               | NA        | 3 | 4,357  | 0,317 | 0      |
| 3 | Q14814 MEF2D_HUMAN  | R.SPAPPPPAVFPAAARPEPGDGLSS#PAGGSYE.T      | S472      | 3 | 4,3491 | 0,371 | 0,31   |
| 3 | O75821 EIF3G_HUMAN  | E.LLKGIPLATGDT#S#PEPE.L                   | T41:S42   | 2 | 4,3344 | 0,44  | 0,45   |
| 3 | Q8WWM7 ATX2L_HUMAN  | E.VDGLLTSEPMGS#PVSSKTE.S                  | S594      | 2 | 4,2964 | 0,529 | 0,606  |
| 3 | Q9UKV3 ACINU_HUMAN  | E.IEPM*EGPAPPVLIQLS#PPNTDADTRE.L          | S453      | 3 | 4,2814 | 0,429 | 0,317  |
| 3 | Q13283 G3BP1_HUMAN  | E.DAQKSSS#PAPADIAQTVQE.D                  | S232      | 2 | 4,2791 | 0,403 | 0,483  |
| 3 | Q9UHR4 BI2L1_HUMAN  | E.AVTVPTPS#PTPVRISISTVNLSE.N              | S414      | 2 | 4,2747 | 0,466 | 0,314  |
| 3 | P38398 BRCA1_HUMAN  | E.LGSDS#SEDTVNKATYCSVGDQE.L               | S186      | 2 | 4,253  | 0,557 | 0,6    |
| 3 | Q16186 ADRM1_HUMAN  | E.YLNNPPMPGALGASGSS#GHE.L                 | S143      | 2 | 4,2479 | 0,494 | 0,719  |
| 3 | P29966 MARCS_HUMAN  | E.AAPAEPPAAAAASSACAAPSQE.A                | NA        | 3 | 4,224  | 0,432 | 0,09   |
| 3 | P61981 1433G_HUMAN  | D.NLTLWTSDDQDDGEGENN.-                    | NA        | 2 | 4,1867 | 0,478 | 0,704  |
| 3 | Q13283 G3BP1_HUMAN  | E.TAPEDAQKSSS#PAPADIAQTVQE.D              | S232      | 3 | 4,1827 | 0,342 | 0,302  |
| 3 | P09497 CLCB_HUMAN   | E.SGAPEAAEEDPAAFLAQQE.S                   | NA        | 2 | 4,179  | 0,553 | 0,183  |
| 3 | Q53F64 Q53F64_HUMAN | ES#PAGAGTGAAAGAGGATAAPPSGNQNGAEGDQINASKNE | S28       | 3 | 4,1774 | 0,498 | 0,097  |
| 3 | Q8N9T8 KRI1_HUMAN   | E.GVHGPPVQLAVDDS#S#DEGE.L                 | S286:S287 | 2 | 4,1748 | 0,556 | 0,59   |
| 3 | Q92538 GBF1_HUMAN   | E.ATS#PVPLLATPRPTDPIPTSE.V                | S1839     | 2 | 4,1746 | 0,396 | 0,327  |
| 3 | P43358 MAGA4_HUMAN  | E.ALGLVGAQAPTTEEQE.A                      | NA        | 2 | 4,1652 | 0,515 | 0,454  |

|   |                    |                                       |                |   |        |       |        |
|---|--------------------|---------------------------------------|----------------|---|--------|-------|--------|
| 3 | Q66K89 E4F1_HUMAN  | E.M*AEAPGS#PHQQGLGLAGEGE.Q            | S165           | 2 | 4,1613 | 0,539 | 0,54   |
| 3 | Q8IYB7 DI3L2_HUMAN | E.AQFDGS#DSEDGHGITQNVLVD.G            | S173           | 2 | 4,1559 | 0,397 | 0,321  |
| 3 | O15027 SC16A_HUMAN | E.LVPPQQQAS#PPQLPKAM*FSE.L            | S891           | 3 | 4,1419 | 0,351 | 0,16   |
| 3 | O15504 NUPL2_HUMAN | E.GFGLSENPFASLS#PDEQKDE.K             | S106           | 2 | 4,1274 | 0,481 | 0,217  |
| 3 | Q96AP0 ACD_HUMAN   | E.LILGSETPSS#PRAGQLLE.V               | S111           | 2 | 4,1261 | 0,457 | 0,063  |
| 3 | P35612 ADDB_HUMAN  | E.AAS#PPPPQGGQPYFDRFSEDDPE.Y          | S11            | 3 | 4,1    | 0,182 | 0,434  |
| 3 | O43399 TPD54_HUMAN | E.NGSDNLPSSAGS#GDKPLSDPAPF.-          | S195           | 3 | 4,0959 | 0,187 | 0,158  |
| 3 | O43399 TPD54_HUMAN | E.NGSDNLPSSAGS#GDKPLSDPAPF.-          | S195           | 2 | 4,0812 | 0,359 | 0,317  |
| 3 | Q969F1 TF3C6_HUMAN | E.LS#GIIDSDFLSKCE.N                   | S28            | 2 | 4,0716 | 0,456 | 0,293  |
| 3 | Q6PKG0 LARP1_HUMAN | E.TES#APGS#PRAVT#PVPTKTEE.V           | S517:S521:T526 | 3 | 4,0696 | 0,279 | 0,239  |
| 3 | Q8WWM7 ATX2L_HUMAN | E.VDGLLTSEPM*GS#PVSSKTE.S             | S594           | 3 | 4,0517 | 0,485 | 0,451  |
| 3 | Q9UBW7 ZMYM2_HUMAN | E.LLTM*TDM*MS#EDEGKTE.T               | S958           | 2 | 4,0489 | 1     | -0,314 |
| 3 | Q96T60 PNKP_HUMAN  | E.TRTPESQPD#PPGT#PLVSQDE.K            | T118:T122      | 3 | 4,045  | 0,475 | 0,303  |
| 3 | Q12888 TP53B_HUMAN | D.#PQKLAILDQELE.H                     | S727           | 2 | 4,0321 | 0,434 | 0      |
| 3 | Q14966 ZN638_HUMAN | E.DS#LADFNNLKEE.L                     | S1761          | 2 | 4,0161 | 0,41  | 0,662  |
| 3 | P16615 AT2A2_HUMAN | E.LATICLCNDSALDYNE.A                  | NA             | 2 | 4,0111 | 0,468 | 0      |
| 3 | Q14247 SRC8_HUMAN  | E.LS#YRGPVSGTEPEPVYSM*E.A             | S432           | 3 | 3,9994 | 0,157 | 0,584  |
| 3 | Q14103 HNRPD_HUMAN | E.QFGGDGAAAAATAAVGGSAGEQE.G           | NA             | 3 | 3,9655 | 0,305 | 0,184  |
| 3 | P49792 RBP2_HUMAN  | E.T#TPKAVVS#PPKFVFGSE.S               | T2503:S2510    | 2 | 3,9648 | 0,408 | 0,063  |
| 3 | Q14444 CAPR1_HUMAN | E.AASAPAVEDQVPEAEPEPAEE.Y             | NA             | 3 | 3,9598 | 0,297 | 0,428  |
| 3 | Q12888 TP53B_HUMAN | E.TSVISIDS#PQKLAILDQELE.H             | S727           | 2 | 3,9453 | 0,302 | -0,107 |
| 3 | Q12800 TFCP2_HUMAN | E.ITVNNSPS#PGFNSSHSSFSLGE.G           | S291           | 3 | 3,9441 | 0,394 | 0,438  |
| 3 | Q12888 TP53B_HUMAN | E.DM*PFS#PKASVAAM*E.A                 | S265           | 2 | 3,9429 | 0,468 | 0,153  |
| 3 | Q9Y3F4 STRAP_HUMAN | E.LEEIAS#ENSDCIFPSAPDVKA.-            | S335           | 2 | 3,934  | 0,403 | 0,412  |
| 3 | O15027 SC16A_HUMAN | E.LVPPQQQAS#PPQLPKAMFSE.L             | S891           | 3 | 3,9279 | 0,255 | 0,402  |
| 3 | P38398 BRCA1_HUMAN | E.LGSDSSED#VNKATYCSVGDQE.L            | T190           | 3 | 3,925  | 0,179 | 0,375  |
| 3 | Q8NHY2 RFWD2_HUMAN | E.DSTVPQFEAPS#PSHSSIIDSTE.Y           | S319           | 2 | 3,9227 | 0,406 | 0,506  |
| 3 | P10809 CH60_HUMAN  | D.M*AIATGGAVFGEE.G                    | NA             | 2 | 3,9222 | 0,441 | -0,096 |
| 3 | O75533 SF3B1_HUMAN | E.AQGVGLDSTGYDQE.I                    | NA             | 2 | 3,9216 | 0,454 | 0,228  |
| 3 | Q14566 MCM6_HUMAN  | E.AGALM*LADNGVCCIDE.F                 | NA             | 2 | 3,914  | 0,53  | 0,141  |
| 3 | Q9UBW7 ZMYM2_HUMAN | E.LLTM*TDMMS#EDEGKTE.T                | S958           | 2 | 3,8989 | 0,43  | 0,443  |
| 3 | Q02952 AKA12_HUMAN | D.GST#PVADFDAPGTTQKDE.I               | T1175          | 2 | 3,8982 | 0,453 | 0,382  |
| 3 | Q04637 IF4G1_HUMAN | E.AALPPVS#PLKAALSEEE.L                | S1232          | 2 | 3,8829 | 0,466 | 0,135  |
| 3 | P12270 TPR_HUMAN   | E.SGGRS#VPTTQLQVAAPVTVFTE.S           | S2196          | 2 | 3,8818 | 0,425 | 0      |
| 3 | P27816 MAP4_HUMAN  | E.VGLLKDMS#PLS#ETE.M                  | S507:S510      | 2 | 3,88   | 0,397 | -0,145 |
| 3 | Q14C86 GAPD1_HUMAN | E.LES#CSGLGSTSDTDVRE.V                | S740           | 2 | 3,8775 | 0,419 | 0,668  |
| 3 | Q9H5N1 RABE2_HUMAN | E.LLPLSRDPS#PPLEPLEE.L                | S204           | 2 | 3,8774 | 0,387 | 0,308  |
| 3 | Q9NQ55 SSF1_HUMAN  | R.VGGS#DEEASGIPSRASLE.L               | S359           | 2 | 3,8592 | 0,536 | 0,44   |
| 3 | Q969R5 LMBL2_HUMAN | E.AGELPTS#PLHLLS#PGTTPRSLDGSSEPAVCE.M | S67:S73        | 3 | 3,8462 | 0,295 | 0,334  |
| 3 | Q92615 LARP5_HUMAN | E.KFTSSQTQS#PT#PPKPPS#PSFE.L          | S516:T518:S524 | 3 | 3,8358 | 1     | 0,364  |
| 3 | P98175 RBM10_HUMAN | E.LQS#PTHSSALPPATSPTAQE.S             | S540           | 2 | 3,8324 | 0,38  | 0,222  |

|   |                    |                                       |                |   |        |       |        |
|---|--------------------|---------------------------------------|----------------|---|--------|-------|--------|
| 3 | Q2NXX8 ERC6L_HUMAN | E.IADDLS#ASHSALQDAQASE.A              | S922           | 2 | 3,8287 | 0,494 | 0,243  |
| 3 | Q14192 FHL2_HUMAN  | E.DQLLCTDCYSNE.Y                      | NA             | 2 | 3,8246 | 0,362 | 0,161  |
| 3 | Q8WWM7 ATX2L_HUMAN | E.VDGLLTSEPMGS#PVSSKTE.S              | S594           | 3 | 3,8194 | 0,382 | 0,727  |
| 3 | Q96A49 SYAP1_HUMAN | E.FVSDAFDACNLNQE.D                    | NA             | 2 | 3,8158 | 0,457 | 0,299  |
| 3 | Q9NR45 SIAS_HUMAN  | R.ALGSPT#KQLLPCEM*ACNE.K              | T277           | 3 | 3,8145 | 0,302 | 0,432  |
| 3 | Q12888 TP53B_HUMAN | E.DVCIDLTCDSGSAVPS#PATRSE.A           | S630           | 2 | 3,8082 | 0,442 | 0,671  |
| 3 | Q12800 TFCP2_HUMAN | E.ITVYVNNSPS#PGFNSSHSSFLGE.G          | S291           | 2 | 3,805  | 0,484 | 0,195  |
| 3 | Q6PKG0 LARP1_HUMAN | E.T#ES#APGSPRAVT#PVPTKTEE.V           | T515:S517:T526 | 2 | 3,7999 | 1     | 0,957  |
| 3 | P25686 DNJB2_HUMAN | E.QQPSVTSRSGGTQVQQTPASCPLDS#DLS#EDE.D | S247:S250      | 3 | 3,7935 | 0,339 | 0,528  |
| 3 | P46939 UTRO_HUMAN  | E.RTNGSFLTDSS#STTGS#VEDE.H            | S3216:S3221    | 3 | 3,7913 | 1     | 0,163  |
| 3 | Q12888 TP53B_HUMAN | E.SVAS#PQKTMVSLSCICE.A                | S1028          | 2 | 3,7869 | 0,565 | 0,247  |
| 3 | P48681 NEST_HUMAN  | E.ASTGQS#PEDHASLAPPLS#PDHSSLE.A       | S459:S471      | 3 | 3,7842 | 1     | 0,544  |
| 3 | Q9H074 PAIP1_HUMAN | E.TLNGCVTTDDALQE.L                    | NA             | 2 | 3,7686 | 0,3   | 0,159  |
| 3 | Q12888 TP53B_HUMAN | E.NTQIEDTEPMS#PVLNSKFVPAEND.S         | S552           | 2 | 3,7399 | 0,325 | 0,62   |
| 3 | P35579 MYH9_HUMAN  | E.LEDTLDSTAAQQE.L                     | NA             | 2 | 3,7347 | 0,425 | 0,086  |
| 3 | Q8N163 K1967_HUMAN | E.DSEVRSVAS#NQS#EM*E.F                | S678:S681      | 2 | 3,7324 | 0,379 | 0,397  |
| 3 | P29966 MARCS_HUMAN | E.AGASAAAACEAPSAAGPGAPPEQE.A          | NA             | 2 | 3,7227 | 0,541 | 0,59   |
| 3 | Q14376 GALE_HUMAN  | E.GDVAACYANPSLAQEE.L                  | NA             | 2 | 3,7215 | 0,42  | 0,288  |
| 3 | Q9UHR4 BI2L1_HUMAN | E.IKTPASTPVSGT#PQAS#PM*IE.R           | T257:S261      | 3 | 3,721  | 0,393 | 0,836  |
| 3 | P22102 PUR2_HUMAN  | E.GDGGPNTGGMGAYCPAPQVSNL.L            | NA             | 2 | 3,7117 | 0,536 | 0,23   |
| 3 | Q9Y5K6 CD2AP_HUMAN | E.TDVVNFDDIASSE.N                     | NA             | 2 | 3,7063 | 0,418 | 0,346  |
| 3 | Q02952 AKA12_HUMAN | E.LS#LQEGDLNGQKALNGQALNSQEE.E         | S75            | 3 | 3,6966 | 0,204 | 1,131  |
| 3 | Q8N3U4 STAG2_HUMAN | E.DVM*M*SS#EGRIEDLNE.G                | S1178          | 2 | 3,6956 | 0,409 | 0,133  |
| 3 | Q9BVJ6 UT14A_HUMAN | E.LSQDAEPAGS#QETKDSGSQEVLSL.L         | S445           | 2 | 3,6889 | 0,404 | 0,569  |
| 3 | Q14690 RRP5_HUMAN  | E.DDS#LVDVYYRE.G                      | S1498          | 2 | 3,6878 | 0,307 | 0,252  |
| 3 | Q14789 GOGB1_HUMAN | E.LS#GDDDTDQNM*RAPLDPE.L              | S17            | 2 | 3,6862 | 0,331 | 0,468  |
| 3 | Q8N163 K1967_HUMAN | E.VRSVAS#NQS#EM*E.F                   | S678:S681      | 2 | 3,6817 | 0,472 | -0,081 |
| 3 | Q9BVJ6 UT14A_HUMAN | E.LSQDAEPAGSQET#KDSGSQEVLSL.L         | T448           | 3 | 3,6813 | 0,209 | 0,356  |
| 3 | Q9NR45 SIAS_HUMAN  | R.ALGS#PTKQLLPCEMACNE.K               | S275           | 3 | 3,6758 | 0,204 | 0,087  |
| 3 | Q9NQ55 SSF1_HUMAN  | E.LLATGAGLS#ESEAEPDGDHNITE.L          | S238           | 3 | 3,6592 | 0,202 | 0,532  |
| 3 | Q92974 ARHG2_HUMAN | E.LLLTPREPALPLEPDSGGNTS#PGVTANGE.A    | S695           | 3 | 3,6555 | 0,373 | 0,552  |
| 3 | Q9NVP1 DDX18_HUMAN | E.DTSFASLCLNVNE.N                     | NA             | 2 | 3,6506 | 0,468 | 0,415  |
| 3 | Q15418 KS6A1_HUMAN | E.LVPLDPENGQTS#GEEAGLQPSKDE.G         | S26            | 3 | 3,6493 | 0,175 | 0,777  |
| 3 | Q8N163 K1967_HUMAN | E.VRSVAS#NQS#EME.F                    | S678:S681      | 2 | 3,649  | 0,434 | 0,082  |
| 3 | P25789 PSA4_HUMAN  | E.DM*ACSVAGITSDANVLTNE.L              | NA             | 2 | 3,6466 | 0,509 | 0,369  |
| 3 | P29966 MARCS_HUMAN | E.AGASAAAACEAPSAAGPGAPPEQE.A          | NA             | 3 | 3,6422 | 0,266 | -0,177 |
| 3 | Q8N3U4 STAG2_HUMAN | E.DVMM*SS#EGRIEDLNE.G                 | S1178          | 2 | 3,6384 | 0,317 | -0,134 |
| 3 | Q15233 NONO_HUMAN  | E.GIGAIGGT#PPAFNRAAPGAE.F             | T450           | 2 | 3,6286 | 0,424 | 0,641  |
| 3 | Q12888 TP53B_HUMAN | E.DM*PFS#PKASVAAME.A                  | S265           | 2 | 3,6206 | 0,504 | 0,309  |
| 3 | Q04637 IF4G1_HUMAN | E.FSSS#PLQAPTPLASHTVE.I               | S343           | 2 | 3,6195 | 0,306 | 0,438  |
| 3 | Q9Y696 CLIC4_HUMAN | E.YLNSPLPDEIDE.N                      | NA             | 2 | 3,6188 | 0,399 | 0,174  |

|   |                     |                                            |                |   |        |       |        |
|---|---------------------|--------------------------------------------|----------------|---|--------|-------|--------|
| 3 | P11413 G6PD_HUMAN   | E.VQANNVVLGQYVGNPDGEGE.A                   | NA             | 2 | 3,6139 | 0,507 | 0,711  |
| 3 | Q14C86 GAPD1_HUMAN  | E.GISEGSPNRSNS#VSS#LDLE.G                  | S585:S588      | 2 | 3,6119 | 0,221 | 0,579  |
| 3 | Q9H8S9 MOL1B_HUMAN  | E.AT#LGSGNLRQAVM*LPE.G                     | T35            | 2 | 3,6052 | 0,371 | 0,209  |
| 3 | Q4KMP7 TB10B_HUMAN  | R.AAGGAPS#PPPPVRRAS#AGPAPGPVVTA.E.G        | S403:S412      | 3 | 3,6048 | 0,413 | 0,34   |
| 3 | Q13283 G3BP1_HUMAN  | E.ETAPEDAQKSSS#PAPADIAQTVQE.D              | S232           | 3 | 3,6032 | 0,206 | 1,363  |
| 3 | P33993 MCM7_HUMAN   | E.GGALVLADQGVCCIDE.F                       | NA             | 2 | 3,5942 | 0,424 | 0,146  |
| 3 | Q09028 RBBP4_HUMAN  | E.NIYNDEDPEGSVDPEGQGS.-                    | NA             | 2 | 3,5919 | 0,463 | 0,302  |
| 3 | Q6GYQ0 GRIPE_HUMAN  | E.VAS#LTTLHIDSE.T                          | S958           | 2 | 3,5677 | 0,437 | 0,268  |
| 3 | Q9H3P7 GCP60_HUMAN  | E.VS#VDGLTSPDPEERPGAE.G                    | S13            | 2 | 3,561  | 0,499 | 0      |
| 3 | Q9H8S9 MOL1B_HUMAN  | E.AT#LGSGNLRQAVM*LPEGEDLINE.W              | T35            | 3 | 3,5581 | 0,246 | 0,38   |
| 3 | A8MVB1 A8MVB1_HUMAN | E.KLVSPPASAAASS#PSSSPS#PQPVSE.L            | S37:S43        | 3 | 3,5576 | 1     | 0,29   |
| 3 | Q13885 TBB2A_HUMAN  | E.M*EFTEAESNM*NDLVSE.Y                     | NA             | 2 | 3,5547 | 0,369 | 0,585  |
| 3 | P49006 MRP_HUMAN    | E.AGPOATEPSTPSGPESGPTASAEQNE.-             | NA             | 3 | 3,5463 | 0,392 | 0,212  |
| 3 | Q8IY92 BTBDC_HUMAN  | E.LFSIIDVDADQEPSQS#PPRSE.A                 | S523           | 3 | 3,5462 | 0,315 | 0,076  |
| 3 | P06748 NPM_HUMAN    | D.MS#PLRPQNYLFGCE.L                        | S10            | 2 | 3,5419 | 0,541 | 0,272  |
| 3 | P25789 PSA4_HUMAN   | E.DM*ACSVAGITSDANVLTNE.L                   | NA             | 3 | 3,5302 | 0,295 | 0,277  |
| 3 | P09497 CLCB_HUMAN   | E.SGAPEAAEEDPAAAFQAQSE.I                   | NA             | 2 | 3,5237 | 0,436 | 0,44   |
| 3 | P35232 PHB_HUMAN    | E.LIANSLATAGDGLIE.L                        | NA             | 2 | 3,5181 | 0,461 | 0,167  |
| 3 | Q9H5V8 CDCP1_HUMAN  | E.DTM*VY#GHLLQDSSGSFLQPE.V                 | Y743           | 2 | 3,515  | 0,443 | 0,421  |
| 3 | Q9H307 PININ_HUMAN  | E.TNRVES#VEPS#ENE.A                        | S413:S417      | 2 | 3,5128 | 0,381 | 0,222  |
| 3 | Q68E01 INT3_HUMAN   | E.FCSSPS#PPVEVKIEEPVSM*E.M                 | S502           | 3 | 3,5127 | 0,275 | 0,702  |
| 3 | P49792 RBP2_HUMAN   | E.T#TPKAVVS#PPKFVFGSE.S                    | T2503:S2510    | 3 | 3,5034 | 0,27  | 0,281  |
| 3 | Q13263 TIF1B_HUMAN  | R.GAAAAATGQPGTAPAGT#PGAPPLAGMAIVKEEE.T     | T541           | 3 | 3,4963 | 0,348 | 0,361  |
| 3 | Q14247 SRC8_HUMAN   | E.LS#YRGPVSGTEPEPVYSME.A                   | S432           | 2 | 3,4847 | 0,341 | -0,112 |
| 3 | P56537 IF6_HUMAN    | E.AQPSTIATS#M*RDSLIDSLT.-                  | S235           | 2 | 3,4827 | 0,508 | 0,348  |
| 3 | Q5VT52 K0460_HUMAN  | E.LS#DVEDDGSKIIVE.D                        | S374           | 2 | 3,4795 | 0,298 | 0,305  |
| 3 | Q9H9R9 DBND1_HUMAN  | R.RQPLSS#VSS#LE.V                          | S64:S67        | 2 | 3,4784 | 0,35  | 0      |
| 3 | Q9UHY1 NRBP_HUMAN   | E.VT#SPVPPSVKTPTEPAEVE.T                   | T421           | 3 | 3,4763 | 0,359 | 0,49   |
| 3 | P55036 PSMD4_HUMAN  | E.AGIATTGTEDSDALLKM*TIS#QQE.F              | S266           | 3 | 3,4721 | 0,16  | 0,706  |
| 3 | Q8NCD3 HJURP_HUMAN  | E.SVAWALAPAVPQS#PLKNE.L                    | S140           | 2 | 3,4703 | 0,299 | 0,062  |
| 3 | Q08945 SSRP1_HUMAN  | E.YADS#DEDQHDAYLE.R                        | S444           | 2 | 3,4661 | 0,406 | 0,139  |
| 3 | Q561V9 Q561V9_HUMAN | E.VEM*LVAGHEDS#NGCINYE.E.L                 | S135           | 3 | 3,4612 | 0,262 | 0,243  |
| 3 | Q14C86 GAPD1_HUMAN  | E.VSS#RPS#TPGLSVVSGISATSEIPNKIE.D          | S758:S761      | 3 | 3,4576 | 1     | 0,245  |
| 3 | P27816 MAP4_HUMAN   | E.ALNSPHS#ES#FVSPEAVAEPPOQTAVPLELAKE.I     | S200:S202      | 3 | 3,4558 | 0,235 | 0,418  |
| 3 | Q92615 LARP5_HUMAN  | E.KFTSS#QT#QSTPPKPPS#PSFE.L                | S512:T514:S524 | 3 | 3,4536 | 1     | 0,364  |
| 3 | Q9Y618 NCOR2_HUMAN  | E.QLS#PRGQAGPPESLGVPTAQE.A                 | S1173          | 3 | 3,4499 | 0,172 | 0,083  |
| 3 | O75400 PR40A_HUMAN  | E.VTSIVATVVDNE.N                           | NA             | 2 | 3,4467 | 0,392 | 0,098  |
| 3 | Q9NPI6 DCP1A_HUMAN  | R.KASSPS#PLTIGT#PE.S                       | S525:T531      | 2 | 3,4446 | 0,416 | 0      |
| 3 | Q53F64 Q53F64_HUMAN | 3ES#PAGAGTGAAAGAGGATAAPPSGNQNGAEGDQINASKNI | S28            | 3 | 3,4431 | 0,459 | 0,3    |
| 3 | Q9BT09 CNPY3_HUMAN  | E.LGGLEGDPSPPEDE.G                         | NA             | 2 | 3,443  | 0,414 | 0,254  |
| 3 | O60271 JIP4_HUMAN   | E.GVTGAATSPSTNGAS#PVM*DKPPEM*EAE.N         | S865           | 3 | 3,4296 | 0,417 | 0,734  |



|   |                    |                                           |                   |   |        |       |        |
|---|--------------------|-------------------------------------------|-------------------|---|--------|-------|--------|
| 3 | Q8IZM8 ZN654_HUMAN | E.NGS#PNNSLNNVFKPLTE.C                    | S134              | 2 | 3,4289 | 0,352 | 0,127  |
| 3 | P48960 CD97_HUMAN  | E.IITPTETCDDINE.C                         | NA                | 2 | 3,4262 | 0,377 | 0,226  |
| 3 | Q12888 TP53B_HUMAN | E.DMPFS#PKASVAAME.A                       | S265              | 2 | 3,4193 | 0,451 | 0,313  |
| 3 | O75376 NCOR1_HUMAN | E.TAPSTS#PSLAVPSTKPAEDE.S                 | S764              | 2 | 3,4148 | 0,567 | 0,473  |
| 3 | Q15276 RABE1_HUMAN | E.NFDTAS#LGLSLQM*PSGFMLTKDQE.R            | S456              | 3 | 3,4085 | 0,251 | 0,28   |
| 3 | Q8NG31 CASC5_HUMAN | E.LSQRKS#LGT#PTVICTPT#EE.S                | S1008:T1011:T1019 | 3 | 3,406  | 0,126 | 0,466  |
| 3 | Q00653 NFKB2_HUMAN | E.DSAYGSQSVEQE.A                          | NA                | 2 | 3,4055 | 0,332 | -0,094 |
| 3 | Q16186 ADRM1_HUMAN | E.IM*APILANADVQE.R                        | NA                | 2 | 3,3991 | 0,32  | 0      |
| 3 | O75376 NCOR1_HUMAN | E.TAPST#SPSLAVPSTKPAEDESVE.T              | T763              | 2 | 3,3879 | 0,384 | 0,513  |
| 3 | Q14247 SRC8_HUMAN  | R.AKTQT#PPVS#PAPQPTEE.R                   | T401:S405         | 2 | 3,3873 | 0,374 | 0,567  |
| 3 | P51608 MECP2_HUMAN | E.SSEDPTS#PPEPQDLSSVCKEE.K                | S401              | 3 | 3,386  | 0,299 | 0,294  |
| 3 | P25789 PSA4_HUMAN  | E.DMACSVAGITSDANVLTNE.L                   | NA                | 3 | 3,3843 | 0,141 | 0,093  |
| 3 | Q6NZ12 PTRF_HUMAN  | E.AGDLRRGS#S#PDVHALLE.I                   | S365:S366         | 3 | 3,3659 | 0,109 | 0,094  |
| 3 | Q9UQ35 SRRM2_HUMAN | E.AVEVPSM*ASSWGGPHFS#PE.H                 | S1311             | 2 | 3,3552 | 0,305 | 0      |
| 3 | Q12888 TP53B_HUMAN | E.DMPFS#PKASVAAM*E.A                      | S265              | 2 | 3,3534 | 0,483 | 0,387  |
| 3 | Q13685 AAMP_HUMAN  | E.SGAAADTPPLETLS#FHGDDE.I                 | S20               | 2 | 3,3531 | 0,288 | 0,689  |
| 3 | P62158 CALM_HUMAN  | E.ADIDGDGQVNYEE.F                         | NA                | 2 | 3,3518 | 0,302 | 0      |
| 3 | Q13263 TIF1B_HUMAN | R.GAAAAATGQPGTAPAGT#PGAPPLAGM*AIVKEEETE.A | T541              | 3 | 3,3478 | 0,126 | 0,446  |
| 3 | O00299 CLIC1_HUMAN | D.NYLTSPLPEEVDE.T                         | NA                | 2 | 3,3476 | 0,438 | 0,567  |
| 3 | P35580 MYH10_HUMAN | E.LEDTLDTTAAQQE.L                         | NA                | 2 | 3,3475 | 0,338 | 0,17   |
| 3 | Q16186 ADRM1_HUMAN | E.IMAPILANADVQE.R                         | NA                | 2 | 3,3353 | 0,415 | 0,352  |
| 3 | P43358 MAGA4_HUMAN | E.AAVSSSSPLVPGTLEEVPAE.S                  | NA                | 3 | 3,3352 | 0,273 | 0,091  |
| 3 | P25054 APC_HUMAN   | E.SLSPSS#RPAS#PTRSQAQTPVLSPLPD.M          | S2469:S2473       | 3 | 3,3341 | 0,248 | 0,501  |
| 3 | Q12888 TP53B_HUMAN | E.TSVISIDS#PQKLAILDQE.L                   | S727              | 2 | 3,3272 | 0,24  | 0,24   |
| 3 | Q15029 U5S1_HUMAN  | E.M*DFLADLM*DNSE.L                        | NA                | 2 | 3,3265 | 0,326 | 0,085  |
| 3 | O95232 CROP_HUMAN  | E.VNGTSEDIKS#EGDTQS#N.-                   | S425:S431         | 2 | 3,3257 | 0,33  | 0,126  |
| 3 | Q13151 ROA0_HUMAN  | E.ADAAM*AAS#PHAVDGNTVE.L                  | S68               | 2 | 3,3245 | 0,342 | 0,134  |
| 3 | P46100 ATRX_HUMAN  | E.TFSS#AEGTVDKDTTIME.L                    | S890              | 2 | 3,3208 | 0,438 | 0,893  |
| 3 | Q68E01 INT3_HUMAN  | E.FCSSPS#PPVEVKIEEPVSME.M                 | S502              | 2 | 3,3201 | 0,314 | 0,105  |
| 3 | Q8IUD2 RB6I2_HUMAN | E.DNLNDSSQQLQD.S                          | NA                | 2 | 3,316  | 0,319 | -0,354 |
| 3 | Q15365 PCBP1_HUMAN | E.STGAQVQVAGDM*LPNSTE.R                   | NA                | 2 | 3,3126 | 0,401 | 0,335  |
| 3 | Q7Z569 BRAP_HUMAN  | E.CINAAPDPS#KQLPDQISFFSGNPSVE.I           | S119              | 3 | 3,3121 | 0,348 | 0,184  |
| 3 | Q12888 TP53B_HUMAN | E.DTEPMS#PVLNSKFVPAEND.S                  | S552              | 2 | 3,312  | 0,301 | 0,45   |
| 3 | P22102 PUR2_HUMAN  | E.GDGGPNTGGM*GAYCPAPQVSND.L               | NA                | 2 | 3,3106 | 0,443 | 0,228  |
| 3 | Q9H8U3 ZFAN3_HUMAN | E.TTSDNNTSITPTLSPSQQLPTELNV#SPSKEE.C      | T92               | 3 | 3,2911 | 0,275 | 0,577  |
| 3 | Q6ZN55 ZN574_HUMAN | E.VQASS#PAEVPVSPDPLPASDHSYE.L             | S257              | 3 | 3,288  | 0,203 | 0,34   |
| 3 | P23526 SAHH_HUMAN  | E.IDPINALQAAM*E.G                         | NA                | 2 | 3,2869 | 0,383 | -0,187 |
| 3 | Q8N8S7 ENAH_HUMAN  | E.TGPTLPRQNS#QLPAQVQNGPSQEELE.I           | S125              | 3 | 3,2857 | 0,093 | 0,442  |
| 3 | Q9H0H5 RGAP1_HUMAN | E.SGSILS#DISFDKTDE.S                      | S154              | 2 | 3,2815 | 0,388 | 0,072  |
| 3 | P27816 MAP4_HUMAN  | E.IEVAQANDIISSTE.I                        | NA                | 2 | 3,2665 | 0,384 | 0      |
| 3 | P60842 IF4A1_HUMAN | E.IVDSFDDM*NLSE.S                         | NA                | 2 | 3,2639 | 0,426 | 0,174  |

|   |                     |                                      |                |   |        |       |        |
|---|---------------------|--------------------------------------|----------------|---|--------|-------|--------|
| 3 | P63208 SKP1_HUMAN   | K.NDFTEEEEAQVR.K                     | NA             | 2 | 3,2635 | 0,435 | 0      |
| 3 | Q13765 NACA_HUMAN   | E.DLSQQAQLAAAE.K                     | NA             | 2 | 3,2618 | 0,397 | 0,098  |
| 3 | Q13951 PEBB_HUMAN   | E.DALAQQAFAEE.A                      | NA             | 2 | 3,2602 | 0,329 | 0,217  |
| 3 | Q6NZI2 PTRF_HUMAN   | E.SDAVLVDKS#DS#D.-                   | S387:S389      | 2 | 3,2599 | 0,269 | 0      |
| 3 | Q00613 HSF1_HUMAN   | E.GRPPS#PPPTST#PE.K                  | S363:T369      | 2 | 3,2598 | 0,292 | 0,082  |
| 3 | Q9P275 UBP36_HUMAN  | E.DLVSLPHQLPEASEPPQS#PSE.K           | S807           | 3 | 3,259  | 0,28  | 0,235  |
| 3 | P40227 TCPZ_HUMAN   | E.SGQLVGVDLNTGEPM*VAAE.V             | NA             | 2 | 3,2552 | 0,305 | 0,641  |
| 3 | Q2KHM9 K0753_HUMAN  | E.EGPFILDQS#ASFKE.V                  | S476           | 2 | 3,2528 | 0,365 | 0,277  |
| 3 | P16333 NCK1_HUMAN   | E.EGDS#PLGDHVGSLSE.K                 | S166           | 2 | 3,2503 | 0,291 | 0,155  |
| 3 | O95336 6PGL_HUMAN   | E.SQVITINPELPEVE.A                   | NA             | 2 | 3,2448 | 0,269 | 0,233  |
| 3 | O60271 JIP4_HUMAN   | E.TRNVS#TGS#AENEE.K                  | S329:S332      | 2 | 3,2412 | 0,363 | 0,079  |
| 3 | Q16186 ADRM1_HUMAN  | E.YLNNPPMPGALGASGSS#GHE.L            | S143           | 3 | 3,2402 | 0,211 | 0      |
| 3 | P23526 SAHH_HUMAN   | E.IDPINALQAAME.G                     | NA             | 2 | 3,2379 | 0,475 | -0,285 |
| 3 | Q14C86 GAPD1_HUMAN  | E.GISEGPSNRSNS#VSS#LDLE.G            | S585:S588      | 3 | 3,2331 | 0,206 | 0,434  |
| 3 | Q9UQ35 SRRM2_HUMAN  | E.DLNGPFLNQL.E.T                     | NA             | 2 | 3,2324 | 0,34  | 0      |
| 3 | P22670 RFX1_HUMAN   | E.LQS#PQPQAQPPGGQKQYVTE.L            | S60            | 3 | 3,2247 | 0,145 | 0,081  |
| 3 | Q01433 AMPD2_HUMAN  | E.QGPDT#PVSADAPVHPPALE.Q             | T289           | 2 | 3,2025 | 0,255 | 0,802  |
| 3 | O14745 NHERF_HUMAN  | E.LNS#QDSPPKQDSTAPSSTSSSDPILD.F      | S299           | 2 | 3,1991 | 0,353 | 0,975  |
| 3 | Q14204 DYHC1_HUMAN  | E.VLFDAADANAIEE.V                    | NA             | 2 | 3,1987 | 0,266 | 0,266  |
| 3 | P49588 SYAC_HUMAN   | E.LLDDPSGPAGSLTSVE.F                 | NA             | 2 | 3,1979 | 0,278 | 0,157  |
| 3 | O43815 STRN_HUMAN   | E.FDFLVTSEEGDNE.S                    | NA             | 2 | 3,1975 | 0,305 | 0,162  |
| 3 | P25398 RS12_HUMAN   | E.GIAAGGVM*DVNTALQE.V                | NA             | 2 | 3,1933 | 0,439 | 0,312  |
| 3 | Q9Y6R0 NUMBL_HUMAN  | E.AAAAPTAVGPAQPGHVSPT#PATTS#PGEKGE.A | T265:S270      | 3 | 3,1836 | 1     | 0,304  |
| 3 | O43776 SYNC_HUMAN   | E.LIGLAPAGGADNLINEE.S                | NA             | 2 | 3,1828 | 0,471 | 0,366  |
| 3 | Q8N3U4 STAG2_HUMAN  | E.DVMMSS#EGRIEDLNE.G                 | S1178          | 2 | 3,1802 | 0,287 | 0,608  |
| 3 | Q9NUL3 STAU2_HUMAN  | E.AIGLKGSS#PT#PPCS#PVQPSKQLE.Y       | S486:T488:S492 | 3 | 3,1733 | 0,272 | 0,21   |
| 3 | O00165 HAX1_HUMAN   | E.DNDLDSQVSQE.G                      | NA             | 2 | 3,1715 | 0,366 | 0,098  |
| 3 | P33992 MCM5_HUMAN   | E.GGAM*VLADGGVVCIDE.F                | NA             | 2 | 3,1662 | 0,396 | 0,464  |
| 3 | O15504 NUPL2_HUMAN  | E.GFGLSENPFASLS#PDEQKDE.K            | S106           | 3 | 3,166  | 0,283 | 0,244  |
| 3 | Q5VU20 Q5VU20_HUMAN | E.LTDLQSNVTEETPE.G                   | NA             | 2 | 3,161  | 0,514 | 0,289  |
| 3 | Q99549 MPP8_HUMAN   | E.GARVTAVPVS#AADST#EE.L              | S16:T21        | 2 | 3,1607 | 0,423 | -0,134 |
| 3 | Q9UHY1 NRBP_HUMAN   | E.VTS#PVVPPSVKTPPEPAEVE.T            | S422           | 2 | 3,1574 | 0,127 | 0,545  |
| 3 | P55209 NP1L1_HUMAN  | E.IINAIYEPTTEE.C                     | NA             | 2 | 3,1556 | 0,428 | 0,172  |
| 3 | Q5VT06 CE350_HUMAN  | E.YVPSESIGQEQPGS#PDHSILTEE.M         | S1968          | 3 | 3,1443 | 0,317 | 0,497  |
| 3 | P07954 FUMH_HUMAN   | E.LGYLTAEQFDE.W                      | NA             | 2 | 3,1442 | 0,311 | 0,095  |
| 3 | P00533 EGFR_HUMAN   | E.DS#FLQRYSSDPTGALTE.D               | S1064          | 2 | 3,142  | 0,517 | 0,248  |
| 3 | Q99961 SH3G1_HUMAN  | E.LGGESNFGDALLDAGE.S                 | NA             | 2 | 3,1408 | 0,244 | 0,078  |
| 3 | Q9HC35 EMAL4_HUMAN  | E.SRISS#PTLLENS#LE.Q                 | S919:S926      | 2 | 3,1375 | 0,274 | 0,068  |
| 3 | Q14202 ZMYM3_HUMAN  | E.GLLEPLAPDS#PITLQSPHIEEEE.T         | S148           | 2 | 3,1265 | 0,411 | 0,282  |
| 3 | Q12888 TP53B_HUMAN  | D.S#PQKLAILDQE.L                     | S727           | 2 | 3,1203 | 0,177 | 0,185  |
| 3 | Q02952 AKA12_HUMAN  | E.IIEQIPSSSENLEE.L                   | NA             | 2 | 3,1196 | 0,441 | 0,307  |

|   |                     |                                        |             |   |        |       |        |
|---|---------------------|----------------------------------------|-------------|---|--------|-------|--------|
| 3 | Q04637 IF4G1_HUMAN  | E.SEFSSS#PLQAPTPLASHTVE.I              | S343        | 3 | 3,1169 | 0,317 | 0,591  |
| 3 | P55072 TERA_HUMAN   | E.AVCIVLSDDTCSDE.K                     | NA          | 2 | 3,1168 | 0,347 | 0,462  |
| 3 | Q00839 HNRPU_HUMAN  | E.NDVITCFANFE.S                        | NA          | 2 | 3,1126 | 0,365 | 0,183  |
| 3 | Q8ND30 LIPB2_HUMAN  | E.IVM*VTQGPSERTLS#INEEPE.G             | S329        | 2 | 3,1095 | 0,316 | 0,696  |
| 3 | P10809 CH60_HUMAN   | E.VGYDAMAGDFVNM*VE.K                   | NA          | 2 | 3,1084 | 0,469 | 0,075  |
| 3 | P09211 GSTP1_HUMAN  | E.AALVDM*VNDGVED.L                     | NA          | 2 | 3,1059 | 0,317 | 0,179  |
| 3 | Q99459 CDC5L_HUMAN  | E.SDLPSAILQTSQVSE.F                    | NA          | 2 | 3,0993 | 0,388 | -0,081 |
| 3 | Q01082 SPTB2_HUMAN  | E.DFM*TTM*DANEE.K                      | NA          | 2 | 3,0983 | 0,421 | -0,183 |
| 3 | Q8IZT6 ASPM_HUMAN   | E.NKIPIS#PIS#PAFNE.C                   | S222:S225   | 2 | 3,0846 | 0,444 | 0,579  |
| 3 | Q9UQ35 SRRM2_HUMAN  | E.KAGMSSNQS#ISS#PVLD.A                 | S1401:S1404 | 2 | 3,0832 | 0,311 | 0,274  |
| 3 | P41212 ETV6_HUMAN   | E.SYPLSVS#PM*ENNHCPASSE.S              | S238        | 2 | 3,0777 | 0,093 | 0,443  |
| 3 | P46821 MAP1B_HUMAN  | E.VVS#PSQSVTGSAGHTPYQSPTEDE.K          | S1322       | 3 | 3,0768 | 0,118 | 0,355  |
| 3 | P63279 UBC9_HUMAN   | E.LLNEPNIQDPAQAE.A                     | NA          | 2 | 3,0761 | 0,39  | 0,393  |
| 3 | Q9HC35 EMAL4_HUMAN  | E.SRISS#S#PTLLE.N                      | S918:S919   | 2 | 3,0719 | 0,265 | 0,09   |
| 3 | Q05519 SFR11_HUMAN  | E.VIQVTNVSPSASSE.Q                     | NA          | 2 | 3,0706 | 0,425 | 0,258  |
| 3 | P09874 PARP1_HUMAN  | E.VQQAVSQGSSDQILD.L                    | NA          | 2 | 3,0658 | 0,251 | 0,587  |
| 3 | P42166 LAP2A_HUMAN  | R.DSGSFVAFQNIQSE.L                     | NA          | 2 | 3,0651 | 0,438 | 0      |
| 3 | P50502 F10A1_HUMAN  | E.ILSDPEVLAAMQDPE.V                    | NA          | 2 | 3,0601 | 0,388 | 0      |
| 3 | P12956 KU70_HUMAN   | E.ALALDLM*EPE.Q                        | NA          | 2 | 3,0591 | 0,426 | 0      |
| 3 | Q9Y490 TLN1_HUMAN   | E.MDSALSVVQNLE.K                       | NA          | 2 | 3,0491 | 0,388 | 0      |
| 3 | Q66K89 E4F1_HUMAN   | E.M*AEAPGS#PHQQGLGLAGEGE.Q             | S165        | 3 | 3,0487 | 0,164 | 0,18   |
| 3 | Q12888 TP53B_HUMAN  | E.NTQIEDTEPM*S#PVLNSKFVPAEND.S         | S552        | 2 | 3,0487 | 0,424 | 0,881  |
| 3 | P06748 NPM_HUMAN    | D.M*S#PLRPQNYLFGCE.L                   | S10         | 2 | 3,0463 | 0,459 | 0,405  |
| 3 | P51610 HCFC1_HUMAN  | E.LAALVQQQLQE.A                        | NA          | 2 | 3,0332 | 0,14  | 0,178  |
| 3 | Q8N3U4 STAG2_HUMAN  | E.DVM*MSS#EGRIEDLNE.G                  | S1178       | 2 | 3,0293 | 0,342 | 0,268  |
| 3 | Q86U44 MTA70_HUMAN  | E.AALSPTFRSDS#PVPT#APTSGGPKPSTASAVPE.L | S50:T54     | 3 | 3,0229 | 1     | 0,339  |
| 3 | Q9NTJ3 SMC4_HUMAN   | E.EGPPPPSPDGASS#DAEPEPPSGRTEPATAAE.T   | S28         | 3 | 3,018  | 0,222 | 0,578  |
| 3 | Q9NYU2 UGGG1_HUMAN  | E.DLLSDGTSENE.S                        | NA          | 2 | 3,0118 | 0,389 | 0      |
| 3 | P54727 RD23B_HUMAN  | E.DATSALVTGQSYE.N                      | NA          | 2 | 3,0113 | 0,503 | 0,273  |
| 3 | Q9UQ35 SRRM2_HUMAN  | E.AVEVPSM*ASSWGGPHFS#PE.H              | S1311       | 3 | 3,0106 | 0,219 | -0,088 |
| 3 | Q5EBL4 RIPL1_HUMAN  | E.AQDLLSQIAQLQEE.N                     | NA          | 2 | 3,0091 | 0,419 | 0      |
| 3 | P10809 CH60_HUMAN   | E.VGYDAM*AGDFVNM*VE.K                  | NA          | 2 | 3,0088 | 0,374 | 0,148  |
| 3 | P35579 MYH9_HUMAN   | E.DTLNSTAAQQE.L                        | NA          | 2 | 3,0053 | 0,281 | 0,31   |
| 3 | P60842 IF4A1_HUMAN  | E.IVDSFDDMNLSE.S                       | NA          | 2 | 3,0038 | 0,245 | 0,088  |
| 3 | P10599 THIO_HUMAN   | E.VDVDDCQDVASE.C                       | NA          | 2 | 3,0001 | 0,387 | 0,542  |
| 3 | P24534 EF1B_HUMAN   | E.GYVPSQADVAVFE.A                      | NA          | 2 | 2,9957 | 0,441 | 0,177  |
| 3 | ##P09543 CN37_HUMAN | E.DQLFFQLEPKDKAGSS#S#M*K.R             | S399:S400   | 3 | 2,9956 | 0,088 | 0,075  |
| 3 | P10599 THIO_HUMAN   | E.VDVDDCQDVASECE.V                     | NA          | 2 | 2,9955 | 0,433 | 0,669  |
| 3 | O60271 JIP4_HUMAN   | E.GVTGAATSPTNGAS#PVMDKPPEM*EAE.N       | S865        | 3 | 2,9951 | 0,145 | -0,201 |
| 3 | Q15365 PCBP1_HUMAN  | R.AITIAGVPQSVTE.C                      | NA          | 2 | 2,9948 | 0,292 | 0      |
| 3 | Q15758 AAAT_HUMAN   | E.LIQVKS#ELPLDPLVPVPTTE.G              | S503        | 2 | 2,9916 | 0,323 | 0,222  |

|   |                    |                                  |           |   |        |       |        |
|---|--------------------|----------------------------------|-----------|---|--------|-------|--------|
| 3 | Q14568 HS902_HUMAN | E.TQTQDQPMEEEEVE.T               | NA        | 2 | 2,9877 | 0,395 | 0      |
| 3 | Q00613 HSF1_HUMAN  | E.LLS#PQEPPRPPEAE.N              | S444      | 2 | 2,9836 | 0,32  | 0,298  |
| 3 | P39656 OST48_HUMAN | E.LGSECGIEFDEE.K                 | NA        | 2 | 2,9818 | 0,376 | 0,264  |
| 3 | Q8IWB7 WDFY1_HUMAN | D.M*TPVVGCSLATGFS#PH.-           | S408      | 2 | 2,9794 | 0,366 | 0,556  |
| 3 | Q43432 IF4G3_HUMAN | E.LS#SPREDTIPIPLTSCTE.T          | S304      | 3 | 2,9775 | 0,176 | 0,587  |
| 3 | P40227 TCPZ_HUMAN  | E.DAYILTCNVSLE.Y                 | NA        | 2 | 2,9714 | 0,275 | 0,524  |
| 3 | Q15404 RSU1_HUMAN  | E.VLDLTYNNLSE.N                  | NA        | 2 | 2,9704 | 0,3   | 0,19   |
| 3 | Q9UQ35 SRRM2_HUMAN | E.NSFGS#PLEFRNSGPLGTEM*NTGFSSE.V | S1329     | 3 | 2,9669 | 0,268 | -0,256 |
| 3 | P14923 PLAK_HUMAN  | K.GIM*EEDEACGR.Q                 | NA        | 2 | 2,9635 | 0,406 | 0,095  |
| 3 | Q99961 SH3G1_HUMAN | E.GDVITLTNQIDE.N                 | NA        | 2 | 2,9599 | 0,385 | 0      |
| 3 | Q16718 NDUA5_HUMAN | E.DQLQGGQLEE.V                   | NA        | 2 | 2,9509 | 0,191 | 0,109  |
| 3 | Q9UNP9 PIIE_HUMAN  | E.DAAAAIDNM*NE.S                 | NA        | 2 | 2,9481 | 0,408 | 0      |
| 3 | Q02952 AKA12_HUMAN | E.ISPPAESGQAVEE.C                | NA        | 2 | 2,9479 | 0,436 | -0,186 |
| 3 | Q12770 SCAP_HUMAN  | E.GLAAVCTPALRPPS#PGPVLSQAPEDE.G  | S937      | 3 | 2,9457 | 0,226 | 0,473  |
| 3 | Q15393 SF3B3_HUMAN | E.MDYEEADNDPTGE.A                | NA        | 2 | 2,9435 | 0,4   | 0,328  |
| 3 | Q9NZI8 IF2B1_HUMAN | E.VLDSLLAQYGTVE.N                | NA        | 2 | 2,9425 | 0,447 | -0,087 |
| 3 | Q8TEQ0 SNX29_HUMAN | E.ASS#PGHGSPSSLLPSASVPE.S        | S60       | 2 | 2,9388 | 0,278 | 0,119  |
| 3 | Q96AY3 FKB10_HUMAN | E.GLDTGLQGM*CVGE.R               | NA        | 2 | 2,9364 | 0,376 | 0,18   |
| 3 | P62158 CALM_HUMAN  | E.VDADGNGTIDFPE.F                | NA        | 2 | 2,935  | 0,339 | 0,542  |
| 3 | Q8NEZ4 MLL3_HUMAN  | E.SVTLPLETLVS#PHEE.S             | S701      | 2 | 2,929  | 0,283 | 0      |
| 3 | P01112 RASH_HUMAN  | E.TCLLDILDTAGQEE.Y               | NA        | 2 | 2,9273 | 0,424 | -0,155 |
| 3 | P14314 GLU2B_HUMAN | E.LDTDGDGALSEAE.A                | NA        | 2 | 2,9267 | 0,432 | 0,283  |
| 3 | P13010 KU86_HUMAN  | E.GGDVDDLLDM*I.-                 | NA        | 2 | 2,9226 | 0,469 | -0,103 |
| 3 | Q53H82 LACB2_HUMAN | E.NAIFSGDCILGE.G                 | NA        | 2 | 2,9177 | 0,372 | 0,565  |
| 3 | Q15393 SF3B3_HUMAN | E.M*DYEEADNDPTGE.A               | NA        | 2 | 2,9176 | 0,415 | 0      |
| 3 | Q08499 PDE4D_HUMAN | E.WYQSTIQSPS#PAPDDPEEGRQGQTE.K   | S717      | 3 | 2,9172 | 0,108 | 0,368  |
| 3 | Q9Y3A5 SBDS_HUMAN  | E.DLISAFGTDDQTE.I                | NA        | 2 | 2,9137 | 0,392 | 0,086  |
| 3 | Q8WVM7 STAG1_HUMAN | E.TTAHS#DAGS#ELEE.T              | S20:S24   | 2 | 2,908  | 0,237 | 0,081  |
| 3 | P61289 PSME3_HUMAN | E.DGNNGFVSIQEE.T                 | NA        | 2 | 2,9057 | 0,223 | 0      |
| 3 | Q2NL82 TSR1_HUMAN  | E.ICATDAVDDM*EE.G                | NA        | 2 | 2,9009 | 0,41  | 0,088  |
| 3 | P42166 LAP2A_HUMAN | E.SRS#STPLPTISSS#AE.N            | S158:S168 | 2 | 2,8986 | 1     | 1,162  |
| 3 | Q12798 CETN1_HUMAN | E.LGENLTDEELQE.M                 | NA        | 2 | 2,8984 | 0,308 | 0      |
| 3 | P56537 IF6_HUMAN   | E.LSS#LLQVPLVAGTVNRGSE.V         | S175      | 2 | 2,8938 | 0,266 | 0,06   |
| 3 | Q15185 TEBP_HUMAN  | D.S#DDEKM*PDLE.-                 | S151      | 2 | 2,8909 | 0,151 | 0,096  |
| 3 | Q15185 TEBP_HUMAN  | D.SQDS#DDEKM*PDLE.-              | S151      | 2 | 2,8891 | 0,373 | 0,38   |
| 3 | P31930 QCR1_HUMAN  | E.LLGDIVQNCLE.D                  | NA        | 2 | 2,8876 | 0,383 | 0,09   |
| 3 | Q01518 CAP1_HUMAN  | R.ALLVTASQCQPAE.N                | NA        | 2 | 2,8845 | 0,448 | 0,241  |
| 3 | P39023 RL3_HUMAN   | R.LEQQVPVNQVFGQDE.M              | NA        | 2 | 2,8769 | 0,391 | 0,282  |
| 3 | P10809 CH60_HUMAN  | D.AAGVASLLTTAE.V                 | NA        | 2 | 2,853  | 0,31  | 0,111  |
| 3 | P55072 TERA_HUMAN  | E.DNS#VVVLSQPKMDE.L              | S37       | 2 | 2,8523 | 0,412 | -0,899 |
| 3 | Q06323 PSME1_HUMAN | E.DGNNGFVAVQE.K                  | NA        | 2 | 2,8493 | 0,309 | 0,212  |

|   |                     |                                |             |   |        |       |        |
|---|---------------------|--------------------------------|-------------|---|--------|-------|--------|
| 3 | P05783 K1C18_HUMAN  | E.DGEDFNLDALD.S                | NA          | 2 | 2,8405 | 0,342 | 0,191  |
| 3 | Q9NSE4 SYIM_HUMAN   | E.DGVFTDVAGPE.L                | NA          | 2 | 2,84   | 0,427 | -0,11  |
| 3 | Q49AR2 CE022_HUMAN  | E.ATFADLCDGDDEE.T              | NA          | 2 | 2,837  | 0,272 | 0,335  |
| 3 | P41250 SYG_HUMAN    | E.ISELPISIVQD.L                | NA          | 2 | 2,8321 | 0,343 | 0      |
| 3 | P07737 PROF1_HUMAN  | D.SLLQDGEFSM*D.L               | NA          | 2 | 2,8272 | 0,298 | 0,194  |
| 3 | Q9UNX4 WDR3_HUMAN   | E.VM*FFADATS#HLEE.K            | S923        | 2 | 2,8252 | 0,314 | 0      |
| 3 | Q96DY7 MTBP_HUMAN   | E.LS#PGKLQVLPFE.K              | S639        | 2 | 2,8203 | 0,235 | 0      |
| 3 | P62263 RS14_HUMAN   | E.EQVISLGPQVAE.G               | NA          | 2 | 2,8138 | 0,361 | 0,288  |
| 3 | P16070 CD44_HUMAN   | E.SSETPDQFM*TADE.T             | NA          | 2 | 2,8089 | 0,284 | -0,248 |
| 3 | Q71U36 TBA1A_HUMAN  | E.VGVDSVEGEGEEE.G              | NA          | 2 | 2,8078 | 0,276 | 0,183  |
| 3 | Q14160 LAP4_HUMAN   | E.VALVLLGRPS#PGAVGPE.D         | S1600       | 2 | 2,7999 | 0,295 | 0,356  |
| 3 | Q6DD88 ATLA3_HUMAN  | E.DDLQQLQLFTE.Y                | NA          | 2 | 2,7985 | 0,241 | 0,09   |
| 3 | Q9UHR4 BI2L1_HUMAN  | E.TEAVTVPTPS#PTPVRISSTVNLS.E.N | S414        | 2 | 2,7951 | 0,274 | 0,381  |
| 3 | Q09666 AHNK_HUMAN   | E.GDLTGPSVGVVDPDVE.L           | NA          | 2 | 2,7881 | 0,446 | 0      |
| 3 | P58107 EPIPL_HUMAN  | E.AVAAGVVGGEIQE.K              | NA          | 2 | 2,7876 | 0,179 | 0      |
| 3 | P31150 GDIA_HUMAN   | E.YDVIVLGTGLTE.C               | NA          | 2 | 2,7852 | 0,32  | 0      |
| 3 | Q8WU90 ZC3HF_HUMAN  | E.IS#LEDLIERE.R                | S231        | 2 | 2,7847 | 0,295 | 0      |
| 3 | Q96RS6 NUDC1_HUMAN  | E.TNDPILGQATNE.R               | NA          | 2 | 2,784  | 0,368 | -0,086 |
| 3 | Q10570 CPSF1_HUMAN  | E.MLYGDSGSLFS#PSKEE.A          | S756        | 2 | 2,7802 | 0,218 | -0,668 |
| 3 | P49321 NASP_HUMAN   | E.DESLVENNDNIDE.E              | NA          | 2 | 2,7773 | 0,194 | 0,162  |
| 3 | Q96KP4 CNDP2_HUMAN  | E.GGSIPVTLTFQE.A               | NA          | 2 | 2,7761 | 0,399 | 0      |
| 3 | ##P09543 CN37_HUMAN | E.DQLFPFQLEPKDKAGS#S\$SM*K.R   | S398:S399   | 2 | 2,7732 | 0,147 | -0,1   |
| 3 | Q6FIF0 ZFAN6_HUMAN  | E.TEDVQASVSDTAQQPSEE.Q         | NA          | 2 | 2,7709 | 0,37  | 0,254  |
| 3 | P38606 VATA_HUMAN   | E.GDM*ATIQVYEE.T               | NA          | 2 | 2,7709 | 0,195 | 0,096  |
| 3 | Q9Y490 TLN1_HUMAN   | E.AVEDLTTTLNE.A                | NA          | 2 | 2,7686 | 0,338 | 0      |
| 3 | P31946 1433B_HUMAN  | E.AELQDICNDVLE.L               | NA          | 2 | 2,766  | 0,22  | 0,086  |
| 3 | P61020 RAB5B_HUMAN  | E.AQAYADDNSLLFM*E.T            | NA          | 2 | 2,7648 | 0,358 | 0,152  |
| 3 | Q00341 VIGLN_HUMAN  | E.EEYLADVVDSE.A                | NA          | 2 | 2,7629 | 0,392 | 0,192  |
| 3 | Q6IE81 JADE1_HUMAN  | E.NGAPECS#PRNPLEPFASLE.Q       | S392        | 2 | 2,7598 | 0,291 | 0,338  |
| 3 | Q6GYQ0 GRIPE_HUMAN  | E.EQPLPRSSSTS#DILEPFTVE.R      | S799        | 2 | 2,7582 | 0,275 | 0      |
| 3 | O94915 FRYL_HUMAN   | E.SRYSSSS#GGS#YEEE.K           | S1536:S1539 | 2 | 2,7545 | 1     | 0,217  |
| 3 | Q00839 HNRPU_HUMAN  | E.NDVITCFANFESDE.V             | NA          | 2 | 2,7511 | 0,236 | 0,367  |
| 3 | P49755 TMEDA_HUMAN  | K.NYEEIAKVE.K                  | NA          | 2 | 2,7456 | 0,252 | 0,334  |
| 3 | P08133 ANXA6_HUMAN  | E.DLVQQDVQDLYE.A               | NA          | 2 | 2,741  | 0,231 | -0,083 |
| 3 | P33778 H2B1B_HUMAN  | D.IFERIAGE.A                   | NA          | 2 | 2,7397 | 0,148 | 0,13   |
| 3 | P10809 CH60_HUMAN   | E.IIEQLDVTTSEYE.K              | NA          | 2 | 2,7389 | 0,326 | 0,396  |
| 3 | P29966 MARCS_HUMAN  | E.AQPECSPEAPPAEAAE.-           | NA          | 2 | 2,7386 | 0,373 | 0,148  |
| 3 | P62263 RS14_HUMAN   | E.QVISLGPQVAE.G                | NA          | 2 | 2,738  | 0,344 | 0,107  |
| 3 | Q9UNP9 PIIE_HUMAN   | E.DAAAIDNMNE.S                 | NA          | 2 | 2,7378 | 0,251 | 0      |
| 3 | P35579 MYH9_HUMAN   | E.GDSTDLSDQIAE.L               | NA          | 2 | 2,7377 | 0,085 | 0,39   |
| 3 | Q15029 U5S1_HUMAN   | E.MDFLADLM*DNSE.L              | NA          | 2 | 2,7331 | 0,334 | -0,086 |

|   |                    |                            |           |   |        |       |        |
|---|--------------------|----------------------------|-----------|---|--------|-------|--------|
| 3 | Q07666 KHDR1_HUMAN | E.YGYDDTYAEQSYE.G          | NA        | 2 | 2,7327 | 0,148 | 0,456  |
| 3 | Q02952 AKA12_HUMAN | E.AALLTEEVLE.R             | NA        | 2 | 2,7323 | 0,306 | -0,112 |
| 3 | Q15149 PLEC1_HUMAN | E.DLLQDAQDE.K              | NA        | 2 | 2,7301 | 0,321 | 0,35   |
| 3 | O43719 HTSF1_HUMAN | E.TATGMAFEPEIDE.K          | NA        | 2 | 2,7263 | 0,268 | -0,605 |
| 3 | O00629 IMA4_HUMAN  | E.AETIGNLIEE.C             | NA        | 2 | 2,7172 | 0,283 | 0      |
| 3 | O00299 CLIC1_HUMAN | E.FASTCPDDEEIE.L           | NA        | 2 | 2,7123 | 0,125 | 0,173  |
| 3 | P22234 PUR6_HUMAN  | E.IVLADVIDND.S             | NA        | 2 | 2,7097 | 0,439 | 0,224  |
| 3 | P31689 DNJA1_HUMAN | E.LVDFDPNQE.R              | NA        | 2 | 2,7081 | 0,357 | 0,34   |
| 3 | Q8NCW5 AIBP_HUMAN  | E.YQFSVDQLM*E.L            | NA        | 2 | 2,7024 | 0,346 | 0,096  |
| 3 | P43246 MSH2_HUMAN  | E.LLSDDSNFGQFE.L           | NA        | 2 | 2,6984 | 0,258 | -0,267 |
| 3 | P62826 RAN_HUMAN   | E.VAQTALPDEDDDL.-          | NA        | 2 | 2,6982 | 0,269 | 0,162  |
| 3 | Q15369 ELOC_HUMAN  | E.LLMAANFLDC.-             | NA        | 2 | 2,6955 | 0,405 | -0,104 |
| 3 | Q15021 CND1_HUMAN  | E.LGLVGATADDTEAE.L         | NA        | 2 | 2,6942 | 0,389 | 0,179  |
| 3 | Q6PD74 P34_HUMAN   | E.IEGLS#S#DEEH.-           | S310:S311 | 2 | 2,6934 | 0,186 | -0,096 |
| 3 | P09211 GSTP1_HUMAN | E.YVNLPIPINGNGKQ.-         | NA        | 2 | 2,6871 | 0,284 | -0,093 |
| 3 | P51610 HCFC1_HUMAN | E.ALAPADSLNDPAIE.S         | NA        | 2 | 2,6863 | 0,275 | 0,087  |
| 3 | P27816 MAP4_HUMAN  | E.AEAFDDVVGGE.T            | NA        | 2 | 2,6847 | 0,276 | 0      |
| 3 | Q9NPI6 DCP1A_HUMAN | R.KASS#PS#PLTIGTPE.S       | S523:S525 | 2 | 2,6808 | 0,35  | 0,474  |
| 3 | O00566 MPP10_HUMAN | E.VS#DM*GNDDPEM*GERAE.N    | S139      | 2 | 2,6793 | 0,359 | 0,131  |
| 3 | Q96IZ0 PAWR_HUMAN  | E.DAITQQNTIQNE.A           | NA        | 2 | 2,6774 | 0,125 | -0,089 |
| 3 | O75937 DNJC8_HUMAN | E.VLQIDPEVTDEE.I           | NA        | 2 | 2,673  | 0,429 | 0      |
| 3 | Q8WYA6 CTBL1_HUMAN | E.SELDLNDIIQE.M            | NA        | 2 | 2,6633 | 0,107 | -0,473 |
| 3 | P60709 ACTB_HUMAN  | E.ALQPSFLGM*E.S            | NA        | 2 | 2,6631 | 0,367 | 0,291  |
| 3 | Q00341 VIGLN_HUMAN | E.ALIQNLNVE.D              | NA        | 2 | 2,6626 | 0,262 | 0,199  |
| 3 | Q96BK5 PINX1_HUMAN | K.KTPEGDAS#PST#PEENE.T     | S161:T164 | 2 | 2,6618 | 0,298 | -0,066 |
| 3 | Q09666 AHNK_HUMAN  | K.GPKVDIDTPDINIE.G         | NA        | 2 | 2,6583 | 0,295 | 0,24   |
| 3 | Q13426 XRCC4_HUMAN | E.TLRNS#S#PEDLFDEI.-       | S327:S328 | 2 | 2,6546 | 0,301 | 0      |
| 3 | Q9NZ23 CHMP5_HUMAN | E.DM*M*EDANEIQE.A          | NA        | 2 | 2,6518 | 0,221 | 0,18   |
| 3 | P62158 CALM_HUMAN  | E.ADIDGDGQVNYE.E           | NA        | 2 | 2,6518 | 0,193 | -0,094 |
| 3 | P39656 OST48_HUMAN | E.DFGGNINVE.T              | NA        | 2 | 2,6491 | 0,201 | 0,063  |
| 3 | Q9Y613 FHOD1_HUMAN | E.DCALQVSPSGYYLDTE.L       | NA        | 2 | 2,6445 | 0,321 | -0,738 |
| 3 | Q96AC1 FERM2_HUMAN | E.GNPGILAVSQPITSPE.I       | NA        | 2 | 2,6342 | 0,373 | -0,077 |
| 3 | Q08945 SSRP1_HUMAN | D.S#DEDQHDAYLE.R           | S444      | 2 | 2,6301 | 0,261 | 0      |
| 3 | Q00341 VIGLN_HUMAN | E.GPTEDVNVAQEIQE.G         | NA        | 2 | 2,624  | 0,258 | 0,319  |
| 3 | P30153 2AAA_HUMAN  | E.QLGFTTLVGGPE.Y           | NA        | 2 | 2,614  | 0,38  | -0,092 |
| 3 | Q7KZF4 SND1_HUMAN  | E.ADGSETPEPFAAE.A          | NA        | 2 | 2,6112 | 0,34  | 0,185  |
| 3 | Q9BQA1 MEP50_HUMAN | E.DCSLAVLDSSLSE.L          | NA        | 2 | 2,6097 | 0,299 | 0,262  |
| 3 | P35580 MYH10_HUMAN | E.DQSILCTGE.S              | NA        | 2 | 2,6082 | 0,266 | 0,06   |
| 3 | Q5H9F3 BCRL1_HUMAN | E.GTSVTF#PLKSPPQE.R        | S599      | 2 | 2,6042 | 0,277 | -0,207 |
| 3 | P55265 DSRAD_HUMAN | E.SQTPTSATSFSGKS#PVTTLLE.C | S614      | 2 | 2,6036 | 0,247 | 0,396  |
| 3 | P78371 TCPB_HUMAN  | E.GTIGDM*AILGITE.S         | NA        | 2 | 2,6005 | 0,286 | 0,093  |

|   |                    |                          |             |   |        |       |        |
|---|--------------------|--------------------------|-------------|---|--------|-------|--------|
| 3 | P08670 VIME_HUMAN  | K.TVETRDGQVINE.T         | NA          | 2 | 2,5995 | 0,22  | 0,09   |
| 3 | P40692 MLH1_HUMAN  | E.DGNILQLANLPD.L         | NA          | 2 | 2,5974 | 0,36  | 0      |
| 3 | Q15155 NOMO1_HUMAN | E.DVLGCNVSPVPGFQPQDE.S   | NA          | 2 | 2,5943 | 0,384 | 0      |
| 3 | P49792 RBP2_HUMAN  | E.TT#PKAVVS#PPKFVFGSE.S  | T2504:S2510 | 2 | 2,594  | 0,315 | 0      |
| 3 | Q15369 ELOC_HUMAN  | E.LLM*AAFLDC.-           | NA          | 2 | 2,5913 | 0,407 | 0,103  |
| 3 | P62333 PRS10_HUMAN | E.VIELPLTNPE.L           | NA          | 2 | 2,5903 | 0,287 | 0      |
| 3 | Q9Y4L1 HYOU1_HUMAN | E.DAEPISPEPE.K           | NA          | 2 | 2,5879 | 0,216 | 0      |
| 3 | Q99426 TBCB_HUMAN  | E.DALLGSYPVDD.G          | NA          | 2 | 2,5865 | 0,307 | -0,105 |
| 3 | Q14257 RCN2_HUMAN  | E.ILENPDLFLTSE.A         | NA          | 2 | 2,5807 | 0,235 | 0      |
| 3 | P56545 CTBP2_HUMAN | D.LATVAFCDAQSTQE.I       | NA          | 2 | 2,5775 | 0,243 | 0,475  |
| 3 | Q92598 HS105_HUMAN | E.AFYSDPQGVYPPE.A        | NA          | 2 | 2,5751 | 0,263 | 0      |
| 3 | Q9BVW5 TIPIN_HUMAN | E.DFVSNNDVVAE.N          | NA          | 2 | 2,5745 | 0,264 | 0      |
| 3 | Q13885 TBB2A_HUMAN | E.FTEAESNM*NDLVSE.Y      | NA          | 2 | 2,5742 | 0,354 | 0,229  |
| 3 | P35580 MYH10_HUMAN | E.DTLDTTAAQQE.L          | NA          | 2 | 2,5732 | 0,196 | 0,409  |
| 3 | Q13263 TIF1B_HUMAN | E.AAIGAPPTATEGPE.T       | NA          | 2 | 2,5651 | 0,443 | -0,286 |
| 3 | P09211 GSTP1_HUMAN | E.AALVDM*VNDGVE.D        | NA          | 2 | 2,5641 | 0,374 | 0,195  |
| 3 | Q7Z3C6 ATG9A_HUMAN | E.ASYSDS#PPGEEDLLVHVAE.G | S18         | 2 | 2,5512 | 0,245 | 0,233  |
| 3 | Q14203 DCTN1_HUMAN | E.VAAAAQLIAPLAENE.G      | NA          | 2 | 2,5484 | 0,329 | -0,079 |
| 3 | P12955 PEPD_HUMAN  | E.DVVVTDSGIE.L           | NA          | 2 | 2,5453 | 0,234 | 0,118  |
| 3 | P68104 EF1A1_HUMAN | K.DGNASGTTLE.A           | NA          | 2 | 2,544  | 0,313 | 0,34   |
| 3 | Q15185 TEBP_HUMAN  | D.S#DDEKMPDLE.-          | S151        | 2 | 2,5428 | 0,268 | -0,097 |
| 3 | P61158 ARP3_HUMAN  | E.FANPDFTQPISEVVDE.V     | NA          | 2 | 2,5381 | 0,443 | 0,135  |
| 3 | P13010 KU86_HUMAN  | E.EGGDVDLLDM*I.-         | NA          | 2 | 2,5345 | 0,308 | -0,187 |
| 3 | Q92831 PCAF_HUMAN  | R.KMTDS#HVLE.E           | S434        | 2 | 2,5334 | 0,103 | -1,498 |
| 3 | Q13185 CBX3_HUMAN  | K.KVEEAPEEFVVE.K         | NA          | 2 | 2,5327 | 0,286 | 0,239  |
| 3 | P53004 BIEA_HUMAN  | E.DALSSQEVE.V            | NA          | 2 | 2,5324 | 0,19  | 0,187  |
| 3 | Q9Y5Q9 TF3C3_HUMAN | E.ANDVTSAINIIDE.A        | NA          | 2 | 2,5316 | 0,236 | 0,089  |
| 3 | Q9H813 TM206_HUMAN | E.RSTS#YQELS#EE.L        | S9:S14      | 2 | 2,5279 | 0,192 | 0,082  |
| 3 | O95373 IPO7_HUMAN  | E.GYSTIIDDEDNPVDE.Y      | NA          | 2 | 2,5219 | 0,254 | 0,58   |
| 3 | O60271 JIP4_HUMAN  | E.DGVVYQEEPGGSGAVM*SE.R  | NA          | 2 | 2,5204 | 0,366 | 0,067  |
| 3 | O75643 U520_HUMAN  | R.NALLQLTDSQIAD.V        | NA          | 2 | 2,5203 | 0,291 | 0,348  |
| 3 | P51114 FXR1_HUMAN  | E.DAVLM*DGM*TE.S         | NA          | 2 | 2,5143 | 0,347 | 0      |
| 3 | Q13885 TBB2A_HUMAN | E.MEFTEAESNMNDLVSE.Y     | NA          | 2 | 2,5119 | 0,293 | 0,331  |
| 3 | Q02952 AKA12_HUMAN | E.VEGGVPDIEEQE.R         | NA          | 2 | 2,5094 | 0,233 | -0,094 |
| 3 | Q9P031 TAP26_HUMAN | E.DQCSFDQPQPE.E          | NA          | 2 | 2,4966 | 0,231 | 0,09   |
| 3 | Q15020 SART3_HUMAN | E.NGPAAAPAVAAPAATE.A     | NA          | 2 | 2,4952 | 0,354 | 0      |
| 3 | Q9UPN3 MACF1_HUMAN | E.DLLQDSM*DE.K           | NA          | 2 | 2,4835 | 0,184 | 0,226  |
| 3 | P35579 MYH9_HUMAN  | E.LDNVTGLLSQSD.S         | NA          | 2 | 2,4832 | 0,204 | -0,387 |
| 3 | Q96CT7 CC124_HUMAN | E.DAIAVLSVAEE.A          | NA          | 2 | 2,4808 | 0,152 | 0,109  |
| 3 | Q10567 AP1B1_HUMAN | E.TDLIEPTLLDE.L          | NA          | 2 | 2,4783 | 0,281 | 0,194  |
| 3 | P35580 MYH10_HUMAN | E.LDNVSTLLEE.A           | NA          | 2 | 2,4779 | 0,115 | 0      |

|   |                     |                               |             |   |        |       |        |
|---|---------------------|-------------------------------|-------------|---|--------|-------|--------|
| 3 | O60271 JIP4_HUMAN   | E.LSSAGSGLIGDVDE.G            | NA          | 2 | 2,4777 | 0,188 | 0,092  |
| 3 | Q13685 AAMP_HUMAN   | E.LDPGPPDPDDLAQE.M            | NA          | 2 | 2,4777 | 0,21  | 0,495  |
| 3 | Q95685 PPR3D_HUMAN  | R.ARS#LPSS#PE.R               | S74:S78     | 2 | 2,4756 | 0,219 | -0,221 |
| 3 | P49327 FAS_HUMAN    | E.QGVTFPSGDIQE.Q              | NA          | 2 | 2,4721 | 0,286 | 0      |
| 3 | Q4G0J3 LARP7_HUMAN  | R.SRPTS#EGS#DIE.S             | S258:S261   | 2 | 2,4629 | 0,22  | 0,182  |
| 3 | A4UCT1 A4UCT1_HUMAN | -.DAGAEYVVE.S                 | NA          | 2 | 2,4628 | 0,195 | 0,192  |
| 3 | Q15942 ZYX_HUMAN    | E.IFPSPPPPPEEE.G              | NA          | 2 | 2,4605 | 0,322 | 0,091  |
| 3 | Q9H4A3 WNK1_HUMAN   | E.LSEPSHLNGPS#S#DPE.A         | S2011:S2012 | 2 | 2,4603 | 0,315 | 0,141  |
| 3 | P09382 LEG1_HUMAN   | E.AVFPFQPGS#VAE.V             | S84         | 2 | 2,4553 | 0,195 | 0,184  |
| 3 | P49736 MCM2_HUMAN   | D.VEELTAS#QRE.A               | S108        | 2 | 2,4524 | 0,201 | -0,196 |
| 3 | P15311 EZRI_HUMAN   | E.SLQDEGAEPTGYSAE.L           | NA          | 2 | 2,4518 | 0,367 | -0,236 |
| 3 | Q02790 FKBP4_HUMAN  | E.NLDLPYGLE.R                 | NA          | 2 | 2,4493 | 0,219 | 0,118  |
| 3 | Q8NI08 NCOA7_HUMAN  | E.DFIVQDLE.V                  | NA          | 2 | 2,4454 | 0,158 | 0,187  |
| 3 | Q9Y4B4 ARIP4_HUMAN  | E.GLARPVS#PDS#PEIIE.L         | S1169:S1172 | 2 | 2,4452 | 0,352 | 0,735  |
| 3 | Q32MZ4 LRRF1_HUMAN  | E.DTAPFLGTLGATYE.E            | NA          | 2 | 2,4411 | 0,365 | 0,08   |
| 3 | Q13838 UAP56_HUMAN  | E.LLDYEDDEVE.T                | NA          | 2 | 2,4378 | 0,163 | 0      |
| 3 | Q6NZI2 PTRF_HUMAN   | E.SDAVLVDK.S                  | NA          | 2 | 2,4322 | 0,133 | 0,36   |
| 3 | Q16186 ADRM1_HUMAN  | E.YLNNPPM*PGALGASGSS#GHE.L    | S143        | 2 | 2,4319 | 0,225 | 0,357  |
| 3 | Q16543 CDC37_HUMAN  | E.GEEAGPGDPLLE.A              | NA          | 2 | 2,4316 | 0,345 | -0,103 |
| 3 | P28838 AMPL_HUMAN   | E.DDVPQFTSAGE.N               | NA          | 2 | 2,4298 | 0,289 | 0      |
| 3 | P49792 RBP2_HUMAN   | E.VSST#SETTPKAVVS#PPKFVFGSE.S | T2500:S2510 | 2 | 2,429  | 0,227 | 0,192  |
| 3 | Q9UK76 HN1_HUMAN    | E.NVDTDLPGSLGQSE.E            | NA          | 2 | 2,4214 | 0,356 | 0,256  |
| 3 | O00410 IMB3_HUMAN   | E.CIAQLSPEQQAAIQE.L           | NA          | 2 | 2,4211 | 0,326 | 0,868  |
| 3 | Q7Z4S6 KI21A_HUMAN  | R.DQVLQNLGSVE.S               | NA          | 2 | 2,4197 | 0,122 | 0,508  |
| 3 | Q99497 PARK7_HUMAN  | E.GPYDVVVLPGGNLGAQNLSE.S      | NA          | 2 | 2,4045 | 0,256 | 0,122  |
| 3 | P28838 AMPL_HUMAN   | E.VDPCGDAQAAAE.G              | NA          | 2 | 2,4025 | 0,228 | -0,101 |
| 3 | Q9H5V8 CDCP1_HUMAN  | E.DTM*VYGHLLQDSSGS#FLQPE.V    | S753        | 2 | 2,3985 | 0,27  | 0,631  |
| 3 | Q15404 RSU1_HUMAN   | E.VLNFFNNIIE.L                | NA          | 2 | 2,3945 | 0,166 | 0,089  |
| 3 | P30566 PUR8_HUMAN   | E.AEQTGLLPITDEQIQE.M          | NA          | 2 | 2,3944 | 0,149 | 1,914  |
| 3 | Q13263 TIF1B_HUMAN  | E.DNAPATSYCVE.C               | NA          | 2 | 2,394  | 0,382 | -0,099 |
| 3 | Q9UK45 LSM7_HUMAN   | E.AIPNPFIQQDA.-               | NA          | 2 | 2,3915 | 0,086 | 0,182  |
| 3 | P49368 TCPG_HUMAN   | E.DDVGTGAGLLE.I               | NA          | 2 | 2,3899 | 0,1   | 0      |
| 3 | P19623 SPEE_HUMAN   | E.DGVLCQGE.C                  | NA          | 2 | 2,3898 | 0,365 | 0,353  |
| 3 | Q9BUJ2 HNRL1_HUMAN  | E.NDVIGCFADFE.C               | NA          | 2 | 2,3882 | 0,289 | -0,19  |
| 3 | Q02224 CENPE_HUMAN  | K.FQES#QEEIK.S                | S1340       | 2 | 2,3819 | 0,115 | 0,1    |
| 3 | P55209 NP1L1_HUMAN  | R.LDGLVETPTGYIE.S             | NA          | 2 | 2,3798 | 0,255 | -0,087 |
| 3 | P02545 LMNA_HUMAN   | K.AAYEAE LGDAR.K              | NA          | 2 | 2,379  | 0,212 | 1,779  |
| 3 | P08133 ANXA6_HUMAN  | E.DAQVAEILE.I                 | NA          | 2 | 2,375  | 0,177 | 0,23   |
| 3 | Q9Y244 POMP_HUMAN   | E.TIGFEDILNDPSQSE.V           | NA          | 2 | 2,3667 | 0,247 | 0,366  |
| 3 | Q6S8J3 A26CA_HUMAN  | K.SYELPDGQVITIGNE.R           | NA          | 2 | 2,3614 | 0,161 | 0,075  |
| 3 | Q14671 PUM1_HUMAN   | E.VNSVLS#PRS#E.S              | S209:S212   | 2 | 2,3603 | 0,234 | 0      |



|   |                    |                              |              |   |        |       |        |
|---|--------------------|------------------------------|--------------|---|--------|-------|--------|
| 3 | P22626 ROA2_HUMAN  | D.TIEITDR.Q                  | NA           | 2 | 2,3602 | 0,181 | 0,063  |
| 3 | Q15691 MARE1_HUMAN | E.GFVIPDEGGPQEE.Q            | NA           | 2 | 2,3594 | 0,146 | 0,266  |
| 3 | P30876 RPB2_HUMAN  | E.DAPPIDLQAE.A               | NA           | 2 | 2,3571 | 0,131 | -0,228 |
| 3 | P10809 CH60_HUMAN  | E.VGYDAM*AGDFVNMVE.K         | NA           | 2 | 2,3571 | 0,31  | 0      |
| 3 | P25398 RS12_HUMAN  | E.GIAAGGVMDVNTALQE.V         | NA           | 2 | 2,3526 | 0,148 | 0,158  |
| 3 | P51114 FXR1_HUMAN  | E.DAVLMDGM*TE.S              | NA           | 2 | 2,3518 | 0,207 | 0,111  |
| 3 | Q9BQ52 RNZ2_HUMAN  | E.ALQLPNFQQSVQE.Y            | NA           | 2 | 2,3513 | 0,259 | 0,081  |
| 3 | P22314 UBA1_HUMAN  | E.GGEIIVTDM*DTIE.K           | NA           | 2 | 2,3508 | 0,196 | 0,26   |
| 3 | Q58FF7 H90B3_HUMAN | E.GLELPEDEEE.K               | NA           | 2 | 2,3475 | 0,373 | 0      |
| 3 | Q9UPA5 BSN_HUMAN   | R.AAS#PT#PKQASAT#TPGHESPRE.T | S93:T95:T102 | 2 | 2,3458 | 0,2   | -0,517 |
| 3 | Q96SB3 NEB2_HUMAN  | E.DALSPVDMPEE.K              | NA           | 2 | 2,3435 | 0,273 | 0      |
| 3 | Q14974 IMB1_HUMAN  | E.AIGYICQDIDPE.Q             | NA           | 2 | 2,3367 | 0,284 | 0,175  |
| 3 | Q16576 RBBP7_HUMAN | E.M*FEDTVEER.V               | NA           | 2 | 2,3278 | 0,253 | -0,104 |
| 3 | P27694 RFA1_HUMAN  | E.SAEAILGQNAAYLGE.L          | NA           | 2 | 2,3267 | 0,317 | 0,162  |
| 3 | Q58FF7 H90B3_HUMAN | E.DQTEYLEE.R                 | NA           | 2 | 2,3258 | 0,085 | 0,119  |
| 3 | Q02790 FKBP4_HUMAN | E.IGEGENLDLPYGLE.R           | NA           | 2 | 2,3254 | 0,195 | 0,161  |
| 3 | O75534 CSDE1_HUMAN | E.VQDGIELQAGDEVE.F           | NA           | 2 | 2,323  | 0,278 | 0,325  |
| 3 | Q5F1R6 DJC21_HUMAN | E.DSPQENVSVTE.I              | NA           | 2 | 2,3203 | 0,243 | -0,304 |
| 3 | O60264 SMCA5_HUMAN | E.SEITDEDIDGILE.R            | NA           | 2 | 2,3185 | 0,22  | 0,421  |
| 3 | P36543 VATE1_HUMAN | E.SYLPEDIAGGVE.I             | NA           | 2 | 2,3143 | 0,196 | 0,195  |
| 3 | Q5H9R7 SAPS3_HUMAN | E.AAGSVAM*EASS#DGEED.A       | S777         | 2 | 2,3086 | 0,337 | 0,301  |
| 3 | Q9NSE4 SYIM_HUMAN  | E.TISTLSGVDLE.N              | NA           | 2 | 2,3025 | 0,147 | -0,107 |
| 3 | P46937 YAP1_HUMAN  | E.ALSSDILNDME.S              | NA           | 2 | 2,2998 | 0,094 | 0,505  |
| 3 | Q9Y519 T184B_HUMAN | E.KTLLLS#S#DDEF.-            | S402:S403    | 2 | 2,2969 | 0,219 | 0,085  |
| 3 | P12956 KU70_HUMAN  | E.LVYPPDYNPE.G               | NA           | 2 | 2,2925 | 0,197 | 0,101  |
| 3 | P49023 PAXI_HUMAN  | E.SSVSPVPVAITVNQGE.M         | NA           | 2 | 2,2904 | 0,3   | 0,463  |
| 3 | Q8WWI5 CTL1_HUMAN  | E.LKPMAS#GAS#SA.-            | S652:S655    | 2 | 2,2894 | 0,295 | 0,207  |
| 3 | Q15468 STIL_HUMAN  | E.SDNGM*MGLS#PDAYRFLTE.Q     | S719         | 2 | 2,2859 | 0,347 | 0      |
| 3 | P49755 TMEDA_HUMAN | E.DLSESIVND.F                | NA           | 2 | 2,2857 | 0,176 | 0,123  |
| 3 | P30153 2AAA_HUMAN  | E.IIPM*FSNLASDE.Q            | NA           | 2 | 2,2843 | 0,19  | 0,09   |
| 3 | P67870 CSK2B_HUMAN | E.NQPM*LPIGLSDIPGE.A         | NA           | 2 | 2,2751 | 0,323 | 0,229  |
| 3 | P35612 ADDB_HUMAN  | E.AAS#PPPPQQQPYFDRFSEDDPE.Y  | S11          | 2 | 2,2696 | 0,165 | 0,869  |
| 3 | P13639 EF2_HUMAN   | E.LLYEGPPDDE.A               | NA           | 2 | 2,2693 | 0,231 | 0,106  |
| 3 | O60343 TBCD4_HUMAN | E.INLIS#PDTKSVVLE.K          | S370         | 2 | 2,2634 | 0,22  | 0,228  |
| 3 | Q16643 DREB_HUMAN  | E.VTLAEVPLLDE.V              | NA           | 2 | 2,2582 | 0,147 | -0,204 |
| 3 | Q13435 SF3B2_HUMAN | E.IEYVTEPE.I                 | NA           | 2 | 2,249  | 0,256 | 0      |
| 3 | P78347 GTF2I_HUMAN | E.SAEPSQLVDPATEE.I           | NA           | 2 | 2,2389 | 0,201 | 0,164  |
| 3 | P07602 SAP_HUMAN   | E.ICALVGFCDV.V               | NA           | 2 | 2,2374 | 0,239 | 0      |
| 3 | Q14966 ZN638_HUMAN | E.IQDDSS#DLHLVTLDE.V         | S1744        | 2 | 2,2367 | 0,274 | -0,137 |
| 3 | P52597 HNRPF_HUMAN | E.YSGLSDGYGFTTD.L            | NA           | 2 | 2,233  | 0,211 | 0,353  |
| 3 | P14314 GLU2B_HUMAN | E.LDDDMDGTVSVTE.L            | NA           | 2 | 2,2248 | 0,245 | 0,175  |

|   |                     |                              |           |   |        |       |        |
|---|---------------------|------------------------------|-----------|---|--------|-------|--------|
| 3 | Q14204 DYHC1_HUMAN  | E.DGGEAPAALE.A               | NA        | 2 | 2,2236 | 0,193 | 0,197  |
| 3 | Q86UX6 ST32C_HUMAN  | E.NDYLQDCLDAIQQD.F           | NA        | 2 | 2,219  | 0,27  | 0,428  |
| 3 | Q15843 NEDD8_HUMAN  | K.TLTGKEIEID.I               | NA        | 2 | 2,2142 | 0,185 | 0,218  |
| 3 | Q9Y3C8 UFC1_HUMAN   | E.FDIPITYPTTAPE.I            | NA        | 2 | 2,2123 | 0,217 | 0,416  |
| 3 | Q15366 PCBP2_HUMAN  | E.AYTIQQQYAIPQPD.L           | NA        | 2 | 2,2053 | 0,297 | 0,312  |
| 3 | P04406 G3P_HUMAN    | K.VIHDNFGIVE.G               | NA        | 2 | 2,2008 | 0,217 | 0      |
| 4 | Q8WUD4 CCD12_HUMAN  | E.DSLASAVDAATEQKTCDS#D.-     | S165      | 2 | 6,3476 | 0,51  | 0,355  |
| 4 | Q07866 KLC1_HUMAN   | E.SLNVDDVVKYES#GPDGEE.V      | S530      | 2 | 6,1151 | 0,502 | 0,247  |
| 4 | Q13283 G3BP1_HUMAN  | E.DAQKSSS#PAPADIAQTVQE.D     | S232      | 2 | 6,0274 | 0,583 | 0,422  |
| 4 | Q14566 MCM6_HUMAN   | E.GAGGINGHADS#PAPVNGINGYNE.D | S689      | 2 | 5,9047 | 0,508 | 0      |
| 4 | Q7Z417 NUFP2_HUMAN  | E.IESQNPLAS#PTNTLLGSAKE.Q    | S629      | 2 | 5,8731 | 0,48  | 0,114  |
| 4 | B2CI53 B2CI53_HUMAN | R.NGILAS PQS#APGNLDNSKSGE.I  | S263      | 2 | 5,8226 | 0,515 | 0,228  |
| 4 | Q13283 G3BP1_HUMAN  | E.TAPEDAQKSSS#PAPADIAQTVQE.D | S232      | 2 | 5,6982 | 0,551 | 0,403  |
| 4 | Q86SQ0 PHLB2_HUMAN  | E.LLSDLTRT#PPPPSSTFPKAS#SE.S | T550:S562 | 3 | 5,4825 | 1     | 0,294  |
| 4 | Q9Y3D3 RT16_HUMAN   | E.VLLASQKTDAEAT#DTEATET.-    | T130      | 2 | 5,341  | 0,621 | 0      |
| 4 | Q13283 G3BP1_HUMAN  | D.AQKSSS#PAPADIAQTVQE.D      | S232      | 2 | 5,3279 | 0,49  | -0,064 |
| 4 | Q9BVJ6 UT14A_HUMAN  | E.LSQDAEPAGS#QETKDSGSQE.V    | S445      | 2 | 5,218  | 0,603 | 0,114  |
| 4 | Q14839 CHD4_HUMAN   | E.VTAVDGYET#DHQDYCE.V        | T367      | 2 | 5,2059 | 0,553 | 0,062  |
| 4 | Q7Z417 NUFP2_HUMAN  | E.SQNPLAS#PTNTLLGSAKE.Q      | S629      | 2 | 5,0932 | 0,561 | 0,064  |
| 4 | Q15042 RB3GP_HUMAN  | E.FFECLS#DTEELKNGQE.S        | S590      | 2 | 5,077  | 0,463 | 0,117  |
| 4 | P31749 AKT1_HUMAN   | E.MDFRSGS#PSDNSGAEEM*E.V     | S124      | 2 | 5,0383 | 0,461 | -0,179 |
| 4 | Q14966 ZN638_HUMAN  | E.SEVQTATDS#PSVKPNELEEE.S    | S1119     | 2 | 5,0268 | 0,6   | -0,108 |
| 4 | O43815 STRN_HUMAN   | E.LNQGDMKPPSYDS#DEGNETE.V    | S137      | 2 | 5,0105 | 0,46  | 0,317  |
| 4 | Q9BXJ9 NARG1_HUMAN  | E.DM*KITVNGDS#SAEAE.L        | S855      | 2 | 5,0072 | 0,4   | -0,068 |
| 4 | P46100 ATRX_HUMAN   | E.VQSSVDHQGDGSS#GTEQEVE.S    | S550      | 2 | 4,9793 | 0,477 | -0,226 |
| 4 | Q96RY5 CRML_HUMAN   | E.NS#IDYISRFNDLAQE.L         | S1226     | 2 | 4,9614 | 0,4   | 0,131  |
| 4 | P56537 IF6_HUMAN    | E.AQPSTIATSM*RDSLIDS#LT.-    | S243      | 2 | 4,9577 | 0,545 | 0,116  |
| 4 | Q15398 DLG7_HUMAN   | E.MGIPQQTTS#PENAGPQNTKSE.H   | S662      | 3 | 4,9252 | 0,516 | 0      |
| 4 | Q9C0C2 TB182_HUMAN  | E.SQEPLAQES#PLPLATRE.A       | S601      | 2 | 4,9218 | 0,478 | 0,183  |
| 4 | Q9Y6A5 TACC3_HUMAN  | E.NQM*VS#PGKVSGSPEQAVEE.N    | S170      | 2 | 4,9076 | 0,434 | 0      |
| 4 | Q6PKG0 LARP1_HUMAN  | E.TES#APGS#PRAVTPVPTKTEE.V   | S517:S521 | 3 | 4,8787 | 0,344 | 0,331  |
| 4 | Q15398 DLG7_HUMAN   | E.M*GIPQQTTS#PENAGPQNTKSE.H  | S662      | 2 | 4,872  | 0,493 | 0,317  |
| 4 | Q14C86 GAPD1_HUMAN  | E.LESCSGLGS#TSDDTDVRE.V      | S746      | 2 | 4,7869 | 0,58  | -0,182 |
| 4 | Q99661 KIF2C_HUMAN  | E.MEACSNALIPGNLS#KEEEE.L     | S621      | 2 | 4,7584 | 0,491 | 0      |
| 4 | Q15398 DLG7_HUMAN   | E.MGIPQQTTS#PENAGPQNTKSE.H   | S662      | 2 | 4,753  | 0,548 | 0,106  |
| 4 | Q9C0C2 TB182_HUMAN  | E.SQEPLAQES#PLPLATRE.A       | S601      | 3 | 4,7518 | 0,426 | 0      |
| 4 | O95155 UBE4B_HUMAN  | E.TQSQSL#RSQSMDIDGVSCE.K     | S101      | 2 | 4,7463 | 0,406 | 0,319  |
| 4 | P98175 RBM10_HUMAN  | E.LQSPTHSSALPPATS#PTAQE.S    | S553      | 2 | 4,7448 | 0,552 | 0,222  |
| 4 | O43815 STRN_HUMAN   | E.LNQGDM*KPPSYDS#DEGNETE.V   | S137      | 2 | 4,7221 | 0,462 | 0,105  |
| 4 | Q15398 DLG7_HUMAN   | E.M*GIPQQTTS#PENAGPQNTKSE.H  | S662      | 3 | 4,7213 | 0,492 | 0,079  |
| 4 | Q14C86 GAPD1_HUMAN  | E.SCSGLGS#TSDDTDVRE.V        | S746      | 2 | 4,7203 | 0,589 | -0,207 |

|   |                     |                                       |             |   |        |       |        |
|---|---------------------|---------------------------------------|-------------|---|--------|-------|--------|
| 4 | P42566 EP15_HUMAN   | E.SEPIHQES#PARS#SPELLPSGVTDENE.V      | S558:S562   | 3 | 4,7055 | 0,322 | 0,432  |
| 4 | Q9Y6A5 TACC3_HUMAN  | E.NQMVS#PGKVSGSPEQAVEE.N              | S170        | 2 | 4,6816 | 0,538 | 0,238  |
| 4 | Q99661 KIF2C_HUMAN  | E.M*EACSNALIPGNLS#KEEEE.L             | S621        | 2 | 4,6751 | 0,479 | 0      |
| 4 | O95817 BAG3_HUMAN   | E.VKVPPAPVPCPPPS#PGPSAVPSS#PKSVATEE.R | S377:S386   | 3 | 4,6584 | 1     | 0,114  |
| 4 | P04792 HSPB1_HUMAN  | E.SPAAVAAPAYSRLS#RQLS#SGVSE.I         | S78:S82     | 3 | 4,6428 | 1     | 0,223  |
| 4 | Q96T58 MINT_HUMAN   | E.SGVVAVS#PEKSES#PQKE.D               | S2120:S2126 | 2 | 4,6315 | 0,395 | -0,318 |
| 4 | Q9UK61 CC063_HUMAN  | E.S#SPQNGGGGGLNIAEPSGGAGREE.N         | S36         | 2 | 4,6296 | 0,462 | 0,107  |
| 4 | Q96B01 R51A1_HUMAN  | E.LPTVTTNVQNS#QDKSIE.K                | S120        | 2 | 4,628  | 0,356 | 0,062  |
| 4 | Q12888 TP53B_HUMAN  | E.SVAS#PQKTMSVLSCICE.A                | S1028       | 2 | 4,6159 | 0,49  | 0,062  |
| 4 | B2CI53 B2CI53_HUMAN | R.NGILAS PQS#APGNLDNSKSGE.I           | S263        | 3 | 4,6061 | 0,42  | 0,428  |
| 4 | Q0JRZ9 FCHO2_HUMAN  | E.IPRPFS#PPVTSNTS#PPPAAPLARAE.S       | S488:S496   | 3 | 4,5964 | 1     | 0,201  |
| 4 | Q8IZH2 XRN1_HUMAN   | E.SSSASLKS#SPIAQPASSFQVE.T            | S1656       | 2 | 4,5921 | 0,487 | 0,335  |
| 4 | Q99459 CDC5L_HUMAN  | E.AQNLM*ALTNVDT#PLKGG LNT#PLHE.S      | T377:T385   | 3 | 4,5843 | 0,336 | 0,202  |
| 4 | Q9UQ35 SRRM2_HUMAN  | E.FSASPMLKSGM*S#PE.Q                  | S1132       | 2 | 4,5224 | 0,459 | 0      |
| 4 | B2RDY9 B2RDY9_HUMAN | E.SAS#RSALFAQINQGE.S                  | S253        | 2 | 4,4975 | 0,468 | 0,441  |
| 4 | Q8N201 INT1_HUMAN   | E.LLIAEEKLS#PEQE.G                    | S307        | 2 | 4,4972 | 0,311 | 0,232  |
| 4 | Q9NYF8 BCLF1_HUMAN  | E.DQEALDYFS#DKE.S                     | S385        | 2 | 4,4491 | 0,253 | 0,158  |
| 4 | O14578 CTRO_HUMAN   | E.SVVSGLDS#PAKTSSME.K                 | S440        | 2 | 4,4388 | 0,399 | -0,146 |
| 4 | Q92794 MYST3_HUMAN  | E.TVQAVQSLTQEESS#EHE.G                | S1437       | 2 | 4,3639 | 0,525 | 0,185  |
| 4 | P52565 GDIR1_HUMAN  | E.QLAQIAAENEDE.H                      | NA          | 2 | 4,3453 | 0,508 | 0,167  |
| 4 | Q9UQ35 SRRM2_HUMAN  | E.NSFGS#PLEFRNSG PLGTE.M              | S1329       | 2 | 4,3397 | 0,396 | 0,061  |
| 4 | Q8ND24 RN214_HUMAN  | E.VAGVVANAPS#PPESSSLCASKSDE.G         | S15         | 3 | 4,3206 | 0,409 | -0,075 |
| 4 | Q9HC35 EMAL4_HUMAN  | E.TVADTTLTKAPVSS#TE.S                 | S888        | 2 | 4,3057 | 0,448 | -0,072 |
| 4 | Q13283 G3BP1_HUMAN  | E.TAPEDAQKSSS#PAPADIAQTVQE.D          | S232        | 3 | 4,2717 | 0,404 | 1,058  |
| 4 | Q14157 UBP2L_HUMAN  | E.GATGSAVKSDS#PSTSSIPPLNE.T           | S647        | 2 | 4,2684 | 0,528 | 0,336  |
| 4 | Q9Y3F4 STRAP_HUMAN  | E.IASENS#DCIFPSAPDVKA.-               | S338        | 2 | 4,2649 | 0,476 | 0,122  |
| 4 | Q9HC35 EMAL4_HUMAN  | E.TVADTTLTKAPVS#STE.S                 | S887        | 2 | 4,259  | 0,526 | -0,143 |
| 4 | Q9Y2L9 LRCH1_HUMAN  | E.VQSDLTLQSNQS#PNEIRE.N               | S524        | 2 | 4,2542 | 0,398 | 0,299  |
| 4 | Q9H0H5 RGAP1_HUMAN  | E.SGSILSDIS#FDKTDE.S                  | S157        | 2 | 4,2423 | 0,402 | 0,144  |
| 4 | Q9Y2L9 LRCH1_HUMAN  | E.VQSDLTLQSNQS#PNEIRE.N               | S524        | 3 | 4,2173 | 0,331 | 0,449  |
| 4 | Q9UKX7 NUP50_HUMAN  | E.TQS#PSLFGSTKLQQE.S                  | S221        | 2 | 4,2129 | 0,407 | 0,07   |
| 4 | Q9H814 RNUXA_HUMAN  | E.TFASDTNEALASLDES#QEGHAE.A           | S368        | 2 | 4,2061 | 0,469 | 0,102  |
| 4 | P82094 TMF1_HUMAN   | E.SGRSAT#PVNCEQPDILVSSTPINE.G         | T401        | 3 | 4,2049 | 0,26  | 0,483  |
| 4 | Q9UHY1 NRBP_HUMAN   | E.SQTVLS#SGSDPKVE.S                   | S11         | 2 | 4,2035 | 0,52  | -0,161 |
| 4 | Q13283 G3BP1_HUMAN  | E.ETAPEDAQKSSS#PAPADIAQTVQE.D         | S232        | 2 | 4,1973 | 0,485 | 0,096  |
| 4 | Q8TAQ2 SMRC2_HUMAN  | E.DLTKDM*DEPS#PVPNVEE.V               | S347        | 2 | 4,1958 | 0,407 | -0,061 |
| 4 | Q9Y580 RBM7_HUMAN   | R.TM*DNM*TSSAQIQRFS#SPE.N             | S136        | 2 | 4,1799 | 0,488 | 0,208  |
| 4 | Q13283 G3BP1_HUMAN  | E.ETAPEDAQKSSS#PAPADIAQTVQE.D         | S232        | 3 | 4,1718 | 0,416 | -0,072 |
| 4 | Q561V9 Q561V9_HUMAN | E.MLVAGHEDS#NGCIN YEE.L               | S135        | 2 | 4,1717 | 0,406 | 0,363  |
| 4 | Q9UQ35 SRRM2_HUMAN  | E.GDAPFSEPGTTSTQRPS#PE.T              | S323        | 2 | 4,1439 | 0,365 | -0,115 |
| 4 | O95155 UBE4B_HUMAN  | E.TQSQSLRSQS#M*DIGVSC E.K             | S105        | 2 | 4,129  | 0,487 | 0      |

|   |                     |                                |           |   |        |       |        |
|---|---------------------|--------------------------------|-----------|---|--------|-------|--------|
| 4 | Q8WVT3 TTC15_HUMAN  | E.TAS#EGSSPLADKLINE.H          | S52       | 2 | 4,1264 | 0,355 | 0,076  |
| 4 | Q562F6 SGOL2_HUMAN  | E.CSFAFQVS#DDEHE.K             | S1187     | 2 | 4,1205 | 0,373 | 0,305  |
| 4 | A6NKF1 SAC31_HUMAN  | E.VVMAEEDEGTDPRGS#PA.-         | S401      | 2 | 4,1146 | 0,492 | 0,062  |
| 4 | Q92797 SYMPK_HUMAN  | E.AALLDSS#LEGPLKE.T            | S1222     | 2 | 4,1118 | 0,449 | 0,151  |
| 4 | Q8N8S7 ENAH_HUMAN   | E.TGPTLPRQNS#QLPAQVQNGPSQEE.L  | S125      | 3 | 4,101  | 0,374 | 0,069  |
| 4 | O95232 CROP_HUMAN   | E.VNGTSEDIKS#EGDTQSN.-         | S425      | 2 | 4,0952 | 0,349 | 0,066  |
| 4 | Q9H814 RNUXA_HUMAN  | E.ALASLDES#QEGHAE.A            | S368      | 2 | 4,0944 | 0,438 | -0,238 |
| 4 | P46821 MAP1B_HUMAN  | E.VVSPSQSVTGSAGHTPYYS#PTDE.K   | S1339     | 2 | 4,0878 | 0,415 | 0,474  |
| 4 | Q86VR2 F134C_HUMAN  | E.LAAFCPQLDDS#TVARE.L          | S274      | 2 | 4,0877 | 0,562 | 0,065  |
| 4 | P40123 CAP2_HUMAN   | E.SS#PSRSALFAQLNQE.A           | S257      | 2 | 4,0648 | 0,408 | 0,275  |
| 4 | Q86V81 THOC4_HUMAN  | E.LDAQLDAYNARMDT#S.-           | T256      | 2 | 4,0564 | 0,473 | 0      |
| 4 | Q8TAQ2 SMRC2_HUMAN  | E.DLTKDMDEPS#PVPNVEE.V         | S347      | 2 | 4,0519 | 0,385 | 0,061  |
| 4 | Q8N3D4 EH1L1_HUMAN  | E.AGGQVGPAPRPPETS#PE.M         | S285      | 2 | 4,0471 | 0,415 | -0,329 |
| 4 | P43487 RANG_HUMAN   | E.NTDESNHDPQFEPVSLPEQEI.K      | NA        | 3 | 4,0336 | 0,261 | 0      |
| 4 | Q6PIR0 Q6PIR0_HUMAN | E.TSQPSDKTVLDS#YALIGE.T        | S384      | 2 | 4,0322 | 0,324 | -0,116 |
| 4 | P60660 MYL6_HUMAN   | E.M*LVAGHEDS#NGCINYE.A         | S135      | 2 | 4,0318 | 0,471 | 0,064  |
| 4 | Q8N1G0 ZN687_HUMAN  | E.NGPGM*QPPVSS#PPLGALKQE.S     | S215      | 3 | 4,0307 | 0,292 | 0,261  |
| 4 | Q8WWM7 ATX2L_HUMAN  | E.VDGLLTSEPM*GS#PVSSKTE.S      | S594      | 2 | 4,0276 | 0,463 | 0,24   |
| 4 | P46013 KI67_HUMAN   | E.NLLGKQFQGTDS#GEEPLLPTSE.S    | S793      | 2 | 4,0164 | 0,557 | 0,1    |
| 4 | Q99661 KIF2C_HUMAN  | E.LSPHS#GPSGEQLIQM*E.T         | S592      | 2 | 4,0146 | 0,222 | -0,203 |
| 4 | Q15642 CIP4_HUMAN   | E.DFSQPMNRAPS#DSS#LGTPSDGRPE.L | S296:S299 | 3 | 4,0136 | 1     | 0,135  |
| 4 | P46821 MAP1B_HUMAN  | E.SSPLYS#PTFSDSTSAVKE.K        | S1797     | 2 | 3,9894 | 0,473 | 0,308  |
| 4 | P31749 AKT1_HUMAN   | E.M*DFRSGS#PSDNSGAEM*E.V       | S124      | 2 | 3,9841 | 0,424 | 0,119  |
| 4 | Q86U42 PABP2_HUMAN  | E.VEKQM*NM*S#PPPGNAGPVIMSIEE.K | S150      | 3 | 3,9761 | 0,259 | 0      |
| 4 | Q9BXJ9 NARG1_HUMAN  | E.DMKITVNGDS#SAEAE.L           | S855      | 2 | 3,9617 | 0,399 | 0      |
| 4 | Q9Y6A5 TACC3_HUMAN  | E.NQM*VSPGKVS#PEQAVEE.N        | S177      | 2 | 3,9548 | 0,311 | 0,236  |
| 4 | Q14207 NPAT_HUMAN   | E.NLPTIILSSPT#KS#PTKNAE.L      | T777:S779 | 2 | 3,9496 | 1     | 0,225  |
| 4 | P38432 P80C_HUMAN   | E.LTSSYS#PDVSDYKE.G            | S489      | 2 | 3,9469 | 0,164 | 0,073  |
| 4 | Q6T4R5 NHS_HUMAN    | E.IDS#DESPVARE.R               | S394      | 2 | 3,9255 | 0,406 | -0,188 |
| 4 | Q96GA3 LTV1_HUMAN   | E.DDFILQANKAT#GEEE.G           | T171      | 2 | 3,9209 | 0,447 | 0,277  |
| 4 | Q9Y6A5 TACC3_HUMAN  | E.NQMVSPGKVS#GSPEQAVEE.N       | S175      | 2 | 3,9143 | 0,15  | 0,951  |
| 4 | O15027 SC16A_HUMAN  | E.ASGSFFKQIDSS#PVGGETDE.T      | S391      | 2 | 3,9131 | 0,355 | 0,228  |
| 4 | Q16637 SMN_HUMAN    | E.VANNIEQNAQENENE.S            | NA        | 2 | 3,9106 | 0,437 | -0,213 |
| 4 | Q10570 CPSF1_HUMAN  | E.M*LYGDGSLFS#PSKE.E           | S756      | 2 | 3,9029 | 0,456 | 0,214  |
| 4 | Q9UQ35 SRRM2_HUMAN  | E.FSASPMLKSGMS#PE.Q            | S1132     | 2 | 3,9019 | 0,515 | 0      |
| 4 | Q7Z309 F122B_HUMAN  | E.SLSLS#DSDFDKPE.K             | S93       | 2 | 3,9013 | 0,356 | 0,161  |
| 4 | Q14566 MCM6_HUMAN   | E.GAGGINGHADS#PAPVNGINGYNE.D   | S689      | 3 | 3,8893 | 0,24  | -1,133 |
| 4 | Q9UHY1 NRBP_HUMAN   | E.SQTVLSSGS#DPKVE.S            | S14       | 2 | 3,8871 | 0,495 | -0,081 |
| 4 | Q16186 ADRM1_HUMAN  | E.YLNNPPM*PGALGASGSS#GHE.L     | S143      | 2 | 3,8846 | 0,484 | -0,119 |
| 4 | Q7L590 MCM10_HUMAN  | E.SALDCNS#EENNFLTRE.N          | S26       | 2 | 3,8795 | 0,337 | 0,123  |
| 4 | Q14978 NOLC1_HUMAN  | R.GGSISVQVNSIKFDS#E.-          | S698      | 2 | 3,8653 | 0,435 | 0,07   |

|   |                     |                                       |             |   |        |       |        |
|---|---------------------|---------------------------------------|-------------|---|--------|-------|--------|
| 4 | O14578 CTRO_HUMAN   | E.SVVSGGLDS#PAKTSSM*E.K               | S440        | 2 | 3,8551 | 0,487 | 0      |
| 4 | Q15233 NONO_HUMAN   | E.GIGAIGGT#PPAFNRAAPGAE.F             | T450        | 2 | 3,8533 | 0,442 | 0,32   |
| 4 | Q12888 TP53B_HUMAN  | E.SVAS#PQKTM*SVLSCICE.A               | S1028       | 2 | 3,8516 | 0,47  | 0,184  |
| 4 | Q8WWM7 ATX2L_HUMAN  | E.VDGLLTSEPMGS#PVSSKTE.S              | S594        | 2 | 3,8483 | 0,404 | 0,363  |
| 4 | Q9UQ35 SRRM2_HUMAN  | E.VEERPAVSLTLDQSQS#QASLE.A            | S1289       | 2 | 3,8445 | 0,366 | 0,515  |
| 4 | P49815 TSC2_HUMAN   | D.LSFQPSQPLSKSSSS#PE.L                | S1388       | 2 | 3,8331 | 0,42  | 0,194  |
| 4 | A8K8B2 A8K8B2_HUMAN | E.SSFLSSQNGDSSTSQE.T                  | NA          | 2 | 3,8188 | 0,488 | -0,22  |
| 4 | Q9HC35 EMAL4_HUMAN  | E.NSLEQTVEPSSEDHS#EEE.S               | S938        | 2 | 3,8173 | 0,401 | 0,12   |
| 4 | Q6PGN9 PSRC1_HUMAN  | E.TLDFGGLS#PSDSREEE.D                 | S22         | 2 | 3,8139 | 0,482 | 0,134  |
| 4 | Q13283 G3BP1_HUMAN  | E.TAPEDAQKS#SSPAPADIAQTVQE.D          | S230        | 3 | 3,813  | 0,208 | -0,529 |
| 4 | Q9Y2F5 K0947_HUMAN  | E.AGCIPVTSAEKS#PE.A                   | S1470       | 2 | 3,8087 | 0,432 | -0,08  |
| 4 | Q8WXI9 P66B_HUMAN   | R.GRLT#PSPDIIVLSDNE.A                 | T120        | 2 | 3,7934 | 0,411 | 0      |
| 4 | O00562 PITM1_HUMAN  | E.FFDAHEGFS#DSEE.V                    | S358        | 2 | 3,7853 | 0,435 | 0      |
| 4 | O43242 PSMD3_HUMAN  | E.AATGGGS#TGEADGKTA AAAAE.H           | S47         | 2 | 3,7828 | 0,47  | -0,132 |
| 4 | P46013 KI67_HUMAN   | E.AQS#LEDLAGFKE.L                     | S1098       | 2 | 3,7824 | 0,376 | 0      |
| 4 | Q15007 FL2D_HUMAN   | E.GNTTEDDFPSS#PNGNGKSSNSSEE.R         | S306        | 2 | 3,7527 | 0,41  | 0,289  |
| 4 | P27816 MAP4_HUMAN   | E.M*ALGKDVT#PPPETE.V                  | T521        | 2 | 3,7484 | 0,441 | 0      |
| 4 | Q561V9 Q561V9_HUMAN | E.M*LVAGHEDS#NGCINYE.L                | S135        | 2 | 3,745  | 0,496 | -0,18  |
| 4 | Q7KZ85 SPT6H_HUMAN  | E.STPM*SIAGDAT#PLLED*DR.-             | T1718       | 2 | 3,7369 | 0,432 | -0,229 |
| 4 | Q15154 PCM1_HUMAN   | E.TAS#PVAVSLRSDGSENLC#PQQRTE.K        | S861:T877   | 3 | 3,7321 | 0,26  | 0,248  |
| 4 | Q6P2E9 EDC4_HUMAN   | E.TCSTLAES#PRNGLQE.K                  | S844        | 2 | 3,7229 | 0,549 | -0,21  |
| 4 | Q13439 GOGA4_HUMAN  | E.VFTKEENPES#DGEPVVE.D                | S266        | 2 | 3,7113 | 0,365 | 0      |
| 4 | P27816 MAP4_HUMAN   | E.TEM*ALGKDVT#PPPETE.V                | T521        | 2 | 3,7095 | 0,447 | 0      |
| 4 | O14745 NHERF_HUMAN  | E.AALES#PRPALVRSASS#DTSEE.L           | S280:S291   | 3 | 3,7089 | 0,293 | 0,235  |
| 4 | Q86V81 THOC4_HUMAN  | E.LDAQLDAYNARM*DT#S.-                 | T256        | 2 | 3,7066 | 0,434 | 0,274  |
| 4 | Q6ZTN6 AN13D_HUMAN  | E.SLQLSTEPGPGS#PPRT#PPAPGPPSFEE.Q     | S465:T469   | 3 | 3,7058 | 0,256 | -0,06  |
| 4 | Q13263 TIF1B_HUMAN  | E.GPGAEGPRLAS#PSGSTSSGLE.V            | S594        | 2 | 3,7044 | 0,335 | 0,245  |
| 4 | O75113 N4BP1_HUMAN  | E.FTQNAATGLNIS#RDE.T                  | S226        | 2 | 3,6989 | 0,458 | 0      |
| 4 | Q99590 SFRIP_HUMAN  | E.TASQSQRS#PISDNSGCDAPGNSNP SLPSSAE.S | S23         | 3 | 3,6963 | 0,415 | 0,649  |
| 4 | Q9Y508 ZN313_HUMAN  | E.DM*M*NQVLQRS#IIDQ.-                 | S224        | 2 | 3,695  | 0,399 | 0,338  |
| 4 | P12694 ODBA_HUMAN   | R.QQQQFSS#LDDKPFPGASAE.F              | S47         | 3 | 3,6931 | 0,162 | 0,48   |
| 4 | P49792 RBP2_HUMAN   | E.T#TPKAVVS#PPKFVFGSE.S               | T2503:S2510 | 2 | 3,6858 | 0,371 | -0,063 |
| 4 | Q16186 ADRM1_HUMAN  | E.YLNNPPMPGALGASGSS#GHE.L             | S143        | 2 | 3,6816 | 0,461 | 0,24   |
| 4 | P38432 P80C_HUMAN   | E.LIDPRLIES#PSNTSSTEP.A.-             | S566        | 2 | 3,6783 | 0,27  | 0,22   |
| 4 | Q9BVW5 TIPIN_HUMAN  | E.TLLDQS#FKNVQQQLD.A                  | S282        | 2 | 3,6739 | 0,303 | 0,066  |
| 4 | P57764 GSDC1_HUMAN  | E.GS#GRFSLPGATCLQGE.G                 | S181        | 2 | 3,6674 | 0,353 | 0      |
| 4 | O43166 SI1L1_HUMAN  | E.YGS#TSSIDKQGTSGE.S                  | S208        | 2 | 3,6664 | 0,495 | 0      |
| 4 | Q6S8J3 A26CA_HUMAN  | E.M*ATAASS#SSLEKSYE.L                 | S933        | 2 | 3,6536 | 0,518 | -0,368 |
| 4 | Q99661 KIF2C_HUMAN  | E.ACSNGALIPGNLS#KEEEE.L               | S621        | 2 | 3,6529 | 0,273 | 0,183  |
| 4 | Q99618 CDCA3_HUMAN  | R.VADPRSPS#AGILRT#PIQVE.S             | S31:T37     | 3 | 3,6504 | 0,163 | 0,084  |
| 4 | Q92797 SYMPK_HUMAN  | E.DAMKT#PS#PAAEDAREPE.A               | T1257:S1259 | 3 | 3,6452 | 0,252 | -0,556 |

|   |                     |                                         |             |   |        |       |        |
|---|---------------------|-----------------------------------------|-------------|---|--------|-------|--------|
| 4 | Q15007 FL2D_HUMAN   | E.GNTTEDDFPSS#PGNGNKSSNSSEE.R           | S306        | 3 | 3,6435 | 0,472 | 0,072  |
| 4 | Q02952 AKA12_HUMAN  | E.TGTDGILAGSQEHDPGQSSSQEAGS#PTEGE.G     | S749        | 3 | 3,6404 | 0,312 | 0,116  |
| 4 | P27816 MAP4_HUMAN   | E.MALGKDV#PPPETE.V                      | T521        | 2 | 3,6399 | 0,485 | 0      |
| 4 | O15027 SC16A_HUMAN  | E.ARS#PDPGIVPQEAPVGNLSE.L               | S1844       | 2 | 3,6386 | 0,395 | 0,111  |
| 4 | Q14247 SRC8_HUMAN   | E.LSYRGPVS#GTEPEPVYSM*E.A               | S438        | 2 | 3,637  | 0,274 | 0,111  |
| 4 | P27816 MAP4_HUMAN   | E.VGLLKDM*#S#PLSETE.M                   | S507        | 2 | 3,6339 | 0,446 | 0,378  |
| 4 | Q6PJY5 Q6PJY5_HUMAN | E.GSLQKGTPEPS#PGGTPQPSRPVS#PAGPPEGVPE.E | S113:S125   | 3 | 3,6332 | 0,255 | 0,112  |
| 4 | Q99459 CDC5L_HUMAN  | E.AQNLM*ALTNVDT#PLKGG LNT#PLHE.S        | T377:T385   | 2 | 3,6205 | 0,515 | 0,896  |
| 4 | Q9UQ35 SRRM2_HUMAN  | E.NSFGS#PLEFRNSGPLGTE.M                 | S1329       | 3 | 3,6202 | 0,329 | 0,552  |
| 4 | Q9NZ63 CIO78_HUMAN  | E.DLHLGTS#FSAE.T                        | S101        | 2 | 3,5956 | 0,332 | 0,097  |
| 4 | Q7KZ85 SPT6H_HUMAN  | E.STPM*SIAGDAT#PLLEMDR.-                | T1718       | 2 | 3,5743 | 0,424 | 0      |
| 4 | Q99459 CDC5L_HUMAN  | E.AQNLMALTNVDT#PLKGG LNT#PLHE.S         | T377:T385   | 3 | 3,5739 | 0,317 | -0,068 |
| 4 | Q16643 DREB_HUMAN   | E.GASTLQGEPRAPT#PPSGTE.V                | T497        | 2 | 3,5715 | 0,403 | 0,126  |
| 4 | Q12968 NFAC3_HUMAN  | E.LCSDDQGSLS#PARE.T                     | S366        | 2 | 3,5711 | 0,486 | -0,227 |
| 4 | Q6NZY4 ZCHC8_HUMAN  | E.NSGLALYDGDGT#DGETE.V                  | T342        | 2 | 3,5672 | 0,451 | 0,19   |
| 4 | Q9C0C2 TB182_HUMAN  | E.AQDLCRAS#PEPPGPE.S                    | S672        | 2 | 3,5629 | 0,442 | -0,286 |
| 4 | Q6S8J3 A26CA_HUMAN  | E.M*ATAASSS#SLEKSYE.L                   | S934        | 2 | 3,5619 | 0,407 | 0,074  |
| 4 | P56537 IF6_HUMAN    | E.AQPSTIATSM*RDS#LIDSLT.-               | S239        | 2 | 3,5463 | 0,32  | 0,116  |
| 4 | P18031 PTN1_HUMAN   | E.KGS#PLNAAPYGIESMSQDTE.V               | S352        | 2 | 3,5433 | 0,42  | 0,112  |
| 4 | P12270 TPR_HUMAN    | E.SGGRSVPTT#PLQVAAPVTVFTE.S             | T2200       | 2 | 3,5422 | 0,382 | 0,213  |
| 4 | Q9UQ35 SRRM2_HUMAN  | E.FSASPM*LKSGM*S#PE.Q                   | S1132       | 2 | 3,5391 | 0,412 | -0,232 |
| 4 | P49792 RBP2_HUMAN   | E.TT#PKAVVS#PPKFVFGSE.S                 | T2504:S2510 | 2 | 3,5379 | 0,392 | -0,125 |
| 4 | Q16254 E2F4_HUMAN   | E.ASRPNS#PQLTPTAVPGSAE.V                | S244        | 2 | 3,5296 | 0,397 | -0,498 |
| 4 | Q8NG31 CASC5_HUMAN  | E.IDNES#ALEDKE.D                        | S1126       | 2 | 3,5243 | 0,249 | -0,727 |
| 4 | A1L020 MEX3A_HUMAN  | E.NDFLAGS#PDA/AIDSRYSD.A                | S308        | 2 | 3,5243 | 0,515 | 0,122  |
| 4 | P19174 PLCG1_HUMAN  | E.NGDLS#PFSGTS LRE.R                    | S1221       | 2 | 3,5232 | 0,385 | 0,469  |
| 4 | P56537 IF6_HUMAN    | R.LSALGNVTT CND.Y                       | NA          | 2 | 3,5204 | 0,412 | -0,096 |
| 4 | Q8NFP9 NBEA_HUMAN   | E.GDDDAVS#LLQEKE.I                      | S2138       | 2 | 3,5179 | 0,297 | -0,163 |
| 4 | P11169 GTR3_HUMAN   | E.MNS#IEPAKE.T                          | S485        | 2 | 3,5122 | 0,212 | -0,111 |
| 4 | P49327 FAS_HUMAN    | E.VACGYADGCLSQEE.A                      | NA          | 2 | 3,5069 | 0,433 | 0,157  |
| 4 | Q5JRX3 PREP_HUMAN   | E.IFNNPCFE EEE.H                        | NA          | 2 | 3,4901 | 0,319 | 0      |
| 4 | Q8IXT5 RB12B_HUMAN  | R.GRPGS#GTS GVDLSNFIE.S                 | S98         | 2 | 3,49   | 0,336 | 0,066  |
| 4 | Q9H7Z6 MYST1_HUMAN  | E.GTAPS#PGRVS#PPTPARGEPE.V              | S37:S42     | 3 | 3,4883 | 0,308 | -0,086 |
| 4 | Q9NQ57 INCE_HUMAN   | E.IANSTPNPKPAASSPET#PSAGQQE.A           | T424        | 3 | 3,4791 | 0,264 | 0,074  |
| 4 | Q9NS86 LANC2_HUMAN  | E.AAAGALLASGAAEE.T                      | NA          | 2 | 3,4771 | 0,272 | 0      |
| 4 | Q9Y6M7 S4A7_HUMAN   | E.NS#TVDFSKVD.M                         | S407        | 2 | 3,4726 | 0,415 | -0,102 |
| 4 | P27816 MAP4_HUMAN   | E.VGLLKDM*#S#PLSE.T                     | S507        | 2 | 3,4662 | 0,389 | 0,176  |
| 4 | Q9Y3Q8 T22D4_HUMAN  | E.TGESAGT#SRAAT#PLPSLRVE.A              | T206:T211   | 3 | 3,4553 | 0,143 | 0,678  |
| 4 | Q8IW35 CEP97_HUMAN  | E.DIQTDEDKLNCS#LLSSE.S                  | S397        | 2 | 3,4489 | 0,463 | 0,238  |
| 4 | P41250 SYG_HUMAN    | E.SVLAQLDNYGQQE.L                       | NA          | 2 | 3,4448 | 0,326 | 0,25   |
| 4 | P38398 BRCA1_HUMAN  | E.DTS#FAENDIKE.S                        | S1164       | 2 | 3,438  | 0,366 | -0,09  |

|   |                     |                                   |           |   |        |       |        |
|---|---------------------|-----------------------------------|-----------|---|--------|-------|--------|
| 4 | Q9UPN6 RBM16_HUMAN  | E.TVQTTQS#PTPVEKE.T               | S617      | 3 | 3,4378 | 0,213 | 0      |
| 4 | O75781 PALM_HUMAN   | E.NAAAPS#PVRAPAPS#PAKE.E          | S116:S124 | 2 | 3,4257 | 0,357 | 0      |
| 4 | Q6NZI2 PTRF_HUMAN   | E.SDAVLVDKS#DSD.-                 | S387      | 2 | 3,4129 | 0,349 | 0      |
| 4 | P54578 UBP14_HUMAN  | E.NQLQLSCFINQE.V                  | NA        | 2 | 3,4031 | 0,408 | 0,163  |
| 4 | Q6PKG0 LARP1_HUMAN  | E.TES#APGSRAVT#PVPTKTEE.V         | S517:T526 | 2 | 3,3972 | 0,407 | 0,331  |
| 4 | Q9UQ35 SRRM2_HUMAN  | E.FSASPM*LKSGMS#PE.Q              | S1132     | 2 | 3,3954 | 0,393 | 0,078  |
| 4 | Q05BP1 Q05BP1_HUMAN | E.VGPLAHLAPS#PQSE.A               | S22       | 2 | 3,3951 | 0,24  | 0,329  |
| 4 | P40261 NNMT_HUMAN   | E.VISQSYSSTM*ANNE.G               | NA        | 2 | 3,3923 | 0,329 | -0,079 |
| 4 | Q8N1G0 ZN687_HUMAN  | E.NGPQMPPVSS#PPLGALKQE.S          | S215      | 3 | 3,3867 | 0,287 | 0,263  |
| 4 | Q9UGU0 TCF20_HUMAN  | E.NDTVITIS#PKQE.G                 | S1522     | 2 | 3,379  | 0,409 | 0      |
| 4 | Q12873 CHD3_HUMAN   | E.LQGDGPPSS#PTNDPTVKYE.T          | S713      | 2 | 3,3768 | 0,345 | 0,234  |
| 4 | Q9Y580 RBM7_HUMAN   | R.TM*DNMTSSAQIIQRSFS#SPE.N        | S136      | 2 | 3,3748 | 0,39  | 0,105  |
| 4 | P49589 SYCC_HUMAN   | E.GEGDLSIS#ADRLSE.K               | S307      | 2 | 3,3703 | 0,389 | -0,479 |
| 4 | Q13501 SQSTM_HUMAN  | E.SEGPSS#LDPSQEGPTGLKE.A          | S366      | 2 | 3,3692 | 0,505 | 0,245  |
| 4 | P31749 AKT1_HUMAN   | E.MDFRSGS#PSDNSGAEEME.V           | S124      | 2 | 3,3686 | 0,418 | 0,181  |
| 4 | Q8IWS0 PHF6_HUMAN   | E.IDQQQLTQQQLNGN.-                | NA        | 2 | 3,3652 | 0,389 | 0,15   |
| 4 | Q08211 DHX9_HUMAN   | E.IKSEEVPAFGVAS#PPPLTDTPTDTANAE.G | S87       | 3 | 3,3635 | 0,278 | 0,499  |
| 4 | Q14694 UBP10_HUMAN  | E.TKYS#PPAISPLVSE.K               | S365      | 2 | 3,3581 | 0,38  | 0,078  |
| 4 | Q15398 DLG7_HUMAN   | E.SRS#SIEDAQCPGLDLIEE.N           | S689      | 2 | 3,3486 | 0,503 | 0,222  |
| 4 | P27816 MAP4_HUMAN   | E.VGLLKDMS#PLSE.T                 | S507      | 2 | 3,3421 | 0,312 | 0,178  |
| 4 | Q9UQ80 PA2G4_HUMAN  | E.NATSGETLEENE.A                  | NA        | 2 | 3,3363 | 0,491 | -0,094 |
| 4 | Q86XZ4 SPAS2_HUMAN  | E.TLS#IDARELEDPE.S                | S155      | 2 | 3,3289 | 0,468 | 0,078  |
| 4 | Q8IZM8 ZN654_HUMAN  | E.NGS#PNNSLNNVFKPLTE.C            | S134      | 2 | 3,328  | 0,292 | 0      |
| 4 | O15027 SC16A_HUMAN  | E.ARS#PDPGIVPQEAPVGNLSLSE.L       | S1844     | 3 | 3,325  | 0,188 | 0,166  |
| 4 | P29966 MARCS_HUMAN  | E.AGAS#PVEKEAPEGE.A               | S101      | 2 | 3,3245 | 0,5   | -0,08  |
| 4 | P11172 PYR5_HUMAN   | E.AGGDNLGQQYNPQE.V                | NA        | 2 | 3,3241 | 0,301 | 0,155  |
| 4 | P46777 RL5_HUMAN    | E.GQVEVTGDEYNVE.S                 | NA        | 2 | 3,3207 | 0,323 | -0,17  |
| 4 | Q12888 TP53B_HUMAN  | E.TQS#QGLCLQKE.M                  | S698      | 2 | 3,3193 | 0,405 | -0,267 |
| 4 | Q12888 TP53B_HUMAN  | E.SGLQIQKS#PEPE.V                 | S294      | 2 | 3,3134 | 0,434 | 0,175  |
| 4 | P42166 LAP2A_HUMAN  | E.RDS#GSFVAFQNIPIGSE.L            | S442      | 2 | 3,3132 | 0,262 | 0,068  |
| 4 | Q9NRS6 SNX15_HUMAN  | E.AS#GSPARGPLTEAE.L               | S199      | 2 | 3,3034 | 0,459 | 0      |
| 4 | Q99700 ATX2_HUMAN   | E.VTSQGVQTS#SPACKQE.K             | S887      | 2 | 3,3032 | 0,44  | -0,478 |
| 4 | Q92508 FA38A_HUMAN  | E.AGASLYQGLMRTAS#E.L              | S1215     | 2 | 3,2988 | 0,235 | 0,448  |
| 4 | Q8WWH5 TRUB1_HUMAN  | E.AAVVSSPSLKTDTTS#PVLE.T          | S19       | 2 | 3,2959 | 0,312 | -0,13  |
| 4 | Q10570 CPSF1_HUMAN  | E.MLYGDSGSLFS#PSKE.E              | S756      | 2 | 3,288  | 0,462 | -0,144 |
| 4 | P49757 NUMB_HUMAN   | E.GS#FRVTTATEQAE.R                | S194      | 2 | 3,2869 | 0,378 | 0      |
| 4 | P46100 ATRX_HUMAN   | E.SSNYDS#ELEKE.I                  | S819      | 2 | 3,2867 | 0,231 | 0      |
| 4 | Q99767 APBA2_HUMAN  | E.LAALRPES#PAPEEQE.C              | S55       | 2 | 3,2811 | 0,358 | -0,071 |
| 4 | P31629 ZEP2_HUMAN   | E.LVACTQDKAPSPS#ETCDSE.I          | S834      | 2 | 3,2802 | 0,325 | 0      |
| 4 | P28715 ERCC5_HUMAN  | E.LTPAS#PTCTNSVSKNE.T             | S526      | 3 | 3,2794 | 0,23  | -0,102 |
| 4 | O75534 CSDE1_HUMAN  | E.SKS#PAAPGQSPTGSVCYE.R           | S116      | 2 | 3,2773 | 0,525 | -0,128 |

|   |                     |                              |             |   |        |       |        |
|---|---------------------|------------------------------|-------------|---|--------|-------|--------|
| 4 | Q9UKM9 RALY_HUMAN   | E.LEHS#QDTDADDGALQ.-         | S295        | 2 | 3,2736 | 0,269 | -0,072 |
| 4 | Q5CZB5 Q5CZB5_HUMAN | E.GEGAAGAGDHQDPS#LGAGE.A     | S114        | 2 | 3,2653 | 0,407 | -0,137 |
| 4 | Q9Y6A5 TACC3_HUMAN  | E.NQM*VS#PGKVGSGPEQAVEE.N    | S170        | 3 | 3,2589 | 0,124 | 0,088  |
| 4 | Q01831 XPC_HUMAN    | E.VEELS#EPVLGDVRE.S          | S140        | 2 | 3,2567 | 0,136 | 0,148  |
| 4 | P52294 IMA1_HUMAN   | E.TEEEVMS#DGGGFHE.A          | S63         | 2 | 3,2548 | 0,48  | 0      |
| 4 | Q15398 DLG7_HUMAN   | E.SRSS#IEDAQCPGLPLIEE.N      | S690        | 2 | 3,2545 | 0,462 | 0,111  |
| 4 | O75376 NCOR1_HUMAN  | E.TAEQM*DVDQQEHS#AEE.G       | S804        | 2 | 3,2495 | 0,365 | -0,063 |
| 4 | P40818 UBP8_HUMAN   | E.SIPSKPAAQT#PPASIEVDE.N     | T351        | 2 | 3,2471 | 0,355 | 0      |
| 4 | Q8N1G0 ZN687_HUMAN  | E.NGPGMQPPVSS#PPLGALKQE.S    | S215        | 2 | 3,2449 | 0,341 | 0      |
| 4 | Q9H8G2 CI082_HUMAN  | E.LFLAEHS#DLEE.G             | S120        | 2 | 3,2436 | 0,213 | 0      |
| 4 | P27816 MAP4_HUMAN   | E.VGLLKDM*SPLS#ETE.M         | S510        | 2 | 3,2369 | 0,325 | 0      |
| 4 | P60174 TPIS_HUMAN   | E.LASQPDVDGFLVGGASLKPE.F     | NA          | 2 | 3,2298 | 0,323 | -0,061 |
| 4 | Q7Z3T8 ZFY16_HUMAN  | E.DLCLNDS#NSRDE.N            | S317        | 2 | 3,2297 | 0,27  | 0,161  |
| 4 | Q02952 AKA12_HUMAN  | E.VAS#EKLTAASE.Q             | S347        | 2 | 3,223  | 0,374 | 0      |
| 4 | Q9NYF8 BCLF1_HUMAN  | E.ALDYFS#DKE.S               | S385        | 2 | 3,2189 | 0,349 | 0,209  |
| 4 | Q9H4I2 ZHX3_HUMAN   | E.ASEPFDTS#PQAGRQLE.T        | S946        | 2 | 3,2179 | 0,499 | 0,184  |
| 4 | Q9NRS6 SNX15_HUMAN  | E.STEEASGS#PARGPLTEAE.L      | S201        | 2 | 3,2153 | 0,422 | 0,392  |
| 4 | Q13283 G3BP1_HUMAN  | E.DAQKSS#SPAPADIAQTVE.D      | S231        | 3 | 3,2039 | 0,253 | 0,543  |
| 4 | P25490 TYY1_HUMAN   | E.VVGGDDS#DGLRAE.D           | S118        | 2 | 3,1923 | 0,35  | -0,356 |
| 4 | P08069 IGF1R_HUMAN  | E.NGPGPGVLRAS#FDE.R          | S1339       | 2 | 3,1894 | 0,459 | -0,143 |
| 4 | Q9BXJ9 NARG1_HUMAN  | E.GTSAVENLNE.M               | NA          | 2 | 3,1845 | 0,129 | 0,236  |
| 4 | Q7Z406 MYH14_HUMAN  | E.AQPGSGPSPEPEGS#PPAHPQ.-    | S1989       | 3 | 3,1757 | 0,337 | -0,183 |
| 4 | A6NKF1 SAC31_HUMAN  | E.VVM*AEEDDEGTDRPGS#PA.-     | S401        | 2 | 3,1751 | 0,452 | 0      |
| 4 | O95684 FR1OP_HUMAN  | E.GALDLSDVHS#PPKS#PE.G       | S156:S160   | 2 | 3,1748 | 0,475 | 0,135  |
| 4 | P05787 K2C8_HUMAN   | E.AES#M*YQIKYEE.L            | S280        | 2 | 3,1711 | 0,23  | 0,082  |
| 4 | Q9P2B7 K1430_HUMAN  | E.GEVDHSFFDS#DFEE.G          | S19         | 2 | 3,1687 | 0,343 | 0,21   |
| 4 | Q96QC0 PP1RA_HUMAN  | E.ILTSIM*GS#PNSHPSEE.L       | S591        | 2 | 3,1677 | 0,364 | 0      |
| 4 | Q14683 SMC1A_HUMAN  | E.SQS#QGRDLTLEE.N            | S360        | 2 | 3,1655 | 0,376 | 0,085  |
| 4 | Q9Y4B4 ARIP4_HUMAN  | E.GLARPVS#PDSPEIISE.L        | S1169       | 2 | 3,1617 | 0,414 | 0,419  |
| 4 | Q9NZT2 OGFR_HUMAN   | E.GCALSQGS#LRTGTQE.V         | S423        | 2 | 3,1612 | 0,414 | 0,148  |
| 4 | O75534 CSDE1_HUMAN  | E.VLSNTFQFTNE.A              | NA          | 2 | 3,1591 | 0,32  | 0,094  |
| 4 | Q9Y2X9 ZN281_HUMAN  | E.NLS#PGTQTPSNDKASM*LQE.Y    | S651        | 3 | 3,1587 | 0,241 | 0,087  |
| 4 | Q6S8J3 A26CA_HUMAN  | E.M*ATAASSSLE.K              | NA          | 2 | 3,1555 | 0,363 | 0,228  |
| 4 | Q9ULI4 KI26A_HUMAN  | E.CDTQAASAGRAPS#PT#LGSPLPE.A | S1262:T1264 | 3 | 3,1531 | 0,162 | 0,512  |
| 4 | Q96ST3 SIN3A_HUMAN  | R.YM*NSDTTS#PELRE.H          | S1112       | 2 | 3,1505 | 0,217 | -0,149 |
| 4 | Q9UQ80 PA2G4_HUMAN  | E.NATSGETLEENEAGD.-          | NA          | 2 | 3,1498 | 0,405 | -0,079 |
| 4 | P31749 AKT1_HUMAN   | E.M*DFRSGS#PSDMSGAEEME.V     | S124        | 2 | 3,1478 | 0,404 | -0,179 |
| 4 | Q16643 DREB_HUMAN   | E.GYFSQSQEEE.F               | NA          | 2 | 3,1477 | 0,384 | 0      |
| 4 | Q9NZI7 UBIP1_HUMAN  | E.SGLVHDFDAS#LSGIGQE.L       | S22         | 2 | 3,1468 | 0,421 | 0,202  |
| 4 | P11387 TOP1_HUMAN   | E.NGFSS#PPQIKDEPEDD.G        | S112        | 2 | 3,1439 | 0,253 | 0,329  |
| 4 | Q6S8J3 A26CA_HUMAN  | E.MATAASSSLE.K               | NA          | 2 | 3,1437 | 0,342 | 0,231  |



|   |                    |                                   |             |   |        |       |        |
|---|--------------------|-----------------------------------|-------------|---|--------|-------|--------|
| 4 | Q08945 SSRP1_HUMAN | E.YADS#DEDQHDAYLE.R               | S444        | 2 | 3,1431 | 0,337 | 0,139  |
| 4 | Q07157 ZO1_HUMAN   | E.NMS#LTD AKTLIE.R                | S241        | 2 | 3,14   | 0,384 | 0      |
| 4 | Q9UPN6 RBM16_HUMAN | E.TVQTTQS#PTPVEKE.T               | S617        | 2 | 3,1332 | 0,349 | -0,15  |
| 4 | Q94916 NFAT5_HUMAN | E.SSQTPLFHSSPQIQLVQGS#PSSQE.Q     | S1364       | 2 | 3,1322 | 0,358 | 0,553  |
| 4 | P41743 KPCI_HUMAN  | E.GLRPGDTTST#FCGTPNYIAPE.I        | T403        | 2 | 3,132  | 0,318 | 0,314  |
| 4 | Q7Z417 NUFP2_HUMAN | E.S#QNPLASPTNTLLGSAKE.Q           | S623        | 3 | 3,1294 | 0,125 | 0,096  |
| 4 | Q6PKG0 LARP1_HUMAN | E.TESAPGS#PRAVT#PVPTKTEE.V        | S521:T526   | 3 | 3,1292 | 0,263 | 0,248  |
| 4 | Q94916 NFAT5_HUMAN | E.ISS#PARPCSFE.E.A                | S561        | 2 | 3,1291 | 0,42  | -0,084 |
| 4 | P09496 CLCA_HUMAN  | E.SNGPTDSYAAISQVDRLLQS#EPE.S      | S105        | 2 | 3,1255 | 0,351 | -0,3   |
| 4 | P49792 RBP2_HUMAN  | E.TVFTPKTS#PENVDQD.R              | S1400       | 2 | 3,1135 | 0,286 | 0,149  |
| 4 | Q9BV73 CP250_HUMAN | E.GDNIAQGS#GHENSLE.L              | S363        | 2 | 3,1108 | 0,438 | -0,228 |
| 4 | Q01518 CAP1_HUMAN  | E.NQENVSNLVIEDTE.L                | NA          | 2 | 3,1065 | 0,453 | 0,152  |
| 4 | Q8NFW8 NEUA_HUMAN  | E.VAYLGNEVSDEE.C                  | NA          | 2 | 3,1017 | 0,364 | 0,092  |
| 4 | Q95684 FR1OP_HUMAN | E.GALDLSDVHS#PPKS#PE.G            | S156:S160   | 3 | 3,0989 | 0,189 | 0      |
| 4 | Q6ZRS2 SRCAP_HUMAN | E.AKT#PT#SSEPKQELVTAE.V           | T2682:T2684 | 2 | 3,0947 | 0,387 | -0,235 |
| 4 | Q60303 K0556_HUMAN | E.TEGRS#SPGPD TLVLE.F             | S252        | 2 | 3,0907 | 0,311 | 0,351  |
| 4 | P29966 MARCS_HUMAN | E.LQANGSAPAADKEEPAAGSGAAS#PSAAE.K | S81         | 3 | 3,0882 | 0,234 | 0      |
| 4 | Q3KQU3 MA7D1_HUMAN | E.ANANGSS#PEPVKAVE.A              | S742        | 2 | 3,0787 | 0,448 | 0      |
| 4 | Q9Y6A5 TACC3_HUMAN | E.NQM*VS#PGKVS GSPE.Q             | S170        | 2 | 3,0784 | 0,394 | 0      |
| 4 | Q8NCW5 AIBP_HUMAN  | E.YQFSVDQLM*E.L                   | NA          | 2 | 3,0779 | 0,402 | 0      |
| 4 | Q14980 NUMA1_HUMAN | E.ILQQQLQVANE.A                   | NA          | 2 | 3,0753 | 0,336 | 0,475  |
| 4 | Q9BUR4 WDR79_HUMAN | E.FGSPSELS#PRIEEQE.L              | S90         | 2 | 3,0732 | 0,377 | 0      |
| 4 | Q9Y490 TLN1_HUMAN  | E.NIFSSMGDAGE.M                   | NA          | 2 | 3,0724 | 0,387 | 0,108  |
| 4 | Q00653 NFKB2_HUMAN | E.SCYNPLDGIIE.Y                   | NA          | 2 | 3,0679 | 0,413 | 0,274  |
| 4 | P68371 TBB2C_HUMAN | E.YQQYQDATAEEE.G                  | NA          | 2 | 3,0613 | 0,328 | 0,165  |
| 4 | Q00418 EF2K_HUMAN  | E.SDEDS#LGSSGRVCVE.K              | S474        | 2 | 3,061  | 0,41  | 0      |
| 4 | Q9ULH7 MKL2_HUMAN  | E.SQGSAAAS#PSEPKVSE.S             | S200        | 2 | 3,0608 | 0,386 | 0,079  |
| 4 | Q9Y4W2 LAS1L_HUMAN | E.GSEAS#PIGKSPYTL.D.S             | S523        | 2 | 3,0581 | 0,366 | -0,152 |
| 4 | P21580 TNAP3_HUMAN | E.STGGPHS#APPTAPSPFLFE.T          | S459        | 2 | 3,0517 | 0,392 | 0,118  |
| 4 | Q9UQ80 PA2G4_HUMAN | E.ASSGVS VLSLCE.K                 | NA          | 2 | 3,0442 | 0,246 | 0,094  |
| 4 | Q14568 HS902_HUMAN | E.TQTQDQPMEEEEVE.T                | NA          | 2 | 3,0378 | 0,406 | 0,072  |
| 4 | Q02952 AKA12_HUMAN | E.TVS#ILSKTE.G                    | S1256       | 2 | 3,0374 | 0,12  | 1,96   |
| 4 | P28838 AMPL_HUMAN  | E.VDPCGDAQAAAE.G                  | NA          | 2 | 3,0373 | 0,21  | -0,101 |
| 4 | Q13885 TBB2A_HUMAN | E.AESNMNDLVSE.Y                   | NA          | 2 | 3,0338 | 0,395 | 0,404  |
| 4 | Q9H6Z4 RANB3_HUMAN | E.NAAAES#GSESSQEATPEKE.S          | S353        | 3 | 3,0321 | 0,292 | 0      |
| 4 | Q6NVY1 HIBCH_HUMAN | E.NLQQD GSSFALE.Q                 | NA          | 2 | 3,0304 | 0,328 | -0,093 |
| 4 | Q9Y678 COPG_HUMAN  | E.ST#PITAVKQPE.K                  | T594        | 2 | 3,0293 | 0,361 | -0,195 |
| 4 | P35579 MYH9_HUMAN  | E.IANSS#GKGALALEE.K               | S1714       | 2 | 3,0289 | 0,189 | 0,339  |
| 4 | Q9NUL3 STAU2_HUMAN | E.AIGLKGSSPT#PPCS#PVQPSKQLE.Y     | T488:S492   | 3 | 3,0247 | 0,221 | 0,288  |
| 4 | Q9UJX4 APC5_HUMAN  | E.LDVS#VREEE.V                    | S195        | 2 | 3,0243 | 0,128 | -0,211 |
| 4 | Q6PKG0 LARP1_HUMAN | E.TES#APGSPRAVT#PVPTKTEE.V        | S517:T526   | 3 | 3,0218 | 0,249 | -0,083 |

|   |                    |                               |             |   |        |       |        |
|---|--------------------|-------------------------------|-------------|---|--------|-------|--------|
| 4 | Q01082 SPTB2_HUMAN | E.LQSQAQALSQE.G               | NA          | 2 | 3,021  | 0,285 | 0,101  |
| 4 | Q71F23 CENPU_HUMAN | E.TFDPPLHST#AIYADEEE.F        | T78         | 2 | 3,02   | 0,372 | 0,363  |
| 4 | P62263 RS14_HUMAN  | E.SSPYAAM*LAAQD.V             | NA          | 2 | 3,0192 | 0,386 | 0      |
| 4 | Q7Z417 NUFP2_HUMAN | E.IESQNPLAS#PTNTLLGSAKE.Q     | S629        | 3 | 3,0185 | 0,173 | 0,17   |
| 4 | P17535 JUND_HUMAN  | D.LGLLKLAS#PELE.R             | S100        | 2 | 3,0171 | 0,211 | -0,09  |
| 4 | P41212 ETV6_HUMAN  | E.SYPLSVS#PM*ENNHCPASSE.S     | S238        | 2 | 3,0063 | 0,251 | 0,665  |
| 4 | P46087 NOL1_HUMAN  | E.VT#PESGPPKVEE.A             | T195        | 2 | 3,0056 | 0,265 | 0      |
| 4 | Q08211 DHX9_HUMAN  | E.GETVEPYKVNLS#QDLE.H         | S279        | 2 | 3,0053 | 0,218 | 0,128  |
| 4 | P35580 MYH10_HUMAN | E.SQLQDTQELLQEE.T             | NA          | 2 | 3,005  | 0,278 | 0,156  |
| 4 | Q9BQI3 E2AK1_HUMAN | E.VLS#DQEEDRE.Q               | S258        | 2 | 2,9984 | 0,313 | -0,188 |
| 4 | Q00839 HNRPU_HUMAN | E.GISALDGDQM*E.L              | NA          | 2 | 2,9859 | 0,327 | -0,106 |
| 4 | O95196 CSPG5_HUMAN | E.SFNIQNSMS#PKLE.G            | S543        | 2 | 2,9856 | 0,35  | 0      |
| 4 | Q8NE71 ABCF1_HUMAN | E.EQSVSQIDGDFE.D              | NA          | 2 | 2,9768 | 0,424 | 0,09   |
| 4 | Q8WWM7 ATX2L_HUMAN | E.VDGLLTSEPM*GS#PVSSKTE.S     | S594        | 3 | 2,9723 | 0,188 | 0,27   |
| 4 | Q9Y4E1 FA21C_HUMAN | E.TKS#SSQQDVILTTQDIFE.D       | S1200       | 2 | 2,9717 | 0,336 | 0      |
| 4 | P14868 SYDC_HUMAN  | D.LT#IQKADE.V                 | T52         | 2 | 2,971  | 0,287 | 0      |
| 4 | P35579 MYH9_HUMAN  | E.GDSTDLSDQIAE.L              | NA          | 2 | 2,9708 | 0,296 | -0,098 |
| 4 | P11388 TOP2A_HUMAN | E.LILFSNSDNE.R                | NA          | 2 | 2,9707 | 0,238 | 0      |
| 4 | Q92508 FA38A_HUMAN | E.AGASLYQGLM*RTAS#E.L         | S1215       | 2 | 2,9693 | 0,462 | 0,37   |
| 4 | P35579 MYH9_HUMAN  | E.LADEIANSS#GKGALALEE.K       | S1714       | 2 | 2,9677 | 0,407 | 0,065  |
| 4 | Q08378 GOGA3_HUMAN | E.ISLS#PDTDDRLE.N             | S290        | 2 | 2,9677 | 0,4   | -0,169 |
| 4 | P05412 JUN_HUMAN   | D.VGLLKLAS#PELE.R             | S73         | 2 | 2,9612 | 0,336 | -0,181 |
| 4 | Q9UQ35 SRRM2_HUMAN | E.VEERPAVSLTLDQSQS#QASLE.A    | S1289       | 3 | 2,9596 | 0,192 | 0,232  |
| 4 | Q86V48 LUZP1_HUMAN | E.LLDLQDKVIAEGSNS#SM*LAE.I    | S59         | 2 | 2,9588 | 0,258 | 0,104  |
| 4 | P27816 MAP4_HUMAN  | E.VGLLKDMS#PLSETE.M           | S507        | 2 | 2,9544 | 0,364 | 0,076  |
| 4 | P52294 IMA1_HUMAN  | E.VM*S#DGGFHE.A               | S63         | 2 | 2,9537 | 0,172 | 0      |
| 4 | Q99661 KIF2C_HUMAN | E.LSPHS#GPSGEQLIQME.T         | S592        | 2 | 2,9523 | 0,354 | 0,613  |
| 4 | P50991 TCPD_HUMAN  | E.NAGLNPISTVTE.L              | NA          | 2 | 2,9493 | 0,389 | 0,401  |
| 4 | Q96FZ7 CHMP6_HUMAN | E.LLAGSFTQEDE.D               | NA          | 2 | 2,9491 | 0,438 | 0      |
| 4 | Q9Y2D5 AKAP2_HUMAN | E.NSLADFSLPQT#PQTDNPSEGRGE.G  | T526        | 3 | 2,9474 | 0,128 | 0,36   |
| 4 | Q02952 AKA12_HUMAN | E.GSPPPCLGQEE.A               | NA          | 2 | 2,9433 | 0,416 | -0,104 |
| 4 | Q9UK61 CC063_HUMAN | E.S#SPQNGGGGGLNIAEPSGGAGREE.N | S36         | 3 | 2,9412 | 0,096 | 0      |
| 4 | P13010 KU86_HUMAN  | E.TVYCLNDDDE.T                | NA          | 2 | 2,9368 | 0,263 | -0,098 |
| 4 | P52948 NUP98_HUMAN | R.FS#FLSKPVDE.N               | S635        | 2 | 2,9323 | 0,355 | -0,195 |
| 4 | P68104 EF1A1_HUMAN | E.TGVLPKPGM*VVTFAPVNVVTE.V    | NA          | 2 | 2,9309 | 0,227 | 0,235  |
| 4 | P04075 ALDOA_HUMAN | E.TTTQGLDGLSE.R               | NA          | 2 | 2,9296 | 0,202 | 0      |
| 4 | Q6VMQ6 MCAF1_HUMAN | E.NVIEDNKS#ENILE.N            | S420        | 2 | 2,9255 | 0,162 | -0,076 |
| 4 | O43660 PLRG1_HUMAN | E.SGIFACAFDQSE.S              | NA          | 2 | 2,9204 | 0,278 | -0,092 |
| 4 | Q8WWM7 ATX2L_HUMAN | E.GGDSNSDDYDLE.S              | NA          | 2 | 2,9201 | 0,294 | -0,095 |
| 4 | P49792 RBP2_HUMAN  | E.T#TPKAVVS#PPKFVFGSE.S       | T2503:S2510 | 3 | 2,9161 | 0,289 | 0,094  |
| 4 | P30101 PDIA3_HUMAN | E.SLVNEYDDNGE.G               | NA          | 2 | 2,9144 | 0,491 | 0,097  |

|   |                     |                             |             |   |        |       |        |
|---|---------------------|-----------------------------|-------------|---|--------|-------|--------|
| 4 | Q13459 MYO9B_HUMAN  | E.LDPRGS#DEENLDSE.T         | S1993       | 2 | 2,9143 | 0,289 | -0,589 |
| 4 | Q8TCS8 PNPT1_HUMAN  | E.TGVVISQVDEE.T             | NA          | 2 | 2,9134 | 0,309 | 0      |
| 4 | Q5BKZ1 ZN326_HUMAN  | E.GGIEGEGNIQGVGE.G          | NA          | 2 | 2,9051 | 0,35  | -0,093 |
| 4 | Q95155 UBE4B_HUMAN  | E.TQSQSLRSRSQS#M*DIGVSC.E.K | S105        | 3 | 2,9043 | 0,367 | -0,079 |
| 4 | P18206 VINC_HUMAN   | E.AIDTKS#LLDASEE.A          | S721        | 2 | 2,9005 | 0,16  | 0,249  |
| 4 | Q14980 NUMA1_HUMAN  | E.LTTLNATIQQQDQE.L          | NA          | 2 | 2,9    | 0,35  | 0,152  |
| 4 | P20700 LMNB1_HUMAN  | E.NSALQLQVTE.R              | NA          | 2 | 2,8994 | 0,279 | 0      |
| 4 | Q99700 ATX2_HUMAN   | E.VTSQGVQVTSS#PACKQE.K      | S888        | 3 | 2,8935 | 0,155 | -0,102 |
| 4 | Q9H5N1 RABE2_HUMAN  | E.LLPLSRDPS#PPLEPLEE.L      | S204        | 2 | 2,8904 | 0,143 | 0,123  |
| 4 | P04406 G3P_HUMAN    | E.S#TGVVFTTM*E.K            | S98         | 2 | 2,8888 | 0,331 | -0,114 |
| 4 | P20810 ICAL_HUMAN   | E.DFSGPQNASS#LKFE.D         | S527        | 2 | 2,8849 | 0,196 | 0,152  |
| 4 | Q08211 DHX9_HUMAN   | E.LDALDANDE.L               | NA          | 2 | 2,8841 | 0,315 | -0,063 |
| 4 | Q7Z4H7 FA29A_HUMAN  | E.NS#PLSDVAKNTE.S           | S507        | 2 | 2,884  | 0,298 | 0      |
| 4 | P38398 BRCA1_HUMAN  | E.SAQ#PAAAHTTDTAGYNAM*EE.S  | S1613       | 3 | 2,8807 | 0,271 | 0,165  |
| 4 | Q6P996 PDXD1_HUMAN  | E.TSS#VSHIEDLE.K            | S722        | 2 | 2,8728 | 0,258 | 0      |
| 4 | Q6PD74 P34_HUMAN    | E.IEGLS#SDEEH.-             | S310        | 2 | 2,8713 | 0,297 | -0,102 |
| 4 | P11169 GTR3_HUMAN   | E.M*NS#IEPAKE.T             | S485        | 2 | 2,8679 | 0,217 | -0,109 |
| 4 | Q9H8T5 Q9H8T5_HUMAN | E.LGPAPSLGQASHS#DSE.M       | S271        | 2 | 2,8672 | 0,373 | 0,374  |
| 4 | Q16658 FSCN1_HUMAN  | E.QSCAQVVLQAANE.R           | NA          | 2 | 2,8656 | 0,104 | 0,086  |
| 4 | P55060 XPO2_HUMAN   | E.LSDANLQTLTE.Y             | NA          | 2 | 2,8626 | 0,143 | 0,101  |
| 4 | Q8NBU5 ATAD1_HUMAN  | E.YVNSTSEES#HDEDE.I         | S322        | 2 | 2,8613 | 0,336 | -0,213 |
| 4 | Q12888 TP53B_HUMAN  | E.IEPKNS#PEDLGLSLTGD.S      | S500        | 2 | 2,8575 | 0,377 | 0,065  |
| 4 | P14921 ETS1_HUMAN   | E.CADVPLLT#PSSKE.M          | T38         | 2 | 2,8554 | 0,183 | 0      |
| 4 | Q07021 C1QBP_HUMAN  | E.AESDIFS#IRE.V             | S205        | 2 | 2,8554 | 0,278 | 0      |
| 4 | Q12931 TRAP1_HUMAN  | E.SSALPSGQLTSLSE.Y          | NA          | 2 | 2,8536 | 0,359 | 0,532  |
| 4 | Q5R372 Q5R372_HUMAN | E.ISTPRPSS#PGGLPEED.S       | S119        | 2 | 2,8526 | 0,356 | 0,071  |
| 4 | Q92797 SYMPK_HUMAN  | E.DAM*KT#PS#PAAEDAREPE.A    | T1257:S1259 | 2 | 2,8495 | 0,41  | 0,184  |
| 4 | P16070 CD44_HUMAN   | E.SSETPDQFM*TADE.T          | NA          | 2 | 2,8484 | 0,413 | -0,166 |
| 4 | Q15154 PCM1_HUMAN   | E.GCPVSINLS#KAE.T           | S1785       | 2 | 2,8484 | 0,241 | 0,18   |
| 4 | P07954 FUMH_HUMAN   | E.NCVVGIQANTE.R             | NA          | 2 | 2,8469 | 0,262 | 0      |
| 4 | Q92804 RBP56_HUMAN  | E.SSGS#QGGRAPSYDQPD.Y       | S97         | 2 | 2,8464 | 0,45  | 0,144  |
| 4 | Q15149 PLEC1_HUMAN  | E.TQALQQSFLSE.K             | NA          | 2 | 2,8464 | 0,39  | 0      |
| 4 | O00244 ATOX1_HUMAN  | E.FSVDMTCGGCAE.A            | NA          | 2 | 2,8463 | 0,344 | 0      |
| 4 | Q01433 AMPD2_HUMAN  | R.QIS#QDVKLEPD.I            | S168        | 2 | 2,8458 | 0,335 | 0,271  |
| 4 | Q9BX63 FANCI_HUMAN  | E.AASHLS#PENFVEDE.A         | S930        | 2 | 2,8418 | 0,325 | 0,15   |
| 4 | P35579 MYH9_HUMAN   | E.METLQSQLM*AE.K            | NA          | 2 | 2,8409 | 0,355 | 0      |
| 4 | Q15435 PP1R7_HUMAN  | E.NIDTLTNLE.S               | NA          | 2 | 2,8405 | 0,202 | 0      |
| 4 | Q8TB72 PUM2_HUMAN   | E.VNAILS#PRSE.S             | S82         | 2 | 2,8401 | 0,313 | 0,105  |
| 4 | Q8NE71 ABCF1_HUMAN  | E.QSVSQIDGDFE.D             | NA          | 2 | 2,8396 | 0,388 | -0,498 |
| 4 | B2RMZ9 B2RMZ9_HUMAN | R.LNSS#PRAPVS#PLKFSPE.G     | S417:S423   | 2 | 2,8346 | 0,383 | 0,114  |
| 4 | Q4KKU3 Q4KKU3_HUMAN | E.SS#FECVDQKQIEE.Q          | S402        | 2 | 2,828  | 0,155 | 0,654  |

|   |                    |                               |             |   |        |       |        |
|---|--------------------|-------------------------------|-------------|---|--------|-------|--------|
| 4 | Q9HC44 GPBL1_HUMAN | E.GEVLSHS#LEAE.H              | S384        | 2 | 2,8272 | 0,271 | 0,195  |
| 4 | Q14692 BMS1_HUMAN  | E.TS#DIENLLKEEE.D             | S639        | 2 | 2,8263 | 0,454 | 0,081  |
| 4 | P21333 FLNA_HUMAN  | E.VGQFQVDCSSAGSAE.L           | NA          | 2 | 2,8258 | 0,38  | -0,791 |
| 4 | O14744 ANM5_HUMAN  | E.LLGSFADNE.L                 | NA          | 2 | 2,821  | 0,279 | 0      |
| 4 | Q9UQ35 SRRM2_HUMAN | E.GDAPFSEPGTTSTQRPS#PE.T      | S323        | 3 | 2,8207 | 0,128 | 0,172  |
| 4 | Q7KZ85 SPT6H_HUMAN | E.STPMSIAGDAT#PLLDDEM*DR.-    | T1718       | 2 | 2,819  | 0,413 | 0,231  |
| 4 | P29401 TKT_HUMAN   | E.NAIYNNNE.D                  | NA          | 2 | 2,8186 | 0,087 | 0,344  |
| 4 | P31943 HNRH1_HUMAN | E.AFVQFASQE.I                 | NA          | 2 | 2,8183 | 0,273 | 0,119  |
| 4 | Q13426 XRCC4_HUMAN | E.TLRNS#SPEDLFDEI.-           | S327        | 2 | 2,818  | 0,21  | -0,071 |
| 4 | P27816 MAP4_HUMAN  | E.AQTLDSIQIE.T                | NA          | 2 | 2,817  | 0,292 | 0,108  |
| 4 | Q5VYS8 ZCHC6_HUMAN | E.TAESFGS#PPKEE.M             | S706        | 2 | 2,812  | 0,369 | -0,18  |
| 4 | Q9Y5T5 UBP16_HUMAN | E.VLTSS#PTRNLNGAYLTE.G        | S552        | 2 | 2,8112 | 0,294 | 0,127  |
| 4 | P16615 AT2A2_HUMAN | E.FDELNPS#AQRD.A              | S663        | 2 | 2,8096 | 0,236 | -0,178 |
| 4 | O95402 MED26_HUMAN | D.ATQVPS#PLPLAQPS#TPPVRRL.E.L | S314:S322   | 3 | 2,8053 | 0,304 | 0,073  |
| 4 | Q07021 C1QBP_HUMAN | E.SDIFS#IRE.V                 | S205        | 2 | 2,802  | 0,274 | 0,117  |
| 4 | P49792 RBP2_HUMAN  | E.VSST#S#ETTPKAVVSPPKFVFGSE.S | T2500:S2501 | 3 | 2,8015 | 1     | -0,072 |
| 4 | O94782 UBP1_HUMAN  | E.SSEIS#PEPKTE.M              | S475        | 2 | 2,8003 | 0,263 | -0,285 |
| 4 | P63096 GNAI1_HUMAN | E.AAAYIQCQFE.D                | NA          | 2 | 2,7994 | 0,401 | 0,203  |
| 4 | Q5H9F3 BCRL1_HUMAN | E.GTSVTFS#PLKS#PPQLERE.M      | S599:S603   | 3 | 2,7976 | 0,09  | -0,086 |
| 4 | Q6P4Q7 CNNM4_HUMAN | E.NS#PQFPIDGCTTHM*E.N         | S728        | 2 | 2,7966 | 0,287 | 0,2    |
| 4 | P60174 TPIS_HUMAN  | E.GLVVIACIGE.K                | NA          | 2 | 2,7963 | 0,216 | 0,123  |
| 4 | P10243 MYBA_HUMAN  | E.NQPVSAQQNS#PTKFLAVE.A       | S336        | 2 | 2,7954 | 0,216 | 0      |
| 4 | Q14444 CAPR1_HUMAN | E.VESTY#VNRQFMAE.T            | Y294        | 2 | 2,7928 | 0,281 | 0,411  |
| 4 | Q5SW79 CE170_HUMAN | R.LGS#LSARSDSE.A              | S1160       | 2 | 2,7922 | 0,193 | -0,305 |
| 4 | Q14247 SRC8_HUMAN  | E.ASSQQGLAYATE.A              | NA          | 2 | 2,7886 | 0,414 | -0,199 |
| 4 | Q12931 TRAP1_HUMAN | E.LISNASDALE.K                | NA          | 2 | 2,7842 | 0,091 | 0      |
| 4 | Q99747 SNAG_HUMAN  | E.NGTPDTAAMALE.R              | NA          | 2 | 2,7826 | 0,245 | -0,102 |
| 4 | Q02952 AKA12_HUMAN | E.QS#HAEISPPAESGQAVEE.C       | S248        | 2 | 2,7774 | 0,135 | 0      |
| 4 | Q6NZI2 PTRF_HUMAN  | E.SDAVLVDKSDS#D.-             | S389        | 2 | 2,7762 | 0,139 | 0,092  |
| 4 | Q15424 SAFB1_HUMAN | E.SLS#DSRELVEGE.M             | S161        | 2 | 2,7739 | 0,352 | 0,087  |
| 4 | Q9UJX4 APC5_HUMAN  | E.FFLSQQAS#LLKNDE.T           | S221        | 2 | 2,7723 | 0,355 | -0,071 |
| 4 | Q9NWW4 CA123_HUMAN | E.SGTAFSDINLQE.K              | NA          | 2 | 2,7682 | 0,178 | 0,095  |
| 4 | Q9Y365 PCTL_HUMAN  | E.LSVQHADS#LENIDE.S           | S259        | 2 | 2,7661 | 0,196 | 0,444  |
| 4 | P18583 SON_HUMAN   | E.SDQTLAALLS#PKE.S            | S1697       | 2 | 2,7661 | 0,345 | 0,084  |
| 4 | O94992 HEX11_HUMAN | E.SQPPPLQTQACPE.S             | NA          | 2 | 2,7638 | 0,461 | 0      |
| 4 | O14745 NHERF_HUMAN | E.AALES#PRPALVRSAS#SDTSEE.L   | S280:S290   | 2 | 2,7636 | 0,143 | 0      |
| 4 | Q9UKS6 PACN3_HUMAN | E.LS#FRAGEE.L                 | S383        | 2 | 2,7621 | 0,401 | 0,062  |
| 4 | P28715 ERCC5_HUMAN | E.LTPAS#PTCTNSVSKNE.T         | S526        | 2 | 2,7613 | 0,438 | -0,205 |
| 4 | P43358 MAGA4_HUMAN | E.AALLEEEGV.-                 | NA          | 2 | 2,7563 | 0,17  | 0,23   |
| 4 | Q08257 QOR_HUMAN   | E.FQYAAALQAGM*E.I             | NA          | 2 | 2,7562 | 0,311 | -0,085 |
| 4 | Q9Y490 TLN1_HUMAN  | E.AVDNLSAFASNPE.F             | NA          | 2 | 2,7562 | 0,322 | 0,183  |

|   |                    |                                 |             |   |        |       |        |
|---|--------------------|---------------------------------|-------------|---|--------|-------|--------|
| 4 | P23246 SFPO_HUMAN  | E.AFSQFGPIE.R                   | NA          | 2 | 2,7541 | 0,38  | 0,184  |
| 4 | Q14966 ZN638_HUMAN | E.SEVQTATDS#PSVKPNELEEE.S       | S1119       | 3 | 2,7522 | 0,161 | 0,081  |
| 4 | P13667 PDIA4_HUMAN | E.SGEDVNAAILDE.S                | NA          | 2 | 2,7497 | 0,219 | 0,297  |
| 4 | Q14671 PUM1_HUMAN  | E.VNSVLS#PRSE.S                 | S209        | 2 | 2,7429 | 0,301 | -0,104 |
| 4 | Q96FW1 OTUB1_HUMAN | E.LS#VLYKE.Y                    | S55         | 2 | 2,7424 | 0,147 | 0      |
| 4 | O15067 PUR4_HUMAN  | E.AFDLAQSNSE.H                  | NA          | 2 | 2,7416 | 0,144 | -0,113 |
| 4 | P49591 SYSC_HUMAN  | E.VAQLSQFDEE.L                  | NA          | 2 | 2,7402 | 0,345 | 0,105  |
| 4 | Q9NQW6 ANLN_HUMAN  | E.STSAKSCSPSPVS#PQVQPQAADTISD.S | S102        | 3 | 2,74   | 0,151 | 0,067  |
| 4 | P17844 DDX5_HUMAN  | E.LAQQVQVAAE.Y                  | NA          | 2 | 2,7392 | 0,358 | -0,206 |
| 4 | O43353 RIPK2_HUMAN | E.ILVVSR#PS#LNLLQNKSM*.-        | S529:S531   | 3 | 2,7375 | 0,159 | 0      |
| 4 | P61247 RS3A_HUMAN  | E.VSLADLQNDE.V                  | NA          | 2 | 2,7344 | 0,259 | 0,332  |
| 4 | Q02952 AKA12_HUMAN | E.TVSILS#KTEGTQE.A              | S1259       | 2 | 2,7281 | 0,335 | 0      |
| 4 | P78536 ADA17_HUMAN | E.SLS#LFHPSNVE.M                | S706        | 2 | 2,7254 | 0,442 | 0      |
| 4 | Q92797 SYMPK_HUMAN | E.DAM*KT#PS#PAAEDAREPE.A        | T1257:S1259 | 3 | 2,7247 | 0,206 | 0,276  |
| 4 | P25787 PSA2_HUMAN  | E.GQMTEDNIE.V                   | NA          | 2 | 2,7241 | 0,315 | 0      |
| 4 | P85037 FOXK1_HUMAN | R.SGGLQTPCELS#REGS#PIPHDPE.F    | S441:S445   | 3 | 2,7231 | 0,118 | 0,218  |
| 4 | Q15642 CIP4_HUMAN  | E.DFSQPM*NRAPSDS#SLGT#PSDGRPE.L | S298:T302   | 3 | 2,722  | 0,176 | -0,067 |
| 4 | P14625 ENPL_HUMAN  | E.AIQLDGLNAS#QJRE.L             | S64         | 2 | 2,7207 | 0,366 | 0,304  |
| 4 | Q09666 AHNK_HUMAN  | E.APLPS#PKLE.G                  | S5110       | 2 | 2,7155 | 0,212 | 0      |
| 4 | P23443 KS6B1_HUMAN | E.GGQLNES#M*DHGGVGPYE.L         | S53         | 2 | 2,7121 | 0,253 | 0      |
| 4 | P39023 RL3_HUMAN   | E.QQVPVNQVFGQDE.M               | NA          | 2 | 2,711  | 0,386 | 0,328  |
| 4 | Q9H0E9 BRD8_HUMAN  | E.AAS#LEEPKEEDQGE.G             | S641        | 2 | 2,7109 | 0,482 | -0,303 |
| 4 | Q96E22 NGBR_HUMAN  | E.LLGLDCSKYS#PE.F               | S168        | 2 | 2,7106 | 0,107 | 0,334  |
| 4 | P06744 G6PI_HUMAN  | E.LQAAGKS#PEDLE.R               | S455        | 2 | 2,7085 | 0,241 | 1,277  |
| 4 | Q86U42 PABP2_HUMAN | E.GAPGGAGDYGNGLS                | NA          | 2 | 2,7053 | 0,293 | -0,099 |
| 4 | P35579 MYH9_HUMAN  | E.FTTNLTEEEE.K                  | NA          | 2 | 2,7047 | 0,346 | 0,201  |
| 4 | Q9H2W6 RM46_HUMAN  | R.TLATLSENNM*E.A                | NA          | 2 | 2,7035 | 0,292 | -0,197 |
| 4 | P17301 ITA2_HUMAN  | E.GTVQGGDNFQME.M                | NA          | 2 | 2,7028 | 0,252 | -0,095 |
| 4 | Q9NPR2 SEM4B_HUMAN | R.LGS#EIRD.S                    | S825        | 2 | 2,7003 | 0,201 | 0,281  |
| 4 | Q15185 TEBP_HUMAN  | D.S#DDEKM*PDLE.-                | S151        | 2 | 2,6997 | 0,15  | 0      |
| 4 | P60709 ACTB_HUMAN  | R.GYSFTTTAE.R                   | NA          | 2 | 2,699  | 0,219 | 0,25   |
| 4 | Q9P206 K1522_HUMAN | E.SSTAEDALS#IRSE.M              | S127        | 2 | 2,6975 | 0,22  | 0      |
| 4 | Q9BVJ6 UT14A_HUMAN | E.SLLALSQQEE.L                  | NA          | 2 | 2,6933 | 0,31  | 0,218  |
| 4 | P23434 GCSH_HUMAN  | E.NGIGTVGISNFAQE.A              | NA          | 2 | 2,6912 | 0,401 | 0,173  |
| 4 | O95486 SC24A_HUMAN | E.NLLVNLNE.S                    | NA          | 2 | 2,6777 | 0,149 | 0,131  |
| 4 | Q9HAW4 CLSPN_HUMAN | E.LLNLCSGKFTSQDAS#TPASSE.L      | S954        | 2 | 2,6764 | 0,185 | 0,319  |
| 4 | Q14C86 GAPD1_HUMAN | E.LESCSGLGS#TSDDTDVRE.V         | S746        | 3 | 2,6753 | 0,148 | -0,091 |
| 4 | P35579 MYH9_HUMAN  | E.M*ETLQSQLM*AE.K               | NA          | 2 | 2,6743 | 0,259 | -0,093 |
| 4 | Q71RC2 LARP4_HUMAN | E.LTALSTTQQE.K                  | NA          | 2 | 2,6742 | 0,342 | 0,559  |
| 4 | P40123 CAP2_HUMAN  | E.S#SPSRSAFAQLNQGE.A            | S256        | 3 | 2,6714 | 0,201 | 0,413  |
| 4 | O43169 CYB5B_HUMAN | E.TS#VTYYRLEE.V                 | S19         | 2 | 2,6711 | 0,229 | 0,364  |

|   |                     |                                     |             |   |        |       |        |
|---|---------------------|-------------------------------------|-------------|---|--------|-------|--------|
| 4 | P17301 ITA2_HUMAN   | E.GTVQGGDNFQM*E.M                   | NA          | 2 | 2,6661 | 0,371 | -0,282 |
| 4 | Q05209 PTN12_HUMAN  | E.SFVLAS#EHNT#PVRSE.W               | S689:T693   | 2 | 2,6641 | 0,278 | 0,666  |
| 4 | Q9NWT1 PK1IP_HUMAN  | E.SLPAAEPS#PVSKE.Q                  | S320        | 2 | 2,6587 | 0,494 | -0,082 |
| 4 | Q684P5 RPGP2_HUMAN  | E.GDSGGSQPST#TSPFKQE.V              | T666        | 2 | 2,6567 | 0,289 | -0,341 |
| 4 | Q13045 FLII_HUMAN   | E.FMAANNLE.L                        | NA          | 2 | 2,6566 | 0,147 | -0,357 |
| 4 | P68104 EF1A1_HUMAN  | E.S#FSFYPLGR.F                      | S414        | 2 | 2,6551 | 0,372 | -0,1   |
| 4 | P62988 UBIQ_HUMAN   | K.TITLEVEPSDTIENVKAK.I              | NA          | 3 | 2,651  | 0,299 | 0      |
| 4 | Q14839 CHD4_HUMAN   | E.KS#AIDLTPIVVE.D                   | S1648       | 2 | 2,6464 | 0,149 | 0      |
| 4 | Q9NZT2 OGFR_HUMAN   | E.GCAL#QGLSRTGTQE.V                 | S420        | 2 | 2,6455 | 0,433 | 0,074  |
| 4 | Q8TE01 Q8TE01_HUMAN | R.QDLGGTCVNE.G                      | NA          | 2 | 2,6412 | 0,15  | -0,112 |
| 4 | P56537 IF6_HUMAN    | E.AQPSTIATSMRSLIDS#LT.-             | S243        | 2 | 2,6387 | 0,28  | 0,117  |
| 4 | Q9UBU9 NXF1_HUMAN   | E.IQRAFAM*PAPTPSSS#PVPTLSPEQQE.M    | S558        | 3 | 2,6375 | 0,267 | 0,32   |
| 4 | Q02952 AKA12_HUMAN  | E.GSTVNDQQLEE.V                     | NA          | 2 | 2,6363 | 0,237 | -0,2   |
| 4 | Q9NQ88 CL005_HUMAN  | E.QFSQGSNSCLE.T                     | NA          | 2 | 2,6337 | 0,373 | 0      |
| 4 | Q9NVI7 ATD3A_HUMAN  | D.ALNLAQM*QE.Q                      | NA          | 2 | 2,6319 | 0,234 | -0,118 |
| 4 | P55036 PSMD4_HUMAN  | E.NNVLITLANDCE.V                    | NA          | 2 | 2,6299 | 0,349 | 0      |
| 4 | P49321 NASP_HUMAN   | E.SENYVQAVEE.F                      | NA          | 2 | 2,6294 | 0,27  | 0,209  |
| 4 | Q6PKG0 LARP1_HUMAN  | E.SAPGS#PRAVT#PVPTKTEE.V            | S521:T526   | 2 | 2,6267 | 0,401 | 0      |
| 4 | P30307 MPIP3_HUMAN  | E.QIALLVKDM*S#P.-                   | S472        | 2 | 2,6266 | 0,256 | -0,279 |
| 4 | O00151 PDLI1_HUMAN  | E.NISNFNNALE.S                      | NA          | 2 | 2,6235 | 0,183 | 1,289  |
| 4 | O14686 MLL2_HUMAN   | E.VSVLSSGS#PRLQE.T                  | S48         | 2 | 2,623  | 0,291 | 0,254  |
| 4 | P25787 PSA2_HUMAN   | E.SFEGQM*TEDNIE.V                   | NA          | 2 | 2,6228 | 0,416 | 0,259  |
| 4 | Q92543 SNX19_HUMAN  | E.GRAS#PVAAPVFLSYSEPE.G             | S306        | 2 | 2,6226 | 0,253 | 0,062  |
| 4 | P46013 KI67_HUMAN   | E.LFQT#PDHTEE.S                     | T2085       | 2 | 2,6208 | 0,19  | 0      |
| 4 | P22314 UBA1_HUMAN   | E.VQGLQPNGEE.M                      | NA          | 2 | 2,6203 | 0,274 | 0,114  |
| 4 | P36957 ODO2_HUMAN   | E.AQNTCAMLTFNE.I                    | NA          | 2 | 2,6168 | 0,319 | 0,163  |
| 4 | Q13257 MD2L1_HUMAN  | E.SGPQFITNSEE.V                     | NA          | 2 | 2,6166 | 0,309 | 0      |
| 4 | P18669 PGAM1_HUMAN  | E.GLSEEAIM*E.L                      | NA          | 2 | 2,6158 | 0,288 | 0,184  |
| 4 | Q02952 AKA12_HUMAN  | E.VEMLSSQE.R                        | NA          | 2 | 2,6157 | 0,26  | 0,132  |
| 4 | Q86U42 PABP2_HUMAN  | E.VEKQMNMS#PPPGNAGPVIM*SIEE.K       | S150        | 3 | 2,6141 | 0,141 | 0      |
| 4 | P31689 DNJA1_HUMAN  | E.NGFLS#PDKLSLLE.K                  | S335        | 2 | 2,6124 | 0,366 | -0,081 |
| 4 | O00303 EIF3F_HUMAN  | E.VTNCFSVPHNES#EDE.V                | S142        | 2 | 2,612  | 0,266 | 0,397  |
| 4 | P40123 CAP2_HUMAN   | E.SSPS#RSALFAQLNQGE.A               | S259        | 2 | 2,6115 | 0,269 | 0,344  |
| 4 | Q14566 MCM6_HUMAN   | E.IESEIDSEEE.L                      | NA          | 2 | 2,6105 | 0,282 | 0      |
| 4 | Q9NVU7 SDA1_HUMAN   | E.IDS#DEEPRGE.L                     | S585        | 2 | 2,609  | 0,246 | -0,199 |
| 4 | Q6ZRS2 SRCAP_HUMAN  | E.AKT#PT#SSPEKPQELVTAE.V            | T2682:T2684 | 3 | 2,6089 | 0,271 | 0,088  |
| 4 | Q96R06 SPAG5_HUMAN  | E.VAAVSEKPIFQES#PSHLLLEES#PPNPCSE.Q | S197:S205   | 3 | 2,6089 | 0,163 | 0,339  |
| 4 | P46937 YAP1_HUMAN   | E.ALSSDILNDME.S                     | NA          | 2 | 2,6083 | 0,28  | 0      |
| 4 | P23528 COF1_HUMAN   | E.LQANCYEE.V                        | NA          | 2 | 2,6064 | 0,295 | 0,594  |
| 4 | O14639 ABLM1_HUMAN  | R.QSLGESPRTLS#PTPSAE.G              | S431        | 2 | 2,6051 | 0,27  | 0      |
| 4 | P10109 ADX_HUMAN    | E.NNLDIDGFGACE.G                    | NA          | 2 | 2,604  | 0,346 | 0,184  |

|   |                     |                           |       |   |        |       |        |
|---|---------------------|---------------------------|-------|---|--------|-------|--------|
| 4 | P22234 PUR6_HUMAN   | E.TAFIAPQCE.M             | NA    | 2 | 2,6034 | 0,282 | 0      |
| 4 | P42166 LAP2A_HUMAN  | E.QGTES#RSSTPLPTISSAE.N   | S156  | 2 | 2,6014 | 0,247 | 0,242  |
| 4 | P35580 MYH10_HUMAN  | E.SQLQDTQE.L              | NA    | 2 | 2,6002 | 0,206 | -0,064 |
| 4 | Q7Z406 MYH14_HUMAN  | E.AQPGSGPSPEPEGS#PPAHPQ.- | S1989 | 2 | 2,598  | 0,357 | -0,061 |
| 4 | Q14693 LPIN1_HUMAN  | E.VIPMHLATS#PILSE.G       | S106  | 2 | 2,5978 | 0,203 | 0,077  |
| 4 | P12270 TPR_HUMAN    | E.GVQGPLNVLSLEE.G         | NA    | 2 | 2,5926 | 0,275 | 0,184  |
| 4 | Q02952 AKA12_HUMAN  | E.GSTVNDQQL.E             | NA    | 2 | 2,5915 | 0,154 | -0,112 |
| 4 | P06748 NPM_HUMAN    | D.MS#PLRPQNYLFGCE.L       | S10   | 2 | 2,591  | 0,333 | 0,204  |
| 4 | Q9ULF5 S39AA_HUMAN  | E.GQQES#PPKNYLCIEE.E      | S591  | 2 | 2,5901 | 0,307 | 0      |
| 4 | P57735 RAB25_HUMAN  | E.TSALDSTNVE.L            | NA    | 2 | 2,589  | 0,279 | 0      |
| 4 | O00629 IMA4_HUMAN   | E.DSDIDGDYRVQNTS#LE.A     | S72   | 2 | 2,5847 | 0,111 | -0,064 |
| 4 | Q15046 SYK_HUMAN    | E.NVATTDITLE.S            | NA    | 2 | 2,5831 | 0,297 | -0,19  |
| 4 | P05783 K1C18_HUMAN  | E.STTVVTTQSAE.V           | NA    | 2 | 2,5821 | 0,322 | 0,326  |
| 4 | Q9Y580 RBM7_HUMAN   | R.TM*DNM*TSSAQIQRFS#SPE.N | S136  | 3 | 2,5816 | 0,129 | 0,156  |
| 4 | Q92625 ANS1A_HUMAN  | E.QFSGLLHGSS#PVCE.V       | S507  | 2 | 2,5813 | 0,366 | -0,076 |
| 4 | B2RDE1 B2RDE1_HUMAN | D.QTLDDLNE*.-             | NA    | 2 | 2,5739 | 0,295 | 0,223  |
| 4 | Q14764 MVP_HUMAN    | R.QAIPLDENE.G             | NA    | 2 | 2,5736 | 0,159 | 0,119  |
| 4 | P11388 TOP2A_HUMAN  | E.GSPQEDGVELE.G           | NA    | 2 | 2,5715 | 0,228 | 0,526  |
| 4 | O95208 EPN2_HUMAN   | R.GSS#QPNLSTSHSEQE.Y      | S173  | 2 | 2,5675 | 0,208 | 0,073  |
| 4 | P22694 KAPCB_HUMAN  | E.DIRVS#ITE.K             | S339  | 2 | 2,5646 | 0,157 | 0      |
| 4 | Q02952 AKA12_HUMAN  | E.ASFTLTAEEEE.K           | NA    | 2 | 2,5639 | 0,162 | 0,197  |
| 4 | P78527 PRKDC_HUMAN  | E.NASVIDSAE.L             | NA    | 2 | 2,5626 | 0,283 | 0,135  |
| 4 | Q6ZNP1 Q6ZNP1_HUMAN | E.LSLTNIS#PKFQE.T         | S39   | 2 | 2,5564 | 0,373 | 0,586  |
| 4 | P08621 RU17_HUMAN   | E.GLGND#RDM*YM*E.S        | S410  | 2 | 2,5564 | 0,198 | 0      |
| 4 | Q8N3D4 EH1L1_HUMAN  | E.AGGQVGPEAPRPET#SPE.M    | T284  | 3 | 2,555  | 0,117 | 0,099  |
| 4 | Q9C0B5 ZDHC5_HUMAN  | E.LGQLQS#IRSE.G           | S445  | 2 | 2,5536 | 0,287 | -0,101 |
| 4 | O00629 IMA4_HUMAN   | E.AETIGNLIEE.C            | NA    | 2 | 2,5534 | 0,142 | 0,336  |
| 4 | Q9HBM1 SPC25_HUMAN  | E.LALFDKS#INE.F           | S12   | 2 | 2,553  | 0,199 | 0,099  |
| 4 | Q9Y448 T4AF1_HUMAN  | E.QQTLCNNQVND.L           | NA    | 2 | 2,551  | 0,245 | 0      |
| 4 | Q14160 LAP4_HUMAN   | E.VALVLLGRPS#PGAVGPE.D    | S1600 | 2 | 2,5485 | 0,173 | 0,356  |
| 4 | P36551 HEM6_HUMAN   | E.GGGGISCVLQDGCVFE.K      | NA    | 2 | 2,5415 | 0,383 | -0,221 |
| 4 | Q9BRA2 TXD17_HUMAN  | E.SECLQANLVE.M            | NA    | 2 | 2,5412 | 0,218 | 0,315  |
| 4 | P52294 IMA1_HUMAN   | E.VMS#DGGFHE.A            | S63   | 2 | 2,5367 | 0,212 | 0      |
| 4 | P41252 SYIC_HUMAN   | E.SAVSQMQSVIE.L           | NA    | 2 | 2,5367 | 0,206 | 0      |
| 4 | Q9UK45 LSM7_HUMAN   | E.AIPNPFIQQDA.-           | NA    | 2 | 2,5365 | 0,359 | 0      |
| 4 | O15212 PFD6_HUMAN   | E.TLAQLQQE.F              | NA    | 2 | 2,5361 | 0,172 | 0,328  |
| 4 | Q8TEH3 DEN1A_HUMAN  | E.AALQLGQAKS#LE.D         | S592  | 2 | 2,5329 | 0,384 | -0,087 |
| 4 | P30622 CLIP1_HUMAN  | E.IENLQNNQDSE.R           | NA    | 2 | 2,5319 | 0,257 | 0      |
| 4 | Q13573 SNW1_HUMAN   | E.VIALGVNPNRTS#NE.V       | S402  | 2 | 2,5307 | 0,373 | 0,315  |
| 4 | Q8N3U4 STAG2_HUMAN  | E.SETHFSS#DTDFEDIE.G      | S23   | 2 | 2,5284 | 0,22  | 0,265  |
| 4 | Q15424 SAFB1_HUMAN  | E.SLSDS#RELVE.G           | S163  | 2 | 2,5281 | 0,186 | -0,1   |

|   |                    |                             |       |   |        |       |        |
|---|--------------------|-----------------------------|-------|---|--------|-------|--------|
| 4 | P14618 KPYM_HUMAN  | E.GSDVANAVLD.G              | NA    | 2 | 2,528  | 0,353 | 0,063  |
| 4 | Q99459 CDC5L_HUMAN | E.SGITNSASSTLLSE.Y          | NA    | 2 | 2,5276 | 0,365 | -0,089 |
| 4 | O94909 K0819_HUMAN | R.GPSQATS#PIRSPQE.S         | S296  | 2 | 2,5275 | 0,162 | -0,397 |
| 4 | P08621 RU17_HUMAN  | E.GLGND#RDM*YME.S           | S410  | 2 | 2,5261 | 0,404 | 0      |
| 4 | P48681 NEST_HUMAN  | E.VGQGMPLVSEGDGRGS#PFQEEE.G | S1577 | 2 | 2,5254 | 0,305 | 0,524  |
| 4 | Q96EB6 SIRT1_HUMAN | E.AALALQPGGS#PSAAGADRE.A    | S14   | 3 | 2,5193 | 0,311 | 0      |
| 4 | Q8IU8 MINA_HUMAN   | E.SLIS#PIKTE.T              | S47   | 2 | 2,5181 | 0,164 | 0,343  |
| 4 | Q14247 SRC8_HUMAN  | E.LSYRGPVS#GTEPEPVYSME.A    | S438  | 2 | 2,512  | 0,23  | -0,112 |
| 4 | Q96L73 NSD1_HUMAN  | R.AAS#PHQVTPQADE.K          | S2471 | 2 | 2,508  | 0,19  | 0,171  |
| 4 | Q7Z401 MYCPP_HUMAN | E.STS#LTDEDVCHE.L           | S1370 | 2 | 2,5071 | 0,437 | 0      |
| 4 | P62195 PRS8_HUMAN  | E.LLNQLDGF.E.A              | NA    | 2 | 2,5002 | 0,37  | 0      |
| 4 | Q04917 1433F_HUMAN | E.LNEPLSNE.D                | NA    | 2 | 2,4998 | 0,248 | 0,067  |
| 4 | P49137 MAPK2_HUMAN | E.TTSHNSLTT#PCYTPYYVAPE.V   | T222  | 2 | 2,4987 | 0,283 | 0,205  |
| 4 | Q08J23 NSUN2_HUMAN | E.SAASTGQPDNDVTE.G          | NA    | 2 | 2,4974 | 0,303 | 0,175  |
| 4 | Q58FF7 H90B3_HUMAN | E.GLELPEDEEE.K              | NA    | 2 | 2,4968 | 0,362 | 0,316  |
| 4 | P06748 NPM_HUMAN   | D.M*S#PLRPQNYLFGCE.L        | S10   | 2 | 2,4964 | 0,235 | 0,135  |
| 4 | P51114 FXR1_HUMAN  | E.TTQLM*ILSASE.A            | NA    | 2 | 2,4946 | 0,337 | 0,302  |
| 4 | Q9NZI6 TF2L1_HUMAN | E.TLTYLNQGSYE.I             | NA    | 2 | 2,4933 | 0,217 | 0,344  |
| 4 | O75367 H2AY_HUMAN  | E.ISNLAGFEVE.A              | NA    | 2 | 2,4929 | 0,298 | 0      |
| 4 | P11388 TOP2A_HUMAN | E.NTEGSPQEDGVELE.G          | NA    | 2 | 2,4924 | 0,218 | 0      |
| 4 | Q9UMS4 PRP19_HUMAN | E.NGTDPINNQLSE.E            | NA    | 2 | 2,4903 | 0,348 | 0,087  |
| 4 | P22681 CBL_HUMAN   | E.FVSISS#PAHVAT.-           | S900  | 2 | 2,488  | 0,3   | -0,188 |
| 4 | P14314 GLU2B_HUMAN | E.FAYLYQCYE.L               | NA    | 2 | 2,4879 | 0,218 | 0      |
| 4 | Q13823 NOG2_HUMAN  | E.TAGEGS#ESIIEE.T           | S502  | 2 | 2,4871 | 0,136 | 0,171  |
| 4 | O60291 MGRN1_HUMAN | E.S#SSPQQGTRAASIE.N         | S504  | 2 | 2,4831 | 0,198 | -0,163 |
| 4 | Q658J3 A26CA_HUMAN | D.GQVITIGNE.R               | NA    | 2 | 2,4828 | 0,111 | 0,262  |
| 4 | P38432 P80C_HUMAN  | E.LIDPRLIESPSNT#SSTIPA.-    | T570  | 2 | 2,4817 | 0,206 | 0,44   |
| 4 | Q12874 SF3A3_HUMAN | E.LNAISGPNEFAE.F            | NA    | 2 | 2,4798 | 0,16  | -0,097 |
| 4 | P53597 SUCA_HUMAN  | E.IFLNDSATE.G               | NA    | 2 | 2,4797 | 0,166 | 0,242  |
| 4 | Q9BTX7 CT121_HUMAN | E.SDSLRTS#PSVASLSE.N        | S11   | 2 | 2,4774 | 0,273 | 0,529  |
| 4 | Q02952 AKA12_HUMAN | E.ISPPAESGQAVEE.C           | NA    | 2 | 2,4763 | 0,408 | 0      |
| 4 | Q9NYV4 CD2L7_HUMAN | E.IVT#PKETE.T               | T514  | 2 | 2,4738 | 0,197 | 0,184  |
| 4 | Q92785 REQU_HUMAN  | E.GLISQDGSSLE.A             | NA    | 2 | 2,473  | 0,348 | 0,11   |
| 4 | Q00796 DHSO_HUMAN  | E.NYPIPEPGPNE.V             | NA    | 2 | 2,4693 | 0,225 | 0,099  |
| 4 | Q8N8Q8 TOIP2_HUMAN | E.TTIASNAEE.A               | NA    | 2 | 2,4688 | 0,135 | 0      |
| 4 | Q12888 TP53B_HUMAN | E.SVPLHLS#LTE.T             | S692  | 2 | 2,4675 | 0,239 | 0,104  |
| 4 | Q965T2 IWS1_HUMAN  | E.FTGFNQEDLEE.K             | NA    | 2 | 2,4651 | 0,175 | -0,084 |
| 4 | P30307 MPIP3_HUMAN | E.QIALLVKDMS#P.-            | S472  | 2 | 2,4586 | 0,103 | -0,188 |
| 4 | Q05639 EF1A2_HUMAN | E.GNASGVSLLE.A              | NA    | 2 | 2,4571 | 0,174 | 0,322  |
| 4 | Q86VR2 F134C_HUMAN | E.LAITDSEHS#DAE.V           | S288  | 2 | 2,4539 | 0,259 | -0,268 |
| 4 | Q9H4L4 SENP3_HUMAN | E.DGVRGS#PPVPSGPPM*EE.D     | S212  | 2 | 2,453  | 0,381 | -0,135 |



|   |                     |                            |           |   |        |       |        |
|---|---------------------|----------------------------|-----------|---|--------|-------|--------|
| 4 | Q8IYA6 CKP2L_HUMAN  | E.NES#LDNFLKE.T            | S175      | 2 | 2,4527 | 0,153 | 0,095  |
| 4 | P35579 MYH9_HUMAN   | E.M*ETLQSQLMAE.K           | NA        | 2 | 2,4514 | 0,238 | 0,47   |
| 4 | P60660 MYL6_HUMAN   | E.MLVAGHEDS#NGCINYE.A      | S135      | 2 | 2,4494 | 0,169 | 0,129  |
| 4 | P08621 RU17_HUMAN   | E.GLGND#RDMYM*E.S          | S410      | 2 | 2,4494 | 0,097 | 0      |
| 4 | P34932 HSP74_HUMAN  | E.M*LNLYEIENE.G            | NA        | 2 | 2,4488 | 0,159 | 0      |
| 4 | P04792 HSPB1_HUMAN  | R.ALS#RQLSSGVSE.I          | S78       | 2 | 2,4416 | 0,097 | -0,371 |
| 4 | Q13155 MCA2_HUMAN   | E.ESNLSLQALE.S             | NA        | 2 | 2,4393 | 0,1   | -0,221 |
| 4 | P55265 DSRAD_HUMAN  | E.YAQFASQTCE.F             | NA        | 2 | 2,4385 | 0,307 | 0,101  |
| 4 | Q15020 SART3_HUMAN  | E.AALVQEQEE.K              | NA        | 2 | 2,4359 | 0,106 | -0,06  |
| 4 | Q12888 TP53B_HUMAN  | E.S#VASPQKTMSVLSCICE.A     | S1025     | 2 | 2,4347 | 0,204 | 0,123  |
| 4 | Q9BTT0 AN32E_HUMAN  | E.LSDNIISGGLE.V            | NA        | 2 | 2,4313 | 0,298 | 0,218  |
| 4 | Q8NE71 ABCF1_HUMAN  | E.NDFSVSQAE.M              | NA        | 2 | 2,4299 | 0,14  | 0,367  |
| 4 | Q5H9F3 BCRL1_HUMAN  | E.GTSVTFS#PLKSPQLE.R       | S599      | 2 | 2,4277 | 0,347 | -0,069 |
| 4 | P27348 1433T_HUMAN  | E.QGAELSNEE.R              | NA        | 2 | 2,4245 | 0,182 | 0,187  |
| 4 | Q02952 AKA12_HUMAN  | E.VEM*LSSQE.R              | NA        | 2 | 2,4212 | 0,196 | 0,13   |
| 4 | Q99618 CDCA3_HUMAN  | R.VADPRS#PSAGILRT#PIQVE.S  | S29:T37   | 2 | 2,4196 | 0,197 | -0,113 |
| 4 | P29966 MARCS_HUMAN  | E.AAEPGSPTAAEGE.A          | NA        | 2 | 2,4169 | 0,358 | 0,103  |
| 4 | Q9NQC3 RTN4_HUMAN   | E.TAASLPSLS#PLSAASFKE.H    | S239      | 2 | 2,4156 | 0,364 | 0,329  |
| 4 | P20700 LMNB1_HUMAN  | E.AAGVVVEEE.L              | NA        | 2 | 2,4146 | 0,165 | 0      |
| 4 | P48637 GSHB_HUMAN   | E.GGGNNLYGEE.M             | NA        | 2 | 2,4138 | 0,185 | -0,242 |
| 4 | P05787 K2C8_HUMAN   | E.LGNMQGLVE.D              | NA        | 2 | 2,4129 | 0,081 | 0,063  |
| 4 | Q7KZX8 Q7KZX8_HUMAN | E.LSEPIENGETE.M            | NA        | 2 | 2,412  | 0,308 | 0,1    |
| 4 | P55072 TERA_HUMAN   | E.GITGNLFE.V               | NA        | 2 | 2,4113 | 0,258 | 0,215  |
| 4 | Q8IVF2 AHNK2_HUMAN  | E.ASVDVS#PPKVE.A           | S2179     | 2 | 2,4098 | 0,1   | -0,101 |
| 4 | P78417 GSTO1_HUMAN  | E.LYLQNSPE.A               | NA        | 2 | 2,4095 | 0,091 | 0      |
| 4 | P10809 CH60_HUMAN   | E.QLDVTTSEYE.K             | NA        | 2 | 2,409  | 0,358 | 0,103  |
| 4 | Q9UHB6 LIMA1_HUMAN  | E.LGSSGSALEE.G             | NA        | 2 | 2,4076 | 0,153 | -0,128 |
| 4 | Q9Y3T9 NOC2L_HUMAN  | E.LQQLAQGPEDE.L            | NA        | 2 | 2,4006 | 0,278 | -0,099 |
| 4 | P14314 GLU2B_HUMAN  | E.AQALLSGDTQTD.A           | NA        | 2 | 2,3998 | 0,427 | 0,1    |
| 4 | Q86UP2 KTN1_HUMAN   | E.SLQM*QVQDILEQNE.A        | NA        | 2 | 2,3994 | 0,139 | -0,072 |
| 4 | O00244 ATOX1_HUMAN  | E.FSVDM*TCGGCAE.A          | NA        | 2 | 2,3973 | 0,443 | 0,09   |
| 4 | P13798 ACPH_HUMAN   | E.NVQYAGLDFE.A             | NA        | 2 | 2,3958 | 0,218 | 0,211  |
| 4 | Q9ULA0 DNPEP_HUMAN  | E.LEKGT#PEPGLNAVDE.R       | T203      | 2 | 2,3949 | 0,167 | 0,14   |
| 4 | P35580 MYH10_HUMAN  | E.TTDLQDQIAE.L             | NA        | 2 | 2,3942 | 0,147 | 0,215  |
| 4 | Q6DKJ4 NXN_HUMAN    | E.LSDSNAQLNE.G             | NA        | 2 | 2,3935 | 0,237 | -0,105 |
| 4 | Q6PKG0 LARP1_HUMAN  | E.TES#APGS#PRAVTPVPTKTEE.V | S517:S521 | 2 | 2,3928 | 0,31  | 0      |
| 4 | Q8IWI2 GCC2_HUMAN   | E.TFLS#DSEKE.K             | S345      | 2 | 2,3904 | 0,153 | 0      |
| 4 | Q09028 RBBP4_HUMAN  | E.FGGFGS#VSGKIE.I          | S110      | 2 | 2,3892 | 0,197 | 0,289  |
| 4 | P62263 RS14_HUMAN   | E.SSPYAAMLAAQD.V           | NA        | 2 | 2,3892 | 0,219 | 0      |
| 4 | P07437 TBB5_HUMAN   | E.YQQYQDATAEEEE.D          | NA        | 2 | 2,3884 | 0,251 | -0,456 |
| 4 | Q9Y6A5 TACC3_HUMAN  | E.AQPPES#PETRLGQPAE.Q      | S434      | 2 | 2,3882 | 0,395 | -0,066 |

|   |                    |                          |       |   |        |       |        |
|---|--------------------|--------------------------|-------|---|--------|-------|--------|
| 4 | Q13155 MCA2_HUMAN  | E.SNLSLQALE.S            | NA    | 2 | 2,386  | 0,09  | 0,125  |
| 4 | Q15393 SF3B3_HUMAN | E.FASGFASEQCPE.G         | NA    | 2 | 2,3838 | 0,393 | 0,55   |
| 4 | Q9BYT8 NEUL_HUMAN  | E.NCLQALADVE.V           | NA    | 2 | 2,3833 | 0,305 | 0,108  |
| 4 | P78527 PRKDC_HUMAN | E.TQAS#QGTLQTRTQE.G      | S2612 | 2 | 2,3812 | 0,339 | 0      |
| 4 | Q9Y4W2 LAS1L_HUMAN | E.AS#PIGKSPYTLD.S        | S523  | 2 | 2,3786 | 0,182 | 0,092  |
| 4 | P04406 G3P_HUMAN   | E.STGVFTTM*E.K           | NA    | 2 | 2,3783 | 0,34  | 0,493  |
| 4 | Q09666 AHNK_HUMAN  | E.GELQAPDLE.L            | NA    | 2 | 2,3774 | 0,109 | 0,063  |
| 4 | Q13685 AAMP_HUMAN  | E.TVASQPSLGEGESE.S       | NA    | 2 | 2,3772 | 0,227 | 0,08   |
| 4 | Q92585 MAML1_HUMAN | E.AVS#PERLE.L            | S45   | 2 | 2,3771 | 0,234 | -0,373 |
| 4 | Q9C0C2 TB182_HUMAN | E.LLDLTRTFPS#GGEEE.A     | S406  | 2 | 2,3756 | 0,314 | 0      |
| 4 | Q9Y4L1 HYOU1_HUMAN | E.TLVEDSAEEE.S           | NA    | 2 | 2,3742 | 0,106 | 0      |
| 4 | Q02952 AKA12_HUMAN | E.LVTTCQAE.T             | NA    | 2 | 2,3736 | 0,194 | 0,132  |
| 4 | P13010 KU86_HUMAN  | E.GSVTSVGSVNPAAE.N       | NA    | 2 | 2,3715 | 0,341 | 0      |
| 4 | Q14C86 GAPD1_HUMAN | E.GISEGPSNRSNS#VSSLDLE.G | S585  | 2 | 2,3703 | 0,141 | 0,06   |
| 4 | P52292 IMA2_HUMAN  | E.SAWALTNIASGTSE.Q       | NA    | 2 | 2,3698 | 0,34  | -0,173 |
| 4 | P34932 HSP74_HUMAN | E.MLNLYIENE.G            | NA    | 2 | 2,3688 | 0,15  | 0      |
| 4 | Q71U36 TBA1A_HUMAN | E.VGVDSVEGEGEEE.G        | NA    | 2 | 2,367  | 0,256 | 0      |
| 4 | P35579 MYH9_HUMAN  | E.TLQSQLM*AE.K           | NA    | 2 | 2,3666 | 0,197 | -0,118 |
| 4 | Q9Y5B0 CTDP1_HUMAN | E.NS#PAAFPDRE.G          | S740  | 2 | 2,3658 | 0,401 | -0,412 |
| 4 | P16070 CD44_HUMAN  | E.SSETPDQFMTADE.T        | NA    | 2 | 2,3653 | 0,391 | 0,335  |
| 4 | Q07021 C1QBP_HUMAN | E.VSFQSTGE.S             | NA    | 2 | 2,3648 | 0,215 | 0,285  |
| 4 | Q01831 XPC_HUMAN   | E.LS#EPVLGDVRE.S         | S140  | 2 | 2,3646 | 0,401 | 0,094  |
| 4 | P09960 LKHA4_HUMAN | E.VYNFNAINNSE.I          | NA    | 2 | 2,3627 | 0,219 | 0,19   |
| 4 | Q16659 MK06_HUMAN  | E.VQLDPRALS#DVTDEEE.V    | S386  | 2 | 2,3615 | 0,234 | 0,064  |
| 4 | P49757 NUMB_HUMAN  | E.GS#FRVTTATE.Q          | S194  | 2 | 2,3588 | 0,253 | 0,319  |
| 4 | Q00610 CLH1_HUMAN  | E.LINVCNE.N              | NA    | 2 | 2,3521 | 0,143 | 0,071  |
| 4 | Q8WU90 ZC3HF_HUMAN | E.IS#LEDLIERE.R          | S231  | 2 | 2,3513 | 0,273 | -0,094 |
| 4 | P09496 CLCA_HUMAN  | E.AFVNDIDE.S             | NA    | 2 | 2,3513 | 0,186 | 0,264  |
| 4 | P29966 MARCS_HUMAN | E.AAVASS#PSKANGQE.N      | S27   | 2 | 2,3481 | 0,211 | -0,349 |
| 4 | P35579 MYH9_HUMAN  | E.TLQSQLMAE.K            | NA    | 2 | 2,3478 | 0,091 | 0,06   |
| 4 | P48643 TCPE_HUMAN  | E.NSGM*NPIQTMTE.V        | NA    | 2 | 2,3439 | 0,182 | 0      |
| 4 | Q8N4N4 RN169_HUMAN | E.GLGST#PDAKLD.K         | T554  | 2 | 2,3438 | 0,228 | -0,106 |
| 4 | Q9C0C2 TB182_HUMAN | E.SAASGLGGLLEEE.G        | NA    | 2 | 2,343  | 0,221 | -0,099 |
| 4 | Q9BTT0 AN32E_HUMAN | D.NCLCVNGE.I             | NA    | 2 | 2,3397 | 0,24  | 0,253  |
| 4 | P14618 KPYM_HUMAN  | D.GADCIMLSGE.T           | NA    | 2 | 2,3394 | 0,126 | 0,348  |
| 4 | Q9H6T3 RPAP3_HUMAN | E.LEPNNFEATNE.L          | NA    | 2 | 2,3376 | 0,227 | 0      |
| 4 | P36542 ATPG_HUMAN  | E.LLNSGYEFDE.G           | NA    | 2 | 2,3376 | 0,218 | -0,206 |
| 4 | Q02880 TOP2B_HUMAN | E.LGQNQYAVSGE.I          | NA    | 2 | 2,3365 | 0,156 | 0,628  |
| 4 | Q15424 SAFB1_HUMAN | E.SLSDS#RELVEGE.M        | S163  | 2 | 2,3348 | 0,107 | 0,087  |
| 4 | P06703 S10A6_HUMAN | E.LTIGS#KLQDAE.I         | S46   | 2 | 2,333  | 0,139 | -0,097 |
| 4 | Q03519 TAP2_HUMAN  | E.ATSALDVQCE.Q           | NA    | 2 | 2,3309 | 0,23  | 0,112  |

|   |                    |                      |      |   |        |       |        |
|---|--------------------|----------------------|------|---|--------|-------|--------|
| 4 | P48643 TCPE_HUMAN  | E.NSGMNPQTM*TE.V     | NA   | 2 | 2,3267 | 0,395 | -0,091 |
| 4 | Q05524 ENO1B_HUMAN | E.GGFAPNILE.N        | NA   | 2 | 2,326  | 0,12  | 0,199  |
| 4 | Q14257 RCN2_HUMAN  | E.NTALDDAEEEE.S      | NA   | 2 | 2,3254 | 0,209 | 0      |
| 4 | Q96FV9 THOC1_HUMAN | E.NVTVFNTNEQE.S      | NA   | 2 | 2,3233 | 0,136 | 0      |
| 4 | P20338 RAB4A_HUMAN | E.TSALTGENVEE.A      | NA   | 2 | 2,3207 | 0,238 | -0,106 |
| 4 | Q00839 HNRPU_HUMAN | E.GISALDGDQME.L      | NA   | 2 | 2,3206 | 0,309 | 0,107  |
| 4 | Q01658 NC2B_HUMAN  | E.LVVNCCTE.F         | NA   | 2 | 2,3181 | 0,266 | 0,061  |
| 4 | P61019 RAB2A_HUMAN | E.GVFDINNE.A         | NA   | 2 | 2,3179 | 0,188 | 0,134  |
| 4 | Q8N720 ZN655_HUMAN | E.AAGS#PRVQFQSLE.T   | S12  | 2 | 2,3179 | 0,124 | 0,581  |
| 4 | O94992 HEX11_HUMAN | E.NLQLLTENE.L        | NA   | 2 | 2,3178 | 0,33  | 0      |
| 4 | P13639 EF2_HUMAN   | E.NVNVIIISTYGEGE.S   | NA   | 2 | 2,3174 | 0,332 | 0,175  |
| 4 | Q13098 CSN1_HUMAN  | E.LT#PANSQSRMSTNM*.- | T459 | 2 | 2,3164 | 0,16  | -0,224 |
| 4 | Q15149 PLEC1_HUMAN | E.NLTYLQLME.R        | NA   | 2 | 2,3153 | 0,347 | -0,108 |
| 4 | Q9UPN9 TRI33_HUMAN | E.SSLT#PPLSTNLHLE.S  | T815 | 2 | 2,3134 | 0,315 | -0,077 |
| 4 | P61956 SUMO2_HUMAN | E.TDTPAQLE.M         | NA   | 2 | 2,3062 | 0,224 | 0,418  |
| 4 | Q14692 BMS1_HUMAN  | E.TS#DIENLLKEE.E     | S639 | 2 | 2,3052 | 0,153 | 0,089  |
| 4 | Q15154 PCM1_HUMAN  | E.T#ASPVAVSLRSDGSE.N | T859 | 2 | 2,3027 | 0,213 | 0,235  |
| 4 | Q9Y490 TLN1_HUMAN  | E.GCVSASQAATE.D      | NA   | 2 | 2,3021 | 0,363 | -0,113 |
| 4 | Q9NP61 ARFG3_HUMAN | D.SCVVPPLS#PPPKEE.D  | S143 | 2 | 2,302  | 0,37  | 0,227  |
| 4 | Q9Y570 PPME1_HUMAN | E.GITS#PEGSKSIVE.G   | S243 | 2 | 2,3015 | 0,304 | -0,176 |
| 4 | O60610 DIAP1_HUMAN | E.IVSVTAACEE.L       | NA   | 2 | 2,3013 | 0,327 | -0,113 |
| 4 | Q9BPW8 NIPS1_HUMAN | E.AVGGFFSQIGE.L      | NA   | 2 | 2,3002 | 0,145 | 0      |
| 4 | Q02952 AKA12_HUMAN | E.GTEASAAEETTE.M     | NA   | 2 | 2,3    | 0,167 | -0,102 |
| 4 | Q6NZI2 PTRF_HUMAN  | E.GAVQSIQGE.L        | NA   | 2 | 2,2989 | 0,099 | 0,137  |
| 4 | P49327 FAS_HUMAN   | E.QGVTFPSGDIQE.Q     | NA   | 2 | 2,2982 | 0,183 | 0,095  |
| 4 | P31946 1433B_HUMAN | E.LQDICNDVLE.L       | NA   | 2 | 2,2955 | 0,303 | 0,4    |
| 4 | Q9NVS9 PNPO_HUMAN  | E.AVQCPDIGE.A        | NA   | 2 | 2,2953 | 0,285 | 0,062  |
| 4 | P00387 NB5R3_HUMAN | E.SMQIGDTIE.F        | NA   | 2 | 2,2937 | 0,237 | 0      |
| 4 | P07602 SAP_HUMAN   | E.ICALVGFCDV.V       | NA   | 2 | 2,2919 | 0,092 | -0,206 |
| 4 | Q658J3 A26CA_HUMAN | E.LPDGQVITIGNE.R     | NA   | 2 | 2,2915 | 0,218 | -0,194 |
| 4 | P62310 LSM3_HUMAN  | E.TVTTIEIDEE.T       | NA   | 2 | 2,2914 | 0,171 | 0,424  |
| 4 | P41252 SYIC_HUMAN  | E.NINFPAEEEE.K       | NA   | 2 | 2,2904 | 0,206 | 0,115  |
| 4 | Q14103 HNRPD_HUMAN | E.YFGGFGEVE.S        | NA   | 2 | 2,2897 | 0,226 | 0      |
| 4 | P31689 DNJA1_HUMAN | E.NGFLSPDKLS#LLE.K   | S340 | 2 | 2,2856 | 0,168 | -0,081 |
| 4 | P25787 PSA2_HUMAN  | E.SFEGQMTEDNIE.V     | NA   | 2 | 2,2855 | 0,153 | -0,436 |
| 4 | P37802 TAGL2_HUMAN | E.QISQFLQAAE.R       | NA   | 2 | 2,2843 | 0,216 | 0,43   |
| 4 | P31943 HNRH1_HUMAN | E.AFVQFAS#QE.I       | S161 | 2 | 2,2807 | 0,217 | 0      |
| 4 | P37802 TAGL2_HUMAN | E.LINALYPE.G         | NA   | 2 | 2,2765 | 0,155 | 0,262  |
| 4 | Q8WVK7 SKA2_HUMAN  | E.LS#PLTKEE.K        | S101 | 2 | 2,2753 | 0,231 | 0      |
| 4 | Q96EA4 CCD99_HUMAN | R.SGNTPN#PRLAAE.S    | S555 | 2 | 2,2707 | 0,176 | 0      |
| 4 | P50416 CPT1A_HUMAN | E.LFDLENNPE.Y        | NA   | 2 | 2,2696 | 0,141 | -0,224 |

|   |                     |                          |      |   |        |       |        |
|---|---------------------|--------------------------|------|---|--------|-------|--------|
| 4 | Q6ZP91 Q6ZP91_HUMAN | E.DCYVPQRS#IYD.T         | S38  | 2 | 2,2611 | 0,102 | -0,082 |
| 4 | P41229 JAD1C_HUMAN  | E.STS#PKTFLE.S           | S287 | 2 | 2,2608 | 0,2   | 0,112  |
| 4 | Q9H7M9 GI24_HUMAN   | E.LVRM*DS#NIQGIENPGFE.A  | S235 | 2 | 2,2593 | 0,169 | 0,424  |
| 4 | Q9UQN3 CHM2B_HUMAN  | E.SQDIVNQVLDE.I          | NA   | 2 | 2,2582 | 0,175 | -0,581 |
| 4 | P61224 RAP1B_HUMAN  | E.VDAQQCM*LE.I           | NA   | 2 | 2,2581 | 0,18  | 0      |
| 4 | P08574 CY1_HUMAN    | E.VEVQDGPNEDE.G          | NA   | 2 | 2,2532 | 0,38  | -0,095 |
| 4 | P05556 ITB1_HUMAN   | E.M*CQTCLGVCAE.H         | NA   | 2 | 2,2518 | 0,2   | 0      |
| 4 | Q13885 TBB2A_HUMAN  | E.FTEAESNM*NDLVSE.Y      | NA   | 2 | 2,2504 | 0,14  | -0,076 |
| 4 | P27797 CALR_HUMAN   | D.NFLITNDE.A             | NA   | 2 | 2,25   | 0,096 | 0,063  |
| 4 | P30101 PDIA3_HUMAN  | E.NFDEIVNNE.N            | NA   | 2 | 2,2484 | 0,096 | 0,112  |
| 4 | Q969S2 NEIL2_HUMAN  | E.M*GPPGSS#PTPEPPQKE.V   | S68  | 2 | 2,2463 | 0,282 | -1,127 |
| 4 | Q15459 SF3A1_HUMAN  | E.KQS#DDEVYAPGLDIE.S     | S451 | 2 | 2,2439 | 0,139 | -0,139 |
| 4 | P14625 ENPL_HUMAN   | E.TVEEPMEEEE.A           | NA   | 2 | 2,2425 | 0,18  | -0,2   |
| 4 | P11021 GRP78_HUMAN  | E.SFYEGEDFSE.T           | NA   | 2 | 2,2422 | 0,159 | 0,101  |
| 4 | Q96JM3 ZN828_HUMAN  | E.TDPVKS#PPLPE.H         | S108 | 2 | 2,2422 | 0,301 | -0,387 |
| 4 | Q14247 SRC8_HUMAN   | E.DAAS#FKAE.L            | S426 | 2 | 2,2382 | 0,234 | 0,066  |
| 4 | P38432 P80C_HUMAN   | E.LIDPRLIIESPNTSST#EPA.- | T573 | 2 | 2,2352 | 0,142 | 0,22   |
| 4 | Q00839 HNRPU_HUMAN  | E.NDVITCFANFE.S          | NA   | 2 | 2,235  | 0,29  | -0,092 |
| 4 | Q14192 FHL2_HUMAN   | E.TLFANTCEE.C            | NA   | 2 | 2,2335 | 0,296 | -0,112 |
| 4 | P78364 PHC1_HUMAN   | E.FIASLQGCQE.I           | NA   | 2 | 2,2321 | 0,22  | 0,529  |
| 4 | Q14204 DYHC1_HUMAN  | E.ILIQSVCE.T             | NA   | 2 | 2,2295 | 0,227 | -0,19  |
| 4 | P31943 HNRH1_HUMAN  | E.NSSDFQSNIA.-           | NA   | 2 | 2,2286 | 0,2   | 0,113  |
| 4 | Q00610 CLH1_HUMAN   | E.SLNNLFITEE.D           | NA   | 2 | 2,2278 | 0,134 | 0,207  |
| 4 | Q8NBS9 TXND5_HUMAN  | E.NNFDITAE.G             | NA   | 2 | 2,2273 | 0,236 | 0      |
| 4 | Q9UHB9 SRP68_HUMAN  | E.AAIVQAESEE.T           | NA   | 2 | 2,227  | 0,164 | -0,117 |
| 4 | Q12874 SF3A3_HUMAN  | E.AQNLVEFTDEE.G          | NA   | 2 | 2,2258 | 0,149 | -0,094 |
| 4 | Q05524 ENO1B_HUMAN  | R.AAVPSGASTGIYE.A        | NA   | 2 | 2,2252 | 0,344 | 0      |
| 4 | Q00169 PIPNA_HUMAN  | E.YVQVQLYSVAE.A          | NA   | 2 | 2,2231 | 0,274 | 0,097  |
| 4 | P23368 MAOM_HUMAN   | E.SASSPPVITE.-           | NA   | 2 | 2,223  | 0,224 | 0,247  |
| 4 | P04406 G3P_HUMAN    | E.STGVFTTME.K            | NA   | 2 | 2,2211 | 0,278 | 0,251  |
| 4 | Q13564 ULA1_HUMAN   | E.IISSM*DNPDNE.I         | NA   | 2 | 2,2196 | 0,236 | -0,195 |
| 4 | Q86SQ0 PHLB2_HUMAN  | E.SSYLSILPKT#PEGISEE.Q   | T574 | 2 | 2,2191 | 0,278 | 0,253  |
| 4 | Q92973 TNPO1_HUMAN  | E.AACSAFATLEEE.A         | NA   | 2 | 2,2121 | 0,298 | -0,094 |
| 4 | Q52LJ0 FA98B_HUMAN  | E.GDVLDTLE.A             | NA   | 2 | 2,2112 | 0,182 | 0,142  |
| 4 | P42285 SK2L2_HUMAN  | E.VFSNAIDCLSDE.D         | NA   | 2 | 2,2102 | 0,194 | 0,089  |
| 4 | Q07021 C1QBP_HUMAN  | E.VSFQSTGESE.W           | NA   | 2 | 2,2097 | 0,251 | 0      |
| 4 | P29317 EPHA2_HUMAN  | E.ASESPCLECPE.H          | NA   | 2 | 2,2094 | 0,26  | 0,668  |
| 4 | P55036 PSMD4_HUMAN  | E.GGAM*LGLGASDFE.F       | NA   | 2 | 2,209  | 0,337 | 0,197  |
| 4 | Q00610 CLH1_HUMAN   | E.VVQAANTSGNWEE.L        | NA   | 2 | 2,2086 | 0,219 | 0      |
| 4 | Q70Z53 F10C1_HUMAN  | E.DSLLRNS#DEEE.S         | S278 | 2 | 2,2065 | 0,205 | 0      |
| 4 | P49321 NASP_HUMAN   | E.NMEEEAENQAE.S          | NA   | 2 | 2,2064 | 0,227 | -0,283 |

|   |                    |                        |       |   |        |       |        |
|---|--------------------|------------------------|-------|---|--------|-------|--------|
| 4 | Q14966 ZN638_HUMAN | D.S#PSVKPNELEEE.S      | S1119 | 2 | 2,2038 | 0,225 | 0,17   |
| 4 | P48643 TCPE_HUMAN  | E.NSGM*NPIQTM*TE.V     | NA    | 2 | 2,2037 | 0,316 | 0      |
| 4 | P55196 AFAD_HUMAN  | E.LM*TRTSS#VVTLV.V     | S1066 | 2 | 2,2028 | 0,128 | -0,085 |
| 4 | P25787 PSA2_HUMAN  | E.GQM*TEDNIE.V         | NA    | 2 | 2,2021 | 0,178 | 0,116  |
| 4 | P49321 NASP_HUMAN  | E.FQSCNLQEQ.Q          | NA    | 2 | 2,202  | 0,118 | 0      |
| 4 | Q96G03 PGM2_HUMAN  | E.LCAPPGNSDPE.Q        | NA    | 2 | 2,2011 | 0,124 | 0,105  |
| 4 | P62258 1433E_HUMAN | E.ALQDVEDENQ.-         | NA    | 2 | 2,2011 | 0,232 | 0,21   |
| 4 | Q13885 TBB2A_HUMAN | E.SNM*NDLVSE.Y         | NA    | 2 | 2,1973 | 0,086 | 0,357  |
| 4 | Q86WR7 CJ047_HUMAN | E.ALS#PTSPFRE.G        | S212  | 2 | 2,1963 | 0,205 | -0,206 |
| 4 | P49321 NASP_HUMAN  | E.NGVLGNALE.G          | NA    | 2 | 2,1901 | 0,132 | 0,206  |
| 4 | Q9UBQ5 EIF3K_HUMAN | E.SGQIFICSQEE.S        | NA    | 2 | 2,1895 | 0,214 | 0,094  |
| 4 | P22314 UBA1_HUMAN  | E.SGDFVSFSE.V          | NA    | 2 | 2,1894 | 0,136 | 0,25   |
| 4 | Q71U36 TBA1A_HUMAN | D.GALNVDLTF            | NA    | 2 | 2,1847 | 0,116 | 0,262  |
| 4 | P49588 SYAC_HUMAN  | E.MGDTGPCGPCSE.I       | NA    | 2 | 2,1847 | 0,218 | 0      |
| 4 | P51116 FXR2_HUMAN  | E.NISNAQALLE.Y         | NA    | 2 | 2,183  | 0,172 | 0,114  |
| 4 | Q9H8S9 MOL1B_HUMAN | E.ATLGS#GNLRQAVM*LPE.G | S38   | 2 | 2,1827 | 0,177 | 0,07   |
| 4 | Q96C57 CL043_HUMAN | E.AAVSASDILQE.S        | NA    | 2 | 2,1818 | 0,116 | -0,111 |
| 4 | Q12888 TP53B_HUMAN | E.ALSSVLDQEE.A         | NA    | 2 | 2,1783 | 0,248 | 0,112  |
| 4 | Q14204 DYHC1_HUMAN | E.VSAVQNVAD.V          | NA    | 2 | 2,178  | 0,155 | 0      |
| 4 | O00487 PSDE_HUMAN  | E.GLTLDQDYSE.H         | NA    | 2 | 2,1773 | 0,127 | 0      |
| 4 | Q86UP2 KTN1_HUMAN  | E.ASSASQFEELE.I        | NA    | 2 | 2,1764 | 0,285 | 0      |
| 4 | P26641 EF1G_HUMAN  | E.SNAIAYYSNEE.L        | NA    | 2 | 2,1759 | 0,322 | 0,538  |
| 4 | P08670 VIME_HUMAN  | D.FSLADAINTE.F         | NA    | 2 | 2,1758 | 0,089 | 0      |
| 4 | Q09666 AHNK_HUMAN  | K.AEAPLPS#PKLE.G       | S5110 | 2 | 2,1726 | 0,139 | 0      |
| 4 | Q81WC1 MA7D3_HUMAN | E.AS#PKAGVGM*APE.V     | S322  | 2 | 2,1691 | 0,238 | -0,101 |
| 4 | Q9Y4W2 LAS1L_HUMAN | E.QGS#VNDVKEEE.K       | S560  | 2 | 2,1684 | 0,265 | 0,093  |
| 4 | P20929 NEBU_HUMAN  | K.NATQILNE.K           | NA    | 2 | 2,1658 | 0,19  | 0,338  |
| 4 | O94903 PROSC_HUMAN | E.VGSTNVRIGS#TIFGE.R   | S244  | 2 | 2,1653 | 0,128 | 0,151  |
| 4 | P10809 CH60_HUMAN  | E.QLDVTTSE.Y           | NA    | 2 | 2,1647 | 0,179 | 0,137  |
| 4 | Q9H2G2 SLK_HUMAN   | E.NLPDTEDEQE.T         | NA    | 2 | 2,1621 | 0,129 | 0      |
| 4 | P25786 PSA1_HUMAN  | E.FMECNLNE.L           | NA    | 2 | 2,1588 | 0,11  | -0,115 |
| 4 | Q7L2H7 EIF3M_HUMAN | E.ISFDTM*QQE.L         | NA    | 2 | 2,158  | 0,253 | 0,219  |
| 4 | Q08499 PDE4D_HUMAN | E.VEIPSPT#QKE.K        | T350  | 2 | 2,1562 | 0,139 | 0      |
| 4 | P15374 UCHL3_HUMAN | E.GQTEAPSIDE.K         | NA    | 2 | 2,1552 | 0,218 | 0,117  |
| 4 | Q14789 G0GB1_HUMAN | E.FNNTTQEDVQE.R        | NA    | 2 | 2,155  | 0,181 | -0,092 |
| 4 | P62917 RL8_HUMAN   | E.GTIVCCLE.E           | NA    | 2 | 2,1519 | 0,277 | 0,128  |
| 4 | Q14568 HS902_HUMAN | E.TQTQDQPM*EEEEVE.T    | NA    | 2 | 2,1463 | 0,255 | -0,214 |
| 4 | P40227 TCPZ_HUMAN  | E.T#DTSLIRGLVLD.H      | T202  | 2 | 2,1377 | 0,257 | -0,088 |
| 4 | Q15427 SF3B4_HUMAN | R.NQDATVYVGGGLDE.K     | NA    | 2 | 2,1352 | 0,329 | 0,353  |
| 4 | P78417 GSTO1_HUMAN | E.NSQGQLIYE.S          | NA    | 2 | 2,1349 | 0,23  | 0,116  |
| 4 | Q02952 AKA12_HUMAN | E.VEGSTVNDQQLEE.V      | NA    | 2 | 2,1346 | 0,16  | -0,674 |

|   |                    |                        |       |   |        |       |        |
|---|--------------------|------------------------|-------|---|--------|-------|--------|
| 4 | Q8WXH0 SYNE2_HUMAN | E.SLLKALS#PSDSLE.I     | S1772 | 2 | 2,1345 | 0,288 | -0,424 |
| 4 | P31949 S10AB_HUMAN | D.TNSDGLDFSE.F         | NA    | 2 | 2,1295 | 0,278 | 0      |
| 4 | Q96R06 SPAG5_HUMAN | E.LQSLCSLLQE.S         | NA    | 2 | 2,1283 | 0,277 | 0      |
| 4 | Q658J3 A26CA_HUMAN | E.M*ATAASS#SLE.K       | S933  | 2 | 2,1222 | 0,191 | 0,106  |
| 4 | P50502 F10A1_HUMAN | E.VLAAM*QDPE.V         | NA    | 2 | 2,1218 | 0,2   | 0,062  |
| 4 | Q10570 CPSF1_HUMAN | E.MLYGDSGSLF5#PSKEE.A  | S756  | 2 | 2,1175 | 0,35  | 0,267  |
| 4 | Q13885 TBB2A_HUMAN | E.AESNM*NDLVSE.Y       | NA    | 2 | 2,116  | 0,123 | 0,1    |
| 4 | Q13813 SPTA2_HUMAN | E.VGADLEQVE.V          | NA    | 2 | 2,1145 | 0,152 | 0,064  |
| 4 | P49023 PAXI_HUMAN  | E.SLLDELE.S            | NA    | 2 | 2,1124 | 0,09  | 0,372  |
| 4 | O00299 CLIC1_HUMAN | E.FASTCPDDEEIE.L       | NA    | 2 | 2,1121 | 0,162 | 0,259  |
| 4 | Q9Y2W2 WBP11_HUMAN | E.FNPVQQPQLNE.K        | NA    | 2 | 2,1098 | 0,155 | 0,186  |
| 4 | P55072 TERA_HUMAN  | E.TDPSPYCIVAPDTVIHCE.G | NA    | 2 | 2,103  | 0,142 | -0,235 |
| 4 | P14625 ENPL_HUMAN  | E.TVEEPM*EEEE.A        | NA    | 2 | 2,1005 | 0,106 | 0,099  |
| 4 | Q96R06 SPAG5_HUMAN | E.LLCQLTQSNEE.Q        | NA    | 2 | 2,0999 | 0,136 | 0,548  |
| 4 | P26641 EF1G_HUMAN  | E.S#NAIAYVSNEE.L       | S72   | 2 | 2,0983 | 0,129 | 0,508  |
| 4 | P27816 MAP4_HUMAN  | E.VGLLKDMSPLS#ETE.M    | S510  | 2 | 2,0982 | 0,207 | -0,076 |
| 4 | Q8NI36 WDR36_HUMAN | E.ITNLSSQVEE.N         | NA    | 2 | 2,097  | 0,09  | 0,218  |
| 4 | Q96RV3 PCX1_HUMAN  | E.LS#LLGRASQLE.T       | S735  | 2 | 2,0949 | 0,255 | -0,193 |
| 4 | Q9BQA1 MEP50_HUMAN | E.GFCSAGVQTE.A         | NA    | 2 | 2,0906 | 0,234 | 0      |
| 4 | Q16352 AINX_HUMAN  | E.VAGYQDSIGQLE.N       | NA    | 2 | 2,0845 | 0,182 | 0,191  |
| 4 | P18085 ARF4_HUMAN  | E.GLDWLSNE.L           | NA    | 2 | 2,0815 | 0,177 | 0,065  |
| 4 | P13693 TCTP_HUMAN  | E.IADGLCLE.V           | NA    | 2 | 2,0808 | 0,11  | 0,137  |
| 4 | P52294 IMA1_HUMAN  | E.EEVMS#DGGFHE.A       | S63   | 2 | 2,0804 | 0,33  | -0,185 |
| 4 | P09211 GSTP1_HUMAN | E.AALVDM*VND.G         | NA    | 2 | 2,0792 | 0,382 | 0,19   |
| 4 | P98172 EFNB1_HUMAN | E.M*PPQS#PANIYYKV.-    | S338  | 2 | 2,0785 | 0,092 | -0,152 |
| 4 | Q09028 RBBP4_HUMAN | E.AAFDDAVEE.R          | NA    | 2 | 2,0741 | 0,131 | 0,189  |
| 4 | Q99543 DNJC2_HUMAN | E.LASLQCLNE.T          | NA    | 2 | 2,0721 | 0,139 | 0,116  |
| 4 | Q9Y3B8 ORN_HUMAN   | E.STITLQQAEEY.F        | NA    | 2 | 2,0674 | 0,143 | 0,19   |
| 4 | Q01081 U2AF1_HUMAN | E.YLASIFGTE.K          | NA    | 2 | 2,0671 | 0,188 | 0      |
| 4 | P28749 RBL1_HUMAN  | D.MQPLS#PISVHE.R       | S640  | 2 | 2,0635 | 0,166 | -0,093 |
| 4 | Q9Y508 ZN313_HUMAN | E.DMMNQVLQRS#IIDQ.-    | S224  | 2 | 2,0633 | 0,153 | 0,413  |
| 4 | Q15149 PLEC1_HUMAN | E.QMAQQLAEE.T          | NA    | 2 | 2,0628 | 0,086 | 0      |
| 4 | Q14204 DYHC1_HUMAN | E.GEIAENLPEQE.I        | NA    | 2 | 2,0594 | 0,166 | -0,099 |
| 4 | Q9H009 NACA2_HUMAN | D.LSQQAQLA-AAE.K       | NA    | 2 | 2,0582 | 0,083 | 0,108  |
| 4 | Q9BY11 PACN1_HUMAN | E.LS#FKAGDE.L          | S405  | 2 | 2,0525 | 0,141 | 0,064  |
| 4 | P55884 EIF3B_HUMAN | E.IIPLGNQE.-           | NA    | 2 | 2,049  | 0,155 | 0,207  |
| 4 | Q13885 TBB2A_HUMAN | E.FTEAESNMNDLVSE.Y     | NA    | 2 | 2,0483 | 0,204 | 0,462  |
| 4 | Q0VGL1 U539_HUMAN  | E.NDEQAASAISE.L        | NA    | 2 | 2,0467 | 0,194 | 0,107  |
| 4 | Q15942 ZYG_HUMAN   | E.GCYTDTLE.K           | NA    | 2 | 2,0465 | 0,167 | 0,254  |
| 4 | P42704 LPPRC_HUMAN | E.GNQEVPPFDVPE.L       | NA    | 2 | 2,0387 | 0,099 | 0,099  |
| 4 | Q16531 DDB1_HUMAN  | E.QGSYVVAM*E.T         | NA    | 2 | 2,0377 | 0,093 | -0,671 |

|   |                    |                        |       |   |        |       |        |
|---|--------------------|------------------------|-------|---|--------|-------|--------|
| 4 | P05556 ITB1_HUMAN  | E.MCQTCLGVCAE.H        | NA    | 2 | 2,0366 | 0,251 | -0,275 |
| 4 | Q9H4B7 TBB1_HUMAN  | R.ISVYYNE.A            | NA    | 2 | 2,0358 | 0,16  | 0,206  |
| 4 | P38919 IF4A3_HUMAN | E.QYYSTQIDE.M          | NA    | 2 | 2,0351 | 0,171 | 0,106  |
| 4 | Q15149 PLEC1_HUMAN | E.NLTYLQLM*E.R         | NA    | 2 | 2,0264 | 0,088 | -0,107 |
| 4 | Q96EZ8 MCRS1_HUMAN | D.SSLM*ASGTASRS#EDEE.S | S22   | 2 | 2,0261 | 0,157 | -0,209 |
| 4 | Q9NRS6 SNX15_HUMAN | E.STEEASGS#PARGPLTE.A  | S201  | 2 | 2,0258 | 0,247 | -0,366 |
| 4 | Q92619 HMHA1_HUMAN | E.ASALGHLS#FLE.Q       | S1053 | 2 | 2,0255 | 0,32  | -0,299 |
| 4 | Q04637 IF4G1_HUMAN | E.GQDIGAFVAE.Q         | NA    | 2 | 2,0254 | 0,115 | 0,182  |
| 4 | Q9NZI8 IF2B1_HUMAN | E.SVTPADLE.K           | NA    | 2 | 2,0231 | 0,117 | 0,293  |
| 4 | Q75N03 HAKAI_HUMAN | E.LSM*APPPRSVS#QE.T    | S278  | 2 | 2,023  | 0,108 | 0      |
| 4 | Q08J23 NSUN2_HUMAN | E.STQLSPADLTE.G        | NA    | 2 | 2,0199 | 0,217 | 0,105  |
| 4 | Q15233 NONO_HUMAN  | E.AFSVFGQVE.R          | NA    | 2 | 2,0177 | 0,081 | -0,186 |
| 4 | P82979 HCC1_HUMAN  | R.FNVVPSLE.S           | NA    | 2 | 2,0163 | 0,188 | 0,067  |
| 4 | P54652 HSP72_HUMAN | R.TLSSSTQASIE.I        | NA    | 2 | 2,0155 | 0,186 | -0,434 |
| 4 | Q13098 CSN1_HUMAN  | E.LQNAPDAIPE.S         | NA    | 2 | 2,0142 | 0,093 | -0,114 |
| 4 | Q14160 LAP4_HUMAN  | E.QLDLGGNDLE.V         | NA    | 2 | 2,0141 | 0,212 | 0,227  |
| 4 | Q6ZU80 CN145_HUMAN | E.TS#TQVALDHLE.S       | S961  | 2 | 2,0106 | 0,205 | -0,094 |
| 4 | P13489 RINI_HUMAN  | E.LDLSNNCLGD.A         | NA    | 2 | 2,0101 | 0,24  | 0,327  |
| 4 | Q14694 UBP10_HUMAN | E.NLGVANGQILE.S        | NA    | 2 | 2,0087 | 0,173 | 0      |
| 4 | P48643 TCPE_HUMAN  | E.NSGMNPQTMTE.V        | NA    | 2 | 2,0037 | 0,296 | 0,092  |
| 4 | Q14693 LPIN1_HUMAN | E.VIPM*HLATS#PILSE.G   | S106  | 2 | 2,002  | 0,128 | 0,152  |
| 4 | O00571 DDX3X_HUMAN | E.LFSGNGTGINF.E.K      | NA    | 2 | 2,0017 | 0,218 | -0,097 |
| 4 | P04075 ALDOA_HUMAN | E.SLFVS#NHAY.-         | S360  | 2 | 1,9988 | 0,104 | -0,218 |
| 4 | Q9NWB6 ARGL1_HUMAN | K.IAEAQAKLAE.E         | NA    | 2 | 1,9988 | 0,174 | 0,351  |
| 4 | P19338 NUCL_HUMAN  | E.IDGRS#ISLYYTGE.K     | S458  | 2 | 1,9983 | 0,18  | 0      |
| 4 | P16615 AT2A2_HUMAN | E.TALTCLVE.K           | NA    | 2 | 1,9938 | 0,101 | 0,135  |
| 4 | P60842 IF4A1_HUMAN | E.TFYNTSIE.E           | NA    | 2 | 1,9936 | 0,145 | 0,125  |
| 4 | Q15091 K0391_HUMAN | E.SIQLSPEEYE.C         | NA    | 2 | 1,9905 | 0,088 | 0,204  |
| 4 | Q9UNN5 FAF1_HUMAN  | E.GDALLQFTAE.F         | NA    | 2 | 1,9901 | 0,179 | 0,229  |
| 4 | Q92619 HMHA1_HUMAN | E.ASALGHLS#FLEQQQSE.A  | S1053 | 2 | 1,9894 | 0,19  | 0,134  |
| 4 | P18583 SON_HUMAN   | E.FSGQSGAAGALE.L       | NA    | 2 | 1,9884 | 0,092 | 0,223  |
| 4 | O43633 CHM2A_HUMAN | E.SDAVVSQVLDE.L        | NA    | 2 | 1,986  | 0,262 | 0,105  |
| 4 | Q13625 ASPP2_HUMAN | E.NGVNS#PRMDLTLAE.L    | S121  | 2 | 1,9854 | 0,214 | 0,229  |
| 4 | Q1KMD3 HNRL2_HUMAN | E.NDVIGCFANFE.T        | NA    | 2 | 1,9837 | 0,198 | 0,095  |
| 4 | Q9BSH4 CCD44_HUMAN | D.SLGLCSVSCALE.F       | NA    | 2 | 1,981  | 0,383 | 0      |
| 4 | P38606 VATA_HUMAN  | E.ILQEEEDLAE.I         | NA    | 2 | 1,9801 | 0,122 | 0,41   |
| 4 | P09622 DLDH_HUMAN  | E.ANLAASFGKS#INF.-     | S506  | 2 | 1,9789 | 0,178 | -0,086 |
| 4 | Q01081 U2AF1_HUMAN | E.LS#PVTFRE.A          | S145  | 2 | 1,9778 | 0,158 | 0,427  |
| 4 | Q9H910 HN1L_HUMAN  | E.SSNLFGSPEE.A         | NA    | 2 | 1,9769 | 0,183 | -0,114 |
| 4 | P02545 LMNA_HUMAN  | E.AALSTALSE.K          | NA    | 2 | 1,9717 | 0,11  | 0,424  |
| 4 | P04920 B3A2_HUMAN  | R.TSPSS#PAPLPHQE.A     | S173  | 2 | 1,9681 | 0,246 | -0,171 |

|   |                     |                       |       |   |        |       |        |
|---|---------------------|-----------------------|-------|---|--------|-------|--------|
| 4 | Q9Y6M7 S4A7_HUMAN   | D.NM*IASGQLDE.S       | NA    | 2 | 1,964  | 0,11  | -0,335 |
| 4 | Q7L2H7 EIF3M_HUMAN  | E.ISFDTMQQE.L         | NA    | 2 | 1,9628 | 0,227 | -0,111 |
| 4 | O43264 ZW10_HUMAN   | E.IIQSTEEFE.N         | NA    | 2 | 1,9621 | 0,169 | 0      |
| 4 | P49006 MRP_HUMAN    | E.GGGDSSASSPTEEQE.Q   | NA    | 2 | 1,9561 | 0,24  | 0,234  |
| 4 | Q13885 TBB2A_HUMAN  | E.TYSIDNE.A           | NA    | 2 | 1,9559 | 0,104 | 0,217  |
| 4 | Q658J3 A26CA_HUMAN  | E.MATAASSSS#LE.K      | S935  | 2 | 1,9557 | 0,293 | 0,108  |
| 4 | O75223 CG024_HUMAN  | E.NGLPLEYQE.K         | NA    | 2 | 1,9522 | 0,217 | 0,115  |
| 4 | Q8IZT6 ASPM_HUMAN   | E.SESVNPILS#PNQFLKD.N | S392  | 2 | 1,9509 | 0,28  | 0,065  |
| 4 | Q86VP6 CAND1_HUMAN  | E.FQSQISSNPE.L        | NA    | 2 | 1,9442 | 0,12  | 0      |
| 4 | P26641 EF1G_HUMAN   | E.GDDGFVFE.S          | NA    | 2 | 1,9391 | 0,118 | 0,467  |
| 4 | Q12846 STX4_HUMAN   | E.LEQM*LDSGQSE.V      | NA    | 2 | 1,9369 | 0,089 | -0,097 |
| 4 | Q92917 GPKOW_HUMAN  | E.LYIQDNSE.R          | NA    | 2 | 1,9305 | 0,212 | -0,11  |
| 4 | P06396 GELS_HUMAN   | E.SFNNGDCFILD.L       | NA    | 2 | 1,9299 | 0,132 | 0      |
| 4 | P35579 MYH9_HUMAN   | E.AMITDLEE.R          | NA    | 2 | 1,9297 | 0,09  | 0      |
| 4 | P43897 EFTS_HUMAN   | E.GLIGLLQE.G          | NA    | 2 | 1,9296 | 0,087 | 0,217  |
| 4 | O43290 SNUT1_HUMAN  | E.FGVSTLVEEE.F        | NA    | 2 | 1,9293 | 0,086 | 0,22   |
| 4 | Q02952 AKA12_HUMAN  | E.VEGSTVNDQLE.E       | NA    | 2 | 1,9234 | 0,132 | 0      |
| 4 | Q05682 CALD1_HUMAN  | E.VNAQNSVPDEE.A       | NA    | 2 | 1,9193 | 0,155 | 0      |
| 4 | P05556 ITB1_HUMAN   | E.NNIQTIFAVTEE.F      | NA    | 2 | 1,9154 | 0,379 | 0,354  |
| 4 | Q1KMD3 HNRL2_HUMAN  | E.ALDAEMLEDE.A        | NA    | 2 | 1,9129 | 0,111 | 0      |
| 4 | Q8TDY2 RBCC1_HUMAN  | E.SLLTS#FPKSVE.H      | S257  | 2 | 1,9116 | 0,098 | 0      |
| 4 | Q3B820 YB032_HUMAN  | E.DSLSDSSRS#VSE.K     | S142  | 2 | 1,9088 | 0,104 | -0,181 |
| 4 | Q96FW1 OTUB1_HUMAN  | E.IAVQNPLVSE.R        | NA    | 2 | 1,9046 | 0,1   | 0,114  |
| 4 | Q96SB3 NEB2_HUMAN   | E.VAQLIQQTLEQE.R      | NA    | 2 | 1,9031 | 0,199 | -0,087 |
| 4 | Q02952 AKA12_HUMAN  | E.VVLPSEEE.G          | NA    | 2 | 1,903  | 0,181 | -0,068 |
| 4 | Q86V48 LUZP1_HUMAN  | E.LTSVSNHVSS#PFE.L    | S840  | 2 | 1,9027 | 0,183 | 0      |
| 4 | Q15459 SF3A1_HUMAN  | E.VYAPGLDIE.S         | NA    | 2 | 1,9019 | 0,154 | 0      |
| 4 | Q13610 PWP1_HUMAN   | D.ISTVSSVNE.A         | NA    | 2 | 1,8942 | 0,084 | 0,456  |
| 4 | P09211 GSTP1_HUMAN  | E.VLAPGCLD.A          | NA    | 2 | 1,8855 | 0,309 | 0,217  |
| 4 | B0I1T5 B0I1T5_HUMAN | E.GLQS#PRGTPDSE.S     | S1292 | 2 | 1,8855 | 0,134 | -0,184 |
| 4 | O00629 IMA4_HUMAN   | E.AAWALTNIASGTSE.Q    | NA    | 2 | 1,8821 | 0,331 | 0,263  |
| 4 | Q658J3 A26CA_HUMAN  | E.KSYELPDGQVIT#IGNE.R | T949  | 2 | 1,8757 | 0,117 | -0,066 |
| 4 | P51587 BRCA2_HUMAN  | E.QGLTLPLYQS#PVKE.L   | S93   | 2 | 1,8715 | 0,305 | 0,221  |
| 4 | P08621 RU17_HUMAN   | E.SEGGDGYLAPE.N       | NA    | 2 | 1,8692 | 0,121 | 1,226  |
| 4 | Q9P1Y6 K1542_HUMAN  | E.AS#PAPLAQGEPGRE.D   | S1202 | 2 | 1,8663 | 0,317 | 0      |
| 4 | Q9UBS0 KS6B2_HUMAN  | E.GAVT#HTFCGTIE.Y     | T226  | 2 | 1,8621 | 0,176 | -0,178 |
| 4 | P15311 EZRI_HUMAN   | E.GAEPTGSAE.L         | NA    | 2 | 1,8587 | 0,142 | -0,373 |
| 4 | Q5UIP0 RIF1_HUMAN   | E.SVDIQDQEE.K         | NA    | 2 | 1,8529 | 0,185 | -0,115 |
| 4 | Q9NPH2 INO1_HUMAN   | E.VIPGLNDTAE.N        | NA    | 2 | 1,8461 | 0,161 | 0,119  |
| 4 | P61586 RHOA_HUMAN   | E.NYVADIE.V           | NA    | 2 | 1,8457 | 0,146 | 0,222  |
| 4 | Q9UKM9 RALY_HUMAN   | E.GLLTHS#EEEE.H       | S288  | 2 | 1,8176 | 0,084 | 0,274  |



|   |                    |                                           |       |   |        |       |        |
|---|--------------------|-------------------------------------------|-------|---|--------|-------|--------|
| 4 | Q9NTK5 OLA1_HUMAN  | E.YFFTAGPDE.V                             | NA    | 2 | 1,8079 | 0,108 | 0,35   |
| 4 | O95433 AHPA1_HUMAN | E.IPNLSDENSVD.E.V                         | NA    | 2 | 1,804  | 0,173 | 0      |
| 4 | P40222 TXLNA_HUMAN | E.GPGAQAPSS#PRVTE.A                       | S515  | 2 | 1,7946 | 0,112 | -0,17  |
| 4 | Q15233 NONO_HUMAN  | R.FGQAATM*E.G                             | NA    | 2 | 1,791  | 0,161 | 0,28   |
| 4 | Q12797 ASPH_HUMAN  | E.QAVYEPLNE.G                             | NA    | 2 | 1,7901 | 0,144 | 0,307  |
| 4 | P45974 UBP5_HUMAN  | E.CAFSFDTPESE.G                           | NA    | 2 | 1,7877 | 0,213 | 0,095  |
| 4 | P07355 ANXA2_HUMAN | R.RAEDGSVIDYE.L                           | NA    | 2 | 1,7839 | 0,089 | 0,195  |
| 4 | Q14789 G0GB1_HUMAN | E.ISNLNQLIEE.F                            | NA    | 2 | 1,7832 | 0,144 | 0      |
| 4 | P43490 NAMPT_HUMAN | E.TSGNLDGLE.Y                             | NA    | 2 | 1,7822 | 0,105 | 0,135  |
| 4 | Q9UJZ1 STML2_HUMAN | E.SLNASIVDAINQAAD.C                       | NA    | 2 | 1,7706 | 0,21  | 0,081  |
| 4 | Q00839 HNRPU_HUMAN | R.LQAALDDEE.A                             | NA    | 2 | 1,7607 | 0,131 | 0,425  |
| 4 | Q2NKX8 ERC6L_HUMAN | E.LCTNSSLGM*E.K                           | NA    | 2 | 1,7511 | 0,128 | 0,216  |
| 4 | P56537 IF6_HUMAN   | E.AQPSTIATS#M*RDSLIDSLT.-                 | S235  | 2 | 1,7499 | 0,168 | -0,116 |
| 4 | P13797 PLST_HUMAN  | E.NQDIDWTLLE.G                            | NA    | 2 | 1,7321 | 0,208 | -0,098 |
| 4 | P06493 CDC2_HUMAN  | E.GT#YGVVYK.G                             | T14   | 2 | 1,732  | 0,286 | -0,126 |
| 4 | O60281 ZN292_HUMAN | E.LFITKLINEDS#TSVE.T                      | S1743 | 2 | 1,7257 | 0,254 | -0,136 |
| 4 | Q02952 AKA12_HUMAN | E.SSASSPEEPEE.I                           | NA    | 2 | 1,7205 | 0,187 | 0      |
| 4 | Q5T5Y3 CAMP1_HUMAN | E.VVDVNECDLS#IEKLE.T                      | S1023 | 2 | 1,7151 | 0,081 | 0,374  |
| 4 | P14314 GLU2B_HUMAN | E.ISFDFGPNGE.F                            | NA    | 2 | 1,7025 | 0,375 | -0,113 |
| 4 | Q96I25 SPF45_HUMAN | E.QGLSTALSVE.K                            | NA    | 2 | 1,701  | 0,103 | 0,364  |
| 4 | Q9Y2N3 PO121_HUMAN | E.TVLS#ALKE.K                             | S291  | 2 | 1,6975 | 0,106 | 0,065  |
| 4 | P11021 GRP78_HUMAN | D.VCPLTLGIE.T                             | NA    | 2 | 1,661  | 0,139 | -0,061 |
| 4 | Q02952 AKA12_HUMAN | E.SSELVTTCAE.T                            | NA    | 2 | 1,6605 | 0,099 | -0,398 |
| 4 | Q8WXX5 DNJC9_HUMAN | E.MDNFLAQME.A                             | NA    | 2 | 1,6491 | 0,1   | 0      |
| 4 | Q9UHX1 PUF60_HUMAN | R.FDNSDLA.-                               | NA    | 2 | 1,6481 | 0,408 | 0,351  |
| 4 | P49006 MRP_HUMAN   | E.IGACSDGTAQE.G                           | NA    | 2 | 1,6172 | 0,18  | 0,099  |
| 4 | P54577 SYIC_HUMAN  | E.SQGM*LLCASIE.G                          | NA    | 2 | 1,6117 | 0,119 | 0,299  |
| 4 | Q6S8J3 A26CA_HUMAN | E.M*ATAASSSS#LE.K                         | S935  | 2 | 1,5843 | 0,121 | 0,106  |
| 4 | P27816 MAP4_HUMAN  | E.AT#PVPIKDME.I                           | T585  | 2 | 1,5608 | 0,242 | -0,103 |
| 4 | Q9NZI8 IF2B1_HUMAN | E.NCEQVNTSE.T                             | NA    | 2 | 1,5498 | 0,152 | 0      |
| 4 | P55036 PSMD4_HUMAN | E.GGAMLGLGASDFE.F                         | NA    | 2 | 1,4734 | 0,131 | -0,1   |
| 4 | P62805 H4_HUMAN    | K.TVTAM*DVVYALK.R                         | NA    | 2 | 1,4309 | 0,127 | 0,184  |
| 4 | Q9Y282 ERGI3_HUMAN | E.GCQVYGFL.E.V                            | NA    | 2 | 1,4146 | 0,089 | -0,114 |
| 4 | Q96E15 TCAL4_HUMAN | E.IEGKPES#EGEPGSE.T                       | S102  | 2 | 1,3699 | 0,083 | -0,08  |
| 4 | Q8N163 K1967_HUMAN | E.DSEVRSVAS#NQSEM*E.F                     | S678  | 2 | 1,3322 | 0,131 | 0,138  |
| 5 | Q8IX01 SFR14_HUMAN | E.ASGPS#PKPAGVDISEAPQTSSPCPSADIDM*KTM*E.T | S757  | 3 | 8,1022 | 0,582 | 0,718  |
| 5 | Q8IX01 SFR14_HUMAN | E.AS#GPSKPKAGVDISEAPQTSSPCPSADIDMKT*E.T   | S754  | 3 | 7,1426 | 0,532 | 0      |
| 5 | Q96S66 CLCC1_HUMAN | E.SSQSAKPVSGQDTSNGTEGS#PAAE.K             | S509  | 2 | 6,4794 | 0,6   | 0,103  |
| 5 | P40855 PEX19_HUMAN | E.TLSGLAKNATDLQNSS#MSEEE.L                | S147  | 2 | 6,2349 | 0,567 | 0,212  |
| 5 | Q9C0B0 UNK_HUMAN   | E.HFASGSFS#PGTSPAFLSGPGAAE.L              | S631  | 2 | 5,6211 | 0,506 | 0,324  |
| 5 | O43829 ZF161_HUMAN | E.SKDLGSQT#PQALTFNDGM*SE.V                | T235  | 2 | 5,5919 | 0,454 | 0,549  |

|   |                     |                                       |             |   |        |       |        |
|---|---------------------|---------------------------------------|-------------|---|--------|-------|--------|
| 5 | P35579 MYH9_HUMAN   | E.ALKTELEDT#LDSTAAQQE.L               | T1151       | 2 | 5,4928 | 0,583 | 0,119  |
| 5 | P40855 PEX19_HUMAN  | E.TLSGLAKNATDLQNSS#M*SEEE.L           | S147        | 2 | 5,4404 | 0,5   | 0,421  |
| 5 | Q14247 SRC8_HUMAN   | E.RLPS#SPVYEDAAS#FKAE.L               | S417:S426   | 2 | 5,3393 | 0,456 | 0,301  |
| 5 | Q5VWN6 CJ018_HUMAN  | E.LNQPASAACKTGDFSPS#PE.K              | S1541       | 2 | 5,311  | 0,457 | -0,119 |
| 5 | Q00537 PCTK2_HUMAN  | E.NLKM*GS#DGESDQASGTSSDE.V            | S105        | 2 | 5,2642 | 0,564 | -0,116 |
| 5 | Q9UQ35 SRRM2_HUMAN  | E.VEERPAVSLTLDQSQSQAS#LE.A            | S1292       | 3 | 5,2531 | 0,495 | 0,309  |
| 5 | Q96RG2 PASK_HUMAN   | E.LRETPSSLAVGS#DPDVGSLQE.Q            | S777        | 2 | 5,2295 | 0,542 | 0,109  |
| 5 | Q96T23 RSF1_HUMAN   | E.SEKPGS#PEAAETS#PPSNIIDHCE.K         | S612:S619   | 3 | 5,1924 | 0,441 | 0,07   |
| 5 | O15027 SC16A_HUMAN  | E.ASGSFFKQIDSS#PVGGETDE.T             | S391        | 2 | 5,1005 | 0,51  | 0,228  |
| 5 | Q14247 SRC8_HUMAN   | E.LSYRGPVSGTEPEPVYS#M*E.A             | S447        | 2 | 5,0572 | 0,461 | 0,222  |
| 5 | O15234 CASC3_HUMAN  | E.QTSVRDPS#PEADAPVLGS#PEKE.E          | S363:S373   | 3 | 4,9554 | 0,263 | 0,222  |
| 5 | O75420 PERQ1_HUMAN  | E.AEKLVASLQDSS#LEEE.Q                 | S443        | 2 | 4,9168 | 0,523 | 0,2    |
| 5 | Q9UQ35 SRRM2_HUMAN  | E.VEERPAVSLTLDQSQSQAS#LE.A            | S1292       | 2 | 4,9145 | 0,52  | 0,309  |
| 5 | Q13263 TIF1B_HUMAN  | E.TKPVLM*ALAEPGAEGPRLAS#PSGSTS#SGLE.V | S594:S600   | 3 | 4,9145 | 1     | 0,233  |
| 5 | Q5JSH3 WDR44_HUMAN  | E.TENTAYKVGNES#PVQE.L                 | S50         | 2 | 4,8862 | 0,489 | 0      |
| 5 | Q9UHR4 BI2L1_HUMAN  | E.IKTPASTPVSGT#PQASPM*IE.R            | T257        | 2 | 4,879  | 0,441 | 0,116  |
| 5 | A8MVB1 A8MVB1_HUMAN | E.KLVSPASAAASS#PSSSPSPQPVSE.L         | S37         | 2 | 4,8396 | 0,562 | 0,299  |
| 5 | P29374 ARI4A_HUMAN  | E.SNQCIQQLTSEFRDS#PAEE.T              | S932        | 2 | 4,8032 | 0,348 | 0,21   |
| 5 | O95817 BAG3_HUMAN   | E.VKVPPAPVPCPPPS#PGPSAVPSSPKS#VATEE.R | S377:S389   | 3 | 4,7989 | 1     | 0,341  |
| 5 | Q9P266 K1462_HUMAN  | E.HSDVDGVVTSTDPVPEPEPS#PLE.S          | S1194       | 2 | 4,7929 | 0,543 | 0,393  |
| 5 | Q5JSH3 WDR44_HUMAN  | E.TTKLTQTSS#TEQLNVLE.T                | S162        | 2 | 4,7864 | 0,458 | 0      |
| 5 | O95232 CROP_HUMAN   | E.VNGTSEDIKSEGDTQS#N.-                | S431        | 2 | 4,7577 | 0,565 | 0,262  |
| 5 | Q8N1G0 ZN687_HUMAN  | E.ASLLKLPAT#PTSE.G                    | T377        | 2 | 4,7277 | 0,442 | 0,082  |
| 5 | Q14160 LAP4_HUMAN   | E.LRSLEPSPS#PGPQEEDGE.V               | S1581       | 2 | 4,6893 | 0,452 | 0,426  |
| 5 | O43815 STRN_HUMAN   | E.LNQGDM*KPPSYDS#DEGNE.T              | S137        | 2 | 4,6651 | 0,528 | -0,117 |
| 5 | Q9UHR4 BI2L1_HUMAN  | E.IKTPASTPVSGTPQAS#PM*IE.R            | S261        | 2 | 4,6544 | 0,471 | 0,347  |
| 5 | O15085 ARHGB_HUMAN  | E.LLKSLLGGESSGGT#T#PVGSFHTE.A         | T1461:T1462 | 2 | 4,6483 | 1     | 0,21   |
| 5 | Q9BQY9 DBND2_HUMAN  | E.SQRPPIGSIS#SM*EVNVDLLE.Q            | S153        | 2 | 4,6479 | 0,465 | -0,216 |
| 5 | P04792 HSPB1_HUMAN  | E.SPAVAAPAYSRLS#RQLS#SGVSE.I          | S78:S82     | 3 | 4,6454 | 1     | 1,114  |
| 5 | Q02952 AKA12_HUMAN  | E.GDLNGQKQALNGQALNS#QEEEE.V           | S96         | 2 | 4,6305 | 0,388 | 0,1    |
| 5 | Q96QE3 ATAD5_HUMAN  | E.IVKSGYIS#ESENSE.I                   | S306        | 2 | 4,6291 | 0,499 | -0,15  |
| 5 | Q15424 SAFB1_HUMAN  | E.DKETINNLDTSS#SDFTILQE.I             | S196        | 2 | 4,594  | 0,514 | 0,208  |
| 5 | P78310 CXAR_HUMAN   | R.SYIGSNHSSLGSM*S#PSNM*E.G            | S306        | 2 | 4,5936 | 0,474 | 0,116  |
| 5 | O95817 BAG3_HUMAN   | E.VKVPPAPVPCPPPS#PGPSAVPSS#PKSVATEE.R | S377:S386   | 3 | 4,5887 | 1     | 0,227  |
| 5 | Q96B54 ZN428_HUMAN  | E.GTYHCTECEDS#FDNLGE.L                | S169        | 2 | 4,551  | 0,443 | 0,231  |
| 5 | Q92945 FUBP2_HUMAN  | D.SGCKVQIS#PDSGGLPE.R                 | S181        | 2 | 4,5443 | 0,434 | -0,214 |
| 5 | P98171 RHG04_HUMAN  | E.KQVVGAGLQTAGESGS#SPEGLLASE.L        | S823        | 2 | 4,5431 | 0,463 | 0,299  |
| 5 | Q92878 RAD50_HUMAN  | E.NQSCCPVQQRVFQT#EAE.L                | T690        | 2 | 4,5127 | 0,376 | 0,111  |
| 5 | P21333 FLNA_HUMAN   | E.AIGDDVGTGLGFSVEGSPQAKIE.C           | NA          | 2 | 4,4949 | 0,38  | 1,114  |
| 5 | Q86T10 TBCD1_HUMAN  | E.SSFKLLGS#SEDLSSDSE.S                | S565        | 2 | 4,4426 | 0,391 | 0,131  |
| 5 | Q7Z434 MAVS_HUMAN   | E.LSKPGVLASQVDS#PFSGCFE.D             | S430        | 2 | 4,4276 | 0,492 | 0,221  |

|   |                     |                                            |             |   |        |       |        |
|---|---------------------|--------------------------------------------|-------------|---|--------|-------|--------|
| 5 | Q92797 SYMPK_HUMAN  | E.DAM*KT#PS#PAAEDAREPE.A                   | T1257:S1259 | 3 | 4,4117 | 0,4   | 0,184  |
| 5 | Q13283 G3BP1_HUMAN  | E.DAQKSSS#PAPADIAQTVQE.D                   | S232        | 2 | 4,4046 | 0,491 | 0,181  |
| 5 | Q92917 GPKOW_HUMAN  | E.LHYDAICQYMGPS#DTDDD.-                    | S471        | 2 | 4,3872 | 0,48  | 0,222  |
| 5 | Q6PKG0 LARP1_HUMAN  | E.TES#APGS#PRAVTPVPTKTEE.V                 | S517:S521   | 3 | 4,358  | 0,328 | 0,083  |
| 5 | Q7Z460 CLAP1_HUMAN  | E.CDIVSRDGGGAAS#PATE.G                     | S1223       | 2 | 4,355  | 0,551 | 0      |
| 5 | Q8IYH0 Q8IYH0_HUMAN | R.TIKTVDLGIS#DLEDDC.-                      | S201        | 2 | 4,3529 | 0,415 | 0,26   |
| 5 | Q9UHR4 BI2L1_HUMAN  | E.IKTPASTPVSGTPQAS#PM*IE.R                 | S261        | 3 | 4,3465 | 0,285 | 0,607  |
| 5 | O14641 DVL2_HUMAN   | R.HLAGYES#SSTLM*TSE.L                      | S194        | 2 | 4,3416 | 0,553 | -0,143 |
| 5 | Q9P266 K1462_HUMAN  | E.HSDVDGVVTSTDPVPEPEPS#PLE.S               | S1194       | 3 | 4,3405 | 0,412 | 0,516  |
| 5 | P46100 ATRX_HUMAN   | E.NLVLSSTHGFCQSS#GDE.A                     | S1245       | 2 | 4,3341 | 0,464 | 0      |
| 5 | Q96QR8 PURB_HUMAN   | E.HYAQLGPSS#PEQLAAGAE.E.G                  | S101        | 2 | 4,3126 | 0,48  | 0,36   |
| 5 | Q9Y3S1 WNK2_HUMAN   | E.SYGGSDVTSKGELS#DSCE.G                    | S1150       | 2 | 4,2869 | 0,495 | 0,249  |
| 5 | Q15424 SAFB1_HUMAN  | E.DKETINNLDT#SSSDFTILQE.I                  | T194        | 2 | 4,25   | 0,368 | 0      |
| 5 | Q9H118 ASCC2_HUMAN  | E.AVSQASSHPENS#EEEE.C                      | S447        | 2 | 4,2487 | 0,448 | 0,067  |
| 5 | P56537 IF6_HUMAN    | E.AQPSTIATSM*RDSLIDSLT#.-                  | T245        | 2 | 4,2415 | 0,469 | 0,348  |
| 5 | Q14160 LAP4_HUMAN   | R.LRVQS#PEPPAPERALS#PAE.L                  | S1475:S1486 | 3 | 4,2311 | 0,281 | 0,166  |
| 5 | Q14202 ZMYM3_HUMAN  | E.LDKASSDLCDLVSNQS#AEGLE.D                 | S960        | 2 | 4,2249 | 0,488 | 0,2    |
| 5 | P29374 ARI4A_HUMAN  | E.LSSLDNKNFSS#ATEDE.I                      | S840        | 2 | 4,2086 | 0,412 | 0      |
| 5 | Q9UNZ2 NSF1C_HUMAN  | E.GQKLGSTAPQVLSTSS#PAQQAENE.A              | S272        | 2 | 4,2014 | 0,499 | 0,292  |
| 5 | Q76L83 ASXL2_HUMAN  | E.TNM*KEPLATLVDQS#PE.S                     | S562        | 2 | 4,1994 | 0,379 | 0,196  |
| 5 | Q8TF40 FNIP1_HUMAN  | E.AAQTKVTFLLIGDSM*S#PDSDE.L                | S760        | 2 | 4,1864 | 0,398 | 0,74   |
| 5 | Q13263 TIF1B_HUMAN  | E.TKPVLM*ALAEPGAEGPRLASPSGST#SS#GLE.V      | T599:S601   | 3 | 4,17   | 1     | 0,349  |
| 5 | Q9BXJ9 NARG1_HUMAN  | E.DM*KITVNGDS#SAE.A                        | S855        | 2 | 4,1594 | 0,38  | 0,083  |
| 5 | B2RDY9 B2RDY9_HUMAN | E.SASRS#ALFAQINQGE.S                       | S255        | 2 | 4,1593 | 0,387 | 0,221  |
| 5 | Q5JSH3 WDR44_HUMAN  | E.NTAYKVGNES#PVQE.L                        | S50         | 2 | 4,1561 | 0,436 | 0,302  |
| 5 | P27816 MAP4_HUMAN   | E.M*ALGKDVTPPPPETE.V                       | T521        | 2 | 4,1449 | 0,491 | 0,232  |
| 5 | Q9UNZ2 NSF1C_HUMAN  | E.GQKLGSTAPQVLSTSS#PAQQAENE.A              | S272        | 3 | 4,1441 | 0,394 | 0,365  |
| 5 | P19338 NUCL_HUMAN   | E.IEPAAM*KAAAAAPAS#EDED.D                  | S184        | 2 | 4,1414 | 0,438 | 0,062  |
| 5 | Q96GX5 MASTL_HUMAN  | E.NIVNSFTDKQQT#PE.K                        | T519        | 2 | 4,1399 | 0,492 | 0,502  |
| 5 | Q02952 AKA12_HUMAN  | E.QSHAEIS#PPAESGQAVEE.C                    | S253        | 2 | 4,1317 | 0,311 | -0,063 |
| 5 | Q86W56 PARG_HUMAN   | E.NVSQLSLDKS#PTE.K                         | S137        | 2 | 4,1293 | 0,368 | 0      |
| 5 | P15407 FOSL1_HUMAN  | E.GAKEGDTGSTSGTS#SPPAPCRVPCISLS#PGPVLEPE.A | S190:S205   | 3 | 4,1185 | 1     | 0,38   |
| 5 | Q12802 AKP13_HUMAN  | E.KELVPDQAVISDSTFSLANS#PGSE.S              | S790        | 2 | 4,116  | 0,52  | 0,475  |
| 5 | Q9NQX3 GEPH_HUMAN   | E.LEDLPS#PPPPPLS#PPPTTSPHKQTE.D            | S188:S194   | 3 | 4,0829 | 0,399 | 0,202  |
| 5 | O75400 PR40A_HUMAN  | R.FVKEPAFEDITLES#E.R                       | S787        | 2 | 4,0581 | 0,433 | 0,333  |
| 5 | P31749 AKT1_HUMAN   | E.M*DFRSGS#PSDNSGAEEM*E.V                  | S124        | 2 | 4,0511 | 0,441 | 0,119  |
| 5 | Q12756 KIF1A_HUMAN  | E.SCPVVGMSRSGTS#QEE.L                      | S937        | 2 | 4,0476 | 0,505 | -0,068 |
| 5 | Q12888 TP53B_HUMAN  | D.AFRSTPFIVPSS#PTEQE.G                     | S380        | 2 | 4,0423 | 0,444 | 0,309  |
| 5 | Q9HBD1 RC3H2_HUMAN  | E.NKIGS#PPKT#PVSNAATSAGPSNVGTE.L           | S549:T553   | 3 | 4,0361 | 0,401 | 0,334  |
| 5 | Q8TCN5 ZN507_HUMAN  | E.NEKL5#PTSNTSYSLE.K                       | S780        | 2 | 4,0248 | 0,428 | -0,139 |
| 5 | Q14201 BTG3_HUMAN   | E.VKPSSVTAAS#PVYQISE.L                     | S169        | 2 | 4,0237 | 0,359 | 0,191  |

|   |                     |                                           |                 |   |        |       |        |
|---|---------------------|-------------------------------------------|-----------------|---|--------|-------|--------|
| 5 | O94842 TOX4_HUMAN   | E.SSPERPM*NNS#PEAHTVEAPS#PETICE.M         | S523:S533       | 3 | 4,0204 | 0,241 | 0,361  |
| 5 | Q96JM3 ZN828_HUMAN  | E.LQTPLPS#PEPSKPASVSSPEPPKSVPVCE.S        | S173            | 3 | 4,0186 | 0,349 | 0      |
| 5 | P04406 G3P_HUMAN    | R.VIISAPSADAPM*FVM*GVNHE.K                | NA              | 2 | 4,0182 | 0,479 | 0,231  |
| 5 | P49006 MRP_HUMAN    | E.SQEPQAKGAEASAAS#EEE.A                   | S165            | 2 | 4,016  | 0,56  | 0      |
| 5 | O15085 ARHGB_HUMAN  | E.LLKSLGGESS#GGTT#PVGFSFHE.A              | S1458:T1462     | 3 | 4,0084 | 0,288 | 0,631  |
| 5 | Q96T58 MINT_HUMAN   | E.SGVVAVS#PEKSES#PQKE.D                   | S2120:S2126     | 2 | 4,0008 | 0,449 | -0,127 |
| 5 | O75410 TACC1_HUMAN  | E.KAPVSVSCGGES#PLDGICLSE.S                | S591            | 2 | 3,9808 | 0,488 | 0,327  |
| 5 | Q9NRF2 SH2B1_HUMAN  | E.VARASGSLSPILAPLS#PGAE.I                 | S96             | 2 | 3,9729 | 0,522 | 0,354  |
| 5 | Q7Z6Z7 HUWE1_HUMAN  | R.GNKACS#PCSSQSSSSGICTD.F                 | S3373           | 2 | 3,9706 | 0,408 | 0,112  |
| 5 | Q92878 RAD50_HUMAN  | E.DKLFDVCGS#QDFE.S                        | S635            | 2 | 3,969  | 0,395 | 0,298  |
| 5 | Q9BXJ9 NARG1_HUMAN  | E.DM*KITVNGDS#SAEAE.L                     | S855            | 2 | 3,9688 | 0,452 | 0,204  |
| 5 | Q9H832 UBE2Z_HUMAN  | E.NAEM*DS#DSSSS#GTETDLHGSLRV.-            | S337:S342       | 3 | 3,9678 | 1     | 0,213  |
| 5 | Q96S66 CLCC1_HUMAN  | E.SSQSAKPVSGQDTSNGTEGS#PAAE.K             | S509            | 3 | 3,9665 | 0,388 | 0,386  |
| 5 | P40855 PEX19_HUMAN  | E.TLSGLAKNATDLQNSS#MSEEE.L                | S147            | 3 | 3,9546 | 0,419 | 0,397  |
| 5 | Q9UHR4 BI2L1_HUMAN  | E.IKTPASTPVSGTPQAS#PMIE.R                 | S261            | 2 | 3,9509 | 0,353 | 0,233  |
| 5 | A8MVB1 A8MVB1_HUMAN | E.KLVSPPASAAASSPS#SSPSPQPVSE.L            | S39             | 3 | 3,9456 | 0,365 | 0,15   |
| 5 | P35612 ADDB_HUMAN   | E.AET#KSPLVS#PSKSLEE.G                    | T611:S617       | 2 | 3,9414 | 0,526 | 0,328  |
| 5 | O95155 UBE4B_HUMAN  | E.TQSQSLRSQS#M*DIGVSCE.K                  | S105            | 2 | 3,9363 | 0,361 | 0,211  |
| 5 | Q9H0F6 SHRPN_HUMAN  | E.GQNGSKSNS#PPALGPE.A                     | S131            | 2 | 3,9166 | 0,39  | 0      |
| 5 | Q86V81 THOC4_HUMAN  | E.LDAQLDAYNARM*DT#S.-                     | T256            | 2 | 3,8999 | 0,546 | 0      |
| 5 | Q12756 KIF1A_HUMAN  | E.SCPVVGVM*SRSQT#SQEE.L                   | T936            | 2 | 3,8908 | 0,562 | 0,068  |
| 5 | Q2TAL8 QRIC1_HUMAN  | D.SAHLYSATGTITS#PTGE.T                    | S303            | 2 | 3,8904 | 0,334 | 0,275  |
| 5 | Q9H6Z4 RANB3_HUMAN  | E.NAAAESGSESSQEAT#PEKE.S                  | T363            | 2 | 3,8763 | 0,443 | -0,234 |
| 5 | Q7Z2K8 GRIN1_HUMAN  | E.TRSVATGPM*T#PQAAAPPAPPE.V               | T877            | 2 | 3,8731 | 0,514 | 0,223  |
| 5 | O14641 DVL2_HUMAN   | R.HLAGYESS#STLM*TSELE.S                   | S195            | 2 | 3,872  | 0,469 | 0      |
| 5 | Q16512 PKN1_HUMAN   | E.GM*GYGDRT#STFCGTPE.F                    | T772            | 2 | 3,8506 | 0,32  | 0,067  |
| 5 | O15446 RPA34_HUMAN  | E.M*KPLES#PGGTM*APQQPE.G                  | S359            | 2 | 3,8484 | 0,389 | 0,128  |
| 5 | Q86SQ0 PHLB2_HUMAN  | E.LEKLQLS#DEESVFE.E                       | S489            | 2 | 3,8365 | 0,327 | 0,21   |
| 5 | Q8WXI9 P66B_HUMAN   | R.GRLTPS#PDIIVLSDNE.A                     | S122            | 2 | 3,8253 | 0,427 | 0,068  |
| 5 | P46821 MAP1B_HUMAN  | R.TTKS#PSDSGYSE.T                         | S1915           | 2 | 3,8232 | 0,435 | -0,162 |
| 5 | Q9NZD8 SPG21_HUMAN  | E.VQKGS#LGISQEEQ.-                        | S300            | 2 | 3,8132 | 0,465 | 0      |
| 5 | O95714 HERC2_HUMAN  | E.STHPSS#PGFEDCSSSE.A                     | S2423           | 2 | 3,8105 | 0,506 | -0,204 |
| 5 | P31943 HNRH1_HUMAN  | E.GRPS#GEAFVELESEDE.V                     | S54             | 2 | 3,8035 | 0,466 | 0,133  |
| 5 | Q2KHR3 QSER1_HUMAN  | E.SSTQRLS#DGEINAQE.S                      | S586            | 2 | 3,8007 | 0,367 | -0,142 |
| 5 | Q9BXJ9 NARG1_HUMAN  | E.DMKITVNGDS#SAE.A                        | S855            | 2 | 3,7984 | 0,32  | -0,084 |
| 5 | Q14C86 GAPD1_HUMAN  | E.CSSDFGGKDSVTS#PDM*DE.I                  | S801            | 2 | 3,7954 | 0,432 | -0,18  |
| 5 | O75821 EIF3G_HUMAN  | E.LLKGIPLATGDT#PEPE.L                     | S42             | 2 | 3,7837 | 0,532 | 1,208  |
| 5 | Q14676 MDC1_HUMAN   | E.TQPQRLLLAEDS#EEE.V                      | S168            | 2 | 3,7822 | 0,489 | 0,066  |
| 5 | Q9UKM9 RALY_HUMAN   | E.LEHSQDT#DADDGALQ.-                      | T298            | 2 | 3,7721 | 0,413 | 0,288  |
| 5 | Q9H7N4 SFR19_HUMAN  | R.AAKVPS#TPPPKAAPPALT#PDSQTVDSSCKT#PE.V   | S975:T989:T1001 | 3 | 3,7603 | 1     | 0,199  |
| 5 | Q15365 PCBP1_HUMAN  | E.TLSQS#PQGRVM*TIPYQPM*PASSPVICAGGQDRCS.D | S173            | 3 | 3,7302 | 0,374 | 0,375  |

|   |                     |                                       |             |   |        |       |        |
|---|---------------------|---------------------------------------|-------------|---|--------|-------|--------|
| 5 | P27816 MAP4_HUMAN   | E.MALGKDVTPPPETE.V                    | T521        | 2 | 3,7275 | 0,511 | 0,312  |
| 5 | P40855 PEX19_HUMAN  | E.TLSGLAKNATDLQNSSM*S#EEE.L           | S149        | 3 | 3,7264 | 0,248 | 0,946  |
| 5 | Q2M1Z3 CDGAP_HUMAN  | D.S#KVLSPIRS#PTQTVSPGLLCE.L           | S1369:S1378 | 3 | 3,7256 | 1     | 0,07   |
| 5 | P07900 HS90A_HUMAN  | E.SEDKPEIEDVGS#D.E                    | S263        | 2 | 3,7059 | 0,414 | 0,081  |
| 5 | P40123 CAP2_HUMAN   | E.SS#PSRSALFAQLNQGE.A                 | S257        | 2 | 3,6961 | 0,428 | 0,275  |
| 5 | P67936 TPM4_HUMAN   | E.NVGLHQTLDQT#LNE.L                   | T241        | 2 | 3,6908 | 0,267 | 0,514  |
| 5 | O75410 TACC1_HUMAN  | E.TKSLSFSSDS#EGNFETPE.A               | S57         | 2 | 3,6823 | 0,308 | -0,299 |
| 5 | P27816 MAP4_HUMAN   | E.ALNS#PHSESFVSPPEVAEPPQPTAVPLELAKE.I | S197        | 3 | 3,6702 | 0,5   | 0,214  |
| 5 | Q92917 GPKOW_HUMAN  | E.LHYDAICQYM*GPS#DTDDD.-              | S471        | 2 | 3,6637 | 0,512 | 0,331  |
| 5 | Q93008 USP9X_HUMAN  | E.GSEEV#PPQTKDQ.-                     | S2540       | 2 | 3,6609 | 0,391 | -0,082 |
| 5 | Q96T23 RSF1_HUMAN   | E.SEKPGS#PEAAETS#PPSNIIDHCE.K         | S612:S619   | 2 | 3,6607 | 0,438 | 0,374  |
| 5 | Q96JM3 ZN828_HUMAN  | E.LQTPSPPEPSKPASVSS#PEPPKSVPVCE.S     | S184        | 3 | 3,6588 | 0,321 | 0,234  |
| 5 | Q9Y4M2 Q9Y4M2_HUMAN | E.LM*VKSSFLS#PE.R                     | S134        | 2 | 3,6519 | 0,293 | -0,172 |
| 5 | Q9NUL3 STAU2_HUMAN  | E.AIGLKGSPT#PPCS#PVQPSKQLE.Y          | T488:S492   | 3 | 3,6465 | 0,309 | 0,216  |
| 5 | Q15464 SHB_HUMAN    | E.GQSVDS#DSESTVS#PRLRE.S              | S310:S317   | 2 | 3,6459 | 0,266 | 0,116  |
| 5 | Q99590 SFRIP_HUMAN  | R.SSVAAPEKSSSND#VDEE.T                | S90         | 2 | 3,6417 | 0,458 | 0,191  |
| 5 | Q96CW6 S7A6Q_HUMAN  | E.FGYDSPHLDSD#D.-                     | S308        | 2 | 3,6372 | 0,416 | 0,253  |
| 5 | Q02952 AKA12_HUMAN  | E.GDLNGQKQALNGQALNS#QEEEE.V           | S96         | 3 | 3,6231 | 0,308 | 0,075  |
| 5 | Q7Z6E9 RBBP6_HUMAN  | E.GSSSTLVDT#STSST#GGSPVRKSEE.K        | T1269:T1274 | 3 | 3,6077 | 1     | 0,068  |
| 5 | Q9BXJ9 NARG1_HUMAN  | E.DMKITVNGDS#SAEAE.L                  | S855        | 2 | 3,6026 | 0,251 | -0,069 |
| 5 | Q5VT52 K0460_HUMAN  | E.SVGSFRSNS#FNSTFE.H                  | S1185       | 2 | 3,5945 | 0,445 | 0,07   |
| 5 | P31749 AKT1_HUMAN   | E.M*DFRSGS#PSDMSGAE.M                 | S124        | 2 | 3,5926 | 0,475 | 0      |
| 5 | P10155 RO60_HUMAN   | E.KQIANS#QDGYVWQVTD.M                 | S19         | 2 | 3,5895 | 0,381 | 0,253  |
| 5 | Q9Y3D3 RT16_HUMAN   | E.VLLASQKTDAAEAT#DTE.A                | T130        | 2 | 3,5895 | 0,451 | -0,069 |
| 5 | P31749 AKT1_HUMAN   | E.MDFRSGS#PSDMSGAE.M                  | S124        | 2 | 3,589  | 0,485 | -0,138 |
| 5 | Q969K3 RNF34_HUMAN  | R.VRAS#LSDLSLDDVE.G                   | S254        | 2 | 3,5825 | 0,416 | -0,072 |
| 5 | Q9BQK8 LPIN3_HUMAN  | E.LTSPKS#DSELE.V                      | S224        | 2 | 3,5814 | 0,37  | 0,19   |
| 5 | Q02952 AKA12_HUMAN  | E.HDPGQGSSS#PEQAGSPTEGE.G             | S743        | 2 | 3,58   | 0,324 | 0,18   |
| 5 | Q9Y490 TLN1_HUMAN   | E.DTKVLVQNAAGS#QE.K                   | S2040       | 2 | 3,5755 | 0,305 | 0      |
| 5 | Q7Z4H7 FA29A_HUMAN  | E.VARAVLSDS#PQLSE.G                   | S552        | 2 | 3,5729 | 0,461 | 0,157  |
| 5 | Q6NZI2 PTRF_HUMAN   | E.SDAVLVLDKSDS#D.-                    | S389        | 2 | 3,5725 | 0,348 | 0      |
| 5 | Q641Q2 FA21A_HUMAN  | E.KAVAS#PEATVSQTDE.N                  | S498        | 2 | 3,5673 | 0,54  | 0,227  |
| 5 | Q8TEP8 CE192_HUMAN  | E.SFRPST#SPLSHSS#PSEISGTSSSGCALE.S    | T392:S399   | 3 | 3,5481 | 1     | 0,304  |
| 5 | Q8NI35 INADL_HUMAN  | E.NM*STGYHLGS#PTAE.H                  | S1782       | 2 | 3,5412 | 0,467 | 0,078  |
| 5 | Q5H9R7 SAPS3_HUMAN  | E.FTSSLSTKDSLRS#NS#PVEM*E.T           | S738:S740   | 3 | 3,5373 | 1     | 0,383  |
| 5 | Q5UIP0 RIF1_HUMAN   | E.SSKIGISDIS#SLSE.K                   | S1706       | 2 | 3,5331 | 0,424 | 0      |
| 5 | O60307 MAST3_HUMAN  | E.M*VPLSHLEEQPPAPES#PE.S              | S348        | 2 | 3,53   | 0,447 | 0,441  |
| 5 | Q2NKX8 ERC6L_HUMAN  | E.LCTNSS#LGM*EKS#FATKNE.A             | S829:S835   | 2 | 3,5262 | 0,433 | 0      |
| 5 | P98171 RHG04_HUMAN  | E.KQVVGAGLQTAGESGSS#PEGLLASE.L        | S824        | 3 | 3,5215 | 0,261 | 0,075  |
| 5 | P48681 NEST_HUMAN   | E.NQEPLRS#PEVGDEE.A                   | S680        | 2 | 3,5116 | 0,461 | -0,073 |
| 5 | Q99590 SFRIP_HUMAN  | E.IIQTVDQRS#VKS#PE.V                  | S311:S314   | 2 | 3,5006 | 0,354 | 0,208  |

|   |                     |                                |             |   |        |       |        |
|---|---------------------|--------------------------------|-------------|---|--------|-------|--------|
| 5 | Q9H4A3 WNK1_HUMAN   | E.LSEPSHLNGPSS#DPE.A           | S2012       | 2 | 3,5001 | 0,44  | 0,445  |
| 5 | Q5T011 K0467_HUMAN  | D.LQAYAGRQAS#QTE.S             | S326        | 2 | 3,4994 | 0,453 | 0      |
| 5 | P04406 G3P_HUMAN    | R.VIISAPSADAPM*FVM*GVNHE.K     | NA          | 3 | 3,4972 | 0,469 | 0,259  |
| 5 | Q9Y3X0 CCDC9_HUMAN  | E.LNS#PRTTLAGALS#PGE.A         | S510:S521   | 2 | 3,4929 | 0,391 | -0,13  |
| 5 | P04406 G3P_HUMAN    | K.AVGKVIPELNGK.L               | NA          | 2 | 3,4825 | 0,345 | -0,1   |
| 5 | Q8IWU2 LMTK2_HUMAN  | E.LSQTALRSVELEESS#TDE.D        | S601        | 2 | 3,4761 | 0,345 | 0,223  |
| 5 | Q92917 GPKOW_HUMAN  | E.LHYDAICQYMGPSDT#DDD.-        | T473        | 3 | 3,476  | 0,385 | 0,333  |
| 5 | Q86UP2 KTN1_HUMAN   | E.IQNGNLHES#DSE.S              | S75         | 2 | 3,4749 | 0,381 | 0,257  |
| 5 | Q92628 K0232_HUMAN  | E.KALYS#PLFPASECEE.C           | S1294       | 2 | 3,4611 | 0,456 | 0,067  |
| 5 | O14641 DVL2_HUMAN   | R.HLAGYES#SSTLMTSE.L           | S194        | 2 | 3,4534 | 0,502 | 0,36   |
| 5 | Q8TDY2 RBCC1_HUMAN  | E.QTIHQVSLDLDSLAE#PE.S         | S727        | 2 | 3,4529 | 0,315 | 0,118  |
| 5 | Q9NV56 MRGBP_HUMAN  | E.VGGGGAAGDKGPGEAATS#PAEE.T    | S23         | 2 | 3,4474 | 0,487 | -0,124 |
| 5 | P49757 NUMB_HUMAN   | E.GS#FRVTTATEQAE.R             | S194        | 2 | 3,4433 | 0,326 | 0,083  |
| 5 | O60684 IMA7_HUMAN   | E.HYFGVEDDDSS#LAPQVDE.T        | S510        | 2 | 3,4377 | 0,33  | 0,232  |
| 5 | Q14C86 GAPD1_HUMAN  | E.GISEGPSNRSNSVSS#LDLE.G       | S588        | 2 | 3,4365 | 0,421 | 0,06   |
| 5 | P25208 NFYB_HUMAN   | E.KIGIGGAVTATDGLS#EELTEE.A     | S162        | 2 | 3,4319 | 0,352 | 0,237  |
| 5 | O75534 CSDE1_HUMAN  | E.SKSPAAPGQSPT#GSVCYE.R        | T125        | 2 | 3,4257 | 0,34  | 0,192  |
| 5 | Q2KHR3 QSER1_HUMAN  | E.HLSSFS#SDEDDPGYSQD.A         | S1230       | 2 | 3,4249 | 0,32  | -0,124 |
| 5 | Q8IZT6 ASPM_HUMAN   | E.NKIPIS#PISPAFNE.C            | S222        | 2 | 3,4233 | 0,273 | 0,076  |
| 5 | Q96QE3 ATAD5_HUMAN  | E.IVKSGYIS#ESE.N               | S306        | 2 | 3,4089 | 0,503 | 0,661  |
| 5 | P31749 AKT1_HUMAN   | E.MDFRSGSPSDNS#GAEEM*E.V       | S129        | 2 | 3,4054 | 0,313 | 0,299  |
| 5 | Q9UJA5 TRM6_HUMAN   | E.SNGTLEEKQAS#EQENE.D          | S298        | 2 | 3,4028 | 0,246 | 0,195  |
| 5 | Q9BWU0 NADAP_HUMAN  | R.LKASSQVLSSEPS#QDSLDAFM*SE.M  | S532        | 2 | 3,4014 | 0,162 | 0,574  |
| 5 | Q02952 AKA12_HUMAN  | E.QKGESSAS#SPEEPEITCLE.K       | S568        | 2 | 3,3944 | 0,381 | 0,107  |
| 5 | Q5T200 ZC3HD_HUMAN  | E.S#TSRDS#LALDKE.R             | S1404:S1409 | 2 | 3,3896 | 0,428 | 0      |
| 5 | Q9BWU0 NADAP_HUMAN  | R.LKASSQVLSSEPSQDS#LDAFM*SE.M  | S535        | 2 | 3,3882 | 0,412 | 0,765  |
| 5 | Q9BQY9 DBND2_HUMAN  | E.SQRPPIGSIS#SM*EVNVDLTLEQVE.L | S153        | 3 | 3,383  | 0,321 | 0,28   |
| 5 | Q7Z2Z1 CO042_HUMAN  | E.AEPLSKEESS#LGEE.S            | S1595       | 2 | 3,3824 | 0,375 | 0,308  |
| 5 | Q8IW35 CEP97_HUMAN  | E.HSS#PVQDCQISQE.S             | S331        | 2 | 3,3811 | 0,368 | 0,153  |
| 5 | Q15149 PLEC1_HUMAN  | E.VQYLTGGLIEPDTPGRVPLDE.A      | NA          | 2 | 3,3767 | 0,325 | 0,215  |
| 5 | Q6ZNJ1 NBEL2_HUMAN  | E.ASALRDNLGEVPLT#PTEE.A        | T1867       | 2 | 3,3741 | 0,196 | 0,368  |
| 5 | Q8WY36 BBX_HUMAN    | E.VSSGTCRPDVSES#PE.L           | S236        | 2 | 3,3642 | 0,23  | 0,072  |
| 5 | O60664 M6PBP_HUMAN  | E.LVSSKVS#GAQE.M               | S130        | 2 | 3,362  | 0,291 | -0,206 |
| 5 | Q9Y2L1 RRP44_HUMAN  | E.LIDRLACL#EEGNEIE.S           | S215        | 2 | 3,3563 | 0,437 | -0,189 |
| 5 | P46100 ATRX_HUMAN   | E.VQSSVDHQGDGSS#GTEQE.V        | S550        | 2 | 3,3547 | 0,516 | -0,127 |
| 5 | Q6PJG2 CN043_HUMAN  | E.LASLQNAKDGS#GSEE.K           | S486        | 2 | 3,3547 | 0,452 | -0,154 |
| 5 | Q96RG2 PASK_HUMAN   | E.M*GNRS#LSDVAQAQE.L           | S1287       | 2 | 3,3521 | 0,37  | 0,076  |
| 5 | Q6PID6 TTC33_HUMAN  | E.VTHFS#PKS#IPDYDFE.S          | S197:S200   | 2 | 3,3475 | 0,373 | 0,126  |
| 5 | Q66K74 MAP1S_HUMAN  | E.LPLAASSIPRPT#PS#PE.S         | T638:S640   | 3 | 3,3465 | 0,327 | 0,282  |
| 5 | P78559 MAP1A_HUMAN  | E.TSLDVSSKQLS#PE.S             | S1218       | 2 | 3,336  | 0,403 | 0,166  |
| 5 | A8MVB1 A8MVB1_HUMAN | E.KLVSPPASAAASSPSSPS#PQPVSE.L  | S43         | 3 | 3,3314 | 0,101 | 0,224  |

|   |                     |                                          |             |   |        |       |        |
|---|---------------------|------------------------------------------|-------------|---|--------|-------|--------|
| 5 | Q9UKN5 PRDM4_HUMAN  | E.NVSRVTS#PISTDGM*AEE.L                  | S202        | 2 | 3,3272 | 0,454 | 0,194  |
| 5 | P46100 ATRX_HUMAN   | E.SSNYDS#ELEKE.I                         | S819        | 2 | 3,3188 | 0,228 | 0      |
| 5 | Q04637 IF4G1_HUMAN  | E.IHEPNGMVPSEDLPEVES#SPE.L               | S376        | 2 | 3,3135 | 0,335 | 0,39   |
| 5 | Q9P0U4 CXXC1_HUMAN  | E.SYKYFPSSLS#PVTPE.S                     | S224        | 2 | 3,3134 | 0,462 | 0      |
| 5 | P22681 CBL_HUMAN    | E.GNLAAAHANTGPEES#ENE.D                  | S767        | 2 | 3,3134 | 0,517 | 0,129  |
| 5 | P04406 G3P_HUMAN    | R.VIISAPSADAPM*FVMGVNHE.K                | NA          | 2 | 3,3066 | 0,459 | 0,232  |
| 5 | Q14966 ZN638_HUMAN  | E.AEKATCDS#DFAVETLE.L                    | S1158       | 2 | 3,3051 | 0,486 | 0,327  |
| 5 | P04637 P53_HUMAN    | K.LMFKTEGPDS#D.-                         | S392        | 2 | 3,294  | 0,388 | -0,092 |
| 5 | P42166 LAP2A_HUMAN  | E.SRS#STPLPTISSAE.N                      | S158        | 2 | 3,2896 | 0,445 | 0,381  |
| 5 | Q14566 MCM6_HUMAN   | E.TNSRVS#GVDGYETE.G                      | S271        | 2 | 3,2833 | 0,402 | 0      |
| 5 | Q08499 PDE4D_HUMAN  | E.ACVIDDRS#PDT.-                         | S806        | 2 | 3,2814 | 0,317 | 0,184  |
| 5 | Q9BQK8 LPIN3_HUMAN  | E.GRAGATS#PPRGGPS#TPSTSVAGGVDPGLPIQQTE.A | S274:S281   | 3 | 3,2792 | 1     | 0,316  |
| 5 | Q96B23 CR025_HUMAN  | E.TAKEEDGS#VELE.S                        | S34         | 2 | 3,2785 | 0,277 | 0      |
| 5 | Q15446 RPA34_HUMAN  | E.MKPLES#PGGTM*APQQPE.G                  | S359        | 2 | 3,2764 | 0,29  | 0,193  |
| 5 | B1ALK7 B1ALK7_HUMAN | E.TKS#NGQTVIEE.K                         | S638        | 2 | 3,2685 | 0,192 | 0      |
| 5 | Q13625 ASPP2_HUMAN  | E.NIYSNSQGKPGS#PEPE.T                    | S673        | 2 | 3,2682 | 0,456 | 0,068  |
| 5 | Q5VZK9 LR16A_HUMAN  | E.IKTPDS#FEESQGEE.I                      | S1131       | 2 | 3,2666 | 0,402 | 0,073  |
| 5 | Q8IWC1 MA7D3_HUMAN  | E.TVPKVSIVAS#PE.A                        | S385        | 2 | 3,2653 | 0,301 | 0,187  |
| 5 | Q15381 NVL_HUMAN    | E.IQDSKDSS#LLE.S                         | S211        | 2 | 3,264  | 0,348 | 0,186  |
| 5 | A0JNW5 UH1BL_HUMAN  | E.SSGLVYKS#GSGEIGSE.T                    | S987        | 2 | 3,2636 | 0,348 | 0      |
| 5 | Q92797 SYMPK_HUMAN  | E.DAMKT#PS#PAAEDAREPE.A                  | T1257:S1259 | 3 | 3,2625 | 0,251 | -0,093 |
| 5 | Q9NZI7 UBIP1_HUMAN  | E.SGLVHDFDASLS#GIGQE.L                   | S24         | 2 | 3,2622 | 0,328 | 0,404  |
| 5 | P04150 GCR_HUMAN    | E.FSSGS#PGKETNE.S                        | S203        | 2 | 3,2594 | 0,443 | 0      |
| 5 | Q8N3U4 STAG2_HUMAN  | E.THFSS#DTDFEDIE.G                       | S23         | 2 | 3,2574 | 0,298 | 0,15   |
| 5 | Q15027 SC16A_HUMAN  | E.ASGSFFKQIDSS#PVGGETDE.T                | S391        | 3 | 3,2572 | 0,228 | 0,428  |
| 5 | P60709 ACTB_HUMAN   | R.GYSFTTT#AERE.I                         | T203        | 2 | 3,2535 | 0,488 | 0      |
| 5 | B2CI53 B2CI53_HUMAN | K.ALKYSVDPS#IVNISDE.M                    | S1073       | 2 | 3,253  | 0,484 | 0,2    |
| 5 | P30260 CDC27_HUMAN  | E.ITKLDSS#IISE.G                         | S435        | 2 | 3,2524 | 0,397 | 0      |
| 5 | Q43815 STRN_HUMAN   | E.LNQGDM*KPPSYDS#DEGNETE.V               | S137        | 2 | 3,25   | 0,345 | 0,21   |
| 5 | Q8IW35 CEP97_HUMAN  | E.DKLNCS#LLSSE.S                         | S397        | 2 | 3,2484 | 0,157 | 0      |
| 5 | Q16204 CCDC6_HUMAN  | E.ALCRQLSES#ESSLE.M                      | S325        | 2 | 3,2456 | 0,363 | 0,289  |
| 5 | P46821 MAP1B_HUMAN  | E.GTVSDKSAT#PVDE.G                       | T1532       | 2 | 3,2453 | 0,426 | -0,264 |
| 5 | Q2NKX8 ERC6L_HUMAN  | E.DSADNRQNFSSQS#LE.H                     | S971        | 2 | 3,2444 | 0,4   | 0,069  |
| 5 | P52272 HNRPM_HUMAN  | E.IIAKQGGGGGGGS#VPGIE.R                  | S397        | 2 | 3,2405 | 0,389 | 0,149  |
| 5 | Q14160 LAP4_HUMAN   | E.LRSLEPSPS#PGPQEEDGE.V                  | S1581       | 3 | 3,2395 | 0,088 | 0      |
| 5 | Q16204 CCDC6_HUMAN  | E.ALCRQLS#ESESLE.M                       | S323        | 2 | 3,2384 | 0,308 | 0,361  |
| 5 | P52948 NUP98_HUMAN  | E.NGERFS#FLS#KPVDE.N                     | S635:S638   | 2 | 3,2376 | 0,25  | 0,137  |
| 5 | Q14966 ZN638_HUMAN  | E.AEKATCDS#DFAVE.T                       | S1158       | 2 | 3,2364 | 0,364 | 0      |
| 5 | Q07666 KHDR1_HUMAN  | E.YDYDGHGEVQDS#YE.A                      | S407        | 2 | 3,234  | 0,421 | 0,135  |
| 5 | P35612 ADDB_HUMAN   | E.TKS#PLVS#PSKSLEE.G                     | S613:S617   | 2 | 3,2282 | 0,364 | 0,073  |
| 5 | Q9UKV3 ACINU_HUMAN  | E.MKTTS#PLEEEE.R                         | S365        | 2 | 3,2263 | 0,328 | -0,089 |

|   |                     |                                  |           |   |        |       |        |
|---|---------------------|----------------------------------|-----------|---|--------|-------|--------|
| 5 | Q12888 TP53B_HUMAN  | E.NKVADPVDSSNLDTCGSIS#QVIE.Q     | S105      | 2 | 3,2247 | 0,453 | 0,676  |
| 5 | O00291 HIP1_HUMAN   | E.HISPVVVIPAEASS#PDSEPVLE.K      | S313      | 2 | 3,2232 | 0,318 | 0,104  |
| 5 | Q9Y2W6 TDRKH_HUMAN  | E.ITHTLSCLS#LSE.A                | S542      | 2 | 3,2223 | 0,25  | 0,169  |
| 5 | Q14676 MDC1_HUMAN   | E.RS#QASTTVDINTQVE.K             | S513      | 2 | 3,2218 | 0,442 | 0,141  |
| 5 | Q9BVI0 PHF20_HUMAN  | E.NTM*KTEPTS#PLVE.L              | S415      | 2 | 3,2205 | 0,377 | 0,237  |
| 5 | Q6NZI2 PTRF_HUMAN   | E.ESDAVLVDKSDS#D.-               | S389      | 2 | 3,2192 | 0,355 | -0,084 |
| 5 | Q9H4N4 Q9H4N4_HUMAN | E.TRLS#FSDTYQDYE.E               | S47       | 2 | 3,2145 | 0,33  | 0,143  |
| 5 | Q8WYP5 AHTF1_HUMAN  | E.DELKDDAQ#VE.T                  | S2190     | 2 | 3,212  | 0,274 | 0,092  |
| 5 | Q9Y6D5 BIG2_HUMAN   | E.NSQTNGIADDRQSLSS#ADNLE.S       | S349      | 2 | 3,2109 | 0,455 | 0,632  |
| 5 | Q14160 LAP4_HUMAN   | E.LRSLEPS#PSPGPQEEDGE.V          | S1579     | 2 | 3,2065 | 0,428 | 0,122  |
| 5 | O60502 NCOAT_HUMAN  | E.SKS#PEM*SM*QEDCISD.I           | S511      | 2 | 3,2064 | 0,423 | 0,132  |
| 5 | Q12802 AKP13_HUMAN  | E.KELVPDQAVISDSTFSLANS#PGSE.S    | S790      | 3 | 3,2024 | 0,404 | 0,071  |
| 5 | Q14641 DVL2_HUMAN   | R.HLAGYES#SSTLMTSELE.S           | S194      | 2 | 3,202  | 0,452 | 0,189  |
| 5 | P85037 FOXK1_HUMAN  | E.CLS#REGS#PIPHDPE.F             | S441:S445 | 3 | 3,2019 | 0,138 | 0      |
| 5 | P13798 ACPH_HUMAN   | E.SFFQTKALDVS#ASDDE.I            | S185      | 2 | 3,2016 | 0,407 | 0,265  |
| 5 | Q9UET6 RRMJ1_HUMAN  | E.GGSEYKYTPPTQPPI#PPYQE.A        | S271      | 2 | 3,194  | 0,403 | 0,505  |
| 5 | P50548 ERF_HUMAN    | R.LGRGS#VSDCSDGTSE.L             | S185      | 2 | 3,1934 | 0,511 | 0,076  |
| 5 | O75534 CSDE1_HUMAN  | E.SKS#PAAPGQSPTGSVCYE.R          | S116      | 2 | 3,1894 | 0,528 | 0      |
| 5 | Q96KM6 Z512B_HUMAN  | E.ALKAAGPAS#PPEEDPE.R            | S409      | 2 | 3,1838 | 0,32  | 0,147  |
| 5 | Q99700 ATX2_HUMAN   | E.NSSSNTSGSSKPNSPSIS#PSILSNT.E.H | S864      | 3 | 3,1818 | 0,253 | 0,325  |
| 5 | Q5CZB5 Q5CZB5_HUMAN | E.GEGAAGAGDHQDPS#LGAGE.A         | S114      | 2 | 3,1794 | 0,334 | 0,137  |
| 5 | Q04637 IF4G1_HUMAN  | E.IHEPNGM*VPSLEDLEPEVES#SPE.L    | S376      | 2 | 3,1772 | 0,323 | 0,485  |
| 5 | Q12888 TP53B_HUMAN  | E.SGLQIQKS#PEPE.V                | S294      | 2 | 3,1733 | 0,414 | 0,263  |
| 5 | Q8NFJ5 RAI3_HUMAN   | E.NRAYS#QEEITQGFE.T              | S301      | 2 | 3,1699 | 0,383 | 0,519  |
| 5 | Q9Y2F5 K0947_HUMAN  | E.VAAVKSIS#PE.V                  | S925      | 2 | 3,1693 | 0,439 | 0,113  |
| 5 | Q9NWH9 SLTM_HUMAN   | E.VSKPLPSEGS#LAE.A               | S217      | 2 | 3,1677 | 0,248 | 0,088  |
| 5 | Q09666 AHNK_HUMAN   | D.ISVKGPAFNM*AS#PE.S             | S5552     | 2 | 3,1602 | 0,321 | -0,237 |
| 5 | Q96HN2 SAHH3_HUMAN  | E.VELKDL#PSEAE.S                 | S23       | 2 | 3,152  | 0,37  | 0,087  |
| 5 | Q6R327 RICTR_HUMAN  | E.VVPSKFGISGCS#DGVSQE.G          | S1577     | 2 | 3,151  | 0,35  | 0,302  |
| 5 | Q6P0N0 CN106_HUMAN  | E.VAAAVGSR#PEE.C                 | S914      | 2 | 3,146  | 0,374 | -0,097 |
| 5 | Q6Y7W6 PERQ2_HUMAN  | E.CGFYQRS#FDE.V                  | S139      | 2 | 3,1451 | 0,47  | -0,176 |
| 5 | Q02952 AKA12_HUMAN  | E.QKGESSASS#PEEPEEITCLE.K        | S569      | 3 | 3,1394 | 0,218 | 0,16   |
| 5 | Q9UQ35 SRRM2_HUMAN  | E.LSNS#PLRE.N                    | S1320     | 2 | 3,135  | 0,248 | -0,184 |
| 5 | Q9H6Z4 RANB3_HUMAN  | E.RTSS#LTQFPSPQSEE.R             | S126      | 2 | 3,1319 | 0,479 | -0,069 |
| 5 | P50747 BPL1_HUMAN   | E.SVADETS#PERE.G                 | S147      | 2 | 3,1277 | 0,453 | -0,094 |
| 5 | Q86V48 LUZP1_HUMAN  | R.HTS#TSNIQVGLAE.L               | S820      | 2 | 3,1259 | 0,365 | -0,085 |
| 5 | O60502 NCOAT_HUMAN  | E.S#KSPEM*SMQEDCISD.I            | S509      | 2 | 3,124  | 0,188 | -0,066 |
| 5 | P04792 HSPB1_HUMAN  | R.ALSRQLS#SGVSE.I                | S82       | 2 | 3,1227 | 0,329 | 0,279  |
| 5 | Q9Y5U2 TSSC4_HUMAN  | E.LAHLAGPGS#PEAE.E               | S265      | 2 | 3,1214 | 0,339 | 0,184  |
| 5 | Q6S8J3 A26CA_HUMAN  | E.KLCY#VALDFEQE.M                | Y918      | 2 | 3,1192 | 0,196 | 0,076  |
| 5 | Q7Z3T8 ZFY16_HUMAN  | E.GAKSGPLIS#DAELD.A              | S529      | 2 | 3,1131 | 0,246 | 0      |



|   |                    |                                   |             |   |        |       |        |
|---|--------------------|-----------------------------------|-------------|---|--------|-------|--------|
| 5 | Q8N3D4 EH1L1_HUMAN | E.AGGQVGPEAPRPPETS#PE.M           | S285        | 2 | 3,1121 | 0,398 | 0,066  |
| 5 | Q96S38 KS6C1_HUMAN | E.SLFRICS#PLSGANE.Y               | S823        | 2 | 3,1028 | 0,345 | 0      |
| 5 | Q8NEY1 NAV1_HUMAN  | D.SDNISLKSIGS#PE.S                | S760        | 2 | 3,1003 | 0,412 | 0,171  |
| 5 | Q96T58 MINT_HUMAN  | E.SGVVAVS#PEKSES#PQKE.D           | S2120:S2126 | 3 | 3,0998 | 0,164 | 0      |
| 5 | Q96RL1 UIMC1_HUMAN | E.TGAFRVPS#PGM*EE.A               | S653        | 2 | 3,0991 | 0,469 | 0,166  |
| 5 | Q96EZ8 MCRS1_HUMAN | D.SSLM*ASGTASRS#EDEE.S            | S22         | 2 | 3,0967 | 0,474 | -0,07  |
| 5 | Q86V48 LUZP1_HUMAN | E.STNSNAYTQRS#STDFSE.L            | S956        | 2 | 3,096  | 0,414 | 0      |
| 5 | Q12756 KIF1A_HUMAN | R.YGATDLRTPQPCS#RPAS#PEPE.L       | S1528:S1532 | 3 | 3,0908 | 0,103 | 0      |
| 5 | Q9ULD4 BRPF3_HUMAN | E.NGEDHGVAGSPAS#PASIEEE.R         | S962        | 2 | 3,0862 | 0,445 | 0,6    |
| 5 | Q9H5H4 ZN768_HUMAN | E.GYLGRNMS#ENEEEEE.I              | S33         | 2 | 3,0824 | 0,317 | 0,141  |
| 5 | Q9NPI6 DCP1A_HUMAN | R.KASSPS#PLTIGTPE.S               | S525        | 2 | 3,0785 | 0,406 | 0,167  |
| 5 | P42166 LAP2A_HUMAN | E.SRSST#PLPTISSAE.N               | T160        | 2 | 3,0768 | 0,396 | -0,229 |
| 5 | P82094 TMF1_HUMAN  | E.SQVKDSS#LCVSGE.T                | S156        | 2 | 3,0766 | 0,442 | -0,165 |
| 5 | Q9BRK4 LZTS2_HUMAN | E.LQQLRDS#LDENE.A                 | S346        | 2 | 3,0752 | 0,215 | 0      |
| 5 | Q9UN86 G3BP2_HUMAN | E.EQERQPS#PEPVQE.N                | S163        | 2 | 3,0707 | 0,298 | 0      |
| 5 | Q9NZJ4 SACS_HUMAN  | E.RY#ASNVCFTTLGTE.F               | Y2509       | 2 | 3,07   | 0,446 | 0,144  |
| 5 | P11388 TOP2A_HUMAN | E.ADDVKGSVPLS#S#SPPATHFPDETE.I    | S1391:S1392 | 3 | 3,0697 | 0,197 | 0,069  |
| 5 | P08670 VIME_HUMAN  | E.VDALKGTNES#LE.R                 | S339        | 2 | 3,0687 | 0,315 | 0,18   |
| 5 | Q7LBC6 JHD2B_HUMAN | E.SLADDS#SRDS#FKQSLE.S            | S552:S556   | 3 | 3,0683 | 0,197 | 0,45   |
| 5 | Q9NYF8 BCLF1_HUMAN | E.TQS#PEQVKSE.K                   | S496        | 2 | 3,0682 | 0,279 | -0,302 |
| 5 | Q9H6Z4 RANB3_HUMAN | E.NAAAESGSESS#QEATPEKE.S          | S359        | 2 | 3,0675 | 0,325 | 0      |
| 5 | P06576 ATPB_HUMAN  | E.VSALLGRIPSAVGYQPTLATDM*GTM*QE.R | NA          | 3 | 3,0622 | 0,152 | 0,516  |
| 5 | O43293 DAPK3_HUMAN | E.YT#IKSHS#SLPPNNSYADFE.R         | T306:S311   | 3 | 3,0601 | 1     | 0,236  |
| 5 | Q9Y5U2 TSSC4_HUMAN | E.LAHLAGPGS#PEAEE.W               | S265        | 2 | 3,0599 | 0,388 | 0,084  |
| 5 | Q9H6Z4 RANB3_HUMAN | E.RTS#SLTQFPPSQSEE.R              | S125        | 2 | 3,0573 | 0,474 | 0,206  |
| 5 | O43815 STRN_HUMAN  | E.LNQGDMKPPSYDS#DEGNE.T           | S137        | 2 | 3,0567 | 0,158 | -0,118 |
| 5 | O60303 K0556_HUMAN | E.GRSS#PGPDTLVVLE.F               | S253        | 2 | 3,054  | 0,436 | 0      |
| 5 | Q02952 AKA12_HUMAN | E.ARGDTVVS#EAELTPEAVTAAE.T        | S967        | 2 | 3,0517 | 0,375 | 0      |
| 5 | O95872 BAT4_HUMAN  | E.NRS#PTPSLQYCE.N                 | S210        | 2 | 3,0504 | 0,491 | 0      |
| 5 | Q00839 HNRPU_HUMAN | R.AKS#PQPPVEEED.E.H               | S270        | 2 | 3,0473 | 0,447 | 0      |
| 5 | Q14493 SLBP_HUMAN  | E.ACLTEPLRDFSAM*S#.-              | S270        | 2 | 3,0456 | 0,417 | 0,216  |
| 5 | O94909 K0819_HUMAN | E.LELRVS#EDEE.K                   | S274        | 2 | 3,0454 | 0,271 | -0,188 |
| 5 | Q8IX90 CM003_HUMAN | E.NLLRT#PT#PPEVTKIPE.D            | T358:T360   | 3 | 3,0423 | 0,3   | -0,372 |
| 5 | Q14247 SRC8_HUMAN  | E.LSYRGPVSGTEPEPVYS#ME.A          | S447        | 2 | 3,0411 | 0,486 | 0      |
| 5 | Q9C0C2 TB182_HUMAN | E.AQDLCRAS#PEPPGPE.S              | S672        | 2 | 3,0342 | 0,376 | 0      |
| 5 | Q8TDR0 MIPT3_HUMAN | E.SHNS#DNEEDDQFVVE.A              | S501        | 2 | 3,032  | 0,32  | -0,132 |
| 5 | O94915 FRYL_HUMAN  | E.VLQIRDET#PTLE.A                 | T2547       | 2 | 3,0291 | 0,348 | -0,163 |
| 5 | Q14694 UBP10_HUMAN | E.TKYS#PPAIS#PLVSEKQVE.V          | S365:S370   | 2 | 3,0267 | 0,285 | 0,343  |
| 5 | Q8N137 CNTRB_HUMAN | E.LRSR#LSVGL.E.K                  | S78         | 2 | 3,0175 | 0,235 | 0      |
| 5 | Q99590 SFRIP_HUMAN | E.IIQTVDRQS#VKS#PE.V              | S311:S314   | 3 | 3,0152 | 0,216 | 0      |
| 5 | Q2NKX8 ERC6L_HUMAN | E.LCTNS#SLGM*EKS#FATKNE.A         | S828:S835   | 3 | 3,0125 | 0,234 | 0      |

|   |                     |                                |             |   |        |       |        |
|---|---------------------|--------------------------------|-------------|---|--------|-------|--------|
| 5 | Q5SW79 CE170_HUMAN  | E.SGM*TVRSTGS#ATSLASQGE.R      | S630        | 2 | 3,0118 | 0,383 | 0,063  |
| 5 | Q03468 ERCC6_HUMAN  | E.CSNSSGTGKTSM*PS#GDESIDE.K    | S1142       | 2 | 3,0104 | 0,301 | 0      |
| 5 | P11388 TOP2A_HUMAN  | E.ADDVKGSVPLSS#S#PPATHFPDETE.I | S1392:S1393 | 3 | 3,0064 | 0,177 | 0      |
| 5 | O60271 JIP4_HUMAN   | E.SGQVDKAS#LCGSM*TSNSSAE.T     | S822        | 2 | 3,0036 | 0,352 | -0,116 |
| 5 | Q15643 TRIPB_HUMAN  | E.LNQS#ISEKE.T                 | S486        | 2 | 3,0015 | 0,175 | -0,216 |
| 5 | Q12872 SFRS8_HUMAN  | E.AGKIEES#PFSVEE.S             | S709        | 2 | 3,0001 | 0,288 | 0      |
| 5 | Q96PZ0 PUS7_HUMAN   | E.GKT#PPVFASE.G                | T610        | 2 | 2,9995 | 0,341 | -0,219 |
| 5 | Q8N2Y8 RUSC2_HUMAN  | E.GGYGCPHASS#PE.L              | S356        | 2 | 2,9926 | 0,502 | -0,188 |
| 5 | Q09666 AHNK_HUMAN   | R.LKS#EDGVEGDLGE.T             | S135        | 2 | 2,9852 | 0,402 | -0,342 |
| 5 | Q14694 UBP10_HUMAN  | E.TKYS#PPAISPLVSE.K            | S365        | 2 | 2,9803 | 0,445 | 0,078  |
| 5 | Q4LE39 ARI4B_HUMAN  | R.LSKPPFQTNPS#PE.M             | S675        | 2 | 2,9802 | 0,274 | 0,08   |
| 5 | Q13641 TPBG_HUMAN   | E.INADPRLTNLSSNS#DV.-          | S418        | 2 | 2,9785 | 0,435 | 0      |
| 5 | P18031 PTN1_HUMAN   | E.EKGS#PLNAAPYGIE.S            | S352        | 2 | 2,975  | 0,408 | 0,24   |
| 5 | P67809 YBOX1_HUMAN  | R.NYQQNYQNS#ESGEKNE.G          | S165        | 2 | 2,9748 | 0,169 | 0,061  |
| 5 | P55209 NP1L1_HUMAN  | E.RLDGLVET#PTGYIE.S            | T62         | 2 | 2,9748 | 0,426 | 0,297  |
| 5 | Q8N680 ZBTB2_HUMAN  | E.GRS#ILLGSGDSE.V              | S483        | 2 | 2,9726 | 0,341 | 0      |
| 5 | Q13085 ACACA_HUMAN  | E.VIRILSTM*DS#PST.-            | S2343       | 2 | 2,9717 | 0,425 | 0,161  |
| 5 | Q9BQY9 DBND2_HUMAN  | E.SQRPPGISISS#M*EVNVDTLE.Q     | S154        | 3 | 2,9673 | 0,306 | -0,649 |
| 5 | P18031 PTN1_HUMAN   | E.KGS#PLNAAPYGIE.S             | S352        | 2 | 2,9631 | 0,318 | 0,437  |
| 5 | O60684 IMA7_HUMAN   | E.HYFGVEDDDS#SLAPQVDE.T        | S509        | 2 | 2,9626 | 0,406 | 0,348  |
| 5 | Q8WYP5 AHTF1_HUMAN  | E.LNHLS#PVQGTE.A               | S1411       | 2 | 2,9585 | 0,233 | 0,191  |
| 5 | Q14966 ZN638_HUMAN  | E.KATCDS#DFAVETLE.L            | S1158       | 2 | 2,9568 | 0,242 | 0      |
| 5 | Q13017 RHG05_HUMAN  | E.NSYLS#DNTRE.S                | S951        | 2 | 2,9535 | 0,373 | 0,095  |
| 5 | P38398 BRCA1_HUMAN  | E.LVVSRLNS#PPNCTE.L            | S632        | 2 | 2,9513 | 0,339 | 0,366  |
| 5 | Q15424 SAFB1_HUMAN  | D.KETINNLDTSS#SSDFTILQE.I      | S195        | 2 | 2,9475 | 0,395 | 0,218  |
| 5 | P24278 ZBT25_HUMAN  | E.SVISQSHPS#PSSE.V             | S220        | 2 | 2,947  | 0,42  | 0,086  |
| 5 | P51587 BRCA2_HUMAN  | E.TTSISKITVNPDSSEELFS#DNE.N    | S884        | 2 | 2,9435 | 0,326 | -0,203 |
| 5 | Q9Y5U2 TSSC4_HUMAN  | E.LAHLAGPGS#PE.A               | S265        | 2 | 2,9412 | 0,442 | 0,108  |
| 5 | Q9ULD5 ZN777_HUMAN  | E.NQRSS#PLSFPSVPQEE.T          | S7          | 2 | 2,9408 | 0,323 | 0,065  |
| 5 | Q68E09 Q68E09_HUMAN | E.AQRGAS#PPISAIEE.F            | S11         | 2 | 2,9404 | 0,368 | 0      |
| 5 | P14314 GLU2B_HUMAN  | E.LM*TPAACPEPPPEAPTEDDHDEL.-   | NA          | 2 | 2,9398 | 0,314 | 0,287  |
| 5 | Q7Z3B3 K1267_HUMAN  | E.DTRCST#PELGLDE.Q             | T1022       | 2 | 2,9302 | 0,367 | -0,155 |
| 5 | Q5H9R7 SAPS3_HUMAN  | D.SLRSNS#PVEM*E.T              | S740        | 2 | 2,9286 | 0,177 | 0,181  |
| 5 | A0MZ66 SHOT1_HUMAN  | E.AEFNS#PSPPT#PEPEGPRKLE.G     | S532:T537   | 3 | 2,9253 | 0,219 | 0,84   |
| 5 | Q9NUL3 STAU2_HUMAN  | E.AIGLKGS#PT#PPCSPVQPSKQLE.Y   | S486:T488   | 3 | 2,9208 | 0,319 | 0,649  |
| 5 | O60502 NCOAT_HUMAN  | E.SKS#PEMSMQE.D                | S511        | 2 | 2,9162 | 0,272 | 0,297  |
| 5 | Q5SW79 CE170_HUMAN  | E.SGM*TVRSTGSATSLAS#QGE.R      | S636        | 2 | 2,9134 | 0,496 | 0,317  |
| 5 | Q14694 UBP10_HUMAN  | E.TKYS#PPAIS#PLVSEKQVE.V       | S365:S370   | 3 | 2,9131 | 0,225 | 0,257  |
| 5 | Q5VUA4 ZN318_HUMAN  | E.DQLSEGRNS#PE.K               | S1243       | 2 | 2,9116 | 0,27  | 0,093  |
| 5 | Q9HAU5 RENT2_HUMAN  | E.NKEVSS#PDDLELE.L             | S514        | 2 | 2,9105 | 0,271 | -0,078 |
| 5 | Q96PY6 NEK1_HUMAN   | E.NTTIRSEIS#PEGE.K             | S837        | 2 | 2,9074 | 0,373 | 0      |

|   |                    |                                        |                |   |        |       |        |
|---|--------------------|----------------------------------------|----------------|---|--------|-------|--------|
| 5 | Q13118 KLF10_HUMAN | E.NRPVT#PVSDLSEEE.N                    | T66            | 2 | 2,9073 | 0,327 | 1,034  |
| 5 | Q9NRF2 SH2B1_HUMAN | E.VARASGSLSPILAPLS#PGAE.I              | S96            | 3 | 2,905  | 0,086 | 0      |
| 5 | P42166 LAP2A_HUMAN | E.ISTRPPLGS#TE.L                       | S235           | 2 | 2,9048 | 0,362 | 0      |
| 5 | Q86SQ0 PHLB2_HUMAN | E.LEKLQLS#DEE.S                        | S489           | 2 | 2,9039 | 0,156 | -0,38  |
| 5 | Q9NZD8 SPG21_HUMAN | E.LEVQKQSLGIS#QEEQ.-                   | S304           | 2 | 2,9015 | 0,347 | 0,283  |
| 5 | Q14669 TRIPC_HUMAN | E.SSCVKSGSGS#ESTGAE.E.R                | S163           | 2 | 2,8981 | 0,334 | -0,281 |
| 5 | O60307 MAST3_HUMAN | E.MVPLSHLEEEQPAPES#PE.S                | S348           | 3 | 2,8969 | 0,106 | -0,25  |
| 5 | Q92900 RENT1_HUMAN | R.AYQHGGVTGLS#QY.-                     | S1127          | 2 | 2,8959 | 0,331 | 0      |
| 5 | P78312 CD008_HUMAN | E.SKADS#PPPSYPTQQA.E.Q                 | S393           | 2 | 2,8954 | 0,432 | -0,411 |
| 5 | P15822 ZEP1_HUMAN  | E.VS#DLRSKSFDCGSIT#PPQTTPLTE.L         | S1380:T1393    | 3 | 2,8906 | 0,109 | 0,065  |
| 5 | Q14160 LAP4_HUMAN  | R.LRVQS#PEPPAPE.R                      | S1475          | 2 | 2,8839 | 0,398 | 0,174  |
| 5 | Q92878 RAD50_HUMAN | E.NQSCCPVQQRVFQT#EAE.L                 | T690           | 3 | 2,8787 | 0,357 | 0,25   |
| 5 | Q6P4F7 RHGBA_HUMAN | E.SVKTGLLS#PDVDE.K                     | S484           | 2 | 2,8724 | 0,342 | 0,154  |
| 5 | Q99567 NUP88_HUMAN | E.SPLRVLAET#PDSFE.K                    | T525           | 2 | 2,8724 | 0,355 | -0,074 |
| 5 | P49711 CTCF_HUMAN  | E.LQGAYENEVS#KE.G                      | S143           | 2 | 2,8653 | 0,36  | 0,337  |
| 5 | Q8IW35 CEP97_HUMAN | E.SHGIS#PPLQGE.I                       | S825           | 2 | 2,8626 | 0,369 | -0,102 |
| 5 | Q66K74 MAP1S_HUMAN | E.LPLAASSIPRPT#PS#PE.S                 | T638:S640      | 2 | 2,8596 | 0,392 | 0,125  |
| 5 | Q8WVM7 STAG1_HUMAN | E.TTAHSDAGS#ELEETE.V                   | S24            | 2 | 2,8565 | 0,32  | 0,221  |
| 5 | P62699 YPEL5_HUMAN | E.SEGFEEHVPS#DNS.-                     | S118           | 2 | 2,8552 | 0,473 | -0,081 |
| 5 | A1L390 PKHG3_HUMAN | E.KGPLPS#PTAGLEE.S                     | S1154          | 2 | 2,8533 | 0,318 | 0      |
| 5 | P00558 PGK1_HUMAN  | K.SLLGKDVFLK.D                         | NA             | 2 | 2,8526 | 0,248 | -0,099 |
| 5 | Q9UQ35 SRRM2_HUMAN | E.NSFGS#PLEFRNSGPLGTE.M                | S1329          | 2 | 2,8446 | 0,243 | 0,491  |
| 5 | P11940 PABP1_HUMAN | E.LLHMLES#PE.S                         | S599           | 2 | 2,8434 | 0,203 | 0      |
| 5 | Q9Y6D6 BIG1_HUMAN  | E.TINRYGS#LNSLE.S                      | S664           | 2 | 2,8421 | 0,402 | 0,253  |
| 5 | Q9Y2W6 TDRKH_HUMAN | E.ITHTLS#CLSLE.A                       | S539           | 2 | 2,8419 | 0,161 | 0      |
| 5 | Q6VMQ6 MCAF1_HUMAN | E.SSFGS#PSKQESSE.S                     | S477           | 2 | 2,8419 | 0,284 | 0,085  |
| 5 | Q5UIP0 RIF1_HUMAN  | E.SKENT#PPVVISADQMVNE.D                | T1388          | 2 | 2,8376 | 0,383 | 0,299  |
| 5 | Q9H5H4 ZN768_HUMAN | E.GYLGRNM*S#ENEEEE.I                   | S33            | 2 | 2,8373 | 0,336 | -0,209 |
| 5 | Q5H9R7 SAPS3_HUMAN | E.FTSSLSTKDS#LRSNS#PVEM*E.T            | S735:S740      | 3 | 2,8364 | 0,09  | 0      |
| 5 | P49792 RBP2_HUMAN  | E.SSINYTFKT#PE.K                       | T2613          | 2 | 2,8351 | 0,391 | -0,089 |
| 5 | Q86TI2 DPP9_HUMAN  | E.VIHVPS#PALE.E                        | S292           | 2 | 2,8341 | 0,36  | 0,107  |
| 5 | Q92615 LARP5_HUMAN | E.KFTSSQTQS#PT#PPKPPS#PSFE.L           | S516:T518:S524 | 3 | 2,833  | 0,087 | 0,291  |
| 5 | Q03468 ERCC6_HUMAN | E.MAIKQES#GGDGEVEE.Y                   | S35            | 2 | 2,8303 | 0,36  | 0,147  |
| 5 | Q9UHB6 LIMA1_HUMAN | R.KIS#ENSYSLDDLE.I                     | S225           | 2 | 2,8285 | 0,296 | 0,383  |
| 5 | Q9UBF8 PI4KB_HUMAN | E.QRAGS#FSTVPNYDNDDE.A                 | S445           | 2 | 2,8249 | 0,286 | 0,306  |
| 5 | Q9HCM1 CL035_HUMAN | E.SAIHS#PM*NDQQISQE.S                  | S868           | 2 | 2,823  | 0,35  | 0,206  |
| 5 | P15336 ATF2_HUMAN  | D.SVIVADQT#PT#PTRFLKNCEE.V             | T51:T53        | 3 | 2,8205 | 0,235 | 0,371  |
| 5 | O75179 ANR17_HUMAN | E.KATVPVAAATAAEGEGS#PPAVA AVAGPPAAAE.V | S19            | 3 | 2,8179 | 0,345 | 0,318  |
| 5 | P04792 HSPB1_HUMAN | E.SPAVAAPAY#SRALSRQLS#SGVSE.I          | Y73:S82        | 3 | 2,8178 | 0,319 | 0,074  |
| 5 | Q8N108 MIER1_HUMAN | E.SAASSRAP#PPPTASNSSNSQSE.K            | S401           | 2 | 2,8153 | 0,266 | 0,319  |
| 5 | Q15149 PLEC1_HUMAN | E.VQYLTTGLIEPDTGRVPLDE.A               | NA             | 3 | 2,8134 | 0,217 | 0,322  |

|   |                    |                                |             |   |        |       |        |
|---|--------------------|--------------------------------|-------------|---|--------|-------|--------|
| 5 | P49792 RBP2_HUMAN  | E.T#TPKAVVS#PPKFVFGSE.S        | T2503:S2510 | 2 | 2,8092 | 0,462 | 0,063  |
| 5 | Q9UKV3 ACINU_HUMAN | E.AS#SPPHPQLHS#EEE.I           | S424:S434   | 2 | 2,8088 | 0,436 | -0,068 |
| 5 | Q14978 NOLC1_HUMAN | R.GGSISVQVNSIKFDS#E.-          | S698        | 2 | 2,8058 | 0,303 | -0,14  |
| 5 | Q8IZT6 ASPM_HUMAN  | E.ENKIPISPIS#PAFNE.C           | S225        | 2 | 2,7987 | 0,325 | 0      |
| 5 | Q16352 AINX_HUMAN  | E.IEGLRGANES#LE.R              | S335        | 2 | 2,7984 | 0,287 | 0,089  |
| 5 | Q9COB0 UNK_HUMAN   | E.HFASGSFSPGT#SPAFLSGPGAAE.L   | T634        | 3 | 2,7977 | 0,105 | 0,243  |
| 5 | Q9UKM9 RALY_HUMAN  | E.GLLTHS#EEE.L                 | S288        | 2 | 2,7956 | 0,253 | 0,446  |
| 5 | Q13426 XRCC4_HUMAN | E.TLRNSS#PEDLFDEI.-            | S328        | 2 | 2,7945 | 0,248 | -0,142 |
| 5 | Q9Y3X0 CCDC9_HUMAN | E.TKEGAAS#PAPETPQPTSPE.T       | S376        | 2 | 2,7933 | 0,357 | 0      |
| 5 | P18754 RCC1_HUMAN  | E.GALGRDTS#VEGSE.M             | S104        | 2 | 2,7929 | 0,239 | 0      |
| 5 | Q6I9Y2 THOC7_HUMAN | E.NDEKLS#EVEE.A                | S188        | 2 | 2,7922 | 0,217 | 0,192  |
| 5 | Q96MU7 YTDC1_HUMAN | R.AKS#PT#PDGSRIGLE.V           | S146:T148   | 2 | 2,7881 | 0,303 | 0      |
| 5 | Q3YEC7 PARF_HUMAN  | E.VAAPTKEGPAPAPQQCS#EPE.T      | S492        | 2 | 2,7852 | 0,414 | -0,121 |
| 5 | Q08211 DHX9_HUMAN  | E.IKSEEVPAFGVAS#PPPLTDTDPD.T   | S87         | 2 | 2,7849 | 0,219 | 0,208  |
| 5 | O60502 NCOAT_HUMAN | E.SKS#PEMSMQEDCISD.I           | S511        | 2 | 2,7846 | 0,261 | 0      |
| 5 | Q9P2R6 RERE_HUMAN  | E.ISRPNS#PSEGESE.S             | S679        | 2 | 2,7776 | 0,329 | -0,085 |
| 5 | P62736 ACTA_HUMAN  | D.LAGRDLTDYLM*K.I              | NA          | 3 | 2,7767 | 0,332 | 0,065  |
| 5 | P55201 BRPF1_HUMAN | R.KTEGVS#PIPQEIFE.Y            | S238        | 2 | 2,775  | 0,338 | 0,664  |
| 5 | Q9HC35 EMAL4_HUMAN | E.ESRISS#PTLLE.N               | S919        | 2 | 2,7728 | 0,176 | 0,087  |
| 5 | Q3YEC7 PARF_HUMAN  | E.VAAPTKEGPAPAPQQCS#EPE.T      | S492        | 3 | 2,764  | 0,125 | 0      |
| 5 | O75376 NCOR1_HUMAN | E.FS#PRSQNSQPE.G               | S1111       | 2 | 2,7611 | 0,268 | 0      |
| 5 | Q9UHR4 BI2L1_HUMAN | E.IKTPASTPVSGTPQAS#PMIE.R      | S261        | 3 | 2,7534 | 0,095 | 0,262  |
| 5 | Q96RS0 TGS1_HUMAN  | E.TNNPEPEKQSVSS#AGELE.T        | S578        | 2 | 2,7533 | 0,201 | 0,34   |
| 5 | Q9BVI0 PHF20_HUMAN | E.NTMKTEPTS#PLVE.L             | S415        | 2 | 2,7523 | 0,202 | 0,24   |
| 5 | P68104 EF1A1_HUMAN | K.IGGIGTVPVGR.V                | NA          | 2 | 2,7521 | 0,315 | 0,119  |
| 5 | Q04726 TLE3_HUMAN  | E.SSANNVS#PSESLRASE.K          | S203        | 2 | 2,7504 | 0,389 | 0,068  |
| 5 | Q9Y2W1 TR150_HUMAN | E.AQVNVVM*DS#FDE.D             | S575        | 2 | 2,7504 | 0,357 | 0,162  |
| 5 | Q9BQA9 CQ062_HUMAN | E.LHCLESPTELSQSS#DSEAGDPASQS.- | S176        | 2 | 2,7502 | 0,44  | 0,18   |
| 5 | Q9UQ35 SRRM2_HUMAN | E.NSFGS#PLEFR.N                | S1329       | 2 | 2,75   | 0,457 | -0,099 |
| 5 | Q9ULJ3 ZN295_HUMAN | E.HGS#PVSEDNFEE.G              | S504        | 2 | 2,7495 | 0,332 | 0      |
| 5 | O75821 EIF3G_HUMAN | E.LLKGIPLATGDT#PEPE.L          | S42         | 3 | 2,7451 | 0,258 | -0,503 |
| 5 | Q00613 HSF1_HUMAN  | E.GRPPS#PPPTSTPE.K             | S363        | 2 | 2,7442 | 0,332 | 0,174  |
| 5 | O94915 FRYL_HUMAN  | E.SGLPKNPSVVFSS#NEDLE.V        | S2385       | 2 | 2,744  | 0,417 | 0,305  |
| 5 | Q96E15 TCAL4_HUMAN | E.IEGKPES#EGEPGSE.T            | S102        | 2 | 2,7392 | 0,297 | 0      |
| 5 | Q9Y2U5 M3K2_HUMAN  | R.DRSS#PPPGYIPDE.L             | S164        | 2 | 2,7377 | 0,275 | -0,081 |
| 5 | P11137 MAP2_HUMAN  | E.FQTGKESQPS#PPAQE.A           | S629        | 2 | 2,7362 | 0,346 | 0,214  |
| 5 | Q8N3U4 STAG2_HUMAN | E.SETHFSS#DTDFEDIE.G           | S23         | 2 | 2,7358 | 0,328 | 0,133  |
| 5 | Q13200 PSMD2_HUMAN | E.DVLTLLLPVM*GDSKSSM*E.V       | NA          | 2 | 2,7353 | 0,338 | 0      |
| 5 | P49790 NU153_HUMAN | E.NKS#SFNLGTIE.T               | S1046       | 2 | 2,7319 | 0,297 | 0,095  |
| 5 | Q15067 ACOX1_HUMAN | E.LLTHILDGS#PE.K               | S26         | 2 | 2,7285 | 0,327 | 0,191  |
| 5 | Q9Y266 NUDC_HUMAN  | E.TSGPQIKELT#DEEAE.R           | T108        | 2 | 2,7281 | 0,403 | 0,212  |

|   |                      |                                    |                |   |        |       |        |
|---|----------------------|------------------------------------|----------------|---|--------|-------|--------|
| 5 | Q4VBZ6 Q4VBZ6_HUMAN  | E.QM*NGPVGAS#RQSS#GPGASSGTSGDHGE.L | S37:S41        | 3 | 2,7263 | 0,183 | 0,265  |
| 5 | Q14690 RRP5_HUMAN    | E.YVEAKSS#VLED.-                   | S1867          | 2 | 2,7248 | 0,234 | 0      |
| 5 | Q92797 SYMPK_HUMAN   | E.RS#PQTLAPVGE.D                   | S1243          | 2 | 2,7225 | 0,321 | 0,198  |
| 5 | Q04637 IF4G1_HUMAN   | E.IHEPNGM*VPSEDLPEVES#SPE.L        | S376           | 3 | 2,7223 | 0,156 | 0,073  |
| 5 | P00558 PGK1_HUMAN    | K.SLLGKDVLFK.D                     | NA             | 3 | 2,7221 | 0,199 | 0,741  |
| 5 | Q9GZZ9 UBA5_HUMAN    | E.LKNFS#GPVPDLPE.G                 | S358           | 2 | 2,7212 | 0,278 | 0,163  |
| 5 | Q03188 CENPC_HUMAN   | E.ISRCS#LSEPLESDE.A                | S613           | 2 | 2,7162 | 0,403 | 0,072  |
| 5 | Q7Z2W4 ZCCHV_HUMAN   | E.FLASASASAERSCT#PS#PDQISHRAS#LE.D | T273:S275:S284 | 3 | 2,7152 | 0,188 | 0      |
| 5 | P20700 LMNB1_HUMAN   | E.MNTS#TVNSAREE.L                  | S284           | 2 | 2,7152 | 0,257 | 0,086  |
| 5 | O95684 FR1OP_HUMAN   | E.GALDLSDVHS#PPKS#PE.G             | S156:S160      | 3 | 2,7103 | 0,184 | -0,101 |
| 5 | O94909 K0819_HUMAN   | E.LELRVS#E.D                       | S274           | 2 | 2,7096 | 0,223 | 0,066  |
| 5 | O60664 M6PBP_HUMAN   | E.QSYFVRLGS#LSE.R                  | S241           | 2 | 2,7033 | 0,358 | 0      |
| 5 | P49736 MCM2_HUMAN    | E.SFTM*AS#SPAQR.R                  | S12            | 2 | 2,7005 | 0,389 | 0      |
| 5 | Q8NBT0 WD51A_HUMAN   | E.NQQLIMQRAT#P.-                   | T406           | 2 | 2,6923 | 0,35  | 0,177  |
| 5 | Q9Y624 JAM1_HUMAN    | E.GEFKQTSS#FLV.-                   | S296           | 2 | 2,6911 | 0,263 | -0,922 |
| 5 | Q7Z7E8 UB2Q1_HUMAN   | R.FRIAS#ACLDE.L                    | S63            | 2 | 2,6887 | 0,258 | 0,29   |
| 5 | Q6NZI2 PTRF_HUMAN    | E.SDAVLVDKS#D.S                    | S387           | 2 | 2,6845 | 0,288 | -0,108 |
| 5 | Q9BYP7 WNK3_HUMAN    | E.ILTAGKQPSS#DSE.F                 | S1424          | 2 | 2,6805 | 0,305 | -0,173 |
| 5 | Q5H9R7 SAPS3_HUMAN   | D.SLRSNS#PVEME.T                   | S740           | 2 | 2,6769 | 0,284 | -0,184 |
| 5 | P04637 P53_HUMAN     | K.LM*FKTEGPDS#D.-                  | S392           | 2 | 2,6767 | 0,26  | 0      |
| 5 | Q13263 TIF1B_HUMAN   | E.KLS#PPYSSPQE.F                   | S752           | 2 | 2,675  | 0,273 | 0      |
| 5 | P15880 RS2_HUMAN     | K.SPYQEFTDHLVK.T                   | NA             | 3 | 2,6716 | 0,236 | 0,312  |
| 5 | Q02952 AKA12_HUMAN   | E.TVSILSKTEGT#QE.A                 | T1264          | 2 | 2,6702 | 0,33  | 0,083  |
| 5 | P18583 SON_HUMAN     | E.IGEEKILPTS#E.T                   | S1570          | 2 | 2,6661 | 0,242 | 0      |
| 5 | Q8N565 MREG_HUMAN    | E.LHYLPFPS#P.-                     | S213           | 2 | 2,6657 | 0,366 | 0,212  |
| 5 | Q12933 TRAF2_HUMAN   | E.LLQRCES#LE.K                     | S274           | 2 | 2,6656 | 0,214 | -0,099 |
| 5 | Q5SYE7 NHSL1_HUMAN   | E.ALRAVPSPT#TGEE.G                 | T1235          | 2 | 2,6635 | 0,431 | 0      |
| 5 | Q14694 UBP10_HUMAN   | E.NDGVV#GGGLQRE.R                  | S141           | 2 | 2,6602 | 0,259 | 0      |
| 5 | Q9Y2H0 DLGP4_HUMAN   | R.AASVRQNS#ATESADSIE.I             | S970           | 2 | 2,6572 | 0,312 | -0,269 |
| 5 | Q9Y365 PCTL_HUMAN    | E.LSVQHADS#LENIDE.S                | S259           | 2 | 2,6564 | 0,193 | 0      |
| 5 | O60281 ZN292_HUMAN   | E.TLKIGDLT#PQNLE.R                 | T263           | 2 | 2,6539 | 0,261 | 0,08   |
| 5 | P40939 ECHA_HUMAN    | E.VEAVIPDHCIFASNTSALPISE.I         | NA             | 2 | 2,6336 | 0,317 | 0,103  |
| 5 | O15031 PLXB2_HUMAN   | E.DSCPQFLGPSPLVPM*NHE.T            | NA             | 2 | 2,6324 | 0,341 | 0,68   |
| 5 | Q14157 UBP2L_HUMAN   | E.AKGGV#TTGGSQFLE.Q                | S356           | 2 | 2,6293 | 0,288 | 0      |
| 5 | ##Q9HBE5 IL21R_HUMAN | D.FTDM*DLGALPSGAES#ES#VGGPSR.G     | S63:S65        | 3 | 2,629  | 0,141 | -0,968 |
| 5 | P25445 TNR6_HUMAN    | E.NQGSHEV#PTLNPE.T                 | S212           | 2 | 2,6232 | 0,111 | -0,246 |
| 5 | Q09666 AHNK_HUMAN    | R.SNS#FSDERE.F                     | S5782          | 2 | 2,6227 | 0,433 | -0,106 |
| 5 | Q8IY92 BTBDC_HUMAN   | E.GSLPHS#DDAGDYE.Q                 | S294           | 2 | 2,6178 | 0,417 | 0,085  |
| 5 | Q71U36 TBA1A_HUMAN   | E.GEFS#EARE.D                      | S419           | 2 | 2,6177 | 0,212 | -0,546 |
| 5 | Q9UBU9 NXF1_HUMAN    | E.IQRAFAM*PAPTPS#SSPVPTLSPEQQE.M   | S556           | 3 | 2,6167 | 0,295 | 0,192  |
| 5 | P19338 NUCL_HUMAN    | E.IEPAAM*KAAAAAPAS#EDE.D           | S184           | 2 | 2,6164 | 0,272 | 0      |

|   |                    |                                    |             |   |        |       |        |
|---|--------------------|------------------------------------|-------------|---|--------|-------|--------|
| 5 | Q9BZL6 KPCD2_HUMAN | E.NALHAS#EEEEGE.G                  | S362        | 2 | 2,6153 | 0,179 | -0,087 |
| 5 | Q2TB10 ZN800_HUMAN | E.SSPPSITHS#PQNE.L                 | S426        | 2 | 2,6132 | 0,433 | 0      |
| 5 | Q92667 AKAP1_HUMAN | E.TSSS#PRDKAIT#PPLPE.S             | S526:T533   | 2 | 2,6126 | 0,344 | 0      |
| 5 | Q9UKV3 ACINU_HUMAN | E.ASS#PPHPQLHS#EEE.I               | S425:S434   | 3 | 2,6093 | 0,208 | -0,102 |
| 5 | Q13435 SF3B2_HUMAN | E.KEDFS#DM*VAE.H                   | S838        | 2 | 2,6079 | 0,408 | 0,096  |
| 5 | Q8NBT0 WD51A_HUMAN | E.NQQLIM*QRAT#P.-                  | T406        | 2 | 2,6044 | 0,296 | -0,087 |
| 5 | O60307 MAST3_HUMAN | E.MVPLSHLEEEQPPAPES#PE.S           | S348        | 2 | 2,6042 | 0,258 | 0,222  |
| 5 | Q6ZN16 M3K15_HUMAN | E.HGSVS#PDSDAQDALFE.R              | S952        | 2 | 2,6023 | 0,377 | 0,066  |
| 5 | P61158 ARP3_HUMAN  | R.TLTGTVIDSGDGVTHVIPVAE.G          | NA          | 2 | 2,6006 | 0,312 | 0,117  |
| 5 | Q02880 TOP2B_HUMAN | E.YTFS#PGKSKAT#PE.K                | S1424:T1431 | 2 | 2,599  | 0,264 | 0,233  |
| 5 | Q15942 ZYX_HUMAN   | R.EKVSS#IDLE.I                     | S143        | 2 | 2,5979 | 0,138 | -0,111 |
| 5 | P27824 CALX_HUMAN  | E.ILVDQSVVNSGNLLNDM*TPPVNPSRE.I    | NA          | 3 | 2,592  | 0,321 | 0,194  |
| 5 | O15027 SC16A_HUMAN | E.ASGSFFKQIDSS#PVGGETD.E           | S391        | 2 | 2,5856 | 0,283 | -0,85  |
| 5 | Q92619 HMHA1_HUMAN | E.VASGSHSGS#EEQLE.A                | S1074       | 2 | 2,5849 | 0,181 | 0,163  |
| 5 | Q96F24 NRBF2_HUMAN | E.GQSPLSQKYS#PSTE.K                | S120        | 2 | 2,5842 | 0,193 | 0,077  |
| 5 | Q02952 AKA12_HUMAN | E.SDKAIT#PQAQEE.L                  | T1760       | 2 | 2,5826 | 0,415 | 0,349  |
| 5 | Q9Y5B0 CTDP1_HUMAN | E.NS#PAAFPDRE.G                    | S740        | 2 | 2,5805 | 0,445 | 0,103  |
| 5 | Q14160 LAP4_HUMAN  | E.LRSLEPS#PSPGPQEE.D               | S1579       | 2 | 2,5754 | 0,339 | 0,215  |
| 5 | Q9Y6I3 EPN1_HUMAN  | E.AVGSPPPAATPT#PT#PPTRKTP.E.S      | T437:T439   | 3 | 2,5741 | 0,095 | 0,236  |
| 5 | Q96MU7 YTDC1_HUMAN | R.AKS#PT#PDGSRIGLE.V               | S146:T148   | 3 | 2,5708 | 0,115 | 0      |
| 5 | P35232 PHB_HUMAN   | E.LVSRQVS#DDLTE.R                  | S151        | 2 | 2,5686 | 0,151 | 0      |
| 5 | Q14966 ZN638_HUMAN | E.SPGLKNS#PIDE.S                   | S1106       | 2 | 2,5677 | 0,239 | -0,099 |
| 5 | Q92614 MY18A_HUMAN | E.TSTPSEHSAAPS#PQVE.V              | S164        | 2 | 2,567  | 0,085 | -0,143 |
| 5 | Q8TB72 PUM2_HUMAN  | E.VNAILSPRS#E.S                    | S85         | 2 | 2,5665 | 0,236 | 0      |
| 5 | Q9UN86 G3BP2_HUMAN | E.QEERQPS#PEPVQE.N                 | S163        | 2 | 2,5658 | 0,286 | 0,149  |
| 5 | Q9Y2F5 K0947_HUMAN | E.LDRLS#TSE.V                      | S1171       | 2 | 2,5654 | 0,152 | 0,122  |
| 5 | Q14247 SRC8_HUMAN  | R.AKTQT#PPVSPAPQPT.E.R             | T401        | 2 | 2,5648 | 0,308 | 0      |
| 5 | O75691 UTP20_HUMAN | E.YTCKS#LSDNGQPGT#PDPADSGGTS.AKE.S | S1732:T1741 | 3 | 2,5636 | 0,173 | 0,189  |
| 5 | Q99549 MPP8_HUMAN  | D.IQRLS#LNNDIFE.A                  | S126        | 2 | 2,5627 | 0,358 | 0      |
| 5 | P23528 COF1_HUMAN  | E.KLGGs#AVISLE.G                   | S156        | 2 | 2,5613 | 0,201 | 0,106  |
| 5 | Q658J3 A26CA_HUMAN | E.LPDGQVITIGNE.R                   | NA          | 2 | 2,5587 | 0,203 | -0,097 |
| 5 | O15047 SET1A_HUMAN | E.RVAGS#PVTPLPEQE.A                | S1103       | 2 | 2,5573 | 0,257 | -0,078 |
| 5 | P07355 ANXA2_HUMAN | E.ILOCKLS#LE.G                     | S12         | 2 | 2,5573 | 0,279 | 0      |
| 5 | Q14671 PUM1_HUMAN  | E.VNSVLSPRS#E.S                    | S212        | 2 | 2,557  | 0,269 | 0      |
| 5 | P26038 MOES_HUMAN  | E.LTARIS#QLE.M                     | S429        | 2 | 2,5545 | 0,233 | 0      |
| 5 | Q9NQW6 ANLN_HUMAN  | E.GELDM*EKS#QEE.M                  | S583        | 2 | 2,5517 | 0,278 | 0      |
| 5 | P50851 LRBA_HUMAN  | E.NSSIEKTSS#LE.S                   | S1000       | 2 | 2,549  | 0,195 | 0      |
| 5 | Q92576 PHF3_HUMAN  | E.STEFNKS#NLE.V                    | S419        | 2 | 2,5423 | 0,227 | -0,098 |
| 5 | P48960 CD97_HUMAN  | R.ALRAS#ESGI.-                     | S831        | 2 | 2,5404 | 0,434 | -0,062 |
| 5 | Q9Y6N7 ROBO1_HUMAN | E.TYTDDLPPPPVPPPAIKS#PTAQSKTQLE.V  | S1492       | 3 | 2,5356 | 0,239 | 0,239  |
| 5 | Q5VT52 K0460_HUMAN | E.TRVSSS#CLDLPDSTEE.K              | S1070       | 2 | 2,5353 | 0,14  | 0,715  |

|   |                     |                             |             |   |        |       |        |
|---|---------------------|-----------------------------|-------------|---|--------|-------|--------|
| 5 | Q00839 HNRPU_HUMAN  | R.AKS#PQPPVEEE.D            | S270        | 2 | 2,5349 | 0,29  | -0,095 |
| 5 | O15320 CTGE5_HUMAN  | E.TRAFLS#PPTLLE.G           | S536        | 2 | 2,5337 | 0,32  | -0,342 |
| 5 | O43149 ZZEF1_HUMAN  | E.VERPVS#SPGDPE.Q           | S2443       | 2 | 2,5324 | 0,302 | 0,09   |
| 5 | Q96T23 RSF1_HUMAN   | E.SEKPGS#PEAAE.T            | S612        | 2 | 2,5315 | 0,373 | -0,103 |
| 5 | Q8IU85 KCC1D_HUMAN  | E.GKGDVM*ST#ACGTPGYVAPE.V   | T180        | 2 | 2,5274 | 0,266 | 0,122  |
| 5 | P06493 CDC2_HUMAN   | E.GTY#GVVYK.G               | Y15         | 2 | 2,5272 | 0,392 | 0,252  |
| 5 | Q96EA4 CCD99_HUMAN  | R.SGNTPN#PRLAAE.S           | S555        | 2 | 2,5254 | 0,323 | -0,525 |
| 5 | Q9UHX1 PUF60_HUMAN  | E.NGQSTAAKGLPLT#PEQQE.A     | T60         | 3 | 2,525  | 0,143 | 0,339  |
| 5 | O15027 SC16A_HUMAN  | E.GAGVWHQDGalPQQCPGT#PSSE.M | T1729       | 3 | 2,5239 | 0,122 | 0      |
| 5 | Q9Y5S2 MRCKB_HUMAN  | D.LTFRTSS#ASEQE.T           | S970        | 2 | 2,5215 | 0,143 | 0,17   |
| 5 | P54278 PMS2_HUMAN   | E.YAASS#PGDRGSQE.H          | S523        | 2 | 2,5205 | 0,311 | -0,174 |
| 5 | Q9NYF8 BCLF1_HUMAN  | E.ALDYFS#DKE.S              | S385        | 2 | 2,5199 | 0,315 | -0,209 |
| 5 | Q9H019 FA54B_HUMAN  | R.NAS#VPNLRGSEE.R           | S103        | 2 | 2,5183 | 0,302 | 0,271  |
| 5 | Q9UHB6 LIMA1_HUMAN  | E.FTTQNQKS#QDVE.L           | S726        | 2 | 2,5174 | 0,29  | 0,081  |
| 5 | P11766 ADHX_HUMAN   | E.FVTHNLS#FDE.I             | S351        | 2 | 2,5125 | 0,156 | -0,189 |
| 5 | Q14247 SRC8_HUMAN   | E.RLPSS#PVYE.D              | S418        | 2 | 2,5113 | 0,294 | 0,325  |
| 5 | Q15276 RABE1_HUMAN  | R.AIKAM*T#PEQEE.T           | T480        | 2 | 2,5106 | 0,387 | -0,182 |
| 5 | Q6ZRS2 SRCAP_HUMAN  | E.AKT#PTSS#PEKQELVTAE.V     | T2682:S2686 | 2 | 2,5082 | 0,139 | 0,118  |
| 5 | Q32MZ4 LRRF1_HUMAN  | E.HESPS#QDISDACEAE.S        | S735        | 2 | 2,5012 | 0,321 | -0,278 |
| 5 | P34931 HS71L_HUMAN  | D.LNKS#INPDE.A              | S364        | 2 | 2,5005 | 0,226 | -0,55  |
| 5 | P50542 PEX5_HUMAN   | E.AASKPLGVA#EDE.L           | S58         | 2 | 2,4994 | 0,272 | -0,36  |
| 5 | Q6PJT7 ZC3HE_HUMAN  | E.TYS#PFFRNSE.K             | S274        | 2 | 2,4963 | 0,293 | 0,169  |
| 5 | O43247 EAN57_HUMAN  | -.M*ELGHGAGT#TTFT#R.A       | T9:T13      | 2 | 2,4933 | 0,188 | 1,843  |
| 5 | Q9NTI5 PDS5B_HUMAN  | R.AQQRAES#PESSAIE.S         | S1358       | 2 | 2,4837 | 0,303 | -0,077 |
| 5 | P48681 NEST_HUMAN   | E.ALGVES#EQEE.L             | S1261       | 2 | 2,4821 | 0,289 | -0,094 |
| 5 | P05387 RLA2_HUMAN   | K.DIKKILDSVGIE.A            | NA          | 2 | 2,4796 | 0,278 | -0,826 |
| 5 | Q08999 RBL2_HUMAN   | E.ICIAGS#PLT#PRRVTE.V       | S639:T642   | 2 | 2,477  | 0,246 | 0,333  |
| 5 | Q3ZTR8 Q3ZTR8_HUMAN | E.VVS#LQRE.S                | S127        | 2 | 2,4727 | 0,119 | 0      |
| 5 | Q6NYC8 PHTNS_HUMAN  | E.VESRLS#PGE.S              | S224        | 2 | 2,4701 | 0,106 | 0,116  |
| 5 | Q17R98 ZN827_HUMAN  | E.NTIRTTT#SPFFSE.D          | T759        | 2 | 2,4698 | 0,393 | 0,232  |
| 5 | Q15751 HERC1_HUMAN  | E.GGGLM*TRSES#LTAE.S        | S1491       | 2 | 2,4622 | 0,321 | 0,162  |
| 5 | Q9H307 PININ_HUMAN  | E.TNRVES#VEPSENE.A          | S413        | 2 | 2,4615 | 0,224 | 0,389  |
| 5 | Q9UBW7 ZMYM2_HUMAN  | E.LASQKGS#VSE.T             | S112        | 2 | 2,4548 | 0,367 | -0,225 |
| 5 | O95208 EPN2_HUMAN   | R.GSSQPNLSTSHS#EQE.Y        | S182        | 2 | 2,4442 | 0,087 | 0      |
| 5 | Q14451 GRB7_HUMAN   | R.RAT#SLPSIPNPFPE.L         | T62         | 2 | 2,4441 | 0,302 | 0,076  |
| 5 | Q9BXW6 OSBL1_HUMAN  | E.AVTARS#FEEE.G             | S499        | 2 | 2,4407 | 0,172 | -0,1   |
| 5 | Q9H6E5 TUT1_HUMAN   | E.FQS#PASKS#PKGAAPD.S       | S133:S138   | 2 | 2,4355 | 0,337 | 0      |
| 5 | Q7LG56 RIR2B_HUMAN  | E.AAGLDQDERS#DTNE.S         | S20         | 2 | 2,4323 | 0,228 | -0,206 |
| 5 | P07737 PROF1_HUMAN  | K.DSPSVWAAVPGKTFVNITPAE.V   | NA          | 2 | 2,429  | 0,29  | 0      |
| 5 | Q8IYX8 CF182_HUMAN  | E.SHS#VCDDIECE.L            | S355        | 2 | 2,4283 | 0,251 | -0,341 |
| 5 | Q8NEB9 PK3C3_HUMAN  | E.KDGDDESS#PILTSFE.L        | S244        | 2 | 2,4274 | 0,226 | 0,304  |

|   |                     |                              |             |   |        |       |        |
|---|---------------------|------------------------------|-------------|---|--------|-------|--------|
| 5 | P41227 ARD1A_HUMAN  | E.TTESTDVKDSSEASDS#AS.-      | S233        | 2 | 2,4271 | 0,305 | 0,064  |
| 5 | O15085 ARHGB_HUMAN  | E.LLKSLGGES#S#GGTTPVGSFHTE.A | S1457:S1458 | 2 | 2,4249 | 0,34  | 0,315  |
| 5 | Q16512 PKN1_HUMAN   | E.GMGYGDRT#STFCGTPE.F        | T772        | 2 | 2,4209 | 0,349 | 0,269  |
| 5 | Q8WXG6 MADD_HUMAN   | E.SDSRASS#PNSTVSTSTE.G       | S830        | 2 | 2,419  | 0,287 | 0,128  |
| 5 | O60502 NCOAT_HUMAN  | E.SKS#PEMSM*QEDCISD.I        | S511        | 2 | 2,4147 | 0,408 | 0,199  |
| 5 | Q9BW91 NUDT9_HUMAN  | E.SNFS#PKFNE.K               | S121        | 2 | 2,4108 | 0,235 | -0,106 |
| 5 | Q5SW79 CE170_HUMAN  | E.SGMTVRS#TGSATSLASQGE.R     | S627        | 2 | 2,4095 | 0,332 | -0,128 |
| 5 | Q8WXH0 SYNE2_HUMAN  | E.VVLKAPDSS#PE.S             | S3076       | 2 | 2,4073 | 0,2   | 0,2    |
| 5 | Q8WYP5 AHTF1_HUMAN  | E.TRIS#FVEE.D                | S1241       | 2 | 2,4057 | 0,122 | 0,115  |
| 5 | P42566 EP15_HUMAN   | E.TANLNEHVEGQS#NLE.S         | S547        | 2 | 2,4024 | 0,136 | 0,281  |
| 5 | Q96RL1 UIMC1_HUMAN  | E.TGAFRVPS#PGMEE.A           | S653        | 2 | 2,4021 | 0,361 | 0,167  |
| 5 | Q6VVMQ6 MCAF1_HUMAN | E.SSFGS#PSKQE.S              | S477        | 2 | 2,3997 | 0,199 | 0,108  |
| 5 | Q99700 ATX2_HUMAN   | E.NKGIS#PVVSE.H              | S783        | 2 | 2,398  | 0,202 | 0,22   |
| 5 | Q12851 M4K2_HUMAN   | R.SLTIRS#ASE.F               | S384        | 2 | 2,3932 | 0,249 | 0,234  |
| 5 | Q8IZT6 ASPM_HUMAN   | E.ENKIPIS#PISPAFNE.C         | S222        | 2 | 2,3904 | 0,183 | -0,07  |
| 5 | Q9H6A9 PCX3_HUMAN   | E.RES#PAAQPLLE.H             | S2023       | 2 | 2,3872 | 0,309 | 0      |
| 5 | Q9NW75 GPTC2_HUMAN  | E.LVHDLVS#ALEE.S             | S34         | 2 | 2,3861 | 0,126 | 0,187  |
| 5 | Q8NHV4 NEDD1_HUMAN  | E.SGNLNTSPSSNQTRNS#E.K       | S525        | 2 | 2,3838 | 0,307 | 0      |
| 5 | O15234 CASC3_HUMAN  | E.QTSVRDPS#PEADAPVLGS#PEKE.E | S363:S373   | 2 | 2,383  | 0,355 | 0,395  |
| 5 | O94909 K0819_HUMAN  | R.GPSQATSPIRS#PQE.S          | S300        | 2 | 2,3793 | 0,211 | -0,159 |
| 5 | Q15418 KS6A1_HUMAN  | R.KLPS#TTL.-                 | S732        | 2 | 2,3777 | 0,407 | 0,145  |
| 5 | Q86V48 LUZP1_HUMAN  | E.STNSNAYTQRSST#DFSE.L       | T958        | 2 | 2,3699 | 0,356 | 0,124  |
| 5 | Q9NQ55 SSF1_HUMAN   | E.ASGIPRTAS#LE.L             | S372        | 2 | 2,3671 | 0,101 | 0      |
| 5 | Q9NWB7 IFT57_HUMAN  | R.TRLLS#EVM*EE.L             | S347        | 2 | 2,3662 | 0,106 | -0,094 |
| 5 | Q5VZK9 LR16A_HUMAN  | E.IKT#PDSFEE.S               | T1128       | 2 | 2,3656 | 0,156 | 0,106  |
| 5 | P49757 NUMB_HUMAN   | E.GS#FRVTTATE.Q              | S194        | 2 | 2,3589 | 0,191 | 0,212  |
| 5 | P34932 HSP74_HUMAN  | E.QQQQTPAENKAES#EEM*E.T      | S546        | 2 | 2,3579 | 0,197 | 0,118  |
| 5 | O60832 DKC1_HUMAN   | R.KS#LPEEDVAE.I              | S21         | 2 | 2,3538 | 0,125 | -0,102 |
| 5 | Q8IWZ8 SF04_HUMAN   | E.IKVS#PPEGAE.T              | S181        | 2 | 2,3486 | 0,11  | -0,11  |
| 5 | A7E2V4 K0913_HUMAN  | E.SSPHS#PCEGLPSE.A           | S1092       | 2 | 2,3481 | 0,246 | -0,167 |
| 5 | Q14451 GRB7_HUMAN   | R.RATS#LPSIPNPFPE.L          | S63         | 2 | 2,3427 | 0,392 | -0,152 |
| 5 | Q9Y4C1 JHD2A_HUMAN  | E.HAPS#PSDVSNAPE.V           | S445        | 2 | 2,3413 | 0,194 | 0,176  |
| 5 | Q9BVJ6 UT14A_HUMAN  | E.LEAHGVS#ESE.G              | S405        | 2 | 2,3387 | 0,099 | 0      |
| 5 | Q8TDM6 DLG5_HUMAN   | E.EQKCVPASGELS#PELQE.W       | S1146       | 2 | 2,3336 | 0,128 | 0,246  |
| 5 | P19338 NUCL_HUMAN   | E.IEPAAMKAAAAAPAS#EDED.D     | S184        | 2 | 2,3335 | 0,088 | -0,063 |
| 5 | Q6ZRS2 SRCAP_HUMAN  | E.KNLSLT#PSAPSLTLE.A         | T2603       | 2 | 2,3269 | 0,108 | 0,443  |
| 5 | Q02952 AKA12_HUMAN  | E.KS#EDSIAGSGVE.H            | S780        | 2 | 2,3206 | 0,135 | -0,097 |
| 5 | Q8IY17 PLPL6_HUMAN  | R.GRIS#VSLQEE.A              | S437        | 2 | 2,3197 | 0,139 | 0,917  |
| 5 | P49915 GUAA_HUMAN   | E.SASLVAS#GKAE.L             | S382        | 2 | 2,3194 | 0,234 | -0,111 |
| 5 | O95232 CROP_HUMAN   | E.VNGTSEDIKS#E.G             | S425        | 2 | 2,3145 | 0,203 | 0      |
| 5 | Q12888 TP53B_HUMAN  | E.NKVADPVDS#NLDTCGSIQVIE.Q   | S96         | 2 | 2,3134 | 0,28  | 0,193  |



|   |                     |                              |             |   |        |       |        |
|---|---------------------|------------------------------|-------------|---|--------|-------|--------|
| 5 | Q92625 ANS1A_HUMAN  | E.KSPS#FASEWDE.I             | S663        | 2 | 2,3089 | 0,339 | 0,179  |
| 5 | P42166 LAP2A_HUMAN  | E.QGTESRSST#PLPTISSAE.N      | T160        | 2 | 2,3071 | 0,254 | 0,121  |
| 5 | P15880 RS2_HUMAN    | E.TVFTKS#PYQE.F              | S264        | 2 | 2,3057 | 0,334 | 0,095  |
| 5 | O14686 MLL2_HUMAN   | E.LVNRPPS#STE.L              | S2694       | 2 | 2,3049 | 0,324 | -0,103 |
| 5 | Q9H0H5 RGAP1_HUMAN  | K.T#RSIGSAVDQGNE.S           | T201        | 2 | 2,3014 | 0,216 | 0,518  |
| 5 | O14929 HAT1_HUMAN   | E.ISM*QHEQLEES#FQE.L         | S401        | 2 | 2,2994 | 0,287 | -0,2   |
| 5 | P30305 MPIP2_HUMAN  | E.AFAQRPSS#APD.L             | S230        | 2 | 2,2919 | 0,126 | -0,099 |
| 5 | Q6NZI2 PTRF_HUMAN   | E.SDAVLVDKS#DS#D.-           | S387:S389   | 2 | 2,2855 | 0,118 | 0,173  |
| 5 | P08238 HS90B_HUMAN  | E.TQKS#IYYITGE.S             | S482        | 2 | 2,2801 | 0,208 | 0,176  |
| 5 | Q6UXD5 SE6L2_HUMAN  | E.AGDREYEVS#I.-              | S909        | 2 | 2,2785 | 0,274 | 0,277  |
| 5 | Q9P266 K1462_HUMAN  | E.DVGFRGNS#PE.M              | S885        | 2 | 2,272  | 0,228 | 0,105  |
| 5 | Q86XZ4 SPAS2_HUMAN  | E.TLS#IDARE.L                | S155        | 2 | 2,269  | 0,252 | 0,062  |
| 5 | Q86SQ0 PHLB2_HUMAN  | E.KLQLS#DEESVFE.E            | S489        | 2 | 2,2662 | 0,202 | 0,325  |
| 5 | P49792 RBP2_HUMAN   | E.TVFTPKTS#PE.N              | S1400       | 2 | 2,2658 | 0,265 | 0,103  |
| 5 | Q9UMZ2 SYNG_HUMAN   | D.VFRQLS#LE.G                | S752        | 2 | 2,2623 | 0,175 | 0      |
| 5 | P29401 TKT_HUMAN    | E.DLAM*FRSVPTSTVFYPSDGVATE.K | NA          | 2 | 2,2583 | 0,286 | 0      |
| 5 | Q5SYE7 NHSL1_HUMAN  | R.GGPVSR#PGAPSAGE.A          | S1167       | 2 | 2,2546 | 0,309 | 0      |
| 5 | Q8WWI1 LMO7_HUMAN   | E.SGEGEIS#PQRE.V             | S1026       | 2 | 2,2513 | 0,271 | -0,192 |
| 5 | Q96C57 CL043_HUMAN  | E.SAIHS#PGTVE.K              | S179        | 2 | 2,2331 | 0,233 | -0,113 |
| 5 | Q9NPI6 DCP1A_HUMAN  | R.KASS#PSPLTIGTPE.S          | S523        | 2 | 2,2329 | 0,288 | 0,416  |
| 5 | Q14247 SRC8_HUMAN   | E.RLPSS#PVYEDAAS#FKAE.L      | S418:S426   | 2 | 2,2326 | 0,345 | 0,482  |
| 5 | P11940 PABP1_HUMAN  | E.LLHM*LES#PE.S              | S599        | 2 | 2,2313 | 0,103 | -0,105 |
| 5 | Q9NQW6 ANLN_HUMAN   | E.GELMEKS#QEE.M              | S583        | 2 | 2,2286 | 0,215 | -0,177 |
| 5 | Q8WVM7 STAG1_HUMAN  | E.TTAHS#DAGSELEE.T           | S20         | 2 | 2,2189 | 0,084 | 0,086  |
| 5 | Q9NRY4 GRLF1_HUMAN  | R.FASYRTSFSVGS#DDE.L         | S1179       | 2 | 2,2146 | 0,39  | 0,279  |
| 5 | P19338 NUCL_HUMAN   | E.IEPAAMKAAAAAPAS#ED.E       | S184        | 2 | 2,2127 | 0,136 | -0,072 |
| 5 | P00558 PGK1_HUMAN   | K.SLLGKDVFLKD.C              | NA          | 2 | 2,2117 | 0,345 | -0,272 |
| 5 | Q9BXX5 B2L13_HUMAN  | E.KS#SPATSLFVE.L             | S370        | 2 | 2,2085 | 0,205 | 0      |
| 5 | Q9HC35 EMAL4_HUMAN  | E.KLS#LPQNE.T                | S869        | 2 | 2,2037 | 0,163 | 0,181  |
| 5 | Q05655 KPCD_HUMAN   | E.SRAST#FCGTPDYIAPE.I        | T507        | 2 | 2,197  | 0,138 | 0,725  |
| 5 | Q6UB99 ANR11_HUMAN  | E.GVFSSLQAKPS#PS#PRAE.L      | S1892:S1894 | 2 | 2,1949 | 0,329 | 0,064  |
| 5 | Q8N4S0 CCD82_HUMAN  | E.LNLS#KIQSE.G               | S88         | 2 | 2,1873 | 0,098 | 0,219  |
| 5 | O75582 KS6A5_HUMAN  | E.TERAYS#FCGTIE.Y            | S212        | 2 | 2,1789 | 0,318 | 0      |
| 5 | Q6PGN9 PSRC1_HUMAN  | E.QCALQDRES#AGE.G            | S98         | 2 | 2,1768 | 0,194 | 0,085  |
| 5 | Q8N110 DOCK4_HUMAN  | E.SKT#PPPYSVYE.R             | T1899       | 2 | 2,1763 | 0,162 | 1,267  |
| 5 | Q9P2B7 K1430_HUMAN  | E.GEVDHSFFDS#DFEE.G          | S19         | 2 | 2,1736 | 0,315 | 0,21   |
| 5 | Q14566 MCM6_HUMAN   | E.LTQAGLKGST#EGSE.S          | T799        | 2 | 2,1722 | 0,206 | 0,335  |
| 5 | Q9NYL9 TMOD3_HUMAN  | E.KVS#LDPELEE.A              | S114        | 2 | 2,1658 | 0,129 | -0,197 |
| 5 | Q9UPQ6 Q9UPQ6_HUMAN | E.SET#RSESSDFE.V             | T314        | 2 | 2,1611 | 0,325 | 0,18   |
| 5 | Q9NTJ4 MA2C1_HUMAN  | D.AWDVMDY#HLETR.K            | Y744        | 2 | 2,161  | 0,086 | 1,51   |
| 5 | Q9UMN6 MLL4_HUMAN   | E.RS#PLLPLPE.D               | S2356       | 2 | 2,1598 | 0,218 | 0,111  |

|   |                     |                                |             |   |        |       |        |
|---|---------------------|--------------------------------|-------------|---|--------|-------|--------|
| 5 | P48637 GSHB_HUMAN   | E.GGGNNLYGEE.M                 | NA          | 2 | 2,1597 | 0,105 | 0,121  |
| 5 | P48681 NEST_HUMAN   | E.LQFPRT#PE.G                  | T338        | 2 | 2,1553 | 0,155 | -0,114 |
| 5 | Q02952 AKA12_HUMAN  | E.VHVS#TVEE.R                  | S422        | 2 | 2,1529 | 0,127 | 0,249  |
| 5 | Q9H6F5 CCD86_HUMAN  | R.LGGLRPES#PE.S                | S18         | 2 | 2,1512 | 0,16  | -0,323 |
| 5 | P13798 ACPH_HUMAN   | E.SFFQTKALDVSAS#DDE.I          | S187        | 2 | 2,1511 | 0,089 | 0,199  |
| 5 | O43865 SAHH2_HUMAN  | R.SLSRS#ISQSSTD.S              | S66         | 2 | 2,1491 | 0,329 | -0,091 |
| 5 | O60333 KIF1B_HUMAN  | E.ANSRASS#PCPEFE.Q             | S1659       | 2 | 2,1472 | 0,292 | 0,08   |
| 5 | ##P48048 IRK1_HUMAN | E.GEPTVTTKLLK.G                | NA          | 2 | 2,1461 | 0,206 | 0,308  |
| 5 | Q9H2Y7 ZF106_HUMAN  | E.QNPLETS#RSGCDE.V             | S1468       | 2 | 2,1447 | 0,209 | 0,155  |
| 5 | Q15047 SETB1_HUMAN  | E.GGFADSDSHS#S#FKTNE.G         | S1002:S1003 | 2 | 2,141  | 0,298 | 0,066  |
| 5 | Q5UIP0 RIF1_HUMAN   | E.CGSLDKTS#PEM*SNSNDE.R        | S1162       | 2 | 2,1404 | 0,182 | 0      |
| 5 | P55196 AFAD_HUMAN   | E.TSFTRTIS#NPE.V               | S215        | 2 | 2,1395 | 0,267 | 0,183  |
| 5 | Q8IVF2 AHNK2_HUMAN  | E.VTIHSIVT#PE.F                | T5484       | 2 | 2,1342 | 0,157 | 0,207  |
| 5 | P40855 PEX19_HUMAN  | E.GCS#VGAEADRE.L               | S9          | 2 | 2,1299 | 0,226 | -0,099 |
| 5 | P55209 NP1L1_HUMAN  | E.RLDGLVETPTGY#IE.S            | Y66         | 2 | 2,1243 | 0,095 | 0      |
| 5 | Q16630 CPSF6_HUMAN  | E.M*DTART#PLSEAE.F             | T407        | 2 | 2,1189 | 0,212 | 0,086  |
| 5 | O95425 SVIL_HUMAN   | R.M*NARYQT#QPVTLGE.V           | T852        | 2 | 2,118  | 0,265 | 0      |
| 5 | Q6PKG0 LARP1_HUMAN  | E.SAPGS#PRAVT#PVPTKTEE.V       | S521:T526   | 2 | 2,1153 | 0,397 | 0,307  |
| 5 | Q5VUA4 ZN318_HUMAN  | E.VILKGS#PEE.K                 | S1420       | 2 | 2,1122 | 0,128 | 0,116  |
| 5 | Q9H2U2 IPYR2_HUMAN  | E.SVSS#SPNKESNEEE.Q            | S316        | 2 | 2,1119 | 0,211 | -0,152 |
| 5 | P06756 ITAV_HUMAN   | R.EQLQPHENGEGNS#ET.-           | S1046       | 2 | 2,111  | 0,274 | 0,14   |
| 5 | O00401 WASL_HUMAN   | E.TSKVIY#DFIE.K                | Y256        | 2 | 2,1084 | 0,197 | 0,188  |
| 5 | Q9NRY5 F1142_HUMAN  | E.KAETSLGIPS#PSEISTE.V         | S129        | 2 | 2,1032 | 0,405 | 0,2    |
| 5 | Q96RV3 PCX1_HUMAN   | E.LESSKPLS#GSKES#LVE.N         | S323:S328   | 2 | 2,103  | 0,206 | 0,132  |
| 5 | Q8WYB5 MYST4_HUMAN  | E.TSEGKT#SPS#PIRIEEE.V         | T1300:S1303 | 2 | 2,1013 | 0,11  | 0,064  |
| 5 | O43633 CHM2A_HUMAN  | E.LSNLPSTGGS#LS#VAAGGKAE.A     | S188:S190   | 2 | 2,0968 | 0,131 | 0,232  |
| 5 | Q9BYW2 SETD2_HUMAN  | E.ASKLPT#SEPEADAE.I            | T1951       | 2 | 2,0861 | 0,223 | -0,08  |
| 5 | P06576 ATPB_HUMAN   | E.LGIYPAVDPLDSTSRIM*DPNIVGSE.H | NA          | 2 | 2,0776 | 0,114 | -0,456 |
| 5 | Q8TEA8 DTD1_HUMAN   | E.DRSASS#GAEGDVSSE.R           | S197        | 2 | 2,0764 | 0,263 | -0,159 |
| 5 | Q14966 ZN638_HUMAN  | E.M*VKNS#NSLFTLDE.L            | S1639       | 2 | 2,0635 | 0,183 | 0,23   |
| 5 | Q16630 CPSF6_HUMAN  | E.M*DTART#PLSE.A               | T407        | 2 | 2,0581 | 0,198 | 0      |
| 5 | P15559 NQO1_HUMAN   | E.GHLS#PDIVAE.Q                | S82         | 2 | 2,0513 | 0,114 | 0,109  |
| 5 | Q9Y266 NUDC_HUMAN   | E.NSKLS#DLDSE.T                | S277        | 2 | 2,0502 | 0,083 | 0      |
| 5 | Q5CZB5 Q5CZB5_HUMAN | E.GAAGAGDHQDPS#LGAGE.A         | S114        | 2 | 2,0502 | 0,178 | 0,077  |
| 5 | P06493 CDC2_HUMAN   | E.GT#YGVVYK.G                  | T14         | 2 | 2,0437 | 0,297 | 0,126  |
| 5 | Q5R372 Q5R372_HUMAN | E.ISTPRPS#SPGGLPE.E            | S118        | 2 | 2,0272 | 0,197 | 0      |
| 5 | O14974 MYPT1_HUMAN  | R.KTGSY#GALAE.I                | Y446        | 2 | 2,0194 | 0,11  | -0,113 |
| 5 | Q8N3D4 EH1L1_HUMAN  | E.IASRS#SGVPGLE.S              | S828        | 2 | 2,0194 | 0,265 | -0,195 |
| 5 | Q13523 PRP4B_HUMAN  | E.TQS#LREQPE.M                 | S8          | 2 | 1,9998 | 0,116 | 0,209  |
| 5 | P20700 LMNB1_HUMAN  | E.M*NTST#VNSAREE.L             | T285        | 2 | 1,9986 | 0,165 | 0      |
| 5 | P13010 KU86_HUMAN   | E.QGGAHFS#VSSLAE.G             | S577        | 2 | 1,9879 | 0,215 | 0,089  |

|   |                    |                               |                   |   |        |       |        |
|---|--------------------|-------------------------------|-------------------|---|--------|-------|--------|
| 5 | Q96RG2 PASK_HUMAN  | E.M*GNRSL#DVAQAQE.L           | S1289             | 2 | 1,98   | 0,086 | 0,076  |
| 5 | Q92797 SYMPK_HUMAN | E.ERS#PQLTAPVGE.D             | S1243             | 2 | 1,98   | 0,284 | 0,179  |
| 5 | Q8N543 OGFD1_HUMAN | E.GTSHS#PPEPE.N               | S395              | 2 | 1,9733 | 0,108 | -0,109 |
| 5 | Q9UQ35 SRRM2_HUMAN | R.VSGRTS#PPLLD.R              | S2398             | 2 | 1,97   | 0,278 | 0      |
| 5 | Q13115 DUS4_HUMAN  | E.AAS#PSGPLRE.R               | S345              | 2 | 1,9699 | 0,178 | -0,229 |
| 5 | Q9NUL3 STAU2_HUMAN | E.AIGLKGSSPT#PPCS#PVQPSKQLE.Y | T488:S492         | 2 | 1,9658 | 0,093 | -0,096 |
| 5 | Q5JTC6 F123B_HUMAN | E.ASSLEEPS#PE.T               | S286              | 2 | 1,9641 | 0,145 | -0,386 |
| 5 | Q6WCQ1 MRIP_HUMAN  | E.VDRS#PGLPM*SD.L             | S618              | 2 | 1,9582 | 0,23  | -0,096 |
| 5 | Q9BV73 CP250_HUMAN | E.GDNIAQSGGHENS#LE.L          | S368              | 2 | 1,9536 | 0,178 | 0,228  |
| 5 | Q9C0C9 UBE2O_HUMAN | E.QLLTGS#PTS#PTVEPEKPTRE.K    | S836:S839         | 2 | 1,9522 | 0,122 | 0,21   |
| 5 | Q5UIP0 RIF1_HUMAN  | E.SKENT#PPVVISADQM*VNE.D      | T1388             | 2 | 1,9518 | 0,166 | 0      |
| 5 | O15015 ZN646_HUMAN | E.AAPARS#PPLQLSE.A            | S930              | 2 | 1,9488 | 0,131 | 0      |
| 5 | Q5SVQ8 ZBT41_HUMAN | E.LTEKSS#PEETLNE.L            | S191              | 2 | 1,9377 | 0,154 | -0,078 |
| 5 | Q7Z4V5 HDGR2_HUMAN | R.ARGDS#EALDEES.-             | S664              | 2 | 1,9347 | 0,174 | 0,09   |
| 5 | Q8NG31 CASC5_HUMAN | E.SDRLVANDS#QLTPLEE.W         | S1039             | 2 | 1,9335 | 0,164 | 0,261  |
| 5 | Q2KHR3 QSER1_HUMAN | E.TGGNS#PSDKVDNE.L            | S1211             | 2 | 1,9283 | 0,147 | -0,174 |
| 5 | O60291 MGRN1_HUMAN | E.SS#SPQQGTRAASIE.N           | S505              | 2 | 1,9271 | 0,23  | -0,163 |
| 5 | O43683 BUB1_HUMAN  | D.GKFS#PIQE.K                 | S655              | 2 | 1,9205 | 0,139 | 0,309  |
| 5 | Q8IY67 RAVR1_HUMAN | E.LVRPFGS#LE.R                | S157              | 2 | 1,9083 | 0,148 | 0,222  |
| 5 | Q8TE77 SSH3_HUMAN  | E.SLRPPS#AEPGGSSE.Q           | S259              | 2 | 1,8997 | 0,189 | -0,084 |
| 5 | Q16851 UGPA_HUMAN  | D.LSKAM*S#QDGASQFQE.V         | S13               | 2 | 1,899  | 0,126 | 0,567  |
| 5 | Q5JSJ4 DX26B_HUMAN | E.LHLPLNS#PLPGSE.L            | S150              | 2 | 1,8917 | 0,24  | 0,084  |
| 5 | P04920 B3A2_HUMAN  | E.QALLPRVPT#DE.I              | T257              | 2 | 1,8876 | 0,098 | -0,092 |
| 5 | Q6NZI2 PTRF_HUMAN  | E.SDAVLVDK.S                  | NA                | 2 | 1,8781 | 0,242 | 0,288  |
| 5 | Q00839 HNRPU_HUMAN | R.AKS#PQPPVEE.E               | S270              | 2 | 1,872  | 0,216 | -0,21  |
| 5 | P60709 ACTB_HUMAN  | E.ALFPQSFLGM*E.S              | NA                | 2 | 1,8627 | 0,326 | -0,291 |
| 5 | Q5SYE7 NHSL1_HUMAN | R.GGPVRS#PGAPSAGEAE.A         | S1167             | 2 | 1,8447 | 0,363 | -0,076 |
| 5 | Q9UBS0 KS6B2_HUMAN | E.GAVTHT#FCGTIE.Y             | T228              | 2 | 1,8429 | 0,088 | 0      |
| 5 | Q5VUA4 ZN318_HUMAN | K.ELS#EGIVDEGVST#S#IGPHSIDD.S | S1789:T1799:S1800 | 2 | 1,8229 | 0,107 | -0,88  |
| 5 | Q9UKV3 ACINU_HUMAN | E.ASS#PPHPQLHS#EEE.I          | S425:S434         | 2 | 1,822  | 0,417 | -0,203 |
| 5 | Q8NBU5 ATAD1_HUMAN | E.YVNSTSEES#HDEDE.I           | S322              | 2 | 1,816  | 0,412 | 0,142  |
| 5 | Q15021 CND1_HUMAN  | E.FHLPLS#PEE.L                | S13               | 2 | 1,8125 | 0,09  | 0      |
| 5 | Q5UIP0 RIF1_HUMAN  | E.TSKYAEYS#FTSLPVPE.S         | S1663             | 2 | 1,8079 | 0,135 | 0,129  |
| 5 | Q96JK2 WDR22_HUMAN | E.IQPSRAS#PTSDIE.S            | S648              | 2 | 1,8048 | 0,194 | -0,165 |
| 5 | O43432 IF4G3_HUMAN | E.HS#PVVYGTVE.S               | S192              | 2 | 1,8012 | 0,203 | -0,104 |
| 5 | Q14839 CHD4_HUMAN  | E.KSAIDLTP#PIVVE.D            | T1653             | 2 | 1,7954 | 0,081 | -0,089 |
| 5 | P62937 PIA_HUMAN   | D.GEPLGRVSFE.L                | NA                | 2 | 1,7913 | 0,105 | 0      |
| 5 | P49736 MCM2_HUMAN  | E.LTAS#QREAAE.R               | S108              | 2 | 1,7801 | 0,328 | -0,211 |
| 5 | Q9UHV9 PFD2_HUMAN  | E.GAGAKAS#SAGVLVS.-           | S147              | 2 | 1,7773 | 0,093 | 0      |
| 5 | O60307 MAST3_HUMAN | E.RGPS#PSLLNTISLD.T           | S774              | 2 | 1,7701 | 0,353 | 0,079  |
| 5 | Q6T4R5 NHS_HUMAN   | E.IDSDES#PVARE.R              | S397              | 2 | 1,7668 | 0,127 | -0,282 |

|   |                      |                                         |           |   |        |       |        |
|---|----------------------|-----------------------------------------|-----------|---|--------|-------|--------|
| 5 | Q96EY5 F125A_HUMAN   | E.GKSCS#PLAFSAFGD.L                     | S232      | 2 | 1,7623 | 0,115 | -0,16  |
| 5 | Q9UPN6 RBM16_HUMAN   | E.TVQTT#QSPTPVEKE.T                     | T615      | 2 | 1,7222 | 0,108 | -0,225 |
| 5 | O43432 IF4G3_HUMAN   | E.NGEEAEPVRNGAESVS#E.G                  | S585      | 2 | 1,6931 | 0,185 | -0,066 |
| 5 | Q9UN86 G3BP2_HUMAN   | E.ERQPS#PEPVQE.N                        | S163      | 2 | 1,6915 | 0,113 | -0,266 |
| 5 | Q5UIP0 RIF1_HUMAN    | E.CGSLDKT#SPE.M                         | T1161     | 2 | 1,6723 | 0,188 | 0      |
| 5 | Q9BZF3 OSBL6_HUMAN   | E.SRLS#M*SESVSE.F                       | S487      | 2 | 1,6662 | 0,108 | -0,093 |
| 5 | Q14566 MCM6_HUMAN    | E.TNSRVS#GVDGYE.T                       | S271      | 2 | 1,665  | 0,267 | -0,089 |
| 5 | Q9UGU0 TCF20_HUMAN   | E.NDTVITIS#PKQE.G                       | S1522     | 2 | 1,6222 | 0,113 | -0,558 |
| 5 | O15061 DMN_HUMAN     | E.RM*S#YEGPTAE.V                        | S1141     | 2 | 1,6081 | 0,306 | -0,197 |
| 5 | A8K5L5 A8K5L5_HUMAN  | E.SQLDGS#LIS#RRAYVYV.-                  | S470:S473 | 2 | 1,6058 | 0,221 | 0,87   |
| 5 | P60981 DEST_HUMAN    | E.KLGG#LIVAFE.G                         | S155      | 2 | 1,5932 | 0,217 | -0,301 |
| 5 | Q7Z4V5 HDGR2_HUMAN   | E.SSES#EKTSDQDFTPE.K                    | S196      | 2 | 1,5916 | 0,246 | 0,527  |
| 5 | P19338 NUCL_HUMAN    | E.IEPAAM*KAAAAAPAS#EEDDD.E              | S184      | 2 | 1,5826 | 0,204 | 0,236  |
| 5 | P52292 IMA2_HUMAN    | E.SVYKASLS#LIE.K                        | S490      | 2 | 1,5473 | 0,089 | -0,095 |
| 5 | ##Q5T6X5 GPC6A_HUMAN | R.LT#AAMAVT#VE.T                        | T814:T820 | 2 | 1,5213 | 0,164 | -0,942 |
| 5 | P28290 SSFA2_HUMAN   | E.QS#YLKSE.L                            | S1079     | 2 | 1,4351 | 0,103 | 0,196  |
| 5 | P38159 HNRPG_HUMAN   | E.QATKPS#FE.S                           | S88       | 2 | 1,3982 | 0,267 | 0,123  |
| 6 | P05783 K1C18_HUMAN   | R.STS#FRGGM*GSGGLATGIAGGLAGM*GGIQNEKE.T | S53       | 3 | 6,8835 | 0,444 | 0,594  |
| 6 | P60174 TPIS_HUMAN    | E.LASQPDVDGFLVGGASLKPE.F                | NA        | 2 | 6,0136 | 0,536 | 0,305  |
| 6 | Q9NYL9 TMOD3_HUMAN   | E.KVSLDPELEEALTSASDT#E.L                | T129      | 2 | 5,8707 | 0,472 | 0,115  |
| 6 | P43308 SSRB_HUMAN    | E.DGPVVIGSTSAPGQGGILAQRE.F              | NA        | 3 | 5,8568 | 0,476 | 0,434  |
| 6 | Q5T8I3 F102B_HUMAN   | E.KILQSQDFSLDS#SAEEE.G                  | S289      | 2 | 5,7498 | 0,574 | 0,061  |
| 6 | P13667 PDIA4_HUMAN   | E.NGVLVLNDANFDNFVADKD.T                 | NA        | 2 | 5,7493 | 0,447 | 0      |
| 6 | P43308 SSRB_HUMAN    | E.DGPVVIGSTSAPGQGGILAQRE.F              | NA        | 2 | 5,6899 | 0,559 | 0,347  |
| 6 | Q7Z417 NUFP2_HUMAN   | E.NLNKTIQNSSVS#PTSSSSSSSTGE.T           | S376      | 2 | 5,6894 | 1     | 0      |
| 6 | Q9NZ23 Q9NZ23_HUMAN  | E.DQVVSSDIVNNTHGSIFD.A                  | NA        | 2 | 5,4496 | 0,528 | 0,063  |
| 6 | Q13263 TIF1B_HUMAN   | E.TKPVLM*ALAEPGAEGPRLAS#PSGSTSS#GLE.V   | S594:S601 | 3 | 5,4427 | 1     | -0,116 |
| 6 | P19338 NUCL_HUMAN    | E.SKTLVLSNLS#YSATEE.T                   | S494      | 2 | 5,4095 | 0,474 | 0      |
| 6 | Q92917 GPKOW_HUMAN   | E.LHYDAICQYMGPS#DTDDD.-                 | S471      | 2 | 5,3744 | 0,639 | 0,222  |
| 6 | O75694 NU155_HUMAN   | E.DQACATCLILACSTAACDRE.V                | NA        | 2 | 5,3196 | 0,558 | 0,32   |
| 6 | Q92917 GPKOW_HUMAN   | E.LHYDAICQYM*GPS#DTDDD.-                | S471      | 2 | 5,2781 | 0,562 | 0,221  |
| 6 | Q96JM3 ZN828_HUMAN   | E.SQKLAPVPS#PEPQKPAPVS#PE.S             | S204:S214 | 2 | 5,2737 | 0,531 | 0,104  |
| 6 | O43741 AAKB2_HUMAN   | E.TSCRDLSS#PPGPGQE.M                    | S184      | 2 | 5,2288 | 0,569 | -0,127 |
| 6 | Q13263 TIF1B_HUMAN   | E.TKPVLM*ALAEPGAEGPRLAS#PS#GSTSSGLE.V   | S594:S596 | 3 | 5,2261 | 1     | 0,116  |
| 6 | Q96T60 PNKP_HUMAN    | E.TRTPESQPD#PPGTPLVSQDE.K               | T118      | 2 | 5,2139 | 0,596 | 0,733  |
| 6 | O00410 IMB3_HUMAN    | E.FVNLGDQQSFGIKTAGLEE.K                 | NA        | 2 | 5,1314 | 0,543 | 0      |
| 6 | Q02790 FKBP4_HUMAN   | E.SGAQSAPLPMEGVDISPKQDE.G               | NA        | 2 | 5,0984 | 0,518 | 0,226  |
| 6 | P21333 FLNA_HUMAN    | E.AIGDDVGTGLGFSVEGSPQAKIE.C             | NA        | 2 | 5,0931 | 0,512 | 0,223  |
| 6 | P16989 DBPA_HUMAN    | E.AKAGEAPTENPAPPTQQS#SAE.-              | S369      | 2 | 5,076  | 0,496 | -0,113 |
| 6 | Q8IW19 APLF_HUMAN    | E.DNILNET#PKSPVINLPHETTASQLE.G          | T128      | 3 | 5,0425 | 0,408 | 0,379  |
| 6 | Q92615 LARP5_HUMAN   | E.KFTSSQTQSPT#PPKPPS#PSFE.L             | T518:S524 | 3 | 5,0363 | 0,372 | 0,451  |

|   |                     |                                            |             |   |        |       |        |
|---|---------------------|--------------------------------------------|-------------|---|--------|-------|--------|
| 6 | P26358 DNMT1_HUMAN  | E.KLSIFDANES#GFESYE.A                      | S394        | 2 | 4,9336 | 0,431 | 0,255  |
| 6 | P46939 UTRO_HUMAN   | E.RTNGSFLTDSSS#TTGSVEDE.H                  | S3217       | 2 | 4,9162 | 0,486 | 0,45   |
| 6 | Q96QR8 PURB_HUMAN   | E.HYAQLGPSS#PEQLAAGAE.E.G                  | S101        | 2 | 4,8745 | 0,537 | 0,3    |
| 6 | Q8WU17 RN139_HUMAN  | R.NGVIQHTGAAAEFNDT#D.-                     | T663        | 2 | 4,8676 | 0,597 | 0      |
| 6 | P20020 AT2B1_HUMAN  | E.M*NKSATSSSPGS#PLHSLET#SL.-               | S1249:T1256 | 2 | 4,8599 | 1     | 0,423  |
| 6 | Q16204 CCDC6_HUMAN  | E.KLDQPV#APPS#PRDISME.I                    | S240:S244   | 2 | 4,7826 | 0,485 | 0      |
| 6 | O75376 NCOR1_HUMAN  | E.REPAPLLSAQYETLSDS#DD.-                   | S2438       | 2 | 4,7527 | 0,442 | 0,335  |
| 6 | Q14974 IMB1_HUMAN   | E.AIGYICQDIDPEQLQDKSNE.I                   | NA          | 3 | 4,7519 | 0,3   | 0,627  |
| 6 | Q02790 FKBP4_HUMAN  | E.SGAQSAPLPMEGVDISPKQDE.G                  | NA          | 3 | 4,7359 | 0,395 | 0,424  |
| 6 | Q9UNI6 DUS12_HUMAN  | E.LFVADPTTVSQGLKDE.V                       | NA          | 2 | 4,6857 | 0,466 | 0,355  |
| 6 | Q9Y262 IF3EI_HUMAN  | E.AAYDPYAYPS#DYDM*HTGDPKQDLAYE.R           | S21         | 3 | 4,6635 | 0,445 | 0,355  |
| 6 | Q02952 AKA12_HUMAN  | E.LVEMDAEPQEAEPAGE.L                       | NA          | 2 | 4,6411 | 0,345 | 0,068  |
| 6 | Q8TEA8 DTD1_HUMAN   | E.DRSASS#GAEGDVS#SEREP.-                   | S197:S204   | 2 | 4,6206 | 0,495 | -0,061 |
| 6 | Q02952 AKA12_HUMAN  | E.ESQLPGTGGPEDVLPVQRAE.A                   | NA          | 3 | 4,6203 | 0,345 | 0      |
| 6 | P21333 FLNA_HUMAN   | E.AIGDDVGTGLFSVEGSPQAKIE.C                 | NA          | 3 | 4,5888 | 0,312 | 0,501  |
| 6 | Q96EB6 SIRT1_HUMAN  | E.RAGGAGFGT#DGDDQEAINE.A                   | T719        | 2 | 4,5857 | 0,487 | 0,374  |
| 6 | Q14676 MDC1_HUMAN   | E.TQPQRLLAEDS#EEE.V                        | S168        | 2 | 4,5592 | 0,51  | 0,199  |
| 6 | Q9UBQ5 EIF3K_HUMAN  | E.KIDFDSVSSIMASS#Q.-                       | S217        | 2 | 4,5529 | 0,381 | 0      |
| 6 | Q14974 IMB1_HUMAN   | E.AIGYICQDIDPEQLQDKSNE.I                   | NA          | 2 | 4,4989 | 0,388 | 0,209  |
| 6 | Q9UUK3 PARP4_HUMAN  | E.GSRCPVFAFQSS#DTESDE.L                    | S1521       | 2 | 4,4968 | 0,53  | 0,233  |
| 6 | Q9UET6 RRMJ1_HUMAN  | E.YKYTPPTQPPIS#PPYQE.A                     | S271        | 2 | 4,4918 | 0,444 | 0,117  |
| 6 | O95155 UBE4B_HUMAN  | E.KSM*SQVDVDS#GIENM*E.V                    | S124        | 2 | 4,4794 | 0,405 | 0,454  |
| 6 | P07355 ANXA2_HUMAN  | E.TVILGLLKTPAQYDASE.L                      | NA          | 2 | 4,477  | 0,467 | 0,067  |
| 6 | Q96JM3 ZN828_HUMAN  | E.SQKLAPVPS#PEPQKPAPVS#PE.S                | S204:S214   | 3 | 4,4607 | 0,426 | 0,859  |
| 6 | Q63ZY3 KANK2_HUMAN  | E.RSCDGAAGLPEVPAESSS#PPGSE.V               | S428        | 2 | 4,4559 | 0,493 | 0,503  |
| 6 | Q9BVG4 CX026_HUMAN  | E.LVSVAHALSLPAESYGNDPDIE.M                 | NA          | 2 | 4,4418 | 0,499 | 0,425  |
| 6 | Q7Z417 NUFP2_HUMAN  | E.NLNKTIQNSSVSPT#SSSSSSSTGE.T              | T378        | 3 | 4,4291 | 1     | 0,214  |
| 6 | Q96S66 CLCC1_HUMAN  | E.SSQSAKPVSGQDTSGNTEGS#PAAE.K              | S509        | 2 | 4,3995 | 0,474 | -0,103 |
| 6 | Q96T37 RBM15_HUMAN  | E.LGSQLSDEAVEDGLFHE.F                      | NA          | 2 | 4,3976 | 0,477 | -0,066 |
| 6 | P80723 BASP_HUMAN   | E.AAAAPAESAAPAAGEEPSKEE.G                  | NA          | 2 | 4,3964 | 0,488 | -0,187 |
| 6 | Q02790 FKBP4_HUMAN  | E.SGAQSAPLPM*EGVDISPKQDE.G                 | NA          | 2 | 4,3887 | 0,427 | -0,112 |
| 6 | Q16204 CCDC6_HUMAN  | E.KLDQPV#APPS#PRDISM*E.I                   | S240:S244   | 3 | 4,3844 | 0,361 | 0,085  |
| 6 | Q659C4 LARP2_HUMAN  | E.TKLNPGENV#EDE.A                          | S60         | 2 | 4,3698 | 0,483 | -0,078 |
| 6 | Q9UBQ5 EIF3K_HUMAN  | E.KIDFDSVSSIM*ASS#Q.-                      | S217        | 2 | 4,3635 | 0,413 | 0,143  |
| 6 | Q01167 FOXK2_HUMAN  | E.S#LSREGSPAPLEPEPGAAQPKLAVIQE.A           | S392        | 3 | 4,3457 | 0,206 | 0,706  |
| 6 | Q8TER5 SOLO_HUMAN   | E.HAGPSLPLGLS#PGACS#LPARVEEE.A             | S1438:S1443 | 3 | 4,342  | 0,262 | 0,367  |
| 6 | Q9Y4F1 FARP1_HUMAN  | E.IEQRPTPGS#RLGAPENSGIS#TLE.R              | S12:S23     | 3 | 4,3337 | 0,478 | 0,142  |
| 6 | P55072 TERA_HUMAN   | E.TDPSPYCVIAPDVIHCE.G                      | NA          | 3 | 4,3296 | 0,406 | 0,265  |
| 6 | A5YM69 A5YM69_HUMAN | E.HLDMAPFSSDLGS#EEEE.V                     | S145        | 2 | 4,3157 | 0,539 | 0,309  |
| 6 | Q9UQ35 SRRM2_HUMAN  | E.TKEQNSALPTSS#QDEELM*E.V                  | S1233       | 2 | 4,3152 | 0,511 | -0,109 |
| 6 | P49023 PAXI_HUMAN   | E.GGFM*AQGKTGSSS#PPGGPPKPGSQLDSM*LGSLQSD.L | S322        | 3 | 4,297  | 0,378 | 0      |

|   |                    |                                            |                |   |        |       |        |
|---|--------------------|--------------------------------------------|----------------|---|--------|-------|--------|
| 6 | P60174 TPIS_HUMAN  | E.LAS#QPDVDGFLVGGASLKPE.F                  | S223           | 2 | 4,2623 | 0,417 | 0      |
| 6 | P98171 RHG04_HUMAN | E.KQVVGAGLQTAGESGSS#PE.G                   | S824           | 2 | 4,2619 | 0,509 | 0,065  |
| 6 | P68104 EF1A1_HUMAN | E.TGVLKPGMVVTFAPVNVTTTE.V                  | NA             | 2 | 4,2619 | 0,559 | 0,118  |
| 6 | Q13263 TIF1B_HUMAN | E.GTSAPGGGGPTLDDSD#ATICRVCQKPGDLVM*CNQCE.F | S624           | 3 | 4,2126 | 0,367 | 0,192  |
| 6 | Q13509 TBB3_HUMAN  | E.VISDEHGDIPSGNYVGDSDLQLE.R                | NA             | 2 | 4,2101 | 0,474 | 0,198  |
| 6 | Q96GI7 FA89A_HUMAN | E.YKGACQAASS#PDCTYALE.N                    | S130           | 2 | 4,189  | 0,467 | 0,589  |
| 6 | Q16204 CCDC6_HUMAN | E.KLDQPV#APPS#PRDISM*E.I                   | S240:S244      | 2 | 4,1867 | 0,439 | 0,228  |
| 6 | O75694 NU155_HUMAN | E.DQACATCLILACSTAACDRE.V                   | NA             | 3 | 4,1783 | 0,41  | 0,16   |
| 6 | O75970 MPDZ_HUMAN  | E.RTAPTALGITLSSS#PTSTPE.L                  | S354           | 2 | 4,1605 | 0,504 | 0,354  |
| 6 | P04792 HSPB1_HUMAN | E.SPAVAAPAYSRAL#RQLS#SGVSE.I               | S78:S82        | 3 | 4,1569 | 0,351 | -0,148 |
| 6 | Q8IWY9 CDAN1_HUMAN | R.SKQLQQS#PTPTCPTPE.L                      | S265           | 2 | 4,1534 | 0,5   | -0,065 |
| 6 | Q02790 FKBP4_HUMAN | E.SGAQSAPLPM*EGVDISPKQDE.G                 | NA             | 3 | 4,1467 | 0,479 | 0,168  |
| 6 | P80723 BASP_HUMAN  | E.AAAAPAESAAPAAGEEPSKEE.G                  | NA             | 3 | 4,1421 | 0,422 | 0      |
| 6 | Q96S66 CLCC1_HUMAN | E.SSQSAKPVSGQDTSNGTEGS#PAAE.K              | S509           | 3 | 4,1397 | 0,466 | -0,154 |
| 6 | P18583 SON_HUMAN   | E.M*EHNTVCAAGTS#PVGE.I                     | S1556          | 2 | 4,1298 | 0,452 | -0,417 |
| 6 | P68400 CSK21_HUMAN | E.FYHPGQEYNVR.V                            | NA             | 3 | 4,1292 | 0,332 | 0,195  |
| 6 | Q12906 ILF3_HUMAN  | E.CLASGIVM*PDGSGIYDPCEKE.A                 | NA             | 2 | 4,1275 | 0,508 | 0,105  |
| 6 | P42166 LAP2A_HUMAN | E.SRSST#PLPTISSSAE.N                       | T160           | 2 | 4,127  | 0,435 | 0      |
| 6 | Q13043 STK4_HUMAN  | E.TGQIVAIAKQVPVESDLQE.I                    | NA             | 2 | 4,1087 | 0,51  | 0,187  |
| 6 | P68104 EF1A1_HUMAN | E.TGVLKPGM*VVTTFAPVNVTTTE.V                | NA             | 2 | 4,0949 | 0,374 | 0,353  |
| 6 | Q16204 CCDC6_HUMAN | E.KLDQPV#APPS#PRDISME.I                    | S240:S244      | 3 | 4,0882 | 0,317 | 0,086  |
| 6 | Q9C0D5 TANC1_HUMAN | E.SSAGDGPVPYSQGSLLIM*PRPNS#VAATSSTKLE.D    | S313           | 3 | 4,0875 | 0,263 | 1,264  |
| 6 | P61160 ARP2_HUMAN  | E.LLFNTIQAADIDTRSE.F                       | NA             | 3 | 4,0765 | 0,331 | 0,405  |
| 6 | Q6PKG0 LARP1_HUMAN | E.TES#APGS#PRAVT#PVPTKTEE.V                | S517:S521:T526 | 3 | 4,0728 | 0,37  | 0,239  |
| 6 | Q8WXI9 P66B_HUMAN  | R.GRLTSPDIIVLS#DNE.A                       | S129           | 2 | 4,0683 | 0,433 | 0,135  |
| 6 | Q01970 PLCB3_HUMAN | E.GLGDGPLVACASNGHAPGSS#GHLSGADSESQEE.N     | S1217          | 3 | 4,0621 | 0,304 | 0      |
| 6 | Q9H307 PININ_HUMAN | E.TNRVES#VEPSENE.A                         | S413           | 2 | 4,062  | 0,398 | 0,155  |
| 6 | Q13263 TIF1B_HUMAN | E.TKPVLMLAEGPGAEGPRLAS#PS#GSTSSGLE.V       | S594:S596      | 3 | 4,0551 | 1     | 0,117  |
| 6 | Q92917 GPKOW_HUMAN | E.LHYDAICQYMGPSDT#DDD.-                    | T473           | 2 | 4,0461 | 0,431 | 0,333  |
| 6 | P78310 CXAR_HUMAN  | E.GYSKTQYNQVPS#EDFE.R                      | S323           | 2 | 4,0383 | 0,427 | 0      |
| 6 | Q02952 AKA12_HUMAN | E.ARGDTVVSEAE#PEAVTAAE.T                   | T972           | 2 | 4,0313 | 0,434 | 0,667  |
| 6 | P08729 K2C7_HUMAN  | E.LQSQISDTSVVLSM*DNSRSLD.L                 | NA             | 2 | 4,0164 | 0,458 | -0,106 |
| 6 | Q02952 AKA12_HUMAN | E.SQLPGTGGPEDVLQPVQRAE.A                   | NA             | 2 | 4,004  | 0,47  | 0      |
| 6 | Q04721 NOTC2_HUMAN | E.AADIRRTPS#LALT#PPQAEQE.V                 | S1804:T1808    | 3 | 3,998  | 0,297 | 0,157  |
| 6 | P16989 DBPA_HUMAN  | E.AKAGEAPTENPAPPTQSS#AE.-                  | S370           | 3 | 3,9803 | 0,418 | 0,169  |
| 6 | P55327 TPD52_HUMAN | E.VLNSAANASATTTEPLPEKTQE.S                 | NA             | 3 | 3,9771 | 0,34  | -0,161 |
| 6 | Q99549 MPP8_HUMAN  | E.GARVTAVPVSAADST#EE.L                     | T21            | 2 | 3,9602 | 0,487 | 0,07   |
| 6 | Q9H000 MKRN2_HUMAN | R.KTQPMS*VSNPGSCSDPQPS#PE.M                | S139           | 2 | 3,9556 | 0,44  | 0,105  |
| 6 | P11021 GRP78_HUMAN | E.IVQPIISKLYGSAGPPPTGEEDTAE.K              | NA             | 3 | 3,944  | 0,308 | 0,498  |
| 6 | Q14160 LAP4_HUMAN  | R.LRVQS#PEPPAPERALS#PAE.L                  | S1475:S1486    | 3 | 3,9408 | 0,328 | -0,166 |
| 6 | P31949 S10AB_HUMAN | E.FLNLIGGLAM*ACHD.S                        | NA             | 2 | 3,9314 | 0,463 | 0,079  |

|   |                     |                                        |             |   |        |       |        |
|---|---------------------|----------------------------------------|-------------|---|--------|-------|--------|
| 6 | Q9BUF5 TBB6_HUMAN   | E.VISDEHGIDPAGGYVGDLSALQLE.R           | NA          | 2 | 3,9194 | 0,537 | 0,417  |
| 6 | Q13367 AP3B2_HUMAN  | E.NAEKAFYGS#EEDE.A                     | S272        | 2 | 3,9168 | 0,47  | 0      |
| 6 | Q6IMN6 CAPR2_HUMAN  | E.SVLDFDKPSSAIPTSQPPSATPGS#PVASKE.Q    | S660        | 3 | 3,9155 | 0,351 | 0,119  |
| 6 | Q02952 AKA12_HUMAN  | E.ESQLPGTGGPEDVLQPVQRAE.A              | NA          | 2 | 3,9149 | 0,438 | 0,111  |
| 6 | Q8TD19 NEK9_HUMAN   | E.AS#SPRLNPVAVTCAGKGTPLTPACACSSLQVE.V  | S868        | 3 | 3,9001 | 0,207 | 0,108  |
| 6 | A8MVB1 A8MVB1_HUMAN | E.KLVSPPASAAAASSPSS#SPSPQPVSE.L        | S40         | 3 | 3,8952 | 0,395 | 0,374  |
| 6 | P67809 YBOX1_HUMAN  | E.TKAADPPAENSS#APEAEQGGAE.-            | S314        | 3 | 3,8893 | 0,354 | 0,166  |
| 6 | Q92615 LARP5_HUMAN  | E.KFTSSQTQSPT#PPKPPS#PSFE.L            | T518:S524   | 2 | 3,8862 | 1     | 0,301  |
| 6 | Q96J02 ITCH_HUMAN   | E.TRVSTNGS#DDPEDAGAGE.N                | S221        | 2 | 3,8428 | 0,526 | -0,328 |
| 6 | A5YM69 A5YM69_HUMAN | E.HLDM*APFSSDLGS#EEEE.V                | S145        | 2 | 3,8337 | 0,429 | 0,184  |
| 6 | P12268 IMDH2_HUMAN  | E.DLVVAPAGITLKEANE.I                   | NA          | 2 | 3,8319 | 0,336 | 0,149  |
| 6 | Q14204 DYHC1_HUMAN  | E.IVLSAGSTPRIQGLTVEQAE.A               | NA          | 2 | 3,8175 | 0,448 | 0,118  |
| 6 | Q9HC35 EMAL4_HUMAN  | E.QAKATLLEDQDPS#PSS.-                  | S978        | 2 | 3,8122 | 0,456 | 0,129  |
| 6 | Q9UKV3 ACINU_HUMAN  | E.LLVSQHT#VQLVGGSLSPSS#DTKAESPAEKVPE.E | T470:S484   | 3 | 3,8084 | 1     | 0,3    |
| 6 | Q9UQ35 SRRM2_HUMAN  | E.TKEQNSALPTSS#QDEELME.V               | S1233       | 2 | 3,7998 | 0,466 | 0,44   |
| 6 | P55072 TERA_HUMAN   | E.TDPSPYCVAPDVTIHCE.G                  | NA          | 2 | 3,7976 | 0,457 | 0,235  |
| 6 | Q8N1G4 LRC47_HUMAN  | E.NKEEGSL#DTE.A                        | S520        | 2 | 3,7825 | 0,422 | -0,284 |
| 6 | P61160 ARP2_HUMAN   | E.LLFNTIQAADIDTRSE.F                   | NA          | 2 | 3,773  | 0,442 | 0,203  |
| 6 | Q10713 MPPA_HUMAN   | E.LEDLNLRPDPELLTE.M                    | NA          | 2 | 3,7663 | 0,553 | -0,196 |
| 6 | A8MVB1 A8MVB1_HUMAN | E.KLVSPPASAAAASSPSS#PQPVSE.L           | S43         | 2 | 3,7633 | 0,407 | 0,499  |
| 6 | P20020 AT2B1_HUMAN  | E.MNKSATSSSPGS#PLHSLETS#L.-            | S1249:S1257 | 2 | 3,7571 | 1     | 0,107  |
| 6 | Q9UBF8 PI4KB_HUMAN  | E.VHTNSCDNISQFSVDSIT#SQE.S             | T491        | 2 | 3,7322 | 0,404 | 0,698  |
| 6 | P24534 EF1B_HUMAN   | E.DYVQSM*DVAFNKI.-                     | NA          | 2 | 3,7309 | 0,407 | 0,151  |
| 6 | P61758 PFD3_HUMAN   | E.AVFVEDVDSFMKQPGNE.T                  | NA          | 3 | 3,7268 | 0,347 | 0,096  |
| 6 | Q9C0C9 UBE2O_HUMAN  | E.QLLTGS#PTS#PTVEPEKPTRE.K             | S836:S839   | 3 | 3,7235 | 0,333 | 0,079  |
| 6 | P68104 EF1A1_HUMAN  | E.T#GVLKPGM*VVTFAPVNVVTE.V             | T269        | 2 | 3,723  | 0,439 | 0,679  |
| 6 | P33991 MCM4_HUMAN   | E.NVGIDITEPLYM*QRLGE.I                 | NA          | 2 | 3,7205 | 0,427 | 0      |
| 6 | P17275 JUNB_HUMAN   | E.ARS#RDAT#PPVSPINM*EDQE.R             | S251:T255   | 3 | 3,7182 | 0,251 | 0,08   |
| 6 | P55036 PSMD4_HUMAN  | E.AGIATTGTEDSDALLKM*TISQQE.F           | NA          | 3 | 3,705  | 0,419 | 0,291  |
| 6 | P49321 NASP_HUMAN   | E.NKS#LQENEEEE.I                       | S503        | 2 | 3,7018 | 0,393 | 0,085  |
| 6 | Q86VP6 CAND1_HUMAN  | E.SIQKDSSTNLESM*DTS#.-                 | S1230       | 2 | 3,6944 | 0,532 | 0,19   |
| 6 | P60174 TPIS_HUMAN   | E.LASQPDVDGFLVGGASLKPE.F               | NA          | 3 | 3,693  | 0,321 | 0,64   |
| 6 | Q9NZD8 SPG21_HUMAN  | E.VQKGLGIS#QEEQ.-                      | S304        | 2 | 3,6883 | 0,304 | -0,247 |
| 6 | O75643 U520_HUMAN   | E.TM*DLDQGGREALAPRQVLDLE.D             | NA          | 2 | 3,6832 | 0,472 | -0,112 |
| 6 | Q9Y6I3 EPN1_HUMAN   | E.LLAGEVPARS#PGAFDM*SGVRGSLAE.A        | S410        | 3 | 3,6806 | 0,375 | 0,071  |
| 6 | Q92917 GPKOW_HUMAN  | E.LHYDAICQYM*GPS#DTDDD.-               | S471        | 3 | 3,6757 | 0,395 | 0,496  |
| 6 | Q96AG4 LRC59_HUMAN  | E.LDLSLSDLNEVPVKE.L                    | NA          | 2 | 3,6746 | 0,51  | 0,073  |
| 6 | Q92917 GPKOW_HUMAN  | E.LHYDAICQYMGPS#DTDDD.-                | S471        | 3 | 3,6735 | 0,316 | 0,167  |
| 6 | P27816 MAP4_HUMAN   | E.EGRPVVSGTGNDDIT#PPNKELPPS#PE.K       | T687:S696   | 3 | 3,6724 | 0,238 | 0,321  |
| 6 | P30876 RPB2_HUMAN   | E.TVM*LAM*TPDDLQKE.V                   | NA          | 2 | 3,67   | 0,447 | 0,07   |
| 6 | P68104 EF1A1_HUMAN  | E.TGVKPGM*VVTFAPVNVVTE.V               | NA          | 3 | 3,6677 | 0,256 | 0,705  |

|   |                     |                                        |                |   |        |       |        |
|---|---------------------|----------------------------------------|----------------|---|--------|-------|--------|
| 6 | Q8IWZ3 ANKH1_HUMAN  | E.SFILDQEDLDNPVLKTTSE.I                | NA             | 2 | 3,6597 | 0,438 | 0,113  |
| 6 | Q15149 PLEC1_HUMAN  | E.VQYLTTGLIEPDTGRVPLDE.A               | NA             | 2 | 3,6574 | 0,333 | 0,215  |
| 6 | Q6PKG0 LARP1_HUMAN  | E.T#ESAPGS#PRAVT#PVPTKTEE.V            | T515:S521:T526 | 2 | 3,6559 | 0,511 | 0,426  |
| 6 | P54920 SNAA_HUMAN   | K.KTIQGDDEEDLR.-                       | NA             | 3 | 3,6538 | 0,124 | 0      |
| 6 | P04183 KITH_HUMAN   | R.KLFAPQQILQCS#PAN.-                   | S231           | 2 | 3,6536 | 0,323 | 0      |
| 6 | Q7Z3K3 POGZ_HUMAN   | E.SLHQLFEGES#E.T                       | S1392          | 2 | 3,636  | 0,214 | 0      |
| 6 | Q96T88 UHRF1_HUMAN  | E.RDSELS#DTDSGCCLGQSE.S                | S91            | 2 | 3,6352 | 0,517 | 0,233  |
| 6 | P04792 HSPB1_HUMAN  | E.GTLTVEAPMPKLATQSNE.I                 | NA             | 2 | 3,6222 | 0,439 | 0,194  |
| 6 | Q92917 GPKOW_HUMAN  | E.LHYDAICQYM*GPSDT#DDD.-               | T473           | 3 | 3,6221 | 0,268 | 0,331  |
| 6 | O95208 EPN2_HUMAN   | R.MAQVATGM*GSNQITFGRGS#SQPNLSTSHSEQE.Y | S172           | 3 | 3,6202 | 0,394 | 0,746  |
| 6 | Q92615 LARP5_HUMAN  | E.EKFTSSQTQSPT#PPKPPS#PSFE.L           | T518:S524      | 3 | 3,6184 | 0,176 | 0,285  |
| 6 | O95208 EPN2_HUMAN   | R.M*AQVATGM*GSNQITFGRGS#QPNLSTSHSEQE.Y | S173           | 3 | 3,6177 | 0,271 | 0,424  |
| 6 | O94762 RECO5_HUMAN  | E.GVQGPPM*APEKYTGEEDGAGGHS#PAPPQTE.E   | S815           | 3 | 3,6064 | 0,352 | -0,119 |
| 6 | P33991 MCM4_HUMAN   | E.NVGIDITEPLYM*QRLGE.I                 | NA             | 3 | 3,6032 | 0,376 | 0,279  |
| 6 | Q9P122 CACO1_HUMAN  | E.KSVLMAAVQS#GGEE.A                    | S612           | 2 | 3,6025 | 0,252 | 0,246  |
| 6 | Q15149 PLEC1_HUMAN  | E.ILTDPSDDTKGFFDPNTEE.N                | NA             | 2 | 3,6004 | 0,382 | 0,114  |
| 6 | Q5VT06 CE350_HUMAN  | E.TRSPS#PISISSE.T                      | S1830          | 2 | 3,6002 | 0,421 | 0      |
| 6 | Q6DEN2 Q6DEN2_HUMAN | E.SREPAPAS#PAPAGVE.I                   | S102           | 2 | 3,597  | 0,419 | -0,161 |
| 6 | Q8IZT6 ASPM_HUMAN   | E.NKIPISPIS#PAFNE.C                    | S225           | 2 | 3,5826 | 0,29  | 0,152  |
| 6 | Q9UQ35 SRRM2_HUMAN  | E.KAGMSSNQSISS#PVL.D.A                 | S1404          | 2 | 3,5762 | 0,385 | 0,072  |
| 6 | Q6S8J3 A26CA_HUMAN  | R.TTGIVM*DSGDGVTHTVPIYE.G              | NA             | 2 | 3,5751 | 0,367 | 0,579  |
| 6 | P54105 ICLN_HUMAN   | E.VDTPVAGQFEDADVDH.-                   | NA             | 2 | 3,5651 | 0,527 | 0,064  |
| 6 | P55795 HNRH2_HUMAN  | E.LFLNSTAGTSGGAYDHSYVE.L               | NA             | 2 | 3,5631 | 0,441 | 0,117  |
| 6 | P04083 ANXA1_HUMAN  | E.VVLALLKTPAQFDADE.L                   | NA             | 2 | 3,5607 | 0,48  | -0,071 |
| 6 | Q9NZL4 HPBP1_HUMAN  | E.KLLQTCFSS#PADDSM*D.R                 | S354           | 2 | 3,5505 | 0,438 | 0,128  |
| 6 | Q03164 HRX_HUMAN    | E.VHPPLPISQS#PENE.S                    | S518           | 2 | 3,5422 | 0,451 | 0,075  |
| 6 | P61758 PFD3_HUMAN   | E.AVFVEDVDSFMKQPGNE.T                  | NA             | 2 | 3,5336 | 0,308 | 0      |
| 6 | O75665 OFD1_HUMAN   | E.AFKNITSSS#PE.R                       | S686           | 2 | 3,5273 | 0,328 | -0,387 |
| 6 | Q7Z417 NUFP2_HUMAN  | E.ISLKNLS#SDE.A                        | S112           | 2 | 3,5269 | 0,184 | 0,309  |
| 6 | Q9HAU5 RENT2_HUMAN  | E.NKEVSS#PDDLELE.L                     | S514           | 2 | 3,5222 | 0,312 | 0,392  |
| 6 | Q9BQY9 DBND2_HUMAN  | E.SQRPPIGSISS#M*E.V                    | S154           | 2 | 3,5182 | 0,428 | 0,082  |
| 6 | P19338 NUCL_HUMAN   | E.SKTLVLSNLSYS#ATEE.T                  | S496           | 2 | 3,5163 | 0,528 | 0      |
| 6 | P67809 YBOX1_HUMAN  | E.TKAADPPAENSS#APEAEQGGAE.-            | S314           | 2 | 3,5147 | 0,485 | 0      |
| 6 | Q14160 LAP4_HUMAN   | E.LRSLESPSPS#PGPQEE.D                  | S1581          | 2 | 3,5115 | 0,501 | 0      |
| 6 | Q13868 EXOS2_HUMAN  | E.AGGFIANLEPVSLADRE.V                  | NA             | 2 | 3,5045 | 0,335 | -0,069 |
| 6 | Q5JSH3 WDR44_HUMAN  | E.NTAYKVGNES#PVQE.L                    | S50            | 2 | 3,5022 | 0,33  | 0,076  |
| 6 | Q12888 TP53B_HUMAN  | E.IEPKNS#PEDLGLSLTGDSCCLM*LSTSE.Y      | S500           | 3 | 3,5006 | 0,212 | 0,061  |
| 6 | O15534 PER1_HUMAN   | E.GRSSSS#PALPTAGNCTS.-                 | S1279          | 2 | 3,5003 | 0,583 | 0,141  |
| 6 | P36578 RL4_HUMAN    | E.VPELPLVVEDKVE.G                      | NA             | 2 | 3,4995 | 0,325 | 0,083  |
| 6 | Q9Y266 NUDC_HUMAN   | E.NSKLS#DLTSE.T                        | S277           | 2 | 3,4994 | 0,227 | 0      |
| 6 | P07355 ANXA2_HUMAN  | E.TVILGLLKTPAQYDASE.L                  | NA             | 3 | 3,4934 | 0,349 | 0,101  |



|   |                    |                                 |             |   |        |       |        |
|---|--------------------|---------------------------------|-------------|---|--------|-------|--------|
| 6 | Q66K89 E4F1_HUMAN  | E.HAGELVIAS#PEGQLE.V            | S772        | 2 | 3,4919 | 0,491 | 0,075  |
| 6 | Q6PKG0 LARP1_HUMAN | E.TES#APGS#PRAVTPVPTKTEE.V      | S517:S521   | 3 | 3,4917 | 0,267 | -0,165 |
| 6 | P13639 EF2_HUMAN   | E.ESQVAGTPM*FVVKAYLPVNE.S       | NA          | 2 | 3,4836 | 0,313 | 0      |
| 6 | Q66K74 MAP1S_HUMAN | E.RAGGLGAEET#PPTSVSE.S          | T782        | 2 | 3,4721 | 0,472 | -0,07  |
| 6 | Q8TDM6 DLG5_HUMAN  | E.QKCVPASGELS#PELQE.W           | S1146       | 2 | 3,4688 | 0,261 | 0,132  |
| 6 | Q04721 NOTC2_HUMAN | E.AADIRRT#PSLALT#PPQAEQE.V      | T1802:T1808 | 3 | 3,4673 | 0,304 | 0,315  |
| 6 | Q02040 SF17A_HUMAN | E.VQSSCRVVPEDGS#PE.K            | S537        | 2 | 3,455  | 0,405 | -0,141 |
| 6 | O95872 BAT4_HUMAN  | E.NRSPT#PSLQYCE.N               | T212        | 2 | 3,4549 | 0,43  | -0,398 |
| 6 | Q02952 AKA12_HUMAN | E.LVEM*DAEPQEAEPKE.L            | NA          | 2 | 3,4475 | 0,366 | -0,203 |
| 6 | Q01804 OTUD4_HUMAN | E.HVSLSNPAPLLVS#PE.V            | S578        | 2 | 3,4462 | 0,391 | 0,298  |
| 6 | P54132 BLM_HUMAN   | E.LNPET#STDCDARQISLQQQLIHVM*E.H | T357        | 3 | 3,4444 | 0,201 | 0,061  |
| 6 | Q8TER5 SOLO_HUMAN  | E.HAGPSLPGLS#PGACS#LPARVEEE.A   | S1438:S1443 | 2 | 3,4363 | 0,339 | 0,686  |
| 6 | P25205 MCM3_HUMAN  | D.LLFIM*LDQM*DPEQDRE.I          | NA          | 2 | 3,4359 | 0,306 | 0,422  |
| 6 | Q8WU17 RN139_HUMAN | R.NGVIQHTGAAAEFNDDT#D.-         | T663        | 3 | 3,4323 | 0,354 | -0,527 |
| 6 | Q9NZN5 ARHGC_HUMAN | E.DYQIAIPDSHLPVSEE.R            | NA          | 2 | 3,4266 | 0,272 | -0,067 |
| 6 | Q5VZL5 ZMYM4_HUMAN | E.KDQGSTYS#GDLE.S               | S1091       | 2 | 3,422  | 0,427 | 0      |
| 6 | P31949 S10AB_HUMAN | E.FLNLIIGGLAM*ACHD.S            | NA          | 3 | 3,4182 | 0,286 | 0,354  |
| 6 | P04792 HSPB1_HUMAN | E.GTLTVEAPM*PKLATQSNE.I         | NA          | 2 | 3,4149 | 0,387 | 0,256  |
| 6 | Q8WZ82 OVCA2_HUMAN | E.ADVFSALEEPAVCRGLEE.S          | NA          | 2 | 3,4123 | 0,426 | 0,245  |
| 6 | P06748 NPM_HUMAN   | E.GS#PIKVTLATLKM*SVQPTVSLGGFE.I | S70         | 3 | 3,3995 | 0,296 | 0      |
| 6 | Q9BZV1 UBXD1_HUMAN | E.ATVSGSPEAPGTNVVSEPREE.G       | NA          | 2 | 3,3951 | 0,422 | 0,231  |
| 6 | P22314 UBA1_HUMAN  | E.LVALAQAVNARALPAVQQNNLDE.D     | NA          | 3 | 3,3926 | 0,343 | 0,605  |
| 6 | P53582 AMPM1_HUMAN | E.VLDVAAGM*IKPGVTTEE.I          | NA          | 2 | 3,3911 | 0,432 | -0,14  |
| 6 | P29374 ARI4A_HUMAN | E.SRS#VKSES#DITIE.V             | S1018:S1023 | 2 | 3,3893 | 0,389 | -0,076 |
| 6 | Q8IWZ3 ANKH1_HUMAN | E.THPSSS#PTPTSNTQEE.A           | S2069       | 2 | 3,3813 | 0,365 | -0,327 |
| 6 | Q8NEF9 SRFB1_HUMAN | E.KEYFDDS#TEE.R                 | S264        | 2 | 3,3534 | 0,467 | -0,091 |
| 6 | P11233 RALA_HUMAN  | E.DENVPFLLVGNKSDLE.D            | NA          | 2 | 3,3483 | 0,33  | -0,068 |
| 6 | Q6IQ55 TTBK2_HUMAN | E.KSILLES#DNEDE.K               | S786        | 2 | 3,3453 | 0,323 | -0,249 |
| 6 | Q9Y217 MTMR6_HUMAN | E.FSKSEPAVVS#LE.Y               | S611        | 2 | 3,3451 | 0,292 | 0,089  |
| 6 | O43683 BUB1_HUMAN  | E.NVVAKQCTQATLDS#CEE.N          | S640        | 2 | 3,3413 | 0,413 | 0      |
| 6 | P11766 ADHX_HUMAN  | E.FGATECINPQDFSKPIQE.V          | NA          | 2 | 3,3322 | 0,33  | 0      |
| 6 | Q9H5H4 ZN768_HUMAN | E.GYLGRNMS#ENEEEE.I             | S33         | 2 | 3,3282 | 0,395 | -0,07  |
| 6 | Q5T200 ZC3HD_HUMAN | E.SRS#LS#PSHLTE.D               | S875:S877   | 2 | 3,3083 | 0,375 | -0,089 |
| 6 | Q9P1Y5 K1543_HUMAN | E.ASKPPAPSEGS#PKAVAS#SPAATNSE.V | S547:S553   | 3 | 3,308  | 0,432 | -0,293 |
| 6 | Q92754 AP2C_HUMAN  | E.ALIVIDKSYM*NGPDQSPADS#NKTLE.K | S438        | 3 | 3,3057 | 0,19  | 0,392  |
| 6 | Q9P1Z2 CACO1_HUMAN | E.KSVLM*AAVQS#GGEE.A            | S612        | 2 | 3,3045 | 0,383 | -0,325 |
| 6 | P60174 TPIS_HUMAN  | E.LASQPDVDGFLVGAS#LKPE.F        | S236        | 2 | 3,2971 | 0,38  | 0,117  |
| 6 | Q99459 CDC5L_HUMAN | E.AQNLM*ALTNVDTPLKGGGLNT#PLHE.S | T385        | 3 | 3,2923 | 0,238 | 0,138  |
| 6 | Q04637 IF4G1_HUMAN | E.SEFSSSPLQAPTPLASHTVE.I        | NA          | 2 | 3,2883 | 0,352 | 0,234  |
| 6 | Q9H000 MKR2_HUMAN  | R.KTQPSMVSNPNGSCSDPQPS#PE.M     | S139        | 2 | 3,2854 | 0,441 | 0,423  |
| 6 | Q4KMP7 TB10B_HUMAN | E.GLHPSLPS#PTGNST#PLGSSKE.T     | S432:T438   | 3 | 3,2843 | 1     | 0,247  |

|   |                    |                                       |             |   |        |       |        |
|---|--------------------|---------------------------------------|-------------|---|--------|-------|--------|
| 6 | O60684 IMA7_HUMAN  | E.HYFGVEDDDSS#LAPQVDE.T               | S510        | 2 | 3,2819 | 0,391 | 0,232  |
| 6 | Q8N2M8 SFR16_HUMAN | E.KITFITSFGGS#DEE.A                   | S320        | 2 | 3,2805 | 0,349 | -0,076 |
| 6 | P04792 HSPB1_HUMAN | E.GTLTVEAPMPKLATQSNE.I                | NA          | 3 | 3,2765 | 0,226 | 0,097  |
| 6 | P31942 HNRH3_HUMAN | E.IVPNGITLTM*DYQGRSTGE.A              | NA          | 2 | 3,2749 | 0,436 | 0,354  |
| 6 | P14618 KPYM_HUMAN  | E.AGTAFIQTQQLHAAM*ADTFLE.H            | NA          | 2 | 3,2729 | 0,344 | 0,107  |
| 6 | Q9HC35 EMAL4_HUMAN | E.SRISS#PTLLENLE.Q                    | S919        | 2 | 3,2676 | 0,375 | -0,214 |
| 6 | O60271 JIP4_HUMAN  | E.KFIEFEDS#QEQE.K                     | S109        | 2 | 3,2658 | 0,197 | 0,076  |
| 6 | O94762 RECQ5_HUMAN | E.GVQGPMPAPEKYTGEEDGAGGHS#PAPPQTE.E   | S815        | 3 | 3,264  | 0,272 | 0,477  |
| 6 | Q8IWE2 NXP20_HUMAN | E.DQTVVSDVAKVSEEE.T                   | NA          | 2 | 3,2621 | 0,414 | 0,281  |
| 6 | P25205 MCM3_HUMAN  | D.LTTLVAFSSSVYPTKDEE.N                | NA          | 2 | 3,2579 | 0,328 | 0,234  |
| 6 | Q02952 AKA12_HUMAN | R.EVIAEEEEPTVTPELPENRE.A              | NA          | 2 | 3,2556 | 0,449 | 0,536  |
| 6 | P20020 AT2B1_HUMAN | E.M*NKSATSSSPGS#PLHSLETS#L.-          | S1249:S1257 | 3 | 3,2474 | 0,304 | 0,238  |
| 6 | Q8WWM7 ATX2L_HUMAN | E.VDGLLTSEPM*GSPVSSKTE.S              | NA          | 2 | 3,2408 | 0,391 | 0,313  |
| 6 | P54105 ICLN_HUMAN  | E.VDTPPTVAGQFEDADV.DH.-               | NA          | 3 | 3,239  | 0,282 | 0,095  |
| 6 | P52948 NUP98_HUMAN | E.VVVYLLDDNQPPVGE.G                   | NA          | 2 | 3,234  | 0,363 | 0,146  |
| 6 | Q9NUQ3 TXLNG_HUMAN | E.NRNLVS#PAYCTQE.S                    | S97         | 2 | 3,2281 | 0,397 | 0      |
| 6 | P04083 ANXA1_HUMAN | E.VVLALLKTPAQFDADE.L                  | NA          | 3 | 3,226  | 0,342 | 0,211  |
| 6 | P15822 ZEP1_HUMAN  | E.SHVLGTGQS#LDE.S                     | S917        | 2 | 3,2242 | 0,475 | -0,369 |
| 6 | P27816 MAP4_HUMAN  | D.TPSSKPTLLANGGHGVEGS#DTTGSPTEFLEE.K  | S94         | 3 | 3,2194 | 0,173 | 0,115  |
| 6 | Q14160 LAP4_HUMAN  | E.LRSLEPSPS#PGPQEEDGE.V               | S1581       | 2 | 3,2078 | 0,425 | 0,244  |
| 6 | Q16537 2A5E_HUMAN  | E.LTPLPLLLKDVPSSEQPE.L                | NA          | 2 | 3,2052 | 0,412 | -0,065 |
| 6 | Q12906 ILF3_HUMAN  | E.CLASGIVMPDGS#GIYDPCEKE.A            | NA          | 2 | 3,2019 | 0,395 | 0,319  |
| 6 | Q96TA1 NIBL1_HUMAN | E.TGEQVSS#PSSH#PALHTTTEDSAGVQTEF.-    | S712        | 3 | 3,1995 | 0,366 | 0,246  |
| 6 | P38919 IF4A3_HUMAN | E.TSEVDVTPFTDMGLRE.D                  | NA          | 2 | 3,199  | 0,365 | 0,482  |
| 6 | P68104 EF1A1_HUMAN | E.TGVLPKPM*VVTFAPVNV#TE.V             | T286        | 2 | 3,1978 | 0,39  | 0,113  |
| 6 | P02686 MBP_HUMAN   | E.LNAEKAS#TNS#ETNRGESE.K              | S16:S19     | 3 | 3,186  | 0,167 | -0,174 |
| 6 | Q9NW13 RBM28_HUMAN | E.AAQKCLLAAS#PENE.A                   | S397        | 2 | 3,1859 | 0,419 | -0,077 |
| 6 | P27707 DCK_HUMAN   | E.FEELTMS#QKNGGNVLM*#M*YEKPE.R        | S74         | 3 | 3,1844 | 0,249 | 0,325  |
| 6 | Q5HYI7 MTX3_HUMAN  | E.NNSFQRLS#P.-                        | S311        | 2 | 3,1793 | 0,287 | -0,213 |
| 6 | P31949 S10AB_HUMAN | E.FLNLIGGLAMACHD.S                    | NA          | 2 | 3,1745 | 0,455 | -0,159 |
| 6 | Q02952 AKA12_HUMAN | E.SGEHTQVPADS#PDSQEE.Q                | S554        | 2 | 3,1689 | 0,335 | -0,129 |
| 6 | Q96QR8 PURB_HUMAN  | E.HYAQLGPSS#PEQLAAGAE.E.G             | S101        | 3 | 3,1687 | 0,294 | 0,18   |
| 6 | Q86YR5 GPSM1_HUMAN | E.DRIAQPSMTAS#PQTEE.F                 | S522        | 2 | 3,1613 | 0,388 | -0,133 |
| 6 | P04920 B3A2_HUMAN  | E.RTS#PS#SPAPLPHQE.A                  | S170:S172   | 2 | 3,1601 | 0,446 | 0,073  |
| 6 | Q8IW41 MAPK5_HUMAN | E.IVKQVIEEQTT#HES#Q.-                 | S469:S472   | 2 | 3,1589 | 0,366 | -0,061 |
| 6 | Q68D10 SPT2_HUMAN  | E.YNHAES#EQEYEE.Q                     | S139        | 2 | 3,1573 | 0,241 | -0,141 |
| 6 | O95235 KI20A_HUMAN | E.HSLQVS#PSLE.K                       | S532        | 2 | 3,1542 | 0,273 | 0      |
| 6 | Q14676 MDC1_HUMAN  | E.TQPQRLLAEDS#EEE.V                   | S168        | 3 | 3,1507 | 0,316 | 0,398  |
| 6 | Q96JM2 ZN462_HUMAN | E.DARLS#PEKSLQLASANPAISSTPYQCTVCQSE.Y | S296        | 3 | 3,1506 | 0,313 | 0,408  |
| 6 | Q09666 AHNK_HUMAN  | E.GAKDIDISS#PE.F                      | S177        | 2 | 3,1465 | 0,113 | 0,201  |
| 6 | Q9P1Y6 K1542_HUMAN | E.AS#PAPLAQGE#GREDL#PTRL#PALGE.A      | S1202       | 3 | 3,1464 | 0,408 | 0,209  |

|   |                     |                                     |             |   |        |       |        |
|---|---------------------|-------------------------------------|-------------|---|--------|-------|--------|
| 6 | O75643 U520_HUMAN   | E.TMDLDQGGREALAPRQVLDLE.D           | NA          | 2 | 3,146  | 0,269 | 0,225  |
| 6 | Q96N67 DOCK7_HUMAN  | E.RSPS#GSAFGSQE.N                   | S1432       | 2 | 3,1451 | 0,429 | 0      |
| 6 | P30837 AL1B1_HUMAN  | E.ALFFNM*GQCCCAGSRTFVEE.S           | NA          | 3 | 3,1431 | 0,103 | 0,61   |
| 6 | P06576 ATPB_HUMAN   | E.VSALLGRIPSAVGYQPTLATDM*GTM*QE.R   | NA          | 3 | 3,1409 | 0,461 | 0      |
| 6 | O60884 DNJA2_HUMAN  | E.LEDLLSRPEVPNIIGE.T                | NA          | 2 | 3,1177 | 0,51  | 0,065  |
| 6 | P31943 HNRH1_HUMAN  | K.HTGPNPDTANDGFVR.L                 | NA          | 3 | 3,108  | 0,207 | 0,109  |
| 6 | Q8IW35 CEP97_HUMAN  | E.SHGIS#PPLQGE.I                    | S825        | 2 | 3,1068 | 0,257 | -0,203 |
| 6 | P61758 PFD3_HUMAN   | E.AVFDVDFVDFM*KQPGNE.T              | NA          | 3 | 3,1044 | 0,286 | 0,19   |
| 6 | Q684P5 RPGP2_HUMAN  | E.LANSSDATALPDRPLS#PPLTAPPTM*KSSE.F | S45         | 3 | 3,1037 | 0,268 | 0,061  |
| 6 | P12268 IMDH2_HUMAN  | E.DLVVAPAGITLKE.A                   | NA          | 3 | 3,0942 | 0,26  | 0,345  |
| 6 | Q6P4Q7 CNNM4_HUMAN  | E.DEQSNIVDILYVKD.L                  | NA          | 2 | 3,0886 | 0,402 | 0,074  |
| 6 | Q9UNE7 STUB1_HUMAN  | E.GGARLGAGGGS#PEKS#PSAQE.L          | S19:S23     | 2 | 3,0685 | 0,232 | 0      |
| 6 | P55036 PSMD4_HUMAN  | E.AGIATTGTEDSDALLKM*TISQQE.F        | NA          | 2 | 3,0673 | 0,224 | 0,486  |
| 6 | O15085 ARHGB_HUMAN  | E.LLKSLGGES#SGGTT#PVGSFHTE.A        | S1457:T1462 | 3 | 3,0644 | 0,167 | 0,394  |
| 6 | Q13509 TBB3_HUMAN   | E.VISDEHGIDPSGNYVGDSDLQLE.R         | NA          | 3 | 3,0642 | 0,15  | 0,372  |
| 6 | P62753 RS6_HUMAN    | R.LSS#LRASTSKS#E.S                  | S236:S244   | 3 | 3,0622 | 0,083 | 0,064  |
| 6 | O75369 FLNB_HUMAN   | E.DAGEGGLDLAIEGPSKAE.I              | NA          | 2 | 3,0512 | 0,216 | 0,071  |
| 6 | Q9H5H4 ZN768_HUMAN  | E.LKTQS#PEFE.A                      | S160        | 2 | 3,0447 | 0,182 | -0,211 |
| 6 | Q9Y4L1 HYOU1_HUMAN  | E.AEAPVEDGSQPPPEPKGDATPE.G          | NA          | 3 | 3,0444 | 0,32  | 0,158  |
| 6 | O00410 IMB3_HUMAN   | E.FVNLGDQQSFGIKTAGLEE.K             | NA          | 3 | 3,044  | 0,217 | 0,089  |
| 6 | P46199 IF2M_HUMAN   | E.AILNIIDTYDASHECE.L                | NA          | 2 | 3,038  | 0,393 | 0,72   |
| 6 | Q8N4N4 RN169_HUMAN  | E.RSVS#PESNDSISEE.L                 | S368        | 2 | 3,0368 | 0,349 | -0,529 |
| 6 | Q641Q2 FA21A_HUMAN  | E.KAVAS#PEATVSQTDE.N                | S498        | 2 | 3,0367 | 0,376 | -0,076 |
| 6 | P21333 FLNA_HUMAN   | E.VVIQDPMGQKGTVEPQLE.A              | NA          | 2 | 3,0339 | 0,306 | 0,186  |
| 6 | Q6NZI2 PTRF_HUMAN   | E.SDAVLVDKSDS#D.-                   | S389        | 2 | 3,0268 | 0,285 | -0,183 |
| 6 | O75369 FLNB_HUMAN   | E.VGSLGFAIEGPSQAKIE.Y               | NA          | 2 | 3,0165 | 0,348 | 0,287  |
| 6 | O15400 STX7_HUMAN   | E.IQRTLNLQLGTPQDS#PE.L              | S45         | 2 | 3,0092 | 0,229 | -0,065 |
| 6 | P14618 KPYM_HUMAN   | E.ASDGIM*VARGDLGIEIPAE.K            | NA          | 2 | 3,0084 | 0,318 | 0      |
| 6 | P82663 RT25_HUMAN   | E.VEGQVPCPSLVPLPE.M                 | NA          | 2 | 2,9982 | 0,179 | 0      |
| 6 | P28838 AMPL_HUMAN   | E.QAM*GSFLSVAKGSDEPPVFLE.I          | NA          | 2 | 2,9966 | 0,351 | 0      |
| 6 | Q99986 VRK1_HUMAN   | E.SVGS DAPCVVKVPSDNGPLFTE.L         | NA          | 3 | 2,9962 | 0,37  | 0,304  |
| 6 | Q15022 SUZ12_HUMAN  | E.KGESAS#PANEEITEE.Q                | S695        | 2 | 2,9881 | 0,219 | 0      |
| 6 | P30041 PRDX6_HUMAN  | E.LAILLGM*LDPAEKDE.K                | NA          | 2 | 2,9871 | 0,489 | 0      |
| 6 | P12268 IMDH2_HUMAN  | E.DLVVAPAGITLKE.A                   | NA          | 2 | 2,9852 | 0,269 | 0,368  |
| 6 | A4D205 A4D205_HUMAN | E.LM*DVHVVFCTDSIQGTVPVESDE.M        | NA          | 2 | 2,9789 | 0,369 | 0,509  |
| 6 | Q14444 CAPR1_HUMAN  | E.AAAGAGAAAPASQHPATGTGAVQTE.A       | NA          | 3 | 2,9741 | 0,182 | -0,085 |
| 6 | O00273 DFFA_HUMAN   | E.KQAPELSL#SQDLE.L                  | S256        | 2 | 2,9732 | 0,351 | 0,826  |
| 6 | Q08J23 NSUN2_HUMAN  | E.GQRAGEPNS#PDAAE.A                 | S743        | 2 | 2,967  | 0,347 | 0,079  |
| 6 | P11021 GRP78_HUMAN  | E.IIANDQGNRITPSYVAFTPE.G            | NA          | 2 | 2,9606 | 0,348 | 0,332  |
| 6 | P13639 EF2_HUMAN    | E.ESQVAGTPM*FVVKAYLPVNE.S           | NA          | 3 | 2,9437 | 0,192 | 0,083  |
| 6 | O94842 TOX4_HUMAN   | E.AHTVEAPS#PETICE.M                 | S533        | 2 | 2,9347 | 0,389 | 0      |

|   |                    |                                          |             |   |        |       |        |
|---|--------------------|------------------------------------------|-------------|---|--------|-------|--------|
| 6 | P13639 EF2_HUMAN   | E.SQVAGTPMFVVKAYLPVNE.S                  | NA          | 2 | 2,9272 | 0,216 | 0,238  |
| 6 | Q9UQ35 SRRM2_HUMAN | E.LSNS#PLRE.N                            | S1320       | 2 | 2,9225 | 0,265 | -0,122 |
| 6 | Q13404 UB2V1_HUMAN | E.NM*KLPQPPEGQCYSN.-                     | Y219        | 2 | 2,9152 | 0,296 | 0      |
| 6 | O15372 EIF3H_HUMAN | E.ITNCFPPQHTEDDADFDE.V                   | NA          | 2 | 2,9143 | 0,268 | 0,212  |
| 6 | Q02952 AKA12_HUMAN | E.TGETLEPAGAHLVLEE.K                     | NA          | 2 | 2,9088 | 0,296 | 0      |
| 6 | P11586 C1TC_HUMAN  | E.DSTVHGFLVQLPLDSE.N                     | NA          | 2 | 2,9066 | 0,305 | -0,208 |
| 6 | P15924 DESP_HUMAN  | E.I LSDPDDTKGFFDPNTEE.N                  | NA          | 2 | 2,8924 | 0,193 | 0      |
| 6 | Q9H5H4 ZN768_HUMAN | E.GYLRGNM*S#ENEEEE.I                     | S33         | 2 | 2,8888 | 0,356 | 0      |
| 6 | Q14966 ZN638_HUMAN | R.NLKGILEES#PSEAE.D                      | S1243       | 2 | 2,8877 | 0,337 | 0,382  |
| 6 | O95243 MBD4_HUMAN  | E.RSL#SGSNFCSE.Q                         | S318        | 2 | 2,8797 | 0,133 | 0,346  |
| 6 | P15311 EZRI_HUMAN  | R.VQRQLTLS#SE.L                          | S535        | 2 | 2,8791 | 0,344 | -0,18  |
| 6 | P41208 CETN2_HUMAN | E.AFDLFDADGTGTIDVKE.L                    | NA          | 2 | 2,8787 | 0,492 | -0,067 |
| 6 | Q8NFD5 ARI1B_HUMAN | E.SSSHPALS#QSPM*PQE.R                    | S769        | 2 | 2,8783 | 0,36  | -0,218 |
| 6 | Q86W42 THOC6_HUMAN | E.NSLILAGGDCQLHTM*DLE.T                  | NA          | 2 | 2,8776 | 0,334 | 0,426  |
| 6 | O95232 CROP_HUMAN  | E.VNGTSEDIKSEGDTQS#N.-                   | S431        | 2 | 2,872  | 0,427 | -0,131 |
| 6 | Q9H000 MKR2_HUMAN  | R.KTQPMS*VSNPGSCSDPQPS#PE.M              | S139        | 3 | 2,8718 | 0,323 | 0      |
| 6 | Q8NEY8 PPHLN_HUMAN | R.SGSSVSRYS#PE.R                         | S155        | 2 | 2,8715 | 0,369 | 0      |
| 6 | Q6GYQ0 GRIPE_HUMAN | E.VATITGESAS#PVHS#PLGSRSTPSPSTLNIDHM*E.Q | S990:S994   | 3 | 2,8699 | 0,085 | 0,292  |
| 6 | O95208 EPN2_HUMAN  | R.M*AQVATGM*GNSQITFGRGS#SQPNLSTSHSEQE.Y  | S172        | 3 | 2,8697 | 0,224 | 0,424  |
| 6 | Q9BQY9 DBND2_HUMAN | E.SQRPPIGS#ISSM*E.V                      | S151        | 2 | 2,8682 | 0,385 | -0,082 |
| 6 | P20020 AT2B1_HUMAN | E.M*NKSATSS#SPGS#PLHSLE.T                | S1245:S1249 | 2 | 2,8638 | 1     | 0,182  |
| 6 | Q99986 VRK1_HUMAN  | E.SVGS DAPCVVKVEPSDNGPLFTE.L             | NA          | 2 | 2,8553 | 0,33  | 0,711  |
| 6 | O94909 K0819_HUMAN | E.RGPS#QATS#PIRSPQE.S                    | S292:S296   | 3 | 2,8546 | 0,227 | 0,103  |
| 6 | P04792 HSPB1_HUMAN | E.GTLTVEAPM*PKLATQSNE.I                  | NA          | 3 | 2,8534 | 0,171 | 0,192  |
| 6 | Q04637 IF4G1_HUMAN | E.FSSSPLQAPTPLASHTVE.I                   | NA          | 2 | 2,853  | 0,293 | 0,261  |
| 6 | P20674 COX5A_HUMAN | E.LGISTPEELGLDKV.-                       | NA          | 2 | 2,8507 | 0,466 | 0      |
| 6 | P40939 ECHA_HUMAN  | E.AVIPDHCIFASNTSALPISE.I                 | NA          | 2 | 2,8442 | 0,232 | 0,228  |
| 6 | P11586 C1TC_HUMAN  | E.DSTVHGFLVQLPLDSENSINTEE.V              | NA          | 2 | 2,8424 | 0,244 | 0,288  |
| 6 | O00566 MPP10_HUMAN | E.VAPVSVSDAALLAPEEIKE.K                  | NA          | 2 | 2,8402 | 0,384 | -0,63  |
| 6 | P42167 LAP2B_HUMAN | E.HNQSY#YSQAGITE.T                       | S222        | 2 | 2,828  | 0,2   | 0      |
| 6 | Q8TD26 CHD6_HUMAN  | E.AKCLAS#PSLNPGNE.S                      | S1812       | 2 | 2,8262 | 0,365 | -0,079 |
| 6 | Q02447 SP3_HUMAN   | E.TQAQNIQVSTAQPVVQHLQLQE.S               | NA          | 3 | 2,8186 | 0,171 | 0,149  |
| 6 | P06748 NPM_HUMAN   | D.NDENEHQLSLR.T                          | NA          | 3 | 2,8171 | 0,31  | 0,27   |
| 6 | Q13310 PABP4_HUMAN | E.AAQKVGAVAAATS#.-                       | S644        | 2 | 2,8171 | 0,376 | -0,299 |
| 6 | P42167 LAP2B_HUMAN | E.HNQSYS#QAGITE.T                        | S224        | 2 | 2,8125 | 0,346 | 0      |
| 6 | P29966 MARCS_HUMAN | E.LQANGSAPAADKEEPAAAGSGAASPSAAE.K        | NA          | 3 | 2,8124 | 0,22  | 0,07   |
| 6 | P49588 SYAC_HUMAN  | E.TYPDVRVVSIGVPVSE.L                     | NA          | 2 | 2,8114 | 0,288 | -0,135 |
| 6 | O00231 PSD11_HUMAN | E.GVLIIFDEPPVDKTYE.A                     | NA          | 2 | 2,8109 | 0,424 | -0,266 |
| 6 | Q7Z6Z7 HUWE1_HUMAN | E.VQGRSDGSGESAQPPEDSS#PPASSE.S           | S2918       | 2 | 2,8107 | 0,449 | 0,385  |
| 6 | P50990 TCPQ_HUMAN  | E.DGAISTIVLRGSTDNLM*DDIE.R               | NA          | 2 | 2,8092 | 0,215 | 0,108  |
| 6 | Q9UKM9 RALY_HUMAN  | E.HS#QDTDADDGALQ.-                       | S295        | 2 | 2,808  | 0,248 | 0,168  |

|   |                    |                                      |           |   |        |       |        |
|---|--------------------|--------------------------------------|-----------|---|--------|-------|--------|
| 6 | O75534 CSDE1_HUMAN | E.SKSPAAPGQS#PTGSVCYE.R              | S123      | 2 | 2,8075 | 0,491 | -0,192 |
| 6 | P07355 ANXA2_HUMAN | E.T#VILGLLTPAQYDASE.L                | T97       | 2 | 2,8068 | 0,507 | -0,129 |
| 6 | O75674 TM1L1_HUMAN | E.ATNTTSEPSAPSQDLLDLS#PSPRMPRATLGE.L | S321      | 3 | 2,8007 | 0,382 | 0,221  |
| 6 | Q9UI12 VATH_HUMAN  | E.VSDDPQVLAVAAHDVGE.Y                | NA        | 2 | 2,7994 | 0,434 | -0,071 |
| 6 | Q9Y6R0 NUMBL_HUMAN | E.AAAAPTAVGPAQPGHVS#PTPATTSPGEKGE.A  | S263      | 3 | 2,7979 | 0,283 | 0,062  |
| 6 | Q9BVG4 CX026_HUMAN | E.LVSVAHALSLPAESYGNDPDIE.M           | NA        | 3 | 2,7953 | 0,172 | -0,478 |
| 6 | Q9HC35 EMAL4_HUMAN | E.SRISS#PTLLE.N                      | S919      | 2 | 2,7949 | 0,297 | 0,769  |
| 6 | P43351 RAD52_HUMAN | E.KDFLAGVT#QE.L                      | T318      | 2 | 2,7906 | 0,274 | 0,205  |
| 6 | P28066 PSA5_HUMAN  | E.YDRGVNTFS#PE.G                     | S16       | 2 | 2,7903 | 0,294 | 0,089  |
| 6 | Q9Y624 JAM1_HUMAN  | E.FKQTSS#FLV.-                       | S296      | 2 | 2,7874 | 0,372 | 0      |
| 6 | P53582 AMPM1_HUMAN | E.VLDVAAGMIKPGVTTEE.I                | NA        | 2 | 2,7813 | 0,345 | 0,212  |
| 6 | Q9H3P7 GCP60_HUMAN | E.VSVDGLTLSPDPEERPGAE.G              | NA        | 2 | 2,7786 | 0,537 | 0      |
| 6 | O75367 H2AY_HUMAN  | E.AIINPTNADIDLKDDLGNLTL.K            | NA        | 2 | 2,7785 | 0,404 | 0,108  |
| 6 | Q02952 AKA12_HUMAN | E.AVCTKIQQVQSS#E.A                   | S1415     | 2 | 2,7773 | 0,326 | 0      |
| 6 | Q14966 ZN638_HUMAN | E.NCAKEAIS#DAALE.A                   | S885      | 2 | 2,7765 | 0,225 | -0,083 |
| 6 | Q15651 HMG3_HUMAN  | E.AQKTES#VDNEGE.-                    | S93       | 2 | 2,7759 | 0,433 | -0,44  |
| 6 | O43432 IF4G3_HUMAN | E.KLDFIESDS#PCSSE.A                  | S1409     | 2 | 2,7635 | 0,375 | 0,603  |
| 6 | Q9NVA2 SEP11_HUMAN | E.INATM*SVHLPFAVVGSTEE.V             | NA        | 2 | 2,7596 | 0,127 | 0,06   |
| 6 | Q92615 LARP5_HUMAN | E.KFTSSQTQS#PTPPKPPS#PSFE.L          | S516:S524 | 2 | 2,7484 | 1     | 0,401  |
| 6 | Q9Y2K1 ZBTB1_HUMAN | E.NM*RPPNNS#PVQE.D                   | S412      | 2 | 2,7425 | 0,317 | -0,156 |
| 6 | Q9Y490 TLN1_HUMAN  | E.LAVFCSPEPPAKTSTPE.D                | NA        | 2 | 2,737  | 0,189 | 0      |
| 6 | Q06265 EXOS9_HUMAN | E.KAPIDTS#DVEE.K                     | S306      | 2 | 2,7272 | 0,435 | 0      |
| 6 | Q92615 LARP5_HUMAN | E.EKFTSSQT#QSPTPPKPPS#PSFE.L         | T514:S524 | 3 | 2,7238 | 0,221 | 0,071  |
| 6 | Q9UQ35 SRRM2_HUMAN | E.KAGM*SSNQSISS#PVLD.A               | S1404     | 2 | 2,7224 | 0,126 | -0,071 |
| 6 | Q9Y519 T184B_HUMAN | E.KTLLSS#DDEF.-                      | S403      | 2 | 2,7206 | 0,264 | 0      |
| 6 | Q05639 EF1A2_HUMAN | E.TGILRPGM*VVFAPVNITTE.V             | NA        | 2 | 2,7147 | 0,347 | 0,343  |
| 6 | P29401 TKT_HUMAN   | E.DLAM*FRSVPTSTVFYPSDGVATE.K         | NA        | 2 | 2,7147 | 0,359 | 0,195  |
| 6 | Q3KQU3 MA7D1_HUMAN | E.LPASLVNGLQPLPAHQE.N                | NA        | 2 | 2,705  | 0,416 | 0,068  |
| 6 | P36957 ODO2_HUMAN  | K.DDLVTVKTPAFAESVTE.G                | NA        | 2 | 2,7023 | 0,299 | 0,268  |
| 6 | Q13435 SF3B2_HUMAN | R.SRGS#PAADVEIE.Y                    | S339      | 2 | 2,7017 | 0,311 | -0,081 |
| 6 | Q02952 AKA12_HUMAN | E.ARGDVTVS#EAELTPE.A                 | S967      | 2 | 2,6983 | 0,102 | 0,221  |
| 6 | O75175 CNOT3_HUMAN | R.AAISSGIEDPVPTLHLTE.R               | NA        | 2 | 2,6968 | 0,301 | 0      |
| 6 | P13693 TCTP_HUMAN  | E.DGVTPYM*IFFKDGLE.M                 | NA        | 2 | 2,6943 | 0,444 | -0,209 |
| 6 | P50851 LRBA_HUMAN  | E.TRNADDELV#SDIIE.A                  | S1051     | 2 | 2,6921 | 0,229 | 0,139  |
| 6 | Q01105 SET_HUMAN   | E.IDRLNEQAS#EE.I                     | S63       | 2 | 2,6914 | 0,195 | 0      |
| 6 | Q86VM9 ZCH18_HUMAN | E.LSRGPTSS#PCEEE.G                   | S95       | 2 | 2,6905 | 0,39  | -0,239 |
| 6 | O75674 TM1L1_HUMAN | E.ATNTTSEPSAPSQDLLDLS#PRM*PRATLGE.L  | S323      | 3 | 2,6845 | 0,281 | 0,219  |
| 6 | P25205 MCM3_HUMAN  | D.LLFIM*LDQM*DPEQDRE.I               | NA        | 3 | 2,6811 | 0,234 | -0,181 |
| 6 | Q9BYV8 CEP41_HUMAN | E.IQRLEDNDSAAS#DPDAE.T               | S99       | 2 | 2,6809 | 0,479 | -0,063 |
| 6 | Q9H813 TM206_HUMAN | E.RSTS#YQELSEE.L                     | S9        | 2 | 2,6793 | 0,337 | -0,087 |
| 6 | P46821 MAP1B_HUMAN | E.ATEPEPSGSIANPAASTSPS#LSHRFLD.S     | S27       | 3 | 2,6782 | 0,22  | 0,195  |

|   |                    |                                   |             |   |        |       |        |
|---|--------------------|-----------------------------------|-------------|---|--------|-------|--------|
| 6 | Q86YR5 GPSM1_HUMAN | E.DRIAQPSM*TAS#PQTEE.F            | S522        | 2 | 2,6738 | 0,378 | -0,263 |
| 6 | Q8NEJ9 NGDN_HUMAN  | E.LKEQY#SDAPEE.I                  | Y213        | 2 | 2,6737 | 0,321 | 0,088  |
| 6 | P56537 IF6_HUMAN   | E.LSSLLQVPLVAGTVNRGSE.V           | NA          | 3 | 2,6701 | 0,298 | -0,094 |
| 6 | Q13367 AP3B2_HUMAN | E.KAFYGS#EEDE.A                   | S272        | 2 | 2,6671 | 0,32  | 0      |
| 6 | P13639 EF2_HUMAN   | E.SQVAGTPM*FVVKAYLPVNE.S          | NA          | 2 | 2,6659 | 0,219 | -0,118 |
| 6 | Q6UWZ7 CCD98_HUMAN | E.AKNSITDS#QMDDVE.V               | S48         | 2 | 2,6638 | 0,186 | 0,075  |
| 6 | Q92538 GBF1_HUMAN  | E.KSQSASVES#IPEVLEE.C             | S352        | 2 | 2,662  | 0,348 | 0,269  |
| 6 | Q92854 SEM4D_HUMAN | E.LKFADS#DADGD.-                  | S857        | 2 | 2,6571 | 0,303 | 0      |
| 6 | Q7Z2T5 TRM1L_HUMAN | E.SHVQS#ASEDTVTE.R                | S707        | 2 | 2,6525 | 0,382 | -0,166 |
| 6 | Q14974 IMB1_HUMAN  | E.GPEPSQLKPLVIQAM*PTLIE.L         | NA          | 2 | 2,6513 | 0,222 | 0,785  |
| 6 | P20020 AT2B1_HUMAN | E.MNKSATS#SSPGS#PLHSLE.T          | S1244:S1249 | 2 | 2,65   | 1     | 0,061  |
| 6 | Q86TI0 TBCD1_HUMAN | E.SSFKLLGSSIDLSSDS#E.S            | S573        | 2 | 2,6479 | 0,327 | 0,327  |
| 6 | Q96B23 CR025_HUMAN | E.TAKEEDGS#VELE.S                 | S34         | 2 | 2,6475 | 0,138 | 0      |
| 6 | P49327 FAS_HUMAN   | E.TM*STNDTIVSGTLPQRM*ASCLE.V      | NA          | 3 | 2,6442 | 0,128 | 0,599  |
| 6 | Q8WXI9 P66B_HUMAN  | R.GRLTPSPDIIVLS#DNE.A             | S129        | 3 | 2,6423 | 0,12  | 0      |
| 6 | P20700 LMNB1_HUMAN | E.NRCQS#LTEDLE.F                  | S200        | 2 | 2,6414 | 0,222 | 0,169  |
| 6 | Q02790 FKBP4_HUMAN | E.QKSNTAGS#QSQVETEA.-             | S451        | 2 | 2,6374 | 0,302 | -0,28  |
| 6 | Q9Y3Q8 T22D4_HUMAN | E.M*GQVPLDSRPS#PALYFTHD.A         | S264        | 3 | 2,6322 | 0,162 | 0      |
| 6 | P33991 MCM4_HUMAN  | E.NVGIDITEPLYMQRLGE.I             | NA          | 2 | 2,6295 | 0,448 | 0,376  |
| 6 | P55072 TERA_HUMAN  | E.DNSVVLSQPKM*DE.L                | NA          | 2 | 2,6281 | 0,336 | 0,234  |
| 6 | Q96EV8 DTBP1_HUMAN | R.REPIGS#M*SSM*E.V                | S227        | 2 | 2,6274 | 0,313 | -0,091 |
| 6 | Q5BKY9 F133B_HUMAN | E.DKPLSSELS#E.S                   | S196        | 2 | 2,6228 | 0,208 | 0,096  |
| 6 | P68104 EF1A1_HUMAN | E.T#GVLKPGM*VVFAPVNVTE.V          | T269        | 3 | 2,6174 | 0,228 | 0,339  |
| 6 | P27816 MAP4_HUMAN  | E.AVAEPPQPTAVPLELAKE.I            | NA          | 3 | 2,6134 | 0,119 | 0,098  |
| 6 | O15075 DCLK1_HUMAN | E.TVRSPTS#PF.-                    | S738        | 2 | 2,6048 | 0,111 | 0,112  |
| 6 | Q7Z4V5 HDGR2_HUMAN | R.ARGDS#EALDEES.-                 | S664        | 2 | 2,595  | 0,369 | -0,269 |
| 6 | Q7Z6Z7 HUWE1_HUMAN | E.NKGNDDT#PLALE.S                 | T1722       | 2 | 2,5899 | 0,163 | -0,487 |
| 6 | Q9NPI6 DCP1A_HUMAN | E.RNQM*GDSNISS#PGLQPSTQLSNLGSTE.T | S180        | 3 | 2,5896 | 0,268 | 0,314  |
| 6 | Q8NI08 NCOA7_HUMAN | E.VDKQS#GS#PESRVE.N               | S500:S502   | 2 | 2,5881 | 0,188 | -0,077 |
| 6 | Q15149 PLEC1_HUMAN | R.CITDPQTLCLLPLKE.K               | NA          | 2 | 2,5587 | 0,274 | -0,131 |
| 6 | P07355 ANXA2_HUMAN | E.TVILGLLKTPAQYD.A                | NA          | 2 | 2,5587 | 0,421 | -0,159 |
| 6 | Q9Y2J4 AMOL2_HUMAN | D.TTLIRHS#PQPS#PSSSFNE.G          | S602:S606   | 2 | 2,5546 | 0,232 | 0,114  |
| 6 | O43829 ZF161_HUMAN | R.KQVT#PSAIQSE.T                  | T419        | 2 | 2,5542 | 0,213 | -0,096 |
| 6 | Q8TCT7 PSL1_HUMAN  | E.GRDQAQPS#PVTQPGASA.-            | S583        | 2 | 2,5437 | 0,344 | 0      |
| 6 | Q99700 ATX2_HUMAN  | E.NKGIS#PVVSE.H                   | S783        | 2 | 2,5377 | 0,291 | -0,22  |
| 6 | Q14247 SRC8_HUMAN  | E.RLPSS#PVYE.D                    | S418        | 2 | 2,5354 | 0,361 | 0,216  |
| 6 | Q9H0J9 PAR12_HUMAN | R.KDSSGSVS#PNTLSQEE.G             | S263        | 2 | 2,5328 | 0,379 | -0,21  |
| 6 | P07900 HS90A_HUMAN | E.SEDKPEIEDVGS#D.E                | S263        | 2 | 2,5302 | 0,192 | -0,325 |
| 6 | P61758 PFD3_HUMAN  | E.AVFVEDVDSFM*KQPGNE.T            | NA          | 2 | 2,5258 | 0,167 | 0,19   |
| 6 | O95372 LYPA2_HUMAN | E.LDPM*VPVRFALTAE.K               | NA          | 2 | 2,5255 | 0,393 | -0,15  |
| 6 | P04792 HSPB1_HUMAN | R.ALSRQLS#SGVSE.I                 | S82         | 2 | 2,5235 | 0,291 | -0,093 |

|   |                    |                                      |           |   |        |       |        |
|---|--------------------|--------------------------------------|-----------|---|--------|-------|--------|
| 6 | Q8TEW0 PARD3_HUMAN | E.GFGRQS#MSE.K                       | S827      | 2 | 2,5224 | 0,282 | -0,113 |
| 6 | Q8NG27 PJA1_HUMAN  | E.VREPS#LQEE.Q                       | S448      | 2 | 2,5218 | 0,177 | -0,105 |
| 6 | Q92576 PHF3_HUMAN  | D.NLKVAQNS#PSVE.N                    | S1722     | 2 | 2,5187 | 0,302 | 0,089  |
| 6 | P18583 SON_HUMAN   | E.MEHNTVCAAGTS#PVGE.I                | S1556     | 2 | 2,5184 | 0,279 | 0      |
| 6 | P46063 RECQ1_HUMAN | E.LKLIYVT#PE.K                       | T190      | 2 | 2,5182 | 0,214 | 0,211  |
| 6 | P49915 GUAA_HUMAN  | E.IFPLETPAFAIKE.Q                    | NA        | 2 | 2,5166 | 0,418 | -0,331 |
| 6 | Q13263 TIF1B_HUMAN | E.TKPVLMALAEPGAEGPRLAS#PSGSTSS#GLE.V | S594:S601 | 3 | 2,5163 | 1     | 0      |
| 6 | Q5VZL5 ZMYM4_HUMAN | E.KDQGSTYS#GDLESE.A                  | S1091     | 2 | 2,5041 | 0,369 | 0,153  |
| 6 | O43670 ZN207_HUMAN | E.TIDAVPNAIPGRTDIELE.I               | NA        | 2 | 2,4974 | 0,219 | 0      |
| 6 | O43663 PRC1_HUMAN  | E.ILCM*PHYDIDSASVPSLEE.L             | NA        | 2 | 2,4963 | 0,2   | 0,445  |
| 6 | Q9UMZ2 SYNG_HUMAN  | E.NKPLGES#FAE.F                      | S557      | 2 | 2,4956 | 0,333 | 0,104  |
| 6 | Q15149 PLEC1_HUMAN | R.RYASGS#SASLGGPE.S                  | S4672     | 2 | 2,49   | 0,092 | 0,258  |
| 6 | P13010 KU86_HUMAN  | E.QGGAHFSVSS#LAE.G                   | S580      | 2 | 2,479  | 0,225 | 0,089  |
| 6 | Q658J3 A26CA_HUMAN | E.MATAASSSSLE.K                      | NA        | 2 | 2,4759 | 0,256 | -0,116 |
| 6 | Q13136 LIPA1_HUMAN | D.SATVRTYS#C.-                       | S1201     | 2 | 2,4729 | 0,478 | -0,217 |
| 6 | P08195 4F2_HUMAN   | E.KQPM*NAASGAAM*S#LAGAE.K            | S33       | 2 | 2,4641 | 0,215 | 0,134  |
| 6 | Q02952 AKA12_HUMAN | E.HDPGQGSSPEQAGS#PTEGE.G             | S749      | 2 | 2,446  | 0,284 | -0,12  |
| 6 | Q12802 AKP13_HUMAN | E.ACHMSLSS#PE.L                      | S1282     | 2 | 2,4429 | 0,174 | 0,407  |
| 6 | Q12767 K0195_HUMAN | E.TKLGM*NS#PF.-                      | S1354     | 2 | 2,4383 | 0,258 | 0,112  |
| 6 | P48960 CD97_HUMAN  | R.ALRASES#GI.-                       | S833      | 2 | 2,4381 | 0,374 | 0,124  |
| 6 | P07355 ANXA2_HUMAN | E.TVILGLLKTPAQYDAS#E.L               | S112      | 2 | 2,4339 | 0,383 | -0,129 |
| 6 | Q9H307 PININ_HUMAN | E.TNRVESVEPS#ENE.A                   | S417      | 2 | 2,4212 | 0,346 | 0,389  |
| 6 | O15427 MOT4_HUMAN  | E.VVHTPETS#V.-                       | S464      | 2 | 2,4159 | 0,44  | -0,116 |
| 6 | Q8NFC6 FA44A_HUMAN | E.IGHASTCTGLGEES#E.G                 | S1893     | 2 | 2,4103 | 0,458 | 1,199  |
| 6 | P55084 ECHB_HUMAN  | E.GGQYGLVAACAAGGQGHAM*IVE.A          | NA        | 2 | 2,4054 | 0,173 | 0,458  |
| 6 | Q9Y2K1 ZBTB1_HUMAN | E.NM*RPPNNS#SPVQEDAE.N               | S411      | 2 | 2,4052 | 0,372 | 0,324  |
| 6 | P35612 ADDB_HUMAN  | E.TKS#PLVS#PSKSLEE.G                 | S613:S617 | 2 | 2,3986 | 0,218 | 0,22   |
| 6 | O94909 K0819_HUMAN | E.RGPS#QATS#PIRSPQE.S                | S292:S296 | 2 | 2,3975 | 0,343 | 0      |
| 6 | Q9Y365 PCTL_HUMAN  | E.RMGGAGGEGS#DDDTSLT.-               | S284      | 2 | 2,3934 | 0,465 | 0,215  |
| 6 | Q13427 PPIG_HUMAN  | E.VRILS#CGE.L                        | S173      | 2 | 2,391  | 0,227 | -0,06  |
| 6 | Q02790 FKBP4_HUMAN | E.EQKSNTAGSQS#QVETEA.-               | S453      | 2 | 2,389  | 0,348 | -0,13  |
| 6 | P30876 RPB2_HUMAN  | E.TVMLAM*TPDDLQEKE.V                 | NA        | 2 | 2,3872 | 0,295 | -0,211 |
| 6 | P12814 ACTN1_HUMAN | E.GAM*EDLQDTFIVHTIEE.I               | NA        | 2 | 2,3793 | 0,357 | 0,062  |
| 6 | Q13404 UB2V1_HUMAN | E.NM*KLPQPPEGQCYS#N.-                | S220      | 2 | 2,3744 | 0,206 | 0      |
| 6 | Q13085 ACACA_HUMAN | E.VIRILSTM*DSPS#T.-                  | S2345     | 2 | 2,3694 | 0,316 | -0,161 |
| 6 | Q16204 CCDC6_HUMAN | E.ALCRQLS#ESE.S                      | S323      | 2 | 2,3593 | 0,099 | 0,096  |
| 6 | Q5VZL5 ZMYM4_HUMAN | E.KDQGSTY#SGDLE.S                    | Y1090     | 2 | 2,3589 | 0,31  | 0,088  |
| 6 | Q86XP3 DDX42_HUMAN | E.LEPGDGPIAVIVCPTR.E                 | NA        | 2 | 2,3573 | 0,407 | 0,602  |
| 6 | P56537 IF6_HUMAN   | E.LSSLLQVPLVAGTVNRGSE.V              | NA        | 2 | 2,3541 | 0,329 | 0,063  |
| 6 | P78347 GTF2I_HUMAN | E.SAEPSQLEVPATEEIKE.T                | NA        | 2 | 2,3523 | 0,283 | 0,197  |
| 6 | Q12888 TP53B_HUMAN | E.SGLQIQKS#PEPE.V                    | S294      | 2 | 2,3439 | 0,215 | 0,175  |

|   |                     |                               |           |   |        |       |        |
|---|---------------------|-------------------------------|-----------|---|--------|-------|--------|
| 6 | Q13435 SF3B2_HUMAN  | R.SRGSDS#PAADVE.I             | S339      | 2 | 2,3421 | 0,257 | -0,288 |
| 6 | P42704 LPPRC_HUMAN  | E.DVALQILLACPVSK.E.D          | NA        | 2 | 2,3395 | 0,354 | -0,147 |
| 6 | Q2TAZ0 ATG2A_HUMAN  | E.TRAQPSS#PLEGQAE.G           | S1630     | 2 | 2,334  | 0,247 | -0,079 |
| 6 | P49368 TCPG_HUMAN   | E.DIIQLKPDVVITE.K             | NA        | 2 | 2,3326 | 0,267 | 0,165  |
| 6 | Q8IWJ2 GCC2_HUMAN   | E.GKINS#LTEE.K                | S490      | 2 | 2,3285 | 0,119 | -0,228 |
| 6 | Q96R06 SPAG5_HUMAN  | E.SQEAPGPAVEDVGRILGSDTE.S     | NA        | 2 | 2,3275 | 0,301 | -0,115 |
| 6 | Q86VP6 CAND1_HUMAN  | E.SIQKDS#SSTNLE.S             | S1219     | 2 | 2,3271 | 0,34  | -0,088 |
| 6 | P09497 CLCB_HUMAN   | E.ANGPADGYAAIAQADRLTQEPE.S    | NA        | 2 | 2,3237 | 0,315 | 0,432  |
| 6 | Q9Y426 CU025_HUMAN  | E.VAIRQLS#E.S                 | S497      | 2 | 2,3139 | 0,287 | 0,122  |
| 6 | P48681 NEST_HUMAN   | E.GDRGS#PFQEEE.G              | S1577     | 2 | 2,3066 | 0,179 | -0,092 |
| 6 | Q8IWY8 ZSC29_HUMAN  | R.ARS#PDLGPQE.Q               | S152      | 2 | 2,3045 | 0,317 | -0,212 |
| 6 | P04181 OAT_HUMAN    | E.AGVVVPDPGYLM*GVRE.L         | NA        | 2 | 2,302  | 0,436 | 0      |
| 6 | Q7Z7E8 UB2Q1_HUMAN  | R.FRIAS#ACLDE.L               | S63       | 2 | 2,2869 | 0,086 | 0,193  |
| 6 | Q8N163 K1967_HUMAN  | E.VRSVAS#NQSEME.F             | S678      | 2 | 2,2799 | 0,361 | 0,172  |
| 6 | P49915 GUAA_HUMAN   | E.VFLAQGTLRPDLIE.S            | NA        | 2 | 2,2717 | 0,328 | 0,698  |
| 6 | Q9BV73 CP250_HUMAN  | E.AMRAAQAGS#LE.I              | S2322     | 2 | 2,2693 | 0,105 | 0      |
| 6 | Q6UXD5 SE6L2_HUMAN  | E.AGDREYEVS#I.-               | S909      | 2 | 2,265  | 0,289 | -0,185 |
| 6 | P62753 RS6_HUMAN    | R.LSS#LRAS#TSKSE.S            | S236:S240 | 2 | 2,2535 | 0,28  | -0,171 |
| 6 | Q99460 PSMD1_HUMAN  | E.ALQLM*ATYLPKDTSPGSAYQE.G    | NA        | 2 | 2,2504 | 0,301 | 0,106  |
| 6 | P31948 STIP1_HUMAN  | E.VQQIM*SDPAMRLILE.Q          | NA        | 2 | 2,2476 | 0,366 | 0,416  |
| 6 | Q95359 TACC2_HUMAN  | E.TKFSS#PTEE.L                | S2512     | 2 | 2,2469 | 0,159 | -0,11  |
| 6 | Q9Y2K1 ZBTB1_HUMAN  | E.NMRPPNNS#SPVQEDAE.N         | S411      | 2 | 2,2467 | 0,234 | -0,131 |
| 6 | P60174 TPIS_HUMAN   | D.GFLVGGASLKPE.F              | NA        | 2 | 2,2425 | 0,241 | 0      |
| 6 | P14618 KPYM_HUMAN   | E.SFASDPILYRPVAVALD.T         | NA        | 2 | 2,2413 | 0,271 | 0      |
| 6 | O75822 EIF3J_HUMAN  | E.TFGVNNNAVYGDAM*NPSSRDDFTE.F | NA        | 2 | 2,2396 | 0,288 | 0,278  |
| 6 | Q92990 GLMN_HUMAN   | E.DFGLFQLAGQRCIEE.G           | NA        | 2 | 2,2394 | 0,203 | -0,137 |
| 6 | Q6NZI2 PTRF_HUMAN   | R.RGS#S#PDVHALLE.I            | S365:S366 | 2 | 2,2256 | 0,351 | 0,339  |
| 6 | Q9NX40 OCAD1_HUMAN  | E.SAPTGITDHIVQGPDPNLE.E       | NA        | 2 | 2,2143 | 0,162 | 0,249  |
| 6 | Q9BRK5 CAB45_HUMAN  | E.FEELIDSNHDGIVTAAE.L         | NA        | 2 | 2,2104 | 0,301 | 0,382  |
| 6 | Q9UN86 G3BP2_HUMAN  | E.ERQPS#PEPVQE.N              | S163      | 2 | 2,2039 | 0,203 | -0,177 |
| 6 | Q6UWZ7 CCD98_HUMAN  | E.YSRS#PTF.-                  | S406      | 2 | 2,1942 | 0,221 | -0,13  |
| 6 | P68104 EF1A1_HUMAN  | D.AAIVDM*VPGKPM*CVE.S         | NA        | 2 | 2,1921 | 0,264 | 0,296  |
| 6 | Q13405 RM49_HUMAN   | E.DFLSPLLGKTPVTQVNE.V         | NA        | 2 | 2,1721 | 0,258 | -0,131 |
| 6 | Q9Y2X9 ZN281_HUMAN  | E.KQIYTS#PLE.C                | S714      | 2 | 2,171  | 0,221 | -1,065 |
| 6 | Q02790 FKBP4_HUMAN  | E.EQKSNTAGS#QSQVETEA.-        | S451      | 2 | 2,1692 | 0,242 | -0,065 |
| 6 | Q13029 PRDM2_HUMAN  | E.RETVS#PPCFDE.Y              | S796      | 2 | 2,1521 | 0,091 | -0,258 |
| 6 | Q14353 GAMT_HUMAN   | E.VGFGM*AIAASKVQEAPIDE.H      | NA        | 2 | 2,1516 | 0,188 | 0,626  |
| 6 | Q8N7Q0 Q8N7Q0_HUMAN | K.NHEEEVKGL.-                 | NA        | 2 | 2,1502 | 0,488 | -0,116 |
| 6 | P52948 NUP98_HUMAN  | E.NGERFS#FLS#KPVDE.N          | S635:S638 | 2 | 2,1385 | 0,133 | 0,205  |
| 6 | Q9C0C2 TB182_HUMAN  | E.LKDTQS#PSTCSE.G             | S712      | 2 | 2,1363 | 0,389 | -0,085 |
| 6 | Q8N565 MREG_HUMAN   | E.LHYLPFPS#P.-                | S213      | 2 | 2,1321 | 0,281 | -0,212 |



|   |                      |                                |                  |   |        |       |        |
|---|----------------------|--------------------------------|------------------|---|--------|-------|--------|
| 6 | P30876 RPB2_HUMAN    | E.TVMLAMTPDDLQEKE.V            | NA               | 2 | 2,1281 | 0,229 | -0,142 |
| 6 | O75909 CCNK_HUMAN    | E.NKENSS#PSVTSANLD.H           | S9               | 2 | 2,1199 | 0,355 | -0,074 |
| 6 | Q9H8Y5 ANKZ1_HUMAN   | R.RLAAQLGAPTS#PIPD.S           | S675             | 2 | 2,1064 | 0,178 | 0,231  |
| 6 | Q9H3P2 NELFA_HUMAN   | E.DLPKADGQGSTTM*LVDTVFE.M      | NA               | 2 | 2,0892 | 0,099 | 0,684  |
| 6 | Q15121 PEA15_HUMAN   | D.IIRQPS#EEE.I                 | S116             | 2 | 2,0807 | 0,222 | -0,207 |
| 6 | Q9Y365 PCTL_HUMAN    | E.RM*GGAGGEGS#DDDTSLT.-        | S284             | 2 | 2,0737 | 0,254 | -0,213 |
| 6 | A1L425 A1L425_HUMAN  | E.TKYELNSLLK.S                 | NA               | 2 | 2,0665 | 0,146 | -0,303 |
| 6 | Q8TEW0 PARD3_HUMAN   | E.GFGRQS#M*SE.K                | S827             | 2 | 2,0633 | 0,112 | -0,111 |
| 6 | Q2KHR2 RFXD2_HUMAN   | E.QKQQS#PLPGE.S                | S225             | 2 | 2,0508 | 0,126 | -0,207 |
| 6 | Q02218 ODO1_HUMAN    | R.FLQM*CNDDPDVLPDLKE.A         | NA               | 2 | 2,0417 | 0,253 | 0,236  |
| 6 | Q9UN86 G3BP2_HUMAN   | E.RQPS#PEPVQE.N                | S163             | 2 | 2,0407 | 0,09  | -0,196 |
| 6 | Q14966 ZN638_HUMAN   | R.NLKGILEESPS#EAE.D            | S1245            | 2 | 1,9994 | 0,18  | 0,459  |
| 6 | Q70CQ2 UBP34_HUMAN   | E.M*NATHIAQGS#QE.S             | S567             | 2 | 1,9915 | 0,22  | 0,529  |
| 6 | Q6ZRV2 FA83H_HUMAN   | E.S#KGSPTSAYPE.R               | S867             | 2 | 1,9897 | 0,232 | -0,203 |
| 6 | Q17RY0 CPEB4_HUMAN   | E.KQQLS#PSPGQE.A               | S97              | 2 | 1,9702 | 0,322 | -0,191 |
| 6 | P42025 ACTY_HUMAN    | E.LLFQPDVGVGESEGLHE.V          | NA               | 2 | 1,9515 | 0,122 | 0,193  |
| 6 | P40939 ECHA_HUMAN    | E.VEAVIPDHCIFASNTSALPISE.I     | NA               | 2 | 1,9497 | 0,241 | 0,103  |
| 6 | P42566 EP15_HUMAN    | E.SEPIHQES#PARSS#PE.L          | S558:S563        | 2 | 1,9485 | 0,203 | -0,135 |
| 6 | Q8TBZ6 RG9D2_HUMAN   | E.DLIYLTSDSPNILKE.L            | NA               | 2 | 1,944  | 0,332 | 0,284  |
| 6 | O75170 SAPS2_HUMAN   | E.SGPRCSS#PVDTE.C              | S771             | 2 | 1,9402 | 0,121 | 0      |
| 6 | P52597 HNRPF_HUMAN   | R.RYIGIVK.Q                    | NA               | 2 | 1,9327 | 0,131 | 0,287  |
| 6 | P12814 ACTN1_HUMAN   | E.DLQDTFIVHTIEE.I              | NA               | 2 | 1,9057 | 0,111 | 0,704  |
| 6 | P35612 ADDB_HUMAN    | E.T#KSLVSPS#KSLE.E             | T611:S619        | 2 | 1,9035 | 0,192 | 0,159  |
| 6 | P31943 HNRH1_HUMAN   | E.IVPNGITLPVDFQGRSTGE.A        | NA               | 2 | 1,895  | 0,154 | -0,122 |
| 6 | Q5H9R7 SAPS3_HUMAN   | D.SLRNS#PVEM*E.T               | S740             | 2 | 1,8932 | 0,292 | -0,272 |
| 6 | P43246 MSH2_HUMAN    | E.ALLIQIGPKCVLPGGE.T           | NA               | 2 | 1,8681 | 0,234 | -0,136 |
| 6 | Q9P243 ZN406_HUMAN   | E.SHGAQS#PLGE.G                | S652             | 2 | 1,7768 | 0,101 | -0,23  |
| 6 | P50851 LRBA_HUMAN    | E.LKVEGS#PTEE.A                | S1118            | 2 | 1,7633 | 0,152 | 0      |
| 6 | O60237 MYPT2_HUMAN   | K.VLTELKS#D.N                  | S961             | 2 | 1,7147 | 0,104 | -1,61  |
| 6 | Q86UP2 KTN1_HUMAN    | E.IQNGNLHES#DSE.S              | S75              | 2 | 1,6928 | 0,259 | -0,172 |
| 6 | Q9NZV1 CRIM1_HUMAN   | K.KGT#RVQVDS#S#QR.M            | T995:S1001:S1002 | 2 | 1,6906 | 0,13  | -1,372 |
| 6 | ##Q6P1K8 T2H2L_HUMAN | D.EITAKLSGSE.D                 | NA               | 2 | 1,6784 | 0,13  | 1,061  |
| 6 | P31150 GDIA_HUMAN    | E.LLEPIDQKFVAISD.L             | NA               | 2 | 1,6644 | 0,257 | 0,077  |
| 6 | Q14694 UBP10_HUMAN   | E.GLVPVSEDPVAIKIAE.L           | NA               | 2 | 1,6041 | 0,132 | 0      |
| 6 | Q9NQW7 XPP1_HUMAN    | E.YVTEPIQAYIIPSGDAHQSE.Y       | NA               | 2 | 1,5521 | 0,196 | 0,66   |
| 6 | P31948 STIP1_HUMAN   | E.VQQIM*SDPAM*RLILE.Q          | NA               | 2 | 1,5511 | 0,166 | 0      |
| 6 | P22570 ADRO_HUMAN    | E.DLPCGLVLSIGYK.S              | NA               | 2 | 1,5489 | 0,145 | -0,08  |
| 6 | Q58FF7 H90B3_HUMAN   | E.GLELPEDEEE.K                 | NA               | 2 | 1,5391 | 0,09  | 0      |
| 6 | ##P57740 NU107_HUMAN | D.MEY#KKE.K                    | Y131             | 2 | 1,4273 | 0,081 | -0,067 |
| 6 | Q12792 TWF1_HUMAN    | R.LIRGPAETEATT#D.-             | T367             | 2 | 1,3123 | 0,257 | 0      |
| 7 | Q15642 CIP4_HUMAN    | E.DFSQPMNRAPS#DSSSLGTPSDGRPE.L | S296             | 3 | 6,411  | 0,458 | 0,278  |

|   |                    |                                        |             |   |        |       |        |
|---|--------------------|----------------------------------------|-------------|---|--------|-------|--------|
| 7 | O75061 AUXI_HUMAN  | E.DHAALVNQESEQS#DDE.L                  | S456        | 2 | 5,6371 | 0,575 | -0,196 |
| 7 | P46939 UTRO_HUMAN  | E.RTNGSFLTDSSSTTGS#VEDE.H              | S3221       | 2 | 5,5569 | 0,582 | 0,337  |
| 7 | Q5JRA6 MIA3_HUMAN  | D.LLPSGSRDEPPASQSTSQDCSQALKQS#P.-      | S1906       | 3 | 5,3324 | 0,459 | 0,465  |
| 7 | Q12802 AKP13_HUMAN | E.NALSSGTLQEEQRT#PPPGQDTQQFHE.K        | T953        | 3 | 5,3218 | 0,51  | 0,553  |
| 7 | P31150 GDIA_HUMAN  | E.SQVFCSCSYDATTHFE.T                   | NA          | 2 | 5,2636 | 0,598 | 0,189  |
| 7 | P35611 ADDA_HUMAN  | E.AHRPPS#PTEAPTEAS#PEPAPDPAPVAEE.A     | S669:S678   | 3 | 5,2611 | 0,51  | 0,304  |
| 7 | P14625 ENPL_HUMAN  | E.AIQLDGLNASQIRE.L                     | NA          | 3 | 5,1908 | 0,413 | 0,18   |
| 7 | Q14C86 GAPD1_HUMAN | E.DTQFVDGYKQLGFQE.T                    | NA          | 2 | 5,113  | 0,404 | 0,412  |
| 7 | Q16643 DREB_HUMAN  | E.DGSDDLKLAASGEGGLQE.L                 | NA          | 2 | 4,9864 | 0,483 | 0,069  |
| 7 | P55884 EIF3B_HUMAN | E.GLLRPAGPGAPEAAGTEASSE.V              | NA          | 2 | 4,9557 | 0,594 | 0,118  |
| 7 | Q15477 SKIV2_HUMAN | E.AVGQPPGGPRGDTVASPCSAPLARASS#LE.D     | S256        | 3 | 4,9246 | 0,38  | 0,445  |
| 7 | Q15648 MED1_HUMAN  | E.KSYQNS#PSS#DDGIRPLPE.Y               | S1479:S1482 | 2 | 4,9188 | 1     | 0,114  |
| 7 | Q15642 CIP4_HUMAN  | E.DFSQPM*NRAPS#DSSLGTPSDGRPE.L         | S296        | 3 | 4,9051 | 0,349 | -0,069 |
| 7 | Q5UIP0 RIF1_HUMAN  | E.SQES#PNENFKTVGCLGDSKNVSQE.S          | S1854       | 3 | 4,901  | 0,234 | 0      |
| 7 | Q9NYV4 CD2L7_HUMAN | E.TTSGTSTEPVKNS#SPAPPQPAPGKVE.S        | S1082       | 3 | 4,8799 | 0,513 | 0,415  |
| 7 | O75717 WDHD1_HUMAN | E.NRSNILSDNPDFS#DE.A                   | S1041       | 2 | 4,8531 | 0,472 | 0,203  |
| 7 | Q63ZY3 KANK2_HUMAN | E.RSCDGAAGLPEVPAESSSS#PPGSE.V          | S428        | 2 | 4,8472 | 0,551 | 0,101  |
| 7 | Q01970 PLCB3_HUMAN | E.GLGDGPLVACASNGHAPGSSGHLGADSES#QEE.N  | S1227       | 3 | 4,8118 | 0,271 | 0,34   |
| 7 | Q9NYV4 CD2L7_HUMAN | E.TTSGTSTEPVKNS#PAPPQPAPGKVE.S         | S1083       | 3 | 4,7402 | 0,5   | 0,346  |
| 7 | Q05682 CALD1_HUMAN | E.KGNVFSS#PTAAGT#PNKE.T                | S724:T730   | 2 | 4,707  | 0,533 | 0,131  |
| 7 | Q2QGD7 ZXDC_HUMAN  | E.LLAPIKVEPDS#PSRPGAVGQQE.G            | S665        | 3 | 4,6719 | 0,463 | 0,541  |
| 7 | Q15154 PCM1_HUMAN  | E.TASPVAVSLRSDGS#ENLCTPQQSRTE.K        | S872        | 3 | 4,6712 | 0,469 | -0,064 |
| 7 | O95817 BAG3_HUMAN  | E.VKVPPAPVPCPPSPGPSAVPSS#PKSVATEE.R    | S386        | 3 | 4,6637 | 0,309 | 0,116  |
| 7 | O00505 IMA3_HUMAN  | E.ATQGGTYNFDPTANLQTK.E.F               | NA          | 2 | 4,6618 | 0,472 | 0,831  |
| 7 | Q9C0C2 TB182_HUMAN | R.SYQFGIIGNDRVSGAGFS#PSSKM*E.G         | S1138       | 3 | 4,6583 | 0,379 | 0,348  |
| 7 | O95865 DDAH2_HUMAN | E.NATLDGTDVLFTRGRE.F                   | NA          | 2 | 4,6539 | 0,505 | 0,227  |
| 7 | Q86SQ0 PHLB2_HUMAN | E.LLSDLTRTPPPSSTFPKASS#E.S             | S563        | 3 | 4,6373 | 0,273 | 0,228  |
| 7 | Q5VWN6 CJ018_HUMAN | E.VDSSSASTTLGRQCS#LNCISSGCHTSGDSLE.L   | S1220       | 3 | 4,6303 | 0,415 | 0,109  |
| 7 | O43166 SI1L1_HUMAN | E.DQALAQM*KPYSSS#KDS#PTLASKVDQLE.G     | S1730:S1734 | 3 | 4,6153 | 0,528 | 0,343  |
| 7 | Q92615 LARP5_HUMAN | E.KFTSSQTQSPT#PPKPPS#PSFE.L            | T518:S524   | 3 | 4,6069 | 0,242 | 0,15   |
| 7 | Q9ULT8 HECD1_HUMAN | E.GHDSLS#VGS#FEEDSKSE.F                | S2317:S2320 | 2 | 4,5671 | 0,582 | 0,372  |
| 7 | P61160 ARP2_HUMAN  | E.LLFNTIQAADIDTRSE.F                   | NA          | 2 | 4,5605 | 0,373 | 0,203  |
| 7 | Q13813 SPTA2_HUMAN | E.NAEEDLTPVRCNSLEE.I                   | NA          | 2 | 4,5482 | 0,459 | 0,306  |
| 7 | P98171 RHG04_HUMAN | E.KQVVGAGLQTAGESGSS#PE.G               | S824        | 2 | 4,5454 | 0,594 | -0,13  |
| 7 | Q13242 SFRS9_HUMAN | E.AGDVCYADVQKDGVM*VE.Y                 | NA          | 2 | 4,5399 | 0,5   | 0,127  |
| 7 | P09496 CLCA_HUMAN  | E.SNGPTDSYAAISQVDRQLQSEPE.S            | NA          | 2 | 4,5371 | 0,476 | 0,206  |
| 7 | Q96JM3 ZN828_HUMAN | E.SQKLAPVPS#PEPQKPAPVS#PE.S            | S204:S214   | 3 | 4,5158 | 0,432 | 0,39   |
| 7 | Q13546 RIPK1_HUMAN | D.CVAVPSSRSNSAT#EQPGSLHSSQGLGM*GPVEE.S | T337        | 3 | 4,4644 | 0,433 | 0,218  |
| 7 | P04792 HSPB1_HUMAN | E.GTLTVEAPM*PKLATQSNE.I                | NA          | 2 | 4,4459 | 0,466 | 0,449  |
| 7 | P31040 DHSA_HUMAN  | K.VSDSISAQYPVVDHE.F                    | NA          | 2 | 4,4319 | 0,524 | 0      |
| 7 | P50402 EMD_HUMAN   | E.DALLYQSKGYNDYYEE.S                   | NA          | 2 | 4,4306 | 0,535 | 0,117  |

|   |                     |                                       |             |   |        |       |        |
|---|---------------------|---------------------------------------|-------------|---|--------|-------|--------|
| 7 | Q8TEA8 DTD1_HUMAN   | E.DRSASS#GAEGDVS#SEREP.-              | S197:S204   | 2 | 4,425  | 0,547 | 0,183  |
| 7 | P80723 BASP_HUMAN   | E.AAAAPAESAAPAAGEEPSKE.E              | NA          | 2 | 4,4124 | 0,429 | 0,134  |
| 7 | P80723 BASP_HUMAN   | E.AAAAPAESAAPAAGEEPSKEE.G             | NA          | 3 | 4,4117 | 0,364 | 0,094  |
| 7 | O95817 BAG3_HUMAN   | E.VKVPPAPVPCPPPS#PGPSAVPSSPKSVATEE.R  | S377        | 3 | 4,4046 | 0,174 | 0,466  |
| 7 | Q15642 CIP4_HUMAN   | E.DFSQPM*NRAPSDSS#LGTPSDGRPE.L        | S299        | 3 | 4,3922 | 0,463 | 0,208  |
| 7 | Q01167 FOXK2_HUMAN  | E.SLSREGS#PALEPEPGAAQPKLAVIQE.A       | S398        | 3 | 4,3808 | 0,334 | 0,449  |
| 7 | Q16643 DREB_HUMAN   | E.LEQEQEPEPHLLTNGE.T                  | NA          | 2 | 4,3802 | 0,427 | 0,065  |
| 7 | Q8N556 AFAP1_HUMAN  | E.AYSGCSGPVDSECPSS#PVHKAEL            | S265        | 3 | 4,374  | 0,269 | 0,068  |
| 7 | Q9NZL9 MAT2B_HUMAN  | E.NQPDAASQLNVDASGNLAKE.A              | NA          | 2 | 4,3583 | 0,574 | 0,418  |
| 7 | Q9UQ35 SRRM2_HUMAN  | E.TKEQNSALPTSS#QDEE.L                 | S1233       | 2 | 4,3495 | 0,396 | 0,066  |
| 7 | P27816 MAP4_HUMAN   | E.DTPSSKPTLLANGGHGVEGSDTTGSPT#EFLEE.K | T101        | 3 | 4,3456 | 0,475 | 1,216  |
| 7 | O95817 BAG3_HUMAN   | E.VKVPPAPVPCPPSPGPSAVPS#SPKSVATEE.R   | S385        | 3 | 4,315  | 0,14  | 0      |
| 7 | Q8N1F7 NUP93_HUMAN  | E.SEPSYSDVGPGRSLDNIEM                 | NA          | 2 | 4,3012 | 0,48  | 0,55   |
| 7 | Q9NQW6 ANLN_HUMAN   | E.NKQPVESTSAKSCS#PSPVS#PQVQQAADTISD.S | S97:S102    | 3 | 4,2829 | 1     | 0,523  |
| 7 | Q00610 CLH1_HUMAN   | E.AIDSYIKADDPSSYM*E.V                 | NA          | 2 | 4,2821 | 0,392 | 0,402  |
| 7 | Q53EZ4 CEP55_HUMAN  | E.KVAAS#PKS#PTAALNE.S                 | S425:S428   | 2 | 4,265  | 0,444 | 0,074  |
| 7 | O43852 CALU_HUMAN   | E.IVDKYDLFVGSQATDFGE.A                | NA          | 2 | 4,2637 | 0,498 | 0,304  |
| 7 | P17066 HSP76_HUMAN  | E.ILANDQGNRTTSPYVAFTDTE.R             | NA          | 2 | 4,26   | 0,486 | 0,211  |
| 7 | P11388 TOP2A_HUMAN  | E.ADDVKGSVPLSSS#PPATHFPDETE.I         | S1393       | 2 | 4,2568 | 0,524 | 0,381  |
| 7 | O43399 TPD54_HUMAN  | E.NGSDNLPSSAGSGDKPLSDPAPF.-           | NA          | 2 | 4,2533 | 0,502 | 0,547  |
| 7 | P78332 RBM6_HUMAN   | E.HESPADFQNSQS#PVQDQD.K               | S362        | 2 | 4,2514 | 0,367 | 0,231  |
| 7 | P11142 HSP7C_HUMAN  | R.LIGDAAKNQVAM*NPTNTVFD.A             | NA          | 2 | 4,2485 | 0,386 | 0,114  |
| 7 | Q6PJY5 Q6PJY5_HUMAN | E.GSLQKGTPEPSGGTPQPSRVS#PAGPPEGVPE.E  | S125        | 3 | 4,2464 | 0,438 | 0,231  |
| 7 | Q5TGY3 AHDC1_HUMAN  | E.AACLSAPHLAS#PPAT#PKADKEPLE.M        | S1507:T1511 | 3 | 4,2395 | 0,382 | 0,348  |
| 7 | Q86U42 PABP2_HUMAN  | E.ADARSIYVGNVDYGATAEELE.A             | NA          | 2 | 4,2279 | 0,54  | 0,653  |
| 7 | Q12904 MCA1_HUMAN   | E.NVIQSTAVTTVSSGTFKE.Q                | NA          | 2 | 4,215  | 0,592 | 0,283  |
| 7 | P31943 HNRH1_HUMAN  | E.GRPSGEAFVELES#EDE.V                 | S63         | 2 | 4,2143 | 0,255 | 0,2    |
| 7 | P35580 MYH10_HUMAN  | E.DQSILCTGESGAGKTE.N                  | NA          | 2 | 4,2072 | 0,531 | -0,074 |
| 7 | Q4V328 GRAP1_HUMAN  | E.SSAVPARSLSSS#PQAQPPRPAELSDDEE.V     | S692        | 3 | 4,204  | 0,268 | 1,401  |
| 7 | P11388 TOP2A_HUMAN  | E.ADDVKGSVPLSSS#PPATHFPDETE.I         | S1393       | 3 | 4,1975 | 0,354 | 0,928  |
| 7 | P23443 KS6B1_HUMAN  | E.GGQLNES#M*DHGGVGPYELGMEHCE.K        | S53         | 3 | 4,1955 | 0,317 | 0,339  |
| 7 | P23588 IF4B_HUMAN   | E.DGGTGGGTYVSKPVSWADE.T               | NA          | 2 | 4,1929 | 0,472 | 0,186  |
| 7 | Q9UPU9 SAM4A_HUMAN  | E.LHQM*ILTPIKAYSS#PSTT#PE.A           | S231:T235   | 3 | 4,1901 | 1     | -0,153 |
| 7 | Q8IY17 PLPL6_HUMAN  | E.ASGGSLAAPART#PTQEPREQPAGACE.Y       | T455        | 3 | 4,1861 | 0,347 | 0,204  |
| 7 | Q659C4 LARP2_HUMAN  | E.TKLNPGENVVS#EDE.A                   | S60         | 2 | 4,1498 | 0,457 | 0      |
| 7 | Q14C86 GAPD1_HUMAN  | E.LESCSGLGSTDVRE.V                    | NA          | 2 | 4,135  | 0,515 | 0,19   |
| 7 | Q9UNS2 CSN3_HUMAN   | E.ITVNPQFVQKSMGS#QEDDSGNKPSSYS.-      | S410        | 3 | 4,1287 | 0,277 | 0,243  |
| 7 | Q96TA1 NIBL1_HUMAN  | E.ASS#PPAS#PLQHLLPGKAVDLGPPKPSDQE.T   | S679:S683   | 3 | 4,1048 | 0,176 | 0,473  |
| 7 | Q9H000 MKR2_HUMAN   | R.KTQPMS*VSNPGSCSDPQPS#PE.M           | S139        | 2 | 4,0847 | 0,387 | 0,105  |
| 7 | Q86SQ0 PHLB2_HUMAN  | E.LLSDLTRT#PPPSSTFPKASSE.S            | T550        | 3 | 4,0613 | 0,266 | 0,304  |
| 7 | Q2QGD7 ZXDC_HUMAN   | E.LLAPIKVEPDS#PSRPGAVGQQE.G           | S665        | 2 | 4,0401 | 0,46  | 0,309  |

|   |                    |                                      |                   |   |        |       |        |
|---|--------------------|--------------------------------------|-------------------|---|--------|-------|--------|
| 7 | Q13283 G3BP1_HUMAN | E.DAQKSSS#PAPADIAQTVQE.D             | S232              | 2 | 4,0355 | 0,48  | 0,302  |
| 7 | A7E2V4 K0913_HUMAN | E.SSPHS#PCEGLPSEAAALTPRPE.G          | S1092             | 3 | 4,0348 | 0,354 | 0,318  |
| 7 | P04792 HSPB1_HUMAN | E.GTLTVEAMPKLATQSNE.I                | NA                | 2 | 4,0346 | 0,549 | 0,453  |
| 7 | Q00610 CLH1_HUMAN  | E.AIDSYIKADDPSSYME.V                 | NA                | 2 | 4,0315 | 0,477 | 0,203  |
| 7 | Q02952 AKA12_HUMAN | E.DSIAGSGVEHST#PDTEPGKEE.S           | T793              | 2 | 4,0019 | 0,44  | 0,22   |
| 7 | Q02952 AKA12_HUMAN | E.GEEPQASAQDETPTSAAKEE.S             | NA                | 2 | 3,9993 | 0,547 | 0      |
| 7 | P54105 ICLN_HUMAN  | E.GM*LSQSVSSQYNM*AGVRTE.D            | NA                | 2 | 3,9945 | 0,371 | 0,47   |
| 7 | O00629 IMA4_HUMAN  | E.DSDIDGDYRVQNTSLE.A                 | NA                | 2 | 3,991  | 0,501 | 0,2    |
| 7 | Q6PKG0 LARP1_HUMAN | E.TES#APGS#PRAVTPVPTKTEE.V           | S517:S521         | 3 | 3,9859 | 0,307 | 0,083  |
| 7 | P18858 DNL1_HUMAN  | E.ALS#PAKGQKPALDCSQVS#PPRPATSPE.N    | S76:S91           | 3 | 3,9842 | 0,297 | 0,62   |
| 7 | Q14247 SRC8_HUMAN  | E.LSYRGPVSGTEPEPVYSME.A              | NA                | 2 | 3,9773 | 0,418 | 0      |
| 7 | Q9NWS6 F118A_HUMAN | D.LAT#QICKQQSPDADRVDSTLLGNACQD.C     | T304              | 3 | 3,965  | 0,323 | 0      |
| 7 | P49815 TSC2_HUMAN  | E.LQTLQDILGDPGDKADVGRSL#PE.V         | S1411             | 3 | 3,964  | 0,334 | -0,073 |
| 7 | Q16881 TRXR1_HUMAN | D.LIIIGGSGGLAAAKE.A                  | NA                | 2 | 3,9608 | 0,493 | 0,085  |
| 7 | P55072 TERA_HUMAN  | E.DNSVVLSLQPKM*DE.L                  | NA                | 2 | 3,9602 | 0,488 | 0,78   |
| 7 | Q2M218 AAK1_HUMAN  | E.AS#LNKSKSATTT#PSGS#PRTSQQNVYNPSE.G | S664:T674:S678    | 3 | 3,9559 | 1     | 0,112  |
| 7 | Q9GZR7 DDX24_HUMAN | E.LTDYQLVS#PAKNPSSLFSKE.A            | S60               | 3 | 3,9552 | 0,365 | 0,318  |
| 7 | O14744 ANM5_HUMAN  | E.YTSFLAPISSSKLYNE.V                 | NA                | 2 | 3,9547 | 0,379 | -0,134 |
| 7 | P55072 TERA_HUMAN  | E.DNSVVLSLQPKMDE.L                   | NA                | 2 | 3,9466 | 0,245 | 0,236  |
| 7 | Q9H000 MKRN2_HUMAN | R.KTQPSMVSNPSCSDPQPS#PE.M            | S139              | 2 | 3,9429 | 0,388 | 1,056  |
| 7 | Q9UNN5 FAF1_HUMAN  | E.VFGMASSALRKS#PM*M*PENAENE.G        | S320              | 3 | 3,9307 | 0,174 | 0,073  |
| 7 | O75509 TNR21_HUMAN | E.NSALLTVEPS#PQDKNKGFFVDE.S          | S541              | 3 | 3,9248 | 0,284 | 0,436  |
| 7 | Q15149 PLEC1_HUMAN | R.RYASGSSAS#LGGPE.S                  | S4675             | 2 | 3,9243 | 0,504 | 0,344  |
| 7 | Q7KZF4 SND1_HUMAN  | E.YGMIYLGKDTNGENIAE.S                | NA                | 2 | 3,9076 | 0,44  | 0,194  |
| 7 | P33176 KINH_HUMAN  | E.IGIAVGNNDVKQPE.G                   | NA                | 2 | 3,9008 | 0,269 | 0,336  |
| 7 | P46821 MAP1B_HUMAN | E.KVSPSKS#PSLS#PSPPS#PLEKTPLEGE.R    | S1256:S1260:S1265 | 3 | 3,8979 | 1     | 0,46   |
| 7 | Q14498 RBM39_HUMAN | E.RTDASSASSFLDS#DELE.R               | S341              | 2 | 3,893  | 0,392 | -0,064 |
| 7 | P04083 ANXA1_HUMAN | E.VVLALLKTPAQFDADE.L                 | NA                | 2 | 3,8905 | 0,337 | -0,071 |
| 7 | Q9BRJ6 CG050_HUMAN | E.AVLRPGLDAEPELS#PEEQRVLE.R          | S59               | 3 | 3,8843 | 0,26  | 0,796  |
| 7 | P09525 ANXA4_HUMAN | E.GNYLDDALVRQDAQDLYE.A               | NA                | 2 | 3,8695 | 0,471 | 0,116  |
| 7 | Q16531 DDB1_HUMAN  | E.NAFNLFVCQKDSAATTDEE.R              | NA                | 2 | 3,862  | 0,407 | 0,339  |
| 7 | Q15003 CND2_HUMAN  | E.IDPMFQKTAASFDE.C                   | NA                | 2 | 3,8593 | 0,437 | 0,153  |
| 7 | O60271 JIP4_HUMAN  | E.TRNVSTGS#AENEE.K                   | S332              | 2 | 3,8589 | 0,339 | -0,166 |
| 7 | Q8N8S7 ENAH_HUMAN  | E.TGPTLPRQNSQLPAQVQNGPSQEE.L         | NA                | 3 | 3,8537 | 0,394 | 0,142  |
| 7 | Q96R06 SPAG5_HUMAN | E.VAAVSEKPIFQESPHLLEES#PPNPCSE.Q     | S205              | 3 | 3,8263 | 0,484 | 0,232  |
| 7 | Q9UQ35 SRRM2_HUMAN | E.KSATRPS#PS#PERSS#TGPEPPAPTLLAE.R   | S351:S353:S358    | 3 | 3,822  | 1     | 0,118  |
| 7 | Q9NTZ6 RBM12_HUMAN | E.DSIYIAYGPNKATGE.G                  | NA                | 2 | 3,8172 | 0,374 | 0      |
| 7 | O60890 OPHN1_HUMAN | E.RTVFYTSSLDES#EDE.I                 | S610              | 2 | 3,7962 | 0,543 | -0,263 |
| 7 | P62841 RS15_HUMAN  | E.M*VGSM*VGYYNGKTFNQVE.I             | NA                | 2 | 3,7905 | 0,373 | 0,245  |
| 7 | Q15642 CIP4_HUMAN  | E.DFSQPMNRPASDSS#LGTPSDGRPE.L        | S299              | 3 | 3,7734 | 0,349 | 0,278  |
| 7 | Q07065 CKAP4_HUMAN | E.DGVLSMQVASARQTE.S                  | NA                | 2 | 3,7647 | 0,503 | 0,307  |

|   |                     |                                             |             |   |        |       |        |
|---|---------------------|---------------------------------------------|-------------|---|--------|-------|--------|
| 7 | Q9BY44 EIF2A_HUMAN  | R.S#DKSPDLAPTPAPQSTPRNTVVSQISGDPE.I         | S503        | 3 | 3,7645 | 0,346 | 0,232  |
| 7 | Q96TA1 NIBL1_HUMAN  | E.AS#SPPAS#PLQHLLPGKAVDLGPPKPSDQE.T         | S678:S683   | 3 | 3,758  | 0,231 | 0,118  |
| 7 | Q63HJ5 Q63HJ5_HUMAN | E.GTNLPDVPNKSAAPS#PTSNSTYLTM*NAASRE.I       | S295        | 3 | 3,7523 | 0,231 | 0      |
| 7 | Q9H4L7 SMRCD_HUMAN  | E.VSRANT#PDSBIT#EKTE.D                      | T54:T60     | 2 | 3,75   | 0,252 | 0      |
| 7 | Q92754 AP2C_HUMAN   | E.ALIVIDKSYMNPQDQS#PADSNKTLE.K              | S434        | 3 | 3,7467 | 0,296 | 0,197  |
| 7 | Q13506 NAB1_HUMAN   | E.HLSPADLGS#PAS#PKESSE.A                    | S180:S183   | 2 | 3,7457 | 0,498 | 0      |
| 7 | Q9BYP7 WNK3_HUMAN   | E.RATGVDSITVDSNSSQTGS#SE.Q                  | S844        | 2 | 3,7277 | 0,518 | 0      |
| 7 | Q14694 UBP10_HUMAN  | E.FILGCTASKIT#PDGITKE.A                     | T100        | 3 | 3,7186 | 0,331 | 0,36   |
| 7 | O60271 JIP4_HUMAN   | E.T#RNVS#TGSAENEKSE.V                       | T325:S329   | 3 | 3,7178 | 0,21  | 0,386  |
| 7 | Q02952 AKA12_HUMAN  | E.HDPGQGSSEPEQAGS#PTEGE.G                   | S749        | 2 | 3,7095 | 0,514 | 0      |
| 7 | Q5W0B1 RN219_HUMAN  | E.KTELNLS#KGS#LTNDQLE.N                     | S592:S595   | 2 | 3,7002 | 0,304 | 0,238  |
| 7 | Q8WYA6 CTBL1_HUMAN  | E.VLAILLQDNNDENRE.L                         | NA          | 2 | 3,6998 | 0,468 | 0,52   |
| 7 | Q9Y5L4 TIM13_HUMAN  | E.GGFGSDFGSGSGKLDPLIM*E.Q                   | NA          | 2 | 3,692  | 0,356 | 0,465  |
| 7 | Q8N1G4 LRC47_HUMAN  | E.NKEEGSLS#DTE.A                            | S520        | 2 | 3,6882 | 0,365 | 0      |
| 7 | P55795 HNRH2_HUMAN  | E.GRPSGEAFVELES#EEE.V                       | S63         | 2 | 3,6851 | 0,455 | 0,198  |
| 7 | P49321 NASP_HUMAN   | E.NKS#LQENEEEE.I                            | S503        | 2 | 3,676  | 0,344 | 0      |
| 7 | Q07065 CKAP4_HUMAN  | E.DGVLSM*QVASARQTE.S                        | NA          | 2 | 3,6728 | 0,47  | -0,379 |
| 7 | P04792 HSPB1_HUMAN  | E.SPAAVAPAYSRAALS#RQLS#SGVSE.I              | S78:S82     | 3 | 3,6683 | 0,382 | 0,445  |
| 7 | Q92922 SMRC1_HUMAN  | R.KHS#PS#PPPPTTE.S                          | S328:S330   | 2 | 3,6662 | 0,479 | -0,08  |
| 7 | P84090 ERH_HUMAN    | E.GRTYADYES#VNE.C                           | S24         | 2 | 3,6626 | 0,41  | 0,164  |
| 7 | Q27J81 INF2_HUMAN   | E.GQQPAAAAACEPVDHAQSE.S                     | NA          | 2 | 3,6547 | 0,509 | 0,126  |
| 7 | P24534 EF1B_HUMAN   | E.DYVQSM*DVAAFNKI.-                         | NA          | 2 | 3,6484 | 0,434 | 0,453  |
| 7 | Q13242 SFRS9_HUMAN  | E.AGDVCYADVQKDGVMVE.Y                       | NA          | 2 | 3,6458 | 0,285 | -0,064 |
| 7 | Q96R06 SPAG5_HUMAN  | E.TNS#ISLNGPLRTDDLVEE.V                     | S157        | 3 | 3,6452 | 0,326 | -0,083 |
| 7 | P09874 PARP1_HUMAN  | E.YSAS#QLKGFSLLEDKE.A                       | S179        | 2 | 3,6377 | 0,436 | 0      |
| 7 | Q7Z6B7 SRGP1_HUMAN  | E.KCM*AGDDYCDS#PYSE.H                       | S717        | 2 | 3,6309 | 0,417 | 0,322  |
| 7 | P62834 RAP1A_HUMAN  | E.ILDTAGTEQFTAM*RD.L                        | NA          | 2 | 3,6278 | 0,569 | 0,145  |
| 7 | Q14004 CD2L5_HUMAN  | E.QGLLLGGASAATAATAAGGTGGSGGS#PASSSGTQRRGE.G | S180        | 3 | 3,6277 | 0,363 | 0,327  |
| 7 | O75821 EIF3G_HUMAN  | E.LLKGIPLATGDTSPPE.L                        | NA          | 2 | 3,6277 | 0,566 | 0,281  |
| 7 | Q92615 LARP5_HUMAN  | E.KFTSSQTQS#PTPPKPPS#PSFE.L                 | S516:S524   | 3 | 3,6253 | 1     | 0,15   |
| 7 | Q4G0J3 LARP7_HUMAN  | E.NRDIEIS#TEEE.K                            | S337        | 2 | 3,6228 | 0,259 | 0,345  |
| 7 | Q96T23 RSF1_HUMAN   | E.NVGKVGSPLDYSLVDLPSTNGQS#PGKAIE.N          | S1365       | 3 | 3,6183 | 0,16  | 0,061  |
| 7 | Q8N163 K1967_HUMAN  | E.VRSVASNQS#EME.F                           | S681        | 2 | 3,6181 | 0,367 | 0      |
| 7 | O75531 BAF_HUMAN    | R.DFVAEPM*GEKPVGSLAGIGE.V                   | NA          | 2 | 3,6151 | 0,45  | 0,242  |
| 7 | Q8TEA8 DTD1_HUMAN   | E.DRSASS#GAEGDVSS#HEREP.-                   | S197:S205   | 3 | 3,6135 | 0,273 | 0,092  |
| 7 | Q96QE3 ATAD5_HUMAN  | E.DSVIIDSS#PTALKHPE.K                       | S756        | 2 | 3,6095 | 0,443 | 0,706  |
| 7 | Q9ULT8 HECD1_HUMAN  | E.GHDS#LSVGS#FEEDSKSE.F                     | S2315:S2320 | 3 | 3,608  | 0,32  | 0,186  |
| 7 | O43252 PAPS1_HUMAN  | E.LVLKTDSCDVNDCVQVVE.L                      | NA          | 2 | 3,6045 | 0,32  | 0      |
| 7 | Q6XQN6 PNCB_HUMAN   | E.RLQALVNSLCAGQS#P.-                        | S537        | 2 | 3,6028 | 0,551 | 0,216  |
| 7 | Q02952 AKA12_HUMAN  | D.GSTPVADFADPQTTQKDE.I                      | NA          | 2 | 3,5992 | 0,306 | 0,266  |
| 7 | P18858 DNL1_HUMAN   | E.DEALS#PAKGQKPALDCSQVS#PPRPATSPE.N         | S76:S91     | 3 | 3,5984 | 0,385 | 0,344  |

|   |                    |                                          |           |   |        |       |        |
|---|--------------------|------------------------------------------|-----------|---|--------|-------|--------|
| 7 | Q9UNE7 STUB1_HUMAN | E.GGARLGAGGGS#PEKS#PSAQE.L               | S19:S23   | 2 | 3,5958 | 0,437 | 0,062  |
| 7 | Q8IWE2 NXP20_HUMAN | E.DQTVVSVDAKVSEEE.T                      | NA        | 2 | 3,5843 | 0,482 | 0,211  |
| 7 | Q9NYV4 CD2L7_HUMAN | E.TTSGTSTEPVKN#SPAPPQAPGKVE.S            | S1082     | 2 | 3,581  | 0,38  | 0,277  |
| 7 | Q9UNS2 CSN3_HUMAN  | E.ITVNPQFVQKSM*GSQEDDSGNKPSS#YS.-        | S421      | 3 | 3,578  | 0,279 | 0,121  |
| 7 | Q15029 U5S1_HUMAN  | E.IDIKVADPVVTFCE.T                       | NA        | 2 | 3,5774 | 0,382 | 0,076  |
| 7 | Q6ZRV2 FA83H_HUMAN | R.RGSLT#LTI#SGESPKAGPAEEGPGM*E.V         | T938      | 3 | 3,5749 | 0,277 | 0,333  |
| 7 | O95696 BRD1_HUMAN  | E.NQKQGEQQS#LIDE.D                       | S209      | 2 | 3,5681 | 0,385 | 0      |
| 7 | P49792 RBP2_HUMAN  | E.T#TPKAVVSPPKFVFGSE.S                   | T2503     | 3 | 3,5636 | 0,43  | 0,489  |
| 7 | P17706 PTN2_HUMAN  | E.DLSPAFDHS#PNKIM*TE.K                   | S304      | 2 | 3,5597 | 0,445 | 0,129  |
| 7 | Q86SQ0 PHLB2_HUMAN | E.SSYLSILPKT#PEGISEEQRSQE.L              | T574      | 3 | 3,5571 | 0,311 | 0,572  |
| 7 | P18858 DNL1_HUMAN  | E.QATTSQAQVACLRYKQSQIQNQGEDS#GS#DPEDTY.- | S911:S913 | 3 | 3,5569 | 0,266 | 0,462  |
| 7 | Q92576 PHF3_HUMAN  | E.DAGSSDISSDAACTNPNKTE.N                 | NA        | 2 | 3,5487 | 0,516 | 0      |
| 7 | Q02790 FKBP4_HUMAN | E.SGASQAPLPM*EGVDISPKQDE.G               | NA        | 3 | 3,5417 | 0,374 | 0,421  |
| 7 | Q06323 PSME1_HUMAN | E.LDAFLKEPALNE.A                         | NA        | 2 | 3,5358 | 0,358 | 0,269  |
| 7 | Q9UBQ7 GRHPR_HUMAN | E.VEQWDSDEPIPAKE.L                       | NA        | 2 | 3,5302 | 0,27  | 0,149  |
| 7 | Q14160 LAP4_HUMAN  | E.VSPGVIANPFAAGIGHRNS#LE.S               | S1220     | 2 | 3,5288 | 0,283 | 0,112  |
| 7 | Q13136 LIPA1_HUMAN | E.TDNSSQDALGLSKLGGQAE.K                  | NA        | 2 | 3,5263 | 0,47  | 0,323  |
| 7 | P27987 IP3KB_HUMAN | E.KGIPAS#PRCGS#PTAM*E.I                  | S264:S269 | 2 | 3,5214 | 0,385 | -0,067 |
| 7 | P08559 ODPA_HUMAN  | E.NNRYGM*GTS#VE.R                        | S232      | 2 | 3,5201 | 0,326 | 0,092  |
| 7 | Q7Z2K8 GRIN1_HUMAN | E.GASCSDGPRGSLACPSPTCFSPQES#PSKETLE.A    | S104      | 3 | 3,5138 | 0,366 | 0,737  |
| 7 | P21333 FLNA_HUMAN  | E.AGAGGLAIAVEGPSKAE.I                    | NA        | 2 | 3,5026 | 0,462 | 0,57   |
| 7 | P98196 AT11A_HUMAN | E.YIFTDKTGLTENNM*E.F                     | NA        | 2 | 3,4992 | 0,339 | 0,258  |
| 7 | Q96SB3 NEB2_HUMAN  | E.NGSTVATAAS#PAPEEPKAAPEKE.A             | S338      | 3 | 3,485  | 0,295 | 0      |
| 7 | Q8WXI9 P66B_HUMAN  | E.RGRLT#PS#PDIIVLSDNE.A                  | T120:S122 | 3 | 3,4844 | 0,26  | 0,627  |
| 7 | Q9UQ35 SRRM2_HUMAN | E.KAGM*SSNQSISS#PVLDA                    | S1404     | 2 | 3,4751 | 0,328 | 0,142  |
| 7 | Q13546 RIPK1_HUMAN | D.CVAVPS#SRSNSATEQPGSLHSSQGLGMGPVEE.S    | S330      | 3 | 3,4737 | 0,318 | 0,11   |
| 7 | Q9P2B4 CT2NL_HUMAN | E.DLASSCSNTVVANGKDVE.L                   | NA        | 2 | 3,4735 | 0,416 | 0,25   |
| 7 | P60174 TPIS_HUMAN  | E.LIGTLNAAKVPADTE.V                      | NA        | 2 | 3,4514 | 0,514 | 0,484  |
| 7 | Q9UBE0 SAE1_HUMAN  | R.AQNLNPM*VDVKVDTE.D                     | NA        | 2 | 3,4492 | 0,422 | 0,361  |
| 7 | P20810 ICAL_HUMAN  | E.DFSGPQNASSLKFE.D                       | NA        | 2 | 3,444  | 0,378 | 0,4    |
| 7 | P47756 CAPZB_HUMAN | E.VEANNAFDQYRDLYFE.G                     | NA        | 2 | 3,4427 | 0,4   | -0,061 |
| 7 | P05198 IF2A_HUMAN  | E.VACYGYEGIDAVKE.A                       | NA        | 2 | 3,4366 | 0,439 | 0,62   |
| 7 | Q8IZD4 DCP1B_HUMAN | E.TVEPPQTLHQQQQQQQQQQE.K                 | NA        | 3 | 3,4329 | 0,216 | 0,071  |
| 7 | Q96SB3 NEB2_HUMAN  | E.NGS#TVATAASPAPEEPKAAPEKE.A             | S331      | 3 | 3,4297 | 0,213 | 0,072  |
| 7 | Q99614 TTC1_HUMAN  | E.DLLNGLKVTDTQE.A                        | NA        | 2 | 3,4275 | 0,406 | 0,253  |
| 7 | P21333 FLNA_HUMAN  | E.VLVYVEDPAGHQEE.A                       | NA        | 2 | 3,4249 | 0,416 | 0      |
| 7 | Q2TAZO ATG2A_HUMAN | E.TRAQPSS#PLEGQAE.G                      | S1630     | 2 | 3,4185 | 0,449 | 0,079  |
| 7 | Q8NEF9 SRFB1_HUMAN | E.KEYFDDS#TEE.R                          | S264      | 2 | 3,4167 | 0,414 | 0,182  |
| 7 | Q9HC35 EMAL4_HUMAN | E.TVADTTLTAKAPVSSTE.S                    | NA        | 2 | 3,4092 | 0,516 | 0,151  |
| 7 | O60506 HNRPQ_HUMAN | E.DGALAVLQQFKD.S                         | NA        | 2 | 3,4041 | 0,457 | 0,187  |
| 7 | Q9UNE7 STUB1_HUMAN | E.GGARLGAGGGS#PE.K                       | S19       | 2 | 3,3987 | 0,359 | 0,105  |

|   |                    |                                      |             |   |        |       |        |
|---|--------------------|--------------------------------------|-------------|---|--------|-------|--------|
| 7 | Q8WXI9 P66B_HUMAN  | E.RGRLT#PS#PDIIVLSDNE.A              | T120:S122   | 2 | 3,3972 | 0,421 | 0,478  |
| 7 | P31949 S10AB_HUMAN | E.FLNLIIGGLAM*ACHD.S                 | NA          | 2 | 3,3856 | 0,498 | -0,236 |
| 7 | Q8IWC1 MA7D3_HUMAN | E.SVKGS#PKESMEAS#PE.A                | S433:S441   | 2 | 3,3848 | 0,373 | 0      |
| 7 | P23434 GCSH_HUMAN  | E.ALAENPGLVKNKSCYE.D                 | NA          | 2 | 3,3816 | 0,441 | 0,147  |
| 7 | Q9P1Y6 K1542_HUMAN | E.DLPTRLPALGEAHVS#PE.V               | S1229       | 2 | 3,3793 | 0,299 | 0,648  |
| 7 | Q562F6 SGOL2_HUMAN | E.SNNLSADTPCATVLDKQHISS#PELNCNNE.I   | S302        | 3 | 3,3776 | 0,24  | 0,553  |
| 7 | P14625 ENPL_HUMAN  | E.SDDPM*AYIHFTAE.G                   | NA          | 2 | 3,3769 | 0,283 | 0,484  |
| 7 | P23443 KS6B1_HUMAN | E.GGQLNES#M*DHGGVGPYELGM*EHCE.K      | S53         | 3 | 3,3767 | 0,13  | 0,135  |
| 7 | P07954 FUMH_HUMAN  | E.NEPGSSIM*PGKVNPTQCE.A              | NA          | 2 | 3,376  | 0,493 | 0,311  |
| 7 | Q9NPI6 DCP1A_HUMAN | R.KASSPSPLTIGT#PE.S                  | T531        | 2 | 3,3759 | 0,412 | 0,5    |
| 7 | Q9NWS0 PIHD1_HUMAN | E.STQIQPQPGFCIKTNSSE.G               | NA          | 2 | 3,3749 | 0,358 | 0,422  |
| 7 | Q03518 TAP1_HUMAN  | E.NIAYGLTQKPTM*EE.I                  | NA          | 2 | 3,3628 | 0,431 | 0,379  |
| 7 | O60841 IF2P_HUMAN  | R.SRINSSGES#GDESDE.F                 | S186        | 2 | 3,3614 | 0,359 | -0,074 |
| 7 | Q15642 CIP4_HUMAN  | E.DFSQPM*NRAPSDSSLGT#PSDGRPE.L       | T302        | 3 | 3,3611 | 0,244 | 0,484  |
| 7 | Q71U36 TBA1A_HUMAN | D.GQM*PSDKTIGGGDDSFNTFFSE.T          | NA          | 2 | 3,3555 | 0,431 | 0,207  |
| 7 | P08107 HSP71_HUMAN | R.LIGDAAKNQVALNPQNTVFD.A             | NA          | 2 | 3,3553 | 0,323 | 0,229  |
| 7 | Q02952 AKA12_HUMAN | E.VAS#EKLTASEQAHPQPAE.S              | S347        | 2 | 3,3527 | 0,396 | 0      |
| 7 | Q14204 DYHC1_HUMAN | E.SYDPVLPVLPVLR.V                    | NA          | 2 | 3,3512 | 0,448 | 0,241  |
| 7 | Q8WUM4 PDC6I_HUMAN | E.LNAAIPSANPAKTM*QGSE.V              | NA          | 2 | 3,3511 | 0,314 | 0,134  |
| 7 | Q10567 AP1B1_HUMAN | E.VVLAEKPLISEE.T                     | NA          | 2 | 3,349  | 0,449 | 0,092  |
| 7 | Q96JM3 ZN828_HUMAN | E.SQKLAPVPS#PEPQKPAPVS#PE.S          | S204:S214   | 2 | 3,347  | 0,296 | 0,521  |
| 7 | P11142 HSP7C_HUMAN | R.LIGDAAKNQVAMNPTNTVFD.A             | NA          | 2 | 3,3419 | 0,439 | 0,461  |
| 7 | P17066 HSP76_HUMAN | E.ILANDQGNRTTPSYVAFTD.T              | NA          | 2 | 3,335  | 0,427 | 0,351  |
| 7 | Q96RS0 TGS1_HUMAN  | E.KCQSVS#SAGELE.T                    | S577        | 2 | 3,3318 | 0,322 | -0,177 |
| 7 | Q08211 DHX9_HUMAN  | E.GETVEPYKVNLSQDLE.H                 | NA          | 2 | 3,3294 | 0,305 | 0,268  |
| 7 | Q9GZM8 NDEL1_HUMAN | E.VTRKS#APSS#PTLDCE.K                | S194:S198   | 2 | 3,3272 | 0,456 | 0,135  |
| 7 | Q6PL18 ATAD2_HUMAN | E.LRNNS#NTCNIENE.L                   | S1243       | 2 | 3,3264 | 0,322 | 0,074  |
| 7 | Q9UJZ1 STML2_HUMAN | E.YAVTQLAQTMM*RSE.L                  | NA          | 2 | 3,3219 | 0,444 | 0,076  |
| 7 | P17066 HSP76_HUMAN | E.ILANDQGNRTTPSYVAFTDTE.R            | NA          | 3 | 3,3216 | 0,362 | 0,791  |
| 7 | P49792 RBP2_HUMAN  | E.VM*VPSFCKSEEPSITKSISS#PSVSSE.T     | S2805       | 3 | 3,3207 | 0,186 | 0,425  |
| 7 | Q14586 ZN267_HUMAN | E.NYRNLVS#LGLVVS#KPDILT#FLEQRK.E     | S42:S48:T54 | 3 | 3,3202 | 0,106 | 1,281  |
| 7 | Q86VP6 CAND1_HUMAN | E.TIVDTLCTNM*LSDK.E.Q                | NA          | 2 | 3,316  | 0,451 | -0,278 |
| 7 | P18583 SON_HUMAN   | E.HNTVCAAGTS#PVGE.I                  | S1556       | 2 | 3,314  | 0,437 | -0,412 |
| 7 | Q8N163 K1967_HUMAN | E.VRSVASNQS#EM*E.F                   | S681        | 2 | 3,3024 | 0,387 | -0,085 |
| 7 | P07954 FUMH_HUMAN  | E.NEPGSSIMPGKVNPTQCE.A               | NA          | 2 | 3,2977 | 0,495 | 0,314  |
| 7 | O94762 RECQ5_HUMAN | E.GVQGPPM*APEKYTGEEDGAGGHS#PAPPQTE.E | S815        | 3 | 3,2944 | 0,376 | 0,237  |
| 7 | P80723 BASP_HUMAN  | E.AAAAPAESAPAGEEPSKEE.G              | NA          | 2 | 3,2926 | 0,513 | -0,062 |
| 7 | O15085 ARHGB_HUMAN | E.LDRNLAEDASS#TE.A                   | S1313       | 2 | 3,2924 | 0,419 | 0,163  |
| 7 | P18031 PTN1_HUMAN  | E.DNDYINASLIKME.E.A                  | NA          | 2 | 3,2737 | 0,266 | 0,369  |
| 7 | Q9UBC2 EP15R_HUMAN | R.GS#FGAM*DDPFKNKALLFSNNTQE.L        | S593        | 3 | 3,2717 | 0,184 | 0,07   |
| 7 | Q9Y2V2 CHSP1_HUMAN | R.ERS#PS#PLRGNVPS#PLPTR.R            | S30:S32:S41 | 3 | 3,2611 | 0,183 | 0,955  |

|   |                    |                                    |                |   |        |       |        |
|---|--------------------|------------------------------------|----------------|---|--------|-------|--------|
| 7 | Q9UHB6 LIMA1_HUMAN | E.DAPIAKVGVLAASME.A                | NA             | 2 | 3,261  | 0,438 | -0,083 |
| 7 | Q5F1R6 DJC21_HUMAN | E.KEFGDGS#DENE.M                   | S283           | 2 | 3,2504 | 0,331 | 0      |
| 7 | P11142 HSP7C_HUMAN | E.ELNADLFRGTLDPVE.K                | NA             | 2 | 3,2483 | 0,359 | -0,289 |
| 7 | P67870 CSK2B_HUMAN | E.DYIQDKFNLTGLNE.Q                 | NA             | 2 | 3,2471 | 0,451 | 0      |
| 7 | P13693 TCTP_HUMAN  | E.NM*NPDGM*VALLDYRE.D              | NA             | 2 | 3,2397 | 0,378 | 0,62   |
| 7 | Q7Z434 MAVS_HUMAN  | E.QALQTL#PRAIPRNPDGGPLESSD.L       | S165           | 3 | 3,2384 | 0,146 | 0,068  |
| 7 | Q14247 SRC8_HUMAN  | E.EQARAKTQT#PPVS#PAPQPTTE.R        | T401:S405      | 3 | 3,2382 | 0,234 | 1,586  |
| 7 | P23229 ITA6_HUMAN  | E.DGPYEVGGETEHEDE.S                | NA             | 2 | 3,2353 | 0,366 | 0      |
| 7 | Q9BSC4 NOL10_HUMAN | E.DQQTVLKPQFYE.I                   | NA             | 2 | 3,2342 | 0,373 | 0,163  |
| 7 | Q6PKG0 LARP1_HUMAN | E.TESAPGS#PRAVTPVPTKTEE.V          | S521           | 3 | 3,2316 | 0,155 | 0,171  |
| 7 | Q9H0H5 RGAP1_HUMAN | E.SGSILSDISFDKTDE.S                | NA             | 2 | 3,2305 | 0,433 | 0,151  |
| 7 | Q12888 TP53B_HUMAN | E.QGTSTVDQNFQKQDATVQTE.R           | NA             | 2 | 3,2294 | 0,194 | 0,227  |
| 7 | Q04637 IF4G1_HUMAN | E.AVGDLLDAFKE.A                    | NA             | 2 | 3,2269 | 0,334 | -0,207 |
| 7 | P36957 ODO2_HUMAN  | K.DDLVTVKTPAFAE.S                  | NA             | 2 | 3,2206 | 0,385 | 0      |
| 7 | P55072 TERA_HUMAN  | E.DNSVVLS#QPKM*DE.L                | S42            | 2 | 3,2146 | 0,199 | 0,148  |
| 7 | Q7Z6B7 SRGP1_HUMAN | E.KCMAGDDYCD#PYSE.H                | S717           | 2 | 3,2136 | 0,269 | 0,065  |
| 7 | Q8IW35 CEP97_HUMAN | E.DIQTDEKLNCSLLSE.S                | NA             | 2 | 3,2067 | 0,357 | 0,124  |
| 7 | Q9Y478 AAKB1_HUMAN | E.LSS#PPGPHYQEPYVCKPE.E            | S182           | 3 | 3,2018 | 0,27  | 0,325  |
| 7 | Q9UPU9 SAM4A_HUMAN | E.LHQMILTPIKAYSS#PST#TPE.A         | S231:T234      | 2 | 3,1996 | 1     | 0,514  |
| 7 | Q9BQG0 MBB1A_HUMAN | E.SRDPAQPMS#PGE.A                  | S11            | 2 | 3,1978 | 0,418 | -0,271 |
| 7 | O95373 IPO7_HUMAN  | E.TENDDLTNVIQKM*ICE.Y              | NA             | 2 | 3,1818 | 0,43  | 0,315  |
| 7 | Q96C57 CL043_HUMAN | E.HEQDGNELQTT#PE.F                 | T79            | 2 | 3,1675 | 0,28  | 0,077  |
| 7 | P20618 PSB1_HUMAN  | E.DFAIVASDTRLSE.G                  | NA             | 2 | 3,1664 | 0,341 | 0,086  |
| 7 | O95202 LETM1_HUMAN | E.IDILSDACSKLQE.Q                  | NA             | 2 | 3,1662 | 0,323 | 0,245  |
| 7 | P14625 ENPL_HUMAN  | E.AIQLDGLNASQIRE.L                 | NA             | 2 | 3,1636 | 0,439 | 0,639  |
| 7 | Q99549 MPP8_HUMAN  | E.KFVESQVES#E.S                    | S264           | 2 | 3,1603 | 0,371 | 0      |
| 7 | O75153 EIF3X_HUMAN | E.SKSEDPGQEQEAGS#EEE.G             | S664           | 2 | 3,1592 | 0,513 | 0      |
| 7 | Q15003 CND2_HUMAN  | E.IDPM*FQKTAASFDE.C                | NA             | 2 | 3,1592 | 0,417 | 0,227  |
| 7 | Q9Y617 SERC_HUMAN  | E.LLDYKGVGISVLE.M                  | NA             | 2 | 3,156  | 0,243 | -0,26  |
| 7 | Q14254 FLOT2_HUMAN | E.IVVLSGDNSKVTSE.V                 | NA             | 2 | 3,1492 | 0,387 | 0,169  |
| 7 | Q9UHB6 LIMA1_HUMAN | E.DAPIAKVGVLAASM*E.A               | NA             | 2 | 3,1433 | 0,472 | 0,328  |
| 7 | Q86VP6 CAND1_HUMAN | E.TIVDTLCTNM*LSDKE.Q               | NA             | 3 | 3,1411 | 0,242 | 0,625  |
| 7 | P46821 MAP1B_HUMAN | E.KVSPSKS#PSLSPS#PPSPLE.K          | S1256:S1262    | 2 | 3,14   | 1     | 0,117  |
| 7 | P49792 RBP2_HUMAN  | E.TT#PKAVVSPPKFVFGSE.S             | T2504          | 2 | 3,1382 | 0,253 | 0,13   |
| 7 | Q4V328 GRAP1_HUMAN | E.SSAVPARSLSS#SPQAQPPRPAELSDVEAE.L | S691           | 3 | 3,1382 | 0,225 | 0,231  |
| 7 | Q86VP6 CAND1_HUMAN | E.TIVDTLCTNMLSDKE.Q                | NA             | 2 | 3,1377 | 0,312 | -0,07  |
| 7 | P28715 ERCC5_HUMAN | E.SKFDSSLLSS#DDE.T                 | S563           | 2 | 3,1353 | 0,354 | 0,323  |
| 7 | Q6PKG0 LARP1_HUMAN | E.TES#APGS#PRAVT#PVPTKTEE.V        | S517:S521:T526 | 3 | 3,1308 | 0,243 | 0,08   |
| 7 | Q9Y4L1 HYOU1_HUMAN | E.DEGVGATTVM*LKE.K                 | NA             | 2 | 3,1281 | 0,486 | 0,179  |
| 7 | P55072 TERA_HUMAN  | E.DNSVVS#LSQPKM*DE.L               | S40            | 2 | 3,1228 | 0,321 | 0,074  |
| 7 | Q92888 ARHG1_HUMAN | E.DFARGAAS#PGPSRPLVPVSIIGAED.E.D   | S10            | 3 | 3,1187 | 0,308 | 0      |



|   |                     |                                   |                |   |        |       |        |
|---|---------------------|-----------------------------------|----------------|---|--------|-------|--------|
| 7 | P31946 1433B_HUMAN  | E.ILNS#PEKACSLAKTAFDE.A           | S186           | 3 | 3,1183 | 0,201 | 0,265  |
| 7 | P57076 CU059_HUMAN  | E.DLSGTQAGLNVIKE.A                | NA             | 2 | 3,1163 | 0,347 | 0,169  |
| 7 | P08069 IGF1R_HUMAN  | E.RALPLQSSST#C.-                  | T1366          | 2 | 3,1157 | 0,491 | -0,093 |
| 7 | Q13480 GAB1_HUMAN   | E.NYVPM*NPNS#PPRQHSSSFTEPIQE.A    | S454           | 3 | 3,1151 | 0,218 | -0,192 |
| 7 | P55072 TERA_HUMAN   | E.VDIGIPDATGRLE.I                 | NA             | 2 | 3,1147 | 0,363 | 0,18   |
| 7 | O15047 SET1A_HUMAN  | E.VRT#SPRPAS#PARSGS#PAPETTNE.S    | T458:S464:S470 | 3 | 3,1122 | 0,27  | 0,281  |
| 7 | P53621 COPA_HUMAN   | E.KCPLSGACYS#PE.F                 | S1193          | 2 | 3,0994 | 0,314 | 0,168  |
| 7 | O75534 CSDE1_HUMAN  | E.ILDGNQLHIADEVE.F                | NA             | 2 | 3,0984 | 0,341 | 0,701  |
| 7 | Q4LE39 ARI4B_HUMAN  | R.RLS#KPPFQTNPS#PE.M              | S666:S675      | 2 | 3,0969 | 0,383 | 0,416  |
| 7 | P07355 ANXA2_HUMAN  | E.TVILGLLKTPAQYD.A                | NA             | 2 | 3,0969 | 0,258 | -0,239 |
| 7 | O15085 ARHGB_HUMAN  | E.DLLVLLKQKDE.K                   | NA             | 2 | 3,0941 | 0,192 | -0,186 |
| 7 | Q05682 CALD1_HUMAN  | E.KGNVFSS#PTAAGT#PNKE.T           | S724:T730      | 3 | 3,0867 | 0,252 | 0,294  |
| 7 | P49792 RBP2_HUMAN   | E.VM*VPSFCKSEEPDSITKSIS#SPSVSSE.T | S2804          | 3 | 3,082  | 0,321 | 0,669  |
| 7 | O00170 AIP_HUMAN    | E.LDPALAPVVSRE.L                  | NA             | 2 | 3,0705 | 0,454 | 0,096  |
| 7 | Q99570 PI3R4_HUMAN  | E.VIQTGKPPRESS#AGICVPLSTSSQVPE.V  | S895           | 3 | 3,0684 | 0,225 | 0,428  |
| 7 | A6H8Y1 BDP1_HUMAN   | E.AVILPCTQTERNLS#PSNSCEPKEE.S     | S1524          | 3 | 3,0653 | 0,261 | 0,387  |
| 7 | Q7KZF4 SND1_HUMAN   | E.YGM*IYLGKDTNGENIAE.S            | NA             | 2 | 3,0621 | 0,201 | 0,385  |
| 7 | Q13188 STK3_HUMAN   | E.DSLTKQPEEVFDVLE.K               | NA             | 2 | 3,0619 | 0,245 | -0,279 |
| 7 | P14625 ENPL_HUMAN   | E.SDDPM*AYIHFTAEGE.V              | NA             | 2 | 3,0605 | 0,369 | 0      |
| 7 | P57740 NU107_HUMAN  | E.QGM*ESPLPAEDDNAIRE.H            | NA             | 2 | 3,0596 | 0,33  | 0,323  |
| 7 | Q16643 DREB_HUMAN   | E.NAEPVGTTYQKTDAAVE.M             | NA             | 2 | 3,0551 | 0,366 | 0,068  |
| 7 | P08107 HSP71_HUMAN  | E.VISWLDANTLAEKDE.F               | NA             | 2 | 3,0498 | 0,32  | 0,573  |
| 7 | O43815 STRN_HUMAN   | E.VAPALSVFNDTKE.L                 | NA             | 2 | 3,0471 | 0,516 | 0,175  |
| 7 | Q06787 FMR1_HUMAN   | R.RGPGYSGTNSEASNAS#ETE.S          | S500           | 2 | 3,0456 | 0,414 | 0,233  |
| 7 | Q8IWT3 PARC_HUMAN   | E.SKSEASFS#EEETE.S                | S605           | 2 | 3,0439 | 0,31  | 0,079  |
| 7 | Q14157 UBP2L_HUMAN  | D.LTQAKNGFSSVQATQLQTTQSVE.G       | NA             | 3 | 3,0434 | 0,289 | 0,223  |
| 7 | Q13404 UB2V1_HUMAN  | E.NM*KLPQPPEGQCYS#N.-             | S220           | 2 | 3,0401 | 0,321 | 0,131  |
| 7 | O00299 CLIC1_HUMAN  | E.TVQKLCPPGGQLPFLLYGTE.V          | NA             | 2 | 3,0394 | 0,301 | 0      |
| 7 | Q16204 CCDC6_HUMAN  | E.KLDQPV#APPS#PRDISM*E.I          | S240:S244      | 3 | 3,0377 | 0,201 | 0,341  |
| 7 | P11142 HSP7C_HUMAN  | R.LIGDAAKNQVAM*NPTNTVFD.A         | NA             | 3 | 3,0372 | 0,393 | 0,257  |
| 7 | Q6DD88 ATLA3_HUMAN  | E.VCGGEKPYLSPDILEE.K              | NA             | 2 | 3,0352 | 0,331 | 0,203  |
| 7 | Q9Y3F4 STRAP_HUMAN  | E.IASENSDCIFPSAPDVKA.-            | NA             | 2 | 3,0349 | 0,469 | 0,445  |
| 7 | O43684 BUB3_HUMAN   | E.GRVAVEYLDPS#PE.V                | S211           | 2 | 3,0329 | 0,295 | 0,242  |
| 7 | Q9Y490 TLN1_HUMAN   | E.TQVVLINAVKD.V                   | NA             | 2 | 3,0321 | 0,369 | 0,203  |
| 7 | P49588 SYAC_HUMAN   | E.ALATAVIPQWQKDE.L                | NA             | 2 | 3,0285 | 0,412 | 0,622  |
| 7 | Q12888 TP53B_HUMAN  | E.AM*VTDVLEDQKE.G                 | NA             | 2 | 3,0277 | 0,286 | -0,088 |
| 7 | Q9UNN5 FAF1_HUMAN   | E.VFGM*ASSALRKS#PM*MPENAENE.G     | S320           | 3 | 3,0258 | 0,2   | 0,438  |
| 7 | B1ALX9 B1ALX9_HUMAN | E.GDNYSATLLEPAASLS#PDHKNM*E.I     | S226           | 3 | 3,0229 | 0,121 | 0,485  |
| 7 | Q16531 DDB1_HUMAN   | E.ATADDLIKVVVEE.L                 | NA             | 2 | 3,0209 | 0,257 | 0,187  |
| 7 | P78332 RBM6_HUMAN   | E.KLQSFDS#PE.R                    | S1025          | 2 | 3,019  | 0,334 | 0,108  |
| 7 | Q13151 ROAO_HUMAN   | E.ADAAMAASPHAVDGNTE.L             | NA             | 2 | 3,0133 | 0,45  | 0,071  |

|   |                    |                                     |           |   |        |       |        |
|---|--------------------|-------------------------------------|-----------|---|--------|-------|--------|
| 7 | P31946 1433B_HUMAN | E.ILNS#PEKACSLAKTAFDE.A             | S186      | 2 | 3,0103 | 0,414 | -0,353 |
| 7 | Q92628 K0232_HUMAN | E.GIASFSPS#FKPKSILCSDSDSE.V         | S1069     | 3 | 3,0071 | 0,212 | 0,225  |
| 7 | Q9P0W8 SPAT7_HUMAN | E.ISNGLCGLNTS#PSQSVQFSSVKGDNHDM*E.L | S562      | 3 | 3,0063 | 0,235 | 0,772  |
| 7 | O60271 JIP4_HUMAN  | E.TRNVT#GSAENEE.K                   | T330      | 2 | 2,9974 | 0,296 | -0,248 |
| 7 | Q7Z5L2 GIDRP_HUMAN | E.FKTEEQDDSGS#IE.F                  | S538      | 2 | 2,9973 | 0,374 | 0      |
| 7 | P51114 FXR1_HUMAN  | E.LDEDTGTFRYGE.S                    | NA        | 2 | 2,9967 | 0,464 | 1,127  |
| 7 | P55072 TERA_HUMAN  | E.DNSVVVLSQPKMDE.L                  | NA        | 3 | 2,994  | 0,187 | 0,236  |
| 7 | P10809 CH60_HUMAN  | E.VVVTEIPKEE.K                      | NA        | 2 | 2,9933 | 0,379 | 0,427  |
| 7 | P12956 KU70_HUMAN  | E.QAVDLTLPKVE.A                     | NA        | 2 | 2,9925 | 0,385 | 0,302  |
| 7 | O00410 IMB3_HUMAN  | D.ALIKAIGTEPDSVDLSE.I               | NA        | 2 | 2,9893 | 0,423 | -0,069 |
| 7 | Q8IVF2 AHNK2_HUMAN | E.VQAGQVDVKLPEGPVSE.G               | NA        | 2 | 2,9863 | 0,236 | 0,487  |
| 7 | O75369 FLNB_HUMAN  | E.AGAGGLSIAVEGPKAE.I                | NA        | 2 | 2,9859 | 0,432 | 0,564  |
| 7 | Q9Y6I3 EPN1_HUMAN  | E.LLAGEVPARSPGAFDM*SGVRGS#LAE.A     | S422      | 3 | 2,9842 | 0,2   | 0,354  |
| 7 | Q13151 ROA0_HUMAN  | E.ADAAM*AASPHAVDGNTE.L              | NA        | 2 | 2,9792 | 0,368 | 0,14   |
| 7 | P80723 BASP_HUMAN  | E.QAAPGPAAGGEAPKAAE.A               | NA        | 3 | 2,9783 | 0,336 | 0,184  |
| 7 | Q14247 SRC8_HUMAN  | E.SAEAPGHYPAEDSTYDEYE.N             | NA        | 2 | 2,976  | 0,343 | 0,344  |
| 7 | Q6S8J3 A26CA_HUMAN | E.KLCYVALDFEQE.M                    | NA        | 2 | 2,9747 | 0,239 | 0      |
| 7 | Q92841 DDX17_HUMAN | R.GDGPICLVLPATRE.L                  | NA        | 2 | 2,971  | 0,314 | 0,244  |
| 7 | Q9C0C2 TB182_HUMAN | E.RQQAGAQQPGS#ADLEDGE.M             | S1073     | 2 | 2,9684 | 0,493 | 0,131  |
| 7 | P07384 CAN1_HUMAN  | E.YVVVPSTFEPNKE.G                   | NA        | 2 | 2,9678 | 0,27  | 0,404  |
| 7 | Q9Y478 AAKB1_HUMAN | E.LSSS#PPGPYHQEPYVCKPEE.R           | S182      | 3 | 2,9651 | 0,151 | 0,307  |
| 7 | Q02952 AKA12_HUMAN | E.DSIAGSGVEHS#TPDTEPGKEE.S          | S792      | 3 | 2,9631 | 0,344 | 0,494  |
| 7 | Q6NZI2 PTRF_HUMAN  | E.AGDLRRGS#S#PDVHALLE.I             | S365:S366 | 3 | 2,958  | 0,081 | 0,094  |
| 7 | A0AVT1 UBA6_HUMAN  | E.FEVLDTTGEEPKE.I                   | NA        | 2 | 2,9565 | 0,33  | 0,082  |
| 7 | P29317 EPA2_HUMAN  | E.DACQACSPGFFKFE.A                  | NA        | 2 | 2,9539 | 0,294 | 0,293  |
| 7 | Q13501 SQSTM_HUMAN | E.SASGPSEDPSVNFKNVGE.S              | NA        | 2 | 2,9504 | 0,322 | 0,505  |
| 7 | Q4G0J3 LARP7_HUMAN | E.NRDIEIST#EEE.K                    | T338      | 2 | 2,9407 | 0,31  | 0,086  |
| 7 | Q99497 PARK7_HUMAN | D.GLILTSRGPSTFE.F                   | NA        | 2 | 2,9387 | 0,297 | 0,17   |
| 7 | Q9BSQ5 CCM2_HUMAN  | E.SSRGLSAGS#LSE.S                   | S181      | 2 | 2,9382 | 0,305 | 0,099  |
| 7 | O60506 HNRPQ_HUMAN | E.DGALAVLQQFKDSD.L                  | NA        | 2 | 2,9361 | 0,48  | 0,081  |
| 7 | P46087 NOL1_HUMAN  | E.LSTVPSVTKQASSS#FQDSSQPAGKAE.G     | S675      | 3 | 2,9355 | 0,162 | 0,39   |
| 7 | O94804 STK10_HUMAN | E.AECPNPS#TPSKAAKFFPYSSADAS.-       | S951      | 3 | 2,9277 | 0,318 | 0      |
| 7 | O95202 LETM1_HUMAN | R.VVAAPQRPGTEPQPE.M                 | NA        | 2 | 2,9272 | 0,355 | 0,077  |
| 7 | P80723 BASP_HUMAN  | E.QAAPGPAAGGEAPKAAE.A               | NA        | 2 | 2,9244 | 0,415 | 0,163  |
| 7 | O94915 FRYL_HUMAN  | E.SRYSSS#GGSYEEE.K                  | S1536     | 2 | 2,9216 | 0,347 | -0,076 |
| 7 | O43310 K0427_HUMAN | E.DTAGDTGHSSLEAPRS#PDTLAPVASE.R     | S299      | 3 | 2,9191 | 0,234 | 0,55   |
| 7 | P62191 PRS4_HUMAN  | E.IIDDNHAIVSTSVGSE.H                | NA        | 2 | 2,9183 | 0,37  | 0,368  |
| 7 | Q9UHY7 ENOPH_HUMAN | E.DAHLDGAVPIAASNGVDD.L              | NA        | 2 | 2,9152 | 0,476 | 0,452  |
| 7 | Q5VZK9 LR16A_HUMAN | E.NRFGTGT#PE.K                      | T1228     | 2 | 2,9118 | 0,296 | 0,114  |
| 7 | P55072 TERA_HUMAN  | E.DNS#VVVLSQPKM*DE.L                | S37       | 2 | 2,9116 | 0,244 | 0,074  |
| 7 | P46100 ATRX_HUMAN  | E.IEDAS#PTKCPITTKLVLDE.D            | S1527     | 3 | 2,9104 | 0,163 | 0,662  |

|   |                    |                                      |           |   |        |       |        |
|---|--------------------|--------------------------------------|-----------|---|--------|-------|--------|
| 7 | P60174 TPIS_HUMAN  | D.GFLVGGASLKPE.F                     | NA        | 2 | 2,9094 | 0,375 | 0,311  |
| 7 | Q8WYP5 AHTF1_HUMAN | E.DLLKLPFTDTEQE.C                    | NA        | 2 | 2,9074 | 0,485 | -0,315 |
| 7 | P09874 PARP1_HUMAN | E.DFLQDVSASTKSLQE.L                  | NA        | 2 | 2,9037 | 0,255 | -0,146 |
| 7 | P36578 RL4_HUMAN   | E.LPLVVEDKVE.G                       | NA        | 2 | 2,9029 | 0,304 | -0,214 |
| 7 | Q9C073 F117A_HUMAN | E.LASTPNDKASS#PGHPAFLE.D             | S306      | 2 | 2,9017 | 0,32  | 0,242  |
| 7 | O00232 PSD12_HUMAN | E.VDYSATVDQRLPE.C                    | NA        | 2 | 2,8902 | 0,408 | 0,49   |
| 7 | P38646 GRP75_HUMAN | E.QQIVIQSSGGLSKDDIE.N                | NA        | 2 | 2,8872 | 0,36  | 0,269  |
| 7 | P62258 1433E_HUMAN | E.DLVYQAKLAE.Q                       | NA        | 2 | 2,882  | 0,433 | 0,106  |
| 7 | P55263 ADK_HUMAN   | E.VTAFAVLDQDQKE.I                    | NA        | 2 | 2,8799 | 0,174 | 0,5    |
| 7 | O94915 FRYL_HUMAN  | E.SRYSSSSGGGS#YEEE.K                 | S1539     | 2 | 2,8797 | 0,391 | 0      |
| 7 | Q8N752 KC1AL_HUMAN | K.IGSGSFGDVYLGITTTNGE.E              | NA        | 2 | 2,8792 | 0,159 | 0,259  |
| 7 | Q8IUW5 RELL1_HUMAN | E.KIELNDS#VNE.N                      | S109      | 2 | 2,8738 | 0,253 | 0,197  |
| 7 | Q13435 SF3B2_HUMAN | E.M*DDPSVGPKIPQALE.K                 | NA        | 2 | 2,8658 | 0,367 | 0,151  |
| 7 | Q99614 TTC1_HUMAN  | E.DLLNGLKVTDTQEAE.C                  | NA        | 2 | 2,8635 | 0,409 | 0,371  |
| 7 | P49023 PAXI_HUMAN  | E.GGFMAQKGTGSSS#PPGGPPKPGSQLD.S      | S322      | 3 | 2,8616 | 0,209 | 0,58   |
| 7 | P15170 ERF3A_HUMAN | E.ISEAEPGGGS#LGDGRPPEESAHE.M         | S36       | 3 | 2,8603 | 0,257 | 0,543  |
| 7 | Q6KB66 K2C80_HUMAN | E.KYFSQESEVS#E.-                     | S451      | 2 | 2,8555 | 0,279 | -0,086 |
| 7 | Q58FF8 H90B2_HUMAN | E.SKEQVANSFAVE.Q                     | NA        | 2 | 2,8489 | 0,397 | 0,28   |
| 7 | Q13131 AAPK1_HUMAN | E.VSLTSSVTS#LDSSPVDLTPRPGSHTIE.F     | S518      | 3 | 2,8474 | 0,315 | 0,447  |
| 7 | Q53H82 LACB2_HUMAN | E.DLYDYM*NSLKE.L                     | NA        | 2 | 2,8472 | 0,297 | 0,26   |
| 7 | P27987 IP3KB_HUMAN | E.SQRQSDALPS#PE.L                    | S544      | 2 | 2,8469 | 0,279 | 0,242  |
| 7 | Q86UP2 KTN1_HUMAN  | E.VIDLLKPDQVE.G                      | NA        | 2 | 2,8463 | 0,273 | 0,192  |
| 7 | Q15149 PLEC1_HUMAN | E.GTSCIAGVFVDATKE.R                  | NA        | 2 | 2,8432 | 0,37  | 0,314  |
| 7 | Q9UQ35 SRRM2_HUMAN | R.SRSVS#PCSNVE.S                     | S954      | 2 | 2,8432 | 0,271 | 0,562  |
| 7 | P35611 ADDA_HUMAN  | E.AHRPPS#PTEAPTEAS#PEPAPDPAPVAE.E    | S669:S678 | 3 | 2,8396 | 0,175 | 0,254  |
| 7 | Q9H8Y8 GORS2_HUMAN | E.KPVSAAVDANASES#P.-                 | S451      | 2 | 2,8384 | 0,439 | 0      |
| 7 | P46013 KI67_HUMAN  | E.LFQTPGTDKPTTDE.K                   | NA        | 2 | 2,8375 | 0,326 | 0,945  |
| 7 | Q969F1 TF3C6_HUMAN | E.LSGIIDSDFLSKCE.N                   | NA        | 2 | 2,8343 | 0,314 | 0,154  |
| 7 | Q9Y508 ZN313_HUMAN | E.DM*M*NQVLQRSIIDQ.-                 | NA        | 2 | 2,8294 | 0,238 | 0,142  |
| 7 | Q92922 SMRC1_HUMAN | E.SSCIAGTGPDEPEKLE.G                 | NA        | 2 | 2,8265 | 0,392 | 0,217  |
| 7 | P61758 PFD3_HUMAN  | E.DLDFLRDQFTTTE.V                    | NA        | 2 | 2,8242 | 0,491 | -0,076 |
| 7 | Q13614 MTMR2_HUMAN | E.ISNRSTSSSERASS#PAQCVT#PVQTVV.-     | S631:T637 | 3 | 2,8238 | 0,086 | 0,063  |
| 7 | Q53EZ4 CEP55_HUMAN | E.KVAAS#PKSPT#AALNE.S                | S425:T430 | 2 | 2,8172 | 0,3   | 0,074  |
| 7 | Q12765 SCRN1_HUMAN | E.VVYFSAADHEPE.S                     | NA        | 2 | 2,8126 | 0,47  | 0      |
| 7 | Q9NWH9 SLTM_HUMAN  | R.DRFVGQS#E.G                        | S800      | 2 | 2,8115 | 0,178 | -0,06  |
| 7 | Q43504 HBXIP_HUMAN | E.DTM*KNPSIVGLCTD.S                  | NA        | 2 | 2,807  | 0,332 | 0,073  |
| 7 | Q6NZ12 PTRF_HUMAN  | E.SDAVLVDKSDS#D.-                    | S389      | 2 | 2,8051 | 0,436 | 0      |
| 7 | Q02447 SP3_HUMAN   | E.VLSATPTTIKDE.A                     | NA        | 2 | 2,8015 | 0,285 | -0,096 |
| 7 | O75381 PEX14_HUMAN | E.S#T#SSSPGKEGHSPEGSTVTYHLLGPQEEGE.G | S271:T272 | 3 | 2,7983 | 1     | 0,451  |
| 7 | P46013 KI67_HUMAN  | E.NLLGKQFQGTDSGEEPLLPTSE.S           | NA        | 2 | 2,7981 | 0,407 | 0,31   |
| 7 | Q15942 ZYX_HUMAN   | E.GGPEAPIPPPPQPREKVSS#IDLE.I         | S143      | 3 | 2,7954 | 0,143 | 1,616  |

|   |                    |                                       |                |   |        |       |        |
|---|--------------------|---------------------------------------|----------------|---|--------|-------|--------|
| 7 | Q14690 RRP5_HUMAN  | E.DDSLVDVYYRE.G                       | NA             | 2 | 2,7951 | 0,294 | 0,178  |
| 7 | Q17RY0 CPEB4_HUMAN | E.KQQLSPS#PGQE.A                      | S99            | 2 | 2,795  | 0,379 | 0,191  |
| 7 | Q13506 NAB1_HUMAN  | E.HSLSPADLGS#PAS#PKESSE.A             | S180:S183      | 3 | 2,7919 | 0,25  | 0,267  |
| 7 | P51610 HCFC1_HUMAN | E.TGTTNTATTSNAGSAQRVCS#NPPCETHE.T     | S1318          | 3 | 2,7905 | 0,142 | 0,242  |
| 7 | P62753 RS6_HUMAN   | R.RLS#S#LRAS#TSKSE.S                  | S235:S236:S240 | 3 | 2,788  | 0,176 | 0,11   |
| 7 | Q3KQU3 MA7D1_HUMAN | E.NGFSTNGPSGDKSLSRTPETLLPFAEAE.A      | T813           | 3 | 2,7865 | 0,299 | 0,061  |
| 7 | Q00610 CLH1_HUMAN  | E.AIDSYIKADDPSYEM*E.V                 | NA             | 3 | 2,7835 | 0,217 | 0,402  |
| 7 | Q9NX40 OCAD1_HUMAN | E.SAPTGITDHIVQGPDPLE.E                | NA             | 2 | 2,7811 | 0,325 | 0,498  |
| 7 | Q9Y2H2 SAC2_HUMAN  | E.DRQLANS#LE.S                        | S878           | 2 | 2,7808 | 0,186 | -0,108 |
| 7 | Q96R06 SPAG5_HUMAN | E.VAAVSEKPIFQES#PSHLL.E               | S197           | 3 | 2,7807 | 0,419 | 0,254  |
| 7 | Q92619 HMHA1_HUMAN | E.SRVVSNDS#DLEE.A                     | S1032          | 2 | 2,7762 | 0,271 | 0      |
| 7 | Q03188 CENPC_HUMAN | E.ASLQFVVEPSEATNRS#VQAHE.V            | S110           | 3 | 2,7744 | 0,123 | 0,308  |
| 7 | Q13813 SPTA2_HUMAN | R.DLAALGDKVNSLGE.T                    | NA             | 2 | 2,7715 | 0,38  | 0,087  |
| 7 | Q15149 PLEC1_HUMAN | E.QIQAM*PLADSQAVRE.Q                  | NA             | 2 | 2,7689 | 0,344 | 0,146  |
| 7 | O00505 IMA3_HUMAN  | E.DSDVDADFKAQNVLE.A                   | NA             | 2 | 2,768  | 0,394 | 0,483  |
| 7 | P27348 1433T_HUMAN | E.LACTLAKTAFDEAIAE.L                  | NA             | 2 | 2,7646 | 0,374 | 0      |
| 7 | P36957 ODO2_HUMAN  | E.ALLVPDGGKVE.G                       | NA             | 2 | 2,7646 | 0,359 | 0,222  |
| 7 | P61247 RS3A_HUMAN  | E.RADGYEPPVQES#V.-                    | S263           | 2 | 2,7644 | 0,291 | 0,24   |
| 7 | Q9Y265 RUVB1_HUMAN | E.IIQDVTLHDL.D                        | NA             | 2 | 2,7626 | 0,237 | -0,19  |
| 7 | P42167 LAP2B_HUMAN | E.HNQSYS#QAGITE.T                     | S224           | 2 | 2,7625 | 0,408 | 0      |
| 7 | P34932 HSP74_HUMAN | D.ATQIAGLNCLRLM*NE.T                  | NA             | 2 | 2,7607 | 0,295 | 0,709  |
| 7 | O43310 K0427_HUMAN | E.DTAGDGTGHSSLEAPRS#PDTLAPVASE.R      | S299           | 2 | 2,759  | 0,379 | 0,734  |
| 7 | P42166 LAP2A_HUMAN | E.SRSSTPLTISS#AE.N                    | S168           | 2 | 2,7559 | 0,37  | 0,076  |
| 7 | O15085 ARHGB_HUMAN | E.NDLLDLGDPLRE.R                      | NA             | 2 | 2,7515 | 0,367 | 0,082  |
| 7 | Q9BQE3 TBA1C_HUMAN | E.KDYEEVGADS#AD.G                     | S439           | 2 | 2,7496 | 0,341 | 0,088  |
| 7 | P27816 MAP4_HUMAN  | E.DTPSSKPTLLANGGHGVEGSDT#TGSPTEFLEE.K | T96            | 3 | 2,7491 | 0,168 | -0,221 |
| 7 | Q8TD16 BICD2_HUMAN | E.GQGGAGRTS#PGGRT#SPE.A               | S568:T573      | 2 | 2,7456 | 0,301 | -0,282 |
| 7 | P08238 HS90B_HUMAN | R.TLTLVDTGIGM*TK.A                    | NA             | 2 | 2,7429 | 0,311 | 0,625  |
| 7 | P78527 PRKDC_HUMAN | E.DNSM*NVDQGDPSDRM*E.V                | NA             | 2 | 2,7427 | 0,398 | 0,187  |
| 7 | Q9UQ35 SRRM2_HUMAN | E.KAGMSSNQSISS#PVL.D.A                | S1404          | 2 | 2,7387 | 0,132 | 0,43   |
| 7 | Q9Y536 PAL4B_HUMAN | E.NFRALSTGE.K                         | NA             | 2 | 2,7376 | 0,301 | 0      |
| 7 | P14625 ENPL_HUMAN  | E.SDDPMAYIHFTAEGE.V                   | NA             | 2 | 2,7303 | 0,397 | 0,072  |
| 7 | O95433 AHSA1_HUMAN | E.SVDPVGGQPALKTEE.R                   | NA             | 2 | 2,729  | 0,308 | 0,166  |
| 7 | Q8IW41 MAPK5_HUMAN | E.IVKQVIEEQTTS#HES#Q.-                | S469:S472      | 2 | 2,7269 | 0,378 | 0      |
| 7 | Q8WUM4 PDC6I_HUMAN | D.TIVLLCKPEPE.L                       | NA             | 2 | 2,7236 | 0,323 | 0,282  |
| 7 | P10599 THIO_HUMAN  | E.ALDAAGDKLVVVD.F                     | NA             | 2 | 2,7211 | 0,38  | 0,285  |
| 7 | P62841 RS15_HUMAN  | E.MVGSVMGVYNGKTFNQVE.I                | NA             | 2 | 2,7205 | 0,314 | 0,56   |
| 7 | P49792 RBP2_HUMAN  | E.VMVPSFKSEEPSITKSISS#PSVSSE.T        | S2805          | 3 | 2,7203 | 0,319 | 0,367  |
| 7 | Q6IE81 JADE1_HUMAN | E.NGAPECS#PRNPLEPFASLEQNREE.A         | S392           | 3 | 2,7195 | 0,154 | 0,195  |
| 7 | Q32MZ4 LRRF1_HUMAN | E.LTYQNTDLSEIKE.E                     | NA             | 2 | 2,7178 | 0,271 | 0,236  |
| 7 | P38432 P80C_HUMAN  | E.LTSSYSPDVSDYKE.G                    | NA             | 2 | 2,7111 | 0,462 | 0,153  |

|   |                       |                                |             |   |        |       |        |
|---|-----------------------|--------------------------------|-------------|---|--------|-------|--------|
| 7 | Q9Y490 TLN1_HUMAN     | E.FAGFQCQIQFGPHNE.Q            | NA          | 2 | 2,711  | 0,372 | 0,411  |
| 7 | Q6S8J3 A26CA_HUMAN    | E.KSYELPDGQVITIGNE.R           | NA          | 2 | 2,711  | 0,315 | 0,069  |
| 7 | Q5VZL5 ZMYM4_HUMAN    | E.KDQGSTYS#GDLE.S              | S1091       | 2 | 2,7098 | 0,396 | 0      |
| 7 | P06744 G6PI_HUMAN     | E.SSLFIIASKTFTTQE.T            | NA          | 2 | 2,7092 | 0,418 | -0,146 |
| 7 | Q9GZM8 NDEL1_HUMAN    | E.VTRKS#APSS#PTLD.C            | S194:S198   | 2 | 2,708  | 0,282 | -0,241 |
| 7 | Q6NZI2 PTRF_HUMAN     | E.SDAVLVDKS#DS#D.-             | S387:S389   | 2 | 2,7067 | 0,25  | 0,086  |
| 7 | Q12906 ILF3_HUMAN     | E.TEAKPAVVAPAPVVE.A            | NA          | 2 | 2,7065 | 0,257 | 0,083  |
| 7 | P62937 PPIA_HUMAN     | D.IAVDGEPLGRVSFE.L             | NA          | 2 | 2,7053 | 0,269 | 0,082  |
| 7 | Q9BRS8 LARP6_HUMAN    | E.GRLNCSTS#PE.I                | S409        | 2 | 2,7052 | 0,083 | -0,102 |
| 7 | Q14194 DPYL1_HUMAN    | E.NLIVPGGVKTIE.A               | NA          | 2 | 2,7031 | 0,151 | 0,394  |
| 7 | P14618 KPYM_HUMAN     | E.ASDGIM*VARGDLGIEIPAE.K       | NA          | 2 | 2,6966 | 0,364 | 0,19   |
| 7 | P00558 PGK1_HUMAN     | D.VLFLKDCVGPVEE.K              | NA          | 2 | 2,6913 | 0,358 | 0,405  |
| 7 | P08559 ODPA_HUMAN     | E.NNRYGMGT#VE.R                | S232        | 2 | 2,6838 | 0,414 | 0,093  |
| 7 | P61160 ARP2_HUMAN     | E.LLFNTIQAADIDTRSE.F           | NA          | 3 | 2,6814 | 0,342 | 0,101  |
| 7 | P09874 PARP1_HUMAN    | E.VAYSLLRGG#DDSSKPIDVNYE.K     | S782        | 2 | 2,6789 | 0,262 | 0,568  |
| 7 | Q68D38 Q68D38_HUMAN   | E.DISTTVVYRM*E.S               | NA          | 2 | 2,673  | 0,473 | 0,183  |
| 7 | ##Q15899 Q15899_HUMAN | R.IT#SPLTT#DSVLS#VLTR.L        | T35:T40:S45 | 2 | 2,6676 | 0,108 | 0,942  |
| 7 | P05386 RLA1_HUMAN     | E.LACIYSALILHDDE.V             | NA          | 2 | 2,6636 | 0,352 | -0,149 |
| 7 | Q66K74 MAP1S_HUMAN    | E.LGPIPAGEEKALE.L              | NA          | 2 | 2,6613 | 0,385 | 0,276  |
| 7 | Q14004 CD2L5_HUMAN    | E.ASLQLRPPPEPST#PVSGQDDLQHQD.M | T1226       | 3 | 2,6612 | 0,112 | 0,882  |
| 7 | Q9Y266 NUDC_HUMAN     | R.FDGMLLAM*AQQHE.G             | NA          | 2 | 2,6558 | 0,237 | 0,405  |
| 7 | P62158 CALM_HUMAN     | E.AFS#LFDKDGDTITTKE.L          | S18         | 3 | 2,6522 | 0,198 | 0,095  |
| 7 | P30153 2AAA_HUMAN     | E.ALVM*PTLRQAAE.D              | NA          | 2 | 2,6521 | 0,341 | 0,185  |
| 7 | Q9H6F5 CCD86_HUMAN    | E.SPQQQPEPGAAS#PQRQDDLHLE.S    | S91         | 3 | 2,6508 | 0,158 | 0,448  |
| 7 | Q9UKI8 TLK1_HUMAN     | E.SSNHSFGSLGSLDKES#ET#PE.K     | S109:T111   | 3 | 2,6491 | 0,123 | 0,388  |
| 7 | Q5JWS8 Q5JWS8_HUMAN   | D.LQVLENY#S#DAPMT#PKQILQVIE.A  | Y20:S21:T26 | 3 | 2,6419 | 0,092 | 0,463  |
| 7 | P43686 PRS6B_HUMAN    | E.AVELPLTHFE.L                 | NA          | 2 | 2,6413 | 0,228 | 0      |
| 7 | Q9Y4L1 HYOU1_HUMAN    | E.DEGVGATTVMLKE.K              | NA          | 2 | 2,6376 | 0,271 | 0,271  |
| 7 | Q14966 ZN638_HUMAN    | E.KES#PGLKNS#PIDE.S            | S1100:S1106 | 2 | 2,6362 | 0,184 | 0,155  |
| 7 | Q8TAT6 NPL4_HUMAN     | E.LLEDPKAEVVDE.I               | NA          | 2 | 2,6361 | 0,185 | 0,36   |
| 7 | P52434 RPAB3_HUMAN    | E.DIFDVKDIDPE.G                | NA          | 2 | 2,6345 | 0,412 | 0,093  |
| 7 | P14625 ENPL_HUMAN     | E.SDDPMAYIHFTA.E.G             | NA          | 2 | 2,6338 | 0,406 | 0,082  |
| 7 | Q8IVT2 CSO21_HUMAN    | E.SRIYAS#EEDD.-                | S675        | 2 | 2,6335 | 0,428 | -0,096 |
| 7 | P43246 M5H2_HUMAN     | E.M*IETTLDM*DQVENHE.F          | NA          | 2 | 2,6333 | 0,248 | 0,399  |
| 7 | O75157 T22D2_HUMAN    | E.IFDVSRATDYGPVEEVE.R          | NA          | 2 | 2,6329 | 0,328 | 0,553  |
| 7 | P07237 PDIA1_HUMAN    | E.VAVIGFFKDV.E.S               | NA          | 2 | 2,6279 | 0,301 | -0,1   |
| 7 | P30153 2AAA_HUMAN     | E.ALVMPTLRQAAE.D               | NA          | 2 | 2,6266 | 0,3   | 0,282  |
| 7 | P42166 LAP2A_HUMAN    | E.SRSSTPLTISS#SAE.N            | S167        | 2 | 2,6225 | 0,337 | 0,458  |
| 7 | Q99618 CDCA3_HUMAN    | R.VADPRS#PSAGILRTPIQVE.S       | S29         | 3 | 2,6224 | 0,173 | 0,175  |
| 7 | P42166 LAP2A_HUMAN    | E.ATQILSVPKVDDE.I              | NA          | 2 | 2,6162 | 0,176 | 0,259  |
| 7 | P27708 PYR1_HUMAN     | E.SIVVAPSQTLNDRE.Y             | NA          | 2 | 2,6122 | 0,417 | 0,08   |

|   |                    |                                       |             |   |        |       |        |
|---|--------------------|---------------------------------------|-------------|---|--------|-------|--------|
| 7 | P49792 RBP2_HUMAN  | E.T#TPKAVVSPPKFVFGSE.S                | T2503       | 2 | 2,6111 | 0,281 | 0,065  |
| 7 | Q9BY42 CT043_HUMAN | E.DDVIVLNGTKE.D                       | NA          | 2 | 2,6109 | 0,293 | -0,203 |
| 7 | P49736 MCM2_HUMAN  | E.AGALVLADRGVCLIDE.F                  | NA          | 2 | 2,6081 | 0,248 | 0,146  |
| 7 | P13693 TCTP_HUMAN  | E.NM*NPDGMVALLDYRE.D                  | NA          | 2 | 2,6074 | 0,391 | 0      |
| 7 | Q9Y4B5 K0802_HUMAN | E.TGTNSRGRS#PS#PIGVGSE.M              | S1803:S1805 | 3 | 2,6066 | 0,188 | 0,095  |
| 7 | O95772 MENTO_HUMAN | E.NRLLIVQDAS#E.R                      | S193        | 2 | 2,6057 | 0,372 | 0,091  |
| 7 | Q8NEZ4 MLL3_HUMAN  | E.GNAVACPVSSAQ#PPHSAGAPAAKGDGSGNE.L   | S3758       | 3 | 2,6048 | 0,114 | 0      |
| 7 | P28066 PSA5_HUMAN  | E.YDRGVNTFS#PE.G                      | S16         | 2 | 2,6035 | 0,257 | 0      |
| 7 | P49116 NR2C2_HUMAN | E.DGTVLLATDSKAE.T                     | NA          | 2 | 2,6024 | 0,373 | 0,277  |
| 7 | P09874 PARP1_HUMAN | E.VAYSLLRGGSDSS#KDPIDVNYE.K           | S786        | 3 | 2,6014 | 0,108 | 0,425  |
| 7 | Q9HC35 EMAL4_HUMAN | E.TVADTTLTKAPVSST#E.S                 | T889        | 2 | 2,6013 | 0,296 | 0,717  |
| 7 | Q14157 UBP2L_HUMAN | D.LAVLLGKTPSTM*E.N                    | NA          | 2 | 2,5993 | 0,28  | 0,266  |
| 7 | P55072 TERA_HUMAN  | E.DNSVVLSQPKM*D.E                     | NA          | 2 | 2,5985 | 0,445 | 0      |
| 7 | Q86SQ0 PHLB2_HUMAN | E.YTKPDSRLS#TGT#TVE.D                 | S468:T471   | 2 | 2,5879 | 0,313 | 0,202  |
| 7 | Q9ULH7 MKL2_HUMAN  | E.QLVDQGIMPLKS#PAAFHE.Q               | S66         | 3 | 2,5842 | 0,219 | 0,593  |
| 7 | Q96FF9 CDCA5_HUMAN | E.DLFKTHSVPAT#PTST#PVPNPEAE.S         | T111:T115   | 3 | 2,5836 | 0,092 | -0,07  |
| 7 | Q13813 SPTA2_HUMAN | E.AFLNTEKGDLSLDSVE.A                  | NA          | 2 | 2,5836 | 0,314 | 0,351  |
| 7 | O75116 ROCK2_HUMAN | E.TGM*VHCDTAVGTPDYISPE.V              | NA          | 2 | 2,5821 | 0,216 | 0,118  |
| 7 | Q14789 GOGB1_HUMAN | E.DLNQVITIKD.S                        | NA          | 2 | 2,5817 | 0,258 | 0,211  |
| 7 | Q7Z3B3 K1267_HUMAN | E.YSHGQS#PRS#PISPE.L                  | S988:S991   | 2 | 2,5795 | 0,37  | -0,143 |
| 7 | Q13371 PHLP_HUMAN  | E.VLVLTSVRNSATCHSEDS#DLEID.-          | S296        | 2 | 2,5767 | 0,308 | 0,37   |
| 7 | O43396 TXNL1_HUMAN | D.LM*PFINKAGCECLNE.S                  | NA          | 2 | 2,5746 | 0,327 | 0,135  |
| 7 | Q7L590 MCM10_HUMAN | E.GDDVLFYDES#PPPRPKLSALAE.A           | S644        | 3 | 2,5731 | 0,111 | 0,293  |
| 7 | Q02790 FKBP4_HUMAN | E.QKSNTAGSQS#QVETEA.-                 | S453        | 2 | 2,5724 | 0,286 | 0,14   |
| 7 | Q08752 PPID_HUMAN  | E.LFADIVPKTAE.N                       | NA          | 2 | 2,5691 | 0,265 | 0      |
| 7 | Q5T4S7 UBR4_HUMAN  | E.LIEEPGLTCCICRE.G                    | NA          | 2 | 2,5641 | 0,43  | 0,418  |
| 7 | P38646 GRP75_HUMAN | E.AVNM*AEGIIHDTE.T                    | NA          | 2 | 2,5618 | 0,26  | 0,172  |
| 7 | Q15003 CND2_HUMAN  | E.GTEDLSVDLVRQGD.-                    | NA          | 2 | 2,5604 | 0,24  | -0,406 |
| 7 | Q9BRS8 LARP6_HUMAN | E.EGRINCSTS#PE.I                      | S409        | 2 | 2,5602 | 0,33  | 0      |
| 7 | O94826 TOM70_HUMAN | E.GYALYAQALTDQQQFGKADE.M              | NA          | 3 | 2,5587 | 0,169 | 0,413  |
| 7 | Q96QE3 ATAD5_HUMAN | E.DSVIIIDSS#PTALKHPE.K                | S756        | 3 | 2,5578 | 0,178 | 0,289  |
| 7 | P27987 IP3KB_HUMAN | E.KGIPAS#PRCGS#PTAME.I                | S264:S269   | 2 | 2,5561 | 0,324 | 0,335  |
| 7 | Q58FF7 H90B3_HUMAN | E.YCVQQLKE.F                          | NA          | 2 | 2,5548 | 0,168 | 0,228  |
| 7 | P78371 TCPB_HUMAN  | E.ACTIVLRGATQQILDEAE.R                | NA          | 2 | 2,5531 | 0,295 | 0,123  |
| 7 | Q9UQ35 SRRM2_HUMAN | E.LSNS#PLRE.N                         | S1320       | 2 | 2,5514 | 0,228 | -0,061 |
| 7 | P52701 M5H6_HUMAN  | E.DLMVVPDKISE.V                       | NA          | 2 | 2,5459 | 0,216 | -0,098 |
| 7 | P08107 HSP71_HUMAN | R.LIGDAAKNQVALNPQNTVFD.A              | NA          | 3 | 2,5413 | 0,237 | 0,258  |
| 7 | Q14157 UBP2L_HUMAN | E.GATGSVAKSDSPSTSSIPPLNE.T            | NA          | 2 | 2,54   | 0,272 | 0,348  |
| 7 | Q9HCP0 KC1G1_HUMAN | E.LNVDDPT#GAHSNAPITAHAE.V             | T384        | 3 | 2,5356 | 0,113 | 0,173  |
| 7 | Q5T1M5 FKB15_HUMAN | E.QSASASSGQPQAPLNRERPES#PMVPSEQVVEE.A | S979        | 3 | 2,5344 | 0,11  | 0,732  |
| 7 | Q9BVS4 RIOK2_HUMAN | E.KAEVYGS#ENESE.R                     | S350        | 2 | 2,5341 | 0,375 | -0,172 |

|   |                     |                          |           |   |        |       |        |
|---|---------------------|--------------------------|-----------|---|--------|-------|--------|
| 7 | Q9UBU7 DBF4A_HUMAN  | E.AKFAQTLGRIS#PVPS#PE.S  | S103:S107 | 2 | 2,5333 | 0,106 | 0,561  |
| 7 | Q9HB07 MYG1_HUMAN   | E.DSM*VGTLYDKM*YE.N      | NA        | 2 | 2,5328 | 0,205 | 0,231  |
| 7 | P09874 PARP1_HUMAN  | E.YS#ASQLKGFSLLATEDKE.A  | S177      | 3 | 2,5297 | 0,146 | 0,266  |
| 7 | P50402 EMD_HUMAN    | E.DALLYQSKGYNDYYEE.S     | NA        | 3 | 2,5257 | 0,219 | 0,351  |
| 7 | Q06830 PRDX1_HUMAN  | D.YGVLKADE.G             | NA        | 2 | 2,5247 | 0,117 | 0      |
| 7 | P27987 IP3KB_HUMAN  | E.RQGQFLGSETS#PAPE.R     | S355      | 2 | 2,5222 | 0,303 | 0,942  |
| 7 | P04792 HSPB1_HUMAN  | E.GTLTVEAPMPKLATQSNE.I   | NA        | 3 | 2,5219 | 0,214 | 0,485  |
| 7 | Q96I24 FUBP3_HUMAN  | E.LVQGGQAPVGM*KAE.G      | NA        | 2 | 2,5115 | 0,371 | 0      |
| 7 | P51114 FXR1_HUMAN   | E.NGLVTVADYISRAE.S       | NA        | 2 | 2,5096 | 0,447 | 0      |
| 7 | P78371 TCPB_HUMAN   | E.ACTIVLRGATQQILDE.A     | NA        | 2 | 2,504  | 0,232 | 0,068  |
| 7 | Q86UP2 KTN1_HUMAN   | E.ALCVVDLLKE.K           | NA        | 2 | 2,4952 | 0,316 | -0,105 |
| 7 | P14406 CX7A2_HUMAN  | E.DDEIPLYLKGGVAD.A       | NA        | 2 | 2,4915 | 0,318 | 0,243  |
| 7 | Q16543 CDC37_HUMAN  | D.HIEVS#DDEDE.T          | S13       | 2 | 2,4906 | 0,173 | 0,385  |
| 7 | Q13404 UB2V1_HUMAN  | E.NM*KLPQPPEGQCY#SN.-    | Y219      | 2 | 2,4896 | 0,146 | 0,131  |
| 7 | P52272 HNRPM_HUMAN  | R.MGLAM*GGGGGASFDRAIE.M  | NA        | 2 | 2,4764 | 0,229 | 0,285  |
| 7 | Q86VP6 CAND1_HUMAN  | E.SIQKDSSTNLESM*DTS#.-   | S1230     | 2 | 2,4741 | 0,382 | 0,38   |
| 7 | Q9C0C2 TB182_HUMAN  | E.RQQAGAQQPGS#ADLE.D     | S1073     | 2 | 2,4704 | 0,313 | 0,468  |
| 7 | O95125 ZN202_HUMAN  | E.DDFTCRPES#VLQRDDPVLE.T | S33       | 2 | 2,4692 | 0,412 | 0,103  |
| 7 | P25205 MCM3_HUMAN   | E.AGAM*VLADRGVVCIDE.F    | NA        | 2 | 2,4666 | 0,198 | 0,072  |
| 7 | Q68D38 Q68D38_HUMAN | E.SNEDISTTVVYRM*E.S      | NA        | 2 | 2,4531 | 0,357 | 0,073  |
| 7 | O94842 TOX4_HUMAN   | E.AHTVEAPS#PE.T          | S533      | 2 | 2,4495 | 0,241 | 0      |
| 7 | Q02952 AKA12_HUMAN  | E.HTQVPADS#PDSQEE.Q      | S554      | 2 | 2,4481 | 0,303 | 0,075  |
| 7 | Q9BVS4 RIOK2_HUMAN  | E.KAEVYGS#ENE.S          | S350      | 2 | 2,4415 | 0,256 | 0,101  |
| 7 | Q96FW1 OTUB1_HUMAN  | E.IAVQNPLVSRLE.L         | NA        | 2 | 2,4346 | 0,397 | 0,166  |
| 7 | P14314 GLU2B_HUMAN  | E.LQTHPELDTDGDGALSEAE.A  | NA        | 2 | 2,4339 | 0,315 | 0,244  |
| 7 | P52732 KIF11_HUMAN  | E.NRGINT#LE.R            | T1029     | 2 | 2,4322 | 0,148 | 0,184  |
| 7 | Q9HBW0 LPAR2_HUMAN  | E.NGHPLMDST#L.-          | T350      | 2 | 2,4271 | 0,397 | 0      |
| 7 | Q9NZ53 PDXL2_HUMAN  | E.NGCHDNPTLDVASDSQS#E.M  | S562      | 2 | 2,4255 | 0,359 | 0,181  |
| 7 | Q12756 KIF1A_HUMAN  | E.SHGSSASS#PLSAE.G       | S1430     | 2 | 2,4255 | 0,368 | 0,088  |
| 7 | Q8NCA5 FA98A_HUMAN  | E.SLEDLGYKGPLLE.D        | NA        | 2 | 2,4252 | 0,273 | 0,255  |
| 7 | O60271 JIP4_HUMAN   | E.DLPLEPSVTKAE.R         | NA        | 2 | 2,4223 | 0,414 | 0      |
| 7 | Q13428 TCOF_HUMAN   | E.AQVQASVVKVLTE.L        | NA        | 2 | 2,4205 | 0,338 | 0      |
| 7 | Q9NYU2 UGGG1_HUMAN  | E.LFNQDDFHLE.N           | NA        | 2 | 2,4194 | 0,197 | -0,175 |
| 7 | P27816 MAP4_HUMAN   | E.KVALSS#ETE.V           | S440      | 2 | 2,4181 | 0,225 | -0,234 |
| 7 | Q86Y82 STX12_HUMAN  | E.ADILDVNQIFKD.L         | NA        | 2 | 2,4178 | 0,307 | -0,263 |
| 7 | P31689 DNJA1_HUMAN  | E.TTYYDVLGVKPNATQEE.L    | NA        | 2 | 2,4176 | 0,35  | 0,253  |
| 7 | P45974 UBP5_HUMAN   | E.DVKIVILPDYLE.I         | NA        | 2 | 2,4086 | 0,277 | -0,344 |
| 7 | O00487 PSDE_HUMAN   | E.AVDVPVFAQKM*LD.M       | NA        | 2 | 2,406  | 0,221 | 0,362  |
| 7 | Q96JM3 ZN828_HUMAN  | E.IRSPAGS#PE.L           | S436      | 2 | 2,4017 | 0,183 | 0,061  |
| 7 | P55196 AFAD_HUMAN   | R.DLQYITVSKEE.L          | NA        | 2 | 2,4016 | 0,145 | 0,552  |
| 7 | O76003 GLRX3_HUMAN  | E.LPQVSFVKLE.A           | NA        | 2 | 2,4001 | 0,149 | 0,105  |

|   |                    |                              |                |   |        |       |        |
|---|--------------------|------------------------------|----------------|---|--------|-------|--------|
| 7 | Q02952 AKA12_HUMAN | E.KAPQVTES#IE.S              | S1129          | 2 | 2,3955 | 0,296 | 0,206  |
| 7 | P07195 LDHB_HUMAN  | E.KLIAPVAEEE.A               | NA             | 2 | 2,3948 | 0,214 | 0      |
| 7 | P52272 HNRPM_HUMAN | R.M*GPLGLDHMASSIE.R          | NA             | 2 | 2,3916 | 0,308 | 0,497  |
| 7 | Q9NWU1 OXSM_HUMAN  | E.ISYINAHATSTPLGDAAE.N       | NA             | 2 | 2,3916 | 0,237 | 0      |
| 7 | O75509 TNR21_HUMAN | E.NSALLTVEPS#PQDKNKGFVDE.S   | S541           | 2 | 2,3908 | 0,115 | 0,194  |
| 7 | Q14204 DYHC1_HUMAN | E.DNSVVLGISSREGEE.V          | NA             | 2 | 2,3885 | 0,286 | 0,383  |
| 7 | Q96Q42 ALS2_HUMAN  | E.NHASTALS#PSTE.T            | S277           | 2 | 2,3879 | 0,21  | 0,094  |
| 7 | Q96BK5 PINX1_HUMAN | K.KTPEGDASPST#PEENE.T        | T164           | 2 | 2,387  | 0,391 | 0,069  |
| 7 | P07951 TPM2_HUMAN  | E.NAIDRAEQAE.A               | NA             | 2 | 2,3858 | 0,204 | 0      |
| 7 | O43447 PPIH_HUMAN  | E.LFADVVPKTAE.N              | NA             | 2 | 2,3854 | 0,272 | 0,205  |
| 7 | O75531 BAF_HUMAN   | E.KPVGSLAGIGE.V              | NA             | 2 | 2,3851 | 0,275 | 0      |
| 7 | O95777 LSM8_HUMAN  | E.RVFSSS#QGVE.Q              | S49            | 2 | 2,3827 | 0,319 | 0      |
| 7 | Q96RV3 PCX1_HUMAN  | E.SSKPLSGS#KES#LVE.N         | S325:S328      | 2 | 2,3789 | 0,346 | 0,076  |
| 7 | Q02952 AKA12_HUMAN | E.QVSGSQGPSEEKPAPLATE.V      | NA             | 2 | 2,3787 | 0,328 | 0,064  |
| 7 | Q92628 K0232_HUMAN | E.GIASFS#PSFKPKSILCSDSDSE.V  | S1067          | 2 | 2,3763 | 0,222 | 0,2    |
| 7 | Q16851 UGPA_HUMAN  | E.SLLPVAKDVSYSGENTE.A        | NA             | 2 | 2,3717 | 0,273 | 0,337  |
| 7 | P68104 EF1A1_HUMAN | K.IGGIGTVPVGR.V              | NA             | 2 | 2,3712 | 0,283 | 0,238  |
| 7 | Q6PKG0 LARP1_HUMAN | E.T#ESAPGS#PRAVT#PVPKTEE.V   | T515:S521:T526 | 2 | 2,3711 | 0,295 | 0,213  |
| 7 | Q9NTK5 OLA1_HUMAN  | E.MIGPIIDKLE.K               | NA             | 2 | 2,3664 | 0,101 | 0      |
| 7 | Q06265 EXOS9_HUMAN | E.KAPIDTS#DVEE.K             | S306           | 2 | 2,3638 | 0,226 | -0,095 |
| 7 | Q13029 PRDM2_HUMAN | E.KASQDTINSS#VVEE.N          | S471           | 2 | 2,3602 | 0,188 | 0,308  |
| 7 | P45880 VDAC2_HUMAN | E.DQICQGLKLTFD.T             | NA             | 2 | 2,3563 | 0,262 | 0      |
| 7 | Q53H82 LACB2_HUMAN | E.DLYDYMNSLKE.L              | NA             | 2 | 2,3561 | 0,384 | -0,088 |
| 7 | Q9BYT8 NEUL_HUMAN  | E.DDTFLVFSKAE.L              | NA             | 2 | 2,3512 | 0,094 | 0,096  |
| 7 | P29374 ARI4A_HUMAN | E.SRS#VKS#ESDITIE.V          | S1018:S1021    | 2 | 2,347  | 0,133 | 0,303  |
| 7 | Q14789 G0GB1_HUMAN | E.DVSYLSGQLSEKE.A            | NA             | 2 | 2,3434 | 0,299 | 0,503  |
| 7 | P18583 SON_HUMAN   | E.M*EHNTVCAAGTS#PVGE.I       | S1556          | 2 | 2,3357 | 0,284 | -1,181 |
| 7 | P40222 TXLNA_HUMAN | E.AGPEGAQERPSQAAPAVE.A       | NA             | 2 | 2,3344 | 0,37  | 0,138  |
| 7 | O75940 SPF30_HUMAN | E.VTPLLNLKPVEE.G             | NA             | 2 | 2,3335 | 0,277 | 0,09   |
| 7 | O95352 ATG7_HUMAN  | E.DLTGLTLLHQE.T              | NA             | 2 | 2,3276 | 0,337 | 0,295  |
| 7 | Q9UHD8 SEPT9_HUMAN | E.M*IPFAVVGSDHE.Y            | NA             | 2 | 2,3264 | 0,31  | 0,463  |
| 7 | Q8TEQ0 SNX29_HUMAN | E.TRNVEPQS#GDL.-             | S425           | 2 | 2,3171 | 0,274 | 0,094  |
| 7 | P52272 HNRPM_HUMAN | R.M*GPLGLDHMASSIE.R          | NA             | 2 | 2,3168 | 0,12  | 0,246  |
| 7 | Q96G28 CC104_HUMAN | E.ACT#SPLAKTHTSQAILQPVLAAE.D | T84            | 2 | 2,3164 | 0,111 | 0,589  |
| 7 | P28072 PSB6_HUMAN  | R.DGS#SGGVIRLAAIAE.S         | S203           | 2 | 2,3135 | 0,315 | 0,082  |
| 7 | Q14247 SRC8_HUMAN  | E.EQARAKTQT#PPVS#PAPQPTTEE.R | T401:S405      | 2 | 2,3116 | 0,41  | 0,202  |
| 7 | O43252 PAPS1_HUMAN | E.VFVDAPLHVCE.Q              | NA             | 2 | 2,3089 | 0,268 | 0,095  |
| 7 | P28072 PSB6_HUMAN  | R.DGSSGGVIRLAAIAE.S          | NA             | 2 | 2,3083 | 0,306 | 0,603  |
| 7 | P31930 QCR1_HUMAN  | E.TQVSLLDNGLRVASE.Q          | NA             | 2 | 2,3076 | 0,197 | 0,381  |
| 7 | Q8N2Y8 RUSC2_HUMAN | E.REGPAAS#PAENEE.G           | S1368          | 2 | 2,3066 | 0,274 | -0,085 |
| 7 | Q9Y6A5 TACC3_HUMAN | E.NQM*VSPGKVSQSPEQAVEE.N     | NA             | 2 | 2,3064 | 0,25  | 0,123  |



|   |                    |                            |             |   |        |       |        |
|---|--------------------|----------------------------|-------------|---|--------|-------|--------|
| 7 | Q9Y266 NUDC_HUMAN  | R.FDGM*LLAM*AQQHE.G        | NA          | 2 | 2,3038 | 0,172 | -0,32  |
| 7 | Q99666 RGPD5_HUMAN | E.TTTKAVVS#PPKFVSE.S       | S1534       | 2 | 2,3037 | 0,205 | 0,255  |
| 7 | Q9NWS0 PIHD1_HUMAN | E.LGDLYTPAPGRAE.S          | NA          | 2 | 2,3005 | 0,365 | -0,269 |
| 7 | Q8NI08 NCOA7_HUMAN | E.VDKQS#GS#PESRVE.N        | S500:S502   | 2 | 2,3004 | 0,258 | 0,155  |
| 7 | Q96Q15 SMG1_HUMAN  | E.LRVNNVTS#PE.F            | S111        | 2 | 2,3002 | 0,129 | 0,101  |
| 7 | Q6NZI2 PTRF_HUMAN  | E.SDAVLVDKS#D.S            | S387        | 2 | 2,2992 | 0,215 | -0,108 |
| 7 | Q3MIN7 RGL3_HUMAN  | E.GTRNTLSVS#PS.-           | S708        | 2 | 2,298  | 0,194 | 0,102  |
| 7 | P20839 IMDH1_HUMAN | E.LVVAPAGVTLKE.A           | NA          | 2 | 2,2943 | 0,306 | 0,51   |
| 7 | Q9HCS7 SYF1_HUMAN  | E.DNGQLDDARVILE.K          | NA          | 2 | 2,2819 | 0,163 | 0,502  |
| 7 | P67809 YBOX1_HUMAN | E.TKAADPPAENSS#APEAE.Q     | S314        | 2 | 2,2789 | 0,11  | -0,069 |
| 7 | Q9Y4P1 ATG4B_HUMAN | E.RFFDS#EDE.D              | S383        | 2 | 2,2774 | 0,355 | 0,108  |
| 7 | Q9P0V9 SEP10_HUMAN | E.M*LICTNM*EDLRE.Q         | NA          | 2 | 2,2728 | 0,168 | 0,392  |
| 7 | P60709 ACTB_HUMAN  | R.GYSFTTTAERE.I            | NA          | 2 | 2,2716 | 0,496 | 0,097  |
| 7 | Q9Y6Y8 S23IP_HUMAN | E.SLLM*CTVDDLKE.M          | NA          | 2 | 2,2716 | 0,133 | 0,339  |
| 7 | Q2TAL8 QRIC1_HUMAN | E.FLDSLASKGPEALQE.F        | NA          | 2 | 2,2705 | 0,177 | 0,836  |
| 7 | P56537 IF6_HUMAN   | E.EILADVLKVE.V             | NA          | 2 | 2,2692 | 0,243 | -0,108 |
| 7 | Q7Z5J4 RAI1_HUMAN  | E.EVGGVKEE.A               | NA          | 2 | 2,2657 | 0,098 | 0,216  |
| 7 | Q02952 AKA12_HUMAN | E.ARGDTVVS#EAE.L           | S967        | 2 | 2,265  | 0,189 | 0,101  |
| 7 | P25705 ATPA_HUMAN  | R.AAKM*NDAFGGGSLTALPVIE.T  | NA          | 2 | 2,2628 | 0,238 | -0,185 |
| 7 | Q9Y4B5 K0802_HUMAN | E.TGTNS#RGRSPS#PIGVGSE.M   | S1799:S1805 | 2 | 2,259  | 0,172 | 0      |
| 7 | Q9Y2K1 ZBTB1_HUMAN | E.NM*RPPNNS#PVQE.D         | S412        | 2 | 2,254  | 0,124 | -0,156 |
| 7 | P11142 HSP7C_HUMAN | E.TKSFYPEE.V               | NA          | 2 | 2,2524 | 0,222 | -0,122 |
| 7 | Q32MZ4 LRRF1_HUMAN | E.HESPSQDIS#DACEAE.S       | S739        | 2 | 2,2498 | 0,35  | 0      |
| 7 | Q71U36 TBA1A_HUMAN | E.HSDCAFM*VDNE.A           | NA          | 2 | 2,238  | 0,084 | 0,182  |
| 7 | Q13573 SNW1_HUMAN  | E.VM*NADDPDLQRPDEE.A       | NA          | 2 | 2,2352 | 0,316 | 0,139  |
| 7 | Q96T60 PNKP_HUMAN  | E.SRALLSAS#PE.V            | S364        | 2 | 2,2333 | 0,153 | 0,11   |
| 7 | P52701 MSH6_HUMAN  | E.DLM*VVPDKISE.V           | NA          | 2 | 2,2302 | 0,305 | 0,097  |
| 7 | P30153 2AAA_HUMAN  | E.NVIM*SQILPCIKE.L         | NA          | 2 | 2,23   | 0,187 | 0,234  |
| 7 | Q5T200 ZC3HD_HUMAN | E.SRS#LS#PSHLTE.D          | S875:S877   | 2 | 2,2291 | 0,2   | 0,178  |
| 7 | P18583 SON_HUMAN   | E.SDSFLKFDSEPSVALE.L       | NA          | 2 | 2,2274 | 0,372 | -0,265 |
| 7 | Q9Y490 TLN1_HUMAN  | E.FGDAISTASKALCGFTE.A      | NA          | 2 | 2,2267 | 0,36  | 0      |
| 7 | O75955 FLOT1_HUMAN | E.VLDILTRLPE.S             | NA          | 2 | 2,2214 | 0,273 | -0,209 |
| 7 | Q9UKJ3 GPTC8_HUMAN | E.SGLERGEEQEQS#E.T         | S762        | 2 | 2,2175 | 0,145 | -0,078 |
| 7 | P17812 PYRG1_HUMAN | E.NFCNIHVSLVPQPSSTGE.Q     | NA          | 2 | 2,217  | 0,234 | 0,614  |
| 7 | O15514 RPB4_HUMAN  | E.DASQLIFPKEFE.T           | NA          | 2 | 2,2134 | 0,336 | -0,257 |
| 7 | O96028 NSD2_HUMAN  | E.M*KGIGTPPNT#TPIKNGS#PE.I | T114:S121   | 2 | 2,2107 | 0,35  | 0,462  |
| 7 | O95865 DDAH2_HUMAN | E.ALQKLSDVTLVPVSCSE.L      | NA          | 2 | 2,2106 | 0,259 | 0,463  |
| 7 | A6NDU8 U600_HUMAN  | E.LGDLAQAHIQQLSE.A         | NA          | 2 | 2,2091 | 0,213 | 0,401  |
| 7 | Q9Y490 TLN1_HUMAN  | D.TASDVLDKASSLIEE.A        | NA          | 2 | 2,2072 | 0,271 | -0,155 |
| 7 | P52272 HNRPM_HUMAN | R.MGPLGLDHM*ASSIE.R        | NA          | 2 | 2,2019 | 0,199 | 0,083  |
| 7 | Q15149 PLEC1_HUMAN | E.QIQAMPLADSQAVRE.Q        | NA          | 2 | 2,1869 | 0,222 | 0,295  |

|   |                       |                              |           |   |        |       |        |
|---|-----------------------|------------------------------|-----------|---|--------|-------|--------|
| 7 | Q9NTK5 OLA1_HUMAN     | E.M*IGPIIDKLE.K              | NA        | 2 | 2,1821 | 0,25  | -0,107 |
| 7 | Q86TC9 MYPN_HUMAN     | E.RTPVDES#DDE.I              | S928      | 2 | 2,1745 | 0,317 | 0      |
| 7 | P49327 FAS_HUMAN      | E.VVIAGM*SGKLP.E.S           | NA        | 2 | 2,1739 | 0,327 | 0,1    |
| 7 | O95433 AHSA1_HUMAN    | E.LVQAFTHAPATLE.A            | NA        | 2 | 2,1728 | 0,314 | 0,873  |
| 7 | P60174 TPIS_HUMAN     | E.GLGVACIGEKLE.R             | NA        | 2 | 2,1692 | 0,294 | -0,248 |
| 7 | Q58FF7 H90B3_HUMAN    | E.DLPLNISRE.M                | NA        | 2 | 2,1684 | 0,18  | 0,115  |
| 7 | P62191 PRS4_HUMAN     | E.SVELPLTHPEYEE.M            | NA        | 2 | 2,1677 | 0,38  | 0,072  |
| 7 | Q6PKG0 LARP1_HUMAN    | E.TES#APGS#PRAVTPVPTKTEE.V   | S517:S521 | 2 | 2,1664 | 0,162 | 0,331  |
| 7 | Q15293 RCN1_HUMAN     | E.FTAFHPEEFE.H               | NA        | 2 | 2,1598 | 0,26  | -0,179 |
| 7 | P31946 1433B_HUMAN    | E.LLDKYLIPNATQPE.S           | NA        | 2 | 2,159  | 0,232 | -0,076 |
| 7 | Q9BYK8 PR285_HUMAN    | E.DGLLDTVARPE.S              | NA        | 2 | 2,1549 | 0,341 | 0      |
| 7 | P14618 KPYM_HUMAN     | R.GIFPVLCCKDPVQE.A           | NA        | 2 | 2,149  | 0,235 | 0,162  |
| 7 | Q15942 ZYG_HUMAN      | E.GGPEAPIPPPPQPREKVS#SIDLE.I | S142      | 2 | 2,1456 | 0,206 | 0,588  |
| 7 | P62753 RS6_HUMAN      | R.LS#SLRASTS#KSE.S           | S235:S242 | 2 | 2,1417 | 0,235 | -0,171 |
| 7 | P08238 HS90B_HUMAN    | E.TQKSIYYITGE.S              | NA        | 2 | 2,1363 | 0,207 | 0,187  |
| 7 | P38919 IF4A3_HUMAN    | E.VDVPTPTFDTMGLRE.D          | NA        | 2 | 2,131  | 0,409 | 0,463  |
| 7 | P52272 HNRPM_HUMAN    | R.MGLAMGGGGGASFDR.AIE.M      | NA        | 2 | 2,1172 | 0,19  | 0,359  |
| 7 | Q13895 BYST_HUMAN     | E.VVVDPEDE.AIE.M             | NA        | 2 | 2,1    | 0,281 | 0      |
| 7 | Q96BH1 RNF25_HUMAN    | D.LASLKAPEPQQPM*E.L          | NA        | 2 | 2,0999 | 0,265 | 0,375  |
| 7 | Q9HBW0 LPAR2_HUMAN    | E.NGHPLM*DST#L.-             | T350      | 2 | 2,0929 | 0,406 | 0      |
| 7 | Q5QJE6 TDIF2_HUMAN    | E.SHTEAIS#DAE.T              | S184      | 2 | 2,0919 | 0,329 | 0      |
| 7 | Q9UNX4 WDR3_HUMAN     | E.KLILTLT#.-                 | T943      | 2 | 2,0914 | 0,301 | 0,138  |
| 7 | Q15154 PCM1_HUMAN     | E.DLPLKLIYSE.A               | NA        | 2 | 2,0872 | 0,231 | -0,094 |
| 7 | ##Q9BYA1 Q9BYA1_HUMAN | -.KLTM*LRKGSS#R.Y            | S10       | 2 | 2,0819 | 0,152 | -1,599 |
| 7 | P49327 FAS_HUMAN      | E.VVIAGMSGKLP.E.S            | NA        | 2 | 2,0789 | 0,272 | 0,203  |
| 7 | Q6IA69 NADE1_HUMAN    | E.RAEPQS#LDGVD.-             | S701      | 2 | 2,0782 | 0,465 | 0,096  |
| 7 | Q9H307 PININ_HUMAN    | E.TNRVESVEPS#ENE.A           | S417      | 2 | 2,0722 | 0,189 | 0,311  |
| 7 | Q14839 CHD4_HUMAN     | E.YLDATGGTLHPYQM*E.G         | NA        | 2 | 2,067  | 0,118 | 1,639  |
| 7 | Q6S8J3 A26CA_HUMAN    | E.M*ATAASSSSLEKSYELPD.G      | NA        | 2 | 2,0625 | 0,164 | 0,449  |
| 7 | P11142 HSP7C_HUMAN    | E.LNADLFRGTLDPVE.K           | NA        | 2 | 2,0556 | 0,216 | 0      |
| 7 | Q9NR46 SHLB2_HUMAN    | E.VLLQPNPSARVEE.F            | NA        | 2 | 2,0516 | 0,213 | 0,252  |
| 7 | Q8N954 CCD75_HUMAN    | E.DLSSNCPGPTSADHD.-          | NA        | 2 | 2,0481 | 0,293 | -0,621 |
| 7 | P35221 CTNA1_HUMAN    | E.MDNYEPGVYTEKVL.E.A         | NA        | 2 | 2,0422 | 0,237 | 0,137  |
| 7 | P60174 TPIS_HUMAN     | E.FVDIINAKQ.-                | NA        | 2 | 2,0339 | 0,154 | 0      |
| 7 | P55072 TERA_HUMAN     | E.LVQYPVEHPD.K               | NA        | 2 | 2,0331 | 0,291 | 0      |
| 7 | P62191 PRS4_HUMAN     | E.SVELPLTHPE.Y               | NA        | 2 | 2,0305 | 0,325 | 0      |
| 7 | P07814 SYEP_HUMAN     | E.LAEPIAIRPTS#E.T            | S1122     | 2 | 2,0241 | 0,185 | -0,354 |
| 7 | P35998 PRS7_HUMAN     | E.VVETPLLHPE.R               | NA        | 2 | 2,0237 | 0,192 | 0,215  |
| 7 | P20700 LMNB1_HUMAN    | R.LKLS#PS#PSSR.V             | S391:S393 | 2 | 2,0174 | 0,081 | -0,099 |
| 7 | P56537 IF6_HUMAN      | E.AQPSTIATSM*RDSLIDSLT.-     | NA        | 2 | 2,0165 | 0,105 | 0,362  |
| 7 | P61160 ARP2_HUMAN     | E.ALFPHLINVE.G               | NA        | 2 | 2,0121 | 0,271 | -0,19  |

|   |                    |                              |           |   |        |       |        |
|---|--------------------|------------------------------|-----------|---|--------|-------|--------|
| 7 | Q9Y2W1 TR150_HUMAN | E.KDNIQPTT#E.-               | T954      | 2 | 2,012  | 0,144 | -0,108 |
| 7 | P55072 TERA_HUMAN  | E.DNSVVSLSQPKMD.E            | NA        | 2 | 2,0109 | 0,374 | 0,258  |
| 7 | P60709 ACTB_HUMAN  | E.TTFNSIM*KCD.V              | NA        | 2 | 2,0009 | 0,086 | 0      |
| 7 | P05787 K2C8_HUMAN  | E.VDPNIQAVRTQE.K             | NA        | 2 | 1,9989 | 0,418 | -0,089 |
| 7 | Q4G0J3 LARP7_HUMAN | E.NRDIEIST#EE.E              | T338      | 2 | 1,986  | 0,231 | -0,19  |
| 7 | Q08379 GOGA2_HUMAN | E.VSLAGSVEPAQGEARE.G         | NA        | 2 | 1,9796 | 0,293 | 0,381  |
| 7 | Q9NYP9 CU045_HUMAN | E.AESKLS#FATCKS#.-           | S227:S233 | 2 | 1,9776 | 0,212 | -0,164 |
| 7 | Q9NNW7 TRXR2_HUMAN | E.ATSVPHIYAIGDVVE.G          | NA        | 2 | 1,9774 | 0,242 | 0,466  |
| 7 | P04075 ALDOA_HUMAN | E.NANVLARYASICQQNGIVPIVEPE.I | NA        | 2 | 1,9725 | 0,341 | 0,092  |
| 7 | Q9BQG0 MBB1A_HUMAN | E.SRDPAQPM*S#PGE.A           | S11       | 2 | 1,9623 | 0,173 | -0,089 |
| 7 | P36776 LONM_HUMAN  | D.IIALNPLYRE.S               | NA        | 2 | 1,9483 | 0,236 | 0,304  |
| 7 | Q9Y6Y8 S23IP_HUMAN | E.DTALLLKE.I                 | NA        | 2 | 1,9373 | 0,187 | 0,06   |
| 7 | Q71U36 TBA1A_HUMAN | E.HSDCAFMDVNE.A              | NA        | 2 | 1,9349 | 0,081 | 0,184  |
| 7 | P55072 TERA_HUMAN  | D.NSVVVSLSQPKM*DE.L          | NA        | 2 | 1,9348 | 0,128 | 0,168  |
| 7 | Q9BYG5 PAR6B_HUMAN | E.DNGVPPQIPKAVPNT.E.S        | NA        | 2 | 1,9338 | 0,161 | 0,214  |
| 7 | Q8NB90 SPAT5_HUMAN | E.IIELPLKQPE.L               | NA        | 2 | 1,9267 | 0,091 | 0,103  |
| 7 | O00566 MPP10_HUMAN | D.AALLAPEEIKE.K              | NA        | 2 | 1,9267 | 0,191 | 0,103  |
| 7 | Q6Y7W6 PERQ2_HUMAN | E.FIRSES#E.N                 | S201      | 2 | 1,9246 | 0,1   | 0,064  |
| 7 | Q9H5H4 ZN768_HUMAN | E.SRSPGLVPPS#PE.F            | S97       | 2 | 1,9213 | 0,164 | 0      |
| 7 | P51858 HDGF_HUMAN  | E.TAFLGPKDLFPYEE.S           | NA        | 2 | 1,9167 | 0,112 | -0,15  |
| 7 | Q96SB3 NEB2_HUMAN  | E.LFPVELEKDSE.G              | NA        | 2 | 1,9157 | 0,17  | 0      |
| 7 | O95235 KI20A_HUMAN | E.HSLQVS#PSLE.K              | S532      | 2 | 1,9136 | 0,117 | 0      |
| 7 | P04792 HSPB1_HUMAN | R.ALSRQLS#SGVSE.I            | S82       | 2 | 1,9042 | 0,113 | 0      |
| 7 | O14939 PLD2_HUMAN  | E.DESLLPPLGSKE.G             | NA        | 2 | 1,9015 | 0,182 | -0,095 |
| 7 | P49366 DHYS_HUMAN  | E.DLIKCLAPTYLGE.F            | NA        | 2 | 1,8995 | 0,359 | 0,163  |
| 7 | P09960 LKHA4_HUMAN | E.DAIPLALKM*ATE.Q            | NA        | 2 | 1,889  | 0,308 | 0,189  |
| 7 | Q02952 AKA12_HUMAN | E.TLEPAGAHVLVE.E             | NA        | 2 | 1,8862 | 0,127 | 0,098  |
| 7 | Q6ZMI0 CC128_HUMAN | E.DQLSM*M*SDHLCSM*NE.T       | NA        | 2 | 1,8859 | 0,263 | 0,198  |
| 7 | P04406 G3P_HUMAN   | E.FGYSNRVVD.L                | NA        | 2 | 1,8796 | 0,287 | 0      |
| 7 | P30153 2AAA_HUMAN  | E.NVIMSQILPCIKE.L            | NA        | 2 | 1,8776 | 0,12  | -0,079 |
| 7 | P02545 LMNA_HUMAN  | R.LRLS#PSPTS#QR.S            | S390:S395 | 2 | 1,8761 | 0,237 | 0,261  |
| 7 | Q9UHD8 SEPT9_HUMAN | E.MIPFAVVGSDHE.Y             | NA        | 2 | 1,8758 | 0,15  | 0,375  |
| 7 | Q9NX46 ARHL2_HUMAN | E.LLDQASVTREEVSE.L           | NA        | 2 | 1,873  | 0,105 | 0,437  |
| 7 | P05198 IF2A_HUMAN  | E.DVVM*VNVRSIAE.M            | NA        | 2 | 1,8637 | 0,229 | 0,272  |
| 7 | P17812 PYRG1_HUMAN | D.VSSIYRVPLLEE.Q             | NA        | 2 | 1,8623 | 0,249 | -0,482 |
| 7 | Q14980 NUMA1_HUMAN | E.AATLAANNTQLQARVE.M         | NA        | 2 | 1,8599 | 0,148 | 0,511  |
| 7 | Q13367 AP3B2_HUMAN | E.KAFY#GSEEDE.A              | Y270      | 2 | 1,8488 | 0,16  | 0,097  |
| 7 | Q9UHA4 MK1I1_HUMAN | E.LRQVVEVS#.-                | S124      | 2 | 1,8442 | 0,157 | 0,06   |
| 7 | P11586 C1TC_HUMAN  | E.DSTVHGFVLQPLDSE.N          | NA        | 2 | 1,8436 | 0,25  | -0,278 |
| 7 | Q9Y2K1 ZBTB1_HUMAN | E.NMRPPNNS#SPVQE.D           | S411      | 2 | 1,8322 | 0,117 | 0,63   |
| 7 | Q02952 AKA12_HUMAN | E.HTQVPADSPDS#QEE.Q          | S557      | 2 | 1,8297 | 0,254 | 0      |

|   |                    |                                      |             |   |        |       |        |
|---|--------------------|--------------------------------------|-------------|---|--------|-------|--------|
| 7 | Q9BZF3 OSBL6_HUMAN | E.SRLSM*SES#VSE.F                    | S491        | 2 | 1,8287 | 0,199 | 0      |
| 7 | O43678 NDUA2_HUMAN | E.TNVPLNDFSADQVTRALE.N               | NA          | 2 | 1,8203 | 0,081 | 0,491  |
| 7 | P08559 ODPA_HUMAN  | E.EGPPVTTVLTRE.D                     | NA          | 2 | 1,8154 | 0,245 | 0      |
| 7 | Q86TC9 MYPN_HUMAN  | R.SSVPIPIPADTRDNE.V                  | NA          | 2 | 1,8139 | 0,189 | 0,454  |
| 7 | Q9UBG0 MRC2_HUMAN  | E.GARYS#RSSS#SPTEATE.K               | S1453:S1457 | 2 | 1,8085 | 0,192 | 0,066  |
| 7 | Q9HCS7 SYF1_HUMAN  | E.QQSVPAAVFGSLKED.-                  | NA          | 2 | 1,8063 | 0,284 | 0,387  |
| 7 | Q92974 ARHG2_HUMAN | E.ARTFNGS#IE.L                       | S710        | 2 | 1,7971 | 0,321 | 0      |
| 7 | P62805 H4_HUMAN    | K.TVTAM*DVVYALK.R                    | NA          | 2 | 1,796  | 0,177 | 0,46   |
| 7 | Q9Y508 ZN313_HUMAN | E.DMMNQVLQRSIIDQ.-                   | NA          | 2 | 1,7739 | 0,083 | -0,216 |
| 7 | P45974 UBP5_HUMAN  | E.GRSAADS#ISE.S                      | S783        | 2 | 1,772  | 0,193 | 0      |
| 7 | O60832 DKC1_HUMAN  | K.AKEVELVS#E.-                       | S513        | 2 | 1,7576 | 0,081 | 0,113  |
| 7 | O15265 ATX7_HUMAN  | R.RPLPS#PE.V                         | S86         | 2 | 1,753  | 0,188 | 0,139  |
| 7 | Q13200 PSMD2_HUMAN | E.NNRFGG#GSQVD.S                     | S361        | 2 | 1,7496 | 0,247 | -0,185 |
| 7 | P61158 ARP3_HUMAN  | E.DHYFLLTEPLNTPE.N                   | NA          | 2 | 1,7422 | 0,223 | -0,205 |
| 7 | P49356 FNTB_HUMAN  | E.LKDETSAPAT#D.-                     | T436        | 2 | 1,714  | 0,212 | 0      |
| 7 | ##Q8N4C6 NIN_HUMAN | E.NRLIS#NE.Q                         | S567        | 2 | 1,7042 | 0,102 | 0,132  |
| 7 | Q6S8J3 A26CA_HUMAN | E.KM*TQIMFE.T                        | NA          | 2 | 1,6859 | 0,094 | 0,234  |
| 7 | O75943 RAD17_HUMAN | E.HGMIDPDS#GDE.A                     | S613        | 2 | 1,6583 | 0,306 | 0,195  |
| 7 | Q96AG4 LRC59_HUMAN | E.LAALPKATILD.L                      | NA          | 2 | 1,6546 | 0,242 | 0      |
| 7 | Q8N1G4 LRC47_HUMAN | E.NKEEGSL#DTEAD.A                    | S520        | 2 | 1,6371 | 0,117 | 0      |
| 7 | P22626 ROA2_HUMAN  | E.YGKIDTIE.I                         | NA          | 2 | 1,6185 | 0,116 | 0      |
| 7 | P02686 MBP_HUMAN   | E.LNAEKAS#T#NSETNRGE.S               | S16:T17     | 2 | 1,6183 | 0,157 | -0,13  |
| 7 | P53992 SC24C_HUMAN | E.IRQLLS#.-                          | S1094       | 2 | 1,6052 | 0,226 | 0,377  |
| 7 | Q9H4L7 SMRCD_HUMAN | E.DQDM*QYASQSEVPNGKE.V               | NA          | 2 | 1,6013 | 0,184 | -0,126 |
| 7 | P80723 BASP_HUMAN  | E.QEQAAPGPAAGGEAPKAAE.A              | NA          | 2 | 1,5984 | 0,222 | 0,07   |
| 7 | Q9BZK7 TBL1R_HUMAN | E.DGTLFDGRPIE.S                      | NA          | 2 | 1,5844 | 0,301 | 0,1    |
| 7 | P11233 RALA_HUMAN  | E.NVPFLLVGNKSDLE.D                   | NA          | 2 | 1,5737 | 0,086 | 0,079  |
| 7 | P49321 NASP_HUMAN  | E.AVAQFSKSIEVIE.N                    | NA          | 2 | 1,5515 | 0,108 | 0,172  |
| 7 | O75792 RNH2A_HUMAN | E.RGLESATS#L.-                       | S298        | 2 | 1,5423 | 0,304 | 0      |
| 7 | P24928 RPB1_HUMAN  | E.IVTPFNIDRLQE.L                     | NA          | 2 | 1,5057 | 0,15  | 0,169  |
| 7 | P09960 LKHA4_HUMAN | E.DAIPLALKMATE.Q                     | NA          | 2 | 1,461  | 0,258 | 0,096  |
| 8 | Q13263 TIF1B_HUMAN | E.TKPVLM*ALAEPGAEGPRLAS#PSGSTSSGLE.V | S594        | 3 | 6,5188 | 0,451 | 0,179  |
| 8 | Q7Z6Z7 HUWE1_HUMAN | E.VANCCIRIALPAPRGSQTAS#DDEFE.N       | S1907       | 3 | 6,072  | 0,39  | 0,197  |
| 8 | P31946 1433B_HUMAN | E.VASGDNKQTTVSNQQAYQE.A              | NA          | 2 | 5,8688 | 0,591 | 0,113  |
| 8 | Q5PRF9 SAM4B_HUMAN | E.LGARAFTTPDHAPLS#PQSSVASSGSEQTEE.Q  | S271        | 3 | 5,8174 | 0,497 | 0,57   |
| 8 | Q8WXI9 P66B_HUMAN  | E.IEQRLQQQAALS#PTTAPAVSSVSKQE.T      | S486        | 3 | 5,6852 | 0,491 | 0,129  |
| 8 | Q00839 HNRPU_HUMAN | E.AGGRPAM*EPNGS#LDLGGDSAGRSAGLEQE.A  | S59         | 3 | 5,5303 | 0,315 | 0,182  |
| 8 | Q00839 HNRPU_HUMAN | E.AGGRPAMEPNGS#LDLGGDSAGRSAGLEQE.A   | S59         | 3 | 5,3321 | 0,467 | 0,306  |
| 8 | Q02952 AKA12_HUMAN | E.GDLNGQKGALNGQALNSQEEEE.V           | NA          | 2 | 5,1295 | 0,456 | 0,31   |
| 8 | Q02952 AKA12_HUMAN | E.LDKVKSATLS#S#TESTASE.M             | S644:S645   | 2 | 5,0331 | 1     | 0,121  |
| 8 | Q00839 HNRPU_HUMAN | E.AGGRPAMEPNGSLDLGGDS#AGRSAGLEQE.A   | S66         | 3 | 4,9947 | 0,409 | 0,367  |

|   |                     |                                     |             |   |        |       |        |
|---|---------------------|-------------------------------------|-------------|---|--------|-------|--------|
| 8 | Q8N4Q1 MIA40_HUMAN  | E.DHETPSSAELVADDPNDPYEE.H           | NA          | 2 | 4,9562 | 0,427 | 0,314  |
| 8 | Q96SB3 NEB2_HUMAN   | E.NGSTVATAAS#PAPEEPKAQAAPEKE.A      | S338        | 3 | 4,9025 | 0,508 | -0,361 |
| 8 | Q9UQ35 SRRM2_HUMAN  | E.SYFGVSSLQLKGQSQTS#PDHRSQTS#SPE.V  | S1064:S1072 | 3 | 4,8996 | 1     | 0,345  |
| 8 | Q92797 SYMPK_HUMAN  | E.DAM*KTPS#PAAEDAREPE.A             | S1259       | 3 | 4,897  | 0,506 | 0,67   |
| 8 | Q7Z2K8 GRIN1_HUMAN  | E.GASCSDGPRGLACPSPTCFSPQES#PSKE.T   | S104        | 3 | 4,8831 | 0,312 | 0,117  |
| 8 | P49023 PAXI_HUMAN   | E.GGFM*AQKGTGSSS#PPGGPPKPGSQLD.S    | S322        | 3 | 4,8591 | 0,442 | 0      |
| 8 | Q6NYC8 PHTNS_HUMAN  | E.VESRLS#PGESAYQKLGLE.A             | S224        | 3 | 4,801  | 0,415 | 0,512  |
| 8 | Q9UPT8 ZC3H4_HUMAN  | E.GSLHSS#PVGPSKSGSPPTEEEGE.R        | S908        | 3 | 4,7551 | 0,493 | 0,135  |
| 8 | Q12893 TM115_HUMAN  | E.SGAKVDS#PLPSDKAPT#PPGKGAPE.S      | S320:T329   | 3 | 4,7123 | 0,3   | 0,433  |
| 8 | Q5UIP0 RIF1_HUMAN   | E.NRPFS#PSPLNNISSTVTVKNNQE.T        | S1236       | 3 | 4,6672 | 0,419 | 0,139  |
| 8 | Q9P2K8 E2AK4_HUMAN  | E.RQYSVCNSED#PGSCE.I                | S261        | 2 | 4,6394 | 0,45  | 0,312  |
| 8 | Q9UNS2 CSN3_HUMAN   | E.ITVNPQFVQKSMGSEQEDDSGNKPSYS#.-    | S423        | 3 | 4,6286 | 0,439 | 0,304  |
| 8 | Q92797 SYMPK_HUMAN  | E.DAMKTPS#PAAEDAREPE.A              | S1259       | 3 | 4,6134 | 0,465 | 0,483  |
| 8 | Q9UGU0 TCF20_HUMAN  | E.ATS#PGAKDM*PLSSDGNPKVNE.K         | S583        | 3 | 4,5952 | 0,436 | 0,331  |
| 8 | Q96AE4 FUBP1_HUMAN  | E.YYRQQAAYYAQTS#PQGMPQHPPAPQGQ.-    | S630        | 3 | 4,5471 | 0,373 | -0,116 |
| 8 | Q7Z2W4 ZCCHV_HUMAN  | E.FLASASASAERSCT#PS#PDQISHRASLE.D   | T273:S275   | 3 | 4,5392 | 0,347 | 0,121  |
| 8 | Q6S8J3 A26CA_HUMAN  | E.KS#YELPDGQVITIGNE.R               | S939        | 2 | 4,5322 | 0,482 | 0,265  |
| 8 | Q5CZB5 Q5CZB5_HUMAN | E.GEGAAGAGDHQDPS#LGAGEAASKE.S       | S114        | 3 | 4,532  | 0,272 | 0,89   |
| 8 | Q14974 MYPT1_HUMAN  | E.TSSTSAGDRYDSSLGRS#GSYSYLEE.R      | S908        | 3 | 4,4793 | 1     | 0,329  |
| 8 | Q15085 ARHGB_HUMAN  | E.LLKS LGESS#GGTTPVGSFHTE.A         | S1458       | 2 | 4,4221 | 0,389 | 0,436  |
| 8 | Q9Y5S2 MRCKB_HUMAN  | E.YFNAPLAHDLTFRSS#ASEQE.T           | S970        | 3 | 4,3963 | 0,459 | 0,071  |
| 8 | Q13283 G3BP1_HUMAN  | E.DAQKSSPAPADIAQTVQE.D              | NA          | 2 | 4,3566 | 0,568 | -0,188 |
| 8 | Q92538 GBF1_HUMAN   | E.GTHVEKSQSAS#VES#IPEVLEE.C         | S349:S352   | 3 | 4,3446 | 0,372 | 0,152  |
| 8 | Q96JM3 ZN828_HUMAN  | E.SQKLAPVPS#PEPQKPAPVS#PE.S         | S204:S214   | 3 | 4,3362 | 0,285 | 0,547  |
| 8 | Q9UGU0 TCF20_HUMAN  | E.AT#SPGAKDMLSSDGNPKVNE.K           | T582        | 3 | 4,3225 | 0,346 | 0,167  |
| 8 | Q60271 JIP4_HUMAN   | E.TRNVS#TGS#AENEKSE.V               | S329:S332   | 2 | 4,3187 | 0,523 | 0      |
| 8 | Q92615 LARP5_HUMAN  | R.SPS#PAHLRDDPKVAE.K                | S601        | 3 | 4,3112 | 0,288 | 0,112  |
| 8 | Q13136 LIPA1_HUMAN  | E.AEGPPGGGGHGS#PSQPADSHFE.Q         | S26         | 3 | 4,2865 | 0,418 | 0,444  |
| 8 | Q75381 PEX14_HUMAN  | E.STSS#SPGKEGHS#PEGSTVTVYHLLGPQEE.G | S274:S282   | 3 | 4,2746 | 1     | 0,299  |
| 8 | Q99459 CDC5L_HUMAN  | E.YNVTNNSVALRT#PRT#PASQDRILQE.A     | T352:T355   | 3 | 4,2744 | 1     | 0,183  |
| 8 | Q8NG31 CASC5_HUMAN  | E.LSQRKSLGT#PTVICT#PTEE.S           | T1011:T1017 | 3 | 4,2684 | 0,386 | 0,562  |
| 8 | P07355 ANXA2_HUMAN  | E.GDHST#PPSAYGSVKAYTNFDAE.R         | T19         | 2 | 4,2667 | 0,41  | 0,306  |
| 8 | Q05682 CALD1_HUMAN  | E.KGNVFSS#PTAAGT#PNKE.T             | S724:T730   | 2 | 4,263  | 0,42  | 0      |
| 8 | Q13263 TIF1B_HUMAN  | E.TKPVLMAAEGPGAEGPRLAS#PSGSTSSGLE.V | S594        | 3 | 4,2397 | 0,423 | 0,06   |
| 8 | Q8NG31 CASC5_HUMAN  | E.LSQRKSLGT#PTVICT#PTEE.S           | T1011:T1017 | 2 | 4,2286 | 0,358 | 0,322  |
| 8 | Q9BPX7 CG025_HUMAN  | E.ALATPLPKDYTT#DSEH.-               | T417        | 2 | 4,216  | 0,239 | 0      |
| 8 | Q95817 BAG3_HUMAN   | E.VKVPPAPVPCPPS#PGPSAVPSSPKSVATEE.R | S377        | 3 | 4,2128 | 0,249 | 0,466  |
| 8 | Q9UBP9 GULP1_HUMAN  | E.NQLRITQVSAPPAGSM*TPKS#PSTDIFD.M   | S211        | 3 | 4,2058 | 0,448 | 0,248  |
| 8 | Q9UNS2 CSN3_HUMAN   | E.ITVNPQFVQKSM*GSQEDDSGNKPSYS#.-    | S423        | 3 | 4,1807 | 0,36  | 0,242  |
| 8 | Q00653 NFKB2_HUMAN  | D.DFKLNSS#IVEPKPEAPE.T              | S23         | 2 | 4,1579 | 0,371 | 0,185  |
| 8 | Q9H0F6 SHRPN_HUMAN  | E.ASTLKGPPPEADLPRS#PGNLTE.R         | S165        | 3 | 4,1538 | 0,19  | 0,393  |

|   |                     |                                      |             |   |        |       |        |
|---|---------------------|--------------------------------------|-------------|---|--------|-------|--------|
| 8 | Q96JM3 ZN828_HUMAN  | E.SQKLAPVPS#PEPQKPAPVSPE.S           | S204        | 2 | 4,093  | 0,382 | 0,431  |
| 8 | Q9UNZ2 NSF1C_HUMAN  | E.GQKLGSTAPQVLSTSSPAQQAENE.A         | NA          | 3 | 4,0814 | 0,31  | 0,226  |
| 8 | Q99613 EIF3C_HUMAN  | E.LVTKPVGNGYKQPLLLS#EDEE.D           | S39         | 3 | 4,0751 | 0,282 | 0,445  |
| 8 | Q92797 SYMPK_HUMAN  | E.TAAGGLTLKEERS#PQTLAPVGE.D          | S1243       | 2 | 4,0672 | 0,375 | 0,212  |
| 8 | Q96T23 RSF1_HUMAN   | E.SEKPGS#PEAAETSPPSNIIDHCE.K         | S612        | 3 | 4,0516 | 0,398 | -0,072 |
| 8 | Q9UQ35 SRRM2_HUMAN  | E.FSASPM*LKSGMS#PEQSRFQSD.S          | S1132       | 3 | 4,0498 | 0,394 | 0,379  |
| 8 | Q8N3D4 EH1L1_HUMAN  | E.AQVASGAGAGAPRASS#PEKAEE.D          | S1017       | 2 | 4,0495 | 0,424 | 0,115  |
| 8 | Q9Y6W5 WASF2_HUMAN  | E.TYNTCDT#PPPLNLTPTPRDDGKE.A         | T129        | 3 | 4,0411 | 0,349 | 0,795  |
| 8 | A8K6V7 A8K6V7_HUMAN | E.LEEKS#TT#PPPAEPVSLPQEPKPRVE.A      | S225:T227   | 3 | 4,0309 | 0,376 | 0,182  |
| 8 | Q4G0F5 VP26B_HUMAN  | E.GTTS#LGEVRTPSQLSDNCRQ.-            | S319        | 3 | 4,0274 | 0,393 | 0,534  |
| 8 | Q01082 SPTB2_HUMAN  | E.SQQQWDTSGEQVVSQNLPAEQGS#PRM*AE.T   | S2138       | 3 | 4,0067 | 0,336 | 0,448  |
| 8 | P46821 MAP1B_HUMAN  | R.KLGDVS#PTQIDVVSQFGSFK.E.D          | S1501       | 3 | 3,9776 | 0,304 | 0,809  |
| 8 | Q96JM3 ZN828_HUMAN  | E.SQKLAPVPS#PEPQKPAPVSPE.S           | S204        | 3 | 3,9743 | 0,267 | 0,808  |
| 8 | Q969F1 TF3C6_HUMAN  | E.IQM*NDSSNLS#CEQEKPM*HLE.I          | S177        | 3 | 3,9532 | 0,38  | -0,292 |
| 8 | P25054 APC_HUMAN    | E.DCPINNPRSGRS#PTGNTPPVIDSVSE.K      | S2674       | 3 | 3,9485 | 0,269 | 0,064  |
| 8 | P04406 G3P_HUMAN    | E.NGKLVINGNPITIFQE.R                 | NA          | 2 | 3,9482 | 0,492 | 0,069  |
| 8 | Q6NYC8 PHTNS_HUMAN  | E.VESRLS#PGESAYQKLGTE.A              | S224        | 2 | 3,9269 | 0,427 | 0,341  |
| 8 | P42345 FRAP_HUMAN   | E.SIHS#FIGDGLVKPE.A                  | S2481       | 2 | 3,9186 | 0,418 | 0,232  |
| 8 | Q14694 UBP10_HUMAN  | E.TKYS#PPAISPLVSEKQVE.V              | S365        | 3 | 3,9128 | 0,332 | 0,356  |
| 8 | Q9UGU0 TCF20_HUMAN  | E.ATS#PGAKDMLSSDGNPKVNE.K            | S583        | 3 | 3,9109 | 0,3   | 0,5    |
| 8 | Q02952 AKA12_HUMAN  | E.REVIAEEEPPTVTEPLPE.N               | NA          | 2 | 3,9061 | 0,322 | 0,66   |
| 8 | P46821 MAP1B_HUMAN  | E.KVS#PSKSPSLSPSPS#PLEKTPLGE.R       | S1252:S1265 | 3 | 3,8932 | 0,171 | 0,608  |
| 8 | Q02952 AKA12_HUMAN  | E.GDLNGQKQKALNGQKALNSQEEEE.V         | NA          | 3 | 3,8859 | 0,384 | 0,31   |
| 8 | Q86U44 MTA70_HUMAN  | E.IDACMDSEAPGSKDHTPS#QE.L            | S350        | 3 | 3,8823 | 0,337 | 0,325  |
| 8 | P07237 PDIA1_HUMAN  | E.NIVIAKM*DSTANE.V                   | NA          | 2 | 3,8603 | 0,493 | 0,172  |
| 8 | P49023 PAXI_HUMAN   | E.GGFMAQKGTGSSS#PPGGPPKPGSQLD.S      | S322        | 3 | 3,8581 | 0,395 | 0,218  |
| 8 | Q92576 PHF3_HUMAN   | E.NNLQDNQTS#NSSPCRSNVGKGNIDGNVSCSE.N | S1611       | 3 | 3,848  | 0,28  | 0,427  |
| 8 | Q71F56 MD13L_HUMAN  | E.VEDGLGS#PKPEEIKD.F                 | S923        | 2 | 3,8467 | 0,399 | 0,288  |
| 8 | P07237 PDIA1_HUMAN  | E.NIVIAKMDSTANE.V                    | NA          | 2 | 3,8434 | 0,498 | -0,087 |
| 8 | Q5JRA6 MIA3_HUMAN   | D.LLPSGSRDEPPASQSTSQDCSQALKQS#P.-    | S1906       | 3 | 3,8391 | 0,308 | 0,465  |
| 8 | Q96AE4 FUBP1_HUMAN  | E.YYRQQAAYYAQTS#PQGM*PQHPPAPQGQ.-    | S630        | 3 | 3,8348 | 0,4   | 0,232  |
| 8 | Q9UQ35 SRRM2_HUMAN  | E.SYFGVSSLQLKGQSQT#S#PDHRSQSDTSSPE.V | T1063:S1064 | 3 | 3,834  | 1     | 0,115  |
| 8 | Q9NPI6 DCP1A_HUMAN  | E.RKASS#PS#PLTIGTPE.S                | S523:S525   | 2 | 3,8297 | 0,451 | 0,143  |
| 8 | Q13283 G3BP1_HUMAN  | E.IQEEKPEPVLEE.T                     | NA          | 2 | 3,8189 | 0,142 | 0,169  |
| 8 | Q15648 MED1_HUMAN   | E.KSYQNSPS#S#DDGIRPLPE.Y             | S1481:S1482 | 2 | 3,8061 | 1     | 0,114  |
| 8 | Q0JR29 FCHO2_HUMAN  | E.IPRPFSPPVTSNTS#PPPAAPLARA.E.S      | S496        | 3 | 3,8019 | 0,291 | 0,552  |
| 8 | Q9HBD1 RC3H2_HUMAN  | E.NKIGS#PPKTPVSNVAATSAGPSNVGTE.L     | S549        | 3 | 3,7959 | 0,31  | -0,069 |
| 8 | P55072 TERA_HUMAN   | E.CQANFISIKGPE.L                     | NA          | 2 | 3,7957 | 0,349 | 0,358  |
| 8 | Q9BUA3 YK007_HUMAN  | E.GGLPRAES#PSPAPPPGLRGTLD.L          | S308        | 3 | 3,7862 | 0,264 | 0,082  |
| 8 | P21333 FLNA_HUMAN   | E.ISIQDMTAQVT#SPSGKTHE.A             | T2179       | 2 | 3,7758 | 0,373 | 0      |
| 8 | Q8NHZ8 CDC26_HUMAN  | E.VVGG#DGEGAIGLSSDPKSRE.Q            | S42         | 3 | 3,7612 | 0,417 | 0,174  |

|   |                     |                                         |           |   |        |       |        |
|---|---------------------|-----------------------------------------|-----------|---|--------|-------|--------|
| 8 | Q6S8J3 A26CA_HUMAN  | E.KSY#ELPDGQVITIGNE.R                   | Y940      | 2 | 3,7542 | 0,396 | 0,066  |
| 8 | P05787 K2C8_HUMAN   | E.VDPNIQAVRTQE.K                        | NA        | 3 | 3,7521 | 0,317 | 0,2    |
| 8 | Q9UPN3 MACF1_HUMAN  | E.LATSGGQS#PTGEQIPQFQQRQKE.L            | S3634     | 3 | 3,7419 | 0,313 | 0,282  |
| 8 | Q66K74 MAP1S_HUMAN  | E.LPLAASSIPRPRTPS#PE.S                  | S640      | 3 | 3,7409 | 0,308 | -0,098 |
| 8 | P11172 PYR5_HUMAN   | E.NVFVAANHNGS#PLSIKE.A                  | S214      | 2 | 3,7393 | 0,388 | -0,065 |
| 8 | Q92797 SYMPK_HUMAN  | E.DAMKTPS#PAAEDAREPE.A                  | S1259     | 2 | 3,7392 | 0,469 | 0      |
| 8 | Q969F1 TF3C6_HUMAN  | E.IQM*NDS#SNLSCEQEKPM*HLE.I             | S173      | 3 | 3,7279 | 0,252 | 0,219  |
| 8 | Q5VWG9 TAF3_HUMAN   | E.TIQVKQIQT#PPDAGKLNSE.N                | T364      | 3 | 3,7253 | 0,275 | -0,17  |
| 8 | P35998 PRS7_HUMAN   | E.IDAIGGARFDDGAGGDNE.V                  | NA        | 2 | 3,7115 | 0,465 | 0,139  |
| 8 | Q00839 HNRPU_HUMAN  | E.AGGRPAM*EPGNGSLDLGGDSAGRS#GAGLEQE.A   | S70       | 3 | 3,6927 | 0,169 | 0,304  |
| 8 | P42704 LPPRC_HUMAN  | E.NGCLSDSDMFSQAGLRSE.A                  | NA        | 2 | 3,6859 | 0,414 | -0,062 |
| 8 | O15234 CASC3_HUMAN  | E.QTSVRDPS#PEADAPVLGSPEKE.E             | S363      | 3 | 3,6836 | 0,26  | 0,23   |
| 8 | Q15085 ARHGB_HUMAN  | E.LLKSLGGESSGGTT#PVGSFHTE.A             | T1462     | 3 | 3,6626 | 0,145 | 0,163  |
| 8 | P22234 PUR6_HUMAN   | E.LFFKDDANNDPQWSEE.Q                    | NA        | 2 | 3,6351 | 0,453 | 0,25   |
| 8 | Q14247 SRC8_HUMAN   | E.QARAKTQT#PPVS#PAPQPTTEE.R             | T401:S405 | 3 | 3,6346 | 0,211 | -0,798 |
| 8 | Q6UB99 ANR11_HUMAN  | E.GVFSSLQAKPSPS#PRAE.L                  | S1894     | 3 | 3,6327 | 0,373 | 0,199  |
| 8 | Q14974 IMB1_HUMAN   | E.AYTGIVQGLKGDQE.N                      | NA        | 2 | 3,6176 | 0,438 | 0,082  |
| 8 | Q6IQ49 CA055_HUMAN  | E.NVAVAKLQES#QPGNAVIDKE.T               | S373      | 3 | 3,6149 | 0,372 | 0,251  |
| 8 | Q8N4Q1 MIA40_HUMAN  | E.DHETPSSAELVADDPNDPYEE.H               | NA        | 3 | 3,6148 | 0,198 | 0,707  |
| 8 | Q9Y2K5 R3HD2_HUMAN  | D.IIQLHISPCS#DKEEE.K                    | S109      | 3 | 3,6133 | 0,2   | 0,195  |
| 8 | Q92797 SYMPK_HUMAN  | E.DAM*KTPS#PAAEDAREPE.A                 | S1259     | 2 | 3,6102 | 0,49  | 0,064  |
| 8 | Q6Y7W6 PERQ2_HUMAN  | E.ASEETPQTSSSSARPGT#PSDHQSQE.A          | T382      | 3 | 3,597  | 0,304 | 0,068  |
| 8 | P10809 CH60_HUMAN   | E.IAQVATISANGDKE.I                      | NA        | 3 | 3,588  | 0,236 | 0,129  |
| 8 | P10809 CH60_HUMAN   | E.IAQVATISANGDKE.I                      | NA        | 2 | 3,5838 | 0,394 | 0,172  |
| 8 | P30101 PDIA3_HUMAN  | E.SNDGPVKVVAENFDE.I                     | NA        | 2 | 3,5803 | 0,341 | 0,426  |
| 8 | Q00613 HSF1_HUMAN   | E.SEPAPASVTALTDARGHTDEGRPPS#PPPTS#TPE.K | S363:S368 | 3 | 3,5637 | 1     | 0,102  |
| 8 | Q9HCM4 E41L5_HUMAN  | E.DS#LLSHKNANVQDAATNSAVLNE.N            | S582      | 3 | 3,5531 | 0,245 | 0,147  |
| 8 | Q96T37 RBM15_HUMAN  | E.FSQQLDS#PAKALAKSEE.D                  | S935      | 2 | 3,552  | 0,39  | 0,118  |
| 8 | Q02790 FKBP4_HUMAN  | E.DLTHEEDGGIIR.R                        | NA        | 2 | 3,5449 | 0,412 | 0,181  |
| 8 | P43487 RANG_HUMAN   | E.SNHDPQFEPIVSLPEQE.I                   | NA        | 2 | 3,5219 | 0,443 | 0,248  |
| 8 | Q14160 LAP4_HUMAN   | E.NAVTITPLRPEDDYS#PRE.R                 | S835      | 2 | 3,516  | 0,306 | 0,113  |
| 8 | Q8NHZ8 CDC26_HUMAN  | E.VVGS#DGEGAIGLSSDPKSRE.Q               | S42       | 2 | 3,5156 | 0,536 | 0,233  |
| 8 | A8K6V7 A8K6V7_HUMAN | E.LEEKS#T#TPPPAEPVSLPQEPKPRVE.A         | S225:T226 | 3 | 3,5043 | 0,253 | 0,304  |
| 8 | P42704 LPPRC_HUMAN  | E.NGCLSDSDM*FSQAGLRSE.A                 | NA        | 2 | 3,503  | 0,369 | 0,184  |
| 8 | O94885 SASH1_HUMAN  | E.VEKPDASPT#SLQLRSQIEE.S                | T103      | 3 | 3,4963 | 0,25  | 0,332  |
| 8 | P40189 IL6RB_HUMAN  | E.GHSSGIGSSCM*SSSRPS#ISS#SDENE.S        | S740:S743 | 3 | 3,4951 | 1     | 0,198  |
| 8 | P18858 DNL1_HUMAN   | E.ALS#PAKGQKPALD.C                      | S76       | 3 | 3,4932 | 0,328 | 0,266  |
| 8 | P08670 VIME_HUMAN   | E.AANYQDTIGRLQDE.I                      | NA        | 2 | 3,4931 | 0,356 | 0,536  |
| 8 | Q15085 ARHGB_HUMAN  | E.LLKSLGGESS#GGTTPVGSFHTE.A             | S1458     | 3 | 3,4868 | 0,362 | 0,49   |
| 8 | Q8IZ21 PHAR4_HUMAN  | E.NSDSFS#EDSSTLGRTRSLPITIE.M            | S453      | 3 | 3,4866 | 0,268 | 0      |
| 8 | P07237 PDIA1_HUMAN  | E.NIVIAKMDSTANEVE.A                     | NA        | 2 | 3,4739 | 0,469 | 0,149  |

|   |                    |                                    |           |   |        |       |        |
|---|--------------------|------------------------------------|-----------|---|--------|-------|--------|
| 8 | Q9BQ67 GRWD1_HUMAN | E.SGDTSS#EGPAQVYLPGRGPPLRE.G       | S26       | 3 | 3,4733 | 0,118 | 0,373  |
| 8 | P31948 STIP1_HUMAN | E.IAT#PPPPPPKKE.T                  | T198      | 3 | 3,4728 | 0,362 | 0,126  |
| 8 | Q658J3 A26CA_HUMAN | E.KSYELPDGQVITIGNE.R               | NA        | 2 | 3,464  | 0,419 | 0,069  |
| 8 | Q562F6 SGOL2_HUMAN | E.SNNLSADTPCATVLDKQHIS#SPELNCNNE.I | S301      | 3 | 3,4578 | 0,282 | 0,442  |
| 8 | Q9Y2K5 R3HD2_HUMAN | E.TQDIIQLHISCPS#DKEEE.K            | S109      | 2 | 3,4517 | 0,328 | 0,329  |
| 8 | Q13136 LIPA1_HUMAN | E.AEGPPGGGGHSGSGSPS#QPDADSHFE.Q    | S28       | 2 | 3,4312 | 0,39  | 0,691  |
| 8 | Q9UGU0 TCF20_HUMAN | E.ATS#PGAKDMPLSSDGNPKVNE.K         | S583      | 2 | 3,4169 | 0,479 | 0,222  |
| 8 | P62829 RL23_HUMAN  | E.DNAGVIVNNKGE.M                   | NA        | 2 | 3,4119 | 0,392 | -0,099 |
| 8 | Q7Z6E9 RBBP6_HUMAN | E.GSSSTLVDTSTSS#TGGSPVRKSEE.K      | S1273     | 3 | 3,4096 | 0,361 | 0,422  |
| 8 | Q63HQ0 CD016_HUMAN | E.FENLVES#DEGESPGSSHRPLTE.E        | S51       | 3 | 3,4007 | 0,199 | 1,466  |
| 8 | P45880 VDAC2_HUMAN | E.FSTSGSNTDTGKVTGTLE.T             | NA        | 2 | 3,4003 | 0,412 | 0      |
| 8 | Q8IV48 THEX1_HUMAN | E.GGEEPPRPS#PEETQQCKFDGQE.T        | S34       | 3 | 3,3954 | 0,122 | 0,142  |
| 8 | Q9Y3X0 CCDC9_HUMAN | E.LNS#PRTTHLAGALSPGE.A             | S510      | 2 | 3,3952 | 0,456 | 0,813  |
| 8 | P55072 TERA_HUMAN  | E.FLAKM*TNGFSGADLTE.I              | NA        | 2 | 3,3843 | 0,318 | 0,142  |
| 8 | Q9ULD9 ZN608_HUMAN | E.ADKVYFTDNAPS#SIGSASRLE.C         | S895      | 3 | 3,3826 | 0,104 | 0,657  |
| 8 | Q9UPT8 ZC3H4_HUMAN | E.GSLHSS#PVGPSKSGSGPPTEEEE.G       | S908      | 3 | 3,3744 | 0,245 | -0,364 |
| 8 | P13798 ACPH_HUMAN  | E.DDCFGCLSWSHSE.T                  | NA        | 2 | 3,3531 | 0,368 | 0,076  |
| 8 | Q96FF9 CDCA5_HUMAN | E.DLFKTHSVPAT#PTSTPVPNPEAE.S       | T111      | 3 | 3,3481 | 0,277 | -0,436 |
| 8 | Q9H0E9 BRD8_HUMAN  | E.ADVAIGKGET#PLTNVKTE.A            | T569      | 3 | 3,3407 | 0,133 | -0,539 |
| 8 | P48634 BAT2_HUMAN  | E.SDLAPS#DKEAPTKE.G                | S1120     | 2 | 3,3389 | 0,348 | 0      |
| 8 | P35606 COPB2_HUMAN | E.LDGKPAS#PTPVIVAS#HTANKEE.K       | S859:S867 | 3 | 3,3307 | 0,333 | 0,302  |
| 8 | Q13371 PHLP_HUMAN  | E.VLVLTSVRNSATCHSEDS#DLE.I         | S296      | 3 | 3,329  | 0,352 | 0,303  |
| 8 | P31946 1433B_HUMAN | E.ILNS#PEKACSLAKTAFDE.A            | S186      | 2 | 3,3213 | 0,372 | 0,235  |
| 8 | Q16643 DREB_HUMAN  | E.DGSDDLKLAASGE.G                  | NA        | 2 | 3,3193 | 0,493 | 0,095  |
| 8 | P78371 TCPB_HUMAN  | E.ALLSSAVDHGSDE.V                  | NA        | 2 | 3,3106 | 0,469 | 0,094  |
| 8 | P55072 TERA_HUMAN  | E.AEKNAPAIIFIDE.L                  | NA        | 2 | 3,3054 | 0,277 | 0,256  |
| 8 | Q5UIP0 RIF1_HUMAN  | E.LIIEDNNAS#PQKLRE.L               | S2144     | 2 | 3,3035 | 0,284 | 0,067  |
| 8 | Q01105 SET_HUMAN   | D.FYFDENPYFENK.V                   | NA        | 2 | 3,2969 | 0,372 | 0,303  |
| 8 | A0MZ66 SHOT1_HUMAN | E.AEFNSPS#PPTPEPGEGPRKLE.G         | S534      | 3 | 3,2831 | 0,285 | 0,237  |
| 8 | P30305 MPIP2_HUMAN | E.AFAQRPSS#APDLMCLS#PDRKM*E.V      | S230:S238 | 3 | 3,2806 | 0,271 | 0,409  |
| 8 | P42566 EP15_HUMAN  | E.SEPIHQESPARS#SPELLPSGVTDENE.V    | S562      | 3 | 3,2769 | 0,287 | 0,824  |
| 8 | Q15642 CIP4_HUMAN  | E.DFSQPM*NRAPSDSSLT#PSDGRPE.L      | T302      | 3 | 3,2684 | 0,285 | 0,069  |
| 8 | Q08J23 NSUN2_HUMAN | E.ANS#PDVTAGCDPAGVHPPR.-           | S751      | 3 | 3,2635 | 0,235 | 0,183  |
| 8 | Q9BRQ6 CHCH6_HUMAN | E.S#TLPRSGSSGGQQPSGM*KE.G          | S67       | 3 | 3,2634 | 0,346 | -0,368 |
| 8 | Q71U36 TBA1A_HUMAN | E.DMAALEKDYEE.V                    | NA        | 2 | 3,2535 | 0,299 | 0,186  |
| 8 | Q14247 SRC8_HUMAN  | E.EQARAKTQT#PPVS#PAPQPTEE.R        | T401:S405 | 3 | 3,2528 | 0,34  | -0,302 |
| 8 | Q06323 PSME1_HUMAN | E.LDAFLKEPALNE.A                   | NA        | 2 | 3,2423 | 0,318 | -0,269 |
| 8 | Q5VUA4 ZN318_HUMAN | E.VILKGS#PEEKVVLAE.K               | S1420     | 3 | 3,2361 | 0,276 | 0,216  |
| 8 | P06400 RB_HUMAN    | E.GLPT#PTKM*T#PRSRILVSIQE.S        | T821:T826 | 3 | 3,2346 | 0,126 | 0,393  |
| 8 | Q6PID6 TTC33_HUMAN | E.VTHFS#PKSIPDYDFESDE.I            | S197      | 3 | 3,2345 | 0,315 | 0,25   |
| 8 | Q14694 UBP10_HUMAN | E.TKYSPPAIS#PLVSEKQVE.V            | S370      | 3 | 3,2182 | 0,177 | 0,267  |



|   |                    |                                       |                |   |        |       |        |
|---|--------------------|---------------------------------------|----------------|---|--------|-------|--------|
| 8 | Q9UQ35 SRRM2_HUMAN | E.KSATRPS#PS#PERS#STGPEPPAPTPLLA.E.R  | S351:S353:S357 | 3 | 3,2099 | 1     | 0,118  |
| 8 | P13798 ACPH_HUMAN  | E.SFFQTKALDVSASDDE.I                  | NA             | 2 | 3,2041 | 0,528 | 0,277  |
| 8 | Q86WR7 CJ047_HUMAN | R.AQVLATIHGHAGAFPAAGDAGEGAPGGSS#PE.R  | S312           | 3 | 3,1918 | 0,349 | 0,436  |
| 8 | Q8TBN0 R3GEF_HUMAN | E.VTALKTLVITSTPAS#PNRE.L              | S168           | 2 | 3,1829 | 0,284 | 0,47   |
| 8 | Q13501 SQSTM_HUMAN | E.SSSTEKSSS#QPSSCCSDPSKPGGNVE.G       | S284           | 3 | 3,1724 | 1     | -0,126 |
| 8 | P08195 4F2_HUMAN   | D.LLQIDPNFGSKE.D                      | NA             | 2 | 3,1687 | 0,356 | -0,09  |
| 8 | Q15185 TEBP_HUMAN  | E.FCVEDSKDVNVNFE.K                    | NA             | 2 | 3,1521 | 0,272 | 0,215  |
| 8 | Q02952 AKA12_HUMAN | E.LDKVKSATLS#STES#TASE.M              | S644:S648      | 2 | 3,1502 | 1     | 0,182  |
| 8 | O95359 TACC2_HUMAN | E.S#VDPFKTSSKTPSSPSKSPAS#FEIPASAM*E.A | S2377:S2397    | 3 | 3,1502 | 1     | 0,335  |
| 8 | Q14247 SRC8_HUMAN  | E.EQARAKTQT#PPVS#PAPQPTTEE.R          | T401:S405      | 2 | 3,1482 | 0,464 | 0,504  |
| 8 | Q02952 AKA12_HUMAN | E.MDAEPQEAEPAKE.L                     | NA             | 2 | 3,1373 | 0,254 | 0      |
| 8 | Q00653 NFKB2_HUMAN | E.YDDFKLNS#SIVEPKEPAPE.T              | S22            | 3 | 3,1364 | 0,099 | 0,324  |
| 8 | P11831 SRF_HUMAN   | E.LQVVNLDTAHSTKS#E.-                  | S507           | 2 | 3,1329 | 0,394 | 0      |
| 8 | P60981 DEST_HUMAN  | E.CQANGPEDLNRACIAE.K                  | NA             | 2 | 3,1313 | 0,274 | 0,201  |
| 8 | Q9Y6M7 S4A7_HUMAN  | E.AVVDLGTSS#TVNTKFE.K                 | S26            | 2 | 3,1268 | 0,365 | 0,26   |
| 8 | Q8TBN0 R3GEF_HUMAN | E.VTALKTLVITSTPAS#PNRE.L              | S168           | 3 | 3,1094 | 0,191 | 0,44   |
| 8 | Q05682 CALD1_HUMAN | E.KGNVFSST#AAGT#PNKE.T                | T726:T730      | 3 | 3,1068 | 0,144 | 0,196  |
| 8 | Q7Z2Z1 CO042_HUMAN | E.GVCQLPDQS#PPRNSMPKAAE.A             | S1750          | 3 | 3,1046 | 0,261 | 0,315  |
| 8 | Q09472 EP300_HUMAN | E.VNSQAIAEKQPS#QEVKM*E.A              | S973           | 3 | 3,1032 | 0,26  | 0,52   |
| 8 | P28360 MSX1_HUMAN  | E.DALVKAES#PEKPE.R                    | S130           | 2 | 3,0998 | 0,202 | 1,308  |
| 8 | Q96S38 KS6C1_HUMAN | E.YGQEKIEPGS#LNPEPFM*KTE.G            | S528           | 3 | 3,0983 | 0,252 | -0,604 |
| 8 | Q969F1 TF3C6_HUMAN | E.IQMNDSSNLS#CEQEKPM*HLE.I            | S177           | 3 | 3,0976 | 0,405 | 0,147  |
| 8 | Q641Q2 FA21A_HUMAN | E.DQNIQAPQKE.V                        | NA             | 2 | 3,097  | 0,32  | 0      |
| 8 | P49792 RBP2_HUMAN  | E.TTPKAVVS#PPKFVFGSE.S                | S2510          | 2 | 3,0944 | 0,172 | 0,391  |
| 8 | Q92538 GBF1_HUMAN  | E.GTHVEKSQSAS#VES#IPEVLEE.C           | S349:S352      | 2 | 3,0943 | 0,206 | 0,202  |
| 8 | Q9BYW2 SETD2_HUMAN | E.IGDTLSTAEES#PPKSRVE.L               | S131           | 3 | 3,0902 | 0,294 | 0,176  |
| 8 | P28066 PSA5_HUMAN  | E.AIKLGSTAIGIQTSE.G                   | NA             | 2 | 3,0836 | 0,527 | 0,737  |
| 8 | Q58FG1 HS904_HUMAN | E.YLNFIRGVVDSE.D                      | NA             | 2 | 3,0778 | 0,429 | 0,086  |
| 8 | P48637 GSHB_HUMAN  | E.NCLLRPGS#PARVVQCISE.L               | S415           | 2 | 3,076  | 0,353 | 0,114  |
| 8 | P18858 DNL1_HUMAN  | E.ALS#PAKGQKPALDCSQVS#PPRPATSPE.N     | S76:S91        | 3 | 3,0713 | 0,213 | 0,248  |
| 8 | Q8TER5 SOLO_HUMAN  | E.ALGNLPS#PSEHKLPE.C                  | S419           | 2 | 3,0515 | 0,386 | 0,292  |
| 8 | O15042 SR140_HUMAN | E.SLCS#PHQNLRSRPLLE.N                 | S67            | 2 | 3,0399 | 0,298 | 0,314  |
| 8 | Q9UGU0 TCF20_HUMAN | E.ATS#PGAKDM*PLSSDGNPKVNE.K           | S583           | 2 | 3,0381 | 0,377 | 0,331  |
| 8 | O00231 PSD11_HUMAN | R.DIQENDEEAVQVK.E                     | NA             | 2 | 3,0348 | 0,409 | 0,161  |
| 8 | Q9GZM8 NDEL1_HUMAN | E.VTRKS#APS#SPTLDCE.K                 | S194:S197      | 2 | 3,0285 | 0,398 | 0,202  |
| 8 | P49411 EFTU_HUMAN  | E.AQVYILSKEE.G                        | NA             | 2 | 3,0267 | 0,322 | 0      |
| 8 | P11388 TOP2A_HUMAN | E.LKPQKS#VVS#DLE.A                    | S1374:S1377    | 2 | 3,0213 | 0,266 | -0,081 |
| 8 | Q6S8J3 A26CA_HUMAN | E.M*ATAASSSSLEKSYE.L                  | NA             | 2 | 3,0087 | 0,37  | -0,077 |
| 8 | Q8IXS6 PALM2_HUMAN | E.LVSGRPVSDTTEPSS#PEGKEE.S            | S351           | 3 | 3,007  | 0,142 | 0,16   |
| 8 | O75970 MPDZ_HUMAN  | E.DVTKDADLS#PVNASIIKE.N               | S483           | 3 | 3,0034 | 0,128 | 0,367  |
| 8 | P22314 UBA1_HUMAN  | E.LQSANASVDDSRLEE.L                   | NA             | 2 | 3,0008 | 0,446 | 0,075  |

|   |                    |                                          |             |   |        |       |        |
|---|--------------------|------------------------------------------|-------------|---|--------|-------|--------|
| 8 | O75554 WBP4_HUMAN  | E.NEYVS#TSEADGGGEPKVVFK.E.K              | S323        | 3 | 2,9991 | 0,176 | 0,079  |
| 8 | Q14247 SRC8_HUMAN  | R.AKTQT#PPVVS#PAPQPT.EE.R                | T401:S405   | 2 | 2,9991 | 0,343 | 0,126  |
| 8 | Q9UNE7 STUB1_HUMAN | E.GGARLGAGGGGS#PEKS#PSAQE.L              | S19:S23     | 2 | 2,9969 | 0,368 | 0,062  |
| 8 | Q14247 SRC8_HUMAN  | R.QDAAVGFDFYKE.K                         | NA          | 2 | 2,9894 | 0,317 | 0,183  |
| 8 | Q8WYQ5 DGCR8_HUMAN | E.QSSDLTPSGDVVS#PVKPLSRSAE.L             | S377        | 3 | 2,9838 | 0,316 | 0,157  |
| 8 | Q9BZF3 OSBL6_HUMAN | E.RTAS#SST#EPSVSRQLLEPEPVPLSKE.A         | S44:T47     | 3 | 2,978  | 1     | 0,307  |
| 8 | P14314 GLU2B_HUMAN | E.TM*VTSTTEPSRCE.Y                       | NA          | 2 | 2,9731 | 0,437 | -0,564 |
| 8 | Q8TDD1 DDX54_HUMAN | K.LGPGRPLPFTPTSECTS#DVEPDTR.E.M          | S75         | 3 | 2,9696 | 0,213 | 0,322  |
| 8 | Q9UQ35 SRRM2_HUMAN | E.FSASPM*LKSGM*S#PEQSRFQSD.S             | S1132       | 3 | 2,9619 | 0,27  | 0      |
| 8 | Q5T200 ZC3HD_HUMAN | E.SRS#LS#PSHLTE.D                        | S875:S877   | 2 | 2,9558 | 0,21  | 0,266  |
| 8 | Q5VUA4 ZN318_HUMAN | E.VILKGS#PEEKVVLAE.K                     | S1420       | 2 | 2,949  | 0,345 | 0,216  |
| 8 | Q6PID6 TTC33_HUMAN | E.VTHFS#PKSIPDYDFESDE.I                  | S197        | 2 | 2,9442 | 0,42  | 0,223  |
| 8 | Q13541 4EBP1_HUMAN | E.CRNSPVT#KT#PPRDLPITIPGVTSPPSSDEPPM*E.A | T68:T70     | 3 | 2,943  | 0,139 | 0,31   |
| 8 | Q96T23 RSF1_HUMAN  | D.AQRLS#PIPEEVPKSTLE.S                   | S594        | 3 | 2,9378 | 0,1   | 0      |
| 8 | Q9NT62 ATG3_HUMAN  | E.DAILQTRTYD.L                           | NA          | 2 | 2,9358 | 0,359 | -0,102 |
| 8 | Q15424 SAFB1_HUMAN | E.LAEAPTEAPS#PEAR.D.S                    | S344        | 2 | 2,9271 | 0,355 | 0,373  |
| 8 | Q9GZR2 REXO4_HUMAN | E.TS#PQVKGEEMPAGKDQE.A                   | S111        | 2 | 2,9219 | 0,471 | 0,192  |
| 8 | Q14444 CAPR1_HUMAN | E.LQYVLDKLGDD.E.V                        | NA          | 2 | 2,9188 | 0,429 | 0      |
| 8 | O43572 AKA10_HUMAN | E.SSSTLTVASRNSPAS#PLKE.L                 | S281        | 3 | 2,9147 | 0,369 | 0,273  |
| 8 | Q969F1 TF3C6_HUMAN | E.IQM*NDS#SNLSCEQEKP.MHLE.I              | S173        | 3 | 2,9143 | 0,104 | 0,294  |
| 8 | O95684 FR1OP_HUMAN | E.GALDLSDVHSPPKS#PE.G                    | S160        | 2 | 2,9132 | 0,309 | -0,071 |
| 8 | Q14694 UBP10_HUMAN | E.TKYS#PPAISPLVSEKQVE.V                  | S365        | 2 | 2,9084 | 0,213 | 0,357  |
| 8 | Q9BRQ6 CHCH6_HUMAN | E.S#TLPRSGSSGGQQPSGMKE.G                 | S67         | 3 | 2,9023 | 0,292 | 0,186  |
| 8 | P43358 MAGA4_HUMAN | E.LGVMGVYDGRE.H                          | NA          | 2 | 2,8985 | 0,441 | 0,306  |
| 8 | Q8IX90 CM003_HUMAN | E.NLLRTP#PPEVTKIPE.D                     | T360        | 3 | 2,8956 | 0,239 | 0,097  |
| 8 | P61158 ARP3_HUMAN  | E.DHYFLLTEPPLNTP.E.N                     | NA          | 2 | 2,8898 | 0,503 | -0,068 |
| 8 | P09936 UCHL1_HUMAN | E.DGS#VLKQFLSE.T                         | S112        | 2 | 2,886  | 0,385 | 0,187  |
| 8 | P11388 TOP2A_HUMAN | E.ADDVKGSVPLSSS#PPATHFPDE.T              | S1393       | 3 | 2,8853 | 0,258 | 0,392  |
| 8 | Q08945 SSRP1_HUMAN | E.IPLSNVSQCTTGKNE.V                      | NA          | 2 | 2,8833 | 0,408 | 0,148  |
| 8 | P56537 IF6_HUMAN   | E.ILADV.LKVE.V                           | NA          | 2 | 2,8807 | 0,349 | 0,244  |
| 8 | Q9GZR2 REXO4_HUMAN | E.T#SPQVKGEEMPAGKDQE.A                   | T110        | 3 | 2,8742 | 0,184 | 0,096  |
| 8 | Q09666 AHNK_HUMAN  | E.SDLKGPEVDIEGPE.G                       | NA          | 2 | 2,8724 | 0,361 | 0,164  |
| 8 | O75381 PEX14_HUMAN | K.SPSPSS#PAAVNHSSDISPV.SNE.S             | S252        | 3 | 2,8723 | 0,136 | 0,222  |
| 8 | P52701 M5H6_HUMAN  | E.SDSIGLTPGEKSE.L                        | NA          | 2 | 2,872  | 0,464 | -0,092 |
| 8 | P43358 MAGA4_HUMAN | E.LGVM*GVYDGRE.H                         | NA          | 2 | 2,8593 | 0,338 | 0      |
| 8 | O95359 TACC2_HUMAN | E.SVDPFKTS#SKTPSSPSKSPAS#FEIPASAME.A     | S2384:S2397 | 3 | 2,857  | 0,104 | 0,562  |
| 8 | Q13162 PRDX4_HUMAN | E.GTAVIDGEFKE.L                          | NA          | 2 | 2,8537 | 0,271 | -0,105 |
| 8 | P60709 ACTB_HUMAN  | R.GYSFTTTAERE.I                          | NA          | 2 | 2,8487 | 0,44  | 0,193  |
| 8 | O14531 DPYL4_HUMAN | D.LGALAQVHAE.N                           | NA          | 2 | 2,8476 | 0,358 | 0,06   |
| 8 | Q02952 AKA12_HUMAN | E.M*DAEPQEAEP.AKE.L                      | NA          | 2 | 2,8421 | 0,382 | -0,418 |
| 8 | P08670 VIME_HUMAN  | E.AANYQDTIGRLQDE.I                       | NA          | 3 | 2,8406 | 0,116 | 0,229  |

|   |                     |                                  |             |   |        |       |        |
|---|---------------------|----------------------------------|-------------|---|--------|-------|--------|
| 8 | O95470 SGPL1_HUMAN  | D.SLYSTDTVTQGSQM*NGS#PKPH.-      | S564        | 2 | 2,8398 | 0,333 | 0,105  |
| 8 | P10809 CH60_HUMAN   | E.VVVTEIPKEE.K                   | NA          | 2 | 2,8374 | 0,44  | 0,213  |
| 8 | P62258 1433E_HUMAN  | E.NSLVAYKAAASDIAM*TE.L           | NA          | 3 | 2,8322 | 0,244 | 0,215  |
| 8 | Q9Y2K5 R3HD2_HUMAN  | D.IIQLHISCPS#DKEEE.K             | S109        | 2 | 2,8278 | 0,399 | 0      |
| 8 | P13667 PDIA4_HUMAN  | E.SDPAYQQYQDAANLRE.D             | NA          | 3 | 2,8225 | 0,233 | -0,184 |
| 8 | A8K9W7 A8K9W7_HUMAN | E.SEDPDYYQYNIQGS#HSS#EGNE.G      | S260        | 3 | 2,8223 | 0,265 | 0,208  |
| 8 | Q3KRA6 U538_HUMAN   | E.DSTLKAAGIASETE.I               | NA          | 2 | 2,8147 | 0,35  | 0,088  |
| 8 | A5YM69 A5YM69_HUMAN | E.TSSDNSGQTRYSPCEEHPAET#NQNE.G   | T193        | 3 | 2,8143 | 0,199 | 0,356  |
| 8 | O14979 HNRDL_HUMAN  | E.NIELPM*DTKTNE.R                | NA          | 2 | 2,8134 | 0,18  | -0,086 |
| 8 | P06748 NPM_HUMAN    | D.M*SPLRPQNYLFGCE.L              | NA          | 2 | 2,8109 | 0,28  | -0,212 |
| 8 | Q86WC4 OSTM1_HUMAN  | K.RLKS#S#TSFANIQ.N               | S322:S323   | 2 | 2,8071 | 0,251 | 0,372  |
| 8 | Q12906 ILF3_HUMAN   | E.AKPAVVAPAPVVE.A                | NA          | 2 | 2,8045 | 0,455 | 0,293  |
| 8 | P15822 ZEP1_HUMAN   | E.S#VSPKKPLFLQQPSE.L             | S128        | 2 | 2,7955 | 0,193 | 0      |
| 8 | P05787 K2C8_HUMAN   | R.TEM*ENEFVLK.K                  | NA          | 2 | 2,7917 | 0,349 | 0,178  |
| 8 | Q9NNW5 WDR6_HUMAN   | E.ISAAPS#GKAIFVKE.R              | S472        | 2 | 2,7908 | 0,28  | 0,081  |
| 8 | P60174 TPIS_HUMAN   | E.FVDIINAKQ.-                    | NA          | 2 | 2,7888 | 0,249 | 0      |
| 8 | P09382 LEG1_HUMAN   | D.QANLTVKLPDGYE.F                | NA          | 2 | 2,7867 | 0,307 | 0,169  |
| 8 | P62258 1433E_HUMAN  | E.DLVYQAKLAE.Q                   | NA          | 2 | 2,7862 | 0,411 | 0,212  |
| 8 | Q9ULT8 HECD1_HUMAN  | E.GHDSLS#VGS#FEEDSKSE.F          | S2317:S2320 | 2 | 2,7804 | 0,441 | 0,372  |
| 8 | Q8WVC0 LEO1_HUMAN   | E.VEIPKVNTDLGND.L                | NA          | 2 | 2,7773 | 0,454 | 0,259  |
| 8 | Q9Y490 TLN1_HUMAN   | E.SALQLLYTAKE.A                  | NA          | 2 | 2,7717 | 0,368 | 0,296  |
| 8 | Q5CZB5 Q5CZB5_HUMAN | E.GEGAAGAGDHDQPSLGAGE.A          | NA          | 2 | 2,7715 | 0,36  | 0,216  |
| 8 | P06576 ATPB_HUMAN   | E.TLGRIM*NVIGEPIDE.R             | NA          | 2 | 2,7715 | 0,172 | 0,146  |
| 8 | P55072 TERA_HUMAN   | E.EAEKNAPAIIFIDE.L               | NA          | 2 | 2,7703 | 0,254 | 0,156  |
| 8 | P78371 TCPB_HUMAN   | E.ALLSSAVDHGS#DE.V               | S150        | 2 | 2,7677 | 0,266 | 0,265  |
| 8 | Q96T58 MIINT_HUMAN  | E.SGVVAVS#PEKSESPQKE.D           | S2120       | 3 | 2,7595 | 0,275 | 0,1    |
| 8 | Q8WYH8 ING5_HUMAN   | E.YISTVKTLS#PDQRVE.R             | S57         | 3 | 2,7567 | 0,198 | 0,201  |
| 8 | P31946 1433B_HUMAN  | E.VASGDNKQTTVSNSQQAYQE.A         | NA          | 3 | 2,7567 | 0,131 | 0,34   |
| 8 | Q96H20 SNF8_HUMAN   | E.DQLAQMSKQLD.M                  | NA          | 2 | 2,7438 | 0,249 | 0,191  |
| 8 | P06744 G6PI_HUMAN   | E.LQAAGKSPEDLE.R                 | NA          | 2 | 2,7417 | 0,392 | 0,388  |
| 8 | Q99733 NP1L4_HUMAN  | E.RLDNVPHT#PSSY#IE.T             | T51:Y55     | 2 | 2,7375 | 0,369 | 0,273  |
| 8 | P05787 K2C8_HUMAN   | E.VDPNIQAVRTQE.K                 | NA          | 2 | 2,7366 | 0,442 | 0,178  |
| 8 | P12004 PCNA_HUMAN   | E.LGNGNIKLS#QTSNVDKEEE.A         | S183        | 3 | 2,7325 | 0,206 | -0,424 |
| 8 | P11388 TOP2A_HUMAN  | E.ADDVKGSVPLSSS#PPATHFPDETE.I    | S1393       | 3 | 2,7323 | 0,222 | 0      |
| 8 | P61158 ARP3_HUMAN   | R.YSYVCPDLVKE.F                  | NA          | 2 | 2,7259 | 0,153 | 0      |
| 8 | O95470 SGPL1_HUMAN  | D.SLYSTDTVTQGS#QM*NGSPKPH.-      | S559        | 3 | 2,7242 | 0,268 | 0,157  |
| 8 | Q02952 AKA12_HUMAN  | E.GSIDTGITVS#REKVTE.V            | S1295       | 2 | 2,7212 | 0,475 | 0,138  |
| 8 | O43572 AKA10_HUMAN  | E.SSSTLTVASRNSPAS#PLKE.L         | S281        | 2 | 2,7206 | 0,378 | -0,121 |
| 8 | P49589 SYCC_HUMAN   | E.GEGDLSISADRLSE.K               | NA          | 2 | 2,7148 | 0,217 | 0,421  |
| 8 | Q9BRX5 PSF3_HUMAN   | E.DTSALVARLDE.M                  | NA          | 2 | 2,7131 | 0,184 | 0,205  |
| 8 | Q13127 REST_HUMAN   | E.GSDLSDNM*S#EGSDDSGLHGARPVPQE.S | S1024       | 3 | 2,7128 | 0,167 | 0,665  |

|   |                    |                                         |           |   |        |       |        |
|---|--------------------|-----------------------------------------|-----------|---|--------|-------|--------|
| 8 | Q9C0C2 TB182_HUMAN | E.VLEPGRDS#PPSWRPQPDGE.A                | S1503     | 3 | 2,7107 | 0,286 | 0,499  |
| 8 | Q96T58 MINT_HUMAN  | E.SGVVAVSPEKS#ESPQKE.D                  | S2124     | 2 | 2,7087 | 0,322 | -0,066 |
| 8 | P14314 GLU2B_HUMAN | E.LQTHPELDTDGDGALSEAE.A                 | NA        | 2 | 2,7066 | 0,378 | 0,061  |
| 8 | P27816 MAP4_HUMAN  | E.EGRPVVSGTGNDDITT#PPNKELPPSPE.K        | T687      | 3 | 2,7063 | 0,254 | -0,198 |
| 8 | P30040 ERP29_HUMAN | E.VGISDYGDKLNLM*E.L                     | NA        | 2 | 2,7038 | 0,378 | 0,084  |
| 8 | O95684 FR1OP_HUMAN | E.GALDLSDVHSPPKS#PE.G                   | S160      | 3 | 2,7018 | 0,234 | 0,106  |
| 8 | Q00653 NFKB2_HUMAN | E.Y#DDFKLNSSIVEPKEPAPE.T                | Y15       | 2 | 2,6986 | 0,26  | 0,216  |
| 8 | Q6PID6 TTC33_HUMAN | E.VT#HFSPKSIPDYDFE.S                    | T194      | 3 | 2,6972 | 0,093 | 0,098  |
| 8 | Q9UKV3 ACINU_HUMAN | R.GS#PKKCEAEEAEPAAATQPQTSE.T            | S729      | 3 | 2,6966 | 0,142 | 0,218  |
| 8 | Q8N163 K1967_HUMAN | E.LLLLRDDGEEE.F                         | NA        | 2 | 2,6918 | 0,384 | 0      |
| 8 | Q15773 MLF2_HUMAN  | E.RQDYINLDES#E.A                        | S187      | 2 | 2,6842 | 0,1   | 0,167  |
| 8 | Q02952 AKA12_HUMAN | E.AEAVPAQKERPPAPSS#FVFQEE.T             | S1226     | 3 | 2,6811 | 0,12  | 0,367  |
| 8 | P42345 FRAP_HUMAN  | E.SIHS#FIGDGLVKPE.A                     | S2481     | 3 | 2,6804 | 0,147 | 0,116  |
| 8 | P30049 ATPD_HUMAN  | D.M*LDLGAAKANLE.K                       | NA        | 2 | 2,679  | 0,177 | 0      |
| 8 | O60271 JIP4_HUMAN  | E.NLDSVFAQDQEHQVE.L                     | NA        | 2 | 2,6788 | 0,319 | 0,277  |
| 8 | O14745 NHERF_HUMAN | E.AALESPRALVRSAS#SDTSEE.L               | S290      | 3 | 2,6775 | 0,246 | 1,056  |
| 8 | Q92562 SAC3_HUMAN  | E.GS#VS#QRSTPVKM*TDAGDSAKVTE.N          | S771:S773 | 3 | 2,6772 | 0,238 | 0,145  |
| 8 | P04844 RPN2_HUMAN  | E.IEDLVARLDE.L                          | NA        | 2 | 2,6737 | 0,321 | -0,208 |
| 8 | Q6S8J3 A26CA_HUMAN | E.KSYELPDGQVITIGNE.R                    | NA        | 3 | 2,6724 | 0,205 | 0,415  |
| 8 | Q9Y3F4 STRAP_HUMAN | E.NSDCIFPSAPDVKA.-                      | NA        | 2 | 2,6696 | 0,278 | 0,481  |
| 8 | O75534 CSDE1_HUMAN | E.ILDGNQLHIADE.V                        | NA        | 2 | 2,6671 | 0,224 | -0,091 |
| 8 | Q9H7Z6 MYST1_HUMAN | E.GTAPS#PGRVSPPTPARGEPE.V               | S37       | 3 | 2,663  | 0,111 | 0,179  |
| 8 | Q71U36 TBA1A_HUMAN | E.HGIQPDGQM*PS#DKTIGGGDDSFNTFFSE.T      | S38       | 3 | 2,6628 | 0,172 | 0,238  |
| 8 | Q71U36 TBA1A_HUMAN | E.DM*AALKDYEE.V                         | NA        | 2 | 2,6615 | 0,305 | 0,459  |
| 8 | Q13541 4EBP1_HUMAN | E.CRNS#PVT#KTPPRDLPTIPGVTSPPSSDEPPM*E.A | S65:T68   | 3 | 2,6614 | 0,142 | 0,621  |
| 8 | P04083 ANXA1_HUMAN | E.DLADSDARALYE.A                        | NA        | 2 | 2,6599 | 0,492 | 0,273  |
| 8 | P31946 1433B_HUMAN | E.ILNS#PEKACSLAKTAFDE.A                 | S186      | 3 | 2,6595 | 0,138 | 0,529  |
| 8 | Q14318 FKBP8_HUMAN | E.VTLKTAVDGPDL.E.M                      | NA        | 2 | 2,6587 | 0,23  | 0,809  |
| 8 | P08708 RS17_HUMAN  | E.IIEVDPTKE.M                           | NA        | 2 | 2,6544 | 0,357 | 0,316  |
| 8 | P28066 PSA5_HUMAN  | E.LEEVIKDI.-                            | NA        | 2 | 2,6453 | 0,181 | 0,127  |
| 8 | P02545 LMNA_HUMAN  | R.SGAQASSTPLS#PTRITRLQE.K               | S22       | 3 | 2,645  | 0,103 | 0      |
| 8 | P15822 ZEP1_HUMAN  | E.VSDLRS#KSFDCGSITPPQTTLTE.L            | S1384     | 3 | 2,6409 | 0,159 | 0,606  |
| 8 | Q14160 LAP4_HUMAN  | E.NAVTITPLRPEDDYS#PRE.R                 | S835      | 3 | 2,6403 | 0,173 | 0,51   |
| 8 | P48637 GSHB_HUMAN  | E.NCLLRPGS#PARVVQCISE.L                 | S415      | 3 | 2,6381 | 0,285 | 0,343  |
| 8 | Q02952 AKA12_HUMAN | E.GGGAGTKS#VPEDDGHALLAE.R               | S1674     | 2 | 2,6379 | 0,348 | 0,124  |
| 8 | P68104 EF1A1_HUMAN | K.IGGIGTVPVGR.V                         | NA        | 2 | 2,6341 | 0,369 | 0      |
| 8 | P15170 ERF3A_HUMAN | E.ISEAEPGGGS#LGDGRPPEESAHE.M            | S36       | 3 | 2,6337 | 0,224 | 0,31   |
| 8 | P14927 QCR7_HUMAN  | E.NFYLEPYLKE.V                          | NA        | 2 | 2,6326 | 0,279 | 0,093  |
| 8 | P56192 SYMC_HUMAN  | E.TVTTAKPQQIQALMDE.V                    | NA        | 2 | 2,6323 | 0,234 | 0,413  |
| 8 | O60271 JIP4_HUMAN  | E.TRNVS#T#GSAENEKSE.V                   | S329:T330 | 3 | 2,6295 | 0,2   | 0,482  |
| 8 | Q02952 AKA12_HUMAN | E.TDVVLKVDAQE.A                         | NA        | 2 | 2,6277 | 0,259 | -0,1   |

|   |                    |                                 |                |   |        |       |        |
|---|--------------------|---------------------------------|----------------|---|--------|-------|--------|
| 8 | Q9H511 KLH31_HUMAN | D.IS#PLGLATVIAYAY#T#GK.L        | S117:Y129:T130 | 3 | 2,6249 | 0,181 | 1,295  |
| 8 | Q6PID6 TTC33_HUMAN | E.VTHFS#PKSIPDYDFE.S            | S197           | 2 | 2,6153 | 0,133 | 0,197  |
| 8 | O15042 SR140_HUMAN | E.SLCS#PHQNLRSRPLLE.N           | S67            | 3 | 2,6118 | 0,21  | 0,658  |
| 8 | Q14149 MORC3_HUMAN | E.SINGKSES#PDHM*VSQYQQALEE.I    | S765           | 3 | 2,6115 | 0,116 | 0,569  |
| 8 | P08238 HS90B_HUMAN | E.LFSELAEDKE.N                  | NA             | 2 | 2,6109 | 0,232 | 0,103  |
| 8 | P49023 PAXI_HUMAN  | E.M*S#SPQRVSTSQQTRIS#ASSATRE.L  | S243:S258      | 3 | 2,6098 | 0,098 | -0,065 |
| 8 | P11021 GRP78_HUMAN | K.ELEEIVQPIISK.L                | NA             | 2 | 2,6094 | 0,37  | 0,349  |
| 8 | P35579 MYH9_HUMAN  | E.LEEICHDLA.A                   | NA             | 2 | 2,6081 | 0,15  | 0,211  |
| 8 | Q96JM3 ZN828_HUMAN | E.LLAS#PKKLE.D                  | S603           | 2 | 2,5984 | 0,214 | 0,307  |
| 8 | Q8WVM8 SCFD1_HUMAN | E.DDMFVLCNQNKE.L                | NA             | 2 | 2,5976 | 0,251 | 0,565  |
| 8 | Q9C0C9 UBE2O_HUMAN | E.QLLTGSPT#SPTVEPEKPTRE.K       | T838           | 3 | 2,5938 | 0,194 | 0,407  |
| 8 | Q9UM50 NFU1_HUMAN  | E.DGGDVYKGF.D                   | NA             | 2 | 2,5918 | 0,298 | 0      |
| 8 | P54132 BLM_HUMAN   | E.DFS#FSEPLPNTTNQQRVKD.F        | S72            | 3 | 2,5891 | 0,33  | 0,079  |
| 8 | Q14683 SMC1A_HUMAN | E.GSS#QGEDSVSGSQRISSEYARE.A     | S957           | 3 | 2,5886 | 0,2   | 0,461  |
| 8 | O00170 AIP_HUMAN   | E.AQADFAKLE.L                   | NA             | 2 | 2,5876 | 0,291 | -0,223 |
| 8 | Q99613 EIF3C_HUMAN | E.LVTKPVGGNYGKQPLLS#ELEE.D      | S39            | 2 | 2,5872 | 0,349 | 0,891  |
| 8 | Q9UBT2 SAE2_HUMAN  | E.DGKGTILISSEGETE.A             | NA             | 2 | 2,5842 | 0,27  | 0,073  |
| 8 | Q15648 MED1_HUMAN  | E.KSYQNSPS#S#DDGIRPLPE.Y        | S1481:S1482    | 3 | 2,578  | 0,158 | 0,085  |
| 8 | Q9BTT0 AN32E_HUMAN | E.IEGLNDFKE.L                   | NA             | 2 | 2,5763 | 0,337 | -0,523 |
| 8 | Q01518 CAP1_HUMAN  | R.SGPKPFSAPKQT#SPS#PK.R         | T307:S310      | 3 | 2,571  | 0,265 | 0,092  |
| 8 | P20700 LMNB1_HUMAN | R.AGGPTTPLSPT#RLSRLQE.K         | T25            | 3 | 2,5693 | 0,171 | 0,187  |
| 8 | Q02952 AKA12_HUMAN | E.LDKVKSATLSS#T#ESTASE.M        | S645:T646      | 3 | 2,5642 | 0,202 | 0,363  |
| 8 | Q09666 AHNK_HUMAN  | E.GAKDIDISS#PE.F                | S177           | 2 | 2,5621 | 0,169 | 0,101  |
| 8 | Q7Z6E9 RBBP6_HUMAN | E.GSSSTLVDYTS#TSSSTGGSPVRKSEE.K | S1270          | 2 | 2,562  | 0,224 | 0,282  |
| 8 | P09493 TPM1_HUMAN  | R.LATALQKLE.E                   | NA             | 2 | 2,5573 | 0,128 | -0,124 |
| 8 | P53990 K0174_HUMAN | E.IADYLAAGKDE.R                 | NA             | 2 | 2,5558 | 0,183 | 0,419  |
| 8 | P08133 ANXA6_HUMAN | E.IADTPSGDKTSLE.T               | NA             | 2 | 2,5554 | 0,306 | 0,183  |
| 8 | P62753 RS6_HUMAN   | R.RLS#S#LRAS#TSKSE.S            | S235:S236:S240 | 3 | 2,5538 | 0,248 | 0,22   |
| 8 | P21359 NF1_HUMAN   | E.GYLAATYPT#VGQTSRARKSM*S#LD.M  | T2510:S2523    | 3 | 2,5516 | 1     | 0,533  |
| 8 | Q13283 G3BP1_HUMAN | E.DAQKSSS#PAPADIAQTVQE.D        | S232           | 2 | 2,551  | 0,379 | 0,06   |
| 8 | Q06830 PRDX1_HUMAN | D.YGVLKADE.G                    | NA             | 2 | 2,5426 | 0,128 | 0,204  |
| 8 | Q15233 NONO_HUMAN  | R.EQPPRFAQPGSFEYE.Y             | NA             | 2 | 2,539  | 0,34  | 0,342  |
| 8 | Q658J3 A26CA_HUMAN | E.KSYELPDGQVIT#IGNE.R           | T949           | 2 | 2,5311 | 0,425 | 0,132  |
| 8 | P11177 ODPB_HUMAN  | E.DNSIPQVKD.I                   | NA             | 2 | 2,5297 | 0,301 | 0,12   |
| 8 | P11172 PYR5_HUMAN  | D.AIVLLDRE.Q                    | NA             | 2 | 2,5283 | 0,165 | 0,131  |
| 8 | P51149 RAB7A_HUMAN | E.FLIQASPRDPE.N                 | NA             | 2 | 2,5253 | 0,276 | 0,288  |
| 8 | Q15003 CND2_HUMAN  | E.GTEDLSVDLVRQGD.-              | NA             | 2 | 2,5252 | 0,156 | 0,406  |
| 8 | O43395 PRPF3_HUMAN | E.VFGDDSEISKE.S                 | NA             | 2 | 2,5211 | 0,22  | 0      |
| 8 | O75781 PALM_HUMAN  | E.NAAAPSPVRAPAPS#PAKE.E         | S124           | 2 | 2,5187 | 0,283 | 0,135  |
| 8 | P30101 PDIA3_HUMAN | E.LSDFISYLQRE.A                 | NA             | 2 | 2,5174 | 0,253 | 0,178  |
| 8 | Q99436 PSB7_HUMAN  | D.GIVLGADTRATE.G                | NA             | 2 | 2,5161 | 0,212 | 0,304  |

|   |                     |                                  |             |   |        |       |        |
|---|---------------------|----------------------------------|-------------|---|--------|-------|--------|
| 8 | Q12802 AKP13_HUMAN  | E.CSTPLPEDCSPT#HS#PRVLFRSNTE.E   | T2400:S2402 | 3 | 2,5153 | 0,154 | 0,373  |
| 8 | Q96A33 CCD47_HUMAN  | E.SNFTLVGDDGTNKE.A               | NA          | 2 | 2,515  | 0,362 | 0,163  |
| 8 | Q9H9J4 UBP42_HUMAN  | E.DAAAPKAPGPS#PAKE.K             | S936        | 2 | 2,5123 | 0,254 | -0,082 |
| 8 | Q86V81 THOC4_HUMAN  | E.LDAQLDAYNARM*DTS.-             | NA          | 2 | 2,5117 | 0,319 | -0,431 |
| 8 | P78371 TCPB_HUMAN   | E.ALLSS#AVDHGSDE.V               | S144        | 2 | 2,5094 | 0,316 | 0,088  |
| 8 | Q9UIF9 BAZ2A_HUMAN  | E.ANDHFNFTGLPPAPAASGLKPSPS#SGE.G | S31         | 3 | 2,508  | 0,129 | 0,2    |
| 8 | P52272 HNRPM_HUMAN  | R.M*AAPIDRVGQTIE.R               | NA          | 2 | 2,5058 | 0,396 | 0      |
| 8 | Q9Y536 PAL4B_HUMAN  | E.NFRALSTGE.K                    | NA          | 2 | 2,5055 | 0,274 | 0,061  |
| 8 | Q8WVM8 SCFD1_HUMAN  | E.DDM*FVLCNQNKE.L                | NA          | 2 | 2,4974 | 0,348 | 0,399  |
| 8 | O76003 GLRX3_HUMAN  | E.LVGGLDIVKE.L                   | NA          | 2 | 2,496  | 0,179 | -0,117 |
| 8 | Q14194 DPYL1_HUMAN  | E.DGLIKQIGE.N                    | NA          | 2 | 2,4924 | 0,25  | -0,188 |
| 8 | P17987 TCPA_HUMAN   | E.AAITILRIDDL                    | NA          | 2 | 2,4831 | 0,278 | 0,111  |
| 8 | Q16881 TRXR1_HUMAN  | R.VVGFHVLGPNAGE.V                | NA          | 2 | 2,4822 | 0,322 | 0,188  |
| 8 | P29218 IMPA1_HUMAN  | E.IQVIPLQRDDED.-                 | NA          | 2 | 2,4766 | 0,24  | 0,423  |
| 8 | P31946 1433B_HUMAN  | E.LLDKYLIPNATQPE.S               | NA          | 2 | 2,4736 | 0,166 | 0,076  |
| 8 | Q16881 TRXR1_HUMAN  | D.STIGIHPVCAE.V                  | NA          | 2 | 2,4476 | 0,378 | 0      |
| 8 | Q96B23 CR025_HUMAN  | E.LRRDS#SES#QLASTE.S             | S66:S69     | 2 | 2,4415 | 0,472 | 0,14   |
| 8 | Q9BXJ9 NARG1_HUMAN  | E.ALYDGSGLGDCKE.A                | NA          | 2 | 2,4356 | 0,405 | 0,368  |
| 8 | P46013 KI67_HUMAN   | E.LFQT#PICTDKPTTHE.K             | T2203       | 2 | 2,4336 | 0,157 | 0      |
| 8 | Q15052 ARHG6_HUMAN  | E.DAQLKVIE.A                     | NA          | 2 | 2,4318 | 0,135 | 0,237  |
| 8 | Q96FW1 OTUB1_HUMAN  | E.AIMAQQDRIQQE.I                 | NA          | 2 | 2,4315 | 0,099 | 0,341  |
| 8 | Q9Y3B3 TMED7_HUMAN  | E.DIAQGTKCTLE.F                  | NA          | 2 | 2,4245 | 0,362 | 0,296  |
| 8 | Q96MW1 CCD43_HUMAN  | E.DSLLNICKE.I                    | NA          | 2 | 2,4114 | 0,201 | 0,112  |
| 8 | Q9UQ35 SRRM2_HUMAN  | E.NSFGS#PLEFRNSGPLGTE.M          | S1329       | 2 | 2,4099 | 0,254 | 0,245  |
| 8 | P05386 RLA1_HUMAN   | E.ES#DDDM*GFGLFD.-               | S104        | 2 | 2,4078 | 0,358 | 0,254  |
| 8 | P10644 KAP0_HUMAN   | E.DGQKIVVQGEPEGDE.F              | NA          | 2 | 2,4071 | 0,342 | 0,166  |
| 8 | Q16531 DDB1_HUMAN   | R.QGQGLVTCGAFKE.G                | NA          | 2 | 2,4065 | 0,299 | -0,303 |
| 8 | Q02880 TOP2B_HUMAN  | E.LKVKAS#PIT#NDGEDE.F            | S1400:T1403 | 2 | 2,4038 | 0,35  | 0,069  |
| 8 | P09493 TPM1_HUMAN   | R.LATALQKLEE.A                   | NA          | 2 | 2,4017 | 0,27  | 0,219  |
| 8 | Q8TE01 Q8TE01_HUMAN | E.ATILDQNNARVNE.E                | NA          | 2 | 2,3899 | 0,316 | -0,084 |
| 8 | P46939 UTRO_HUMAN   | E.DINAYFKQLDE.L                  | NA          | 2 | 2,3856 | 0,362 | 0,09   |
| 8 | P78332 RBM6_HUMAN   | E.KLQSFDS#PE.R                   | S1025       | 2 | 2,3815 | 0,181 | -0,108 |
| 8 | Q9UL46 PSME2_HUMAN  | E.AFQTTISKYFSE.R                 | NA          | 2 | 2,3779 | 0,165 | 0,086  |
| 8 | P49454 CENPF_HUMAN  | E.ADQS#PKNSAILQNRVDSLE.F         | S821        | 2 | 2,376  | 0,24  | 0,338  |
| 8 | Q01813 K6PP_HUMAN   | R.NVIFQPVAEK.K                   | NA          | 2 | 2,3757 | 0,382 | 0      |
| 8 | P18031 PTN1_HUMAN   | E.DTNLKLTLISE.D                  | NA          | 2 | 2,3696 | 0,094 | 0,196  |
| 8 | P48637 GSHB_HUMAN   | E.GVLLRTSQEPTSSE.V               | NA          | 2 | 2,3692 | 0,424 | 0,162  |
| 8 | P09936 UCHL1_HUMAN  | E.DGSVLKQFLSETE.K                | NA          | 2 | 2,3682 | 0,151 | 0,336  |
| 8 | O94909 K0819_HUMAN  | E.GEPLSLPTPRS#PSDRE.L            | S546        | 2 | 2,3674 | 0,172 | 0,134  |
| 8 | Q12931 TRAP1_HUMAN  | E.DIPLNLSRE.L                    | NA          | 2 | 2,3616 | 0,303 | 0,231  |
| 8 | O75449 KTNA1_HUMAN  | D.S#TPLKAAQHDLPASEGE.V           | S80         | 2 | 2,361  | 0,372 | 0,2    |

|   |                    |                            |           |   |        |       |        |
|---|--------------------|----------------------------|-----------|---|--------|-------|--------|
| 8 | P40227 TCPZ_HUMAN  | E.TDTSLRIGLVLD.H           | NA        | 2 | 2,3606 | 0,119 | 0,375  |
| 8 | O43684 BUB3_HUMAN  | E.DGIFIRQVDAE.T            | NA        | 2 | 2,3577 | 0,338 | 0,358  |
| 8 | P35244 RFA3_HUMAN  | E.DSHPFDLGLYNE.A           | NA        | 2 | 2,3513 | 0,32  | 0,26   |
| 8 | P58546 MTPN_HUMAN  | E.FM*WALKNGDLDE.V          | NA        | 2 | 2,3472 | 0,231 | 0,252  |
| 8 | Q96H20 SNF8_HUMAN  | E.DQLAQM*SKQLD.M           | NA        | 2 | 2,346  | 0,162 | 0,094  |
| 8 | P49959 MRE11_HUMAN | E.DLVKQYFQTAE.K            | NA        | 2 | 2,3344 | 0,318 | 0,273  |
| 8 | P27708 PYR1_HUMAN  | E.NLDPLGIHTGE.S            | NA        | 2 | 2,3278 | 0,309 | 0,209  |
| 8 | P49792 RBP2_HUMAN  | K.IIDSDSNLSVVK.K           | NA        | 2 | 2,3265 | 0,207 | -0,087 |
| 8 | P52788 SPSY_HUMAN  | E.IDSILNKVEE.R             | NA        | 2 | 2,3255 | 0,159 | 0,105  |
| 8 | Q92615 LARP5_HUMAN | R.SPS#PAHLPDDPKVAE.K       | S601      | 2 | 2,3231 | 0,324 | 0,372  |
| 8 | P01112 RASH_HUMAN  | E.DAFYTLVRE.I              | NA        | 2 | 2,3229 | 0,307 | 0      |
| 8 | P55769 NH2L1_HUMAN | E.ADVNPKAYPLAD.A           | NA        | 2 | 2,3226 | 0,35  | 0,096  |
| 8 | P60174 TPIS_HUMAN  | E.LIGTLNAAKVPADTE.V        | NA        | 2 | 2,3219 | 0,362 | -0,161 |
| 8 | Q2TAA2 IAH1_HUMAN  | E.LSLLGDGDH.-              | NA        | 2 | 2,3176 | 0,316 | 0,132  |
| 8 | P08473 NEP_HUMAN   | E.DLIAQIRE.V               | NA        | 2 | 2,3126 | 0,189 | 0,191  |
| 8 | P43897 EFTS_HUMAN  | E.LSGLPAGPDRE.G            | NA        | 2 | 2,3125 | 0,264 | -0,219 |
| 8 | P46821 MAP1B_HUMAN | E.VVEEHCAS#PEDKTLE.V       | S1312     | 2 | 2,3084 | 0,122 | 0      |
| 8 | Q96T58 MINT_HUMAN  | E.SGVVAVS#PEKSESPQKE.D     | S2120     | 2 | 2,3079 | 0,35  | 0,199  |
| 8 | Q15149 PLEC1_HUMAN | E.AQQPTFDALRDE.L           | NA        | 2 | 2,2932 | 0,26  | 0,351  |
| 8 | P25705 ATPA_HUMAN  | E.LLKQGQYSPM*AIEE.Q        | NA        | 2 | 2,2927 | 0,312 | 0,075  |
| 8 | Q15020 SART3_HUMAN | E.DWDIAVQKTE.T             | NA        | 2 | 2,2923 | 0,3   | 0,101  |
| 8 | P08174 DAF_HUMAN   | E.DTVITYKCEE.S             | NA        | 2 | 2,2845 | 0,19  | 0,194  |
| 8 | P29218 IMPA1_HUMAN | E.DITKSLVTE.L              | NA        | 2 | 2,2764 | 0,234 | 0      |
| 8 | P09936 UCHL1_HUMAN | E.DGSVLKQFLSE.T            | NA        | 2 | 2,2733 | 0,182 | 0,299  |
| 8 | Q9UHX1 PUF60_HUMAN | E.NGQSTAAKLGLPPLTPEQQE.A   | NA        | 2 | 2,271  | 0,185 | -0,117 |
| 8 | Q96DG6 CMBL_HUMAN  | E.DCSPADKPYIDE.A           | NA        | 2 | 2,2694 | 0,172 | -0,087 |
| 8 | Q9H2G2 SLK_HUMAN   | E.VSVTTSKIVTDSDS#KTEE.L    | S818      | 2 | 2,268  | 0,281 | 0,487  |
| 8 | Q15631 TSN_HUMAN   | E.ILGIEPDRE.K              | NA        | 2 | 2,2552 | 0,174 | 0,117  |
| 8 | Q96SB4 SRPK1_HUMAN | E.SSTIGQDQTLM*ERDTE.G      | NA        | 2 | 2,2498 | 0,119 | -0,267 |
| 8 | P56385 ATP51_HUMAN | E.LAEDDSILK.-              | NA        | 2 | 2,2447 | 0,167 | 0,122  |
| 8 | P55072 TERA_HUMAN  | K.DVDLEFLAK.M              | NA        | 2 | 2,2428 | 0,253 | 0      |
| 8 | P20073 ANXA7_HUMAN | R.LLVSM*CQGNRDE.N          | NA        | 2 | 2,2422 | 0,294 | -0,085 |
| 8 | P06576 ATPB_HUMAN  | D.SGAPIKIPVGPE.T           | NA        | 2 | 2,2402 | 0,354 | 0,209  |
| 8 | P21333 FLNA_HUMAN  | E.GGVVGKSADFVVE.A          | NA        | 2 | 2,2372 | 0,192 | 0,386  |
| 8 | P62258 1433E_HUMAN | E.NSLVAYKAASDIAM*TE.L      | NA        | 2 | 2,2351 | 0,144 | 0,646  |
| 8 | Q12931 TRAP1_HUMAN | E.DIPLNLS#RE.L             | S401      | 2 | 2,2207 | 0,285 | 0,107  |
| 8 | P27482 CALL3_HUMAN | E.LGTVM*RSLGQNPTEAE.L      | NA        | 2 | 2,2142 | 0,255 | 0,142  |
| 8 | Q8IXM2 CQ049_HUMAN | E.GLGET#PPAKKLNFDQA.-      | T161      | 2 | 2,2125 | 0,205 | 0,138  |
| 8 | P25490 TTY1_HUMAN  | E.VILVQTREE.V              | NA        | 2 | 2,1942 | 0,223 | 0      |
| 8 | O43237 DC1L2_HUMAN | E.NFTTVKPEDAYE.D           | NA        | 2 | 2,1928 | 0,177 | -0,086 |
| 8 | Q14247 SRC8_HUMAN  | E.QARAKTQT#PPVS#PAPQPTEE.R | T401:S405 | 2 | 2,177  | 0,18  | 0,213  |

|   |                    |                           |             |   |        |       |        |
|---|--------------------|---------------------------|-------------|---|--------|-------|--------|
| 8 | O00303 EIF3F_HUMAN | E.VTNCFSVPHNESEDE.V       | NA          | 2 | 2,1717 | 0,13  | -0,346 |
| 8 | Q9NPR2 SEM4B_HUMAN | E.SEKRPLS#IQDS#FVE.V      | S804:S808   | 2 | 2,1706 | 0,092 | 0,068  |
| 8 | P22626 ROA2_HUMAN  | D.TIEIITDR.Q              | NA          | 2 | 2,1705 | 0,196 | -0,063 |
| 8 | P07195 LDHB_HUMAN  | E.KLIAPVAEEEE.A           | NA          | 2 | 2,1692 | 0,112 | 0      |
| 8 | P53396 ACLY_HUMAN  | E.LNNIISRTTDGVYE.G        | NA          | 2 | 2,1514 | 0,224 | 0,153  |
| 8 | Q92922 SMRC1_HUMAN | R.KHS#PS#PPPPTPE.S        | S328:S330   | 2 | 2,1504 | 0,306 | -0,239 |
| 8 | Q8NCA5 FA98A_HUMAN | E.DLGKYGPLE.D             | NA          | 2 | 2,1501 | 0,227 | -0,11  |
| 8 | P30837 AL1B1_HUMAN | E.LDTQQGPQVDKE.Q          | NA          | 2 | 2,1413 | 0,235 | -0,27  |
| 8 | Q9BTT0 AN32E_HUMAN | E.IEGLNDTFKELE.F          | NA          | 2 | 2,1412 | 0,249 | 0      |
| 8 | Q5VZL5 ZMYM4_HUMAN | E.LAKAKSEDS#DVELS#D.-     | S1542:S1547 | 2 | 2,1404 | 0,321 | -0,069 |
| 8 | P55072 TERA_HUMAN  | E.FLAKMTNGFSGADLTE.I      | NA          | 2 | 2,1361 | 0,247 | 0,215  |
| 8 | Q99733 NP1L4_HUMAN | E.RLDNVPHT#PSS#YIE.T      | T51:S54     | 2 | 2,1302 | 0,179 | 0,273  |
| 8 | P49591 SYSC_HUMAN  | E.NRLQNMEVT#DA.-          | T512        | 2 | 2,128  | 0,176 | 0,712  |
| 8 | A8MT69 STR13_HUMAN | E.DALRVDVDQLE.K           | NA          | 2 | 2,1253 | 0,127 | 0,383  |
| 8 | Q14152 EIF3A_HUMAN | E.EIPLIKSAYEE.Q           | NA          | 2 | 2,1218 | 0,174 | 0,094  |
| 8 | Q58FF8 H90B2_HUMAN | E.SKEQVANSAFVE.Q          | NA          | 2 | 2,1101 | 0,111 | 0,186  |
| 8 | Q9Y265 RUVB1_HUMAN | E.LGSKVPFCPM*VGSE.V       | NA          | 2 | 2,1085 | 0,223 | 0,08   |
| 8 | P18858 DNL1_HUMAN  | E.ALS#PAKGQKPALD.C        | S76         | 2 | 2,1065 | 0,367 | 0      |
| 8 | P14314 GLU2B_HUMAN | E.TMVTSTTEPSRCE.Y         | NA          | 2 | 2,1064 | 0,347 | 0,488  |
| 8 | O14979 HNRDL_HUMAN | K.DAASVDKVL.L             | NA          | 2 | 2,1006 | 0,248 | 0,233  |
| 8 | P35580 MYH10_HUMAN | E.LEEILHDLE.S             | NA          | 2 | 2,0893 | 0,249 | 0      |
| 8 | Q13642 FHL1_HUMAN  | E.DFYCVTCHE.T             | NA          | 2 | 2,0831 | 0,348 | 0,099  |
| 8 | Q9C0C9 UBE2O_HUMAN | E.QLLTGSPTS#PTVEPEKPTRE.K | S839        | 2 | 2,0786 | 0,119 | 0      |
| 8 | O00154 BACH_HUMAN  | E.VPPVVYSRQEQUEE.G        | NA          | 2 | 2,077  | 0,196 | 0,072  |
| 8 | Q16718 NDUA5_HUMAN | E.VILQAEHE.L              | NA          | 2 | 2,073  | 0,227 | -0,065 |
| 8 | P32322 P5CR1_HUMAN | E.GATVYATGTHAQVE.D        | NA          | 2 | 2,0726 | 0,141 | 0,434  |
| 8 | P52272 HNRPM_HUMAN | E.IIAKQGGGGGGSVPGIE.R     | NA          | 2 | 2,0649 | 0,195 | 0,55   |
| 8 | P14735 IDE_HUMAN   | E.IISQQYNFDRDNTE.V        | NA          | 2 | 2,0643 | 0,109 | 0,21   |
| 8 | P54727 RD23B_HUMAN | E.YLLMGIPGDRE.S           | NA          | 2 | 2,0583 | 0,283 | 0,097  |
| 8 | Q03252 LMNB2_HUMAN | E.LEQTYQAKLD.S            | NA          | 2 | 2,0556 | 0,14  | 0      |
| 8 | Q8IVF2 AHNK2_HUMAN | E.VDVEAPGAKLD.S           | NA          | 2 | 2,0442 | 0,21  | 0,329  |
| 8 | P15170 ERF3A_HUMAN | E.AEPGGGS#LGDGRPPEESAHE.M | S36         | 2 | 2,0434 | 0,142 | -0,06  |
| 8 | Q8WYA6 CTBL1_HUMAN | E.LTDIDTLHESEE.G          | NA          | 2 | 2,0361 | 0,144 | 0,261  |
| 8 | Q09666 AHNK_HUMAN  | K.GDVVDSVPEVEGK.L         | NA          | 2 | 2,0207 | 0,11  | 0      |
| 8 | O14745 NHERF_HUMAN | E.SPRPALVRS#ASSDT#SEE.L   | S288:T293   | 2 | 2,0068 | 0,394 | 0,376  |
| 8 | P22061 PIMT_HUMAN  | E.LLFDQLHE.G              | NA          | 2 | 2      | 0,101 | 0,06   |
| 8 | Q68EM7 RHG17_HUMAN | E.DSLLGKMLE.T             | NA          | 2 | 1,9966 | 0,325 | 0,364  |
| 8 | P38159 HNRPG_HUMAN | E.RGLPPS#ME.R             | S352        | 2 | 1,9942 | 0,104 | 0,189  |
| 8 | Q9UQ80 PA2G4_HUMAN | D.AM*PFTLRAFEDE.K         | NA          | 2 | 1,989  | 0,384 | 0,254  |
| 8 | Q96I27 RSRC1_HUMAN | E.IEAIES#DSFVQQTFRSSKE.V  | S237        | 2 | 1,9733 | 0,282 | 0,214  |
| 8 | P30085 KCY_HUMAN   | E.VVQIFDKEG.-             | NA          | 2 | 1,9676 | 0,189 | 0,118  |



|   |                      |                                |             |   |        |       |        |
|---|----------------------|--------------------------------|-------------|---|--------|-------|--------|
| 8 | P61604 CH10_HUMAN    | E.TVTKGGIMLPE.K                | NA          | 2 | 1,9667 | 0,291 | -0,106 |
| 8 | Q14694 UBP10_HUMAN   | E.SIDLDPTKPE.S                 | NA          | 2 | 1,9623 | 0,251 | 0,219  |
| 8 | P08107 HSP71_HUMAN   | E.TKAFYPEE.I                   | NA          | 2 | 1,9583 | 0,146 | 0,31   |
| 8 | Q07021 C1QBP_HUMAN   | E.AESDIFSIRE.V                 | NA          | 2 | 1,9349 | 0,286 | 0,209  |
| 8 | Q92615 LARP5_HUMAN   | E.VLRSLPLVQVDE.K               | NA          | 2 | 1,9339 | 0,158 | 0,357  |
| 8 | O14974 MYPT1_HUMAN   | E.TSSTSAGDRYDSSLGRSGS#YSYLEE.R | S910        | 2 | 1,9338 | 0,313 | 0,263  |
| 8 | P54727 RD23B_HUMAN   | E.YLLM*GIPGDRE.S               | NA          | 2 | 1,9306 | 0,291 | 0,191  |
| 8 | Q658J3 A26CA_HUMAN   | E.KMTQIMFE.T                   | NA          | 2 | 1,9296 | 0,15  | 0,356  |
| 8 | P04406 G3P_HUMAN     | E.FGYSNRVVD.L                  | NA          | 2 | 1,9269 | 0,293 | 0      |
| 8 | P20073 ANXA7_HUMAN   | R.LLVSMCQGNRDE.N               | NA          | 2 | 1,9264 | 0,167 | 0,172  |
| 8 | O15061 DMN_HUMAN     | E.SLS#RQRSPAPGS#PDEE.G         | S1040:S1049 | 2 | 1,9028 | 0,264 | 0      |
| 8 | Q658J3 A26CA_HUMAN   | E.KM*TQIMFE.T                  | NA          | 2 | 1,8982 | 0,121 | 0,351  |
| 8 | P06576 ATPB_HUMAN    | D.S#GAPIKIPVGPPE.T             | S128        | 2 | 1,8957 | 0,189 | 0,196  |
| 8 | Q68EM7 RHG17_HUMAN   | E.DSLLGKM*LE.T                 | NA          | 2 | 1,8944 | 0,081 | 0,06   |
| 8 | Q02790 FKBP4_HUMAN   | D.IAIATM*KVGE.V                | NA          | 2 | 1,8886 | 0,374 | 0,349  |
| 8 | P09960 LKHA4_HUMAN   | E.ISLPIALSKNQE.I               | NA          | 2 | 1,8871 | 0,134 | 0,279  |
| 8 | O94909 K0819_HUMAN   | E.RGPSQATS#PIRS#PQE.S          | S296:S300   | 2 | 1,8841 | 0,185 | 0,689  |
| 8 | Q8WUM4 PDC6I_HUMAN   | E.QGGIQTVDQLIKE.L              | NA          | 2 | 1,8727 | 0,135 | 0,256  |
| 8 | P12004 PCNA_HUMAN    | E.M*KLM*DLDVEQLGIPEQE.Y        | NA          | 2 | 1,8624 | 0,276 | 0,362  |
| 8 | P61604 CH10_HUMAN    | E.TVTKGGIM*LPE.K               | NA          | 2 | 1,847  | 0,17  | 0      |
| 8 | P29966 MARCS_HUMAN   | E.AGASPVEKEAPAEGE.A            | NA          | 2 | 1,8441 | 0,348 | 0,085  |
| 8 | P30837 AL1B1_HUMAN   | E.LGEDGLKAYTE.V                | NA          | 2 | 1,8165 | 0,243 | 0,306  |
| 8 | P11413 G6PD_HUMAN    | E.DFFARNSYVAGQYDD.A            | NA          | 2 | 1,8147 | 0,205 | -0,207 |
| 8 | P62191 PRS4_HUMAN    | E.SVELPLTHPE.Y                 | NA          | 2 | 1,8106 | 0,138 | 0      |
| 8 | Q99873 ANM1_HUMAN    | E.DYLTVKTGEE.I                 | NA          | 2 | 1,798  | 0,256 | -0,106 |
| 8 | P62258 1433E_HUMAN   | E.NSLVAYKAASDIAMTE.L           | NA          | 2 | 1,7968 | 0,135 | 0,072  |
| 8 | O75781 PALM_HUMAN    | E.NAAAPS#PVRAPAPSPAKE.E        | S116        | 2 | 1,7936 | 0,179 | -0,067 |
| 8 | Q9Y678 COPG_HUMAN    | E.STPITAVKQPE.K                | NA          | 2 | 1,7919 | 0,081 | 0,208  |
| 8 | P36776 LONM_HUMAN    | E.NLQDFVKGKPVFTVE.R            | NA          | 2 | 1,7632 | 0,168 | 0,153  |
| 8 | P14866 HNRPL_HUMAN   | E.GYGPPPPHYE.G                 | NA          | 2 | 1,7597 | 0,203 | -0,219 |
| 8 | Q7KZF4 SND1_HUMAN    | R.SASYKPVFVTE.I                | NA          | 2 | 1,7376 | 0,1   | 0,099  |
| 8 | Q9Y5K6 CD2AP_HUMAN   | E.LEVTDDGETHE.A                | NA          | 2 | 1,7326 | 0,265 | -0,196 |
| 8 | P63244 GBLP_HUMAN    | K.IIVDELKQE.V                  | NA          | 2 | 1,7222 | 0,143 | -0,337 |
| 8 | O60716 CTND1_HUMAN   | E.DGYPGGSDNYGS#LSRVTRIEE.R     | S230        | 2 | 1,7191 | 0,085 | 0,104  |
| 8 | Q9GZY8 CB033_HUMAN   | E.DVSFSRPADLD.L                | NA          | 2 | 1,6886 | 0,145 | 0,499  |
| 8 | O75534 CSDE1_HUMAN   | E.DISIEHFE.G                   | NA          | 2 | 1,6876 | 0,082 | 0,123  |
| 8 | P08238 HS90B_HUMAN   | E.TQKSIYITGE.S                 | NA          | 2 | 1,6702 | 0,16  | 0      |
| 8 | P08195 4F2_HUMAN     | D.LLQIDPNFGSK.E                | NA          | 2 | 1,6006 | 0,167 | 0      |
| 8 | P50990 TCPQ_HUMAN    | E.AEVPVKDM*LE.A                | NA          | 2 | 1,5748 | 0,14  | -0,2   |
| 8 | P41252 SYIC_HUMAN    | E.IVVIHQDPE.A                  | NA          | 2 | 1,557  | 0,271 | -0,116 |
| 8 | ##O94804 STK10_HUMAN | E.LTM*LVNGAK.L                 | NA          | 2 | 1,5302 | 0,096 | 0,887  |

|   |                    |                                     |           |   |        |       |        |
|---|--------------------|-------------------------------------|-----------|---|--------|-------|--------|
| 8 | P31947 1433S_HUMAN | E.DM*AAFM*KGAVE.K                   | NA        | 2 | 1,5179 | 0,153 | -0,203 |
| 8 | P27816 MAP4_HUMAN  | R.AS#PIKMDLAPSKD.M                  | S358      | 2 | 1,5048 | 0,263 | -0,336 |
| 8 | Q9NQW7 XPP1_HUMAN  | E.DGAFGIRIE.N                       | NA        | 2 | 1,4651 | 0,097 | 0,312  |
| 8 | P10398 ARAF_HUMAN  | E.LLTPQGPS#PRTQHCDPE.H              | S186      | 2 | 1,4619 | 0,235 | 0,242  |
| 8 | Q6PKG0 LARP1_HUMAN | E.SAPGS#PRAVTPVPTKTEE.V             | S521      | 2 | 1,4333 | 0,113 | 0,064  |
| 8 | P04406 G3P_HUMAN   | K.LTGM*AFR.V                        | NA        | 2 | 1,432  | 0,218 | 0,376  |
| 8 | Q6S8J3 A26CA_HUMAN | D.SGDGVTHTVPIYE.G                   | NA        | 2 | 1,4271 | 0,105 | 0,177  |
| 8 | P29692 EF1D_HUMAN  | E.NQSLRGVVQE.L                      | NA        | 2 | 1,4106 | 0,099 | 0      |
| 9 | O94887 FARP2_HUMAN | E.FKDSSSLTDPQVSYVKS#PAAE.R          | S439      | 2 | 5,8576 | 0,614 | 0,101  |
| 9 | Q12893 TM115_HUMAN | E.SGAKVDS#PLPSDKAPT#PPGKGAPE.S      | S320:T329 | 3 | 5,7583 | 0,324 | 0,217  |
| 9 | Q9C0C2 TB182_HUMAN | D.LGLRNM*APGAVCS#PGESKE.L           | S1297     | 3 | 5,5423 | 0,407 | 0,088  |
| 9 | P29692 EF1D_HUMAN  | E.NIQS#LAGSSGPGASSGTSGDHGE.L        | S60       | 3 | 5,4936 | 0,544 | 0,321  |
| 9 | Q9NQW6 ANLN_HUMAN  | E.NKQPVESTSAKSCSPVSV#PQVQQAADTISD.S | S102      | 3 | 5,4269 | 0,436 | 0,535  |
| 9 | Q96JM3 ZN828_HUMAN | E.SQKLAPVPSPEPQKPAPVS#PE.S          | S214      | 3 | 5,4243 | 0,347 | 0,162  |
| 9 | Q96I24 FUBP3_HUMAN | E.YYRQQVAFYQGTLGQAQAH#QEQ.-         | S569      | 3 | 5,3435 | 0,283 | 0,197  |
| 9 | Q9H4A3 WNK1_HUMAN  | E.QQSSTPGSLFSPAPAPKNGSS#SDSSVGE.K   | S30       | 3 | 5,3433 | 0,354 | 0      |
| 9 | Q9NZW5 MPP6_HUMAN  | E.AHDIVASKCYDS#PPS#SPE.M            | S106:S109 | 2 | 5,3098 | 0,489 | 0      |
| 9 | P35611 ADDA_HUMAN  | E.AHRPPS#PTEAPTEASPEPAPDPAPVAEE.A   | S669      | 3 | 5,2596 | 0,411 | 0,375  |
| 9 | Q9Y2X9 ZN281_HUMAN | E.HSELVQEENLS#PGTQTPSNDKASM*LQE.Y   | S651      | 3 | 5,2207 | 0,429 | 1,194  |
| 9 | O75044 FNBP2_HUMAN | E.GPVYSRGGSMEDYCD#PHGE.T            | S702      | 3 | 5,1406 | 0,42  | 0,08   |
| 9 | Q8IW19 MGAP_HUMAN  | E.DQRQPSSSS#SPSPFQQTSCHSSPE.N       | S1258     | 3 | 5,0344 | 0,38  | 0,435  |
| 9 | Q13506 NAB1_HUMAN  | E.SEHLSPADLGSPAS#PKESSE.A           | S183      | 3 | 5,0144 | 0,364 | 0,083  |
| 9 | O75691 UTP20_HUMAN | E.YTCKSLSDNGQPGT#PDPADSGGTSAKE.S    | T1741     | 3 | 5,0056 | 0,476 | 0      |
| 9 | Q8N108 MIER1_HUMAN | E.SAASSRAPS#PPPTASNSSNSQSEKE.D      | S401      | 3 | 4,9918 | 0,439 | 0,215  |
| 9 | Q96AE4 FUBP1_HUMAN | E.YYRQQAAYYAQTS#PQGM*PQHPPAPQGG.-   | S630      | 3 | 4,9774 | 0,483 | 0,232  |
| 9 | Q14444 CAPR1_HUMAN | E.TLKQQNQYQASYNQS#FSSQPHQVE.Q       | S548      | 3 | 4,9501 | 0,422 | 0,313  |
| 9 | O15014 ZN609_HUMAN | E.ADKIYSFTDNAPS#PSIGGSSRLE.N        | S804      | 3 | 4,9315 | 0,421 | 0,147  |
| 9 | Q13506 NAB1_HUMAN  | E.SEHLSPADLGSPAS#PKESSE.A           | S183      | 2 | 4,8986 | 0,531 | 0      |
| 9 | Q9NR48 ASH1L_HUMAN | E.NNKSFNAPVEIPS#PSETPAKPSEPE.S      | S1953     | 3 | 4,8776 | 0,445 | 0,191  |
| 9 | Q9P2E9 RRBP1_HUMAN | E.SASVQGRNTDVAQS#PEAPKQE.A          | S615      | 3 | 4,877  | 0,319 | 0,241  |
| 9 | Q9H4A3 WNK1_HUMAN  | E.QQSSTPGSLFSPAPAPKNGSS#DSSVGE.K    | S31       | 3 | 4,8452 | 0,207 | -0,183 |
| 9 | O00401 WASL_HUMAN  | E.TSKVIY#DFIEKTGGVE.A               | Y256      | 2 | 4,7781 | 0,426 | 0,065  |
| 9 | Q71U36 TBA1A_HUMAN | E.HGIQPDGQM*PSDKTIGGGDSS#FNTFFSE.T  | S48       | 3 | 4,7348 | 0,486 | 0,238  |
| 9 | Q4V328 GRAP1_HUMAN | E.M*NSPSRTQTGDSSS#ISSFSYRE.I        | S666      | 3 | 4,7056 | 1     | -0,073 |
| 9 | P51784 UBP11_HUMAN | D.VARRLLSPAGSSGAPAS#PACSS#PPSSE.F   | S905:S910 | 3 | 4,6989 | 1     | -0,398 |
| 9 | P19338 NUCL_HUMAN  | E.SKTLVLSNLSYSATEE.T                | NA        | 2 | 4,6542 | 0,498 | -0,14  |
| 9 | O00443 P3C2A_HUMAN | E.ITDSKVSNLQVS#PKSE.D               | S259      | 2 | 4,6175 | 0,346 | 0      |
| 9 | Q96AE4 FUBP1_HUMAN | E.YYRQQAAYYAQTS#PQGMPPHPPAPQGG.-    | S630      | 3 | 4,5295 | 0,373 | 0,466  |
| 9 | Q9H832 UBE2Z_HUMAN | E.NAEM*DSDSS#SSGTETDLHGSLRV.-       | S340      | 3 | 4,5198 | 0,458 | 0,073  |
| 9 | Q9HCD6 TANC2_HUMAN | E.SMSVYRSQSGS#PVRYQQE.T             | S1560     | 3 | 4,4626 | 0,293 | 0,337  |
| 9 | Q15648 MED1_HUMAN  | R.GSPS#HSKSPAYTPQNLDSESE.S          | S1449     | 3 | 4,4394 | 0,382 | -0,08  |

|   |                     |                                      |           |   |        |       |        |
|---|---------------------|--------------------------------------|-----------|---|--------|-------|--------|
| 9 | O60271 JIP4_HUMAN   | E.TRNVS#TGS#AENEKSE.V                | S329:S332 | 2 | 4,4325 | 0,499 | -0,257 |
| 9 | Q99613 EIF3C_HUMAN  | E.LVTKPVGNGYKQPLLS#EDEE.D            | S39       | 3 | 4,3967 | 0,297 | 0      |
| 9 | Q16204 CCDC6_HUMAN  | E.KLDQPVSAAPS#PRDISM*E.I             | S244      | 2 | 4,3563 | 0,451 | 0,237  |
| 9 | P07355 ANXA2_HUMAN  | E.GDHSTPPSAY#GSVKAYTNFDAE.R          | Y24       | 2 | 4,2989 | 0,355 | 0,102  |
| 9 | Q13509 TBB3_HUMAN   | E.HGIDPSGNYVGDSDLQLE.R               | NA        | 2 | 4,2904 | 0,369 | 0,064  |
| 9 | Q9NQW6 ANLN_HUMAN   | E.NKQPVESTSAKSCSPS#PVSPQVQQAADTISD.S | S99       | 3 | 4,29   | 0,437 | 0,321  |
| 9 | Q8NEF9 SRFB1_HUMAN  | E.NTLYSNDNGSNLQRE.A                  | NA        | 2 | 4,2769 | 0,499 | 0,071  |
| 9 | Q96JM3 ZN828_HUMAN  | E.SQKLAPVSPPEQKAPVS#PE.S             | S214      | 2 | 4,2638 | 0,393 | 0,216  |
| 9 | P07355 ANXA2_HUMAN  | E.GDHSTPPSAYGS#VKAYTNFDAE.R          | S26       | 2 | 4,2584 | 0,429 | 0,204  |
| 9 | O75691 UTP20_HUMAN  | E.YTCKSLSDNGQPGT#PDPADSGGTSAKESE.C   | T1741     | 3 | 4,2554 | 0,466 | 0,241  |
| 9 | Q9Y6A5 TACC3_HUMAN  | E.STAPTNLVAGRAMTSL#PQEE.V            | S317      | 2 | 4,245  | 0,37  | 0,426  |
| 9 | P49815 TSC2_HUMAN   | E.GGRPSVDLSFQPSQPLSKSSS#PE.L         | S1388     | 3 | 4,2433 | 0,291 | -0,358 |
| 9 | P29966 MARCS_HUMAN  | E.AAAERPGAAVASS#PSKANGQE.N           | S27       | 2 | 4,1912 | 0,462 | 0,112  |
| 9 | Q93009 UBP7_HUMAN   | E.DQFCGHQGNM*YDEE.K                  | NA        | 2 | 4,1849 | 0,35  | 0,197  |
| 9 | P18669 PGAM1_HUMAN  | E.NRFS#GWYDADLSPAGHEE.A              | S23       | 2 | 4,166  | 0,44  | -0,115 |
| 9 | Q5H9R7 SAPS3_HUMAN  | E.FTSSLTKDSLRSNS#PVEM*E.T            | S740      | 2 | 4,1652 | 0,363 | 0      |
| 9 | P17706 PTN2_HUMAN   | E.LSKEDLS#PAFDHS#PNKIM*TE.K          | S298:S304 | 3 | 4,1457 | 0,273 | 0,376  |
| 9 | Q92562 SAC3_HUMAN   | E.GSVSQRS#T#PVKM*TDAGDSAKVTE.N       | S776:T777 | 3 | 4,1388 | 0,137 | -0,072 |
| 9 | P49815 TSC2_HUMAN   | E.GGRPSVDLSFQPSQPLSKSSS#SPE.L        | S1387     | 3 | 4,0898 | 0,274 | 0      |
| 9 | Q6PKG0 LARP1_HUMAN  | E.VSNLKTLPKGLSAS#LPDLDE.N            | S548      | 2 | 4,0876 | 0,398 | 0      |
| 9 | O43293 DAPK3_HUMAN  | E.YTIKSHS#SLPPNNSYADFE.R             | S311      | 3 | 4,0806 | 0,283 | 0,244  |
| 9 | Q96GV9 CE030_HUMAN  | E.SRSTLTLPFPGAANS#PGKAE.A            | S25       | 3 | 4,0661 | 0,234 | 0      |
| 9 | P17275 JUNB_HUMAN   | E.ARSRDAT#PPVS#PINMEDQE.R            | T255:S259 | 2 | 4,0554 | 0,454 | -0,322 |
| 9 | Q7LBC6 JHD2B_HUMAN  | E.SLADSSS#RDSFKQSLE.S                | S553      | 2 | 4,0553 | 0,402 | 0,125  |
| 9 | Q13085 ACACA_HUMAN  | E.LNQHSRFIIGS#VSEDNS#EDE.I           | S23:S29   | 3 | 4,0407 | 0,518 | 0      |
| 9 | Q6PKG0 LARP1_HUMAN  | E.VSNLKTLPKGLSAS#LPDLDE.N            | S548      | 3 | 4,0133 | 0,348 | 0,162  |
| 9 | Q92615 LARP5_HUMAN  | E.KFTSSQTQSPTPKPPS#PSFE.L            | S524      | 2 | 4,0114 | 0,371 | 0,207  |
| 9 | Q15916 ZBTB6_HUMAN  | E.M*KS#PELSTVDIGFKDNE.I              | S202      | 2 | 4,0065 | 0,412 | 0,304  |
| 9 | Q99598 TSNAX_HUMAN  | E.GKDVNS#SSPVM*LAFKSFQQE.L           | S31       | 3 | 3,9717 | 0,143 | 0,478  |
| 9 | P16070 CD44_HUMAN   | E.M*VHLVNKESSE#ETPDQFM*TADE.T        | S718      | 3 | 3,9593 | 0,21  | 0,363  |
| 9 | Q9Y490 TLN1_HUMAN   | E.DTKVLVQNAAGSQE.K                   | NA        | 2 | 3,9552 | 0,475 | 0,084  |
| 9 | Q9HCD6 TANC2_HUMAN  | E.SM*SVYRSQSGS#PVRYQQE.T             | S1560     | 3 | 3,9152 | 0,372 | 0,167  |
| 9 | Q2M218 AAK1_HUMAN   | E.ASLNKSKSATTT#PSGSPRT#SQQNVYNPSE.G  | T674:T681 | 3 | 3,9106 | 1     | -0,229 |
| 9 | Q96AE4 FUBP1_HUMAN  | E.SGCKIQIAPDSGGLPE.R                 | NA        | 2 | 3,9054 | 0,307 | 0,15   |
| 9 | Q92597 NDRG1_HUMAN  | E.GAHLDTIPNSGAAGNSAGPKSM*EVS#C.-     | S393      | 3 | 3,8996 | 0,338 | 0,209  |
| 9 | Q92878 RAD50_HUMAN  | E.DKLFVCGSQDFE.S                     | NA        | 2 | 3,8985 | 0,458 | -0,235 |
| 9 | O60271 JIP4_HUMAN   | E.TRNVS#TGS#AENEKSE.V                | T330:S332 | 3 | 3,8886 | 0,228 | 0      |
| 9 | A8MWW4 A8MWW4_HUMAN | -.PLAKDLLHPS#PEEE.K                  | S10       | 2 | 3,8861 | 0,456 | 0,147  |
| 9 | Q92615 LARP5_HUMAN  | E.EKFTSSQTQSPTPKPPS#PSFE.L           | S524      | 3 | 3,8859 | 0,343 | 0,074  |
| 9 | P78527 PRKDC_HUMAN  | E.TQASQGTLQTRTQE.G                   | NA        | 2 | 3,8636 | 0,462 | 0,079  |
| 9 | Q9C0C9 UBE2O_HUMAN  | E.KAQUALPNGVPKASS#SPEPPAVAE.L        | S1167     | 2 | 3,8582 | 0,266 | 0,105  |

|   |                    |                                       |             |   |        |       |        |
|---|--------------------|---------------------------------------|-------------|---|--------|-------|--------|
| 9 | Q7Z2W4 ZCCHV_HUMAN | E.FLASASASAERS#CTPS#PDQISHRASLE.D     | S271:S275   | 3 | 3,8549 | 1     | 0,362  |
| 9 | Q9NR45 SIAS_HUMAN  | E.RALGS#PTKQLLPCEMACNE.K              | S275        | 3 | 3,8542 | 0,337 | 0,081  |
| 9 | Q9UQ35 SRRM2_HUMAN | E.KSATRPS#PS#PERSTGPEPPAPTLLAE.R      | S351:S353   | 3 | 3,8276 | 1     | 0,364  |
| 9 | O75044 FNBP2_HUMAN | E.GPVYSRGGSM*EDYCD#PHGE.T             | S702        | 3 | 3,8116 | 0,344 | 0,159  |
| 9 | P29966 MARCS_HUMAN | E.AAAERPGEAAVASSPS#KANGQE.N           | S29         | 3 | 3,7977 | 0,355 | 0,672  |
| 9 | Q92615 LARP5_HUMAN | E.KFTSSQTQSPTPKPPS#PSFE.L             | S524        | 3 | 3,7911 | 0,168 | 0,311  |
| 9 | P08670 VIME_HUMAN  | E.NTLQSFQDQVDNAS#LARLD.L              | S214        | 3 | 3,7906 | 0,335 | 0      |
| 9 | P98172 EFNB1_HUMAN | E.KVS#GDYGHVPVIVQE.M                  | S321        | 2 | 3,7878 | 0,488 | 0,344  |
| 9 | Q09666 AHNK_HUMAN  | E.VGFHGAAPDISVKGPAFNM*AS#PE.S         | S5552       | 3 | 3,7837 | 0,293 | -0,229 |
| 9 | P33316 DUT_HUMAN   | E.VQALDDTERGS#GGFGSTGKN.-             | S243        | 2 | 3,7815 | 0,284 | 0,118  |
| 9 | P17275 JUNB_HUMAN  | E.ARSRDAT#PPVS#PINM*EDQE.R            | T255:S259   | 3 | 3,7793 | 0,272 | 0,4    |
| 9 | P60709 ACTB_HUMAN  | R.GYS#FTTAEERE.I                      | S199        | 2 | 3,7681 | 0,528 | 0,091  |
| 9 | Q7L2J0 MEPCE_HUMAN | E.SHPVPPTAPLT#PLLHGE.G                | T291        | 3 | 3,7662 | 0,298 | -0,099 |
| 9 | Q96582 UBL7_HUMAN  | E.SSHTPTPGTQGHSSGT#SPMSSGVQSGTPTIND.L | T300        | 3 | 3,7587 | 1     | -0,224 |
| 9 | P27816 MAP4_HUMAN  | E.IAQTKGISEDS#HLE.S                   | S605        | 2 | 3,7454 | 0,442 | -0,07  |
| 9 | P62829 RL23_HUMAN  | E.DNAGVIVNNKGE.M                      | NA          | 2 | 3,7446 | 0,42  | 0,099  |
| 9 | Q99590 SFRIP_HUMAN | E.IIQTVDQRSVKS#PE.V                   | S314        | 3 | 3,7352 | 0,192 | 0,653  |
| 9 | Q7LBC6 JHD2B_HUMAN | E.SLADSSS#RDSFKQSLE.S                 | S553        | 3 | 3,7294 | 0,39  | 0,187  |
| 9 | Q02952 AKA12_HUMAN | E.KEPSKAES#PTS#PVTSE.T                | S283:S286   | 2 | 3,7188 | 1     | 0,064  |
| 9 | Q7L1V2 MON1B_HUMAN | E.TGSKDKDQPPS#PS#PPPQSE.A             | S59:S61     | 3 | 3,7163 | 0,312 | 0,599  |
| 9 | P08670 VIME_HUMAN  | E.AANYQDTIGRLQDE.I                    | NA          | 2 | 3,7107 | 0,356 | 0,077  |
| 9 | P04075 ALDOA_HUMAN | E.STGS#IAKRLQSIGTENTEE.N              | S39         | 2 | 3,7103 | 0,32  | 0,232  |
| 9 | Q6PJT7 ZC3HE_HUMAN | E.VVQGS#RTPRIS#PPIKEEE.T              | S403:S409   | 3 | 3,6933 | 0,308 | 0,317  |
| 9 | Q04837 SSB_HUMAN   | E.GKNPVTIFSLATNE.M                    | NA          | 2 | 3,6587 | 0,511 | 0      |
| 9 | P17275 JUNB_HUMAN  | E.ARSRDAT#PPVS#PINMEDQE.R             | T255:S259   | 3 | 3,6482 | 0,269 | -0,08  |
| 9 | Q9H3S7 PTN23_HUMAN | E.S#QHGGTQSPGGGQPLLQPTKVDAAE.G        | S1126       | 3 | 3,6476 | 0,255 | 0,288  |
| 9 | O43683 BUB1_HUMAN  | E.NM*VVPSRDGKFS#PIQE.K                | S655        | 2 | 3,6434 | 0,285 | 0,193  |
| 9 | O43663 PRC1_HUMAN  | E.LDHTPDT#SFERDVVCE.D                 | T194        | 2 | 3,6333 | 0,337 | 0,305  |
| 9 | O43166 SI1L1_HUMAN | E.NHRPLS#AAS#NSDQLE.D                 | S1708:S1711 | 2 | 3,6303 | 0,537 | 0,203  |
| 9 | P14314 GLU2B_HUMAN | E.EQLAAAKAQEQE.L                      | NA          | 2 | 3,6282 | 0,368 | 0      |
| 9 | Q92692 PVRL2_HUMAN | E.HS#PLKTPYFDAGASCTE.Q                | S433        | 2 | 3,6228 | 0,447 | 0,124  |
| 9 | Q99590 SFRIP_HUMAN | E.GEIIQTVDRQS#VKSPE.V                 | S311        | 3 | 3,6173 | 0,316 | 0,392  |
| 9 | O75821 EIF3G_HUMAN | E.LLKGIPLATGDT#PEPE.L                 | S42         | 2 | 3,6126 | 0,299 | 0      |
| 9 | Q86UP2 KTN1_HUMAN  | E.SDLSKTKQLQDVQDE.N                   | NA          | 2 | 3,6092 | 0,3   | -0,068 |
| 9 | P27816 MAP4_HUMAN  | E.EGRPVVSGTGNDITPPNKELPPS#PE.K        | S696        | 3 | 3,6023 | 0,253 | 0,397  |
| 9 | P18669 PGAM1_HUMAN | E.NRFS#GWYDADLSPAGHEE.A               | S23         | 3 | 3,5997 | 0,132 | 0      |
| 9 | O60264 SMCA5_HUMAN | E.IFDDAS#PGKQKE.I                     | S66         | 2 | 3,5942 | 0,377 | 0,086  |
| 9 | P19525 E2AK2_HUMAN | E.KKAVS#PLLLTTNS#SE.G                 | S83:S92     | 2 | 3,5838 | 1     | 0,066  |
| 9 | O94887 FARP2_HUMAN | E.FKDSSSLTDPQVSYVKS#PAAE.R            | S439        | 3 | 3,5757 | 0,34  | 0,151  |
| 9 | Q9Y265 RUVB1_HUMAN | E.SGLAKQAASGLVGQE.N                   | NA          | 2 | 3,5709 | 0,484 | 0,172  |
| 9 | Q96JJ7 TXD10_HUMAN | E.SKEQQEPS#SGGSVVPTVQEPKDVLE.K        | S433        | 3 | 3,5693 | 0,109 | 0,335  |

|   |                     |                                    |           |   |        |       |        |
|---|---------------------|------------------------------------|-----------|---|--------|-------|--------|
| 9 | Q99590 SFRIP_HUMAN  | E.IIQTVDRQSVKS#PE.V                | S314      | 2 | 3,5691 | 0,287 | 0,073  |
| 9 | Q15819 UB2V2_HUMAN  | E.NM*KLPQPPEGQTYNN.-               | NA        | 2 | 3,5426 | 0,225 | 0,07   |
| 9 | Q4KMP7 TB10B_HUMAN  | E.GLHPSLPSPT#GNSTPLGSSKE.T         | T434      | 3 | 3,5369 | 0,373 | 0,256  |
| 9 | Q13765 NACA_HUMAN   | E.AKIEDLSQQAQLAAAE.K               | NA        | 2 | 3,5226 | 0,417 | 0,072  |
| 9 | Q9HC35 EMAL4_HUMAN  | E.QAKATLLEDQQDPSPSS.-              | NA        | 2 | 3,521  | 0,445 | 0,067  |
| 9 | Q99590 SFRIP_HUMAN  | E.GEIIQTVDRQSVKS#PE.V              | S314      | 2 | 3,5124 | 0,385 | 0      |
| 9 | O00139 KIF2A_HUMAN  | E.GAEINKS#LLALKE.C                 | S484      | 2 | 3,5007 | 0,328 | 0      |
| 9 | Q92692 PVRL2_HUMAN  | E.HS#PLKTPYFDAGASCTEQE.M           | S433      | 3 | 3,4953 | 0,378 | -0,082 |
| 9 | P31948 STIP1_HUMAN  | E.IAT#PPPPPPPKKE.T                 | T198      | 3 | 3,4934 | 0,326 | 0,126  |
| 9 | Q9Y6A5 TACC3_HUMAN  | E.STAPTNNHLVAGRAM*TLS#PQEE.V       | S317      | 2 | 3,4869 | 0,425 | 0,317  |
| 9 | Q5H9R7 SAPS3_HUMAN  | E.FTSSLSTKDSLRSNS#PVEME.T          | S740      | 2 | 3,483  | 0,453 | 0,106  |
| 9 | Q9H307 PININ_HUMAN  | E.IAIVHS#DAEKE.Q                   | S347      | 2 | 3,4814 | 0,476 | 0,189  |
| 9 | Q14674 ESPL1_HUMAN  | E.ILRGS#DGEDSASGGKTPAPGPE.A        | S1508     | 3 | 3,4753 | 0,187 | 0,168  |
| 9 | P18615 NELFE_HUMAN  | E.KGPVPTFQPFQRSIS#ADDDLQE.S        | S115      | 3 | 3,4687 | 0,248 | -0,215 |
| 9 | P63208 SKP1_HUMAN   | K.NDFTEEEEAQVR.K                   | NA        | 2 | 3,4593 | 0,454 | 0      |
| 9 | Q2QGD7 ZXDC_HUMAN   | E.GSHGLPQSTLPS#PAEQHGAQDTE.L       | S688      | 3 | 3,4521 | 0,128 | -0,075 |
| 9 | A8K1U6 A8K1U6_HUMAN | E.TGVFVINHFTCRS#.-                 | S523      | 2 | 3,4504 | 0,359 | -0,075 |
| 9 | Q16204 CCDC6_HUMAN  | E.KLDQPVSAAPS#PRDISM*E.I           | S244      | 3 | 3,4485 | 0,176 | 0      |
| 9 | Q96AE4 FUBP1_HUMAN  | E.YYRQQAAYYAQT#SPQGM*PQHPPAPQGQ.-  | T629      | 3 | 3,4441 | 0,234 | 0,116  |
| 9 | Q9UPX8 SHAN2_HUMAN  | E.IKS#PILSGPKANVISE.L              | S1017     | 2 | 3,442  | 0,41  | 0,211  |
| 9 | Q92597 NDRG1_HUMAN  | E.GAHLDT#PNSGAAGNSAGPKSM*E.V       | T375      | 3 | 3,4336 | 0,221 | -0,08  |
| 9 | Q9NR45 SIAS_HUMAN   | E.RALGS#PTKQLLPCEM*ACNE.K          | S275      | 3 | 3,4287 | 0,396 | 0,564  |
| 9 | Q7L2J0 MEPCE_HUMAN  | E.SHPVPPTAPLT#PLLHGE.G             | T291      | 2 | 3,4122 | 0,356 | -0,199 |
| 9 | Q8WXE1 ATRIP_HUMAN  | E.ACS#PQFGKTSFPTKE.S               | S239      | 3 | 3,4035 | 0,309 | 0,104  |
| 9 | Q92560 BAP1_HUMAN   | E.GGKGSS#PSIRPIQGSQGSS#SPVEKEVVE.A | S583:S596 | 3 | 3,3992 | 0,109 | 0,249  |
| 9 | P08107 HSP71_HUMAN  | E.SYAFNM*KSAVEDE.G                 | NA        | 2 | 3,3885 | 0,373 | 0,162  |
| 9 | Q5UIP0 RIF1_HUMAN   | E.LIIEDNNAS#PQKLRE.L               | S2144     | 2 | 3,3854 | 0,292 | 0,134  |
| 9 | Q4LE39 ARI4B_HUMAN  | D.LVISKPVSKS#PE.R                  | S778      | 2 | 3,3818 | 0,287 | -0,358 |
| 9 | O00139 KIF2A_HUMAN  | E.DGKQQVQVVGGLQE.R                 | NA        | 2 | 3,3815 | 0,29  | 0,085  |
| 9 | Q8NEZ4 MLL3_HUMAN   | E.VDNSKQLIPTLQRSVS#EE.S            | S113      | 3 | 3,3809 | 0,269 | 0,172  |
| 9 | Q9C0C2 TB182_HUMAN  | D.LGLRNMAPGAVCS#PGESKE.L           | S1297     | 3 | 3,3763 | 0,118 | 0      |
| 9 | P02545 LMNA_HUMAN   | E.LDFQKNIYS#EELRE.T                | S212      | 3 | 3,3722 | 0,272 | -0,294 |
| 9 | P52788 SPSY_HUMAN   | D.LQSYDGDAGQKKEE.I                 | NA        | 2 | 3,3671 | 0,445 | 0      |
| 9 | P17706 PTN2_HUMAN   | E.LSKEDLS#PAFDHS#PNKIMTE.K         | S298:S304 | 3 | 3,3657 | 0,233 | 0,076  |
| 9 | Q92609 TBCD5_HUMAN  | E.SM*PVQLNKGLSSKNISSPS#VE.S        | S541      | 3 | 3,3602 | 0,297 | 0,23   |
| 9 | Q92945 FUBP2_HUMAN  | R.GGEQINKIQQDSGCKVQIS#PDSGGLPE.R   | S181      | 3 | 3,3574 | 0,252 | -0,188 |
| 9 | Q2TAA2 IAH1_HUMAN   | E.NRVILITPTLCE.T                   | NA        | 2 | 3,3574 | 0,393 | 0,08   |
| 9 | Q5UIP0 RIF1_HUMAN   | E.NRPFSPS#PLNNSISSTVTVKNNQE.T      | S1238     | 3 | 3,3519 | 0,324 | 0      |
| 9 | Q71F56 MD13L_HUMAN  | E.QHPAFS#PVM*NYKDGISSE.T           | S878      | 3 | 3,3516 | 0,28  | -0,087 |
| 9 | O14964 HGS_HUMAN    | E.EARKS#PTPSAPVPLTEPAAQPGE.G       | S345      | 2 | 3,3462 | 0,56  | 0,101  |
| 9 | Q6PGN9 PSRC1_HUMAN  | E.TFVLKDS#PVRD.L                   | S122      | 2 | 3,346  | 0,421 | 0,09   |

|   |                    |                             |             |   |        |       |        |
|---|--------------------|-----------------------------|-------------|---|--------|-------|--------|
| 9 | Q6S8J3 A26CA_HUMAN | E.KLCYVALDFEQE.M            | NA          | 2 | 3,3321 | 0,246 | 0,322  |
| 9 | O60216 RAD21_HUMAN | E.SEQSTS#NLNEKINHLE.Y       | S200        | 2 | 3,3222 | 0,393 | -0,381 |
| 9 | Q5VZL5 ZMYM4_HUMAN | E.LAKAKSEDS#DVELS#D.-       | S1542:S1547 | 2 | 3,3166 | 0,376 | 0,138  |
| 9 | O43683 BUB1_HUMAN  | E.NMVVPSRDGKFS#PIQE.K       | S655        | 2 | 3,3133 | 0,269 | 0,194  |
| 9 | Q58FF8 H90B2_HUMAN | E.FDGKS#LVSVTKE.G           | S305        | 3 | 3,3111 | 0,096 | 0,197  |
| 9 | Q9UPN3 MACF1_HUMAN | E.VLKSM*DAM*SSPT#KTE.T      | T2431       | 3 | 3,3062 | 0,322 | 0,211  |
| 9 | Q5THK1 CV030_HUMAN | E.LDGVKAACPCPQSS#PPEQKE.A   | S1994       | 3 | 3,3055 | 0,164 | -0,08  |
| 9 | Q96SB4 SRPK1_HUMAN | E.DLHNANDCDVQNLNQE.S        | NA          | 2 | 3,3037 | 0,282 | 0,064  |
| 9 | O43303 CE110_HUMAN | E.GFNS#PKQCDSSNISHVENE.A    | S170        | 3 | 3,3016 | 0,231 | 0      |
| 9 | Q4KMP7 TB10B_HUMAN | E.GLHPSLPS#PTGNSTPLGSSKE.T  | S432        | 2 | 3,2945 | 0,413 | 0,455  |
| 9 | Q6P2E9 EDC4_HUMAN  | E.NDSLADGTHGAGAM*E.S        | NA          | 2 | 3,2927 | 0,323 | -0,161 |
| 9 | Q9UKV3 ACINU_HUMAN | R.GS#PKKCEAEAEPPAATQPQTSE.T | S729        | 2 | 3,2773 | 0,456 | 0,968  |
| 9 | P38646 GRP75_HUMAN | E.VKSTNGDTFLGGEDFD.Q        | NA          | 2 | 3,2466 | 0,463 | -0,215 |
| 9 | Q96B23 CR025_HUMAN | E.LRRDS#SES#QLASTE.S        | S66:S69     | 2 | 3,2447 | 0,441 | 0,14   |
| 9 | Q9NVI7 ATD3A_HUMAN | E.DQLKQQQLLEE.N             | NA          | 2 | 3,2396 | 0,178 | 0,328  |
| 9 | Q86TG7 PEG10_HUMAN | E.NNNLQSQVQKLTEE.N          | NA          | 2 | 3,2354 | 0,375 | -0,074 |
| 9 | Q15819 UB2V2_HUMAN | E.NMKLPQPPEGQTYNN.-         | NA          | 2 | 3,2131 | 0,329 | 0,775  |
| 9 | Q9Y6D9 MD1L1_HUMAN | R.DGMRAILGSYDSE.L           | NA          | 2 | 3,2008 | 0,383 | 0,173  |
| 9 | Q9UPN3 MACF1_HUMAN | E.VLKSM DAMSS#PTKTE.T       | S2429       | 2 | 3,1969 | 0,372 | 0,072  |
| 9 | Q9UEY8 ADDG_HUMAN  | E.ITIKS#PEKIEE.V            | S664        | 2 | 3,1825 | 0,177 | 0,089  |
| 9 | Q8WXE1 ATRIP_HUMAN | E.ACS#PQFGKTSFPTKE.S        | S239        | 2 | 3,1598 | 0,178 | 0,138  |
| 9 | P49321 NASP_HUMAN  | E.NKS#LQENEEEE.I            | S503        | 2 | 3,1573 | 0,349 | 0      |
| 9 | P24534 EF1B_HUMAN  | E.DDKVGTDMLEE.Q             | NA          | 2 | 3,1552 | 0,345 | 0      |
| 9 | P55769 NH2L1_HUMAN | E.GSCLKQQIQSIQQSIE.R        | NA          | 2 | 3,1509 | 0,362 | -0,202 |
| 9 | P20700 LMNB1_HUMAN | E.SLSSQLSNLQKE.S            | NA          | 2 | 3,1495 | 0,275 | 0      |
| 9 | P05787 K2C8_HUMAN  | E.AAIADAEQRGE.L             | NA          | 2 | 3,1484 | 0,455 | -0,108 |
| 9 | P07900 HS90A_HUMAN | E.LLRYYSASGDE.M             | NA          | 2 | 3,139  | 0,328 | -0,089 |
| 9 | Q9UPN3 MACF1_HUMAN | E.VLKSM*DAMSS#PTKTE.T       | S2429       | 2 | 3,1146 | 0,329 | -0,071 |
| 9 | Q96KB5 TOPK_HUMAN  | E.GISNFKT#PSKLSE.K          | T9          | 2 | 3,1036 | 0,282 | -0,082 |
| 9 | P02545 LMNA_HUMAN  | R.NSNLVGAAHEE.L             | NA          | 2 | 3,0992 | 0,396 | 0,107  |
| 9 | P09211 GSTP1_HUMAN | E.YVNLPINGNGKQ.-            | NA          | 2 | 3,0947 | 0,315 | -0,093 |
| 9 | Q9UPN3 MACF1_HUMAN | E.VLKSM*DAM*SSPT#KTE.T      | T2431       | 2 | 3,0918 | 0,274 | 0      |
| 9 | P19338 NUCL_HUMAN  | E.IDGRSISLYYTGE.K           | NA          | 2 | 3,0905 | 0,381 | 0      |
| 9 | O14617 AP3D1_HUMAN | E.TSKS#PEKDVP MVE.K         | S829        | 2 | 3,0879 | 0,195 | 0,16   |
| 9 | Q9Y618 NCOR2_HUMAN | E.AAKPPEPEKPVSP#PPPIE.S     | S215        | 2 | 3,0869 | 0,369 | 0,065  |
| 9 | P27816 MAP4_HUMAN  | E.VALAKDMES#PTKLD.V         | S280        | 2 | 3,083  | 0,466 | 0      |
| 9 | Q93009 UBP7_HUMAN  | E.DQFCGHQGN DMYDEE.K        | NA          | 2 | 3,0791 | 0,365 | -0,066 |
| 9 | Q9UPN3 MACF1_HUMAN | E.VLKSM DAM*S#SPTKTE.T      | S2428       | 2 | 3,0694 | 0,414 | -0,071 |
| 9 | P60709 ACTB_HUMAN  | R.GYSFTTTAERE.I             | NA          | 2 | 3,0584 | 0,565 | 0,097  |
| 9 | P27816 MAP4_HUMAN  | E.VALAKDM*ES#PTKLD.V        | S280        | 2 | 3,0543 | 0,353 | 0,151  |
| 9 | Q13404 UB2V1_HUMAN | E.NMKLPQPPEGQCYSN.-         | NA          | 2 | 3,0451 | 0,285 | 0,138  |

|   |                     |                          |             |   |        |       |        |
|---|---------------------|--------------------------|-------------|---|--------|-------|--------|
| 9 | P06703 S10A6_HUMAN  | E.LTIGSKLQDAE.I          | NA          | 2 | 3,0317 | 0,393 | -0,311 |
| 9 | P48681 NEST_HUMAN   | E.DHASLAPPLS#PDHSSLE.A   | S471        | 2 | 3,0299 | 0,42  | 0,263  |
| 9 | Q09666 AHNK_HUMAN   | K.GPKVDIDTPDINIE.G       | NA          | 2 | 3,0274 | 0,373 | -0,48  |
| 9 | P55060 XPO2_HUMAN   | D.NAALYAQKYDEE.F         | NA          | 2 | 3,0238 | 0,344 | 0,172  |
| 9 | Q96PK2 MACF4_HUMAN  | E.DTQKLDNFLGE.V          | NA          | 2 | 3,0201 | 0,368 | -0,095 |
| 9 | Q58FF8 H90B2_HUMAN  | E.FDGKS#LVSVTKE.G        | S305        | 2 | 3,0171 | 0,288 | -0,176 |
| 9 | P46821 MAP1B_HUMAN  | E.KSGKQGS#PDQVS#PVSE.M   | S1438:S1443 | 2 | 3,0125 | 0,342 | 0      |
| 9 | O75431 MTX2_HUMAN   | E.NATLYQQLKGE.Q          | NA          | 2 | 2,9866 | 0,313 | -0,193 |
| 9 | Q13185 CBX3_HUMAN   | K.KVEEAPEEFVVE.K         | NA          | 2 | 2,9767 | 0,313 | -0,08  |
| 9 | P55327 TPD52_HUMAN  | E.DVKNS#PTFKSFEE.K       | S131        | 2 | 2,9762 | 0,287 | 0      |
| 9 | Q99959 PKP2_HUMAN   | E.NDFVGGRS#PVPKTYD.M     | S102        | 2 | 2,9749 | 0,275 | 0,211  |
| 9 | O60684 IMA7_HUMAN   | E.HYFGVEDDDSSLAPQVDE.T   | NA          | 2 | 2,9651 | 0,327 | 0,483  |
| 9 | Q9UGV2 NDRG3_HUMAN  | E.SCES#PDVLDLRHQTME.V    | S361        | 2 | 2,9466 | 0,451 | 0,194  |
| 9 | Q96CP2 FWCH2_HUMAN  | E.GESVKASQEPS#PKPGTE.V   | S21         | 2 | 2,9381 | 0,261 | -0,067 |
| 9 | Q9H307 PININ_HUMAN  | E.IAIVHS#DAEKEQE.E       | S347        | 2 | 2,9353 | 0,32  | 0      |
| 9 | P17152 TMM11_HUMAN  | E.RVS#LSATDCYIVHE.I      | S23         | 2 | 2,927  | 0,397 | 0      |
| 9 | Q9UGV2 NDRG3_HUMAN  | E.SCES#PDVLDLRHQTME.V    | S361        | 2 | 2,9261 | 0,515 | 0,321  |
| 9 | Q9H4H8 FA83D_HUMAN  | E.SSTVS#EEDYFSSHRDE.L    | S369        | 2 | 2,9252 | 0,359 | 0,187  |
| 9 | Q02952 AKA12_HUMAN  | E.KEPSKSAESPT#S#PVTSE.T  | T285:S286   | 2 | 2,9116 | 1     | 0,064  |
| 9 | O60841 IF2P_HUMAN   | E.TVAVKPTENNEEE.F        | NA          | 2 | 2,9086 | 0,339 | 0      |
| 9 | P38646 GRP75_HUMAN  | E.TGVDLTKD.N             | NA          | 2 | 2,9013 | 0,162 | 0,072  |
| 9 | P61978 HNRPK_HUMAN  | E.NTQTTIKLFQE.C          | NA          | 2 | 2,9009 | 0,272 | 0,092  |
| 9 | P60709 ACTB_HUMAN   | R.GY#SFTTTAERE.I         | Y198        | 2 | 2,8882 | 0,546 | 0      |
| 9 | Q8TF05 PP4R1_HUMAN  | E.SEGVPVSS#PNITMATRKE.L  | S496        | 2 | 2,8739 | 0,34  | 0,308  |
| 9 | O60216 RAD21_HUMAN  | E.SEQST#SNLNEKINHLE.Y    | T199        | 2 | 2,8735 | 0,22  | 0,19   |
| 9 | P67936 TPM4_HUMAN   | E.NVGLHQTLDTLNE.L        | NA          | 2 | 2,8581 | 0,159 | 0      |
| 9 | P37802 TAGL2_HUMAN  | E.NFQNWLDKGTVLCE.L       | NA          | 2 | 2,8565 | 0,244 | -0,212 |
| 9 | Q9Y6G9 DC1L1_HUMAN  | E.NFQTLKAEDNFE.D         | NA          | 2 | 2,8532 | 0,229 | -0,084 |
| 9 | Q9BZE4 NOG1_HUMAN   | E.DDQKIFTDLQSE.G         | NA          | 2 | 2,8445 | 0,347 | 0,085  |
| 9 | Q02952 AKA12_HUMAN  | E.STAVGQAHS#DISKDM*SE.A  | S1628       | 2 | 2,8434 | 0,355 | 0,131  |
| 9 | P60709 ACTB_HUMAN   | E.TTFNSIMKCD.V           | NA          | 2 | 2,8431 | 0,283 | 0,1    |
| 9 | P20700 LMNB1_HUMAN  | E.DLKDQIAQLE.A           | NA          | 2 | 2,8409 | 0,192 | -0,104 |
| 9 | P24534 EF1B_HUMAN   | E.DDKVGTDM*LE.E          | NA          | 2 | 2,8394 | 0,342 | 0,214  |
| 9 | Q8N4C8 MINK1_HUMAN  | R.SDSVLPASHGHLPQAGS#LE.R | S763        | 2 | 2,8375 | 0,264 | 0      |
| 9 | Q9BSQ5 CCM2_HUMAN   | E.SVDVGGAS#PHSKTISE.S    | S280        | 2 | 2,8372 | 0,384 | 0,222  |
| 9 | Q58FF7 H90B3_HUMAN  | K.EDQTEYLEER.R           | NA          | 2 | 2,8357 | 0,372 | -0,093 |
| 9 | B0I1T5 B0I1T5_HUMAN | E.SSVDCLKES#PNKQQE.R     | S1205       | 2 | 2,8307 | 0,154 | 0,4    |
| 9 | Q58FF7 H90B3_HUMAN  | E.LKIDIIPNPQE.R          | NA          | 2 | 2,8286 | 0,222 | -0,095 |
| 9 | Q9UHV7 MED13_HUMAN  | E.GFCS#PKPSEIKD.F        | S890        | 2 | 2,8286 | 0,329 | 0      |
| 9 | P07195 LDHB_HUMAN   | E.M*GTDNDSSENWKE.V       | NA          | 2 | 2,8252 | 0,348 | -0,254 |
| 9 | Q5TCU3 Q5TCU3_HUMAN | E.TLASAKEENVE.I          | NA          | 2 | 2,8221 | 0,189 | 0,205  |

|   |                    |                             |           |   |        |       |        |
|---|--------------------|-----------------------------|-----------|---|--------|-------|--------|
| 9 | P00558 PGK1_HUMAN  | E.GKVLPGVDALSNI.-           | NA        | 2 | 2,8217 | 0,379 | -0,095 |
| 9 | Q9Y2F5 K0947_HUMAN | E.LCSS#PLGKRPLNE.L          | S533      | 2 | 2,818  | 0,286 | -0,079 |
| 9 | P14314 GLU2B_HUMAN | E.QLAAAKAQEQE.L             | NA        | 2 | 2,8016 | 0,315 | 0,093  |
| 9 | Q96RL1 UIMC1_HUMAN | E.KLLLEEEPTTSHGQS#SQGIVEE.T | S401      | 2 | 2,8008 | 0,292 | 0,294  |
| 9 | P08107 HSP71_HUMAN | E.SYAFNMKSAVEDE.G           | NA        | 2 | 2,7944 | 0,298 | -0,082 |
| 9 | Q9NQ88 CL005_HUMAN | E.KIIQGGQGVDEPLSE.T         | NA        | 2 | 2,793  | 0,438 | 0,242  |
| 9 | P35579 MYH9_HUMAN  | E.IANSSGKALALEE.K           | NA        | 2 | 2,7855 | 0,27  | -0,449 |
| 9 | Q8WU20 FRS2_HUMAN  | E.NVTVPAS#AHKIE.Y           | S403      | 2 | 2,7834 | 0,293 | -0,091 |
| 9 | Q13813 SPTA2_HUMAN | E.DFDKAINVQEE.K             | NA        | 2 | 2,7792 | 0,187 | 0      |
| 9 | P08243 ASNS_HUMAN  | E.DSNLIPKE.I                | NA        | 2 | 2,7789 | 0,15  | 0      |
| 9 | P24534 EF1B_HUMAN  | E.DDKVGTDM*LEE.Q            | NA        | 2 | 2,7782 | 0,347 | 0      |
| 9 | P17987 TCPA_HUMAN  | E.DAVHSGALND.-              | NA        | 2 | 2,7752 | 0,261 | -0,122 |
| 9 | P60709 ACTB_HUMAN  | E.TTFNSIM*KCD.V             | NA        | 2 | 2,7747 | 0,354 | 0,198  |
| 9 | P19338 NUCL_HUMAN  | E.S#KTLVLSNLSYSATEE.T       | S485      | 2 | 2,7735 | 0,368 | -0,402 |
| 9 | Q02952 AKA12_HUMAN | E.STAVGQAHS#DISKDMSE.A      | S1628     | 2 | 2,7733 | 0,181 | 0,066  |
| 9 | O60716 CTND1_HUMAN | E.GAM*SVVSVETS#DDGTTRRTE.T  | S129      | 2 | 2,7691 | 0,344 | 0,445  |
| 9 | Q8IVF2 AHNK2_HUMAN | E.GDLSLADKD.V               | NA        | 2 | 2,7649 | 0,305 | -0,065 |
| 9 | O00629 IMA4_HUMAN  | E.NEDIYKLAYE.I              | NA        | 2 | 2,7633 | 0,259 | -0,194 |
| 9 | Q9UHV9 PFD2_HUMAN  | E.HS#LVIDTLKE.V             | S55       | 2 | 2,7606 | 0,37  | 0,198  |
| 9 | Q6NZ12 PTRF_HUMAN  | R.RGS#S#PDVHALLE.I          | S365:S366 | 2 | 2,7586 | 0,182 | 0,254  |
| 9 | Q09666 AHNK_HUMAN  | E.VTQNS#PAARTGVVKE.G        | S41       | 2 | 2,7497 | 0,195 | 0,149  |
| 9 | P29692 EF1D_HUMAN  | E.LQQAISKLE.A               | NA        | 2 | 2,7331 | 0,146 | 0      |
| 9 | Q8IWC1 MA7D3_HUMAN | E.AMVKAS#PKTSLE.A           | S449      | 2 | 2,7258 | 0,317 | -0,182 |
| 9 | P16615 AT2A2_HUMAN | E.DSANFIKYE.T               | NA        | 2 | 2,7209 | 0,31  | -0,112 |
| 9 | P60660 MYL6_HUMAN  | E.MNVKVLDFE.H               | NA        | 2 | 2,7187 | 0,245 | -0,223 |
| 9 | P17987 TCPA_HUMAN  | E.VVQERICDDE.L              | NA        | 2 | 2,7102 | 0,43  | 0,097  |
| 9 | P49711 CTCF_HUMAN  | E.DACHLPQNQTDGGE.V          | NA        | 2 | 2,7099 | 0,326 | 0,158  |
| 9 | P05787 K2C8_HUMAN  | E.SMYQIKYEE.L               | NA        | 2 | 2,7072 | 0,322 | 0,102  |
| 9 | P04637 P53_HUMAN   | E.DSSGNLLGRNSFE.V           | NA        | 2 | 2,7005 | 0,255 | -0,087 |
| 9 | P46087 NOL1_HUMAN  | R.LGSVEAPKTNKS#PE.A         | S67       | 2 | 2,7003 | 0,318 | -0,079 |
| 9 | Q86UP2 KTN1_HUMAN  | E.LNLLKAQLNE.T              | NA        | 2 | 2,6901 | 0,184 | -0,106 |
| 9 | P60174 TPIS_HUMAN  | E.LIGTLNAAKVPADTE.V         | NA        | 2 | 2,6816 | 0,206 | -0,161 |
| 9 | O95707 RPP29_HUMAN | E.ANDSVDVQPSGAQRAE.A        | NA        | 2 | 2,6812 | 0,355 | 0,158  |
| 9 | Q9H7F0 AT133_HUMAN | E.AIPVKLVHDS#LE.D           | S817      | 2 | 2,6783 | 0,364 | -0,174 |
| 9 | P17275 JUNB_HUMAN  | E.ARSRDAT#PPVS#PINM*EDQE.R  | T255:S259 | 2 | 2,6764 | 0,235 | 0,32   |
| 9 | P05787 K2C8_HUMAN  | E.SM*Y#QIKYEE.L             | Y282      | 2 | 2,6743 | 0,286 | 0,379  |
| 9 | Q9BX68 HINT2_HUMAN | E.DQQCLVFRD.V               | NA        | 2 | 2,6739 | 0,277 | -0,103 |
| 9 | P05787 K2C8_HUMAN  | E.SM*YQIKYEE.L              | NA        | 2 | 2,6705 | 0,308 | 0      |
| 9 | Q9Y6H1 CHCH2_HUMAN | E.CAQNQGDIKLCE.G            | NA        | 2 | 2,6705 | 0,281 | -0,255 |
| 9 | Q15311 RBP1_HUMAN  | E.IASLS#KEDVSKEE.M          | S463      | 2 | 2,6695 | 0,195 | 0,242  |
| 9 | P60709 ACTB_HUMAN  | R.GYSFTTT#AERE.I            | T203      | 2 | 2,669  | 0,38  | 0,182  |



|   |                    |                           |           |   |        |       |        |
|---|--------------------|---------------------------|-----------|---|--------|-------|--------|
| 9 | P46821 MAP1B_HUMAN | E.VVEEHCAS#PEDKTLE.V      | S1312     | 2 | 2,6668 | 0,282 | 0,067  |
| 9 | P52948 NUP98_HUMAN | E.NGERFS#FLSKPVDE.N       | S635      | 2 | 2,664  | 0,329 | -0,072 |
| 9 | Q9UHB6 LIMA1_HUMAN | E.FTTQNQKSQDVE.L          | NA        | 2 | 2,6621 | 0,318 | 0,171  |
| 9 | P42566 EP15_HUMAN  | E.SEPIHQES#PARSSPE.L      | S558      | 2 | 2,6545 | 0,268 | -0,07  |
| 9 | Q15019 SEPT2_HUMAN | E.NEDM*NKDQILLE.K         | NA        | 2 | 2,6477 | 0,199 | 0      |
| 9 | P55327 TPD52_HUMAN | E.DVKNS#PTFKSFE.E         | S131      | 2 | 2,6471 | 0,302 | 0      |
| 9 | P46459 NSF_HUMAN   | E.NDIKPAFGTNQE.D          | NA        | 2 | 2,6391 | 0,255 | 0      |
| 9 | P05783 K1C18_HUMAN | E.DLRAQIFANTVD.N          | NA        | 2 | 2,6291 | 0,466 | -0,269 |
| 9 | P55209 NP1L1_HUMAN | E.RLDGLVETPTGYIE.S        | NA        | 2 | 2,6273 | 0,315 | -0,39  |
| 9 | Q8WU90 ZC3HF_HUMAN | R.FSTYTS#DKDENKLE.A       | S360      | 2 | 2,5971 | 0,326 | 0,132  |
| 9 | Q8N344 MIER2_HUMAN | E.ASSLGRQS#PRVVSCL.E.H    | S11       | 2 | 2,5844 | 0,391 | 0,334  |
| 9 | P46379 BAT3_HUMAN  | E.DQRLINLVGE.S            | NA        | 2 | 2,5756 | 0,197 | 0      |
| 9 | P02545 LMNA_HUMAN  | E.LDFQKNYSEE.L            | NA        | 2 | 2,568  | 0,295 | 0      |
| 9 | P19338 NUCL_HUMAN  | E.LTGLKVFNGE.I            | NA        | 2 | 2,5643 | 0,274 | 0,113  |
| 9 | Q8TEW0 PARD3_HUMAN | D.VGPSLGLKSSS#LE.S        | S889      | 2 | 2,5638 | 0,373 | 0,247  |
| 9 | Q9UQ35 SRRM2_HUMAN | E.NSFGS#PLEFRNSGPLGTE.M   | S1329     | 2 | 2,5584 | 0,376 | 0,245  |
| 9 | Q8IXH7 NELFD_HUMAN | E.NDSIAGTIKTE.G           | NA        | 2 | 2,5583 | 0,34  | 0,106  |
| 9 | Q9NZM1 MYOF_HUMAN  | E.LFDNDQVGKDE.F           | NA        | 2 | 2,5522 | 0,326 | -0,381 |
| 9 | Q58FG1 HS904_HUMAN | E.YCVQQLKEFE.G            | NA        | 2 | 2,5515 | 0,128 | -0,091 |
| 9 | Q5T3I0 GPTC4_HUMAN | E.DLNLEDRGEE.T            | NA        | 2 | 2,5513 | 0,254 | 0,103  |
| 9 | P35579 MYH9_HUMAN  | E.ILAQAKENE.K             | NA        | 2 | 2,5492 | 0,165 | 0      |
| 9 | Q9NV88 INT9_HUMAN  | E.DSTHIICDNDE.M           | NA        | 2 | 2,5445 | 0,322 | 0      |
| 9 | Q08499 PDE4D_HUMAN | E.VEIPS#PTQKEKE.K         | S348      | 2 | 2,54   | 0,083 | -0,083 |
| 9 | Q02952 AKA12_HUMAN | E.LDKVKSATLS#ST#ESTASE.M  | S644:T646 | 2 | 2,5394 | 1     | 0,545  |
| 9 | O60216 RAD21_HUMAN | E.NDFGDFGM*DDRE.I         | NA        | 2 | 2,5361 | 0,406 | 0      |
| 9 | Q02790 FKBP4_HUMAN | E.GVDISPKQDE.G            | NA        | 2 | 2,534  | 0,194 | 0,336  |
| 9 | P16949 STMN1_HUMAN | E.AEVLKQLAE.K             | NA        | 2 | 2,5272 | 0,135 | -0,061 |
| 9 | P26368 U2AF2_HUMAN | E.IVEDVRDE.C              | NA        | 2 | 2,5255 | 0,138 | 0,125  |
| 9 | Q9BSQ5 CCM2_HUMAN  | E.SVDVGGASPHSKTIS#ESE.L   | S287      | 2 | 2,523  | 0,258 | -0,065 |
| 9 | O60271 JIP4_HUMAN  | D.LSGYKGS#TPTKGIE.N       | S364      | 2 | 2,5149 | 0,303 | 0,152  |
| 9 | Q06830 PRDX1_HUMAN | D.YGVLKADE.G              | NA        | 2 | 2,5142 | 0,165 | 0,477  |
| 9 | Q8NAP3 ZBT38_HUMAN | R.SPQPAAVLTRSKS#PNNE.G    | S309      | 2 | 2,5141 | 0,282 | 0,26   |
| 9 | Q9H7P9 PKHG2_HUMAN | E.M*DERGPS#PLHVLE.G       | S610      | 2 | 2,5119 | 0,204 | -0,542 |
| 9 | Q02952 AKA12_HUMAN | E.SGEHTQVPADSPDSQEE.Q     | NA        | 2 | 2,5095 | 0,488 | 0,202  |
| 9 | Q9Y536 PAL4B_HUMAN | E.NFRALSTGE.K             | NA        | 2 | 2,5086 | 0,142 | -0,123 |
| 9 | Q02790 FKBP4_HUMAN | E.ASSGDHPT#DTEMKEE.Q      | T436      | 2 | 2,508  | 0,215 | 0      |
| 9 | Q92615 LARP5_HUMAN | E.EKFTSSQTSPTPKPPS#PSFE.L | S524      | 2 | 2,507  | 0,228 | 0,196  |
| 9 | P20810 ICAL_HUMAN  | E.DAKLAAAISE.V            | NA        | 2 | 2,4954 | 0,242 | 0,123  |
| 9 | P29692 EF1D_HUMAN  | E.NGASVILRD.I             | NA        | 2 | 2,4915 | 0,248 | 0,065  |
| 9 | P55072 TERA_HUMAN  | E.IM*SKLAGESE.S           | NA        | 2 | 2,4894 | 0,252 | -0,113 |
| 9 | Q8TBE0 BAHD1_HUMAN | E.GKLS#PVAAPHEE.G         | S405      | 2 | 2,4853 | 0,334 | -0,093 |

|   |                     |                         |           |   |        |       |        |
|---|---------------------|-------------------------|-----------|---|--------|-------|--------|
| 9 | P04075 ALDOA_HUMAN  | E.S#LFVSNHAY.-          | S356      | 2 | 2,485  | 0,257 | -0,218 |
| 9 | P49755 TMEDA_HUMAN  | K.NYEEIAKVE.K           | NA        | 2 | 2,4821 | 0,189 | 0      |
| 9 | P38606 VATA_HUMAN   | E.DM*QNAFRSLED.-        | NA        | 2 | 2,4799 | 0,225 | -0,273 |
| 9 | P08238 HS90B_HUMAN  | E.TQKSIYYITGE.S         | NA        | 2 | 2,4733 | 0,367 | -0,375 |
| 9 | P30414 NKTR_HUMAN   | E.ICTPDRSS#PAKVEE.T     | S1138     | 2 | 2,4669 | 0,158 | 0,439  |
| 9 | Q72627 HUWE1_HUMAN  | E.SILSNNTTDDHCQE.F      | NA        | 2 | 2,4633 | 0,217 | 0,373  |
| 9 | Q06830 PRDX1_HUMAN  | E.IIAFSDRAEE.F          | NA        | 2 | 2,4578 | 0,263 | 0      |
| 9 | O95881 TXD12_HUMAN  | E.NGNPSYKYFYVSAE.Q      | NA        | 2 | 2,45   | 0,407 | 0,372  |
| 9 | P62805 H4_HUMAN     | E.NVIRDAVITYTE.H        | NA        | 2 | 2,4476 | 0,291 | -0,095 |
| 9 | P09493 TPM1_HUMAN   | R.LATALQKLEE.A          | NA        | 2 | 2,4462 | 0,246 | -0,109 |
| 9 | P14923 PLAK_HUMAN   | K.GIM*EEDEACGR.Q        | NA        | 2 | 2,4438 | 0,248 | 0,095  |
| 9 | P06576 ATPB_HUMAN   | E.STVRTIAM*DGTE.G       | NA        | 2 | 2,4417 | 0,245 | -0,094 |
| 9 | O15355 PPM1G_HUMAN  | E.NGPTAKAYTGFSNSE.R     | NA        | 2 | 2,4387 | 0,46  | -0,15  |
| 9 | P02545 LMNA_HUMAN   | E.VSGIKAAYEAE.L         | NA        | 2 | 2,4336 | 0,269 | 0,107  |
| 9 | P63151 2ABA_HUMAN   | E.NDCIFDKFE.C           | NA        | 2 | 2,4227 | 0,343 | -0,103 |
| 9 | P21980 TGM2_HUMAN   | E.QKTVEIPDPVEAGEE.V     | NA        | 2 | 2,4146 | 0,207 | 0,669  |
| 9 | P49006 MRP_HUMAN    | E.SQEPQAKGAEASAASEEE.A  | NA        | 2 | 2,4125 | 0,236 | -0,067 |
| 9 | P00558 PGK1_HUMAN   | E.KACANPAAGSVILLE.N     | NA        | 2 | 2,4124 | 0,198 | 0      |
| 9 | Q6AI39 K0240_HUMAN  | E.KVVGSS#PGHPAVQVE.S    | S675      | 2 | 2,4089 | 0,255 | -0,078 |
| 9 | O95486 SC24A_HUMAN  | E.DIQKLNCPNPE.L         | NA        | 2 | 2,4054 | 0,187 | 0,297  |
| 9 | Q8WXI9 P66B_HUMAN   | E.RGRLT#PSPDIIVLS#DNE.A | T120:S129 | 2 | 2,4052 | 0,285 | 0,06   |
| 9 | Q07021 C1QBP_HUMAN  | E.SDIFSIRE.V            | NA        | 2 | 2,3889 | 0,333 | 0,379  |
| 9 | O14617 AP3D1_HUMAN  | E.TSKS#PEKDVPM*VE.K     | S829      | 2 | 2,3888 | 0,316 | 0      |
| 9 | Q06587 RING1_HUMAN  | E.IAVS#PRSLHSE.L        | S38       | 2 | 2,3876 | 0,281 | -0,191 |
| 9 | O94913 PCF11_HUMAN  | E.LQEPDCS#PKVKEE.R      | S1520     | 2 | 2,381  | 0,225 | 1,712  |
| 9 | P05362 ICAM1_HUMAN  | E.SVTVTRDLE.G           | NA        | 2 | 2,3809 | 0,261 | -0,12  |
| 9 | Q16204 CCDC6_HUMAN  | E.NDTISKQLTLE.Q         | NA        | 2 | 2,3766 | 0,263 | 0,097  |
| 9 | Q13526 PIN1_HUMAN   | E.DASFALRTGE.M          | NA        | 2 | 2,3748 | 0,33  | 0      |
| 9 | Q12904 MCA1_HUMAN   | E.QIQPDLHTNDE.C         | NA        | 2 | 2,3648 | 0,242 | -0,093 |
| 9 | P55072 TERA_HUMAN   | E.IMSKLAGESE.S          | NA        | 2 | 2,3639 | 0,27  | 0,115  |
| 9 | P08670 VIME_HUMAN   | K.TVETRDGQVINE.T        | NA        | 2 | 2,363  | 0,097 | 0,448  |
| 9 | P11177 ODPB_HUMAN   | E.DNSIPQVKD.I           | NA        | 2 | 2,3618 | 0,261 | 0      |
| 9 | Q9NQW6 ANLN_HUMAN   | E.DVTSKLDE.K            | NA        | 2 | 2,3604 | 0,327 | 0,067  |
| 9 | Q86UP2 KTN1_HUMAN   | E.LDSLKDAVE.H           | NA        | 2 | 2,3523 | 0,141 | 0,308  |
| 9 | Q14019 COTL1_HUMAN  | E.VVQNFAKE.F            | NA        | 2 | 2,3417 | 0,235 | -0,065 |
| 9 | P35244 RFA3_HUMAN   | E.DSHPFDLGLYNE.A        | NA        | 2 | 2,3381 | 0,186 | 0,173  |
| 9 | Q86TP5 Q86TP5_HUMAN | E.LFDS#RGNPTVE.V        | S14       | 2 | 2,3371 | 0,288 | -0,278 |
| 9 | P15311 EZRI_HUMAN   | E.YLKIAQDLE.M           | NA        | 2 | 2,3359 | 0,153 | 0,223  |
| 9 | P34932 HSP74_HUMAN  | E.NQLLWQIDRE.M          | NA        | 2 | 2,3353 | 0,265 | 0      |
| 9 | O00505 IMA3_HUMAN   | E.NEDIYKLAFE.I          | NA        | 2 | 2,3347 | 0,292 | -0,098 |
| 9 | P13797 PLST_HUMAN   | -.M*ATTQISKDE.L         | NA        | 2 | 2,3314 | 0,292 | 0,107  |

|    |                      |                                         |           |   |        |       |        |
|----|----------------------|-----------------------------------------|-----------|---|--------|-------|--------|
| 9  | Q96L93 KI16B_HUMAN   | D.GEELEKAQLR.F                          | NA        | 2 | 2,3248 | 0,089 | 0,312  |
| 9  | P19338 NUCL_HUMAN    | E.SAEDLEKALE.L                          | NA        | 2 | 2,3238 | 0,273 | -0,11  |
| 9  | Q8TF05 PP4R1_HUMAN   | E.SEGPVPSS#PNITM*ATRKE.L                | S496      | 2 | 2,3213 | 0,118 | 0      |
| 9  | Q6NZ12 PTRF_HUMAN    | E.SEALPEKE.G                            | NA        | 2 | 2,3143 | 0,119 | 0,068  |
| 9  | P49588 SYAC_HUMAN    | E.M*ESGASAKALNE.A                       | NA        | 2 | 2,312  | 0,198 | 0,199  |
| 9  | Q00839 HNRPU_HUMAN   | E.TEDYGEKFDE.N                          | NA        | 2 | 2,3113 | 0,176 | -0,099 |
| 9  | Q8NI35 INADL_HUMAN   | E.SCYILHS#SSNEDKTE.F                    | S787      | 2 | 2,3089 | 0,261 | 0,066  |
| 9  | P40227 TCPZ_HUMAN    | K.SETDTSLIR.G                           | NA        | 2 | 2,297  | 0,332 | -0,239 |
| 9  | Q92878 RAD50_HUMAN   | E.DKLFDFVCGSQDFESD.L                    | NA        | 2 | 2,2819 | 0,308 | -0,346 |
| 9  | P42704 LPPRC_HUMAN   | E.DALNLKEE.F                            | NA        | 2 | 2,2794 | 0,183 | 0,131  |
| 9  | Q9Y6A5 TACC3_HUMAN   | E.DYLARITQE.G                           | NA        | 2 | 2,277  | 0,278 | 0,33   |
| 9  | Q09666 AHNK_HUMAN    | E.LKS#AKMDIDVPDVE.V                     | S856      | 2 | 2,2723 | 0,167 | -0,074 |
| 9  | P56537 IF6_HUMAN     | R.NSLPDTVQIR.R                          | NA        | 2 | 2,2701 | 0,205 | 0      |
| 9  | P17812 PYRG1_HUMAN   | E.EQGLKFGVQDVE.G                        | NA        | 2 | 2,2675 | 0,362 | -0,09  |
| 9  | Q14444 CAPR1_HUMAN   | E.TQFTSGEKEQVDE.W                       | NA        | 2 | 2,263  | 0,239 | -0,081 |
| 9  | P04792 HSPB1_HUMAN   | E.APM*PKLATQSNE.I                       | NA        | 2 | 2,2523 | 0,189 | 0,094  |
| 9  | ##Q9NWL6 ASND1_HUMAN | E.SFLSLIESENK.C                         | NA        | 2 | 2,2488 | 0,153 | 0      |
| 9  | P27695 APEX1_HUMAN   | E.DGDELRTPE.A                           | NA        | 2 | 2,2483 | 0,226 | 0,21   |
| 9  | Q14683 SMC1A_HUMAN   | E.GSSQGEDSVSGS#QRIISSIYARE.A            | S966      | 2 | 2,2363 | 0,536 | 0,513  |
| 9  | P98179 RBM3_HUMAN    | E.DHFSSFGPISE.V                         | NA        | 2 | 2,23   | 0,265 | 0      |
| 9  | Q7Z2W4 ZCCHV_HUMAN   | R.SCTPSPDQISHRAS#LE.D                   | S284      | 2 | 2,2299 | 0,39  | 0      |
| 9  | Q14680 MELK_HUMAN    | E.NVYT#PKSAVKNEE.Y                      | T428      | 2 | 2,2285 | 0,173 | 0,391  |
| 9  | P30048 PRDX3_HUMAN   | E.IVAFSDKANE.F                          | NA        | 2 | 2,2285 | 0,224 | 0      |
| 9  | P35613 BASI_HUMAN    | E.DALPGQKTE.F                           | NA        | 2 | 2,2269 | 0,21  | 0,127  |
| 9  | P51858 HDGF_HUMAN    | E.DAEAPGIRDHES#L.-                      | S239      | 2 | 2,226  | 0,288 | 0,164  |
| 9  | Q13404 UB2V1_HUMAN   | E.NM*KLPQPPEGQCYSN.-                    | NA        | 2 | 2,2162 | 0,101 | 0,206  |
| 9  | Q15084 PDIA6_HUMAN   | E.LDDLKDEL.-                            | NA        | 2 | 2,2144 | 0,176 | -0,18  |
| 9  | P06744 G6PI_HUMAN    | E.LQAAGKSPEDLE.R                        | NA        | 2 | 2,2093 | 0,261 | 0      |
| 9  | Q8N4B4 FBX39_HUMAN   | R.LDYLNLK.G                             | NA        | 2 | 2,2039 | 0,092 | 0,208  |
| 10 | Q9UPP1 PHF8_HUMAN    | D.LLKASRQVGGPDYAALTEAPAS#PSTQE.A        | S751      | 3 | 6,2517 | 0,493 | 0,516  |
| 10 | Q08J23 NSUN2_HUMAN   | E.GQRAGEPNS#PDAEEANS#PDVTAGCDPAGVHPPR.- | S743:S751 | 3 | 6,1443 | 0,54  | 0,833  |
| 10 | Q76L83 ASXL2_HUMAN   | E.GKQSDGQT#GSPQNSNSFSVSVKVE.N           | T222      | 3 | 5,7031 | 0,483 | 0,14   |
| 10 | Q9NQW6 ANLN_HUMAN    | E.NKQPVESTSAKSCSPVSV#PQVQPQAADTISD.S    | S102      | 3 | 5,5572 | 0,466 | -0,321 |
| 10 | P51636 CAV2_HUMAN    | E.KADVQLFM*DDDSYS#HHS#GLE.Y             | S20:S23   | 3 | 5,4613 | 0,374 | 0      |
| 10 | Q9H8Y8 GORS2_HUMAN   | E.DRVGDSTPVSEKPVSAAVDANASES#P.-         | S451      | 3 | 5,3687 | 0,536 | 0,069  |
| 10 | Q43251 RBM9_HUMAN    | E.HNLTLYGSTQAHEQSSNS#PSTQNGSLTTE.G      | S85       | 3 | 5,2723 | 1     | 0,454  |
| 10 | Q13506 NAB1_HUMAN    | E.HSLSPADLGSPAS#PKESSE.A                | S183      | 2 | 5,1399 | 0,481 | -0,247 |
| 10 | Q9NW68 BSDC1_HUMAN   | E.AKVPVAKISTFPEGEPGPQS#PCEE.N           | S258      | 3 | 5,1108 | 0,484 | 0,695  |
| 10 | Q02952 AKA12_HUMAN   | E.AKTEPFTQGKVVGGQTT#PE.S                | T1116     | 2 | 5,0956 | 0,419 | 0,183  |
| 10 | P29692 EF1D_HUMAN    | E.NIQKSLAGSSGPGASSGT#SGDHGE.L           | T73       | 3 | 5,0939 | 0,327 | 0,08   |
| 10 | Q5JT44 Q5JT44_HUMAN  | E.GDNLET#PSQS#PQLFHDDTHSRIE.Q           | T124:S128 | 3 | 4,9659 | 0,473 | 0,46   |

|    |                     |                                        |             |   |        |       |        |
|----|---------------------|----------------------------------------|-------------|---|--------|-------|--------|
| 10 | O60238 BNI3L_HUMAN  | E.SGQSSSRGSSHCDS#PSPQEDGQIM*FDVE.M     | S95         | 3 | 4,9596 | 0,502 | 0,118  |
| 10 | Q92804 RBP56_HUMAN  | E.NQKQSSYSQQPYNNQGGQQNM*E.S            | NA          | 3 | 4,8896 | 0,405 | -0,623 |
| 10 | O95359 TACC2_HUMAN  | E.SVDPFKTSSKTPSS#PSKS#PASFE.I          | S2390:S2394 | 3 | 4,8832 | 1     | 0,215  |
| 10 | Q7Z2T5 TRM1L_HUMAN  | E.SHVQS#ASEDTVTERVE.M                  | S707        | 2 | 4,798  | 0,473 | -0,329 |
| 10 | P27816 MAP4_HUMAN   | E.EGRPVVSGTGNDDITT#PPNKE.L             | T687        | 3 | 4,7748 | 0,336 | 0      |
| 10 | Q9H307 PININ_HUMAN  | E.CKSLS#PGKENVSALDM*E.K                | S443        | 2 | 4,7627 | 0,414 | -0,373 |
| 10 | Q9UER7 DAXX_HUMAN   | E.AAAGKGDGDKS#PM*SSLQISNE.K            | S495        | 2 | 4,7406 | 0,471 | 0,348  |
| 10 | Q08J23 NSUN2_HUMAN  | E.GKPTDPSKLES#PSFTGTGDTE.I             | S473        | 2 | 4,6732 | 0,424 | 0,109  |
| 10 | Q8TE77 SSH3_HUMAN   | E.LHGDQTDGFGQGSQS#PQKQEE.Q             | S87         | 2 | 4,6232 | 0,497 | 0      |
| 10 | Q15648 MED1_HUMAN   | E.KSYQNSPSS#DDGIRPLPE.Y                | S1482       | 2 | 4,5139 | 0,515 | -0,589 |
| 10 | P60709 ACTB_HUMAN   | D.LYANTVLSGGTTMYPGIADRM*QKE.I          | NA          | 3 | 4,5087 | 1     | 0,07   |
| 10 | Q6NYC8 PHTNS_HUMAN  | E.S#RLSPGESAYQKLGLTE.A                 | S221        | 3 | 4,4916 | 0,377 | 0,095  |
| 10 | P20700 LMNB1_HUMAN  | E.NARLSS#EM*NTSTVNSAREE.L              | S279        | 3 | 4,4645 | 0,34  | 0,167  |
| 10 | P42166 LAP2A_HUMAN  | E.HSAMLVSTAAS#PSLIKE.T                 | S310        | 2 | 4,4521 | 0,532 | 0      |
| 10 | P60709 ACTB_HUMAN   | D.LYANTVLSGGTTMYPGIADRMQKE.I           | NA          | 3 | 4,442  | 0,377 | 0,278  |
| 10 | Q9UHB6 LIMA1_HUMAN  | E.VQQPVHPKPLS#PDSRASS#LSE.S            | S362:S369   | 3 | 4,4379 | 1     | 0,227  |
| 10 | Q9C0C9 UBE2O_HUMAN  | E.KAQALPNGVPKASS#SPEPPAVAE.L           | S1167       | 2 | 4,432  | 0,37  | 0      |
| 10 | P35611 ADDA_HUMAN   | E.AHRPPS#PTEAPTEASPEPAPDPAPVAEE.A      | S669        | 3 | 4,4319 | 0,408 | 0,063  |
| 10 | Q969R5 LMBL2_HUMAN  | E.HLDVASPKASS#PELPVSVE.N               | S689        | 2 | 4,3531 | 0,448 | 0,226  |
| 10 | Q92615 LARP5_HUMAN  | E.KFTSQTQSPTPPKPPS#PSFE.L              | S524        | 2 | 4,3032 | 0,471 | 0,311  |
| 10 | B2RDY9 B2RDY9_HUMAN | E.SAS#RSALFAQINQGE.S                   | S253        | 2 | 4,269  | 0,423 | 0,221  |
| 10 | Q92804 RBP56_HUMAN  | E.NQKQSSYSQQPYNNQGGQQNME.S             | NA          | 3 | 4,2644 | 0,376 | -0,07  |
| 10 | B2CI53 B2CI53_HUMAN | E.RNGILAS#PQSAPGNLDNSKSGE.I            | S260        | 3 | 4,258  | 0,37  | 0,08   |
| 10 | P46821 MAP1B_HUMAN  | E.GEKL#PKSDISPLT#PRE.S                 | S1779:T1788 | 3 | 4,2561 | 0,272 | 0,182  |
| 10 | P60709 ACTB_HUMAN   | D.LYANTVLSGGTTMYPGIADRM*QKE.I          | NA          | 3 | 4,2517 | 0,391 | 0,276  |
| 10 | P42166 LAP2A_HUMAN  | E.HSAM*LVSTAAS#PSLIKE.T                | S310        | 2 | 4,2243 | 0,413 | 0,199  |
| 10 | Q58FF8 H90B2_HUMAN  | E.S#KEQVANSFAVE.Q                      | S266        | 2 | 4,19   | 0,436 | 0,088  |
| 10 | Q14498 RBM39_HUMAN  | E.RTDASSASSFLDSDELE.R                  | NA          | 2 | 4,1833 | 0,503 | 0,333  |
| 10 | P46821 MAP1B_HUMAN  | E.KVSPKS#PSLSPSPSLEKT#PLGE.R           | S1256:T1270 | 3 | 4,1267 | 1     | 0,135  |
| 10 | Q9P266 K1462_HUMAN  | E.SLLPGIRRAGQNQPAEPDASACTPES#PQEE.L    | S1123       | 3 | 4,107  | 0,411 | 0,111  |
| 10 | P25205 MCM3_HUMAN   | E.MPQVHT#PKTADS#QETKE.S                | T722:S728   | 3 | 4,1044 | 0,151 | 0      |
| 10 | Q9NPI6 DCP1A_HUMAN  | E.RKASS#PSPLTIGT#PE.S                  | S523:T531   | 2 | 4,0289 | 0,398 | 0,215  |
| 10 | P80723 BASP_HUMAN   | E.TKS#DGAPASDSKPGSSE.A                 | S164        | 3 | 4,0288 | 0,32  | -0,323 |
| 10 | Q00613 HSF1_HUMAN   | E.SEPAPASVTALTDARGHT#DTEGRPPSPPTSTPE.K | T355        | 3 | 4,0249 | 0,332 | 0,626  |
| 10 | Q9BV73 CP250_HUMAN  | E.KAQDLALSQAQTKASVSS#LQE.V             | S2189       | 3 | 4,0112 | 0,264 | -0,081 |
| 10 | Q5W0V3 K1600_HUMAN  | E.WLSS#PPAT#PDHPKNDGKTE.V              | S549:T553   | 3 | 4,0105 | 0,267 | 0      |
| 10 | Q14247 SRC8_HUMAN   | E.QARAKTQT#PPVSPAPQPTEERLPSS#PVYE.D    | T401:S418   | 3 | 4,0061 | 1     | 0,22   |
| 10 | Q9NZL4 HPBP1_HUMAN  | E.KLLQTCFSS#PADDSM*DR.-                | S354        | 3 | 3,9754 | 0,252 | 0,266  |
| 10 | O43583 DENR_HUMAN   | E.FAKLTVENS#PKQE.A                     | S73         | 2 | 3,9546 | 0,41  | 0,155  |
| 10 | Q5VZL5 ZMYM4_HUMAN  | E.LAKAKSEDS#DVELS#D.-                  | S1542:S1547 | 2 | 3,9344 | 0,411 | 0      |
| 10 | O75691 UTP20_HUMAN  | E.YTCKLSLDNGQPGT#PDPADSGGTSAKE.S       | T1741       | 3 | 3,9294 | 0,387 | 0,389  |

|    |                     |                                   |                |   |        |       |        |
|----|---------------------|-----------------------------------|----------------|---|--------|-------|--------|
| 10 | Q02952 AKA12_HUMAN  | E.AKTEPFTQGKVVGGQTT#PESFE.K       | T1116          | 3 | 3,8985 | 0,258 | 0,465  |
| 10 | Q99590 SFRIP_HUMAN  | E.IIQTVDNRQSVKS#PE.V              | S314           | 2 | 3,8865 | 0,193 | 0      |
| 10 | Q9P265 DIP2B_HUMAN  | E.GS#LRRQAALSAALQQSLQNAE.S        | S153           | 3 | 3,8615 | 0,368 | 0,239  |
| 10 | P23443 KS6B1_HUMAN  | E.SIHDGTVTHT#FCGTIE.Y             | T252           | 2 | 3,8582 | 0,568 | 0      |
| 10 | P50443 S26A2_HUMAN  | E.LQRESS#TDFKQFE.T                | S36            | 3 | 3,837  | 0,192 | 0,324  |
| 10 | Q13506 NAB1_HUMAN   | E.HSLSPADLGPAS#PKESSE.A           | S183           | 3 | 3,8281 | 0,436 | -0,278 |
| 10 | Q92615 LARP5_HUMAN  | E.KFTSSQTQSPTPPKPPSPS#FE.L        | S526           | 3 | 3,8132 | 0,258 | 0,155  |
| 10 | Q08J23 NSUN2_HUMAN  | E.GKPTDPSKLES#PSFTGTGDTE.I        | S473           | 3 | 3,7816 | 0,306 | 0,082  |
| 10 | Q52LD0 Q52LD0_HUMAN | E.YGKAGGS#PAS#YHGSTSPRVSSSELE.Q   | S192:S195      | 3 | 3,7668 | 0,393 | 0,283  |
| 10 | Q9Y6M5 ZNT1_HUMAN   | R.VKST#RPGSSDINVAPGEQGPDQEE.T     | T168           | 3 | 3,74   | 0,381 | 0      |
| 10 | Q7L7X3 TAOK1_HUMAN  | E.GDHTVM*#S#NS#SVIHLKPEEE.N       | S392:S394      | 3 | 3,7346 | 0,247 | 0,24   |
| 10 | P62988 UBIQ_HUMAN   | E.DGRTL#DYNIQKE.S                 | S57            | 3 | 3,7346 | 0,12  | 0,791  |
| 10 | P17275 JUNB_HUMAN   | E.ARSRDAT#PPVS#PINM*EDQE.R        | T255:S259      | 3 | 3,7328 | 0,235 | 0,08   |
| 10 | Q92597 NDRG1_HUMAN  | E.GAHLDITPNSGAAGNSAGPKS#M*E.V     | S389           | 3 | 3,7092 | 0,357 | 0      |
| 10 | P25054 APC_HUMAN    | E.NRLNS#FIQVDAPDQKGT.E.I          | S2724          | 3 | 3,7062 | 0,128 | 0,173  |
| 10 | P78347 GTF2I_HUMAN  | E.STSSKS#PPRKINSS#PNVNTTASGVE.D   | S823:S831      | 3 | 3,7002 | 1     | 0,135  |
| 10 | Q02952 AKA12_HUMAN  | E.AKTEPFTQGKVVGGQTT#PESFE.K       | T1116          | 2 | 3,6894 | 0,385 | 0,31   |
| 10 | Q43768 ENSA_HUMAN   | R.KSS#LVTSKLAGGQVE.-              | S109           | 2 | 3,6848 | 0,524 | 0,154  |
| 10 | Q96RU3 FNBP1_HUMAN  | E.DYTQPM*KRTVS#DNS#LSNSRGE.G      | S296:S299      | 3 | 3,6776 | 1     | -0,071 |
| 10 | Q92615 LARP5_HUMAN  | E.KFTSSQTQSPTPPKPPS#PSFE.L        | S524           | 3 | 3,6675 | 0,22  | 0,388  |
| 10 | O00139 KIF2A_HUMAN  | E.INKS#LLALKE.C                   | S484           | 2 | 3,6624 | 0,346 | 0,101  |
| 10 | Q5VVJ2 MYSM1_HUMAN  | D.ARQLPS#PEPCEIQKNLNDNE.M         | S340           | 3 | 3,6461 | 0,21  | 0,15   |
| 10 | P43487 RANG_HUMAN   | E.NTDESNHDPQFEPIVSLPEQEI.K.T      | NA             | 3 | 3,6171 | 0,258 | 0,274  |
| 10 | P04075 ALDOA_HUMAN  | E.STGSIARQLQS#IGTENTEE.N          | S46            | 3 | 3,6096 | 0,3   | -0,174 |
| 10 | Q96JM3 ZN828_HUMAN  | E.LRKPGPPLS#PEIRS#PAGS#PE.L       | S427:S432:S436 | 3 | 3,5803 | 0,102 | 0,157  |
| 10 | Q43765 SGTA_HUMAN   | E.LIEQLRSQIR#RTPS#ASNDQDQE.-      | S301:S305      | 3 | 3,5731 | 0,26  | 0,646  |
| 10 | Q6NZI2 PTRF_HUMAN   | E.AGDLRRGS#S#PDVHALLE.I           | S365:S366      | 3 | 3,5647 | 0,212 | 0,187  |
| 10 | Q9UER7 DAXX_HUMAN   | E.AAAGKDGDKS#PMSSLQISNE.K         | S495           | 2 | 3,5627 | 0,521 | 0,117  |
| 10 | Q6NYC8 PHTNS_HUMAN  | E.S#RLSPGESAYQKGLTE.A             | S221           | 2 | 3,5592 | 0,406 | 0,064  |
| 10 | P78310 CXAR_HUMAN   | R.TSTARSYIGSNHSSLGSM*S#PSNM*E.G   | S306           | 3 | 3,5531 | 0,362 | 0,07   |
| 10 | O60238 BNI3L_HUMAN  | E.SGQSSSRGSSHCDS#PSPQEDGQIMFDVE.M | S95            | 3 | 3,5487 | 0,275 | 0,474  |
| 10 | Q14964 HGS_HUMAN    | E.ARKS#PTPSAPVPLTEPAAQPGE.G       | S345           | 2 | 3,5486 | 0,402 | -0,214 |
| 10 | Q09666 AHNK_HUMAN   | E.GQTPKAGLRVS#APE.V               | S332           | 2 | 3,5297 | 0,242 | -0,327 |
| 10 | Q9UGV2 NDRG3_HUMAN  | E.SCESPDVLDLRHQTMVEVS#C.-         | S374           | 3 | 3,5219 | 0,31  | 0,082  |
| 10 | Q9UQ35 SRRM2_HUMAN  | E.KAGMSSNQSIS#SPVLDVAVPRT#PSRE.R  | S1403:T1413    | 3 | 3,5157 | 1     | 0,264  |
| 10 | Q9HCG8 NCM_HUMAN    | E.NLNSYQRNSS#PEDRYEE.Q            | S28            | 3 | 3,5133 | 0,17  | 0,252  |
| 10 | Q14530 TXND9_HUMAN  | E.IQKLDQM*DEDE.L                  | NA             | 2 | 3,5069 | 0,384 | -0,707 |
| 10 | P55786 PSA_HUMAN    | E.LDALDNSHPIEVSVGHPSVDE.I         | NA             | 3 | 3,5051 | 0,217 | 0      |
| 10 | P42679 MATK_HUMAN   | E.LRSAGAPASVSGQDADGST#SPRSQEP.-   | T500           | 3 | 3,5032 | 0,201 | 0,14   |
| 10 | Q9UQ35 SRRM2_HUMAN  | E.KSATRPS#PS#PERSSTGPEPPAPTLLAE.R | S351:S353      | 3 | 3,5021 | 1     | 1,152  |
| 10 | Q5W0B1 RN219_HUMAN  | E.SDNSKS#PCNNGFKSLD.L             | S553           | 3 | 3,4954 | 0,253 | -0,297 |

|    |                     |                                   |             |   |        |       |        |
|----|---------------------|-----------------------------------|-------------|---|--------|-------|--------|
| 10 | Q9UNE7 STUB1_HUMAN  | E.GGARLGAGGGS#PEKSPSAQE.L         | S19         | 2 | 3,4852 | 0,421 | 0,064  |
| 10 | P39748 FEN1_HUMAN   | E.AEKQLQQAQAAGAEQE.V              | NA          | 2 | 3,483  | 0,398 | -0,072 |
| 10 | Q58FF8 H90B2_HUMAN  | E.SKEQVANSFAVE.Q                  | NA          | 2 | 3,4733 | 0,47  | 0,186  |
| 10 | Q6KC79 NIPBL_HUMAN  | E.KAAMYDISSPS#KD.S                | S352        | 2 | 3,465  | 0,457 | 0,152  |
| 10 | Q92560 BAP1_HUMAN   | E.GGKGS#PSIRIQGS#QGSSSPEVE.V      | S583:S592   | 3 | 3,4603 | 1     | 0,07   |
| 10 | P20020 AT2B1_HUMAN  | E.M*NKSATSSSPGSPHLSLET#SL.-       | T1256       | 2 | 3,4544 | 0,452 | 0      |
| 10 | Q92597 NDRG1_HUMAN  | E.GAHLDITPNSGAAGNSAGPKSM*EVS#C.-  | S393        | 3 | 3,4454 | 0,345 | 0,349  |
| 10 | Q9BZG8 DPH1_HUMAN   | E.GS#ARPPSAVACEDCSRDE.K           | S419        | 3 | 3,4342 | 0,189 | 0,83   |
| 10 | Q9UBU7 DBF4A_HUMAN  | E.AKFAQTLGRIS#PVPSPE.S            | S103        | 2 | 3,4329 | 0,327 | 0,195  |
| 10 | P52597 HNRPF_HUMAN  | R.M*RPAYSTGYGGYEE.Y               | NA          | 2 | 3,4238 | 0,456 | 0,295  |
| 10 | P50443 S26A2_HUMAN  | E.LQRESS#TDFKQFE.T                | S36         | 2 | 3,4225 | 0,361 | -0,144 |
| 10 | O43166 SI1L1_HUMAN  | E.NHRPLS#AAS#NSDQLE.D             | S1708:S1711 | 2 | 3,4139 | 0,493 | 0,068  |
| 10 | Q02880 TOP2B_HUMAN  | E.YTFS PGSKAT#PE.K                | T1431       | 2 | 3,4112 | 0,284 | -0,082 |
| 10 | Q9NZL4 HPBP1_HUMAN  | E.KLLQTCFSS#PADDSM*DR.-           | S354        | 2 | 3,4078 | 0,473 | 0,354  |
| 10 | P42166 LAP2A_HUMAN  | E.SRSSTPLTISSAE.N                 | NA          | 2 | 3,4032 | 0,562 | 0,241  |
| 10 | B2RDY9 B2RDY9_HUMAN | E.SASRSALFAQINQGE.S               | NA          | 2 | 3,3961 | 0,379 | -0,077 |
| 10 | P14618 KPYM_HUMAN   | E.SFASDPILYRPVAVALDTKGPE.I        | NA          | 3 | 3,3839 | 0,393 | 0,312  |
| 10 | Q06323 PSME1_HUMAN  | E.DKGPPCGPVNCNE.K                 | NA          | 2 | 3,375  | 0,373 | -0,085 |
| 10 | Q6S8J3 A26CA_HUMAN  | E.KLCYVALDFEQE.M                  | NA          | 2 | 3,3749 | 0,36  | 0,242  |
| 10 | Q58FG0 HS905_HUMAN  | E.TKDQVANSFAVE.C                  | NA          | 2 | 3,3717 | 0,368 | 0,186  |
| 10 | P21333 FLNA_HUMAN   | E.TRGAGTGGLLAVEGPSE.A             | NA          | 2 | 3,3654 | 0,471 | 0,075  |
| 10 | Q14978 NOLC1_HUMAN  | R.GSYRGGISISVQVNSIKFDS#E.-        | S698        | 3 | 3,3617 | 0,175 | 0,331  |
| 10 | Q9H4G0 E41L1_HUMAN  | E.DVLLKHQAS#INE.L                 | S510        | 2 | 3,3615 | 0,428 | 0,169  |
| 10 | Q96CS3 UBXD8_HUMAN  | R.NQTQVLRQQQDE.A                  | NA          | 2 | 3,3451 | 0,314 | -0,164 |
| 10 | Q86YT6 MIB1_HUMAN   | E.KVSGQVGSRS#PSM*ISNDSETLEE.C     | S805        | 3 | 3,3446 | 0,182 | 0,217  |
| 10 | Q9NZL4 HPBP1_HUMAN  | E.KLLQTCFSSPADDS#M*DR.-           | S359        | 2 | 3,3223 | 0,383 | 0,118  |
| 10 | Q5SW79 CE170_HUMAN  | E.LSKSAS#AKS#IDSKVADAATE.V        | S135:S138   | 3 | 3,3197 | 0,256 | 0,086  |
| 10 | O75943 RAD17_HUMAN  | E.HGM*IDPDS#GDEAQLNGGHSAAE.S      | S613        | 3 | 3,3168 | 0,229 | 0,232  |
| 10 | P30101 PDIA3_HUMAN  | E.SRISDTGSAGLM*LVE.F              | NA          | 2 | 3,3166 | 0,275 | 0      |
| 10 | Q6ZSR9 YJ005_HUMAN  | E.SCRPPPGKLGAVPFAPPEVS#PE.Q       | S93         | 3 | 3,3159 | 0,2   | 0,075  |
| 10 | Q6S8J3 A26CA_HUMAN  | E.KSYELPDGQVITIGNE.R              | NA          | 2 | 3,3147 | 0,352 | -0,138 |
| 10 | P35749 MYH11_HUMAN  | E.MKTQLEEELEDE.L                  | NA          | 2 | 3,3067 | 0,181 | -0,268 |
| 10 | P46013 KI67_HUMAN   | E.VKAQSLVISPPAPS#PR.K             | S584        | 3 | 3,2952 | 0,182 | -0,318 |
| 10 | Q13136 LIPA1_HUMAN  | E.RDS#LQRQLNTALPQE.F              | S77         | 2 | 3,2745 | 0,243 | 0,132  |
| 10 | P05556 ITB1_HUMAN   | E.NVKSLGTDLMNE.M                  | NA          | 2 | 3,2544 | 0,343 | -0,092 |
| 10 | Q9Y483 MTF2_HUMAN   | E.GTAHSSNTS#DVDFTGASSAKE.T        | S452        | 3 | 3,2462 | 0,137 | -0,085 |
| 10 | Q8TEA8 DTD1_HUMAN   | E.DRSASS#GAEGDVSSEREP.-           | S197        | 2 | 3,2428 | 0,389 | 0,064  |
| 10 | Q8ND82 Z280C_HUMAN  | E.NASKPDFTKNSQVGSNDSS#ILLFDSTQE.S | S141        | 3 | 3,2418 | 0,281 | 0,471  |
| 10 | P46821 MAP1B_HUMAN  | E.KSGKQGS#PDQVS#PVSE.M            | S1438:S1443 | 2 | 3,2417 | 0,345 | 0      |
| 10 | Q9H8Y8 GORS2_HUMAN  | E.GKKIS#LPGQM*AGTPIT#PLKDGTFE.V   | S214:T225   | 3 | 3,2407 | 0,153 | 0,069  |
| 10 | Q8TE77 SSH3_HUMAN   | E.LHGDQTDGFGQGSQ#PQKQEE.Q         | S87         | 3 | 3,2314 | 0,203 | -0,08  |

|    |                     |                                   |             |   |        |       |        |
|----|---------------------|-----------------------------------|-------------|---|--------|-------|--------|
| 10 | Q5JYT3 Q5JYT3_HUMAN | E.IGSRDGPQTSNS#SM*KLQAN.-         | S1186       | 3 | 3,2138 | 0,152 | 0,166  |
| 10 | Q9UQ35 SRRM2_HUMAN  | E.KAGM*SSNQS#ISSPVLDVAVPRT#PSRE.R | S1401:T1413 | 3 | 3,2135 | 1     | 0,131  |
| 10 | P46013 KI67_HUMAN   | E.SLTAGKATKIPCES#PPLE.V           | S2708       | 2 | 3,2121 | 0,463 | 0,123  |
| 10 | P30086 PEBP1_HUMAN  | E.LRAPVAGTCYQAE.W                 | NA          | 2 | 3,2005 | 0,438 | 0,085  |
| 10 | O43567 RNF13_HUMAN  | E.HDVVVVLQPNGERDYNIANT#V.-        | T380        | 3 | 3,1951 | 0,347 | 0,149  |
| 10 | P55327 TPD52_HUMAN  | E.DVKNS#PTFKSFE.E                 | S131        | 2 | 3,1946 | 0,378 | 0      |
| 10 | Q86SQ0 PHLB2_HUMAN  | E.SLRQAS#GTPQPALRE.R              | S402        | 3 | 3,1941 | 0,136 | 0      |
| 10 | P35579 MYH9_HUMAN   | E.AKIAQLEEQDNE.T                  | NA          | 2 | 3,1919 | 0,277 | 0,406  |
| 10 | P05556 ITB1_HUMAN   | E.NVKSLGTDLM*NE.M                 | NA          | 2 | 3,1887 | 0,339 | 0,274  |
| 10 | Q9NX63 CHCH3_HUMAN  | E.SSPSGSQRYRYS#GAYGASVSDEE.L      | S50         | 2 | 3,1849 | 0,408 | 0,101  |
| 10 | Q5T200 ZC3HD_HUMAN  | E.DNKLSQSSIQQE.L                  | NA          | 2 | 3,1838 | 0,305 | 0,089  |
| 10 | Q86YT6 MIB1_HUMAN   | E.KVSGQVGSRS#PSMISNDSETLEE.C      | S805        | 3 | 3,1814 | 0,208 | 0,436  |
| 10 | Q9NZL4 HPBP1_HUMAN  | E.KLLQTCFSSPADDS#M*DR.-           | S359        | 3 | 3,1748 | 0,115 | -0,177 |
| 10 | P08238 HS90B_HUMAN  | E.T#QKSIYYITGE.S                  | T479        | 2 | 3,1745 | 0,323 | 0,265  |
| 10 | Q5UIP0 RIF1_HUMAN   | E.NFKTVGPCLGDSKNVS#QESLE.T        | S1873       | 3 | 3,1739 | 0,137 | 0      |
| 10 | P45974 UBP5_HUMAN   | E.IDM*NQRIGE.W                    | NA          | 2 | 3,1736 | 0,257 | 0      |
| 10 | Q03252 LMNB2_HUMAN  | E.SFRTVLVNADGEE.V                 | NA          | 2 | 3,166  | 0,289 | 0,085  |
| 10 | P56211 ARP19_HUMAN  | E.DKVTS#PEKAAE.A                  | S23         | 2 | 3,1651 | 0,343 | -0,279 |
| 10 | Q53EZ4 CEP55_HUMAN  | E.KVAAS#PKSPTAALNE.S              | S425        | 2 | 3,1609 | 0,388 | 0,078  |
| 10 | Q7Z6Z7 HUWE1_HUMAN  | E.KFQDADPLEQDE.L                  | NA          | 2 | 3,1593 | 0,267 | 0,085  |
| 10 | Q14974 IMB1_HUMAN   | E.VKNYVLQTLGTE.T                  | NA          | 2 | 3,1496 | 0,37  | 0,089  |
| 10 | Q86UP2 KTN1_HUMAN   | E.VQKLQALANE.Q                    | NA          | 2 | 3,1447 | 0,303 | -0,11  |
| 10 | Q9NZL4 HPBP1_HUMAN  | E.KLLQTCFSSPADDS#MDR.-            | S359        | 3 | 3,1389 | 0,299 | -0,357 |
| 10 | Q5SQN1 CA142_HUMAN  | E.DALVLRSAARTSS#PAE.K             | S318        | 3 | 3,134  | 0,089 | -0,221 |
| 10 | O95684 FR1OP_HUMAN  | E.KGPTTGEGALDLDVHS#PPKS#PE.G      | S156:S160   | 2 | 3,1334 | 0,352 | 0,492  |
| 10 | B2RDY9 B2RDY9_HUMAN | E.SASRS#ALFAQINQGE.S              | S255        | 2 | 3,127  | 0,334 | 0,221  |
| 10 | Q9UNE7 STUB1_HUMAN  | E.GGARLGAGGGS#PEKSPSAQE.L         | S19         | 3 | 3,1255 | 0,279 | 0,966  |
| 10 | P55327 TPD52_HUMAN  | E.DVKNSPTFKS#FEE.K                | S136        | 2 | 3,1246 | 0,328 | -0,076 |
| 10 | Q12756 KIF1A_HUMAN  | E.GRYGATDLRTPQPCS#RPAS#PEPELLPE.A | S1528:S1532 | 3 | 3,1171 | 0,252 | 0,232  |
| 10 | Q99700 ATX2_HUMAN   | E.NIKPNETS#PSFSKAE.N              | S771        | 2 | 3,116  | 0,312 | -0,282 |
| 10 | Q99700 ATX2_HUMAN   | E.NIKPNETS#PSFSKAE.N              | S771        | 3 | 3,1072 | 0,243 | 0,106  |
| 10 | Q9C0C9 UBE2O_HUMAN  | E.KAQUALPNGVPKASS#SPEPPAVAE.L     | S1167       | 3 | 3,1066 | 0,298 | 0,315  |
| 10 | O95202 LETM1_HUMAN  | E.SKLTSLAAALDE.N                  | NA          | 2 | 3,0977 | 0,425 | 0      |
| 10 | Q9P260 K1468_HUMAN  | E.DKISLLNSE.K                     | NA          | 2 | 3,0963 | 0,22  | 0,239  |
| 10 | Q6ULP2 AFTIN_HUMAN  | E.TILTKSDLKQTSNDLS#EE.C           | S508        | 3 | 3,0864 | 0,318 | -0,087 |
| 10 | O43583 DENR_HUMAN   | E.FAKLTVENS#PKQE.A                | S73         | 3 | 3,0835 | 0,235 | 0,699  |
| 10 | P84098 RL19_HUMAN   | E.IIKTLS#KEEE.T                   | S189        | 2 | 3,0774 | 0,354 | 0,096  |
| 10 | Q71RC2 LARP4_HUMAN  | E.LRSNVVS#PTKNEDNGAPE.N           | S647        | 2 | 3,0768 | 0,419 | 0,061  |
| 10 | P78364 PHC1_HUMAN   | E.RDDVSTLGS*LPKAS#PVAE.S          | S664        | 3 | 3,0766 | 0,176 | 0      |
| 10 | Q15648 MED1_HUMAN   | E.KSYQNS#PSSDDGIRPLPE.Y           | S1479       | 3 | 3,0713 | 0,424 | -0,619 |
| 10 | P20020 AT2B1_HUMAN  | E.MNKSATSSS#PGSPLHSLE.T           | S1246       | 3 | 3,0684 | 0,209 | 0,096  |

|    |                     |                                       |             |   |        |       |        |
|----|---------------------|---------------------------------------|-------------|---|--------|-------|--------|
| 10 | Q9NX63 CHCH3_HUMAN  | E.SSPSGSKSQRYSGAY#GASVSDEE.L          | Y53         | 3 | 3,0665 | 0,267 | 0,076  |
| 10 | Q05682 CALD1_HUMAN  | E.AKTTTTNTQVEGDDE.A                   | NA          | 2 | 3,0621 | 0,494 | -0,227 |
| 10 | P20020 AT2B1_HUMAN  | E.M*NKSATSSSPGS#PLHSLE.T              | S1249       | 2 | 3,0608 | 0,468 | -0,19  |
| 10 | Q9Y6K9 NEMO_HUMAN   | E.DLKQQLQQAEE.A                       | NA          | 2 | 3,047  | 0,265 | -0,367 |
| 10 | Q96S66 CLCC1_HUMAN  | R.DVDLRFQTGNKS#PE.V                   | S438        | 3 | 3,0408 | 0,256 | -0,108 |
| 10 | P51116 FXR2_HUMAN   | E.TSKQLAAAFQEE.F                      | NA          | 2 | 3,0347 | 0,365 | 0,184  |
| 10 | P55209 NP1L1_HUMAN  | E.FHFEPNEYFTNE.V                      | NA          | 2 | 3,0304 | 0,329 | 0,465  |
| 10 | Q86UP2 KTN1_HUMAN   | E.NES#LKAHVQE.V                       | S906        | 2 | 3,0189 | 0,371 | 0,395  |
| 10 | O60264 SMCA5_HUMAN  | E.IFDDAS#PGKQKE.I                     | S66         | 2 | 3,0151 | 0,345 | -0,086 |
| 10 | Q92625 ANS1A_HUMAN  | E.LKLSRSL#KS#DSDLTCSPT.E.D            | S624:S626   | 3 | 3,0145 | 0,103 | 0,293  |
| 10 | Q99873 ANM1_HUMAN   | K.DVAIKEPLVDVDPK.Q                    | NA          | 3 | 3,0128 | 0,245 | 0,447  |
| 10 | P29558 RBMS1_HUMAN  | E.TSNDHSPY#TFQPNK.-                   | Y400        | 3 | 3,0123 | 0,244 | 0      |
| 10 | P29692 EF1D_HUMAN   | E.NIQKSLAGSSGPGASSGTS#GDHGE.L         | S74         | 2 | 3,0066 | 0,403 | 0,535  |
| 10 | Q14566 MCM6_HUMAN   | E.TNSRVSGVDGYETE.G                    | NA          | 2 | 2,9939 | 0,469 | 0,322  |
| 10 | P08670 VIME_HUMAN   | E.SVAAKNLQEA.E                        | NA          | 2 | 2,9928 | 0,309 | 0,105  |
| 10 | Q9UKI8 TLK1_HUMAN   | E.SSNHSFGSLGSL#DKESETPE.K             | S105        | 2 | 2,9919 | 0,296 | 0,322  |
| 10 | P38398 BRCA1_HUMAN  | E.KAVLTSQKS#SEYPISQNP.E.G             | S1460       | 3 | 2,9878 | 0,228 | 0,167  |
| 10 | Q96KB5 TOPK_HUMAN   | E.GISNFKTPSKLS#E.K                    | S14         | 3 | 2,9817 | 0,38  | 0,246  |
| 10 | Q99590 SFRIP_HUMAN  | E.IIQTVDQRQSVKS#PE.V                  | S314        | 3 | 2,9785 | 0,234 | 0,218  |
| 10 | P51648 AL3A2_HUMAN  | E.GQKIAFGGETDE.A                      | NA          | 2 | 2,9743 | 0,36  | 0,097  |
| 10 | P39023 RL3_HUMAN    | E.RLEQQVPVNQVFGQDE.M                  | NA          | 2 | 2,9711 | 0,499 | 0,065  |
| 10 | P08670 VIME_HUMAN   | E.SVAAKNLQEA.E.W                      | NA          | 2 | 2,9692 | 0,242 | 0,095  |
| 10 | Q9Y4B6 VPRBP_HUMAN  | E.NQDIAANYRDE.N                       | NA          | 2 | 2,966  | 0,427 | 0,093  |
| 10 | O96028 NSD2_HUMAN   | E.M*KGIGTPPNTTPIKNGS#PE.I             | S121        | 3 | 2,9494 | 0,203 | 0,09   |
| 10 | P61160 ARP2_HUMAN   | E.IKDLM*VGDEASE.L                     | NA          | 2 | 2,949  | 0,364 | 0      |
| 10 | P55327 TPD52_HUMAN  | E.DVKNS#PTFKSFEE.K                    | S131        | 2 | 2,9456 | 0,231 | -0,152 |
| 10 | Q9Y3D9 RT23_HUMAN   | E.LQKLGETDEE.K                        | NA          | 2 | 2,9442 | 0,248 | 0      |
| 10 | P63104 1433Z_HUMAN  | E.KFLIPNAS#QAE.S                      | S110        | 2 | 2,9433 | 0,19  | 0,094  |
| 10 | Q14444 CAPR1_HUMAN  | E.SRLAQPNQVPVQPE.A                    | NA          | 2 | 2,9426 | 0,274 | 0,312  |
| 10 | Q02952 AKA12_HUMAN  | E.LQS#HAKSPPS#PVERE.M                 | S1324:S1331 | 3 | 2,9426 | 0,286 | 0,1    |
| 10 | Q58FF8 H90B2_HUMAN  | E.SKEQVANS#AFVE.Q                     | S273        | 2 | 2,9387 | 0,351 | 0,264  |
| 10 | Q02952 AKA12_HUMAN  | E.KGLAEVQQDGAE.E.G                    | NA          | 2 | 2,9312 | 0,384 | 0,162  |
| 10 | Q92499 DDX1_HUMAN   | E.LKFNFGE.E.F                         | NA          | 2 | 2,9206 | 0,229 | -0,329 |
| 10 | Q7Z5K2 WAPL_HUMAN   | E.TNDTWNSQFGKRPES#PSE.I               | S221        | 3 | 2,9193 | 0,191 | -0,169 |
| 10 | Q52LD0 Q52LD0_HUMAN | E.YGKAGGS#PASY#HGSTSPRVSE.L           | S192:Y196   | 2 | 2,9178 | 0,312 | -0,104 |
| 10 | Q99956 DUS9_HUMAN   | E.RHSQEQSGGQAS#AASNPPSFFT#TPTSDGAFE.L | S361:T371   | 3 | 2,916  | 1     | 0,322  |
| 10 | Q92621 NU205_HUMAN  | E.NRS#VSGFLHFD.T                      | S1165       | 3 | 2,9128 | 0,207 | 0      |
| 10 | P31943 HNRH1_HUMAN  | E.MDWVLKHTGPN#PDTAND.G                | S104        | 3 | 2,9113 | 0,276 | 0,264  |
| 10 | Q9UER7 DAXX_HUMAN   | E.AAAGKDGDKS#PMSSLQJSNE.K             | S495        | 3 | 2,9064 | 0,153 | 0,088  |
| 10 | P08133 ANXA6_HUMAN  | E.IKDAISGIGTDE.K                      | NA          | 2 | 2,906  | 0,387 | -0,4   |
| 10 | P40123 CAP2_HUMAN   | E.SSPSRALFAQLNQGE.A                   | NA          | 2 | 2,9053 | 0,455 | 0,072  |



|    |                     |                                      |             |   |        |       |        |
|----|---------------------|--------------------------------------|-------------|---|--------|-------|--------|
| 10 | Q07157 ZO1_HUMAN    | E.NDRVAM*VNGVSM*DNVE.H               | NA          | 2 | 2,9037 | 0,407 | -0,685 |
| 10 | Q9UNE7 STUB1_HUMAN  | E.GGARLGAGGGS#PEKS#PSAQELKE.Q        | S19:S23     | 3 | 2,9018 | 0,215 | -0,078 |
| 10 | Q01105 SET_HUMAN    | E.IDRLNEQASEE.I                      | NA          | 2 | 2,8984 | 0,316 | -0,187 |
| 10 | P20020 AT2B1_HUMAN  | E.M*NKSATSSSPGS#PLHSLE.T             | S1249       | 3 | 2,8966 | 0,093 | 0,19   |
| 10 | Q9H2Y7 ZF106_HUMAN  | E.GVSISS#PGLARKRSL#E.S               | S851:S861   | 3 | 2,8939 | 0,223 | 0,184  |
| 10 | Q04721 NOTC2_HUMAN  | E.AADIRRTPSLALT#PPQAEQE.V            | T1808       | 3 | 2,8934 | 0,191 | 0,326  |
| 10 | O60271 JIP4_HUMAN   | E.GFVKVTDAPNKS#E.I                   | S311        | 2 | 2,8788 | 0,428 | -0,166 |
| 10 | Q6IN79 Q6IN79_HUMAN | E.KVLTSQKS#SEYPISQNPE.G              | S356        | 3 | 2,8719 | 0,123 | 0      |
| 10 | P49321 NASP_HUMAN   | E.DKVQIAANEE.T                       | NA          | 2 | 2,8652 | 0,255 | 0,218  |
| 10 | P05787 K2C8_HUMAN   | E.INFLRLQYEEE.I                      | NA          | 2 | 2,8597 | 0,296 | -0,503 |
| 10 | Q59HC3 Q59HC3_HUMAN | E.GDNM*ET#PASS#PQLSHDDTHSRIE.H       | T1110:S1114 | 3 | 2,8544 | 0,128 | 0,068  |
| 10 | P29692 EF1D_HUMAN   | E.NQS#LRGVVQE.L                      | S93         | 2 | 2,8541 | 0,273 | -0,303 |
| 10 | Q52LD0 Q52LD0_HUMAN | E.YGKAGGS#PAS#YHGSTSPRVSE.L          | S192:S195   | 3 | 2,851  | 0,319 | 0,547  |
| 10 | O60271 JIP4_HUMAN   | E.TRNVS#TGS#AENEKSE.V                | S329:S332   | 2 | 2,8454 | 0,374 | 0,257  |
| 10 | Q9UK76 HN1_HUMAN    | R.RNSSEAS#SGDFLDLKG.E.G              | S91         | 3 | 2,8435 | 0,137 | 0,29   |
| 10 | Q02952 AKA12_HUMAN  | E.AKTEPFTQGKVVQTT#PE.S               | T1116       | 3 | 2,839  | 0,226 | 0,366  |
| 10 | Q92597 NDRG1_HUMAN  | E.GAHLDITPNSGAAGNSAGPKSMEVS#C.-      | S393        | 3 | 2,8358 | 0,277 | 0,351  |
| 10 | P38398 BRCA1_HUMAN  | E.NFEEHSM*S#PERE.M                   | S1009       | 2 | 2,8327 | 0,378 | -0,384 |
| 10 | Q8IUD2 RB6I2_HUMAN  | E.NQHMQMTIQALQDE.L                   | NA          | 2 | 2,8312 | 0,289 | 0,362  |
| 10 | P28290 SSFA2_HUMAN  | E.NTGTQKSTCS#PGDHIE.I                | S613        | 2 | 2,831  | 0,4   | 0,063  |
| 10 | Q13158 FADD_HUMAN   | E.VQQARDLQNRSGAM*S#PM*SWNSDASTSEAS.- | S194        | 3 | 2,8233 | 0,228 | 0,227  |
| 10 | P49454 CENPF_HUMAN  | E.VKILNDDS#GLLHGE.L                  | S1353       | 2 | 2,8217 | 0,193 | -0,23  |
| 10 | Q14980 NUMA1_HUMAN  | E.SRPSLSLGTITDEE.M                   | NA          | 2 | 2,8164 | 0,312 | 0      |
| 10 | P07900 HS90A_HUMAN  | E.FYKSLTNDWE.D                       | NA          | 2 | 2,8147 | 0,296 | 0      |
| 10 | Q9H6K1 CF106_HUMAN  | E.GNFNPFAS#PQKNRQSD.E.N              | S215        | 2 | 2,8131 | 0,226 | 0,182  |
| 10 | P39687 AN32A_HUMAN  | E.LSDNRVSGGLE.V                      | NA          | 2 | 2,813  | 0,224 | 0      |
| 10 | P07355 ANXA2_HUMAN  | R.YKSYSPYDML.E.S                     | NA          | 2 | 2,8106 | 0,372 | 0      |
| 10 | Q86VP6 CAND1_HUMAN  | D.SIKLDDDSE.R                        | NA          | 2 | 2,8081 | 0,319 | 0,119  |
| 10 | P61160 ARP2_HUMAN   | E.IKDLM*VGDE.A                       | NA          | 2 | 2,806  | 0,23  | 0      |
| 10 | Q71U36 TBA1A_HUMAN  | E.HSDCAFMDVNEAIYD.I                  | NA          | 2 | 2,8022 | 0,407 | 0      |
| 10 | Q8N6H7 ARFG2_HUMAN  | E.HGPNTDLLGTS#PKASLE.L               | S201        | 2 | 2,801  | 0,476 | 0,269  |
| 10 | Q15464 SHB_HUMAN    | E.GQSVDS#DSESTVSPRLRE.S              | S310        | 3 | 2,7948 | 0,253 | -0,09  |
| 10 | Q8TBE0 BAHD1_HUMAN  | E.GKLS#PVAAPHEE.G                    | S405        | 2 | 2,7921 | 0,266 | 0      |
| 10 | P02768 ALBU_HUMAN   | E.FAKTCVADE.S                        | NA          | 2 | 2,7921 | 0,246 | -0,117 |
| 10 | P46013 KI67_HUMAN   | E.SLTAGKATKIPCES#PPLE.V              | S2708       | 3 | 2,7872 | 0,235 | 0      |
| 10 | Q96S66 CLCC1_HUMAN  | R.DVDLRFQTGNKS#PE.V                  | S438        | 2 | 2,7857 | 0,324 | -0,217 |
| 10 | P08238 HS90B_HUMAN  | E.TQKSIYYITGE.S                      | NA          | 2 | 2,777  | 0,419 | 0,187  |
| 10 | Q9H4A3 WNK1_HUMAN   | K.RAS#FAKSVIGTPE.F                   | S378        | 2 | 2,7766 | 0,329 | 0      |
| 10 | O14964 HGS_HUMAN    | E.ARKS#PTPSAPVPLTEPAAQPGE.G          | S345        | 3 | 2,7689 | 0,354 | 0,08   |
| 10 | P49792 RBP2_HUMAN   | E.NKSGTGAAGAS#DTTIKPNPE.N            | S2207       | 3 | 2,7651 | 0,19  | 0,089  |
| 10 | Q8TCS8 PNPT1_HUMAN  | E.ICKDDQEQQLE.F                      | NA          | 2 | 2,7645 | 0,223 | -0,434 |

|    |                    |                                     |           |   |        |       |        |
|----|--------------------|-------------------------------------|-----------|---|--------|-------|--------|
| 10 | Q8N2F6 ARM10_HUMAN | E.LGIRSSKS#AGALEE.G                 | S45       | 2 | 2,7543 | 0,377 | -0,57  |
| 10 | P78364 PHC1_HUMAN  | E.RDDVSTLGSMPLPAKAS#PVAE.S          | S664      | 3 | 2,7537 | 0,215 | 0,431  |
| 10 | Q71U36 TBA1A_HUMAN | E.HGIQPDGQM*PSDKTIGGGDDDS#FNTFFSE.T | S48       | 3 | 2,7536 | 0,22  | 0,238  |
| 10 | Q92688 AN32B_HUMAN | E.CLKSLDLFNCE.V                     | NA        | 2 | 2,7392 | 0,376 | 0,174  |
| 10 | Q16891 IMMT_HUMAN  | E.QNLSEKLSEQE.L                     | NA        | 2 | 2,7342 | 0,193 | 0,093  |
| 10 | P49792 RBP2_HUMAN  | E.NKGSSTGAAGAS#DTTIKPNPE.N          | S2207     | 2 | 2,7335 | 0,359 | 0,119  |
| 10 | Q9H6Z4 RANB3_HUMAN | E.KVEVITGEEAE.S                     | NA        | 2 | 2,7321 | 0,302 | 0,101  |
| 10 | O00472 ELL2_HUMAN  | E.IAKLNNSS#PNSSGGVKE.D              | S503      | 2 | 2,7308 | 0,297 | -0,137 |
| 10 | O60271 JIP4_HUMAN  | E.TRVST#GS#AENEKSE.V                | T330:S332 | 3 | 2,729  | 0,274 | 0,289  |
| 10 | P52732 KIF11_HUMAN | E.DKLIQAQNL.E                       | NA        | 2 | 2,7192 | 0,092 | 0,467  |
| 10 | P14625 ENPL_HUMAN  | D.GLNASQIRE.L                       | NA        | 2 | 2,7135 | 0,218 | 0,37   |
| 10 | Q9Y536 PAL4B_HUMAN | E.NFRALSTGE.K                       | NA        | 2 | 2,7119 | 0,284 | 0,245  |
| 10 | O00231 PSD11_HUMAN | E.FQRAQS#LLSTDRE.A                  | S14       | 2 | 2,7117 | 0,281 | 0,15   |
| 10 | P20020 AT2B1_HUMAN | E.MNKSATSSSPGS#PLHSLE.T             | S1249     | 3 | 2,7109 | 0,196 | 0      |
| 10 | P46013 KI67_HUMAN  | E.LLAVGKFTRTS#GE.T                  | S1048     | 2 | 2,7072 | 0,46  | 0      |
| 10 | P63104 1433Z_HUMAN | E.KFLIPNASQAE.S                     | NA        | 2 | 2,6978 | 0,216 | 0,1    |
| 10 | P67775 PP2AA_HUMAN | E.SRQITQVYGFYDE.C                   | NA        | 2 | 2,6963 | 0,433 | 0,152  |
| 10 | Q9GZR7 DDX24_HUMAN | E.AGAETRS#PGKAEAE.S                 | S287      | 3 | 2,6951 | 0,09  | -0,189 |
| 10 | P52948 NUP98_HUMAN | E.RFS#FLSKPVDE.N                    | S635      | 2 | 2,684  | 0,238 | 0,087  |
| 10 | P51858 HDGF_HUMAN  | E.DAEAPGIRDHES#L.-                  | S239      | 2 | 2,6816 | 0,398 | 0,164  |
| 10 | P20020 AT2B1_HUMAN | E.MNKSATSSSPGSPLHSLETS#L.-          | S1257     | 3 | 2,6806 | 0,177 | 0,165  |
| 10 | O43752 STX6_HUMAN  | E.LQRANS#HFIEE.Q                    | S152      | 2 | 2,6791 | 0,299 | 0,086  |
| 10 | Q13501 SQSTM_HUMAN | E.KSSS#QPSSCCSDPSKPGGNVE.G          | S284      | 3 | 2,6679 | 0,092 | 0      |
| 10 | Q8TEA8 DTD1_HUMAN  | E.DRSAS#SGAEGDVSSEREP.-             | S196      | 3 | 2,6649 | 0,157 | 0,191  |
| 10 | O00273 DFFA_HUMAN  | E.GSLLSKQEE.S                       | NA        | 2 | 2,6609 | 0,087 | 0      |
| 10 | P20073 ANXA7_HUMAN | E.DAQRLYQAGE.G                      | NA        | 2 | 2,6606 | 0,27  | -0,212 |
| 10 | Q6ULP2 AFTIN_HUMAN | E.TILTKSDLKQTSNDLS#EE.C             | S508      | 2 | 2,6537 | 0,209 | 0,232  |
| 10 | P17655 CAN2_HUMAN  | R.AIKYLNQDYE.A                      | NA        | 2 | 2,6532 | 0,218 | -0,194 |
| 10 | P21796 VDAC1_HUMAN | E.FQLHTNVNDGTE.F                    | NA        | 2 | 2,6519 | 0,334 | 0      |
| 10 | P63241 IF5A1_HUMAN | E.IEQKYDCGEE.I                      | NA        | 2 | 2,648  | 0,274 | 0      |
| 10 | Q96T23 RSF1_HUMAN  | E.SYS#PSKDRNIITE.G                  | S463      | 2 | 2,6458 | 0,446 | 0,077  |
| 10 | P35249 RFC4_HUMAN  | E.VDKCLADGADE.H                     | NA        | 2 | 2,6447 | 0,351 | -0,307 |
| 10 | Q658J3 A26CA_HUMAN | E.KMTQIMFE.T                        | NA        | 2 | 2,6398 | 0,158 | 0,475  |
| 10 | O43715 TRIA1_HUMAN | E.KEIPIEGLE.F                       | NA        | 2 | 2,6395 | 0,124 | 0      |
| 10 | Q14692 BMS1_HUMAN  | E.GSKAGLS#PANCQSDRVNLE.K            | S552      | 3 | 2,6388 | 0,135 | 0,263  |
| 10 | Q07021 C1QBP_HUMAN | E.DLKS#FVKSQ.-                      | S277      | 2 | 2,6375 | 0,123 | 0      |
| 10 | Q969R5 LMBL2_HUMAN | E.HLDVASPDKAS#SPELPSVSE.N           | S688      | 3 | 2,6299 | 0,312 | 0,17   |
| 10 | P20020 AT2B1_HUMAN | E.M*NKSATSSS#PGSPLHSLE.T            | S1246     | 3 | 2,6294 | 0,127 | 0,095  |
| 10 | P27348 1433T_HUMAN | D.KYLIANATNPE.S                     | NA        | 2 | 2,6282 | 0,369 | 0,297  |
| 10 | Q92621 NU205_HUMAN | E.NRS#VSGFLHFD.T                    | S1165     | 2 | 2,6265 | 0,331 | 0,09   |
| 10 | Q9ULT8 HECD1_HUMAN | E.GHDSLSVGS#FEEDSKSE.F              | S2320     | 3 | 2,6262 | 0,095 | 0,484  |

|    |                    |                                 |           |   |        |       |        |
|----|--------------------|---------------------------------|-----------|---|--------|-------|--------|
| 10 | Q15424 SAFB1_HUMAN | E.NEKILDILGE.T                  | NA        | 2 | 2,6259 | 0,121 | 0      |
| 10 | Q09666 AHNK_HUMAN  | E.GQTPKAGLRVS#APE.V             | S332      | 3 | 2,6235 | 0,147 | 0,061  |
| 10 | Q658J3 A26CA_HUMAN | E.KMTQIM*FE.T                   | NA        | 2 | 2,6231 | 0,201 | 0,117  |
| 10 | O95684 FR1OP_HUMAN | E.KGPTTGEALDLSDVHS#PPKS#PE.G    | S156:S160 | 3 | 2,6198 | 0,314 | 0,443  |
| 10 | Q8IX90 CM003_HUMAN | E.NFQKTDVKDDL#DPPVASSCISE.K     | S139      | 3 | 2,6162 | 0,104 | 0,278  |
| 10 | Q02952 AKA12_HUMAN | E.SDKAITPQAQEE.L                | NA        | 2 | 2,6157 | 0,304 | 0      |
| 10 | P49792 RBP2_HUMAN  | E.KVELVTGEEDE.K                 | NA        | 2 | 2,6136 | 0,276 | -0,489 |
| 10 | P52292 IMA2_HUMAN  | E.CGGLDKIE.A                    | NA        | 2 | 2,61   | 0,101 | 0,137  |
| 10 | P42224 STAT1_HUMAN | E.IKSLEDLQDE.Y                  | NA        | 2 | 2,61   | 0,215 | 0      |
| 10 | O75937 DNJC8_HUMAN | E.GKPTIVEEDDPE.L                | NA        | 2 | 2,6056 | 0,298 | -0,092 |
| 10 | P25205 MCM3_HUMAN  | E.M*PQVHT#PKTADSQE.T            | T722      | 2 | 2,602  | 0,368 | -0,147 |
| 10 | P08670 VIME_HUMAN  | D.NASLARLDLE.R                  | NA        | 2 | 2,5998 | 0,356 | -0,111 |
| 10 | Q86SQ0 PHLB2_HUMAN | E.YTKPDSRSL#TGTTVE.D            | S468      | 2 | 2,5989 | 0,383 | -0,211 |
| 10 | P08670 VIME_HUMAN  | E.VDALKGTNE.S                   | NA        | 2 | 2,5968 | 0,176 | 0,193  |
| 10 | Q02790 FKBP4_HUMAN | E.EQKSNTAGSQSQVETEA.-           | NA        | 2 | 2,5962 | 0,429 | 0,068  |
| 10 | Q16891 IMMT_HUMAN  | E.GKPTPALSEE.A                  | NA        | 2 | 2,5955 | 0,237 | -0,474 |
| 10 | Q15149 PLEC1_HUMAN | E.GQLQKLQE.A                    | NA        | 2 | 2,5953 | 0,088 | 0      |
| 10 | Q02790 FKBP4_HUMAN | E.AHLAVNDFE.L                   | NA        | 2 | 2,5904 | 0,263 | 0,3    |
| 10 | Q13263 TIF1B_HUMAN | E.KLSPPYSSPQE.F                 | NA        | 2 | 2,5887 | 0,391 | -0,099 |
| 10 | Q86WB0 NIPA_HUMAN  | E.AAS#PTRTRPVRSM*GTGDT#PGLE.V   | S370:T387 | 3 | 2,5836 | 1     | 0,208  |
| 10 | Q96C57 CL043_HUMAN | E.SAIHS#PGTVEKE.A               | S179      | 2 | 2,5717 | 0,274 | -0,366 |
| 10 | Q92688 AN32B_HUMAN | E.NRIFGLDMLAE.K                 | NA        | 2 | 2,566  | 0,445 | -0,091 |
| 10 | Q86YP4 P66A_HUMAN  | E.ALMKSS#PEERE.R                | S137      | 2 | 2,5613 | 0,144 | -0,629 |
| 10 | P60174 TPIS_HUMAN  | E.LIGTLNAAKVPADTE.V             | NA        | 2 | 2,5601 | 0,32  | 0,081  |
| 10 | Q69YH5 CDCA2_HUMAN | E.ERVAS#DSPKPALTLQQGQE.F        | S725      | 3 | 2,5565 | 0,138 | 0      |
| 10 | Q9NWH9 SLTM_HUMAN  | E.VSKPLPS#EGS#LAEADHTAHEE.M     | S214:S217 | 3 | 2,5563 | 0,181 | 0,464  |
| 10 | Q8TEA8 DTD1_HUMAN  | E.DRSASS#GAEGDVSSEREP.-         | S197      | 3 | 2,5544 | 0,226 | 0,573  |
| 10 | Q5T200 ZC3HD_HUMAN | E.STSRDS#LALDKE.R               | S1409     | 2 | 2,5526 | 0,167 | -0,174 |
| 10 | Q8WWQ0 PHIP_HUMAN  | E.AGISNTSRLSRGS#ISSTSE.V        | S674      | 3 | 2,5524 | 0,191 | 0,368  |
| 10 | P27797 CALR_HUMAN  | E.QNIDCGGGYVKLFPNSLDQTD*HGDSE.Y | NA        | 3 | 2,5471 | 0,221 | 0,364  |
| 10 | P68106 FKB1B_HUMAN | E.IET#IS#PGDGRTFPK.K            | T7:S9     | 3 | 2,5465 | 0,112 | 0,981  |
| 10 | Q658J3 A26CA_HUMAN | E.HGIITNWDDM*E.K                | NA        | 2 | 2,5457 | 0,363 | -0,091 |
| 10 | P11142 HSP7C_HUMAN | D.NNLLGKFE.L                    | NA        | 2 | 2,5422 | 0,273 | 0,261  |
| 10 | P62136 PP1A_HUMAN  | E.NDRGVSFTFGAE.V                | NA        | 2 | 2,5412 | 0,371 | -0,188 |
| 10 | P42575 CASP2_HUMAN | E.KDIITLE.M                     | NA        | 2 | 2,5385 | 0,106 | 0,22   |
| 10 | Q9UPS8 ANR26_HUMAN | E.DTRNVGMPVAHMES#PE.R           | S489      | 3 | 2,5364 | 0,132 | -0,198 |
| 10 | Q13439 GOGA4_HUMAN | E.SLFRS#PIKE.S                  | S78       | 2 | 2,5358 | 0,136 | 0,211  |
| 10 | O15320 CTGE5_HUMAN | E.SSLKDAS#FEKEATE.A             | S116      | 2 | 2,5356 | 0,244 | -1,881 |
| 10 | P08107 HSP71_HUMAN | D.NNLLGRFE.L                    | NA        | 2 | 2,5352 | 0,15  | -0,063 |
| 10 | P27816 MAP4_HUMAN  | E.TERAS#PIKMD.L                 | S358      | 3 | 2,5349 | 0,283 | 0,298  |
| 10 | P39687 AN32A_HUMAN | E.GKLEGLTDEFEE.L                | NA        | 2 | 2,5322 | 0,449 | 0      |

|    |                    |                             |           |   |        |       |        |
|----|--------------------|-----------------------------|-----------|---|--------|-------|--------|
| 10 | P39687 AN32A_HUMAN | E.NLKSLDLFNCE.V             | NA        | 2 | 2,5238 | 0,396 | 0,09   |
| 10 | P34931 HS71L_HUMAN | D.LNKSINPDE.A               | NA        | 2 | 2,5236 | 0,214 | 0,118  |
| 10 | P04792 HSPB1_HUMAN | E.SPAAAPAYSRLSRQLS#SGVSE.I  | S82       | 3 | 2,5222 | 0,168 | 0,077  |
| 10 | P46940 IQGA1_HUMAN | E.LQDKFNVDE.Y               | NA        | 2 | 2,5216 | 0,176 | -0,11  |
| 10 | Q9Y490 TLN1_HUMAN  | E.KM*VGGIAQIIAAQEE.M        | NA        | 2 | 2,5186 | 0,188 | 0,155  |
| 10 | Q14974 IMB1_HUMAN  | E.KTVS#PDRLELE.A            | S12       | 2 | 2,5161 | 0,237 | 0,268  |
| 10 | P62333 PRS10_HUMAN | E.VLKQLTEE.K                | NA        | 2 | 2,5155 | 0,111 | 0,127  |
| 10 | Q02535 ID3_HUMAN   | -.M*KALS#PVRGCYE.A          | S5        | 2 | 2,5152 | 0,12  | -0,081 |
| 10 | Q05519 SFR11_HUMAN | E.CS#VEKGTGDSLRE.S          | S456      | 2 | 2,512  | 0,496 | 0,08   |
| 10 | Q9Y4W6 AFG32_HUMAN | E.ATARLIDDE.V               | NA        | 2 | 2,5109 | 0,3   | -0,061 |
| 10 | Q8IVF2 AHNK2_HUMAN | E.AYEPRDAHDVS#PTSTDTE.A     | S294      | 3 | 2,5081 | 0,096 | 0,353  |
| 10 | P62988 UBIQ_HUMAN  | E.DGRTLSDY#NIQKE.S          | Y59       | 2 | 2,5069 | 0,2   | 0,528  |
| 10 | P12004 PCNA_HUMAN  | E.APNQEKVSDYE.M             | NA        | 2 | 2,5067 | 0,094 | -0,095 |
| 10 | P13804 ETFA_HUMAN  | E.KASSTSPVEISE.W            | NA        | 2 | 2,5006 | 0,221 | 0,099  |
| 10 | P18754 RCC1_HUMAN  | E.YGRLGLGEGAE.K             | NA        | 2 | 2,4987 | 0,402 | 0,098  |
| 10 | P60660 MYL6_HUMAN  | E.VLKVLGNPKS#DE.M           | S57       | 2 | 2,4967 | 0,363 | -0,531 |
| 10 | Q8WUM4 PDC6I_HUMAN | E.NDLKSVNFD.M               | NA        | 2 | 2,4961 | 0,257 | 0,116  |
| 10 | Q06830 PRDX1_HUMAN | D.YGVLKADE.G                | NA        | 2 | 2,494  | 0,148 | 0,136  |
| 10 | Q99426 TBCB_HUMAN  | E.YEDVSRVE.K                | NA        | 2 | 2,4902 | 0,311 | 0,122  |
| 10 | Q9UBB4 ATX10_HUMAN | E.LACRDPSQVE.N              | NA        | 2 | 2,4879 | 0,184 | 0,104  |
| 10 | Q965T2 IWS1_HUMAN  | E.TRKLPGS#DS#ENEE.L         | S131:S133 | 2 | 2,4844 | 0,319 | 0,15   |
| 10 | Q9UID6 ZN639_HUMAN | E.LYLHFQEHS#CDE.Q           | S312      | 2 | 2,4823 | 0,299 | 0,515  |
| 10 | P11177 ODPB_HUMAN  | E.KVFLGEE.V                 | NA        | 2 | 2,4809 | 0,14  | 0,065  |
| 10 | O95817 BAG3_HUMAN  | E.KVQGLEQAVDNFE.G           | NA        | 2 | 2,4808 | 0,324 | 0,165  |
| 10 | P38646 GRP75_HUMAN | E.FKDQLPADE.C               | NA        | 2 | 2,4692 | 0,203 | -0,115 |
| 10 | Q16555 DPYL2_HUMAN | K.DRFQLTDCQIYE.V            | NA        | 2 | 2,4666 | 0,368 | -0,077 |
| 10 | O75351 VPS4B_HUMAN | E.NKPSIIFIDE.I              | NA        | 2 | 2,4642 | 0,176 | -0,104 |
| 10 | Q16352 AINX_HUMAN  | E.SLAAKNLQSAEE.W            | NA        | 2 | 2,4639 | 0,288 | 0      |
| 10 | Q9NUG6 PDRG1_HUMAN | E.LKGFNLNPLNQDE.L           | NA        | 2 | 2,4636 | 0,276 | 0,244  |
| 10 | P14618 KPYM_HUMAN  | D.NAYM*EKCD.E.N             | NA        | 2 | 2,46   | 0,307 | -0,311 |
| 10 | O60524 SDCG1_HUMAN | E.NGFSGNVKVDE.K             | NA        | 2 | 2,4585 | 0,329 | 0      |
| 10 | P35580 MYH10_HUMAN | E.LQGALARGDDE.T             | NA        | 2 | 2,457  | 0,209 | -0,107 |
| 10 | P08107 HSP71_HUMAN | E.TKAFYPEE.I                | NA        | 2 | 2,4561 | 0,283 | 0,434  |
| 10 | P04406 G3P_HUMAN   | E.FGYSNRVVD.L               | NA        | 2 | 2,4551 | 0,457 | 0,115  |
| 10 | Q99638 RAD9A_HUMAN | D.GHFVLATLSDTDSHSQDLGS#PE.R | S277      | 2 | 2,4483 | 0,366 | 0,102  |
| 10 | Q9H3N1 TXND1_HUMAN | R.SNVRVITDE.N               | NA        | 2 | 2,4474 | 0,294 | 0,236  |
| 10 | P08670 VIME_HUMAN  | E.QQNKILLAELE.Q             | NA        | 2 | 2,4472 | 0,283 | -0,094 |
| 10 | P13639 EF2_HUMAN   | D.ITKGVQYLNE.I              | NA        | 2 | 2,4445 | 0,247 | 0,105  |
| 10 | P35579 MYH9_HUMAN  | R.DLQGRDEQSEE.K             | NA        | 2 | 2,4438 | 0,104 | -0,187 |
| 10 | P29558 RBMS1_HUMAN | E.TSNDHS#PYTFQPNK.-         | S398      | 2 | 2,4432 | 0,262 | 0,071  |
| 10 | Q96D46 NMD3_HUMAN  | E.S#TDRSPGHILCCE.C          | S7        | 2 | 2,4398 | 0,1   | 0,076  |

|    |                     |                           |       |   |        |       |        |
|----|---------------------|---------------------------|-------|---|--------|-------|--------|
| 10 | Q01518 CAP1_HUMAN   | E.NKLSDLLAPISE.Q          | NA    | 2 | 2,4396 | 0,344 | -0,094 |
| 10 | P49792 RBP2_HUMAN   | E.GGPLYKNGS#LRNADSE.I     | S767  | 2 | 2,4381 | 0,263 | 0,139  |
| 10 | P80723 BASP_HUMAN   | E.TKS#DGAPASDSKPGSSE.A    | S164  | 2 | 2,4339 | 0,456 | -0,43  |
| 10 | P04075 ALDOA_HUMAN  | E.STGSIARKRLQS#IGTENTEE.N | S46   | 2 | 2,4334 | 0,284 | 0,232  |
| 10 | P55072 TERA_HUMAN   | E.IM*SKLAGESE.S           | NA    | 2 | 2,4334 | 0,196 | 0,339  |
| 10 | P20020 AT2B1_HUMAN  | E.MNKSATSSSPGS#PLHSLE.T   | S1249 | 2 | 2,4333 | 0,296 | -0,767 |
| 10 | P55060 XPO2_HUMAN   | E.IQKVSGNVE.K             | NA    | 2 | 2,4321 | 0,218 | -0,188 |
| 10 | O14980 XPO1_HUMAN   | E.IALRQADEE.K             | NA    | 2 | 2,4318 | 0,195 | -0,117 |
| 10 | P15311 EZRI_HUMAN   | R.VQRQLLTLSE.L            | NA    | 2 | 2,4301 | 0,194 | 0,096  |
| 10 | P07195 LDHB_HUMAN   | E.KLIAPVAEEE.A            | NA    | 2 | 2,4248 | 0,307 | 0,333  |
| 10 | Q9P0K7 RAI14_HUMAN  | E.NSS#DLSQKLKE.T          | S479  | 2 | 2,424  | 0,3   | 0,092  |
| 10 | Q6P996 PDXD1_HUMAN  | E.GHPGAPS#PQHTDQTE.A      | S757  | 2 | 2,4237 | 0,44  | -0,223 |
| 10 | P14618 KPYM_HUMAN   | D.NAYMEKCDE.N             | NA    | 2 | 2,4219 | 0,356 | 0,21   |
| 10 | Q86SQ0 PHLB2_HUMAN  | R.KSS#ISSISGRDDLDM*D.Y    | S415  | 2 | 2,417  | 0,401 | 0,572  |
| 10 | Q9UHR5 S30BP_HUMAN  | E.KLIQFCAIDE.L            | NA    | 2 | 2,4166 | 0,348 | -0,099 |
| 10 | Q6I9Y2 THOC7_HUMAN  | E.NDEKLSEVEE.A            | NA    | 2 | 2,4166 | 0,228 | -1,228 |
| 10 | Q96PK6 RBM14_HUMAN  | E.NAGALRAIE.A             | NA    | 2 | 2,4148 | 0,233 | 0,2    |
| 10 | Q15050 RRS1_HUMAN   | E.LLAKAEQDE.A             | NA    | 2 | 2,4026 | 0,272 | 0,18   |
| 10 | Q9BTT0 AN32E_HUMAN  | E.GLNDTFKE.L              | NA    | 2 | 2,4004 | 0,184 | 0      |
| 10 | Q6PJ19 Q6PJ19_HUMAN | E.NALDKLFSSE.Q            | NA    | 2 | 2,3948 | 0,309 | 0,109  |
| 10 | P16070 CD44_HUMAN   | E.KALSIGFE.T              | NA    | 2 | 2,393  | 0,215 | 0,141  |
| 10 | Q9Y490 TLN1_HUMAN   | E.AKPAAVAAENEE.I          | NA    | 2 | 2,3886 | 0,323 | -0,203 |
| 10 | Q9NSE4 SYIM_HUMAN   | E.SSDTLCPRCAE.V           | NA    | 2 | 2,3885 | 0,126 | -0,188 |
| 10 | P24534 EF1B_HUMAN   | E.TDMAKLEE.C              | NA    | 2 | 2,3861 | 0,2   | 0      |
| 10 | Q99700 ATX2_HUMAN   | E.NKGISPVVSE.H            | NA    | 2 | 2,3817 | 0,323 | -0,355 |
| 10 | P12004 PCNA_HUMAN   | E.MKLMDLVE.Q              | NA    | 2 | 2,3805 | 0,253 | -0,112 |
| 10 | P02545 LMNA_HUMAN   | E.VSGIKAAYE.A             | NA    | 2 | 2,3759 | 0,288 | 0,195  |
| 10 | P05787 K2C8_HUMAN   | D.ANAKLSELE.A             | NA    | 2 | 2,3748 | 0,145 | 0      |
| 10 | P53621 COPA_HUMAN   | E.KNPTDAYQLNYD.M          | NA    | 2 | 2,3563 | 0,281 | 0,254  |
| 10 | P12004 PCNA_HUMAN   | E.ALKDLIN.E.A             | NA    | 2 | 2,3554 | 0,115 | 0,133  |
| 10 | Q13601 KRR1_HUMAN   | E.DNPRGLLEE.S             | NA    | 2 | 2,3554 | 0,305 | 0      |
| 10 | Q99829 CPNE1_HUMAN  | E.FSKTLQLE.Y              | NA    | 2 | 2,3535 | 0,162 | -0,063 |
| 10 | Q658J3 A26CA_HUMAN  | E.KM*TQIM*FE.T            | NA    | 2 | 2,3497 | 0,091 | 0,576  |
| 10 | P15311 EZRI_HUMAN   | E.QIQRALQLEEE.R           | NA    | 2 | 2,3494 | 0,202 | -0,09  |
| 10 | P35579 MYH9_HUMAN   | E.LQVKFNE.G               | NA    | 2 | 2,3473 | 0,1   | -0,139 |
| 10 | P13639 EF2_HUMAN    | E.ICLKDLEED.H             | NA    | 2 | 2,3447 | 0,285 | 0      |
| 10 | P19338 NUCL_HUMAN   | E.ADAEKTTEE.K             | NA    | 2 | 2,3407 | 0,197 | 0,235  |
| 10 | P05023 AT1A1_HUMAN  | E.LKDAFQNAYLE.L           | NA    | 2 | 2,3396 | 0,251 | -0,093 |
| 10 | P07384 CAN1_HUMAN   | E.NAIKYLQDYE.Q            | NA    | 2 | 2,3337 | 0,25  | -0,093 |
| 10 | Q9NWS0 PIHD1_HUMAN  | E.DKYNLQLNPE.W            | NA    | 2 | 2,3297 | 0,16  | -0,099 |
| 10 | Q71U36 TBA1A_HUMAN  | E.GEFSEARED.M             | NA    | 2 | 2,3294 | 0,326 | -0,469 |

|    |                    |                            |           |   |        |       |        |
|----|--------------------|----------------------------|-----------|---|--------|-------|--------|
| 10 | Q15185 TEBP_HUMAN  | E.DSKDVNVNFE.K             | NA        | 2 | 2,3286 | 0,167 | 0,105  |
| 10 | Q7KZF4 SND1_HUMAN  | R.SSYKSLLSAEE.A            | NA        | 2 | 2,3209 | 0,36  | 0,089  |
| 10 | Q8TEX9 IPO4_HUMAN  | E.NAFFDEKE.D               | NA        | 2 | 2,3207 | 0,198 | 0      |
| 10 | Q13185 CBX3_HUMAN  | E.AFLNS#QKAGKE.K           | S79       | 2 | 2,3206 | 0,267 | -0,192 |
| 10 | P43243 MATR3_HUMAN | E.SGYIDRM*DYE.D            | NA        | 2 | 2,3194 | 0,338 | -0,186 |
| 10 | P16144 ITB4_HUMAN  | E.AGGS#LTRHVTQE.F          | S1791     | 2 | 2,3166 | 0,141 | -0,091 |
| 10 | P38606 VATA_HUMAN  | E.TDKITLE.V                | NA        | 2 | 2,3158 | 0,12  | 0,298  |
| 10 | Q99829 CPNE1_HUMAN | E.LRDDDFLGGAE.C            | NA        | 2 | 2,3116 | 0,141 | 0,101  |
| 10 | P62195 PRS8_HUMAN  | E.HAPSIIFM*DE.I            | NA        | 2 | 2,3102 | 0,211 | 0      |
| 10 | P42566 EP15_HUMAN  | E.SEPIHQESPARS#SPE.L       | S562      | 2 | 2,3055 | 0,348 | -0,141 |
| 10 | P07355 ANXA2_HUMAN | E.IICSRTNQE.L              | NA        | 2 | 2,3038 | 0,256 | -0,218 |
| 10 | Q96I24 FUBP3_HUMAN | D.AGVRIQFKPDDGIS#PE.R      | S296      | 2 | 2,2997 | 0,168 | -0,135 |
| 10 | O00116 ADAS_HUMAN  | E.NNLTAHVE.A               | NA        | 2 | 2,2969 | 0,201 | 0,068  |
| 10 | Q02952 AKA12_HUMAN | E.KEPSKSAES#PT#SPVTSE.T    | S283:T285 | 2 | 2,2922 | 1     | 0,191  |
| 10 | P26038 MOES_HUMAN  | K.QRIDEFESM*.-             | NA        | 2 | 2,2874 | 0,383 | -0,417 |
| 10 | Q9NYF8 BCLF1_HUMAN | R.FTSYQKATEE.H             | NA        | 2 | 2,283  | 0,32  | -0,101 |
| 10 | Q5JTD0 TJAP1_HUMAN | E.CHSLGTARGS#PEEELPLPAFE.K | S300      | 2 | 2,2808 | 0,167 | 0,308  |
| 10 | P00367 DHE3_HUMAN  | E.ADKIFLE.R                | NA        | 2 | 2,2792 | 0,131 | 0,292  |
| 10 | Q8IY81 RRMJ3_HUMAN | E.DIRVCCQD.I               | NA        | 2 | 2,2723 | 0,296 | -0,114 |
| 10 | P24534 EF1B_HUMAN  | E.TDM*AKLEE.C              | NA        | 2 | 2,2683 | 0,167 | -0,512 |
| 10 | Q00610 CLH1_HUMAN  | E.KIVLDNSVFS#E.H           | S1019     | 2 | 2,2679 | 0,257 | 0,183  |
| 10 | P62753 RS6_HUMAN   | R.LSS#LRASTKSE.S           | S236      | 2 | 2,2661 | 0,43  | -0,091 |
| 10 | P42704 LPPRC_HUMAN | D.SVNSARAILQE.N            | NA        | 2 | 2,265  | 0,185 | -0,103 |
| 10 | P08670 VIME_HUMAN  | E.MLQREEAE.N               | NA        | 2 | 2,2636 | 0,111 | 0,364  |
| 10 | Q9UGN5 PARP2_HUMAN | E.SLKS#PLKPE.S             | S226      | 2 | 2,2614 | 0,161 | 0      |
| 10 | P51991 ROA3_HUMAN  | E.TTDDSLRE.H               | NA        | 2 | 2,2595 | 0,302 | 0,13   |
| 10 | Q9ULD4 BRPF3_HUMAN | R.GTHLPES#PKLE.D           | S713      | 2 | 2,2586 | 0,173 | 0,284  |
| 10 | P10809 CH60_HUMAN  | E.VVVTEIPKEE.K             | NA        | 2 | 2,2524 | 0,37  | -0,427 |
| 10 | Q06124 PTN11_HUMAN | E.NVGLM*QQQKS#FR.-         | S595      | 2 | 2,2469 | 0,281 | 0,159  |
| 10 | Q9BY11 PACN1_HUMAN | E.LSFKAGDE.L               | NA        | 2 | 2,2443 | 0,097 | 0,141  |
| 10 | P05362 ICAM1_HUMAN | E.DNGRSFSCSATLE.V          | NA        | 2 | 2,2433 | 0,262 | 0,085  |
| 10 | P63104 1433Z_HUMAN | E.TELRDICND.V              | NA        | 2 | 2,2391 | 0,419 | 0      |
| 10 | O75153 EIF3X_HUMAN | E.GSS#ASGLAKVKE.L          | S670      | 2 | 2,2382 | 0,192 | 0      |
| 10 | P13010 KU86_HUMAN  | E.AIKFSEE.Q                | NA        | 2 | 2,2378 | 0,12  | 0,37   |
| 10 | O43166 SI1L1_HUMAN | E.LGKSS#DLEDNRSE.D         | S311      | 2 | 2,2355 | 0,299 | -0,319 |
| 10 | Q8N1F7 NUP93_HUMAN | E.KDNALLSAIEE.S            | NA        | 2 | 2,227  | 0,263 | -0,101 |
| 10 | P38646 GRP75_HUMAN | E.DKVIAYVD.L               | NA        | 2 | 2,2252 | 0,207 | 0,33   |
| 10 | Q9GZR7 DDX24_HUMAN | E.AGAET#RSPGKAEAE.S        | T285      | 2 | 2,2186 | 0,349 | -0,42  |
| 10 | P48643 TCPE_HUMAN  | E.KLGFAGLVQE.I             | NA        | 2 | 2,2181 | 0,102 | -0,115 |
| 10 | P11142 HSP7C_HUMAN | E.TKSFYP EE.V              | NA        | 2 | 2,2105 | 0,259 | 0,061  |
| 10 | Q14839 CHD4_HUMAN  | E.VKSTAPETAIE.C            | NA        | 2 | 2,2083 | 0,113 | 0      |

|    |                    |                          |             |   |        |       |        |
|----|--------------------|--------------------------|-------------|---|--------|-------|--------|
| 10 | Q13206 DDX10_HUMAN | E.LVLHLLRSQS#.-          | S875        | 2 | 2,2082 | 0,193 | -0,098 |
| 10 | P10599 THIO_HUMAN  | E.KYS#NVIFLE.V           | S50         | 2 | 2,2059 | 0,083 | 0      |
| 10 | Q15814 TBCC_HUMAN  | E.SIQDS#PLPKKAE.G        | S168        | 2 | 2,2013 | 0,088 | 0,175  |
| 10 | P98179 RBM3_HUMAN  | E.DHFSFGPISE.V           | NA          | 2 | 2,1975 | 0,419 | 0,2    |
| 10 | P12004 PCNA_HUMAN  | E.MKLM*DLDVE.Q           | NA          | 2 | 2,1944 | 0,13  | 0,22   |
| 10 | Q96T23 RSF1_HUMAN  | E.GKQLVNGEVSD.E.R        | NA          | 2 | 2,1914 | 0,245 | 0      |
| 10 | Q14204 DYHC1_HUMAN | E.ISDAIRE.K              | NA          | 2 | 2,1912 | 0,159 | 0,379  |
| 10 | O94826 TOM70_HUMAN | E.NYDKIISE.C             | NA          | 2 | 2,1911 | 0,114 | 0,435  |
| 10 | Q9GZT3 SLIRP_HUMAN | E.EGLRNALQQE.N           | NA          | 2 | 2,1857 | 0,084 | -0,105 |
| 10 | Q86YP4 P66A_HUMAN  | E.ALM*KSS#PEERE.R        | S137        | 2 | 2,1855 | 0,114 | -0,355 |
| 10 | P13984 T2FB_HUMAN  | E.SSSDKLSLE.G            | NA          | 2 | 2,1834 | 0,196 | 0,063  |
| 10 | P17987 TCPA_HUMAN  | E.DAVHSGALND.-           | NA          | 2 | 2,1798 | 0,385 | -0,061 |
| 10 | Q08211 DHX9_HUMAN  | E.QDHDLQAILQE.R          | NA          | 2 | 2,1787 | 0,178 | 0,186  |
| 10 | Q15149 PLEC1_HUMAN | E.SYSALM*RE.L            | NA          | 2 | 2,1676 | 0,207 | -0,251 |
| 10 | P31943 HNRH1_HUMAN | E.GRPSGEAFVELE.S         | NA          | 2 | 2,1675 | 0,299 | 0,095  |
| 10 | Q6S8J3 A26CA_HUMAN | E.KM*TQIMFE.T            | NA          | 2 | 2,1658 | 0,119 | 0,234  |
| 10 | O60271 JIP4_HUMAN  | E.KDVLQGELE.A            | NA          | 2 | 2,1651 | 0,113 | 0,118  |
| 10 | P21333 FLNA_HUMAN  | E.VSVKFNEE.H             | NA          | 2 | 2,1647 | 0,112 | 0,32   |
| 10 | P08670 VIME_HUMAN  | E.M*LQREEAE.N            | NA          | 2 | 2,1595 | 0,104 | -0,119 |
| 10 | P23528 COF1_HUMAN  | E.KLGGSAVISLE.G          | NA          | 2 | 2,1535 | 0,149 | 0,114  |
| 10 | Q9GZT8 NIF3L_HUMAN | E.NKINIILSE.T            | NA          | 2 | 2,1517 | 0,112 | 0      |
| 10 | Q71U36 TBA1A_HUMAN | E.HSDCAFM*VDNE.A         | NA          | 2 | 2,1498 | 0,174 | 0      |
| 10 | P54105 ICLN_HUMAN  | E.DSIRDYEDGM*E.V         | NA          | 2 | 2,1467 | 0,163 | 0,363  |
| 10 | Q8WUM4 PDC6I_HUMAN | E.SLRLLEDDEE.A           | NA          | 2 | 2,1452 | 0,175 | 0,221  |
| 10 | P07951 TPM2_HUMAN  | E.KTIDDLE.D              | NA          | 2 | 2,1411 | 0,13  | 0      |
| 10 | P04406 G3P_HUMAN   | E.FGY#SNRVVD.L           | Y320        | 2 | 2,1284 | 0,247 | -0,215 |
| 10 | O60313 OPA1_HUMAN  | E.EHPAYLASDE.I           | NA          | 2 | 2,1267 | 0,164 | 0,108  |
| 10 | Q96CP2 FWCH2_HUMAN | E.SVKASQEPS#PKPGTE.V     | S21         | 2 | 2,1255 | 0,246 | -0,301 |
| 10 | Q12802 AKP13_HUMAN | E.EEM*DS#IT#EVPANCSVLR.S | S1540:T1542 | 2 | 2,1253 | 0,095 | 0,918  |
| 10 | P23528 COF1_HUMAN  | D.GVIKVFND.M             | NA          | 2 | 2,1222 | 0,208 | 0,068  |
| 10 | Q96GQ7 DDX27_HUMAN | E.KDYYAVLQLE.A           | NA          | 2 | 2,1152 | 0,102 | 0,104  |
| 10 | P61981 1433G_HUMAN | D.NYLIKNCSE.T            | NA          | 2 | 2,113  | 0,245 | 0,107  |
| 10 | P16949 STMN1_HUMAN | E.LILS#PRSKE.S           | S25         | 2 | 2,1035 | 0,105 | 0      |
| 10 | Q8NAP3 ZBT38_HUMAN | E.TVTDLAAAGK.K           | NA          | 2 | 2,101  | 0,087 | 0,322  |
| 10 | P48637 GSHB_HUMAN  | E.KIEPEPFE.N             | NA          | 2 | 2,0986 | 0,099 | 0,062  |
| 10 | Q9NR45 SIAS_HUMAN  | E.RALGS#PTKQLLPCE.M      | S275        | 2 | 2,0978 | 0,175 | 0,148  |
| 10 | P68036 UB2L3_HUMAN | E.KGQVCLPVISAE.N         | NA          | 2 | 2,0956 | 0,121 | 0,094  |
| 10 | Q9BX63 FANCI_HUMAN | E.NSASS#PPRFKTE.K        | S1032       | 2 | 2,0952 | 0,408 | 0,174  |
| 10 | O75694 NU155_HUMAN | E.DRM*YDPLSE.L           | NA          | 2 | 2,0944 | 0,243 | -0,107 |
| 10 | P42167 LAP2B_HUMAN | E.LSDFRM*EE.S            | NA          | 2 | 2,0931 | 0,095 | 0,117  |
| 10 | P04844 RPN2_HUMAN  | E.TKDLLLLAAVSE.D         | NA          | 2 | 2,0923 | 0,11  | 0      |

|    |                     |                       |       |   |        |       |        |
|----|---------------------|-----------------------|-------|---|--------|-------|--------|
| 10 | Q9BTT0 AN32E_HUMAN  | E.DYRESIFE.L          | NA    | 2 | 2,0872 | 0,182 | -0,115 |
| 10 | P07355 ANXA2_HUMAN  | R.RAEDGSVIDYE.L       | NA    | 2 | 2,0854 | 0,135 | 0,097  |
| 10 | P18754 RCC1_HUMAN   | E.GALGRDTSVE.G        | NA    | 2 | 2,085  | 0,166 | 0,121  |
| 10 | P13639 EF2_HUMAN    | E.S#GEHIIAGAGE.L      | S541  | 2 | 2,0829 | 0,086 | 0,109  |
| 10 | Q06124 PTN11_HUMAN  | E.NVGLMQQKS#FR.-      | S595  | 2 | 2,0787 | 0,318 | -0,322 |
| 10 | Q92597 NDRG1_HUMAN  | E.KGETITGLLQE.F       | NA    | 2 | 2,0771 | 0,103 | 0,103  |
| 10 | P09874 PARP1_HUMAN  | E.ANIRVVSE.D          | NA    | 2 | 2,0724 | 0,187 | 0,206  |
| 10 | P31946 1433B_HUMAN  | E.KACS#LAKTAFDEAIAE.L | S192  | 2 | 2,0693 | 0,329 | 0,068  |
| 10 | Q05D04 Q05D04_HUMAN | E.IKDSLAEVEE.K        | NA    | 2 | 2,0628 | 0,206 | -0,108 |
| 10 | P18206 VINC_HUMAN   | E.QAIRQILDE.A         | NA    | 2 | 2,0598 | 0,208 | -0,112 |
| 10 | Q02952 AKA12_HUMAN  | E.TLAGVKSQE.M         | NA    | 2 | 2,0577 | 0,183 | 0,196  |
| 10 | O75822 EIF3J_HUMAN  | E.KSLYYASFLE.V        | NA    | 2 | 2,056  | 0,31  | -0,2   |
| 10 | P85037 FOXK1_HUMAN  | E.CLSREGS#PIPHDPE.F   | S445  | 2 | 2,0536 | 0,117 | 0,219  |
| 10 | P55884 EIF3B_HUMAN  | E.KQVPVDVVE.M         | NA    | 2 | 2,0514 | 0,112 | 0,241  |
| 10 | Q71U36 TBA1A_HUMAN  | E.HSDCAFMDVNE.A       | NA    | 2 | 2,0501 | 0,175 | 0,276  |
| 10 | P54105 ICLN_HUMAN   | E.GLLRQPDTE.A         | NA    | 2 | 2,0406 | 0,213 | 0,105  |
| 10 | Q9NX63 CHCH3_HUMAN  | E.FYRVTE.Q            | NA    | 2 | 2,0401 | 0,101 | 0,266  |
| 10 | P30101 PDIA3_HUMAN  | E.DKTVAYTE.Q          | NA    | 2 | 2,0394 | 0,121 | 0,263  |
| 10 | Q02790 FKBP4_HUMAN  | E.M*NSEEKLE.Q         | NA    | 2 | 2,0392 | 0,083 | 0,061  |
| 10 | P40222 TXLNA_HUMAN  | E.FQNTLSKSSE.V        | NA    | 2 | 2,0357 | 0,092 | 0,535  |
| 10 | B0AZS1 B0AZS1_HUMAN | E.DDRNS#FTLKLE.D      | S20   | 2 | 2,0331 | 0,103 | 0      |
| 10 | P27348 1433T_HUMAN  | E.LRSICTTVLE.L        | NA    | 2 | 2,0308 | 0,276 | 0,205  |
| 10 | P22626 ROA2_HUMAN   | E.YGKIDTIE.I          | NA    | 2 | 2,0288 | 0,2   | 0,325  |
| 10 | P54725 RD23A_HUMAN  | R.LKALGFPE.S          | NA    | 2 | 2,0246 | 0,237 | 0      |
| 10 | P29692 EF1D_HUMAN   | E.NQSLRGVVQE.L        | NA    | 2 | 2,024  | 0,186 | 0,216  |
| 10 | P10599 THIO_HUMAN   | E.KYSNVIFLE.V         | NA    | 2 | 2,0204 | 0,216 | 0      |
| 10 | P50990 TCPQ_HUMAN   | E.MGHCDVYLSE.V        | NA    | 2 | 2,0152 | 0,14  | 0      |
| 10 | P05783 K1C18_HUMAN  | E.LAMRQSVE.N          | NA    | 2 | 2,0131 | 0,227 | -0,065 |
| 10 | Q9UQ35 SRRM2_HUMAN  | E.LDVKPSAS#PQERSE.S   | S1552 | 2 | 2,0098 | 0,17  | 0,075  |
| 10 | A6NJL0 A6NJL0_HUMAN | D.QNLKCLSAEE.M        | NA    | 2 | 2,0067 | 0,235 | -0,097 |
| 10 | P27816 MAP4_HUMAN   | E.TERAS#PIKMD.L       | S358  | 2 | 1,9956 | 0,239 | -0,099 |
| 10 | P18754 RCC1_HUMAN   | E.QGQLGRVPE.L         | NA    | 2 | 1,994  | 0,221 | 0,062  |
| 10 | P62854 RS26_HUMAN   | E.AAAVRDISE.A         | NA    | 2 | 1,9928 | 0,126 | 0,065  |
| 10 | Q09666 AHNK_HUMAN   | E.GAKDIDISSPE.F       | NA    | 2 | 1,9906 | 0,126 | 0,216  |
| 10 | Q92973 TNPO1_HUMAN  | E.YM*LQRTQDQDE.N      | NA    | 2 | 1,9857 | 0,09  | -0,085 |
| 10 | Q15149 PLEC1_HUMAN  | E.NLTYRQLLE.R         | NA    | 2 | 1,9841 | 0,126 | 0      |
| 10 | Q658J3 A26CA_HUMAN  | E.KLCYVALDFE.Q        | NA    | 2 | 1,9805 | 0,222 | 0,097  |
| 10 | P22314 UBA1_HUMAN   | E.VSQPRLAE.L          | NA    | 2 | 1,9792 | 0,183 | 0,068  |
| 10 | O76031 CLPX_HUMAN   | E.KAQQGIVFLDE.V       | NA    | 2 | 1,9727 | 0,137 | -0,098 |
| 10 | Q9NZI8 IF2B1_HUMAN  | E.NFFGPKKEE.V         | NA    | 2 | 1,971  | 0,1   | 0,126  |
| 10 | P14625 ENPL_HUMAN   | E.FLNKMT.E            | NA    | 2 | 1,9694 | 0,124 | 0,069  |



|    |                    |                           |           |   |        |       |        |
|----|--------------------|---------------------------|-----------|---|--------|-------|--------|
| 10 | P11021 GRP78_HUMAN | E.GEKNILVFD.L             | NA        | 2 | 1,9688 | 0,133 | 0,118  |
| 10 | P60903 S10AA_HUMAN | E.KEFPGFLE.N              | NA        | 2 | 1,9677 | 0,114 | 0,063  |
| 10 | Q01105 SET_HUMAN   | E.AIEHIDE.V               | NA        | 2 | 1,9608 | 0,232 | 0,295  |
| 10 | P06753 TPM3_HUMAN  | E.GDLERTEE.R              | NA        | 2 | 1,9576 | 0,282 | 0      |
| 10 | Q9Y266 NUDC_HUMAN  | E.TSGPQIKE.L              | NA        | 2 | 1,9549 | 0,095 | 0,213  |
| 10 | P08107 HSP71_HUMAN | R.VSAKNALE.S              | NA        | 2 | 1,9533 | 0,257 | 0      |
| 10 | P43243 MATR3_HUMAN | R.M*GRGPGPLQE.R           | NA        | 2 | 1,9532 | 0,107 | 0,231  |
| 10 | Q00839 HNRPU_HUMAN | E.DYGEKFDE.N              | NA        | 2 | 1,9479 | 0,081 | 0,122  |
| 10 | Q96B23 CR025_HUMAN | E.LRRDS#SES#QLASTE.S      | S66:S69   | 2 | 1,9438 | 0,222 | 0,14   |
| 10 | P55060 XPO2_HUMAN  | E.KVIVPNME.F              | NA        | 2 | 1,9399 | 0,206 | 0,197  |
| 10 | Q16543 CDC37_HUMAN | E.AVPKT#GDEKDVSV.-        | T370      | 2 | 1,936  | 0,204 | -0,257 |
| 10 | Q86WI3 NLRC5_HUMAN | E.ALRAATSLEE.L            | NA        | 2 | 1,9359 | 0,121 | 0,575  |
| 10 | P48643 TCPE_HUMAN  | E.ADKCPTLE.Q              | NA        | 2 | 1,93   | 0,155 | -0,327 |
| 10 | Q6S8J3 A26CA_HUMAN | E.HGIITNWDDME.K           | NA        | 2 | 1,9268 | 0,21  | 0,092  |
| 10 | Q15149 PLEC1_HUMAN | E.GTAQQRLAAEQE.L          | NA        | 2 | 1,9236 | 0,124 | 0,094  |
| 10 | Q92841 DDX17_HUMAN | E.NKTIIFVE.T              | NA        | 2 | 1,9223 | 0,102 | 0,19   |
| 10 | Q9BSH4 CCD44_HUMAN | R.NVFKFICD.A              | NA        | 2 | 1,9154 | 0,244 | 0      |
| 10 | Q9NVI7 ATD3A_HUMAN | E.NADIIRE.Q               | NA        | 2 | 1,9136 | 0,158 | 0,294  |
| 10 | P29692 EF1D_HUMAN  | E.AAQLREE.R               | NA        | 2 | 1,9055 | 0,123 | 0,299  |
| 10 | P05783 K1C18_HUMAN | E.LAM*RQSVE.N             | NA        | 2 | 1,9027 | 0,168 | 0      |
| 10 | P17987 TCPA_HUMAN  | E.SKSVVPGGGAVE.A          | NA        | 2 | 1,9021 | 0,301 | 0      |
| 10 | P27816 MAP4_HUMAN  | E.TERAS#PIKM*D.L          | S358      | 2 | 1,9014 | 0,093 | -0,392 |
| 10 | P00558 PGK1_HUMAN  | D.KYSLEPVAVE.L            | NA        | 2 | 1,8962 | 0,108 | 0      |
| 10 | Q96EP5 DAZP1_HUMAN | E.TLRSYFSQYGE.V           | NA        | 2 | 1,8951 | 0,274 | 0,09   |
| 10 | P20020 AT2B1_HUMAN | E.ANHDGDFGITLAE.L         | NA        | 2 | 1,8913 | 0,102 | -0,359 |
| 10 | P42166 LAP2A_HUMAN | E.KSGIQPLCPE.R            | NA        | 2 | 1,89   | 0,221 | -0,324 |
| 10 | Q15008 PSMD6_HUMAN | E.DAEKNLGESE.I            | NA        | 2 | 1,8865 | 0,132 | 0      |
| 10 | P17275 JUNB_HUMAN  | E.ARS#RDATPPVS#PINM*E.D   | S251:S259 | 2 | 1,8854 | 0,188 | 0,064  |
| 10 | P00367 DHE3_HUMAN  | E.FQDRISGASE.K            | NA        | 2 | 1,8836 | 0,093 | 0,11   |
| 10 | Q8N6T3 ARFG1_HUMAN | E.GATKFGSQAS#QKASE.L      | S237      | 2 | 1,8781 | 0,268 | 0      |
| 10 | Q15149 PLEC1_HUMAN | E.GTGLRLLE.A              | NA        | 2 | 1,8672 | 0,189 | 0      |
| 10 | P28838 AMPL_HUMAN  | E.FLLRFSQDNA.-            | NA        | 2 | 1,862  | 0,174 | 0      |
| 10 | Q92688 AN32B_HUMAN | E.NRIFGGLDM*LAE.K         | NA        | 2 | 1,8465 | 0,248 | 0      |
| 10 | P27816 MAP4_HUMAN  | E.EGRPVVSGTGNDITT#PPNKE.L | T687      | 2 | 1,8279 | 0,297 | 0,454  |
| 10 | P07814 SYEP_HUMAN  | E.NILHVSE.N               | NA        | 2 | 1,8263 | 0,099 | 0,3    |
| 10 | P31946 1433B_HUMAN | D.KYLIPNATQPE.S           | NA        | 2 | 1,8252 | 0,098 | 0,192  |
| 10 | P51991 ROA3_HUMAN  | E.EYNLRDYFE.K             | NA        | 2 | 1,8033 | 0,102 | 0,098  |
| 10 | Q6S8J3 A26CA_HUMAN | E.KLCYVALD.F              | NA        | 2 | 1,7982 | 0,117 | 0,373  |
| 10 | Q14980 NUMA1_HUMAN | E.KQAAS#PLEPKELEE.L       | S271      | 2 | 1,7912 | 0,361 | -1,036 |
| 10 | P55265 DSRAD_HUMAN | E.KICDYLFNVSD.S           | NA        | 2 | 1,7779 | 0,18  | 0,089  |
| 10 | P46087 NOL1_HUMAN  | E.KQQLPEQPFE.K            | NA        | 2 | 1,7766 | 0,093 | -0,098 |

|    |                      |                                            |           |   |        |       |        |
|----|----------------------|--------------------------------------------|-----------|---|--------|-------|--------|
| 10 | P51991 ROA3_HUMAN    | E.YNLRDYFE.K                               | NA        | 2 | 1,775  | 0,181 | 0      |
| 10 | Q02952 AKA12_HUMAN   | E.YDAVERE.K                                | NA        | 2 | 1,7727 | 0,112 | 0,138  |
| 10 | P27144 KAD4_HUMAN    | E.ALDKICE.V                                | NA        | 2 | 1,7569 | 0,127 | -0,072 |
| 10 | Q86WB0 NIPA_HUMAN    | E.GT#PQKIRQLIDE.G                          | T28       | 2 | 1,7459 | 0,289 | 0,248  |
| 10 | Q16881 TRXR1_HUMAN   | E.TVGVKINE.K                               | NA        | 2 | 1,7315 | 0,088 | 0,142  |
| 10 | O15305 PMM2_HUMAN    | E.KYDYVFPE.N                               | NA        | 2 | 1,7214 | 0,092 | 0      |
| 10 | Q9Y6M7 S4A7_HUMAN    | D.LGKTSS#TVNTKFE.K                         | S26       | 2 | 1,7199 | 0,21  | 0,082  |
| 10 | P21796 VDAC1_HUMAN   | E.TTKVTGSLE.T                              | NA        | 2 | 1,7088 | 0,178 | 0      |
| 10 | Q14974 IMB1_HUMAN    | R.HFIMQVCE.A                               | NA        | 2 | 1,6618 | 0,117 | 0,105  |
| 10 | P40926 MDHM_HUMAN    | E.KMISDAIPE.L                              | NA        | 2 | 1,6606 | 0,142 | 0,243  |
| 10 | Q96K75 ZN514_HUMAN   | R.S#KS#KESM*PSWGISKEE.L                    | S78:S80   | 2 | 1,6581 | 0,158 | 0,307  |
| 10 | Q9NZL4 HPBP1_HUMAN   | E.KLLQTCFSSPADDS#MDR.-                     | S359      | 2 | 1,655  | 0,158 | 0,595  |
| 10 | P78527 PRKDC_HUMAN   | E.SLNHLLYDE.F                              | NA        | 2 | 1,6411 | 0,126 | -0,332 |
| 10 | P43243 MATR3_HUMAN   | E.SGYDRMDYE.D                              | NA        | 2 | 1,596  | 0,256 | -0,094 |
| 10 | P40926 MDHM_HUMAN    | E.EKMISDAIPE.L                             | NA        | 2 | 1,5685 | 0,112 | -0,108 |
| 10 | Q07021 C1QBP_HUMAN   | E.SDIFSIRE.V                               | NA        | 2 | 1,5549 | 0,088 | 0,252  |
| 10 | Q8NE71 ABCF1_HUMAN   | E.NASDIKLE.K                               | NA        | 2 | 1,536  | 0,11  | 0,206  |
| 10 | O60832 DKC1_HUMAN    | R.KSLPEEDVAE.I                             | NA        | 2 | 1,5243 | 0,084 | -0,109 |
| 10 | Q07666 KHDR1_HUMAN   | E.YDYGHGE.V                                | NA        | 2 | 1,5014 | 0,126 | 0      |
| 10 | P30154 2AAB_HUMAN    | E.NLPIEDRE.T                               | NA        | 2 | 1,4653 | 0,099 | 0      |
| 10 | Q15084 PDIA6_HUMAN   | E.LTPSNFNRE.V                              | NA        | 2 | 1,4491 | 0,177 | -0,226 |
| 10 | ##Q96BP2 CHCH1_HUMAN | R.GRLSPTAM*.-                              | NA        | 2 | 1,44   | 0,111 | 1,006  |
| 10 | Q99873 ANM1_HUMAN    | K.NNRDLDFID.L                              | NA        | 2 | 1,3988 | 0,133 | 0      |
| 11 | Q2TAL8 QRIC1_HUMAN   | E.AYNAVHVSGS#PTALAAVKLEDDKE.K              | S345      | 3 | 5,6932 | 0,524 | -0,071 |
| 11 | Q13263 TIF1B_HUMAN   | E.GSAGGEKRSTAPSAAASASASAAAASS#PAGGGAEALE.L | S50       | 3 | 5,5836 | 0,479 | 0,466  |
| 11 | Q08J23 NSUN2_HUMAN   | E.GQRAGEPNS#PDAEEANS#PDVTAGCDPAGVHPPR.-    | S743:S751 | 3 | 5,4962 | 0,417 | 0,312  |
| 11 | Q99575 POP1_HUMAN    | E.SRVQAYEEPSVASS#PNGKE.S                   | S730      | 3 | 5,1152 | 0,477 | 0,519  |
| 11 | Q9ULT8 HECD1_HUMAN   | E.GHDSLSVGS#FEEDSKSE.F                     | S2320     | 2 | 5,0841 | 0,561 | -0,194 |
| 11 | P46100 ATRX_HUMAN    | E.KCGLGQENS#DNEHLVENE.V                    | S634      | 2 | 5,0744 | 0,426 | 0,113  |
| 11 | Q9NZW5 MPP6_HUMAN    | E.AHDIVASKCYDS#PPSSPE.M                    | S106      | 2 | 4,9918 | 0,53  | -0,06  |
| 11 | Q9UQ35 SRRM2_HUMAN   | E.SYFGVSSLQLKGQSQTSPDHRSDTSSPE.V           | S1064     | 3 | 4,8207 | 0,395 | 0,354  |
| 11 | O15530 PDPK1_HUMAN   | E.SKQARANS#FVGTAQYVSP.E.L                  | S241      | 2 | 4,6603 | 0,196 | 0,345  |
| 11 | Q9H1B7 EAP1_HUMAN    | E.VGVGAGGKRPGS#VSS#TDQERE.L                | S334:S337 | 3 | 4,6162 | 0,536 | 0,164  |
| 11 | Q02952 AKA12_HUMAN   | E.LDKVKSATLS#STESTASE.M                    | S644      | 2 | 4,6038 | 0,528 | 0      |
| 11 | P49023 PAXI_HUMAN    | E.HVYFSPNKQKS#AEPS#PTVM*STSLGSLNSE.L       | S126:S130 | 3 | 4,5673 | 1     | 0,222  |
| 11 | P04183 KITH_HUMAN    | E.AVAARKLFAPQQILQCS#PAN.-                  | S231      | 3 | 4,5576 | 0,316 | 0,081  |
| 11 | Q99575 POP1_HUMAN    | E.SRVQAYEEPSVASS#PNGKE.S                   | S730      | 2 | 4,5021 | 0,445 | 0,115  |
| 11 | Q6NZI2 PTRF_HUMAN    | E.AGDLRRGS#S#PDVHALLE.I                    | S365:S366 | 3 | 4,4688 | 0,422 | 0,187  |
| 11 | P41227 ARD1A_HUMAN   | E.SKGN#PPSSGEACRE.E                        | S186      | 3 | 4,459  | 0,295 | -0,223 |
| 11 | Q02952 AKA12_HUMAN   | E.AKTEPFTQGKVVQTT#PE.S                     | T1116     | 2 | 4,4514 | 0,306 | -0,061 |
| 11 | Q8TE77 SSH3_HUMAN    | E.LHGDQDFGQGSQS#PQKQEE.Q                   | S87       | 2 | 4,3922 | 0,486 | 0,106  |

|    |                     |                                           |                |   |        |       |        |
|----|---------------------|-------------------------------------------|----------------|---|--------|-------|--------|
| 11 | Q05682 CALD1_HUMAN  | E.KGNVFSSPTAAGT#PNKE.T                    | T730           | 2 | 4,35   | 0,447 | 0      |
| 11 | O15234 CASC3_HUMAN  | E.LKSEANDAVNS#STKEE.K                     | S125           | 2 | 4,3392 | 0,413 | -0,135 |
| 11 | Q53EZ4 CEP55_HUMAN  | E.KVAASPKS#PTAALNE.S                      | S428           | 2 | 4,3141 | 0,385 | 0,156  |
| 11 | P35658 NU214_HUMAN  | E.GERQPKSPGS#TPTT#PTSSQAPQKLD.A           | S433:T437      | 3 | 4,3011 | 1     | 0,199  |
| 11 | P51858 HDGF_HUMAN   | E.IENNPTVKASGYQS#SQKKSCVEEPEPEPE.A        | S102           | 3 | 4,2908 | 0,391 | 0,219  |
| 11 | P53985 MOT1_HUMAN   | E.SKEEETS#IDVAGKPNE.V                     | S467           | 2 | 4,2535 | 0,38  | 0,135  |
| 11 | A8K6V7 A8K6V7_HUMAN | E.LEEKSTT#PPPAEPVSLPQEPKPRVE.A            | T227           | 3 | 4,2479 | 0,451 | 0,374  |
| 11 | P51858 HDGF_HUMAN   | E.IENNPTVKASGYQS#SQKKSCVEEPEPEPE.A        | S107           | 3 | 4,2384 | 0,337 | 0,219  |
| 11 | P11021 GRP78_HUMAN  | E.VVATNGDTHLGGEDFDQRVM*E.H                | NA             | 3 | 4,2224 | 0,434 | 0      |
| 11 | Q6WKZ4 RFIP1_HUMAN  | E.KDTAAVVSRQGS#SLNLF.E.D                  | S500           | 2 | 4,2169 | 0,479 | 0      |
| 11 | Q9C0C2 TB182_HUMAN  | E.FGKRDS#LGAYASQDANE.Q                    | S893           | 3 | 4,1473 | 0,422 | 0      |
| 11 | B2CI53 B2CI53_HUMAN | E.RNGILASQSS#APGNLDNSKSGE.I               | S263           | 3 | 4,1323 | 0,276 | 0,16   |
| 11 | Q9BRZ2 TRI56_HUMAN  | E.RQGGVQPQAGDGAQT#PKEE.K                  | T418           | 3 | 4,1232 | 0,322 | -0,09  |
| 11 | O95239 KIF4A_HUMAN  | E.VRGQVSESEDS#ITKQIE.S                    | S815           | 2 | 4,0949 | 0,382 | 0      |
| 11 | P27708 PYR1_HUMAN   | E.NAGVHSGDATLVTTPQDITAKTLE.R              | NA             | 3 | 4,0832 | 0,248 | 0,15   |
| 11 | Q92598 HS105_HUMAN  | E.LNNTCEPVVTQPKPKIES#PKLE.R               | S809           | 3 | 4,0681 | 0,251 | 0,281  |
| 11 | Q02880 TOP2B_HUMAN  | E.LKVKAS#PITNDGEDE.F                      | S1400          | 2 | 4,0446 | 0,61  | 0,288  |
| 11 | P41227 ARD1A_HUMAN  | E.SKGN#PPSSGEACREE.K                      | S186           | 3 | 4,0166 | 0,202 | 0,206  |
| 11 | Q9ULT8 HECD1_HUMAN  | E.GHDSLSVGS#FEEDSKSE.F                    | S2320          | 3 | 3,9826 | 0,246 | -0,29  |
| 11 | O43583 DENR_HUMAN   | E.AQRFFAQKFCGAS#VTGEDE.I                  | S157           | 3 | 3,9546 | 0,32  | -0,316 |
| 11 | Q5VZL5 ZMYM4_HUMAN  | E.LAKAKSEDS#DVELS#D.-                     | S1542:S1547    | 2 | 3,9514 | 0,426 | 0      |
| 11 | Q9UQ35 SRRM2_HUMAN  | E.KSATRPS#PS#PERSSTGPEPPAPTLLAE.R         | S351:S353      | 3 | 3,9163 | 1     | -0,182 |
| 11 | Q6WCQ1 MRIP_HUMAN   | E.M*RTKDQPDGSSLS#PAQS#PSQSQPPAASSLREPLE.S | S219:S223      | 3 | 3,9013 | 1     | 0,48   |
| 11 | P55884 EIF3B_HUMAN  | R.SDSRAQAVSEDAAGNE.G                      | NA             | 2 | 3,8789 | 0,435 | -0,23  |
| 11 | Q02952 AKA12_HUMAN  | E.LDKVKSAT#LSSTE.S                        | T642           | 2 | 3,8301 | 0,343 | -0,251 |
| 11 | O43166 SI1L1_HUMAN  | E.DLKKLIDLES#PTPE.S                       | S1549          | 2 | 3,8035 | 0,416 | -0,145 |
| 11 | O75717 WDHD1_HUMAN  | E.NRSNILSDNPDFSDE.A                       | NA             | 2 | 3,8003 | 0,53  | 0      |
| 11 | Q9HCD6 TANC2_HUMAN  | E.ARPSQGLPVIQS#PPS#SPPHRD.S               | S1442:S1445    | 3 | 3,7838 | 0,194 | 0,077  |
| 11 | Q969V6 MKL1_HUMAN   | E.EGPRAGSCCLS#PGGRAE.L                    | S511           | 3 | 3,7808 | 0,113 | 0      |
| 11 | Q71RC2 LARP4_HUMAN  | E.LRSNVVS#PTKNEDNGAPE.N                   | S647           | 2 | 3,7774 | 0,426 | 0,061  |
| 11 | Q8TEA8 DTD1_HUMAN   | E.DRSASS#GAEGDVSSEREP.-                   | S197           | 2 | 3,7694 | 0,547 | 0,191  |
| 11 | Q86TC9 MYPN_HUMAN   | D.S#FQERFNGQAT#KTPEPS#SPVK.E              | S627:T637:S643 | 3 | 3,7552 | 0,16  | -0,853 |
| 11 | Q14694 UBP10_HUMAN  | E.M*LNLKLLS#PSNE.K                        | S547           | 2 | 3,75   | 0,308 | 0      |
| 11 | Q9H8G2 CI082_HUMAN  | E.KELFLAHS#DLEE.G                         | S120           | 2 | 3,7372 | 0,371 | -0,223 |
| 11 | Q53EPO FND3B_HUMAN  | R.ARS#SPKSNDSDLQEYE.L                     | S253           | 2 | 3,7167 | 0,463 | 0,064  |
| 11 | Q02952 AKA12_HUMAN  | E.LDKVKSATLSS#TESTASE.M                   | S645           | 2 | 3,7131 | 0,486 | -0,063 |
| 11 | Q05682 CALD1_HUMAN  | E.KGNVFSS#PTAAGTPNKE.T                    | S724           | 2 | 3,7107 | 0,423 | -0,137 |
| 11 | Q6KC79 NIPBL_HUMAN  | E.KAAMYDISS#PSKD.S                        | S350           | 2 | 3,6686 | 0,448 | 0      |
| 11 | O94979 SC31A_HUMAN  | E.NGNILYDPSKIIAGDKE.V                     | NA             | 3 | 3,6544 | 0,38  | -0,187 |
| 11 | P48681 NEST_HUMAN   | E.NLRS#PEEVDK.E.S                         | S905           | 3 | 3,6247 | 0,233 | 0,131  |
| 11 | Q9NUQ3 TXLNG_HUMAN  | E.NNNKALLQM*AEE.K                         | NA             | 2 | 3,6087 | 0,371 | 0,175  |

|    |                     |                                     |                |   |        |       |        |
|----|---------------------|-------------------------------------|----------------|---|--------|-------|--------|
| 11 | Q9HCD6 TANC2_HUMAN  | E.ARPSQGLPVIQS#PPSS#PPHRD.S         | S1442:S1446    | 3 | 3,5981 | 0,193 | 0,23   |
| 11 | O43166 SI1L1_HUMAN  | E.DQALAQM*KPYSSSKDSS#PTLASKVDQLE.G  | S1734          | 3 | 3,588  | 0,263 | 0,117  |
| 11 | P56524 HDAC4_HUMAN  | E.AHAQAGVQVKQEPES#DEEE.A            | S565           | 3 | 3,5836 | 0,356 | 0      |
| 11 | Q8IX90 CM003_HUMAN  | E.KSPRS#PQLSDFGLE.R                 | S155           | 2 | 3,582  | 0,513 | 0      |
| 11 | P61247 RS3A_HUMAN   | E.TGAKVERADGYEPPVQES#V.-            | S263           | 2 | 3,5759 | 0,483 | 0,116  |
| 11 | P42224 STAT1_HUMAN  | E.VHPSRLQTTDNLPM*S#PEEFDE.V         | S727           | 3 | 3,5362 | 0,394 | 0,276  |
| 11 | P31948 STIP1_HUMAN  | E.KGNKALS#VGNIDDALQCYSE.A           | S16            | 3 | 3,5164 | 0,185 | -0,324 |
| 11 | O75145 LIPA3_HUMAN  | E.GQTSGSSRADGVSVRTYS#C.-            | S1193          | 3 | 3,5147 | 0,323 | 0,178  |
| 11 | Q9Y467 SALL2_HUMAN  | E.GGKPERS#SSPASALTPEGE.A            | S872           | 2 | 3,4926 | 0,425 | 0,252  |
| 11 | Q52LD0 Q52LD0_HUMAN | E.YGKAGGSPASYHGSTS#PRVS#SELE.Q      | S201:S205      | 3 | 3,4885 | 0,244 | 0,071  |
| 11 | Q9NZW5 MPP6_HUMAN   | E.AHDIVASKCYDS#PPSSPE.M             | S106           | 3 | 3,4883 | 0,393 | -0,179 |
| 11 | P27987 IP3KB_HUMAN  | E.KGIPASPRCGS#PTAM*E.I              | S269           | 2 | 3,465  | 0,391 | -0,07  |
| 11 | Q9UHV7 MED13_HUMAN  | E.GFCS#PKPSEIKDFSYYKPE.N            | S890           | 3 | 3,4182 | 0,172 | 0,223  |
| 11 | Q9C0C2 TB182_HUMAN  | E.FGKRDS#LGAYASQDANE.Q              | S893           | 2 | 3,4126 | 0,578 | -0,064 |
| 11 | P04183 KITH_HUMAN   | E.AVAARKLFAPQQILQCS#PAN.-           | S231           | 2 | 3,4106 | 0,358 | 0,431  |
| 11 | P02794 FRIH_HUMAN   | E.YLFDKHTLGDS#DNES.-                | S179           | 2 | 3,3777 | 0,462 | 0,067  |
| 11 | Q96JM3 ZN828_HUMAN  | E.LRKPGPPLS#PEIRS#PAGS#PE.L         | S427:S432:S436 | 3 | 3,3438 | 0,267 | 0,393  |
| 11 | Q02952 AKA12_HUMAN  | E.DSIAGSGVEHSTPDTEPGKEE.S           | NA             | 3 | 3,3422 | 0,176 | -0,085 |
| 11 | Q14980 NUMA1_HUMAN  | E.AERKNS#LISSLEEE.V                 | S1225          | 2 | 3,3302 | 0,395 | -0,145 |
| 11 | P54578 UBP14_HUMAN  | E.KGEQGQYLQDANE.C                   | NA             | 2 | 3,3203 | 0,338 | -0,076 |
| 11 | O43583 DENR_HUMAN   | E.FAKLTVENS#PKQE.A                  | S73            | 2 | 3,3074 | 0,332 | 0,233  |
| 11 | Q9Y580 RBM7_HUMAN   | E.RTM*DNM*TSSAQIIQRSFSS#PE.N        | S137           | 3 | 3,3047 | 0,226 | 0      |
| 11 | Q8N568 DCLK2_HUMAN  | E.LDRCS#PEGVNGNRCSE.S               | S375           | 3 | 3,2993 | 0,095 | -0,179 |
| 11 | B2RCX0 B2RCX0_HUMAN | E.LNSNHDGADETS#EKE.Q                | S24            | 2 | 3,2798 | 0,368 | -0,353 |
| 11 | Q13610 PWP1_HUMAN   | E.DFLIKPSDNLIVCGRAE.Q               | NA             | 3 | 3,267  | 0,355 | -1,597 |
| 11 | Q8TEA8 DTD1_HUMAN   | E.DRSASSGAEGDVSS#EREP.-             | S205           | 2 | 3,2393 | 0,501 | 0,064  |
| 11 | Q9Y613 FHOD1_HUMAN  | E.IM*DLLVQSVTKSS#PRALAARE.R         | S1119          | 3 | 3,2226 | 0,189 | 0,154  |
| 11 | Q8NEL9 DDHD1_HUMAN  | E.NEGISTIPS#PVTS#PVLRRHYGE.S        | S723:S727      | 3 | 3,2198 | 0,304 | 0,138  |
| 11 | P30622 CLIP1_HUMAN  | E.SISNLS#EAGS#IKKGERE.L             | S200:S204      | 2 | 3,2185 | 0,484 | 0,062  |
| 11 | P04920 B3A2_HUMAN   | E.RTSPSS#PAPLPHQE.A                 | S173           | 2 | 3,2165 | 0,387 | -0,231 |
| 11 | Q6ZRV2 FA83H_HUMAN  | E.LGPDGHQRLDYVPS#SAS#RE.V           | S513:S516      | 3 | 3,2145 | 0,141 | 0      |
| 11 | Q5T200 ZC3HD_HUMAN  | E.IIIKKEVS#PE.V                     | S198           | 2 | 3,2066 | 0,304 | 0      |
| 11 | P31948 STIP1_HUMAN  | E.KGNKALS#VGNIDDALQCYSE.A           | S16            | 2 | 3,2035 | 0,458 | 0,108  |
| 11 | Q13206 DDX10_HUMAN  | E.LVLHLLRSQS#.-                     | S875           | 2 | 3,2028 | 0,524 | -0,098 |
| 11 | Q8IYB3 SRRM1_HUMAN  | E.ATSTSDILKVPKPEPIPEPKEPS#PE.K      | S260           | 3 | 3,1971 | 0,367 | 0,132  |
| 11 | Q66K74 MAP1S_HUMAN  | E.LPLAASSIPRPT#PS#PESHSPAEGSE.R     | T638:S640      | 3 | 3,1926 | 1     | 0,368  |
| 11 | Q92598 HS105_HUMAN  | E.LNNTCEPVVTQPKPKIES#PKLE.R         | S809           | 2 | 3,1921 | 0,405 | 0,281  |
| 11 | P49023 PAXI_HUMAN   | E.HVYS#FPNKQKSAEPS#PTVMSTSLGSNLSE.L | S119:S130      | 3 | 3,1842 | 1     | 0,223  |
| 11 | P38398 BRCA1_HUMAN  | E.NNS#PEHLKDE.V                     | S114           | 2 | 3,1816 | 0,249 | 0      |
| 11 | Q7Z417 NUFP2_HUMAN  | E.LEKRTS#PQVLGSILKSGTTS#E.S         | S572:S586      | 3 | 3,1805 | 0,218 | -0,077 |
| 11 | Q15075 EEA1_HUMAN   | E.NKLQQQLTQAAQE.L                   | NA             | 2 | 3,1634 | 0,315 | 0,163  |

|    |                     |                                     |           |   |        |       |        |
|----|---------------------|-------------------------------------|-----------|---|--------|-------|--------|
| 11 | P49674 KC1E_HUMAN   | E.VSRIPAS#QT#SVPFDHLGK.-            | S405:T407 | 3 | 3,1532 | 0,21  | 0      |
| 11 | Q9Y4B5 K0802_HUMAN  | E.LQKYKSLYGDVDS#PLPTGE.A            | S540      | 3 | 3,1504 | 0,315 | -0,084 |
| 11 | Q12931 TRAP1_HUMAN  | E.NAM*IAAGLVDDPRAM*VGRLNE.L         | NA        | 3 | 3,1467 | 0,186 | -0,081 |
| 11 | P04075 ALDOA_HUMAN  | E.STGSIARKLQS#IGTENTEE.N            | S46       | 3 | 3,1447 | 0,263 | -0,435 |
| 11 | Q499L7 Q499L7_HUMAN | E.NKSVAQQASLTE.Q                    | NA        | 2 | 3,1429 | 0,361 | 0,191  |
| 11 | P48681 NEST_HUMAN   | E.NLRS#PEEVDKE.S                    | S905      | 2 | 3,1418 | 0,355 | -0,175 |
| 11 | Q02952 AKA12_HUMAN  | E.AKTEPFTQGVVQTT#PE.S               | T1116     | 3 | 3,1334 | 0,272 | 0      |
| 11 | Q14126 DSG2_HUMAN   | E.ATM*KGSS#S#ASIVKGQHE.M            | S700:S701 | 2 | 3,1115 | 0,391 | -0,322 |
| 11 | Q5VUB5 CJ038_HUMAN  | E.HLYPAPSS#PEKE.Q                   | S525      | 2 | 3,1111 | 0,435 | 0,085  |
| 11 | P10809 CH60_HUMAN   | E.GLTLNLEDVQPHDLGKVG.E.V            | NA        | 3 | 3,1088 | 0,299 | 0      |
| 11 | Q8IX12 CCAR1_HUMAN  | E.DM*LGNRLLPTPTVKQE.S               | NA        | 3 | 3,0981 | 0,114 | -0,283 |
| 11 | Q14247 SRC8_HUMAN   | E.EQARAKTQTPPV#PAPQPTEE.R           | S405      | 3 | 3,0871 | 0,159 | -0,078 |
| 11 | Q562F6 SGOL2_HUMAN  | E.SDLKHITSEADS#DPGNPVE.L            | S1032     | 2 | 3,0867 | 0,223 | 0,467  |
| 11 | Q71U36 TBA1A_HUMAN  | E.HSDCAFM*VDNE.A                    | NA        | 2 | 3,0826 | 0,353 | 0      |
| 11 | Q01433 AMPD2_HUMAN  | E.RQIS#QDVKLEPD.I                   | S168      | 2 | 3,0609 | 0,466 | 0,081  |
| 11 | Q8NCP5 ZBT44_HUMAN  | E.KGLDAGQENNSNCNFTSRDGSIS#PVSSE.C   | S161      | 3 | 3,0494 | 0,283 | 0      |
| 11 | Q6NZI2 PTRF_HUMAN   | D.LRRGS#S#PDVHALLE.I                | S365:S366 | 3 | 3,045  | 0,192 | 0,107  |
| 11 | P46100 ATRX_HUMAN   | E.KCGLGQENS#DNEHLVE.N               | S634      | 2 | 3,041  | 0,364 | -0,064 |
| 11 | Q6S8J3 A26CA_HUMAN  | E.KLCYVALDFEQE.M                    | NA        | 2 | 3,0387 | 0,321 | 0,081  |
| 11 | O15027 SC16A_HUMAN  | E.LSRCS#SMSSLSRE.V                  | S2116     | 3 | 3,0381 | 0,34  | 0,116  |
| 11 | P06748 NPM_HUMAN    | E.KGGS#LPKVE.A                      | S260      | 2 | 3,028  | 0,301 | 0,245  |
| 11 | A6NFI3 A6NFI3_HUMAN | R.LSRGGDAKS#PVLQE.K                 | S112      | 2 | 3,0215 | 0,227 | -0,079 |
| 11 | Q9H165 BC11A_HUMAN  | E.KAVDKPPS#PSPIE.M                  | S86       | 2 | 3,0213 | 0,375 | 0,084  |
| 11 | Q8TEA8 DTD1_HUMAN   | E.DRSASSGAEGDVSS#EREP.-             | S205      | 3 | 3,0156 | 0,216 | 0,191  |
| 11 | P55145 ARMET_HUMAN  | E.NRLCYIGATDD.A                     | NA        | 2 | 3,0071 | 0,362 | 0,167  |
| 11 | Q15047 SETB1_HUMAN  | E.SSRNYGYNPS#PVKPE.G                | S1066     | 3 | 3,0053 | 0,1   | 0,103  |
| 11 | P21333 FLNA_HUMAN   | R.RAPS#VANVGSHCD.L                  | S2152     | 2 | 2,9994 | 0,42  | -0,252 |
| 11 | P07355 ANXA2_HUMAN  | E.LKASM*KGLGTDEDS#LIE.I             | S127      | 2 | 2,9924 | 0,516 | 0,256  |
| 11 | Q05519 SFR11_HUMAN  | E.CSVEKGTGDS#LRE.S                  | S464      | 2 | 2,9878 | 0,349 | 0,08   |
| 11 | P00558 PGK1_HUMAN   | K.SLLGKDVFLKD.C                     | NA        | 2 | 2,969  | 0,362 | -0,362 |
| 11 | Q76L83 ASXL2_HUMAN  | E.SLVTS#PSKPKS#PGVEKPIVKPTAGAGPQE.T | S524:S530 | 3 | 2,9629 | 0,098 | 0,12   |
| 11 | Q13546 RIPK1_HUMAN  | E.NAVVKRMQS#LQLD.C                  | S320      | 2 | 2,9603 | 0,363 | 0,077  |
| 11 | P07951 TPM2_HUMAN   | E.NAIDRAEQAE.A                      | NA        | 2 | 2,9522 | 0,293 | 0      |
| 11 | P04406 G3P_HUMAN    | K.AVGKVIPELNGK.L                    | NA        | 2 | 2,9442 | 0,325 | -0,1   |
| 11 | O95684 FR1OP_HUMAN  | E.KGPTTGEGALDLSDVHS#PPKS#PE.G       | S156:S160 | 3 | 2,9439 | 0,214 | 0,295  |
| 11 | Q9HA05 Q9HA05_HUMAN | E.DTLVNNVPLPNTLPLPKRE.T             | NA        | 3 | 2,941  | 0,208 | -0,258 |
| 11 | Q8TE77 SSH3_HUMAN   | E.LHGDQDTDFGQGSQS#PQKQEE.Q          | S87       | 3 | 2,9378 | 0,244 | 0,159  |
| 11 | P04792 HSPB1_HUMAN  | E.SPAVAAPAYSRLSRQLS#SGVSE.I         | S82       | 3 | 2,9375 | 0,183 | 0      |
| 11 | Q9UGL1 JAD1B_HUMAN  | E.LYQTLAKPSPAQQTDRS#SPVRSSE.K       | S1383     | 3 | 2,9366 | 0,176 | 0,125  |
| 11 | Q02952 AKA12_HUMAN  | E.LDKVKS#ATLSSTE.S                  | S640      | 2 | 2,9271 | 0,384 | 0,502  |
| 11 | B2RXH1 B2RXH1_HUMAN | E.KSSLGEKAES#VANVNANTPSSE.L         | S685      | 3 | 2,9103 | 0,14  | 0,398  |

|    |                     |                                     |           |   |        |       |        |
|----|---------------------|-------------------------------------|-----------|---|--------|-------|--------|
| 11 | Q5T200 ZC3HD_HUMAN  | E.SRSLS#PSHLTE.D                    | S877      | 2 | 2,9003 | 0,287 | 0,189  |
| 11 | P61604 CH10_HUMAN   | K.VGDKVLLPEYGGTK.V                  | NA        | 2 | 2,8961 | 0,15  | 0,083  |
| 11 | P62736 ACTA_HUMAN   | D.LAGRDLTDYLM*K.I                   | NA        | 3 | 2,8841 | 0,212 | 0,324  |
| 11 | O15027 SC16A_HUMAN  | E.LSRCS#SM*SSLSRE.V                 | S2116     | 2 | 2,8832 | 0,323 | 0      |
| 11 | Q727K6 PRR6_HUMAN   | R.RSS#PRAQEEGPGEPPE.L               | S70       | 3 | 2,8803 | 0,273 | -0,092 |
| 11 | Q16543 CDC37_HUMAN  | E.AVPKGTGDEKDVSV.-                  | S377      | 2 | 2,8797 | 0,425 | -0,171 |
| 11 | P16949 STMN1_HUMAN  | E.NNNFSKMAEE.K                      | NA        | 2 | 2,8745 | 0,249 | 0,309  |
| 11 | P11388 TOP2A_HUMAN  | E.LKPQKS#VVSDLE.A                   | S1374     | 2 | 2,8688 | 0,443 | 0      |
| 11 | Q9UJY5 GGA1_HUMAN   | R.M*RPTLFRLAS#DTEDNDE.A             | S268      | 3 | 2,8602 | 0,201 | 0,174  |
| 11 | O75592 MYCB2_HUMAN  | E.NRAPS#PHVVQE.N                    | S2882     | 2 | 2,8524 | 0,36  | -0,093 |
| 11 | P61289 PSME3_HUMAN  | E.LDSFLKEPILNIHD.L                  | NA        | 3 | 2,8523 | 0,297 | -0,111 |
| 11 | A6NK10 A6NK10_HUMAN | R.RS#LRAAQTGQVDGE.L                 | S44       | 3 | 2,845  | 0,234 | 0      |
| 11 | Q02952 AKA12_HUMAN  | E.HTQVPADSPDS#QEEQKGE.S             | S557      | 2 | 2,8448 | 0,413 | 0      |
| 11 | Q96LB3 IFT74_HUMAN  | E.DKSIGS#PM*EERE.K                  | S300      | 2 | 2,842  | 0,222 | -0,166 |
| 11 | O95425 SVIL_HUMAN   | E.LSATRQAHDLS#PAAE.S                | S221      | 2 | 2,8351 | 0,261 | 0,222  |
| 11 | Q5M775 SPEC1_HUMAN  | E.KLIYLEHS#PNSE.G                   | S260      | 2 | 2,8329 | 0,218 | -0,242 |
| 11 | Q9H330 CI005_HUMAN  | E.SAPTLSTSPS#PSSPS#PTSPSPTLGRRRPE.I | S322:S327 | 3 | 2,8328 | 1     | 0,237  |
| 11 | Q14247 SRC8_HUMAN   | E.QARAKTQT#PPVSPAPQPTEE.R           | T401      | 3 | 2,8317 | 0,129 | 1,24   |
| 11 | Q727K6 PRR6_HUMAN   | R.RS#SPRAQEEGPGEPPE.L               | S69       | 2 | 2,8301 | 0,429 | 0,061  |
| 11 | P16949 STMN1_HUMAN  | E.NNNFSKM*AEE.K                     | NA        | 2 | 2,8237 | 0,409 | 0      |
| 11 | Q8N2Y8 RUSC2_HUMAN  | E.HTKIS#PPPGPGDPGPSQPSE.Y           | S428      | 3 | 2,8185 | 0,086 | 0,254  |
| 11 | Q8NG31 CASC5_HUMAN  | E.LSQRKSLGTPVICT#PTEE.S             | T1017     | 3 | 2,8093 | 0,295 | 0,083  |
| 11 | Q99661 KIF2C_HUMAN  | E.LRITAQENDM*E.V                    | NA        | 2 | 2,8059 | 0,401 | -0,091 |
| 11 | Q14974 IMB1_HUMAN   | E.KTVS#PDRLE.L                      | S12       | 2 | 2,8029 | 0,287 | -0,434 |
| 11 | Q2M218 AAK1_HUMAN   | E.ASLNKSKSATTTSPGSPRT#S#QQNVYNPSE.G | T681:S682 | 3 | 2,7983 | 0,222 | 0,229  |
| 11 | P50458 LHX2_HUMAN   | E.GHEPHS#PSQTLTLNLF.-               | S396      | 2 | 2,7873 | 0,343 | 0,198  |
| 11 | O15143 ARC1B_HUMAN  | R.FQNLDKKAS#SE.G                    | S310      | 2 | 2,7732 | 0,236 | -0,091 |
| 11 | Q8TEA8 DTD1_HUMAN   | E.DRSASS#GAEGDVSSEREP.-             | S197      | 3 | 2,7722 | 0,268 | 0,668  |
| 11 | Q49A39 Q49A39_HUMAN | E.KQPS#PEEIRE.R                     | S257      | 2 | 2,772  | 0,239 | -0,094 |
| 11 | Q03188 CENPC_HUMAN  | E.NIHTS#HITQDE.F                    | S447      | 2 | 2,7717 | 0,371 | 0      |
| 11 | O94964 CT117_HUMAN  | E.ITNCVRQAM*RSQS#LE.R               | S251      | 3 | 2,768  | 0,123 | 0      |
| 11 | P00558 PGK1_HUMAN   | K.SLLGKDVLFK.D                      | NA        | 2 | 2,7601 | 0,197 | -0,297 |
| 11 | Q8N6T3 ARFG1_HUMAN  | E.GATKFGSQAS#QKASE.L                | S237      | 3 | 2,7535 | 0,155 | 0,116  |
| 11 | Q14980 NUMA1_HUMAN  | E.AQLQAQLNE.L                       | NA        | 2 | 2,7527 | 0,326 | 0      |
| 11 | P22626 ROA2_HUMAN   | R.GGGGNFGPGPGSNFRGSDGYGSGR.G        | NA        | 3 | 2,7477 | 0,217 | 0,242  |
| 11 | P05787 K2C8_HUMAN   | R.TEM*ENEFVLIKK.D                   | NA        | 3 | 2,7447 | 0,127 | 0,489  |
| 11 | P27816 MAP4_HUMAN   | E.GRPVVSMTGNDITT#PPNKE.L            | T687      | 3 | 2,7432 | 0,127 | -0,091 |
| 11 | Q58FF8 H90B2_HUMAN  | E.SKEQVANSFAVE.Q                    | NA        | 2 | 2,7405 | 0,277 | 0      |
| 11 | Q8WY36 BBX_HUMAN    | E.LRQKS#PLFQFAE.I                   | S243      | 2 | 2,7359 | 0,382 | 0      |
| 11 | Q9Y536 PAL4B_HUMAN  | E.NFRALSTGE.K                       | NA        | 2 | 2,7358 | 0,324 | 0,123  |
| 11 | Q13546 RIPK1_HUMAN  | E.NAVVKRM*QS#LQLD.C                 | S320      | 2 | 2,7343 | 0,223 | -0,229 |

|    |                    |                                             |             |   |        |       |        |
|----|--------------------|---------------------------------------------|-------------|---|--------|-------|--------|
| 11 | P54725 RD23A_HUMAN | E.SSTSFPAPTSGM*SHPPAAREDKS#PSEE.S           | S123        | 3 | 2,7192 | 0,156 | 0,119  |
| 11 | Q9Y266 NUDC_HUMAN  | E.NSKLSDLDSETRS#M*VE.K                      | S285        | 2 | 2,7164 | 0,207 | -0,192 |
| 11 | Q5SW79 CE170_HUMAN | E.SSKSLVRQGS#FTIE.K                         | S838        | 2 | 2,7093 | 0,254 | 0,151  |
| 11 | P55060 XPO2_HUMAN  | D.NKLLQTDDEEE.A                             | NA          | 2 | 2,6928 | 0,352 | 0,549  |
| 11 | Q99733 NP1L4_HUMAN | E.RLDNVPHT#PSSYIE.T                         | T51         | 2 | 2,6888 | 0,276 | -0,071 |
| 11 | Q8IVF2 AHNK2_HUMAN | E.AYEPDAHDV#PTSTDTE.A                       | S294        | 3 | 2,6834 | 0,187 | 0,088  |
| 11 | Q14966 ZN638_HUMAN | E.KES#PGLKNSPIDE.S                          | S1100       | 2 | 2,6828 | 0,214 | 0,082  |
| 11 | P34931 HS71L_HUMAN | D.LNKSINPDE.A                               | NA          | 2 | 2,6811 | 0,254 | 0,355  |
| 11 | Q9Y217 FYV1_HUMAN  | E.SKISAM*DAS#PRNIS#PGLQNGEKE.D              | S1544:S1549 | 3 | 2,6779 | 0,273 | 0,14   |
| 11 | Q14974 IMB1_HUMAN  | E.DDIVPHVLPFIKE.H                           | NA          | 2 | 2,6735 | 0,309 | -0,401 |
| 11 | Q13263 TIF1B_HUMAN | E.GSAGGEKRSTAPSAASASAAAASS#PAGGGAE.A        | S50         | 3 | 2,6552 | 0,209 | 0      |
| 11 | P08047 SP1_HUMAN   | E.KGVGGNNGGNGNGGGAFAFSQARSST#GSSSSTGGGGQE.S | T43         | 3 | 2,6412 | 0,234 | 0,221  |
| 11 | Q5JSH3 WDR44_HUMAN | E.DVHLGGGYPVGS#PGKVGLSTFKE.T                | S27         | 3 | 2,6386 | 0,218 | -0,077 |
| 11 | Q9BTL3 F103A_HUMAN | E.YLKRPPES#PPIVEE.W                         | S36         | 2 | 2,6333 | 0,349 | 0      |
| 11 | Q9UNE7 STUB1_HUMAN | E.GGARLGAGGS#PEKSPSAQE.L                    | S19         | 3 | 2,6293 | 0,16  | 0,193  |
| 11 | P16949 STMN1_HUMAN | E.NNNFSKM*AE.E                              | NA          | 2 | 2,623  | 0,296 | 0      |
| 11 | Q02952 AKA12_HUMAN | E.LDKVKSATLSSTEST#ASE.M                     | T649        | 3 | 2,6209 | 0,198 | 0,189  |
| 11 | Q8NFP7 NUD10_HUMAN | E.KLKLGG#PTNGNSM*APSSPDSDP.-                | S148        | 2 | 2,6183 | 0,313 | 0,104  |
| 11 | P04406 G3P_HUMAN   | K.AVGKVIPELNGK.L                            | NA          | 3 | 2,6135 | 0,111 | 0,672  |
| 11 | Q9UNE7 STUB1_HUMAN | E.GGARLGAGGS#PEKSPSAQE.L                    | S19         | 2 | 2,6084 | 0,366 | 0,258  |
| 11 | Q07021 C1QBP_HUMAN | E.DLKSFKS#Q.-                               | S281        | 2 | 2,6083 | 0,212 | 0      |
| 11 | Q9Y536 PAL4B_HUMAN | E.NFRALS#TGE.K                              | S40         | 2 | 2,6016 | 0,279 | 0,114  |
| 11 | Q71U36 TBA1A_HUMAN | E.HSDCAFMDNE.A                              | NA          | 2 | 2,5986 | 0,146 | 0,092  |
| 11 | P49790 NU153_HUMAN | E.NKSSFNLGTIE.T                             | NA          | 2 | 2,5963 | 0,309 | -0,101 |
| 11 | P08559 ODPA_HUMAN  | E.NNRYGM*GTS#VERAAASTD.Y                    | S232        | 3 | 2,589  | 0,375 | 0,092  |
| 11 | Q15047 SETB1_HUMAN | E.SSRNYGYNPS#PVKPE.G                        | S1066       | 2 | 2,5866 | 0,295 | 0,069  |
| 11 | P28070 PSB4_HUMAN  | E.KQPVLSQTE.A                               | NA          | 2 | 2,5837 | 0,135 | 0      |
| 11 | Q5VZL5 ZMYM4_HUMAN | E.LAKAKS#EDSDVELSD.-                        | S1539       | 2 | 2,5711 | 0,134 | -0,072 |
| 11 | P16949 STMN1_HUMAN | E.LEKRAS#GQAFE.L                            | S16         | 2 | 2,568  | 0,333 | 0,185  |
| 11 | Q43491 E41L2_HUMAN | E.DILKHQAS#ISE.L                            | S647        | 2 | 2,5623 | 0,288 | -0,092 |
| 11 | Q96SB3 NEB2_HUMAN  | R.GVRLSLPRASS#LNE.N                         | S100        | 2 | 2,5586 | 0,381 | -0,155 |
| 11 | Q8NFP7 NUD10_HUMAN | E.KLKLGG#PTNGNSMAPSSPDSDP.-                 | S148        | 3 | 2,5525 | 0,129 | 0,626  |
| 11 | Q6NV74 CB055_HUMAN | E.SGQDATRPRVRF#QE.N                         | S113        | 3 | 2,5486 | 0,197 | 0,104  |
| 11 | Q9Y536 PAL4B_HUMAN | E.NFRALST#GE.K                              | T41         | 2 | 2,5446 | 0,264 | -0,341 |
| 11 | Q9H079 CO029_HUMAN | R.T#YLVNSSDS#GSSQTESPSSK.Y                  | T120:S128   | 3 | 2,5355 | 0,205 | 0,824  |
| 11 | Q9BY44 EIF2A_HUMAN | E.TLCARNVNNNE.V                             | NA          | 2 | 2,5316 | 0,255 | 0      |
| 11 | P42224 STAT1_HUMAN | E.VHPSRLQTTDNLPM*S#PEEFDE.V                 | S727        | 2 | 2,5299 | 0,282 | 0,46   |
| 11 | Q92945 FUBP2_HUMAN | R.DQGGFGDRNE.Y                              | NA          | 2 | 2,5296 | 0,177 | -0,223 |
| 11 | Q95684 FR1OP_HUMAN | E.NKTPLVNE.S                                | NA          | 2 | 2,5276 | 0,172 | 0,2    |
| 11 | Q8N3Z6 ZCHC7_HUMAN | E.NAHLGSSSLQSNE.L                           | NA          | 2 | 2,5274 | 0,263 | -0,182 |
| 11 | Q3KQU3 MA7D1_HUMAN | E.AFLKKAUVQS#PQVTE.V                        | S834        | 2 | 2,5259 | 0,272 | 0      |

|    |                    |                              |             |   |        |       |        |
|----|--------------------|------------------------------|-------------|---|--------|-------|--------|
| 11 | Q14966 ZN638_HUMAN | E.KES#PGLKNSPIDE.S           | S1100       | 3 | 2,5217 | 0,248 | 0,061  |
| 11 | Q9H4A3 WNK1_HUMAN  | E.SRVSS#QQTVSYGSQHE.Q        | S671        | 3 | 2,5201 | 0,133 | -0,098 |
| 11 | P09382 LEG1_HUMAN  | E.AINYM*AADGDFKIKVAFD.-      | NA          | 3 | 2,5199 | 0,088 | -0,169 |
| 11 | Q15149 PLEC1_HUMAN | E.GTAQQRLAEEQE.L             | NA          | 2 | 2,5187 | 0,171 | 0,75   |
| 11 | P05787 K2C8_HUMAN  | E.IEGLKGQRAS#LE.A            | S330        | 3 | 2,5176 | 0,105 | 0,265  |
| 11 | Q02790 FKBP4_HUMAN | E.FKGEDLTEEE.D               | NA          | 2 | 2,5046 | 0,088 | -0,612 |
| 11 | P07384 CAN1_HUMAN  | R.KAPSDLYQIILK.A             | NA          | 2 | 2,5024 | 0,294 | -0,439 |
| 11 | Q9Y580 RBM7_HUMAN  | E.RTM*DNM*TSSAQIIQRSFS#SPE.N | S136        | 3 | 2,5022 | 0,109 | 0,22   |
| 11 | Q02878 RL6_HUMAN   | K.AVDSQILPKIK.A              | NA          | 2 | 2,4923 | 0,293 | -0,201 |
| 11 | P46821 MAP1B_HUMAN | E.KSGKQGS#PDQVSPVS#E.M       | S1438:S1446 | 2 | 2,4848 | 0,165 | 0,136  |
| 11 | P08559 ODPA_HUMAN  | E.NNRYGM*GTSVE.R             | NA          | 2 | 2,4799 | 0,27  | -0,196 |
| 11 | O15085 ARHGB_HUMAN | E.NVPRSRS#DVIDMDAAAE.A       | S635        | 2 | 2,4783 | 0,363 | 0      |
| 11 | P38646 GRP75_HUMAN | E.FKDQLPADE.C                | NA          | 2 | 2,4762 | 0,248 | 0,115  |
| 11 | P13489 RINI_HUMAN  | E.LNLRNE.L                   | NA          | 2 | 2,4687 | 0,134 | 0,216  |
| 11 | P11274 BCR_HUMAN   | E.GEGKGPLLRSQS#TSEQE.K       | S301        | 2 | 2,4662 | 0,344 | 0,13   |
| 11 | Q9NYP9 CU045_HUMAN | E.SKLS#FATCKS.-              | S227        | 2 | 2,4639 | 0,277 | -0,202 |
| 11 | P27797 CALR_HUMAN  | E.VKIDNSQVE.S                | NA          | 2 | 2,4617 | 0,139 | 0,118  |
| 11 | P50990 TCPQ_HUMAN  | E.KLFVTND.A                  | NA          | 2 | 2,4558 | 0,303 | 0,51   |
| 11 | P11047 LAMC1_HUMAN | E.NFFRLGNNE.A                | NA          | 2 | 2,4537 | 0,226 | 0,11   |
| 11 | P67936 TPM4_HUMAN  | E.LKCGDLEEE.L                | NA          | 2 | 2,4456 | 0,223 | 0      |
| 11 | Q9Y4L1 HYOU1_HUMAN | E.LGKNINADE.A                | NA          | 2 | 2,4441 | 0,1   | 0,063  |
| 11 | P20700 LMNB1_HUMAN | E.IRDQM*QQQLNDYE.Q           | NA          | 2 | 2,4399 | 0,279 | -0,431 |
| 11 | Q96ST2 IWS1_HUMAN  | E.TRKLPGS#DS#ENEE.L          | S131:S133   | 2 | 2,4282 | 0,216 | -0,15  |
| 11 | Q15435 PP1R7_HUMAN | E.NNNKLTM*LD.I               | NA          | 2 | 2,4183 | 0,283 | 0,226  |
| 11 | P28066 PSA5_HUMAN  | E.EKLNATNIE.L                | NA          | 2 | 2,4027 | 0,141 | 0,118  |
| 11 | Q9HC35 EMAL4_HUMAN | E.KLSLPQNE.T                 | NA          | 2 | 2,4016 | 0,247 | 0,131  |
| 11 | P50990 TCPQ_HUMAN  | E.GNKNVGLDIE.A               | NA          | 2 | 2,3969 | 0,276 | 0      |
| 11 | Q9NZT2 OGFR_HUMAN  | R.KVEEEGS#PGDPDHE.A          | S315        | 2 | 2,3917 | 0,164 | 0      |
| 11 | P11142 HSP7C_HUMAN | E.TKSFYPEE.V                 | NA          | 2 | 2,3848 | 0,271 | -0,366 |
| 11 | Q08752 PPID_HUMAN  | E.NFRALCTGE.K                | NA          | 2 | 2,3787 | 0,167 | 0,114  |
| 11 | P50991 TCPD_HUMAN  | E.YSRTLSGM*E.S               | NA          | 2 | 2,378  | 0,257 | 0,115  |
| 11 | P30084 ECHM_HUMAN  | E.KAQFAQPE.I                 | NA          | 2 | 2,3642 | 0,196 | 0,266  |
| 11 | Q9H4A3 WNK1_HUMAN  | E.SRVSS#QQTVSYGSQHE.Q        | S671        | 2 | 2,3323 | 0,294 | -0,262 |
| 11 | Q71U36 TBA1A_HUMAN | E.GEFSEARE.D                 | NA          | 2 | 2,3129 | 0,233 | 0,264  |
| 11 | P84090 ERH_HUMAN   | E.GRTYADYESVNE.C             | NA          | 2 | 2,3087 | 0,122 | -0,174 |
| 11 | Q9Y6R4 M3K4_HUMAN  | E.LQFRSLR#RHSS#PTEE.R        | S1247:S1251 | 2 | 2,3053 | 0,307 | -0,126 |
| 11 | Q02952 AKA12_HUMAN | E.KEPSKSAESPT#S#PVTSE.T      | T285:S286   | 2 | 2,3048 | 0,246 | 0,064  |
| 11 | Q01105 SET_HUMAN   | E.IDRLNEQASEE.I              | NA          | 2 | 2,3043 | 0,314 | 0      |
| 11 | P13667 PDIA4_HUMAN | E.VKDLGLSE.S                 | NA          | 2 | 2,2987 | 0,185 | 0,425  |
| 11 | Q9NPR2 SEM4B_HUMAN | E.SEKRPLS#IQDSFVE.V          | S804        | 2 | 2,2985 | 0,304 | 0      |
| 11 | Q6KC79 NIPBL_HUMAN | E.KAAM*YDISS#PSKD.S          | S350        | 2 | 2,2861 | 0,362 | 0,15   |



|    |                     |                           |       |   |        |       |        |
|----|---------------------|---------------------------|-------|---|--------|-------|--------|
| 11 | P05787 K2C8_HUMAN   | E.SRLEGLTDE.I             | NA    | 2 | 2,271  | 0,205 | -0,06  |
| 11 | P56524 HDAC4_HUMAN  | E.AHAQAGVQVQKQEPIS#DEEE.A | S565  | 2 | 2,27   | 0,1   | 0,107  |
| 11 | Q4KMQ2 TM16F_HUMAN  | E.AVDNNLRPKS#E.-          | S909  | 2 | 2,2681 | 0,228 | 0      |
| 11 | P07951 TPM2_HUMAN   | E.KTIDDELEDE.V            | NA    | 2 | 2,2678 | 0,175 | -0,905 |
| 11 | P60709 ACTB_HUMAN   | R.GYSFTTTAERE.I           | NA    | 2 | 2,2656 | 0,369 | 0      |
| 11 | P02545 LMNA_HUMAN   | E.SRLADALQE.L             | NA    | 2 | 2,2572 | 0,168 | 0      |
| 11 | P62158 CALM_HUMAN   | E.AFRVFDKDGNGYIS#AAE.L    | S102  | 2 | 2,2559 | 0,354 | 0,063  |
| 11 | Q14764 MVP_HUMAN    | R.QKILDQSEAE.K            | NA    | 2 | 2,251  | 0,196 | -0,315 |
| 11 | P11021 GRP78_HUMAN  | K.NKITITND.Q              | NA    | 2 | 2,2497 | 0,292 | 0,266  |
| 11 | P06748 NPM_HUMAN    | E.DIKAKM*QAS#IE.K         | S254  | 2 | 2,2495 | 0,395 | 0      |
| 11 | P05387 RLA2_HUMAN   | K.DIKKILDSVGIE.A          | NA    | 2 | 2,2462 | 0,367 | -0,642 |
| 11 | Q9BZG1 RAB34_HUMAN  | E.KDALQVAQE.M             | NA    | 2 | 2,2455 | 0,133 | 0,061  |
| 11 | P63313 TYB10_HUMAN  | E.TIEQEKRS#EIS.-          | S41   | 2 | 2,2305 | 0,121 | -0,261 |
| 11 | Q12840 KIF5A_HUMAN  | K.QDLKGLE.E               | NA    | 2 | 2,2259 | 0,086 | 0,304  |
| 11 | P11021 GRP78_HUMAN  | D.NHLLGTFD.L              | NA    | 2 | 2,2221 | 0,246 | 0,133  |
| 11 | Q01130 SFRS2_HUMAN  | R.SKS#PPKSPEEE.G          | S208  | 2 | 2,2112 | 0,275 | -0,188 |
| 11 | Q9H2G2 SLK_HUMAN    | E.NQM*RDQLQCE.A           | NA    | 2 | 2,2089 | 0,173 | -0,168 |
| 11 | P20700 LMNB1_HUMAN  | R.LKLSPS#PSSR.V           | S393  | 2 | 2,2035 | 0,116 | -0,106 |
| 11 | P43121 MUC18_HUMAN  | E.DKDAQFYCE.L             | NA    | 2 | 2,1917 | 0,236 | -0,104 |
| 11 | P45974 UBP5_HUMAN   | E.FSTNRQQDAQE.F           | NA    | 2 | 2,1887 | 0,154 | 0      |
| 11 | P39687 AN32A_HUMAN  | E.GKLEGLTDE.F             | NA    | 2 | 2,1861 | 0,17  | 0,127  |
| 11 | P27816 MAP4_HUMAN   | R.KPCNSQPSELSSE.T         | NA    | 2 | 2,1754 | 0,192 | -0,25  |
| 11 | Q9UPN9 TRI33_HUMAN  | E.DGRRS#ACM*LSSPE.S       | S803  | 2 | 2,1625 | 0,289 | 0      |
| 11 | Q6P996 PDXD1_HUMAN  | E.KVERLS#SGPEQITL.E.A     | S736  | 2 | 2,1591 | 0,356 | -0,207 |
| 11 | P05783 K1C18_HUMAN  | E.NSLREVE.A               | NA    | 2 | 2,1433 | 0,132 | 0,576  |
| 11 | P78559 MAP1A_HUMAN  | E.VLRYPDERS#LSPEDAE.S     | S1144 | 2 | 2,1427 | 0,21  | -0,267 |
| 11 | Q13409 DC1I2_HUMAN  | E.INANRADAEEE.A           | NA    | 2 | 2,1354 | 0,213 | -0,198 |
| 11 | P67936 TPM4_HUMAN   | E.KTIDDELE.K              | NA    | 2 | 2,1212 | 0,181 | 0,063  |
| 11 | O60502 NCOAT_HUMAN  | E.LKPMDDTKES#IAE.S        | S505  | 2 | 2,118  | 0,27  | 0,157  |
| 11 | Q8N2M8 SFR16_HUMAN  | E.TGAAKPKLT#PQE.K         | T558  | 2 | 2,0822 | 0,212 | -0,277 |
| 11 | Q9UJ41 RABX5_HUMAN  | E.AKAPSPSINRQT#SIE.T      | T309  | 2 | 2,0779 | 0,119 | 0,073  |
| 11 | Q9UPN9 TRI33_HUMAN  | E.DGRRS#ACMLSSPE.S        | S803  | 2 | 2,0766 | 0,304 | -0,079 |
| 11 | P05386 RLA1_HUMAN   | E.S#DDDM*GFGLFD.-         | S104  | 2 | 2,069  | 0,181 | -0,186 |
| 11 | Q00839 HNRPU_HUMAN  | K.DLPEHAVLK.M             | NA    | 2 | 2,0671 | 0,179 | -0,179 |
| 11 | P55209 NP1L1_HUMAN  | E.FHFEPNE.Y               | NA    | 2 | 2,0655 | 0,1   | 0,066  |
| 11 | A6H8Y8 A6H8Y8_HUMAN | E.GM*DISTRSKDPGS#AE.R     | S32   | 2 | 2,064  | 0,218 | -0,074 |
| 11 | Q9H0A0 NAT10_HUMAN  | E.VGKLKS#M*DLSE.Y         | S957  | 2 | 2,0525 | 0,109 | 0      |
| 11 | P41227 ARD1A_HUMAN  | E.S#KGNSPSSGEACRE.E       | S182  | 2 | 2,0466 | 0,122 | 0,074  |
| 11 | Q9UI15 TAGL3_HUMAN  | E.QKYDADLE.N              | NA    | 2 | 2,0426 | 0,111 | 0,186  |
| 11 | O15320 CTGE5_HUMAN  | E.SSLKDAS#FEKE.A          | S116  | 2 | 2,0406 | 0,376 | -0,092 |
| 11 | Q8N1F7 NUP93_HUMAN  | E.KDNALLSAIEE.S           | NA    | 2 | 2,0394 | 0,16  | 0,101  |

|    |                     |                             |           |   |        |       |        |
|----|---------------------|-----------------------------|-----------|---|--------|-------|--------|
| 11 | Q96C01 F136A_HUMAN  | E.SM*VKS#LERE.N             | S19       | 2 | 2,0362 | 0,232 | -0,208 |
| 11 | Q07889 SOS1_HUMAN   | R.KIS#YSRIPE.S              | S1064     | 2 | 2,028  | 0,137 | 0      |
| 11 | Q8IVF2 AHNK2_HUMAN  | E.AYEPDAHDVS#PTSTDTE.A      | S294      | 2 | 2,0191 | 0,095 | -0,118 |
| 11 | P34897 GLYM_HUMAN   | E.NFCSRAALE.A               | NA        | 2 | 2,0173 | 0,167 | 0      |
| 11 | Q8IZ21 PHAR4_HUMAN  | R.KLS#QRPTVAE.L             | S628      | 2 | 2,0161 | 0,15  | -0,101 |
| 11 | P02794 FRIH_HUMAN   | E.YLFDKHTLGSDNES#.-         | S183      | 2 | 2,0121 | 0,223 | 0      |
| 11 | Q66K14 TBC9B_HUMAN  | E.RQFSTAS#DHEQPGVSG.-       | S1241     | 2 | 1,9812 | 0,15  | 0      |
| 11 | P22102 PUR2_HUMAN   | E.FNCRFGDPE.C               | NA        | 2 | 1,9738 | 0,216 | 0,107  |
| 11 | Q71U36 TBA1A_HUMAN  | E.HS#DCAFM*VDNE.A           | S198      | 2 | 1,9694 | 0,206 | -0,172 |
| 11 | Q9UMX3 BOK_HUMAN    | E.VLRRS#SVFAAE.I            | S7        | 2 | 1,9644 | 0,206 | 0,278  |
| 11 | P28066 PSA5_HUMAN   | E.KLNATNIE.L                | NA        | 2 | 1,9613 | 0,098 | 0,068  |
| 11 | P02545 LMNA_HUMAN   | R.LRLSPS#PTSQR.S            | S392      | 2 | 1,9453 | 0,155 | 0,185  |
| 11 | Q502X6 Q502X6_HUMAN | E.NIHYLND.G                 | NA        | 2 | 1,9376 | 0,199 | 0,137  |
| 11 | P50897 PPT1_HUMAN   | E.GDHLQLSEE.W               | NA        | 2 | 1,935  | 0,122 | 0,119  |
| 11 | P10599 THIO_HUMAN   | E.SKTAFAQE.A                | NA        | 2 | 1,9229 | 0,091 | 0,602  |
| 11 | A0MZ66 SHOT1_HUMAN  | E.NAKLTQQLSEE.R             | NA        | 2 | 1,9054 | 0,129 | -0,094 |
| 11 | O60502 NCOAT_HUMAN  | E.LKPM*DTDKES#IAE.S         | S505      | 2 | 1,8939 | 0,312 | -0,155 |
| 11 | Q9BS91 S35A5_HUMAN  | R.LTKPKSDES#DEDTF.-         | S419      | 2 | 1,8615 | 0,121 | 0,144  |
| 11 | P08559 ODPA_HUMAN   | E.NNRYGM*GT#SVERAAASTD.Y    | T231      | 2 | 1,8549 | 0,132 | 0,245  |
| 11 | P49792 RBP2_HUMAN   | E.NKGS GTGAAGASDT#TIKPNPE.N | T2209     | 2 | 1,8398 | 0,31  | 0,119  |
| 11 | Q71RC2 LARP4_HUMAN  | E.LRSNVVS#PTKNE.D           | S647      | 2 | 1,8389 | 0,17  | 0      |
| 11 | Q9UQ35 SRRM2_HUMAN  | E.LNNKCLT#PQRE.R            | T1511     | 2 | 1,8202 | 0,15  | -0,084 |
| 11 | Q15785 TOM34_HUMAN  | E.TTATKNRVPS#AGDVE.K        | S186      | 2 | 1,8201 | 0,406 | -0,075 |
| 11 | A8MSX0 A8MSX0_HUMAN | E.LSQPRS#HTS#LKDE.L         | S99:S102  | 2 | 1,8126 | 0,201 | 0      |
| 11 | O95433 AHSA1_HUMAN  | E.GRGIPAPEEE.R              | NA        | 2 | 1,8018 | 0,081 | 0      |
| 11 | Q14247 SRC8_HUMAN   | E.QARAKT#QTPPVSPAPQPTEE.R   | T399      | 2 | 1,776  | 0,158 | 0      |
| 11 | O60281 ZN292_HUMAN  | E.NNTNHYSQIE.G              | NA        | 2 | 1,768  | 0,147 | -0,187 |
| 11 | Q71RC2 LARP4_HUMAN  | E.QYVPPRS#PK.-              | S722      | 2 | 1,7611 | 0,086 | 0,106  |
| 11 | ##P34897 GLYM_HUMAN | K.S#KVELGINVGED.I           | S45       | 2 | 1,7558 | 0,102 | -1,457 |
| 11 | Q13136 LIPA1_HUMAN  | E.NTPSTS#GKRSSDGS#LSHEE.D   | S234:S242 | 2 | 1,7458 | 0,19  | 0,114  |
| 11 | Q02790 FKBP4_HUMAN  | E.QKSNTAGSQSQVETEA.-        | NA        | 2 | 1,7447 | 0,18  | -0,073 |
| 11 | Q16352 AINX_HUMAN   | E.KEQLQGLND.R               | NA        | 2 | 1,7399 | 0,229 | 0,234  |
| 11 | Q6NZI2 PTRF_HUMAN   | D.LRRGS#S#PDVHALLE.I        | S365:S366 | 2 | 1,737  | 0,146 | -0,143 |
| 11 | P35222 CTNB1_HUMAN  | D.TQRRTS#M*GGTQQQFVE.G      | S552      | 2 | 1,7319 | 0,234 | 0,125  |
| 11 | Q6PGP3 Q6PGP3_HUMAN | D.ESVKLIPIE.F               | NA        | 2 | 1,7312 | 0,117 | -0,211 |
| 11 | P05386 RLA1_HUMAN   | E.ES#DDDM*GFGLFD.-          | S104      | 2 | 1,707  | 0,181 | -0,169 |
| 11 | P16949 STMN1_HUMAN  | E.SKDDPADETEAD.-            | NA        | 2 | 1,6975 | 0,207 | 0      |
| 11 | Q9UJY5 GGA1_HUMAN   | R.M*RPTLFRLAS#DTEDNDE.A     | S268      | 2 | 1,6965 | 0,184 | 0,116  |
| 11 | P24941 CDK2_HUMAN   | E.GT#Y#GVVYKARNKLTGE.V      | T14:Y15   | 2 | 1,6923 | 0,134 | 0,255  |
| 11 | P42704 LPPRC_HUMAN  | E.KGDLSTALE.V               | NA        | 2 | 1,6798 | 0,179 | 0,065  |
| 11 | O15061 DMN_HUMAN    | E.SLSRQRS#PAPGSPDEE.G       | S1044     | 2 | 1,667  | 0,268 | -0,068 |

|    |                     |                                         |             |   |        |       |        |
|----|---------------------|-----------------------------------------|-------------|---|--------|-------|--------|
| 11 | Q9NZT2 OGFR_HUMAN   | E.DRPEPLS#PKE.S                         | S378        | 2 | 1,6616 | 0,176 | -0,098 |
| 11 | P19838 NFKB1_HUMAN  | E.TSFRKLS#FTE.S                         | S937        | 2 | 1,6332 | 0,278 | 1,13   |
| 11 | Q9NWK9 CA181_HUMAN  | E.GVRLS#PEPGRE.G                        | S25         | 2 | 1,6274 | 0,114 | 0      |
| 11 | A6NK10 A6NK10_HUMAN | R.RS#LRAAQTGQVDGE.L                     | S44         | 2 | 1,6087 | 0,202 | -0,078 |
| 11 | Q14592 ZN460_HUMAN  | E.NSYKFEE.M                             | NA          | 2 | 1,5456 | 0,084 | 0,2    |
| 11 | Q8WXI9 P66B_HUMAN   | E.RGRLT#PSPDIIVLSDNE.A                  | T120        | 2 | 1,4572 | 0,131 | -0,249 |
| 11 | A8K8W9 A8K8W9_HUMAN | R.KKIS#SGKSEPPLSNEK.I                   | S138        | 2 | 1,4015 | 0,092 | 1,147  |
| 12 | Q9H8Y8 GORS2_HUMAN  | E.GKKISLPGQM*AGT#PIT#PLKDGFT.E.V        | T222:T225   | 3 | 5,5369 | 0,402 | -0,069 |
| 12 | P35606 COPB2_HUMAN  | E.LDGKPAS#PTPVIVASHTANKEE.K             | S859        | 3 | 5,2503 | 0,376 | 0,156  |
| 12 | Q2TAL8 QRIC1_HUMAN  | E.AYNAVHVSGS#PTALAAVKLEDDKE.K           | S345        | 3 | 4,9684 | 0,516 | 0,285  |
| 12 | Q2TB10 ZN800_HUMAN  | E.IKVKVEPADSVESPPS#ITHS#PQNE.L          | S422:S426   | 3 | 4,7467 | 0,352 | 0,129  |
| 12 | Q9UHK0 NUFP1_HUMAN  | E.NQVLDSAPKS#PSQDVKATVRNFSE.A           | S403        | 3 | 4,7378 | 0,382 | 0,066  |
| 12 | Q66K74 MAP1S_HUMAN  | E.LPLAASSIPRPT#PSPESHRS#PAEGSE.R        | T638:S646   | 3 | 4,6182 | 1     | 0,061  |
| 12 | Q15648 MED1_HUMAN   | E.RGS#PSHSHS#PAYTPQNLDSESE.S            | S1447:S1453 | 3 | 4,5251 | 0,3   | 0,144  |
| 12 | P18858 DNL1_HUMAN   | E.ALSPAKGQKPALDCSQVS#PPRPATSPE.N        | S91         | 3 | 4,2853 | 0,356 | 0,064  |
| 12 | Q08J23 NSUN2_HUMAN  | E.GQRAGEPNS#PDAAEANS#PDVTAGCDPAGVHPPR.- | S743:S751   | 3 | 4,2836 | 0,312 | 0,104  |
| 12 | Q12830 BPTF_HUMAN   | E.VKKVTS#PITSEEE.S                      | S1534       | 2 | 4,2459 | 0,509 | 0      |
| 12 | Q02880 TOP2B_HUMAN  | E.LKVKAS#PITNDGEDE.F                    | S1400       | 2 | 4,2401 | 0,546 | 0      |
| 12 | Q16555 DPYL2_HUMAN  | E.VSVTPKTVTPASSAKTS#PAK.Q               | S522        | 3 | 4,2255 | 0,315 | -0,18  |
| 12 | Q71U36 TBA1A_HUMAN  | E.HGIQPDGQM*PSDKTIGGGDDSFNTFFSE.T       | NA          | 3 | 4,2125 | 0,479 | 0,305  |
| 12 | O60271 JIP4_HUMAN   | E.TRNVTGS#AENEKSE.V                     | S332        | 2 | 4,2102 | 0,412 | -0,201 |
| 12 | Q5UIP0 RIF1_HUMAN   | E.TKKADVQAPVS#PSETSQANPYSE.G            | S1772       | 3 | 4,2026 | 0,471 | -0,146 |
| 12 | Q96KP4 CNDP2_HUMAN  | E.ATGKNVM*LLPVGSAADDGAHSQNE.K           | NA          | 3 | 4,1545 | 0,25  | -0,079 |
| 12 | O60271 JIP4_HUMAN   | E.TRNVTGS#AENEKSE.V                     | S332        | 3 | 4,0991 | 0,405 | 0,101  |
| 12 | Q02952 AKA12_HUMAN  | E.KEPSKSAESPTS#PVTSE.T                  | S286        | 2 | 4,0921 | 0,514 | -0,199 |
| 12 | Q58WW2 IQWD1_HUMAN  | E.KLS#PKPGTGEPVLSLHYSTE.G               | S467        | 3 | 4,0864 | 0,234 | -0,082 |
| 12 | Q8NCF5 NF2IP_HUMAN  | E.VLSRDS#PLKTLMSHYEE.A                  | S369        | 3 | 4,0279 | 0,444 | 0      |
| 12 | Q13085 ACACA_HUMAN  | E.LNQHSRFIGSVSEDNS#EDE.I                | S29         | 3 | 3,99   | 0,314 | 0,155  |
| 12 | Q9H1A4 APC1_HUMAN   | E.LRDS#SKLHDS#LYNE.D                    | S563:S569   | 2 | 3,9899 | 0,581 | 0      |
| 12 | P11142 HSP7C_HUMAN  | D.TERLIGDAAKNQVAM*NPTNTVFD.A            | NA          | 3 | 3,9788 | 0,213 | -0,29  |
| 12 | Q9UQ35 SRRM2_HUMAN  | E.KSATRPS#PS#PERSSTGPEPPAPTLLAE.R       | S351:S353   | 3 | 3,9754 | 1     | 0,182  |
| 12 | Q8IWI9 MGAP_HUMAN   | E.SKVM*PTLAPVVAKLGNNGAS#PSSAGK.-        | S3020       | 3 | 3,9468 | 0,23  | 0      |
| 12 | A8K6V7 A8K6V7_HUMAN | E.KSTT#PPPAEPVSLPQEPKPRVE.A             | T227        | 3 | 3,9424 | 0,355 | 0,143  |
| 12 | Q13085 ACACA_HUMAN  | E.LNQHSRFIGSVSEDNS#EDE.I                | S29         | 2 | 3,939  | 0,456 | 0      |
| 12 | Q7Z3K3 POGZ_HUMAN   | R.ASRGQPRTPVSSNDT#PPSALQE.A             | T707        | 3 | 3,902  | 0,166 | 0      |
| 12 | Q92667 AKAP1_HUMAN  | E.AKSIPLCPLSS#PKGVLFSKSAE.V             | S151        | 3 | 3,8571 | 0,407 | -0,07  |
| 12 | Q17RY0 CPEB4_HUMAN  | E.KIRIES#PVLTFDFYQE.A                   | S137        | 2 | 3,8406 | 0,487 | 0,185  |
| 12 | Q5UIP0 RIF1_HUMAN   | E.TKKADVQAPVS#PSETSQANPYSE.G            | S1772       | 2 | 3,8327 | 0,335 | 0,291  |
| 12 | Q5UIP0 RIF1_HUMAN   | E.TKKADVQAPVSPSET#SQANPYSE.G            | T1776       | 3 | 3,8266 | 0,298 | 0      |
| 12 | P17706 PTN2_HUMAN   | E.LSKEDLSPAFDHS#PNKIM*TE.K              | S304        | 3 | 3,8128 | 0,435 | 0      |
| 12 | A8K6V7 A8K6V7_HUMAN | E.KST#TPPPAEPVSLPQEPKPRVE.A             | T226        | 3 | 3,7997 | 0,294 | 0,071  |

|    |                    |                                  |             |   |        |       |        |
|----|--------------------|----------------------------------|-------------|---|--------|-------|--------|
| 12 | Q15185 TEBP_HUMAN  | D.S#DEDM*SNFDRFSE.M              | S113        | 2 | 3,7699 | 0,387 | -0,364 |
| 12 | A0MZ66 SHOT1_HUMAN | E.NKEDS#IENVRE.T                 | S619        | 2 | 3,7344 | 0,363 | 0      |
| 12 | P10809 CH60_HUMAN  | R.LAKLSDGVAVLKVGGTSDVE.V         | NA          | 3 | 3,7295 | 0,375 | 0,093  |
| 12 | P62158 CALM_HUMAN  | E.AFSLFDKDGDTITTK.E.L            | NA          | 2 | 3,7163 | 0,51  | 0,066  |
| 12 | P31943 HNRH1_HUMAN | K.HTGPNPDTANDGFVR.L              | NA          | 3 | 3,6963 | 0,177 | 0,109  |
| 12 | Q02952 AKA12_HUMAN | E.LDKVKSATLSSTES#TASE.M          | S648        | 2 | 3,6753 | 0,434 | -0,189 |
| 12 | Q9NQW6 ANLN_HUMAN  | E.ICLQSQSKDKSTT#PGGTGIKPFLE.R    | T364        | 3 | 3,6713 | 0,217 | 0,205  |
| 12 | P10809 CH60_HUMAN  | R.LAKLSDGVAVLKVGGTSDVE.V         | NA          | 2 | 3,6603 | 0,326 | 0,062  |
| 12 | Q9BWU0 NADAP_HUMAN | E.RLKASSQVLSSES#PSQDSLDAFM*SE.M  | S530        | 3 | 3,6474 | 0,335 | -0,338 |
| 12 | P62158 CALM_HUMAN  | E.AFSLFDKDGDTITTK.E.L            | NA          | 3 | 3,6387 | 0,402 | 0,595  |
| 12 | Q9Y3C6 PPIL1_HUMAN | E.TNS#QDRPVDDVKIKAYPSG.-         | S149        | 3 | 3,6342 | 0,176 | -0,321 |
| 12 | P35611 ADDA_HUMAN  | E.DGHRST#SAVPNLFVPLNTNPKEVQE.M   | T482        | 3 | 3,6328 | 0,189 | 0,25   |
| 12 | O43166 SI1L1_HUMAN | D.LKKLIDLES#PTPE.S               | S1549       | 2 | 3,6131 | 0,409 | 0      |
| 12 | P68104 EF1A1_HUMAN | D.VYKIGGIGTVPVGRVE.T             | NA          | 2 | 3,6098 | 0,396 | -0,223 |
| 12 | O43149 ZZEF1_HUMAN | E.KESPGDLTRS#PE.M                | S240        | 2 | 3,6086 | 0,297 | -0,175 |
| 12 | Q66K74 MAP1S_HUMAN | E.LPLAASSIPRPT#PSPES#HRSPAEGSE.R | T638:S643   | 3 | 3,6079 | 0,272 | 0      |
| 12 | P54920 SNAA_HUMAN  | K.KTIQGDEEDLR.-                  | NA          | 3 | 3,6063 | 0,16  | 0,28   |
| 12 | P29401 TKT_HUMAN   | R.KISSDLDGHPVPKQAFD.V            | NA          | 3 | 3,6036 | 0,276 | -0,094 |
| 12 | Q02952 AKA12_HUMAN | E.KEPSKSAES#PTSPVTSE.T           | S283        | 2 | 3,5985 | 0,409 | -0,133 |
| 12 | P46821 MAP1B_HUMAN | E.HCAS#PEDKTL.E.V                | S1312       | 2 | 3,5975 | 0,554 | -0,268 |
| 12 | Q6NZ12 PTRF_HUMAN  | E.AGDLRRGS#S#PDVHALLE.I          | S365:S366   | 3 | 3,5952 | 0,329 | 0,656  |
| 12 | Q02952 AKA12_HUMAN | E.LQSHAKS#PPS#PVERE.M            | S1328:S1331 | 3 | 3,5909 | 0,285 | 0,803  |
| 12 | Q02952 AKA12_HUMAN | E.VSKQLLQTVNVPIDGAKE.V           | NA          | 3 | 3,5805 | 0,26  | 0,089  |
| 12 | Q71U36 TBA1A_HUMAN | E.HGIQPDGQM*PSDKTIGGGDD.S        | NA          | 3 | 3,5734 | 0,251 | -0,269 |
| 12 | P09525 ANXA4_HUMAN | E.DAIIISVLAYRNTAQRQE.I           | NA          | 3 | 3,5718 | 0,316 | 0      |
| 12 | Q8NCF5 NF2IP_HUMAN | E.VLSLRDS#PLKTLM*SHYEE.A         | S369        | 3 | 3,5422 | 0,146 | 0,251  |
| 12 | P09874 PARP1_HUMAN | E.YSASQLKGFSLLATEDKE.A           | NA          | 3 | 3,537  | 0,176 | 0,092  |
| 12 | Q6S8J3 A26CA_HUMAN | E.KLCYVALDFEQE.M                 | NA          | 2 | 3,5323 | 0,325 | 0      |
| 12 | P24941 CDK2_HUMAN  | E.NFQKVEKIGEGT#Y#GVVYK.A         | T14:Y15     | 3 | 3,5066 | 0,255 | -0,247 |
| 12 | P11172 PYR5_HUMAN  | E.NVFVAANHNGS#PLSIKEAPKE.L       | S214        | 3 | 3,5041 | 0,293 | 0,079  |
| 12 | P08107 HSP71_HUMAN | D.TERLIGDAAKNQVALNPQNTVFD.A      | NA          | 3 | 3,4955 | 0,37  | 0,582  |
| 12 | P35606 COPB2_HUMAN | E.LDGKPAS#PTPVIVASHTANKE.E       | S859        | 3 | 3,4902 | 0,188 | 0,083  |
| 12 | P52948 NUP98_HUMAN | E.NHQQDGEDS#LVSHFYTNPIAKPIQTPE.S | S653        | 3 | 3,4713 | 0,409 | 0,327  |
| 12 | Q8IYB3 SRRM1_HUMAN | E.KT#PELPEPSVKVKEPSVQE.A         | T220        | 3 | 3,4691 | 0,204 | -0,332 |
| 12 | Q99728 BARD1_HUMAN | E.SKQKLVSFCSQPSVISS#PQINGE.I     | S251        | 3 | 3,4685 | 0,389 | 0,281  |
| 12 | Q9NY27 PP4R2_HUMAN | E.KNNSNSLNRMGVM*FPGNS#PSYTE.R    | S159        | 3 | 3,4638 | 0,144 | -0,066 |
| 12 | Q9NVM9 CL011_HUMAN | E.AEIIKDSPDS#PEPPNKKPLVE.M       | S626        | 3 | 3,4537 | 0,148 | 0,307  |
| 12 | Q99497 PARK7_HUMAN | E.VAAQVKAPLVLKD.-                | NA          | 3 | 3,4515 | 0,457 | 0,203  |
| 12 | P35606 COPB2_HUMAN | E.LDGKPAS#PTPVIVASHTANKEE.K      | S859        | 2 | 3,4348 | 0,511 | 0      |
| 12 | P07355 ANXA2_HUMAN | E.LKASM*KGLGTDEDS#LIE.I          | S127        | 2 | 3,3943 | 0,408 | 0      |
| 12 | O43663 PRC1_HUMAN  | E.LSKASKSDATSGILNS#TNIQS.-       | S615        | 3 | 3,3923 | 0,354 | -0,083 |

|    |                     |                                      |             |   |        |       |        |
|----|---------------------|--------------------------------------|-------------|---|--------|-------|--------|
| 12 | Q99497 PARK7_HUMAN  | E.DAKKEGPDVVVLPGGNLAQNLSE.S          | NA          | 3 | 3,377  | 0,232 | 0,498  |
| 12 | O75381 PEX14_HUMAN  | E.STSSSPGKEGHS#PEGSTVTYHLLGPQEE.G    | S282        | 3 | 3,3476 | 0,247 | -0,061 |
| 12 | P19525 E2AK2_HUMAN  | E.KKAVS#PLLLTTTNSSE.G                | S83         | 2 | 3,3452 | 0,336 | -0,207 |
| 12 | Q13547 HDAC1_HUMAN  | E.YFGPDFKLHISPSNM*TNQNTNE.Y          | NA          | 3 | 3,345  | 0,286 | -0,214 |
| 12 | P49321 NASP_HUMAN   | E.NKSLQENEEEE.I                      | NA          | 2 | 3,3332 | 0,229 | -0,181 |
| 12 | Q15942 ZYX_HUMAN    | E.ALSAGT#GSPQPFSFTYAQQREKPRVQE.K     | T306        | 3 | 3,3293 | 0,324 | -0,182 |
| 12 | Q13347 EIF3I_HUMAN  | R.TERPVNSAALSPNYDHVVLLGGGQE.A        | NA          | 3 | 3,3226 | 0,144 | -0,219 |
| 12 | Q09666 AHNK_HUMAN   | E.GTLTGPRRLGS#PSGKTGTSCRISMSE.V      | S559        | 3 | 3,314  | 0,289 | 0      |
| 12 | O60832 DKC1_HUMAN   | E.RKS#LPEEDVAE.I                     | S21         | 2 | 3,3129 | 0,406 | -0,18  |
| 12 | Q14966 ZN638_HUMAN  | E.KESPLKNS#PIDE.S                    | S1106       | 2 | 3,31   | 0,259 | -0,082 |
| 12 | Q9BZD4 NUF2_HUMAN   | E.SLTKKIVDS#PE.K                     | S247        | 2 | 3,2959 | 0,257 | -0,282 |
| 12 | P07814 SYEP_HUMAN   | E.APCVLIYIPDGHTKE.M                  | NA          | 3 | 3,2698 | 0,26  | 0      |
| 12 | P25787 PSA2_HUMAN   | E.DAIHTAILTLKE.S                     | NA          | 3 | 3,2693 | 0,131 | 0,552  |
| 12 | Q96JM3 ZN828_HUMAN  | E.LRKP GPPLS#PEIRSPAGS#PE.L          | S427:S436   | 3 | 3,2619 | 0,152 | -0,326 |
| 12 | P19525 E2AK2_HUMAN  | E.KKAVS#PLLLTTTNSSE.G                | S83         | 3 | 3,2414 | 0,354 | -0,103 |
| 12 | A8K6V7 A8K6V7_HUMAN | E.EKSTT#PPPAEPVSLPQEPKPRVE.A         | T227        | 3 | 3,2262 | 0,315 | 0,272  |
| 12 | Q9UKV3 ACINU_HUMAN  | E.KS#KSPS#PPRLTE.D                   | S384:S388   | 3 | 3,2223 | 0,147 | 0,123  |
| 12 | Q5PRF9 SAM4B_HUMAN  | E.HALGDGTDKTST#I.-                   | T693        | 2 | 3,2219 | 0,423 | -0,087 |
| 12 | Q92547 TOPB1_HUMAN  | E.ALQRQRQTVPDVNT#EPSQNE.Q            | T1135       | 3 | 3,2022 | 0,273 | 0,156  |
| 12 | O60841 IF2P_HUMAN   | E.NVRIPGM*LIIDTPGHE.S                | NA          | 3 | 3,2018 | 0,258 | -0,103 |
| 12 | Q12756 KIF1A_HUMAN  | E.GRYGATDLRTPQPCS#RPAS#PEPE.L        | S1528:S1532 | 3 | 3,1963 | 0,289 | 0,271  |
| 12 | P84103 SFRS3_HUMAN  | D.SCPLDCKVYVGNLGNNGNKTELE.R          | NA          | 3 | 3,1945 | 0,218 | 0,213  |
| 12 | P11142 HSP7C_HUMAN  | D.TERLIGDAAKNQVAMNPTNTVFD.A          | NA          | 3 | 3,1771 | 0,27  | 0,073  |
| 12 | O95067 CCNB2_HUMAN  | E.KLAPKGPS#PTPE.D                    | S92         | 2 | 3,1733 | 0,364 | 0      |
| 12 | Q92576 PHF3_HUMAN   | E.KNSCVQQSDNLKVAQNS#PSVE.N           | S1722       | 3 | 3,1645 | 0,086 | 0      |
| 12 | Q58FF8 H90B2_HUMAN  | E.LISNASDALDKIRYE.S                  | NA          | 2 | 3,1566 | 0,323 | -0,143 |
| 12 | O00429 DNM1L_HUMAN  | E.LAYINTKHPDFADACGLM*NNNIEE.Q        | NA          | 3 | 3,1385 | 0,179 | -0,066 |
| 12 | P68400 CSK21_HUMAN  | E.FYHPGQEYNVR.V                      | NA          | 3 | 3,1096 | 0,214 | 0      |
| 12 | Q96JM3 ZN828_HUMAN  | E.LRKP GPPLS#PEIRS#PAGSPE.L          | S427:S432   | 3 | 3,0996 | 0,113 | -0,081 |
| 12 | Q9NTK5 OLA1_HUMAN   | E.GSVDPIRDIEIHEE.L                   | NA          | 3 | 3,0933 | 0,129 | -0,106 |
| 12 | Q02790 FKBP4_HUMAN  | E.MKKEEQSNTAGS#QSQVETEA.-            | S451        | 3 | 3,0842 | 0,353 | -0,243 |
| 12 | Q8N655 CJ012_HUMAN  | E.DVISRPHS#PPEIVSREESPQCSE.N         | S381        | 3 | 3,0838 | 0,298 | 0,27   |
| 12 | O14983 AT2A1_HUMAN  | E.ITAM*TGdGVNDAPALKKAE.I             | NA          | 3 | 3,0785 | 0,398 | -0,095 |
| 12 | P49023 PAXI_HUMAN   | E.HVYSFPNKQKS#AEPS#PTVM*STSLGSNLSE.L | S126:S130   | 3 | 3,0755 | 0,302 | 0,333  |
| 12 | Q9NY27 PP4R2_HUMAN  | E.KNNSNSLNRM*NGVM*FPGNS#PSYTE.R      | S159        | 3 | 3,0699 | 0,135 | -0,132 |
| 12 | Q71U36 TBA1A_HUMAN  | E.HGIQPDGQMPSDKTIGGGDDSFNTFFSE.T     | NA          | 3 | 3,0641 | 0,434 | 0,061  |
| 12 | Q9Y3F4 STRAP_HUMAN  | D.SNYLLTGGQDKLLRIYD.L                | NA          | 3 | 3,0534 | 0,296 | -0,186 |
| 12 | P62750 RL23A_HUMAN  | D.IDVAKVNTLIRPDGE.K                  | NA          | 3 | 3,0527 | 0,202 | 0      |
| 12 | Q86SQ0 PHLB2_HUMAN  | R.LETILS#LCAEYTKPDSRLSTGT#TVED.V     | S455:T471   | 3 | 3,0351 | 0,159 | 0,598  |
| 12 | Q5VTL8 PR38B_HUMAN  | E.GHGSSS#FDRELE.R                    | S290        | 2 | 3,0211 | 0,399 | 0,087  |
| 12 | P50991 TCPD_HUMAN   | E.ILTDMSRPVELSDRE.T                  | NA          | 3 | 3,0137 | 0,318 | -0,104 |

|    |                    |                                  |                |   |        |       |        |
|----|--------------------|----------------------------------|----------------|---|--------|-------|--------|
| 12 | Q5VZL5 ZMYM4_HUMAN | E.LAKAKSEDS#DVELS#D.-            | S1542:S1547    | 2 | 3,0134 | 0,299 | 0      |
| 12 | P49591 SYSC_HUMAN  | E.DLPIKYAGLSTCFRQE.V             | NA             | 3 | 3,0047 | 0,262 | -0,096 |
| 12 | Q12765 SCRN1_HUMAN | E.DANSCHSFQSAYLIVDRDE.A          | NA             | 3 | 2,9919 | 0,157 | -0,246 |
| 12 | P50395 GDIB_HUMAN  | E.SQIFISRTYDATTHFE.T             | NA             | 3 | 2,9872 | 0,296 | -0,095 |
| 12 | Q5VWG9 TAF3_HUMAN  | E.NFLGKRPLDS#PE.A                | S183           | 2 | 2,974  | 0,34  | -0,168 |
| 12 | P06748 NPM_HUMAN   | D.NDENEHQLSLR.T                  | NA             | 2 | 2,9693 | 0,284 | 0      |
| 12 | Q9UQB8 BAIP2_HUMAN | E.NKTLPRS#SSM*AAGLE.R            | S364           | 2 | 2,9601 | 0,308 | -0,294 |
| 12 | O15067 PUR4_HUMAN  | E.TSFQLDRLQAEPRCVAEEE.R          | NA             | 3 | 2,9548 | 0,199 | 0      |
| 12 | Q17RY0 CPEB4_HUMAN | E.KIRIES#PVLTFDFYQE.A            | S137           | 3 | 2,9524 | 0,162 | 0,093  |
| 12 | Q5VUA4 ZN318_HUMAN | E.NSNLSRTKSSDTSST#SPLNSSASQEE.L  | T1615          | 3 | 2,9474 | 0,206 | -0,065 |
| 12 | Q9Y2N3 PO121_HUMAN | E.LCHHS#SSST#PLAADKE.S           | S441:T445      | 3 | 2,9447 | 0,146 | -0,096 |
| 12 | Q9Y2U5 M3K2_HUMAN  | E.LHQVARNGS#FTSINSE.G            | S182           | 2 | 2,9398 | 0,359 | 0      |
| 12 | P11274 BCR_HUMAN   | E.GKGPLLRQS#TSEQE.K              | S301           | 2 | 2,9247 | 0,374 | 0      |
| 12 | P10809 CH60_HUMAN  | E.AGDGTTTATVLARSIAKE.G           | NA             | 2 | 2,9174 | 0,302 | -0,208 |
| 12 | Q99471 PFD5_HUMAN  | E.AKDCLNVLNKS#NE.G               | S56            | 2 | 2,9014 | 0,482 | -0,693 |
| 12 | P98171 RHG04_HUMAN | R.GPGAPAS#PSASHPQGLDTPKPH.-      | S930           | 3 | 2,8968 | 0,163 | 0,16   |
| 12 | Q9Y394 DHR57_HUMAN | E.KDILVLPDLTDTGSHE.A             | NA             | 3 | 2,8785 | 0,155 | -0,098 |
| 12 | P51858 HDGF_HUMAN  | E.NNPTVKASGYQSS#QKKSCVEEPEPEPE.A | S103           | 3 | 2,877  | 0,101 | 0      |
| 12 | P08107 HSP71_HUMAN | R.AKRTLSS#STQASLE.I              | S276           | 2 | 2,8708 | 1     | 0      |
| 12 | Q15717 ELAV1_HUMAN | E.DCRGDIGRTNLIVNYLPQNM*TQDE.L    | NA             | 3 | 2,8557 | 0,207 | -0,064 |
| 12 | Q13200 PSMD2_HUMAN | E.DYIKSGALLACGIVNSGVRNE.C        | NA             | 3 | 2,8457 | 0,251 | -0,245 |
| 12 | P36507 MP2K2_HUMAN | R.RKPVLPALTINPTIAEGPS#PTSE.G     | S23            | 3 | 2,8422 | 0,335 | 0,222  |
| 12 | Q07955 SFRS1_HUMAN | R.VKVDGPRSPS#Y#GRS#R.S           | S201:Y202:S205 | 3 | 2,8375 | 0,129 | -0,385 |
| 12 | P62191 PRS4_HUMAN  | E.NVLYKKQEGT#PE.G                | T434           | 2 | 2,8279 | 0,137 | -0,246 |
| 12 | O00418 EF2K_HUMAN  | R.DAVNQNTKLLQSAKT#ILRGTEE.K      | T348           | 3 | 2,8206 | 0,109 | 0,292  |
| 12 | O60271 JIP4_HUMAN  | R.TKLHQLS#GSDQLE.S               | S183           | 2 | 2,8144 | 0,352 | -0,079 |
| 12 | Q96115 SCLY_HUMAN  | E.AAVAPGRDAPAPAASQPSGCGKHNS#PE.R | S27            | 3 | 2,8141 | 0,232 | -0,068 |
| 12 | Q03164 HRX_HUMAN   | E.NRTIAHSPT#SFTE.S               | T2100          | 2 | 2,8037 | 0,384 | -0,079 |
| 12 | P08670 VIME_HUMAN  | E.AENTLQSFQRQVDNASLARLD.L        | NA             | 3 | 2,802  | 0,166 | 0      |
| 12 | O43149 ZZEF1_HUMAN | E.KESPGDLTRS#PE.M                | S240           | 3 | 2,7854 | 0,149 | 0      |
| 12 | P49589 SYCC_HUMAN  | E.DVQAALKPFVSVKLE.T              | NA             | 3 | 2,7845 | 0,255 | 0,11   |
| 12 | P21359 NF1_HUMAN   | E.GYLAATYPTVGQT#SPRARKSM*SLD.M   | T2514          | 3 | 2,7812 | 0,277 | -0,137 |
| 12 | Q02952 AKA12_HUMAN | E.SAHEPRLS#AEYE.K                | S371           | 2 | 2,7804 | 0,276 | 0      |
| 12 | P35658 NU214_HUMAN | E.GERQPKSPGST#PTT#PTSSQAPQKLD.A  | T434:T437      | 3 | 2,7767 | 0,081 | 0      |
| 12 | Q7L1V2 MON1B_HUMAN | E.TGSKDKDQPPSPS#PPPQSE.A         | S61            | 3 | 2,7746 | 0,241 | -0,089 |
| 12 | Q9BPX5 ARP5L_HUMAN | E.NKFVDEQEE.A                    | NA             | 2 | 2,7715 | 0,33  | -0,214 |
| 12 | Q5TZA2 CROCC_HUMAN | E.LRRS#SAPFS#PPSGPPEK.-          | S2004:S2009    | 3 | 2,7475 | 0,148 | -0,186 |
| 12 | Q09666 AHNK_HUMAN  | D.VTGREGAKDIDISS#PE.F            | S177           | 2 | 2,744  | 0,311 | -0,07  |
| 12 | P15531 NDKA_HUMAN  | R.TFIAIKPDGVQRGLVGE.I            | NA             | 3 | 2,7371 | 0,312 | 0,406  |
| 12 | Q9UPU9 SAM4A_HUMAN | E.HALGDGVDRTS#TI.-               | S527           | 2 | 2,7348 | 0,443 | -0,257 |
| 12 | P10809 CH60_HUMAN  | E.AGDGTTTATVLARSIAKE.G           | NA             | 3 | 2,725  | 0,392 | 0,104  |

|    |                     |                                    |           |   |        |       |        |
|----|---------------------|------------------------------------|-----------|---|--------|-------|--------|
| 12 | Q6ZNP1 Q6ZNP1_HUMAN | E.VKEKPCVS#PTVGE.K                 | S325      | 2 | 2,7213 | 0,203 | -0,081 |
| 12 | A8K933 A8K933_HUMAN | E.LCHHSSSS#S#TPLAADRE.S            | S201:S202 | 3 | 2,7192 | 0,174 | 0,095  |
| 12 | Q92613 JADE3_HUMAN  | E.TDQQPHS#PDSSSSVHSIRNM*QVPQESLE.M | S566      | 3 | 2,6942 | 0,358 | 0      |
| 12 | P25787 PSA2_HUMAN   | E.LEDAIHTAILTLKE.S                 | NA        | 3 | 2,6822 | 0,277 | 0      |
| 12 | O95684 FR1OP_HUMAN  | E.KGPTTGEALDLDSDVHS#PPKS#PE.G      | S156:S160 | 3 | 2,6768 | 0,318 | 0,148  |
| 12 | Q6P2E9 EDC4_HUMAN   | E.LGSEGLGSAAHGS#QPDLRRIVE.L        | S565      | 3 | 2,6597 | 0,378 | 0      |
| 12 | P08107 HSP71_HUMAN  | R.AKRTLS#SSTQASLE.I                | S275      | 2 | 2,6481 | 0,337 | -0,157 |
| 12 | P31689 DNJA1_HUMAN  | R.GKNVVHQLS#VTLE.D                 | S112      | 2 | 2,6301 | 0,124 | 0,081  |
| 12 | Q5VZK9 LR16A_HUMAN  | E.KRS#SGFISELPSEE.G                | S967      | 2 | 2,6281 | 0,291 | -0,148 |
| 12 | Q99497 PARK7_HUMAN  | E.DAKKEGPDYDVVVLPGGNLGAQNLSE.S     | NA        | 2 | 2,6271 | 0,238 | 0,19   |
| 12 | P33316 DUT_HUMAN    | E.DYRGNVGVVLFNFGKE.K               | NA        | 3 | 2,6251 | 0,171 | -0,101 |
| 12 | Q14697 GANAB_HUMAN  | E.LFLDDGHTFNQYQTRQE.F              | NA        | 3 | 2,6012 | 0,097 | 0,184  |
| 12 | Q02952 AKA12_HUMAN  | E.LDKVKSATLSSTES#TASE.M            | S648      | 3 | 2,6008 | 0,202 | -0,095 |
| 12 | P61158 ARP3_HUMAN   | E.DHYLLTEPPLNTPENRE.Y              | NA        | 3 | 2,5946 | 0,206 | 0,084  |
| 12 | P50990 TCPQ_HUMAN   | E.GAKHFS#GLEE.A                    | S23       | 2 | 2,5908 | 0,221 | -0,211 |
| 12 | Q99497 PARK7_HUMAN  | E.VAAQVKAPLVLKD.-                  | NA        | 2 | 2,5902 | 0,224 | -0,09  |
| 12 | P07355 ANXA2_HUMAN  | E.VTIVNILTNRNSNAQRQD.I             | NA        | 3 | 2,5873 | 0,165 | -0,188 |
| 12 | Q9NSC5 HOME3_HUMAN  | R.LKKM*LS#EGSVGE.V                 | S176      | 2 | 2,5851 | 0,407 | -0,266 |
| 12 | O15534 PER1_HUMAN   | D.LGRLRGLDSSSTAPS#ALGE.R           | S815      | 3 | 2,5806 | 0,121 | -0,372 |
| 12 | Q9NPR2 SEM4B_HUMAN  | E.SEKRPLSIQDS#FVE.V                | S808      | 2 | 2,5756 | 0,413 | 0,213  |
| 12 | Q53EP0 FND3B_HUMAN  | R.ARS#SPKSNDSLQE.Y                 | S253      | 2 | 2,5718 | 0,267 | -0,227 |
| 12 | Q9H8Y5 ANKZ1_HUMAN  | E.ALARAPRTS#CSGSGERES#PE.R         | S47:S56   | 3 | 2,5688 | 0,123 | 0      |
| 12 | Q96T23 RSF1_HUMAN   | E.IHSQKAQIEEPDPPPEM*ETS#LDSSE.M    | S530      | 3 | 2,5638 | 0,082 | 0,262  |
| 12 | P49589 SYCC_HUMAN   | E.DVQAALKPFVSKLNE.T                | NA        | 2 | 2,5553 | 0,22  | 0,221  |
| 12 | O60271 JIP4_HUMAN   | E.TRNVST#GSAENEKSE.V               | T330      | 3 | 2,5529 | 0,182 | -0,302 |
| 12 | Q724H7 FA29A_HUMAN  | E.EDILNKS#LDAKEPPSDLTR.-           | S943      | 3 | 2,5497 | 0,214 | 0      |
| 12 | Q96DR7 SGEF_HUMAN   | R.GLFPGPQKSSSEQKLPLQRLPS#QENE.L    | S222      | 3 | 2,5481 | 0,229 | 0,431  |
| 12 | O95239 KIF4A_HUMAN  | E.KQLEES#VSEKE.Q                   | S951      | 2 | 2,5448 | 0,23  | 0      |
| 12 | P35606 COPB2_HUMAN  | D.GKPAS#PTPVIVASHTANKEE.K          | S859      | 3 | 2,5419 | 0,319 | -0,173 |
| 12 | O15091 K0391_HUMAN  | E.DHALAPVRNTIQLPTQPLNSEE.W         | NA        | 3 | 2,5408 | 0,231 | -0,075 |
| 12 | P29374 ARI4A_HUMAN  | E.SRSVKS#ESDITIE.V                 | S1021     | 2 | 2,537  | 0,259 | -0,159 |
| 12 | P30101 PDIA3_HUMAN  | E.STAGEIPVVAIRTAKEE.K              | NA        | 3 | 2,5175 | 0,287 | 0,108  |
| 12 | Q96MU7 YTDC1_HUMAN  | R.RAKS#PT#PDGSRIGLE.V              | S146:T148 | 2 | 2,5173 | 0,241 | -0,261 |
| 12 | Q02790 FKBP4_HUMAN  | E.M*KEEQKSNTAGSQS#QVETEA.-         | S453      | 3 | 2,5001 | 0,283 | 0      |
| 12 | P25787 PSA2_HUMAN   | E.DAIHTAILTLKE.S                   | NA        | 2 | 2,4801 | 0,383 | 0,092  |
| 12 | Q9BZV2 S19A3_HUMAN  | E.IKSSS#VNPVLEE.T                  | S212      | 2 | 2,4793 | 0,367 | -0,242 |
| 12 | Q96B23 CR025_HUMAN  | E.LRRDS#SESQLASTE.S                | S66       | 2 | 2,4473 | 0,43  | -0,147 |
| 12 | Q15149 PLEC1_HUMAN  | E.LQSKRAS#FAE.K                    | S1721     | 2 | 2,4436 | 0,418 | 0,201  |
| 12 | P42167 LAP2B_HUMAN  | E.HNQSYSQAGITE.T                   | NA        | 2 | 2,4336 | 0,329 | -0,274 |
| 12 | O94967 WDR47_HUMAN  | E.KNELRDST#EQFQE.Y                 | T423      | 2 | 2,4277 | 0,356 | 0,286  |
| 12 | Q5VZL5 ZMYM4_HUMAN  | E.TLHHTLPQT#PE.T                   | T217      | 2 | 2,4122 | 0,165 | -0,09  |

|    |                    |                          |           |   |        |       |        |
|----|--------------------|--------------------------|-----------|---|--------|-------|--------|
| 12 | P06748 NPM_HUMAN   | E.KT#PKT#PKGSSVE.D       | T234:T237 | 2 | 2,3797 | 0,304 | -0,161 |
| 12 | Q9UKV3 ACINU_HUMAN | E.KSKS#PS#PPRLTE.D       | S386:S388 | 2 | 2,3317 | 0,384 | -0,328 |
| 12 | Q96AC1 FERM2_HUMAN | E.NHLNNS#DKEVDE.V        | S339      | 2 | 2,3292 | 0,228 | -0,082 |
| 12 | Q8NEY8 PPHLN_HUMAN | E.KLEKS#DESNLPE.I        | S244      | 2 | 2,3282 | 0,161 | 0      |
| 12 | P62753 RS6_HUMAN   | R.RLSS#LRAS#TSKSE.S      | S236:S240 | 2 | 2,305  | 0,148 | 0,154  |
| 12 | P11831 SRF_HUMAN   | R.GLKRSL#EM*E.I          | S103      | 2 | 2,2802 | 0,286 | -0,098 |
| 12 | Q71U36 TBA1A_HUMAN | E.HSDCAF#VDNE.A          | NA        | 2 | 2,2736 | 0,234 | -0,182 |
| 12 | P25942 TNR5_HUMAN  | E.DGKESRIS#VQE.R         | S272      | 2 | 2,2709 | 0,299 | -0,184 |
| 12 | P06748 NPM_HUMAN   | E.DIKAKM*QAS#IE.K        | S254      | 2 | 2,2706 | 0,356 | -0,183 |
| 12 | Q71U36 TBA1A_HUMAN | E.HSDCAF#VDNE.A          | NA        | 2 | 2,2516 | 0,15  | -0,184 |
| 12 | Q13033 STRN3_HUMAN | E.IKRSS#GDVLE.T          | S241      | 2 | 2,2242 | 0,099 | 0      |
| 12 | P02794 FRIH_HUMAN  | E.YLFDKHTLGDS#DNES.-     | S179      | 2 | 2,2215 | 0,335 | -0,402 |
| 12 | P04406 G3P_HUMAN   | E.FGYSNRVVD.L            | NA        | 2 | 2,2206 | 0,283 | -0,346 |
| 12 | P05386 RLA1_HUMAN  | E.S#DDDM*GFGLFD.-        | S104      | 2 | 2,1812 | 0,193 | -0,278 |
| 12 | P08238 HS90B_HUMAN | E.LLRYHTSQS#GDE.M        | S462      | 2 | 2,1583 | 0,298 | -0,246 |
| 12 | Q3KQU3 MA7D1_HUMAN | E.ARS#PGLQKE.A           | S753      | 2 | 2,1483 | 0,097 | -0,229 |
| 12 | P11831 SRF_HUMAN   | R.GLKRSL#EME.I           | S103      | 2 | 2,1476 | 0,278 | 0      |
| 12 | Q96H22 CENPN_HUMAN | E.TFKSGLNGS#ILAE.R       | S282      | 2 | 2,1409 | 0,179 | -0,474 |
| 12 | Q6NZI2 PTRF_HUMAN  | E.AGDLRRGS#S#PDVHALLE.I  | S365:S366 | 2 | 2,1316 | 0,106 | 0      |
| 12 | Q9P265 DIP2B_HUMAN | R.YRS#DIHTE.A            | S100      | 2 | 2,108  | 0,224 | -0,111 |
| 12 | Q09666 AHNK_HUMAN  | E.GHLS#VKGSGGE.W         | S5589     | 2 | 2,089  | 0,334 | -0,22  |
| 12 | Q13137 CACO2_HUMAN | E.DHVFCHS#L.-            | S445      | 2 | 2,0818 | 0,162 | -0,111 |
| 12 | P04792 HSPB1_HUMAN | E.SRAQLGGPEAAKS#DE.T     | S199      | 2 | 2,0469 | 0,388 | -0,153 |
| 12 | Q9UQB8 BAIP2_HUMAN | E.NKTLPRSS#SMAAGLE.R     | S365      | 2 | 2,027  | 0,115 | -0,074 |
| 12 | P11388 TOP2A_HUMAN | E.LKPQKSVVS#DLE.A        | S1377     | 2 | 2,0198 | 0,138 | 0,171  |
| 12 | Q7LBC6 JHD2B_HUMAN | E.AVKRFS#LDE.R           | S798      | 2 | 2,0187 | 0,301 | -0,213 |
| 12 | Q6S8J3 A26CA_HUMAN | E.KM*TQIM*FE.T           | NA        | 2 | 2,0084 | 0,174 | 0      |
| 12 | Q76I76 SSH2_HUMAN  | E.LNKKDITTS#ADQIAE.V     | S487      | 2 | 1,9875 | 0,199 | -0,212 |
| 12 | P13994 CC130_HUMAN | E.GSRQDKPLS#PAGSSQE.A    | S362      | 2 | 1,9729 | 0,238 | -0,495 |
| 12 | Q96EA4 CCD99_HUMAN | E.RSGNTPNS#PRLAAE.S      | S555      | 2 | 1,9704 | 0,263 | 0      |
| 12 | P68104 EF1A1_HUMAN | K.IGGIGTVPVGR.V          | NA        | 2 | 1,9639 | 0,134 | 0      |
| 12 | P05386 RLA1_HUMAN  | E.ES#DDDM*GFGLFD.-       | S104      | 2 | 1,9388 | 0,237 | -0,338 |
| 12 | P30622 CLIP1_HUMAN | E.SISNLS#EAGS#IKKGERE.L  | S200:S204 | 2 | 1,9322 | 0,189 | 0,062  |
| 12 | P24941 CDK2_HUMAN  | E.GT#Y#GVVYKARNKLTGE.V   | T14:Y15   | 2 | 1,8922 | 0,298 | -0,382 |
| 12 | Q9UHI6 DDX20_HUMAN | R.RSS#FRLQTE.A           | S743      | 2 | 1,8752 | 0,205 | 0,405  |
| 12 | P37802 TAGL2_HUMAN | E.KQYDADLE.Q             | NA        | 2 | 1,8653 | 0,102 | 0,124  |
| 12 | O76021 RL1D1_HUMAN | R.RLLPSLIGR.H            | NA        | 2 | 1,8167 | 0,125 | 0      |
| 12 | Q02880 TOP2B_HUMAN | E.LKVKAS#PITNDGE.D       | S1400     | 2 | 1,7905 | 0,112 | -0,252 |
| 12 | Q9H307 PININ_HUMAN | E.CKSLS#PGKE.N           | S443      | 2 | 1,6761 | 0,097 | -0,112 |
| 12 | P55347 PKNX1_HUMAN | E.GVS#PPPVESQT#PM*DVDK.Q | S41:T49   | 2 | 1,6552 | 0,216 | 0,436  |
| 12 | Q71RC2 LARP4_HUMAN | E.LRSNVVS#PTKNE.D        | S647      | 2 | 1,6537 | 0,166 | -0,257 |



|    |                     |                                            |           |   |        |       |        |
|----|---------------------|--------------------------------------------|-----------|---|--------|-------|--------|
| 12 | Q969K3 RNF34_HUMAN  | E.RVRAS#LSDLSSLDDVE.G                      | S254      | 2 | 1,5906 | 0,089 | -0,132 |
| 12 | Q9Y6M5 ZNT1_HUMAN   | E.IKNM*PNKQPES#SL.-                        | S505      | 2 | 1,5897 | 0,174 | 0      |
| 12 | O95747 OXSR1_HUMAN  | E.KTLQRAPT#ISE.R                           | T310      | 2 | 1,509  | 0,185 | -0,369 |
| 12 | P11172 PYR5_HUMAN   | E.NVFAANHNGSPLS#IKEAPKE.L                  | S217      | 2 | 1,3976 | 0,165 | -0,106 |
| 13 | Q08J23 NSUN2_HUMAN  | E.GQRAGEPNS#PDAAEANS#PDVTAGCDPAGVHPPR.-    | S743      | 3 | 6,1627 | 0,495 | 0,533  |
| 13 | Q7Z417 NUFP2_HUMAN  | E.LEKRTS#PQVLGSILKSGTTSE.S                 | S572      | 3 | 5,6642 | 0,448 | 0,871  |
| 13 | Q15398 DLG7_HUMAN   | E.RM*S#LPLLAGGVADDINTNKKE.G                | S725      | 3 | 5,4503 | 0,454 | 0,313  |
| 13 | Q08J23 NSUN2_HUMAN  | E.GQRAGEPNS#PDAAEANS#PDVTAGCDPAGVHPPR.-    | S751      | 3 | 5,3159 | 0,481 | 0,639  |
| 13 | Q96L14 C170L_HUMAN  | E.ARALHPAAVSAAAEFENAES#E.A                 | S269      | 3 | 5,2575 | 0,521 | 0,329  |
| 13 | Q9H299 SH3L3_HUMAN  | E.MRALAGNPKATPPQIVNGDQYCGDYE.L             | NA        | 3 | 5,1296 | 0,431 | 0,575  |
| 13 | Q5H9R7 SAPS3_HUMAN  | E.AKCAAPRPPSSS#PEQRTGQPSAPGDTSVNGPV.-      | S853      | 3 | 5,1232 | 0,39  | 0,334  |
| 13 | Q9NWH9 SLTM_HUMAN   | E.ASKPKDGQDAIAQS#PEKE.S                    | S289      | 3 | 5,1089 | 0,305 | 0,092  |
| 13 | Q9BY44 EIF2A_HUMAN  | E.ARSDKS#PDLAPTPAPQSTPRNTVVSQISGDPE.I      | S506      | 3 | 5,0387 | 0,496 | 0,648  |
| 13 | Q9UHB6 LIMA1_HUMAN  | E.VQQPVHPKPLSPDRASS#LSE.S                  | S369      | 3 | 4,9661 | 0,406 | 0,078  |
| 13 | Q9H299 SH3L3_HUMAN  | E.M*RALAGNPKATPPQIVNGDQYCGDYE.L            | NA        | 3 | 4,93   | 0,509 | 0,254  |
| 13 | P63104 1433Z_HUMAN  | E.VAAGDDKKGIVDQSQQAYQE.A                   | NA        | 2 | 4,8885 | 0,359 | 0,341  |
| 13 | P12004 PCNA_HUMAN   | E.LGNNGNIKLSQTSNVDKEEE.A                   | NA        | 3 | 4,827  | 0,38  | 0,353  |
| 13 | Q8WYL5 SSH1_HUMAN   | E.STRPDS#PALFVDKPTGERTE.R                  | S237      | 3 | 4,8241 | 0,245 | 0,076  |
| 13 | P17706 PTN2_HUMAN   | E.LSKEDLSPAFDHS#PNKIM*TE.K                 | S304      | 3 | 4,7901 | 0,29  | 0,544  |
| 13 | Q13428 TCOF_HUMAN   | E.TAKATPRLASTNSS#VLGADLPSSM*KE.K           | S111      | 3 | 4,7866 | 0,385 | 0,067  |
| 13 | P05787 K2C8_HUMAN   | E.TRDGKLV#ESS#DVLPK.-                      | S475:S478 | 2 | 4,7738 | 0,396 | 0,258  |
| 13 | Q14247 SRC8_HUMAN   | E.QARAKTQTPPVSPAPQPTTEERLPS#SPVYE.D        | S417      | 3 | 4,6796 | 0,422 | 0,339  |
| 13 | Q92598 HS105_HUMAN  | E.CLNQRPPENPDTDKNVQQDNSE.A                 | NA        | 3 | 4,659  | 0,249 | 0,423  |
| 13 | Q13416 ORC2_HUMAN   | E.LAKT#PQKSVSFLKNDPE.I                     | T116      | 3 | 4,6194 | 0,279 | 0,354  |
| 13 | Q9UHB6 LIMA1_HUMAN  | E.VQQPVHPKPLS#PDRASSLSE.S                  | S362      | 3 | 4,5502 | 0,273 | -0,782 |
| 13 | Q6AWB1 Q6AWB1_HUMAN | E.GTDTTAKTSKLPTRPASTGVAGASSLGPSPGSAS#AGE.L | S137      | 3 | 4,4928 | 0,419 | 0,425  |
| 13 | P18754 RCC1_HUMAN   | E.AGGM*HTVCLSKSGQVVSFGCNDE.G               | NA        | 3 | 4,4551 | 0,392 | 0,363  |
| 13 | Q9Y6G9 DC1L1_HUMAN  | E.LDRITRKPVTVS#PTTPTSPT#EGEAS.-            | S510:T518 | 3 | 4,4319 | 1     | 0,523  |
| 13 | O14641 DVL2_HUMAN   | E.RHLAGYES#SSTLM*TSE.L                     | S194      | 2 | 4,4261 | 0,546 | 0,065  |
| 13 | O00139 KIF2A_HUMAN  | E.DGKQQVQVGLQERE.V                         | NA        | 3 | 4,4204 | 0,374 | 0,107  |
| 13 | Q14247 SRC8_HUMAN   | E.DVTQVSSAYQKTVPEAVTSKTSNIRANFE.N          | NA        | 3 | 4,4186 | 0,331 | 0,112  |
| 13 | P63241 IF5A1_HUMAN  | E.DLRLPEGDLGKE.I                           | NA        | 3 | 4,3324 | 0,436 | -0,068 |
| 13 | Q5JT44 Q5JT44_HUMAN | E.GDNLET#PSQSPQLFHDDTHSRIE.Q               | T124      | 3 | 4,3171 | 0,359 | 0,068  |
| 13 | Q9NVM9 CL011_HUMAN  | E.IIKDSPDS#PEPPNKKPLVE.M                   | S626      | 2 | 4,2913 | 0,35  | 0,335  |
| 13 | Q8NFP7 NUD10_HUMAN  | E.KLKLGGSPNTNGNSMAPS#SPDSDP.-              | S158      | 3 | 4,2881 | 0,423 | 0,548  |
| 13 | O95684 FR1OP_HUMAN  | E.KGPTTGEGALDLSDVHS#PPKSPE.G               | S156      | 3 | 4,2752 | 0,299 | 0,153  |
| 13 | P41240 CSK_HUMAN    | E.DNVAKVSDFGLTKE.A                         | NA        | 3 | 4,253  | 0,276 | 0,24   |
| 13 | Q14839 CHD4_HUMAN   | R.NILSRLANRAPEPTQQAQQQ.-                   | NA        | 3 | 4,252  | 0,281 | 0,223  |
| 13 | Q8NFP7 NUD10_HUMAN  | E.KLKLGGSPNTNGNSM*APSSPDS#DP.-             | S162      | 3 | 4,23   | 0,428 | 0      |
| 13 | P08670 VIME_HUMAN   | E.NTLQSFQRQDVNDASLARLD.L                   | NA        | 3 | 4,2143 | 0,382 | 0,338  |
| 13 | Q99613 EIF3C_HUMAN  | E.SHITSYKQNPSEQS#ADE.D                     | S166      | 2 | 4,2096 | 0,528 | 0,064  |

|    |                     |                                         |           |   |        |       |        |
|----|---------------------|-----------------------------------------|-----------|---|--------|-------|--------|
| 13 | Q96L14 C170L_HUMAN  | E.ARALHPAAVSAAEFENAES#E.A               | S269      | 2 | 4,2052 | 0,452 | 0,44   |
| 13 | Q9Y6G9 DC1L1_HUMAN  | E.LDRITRKPVTVSPTT#PTS#PTEGEAS.-         | T513:S516 | 3 | 4,1832 | 1     | -0,065 |
| 13 | P28749 RBL1_HUMAN   | E.IGT#PRKFTTRD#PLGKLTAAQANVE.Y          | T332:T340 | 3 | 4,1826 | 0,356 | 0,274  |
| 13 | P22087 FBRL_HUMAN   | E.NM*KPQEQLTLEPYERD.H                   | NA        | 3 | 4,1824 | 0,314 | 0,547  |
| 13 | Q86UE4 LYRIC_HUMAN  | E.KSVKLSSQIS#AGEE.K                     | S298      | 2 | 4,177  | 0,43  | 0,316  |
| 13 | Q15418 KS6A1_HUMAN  | E.KKAYS#FCGTVE.Y                        | S221      | 2 | 4,1686 | 0,501 | 0,445  |
| 13 | P04075 ALDOA_HUMAN  | E.LSDIAHRIVAPGKGILAADE.S                | NA        | 3 | 4,1653 | 0,318 | 0,358  |
| 13 | B2RAI3 B2RAI3_HUMAN | D.FKFM*AQGKTGSSS#PPGGPPKPGSQLD.S        | S288      | 3 | 4,1648 | 0,335 | 0,203  |
| 13 | P22087 FBRL_HUMAN   | E.NMKPQEQLTLEPYERD.H                    | NA        | 3 | 4,1521 | 0,277 | 0,459  |
| 13 | B2RAI3 B2RAI3_HUMAN | D.FKFMAQGKTGSSS#PPGGPPKPGSQLD.S         | S288      | 3 | 4,1291 | 0,34  | 0,205  |
| 13 | Q92598 HS105_HUMAN  | E.LNNTCEPVVTPKPKIES#PKLE.R              | S809      | 3 | 4,1153 | 0,29  | 0      |
| 13 | Q02952 AKA12_HUMAN  | E.LQSHAKSPPS#PVERE.M                    | S1331     | 3 | 4,1077 | 0,423 | 0      |
| 13 | Q09666 AHNK_HUMAN   | E.LNLKS#PKVKGDLDIAGPNLE.G               | S3426     | 2 | 4,0797 | 0,421 | 0      |
| 13 | P46821 MAP1B_HUMAN  | E.GEKLSPKS#DISPLTPRE.S                  | S1782     | 3 | 4,0769 | 0,183 | 0,095  |
| 13 | Q66K64 DCA15_HUMAN  | E.AAPARSSGS#PEPSPAIAKAKE.F              | S310      | 3 | 4,0737 | 0,309 | 0,435  |
| 13 | O75569 PRKRA_HUMAN  | E.KFLAKFSNIS#PE.N                       | S196      | 2 | 4,0527 | 0,42  | 0      |
| 13 | Q6NZI2 PTRF_HUMAN   | E.AGDLRRGS#S#PDVHALLE.I                 | S365:S366 | 3 | 4,0468 | 0,281 | 0,094  |
| 13 | O95684 FR1OP_HUMAN  | E.KGPTTGEGALDLSDVHSPKS#PE.G             | S160      | 3 | 4,0303 | 0,358 | 0,076  |
| 13 | Q08J23 NSUN2_HUMAN  | E.GQRAGEPNS#PDAAEANS#PDVTAGCDPAGVHPPR.- | S743:S751 | 3 | 4,0007 | 0,387 | 0,729  |
| 13 | Q9BW19 KIFC1_HUMAN  | E.NQQQLDQLRDAQQVKALGTE.R                | NA        | 3 | 3,9867 | 0,206 | 0,379  |
| 13 | Q9H4M9 EHD1_HUMAN   | E.IFYTLS#PVNGKITGANAKKE.M               | S456      | 3 | 3,9797 | 0,328 | 0,164  |
| 13 | Q68CQ4 DEF_HUMAN    | E.SGDNSSLKAS#QDPFLQHVNKE.L              | S186      | 3 | 3,9782 | 0,351 | 0,231  |
| 13 | Q14974 IMB1_HUMAN   | E.NVHPDVMLVQPRVE.F                      | NA        | 3 | 3,9377 | 0,19  | 0,112  |
| 13 | P31948 STIP1_HUMAN  | E.KGNKALSVGNIDDALQCYSE.A                | NA        | 3 | 3,9331 | 0,387 | 0,252  |
| 13 | P50990 TCPQ_HUMAN   | E.VSSLRTSIMSKQYGNE.V                    | NA        | 3 | 3,921  | 0,415 | 0,287  |
| 13 | O15320 CTGE5_HUMAN  | E.KLNRS#NSELEDE.I                       | S137      | 2 | 3,917  | 0,365 | 0,161  |
| 13 | P49848 TAF6_HUMAN   | E.GKGGPTSHSPVPPASS#PSPLSGSALCGGKQE.A    | S634      | 3 | 3,9121 | 0,167 | 0,343  |
| 13 | B2CI53 B2CI53_HUMAN | R.NGILASPQS#APGNLDNSKSGEIKNGSGGSRE.N    | S263      | 3 | 3,9061 | 0,353 | 0,345  |
| 13 | Q9P2E9 RRBP1_HUMAN  | E.GAPIQGKKADS#VANQGTKVE.G               | S552      | 3 | 3,886  | 0,267 | -0,264 |
| 13 | Q7L014 DDX46_HUMAN  | E.DQARYAGDIKALE.L                       | NA        | 3 | 3,8542 | 0,316 | 0,117  |
| 13 | P52594 NUPL_HUMAN   | D.SAPTLHLNKGTPSQS#PVVGRSQGQQQE.K        | S181      | 3 | 3,8511 | 0,212 | 0,691  |
| 13 | P02545 LMNA_HUMAN   | E.LDFQKNIYSEELRE.T                      | NA        | 3 | 3,8498 | 0,281 | -0,103 |
| 13 | Q02952 AKA12_HUMAN  | E.KEPSKSAESPTS#PVTSE.T                  | S286      | 2 | 3,8239 | 0,465 | -0,066 |
| 13 | O00571 DDX3X_HUMAN  | E.KYDDIPVEATGNNPCPHIE.S                 | NA        | 3 | 3,81   | 0,176 | 0,337  |
| 13 | Q09666 AHNK_HUMAN   | E.LNLKS#PKVKGDLDIAGPNLE.G               | S3426     | 3 | 3,8036 | 0,315 | 0,831  |
| 13 | Q9UPQ0 LIMC1_HUMAN  | E.LVLSQKVVKPKS#PEPE.A                   | S718      | 3 | 3,802  | 0,173 | 0,492  |
| 13 | O95359 TACC2_HUMAN  | E.SVDPFKTSSKTPSSPS#KSPASFE.I            | S2392     | 3 | 3,7986 | 0,326 | -0,148 |
| 13 | O95425 SVIL_HUMAN   | E.IKTPTGEGLLDS#PSKTM*SIKE.R             | S1120     | 3 | 3,7905 | 0,301 | 0,314  |
| 13 | P25788 PSA3_HUMAN   | E.VAKIYIVHDE.V                          | NA        | 3 | 3,7869 | 0,285 | 0,211  |
| 13 | Q9UKV3 ACINU_HUMAN  | E.KSKS#PS#PPRLTE.D                      | S386:S388 | 3 | 3,7806 | 0,126 | 0,123  |
| 13 | Q9H2P0 ADNP_HUMAN   | E.HVLKVIPEDAS#ESEE.K                    | S921      | 2 | 3,7797 | 0,318 | 0,069  |

|    |                     |                                     |                |   |        |       |        |
|----|---------------------|-------------------------------------|----------------|---|--------|-------|--------|
| 13 | P17275 JUNB_HUMAN   | E.ARSRDATPPVS#PINMEDQE.R            | S259           | 3 | 3,7733 | 0,282 | 0,334  |
| 13 | Q5JSZ5 K0515_HUMAN  | E.GGGRHIISATSLSTS#PTE.L             | S226           | 2 | 3,7668 | 0,528 | 0,132  |
| 13 | Q59HC3 Q59HC3_HUMAN | E.GDNMETPASS#PQLSHDDTHSRIE.H        | S1114          | 3 | 3,7651 | 0,357 | 0,422  |
| 13 | P24928 RPB1_HUMAN   | E.DLVKDVLSNAHIQNE.L                 | NA             | 2 | 3,7591 | 0,373 | 0,072  |
| 13 | Q9NWH9 SLTM_HUMAN   | E.VSKPLPS#EGSLAEADHTAHEE.M          | S214           | 3 | 3,741  | 0,335 | 0,16   |
| 13 | Q9NVM9 CL011_HUMAN  | E.IIKDSPDS#PEPPNKKPLVE.M            | S626           | 3 | 3,7282 | 0,18  | 0,419  |
| 13 | Q8IYB3 SRRM1_HUMAN  | E.ILKVPKPEIPEKPEPS#PE.K             | S260           | 3 | 3,724  | 0,272 | 0,581  |
| 13 | Q9UHB7 AFF4_HUMAN   | E.KDLLPS#PAGPVPSKDPKTE.H            | S814           | 3 | 3,7095 | 0,291 | 0,356  |
| 13 | P41227 ARD1A_HUMAN  | E.NKVES#KGNRS#PPSSGEACRE.E          | S182:S186      | 3 | 3,7026 | 0,27  | -0,083 |
| 13 | O60271 JIP4_HUMAN   | E.NKAFDRNTES#LFEE.L                 | S381           | 2 | 3,6914 | 0,481 | 0,274  |
| 13 | P46821 MAP1B_HUMAN  | E.KSGKQGGSPDQVS#PVSE.M              | S1443          | 2 | 3,6406 | 0,395 | -0,071 |
| 13 | O43166 SI1L1_HUMAN  | E.NHRPLS#AASNSDQLE.D                | S1708          | 2 | 3,6284 | 0,514 | -0,355 |
| 13 | P78347 GTF2I_HUMAN  | E.STSSKS#PPRKINSSPNVNTTASGVED.L     | S823           | 3 | 3,6189 | 0,313 | -0,2   |
| 13 | Q92922 SMRC1_HUMAN  | R.KHS#PS#PPPTPTESR.K                | S328:S330      | 3 | 3,5987 | 0,226 | 0,103  |
| 13 | Q09666 AHNK_HUMAN   | E.GTLTGPRLGS#PSGKTGTCRISMSE.V       | S559           | 3 | 3,5938 | 0,283 | 0      |
| 13 | P09960 LKHA4_HUMAN  | E.DNLRSLVLDTKDLTIE.K                | NA             | 3 | 3,5885 | 0,279 | 0      |
| 13 | O14641 DVL2_HUMAN   | E.RHLAGYES#SSTLMTSE.L               | S194           | 2 | 3,586  | 0,49  | 0,396  |
| 13 | Q9UQ35 SRRM2_HUMAN  | E.KSATRPS#PS#PERSSTGPEPPAPTLLAE.R   | S351:S353      | 3 | 3,5662 | 1     | 0,364  |
| 13 | Q8NCF5 NF2IP_HUMAN  | E.VLSRDS#PLKTLM*SHYEE.A             | S369           | 3 | 3,5637 | 0,152 | 0,334  |
| 13 | O15042 SR140_HUMAN  | E.SARES#LCDSPHQNLSRPLLE.N           | S63            | 3 | 3,5617 | 0,214 | -0,153 |
| 13 | P43686 PRS6B_HUMAN  | E.DYVARPDKISGADINSICQE.S            | NA             | 3 | 3,5534 | 0,347 | 0,569  |
| 13 | P12956 KU70_HUMAN   | E.KIM*AT#PEQVGKM*KAIVE.K            | T455           | 3 | 3,5229 | 0,212 | 0,461  |
| 13 | Q76FK4 NOL8_HUMAN   | E.TDHRNSS#PGEAS#LLEKE.T             | S1099:S1104    | 3 | 3,5215 | 0,235 | 0,18   |
| 13 | Q8NFP7 NUD10_HUMAN  | E.KLKLGGSPTINGNSM*APSS#PDSDP.-      | S159           | 3 | 3,5135 | 0,341 | 0,389  |
| 13 | Q99729 ROAA_HUMAN   | K.DAASVEKVLQKE.H                    | NA             | 3 | 3,5038 | 0,42  | 0,255  |
| 13 | O00522 KRIT1_HUMAN  | E.DAYVAVIRPKNT#ASLNSRE.Y            | T20            | 3 | 3,5004 | 0,363 | 0,251  |
| 13 | Q9UKJ3 GPTC8_HUMAN  | E.AKKALGGDVS#DQSLE.S                | S78            | 2 | 3,4854 | 0,384 | 0,611  |
| 13 | Q12874 SF3A3_HUMAN  | E.YLQDYTRVKPLQDQNE.L                | NA             | 3 | 3,4727 | 0,189 | 0,43   |
| 13 | O60271 JIP4_HUMAN   | E.GSKQRSAS#QSS#LDKLDQE.L            | S730:S733      | 3 | 3,4726 | 0,204 | 0,517  |
| 13 | Q9NXH9 TRM1_HUMAN   | E.GTCQRGDQCCYSHS#PPTPRVSADAAPDCPE.T | S625           | 3 | 3,4599 | 0,208 | 0,529  |
| 13 | Q16643 DREB_HUMAN   | R.VASASAGSCDVPS#PFNHRPGSHLD.S       | S312           | 3 | 3,4535 | 0,22  | 0,359  |
| 13 | P80723 BASP_HUMAN   | E.GTPKESEPOAAAEPAAEAKE.G            | NA             | 3 | 3,4516 | 0,307 | 0,094  |
| 13 | Q9NYV4 CD2L7_HUMAN  | E.SKGS#PVFLPRKE.N                   | S423           | 3 | 3,4455 | 0,243 | 0,128  |
| 13 | O43149 ZZEF1_HUMAN  | E.KESPGDLTRS#PE.M                   | S240           | 2 | 3,4304 | 0,281 | -0,262 |
| 13 | Q96JM3 ZN828_HUMAN  | E.LRKPGPPLS#PEIRS#PAGS#PE.L         | S427:S432:S436 | 3 | 3,4265 | 0,302 | 0,393  |
| 13 | Q9NYV6 RRN3_HUMAN   | E.NDFFNS#PPRKTVRFGGTVTE.V           | S44            | 3 | 3,4215 | 0,298 | 0,156  |
| 13 | P05387 RLA2_HUMAN   | K.NIEDVIAQGIGK.L                    | NA             | 2 | 3,4105 | 0,407 | 0,194  |
| 13 | Q12888 TP53B_HUMAN  | E.ARSEDPTT#PIRGNLLHFPSSQGEEL.K      | T1055          | 3 | 3,4092 | 0,409 | 0,373  |
| 13 | P07900 HS90A_HUMAN  | E.LISNSSDALDKIRYE.S                 | NA             | 2 | 3,3963 | 0,404 | 0,212  |
| 13 | P31946 1433B_HUMAN  | E.QAERYDDMAAAMKAVTE.Q               | NA             | 3 | 3,3955 | 0,165 | 0,193  |
| 13 | Q9Y490 TLN1_HUMAN   | E.ISHLIEPLANAARAE.A                 | NA             | 3 | 3,3945 | 0,193 | -0,114 |

|    |                      |                                        |                   |   |        |       |        |
|----|----------------------|----------------------------------------|-------------------|---|--------|-------|--------|
| 13 | Q96RL1 UIMC1_HUMAN   | E.MQSSFTRRDLNES#PVKSFVSISE.A           | S677              | 3 | 3,3865 | 0,2   | 0,269  |
| 13 | Q14721 KCNB1_HUMAN   | E.DMYNKMAKTQS#QPILNTKE.S               | S541              | 3 | 3,3812 | 0,103 | 0,552  |
| 13 | P26440 IVD_HUMAN     | E.DCKIPAANILGHE.N                      | NA                | 3 | 3,3774 | 0,218 | 0,127  |
| 13 | P08670 VIME_HUMAN    | E.NTLQSFQRQVDNASLARLD.L                | NA                | 2 | 3,3662 | 0,349 | 0,338  |
| 13 | Q8NI08 NCOA7_HUMAN   | E.TSHGS#PTVTKLSKEPSDTSSAFE.S           | S384              | 3 | 3,3628 | 0,27  | 0,518  |
| 13 | Q09666 AHNK_HUMAN    | E.GDIKAPSLDIKGPE.V                     | NA                | 3 | 3,3611 | 0,254 | 0,254  |
| 13 | Q6UXH1 CREL2_HUMAN   | E.KTLSKYES#SE.I                        | S70               | 2 | 3,3589 | 0,224 | -0,097 |
| 13 | O00522 KRIT1_HUMAN   | D.AYVAVIRPKNTAS#LNSRE.Y                | S22               | 3 | 3,356  | 0,232 | 0,442  |
| 13 | P51636 CAV2_HUMAN    | E.KADVQLFMDDDSYSHHS#GLE.Y              | S23               | 3 | 3,3559 | 0,146 | -0,154 |
| 13 | P49023 PAXI_HUMAN    | E.QNDKPYCQNCFLKFC.-                    | NA                | 3 | 3,3555 | 0,181 | -0,171 |
| 13 | P23919 KTHY_HUMAN    | E.DAIRTATEKPLGE.L                      | NA                | 3 | 3,355  | 0,398 | 0,392  |
| 13 | P17812 PYRG1_HUMAN   | E.DHPFFVGVQYHPE.F                      | NA                | 3 | 3,3534 | 0,298 | 0,349  |
| 13 | Q14721 KCNB1_HUMAN   | E.DM*YNKMAKTQS#QPILNTKE.S              | S541              | 3 | 3,3524 | 0,201 | 0,235  |
| 13 | P18206 VINC_HUMAN    | E.DQILKRDM*PPAFIKVE.N                  | NA                | 3 | 3,3515 | 0,23  | 0      |
| 13 | ##Q8IZF6 GP112_HUMAN | R.LS#HLHSFTTNIDMPNS#IRTSSSTTTDVFS#TD.Q | S1423:S1437:S1450 | 3 | 3,3445 | 0,122 | -0,301 |
| 13 | Q9BZD4 NUF2_HUMAN    | E.SLTKKIVDS#PE.K                       | S247              | 2 | 3,3427 | 0,313 | 0,282  |
| 13 | Q05682 CALD1_HUMAN   | E.KQSVDKVTS#PTKV.-                     | S789              | 3 | 3,3367 | 0,271 | 0,305  |
| 13 | Q86WJ1 CHD1L_HUMAN   | R.AGATS#RGGQAPGFLRLHTE.G               | S8                | 3 | 3,3323 | 0,166 | 0,173  |
| 13 | Q5VZL5 ZMYM4_HUMAN   | E.LAKAKSESDVELS#D.-                    | S1547             | 2 | 3,3181 | 0,225 | 0,072  |
| 13 | P31949 S10AB_HUMAN   | D.SFLKAVPSQKRT#.-                      | T105              | 3 | 3,3172 | 0,295 | 0,127  |
| 13 | Q6PJT7 ZC3HE_HUMAN   | E.VVQGQSRTPRIS#PPIKEEE.T               | S409              | 3 | 3,3159 | 0,286 | 0,574  |
| 13 | Q96MU7 YTDC1_HUMAN   | R.RAKS#PT#PDGSEIRGLE.V                 | S146:T148         | 3 | 3,3151 | 0,181 | 0,098  |
| 13 | P53667 LIMK1_HUMAN   | E.HDPHDTLGHGLGPETS#PLSS#PAYTPSGE.A     | S271:S275         | 3 | 3,3073 | 1     | 0,061  |
| 13 | Q9H3M3 Q9H3M3_HUMAN  | E.KATDATTATFFKM*PQEKS#PGYS.-           | S478              | 3 | 3,3004 | 0,236 | 0,146  |
| 13 | Q12888 TP53B_HUMAN   | E.GRQDKPM*DTS#VLSEE.G                  | S395              | 2 | 3,2551 | 0,515 | 0,341  |
| 13 | Q02952 AKA12_HUMAN   | E.KEPSKSAES#PTS#PVTSE.T                | S283:S286         | 2 | 3,2532 | 1     | 0,381  |
| 13 | Q14008 CKAP5_HUMAN   | E.GKGRISTSTGIS#PQM*E.V                 | S1904             | 2 | 3,2143 | 0,348 | 0,21   |
| 13 | Q71U36 TBA1A_HUMAN   | E.KAYHEQLS#VAE.I                       | S287              | 2 | 3,1995 | 0,425 | 0,27   |
| 13 | Q5UIP0 RIF1_HUMAN    | E.HLEKSS#LSNNE.C                       | S1149             | 2 | 3,1498 | 0,385 | -0,182 |
| 13 | Q15311 RBP1_HUMAN    | E.HGSGLTRTPS#SEE.I                     | S29               | 2 | 3,0965 | 0,569 | -0,424 |
| 13 | Q02952 AKA12_HUMAN   | E.LQSHAKS#PPSPVERE.M                   | S1328             | 2 | 3,0875 | 0,415 | -0,14  |
| 13 | Q8NI35 INADL_HUMAN   | E.KLEKVPDS#PENE.L                      | S522              | 2 | 3,0822 | 0,321 | -0,083 |
| 13 | O60832 DKC1_HUMAN    | E.RKS#LPEEDVAE.I                       | S21               | 2 | 3,0587 | 0,337 | 0,09   |
| 13 | Q99729 ROAA_HUMAN    | K.DAASVEKVLQKE.H                       | NA                | 2 | 3,0498 | 0,216 | 0,085  |
| 13 | P60709 ACTB_HUMAN    | E.GYALPHAILRLD.L                       | NA                | 2 | 3,0436 | 0,469 | -0,273 |
| 13 | Q06323 PSME1_HUMAN   | E.NLLGSYFPKKISE.L                      | NA                | 2 | 3,0384 | 0,344 | 0      |
| 13 | P07355 ANXA2_HUMAN   | E.GDHSTPPSAYGSKAYTNFDAE.R              | NA                | 2 | 3,0381 | 0,363 | 0,105  |
| 13 | Q68EM7 RHG17_HUMAN   | R.KRPAS#MAVM*E.G                       | S484              | 2 | 3,0264 | 0,399 | -0,1   |
| 13 | Q96B23 CR025_HUMAN   | E.LRRDS#SESQLASTE.S                    | S66               | 2 | 3,0043 | 0,457 | 0,221  |
| 13 | Q6S8J3 A26CA_HUMAN   | E.KLCYVALDFEQE.M                       | NA                | 2 | 2,998  | 0,136 | 0,081  |
| 13 | P11717 MPRI_HUMAN    | E.SSHPVRNAQS#NALQE.R                   | S2440             | 2 | 2,9855 | 0,21  | 0      |

|    |                    |                            |             |   |        |       |        |
|----|--------------------|----------------------------|-------------|---|--------|-------|--------|
| 13 | Q8N2M8 SFR16_HUMAN | E.KLTRPAAS#PAVGE.K         | S532        | 2 | 2,9709 | 0,422 | 0,089  |
| 13 | Q9UQ35 SRRM2_HUMAN | K.THTTALAGRS#PS#PASGR.R    | S295:S297   | 2 | 2,9672 | 0,22  | 0,334  |
| 13 | P98171 RHG04_HUMAN | E.LVHRPEPCTS#PE.A          | S842        | 2 | 2,9653 | 0,202 | 0,081  |
| 13 | P17812 PYRG1_HUMAN | E.DHPFFVGVQYHPE.F          | NA          | 2 | 2,9605 | 0,462 | 0,078  |
| 13 | Q02952 AKA12_HUMAN | E.LQSHAKS#PPS#PVERE.M      | S1328:S1331 | 2 | 2,9578 | 0,344 | 0      |
| 13 | P18031 PTN1_HUMAN  | E.DIKSYTVRQLE.L            | NA          | 2 | 2,9573 | 0,425 | 0,161  |
| 13 | O75554 WBP4_HUMAN  | E.KSIQKQNS#LGSNEE.K        | S277        | 2 | 2,9524 | 0,399 | 0,074  |
| 13 | Q7Z417 NUFP2_HUMAN | E.LEKRT#SPQVLGSILKSGTTSE.S | T571        | 2 | 2,9378 | 0,082 | 0,317  |
| 13 | P25398 RS12_HUMAN  | E.HQINLIKVDD.N             | NA          | 2 | 2,9201 | 0,193 | 0      |
| 13 | P46821 MAP1B_HUMAN | E.RTTKS#PSDSGYSYE.T        | S1915       | 2 | 2,915  | 0,448 | 0,294  |
| 13 | Q5VTL8 PR38B_HUMAN | E.GHGSS#SFDRE.L            | S289        | 2 | 2,9099 | 0,516 | 0,105  |
| 13 | O15427 MOT4_HUMAN  | E.KNGEVVHTPET#SV.-         | T463        | 2 | 2,8711 | 0,341 | 0,413  |
| 13 | Q12888 TP53B_HUMAN | E.GRQDKPM*DTSVLS#EE.G      | S398        | 2 | 2,8676 | 0,316 | 0,409  |
| 13 | P17706 PTN2_HUMAN  | E.LSKEDLSPAFDHS#PNKIMTE.K  | S304        | 2 | 2,8455 | 0,364 | -0,417 |
| 13 | Q6WCQ1 MRIP_HUMAN  | E.GRSKT#FDWAE.F            | T541        | 2 | 2,8178 | 0,391 | -0,096 |
| 13 | A5A3E0 A26CB_HUMAN | E.LRVAPEEHPVLLTE.A         | NA          | 2 | 2,804  | 0,408 | 0,076  |
| 13 | P29966 MARCS_HUMAN | E.NGHVKVNGDAS#PAAAE.S      | S46         | 2 | 2,7941 | 0,435 | -0,226 |
| 13 | P13639 EF2_HUMAN   | E.SGEHIAGAGELHLE.I         | NA          | 2 | 2,7919 | 0,346 | 0,318  |
| 13 | P07355 ANXA2_HUMAN | E.LAS#ALKSALSGHLE.T        | S85         | 2 | 2,7887 | 0,429 | -0,165 |
| 13 | P62753 RS6_HUMAN   | R.RLSS#LRAS#TSKSE.S        | S236:S240   | 2 | 2,7885 | 0,216 | 0,309  |
| 13 | P02649 APOE_HUMAN  | E.KVQAAVGTSAAPVPSDNH.-     | NA          | 2 | 2,7883 | 0,292 | 0,14   |
| 13 | Q6GYQ0 GRIPE_HUMAN | R.VRHFS#QSEETGNE.V         | S773        | 2 | 2,7872 | 0,285 | 0,153  |
| 13 | Q86V48 LUZP1_HUMAN | E.RHTS#TSNIQVGLAE.L        | S820        | 2 | 2,7773 | 0,35  | 0,23   |
| 13 | Q9H4A3 WNK1_HUMAN  | E.HSSGAQHASVS#LE.T         | S1677       | 2 | 2,745  | 0,419 | 0,165  |
| 13 | Q9NPI6 DCP1A_HUMAN | E.RKASSPS#PLTIGTPE.S       | S525        | 2 | 2,732  | 0,276 | 0,452  |
| 13 | Q9UQ80 PA2G4_HUMAN | E.DLVVTKYKM*GGD.I          | NA          | 2 | 2,7221 | 0,215 | 0,182  |
| 13 | Q14738 2A5D_HUMAN  | E.DIQLLKRTVETE.A           | NA          | 2 | 2,7195 | 0,25  | 0,084  |
| 13 | Q05682 CALD1_HUMAN | E.KQSVDKVTSPT#KV.-         | T791        | 2 | 2,7006 | 0,253 | -0,163 |
| 13 | Q9UQ80 PA2G4_HUMAN | E.DLVVTKYKMGGD.I           | NA          | 2 | 2,6951 | 0,139 | 0,644  |
| 13 | Q15029 U5S1_HUMAN  | E.DKKYYPTAEE.V             | NA          | 2 | 2,6375 | 0,288 | -0,196 |
| 13 | Q9UHB6 LIMA1_HUMAN | E.VQQPVHPKPLS#PDSRASSLSE.S | S362        | 2 | 2,6068 | 0,126 | -0,104 |
| 13 | P06748 NPM_HUMAN   | E.KT#PKT#PKGPPSSVE.D       | T234:T237   | 2 | 2,606  | 0,224 | -0,161 |
| 13 | P04637 P53_HUMAN   | K.KLMFKTEGPDS#D.-          | S392        | 2 | 2,6053 | 0,281 | 0,169  |
| 13 | Q6P6C2 ALKB5_HUMAN | E.NYWRKSYES#SEDCSE.A       | S374        | 2 | 2,6043 | 0,158 | 0,362  |
| 13 | O60678 ANM3_HUMAN  | E.DTITLIKGKIEE.V           | NA          | 2 | 2,5955 | 0,294 | 0      |
| 13 | P22087 FBRL_HUMAN  | E.NM*KPQEQLTLEPYERD.H      | NA          | 2 | 2,5822 | 0,411 | 0,122  |
| 13 | P78347 GTF2I_HUMAN | E.DLQLDKPASGVKE.E          | NA          | 2 | 2,5727 | 0,148 | 0,349  |
| 13 | Q13177 PAK2_HUMAN  | E.KERPEIS#PPSDFE.H         | S75         | 2 | 2,5666 | 0,28  | -0,454 |
| 13 | P56182 RRP1_HUMAN  | R.GKGEKEPPS#PGM*E.R        | S383        | 2 | 2,5552 | 0,249 | -0,17  |
| 13 | Q96BK5 PINX1_HUMAN | E.KKS#FSLEE.K              | S110        | 2 | 2,5482 | 0,255 | -0,116 |
| 13 | Q96JM3 ZN828_HUMAN | E.LRKPGPPLS#PE.I           | S427        | 2 | 2,5456 | 0,345 | 0      |

|    |                     |                               |           |   |        |       |        |
|----|---------------------|-------------------------------|-----------|---|--------|-------|--------|
| 13 | P98171 RHG04_HUMAN  | E.LVHRPEPCT#SPE.A             | T841      | 2 | 2,5276 | 0,26  | 0      |
| 13 | Q02952 AKA12_HUMAN  | E.KEPSKSAESPTSPVT#SE.T        | T289      | 2 | 2,5245 | 0,274 | -0,199 |
| 13 | Q13523 PRP4B_HUMAN  | E.DKFKGS#LSE.G                | S507      | 2 | 2,4744 | 0,229 | -0,112 |
| 13 | O60271 JIP4_HUMAN   | E.RT#KLHQLS#GSDQLE.S          | T177:S183 | 2 | 2,4645 | 0,226 | 0      |
| 13 | Q15545 TAF7_HUMAN   | E.VKRLLS#TDAE.A               | S171      | 2 | 2,4201 | 0,369 | 0,101  |
| 13 | A4LAA3 A4LAA3_HUMAN | E.VSRM*SHSS#SSDTDINE.I        | S748      | 2 | 2,4118 | 0,127 | -0,066 |
| 13 | P04637 P53_HUMAN    | K.KLM*FKTEGPDS#D.-            | S392      | 2 | 2,3929 | 0,11  | 0      |
| 13 | P49815 TSC2_HUMAN   | E.VKARSQS#GTLDGE.S            | S1420     | 2 | 2,392  | 0,15  | -0,085 |
| 13 | Q6ZNB8 Q6ZNB8_HUMAN | R.AGET#PANCVS#RRAVPGPDD.S     | T171:S177 | 2 | 2,3919 | 0,143 | 1,032  |
| 13 | Q96B23 CR025_HUMAN  | E.LRRDSS#ESQLASTE.S           | S67       | 2 | 2,3893 | 0,54  | -0,074 |
| 13 | P31949 S10AB_HUMAN  | E.LAAFTKNQKDPGVLD.R           | NA        | 2 | 2,3891 | 0,181 | 0,151  |
| 13 | P05387 RLA2_HUMAN   | E.DVIAQGIGK.L                 | NA        | 2 | 2,3867 | 0,222 | 0,271  |
| 13 | Q9UPQ0 LIMC1_HUMAN  | E.LVLSQKVVKPKS#PEPE.A         | S718      | 2 | 2,3299 | 0,302 | 0,131  |
| 13 | Q68EM7 RHG17_HUMAN  | R.KRPAS#MAVME.G               | S484      | 2 | 2,278  | 0,257 | 0      |
| 13 | P06454 PTMA_HUMAN   | E.ITTKDLKE.K                  | NA        | 2 | 2,2705 | 0,181 | -0,064 |
| 13 | Q92688 AN32B_HUMAN  | D.ISTLEPLKKE.C                | NA        | 2 | 2,2271 | 0,11  | 0,096  |
| 13 | Q9UQ35 SRRM2_HUMAN  | E.KSATRPS#PSPE.R              | S351      | 2 | 2,2122 | 0,197 | -0,296 |
| 13 | Q96AC1 FERM2_HUMAN  | E.NHLNNS#DKEVDE.V             | S339      | 2 | 2,2093 | 0,428 | 0,49   |
| 13 | P16949 STMN1_HUMAN  | E.FPLS#PPKKKDLLEE.I           | S38       | 2 | 2,2026 | 0,189 | 0,067  |
| 13 | P16949 STMN1_HUMAN  | E.LEKRAS#GQAFE.L              | S16       | 2 | 2,1972 | 0,191 | -0,278 |
| 13 | Q8WUB8 PHF10_HUMAN  | E.YYKRS#PDE.L                 | S182      | 2 | 2,1705 | 0,134 | 0      |
| 13 | Q13523 PRP4B_HUMAN  | E.DKFKGSLS#E.G                | S509      | 2 | 2,149  | 0,2   | 0,112  |
| 13 | Q7L9B9 EED1_HUMAN   | E.HGPFRR#VED.L                | S173      | 2 | 2,1426 | 0,329 | 0,109  |
| 13 | P23919 KTHY_HUMAN   | E.DAIRTATEKPLGE.L             | NA        | 2 | 2,1322 | 0,119 | 0      |
| 13 | Q03252 LMNB2_HUMAN  | E.NRCQSLQEE.L                 | NA        | 2 | 2,1189 | 0,177 | 0,105  |
| 13 | Q9UPM8 AP4E1_HUMAN  | E.DDYYSNLHDTGDKE.L            | NA        | 2 | 2,1038 | 0,289 | -0,482 |
| 13 | Q96P47 CENG3_HUMAN  | E.LHRSPS#LL.-                 | S873      | 2 | 2,1037 | 0,322 | 0      |
| 13 | Q86X29 LSR_HUMAN    | R.LKKNLALS#RES#LVV.-          | S643:S646 | 2 | 2,1031 | 0,355 | 0,282  |
| 13 | Q9C0C6 K1737_HUMAN  | E.HLCRS#PDIFSE.Q              | S302      | 2 | 2,0983 | 0,279 | 0,339  |
| 13 | Q68DN6 RGPD1_HUMAN  | E.SVKRIFS#SE.K                | S1535     | 2 | 2,0766 | 0,138 | -0,108 |
| 13 | Q13470 TNK1_HUMAN   | R.M*KGISRS#LE.S               | S502      | 2 | 2,0449 | 0,136 | 0,109  |
| 13 | Q14160 LAP4_HUMAN   | E.RLRVQS#PEPPAPE.R            | S1475     | 2 | 2,003  | 0,192 | 0,157  |
| 13 | Q2T9K0 TMM44_HUMAN  | D.SVRTAHL#DDD.-               | S472      | 2 | 1,9998 | 0,286 | 0,188  |
| 13 | Q5JTD0 TJAP1_HUMAN  | E.CHSJLTARGS#PEEE.L           | S300      | 2 | 1,9986 | 0,268 | 0,076  |
| 13 | P13994 CC130_HUMAN  | E.GSRQDKPLS#PAGSSQE.A         | S362      | 2 | 1,9842 | 0,121 | 0,071  |
| 13 | P31947 1433S_HUMAN  | E.DM*AAFMKGAVEKGEE.L          | NA        | 2 | 1,966  | 0,184 | 0,524  |
| 13 | B2RTT8 B2RTT8_HUMAN | E.FHLRPPS#DPE.T               | S499      | 2 | 1,9574 | 0,113 | 0,191  |
| 13 | P46821 MAP1B_HUMAN  | E.RKLGDS#PTQJD.V              | S1501     | 2 | 1,9559 | 0,149 | 0,52   |
| 13 | P49591 SYSC_HUMAN   | E.NRLQNM*E.V                  | NA        | 2 | 1,9533 | 0,118 | 0,132  |
| 13 | P07197 NFM_HUMAN    | E.KGKS#PVPKS#PVEE.K           | S628:S633 | 2 | 1,9026 | 0,128 | 0,317  |
| 14 | Q9H8Y8 GORS2_HUMAN  | E.GKKISLPGQMAGTPIT#PLKDGfte.V | T225      | 3 | 6,9167 | 0,531 | -0,143 |

|    |                     |                                      |           |   |        |       |        |
|----|---------------------|--------------------------------------|-----------|---|--------|-------|--------|
| 14 | Q13263 TIF1B_HUMAN  | E.KRSTAPSAASASASAAAASS#PAGGGAEALE.L  | S50       | 3 | 6,272  | 0,394 | 0,068  |
| 14 | Q9H8Y8 GORS2_HUMAN  | E.GKKISLPGQM*AGTPIT#PLKDGFE.V        | T225      | 3 | 6,148  | 0,469 | 0,354  |
| 14 | P29692 EF1D_HUMAN   | E.NIQKSLAGSSGPGASSGTSGDHGE.L         | NA        | 3 | 5,9907 | 0,567 | 0,582  |
| 14 | Q9H8Y8 GORS2_HUMAN  | E.GKKISLPGQMAGT#PITPLKDGFE.V         | T222      | 3 | 5,6423 | 0,442 | -0,356 |
| 14 | P29692 EF1D_HUMAN   | E.NIQKSLAGSSGPGASSGTSGDHGE.L         | NA        | 2 | 5,4441 | 0,607 | 0,111  |
| 14 | Q13263 TIF1B_HUMAN  | E.KRSTAPSAASASASAAAASS#PAGGGAE.A     | S50       | 3 | 5,2805 | 0,499 | 0,232  |
| 14 | Q2TB10 ZN800_HUMAN  | E.IKVKVEPADSVES#PPSITHSPQNE.L        | S419      | 3 | 5,2708 | 0,347 | 0,066  |
| 14 | Q5EBL4 RIPL1_HUMAN  | E.NRIPQPPPIAHPRT#SPQPE.S             | T345      | 3 | 5,1292 | 0,366 | 0,413  |
| 14 | P68104 EF1A1_HUMAN  | E.DGPKFLKSGDAAIVDM*VPGKPM*CVE.S      | NA        | 3 | 5,0515 | 0,377 | 0,679  |
| 14 | Q9BTH3 Q9BTH3_HUMAN | E.IRVNHEPEPAGGATPGATLPKS#PSQPAEASE.V | S300      | 3 | 5,0378 | 0,541 | 0,461  |
| 14 | P68104 EF1A1_HUMAN  | E.DGPKFLKSGDAAIVDM*VPGKPMCVE.S       | NA        | 3 | 5,0275 | 0,476 | 0,41   |
| 14 | P29590 PML_HUMAN    | D.LSSCITQGKDAAVSKKAS#PE.A            | S403      | 3 | 4,9073 | 0,469 | 0      |
| 14 | P46063 RECCQ1_HUMAN | E.AHAITMQVTKSTQNS#FRAE.S             | S597      | 3 | 4,8381 | 0,439 | 0,416  |
| 14 | P68104 EF1A1_HUMAN  | E.DGPKFLKSGDAAIVDMVPGKPM*CVE.S       | NA        | 3 | 4,7513 | 0,39  | 0,342  |
| 14 | P00441 SODC_HUMAN   | E.DSVISLSDHDCIGRTLTVVHE.K            | NA        | 3 | 4,7354 | 0,423 | -0,476 |
| 14 | A8K1N6 A8K1N6_HUMAN | E.LLKKGSLPTS#PRLVNE.S                | S284      | 3 | 4,7129 | 0,388 | 0,658  |
| 14 | Q15369 ELOC_HUMAN   | E.HALTSGTIKAM*LSGPGQFAENE.T          | NA        | 3 | 4,6761 | 0,389 | 0,402  |
| 14 | Q13206 DDX10_HUMAN  | E.LVRSQADKVI PRAPS#LTNDE.V           | S539      | 3 | 4,6738 | 0,27  | -0,076 |
| 14 | Q9HC35 EMAL4_HUMAN  | E.SHSNDQSPQIRAS#PS#PQPSSQLQIHRQTPE.S | S144:S146 | 3 | 4,5558 | 0,311 | 0,407  |
| 14 | Q8WU17 RN139_HUMAN  | E.RNGVIQHTGAAAEFNDT#D.-              | T663      | 2 | 4,5347 | 0,533 | 0,436  |
| 14 | P49792 RBP2_HUMAN   | E.NVQDRFALVT#PKKE.G                  | T1412     | 3 | 4,5276 | 0,2   | 0,212  |
| 14 | P68104 EF1A1_HUMAN  | E.DGPKFLKSGDAAIVDM*VPGKPM*CVE.S      | NA        | 2 | 4,5193 | 0,495 | 0,453  |
| 14 | Q9H8Y8 GORS2_HUMAN  | E.GKKISLPGQM*AGT#PITPLKDGFE.V        | T222      | 3 | 4,5186 | 0,325 | 0,425  |
| 14 | Q9Y6G9 DC1L1_HUMAN  | E.LDRITRKPVTVSPTTPT#S#PTEGEAS.-      | T515:S516 | 3 | 4,4901 | 1     | 0,327  |
| 14 | Q9UPA5 BSN_HUMAN    | E.TQDPLKLHSSPAS#PSSASKE.I            | S1362     | 3 | 4,4799 | 0,251 | 0,682  |
| 14 | P20073 ANXA7_HUMAN  | E.DAQRLYQAGEGRLGTDE.S                | NA        | 3 | 4,4344 | 0,25  | 0,097  |
| 14 | P42704 LPPRC_HUMAN  | E.SKNDLFQKTVQLTSSELE.S               | NA        | 2 | 4,4083 | 0,52  | 0      |
| 14 | Q5SYE7 NHSL1_HUMAN  | E.GSRATM*PQVPGGSVKPKIM*S#PE.K        | S842      | 3 | 4,3902 | 0,366 | 0      |
| 14 | Q02790 FKBP4_HUMAN  | E.HSIVYLKPSYAFGS#VGKE.K              | S229      | 3 | 4,3877 | 0,367 | 0,444  |
| 14 | Q9UKV8 I2C2_HUMAN   | E.ISKLM*RSAS#FNTPYVRE.F              | S379      | 3 | 4,3603 | 0,329 | 0,166  |
| 14 | Q15149 PLEC1_HUMAN  | E.LQLVITYKAQLEPVAS#PAKKPKVQSGSE.S    | S1435     | 3 | 4,3495 | 0,427 | 0,061  |
| 14 | O95208 EPN2_HUMAN   | E.FDNLRTSKKTAESVT#SLPSQNNGTSPDPFE.S  | T476      | 3 | 4,3373 | 0,353 | 0,849  |
| 14 | Q86TC9 MYPN_HUMAN   | R.FNGQATKTPEPSS#PVKEPPPVLAKPKLD.S    | S644      | 3 | 4,2899 | 0,394 | 0      |
| 14 | Q5SYE7 NHSL1_HUMAN  | E.NLGHLLGGASGTGTLRPKS#QE.L           | S388      | 3 | 4,2894 | 0,486 | 0,168  |
| 14 | O95819 M4K4_HUMAN   | E.AQSKQTRVLEPPVPSRSES#FSNGNSE.S      | S602      | 3 | 4,2852 | 0,181 | 0,493  |
| 14 | P00558 PGK1_HUMAN   | D.KIQLINNM*LDKVNE.M                  | NA        | 3 | 4,2829 | 0,456 | 0      |
| 14 | Q9NX31 CT111_HUMAN  | E.DYSQSLHARTLSGS#PRSCSE.Q            | S249      | 3 | 4,2614 | 0,212 | 0,079  |
| 14 | Q8TDD1 DDX54_HUMAN  | R.KLGPGRPLPTFPTSECT#SDVEPDTRE.M      | T74       | 3 | 4,243  | 0,398 | 0      |
| 14 | Q15545 TAF7_HUMAN   | E.NQGLDISS#PGM*SGHRQGHDSLE.H         | S201      | 3 | 4,2361 | 0,462 | 0,151  |
| 14 | Q92615 LARP5_HUMAN  | E.RSPS#PAHLPPDPKVAE.K                | S601      | 3 | 4,2266 | 0,126 | 0,611  |
| 14 | Q8TF01 SFR18_HUMAN  | R.DRQRS#PIALPVKQEPQID.A              | S211      | 3 | 4,2206 | 0,347 | 0,161  |

|    |                     |                                   |           |   |        |       |        |
|----|---------------------|-----------------------------------|-----------|---|--------|-------|--------|
| 14 | Q12792 TWF1_HUMAN   | E.DVSLHGYKYLQS#SPAPLTAEEEE.L      | S160      | 3 | 4,2009 | 0,438 | 0,377  |
| 14 | A7KAX9 A7KAX9_HUMAN | R.DATNRS#PTQIVKMKNE.T             | S952      | 3 | 4,178  | 0,109 | 0,182  |
| 14 | Q15007 FL2D_HUMAN   | E.RTGRGGSGYVNLQSLAGYESVDS#PTGSE.N | S341      | 3 | 4,1373 | 0,538 | -0,195 |
| 14 | P08670 VIME_HUMAN   | E.QHVQIDVDVSKPD.L                 | NA        | 3 | 4,1371 | 0,357 | 0      |
| 14 | Q5SYE7 NHSL1_HUMAN  | E.GSRATMPQVPGGSKPKIMS#PE.K        | S842      | 3 | 4,1333 | 0,211 | -0,47  |
| 14 | P63241 IF5A1_HUMAN  | E.DLRLPEGDLGKE.I                  | NA        | 3 | 4,104  | 0,357 | 0,273  |
| 14 | P08238 HS90B_HUMAN  | E.TQKSIYYITGESKE.Q                | NA        | 2 | 4,0979 | 0,519 | 0      |
| 14 | P07108 ACBP_HUMAN   | E.DAM*KAYINKVEE.L                 | NA        | 3 | 4,0977 | 0,261 | 0,128  |
| 14 | Q9BTC0 DIDO1_HUMAN  | E.KTAAPS#PSLLYKSTKE.D             | S523      | 3 | 4,0569 | 0,208 | 0,203  |
| 14 | P46063 RECC1_HUMAN  | E.AHAITM*QVTKSTQNS#FRAE.S         | S597      | 3 | 4,0504 | 0,348 | 0,083  |
| 14 | Q8WU17 RN139_HUMAN  | E.RNGVIQHTGAAEEFNDDT#D.-          | T663      | 3 | 4,0428 | 0,396 | 0,408  |
| 14 | Q9Y6G9 DC1L1_HUMAN  | E.LDRITRKPVTVSPT#TPTS#PTEGEAS.-   | T512:S516 | 3 | 4,0415 | 1     | 0,131  |
| 14 | A5PKX8 A5PKX8_HUMAN | E.NGQELS#PIALEPGPEPHRAKQE.A       | S288      | 3 | 4,0402 | 0,344 | 0,148  |
| 14 | P05787 K2C8_HUMAN   | E.LAIKDANAKLSE.L                  | NA        | 2 | 4,0319 | 0,297 | 0,288  |
| 14 | P63104 1433Z_HUMAN  | E.QAERYDDMAACMKSVTE.Q             | NA        | 3 | 3,9973 | 0,29  | -0,456 |
| 14 | Q5UIP0 RIF1_HUMAN   | E.TKKADVQAPVS#PSE.T               | S1772     | 2 | 3,9825 | 0,431 | -0,159 |
| 14 | P12081 SYHC_HUMAN   | E.DSKLIYDLKDQGGE.L                | NA        | 3 | 3,9399 | 0,338 | 0,116  |
| 14 | Q9Y2W6 TDRKH_HUMAN  | E.TKKSSGEITHTLS#CLS#LSE.A         | S539:S542 | 3 | 3,9279 | 0,377 | 0,409  |
| 14 | P41250 SYG_HUMAN    | E.DKAPQVDVDKAVAE.L                | NA        | 3 | 3,9025 | 0,31  | 0,677  |
| 14 | Q9Y5Z4 HEBP2_HUMAN  | E.KVYYTAGYNS#PVKLLNRNNE.V         | S181      | 3 | 3,9016 | 0,254 | 1,435  |
| 14 | Q9BX66 SRBS1_HUMAN  | R.RVGEQDSAPTQEKPT#SPGKAIE.K       | T349      | 3 | 3,8823 | 0,278 | -0,076 |
| 14 | P68104 EF1A1_HUMAN  | E.DGPKFLKSGDAAIVDMVPGKPM*CVE.S    | NA        | 2 | 3,8723 | 0,441 | -0,365 |
| 14 | Q5EBL4 RIPL1_HUMAN  | E.NRIPQPPPIAHPRTS#PQPE.S          | S346      | 3 | 3,8624 | 0,248 | 0,248  |
| 14 | P46013 KI67_HUMAN   | E.STTDDKTTKIACKS#PPPE.S           | S2105     | 3 | 3,8328 | 0,205 | -0,178 |
| 14 | Q71U36 TBA1A_HUMAN  | E.HGIQPDGQM*PSDKTIGGGDDSFNTFFSE.T | NA        | 3 | 3,8198 | 0,352 | 0,427  |
| 14 | O00148 DDX39_HUMAN  | E.NDAKILNDVQDRFE.V                | NA        | 2 | 3,8121 | 0,414 | 0,364  |
| 14 | Q08AD1 CA1L1_HUMAN  | E.KSPHT#PQPDIANGFFLHSQE.M         | T569      | 3 | 3,7745 | 0,177 | -0,223 |
| 14 | Q5SYE7 NHSL1_HUMAN  | E.GSRATMPQVPGGSKPKIM*S#PE.K       | S842      | 3 | 3,7626 | 0,259 | 0,311  |
| 14 | Q03252 LMNB2_HUMAN  | E.ARM*RLES#LSYQLSGLQKQASAAE.D     | S296      | 3 | 3,7471 | 0,368 | 0,139  |
| 14 | P22059 OSBP1_HUMAN  | E.NLGHKRT#GSNIS#GASSDISLDE.Q      | T377:S382 | 3 | 3,6743 | 0,266 | 0,378  |
| 14 | Q7L2J0 MEPCE_HUMAN  | E.VS#RTLNAETPKS#SPLPAKGRDPVE.I    | S206:S216 | 3 | 3,6693 | 0,149 | 0,27   |
| 14 | Q58FF8 H90B2_HUMAN  | E.FDGKSLVSVTKE.G                  | NA        | 3 | 3,6679 | 0,277 | 0,977  |
| 14 | P25205 MCM3_HUMAN   | E.MPQVHT#PKTADSQETKE.S            | T722      | 3 | 3,6571 | 0,114 | 0,091  |
| 14 | Q9UKV8 I2C2_HUMAN   | E.ISKLMRSAS#FNTPYVRE.F            | S379      | 3 | 3,6462 | 0,254 | 0,417  |
| 14 | P22059 OSBP1_HUMAN  | E.NLGHKRTGS#NIS#GASSDISLDE.Q      | S379:S382 | 2 | 3,6462 | 0,43  | 0      |
| 14 | P46937 YAP1_HUMAN   | E.LRTM*TTNS#SDPFLNSGTYHSRDE.S     | S331      | 3 | 3,6442 | 0,252 | 0,201  |
| 14 | Q53EZ4 CEP55_HUMAN  | E.NREKVAAS#PKS#PTAALNE.S          | S425:S428 | 3 | 3,6434 | 0,272 | 0,09   |
| 14 | P37802 TAGL2_HUMAN  | E.VQKQIEKQYDADLE.Q                | NA        | 2 | 3,6407 | 0,358 | 0,071  |
| 14 | Q6NZ12 PTRF_HUMAN   | E.AGDLRRGS#S#PDVHALLE.I           | S365:S366 | 3 | 3,6192 | 0,269 | 0,656  |
| 14 | P49792 RBP2_HUMAN   | E.SSINYTFKT#PEKAKE.K              | T2613     | 3 | 3,6096 | 0,349 | 0,1    |
| 14 | O00231 PSD11_HUMAN  | R.DIQENDEEAVQVK.E                 | NA        | 2 | 3,599  | 0,4   | -0,08  |



|    |                    |                                         |                |   |        |       |        |
|----|--------------------|-----------------------------------------|----------------|---|--------|-------|--------|
| 14 | P68104 EF1A1_HUMAN | E.DGPKFLKSGDAAIVDMVPGKPMCVE.S           | NA             | 2 | 3,5903 | 0,468 | -0,092 |
| 14 | Q96JM3 ZN828_HUMAN | E.LRKPGPPLS#PEIRS#PAGS#PE.L             | S427:S432:S436 | 3 | 3,5849 | 0,349 | 0,157  |
| 14 | Q14966 ZN638_HUMAN | E.RNLKGILEES#PSEAE.D                    | S1243          | 2 | 3,5724 | 0,423 | 0,139  |
| 14 | P19525 E2AK2_HUMAN | E.KKAVSPLLLTTTNS#SE.G                   | S92            | 2 | 3,5695 | 0,468 | 0,276  |
| 14 | P68104 EF1A1_HUMAN | E.DGPKFLKSGDAAIVDM*VPGKPMCVE.S          | NA             | 2 | 3,5657 | 0,474 | 0,365  |
| 14 | Q15369 ELOC_HUMAN  | E.HALTSGTIKAMLSGPGQFAENE.T              | NA             | 3 | 3,5617 | 0,378 | 0,243  |
| 14 | P78371 TCPB_HUMAN  | E.DKLIHFSGVALGE.A                       | NA             | 2 | 3,5587 | 0,401 | -0,088 |
| 14 | O00592 PODXL_HUMAN | E.KKVVS#LNGE.L                          | S499           | 2 | 3,5506 | 0,346 | 0,116  |
| 14 | P07108 ACBP_HUMAN  | E.DAMKAYINKVEE.L                        | NA             | 3 | 3,5487 | 0,25  | 0,194  |
| 14 | Q9NWS0 PIHD1_HUMAN | E.NRLVM*GGPQQLYHLD.A                    | NA             | 3 | 3,5457 | 0,227 | 0,208  |
| 14 | Q92576 PHF3_HUMAN  | E.KQES#PKSTFSPAPRPE.M                   | S1178          | 3 | 3,5416 | 0,225 | 0,294  |
| 14 | P09211 GSTP1_HUMAN | E.DLRCKYISLIYTNYE.A                     | NA             | 2 | 3,5273 | 0,298 | 0      |
| 14 | P68104 EF1A1_HUMAN | E.DGPKFLKSGDAAIVDMVPGKPMCVE.S           | NA             | 3 | 3,5241 | 0,282 | -0,069 |
| 14 | Q7Z2Z1 CO042_HUMAN | R.LQKS#PAKM*T#PTKQAAFKE.S               | S1141:T1146    | 3 | 3,5156 | 0,21  | 0,084  |
| 14 | Q12965 MYO1E_HUMAN | R.RNS#INRNFIGDYIGM*EEHPE.L              | S736           | 3 | 3,5056 | 0,284 | -0,147 |
| 14 | P25205 MCM3_HUMAN  | E.M*PQVHT#PKTADSQETKE.S                 | T722           | 3 | 3,5049 | 0,24  | 0,09   |
| 14 | Q8WUM4 PDC6I_HUMAN | E.GLLKNIQVSHQE.F                        | NA             | 3 | 3,5013 | 0,299 | 0,067  |
| 14 | P68371 TBB2C_HUMAN | E.HGIDPTGTYHGSDQLQE.R                   | NA             | 2 | 3,4992 | 0,364 | 0      |
| 14 | Q9UQ35 SRRM2_HUMAN | E.KM*ALPPQEDATAS#PPRQKD.K               | S1179          | 3 | 3,4945 | 0,169 | 0,168  |
| 14 | Q92922 SMRC1_HUMAN | R.KHS#PS#PPPPTPTESR.K                   | S328:S330      | 3 | 3,493  | 0,168 | 0,103  |
| 14 | Q8IZ69 HTF9C_HUMAN | E.RVEHPNGTGVLGPHS#PPAQPTGPPDNTLQE.T     | S602           | 3 | 3,4897 | 0,299 | -0,112 |
| 14 | Q9UHK0 NUFP1_HUMAN | D.SSAPKS#PSQDVKATVRNFSE.A               | S403           | 3 | 3,4884 | 0,146 | 0,083  |
| 14 | P63241 IF5A1_HUMAN | E.DICPSTHNM*DVPNIKRNDFQLIGIQD.G         | NA             | 3 | 3,4762 | 0,09  | 0,419  |
| 14 | Q96AQ6 PBIP1_HUMAN | E.NQDIRLLQAQLQAQKEE.L                   | NA             | 3 | 3,4733 | 0,245 | -0,632 |
| 14 | O60841 IF2P_HUMAN  | E.AAQGVKILGKDLE.K                       | NA             | 3 | 3,4717 | 0,343 | 0,204  |
| 14 | Q9BWD1 THIC_HUMAN  | E.DQDKVAVLSQNRTE.N                      | NA             | 2 | 3,4716 | 0,454 | 0,076  |
| 14 | Q01105 SET_HUMAN   | D.FYFDENPYFENK.V                        | NA             | 2 | 3,4701 | 0,397 | 0,151  |
| 14 | Q6GYQ0 GRIPE_HUMAN | E.DFAAQVFSAPYHHLPSDADH.-                | NA             | 3 | 3,4694 | 0,184 | 0,236  |
| 14 | P62988 UBIQ_HUMAN  | E.DGRTLSDYNIQKE.S                       | NA             | 3 | 3,4667 | 0,129 | 0,594  |
| 14 | Q5QE6 TDIF2_HUMAN  | E.INKPNFYNNDFDDDFSHRS#SE.N              | S273           | 3 | 3,4457 | 0,086 | 0,693  |
| 14 | P12814 ACTN1_HUMAN | E.NQILTRDAKGISQEQM*NE.F                 | NA             | 3 | 3,4447 | 0,312 | 0,262  |
| 14 | Q96AQ6 PBIP1_HUMAN | R.ALQAPHS#PSKTDGKE.L                    | S43            | 3 | 3,432  | 0,333 | 0,222  |
| 14 | Q96JM3 ZN828_HUMAN | D.TEPRKPALEPEAKTAPPAS#PE.A              | S542           | 3 | 3,4316 | 0,274 | 0,076  |
| 14 | Q9Y4B5 K0802_HUMAN | E.REGPGRDHAPS#IPT#SPFGDSLE.S            | S609:T612      | 3 | 3,4201 | 0,331 | 0,221  |
| 14 | O14545 TRAD1_HUMAN | E.ADQSHGGPRS#LSDIKGAADE.I               | S278           | 3 | 3,4113 | 0,202 | 0      |
| 14 | Q5SW79 CE170_HUMAN | E.LSKSASAKS#IDSKVADAATE.V               | S138           | 3 | 3,4083 | 0,378 | 0,089  |
| 14 | Q08J23 NSUN2_HUMAN | E.GQRAGEPNS#PDAAEANS#PDVTAGCDPAGVHPPR.- | S743:S751      | 3 | 3,407  | 0,447 | 0,104  |
| 14 | O95777 LSM8_HUMAN  | E.SHERVFSSS#QGVE.Q                      | S49            | 2 | 3,4069 | 0,413 | -0,16  |
| 14 | P52272 HNRPM_HUMAN | E.CGHVLYADIKM*E.N                       | NA             | 3 | 3,404  | 0,219 | 0,252  |
| 14 | Q09666 AHNK_HUMAN  | E.LNLKS#PKVKGDLDIAGPNLE.G               | S3426          | 3 | 3,3983 | 0,279 | 0,166  |
| 14 | P52907 CAZA1_HUMAN | D.VRLLNNDNLLRE.G                        | NA             | 3 | 3,398  | 0,297 | -0,116 |

|    |                     |                                     |                |   |        |       |        |
|----|---------------------|-------------------------------------|----------------|---|--------|-------|--------|
| 14 | Q9Y265 RUVB1_HUMAN  | E.SGLAKQAASGLVGQENARE.A             | NA             | 3 | 3,3862 | 0,284 | -0,097 |
| 14 | Q9UK45 LSM7_HUMAN   | E.YMRDPDDQYKLTE.D                   | NA             | 3 | 3,3668 | 0,16  | -0,109 |
| 14 | P27816 MAP4_HUMAN   | E.TERAS#PIKMDLAPSKD.M               | S358           | 3 | 3,3626 | 0,37  | 0,398  |
| 14 | P49368 TCPG_HUMAN   | E.DSCVLRGVM*INKD.V                  | NA             | 3 | 3,3626 | 0,398 | 0,12   |
| 14 | P12081 SYHC_HUMAN   | E.DSKLIYDLKDQGGE.L                  | NA             | 2 | 3,3449 | 0,297 | 0,232  |
| 14 | P68104 EF1A1_HUMAN  | E.ALDCILPPTRPTDKPLRLPLQD.V          | NA             | 3 | 3,3446 | 0,274 | -0,145 |
| 14 | P12814 ACTN1_HUMAN  | E.NQILTRDAKGISQEQMNE.F              | NA             | 3 | 3,3418 | 0,34  | 0,353  |
| 14 | Q8IVF2 AHNK2_HUMAN  | E.DSKLSLVLDKDE.V                    | NA             | 2 | 3,3397 | 0,399 | -0,269 |
| 14 | Q9BWD1 THIC_HUMAN   | E.DQDKVAVLSQNRTE.N                  | NA             | 3 | 3,337  | 0,283 | 0,228  |
| 14 | P83731 RL24_HUMAN   | R.TDGKVFQFLNAKCE.S                  | NA             | 3 | 3,3323 | 0,162 | -0,221 |
| 14 | Q86T35 Q86T35_HUMAN | E.ANKTPLEKEPHS#PADQPEQQAE.S         | S265           | 3 | 3,3269 | 0,23  | 0,072  |
| 14 | P63241 IF5A1_HUMAN  | E.AVAIKAMAK.-                       | NA             | 2 | 3,3242 | 0,366 | 0,063  |
| 14 | Q13416 ORC2_HUMAN   | E.LAKTPQKSVS#FSLKNDPE.I             | S122           | 3 | 3,324  | 0,199 | 0,177  |
| 14 | P41250 SYG_HUMAN    | E.DKAPQVDVDKAVAE.L                  | NA             | 2 | 3,3163 | 0,442 | 0      |
| 14 | O14646 CHD1_HUMAN   | R.SKKSS#VSDAPVHITASGEPVPISEE.S      | S1385          | 3 | 3,3159 | 0,299 | 0,139  |
| 14 | Q9UPN9 TRI33_HUMAN  | E.DGRRSACMLSSPESSLT#PPLSTNLHLE.S    | T815           | 3 | 3,3107 | 0,237 | 0,301  |
| 14 | P00558 PGK1_HUMAN   | D.KIQLINMLDKVNE.M                   | NA             | 3 | 3,3102 | 0,391 | 0,219  |
| 14 | A9CQZ4 A9CQZ4_HUMAN | E.NKTIDFDSLS#VGRGSGQVVAQQRD.V       | S56            | 3 | 3,291  | 0,309 | 0,138  |
| 14 | Q8IXT5 RB12B_HUMAN  | E.DFRFPPEDFRHS#PE.D                 | S575           | 3 | 3,2694 | 0,161 | 0,197  |
| 14 | O94906 PRP6_HUMAN   | E.DARIM*LSRAVE.C                    | NA             | 3 | 3,2602 | 0,22  | 0,215  |
| 14 | P05787 K2C8_HUMAN   | E.AAIADAEQRGE.L                     | NA             | 2 | 3,2579 | 0,489 | 0      |
| 14 | P07814 SYEP_HUMAN   | E.DVAM*LHIKPDQFTYTSDFE.T            | NA             | 3 | 3,25   | 0,19  | -0,076 |
| 14 | Q01518 CAP1_HUMAN   | R.SGPKPFSAPKQT#SPS#PK.R             | T307:S310      | 3 | 3,2385 | 0,134 | -0,458 |
| 14 | P61026 RAB10_HUMAN  | E.DILRKT#PVKEPNSE.N                 | T174           | 3 | 3,2234 | 0,164 | -0,107 |
| 14 | P14625 ENPL_HUMAN   | E.LVKNLGTIAKSGTSE.F                 | NA             | 2 | 3,2032 | 0,22  | 0,241  |
| 14 | O43264 ZW10_HUMAN   | E.DIDLLKSRIE.S                      | NA             | 2 | 3,2026 | 0,201 | 0,203  |
| 14 | P04406 G3P_HUMAN    | E.NGKLVINGNPITIFQE.R                | NA             | 2 | 3,1983 | 0,411 | 0,139  |
| 14 | P63241 IF5A1_HUMAN  | E.DLRLPEGDLGKE.I                    | NA             | 2 | 3,1968 | 0,253 | 0,182  |
| 14 | Q8TBA6 GOGA5_HUMAN  | E.NVSSNAACPDHT#PTPNDGKSHE.L         | T212           | 3 | 3,1955 | 0,177 | -0,217 |
| 14 | O95831 AIFM1_HUMAN  | E.KCLIATGGTTPRSL#AIDRAGAE.V         | S268           | 3 | 3,1938 | 0,246 | 0,236  |
| 14 | Q9UKV3 ACINU_HUMAN  | E.NLQKHS#TPHAAFQPN SQIGEE.M         | S115           | 3 | 3,1886 | 0,239 | 0,682  |
| 14 | Q8IXJ6 SIRT2_HUMAN  | E.HASIDAQSGAGVNPSTAS#PKKS#PPPAKDE.A | S368:S372      | 3 | 3,1834 | 1     | -0,23  |
| 14 | P22059 OSBP1_HUMAN  | E.NLGHKRTGS#NIS#GAS#SDISLDE.Q       | S379:S382:S385 | 3 | 3,1748 | 0,204 | 0,073  |
| 14 | P13639 EF2_HUMAN    | E.IKDSVVAGFQWATKE.G                 | NA             | 3 | 3,1745 | 0,09  | -0,327 |
| 14 | Q658J3 A26CA_HUMAN  | E.KLCYVALDFEQE.M                    | NA             | 2 | 3,1728 | 0,357 | 0      |
| 14 | P31751 AKT2_HUMAN   | E.LDQRTHFPQFSYSAS#IRE.-             | S478           | 3 | 3,1696 | 0,378 | 0,404  |
| 14 | P61981 1433G_HUMAN  | E.QAERYDDMAAAMKNVTE.L               | NA             | 3 | 3,1634 | 0,245 | 0,094  |
| 14 | P41252 SYIC_HUMAN   | E.SHQNYKDVQDPSVFTFPLEEDE.T          | NA             | 3 | 3,1627 | 0,418 | 0,134  |
| 14 | Q9NYZ3 GTSE1_HUMAN  | E.IPAS#PSRTKIPAEKE.S                | S243           | 3 | 3,1569 | 0,192 | 0,107  |
| 14 | P40855 PEX19_HUMAN  | D.ASGPQKRS#PGDTAKDALFASQE.K         | S54            | 3 | 3,1515 | 0,301 | -0,313 |
| 14 | P25942 TNR5_HUMAN   | E.TLHGQCQPVTQEDGKESRIS#VQE.R        | S272           | 3 | 3,1494 | 0,345 | 0      |

|    |                     |                               |             |   |        |       |        |
|----|---------------------|-------------------------------|-------------|---|--------|-------|--------|
| 14 | A7KAX9 A7KAX9_HUMAN | R.DAT#NRSPTQIVKM*KTNE.T       | T949        | 3 | 3,1457 | 0,139 | 0      |
| 14 | Q9H9B1 EHMT1_HUMAN  | E.DDKLQGAASHVPE.G             | NA          | 3 | 3,1363 | 0,231 | 0,134  |
| 14 | P09874 PARP1_HUMAN  | E.AGGVTGKGDGIGSKAE.K          | NA          | 3 | 3,1301 | 0,318 | 0,179  |
| 14 | O00148 DDX39_HUMAN  | E.NDAKILNDVQDRFE.V            | NA          | 3 | 3,1264 | 0,308 | 0,218  |
| 14 | O94826 TOM70_HUMAN  | E.GRAS#PAPGSGHPEGPGAHL.D.M    | S91         | 3 | 3,1262 | 0,227 | 0,282  |
| 14 | Q92598 HS105_HUMAN  | R.IAKFFGKDISTTLNADE.A         | NA          | 3 | 3,1191 | 0,28  | 0,391  |
| 14 | P30153 2AAA_HUMAN   | E.KLTQDQDQDVVKYFAQE.A         | NA          | 3 | 3,1157 | 0,262 | 0,095  |
| 14 | P07951 TPM2_HUMAN   | E.LKIVTNNLKSLE.A              | NA          | 3 | 3,1128 | 0,103 | 0,2    |
| 14 | Q09666 AHNK_HUMAN   | D.IKS#PKFKAEAPLPS#PKLE.G      | S5099:S5110 | 3 | 3,1073 | 0,296 | 0,94   |
| 14 | P30041 PRDX6_HUMAN  | E.DHLAWSKDINAYNCEEPT.E.K      | NA          | 3 | 3,0839 | 0,259 | 0,319  |
| 14 | P21796 VDAC1_HUMAN  | E.DQLARGLKLTFD.S              | NA          | 2 | 3,0824 | 0,231 | -0,177 |
| 14 | P26639 SYTC_HUMAN   | E.KAS#SPSGKM*GGEEKPIGAGEE.K   | S7          | 3 | 3,0772 | 0,295 | 0,342  |
| 14 | Q29RF7 PDS5A_HUMAN  | R.KRAAVGQES#PGGLE.A           | S1305       | 2 | 3,076  | 0,485 | 0,165  |
| 14 | Q02952 AKA12_HUMAN  | E.LQSHAKSPPS#PVERE.M          | S1331       | 3 | 3,0743 | 0,284 | 0,105  |
| 14 | P07951 TPM2_HUMAN   | E.LKIVTNNLKSLE.A              | NA          | 2 | 3,0669 | 0,225 | 0,267  |
| 14 | Q5VSL9 FA40A_HUMAN  | E.DSIKIVIRNMRAS#PPASASDLIE.Q  | S335        | 3 | 3,0571 | 0,279 | 0,508  |
| 14 | P05023 AT1A1_HUMAN  | E.VSMDDHKLSDLE.L              | NA          | 3 | 3,0526 | 0,11  | 0,329  |
| 14 | P29692 EF1D_HUMAN   | E.HVQSVDAIAFNKI.-             | NA          | 3 | 3,0464 | 0,36  | 0,254  |
| 14 | P27816 MAP4_HUMAN   | E.TERAS#PIKM*DLAPSKD.M        | S358        | 3 | 3,0456 | 0,244 | 0,394  |
| 14 | P07814 SYEP_HUMAN   | E.DLKTTHMVVANTME.D            | NA          | 2 | 3,0414 | 0,348 | 0,246  |
| 14 | P42766 RL35_HUMAN   | E.LLKQLDDLKVE.L               | NA          | 3 | 3,0384 | 0,296 | 0,348  |
| 14 | Q58FF8 H90B2_HUMAN  | E.SLTDPSKLDGKE.L              | NA          | 2 | 3,0316 | 0,341 | -0,089 |
| 14 | Q71U36 TBA1A_HUMAN  | E.HGIQPDGQM*PSDKTIGGGDD.S     | NA          | 3 | 3,0277 | 0,219 | 0,09   |
| 14 | P27816 MAP4_HUMAN   | R.LATNTSAPDLKNVRSKVGST#E.N    | T942        | 3 | 3,0276 | 0,262 | 0,242  |
| 14 | Q9UQ35 SRRM2_HUMAN  | E.KMALPPQEDATAS#PPRQKD.K      | S1179       | 3 | 3,0233 | 0,155 | -0,508 |
| 14 | P08238 HS90B_HUMAN  | E.AFSKNLKLGIHE.D              | NA          | 3 | 3,0209 | 0,336 | -0,067 |
| 14 | O60869 EDF1_HUMAN   | E.SGRAIPNNQVLGKIE.R           | NA          | 3 | 3,0205 | 0,243 | 0      |
| 14 | P60660 MYL6_HUMAN   | E.VLKVLGNPKSDE.M              | NA          | 2 | 3,0087 | 0,369 | -0,094 |
| 14 | Q5VWG9 TAF3_HUMAN   | E.KTKLPSS#VE.V                | S518        | 2 | 3,0076 | 0,177 | 0,114  |
| 14 | Q6NZI2 PTRF_HUMAN   | E.AGDLRRGS#SPDVHALLE.I        | S365        | 3 | 3,005  | 0,254 | 1,074  |
| 14 | P14618 KPYM_HUMAN   | E.LRRLAPITSDPTEATAVGAVE.A     | NA          | 3 | 3,0026 | 0,292 | 0,422  |
| 14 | Q05639 EF1A2_HUMAN  | E.DNPKSLKSGDAAIVE.M           | NA          | 2 | 2,9966 | 0,371 | -0,158 |
| 14 | P46937 YAP1_HUMAN   | E.LRTMTTNS#DPFLNSGTYHSRDE.S   | S332        | 3 | 2,9903 | 0,389 | 0,135  |
| 14 | Q9Y2I7 FYV1_HUMAN   | E.SKISAM*DASPRNIS#PGLQNGEKE.D | S1549       | 3 | 2,9853 | 0,171 | -0,145 |
| 14 | Q96Q45 AL2S4_HUMAN  | E.GLAQTAGRRPS#EGNEPSTKE.L     | S86         | 3 | 2,9813 | 0,226 | 0,253  |
| 14 | Q96C19 EFHD2_HUMAN  | E.AKVQAINVSSRFEEE.I           | NA          | 3 | 2,9744 | 0,116 | -0,107 |
| 14 | Q8WTT2 NOC3L_HUMAN  | E.DLNQLIKRYSSE.V              | NA          | 2 | 2,9718 | 0,344 | 0,083  |
| 14 | Q9NWS0 PIHD1_HUMAN  | E.NRLVMGGPQQLYHLD.A           | NA          | 3 | 2,9713 | 0,258 | 0,21   |
| 14 | Q9BPX3 CND3_HUMAN   | E.KSKLNLAQFLNEDLS#.-          | S1015       | 2 | 2,97   | 0,426 | -0,068 |
| 14 | Q8N954 CCD75_HUMAN  | E.DKEDLSSNCPGPTSADHD.-        | NA          | 3 | 2,9684 | 0,243 | 0,188  |
| 14 | P60900 PSA6_HUMAN   | E.IDAHLVALAERD.-              | NA          | 3 | 2,9654 | 0,191 | 0,069  |

|    |                     |                                 |             |   |        |       |        |
|----|---------------------|---------------------------------|-------------|---|--------|-------|--------|
| 14 | P11021 GRP78_HUMAN  | E.GERLIGDAAKNQLTSNPE.N          | NA          | 3 | 2,9597 | 0,229 | 0,287  |
| 14 | P07814 SYEP_HUMAN   | E.DLKTHMVVANTM*E.D              | NA          | 2 | 2,9593 | 0,222 | -0,324 |
| 14 | O94826 TOM70_HUMAN  | E.GRAS#PAPGSGHPEGPGAHL.D.M      | S91         | 2 | 2,9567 | 0,439 | 0      |
| 14 | P06733 ENOA_HUMAN   | R.LAKYNQLLRIEEE.L               | NA          | 3 | 2,9485 | 0,083 | 0      |
| 14 | P09211 GSTP1_HUMAN  | E.DLRCKYISLIYTNYE.A             | NA          | 3 | 2,9456 | 0,195 | 0,563  |
| 14 | O43818 U3IP2_HUMAN  | E.DQVAGRLKEDVLE.Q               | NA          | 2 | 2,9406 | 0,115 | 0,332  |
| 14 | P36578 RL4_HUMAN    | E.SSGKNVTLPAVFK.A               | NA          | 3 | 2,9376 | 0,237 | 0,136  |
| 14 | P60709 ACTB_HUMAN   | R.GYSFTTTAERE.I                 | NA          | 2 | 2,9342 | 0,417 | 0,29   |
| 14 | P31949 S10AB_HUMAN  | D.SFLKAVPSQKRT.-                | NA          | 3 | 2,9274 | 0,191 | 0,067  |
| 14 | P27348 1433T_HUMAN  | E.VACGDDRRKQTIDNSQGAYQE.A       | NA          | 3 | 2,9139 | 0,199 | 0,243  |
| 14 | O94854 K0754_HUMAN  | E.SSSALTESS#GHLDHREPQSE.S       | S43         | 3 | 2,9113 | 0,16  | -0,246 |
| 14 | O95292 VAPB_HUMAN   | E.LPAENDKPHDVE.I                | NA          | 2 | 2,8986 | 0,325 | 0      |
| 14 | P61981 1433G_HUMAN  | E.QAERYDDM*AAAMKNVTE.L          | NA          | 3 | 2,8956 | 0,107 | -0,28  |
| 14 | Q99497 PARK7_HUMAN  | E.KDGLILTSRGPSTFE.F             | NA          | 3 | 2,8917 | 0,407 | 0      |
| 14 | Q7RTV0 PHF5A_HUMAN  | D.SYVRPCTLVRICDE.C              | NA          | 3 | 2,8874 | 0,328 | 0,31   |
| 14 | P68431 H31_HUMAN    | E.DTNLCAIHAK.R                  | NA          | 2 | 2,887  | 0,237 | -0,107 |
| 14 | P78316 NOP14_HUMAN  | E.LTHYQSLADIEKHNDIVDS#D.S       | S146        | 3 | 2,8849 | 0,205 | 0,299  |
| 14 | P27816 MAP4_HUMAN   | E.TERAS#PIKMDLAPSKD.M           | S358        | 2 | 2,881  | 0,294 | -0,066 |
| 14 | P62750 RL23A_HUMAN  | D.VAKVNTLIRPDGE.K               | NA          | 3 | 2,8778 | 0,177 | 0      |
| 14 | Q9BWJ5 SF3B5_HUMAN  | E.KMLQPCGPPADKPEEN.-            | NA          | 3 | 2,8726 | 0,193 | 0,303  |
| 14 | Q32MZ4 LRRF1_HUMAN  | E.LNALKSTGDGTLGRASE.V           | NA          | 3 | 2,8721 | 0,124 | 0,216  |
| 14 | Q5T4S7 UBR4_HUMAN   | E.S#LVRHAS#TSSPADKAKVTISD.G     | S1754:S1760 | 3 | 2,8656 | 0,362 | 0      |
| 14 | Q6S8J3 A26CA_HUMAN  | E.KSYELPDGQVITIGNE.R            | NA          | 2 | 2,8654 | 0,397 | 0      |
| 14 | P48444 COPD_HUMAN   | E.VDNFVDKLGSE.G                 | NA          | 3 | 2,8599 | 0,13  | 0,212  |
| 14 | Q9Y266 NUDC_HUMAN   | E.DGKVVTVHLE.K                  | NA          | 2 | 2,8589 | 0,335 | 0,111  |
| 14 | Q58FF8 H90B2_HUMAN  | E.FDGKSLVSVTKE.G                | NA          | 2 | 2,856  | 0,307 | 0,373  |
| 14 | P14625 ENPL_HUMAN   | E.LVKNLGTIAKSGTSE.F             | NA          | 3 | 2,8545 | 0,134 | 0,361  |
| 14 | A8K1N6 A8K1N6_HUMAN | E.LLKKGSLLPTS#PRLVNE.S          | S284        | 2 | 2,8539 | 0,258 | 0,251  |
| 14 | P62937 PPIA_HUMAN   | E.LFADKVPKTAE.N                 | NA          | 3 | 2,8488 | 0,24  | 0,45   |
| 14 | P31948 STIP1_HUMAN  | D.VYQKALDLSSCKE.A               | NA          | 3 | 2,8486 | 0,112 | 0,552  |
| 14 | Q96C01 F136A_HUMAN  | E.DSQASM*KQVHQIE.R              | NA          | 2 | 2,8465 | 0,291 | -0,073 |
| 14 | Q2T9K0 TMM44_HUMAN  | E.LLGSQVHQDSVRTAHL#DDD.-        | S472        | 3 | 2,8419 | 0,289 | 0,241  |
| 14 | P07108 ACBP_HUMAN   | E.DAM*KAYINKVEE.L               | NA          | 2 | 2,8416 | 0,203 | -0,257 |
| 14 | Q5VUA4 ZN318_HUMAN  | E.GERNS#PNPRSVRIPS#PNILKTGLTE.N | S2091:S2101 | 3 | 2,84   | 0,176 | -0,063 |
| 14 | Q52LD0 Q52LD0_HUMAN | E.YGKAGGS#PAS#YHGSTSPRVSE.L     | S192:S195   | 3 | 2,8362 | 0,289 | 0,078  |
| 14 | Q14019 COTL1_HUMAN  | E.LKKAGGANYPDQQT#E.-            | T141        | 2 | 2,8277 | 0,317 | -0,237 |
| 14 | A6NJL0 A6NJL0_HUMAN | E.QIRLM*DQNLKCLSAEE.M           | NA          | 3 | 2,8255 | 0,194 | 0,18   |
| 14 | Q12756 KIF1A_HUMAN  | E.DGGTLGVFSPKTPHLVNLNEDPLM*SE.C | NA          | 3 | 2,8231 | 0,304 | 0,251  |
| 14 | P06756 ITAV_HUMAN   | E.REQLQPHENGEGNS#ET.-           | S1046       | 2 | 2,8219 | 0,293 | 0,192  |
| 14 | P68104 EF1A1_HUMAN  | D.VYKIGGIGTVPVGRVE.T            | NA          | 3 | 2,8217 | 0,144 | 0,111  |
| 14 | Q52LD0 Q52LD0_HUMAN | E.YGKAGGS#PAS#YHGSTSPRVSE.L     | S192        | 3 | 2,8184 | 0,26  | 0      |

|    |                    |                             |       |   |        |       |        |
|----|--------------------|-----------------------------|-------|---|--------|-------|--------|
| 14 | P13693 TCTP_HUMAN  | -.M*IIYRDLISHDE.M           | NA    | 2 | 2,8077 | 0,267 | -0,562 |
| 14 | Q12830 BPTF_HUMAN  | E.TKSHLLSSS#DAE.G           | S1478 | 2 | 2,8038 | 0,261 | -0,18  |
| 14 | Q58FF7 H90B3_HUMAN | E.YCVQQLKE.F                | NA    | 2 | 2,7874 | 0,245 | 0,343  |
| 14 | Q15545 TAF7_HUMAN  | E.NQGLDISS#PGMSGHRRQGHSLE.H | S201  | 3 | 2,7867 | 0,132 | 1,523  |
| 14 | Q8N3D4 EH1L1_HUMAN | E.DRRPLPGSQAPPALVSSQSLE.W   | NA    | 3 | 2,7846 | 0,183 | 0,238  |
| 14 | P22314 UBA1_HUMAN  | E.DLIRKLAYVAAGD.L           | NA    | 2 | 2,7811 | 0,344 | -0,087 |
| 14 | Q13564 ULA1_HUMAN  | E.DLRDKPFPE.L               | NA    | 3 | 2,7768 | 0,169 | 0,074  |
| 14 | Q14141 SEPT6_HUMAN | E.LLQSQGSQAGGSQT#LKRDK.E.K  | T418  | 3 | 2,7718 | 0,09  | -0,331 |
| 14 | P26639 SYTC_HUMAN  | E.KAS#SPSGKM*GGEEKPIGAGE.E  | S7    | 3 | 2,7684 | 0,291 | 0,091  |
| 14 | P60174 TPIS_HUMAN  | E.LIGQKVAHALAE.G            | NA    | 2 | 2,7602 | 0,377 | 0,098  |
| 14 | P21580 TNAP3_HUMAN | E.DLKVHFLTDPENE.M           | NA    | 2 | 2,7566 | 0,329 | 0,784  |
| 14 | P62736 ACTA_HUMAN  | E.AQSKRGILTLYPIE.H          | NA    | 3 | 2,7415 | 0,213 | 0,107  |
| 14 | P31948 STIP1_HUMAN | E.DGCKTVDLKPD.W             | NA    | 3 | 2,7339 | 0,307 | 0,073  |
| 14 | Q14692 BMS1_HUMAN  | E.LGGLFRVNQPDRE.C           | NA    | 3 | 2,7338 | 0,1   | 0,244  |
| 14 | Q5H9R7 SAPS3_HUMAN | E.KHIAFT#PE.S               | T631  | 2 | 2,726  | 0,18  | -0,06  |
| 14 | P42167 LAP2B_HUMAN | E.HFRIDGPVIS#E.S            | S276  | 2 | 2,7249 | 0,455 | 0,542  |
| 14 | Q9Y4K4 M4K5_HUMAN  | E.SRPTENPTAHSNLYILAGHENS#.- | Y846  | 3 | 2,7248 | 0,238 | 0,966  |
| 14 | Q6P0N0 CN106_HUMAN | E.SIVATTKSKKDT#FVLE.S       | T267  | 3 | 2,7247 | 0,097 | 0,495  |
| 14 | P05023 AT1A1_HUMAN | E.VSM*DDHKLSLDE.L           | NA    | 3 | 2,7228 | 0,237 | 0,13   |
| 14 | Q9NZI8 IF2B1_HUMAN | E.NHALKVSYPDEQIAQGPE.N      | NA    | 3 | 2,7218 | 0,344 | 0,087  |
| 14 | Q9NX63 CHCH3_HUMAN | E.NITVVKGIRLSE.N            | NA    | 2 | 2,7213 | 0,211 | 0      |
| 14 | Q9H1B7 EAP1_HUMAN  | E.VGVGAGGKRPGS#VSSTDQERE.L  | S334  | 3 | 2,7166 | 0,249 | 0,34   |
| 14 | P55072 TERA_HUMAN  | E.DIGGLEDVKRE.L             | NA    | 2 | 2,7109 | 0,349 | 0,198  |
| 14 | P42704 LPPRC_HUMAN | E.SKNLDFQKTVQLTSSELE.S      | NA    | 3 | 2,7108 | 0,338 | -0,354 |
| 14 | P31949 S10AB_HUMAN | E.FLNLIGGLAM*ACHD.S         | NA    | 2 | 2,7103 | 0,346 | -0,158 |
| 14 | P49755 TMEDA_HUMAN | E.DATKGKFAFTE.D             | NA    | 2 | 2,6855 | 0,4   | 0,093  |
| 14 | Q15691 MARE1_HUMAN | R.DFYFGKLRNIE.L             | NA    | 2 | 2,6814 | 0,331 | 0      |
| 14 | P60174 TPIS_HUMAN  | E.LIGTLNAAKVPADTE.V         | NA    | 2 | 2,6807 | 0,22  | -0,081 |
| 14 | P68104 EF1A1_HUMAN | E.DGPKFLKSGDAAIVD.M         | NA    | 2 | 2,6755 | 0,485 | 0,08   |
| 14 | Q15154 PCM1_HUMAN  | E.SDKRVTNDIS#PE.S           | S65   | 2 | 2,6578 | 0,236 | 0      |
| 14 | P07814 SYEP_HUMAN  | E.DLKTTHM*VVANTM*E.D        | NA    | 2 | 2,6465 | 0,159 | 0,08   |
| 14 | O60841 IF2P_HUMAN  | E.AAQGVKILGKDLE.K           | NA    | 2 | 2,6417 | 0,365 | -0,364 |
| 14 | Q8N108 MIER1_HUMAN | E.DKVIIIFLKD.A              | NA    | 2 | 2,6409 | 0,1   | -0,112 |
| 14 | Q07955 SFRS1_HUMAN | E.DM*TYAVRKL.D.N            | NA    | 2 | 2,6298 | 0,37  | 0,099  |
| 14 | Q96FW1 OTUB1_HUMAN | E.DDNIYQQKIKD.L             | NA    | 2 | 2,62   | 0,306 | 0,265  |
| 14 | O43847 NRDC_HUMAN  | E.GRRGS#LSNAGDPE.I          | S94   | 2 | 2,6084 | 0,335 | 0,087  |
| 14 | P55327 TPD52_HUMAN | E.DVKNSPTFKSFEE.K           | NA    | 2 | 2,5969 | 0,214 | 1,118  |
| 14 | Q9NP61 ARFG3_HUMAN | E.DLAKVVSKEE.S              | NA    | 2 | 2,5923 | 0,211 | -0,218 |
| 14 | P27816 MAP4_HUMAN  | E.NKIVPAKDLVLLSE.I          | NA    | 2 | 2,5844 | 0,231 | -0,159 |
| 14 | Q9UPY8 MARE3_HUMAN | R.DFYFSKLRDIE.L             | NA    | 2 | 2,574  | 0,312 | 0      |
| 14 | P68104 EF1A1_HUMAN | E.TGVLPKPGM*VVTFAPVNVTTTE.V | NA    | 2 | 2,5698 | 0,165 | -0,118 |

|    |                    |                          |           |   |        |       |        |
|----|--------------------|--------------------------|-----------|---|--------|-------|--------|
| 14 | P60174 TPIS_HUMAN  | E.FVDIINAKQ.-            | NA        | 2 | 2,5534 | 0,249 | 0      |
| 14 | Q9NVN8 GNL3L_HUMAN | E.IKLLHS#PM*TKIADAIE.N   | S465      | 2 | 2,5446 | 0,199 | 0,39   |
| 14 | P35998 PRS7_HUMAN  | E.DDIQQLKKINE.L          | NA        | 2 | 2,5399 | 0,147 | -0,084 |
| 14 | Q6UB35 C1TM_HUMAN  | E.DTRVHGLALQISE.N        | NA        | 2 | 2,513  | 0,271 | 0,17   |
| 14 | Q53EZ4 CEP55_HUMAN | E.NREKVAAS#PKS#PTAALNE.S | S425:S428 | 2 | 2,5094 | 0,238 | -0,06  |
| 14 | Q965T2 IWS1_HUMAN  | E.TRKLPGS#DSENEE.L       | S131      | 2 | 2,4992 | 0,356 | -0,237 |
| 14 | P62937 PPIA_HUMAN  | E.LFADKVPKTAE.N          | NA        | 2 | 2,4868 | 0,151 | -0,2   |
| 14 | Q02790 FKBP4_HUMAN | E.DLTEEEDGGIIR.R         | NA        | 2 | 2,4855 | 0,255 | -0,815 |
| 14 | Q6UB98 ANR12_HUMAN | E.HTKTCLS#PGSSE.M        | S568      | 2 | 2,4763 | 0,412 | 0,176  |
| 14 | P11142 HSP7C_HUMAN | E.VSSMVLTKM*KE.I         | NA        | 2 | 2,4693 | 0,243 | -0,096 |
| 14 | Q16576 RBBP7_HUMAN | E.DVAWHLLHE.S            | NA        | 2 | 2,4611 | 0,229 | 0,218  |
| 14 | P51858 HDGF_HUMAN  | E.DAEAPGIRDHE.S          | NA        | 2 | 2,4527 | 0,279 | 0      |
| 14 | O60271 JIP4_HUMAN  | E.RT#KLHQLS#GSDQLE.S     | T177:S183 | 2 | 2,4523 | 0,277 | 0,069  |
| 14 | P00558 PGK1_HUMAN  | E.GKVLPGVDALSNI.-        | NA        | 2 | 2,4406 | 0,366 | 0,095  |
| 14 | Q6UXH1 CREL2_HUMAN | E.KTLSKYESS#E.I          | S71       | 2 | 2,4406 | 0,202 | -0,195 |
| 14 | Q5T5Y3 CAMP1_HUMAN | R.KLQRLNS#CE.T           | S827      | 2 | 2,4248 | 0,447 | -0,298 |
| 14 | P36578 RL4_HUMAN   | E.SSGKNVTLPAVFK.A        | NA        | 2 | 2,4245 | 0,328 | -0,181 |
| 14 | Q9UQ80 PA2G4_HUMAN | E.DLVVTKYK.M             | NA        | 2 | 2,4228 | 0,111 | 0,253  |
| 14 | P55072 TERA_HUMAN  | K.DVDLEFLAK.M            | NA        | 2 | 2,3901 | 0,364 | 0,232  |
| 14 | Q9HCK8 CHD8_HUMAN  | E.HRVLDNFS#DIVE.G        | S1400     | 2 | 2,3836 | 0,281 | -0,32  |
| 14 | Q09666 AHNK_HUMAN  | K.GDVDVSVPEVEGK.L        | NA        | 2 | 2,3577 | 0,313 | -0,55  |
| 14 | P35579 MYH9_HUMAN  | E.LADKVTKLQVE.L          | NA        | 2 | 2,3517 | 0,223 | -0,098 |
| 14 | P50990 TCPQ_HUMAN  | E.VISKLYAVHQE.G          | NA        | 2 | 2,3507 | 0,161 | 0,19   |
| 14 | Q9UPT5 EXOC7_HUMAN | E.DFADNIKNDPDKE.Y        | NA        | 2 | 2,3393 | 0,322 | 0,08   |
| 14 | Q9Y536 PAL4B_HUMAN | E.NFRALSTGE.K            | NA        | 2 | 2,339  | 0,211 | 0,307  |
| 14 | O43166 SI1L1_HUMAN | E.NHRPLSAAS#NSDQLE.D     | S1711     | 2 | 2,3297 | 0,113 | 0      |
| 14 | P23284 PPIB_HUMAN  | E.VEKPFIAIKE.-           | NA        | 2 | 2,329  | 0,13  | -0,108 |
| 14 | Q92615 LARP5_HUMAN | E.RS#PSPAHLPPDDPKVAE.K   | S599      | 2 | 2,3045 | 0,271 | -0,204 |
| 14 | P62906 RL10A_HUMAN | E.AKAVDIPHMDIE.A         | NA        | 2 | 2,3011 | 0,293 | 0,364  |
| 14 | P05787 K2C8_HUMAN  | E.INFLRQLYEEE.I          | NA        | 2 | 2,3009 | 0,263 | -0,168 |
| 14 | Q15418 KS6A1_HUMAN | E.KKAYS#FCGTVE.Y         | S221      | 2 | 2,2969 | 0,412 | -0,267 |
| 14 | P11142 HSP7C_HUMAN | E.VSSM*VLTKM*KE.I        | NA        | 2 | 2,2769 | 0,158 | -0,285 |
| 14 | Q8NI08 NCOA7_HUMAN | E.DLDKVKLIE.Y            | NA        | 2 | 2,2724 | 0,134 | -0,114 |
| 14 | Q58FG1 HS904_HUMAN | E.YLNFIRGVVDSE.D         | NA        | 2 | 2,266  | 0,41  | -0,346 |
| 14 | P08238 HS90B_HUMAN | E.TQKSIYYITGE.S          | NA        | 2 | 2,2598 | 0,307 | -0,281 |
| 14 | O00566 MPP10_HUMAN | E.DTGVNLNVKNSDE.V        | NA        | 2 | 2,2516 | 0,238 | 0,172  |
| 14 | Q58FF8 H90B2_HUMAN | E.S#LTDPSKLDGKE.L        | S58       | 2 | 2,241  | 0,329 | 0      |
| 14 | P22314 UBA1_HUMAN  | E.FT#PKSGVKIHSVSDQE.L    | T800      | 2 | 2,2238 | 0,242 | 0,348  |
| 14 | P10809 CH60_HUMAN  | E.DVQPHDLGKVE.V          | NA        | 2 | 2,2095 | 0,383 | 0,377  |
| 14 | P68104 EF1A1_HUMAN | D.AAIVDM*VPGKPM*CVE.S    | NA        | 2 | 2,1892 | 0,227 | 0,814  |
| 14 | Q13561 DCTN2_HUMAN | E.DADTQSKVHQLYE.T        | NA        | 2 | 2,171  | 0,182 | 0,239  |

|    |                      |                                  |             |   |        |       |        |
|----|----------------------|----------------------------------|-------------|---|--------|-------|--------|
| 14 | Q6S8J3 A26CA_HUMAN   | E.KM*TQIM*FE.T                   | NA          | 2 | 2,1482 | 0,221 | 0,115  |
| 14 | P63241 IF5A1_HUMAN   | E.AAVAIKAM*AK.-                  | NA          | 2 | 2,1462 | 0,132 | 0,062  |
| 14 | P08670 VIME_HUMAN    | E.YRRQVQS#LTCE.V                 | S325        | 2 | 2,1428 | 0,354 | -0,161 |
| 14 | O00482 NR5A2_HUMAN   | R.LVMLPKVET#E.A                  | T47         | 2 | 2,1423 | 0,196 | 1,477  |
| 14 | Q96AQ6 PBIP1_HUMAN   | R.ALQAPHS#PSKTDGKE.L             | S43         | 2 | 2,1416 | 0,19  | -0,222 |
| 14 | Q9BY89 K1671_HUMAN   | E.RVHSEAIS#PAPE.E                | S749        | 2 | 2,1335 | 0,087 | -0,089 |
| 14 | Q06830 PRDX1_HUMAN   | E.IIAFSDRAEE.F                   | NA          | 2 | 2,1314 | 0,222 | -0,318 |
| 14 | Q8NBS9 TXND5_HUMAN   | E.DAKVYVAKVD.C                   | NA          | 2 | 2,1239 | 0,294 | 0      |
| 14 | ##Q9HCF4 ALO17_HUMAN | D.ETVNALIKE.D                    | NA          | 2 | 2,1217 | 0,081 | 0,36   |
| 14 | Q07021 C1QBP_HUMAN   | E.SDIFSIRE.V                     | NA          | 2 | 2,1127 | 0,205 | 0,757  |
| 14 | P41091 IF2G_HUMAN    | E.IEVRPGIVSKDSE.G                | NA          | 2 | 2,1063 | 0,268 | -0,427 |
| 14 | P10599 THIO_HUMAN    | E.KYSNVIFLE.V                    | NA          | 2 | 2,0995 | 0,173 | -0,219 |
| 14 | Q9UKJ3 GPTC8_HUMAN   | E.RKPS#VSEE.V                    | S694        | 2 | 2,0795 | 0,169 | -0,181 |
| 14 | P51858 HDGF_HUMAN    | E.DAEAPGIRDHESL.-                | NA          | 2 | 2,0511 | 0,258 | -0,173 |
| 14 | P06400 RB_HUMAN      | D.S#GPEDLPLVRLE.F                | S37         | 2 | 2,0221 | 0,278 | -0,174 |
| 14 | P04406 G3P_HUMAN     | E.FGYSNRVVD.L                    | NA          | 2 | 1,9844 | 0,387 | 0      |
| 14 | P55072 TERA_HUMAN    | E.VYLKPYFLE.A                    | NA          | 2 | 1,9786 | 0,091 | -0,208 |
| 14 | P05787 K2C8_HUMAN    | E.TRDGLVLS#E.S                   | S475        | 2 | 1,9514 | 0,101 | -0,112 |
| 14 | Q15772 SPEG_HUMAN    | E.NRGLQKSSS#FSQGE.A              | S2130       | 2 | 1,9493 | 0,337 | 0,152  |
| 14 | P53041 PPP5_HUMAN    | E.DGKVTISFMKE.L                  | NA          | 2 | 1,9453 | 0,157 | 0,292  |
| 14 | Q5SW79 CE170_HUMAN   | E.LSKSASAKS#IDSKVADAATE.V        | S138        | 2 | 1,921  | 0,206 | 0,237  |
| 14 | Q9BRT9 SLD5_HUMAN    | E.DLKVSIHQM*E.M                  | NA          | 2 | 1,9162 | 0,304 | 0,1    |
| 15 | P46821 MAP1B_HUMAN   | E.RKLGDVVS#PTQIDVSVQFGSFKE.D     | S1501       | 3 | 5,2936 | 0,417 | 0,151  |
| 15 | Q8IZM8 ZN654_HUMAN   | E.AHLAQKQCQLFGFDS#DDES#A.-       | S576:S580   | 3 | 4,9112 | 0,495 | 0,145  |
| 15 | B2CI53 B2CI53_HUMAN  | E.NAKVTRS#NM*SPDKPVS#VKISFE.D    | S1102:S1111 | 3 | 4,8967 | 0,329 | 0,07   |
| 15 | Q96EV2 RBM33_HUMAN   | E.VKVKPAS#PVAQPKEE.A             | S775        | 3 | 4,856  | 0,382 | 0,759  |
| 15 | P68104 EF1A1_HUMAN   | E.DGPKFLKSGDAAIVDM*VPGKPMCVE.S   | NA          | 3 | 4,8224 | 0,42  | 0,137  |
| 15 | P68104 EF1A1_HUMAN   | E.DGPKFLKSGDAAIVDM*VPGKPM*CVE.S  | NA          | 3 | 4,5596 | 0,351 | 0,204  |
| 15 | Q9P260 K1468_HUMAN   | R.KNY#KSSPEIQEPIKPLE.K           | Y241        | 3 | 4,5158 | 0,235 | 0,088  |
| 15 | Q9Y6G9 DC1L1_HUMAN   | E.LDRITRKPVTVS#PTTPTSPTTEGEAS.-  | S510        | 3 | 4,5027 | 0,517 | 0,202  |
| 15 | P28066 PSA5_HUMAN    | E.KRITS#PLM*EPSSIEKIVE.I         | S56         | 3 | 4,438  | 0,214 | 0,085  |
| 15 | P28066 PSA5_HUMAN    | E.KRITS#PLMEPSSIEKIVE.I          | S56         | 3 | 4,3958 | 0,275 | 0,086  |
| 15 | O43395 PRPF3_HUMAN   | R.KKQLSFISPTPQPKT#PSSSQPE.R      | T172        | 3 | 4,3922 | 0,365 | 0,283  |
| 15 | Q92560 BAP1_HUMAN    | E.GGKGSSPSIRPIQGSQGS#PVEKE.V     | S597        | 3 | 4,3715 | 0,235 | 0,144  |
| 15 | Q9BQA1 MEP50_HUMAN   | -.MRKET#PPPLVPPAARE.W            | T5          | 3 | 4,27   | 0,114 | 0,098  |
| 15 | P22059 OSBP1_HUMAN   | E.NLGHKRTGS#NIS#GASSDISLDE.Q     | S379:S382   | 3 | 4,2583 | 0,289 | 0,454  |
| 15 | O43395 PRPF3_HUMAN   | R.KKQLSFISPTPQPKT#PSSSQPE.R      | S174        | 3 | 4,0514 | 0,342 | 0,565  |
| 15 | P00558 PGK1_HUMAN    | E.DKVSHVSTGGGASLE.L              | NA          | 2 | 3,9832 | 0,393 | 0,084  |
| 15 | Q02952 AKA12_HUMAN   | E.KQEKEPSKSAES#PTS#PVTSE.T       | S283:S286   | 3 | 3,9748 | 1     | 0,079  |
| 15 | Q9Y6G9 DC1L1_HUMAN   | E.LDRITRKPVTVSPTTPTS#PTEGE.A     | S516        | 3 | 3,9572 | 0,519 | 0,214  |
| 15 | Q9UQ35 SRRM2_HUMAN   | E.KSKDSLVQSCPGSLSLCAGVKSS#PPGE.S | T1043       | 3 | 3,9452 | 0,413 | 0,619  |

|    |                     |                                     |             |   |        |       |        |
|----|---------------------|-------------------------------------|-------------|---|--------|-------|--------|
| 15 | O43439 MTG8R_HUMAN  | E.LVSRQHS#PGSADSLSNSDQRE.F          | S409        | 3 | 3,931  | 0,365 | 0      |
| 15 | Q96CN9 GCC1_HUMAN   | E.NKTALAASSRS#PLDSHGEE.S            | S416        | 3 | 3,9169 | 0,225 | 0,507  |
| 15 | P53667 LIMK1_HUMAN  | E.HDPHDTLGHGLGPETS#PLSSPAYTPSGE.A   | S271        | 3 | 3,9035 | 0,371 | 0,249  |
| 15 | P49792 RBP2_HUMAN   | E.MKLHDSSGS#QVGTGFKSNFSE.K          | S1835       | 3 | 3,8884 | 0,225 | 0,315  |
| 15 | Q15637 SF01_HUMAN   | E.QIRNILKQGIETPEDQND.L              | NA          | 3 | 3,8682 | 0,311 | 0,087  |
| 15 | P30837 AL1B1_HUMAN  | E.GAKLLCGGERFGE.R                   | NA          | 3 | 3,8306 | 0,254 | 0,328  |
| 15 | O14545 TRAD1_HUMAN  | E.ADQSHGGPRS#LSDIKGAADE.I           | S278        | 3 | 3,8231 | 0,235 | 0,087  |
| 15 | Q9UHV9 PFD2_HUMAN   | E.HSLVIDTLKEVDE.T                   | NA          | 2 | 3,7868 | 0,387 | -0,163 |
| 15 | P27816 MAP4_HUMAN   | E.RAS#PIKMDLAPSKD.M                 | S358        | 3 | 3,7819 | 0,312 | 0      |
| 15 | Q9NZI8 IF2B1_HUMAN  | E.NHALKVSYPDEQIAQGPE.N              | NA          | 3 | 3,7671 | 0,459 | 0,087  |
| 15 | P04075 ALDOA_HUMAN  | E.STGSIKRLQSIGTENTEE.N              | NA          | 2 | 3,7532 | 0,439 | 0      |
| 15 | Q96AD5 PLPL2_HUMAN  | E.LRRVQS#LPSVPLSCAAYRE.A            | S404        | 3 | 3,7157 | 0,28  | 0,321  |
| 15 | P05362 ICAM1_HUMAN  | E.LRVLYGPRLDE.R                     | NA          | 3 | 3,7127 | 0,276 | 0,275  |
| 15 | P14618 KPYM_HUMAN   | E.KDIQDLKFGVEQD.V                   | NA          | 2 | 3,7025 | 0,288 | 0      |
| 15 | Q8NFC6 FA44A_HUMAN  | R.KLS#VLGKDGKPVSE.Y                 | S800        | 3 | 3,7021 | 0,35  | 0      |
| 15 | P46013 KI67_HUMAN   | E.SM*TDKTKIPCKSS#PE.L               | S2828       | 3 | 3,6953 | 0,168 | 0      |
| 15 | Q9Y2W1 TR150_HUMAN  | E.KGSFS#DTGLGDGKM*KSD.S             | S379        | 3 | 3,6759 | 0,303 | 0,1    |
| 15 | P49792 RBP2_HUMAN   | E.M*KLHDSSGS#QVGTGFKSNFSE.K         | S1835       | 3 | 3,673  | 0,213 | 0,156  |
| 15 | Q13263 TIF1B_HUMAN  | E.VSGLMRKVPRVS#LE.R                 | S489        | 3 | 3,6477 | 0,238 | 0,222  |
| 15 | Q12802 AKP13_HUMAN  | E.NYNFLPHSPS#KKDSE.W                | S1733       | 3 | 3,6405 | 0,334 | 0,199  |
| 15 | P60842 IF4A1_HUMAN  | E.GIRQFYINVERE.E                    | NA          | 3 | 3,6328 | 0,091 | 0,12   |
| 15 | Q02952 AKA12_HUMAN  | E.LQSHAKSPPS#PVERE.M                | S1331       | 3 | 3,6128 | 0,324 | 1,155  |
| 15 | Q9UQ35 SRRM2_HUMAN  | E.KSATRPS#PS#PERSSTGPEPPAPTLLAE.R   | S351:S353   | 3 | 3,5855 | 1     | 0,182  |
| 15 | Q15393 SF3B3_HUMAN  | E.LDRT#PPEVSKLE.D                   | T1200       | 3 | 3,5785 | 0,298 | 0,46   |
| 15 | B2CI53 B2CI53_HUMAN | E.NAKVTRSNMS#PDKPVS#VKISFE.D        | S1105:S1111 | 3 | 3,577  | 0,303 | 0,423  |
| 15 | P49023 PAXI_HUMAN   | E.HVYSFPNKQKSAEPSPTVM*STSLGS#NLSE.L | S140        | 3 | 3,5363 | 0,267 | 0,569  |
| 15 | Q02952 AKA12_HUMAN  | E.LQSHAKS#PPSPVERE.M                | S1328       | 2 | 3,5356 | 0,557 | -0,28  |
| 15 | Q53EZ4 CEP55_HUMAN  | E.NREKVAAS#PKS#PTAALNE.S            | S425:S428   | 3 | 3,5222 | 0,203 | 0,179  |
| 15 | P24941 CDK2_HUMAN   | E.GTY#GVVYKARNKLTGE.V               | Y15         | 3 | 3,4767 | 0,329 | 0,598  |
| 15 | Q9BQA1 MEP50_HUMAN  | -.M*RKET#PPPLVPPAARE.W              | T5          | 3 | 3,4368 | 0,147 | 0,097  |
| 15 | Q9P275 UBP36_HUMAN  | E.GGLHQDPLRHSCS#PM*GDGDPE.A         | S939        | 3 | 3,4325 | 0,264 | 0      |
| 15 | P13639 EF2_HUMAN    | E.DIDKGEVSARQE.L                    | NA          | 2 | 3,4211 | 0,343 | -0,091 |
| 15 | Q32MZ4 LRRF1_HUMAN  | E.TGLRDEKPIKTEVPGS#PAGTE.G          | S521        | 3 | 3,4135 | 0,277 | 0,162  |
| 15 | Q9NZM1 MYOF_HUMAN   | E.LDLRHTIIPAKS#PE.K                 | S1915       | 3 | 3,4105 | 0,158 | 0,219  |
| 15 | Q13263 TIF1B_HUMAN  | E.VSGLM*RKVPRVS#LE.R                | S489        | 3 | 3,4076 | 0,266 | 0,11   |
| 15 | Q92993 TIP60_HUMAN  | E.AKT#PTKNGLPGSRPGS#PERE.V          | T77:S90     | 3 | 3,4043 | 0,243 | 0,163  |
| 15 | P37802 TAGL2_HUMAN  | E.VQQKIEKQYDADLE.Q                  | NA          | 2 | 3,378  | 0,316 | 0,071  |
| 15 | Q15149 PLEC1_HUMAN  | E.LQS#KRASFAEKTAQLE.R               | S1717       | 3 | 3,3679 | 0,264 | -0,097 |
| 15 | Q9P275 UBP36_HUMAN  | E.GGLHQDPLRHSCS#PMGDGDPE.A          | S939        | 3 | 3,3663 | 0,349 | -0,078 |
| 15 | P27816 MAP4_HUMAN   | E.RAS#PIKM*DLAPSKD.M                | S358        | 3 | 3,3608 | 0,243 | -0,338 |
| 15 | Q52LW3 RHG29_HUMAN  | E.HLSS#SGGLAKNLNKQLE.K              | S356        | 3 | 3,3521 | 0,508 | 0,293  |



|    |                    |                                 |             |   |        |       |        |
|----|--------------------|---------------------------------|-------------|---|--------|-------|--------|
| 15 | O14974 MYPT1_HUMAN | E.KDTAGVTRSASS#PRLSSSLD.N       | S473        | 3 | 3,3482 | 0,355 | 0,086  |
| 15 | P18621 RL17_HUMAN  | E.KEQIVPKPEEE.V                 | NA          | 2 | 3,3407 | 0,221 | 0,092  |
| 15 | P61247 RS3A_HUMAN  | E.LHGEGS#SSGKATGDETGAKVE.R      | S236        | 3 | 3,3186 | 0,366 | 0,174  |
| 15 | Q9Y2W1 TR150_HUMAN | E.KGSFS#DTGLGDGKMKSD.S          | S379        | 3 | 3,3165 | 0,201 | 0,101  |
| 15 | P31946 1433B_HUMAN | E.KACSLAKTAFDEAIAE.L            | NA          | 2 | 3,3145 | 0,274 | 0      |
| 15 | P46939 UTRO_HUMAN  | E.HYDPSQS#PQLFHDDTHS#RIE.Q      | S3182:S3192 | 3 | 3,3019 | 0,296 | 0,214  |
| 15 | P26639 SYTC_HUMAN  | E.KAS#SPSGKM*GGEEKPIGAGE.E      | S7          | 3 | 3,2981 | 0,377 | 0      |
| 15 | Q9BY44 EIF2A_HUMAN | E.ARSDKS#PDLAPTPAPQSTPR.N       | S506        | 3 | 3,2944 | 0,153 | 0,168  |
| 15 | P49585 PCY1A_HUMAN | R.HKAAAYDIS#EDEED.-             | S362        | 2 | 3,288  | 0,422 | 0,656  |
| 15 | Q92900 RENT1_HUMAN | E.DLEKPGVDEEPQHVLRLRYE.D        | NA          | 3 | 3,2713 | 0,235 | 0,242  |
| 15 | P12036 NFH_HUMAN   | E.VKS#PVKEEEKPQE.V              | S828        | 3 | 3,2708 | 0,179 | 0,114  |
| 15 | Q02952 AKA12_HUMAN | E.KQEKEPSKSAES#PTS#PVTSE.T      | S283:S286   | 2 | 3,2691 | 1     | 0,423  |
| 15 | Q9H9R9 DBND1_HUMAN | E.RRQPLSS#VSS#LEVHFD.L          | S64:S67     | 3 | 3,2626 | 0,241 | 0      |
| 15 | P06733 ENOA_HUMAN  | R.LAKYNQLLRIEEE.L               | NA          | 2 | 3,2511 | 0,341 | -0,075 |
| 15 | P21333 FLNA_HUMAN  | E.DRKDGSCGVAYVVQEPGDYE.V        | NA          | 3 | 3,2398 | 0,348 | 0,571  |
| 15 | Q9P2R6 RERE_HUMAN  | E.DIRSSGRNS#PSAASTSSNDSKAE.T    | S613        | 3 | 3,2278 | 0,239 | 0,076  |
| 15 | P49454 CENPF_HUMAN | E.NLTRKET#PSAPAKGVEE.L          | T1637       | 3 | 3,2247 | 0,163 | 0,096  |
| 15 | P04406 G3P_HUMAN   | E.RDPS#KIKWGDAGAAYVVE.S         | S83         | 3 | 3,2162 | 0,282 | 0,261  |
| 15 | P00505 AATM_HUMAN  | E.AQIAAKNLDKE.Y                 | NA          | 2 | 3,2034 | 0,365 | -0,102 |
| 15 | Q7Z417 NUFP2_HUMAN | E.LEKRTSPQVLGSILKSGTTS#E.S      | S586        | 3 | 3,2027 | 0,307 | 0,158  |
| 15 | P06753 TPM3_HUMAN  | E.LKNVTNNLKSLE.A                | NA          | 3 | 3,196  | 0,176 | 0,2    |
| 15 | O75937 DNJC8_HUMAN | E.AVDKAYKLLLDQE.Q               | NA          | 2 | 3,1933 | 0,273 | 0,162  |
| 15 | Q92615 LARP5_HUMAN | E.ICQRTSKEPPSS#PLQPQKE.Q        | S664        | 3 | 3,1893 | 0,15  | 0,08   |
| 15 | Q9Y4L1 HYOU1_HUMAN | E.DKLAQSVQKLQD.L                | NA          | 2 | 3,1861 | 0,335 | 0      |
| 15 | P17301 ITA2_HUMAN  | E.NRM*GDVYKCPVDLSTATCE.K        | NA          | 3 | 3,1604 | 0,348 | 0,41   |
| 15 | Q5VT06 CE350_HUMAN | E.LKS#PTELMKSKE.R               | S2460       | 3 | 3,135  | 0,184 | 0,186  |
| 15 | Q9P0K7 RAI14_HUMAN | E.LQDKLQAKS#PKEAE.A             | S374        | 3 | 3,095  | 0,19  | 0,769  |
| 15 | Q9H7N4 SFR19_HUMAN | E.SRS#PFLKPDERAPTE.M            | S874        | 3 | 3,0926 | 0,13  | 0,101  |
| 15 | O00231 PSD11_HUMAN | E.FQRAQSLSTDRE.A                | NA          | 3 | 3,0866 | 0,131 | 0,354  |
| 15 | Q13561 DCTN2_HUMAN | E.ATKNSKGGSGGKTTGT#PPDSSLVTYE.L | T198        | 3 | 3,0863 | 0,112 | 0,489  |
| 15 | P08670 VIME_HUMAN  | E.TRDGQVINET#SQHHDDLE.-         | T458        | 3 | 3,0845 | 0,089 | 0,252  |
| 15 | Q6NZI2 PTRF_HUMAN  | E.VKLPAKLS#ISKS#LKE.S           | S167:S171   | 2 | 3,0657 | 0,283 | -0,068 |
| 15 | Q9C0C2 TB182_HUMAN | E.HGVGGVSVQCPEPGLRHNGSLS#PGLA.A | S1385       | 3 | 3,0603 | 0,382 | 0,209  |
| 15 | Q9UBU7 DBF4A_HUMAN | E.KKLLFIS#EPIPHPSNE.L           | S413        | 3 | 3,0565 | 0,137 | 0,095  |
| 15 | P04181 OAT_HUMAN   | E.NADKLGILRNE.L                 | NA          | 2 | 3,0488 | 0,375 | -0,18  |
| 15 | Q58FG1 HS904_HUMAN | E.GKTLVSVTKE.D                  | NA          | 2 | 3,0277 | 0,373 | 0      |
| 15 | Q13428 TCOF_HUMAN  | E.AKPQQAAGMLS#PKTGGKE.A         | S1257       | 3 | 3,0233 | 0,259 | 0,195  |
| 15 | P04181 OAT_HUMAN   | E.NADKLGILRNE.L                 | NA          | 3 | 3,015  | 0,19  | 0,202  |
| 15 | O43805 SSNA1_HUMAN | E.AGNLTKATAPDQKSSGGRDS#.-       | S119        | 3 | 3,0106 | 0,351 | 0,627  |
| 15 | Q6NZI2 PTRF_HUMAN  | E.AGDLRRGS#S#PDVHALLE.I         | S365:S366   | 3 | 3,0066 | 0,143 | 0,375  |
| 15 | Q02952 AKA12_HUMAN | E.KQEKEPSKSAESPT#S#PVTSE.T      | T285:S286   | 3 | 2,9979 | 0,238 | 0      |

|    |                    |                                    |             |   |        |       |        |
|----|--------------------|------------------------------------|-------------|---|--------|-------|--------|
| 15 | P19338 NUCL_HUMAN  | E.LKTGISDVFAKND.L                  | NA          | 2 | 2,997  | 0,345 | 0,26   |
| 15 | P13639 EF2_HUMAN   | E.DIDKGEVSARQE.L                   | NA          | 3 | 2,9914 | 0,206 | 0,272  |
| 15 | P50990 TCPQ_HUMAN  | E.TKGTVLIKTAE.L                    | NA          | 2 | 2,9827 | 0,429 | -0,095 |
| 15 | Q9P206 K1522_HUMAN | R.RST#VLGLPQHVVQKE.L               | T162        | 3 | 2,9768 | 0,113 | 0,438  |
| 15 | Q7L7X3 TAOK1_HUMAN | E.HFATIRTAS#LVTRQM*QE.H            | S445        | 3 | 2,9765 | 0,269 | 0,351  |
| 15 | Q7RTP6 MICA3_HUMAN | E.SLVNSRT#TPKLTRNE.S               | T508        | 3 | 2,9764 | 0,174 | 0,102  |
| 15 | O60303 K0556_HUMAN | E.SDSAHLGRVVS#PTKE.Q               | S453        | 3 | 2,9706 | 0,145 | -0,33  |
| 15 | P09211 GSTP1_HUMAN | E.YVNLPINGNGKQ.-                   | NA          | 2 | 2,9674 | 0,295 | 0,093  |
| 15 | Q09666 AHNK_HUMAN  | D.IKS#PKFKAEAPLPS#PKLE.G           | S5099:S5110 | 3 | 2,9601 | 0,176 | 0,171  |
| 15 | Q14980 NUMA1_HUMAN | E.NFLQKAPVSTCSSTFPEELS#PPSHQAKRE.I | S169        | 3 | 2,9589 | 0,186 | 0,318  |
| 15 | Q96A08 H2B1A_HUMAN | E.IQTAVRLLLPGLAKHAVSE.G            | NA          | 3 | 2,9531 | 0,127 | -0,085 |
| 15 | P12694 ODBA_HUMAN  | E.AM*TYRIGHHS#TSSDSSAYRS#VDE.V     | S337:S347   | 3 | 2,9297 | 1     | 0,398  |
| 15 | P17301 ITA2_HUMAN  | E.NRMGDVYKCPVDLSTATCE.K            | NA          | 3 | 2,908  | 0,332 | 0      |
| 15 | Q96EV2 RBM33_HUMAN | E.VKVKPAS#PVAQPKEE.A               | S775        | 2 | 2,9072 | 0,418 | -0,145 |
| 15 | P06748 NPM_HUMAN   | E.DIKAKMQASIE.K                    | NA          | 2 | 2,906  | 0,267 | 0,099  |
| 15 | P12814 ACTN1_HUMAN | E.TAANRICKVLAVNQE.N                | NA          | 3 | 2,9046 | 0,2   | 0,108  |
| 15 | P68104 EF1A1_HUMAN | E.DGPKFLKSGDAAIVDMVPGKPM*CVE.S     | NA          | 3 | 2,8923 | 0,305 | 0,205  |
| 15 | P17987 TCPA_HUMAN  | E.VEHPAAKVLC.E.L                   | NA          | 3 | 2,8905 | 0,251 | 0,365  |
| 15 | P02545 LMNA_HUMAN  | E.LGDARKTLDS#VAKE.R                | S94         | 3 | 2,8664 | 0,139 | 0      |
| 15 | Q12756 KIF1A_HUMAN | E.ADSKKLPS#PARATE.T                | S1548       | 3 | 2,855  | 0,107 | 0,472  |
| 15 | Q09666 AHNK_HUMAN  | E.LNLKS#PKVKGDLD.I                 | S3426       | 3 | 2,8509 | 0,131 | 0,182  |
| 15 | Q09666 AHNK_HUMAN  | E.ASISGSKGDLKSSKASLGS#LE.G         | S5752       | 3 | 2,8329 | 0,125 | 0,522  |
| 15 | Q8TDM6 DLG5_HUMAN  | E.IGDLRAQQQVLKHNGS#SE.I            | S295        | 3 | 2,8326 | 0,104 | -0,084 |
| 15 | Q32MZ4 LRRF1_HUMAN | E.TGLRDEKPIKTEVPGS#PAGTE.G         | S521        | 2 | 2,8201 | 0,317 | 0,108  |
| 15 | P35579 MYH9_HUMAN  | E.VNILKKTLEEE.A                    | NA          | 2 | 2,7963 | 0,168 | 0      |
| 15 | P14618 KPYM_HUMAN  | E.KDIQDLKFGVEQD.V                  | NA          | 3 | 2,7813 | 0,164 | 0,119  |
| 15 | Q96PK6 RBM14_HUMAN | E.SQLSFRRS#PTKSSLD.Y               | S627        | 3 | 2,7738 | 0,228 | 1,125  |
| 15 | Q07021 C1QBP_HUMAN | E.DLKSFVKSQ.-                      | NA          | 2 | 2,7638 | 0,388 | 0,232  |
| 15 | Q12931 TRAP1_HUMAN | E.DIAKLLRYE.S                      | NA          | 2 | 2,7547 | 0,231 | 0      |
| 15 | P49023 PAXI_HUMAN  | E.HVYSFPNKQKSAEPSPTVMSTS#LGSNLSE.L | S137        | 3 | 2,7453 | 0,193 | -0,114 |
| 15 | P50990 TCPQ_HUMAN  | E.TKGTVLIKTAE.L                    | NA          | 3 | 2,7345 | 0,205 | 0,425  |
| 15 | P05787 K2C8_HUMAN  | E.IEGLKGQRASLE.A                   | NA          | 2 | 2,7284 | 0,17  | 0      |
| 15 | P27348 1433T_HUMAN | E.LIQKAKLAE.Q                      | NA          | 2 | 2,7269 | 0,196 | 0,301  |
| 15 | Q13409 DC1I2_HUMAN | E.GSVYT#ACRHGSKAGISE.M             | T458        | 3 | 2,7195 | 0,252 | 0,197  |
| 15 | Q16659 MK06_HUMAN  | E.LKSLISKS#VSQEKQE.K               | S569        | 3 | 2,7184 | 0,215 | 0      |
| 15 | P04406 G3P_HUMAN   | E.HQVVSSDFNSDTHSSTFD.A             | NA          | 3 | 2,7129 | 0,12  | 0,182  |
| 15 | P05387 RLA2_HUMAN  | E.ADDDRLNKVISE.L                   | NA          | 3 | 2,7092 | 0,173 | 0      |
| 15 | Q8N201 INT1_HUMAN  | E.KRAIS#PSIKEPSVVP.IE.V            | S104        | 3 | 2,6965 | 0,25  | 0,095  |
| 15 | P21333 FLNA_HUMAN  | E.DRKDGSCGVAYVVQEPGDYE.V           | NA          | 2 | 2,6859 | 0,126 | 0,109  |
| 15 | P06748 NPM_HUMAN   | E.DIKAKM*QASIE.K                   | NA          | 2 | 2,6843 | 0,288 | 0,098  |
| 15 | O43707 ACTN4_HUMAN | E.DQLSHLKQYE.R                     | NA          | 2 | 2,6752 | 0,234 | 0,097  |

|    |                     |                                 |             |   |        |       |        |
|----|---------------------|---------------------------------|-------------|---|--------|-------|--------|
| 15 | O75526 HNRGT_HUMAN  | E.VLLMKDRE.T                    | NA          | 2 | 2,6536 | 0,228 | 0,061  |
| 15 | Q13428 TCOF_HUMAN   | E.AKPQQAAGM*LS#PKTGGKE.A        | S1257       | 3 | 2,6513 | 0,287 | 0,097  |
| 15 | Q14126 DSG2_HUMAN   | E.HRS#LLSGRATQFTGATGAIM*TTE.T   | S723        | 3 | 2,6362 | 0,091 | 0      |
| 15 | Q00610 CLH1_HUMAN   | E.YLTKVDKLDASE.S                | NA          | 2 | 2,6327 | 0,324 | 0      |
| 15 | Q14126 DSG2_HUMAN   | E.ATM*KGSSS#ASIVKGQHE.M         | S701        | 3 | 2,6296 | 0,201 | 0,504  |
| 15 | P05186 PPBT_HUMAN   | K.GFFLLVEGGR.I                  | NA          | 2 | 2,6249 | 0,326 | -0,446 |
| 15 | P22314 UBA1_HUMAN   | E.FTPKS#GVKIHVSDQE.L            | S803        | 3 | 2,6247 | 0,171 | 0,209  |
| 15 | B0QZ64 B0QZ64_HUMAN | E.NKLHGPS#NRSNSVS#SLDLE.G       | S559:S566   | 2 | 2,6128 | 0,114 | 0,331  |
| 15 | P31946 1433B_HUMAN  | E.LVQKAKLAE.Q                   | NA          | 2 | 2,6116 | 0,24  | -0,061 |
| 15 | Q9NYF8 BCLF1_HUMAN  | E.TQS#PEQVKSEKLD.L              | S496        | 3 | 2,5953 | 0,212 | 0,323  |
| 15 | Q9NYV4 CD2L7_HUMAN  | E.TDDYGKAQVAKS#SSKE.S           | S169        | 3 | 2,5917 | 0,162 | 0      |
| 15 | P04406 G3P_HUMAN    | D.LMAHMASKE.-                   | NA          | 2 | 2,5888 | 0,288 | 0,18   |
| 15 | P35080 PROF2_HUMAN  | E.IDMIVGKDRE.G                  | NA          | 2 | 2,5833 | 0,217 | -0,104 |
| 15 | Q9Y6G9 DC1L1_HUMAN  | E.LDRITRKPVTVSPT#TPT#SPTEGEAS.- | T512:T515   | 3 | 2,5786 | 1     | 0,261  |
| 15 | A7XZE4 A7XZE4_HUMAN | E.LRTMDQALKSLM*ASEEE.Y          | NA          | 3 | 2,5636 | 0,205 | 0,279  |
| 15 | P61758 PFD3_HUMAN   | E.TADTVLKKLDE.Q                 | NA          | 2 | 2,5495 | 0,201 | 0      |
| 15 | P32004 L1CAM_HUMAN  | E.DGS#FIGQYSGKKEKE.A            | S1224       | 3 | 2,5436 | 0,348 | 0,626  |
| 15 | P12694 ODBA_HUMAN   | E.AMTYRIGHHS#TSDSSAYRS#VDE.V    | S337:S347   | 3 | 2,5419 | 0,315 | 0,133  |
| 15 | P11532 DMD_HUMAN    | E.HKGLSPLSPPEMMPT#SPQSPRAE.L    | T3548       | 3 | 2,5408 | 0,09  | 0,132  |
| 15 | Q8NI08 NCOA7_HUMAN  | E.CLS#LDPEERKKA.E.S             | S441        | 3 | 2,5329 | 0,264 | 0,332  |
| 15 | Q32MZ4 LRRF1_HUMAN  | E.GVAKDNAKIDGAT#QSSPAEPKSE.D    | T711        | 3 | 2,5232 | 0,154 | 0,077  |
| 15 | P20700 LMNB1_HUMAN  | E.ASLAAAKQLADE.T                | NA          | 2 | 2,5163 | 0,312 | -0,185 |
| 15 | Q96SB4 SRPK1_HUMAN  | E.DIQRQYRSLE.V                  | NA          | 3 | 2,5094 | 0,204 | -0,065 |
| 15 | Q8TD16 BICD2_HUMAN  | R.GRRS#PILLPKGLLAPE.A           | S582        | 3 | 2,5077 | 0,136 | 0,102  |
| 15 | Q5H9R7 SAPS3_HUMAN  | E.KHIAFT#PE.S                   | T631        | 2 | 2,5064 | 0,285 | -0,06  |
| 15 | Q9H773 XTP3A_HUMAN  | R.S#SSRKYTELPHGAISE.D           | S136        | 3 | 2,5007 | 0,159 | 0,199  |
| 15 | P35249 RFC4_HUMAN   | E.NNLSDKQKSIITE.K               | NA          | 2 | 2,4993 | 0,318 | 0,328  |
| 15 | P48643 TCPE_HUMAN   | E.DYKALQKYE.K                   | NA          | 2 | 2,4958 | 0,321 | 0,105  |
| 15 | P68431 H31_HUMAN    | E.DTNLCAIHAK.R                  | NA          | 2 | 2,4942 | 0,266 | 0,107  |
| 15 | Q9UQ35 SRRM2_HUMAN  | E.HKELS#NS#PLRE.N               | S1318:S1320 | 2 | 2,4872 | 0,114 | 0,166  |
| 15 | P51858 HDGF_HUMAN   | E.DAEAPGIRDHE.S                 | NA          | 2 | 2,4829 | 0,301 | 0,202  |
| 15 | P12268 IMDH2_HUMAN  | E.ADKIKVAQGVSGAVQD.K            | NA          | 2 | 2,481  | 0,316 | 0,385  |
| 15 | P24941 CDK2_HUMAN   | E.GTY#GVVYKARNKLTGE.V           | Y15         | 2 | 2,4776 | 0,33  | -0,133 |
| 15 | Q9P289 MST4_HUMAN   | E.KFQKCSADES#P.-                | S415        | 2 | 2,4724 | 0,255 | -0,975 |
| 15 | P17066 HSP76_HUMAN  | R.VEILANDQGNR.T                 | NA          | 2 | 2,4639 | 0,184 | -0,099 |
| 15 | Q01970 PLCB3_HUMAN  | R.KRPLEQSNS#ALSE.S              | S492        | 2 | 2,4633 | 0,354 | 0,159  |
| 15 | P84098 RL19_HUMAN   | E.IIKTLSKEEE.T                  | NA          | 2 | 2,4591 | 0,177 | 0,308  |
| 15 | Q86UP2 KTN1_HUMAN   | E.GILQKLQRSVEQEE.N              | NA          | 2 | 2,451  | 0,299 | -0,147 |
| 15 | Q09028 RBBP4_HUMAN  | E.DVSWHLLHE.S                   | NA          | 2 | 2,4457 | 0,26  | 0      |
| 15 | P34931 HS71L_HUMAN  | R.TTPSYVAFTDTER.L               | NA          | 2 | 2,4046 | 0,295 | 0,164  |
| 15 | P49755 TMEDA_HUMAN  | K.NYEEIAKVE.K                   | NA          | 2 | 2,3623 | 0,215 | 0,111  |

|    |                       |                             |       |   |        |       |        |
|----|-----------------------|-----------------------------|-------|---|--------|-------|--------|
| 15 | P17661 DESM_HUMAN     | E.IATYRKLE.G                | NA    | 2 | 2,3473 | 0,138 | 0      |
| 15 | P62136 PP1A_HUMAN     | E.NFFLLRGNHE.C              | NA    | 2 | 2,3097 | 0,25  | 0      |
| 15 | P82933 RT09_HUMAN     | E.DFIKKQIEE.F               | NA    | 2 | 2,2879 | 0,194 | 0      |
| 15 | P26373 RL13_HUMAN     | E.SLQANVQRLKE.Y             | NA    | 2 | 2,2802 | 0,242 | 0,095  |
| 15 | P04406 G3P_HUMAN      | K.VIHDNFGIVE.G              | NA    | 2 | 2,2532 | 0,309 | 0,32   |
| 15 | P35579 MYH9_HUMAN     | E.KQIATLHAQVAD.M            | NA    | 2 | 2,2466 | 0,134 | 0      |
| 15 | Q9Y696 CLIC4_HUMAN    | R.GLLKTLQKLE.Y              | NA    | 2 | 2,2241 | 0,198 | 0,097  |
| 15 | P30038 AL4A1_HUMAN    | R.DALQKALKD.L               | NA    | 2 | 2,2145 | 0,208 | 0,122  |
| 15 | ##Q9HAE1 Q9HAE1_HUMAN | K.YEIEVRM*.-                | NA    | 2 | 2,1924 | 0,296 | 0,191  |
| 15 | Q12888 TP53B_HUMAN    | E.DSKMANAKQLSSDAE.A         | NA    | 2 | 2,1515 | 0,126 | -0,459 |
| 15 | P61247 RS3A_HUMAN     | E.KACQSIYPLHD.V             | NA    | 2 | 2,1501 | 0,181 | 0      |
| 15 | Q9P2R6 RERE_HUMAN     | E.DIRSSGRNPS#AASTSSNDSKAE.T | S615  | 2 | 2,1455 | 0,379 | 0,203  |
| 15 | Q13123 RED_HUMAN      | E.DKKQLGDFFGM*SNSYAE.C      | NA    | 2 | 2,1378 | 0,304 | 0,375  |
| 15 | Q12888 TP53B_HUMAN    | E.DSKM*ANAKQLSSDAE.A        | NA    | 2 | 2,127  | 0,186 | -0,076 |
| 15 | P33778 H2B1B_HUMAN    | D.IFERIAGE.A                | NA    | 2 | 2,1137 | 0,119 | 0,261  |
| 15 | P31946 1433B_HUMAN    | E.KACS#LAKTAFDEAIAE.L       | S192  | 2 | 2,1136 | 0,195 | 0,068  |
| 15 | Q58FF7 H90B3_HUMAN    | K.EDQTEYLEER.R              | NA    | 2 | 2,0993 | 0,26  | 0,651  |
| 15 | Q96C19 EFHD2_HUMAN    | E.DFDSKLSFRE.F              | NA    | 2 | 2,0787 | 0,218 | -0,588 |
| 15 | P22626 ROA2_HUMAN     | D.TIEITDR.Q                 | NA    | 2 | 2,0753 | 0,176 | 0,063  |
| 15 | Q14103 HNRPD_HUMAN    | E.SESVDKVMQKE.H             | NA    | 2 | 2,0737 | 0,185 | 0      |
| 15 | P08670 VIME_HUMAN     | E.YRRQVQS#LTCE.V            | S325  | 2 | 2,0576 | 0,173 | 0,241  |
| 15 | P51451 BLK_HUMAN      | K.IADFLAR.I                 | NA    | 2 | 2,0431 | 0,09  | 0      |
| 15 | P78527 PRKDC_HUMAN    | K.YFEGVSPK.S                | NA    | 2 | 2,0404 | 0,203 | 0,132  |
| 15 | Q09666 AHNK_HUMAN     | E.LNLKS#PKVKGDL.D           | S3426 | 2 | 2,0373 | 0,165 | 0,162  |
| 15 | P68431 H31_HUMAN      | K.STELLIR.K                 | NA    | 2 | 2,0258 | 0,143 | 0,147  |
| 15 | O95453 PARN_HUMAN     | E.DQKKFIDQVVE.K             | NA    | 2 | 2,0197 | 0,094 | 0,09   |
| 15 | P28066 PSA5_HUMAN     | E.KRITS#PLMEPSSIEKIVE.I     | S56   | 2 | 2,0053 | 0,218 | 0,114  |
| 15 | P62820 RAB1A_HUMAN    | E.YDYLFK.L                  | NA    | 2 | 1,9794 | 0,203 | 0,431  |
| 15 | Q8IYS1 P20D2_HUMAN    | E.DFKLKLQEE.Q               | NA    | 2 | 1,9547 | 0,083 | -0,212 |
| 15 | P51991 ROA3_HUMAN     | K.EDTEEYNLR.D               | NA    | 2 | 1,9534 | 0,153 | -0,209 |
| 15 | Q7Z4C7 Q7Z4C7_HUMAN   | E.SLS#PRKLKLTFFEE.L         | S179  | 2 | 1,9354 | 0,261 | 0,075  |
| 15 | Q14126 DSG2_HUMAN     | E.ATM*KGSSS#ASIVKGQHE.M     | S701  | 2 | 1,9221 | 0,264 | 0,067  |
| 16 | Q7Z333 SETX_HUMAN     | E.TIKAKHGS#PATDDACPLNQCD.S  | S1430 | 3 | 5,4982 | 0,455 | 0,461  |
| 16 | Q9NWH9 SLTM_HUMAN     | E.ASKPKDQGDAIAQS#PEKE.S     | S289  | 3 | 5,0676 | 0,33  | 0,277  |
| 16 | P04075 ALDOA_HUMAN    | E.LSDIAHRIVAPGKILA.ADE.S    | NA    | 3 | 4,7531 | 0,286 | 0,179  |
| 16 | O00330 ODPX_HUMAN     | E.DALKLVQLKQTGKITE.S        | NA    | 3 | 4,6704 | 0,392 | 0,205  |
| 16 | Q9BRK4 LZTS2_HUMAN    | E.AKVQRAAGVGGS#LRAQVE.R     | S570  | 3 | 4,5502 | 0,449 | 0      |
| 16 | Q02952 AKA12_HUMAN    | E.LQSHAKSPPS#PVERE.M        | S1331 | 3 | 4,5041 | 0,305 | 0,945  |
| 16 | P31948 STIP1_HUMAN    | E.KGNKALSVGNIDDALQCYSE.A    | NA    | 3 | 4,3959 | 0,363 | 0,419  |
| 16 | Q07065 CKAP4_HUMAN    | E.SAKGLLDDL.RND.L           | NA    | 3 | 4,3696 | 0,373 | 0,347  |
| 16 | Q9NYV4 CD2L7_HUMAN    | E.SKGS#PVFLPRKE.N           | S423  | 3 | 4,169  | 0,333 | 0,257  |

|    |                     |                                     |             |   |        |       |        |
|----|---------------------|-------------------------------------|-------------|---|--------|-------|--------|
| 16 | Q8TEW0 PARD3_HUMAN  | E.TKLNTVDDQKAGSPS#RD.V              | S875        | 3 | 4,0382 | 0,321 | -0,574 |
| 16 | Q02952 AKA12_HUMAN  | E.KQEKEPSKSAESPT#S#PVTSE.T          | T285:S286   | 3 | 4,0177 | 1     | 0      |
| 16 | Q86W92 LIPB1_HUMAN  | D.TQLCDKLLTSSLQKSS#SLGNLKE.T        | S465        | 3 | 4,0117 | 0,286 | -0,066 |
| 16 | P05787 K2C8_HUMAN   | E.TRDGKLVSES#SDVLPK.-               | S477        | 3 | 4,0054 | 0,132 | 0,202  |
| 16 | P31948 STIP1_HUMAN  | E.KGNKALSVGNIDDALQCYSE.A            | NA          | 2 | 3,9357 | 0,383 | 0,112  |
| 16 | Q9Y2W1 TR150_HUMAN  | E.FRSIFQHIQSAQSQRS#PSE.L            | S622        | 3 | 3,8727 | 0,225 | 0,158  |
| 16 | Q9Y6G9 DC1L1_HUMAN  | E.LDRITRKPVTVSPTTPTS#PTEGEAS.-      | S516        | 3 | 3,8707 | 0,415 | 0      |
| 16 | Q6NZI2 PTRF_HUMAN   | E.AGDLRRGS#S#PDVHALLE.I             | S365:S366   | 3 | 3,8602 | 0,369 | 0,281  |
| 16 | P61956 SUMO2_HUMAN  | E.NNDHINLKVAGQD.G                   | NA          | 2 | 3,8532 | 0,479 | -0,17  |
| 16 | Q9UHI6 DDX20_HUMAN  | E.KATS#PKELGCDRQSE.E                | S532        | 3 | 3,8102 | 0,374 | 0      |
| 16 | Q05682 CALD1_HUMAN  | E.KQSVDKVTS#PTKV.-                  | S789        | 3 | 3,7984 | 0,396 | 0,305  |
| 16 | Q02952 AKA12_HUMAN  | E.KLTASEQAHPQEPAES#AHEPRLSAEYE.K    | S364        | 3 | 3,7957 | 0,314 | 0,119  |
| 16 | P36578 RL4_HUMAN    | E.SSGKNVTLPAVFKAPIRPD.I             | NA          | 3 | 3,7748 | 0,324 | 0,183  |
| 16 | Q8NFC6 FA44A_HUMAN  | E.KNVLLNSLQKEDKS#PE.T               | S2475       | 3 | 3,766  | 0,219 | 0      |
| 16 | Q96EV2 RBM33_HUMAN  | E.VKVKPAS#PVAQPKEE.A                | S775        | 3 | 3,7521 | 0,324 | 0,217  |
| 16 | Q9P2K3 RCOR3_HUMAN  | E.THPM*DGND#DYDPKKE.A               | S171        | 3 | 3,7436 | 0,303 | -0,188 |
| 16 | Q12756 KIF1A_HUMAN  | E.YTHSHVCVSAS#ESKLSE.M              | S1477       | 3 | 3,6951 | 0,107 | -0,091 |
| 16 | O15231 ZN185_HUMAN  | E.HSYVLSAAKST#GSPTQE.T              | T69         | 3 | 3,6871 | 0,389 | 0      |
| 16 | Q9Y6G9 DC1L1_HUMAN  | E.LDRITRKPVTVSPTTPTS#PTEGE.A        | S516        | 3 | 3,6741 | 0,337 | 0,143  |
| 16 | Q05682 CALD1_HUMAN  | E.KQSVDKVTS#PTKV.-                  | S789        | 2 | 3,6138 | 0,358 | -0,407 |
| 16 | Q99471 PFD5_HUMAN   | E.AKDCLNVLNKS#NEGKE.L               | S56         | 3 | 3,5547 | 0,175 | -0,289 |
| 16 | Q6DN90 IQEC1_HUMAN  | E.GLKRSALSSS#LRDLSE.A               | S925        | 3 | 3,5268 | 0,32  | 0      |
| 16 | P28749 RBL1_HUMAN   | E.SKVK#PVSILTAHSLIGAS#PKQTNLTKAQE.V | S749:S762   | 3 | 3,5154 | 0,091 | 0,345  |
| 16 | P05787 K2C8_HUMAN   | E.TRDGKLV#ESSDVLPK.-                | S475        | 3 | 3,4645 | 0,27  | 0,101  |
| 16 | P18206 VINC_HUMAN   | E.DQILKRDM*PPAFIKVE.N               | NA          | 3 | 3,4592 | 0,161 | 0,095  |
| 16 | Q9ULW0 TPX2_HUMAN   | E.IKSSDQPLTVPV#PKFSTRFHC.-          | S738        | 3 | 3,4561 | 0,152 | 0,07   |
| 16 | Q9NSC5 HOME3_HUMAN  | E.KLFRS#QSADAPGPTERE.R              | S157        | 3 | 3,4448 | 0,315 | -0,186 |
| 16 | Q8TDY2 RBCC1_HUMAN  | E.M*KRSTELVLS#PDM*PRTTNE.S          | S243        | 3 | 3,4334 | 0,147 | -0,947 |
| 16 | O95989 NUDT3_HUMAN  | E.DAIKVLQYHKPVQASYFE.T              | NA          | 3 | 3,4142 | 0,422 | 0,086  |
| 16 | Q9H459 Q9H459_HUMAN | E.GLTLHRVGTQHS#L.-                  | S515        | 3 | 3,3668 | 0,342 | 0,183  |
| 16 | P31949 S10AB_HUMAN  | D.SFLKAVPSQKRT#.-                   | T105        | 3 | 3,3633 | 0,311 | 0,38   |
| 16 | O15305 PMM2_HUMAN   | E.NDGYKTIYFFGDKTM*PGGNDHE.I         | NA          | 3 | 3,321  | 0,27  | -0,073 |
| 16 | P46821 MAP1B_HUMAN  | E.KEVPSKEEPS#PVKAE.V                | S614        | 3 | 3,3175 | 0,168 | 0,316  |
| 16 | P24941 CDK2_HUMAN   | E.GTY#GVVYKARNKLTGE.V               | Y15         | 3 | 3,3097 | 0,151 | 0,199  |
| 16 | Q6ZSZ6 TSH1_HUMAN   | E.KSSLAKAAS#PIAKE.N                 | S671        | 3 | 3,2819 | 0,244 | 0      |
| 16 | P43487 RANG_HUMAN   | E.NTDESNHDPQFPIVSLPEQEI.T           | NA          | 3 | 3,265  | 0,259 | 0,069  |
| 16 | Q5T1M5 FKB15_HUMAN  | E.AGSTVAGAALRPSHHSQRS#SLS#GDEEDE.L  | S1161:S1164 | 3 | 3,2528 | 0,164 | 0,182  |
| 16 | Q14247 SRC8_HUMAN   | E.RQDSAAVGFYKE.K                    | NA          | 3 | 3,2463 | 0,312 | 0,062  |
| 16 | P22059 OSBP1_HUMAN  | E.NLGHKRT#GSNIS#GASSDISLDE.Q        | T377:S382   | 3 | 3,2401 | 0,243 | 0      |
| 16 | Q9UKV3 ACINU_HUMAN  | E.KSKS#PS#PPRLTE.D                  | S386:S388   | 3 | 3,2184 | 0,161 | 0,184  |
| 16 | Q02952 AKA12_HUMAN  | E.LQSHAKS#PPSPVERE.M                | S1328       | 2 | 3,2155 | 0,433 | -0,7   |

|    |                    |                                      |                |   |        |       |        |
|----|--------------------|--------------------------------------|----------------|---|--------|-------|--------|
| 16 | P31327 CPSM_HUMAN  | E.DRQLFSDKLINE.I                     | NA             | 2 | 3,2033 | 0,27  | -0,089 |
| 16 | Q9HC35 EMAL4_HUMAN | E.SHSNDQSPQIRAS#PSPQPSSQPLQIHRQTPE.S | S144           | 3 | 3,1953 | 0,323 | 0,104  |
| 16 | Q9Y2L9 LRCH1_HUMAN | E.DSCHRLS#PVKGE.F                    | S370           | 3 | 3,1889 | 0,239 | -0,499 |
| 16 | Q99471 PFD5_HUMAN  | E.AKDCLNLVLNKSNE.G                   | NA             | 3 | 3,1773 | 0,116 | -0,182 |
| 16 | Q9ULV4 COR1C_HUMAN | E.IKSIKDTICNQDE.R                    | NA             | 2 | 3,1589 | 0,421 | -0,624 |
| 16 | Q9NYJ8 TAB2_HUMAN  | E.GSRMNGSRTLTHSIS#DGQLQGGQSNSE.L     | S108           | 3 | 3,155  | 0,194 | 0,254  |
| 16 | P55072 TERA_HUMAN  | E.ICQRACKLAIRES#IE.S                 | S702           | 3 | 3,1497 | 0,242 | 0,19   |
| 16 | P55072 TERA_HUMAN  | E.ICQRACKLAIRES#IESE.I               | S702           | 3 | 3,1488 | 0,259 | 0,256  |
| 16 | P04792 HSPB1_HUMAN | E.SRAQLGGPEAAKSDE.T                  | NA             | 3 | 3,1186 | 0,238 | 0,241  |
| 16 | P49916 DNL3_HUMAN  | E.KLATKSS#PVKVG.E.K                  | S826           | 3 | 3,0936 | 0,268 | -0,128 |
| 16 | Q12830 BPTF_HUMAN  | E.TKSHLLSSS#DAEGNYRDSLE.T            | S1478          | 3 | 3,0872 | 0,232 | -0,16  |
| 16 | A4D1S0 KLRG2_HUMAN | E.GRASPAEGSAGSPGS#PTCCRCKE.L         | S215           | 3 | 3,0772 | 0,264 | -0,074 |
| 16 | P48643 TCPE_HUMAN  | E.AEQLLDRIHPIRIADGYE.Q               | NA             | 3 | 3,0668 | 0,101 | -0,253 |
| 16 | P18206 VINC_HUMAN  | E.DQLKRDMPPAFIKVE.N                  | NA             | 3 | 3,064  | 0,212 | -0,193 |
| 16 | Q5VT06 CE350_HUMAN | E.TDRKS#PSVLSQSKE.G                  | S1502          | 3 | 3,0597 | 0,216 | -0,529 |
| 16 | Q8IXM3 RM41_HUMAN  | E.KDFKDGTFDPDNLE.K                   | NA             | 2 | 3,0392 | 0,281 | -0,149 |
| 16 | Q9NWH9 SLTM_HUMAN  | E.ASKPKDGGQDAIAQS#PEKE.S             | S289           | 2 | 3,0249 | 0,461 | -0,185 |
| 16 | P25398 RS12_HUMAN  | E.HQINLIKVDD.N                       | NA             | 2 | 3,0051 | 0,203 | 0,306  |
| 16 | P22059 OSBP1_HUMAN | E.NLGHKRTGS#NIS#GAS#SDISLDE.Q        | S379:S382:S385 | 3 | 3,0008 | 0,197 | 0,293  |
| 16 | Q13627 DYR1A_HUMAN | E.GHLTM*RQGADREESPM*TGVCVQQS#PVASS.- | S758           | 3 | 2,9883 | 0,303 | 0,34   |
| 16 | P51572 BAP31_HUMAN | E.NQVLAMRKQSE.G                      | NA             | 2 | 2,9811 | 0,322 | 0,374  |
| 16 | P31946 1433B_HUMAN | E.KACSLAKTAFDE.A                     | NA             | 2 | 2,9766 | 0,412 | -0,091 |
| 16 | Q9UHB6 LIMA1_HUMAN | E.RPAQLANARETPHS#PGVE.D              | S490           | 3 | 2,976  | 0,334 | 0      |
| 16 | Q76FK4 NOL8_HUMAN  | E.TDHRNS#SPGEASLLEKE.T               | S1098          | 3 | 2,967  | 0,186 | -0,094 |
| 16 | Q15464 SHB_HUMAN   | R.APGGGFKPIKHGS#PE.F                 | S388           | 3 | 2,9552 | 0,375 | 0,235  |
| 16 | Q15424 SAFB1_HUMAN | R.TVVM*DKSKGVPVISVKTSGS#KE.R         | S582           | 3 | 2,9338 | 0,427 | 0,154  |
| 16 | Q9NYJ8 TAB2_HUMAN  | E.GSRM*NGSRTLTHSIS#DGQLQGGQSNSE.L    | S108           | 3 | 2,9215 | 0,17  | -0,126 |
| 16 | Q02952 AKA12_HUMAN | E.KQEKEPSKSAES#PTS#PVTSE.T           | S283:S286      | 3 | 2,9097 | 0,122 | -0,159 |
| 16 | P55072 TERA_HUMAN  | R.SVSDNDIRKYE.M                      | NA             | 2 | 2,8921 | 0,314 | 0      |
| 16 | Q9ULU4 PKCB1_HUMAN | E.KADPGAVKDKAS#PEPE.K                | S668           | 2 | 2,89   | 0,271 | 0      |
| 16 | P42356 PI4KA_HUMAN | E.GTLKRKTS#SVSSISQVSPE.R             | S198           | 3 | 2,8775 | 0,236 | -0,088 |
| 16 | Q14974 IMB1_HUMAN  | E.FTKANFDKESE.R                      | NA             | 2 | 2,8767 | 0,33  | 1,483  |
| 16 | P62988 UBIQ_HUMAN  | K.TITLEVEPSDTIENVKAK.I               | NA             | 3 | 2,8743 | 0,28  | 0      |
| 16 | Q9P2K3 RCOR3_HUMAN | E.THPMDGNDSDYDPKKE.A                 | S171           | 3 | 2,8673 | 0,122 | -0,569 |
| 16 | Q15029 U5S1_HUMAN  | E.DKKYYPTAEE.V                       | NA             | 2 | 2,8663 | 0,361 | 0      |
| 16 | P10599 THIO_HUMAN  | E.FSGANKEKLE.A                       | NA             | 2 | 2,8582 | 0,092 | -0,652 |
| 16 | Q9Y490 TLN1_HUMAN  | E.DSVS#PKKSTVLQQYNRVGVKVE.H          | S425           | 3 | 2,8422 | 0,302 | 0,214  |
| 16 | Q9Y5J7 TIM9_HUMAN  | E.SDQIKQFKE.F                        | NA             | 2 | 2,8417 | 0,191 | -0,217 |
| 16 | Q9Y3D7 TIM16_HUMAN | E.LKIQAQEDRE.K                       | NA             | 3 | 2,8248 | 0,085 | -0,223 |
| 16 | Q15393 SF3B3_HUMAN | E.DHDFQHV.E.M                        | NA             | 2 | 2,8034 | 0,353 | -0,104 |
| 16 | Q92993 TIP60_HUMAN | E.AKTPTKNGLPGS#RPGS#PERE.V           | S86:S90        | 3 | 2,7944 | 0,156 | -0,409 |

|    |                     |                           |                |   |        |       |        |
|----|---------------------|---------------------------|----------------|---|--------|-------|--------|
| 16 | P07237 PDIA1_HUMAN  | E.IRLAKVDATEE.S           | NA             | 2 | 2,7768 | 0,392 | -0,098 |
| 16 | P00558 PGK1_HUMAN   | E.AFARGTKALMDE.V          | NA             | 2 | 2,761  | 0,298 | 0,279  |
| 16 | Q92576 PHF3_HUMAN   | E.NSVRS#PRKS#PRLM*AQE.Q   | S125:S129      | 3 | 2,7586 | 0,423 | 0,18   |
| 16 | P07355 ANXA2_HUMAN  | E.LKASM*KGLGTDE.D         | NA             | 2 | 2,7489 | 0,262 | -0,096 |
| 16 | Q96BM9 ARL8A_HUMAN  | E.KM*NLSAIQDRE.I          | NA             | 3 | 2,7484 | 0,287 | 0,346  |
| 16 | Q3V6T2 GRDN_HUMAN   | E.VKAGAVNNQSRPQSHSS#GE.F  | S1623          | 3 | 2,7448 | 0,106 | -0,27  |
| 16 | P25054 APC_HUMAN    | D.LKDIQRPDSEHGLSPDS#E.N   | S2096          | 3 | 2,7435 | 0,118 | -0,087 |
| 16 | P15374 UCHL3_HUMAN  | E.SGSTLKKFLEE.S           | NA             | 3 | 2,7353 | 0,263 | 0,295  |
| 16 | A8MSX0 A8MSX0_HUMAN | E.LSQPRSHT#SLKDE.L        | T101           | 3 | 2,7201 | 0,172 | 0,116  |
| 16 | Q07955 SFRS1_HUMAN  | R.VKVDGPRS#PSY#GRS#R.S    | S199:Y202:S205 | 3 | 2,7174 | 0,126 | -0,289 |
| 16 | Q8N4C8 MINK1_HUMAN  | E.RSDSVLPASHGHLPOAGS#LE.R | S763           | 2 | 2,7164 | 0,427 | 0,114  |
| 16 | P34932 HSP74_HUMAN  | E.SEERPRLFEE.L            | NA             | 2 | 2,7066 | 0,289 | 0,097  |
| 16 | P62081 RS7_HUMAN    | E.M*NSDLKAQLRE.L          | NA             | 2 | 2,691  | 0,365 | 0,092  |
| 16 | Q9H9Q2 CSN7B_HUMAN  | E.VTNIKTKLAT#ASSSAQE.M    | T223           | 3 | 2,6891 | 0,173 | 0,187  |
| 16 | P49916 DNL3_HUMAN   | E.KLATKSS#PVKVGE.K        | S826           | 2 | 2,6809 | 0,417 | -0,514 |
| 16 | P07900 HS90A_HUMAN  | E.NLCKIM*KDILE.K          | NA             | 2 | 2,669  | 0,208 | -0,263 |
| 16 | P55854 SUMO3_HUMAN  | E.NDHINLKVAGQD.G          | NA             | 2 | 2,6603 | 0,371 | -0,184 |
| 16 | P31946 1433B_HUMAN  | E.KACSLAKTAFDE.A          | NA             | 3 | 2,658  | 0,158 | 0,477  |
| 16 | P12004 PCNA_HUMAN   | D.MGHLKYYPKIEDEEGS#.-     | S261           | 3 | 2,6469 | 0,121 | -0,423 |
| 16 | O75179 ANR17_HUMAN  | R.KS#VSGKASIKLSE.T        | S1666          | 3 | 2,6412 | 0,188 | 0      |
| 16 | P31949 S10AB_HUMAN  | D.SFLKAVPSQKRT#.-         | T105           | 2 | 2,6323 | 0,283 | -0,254 |
| 16 | Q00610 CLH1_HUMAN   | E.SDKFICIRE.K             | NA             | 2 | 2,6276 | 0,32  | -0,104 |
| 16 | P21283 VATC1_HUMAN  | E.NKFIVRDFQYNEEE.M        | NA             | 3 | 2,62   | 0,148 | 0,2    |
| 16 | Q3V6T2 GRDN_HUMAN   | E.FSLLHDHE.A              | NA             | 2 | 2,6154 | 0,225 | 0,183  |
| 16 | P62424 RL7A_HUMAN   | E.AKKVVNPLFE.K            | NA             | 2 | 2,6109 | 0,281 | 0,213  |
| 16 | P14625 ENPL_HUMAN   | E.KAVVSQRLTE.S            | NA             | 2 | 2,6067 | 0,262 | -0,108 |
| 16 | Q53EN3 Q53EN3_HUMAN | E.VQRRIS#AHQPGPEGQEE.S    | S289           | 3 | 2,6024 | 0,096 | -0,092 |
| 16 | P06454 PTMA_HUMAN   | E.ITTKDLKE.K              | NA             | 2 | 2,5964 | 0,172 | -0,129 |
| 16 | Q9UQE7 SMC3_HUMAN   | E.DQKRVDALNDE.I           | NA             | 2 | 2,5857 | 0,096 | -0,281 |
| 16 | P05455 LA_HUMAN     | E.ALKKIIEDQQE.S           | NA             | 2 | 2,5614 | 0,171 | 0,093  |
| 16 | Q8IUD2 RB6I2_HUMAN  | E.NDLLRKDVE.V             | NA             | 2 | 2,5461 | 0,26  | 0      |
| 16 | P04075 ALDOA_HUMAN  | E.LSDIAHRIVAPGKILAAD.E.S  | NA             | 2 | 2,5169 | 0,274 | 0      |
| 16 | P07355 ANXA2_HUMAN  | E.LKASMKGLGTDE.D          | NA             | 2 | 2,5105 | 0,309 | -0,098 |
| 16 | P23528 COF1_HUMAN   | E.DKKNIILEE.G             | NA             | 2 | 2,4872 | 0,096 | 0      |
| 16 | Q16891 IMMT_HUMAN   | D.NVVKKVQAAQSE.A          | NA             | 2 | 2,4851 | 0,293 | -0,281 |
| 16 | P43686 PRS6B_HUMAN  | E.NRYIVLAKDFE.K           | NA             | 2 | 2,4833 | 0,375 | -0,446 |
| 16 | Q07065 CKAP4_HUMAN  | E.SAKGLDDLRLND.L          | NA             | 2 | 2,4585 | 0,303 | -0,093 |
| 16 | P43034 LIS1_HUMAN   | E.LDKKYAGLLE.K            | NA             | 2 | 2,442  | 0,129 | 0      |
| 16 | P18669 PGAM1_HUMAN  | R.HYGGLTGLNKAE.T          | NA             | 2 | 2,4167 | 0,328 | -0,097 |
| 16 | Q96RS6 NUDC1_HUMAN  | E.GKLYSSIDHE.S            | NA             | 2 | 2,3951 | 0,164 | 0,425  |
| 16 | Q96K21 ZFY19_HUMAN  | E.HQTSAYS#PPRAGQEH.-      | S463           | 2 | 2,39   | 0,383 | -0,07  |

|    |                    |                                     |             |   |        |       |        |
|----|--------------------|-------------------------------------|-------------|---|--------|-------|--------|
| 16 | Q06830 PRDX1_HUMAN | E.FKKLNCQVIGASVD.S                  | NA          | 2 | 2,3836 | 0,307 | 0,155  |
| 16 | Q9Y3D7 TIM16_HUMAN | E.LKIQAQEDRE.K                      | NA          | 2 | 2,3804 | 0,333 | -0,794 |
| 16 | P14618 KPYM_HUMAN  | E.IRTGLIKGSGTAE.V                   | NA          | 2 | 2,3503 | 0,34  | -0,187 |
| 16 | P10809 CH60_HUMAN  | R.KGVITVKD.G                        | NA          | 2 | 2,331  | 0,183 | 0,213  |
| 16 | Q99471 PFD5_HUMAN  | E.AKDCLNLVLNKSNE.G                  | NA          | 2 | 2,3181 | 0,115 | -0,162 |
| 16 | P12277 KCRB_HUMAN  | E.TLFKSKDYE.F                       | NA          | 2 | 2,3022 | 0,196 | 0,108  |
| 16 | O15231 ZN185_HUMAN | E.HSYVLSAAKKSTGS#PTQE.T             | S71         | 2 | 2,3004 | 0,356 | 0      |
| 16 | P07355 ANXA2_HUMAN | E.TAIKTKGVDE.V                      | NA          | 2 | 2,2536 | 0,288 | 0      |
| 16 | O95372 LYPA2_HUMAN | E.NIKALIEHE.M                       | NA          | 2 | 2,2436 | 0,176 | 0      |
| 16 | Q9UKV3 ACINU_HUMAN | E.KSKSPS#PPRLT#E.D                  | S388:T393   | 2 | 2,2352 | 0,196 | 0      |
| 16 | P68104 EF1A1_HUMAN | K.IGGIGTVPVGR.V                     | NA          | 2 | 2,2135 | 0,252 | 0      |
| 16 | O94925 GLSK_HUMAN  | E.NKIKQGLLPSLE.D                    | NA          | 2 | 2,2052 | 0,279 | -0,182 |
| 16 | P25398 RS12_HUMAN  | E.WVGLCKIDRE.G                      | NA          | 2 | 2,1818 | 0,355 | -0,478 |
| 16 | P00387 NB5R3_HUMAN | E.KDILLRPE.L                        | NA          | 2 | 2,1764 | 0,09  | 0      |
| 16 | P17480 UBF1_HUMAN  | R.GKLPES#PKRAEE.I                   | S484        | 2 | 2,1672 | 0,136 | -1,03  |
| 16 | P05787 K2C8_HUMAN  | E.TRDGKLVSES#SDVLPK.-               | S477        | 2 | 2,1472 | 0,315 | 0,269  |
| 16 | Q14145 KEAP1_HUMAN | E.DHTKQAFGIM*NE.L                   | NA          | 2 | 2,1398 | 0,255 | 0      |
| 16 | Q9Y266 NUDC_HUMAN  | E.M*DFSKAKFN.-                      | NA          | 2 | 2,0951 | 0,132 | -0,111 |
| 16 | Q13618 CUL3_HUMAN  | E.DRKVYTYVA.-                       | NA          | 2 | 2,0758 | 0,262 | -0,328 |
| 16 | Q9UQ35 SRRM2_HUMAN | E.HKELS#NS#PLRE.N                   | S1318:S1320 | 2 | 2,0536 | 0,196 | 0,166  |
| 16 | Q9H9Q2 CSN7B_HUMAN | E.VTNIKTKLATAS#SSAQE.M              | S225        | 2 | 2,0284 | 0,287 | 0,125  |
| 16 | O94874 K0776_HUMAN | D.LVLKSRKSS#VTEE.-                  | S790        | 2 | 2,023  | 0,397 | -0,392 |
| 16 | Q723E2 CJ118_HUMAN | E.DHIKQLVEE.I                       | NA          | 2 | 2,0222 | 0,178 | 0,11   |
| 16 | Q15459 SF3A1_HUMAN | E.TAIGKKIGEEE.I                     | NA          | 2 | 1,996  | 0,233 | -0,727 |
| 16 | Q14980 NUMA1_HUMAN | E.NGDLSFKLRE.F                      | NA          | 2 | 1,9454 | 0,125 | 0,207  |
| 16 | P49321 NASP_HUMAN  | E.NRM*AVLNEQVKE.A                   | NA          | 2 | 1,9309 | 0,095 | -0,084 |
| 16 | Q9Y266 NUDC_HUMAN  | E.MDFSKAKFN.-                       | NA          | 2 | 1,9175 | 0,18  | 0,112  |
| 16 | Q9NYV4 CD2L7_HUMAN | E.S#KGSVPFLPRKE.N                   | S420        | 2 | 1,9151 | 0,081 | -0,086 |
| 16 | P51572 BAP31_HUMAN | E.NQVLAM*RKQSE.G                    | NA          | 2 | 1,909  | 0,217 | -0,37  |
| 16 | O14737 PDCD5_HUMAN | E.LQAKHGDPGDAQQE.A                  | NA          | 2 | 1,9019 | 0,092 | -1,014 |
| 16 | Q5T457 UBR4_HUMAN  | E.SSPRVKSPS#KQAPGE.K                | S627        | 2 | 1,9003 | 0,106 | -0,373 |
| 16 | Q15418 KS6A1_HUMAN | E.KKAYS#FCGTVE.Y                    | S221        | 2 | 1,8972 | 0,152 | -0,267 |
| 16 | P34931 HS71L_HUMAN | R.TTPSYVAFTDTER.L                   | NA          | 2 | 1,8876 | 0,388 | -0,082 |
| 16 | Q9UBQ5 EIF3K_HUMAN | E.SIKPKNIVE.K                       | NA          | 2 | 1,8415 | 0,105 | 0      |
| 16 | P18077 RL35A_HUMAN | E.HTALLKIE.G                        | NA          | 2 | 1,8179 | 0,085 | 0,264  |
| 16 | P34897 GLYM_HUMAN  | D.FKSFLK DSE.T                      | NA          | 2 | 1,8081 | 0,168 | 0      |
| 17 | Q9NWH9 SLTM_HUMAN  | E.ASKPKDGDQDAIAQS#PEKE.S            | S289        | 3 | 4,7313 | 0,282 | -0,185 |
| 17 | Q71F23 CENPU_HUMAN | E.FSKHCGLSLSST#PPGKE.A              | T98         | 3 | 4,6101 | 0,404 | 0,287  |
| 17 | Q9NZM1 MYOF_HUMAN  | E.DRDHYIPNTLNPVFGRM*YE.L            | NA          | 3 | 4,5687 | 0,213 | -0,389 |
| 17 | P51114 FXR1_HUMAN  | E.NKLPREDGMVFPVFGTKE.S              | NA          | 3 | 4,285  | 0,41  | -0,085 |
| 17 | Q13263 TIF1B_HUMAN | E.GYGFGSGDDPYSSAEPHVSGVKRSRS#GEGE.V | S473        | 3 | 4,142  | 0,296 | 0      |



|    |                    |                                   |           |   |        |       |        |
|----|--------------------|-----------------------------------|-----------|---|--------|-------|--------|
| 17 | P09211 GSTP1_HUMAN | E.AGKDDYVKALPGQLKPF.E.T           | NA        | 3 | 4,1402 | 0,323 | 0      |
| 17 | Q6P0N0 CN106_HUMAN | E.KKAPLHNLTYELPTLNQEQE.N          | T218      | 3 | 4,123  | 0,276 | 0,075  |
| 17 | Q9NP64 NO40_HUMAN  | R.RRS#FQDYTGQKITLE.A              | S114      | 3 | 4,1011 | 0,387 | 0      |
| 17 | Q86UP2 KTN1_HUMAN  | E.SDASKIPGKKVEPVPVTKQPT#PPSE.A    | T153      | 3 | 4,0845 | 0,407 | -0,136 |
| 17 | P51114 FXR1_HUMAN  | E.NKLPREDGM*VPFVFGTKE.S           | NA        | 3 | 4,0499 | 0,272 | -0,084 |
| 17 | Q9NSC5 HOME3_HUMAN | E.KLFRSQS#ADAPGPTERE.R            | S159      | 3 | 4,0459 | 0,228 | 0,186  |
| 17 | P19338 NUCL_HUMAN  | R.DARTLLAKNLPYKVTQDE.L            | NA        | 3 | 4,0081 | 0,215 | 0,529  |
| 17 | P05787 K2C8_HUMAN  | E.TRDGLVSESS#DVLPK.-              | S478      | 3 | 3,981  | 0,245 | 0,202  |
| 17 | Q02952 AKA12_HUMAN | E.KQEKEPSKSAES#PTSPVTSE.T         | S283      | 3 | 3,9617 | 0,462 | 0,247  |
| 17 | P19338 NUCL_HUMAN  | R.DARTLLAKNLPYKVTQDE.L            | NA        | 2 | 3,9524 | 0,316 | 0      |
| 17 | O00330 ODPX_HUMAN  | E.DALKLVQLKQTGKITE.S              | NA        | 3 | 3,948  | 0,37  | 0,102  |
| 17 | Q02952 AKA12_HUMAN | E.KQEKEPSKSAESPTS#PVTSE.T         | S286      | 3 | 3,9334 | 0,418 | -0,164 |
| 17 | P37802 TAGL2_HUMAN | E.GQAPVKKIQASTM*AFKQME.Q          | NA        | 3 | 3,8935 | 0,396 | -0,173 |
| 17 | Q8IX12 CCAR1_HUMAN | E.DLYHKSCALAEDPQELRD.G            | NA        | 3 | 3,7528 | 0,208 | 0      |
| 17 | Q9UKV3 ACINU_HUMAN | E.KSKSPS#PPRLTE.D                 | S388      | 3 | 3,7482 | 0,238 | 0,13   |
| 17 | P62736 ACTA_HUMAN  | D.LAGRDLTDYLM*K.I                 | NA        | 3 | 3,7456 | 0,357 | 0,065  |
| 17 | P22059 OSBP1_HUMAN | E.NLGHKRTGS#NISGASSDISLDE.Q       | S379      | 3 | 3,6873 | 0,276 | 0,313  |
| 17 | Q6FIF0 ZFAN6_HUMAN | E.HLQRQNSSNGRIS#PPATSVSSLSE.S     | S49       | 3 | 3,6203 | 0,267 | 0,139  |
| 17 | Q8IZM8 ZN654_HUMAN | E.AHLAQKCCQTLFGFDS#DDESA.-        | S576      | 3 | 3,6193 | 0,318 | 0,299  |
| 17 | Q05682 CALD1_HUMAN | E.KQSVDKVTS#PTKV.-                | S789      | 3 | 3,6086 | 0,213 | 0,489  |
| 17 | Q6NZI2 PTRF_HUMAN  | E.AGDLRRGS#S#PDVHALLE.I           | S365:S366 | 3 | 3,5922 | 0,258 | 0,281  |
| 17 | P38919 IF4A3_HUMAN | E.DIRKLDYQHVVAGT#PGRVFD.M         | T163      | 3 | 3,5849 | 0,196 | -0,378 |
| 17 | Q9HAW4 CLSPN_HUMAN | E.KQKQSDIRPS#PGDSSVLQQE.S         | S421      | 3 | 3,5823 | 0,308 | 0      |
| 17 | P60709 ACTB_HUMAN  | E.TTFNSIMKCDVDIRKD.L              | NA        | 3 | 3,5034 | 0,352 | 0,282  |
| 17 | Q9Y2W6 TDRKH_HUMAN | E.TKKSSGEITHLS#CLSLSA.A           | S539      | 3 | 3,5011 | 0,328 | 0,085  |
| 17 | P55209 NP1L1_HUMAN | R.KYAVLYQPLFDKRF.E.I              | NA        | 3 | 3,4952 | 0,292 | -0,095 |
| 17 | O15231 ZN185_HUMAN | E.HSYVLSAAKKS#TGSPTQE.T           | S68       | 3 | 3,4797 | 0,306 | 0,186  |
| 17 | Q93008 USP9X_HUMAN | R.SHS#ARMTLAKACE.L                | S2455     | 3 | 3,4244 | 0,437 | 0,593  |
| 17 | Q5VZ89 DEN4C_HUMAN | E.SRAGM*LLKKS#SLDSNSSE.M          | S824      | 3 | 3,4201 | 0,295 | -0,091 |
| 17 | P63241 IF5A1_HUMAN | E.DICPSTHNMVDPNIKRND.F            | NA        | 2 | 3,4174 | 0,414 | 0,574  |
| 17 | P55072 TERA_HUMAN  | E.VGYDDIGGCRKQLAQIKE.M            | NA        | 3 | 3,4087 | 0,125 | 0,178  |
| 17 | Q9UQ35 SRRM2_HUMAN | E.KSATRPS#PS#PERSSTGPEPPAPTLLAE.R | S351:S353 | 3 | 3,3758 | 1     | 0,364  |
| 17 | Q5VZL5 ZMYM4_HUMAN | E.KKTL#QGESQTSEHE.L               | S1064     | 3 | 3,3741 | 0,302 | -0,207 |
| 17 | P37802 TAGL2_HUMAN | E.GQAPVKKIQASTM*AFKQM*E.Q         | NA        | 3 | 3,3673 | 0,155 | 0,258  |
| 17 | P37802 TAGL2_HUMAN | E.GQAPVKKIQASTMAFKQM*E.Q          | NA        | 3 | 3,3563 | 0,293 | 0,087  |
| 17 | Q13233 M3K1_HUMAN  | E.KTGKGLCATKLSAS#SEDIS.E.R        | S925      | 3 | 3,3495 | 0,194 | 0,254  |
| 17 | Q7KZ17 MARK2_HUMAN | E.SGRKASSTAKVPAS#PLPGL.E.R        | S456      | 3 | 3,3433 | 0,283 | 0,09   |
| 17 | Q15181 IPYR_HUMAN  | E.KGQYISPFHDIPIYADKD.V            | NA        | 3 | 3,3248 | 0,321 | -0,087 |
| 17 | Q93008 USP9X_HUMAN | R.SHS#ARMTLAKACE.L                | S2455     | 2 | 3,3182 | 0,518 | -0,396 |
| 17 | Q15398 DLG7_HUMAN  | E.NHVVNKTDLKVDCLS#SE.R            | S720      | 3 | 3,2979 | 0,213 | -0,09  |
| 17 | Q5VZ89 DEN4C_HUMAN | E.RRS#SLPLDHGSPAQENPESE.K         | S1041     | 3 | 3,2849 | 0,391 | 0      |

|    |                    |                                      |           |   |        |       |        |
|----|--------------------|--------------------------------------|-----------|---|--------|-------|--------|
| 17 | P60709 ACTB_HUMAN  | E.EHPVLLTEAPLNPKANRE.K               | NA        | 3 | 3,2843 | 0,187 | 0      |
| 17 | Q9NZB2 F120A_HUMAN | E.LKSKSGESKSSAM*SS#DGSLAE.N          | S1045     | 3 | 3,2837 | 0,119 | -0,084 |
| 17 | O60271 JIP4_HUMAN  | E.GSKQRSASQSS#LDKLDQE.L              | S733      | 3 | 3,2719 | 0,163 | 0,358  |
| 17 | P12036 NFH_HUMAN   | E.VKS#PEKAKS#PLKE.D                  | S801:S807 | 3 | 3,2233 | 0,115 | -0,457 |
| 17 | Q9Y2F5 K0947_HUMAN | E.NLKEKS#PFRE.T                      | S1303     | 3 | 3,2032 | 0,171 | 0,344  |
| 17 | Q05682 CALD1_HUMAN | E.KQSVDKVT#SPTKV.-                   | T788      | 2 | 3,1968 | 0,321 | -0,326 |
| 17 | Q9Y217 MTMR6_HUMAN | E.LLHSVHPES#PNLKTSLCFKE.Q            | S561      | 3 | 3,1927 | 0,232 | 0,303  |
| 17 | P09211 GSTP1_HUMAN | E.AGKDDYVKALPGQLKPF.E.T              | NA        | 2 | 3,1782 | 0,378 | 0,309  |
| 17 | P11021 GRP78_HUMAN | E.KAKRALSSQHQARIE.I                  | NA        | 3 | 3,1687 | 0,33  | -0,212 |
| 17 | P63241 IF5A1_HUMAN | E.DICPSTHNMDVPNIKRND.F               | NA        | 3 | 3,1611 | 0,118 | 0,602  |
| 17 | P63241 IF5A1_HUMAN | E.DICPSTHNM*DVPNIKRND.F              | NA        | 2 | 3,142  | 0,311 | -0,228 |
| 17 | P06576 ATPB_HUMAN  | E.AVAKADKLAEEHSS#.-                  | S529      | 2 | 3,1373 | 0,294 | -0,318 |
| 17 | Q6DN90 IQEC1_HUMAN | E.GLKRSALSSS#LRDLSE.A                | S925      | 3 | 3,13   | 0,259 | 0,508  |
| 17 | Q8IY57 YAF2_HUMAN  | E.KTKSPPASSAASADQHSQSGS#SSDNTE.R     | S153      | 3 | 3,1204 | 0,249 | 0      |
| 17 | Q8NBS9 TXND5_HUMAN | E.DAKVYVAKVDCTAHS.D.V                | NA        | 3 | 3,0844 | 0,339 | -0,103 |
| 17 | Q5VZ89 DEN4C_HUMAN | E.RRS#SLPLDHGSPAQENPE.S              | S1041     | 3 | 3,0833 | 0,258 | 0,088  |
| 17 | O15155 BET1_HUMAN  | E.SLRSKVTAIKSL#IE.I                  | S50       | 3 | 3,0723 | 0,146 | 0,107  |
| 17 | P04406 G3P_HUMAN   | E.FGYSNRVVDLM*AHM*ASKE.-             | NA        | 3 | 3,0435 | 0,187 | 0,175  |
| 17 | P04406 G3P_HUMAN   | K.AVGKVIPELNGK.L                     | NA        | 2 | 3,0286 | 0,309 | -0,1   |
| 17 | Q9Y2W1 TR150_HUMAN | E.MKS#PREPGYKAE.G                    | S698      | 3 | 3,0237 | 0,319 | 0,497  |
| 17 | Q9UQ35 SRRM2_HUMAN | E.VALKRVPS#PTPAPKEAVRE.G             | S2581     | 3 | 3,0229 | 0,211 | -0,43  |
| 17 | Q12792 TWF1_HUMAN  | E.DVSLHGYYKYLSSQSSPAPLTAEEEE.L       | NA        | 3 | 3,0159 | 0,336 | 0,194  |
| 17 | Q12756 KIF1A_HUMAN | D.SKKLPS#PARATE.T                    | S1548     | 3 | 3,0086 | 0,158 | 0,201  |
| 17 | Q8IZM8 ZN654_HUMAN | E.AHLAQKQCQTLFGFDS#DDESA.-           | S576      | 2 | 2,9956 | 0,379 | 0,199  |
| 17 | P61604 CH10_HUMAN  | K.VGDKVLLPEYGGTK.V                   | NA        | 2 | 2,9752 | 0,293 | -0,248 |
| 17 | Q15942 ZYX_HUMAN   | E.KQHPVPPPAQNQNQVRS#PGAPGPLTLKEVEE.L | S344      | 3 | 2,9681 | 0,134 | 0,535  |
| 17 | Q8WYA0 IFT81_HUMAN | E.AKEKLAS#LERE.A                     | S371      | 3 | 2,953  | 0,173 | 0,203  |
| 17 | Q6P597 KLC3_HUMAN  | D.KAPRTLSASTQDLS#PH.-                | S502      | 3 | 2,9397 | 0,316 | 0,409  |
| 17 | P08238 HS90B_HUMAN | E.LLRYHTSQSGDE.M                     | NA        | 2 | 2,9328 | 0,421 | -0,174 |
| 17 | P60709 ACTB_HUMAN  | E.TTFNSIM*KCDVDIRKD.L                | NA        | 3 | 2,9278 | 0,13  | 0,467  |
| 17 | O15144 ARPC2_HUMAN | E.MKTITGKTFS#SR.-                    | S298      | 3 | 2,8799 | 0,345 | 0,127  |
| 17 | Q8WWY3 PRP31_HUMAN | E.FLKVKGEKSGLM*S#T.-                 | S498      | 2 | 2,8595 | 0,392 | -0,151 |
| 17 | Q92598 HS105_HUMAN | E.NKIPDADKANE.K                      | NA        | 3 | 2,8463 | 0,197 | 0,677  |
| 17 | Q96JM3 ZN828_HUMAN | E.TRKPGPSGSPSES#PKAASD.I             | S507      | 3 | 2,8389 | 0,289 | 0      |
| 17 | P00558 PGK1_HUMAN  | K.SLLGKDVLFKLD.C                     | NA        | 2 | 2,8296 | 0,245 | -0,181 |
| 17 | P22059 OSBP1_HUMAN | E.NLGHKRTGS#NISGASSDISLDE.Q          | S379      | 2 | 2,8    | 0,431 | 0,104  |
| 17 | P14618 KPYM_HUMAN  | D.YKNICKVVE.V                        | NA        | 2 | 2,7953 | 0,272 | 0      |
| 17 | Q92576 PHF3_HUMAN  | E.NSVRS#PRKS#PRLM*AQE.Q              | S125:S129 | 3 | 2,7846 | 0,184 | 0      |
| 17 | Q86YC2 PALB2_HUMAN | E.KSLKSPS#DTLDGRNE.N                 | S359      | 3 | 2,7819 | 0,121 | 0,212  |
| 17 | A0MZ66 SHOT1_HUMAN | E.NKEDSIENVRE.T                      | NA        | 2 | 2,7699 | 0,287 | 0,183  |
| 17 | P31040 DHSA_HUMAN  | E.YDYSKPIQGGQKPFEE.H                 | NA        | 3 | 2,7543 | 0,195 | -0,175 |

|    |                    |                           |       |   |        |       |        |
|----|--------------------|---------------------------|-------|---|--------|-------|--------|
| 17 | P07900 HS90A_HUMAN | E.NQKHIIYITGE.T           | NA    | 2 | 2,7463 | 0,305 | -0,179 |
| 17 | P18669 PGAM1_HUMAN | E.LDKNLKPIKPM*QFLGDEE.T   | NA    | 3 | 2,7411 | 0,206 | 0,258  |
| 17 | Q58FF8 H90B2_HUMAN | E.FDGKSLVSVTKE.G          | NA    | 3 | 2,7407 | 0,177 | 0,489  |
| 17 | Q96T58 MINT_HUMAN  | E.NHPKT#PESAPENKDSE.L     | T1619 | 3 | 2,7314 | 0,266 | -0,295 |
| 17 | O75874 IDHC_HUMAN  | E.NRDATNDQVTKDAAE.A       | NA    | 3 | 2,7281 | 0,113 | 0      |
| 17 | Q96FV9 THOC1_HUMAN | E.DFLGKGPTKKILM*GNEE.L    | NA    | 3 | 2,7255 | 0,168 | 0,097  |
| 17 | P37802 TAGL2_HUMAN | E.GQAPVKKIQASTMAFKQME.Q   | NA    | 3 | 2,7252 | 0,117 | 0      |
| 17 | P55072 TERA_HUMAN  | E.THGHVVGADLAALCSE.A      | NA    | 2 | 2,7141 | 0,414 | 0,317  |
| 17 | Q9UKV3 ACINU_HUMAN | E.KSKSPS#PPRLTE.D         | S388  | 2 | 2,696  | 0,291 | -0,26  |
| 17 | A1L390 PKHG3_HUMAN | E.KGLARHGS#ATDSLSCQLSPE.V | S656  | 3 | 2,6945 | 0,327 | 0,334  |
| 17 | P62424 RL7A_HUMAN  | E.AIRTNYNDRYDE.I          | NA    | 3 | 2,6922 | 0,161 | 0,179  |
| 17 | Q9H583 HEAT1_HUMAN | E.NRLGGEEKFQE.R           | NA    | 3 | 2,6734 | 0,198 | 0,42   |
| 17 | Q8WWY3 PRP31_HUMAN | E.FLKVKGEKSGLMS#T.-       | S498  | 2 | 2,6584 | 0,415 | -0,304 |
| 17 | Q86UP2 KTN1_HUMAN  | E.NKLFKSQIE.Q             | NA    | 2 | 2,6539 | 0,126 | -0,11  |
| 17 | Q9UJX5 APC4_HUMAN  | E.ASNKPVKIKEEVLS#ESE.A    | S777  | 3 | 2,6507 | 0,096 | -0,093 |
| 17 | P10809 CH60_HUMAN  | E.KGIIDPTKVVRTALLD.A      | NA    | 3 | 2,6476 | 0,183 | -0,21  |
| 17 | P63313 TYB10_HUMAN | E.KNTLPTKE.T              | NA    | 2 | 2,6306 | 0,169 | 0,131  |
| 17 | Q86UL3 PLCF_HUMAN  | E.IRRSGS#SKALDNTPEFE.L    | S100  | 3 | 2,6291 | 0,088 | 0,552  |
| 17 | Q9H799 CE042_HUMAN | E.FKKTLASKTIS#ISEE.V      | S1660 | 3 | 2,6164 | 0,193 | -0,311 |
| 17 | Q14019 COTL1_HUMAN | E.LKKAGGANYDAQTE.-        | NA    | 2 | 2,6129 | 0,333 | -0,083 |
| 17 | Q93008 USP9X_HUMAN | R.SHS#ARM*TLAKACE.L       | S2455 | 2 | 2,5974 | 0,447 | -0,078 |
| 17 | O00299 CLIC1_HUMAN | E.GVSQRKFLDGNE.L          | NA    | 2 | 2,5931 | 0,323 | 0      |
| 17 | P63241 IF5A1_HUMAN | E.DICPSTHNM*DVPNIKRND.F   | NA    | 3 | 2,5923 | 0,088 | 0,171  |
| 17 | P04406 G3P_HUMAN   | K.AVGKVIPELNGK.L          | NA    | 3 | 2,5707 | 0,113 | 0,522  |
| 17 | Q8TCG1 K1524_HUMAN | E.TVKKLINES#LKEQNE.K      | S768  | 3 | 2,5602 | 0,195 | 0      |
| 17 | P67936 TPM4_HUMAN  | E.AEDRAQGLQRE.L           | NA    | 3 | 2,5437 | 0,138 | -0,215 |
| 17 | Q93008 USP9X_HUMAN | R.SHS#ARM*TLAKACE.L       | S2455 | 3 | 2,5128 | 0,299 | 0,587  |
| 17 | P00558 PGK1_HUMAN  | K.SLLGKDVFLK.D            | NA    | 2 | 2,5113 | 0,249 | -0,297 |
| 17 | Q09666 AHNK_HUMAN  | K.VEGDLKGPEVDLK.G         | NA    | 3 | 2,5096 | 0,237 | 0,065  |
| 17 | P54136 SYRC_HUMAN  | E.NITKHLPDNE.C            | NA    | 2 | 2,4816 | 0,233 | 0      |
| 17 | P54652 HSP72_HUMAN | R.AKRTLSSSTQASIE.I        | NA    | 2 | 2,4788 | 0,279 | -0,33  |
| 17 | Q9NY12 NOLA1_HUMAN | E.NKEQIGKVDE.I            | NA    | 2 | 2,474  | 0,175 | 0      |
| 17 | Q15424 SAFB1_HUMAN | E.DGRKFDACNE.V            | NA    | 2 | 2,4692 | 0,19  | -0,083 |
| 17 | P60709 ACTB_HUMAN  | E.TTFNSIMKCDVDIRKD.L      | NA    | 2 | 2,4685 | 0,245 | 0,126  |
| 17 | O15144 ARPC2_HUMAN | E.M*KTITGKTFS#SR.-        | S298  | 2 | 2,4477 | 0,167 | -0,252 |
| 17 | P06748 NPM_HUMAN   | E.KGGSLPKVE.A             | NA    | 2 | 2,4044 | 0,141 | 0,133  |
| 17 | P06737 PYGL_HUMAN  | E.NKLFQSFLF.T             | NA    | 2 | 2,3725 | 0,108 | 0      |
| 17 | O60749 SNX2_HUMAN  | E.AKVQQGERDFE.Q           | NA    | 2 | 2,3263 | 0,237 | -0,187 |
| 17 | P05787 K2C8_HUMAN  | E.GLKGQRASLE.A            | NA    | 2 | 2,2723 | 0,194 | 0      |
| 17 | P06748 NPM_HUMAN   | E.KTPKT#PKGPPSSVE.D       | T237  | 2 | 2,2336 | 0,099 | -0,34  |
| 17 | P05387 RLA2_HUMAN  | K.DIKKILDSVGIE.A          | NA    | 2 | 2,2295 | 0,24  | -0,734 |

|    |                    |                                  |             |   |        |       |        |
|----|--------------------|----------------------------------|-------------|---|--------|-------|--------|
| 17 | P35579 MYH9_HUMAN  | E.KTISAKYAE.R                    | NA          | 2 | 2,221  | 0,245 | 0,107  |
| 17 | Q9Y2W1 TR150_HUMAN | E.MKS#PREPGYKAE.G                | S698        | 2 | 2,2106 | 0,178 | -0,166 |
| 17 | POC0S8 H2A1_HUMAN  | R.HLQLAIRNDEE.L                  | NA          | 2 | 2,1829 | 0,252 | -0,091 |
| 17 | Q13523 PRP4B_HUMAN | E.DKFKGSLSE.G                    | NA          | 2 | 2,1555 | 0,083 | 0,181  |
| 17 | P00558 PGK1_HUMAN  | E.NLRFHVEEE.G                    | NA          | 2 | 2,1262 | 0,177 | 0,104  |
| 17 | P12956 KU70_HUMAN  | E.ALTKHFQD.-                     | NA          | 2 | 2,0837 | 0,207 | 0,191  |
| 17 | P54577 SYYC_HUMAN  | E.HVFKVGYE.K                     | NA          | 2 | 2,0802 | 0,267 | 0,125  |
| 17 | Q6P1N9 TATD1_HUMAN | E.NNKGKVAIGE.C                   | NA          | 2 | 2,0523 | 0,186 | 0,216  |
| 17 | Q2TAY7 SMU1_HUMAN  | E.NSLHRALATLQEE.T                | NA          | 2 | 2,0486 | 0,124 | 0,329  |
| 17 | P62826 RAN_HUMAN   | E.KKYVATLGVE.V                   | NA          | 2 | 2,0474 | 0,307 | 0,22   |
| 17 | P23526 SAHH_HUMAN  | E.KVNIKPQVD.R                    | NA          | 2 | 2,0417 | 0,218 | 0,117  |
| 17 | Q15149 PLEC1_HUMAN | E.TDHQKNLLDEE.L                  | NA          | 2 | 2,0286 | 0,11  | -0,091 |
| 17 | Q15181 IPYR_HUMAN  | E.YRVFLKNE.K                     | NA          | 2 | 2,0252 | 0,118 | 0      |
| 17 | Q8TAT6 NPL4_HUMAN  | E.NISCKIKSGCE.G                  | NA          | 2 | 2,0161 | 0,248 | 0,659  |
| 17 | P05023 AT1A1_HUMAN | D.DHKLSLDE.L                     | NA          | 2 | 2,0058 | 0,106 | 0      |
| 17 | Q7L576 CYFP1_HUMAN | E.DHMRFISE.L                     | NA          | 2 | 1,9759 | 0,3   | 0,118  |
| 17 | P61978 HNRPK_HUMAN | E.FGKRPAEDM*EEE.Q                | NA          | 2 | 1,9601 | 0,211 | -0,336 |
| 17 | Q15819 UB2V2_HUMAN | E.NRIYSLKVE.C                    | NA          | 2 | 1,9218 | 0,131 | 0,109  |
| 17 | Q9UQ35 SRRM2_HUMAN | E.HKELS#NS#PLRE.N                | S1318:S1320 | 2 | 1,8434 | 0,139 | -0,415 |
| 17 | P27707 DCK_HUMAN   | E.DFKDKYE.S                      | NA          | 2 | 1,8395 | 0,159 | 0,129  |
| 17 | P07237 PDIA1_HUMAN | D.GFKKFLE.S                      | NA          | 2 | 1,814  | 0,088 | 0,07   |
| 18 | Q06830 PRDX1_HUMAN | E.TLRLVQAFQFTDKHGE.V             | NA          | 3 | 4,9577 | 0,316 | -0,097 |
| 18 | Q13162 PRDX4_HUMAN | E.TLRLVQAFQYTDKHGE.V             | NA          | 3 | 4,3508 | 0,253 | 0,096  |
| 18 | P11021 GRP78_HUMAN | E.KAKRALSSQHQARIE.I              | NA          | 3 | 4,3371 | 0,407 | -0,106 |
| 18 | P63000 RAC1_HUMAN  | E.KKLTPTYPQGLAM*AKE.I            | NA          | 3 | 4,2963 | 0,306 | 0      |
| 18 | Q99547 MPH6_HUMAN  | E.NGDIT#PIKAKKMFLKPQD.-          | T147        | 3 | 4,1097 | 0,492 | 0,517  |
| 18 | Q13283 G3BP1_HUMAN | D.SHQLFIGNLPHEVDKSE.L            | NA          | 3 | 4,0857 | 0,4   | 0,281  |
| 18 | O15015 ZN646_HUMAN | R.HHQSQSSGTTADKAPS#PLGVAGDAM*E.M | S991        | 3 | 4,0854 | 0,233 | 0,205  |
| 18 | Q9Y2J4 AMOL2_HUMAN | E.LKALRAQRRQAGAPGGSSGSGS#PE.L    | S540        | 3 | 4,08   | 0,476 | -0,15  |
| 18 | O15027 SC16A_HUMAN | E.HRPASALVNPLARGDS#PE.N          | S164        | 3 | 4,0755 | 0,168 | 0,279  |
| 18 | Q99547 MPH6_HUMAN  | E.NGDIT#PIKAKKM*FLKPQD.-         | T147        | 3 | 4,0638 | 0,302 | 0,171  |
| 18 | Q02952 AKA12_HUMAN | E.KQEKEPSKSAESPT#SPVTSE.T        | T285        | 2 | 4,0074 | 0,301 | -0,11  |
| 18 | Q02952 AKA12_HUMAN | E.KQEKEPSKSAESPT#SPVTSE.T        | T285        | 3 | 4,0054 | 0,23  | -0,164 |
| 18 | P13667 PDIA4_HUMAN | E.LSKRSPPIPLAKVDATEA.T           | NA          | 3 | 3,9351 | 0,3   | 0,193  |
| 18 | Q02952 AKA12_HUMAN | E.KQEKEPSKSAESPTS#PVTSE.T        | S286        | 3 | 3,9076 | 0,35  | 0,411  |
| 18 | Q5H9R7 SAPS3_HUMAN | E.TNKRNTVDLVTTCCHIHS#SS#DDE.I    | S523:S525   | 3 | 3,8774 | 0,353 | 0,204  |
| 18 | P68104 EF1A1_HUMAN | E.TSKYYVTIIDAPGHRD.F             | NA          | 3 | 3,8458 | 0,21  | 0,399  |
| 18 | Q8NEF9 SRFB1_HUMAN | E.HGPKAVT#IANSPSKPSEKDSVVSLE.S   | T199        | 3 | 3,8443 | 0,202 | 0,275  |
| 18 | Q00341 VIGLN_HUMAN | E.HRSGLVPQQIKVATLNS#EEE.S        | S31         | 3 | 3,8096 | 0,231 | -0,158 |
| 18 | P22059 OSBP1_HUMAN | E.NLGHKRTGSNISGASS#DISLDE.Q      | S386        | 3 | 3,7432 | 0,309 | 0,313  |
| 18 | P09936 UCHL1_HUMAN | E.DTLLKDAAKVCRE.F                | NA          | 3 | 3,7043 | 0,275 | -0,12  |

|    |                     |                                 |           |   |        |       |        |
|----|---------------------|---------------------------------|-----------|---|--------|-------|--------|
| 18 | B2CI53 B2CI53_HUMAN | E.NAKVTRSNMS#PDKPVSVKISFE.D     | S1105     | 3 | 3,6768 | 0,122 | 0      |
| 18 | P48643 TCPE_HUMAN   | E.DTKLIKGVIVDKD.F               | NA        | 3 | 3,6437 | 0,334 | 0,127  |
| 18 | Q13948 CASP_HUMAN   | E.DVQRLQASLTKLRE.N              | NA        | 3 | 3,6056 | 0,303 | 0      |
| 18 | P12004 PCNA_HUMAN   | E.ARLVQGSILKVKLE.A              | NA        | 3 | 3,5622 | 0,137 | 0      |
| 18 | P41567 EIF1_HUMAN   | E.IGLAKDDQLKVHGF.-              | NA        | 3 | 3,5381 | 0,419 | 0      |
| 18 | Q9Y4B5 K0802_HUMAN  | E.REGPGRDHAPSIPTS#PFGDSLE.S     | S613      | 3 | 3,533  | 0,262 | 0      |
| 18 | Q8IWC1 MA7D3_HUMAN  | E.MDKQALIPIAKKRLSSY#TE.C        | Y491      | 3 | 3,4681 | 0,188 | 0      |
| 18 | P33176 KINH_HUMAN   | E.AKAKLITDLQDQNKQKM*M*LE.Q      | NA        | 3 | 3,466  | 0,235 | 0,407  |
| 18 | Q15185 TEBP_HUMAN   | D.S#DEDMSNFDRFSE.M              | S113      | 2 | 3,4353 | 0,438 | 0,294  |
| 18 | Q8NE01 CNNM3_HUMAN  | E.KTTTAAGSSHSRPGVPEGS#PGRNPGV.- | S700      | 3 | 3,4084 | 0,327 | 0,205  |
| 18 | Q02952 AKA12_HUMAN  | E.LQSHAKSPPS#PVERE.M            | S1331     | 3 | 3,3658 | 0,279 | -0,21  |
| 18 | Q9BTT0 AN32E_HUMAN  | E.KCPNLTYLNLSGNKIKD.L           | NA        | 3 | 3,3487 | 0,177 | -0,185 |
| 18 | Q8NBS9 TXND5_HUMAN  | E.LSKKEFPGLAGVKIAE.V            | NA        | 3 | 3,3463 | 0,173 | 0,434  |
| 18 | B2CI53 B2CI53_HUMAN | E.NAKVT#RSNM*SPDKPVSVKISFE.D    | T1100     | 3 | 3,346  | 0,236 | 0,145  |
| 18 | Q6ULP2 AFTIN_HUMAN  | E.CQLARKSSGTGT#EPVAKLKNGQEGE.I  | T522      | 3 | 3,3437 | 0,221 | 0,269  |
| 18 | O15355 PPM1G_HUMAN  | E.AGKALDMSYDHKPEDE.V            | NA        | 3 | 3,3409 | 0,116 | 1,114  |
| 18 | Q9UK58 CCNL1_HUMAN  | E.KS#PISINVKTVKKEPE.D           | S352      | 3 | 3,3307 | 0,38  | 0,195  |
| 18 | Q96D71 REPS1_HUMAN  | E.LKRTGSDHTNPTS#PLLVKPSDLLEE.N  | S430      | 3 | 3,3242 | 0,255 | -0,129 |
| 18 | Q9BTZ2 DHRS4_HUMAN  | E.GLSVTGTVCHVGKAEDRE.R          | NA        | 3 | 3,3186 | 0,381 | -0,191 |
| 18 | P49591 SYSC_HUMAN   | D.LFRVDKGGDPALIRE.T             | NA        | 3 | 3,2623 | 0,306 | 0      |
| 18 | Q13561 DCTN2_HUMAN  | E.LVQRLVTIKQLHE.Q               | NA        | 3 | 3,23   | 0,229 | 0      |
| 18 | Q7Z478 DHX29_HUMAN  | E.DHPVFNPA*M*KISHQQNE.R         | NA        | 3 | 3,2242 | 0,267 | 0,273  |
| 18 | Q8IWC1 MA7D3_HUMAN  | E.M*DKQALIPIAKKRLSS#YTE.C       | S490      | 3 | 3,2194 | 0,404 | 0,32   |
| 18 | O60271 JIP4_HUMAN   | E.NKM*KNLPPVYLRPLDE.K           | NA        | 3 | 3,2194 | 0,118 | 0      |
| 18 | P60709 ACTB_HUMAN   | E.TTFNSIM*KCDVDIRKD.L           | NA        | 3 | 3,2146 | 0,258 | 0,28   |
| 18 | Q6NZI2 PTRF_HUMAN   | E.VKLPAKLSISKS#LKE.S            | S171      | 3 | 3,2105 | 0,319 | 0      |
| 18 | P60709 ACTB_HUMAN   | E.TTFNSIMKCDVDIRKD.L            | NA        | 3 | 3,1881 | 0,372 | 0,094  |
| 18 | P29401 TKT_HUMAN    | K.SKDDQVTVIGAGVTLHE.A           | NA        | 3 | 3,186  | 0,152 | 0,207  |
| 18 | Q6NZI2 PTRF_HUMAN   | E.AGDLRRGS#S#PDVHALLE.I         | S365:S366 | 3 | 3,1689 | 0,258 | 0,187  |
| 18 | Q8TER5 SOLO_HUMAN   | R.KRS#ISAQQLVSE.L               | S1082     | 3 | 3,1638 | 0,311 | -0,116 |
| 18 | Q8WXH0 SYNE2_HUMAN  | R.KLNRRGS#MSYLAAVEEE.V          | S4108     | 3 | 3,1466 | 0,182 | -0,27  |
| 18 | Q00839 HNRPU_HUMAN  | E.NKYRAKS#PQPPVEEE.D            | S270      | 3 | 3,1438 | 0,107 | 0,755  |
| 18 | P07900 HS90A_HUMAN  | E.NQKHIIYITGETKDQVANSFAVE.R     | NA        | 3 | 3,1305 | 0,303 | 0      |
| 18 | P50502 F10A1_HUMAN  | E.SM*GGKVPPATQKAKSEE.N          | NA        | 3 | 3,1224 | 0,223 | -0,312 |
| 18 | P06733 ENOA_HUMAN   | R.LAKYNQLLRIEEE.L               | NA        | 3 | 3,1155 | 0,081 | 0      |
| 18 | Q16186 ADRM1_HUMAN  | E.AFAKAM*QNNAKPEQKE.G           | NA        | 3 | 3,113  | 0,179 | -0,201 |
| 18 | P15927 RFA2_HUMAN   | E.GHIYSTVDDDHFKSTDAE.-          | NA        | 3 | 3,1092 | 0,416 | 0,449  |
| 18 | P22059 OSBP1_HUMAN  | E.NLGHKRTGSNIS#GASSDISLDE.Q     | S382      | 3 | 3,0891 | 0,293 | -0,078 |
| 18 | Q9UJZ1 STML2_HUMAN  | E.GKKQAQILASE.A                 | NA        | 2 | 3,016  | 0,328 | -0,104 |
| 18 | Q15942 ZYX_HUMAN    | E.KQHPVPPAQNQNQVRS#PGAPGPLTKE.V | S344      | 3 | 2,992  | 0,262 | 0      |
| 18 | P62736 ACTA_HUMAN   | E.AQSKRGILTLYPIE.H              | NA        | 3 | 2,9769 | 0,155 | 0,213  |

|    |                     |                                   |                   |   |        |       |        |
|----|---------------------|-----------------------------------|-------------------|---|--------|-------|--------|
| 18 | P06748 NPM_HUMAN    | D.NDENEHQLSLR.T                   | NA                | 2 | 2,9422 | 0,183 | -0,27  |
| 18 | P10809 CH60_HUMAN   | E.IANAHRKPLVIAEDVDGE.A            | NA                | 3 | 2,9372 | 0,292 | 0,178  |
| 18 | Q9UNZ2 NSF1C_HUMAN  | E.DFVKPKGAFKFTGE.G                | NA                | 2 | 2,9276 | 0,42  | 0      |
| 18 | P48643 TCPE_HUMAN   | E.DTKLIKGVIVDKD.F                 | NA                | 2 | 2,9192 | 0,225 | 0,253  |
| 18 | Q68D10 SPT2_HUMAN   | E.KHLALSSSKS#M*PGE.R              | S282              | 3 | 2,9143 | 0,257 | 0,117  |
| 18 | P10809 CH60_HUMAN   | E.IANAHRKPLVIAEDVDGE.A            | NA                | 2 | 2,8854 | 0,214 | 0,118  |
| 18 | P62081 RS7_HUMAN    | E.TFSGVYKLTGKDVNFE.F              | NA                | 3 | 2,8585 | 0,146 | -0,095 |
| 18 | P10809 CH60_HUMAN   | D.DAM*LLKGGKDKAQIE.K              | NA                | 2 | 2,8231 | 0,345 | -0,075 |
| 18 | Q14152 EIF3A_HUMAN  | R.KERLES#LNIQRE.K                 | S584              | 3 | 2,7895 | 0,148 | 0,115  |
| 18 | P43490 NAMPT_HUMAN  | E.KYDGHLPKAVPE.G                  | NA                | 3 | 2,7832 | 0,163 | -0,107 |
| 18 | Q09666 AHNK_HUMAN   | E.GLGGKLGKPDVKLPD.M               | NA                | 3 | 2,7733 | 0,202 | 0      |
| 18 | Q96RI3 Q96RI3_HUMAN | D.DAM*LLKGGKDKAQIE.K              | NA                | 3 | 2,7295 | 0,112 | 0,336  |
| 18 | Q9Y2V2 CHSP1_HUMAN  | E.VVITHLAPGTKHE.T                 | NA                | 3 | 2,7178 | 0,36  | 0,13   |
| 18 | P35251 RFC1_HUMAN   | E.NTKTKNKPLS#PIKLTPTSVDL.Y        | S156              | 3 | 2,7127 | 0,217 | 0,231  |
| 18 | Q9UJZ1 STML2_HUMAN  | E.GKKQAQILASEAE.K                 | NA                | 2 | 2,7114 | 0,463 | -0,178 |
| 18 | Q14847 LASP1_HUMAN  | E.FEKNKGKGSVVADT#PE.L             | T104              | 3 | 2,6944 | 0,271 | 0      |
| 18 | Q5T1M5 FKB15_HUMAN  | E.AGSTVAGAALRPSHHSQRSSLS#GDEEDE.L | S1164             | 3 | 2,6785 | 0,259 | 0,25   |
| 18 | O94826 TOM70_HUMAN  | E.KAIDM*FNKAINLAKSE.M             | NA                | 3 | 2,6723 | 0,124 | 0      |
| 18 | P83731 RL24_HUMAN   | R.YARTDGKVFQFLNAKCE.S             | NA                | 3 | 2,6718 | 0,249 | 0,179  |
| 18 | Q04917 1433F_HUMAN  | E.DSYKDSTLIM*QLLR.D               | NA                | 3 | 2,6495 | 0,175 | -0,215 |
| 18 | Q8N1F7 NUP93_HUMAN  | E.AAKLYDLAKNADKVL.E.L             | NA                | 3 | 2,6395 | 0,247 | -0,104 |
| 18 | Q15843 NEDD8_HUMAN  | -.M*LIKVKTLTGKIE.I                | NA                | 3 | 2,6337 | 0,095 | 0      |
| 18 | P52272 HNRPM_HUMAN  | E.NGKSKGCGVVKFES#PE.V             | S701              | 3 | 2,6237 | 0,241 | 0      |
| 18 | P62258 1433E_HUMAN  | D.KHLIPAANTGE.S                   | NA                | 2 | 2,6057 | 0,311 | 0,53   |
| 18 | P11021 GRP78_HUMAN  | D.LFRSTM*KPVQKVL.E.D              | NA                | 3 | 2,5897 | 0,15  | 0,108  |
| 18 | Q9H1A4 APC1_HUMAN   | E.LRDSSKLHDS#LYNE.D               | S569              | 2 | 2,5874 | 0,389 | -0,139 |
| 18 | P26641 EF1G_HUMAN   | E.KKAAAPAPEEE.M                   | NA                | 2 | 2,5342 | 0,081 | -0,321 |
| 18 | Q9UNZ2 NSF1C_HUMAN  | E.DFVKPKGAFKFTGE.G                | NA                | 3 | 2,516  | 0,156 | -0,334 |
| 18 | Q86W92 LIPB1_HUMAN  | D.KLLTSSLQKSS#SLGNLKKE.T          | S465              | 3 | 2,5102 | 0,196 | 0,171  |
| 18 | P55072 TERA_HUMAN   | E.SNLRKAFEE.A                     | NA                | 2 | 2,4944 | 0,255 | -0,335 |
| 18 | P02794 FRIH_HUMAN   | E.YLFDKHTLGDS#DNES.-              | S179              | 2 | 2,491  | 0,279 | -0,067 |
| 18 | P63244 GBLP_HUMAN   | E.GKHLYTLD.G                      | NA                | 2 | 2,4667 | 0,251 | 0,129  |
| 18 | P12259 FA5_HUMAN    | K.IKKIT#AIITQGCKSLS#S#E.M         | T2134:S2145:S2146 | 2 | 2,4512 | 0,084 | -1,761 |
| 18 | Q6NZI2 PTRF_HUMAN   | E.VKLPKLS#ISKSLKE.S               | S167              | 2 | 2,3809 | 0,27  | 0,071  |
| 18 | P55072 TERA_HUMAN   | E.SNLRKAFE.E                      | NA                | 2 | 2,3536 | 0,191 | 0,063  |
| 18 | P02545 LMNA_HUMAN   | E.AKLRDLE.D                       | NA                | 2 | 2,3451 | 0,081 | 0,578  |
| 18 | P78371 TCPB_HUMAN   | D.HFTKLAVE.A                      | NA                | 2 | 2,3189 | 0,14  | 0,065  |
| 18 | Q00839 HNRPU_HUMAN  | E.NKYSRAKS#PQPPVEE.E              | S270              | 2 | 2,2955 | 0,197 | -0,202 |
| 18 | P26373 RL13_HUMAN   | E.KARVITEEE.K                     | NA                | 2 | 2,2551 | 0,195 | 0,227  |
| 18 | P54709 AT1B3_HUMAN  | E.DLKKFLKPYTLEE.Q                 | NA                | 2 | 2,2412 | 0,103 | -0,15  |
| 18 | P49321 NASP_HUMAN   | E.AHDRLLAE.T                      | NA                | 2 | 2,2311 | 0,203 | 0,132  |

|    |                    |                                |                |   |        |       |        |
|----|--------------------|--------------------------------|----------------|---|--------|-------|--------|
| 18 | P58107 EPIPL_HUMAN | E.HGIRLLE.A                    | NA             | 2 | 2,2189 | 0,242 | 0,218  |
| 18 | Q14C86 GAPD1_HUMAN | E.AFKQRHS#YPE.R                | S892           | 2 | 2,1988 | 0,22  | -0,273 |
| 18 | Q13356 PPIL2_HUMAN | K.LDGRSLIK.L                   | NA             | 2 | 2,1798 | 0,097 | 0,135  |
| 18 | P31943 HNRH1_HUMAN | R.IGHRYIE.I                    | NA             | 2 | 2,1726 | 0,144 | 0,137  |
| 18 | O43390 HNRPR_HUMAN | E.HYKTLIE.A                    | NA             | 2 | 2,1545 | 0,155 | -0,81  |
| 18 | O75436 VP26A_HUMAN | E.KHYLFYDGE.S                  | NA             | 2 | 2,1017 | 0,171 | -0,104 |
| 18 | Q71U36 TBA1A_HUMAN | E.TGAGKXVPRAVFVDLEPTVIDE.V     | NA             | 2 | 2,0863 | 0,152 | 0,208  |
| 18 | P45974 UBP5_HUMAN  | E.HLSHFGID.M                   | NA             | 2 | 2,0269 | 0,153 | -0,132 |
| 18 | Q5H9R7 SAPS3_HUMAN | E.KHIAFTPE.S                   | NA             | 2 | 2,0251 | 0,13  | -0,388 |
| 18 | Q14966 ZN638_HUMAN | E.KAVVT#EPAK.G                 | T1870          | 2 | 1,9481 | 0,089 | -1,61  |
| 18 | Q9UK61 CC063_HUMAN | E.FVDGLHEK.L                   | NA             | 2 | 1,942  | 0,129 | -0,129 |
| 18 | Q13151 ROA0_HUMAN  | E.SGLRGHFE.A                   | NA             | 2 | 1,9139 | 0,164 | 0      |
| 18 | P49366 DHYS_HUMAN  | E.KKLEPLSQDE.D                 | NA             | 2 | 1,8497 | 0,148 | 0,206  |
| 18 | Q8NEF9 SRFB1_HUMAN | E.HGPKAVTIANSPPKPS#EKDSVVSLE.S | S208           | 2 | 1,8443 | 0,13  | 0,918  |
| 18 | P13639 EF2_HUMAN   | E.TRFT#DTRKDE.Q                | T57            | 2 | 1,829  | 0,292 | -1,085 |
| 18 | Q00839 HNRPU_HUMAN | E.NKYSRAKS#PQPPVEEE.D          | S270           | 2 | 1,7787 | 0,278 | 0,189  |
| 18 | Q00610 CLH1_HUMAN  | E.HIGNLDRAYE.F                 | NA             | 2 | 1,7745 | 0,099 | 1,643  |
| 18 | Q86TI2 DPP9_HUMAN  | E.HHLYVVSYE.A                  | NA             | 2 | 1,7211 | 0,1   | 0,213  |
| 18 | Q86UL3 PLCF_HUMAN  | E.IRRSGS#SKALDNTPE.F           | S100           | 2 | 1,6918 | 0,187 | -0,143 |
| 18 | P07237 PDIA1_HUMAN | E.FCHRFE.G                     | NA             | 2 | 1,6513 | 0,124 | 0      |
| 18 | Q9UQ35 SRRM2_HUMAN | E.HKELS#NS#PLRE.N              | S1318:S1320    | 2 | 1,6405 | 0,13  | 0      |
| 18 | P02545 LMNA_HUMAN  | E.NRLQTM*KEE.L                 | NA             | 2 | 1,6374 | 0,144 | -0,209 |
| 18 | P04075 ALDOA_HUMAN | E.ILPDGDHDLKRCQYVTE.K          | NA             | 2 | 1,6241 | 0,116 | -0,356 |
| 18 | P18583 SON_HUMAN   | E.SKTKS#HDDGNIDLE.S            | S142           | 2 | 1,5915 | 0,15  | 0,074  |
| 18 | P04083 ANXA1_HUMAN | D.VAALHKAIM*VKGVDE.A           | NA             | 2 | 1,5791 | 0,12  | 0,611  |
| 18 | Q9BXP5 ARS2_HUMAN  | E.RFS#PPRHE.L                  | S67            | 2 | 1,5013 | 0,19  | 0,11   |
| 18 | Q13427 PPIG_HUMAN  | E.NQRS#PVRVKE.R                | S397           | 2 | 1,3451 | 0,367 | 0,472  |
| 19 | Q9UHB6 LIMA1_HUMAN | R.SRPFTVAASFQSTSVKS#PK.T       | S604           | 3 | 5,4884 | 0,395 | 0      |
| 19 | P14625 ENPL_HUMAN  | E.KNLLHVTDGTGVM*TREE.L         | NA             | 3 | 5,4544 | 0,477 | 0,286  |
| 19 | P28799 GRN_HUMAN   | E.DHIHCCPAGFTCDTQKGTCE.Q       | NA             | 3 | 4,9704 | 0,46  | 0,153  |
| 19 | Q9BXP5 ARS2_HUMAN  | D.VHIM*QHHLVLIQARLGS#IAE.I     | S136           | 3 | 4,7918 | 0,355 | 0,546  |
| 19 | P14625 ENPL_HUMAN  | E.KNLLHVTDGTGVMTREE.L          | NA             | 3 | 4,6561 | 0,515 | 0,481  |
| 19 | P54136 SYRC_HUMAN  | E.NKKVIVDFSSPNIAKE.M           | NA             | 2 | 4,3945 | 0,399 | -0,75  |
| 19 | P60903 S10AA_HUMAN | E.NQKDPLAVDKIM*KD.L            | NA             | 3 | 4,3332 | 0,272 | 0,224  |
| 19 | Q92598 HS105_HUMAN | E.AKIGRFVVQNVSAQKDGE.K         | NA             | 3 | 4,2545 | 0,372 | 0,282  |
| 19 | P54886 P5CS_HUMAN  | E.IIHHLADLLTDQRDE.I            | NA             | 3 | 4,2109 | 0,272 | 0,102  |
| 19 | Q15637 SF01_HUMAN  | E.RAYIVQLQIEDLTR.K             | NA             | 3 | 4,1812 | 0,216 | 0,106  |
| 19 | P06748 NPM_HUMAN   | E.HQLSLRTVSLGAGAKDE.L          | NA             | 2 | 4,1692 | 0,445 | -0,137 |
| 19 | Q9BSE4 HERP2_HUMAN | E.YHM*VHLVCTSR#PPS#SPKSSTNRE.S | T90:S93        | 3 | 4,1597 | 0,216 | 0,062  |
| 19 | P22059 OSBP1_HUMAN | E.NLGHKRTGS#NIS#GAS#SDISLDE.Q  | S379:S382:S385 | 3 | 4,0991 | 0,308 | 0,513  |
| 19 | P27694 RFA1_HUMAN  | E.NKSKDSLVDIIGICKSYE.D         | NA             | 3 | 4,0862 | 0,195 | 0,442  |

|    |                    |                                 |         |   |        |       |        |
|----|--------------------|---------------------------------|---------|---|--------|-------|--------|
| 19 | Q9UPZ3 HPS5_HUMAN  | E.KIGTLHTS#PDLKVRPE.L           | S563    | 3 | 4,0833 | 0,346 | 0,391  |
| 19 | Q71U36 TBA1A_HUMAN | E.DAANNYARGHYTIGKE.I            | NA      | 3 | 4,0545 | 0,434 | 0,103  |
| 19 | Q9UJZ1 STML2_HUMAN | E.LGKLSLDKVFRE.R                | NA      | 3 | 4,007  | 0,411 | 0      |
| 19 | Q4V328 GRAP1_HUMAN | R.DCHLKTISLQKE.V                | NA      | 3 | 4,0038 | 0,284 | 0,469  |
| 19 | Q16881 TRXR1_HUMAN | R.DNNKCYAKIICNTKDNE.R           | NA      | 2 | 3,9957 | 0,431 | 0,581  |
| 19 | P30040 ERP29_HUMAN | E.ARQALLKQGDNLSSVKE.T           | NA      | 3 | 3,9873 | 0,285 | -0,092 |
| 19 | P10809 CH60_HUMAN  | R.KGVITVKDGKTLNDE.L             | NA      | 3 | 3,9563 | 0,407 | 0      |
| 19 | P30044 PRDX5_HUMAN | E.GKVRLLADPTGAFGKE.T            | NA      | 3 | 3,8659 | 0,314 | 0      |
| 19 | P21796 VDAC1_HUMAN | E.TAKSRVTSQSNFAVGKYTDE.F        | NA      | 3 | 3,8595 | 0,359 | 0,174  |
| 19 | Q02952 AKA12_HUMAN | E.LQSHAKSPPS#PVERE.M            | S1331   | 3 | 3,8524 | 0,26  | 0,105  |
| 19 | Q9P2E9 RRBP1_HUMAN | E.GAQNQKQKVDTT#PNQGKKE.G        | T275    | 3 | 3,8518 | 0,122 | 0,083  |
| 19 | P23919 KTHY_HUMAN  | E.DHSVHLLFSANRWE.Q              | NA      | 3 | 3,8434 | 0,312 | 0,107  |
| 19 | P51991 ROA3_HUMAN  | R.GFAFVTFDDHDTVVKIVVQK.Y        | NA      | 3 | 3,8156 | 0,258 | 0,08   |
| 19 | P18859 ATP5J_HUMAN | E.YKSKRQTSGGPVDAS#SEYQQE.L      | S64     | 3 | 3,7875 | 0,314 | 0,302  |
| 19 | Q92530 PSMF1_HUMAN | E.KANVSS#PHREFPPATARE.V         | S153    | 3 | 3,784  | 0,209 | -0,265 |
| 19 | Q9H410 DSN1_HUMAN  | R.IHLGS#SPKKGNCDSLHQE.R         | S57     | 2 | 3,7723 | 0,533 | 0,114  |
| 19 | P05787 K2C8_HUMAN  | R.TSSRAVVVKIE.T                 | NA      | 3 | 3,7715 | 0,294 | 0,065  |
| 19 | P54136 SYRC_HUMAN  | E.NKKVIVDFSSPNIAKE.M            | NA      | 3 | 3,7322 | 0,371 | 0,204  |
| 19 | Q8NEM2 SHCBP_HUMAN | E.SYRKFLNLRSSLSNCNS#DSEQE.N     | S273    | 3 | 3,7047 | 0,395 | 0,404  |
| 19 | Q9NWH9 SLTM_HUMAN  | E.ASKPKDGQDAIAQS#PEKE.S         | S289    | 3 | 3,6914 | 0,132 | -0,37  |
| 19 | Q9UKV3 ACINU_HUMAN | E.NLQKHSTPHAAFQPNQIGEE.M        | NA      | 3 | 3,658  | 0,371 | 0,47   |
| 19 | Q8NEF9 SRFB1_HUMAN | E.HGPKAVTIANS#PSKPKSEKDSVVSLE.S | S203    | 3 | 3,6551 | 0,317 | 0,275  |
| 19 | Q9BSE4 HERP2_HUMAN | E.YHMVHLVCTS#RTPSPSPKSST#NRE.S  | S88:T99 | 3 | 3,6336 | 1     | 0,499  |
| 19 | P10809 CH60_HUMAN  | R.KGVITVKDGKTLNDE.L             | NA      | 2 | 3,6233 | 0,291 | 0,302  |
| 19 | P10109 ADX_HUMAN   | E.DKITVHFINRDGE.T               | NA      | 3 | 3,5804 | 0,353 | 0      |
| 19 | Q9NS87 KIF15_HUMAN | E.KSDKNQQGF5#PKAQKEPCLFANTE.K   | S568    | 3 | 3,5785 | 0,301 | 0,517  |
| 19 | P30837 AL1B1_HUMAN | E.VKTVTIKVPQKNS.-               | NA      | 3 | 3,5773 | 0,281 | 0,38   |
| 19 | P09936 UCHL1_HUMAN | E.DTLLKDAAKVCRE.F               | NA      | 3 | 3,5739 | 0,37  | 0,783  |
| 19 | O75223 CG024_HUMAN | E.KLKAIEPNDYTGKVSEE.I           | NA      | 3 | 3,5592 | 0,283 | 0,476  |
| 19 | Q9GZR1 SENP6_HUMAN | E.SLSSTHHTDGLSKIRLNYSDES#PE.A   | S919    | 3 | 3,5538 | 0,351 | -0,465 |
| 19 | P60903 S10AA_HUMAN | E.NQKDPLAVDKIMKD.L              | NA      | 3 | 3,5501 | 0,265 | 0,113  |
| 19 | Q99848 EBP2_HUMAN  | E.GPKKAVNDVNGLKQCLAE.F          | NA      | 3 | 3,5352 | 0,275 | 0,283  |
| 19 | P09525 ANXA4_HUMAN | E.DAQTLRKAM*KGLGTDE.D           | NA      | 3 | 3,5289 | 0,386 | 0,418  |
| 19 | Q9BXJ9 NARG1_HUMAN | E.SKDLSDTVRTVLKQE.M             | NA      | 3 | 3,5233 | 0,362 | 0,106  |
| 19 | P14625 ENPL_HUMAN  | E.DEYKAFYKFSKE.S                | NA      | 3 | 3,4917 | 0,371 | 0      |
| 19 | Q9UMZ2 SYNG_HUMAN  | K.ISKFDFLVATSQSK.M              | NA      | 3 | 3,4774 | 0,086 | 0,233  |
| 19 | Q9NTK5 OLA1_HUMAN  | E.DGDIIFKFNTPQQPKKK.-           | NA      | 3 | 3,4539 | 0,33  | 0,51   |
| 19 | P07602 SAP_HUMAN   | E.VCKKLVGYLDRNLE.K              | NA      | 3 | 3,4239 | 0,113 | 0,107  |
| 19 | Q14684 RRP1B_HUMAN | E.FKTKDLSILVS#PTGSPSRVAFDPE.Q   | S706    | 3 | 3,4165 | 0,231 | 0,633  |
| 19 | P46939 UTRO_HUMAN  | E.HYDPSQS#PQLFHDDTHSRIE.Q       | S3182   | 3 | 3,3942 | 0,258 | 0      |
| 19 | P06753 TPM3_HUMAN  | E.IKILTDLKE.A                   | NA      | 3 | 3,3936 | 0,161 | 0,913  |



|    |                     |                                 |           |   |        |       |        |
|----|---------------------|---------------------------------|-----------|---|--------|-------|--------|
| 19 | Q10567 AP1B1_HUMAN  | E.GGRGVVHKS LPPRTASS#ES#AESPE.T | S600:S602 | 3 | 3,3863 | 0,244 | 0,494  |
| 19 | P11021 GRP78_HUMAN  | K.TKPYIQVDIGGGQTK.T             | NA        | 3 | 3,3861 | 0,117 | 0,342  |
| 19 | P50851 LRBA_HUMAN   | E.LKAS#PNVEAPQPHRHVLE.I         | S1261     | 3 | 3,3675 | 0,328 | 0,174  |
| 19 | P51858 HDGF_HUMAN   | E.GKLVIDEPAKEKNE.K              | NA        | 3 | 3,3648 | 0,202 | -0,116 |
| 19 | P32321 DCTD_HUMAN   | E.NKLDTKYPYVCHAE.L              | NA        | 3 | 3,3524 | 0,228 | 0,21   |
| 19 | P07942 LAMB1_HUMAN  | E.DKKCFICNSQDPYHE.T             | NA        | 3 | 3,3436 | 0,333 | 0,188  |
| 19 | Q16851 UGPA_HUMAN   | E.NKIVSGNLRILDH.-               | NA        | 2 | 3,3421 | 0,41  | 0,082  |
| 19 | P53041 PPP5_HUMAN   | E.LKTQANDYFKAKDYE.N             | NA        | 3 | 3,3224 | 0,251 | 0      |
| 19 | O75083 WDR1_HUMAN   | E.NDSFAGKGHTNQVSRM*TVDE.S       | NA        | 3 | 3,3136 | 0,347 | 0,331  |
| 19 | O95239 KIF4A_HUMAN  | E.DRKILAQDVAQLKE.K              | NA        | 3 | 3,3114 | 0,203 | 0,112  |
| 19 | P50454 SERPH_HUMAN  | E.HSKINFRDKRSALQSINE.W          | NA        | 3 | 3,3061 | 0,325 | 0,341  |
| 19 | P31946 1433B_HUMAN  | E.SYKDSTLIM*QLLR.D              | NA        | 3 | 3,269  | 0,092 | 0      |
| 19 | Q9UQ80 PA2G4_HUMAN  | E.GMLSHQLKQHVIDGE.K             | NA        | 3 | 3,2664 | 0,375 | 0,216  |
| 19 | P09525 ANXA4_HUMAN  | E.DAQTLRKAMKGLGTDE.D            | NA        | 3 | 3,2535 | 0,425 | 0,422  |
| 19 | P06753 TPM3_HUMAN   | E.IKILTDKLKEAE.T                | NA        | 2 | 3,2486 | 0,265 | 0,261  |
| 19 | Q53G15 Q53G15_HUMAN | E.LTNTSKKALKQY#RASPSFEE.R       | Y375      | 3 | 3,2476 | 0,326 | 0,462  |
| 19 | P11021 GRP78_HUMAN  | E.KAKRALSSQHQARIE.I             | NA        | 3 | 3,2448 | 0,288 | -0,425 |
| 19 | Q13435 SF3B2_HUMAN  | E.AFKLTDVVKKE.K                 | NA        | 3 | 3,2337 | 0,243 | 0,283  |
| 19 | Q5UIP0 RIF1_HUMAN   | E.DHHTSQKVEEPSQCLASGTAISE.L     | NA        | 3 | 3,2199 | 0,412 | 0,291  |
| 19 | O14907 TX1B3_HUMAN  | E.DKTDKGIYVTRVSE.G              | NA        | 3 | 3,1974 | 0,351 | 0,227  |
| 19 | O75521 PECI_HUMAN   | E.NSM*NQVKLLKDPGNE.V            | NA        | 3 | 3,1787 | 0,303 | 0,4    |
| 19 | O43390 HNRPR_HUMAN  | E.STKGPDEAKIKALLE.R             | NA        | 3 | 3,1657 | 0,34  | 0,343  |
| 19 | P00558 PGK1_HUMAN   | E.SPERPFLAILGGAK.V              | NA        | 3 | 3,1555 | 0,1   | 0      |
| 19 | Q6NZI2 PTRF_HUMAN   | E.VKLPAKLSISKS#LKE.S            | S171      | 3 | 3,1542 | 0,292 | 0,319  |
| 19 | P09936 UCHL1_HUMAN  | E.DTLLKDAAKVCRE.F               | NA        | 2 | 3,1408 | 0,388 | 0,08   |
| 19 | Q9UBQ7 GRHPR_HUMAN  | E.GLCNKDFQKM*KE.T               | NA        | 3 | 3,1365 | 0,269 | 0      |
| 19 | P11142 HSP7C_HUMAN  | K.SQIHDIVLVGGSTR.I              | NA        | 3 | 3,1237 | 0,225 | 0,74   |
| 19 | Q9NX55 HYPK_HUMAN   | E.LAKVTIKKEDLE.L                | NA        | 3 | 3,12   | 0,219 | 0,066  |
| 19 | Q09666 AHNK_HUMAN   | D.IKSPKFKA EAPLPS#PKLE.G        | S5110     | 3 | 3,1119 | 0,297 | 0,266  |
| 19 | P63241 IF5A1_HUMAN  | K.VHLVGDIFGTGK.K                | NA        | 3 | 3,1033 | 0,196 | 0,915  |
| 19 | P11413 G6PD_HUMAN   | E.DQIYRIDHYLGKE.M               | NA        | 3 | 3,0944 | 0,326 | 0,222  |
| 19 | Q9UNF1 MAGD2_HUMAN  | E.DVKVSKASGVSKATE.V             | NA        | 3 | 3,0658 | 0,365 | 0,486  |
| 19 | P08670 VIME_HUMAN   | R.SLYASS#PGGVYATR.S             | S56       | 2 | 3,0413 | 0,299 | -0,162 |
| 19 | P63241 IF5A1_HUMAN  | K.VHLVGDIFGTGK.K                | NA        | 2 | 3,0336 | 0,335 | 0,094  |
| 19 | P06744 G6PI_HUMAN   | E.LGKQLAKKIEPE.L                | NA        | 3 | 3,0299 | 0,21  | 0,135  |
| 19 | P31949 S10AB_HUMAN  | D.SFLKAVPSQKRT.-                | NA        | 3 | 3,0279 | 0,294 | 0      |
| 19 | Q9P2N5 RBM27_HUMAN  | E.LKTSSAVST#PSKVTKTE.A          | T888      | 3 | 3,0255 | 0,302 | 0,557  |
| 19 | Q92576 PHF3_HUMAN   | E.CKAKPVGS#PLFKFSDKEE.H         | S283      | 3 | 3,0082 | 0,309 | 0,852  |
| 19 | Q99961 SH3G1_HUMAN  | E.M*EKKVDVTSKAVTE.V             | NA        | 3 | 2,9939 | 0,172 | 0,463  |
| 19 | Q06323 PSME1_HUMAN  | R.GDAVTKAAKQPHVGD.Y             | NA        | 3 | 2,9494 | 0,307 | 0,612  |
| 19 | Q9Y2L9 LRCH1_HUMAN  | E.DSCHRLS#PVKGEFHQE.F           | S370      | 3 | 2,9408 | 0,139 | 0,182  |

|    |                     |                             |       |   |        |       |        |
|----|---------------------|-----------------------------|-------|---|--------|-------|--------|
| 19 | Q58FF7 H90B3_HUMAN  | E.DHLAVKHFSVEGQLE.F         | NA    | 2 | 2,9394 | 0,378 | 0,286  |
| 19 | P08238 HS90B_HUMAN  | E.AFSKNLKLGIHE.D            | NA    | 2 | 2,9319 | 0,452 | -0,09  |
| 19 | P16949 STMN1_HUMAN  | E.AEVLKQLAEKRE.H            | NA    | 3 | 2,9263 | 0,287 | 0,129  |
| 19 | P67936 TPM4_HUMAN   | E.IKLLSDKLKEAE.T            | NA    | 3 | 2,9253 | 0,175 | 0,198  |
| 19 | Q8N6T3 ARFG1_HUMAN  | E.NVLKPAQEKVKE.G            | NA    | 3 | 2,9229 | 0,257 | 0,331  |
| 19 | O75940 SPF30_HUMAN  | E.DLLKLLKDLQE.V             | NA    | 2 | 2,9215 | 0,155 | 0,454  |
| 19 | P31949 S10AB_HUMAN  | D.SFLKAVPSQKRT.-            | NA    | 2 | 2,9111 | 0,257 | -0,448 |
| 19 | P07237 PDIA1_HUMAN  | E.DHVLVLRKSNFAE.A           | NA    | 2 | 2,9101 | 0,346 | 0,24   |
| 19 | P34932 HSP74_HUMAN  | E.LKNLGQPIKIRFQE.S          | NA    | 3 | 2,9098 | 0,092 | 0,543  |
| 19 | Q9NQW6 ANLN_HUMAN   | E.KNNAFPCQVNIKQKM*QE.L      | NA    | 3 | 2,8913 | 0,123 | 0,175  |
| 19 | Q09666 AHNK_HUMAN   | E.GDFKGPVKVDIKAPE.V         | NA    | 3 | 2,8867 | 0,252 | 0,914  |
| 19 | Q15758 AAAT_HUMAN   | E.GNPLLKHYRGPAGDATVAS#EKE.S | S535  | 3 | 2,8752 | 0,3   | -0,536 |
| 19 | Q9H0S4 DDX47_HUMAN  | E.HLIGKKLPGFPTQDDE.V        | NA    | 3 | 2,8706 | 0,274 | 0,306  |
| 19 | Q96RI3 Q96RI3_HUMAN | D.AMLLKGGKDKAQL.E.K         | NA    | 3 | 2,8627 | 0,19  | 0      |
| 19 | P06753 TPM3_HUMAN   | E.IKILTDKLKE.A              | NA    | 2 | 2,86   | 0,244 | 0,406  |
| 19 | P26641 EF1G_HUMAN   | E.FLRKFPAGKVPFAE.G          | NA    | 3 | 2,8217 | 0,192 | 0,341  |
| 19 | P52292 IMA2_HUMAN   | E.NQLQATQAARKLLSRE.K        | NA    | 3 | 2,821  | 0,279 | 0,2    |
| 19 | B0QZ64 B0QZ64_HUMAN | E.NKHLGSPNSRNSVSS#LDLE.G    | S567  | 3 | 2,8122 | 0,273 | 0,343  |
| 19 | Q07021 C1QBP_HUMAN  | E.VIKNDDGKKALVLD.C          | NA    | 3 | 2,7952 | 0,126 | 0,06   |
| 19 | Q5VZL5 ZMYM4_HUMAN  | E.KKTLQGESQT#SEHE.L         | T1070 | 3 | 2,7852 | 0,196 | -0,31  |
| 19 | Q9H410 DSN1_HUMAN   | R.IHLGSS#PKKGGNCDLSHQE.R    | S58   | 3 | 2,7837 | 0,354 | 0,085  |
| 19 | Q5W0B1 RN219_HUMAN  | E.DKHLVTDNPSKINPE.T         | NA    | 3 | 2,782  | 0,228 | 0,214  |
| 19 | P30042 ES1_HUMAN    | E.AHVDQKKNVVTTPAFM*CE.T     | NA    | 3 | 2,7796 | 0,243 | 0,875  |
| 19 | Q15185 TEBP_HUMAN   | E.IDLFHCIDPNDK.H            | NA    | 3 | 2,7556 | 0,135 | 0,116  |
| 19 | O60271 JIP4_HUMAN   | E.RTKLHQLS#GSDQLE.S         | S183  | 2 | 2,7551 | 0,326 | 0,144  |
| 19 | O75534 CSDE1_HUMAN  | E.ATFSNPKTT#SPNKGKEKE.A     | T444  | 3 | 2,7503 | 0,268 | 0      |
| 19 | Q9Y696 CLIC4_HUMAN  | E.DIKFSTRKFLDNE.M           | NA    | 3 | 2,7484 | 0,196 | 0,219  |
| 19 | P84077 ARF1_HUMAN   | E.LRDAVLLVFANK.Q            | NA    | 3 | 2,7436 | 0,099 | 0,202  |
| 19 | P17987 TCPA_HUMAN   | D.STDLVAKLRAFNE.A           | NA    | 3 | 2,7424 | 0,231 | 0,114  |
| 19 | Q8NBT2 SPC24_HUMAN  | E.DTRLKASLLQLTRE.L          | NA    | 3 | 2,7287 | 0,103 | 0,334  |
| 19 | Q08257 QOR_HUMAN    | E.VNYIDKIKKYVGE.K           | NA    | 3 | 2,6981 | 0,185 | 0,117  |
| 19 | P09493 TPM1_HUMAN   | E.IKVLSDKLKEAE.T            | NA    | 3 | 2,6839 | 0,19  | 0,067  |
| 19 | Q9H2G2 SLK_HUMAN    | E.LDGSLLKKIIQQQKAE.L        | NA    | 3 | 2,6815 | 0,113 | 0      |
| 19 | P78371 TCPB_HUMAN   | E.DKLIHFSGVALGE.A           | NA    | 2 | 2,6744 | 0,218 | 0,44   |
| 19 | Q9UPN3 MACF1_HUMAN  | E.DNSQRTKWKVISPTGNE.A       | NA    | 3 | 2,6712 | 0,125 | 0      |
| 19 | P40222 TXLNA_HUMAN  | E.THLKQQALALYTEKFEE.F       | NA    | 3 | 2,6549 | 0,082 | 0      |
| 19 | Q86UP2 KTN1_HUMAN   | E.DAAATKDRCKQLTQE.M         | NA    | 3 | 2,6459 | 0,181 | 0      |
| 19 | Q00610 CLH1_HUMAN   | E.SNCYDPERVKNFLKE.A         | NA    | 3 | 2,6229 | 0,155 | 0,096  |
| 19 | Q9BSJ8 ESYT1_HUMAN  | E.AHSHSYSHSS#SLSEPE.L       | S932  | 2 | 2,5894 | 0,11  | 0,359  |
| 19 | P29692 EF1D_HUMAN   | D.KFKYDDAE.R                | NA    | 2 | 2,5716 | 0,1   | 0,18   |
| 19 | Q71U36 TBA1A_HUMAN  | R.LSVDYGKSKLE.F             | NA    | 2 | 2,4369 | 0,126 | -0,625 |

|    |                     |                                |           |   |        |       |        |
|----|---------------------|--------------------------------|-----------|---|--------|-------|--------|
| 19 | P06733 ENOA_HUMAN   | E.KGVPLYRHIADLAGNSE.V          | NA        | 2 | 2,3565 | 0,174 | 0,464  |
| 19 | P09936 UCHL1_HUMAN  | E.DRAKCFE.K                    | NA        | 2 | 2,3503 | 0,132 | 0      |
| 19 | P61026 RAB10_HUMAN  | E.HGIRFFE.T                    | NA        | 2 | 2,2903 | 0,182 | 0,135  |
| 19 | Q15061 WDR43_HUMAN  | E.SKRKS#GGNEVSIEE.R            | S431      | 2 | 2,2827 | 0,46  | 0,229  |
| 19 | P62333 PRS10_HUMAN  | E.DFMKAVRKVAD.S                | NA        | 2 | 2,2329 | 0,327 | 0,095  |
| 19 | P07900 HS90A_HUMAN  | E.NYKKFYE.Q                    | NA        | 2 | 2,2245 | 0,081 | 0,061  |
| 19 | Q6NZI2 PTRF_HUMAN   | E.AGDLRRGS#S#PDVHALLE.I        | S365:S366 | 2 | 2,1683 | 0,1   | 0,375  |
| 19 | P09525 ANXA4_HUMAN  | E.DAQLLRKAMKGLGTDE.D           | NA        | 2 | 2,0773 | 0,127 | 0,774  |
| 19 | Q53G15 Q53G15_HUMAN | E.LTNTSKKALKQYRAS#PSFEE.R      | S378      | 2 | 1,9674 | 0,301 | 0,513  |
| 19 | O43852 CALU_HUMAN   | E.ARHLVYE.S                    | NA        | 2 | 1,9251 | 0,14  | 0,206  |
| 20 | Q4LE39 ARI4B_HUMAN  | E.NKVHADLVISKPVSKS#PE.R        | S778      | 3 | 5,8125 | 0,29  | -0,09  |
| 20 | P13639 EF2_HUMAN    | E.DHACIPIKSDPVVSYRE.T          | NA        | 3 | 4,8134 | 0,314 | 0,173  |
| 20 | Q6NZI2 PTRF_HUMAN   | E.AGDLRRGS#S#PDVHALLE.I        | S365:S366 | 3 | 4,0881 | 0,283 | 0,187  |
| 20 | P20700 LMNB1_HUMAN  | E.HDQLLLNYAKKE.S               | NA        | 3 | 4,0396 | 0,227 | 0      |
| 20 | P46459 NSF_HUMAN    | R.GHQLLSADVDIKE.L              | NA        | 3 | 3,9977 | 0,336 | 0,193  |
| 20 | P0C7M2 RA1L3_HUMAN  | K.KIFVGGIKEDTEE.H              | NA        | 2 | 3,7025 | 0,446 | -0,083 |
| 20 | O94925 GLSK_HUMAN   | E.DDKPHNPM*VNAGAIIVTSLIK.Q     | NA        | 3 | 3,6227 | 0,175 | -0,327 |
| 20 | P05362 ICAM1_HUMAN  | E.AQVHLALGDQR.L                | NA        | 3 | 3,5397 | 0,29  | 0,605  |
| 20 | P07737 PROF1_HUMAN  | E.GVHGGLINKKCYE.M              | NA        | 2 | 3,5119 | 0,441 | -0,331 |
| 20 | O00231 PSD11_HUMAN  | E.HISSLIKLSKADVE.R             | NA        | 3 | 3,4998 | 0,288 | 0      |
| 20 | Q03701 CEBPZ_HUMAN  | E.NGSTT#PKVKKDKQNIFE.F         | T156      | 3 | 3,4455 | 0,157 | -0,272 |
| 20 | Q13442 HAP28_HUMAN  | K.KVTQLDLDPKE.L                | NA        | 3 | 3,4166 | 0,109 | 0,34   |
| 20 | P14625 ENPL_HUMAN   | E.YKAFYKFSKE.S                 | NA        | 3 | 3,3275 | 0,13  | 0,065  |
| 20 | Q13442 HAP28_HUMAN  | R.KGVEGLIDIENPNR.V             | NA        | 3 | 3,2941 | 0,195 | 0      |
| 20 | Q9HC38 GLOD4_HUMAN  | E.KQRALLGYADNQCKLE.L           | NA        | 3 | 3,2019 | 0,095 | 0      |
| 20 | P68104 EF1A1_HUMAN  | E.HALLAYTLGVK.Q                | NA        | 2 | 3,2006 | 0,281 | -0,103 |
| 20 | Q86UP2 KTN1_HUMAN   | E.DAAATKDRCKQLTQE.M            | NA        | 3 | 3,1811 | 0,086 | 0,211  |
| 20 | Q05524 ENO1B_HUMAN  | E.VYHNLKNVIKE.K                | NA        | 3 | 3,1688 | 0,177 | 0,067  |
| 20 | P54577 SYYC_HUMAN   | E.SKIDLLDRKE.D                 | NA        | 3 | 3,1681 | 0,13  | 0,3    |
| 20 | Q15398 DLG7_HUMAN   | E.NHVVNKTDLKVDCLSSE.R          | NA        | 3 | 3,1666 | 0,303 | 0,093  |
| 20 | P54577 SYYC_HUMAN   | E.HVFVKGYEKGQPDEE.L            | NA        | 3 | 3,152  | 0,308 | 0      |
| 20 | P35659 DEK_HUMAN    | R.KDFIKTTVKE.L                 | NA        | 3 | 3,1489 | 0,258 | 0,302  |
| 20 | P51991 ROA3_HUMAN   | R.GFAFVTFDDHDTVDKIVVQK.Y       | NA        | 3 | 3,1443 | 0,318 | -0,321 |
| 20 | O75083 WDR1_HUMAN   | E.HTLVTTSHDASVKE.W             | NA        | 3 | 3,1374 | 0,198 | -0,12  |
| 20 | Q8N1W1 RGNEF_HUMAN  | E.DIKRVKS#LVVQHNE.H            | S325      | 3 | 3,1143 | 0,192 | 0,105  |
| 20 | Q9UNE7 STUB1_HUMAN  | E.HLQRVGHFDPVT#RSPLTQE.Q       | T271      | 3 | 3,0779 | 0,287 | -0,159 |
| 20 | O15427 MOT4_HUMAN   | E.HFLKAEPEKNGEVVHTPET#SV.-     | T463      | 3 | 3,0529 | 0,206 | 0,226  |
| 20 | P06748 NPM_HUMAN    | E.HQLSLRTVSLGAGAKDE.L          | NA        | 3 | 3,0021 | 0,328 | 0      |
| 20 | P19338 NUCL_HUMAN   | E.KATFIKVPQNGKSKGYAFIE.F       | NA        | 3 | 2,9927 | 0,219 | -0,148 |
| 20 | Q00765 REEP5_HUMAN  | E.AKKATVNULLGEEKS#T.-          | S188      | 3 | 2,9858 | 0,208 | -0,204 |
| 20 | P15880 RS2_HUMAN    | E.FTDHLVKTHTRVS#VQRTQAPAVATT.- | S281      | 3 | 2,9746 | 0,306 | -0,45  |

|    |                      |                                         |             |   |        |       |        |
|----|----------------------|-----------------------------------------|-------------|---|--------|-------|--------|
| 20 | P04406 G3P_HUMAN     | D.IKKVVQKASEGPLKGILGYTE.H               | NA          | 3 | 2,9708 | 0,304 | -0,324 |
| 20 | P06576 ATPB_HUMAN    | E.HYDVARGVQKILQD.Y                      | NA          | 3 | 2,9459 | 0,166 | -0,223 |
| 20 | Q86UP2 KTN1_HUMAN    | E.HNVFQNKIHVSQYE.T                      | NA          | 3 | 2,9054 | 0,25  | -0,21  |
| 20 | P36542 ATPG_HUMAN    | R.THSDQFLVAFKE.V                        | NA          | 2 | 2,8966 | 0,262 | 0,257  |
| 20 | O95747 OXSR1_HUMAN   | E.GKAAISQLRS#PRVKE.S                    | S359        | 3 | 2,861  | 0,331 | 0,106  |
| 20 | Q53G15 Q53G15_HUMAN  | E.LTNTSKKALKQYRAS#PSFEE.R               | S378        | 3 | 2,8202 | 0,37  | 0,308  |
| 20 | P47756 CAPZB_HUMAN   | D.HGFAGVILIK.K                          | NA          | 2 | 2,8067 | 0,291 | -0,231 |
| 20 | P07602 SAP_HUMAN     | E.VCKKLVGYLDRNLE.K                      | NA          | 3 | 2,7937 | 0,137 | -0,107 |
| 20 | P55072 TERA_HUMAN    | E.ICQRACKLAIRE.S                        | NA          | 3 | 2,7803 | 0,334 | 0      |
| 20 | P30044 PRDX5_HUMAN   | E.GKVRLLADPTGAFGKE.T                    | NA          | 3 | 2,777  | 0,148 | -0,11  |
| 20 | Q9Y696 CLIC4_HUMAN   | E.DIKFSTRKFLDGNE.M                      | NA          | 3 | 2,7701 | 0,242 | -0,11  |
| 20 | P0C7M2 RA1L3_HUMAN   | R.GFAFVTFDDHDSVDKIVIQK.Y                | NA          | 3 | 2,739  | 0,307 | -0,16  |
| 20 | P08238 HS90B_HUMAN   | E.AFSKNLKLGIHE.D                        | NA          | 3 | 2,7048 | 0,328 | 0      |
| 20 | P40763 STAT3_HUMAN   | E.SLQLTRQQIKKLEE.L                      | NA          | 3 | 2,7017 | 0,145 | -0,106 |
| 20 | Q05524 ENO1B_HUMAN   | E.KGVPLYRHIAD.L                         | NA          | 3 | 2,7009 | 0,277 | 0      |
| 20 | P49368 TCPG_HUMAN    | E.IDIKKYARVE.K                          | NA          | 3 | 2,697  | 0,116 | 0,222  |
| 20 | P08670 VIME_HUMAN    | E.IAFLKKLHEEE.I                         | NA          | 2 | 2,6433 | 0,197 | -0,45  |
| 20 | P14618 KPYM_HUMAN    | E.LKKGATLKITLD.N                        | NA          | 3 | 2,6296 | 0,133 | 0,07   |
| 20 | Q9Y4B6 VPRBP_HUMAN   | E.NKRPSPRKLS#SEPLPLDEE.A                | S202        | 3 | 2,595  | 0,123 | -0,307 |
| 20 | Q96QT6 PHF12_HUMAN   | E.KLSLKP HQGPVLRNS#VP.-                 | S1002       | 3 | 2,5816 | 0,226 | 0      |
| 20 | P04083 ANXA1_HUMAN   | E.TLKKALTGHLEE.V                        | NA          | 2 | 2,5807 | 0,281 | -0,091 |
| 20 | P07814 SYEP_HUMAN    | E.HLITKPVLGKDE.D                        | NA          | 3 | 2,5797 | 0,179 | 0,068  |
| 20 | Q71U36 TBA1A_HUMAN   | E.QLITGKEDAANNYARGHYTIGKE.I             | NA          | 3 | 2,5742 | 0,137 | -0,287 |
| 20 | Q58FF7 H90B3_HUMAN   | E.DHLAVKHFSVE.G                         | NA          | 2 | 2,5581 | 0,357 | 0,381  |
| 20 | Q15046 SYK_HUMAN     | E.VKVDGSEPKLSKNE.L                      | NA          | 3 | 2,5322 | 0,178 | 0,239  |
| 20 | P60174 TPIS_HUMAN    | R.RHVFGESDE.L                           | NA          | 2 | 2,4643 | 0,273 | -0,227 |
| 20 | P06753 TPM3_HUMAN    | E.IKILTDKLKE.A                          | NA          | 2 | 2,1371 | 0,118 | 0      |
| 20 | P14618 KPYM_HUMAN    | R.GDLGIEIPA EK.V                        | NA          | 2 | 2,0388 | 0,194 | -0,107 |
| 20 | Q86UP2 KTN1_HUMAN    | E.DAAATKDRCKQLTQE.M                     | NA          | 2 | 1,975  | 0,149 | 0,563  |
| 20 | Q9UQ35 SRRM2_HUMAN   | E.HKELS#NS#PLRE.N                       | S1318:S1320 | 2 | 1,9382 | 0,235 | -0,332 |
| 20 | ##Q2YD98 K1530_HUMAN | E.GGEPEIDLEKY#K.R                       | Y332        | 2 | 1,9243 | 0,095 | -0,753 |
| 20 | P22626 ROA2_HUMAN    | D.TIEIITDR.Q                            | NA          | 2 | 1,9113 | 0,2   | -0,127 |
| 20 | P09874 PARP1_HUMAN   | K.AEPVEVVAPR.G                          | NA          | 2 | 1,8312 | 0,141 | -0,229 |
| 20 | P0C7M2 RA1L3_HUMAN   | E.SLRSHFE.Q                             | NA          | 2 | 1,6964 | 0,123 | 0,07   |
| 21 | P26641 EF1G_HUMAN    | E.GAFQHVGKAFNQGKIFK.-                   | NA          | 3 | 5,2522 | 0,415 | 0,195  |
| 21 | P46782 RS5_HUMAN     | E.LINAAKGSSNSYAIIKKKDE.L                | NA          | 3 | 5,1726 | 0,355 | -0,449 |
| 21 | P06733 ENOA_HUMAN    | E.HINKTIAPALVSKKLNVT E.Q                | NA          | 3 | 5,0962 | 0,39  | 0,176  |
| 21 | P04406 G3P_HUMAN     | E.KAG AHLQGGAKRVIISAPSADAPMFVM*GVNHE.K  | NA          | 3 | 5,044  | 0,605 | 0,559  |
| 21 | P06733 ENOA_HUMAN    | E.HINKTIAPALVSKKLNVT EQE.K              | NA          | 3 | 4,6535 | 0,496 | 0      |
| 21 | P04406 G3P_HUMAN     | E.KAG AHLQGGAKRVIISAPSADAPM*FVM*GVNHE.K | NA          | 3 | 4,5819 | 0,447 | 0,222  |
| 21 | P05362 ICAM1_HUMAN   | E.LKREPAVGEP AEVTTTVLVR.R               | NA          | 3 | 4,581  | 0,38  | 0,084  |

|    |                    |                                       |           |   |        |       |        |
|----|--------------------|---------------------------------------|-----------|---|--------|-------|--------|
| 21 | P35269 T2FA_HUMAN  | E.ASSALFMAKKKT#PPKRE.R                | T368      | 3 | 4,5238 | 0,122 | -0,186 |
| 21 | P13639 EF2_HUMAN   | E.DHACIPIKKS DPVVS YRE.T              | NA        | 3 | 4,4133 | 0,36  | 0,173  |
| 21 | Q15185 TEBP_HUMAN  | E.KSKLTFSC LGGSDNFKHLNE.I             | NA        | 3 | 4,3931 | 0,48  | 0,321  |
| 21 | Q9H0C8 ILKAP_HUMAN | E.SQKHAALSLSKE.H                      | NA        | 3 | 4,3451 | 0,133 | 0,352  |
| 21 | P48637 GSHB_HUMAN  | R.SHA AKCPDIATQLAGTKKVQQE.L           | NA        | 3 | 4,2975 | 0,282 | -0,154 |
| 21 | Q66K74 MAP1S_HUMAN | E.HRKAVP MAPAPAS#PGSSND.S             | S759      | 3 | 4,2046 | 0,398 | 0,65   |
| 21 | O60313 OPA1_HUMAN  | E.HDDIFDKLKE.A                        | NA        | 3 | 4,1253 | 0,28  | 0      |
| 21 | Q8NEY8 PPHLN_HUMAN | E.DSQLTTRSKAIASKTKE.I                 | NA        | 3 | 4,0342 | 0,321 | 0,098  |
| 21 | Q9UMY1 NOL7_HUMAN  | E.KLTTASQTNIKKS#PGKVKE.V              | S133      | 3 | 4,0304 | 0,372 | -0,342 |
| 21 | P17480 UBF1_HUMAN  | E.KMLNINIKKQATS#PASKKPAQE.G           | S389      | 3 | 3,9523 | 0,326 | 0      |
| 21 | P04406 G3P_HUMAN   | E.KAG AHLQGGAKRVIISAPSADAPMFVMGVNHE.K | NA        | 3 | 3,8941 | 0,321 | 0,337  |
| 21 | Q15149 PLEC1_HUMAN | E.KAHAFAVQQKEQE.L                     | NA        | 3 | 3,884  | 0,225 | 0,423  |
| 21 | P11142 HSP7C_HUMAN | E.DKQKILD KCNE.I                      | NA        | 3 | 3,8301 | 0,203 | 0,197  |
| 21 | P11021 GRP78_HUMAN | E.KKTKPYIQVDIGGGQTKTFAPEE.I           | NA        | 3 | 3,8128 | 0,277 | 0,433  |
| 21 | Q53EZ4 CEP55_HUMAN | E.KNAYQLTEKDKE.I                      | NA        | 3 | 3,7969 | 0,256 | 0,125  |
| 21 | P26038 MOES_HUMAN  | E.VHKS GYLAGDKLLPQRVLE.Q              | NA        | 3 | 3,7876 | 0,407 | 0,086  |
| 21 | P42166 LAP2A_HUMAN | E.NIQKRIDQSKFQE.T                     | NA        | 3 | 3,6892 | 0,323 | 0,112  |
| 21 | P51991 ROA3_HUMAN  | E.DSVKPGAHLTVKKIFVGGIKE.D             | NA        | 3 | 3,6837 | 0,172 | 0      |
| 21 | Q8NFP7 NUD10_HUMAN | E.DAIKVLQCHKPVHAE.Y                   | NA        | 3 | 3,6805 | 0,265 | 0,105  |
| 21 | A6NDU8 U600_HUMAN  | E.KLKLCCGEEKE.C                       | NA        | 3 | 3,6767 | 0,252 | 0,272  |
| 21 | P04843 RPN1_HUMAN  | E.DVKRTVDLSSH LAKVTAE.V               | NA        | 3 | 3,6709 | 0,249 | 0,279  |
| 21 | Q00341 VIGLN_HUMAN | E.HHRFVIGKNGEKLQDLE.L                 | NA        | 3 | 3,5928 | 0,33  | 0      |
| 21 | O15427 MOT4_HUMAN  | E.KLHKPPADS#GVDLREVE.H                | S436      | 3 | 3,5873 | 0,372 | -0,371 |
| 21 | Q8NC51 PAIRB_HUMAN | E.DSVMDH HFRKPANDITSQLE.I             | NA        | 3 | 3,5627 | 0,284 | 0      |
| 21 | P37198 NUP62_HUMAN | E.NGEKITSLHRE.V                       | NA        | 3 | 3,5604 | 0,361 | 0,356  |
| 21 | Q8IWC1 MA7D3_HUMAN | E.DHLKLDGQQQNE.T                      | NA        | 2 | 3,5473 | 0,214 | -0,471 |
| 21 | Q16891 IMMT_HUMAN  | E.KRAFDS AVAKALE.H                    | NA        | 3 | 3,528  | 0,281 | 0,065  |
| 21 | P11142 HSP7C_HUMAN | E.DKQKILD KCNE.I                      | NA        | 2 | 3,4808 | 0,241 | -0,351 |
| 21 | Q15233 NONO_HUMAN  | E.KQQQDQVDRNIKE.A                     | NA        | 3 | 3,4368 | 0,128 | -0,112 |
| 21 | Q6NZI2 PTRF_HUMAN  | E.AGDLRRGS#S#PDVHALLE.I               | S365:S366 | 3 | 3,433  | 0,202 | 0,562  |
| 21 | P43487 RANG_HUMAN  | E.NAQKF KTKFEE.C                      | NA        | 3 | 3,4183 | 0,176 | 0      |
| 21 | Q13155 MCA2_HUMAN  | E.SRQDDILKRLYE.L                      | NA        | 3 | 3,3785 | 0,242 | 0,119  |
| 21 | P67936 TPM4_HUMAN  | E.AV KRRIQALQQQADE.A                  | NA        | 2 | 3,31   | 0,331 | -0,353 |
| 21 | Q8WUA4 TF3C2_HUMAN | E.GPKVSS#PTKPKKIRQPAACPGGEE.V         | S220      | 3 | 3,2742 | 0,395 | 0,352  |
| 21 | Q9NYF8 BCLF1_HUMAN | D.HIKLPQASKSTSE.S                     | NA        | 3 | 3,2237 | 0,358 | 0,128  |
| 21 | Q15233 NONO_HUMAN  | E.VFIHKDKGFGFIRLE.T                   | NA        | 3 | 3,1989 | 0,364 | 0,101  |
| 21 | P08670 VIME_HUMAN  | E.AANRRNDALRQAKQE.S                   | NA        | 2 | 3,1902 | 0,254 | 0,144  |
| 21 | P11586 C1TC_HUMAN  | R.LKHRPDGKYVVVTGITPTPLGE.G            | NA        | 3 | 3,1657 | 0,251 | -0,077 |
| 21 | Q9NWH9 SLTM_HUMAN  | E.KKRIS#SKS#PGHM*VILD.Q               | S550:S553 | 3 | 3,1645 | 0,343 | 0,093  |
| 21 | Q6NZI2 PTRF_HUMAN  | E.VKLP AKLSISLSKE.S                   | NA        | 3 | 3,1499 | 0,111 | 0,223  |
| 21 | O60869 EDF1_HUMAN  | E.VGKVIQQGRQSKGLTQKD.L                | NA        | 3 | 3,1418 | 0,273 | -0,557 |

|    |                    |                                  |       |   |        |       |        |
|----|--------------------|----------------------------------|-------|---|--------|-------|--------|
| 21 | Q8IWC1 MA7D3_HUMAN | R.SSS#LNRRDSNLHSSTDKE.Q          | S223  | 3 | 3,1388 | 0,331 | -0,087 |
| 21 | P12532 KCRU_HUMAN  | R.GQDIRIPTVHTKH.-                | NA    | 3 | 3,1381 | 0,347 | -0,214 |
| 21 | Q8NI27 THOC2_HUMAN | E.SSAKLYNHTPPPLSKS#KERE.M        | S1335 | 3 | 3,1012 | 0,223 | 0,223  |
| 21 | P54577 SYYC_HUMAN  | E.SKIDLLDRKE.D                   | NA    | 3 | 3,0557 | 0,097 | 0,15   |
| 21 | P53367 ARFP1_HUMAN | E.HSFNRDLKHSLPS#GLGLSE.T         | S39   | 3 | 3,0239 | 0,259 | 0,252  |
| 21 | P17987 TCPA_HUMAN  | E.SKDDKHGS#YEDAVHSGALND.-        | S544  | 3 | 3,0156 | 0,288 | 0      |
| 21 | Q07343 PDE4B_HUMAN | E.NHHLAVGVFKLLQEE.H              | NA    | 3 | 3,001  | 0,311 | 0      |
| 21 | Q6NZI2 PTRF_HUMAN  | E.LSKLGAHATTSNTVSKLLE.K          | NA    | 3 | 2,9831 | 0,285 | -0,262 |
| 21 | Q7LBC6 JHD2B_HUMAN | E.DKLQVKNIIYHAVKD.A              | NA    | 3 | 2,9721 | 0,2   | 0,513  |
| 21 | Q92890 UFD1_HUMAN  | R.NSRPLVKKVEEDE.A                | NA    | 3 | 2,9694 | 0,205 | -0,356 |
| 21 | Q9UG63 ABCF2_HUMAN | E.HIDIYHLTRE.M                   | NA    | 3 | 2,967  | 0,377 | -0,07  |
| 21 | P11413 G6PD_HUMAN  | E.KVKVLKCISE.V                   | NA    | 2 | 2,959  | 0,281 | -0,203 |
| 21 | Q96T23 RSF1_HUMAN  | R.KKKPDS#PPKVLEPE.N              | S738  | 3 | 2,9568 | 0,136 | 0,328  |
| 21 | Q66K74 MAP1S_HUMAN | E.HRKAVPM*APAPASPGS#SND.S        | S762  | 3 | 2,9237 | 0,259 | 0      |
| 21 | Q14151 SAFB2_HUMAN | E.KDIKPIIKDE.K                   | NA    | 3 | 2,9178 | 0,161 | 0,457  |
| 21 | P43487 RANG_HUMAN  | E.NAQKFKTKFE.E                   | NA    | 2 | 2,8459 | 0,232 | -0,393 |
| 21 | P09429 HMGB1_HUMAN | E.DMAKADKARYE.R                  | NA    | 2 | 2,7288 | 0,341 | -0,376 |
| 21 | Q09666 AHNK_HUMAN  | D.LHLKS#PKAKGE.V                 | S2397 | 2 | 2,6317 | 0,202 | -0,095 |
| 21 | Q9UL46 PSME2_HUMAN | E.KKEVPKCGFLPGNE.K               | NA    | 2 | 2,6308 | 0,204 | 0,152  |
| 21 | P54577 SYYC_HUMAN  | E.KLHLITRNLQE.V                  | NA    | 2 | 2,5689 | 0,147 | -0,089 |
| 21 | Q00325 MPCP_HUMAN  | E.SLKKKLGLTQ.-                   | NA    | 2 | 2,5678 | 0,187 | -0,109 |
| 21 | P13667 PDIA4_HUMAN | E.DYKFHHTFSTE.I                  | NA    | 2 | 2,5344 | 0,386 | 0,346  |
| 21 | P02545 LMNA_HUMAN  | E.IHAYRKLEGE.EE.R                | NA    | 2 | 2,5217 | 0,347 | -0,231 |
| 21 | P42704 LPPRC_HUMAN | E.KGDIDHVKTLE.K                  | NA    | 2 | 2,3822 | 0,24  | 0,088  |
| 21 | Q658J3 A26CA_HUMAN | E.SGPSIVHRKCF.-                  | NA    | 2 | 2,2675 | 0,238 | -0,095 |
| 21 | P09429 HMGB1_HUMAN | E.DM*AKADKARYE.R                 | NA    | 2 | 2,0524 | 0,148 | -0,371 |
| 21 | P22626 ROA2_HUMAN  | D.TIEITDR.Q                      | NA    | 2 | 2,0187 | 0,239 | 0,381  |
| 21 | P68431 H31_HUMAN   | K.STELLIR.K                      | NA    | 2 | 1,9201 | 0,093 | -0,073 |
| 21 | A6NHG4 DDTL_HUMAN  | E.DNRSHSAHFFE.F                  | NA    | 2 | 1,8662 | 0,41  | -0,362 |
| 21 | Q58FF8 H90B2_HUMAN | K.YIDQEELNK.T                    | NA    | 2 | 1,8364 | 0,134 | -0,424 |
| 22 | Q15185 TEBP_HUMAN  | E.KSKLTFSCGGSDNFKHLNE.I          | NA    | 3 | 4,6626 | 0,292 | 0,24   |
| 22 | P17480 UBF1_HUMAN  | E.KMLNINIKKQATS#PASKKPAQE.G      | S389  | 3 | 4,6484 | 0,412 | -0,153 |
| 22 | P25398 RS12_HUMAN  | E.HQINLIKVDDNKKLGE.W             | NA    | 3 | 4,5555 | 0,388 | 0      |
| 22 | Q14444 CAPR1_HUMAN | E.GKEKPVCGTTYKVLKE.I             | NA    | 3 | 4,5292 | 0,376 | 0,398  |
| 22 | P30041 PRDX6_HUMAN | E.AKKLFPKGVFTKE.L                | NA    | 3 | 4,3158 | 0,378 | 0,184  |
| 22 | P31948 STIP1_HUMAN | E.HLKNPVIAQKIQKLM*D.V            | NA    | 3 | 4,2424 | 0,297 | 0,193  |
| 22 | Q66K74 MAP1S_HUMAN | E.HRKAVPM*APAPAS#PGSSNDSSARSQE.R | S759  | 3 | 4,2269 | 0,377 | -0,134 |
| 22 | Q13347 EIF3I_HUMAN | E.HSRQINDIQLSRD.M                | NA    | 3 | 4,2032 | 0,329 | 0,231  |
| 22 | P49915 GUAA_HUMAN  | E.GKVIEPLKDFHKDE.V               | NA    | 3 | 4,1535 | 0,416 | 0,221  |
| 22 | Q9NWH9 SLTM_HUMAN  | E.ASKPKDGGQDAIAQS#PEKE.S         | S289  | 3 | 4,1144 | 0,285 | 0,092  |
| 22 | O60506 HNRPQ_HUMAN | R.VKKLDYAFIHFDE.R                | NA    | 3 | 3,9523 | 0,415 | 0      |

|    |                    |                               |           |   |        |       |        |
|----|--------------------|-------------------------------|-----------|---|--------|-------|--------|
| 22 | P04075 ALDOA_HUMAN | E.LSDIAHRIVAPGKGILAADE.S      | NA        | 3 | 3,9261 | 0,254 | 0,268  |
| 22 | Q96C86 DCPS_HUMAN  | E.SARDKIIFLHGKVNE.A           | NA        | 3 | 3,9014 | 0,259 | 0,212  |
| 22 | Q02952 AKA12_HUMAN | E.LQSHAKSPPS#PVERE.M          | S1331     | 3 | 3,8564 | 0,392 | 0,315  |
| 22 | Q2TBE0 C19L2_HUMAN | E.HLRDTKSTFAGS#PERE.S         | S475      | 3 | 3,8345 | 0,4   | -0,096 |
| 22 | P18669 PGAM1_HUMAN | E.RHYGGLTGLNKAET              | NA        | 3 | 3,76   | 0,142 | 0,065  |
| 22 | Q16514 TAF12_HUMAN | E.NNQVLTKKKLQDLVRE.V          | NA        | 3 | 3,7093 | 0,274 | 0,19   |
| 22 | Q99700 ATX2_HUMAN  | E.HKRGPEVTSQGVQTSS#PACKQE.K   | S888      | 3 | 3,6865 | 0,439 | -0,147 |
| 22 | Q96I99 SUCB2_HUMAN | E.DAAKKAVASVAKK.-             | NA        | 3 | 3,576  | 0,244 | 0      |
| 22 | Q9Y2W1 TR150_HUMAN | E.HHFGSSGMTLHE.R              | NA        | 3 | 3,5498 | 0,319 | 0,341  |
| 22 | Q9Y3F4 STRAP_HUMAN | E.SYKGHFHGFPIHCVRFPDGE.L      | NA        | 3 | 3,5009 | 0,341 | 0,585  |
| 22 | Q01082 SPTB2_HUMAN | R.KRRPPS#PEPSTKVSEAE.S        | S2102     | 3 | 3,4869 | 0,177 | -0,174 |
| 22 | Q92820 GGH_HUMAN   | E.KLKKFFNVLTNTDGKIE.F         | NA        | 3 | 3,4802 | 0,134 | -0,175 |
| 22 | P22626 ROA2_HUMAN  | E.SGKPGAHVTVKCLFVGGIKEDTE.E   | NA        | 3 | 3,464  | 0,309 | 0,458  |
| 22 | Q9UQ80 PA2G4_HUMAN | E.KTIQNPTDQKQKDE.K            | NA        | 2 | 3,4625 | 0,453 | -0,254 |
| 22 | O43390 HNRPR_HUMAN | R.VKKLDYAFVHFE.D              | NA        | 3 | 3,4106 | 0,364 | 0,225  |
| 22 | P62937 PPIA_HUMAN  | D.GKHVVFGKVE.G                | NA        | 3 | 3,3931 | 0,32  | 0      |
| 22 | P31948 STIP1_HUMAN | E.KGNKALSVGNIDDALQCYSE.A      | NA        | 3 | 3,3702 | 0,309 | 0,168  |
| 22 | P39019 RS19_HUMAN  | D.LDRIAGQVAAANKKH.-           | NA        | 3 | 3,227  | 0,282 | -0,23  |
| 22 | P51572 BAP31_HUMAN | E.HAKLQAAVDGPM*DKKEE.-        | NA        | 3 | 3,215  | 0,15  | -0,389 |
| 22 | Q9NR45 SIAS_HUMAN  | E.KLGKSVVAKVPIPE.G            | NA        | 3 | 3,1678 | 0,172 | 0,244  |
| 22 | Q32MZ4 LRRF1_HUMAN | E.KYKAM*VSNAQLDNE.K           | NA        | 3 | 3,1312 | 0,174 | 0,104  |
| 22 | P17480 UBF1_HUMAN  | E.KM*LNINKKQATS#PASKKPAQE.G   | S389      | 3 | 3,1169 | 0,289 | -0,228 |
| 22 | P55072 TERA_HUMAN  | R.RSVSDNDIRKYE.M              | NA        | 3 | 3,0953 | 0,265 | 0,309  |
| 22 | P12277 KCRB_HUMAN  | E.EDHLRVISMQKGGNM*KE.V        | NA        | 3 | 3,0844 | 0,172 | -0,092 |
| 22 | P49916 DNL3_HUMAN  | E.KLATKSS#PVKVE.K             | S826      | 3 | 3,0804 | 0,143 | 0,064  |
| 22 | P12956 KU70_HUMAN  | E.LKTHISGTLGKFTVPM*LKE.A      | NA        | 3 | 3,0733 | 0,165 | 0,408  |
| 22 | O95149 SPN1_HUMAN  | E.HLSTPKLKGSSHS#PDHPGCLM*EN.- | S350      | 3 | 3,0311 | 0,3   | 0,558  |
| 22 | P16383 GCF_HUMAN   | E.HHLDHLKSLIKED.-             | NA        | 3 | 3,0088 | 0,207 | -0,231 |
| 22 | Q01469 FABP5_HUMAN | E.STITRKLKDGKLVVE.C           | NA        | 3 | 2,994  | 0,174 | 0,108  |
| 22 | Q14247 SRC8_HUMAN  | E.HQTLKEKELE.T                | NA        | 3 | 2,9904 | 0,198 | -0,146 |
| 22 | P63313 TYB10_HUMAN | E.IASFDAKAKLKKTE.T            | NA        | 2 | 2,9659 | 0,304 | 0      |
| 22 | Q4J6C6 PPCEL_HUMAN | E.DSHKKITAQIKFLYEE.L          | NA        | 3 | 2,954  | 0,176 | 0,469  |
| 22 | P06748 NPM_HUMAN   | E.DVKLLSISGKR.S               | NA        | 3 | 2,9448 | 0,2   | 0,451  |
| 22 | Q6NZI2 PTRF_HUMAN  | E.AGDLRRGS#S#PDVHALLE.I       | S365:S366 | 3 | 2,9393 | 0,2   | 0,562  |
| 22 | P23246 SFPO_HUMAN  | R.QHHPPYHQHHQGGPPGGGR.S       | NA        | 3 | 2,9307 | 0,259 | -0,457 |
| 22 | Q9P0V9 SEP10_HUMAN | E.NHCDFVKLRE.M                | NA        | 2 | 2,9165 | 0,329 | 0,833  |
| 22 | Q8N7R7 CCYL1_HUMAN | E.GHHLQHIS#DREM*PE.D          | S67       | 3 | 2,8986 | 0,085 | -0,308 |
| 22 | P13010 KU86_HUMAN  | E.NFRVLVKQKASFE.A             | NA        | 3 | 2,8942 | 0,155 | 0      |
| 22 | Q9NQW6 ANLN_HUMAN  | E.THCQSTPLKKHQGVSKTQS#LPVTE.K | S485      | 3 | 2,8821 | 0,362 | -0,264 |
| 22 | Q8WW12 PCNP_HUMAN  | R.NIKSHLGNVHDQDN.-            | NA        | 3 | 2,8648 | 0,213 | 0,115  |
| 22 | Q9NYL2 MLTK_HUMAN  | E.VAVKLLKIEKE.A               | NA        | 3 | 2,8498 | 0,114 | 0,196  |

|    |                     |                          |       |   |        |       |        |
|----|---------------------|--------------------------|-------|---|--------|-------|--------|
| 22 | P31948 STIP1_HUMAN  | E.EKYKDAIHFYNKSLAE.H     | NA    | 3 | 2,845  | 0,223 | 0,281  |
| 22 | Q9Y3U8 RL36_HUMAN   | E.LSNVLAAM*RKAAAKKD.-    | NA    | 3 | 2,8148 | 0,218 | 0,215  |
| 22 | Q9BYG9 Q9BYG9_HUMAN | E.DIKAKMQASIEKAH.-       | NA    | 3 | 2,8128 | 0,093 | 0      |
| 22 | P27708 PYR1_HUMAN   | E.NRFKFSRLLD.T           | NA    | 3 | 2,7961 | 0,186 | 0      |
| 22 | Q8WUM4 PDC6I_HUMAN  | E.YHQSilakQqKkfGEE.I     | NA    | 3 | 2,7826 | 0,302 | -0,189 |
| 22 | Q8WW12 PCNP_HUMAN   | R.NIKSHLGNVHDQDN.-       | NA    | 2 | 2,7601 | 0,36  | -0,23  |
| 22 | Q9UEG4 ZN629_HUMAN  | E.LLLHQKVHAGGKSSQKS#PE.L | S745  | 3 | 2,6611 | 0,134 | 0,172  |
| 22 | Q8TD16 BICD2_HUMAN  | E.HGGLAKLPLDNKTST#PKKE.G | T319  | 3 | 2,6587 | 0,145 | 0,087  |
| 22 | P12277 KCRB_HUMAN   | E.EDHLRVISM*QKGGNM*KE.V  | NA    | 3 | 2,6372 | 0,113 | 0      |
| 22 | O15116 LSM1_HUMAN   | E.DIDKKHLVLLRD.G         | NA    | 3 | 2,6092 | 0,183 | 0,062  |
| 22 | P25398 RS12_HUMAN   | E.HQINLIKVDD.N           | NA    | 2 | 2,597  | 0,273 | -0,408 |
| 22 | Q13148 TADBP_HUMAN  | E.TDASSAVKVKRAVQKTS.D.L  | NA    | 3 | 2,5838 | 0,422 | 0,387  |
| 22 | Q9P0V9 SEP10_HUMAN  | E.NHCDVFKLRE.M           | NA    | 3 | 2,5703 | 0,232 | 0,069  |
| 22 | P27708 PYR1_HUMAN   | E.DRRFAARMAE.I           | NA    | 3 | 2,561  | 0,382 | 0      |
| 22 | Q14204 DYHC1_HUMAN  | E.AQNAVKSIIKQHLVE.V      | NA    | 3 | 2,5291 | 0,309 | -0,108 |
| 22 | P23526 SAHH_HUMAN   | E.AHLGKLNVLTKLTE.K       | NA    | 3 | 2,5039 | 0,322 | 0,33   |
| 22 | Q99590 SFRIP_HUMAN  | E.HKDFTLKTEE.L           | NA    | 3 | 2,5001 | 0,166 | -0,147 |
| 22 | O43809 CPSF5_HUMAN  | E.HKKLFLVQLQE.K          | NA    | 2 | 2,4755 | 0,127 | -0,265 |
| 22 | P35579 MYH9_HUMAN   | E.AKLLKLEEE.Q            | NA    | 2 | 2,4343 | 0,134 | -0,112 |
| 22 | Q6S8J3 A26CA_HUMAN  | E.KIWHHTFYNE.L           | NA    | 2 | 2,3841 | 0,335 | -0,266 |
| 22 | P00441 SODC_HUMAN   | E.GLHGFHVHE.F            | NA    | 2 | 2,1946 | 0,396 | -0,118 |
| 22 | P23528 COF1_HUMAN   | E.DKKNIILEE.G            | NA    | 2 | 2,1809 | 0,083 | 0      |
| 22 | Q2TBE0 C19L2_HUMAN  | E.HLRDTKS#TFAGSPERE.S    | S470  | 2 | 2,0715 | 0,204 | -0,447 |
| 22 | P31150 GDIA_HUMAN   | E.NM*KRKQNDVFGAEQ.-      | NA    | 2 | 2,0694 | 0,218 | 0,067  |
| 22 | P49411 EFTU_HUMAN   | E.GGGAKFKKYYE.I          | NA    | 2 | 2,0455 | 0,155 | -0,201 |
| 22 | P14324 FPPS_HUMAN   | E.HANAKKILLE.M           | NA    | 2 | 2,0292 | 0,11  | 0,215  |
| 22 | Q00610 CLH1_HUMAN   | E.KRDPHLACVAYE.R         | NA    | 2 | 1,8181 | 0,088 | -0,167 |
| 22 | P18124 RL7_HUMAN    | E.KKKEVPVAVPE.T          | NA    | 2 | 1,6216 | 0,085 | -0,217 |
| 22 | Q01082 SPTB2_HUMAN  | R.KRRPPS#PEPSTKVSEE.A    | S2102 | 2 | 1,376  | 0,239 | -0,192 |
| 22 | P35251 RFC1_HUMAN   | R.KSYS#PRKQSKYE.S        | S283  | 2 | 1,3745 | 0,338 | -0,463 |
| 22 | P27824 CALX_HUMAN   | K.LHFIFR.H               | NA    | 2 | 1,3169 | 0,105 | 0,366  |
| 23 | Q15181 IPYR_HUMAN   | E.FKDKDFAIDIIK.S         | NA    | 3 | 4,0234 | 0,271 | -0,063 |
| 23 | P14618 KPYM_HUMAN   | E.KGKNIKIISKIE.N         | NA    | 3 | 3,9869 | 0,294 | -0,067 |
| 23 | P0C7M2 RA1L3_HUMAN  | K.RGFAFVTFDDHDSV.DK.I    | NA    | 3 | 3,9715 | 0,401 | -0,69  |
| 23 | Q96C86 DCPS_HUMAN   | E.SARDKIIFLHGKVNE.A      | NA    | 3 | 3,82   | 0,238 | 0,53   |
| 23 | P51991 ROA3_HUMAN   | K.RGFAFVTFDDHDTV.DK.I    | NA    | 3 | 3,8145 | 0,281 | -0,293 |
| 23 | P68104 EF1A1_HUMAN  | K.THINIVVIGHVDSGK.S      | NA    | 3 | 3,7643 | 0,342 | 0,115  |
| 23 | Q9H1A4 APC1_HUMAN   | E.KHKS#PSYQIKE.G         | S1347 | 3 | 3,7107 | 0,203 | 0,321  |
| 23 | P31948 STIP1_HUMAN  | E.KYKDAIHFYNKSLAE.H      | NA    | 3 | 3,6831 | 0,417 | -0,1   |
| 23 | P60953 CDC42_HUMAN  | E.KLARDLKAVKYVE.C        | NA    | 3 | 3,6743 | 0,262 | 0,418  |
| 23 | P43487 RANG_HUMAN   | R.GTGDVKKLKHKE.K         | NA    | 3 | 3,4416 | 0,278 | 0,207  |



|    |                    |                             |           |   |        |       |        |
|----|--------------------|-----------------------------|-----------|---|--------|-------|--------|
| 23 | P78527 PRKDC_HUMAN | E.SYSFKDSTGHKNKE.F          | NA        | 3 | 3,4259 | 0,393 | 0,106  |
| 23 | Q6NZI2 PTRF_HUMAN  | E.AGDLRRGS#S#PDVHALLE.I     | S365:S366 | 3 | 3,4044 | 0,236 | 0,094  |
| 23 | P33176 KINH_HUMAN  | E.HSSRSHSIFLINVKQE.N        | NA        | 3 | 3,3441 | 0,299 | -0,097 |
| 23 | Q6NVY1 HIBCH_HUMAN | E.KAKQKIAPVFFRE.E           | NA        | 3 | 3,3211 | 0,183 | 0      |
| 23 | P55084 ECHB_HUMAN  | E.YALRSHSLAKKAQDE.G         | NA        | 3 | 3,3211 | 0,293 | -0,213 |
| 23 | P62081 RS7_HUMAN   | D.GSRLIKVHLDKAQQNNVE.H      | NA        | 3 | 3,2848 | 0,24  | -0,179 |
| 23 | Q15185 TEBP_HUMAN  | E.IDLFHCIDPNDSKHKRTD.R      | NA        | 3 | 3,265  | 0,239 | -0,083 |
| 23 | P07814 SYEP_HUMAN  | E.DFKQYVNKNSKHEE.L          | NA        | 3 | 3,2165 | 0,301 | 0,311  |
| 23 | O43395 PRPF3_HUMAN | K.AADHLKPFLLDDSTLR.F        | NA        | 3 | 3,1788 | 0,142 | 0      |
| 23 | P21980 TGM2_HUMAN  | E.AFTRANHLNKLAEKEE.T        | NA        | 3 | 3,142  | 0,169 | 0,196  |
| 23 | O15305 PMM2_HUMAN  | E.NIRQKQFVADLRKE.F          | NA        | 3 | 3,1132 | 0,237 | 0      |
| 23 | Q07666 KHDR1_HUMAN | D.LFSHKNMKLKE.R             | NA        | 3 | 3,1067 | 0,172 | 0,133  |
| 23 | Q9UJZ1 STML2_HUMAN | E.IKDIHVPPRVKE.S            | NA        | 3 | 3,0537 | 0,086 | 0,192  |
| 23 | P11142 HSP7C_HUMAN | E.NKITITNDKGRLSKE.D         | NA        | 3 | 3,0376 | 0,304 | 0      |
| 23 | P00338 LDHA_HUMAN  | E.ARLKKSADTLWGIQKE.L        | NA        | 3 | 2,9779 | 0,102 | -0,099 |
| 23 | P14618 KPYM_HUMAN  | E.KGKNIKIISKIE.N            | NA        | 2 | 2,969  | 0,195 | -0,267 |
| 23 | P51991 ROA3_HUMAN  | E.DSVKPGAHLTVK.K            | NA        | 3 | 2,9409 | 0,18  | 0,146  |
| 23 | P62753 RS6_HUMAN   | E.YAKLLAKRMKE.A             | NA        | 3 | 2,9062 | 0,273 | 0,203  |
| 23 | Q09666 AHNK_HUMAN  | E.GKLGPKFKMPD.M             | NA        | 3 | 2,8703 | 0,323 | 0,136  |
| 23 | Q09666 AHNK_HUMAN  | E.GKLGPKFKM*PE.M            | NA        | 3 | 2,8324 | 0,469 | 0,199  |
| 23 | Q9UGV6 HMG1X_HUMAN | K.IKGEHPGLSIGDVAK.K         | NA        | 3 | 2,821  | 0,251 | 0,541  |
| 23 | P22626 ROA2_HUMAN  | K.RGFGFVTFDDHDPVDK.I        | NA        | 3 | 2,7901 | 0,264 | -0,198 |
| 23 | P43243 MATR3_HUMAN | E.TSHNYHKFDSE.Y             | NA        | 3 | 2,7811 | 0,241 | 0,201  |
| 23 | O00422 SAP18_HUMAN | E.IKKEPEKPIDRE.K            | NA        | 3 | 2,7805 | 0,086 | 0      |
| 23 | Q00688 FKBP3_HUMAN | K.TANKDHLVTAYNHLFE.T        | NA        | 3 | 2,7772 | 0,189 | 0      |
| 23 | P23528 COF1_HUMAN  | K.KAVLFCLSEDKK.N            | NA        | 3 | 2,7589 | 0,258 | 0,064  |
| 23 | P39023 RL3_HUMAN   | E.VDRPGSKVNKKEVVE.A         | NA        | 3 | 2,7589 | 0,196 | 0,109  |
| 23 | Q09666 AHNK_HUMAN  | E.GKLGPKFKMPE.M             | NA        | 3 | 2,7436 | 0,249 | 0      |
| 23 | P09429 HMGB1_HUMAN | K.KHPDASVNFSE.F             | NA        | 2 | 2,7196 | 0,316 | 0      |
| 23 | P52948 NUP98_HUMAN | E.LKLKHSTVHVDE.L            | NA        | 3 | 2,6031 | 0,214 | 0      |
| 23 | P83881 RL36A_HUMAN | E.LGGDKKRKGQVIQF.-          | NA        | 2 | 2,5917 | 0,275 | -0,078 |
| 23 | Q14697 GANAB_HUMAN | R.KLVAIVDPHIK.V             | NA        | 3 | 2,5728 | 0,182 | 0,297  |
| 23 | Q8IYB3 SRRM1_HUMAN | E.KALRSRKAQVS#PQS.-         | S901      | 3 | 2,5723 | 0,355 | -0,104 |
| 23 | Q08J23 NSUN2_HUMAN | E.ILHCLKNKYFKE.L            | NA        | 3 | 2,5537 | 0,211 | 0,115  |
| 23 | P13984 T2FB_HUMAN  | E.KHQYYNLKD.L               | NA        | 3 | 2,5356 | 0,201 | -0,076 |
| 23 | P35221 CTNA1_HUMAN | E.TQTKIKRAS#QKKHVNPVQALSE.F | S886      | 3 | 2,5232 | 0,149 | 0,213  |
| 23 | P08670 VIME_HUMAN  | D.THSKRTLLIKTVE.T           | NA        | 3 | 2,5063 | 0,196 | 0,06   |
| 23 | P40939 ECHA_HUMAN  | E.DLSLKHRLKE.V              | NA        | 2 | 2,2164 | 0,238 | -0,182 |
| 23 | O75962 TRIO_HUMAN  | R.IMS#VANRLVE.S             | S344      | 2 | 1,9704 | 0,134 | 1,913  |
| 23 | P68104 EF1A1_HUMAN | K.IGGIGTVPVGR.V             | NA        | 2 | 1,94   | 0,123 | -0,238 |
| 23 | P22626 ROA2_HUMAN  | E.EHHLRDYFEE.Y              | NA        | 2 | 1,7443 | 0,209 | -0,444 |

|    |                    |                         |           |   |        |       |        |
|----|--------------------|-------------------------|-----------|---|--------|-------|--------|
| 24 | Q6NZI2 PTRF_HUMAN  | E.AGDLRRGS#S#PDVHALLE.I | S365:S366 | 3 | 4,4088 | 0,15  | 0,094  |
| 24 | Q8IYB3 SRRM1_HUMAN | E.KKEKT#PELPEPSVK.V     | T220      | 3 | 3,7672 | 0,129 | 0,108  |
| 24 | P07355 ANXA2_HUMAN | E.KDIISDTSGDFRK.L       | NA        | 3 | 3,7552 | 0,488 | 0,309  |
| 24 | P55209 NP1L1_HUMAN | E.HDEPILKHLKD.I         | NA        | 3 | 3,63   | 0,26  | 0,068  |
| 24 | Q00610 CLH1_HUMAN  | E.KHDVVFLITK.Y          | NA        | 3 | 3,5408 | 0,205 | 0,381  |
| 24 | P62937 PPIA_HUMAN  | D.GKHVVFGVKVE.G         | NA        | 3 | 3,3877 | 0,282 | 1,117  |
| 24 | O60841 IF2P_HUMAN  | E.KVEGNTVHIEVK.E        | NA        | 3 | 3,3412 | 0,225 | 0,203  |
| 24 | Q9Y6W5 WASF2_HUMAN | E.KRDVVGNVDVATILSR.R    | NA        | 3 | 3,2779 | 0,163 | -0,223 |
| 24 | Q15181 IPYR_HUMAN  | E.FKDKFAIDIK.S          | NA        | 3 | 3,2481 | 0,217 | 0      |
| 24 | Q6I9Y2 THOC7_HUMAN | E.YDALAKVIQHHPDRHE.T    | NA        | 3 | 3,1223 | 0,34  | 0,664  |
| 24 | P08133 ANXA6_HUMAN | R.RILISLATGHREE.G       | NA        | 3 | 3,07   | 0,207 | 0      |
| 24 | Q9NVA2 SEPP1_HUMAN | E.KFDLLKRTHQEE.K        | NA        | 2 | 3,0106 | 0,288 | 0,079  |
| 24 | Q13098 CSN1_HUMAN  | E.ATRKKALLKLE.K         | NA        | 3 | 2,9521 | 0,231 | 0,072  |
| 24 | P51858 HDGF_HUMAN  | R.RAGDILLED#PKRPK.E     | S165      | 3 | 2,8724 | 0,264 | 0,11   |
| 24 | P52948 NUP98_HUMAN | E.LKLKHSTVHVDE.L        | NA        | 3 | 2,85   | 0,226 | 0,715  |
| 24 | P45974 UBP5_HUMAN  | E.HLSHFGIDM*LK.M        | NA        | 3 | 2,8467 | 0,235 | 0,278  |
| 24 | Q9NTJ3 SMC4_HUMAN  | E.KKLNKIKFIEE.N         | NA        | 3 | 2,823  | 0,236 | 0,061  |
| 24 | Q13442 HAP28_HUMAN | K.RKGVEGLIDIENPNR.V     | NA        | 3 | 2,7843 | 0,092 | -0,214 |
| 24 | P24941 CDK2_HUMAN  | E.GTY#GVVYKARNKLTGE.V   | Y15       | 3 | 2,7643 | 0,229 | 0,1    |
| 24 | Q9Y5L4 TIM13_HUMAN | D.KCFRKCIGKPGGSLDNSE.Q  | NA        | 3 | 2,7432 | 0,193 | -0,624 |
| 24 | O75351 VPS4B_HUMAN | E.HDLLKLLKFTE.D         | NA        | 3 | 2,6546 | 0,194 | 0,133  |
| 24 | Q71U36 TBA1A_HUMAN | R.LDHKFDLM*YAK.R        | NA        | 3 | 2,619  | 0,106 | -0,065 |
| 24 | Q9NY61 AATF_HUMAN  | R.KLASASLLDTRK.Y        | NA        | 3 | 2,5935 | 0,21  | 0,322  |
| 24 | P15170 ERF3A_HUMAN | K.HFTILDAPGHK.S         | NA        | 3 | 2,5473 | 0,184 | 0,222  |
| 24 | P62937 PPIA_HUMAN  | E.KFEDENFILK.H          | NA        | 2 | 2,5415 | 0,23  | -0,095 |
| 24 | O00629 IMA4_HUMAN  | D.S#DIDGDYRVQNTSLE.A    | S60       | 2 | 2,4803 | 0,399 | -0,068 |
| 24 | P0C7M2 RA1L3_HUMAN | E.HHLRDYFE.Q            | NA        | 2 | 2,3026 | 0,111 | 0      |
| 24 | P07195 LDHB_HUMAN  | D.VLEDKLGGE.M           | NA        | 2 | 2,1368 | 0,144 | 0      |
| 24 | P31943 HNRH1_HUMAN | K.LALKKDRE.T            | NA        | 2 | 2,0307 | 0,186 | 0,125  |
| 24 | P07355 ANXA2_HUMAN | E.KDIISDTSGDFRK.L       | NA        | 2 | 2,0172 | 0,156 | -0,082 |
| 24 | P22626 ROA2_HUMAN  | E.HHLRDYFEE.Y           | NA        | 2 | 1,9337 | 0,092 | 0,098  |

**Table S2:** Peptide identification information for GSPT workflow. SCX fraction number, protein reference, peptide sequence, phosphorylation localization, charge state, and SEQUEST scoring metrics (cross correlation, delta correlation, and ppm) are provided. Reverse hits that pass filters are included and used to maintain <1% false positive rate.

| Fraction | Ref                | Sequence                          | ModSite            | Charge | XCorr  | dCn   | PPM    |
|----------|--------------------|-----------------------------------|--------------------|--------|--------|-------|--------|
| 1        | Q92598 HS105_HUMAN | E.AGTQPQVQTDAQQTSQS#PPSPELTSEE.N  | S554:              | 3      | 6,3502 | 0,458 | 0,376  |
| 1        | Q02952 AKA12_HUMAN | E.M*VSAVSQLTDS#PDTTEEAT#PVQE.V    | S1012:T1020:       | 3      | 5,9676 | 1     | 0,21   |
| 1        | Q15154 PCM1_HUMAN  | E.SNSLTSVVPYPTASLVSQNES#ENE.G     | S478:              | 3      | 5,5809 | 0,522 | 0,838  |
| 1        | Q9NRM2 ZN277_HUMAN | E.NDTLLCTLS#DSESDLTAQE.QNE.N      | S399:              | 3      | 5,4836 | 0,449 | 0,071  |
| 1        | Q6NZI2 PTRF_HUMAN  | E.ITEESDAVLVDKS#DS#D.-            | S387:S389:         | 2      | 5,4605 | 0,528 | -0,259 |
| 1        | P30622 CLIP1_HUMAN | E.AALNGNGDDLNNYDS#DDQE.K          | S1353:             | 2      | 5,4355 | 0,561 | -0,345 |
| 1        | Q6PGN9 PSRC1_HUMAN | E.TLDFGGLS#PSDS#REEE.D            | S22:S26:           | 2      | 5,4347 | 0,49  | 0      |
| 1        | P49281 NRAM2_HUMAN | E.LYLLNTM*DADS#LVS#R.-            | S564:S567:         | 2      | 5,3947 | 0,541 | -0,323 |
| 1        | Q6NZI2 PTRF_HUMAN  | E.ITEES#DAVLVDKS#DS#D.-           | S379:S387:S389:    | 2      | 5,3744 | 0,508 | -0,249 |
| 1        | Q02952 AKA12_HUMAN | E.MVSAVSQLTDS#PDT#TEEAT#PVQE.V    | S1012:T1015:T1020: | 3      | 5,2405 | 1     | 0,205  |
| 1        | Q9Y6A5 TACC3_HUMAN | E.NQMVS#PGKVSQS#PEQAVEE.N         | S170:S177:         | 2      | 5,2055 | 0,52  | -0,343 |
| 1        | Q9ULU4 PKCB1_HUMAN | E.TDSPTVHGLDS#DS#ESE.L            | S707:S709:         | 2      | 5,1395 | 0,467 | -0,313 |
| 1        | Q8WXI9 P66B_HUMAN  | R.GRLT#PS#PDIIVLSDNE.A            | T120:S122:         | 2      | 5,0962 | 0,392 | -0,194 |
| 1        | P13693 TCTP_HUMAN  | E.GNIDDS#LIGGNASAEGPEGEGTE.S      | S46:               | 3      | 5,0938 | 0,463 | -0,242 |
| 1        | Q6P0N0 CN106_HUMAN | E.SVDS#ADEQFQNTNAE.T              | S275:              | 2      | 5,0582 | 0,576 | 0,422  |
| 1        | Q92598 HS105_HUMAN | E.AGTQPQVQTDAQQTSQS#PPSPE.L       | S554:              | 3      | 5,0248 | 0,386 | -0,31  |
| 1        | Q9NQ57 INCE_HUMAN  | E.IANST#PNPKPAASSPET#PSAGQQE.A    | T412:T424:         | 3      | 4,941  | 1     | -0,072 |
| 1        | Q8WXI9 P66B_HUMAN  | R.GRLT#PS#PDIIVLS#DNE.A           | T120:S122:S129:    | 2      | 4,9186 | 0,41  | -0,186 |
| 1        | O95835 LATS1_HUMAN | E.YINSQGSEQQS#DEDDQNTGSE.I        | S1111:             | 3      | 4,8199 | 0,485 | -0,076 |
| 1        | Q02952 AKA12_HUMAN | E.M*VSAVSQLTDS#PDT#TEEAT#PVQE.V   | T1016:T1020:       | 3      | 4,7897 | 0,403 | 0      |
| 1        | Q9H0H5 RGAP1_HUMAN | E.SGSILS#DIS#FDKTDE.S             | S154:S157:         | 2      | 4,76   | 0,471 | -0,206 |
| 1        | Q14C86 GAPD1_HUMAN | R.S#NSVSS#LDLEGESVSE.L            | S583:S588:         | 2      | 4,7352 | 0,475 | 0,271  |
| 1        | P12270 TPR_HUMAN   | E.SGGRSVPT#T#PLQVAAPVTVFTE.S      | T2199:T2200:       | 3      | 4,7176 | 0,331 | 0,231  |
| 1        | Q02952 AKA12_HUMAN | E.M*VSAVSQLTDS#PDT#TEEAT#PVQE.V   | S1012:T1015:       | 3      | 4,6873 | 1     | 0      |
| 1        | Q9GZN2 TGIF2_HUMAN | E.AGSPTGGLFNT#PPPT#PPEQDKE.D      | T182:T186:         | 3      | 4,6868 | 0,283 | 0,763  |
| 1        | Q6XQN6 PNCB_HUMAN  | R.LQALVNSLCAGQS#P.-               | S537:              | 2      | 4,5892 | 0,364 | 0,079  |
| 1        | Q99700 ATX2_HUMAN  | E.NSSNCTSGS#SKPNS#PSIS#PSILSNTE.H | S855:S860:S864:    | 3      | 4,5809 | 1     | 0      |

|   |                     |                                 |                 |   |        |       |        |
|---|---------------------|---------------------------------|-----------------|---|--------|-------|--------|
| 1 | Q9UQ35 SRRM2_HUMAN  | E.FSAS#PM*LKSGMS#PE.Q           | S1124:S1132:    | 2 | 4,5314 | 0,524 | 0      |
| 1 | Q13426 XRCC4_HUMAN  | E.TLRNS#S#PEDLDFEI.-            | S327:S328:      | 2 | 4,5079 | 0,381 | -0,068 |
| 1 | Q02952 AKA12_HUMAN  | E.MVSAVSQLTDS#PDTTEEAT#PVQE.V   | S1012:T1020:    | 3 | 4,4983 | 0,374 | 0,212  |
| 1 | Q02952 AKA12_HUMAN  | E.VSSLEGS#PPPCLGQEE.A           | S1395:          | 2 | 4,4955 | 0,407 | 0      |
| 1 | Q12888 TP53B_HUMAN  | E.T#SVISIDS#PQKLAILDQE.L        | T720:S727:      | 2 | 4,4818 | 0,395 | -0,115 |
| 1 | Q43166 SI1L1_HUMAN  | E.YGS#TSS#IDKQGTSGE.S           | S208:S211:      | 2 | 4,4787 | 1     | -0,364 |
| 1 | Q9BUR4 WDR79_HUMAN  | E.FGS#PSELS#PRIEEQE.L           | S85:S90:        | 2 | 4,4646 | 0,497 | 0,262  |
| 1 | Q96TA1 NIBL1_HUMAN  | E.VGLPFEASPES#PPPAS#PDGVTE.I    | S628:S633:      | 3 | 4,4166 | 0,426 | 0,547  |
| 1 | Q8N163 K1967_HUMAN  | E.DSEVRS#VAS#NQS#EME.F          | S675:S678:S681: | 2 | 4,3975 | 0,507 | -0,32  |
| 1 | Q7Z3U7 MON2_HUMAN   | E.TECQTTTEEGSS#PTQSTE.Q         | S523:           | 2 | 4,3894 | 0,585 | -0,119 |
| 1 | Q9UQ35 SRRM2_HUMAN  | E.LS#NSPLRENS#FGSPLE.F          | S1318:S1326:    | 2 | 4,3672 | 0,469 | 0,256  |
| 1 | Q6PKG0 LARP1_HUMAN  | E.TES#APGS#PRAVT#PVPTKTEE.V     | S517:S521:T526: | 3 | 4,3532 | 0,401 | 0,08   |
| 1 | P35527 K1C9_HUMAN   | R.GGSGGSYGGGGSGGGYGGGSGSR.G     |                 | 2 | 4,3164 | 0,3   | -0,34  |
| 1 | P48960 CD97_HUMAN   | E.GSYDCVCSPGYEPVSGAK.T          |                 | 2 | 4,3094 | 0,43  | -0,126 |
| 1 | Q15185 TEBP_HUMAN   | D.S#QDS#DDEKM*PDLE.-            | S148:S151:      | 2 | 4,3062 | 0,424 | -0,362 |
| 1 | Q13085 ACACA_HUMAN  | E.VM*GCFSDS#PPQS#PTFPE.A        | S1259:S1263:    | 2 | 4,2978 | 0,509 | 0      |
| 1 | P43358 MAGA4_HUMAN  | R.QPNEGSSSQEEGPTSTS#PDAAE.S     | S99:            | 3 | 4,2851 | 0,388 | 0,082  |
| 1 | Q8N163 K1967_HUMAN  | E.DSEVRS#VAS#NQSEM*E.F          | S675:S678:      | 2 | 4,2777 | 0,501 | -0,596 |
| 1 | Q9Y3T9 NOC2L_HUMAN  | E.FLASFDS#ES#ES#ESENSPQAE.T     | S26:S28:S30:    | 3 | 4,2694 | 0,344 | 0      |
| 1 | Q5JSH3 WDR44_HUMAN  | E.YVSNDAAS#DDEE.K               | S403:           | 2 | 4,2444 | 0,519 | -0,16  |
| 1 | Q8N163 K1967_HUMAN  | E.VRS#VAS#NQS#EME.F             | S675:S678:S681: | 2 | 4,234  | 0,362 | -0,155 |
| 1 | Q99700 ATX2_HUMAN   | E.AVAM*PIPAASPT#PASPASNR.A      | T729:           | 2 | 4,2232 | 0,444 | 0,792  |
| 1 | P21127 CD2L1_HUMAN  | E.GDYVPDS#PALS#PIELKQE.L        | S410:S414:      | 2 | 4,198  | 0,469 | -0,23  |
| 1 | Q9H118 ASCC2_HUMAN  | E.AVSQASS#HPENS#EEEE.C          | S442:S447:      | 2 | 4,1849 | 0,25  | -0,452 |
| 1 | Q94842 TOX4_HUMAN   | E.LVSGS#PVALS#PQPR.C            | S562:S567:      | 2 | 4,1743 | 0,315 | 0,156  |
| 1 | Q6FIF0 ZFAN6_HUMAN  | E.AQSALDSTSSM*QPS#PVSQSLSE.S    | S88:            | 3 | 4,165  | 0,408 | 0      |
| 1 | Q12888 TP53B_HUMAN  | E.TSVIS#IDS#PQKLAILDQE.L        | S724:S727:      | 2 | 4,1406 | 0,45  | -0,231 |
| 1 | A2RTZ0 A2RTZ0_HUMAN | E.ALNQSVIEETS#SDTD.-            | S516:           | 2 | 4,132  | 0,527 | 0,395  |
| 1 | Q5VY92 Q5VY92_HUMAN | R.LQDSS#DPDTGSEEE.G             | S941:           | 2 | 4,1295 | 0,473 | -0,154 |
| 1 | Q15154 PCM1_HUMAN   | E.TAS#PVAVSLRS#DGS#ENLCTPQQSR.T | S861:S869:S872: | 3 | 4,1202 | 1     | 0      |
| 1 | Q9NQX3 GEPH_HUMAN   | E.LEDLPS#PPPPLS#PPPTTS#PHKQTE.D | S188:S194:S200: | 3 | 4,0935 | 0,386 | 0,131  |
| 1 | Q96TA1 NIBL1_HUMAN  | E.YSNSGGGS#PSPST#PE.S           | S588:T593:      | 2 | 4,0893 | 1     | -0,372 |
| 1 | Q9BUR4 WDR79_HUMAN  | E.NTSLPAEEANGSL#EEEE.A          | S114:           | 2 | 4,0889 | 0,497 | -0,394 |

|   |                     |                                   |                    |   |        |       |        |
|---|---------------------|-----------------------------------|--------------------|---|--------|-------|--------|
| 1 | Q9Y6A5 TACC3_HUMAN  | E.SGPGALADLDCSSSSQS#PGSSE.N       | S160:              | 3 | 4,0858 | 0,345 | -0,252 |
| 1 | Q96TA1 NIBL1_HUMAN  | E.YSNSGGGGSPSPST#PE.S             | T593:              | 2 | 4,0822 | 0,514 | -0,391 |
| 1 | Q02952 AKA12_HUMAN  | E.MVSAVSQLTDSPTTEEAT#PVQE.V       | T1020:             | 3 | 4,0713 | 0,283 | 0,364  |
| 1 | Q9HC35 EMAL4_HUMAN  | E.SVIQSNT#PTPPSQPLNE.T            | T897:              | 2 | 4,0531 | 0,414 | -0,123 |
| 1 | Q96RS0 TGS1_HUMAN   | E.DDILAS#DDPSSIEQYE.N             | S154:              | 2 | 4,0449 | 0,409 | -0,325 |
| 1 | P43358 MAGA4_HUMAN  | R.QPNEGSS#SQEEGPSTSPDAE.S         | S89:               | 3 | 4,0371 | 0,294 | 0,326  |
| 1 | Q9GZ2 TGIF2_HUMAN   | E.AGS#PTGGLFNT#PPPT#PPEQDKE.D     | S174:T182:T186:    | 3 | 4,0217 | 0,353 | 0,222  |
| 1 | Q86WR0 CCD25_HUMAN  | E.NMSSNQDGNDS#DEFM*.-             | S204:              | 2 | 3,9892 | 0,364 | -0,615 |
| 1 | Q9HC35 EMAL4_HUMAN  | E.SVIQSNT#PT#PPPSQPLNE.T          | T897:T899:         | 3 | 3,9806 | 0,312 | 0,443  |
| 1 | P12270 TPR_HUMAN    | E.TQVYNQDSQDS#IGE.G               | S1893:             | 2 | 3,977  | 0,447 | -0,293 |
| 1 | Q9BXJ9 NARG1_HUMAN  | E.DM*KITVNGDS#S#AEAE.E.L          | S855:S856:         | 2 | 3,9706 | 0,409 | -0,521 |
| 1 | Q9NQ55 SSF1_HUMAN   | E.LLATGAGLS#ES#EAEPDGDHNITE.L     | S238:S240:         | 3 | 3,9537 | 0,24  | 0,515  |
| 1 | Q9P1Z2 CACO1_HUMAN  | E.AAVGLSCPAALT#DS#EDESPE.D        | T537:S539:         | 2 | 3,9508 | 0,459 | -0,672 |
| 1 | Q9NYF8 BCLF1_HUMAN  | K.KAEGEPQEE#PLKSK.S               | S177:              | 3 | 3,9496 | 0,281 | -0,316 |
| 1 | Q6P1R3 CK061_HUMAN  | E.VLSPAS#PGGLSDGNPSLSDPSTPR.G     | S27:               | 3 | 3,9491 | 0,29  | 0,23   |
| 1 | Q6UXD5 SE6L2_HUMAN  | E.LLVLAGGGSPGLAPR.L               |                    | 2 | 3,9423 | 0,476 | -0,089 |
| 1 | P27816 MAP4_HUMAN   | E.SLQDVQGSAAPTFM*IS#PE.T          | S624:              | 3 | 3,9307 | 0,172 | 0,093  |
| 1 | Q02952 AKA12_HUMAN  | E.M*VSAVSQLTDS#PD.T               | S1012:             | 2 | 3,9263 | 0,462 | -0,675 |
| 1 | Q02952 AKA12_HUMAN  | E.MVSAVSQLTDSPTT#TEEAT#PVQE.V     | T1015:T1016:T1020: | 3 | 3,9226 | 1     | 0,274  |
| 1 | P13693 TCTP_HUMAN   | E.GNIDDS#LIGNNASAEGPEGE.G         | S46:               | 2 | 3,9104 | 0,525 | -0,246 |
| 1 | Q6NV74 CB055_HUMAN  | E.GGVPGEDPSS#RPAT#PE.L            | S334:T338:         | 2 | 3,9014 | 0,382 | -0,285 |
| 1 | A8K8B2 A8K8B2_HUMAN | E.SS#FLSSQNGDSSTSQE.T             | S396:              | 2 | 3,8998 | 0,523 | 0,561  |
| 1 | Q7Z417 NUFP2_HUMAN  | E.SQNPLAS#PTNTLLGS#AKE.Q          | S629:S637:         | 2 | 3,8911 | 0,429 | -0,061 |
| 1 | P54725 RD23A_HUMAN  | E.QFIQM*LNEPPGELADIS#DVEGE.V      | S295:              | 3 | 3,89   | 0,376 | 0,434  |
| 1 | Q7Z6Z7 HUWE1_HUMAN  | E.EAVGD TSAAGSSEQPR.A             |                    | 2 | 3,8788 | 0,502 | -0,312 |
| 1 | Q99700 ATX2_HUMAN   | E.NSSSNTSGS#SKPNS#PSISPSILSNT.E.H | S855:S860:         | 3 | 3,8688 | 1     | 0,063  |
| 1 | Q92598 HS105_HUMAN  | E.AGTQPQVQTDAQQTSQSPPS#PE.L       | S557:              | 3 | 3,835  | 0,363 | -0,232 |
| 1 | O60271 JIP4_HUMAN   | R.NVS#TGS#AENEKSE.V               | S329:S332:         | 2 | 3,8288 | 0,383 | 1,041  |
| 1 | Q9Y2D5 AKAP2_HUMAN  | E.TLSNDFSMDNIS#DSGASNE.T          | S501:              | 2 | 3,8251 | 0,454 | -0,351 |
| 1 | Q9Y2U8 MAN1_HUMAN   | E.SLLGGPGGASAAPAAGSK.V            |                    | 2 | 3,8099 | 0,52  | 0      |
| 1 | Q8N163 K1967_HUMAN  | E.DSEVRS#VASNQS#EM*E.F            | S675:S681:         | 2 | 3,7976 | 0,608 | -0,331 |
| 1 | Q10570 CPSF1_HUMAN  | E.GLGSETS#PTVDDEEE.M              | S737:              | 2 | 3,7923 | 0,311 | -0,519 |
| 1 | P28347 TEAD1_HUMAN  | R.M*SDSADKPIDNDAE.G               |                    | 2 | 3,7808 | 0,494 | -0,4   |

|   |                    |                                  |                    |   |        |       |        |
|---|--------------------|----------------------------------|--------------------|---|--------|-------|--------|
| 1 | P61978 HNRPK_HUMAN | E.GLQLPS#PTATSQPLE.S             | S116:              | 2 | 3,778  | 0,399 | 0      |
| 1 | Q8N543 OGFD1_HUMAN | E.NNQM*AINNS#QQSNEQTDPEPEENE.T   | S410:              | 3 | 3,7776 | 0,307 | -0,187 |
| 1 | Q02952 AKA12_HUMAN | E.TVS#ILS#KTEGTQE.A              | S1256:S1259:       | 2 | 3,7717 | 0,423 | -0,079 |
| 1 | Q9UQ35 SRRM2_HUMAN | E.LSNS#PLRENS#FGS#PLEFR.N        | S1320:S1326:S1329: | 3 | 3,77   | 0,272 | -0,08  |
| 1 | Q13263 TIF1B_HUMAN | R.STAPSAASASASAAASS#PAGGGAEALE.L | S50:               | 3 | 3,7687 | 0,305 | 0,381  |
| 1 | Q9P2R6 RERE_HUMAN  | E.IS#RPNS#PSEGESE.S              | S675:S679:         | 2 | 3,7482 | 0,491 | -0,161 |
| 1 | P38398 BRCA1_HUMAN | E.LLGS#DDS#HDGESE.S              | S395:S398:         | 2 | 3,7447 | 0,38  | -0,241 |
| 1 | Q92900 RENT1_HUMAN | E.AELLGADT#QGS#EFE.F             | T28:S31:           | 2 | 3,7354 | 0,301 | 0,375  |
| 1 | O60271 JIP4_HUMAN  | E.LSS#AGS#GLIGDVDE.G             | S388:S391:         | 2 | 3,7332 | 0,385 | 0,412  |
| 1 | Q01433 AMPD2_HUMAN | E.MLETIPEEAGITM*S#PGPQ.-         | S875:              | 3 | 3,7304 | 0,298 | 0      |
| 1 | Q8TC07 TBC15_HUMAN | E.ILGLQGSEVTTPDS#DVGEDEN         | S640:              | 2 | 3,7293 | 0,476 | -0,114 |
| 1 | Q9H0H5 RGAP1_HUMAN | E.SGS#ILSDIS#FDKTDE.S            | S151:S157:         | 2 | 3,7228 | 0,223 | -0,206 |
| 1 | P21127 CD2L1_HUMAN | D.S#PALS#PIELKQE.L               | S410:S414:         | 2 | 3,7195 | 0,202 | 0,083  |
| 1 | Q9UH62 ARMX3_HUMAN | E.GGSGDVDDAGDCSGAR.Y             |                    | 2 | 3,7175 | 0,521 | -0,489 |
| 1 | O94915 FRYL_HUMAN  | E.AALTAS#QILSR.T                 | S2499:             | 2 | 3,6945 | 0,308 | -0,101 |
| 1 | Q9P206 K1522_HUMAN | E.SSTAEDALS#IRS#E.M              | S127:S130:         | 2 | 3,6747 | 0,484 | 0,32   |
| 1 | P78364 PHC1_HUMAN  | E.NQSGGPLGVDS#PSAE.L             | S786:              | 2 | 3,6675 | 0,414 | 0,245  |
| 1 | P35527 K1C9_HUMAN  | R.SGGGGGGGLGSGGSIR.S             |                    | 2 | 3,6545 | 0,517 | 0      |
| 1 | Q15424 SAFB1_HUMAN | E.TLSGLGDSGAAGAAALSSAS#SE.T      | S23:               | 2 | 3,6534 | 0,453 | -0,374 |
| 1 | P27708 PYR1_HUMAN  | R.IHRAS#DPGLPAEEPKE              | S1859:             | 3 | 3,642  | 0,209 | -0,216 |
| 1 | Q86WR0 CCD25_HUMAN | E.NM*SSNQDGNDS#DEFM*.-           | S204:              | 2 | 3,6326 | 0,431 | -0,338 |
| 1 | Q8N163 K1967_HUMAN | E.DSEVRS#VAS#NQSE.M              | S675:S678:         | 2 | 3,6318 | 0,425 | 0      |
| 1 | Q9UGU0 TCF20_HUMAN | E.SLDGGCSS#SSEDQGE.R             | S525:              | 2 | 3,6239 | 0,42  | -0,459 |
| 1 | Q7Z3K3 POGZ_HUMAN  | E.GAECLNVDDQDEGS#PVTQEPE.L       | S949:              | 3 | 3,6193 | 0,258 | 0,309  |
| 1 | Q7Z309 F122B_HUMAN | E.SLS#LS#DSDFDKPE.K              | S91:S93:           | 2 | 3,6111 | 0,352 | 0,458  |
| 1 | Q7Z6Z7 HUWE1_HUMAN | E.AVGDTSAAGSSEQPR.A              |                    | 2 | 3,6058 | 0,476 | -0,255 |
| 1 | Q5VT06 CE350_HUMAN | E.IS#SPDM*CPRPES#PVFGASGQEE.L    | S2829:S2839:       | 3 | 3,595  | 0,311 | 0,287  |
| 1 | Q5T8D3 ACBD5_HUMAN | E.DLGNVLTSTPNAK.T                |                    | 2 | 3,5935 | 0,509 | 0,092  |
| 1 | Q8TEQ6 GEMI5_HUMAN | E.NSGPVENGVS#DQE.G               | S778:              | 2 | 3,5892 | 0,381 | 0,173  |
| 1 | Q66K74 MAP1S_HUMAN | E.SLPTLSDSPVPLAPGAADS#DEDTE.G    | S809:              | 3 | 3,5823 | 0,299 | 0,284  |
| 1 | Q8WWM7 ATX2L_HUMAN | E.VDGLLTSEPM*GS#PVS#SKTE.S       | S594:S597:         | 2 | 3,5733 | 0,509 | -0,578 |
| 1 | P85037 FOXK1_HUMAN | R.SGGLQT#PECLS#REGS#PIPHDPE.F    | T436:S441:S445:    | 3 | 3,5659 | 0,243 | -0,141 |
| 1 | Q15942 ZYX_HUMAN   | E.IFPS#PPPPPEEE.G                | S116:              | 2 | 3,5647 | 0,335 | 0,086  |

|   |                    |                                 |                    |   |        |       |        |
|---|--------------------|---------------------------------|--------------------|---|--------|-------|--------|
| 1 | Q9BRT9 SLD5_HUMAN  | E.VDFLGQDS#DGGSEE.V             | S12:               | 2 | 3,5639 | 0,359 | 0,318  |
| 1 | Q99700 ATX2_HUMAN  | E.AVAMPIPAAS#PTPASPASNR.A       | S727:              | 3 | 3,554  | 0,32  | -0,461 |
| 1 | Q96K76 UBP47_HUMAN | E.TSDFENIES#PLNE.R              | S910:              | 2 | 3,5517 | 0,407 | -0,077 |
| 1 | Q02952 AKA12_HUMAN | E.MVSAVSQLTDS#PDTT#EEAT#PVQE.V  | S1012:T1016:T1020: | 3 | 3,5424 | 0,144 | 0,274  |
| 1 | O60341 LSD1_HUMAN  | E.M*DESLANLS#EDE.Y              | S131:              | 2 | 3,5285 | 0,342 | 0      |
| 1 | P12270 TPR_HUMAN   | E.SGGRS#VPT#TPLQVAAPVTVFTE.S    | S2196:T2199:       | 3 | 3,5235 | 0,276 | 0,694  |
| 1 | Q9UIS9 MBD1_HUMAN  | E.GASS#PVQVPGPVAASTE.A          | S465:              | 2 | 3,5005 | 0,438 | 0,224  |
| 1 | Q13523 PRP4B_HUMAN | E.M*EDANS#EKS#INEE.N            | S20:S23:           | 2 | 3,5    | 0,314 | -0,438 |
| 1 | Q9UKM9 RALY_HUMAN  | E.LEHS#QDT#DADDGALQ.-           | S295:T298:         | 2 | 3,4972 | 0,393 | 0      |
| 1 | Q8N680 ZBTB2_HUMAN | E.ASQLSQLTSNLAQVNR.T            |                    | 3 | 3,4956 | 0,24  | -0,106 |
| 1 | P32004 L1CAM_HUMAN | E.AAGGNDS#SGATSPINPAVALE.-      | S1243:             | 2 | 3,4881 | 0,33  | 0      |
| 1 | O43379 WDR62_HUMAN | E.LSLPEGPSVPSS#SLPQT#PEQE.K     | S1048:T1053:       | 3 | 3,4823 | 0,171 | 0,313  |
| 1 | Q12756 KIF1A_HUMAN | E.ALS#PAFSEDSE.S                | S1413:             | 2 | 3,4805 | 0,422 | 0,099  |
| 1 | Q969V6 MKL1_HUMAN  | E.AIIVGQVNYPK.V                 |                    | 2 | 3,48   | 0,441 | 0,203  |
| 1 | Q9Y3F4 STRAP_HUMAN | E.LEEIAS#ENS#DCIFSPAPDVKA.-     | S335:S338:         | 3 | 3,4778 | 0,231 | 0,075  |
| 1 | Q9H3S7 PTN23_HUMAN | E.STPIPSS#SPPPLSS#PLPEAPQPK.E   | S1543:S1550:       | 3 | 3,4771 | 0,393 | 0,148  |
| 1 | Q9Y6A5 TACC3_HUMAN | E.SGPGALADLDCSSSSQS#PGSSE.N     | S160:              | 2 | 3,4736 | 0,512 | -0,112 |
| 1 | Q9BVS4 RIOK2_HUMAN | E.GSEFSFS#DGEVAE.K              | S337:              | 2 | 3,4684 | 0,374 | 0,085  |
| 1 | Q12802 AKP13_HUMAN | E.STQCCPGS#PVAQTESPCDLSSIVEEE.N | S345:              | 3 | 3,4613 | 0,329 | 0,621  |
| 1 | P04637 P53_HUMAN   | E.NNVLS#PLPSQAM*DD.L            | S33:               | 2 | 3,4541 | 0,309 | 0,153  |
| 1 | Q9NQW6 ANLN_HUMAN  | E.M*DQALAES#SEEQE.D             | S594:              | 2 | 3,4531 | 0,194 | 0,156  |
| 1 | Q02952 AKA12_HUMAN | E.LS#LQEGDLNGQK.G               | S75:               | 2 | 3,4499 | 0,47  | -0,265 |
| 1 | P98171 RHG04_HUMAN | E.VVASDDGDVLDLDFQTS#PSTE.S      | S408:              | 2 | 3,4494 | 0,419 | -0,114 |
| 1 | Q7Z5K2 WAPL_HUMAN  | E.DCILSLDS#DPLLE.M              | S257:              | 2 | 3,4414 | 0,297 | -0,155 |
| 1 | O75376 NCOR1_HUMAN | E.VIS#PASS#PAPPQEK.L            | S1977:S1981:       | 2 | 3,4248 | 0,3   | -0,311 |
| 1 | Q6GYQ0 GRIPE_HUMAN | E.TS#SLNQQAFAE.V                | S969:              | 2 | 3,4199 | 0,307 | 0,269  |
| 1 | P46100 ATRX_HUMAN  | E.TNPVTSNS#DEECNE.T             | S677:              | 2 | 3,4184 | 0,327 | -0,073 |
| 1 | Q02952 AKA12_HUMAN | E.MVSAVSQLTDS#PDT#TEE.A         | S1012:T1015:       | 2 | 3,4155 | 0,434 | -0,248 |
| 1 | P49711 CTCF_HUMAN  | E.AQPAATDAPNGDLT#PE.M           | T717:              | 2 | 3,4138 | 0,389 | -0,148 |
| 1 | P52701 MSH6_HUMAN  | E.LAVCDEPS#EPEEEEE.M            | S200:              | 2 | 3,4116 | 0,411 | -0,066 |
| 1 | P04264 K2C1_HUMAN  | R.SLDLDSIIAEVK.A                |                    | 2 | 3,4081 | 0,332 | -0,187 |
| 1 | Q12888 TP53B_HUMAN | D.SLSTNSSDLVAPS#PDAFR.S         | S366:              | 2 | 3,4077 | 0,469 | 0      |
| 1 | Q6PKG0 LARP1_HUMAN | R.AVT#PVPTKTEE.V                | T526:              | 2 | 3,4018 | 0,396 | -0,097 |

|   |                     |                                       |              |   |        |       |        |
|---|---------------------|---------------------------------------|--------------|---|--------|-------|--------|
| 1 | Q5VU20 Q5VU20_HUMAN | E.LTDLQSQS#NVTEETPE.G                 | S237:        | 2 | 3,3947 | 0,376 | -0,138 |
| 1 | O75400 PR40A_HUMAN  | E.QAQLTST#PAIQDQSV.E.V                | T345:        | 2 | 3,3906 | 0,351 | -0,204 |
| 1 | Q8WVB6 CTF18_HUMAN  | E.NSPQVDGSP#PPGLE.G                   | S871:        | 2 | 3,3857 | 0,377 | 0,089  |
| 1 | O94909 K0819_HUMAN  | R.GPSQATS#PIRS#PQE.S                  | S296:S300:   | 2 | 3,3817 | 0,303 | 0      |
| 1 | Q8IY92 BTBDC_HUMAN  | E.LFSIIDVDADQEPS#QSP#PPRSE.A          | S521:S523:   | 3 | 3,3763 | 0,219 | -0,073 |
| 1 | Q96S66 CLCC1_HUMAN  | E.AAGS#PDQGSTYS#PAR.G                 | S524:S532:   | 2 | 3,3757 | 0,375 | -0,3   |
| 1 | Q14671 PUM1_HUMAN   | E.VNSVLS#PRSES#GGLGVSM*VE.Y           | S209:S214:   | 3 | 3,3704 | 0,139 | 0,336  |
| 1 | O14641 DVL2_HUMAN   | E.STS#LGDS#DEEDTMSR.F                 | S207:S211:   | 2 | 3,3699 | 0,411 | 0,068  |
| 1 | P12270 TPR_HUMAN    | E.TQVYNQDS#QDS#IGE.G                  | S1890:S1893: | 2 | 3,3688 | 0,371 | -0,28  |
| 1 | Q6PD74 P34_HUMAN    | E.IEGLS#S#DEEH.-                      | S310:S311:   | 2 | 3,3603 | 0,357 | 0      |
| 1 | Q9NYY8 FAKD2_HUMAN  | E.ALPAVAANVQS#TQ.-                    | S708:        | 2 | 3,3602 | 0,473 | 0      |
| 1 | P11388 TOP2A_HUMAN  | E.GS#PQEDGVELE.G                      | S1247:       | 2 | 3,3585 | 0,262 | 0      |
| 1 | Q9HC35 EMAL4_HUMAN  | E.SVIQSNTPPT#PPPSQPLNE.T              | T899:        | 2 | 3,3576 | 0,387 | -0,184 |
| 1 | Q15742 NAB2_HUMAN   | E.AGS#PPFS#PPAGGVPE.G                 | S205:S209:   | 2 | 3,3558 | 0,384 | 0,385  |
| 1 | P08047 SP1_HUMAN    | E.SQPS#PLALLAATCSR.I                  | S59:         | 2 | 3,3483 | 0,498 | 0,665  |
| 1 | P35908 K22E_HUMAN   | K.GGSISGGGYGSGGGK.H                   |              | 2 | 3,3415 | 0,437 | -0,204 |
| 1 | Q7Z406 MYH14_HUMAN  | E.AQPGSGPS#PEPEGS#PPAHPQ.-            | S1983:S1989: | 3 | 3,3367 | 0,19  | -0,088 |
| 1 | Q15154 PCM1_HUMAN   | E.TQALTNY#GSGEDENE.D                  | Y1795:       | 2 | 3,3337 | 0,383 | 0      |
| 1 | Q8N108 MIER1_HUMAN  | E.GETNFS#S#EIEDLARE.G                 | S76:S77:     | 2 | 3,3324 | 0,196 | -0,197 |
| 1 | P49454 CENPF_HUMAN  | E.GAVSANQCS#VDE.V                     | S1522:       | 2 | 3,324  | 0,382 | -0,463 |
| 1 | P35580 MYH10_HUMAN  | E.GASLELS#DDDTE.S                     | S1956:       | 2 | 3,3219 | 0,254 | 0,092  |
| 1 | Q01518 CAP1_HUMAN   | R.SGPKPFSAPKPQT#SPS#PK.R              | T307:S310:   | 3 | 3,3069 | 0,098 | -0,549 |
| 1 | Q01433 AMPD2_HUMAN  | E.M*LETIPEEAGITM*S#PGPQ.-             | S875:        | 3 | 3,3017 | 0,208 | 0,364  |
| 1 | Q99700 ATX2_HUMAN   | E.AVAM*PIPAASPTPAS#PASNRAVT#PSSE.A    | S732:T740:   | 3 | 3,3009 | 1     | 0,199  |
| 1 | Q9Y3Y2 CA077_HUMAN  | E.LDAYM*AQT#DPETND.-                  | T242:        | 2 | 3,2988 | 0,384 | -0,581 |
| 1 | Q92900 RENT1_HUMAN  | E.AELLGADTQGS#EFE.F                   | S31:         | 2 | 3,2883 | 0,376 | 0,237  |
| 1 | O15061 DMN_HUMAN    | E.VSSPT#GFAQSQVLE.D                   | T1109:       | 2 | 3,2876 | 0,399 | 0      |
| 1 | Q9NRM2 ZN277_HUMAN  | E.NDTLLCTLSDS#ESDLTAQEQNE.N           | S401:        | 3 | 3,2852 | 0,094 | 0,214  |
| 1 | O14514 BAI1_HUMAN   | E.NVATLSVSS#LE.R                      | S1469:       | 2 | 3,285  | 0,282 | -0,203 |
| 1 | Q9BUW7 CI016_HUMAN  | E.FQQQLGEAPSDAS#P.-                   | S82:         | 2 | 3,284  | 0,449 | 0,235  |
| 1 | Q86VR2 F134C_HUMAN  | E.LAIT#DSEHS#DAE.V                    | T283:S288:   | 2 | 3,2818 | 0,406 | 0,084  |
| 1 | P08047 SP1_HUMAN    | E.SQPSPLALLAATCSR.I                   |              | 2 | 3,2811 | 0,444 | -0,388 |
| 1 | Q02952 AKA12_HUMAN  | E.TGTDGILAGSQEHDPGQGS#SPEQAGS#PTEGE.G | S742:S749:   | 3 | 3,2778 | 1     | -0,677 |



|   |                    |                             |              |   |        |       |        |
|---|--------------------|-----------------------------|--------------|---|--------|-------|--------|
| 1 | P49848 TAF6_HUMAN  | E.AGDS#PPPAPGT#PK.A         | S653:T660:   | 2 | 3,2755 | 0,221 | -0,271 |
| 1 | Q9UBL3 ASH2L_HUMAN | E.VM*DTQAGS#VDEE.N          | S101:        | 2 | 3,2732 | 0,346 | -0,177 |
| 1 | P49792 RBP2_HUMAN  | E.TVFT#PKTS#PENVDQ.R        | T1396:S1400: | 2 | 3,273  | 0,368 | 0      |
| 1 | P49006 MRP_HUMAN   | E.GGGDSS#ASSPTEEEQE.Q       | S117:        | 2 | 3,2606 | 0,367 | -0,37  |
| 1 | Q02952 AKA12_HUMAN | E.M*VSAVSQLTDSPTD#TEE.A     | T1015:       | 2 | 3,2571 | 0,5   | -0,256 |
| 1 | P06241 FYN_HUMAN   | E.DYFTATEPQY#QPGENL.-       | Y531:        | 2 | 3,2454 | 0,419 | 0      |
| 1 | Q9Y5Q8 TF3C5_HUMAN | E.DFKPS#DGS#ENEM*E.T        | S504:S507:   | 2 | 3,242  | 0,227 | 0      |
| 1 | P61978 HNRPK_HUMAN | E.GLQLPSPT#ATSQPLESDAVE.C   | T118:        | 3 | 3,2391 | 0,271 | 0,246  |
| 1 | Q86WR0 CCD25_HUMAN | E.NMSSNQDGNDS#DEFM.-        | S204:        | 2 | 3,2372 | 0,415 | 0      |
| 1 | P51114 FXR1_HUMAN  | E.DAVLMDGM*TES#DTASVNE.N    | S524:        | 2 | 3,2203 | 0,318 | -0,062 |
| 1 | P17096 HMGA1_HUMAN | E.EGISQES#SEEEQ.-           | S102:        | 2 | 3,2196 | 0,266 | 0      |
| 1 | Q96CW6 S7A6O_HUMAN | E.FGYDS#PHDLDS#D.-          | S302:S308:   | 2 | 3,2176 | 0,416 | 0,319  |
| 1 | Q2NL82 TSR1_HUMAN  | E.WILDGGSQS#GGEGDEYE.Y      | S412:        | 2 | 3,2116 | 0,447 | 0,649  |
| 1 | Q92619 HMHA1_HUMAN | E.VASGS#HSGS#EEQLE.A        | S1070:S1074: | 2 | 3,2068 | 0,273 | -0,232 |
| 1 | Q5QJE6 TDIF2_HUMAN | E.SYTEEIVS#EAE.S            | S141:        | 2 | 3,2037 | 0,365 | 0,091  |
| 1 | Q9HC35 EMAL4_HUMAN | E.TAEESRISS#S#PTLLE.N       | S918:S919:   | 2 | 3,1896 | 0,389 | -0,128 |
| 1 | Q15061 WDR43_HUMAN | E.LNGDS#DLDPENES#E.E        | S666:S674:   | 2 | 3,1865 | 0,22  | 0,504  |
| 1 | Q7Z6Z7 HUWE1_HUMAN | E.SAQPPEDSS#PPASSE.S        | S2918:       | 2 | 3,1823 | 0,425 | -0,234 |
| 1 | Q86WR7 CJ047_HUMAN | R.M*AGNEALS#PTS#PFRE.G      | S212:S215:   | 2 | 3,1807 | 0,436 | 0,274  |
| 1 | Q02952 AKA12_HUMAN | E.M*VSAVSQLT#DS#PDTTEE.A    | T1010:S1012: | 2 | 3,1679 | 0,414 | -0,307 |
| 1 | O15084 ANR28_HUMAN | E.YLYTDVDELNDS#ETY.-        | S1083:       | 2 | 3,1658 | 0,501 | 0,92   |
| 1 | O60271 JIP4_HUMAN  | E.LSS#AGSGLIGDVDE.G         | S388:        | 2 | 3,1612 | 0,331 | 0,349  |
| 1 | P19338 NUCL_HUMAN  | E.DEDEIEPAAMK.A             |              | 2 | 3,1551 | 0,285 | -0,098 |
| 1 | P13693 TCTP_HUMAN  | E.GNIDSLIGGNAS#AEGPEGEGTE.S | S53:         | 2 | 3,1545 | 0,482 | -0,43  |
| 1 | Q92797 SYMPK_HUMAN | E.AALLDS#S#LEGPLPKE.T       | S1221:S1222: | 2 | 3,1519 | 0,41  | -0,072 |
| 1 | Q96EV2 RBM33_HUMAN | E.DDLLGEDLLSGKK.N           |              | 3 | 3,1428 | 0,33  | 0      |
| 1 | Q01433 AMPD2_HUMAN | E.TIPEEAGITM*S#PGPQ.-       | S875:        | 2 | 3,1405 | 0,41  | 0      |
| 1 | Q8WUA4 TF3C2_HUMAN | E.AGPVGNMTVVDS#PGQE.V       | S25:         | 2 | 3,1352 | 0,388 | 0,223  |
| 1 | Q01433 AMPD2_HUMAN | E.M*LETIPEEAGITMS#PGPQ.-    | S875:        | 3 | 3,1295 | 0,287 | 0,366  |
| 1 | P12270 TPR_HUMAN   | E.GVQGPLNV#LSEE.G           | S1185:       | 2 | 3,1254 | 0,361 | 0      |
| 1 | O43379 WDR62_HUMAN | E.LSLPEGPSVSSSLPQT#PEQE.K   | T1053:       | 3 | 3,125  | 0,083 | 0,162  |
| 1 | Q8N163 K1967_HUMAN | E.DSEVRS#VAS#NQSEME.F       | S675:S678:   | 2 | 3,1241 | 0,421 | -0,267 |
| 1 | Q9H4A3 WNK1_HUMAN  | K.QSSTPGSLFLSPPAPAPK.N      |              | 2 | 3,1195 | 0,337 | 0,479  |

|   |                     |                                     |                 |   |        |       |        |
|---|---------------------|-------------------------------------|-----------------|---|--------|-------|--------|
| 1 | Q5T200 ZC3HD_HUMAN  | E.GYEPIS#DDELDE.I                   | S1465:          | 2 | 3,1111 | 0,346 | 0      |
| 1 | Q02952 AKA12_HUMAN  | E.GS#PPPCLGQEE.A                    | S1395:          | 2 | 3,1097 | 0,454 | 0      |
| 1 | Q99700 ATX2_HUMAN   | E.AVAM*PIPAASPT#PAS#PASNR.A         | T729:S732:      | 3 | 3,1096 | 0,435 | 0,088  |
| 1 | P42166 LAP2A_HUMAN  | E.QGTES#RSST#PLPTISSSAE.N           | S156:T160:      | 3 | 3,1022 | 0,186 | 0,175  |
| 1 | Q92900 RENT1_HUMAN  | E.AELLGADT#QGSEFE.F                 | T28:            | 2 | 3,0956 | 0,29  | -0,237 |
| 1 | P40425 PBX2_HUMAN   | E.AVTPSSVTS#PTEGPGSVHSDT#S#N.-      | S416:T428:S429: | 3 | 3,0956 | 0,218 | -0,075 |
| 1 | Q9ULI0 ATD2B_HUMAN  | E.VLPLALPS#PPRQLS#ESE.K             | S939:S945:      | 2 | 3,0926 | 0,242 | -0,061 |
| 1 | Q5SVQ8 ZBT41_HUMAN  | E.LTEKS#S#PEETLNE.L                 | S190:S191:      | 2 | 3,0902 | 0,159 | -0,522 |
| 1 | O43583 DENR_HUMAN   | E.AGISEGQGT#AGEEEE.K                | T86:            | 2 | 3,0884 | 0,339 | -0,474 |
| 1 | A8MVB1 A8MVB1_HUMAN | E.KLVSPASAAAASS#PS#S#SPSPQPVSE.L    | S37:S39:S40:    | 3 | 3,085  | 1     | -0,351 |
| 1 | P23396 RS3_HUMAN    | E.ILPTT#PISE.Q                      | T221:           | 2 | 3,0836 | 0,25  | 0,116  |
| 1 | Q7Z3K3 POGZ_HUMAN   | E.CLNVDQDEGS#PVTQEPE.L              | S949:           | 3 | 3,0811 | 0,187 | -0,173 |
| 1 | Q16643 DREB_HUMAN   | E.TQEPS#PILDSEE.T                   | S381:           | 2 | 3,0799 | 0,344 | -0,086 |
| 1 | Q92619 HMHA1_HUMAN  | E.VAS#GSHSGS#EEQLE.A                | S1068:S1074:    | 2 | 3,0792 | 0,207 | -0,232 |
| 1 | P49643 PRI2_HUMAN   | E.M*DM*EGLEDYFS#EDS.-               | S506:           | 2 | 3,0773 | 0,354 | 0,48   |
| 1 | P19338 NUCL_HUMAN   | E.DEDEIEPAAM*K.A                    |                 | 2 | 3,0753 | 0,321 | -0,29  |
| 1 | Q9BPX3 CND3_HUMAN   | E.GTEINS#DDEQE.S                    | S674:           | 2 | 3,0598 | 0,419 | -0,185 |
| 1 | Q02952 AKA12_HUMAN  | E.M*VSAVSQLTDS#PDT#TEE.A            | S1012:T1015:    | 2 | 3,0584 | 0,355 | -0,307 |
| 1 | Q08J23 NSUN2_HUMAN  | E.STQLS#PADLTE.G                    | S456:           | 2 | 3,0554 | 0,408 | 0,098  |
| 1 | O94916 NFAT5_HUMAN  | E.ASQQQQ#PLQE.Q                     | S744:           | 2 | 3,0448 | 0,259 | -0,252 |
| 1 | P13010 KU86_HUMAN   | E.GSVT#SVGSVNPAE.N                  | T587:           | 2 | 3,0434 | 0,133 | -0,095 |
| 1 | Q2TAL8 QRIC1_HUMAN  | E.VEPQSQPQPS#PE.L                   | S464:           | 2 | 3,041  | 0,185 | -0,174 |
| 1 | Q8WWI1 LMO7_HUMAN   | E.IQLPSQS#PVEE.Q                    | S867:           | 2 | 3,0264 | 0,383 | 0,093  |
| 1 | Q9BXK1 KLF16_HUMAN  | R.STS#PSDSLPCSLAGSPAPS#PAPSPAPAGL.- | S226:S242:      | 3 | 3,0235 | 0,09  | 1,806  |
| 1 | Q9NWF9 RN216_HUMAN  | E.DQQLAS#DDEEPGPAFPM*QE.S           | S249:           | 3 | 3,0223 | 0,24  | 0,083  |
| 1 | Q9UKA4 AKA11_HUMAN  | E.FAPAT#PPSTPHNS#SVGSLSENE.Q        | T1136:S1144:    | 3 | 3,0194 | 0,164 | -0,153 |
| 1 | Q9BUR4 WDR79_HUMAN  | E.FGS#PSELS#PRIE.E                  | S85:S90:        | 2 | 3,0179 | 0,308 | 0      |
| 1 | Q9HA65 TBC17_HUMAN  | E.ILGLAPPAEPHS#PS#PTAS#PLPLSPTR.A   | S602:S604:S608: | 3 | 3,0165 | 0,191 | 0,257  |
| 1 | Q14444 CAPR1_HUMAN  | E.YTEQSEVES#TE.Y                    | S291:           | 2 | 3,014  | 0,208 | 0      |
| 1 | O94888 UBXD7_HUMAN  | E.SLIDASEDS#QLE.A                   | S288:           | 2 | 3,0081 | 0,301 | 0      |
| 1 | Q99661 KIF2C_HUMAN  | E.LSSQMSS#FNE.A                     | S633:           | 2 | 3,0016 | 0,244 | -0,202 |
| 1 | Q12800 TFCP2_HUMAN  | E.ITYVNNS#PS#PGFNSSHSSFSLGE.G       | S289:S291:      | 3 | 3,0008 | 1     | 0,071  |
| 1 | Q9HC35 EMAL4_HUMAN  | E.SVIQSNT#PT#PPSQPLNE.T             | T897:T899:      | 2 | 2,9985 | 0,505 | -0,354 |

|   |                     |                                     |              |   |        |       |        |
|---|---------------------|-------------------------------------|--------------|---|--------|-------|--------|
| 1 | P11388 TOP2A_HUMAN  | E.NTEGS#PQEDGVELE.G                 | S1247:       | 2 | 2,9888 | 0,317 | 0,154  |
| 1 | Q96G46 DUS3L_HUMAN  | E.NCGAQQVPAGPGTST#PPSS#PVRTCGLTDE.D | T273:S277:   | 3 | 2,9783 | 1     | 0      |
| 1 | O75376 NCOR1_HUMAN  | E.TPSDAIEVIS#PASS#PAPPQEK.L         | S1977:S1981: | 3 | 2,9772 | 0,294 | 0,08   |
| 1 | Q9UQ35 SRRM2_HUMAN  | E.NS#FGS#PLEFR.N                    | S1326:S1329: | 2 | 2,9757 | 0,502 | 0,186  |
| 1 | Q8WVM7 STAG1_HUMAN  | E.TTAHS#DAGS#ELEE.T                 | S20:S24:     | 2 | 2,9701 | 0,118 | 0,162  |
| 1 | Q99700 ATX2_HUMAN   | E.AVAMPIPAAS#PTPAS#PASNR.A          | S727:S732:   | 3 | 2,9644 | 0,291 | -0,354 |
| 1 | Q15424 SAFB1_HUMAN  | E.LAEAPTEAPS#PE.A                   | S344:        | 2 | 2,9643 | 0,371 | -0,283 |
| 1 | Q9HCF4 ALO17_HUMAN  | E.AAELLS#EPEEERE.R                  | S1258:       | 2 | 2,9613 | 0,391 | -0,242 |
| 1 | Q02952 AKA12_HUMAN  | E.VSS#LEGS#PPPCLGQEE.A              | S1391:S1395: | 2 | 2,9553 | 0,483 | -0,264 |
| 1 | Q5VWN6 CJ018_HUMAN  | E.VS#PASS#PEPPVPVKE.T               | S1400:S1404: | 2 | 2,9535 | 0,291 | -0,291 |
| 1 | Q96RY5 CRML_HUMAN   | E.ALFDGGGGGPAVSDLS#Q.-              | S1265:       | 2 | 2,9469 | 0,268 | -0,075 |
| 1 | A0MZ66 SHOT1_HUMAN  | E.ADSSS#PTGILATSE.S                 | S494:        | 2 | 2,939  | 0,436 | -0,172 |
| 1 | Q7KZ85 SPT6H_HUMAN  | E.STPMSIAGDAT#PLLDE.M               | T1718:       | 2 | 2,9356 | 0,302 | 0,072  |
| 1 | O43251 RBM9_HUMAN   | E.QSSNSPST#QNGSLTTE.G               | T88:         | 2 | 2,9348 | 0,327 | 0,497  |
| 1 | Q9NTI5 PDS5B_HUMAN  | E.VDVFQGS#PVDDIPQEE.T               | S1417:       | 2 | 2,9338 | 0,388 | 0      |
| 1 | Q9Y3F4 STRAP_HUMAN  | E.IAS#ENS#DCIFSPAPDVKA.-            | S335:S338:   | 2 | 2,9328 | 0,402 | 0,586  |
| 1 | P35908 K22E_HUMAN   | R.FLEQQNQVLQTK.W                    |              | 2 | 2,9321 | 0,276 | -0,083 |
| 1 | Q8WZ73 RFFL_HUMAN   | R.RAS#LSDLTDLEDIE.G                 | S240:        | 2 | 2,9309 | 0,34  | -0,147 |
| 1 | P17096 HMGA1_HUMAN  | E.EGISQES#\$EEEEQ.-                 | S102:S103:   | 2 | 2,9296 | 0,201 | -0,484 |
| 1 | Q9Y3T9 NOC2L_HUMAN  | E.LEDLQLS#ED.D                      | S746:        | 2 | 2,9188 | 0,12  | -0,107 |
| 1 | P49848 TAF6_HUMAN   | E.AGDS#PPPAPGTPK.A                  | S653:        | 2 | 2,9136 | 0,125 | -0,384 |
| 1 | P04792 HSPB1_HUMAN  | R.ALS#RQLS#SGVSE.I                  | S78:S82:     | 2 | 2,8985 | 0,345 | 0      |
| 1 | O00418 EF2K_HUMAN   | E.SDEDS#LGS#SGRVCVE.K               | S474:S477:   | 2 | 2,8976 | 0,281 | -0,417 |
| 1 | P05386 RLA1_HUMAN   | E.SEES#DDDM*GFGLFD.-                | S104:        | 2 | 2,8941 | 0,403 | 0,074  |
| 1 | Q96EZ8 MCRS1_HUMAN  | D.SSLM*ASGTAS#RS#EDEE.S             | S20:S22:     | 2 | 2,8927 | 0,443 | -0,666 |
| 1 | Q5VU20 Q5VU20_HUMAN | E.LT#DLDQS#NVTEETPE.G               | T232:S237:   | 2 | 2,8919 | 0,203 | 0,066  |
| 1 | A6H8X9 A6H8X9_HUMAN | E.AGTS#GCS#IDAKQVEE.Q               | S210:S213:   | 2 | 2,8858 | 0,284 | -0,57  |
| 1 | Q9BWE0 REPI1_HUMAN  | E.GSAQAAPGPGS#PQLPAGPQE.S           | S329:        | 2 | 2,8816 | 0,302 | 0,129  |
| 1 | Q08499 PDE4D_HUMAN  | E.WYQSTIPQS#PS#PAPDDPEEGRQGQTE.K    | S715:S717:   | 3 | 2,8778 | 0,235 | -0,478 |
| 1 | P07199 CENPB_HUMAN  | E.AGGS#FGAYGAQEE.A                  | S486:        | 2 | 2,873  | 0,267 | 0,737  |
| 1 | Q9H0H5 RGAP1_HUMAN  | K.VSLLGPVTT#PE.H                    | T580:        | 2 | 2,8716 | 0,388 | 0      |
| 1 | Q9P1Q0 VPS54_HUMAN  | E.LTPIAVDTTSQR.N                    |              | 2 | 2,8716 | 0,47  | 0,094  |
| 1 | P12931 SRC_HUMAN    | E.DYFTSTEPQY#QPGENL.-               | Y530:        | 2 | 2,8712 | 0,395 | 0,806  |

|   |                       |                                   |                 |   |        |       |        |
|---|-----------------------|-----------------------------------|-----------------|---|--------|-------|--------|
| 1 | Q14160 LAP4_HUMAN     | E.ACPCQPDSGS#PLPAEE.E             | S504:           | 2 | 2,8669 | 0,426 | -0,408 |
| 1 | O95155 UBE4B_HUMAN    | E.GVSSLSSS#PSNSLE.T               | S88:            | 2 | 2,8659 | 0,419 | -0,085 |
| 1 | Q14160 LAP4_HUMAN     | E.ACPCQPDSGS#PLPAEEE.K            | S504:           | 2 | 2,8622 | 0,301 | -0,063 |
| 1 | P40425 PBX2_HUMAN     | E.AVTSPSSVTSPTTEGPGS#VHSDTS#N.-   | S423:S429:      | 3 | 2,8589 | 0,261 | 0,539  |
| 1 | Q07157 ZO1_HUMAN      | E.YSMYSTDSR.H                     |                 | 2 | 2,8569 | 0,443 | -0,33  |
| 1 | O75821 EIF3G_HUMAN    | K.GIPLATGDTS#PEPE.L               | S42:            | 2 | 2,8544 | 0,439 | 0,333  |
| 1 | Q9UBL3 ASH2L_HUMAN    | E.VMDTQAGS#VDEE.N                 | S101:           | 2 | 2,8541 | 0,231 | -1,704 |
| 1 | Q32MZ4 LRRF1_HUMAN    | E.SSS#LPENTVQVE.S                 | S380:           | 2 | 2,8514 | 0,177 | 0,178  |
| 1 | Q8N2Y8 RUSC2_HUMAN    | E.TSRPS#PLGSYS#PIR.S              | S775:S781:      | 2 | 2,8402 | 1     | -0,582 |
| 1 | Q6UN15 FIP1_HUMAN     | E.LSGGT#GGDEEEE.W                 | T17:            | 2 | 2,836  | 0,309 | -0,291 |
| 1 | P48960 CD97_HUMAN     | R.CNPGFSSFSE.I                    |                 | 2 | 2,8327 | 0,295 | 0      |
| 1 | ##Q0EFA6 Q0EFA6_HUMAN | R.RSES#DQHLLS#AEPSLGTADPS#SE.G    | S153:S159:S170: | 3 | 2,8323 | 0,104 | 2      |
| 1 | Q96EV2 RBM33_HUMAN    | E.DDLLGEDLLSGKK.N                 |                 | 2 | 2,8261 | 0,151 | -0,087 |
| 1 | Q9H992 MARH7_HUMAN    | E.SLLEDS#EEEE.G                   | S544:           | 2 | 2,8253 | 0,238 | 0,355  |
| 1 | Q92800 EZH1_HUMAN     | E.LVDALNQYS#DEEEE.G               | S187:           | 2 | 2,8241 | 0,295 | -0,07  |
| 1 | P12270 TPR_HUMAN      | E.TQVYNQDS#QDSIGE.G               | S1890:          | 2 | 2,8217 | 0,356 | -0,147 |
| 1 | Q96C86 DCPS_HUMAN     | E.QVAQLLTGS#PE.L                  | S101:           | 2 | 2,8129 | 0,294 | 0,1    |
| 1 | P21127 CD2L1_HUMAN    | E.GT#PQSSALTE.G                   | T395:           | 2 | 2,8114 | 0,176 | 0,114  |
| 1 | P10599 THIO_HUMAN     | E.VDVDDCQDVAS#ECE.V               | S67:            | 2 | 2,8002 | 0,368 | -0,142 |
| 1 | Q09666 AHNK_HUMAN     | E.FSGPST#PTGTLE.F                 | T5794:          | 2 | 2,7993 | 0,256 | 0,096  |
| 1 | Q16643 DREB_HUMAN     | E.GEPLAAPQT#PTLPSALEE.L           | T559:           | 2 | 2,7976 | 0,458 | 0,064  |
| 1 | Q96SB3 NEB2_HUMAN     | E.LAENEDALS#PVDM*EPE.K            | S656:           | 2 | 2,7944 | 0,265 | -0,329 |
| 1 | Q9NZ53 PDXL2_HUMAN    | E.LLPVNGS#QEE.A                   | S195:           | 2 | 2,7934 | 0,258 | 0,209  |
| 1 | Q9H8M7 CARP_HUMAN     | E.TASISGS#PAESSCQVE.H             | S125:           | 2 | 2,7933 | 0,447 | -0,289 |
| 1 | Q92917 GPKOW_HUMAN    | D.AICQYM*GPS#DTDDD.-              | S471:           | 2 | 2,7931 | 0,302 | -0,217 |
| 1 | Q9UKV3 ACINU_HUMAN    | E.IEPM*EGPAPPVLIQLS#PPNTDADT#RE.L | S453:T461:      | 3 | 2,7859 | 0,106 | 0,123  |
| 1 | Q16643 DREB_HUMAN     | E.GYFSQS#QEEE.F                   | S601:           | 2 | 2,78   | 0,224 | -0,19  |
| 1 | Q16204 CCDC6_HUMAN    | K.SGGIVISPF.R                     |                 | 2 | 2,7785 | 0,35  | 0      |
| 1 | O60341 LSD1_HUMAN     | E.SLANLS#EDEYYSEEE.R              | S131:           | 2 | 2,7775 | 0,282 | 0,525  |
| 1 | Q9BUR4 WDR79_HUMAN    | E.FGS#PSELS#PRIEE.Q               | S85:S90:        | 2 | 2,7756 | 0,12  | 0,076  |
| 1 | Q9UJM3 ERRFI_HUMAN    | E.ALS#LDDTDCE.V                   | S163:           | 2 | 2,771  | 0,355 | 0,1    |
| 1 | Q8WWM7 ATX2L_HUMAN    | E.GGDSNS#DDYDLE.S                 | S238:           | 2 | 2,7646 | 0,328 | 0,268  |
| 1 | O95155 UBE4B_HUMAN    | E.TQSQSL#RSQS#M*DIGVSC.E          | S101:S105:      | 3 | 2,7643 | 0,171 | 0,612  |

|   |                    |                               |              |   |        |       |        |
|---|--------------------|-------------------------------|--------------|---|--------|-------|--------|
| 1 | P49006 MRP_HUMAN   | E.QGEIGACS#DEGTAQE.G          | S135:        | 2 | 2,764  | 0,312 | -0,15  |
| 1 | Q15398 DLG7_HUMAN  | E.MGIPQQTTS#PE.N              | S662:        | 2 | 2,7601 | 0,195 | 0,385  |
| 1 | Q13085 ACACA_HUMAN | E.VMGCFSDS#PPQS#PTFPE.A       | S1259:S1263: | 2 | 2,7574 | 0,335 | 0,538  |
| 1 | Q9H3S7 PTN23_HUMAN | K.EEPPVPEAPSSGPPSSSLE.L       |              | 3 | 2,7555 | 0,294 | 0,097  |
| 1 | Q9HD26 GOPC_HUMAN  | E.VVYVAPEVDS#DDE.N            | S376:        | 2 | 2,7555 | 0,241 | -0,161 |
| 1 | Q07666 KHDR1_HUMAN | E.GYYSQS#QGDSE.Y              | S390:        | 2 | 2,7547 | 0,38  | 0,188  |
| 1 | P21127 CD2L1_HUMAN | E.VGEGT#PQSSALTE.G            | T395:        | 2 | 2,7546 | 0,383 | 0      |
| 1 | Q15742 NAB2_HUMAN  | E.AGS#PPFSPAGGGVPE.G          | S205:        | 2 | 2,7541 | 0,395 | 0,243  |
| 1 | Q15836 VAMP3_HUMAN | R.LQQTQNVDE.V                 |              | 2 | 2,7526 | 0,279 | -0,203 |
| 1 | P46821 MAP1B_HUMAN | E.VAPVS#PEVTQE.V              | S1298:       | 2 | 2,751  | 0,293 | 0      |
| 1 | Q8IX90 CM003_HUMAN | E.NLTDPS#PTISSYE.N            | S346:        | 2 | 2,7498 | 0,365 | 0      |
| 1 | Q9UHY1 NRBP_HUMAN  | E.SQTVLSSGSDPK.V              |              | 2 | 2,7489 | 0,35  | -0,101 |
| 1 | Q15154 PCM1_HUMAN  | E.T#AGSLSGVSITSE.L            | T325:        | 2 | 2,7464 | 0,22  | 1,893  |
| 1 | O15534 PER1_HUMAN  | E.SSNQDALS#GSS#DLLE.L         | S1037:S1040: | 2 | 2,7427 | 0,309 | 0      |
| 1 | O43379 WDR62_HUMAN | E.AGPGDQQGDSYLR.V             |              | 2 | 2,7417 | 0,336 | -0,447 |
| 1 | Q9UQ80 PA2G4_HUMAN | E.NATSGET#LEENEAGD.-          | T386:        | 2 | 2,7411 | 0,212 | -0,453 |
| 1 | Q99700 ATX2_HUMAN  | E.AVAMPIPAASPT#PAS#PASNR.A    | T729:S732:   | 2 | 2,7411 | 0,343 | -0,354 |
| 1 | P35527 K1C9_HUMAN  | R.FSSSSGYGGGSSR.V             |              | 2 | 2,7411 | 0,357 | -0,296 |
| 1 | A1L390 PKHG3_HUMAN | E.S#SGQGPPSPVALLGQVQDFQQSAE.C | S1162:       | 3 | 2,7399 | 0,192 | 0,22   |
| 1 | P49792 RBP2_HUMAN  | E.T#VFTPKTS#PENVD.R           | T1393:S1400: | 2 | 2,737  | 0,18  | -0,142 |
| 1 | Q9HCD6 TANC2_HUMAN | E.NQTSAITQR.I                 |              | 2 | 2,7365 | 0,27  | -0,599 |
| 1 | Q9Y3T9 NOC2L_HUMAN | E.LEDLQLSEDD.-                |              | 2 | 2,7337 | 0,358 | 0,104  |
| 1 | O43598 RCL_HUMAN   | E.ADPPGQVAAS#PDPTT.-          | S169:        | 2 | 2,7333 | 0,268 | 0,162  |
| 1 | Q96JP5 ZFP91_HUMAN | E.VLIEDSDS#AGP.-              | S567:        | 2 | 2,7332 | 0,35  | 0      |
| 1 | P43358 MAGA4_HUMAN | E.AAVSSSS#PLVPGTLEEVPAAE.S    | S44:         | 2 | 2,7332 | 0,299 | 0      |
| 1 | Q96CX2 KCD12_HUMAN | E.GASAGAPS#PTLE.L             | S176:        | 2 | 2,7319 | 0,252 | 0,107  |
| 1 | P49006 MRP_HUMAN   | E.GGGDSSASS#PTEEEQEQE.I       | S120:        | 2 | 2,7301 | 0,264 | -0,311 |
| 1 | P11388 TOP2A_HUMAN | E.NTEGS#PQEDGVE.L             | S1247:       | 2 | 2,7259 | 0,249 | -0,091 |
| 1 | Q8N680 ZBTB2_HUMAN | E.ASQLSQLTSNLAQVNR.T          |              | 2 | 2,7252 | 0,308 | -0,141 |
| 1 | Q99547 MPH6_HUMAN  | E.TVELDVS#DEE.M               | S110:        | 2 | 2,7226 | 0,331 | -0,1   |
| 1 | P49023 PAXI_HUMAN  | E.SSVPS#PVPVPAITVNQGE.M       | S230:        | 2 | 2,7202 | 0,326 | -0,294 |
| 1 | O95453 PARN_HUMAN  | E.AGLEGGVSGEIS#DTE.L          | S587:        | 2 | 2,7156 | 0,344 | 0      |
| 1 | Q7Z3T8 ZFY16_HUMAN | E.IIQS#PISQVPSVE.K            | S939:        | 2 | 2,7103 | 0,182 | 0,165  |

|   |                     |                                    |              |   |        |       |        |
|---|---------------------|------------------------------------|--------------|---|--------|-------|--------|
| 1 | Q96AC1 FERM2_HUMAN  | E.VDAALS#DLEITLE.G                 | S351:        | 2 | 2,7019 | 0,271 | 0      |
| 1 | A7XP29 A7XP29_HUMAN | R.GCADGRDADPTEE.Q                  |              | 2 | 2,7005 | 0,324 | -0,788 |
| 1 | Q32MZ4 LRRF1_HUMAN  | E.VPGS#PAGTEGNCQE.A                | S521:        | 2 | 2,6998 | 0,37  | 0      |
| 1 | Q9UBQ5 EIF3K_HUMAN  | D.SVSSIM*ASS#Q.-                   | S217:        | 2 | 2,697  | 0,371 | 0,335  |
| 1 | Q13426 XRCC4_HUMAN  | E.T#LRNS#SPEDLFDEI.-               | T323:S327:   | 2 | 2,6935 | 0,203 | -0,068 |
| 1 | Q99733 NP1L4_HUMAN  | R.LDNVPH#PSS#YIE.T                 | T51:S54:     | 2 | 2,6925 | 0,183 | 0      |
| 1 | P06241 FYN_HUMAN    | E.DYFTATEPQY#QPGENL.-              | Y531:        | 3 | 2,6917 | 0,131 | -0,094 |
| 1 | Q8N108 MIER1_HUMAN  | E.LLSLYGYGSTVR.L                   |              | 2 | 2,6878 | 0,302 | 0      |
| 1 | Q7Z4S6 KI21A_HUMAN  | E.DAPLNS#PGSE.G                    | S1128:       | 2 | 2,6807 | 0,231 | -0,229 |
| 1 | Q02952 AKA12_HUMAN  | E.VS#SLEGS#PPPCLGQEE.A             | S1390:S1395: | 2 | 2,6778 | 0,38  | -0,132 |
| 1 | P50548 ERF_HUMAN    | E.GAGALAPPPPPQIK.V                 |              | 2 | 2,6767 | 0,344 | 0      |
| 1 | P49281 NRAM2_HUMAN  | E.LYLLNTMDADS#LVS#R.-              | S564:S567:   | 2 | 2,6758 | 0,284 | 0,587  |
| 1 | Q9Y3Y2 CA077_HUMAN  | E.LDAYMAQT#DPETND.-                | T242:        | 2 | 2,675  | 0,371 | -0,587 |
| 1 | P81605 DCD_HUMAN    | K.ENAGEDPGLAR.Q                    |              | 2 | 2,6615 | 0,327 | -0,54  |
| 1 | Q96RT1 LAP2_HUMAN   | E.DVM*FIS#DNE.S                    | S440:        | 2 | 2,6599 | 0,24  | -0,209 |
| 1 | P27816 MAP4_HUMAN   | E.ALNS#PHSES#FVSPE.A               | S197:S202:   | 2 | 2,6567 | 0,317 | -0,147 |
| 1 | Q147X3 MAK3_HUMAN   | E.QQQLNGLIS#PE.L                   | S89:         | 2 | 2,652  | 0,149 | 0,187  |
| 1 | Q6S8J3 A26CA_HUMAN  | E.M*ATAASS#SSLE.K                  | S933:        | 2 | 2,6517 | 0,188 | 0,106  |
| 1 | Q96EV2 RBM33_HUMAN  | E.DDLLGEDLLSGK.K                   |              | 2 | 2,6438 | 0,417 | 0      |
| 1 | Q9BVS4 RIOK2_HUMAN  | E.GSEFS#FS#DGEVAE.K                | S335:S337:   | 2 | 2,6431 | 0,31  | 0,08   |
| 1 | Q9UJM3 ERRFI_HUMAN  | E.ALSLDDT#DCE.V                    | T167:        | 2 | 2,6402 | 0,411 | 0,1    |
| 1 | Q9H813 TM206_HUMAN  | K.SALIVQGPRES.V                    |              | 2 | 2,6363 | 0,355 | 0      |
| 1 | P43358 MAGA4_HUMAN  | R.QPNEGSSSQEEEGPSTSPDAE.S          |              | 2 | 2,6305 | 0,5   | 0,903  |
| 1 | Q99700 ATX2_HUMAN   | E.AVAM*PIPAASPT#PAS#PASNRAVTPSSE.A | T729:S732:   | 3 | 2,63   | 0,102 | -0,266 |
| 1 | Q9H410 DSN1_HUMAN   | E.SS#LS#PVEVFAK.T                  | S28:S30:     | 2 | 2,6234 | 0,253 | 0,184  |
| 1 | O94888 UBXD7_HUMAN  | E.FISVCGS#DEEEE.V                  | S335:        | 2 | 2,6193 | 0,196 | 0,082  |
| 1 | Q02952 AKA12_HUMAN  | E.VEM*LSS#QE.R                     | S505:        | 2 | 2,6069 | 0,141 | 0      |
| 1 | Q8NEY8 PPHLN_HUMAN  | E.AGST#APLFTDQPEEPE.S              | T260:        | 2 | 2,6065 | 0,386 | 1,173  |
| 1 | O60239 3BP5_HUMAN   | E.FGM*M*FPVLGPR.S                  |              | 2 | 2,603  | 0,317 | 0,19   |
| 1 | Q99661 KIF2C_HUMAN  | E.LSSQM*SS#FNE.A                   | S633:        | 2 | 2,6021 | 0,143 | -0,199 |
| 1 | Q01433 AMPD2_HUMAN  | E.EAGITM*SS#PGPQ.-                 | S875:        | 2 | 2,6005 | 0,409 | 0,103  |
| 1 | Q7Z3T8 ZFY16_HUMAN  | E.IIQSPISQVPS#VE.K                 | S946:        | 2 | 2,598  | 0,263 | 0,165  |
| 1 | Q9Y3T9 NOC2L_HUMAN  | E.LEDLQLS#EDD.-                    | S746:        | 2 | 2,5955 | 0,228 | 0,097  |

|   |                    |                             |                 |   |        |       |        |
|---|--------------------|-----------------------------|-----------------|---|--------|-------|--------|
| 1 | P08069 IGF1R_HUMAN | R.ALPLQSST#C.-              | T1366:          | 2 | 2,5952 | 0,452 | 0      |
| 1 | Q9UQ35 SRRM2_HUMAN | E.FSAS#PM*LK.S              | S1124:          | 2 | 2,5946 | 0,181 | 0      |
| 1 | Q03252 LMNB2_HUMAN | R.AGGPAT#PLS#PTRLSR.L       | T14:S17:        | 2 | 2,5903 | 0,21  | -0,372 |
| 1 | Q9UHR4 BI2L1_HUMAN | R.SISTVNLSE.N               |                 | 2 | 2,5903 | 0,233 | -0,064 |
| 1 | Q9NQW6 ANLN_HUMAN  | E.MDQALAES#SEEQE.D          | S594:           | 2 | 2,5902 | 0,112 | -0,158 |
| 1 | Q96T60 PNKP_HUMAN  | E.SQPDT#PPGTPLVSQDE.K       | T118:           | 2 | 2,5872 | 0,2   | -0,209 |
| 1 | Q96TA1 NIBL1_HUMAN | E.YSNSGGGGS#PSPSTPE.S       | S588:           | 2 | 2,5837 | 0,344 | -0,235 |
| 1 | P43243 MATR3_HUMAN | E.AAALLES#GSS#VGDE.T        | S671:S674:      | 2 | 2,5834 | 0,274 | 0,083  |
| 1 | Q15424 SAFB1_HUMAN | E.TINNLDTSSS#DFTILQE.I      | S197:           | 2 | 2,5793 | 0,171 | 0,74   |
| 1 | Q14247 SRC8_HUMAN  | R.AKTQT#PPVS#PAPQPTEE.R     | T401:S405:      | 2 | 2,5776 | 0,499 | -0,315 |
| 1 | P40763 STAT3_HUMAN | E.LTSECATS#PM*.-            | S768:           | 2 | 2,5732 | 0,209 | -0,102 |
| 1 | Q71RC2 LARP4_HUMAN | E.CTSAQQLNM*STSS#PCAAE.L    | S546:           | 2 | 2,5719 | 0,329 | -0,419 |
| 1 | Q15185 TEBP_HUMAN  | D.S#DDEKMPDLE.-             | S151:           | 2 | 2,5646 | 0,133 | -0,097 |
| 1 | Q07157 ZO1_HUMAN   | E.YSM*YSTDSR.H              |                 | 2 | 2,5643 | 0,292 | -0,217 |
| 1 | Q7Z6Z7 HUWE1_HUMAN | E.TDS#VVIAGQPE.V            | S2327:          | 2 | 2,5628 | 0,241 | -0,204 |
| 1 | Q9HC35 EMAL4_HUMAN | D.S#ISAAS#TSDVQDR.L         | S11:S16:        | 2 | 2,5623 | 0,364 | 1,467  |
| 1 | Q14676 MDC1_HUMAN  | R.AQPFGFIDS#DT#DAEEE.R      | S329:T331:      | 2 | 2,5588 | 0,234 | -0,253 |
| 1 | Q9NY61 AATF_HUMAN  | E.ELLFQYPDTR.Y              |                 | 2 | 2,5578 | 0,186 | 0,095  |
| 1 | P98175 RBM10_HUMAN | E.LQS#PTHPSALPPATS#PTAQE.S  | S540:S553:      | 3 | 2,5577 | 0,213 | -0,08  |
| 1 | Q9NQW6 ANLN_HUMAN  | K.S#CSPSPVS#PQVQQAADTISD.S  | S95:S102:       | 3 | 2,5499 | 0,281 | 0,235  |
| 1 | Q9HC35 EMAL4_HUMAN | K.ATLLEDQDPS#PSS.-          | S978:           | 2 | 2,5413 | 0,363 | 0,233  |
| 1 | Q00613 HSF1_HUMAN  | R.VKEEPPS#PPQS#PRVEE.A      | S303:S307:      | 2 | 2,5405 | 0,204 | -0,248 |
| 1 | Q53QZ3 RHG15_HUMAN | E.LMLSEY#\$#KIFGS#EE.D      | Y466:S467:S472: | 2 | 2,5372 | 0,228 | 0,195  |
| 1 | Q9H4L7 SMRCD_HUMAN | E.ATPQPSQPGPSS#PISLS#AEEE.N | S34:S39:        | 2 | 2,5361 | 0,49  | -0,215 |
| 1 | Q15742 NAB2_HUMAN  | E.AGSPFFS#PPAGGGVPE.G       | S209:           | 2 | 2,5302 | 0,225 | 0,243  |
| 1 | Q9NZN5 ARHGC_HUMAN | E.IQS#PSSCADSQSQIM*E.Y      | S1492:          | 2 | 2,5294 | 0,269 | -0,982 |
| 1 | P38159 HNRPG_HUMAN | R.GLPPS#ME.R                | S352:           | 2 | 2,5281 | 0,254 | 0,376  |
| 1 | Q8IX90 CM003_HUMAN | E.QEAINS#DPELSNCE.N         | S119:           | 2 | 2,5252 | 0,17  | -0,289 |
| 1 | O95361 TRI16_HUMAN | E.LDLM*APGPLPR.A            |                 | 2 | 2,5243 | 0,301 | -0,102 |
| 1 | Q92598 HS105_HUMAN | D.AQQTSQSPPS#PE.L           | S557:           | 2 | 2,5077 | 0,194 | -0,639 |
| 1 | Q16204 CCDC6_HUMAN | K.SGGIVISPFRLLE.L           |                 | 2 | 2,5021 | 0,209 | 0,695  |
| 1 | Q6PJG2 CN043_HUMAN | E.LPPY#TPPPILS#PVRE.G       | Y654:S661:      | 2 | 2,5016 | 0,206 | -0,066 |
| 1 | P13056 NR2C1_HUMAN | E.M*SM*IESLS#NDDTSLCE.F     | S302:           | 2 | 2,4985 | 0,331 | -0,188 |

|   |                     |                            |              |   |        |       |        |
|---|---------------------|----------------------------|--------------|---|--------|-------|--------|
| 1 | Q7Z5K2 WAPL_HUMAN   | E.STGDPFGFDS#DDE.S         | S77:         | 2 | 2,4971 | 0,283 | 0,249  |
| 1 | P25963 IKBA_HUMAN   | E.NLQMLPES#EDEE.S          | S283:        | 2 | 2,4949 | 0,311 | 0,081  |
| 1 | Q86WJ1 CHD1L_HUMAN  | E.GSTM*DEIDLES#ILGE.T      | S540:        | 2 | 2,4828 | 0,325 | -0,429 |
| 1 | A2RTZ0 A2RTZ0_HUMAN | E.ALNQYSVIEETS#S#DTD.-     | S516:S517:   | 2 | 2,4798 | 0,219 | -0,316 |
| 1 | Q6ZWE6 PKHM3_HUMAN  | E.VDDIS#PALEVT#E.E         | S10:T16:     | 2 | 2,4763 | 0,192 | 1,095  |
| 1 | P49959 MRE11_HUMAN  | E.VIEVDES#DVEE.D           | S649:        | 2 | 2,4728 | 0,255 | 0,182  |
| 1 | P04637 P53_HUMAN    | E.NNVLS#PLPSQAMDD.L        | S33:         | 2 | 2,469  | 0,294 | 0,077  |
| 1 | P35908 K22E_HUMAN   | R.NLDLDSIIAEVK.A           |              | 2 | 2,464  | 0,286 | -0,183 |
| 1 | Q9BR76 COR1B_HUMAN  | E.NGLT#SPLTEPVVVLE.G       | T118:        | 2 | 2,4614 | 0,246 | 0,222  |
| 1 | Q9H0S4 DDX47_HUMAN  | D.SPT#EASQPIVEEEE.T        | T11:         | 2 | 2,4584 | 0,226 | 0,225  |
| 1 | Q9UKV3 ACINU_HUMAN  | E.LEEASAES#EDE.M           | S169:        | 2 | 2,4536 | 0,225 | -0,189 |
| 1 | P21127 CD2L1_HUMAN  | E.GDYVPDS#PALS#PIELKQE.L   | S410:S414:   | 3 | 2,4514 | 0,266 | 0,259  |
| 1 | Q8NB90 SPAT5_HUMAN  | E.LS#LQLSQLDLE.D           | S232:        | 2 | 2,4512 | 0,199 | -0,182 |
| 1 | P05114 HMG1_HUMAN   | R.KVS#SAEGAAKEEPK.R        | S7:          | 3 | 2,4492 | 0,213 | -0,121 |
| 1 | Q96N64 PWP2A_HUMAN  | E.AAATAAS#PGEGGAGEAPE.M    | S14:         | 2 | 2,4454 | 0,199 | 0,425  |
| 1 | Q8N3P4 VPS8_HUMAN   | E.SILNET#DDEDE.S           | T75:         | 2 | 2,441  | 0,099 | 0,269  |
| 1 | Q9UHR4 BI2L1_HUMAN  | E.TEAVTVPTPS#PTPVR.S       | S414:        | 2 | 2,4386 | 0,362 | -0,075 |
| 1 | P46379 BAT3_HUMAN   | E.NASPAPGTTAE.A            |              | 2 | 2,4385 | 0,331 | 0,107  |
| 1 | Q8IVF2 AHNK2_HUMAN  | E.VT#SPNLVDS#LPME.V        | T4418:S4425: | 2 | 2,4356 | 0,432 | 0,296  |
| 1 | Q9UHY1 NRBP_HUMAN   | E.VT#SPVPPSVKPT#PTPEAEVE.T | T421:T431:   | 3 | 2,4322 | 0,112 | 0,158  |
| 1 | Q86W50 MET10_HUMAN  | E.ASEQFGS#PVAE.R           | S498:        | 2 | 2,4284 | 0,171 | 0,305  |
| 1 | Q9BTX1 NDC1_HUMAN   | E.FSNPS#PSTISAE.G          | S500:        | 2 | 2,4269 | 0,188 | -0,348 |
| 1 | Q92619 HMHA1_HUMAN  | E.AAGS#PPEEGGCTE.G         | S592:        | 2 | 2,421  | 0,219 | -0,273 |
| 1 | P27816 MAP4_HUMAN   | E.SLQDVGQS#AAPTFM*ISPE.T   | S616:        | 2 | 2,4195 | 0,163 | 1,545  |
| 1 | P51114 FXR1_HUMAN   | E.DAVLM*DGM*TESDT#ASVNE.N  | T526:        | 2 | 2,4192 | 0,294 | 0,489  |
| 1 | Q6PD74 P34_HUMAN    | E.IEGLSS#DEEH.-            | S311:        | 2 | 2,4191 | 0,211 | -0,306 |
| 1 | Q96T58 MINT_HUMAN   | E.LKT#PPS#VGPPSVTVVTL.S    | T1633:S1636: | 2 | 2,4183 | 0,254 | -0,185 |
| 1 | Q16576 RBBP7_HUMAN  | E.NIYNDEES#DVTT#ELE.G      | S413:S418:   | 2 | 2,4129 | 0,137 | -1,633 |
| 1 | P18583 SON_HUMAN    | E.LQGPPVT#PVLE.L           | T400:        | 2 | 2,4086 | 0,114 | 0      |
| 1 | Q09666 AHNK_HUMAN   | R.AGAISASGPE.L             |              | 2 | 2,4085 | 0,241 | -0,071 |
| 1 | Q9HC35 EMAL4_HUMAN  | E.SVIQS#NTPT#PPSQPLNE.T    | S895:T899:   | 2 | 2,4084 | 0,112 | -0,236 |
| 1 | Q13435 SF3B2_HUMAN  | R.GSDS#PAADVE.I            | S339:        | 2 | 2,4008 | 0,172 | -0,119 |
| 1 | Q5JSH3 WDR44_HUMAN  | K.VGLSTFKETE.N             |              | 2 | 2,3996 | 0,248 | -0,11  |



|   |                    |                            |            |   |        |       |        |
|---|--------------------|----------------------------|------------|---|--------|-------|--------|
| 1 | Q9BVP2 GNL3_HUMAN  | E.NSS#GM*FAAEE.T           | S504:      | 2 | 2,3972 | 0,244 | -0,214 |
| 1 | O15084 ANR28_HUMAN | E.LNDS#DSETY.-             | S1081:     | 2 | 2,3894 | 0,094 | -0,109 |
| 1 | Q96PK6 RBM14_HUMAN | R.AQPSVSLGAPYR.G           |            | 2 | 2,3862 | 0,324 | -0,098 |
| 1 | Q9UQ35 SRRM2_HUMAN | E.NSFGS#PLEFR.N            | S1329:     | 2 | 2,3831 | 0,275 | -0,297 |
| 1 | Q96EV8 DTBP1_HUMAN | E.NTVLS#PALGPE.S           | S267:      | 2 | 2,3803 | 0,285 | -0,104 |
| 1 | Q7L014 DDX46_HUMAN | E.NDQDAM*EYS#S#EEE.E       | S295:S296: | 2 | 2,3791 | 0,289 | -0,142 |
| 1 | O43290 SNUT1_HUMAN | E.NM*DIS#DEEE.G            | S474:      | 2 | 2,3782 | 0,137 | -0,207 |
| 1 | P35527 K1C9_HUMAN  | K.STMQELNSR.L              |            | 2 | 2,3652 | 0,198 | 0      |
| 1 | Q96JP5 ZFP91_HUMAN | E.VLIEDS#DS#AGP.-          | S565:S567: | 2 | 2,3624 | 0,297 | -0,193 |
| 1 | P38159 HNRPG_HUMAN | R.GLPPS#M*E.R              | S352:      | 2 | 2,3581 | 0,127 | 0,369  |
| 1 | Q9Y4F1 FARP1_HUMAN | E.NSGIST#LE.R              | T24:       | 2 | 2,3577 | 0,172 | 0      |
| 1 | O94842 TOX4_HUMAN  | E.M*ITDVVPEVES#PSQM*DVE.L  | S550:      | 2 | 2,3569 | 0,368 | 1,037  |
| 1 | Q8NCE2 MTMRE_HUMAN | E.SS#PGATGSFTYE.A          | S453:      | 2 | 2,3528 | 0,197 | -0,19  |
| 1 | Q9NY61 AATF_HUMAN  | E.LLFQYPDTR.Y              |            | 2 | 2,3524 | 0,179 | -0,106 |
| 1 | P05386 RLA1_HUMAN  | E.SEES#DDDMGFLFD.-         | S104:      | 2 | 2,3523 | 0,263 | -0,148 |
| 1 | P05783 K1C18_HUMAN | E.STTVVTTQSAE.V            |            | 2 | 2,3499 | 0,158 | 0      |
| 1 | Q12888 TP53B_HUMAN | E.LSQS#QDVEE.N             | S178:      | 2 | 2,3469 | 0,208 | -0,109 |
| 1 | Q9BYG5 PAR6B_HUMAN | E.DNGVPQQIPK.A             |            | 2 | 2,3452 | 0,319 | -0,111 |
| 1 | Q15276 RABE1_HUMAN | E.T#ASLLSSVTQGM*E.S        | T486:      | 2 | 2,3426 | 0,333 | 0,086  |
| 1 | Q9UBB5 MBD2_HUMAN  | E.M*DIEM*DS#GDEA.-         | S407:      | 2 | 2,341  | 0,34  | -0,461 |
| 1 | Q14444 CAPR1_HUMAN | E.AAS#APAVEDQVPE.A         | S264:      | 2 | 2,3378 | 0,229 | 0,179  |
| 1 | P38398 BRCA1_HUMAN | K.VADVLDVLNE.V             |            | 2 | 2,3227 | 0,105 | 0,112  |
| 1 | Q9NRS6 SNX15_HUMAN | E.LEVPVDPSS#PAQE.A         | S180:      | 2 | 2,3215 | 0,107 | -0,074 |
| 1 | Q96T21 SEBP2_HUMAN | E.QAELS#GPEGM*DE.L         | S579:      | 2 | 2,3208 | 0,243 | -0,359 |
| 1 | Q99613 EIF3C_HUMAN | R.FFTTGSDS#ESE.S           | S11:       | 2 | 2,3191 | 0,179 | 0      |
| 1 | Q8IVF2 AHNK2_HUMAN | E.VT#SPNLVDVLSM*E.V        | T4418:     | 2 | 2,3187 | 0,14  | 0,462  |
| 1 | Q9H5N1 RABE2_HUMAN | E.LLPLS#RDPS#PPLEPLEE.L    | S200:S204: | 2 | 2,3163 | 0,252 | -0,237 |
| 1 | O15127 SCAM2_HUMAN | R.AASS#AAQGAQGN.-          | S320:      | 2 | 2,312  | 0,337 | 0      |
| 1 | P46821 MAP1B_HUMAN | E.AEVAPVS#PEVTQE.V         | S1298:     | 2 | 2,3089 | 0,259 | -0,255 |
| 1 | Q9NWF9 RN216_HUMAN | E.DQQLAS#DDEEPPGPAFPM*QE.S | S249:      | 2 | 2,3081 | 0,391 | -0,111 |
| 1 | Q9H4L4 SEN3_HUMAN  | E.LFQGS#DLGM*AEE.A         | S288:      | 2 | 2,3055 | 0,195 | -0,263 |
| 1 | Q03252 LMNB2_HUMAN | R.AGGPAT#PLS#PTRLSR.L      | T14:S17:   | 3 | 2,2961 | 0,26  | -0,111 |
| 1 | Q9H0E9 BRD8_HUMAN  | E.SGTIFGSQIK.D             |            | 2 | 2,2924 | 0,377 | 0      |

|   |                      |                            |                 |   |        |       |        |
|---|----------------------|----------------------------|-----------------|---|--------|-------|--------|
| 1 | Q9Y4W2 LAS1L_HUMAN   | E.VGPFSTGQES#PTAE.N        | S617:           | 2 | 2,2882 | 0,33  | -0,246 |
| 1 | O60341 LSD1_HUMAN    | E.SLANLS#EDEYYS#EEE.R      | S131:S137:      | 2 | 2,2876 | 0,211 | -0,315 |
| 1 | Q92598 HS105_HUMAN   | D.AQQTSQS#PPSPE.L          | S554:           | 2 | 2,2867 | 0,25  | -0,365 |
| 1 | Q12800 TFCP2_HUMAN   | E.SGLVQDFDAS#LSGIGQE.L     | S25:            | 2 | 2,2852 | 0,286 | -0,203 |
| 1 | Q9UHR4 BI2L1_HUMAN   | R.S#HISTVNLS.E.N           | S420:           | 2 | 2,2848 | 0,169 | -0,118 |
| 1 | Q9UHR4 BI2L1_HUMAN   | E.AVT#VPTPS#PTPVR.S        | T409:S414:      | 2 | 2,28   | 0,17  | 0      |
| 1 | Q9UHR4 BI2L1_HUMAN   | E.TEAVTVPT#PS#PTPVR.S      | T412:S414:      | 2 | 2,2753 | 0,239 | -0,143 |
| 1 | Q8N3F8 MILK1_HUMAN   | E.VAQPS#PTASLE.S           | S414:           | 2 | 2,2739 | 0,36  | 0,207  |
| 1 | P05783 K1C18_HUMAN   | R.STFS#TNYR.S              | S10:            | 2 | 2,2733 | 0,223 | -0,116 |
| 1 | Q99700 ATX2_HUMAN    | E.AVAM*PIPAASPT#PASPASNR.A | T729:           | 3 | 2,2716 | 0,195 | 0,457  |
| 1 | Q9UMY1 NOL7_HUMAN    | E.GQLAS#EEEEAE.H           | S26:            | 2 | 2,2695 | 0,385 | 0      |
| 1 | Q92900 RENT1_HUMAN   | E.LLGADT#QGS#EFE.F         | T28:S31:        | 2 | 2,2682 | 0,186 | 0      |
| 1 | Q9BUR4 WDR79_HUMAN   | K.AM*EDTSGEPAAEDE.G        |                 | 2 | 2,2661 | 0,214 | -0,332 |
| 1 | P19338 NUCL_HUMAN    | D.EDEDEIEPAAMK.A           |                 | 2 | 2,2629 | 0,31  | 0,266  |
| 1 | Q15185 TEBP_HUMAN    | D.DEKMPDLE.-               |                 | 2 | 2,2539 | 0,123 | -0,187 |
| 1 | Q9UJM3 ERRFI_HUMAN   | E.ALSLDDT#DCEVE.F          | T167:           | 2 | 2,2521 | 0,173 | 0      |
| 1 | P46379 BAT3_HUMAN    | E.NAS#PAPGTTAEE.A          | S973:           | 2 | 2,2498 | 0,294 | -0,199 |
| 1 | P25490 TYY1_HUMAN    | E.QIIGENS#PPDYSE.Y         | S247:           | 2 | 2,2426 | 0,292 | -0,08  |
| 1 | Q07157 ZO1_HUMAN     | E.ASS#PVPYLSPE.T           | S927:           | 2 | 2,2403 | 0,223 | 0      |
| 1 | Q5VT52 K0460_HUMAN   | E.SEESTS#PSLE.M            | S665:           | 2 | 2,2394 | 0,103 | 0,18   |
| 1 | Q12888 TP53B_HUMAN   | K.M*VIQGPSS#PQGE.A         | S1114:          | 2 | 2,2393 | 0,17  | 0,092  |
| 1 | Q9NQT8 KI13B_HUMAN   | E.AQDGPPS#PLSE.A           | S1559:          | 2 | 2,2321 | 0,103 | 0      |
| 1 | Q12888 TP53B_HUMAN   | D.LVAPS#PDAFR.S            | S366:           | 2 | 2,2319 | 0,24  | 0,212  |
| 1 | Q09666 AHNK_HUMAN    | E.FSGPST#PT#GTLE.F         | T5794:T5796:    | 2 | 2,2313 | 0,137 | -0,451 |
| 1 | P21127 CD2L1_HUMAN   | K.YLPALQGCR.S              |                 | 2 | 2,2286 | 0,3   | -0,226 |
| 1 | P52292 IMA2_HUMAN    | R.NVSSFDDATS#PLQE.N        | S62:            | 2 | 2,2272 | 0,183 | 0,217  |
| 1 | Q9ULJ8 NEB1_HUMAN    | E.AVS#PTVSQLSAVFE.N        | S199:           | 2 | 2,2267 | 0,221 | 0      |
| 1 | Q9UKM9 RALY_HUMAN    | E.AGLPQGEAR.T              |                 | 2 | 2,2234 | 0,321 | -0,204 |
| 1 | ##P40145 ADCY8_HUMAN | R.S#ALNVT#KGWIDY#QPCK.A    | S133:T138:Y144: | 3 | 2,2147 | 0,096 | -0,964 |
| 1 | Q6S8J3 A26CA_HUMAN   | E.M*ATAASSSSLE.K           |                 | 2 | 2,2118 | 0,283 | -0,114 |
| 1 | O14686 MLL2_HUMAN    | E.LGVST#DVS#PARDE.G        | T971:S974:      | 2 | 2,2116 | 0,312 | 0,081  |
| 1 | P43358 MAGA4_HUMAN   | E.AAVSSS#SPLVPGTLEEVPAE.S  | S43:            | 3 | 2,2037 | 0,118 | 0,35   |
| 1 | Q9UHR4 BI2L1_HUMAN   | E.AVT#VPTPSPTPVR.S         | T409:           | 2 | 2,2016 | 0,122 | -0,087 |

|   |                    |                                   |              |   |        |       |        |
|---|--------------------|-----------------------------------|--------------|---|--------|-------|--------|
| 1 | P49848 TAF6_HUMAN  | E.AGDSPPPAPGT#PK.A                | T660:        | 2 | 2,2013 | 0,226 | -0,192 |
| 1 | Q6UN15 FIP1_HUMAN  | E.NASANPPS#GIEDETAE.N             | S62:         | 2 | 2,1971 | 0,145 | 0,29   |
| 1 | Q13283 G3BP1_HUMAN | K.SSS#PAPADIAQTVQE.D              | S232:        | 2 | 2,1936 | 0,103 | 0      |
| 1 | P31943 HNRH1_HUMAN | E.NSS#DFQSNIA.-                   | S442:        | 2 | 2,1912 | 0,091 | 0      |
| 1 | P49792 RBP2_HUMAN  | E.TVFT#PKTS#PE.N                  | T1396:S1400: | 2 | 2,1878 | 0,322 | -0,289 |
| 1 | P11362 FGFR1_HUMAN | K.IGPDNLPYVQILK.T                 |              | 2 | 2,1864 | 0,254 | 0,166  |
| 1 | Q9NUA8 ZBT40_HUMAN | E.ACS#PSPAVQTFSE.A                | S214:        | 2 | 2,1847 | 0,27  | -0,167 |
| 1 | Q02952 AKA12_HUMAN | E.IIEQIPSSSES#NLEE.L              | S154:        | 2 | 2,1825 | 0,179 | 0,146  |
| 1 | P19338 NUCL_HUMAN  | K.AAAAAPAS#EDEDDE.D               | S184:        | 2 | 2,1817 | 0,154 | -0,169 |
| 1 | Q15398 DLG7_HUMAN  | E.LNS#SITSQDVLMSPEKNT#ASQNSILEE.G | S756:T772:   | 3 | 2,1812 | 0,184 | -0,345 |
| 1 | Q6PJG2 CN043_HUMAN | E.LPPYT#PPPILS#PVRE.G             | T655:S661:   | 2 | 2,1808 | 0,22  | 0,066  |
| 1 | O94842 TOX4_HUMAN  | E.VES#PSQM*DVE.L                  | S550:        | 2 | 2,1777 | 0,246 | -0,301 |
| 1 | Q92576 PHF3_HUMAN  | E.NS#LVGLPSCVDE.V                 | S359:        | 2 | 2,1721 | 0,212 | -0,089 |
| 1 | P27707 DCK_HUMAN   | R.SCPSFS#ASSE.G                   | S13:         | 2 | 2,1708 | 0,196 | -0,214 |
| 1 | Q86WB0 NIPA_HUMAN  | E.GIAPEEGGVDK.D                   |              | 2 | 2,1638 | 0,308 | 0,107  |
| 1 | Q99700 ATX2_HUMAN  | E.AVAM*PIPAAS#PTPAS#PASNR.A       | S727:S732:   | 2 | 2,1602 | 0,235 | -0,234 |
| 1 | P49454 CENPF_HUMAN | E.VFCSS#LQEE.N                    | S1626:       | 2 | 2,1591 | 0,144 | -0,207 |
| 1 | O14976 GAK_HUMAN   | R.ADPEPPGLAAGLVQQDLVFE.V          |              | 2 | 2,1586 | 0,402 | -0,236 |
| 1 | Q9UK61 CC063_HUMAN | E.LQSS#PDVQNSLLE.D                | S1552:       | 2 | 2,1513 | 0,18  | -0,242 |
| 1 | Q9UQ35 SRRM2_HUMAN | E.NSFGS#PLE.F                     | S1329:       | 2 | 2,1508 | 0,15  | 0,262  |
| 1 | Q7Z6Z7 HUWE1_HUMAN | E.LS#PAPTITSLSPE.R                | S2826:       | 2 | 2,1472 | 0,256 | -0,175 |
| 1 | Q96AE4 FUBP1_HUMAN | R.SCM*LTGT#PE.S                   | T153:        | 2 | 2,1469 | 0,134 | 0,112  |
| 1 | Q58FF8 H90B2_HUMAN | K.IEDVGS#DEE.D                    | S177:        | 2 | 2,1386 | 0,14  | 0      |
| 1 | Q5JSH3 WDR44_HUMAN | K.VGLSTFKE.T                      |              | 2 | 2,1289 | 0,15  | -0,069 |
| 1 | A5D8W1 YG011_HUMAN | K.ILNLCSGK.I                      |              | 2 | 2,1229 | 0,104 | -0,27  |
| 1 | Q8IX90 CM003_HUMAN | E.QEAINS#DPE.L                    | S119:        | 2 | 2,1176 | 0,173 | 0,338  |
| 1 | P27816 MAP4_HUMAN  | E.SLQDVGQSAAPTFM*IS#PE.T          | S624:        | 2 | 2,1165 | 0,126 | -0,062 |
| 1 | P21127 CD2L1_HUMAN | E.VGEGTPQS#S#ALTE.G               | S398:S399:   | 2 | 2,1113 | 0,344 | -0,17  |
| 1 | P46821 MAP1B_HUMAN | E.QYGFLT#PTK.Q                    | T1067:       | 2 | 2,1089 | 0,33  | 0,494  |
| 1 | O15027 SC16A_HUMAN | E.TTVSQNYR.G                      |              | 2 | 2,1015 | 0,332 | -0,063 |
| 1 | Q9UQ35 SRRM2_HUMAN | E.QNSALPTSS#QDEELM*E.V            | S1233:       | 2 | 2,1012 | 0,125 | 1,822  |
| 1 | Q92547 TOPB1_HUMAN | E.NLDVS#AFQAPE.D                  | S350:        | 2 | 2,0986 | 0,216 | 0,096  |
| 1 | O43399 TPD54_HUMAN | R.TPAVEGLTEAEEL.L                 |              | 2 | 2,096  | 0,255 | 0      |

|   |                      |                             |              |   |        |       |        |
|---|----------------------|-----------------------------|--------------|---|--------|-------|--------|
| 1 | O14497 ARI1A_HUMAN   | E.GALS#PGVSTSGISSSQGE.Q     | S658:        | 2 | 2,09   | 0,248 | -0,143 |
| 1 | P18615 NELFE_HUMAN   | R.SLS#EQPVMDTATATE.Q        | S51:         | 2 | 2,0832 | 0,126 | 0,368  |
| 1 | Q15154 PCM1_HUMAN    | E.TAGS#LSGV#ITSE.L          | S328:S333:   | 2 | 2,0821 | 0,17  | 0,089  |
| 1 | Q8WUQ7 CS029_HUMAN   | E.QGVESEPLFPILK.Q           |              | 2 | 2,0813 | 0,185 | 0,335  |
| 1 | Q9BRT9 SLD5_HUMAN    | E.VDFLGQSDSDGGS#EE.V        | S16:         | 2 | 2,0758 | 0,205 | 0      |
| 1 | O75132 ZBED4_HUMAN   | D.NAS#IGKTLNE.G             | S812:        | 2 | 2,0649 | 0,087 | 1,407  |
| 1 | Q9BRT9 SLD5_HUMAN    | E.VDFLGQDS#DGG#EE.V         | S12:S16:     | 2 | 2,0556 | 0,186 | 0,604  |
| 1 | Q8WVT3 TTC15_HUMAN   | E.TIDLGGDEFGS#EENE.T        | S45:         | 2 | 2,0508 | 0,144 | 0      |
| 1 | Q9H4L7 SMRCD_HUMAN   | E.ATPQPSQPGPSSPIS#LS#AEEE.N | S37:S39:     | 2 | 2,0425 | 0,09  | -0,108 |
| 1 | ##Q9NS15 LTBP3_HUMAN | R.APT#TT#ATPHSQQVSR.E       | T770:T772:   | 2 | 2,0407 | 0,173 | -1,541 |
| 1 | O60239 3BP5_HUMAN    | E.FGMM*FPVLGPR.S            |              | 2 | 2,0394 | 0,148 | 0,289  |
| 1 | Q66K74 MAP1S_HUMAN   | R.LLSL#PLR.G                | S657:        | 2 | 2,0316 | 0,118 | -0,211 |
| 1 | Q96A49 SYAP1_HUMAN   | E.IS#TSPGVSE.F              | S267:        | 2 | 2,0314 | 0,152 | 0,127  |
| 1 | A6ND36 FA83G_HUMAN   | E.VYDPGSEDPR.G              |              | 2 | 2,0303 | 0,254 | 0      |
| 1 | P62424 RL7A_HUMAN    | K.KVVNPLFEK.R               |              | 2 | 2,0274 | 0,155 | -0,568 |
| 1 | Q13263 TIF1B_HUMAN   | E.LS#GGPGDGP.-              | S828:        | 2 | 2,0228 | 0,238 | 0,073  |
| 1 | P43358 MAGA4_HUMAN   | E.AAVS#S#SSPLVPGTLEEVPAAE.S | S41:S42:     | 2 | 2,0165 | 0,225 | -0,112 |
| 1 | Q5JTD0 TJAP1_HUMAN   | E.LNLPIS#PEEE.R             | S491:        | 2 | 2,012  | 0,248 | 0      |
| 1 | Q29RF7 PDS5A_HUMAN   | R.AAVGQES#PGGLE.A           | S1305:       | 2 | 2,011  | 0,344 | -0,204 |
| 1 | Q9UN86 G3BP2_HUMAN   | E.DEVFGDS#EPE.L             | S141:        | 2 | 2,0097 | 0,176 | 0      |
| 1 | Q96CX2 KCD12_HUMAN   | E.GAS#AGAPSPT#LE.L          | S171:T178:   | 2 | 2,0004 | 0,169 | -0,2   |
| 1 | P08240 SRPR_HUMAN    | E.AALSEDINLIR.G             |              | 2 | 1,9997 | 0,255 | -0,301 |
| 1 | Q9H3S7 PTN23_HUMAN   | K.EEPPVPEAPSSGPPSSSLE.L     |              | 2 | 1,9924 | 0,117 | -0,064 |
| 1 | P05386 RLA1_HUMAN    | E.S#DDDM*GFGLFD.-           | S104:        | 2 | 1,9919 | 0,21  | -0,093 |
| 1 | Q5T4S7 UBR4_HUMAN    | E.LAS#PVSP.E.L              | S178:        | 2 | 1,991  | 0,172 | 0,069  |
| 1 | Q13523 PRP4B_HUMAN   | E.DSNM*SVPSEPSSPQS#STR.T    | S572:        | 2 | 1,9886 | 0,238 | 0,552  |
| 1 | Q9UHR4 BI2L1_HUMAN   | E.AVTVPTPSPT#PVR.S          | T416:        | 2 | 1,9881 | 0,23  | -0,174 |
| 1 | P62807 H2B1C_HUMAN   | R.KESYSVYVYK.V              |              | 2 | 1,9863 | 0,254 | -0,385 |
| 1 | Q14247 SRC8_HUMAN    | E.ASS#QQGLAYATE.A           | S458:        | 2 | 1,9849 | 0,114 | 0,093  |
| 1 | Q9NTJ3 SMC4_HUMAN    | R.TESPATAAETASEE.L          |              | 2 | 1,9831 | 0,154 | -0,35  |
| 1 | Q8N3F8 MILK1_HUMAN   | E.VAQPS#PTAS#LE.S           | S414:S418:   | 2 | 1,9734 | 0,264 | 0,097  |
| 1 | Q8WUA4 TF3C2_HUMAN   | E.AGPVGNM*TVVDS#PGQE.V      | S25:         | 2 | 1,97   | 0,238 | -0,295 |
| 1 | Q8IVF2 AHNK2_HUMAN   | E.VTS#PNLDVSLPS#M*E.V       | S4419:S4428: | 2 | 1,9551 | 0,259 | 0,22   |

|   |                     |                             |                 |   |        |       |        |
|---|---------------------|-----------------------------|-----------------|---|--------|-------|--------|
| 1 | Q9HC35 EMAL4_HUMAN  | E.TVADTTLTK.A               |                 | 2 | 1,9521 | 0,342 | -0,128 |
| 1 | Q9UQ35 SRRM2_HUMAN  | E.QNSALPTSS#QDEE.L          | S1233:          | 2 | 1,9485 | 0,224 | -0,164 |
| 1 | Q16563 SYPL1_HUMAN  | K.TVTATFGYPFR.L             |                 | 2 | 1,9482 | 0,254 | 0,387  |
| 1 | Q6PJT7 ZC3HE_HUMAN  | D.LVQPDKPAS#PK.F            | S515:           | 2 | 1,9461 | 0,11  | -0,194 |
| 1 | Q14676 MDC1_HUMAN   | R.LLLAEDS#EEE.V             | S168:           | 2 | 1,9398 | 0,172 | 0,298  |
| 1 | Q13445 TMED1_HUMAN  | E.FTFLLPAGR.K               |                 | 2 | 1,9336 | 0,271 | -0,179 |
| 1 | P17029 ZKSC1_HUMAN  | E.ATGLS#PQAAQE.K            | S13:            | 2 | 1,9322 | 0,191 | 0,106  |
| 1 | Q9Y3T9 NOC2L_HUMAN  | E.DLQLS#EDD.-               | S746:           | 2 | 1,9244 | 0,223 | -0,12  |
| 1 | Q96RT1 LAP2_HUMAN   | E.NFNLLQNGDILNSS#TEE.K      | S715:           | 2 | 1,9203 | 0,268 | -0,118 |
| 1 | Q69YQ0 CYTSA_HUMAN  | E.GSAPGSVEDLLS#QDE.N        | S327:           | 2 | 1,9154 | 0,21  | -0,077 |
| 1 | O43290 SNUT1_HUMAN  | E.NMDIS#DEEE.G              | S474:           | 2 | 1,9049 | 0,227 | 0      |
| 1 | O60343 TBDC4_HUMAN  | E.LLPLS#PLS#PTME.E          | S806:S809:      | 2 | 1,8873 | 0,227 | -0,084 |
| 1 | P55201 BRPF1_HUMAN  | E.GVS#PIPQEIFE.Y            | S238:           | 2 | 1,88   | 0,17  | 0,377  |
| 1 | P04264 K2C1_HUMAN   | R.TLLEGEESR.M               |                 | 2 | 1,8792 | 0,087 | -0,118 |
| 1 | O43167 ZBT24_HUMAN  | D.T#VLASFE.D                | T22:            | 2 | 1,879  | 0,122 | -0,288 |
| 1 | P05388 RLA0_HUMAN   | E.S#DEDM*GFGLFD.-           | S307:           | 2 | 1,8671 | 0,11  | -0,092 |
| 1 | Q9GZR1 SENP6_HUMAN  | E.GTEQYVNSIS#D.-            | S1111:          | 2 | 1,8622 | 0,121 | 0,189  |
| 1 | Q96AY2 EME1_HUMAN   | E.TVTQTQPVR.L               |                 | 2 | 1,8583 | 0,168 | -0,118 |
| 1 | Q13009 TIAM1_HUMAN  | E.TDILS#DDDEFCE.S           | S1506:          | 2 | 1,85   | 0,128 | 0,159  |
| 1 | O95361 TRI16_HUMAN  | E.LDLMAPGPLPR.A             |                 | 2 | 1,8484 | 0,174 | 0,31   |
| 1 | P18615 NELFE_HUMAN  | R.S#LSEQPVM*DTATATE.Q       | S49:            | 2 | 1,8388 | 0,203 | 0,946  |
| 1 | Q9P0K7 RAI14_HUMAN  | E.IS#S#IRE.N                | S317:S318:      | 2 | 1,8317 | 0,135 | -0,071 |
| 1 | Q9BTT0 AN32E_HUMAN  | E.LLQQITYLD.G               |                 | 2 | 1,8267 | 0,182 | 0,11   |
| 1 | Q9H009 NACA2_HUMAN  | E.NTQPTVQEES#EEEE.V         | S166:           | 2 | 1,8225 | 0,226 | -0,333 |
| 1 | Q8TB72 PUM2_HUMAN   | E.VNAILS#PRS#ESGGLGVSM*VE.Y | S82:S85:        | 2 | 1,8107 | 0,245 | 0      |
| 1 | O75798 O75798_HUMAN | K.T#FPLFS#YKFAS#CK.Q        | T139:S144:S149: | 2 | 1,8085 | 0,087 | -1,662 |
| 1 | Q86SQ4 GP126_HUMAN  | R.SLEDEPR.L                 |                 | 2 | 1,8023 | 0,154 | 0,144  |
| 1 | Q9NRZ9 HELLS_HUMAN  | E.NS#EDSSPECLF.-            | S829:           | 2 | 1,8016 | 0,323 | -0,179 |
| 1 | Q71RC2 LARP4_HUMAN  | E.CTSAQQLNMSTSS#PCAA.E.L    | S546:           | 2 | 1,8015 | 0,257 | 0,06   |
| 1 | P05388 RLA0_HUMAN   | E.ES#DEDM*GFGLFD.-          | S307:           | 2 | 1,8009 | 0,086 | 0,251  |
| 1 | P40925 MDHC_HUMAN   | E.SAFEFLS#SA.-              | S332:           | 2 | 1,7855 | 0,342 | 0      |
| 1 | Q8IY92 BTBDC_HUMAN  | E.VILLDS#DEELE.L            | S474:           | 2 | 1,7671 | 0,084 | 0      |
| 1 | Q9H814 RNUXA_HUMAN  | E.ALASLDES#QE.G             | S368:           | 2 | 1,7352 | 0,177 | -0,214 |

|   |                    |                              |                 |   |        |       |        |
|---|--------------------|------------------------------|-----------------|---|--------|-------|--------|
| 1 | P04264 K2C1_HUMAN  | K.SISISVAR.G                 |                 | 2 | 1,7239 | 0,166 | 0,513  |
| 2 | P48960 CD97_HUMAN  | E.GSYDCVCSPGYEPVSGAK.T       |                 | 2 | 4,6868 | 0,473 | -0,316 |
| 2 | P35527 K1C9_HUMAN  | R.GGSGGSGYGGGGSGGGYGGGSGSR.G |                 | 2 | 4,641  | 0,469 | -0,34  |
| 2 | Q6PKG0 LARP1_HUMAN | E.TES#APGS#PRAVT#PVPTKTEE.V  | S517:S521:T526: | 3 | 4,6394 | 0,351 | -0,239 |
| 2 | Q9H357 PTN23_HUMAN | E.STPIPSSS#PPPLSSPLPEAPQPK.E | S1544:          | 3 | 4,5941 | 0,352 | -0,306 |
| 2 | P35908 K22E_HUMAN  | R.GGSGGGGSISSGGYGSGGGSGGR.Y  |                 | 2 | 4,3231 | 0,435 | -0,49  |
| 2 | P52788 SPSY_HUMAN  | D.EVVYDEDSPYQNIK.I           |                 | 2 | 4,2525 | 0,442 | -0,287 |
| 2 | Q13873 BMPR2_HUMAN | R.LVRPGEEDNAAISEVGTIR.Y      |                 | 3 | 4,1674 | 0,257 | -0,451 |
| 2 | P05556 ITB1_HUMAN  | E.CSTDEVNSEDMDAYCR.K         |                 | 2 | 4,077  | 0,591 | -0,313 |
| 2 | P35527 K1C9_HUMAN  | R.SGGGGGGGLSGGGSIR.S         |                 | 2 | 4,0595 | 0,466 | -0,495 |
| 2 | A6NKT7 RGPD3_HUMAN | K.ILDDSDSNLSVVK.K            |                 | 2 | 4,0109 | 0,447 | -0,521 |
| 2 | P27816 MAP4_HUMAN  | E.VGLLKDM*S#PLS#ETE.M        | S507:S510:      | 2 | 4,001  | 0,427 | -0,216 |
| 2 | P04264 K2C1_HUMAN  | K.WELLQQVDTSTR.T             |                 | 2 | 3,9611 | 0,508 | -0,413 |
| 2 | Q96TA1 NIBL1_HUMAN | E.YSNSGGGGSPSPST#PE.S        | T593:           | 2 | 3,8748 | 0,329 | -0,391 |
| 2 | O60218 AK1BA_HUMAN | E.AM*EELVDEGLVK.A            |                 | 2 | 3,7729 | 0,343 | -0,543 |
| 2 | Q16576 RBBP7_HUMAN | E.M*FEDTVEERVINE.E           |                 | 2 | 3,7318 | 0,336 | -0,375 |
| 2 | Q06210 GFPT1_HUMAN | K.GYDFESETDTETIAK.L          |                 | 2 | 3,7272 | 0,446 | -0,501 |
| 2 | Q14247 SRC8_HUMAN  | R.AKTQT#PPVS#PAPQPTEE.R      | T401:S405:      | 2 | 3,7257 | 0,498 | -0,756 |
| 2 | Q15185 TEBP_HUMAN  | D.SQDS#DDEKM*PDLE.-          | S151:           | 2 | 3,6431 | 0,338 | -0,38  |
| 2 | P30101 PDIA3_HUMAN | E.STAGEIPVVAIR.T             |                 | 2 | 3,6383 | 0,389 | -0,503 |
| 2 | Q01105 SET_HUMAN   | D.FYFDENPYFENK.V             |                 | 2 | 3,6343 | 0,412 | -0,756 |
| 2 | P21333 FLNA_HUMAN  | K.AFGPGLQGGSAGSPAR.F         |                 | 2 | 3,6051 | 0,401 | -0,427 |
| 2 | P04264 K2C1_HUMAN  | K.YEELQITAGR.H               |                 | 2 | 3,5786 | 0,195 | -0,31  |
| 2 | Q6NZI2 PTRF_HUMAN  | E.SDAVLVDKS#D.S              | S387:           | 2 | 3,573  | 0,282 | -0,432 |
| 2 | Q9Y6X4 K0888_HUMAN | E.ASSEQLDQFTQSAEK.A          |                 | 2 | 3,5562 | 0,407 | 0      |
| 2 | Q13873 BMPR2_HUMAN | R.YM*APEVLEGAVNLR.D          |                 | 2 | 3,5185 | 0,438 | -0,619 |
| 2 | Q02790 FKBP4_HUMAN | E.DLTEEEDGGIIR.R             |                 | 2 | 3,5156 | 0,402 | -0,362 |
| 2 | P04264 K2C1_HUMAN  | R.SLDLDSIAEVK.A              |                 | 2 | 3,5151 | 0,405 | -0,562 |
| 2 | P11021 GRP78_HUMAN | K.ELEEIVQPIISK.L             |                 | 2 | 3,5089 | 0,352 | -0,262 |
| 2 | Q15018 K0157_HUMAN | K.YPGSGADLPPPQR.A            |                 | 2 | 3,5073 | 0,351 | -0,36  |
| 2 | P04264 K2C1_HUMAN  | R.LRSEIDNVKK.Q               |                 | 3 | 3,4964 | 0,131 | 0,304  |
| 2 | P08195 4F2_HUMAN   | D.LLQIDPNFGSKE.D             |                 | 2 | 3,4459 | 0,377 | -0,538 |
| 2 | P04264 K2C1_HUMAN  | K.SKAEAESLYQSK.Y             |                 | 2 | 3,4403 | 0,351 | -0,455 |

|   |                    |                          |             |   |        |       |        |
|---|--------------------|--------------------------|-------------|---|--------|-------|--------|
| 2 | Q14694 UBP10_HUMAN | E.TKYS#PPAIS#PLVSE.K     | S365:S370:  | 2 | 3,4366 | 0,318 | -0,444 |
| 2 | Q9NPI6 DCP1A_HUMAN | R.KASS#PSPLTIGT#PE.S     | S523:T531:  | 2 | 3,3953 | 0,39  | -0,553 |
| 2 | P09651 ROA1_HUMAN  | R.NQGGYGGSSSSSYGSGR.R    |             | 2 | 3,3651 | 0,498 | -0,216 |
| 2 | P04264 K2C1_HUMAN  | R.LLRDYQELMNTK.L         |             | 3 | 3,3569 | 0,14  | -0,06  |
| 2 | Q99798 ACON_HUMAN  | K.SQFTITPGSEQIR.A        |             | 2 | 3,354  | 0,384 | 0      |
| 2 | P04264 K2C1_HUMAN  | R.TNAENEFVTIKK.D         |             | 2 | 3,3425 | 0,462 | -0,263 |
| 2 | P49848 TAF6_HUMAN  | E.AGDS#PPPAPGTPK.A       | S653:       | 2 | 3,3149 | 0,253 | -0,192 |
| 2 | Q9H3R5 CENPH_HUMAN | R.AGGPPQVAGAQAACSE.D     |             | 2 | 3,3022 | 0,423 | -0,581 |
| 2 | P13645 K1C10_HUMAN | R.ALEESNYELEGK.I         |             | 2 | 3,2943 | 0,369 | 0      |
| 2 | P28347 TEAD1_HUMAN | R.M*SDSADKPIDNDAE.G      |             | 2 | 3,2864 | 0,348 | -0,48  |
| 2 | P04264 K2C1_HUMAN  | K.SLNNQFASFIDK.V         |             | 2 | 3,2816 | 0,296 | -0,529 |
| 2 | P06756 ITAV_HUMAN  | D.GIDDFVSGVPR.A          |             | 2 | 3,2813 | 0,334 | -0,42  |
| 2 | Q86W92 LIPB1_HUMAN | D.FAARS#PSAS#ITDEDSNV.-  | S999:S1003: | 2 | 3,2809 | 0,256 | -0,063 |
| 2 | O94909 K0819_HUMAN | R.GPSQATS#PIRS#PQE.S     | S296:S300:  | 2 | 3,2601 | 0,257 | -0,453 |
| 2 | Q92597 NDRG1_HUMAN | R.TAS#GSSVSLDGTR.S       | S330:       | 2 | 3,2597 | 0,445 | -0,344 |
| 2 | Q7Z6Z7 HUWE1_HUMAN | E.AVGDTSAAGSSEQPR.A      |             | 2 | 3,2339 | 0,469 | -0,511 |
| 2 | P40926 MDHM_HUMAN  | K.GYLGPEQLPDCLK.G        |             | 2 | 3,2215 | 0,398 | -0,491 |
| 2 | O95232 CROP_HUMAN  | E.VNGTSEDIKS#EGDTQS#N.-  | S425:S431:  | 2 | 3,2133 | 0,44  | -0,377 |
| 2 | Q14247 SRC8_HUMAN  | R.AKT#QTPPV#PAPQPTEE.R   | T399:S405:  | 3 | 3,2106 | 0,206 | 0      |
| 2 | P05556 ITB1_HUMAN  | E.CSTDEVNSEDM*DAYCR.K    |             | 2 | 3,1991 | 0,471 | -0,744 |
| 2 | Q9P2R6 RERE_HUMAN  | E.IS#RPNS#PSEGEGE.S      | S675:S679:  | 2 | 3,1925 | 0,262 | -0,402 |
| 2 | P13647 K2C5_HUMAN  | K.YEELQQTAGR.H           |             | 2 | 3,1924 | 0,398 | -0,204 |
| 2 | Q13873 BMPR2_HUMAN | R.GLAYLHTELP.R.G         |             | 2 | 3,1817 | 0,403 | -1,153 |
| 2 | P05556 ITB1_HUMAN  | E.VNSEDMDAYCR.K          |             | 2 | 3,1477 | 0,385 | -0,538 |
| 2 | Q09666 AHNK_HUMAN  | E.GPEVDVNLPK.A           |             | 2 | 3,1433 | 0,424 | -0,343 |
| 2 | P35908 K22E_HUMAN  | R.GSSSGGGYSSGSSSYGSGGR.Q |             | 2 | 3,1233 | 0,47  | -0,07  |
| 2 | Q6NZI2 PTRF_HUMAN  | E.SDAVLVDKSDS#D.-        | S389:       | 2 | 3,1132 | 0,193 | -0,275 |
| 2 | Q16204 CCDC6_HUMAN | K.SGGIVIS#PFRLEE.L       | S52:        | 2 | 3,1014 | 0,271 | -0,822 |
| 2 | P49327 FAS_HUMAN   | E.AIVDGGINPDSL.R.G       |             | 2 | 3,0923 | 0,333 | -0,46  |
| 2 | O43143 DHX15_HUMAN | E.VDDLGPVGD.I            |             | 2 | 3,084  | 0,432 | -0,388 |
| 2 | Q15185 TEBP_HUMAN  | D.S#DDEKM*PDLE.-         | S151:       | 2 | 3,0836 | 0,188 | -0,574 |
| 2 | P35908 K22E_HUMAN  | K.YEELQVTVGR.H           |             | 2 | 3,0596 | 0,389 | -0,715 |
| 2 | P48960 CD97_HUMAN  | R.CNPGFSSFSE.I           |             | 2 | 3,0401 | 0,253 | -0,108 |

|   |                     |                          |              |   |        |       |        |
|---|---------------------|--------------------------|--------------|---|--------|-------|--------|
| 2 | Q15427 SF3B4_HUMAN  | E.FLSEEDADYAIK.I         |              | 2 | 3,0395 | 0,397 | -0,435 |
| 2 | P98082 DAB2_HUMAN   | K.LIGIDVDPDARGD.K        |              | 2 | 3,0339 | 0,282 | -0,09  |
| 2 | P35527 K1C9_HUMAN   | R.FSSSSGYGGSSR.V         |              | 2 | 3,02   | 0,45  | -0,592 |
| 2 | P18615 NELFE_HUMAN  | R.SIS#ADDDLQESSR.R       | S115:        | 2 | 3,0154 | 0,417 | -0,162 |
| 2 | P05787 K2C8_HUMAN   | R.TEM*ENEFLIK.K          |              | 2 | 3,0128 | 0,357 | -0,624 |
| 2 | P04792 HSPB1_HUMAN  | R.ALS#RQLS#SGVSE.I       | S78:S82:     | 2 | 3,0105 | 0,289 | -0,525 |
| 2 | Q00613 HSF1_HUMAN   | E.GRPPS#PPPTST#PE.K      | S363:T369:   | 2 | 3,0059 | 0,333 | -0,495 |
| 2 | Q9H8G2 CI082_HUMAN  | E.ILGLAES#SPNEPK.A       | S311:        | 2 | 3,0053 | 0,259 | -0,34  |
| 2 | P13645 K1C10_HUMAN  | R.SLLEGEQSSGGGR.G        |              | 2 | 3,0045 | 0,397 | -0,676 |
| 2 | Q6S8J3 A26CA_HUMAN  | E.M*ATAASSSLE.K          |              | 2 | 3,0039 | 0,356 | -0,456 |
| 2 | A2A2F9 A2A2F9_HUMAN | -.VVTDDDQGAPEAK.D        |              | 2 | 3,0035 | 0,446 | -0,181 |
| 2 | O95232 CROP_HUMAN   | E.VNGTSEDIKS#EGD.T       | S425:        | 2 | 2,9872 | 0,275 | -0,426 |
| 2 | P13645 K1C10_HUMAN  | R.LENEIQTYR.S            |              | 2 | 2,9824 | 0,119 | 0,209  |
| 2 | P04264 K2C1_HUMAN   | R.TNAENEFVIK.K           |              | 2 | 2,9794 | 0,374 | -0,193 |
| 2 | P46531 NOTC1_HUMAN  | E.INVDCCNPPVDPVSR.S      |              | 2 | 2,9542 | 0,339 | -0,575 |
| 2 | P05198 IF2A_HUMAN   | K.VVTDTDETELAR.Q         |              | 2 | 2,9523 | 0,493 | -0,452 |
| 2 | P25490 TTY1_HUMAN   | E.VVGGDDS#DGLRAED.G      | S118:        | 2 | 2,9428 | 0,355 | -0,329 |
| 2 | P18858 DNL1_HUMAN   | E.QATTSAQVACLYR.K        |              | 2 | 2,9405 | 0,429 | -0,415 |
| 2 | Q9NY61 AATF_HUMAN   | E.LLFQYPDTR.Y            |              | 2 | 2,9398 | 0,295 | -0,317 |
| 2 | P21333 FLNA_HUMAN   | K.YGGQVPNFPK.L           |              | 2 | 2,9137 | 0,232 | -0,284 |
| 2 | O15047 SET1A_HUMAN  | E.RVAGS#PVT#PLPEQE.A     | S1103:T1106: | 2 | 2,9135 | 0,168 | -0,372 |
| 2 | Q14671 PUM1_HUMAN   | E.VNSVLS#PRS#E.S         | S209:S212:   | 2 | 2,8985 | 0,183 | -0,391 |
| 2 | P49736 MCM2_HUMAN   | D.TVDPVQDEM*LAR.F        |              | 2 | 2,897  | 0,312 | 0,088  |
| 2 | O75534 CSDE1_HUMAN  | E.S#KSPAAPGQS#PTGSVCYE.R | S114:S123:   | 2 | 2,8809 | 0,338 | -0,123 |
| 2 | Q14247 SRC8_HUMAN   | R.AKTQT#PPVS#PAPQPTE.E   | T401:S405:   | 2 | 2,8615 | 0,258 | -1,282 |
| 2 | P14618 KPYM_HUMAN   | R.GDLGIEIPAEK.V          |              | 2 | 2,8488 | 0,335 | -0,214 |
| 2 | Q16576 RBBP7_HUMAN  | E.M*FEDTVEER.V           |              | 2 | 2,8482 | 0,331 | -0,521 |
| 2 | Q8NHV4 NEDD1_HUMAN  | E.SGNLNTS#PSSNQTRNS#E.K  | S516:S525:   | 2 | 2,8402 | 0,187 | -0,375 |
| 2 | O43379 WDR62_HUMAN  | E.AGPGDQQGDSYLR.V        |              | 2 | 2,8327 | 0,409 | -0,537 |
| 2 | P13645 K1C10_HUMAN  | R.SQYEQLAEQNRK.D         |              | 2 | 2,8317 | 0,35  | -0,408 |
| 2 | P13647 K2C5_HUMAN   | K.AQYEEIANR.S            |              | 2 | 2,816  | 0,345 | -0,335 |
| 2 | O43399 TPD54_HUMAN  | R.TPAVEGLTEAEEL.L        |              | 2 | 2,8121 | 0,389 | -0,649 |
| 2 | Q58FF8 H90B2_HUMAN  | K.YIDQEELNK.T            |              | 2 | 2,8069 | 0,242 | -0,53  |



|   |                    |                                    |                 |   |        |       |        |
|---|--------------------|------------------------------------|-----------------|---|--------|-------|--------|
| 2 | Q03164 HRX_HUMAN   | R.NLM*LPDGPKQED.G                  |                 | 2 | 2,7895 | 0,165 | -0,581 |
| 2 | P18206 VINC_HUMAN  | K.AVAGNISDPGLQK.S                  |                 | 2 | 2,7772 | 0,378 | -0,384 |
| 2 | P13645 K1C10_HUMAN | K.VTMQNLNDR.L                      |                 | 2 | 2,7693 | 0,264 | -0,447 |
| 2 | P08195 4F2_HUMAN   | R.VILDLPNYRGE.N                    |                 | 2 | 2,7649 | 0,196 | -0,176 |
| 2 | O43379 WDR62_HUMAN | E.VEAGPGDQQGDSYLR.V                |                 | 2 | 2,7634 | 0,436 | -0,46  |
| 2 | Q15366 PCBP2_HUMAN | K.IANPVEGSTDR.Q                    |                 | 2 | 2,7624 | 0,345 | -0,421 |
| 2 | Q6S8J3 A26CA_HUMAN | K.AGFAGDDAPR.A                     |                 | 2 | 2,7534 | 0,331 | -0,187 |
| 2 | Q09666 AHNK_HUMAN  | E.GPEVDVNLPKAD.V                   |                 | 2 | 2,7495 | 0,299 | -0,486 |
| 2 | O14576 DC111_HUMAN | K.SVSTPSEAGSQDSGD.L                |                 | 2 | 2,7473 | 0,38  | -0,514 |
| 2 | P07195 LDHB_HUMAN  | K.LIAPVAEEEEATVPNNK.I              |                 | 2 | 2,7433 | 0,176 | -0,576 |
| 2 | P08195 4F2_HUMAN   | D.LLQIDPNFGSK.E                    |                 | 2 | 2,7385 | 0,217 | -0,594 |
| 2 | Q09666 AHNK_HUMAN  | K.GDVDVSVPEVEGK.L                  |                 | 2 | 2,7347 | 0,354 | -0,367 |
| 2 | Q969V6 MKL1_HUMAN  | E.AIIVGQVNYPK.V                    |                 | 2 | 2,7248 | 0,333 | -0,507 |
| 3 | Q6PKG0 LARP1_HUMAN | E.TES#APGS#PRAVT#PVPTKTEE.V        | S517:S521:T526: | 3 | 6,3167 | 0,442 | -0,239 |
| 3 | Q13263 TIF1B_HUMAN | E.TKPVLM*ALAEGPGAEGPR.L            |                 | 3 | 5,2902 | 0,308 | -0,303 |
| 3 | Q16186 ADRM1_HUMAN | E.YLNNPPM*PGALGASGS#SGHE.L         | S142:           | 3 | 5,1075 | 0,392 | -0,357 |
| 3 | P08729 K2C7_HUMAN  | E.LQSQISDTSVVLISM*DNSR.S           |                 | 2 | 5,0276 | 0,592 | -0,306 |
| 3 | Q13111 CAF1A_HUMAN | E.VQAPCGAASGAGGGVGVDTGK.A          |                 | 3 | 5,0203 | 0,477 | -0,403 |
| 3 | O00505 IMA3_HUMAN  | E.DS#DVDADFKAQNVTL.E.A             | S60:            | 2 | 4,9805 | 0,482 | -0,396 |
| 3 | P04264 K2C1_HUMAN  | R.GGGGGGYGSGGSSYSGGGSYSGGGGGGGGR.G |                 | 3 | 4,972  | 0,375 | -0,077 |
| 3 | Q01167 FOXK2_HUMAN | E.S#LSREGS#PAPLEPEPGAAQPK.L        | S392:S398:      | 3 | 4,8847 | 0,365 | -0,402 |
| 3 | Q9GZR1 SENP6_HUMAN | E.SIS#PQPADSACSSPAPSTGKVE.A        | S352:           | 3 | 4,7777 | 0,344 | -0,325 |
| 3 | Q9NYF8 BCLF1_HUMAN | E.DQEALDYFS#DKE.S                  | S385:           | 2 | 4,7756 | 0,283 | 0,396  |
| 3 | Q13263 TIF1B_HUMAN | E.TKPVLM*ALAEGPGAEGPR.L            |                 | 2 | 4,7688 | 0,347 | -0,337 |
| 3 | Q12888 TP53B_HUMAN | E.NTQIEDTEPMS#PVLNSK.F             | S552:           | 2 | 4,7402 | 0,554 | -0,369 |
| 3 | Q13263 TIF1B_HUMAN | E.TKPVLMALAEGPGAEGPR.L             |                 | 3 | 4,7354 | 0,264 | -0,306 |
| 3 | P61158 ARP3_HUMAN  | E.FANPDFTQPISEVVDE.V               |                 | 2 | 4,7287 | 0,487 | -0,675 |
| 3 | Q13283 G3BP1_HUMAN | E.ETAPEDAQKSSS#PAPADIAQTVQE.D      | S232:           | 3 | 4,7254 | 0,396 | -0,215 |
| 3 | Q8IWB7 WDFY1_HUMAN | D.M*TPVVGCSLATGFS#PH.-             | S408:           | 2 | 4,7216 | 0,554 | -0,417 |
| 3 | Q99996 AKAP9_HUMAN | E.FGVDDSYSEQGAQDS#PTHLE.M          | S165:           | 3 | 4,7018 | 0,361 | 0      |
| 3 | Q9UHR4 BI2L1_HUMAN | E.IKTPASTPVSGT#PQAS#PM*IE.R        | T257:S261:      | 3 | 4,6972 | 0,406 | 0      |
| 3 | Q8WWM7 ATX2L_HUMAN | E.VDGLLTSEPMS#PVSSKTE.S            | S594:           | 2 | 4,6111 | 0,533 | -0,606 |
| 3 | Q14839 CHD4_HUMAN  | E.VTAVDGYET#DHQDYCE.V              | T367:           | 2 | 4,5565 | 0,471 | -0,554 |

|   |                     |                                       |            |   |        |       |        |
|---|---------------------|---------------------------------------|------------|---|--------|-------|--------|
| 3 | Q02952 AKA12_HUMAN  | K.GALNGQGALNSQEEEE.V                  |            | 2 | 4,5483 | 0,457 | -0,593 |
| 3 | O14641 DVL2_HUMAN   | E.STSLGDS#DEEDTMSR.F                  | S211:      | 2 | 4,5299 | 0,613 | -0,357 |
| 3 | P43358 MAGA4_HUMAN  | R.QPNEGSSSQEEEGPSTSPDAE.S             |            | 3 | 4,5288 | 0,383 | 0,338  |
| 3 | Q02952 AKA12_HUMAN  | E.QDELS#LQEGDLNGQK.G                  | S75:       | 2 | 4,528  | 0,478 | -0,557 |
| 3 | Q12888 TP53B_HUMAN  | E.SVAS#PQKTM*SVLSCICE.A               | S1028:     | 2 | 4,5207 | 0,431 | -0,49  |
| 3 | P61981 1433G_HUMAN  | D.NLTLWTSDDQDDDDGGEGNN.-              |            | 3 | 4,4956 | 0,382 | -0,352 |
| 3 | Q13263 TIF1B_HUMAN  | R.STAPSAASASASAAAASSPAGGGAEALE.L      |            | 3 | 4,4455 | 0,363 | 0,079  |
| 3 | Q12888 TP53B_HUMAN  | D.SLSTNSSDLVAPSPDAFR.S                |            | 2 | 4,4114 | 0,489 | -0,785 |
| 3 | O00505 IMA3_HUMAN   | E.SLEDS#DVDADFK.A                     | S60:       | 2 | 4,4076 | 0,526 | -0,429 |
| 3 | Q02952 AKA12_HUMAN  | E.QDELS#LQEGDLNGQK.G                  | S75:       | 3 | 4,3943 | 0,344 | 0      |
| 3 | Q13111 CAF1A_HUMAN  | E.VQAPCGAASGAGGGVGVDTGK.A             |            | 2 | 4,3413 | 0,562 | -0,605 |
| 3 | Q86WB0 NIPA_HUMAN   | K.DTSATSQSVNGS#PQAEQPSLE.S            | S62:       | 3 | 4,3378 | 0,249 | -0,413 |
| 3 | O60306 AQR_HUMAN    | K.KIVAPTVS#QINAE.F                    | S16:       | 2 | 4,3361 | 0,405 | -0,421 |
| 3 | P35527 K1C9_HUMAN   | R.GGSGGSYGGGGSGGGYGGGSGSR.G           |            | 2 | 4,3326 | 0,404 | -0,545 |
| 3 | Q13263 TIF1B_HUMAN  | R.STAPSAASASASAAAASSPAGGGAE.A         |            | 3 | 4,3106 | 0,38  | -0,456 |
| 3 | P08729 K2C7_HUMAN   | E.LQSQISDTSVVLISM*DNSR.S              |            | 3 | 4,2975 | 0,272 | -0,367 |
| 3 | A7XP29 A7XP29_HUMAN | R.GCADGRDADPTEEQM*AE.T                |            | 2 | 4,2956 | 0,474 | -0,196 |
| 3 | O75533 SF3B1_HUMAN  | E.AQGVGLDSTGYDQE.I                    |            | 2 | 4,2916 | 0,529 | -0,457 |
| 3 | Q96JM3 ZN828_HUMAN  | E.LQT#PLPS#PEPSKPASVSSPEPPK.S         | T169:S173: | 3 | 4,278  | 0,324 | 0      |
| 3 | P10244 MYBB_HUMAN   | E.DNS#LLNQGFLOAKPE.K                  | S629:      | 2 | 4,2652 | 0,511 | -0,487 |
| 3 | P06748 NPM_HUMAN    | D.MS#PLRPQNYLFGCE.L                   | S10:       | 2 | 4,2645 | 0,496 | -0,545 |
| 3 | Q99700 ATX2_HUMAN   | E.AVAM*PIPAAS#PTPASPASNR.A            | S727:      | 2 | 4,2548 | 0,472 | -0,427 |
| 3 | Q02952 AKA12_HUMAN  | E.TGTDGILAGSQEHDPGQGS#SSPEQAGSPTEGE.G | S741:      | 3 | 4,2389 | 0,394 | -0,347 |
| 3 | P51610 HCFC1_HUMAN  | E.AAASLVTSTVGGQQNGSVVR.V              |            | 3 | 4,2273 | 0,373 | -0,198 |
| 3 | P22102 PUR2_HUMAN   | E.GDGGPNTGGM*GAYCPAPQVSND.L           |            | 3 | 4,2255 | 0,336 | -0,257 |
| 3 | Q9HC35 EMAL4_HUMAN  | E.SRISS#PTLLENS#LE.Q                  | S919:S926: | 2 | 4,1764 | 0,37  | -0,34  |
| 3 | Q9NPI6 DCP1A_HUMAN  | R.KASSPS#PLTIGT#PE.S                  | S525:T531: | 2 | 4,1516 | 0,427 | -0,395 |
| 3 | P43358 MAGA4_HUMAN  | E.ALGLVGAQAPTTEEQE.A                  |            | 2 | 4,1435 | 0,457 | -0,302 |
| 3 | P43358 MAGA4_HUMAN  | E.S#AGPPQSPQGASALPTTISFTCWR.Q         | S59:       | 3 | 4,1432 | 0,357 | -0,493 |
| 3 | Q02952 AKA12_HUMAN  | E.QVS#GSQGPSEEKPAPLATEVFDE.K          | S386:      | 3 | 4,1053 | 0,311 | -0,663 |
| 3 | P35527 K1C9_HUMAN   | R.SGGGGGGGLGSGGSIR.S                  |            | 2 | 4,0627 | 0,52  | -0,297 |
| 3 | Q04637 IF4G1_HUMAN  | E.AALPPVS#PLKAALSEEE.L                | S1232:     | 2 | 4,0468 | 0,457 | -0,812 |
| 3 | Q7Z6Z7 HUWE1_HUMAN  | E.AVGDTSAAGSSEQPR.A                   |            | 2 | 4,0462 | 0,523 | -0,341 |

|   |                     |                                 |                 |   |        |       |        |
|---|---------------------|---------------------------------|-----------------|---|--------|-------|--------|
| 3 | Q7Z6Z7 HUWE1_HUMAN  | E.EAVGDTSAAGSSEQPR.A            |                 | 2 | 4,0298 | 0,566 | -0,312 |
| 3 | Q9NTJ3 SMC4_HUMAN   | E.EGPPPPSPDGASS#DAEPEPPSGR.T    | S28:            | 3 | 4,0051 | 0,323 | -0,396 |
| 3 | Q7Z309 F122B_HUMAN  | E.S#LSLSDSDFDKPE.K              | S89:            | 2 | 3,9872 | 0,374 | -0,161 |
| 3 | Q12888 TP53B_HUMAN  | E.DGENTQIEDTEPM*S#PVLNSK.F      | S552:           | 3 | 3,9795 | 0,378 | -0,159 |
| 3 | Q12888 TP53B_HUMAN  | E.NTQIEDTEPM*S#PVLNSK.F         | S552:           | 3 | 3,9407 | 0,336 | -0,641 |
| 3 | P09497 CLCB_HUMAN   | E.SGAPEAAEEDPAAAFLAQQE.S        |                 | 2 | 3,9169 | 0,55  | -0,488 |
| 3 | Q15365 PCBP1_HUMAN  | E.STGAQVQVAGDM*LPNSTE.R         |                 | 2 | 3,9159 | 0,517 | -0,469 |
| 3 | Q5VT52 K0460_HUMAN  | E.LS#DVEDDGSKIIVE.D             | S374:           | 2 | 3,9155 | 0,44  | -0,153 |
| 3 | A8MVB1 A8MVB1_HUMAN | E.KLVSPASAAAASS#PSSSPS#PQPVSE.L | S37:S43:        | 3 | 3,9024 | 1     | -0,145 |
| 3 | Q9NWW8 CS062_HUMAN  | E.AASADDGSLNTS#GAGPK.S          | S66:            | 2 | 3,8861 | 0,537 | -0,229 |
| 3 | P43358 MAGA4_HUMAN  | E.AAVSSSSPLVPGTLEEVPAE.S        |                 | 3 | 3,8734 | 0,326 | -0,182 |
| 3 | P52756 RBM5_HUMAN   | E.AQPSTSTSTQAPAAS#PTGVVPGTK.Y   | S444:           | 3 | 3,871  | 0,379 | -0,315 |
| 3 | Q8WWM7 ATX2L_HUMAN  | E.VDGLLTSEPMGS#PVSSKTE.S        | S594:           | 3 | 3,8645 | 0,302 | -0,182 |
| 3 | Q4KMP7 TB10B_HUMAN  | R.RAS#AGPAPGPVVTAE.G            | S412:           | 2 | 3,8566 | 0,496 | -0,251 |
| 3 | P42166 LAP2A_HUMAN  | E.SRSST#PLPTISS#AE.N            | T160:S168:      | 2 | 3,8557 | 1     | -0,073 |
| 3 | P43358 MAGA4_HUMAN  | R.QPNEGSSSQEEEGPSTSPDAE.S       |                 | 2 | 3,8536 | 0,604 | -0,339 |
| 3 | Q9H4A3 WNK1_HUMAN   | E.ATTAQVVSQPQAPQVLPQVSAGK.Q     |                 | 3 | 3,8491 | 0,423 | -0,159 |
| 3 | Q9H0H5 RGAP1_HUMAN  | E.SGSILS#DISFDKTDE.S            | S154:           | 2 | 3,8256 | 0,33  | -0,288 |
| 3 | P05556 ITB1_HUMAN   | E.CSTDEVNSEDMDAYCR.K            |                 | 2 | 3,8228 | 0,572 | -0,125 |
| 3 | Q12888 TP53B_HUMAN  | E.DM*PFS#PKASVAAM*E.A           | S265:           | 2 | 3,813  | 0,519 | -0,306 |
| 3 | P49792 RBP2_HUMAN   | K.AVVS#PPKFVFGSE.S              | S2510:          | 2 | 3,8094 | 0,362 | -0,676 |
| 3 | Q13283 G3BP1_HUMAN  | E.TAPEDAQKSSS#PAPADIAQTVQE.D    | S232:           | 3 | 3,8002 | 0,283 | -0,378 |
| 3 | P04264 K2C1_HUMAN   | K.WELLQVVDSTR.T                 |                 | 2 | 3,7904 | 0,477 | -0,579 |
| 3 | Q8WWK9 CKAP2_HUMAN  | E.VS#IEDTGVDVDPEKLE.M           | S534:           | 2 | 3,788  | 0,543 | -0,735 |
| 3 | Q12888 TP53B_HUMAN  | E.DGENTQIEDTEPMS#PVLNSK.F       | S552:           | 3 | 3,7864 | 0,256 | -0,24  |
| 3 | Q04637 IF4G1_HUMAN  | E.FSSS#PLQAPTPLASHTVE.I         | S343:           | 2 | 3,7861 | 0,492 | -0,438 |
| 3 | Q8N2Y8 RUSC2_HUMAN  | E.TSRPS#PLGSYS#PIR.S            | S775:S781:      | 3 | 3,7796 | 0,202 | 0,109  |
| 3 | P35908 K22E_HUMAN   | R.FLEQQNQVLQTK.W                |                 | 2 | 3,7756 | 0,383 | -0,579 |
| 3 | P35232 PHB_HUMAN    | E.LIANSLATAGDGLIE.L             |                 | 2 | 3,7608 | 0,454 | -0,335 |
| 3 | P25398 RS12_HUMAN   | E.GIAAGGVMDVNTALQE.V            |                 | 2 | 3,7538 | 0,428 | -0,395 |
| 3 | Q99549 MPP8_HUMAN   | E.GVGVVGEDNDAAAR.G              |                 | 2 | 3,7517 | 0,544 | -0,367 |
| 3 | Q5T4S7 UBR4_HUMAN   | R.TSPADHGGSVGSSEGGSAVDSVAGE.H   |                 | 3 | 3,7398 | 0,357 | -0,578 |
| 3 | Q92615 LARP5_HUMAN  | E.KFTSSQTQS#PT#PPKPPS#PSFE.L    | S516:T518:S524: | 3 | 3,7214 | 1     | -0,291 |

|   |                    |                                  |            |   |        |       |        |
|---|--------------------|----------------------------------|------------|---|--------|-------|--------|
| 3 | Q12888 TP53B_HUMAN | E.NTQIEDTEPMS#PVLNSK.F           | S552:      | 3 | 3,7073 | 0,402 | -0,184 |
| 3 | Q8N108 MIER1_HUMAN | E.LLSLYGYGSTVR.L                 |            | 2 | 3,7014 | 0,439 | -0,092 |
| 3 | P46937 YAP1_HUMAN  | E.STDSGLSM*S#SYSVPR.T            | S355:      | 2 | 3,698  | 0,411 | -0,219 |
| 3 | P43358 MAGA4_HUMAN | R.QPNEGSS#SQEEEGPSTSPDAE.S       | S89:       | 3 | 3,6898 | 0,274 | -0,408 |
| 3 | Q8WWM7 ATX2L_HUMAN | E.VDGLLTSEPM*GS#PVSSK.T          | S594:      | 2 | 3,6864 | 0,46  | -0,407 |
| 3 | P16615 AT2A2_HUMAN | E.LATICALCNDSDALDYNE.A           |            | 2 | 3,6834 | 0,492 | -0,377 |
| 3 | Q9Y2U8 MAN1_HUMAN  | E.SLLGGPGGASAAPAAGSK.V           |            | 2 | 3,6724 | 0,54  | -0,332 |
| 3 | P35579 MYH9_HUMAN  | E.LEDTLDSTAAQQE.L                |            | 2 | 3,6718 | 0,391 | -0,515 |
| 3 | Q9H0E9 BRD8_HUMAN  | E.IQQTPTNTVAAS#PAASGAPTLR.L      | S258:      | 3 | 3,665  | 0,461 | 0,247  |
| 3 | P40227 TCPZ_HUMAN  | E.SGQLVGVDLNTGEPM*VAAE.V         |            | 2 | 3,6649 | 0,49  | -0,192 |
| 3 | Q96A49 SYAP1_HUMAN | E.FVSDAFDACNLNQE.D               |            | 2 | 3,663  | 0,477 | -0,599 |
| 3 | Q04637 IF4G1_HUMAN | E.SEFSSS#PLQAPTPLASHTVE.I        | S343:      | 3 | 3,6591 | 0,319 | -0,253 |
| 3 | Q02952 AKA12_HUMAN | K.GALNGQGALNSQEE.E               |            | 2 | 3,6552 | 0,374 | -0,527 |
| 3 | P10809 CH60_HUMAN  | E.VGYDAM*AGDFVNM*VE.K            |            | 2 | 3,6547 | 0,376 | -0,37  |
| 3 | P08133 ANXA6_HUMAN | E.DLVQQDVQDLYE.A                 |            | 2 | 3,6425 | 0,337 | -0,333 |
| 3 | P60842 IF4A1_HUMAN | R.SRDNGPDGM*EPEGVIE.S            |            | 2 | 3,6315 | 0,431 | -0,71  |
| 3 | Q14566 MCM6_HUMAN  | E.AGALMLADNGVCCIDE.F             |            | 2 | 3,6313 | 0,385 | -0,571 |
| 3 | Q9BT09 CNPY3_HUMAN | E.LGGLEGDPSPPEDE.G               |            | 2 | 3,6259 | 0,417 | -0,338 |
| 3 | Q13263 TIF1B_HUMAN | R.STAPSAASASASAAASS#PAGGGAEALE.L | S50:       | 3 | 3,6237 | 0,405 | -0,305 |
| 3 | P08047 SP1_HUMAN   | E.SQPSPLALLAATCSR.I              |            | 2 | 3,6223 | 0,501 | -0,543 |
| 3 | Q96T60 PNKP_HUMAN  | E.TRTPESQPDTPPGT#PLVSQDE.K       | T118:T122: | 3 | 3,6218 | 0,319 | 0,228  |
| 3 | Q9UQR1 ZN148_HUMAN | E.FSEFPLVNVNDNR.A                |            | 2 | 3,6151 | 0,473 | -0,472 |
| 3 | O94915 FRYL_HUMAN  | E.AALTAS#QILSR.T                 | S2499:     | 2 | 3,6122 | 0,283 | -0,504 |
| 3 | Q92598 HS105_HUMAN | E.AGTQPQVQTDAQQTSQSPPSPE.L       |            | 3 | 3,6116 | 0,363 | -0,401 |
| 3 | Q9UHR4 BI2L1_HUMAN | E.IKTPASTPVSGT#PQAS#PMIE.R       | T257:S261: | 3 | 3,5905 | 0,29  | 0      |
| 3 | Q14103 HNRPD_HUMAN | E.QFGGDGAAAAATAAVGGSAGEQE.G      |            | 2 | 3,5853 | 0,456 | -0,429 |
| 3 | Q9NTJ3 SMC4_HUMAN  | E.GPPPPSPDGASS#DAEPEPPSGR.T      | S28:       | 3 | 3,563  | 0,275 | -0,336 |
| 3 | P49790 NU153_HUMAN | E.ITTSS#PSPINSSQALTNK.V          | S498:      | 2 | 3,5619 | 0,448 | -0,443 |
| 3 | P04264 K2C1_HUMAN  | R.SLDLDSIIAEVK.A                 |            | 2 | 3,5535 | 0,356 | -0,375 |
| 3 | Q8WWM7 ATX2L_HUMAN | E.VDGLLTSEPM*GS#PVSSKTE.S        | S594:      | 3 | 3,541  | 0,4   | -0,09  |
| 3 | P01112 RASH_HUMAN  | E.TCLLDILDITAGQEE.Y              |            | 2 | 3,5384 | 0,396 | -0,077 |
| 3 | Q14192 FHL2_HUMAN  | E.DQLLCTDCYSNE.Y                 |            | 2 | 3,5366 | 0,34  | -0,402 |
| 3 | O43379 WDR62_HUMAN | E.VEAGPGDQQGDSYLR.V              |            | 3 | 3,534  | 0,316 | -0,115 |

|   |                     |                                     |                 |   |        |       |        |
|---|---------------------|-------------------------------------|-----------------|---|--------|-------|--------|
| 3 | Q9Y3F4 STRAP_HUMAN  | E.IAS#ENSDCIFPSAPDVKA.-             | S335:           | 3 | 3,5245 | 0,171 | -0,183 |
| 3 | A8MVB1 A8MVB1_HUMAN | E.LDLS#SEPPQLTAK.G                  | S53:            | 2 | 3,5225 | 0,366 | -0,242 |
| 3 | P11413 G6PD_HUMAN   | E.VQANNVVLGQYVGNPDGEGE.A            |                 | 2 | 3,5219 | 0,406 | -0,237 |
| 3 | P61020 RAB5B_HUMAN  | E.AQAYADDNSLLFM*E.T                 |                 | 2 | 3,5171 | 0,521 | -0,609 |
| 3 | Q03252 LMNB2_HUMAN  | R.AGGPAT#PLS#PTRLSR.L               | T14:S17:        | 3 | 3,5137 | 0,31  | -0,111 |
| 3 | P33993 MCM7_HUMAN   | E.GGALVLADQGVCCIDE.F                |                 | 2 | 3,5089 | 0,433 | -0,291 |
| 3 | Q6S8J3 A26CA_HUMAN  | E.M*ATAASSS#SLEK.S                  | S934:           | 2 | 3,5066 | 0,384 | -0,382 |
| 3 | Q15154 PCM1_HUMAN   | K.SVFEPEDSSIVDNE.L                  |                 | 2 | 3,5033 | 0,39  | -0,234 |
| 3 | P35908 K22E_HUMAN   | R.NLDLDSIIAEVK.A                    |                 | 2 | 3,5011 | 0,319 | -0,275 |
| 3 | Q9UQR1 ZN148_HUMAN  | R.AGM*TSS#PDATTGQTFG.-              | S784:           | 2 | 3,5009 | 0,497 | -0,3   |
| 3 | Q9NQ55 SSF1_HUMAN   | R.VGGS#DEEASGIPSR.T                 | S359:           | 2 | 3,4971 | 0,477 | -0,339 |
| 3 | Q14966 ZN638_HUMAN  | E.DS#LADFNNLKEE.L                   | S1761:          | 2 | 3,4911 | 0,367 | -0,248 |
| 3 | Q9H8G2 CI082_HUMAN  | E.ILGLAESS#PNEPK.A                  | S312:           | 2 | 3,4899 | 0,349 | -0,17  |
| 3 | Q15029 U5S1_HUMAN   | E.MDFLADLM*DNSE.L                   |                 | 2 | 3,4892 | 0,429 | -0,431 |
| 3 | Q8N163 K1967_HUMAN  | E.VRSVAS#NQS#EME.F                  | S678:S681:      | 2 | 3,4868 | 0,463 | -0,571 |
| 3 | P49790 NU153_HUMAN  | K.VQM*TS#PSSTGSPMFK.F               | S516:           | 2 | 3,4655 | 0,358 | -0,508 |
| 3 | P17275 JUNB_HUMAN   | E.ARS#RDAT#PPVS#PINMEDQE.R          | S251:T255:S259: | 3 | 3,4587 | 0,181 | 0      |
| 3 | P40261 NNMT_HUMAN   | E.IVVTDYSDQNLQE.L                   |                 | 2 | 3,4509 | 0,378 | -0,24  |
| 3 | O14641 DVL2_HUMAN   | E.STSLGDS#DEEDTM*SR.F               | S211:           | 2 | 3,4443 | 0,529 | -0,353 |
| 3 | Q13685 AAMP_HUMAN   | E.SGAAADTPPLETLS#FHGDDEE.I          | S20:            | 2 | 3,4432 | 0,494 | -0,345 |
| 3 | Q96AP0 ACD_HUMAN    | E.LILGSETPSS#PR.A                   | S111:           | 2 | 3,4386 | 0,514 | 0,274  |
| 3 | P55072 TERA_HUMAN   | E.DNS#VVLSQPKM*DE.L                 | S37:            | 2 | 3,4277 | 0,418 | -0,297 |
| 3 | Q9Y5K6 CD2AP_HUMAN  | E.TDVVNFDDIASSE.N                   |                 | 2 | 3,4236 | 0,449 | -0,346 |
| 3 | P35908 K22E_HUMAN   | R.SKEEAEALYHSK.Y                    |                 | 3 | 3,4205 | 0,323 | -0,197 |
| 3 | O76024 WFS1_HUMAN   | R.SRLNATAS#LEQE.R                   | S32:            | 2 | 3,4153 | 0,38  | -0,436 |
| 3 | P54727 RD23B_HUMAN  | E.DATSALVTGQSYE.N                   |                 | 2 | 3,4113 | 0,502 | -0,182 |
| 3 | Q16514 TAF12_HUMAN  | K.IPGTPGAGGRLS#PE.N                 | S51:            | 2 | 3,4059 | 0,389 | 0      |
| 3 | O60271 JIP4_HUMAN   | E.TRNVS#TGS#AENEE.K                 | S329:S332:      | 2 | 3,4031 | 0,338 | -0,55  |
| 3 | Q12888 TP53B_HUMAN  | E.NTQIEDTEPM*S#PVLNSK.F             | S552:           | 2 | 3,397  | 0,47  | -0,305 |
| 3 | Q99961 SH3G1_HUMAN  | E.LGGESNFGDALLDAGE.S                |                 | 2 | 3,3943 | 0,239 | -0,546 |
| 3 | Q66K89 E4F1_HUMAN   | E.M*AEAPGS#PHQQGLGLAGEGE.Q          | S165:           | 3 | 3,3906 | 0,333 | -0,18  |
| 3 | P13645 K1C10_HUMAN  | R.LENEIQTYR.S                       |                 | 2 | 3,3885 | 0,092 | -0,314 |
| 3 | Q9ULI2 RIMKB_HUMAN  | E.LGPPASTAVDNM*SASSSSVDS#DPESTERE.L | S353:           | 3 | 3,3871 | 0,391 | -0,485 |

|   |                    |                              |            |   |        |       |        |
|---|--------------------|------------------------------|------------|---|--------|-------|--------|
| 3 | Q12888 TP53B_HUMAN | E.DVCIDLTCDSSGQAVPS#PATRSE.A | S630:      | 3 | 3,387  | 0,313 | 0,647  |
| 3 | Q13283 G3BP1_HUMAN | K.SS#SPAPADIAQTVQE.D         | S231:      | 2 | 3,3866 | 0,294 | -0,154 |
| 3 | Q969F1 TF3C6_HUMAN | E.LS#GIHSDFLSKCE.N           | S28:       | 2 | 3,3816 | 0,36  | -0,807 |
| 3 | P29966 MARCS_HUMAN | E.AGASAAACEAPSAAGPGAPPEQE.A  |            | 3 | 3,3781 | 0,24  | -0,354 |
| 3 | P60842 IF4A1_HUMAN | R.SRDNGPDGMEPEGVIE.S         |            | 2 | 3,377  | 0,357 | -0,287 |
| 3 | Q13873 BMPR2_HUMAN | R.YM*APEVLEGAVNLR.D          |            | 2 | 3,3743 | 0,437 | -0,619 |
| 3 | P60842 IF4A1_HUMAN | E.IVDSFDDMNLSE.S             |            | 2 | 3,3688 | 0,37  | -0,264 |
| 3 | Q8WZ73 RFFL_HUMAN  | R.RAS#LSDLTDLEDIE.G          | S240:      | 2 | 3,368  | 0,385 | -0,442 |
| 3 | Q8NCD3 HJURP_HUMAN | E.SVAWALAPAVQOS#PLKNE.L      | S140:      | 3 | 3,367  | 0,221 | -0,374 |
| 3 | O15027 SC16A_HUMAN | E.LVPPQQQAS#PPQLPK.A         | S891:      | 3 | 3,3659 | 0,238 | -0,214 |
| 3 | Q9H3P7 GCP60_HUMAN | R.GPGASGEQPEPGEAAAGGAAEE.A   |            | 3 | 3,3644 | 0,282 | -0,094 |
| 3 | P49790 NU153_HUMAN | E.ITTSSPSPINSSQALTNK.V       |            | 2 | 3,3582 | 0,373 | -0,595 |
| 3 | Q9NTJ3 SMC4_HUMAN  | E.EGPPPPSPDGAS#SDAEPEPPSGR.T | S27:       | 3 | 3,3474 | 0,126 | -0,317 |
| 3 | Q8N1G2 K0082_HUMAN | E.LALSLSSTSDDEPPSSVSHGAK.A   |            | 3 | 3,3448 | 0,353 | -0,502 |
| 3 | Q12888 TP53B_HUMAN | E.DTEPMS#PVLNSK.F            | S552:      | 2 | 3,3445 | 0,319 | -0,349 |
| 3 | P23526 SAHH_HUMAN  | E.IDPINALQAAM*E.G            |            | 2 | 3,3413 | 0,351 | -0,281 |
| 3 | P35908 K22E_HUMAN  | R.HGGGGGGFGGGGFGSR.S         |            | 3 | 3,3406 | 0,298 | 0,138  |
| 3 | Q13873 BMPR2_HUMAN | R.GLAYLHTELPR.G              |            | 2 | 3,3402 | 0,413 | -0,096 |
| 3 | Q6NZI2 PTRF_HUMAN  | E.SDAVLVDKS#DSD.-            | S387:      | 2 | 3,3362 | 0,351 | -0,458 |
| 3 | P14618 KPYM_HUMAN  | E.GSDVANAVLDGADCIM*LSGE.T    |            | 2 | 3,3334 | 0,382 | -0,546 |
| 3 | Q16513 PKN2_HUMAN  | E.LSLVAAS#PTLS#PR.Q          | S302:S306: | 2 | 3,3211 | 0,417 | -0,249 |
| 3 | Q6NZI2 PTRF_HUMAN  | E.SDAVLVDKS#D.S              | S387:      | 2 | 3,3193 | 0,271 | -0,432 |
| 3 | Q14103 HNRPD_HUMAN | E.QFGGDGAAAAATAAVGGSAGEQE.G  |            | 3 | 3,308  | 0,299 | -0,275 |
| 3 | Q9H8S9 MOL1B_HUMAN | R.QAVMLPEGEDLNE.W            |            | 2 | 3,3013 | 0,289 | -0,507 |
| 3 | Q16204 CCDC6_HUMAN | K.SGGIVISPFRLLEE.L           |            | 2 | 3,2975 | 0,348 | -0,608 |
| 3 | Q9UQ35 SRRM2_HUMAN | E.NSFGS#PLEFR.N              | S1329:     | 2 | 3,2853 | 0,447 | -0,198 |
| 3 | Q12888 TP53B_HUMAN | E.SVAS#PQKTMSVLSCICE.A       | S1028:     | 2 | 3,2849 | 0,419 | -0,494 |
| 3 | P23443 KS6B1_HUMAN | E.GGQLNES#M*DHGGVGPYELGM*E.H | S53:       | 3 | 3,2832 | 0,207 | -0,32  |
| 3 | P12270 TPR_HUMAN   | E.S#GGRSVPTTLQVAAPVTVFTE.S   | S2192:     | 3 | 3,2818 | 0,367 | -0,399 |
| 3 | Q8IY92 BTBDC_HUMAN | E.LFSIIDVDADQEPSQS#PPRSE.A   | S523:      | 3 | 3,2814 | 0,169 | -0,304 |
| 3 | Q96RS6 NUDC1_HUMAN | E.TNDPILGFQATNE.R            |            | 2 | 3,2799 | 0,386 | -0,344 |
| 3 | Q14566 MCM6_HUMAN  | E.AGALM*LADNGVCCIDE.F        |            | 2 | 3,2767 | 0,448 | -0,637 |
| 3 | Q96QR8 PURB_HUMAN  | R.GGGGGPCGFQPASR.G           |            | 2 | 3,275  | 0,394 | -0,187 |

|   |                     |                                      |            |   |        |       |        |
|---|---------------------|--------------------------------------|------------|---|--------|-------|--------|
| 3 | P04792 HSPB1_HUMAN  | R.ALS#RQLS#SGVSE.I                   | S78:S82:   | 2 | 3,2736 | 0,299 | -0,7   |
| 3 | O75400 PR40A_HUMAN  | E.VTSIVATVVDNE.N                     |            | 2 | 3,27   | 0,405 | -0,294 |
| 3 | O43815 STRN_HUMAN   | E.FDFLVTSEEGDNE.S                    |            | 2 | 3,2662 | 0,257 | -0,406 |
| 3 | Q8WUA4 TF3C2_HUMAN  | E.AGPVGNM*TVVDS#PGQEVLNQLDVK.T       | S25:       | 3 | 3,2595 | 0,141 | -0,428 |
| 3 | Q8WZ73 RFFL_HUMAN   | E.TQSIDS#EDSFVPGR.R                  | S229:      | 2 | 3,2595 | 0,313 | -0,226 |
| 3 | Q9Y6R0 NUMBL_HUMAN  | E.AAAAPTVPGPAQPGHVS#PT#PATTSPGEKGE.A | S263:T265: | 3 | 3,2526 | 1     | -0,365 |
| 3 | Q6P2E9 EDC4_HUMAN   | E.VEPLGLPQAS#PSR.T                   | S723:      | 2 | 3,2522 | 0,449 | -0,085 |
| 3 | Q15233 NONO_HUMAN   | E.GIGAIGGT#PPAFNR.A                  | T450:      | 2 | 3,2505 | 0,28  | 0,173  |
| 3 | Q9H074 PAIP1_HUMAN  | E.TLNGCVTTDDALQE.L                   |            | 2 | 3,2503 | 0,303 | -0,079 |
| 3 | Q14690 RRP5_HUMAN   | E.DDS#LVDVYYRE.G                     | S1498:     | 2 | 3,2462 | 0,298 | -0,42  |
| 3 | Q14568 HS902_HUMAN  | E.TQTQDQPM*EEEEVE.T                  |            | 2 | 3,2459 | 0,248 | -0,214 |
| 3 | Q9P217 ZSWM5_HUMAN  | E.SQQCELAS#TMLTAAKGDT#LRLR.T         | S809:T819: | 3 | 3,2423 | 0,118 | -0,491 |
| 3 | Q12888 TP53B_HUMAN  | E.S#VASPQKTM*SVLSCICE.A              | S1025:     | 3 | 3,2372 | 0,094 | -0,092 |
| 3 | Q9BQA1 MEP50_HUMAN  | E.DCSLAVLDSSLSE.L                    |            | 2 | 3,2357 | 0,286 | -0,262 |
| 3 | P38398 BRCA1_HUMAN  | E.SGISLFSDDPES#DPSEDRAPE.S           | S1577:     | 3 | 3,2338 | 0,374 | -0,55  |
| 3 | Q9H3P7 GCP60_HUMAN  | R.GPGASGEQPEPGEAAAGGAAEE.A           |            | 2 | 3,224  | 0,431 | -0,441 |
| 3 | P08047 SP1_HUMAN    | E.SQPS#PLALLAATCSR.I                 | S59:       | 2 | 3,2196 | 0,524 | -0,591 |
| 3 | Q96JM3 ZN828_HUMAN  | E.LQTPLPS#PEPSKPASVS#SPEPPK.S        | S173:S183: | 3 | 3,2157 | 0,323 | -0,362 |
| 3 | P14314 GLU2B_HUMAN  | E.LDTDGDGALSEAE.A                    |            | 2 | 3,2145 | 0,356 | -0,189 |
| 3 | P09211 GSTP1_HUMAN  | E.AALVDMVNDGVED.L                    |            | 2 | 3,2102 | 0,391 | -0,272 |
| 3 | Q5VY92 Q5VY92_HUMAN | R.LQDSSDPDTGSEEE.G                   |            | 2 | 3,2078 | 0,399 | -0,243 |
| 3 | Q13951 PEBB_HUMAN   | E.DALAQQAFEE.A                       |            | 2 | 3,2057 | 0,375 | 0      |
| 3 | Q9BVJ6 UT14A_HUMAN  | E.LSQDAEPAGS#QETK.D                  | S445:      | 2 | 3,2039 | 0,375 | -0,317 |
| 3 | P05386 RLA1_HUMAN   | E.SEESDDDM*GFGLFD.-                  |            | 2 | 3,1964 | 0,367 | -0,309 |
| 3 | Q9UKV3 ACINU_HUMAN  | E.IEPM*EGPAPPVLIQLS#PPNTDADTRE.L     | S453:      | 3 | 3,1948 | 0,469 | -0,254 |
| 3 | P49790 NU153_HUMAN  | K.VQM*TS#PSSTGSPM*FK.F               | S516:      | 2 | 3,1897 | 0,384 | -0,503 |
| 3 | P49281 NRAM2_HUMAN  | K.MSDDSVS#GDHGE.S                    | S15:       | 2 | 3,188  | 0,177 | -0,371 |
| 3 | Q8ND30 LIPB2_HUMAN  | E.IVM*VTQGPSER.T                     |            | 2 | 3,1831 | 0,437 | -0,495 |
| 3 | P06748 NPM_HUMAN    | D.M*S#PLRPQNYLFGCE.L                 | S10:       | 2 | 3,1788 | 0,457 | -0,607 |
| 3 | Q9UGP5 DPOLL_HUMAN  | E.ALLQTALSPPPPTRPVVS#PPQK.A          | S177:      | 3 | 3,1726 | 0,129 | -0,463 |
| 3 | Q16186 ADRM1_HUMAN  | E.YLNNPPM*PGALGASGS#SGHE.L           | S142:      | 2 | 3,1685 | 0,466 | -0,238 |
| 3 | Q13033 STRN3_HUMAN  | E.LAGGGGGGPGMAAPPR.Q                 |            | 2 | 3,1681 | 0,478 | -0,646 |
| 3 | A8MVB1 A8MVB1_HUMAN | E.KLVSPASAAASS#SSSS#PSPQPVSE.L       | S37:S41:   | 3 | 3,1654 | 0,252 | -0,217 |

|   |                      |                                     |                 |   |        |       |        |
|---|----------------------|-------------------------------------|-----------------|---|--------|-------|--------|
| 3 | Q99700 ATX2_HUMAN    | E.AVAM*PIPAASPTPASPASNR.A           |                 | 3 | 3,1631 | 0,232 | -0,571 |
| 3 | Q00839 HNRPU_HUMAN   | E.NDVITCFANFE.S                     |                 | 2 | 3,1613 | 0,321 | -0,459 |
| 3 | O43379 WDR62_HUMAN   | E.VEAGPGDQQGDSYLR.V                 |                 | 2 | 3,156  | 0,508 | -0,46  |
| 3 | P04264 K2C1_HUMAN    | K.YEELQITAGR.H                      |                 | 2 | 3,1559 | 0,216 | -0,31  |
| 3 | Q9H8S9 MOL1B_HUMAN   | R.QAVM*LPEGEDLNE.W                  |                 | 2 | 3,1551 | 0,247 | -0,334 |
| 3 | P08648 ITA5_HUMAN    | E.SSLSS#SEGEPEVEYK.S                | S127:           | 2 | 3,1502 | 0,292 | 0,714  |
| 3 | Q02952 AKA12_HUMAN   | E.IIEQIPSESLE.L                     |                 | 2 | 3,1465 | 0,413 | -0,307 |
| 3 | Q16513 PKN2_HUMAN    | E.LSLVAAS#PTLSPR.Q                  | S302:           | 2 | 3,1362 | 0,243 | -1,052 |
| 3 | ##Q9Y5H4 PCDG1_HUMAN | D.AT#LSVEHS#Y#TQLFARVGD.V           | T172:S178:Y179: | 3 | 3,1351 | 0,175 | -0,491 |
| 3 | Q969V6 MKL1_HUMAN    | E.AIIVGQVNYPK.V                     |                 | 2 | 3,1286 | 0,413 | -0,203 |
| 3 | P12956 KU70_HUMAN    | E.ALALDLM*EPE.Q                     |                 | 2 | 3,1243 | 0,41  | -0,109 |
| 3 | P62158 CALM_HUMAN    | E.ADIDGDGQVNYEE.F                   |                 | 2 | 3,1235 | 0,185 | -0,257 |
| 3 | Q9H9R9 DBND1_HUMAN   | R.RQPLSS#VSS#LE.V                   | S64:S67:        | 2 | 3,1233 | 0,291 | -0,358 |
| 3 | Q15393 SF3B3_HUMAN   | E.MDYEEADNDPTGE.A                   |                 | 2 | 3,1229 | 0,429 | -0,411 |
| 3 | P46937 YAP1_HUMAN    | K.QPPPLAPQS#PQGQVM*GGSNSNQQQM*R.L   | S251:           | 3 | 3,1217 | 0,295 | -0,187 |
| 3 | P31946 1433B_HUMAN   | E.AELQDICNDVLE.L                    |                 | 2 | 3,121  | 0,343 | -0,344 |
| 3 | Q12888 TP53B_HUMAN   | E.DTEPM*#PVLNSK.F                   | S552:           | 2 | 3,1145 | 0,347 | -0,345 |
| 3 | Q9Y490 TLN1_HUMAN    | E.M*DSALSVQNLE.K                    |                 | 2 | 3,1111 | 0,344 | -0,277 |
| 3 | O00299 CLIC1_HUMAN   | D.NYLTSPLPEEVDE.T                   |                 | 2 | 3,1077 | 0,405 | -0,243 |
| 3 | Q53F64 Q53F64_HUMAN  | E.GESPAGAGTGAAAGAGGATAAPPSGNQNGAE.G |                 | 3 | 3,1034 | 0,324 | -0,652 |
| 3 | P10599 THIO_HUMAN    | E.VDVDDCQDVASE.C                    |                 | 2 | 3,0964 | 0,35  | -0,09  |
| 3 | P04264 K2C1_HUMAN    | R.NKYEDEINKR.T                      |                 | 3 | 3,0938 | 0,227 | 0,07   |
| 3 | O60271 JIP4_HUMAN    | E.GVTGAATSPSTNGAS#PVM*DKPPEM*E.A    | S865:           | 3 | 3,0889 | 0,168 | -0,288 |
| 3 | P51610 HCFC1_HUMAN   | E.GQATTIPIVLTQQE.L                  |                 | 2 | 3,0867 | 0,37  | -0,814 |
| 3 | Q9H5N1 RABE2_HUMAN   | E.LLPLSRDPS#PPLEPLEE.L              | S204:           | 2 | 3,0836 | 0,2   | -0,308 |
| 3 | Q6S8J3 A26CA_HUMAN   | E.M*ATAASS#SSLEK.S                  | S933:           | 2 | 3,0783 | 0,318 | -0,286 |
| 3 | Q99700 ATX2_HUMAN    | E.AVAMPIPAAS#PTPASPASNR.A           | S727:           | 2 | 3,0738 | 0,394 | -0,246 |
| 3 | P50502 F10A1_HUMAN   | E.ILSDPEVLAAM*QDPE.V                |                 | 2 | 3,0701 | 0,274 | -1,633 |
| 3 | Q96EB6 SIRT1_HUMAN   | E.FYNGLEDEPDVPER.A                  |                 | 2 | 3,07   | 0,305 | -0,291 |
| 3 | Q9UQR1 ZN148_HUMAN   | E.FSEFPLNVVNDNR.A                   |                 | 3 | 3,0695 | 0,154 | -0,236 |
| 3 | P35527 K1C9_HUMAN    | R.FSSSSGYGGGSSR.V                   |                 | 2 | 3,069  | 0,402 | -0,395 |
| 3 | P11413 G6PD_HUMAN    | E.VQANNVVLGQYVGNPDGEGE.A            |                 | 3 | 3,0654 | 0,115 | -0,178 |
| 3 | P40227 TCPZ_HUMAN    | E.DAYILTCNVSL.Y                     |                 | 2 | 3,0585 | 0,301 | -0,436 |



|   |                    |                                      |              |   |        |       |        |
|---|--------------------|--------------------------------------|--------------|---|--------|-------|--------|
| 3 | P49023 PAXI_HUMAN  | E.SSVSPVPAITVNQGE.M                  |              | 2 | 3,0488 | 0,435 | -0,154 |
| 3 | P24534 EF1B_HUMAN  | E.GYVPSQADVAVFE.A                    |              | 2 | 3,0452 | 0,493 | -0,177 |
| 3 | Q13153 PAK1_HUMAN  | E.DYNSSNALNVK.A                      |              | 2 | 3,0446 | 0,399 | -0,398 |
| 3 | Q8N8S7 ENAH_HUMAN  | R.QNS#QLPAQVQNGPSQEELE.I             | S125:        | 3 | 3,0409 | 0,111 | -0,504 |
| 3 | Q9NVP1 DDX18_HUMAN | E.DTSFASLCNLVNE.N                    |              | 2 | 3,0405 | 0,4   | -0,332 |
| 3 | Q5H9F3 BCRL1_HUMAN | E.GTSVTFS#PLKSPPQLE.R                | S599:        | 2 | 3,0396 | 0,437 | -0,414 |
| 3 | P46937 YAP1_HUMAN  | E.STDSGLSM*SSYSVPR.T                 |              | 2 | 3,0374 | 0,299 | -0,23  |
| 3 | P49792 RBP2_HUMAN  | E.TT#PKAVVS#PPKFVFGSE.S              | T2504:S2510: | 2 | 3,0371 | 0,333 | -0,313 |
| 3 | Q969R5 LMBL2_HUMAN | E.AGELPT#SPLHLLSPGTPR.S              | T66:         | 3 | 3,0202 | 0,112 | -0,38  |
| 3 | P10809 CH60_HUMAN  | E.VGYDAMAGDFVNM*VE.K                 |              | 2 | 3,0187 | 0,506 | -0,523 |
| 3 | Q15029 U5S1_HUMAN  | E.M*DFLADLM*DNSE.L                   |              | 2 | 3,0178 | 0,315 | -0,426 |
| 3 | Q9NR45 SIAS_HUMAN  | R.ALGSPT#KQLLPCEMACNE.K              | T277:        | 3 | 3,0138 | 0,142 | -0,784 |
| 3 | Q9NTJ3 SMC4_HUMAN  | R.TESPATAAETASEE.L                   |              | 2 | 3,0116 | 0,465 | -0,525 |
| 3 | P13645 K1C10_HUMAN | R.LKYENEVALR.Q                       |              | 3 | 3,0091 | 0,18  | 0,518  |
| 3 | Q12888 TP53B_HUMAN | D.S#PQKLAILDQE.L                     | S727:        | 2 | 3,001  | 0,188 | -0,369 |
| 3 | Q969R5 LMBL2_HUMAN | E.AGELPTS#PLHLLSPGT#PR.S             | S67:T76:     | 2 | 2,9978 | 0,315 | -0,426 |
| 3 | Q15021 CND1_HUMAN  | E.LGLVGATADDTEAE.L                   |              | 2 | 2,9965 | 0,416 | -0,358 |
| 3 | Q9H9E3 COG4_HUMAN  | D.S#PPKLSGVQQPSEGVGGGR.C             | S6:          | 3 | 2,9959 | 0,164 | -0,286 |
| 3 | P48960 CD97_HUMAN  | E.GSYDCVCSPGYEPVSGAK.T               |              | 3 | 2,9891 | 0,348 | 0      |
| 3 | Q8IVF2 AHNK2_HUMAN | K.TTDLSIQSPS#ADLE.V                  | S1712:       | 2 | 2,9876 | 0,299 | -0,078 |
| 3 | Q9H3P7 GCP60_HUMAN | E.VS#VDGLTLSPDPEERPGAE.G             | S13:         | 2 | 2,9815 | 0,474 | -0,238 |
| 3 | Q00613 HSF1_HUMAN  | E.GRPPS#PPPTST#PE.K                  | S363:T369:   | 2 | 2,9803 | 0,264 | -0,412 |
| 3 | Q96PE2 ARHGH_HUMAN | R.STISSSFGNEETPSSKE.A                |              | 2 | 2,98   | 0,378 | -0,683 |
| 3 | Q93045 STMN2_HUMAN | K.ALEENNNFSK.M                       |              | 2 | 2,9784 | 0,311 | -0,628 |
| 3 | P04264 K2C1_HUMAN  | R.NSKIEISELNR.V                      |              | 3 | 2,9769 | 0,104 | -0,07  |
| 3 | Q8N3U4 STAG2_HUMAN | E.DVM*MS#SEGRIEDLNE.G                | S1177:       | 2 | 2,9741 | 0,386 | -0,402 |
| 3 | Q9BUA3 YK007_HUMAN | E.QEFLVGSS#PGGSGR.A                  | S82:         | 2 | 2,9733 | 0,333 | -0,251 |
| 3 | Q8IX01 SFR14_HUMAN | E.AS#GPSKPKAGVDISEAPQTS#PCPSADIDMK.T | S754:S773:   | 3 | 2,9691 | 0,314 | -0,112 |
| 3 | Q9Y3T9 NOC2L_HUMAN | E.AGLAPGELQQLAQGPEDE.L               |              | 2 | 2,9689 | 0,269 | -0,535 |
| 3 | P10599 THIO_HUMAN  | E.VDVDDCQDVASECE.V                   |              | 2 | 2,9632 | 0,417 | -0,521 |
| 3 | Q14444 CAPR1_HUMAN | E.AASAPAVEDQVPEAEPEPAEE.Y            |              | 3 | 2,9613 | 0,287 | -0,086 |
| 3 | P63279 UBC9_HUMAN  | E.LLNEPNIQDPAQAE.A                   |              | 2 | 2,9605 | 0,316 | -0,157 |
| 3 | Q9H4A3 WNK1_HUMAN  | K.QSSTPGSLFLSPPAPAPK.N               |              | 2 | 2,9559 | 0,312 | -0,479 |

|   |                    |                               |            |   |        |       |        |
|---|--------------------|-------------------------------|------------|---|--------|-------|--------|
| 3 | P35527 K1C9_HUMAN  | K.TLNDRMRQEYEQLIK.N           |            | 3 | 2,9544 | 0,343 | -0,395 |
| 3 | P22102 PUR2_HUMAN  | E.GDGGPNTGGMGAYCPAPQVSND.L    |            | 2 | 2,9543 | 0,548 | -0,46  |
| 3 | P55884 EIF3B_HUMAN | R.AEPGQQQPAEPPPAE.G           |            | 2 | 2,9516 | 0,314 | -0,302 |
| 3 | Q9Y3F4 STRAP_HUMAN | E.IAS#ENSDFPSAPDVKA.-         | S335:      | 2 | 2,9506 | 0,399 | -0,61  |
| 3 | Q9Y618 NCOR2_HUMAN | E.QLS#PRGQAGPPESLGVPTAQE.A    | S1173:     | 3 | 2,9484 | 0,1   | 0      |
| 3 | Q16563 SYPL1_HUMAN | K.TVTATFGYPFR.L               |            | 2 | 2,9399 | 0,471 | -0,194 |
| 3 | Q04656 ATP7A_HUMAN | E.VESTSNS#PSSSSLQK.I          | S357:      | 2 | 2,9378 | 0,371 | -0,302 |
| 3 | P22670 RFX1_HUMAN  | E.LQS#PQPQAQPPGGQK.Q          | S60:       | 2 | 2,9377 | 0,297 | -0,52  |
| 3 | O43488 ARK72_HUMAN | E.LDTAFM*YSDGQSE.T            |            | 2 | 2,936  | 0,394 | -0,33  |
| 3 | P31689 DNJA1_HUMAN | E.NGFLS#PDKLSLLE.K            | S335:      | 2 | 2,9301 | 0,34  | -0,161 |
| 3 | Q9Y3A5 SBDS_HUMAN  | E.DLISAFGTDDQTE.I             |            | 2 | 2,9295 | 0,403 | -0,432 |
| 3 | Q12888 TP53B_HUMAN | E.TSVISIDS#PQK.L              | S727:      | 2 | 2,9291 | 0,322 | -0,389 |
| 3 | P08047 SP1_HUMAN   | R.IESPENSNNSQGPSQSGGTGE.L     |            | 3 | 2,9286 | 0,23  | -0,334 |
| 3 | Q9BVJ6 UT14A_HUMAN | E.LSQDAEPAGSQET#KDSGSQEVLSL   | T448:      | 3 | 2,9283 | 0,134 | -0,356 |
| 3 | Q9UK76 HN1_HUMAN   | E.NVDTLPGSLGQSE.E             |            | 2 | 2,9255 | 0,337 | -0,17  |
| 3 | Q13685 AAMP_HUMAN  | E.LDPGPPDPPDLAQE.M            |            | 2 | 2,9247 | 0,255 | -0,66  |
| 3 | Q9NRY4 GRLF1_HUMAN | E.ACSTTEVFNS#PR.A             | S970:      | 2 | 2,9218 | 0,243 | -0,773 |
| 3 | Q15942 ZYX_HUMAN   | E.GGPEAPIPPPPQPR.E            |            | 3 | 2,9116 | 0,223 | 0,195  |
| 3 | Q6PKG0 LARP1_HUMAN | R.AVT#PVPKTEE.V               | T526:      | 2 | 2,9058 | 0,351 | -0,487 |
| 3 | Q9Y5B6 GCFC_HUMAN  | E.DGVIIS#EHGEDE.M             | S180:      | 2 | 2,905  | 0,179 | -0,265 |
| 3 | P55265 DSRAD_HUMAN | E.SQT#PTPSATSFSGK.S           | T601:      | 2 | 2,9039 | 0,273 | -0,451 |
| 3 | P31946 1433B_HUMAN | K.QTTVSNSQQAYQE.A             |            | 2 | 2,9007 | 0,386 | -0,082 |
| 3 | P12270 TPR_HUMAN   | E.IDSQQEEEPVQASDE.S           |            | 2 | 2,8972 | 0,501 | -0,788 |
| 3 | Q8IXM3 RM41_HUMAN  | E.SEETPLTAAQLFSE.A            |            | 2 | 2,896  | 0,4   | -0,24  |
| 3 | P35579 MYH9_HUMAN  | E.GDSTDLSQIAE.L               |            | 2 | 2,8952 | 0,231 | -0,098 |
| 3 | P50548 ERF_HUMAN   | E.GAGALAPPPPPQIK.V            |            | 3 | 2,8941 | 0,129 | -0,065 |
| 3 | O75643 U520_HUMAN  | R.NALLQLTDSQIAD.V             |            | 2 | 2,8927 | 0,331 | -0,261 |
| 3 | P09211 GSTP1_HUMAN | E.YVNLPIGNGKQ.-               |            | 2 | 2,8882 | 0,311 | -0,371 |
| 3 | P35580 MYH10_HUMAN | E.DQSILCTGE.S                 |            | 2 | 2,8835 | 0,29  | 0,06   |
| 3 | P63241 IF5A1_HUMAN | E.ILITVLSAM*TEE.A             |            | 2 | 2,8809 | 0,284 | -0,365 |
| 3 | P18858 DNL1_HUMAN  | E.QATTSQAQVACLK.R             |            | 2 | 2,8801 | 0,303 | -0,249 |
| 3 | P07954 FUMH_HUMAN  | E.LGYLTAEQFDE.W               |            | 2 | 2,8794 | 0,296 | -0,949 |
| 3 | Q14807 KIF22_HUMAN | E.IGS#PEPM*AAPASASQKLS#PLQK.L | S412:S427: | 3 | 2,879  | 0,281 | -0,307 |

|   |                     |                            |              |   |        |       |        |
|---|---------------------|----------------------------|--------------|---|--------|-------|--------|
| 3 | P13010 KU86_HUMAN   | E.GGDVDDLLDM*I.-           |              | 2 | 2,8779 | 0,417 | -0,31  |
| 3 | Q9Y490 TLN1_HUMAN   | E.MDSALSVVQNLE.K           |              | 2 | 2,8721 | 0,112 | -0,654 |
| 3 | Q02952 AKA12_HUMAN  | E.ISPPAESGQAVEE.C          |              | 2 | 2,8721 | 0,475 | -0,464 |
| 3 | P22102 PUR2_HUMAN   | E.DVDAGQIILQE.A            |              | 2 | 2,8706 | 0,246 | -0,305 |
| 3 | Q96DY7 MTBP_HUMAN   | E.LS#PGKLQVLPFE.K          | S639:        | 2 | 2,8683 | 0,248 | -0,52  |
| 3 | Q15018 K0157_HUMAN  | K.YPGSGADLPPPQR.A          |              | 2 | 2,8659 | 0,296 | -0,09  |
| 3 | P48960 CD97_HUMAN   | E.GSYDCVCSPGYEPVSGAK.T     |              | 2 | 2,865  | 0,487 | -0,442 |
| 3 | P33992 MCM5_HUMAN   | E.GGAM*VLADGGVVCIDE.F      |              | 2 | 2,8627 | 0,22  | -0,386 |
| 3 | Q9Y696 CLIC4_HUMAN  | E.YLNSPLPDEIDE.N           |              | 2 | 2,8614 | 0,317 | -0,347 |
| 3 | Q9BUR4 WDR79_HUMAN  | E.ANGSLS#EEEANGPELGSGK.A   | S114:        | 2 | 2,8602 | 0,385 | -0,127 |
| 3 | Q5VU20 Q5VU20_HUMAN | E.LTDLDQSNVTEETPE.G        |              | 2 | 2,8592 | 0,361 | -0,505 |
| 3 | Q15365 PCBP1_HUMAN  | R.AITIAGVPQSVTE.C          |              | 2 | 2,8581 | 0,365 | -0,474 |
| 3 | Q9Y5J1 UTP18_HUMAN  | E.LVFGDVENDE.D             |              | 2 | 2,8571 | 0,273 | -0,429 |
| 3 | Q9UQ88 CD2L2_HUMAN  | E.GDYVPDS#PALLPIELKQE.L    | S395:        | 2 | 2,8558 | 0,403 | -0,355 |
| 3 | Q96CB8 INT12_HUMAN  | E.TQSS#PITVQSSK.D          | S128:        | 2 | 2,8547 | 0,331 | -0,273 |
| 3 | P27816 MAP4_HUMAN   | E.IEVAQANDIISSTE.I         |              | 2 | 2,8545 | 0,187 | -0,491 |
| 3 | P05556 ITB1_HUMAN   | E.VNSEDMDAYCR.K            |              | 2 | 2,8512 | 0,401 | -0,628 |
| 3 | Q969R5 LMBL2_HUMAN  | E.LPT#SPLHLLSPGT#PR.S      | T66:T76:     | 3 | 2,8471 | 0,199 | -0,21  |
| 3 | O94833 BPAEA_HUMAN  | E.DASCGLLAGLQACE.A         |              | 2 | 2,8457 | 0,402 | -0,25  |
| 3 | Q08945 SSRP1_HUMAN  | D.S#DEDQHDAYLE.R           | S444:        | 2 | 2,8429 | 0,213 | -0,348 |
| 3 | Q8NI36 WDR36_HUMAN  | E.LIEYDSPEQLNE.Q           |              | 2 | 2,8412 | 0,29  | -0,673 |
| 3 | Q7Z6Z7 HUWE1_HUMAN  | R.AGSS#TPGDAPPAVAE.V       | S2888:       | 2 | 2,8391 | 0,294 | -0,347 |
| 3 | P05783 K1C18_HUMAN  | E.DGEDFNLGDALD.S           |              | 2 | 2,8331 | 0,257 | -0,476 |
| 3 | Q12888 TP53B_HUMAN  | K.TMSVLSICE.A              |              | 2 | 2,8232 | 0,419 | -0,305 |
| 3 | Q15942 ZYG_HUMAN    | R.EKVSS#IDLE.I             | S143:        | 2 | 2,822  | 0,128 | -0,333 |
| 3 | Q12888 TP53B_HUMAN  | E.TSVIS#IDSPQKLAILDQE.L    | S724:        | 2 | 2,8148 | 0,295 | -0,898 |
| 3 | O00512 BCL9_HUMAN   | R.AVT#PVSQGSNSSSADPK.A     | T315:        | 2 | 2,8144 | 0,389 | -0,499 |
| 3 | P46939 UTRO_HUMAN   | E.RTNGSFLTDSSS#TTGS#VEDE.H | S3217:S3221: | 3 | 2,813  | 0,121 | -0,65  |
| 3 | Q9HC35 EMAL4_HUMAN  | E.SRIS#S#SPTLLE.N          | S917:S918:   | 2 | 2,8121 | 0,183 | -0,362 |
| 3 | P04792 HSPB1_HUMAN  | E.GT#LTVEAPMPK.L           | T162:        | 2 | 2,8087 | 0,303 | -0,897 |
| 3 | Q969R5 LMBL2_HUMAN  | E.AGELPT#SPLHLLSPGT#PR.S   | T66:T76:     | 3 | 2,8022 | 0,214 | -0,457 |
| 3 | Q02952 AKA12_HUMAN  | K.GALNGQGALNSQE.E          |              | 2 | 2,8019 | 0,256 | -0,291 |
| 3 | Q04637 IF4G1_HUMAN  | E.AALPPVS#PLKAALSEEE.L     | S1232:       | 3 | 2,8003 | 0,11  | -0,508 |

|   |                     |                              |            |   |        |       |        |
|---|---------------------|------------------------------|------------|---|--------|-------|--------|
| 3 | P08047 SP1_HUMAN    | E.SQPSPLALLAATCSR.I          |            | 3 | 2,7945 | 0,302 | -0,116 |
| 3 | Q6NZI2 PTRF_HUMAN   | E.SDAVLVDKS#DS#D.-           | S387:S389: | 2 | 2,7918 | 0,127 | -0,346 |
| 3 | P35579 MYH9_HUMAN   | E.DTL DSTAAQQE.L             |            | 2 | 2,7888 | 0,369 | -0,207 |
| 3 | O75376 NCOR1_HUMAN  | E.TAPSTS#PSLAVPSTKPAEDE.S    | S764:      | 3 | 2,7886 | 0,167 | -0,354 |
| 3 | Q16514 TAF12_HUMAN  | E.VDPNEQLDEDEVEE.M           |            | 2 | 2,7791 | 0,171 | 0,239  |
| 3 | Q8TEU7 RPGF6_HUMAN  | E.VGDVDLTR.L                 |            | 2 | 2,7759 | 0,289 | -0,07  |
| 3 | O60684 IMA7_HUMAN   | E.TQQQFIFQQPEAPM*E.G         |            | 2 | 2,7739 | 0,279 | -0,531 |
| 3 | Q13428 TCOF_HUMAN   | K.LDSS#PSVSTLAAKDDPDGKQE.A   | S1228:     | 3 | 2,7738 | 0,145 | -0,314 |
| 3 | Q00613 HSF1_HUMAN   | E.LLS#PQEP RPPEAE.N          | S444:      | 2 | 2,7735 | 0,111 | -0,298 |
| 3 | P67870 CSK2B_HUMAN  | E.DNPNQSDLIEQAAE.M           |            | 2 | 2,7719 | 0,181 | -0,237 |
| 3 | O75376 NCOR1_HUMAN  | E.VIS#PASSPAPPQEK.L          | S1977:     | 2 | 2,7716 | 0,362 | -0,328 |
| 3 | Q8N3U4 STAG2_HUMAN  | E.DVMMSS#EGRIEDLNE.G         | S1178:     | 2 | 2,7708 | 0,199 | 0,406  |
| 3 | Q9UHR4 BI2L1_HUMAN  | E.TEAVTVPTPS#PTPVR.S         | S414:      | 2 | 2,77   | 0,402 | -0,299 |
| 3 | P16333 NCK1_HUMAN   | E.EGDS#PLGDHVGSLSE.K         | S166:      | 2 | 2,7696 | 0,307 | -0,386 |
| 3 | P22234 PUR6_HUMAN   | E.IVLADVIDND.S               |            | 2 | 2,7681 | 0,447 | -0,449 |
| 3 | Q15393 SF3B3_HUMAN  | E.M*DYEEADNDPTGE.A           |            | 2 | 2,768  | 0,361 | -0,244 |
| 3 | P17987 TCPA_HUMAN   | E.AAMLGQAEEVVQE.R            |            | 2 | 2,7656 | 0,212 | -0,266 |
| 3 | Q02952 AKA12_HUMAN  | E.LS#LQEGDLNGQK.G            | S75:       | 2 | 2,7642 | 0,498 | -0,441 |
| 3 | P49588 SYAC_HUMAN   | E.LLDDPSGPAGSLTSVE.F         |            | 2 | 2,7619 | 0,235 | -0,157 |
| 3 | P04264 K2C1_HUMAN   | R.TNAENEFVTIK.K              |            | 2 | 2,7596 | 0,42  | -0,193 |
| 3 | Q8TB72 PUM2_HUMAN   | E.VNAILS#PRS#E.S             | S82:S85:   | 2 | 2,7593 | 0,125 | 0,392  |
| 3 | O75937 DNJC8_HUMAN  | E.VLQIDPEVTDEE.I             |            | 2 | 2,756  | 0,432 | -0,264 |
| 3 | P78371 TCPB_HUMAN   | E.GTIGDM*AILGITE.S           |            | 2 | 2,7536 | 0,353 | -0,28  |
| 3 | Q9HCM4 E41L5_HUMAN  | E.M*ENS#PLLSPR.S             | S517:      | 2 | 2,7505 | 0,267 | -0,492 |
| 3 | Q99961 SH3G1_HUMAN  | E.GDVITLTNQIDE.N             |            | 2 | 2,7419 | 0,287 | -0,093 |
| 3 | O95336 6PGL_HUMAN   | E.SQVITINPELPVEE.A           |            | 2 | 2,7399 | 0,287 | -0,467 |
| 3 | P42224 STAT1_HUMAN  | E.TQLCQPGLVIDLE.T            |            | 2 | 2,7365 | 0,32  | -0,411 |
| 3 | P13645 K1C10_HUMAN  | K.VTMQNLNDR.L                |            | 2 | 2,7365 | 0,228 | -0,447 |
| 3 | P49790 NU153_HUMAN  | E.ITTSSPS#PINSSQALTNK.V      | S500:      | 3 | 2,7364 | 0,124 | -0,475 |
| 3 | P25789 PSA4_HUMAN   | E.DMACSVAGITSDANVLTNE.L      |            | 3 | 2,735  | 0,2   | -0,372 |
| 3 | O43399 TPD54_HUMAN  | E.NGSDNLPS#SAGSGDKPLSDPAPF.- | S191:      | 3 | 2,7322 | 0,126 | -0,238 |
| 3 | Q9Y508 ZN313_HUMAN  | R.DCGGAAQLAGPAAE.A           |            | 2 | 2,7282 | 0,183 | -0,379 |
| 3 | B2RA01 B2RA01_HUMAN | K.AQYEDIAQK.S                |            | 2 | 2,7238 | 0,173 | -0,229 |

|   |                      |                              |       |   |        |       |        |
|---|----------------------|------------------------------|-------|---|--------|-------|--------|
| 3 | Q92974 ARHG2_HUMAN   | R.EPALPLEPDSGGNTS#PGVTANGE.A | S695: | 3 | 2,721  | 0,107 | -0,32  |
| 3 | Q13873 BMPR2_HUMAN   | K.GSLDERPVAVK.V              |       | 2 | 2,7187 | 0,165 | -0,833 |
| 3 | O00165 HAX1_HUMAN    | E.DNDLDSQVSQE.G              |       | 2 | 2,712  | 0,352 | -0,39  |
| 3 | P48960 CD97_HUMAN    | R.CNPGFSSFSE.I               |       | 2 | 2,7093 | 0,224 | -0,108 |
| 3 | P49368 TCPG_HUMAN    | E.VGDGTTSVIILAGE.M           |       | 2 | 2,7085 | 0,172 | -0,275 |
| 3 | O75436 VP26A_HUMAN   | E.ITGIGPSTTTETE.T            |       | 2 | 2,7076 | 0,242 | 0,187  |
| 3 | Q15149 PLEC1_HUMAN   | E.DLLQDAQDE.K                |       | 2 | 2,7064 | 0,316 | -0,233 |
| 3 | Q13151 ROA0_HUMAN    | E.ADAAM*AAS#PHAVDGNTVE.L     | S68:  | 2 | 2,7044 | 0,329 | -0,535 |
| 3 | Q6P2E9 EDC4_HUMAN    | R.T#RSPDVISSASTALSQDIPE.I    | T727: | 2 | 2,7044 | 0,368 | -0,566 |
| 3 | Q5T4S7 UBR4_HUMAN    | K.LCTFTITQKE.F               |       | 2 | 2,6971 | 0,338 | -0,295 |
| 3 | Q15185 TEBP_HUMAN    | D.SQDS#DDEKM*PDLE.-          | S151: | 2 | 2,6857 | 0,382 | -0,228 |
| 3 | P10599 THIO_HUMAN    | E.VDVDDCQDVAS#ECE.V          | S67:  | 2 | 2,6815 | 0,321 | -0,496 |
| 3 | Q66K89 E4F1_HUMAN    | E.MAEAPGS#PHQQGLGLAGEGE.Q    | S165: | 2 | 2,6811 | 0,488 | -0,908 |
| 3 | P49755 TMEDA_HUMAN   | K.NYEEIAKVE.K                |       | 2 | 2,6787 | 0,292 | 0,223  |
| 3 | P23526 SAHH_HUMAN    | E.IDPINALQAAME.G             |       | 2 | 2,6762 | 0,449 | -0,19  |
| 3 | Q15185 TEBP_HUMAN    | D.S#DDEKM*PDLE.-             | S151: | 2 | 2,676  | 0,169 | 0      |
| 3 | Q8N5D0 WDTC1_HUMAN   | E.VM*LLNM*GYR.I              |       | 2 | 2,6758 | 0,278 | -0,432 |
| 3 | P18583 SON_HUMAN     | E.SDS#FLKFDSEPSAVAL.E.L      | S154: | 2 | 2,6706 | 0,314 | -0,571 |
| 3 | Q8N5D0 WDTC1_HUMAN   | E.VM*LLNMGYR.I               |       | 2 | 2,6704 | 0,286 | 0      |
| 3 | P05783 K1C18_HUMAN   | R.ST#FSTNYR.S                | T8:   | 2 | 2,6697 | 0,341 | -0,231 |
| 3 | Q86WJ1 CHD1L_HUMAN   | K.YVSGDVTHPQAGAE.D           |       | 2 | 2,6696 | 0,386 | -0,512 |
| 3 | Q01082 SPTB2_HUMAN   | R.AQTLPTSVVTITSE.S           |       | 2 | 2,667  | 0,364 | -0,169 |
| 3 | Q13033 STRN3_HUMAN   | E.LAGGGGGGPGM*AAPPR.Q        |       | 2 | 2,6657 | 0,296 | -0,273 |
| 3 | Q9NSE4 SYIM_HUMAN    | E.TISTLSGVDLE.N              |       | 2 | 2,6654 | 0,264 | -0,322 |
| 3 | Q53H82 LACB2_HUMAN   | E.NAIFSGDCILGE.G             |       | 2 | 2,6591 | 0,301 | -0,094 |
| 3 | P46777 RL5_HUMAN     | E.SIDGQPGAFTCYLD.A           |       | 2 | 2,659  | 0,258 | -0,553 |
| 3 | Q09666 AHNK_HUMAN    | E.GDLTGPSVGEVDPDVE.L         |       | 2 | 2,6571 | 0,306 | -0,389 |
| 3 | ##Q9Y5B9 SP16H_HUMAN | R.SGRGLLDEAEDK.E             |       | 2 | 2,6554 | 0,153 | -0,567 |
| 3 | Q6NZI2 PTRF_HUMAN    | E.SDAVLVDK.S                 |       | 2 | 2,6551 | 0,265 | 0,072  |
| 3 | P61978 HNRPK_HUMAN   | E.GLQLPSPTATSQLPLESDAVE.C    |       | 2 | 2,6535 | 0,492 | -0,567 |
| 3 | Q6GMV2 SMYD5_HUMAN   | E.NYLFVCSPK.C                |       | 2 | 2,6533 | 0,308 | 0      |
| 3 | P17655 CAN2_HUMAN    | E.GFEDFTGGIAE.W              |       | 2 | 2,6485 | 0,328 | -0,213 |
| 3 | Q16718 NDUA5_HUMAN   | E.DQLQGGQLEE.V               |       | 2 | 2,6477 | 0,203 | -0,109 |

|   |                     |                            |          |   |        |       |        |
|---|---------------------|----------------------------|----------|---|--------|-------|--------|
| 3 | Q8IWU2 LMTK2_HUMAN  | E.LSQLTALR.S               |          | 2 | 2,6473 | 0,18  | -0,135 |
| 3 | Q9UQ35 SRRM2_HUMAN  | R.NSGPLGTEM*NTGFSSE.V      |          | 2 | 2,6471 | 0,269 | -0,148 |
| 3 | Q8WWM7 ATX2L_HUMAN  | K.ISLAPTDVKE.L             |          | 2 | 2,6447 | 0,237 | -0,227 |
| 3 | Q02952 AKA12_HUMAN  | D.GS#TPVADFDPAGTTQKDE.I    | S1174:   | 2 | 2,6388 | 0,477 | -0,255 |
| 3 | P30153 2AAA_HUMAN   | E.QLGTFTTLVGGPE.Y          |          | 2 | 2,634  | 0,201 | -0,647 |
| 3 | P35527 K1C9_HUMAN   | R.GSGSGSYGGGSGGGYGGGSGSR.G |          | 3 | 2,6323 | 0,35  | -0,306 |
| 3 | Q07666 KHDR1_HUMAN  | E.YGYDDTYAEQSYE.G          |          | 2 | 2,6314 | 0,347 | -0,228 |
| 3 | P42704 LPPRC_HUMAN  | E.DYFTQAM*E.V              |          | 2 | 2,6304 | 0,198 | 0,06   |
| 3 | P13645 K1C10_HUMAN  | K.IRLENEIQTYR.S            |          | 3 | 2,6299 | 0,099 | -0,191 |
| 3 | P08047 SP1_HUMAN    | R.IES#PNENSNSQGPSQSGGTGE.L | S73:     | 3 | 2,6257 | 0,15  | -0,081 |
| 3 | Q16186 ADRM1_HUMAN  | R.SQSAAVTPSSTTSSTR.A       |          | 2 | 2,6227 | 0,389 | -0,389 |
| 3 | P63027 VAMP2_HUMAN  | R.LQQTQAQVDE.V             |          | 2 | 2,622  | 0,106 | -0,316 |
| 3 | Q03252 LMNB2_HUMAN  | R.AGGPAT#PLS#PTR.L         | T14:S17: | 2 | 2,6218 | 0,454 | -0,285 |
| 3 | B2RDE1 B2RDE1_HUMAN | D.QTLLDLNEM*.-             |          | 2 | 2,6194 | 0,351 | -0,112 |
| 3 | Q13765 NACA_HUMAN   | E.LEEQDSTQATTQQAQLAAAAE.I  |          | 3 | 2,619  | 0,259 | -0,332 |
| 3 | Q15185 TEBP_HUMAN   | D.S#DEDMSNFDRFSE.M         | S113:    | 2 | 2,6183 | 0,256 | -0,441 |
| 3 | Q16576 RBBP7_HUMAN  | E.M*FEDTVEER.V             |          | 2 | 2,6181 | 0,329 | -0,416 |
| 3 | O75439 MPPB_HUMAN   | E.ILADIQNSTLGEAE.I         |          | 2 | 2,6166 | 0,488 | -0,308 |
| 3 | P46100 ATRX_HUMAN   | E.T#FSSAEGTVDKDTTIM*E.L    | T887:    | 2 | 2,6162 | 0,388 | -0,633 |
| 3 | Q5JSH3 WDR44_HUMAN  | K.VGLSTFKETE.N             |          | 2 | 2,6135 | 0,39  | -0,11  |
| 3 | P43246 MSH2_HUMAN   | E.LLSDDSNFGQFE.L           |          | 2 | 2,6123 | 0,428 | -0,356 |
| 3 | P27816 MAP4_HUMAN   | K.KCS#LPAEEDSVLE.K         | S636:    | 2 | 2,6122 | 0,239 | -0,078 |
| 3 | P68104 EF1A1_HUMAN  | K.DGNASGTTLLE.A            |          | 2 | 2,6037 | 0,221 | -0,226 |
| 3 | Q9UG63 ABCF2_HUMAN  | E.NGDVVTEPQVAE.K           |          | 2 | 2,6018 | 0,253 | 0,194  |
| 3 | Q9UHR4 BI2L1_HUMAN  | R.SISTVNLSE.N              |          | 2 | 2,6005 | 0,236 | -0,321 |
| 3 | P55072 TERA_HUMAN   | E.M*FAQTLQQR.G             |          | 2 | 2,5983 | 0,178 | -0,597 |
| 3 | O75534 CSDE1_HUMAN  | E.VQDGIELQAGDEVE.F         |          | 2 | 2,5976 | 0,289 | -0,406 |
| 3 | Q2NKX8 ERC6L_HUMAN  | E.TSLGAPEPLSGEQLVGS#PQDK.A | S1188:   | 3 | 2,5954 | 0,085 | -0,167 |
| 3 | Q8IVF2 AHNK2_HUMAN  | E.ADVSLPSM*QGDLK.T         |          | 2 | 2,5937 | 0,351 | -0,266 |
| 3 | Q99549 MPP8_HUMAN   | E.EGVGVVGEDNDAAAR.G        |          | 2 | 2,5936 | 0,327 | -0,502 |
| 3 | P35030 TRY3_HUMAN   | D.TLDNDIMLIK.L             |          | 2 | 2,593  | 0,283 | -0,415 |
| 3 | Q8N655 CJ012_HUMAN  | E.AAQVNPIM*PK.E            |          | 2 | 2,5925 | 0,392 | -0,112 |
| 3 | Q16186 ADRM1_HUMAN  | E.IM*APILANADVQE.R         |          | 2 | 2,5925 | 0,253 | -0,261 |

|   |                    |                              |                 |   |        |       |        |
|---|--------------------|------------------------------|-----------------|---|--------|-------|--------|
| 3 | P55769 NH2L1_HUMAN | E.FIVMAADAEPLE.I             |                 | 2 | 2,5922 | 0,149 | -0,28  |
| 3 | Q9UPN3 MACF1_HUMAN | E.DLLQDSM*DE.K               |                 | 2 | 2,5885 | 0,237 | -0,338 |
| 3 | Q5JSH3 WDR44_HUMAN | K.VGLSTFKE.T                 |                 | 2 | 2,5879 | 0,158 | 0      |
| 3 | P62158 CALM_HUMAN  | E.ADIDGDGQVNYE.E             |                 | 2 | 2,5875 | 0,112 | -0,377 |
| 3 | Q8WU90 ZC3HF_HUMAN | E.IS#LEDLIERE.R              | S231:           | 2 | 2,5872 | 0,206 | -0,376 |
| 3 | Q08945 SSRP1_HUMAN | E.YADS#DEDQHDAYLE.R          | S444:           | 2 | 2,5818 | 0,23  | -0,139 |
| 3 | O15530 PDPK1_HUMAN | D.AVPIQSSVVLCSM*VR.T         | S25:            | 3 | 2,5789 | 0,174 | -0,645 |
| 3 | P35527 K1C9_HUMAN  | R.HGVQELEIELQSLK.K           |                 | 3 | 2,5785 | 0,122 | -0,299 |
| 3 | Q13685 AAMP_HUMAN  | E.TLS#FHGDEEIE.V             | S20:            | 2 | 2,5778 | 0,086 | -0,415 |
| 3 | Q6S8J3 A26CA_HUMAN | E.MATAASS#SSLEK.S            | S933:           | 2 | 2,5777 | 0,267 | -0,193 |
| 3 | P78347 GTF2I_HUMAN | E.DLYVEGLPE.G                |                 | 2 | 2,5773 | 0,22  | -0,236 |
| 3 | Q12888 TP53B_HUMAN | E.DMPFS#PKASVAAME.A          | S265:           | 2 | 2,5759 | 0,217 | -0,469 |
| 3 | Q6S8J3 A26CA_HUMAN | E.LPDGQVITIGNE.R             |                 | 2 | 2,5749 | 0,307 | -0,097 |
| 3 | P04049 RAF1_HUMAN  | E.DINACTLTS#PRLPVF.-         | S642:           | 2 | 2,5705 | 0,369 | -0,453 |
| 3 | P28347 TEAD1_HUMAN | R.MSDSADKPIDNDAE.G           |                 | 2 | 2,5703 | 0,104 | -0,162 |
| 3 | P13010 KU86_HUMAN  | E.EGGDVEDLLDM*1.-            |                 | 2 | 2,5686 | 0,329 | -0,373 |
| 3 | P62333 PRS10_HUMAN | E.VIELPLTNPE.L               |                 | 2 | 2,5677 | 0,301 | -0,542 |
| 3 | P13645 K1C10_HUMAN | K.DAEAWFNEK.S                |                 | 2 | 2,5675 | 0,316 | -0,11  |
| 3 | Q9UHR4 BI2L1_HUMAN | R.SIS#TVNLSE.N               | S422:           | 2 | 2,5674 | 0,087 | 0      |
| 3 | Q8ND30 LIPB2_HUMAN | E.IVMVTQGPSER.T              |                 | 2 | 2,5639 | 0,307 | -0,401 |
| 3 | P52756 RBM5_HUMAN  | K.YAVPDTSTYQYDE.S            |                 | 2 | 2,5639 | 0,331 | -0,393 |
| 3 | Q86WB0 NIPA_HUMAN  | E.GIAPEEGGVDK.D              |                 | 2 | 2,5622 | 0,425 | -0,32  |
| 3 | P15311 EZRI_HUMAN  | E.SLQDEGAEPTGYSAE.L          |                 | 2 | 2,5601 | 0,352 | -0,471 |
| 3 | P13645 K1C10_HUMAN | R.LASYLDKVR.A                |                 | 2 | 2,5596 | 0,121 | -0,115 |
| 3 | P35908 K22E_HUMAN  | R.GSGGGGSGSISGGGYGSGGGSGGR.Y |                 | 2 | 2,5563 | 0,311 | -0,35  |
| 3 | O43776 SYNC_HUMAN  | E.LIGLAPAGGADNLINEE.S        |                 | 2 | 2,5533 | 0,297 | -0,293 |
| 3 | P04264 K2C1_HUMAN  | K.SKAEAESLYQSK.Y             |                 | 3 | 2,5526 | 0,253 | -0,068 |
| 3 | Q5JWR5 DOP1_HUMAN  | R.ST#RHSNPEEHAT#Y#YFTTFSKE.L | T307:T317:Y318: | 3 | 2,548  | 0,166 | 1,65   |
| 3 | P50548 ERF_HUMAN   | E.GAGALAPPPPPQIK.V           |                 | 2 | 2,5451 | 0,313 | -0,346 |
| 3 | Q8NCD3 HJURP_HUMAN | E.SVAWALAPAVPQS#PLKNE.L      | S140:           | 2 | 2,5444 | 0,307 | -0,374 |
| 3 | Q8IUD2 RB6I2_HUMAN | E.DNLNDSSQQLQD.S             |                 | 2 | 2,5418 | 0,173 | -0,443 |
| 3 | P35527 K1C9_HUMAN  | K.STMQELNSR.L                |                 | 2 | 2,5394 | 0,257 | -0,114 |
| 3 | Q13765 NACA_HUMAN  | E.TVPATEQELPQPQAE.T          |                 | 2 | 2,5387 | 0,352 | -0,149 |

|   |                    |                            |       |   |        |       |        |
|---|--------------------|----------------------------|-------|---|--------|-------|--------|
| 3 | P35606 COPB2_HUMAN | E.LEVDLDNLE.L              |       | 2 | 2,5385 | 0,197 | -0,115 |
| 3 | Q9NZI8 IF2B1_HUMAN | E.VLDSLLAQYGTVE.N          |       | 2 | 2,5383 | 0,32  | -0,607 |
| 3 | Q96PK6 RBM14_HUMAN | R.AQPSVSLGAPYR.G           |       | 2 | 2,5383 | 0,322 | -0,196 |
| 3 | Q9UHY1 NRBP_HUMAN  | E.VTS#PVVPPSVK.T           | S422: | 2 | 2,5365 | 0,303 | -0,615 |
| 3 | Q09666 AHNK_HUMAN  | R.AGAISASGPE.L             |       | 2 | 2,5325 | 0,272 | 0,284  |
| 3 | Q9NSE4 SYIM_HUMAN  | E.DGVFTDVAGPE.L            |       | 2 | 2,5316 | 0,121 | -0,22  |
| 3 | Q969V3 NCLN_HUMAN  | E.TAVPVYFAVEDE.A           |       | 2 | 2,5307 | 0,407 | -0,637 |
| 3 | Q15369 ELOC_HUMAN  | E.LLM*AANFLDC.-            |       | 2 | 2,5241 | 0,363 | -0,309 |
| 3 | P35520 CBS_HUMAN   | E.GSILAEPEELNQTE.Q         |       | 2 | 2,5228 | 0,256 | -0,399 |
| 3 | Q15750 TAB1_HUMAN  | E.M*SQPTPS#PAPAAGGR.V      | S378: | 2 | 2,5224 | 0,381 | -0,241 |
| 3 | O75436 VP26A_HUMAN | E.IDIVLNDGE.T              |       | 2 | 2,5213 | 0,218 | -0,062 |
| 3 | P11021 GRP78_HUMAN | E.IESFYEGEDFSE.T           |       | 2 | 2,5192 | 0,126 | -0,168 |
| 3 | P35580 MYH10_HUMAN | E.LEDTLDTTAAQQE.L          |       | 2 | 2,5181 | 0,139 | 0      |
| 3 | Q16204 CCDC6_HUMAN | K.SGGIVISPF.R              |       | 2 | 2,5171 | 0,314 | -0,236 |
| 3 | P25054 APC_HUMAN   | R.SQAQTPVLSPLPD.M          |       | 2 | 2,5162 | 0,204 | -0,169 |
| 3 | O00401 WASL_HUMAN  | R.RVTNVGSLLLTPQENE.S       |       | 2 | 2,5156 | 0,358 | -0,207 |
| 3 | Q02952 AKA12_HUMAN | E.LSLQEGDLNGQK.G           |       | 2 | 2,5134 | 0,212 | 0,75   |
| 3 | P51610 HCFC1_HUMAN | E.AAASLVTSTVGQQNGSVVR.V    |       | 2 | 2,5114 | 0,361 | -0,529 |
| 3 | O00566 MPP10_HUMAN | E.VS#DM*GNDDPEM*GERAE.N    | S139: | 2 | 2,508  | 0,375 | -0,458 |
| 3 | O14818 PSA7_HUMAN  | R.AITVFSPDGHFLQVE.Y        |       | 2 | 2,5077 | 0,234 | -0,073 |
| 3 | Q9NY61 AATF_HUMAN  | E.LLFQYPDTR.Y              |       | 2 | 2,5074 | 0,25  | -0,317 |
| 3 | P50897 PPT1_HUMAN  | E.M*DNAGQLVFLATE.G         |       | 2 | 2,5069 | 0,289 | -0,428 |
| 3 | Q86Y91 KI18B_HUMAN | E.SLGMEAQVER.A             |       | 2 | 2,5065 | 0,321 | -0,327 |
| 3 | P08243 ASNS_HUMAN  | E.VLFNSEEGIQALDE.V         |       | 2 | 2,5049 | 0,204 | -0,234 |
| 3 | Q7Z4S6 KI21A_HUMAN | R.DQVLQNLGSVE.S            |       | 2 | 2,5026 | 0,135 | 0,102  |
| 3 | Q99081 HTF4_HUMAN  | E.GLS#PTPFMNSNLM*GK.T      | S98:  | 2 | 2,502  | 0,272 | -0,361 |
| 3 | Q99549 MPP8_HUMAN  | E.VEEGVGVGEDNDAAAR.G       |       | 2 | 2,5017 | 0,226 | -0,506 |
| 3 | P19623 SPEE_HUMAN  | E.DGVLCCQGE.C              |       | 2 | 2,4971 | 0,288 | -0,235 |
| 3 | P36915 GNL1_HUMAN  | R.NPYALLGEDEC.-            |       | 2 | 2,4948 | 0,324 | -0,286 |
| 3 | O43719 HTSF1_HUMAN | E.TATGM*AFEPEIDE.K         |       | 2 | 2,4935 | 0,329 | -0,257 |
| 3 | O94804 STK10_HUMAN | R.SLQTTSPVVPAGNE.N         |       | 2 | 2,4906 | 0,141 | -0,489 |
| 3 | Q9H5V8 CDCP1_HUMAN | E.DT#M*VYGHLLQDSSGSFLQPE.V | T740: | 3 | 2,4901 | 0,108 | -0,552 |
| 3 | P62826 RAN_HUMAN   | E.VAQTALPDEDDDL.-          |       | 2 | 2,4894 | 0,257 | -0,081 |



|   |                    |                        |              |   |        |       |        |
|---|--------------------|------------------------|--------------|---|--------|-------|--------|
| 3 | Q15942 ZYX_HUMAN   | E.GGPEAPIPPPQPR.E      |              | 2 | 2,4871 | 0,376 | -0,173 |
| 3 | P42166 LAP2A_HUMAN | R.DSGSFVAFQNIPIGSE.L   |              | 2 | 2,4823 | 0,214 | -0,706 |
| 3 | O94915 FRYL_HUMAN  | E.SRYSSSS#GGG#YEEE.K   | S1536:S1539: | 2 | 2,4809 | 0,278 | 0,072  |
| 3 | P35527 K1C9_HUMAN  | K.TLLDIDNTR.M          |              | 2 | 2,4809 | 0,33  | -0,23  |
| 3 | Q13885 TBB2A_HUMAN | D.SDLQLER.I            |              | 2 | 2,4797 | 0,113 | 0      |
| 3 | Q01433 AMPD2_HUMAN | E.LALITQAVQSE.M        |              | 2 | 2,4736 | 0,257 | -0,104 |
| 3 | Q14257 RCN2_HUMAN  | E.ILENPDLFLTSE.A       |              | 2 | 2,4729 | 0,258 | -0,614 |
| 3 | P39023 RL3_HUMAN   | R.LEQQVPVNQVFGQDE.M    |              | 2 | 2,4727 | 0,163 | -0,282 |
| 3 | Q9BV44 THUM3_HUMAN | E.DVSTLIGDDLAS#CKDE.T  | S207:        | 2 | 2,471  | 0,117 | -0,671 |
| 3 | P00558 PGK1_HUMAN  | R.VDFNVPM*K.N          |              | 2 | 2,4702 | 0,204 | 0,316  |
| 3 | P27694 RFA1_HUMAN  | E.SAEAILGQNAAYLGE.L    |              | 2 | 2,4684 | 0,37  | -0,162 |
| 3 | P81605 DCD_HUMAN   | K.ENAGEDPGLAR.Q        |              | 2 | 2,4661 | 0,406 | -0,432 |
| 3 | Q99250 SCN2A_HUMAN | R.DFS#GAGGIGVFS#E.S    | S475:S484:   | 3 | 2,4656 | 0,097 | 0,196  |
| 3 | Q14376 GALE_HUMAN  | E.GDVAACYANPSLAQEE.L   |              | 2 | 2,4655 | 0,265 | -0,432 |
| 3 | P53004 BIEA_HUMAN  | E.DALSSQEVE.V          |              | 2 | 2,4651 | 0,21  | 0      |
| 3 | P00492 HPRT_HUMAN  | R.SPGVVISDDEPGYDLD.L   |              | 2 | 2,4649 | 0,357 | -0,582 |
| 3 | P12081 SYHC_HUMAN  | E.AGIPLVAIIGEQE.L      |              | 2 | 2,4646 | 0,346 | -0,093 |
| 3 | Q6ZRV2 FA83H_HUMAN | R.RLS#LGQGDSTEAAATEE.R | S1003:       | 2 | 2,4639 | 0,28  | -0,63  |
| 3 | P11172 PYR5_HUMAN  | E.DVVTSGSSVLE.T        |              | 2 | 2,4637 | 0,296 | -0,447 |
| 3 | P61289 PSME3_HUMAN | E.DGNNGFVSIQEE.T       |              | 2 | 2,4627 | 0,16  | -0,093 |
| 3 | P00558 PGK1_HUMAN  | K.VLPGVDALSNI.-        |              | 2 | 2,4608 | 0,311 | -0,556 |
| 3 | Q6DD88 ATLA3_HUMAN | E.DDLQQLQLFTE.Y        |              | 2 | 2,4553 | 0,324 | -0,633 |
| 3 | Q9BUA3 YK007_HUMAN | E.FLVGSS#PGGSGR.A      | S82:         | 2 | 2,4552 | 0,185 | 0      |
| 3 | Q8IZL8 PELP1_HUMAN | E.VEEPGEER.G           |              | 2 | 2,4551 | 0,359 | -0,312 |
| 3 | Q15836 VAMP3_HUMAN | R.LQQTQNVQDE.V         |              | 2 | 2,4541 | 0,229 | -0,507 |
| 3 | Q2NL82 TSR1_HUMAN  | E.ICATDAVDDM*EE.G      |              | 2 | 2,4512 | 0,084 | -0,529 |
| 3 | Q14203 DCTN1_HUMAN | E.VAAAAAQLIAPLAENE.G   |              | 2 | 2,4505 | 0,363 | -0,314 |
| 3 | P60709 ACTB_HUMAN  | E.ALFQPSFLGM*E.S       |              | 2 | 2,4477 | 0,377 | -0,291 |
| 3 | Q13111 CAF1A_HUMAN | K.ATLTAS#PLGAS.-       | S933:        | 2 | 2,4422 | 0,435 | -0,114 |
| 3 | P27816 MAP4_HUMAN  | E.AEAFDDVVGE.T         |              | 2 | 2,4416 | 0,143 | 0      |
| 3 | Q9NYU2 UGGG1_HUMAN | E.DLLSDGTSENE.S        |              | 2 | 2,4408 | 0,174 | -0,31  |
| 3 | P09211 GSTP1_HUMAN | E.AALVDM*VNDGVED.L     |              | 2 | 2,4362 | 0,342 | -0,179 |
| 3 | P39656 OST48_HUMAN | E.LGSECGIEFDEE.K       |              | 2 | 2,4361 | 0,187 | 0,264  |

|   |                    |                             |        |   |        |       |        |
|---|--------------------|-----------------------------|--------|---|--------|-------|--------|
| 3 | P22626 ROA2_HUMAN  | R.GGGGNFGPGGSNFR.G          |        | 2 | 2,4353 | 0,404 | -0,266 |
| 3 | P21333 FLNA_HUMAN  | E.AIGDDVGTLGFSVE.G          |        | 2 | 2,4345 | 0,348 | -0,354 |
| 3 | P05556 ITB1_HUMAN  | E.VNSEDMD*DAYCR.K           |        | 2 | 2,4294 | 0,338 | -0,443 |
| 3 | P02545 LMNA_HUMAN  | K.AAYEAE LGDAR.K            |        | 2 | 2,428  | 0,339 | -0,628 |
| 3 | Q15149 PLEC1_HUMAN | E.AQAVPATLPELE.A            |        | 2 | 2,4276 | 0,347 | 0      |
| 3 | P50897 PPT1_HUMAN  | E.MDNAGQLVFLATE.G           |        | 2 | 2,4261 | 0,266 | -0,433 |
| 3 | P26038 MOES_HUMAN  | E.GILNDDIYCPPE.T            |        | 2 | 2,4249 | 0,341 | -0,434 |
| 3 | Q9Y265 RUVB1_HUMAN | E.LVPGVLFVDE.V              |        | 2 | 2,423  | 0,161 | -0,449 |
| 3 | P35612 ADDB_HUMAN  | E.AAS#PPPPQGQPYFDRFSEDDPE.Y | S11:   | 3 | 2,4185 | 0,096 | -0,29  |
| 3 | P62857 RS28_HUMAN  | E.GDVLTLLE.S                |        | 2 | 2,4164 | 0,131 | 0,213  |
| 3 | Q9H0H5 RGAP1_HUMAN | K.VSLLGPVTTPE.H             |        | 2 | 2,4143 | 0,369 | -0,329 |
| 3 | P08107 HSP71_HUMAN | E.VISWLDANTLAE.K            |        | 2 | 2,413  | 0,237 | -0,458 |
| 3 | P14866 HNRPL_HUMAN | E.ADLVEALQE.F               |        | 2 | 2,4087 | 0,12  | -0,247 |
| 3 | Q15084 PDIA6_HUMAN | R.GSTAPVGGGAFPTIVE.R        |        | 2 | 2,4054 | 0,296 | -0,418 |
| 3 | P50402 EMD_HUMAN   | E.DALLYQS#KGYNDDYEE.S       | S87:   | 2 | 2,4029 | 0,195 | -0,225 |
| 3 | P63027 VAMP2_HUMAN | R.RLQQTQAQVDE.V             |        | 2 | 2,402  | 0,194 | -0,371 |
| 3 | Q9P1Q0 VPS54_HUMAN | E.LTPIAVDTTSQR.N            |        | 2 | 2,4002 | 0,408 | -0,094 |
| 3 | Q8N3U4 STAG2_HUMAN | E.DVM*M*SS#EGRIEDLNE.G      | S1178: | 2 | 2,3989 | 0,15  | -0,199 |
| 3 | P49006 MRP_HUMAN   | E.AAGATGDAIEPAPPSQGAE.A     |        | 2 | 2,3978 | 0,245 | -0,499 |
| 3 | Q4KMP7 TB10B_HUMAN | R.AAGGAPS#PPPPVR.R          | S403:  | 2 | 2,3948 | 0,174 | -0,681 |
| 3 | P39656 OST48_HUMAN | E.DFGGNINVE.T               |        | 2 | 2,3913 | 0,188 | -0,063 |
| 3 | Q9BVJ6 UT14A_HUMAN | E.AATQEDPEQLPELE.A          |        | 2 | 2,3912 | 0,183 | -0,078 |
| 3 | Q8TC07 TBC15_HUMAN | R.NDS#PTQIPVSSD.V           | S675:  | 2 | 2,39   | 0,199 | -0,455 |
| 3 | Q9UK45 LSM7_HUMAN  | E.AIPNPFIQQDA.-             |        | 2 | 2,3898 | 0,363 | -0,364 |
| 3 | Q12798 CETN1_HUMAN | E.LGENLTDEELQE.M            |        | 2 | 2,3889 | 0,166 | -0,263 |
| 3 | P52597 HNRPF_HUMAN | E.YSGLSDGYGFTTD.L           |        | 2 | 2,3884 | 0,335 | -0,176 |
| 3 | Q07157 ZO1_HUMAN   | E.YSM*YSTDSR.H              |        | 2 | 2,3876 | 0,319 | -0,325 |
| 3 | Q68EM7 RHG17_HUMAN | E.DS#LLGKM*LE.T             | S88:   | 2 | 2,3682 | 0,184 | -0,221 |
| 3 | P31930 QCR1_HUMAN  | E.LLGDIVQNC SLE.D           |        | 2 | 2,3675 | 0,206 | -0,359 |
| 3 | P38398 BRCA1_HUMAN | E.LGSDS#SEDTVNK.A           | S186:  | 2 | 2,3614 | 0,247 | -0,366 |
| 3 | P60842 IF4A1_HUMAN | E.IVDSFDDM*NLSE.S           |        | 2 | 2,3608 | 0,281 | 0      |
| 3 | Q99733 NP1L4_HUMAN | E.FITGDVEPTDAESE.W          |        | 2 | 2,3598 | 0,165 | -0,323 |
| 3 | P28370 SMCA1_HUMAN | E.SELTDEDITILE.R            |        | 2 | 2,3563 | 0,2   | -0,33  |

|   |                    |                            |       |   |        |       |        |
|---|--------------------|----------------------------|-------|---|--------|-------|--------|
| 3 | P22626 ROA2_HUMAN  | D.TIEIITDR.Q               |       | 2 | 2,3552 | 0,105 | -0,127 |
| 3 | P20810 ICAL_HUMAN  | E.DFLLDALSE.D              |       | 2 | 2,3536 | 0,243 | -0,179 |
| 3 | Q13561 DCTN2_HUMAN | K.YADLPGIAR.N              |       | 2 | 2,3535 | 0,208 | -0,313 |
| 3 | P35908 K22E_HUMAN  | K.IEISELNR.V               |       | 2 | 2,3525 | 0,169 | -0,125 |
| 3 | O43379 WDR62_HUMAN | E.AGPGDQQGDSYLR.V          |       | 2 | 2,3393 | 0,174 | -0,626 |
| 3 | O00629 IMA4_HUMAN  | E.DS#DIDGDYRVQNTSLE.A      | S60:  | 2 | 2,3364 | 0,42  | -0,448 |
| 3 | Q9BUR4 WDR79_HUMAN | K.AM*EDTSGEPAAEDE.G        |       | 2 | 2,3355 | 0,265 | -0,332 |
| 3 | P56545 CTBP2_HUMAN | D.LATVAFCDQAQSTQE.I        |       | 2 | 2,3339 | 0,124 | -0,238 |
| 3 | P07437 TBB5_HUMAN  | D.SDLQLDR.I                |       | 2 | 2,3337 | 0,189 | -0,072 |
| 3 | Q9NZM1 MYOF_HUMAN  | E.DFSSSGTGAASYTVNTGETE.V   |       | 2 | 2,3337 | 0,276 | -0,062 |
| 3 | Q13263 TIF1B_HUMAN | E.DNAPATSYCVE.C            |       | 2 | 2,333  | 0,4   | -0,298 |
| 3 | P31689 DNJA1_HUMAN | E.LVDFDPNQE.R              |       | 2 | 2,3327 | 0,147 | -0,227 |
| 3 | P14314 GLU2B_HUMAN | E.LDTDGDGALSE.A            |       | 2 | 2,3303 | 0,131 | -0,223 |
| 3 | P05783 K1C18_HUMAN | E.DFNLDALD.S               |       | 2 | 2,3249 | 0,342 | -0,062 |
| 3 | Q53EP0 FND3B_HUMAN | E.ITTAAGPPGQCK.A           |       | 2 | 2,3224 | 0,371 | -0,305 |
| 3 | Q8NCW5 AIBP_HUMAN  | E.YQFSVDQLM*E.L            |       | 2 | 2,3218 | 0,211 | -1,147 |
| 3 | Q5F1R6 DJC21_HUMAN | E.DSPQENVSVTE.I            |       | 2 | 2,3217 | 0,253 | -0,405 |
| 3 | P60709 ACTB_HUMAN  | E.ALFQPS#FLGM*E.S          | S265: | 2 | 2,3177 | 0,289 | -0,457 |
| 3 | P13639 EF2_HUMAN   | E.LLYEGPPDDE.A             |       | 2 | 2,3156 | 0,165 | -0,213 |
| 3 | Q86WB0 NIPA_HUMAN  | K.DTSATSQSVNGS#PQAEQPSLE.S | S62:  | 2 | 2,3154 | 0,483 | -0,331 |
| 3 | Q9BUJ2 HNRL1_HUMAN | E.NDVIGCFADFE.C            |       | 2 | 2,3153 | 0,214 | -0,474 |
| 3 | Q04656 ATP7A_HUMAN | K.IPLNVVSQPLTQE.T          |       | 2 | 2,3124 | 0,157 | -0,424 |
| 3 | Q13885 TBB2A_HUMAN | E.MEFTEAESNMNDLVSE.Y       |       | 2 | 2,3111 | 0,265 | -0,331 |
| 3 | Q9H773 XTP3A_HUMAN | R.FSFSPEPTLE.D             |       | 2 | 2,309  | 0,277 | -0,423 |
| 3 | Q03252 LMNB2_HUMAN | E.S#LSYQLSGLQK.Q           | S296: | 2 | 2,3048 | 0,321 | 0,281  |
| 3 | P09211 GSTP1_HUMAN | E.AALVDMVNDGVE.D           |       | 2 | 2,2995 | 0,196 | -0,198 |
| 3 | Q15366 PCBP2_HUMAN | E.AYTIQGQYAIPQPD.L         |       | 2 | 2,2989 | 0,246 | 0      |
| 3 | P78347 GTF2I_HUMAN | E.SAEPSQLEVPATEE.I         |       | 2 | 2,2948 | 0,255 | -0,246 |
| 3 | P16435 NCPR_HUMAN  | E.LGLGDDDDGNLE.E           |       | 2 | 2,2931 | 0,113 | -0,218 |
| 3 | Q9Y490 TLN1_HUMAN  | D.M*SYFGCLDSVM*E.N         |       | 2 | 2,2911 | 0,11  | -0,498 |
| 3 | Q9UHR4 BI2L1_HUMAN | E.AVTVPT#PSPTPVR.S         | T412: | 2 | 2,2904 | 0,231 | -0,348 |
| 3 | P62263 RS14_HUMAN  | E.EQVISLGPQVAE.G           |       | 2 | 2,2887 | 0,081 | -0,192 |
| 3 | Q6ZTN6 AN13D_HUMAN | E.SLQLSTEPR.G              |       | 2 | 2,2824 | 0,166 | -0,237 |

|   |                     |                       |       |   |        |       |        |
|---|---------------------|-----------------------|-------|---|--------|-------|--------|
| 3 | P51991 ROA3_HUMAN   | K.EDTEEYNLR.D         |       | 2 | 2,2824 | 0,32  | -0,313 |
| 3 | P16403 H12_HUMAN    | E.TAPAAPAAAPPAE.K     |       | 2 | 2,2793 | 0,352 | -0,215 |
| 3 | Q9BYG5 PAR6B_HUMAN  | E.DNGVPQQIPK.A        |       | 2 | 2,2791 | 0,313 | -0,334 |
| 3 | Q8TF74 WIPF2_HUMAN  | R.TGPSGQSLAPPPPYR.Q   |       | 2 | 2,2773 | 0,093 | -0,376 |
| 3 | P10809 CH60_HUMAN   | D.AAGVASLLTTAE.V      |       | 2 | 2,2764 | 0,222 | -0,221 |
| 3 | P51114 FXR1_HUMAN   | E.DAVLM*DGM*TE.S      |       | 2 | 2,2735 | 0,118 | -0,219 |
| 3 | Q99733 NP1L4_HUMAN  | E.FITGDVEPTDAE.S      |       | 2 | 2,2703 | 0,107 | -0,471 |
| 3 | Q86U44 MTA70_HUMAN  | E.AALS#PTFR.S         | S43:  | 2 | 2,2638 | 0,169 | 0      |
| 3 | Q16643 DREB_HUMAN   | E.GASTLQGEPR.A        |       | 2 | 2,2598 | 0,294 | -0,24  |
| 3 | Q32LY9 Q32LY9_HUMAN | E.SPIVPPM*S#PSSK.S    | S81:  | 2 | 2,2586 | 0,321 | -0,43  |
| 3 | Q9UQR1 ZN148_HUMAN  | R.AGMTSS#PDATTGQTFG.- | S784: | 2 | 2,2559 | 0,264 | -0,455 |
| 3 | Q14160 LAP4_HUMAN   | E.DEQPPWASPSPTSR.Q    |       | 2 | 2,2548 | 0,212 | -0,314 |
| 3 | P38398 BRCA1_HUMAN  | K.VADVLDVLNE.V        |       | 2 | 2,2538 | 0,15  | -0,224 |
| 3 | Q14568 HS902_HUMAN  | E.TQTQDQPMEEEEVE.T    |       | 2 | 2,2523 | 0,336 | -0,216 |
| 3 | Q86VR2 F134C_HUMAN  | E.LAAFCPQLDDSTVAR.E   |       | 2 | 2,2521 | 0,122 | -0,147 |
| 3 | O75643 U520_HUMAN   | E.LVEQTLSDLE.Q        |       | 2 | 2,249  | 0,093 | -0,213 |
| 3 | P31948 STIP1_HUMAN  | R.LAYINPDALALEE.K     |       | 2 | 2,2486 | 0,083 | -0,628 |
| 3 | P51610 HCFC1_HUMAN  | E.VDQLSLPQELM*AE.A    |       | 2 | 2,243  | 0,087 | -0,574 |
| 3 | P04406 G3P_HUMAN    | K.VIHDNFGIVE.G        |       | 2 | 2,2429 | 0,262 | 0      |
| 3 | P12956 KU70_HUMAN   | E.ALALDLMEPE.Q        |       | 2 | 2,2408 | 0,354 | -0,443 |
| 3 | Q15369 ELOC_HUMAN   | E.LLMAANFLDC.-        |       | 2 | 2,2383 | 0,279 | -0,104 |
| 3 | Q9UNP9 PPIE_HUMAN   | E.DAAAAIDNM*NE.S      |       | 2 | 2,2357 | 0,209 | -0,318 |
| 3 | P25205 MCM3_HUMAN   | E.DQQDTQIYE.K         |       | 2 | 2,2309 | 0,158 | -0,214 |
| 3 | P05388 RLA0_HUMAN   | E.TDYTFPLAE.K         |       | 2 | 2,2245 | 0,238 | -0,231 |
| 3 | Q9Y4L1 HYOU1_HUMAN  | E.DAEPISPE.K          |       | 2 | 2,2235 | 0,201 | -0,309 |
| 3 | Q9BUR4 WDR79_HUMAN  | E.FGS#PSELSPR.I       | S85:  | 2 | 2,2234 | 0,247 | -0,316 |
| 3 | P78347 GTF2I_HUMAN  | E.DFYVEGLPE.G         |       | 2 | 2,2233 | 0,136 | -0,342 |
| 3 | Q6PKG0 LARP1_HUMAN  | R.AVTPVPTKTEE.V       |       | 2 | 2,2228 | 0,187 | -0,312 |
| 3 | O94826 TOM70_HUMAN  | E.DVTAVCILE.G         |       | 2 | 2,2225 | 0,306 | -0,06  |
| 3 | Q16204 CCDC6_HUMAN  | K.SGGIVIS#PFRLEE.L    | S52:  | 2 | 2,2186 | 0,203 | -0,247 |
| 3 | Q06323 PSME1_HUMAN  | E.DGNNFGVAVQE.K       |       | 2 | 2,2179 | 0,178 | -0,212 |
| 3 | Q9BQG0 MBB1A_HUMAN  | E.QLM*TVLQAGK.A       |       | 2 | 2,2137 | 0,225 | -0,662 |
| 3 | P48643 TCPE_HUMAN   | E.TGANLAICQWGFDDDE.A  |       | 2 | 2,2104 | 0,38  | -0,575 |

|   |                       |                           |            |   |        |       |        |
|---|-----------------------|---------------------------|------------|---|--------|-------|--------|
| 3 | P55036 PSMD4_HUMAN    | E.GGAM*LGLGASDFE.F        |            | 2 | 2,2095 | 0,165 | -0,197 |
| 3 | Q9HCD6 TANC2_HUMAN    | K.DCSYGAVTS#PTSTLE.S      | S169:      | 2 | 2,2066 | 0,118 | -0,293 |
| 3 | P49756 RBM25_HUMAN    | E.NCGPTTTVFGVGNISE.K      |            | 2 | 2,2063 | 0,296 | -0,076 |
| 3 | Q8IY81 RRMJ3_HUMAN    | E.IM*S#PLYQDEAPKGTE.A     | S584:      | 2 | 2,2033 | 0,217 | 0,206  |
| 3 | Q02790 FKBP4_HUMAN    | E.NLDLPYGLE.R             |            | 2 | 2,2011 | 0,236 | -0,236 |
| 3 | Q9UPN3 MACF1_HUMAN    | E.DLLQDSMDE.K             |            | 2 | 2,1985 | 0,172 | 0      |
| 3 | P11387 TOP1_HUMAN     | E.FDFLGKD.S               |            | 2 | 2,1976 | 0,126 | 0,072  |
| 3 | Q14694 UBP10_HUMAN    | E.VIEPSDTLPR.T            |            | 2 | 2,1854 | 0,173 | 0      |
| 3 | P46940 IQGA1_HUMAN    | E.LLDDLGEVPTIE.S          |            | 2 | 2,1813 | 0,237 | -0,557 |
| 3 | O43719 HTSF1_HUMAN    | E.TATGMAFEEPIDE.K         |            | 2 | 2,1783 | 0,239 | -0,259 |
| 3 | Q99653 CHP1_HUMAN     | E.ADQDGDSAISFTE.F         |            | 2 | 2,1704 | 0,144 | -0,45  |
| 3 | P04792 HSPB1_HUMAN    | E.SPAAAPAYS.R.A           |            | 2 | 2,1671 | 0,175 | -0,56  |
| 3 | Q9UHR4 BI2L1_HUMAN    | E.IKTPASTPV#GTPQAS#PMIE.R | S255:S261: | 2 | 2,166  | 0,451 | -0,562 |
| 3 | Q6GYQ0 GRIPE_HUMAN    | R.SSSTS#DILEPFTVE.R       | S799:      | 2 | 2,1623 | 0,139 | -0,307 |
| 3 | P27482 CALL3_HUMAN    | R.SLGQNPTAE.L             |            | 2 | 2,1593 | 0,122 | -0,117 |
| 3 | O94925 GLSK_HUMAN     | E.DLLFYTIAE.G             |            | 2 | 2,1566 | 0,27  | 0      |
| 3 | O43598 RCL_HUMAN      | E.ADPPGQVAASPDPTT.-       |            | 2 | 2,1545 | 0,314 | -0,6   |
| 3 | Q7Z7E8 UB2Q1_HUMAN    | E.SDDPNLAAVLE.R           |            | 2 | 2,1514 | 0,1   | -0,107 |
| 3 | Q71RC2 LARP4_HUMAN    | E.LTISCVPVADEQTE.C        |            | 2 | 2,1449 | 0,136 | 0,626  |
| 3 | O75643 U520_HUMAN     | R.CTLSANLVASGE.L          |            | 2 | 2,1442 | 0,128 | -0,3   |
| 3 | P61020 RAB5B_HUMAN    | E.AQAYADDNSLLFME.T        |            | 2 | 2,1365 | 0,292 | -0,538 |
| 3 | Q9BPX3 CND3_HUMAN     | E.ADS#ESDHEVPEPESE.M      | S973:      | 2 | 2,1364 | 0,225 | -0,281 |
| 3 | Q9HC35 EMAL4_HUMAN    | E.SRISS#S#PTLLE.N         | S918:S919: | 2 | 2,1356 | 0,145 | -0,271 |
| 3 | P40692 MLH1_HUMAN     | E.DGNILQLANLPD.L          |            | 2 | 2,1332 | 0,232 | -0,095 |
| 3 | ##Q9HAE1 Q9HAE1_HUMAN | K.YEIEVRM*.-              |            | 2 | 2,1308 | 0,239 | -0,064 |
| 3 | P07737 PROF1_HUMAN    | D.SLLQDGEFSM*D.L          |            | 2 | 2,1296 | 0,227 | 0,097  |
| 3 | Q99426 TBCB_HUMAN     | E.DALLGSYPVDD.G           |            | 2 | 2,1279 | 0,156 | -0,209 |
| 3 | Q05048 CSTF1_HUMAN    | E.FDADVQTM*SPE.A          |            | 2 | 2,1277 | 0,124 | -0,68  |
| 3 | P33991 MCM4_HUMAN     | E.INVIGEPFLNVNCE.H        |            | 2 | 2,1219 | 0,317 | -0,151 |
| 3 | P62263 RS14_HUMAN     | E.QVISLGPQVAE.G           |            | 2 | 2,12   | 0,224 | -0,321 |
| 3 | O95671 ASML_HUMAN     | E.DLFQDAYYSPE.T           |            | 2 | 2,1192 | 0,117 | -0,496 |
| 3 | Q9BUA3 YK007_HUMAN    | R.ALCM*VCGAE.I            |            | 2 | 2,1178 | 0,234 | -0,119 |
| 3 | Q32LY9 Q32LY9_HUMAN   | E.SPIVPPMMS#PSSK.S        | S81:       | 2 | 2,1157 | 0,123 | -0,261 |

|   |                     |                           |            |   |        |       |        |
|---|---------------------|---------------------------|------------|---|--------|-------|--------|
| 3 | Q02447 SP3_HUMAN    | K.IGPPS#PGDDEEE.A         | S73:       | 2 | 2,1153 | 0,144 | -0,369 |
| 3 | Q2M2I8 AAK1_HUMAN   | E.VLQIFCDTCE.A            |            | 2 | 2,1132 | 0,112 | -0,38  |
| 3 | A8MVB1 A8MVB1_HUMAN | R.GAGFPSIPVGKS#PM*VE.Q    | S110:      | 2 | 2,1125 | 0,138 | 0      |
| 3 | Q14444 CAPR1_HUMAN  | E.AASAPAVEDQVPEAEPEPAEE.Y |            | 2 | 2,1104 | 0,229 | -0,8   |
| 3 | Q99700 ATX2_HUMAN   | E.AVAM*PIPAASPTPASPASNR.A |            | 2 | 2,104  | 0,393 | -0,508 |
| 3 | Q15459 SF3A1_HUMAN  | E.DSLM*PEEE.F             |            | 2 | 2,1028 | 0,113 | -0,063 |
| 3 | O43747 AP1G1_HUMAN  | E.DEVLIDILE.S             |            | 2 | 2,0928 | 0,124 | -0,258 |
| 3 | Q02952 AKA12_HUMAN  | E.VEGGVPDIEEQE.R          |            | 2 | 2,0919 | 0,118 | -0,281 |
| 3 | P07602 SAP_HUMAN    | E.ICALVGFCDE.V            |            | 2 | 2,0899 | 0,268 | -0,412 |
| 3 | P13645 K1C10_HUMAN  | R.LAADDFR.L               |            | 2 | 2,0831 | 0,272 | 0,302  |
| 3 | P04264 K2C1_HUMAN   | R.TLLEGEESR.M             |            | 2 | 2,0757 | 0,315 | -0,118 |
| 3 | Q14247 SRC8_HUMAN   | R.AKTQT#PPVS#PAPQPTEE.R   | T401:S405: | 2 | 2,0752 | 0,42  | -0,441 |
| 3 | O00505 IMA3_HUMAN   | R.DDNPSLQFE.A             |            | 2 | 2,0703 | 0,203 | 0      |
| 3 | P37840 SYUA_HUMAN   | E.DM*PVDPDNE.A            |            | 2 | 2,0695 | 0,128 | -0,116 |
| 3 | P51451 BLK_HUMAN    | K.IADFGLAR.I              |            | 2 | 2,0691 | 0,203 | -0,071 |
| 3 | P14923 PLAK_HUMAN   | K.GIM*EEDEACGR.Q          |            | 2 | 2,0669 | 0,2   | -0,095 |
| 3 | O75874 IDHC_HUMAN   | E.LAFFANALEE.V            |            | 2 | 2,0657 | 0,158 | -0,217 |
| 3 | P12955 PEPD_HUMAN   | E.DVVVTDSGIE.L            |            | 2 | 2,0644 | 0,24  | 0,118  |
| 3 | Q8WY54 PPM1E_HUMAN  | E.LFLGEFR.G               |            | 2 | 2,0616 | 0,098 | -0,069 |
| 3 | P37840 SYUA_HUMAN   | E.DMPVDPDNE.A             |            | 2 | 2,0582 | 0,124 | 0      |
| 3 | P28838 AMPL_HUMAN   | E.DDVPQFTSAGE.N           |            | 2 | 2,0573 | 0,31  | 1,465  |
| 3 | Q9BQG0 MBB1A_HUMAN  | E.QLMTVLQAGK.A            |            | 2 | 2,0558 | 0,264 | -0,112 |
| 3 | P55036 PSMD4_HUMAN  | E.FGVDPSADPE.L            |            | 2 | 2,0544 | 0,319 | -0,118 |
| 3 | O15231 ZN185_HUMAN  | R.RES#CGSSVLTDFFE.G       | S233:      | 2 | 2,0534 | 0,214 | -0,234 |
| 3 | Q02952 AKA12_HUMAN  | E.TCVSGEDPTQGADLSPDE.K    |            | 2 | 2,0502 | 0,218 | -0,13  |
| 3 | P42695 CNDD3_HUMAN  | R.ASAGHVAVSSPTPE.T        |            | 2 | 2,0453 | 0,183 | -0,466 |
| 3 | P07195 LDHB_HUMAN   | E.LALVDVLE.D              |            | 2 | 2,0438 | 0,181 | 0,07   |
| 3 | O15027 SC16A_HUMAN  | E.LVPPQQQAS#PPQLPK.A      | S891:      | 2 | 2,0433 | 0,195 | -0,357 |
| 3 | O14576 DC111_HUMAN  | K.SVSTPSEAGSQDSGD.L       |            | 2 | 2,0397 | 0,347 | -0,257 |
| 3 | Q15404 RSU1_HUMAN   | E.VLNFFNNQIEE.L           |            | 2 | 2,0389 | 0,327 | -0,357 |
| 3 | P51587 BRCA2_HUMAN  | E.QGLTLPLYQS#PVKE.L       | S93:       | 2 | 2,0324 | 0,215 | -0,295 |
| 3 | Q14671 PUM1_HUMAN   | E.VNSVLS#PRS#.S           | S209:S212: | 2 | 2,0315 | 0,081 | -0,196 |
| 3 | Q15365 PCBP1_HUMAN  | E.TLSQS#PQGR.V            | S173:      | 2 | 2,0213 | 0,156 | -0,579 |

|   |                    |                                |            |   |        |       |        |
|---|--------------------|--------------------------------|------------|---|--------|-------|--------|
| 3 | P36543 VATE1_HUMAN | E.SYLPEDIAGGVE.I               |            | 2 | 2,0198 | 0,182 | -0,293 |
| 3 | Q13263 TIF1B_HUMAN | R.STAPSAASASASAAAASSPAGGGAE.A  |            | 2 | 2,0164 | 0,303 | -0,304 |
| 3 | P41091 IF2G_HUMAN  | D.AALLLIAGNE.S                 |            | 2 | 2,0118 | 0,167 | -0,186 |
| 3 | Q58FF7 H90B3_HUMAN | E.GLELPEDEEE.K                 |            | 2 | 2,0093 | 0,267 | -0,421 |
| 3 | Q12849 GRSF1_HUMAN | E.DIQPMTAFE.S                  |            | 2 | 2,0089 | 0,226 | -0,116 |
| 3 | P22314 UBA1_HUMAN  | E.GGEIIVTDMDTIE.K              |            | 2 | 2,0085 | 0,296 | -0,613 |
| 3 | Q14966 ZN638_HUMAN | E.IQDDSS#DLHLVTLDE.V           | S1744:     | 2 | 2,0082 | 0,182 | 0,137  |
| 3 | P29966 MARCS_HUMAN | E.AGASAAACEAPSAAGPGAPPEQE.A    |            | 2 | 2,0073 | 0,418 | 0      |
| 3 | Q02790 FKBP4_HUMAN | E.IGEGENLDLPYGLE.R             |            | 2 | 2,007  | 0,105 | -0,482 |
| 3 | Q8WWM7 ATX2L_HUMAN | E.VDGLLTSEPM*G#SPVSSKTE.S      | S594:      | 2 | 2,0034 | 0,405 | -0,481 |
| 4 | Q7L590 MCM10_HUMAN | E.SALDCNS#EENNFLTRE.N          | S26:       | 2 | 5,7522 | 0,415 | -0,555 |
| 4 | Q6PKG0 LARP1_HUMAN | E.TES#APGS#PRAVTPVPTKTEE.V     | S517:S521: | 3 | 5,6491 | 0,374 | -0,248 |
| 4 | Q99459 CDC5L_HUMAN | E.AQNLM*ALTNVDT#PLKGLNT#PLHE.S | T377:T385: | 3 | 5,6317 | 0,462 | -0,47  |
| 4 | Q13283 G3BP1_HUMAN | E.DAQSSS#PAPADIAQTVQE.D        | S232:      | 2 | 5,2726 | 0,581 | -0,302 |
| 4 | Q15642 CIP4_HUMAN  | E.DFSQPMNRAPS#DSS#LGTPSDGRPE.L | S296:S299: | 3 | 5,1394 | 1     | -0,338 |
| 4 | P35527 K1C9_HUMAN  | R.GSGSGSYGGGGSGGGYGGGSGSR.G    |            | 2 | 5,1255 | 0,449 | -0,681 |
| 4 | Q14C86 GAPD1_HUMAN | E.SCSGLGS#TSDDTDVRE.V          | S746:      | 2 | 5,102  | 0,588 | -0,345 |
| 4 | Q7Z417 NUFP2_HUMAN | E.SQNPLAS#PTNTLLGSAKE.Q        | S629:      | 2 | 4,9766 | 0,485 | -0,895 |
| 4 | Q14839 CHD4_HUMAN  | E.VTAVDGYET#DHQDYCE.V          | T367:      | 2 | 4,9244 | 0,476 | -0,369 |
| 4 | P40123 CAP2_HUMAN  | E.S#SPRSALFAQLNQGE.A           | S256:      | 2 | 4,9095 | 0,397 | -0,895 |
| 4 | O43242 PSMD3_HUMAN | E.AATGGGS#TGEADGKTA AAAAE.H    | S47:       | 2 | 4,8963 | 0,595 | -0,463 |
| 4 | Q96EB6 SIRT1_HUMAN | E.AALALQPGGS#PSAAGADRE.A       | S14:       | 2 | 4,877  | 0,599 | -0,402 |
| 4 | Q9UK61 CC063_HUMAN | E.SS#PQNGGGGGLNIAEPSGGAGREE.N  | S37:       | 3 | 4,8691 | 0,323 | -0,161 |
| 4 | O95232 CROP_HUMAN  | E.VNGTSEDIKS#EGDTQSN.-         | S425:      | 2 | 4,8583 | 0,471 | -0,525 |
| 4 | Q8ND24 RN214_HUMAN | E.VAGVVANAPS#PPESSSLCASKSDE.G  | S15:       | 3 | 4,8535 | 0,423 | -0,9   |
| 4 | P48960 CD97_HUMAN  | E.GSYDCVCSPGYEPVSGAK.T         |            | 2 | 4,7806 | 0,457 | -0,379 |
| 4 | Q10570 CPSF1_HUMAN | E.M*LYGDSGSLFS#PSKEE.A         | S756:      | 2 | 4,758  | 0,454 | -0,596 |
| 4 | Q14C86 GAPD1_HUMAN | E.LESCSGLGST#SDDTDVRE.V        | T747:      | 2 | 4,7051 | 0,518 | -0,729 |
| 4 | Q86V81 THOC4_HUMAN | E.LDAQLDAYNARM*DT#S.-          | T256:      | 2 | 4,7015 | 0,395 | 0      |
| 4 | Q9NYF8 BCLF1_HUMAN | E.DQEALDYFS#DKE.S              | S385:      | 2 | 4,6979 | 0,244 | -0,238 |
| 4 | Q07866 KLC1_HUMAN  | E.SLNVDDVVKYES#GPDGGEE.V       | S530:      | 2 | 4,6637 | 0,472 | -0,433 |
| 4 | Q10570 CPSF1_HUMAN | E.M*LYGDSGSLFS#PSKE.E          | S756:      | 2 | 4,6239 | 0,52  | -0,57  |
| 4 | O14641 DVL2_HUMAN  | E.STSLGDS#DEEDTM*SR.F          | S211:      | 2 | 4,5891 | 0,544 | -0,212 |

|   |                    |                                  |                 |   |        |       |        |
|---|--------------------|----------------------------------|-----------------|---|--------|-------|--------|
| 4 | Q9P287 BCCIP_HUMAN | E.LTDLLIQNHIGSVIK.Q              |                 | 2 | 4,5409 | 0,389 | -0,408 |
| 4 | Q15477 SKIV2_HUMAN | E.AVGQPGGPRGDTVSA#PCSAPLAR.A     | S245:           | 3 | 4,5309 | 0,339 | -0,306 |
| 4 | P29966 MARCS_HUMAN | E.AGASPVEKEAPAEGEAAEPGS#PTAAE.G  | S118:           | 3 | 4,5302 | 0,365 | -0,146 |
| 4 | Q9NUL3 STAU2_HUMAN | E.AIGLKGSSPT#PPCS#PVQPSKQLE.Y    | T488:S492:      | 3 | 4,5007 | 0,519 | -0,288 |
| 4 | Q6PGN9 PSRC1_HUMAN | E.TLDFGGLS#PSDSREEE.D            | S22:            | 2 | 4,4988 | 0,451 | -0,402 |
| 4 | Q7Z417 NUFP2_HUMAN | E.IESQNPLASPT#NTLLGSAKE.Q        | T631:           | 3 | 4,4866 | 0,288 | -0,596 |
| 4 | A6NKF1 SAC31_HUMAN | E.VVM*AEEDEGTDRPGS#PA.-          | S401:           | 2 | 4,4788 | 0,477 | -0,43  |
| 4 | O00562 PITM1_HUMAN | E.FFDAHEGFS#DSEE.V               | S358:           | 2 | 4,4513 | 0,425 | -0,306 |
| 4 | Q9Y2D5 AKAP2_HUMAN | E.NSLADFSLPQT#PQTDNPSEGRGE.G     | T526:           | 3 | 4,4239 | 0,349 | -0,36  |
| 4 | Q12888 TP53B_HUMAN | E.SVAS#PQKTMVLSICE.A             | S1028:          | 2 | 4,4103 | 0,516 | -0,247 |
| 4 | Q9UKN8 TF3C4_HUMAN | K.ILLVDS#PGM*GNADDEQQE.E         | S611:           | 2 | 4,3628 | 0,404 | -0,421 |
| 4 | Q15154 PCM1_HUMAN  | E.TASPVAVS#LRSDGS#ENLCTPQQSRTE.K | S866:S872:      | 3 | 4,3568 | 0,299 | -0,434 |
| 4 | P27816 MAP4_HUMAN  | E.VGLLKDMS#PLSETE.M              | S507:           | 2 | 4,3557 | 0,458 | -0,534 |
| 4 | Q9H4I2 ZHX3_HUMAN  | E.ASEPFDTSS#PQAGRQLE.T           | S946:           | 2 | 4,3511 | 0,408 | -0,307 |
| 4 | Q14674 ESPL1_HUMAN | R.GS#DGEDSASGGKTPAPGPE.A         | S1508:          | 2 | 4,3337 | 0,505 | -0,476 |
| 4 | Q8N3D4 EH1L1_HUMAN | E.AGGQVGPEAPRPETS#PE.M           | S285:           | 2 | 4,3333 | 0,356 | -0,526 |
| 4 | Q92615 LARP5_HUMAN | E.KFTSSQTQS#PT#PPKPPS#PSFE.L     | S516:T518:S524: | 3 | 4,3299 | 1     | -0,291 |
| 4 | Q9NQ57 INCE_HUMAN  | E.IANSTPNPKPAASSPET#PSAGQQE.A    | T424:           | 3 | 4,3134 | 0,331 | -0,521 |
| 4 | Q7Z417 NUFP2_HUMAN | E.IESQNPLAS#PTNTLLGSAKE.Q        | S629:           | 2 | 4,3069 | 0,507 | -0,681 |
| 4 | O14578 CTRO_HUMAN  | E.SVVSGLDSPAKTSS#M*E.K           | S446:           | 2 | 4,3054 | 0,508 | -0,289 |
| 4 | Q8IVD9 NUDC3_HUMAN | E.IEIDS#TTELDGHQE.V              | S120:           | 2 | 4,3014 | 0,381 | -0,366 |
| 4 | Q8WUD4 CCD12_HUMAN | E.DSLASAVDAATEQKTCDS#D.-         | S165:           | 2 | 4,2934 | 0,51  | -0,709 |
| 4 | P52701 MSH6_HUMAN  | E.VGTTYVTDKS#EEDNE.I             | S219:           | 2 | 4,2827 | 0,44  | -0,069 |
| 4 | Q96RY5 CRML_HUMAN  | E.NS#IDYISRFNDLAQE.L             | S1226:          | 2 | 4,2746 | 0,275 | -0,196 |
| 4 | Q9HC35 EMAL4_HUMAN | E.TVADTTLTAKPVSS#TE.S            | S888:           | 2 | 4,2715 | 0,543 | -0,359 |
| 4 | P49757 NUMB_HUMAN  | E.GS#FRVTTATEQAE.R               | S194:           | 2 | 4,2667 | 0,4   | -0,248 |
| 4 | P39880 CUX1_HUMAN  | E.IQAGSQGQAGASDS#PSAR.S          | S1321:          | 2 | 4,2538 | 0,508 | -0,552 |
| 4 | Q96D46 NMD3_HUMAN  | E.MLEDLHIS#QDATGEE.G             | S490:           | 2 | 4,2389 | 0,391 | -0,138 |
| 4 | Q8NI08 NCOA7_HUMAN | E.STLDNS#CQGAQM*DNKSE.V          | S617:           | 2 | 4,2373 | 0,423 | -0,185 |
| 4 | Q14202 ZMYM3_HUMAN | E.LDKASS#DLCDLVSNQSAE.G          | S950:           | 2 | 4,2184 | 0,573 | -0,661 |
| 4 | Q14966 ZN638_HUMAN | E.S#ADITFATLNTKGNE.G             | S1697:          | 2 | 4,2071 | 0,482 | -0,147 |
| 4 | Q9UQ35 SRRM2_HUMAN | E.FSASPMLKSGM*S#PE.Q             | S1132:          | 2 | 4,2044 | 0,422 | -0,312 |
| 4 | P39880 CUX1_HUMAN  | E.IQAGSQGQAGASDS#PSAR.S          | S1321:          | 3 | 4,1926 | 0,371 | -0,31  |



|   |                    |                                   |              |   |        |       |        |
|---|--------------------|-----------------------------------|--------------|---|--------|-------|--------|
| 4 | Q99459 CDC5L_HUMAN | E.AQNLMALTNVDT#PLKGGGLNT#PLHE.S   | T377:T385:   | 3 | 4,1914 | 0,36  | -0,135 |
| 4 | P38432 P80C_HUMAN  | E.LTSSYS#PDVSDYKE.G               | S489:        | 2 | 4,1868 | 0,488 | -0,219 |
| 4 | Q9UQ35 SRRM2_HUMAN | E.VEERPAVSLTLDQSQS#QASLE.A        | S1289:       | 3 | 4,1812 | 0,389 | -0,155 |
| 4 | Q9UQ35 SRRM2_HUMAN | E.FSASPM*LKSGMS#PE.Q              | S1132:       | 2 | 4,1774 | 0,49  | -0,234 |
| 4 | Q9UQ35 SRRM2_HUMAN | E.FSASPM LKSGMS#PE.Q              | S1132:       | 2 | 4,1525 | 0,461 | -0,315 |
| 4 | Q9H7Z6 MYST1_HUMAN | E.GTAPS#PGRVS#PPTPARGEPE.V        | S37:S42:     | 3 | 4,1434 | 0,289 | -0,431 |
| 4 | Q86SQ0 PHLB2_HUMAN | E.LEKLQLS#DEESVFE.E               | S489:        | 2 | 4,1428 | 0,336 | -0,489 |
| 4 | Q14C86 GAPD1_HUMAN | E.LESCSGLGS#TSDDTDVRE.V           | S746:        | 2 | 4,1393 | 0,55  | -0,608 |
| 4 | O75781 PALM_HUMAN  | E.NAAAPS#PVRAPAPS#PAKE.E          | S116:S124:   | 2 | 4,1372 | 0,458 | -0,452 |
| 4 | P54105 ICLN_HUMAN  | E.CQALHPDPEDEDS#DD.Y              | S144:        | 2 | 4,1288 | 0,566 | -0,469 |
| 4 | Q5H9F3 BCRL1_HUMAN | E.GTSVT#FSPLKS#PPQLERE.M          | T597:S603:   | 3 | 4,1216 | 0,289 | -0,429 |
| 4 | Q9C0C2 TB182_HUMAN | E.AQDLCRAS#PEPPGPE.S              | S672:        | 2 | 4,1189 | 0,433 | -0,573 |
| 4 | Q9C0G0 ZN407_HUMAN | E.SLS#PGGAVIQVTKQE.I              | S1958:       | 3 | 4,1092 | 0,124 | -0,319 |
| 4 | Q92543 SNX19_HUMAN | E.GRAS#PVAAPVFLSYSEPE.G           | S306:        | 2 | 4,1091 | 0,42  | -0,623 |
| 4 | Q7Z4S6 KI21A_HUMAN | R.KLS#SSDAPAQDTGSSAAAVE.T         | S853:        | 2 | 4,1075 | 0,474 | -0,248 |
| 4 | Q8N1G0 ZN687_HUMAN | E.NGPGMQPPVSS#PPLGALKQE.S         | S215:        | 3 | 4,1006 | 0,417 | -0,351 |
| 4 | O75534 CSDE1_HUMAN | E.SKS#PAAPGQSPTGVCYE.R            | S116:        | 2 | 4,0996 | 0,472 | -0,192 |
| 4 | Q13283 G3BP1_HUMAN | E.TAPEDAQKSSS#PAPADIAQTVQE.D      | S232:        | 3 | 4,0931 | 0,309 | 0,076  |
| 4 | P52565 GDIR1_HUMAN | E.QLAQIAAENEDE.H                  |              | 2 | 4,0927 | 0,486 | -0,167 |
| 4 | Q8WXI9 P66B_HUMAN  | R.GRLT#PSPDIIVLSDNE.A             | T120:        | 2 | 4,0903 | 0,421 | -0,811 |
| 4 | Q9Y2L9 LRCH1_HUMAN | E.VQSDLTLQSNQS#PNEIRE.N           | S524:        | 3 | 4,0781 | 0,28  | -0,299 |
| 4 | O43166 SI1L1_HUMAN | E.Y#GSTSSIDKQGTSGE.S              | Y206:        | 2 | 4,0738 | 0,568 | -0,611 |
| 4 | O95208 EPN2_HUMAN  | R.M*AQVATGM*GSNQITFGR.G           |              | 2 | 4,0735 | 0,429 | -0,339 |
| 4 | Q14966 ZN638_HUMAN | E.SEVQTATDS#PSVKPNELEEE.S         | S1119:       | 3 | 4,0682 | 0,371 | -0,081 |
| 4 | Q9UBU9 NXF1_HUMAN  | R.AFAM*PAPTPS#SSPVPTLSPEQQE.M     | S556:        | 3 | 4,0576 | 0,359 | -0,297 |
| 4 | Q9H8W3 CJ084_HUMAN | E.NS#GLNLQEDKEDE.S                | S28:         | 2 | 4,0387 | 0,409 | -0,466 |
| 4 | Q13131 AAPK1_HUMAN | E.VSLTSS#VT#SLDSSPVDLTPRPGSHTIE.F | S515:T517:   | 3 | 4,0356 | 1     | -0,124 |
| 4 | Q92797 SYMPK_HUMAN | E.DAMKT#PS#PAAEDAREPE.A           | T1257:S1259: | 3 | 4,0332 | 0,275 | -0,371 |
| 4 | Q03468 ERCC6_HUMAN | E.LSVISGNGECSNSSGTGK.T            |              | 2 | 4,03   | 0,496 | -0,417 |
| 4 | Q14247 SRC8_HUMAN  | R.AKTQT#PPVSPAPQPTEERLPSS#PVYE.D  | T401:S418:   | 3 | 4,0233 | 1     | -0,37  |
| 4 | Q8NBU5 ATAD1_HUMAN | E.YVNSTSEES#HDEDE.I               | S322:        | 2 | 4,0218 | 0,475 | -0,638 |
| 4 | Q13283 G3BP1_HUMAN | D.AQKSSS#PAPADIAQTVQE.D           | S232:        | 2 | 4,0141 | 0,485 | -0,32  |
| 4 | Q86U42 PABP2_HUMAN | E.VEQMNM*S#PPPGNAGPVIMSIEE.K      | S150:        | 3 | 4,0123 | 0,199 | -0,43  |

|   |                     |                                  |              |   |        |       |        |
|---|---------------------|----------------------------------|--------------|---|--------|-------|--------|
| 4 | Q15007 FL2D_HUMAN   | E.GNTTEDDFPSS#PGNGNKSSNSSEE.R    | S306:        | 3 | 4,0113 | 0,494 | -0,505 |
| 4 | Q9H0H5 RGAP1_HUMAN  | E.SGSILSDIS#FDKTDE.S             | S157:        | 2 | 4,0032 | 0,459 | -0,144 |
| 4 | P62258 1433E_HUMAN  | E.LDTLS#EESYKD.S                 | S210:        | 2 | 3,9971 | 0,344 | -0,354 |
| 4 | P27816 MAP4_HUMAN   | E.MALGKDVT#PPPETE.V              | T521:        | 2 | 3,9792 | 0,438 | -0,468 |
| 4 | Q92734 TFG_HUMAN    | E.INKNVM*SAFGLTDDQVSGPPSAPAEDR.S |              | 3 | 3,9791 | 0,349 | -0,065 |
| 4 | Q86VR2 F134C_HUMAN  | E.LAAFCPQLDDSD#TVARE.L           | S274:        | 2 | 3,9743 | 0,461 | -0,391 |
| 4 | Q9BXJ9 NARG1_HUMAN  | E.DM*KITVNGDSS#AEAEE.L           | S856:        | 2 | 3,9612 | 0,409 | -0,409 |
| 4 | Q9HC35 EMAL4_HUMAN  | E.TVADTTLTKAPVS#STE.S            | S887:        | 2 | 3,9604 | 0,527 | -0,43  |
| 4 | Q92797 SYMPK_HUMAN  | E.AALLDSS#LEGPLPKE.T             | S1222:       | 2 | 3,9509 | 0,419 | -0,753 |
| 4 | Q9UQ35 SRRM2_HUMAN  | E.NSFGS#PLEFRNSGPLGTE.M          | S1329:       | 2 | 3,9434 | 0,426 | -0,797 |
| 4 | Q10570 CPSF1_HUMAN  | E.MLYGDSGSLFS#PSKE.E             | S756:        | 2 | 3,9432 | 0,435 | -0,575 |
| 4 | Q9UKM9 RALY_HUMAN   | E.LEHS#QDTDADDGALQ.-             | S295:        | 2 | 3,9391 | 0,336 | -0,288 |
| 4 | P35527 K1C9_HUMAN   | R.SGGGGGGGLGSGGSIR.S             |              | 2 | 3,9377 | 0,339 | -0,594 |
| 4 | Q92797 SYMPK_HUMAN  | E.DAMKT#PS#PAAEDAREPE.A          | T1257:S1259: | 2 | 3,9348 | 0,471 | -0,68  |
| 4 | Q7Z3C6 ATG9A_HUMAN  | E.AS#VYQQAEDGKTE.L               | S543:        | 2 | 3,9211 | 0,464 | -0,648 |
| 4 | Q13283 G3BP1_HUMAN  | E.ETAPEDAQKSSS#PAPADIAQTVQE.D    | S232:        | 3 | 3,9196 | 0,339 | -0,502 |
| 4 | Q8TAQ2 SMRC2_HUMAN  | E.DLTKDMDEPS#PVPNVEE.V           | S347:        | 2 | 3,9131 | 0,42  | -0,428 |
| 4 | Q6PKG0 LARP1_HUMAN  | E.TESAPGS#PRAVT#PVPTKTEE.V       | S521:T526:   | 3 | 3,9114 | 0,295 | -0,248 |
| 4 | Q8N3D4 EH1L1_HUMAN  | E.AGGQVGPEAPRPET#SPE.M           | T284:        | 2 | 3,909  | 0,395 | -0,723 |
| 4 | P63241 IF5A1_HUMAN  | D.GYLSLLQDS#GEVRE.D              | S105:        | 2 | 3,8995 | 0,383 | -0,593 |
| 4 | Q01831 XPC_HUMAN    | E.VEELS#EPVLGDVRE.S              | S140:        | 2 | 3,8796 | 0,399 | -0,813 |
| 4 | P49792 RBP2_HUMAN   | E.TT#PKAVVS#PPKFVFGSE.S          | T2504:S2510: | 2 | 3,8774 | 0,387 | -0,375 |
| 4 | O95232 CROP_HUMAN   | E.VNGTSEDIKS#EGDTQS#N.-          | S425:S431:   | 2 | 3,8714 | 0,483 | -0,692 |
| 4 | Q10570 CPSF1_HUMAN  | E.MLYGDSGSLFS#PSKEE.A            | S756:        | 2 | 3,8705 | 0,516 | -0,401 |
| 4 | Q13459 MYO9B_HUMAN  | E.LDPRGS#DEENLDSE.T              | S1993:       | 2 | 3,8695 | 0,261 | -0,884 |
| 4 | Q6P2E9 EDC4_HUMAN   | E.TCSTLAES#PRNGLQE.K             | S844:        | 2 | 3,8617 | 0,444 | -0,49  |
| 4 | Q69YH5 CDCA2_HUMAN  | R.VASDS#PKPALTLQQGQE.F           | S727:        | 2 | 3,8474 | 0,503 | 1,386  |
| 4 | Q12888 TP53B_HUMAN  | E.IEPKNS#PEDLGLSLTGD.S           | S500:        | 2 | 3,8428 | 0,304 | -0,327 |
| 4 | Q9BTE6 AASD1_HUMAN  | E.AQALLQDYISTQS#AKE.-            | S409:        | 2 | 3,8392 | 0,425 | -0,132 |
| 4 | Q9Y2F5 K0947_HUMAN  | E.AGCIPVTSAEKS#PE.A              | S1470:       | 2 | 3,839  | 0,382 | -0,56  |
| 4 | P27816 MAP4_HUMAN   | E.TEM*ALGKDVT#PPPETE.V           | T521:        | 2 | 3,8286 | 0,341 | -0,27  |
| 4 | P27816 MAP4_HUMAN   | E.M*ALGKDVT#PPPETE.V             | T521:        | 2 | 3,8259 | 0,405 | -0,309 |
| 4 | B2RDY9 B2RDY9_HUMAN | E.SAS#RSALFAQINQGE.S             | S253:        | 2 | 3,825  | 0,367 | -0,294 |

|   |                     |                                 |              |   |        |       |        |
|---|---------------------|---------------------------------|--------------|---|--------|-------|--------|
| 4 | P46013 KI67_HUMAN   | E.AQS#LEDLAGFKE.L               | S1098:       | 2 | 3,819  | 0,352 | -0,352 |
| 4 | Q9UKX7 NUP50_HUMAN  | E.TQS#PSLFGSTKLQQE.S            | S221:        | 2 | 3,8146 | 0,323 | -0,634 |
| 4 | Q9C0G0 ZN407_HUMAN  | E.SLS#PGGAVIQVTKQE.I            | S1958:       | 2 | 3,8076 | 0,314 | -0,496 |
| 4 | Q9Y6A5 TACC3_HUMAN  | E.NQM*VS#PGKVSQSPE.Q            | S170:        | 2 | 3,8026 | 0,299 | -0,161 |
| 4 | Q9H814 RNUXA_HUMAN  | E.ALASLDES#QEGHAE.A             | S368:        | 2 | 3,8011 | 0,429 | -0,556 |
| 4 | Q15007 FL2D_HUMAN   | E.GNTTEDDFPSS#PGNGNK.S          | S306:        | 2 | 3,7956 | 0,455 | -0,604 |
| 4 | P35580 MYH10_HUMAN  | E.SQLQDTQELLQEE.T               |              | 2 | 3,793  | 0,241 | -0,469 |
| 4 | P11387 TOP1_HUMAN   | E.NGFSS#PPQIKDEPEDD.G           | S112:        | 2 | 3,7869 | 0,346 | -0,132 |
| 4 | Q15233 NONO_HUMAN   | E.GIGAIGGT#PPAFNR.A             | T450:        | 2 | 3,7862 | 0,449 | -0,173 |
| 4 | P13645 K1C10_HUMAN  | K.GSLGGGFSSGGFSGGSFSR.G         |              | 2 | 3,7844 | 0,365 | -0,357 |
| 4 | Q8NG31 CASC5_HUMAN  | E.IDNES#ALEDK.E.D               | S1126:       | 2 | 3,7833 | 0,296 | -0,363 |
| 4 | P60660 MYL6_HUMAN   | E.M*LVAGHEDS#NGCINYE.A          | S135:        | 2 | 3,7691 | 0,357 | -0,448 |
| 4 | Q12923 PTN13_HUMAN  | E.LS#LYQPLQNSSKE.K              | S941:        | 2 | 3,7588 | 0,41  | -0,538 |
| 4 | Q8N1G0 ZN687_HUMAN  | E.NGPGM*QPPVSS#PPLGALKQE.S      | S215:        | 3 | 3,753  | 0,38  | -0,436 |
| 4 | Q9Y6A5 TACC3_HUMAN  | E.NQM*VS#PGKVSQSPEQAVEE.N       | S170:        | 2 | 3,7519 | 0,603 | -0,472 |
| 4 | Q05BP1 Q05BP1_HUMAN | E.VGPLAHLAPS#PQSE.A             | S22:         | 2 | 3,751  | 0,433 | -0,247 |
| 4 | O60303 K0556_HUMAN  | E.TEGRSS#PGPDTLVVLE.F           | S253:        | 2 | 3,7473 | 0,376 | -0,351 |
| 4 | Q15398 DLG7_HUMAN   | E.MGIPQQTTS#PENAGPQNTKSE.H      | S662:        | 3 | 3,7405 | 0,391 | -0,319 |
| 4 | Q7Z309 F122B_HUMAN  | E.SLSLS#DSDFDKPE.K              | S93:         | 2 | 3,7373 | 0,3   | -0,161 |
| 4 | Q8N2Y8 RUSC2_HUMAN  | E.TSRPSPLGSYS#PIR.S             | S781:        | 3 | 3,732  | 0,36  | 0,114  |
| 4 | Q12968 NFAC3_HUMAN  | E.LCSDDQGSLS#PARE.T             | S366:        | 2 | 3,7252 | 0,459 | -0,529 |
| 4 | Q9BXJ9 NARG1_HUMAN  | E.DMKITVNGDS#SAEAE.L            | S855:        | 2 | 3,721  | 0,377 | -0,344 |
| 4 | Q99767 APBA2_HUMAN  | E.LAALRPES#PAPEEQE.C            | S55:         | 2 | 3,7117 | 0,364 | -0,284 |
| 4 | O43353 RIPK2_HUMAN  | E.ILVVS#RSPS#LNLLQNK.S          | S527:S531:   | 3 | 3,7081 | 0,417 | -0,565 |
| 4 | O00418 EF2K_HUMAN   | E.SDEDS#LGSSGRVCVE.K            | S474:        | 2 | 3,7049 | 0,46  | -0,291 |
| 4 | Q8N201 INT1_HUMAN   | E.LLIAEEKLS#PEQE.G              | S307:        | 2 | 3,7046 | 0,354 | -0,541 |
| 4 | Q9BVJ6 UT14A_HUMAN  | E.LSQDAEPAGS#QETKDSGSQE.V       | S445:        | 3 | 3,6976 | 0,35  | 0,171  |
| 4 | Q99661 KIF2C_HUMAN  | E.LSPHS#GPSGEQLIQM*E.T          | S592:        | 2 | 3,6919 | 0,345 | -0,405 |
| 4 | Q07157 ZO1_HUMAN    | E.NMS#LTDAKTLIE.R               | S241:        | 2 | 3,688  | 0,468 | -0,431 |
| 4 | Q13029 PRDM2_HUMAN  | E.YNGIDLPVENPADGTRS#PS#PCKSLE.A | S912:S914:   | 3 | 3,6864 | 0,337 | -1,018 |
| 4 | Q12888 TP53B_HUMAN  | E.SVAS#PQKTM*SVLSCICE.A         | S1028:       | 2 | 3,6843 | 0,473 | -0,857 |
| 4 | P49792 RBP2_HUMAN   | E.T#TPKAVVS#PPKFVFGSE.S         | T2503:S2510: | 2 | 3,68   | 0,342 | -0,313 |
| 4 | Q9Y3F4 STRAP_HUMAN  | E.IASENS#DCIFPSAPDVKA.-         | S338:        | 2 | 3,6797 | 0,378 | -0,366 |

|   |                    |                                  |              |   |        |       |        |
|---|--------------------|----------------------------------|--------------|---|--------|-------|--------|
| 4 | O75113 N4BP1_HUMAN | E.FTQNAATGLNIS#RDE.T             | S226:        | 2 | 3,6747 | 0,512 | -0,355 |
| 4 | Q96E22 NGBR_HUMAN  | E.LLGLDCSKYS#PE.F                | S168:        | 2 | 3,6623 | 0,331 | -0,25  |
| 4 | Q8TD19 NEK9_HUMAN  | E.SGGCGDSS#PGPSASQGPR.A          | S29:         | 2 | 3,6591 | 0,356 | -0,491 |
| 4 | P27816 MAP4_HUMAN  | E.VGLLKDMS#PLSE.T                | S507:        | 2 | 3,6569 | 0,46  | -0,356 |
| 4 | P49006 MRP_HUMAN   | E.GGGDSSASSPTEEEQE.Q             |              | 2 | 3,6509 | 0,442 | -0,078 |
| 4 | P27816 MAP4_HUMAN  | E.VGLLKDM*S#PLSETE.M             | S507:        | 2 | 3,6506 | 0,383 | -0,453 |
| 4 | Q07021 C1QBP_HUMAN | E.AESDIFS#IRE.V                  | S205:        | 2 | 3,6489 | 0,275 | -0,391 |
| 4 | Q96ST3 SIN3A_HUMAN | R.YM*NSDTS#PELRE.H               | S1112:       | 2 | 3,6412 | 0,45  | -0,149 |
| 4 | Q86U42 PABP2_HUMAN | E.VEQM*NM*S#PPPGNAGPVIMSIEE.K    | S150:        | 3 | 3,6329 | 0,278 | -0,499 |
| 4 | Q9P2B7 K1430_HUMAN | E.GEVDHSFFDS#DFEE.G              | S19:         | 2 | 3,6273 | 0,382 | -0,351 |
| 4 | Q9NZ17 UBIP1_HUMAN | E.SGLVHDFDAS#LSGIGQE.L           | S22:         | 2 | 3,603  | 0,467 | -0,269 |
| 4 | P19174 PLCG1_HUMAN | E.NGDLS#PFGTSLRE.R               | S1221:       | 2 | 3,5784 | 0,486 | -0,391 |
| 4 | P08069 IGF1R_HUMAN | E.NGPGPGVLVLRAS#FDE.R            | S1339:       | 2 | 3,5766 | 0,441 | -0,429 |
| 4 | Q02952 AKA12_HUMAN | E.VAS#EKLTASE.Q                  | S347:        | 2 | 3,5674 | 0,386 | -0,328 |
| 4 | Q15398 DLG7_HUMAN  | E.M*GIPQQTTS#PENAGPQNTKSE.H      | S662:        | 3 | 3,563  | 0,262 | -0,237 |
| 4 | O15085 ARHGB_HUMAN | E.NNQYDAPEPGTQR.L                |              | 2 | 3,5451 | 0,493 | 0      |
| 4 | Q9UQ35 SRRM2_HUMAN | E.FSASPM*LKSGM*S#PE.Q            | S1132:       | 2 | 3,5445 | 0,446 | -0,54  |
| 4 | P85037 FOXK1_HUMAN | R.SGGLQTPECLS#REGS#PIPHDPE.F     | S441:S445:   | 3 | 3,5443 | 0,156 | -0,363 |
| 4 | Q99700 ATX2_HUMAN  | E.VTSQGVQTS#SPACKQE.K            | S887:        | 2 | 3,5427 | 0,43  | -0,819 |
| 4 | Q16643 DREB_HUMAN  | E.TQEPSPILDSEETR.A               |              | 2 | 3,5418 | 0,382 | -0,457 |
| 4 | Q14978 NOLC1_HUMAN | R.GGSISVQVNSIKFDS#E.-            | S698:        | 2 | 3,5389 | 0,468 | -0,419 |
| 4 | Q14694 UBP10_HUMAN | E.TKYS#PPAISPLVSE.K              | S365:        | 2 | 3,5377 | 0,373 | -0,389 |
| 4 | Q16637 SMN_HUMAN   | E.VANNIEQNAQENENE.S              |              | 2 | 3,5371 | 0,43  | -0,569 |
| 4 | P42566 EP15_HUMAN  | E.SEPIHQES#PARS#SPELLPSGVTDENE.V | S558:S562:   | 3 | 3,5337 | 0,198 | -0,432 |
| 4 | Q92797 SYMPK_HUMAN | E.DAM*KT#PS#PAAEDAREPE.A         | T1257:S1259: | 2 | 3,533  | 0,52  | -0,49  |
| 4 | Q3KQU3 MA7D1_HUMAN | E.ANANGSS#PEPVKAVE.A             | S742:        | 2 | 3,5315 | 0,414 | -0,236 |
| 4 | Q9Y365 PCTL_HUMAN  | E.LSVQHADS#LENIDE.S              | S259:        | 2 | 3,5282 | 0,231 | -0,37  |
| 4 | P14625 ENPL_HUMAN  | E.AIQLDGLNAS#QIRE.L              | S64:         | 2 | 3,5278 | 0,299 | 0,076  |
| 4 | Q99618 CDCA3_HUMAN | R.VADPRS#PSAGILRT#PIQVE.S        | S29:T37:     | 3 | 3,5248 | 0,212 | -0,422 |
| 4 | Q9UPN6 RBM16_HUMAN | E.TVQTQS#PTPVEKE.T               | S617:        | 2 | 3,5247 | 0,34  | -0,676 |
| 4 | P41250 SYG_HUMAN   | E.SVLAQLDNYGQQE.L                |              | 2 | 3,5177 | 0,399 | -0,5   |
| 4 | Q6NYC8 PHTNS_HUMAN | R.AKLGLS#PGEPSVLGTVE.A           | S54:         | 2 | 3,5169 | 0,394 | -0,6   |
| 4 | Q8IZM8 ZN654_HUMAN | E.NGS#PNNSLNNVFKPLTE.C           | S134:        | 2 | 3,5163 | 0,403 | -0,317 |

|   |                     |                                   |                 |   |        |       |        |
|---|---------------------|-----------------------------------|-----------------|---|--------|-------|--------|
| 4 | Q9H8G2 CI082_HUMAN  | E.LFLAEHS#DLEE.G                  | S120:           | 2 | 3,5119 | 0,224 | -0,441 |
| 4 | Q66K74 MAP1S_HUMAN  | R.LSLS#PLRGGE.A                   | S657:           | 2 | 3,5118 | 0,22  | -0,11  |
| 4 | Q6PKG0 LARP1_HUMAN  | E.TES#APGS#PRAVT#PVPTKTEE.V       | S517:S521:T526: | 3 | 3,5077 | 0,33  | -0,319 |
| 4 | Q9NRS6 SNX15_HUMAN  | E.STEEASGS#PARGPLTEAE.L           | S201:           | 2 | 3,5014 | 0,496 | -0,131 |
| 4 | P23434 GCSH_HUMAN   | E.NGIGTVGISNFAQE.A                |                 | 2 | 3,5001 | 0,362 | -0,434 |
| 4 | P56537 IF6_HUMAN    | R.LSALGNVTTTEND.Y                 |                 | 2 | 3,4997 | 0,434 | -0,482 |
| 4 | O75781 PALM_HUMAN   | E.NAAAPS#PVRAPAPS#PAKEE.R         | S116:S124:      | 2 | 3,4899 | 0,424 | -0,06  |
| 4 | O14686 MLL2_HUMAN   | E.GPVS#PDVEPGKEETEE.S             | S1396:          | 2 | 3,4898 | 0,435 | -0,48  |
| 4 | Q5CZB5 Q5CZB5_HUMAN | E.GEGAAGAGDHQDPS#LGAGE.A          | S114:           | 2 | 3,4862 | 0,348 | -0,55  |
| 4 | Q9UHY1 NRBP_HUMAN   | E.SQTVLSSGS#DPKVE.S               | S14:            | 2 | 3,4854 | 0,426 | -0,403 |
| 4 | P23443 KS6B1_HUMAN  | E.GGQLNES#M*DHGGVGPYE.L           | S53:            | 2 | 3,482  | 0,491 | -0,132 |
| 4 | P11169 GTR3_HUMAN   | E.MNS#IEPAKE.T                    | S485:           | 2 | 3,4757 | 0,261 | -0,111 |
| 4 | P04264 K2C1_HUMAN   | K.WELLQQVDTSTR.T                  |                 | 2 | 3,4746 | 0,414 | -0,331 |
| 4 | Q9C0C2 TB182_HUMAN  | E.SQEPLAQES#PLPLATRE.A            | S601:           | 2 | 3,4697 | 0,543 | -0,731 |
| 4 | Q9UQ80 PA2G4_HUMAN  | E.NATSETLEENEAGD.-                |                 | 2 | 3,4696 | 0,422 | -0,079 |
| 4 | Q13439 GOGA4_HUMAN  | E.VFTKEENPES#DGEPVVE.D            | S266:           | 2 | 3,4694 | 0,307 | -0,307 |
| 4 | Q5R372 Q5R372_HUMAN | E.ISTPRPSS#PGGLPEED.S             | S119:           | 2 | 3,4682 | 0,369 | -0,355 |
| 4 | Q6PKG0 LARP1_HUMAN  | E.TES#APGS#PRAVTPVPTK.T           | S517:S521:      | 2 | 3,4666 | 0,379 | 0,197  |
| 4 | Q96T58 MINT_HUMAN   | E.SGVVAVS#PEKSES#PQKE.D           | S2120:S2126:    | 2 | 3,4628 | 0,445 | -0,7   |
| 4 | P39880 CUX1_HUMAN   | E.IQAGSQGQAGASDS#PSARSGR.A        | S1321:          | 3 | 3,4593 | 0,357 | -0,442 |
| 4 | Q00613 HSF1_HUMAN   | E.LAPAS#PM*AS#PGGSIDERPLSSSPLVR.V | S275:S279:      | 3 | 3,459  | 0,373 | 0      |
| 4 | P52294 IMA1_HUMAN   | E.TEEEVMS*#DGGFHE.A               | S63:            | 2 | 3,4554 | 0,47  | -0,312 |
| 4 | Q8NFP9 NBEA_HUMAN   | E.GDDDAVS#LLQEKE.I                | S2138:          | 2 | 3,4497 | 0,255 | -0,407 |
| 4 | Q9Y6A5 TACC3_HUMAN  | E.NQMVS#PGKVSQSPEQAVEE.N          | S170:           | 2 | 3,4487 | 0,461 | -0,238 |
| 4 | Q9HBM1 SPC25_HUMAN  | E.LALFDKS#INE.F                   | S12:            | 2 | 3,4448 | 0,287 | -0,397 |
| 4 | Q99700 ATX2_HUMAN   | E.VTSQGVQTSS#PACKQE.K             | S888:           | 3 | 3,4428 | 0,374 | -0,102 |
| 4 | Q16186 ADRM1_HUMAN  | E.YLNNPPM*PGALGASGS#SGHE.L        | S142:           | 3 | 3,4382 | 0,114 | -0,446 |
| 4 | Q8IYL2 U383_HUMAN   | R.GPGPGQGS#PGGGPGPR.S             | S78:            | 2 | 3,4301 | 0,593 | -0,346 |
| 4 | Q9Y4B4 ARIP4_HUMAN  | E.GLARPVS#PDSPEIISE.L             | S1169:          | 2 | 3,4296 | 0,383 | -0,279 |
| 4 | Q9ULD4 BRPF3_HUMAN  | E.LTAQDITECNS#NKE.N               | S76:            | 2 | 3,4247 | 0,474 | -0,43  |
| 4 | Q6PKG0 LARP1_HUMAN  | R.AVT#PVPTKTEE.V                  | T526:           | 2 | 3,4227 | 0,414 | -0,292 |
| 4 | P78536 ADA17_HUMAN  | E.SLS#LFHPSNVE.M                  | S706:           | 2 | 3,419  | 0,458 | -0,559 |
| 4 | Q8TDY2 RBCC1_HUMAN  | E.MSQITITDLLSEQK.A                |                 | 2 | 3,4186 | 0,384 | -0,327 |

|   |                     |                                     |              |   |        |       |        |
|---|---------------------|-------------------------------------|--------------|---|--------|-------|--------|
| 4 | Q9P2D1 CHD7_HUMAN   | E.FANS#PSEDKEE.S                    | S1874:       | 2 | 3,4153 | 0,305 | -0,366 |
| 4 | P35580 MYH10_HUMAN  | E.GASLELS#DDDTESK.T                 | S1956:       | 2 | 3,4073 | 0,377 | -0,316 |
| 4 | Q92794 MYST3_HUMAN  | E.TVQAVQSLTQEESS#EHE.G              | S1437:       | 2 | 3,3912 | 0,448 | -0,369 |
| 4 | Q96E15 TCAL4_HUMAN  | E.IEGKPES#EGEPGSE.T                 | S102:        | 2 | 3,3852 | 0,418 | -0,32  |
| 4 | Q9BUR4 WDR79_HUMAN  | E.FGS#PSELSPRIEEQE.L                | S85:         | 2 | 3,3831 | 0,312 | -0,273 |
| 4 | P43487 RANG_HUMAN   | E.NTDESNHDPQFEPVSLPEQEIK.T          |              | 3 | 3,3792 | 0,213 | -0,343 |
| 4 | O43379 WDR62_HUMAN  | E.VEAGPGDQQGDSYLR.V                 |              | 2 | 3,373  | 0,372 | -0,307 |
| 4 | P60842 IF4A1_HUMAN  | R.SRDNGPDGM*EPE.G                   |              | 2 | 3,3694 | 0,399 | 0      |
| 4 | Q6GYQ0 GRIPE_HUMAN  | E.VASLTTLHIDS#E.T                   | S966:        | 2 | 3,3667 | 0,373 | -0,357 |
| 4 | Q16254 E2F4_HUMAN   | E.ASRPNS#PQLTPTAVPGSAE.V            | S244:        | 2 | 3,36   | 0,483 | -0,498 |
| 4 | P78527 PRKDC_HUMAN  | E.TQAS#QGTQLQTR.T                   | S2612:       | 2 | 3,3599 | 0,366 | -0,288 |
| 4 | Q9H8W4 PKHF2_HUMAN  | D.LLSAGDM*ATCQPAR.S                 |              | 2 | 3,3587 | 0,263 | -0,081 |
| 4 | Q6NZI2 PTRF_HUMAN   | R.RGS#S#PDVHALLE.I                  | S365:S366:   | 2 | 3,3571 | 0,463 | -0,254 |
| 4 | Q9NQW6 ANLN_HUMAN   | K.SCS#PSPVSPQVQQAADTISD.S           | S97:         | 3 | 3,3522 | 0,106 | -0,081 |
| 4 | Q93008 USP9X_HUMAN  | E.NYEGSEEV#PPQTKDQ.-                | S2540:       | 2 | 3,3488 | 0,478 | -0,194 |
| 4 | P49711 CTCF_HUMAN   | E.LQGAYENEVS#KEGLAE.S               | S143:        | 2 | 3,3481 | 0,351 | -0,134 |
| 4 | Q9UKN8 TF3C4_HUMAN  | K.ILLVDS#PGMGNADDEQQEE.G            | S611:        | 2 | 3,3446 | 0,388 | -0,456 |
| 4 | Q13045 FLII_HUMAN   | E.GLSNLADVDLSCND.L                  |              | 2 | 3,3421 | 0,435 | -0,327 |
| 4 | P18433 PTPRA_HUMAN  | E.YIDAFSDY#ANFK.-                   | Y798:        | 2 | 3,3367 | 0,407 | -0,318 |
| 4 | P55036 PSMD4_HUMAN  | E.NNVGLITLANDCE.V                   |              | 2 | 3,3335 | 0,395 | -0,426 |
| 4 | Q14320 FA50A_HUMAN  | E.LKSS#TVGLVTLND.M                  | S63:         | 2 | 3,3326 | 0,335 | -0,684 |
| 4 | Q9H0H5 RGAP1_HUMAN  | E.SGSILSDIS#FDKTD.E                 | S157:        | 2 | 3,3262 | 0,382 | -0,39  |
| 4 | Q96QC0 PP1RA_HUMAN  | E.ILTSIM*GSPNS#HPSEE.L              | S594:        | 2 | 3,3235 | 0,351 | -0,204 |
| 4 | Q9H6Z4 RANB3_HUMAN  | E.NAAAES#GSESSSQEATPEKE.S           | S353:        | 3 | 3,3212 | 0,303 | -0,088 |
| 4 | Q9H8T5 Q9H8T5_HUMAN | E.LGPAPSLGQASHSDS#E.M               | S273:        | 2 | 3,3141 | 0,44  | -0,224 |
| 4 | Q96GA7 SDSL_HUMAN   | E.AVSAVQQLDDE.R                     |              | 2 | 3,3137 | 0,36  | -0,474 |
| 4 | Q92797 SYMPK_HUMAN  | E.AALLDS#SLEGPLPKE.T                | S1221:       | 3 | 3,3124 | 0,355 | -0,113 |
| 4 | Q14692 BMS1_HUMAN   | E.TS#DIENLLKEEE.D                   | S639:        | 2 | 3,3111 | 0,363 | -0,407 |
| 4 | O60841 IF2P_HUMAN   | E.AM*AS#DEETEKVE.G                  | S511:        | 2 | 3,3088 | 0,389 | -0,51  |
| 4 | O95196 CSPG5_HUMAN  | E.SFNIQNSMS#PKLE.G                  | S543:        | 2 | 3,2984 | 0,301 | -0,542 |
| 4 | Q9UGU0 TCF20_HUMAN  | E.NDTVITIS#PKQE.G                   | S1522:       | 2 | 3,2971 | 0,422 | -0,186 |
| 4 | P08047 SP1_HUMAN    | E.SQPSPLALLAATCSR.I                 |              | 2 | 3,2956 | 0,496 | -0,233 |
| 4 | Q96T23 RSF1_HUMAN   | E.NVGKVG#PLDYSLVLDLPSTNGQS#PGKAIE.N | S1349:S1365: | 3 | 3,2877 | 0,177 | 0,118  |

|   |                     |                          |            |   |        |       |        |
|---|---------------------|--------------------------|------------|---|--------|-------|--------|
| 4 | Q96GA3 LTV1_HUMAN   | E.DDFILQANKAT#GEEE.G     | T171:      | 2 | 3,2861 | 0,443 | -0,416 |
| 4 | Q02952 AKA12_HUMAN  | E.TVS#ILSKTE.G           | S1256:     | 2 | 3,2853 | 0,134 | -0,115 |
| 4 | Q14839 CHD4_HUMAN   | E.VM*LQNGET#PKDLNDE.K    | T1679:     | 2 | 3,2841 | 0,304 | -0,407 |
| 4 | P26639 SYTC_HUMAN   | E.GGVSSNDFSSLE.A         |            | 2 | 3,2753 | 0,383 | -0,102 |
| 4 | Q9H8W4 PKHF2_HUMAN  | D.LLSAGDMATCQPAR.S       |            | 2 | 3,2654 | 0,349 | -0,736 |
| 4 | Q13625 ASPP2_HUMAN  | E.NGVNS#PRMDLTLAE.L      | S121:      | 2 | 3,2504 | 0,455 | -0,458 |
| 4 | Q9Y4W2 LAS1L_HUMAN  | E.GSEAS#PIGKSPYTLD.S     | S523:      | 2 | 3,2472 | 0,21  | -0,381 |
| 4 | Q9BX63 FANCI_HUMAN  | E.AASHLS#PENFVEDE.A      | S930:      | 2 | 3,2396 | 0,389 | -0,3   |
| 4 | P57764 GSDC1_HUMAN  | E.GS#GRFSLPGATCLQGE.G    | S181:      | 2 | 3,2386 | 0,419 | -0,711 |
| 4 | Q14151 SAFB2_HUMAN  | E.TSS#LNFKVTPDIEE.S      | S195:      | 2 | 3,2373 | 0,331 | -0,294 |
| 4 | Q12888 TP53B_HUMAN  | E.SGLQIQKS#PEPE.V        | S294:      | 2 | 3,2337 | 0,404 | -0,35  |
| 4 | O95684 FR1OP_HUMAN  | E.GALDLSDVHS#PPKS#PE.G   | S156:S160: | 2 | 3,2332 | 0,416 | -0,27  |
| 4 | P35908 K22E_HUMAN   | R.NLDLDSIIAEVK.A         |            | 2 | 3,2279 | 0,481 | 0      |
| 4 | P04792 HSPB1_HUMAN  | R.ALS#RQLS#SGVSE.I       | S78:S82:   | 2 | 3,2272 | 0,323 | -0,175 |
| 4 | Q16643 DREB_HUMAN   | E.GASTLQGEPRAPT#PPSGTE.V | T497:      | 2 | 3,2266 | 0,425 | -0,379 |
| 4 | Q9BUR4 WDR79_HUMAN  | E.FGSPSELS#PRIEEQE.L     | S90:       | 2 | 3,2265 | 0,41  | -0,41  |
| 4 | Q8NI08 NCOA7_HUMAN  | E.STLDNS#CQGAQM*DNKSE.V  | S617:      | 3 | 3,2226 | 0,248 | -0,277 |
| 4 | Q8IYA6 CKP2L_HUMAN  | E.NES#LDNFLKE.T          | S175:      | 2 | 3,2221 | 0,176 | -0,473 |
| 4 | O75116 ROCK2_HUMAN  | E.NLLLSDS#PSCRE.N        | S425:      | 2 | 3,2211 | 0,402 | -0,083 |
| 4 | P17535 JUND_HUMAN   | D.LGLLKLAS#PELE.R        | S100:      | 2 | 3,217  | 0,26  | -0,09  |
| 4 | Q5W0B1 RN219_HUMAN  | E.LNLS#KGSILTNDQLE.N     | S592:      | 2 | 3,2122 | 0,388 | -0,606 |
| 4 | Q14671 PUM1_HUMAN   | E.VNSVLS#PRSE.S          | S209:      | 2 | 3,2111 | 0,387 | -0,313 |
| 4 | Q92804 RBP56_HUMAN  | E.SSGS#QGGGRAPSYDQPD.Y   | S97:       | 2 | 3,2084 | 0,367 | 0      |
| 4 | Q8IWS0 PHF6_HUMAN   | E.IDQQQLTQQQLNGN.-       |            | 2 | 3,2048 | 0,289 | -0,375 |
| 4 | Q6PKG0 LARP1_HUMAN  | E.SAPGS#PRAVT#PVPTKTEE.V | S521:T526: | 2 | 3,2006 | 0,396 | -0,246 |
| 4 | P40261 NNMT_HUMAN   | E.VISQSYSSTM*ANNE.G      |            | 2 | 3,2006 | 0,406 | -0,473 |
| 4 | Q9UQ35 SRRM2_HUMAN  | E.NSFGS#PLEFR.N          | S1329:     | 2 | 3,2002 | 0,46  | -0,297 |
| 4 | Q9BVW5 TIPIN_HUMAN  | E.TLLDQS#FKNVQQQLD.A     | S282:      | 2 | 3,1944 | 0,343 | -0,591 |
| 4 | Q8TEH3 DEN1A_HUMAN  | E.AALQPLGQAKS#LE.D       | S592:      | 2 | 3,185  | 0,326 | -0,26  |
| 4 | Q8N3U4 STAG2_HUMAN  | E.SETHFSS#DTDFEDIE.G     | S23:       | 2 | 3,1824 | 0,212 | -0,531 |
| 4 | Q5JRC6 Q5JRC6_HUMAN | E.AADLEES#FNEHE.L        | S146:      | 2 | 3,1803 | 0,215 | -0,332 |
| 4 | Q7Z417 NUFP2_HUMAN  | E.SQNPLASPTNT#LLGSAKE.Q  | T633:      | 3 | 3,1775 | 0,225 | -0,288 |
| 4 | P07954 FUMH_HUMAN   | E.NCVVGIQANTE.R          |            | 2 | 3,1704 | 0,369 | -0,304 |

|   |                     |                                  |            |   |        |       |        |
|---|---------------------|----------------------------------|------------|---|--------|-------|--------|
| 4 | P04264 K2C1_HUMAN   | K.YEELQITAGR.H                   |            | 2 | 3,1621 | 0,23  | -0,207 |
| 4 | Q9NRS6 SNX15_HUMAN  | E.STEEASGS#PARGPLTE.A            | S201:      | 2 | 3,162  | 0,46  | -0,658 |
| 4 | P25490 TYY1_HUMAN   | E.VVGGDDS#DGLRAE.D               | S118:      | 2 | 3,1583 | 0,499 | -0,356 |
| 4 | O95551 TTRAP_HUMAN  | E.TTDSTTSKIS#PSEDTQQE.N          | S101:      | 2 | 3,1573 | 0,481 | -0,24  |
| 4 | P27816 MAP4_HUMAN   | E.ISS#AEKVALSSETE.V              | S432:      | 2 | 3,1561 | 0,259 | -0,478 |
| 4 | P04264 K2C1_HUMAN   | R.SLDLDSIIAEVK.A                 |            | 2 | 3,1548 | 0,419 | -0,187 |
| 4 | Q9P2D1 CHD7_HUMAN   | E.FANS#PSEDKEESM*E.I             | S1874:     | 2 | 3,1529 | 0,307 | -0,216 |
| 4 | P27816 MAP4_HUMAN   | E.TEMALGKDV#PPPETE.V             | T521:      | 2 | 3,148  | 0,315 | -0,272 |
| 4 | P52948 NUP98_HUMAN  | R.FS#FLSKPVDE.N                  | S635:      | 2 | 3,1469 | 0,318 | -0,488 |
| 4 | Q9UQ80 PA2G4_HUMAN  | E.NATSGETLEENE.A                 |            | 2 | 3,1448 | 0,471 | -0,283 |
| 4 | Q00839 HNRPU_HUMAN  | E.NDVITCFANFE.S                  |            | 2 | 3,1391 | 0,39  | -0,092 |
| 4 | Q9P287 BCCIP_HUMAN  | E.LTDLLIQNHIGSVIK.Q              |            | 3 | 3,1328 | 0,28  | -0,306 |
| 4 | Q92539 LPIN2_HUMAN  | E.TTYPQTACPKS#DSELE.V            | S243:      | 2 | 3,1299 | 0,541 | -0,32  |
| 4 | Q9H0E9 BRD8_HUMAN   | E.AAS#LEEPKEEDQGE.G              | S641:      | 2 | 3,12   | 0,541 | -0,53  |
| 4 | P29966 MARCS_HUMAN  | E.AGAS#PVEKEAPEGE.A              | S101:      | 2 | 3,1172 | 0,432 | -0,241 |
| 4 | Q86UP2 KTN1_HUMAN   | E.SLQM*QVQDILEQNE.A              |            | 2 | 3,1152 | 0,265 | 0      |
| 4 | Q13283 G3BP1_HUMAN  | E.DAQKS#SSPAPADIAQTVQE.D         | S230:      | 3 | 3,1142 | 0,172 | 0      |
| 4 | Q05209 PTN12_HUMAN  | E.SFVLAS#EHNT#PVRSE.W            | S689:T693: | 2 | 3,1058 | 0,35  | 0,133  |
| 4 | Q92609 TBCE5_HUMAN  | E.AQISFLGQLND.L                  |            | 2 | 3,105  | 0,344 | -0,274 |
| 4 | Q15154 PCM1_HUMAN   | E.TASPVAVSLRS#DGS#ENLCTPQQR.T    | S869:S872: | 3 | 3,1005 | 0,387 | -0,202 |
| 4 | Q9NZ63 CI078_HUMAN  | E.DLHLGTS#FSAE.T                 | S101:      | 2 | 3,0947 | 0,183 | -0,291 |
| 4 | Q9Y490 TLN1_HUMAN   | E.GCVSASQAATE.D                  |            | 2 | 3,0908 | 0,433 | -0,113 |
| 4 | Q6ZNP1 Q6ZNP1_HUMAN | E.LSLTNIS#PKFQE.T                | S39:       | 2 | 3,087  | 0,287 | -0,084 |
| 4 | Q6PKG0 LARP1_HUMAN  | E.TES#APGSRAVT#PVPTKTEE.V        | S517:T526: | 3 | 3,0866 | 0,317 | -0,248 |
| 4 | B2RDY9 B2RDY9_HUMAN | R.SALFAQINQGE.S                  |            | 2 | 3,0815 | 0,4   | -0,311 |
| 4 | P05787 K2C8_HUMAN   | E.AES#MYQIKYEE.L                 | S280:      | 2 | 3,0809 | 0,428 | -0,415 |
| 4 | Q6NZY4 ZCHC8_HUMAN  | E.NSGLALYDGKDG#DGETE.V           | T342:      | 2 | 3,08   | 0,406 | -0,127 |
| 4 | Q14839 CHD4_HUMAN   | E.KS#AIDLTPIVVE.D                | S1648:     | 2 | 3,0778 | 0,293 | -0,447 |
| 4 | P46100 ATRX_HUMAN   | E.SSNYDS#ELEKE.I                 | S819:      | 2 | 3,0773 | 0,268 | -0,265 |
| 4 | P49792 RBP2_HUMAN   | K.AVVS#PPKFVFGSE.S               | S2510:     | 2 | 3,0766 | 0,322 | -0,338 |
| 4 | Q13263 TIF1B_HUMAN  | R.STAPSAASASASAAAS#SPAGGGAEALE.L | S49:       | 3 | 3,075  | 0,258 | -0,153 |
| 4 | P49321 NASP_HUMAN   | E.FQSCNLQEQYLE.A                 |            | 2 | 3,0749 | 0,322 | -0,146 |
| 4 | Q13435 SF3B2_HUMAN  | E.QQAQVEKEDFS#DM*VAE.H           | S838:      | 2 | 3,0723 | 0,272 | 0,438  |



|   |                    |                           |        |   |        |       |        |
|---|--------------------|---------------------------|--------|---|--------|-------|--------|
| 4 | Q13283 G3BP1_HUMAN | K.SS#SPAPADIAQTVQE.D      | S231:  | 2 | 3,0712 | 0,296 | 0      |
| 4 | Q00653 NFKB2_HUMAN | E.SCYNPGLDGII.E.Y         |        | 2 | 3,0635 | 0,375 | -0,456 |
| 4 | P68371 TBB2C_HUMAN | E.YQQYQDATAEEEE.G         |        | 2 | 3,0551 | 0,37  | -0,331 |
| 4 | Q08211 DHX9_HUMAN  | E.LDALDANDE.L             |        | 2 | 3,049  | 0,34  | -0,125 |
| 4 | P27816 MAP4_HUMAN  | E.VGLLKDM*S#PLSE.T        | S507:  | 2 | 3,0452 | 0,341 | -0,264 |
| 4 | Q9NZB2 F120A_HUMAN | R.SSPINPAQSGS#PNHVD.S     | S444:  | 2 | 3,0435 | 0,219 | -0,362 |
| 4 | P46939 UTRO_HUMAN  | K.YGEHEAS#PDNGQNE.F       | S10:   | 2 | 3,0352 | 0,208 | -0,375 |
| 4 | P28715 ERCC5_HUMAN | E.LTPAS#PTCTNSVSKNE.T     | S526:  | 2 | 3,031  | 0,466 | -0,478 |
| 4 | Q96EZ8 MCRS1_HUMAN | D.SSLM*ASGTASRS#EDEE.S    | S22:   | 2 | 3,0304 | 0,451 | -0,418 |
| 4 | P49815 TSC2_HUMAN  | D.LSFQSQPLSKSS#SPE.L      | S1387: | 2 | 3,0294 | 0,293 | -0,906 |
| 4 | Q96D46 NMD3_HUMAN  | E.DLHIS#QDATGEE.G         | S490:  | 2 | 3,025  | 0,305 | -0,437 |
| 4 | Q6NZI2 PTRF_HUMAN  | E.SDAVLVDKSDS#D.-         | S389:  | 2 | 3,0223 | 0,297 | -0,183 |
| 4 | Q9UQ80 PA2G4_HUMAN | E.ASSGVSVLSLCE.K          |        | 2 | 3,0164 | 0,366 | -0,377 |
| 4 | Q9NR30 DDX21_HUMAN | E.SNS#EIEQIPEVQKE.G       | S173:  | 2 | 3,0107 | 0,385 | -0,332 |
| 4 | P27816 MAP4_HUMAN  | E.VGLLKDM*SPLS#ETE.M      | S510:  | 2 | 3,0074 | 0,364 | -0,453 |
| 4 | Q6S8J3 A26CA_HUMAN | E.MATAASSSLE.K            |        | 2 | 3,0067 | 0,312 | -0,463 |
| 4 | Q9ULU4 PKCB1_HUMAN | E.TDSPTVHLGLDS#DSESE.L    | S707:  | 2 | 3,0056 | 0,307 | -0,588 |
| 4 | Q6PD74 P34_HUMAN   | E.IEGLS#SDEEH.-           | S310:  | 2 | 3,0052 | 0,32  | -0,204 |
| 4 | Q9UJX4 APC5_HUMAN  | E.LDVS#VREEE.V            | S195:  | 2 | 3,0042 | 0,279 | -0,211 |
| 4 | P06748 NPM_HUMAN   | D.MS#PLRPQNYLFGCE.L       | S10:   | 2 | 3,0025 | 0,477 | -0,34  |
| 4 | P51587 BRCA2_HUMAN | E.QGLTLPLYQS#PVKE.L       | S93:   | 2 | 3,0012 | 0,402 | -0,443 |
| 4 | Q86VR2 F134C_HUMAN | E.GSEDLDGHS#DPEE.S        | S320:  | 2 | 2,9995 | 0,127 | -0,582 |
| 4 | P42285 SK2L2_HUMAN | E.VFSNAIDCLSDE.D          |        | 2 | 2,9929 | 0,336 | -0,178 |
| 4 | Q6S8J3 A26CA_HUMAN | E.M*ATAASSS#SLEKSYE.L     | S934:  | 2 | 2,988  | 0,361 | -0,074 |
| 4 | Q9UQ35 SRRM2_HUMAN | E.GDAPFSEPGTSTQRPS#PE.T   | S323:  | 3 | 2,9838 | 0,332 | -0,172 |
| 4 | Q9BVJ6 UT14A_HUMAN | E.LSQDAEPAGS#QETKDSGSQE.V | S445:  | 2 | 2,9814 | 0,541 | -0,455 |
| 4 | P20810 ICAL_HUMAN  | E.DFSGPQNASS#LKFE.D       | S527:  | 2 | 2,9718 | 0,258 | -0,38  |
| 4 | P06396 GELS_HUMAN  | E.SFNNGDCFIELD.L          |        | 2 | 2,9715 | 0,203 | -0,281 |
| 4 | Q9UMX0 UBQL1_HUMAN | E.SGGPPGSQDSAAGAE.G       |        | 2 | 2,9662 | 0,44  | -0,284 |
| 4 | Q96MU7 YTDC1_HUMAN | E.LYNPES#EQDKNE.K         | S35:   | 2 | 2,9655 | 0,221 | -0,552 |
| 4 | P29692 EF1D_HUMAN  | E.NGAS#VILRD.I            | S44:   | 2 | 2,9647 | 0,183 | 0      |
| 4 | Q14568 HS902_HUMAN | E.TQTQDQPM*EEEEVE.T       |        | 2 | 2,9636 | 0,353 | -0,785 |
| 4 | Q09666 AHNK_HUMAN  | E.APLPS#PKLE.G            | S5110: | 2 | 2,9605 | 0,352 | -0,118 |

|   |                    |                                   |              |   |        |       |        |
|---|--------------------|-----------------------------------|--------------|---|--------|-------|--------|
| 4 | Q9UQ35 SRRM2_HUMAN | E.NSFGS#PLEFRNSGPLGTE.M           | S1329:       | 3 | 2,9601 | 0,116 | -0,276 |
| 4 | P10809 CH60_HUMAN  | D.AAGVASLLTTAE.V                  |              | 2 | 2,9599 | 0,453 | -0,332 |
| 4 | Q13263 TIF1B_HUMAN | E.TKPVLMALAEAGPGAEGPR.L           |              | 3 | 2,9568 | 0,112 | -0,408 |
| 4 | P30307 MPIP3_HUMAN | E.QIALLVKDMS#P.-                  | S472:        | 2 | 2,9568 | 0,423 | -0,283 |
| 4 | Q9C0C2 TB182_HUMAN | E.SQEPLAGQES#PLPLATRE.A           | S601:        | 3 | 2,955  | 0,222 | -0,183 |
| 4 | Q8WXI9 P66B_HUMAN  | R.GRLTPS#PDIIVLSDNE.A             | S122:        | 3 | 2,9537 | 0,225 | -0,405 |
| 4 | P61247 RS3A_HUMAN  | E.VSLADLQNDE.V                    |              | 2 | 2,9535 | 0,277 | -0,221 |
| 4 | P29966 MARCS_HUMAN | E.AAVASS#PSKANGQE.N               | S27:         | 2 | 2,9449 | 0,261 | 0      |
| 4 | Q9UNE7 STUB1_HUMAN | R.LGAGGGS#PEKSPSAQE.L             | S19:         | 2 | 2,9434 | 0,473 | -0,236 |
| 4 | Q15459 SF3A1_HUMAN | E.KQS#DDEVYAPGLDIE.S              | S451:        | 2 | 2,9431 | 0,383 | -0,486 |
| 4 | Q9BQI3 E2AK1_HUMAN | E.VLS#DQEEDRE.Q                   | S258:        | 2 | 2,9423 | 0,217 | -0,469 |
| 4 | O75534 CSDE1_HUMAN | E.VLSNTFQFTNE.A                   |              | 2 | 2,9404 | 0,239 | -0,188 |
| 4 | O75955 FLOT1_HUMAN | R.AQQVAVQEQE.I                    |              | 2 | 2,9387 | 0,231 | 0,864  |
| 4 | O43353 RIPK2_HUMAN | E.ILVVSR#PS#LNLLQNKSM*.-          | S529:S531:   | 3 | 2,9357 | 0,172 | -0,336 |
| 4 | P49792 RBP2_HUMAN  | E.T#TPKAVVS#PPKFVFGSE.S           | T2503:S2510: | 3 | 2,9337 | 0,309 | -0,469 |
| 4 | Q16204 CCDC6_HUMAN | K.SGGIVISPFRLLEE.L                |              | 2 | 2,929  | 0,246 | -0,348 |
| 4 | Q00613 HSF1_HUMAN  | E.LAPAS#PM*ASPGGSIDERPLSSS#PLVR.V | S275:S292:   | 3 | 2,9287 | 0,184 | -0,397 |
| 4 | Q9NYF8 BCLF1_HUMAN | E.ALDYFS#DKE.S                    | S385:        | 2 | 2,9222 | 0,357 | -0,418 |
| 4 | Q9UKX7 NUP50_HUMAN | E.TQS#PSLFGSTK.L                  | S221:        | 2 | 2,92   | 0,344 | 0      |
| 4 | P29401 TKT_HUMAN   | E.NAIIYNNNE.D                     |              | 2 | 2,9187 | 0,126 | -0,344 |
| 4 | O94782 UBP1_HUMAN  | E.SSEIS#PEPKTE.M                  | S475:        | 2 | 2,9158 | 0,24  | -0,57  |
| 4 | O95208 EPN2_HUMAN  | R.GSS#QPNLSTSHSEQE.Y              | S173:        | 2 | 2,9145 | 0,258 | -0,366 |
| 4 | Q9NWT1 PK1IP_HUMAN | E.SLPPAAEPS#PVSKE.Q               | S320:        | 2 | 2,9137 | 0,258 | -0,41  |
| 4 | Q9NQ88 CL005_HUMAN | E.QFSQGSPSNCLE.T                  |              | 2 | 2,9114 | 0,386 | 0      |
| 4 | Q1KMD3 HNRL2_HUMAN | E.NDVIGCFANFE.T                   |              | 2 | 2,905  | 0,434 | -0,19  |
| 4 | Q02952 AKA12_HUMAN | E.GSTVNDQQLEE.V                   |              | 2 | 2,9026 | 0,235 | -0,2   |
| 4 | Q9P1Y6 K1542_HUMAN | E.GAS#DTEREEPT.E.S                | S915:        | 2 | 2,8981 | 0,264 | -0,174 |
| 4 | Q9UQ35 SRRM2_HUMAN | E.NS#FGSPLEFR.N                   | S1326:       | 2 | 2,8976 | 0,343 | -0,494 |
| 4 | O14686 MLL2_HUMAN  | E.GPVS#PDVEPGKEE.T                | S1396:       | 2 | 2,8926 | 0,401 | 0      |
| 4 | P18583 SON_HUMAN   | E.SDQTLAALLS#PKESSGGE.K           | S1697:       | 2 | 2,8904 | 0,482 | -0,587 |
| 4 | Q9NR50 EI2BG_HUMAN | E.GSNIQGSVICNNAVIE.K              |              | 2 | 2,8879 | 0,26  | -0,583 |
| 4 | O14686 MLL2_HUMAN  | E.LGVSTDVS#PARDE.G                | S974:        | 2 | 2,8859 | 0,433 | -0,086 |
| 4 | Q14568 HS902_HUMAN | E.TQTQDQPMEEEEVE.T                |              | 2 | 2,8852 | 0,301 | -0,288 |

|   |                     |                           |              |   |        |       |        |
|---|---------------------|---------------------------|--------------|---|--------|-------|--------|
| 4 | Q8N108 MIER1_HUMAN  | E.LLSLYGYGSTVR.L          |              | 2 | 2,8839 | 0,312 | 0,092  |
| 4 | Q7Z401 MYCPP_HUMAN  | E.STS#LTDEDVCHE.L         | S1370:       | 2 | 2,8829 | 0,417 | -0,414 |
| 4 | P14868 SYDC_HUMAN   | D.LT#IQKADE.V             | T52:         | 2 | 2,8783 | 0,306 | -0,061 |
| 4 | P49023 PAXI_HUMAN   | K.TGSSS#PPGGPPKPGSQLD.S   | S322:        | 2 | 2,8745 | 0,34  | -0,559 |
| 4 | Q8TCS8 PNPT1_HUMAN  | E.TGVTISQVDEE.T           |              | 2 | 2,8737 | 0,306 | -0,207 |
| 4 | Q5T8D3 ACBD5_HUMAN  | E.DLGNVLTSTPNAK.T         |              | 2 | 2,8707 | 0,311 | -0,367 |
| 4 | P18583 SON_HUMAN    | E.SDQTLAALLS#PKE.S        | S1697:       | 2 | 2,8665 | 0,367 | -0,588 |
| 4 | O75376 NCOR1_HUMAN  | E.TAEQMDVDQQEHS#AEE.G     | S804:        | 2 | 2,8637 | 0,467 | -0,443 |
| 4 | P50502 F10A1_HUMAN  | E.VLAAM*QDPE.V            |              | 2 | 2,8631 | 0,245 | -0,123 |
| 4 | Q14566 MCM6_HUMAN   | E.QFNQQLSTTIQEE.F         |              | 2 | 2,8621 | 0,157 | -0,234 |
| 4 | A6NKF1 SAC31_HUMAN  | E.VVMAEEEDEGTRPGS#PA.-    | S401:        | 2 | 2,8617 | 0,29  | -0,558 |
| 4 | P30414 NKTR_HUMAN   | E.ICT#PDRSS#PAKVEE.T      | T1133:S1138: | 2 | 2,8585 | 0,188 | -0,279 |
| 4 | Q3SXY8 AR13B_HUMAN  | E.CLS#LEKLVNE.H           | S148:        | 2 | 2,8557 | 0,272 | -0,285 |
| 4 | P49792 RBP2_HUMAN   | E.TT#PKAVVS#PPKFVFGSE.S   | T2504:S2510: | 3 | 2,855  | 0,206 | -0,469 |
| 4 | Q16658 FSCN1_HUMAN  | E.QSCAQVVLQAANE.R         |              | 2 | 2,8532 | 0,245 | -0,258 |
| 4 | A6NJL0 A6NJL0_HUMAN | D.QTLIDLNEM*.-            |              | 2 | 2,8532 | 0,393 | -0,223 |
| 4 | P18206 VINC_HUMAN   | E.AIDTKS#LLDASEE.A        | S721:        | 2 | 2,853  | 0,312 | -0,249 |
| 4 | Q8WWM7 ATX2L_HUMAN  | E.VDGLLTSEPM*GS#PVSSKTE.S | S594:        | 2 | 2,8492 | 0,312 | -0,06  |
| 4 | Q9ULA0 DNPEP_HUMAN  | E.LEKGT#PEPGPLNAVDE.R     | T203:        | 2 | 2,8443 | 0,314 | -0,28  |
| 4 | P06748 NPM_HUMAN    | D.M*S#PLRPQNYLFGCE.L      | S10:         | 2 | 2,8418 | 0,516 | -0,337 |
| 4 | Q562F6 SGOL2_HUMAN  | E.CSPAFQVS#DDEHE.K        | S1187:       | 2 | 2,8413 | 0,39  | -0,229 |
| 4 | P42166 LAP2A_HUMAN  | E.RDS#GSFVAFQNIPIGSE.L    | S442:        | 2 | 2,8393 | 0,293 | -0,613 |
| 4 | Q5H9F3 BCRL1_HUMAN  | E.GTSVTF#PLKSPQLE.R       | S599:        | 2 | 2,8387 | 0,419 | -0,276 |
| 4 | P48960 CD97_HUMAN   | R.CNPGFSSFSE.I            |              | 2 | 2,8365 | 0,255 | -0,108 |
| 4 | Q6S8J3 A26CA_HUMAN  | E.M*ATAASSSSLE.K          |              | 2 | 2,8361 | 0,335 | -0,228 |
| 4 | P04792 HSPB1_HUMAN  | E.GTLTVEAPM*PK.L          |              | 2 | 2,8335 | 0,268 | -0,316 |
| 4 | P04264 K2C1_HUMAN   | K.SLNNQFASFIDK.V          |              | 2 | 2,8309 | 0,249 | -0,353 |
| 4 | Q8NCN4 RN169_HUMAN  | E.GLGST#PDAKLD.K          | T554:        | 2 | 2,8295 | 0,333 | -0,317 |
| 4 | P10253 LYAG_HUMAN   | R.GAYTQVIFLAR.N           |              | 2 | 2,8291 | 0,268 | -0,394 |
| 4 | P35527 K1C9_HUMAN   | R.FSSSSGYGGSSR.V          |              | 2 | 2,8277 | 0,436 | -0,494 |
| 4 | Q15054 DPOD3_HUMAN  | R.VAL#DDETKE.T            | S307:        | 2 | 2,8271 | 0,287 | -0,308 |
| 4 | Q8IWW6 RHG12_HUMAN  | E.LSSSSTEQIR.A            |              | 2 | 2,8259 | 0,133 | -0,33  |
| 4 | Q15154 PCM1_HUMAN   | E.T#ASPVAVSLRSDGSE.N      | T859:        | 2 | 2,8222 | 0,418 | -0,549 |

|   |                    |                                 |            |   |        |       |        |
|---|--------------------|---------------------------------|------------|---|--------|-------|--------|
| 4 | Q14980 NUMA1_HUMAN | E.LTTLNATIQQDQE.L               |            | 2 | 2,811  | 0,259 | -0,152 |
| 4 | Q8WVT3 TTC15_HUMAN | E.TAS#EGSSPLADKLN.E.H           | S52:       | 2 | 2,8105 | 0,277 | -0,229 |
| 4 | O43524 FOXO3_HUMAN | E.LQAS#PAKPSGE.T                | S43:       | 2 | 2,8086 | 0,354 | -0,105 |
| 4 | Q6S8J3 A26CA_HUMAN | E.M*ATAAS#SSSLE.K               | S932:      | 2 | 2,8084 | 0,283 | -0,742 |
| 4 | Q9UBB4 ATX10_HUMAN | E.NLASSLQLITE.C                 |            | 2 | 2,808  | 0,241 | 0      |
| 4 | Q9ULH7 MKL2_HUMAN  | E.SQGSAAAS#PSEPKVSE.S           | S200:      | 2 | 2,8021 | 0,331 | 0,079  |
| 4 | P23246 SFPQ_HUMAN  | R.FGQGGAGPVGGQGPR.G             |            | 2 | 2,8015 | 0,417 | -0,091 |
| 4 | Q9Y6A5 TACC3_HUMAN | E.NQM*VSPGKVS#GSPEQAVEE.N       | S175:      | 2 | 2,8013 | 0,343 | -0,236 |
| 4 | Q9UKN8 TF3C4_HUMAN | K.ILLVDS#PGMGNADDEQQE.E         | S611:      | 2 | 2,8001 | 0,379 | 0,182  |
| 4 | Q93009 UBP7_HUMAN  | K.AGEQQLS#EPEDM*E.M             | S18:       | 2 | 2,7947 | 0,326 | -0,391 |
| 4 | Q15233 NONO_HUMAN  | E.GIGAIGGT#PPAFNRAAPGAE.F       | T450:      | 2 | 2,7843 | 0,347 | -0,513 |
| 4 | P49589 SYCC_HUMAN  | E.GEGDLSIS#ADRLSE.K             | S307:      | 2 | 2,7835 | 0,236 | -1,117 |
| 4 | Q9NPR2 SEM4B_HUMAN | R.LGS#EIRD.S                    | S825:      | 2 | 2,7833 | 0,135 | 0,07   |
| 4 | P28749 RBL1_HUMAN  | D.M*QPLS#PISVHE.R               | S640:      | 2 | 2,7813 | 0,337 | -0,457 |
| 4 | P49792 RBP2_HUMAN  | E.TVFTPKTS#PENVD.R              | S1400:     | 2 | 2,7777 | 0,293 | -0,371 |
| 4 | P82094 TMF1_HUMAN  | E.TLAAGTSS#PKTE.G               | S170:      | 2 | 2,7766 | 0,401 | -0,491 |
| 4 | P42566 EP15_HUMAN  | E.SEPIHQES#PARS#SPELLPSGVTD.E.N | S558:S562: | 3 | 2,7748 | 0,165 | -0,471 |
| 4 | P30622 CLIP1_HUMAN | E.ANGLQTPASR.A                  |            | 2 | 2,7745 | 0,35  | -0,328 |
| 4 | P25787 PSA2_HUMAN  | E.GQMTEDNIE.V                   |            | 2 | 2,7725 | 0,275 | -0,235 |
| 4 | Q96QC0 PP1RA_HUMAN | E.ILTSIMGS#PNSHPSEE.L           | S591:      | 2 | 2,7724 | 0,276 | -0,412 |
| 4 | Q14683 SMC1A_HUMAN | E.SQS#QGRDLTLEE.N               | S360:      | 2 | 2,7716 | 0,309 | -0,338 |
| 4 | Q13426 XRCC4_HUMAN | E.TLRNS#SPEDLFDEI.-             | S327:      | 2 | 2,7656 | 0,261 | 0,142  |
| 4 | Q7Z406 MYH14_HUMAN | E.AQPGSGPSPEPEGS#PPAHPQ.-       | S1989:     | 2 | 2,7651 | 0,407 | -0,244 |
| 4 | Q9UQ80 PA2G4_HUMAN | E.ASSS#GVSVLSLCE.K              | S41:       | 2 | 2,7632 | 0,339 | -0,709 |
| 4 | Q00613 HSF1_HUMAN  | R.VKEEPPS#PPQS#PRVEE.A          | S303:S307: | 2 | 2,7573 | 0,353 | -0,248 |
| 4 | Q14980 NUMA1_HUMAN | E.ILQQQLQVANE.A                 |            | 2 | 2,7569 | 0,296 | -0,19  |
| 4 | Q8TDY2 RBCC1_HUMAN | E.M*SQITDLLSEQK.A               |            | 2 | 2,7569 | 0,32  | -0,404 |
| 4 | Q7Z406 MYH14_HUMAN | E.AAQPFLFTPR.G                  |            | 2 | 2,7556 | 0,215 | -0,531 |
| 4 | P55884 EIF3B_HUMAN | E.DAGGNEGRAAEAEPR.A             |            | 3 | 2,7502 | 0,155 | -0,061 |
| 4 | Q96L73 NSD1_HUMAN  | E.NS#LISTKEEPPVLE.R             | S1334:     | 2 | 2,7483 | 0,317 | -0,82  |
| 4 | Q9Y618 NCOR2_HUMAN | E.GT#PPPPPSRDLTE.A              | T1383:     | 2 | 2,7458 | 0,4   | -0,238 |
| 4 | Q8TB72 PUM2_HUMAN  | E.VNAILS#PRSE.S                 | S82:       | 2 | 2,7446 | 0,217 | -0,209 |
| 4 | P49848 TAF6_HUMAN  | K.ANGSQPNSSGS#PQPAP.-           | S672:      | 2 | 2,7446 | 0,172 | -0,082 |

|   |                     |                            |            |   |        |       |        |
|---|---------------------|----------------------------|------------|---|--------|-------|--------|
| 4 | B2CI53 B2CI53_HUMAN | R.NGILAS#PQSAPGNLDNSKSGE.I | S260:      | 3 | 2,7435 | 0,218 | -0,086 |
| 4 | P11172 PYR5_HUMAN   | E.AGGDNLGQQYNSPQE.V        |            | 2 | 2,7433 | 0,357 | -0,464 |
| 4 | P11169 GTR3_HUMAN   | E.M*NS#IEPAKE.T            | S485:      | 2 | 2,7406 | 0,2   | -0,328 |
| 4 | A6NDB9 PALM3_HUMAN  | E.VVQTSS#PRLQE.R           | S303:      | 2 | 2,7361 | 0,272 | -0,369 |
| 4 | P27816 MAP4_HUMAN   | K.DM*ELPTEKEVALVK.D        |            | 3 | 2,7347 | 0,177 | -0,113 |
| 4 | Q92508 FA38A_HUMAN  | E.AGASLYQGLM*RTAS#E.L      | S1215:     | 2 | 2,7344 | 0,197 | 0      |
| 4 | Q86V48 LUZP1_HUMAN  | E.LTSVSNHVSS#PFE.L         | S840:      | 2 | 2,7341 | 0,313 | -0,164 |
| 4 | P22694 KAPCB_HUMAN  | E.DIRVS#ITE.K              | S339:      | 2 | 2,7317 | 0,125 | 0      |
| 4 | P08670 VIME_HUMAN   | E.AANYQDT#IGRLQDE.I        | T361:      | 2 | 2,7301 | 0,286 | 0      |
| 4 | P24752 THIL_HUMAN   | E.AYMGNVLQGGGE.G           |            | 2 | 2,7283 | 0,091 | -0,428 |
| 4 | Q9H2G2 SLK_HUMAN    | E.IGS#LSKTE.T              | S728:      | 2 | 2,7257 | 0,227 | 0,133  |
| 4 | O76003 GLRX3_HUMAN  | E.VGSAGQFEE.L              |            | 2 | 2,7253 | 0,115 | 0      |
| 4 | P05455 LA_HUMAN     | K.FAS#DDEHDE.H             | S366:      | 2 | 2,725  | 0,129 | -0,32  |
| 4 | Q5T4S7 UBR4_HUMAN   | K.LCTFTITQKE.F             |            | 2 | 2,7248 | 0,233 | -0,295 |
| 4 | Q9NRS6 SNX15_HUMAN  | E.ASGS#PARGPLTE.A          | S201:      | 2 | 2,7224 | 0,503 | -0,399 |
| 4 | Q99590 SFRIP_HUMAN  | E.SS#EGEIIQTVDRQSVKS#PE.V  | S299:S314: | 3 | 2,7177 | 0,311 | -0,081 |
| 4 | P35030 TRY3_HUMAN   | D.TLDNDIMLIK.L             |            | 2 | 2,7163 | 0,251 | -0,415 |
| 4 | Q9H5N1 RABE2_HUMAN  | E.LLPLSRDPS#PPLEPLEE.L     | S204:      | 2 | 2,7163 | 0,244 | -0,062 |
| 4 | P62258 1433E_HUMAN  | E.ALQDVEDENQ.-             |            | 2 | 2,715  | 0,149 | -0,21  |
| 4 | Q9UBB5 MBD2_HUMAN   | E.ALM*ADILSR.A             |            | 2 | 2,7116 | 0,333 | -0,061 |
| 4 | P82094 TMF1_HUMAN   | R.S#ATPVNCEQPDILVSSTPINE.G | S399:      | 3 | 2,7084 | 0,132 | -0,156 |
| 4 | Q13573 SNW1_HUMAN   | E.VIALGVNPNRPTS#NE.V       | S402:      | 2 | 2,7066 | 0,143 | -0,315 |
| 4 | P40123 CAP2_HUMAN   | E.S#SPSRALFAQLNQGE.A       | S256:      | 3 | 2,7058 | 0,141 | 0      |
| 4 | B2CI53 B2CI53_HUMAN | R.NGILASPQS#APGNLDNSK.S    | S263:      | 2 | 2,7029 | 0,428 | -0,393 |
| 4 | O94909 K0819_HUMAN  | R.GPSQATS#PIRSPQE.S        | S296:      | 2 | 2,6997 | 0,231 | -0,477 |
| 4 | Q13501 SQSTM_HUMAN  | E.SEGPSS#LDPSQEGPTGLKE.A   | S366:      | 2 | 2,6995 | 0,472 | -0,795 |
| 4 | Q9UQ35 SRRM2_HUMAN  | E.GDAPFSEPGTTSTQRPSS#PE.T  | S323:      | 2 | 2,6943 | 0,427 | -0,573 |
| 4 | O00629 IMA4_HUMAN   | E.DSDIDGDYRVQNTS#LE.A      | S72:       | 2 | 2,6871 | 0,147 | -0,512 |
| 4 | Q14692 BMS1_HUMAN   | E.TS#DIENLLKEE.E           | S639:      | 2 | 2,6859 | 0,252 | -0,356 |
| 4 | Q14764 MVP_HUMAN    | R.QAIPLDENE.G              |            | 2 | 2,6857 | 0,161 | 0      |
| 4 | P36957 ODO2_HUMAN   | E.AQNTCAMLTFNE.I           |            | 2 | 2,6851 | 0,269 | -0,244 |
| 4 | Q9NP61 ARFG3_HUMAN  | D.SCVVPLS#PPPKEE.D         | S143:      | 2 | 2,6846 | 0,22  | -0,075 |
| 4 | Q9NXG2 THUM1_HUMAN  | E.LGQTKPT#SNPQVVNE.G       | T322:      | 2 | 2,6844 | 0,205 | -0,288 |

|   |                     |                           |              |   |        |       |        |
|---|---------------------|---------------------------|--------------|---|--------|-------|--------|
| 4 | Q12888 TP53B_HUMAN  | E.LSQSQDVEE.N             |              | 2 | 2,6835 | 0,234 | 0      |
| 4 | P49321 NASP_HUMAN   | E.NM*EEEAENQAE.S          |              | 2 | 2,6834 | 0,224 | -0,279 |
| 4 | Q5BKZ1 ZN326_HUMAN  | E.GGIEGEGNIQGVGE.G        |              | 2 | 2,6826 | 0,362 | -0,185 |
| 4 | B0I1T5 B0I1T5_HUMAN | E.GLQS#PRGTPDSE.S         | S1292:       | 2 | 2,6825 | 0,292 | -0,184 |
| 4 | Q9C0C2 TB182_HUMAN  | E.SAASGLGGLLEEE.G         |              | 2 | 2,6822 | 0,24  | -0,396 |
| 4 | Q00839 HNRPU_HUMAN  | E.GISALDGDQM*E.L          |              | 2 | 2,6789 | 0,341 | -0,106 |
| 4 | P11388 TOP2A_HUMAN  | E.LILFSNSDNE.R            |              | 2 | 2,6774 | 0,204 | -0,53  |
| 4 | P30622 CLIP1_HUMAN  | E.IENLQNNQDSE.R           |              | 2 | 2,6753 | 0,106 | -0,463 |
| 4 | P04792 HSPB1_HUMAN  | E.SPAVAAPAYS.R            |              | 2 | 2,6729 | 0,354 | -0,56  |
| 4 | Q08378 GOGA3_HUMAN  | E.ISLS#PDTDDRLE.N         | S290:        | 2 | 2,6702 | 0,41  | -0,339 |
| 4 | O00303 EIF3F_HUMAN  | E.VTNCFSVPHNES#EDE.V      | S142:        | 2 | 2,6672 | 0,261 | -0,331 |
| 4 | Q14247 SRC8_HUMAN   | E.DAAS#FKAE.L             | S426:        | 2 | 2,6652 | 0,29  | -0,133 |
| 4 | O75367 H2AY_HUMAN   | E.ISNLAGFEVE.A            |              | 2 | 2,665  | 0,297 | -0,226 |
| 4 | Q96RK0 CIC_HUMAN    | E.GAPQPS#PPPPGPSTAATGR.-  | S1595:       | 2 | 2,6634 | 0,323 | -0,335 |
| 4 | P62081 RS7_HUMAN    | E.S#GISQALLE.L            | S21:         | 2 | 2,661  | 0,144 | -0,245 |
| 4 | Q00839 HNRPU_HUMAN  | E.GISALDGDQME.L           |              | 2 | 2,6588 | 0,241 | -0,107 |
| 4 | P17301 ITA2_HUMAN   | E.GTVQGGDNFQME.M          |              | 2 | 2,6551 | 0,389 | -0,285 |
| 4 | P05412 JUN_HUMAN    | D.VGLLLKAS#PELE.R         | S73:         | 2 | 2,6538 | 0,271 | -0,09  |
| 4 | Q9UQN3 CHM2B_HUMAN  | E.SQDIVNQLVDE.I           |              | 2 | 2,6532 | 0,174 | -0,581 |
| 4 | Q9BXJ9 NARG1_HUMAN  | E.GTSAVENLNE.M            |              | 2 | 2,6493 | 0,187 | 0,118  |
| 4 | Q96MU7 YTDC1_HUMAN  | R.GIS#PIVFDR.S            | S308:        | 2 | 2,6473 | 0,17  | -0,338 |
| 4 | Q5VYS8 ZCHC6_HUMAN  | E.TAESFGS#PPKEE.M         | S706:        | 2 | 2,6449 | 0,333 | -0,359 |
| 4 | Q05682 CALD1_HUMAN  | E.SLGQVTDQVE.V            |              | 2 | 2,6445 | 0,268 | -0,113 |
| 4 | P53597 SUCA_HUMAN   | E.IFLNDSATE.G             |              | 2 | 2,6441 | 0,171 | -0,181 |
| 4 | Q96EB6 SIRT1_HUMAN  | E.AALALQPGGS#PSAAGADRE.A  | S14:         | 3 | 2,6439 | 0,324 | 0,201  |
| 4 | Q9HCS7 SYF1_HUMAN   | E.QQSVPAAVFGS#LKED.-      | S851:        | 2 | 2,6435 | 0,247 | 0,147  |
| 4 | Q15149 PLEC1_HUMAN  | E.NLTYLQLM*E.R            |              | 2 | 2,6429 | 0,275 | -0,107 |
| 4 | P46937 YAP1_HUMAN   | E.ALSSDILNDM*E.S          |              | 2 | 2,6425 | 0,274 | -0,1   |
| 4 | P30414 NKTR_HUMAN   | E.ICT#PDRSS#PAKVEE.T      | T1133:S1138: | 3 | 2,6419 | 0,081 | -0,314 |
| 4 | Q02952 AKA12_HUMAN  | E.GSPPPCLGQEE.A           |              | 2 | 2,638  | 0,378 | -0,625 |
| 4 | Q9UKN8 TF3C4_HUMAN  | K.ILLVDS#PGM*GNADDEQQEE.G | S611:        | 2 | 2,6375 | 0,281 | -0,453 |
| 4 | Q9UK45 LSM7_HUMAN   | E.AIPNPFIQQDA.-           |              | 2 | 2,6375 | 0,192 | -0,364 |
| 4 | P14921 ETS1_HUMAN   | E.CADVPLLT#PSSKE.M        | T38:         | 2 | 2,6365 | 0,221 | -0,163 |

|   |                       |                               |                 |   |        |       |        |
|---|-----------------------|-------------------------------|-----------------|---|--------|-------|--------|
| 4 | Q7KZ85 SPT6H_HUMAN    | E.STPM*SIAGDAT#PLLD*DR.-      | T1718:          | 2 | 2,6331 | 0,643 | -0,343 |
| 4 | P43358 MAGA4_HUMAN    | E.S#AGPPQSPQGASALPTTISFTCWR.Q | S59:            | 3 | 2,633  | 0,218 | -0,141 |
| 4 | O15027 SC16A_HUMAN    | E.ANLIDFTNE.A                 |                 | 2 | 2,6319 | 0,296 | -0,118 |
| 4 | P35579 MYH9_HUMAN     | E.METLQSQLM*AE.K              |                 | 2 | 2,6293 | 0,357 | -0,282 |
| 4 | O15212 PFD6_HUMAN     | E.TLAQLQQE.F                  |                 | 2 | 2,626  | 0,169 | 0,131  |
| 4 | Q9UMS4 PRP19_HUMAN    | E.NGTDPINNQLSE.E              |                 | 2 | 2,6245 | 0,253 | -0,262 |
| 4 | Q8IU8 MINA_HUMAN      | E.SLIS#PIKTE.T                | S47:            | 2 | 2,623  | 0,204 | -0,228 |
| 4 | Q16643 DREB_HUMAN     | E.GYFSQSQEEE.F                |                 | 2 | 2,6226 | 0,276 | -0,304 |
| 4 | Q14693 LPIN1_HUMAN    | E.VIPMHLATS#PILSE.G           | S106:           | 2 | 2,6195 | 0,241 | -0,154 |
| 4 | P54578 UBP14_HUMAN    | E.NQLQLSCFINQE.V              |                 | 2 | 2,619  | 0,345 | -0,327 |
| 4 | ##Q5T904 Q5T904_HUMAN | E.HREGYS#QSS#LGKES#K.L        | S380:S383:S388: | 3 | 2,6183 | 0,206 | -1,325 |
| 4 | P49792 RBP2_HUMAN     | E.NSPSFMFQSSNTE.F             |                 | 2 | 2,6181 | 0,175 | -0,398 |
| 4 | P46379 BAT3_HUMAN     | E.NASPAPGTTAEE.A              |                 | 2 | 2,618  | 0,409 | 0      |
| 4 | Q14444 CAPR1_HUMAN    | E.VES#TEYVNRQFM*AE.T          | S291:           | 2 | 2,6153 | 0,197 | -0,271 |
| 4 | Q7Z434 MAVS_HUMAN     | E.TQAPESPGENSE.Q              |                 | 2 | 2,6152 | 0,259 | -0,294 |
| 4 | Q09028 RBBP4_HUMAN    | E.FGGFGS#VSGKIE.I             | S110:           | 2 | 2,6151 | 0,175 | -1,447 |
| 4 | O94916 NFAT5_HUMAN    | E.ISS#PARPCSFE.E              | S561:           | 2 | 2,6073 | 0,363 | -0,334 |
| 4 | P22234 PUR6_HUMAN     | E.IVLADVIDND.S                |                 | 2 | 2,6063 | 0,256 | -0,224 |
| 4 | P38398 BRCA1_HUMAN    | E.DTS#FAENDIKE.S              | S1164:          | 2 | 2,6051 | 0,314 | -0,271 |
| 4 | O14641 DVL2_HUMAN     | E.LSSYTYGGGSASS#QHSE.G        | S583:           | 2 | 2,5999 | 0,382 | -1,222 |
| 4 | Q9HC35 EMAL4_HUMAN    | E.QTVEPSEDHS#EEE.S            | S938:           | 2 | 2,5973 | 0,262 | 0,076  |
| 4 | Q8WUM0 NU133_HUMAN    | E.NVSILAEDLE.G                |                 | 2 | 2,597  | 0,207 | -0,442 |
| 4 | Q9NYV4 CD2L7_HUMAN    | E.IVT#PKETE.T                 | T514:           | 2 | 2,5964 | 0,119 | 0,184  |
| 4 | Q14160 LAP4_HUMAN     | E.VALVLLGRPS#PGAVGPE.D        | S1600:          | 2 | 2,5854 | 0,281 | -0,214 |
| 4 | P04920 B3A2_HUMAN     | E.QALLPRVPT#DEIE.A            | T257:           | 2 | 2,5821 | 0,284 | -0,469 |
| 4 | Q16643 DREB_HUMAN     | E.GASTLQGEPR.A                |                 | 2 | 2,5796 | 0,242 | 0,06   |
| 4 | P23528 COF1_HUMAN     | E.LQANCYEE.V                  |                 | 2 | 2,5771 | 0,304 | -0,475 |
| 4 | Q6ZU80 CN145_HUMAN    | E.TEQES#ILGVIGKE.I            | S826:           | 2 | 2,5726 | 0,112 | -0,411 |
| 4 | Q96FV9 THOC1_HUMAN    | E.NVTVFNTNEQE.S               |                 | 2 | 2,5687 | 0,356 | -0,283 |
| 4 | P31689 DNJA1_HUMAN    | E.NGFLS#PDKLSLLE.K            | S335:           | 2 | 2,5687 | 0,236 | -0,081 |
| 4 | Q9H7N4 SFR19_HUMAN    | E.GLSQS#ISRISSE.T             | S293:           | 2 | 2,5683 | 0,201 | -0,388 |
| 4 | P21333 FLNA_HUMAN     | R.APS#VANVGSCHCD.L            | S2152:          | 2 | 2,5668 | 0,3   | -0,094 |
| 4 | P48637 GSHB_HUMAN     | E.GGGNNLYGEE.M                |                 | 2 | 2,5656 | 0,18  | 0      |

|   |                     |                        |          |   |        |       |        |
|---|---------------------|------------------------|----------|---|--------|-------|--------|
| 4 | P23246 SFPQ_HUMAN   | E.AFSQFGPIE.R          |          | 2 | 2,5641 | 0,349 | -0,123 |
| 4 | Q8IW35 CEP97_HUMAN  | E.DIQTDEDKLNCSLLS#SE.S | S400:    | 2 | 2,5633 | 0,209 | -0,358 |
| 4 | Q9NS56 TOPRS_HUMAN  | R.TTT#PPDSGVLFE.G      | T205:    | 2 | 2,5603 | 0,265 | -0,182 |
| 4 | Q7L5N1 CSN6_HUMAN   | E.SVIDIINGE.A          |          | 2 | 2,5567 | 0,132 | -0,127 |
| 4 | O00273 DFFA_HUMAN   | E.LSLSSQDLE.L          |          | 2 | 2,5541 | 0,283 | -0,123 |
| 4 | Q86WR7 CJ047_HUMAN  | E.ALS#PTSPFRE.G        | S212:    | 2 | 2,5528 | 0,254 | -0,721 |
| 4 | P61006 RAB8A_HUMAN  | E.NAFFT#LARD.I         | T164:    | 2 | 2,5517 | 0,314 | -0,323 |
| 4 | A6NNK3 A6NNK3_HUMAN | E.SGDIVS#LIHD.-        | S234:    | 2 | 2,5515 | 0,272 | -0,43  |
| 4 | Q03252 LMNB2_HUMAN  | R.AGGPAT#PLS#PTRLSR.L  | T14:S17: | 2 | 2,5444 | 0,228 | -0,446 |
| 4 | Q9UKS6 PACN3_HUMAN  | E.LS#FRAGEE.L          | S383:    | 2 | 2,5437 | 0,311 | 0,062  |
| 4 | P27348 1433T_HUMAN  | E.QGAELNNEE.R          |          | 2 | 2,5409 | 0,15  | -0,375 |
| 4 | P46087 NOL1_HUMAN   | E.VT#PESGPPKVEE.A      | T195:    | 2 | 2,5394 | 0,303 | -0,181 |
| 4 | P35579 MYH9_HUMAN   | E.FTTNLTEEEE.K         |          | 2 | 2,5386 | 0,268 | -0,201 |
| 4 | P43358 MAGA4_HUMAN  | E.AALLEEEEGV.-         |          | 2 | 2,5359 | 0,189 | -0,23  |
| 4 | Q02952 AKA12_HUMAN  | E.LVTTCQAE.T           |          | 2 | 2,5341 | 0,287 | -0,132 |
| 4 | Q99460 PSMD1_HUMAN  | E.NADLPEGE.K           |          | 2 | 2,5335 | 0,15  | 0,144  |
| 4 | Q6KC79 NIPBL_HUMAN  | R.DVPPDILLDS#PE.R      | S318:    | 2 | 2,533  | 0,179 | 0,351  |
| 4 | O14744 ANM5_HUMAN   | E.LLGSFADNE.L          |          | 2 | 2,5314 | 0,205 | 0      |
| 4 | Q6IA86 ELP2_HUMAN   | E.GATVPALGLSNK.A       |          | 2 | 2,528  | 0,193 | -0,216 |
| 4 | Q14247 SRC8_HUMAN   | E.ASSQQGLAYATE.A       |          | 2 | 2,5278 | 0,416 | -0,498 |
| 4 | Q8IWC1 MA7D3_HUMAN  | E.AS#PKAGVGM*APE.V     | S322:    | 2 | 2,5277 | 0,436 | -0,403 |
| 4 | Q9Y6A5 TACC3_HUMAN  | E.AQPPES#PETRLGQPAAE.Q | S434:    | 2 | 2,5208 | 0,45  | -0,328 |
| 4 | P49006 MRP_HUMAN    | E.IGACSDEGTAQE.G       |          | 2 | 2,5182 | 0,281 | -0,296 |
| 4 | Q09028 RBBP4_HUMAN  | E.VNCLSFNPYSE.F        |          | 2 | 2,518  | 0,258 | -0,367 |
| 4 | Q1KMD3 HNRL2_HUMAN  | E.ALDAEMLEDE.A         |          | 2 | 2,5174 | 0,229 | -0,43  |
| 4 | Q9H299 SH3L3_HUMAN  | E.AVEQNTLQE.F          |          | 2 | 2,5165 | 0,194 | 0      |
| 4 | P10109 ADX_HUMAN    | E.NNLDIDGFGACE.G       |          | 2 | 2,5164 | 0,346 | -0,46  |
| 4 | Q7Z3U7 MON2_HUMAN   | E.QQDLQSTS#DQM*DKE.I   | S537:    | 2 | 2,5149 | 0,369 | -0,419 |
| 4 | P52294 IMA1_HUMAN   | E.VMS#DGGFHE.A         | S63:     | 2 | 2,5064 | 0,163 | -0,115 |
| 4 | P20700 LMNB1_HUMAN  | E.NSALQLQVTE.R         |          | 2 | 2,5052 | 0,253 | -0,111 |
| 4 | Q8NE71 ABCF1_HUMAN  | E.QSVSQIDGDFE.D        |          | 2 | 2,505  | 0,271 | -0,598 |
| 4 | Q9Y508 ZN313_HUMAN  | E.DM*MNQVLQRS#IIDQ.-   | S224:    | 2 | 2,5046 | 0,182 | -0,341 |
| 4 | Q03252 LMNB2_HUMAN  | R.AGGPAT#PLS#PTR.L     | T14:S17: | 2 | 2,5032 | 0,34  | -0,285 |



|   |                    |                          |            |   |        |       |        |
|---|--------------------|--------------------------|------------|---|--------|-------|--------|
| 4 | Q9UJZ1 STML2_HUMAN | E.SLNASIVDAINQAAD.C      |            | 2 | 2,5019 | 0,307 | 0,162  |
| 4 | P21333 FLNA_HUMAN  | E.VGQFQVDCSSAGSAE.L      |            | 2 | 2,5019 | 0,314 | -1,503 |
| 4 | O00410 IMB3_HUMAN  | E.VM*GDGCLNNE.H          |            | 2 | 2,5011 | 0,109 | -0,217 |
| 4 | P49591 SYSC_HUMAN  | E.VAQLSQFDEE.L           |            | 2 | 2,499  | 0,279 | -0,105 |
| 4 | Q32MZ4 LRRF1_HUMAN | E.AAVTQVEE.Q             |            | 2 | 2,4969 | 0,182 | 0,288  |
| 4 | Q8TAQ2 SMRC2_HUMAN | E.DLTKDM*DEPS#PVPNVVEE.V | S347:      | 2 | 2,4953 | 0,433 | -0,485 |
| 4 | P06576 ATPB_HUMAN  | E.LGIYPVAVDPLDSTSR.I     |            | 2 | 2,4935 | 0,179 | -0,38  |
| 4 | Q9NQ55 SSF1_HUMAN  | R.VGGS#DEEASGIPSR.T      | S359:      | 2 | 2,4914 | 0,322 | -0,339 |
| 4 | Q07021 C1QBP_HUMAN | E.SDIFS#IRE.V            | S205:      | 2 | 2,4895 | 0,2   | -0,233 |
| 4 | P08621 RU17_HUMAN  | E.GLGNDS#RDMYM*E.S       | S410:      | 2 | 2,4889 | 0,247 | -0,493 |
| 4 | Q15424 SAFB1_HUMAN | E.SLSDS#RELVEGE.M        | S163:      | 2 | 2,4856 | 0,225 | -0,435 |
| 4 | Q9UGU0 TCF20_HUMAN | E.GSSQPPEQLKS#PM*AE.S    | S513:      | 2 | 2,4853 | 0,152 | -0,356 |
| 4 | P50542 PEX5_HUMAN  | E.AASKPLGVAS#EDELVAE.F   | S58:       | 2 | 2,4843 | 0,378 | -0,345 |
| 4 | Q7L0Y3 RG9D1_HUMAN | E.LQNTVSQILLE.S          |            | 2 | 2,4839 | 0,208 | -0,213 |
| 4 | Q14247 SRC8_HUMAN  | R.AKTQT#PPVS#PAPQPTEE.R  | T401:S405: | 2 | 2,4824 | 0,479 | -0,441 |
| 4 | Q86UP2 KTN1_HUMAN  | E.ASSASQFEELE.I          |            | 2 | 2,4808 | 0,154 | -0,204 |
| 4 | Q15435 PP1R7_HUMAN | E.NIDTLTNLE.S            |            | 2 | 2,4776 | 0,139 | -0,118 |
| 4 | P78527 PRKDC_HUMAN | E.LAS#LDCYNHLAE.W        | S2998:     | 2 | 2,4766 | 0,195 | -0,493 |
| 4 | Q99536 VAT1_HUMAN  | E.AATGEDASS#PPPKTE.A     | S18:       | 2 | 2,4761 | 0,25  | 0      |
| 4 | Q16236 NF2L2_HUMAN | E.VGNCS#PHFLNAFE.D       | S243:      | 2 | 2,4726 | 0,32  | -0,466 |
| 4 | P04406 G3P_HUMAN   | E.STGVFTTME.K            |            | 2 | 2,4684 | 0,318 | -0,125 |
| 4 | Q6S8J3 A26CA_HUMAN | E.MATAASS#SSLEKSYE.L     | S933:      | 2 | 2,4681 | 0,17  | -0,074 |
| 4 | P27816 MAP4_HUMAN  | E.AT#PVPIKDME.I          | T585:      | 2 | 2,4676 | 0,388 | -0,413 |
| 4 | Q92598 HS105_HUMAN | D.AQQTQSQPPSPE.L         |            | 2 | 2,4632 | 0,13  | -0,194 |
| 4 | Q96FZ7 CHMP6_HUMAN | E.LLAGSFTQEDE.D          |            | 2 | 2,4626 | 0,359 | -0,101 |
| 4 | Q12873 CHD3_HUMAN  | E.LQGDGPPSS#PTNDPTVKYE.T | S713:      | 2 | 2,4605 | 0,484 | 0      |
| 4 | Q14204 DYHC1_HUMAN | E.SNVLDSGFLE.R           |            | 2 | 2,4578 | 0,358 | -0,226 |
| 4 | P35749 MYH11_HUMAN | D.LEEQLEEEE.A            |            | 2 | 2,4542 | 0,115 | -0,213 |
| 4 | P04406 G3P_HUMAN   | E.STGVFTTM*E.K           |            | 2 | 2,4538 | 0,336 | -0,555 |
| 4 | Q99590 SFRIP_HUMAN | E.LIES#PKLE.S            | S293:      | 2 | 2,4531 | 0,116 | -0,06  |
| 4 | P35579 MYH9_HUMAN  | E.TLQSQLM*AE.K           |            | 2 | 2,4514 | 0,214 | -0,118 |
| 4 | P35579 MYH9_HUMAN  | E.IANSS#GKGALALEE.K      | S1714:     | 2 | 2,4506 | 0,136 | -0,254 |
| 4 | Q6ZTN6 AN13D_HUMAN | E.SLQLSTEPR.G            |            | 2 | 2,448  | 0,275 | 0      |

|   |                    |                        |       |   |        |       |        |
|---|--------------------|------------------------|-------|---|--------|-------|--------|
| 4 | Q9Y490 TLN1_HUMAN  | E.NIFSSM*GDAGE.M       |       | 2 | 2,446  | 0,165 | -0,107 |
| 4 | Q6ZU80 CN145_HUMAN | E.TS#TQVALDHLE.S       | S961: | 2 | 2,4449 | 0,361 | -0,189 |
| 4 | Q02952 AKA12_HUMAN | E.GSTVNDQQLE.E         |       | 2 | 2,4432 | 0,127 | -0,224 |
| 4 | Q0VDF9 HSP7E_HUMAN | E.TLAQYLASE.F          |       | 2 | 2,4407 | 0,208 | 0,123  |
| 4 | P13010 KU86_HUMAN  | E.TVYCLNDDDE.T         |       | 2 | 2,44   | 0,271 | -0,098 |
| 4 | P05783 K1C18_HUMAN | E.STTVVTTQSAE.V        |       | 2 | 2,437  | 0,26  | -0,217 |
| 4 | Q05524 ENO1B_HUMAN | E.GGFAPNILE.N          |       | 2 | 2,4339 | 0,156 | -0,93  |
| 4 | Q9UJM3 ERRFI_HUMAN | R.GS#RPLPLPISE.A       | S150: | 2 | 2,4302 | 0,222 | -0,454 |
| 4 | Q15424 SAFB1_HUMAN | E.SLS#DSRELVEGE.M      | S161: | 2 | 2,4298 | 0,283 | -0,174 |
| 4 | Q9H7N4 SFR19_HUMAN | R.AAKVPST#PPPK.A       | T976: | 2 | 2,4292 | 0,172 | -0,208 |
| 4 | P31949 S10AB_HUMAN | K.ISS#PTETERCIE.S      | S6:   | 2 | 2,4291 | 0,301 | -0,406 |
| 4 | Q02952 AKA12_HUMAN | E.ISPPAESGQAVEE.C      |       | 2 | 2,4281 | 0,412 | -0,279 |
| 4 | P17844 DDX5_HUMAN  | E.LAQVQVAAE.Y          |       | 2 | 2,428  | 0,262 | -0,412 |
| 4 | P27797 CALR_HUMAN  | D.NFLITNDE.A           |       | 2 | 2,4273 | 0,157 | -0,189 |
| 4 | P35527 K1C9_HUMAN  | K.STMQELNSR.L          |       | 2 | 2,4271 | 0,264 | -0,229 |
| 4 | P31689 DNJA1_HUMAN | E.NGFLSPDKLS#LLE.K     | S340: | 2 | 2,4244 | 0,206 | -0,081 |
| 4 | P14618 KPYM_HUMAN  | E.GSDVANAVLD.G         |       | 2 | 2,4212 | 0,355 | 0      |
| 4 | O95486 SC24A_HUMAN | E.NLLVNLNE.S           |       | 2 | 2,4202 | 0,118 | -0,197 |
| 4 | Q86V81 THOC4_HUMAN | E.LDAQLDAYNAR.M        |       | 2 | 2,4198 | 0,332 | -0,488 |
| 4 | Q6NSJ2 PHLB3_HUMAN | E.ASEVLAEPSSR.G        |       | 2 | 2,4169 | 0,229 | -0,106 |
| 4 | Q9C0B5 ZDHC5_HUMAN | E.LGQLQS#IRSE.G        | S445: | 2 | 2,4134 | 0,403 | 0,101  |
| 4 | Q99590 SFRIP_HUMAN | E.TASQSQRS#PISDNSGCD.A | S23:  | 2 | 2,4103 | 0,266 | -0,194 |
| 4 | Q9BVJ6 UT14A_HUMAN | E.SLLALSQEE.L          |       | 2 | 2,4101 | 0,108 | -0,109 |
| 4 | Q9BQA1 MEP50_HUMAN | E.GFCSAGVQTE.A         |       | 2 | 2,4052 | 0,255 | 0      |
| 4 | Q9HCD6 TANC2_HUMAN | E.NM*T#ASTYSLNKIPE.R   | T233: | 2 | 2,4052 | 0,204 | -0,66  |
| 4 | Q13155 MCA2_HUMAN  | E.SNLSLQALE.S          |       | 2 | 2,4041 | 0,227 | -0,188 |
| 4 | Q9Y6M7 S4A7_HUMAN  | E.NST#VDFSKVD.M        | T408: | 2 | 2,4039 | 0,273 | -0,307 |
| 4 | P78417 GSTO1_HUMAN | E.LYLQNSPE.A           |       | 2 | 2,4001 | 0,139 | -0,063 |
| 4 | Q01082 SPTB2_HUMAN | E.LQSQAQALSQE.G        |       | 2 | 2,3985 | 0,273 | -0,101 |
| 4 | P35579 MYH9_HUMAN  | E.AMITDLEE.R           |       | 2 | 2,3982 | 0,203 | -0,132 |
| 4 | P13798 ACPH_HUMAN  | E.NVQYAGLDFE.A         |       | 2 | 2,3956 | 0,211 | -0,422 |
| 4 | Q8WXX5 DNJC9_HUMAN | E.MDNFLAQME.A          |       | 2 | 2,3953 | 0,273 | -0,222 |
| 4 | Q14103 HNRPD_HUMAN | E.YFGGFGEVE.S          |       | 2 | 2,3932 | 0,155 | -0,425 |

|   |                     |                           |        |   |        |       |        |
|---|---------------------|---------------------------|--------|---|--------|-------|--------|
| 4 | P08621 RU17_HUMAN   | E.GLGND#RDM*YMESE.G       | S410:  | 2 | 2,391  | 0,18  | -0,144 |
| 4 | Q9H7N4 SFR19_HUMAN  | E.GLS#QSISR.I             | S291:  | 2 | 2,3903 | 0,103 | -0,131 |
| 4 | Q96FW1 OTUB1_HUMAN  | E.IAVQNPLVSE.R            |        | 2 | 2,3885 | 0,2   | -0,342 |
| 4 | Q9C0B0 UNK_HUMAN    | E.SALDDLNE.F              |        | 2 | 2,3856 | 0,089 | -0,221 |
| 4 | Q16186 ADRM1_HUMAN  | E.YLNNPPMPGALGASGSS#GHE.L | S143:  | 2 | 2,3848 | 0,364 | -0,42  |
| 4 | Q9ULF5 S39AA_HUMAN  | E.GQQES#PPKNYLCIEE.E      | S591:  | 2 | 2,3803 | 0,233 | -0,587 |
| 4 | P04406 G3P_HUMAN    | E.S#TGVFTTME.K            | S98:   | 2 | 2,3756 | 0,094 | -0,348 |
| 4 | Q13523 PRP4B_HUMAN  | E.DSNM*SVPSEPSPQSSTR.T    |        | 2 | 2,3705 | 0,155 | -0,383 |
| 4 | Q15233 NONO_HUMAN   | E.AFSVFGQVE.R             |        | 2 | 2,3697 | 0,198 | -0,186 |
| 4 | Q02952 AKA12_HUMAN  | E.SSASSPEEPEE.I           |        | 2 | 2,369  | 0,288 | -0,106 |
| 4 | Q6NZI2 PTRF_HUMAN   | E.GAVQSIQGE.L             |        | 2 | 2,3632 | 0,127 | -0,069 |
| 4 | Q9NS86 LANC2_HUMAN  | E.AAAGALLASGAAEE.T        |        | 2 | 2,3621 | 0,217 | 0      |
| 4 | P38646 GRP75_HUMAN  | D.VTPLSLGIE.T             |        | 2 | 2,36   | 0,088 | -0,066 |
| 4 | P36957 ODO2_HUMAN   | E.IDMSNIQE.M              |        | 2 | 2,3588 | 0,154 | -0,193 |
| 4 | O00629 IMA4_HUMAN   | E.AETIGNLIEE.C            |        | 2 | 2,3587 | 0,211 | 0      |
| 4 | B2RA01 B2RA01_HUMAN | K.AQYEDIAQK.S             |        | 2 | 2,3586 | 0,198 | -0,458 |
| 4 | Q9UPN9 TRI33_HUMAN  | E.SSLT#PPLSTNLHLE.S       | T815:  | 2 | 2,3568 | 0,248 | -0,307 |
| 4 | Q14192 FHL2_HUMAN   | E.TLFANTCEE.C             |        | 2 | 2,3566 | 0,293 | -0,562 |
| 4 | Q8N1G0 ZN687_HUMAN  | E.ASLKLS#PATPTSE.G        | S374:  | 2 | 2,3564 | 0,2   | -0,49  |
| 4 | Q8IXT5 RB12B_HUMAN  | R.GRPGSGTS#GVDSLNFIE.S    | S101:  | 2 | 2,3532 | 0,109 | -0,197 |
| 4 | P57740 NU107_HUMAN  | E.ISS#PVIREAE.V           | S11:   | 2 | 2,349  | 0,275 | -0,517 |
| 4 | P35579 MYH9_HUMAN   | E.LADEIANSS#GKGALALEE.K   | S1714: | 2 | 2,348  | 0,239 | -0,523 |
| 4 | Q9P2J5 SYLC_HUMAN   | E.NIVYLTNSLE.L            |        | 2 | 2,3471 | 0,321 | -0,209 |
| 4 | Q13371 PHLP_HUMAN   | E.VLVLTSVR.N              |        | 2 | 2,3462 | 0,263 | -0,275 |
| 4 | O15067 PUR4_HUMAN   | E.AFDLAQNSSE.H            |        | 2 | 2,3452 | 0,205 | -0,113 |
| 4 | Q9NY61 AATF_HUMAN   | E.LLFQYPDTR.Y             |        | 2 | 2,3408 | 0,197 | -0,317 |
| 4 | Q9NQC3 RTN4_HUMAN   | E.MGSSFS#VSPKAE.S         | S305:  | 2 | 2,3376 | 0,177 | 0,093  |
| 4 | Q6P4Q7 CNNM4_HUMAN  | E.NS#PQFPIDGCTTHM*E.N     | S728:  | 2 | 2,337  | 0,164 | -0,333 |
| 4 | P42566 EP15_HUMAN   | E.SPARRS#PELLPSGVTDENE.V  | S563:  | 2 | 2,3363 | 0,34  | -0,355 |
| 4 | Q9HC44 GPBL1_HUMAN  | E.GEVLS#HSLEAE.H          | S382:  | 2 | 2,3286 | 0,213 | -0,39  |
| 4 | Q15907 RB11B_HUMAN  | E.TSALDSTNVEE.A           |        | 2 | 2,3282 | 0,283 | -0,314 |
| 4 | O75643 U520_HUMAN   | E.TMDLDQGG.E.A            |        | 2 | 2,3269 | 0,272 | -0,063 |
| 4 | P09211 GSTP1_HUMAN  | E.AALVDM*VND.G            |        | 2 | 2,3229 | 0,436 | 0      |

|   |                    |                          |            |   |        |       |        |
|---|--------------------|--------------------------|------------|---|--------|-------|--------|
| 4 | P16070 CD44_HUMAN  | E.SSETPDQFM*TADE.T       |            | 2 | 2,3215 | 0,287 | -0,248 |
| 4 | P49006 MRP_HUMAN   | E.GESPPVNGTDE.A          |            | 2 | 2,3198 | 0,238 | -0,111 |
| 4 | P40818 UBP8_HUMAN  | E.SIPSKPAAQT#PPASIEVDE.N | T351:      | 2 | 2,3193 | 0,254 | -0,302 |
| 4 | Q92619 HMHA1_HUMAN | E.ASALGHLS#FLEQQQSE.A    | S1053:     | 2 | 2,319  | 0,292 | -0,468 |
| 4 | Q99661 KIF2C_HUMAN | E.ACSNGALIPGNLS#KEEEE.L  | S621:      | 2 | 2,3168 | 0,266 | -0,733 |
| 4 | Q71U36 TBA1A_HUMAN | D.GALNVDLTF              |            | 2 | 2,3166 | 0,086 | 0,131  |
| 4 | P06396 GELS_HUMAN  | E.VAASAILTAQLDEE.L       |            | 2 | 2,3157 | 0,283 | -0,426 |
| 4 | Q6PKG0 LARP1_HUMAN | R.AVTPVPTKTEE.V          |            | 2 | 2,3148 | 0,401 | -0,312 |
| 4 | Q13813 SPTA2_HUMAN | E.VGADLEQVE.V            |            | 2 | 2,3143 | 0,116 | 0,064  |
| 4 | Q01081 U2AF1_HUMAN | E.YLASIFGTE.K            |            | 2 | 2,3134 | 0,246 | 0      |
| 4 | Q9UKV3 ACINU_HUMAN | E.M*S#QNSFIKQYLE.K       | S132:      | 2 | 2,3083 | 0,11  | -0,462 |
| 4 | P11586 C1TC_HUMAN  | E.AGFGADIGM*E.K          |            | 2 | 2,3079 | 0,127 | -0,062 |
| 4 | Q9UKV3 ACINU_HUMAN | E.MS#QNSFIKQYLE.K        | S132:      | 2 | 2,3073 | 0,319 | -0,233 |
| 4 | Q07021 C1QBP_HUMAN | E.VSFQSTGESE.W           |            | 2 | 2,3071 | 0,181 | 0      |
| 4 | Q92625 ANS1A_HUMAN | E.QFSGLLHGSS#PVCE.V      | S507:      | 2 | 2,3064 | 0,245 | -0,458 |
| 4 | O15514 RPB4_HUMAN  | E.LACLANLCPE.T           |            | 2 | 2,3063 | 0,307 | -0,42  |
| 4 | Q9Y2W1 TR150_HUMAN | E.QTFS#GGTSQDTK.A        | S207:      | 2 | 2,3022 | 0,181 | -0,821 |
| 4 | Q96L73 NSD1_HUMAN  | E.VS#PRPALE.S            | S1382:     | 2 | 2,2984 | 0,148 | 0,064  |
| 4 | Q02952 AKA12_HUMAN | E.TAVTVSEE.V             |            | 2 | 2,2984 | 0,126 | 0,438  |
| 4 | P17301 ITA2_HUMAN  | E.GTVQGGDNFQM*E.M        |            | 2 | 2,2942 | 0,184 | -0,376 |
| 4 | P12270 TPR_HUMAN   | R.SVPTT#PLQVAAPVTVFTE.S  | T2200:     | 2 | 2,2938 | 0,411 | 0,252  |
| 4 | P11021 GRP78_HUMAN | D.VCPLTLGIE.T            |            | 2 | 2,2928 | 0,098 | -0,365 |
| 4 | Q9BTT0 AN32E_HUMAN | E.LSDNIISGGLE.V          |            | 2 | 2,2908 | 0,156 | -0,218 |
| 4 | O75534 CSDE1_HUMAN | E.TLQPDDVE.F             |            | 2 | 2,2894 | 0,239 | 0,188  |
| 4 | P61981 1433G_HUMAN | E.LNEPLSNEE.R            |            | 2 | 2,285  | 0,12  | -0,117 |
| 4 | Q13409 DC1I2_HUMAN | E.AVAPVQEE.S             |            | 2 | 2,2846 | 0,289 | 0,072  |
| 4 | Q9Y3A5 SBDS_HUMAN  | E.SEDYQQLE.I             |            | 2 | 2,2838 | 0,174 | 0      |
| 4 | Q8NI35 INADL_HUMAN | E.FSGTIHDINS#SLILE.A     | S805:      | 2 | 2,2812 | 0,082 | -0,566 |
| 4 | Q6NZI2 PTRF_HUMAN  | E.SDAVLVDKS#DS#D.-       | S387:S389: | 2 | 2,2806 | 0,165 | -0,346 |
| 4 | Q9H307 PININ_HUMAN | E.SVEPSENEAS#KE.L        | S422:      | 2 | 2,2804 | 0,097 | -0,352 |
| 4 | P09496 CLCA_HUMAN  | E.IAGIENDE.A             |            | 2 | 2,2799 | 0,093 | 0,354  |
| 4 | O95295 S25BP_HUMAN | D.SGIYPPGS#PGK.-         | S133:      | 2 | 2,2787 | 0,231 | -0,214 |
| 4 | Q14693 LPIN1_HUMAN | E.VIPM*HLATS#PILSE.G     | S106:      | 2 | 2,2771 | 0,164 | -0,532 |

|   |                     |                          |        |   |        |       |        |
|---|---------------------|--------------------------|--------|---|--------|-------|--------|
| 4 | Q12906 ILF3_HUMAN   | D.NLAIQLAAVTE.D          |        | 2 | 2,2732 | 0,156 | -0,427 |
| 4 | Q96EV2 RBM33_HUMAN  | E.DDLLGEDLLSGK.K         |        | 2 | 2,273  | 0,188 | -0,383 |
| 4 | Q15398 DLG7_HUMAN   | E.LFDNKS#LTTE.C          | S796:  | 2 | 2,268  | 0,334 | -0,587 |
| 4 | Q86XZ4 SPAS2_HUMAN  | E.TLS#IDARE.L            | S155:  | 2 | 2,2674 | 0,264 | 0,062  |
| 4 | P04075 ALDOA_HUMAN  | E.SLFVS#NHAY.-           | S360:  | 2 | 2,2661 | 0,14  | -0,327 |
| 4 | Q9BQG0 MBB1A_HUMAN  | E.QLM*TVLQAGK.A          |        | 2 | 2,2657 | 0,24  | -0,442 |
| 4 | Q9NR30 DDX21_HUMAN  | E.GAFSNFPISEE.T          |        | 2 | 2,2651 | 0,177 | -0,407 |
| 4 | P14314 GLU2B_HUMAN  | E.QEISFDGPNGE.F          |        | 2 | 2,2646 | 0,291 | 0      |
| 4 | Q96EA4 CCD99_HUMAN  | R.SGNTPNNS#PRLAAE.S      | S555:  | 2 | 2,2635 | 0,27  | -0,263 |
| 4 | P51116 FXR2_HUMAN   | E.NISNAQALLE.Y           |        | 2 | 2,2596 | 0,101 | -0,114 |
| 4 | Q92615 LARP5_HUMAN  | E.NSETGGNES#QPDSQEDPRE.V | S148:  | 2 | 2,2584 | 0,238 | -0,226 |
| 4 | Q8WWH5 TRUB1_HUMAN  | E.AAVVSSPSLKTDTSPVLE.T   | S19:   | 2 | 2,2561 | 0,192 | -0,13  |
| 4 | Q9NRD1 FBX6_HUMAN   | E.AAQSPY#RAVVQIF.-       | Y286:  | 2 | 2,2515 | 0,272 | -0,239 |
| 4 | Q5BJF6 ODFP2_HUMAN  | E.LLLQKLS#TFEE.T         | S261:  | 2 | 2,2503 | 0,231 | -0,261 |
| 4 | P31749 AKT1_HUMAN   | R.SGS#PSDNSGAEEME.V      | S124:  | 2 | 2,2488 | 0,228 | -0,083 |
| 4 | P00387 NB5R3_HUMAN  | E.SMQIGDTIE.F            |        | 2 | 2,2448 | 0,135 | 0      |
| 4 | O75330 HMMR_HUMAN   | E.LQIDSLLQKE.K           |        | 2 | 2,2429 | 0,17  | -0,308 |
| 4 | P14625 ENPL_HUMAN   | E.TVEEPM*EEEE.A          |        | 2 | 2,2424 | 0,236 | -0,296 |
| 4 | P08621 RU17_HUMAN   | E.GLGNDS#RDMYME.S        | S410:  | 2 | 2,2418 | 0,248 | -0,499 |
| 4 | P82979 HCC1_HUMAN   | R.FNVPVSLE.S             |        | 2 | 2,2414 | 0,084 | -0,202 |
| 4 | O43592 XPOT_HUMAN   | E.VIANQGAENVE.R          |        | 2 | 2,2412 | 0,214 | -0,213 |
| 4 | Q8IVF2 AHNK2_HUMAN  | E.ASVDVS#PPKVE.A         | S2179: | 2 | 2,2385 | 0,154 | 0,404  |
| 4 | P49748 ACADV_HUMAN  | R.GGVVTSNPLGF.-          |        | 2 | 2,2379 | 0,22  | 0,349  |
| 4 | O95155 UBE4B_HUMAN  | E.TQSQSLSR.S             |        | 2 | 2,2358 | 0,136 | 0,202  |
| 4 | O00487 PSDE_HUMAN   | E.GLTLQDYSE.H            |        | 2 | 2,2355 | 0,255 | 0      |
| 4 | P09622 DLDH_HUMAN   | E.ANLAASFGKS#INF.-       | S506:  | 2 | 2,2323 | 0,327 | -0,172 |
| 4 | P63241 IF5A1_HUMAN  | E.ILITVLSAM*TEE.A        |        | 2 | 2,2318 | 0,228 | 0      |
| 4 | Q93009 UBP7_HUMAN   | K.AGEQQLS#EPEDMEM*E.A    | S18:   | 2 | 2,2302 | 0,31  | -0,403 |
| 4 | P22314 UBA1_HUMAN   | E.VQGLQPNGEE.M           |        | 2 | 2,2302 | 0,161 | -0,228 |
| 4 | P59074 CG301_HUMAN  | E.LM*QDIADQQE.L          |        | 2 | 2,2257 | 0,142 | -0,303 |
| 4 | Q9Y3T9 NOC2L_HUMAN  | E.LQQLAQGPEDE.L          |        | 2 | 2,2222 | 0,238 | -0,298 |
| 4 | A8K8B2 A8K8B2_HUMAN | E.SSFLSSQNGDSSTSQE.T     |        | 2 | 2,2221 | 0,291 | 0,147  |
| 4 | P25786 PSA1_HUMAN   | E.FMECNLNE.L             |        | 2 | 2,22   | 0,097 | 0      |

|   |                     |                           |        |   |        |       |        |
|---|---------------------|---------------------------|--------|---|--------|-------|--------|
| 4 | Q99829 CPNE1_HUMAN  | E.ALAQTVLAE.V             |        | 2 | 2,2175 | 0,145 | 0      |
| 4 | Q02952 AKA12_HUMAN  | E.VDEQVACQE.V             |        | 2 | 2,2171 | 0,186 | -0,226 |
| 4 | P41252 SYIC_HUMAN   | E.GTYLNSVIE.S             |        | 2 | 2,2158 | 0,119 | -0,061 |
| 4 | Q9Y2X7 GIT1_HUMAN   | E.NTQSGDPLLGLE.G          |        | 2 | 2,2157 | 0,234 | -0,49  |
| 4 | P62917 RL8_HUMAN    | E.GTIVCCLE.E              |        | 2 | 2,215  | 0,295 | 0,064  |
| 4 | P31949 S10AB_HUMAN  | E.FLSFMNTE.L              |        | 2 | 2,215  | 0,215 | -0,247 |
| 4 | P40227 TCPZ_HUMAN   | E.TDTS#LIRGLVLD.H         | S205:  | 2 | 2,2129 | 0,247 | 0      |
| 4 | Q9H0E9 BRD8_HUMAN   | E.SGTIFGSQIK.D            |        | 2 | 2,2116 | 0,119 | 0      |
| 4 | Q8IWJ2 GCC2_HUMAN   | E.TFLS#DSEKE.K            | S345:  | 2 | 2,2113 | 0,271 | -0,215 |
| 4 | P49757 NUMB_HUMAN   | E.GS#FRVTTATE.Q           | S194:  | 2 | 2,2091 | 0,171 | -0,212 |
| 4 | Q9UBB5 MBD2_HUMAN   | E.ALMADILSR.A             |        | 2 | 2,2083 | 0,274 | -0,185 |
| 4 | O60271 JIP4_HUMAN   | E.NLDSVFAQDQE.H           |        | 2 | 2,2058 | 0,21  | -0,289 |
| 4 | Q9BQG0 MBB1A_HUMAN  | E.QLMTVLQAGK.A            |        | 2 | 2,2047 | 0,171 | 0      |
| 4 | P52294 IMA1_HUMAN   | E.EEVM*S#DGGGFHE.A        | S63:   | 2 | 2,2043 | 0,106 | -0,092 |
| 4 | P04920 B3A2_HUMAN   | R.TSPSS#PAPLPHQE.A        | S173:  | 2 | 2,2039 | 0,138 | -0,427 |
| 4 | P62081 RS7_HUMAN    | E.SGISQALLE.L             |        | 2 | 2,1944 | 0,097 | -0,598 |
| 4 | P55072 TERA_HUMAN   | E.GITGNLFE.V              |        | 2 | 2,1932 | 0,226 | 0,215  |
| 4 | Q8TE01 Q8TE01_HUMAN | R.QDLGGTCVNE.G            |        | 2 | 2,1916 | 0,083 | -0,223 |
| 4 | Q92797 SYMPK_HUMAN  | E.AALLDS#SLEGPLPKE.T      | S1221: | 2 | 2,1911 | 0,156 | -0,527 |
| 4 | P18031 PTN1_HUMAN   | E.KGS#PLNAAPYGIESMSQDTE.V | S352:  | 2 | 2,1888 | 0,465 | -0,449 |
| 4 | Q53H12 AGK_HUMAN    | E.GAGGSFSIDSEEYE.A        |        | 2 | 2,1875 | 0,083 | -0,337 |
| 4 | Q13257 MD2L1_HUMAN  | E.SGPQFITNSEE.V           |        | 2 | 2,1874 | 0,287 | -0,202 |
| 4 | P60709 ACTB_HUMAN   | R.GYSFTTTAE.R             |        | 2 | 2,1833 | 0,236 | 0      |
| 4 | P68104 EF1A1_HUMAN  | E.SFS#DYPPPLGR.F          | S416:  | 2 | 2,1771 | 0,095 | -0,3   |
| 4 | P60174 TPIS_HUMAN   | E.GLGVACIGE.K             |        | 2 | 2,1751 | 0,099 | -0,123 |
| 4 | Q06203 PUR1_HUMAN   | E.GLVSSVQE.G              |        | 2 | 2,1751 | 0,129 | 0,149  |
| 4 | Q92917 GPKOW_HUMAN  | E.LYIQQDNSE.R             |        | 2 | 2,1742 | 0,129 | -0,22  |
| 4 | P55209 NP1L1_HUMAN  | E.IS#EELKE.K              | S143:  | 2 | 2,1742 | 0,088 | -0,46  |
| 4 | P60174 TPIS_HUMAN   | E.LASQPDVD.G              |        | 2 | 2,171  | 0,109 | 0,072  |
| 4 | Q8NCW5 AIBP_HUMAN   | E.YQFSVDQLM*E.L           |        | 2 | 2,1703 | 0,185 | -0,765 |
| 4 | P34932 HSP74_HUMAN  | E.MLNLYIENE.G             |        | 2 | 2,1659 | 0,088 | -0,643 |
| 4 | A6NHR9 SMHD1_HUMAN  | E.NGTAFPFQVE.V            |        | 2 | 2,1648 | 0,309 | -0,22  |
| 4 | P49848 TAF6_HUMAN   | E.AGDSPPPAPGTPK.A         |        | 2 | 2,1622 | 0,135 | -0,102 |

|   |                     |                          |            |   |        |       |        |
|---|---------------------|--------------------------|------------|---|--------|-------|--------|
| 4 | Q13885 TBB2A_HUMAN  | E.AESNM*NDLVSE.Y         |            | 2 | 2,1621 | 0,241 | -0,299 |
| 4 | P08708 RS17_HUMAN   | E.VSALDQEIIE.V           |            | 2 | 2,1586 | 0,089 | -0,437 |
| 4 | P40855 PEX19_HUMAN  | E.GCS#VGAEADRE.L         | S9:        | 2 | 2,1553 | 0,121 | -0,397 |
| 4 | P53396 ACLY_HUMAN   | R.TAS#FSEGRADE.V         | S455:      | 2 | 2,1524 | 0,215 | -0,572 |
| 4 | Q9H4A6 GOLP3_HUMAN  | E.NAFAPLLDE.Q            |            | 2 | 2,1523 | 0,254 | 0,185  |
| 4 | P11387 TOP1_HUMAN   | E.NGFS#SPPQIKDEPEDD.G    | S111:      | 2 | 2,1504 | 0,279 | -0,197 |
| 4 | P45974 UBP5_HUMAN   | E.CAFSFDTPESE.G          |            | 2 | 2,1503 | 0,27  | -0,473 |
| 4 | Q01968 OCRL_HUMAN   | E.NDFLPSLE.L             |            | 2 | 2,1495 | 0,231 | -0,13  |
| 4 | P50416 CPT1A_HUMAN  | E.LFDLENNPE.Y            |            | 2 | 2,1488 | 0,151 | -0,224 |
| 4 | Q9P1Y6 K1542_HUMAN  | E.AS#PAPLAQGEPPGRE.D     | S1202:     | 2 | 2,1417 | 0,413 | -0,167 |
| 4 | P78536 ADA17_HUMAN  | E.SLSLFHPS#NVE.M         | S711:      | 2 | 2,137  | 0,086 | -0,373 |
| 4 | Q9BY11 PACN1_HUMAN  | E.LS#FKAGDE.L            | S405:      | 2 | 2,1337 | 0,232 | -0,258 |
| 4 | Q9HC35 EMAL4_HUMAN  | E.NSLEQTVPESEDHS#EEE.S   | S938:      | 2 | 2,1317 | 0,375 | -0,239 |
| 4 | Q9P258 RCC2_HUMAN   | E.TGSVFAFGE.N            |            | 2 | 2,1309 | 0,249 | 0      |
| 4 | Q13501 SQSTM_HUMAN  | E.SASGPSEDPS#VNFLKNVGE.S | S233:      | 2 | 2,1274 | 0,185 | -0,848 |
| 4 | P60842 IF4A1_HUMAN  | E.TFYNTSIEE.M            |            | 2 | 2,1261 | 0,198 | -0,111 |
| 4 | P27816 MAP4_HUMAN   | E.VGLLKDMS#PLS#ETE.M     | S507:S510: | 2 | 2,1257 | 0,242 | -0,509 |
| 4 | Q8NFW8 NEUA_HUMAN   | E.VAYLGNEVSDEE.C         |            | 2 | 2,1221 | 0,252 | -0,276 |
| 4 | P12268 IMDH2_HUMAN  | E.DLVVAPAGITLKE.A        |            | 2 | 2,1215 | 0,218 | -0,552 |
| 4 | P04181 OAT_HUMAN    | E.VLEEEENLAE.N           |            | 2 | 2,1208 | 0,169 | -0,117 |
| 4 | P62857 RS28_HUMAN   | E.GDVLTLLE.S             |            | 2 | 2,1197 | 0,202 | 0,78   |
| 4 | Q13523 PRP4B_HUMAN  | R.TKLDDLALLE.D           |            | 2 | 2,1191 | 0,104 | -0,431 |
| 4 | Q15149 PLEC1_HUMAN  | E.NLTYLQLME.R            |            | 2 | 2,1187 | 0,086 | 0      |
| 4 | P13693 TCTP_HUMAN   | E.IADGLCLE.V             |            | 2 | 2,118  | 0,151 | 0,068  |
| 4 | Q9H009 NACA2_HUMAN  | E.NTQTPTVQEE.S           |            | 2 | 2,1155 | 0,122 | 0,106  |
| 4 | Q5VY92 Q5VY92_HUMAN | R.LQDSS#DPDTGSEEE.G      | S941:      | 2 | 2,114  | 0,357 | -0,154 |
| 4 | Q5VUA4 ZN318_HUMAN  | E.LLLHS#PAR.S            | S1896:     | 2 | 2,1111 | 0,295 | 0,062  |
| 4 | P29966 MARCS_HUMAN  | E.AGEGGAEAPAAE.G         |            | 2 | 2,1094 | 0,107 | -0,105 |
| 4 | P81605 DCD_HUMAN    | K.ENAGEDPGLAR.Q          |            | 2 | 2,1053 | 0,153 | -0,432 |
| 4 | Q08J23 NSUN2_HUMAN  | E.SAASTGQPDNDVTE.G       |            | 2 | 2,1045 | 0,297 | -0,263 |
| 4 | O75044 FNBP2_HUMAN  | E.GLDAIENAVE.N           |            | 2 | 2,1018 | 0,119 | -0,473 |
| 4 | Q9Y508 ZN313_HUMAN  | E.DM*M*NQVLQRS#IIDQ.-    | S224:      | 2 | 2,0964 | 0,127 | -0,135 |
| 4 | P14314 GLU2B_HUMAN  | E.AQALLSGDTQTD.A         |            | 2 | 2,0958 | 0,394 | -0,3   |

|   |                    |                         |        |   |        |       |        |
|---|--------------------|-------------------------|--------|---|--------|-------|--------|
| 4 | P08670 VIME_HUMAN  | D.FSLADAINTE.F          |        | 2 | 2,095  | 0,19  | -0,226 |
| 4 | Q9Y448 T4AF1_HUMAN | E.QQTLCNNQVND.L         |        | 2 | 2,0932 | 0,268 | -0,457 |
| 4 | P52292 IMA2_HUMAN  | E.SAWALTNIASGTSE.Q      |        | 2 | 2,091  | 0,31  | -0,693 |
| 4 | Q9NYL9 TMOD3_HUMAN | E.EALTSASDTE.L          |        | 2 | 2,0883 | 0,166 | 0,238  |
| 4 | P55060 XPO2_HUMAN  | E.LSDANLQTLTE.Y         |        | 2 | 2,0883 | 0,285 | 0      |
| 4 | Q58FF8 H90B2_HUMAN | E.QVANSAFVE.Q           |        | 2 | 2,0848 | 0,303 | -0,126 |
| 4 | Q9Y5B9 SP16H_HUMAN | E.LAAQLNEE.A            |        | 2 | 2,0807 | 0,084 | 0,069  |
| 4 | Q08257 QOR_HUMAN   | E.FQQYAAALQAGM*E.I      |        | 2 | 2,0794 | 0,193 | -0,338 |
| 4 | Q9NZI8 IF2B1_HUMAN | E.SVTPADLE.K            |        | 2 | 2,0782 | 0,228 | 0,293  |
| 4 | P09211 GSTP1_HUMAN | E.AALVDMVND.G           |        | 2 | 2,0773 | 0,232 | 0,064  |
| 4 | Q13813 SPTA2_HUMAN | E.TFDAGLQAFQQE.G        |        | 2 | 2,0739 | 0,109 | 0,09   |
| 4 | P27816 MAP4_HUMAN  | D.M*AQLPETE.I           |        | 2 | 2,0668 | 0,117 | -0,131 |
| 4 | Q8TDY2 RBCC1_HUMAN | E.SLLTS#FPKSVE.H        | S257:  | 2 | 2,0648 | 0,185 | -0,284 |
| 4 | P49588 SYAC_HUMAN  | E.M*GDTGPCGPCSE.I       |        | 2 | 2,0647 | 0,093 | -0,285 |
| 4 | P20338 RAB4A_HUMAN | E.TSALTGENVEE.A         |        | 2 | 2,0631 | 0,148 | 0      |
| 4 | Q86Y82 STX12_HUMAN | E.VAITEQDLE.L           |        | 2 | 2,0629 | 0,098 | -0,12  |
| 4 | Q8WVK7 SKA2_HUMAN  | E.LS#PLTKEE.K           | S101:  | 2 | 2,0624 | 0,095 | -0,061 |
| 4 | Q03135 CAV1_HUMAN  | E.LS#EKQVYD.A           | S37:   | 2 | 2,0623 | 0,147 | -0,46  |
| 4 | Q58FF7 H90B3_HUMAN | E.GLELPEDEEE.K          |        | 2 | 2,0605 | 0,312 | -0,316 |
| 4 | P29317 EPHA2_HUMAN | E.ASESPCLECPE.H         |        | 2 | 2,0589 | 0,199 | -0,191 |
| 4 | Q9NRS6 SNX15_HUMAN | E.ASGS#PARGPLTEAE.L     | S201:  | 2 | 2,0575 | 0,087 | -0,086 |
| 4 | P49321 NASP_HUMAN  | E.VNGGSGDAVPSGNEVSE.N   |        | 2 | 2,0544 | 0,086 | -0,387 |
| 4 | Q9Y4W2 LAS1L_HUMAN | E.AS#PIGKSPYTLD.S       | S523:  | 2 | 2,0524 | 0,129 | -0,367 |
| 4 | P46060 RAGP1_HUMAN | E.NDGATALAE.A           |        | 2 | 2,0423 | 0,171 | 0,283  |
| 4 | P20810 ICAL_HUMAN  | E.ALSAS#LGTR.Q          | S297:  | 2 | 2,0423 | 0,266 | -0,064 |
| 4 | Q16352 AINX_HUMAN  | E.VAGYQDSIGQLE.N        |        | 2 | 2,0411 | 0,145 | -0,191 |
| 4 | Q9Y4E1 FA21C_HUMAN | E.TKS#SSQQDVILTTQDIFE.D | S1200: | 2 | 2,0311 | 0,175 | 0,345  |
| 4 | Q15149 PLEC1_HUMAN | E.TQALQQSFLSE.K         |        | 2 | 2,0231 | 0,148 | -0,195 |
| 4 | Q08211 DHX9_HUMAN  | E.GETVEPYKVNLS#QDLE.H   | S279:  | 2 | 2,0193 | 0,114 | -0,321 |
| 4 | Q9BPW8 NIPS1_HUMAN | E.AVGGFFSQIGE.L         |        | 2 | 2,014  | 0,085 | -0,219 |
| 4 | P06493 CDC2_HUMAN  | E.GT#YGVVYK.G           | T14:   | 2 | 2,0137 | 0,278 | -0,126 |
| 4 | P09960 LKHA4_HUMAN | E.VYNFNAINNSE.I         |        | 2 | 2,0111 | 0,154 | -0,285 |
| 4 | Q8TD19 NEK9_HUMAN  | E.AS#SPRLNPAVTCAGK.G    | S868:  | 2 | 2,0095 | 0,173 | -0,152 |



|   |                     |                         |            |   |        |       |        |
|---|---------------------|-------------------------|------------|---|--------|-------|--------|
| 4 | Q8N163 K1967_HUMAN  | E.VRSVAS#NQS#EME.F      | S678:S681: | 2 | 2,0072 | 0,18  | 1,304  |
| 4 | Q14257 RCN2_HUMAN   | E.NTALDDAEEE.S          |            | 2 | 1,9976 | 0,162 | -0,11  |
| 4 | Q02952 AKA12_HUMAN  | E.ESQLPGTGGPE.D         |            | 2 | 1,9965 | 0,089 | -0,569 |
| 4 | Q96PE2 ARHGH_HUMAN  | R.STISSSFGNEETPSSKE.A   |            | 2 | 1,9947 | 0,263 | -0,205 |
| 4 | P28838 AMPL_HUMAN   | E.VDPCGDAQAAAE.G        |            | 2 | 1,9863 | 0,171 | -0,507 |
| 4 | Q13823 NOG2_HUMAN   | E.TAGEGSES#IIKEE.T      | S504:      | 2 | 1,985  | 0,241 | -0,341 |
| 4 | P49591 SYSC_HUMAN   | E.FMPPGLQE.L            |            | 2 | 1,9847 | 0,106 | -0,133 |
| 4 | P63096 GNAI1_HUMAN  | E.AAAYIQCFE.D           |            | 2 | 1,9824 | 0,191 | -0,102 |
| 4 | P52701 MSH6_HUMAN   | E.LLSMANFEE.Y           |            | 2 | 1,9795 | 0,224 | -0,116 |
| 4 | Q9Y5T5 UBP16_HUMAN  | E.VLT#SSPTRNLNGAYLTE.G  | T550:      | 2 | 1,9795 | 0,24  | -0,318 |
| 4 | Q5UIP0 RIF1_HUMAN   | E.SVDIQDQEE.K           |            | 2 | 1,9791 | 0,221 | 0,115  |
| 4 | Q14160 LAP4_HUMAN   | E.QLDLGGNDLE.V          |            | 2 | 1,9786 | 0,206 | 0      |
| 4 | P18583 SON_HUMAN    | E.FSQSGAAGALE.L         |            | 2 | 1,978  | 0,156 | 0,111  |
| 4 | P57735 RAB25_HUMAN  | E.TSALDSTNVE.L          |            | 2 | 1,9749 | 0,198 | 0      |
| 4 | O43660 PLRG1_HUMAN  | E.SGIFACAFDQSE.S        |            | 2 | 1,9678 | 0,191 | -0,366 |
| 4 | Q12888 TP53B_HUMAN  | K.TMSVLSCICE.A          |            | 2 | 1,9672 | 0,16  | -0,508 |
| 4 | Q92508 FA38A_HUMAN  | E.AGASLYQGLM*R.T        |            | 2 | 1,9594 | 0,169 | -0,103 |
| 4 | Q9UHV7 MED13_HUMAN  | E.GFCS#PKPSE.I          | S890:      | 2 | 1,9587 | 0,234 | -1,121 |
| 4 | Q9NRS6 SNX15_HUMAN  | E.GAAPS#PTHVAE.L        | S227:      | 2 | 1,9582 | 0,211 | -0,218 |
| 4 | Q8WXH0 SYNE2_HUMAN  | E.SLLKALS#PSDSLE.I      | S1772:     | 2 | 1,9543 | 0,224 | -1,271 |
| 4 | Q01518 CAP1_HUMAN   | E.NQENVSNLVIEDTE.L      |            | 2 | 1,9534 | 0,191 | -0,456 |
| 4 | P40763 STAT3_HUMAN  | E.SLTFDM*E.L            |            | 2 | 1,9529 | 0,246 | 0,071  |
| 4 | P37802 TAGL2_HUMAN  | E.LINALYPE.G            |            | 2 | 1,951  | 0,152 | -0,785 |
| 4 | P35579 MYH9_HUMAN   | E.M*ETLQSQLM*AE.K       |            | 2 | 1,9489 | 0,095 | -0,279 |
| 4 | Q15398 DLG7_HUMAN   | E.SRS#SIEDAQCPGLPLIEE.N | S689:      | 2 | 1,9463 | 0,441 | -0,556 |
| 4 | Q9Y4W2 LAS1L_HUMAN  | E.QGS#VNDVKEEE.K        | S560:      | 2 | 1,9428 | 0,199 | -0,186 |
| 4 | Q9Y490 TLN1_HUMAN   | E.AVDNLSAFASNPE.F       |            | 2 | 1,9416 | 0,18  | -0,457 |
| 4 | P07814 SYEP_HUMAN   | E.VIPVNVPE.A            |            | 2 | 1,9376 | 0,116 | 0,07   |
| 4 | P35269 T2FA_HUMAN   | R.LDTGPOQSLSGK.S        |            | 2 | 1,9331 | 0,286 | -0,553 |
| 4 | Q8WU90 ZC3HF_HUMAN  | E.IS#LEDLIERE.R         | S231:      | 2 | 1,933  | 0,243 | -0,188 |
| 4 | Q6PJH4 Q6PJH4_HUMAN | E.ET#DSSEPVVEDER.L      | T217:      | 2 | 1,9293 | 0,103 | -0,31  |
| 4 | P35527 K1C9_HUMAN   | K.TLLDIDNTR.M           |            | 2 | 1,9286 | 0,082 | -0,115 |
| 4 | Q92785 REQU_HUMAN   | E.DSQPPT#PVSQRSEE.Q     | T248:      | 2 | 1,9279 | 0,17  | -0,447 |

|   |                      |                          |       |   |        |       |        |
|---|----------------------|--------------------------|-------|---|--------|-------|--------|
| 4 | Q9NQG7 HPS4_HUMAN    | E.VLGLS#SSLGKE.L         | S353: | 2 | 1,9268 | 0,189 | -0,104 |
| 4 | Q13564 ULA1_HUMAN    | E.IISSM*DNPDNE.I         |       | 2 | 1,9254 | 0,212 | -0,195 |
| 4 | Q9H6T3 RPAP3_HUMAN   | E.LEPNNFEATNE.L          |       | 2 | 1,9208 | 0,171 | -0,477 |
| 4 | Q02952 AKA12_HUMAN   | E.VVLPSEEE.G             |       | 2 | 1,9192 | 0,1   | 0,338  |
| 4 | P39023 RL3_HUMAN     | E.QQVPVNQVFGQDE.M        |       | 2 | 1,9179 | 0,225 | -0,082 |
| 4 | P27707 DCK_HUMAN     | R.SCPSFSASSE.G           |       | 2 | 1,9158 | 0,17  | -0,115 |
| 4 | P27816 MAP4_HUMAN    | D.MAQLPETE.I             |       | 2 | 1,9153 | 0,123 | -0,066 |
| 4 | Q9NX24 NOLA2_HUMAN   | E.YQEAYDECLEE.V          |       | 2 | 1,9143 | 0,217 | 0,168  |
| 4 | P43897 EFTS_HUMAN    | E.GLIGLLQE.G             |       | 2 | 1,9091 | 0,09  | 0,651  |
| 4 | B2RDE1 B2RDE1_HUMAN  | D.QLLDLLEM.-             |       | 2 | 1,9002 | 0,15  | -0,227 |
| 4 | ##Q9H1E3 NUCKS_HUMAN | E.DEEKPSPT#KE.K          | T42:  | 2 | 1,8852 | 0,132 | -0,394 |
| 4 | P22314 UBA1_HUMAN    | E.SGDFVSFSE.V            |       | 2 | 1,8814 | 0,145 | 0      |
| 4 | P11388 TOP2A_HUMAN   | E.GSPQEDGVELE.G          |       | 2 | 1,8779 | 0,149 | -0,105 |
| 4 | P26641 EF1G_HUMAN    | E.GDDGFCVFE.S            |       | 2 | 1,8768 | 0,096 | 0      |
| 4 | Q32MZ4 LRRF1_HUMAN   | E.LTYQNTDLSE.I           |       | 2 | 1,8661 | 0,113 | -0,309 |
| 4 | P27635 RL10_HUMAN    | E.YEQLSSEALE.A           |       | 2 | 1,8659 | 0,288 | -0,104 |
| 4 | P15311 EZRI_HUMAN    | E.GAEPTGYSAE.L           |       | 2 | 1,8651 | 0,184 | -0,497 |
| 4 | P62263 RS14_HUMAN    | E.SSPYAAM*LAAQD.V        |       | 2 | 1,865  | 0,126 | -0,098 |
| 4 | P50502 F10A1_HUMAN   | E.VLAAMQDPE.V            |       | 2 | 1,8639 | 0,189 | -0,125 |
| 4 | Q9NPF0 CD320_HUMAN   | R.TSGLCVPLTWR.C          |       | 2 | 1,8591 | 0,261 | -0,284 |
| 4 | Q92597 NDRG1_HUMAN   | D.ITPNSGAAGNSAGPK.S      |       | 2 | 1,858  | 0,134 | 0      |
| 4 | Q6PIRO Q6PIRO_HUMAN  | E.TSQPSDKTVLDTSY#ALIGE.T | Y385: | 2 | 1,8551 | 0,38  | -0,116 |
| 4 | Q03519 TAP2_HUMAN    | E.ATSALDVQCE.Q           |       | 2 | 1,852  | 0,112 | 0      |
| 4 | Q9Y6A5 TACC3_HUMAN   | E.NQMVSPGKVS#PEQAVEE.N   | S177: | 2 | 1,8482 | 0,303 | 0,713  |
| 4 | O95239 KIF4A_HUMAN   | E.SEDS#ITKQIESLE.T       | S815: | 2 | 1,841  | 0,12  | -0,548 |
| 4 | Q9H4B7 TBB1_HUMAN    | E.LTQQMFD.A              |       | 2 | 1,8384 | 0,132 | -0,207 |
| 4 | Q9Y490 TLN1_HUMAN    | E.AAAGLNQAATE.L          |       | 2 | 1,8374 | 0,288 | -0,3   |
| 4 | Q6P2E9 EDC4_HUMAN    | E.LGSEGLGSAAHGS#QPD.L    | S565: | 2 | 1,8226 | 0,148 | -0,156 |
| 4 | P10243 MYBA_HUMAN    | E.NQPVSAQQNSPT#KFLAVE.A  | T338: | 2 | 1,8191 | 0,13  | -0,599 |
| 4 | P62195 PRS8_HUMAN    | E.LLNQLDGF.E.A           |       | 2 | 1,8168 | 0,111 | -0,116 |
| 4 | Q02790 FKBP4_HUMAN   | E.SGAQSAPLPM*E.G         |       | 2 | 1,8133 | 0,236 | -0,332 |
| 4 | P45985 MP2K4_HUMAN   | E.VACYVCK.I              |       | 2 | 1,813  | 0,147 | -0,136 |
| 4 | P52272 HNRPM_HUMAN   | R.MGAGMGFGL.E.R          |       | 2 | 1,8097 | 0,182 | -0,126 |

|   |                       |                            |            |   |        |       |        |
|---|-----------------------|----------------------------|------------|---|--------|-------|--------|
| 4 | P16070 CD44_HUMAN     | E.SSETPDQFMTADE.T          |            | 2 | 1,8052 | 0,196 | -0,335 |
| 4 | P11586 C1TC_HUMAN     | E.TEQVNGLF.-               |            | 2 | 1,7998 | 0,214 | 0      |
| 4 | ##Q8TCU6 PREX1_HUMAN  | R.IS#FS#RGVSPPTTKPYSVE.M   | S667:S669: | 2 | 1,7969 | 0,095 | 1,877  |
| 4 | O00567 NOL5A_HUMAN    | E.AM*VQAEAAAAE.I           |            | 2 | 1,7963 | 0,121 | -0,215 |
| 4 | P09661 RU2A_HUMAN     | E.MEEDTVTNGS.-             |            | 2 | 1,7959 | 0,144 | -0,225 |
| 4 | Q9BZL4 PP12C_HUMAN    | E.NSS#PPSRIPEPE.S          | S499:      | 2 | 1,7933 | 0,131 | -0,351 |
| 4 | Q9H7Z6 MYST1_HUMAN    | E.GT#APSPGRVS#PPTPARGEPE.V | T34:S42:   | 2 | 1,7902 | 0,32  | -0,46  |
| 4 | P55795 HNRH2_HUMAN    | E.NSSDYQSNLA.-             |            | 2 | 1,7895 | 0,257 | -0,222 |
| 4 | Q13098 CSN1_HUMAN     | E.LQNAPDAIPE.S             |            | 2 | 1,7886 | 0,089 | -0,228 |
| 4 | Q08J23 NSUN2_HUMAN    | E.STQLSPADLTE.G            |            | 2 | 1,7875 | 0,282 | -0,105 |
| 4 | P10809 CH60_HUMAN     | E.QLDVTTSE.Y               |            | 2 | 1,7863 | 0,107 | 0,068  |
| 4 | Q16222 UAP1_HUMAN     | E.LQAM*NFFEE.L             |            | 2 | 1,7855 | 0,109 | 0,061  |
| 4 | Q15404 RSU1_HUMAN     | E.VLNFFNNQIEE.L            |            | 2 | 1,7804 | 0,171 | 0      |
| 4 | Q7L7X3 TAOK1_HUMAN    | E.YCLGSASDLLE.V            |            | 2 | 1,7654 | 0,104 | -0,298 |
| 4 | Q8TDD1 DDX54_HUMAN    | E.CTS#DVEPDTRE.M           | S75:       | 2 | 1,7583 | 0,191 | -0,176 |
| 4 | Q9UMY1 NOL7_HUMAN     | E.GQLASEEEEEAE.H           |            | 2 | 1,7568 | 0,129 | -0,409 |
| 4 | Q14204 DYHC1_HUMAN    | E.ILIQSVCE.T               |            | 2 | 1,7551 | 0,19  | -0,444 |
| 4 | P08574 CY1_HUMAN      | E.VEVQDGPNEDE.M            |            | 2 | 1,754  | 0,326 | -0,379 |
| 4 | O95155 UBE4B_HUMAN    | R.SQS#MDIDGVSC.E.K         | S105:      | 2 | 1,7514 | 0,129 | -0,433 |
| 4 | O60888 CUTA_HUMAN     | E.SVSDSITVLP.-             |            | 2 | 1,7414 | 0,175 | -0,36  |
| 4 | O14579 COPE_HUMAN     | D.AYYIFQE.M                |            | 2 | 1,7365 | 0,105 | -0,392 |
| 4 | Q9BPW8 NIPS1_HUMAN    | E.YLDAYNSLTE.A             |            | 2 | 1,7362 | 0,279 | 0      |
| 4 | P04075 ALDOA_HUMAN    | E.TTTQGLDGLSE.R            |            | 2 | 1,7337 | 0,084 | -0,109 |
| 4 | Q9H4L4 SENP3_HUMAN    | E.DGVRGS#PPVPSGPPM*EE.D    | S212:      | 2 | 1,7325 | 0,134 | -0,338 |
| 4 | ##Q5LJB1 Q5LJB1_HUMAN | K.DNGLAACSKE.Q             |            | 2 | 1,732  | 0,144 | -0,229 |
| 4 | P50991 TCPD_HUMAN     | E.NAGLNPISTVTE.L           |            | 2 | 1,7284 | 0,14  | 0,1    |
| 4 | Q9BYG5 PAR6B_HUMAN    | E.VSLAAIASSSNTFEFE.T       |            | 2 | 1,7165 | 0,107 | -0,48  |
| 4 | Q92785 REQU_HUMAN     | E.GLISQDGSSLE.A            |            | 2 | 1,7134 | 0,206 | -0,221 |
| 4 | Q9UJS0 CMC2_HUMAN     | E.GTLPFNLA.E.A             |            | 2 | 1,7105 | 0,103 | 0,317  |
| 4 | P55265 DSRAD_HUMAN    | E.YAQFASQTCE.F             |            | 2 | 1,7083 | 0,143 | -1,013 |
| 4 | P53597 SUCA_HUMAN     | E.IGGNAEENAAE.F            |            | 2 | 1,7026 | 0,133 | -0,114 |
| 4 | Q9Y2W2 WBP11_HUMAN    | E.LTPLQAMM*LR.M            |            | 2 | 1,7005 | 0,238 | 1,948  |
| 4 | Q02952 AKA12_HUMAN    | E.SSELVTTCAE.T             |            | 2 | 1,6943 | 0,258 | -0,398 |

|   |                     |                                 |            |   |        |       |        |
|---|---------------------|---------------------------------|------------|---|--------|-------|--------|
| 4 | Q8IWE2 NXP20_HUMAN  | K.SVLTGGLDALE.F                 |            | 2 | 1,6874 | 0,116 | -0,34  |
| 4 | O94992 HEX11_HUMAN  | E.NLQLLTENE.L                   |            | 2 | 1,6576 | 0,092 | 0      |
| 4 | Q6IMN6 CAPR2_HUMAN  | R.ALS#PLQSTLSSAASPSQAYE.T       | S102:      | 2 | 1,6569 | 0,299 | 0      |
| 4 | Q96BW5 PTER_HUMAN   | E.FAQLGCYLE.Y                   |            | 2 | 1,6337 | 0,154 | -0,111 |
| 4 | P48643 TCPE_HUMAN   | E.NSGM*NPIQTM*TE.V              |            | 2 | 1,6241 | 0,096 | -0,27  |
| 4 | Q7KZX8 Q7KZX8_HUMAN | E.LSEPIENGETE.M                 |            | 2 | 1,6231 | 0,165 | -0,2   |
| 4 | Q8NE71 ABCF1_HUMAN  | E.EQSVSQIDGDFE.D                |            | 2 | 1,6216 | 0,149 | -0,18  |
| 4 | P22681 CBL_HUMAN    | E.FVSISS#PAHVAT.-               | S900:      | 2 | 1,62   | 0,113 | -0,282 |
| 4 | P07602 SAP_HUMAN    | K.SDVYCEVCE.F                   |            | 2 | 1,6098 | 0,245 | -0,21  |
| 4 | P09211 GSTP1_HUMAN  | E.VLAPGCLD.A                    |            | 2 | 1,6065 | 0,147 | 0,289  |
| 4 | P05783 K1C18_HUMAN  | E.STTVVTT#QSAE.V                | T284:      | 2 | 1,5934 | 0,198 | -0,709 |
| 4 | P18031 PTN1_HUMAN   | E.KGS#PLNAAPYGIEM*SQDTE.V       | S352:      | 2 | 1,5706 | 0,278 | 0,668  |
| 4 | O14745 NHERF_HUMAN  | E.AALES#PRPALVR.S               | S280:      | 2 | 1,563  | 0,157 | -0,269 |
| 4 | P27816 MAP4_HUMAN   | E.VGLLKDMSPLS#E.T               | S510:      | 2 | 1,5544 | 0,179 | -0,535 |
| 4 | P35580 MYH10_HUMAN  | E.CSSQLAEIII.K                  |            | 2 | 1,5463 | 0,221 | -0,206 |
| 4 | Q86SQ0 PHLB2_HUMAN  | E.SSYLSILPKT#PEGISEE.Q          | T574:      | 2 | 1,5451 | 0,133 | -0,126 |
| 4 | Q05682 CALD1_HUMAN  | E.VNAQNSVPDEE.A                 |            | 2 | 1,541  | 0,164 | -0,406 |
| 4 | Q9BQK8 LPIN3_HUMAN  | E.LTSPKS#DSELE.V                | S224:      | 2 | 1,517  | 0,093 | -0,474 |
| 4 | Q8N1G0 ZN687_HUMAN  | E.NGPGM*QPPVSS#PPLGALKQE.S      | S215:      | 2 | 1,5014 | 0,132 | -0,465 |
| 4 | Q9Y5B0 CTDP1_HUMAN  | E.NS#PAAFPDRE.G                 | S740:      | 2 | 1,486  | 0,157 | -0,515 |
| 4 | P05783 K1C18_HUMAN  | R.STFSTNYR.S                    |            | 2 | 1,4785 | 0,161 | 0,125  |
| 4 | Q08050 FOXM1_HUMAN  | E.TLPIS#STPSKS#VLPRTPE.S        | S609:S615: | 2 | 1,4766 | 0,163 | -0,472 |
| 4 | P49815 TSC2_HUMAN   | D.LSFQPSQPLSK.S                 |            | 2 | 1,4278 | 0,081 | -0,198 |
| 4 | Q96C86 DCPS_HUMAN   | E.QVAQLLTGSPE.L                 |            | 2 | 1,4055 | 0,13  | -0,427 |
| 4 | Q8WUQ7 CS029_HUMAN  | E.SEPLFPILK.Q                   |            | 2 | 1,3815 | 0,181 | -0,117 |
| 4 | Q96G03 PGM2_HUMAN   | E.LCAPPGNSDPE.Q                 |            | 2 | 1,376  | 0,218 | -0,105 |
| 4 | O15027 SC16A_HUMAN  | E.ARS#PDPGIVPQEAPVGNLSLSE.L     | S1844:     | 2 | 1,3469 | 0,168 | -0,333 |
| 4 | P13010 KU86_HUMAN   | E.GSVTSVGSVNPAAE.N              |            | 2 | 1,3331 | 0,1   | -0,101 |
| 5 | O95817 BAG3_HUMAN   | E.VKVPPAPVPCPPPS#PGPSAVPS#SPK.S | S377:S385: | 3 | 5,6254 | 0,37  | -0,14  |
| 5 | Q9P287 BCCIP_HUMAN  | E.LTDLLIQNHIGSVIK.Q             |            | 2 | 5,5597 | 0,443 | -0,34  |
| 5 | Q96T23 RSF1_HUMAN   | E.SEKPGS#PEAAETS#PPSNIIDHCE.K   | S612:S619: | 3 | 5,4631 | 0,351 | -0,35  |
| 5 | Q9Y3X0 CCDC9_HUMAN  | E.LNS#PRTTHLGALS#PGE.A          | S510:S521: | 2 | 5,4359 | 0,475 | -0,454 |
| 5 | P35527 K1C9_HUMAN   | R.GGSGGSYGGGGSGGGYGGGSGSR.G     |            | 2 | 5,368  | 0,423 | -0,272 |

|   |                    |                                      |                 |   |        |       |        |
|---|--------------------|--------------------------------------|-----------------|---|--------|-------|--------|
| 5 | Q15464 SHB_HUMAN   | E.GQSVDS#DSESTVS#PR.L                | S310:S317:      | 2 | 5,314  | 1     | -0,713 |
| 5 | Q9ULU4 PKCB1_HUMAN | E.TLNKS#SQGSSSTQSAPSE.T              | S1085:          | 2 | 5,2799 | 0,562 | -0,497 |
| 5 | P05556 ITB1_HUMAN  | E.CSTDEVNSEDMDAYCR.K                 |                 | 2 | 5,2787 | 0,616 | -0,375 |
| 5 | Q6PKG0 LARP1_HUMAN | E.TES#APGS#PRAVT#PVPTKTEE.V          | S517:S521:T526: | 3 | 5,2299 | 0,447 | -0,319 |
| 5 | Q9UNZ2 NSF1C_HUMAN | K.LGSTAPQVLSTSS#PAQQAENE.A           | S272:           | 3 | 5,2201 | 0,216 | 0      |
| 5 | Q92734 TFG_HUMAN   | K.NVM*SAFGLTDDQVSGPPSAPAEDR.S        |                 | 3 | 5,1315 | 0,482 | -0,369 |
| 5 | Q13506 NAB1_HUMAN  | E.SEHSL#PADLGSPAS#PKESSE.A           | S174:S183:      | 3 | 5,119  | 1     | -0,161 |
| 5 | Q9H6Z4 RANB3_HUMAN | E.NAAAESGSESSQEAT#PEKE.S             | T363:           | 3 | 5,0734 | 0,353 | -0,438 |
| 5 | Q13263 TIF1B_HUMAN | E.TKPVLM*ALAEGPGAEGPR.L              |                 | 3 | 5,0706 | 0,335 | 0,101  |
| 5 | P05556 ITB1_HUMAN  | E.CSTDEVNSEDM*DAYCR.K                |                 | 2 | 5,0497 | 0,567 | -0,062 |
| 5 | Q9NV56 MRGBP_HUMAN | E.VGGGGAAGDKGPGEAATS#PAEE.T          | S23:            | 2 | 5,0293 | 0,449 | -0,621 |
| 5 | Q9NUL3 STAU2_HUMAN | E.AIGLKGSSPT#PPCS#PVQPSKQLE.Y        | T488:S492:      | 3 | 5,0213 | 0,393 | -0,216 |
| 5 | Q86V48 LUZP1_HUMAN | E.STNSNAYTQRSS#TDFSE.L               | S957:           | 2 | 4,9905 | 0,524 | -0,309 |
| 5 | Q15365 PCBP1_HUMAN | R.VMTIPYQPM*PASSPVICAGGQDR.C         |                 | 3 | 4,9895 | 0,395 | -0,441 |
| 5 | Q8N108 MIER1_HUMAN | E.SAASSRAPSP#PPTASNSNSQSE.K          | S401:           | 3 | 4,9806 | 0,408 | -0,478 |
| 5 | Q9HD15 SRA1_HUMAN  | K.APRS#PPVGS GPASGVEPTSFPVESE.A      | S87:            | 3 | 4,9779 | 0,499 | 0,291  |
| 5 | Q76L83 ASXL2_HUMAN | E.TNM*KEPLATLVDQS#PE.S               | S562:           | 2 | 4,9387 | 0,376 | -0,392 |
| 5 | Q2TAL8 QRIC1_HUMAN | D.SAHLYSATGTITS#PTGE.T               | S303:           | 2 | 4,8799 | 0,482 | -0,344 |
| 5 | Q13263 TIF1B_HUMAN | E.TKPVLM*ALAEGPGAEGPR.L              |                 | 2 | 4,8421 | 0,408 | -0,27  |
| 5 | Q13263 TIF1B_HUMAN | E.TKPVLMALAEGPGAEGPR.L               |                 | 3 | 4,83   | 0,238 | -0,102 |
| 5 | Q08J23 NSUN2_HUMAN | R.AGEPNS#PDAEEANS#PDVTAGCDPAGVHPPR.- | S743:S751:      | 3 | 4,7868 | 0,54  | -0,231 |
| 5 | Q9H118 ASCC2_HUMAN | E.AVSQASSHPENS#EEEE.C                | S447:           | 2 | 4,7773 | 0,522 | -0,539 |
| 5 | O95817 BAG3_HUMAN  | E.VKVPPAPVPCPPPS#PGPSAVPSS#PK.S      | S377:S386:      | 3 | 4,754  | 0,312 | -0,702 |
| 5 | Q8NHV4 NEDD1_HUMAN | E.SGNLNTSPSSNQTRNS#E.K               | S525:           | 2 | 4,7282 | 0,512 | -0,586 |
| 5 | Q5JSH3 WDR44_HUMAN | E.TENTAYKVGNES#PVQE.L                | S50:            | 2 | 4,6892 | 0,556 | -0,595 |
| 5 | Q8NBU5 ATAD1_HUMAN | E.YVNSTSEES#HDEDE.I                  | S322:           | 2 | 4,6729 | 0,481 | -0,567 |
| 5 | P98171 RHG04_HUMAN | E.KQVVGAGLQTAGESGSS#PEGLLASE.L       | S824:           | 3 | 4,6721 | 0,451 | -0,671 |
| 5 | Q7LG56 RIR2B_HUMAN | E.AAGLDQDERSSS#DTNE.S                | S20:            | 2 | 4,6705 | 0,502 | -0,894 |
| 5 | Q6PJG2 CN043_HUMAN | E.LASLQNAKDGS#GSEE.K                 | S486:           | 2 | 4,6582 | 0,496 | -0,615 |
| 5 | P22681 CBL_HUMAN   | E.GNLAAAHANTGPEES#ENE.D              | S767:           | 2 | 4,6519 | 0,552 | -0,581 |
| 5 | P41227 ARD1A_HUMAN | E.TTESTDVKDSSEAS#DSAS.-              | S231:           | 2 | 4,6293 | 0,492 | -0,836 |
| 5 | Q5JSH3 WDR44_HUMAN | E.NTAYKVGNES#PVQE.L                  | S50:            | 2 | 4,6111 | 0,465 | -0,529 |
| 5 | P12270 TPR_HUMAN   | E.AM*QSEGPVEHVVPVFGSTSGSVR.S         |                 | 3 | 4,6109 | 0,367 | -0,483 |

|   |                     |                                |              |   |        |       |        |
|---|---------------------|--------------------------------|--------------|---|--------|-------|--------|
| 5 | Q9P266 K1462_HUMAN  | E.HSDVDGVVTSTDPVPEPEPS#PLE.S   | S1194:       | 3 | 4,5937 | 0,422 | -0,295 |
| 5 | Q8WYP5 AHTF1_HUMAN  | E.AQDSGEEARNLS#FNE.L           | S1550:       | 2 | 4,586  | 0,441 | -0,349 |
| 5 | Q641Q2 FA21A_HUMAN  | E.KAVAS#PEATVSQTDE.N           | S498:        | 2 | 4,5806 | 0,592 | -0,303 |
| 5 | O95232 CROP_HUMAN   | E.VNGTSEDIKSEGDTQS#N.-         | S431:        | 2 | 4,5766 | 0,564 | -0,525 |
| 5 | Q9NXL9 MCM9_HUMAN   | E.INYSTHIFSPGGS#PE.G           | S707:        | 2 | 4,5686 | 0,289 | -0,579 |
| 5 | Q14694 UBP10_HUMAN  | E.TKY#SPPAIS#PLVSEK.Q          | Y364:S370:   | 3 | 4,5555 | 0,181 | -0,412 |
| 5 | Q9POU4 CXXC1_HUMAN  | E.SYKYFPSSLS#PVTPSE.S          | S224:        | 2 | 4,5549 | 0,526 | -0,588 |
| 5 | Q92797 SYMPK_HUMAN  | E.DAM*KT#PS#PAAEDAREPE.A       | T1257:S1259: | 2 | 4,5522 | 0,469 | -0,368 |
| 5 | Q15648 MED1_HUMAN   | R.GSPSHS#KS#PAYTPQNLDSESE.S    | S1451:S1453: | 3 | 4,5274 | 1     | 0      |
| 5 | Q9UPN4 AZI1_HUMAN   | E.M*EKS#GQDQLDSQQE.G           | S542:        | 2 | 4,5082 | 0,397 | -0,355 |
| 5 | O60763 USO1_HUMAN   | E.NSTRQS#EDLGSQFTE.I           | S106:        | 2 | 4,4695 | 0,429 | -0,412 |
| 5 | Q9Y3S1 WVK2_HUMAN   | E.SYGGSDVTSGKELS#DSCE.G        | S1150:       | 2 | 4,4548 | 0,537 | -0,374 |
| 5 | Q15365 PCBP1_HUMAN  | R.VMTIPYQMPASSPVICAGGQDR.C     |              | 3 | 4,4503 | 0,368 | -0,37  |
| 5 | Q9Y2F5 K0947_HUMAN  | E.RSCSS#PAVSAVSQLPLS#PKETVE.S  | S1891:S1903: | 3 | 4,434  | 0,236 | -0,353 |
| 5 | Q8WXI9 P66B_HUMAN   | R.GRLTPS#PDIIVLSDNE.A          | S122:        | 2 | 4,4324 | 0,422 | -0,743 |
| 5 | Q96GX5 MASTL_HUMAN  | E.NIVNSFTDKQQT#PE.K            | T519:        | 2 | 4,4323 | 0,466 | -0,502 |
| 5 | Q02952 AKA12_HUMAN  | K.GALNGQGALNS#QEEEE.V          | S96:         | 2 | 4,4141 | 0,459 | -0,424 |
| 5 | Q02952 AKA12_HUMAN  | E.TCVSGEDPTQGADLS#PDEK.V       | S483:        | 2 | 4,4048 | 0,546 | -0,234 |
| 5 | Q86V81 THOC4_HUMAN  | E.LDAQLDAYNARM*DT#S.-          | T256:        | 2 | 4,4034 | 0,459 | -0,274 |
| 5 | Q9H832 UBE2Z_HUMAN  | E.NAEM*DS#DSSSSGT#ETDLHGSLRV.- | S337:T344:   | 3 | 4,4027 | 1     | -0,356 |
| 5 | Q13283 G3BP1_HUMAN  | E.DAQKSSS#PAPADIAQTVQE.D       | S232:        | 2 | 4,4006 | 0,578 | -0,543 |
| 5 | Q14498 RBM39_HUMAN  | E.RTDASS#ASSFLDSDELE.R         | S334:        | 2 | 4,3911 | 0,454 | -0,575 |
| 5 | O60271 JIP4_HUMAN   | E.SGQVDKAS#LCGSM*TSNSSAE.T     | S822:        | 2 | 4,3832 | 0,54  | -0,347 |
| 5 | Q9H7N4 SFR19_HUMAN  | R.APEGDDFLSLHAES#DGE.G         | S453:        | 2 | 4,3782 | 0,527 | -0,522 |
| 5 | Q8NHV4 NEDD1_HUMAN  | E.SGNLNTS#PSSNQTR.N            | S516:        | 2 | 4,3778 | 0,459 | -0,554 |
| 5 | P55884 EIF3B_HUMAN  | E.GLLRPAGPGAPEAAGTEAS#SEE.V    | S51:         | 2 | 4,3729 | 0,593 | -0,341 |
| 5 | Q96CW6 S7A6O_HUMAN  | E.FGYDSPHLDLS#D.-              | S308:        | 2 | 4,3497 | 0,464 | -0,337 |
| 5 | Q9UJK0 CP042_HUMAN  | E.FLANAKES#PQEEE.I             | S228:        | 2 | 4,3463 | 0,457 | -0,31  |
| 5 | P08729 K2C7_HUMAN   | E.LQSQISDTSVVLISM*DNSR.S       |              | 3 | 4,3194 | 0,366 | 0      |
| 5 | Q9H8Y8 GORS2_HUMAN  | D.STPVSEKPVSAAVDANAS#ESP.-     | S449:        | 2 | 4,3061 | 0,407 | 0,92   |
| 5 | Q96T58 MINT_HUMAN   | E.SGVVAVS#PEKSES#PQKE.D        | S2120:S2126: | 2 | 4,3035 | 0,421 | -0,636 |
| 5 | Q14694 UBP10_HUMAN  | E.TKY#SPPAIS#PLVSEKQVE.V       | Y364:S370:   | 3 | 4,2997 | 0,358 | -0,343 |
| 5 | Q9H4N4 Q9H4N4_HUMAN | E.TRLS#FSDTYQDYE.E             | S47:         | 2 | 4,288  | 0,455 | -0,358 |

|   |                    |                                |            |   |        |       |        |
|---|--------------------|--------------------------------|------------|---|--------|-------|--------|
| 5 | O15446 RPA34_HUMAN | E.M*KPLES#PGGTM*APQQPE.G       | S359:      | 2 | 4,2874 | 0,283 | -0,703 |
| 5 | Q9NQX3 GEPH_HUMAN  | E.LEDLPS#PPPPLS#PPPTTSPHKQTE.D | S188:S194: | 3 | 4,2862 | 0,37  | -0,403 |
| 5 | Q9UHB6 LIMA1_HUMAN | R.KIS#ENSYSLDDLE.I             | S225:      | 2 | 4,2722 | 0,432 | -0,306 |
| 5 | P39880 CUX1_HUMAN  | E.IQAGSQGQAGASDS#PSAR.S        | S1321:     | 2 | 4,2622 | 0,453 | -0,621 |
| 5 | Q8TEA8 DTD1_HUMAN  | E.DRSASS#GAEGDVSSE.R           | S197:      | 2 | 4,2471 | 0,541 | -0,557 |
| 5 | Q13625 ASPP2_HUMAN | E.NIYSNSQKGKPGS#PEPE.T         | S673:      | 2 | 4,2399 | 0,528 | -0,821 |
| 5 | P13645 K1C10_HUMAN | K.GSLGGGFSSGGFSGGSFSR.G        |            | 2 | 4,228  | 0,559 | -0,429 |
| 5 | P48681 NEST_HUMAN  | E.NQEPLRS#PEVGDEE.A            | S680:      | 2 | 4,1973 | 0,583 | -0,654 |
| 5 | Q86UP2 KTN1_HUMAN  | E.IQNGNLHES#DSE.S              | S75:       | 2 | 4,1965 | 0,484 | -0,429 |
| 5 | Q92917 GPKOW_HUMAN | E.NAGVDPTLAIPM*IQK.G           |            | 2 | 4,1813 | 0,429 | -0,462 |
| 5 | Q9UHR4 BI2L1_HUMAN | E.IKTPASTPVSGTPQAS#PM*IE.R     | S261:      | 3 | 4,1776 | 0,396 | 0,087  |
| 5 | Q14493 SLBP_HUMAN  | E.ACLTEPLRDFSAM*S#.-           | S270:      | 2 | 4,1773 | 0,576 | -0,576 |
| 5 | Q15365 PCBP1_HUMAN | R.VM*TIPYQPM*PASSPVICAGGQDR.C  |            | 3 | 4,1488 | 0,252 | -0,292 |
| 5 | Q5UIP0 RIF1_HUMAN  | E.SKENT#PPVVISADQMVNE.D        | T1388:     | 3 | 4,1413 | 0,308 | -0,269 |
| 5 | O75420 PERQ1_HUMAN | E.AEKLVASLQDSS#LEEE.Q          | S443:      | 2 | 4,1372 | 0,44  | -0,2   |
| 5 | Q96B54 ZN428_HUMAN | E.GTYHCTECEDS#FDNLGE.L         | S169:      | 2 | 4,1198 | 0,517 | -0,346 |
| 5 | P32004 L1CAM_HUMAN | E.KEAAGGNDSS#GATSPINPAVALE.-   | S1244:     | 3 | 4,118  | 0,276 | -0,409 |
| 5 | Q04637 IF4G1_HUMAN | E.IHEPNGM*VPSLEPEVESS#PE.L     | S377:      | 3 | 4,113  | 0,378 | -0,291 |
| 5 | Q8TDY2 RBCC1_HUMAN | E.QTIHQVSLDLSLAES#PE.S         | S727:      | 2 | 4,1111 | 0,482 | -0,118 |
| 5 | Q13263 TIF1B_HUMAN | E.TKPVLMALAEGPGAEGPR.L         |            | 2 | 4,095  | 0,452 | -0,476 |
| 5 | Q969K3 RNF34_HUMAN | R.VRAS#LSDLSSLDDVE.G           | S254:      | 2 | 4,0893 | 0,513 | -0,579 |
| 5 | Q00537 PCTK2_HUMAN | E.NLKM*GS#DGESDQASGTSSDE.V     | S105:      | 3 | 4,0879 | 0,431 | -0,52  |
| 5 | P10155 RO60_HUMAN  | E.KQIANS#QDGYVWQVTD.M          | S19:       | 2 | 4,0857 | 0,489 | -0,442 |
| 5 | Q8IZH2 XRN1_HUMAN  | E.AQSSQATPVQTSQPSSNIVKVS#PR.E  | S1645:     | 3 | 4,0654 | 0,315 | 0,136  |
| 5 | O00512 BCL9_HUMAN  | R.AVT#PVSQGSNSSADPK.A          | T315:      | 2 | 4,0621 | 0,488 | -0,57  |
| 5 | Q9NQX3 GEPH_HUMAN  | E.LEDLPS#PPPPLS#PPPTTSPHK.Q    | S188:S194: | 3 | 4,0614 | 0,312 | 0      |
| 5 | O43293 DAPK3_HUMAN | E.YTIKS#HS#SLPPNNSYADFE.R      | S309:S311: | 3 | 4,0594 | 1     | -0,236 |
| 5 | P08758 ANXA5_HUMAN | R.GTVTDFPGFDERADAE.T           |            | 2 | 4,0491 | 0,56  | -0,707 |
| 5 | Q96S66 CLCC1_HUMAN | E.SSQSAKPVSGQDTSNGNTEGS#PAAE.K | S509:      | 3 | 4,0458 | 0,457 | -0,231 |
| 5 | O75531 BAF_HUMAN   | R.DFVAEPM*GEKPVGSLAGIGE.V      |            | 2 | 4,0398 | 0,576 | -0,665 |
| 5 | Q9UJA5 TRM6_HUMAN  | E.SNGTLEEKQAS#EQENE.D          | S298:      | 2 | 4,0364 | 0,376 | -0,782 |
| 5 | Q9ULD5 ZN777_HUMAN | E.NQRSS#PLSFPSVPQEE.T          | S7:        | 2 | 4,0225 | 0,401 | -0,648 |
| 5 | Q03468 ERCC6_HUMAN | E.M*AIKQES#GGDGEVEE.Y          | S35:       | 2 | 3,9704 | 0,52  | -0,437 |

|   |                    |                                       |                 |   |        |       |        |
|---|--------------------|---------------------------------------|-----------------|---|--------|-------|--------|
| 5 | Q13501 SQSTM_HUMAN | E.SSSTEEKSS#QPSS#CCSDPSKPGGNVE.G      | S284:S288:      | 3 | 3,9674 | 1     | -0,369 |
| 5 | Q9BXJ9 NARG1_HUMAN | E.DM*KITVNGDS#SAE.A                   | S855:           | 2 | 3,9477 | 0,442 | -0,334 |
| 5 | O95817 BAG3_HUMAN  | E.VKVPPAPVPCPPPS#PGPSAVPSS#PKSVATEE.R | S377:S386:      | 3 | 3,9459 | 0,393 | -0,341 |
| 5 | Q92945 FUBP2_HUMAN | D.SGCKVQIS#PDSGGLPE.R                 | S181:           | 2 | 3,9277 | 0,396 | -0,143 |
| 5 | Q9H0F6 SHRPN_HUMAN | E.GQNGSKSNS#PPALGPE.A                 | S131:           | 2 | 3,9234 | 0,466 | -0,377 |
| 5 | Q92615 LARP5_HUMAN | E.KFTSSQTQS#PT#PPKPPS#PSFE.L          | S516:T518:S524: | 3 | 3,9186 | 1     | -0,073 |
| 5 | Q9BVI0 PHF20_HUMAN | E.NTM*KTEPTS#PLVE.L                   | S415:           | 2 | 3,9144 | 0,441 | -0,237 |
| 5 | P31749 AKT1_HUMAN  | E.M*DFRSGS#PSDNSGAE.E.M               | S124:           | 2 | 3,9137 | 0,384 | -0,479 |
| 5 | Q5QJE6 TDIF2_HUMAN | E.NSGQRES#LSGDTGSLSCD.N               | S474:           | 2 | 3,9087 | 0,2   | -0,125 |
| 5 | Q15643 TRIPB_HUMAN | E.LNQS#ISEKE.T                        | S486:           | 2 | 3,8965 | 0,299 | -0,433 |
| 5 | Q5VZK9 LR16A_HUMAN | E.IKTPDS#FEESQGEE.I                   | S1131:          | 2 | 3,8955 | 0,437 | -0,946 |
| 5 | Q14980 NUMA1_HUMAN | E.SRPSLS#LGTITDEE.M                   | S1947:          | 2 | 3,8898 | 0,379 | -0,154 |
| 5 | Q76L83 ASXL2_HUMAN | E.TNMKEPLATLVDQS#PE.S                 | S562:           | 2 | 3,8844 | 0,466 | -0,395 |
| 5 | Q96GX5 MASTL_HUMAN | E.NIVNSFTDKQT#PE.K                    | T519:           | 3 | 3,8762 | 0,36  | -0,108 |
| 5 | Q5JSH3 WDR44_HUMAN | E.TTKLTQTSS#TEQLNVLE.T                | S162:           | 2 | 3,8739 | 0,357 | -0,495 |
| 5 | O15234 CASC3_HUMAN | E.QTS#VRDPSPEADAPVLGS#PEKE.E          | S358:S373:      | 3 | 3,8712 | 0,269 | -0,296 |
| 5 | Q9H6Z4 RANB3_HUMAN | E.NAAAESGSESSQEAT#PEKE.S              | T363:           | 2 | 3,8636 | 0,525 | -0,584 |
| 5 | P46821 MAP1B_HUMAN | R.TTKSPS#DSGYSYE.T                    | S1917:          | 2 | 3,8588 | 0,469 | -0,406 |
| 5 | Q14160 LAP4_HUMAN  | E.LRSLEPS#PGPQEEDGE.V                 | S1581:          | 2 | 3,8517 | 0,385 | 0,487  |
| 5 | P27816 MAP4_HUMAN  | E.M*ALGKDVT#PPPETE.V                  | T521:           | 2 | 3,8506 | 0,507 | -0,309 |
| 5 | P49368 TCPG_HUMAN  | E.KIPGGIIEDSCVLR.G                    |                 | 3 | 3,8468 | 0,335 | -0,117 |
| 5 | Q6ZN16 M3K15_HUMAN | E.HGSVS#PDSDAQPDALFE.R                | S952:           | 2 | 3,8441 | 0,375 | -0,527 |
| 5 | Q92917 GPKOW_HUMAN | E.LHYDAICQYMGPS#DTDDD.-               | S471:           | 3 | 3,8401 | 0,351 | -0,333 |
| 5 | Q9Y3B9 RRP15_HUMAN | E.SDGPDDSRPESASDS#DT.-                | S280:           | 2 | 3,8356 | 0,468 | -0,47  |
| 5 | Q5SYE7 NHSL1_HUMAN | R.GGPVSR#PGAPSAGEAE.A                 | S1167:          | 2 | 3,8341 | 0,454 | -0,684 |
| 5 | Q02952 AKA12_HUMAN | E.AAPDTTADPAIAASDPATK.L               |                 | 2 | 3,8219 | 0,396 | -0,41  |
| 5 | P49790 NU153_HUMAN | E.ITTSS#PSPINSSQALTNK.V               | S498:           | 2 | 3,8152 | 0,506 | -0,19  |
| 5 | P11137 MAP2_HUMAN  | E.FQTGKESQPS#PPAQE.A                  | S629:           | 2 | 3,8146 | 0,386 | -0,428 |
| 5 | P15880 RS2_HUMAN   | K.SPYQEFTDHLVK.T                      |                 | 3 | 3,8127 | 0,314 | -0,187 |
| 5 | Q12923 PTN13_HUMAN | E.HVPVT#PQCTLSQNAQGGQPE.K             | T1464:          | 3 | 3,8123 | 0,302 | 0,312  |
| 5 | Q12830 BPTF_HUMAN  | E.GCQSDSM*RQEQS#PNANNDQPE.D           | S1112:          | 3 | 3,8065 | 0,378 | -0,441 |
| 5 | P27816 MAP4_HUMAN  | E.MALGKDVT#PPPETE.V                   | T521:           | 2 | 3,8057 | 0,441 | -0,078 |
| 5 | Q13263 TIF1B_HUMAN | R.VCQKPGDLVM*CNQCE.F                  |                 | 2 | 3,7996 | 0,384 | -0,592 |



|   |                    |                               |            |   |        |       |        |
|---|--------------------|-------------------------------|------------|---|--------|-------|--------|
| 5 | P05362 ICAM1_HUMAN | E.AQVHLALGDQR.L               |            | 3 | 3,7972 | 0,351 | 0,303  |
| 5 | Q03188 CENPC_HUMAN | E.ISRCS#LSEPLESDE.A           | S613:      | 2 | 3,7921 | 0,496 | -0,215 |
| 5 | Q93008 USP9X_HUMAN | E.GSEEV#PPQTKDQ.-             | S2540:     | 2 | 3,7873 | 0,325 | -0,329 |
| 5 | Q13283 G3BP1_HUMAN | K.SSS#PAPADIAQTVQE.D          | S232:      | 2 | 3,7858 | 0,363 | -0,309 |
| 5 | Q8WVB6 CTF18_HUMAN | E.LEGAS#TPS#PSGVPLFTAGRPPR.T  | S33:S36:   | 3 | 3,7847 | 0,289 | -0,466 |
| 5 | Q86V81 THOC4_HUMAN | E.LDAQLDAYNAR.M               |            | 2 | 3,7814 | 0,427 | -0,195 |
| 5 | P07900 HS90A_HUMAN | E.SEDKPEIEDVGS#D.E            | S263:      | 2 | 3,7798 | 0,382 | -0,407 |
| 5 | Q9P2B7 K1430_HUMAN | E.VDHSFFDS#DFEE.G             | S19:       | 2 | 3,7777 | 0,371 | -0,471 |
| 5 | Q9UHR4 BI2L1_HUMAN | E.IKTPASTPVSGTPQAS#PM*IE.R    | S261:      | 2 | 3,7699 | 0,443 | -0,463 |
| 5 | Q5T7W0 ZN618_HUMAN | E.NNIASNQRS#PPAVVEE.K         | S429:      | 2 | 3,7603 | 0,436 | -0,387 |
| 5 | Q6PKG0 LARP1_HUMAN | E.TES#APGS#PRAVTPVPTKTEE.V    | S517:S521: | 3 | 3,7575 | 0,197 | -0,331 |
| 5 | Q92878 RAD50_HUMAN | E.DKLFDVCGS#QDFE.S            | S635:      | 2 | 3,7536 | 0,294 | -0,67  |
| 5 | O75582 KS6A5_HUMAN | E.TERAYS#FCGTIE.Y             | S212:      | 2 | 3,751  | 0,321 | -0,161 |
| 5 | Q9BQY9 DBND2_HUMAN | E.SQRPPIGSIS#SM*EVNVDTL.E.Q   | S153:      | 3 | 3,739  | 0,268 | -0,243 |
| 5 | Q9COC2 TB182_HUMAN | E.AQDLCRAS#PEPPGPE.S          | S672:      | 2 | 3,7389 | 0,451 | -0,644 |
| 5 | Q8WVM7 STAG1_HUMAN | E.TTAHSDAGS#ELEETE.V          | S24:       | 2 | 3,7376 | 0,321 | -0,515 |
| 5 | O15446 RPA34_HUMAN | E.M*KPLES#PGGTMAPQQPE.G       | S359:      | 2 | 3,7268 | 0,304 | -0,387 |
| 5 | Q8NFD5 ARI1B_HUMAN | E.SSSH PALSQS#PM*PQE.R        | S771:      | 2 | 3,7124 | 0,455 | -0,436 |
| 5 | Q14676 MDC1_HUMAN  | E.RS#QASTTV DINTQVE.K         | S513:      | 2 | 3,7042 | 0,456 | -0,141 |
| 5 | Q9P2B7 K1430_HUMAN | E.GEVDHSFFDS#DFEE.G           | S19:       | 2 | 3,7038 | 0,333 | -0,421 |
| 5 | Q92878 RAD50_HUMAN | E.DKLFDVCGS#QDFESD.L          | S635:      | 2 | 3,6902 | 0,503 | -0,464 |
| 5 | Q8IZT6 ASPM_HUMAN  | E.NKIPIS#PISPAFNE.C           | S222:      | 2 | 3,6869 | 0,398 | -0,456 |
| 5 | Q12802 AKP13_HUMAN | E.KELVPDQAVISDSTFSLANS#PGSE.S | S790:      | 3 | 3,6742 | 0,389 | -0,213 |
| 5 | Q07666 KHDR1_HUMAN | E.YDYGHGEVQDS#YE.A            | S407:      | 2 | 3,6721 | 0,48  | -0,338 |
| 5 | Q02952 AKA12_HUMAN | E.QSHAEIS#PPAESGQAVEE.C       | S253:      | 2 | 3,672  | 0,449 | -0,502 |
| 5 | Q8TCN5 ZN507_HUMAN | E.NEKL#PTSNTSYSLE.K           | S780:      | 2 | 3,6684 | 0,406 | -0,418 |
| 5 | Q9NPI6 DCP1A_HUMAN | R.KASSPS#PLTIGTPE.S           | S525:      | 2 | 3,6662 | 0,531 | -0,25  |
| 5 | O95208 EPN2_HUMAN  | E.LEQARPQT#SGEEE.L            | T273:      | 2 | 3,6661 | 0,377 | -0,55  |
| 5 | P04264 K2C1_HUMAN  | R.SLDLDSIIAEVK.A              |            | 2 | 3,6658 | 0,371 | -0,562 |
| 5 | Q6NZI2 PTRF_HUMAN  | R.RGS#S#PDVHALLE.I            | S365:S366: | 2 | 3,6571 | 0,499 | -0,254 |
| 5 | Q9NZD8 SPG21_HUMAN | E.VQKGS#LGISQEEQ.-            | S300:      | 2 | 3,6563 | 0,366 | -0,329 |
| 5 | Q9H6Z4 RANB3_HUMAN | E.RTSS#LTQFPQSQSEE.R          | S126:      | 2 | 3,6531 | 0,355 | -0,138 |
| 5 | Q00839 HNRPU_HUMAN | R.AKS#PQPPVEEDE.H             | S270:      | 2 | 3,6496 | 0,364 | -0,477 |

|   |                     |                                     |              |   |        |       |        |
|---|---------------------|-------------------------------------|--------------|---|--------|-------|--------|
| 5 | O43776 SYNC_HUMAN   | R.LM*TDTINEPILLCR.F                 |              | 2 | 3,6489 | 0,413 | -0,286 |
| 5 | P62699 YPEL5_HUMAN  | E.SEGFEEHVPS#DNS.-                  | S118:        | 2 | 3,6484 | 0,476 | -0,403 |
| 5 | P53396 ACLY_HUMAN   | R.TAS#FSEGRADE.V                    | S455:        | 2 | 3,6448 | 0,43  | -0,477 |
| 5 | Q96ST3 SIN3A_HUMAN  | R.YM*NSDTTS#PELRE.H                 | S1112:       | 2 | 3,6424 | 0,471 | -0,447 |
| 5 | Q9Y5U2 TSSC4_HUMAN  | E.LAHLAGPGS#PEAEE.W                 | S265:        | 2 | 3,6361 | 0,351 | -0,084 |
| 5 | O95232 CROP_HUMAN   | E.VNGTSEDIKS#E.G                    | S425:        | 2 | 3,6347 | 0,377 | -0,388 |
| 5 | Q8IWW6 RHG12_HUMAN  | R.AT#TPPNQGRPDS#PVYANLQE.L          | T230:S240:   | 3 | 3,6277 | 0,249 | -0,079 |
| 5 | Q2KHR3 QSER1_HUMAN  | E.SSTQRLS#DGEINAQE.S                | S586:        | 2 | 3,6162 | 0,364 | -0,498 |
| 5 | Q14676 MDC1_HUMAN   | E.AWPLHGDCET#DAEE.G                 | T579:        | 2 | 3,6157 | 0,289 | -0,285 |
| 5 | O14641 DVL2_HUMAN   | R.HLAGYES#SSTLM*TSELE.S             | S194:        | 2 | 3,6145 | 0,504 | -0,5   |
| 5 | B2RDY9 B2RDY9_HUMAN | E.SASRS#ALFAQINQGE.S                | S255:        | 2 | 3,6105 | 0,436 | -0,221 |
| 5 | P46100 ATRX_HUMAN   | E.SSNYDS#ELEKE.I                    | S819:        | 2 | 3,6093 | 0,269 | -0,177 |
| 5 | Q9BXJ9 NARG1_HUMAN  | E.DM*KITVNGDS#SAEAE.L               | S855:        | 2 | 3,6074 | 0,362 | -0,545 |
| 5 | Q8N3U4 STAG2_HUMAN  | E.SETHFSS#DTDFEDIE.G                | S23:         | 2 | 3,6019 | 0,275 | -0,597 |
| 5 | Q5H9R7 SAPS3_HUMAN  | E.FTSSLSTKDS#LRS#NSPVEM*E.T         | S735:S738:   | 3 | 3,6016 | 0,24  | -0,077 |
| 5 | Q0VGA0 Q0VGA0_HUMAN | E.GLRPAS#PLALTQE.Q                  | S388:        | 2 | 3,5987 | 0,394 | -0,341 |
| 5 | O94915 FRYL_HUMAN   | E.SGLPKNPSVVFSS#NEDLE.V             | S2385:       | 2 | 3,5959 | 0,368 | -0,732 |
| 5 | P21333 FLNA_HUMAN   | K.LQVEPAVDTSQVQCYGPGIE.G            |              | 3 | 3,5954 | 0,301 | -0,345 |
| 5 | Q9Y3X0 CCDC9_HUMAN  | E.TKEGAAS#PAPETPQPTSPE.T            | S376:        | 2 | 3,5927 | 0,461 | -0,432 |
| 5 | Q12888 TP53B_HUMAN  | D.SLSTNSSDLVAPS#PDAFR.S             | S366:        | 2 | 3,5839 | 0,382 | -0,377 |
| 5 | O95208 EPN2_HUMAN   | R.GSSQPNLSTSHS#EQE.Y                | S182:        | 2 | 3,577  | 0,356 | -0,512 |
| 5 | Q96MU7 YTDC1_HUMAN  | R.AKS#PT#PDGSEIRIGLE.V              | S146:T148:   | 2 | 3,575  | 0,294 | 0,426  |
| 5 | O14617 AP3D1_HUMAN  | R.ALDIDLKPLADSE.K                   |              | 2 | 3,5727 | 0,479 | -0,483 |
| 5 | P40855 PEX19_HUMAN  | K.NATDLQNSS#M*SEEE.L                | S147:        | 2 | 3,5712 | 0,478 | -0,591 |
| 5 | P78312 CD008_HUMAN  | E.SKADS#PPPSYPTQAE.Q                | S393:        | 2 | 3,571  | 0,43  | -0,342 |
| 5 | Q5T200 ZC3HD_HUMAN  | E.S#TSRDS#LALDKE.R                  | S1404:S1409: | 2 | 3,5667 | 0,351 | -0,494 |
| 5 | Q15424 SAFB1_HUMAN  | E.LAEAPT#EAPS#PEAR.D                | T340:S344:   | 2 | 3,5629 | 0,339 | -0,458 |
| 5 | Q9BYP7 WNK3_HUMAN   | E.ILTAGKQPS#DSE.F                   | S1424:       | 2 | 3,5542 | 0,384 | -0,691 |
| 5 | P35908 K22E_HUMAN   | R.NLDLDSIIAEVK.A                    |              | 2 | 3,5525 | 0,449 | -0,367 |
| 5 | P46821 MAP1B_HUMAN  | E.GTVSDKSAT#PVDE.G                  | T1532:       | 2 | 3,5516 | 0,401 | -0,528 |
| 5 | O94854 K0754_HUMAN  | E.VSEAGAS#NPS#LQEKKE.S              | S25:S28:     | 3 | 3,5464 | 0,18  | -0,399 |
| 5 | P18031 PTN1_HUMAN   | E.EKGS#PLNAAPYGIE.S                 | S352:        | 2 | 3,5447 | 0,401 | -0,24  |
| 5 | P19532 TFE3_HUMAN   | E.AAHTTGPTGS#APNS#PM*ALLTIGSSSEKE.I | S242:S246:   | 3 | 3,5432 | 1     | -0,127 |

|   |                    |                             |              |   |        |       |        |
|---|--------------------|-----------------------------|--------------|---|--------|-------|--------|
| 5 | O60502 NCOAT_HUMAN | E.S#KSPERM*SMQEDCISD.I      | S509:        | 2 | 3,5431 | 0,462 | -0,398 |
| 5 | Q8N3P4 VPS8_HUMAN  | E.LNKS#FNLE.A               | S26:         | 2 | 3,5426 | 0,105 | 0,234  |
| 5 | O75534 CSDE1_HUMAN | E.SKSPAAPGQS#PTGVCYE.R      | S123:        | 2 | 3,5416 | 0,406 | -0,385 |
| 5 | O60303 K0556_HUMAN | E.GRSS#PGPDTLVVLE.F         | S253:        | 2 | 3,54   | 0,382 | -0,324 |
| 5 | P24278 ZBT25_HUMAN | E.SVISQSHPS#PSSE.V          | S220:        | 2 | 3,5341 | 0,408 | -0,343 |
| 5 | Q13873 BMPR2_HUMAN | R.YM*APEVLEGAVNLR.D         |              | 2 | 3,5313 | 0,39  | -0,232 |
| 5 | Q99590 SFRIP_HUMAN | E.IIQTVDRQS#VKS#PE.V        | S311:S314:   | 2 | 3,5301 | 0,349 | -0,555 |
| 5 | P52948 NUP98_HUMAN | E.NGERFS#FLS#KPVDE.N        | S635:S638:   | 2 | 3,5283 | 0,318 | -0,41  |
| 5 | Q9H5H4 ZN768_HUMAN | E.GYLRGNM*S#ENEEEE.I        | S33:         | 2 | 3,5206 | 0,394 | -0,766 |
| 5 | Q8N108 MIER1_HUMAN | E.LLSLYGYGSTVR.L            |              | 2 | 3,5181 | 0,369 | -0,275 |
| 5 | Q9UKM9 RALY_HUMAN  | E.HS#QDTDADDGALQ.-          | S295:        | 2 | 3,5014 | 0,355 | -0,336 |
| 5 | O60716 CTND1_HUMAN | E.GAM*SVVS#VETS#DDGTTRRTE.T | S125:S129:   | 3 | 3,4998 | 0,244 | 0      |
| 5 | Q9UBC2 EP15R_HUMAN | D.GAHGAS#LTDLANLSE.G        | S575:        | 2 | 3,4978 | 0,381 | -0,874 |
| 5 | Q14493 SLBP_HUMAN  | E.ACLTEPLRDFSAMS#.-         | S270:        | 2 | 3,4935 | 0,472 | -0,582 |
| 5 | Q86SQ0 PHLB2_HUMAN | E.LEKLQLS#DEESVFE.E         | S489:        | 2 | 3,4932 | 0,422 | -0,489 |
| 5 | Q2KHR3 QSER1_HUMAN | E.TGGNS#PSDKVDNE.L          | S1211:       | 2 | 3,4932 | 0,336 | -0,261 |
| 5 | Q14694 UBP10_HUMAN | E.TKYS#PPAISPLVSE.K         | S365:        | 2 | 3,4926 | 0,437 | -0,467 |
| 5 | P21333 FLNA_HUMAN  | K.LQVEPAVDTSQVQYCGPGIE.G    |              | 2 | 3,4926 | 0,429 | -0,461 |
| 5 | P49757 NUMB_HUMAN  | E.GS#FRVTTATEQAE.R          | S194:        | 2 | 3,4874 | 0,385 | 0,248  |
| 5 | Q9UKV3 ACINU_HUMAN | E.ASS#PPHPQLHS#EEE.I        | S425:S434:   | 2 | 3,4866 | 0,462 | -0,88  |
| 5 | O43572 AKA10_HUMAN | E.SSSTLTVASRNS#PAS#PLKE.L   | S278:S281:   | 3 | 3,4858 | 0,244 | 0,087  |
| 5 | O75400 PR40A_HUMAN | R.FVKEPAFEDITLES#E.R        | S787:        | 2 | 3,4855 | 0,417 | -0,2   |
| 5 | Q14247 SRC8_HUMAN  | E.RLPSS#PVYEDAAS#FKAE.L     | S418:S426:   | 2 | 3,4814 | 0,409 | -0,12  |
| 5 | Q9P287 BCCIP_HUMAN | E.LTDLLIQQNHIGSVIK.Q        |              | 3 | 3,4801 | 0,348 | -0,204 |
| 5 | Q96EZ8 MCRS1_HUMAN | D.SSLM*ASGTASRS#EDEE.S      | S22:         | 2 | 3,4752 | 0,497 | -0,487 |
| 5 | P40855 PEX19_HUMAN | K.NATDLQNSS#MSEEE.L         | S147:        | 2 | 3,4745 | 0,364 | -0,373 |
| 5 | Q66K74 MAP1S_HUMAN | E.LPLAASSIPRPT#PS#PE.S      | T638:S640:   | 3 | 3,4734 | 0,357 | -0,375 |
| 5 | Q86UP2 KTN1_HUMAN  | E.IQNGNLHESDS#E.S           | S77:         | 2 | 3,4712 | 0,431 | -0,514 |
| 5 | Q96MU7 YTDC1_HUMAN | R.AKS#PT#PDGSEIRIGLE.V      | S146:T148:   | 3 | 3,4607 | 0,366 | 0      |
| 5 | Q96RL1 UIMC1_HUMAN | E.TGAFRVPS#PGM*EE.A         | S653:        | 2 | 3,4549 | 0,406 | -0,166 |
| 5 | O43765 SGTA_HUMAN  | R.S#QIRSRTPS#ASNDDQQE.-     | S297:S305:   | 3 | 3,4497 | 0,097 | -0,176 |
| 5 | Q9Y5B0 CTDP1_HUMAN | E.LAGAPEPQGSCAQGGR.V        |              | 2 | 3,4461 | 0,481 | -0,549 |
| 5 | Q14160 LAP4_HUMAN  | R.LRVQS#PEPPAPERALS#PAE.L   | S1475:S1486: | 3 | 3,446  | 0,242 | -0,332 |

|   |                     |                               |              |   |        |       |        |
|---|---------------------|-------------------------------|--------------|---|--------|-------|--------|
| 5 | Q09666 AHNK_HUMAN   | R.LKS#EDGVEGLGE.T             | S135:        | 2 | 3,4458 | 0,539 | 1,367  |
| 5 | Q14641 DVL2_HUMAN   | R.HLAGYES#SSTLM*TSE.L         | S194:        | 2 | 3,4433 | 0,54  | -0,428 |
| 5 | A8MVB1 A8MVB1_HUMAN | E.KLVSPPASAAASSPS#SSSPQPVSE.L | S39:         | 3 | 3,4403 | 0,31  | 0,449  |
| 5 | O00291 HIP1_HUMAN   | E.HISPVVVIPAEASS#PDSEPVLE.K   | S313:        | 3 | 3,4381 | 0,357 | -0,389 |
| 5 | Q14201 BTG3_HUMAN   | E.VKPSSVTAAAS#PVYQISE.L       | S169:        | 2 | 3,4276 | 0,408 | -0,446 |
| 5 | Q9P031 TAP26_HUMAN  | E.QVHQPLLEEQCS#IDEPLFE.D      | S129:        | 3 | 3,4249 | 0,234 | -0,23  |
| 5 | Q15424 SAFB1_HUMAN  | E.DKETINNLDT#SSSDFTILQE.I     | T194:        | 3 | 3,4212 | 0,19  | -0,467 |
| 5 | Q9Y6D5 BIG2_HUMAN   | E.NSQTNGIADDRQSLSS#ADNLE.S    | S349:        | 3 | 3,4202 | 0,236 | -0,158 |
| 5 | Q14966 ZN638_HUMAN  | E.AEKATCDS#DFAVE.T            | S1158:       | 2 | 3,4183 | 0,316 | -0,32  |
| 5 | Q08499 PDE4D_HUMAN  | E.ACVIDDRS#PDT.-              | S806:        | 2 | 3,417  | 0,381 | -0,275 |
| 5 | P49815 TSC2_HUMAN   | E.GGRPS#VDLSFQPSQPLSK.S       | S1371:       | 3 | 3,4154 | 0,171 | -0,185 |
| 5 | Q8TB45 DEPD6_HUMAN  | E.LLNEKS#PSSQE.T              | S235:        | 2 | 3,4142 | 0,323 | -0,372 |
| 5 | O95714 HERC2_HUMAN  | E.STHPSS#PGFEDCSSSE.A         | S2423:       | 2 | 3,4102 | 0,488 | -0,818 |
| 5 | Q03468 ERCC6_HUMAN  | E.MAIKQES#GGDGEVEE.Y          | S35:         | 2 | 3,4081 | 0,402 | -0,294 |
| 5 | Q99590 SFRIP_HUMAN  | E.GEIIQTVDRQS#VKS#PE.V        | S311:S314:   | 2 | 3,4065 | 0,158 | 0,69   |
| 5 | P42166 LAP2A_HUMAN  | E.SRS#STPLPTISSAE.N           | S158:        | 2 | 3,4053 | 0,401 | -0,381 |
| 5 | Q6NZI2 PTRF_HUMAN   | E.ESDAVLVDKSDS#D.-            | S389:        | 2 | 3,4036 | 0,347 | -0,334 |
| 5 | Q92576 PHF3_HUMAN   | E.NNLQDNQTSNSS#PCR.S          | S1614:       | 2 | 3,4001 | 0,478 | -0,538 |
| 5 | P51991 ROA3_HUMAN   | D.FGNYSQQQSNYGPM*K.G          |              | 2 | 3,3985 | 0,484 | -0,469 |
| 5 | Q9H7N4 SFR19_HUMAN  | K.AAPPPALT#PDSQTVDSS#CKTPE.V  | T989:S998:   | 3 | 3,3933 | 0,168 | 0,29   |
| 5 | Q7Z2Z1 CO042_HUMAN  | E.AEPLSKEESS#LGEE.S           | S1595:       | 2 | 3,39   | 0,328 | -0,385 |
| 5 | Q9UKV3 ACINU_HUMAN  | E.MKTTS#PLEEEE.R              | S365:        | 2 | 3,389  | 0,281 | -0,266 |
| 5 | Q7Z6E9 RBBP6_HUMAN  | E.GSSSTLVDYTS#STGGS#PVRKSEE.K | S1272:S1277: | 3 | 3,3875 | 1     | -0,341 |
| 5 | Q2NXK8 ERC6L_HUMAN  | E.LCTNS#SLGM*EKS#FATKNE.A     | S828:S835:   | 3 | 3,386  | 0,365 | 0,167  |
| 5 | Q14966 ZN638_HUMAN  | E.KATCDS#DFAVETLE.L           | S1158:       | 2 | 3,3827 | 0,383 | -0,293 |
| 5 | Q16643 DREB_HUMAN   | E.TQEPSPILDSEETR.A            |              | 2 | 3,3823 | 0,383 | -0,609 |
| 5 | P04792 HSPB1_HUMAN  | R.ALS#RQLS#SGVSE.I            | S78:S82:     | 2 | 3,3819 | 0,327 | -0,175 |
| 5 | P28347 TEAD1_HUMAN  | R.M*SDSADKPIDNDAE.G           |              | 2 | 3,3804 | 0,403 | -0,32  |
| 5 | Q08999 RBL2_HUMAN   | E.ICIAGS#PLT#PRRVTE.V         | S639:T642:   | 3 | 3,38   | 0,216 | -0,2   |
| 5 | P0C0S8 H2A1_HUMAN   | R.NDEELNKLK.G.V               |              | 2 | 3,3789 | 0,285 | 0      |
| 5 | O75821 EIF3G_HUMAN  | E.LLKGIPLATGDTS#PEPE.L        | S42:         | 2 | 3,3742 | 0,46  | -0,47  |
| 5 | Q92917 GPKOW_HUMAN  | E.NAGVDPTLAIPMIQK.G           |              | 2 | 3,3697 | 0,389 | -0,545 |
| 5 | O43379 WDR62_HUMAN  | E.VEAGPGDQQGDSYLR.V           |              | 3 | 3,3664 | 0,36  | -0,23  |

|   |                    |                                |              |   |        |       |        |
|---|--------------------|--------------------------------|--------------|---|--------|-------|--------|
| 5 | O75952 CABYR_HUMAN | K.TTT#PPSS#PPPTAVSPE.F         | T151:S155:   | 2 | 3,3638 | 1     | -0,212 |
| 5 | O75475 PSIP1_HUMAN | R.DFKPGDLIFAK.M                |              | 3 | 3,3574 | 0,221 | 0,219  |
| 5 | Q9UKV3 ACINU_HUMAN | E.M*KTTTS#PLEEEE.R             | S365:        | 2 | 3,3566 | 0,237 | -0,439 |
| 5 | Q8NBT0 WD51A_HUMAN | E.NQQLIM*QRAT#P.-              | T406:        | 2 | 3,3551 | 0,341 | -0,437 |
| 5 | P19174 PLCG1_HUMAN | E.NGDLS#PFSGTSLRE.R            | S1221:       | 2 | 3,3535 | 0,448 | -0,156 |
| 5 | Q9H4A3 WVK1_HUMAN  | E.LSEPSHLNGPSS#DPE.A           | S2012:       | 2 | 3,3528 | 0,326 | -0,519 |
| 5 | P55209 NP1L1_HUMAN | E.RLDGLVET#PTGYIE.S            | T62:         | 2 | 3,3498 | 0,395 | -0,52  |
| 5 | Q8N3U4 STAG2_HUMAN | E.THFSS#DTDFEDIE.G             | S23:         | 2 | 3,3492 | 0,311 | -0,526 |
| 5 | O15047 SET1A_HUMAN | E.RVAGS#PVTPLPEQE.A            | S1103:       | 2 | 3,3491 | 0,305 | -0,156 |
| 5 | P11388 TOP2A_HUMAN | E.ADDVKGSVPLSS#S#PPATHFPDETE.I | S1392:S1393: | 3 | 3,3474 | 0,243 | -0,415 |
| 5 | Q6Y7W6 PERQ2_HUMAN | E.GEECS#DSEGSNNEE.A            | S335:        | 2 | 3,3441 | 0,373 | -0,148 |
| 5 | P46821 MAP1B_HUMAN | R.SLM*S#S#PEDLTDFEE.L          | S831:S832:   | 2 | 3,344  | 0,453 | -0,513 |
| 5 | Q15149 PLEC1_HUMAN | E.VQYLTGGLIPTDTPGRVPLDE.A      |              | 3 | 3,3413 | 0,305 | -0,322 |
| 5 | O95208 EPN2_HUMAN  | E.LEQARPQTS#GEEE.L             | S274:        | 2 | 3,3387 | 0,389 | -0,471 |
| 5 | Q15067 ACOX1_HUMAN | E.LLTHILDGS#PE.K               | S26:         | 2 | 3,3335 | 0,355 | -0,574 |
| 5 | P49792 RBP2_HUMAN  | K.AVVS#PPKFVFGSE.S             | S2510:       | 2 | 3,3306 | 0,338 | -0,507 |
| 5 | Q14566 MCM6_HUMAN  | E.TNSRVS#GVDGYE.T              | S271:        | 2 | 3,3302 | 0,394 | -0,268 |
| 5 | Q00537 PCTK2_HUMAN | E.NLKM*GSDGES#DQASGTSSDE.V     | S109:        | 2 | 3,33   | 0,429 | -1,04  |
| 5 | Q5JSH3 WDR44_HUMAN | K.LTQTSS#TEQLNVLE.T            | S162:        | 2 | 3,3249 | 0,324 | -0,223 |
| 5 | Q8NI35 INADL_HUMAN | E.NM*STGYHLGS#PTAE.H           | S1782:       | 2 | 3,3229 | 0,421 | 0      |
| 5 | P49790 NU153_HUMAN | K.VQM*TS#PSSTGSPM*FK.F         | S516:        | 2 | 3,3218 | 0,321 | -0,216 |
| 5 | Q2NKX8 ERC6L_HUMAN | E.DSADNRQNFSSQS#LE.H           | S971:        | 2 | 3,3187 | 0,32  | -0,549 |
| 5 | O95684 FR1OP_HUMAN | E.GALDLSDVHS#PPKS#PE.G         | S156:S160:   | 2 | 3,3169 | 0,42  | -0,472 |
| 5 | O60502 NCOAT_HUMAN | E.SKS#PEM*SM*QEDCISD.I         | S511:        | 2 | 3,3139 | 0,394 | -0,723 |
| 5 | O75821 EIF3G_HUMAN | K.GIPLATGDT#PEPE.L             | S42:         | 2 | 3,3129 | 0,534 | 0,083  |
| 5 | Q96HN2 SAHH3_HUMAN | E.VELKDLS#PSEAE.S              | S23:         | 2 | 3,3086 | 0,253 | -0,262 |
| 5 | Q9BV73 CP250_HUMAN | E.GDNIAQSGHENS#LE.L            | S368:        | 2 | 3,307  | 0,363 | -0,683 |
| 5 | O95872 BAT4_HUMAN  | E.NRS#PTPSLQYCE.N              | S210:        | 2 | 3,3064 | 0,42  | 0,558  |
| 5 | Q8WXI9 P66B_HUMAN  | R.LTPS#PDIIVLSDNE.A            | S122:        | 2 | 3,3014 | 0,259 | -0,536 |
| 5 | Q9Y2X3 NOL5_HUMAN  | E.VDSLWKEFET#PE.K              | T34:         | 2 | 3,2961 | 0,217 | -0,391 |
| 5 | Q8IWT3 PARC_HUMAN  | E.LGAGDQSS#PCATRE.K            | S286:        | 2 | 3,2947 | 0,32  | -0,08  |
| 5 | Q9UQ35 SRRM2_HUMAN | E.LSNS#PLRE.N                  | S1320:       | 2 | 3,2933 | 0,138 | 0      |
| 5 | Q6UB99 ANR11_HUMAN | E.GVFSSLQAKPS#PS#PRAE.L        | S1892:S1894: | 2 | 3,2906 | 0,386 | -0,318 |

|   |                    |                               |              |   |        |       |        |
|---|--------------------|-------------------------------|--------------|---|--------|-------|--------|
| 5 | P46100 ATRX_HUMAN  | E.VQSSVDHQGDGSS#GTEQE.V       | S550:        | 2 | 3,2905 | 0,464 | -0,823 |
| 5 | Q9UQR1 ZN148_HUMAN | E.FSEFPLNVNDNR.A              |              | 2 | 3,2877 | 0,467 | -0,629 |
| 5 | Q9UQ35 SRRM2_HUMAN | E.SYFGVSSLQLK.G               |              | 2 | 3,2874 | 0,406 | -0,397 |
| 5 | P48681 NEST_HUMAN  | E.ALGKVES#EQEE.L              | S1261:       | 2 | 3,2859 | 0,39  | -0,282 |
| 5 | Q9BQK8 LPIN3_HUMAN | E.LTSPKS#DSELE.V              | S224:        | 2 | 3,2847 | 0,235 | -0,38  |
| 5 | P78310 CXAR_HUMAN  | R.SYIGSNHSSLGS#M*SPSNM*E.G    | S304:        | 3 | 3,2796 | 0,146 | -0,174 |
| 5 | Q9H0H5 RGAP1_HUMAN | E.SGSILSDIS#FDKTDE.S          | S157:        | 2 | 3,2792 | 0,431 | -0,576 |
| 5 | P20645 MPRD_HUMAN  | K.SNGKETVVGR.L                |              | 2 | 3,2786 | 0,33  | -0,35  |
| 5 | Q969R5 LMBL2_HUMAN | E.AGELPTS#PLHLLSPGTPR.S       | S67:         | 2 | 3,2766 | 0,427 | -0,444 |
| 5 | Q03252 LMNB2_HUMAN | R.AGGPAT#PLSPTRLR.L           | T14:S22:     | 3 | 3,2764 | 0,297 | -0,111 |
| 5 | Q6I9Y2 THOC7_HUMAN | E.NDEKLS#EVEE.A               | S188:        | 2 | 3,276  | 0,22  | -0,192 |
| 5 | Q8TD26 CHD6_HUMAN  | E.SKSS#TSGITGDIGDELQE.A       | S2056:       | 2 | 3,2741 | 0,544 | -0,256 |
| 5 | Q8WXI9 P66B_HUMAN  | R.GRLTPS#PDIIVLSDNE.A         | S122:        | 3 | 3,2741 | 0,276 | -0,304 |
| 5 | Q15007 FL2D_HUMAN  | E.GNTTEDDFPSS#PGNGNK.S        | S306:        | 2 | 3,2739 | 0,34  | -0,269 |
| 5 | Q86TI0 TBCD1_HUMAN | E.SSFKLLGS#SEDLSSDSE.S        | S565:        | 2 | 3,2725 | 0,409 | -0,653 |
| 5 | Q8IX90 CM003_HUMAN | E.KS#PRS#PQLSDFGLE.R          | S152:S155:   | 2 | 3,2719 | 0,494 | -0,213 |
| 5 | Q9BU19 ZN692_HUMAN | E.GSRPSAS#PQAPTLLPQQ.-        | S509:        | 2 | 3,2717 | 0,307 | -0,471 |
| 5 | Q9H165 BC11A_HUMAN | E.NSS#RGAVVGVGDE.S            | S529:        | 2 | 3,2717 | 0,31  | -0,368 |
| 5 | Q2M1Z3 CDGAP_HUMAN | D.SKVLLS#PIRS#PTQTVSPGLLCGE.L | S1374:S1378: | 3 | 3,2716 | 0,231 | -0,352 |
| 5 | Q16352 AINX_HUMAN  | E.IEGLRGANES#LE.R             | S335:        | 2 | 3,2714 | 0,374 | -0,089 |
| 5 | O60502 NCOAT_HUMAN | E.SKS#PEMSMQEDCISD.I          | S511:        | 2 | 3,2711 | 0,508 | -0,401 |
| 5 | O75131 CPNE3_HUMAN | E.ASRSS#PVEFECINE.K           | S243:        | 2 | 3,2708 | 0,373 | -0,286 |
| 5 | Q9Y266 NUDC_HUMAN  | E.TSGPQIKELT#DEE.A            | T108:        | 2 | 3,2678 | 0,319 | -0,16  |
| 5 | Q16186 ADRM1_HUMAN | R.SQSAAVTPSSTTSSTR.A          |              | 2 | 3,2678 | 0,453 | -0,156 |
| 5 | O96007 MOS2L_HUMAN | E.TKLPLS#PPLVE.D              | S20:         | 2 | 3,2657 | 0,277 | -0,479 |
| 5 | P40855 PEX19_HUMAN | E.GCS#VGAEADRE.L              | S9:          | 2 | 3,2651 | 0,388 | -0,397 |
| 5 | O60281 ZN292_HUMAN | E.TLKIGDLT#PQNLE.R            | T263:        | 2 | 3,2637 | 0,35  | -0,08  |
| 5 | P18031 PTN1_HUMAN  | E.KGS#PLNAAPYGIE.S            | S352:        | 2 | 3,2613 | 0,377 | -0,175 |
| 5 | Q14692 BMS1_HUMAN  | E.TS#DIENLLKEEE.D             | S639:        | 2 | 3,2583 | 0,28  | -0,488 |
| 5 | O60502 NCOAT_HUMAN | E.SKS#PEMSMQE.D               | S511:        | 2 | 3,2582 | 0,383 | -0,593 |
| 5 | Q2TB10 ZN800_HUMAN | E.SSPPSITHS#PQNE.L            | S426:        | 2 | 3,2574 | 0,364 | -0,501 |
| 5 | Q9C0C2 TB182_HUMAN | E.AQDLCRAS#PEPPGPE.S          | S672:        | 3 | 3,2543 | 0,211 | -0,107 |
| 5 | Q8IWZ8 SF04_HUMAN  | E.IKVS#PPEGAE.T               | S181:        | 2 | 3,251  | 0,225 | -0,22  |

|   |                    |                            |              |   |        |       |        |
|---|--------------------|----------------------------|--------------|---|--------|-------|--------|
| 5 | Q8IZT6 ASPM_HUMAN  | E.ENKIPISPIS#PAFNE.C       | S225:        | 2 | 3,2502 | 0,348 | -0,562 |
| 5 | Q9Y5U2 TSSC4_HUMAN | E.LAHLAGPGS#PEAE.E         | S265:        | 2 | 3,2485 | 0,331 | -0,092 |
| 5 | P54578 UBP14_HUMAN | R.YAGALRAS#GE.M            | S143:        | 2 | 3,244  | 0,403 | -0,227 |
| 5 | Q13098 CSN1_HUMAN  | E.LTPANSQSRMS#TNM*.-       | S468:        | 2 | 3,2376 | 0,504 | -0,373 |
| 5 | P49790 NU153_HUMAN | E.ITTSSPSPINSSQALTNK.V     |              | 2 | 3,237  | 0,486 | 0,397  |
| 5 | Q9UQ35 SRRM2_HUMAN | E.NSFGS#PLEFR.N            | S1329:       | 2 | 3,2363 | 0,391 | -0,297 |
| 5 | Q92888 ARHG1_HUMAN | R.SGLELEPEEPPGWRE.L        |              | 2 | 3,2358 | 0,192 | -0,424 |
| 5 | P35527 K1C9_HUMAN  | R.IKFEMEQLNR.Q             |              | 3 | 3,2341 | 0,097 | 0,07   |
| 5 | Q5VYS8 ZCHC6_HUMAN | E.KNS#PVDQSDFFYE.F         | S939:        | 2 | 3,2295 | 0,27  | -0,442 |
| 5 | P67936 TPM4_HUMAN  | E.NVGLHQTLDQT#LNE.L        | T241:        | 2 | 3,2272 | 0,294 | 0,147  |
| 5 | Q12756 KIF1A_HUMAN | R.TPQPCS#RPAS#PEPE.L       | S1528:S1532: | 2 | 3,2264 | 0,428 | -0,712 |
| 5 | O60502 NCOAT_HUMAN | E.SKS#PEMSM*QEDCISD.I      | S511:        | 2 | 3,2263 | 0,449 | -0,464 |
| 5 | Q5UIP0 RIF1_HUMAN  | E.SKENT#PPVVISADQM*VNE.D   | T1388:       | 2 | 3,2262 | 0,479 | -0,356 |
| 5 | Q04726 TLE3_HUMAN  | E.SSANNSVS#PSESLRASE.K     | S203:        | 2 | 3,2258 | 0,445 | -0,474 |
| 5 | Q9P2D1 CHD7_HUMAN  | E.FANS#PSEDKEE.S           | S1874:       | 2 | 3,2247 | 0,283 | -0,183 |
| 5 | Q13838 UAP56_HUMAN | K.NCPHIVVGTGPR.I           |              | 3 | 3,2241 | 0,343 | 0,14   |
| 5 | Q9NZJ4 SACS_HUMAN  | E.RY#ASNVCFTTLGTE.F        | Y2509:       | 2 | 3,2222 | 0,495 | -0,646 |
| 5 | Q5SVQ8 ZBT41_HUMAN | E.LTEKSS#PEETLNE.L         | S191:        | 2 | 3,2178 | 0,241 | 0,157  |
| 5 | Q92890 UFD1_HUMAN  | E.STEGEADHS#GYAGE.L        | S217:        | 2 | 3,2127 | 0,449 | -0,491 |
| 5 | Q96RG2 PASK_HUMAN  | E.M*GNRS#LSDVAQAQE.L       | S1287:       | 2 | 3,209  | 0,286 | -0,457 |
| 5 | Q5SYE7 NHSL1_HUMAN | R.GGPVSR#PGAPSAGE.A        | S1167:       | 2 | 3,2076 | 0,449 | -0,434 |
| 5 | Q8N1G2 K0082_HUMAN | E.LALSLSSTSDDEPPSSVSHGAK.A |              | 3 | 3,2068 | 0,391 | -0,167 |
| 5 | Q9Y4P1 ATG4B_HUMAN | R.LERFFDS#EDE.D            | S383:        | 2 | 3,2004 | 0,281 | -0,179 |
| 5 | Q8WY91 THAP4_HUMAN | E.AVQSEHSDAS#PM*SINE.V     | S324:        | 2 | 3,1979 | 0,454 | -0,407 |
| 5 | Q6IN85 SMEK1_HUMAN | E.RFDDMSS#PGLLEPSCE.L      | S127:        | 2 | 3,1949 | 0,309 | -0,064 |
| 5 | Q8NBU5 ATAD1_HUMAN | E.YVNS#TSEESHDE.D          | S317:        | 2 | 3,1948 | 0,353 | -0,165 |
| 5 | Q15154 PCM1_HUMAN  | K.SVFEPEDSS#IVDNE.L        | S816:        | 2 | 3,1918 | 0,313 | -0,37  |
| 5 | Q92625 ANS1A_HUMAN | E.KSPS#FASEWDE.I           | S663:        | 2 | 3,1917 | 0,315 | -0,269 |
| 5 | Q9H307 PININ_HUMAN | E.SEKQQDS#QPEEVM*D.V       | S381:        | 2 | 3,1864 | 0,371 | -0,489 |
| 5 | Q6PKG0 LARP1_HUMAN | R.AVT#PVPTKTEE.V           | T526:        | 2 | 3,181  | 0,358 | -0,39  |
| 5 | P21281 VATB2_HUMAN | E.DFLDIM*GQPINPQCR.I       |              | 2 | 3,1798 | 0,325 | -0,469 |
| 5 | Q14247 SRC8_HUMAN  | R.AKTQT#PPVS#PAPQPTEE.R    | T401:S405:   | 2 | 3,1755 | 0,442 | -0,441 |
| 5 | Q8NEB9 PK3C3_HUMAN | E.KDGDSS#PILTSFE.L         | S244:        | 2 | 3,1752 | 0,287 | -0,608 |

|   |                     |                              |              |   |        |       |        |
|---|---------------------|------------------------------|--------------|---|--------|-------|--------|
| 5 | O43765 SGTA_HUMAN   | R.S#QIRSRT#PSASNDQDQ.-       | S297:T303:   | 3 | 3,1722 | 0,233 | -0,352 |
| 5 | Q12802 AKP13_HUMAN  | R.SLS#RPSS#LIEQE.K           | S2563:S2567: | 2 | 3,1692 | 0,303 | -0,567 |
| 5 | Q6NZI2 PTRF_HUMAN   | E.SDAVLVDKS#DSD.-            | S387:        | 2 | 3,1657 | 0,29  | -0,367 |
| 5 | Q8N3D4 EH1L1_HUMAN  | E.AGGQVGPPEAPRPET#SPE.M      | T284:        | 2 | 3,1656 | 0,398 | -0,657 |
| 5 | Q9H6Z4 RANB3_HUMAN  | E.NAAAESGSESS#QEATPEKE.S     | S359:        | 3 | 3,1653 | 0,254 | -0,525 |
| 5 | O15446 RPA34_HUMAN  | E.MKPLES#PGGTM*APQQPE.G      | S359:        | 2 | 3,1649 | 0,188 | -0,387 |
| 5 | Q9H6Z4 RANB3_HUMAN  | E.NAAAESGSESS#QEATPEKE.S     | S359:        | 2 | 3,1641 | 0,291 | -0,467 |
| 5 | Q8N2Y8 RUSC2_HUMAN  | E.GGYGCPHASS#PE.L            | S356:        | 2 | 3,1634 | 0,426 | -0,282 |
| 5 | Q8TDR0 MIPT3_HUMAN  | E.SHNS#DNEEDDQFVVE.A         | S501:        | 2 | 3,1611 | 0,318 | -0,596 |
| 5 | P42566 EP15_HUMAN   | E.TANLNEHVEGQS#NLE.S         | S547:        | 2 | 3,1558 | 0,498 | -0,141 |
| 5 | Q02952 AKA12_HUMAN  | E.SFEKAPQVTE#IE.S            | S1129:       | 2 | 3,1551 | 0,338 | -0,237 |
| 5 | Q4LE39 ARI4B_HUMAN  | R.LSKPPFQTNP#PE.M            | S675:        | 2 | 3,1544 | 0,343 | -0,401 |
| 5 | P39687 AN32A_HUMAN  | E.NLKS#LDLFNCE.V             | S117:        | 2 | 3,149  | 0,319 | -0,511 |
| 5 | Q9Y2N3 PO121_HUMAN  | E.TATKPQATSAPS#PAPK.Q        | S674:        | 2 | 3,1487 | 0,407 | -0,448 |
| 5 | Q6KC79 NIPBL_HUMAN  | K.TPIT#PQDINRPLNAAQCLSQQE.Q  | T406:        | 3 | 3,1465 | 0,186 | -0,142 |
| 5 | P05556 ITB1_HUMAN   | E.CECQSEGIPESPK.C            |              | 2 | 3,1367 | 0,432 | -0,401 |
| 5 | Q9C0B0 UNK_HUMAN    | E.HFASGS#FSPGTSAPFLSGPGAAE.L | S629:        | 3 | 3,1362 | 0,203 | -0,324 |
| 5 | O43293 DAPK3_HUMAN  | K.SHS#S#LPPNNSYADFE.R        | S311:S312:   | 2 | 3,1333 | 0,298 | -0,401 |
| 5 | Q16563 SYPL1_HUMAN  | K.TVTATFGYPFR.L              |              | 2 | 3,1329 | 0,531 | -0,194 |
| 5 | Q6S8J3 A26CA_HUMAN  | E.KLCY#VALDFEQE.M            | Y918:        | 2 | 3,1301 | 0,307 | -0,383 |
| 5 | Q9H6Z4 RANB3_HUMAN  | E.RTS#SLTQFPPSQSEE.R         | S125:        | 2 | 3,1251 | 0,402 | 0,344  |
| 5 | Q9Y2W6 TDRKH_HUMAN  | E.ITHTLS#CLSLSE.A            | S539:        | 2 | 3,124  | 0,248 | -0,339 |
| 5 | Q9H4N4 Q9H4N4_HUMAN | E.TRLS#FSDTYQDYEE.Y          | S47:         | 2 | 3,1226 | 0,374 | -0,732 |
| 5 | P48960 CD97_HUMAN   | E.GSYDCVCSPGYEPVSGAK.T       |              | 2 | 3,1184 | 0,546 | -0,442 |
| 5 | P42892 ECE1_HUMAN   | R.ATLDEEDLVDS#LSE.G          | S34:         | 2 | 3,1153 | 0,377 | -0,227 |
| 5 | P35612 ADDB_HUMAN   | E.AETKS#PLVS#PSKSLEE.G       | S613:S617:   | 2 | 3,114  | 0,429 | -0,262 |
| 5 | Q71U36 TBA1A_HUMAN  | K.TIGGGDDSFNTFFSE.T          |              | 2 | 3,1117 | 0,337 | -0,383 |
| 5 | Q16513 PKN2_HUMAN   | E.LSLVAAS#PTLSPR.Q           | S302:        | 2 | 3,1114 | 0,34  | -0,175 |
| 5 | O94915 FRYL_HUMAN   | E.VLQIRDET#PTLE.A            | T2547:       | 2 | 3,1107 | 0,369 | -0,245 |
| 5 | Q9NQW6 ANLN_HUMAN   | E.GELDM*EKS#QEE.M            | S583:        | 2 | 3,1078 | 0,313 | -0,263 |
| 5 | P50747 BPL1_HUMAN   | E.SVADETS#PERE.G             | S147:        | 2 | 3,1068 | 0,487 | -0,094 |
| 5 | Q96F24 NRBF2_HUMAN  | E.GQSPLSQKYS#PSTE.K          | S120:        | 2 | 3,1056 | 0,338 | -0,538 |
| 5 | O15085 ARHGB_HUMAN  | K.SLGGESS#GGT#TPVGSFHTE.A    | S1458:T1461: | 2 | 3,1035 | 1     | -0,682 |



|   |                    |                                      |             |   |        |       |        |
|---|--------------------|--------------------------------------|-------------|---|--------|-------|--------|
| 5 | Q9BZL6 KPCD2_HUMAN | E.NALHAS#EEEEGE.G                    | S362:       | 2 | 3,1029 | 0,168 | -0,612 |
| 5 | Q13185 CBX3_HUMAN  | R.LTWHS#CPEDEAQ.-                    | S176:       | 2 | 3,1027 | 0,192 | -0,157 |
| 5 | Q86W92 LIPB1_HUMAN | E.DDM*FKDFAAR.S                      |             | 3 | 3,1026 | 0,25  | 0,594  |
| 5 | Q6NZI2 PTRF_HUMAN  | E.SDAVLVDKSDS#D.-                    | S389:       | 2 | 3,1011 | 0,317 | -0,642 |
| 5 | Q13153 PAK1_HUMAN  | E.DYNSSNALNVK.A                      |             | 2 | 3,0994 | 0,416 | -0,498 |
| 5 | O15446 RPA34_HUMAN | E.MKPLES#PGGTMAPQQPE.G               | S359:       | 2 | 3,0941 | 0,338 | -0,52  |
| 5 | P25445 TNR6_HUMAN  | E.NQGSHE#PTLNPE.T                    | S212:       | 2 | 3,0934 | 0,225 | -0,491 |
| 5 | P35908 K22E_HUMAN  | R.FLEQQNQVLQTK.W                     |             | 2 | 3,0888 | 0,298 | -0,413 |
| 5 | Q9UKV3 ACINU_HUMAN | E.AS#SPPPHPQLHS#EEE.I                | S424:S434:  | 2 | 3,0877 | 0,439 | -0,813 |
| 5 | Q9NW75 GPTC2_HUMAN | E.LVHDLVS#ALEE.S                     | S34:        | 2 | 3,0854 | 0,357 | -0,28  |
| 5 | P49915 GUAA_HUMAN  | E.SASLVAS#GKAE.L                     | S382:       | 2 | 3,0836 | 0,31  | -0,222 |
| 5 | Q5UIP0 RIF1_HUMAN  | E.CGSLDKTS#PEM*SNSNDE.R              | S1162:      | 2 | 3,0821 | 0,642 | -0,352 |
| 5 | Q13873 BMPR2_HUMAN | R.YMAPEVLEGAVNLR.D                   |             | 2 | 3,0793 | 0,458 | -0,078 |
| 5 | P34931 HS71L_HUMAN | K.ATAGDTHLGGEDFDNR.L                 |             | 3 | 3,0791 | 0,385 | -0,327 |
| 5 | O95817 BAG3_HUMAN  | E.VKVPPAPVPCPPS#PGPSAVPSSPKS#VATEE.R | S377:S389:  | 3 | 3,0742 | 0,341 | -0,227 |
| 5 | P20700 LMNB1_HUMAN | E.M*NTST#VNSAREE.L                   | T285:       | 2 | 3,0726 | 0,262 | -0,425 |
| 5 | Q14966 ZN638_HUMAN | E.AEKATCDS#DFAVETLE.L                | S1158:      | 2 | 3,0715 | 0,148 | -0,262 |
| 5 | Q9Y3S1 WNK2_HUMAN  | E.SYGGSDVTS#GKE.L                    | S1145:      | 2 | 3,0686 | 0,449 | -0,578 |
| 5 | P07355 ANXA2_HUMAN | E.ILCKLS#LE.G                        | S12:        | 2 | 3,0682 | 0,389 | -0,231 |
| 5 | P30260 CDC27_HUMAN | E.ITKLDSS#IISE.G                     | S435:       | 2 | 3,0673 | 0,309 | 0      |
| 5 | Q9H7N4 SFR19_HUMAN | K.AAPPPALTPDS#QTVDSSCKT#PE.V         | S992:T1001: | 3 | 3,0636 | 0,205 | 0,507  |
| 5 | P04264 K2C1_HUMAN  | R.TNAENEFVTIKK.D                     |             | 3 | 3,0636 | 0,31  | 0,066  |
| 5 | Q6ZNJ1 NBEL2_HUMAN | E.ASALRDNLGEVPLT#PTEE.A              | T1867:      | 2 | 3,0619 | 0,228 | -0,306 |
| 5 | Q5T8D3 ACBD5_HUMAN | E.DLGNVLTSTPNAK.T                    |             | 2 | 3,0618 | 0,413 | -0,275 |
| 5 | Q9BXK5 B2L13_HUMAN | E.KSS#PATSLFVELDEEE.V                | S371:       | 2 | 3,0613 | 0,397 | -0,328 |
| 5 | O43290 SNUT1_HUMAN | E.KEPVPQPLPSDDTR.V                   |             | 3 | 3,0605 | 0,287 | 0      |
| 5 | Q96M96 FGD4_HUMAN  | R.TPGIGPVLPLEER.G                    |             | 2 | 3,0604 | 0,472 | -0,443 |
| 5 | Q8N9T8 KRI1_HUMAN  | E.GVHGPPVQLAVDDS#SDEGE.L             | S286:       | 2 | 3,0587 | 0,557 | -0,307 |
| 5 | Q8NG31 CASC5_HUMAN | E.SDRLVANDS#QLTPLEE.W                | S1039:      | 2 | 3,058  | 0,369 | -0,523 |
| 5 | P55072 TERA_HUMAN  | E.M*FAQTLQQR.G                       |             | 2 | 3,0545 | 0,314 | -0,299 |
| 5 | Q9GZZ9 UBA5_HUMAN  | E.LKNFS#GPVPLPE.G                    | S358:       | 2 | 3,0543 | 0,281 | -0,409 |
| 5 | P18583 SON_HUMAN   | E.ADAGETLSSTGPFALPDATGTSK.G          |             | 3 | 3,0538 | 0,245 | -0,236 |
| 5 | Q5C9Z4 NOM1_HUMAN  | E.FVHATS#EGEAPGGCE.G                 | S57:        | 2 | 3,0525 | 0,221 | -0,6   |

|   |                     |                            |              |   |        |       |        |
|---|---------------------|----------------------------|--------------|---|--------|-------|--------|
| 5 | Q8WY36 BBX_HUMAN    | E.VSSGTCRPDVSES#PE.L       | S236:        | 2 | 3,0476 | 0,132 | -0,723 |
| 5 | Q9NQS7 INCE_HUMAN   | E.QHVTQLM*STEPLPR.T        |              | 3 | 3,047  | 0,321 | -0,221 |
| 5 | O75569 PRKRA_HUMAN  | E.YTTICRLES#FM*E.T         | S167:        | 2 | 3,0461 | 0,392 | -0,297 |
| 5 | Q12888 TP53B_HUMAN  | E.SGLQIQKS#PEPE.V          | S294:        | 2 | 3,0437 | 0,368 | -0,526 |
| 5 | Q14721 KCNB1_HUMAN  | E.CATLLDKAVLS#PE.S         | S720:        | 2 | 3,0434 | 0,32  | -0,652 |
| 5 | P48960 CD97_HUMAN   | R.CNPGFSSFSE.I             |              | 2 | 3,0431 | 0,212 | 0,108  |
| 5 | O94909 K0819_HUMAN  | E.LELRVS#E.D               | S274:        | 2 | 3,0373 | 0,237 | -0,066 |
| 5 | Q9HC44 GPBL1_HUMAN  | E.GEVLSHS#LE.A             | S384:        | 2 | 3,0365 | 0,192 | -0,116 |
| 5 | P50851 LRBA_HUMAN   | E.NSSIEKTSS#LE.S           | S1000:       | 2 | 3,0362 | 0,409 | -0,287 |
| 5 | Q03468 ERCC6_HUMAN  | E.GIPHSS#QTQE.Q            | S10:         | 2 | 3,0356 | 0,37  | 0,105  |
| 5 | Q14966 ZN638_HUMAN  | E.SPGLKNS#PIDE.S           | S1106:       | 2 | 3,0353 | 0,347 | -0,395 |
| 5 | P42166 LAP2A_HUMAN  | R.SS#TPLPTISSAE.N          | S159:        | 2 | 3,0318 | 0,379 | -0,09  |
| 5 | Q4V328 GRAP1_HUMAN  | E.NNALRT#SLAALE.Q          | T340:        | 2 | 3,0298 | 0,29  | 0,09   |
| 5 | Q6NZI2 PTRF_HUMAN   | E.SDAVLVDKS#DS#D.-         | S387:S389:   | 2 | 3,0284 | 0,279 | -0,605 |
| 5 | P55201 BRPF1_HUMAN  | R.KTEGVS#PIPQEIFE.Y        | S238:        | 2 | 3,0279 | 0,419 | -0,516 |
| 5 | Q9Y2W6 TDRKH_HUMAN  | E.ITHTLSCLS#LSE.A          | S542:        | 2 | 3,0278 | 0,276 | -0,169 |
| 5 | P60709 ACTB_HUMAN   | R.GYSFTTT#AERE.I           | T203:        | 2 | 3,023  | 0,418 | 0,182  |
| 5 | O43815 STRN_HUMAN   | E.LNQGDM*KPPSYDS#DEGNE.T   | S137:        | 2 | 3,021  | 0,49  | -0,817 |
| 5 | Q14493 SLBP_HUMAN   | R.HM*DSQVEDEFDLE.A         |              | 2 | 3,0176 | 0,333 | -0,303 |
| 5 | Q6Y7W6 PERQ2_HUMAN  | E.CGFYQRS#FDEVE.G          | S139:        | 2 | 3,0155 | 0,107 | -0,453 |
| 5 | Q8IY92 BTBDC_HUMAN  | E.GSLPHS#DDAGDYE.Q         | S294:        | 2 | 3,0122 | 0,318 | -0,423 |
| 5 | Q86SQ0 PHLB2_HUMAN  | E.KLQLS#DEESVFEE.A         | S489:        | 2 | 3,0094 | 0,186 | -0,672 |
| 5 | Q9UPQ6 Q9UPQ6_HUMAN | E.SETRS#ESSDFE.V           | S316:        | 2 | 3,0094 | 0,337 | -0,36  |
| 5 | O43379 WDR62_HUMAN  | E.AGPGDQQGDSYLR.V          |              | 2 | 3,0064 | 0,321 | -0,358 |
| 5 | Q9HAU5 RENT2_HUMAN  | E.NKEVSS#PDDLELE.L         | S514:        | 2 | 3,0051 | 0,402 | -0,314 |
| 5 | Q99590 SFRIP_HUMAN  | R.SSVAAPEKSSSND#VDEE.T     | S90:         | 2 | 3,0008 | 0,366 | -0,509 |
| 5 | O15027 SC16A_HUMAN  | E.GSQGGELS#RCSS#M*SSLSRE.V | S2113:S2117: | 3 | 2,9987 | 0,13  | -0,501 |
| 5 | P49189 AL9A1_HUMAN  | R.GGARVEPADASGTE.K         |              | 2 | 2,9986 | 0,412 | -0,371 |
| 5 | Q9UN86 G3BP2_HUMAN  | E.EQEERQPS#PEPVQE.N        | S163:        | 2 | 2,9949 | 0,311 | -0,623 |
| 5 | Q8WYP5 AHTF1_HUMAN  | E.DELKDDAQS#VE.T           | S2190:       | 2 | 2,9938 | 0,344 | -0,275 |
| 5 | Q04721 NOTC2_HUMAN  | R.GPDGCTPLM*LASLR.G        |              | 2 | 2,9938 | 0,418 | -0,162 |
| 5 | Q9UHB6 LIMA1_HUMAN  | E.FTTQNQKS#QDVE.L          | S726:        | 2 | 2,993  | 0,295 | -0,405 |
| 5 | Q96ST2 IWS1_HUMAN   | E.LQKSPAS#DSETE.D          | S170:        | 2 | 2,9925 | 0,376 | -0,534 |

|   |                    |                          |              |   |        |       |        |
|---|--------------------|--------------------------|--------------|---|--------|-------|--------|
| 5 | Q13263 TIF1B_HUMAN | E.KLS#PPYSSPQE.F         | S752:        | 2 | 2,9899 | 0,31  | -0,372 |
| 5 | Q9Y3D3 RT16_HUMAN  | E.VLLASQKTDAEAT#DTE.A    | T130:        | 2 | 2,9876 | 0,284 | -0,757 |
| 5 | Q5T200 ZC3HD_HUMAN | E.STS#RDS#LALDKE.R       | S1406:S1409: | 3 | 2,986  | 0,222 | 0      |
| 5 | Q8N163 K1967_HUMAN | E.DSEVRS#VASNQSE.M       | S675:        | 2 | 2,9859 | 0,352 | -0,164 |
| 5 | Q96JK2 WDR22_HUMAN | E.IQPSRAS#PTS DIE.S      | S648:        | 2 | 2,9856 | 0,33  | -0,33  |
| 5 | Q9UGV2 NDRG3_HUMAN | R.SVTSNQS#DGTQE.S        | S352:        | 2 | 2,983  | 0,437 | -0,458 |
| 5 | P05783 K1C18_HUMAN | E.NS#LREVE.A             | S323:        | 2 | 2,9821 | 0,196 | 0,132  |
| 5 | Q13017 RHG05_HUMAN | E.NSYLS#DNTRE.S          | S951:        | 2 | 2,9802 | 0,406 | -0,286 |
| 5 | O95793 STAU1_HUMAN | R.LEVNGRES#EEE.N         | S176:        | 2 | 2,9775 | 0,254 | -0,356 |
| 5 | Q6VMQ6 MCAF1_HUMAN | E.SSFGS#PSKQE.S          | S477:        | 2 | 2,9766 | 0,366 | -0,215 |
| 5 | Q92667 AKAP1_HUMAN | E.TSSS#PRDKAIT#PPLPE.S   | S526:T533:   | 2 | 2,9754 | 0,305 | -0,657 |
| 5 | Q9BVI0 PHF20_HUMAN | E.NTMKTEPTS#PLVE.L       | S415:        | 2 | 2,9746 | 0,476 | 0,32   |
| 5 | O14686 MLL2_HUMAN  | E.LKGS#PVLLDPEE.L        | S876:        | 2 | 2,9745 | 0,346 | -0,177 |
| 5 | Q9BW91 NUDT9_HUMAN | E.SNFS#PKFNE.K           | S121:        | 2 | 2,9733 | 0,441 | -0,106 |
| 5 | Q9H6E5 TUT1_HUMAN  | E.FQS#PASKS#PKG AAPD.S   | S133:S138:   | 2 | 2,9724 | 0,28  | -0,518 |
| 5 | Q9UQ35 SRRM2_HUMAN | E.NSFGS#PLEFRNSGPLGTE.M  | S1329:       | 2 | 2,9702 | 0,349 | -0,184 |
| 5 | Q99549 MPP8_HUMAN  | D.IQRLS#LNNDIFE.A        | S126:        | 2 | 2,9667 | 0,363 | -0,633 |
| 5 | O60664 M6PBP_HUMAN | E.LVSSKVS#GAQE.M         | S130:        | 2 | 2,9624 | 0,286 | -0,412 |
| 5 | O60684 IMA7_HUMAN  | E.HY#FGVEDDDSSSLAPQVDE.T | Y501:        | 3 | 2,9613 | 0,16  | -0,435 |
| 5 | Q14451 GRB7_HUMAN  | R.RAT#SLPSIPNPFPE.L      | T62:         | 2 | 2,9591 | 0,401 | -0,608 |
| 5 | P35612 ADDB_HUMAN  | E.TKS#PLVS#PSKSLEE.G     | S613:S617:   | 2 | 2,9584 | 0,278 | -0,367 |
| 5 | Q9NXG2 THUM1_HUMAN | E.YGDDM*YGPEK.F          |              | 2 | 2,9562 | 0,45  | -0,512 |
| 5 | Q7Z417 NUFP2_HUMAN | E.SQNPLAS#PTNTLLGSAKE.Q  | S629:        | 2 | 2,955  | 0,465 | -0,384 |
| 5 | Q9H6F5 CCD86_HUMAN | R.LGGLRPES#PE.S          | S18:         | 2 | 2,9519 | 0,275 | -0,323 |
| 5 | Q9UPN6 RBM16_HUMAN | E.TVQTQSQPT#PVEKE.T      | T619:        | 2 | 2,9511 | 0,278 | -0,826 |
| 5 | Q9P2R6 RERE_HUMAN  | E.ISRPNS#PSEGE.S         | S679:        | 2 | 2,9509 | 0,318 | -0,424 |
| 5 | P35527 K1C9_HUMAN  | R.FSSSSGYGGSSR.V         |              | 2 | 2,9506 | 0,447 | -0,494 |
| 5 | Q8IYX8 CF182_HUMAN | E.SHS#VCDDIECE.L         | S355:        | 2 | 2,9484 | 0,226 | -0,341 |
| 5 | O14686 MLL2_HUMAN  | E.LVNRPPS#STE.L          | S2694:       | 2 | 2,946  | 0,429 | -0,414 |
| 5 | Q02952 AKA12_HUMAN | E.SDKAIT#PQAQEE.L        | T1760:       | 2 | 2,942  | 0,36  | -0,349 |
| 5 | Q14C86 GAPD1_HUMAN | R.SNSVSS#LDLE.G          | S588:        | 2 | 2,9416 | 0,223 | -0,216 |
| 5 | Q5JSJ4 DX26B_HUMAN | E.LHLPLNS#PLPGSE.L       | S150:        | 2 | 2,9343 | 0,355 | -0,587 |
| 5 | Q8TD26 CHD6_HUMAN  | E.SKSSTS#GITGDIGDELQE.A  | S2058:       | 2 | 2,9342 | 0,434 | -0,577 |

|   |                    |                                     |               |   |        |       |        |
|---|--------------------|-------------------------------------|---------------|---|--------|-------|--------|
| 5 | P04792 HSPB1_HUMAN | E.SPAAVAPAYS.R.A                    |               | 2 | 2,932  | 0,372 | -0,448 |
| 5 | Q9Y266 NUDC_HUMAN  | E.TSGPQIKELT#DEEAE.R                | T108:         | 2 | 2,9317 | 0,452 | -0,424 |
| 5 | P05783 K1C18_HUMAN | E.LDKYWS#QQIEE.S                    | S272:         | 2 | 2,9305 | 0,112 | -0,482 |
| 5 | P00558 PGK1_HUMAN  | K.SLLGKDVFLK.D                      |               | 2 | 2,9297 | 0,128 | -0,495 |
| 5 | P55884 EIF3B_HUMAN | E.DAGGNEGRAAEAEPR.A                 |               | 3 | 2,926  | 0,305 | -0,183 |
| 5 | P46100 ATRX_HUMAN  | E.NLVLSSTHTGFCQSS#GDE.A             | S1245:        | 2 | 2,9254 | 0,351 | -0,318 |
| 5 | Q2NKX8 ERC6L_HUMAN | E.LCTNSS#LGMKES#FATKNE.A            | S829:S835:    | 3 | 2,9235 | 0,287 | 0      |
| 5 | Q5VZK9 LR16A_HUMAN | E.IKT#PDSFEE.S                      | T1128:        | 2 | 2,9209 | 0,214 | -0,106 |
| 5 | Q8N137 CNTRB_HUMAN | E.LSR#LSVGLK.K                      | S78:          | 2 | 2,9198 | 0,239 | -0,214 |
| 5 | Q8TDJ6 DMXL2_HUMAN | E.M*VDPKPDIGS#YE.R                  | S2123:        | 2 | 2,9178 | 0,296 | 0,181  |
| 5 | Q9UQ35 SRRM2_HUMAN | R.SSGHSSSELS#PDAVE.K                | S1387:        | 2 | 2,9107 | 0,397 | -0,233 |
| 5 | O75821 EIF3G_HUMAN | E.LLKGIPLATGDTS#PEPE.L              | S42:          | 3 | 2,9075 | 0,188 | -0,201 |
| 5 | P06576 ATPB_HUMAN  | E.LGIYPAVDPLDSTSR.I                 |               | 2 | 2,9065 | 0,368 | -0,456 |
| 5 | Q9HCD5 NCOA5_HUMAN | R.LM*RSS#TDS#LPGPISR.Q              | S378:S381:    | 2 | 2,9058 | 0,436 | -0,476 |
| 5 | Q96QR8 PURB_HUMAN  | E.HYAQLGPSS#PEQLAAGAE.E.G           | S101:         | 2 | 2,9015 | 0,414 | -0,36  |
| 5 | Q96RV3 PCX1_HUMAN  | E.LESSKPLSGS#KES#LVE.N              | S325:S328:    | 2 | 2,9006 | 0,262 | 0,066  |
| 5 | P05787 K2C8_HUMAN  | R.SLDMDSIIAE.V                      |               | 2 | 2,8918 | 0,235 | -0,335 |
| 5 | Q5T5U3 RHG21_HUMAN | D.SSRLS#PEVQSVAE.S                  | S1604:        | 2 | 2,8843 | 0,284 | 0,249  |
| 5 | Q96AQ9 F131C_HUMAN | E.LHPENS#PQGIVQLQDLE.S              | S179:         | 2 | 2,8813 | 0,196 | -0,244 |
| 5 | P11940 PABP1_HUMAN | E.LLHMLES#PE.S                      | S599:         | 2 | 2,8808 | 0,246 | -0,531 |
| 5 | Q9BR61 ACBD6_HUMAN | K.ALGDSS#PSQAM*QE.Y                 | S106:         | 2 | 2,8787 | 0,252 | -0,086 |
| 5 | Q86T82 UBP37_HUMAN | E.NSGFDRM*S#EEE.L                   | S704:         | 2 | 2,8767 | 0,1   | -0,437 |
| 5 | Q14160 LAP4_HUMAN  | R.LRVQS#PEPPAPE.R                   | S1475:        | 2 | 2,8703 | 0,362 | -0,174 |
| 5 | P05556 ITB1_HUMAN  | E.VNSEDMDAYCR.K                     |               | 2 | 2,87   | 0,447 | -0,179 |
| 5 | Q6VMQ6 MCAF1_HUMAN | E.SS#FGSPSKQESSE.S                  | S474:         | 2 | 2,8692 | 0,259 | -0,425 |
| 5 | P54289 CA2D1_HUMAN | E.SGYTFIAPR.D                       |               | 2 | 2,867  | 0,292 | -0,181 |
| 5 | P34931 HS71L_HUMAN | D.LNKS#INPDE.A                      | S364:         | 2 | 2,8654 | 0,244 | -0,22  |
| 5 | Q8WXG6 MADD_HUMAN  | R.ASS#PNSTVSNTSTE.G                 | S830:         | 2 | 2,863  | 0,238 | -0,417 |
| 5 | A6NI61 YI006_HUMAN | R.S#T#FVMFGVLT#IAVRIYHDR.W          | S94:T95:T103: | 3 | 2,8618 | 0,15  | 1,707  |
| 5 | Q92576 PHF3_HUMAN  | E.STEFNKS#NLE.V                     | S419:         | 2 | 2,861  | 0,309 | -0,293 |
| 5 | Q09666 AHNK_HUMAN  | R.SNS#FSDERE.F                      | S5782:        | 2 | 2,8584 | 0,359 | -0,212 |
| 5 | O60238 BNI3L_HUMAN | E.SGQSSSRGS#SHCDS#PSPQEDGQIM*FDVE.M | S90:S95:      | 3 | 2,8544 | 1     | -0,23  |
| 5 | Q15283 RASA2_HUMAN | E.KSL#PFFSEE.F                      | S84:          | 2 | 2,8536 | 0,183 | -0,293 |

|   |                    |                            |              |   |        |       |        |
|---|--------------------|----------------------------|--------------|---|--------|-------|--------|
| 5 | P28715 ERCC5_HUMAN | E.TSKPPS#EQGEEE.L          | S678:        | 2 | 2,8532 | 0,198 | -0,436 |
| 5 | Q9UQ35 SRRM2_HUMAN | R.GEFSAS#PMLK.S            | S1124:       | 2 | 2,8526 | 0,258 | -0,213 |
| 5 | Q96EY5 F125A_HUMAN | E.GKSCS#PLAFSAFGD.L        | S232:        | 2 | 2,8519 | 0,335 | -0,48  |
| 5 | Q9Y5U2 TSSC4_HUMAN | E.LAHLAGPGS#PE.A           | S265:        | 2 | 2,8508 | 0,46  | -0,324 |
| 5 | P40855 PEX19_HUMAN | K.NATDLQNSSM*S#EEE.L       | S149:        | 2 | 2,8488 | 0,341 | -0,37  |
| 5 | Q8IW35 CEP97_HUMAN | E.SHGIS#PPLQGE.I           | S825:        | 2 | 2,8483 | 0,375 | -0,305 |
| 5 | P62753 RS6_HUMAN   | R.LSS#LRAS#TSKSE.S         | S236:S240:   | 2 | 2,8438 | 0,364 | -0,257 |
| 5 | Q12851 M4K2_HUMAN  | R.SLTIRS#ASE.F             | S384:        | 2 | 2,8435 | 0,32  | -0,234 |
| 5 | O15085 ARHGB_HUMAN | K.SLGGESS#GGTT#PVGSFHTE.A  | S1458:T1462: | 2 | 2,8429 | 0,271 | -0,372 |
| 5 | Q9NQ57 INCE_HUMAN  | E.QHVTQLMSTEPLPR.T         |              | 3 | 2,8426 | 0,294 | -0,112 |
| 5 | Q96EA4 CCD99_HUMAN | R.SGNTPNNS#PRLAAE.S        | S555:        | 2 | 2,8417 | 0,35  | -0,963 |
| 5 | Q99661 KIF2C_HUMAN | E.LSPHS#GPSGE.Q            | S592:        | 2 | 2,8406 | 0,268 | -0,116 |
| 5 | Q9HAN9 NMNA1_HUMAN | E.ASDCDHQQNS#PTLE.R        | S117:        | 2 | 2,8381 | 0,349 | -0,435 |
| 5 | Q7Z2W4 ZCCHV_HUMAN | E.FLASASASAER.S            |              | 2 | 2,8361 | 0,378 | -0,44  |
| 5 | O75179 ANR17_HUMAN | E.SGSDSNM*RISS#CSDE.S      | S1621:       | 2 | 2,8316 | 0,228 | -0,556 |
| 5 | P04406 G3P_HUMAN   | R.VIISAPSADAPM*FVM*GVNHE.K |              | 3 | 2,8305 | 0,118 | 0,173  |
| 5 | Q9Y2F5 K0947_HUMAN | E.LDRLS#TSE.V              | S1171:       | 2 | 2,8289 | 0,247 | 0      |
| 5 | Q9COG0 ZN407_HUMAN | E.AQGEHM*DLVES#DGE.I       | S2138:       | 2 | 2,8264 | 0,289 | -0,605 |
| 5 | P08107 HSP71_HUMAN | K.GGSGS#GPTIEE.V           | S633:        | 2 | 2,8255 | 0,332 | -0,114 |
| 5 | Q09472 EP300_HUMAN | E.VNSQAI AEKQPS#QE.V       | S973:        | 2 | 2,8249 | 0,173 | -0,227 |
| 5 | Q8IY81 RRMJ3_HUMAN | E.LKM*DLPGVS#IADEGE.T      | S411:        | 2 | 2,8235 | 0,345 | -0,365 |
| 5 | Q13098 CSN1_HUMAN  | E.LTPANSQSRM*S#TNM*.-      | S468:        | 2 | 2,8229 | 0,343 | 0      |
| 5 | Q9NYF8 BCLF1_HUMAN | E.ALDYFS#DKE.S             | S385:        | 2 | 2,8166 | 0,42  | -0,104 |
| 5 | Q16799 RTN1_HUMAN  | E.AGSGPARQS#PVAM*E.T       | S71:         | 2 | 2,809  | 0,15  | -0,42  |
| 5 | P51955 NEK2_HUMAN  | R.KFLS#LASNPE.L            | S365:        | 2 | 2,8045 | 0,193 | -0,514 |
| 5 | Q96T23 RSF1_HUMAN  | E.SEKPGS#PEAAE.T           | S612:        | 2 | 2,8042 | 0,36  | -0,516 |
| 5 | P48960 CD97_HUMAN  | R.ALAS#ESGI.-              | S831:        | 2 | 2,804  | 0,308 | -0,186 |
| 5 | P46939 UTRO_HUMAN  | K.YGEHEAS#PDNGQNE.F        | S10:         | 2 | 2,7978 | 0,211 | -0,225 |
| 5 | Q8TDY2 RBCC1_HUMAN | E.M*SQITIDLLSEQK.A         |              | 2 | 2,797  | 0,253 | -0,646 |
| 5 | Q9NQW6 ANLN_HUMAN  | E.GELDMEKS#QEE.M           | S583:        | 2 | 2,7968 | 0,242 | -0,444 |
| 5 | P35030 TRY3_HUMAN  | D.TLDNDIMLIK.L             |              | 2 | 2,7959 | 0,325 | -0,415 |
| 5 | P82094 TMF1_HUMAN  | E.SQVKDSS#LCVSGE.T         | S156:        | 2 | 2,7923 | 0,341 | -0,744 |
| 5 | Q9UPN3 MACF1_HUMAN | R.AS#SRRGS#DASDFDLE.T      | S5367:S5372: | 2 | 2,7907 | 0,349 | -0,453 |

|   |                    |                             |              |   |        |       |        |
|---|--------------------|-----------------------------|--------------|---|--------|-------|--------|
| 5 | Q9UHX1 PUF60_HUMAN | K.LGLPPLTPEQQE.A            |              | 2 | 2,7899 | 0,439 | -0,369 |
| 5 | Q92878 RAD50_HUMAN | R.ILELDQELIK.A              |              | 2 | 2,7887 | 0,228 | -0,402 |
| 5 | Q92797 SYMPK_HUMAN | E.DAMKT#PS#PAAEDAREPE.A     | T1257:S1259: | 3 | 2,7873 | 0,194 | -0,463 |
| 5 | Q00610 CLH1_HUMAN  | D.M*NDPSNPIR.R              |              | 2 | 2,7849 | 0,298 | -0,23  |
| 5 | Q14126 DSG2_HUMAN  | E.TSM*NTASHS#LCE.Q          | S869:        | 2 | 2,7827 | 0,417 | -0,34  |
| 5 | Q6PJT7 ZC3HE_HUMAN | E.TYS#PFFRNSE.K             | S274:        | 2 | 2,7791 | 0,163 | -0,169 |
| 5 | Q9Y624 JAM1_HUMAN  | E.GEFKQTSS#FLV.-            | S296:        | 2 | 2,7764 | 0,259 | -0,184 |
| 5 | P05556 ITB1_HUMAN  | E.VNSEDM*DAYCR.K            |              | 2 | 2,7761 | 0,457 | -0,266 |
| 5 | O15320 CTGE5_HUMAN | E.TRAFLS#PPTLLE.G           | S536:        | 2 | 2,7752 | 0,165 | -0,514 |
| 5 | Q5H9R7 SAPS3_HUMAN | D.SLRSNS#PVEM*E.T           | S740:        | 2 | 2,7741 | 0,22  | -0,272 |
| 5 | Q6VEQ5 WASH2_HUMAN | R.QDDSSSSAS#PSVQGAPR.E      | S144:        | 2 | 2,774  | 0,342 | -0,278 |
| 5 | Q9Y6E0 STK24_HUMAN | K.ADPEELFTKLE.K             |              | 2 | 2,7732 | 0,111 | -0,472 |
| 5 | Q16513 PKN2_HUMAN  | E.YK PDT#PQSGLE.Y           | T628:        | 2 | 2,7716 | 0,181 | -0,278 |
| 5 | Q9NRY5 F1142_HUMAN | E.KAETSLGIPS#PSEISTE.V      | S129:        | 2 | 2,7703 | 0,517 | -0,535 |
| 5 | P50542 PEX5_HUMAN  | E.AASKPLGVAS#EDE.L          | S58:         | 2 | 2,7692 | 0,338 | -0,36  |
| 5 | Q12830 BPTF_HUMAN  | E.SHT#PVS IQEE.I            | T600:        | 2 | 2,767  | 0,167 | -0,404 |
| 5 | P51610 HCFC1_HUMAN | E.VAAAPSVTPQAGTALLAPFPTQR.V |              | 3 | 2,7667 | 0,209 | -0,404 |
| 5 | Q5T5P2 SKT_HUMAN   | E.STS#PISRTDE.I             | S1650:       | 2 | 2,7642 | 0,352 | -0,52  |
| 5 | Q9NTI5 PDS5B_HUMAN | R.AQQRAS#PESSAIE.S          | S1358:       | 2 | 2,7633 | 0,348 | -0,385 |
| 5 | Q9H6S3 ES8L2_HUMAN | R.SDGVAKM* S#PKDLFE.Q       | S28:         | 2 | 2,7617 | 0,244 | 0,075  |
| 5 | Q86UP2 KTN1_HUMAN  | K.EIQNGNLHES#DSE.S          | S75:         | 2 | 2,7611 | 0,472 | -0,472 |
| 5 | Q32MZ4 LRRF1_HUMAN | E.HES#PSQDISDACEAE.S        | S733:        | 2 | 2,7594 | 0,372 | -0,417 |
| 5 | P18754 RCC1_HUMAN  | E.GALGRDTS#VEGSE.M          | S104:        | 2 | 2,7579 | 0,227 | -0,27  |
| 5 | Q92547 TOPB1_HUMAN | E.NQSSVSHCVDPVS#TITEE.G     | S545:        | 2 | 2,7566 | 0,221 | -0,472 |
| 5 | Q6NYC8 PHTNS_HUMAN | E.VESRLS#PGE.S              | S224:        | 2 | 2,7544 | 0,118 | -0,695 |
| 5 | A1L390 PKHG3_HUMAN | E.KGPLPS#PTAGLEE.S          | S1154:       | 2 | 2,752  | 0,343 | -0,355 |
| 5 | Q14160 LAP4_HUMAN  | E.LRSLEPS#PSPGPQEEDGE.V     | S1579:       | 2 | 2,7513 | 0,242 | 0,609  |
| 5 | Q7Z3B3 K1267_HUMAN | E.DTRCST#PELGLDE.Q          | T1022:       | 2 | 2,7508 | 0,352 | -0,31  |
| 5 | Q9H4A3 WNK1_HUMAN  | E.LSEPSHLNGPSSDPE.A         |              | 2 | 2,7474 | 0,287 | -0,312 |
| 5 | Q8TF05 PP4R1_HUMAN | E.QNSGGKPS#PEGPEEE.S        | S481:        | 2 | 2,7434 | 0,263 | -0,376 |
| 5 | Q9NZI7 UBIP1_HUMAN | E.SGLVHDFDASLS#GIGQE.L      | S24:         | 2 | 2,7388 | 0,226 | -0,269 |
| 5 | Q16204 CCDC6_HUMAN | K.SGGIVISPFRL EE.L          |              | 2 | 2,7384 | 0,227 | -0,521 |
| 5 | Q71U36 TBA1A_HUMAN | E.GEFS#EARE.D               | S419:        | 2 | 2,7367 | 0,168 | -0,304 |

|   |                     |                              |              |   |        |       |        |
|---|---------------------|------------------------------|--------------|---|--------|-------|--------|
| 5 | Q6S8J3 A26CA_HUMAN  | K.AGFAGDDAPR.A               |              | 2 | 2,7361 | 0,314 | 0      |
| 5 | Q9Y2N3 PO121_HUMAN  | E.TATKPQATSAPS#PAPK.Q        | S674:        | 3 | 2,732  | 0,33  | -0,224 |
| 5 | P06756 ITAV_HUMAN   | R.EQLQPHENGEGNS#ET.-         | S1046:       | 2 | 2,7301 | 0,353 | -0,349 |
| 5 | Q86Y91 KI18B_HUMAN  | E.SLGM*EAQVER.A              |              | 2 | 2,7266 | 0,35  | -0,43  |
| 5 | Q9BSJ8 ESYT1_HUMAN  | E.LSGGPPHITSS#APE.L          | S950:        | 2 | 2,7259 | 0,274 | -0,341 |
| 5 | Q5VUA4 ZN318_HUMAN  | E.VILKGS#PEE.K               | S1420:       | 2 | 2,7195 | 0,307 | -0,232 |
| 5 | P62753 RS6_HUMAN    | R.LS#SLRASTS#KSE.S           | S235:S242:   | 2 | 2,7156 | 0,459 | -0,599 |
| 5 | P46821 MAP1B_HUMAN  | E.KTTS#PPEVSGYSYE.K          | S1965:       | 2 | 2,7153 | 0,245 | -0,075 |
| 5 | Q8NC44 F134A_HUMAN  | E.LAGFSPVVDVK.K              |              | 2 | 2,715  | 0,313 | 0,108  |
| 5 | Q8WWM7 ATX2L_HUMAN  | K.ISLAPTDVKE.L               |              | 2 | 2,7142 | 0,205 | 0      |
| 5 | Q5VWN6 CJ018_HUMAN  | E.LNQPASAAK.C                |              | 2 | 2,7141 | 0,131 | -0,136 |
| 5 | Q9P206 K1522_HUMAN  | E.SSTAEDALSIRS#E.M           | S130:        | 2 | 2,7123 | 0,32  | -0,591 |
| 5 | O60341 LSD1_HUMAN   | R.IADQFLGAM*YTLPR.Q          |              | 2 | 2,7116 | 0,276 | -0,681 |
| 5 | Q86SQ0 PHLB2_HUMAN  | E.KLQLS#DEESVFE.E            | S489:        | 2 | 2,7105 | 0,371 | -0,325 |
| 5 | A8MVB1 A8MVB1_HUMAN | R.GAGFPSIPVGKS#PM*VE.Q       | S110:        | 2 | 2,7099 | 0,254 | -0,439 |
| 5 | Q14807 KIF22_HUMAN  | E.IGSPEPM*AAPASASQKLS#PLQK.L | S427:        | 3 | 2,7082 | 0,115 | -0,238 |
| 5 | Q9UHX1 PUF60_HUMAN  | K.LGLPPLT#PEQQE.A            | T60:         | 2 | 2,7082 | 0,291 | -0,348 |
| 5 | Q3KQU3 MA7D1_HUMAN  | K.SLSRT#PETLLPFAEAE.A        | T813:        | 2 | 2,7081 | 0,258 | -0,398 |
| 5 | P35222 CTNB1_HUMAN  | E.TADLGLDIGAQGEPLGYR.Q       |              | 2 | 2,7068 | 0,399 | -0,463 |
| 5 | P46100 ATRX_HUMAN   | E.VQSSVDHQGDGSS#GTEQE.V      | S550:        | 3 | 2,7022 | 0,104 | -0,475 |
| 5 | Q14694 UBP10_HUMAN  | E.NDGV#GGLGQRE.R             | S141:        | 2 | 2,702  | 0,355 | -0,673 |
| 5 | O95684 FR1OP_HUMAN  | E.KSEIS#IGEEIEE.D            | S354:        | 2 | 2,6945 | 0,257 | -0,338 |
| 5 | P15586 GNS_HUMAN    | D.GM*SLLPILR.G               |              | 2 | 2,6931 | 0,142 | -0,12  |
| 5 | P51610 HCFC1_HUMAN  | D.SYLLQLQK.Y                 |              | 2 | 2,6926 | 0,177 | -0,123 |
| 5 | Q8IU85 KCC1D_HUMAN  | E.GKGDVM*ST#ACGTPGYVAPE.V    | T180:        | 2 | 2,6919 | 0,392 | -0,429 |
| 5 | P39687 AN32A_HUMAN  | E.GKLEGLT#DEFEE.L            | T38:         | 2 | 2,6891 | 0,399 | -0,759 |
| 5 | Q9UKM9 RALY_HUMAN   | E.GLLTHS#EEE.L               | S288:        | 2 | 2,689  | 0,139 | -0,446 |
| 5 | Q6ZRS2 SRCAP_HUMAN  | E.AKT#PT#SSPEKPQELVTAE.V     | T2682:T2684: | 3 | 2,688  | 0,158 | -0,088 |
| 5 | Q9NUL3 STAU2_HUMAN  | K.GSSPT#PPCS#PVQPSK.Q        | T488:S492:   | 2 | 2,6859 | 0,167 | -0,434 |
| 5 | Q9UJQ4 SALL4_HUMAN  | E.LGAPVNHGPNDEVAS#EDE.A      | S57:         | 2 | 2,6858 | 0,355 | -0,695 |
| 5 | P08648 ITA5_HUMAN   | E.GQQLLYVTR.V                |              | 2 | 2,6853 | 0,3   | 0      |
| 5 | P11940 PABP1_HUMAN  | E.LLHM*LES#PE.S              | S599:        | 2 | 2,6853 | 0,274 | -0,105 |
| 5 | O43815 STRN_HUMAN   | E.LNQGDM*KPPSYDS#DEGNETE.V   | S137:        | 3 | 2,6846 | 0,124 | -0,63  |

|   |                    |                               |            |   |        |       |        |
|---|--------------------|-------------------------------|------------|---|--------|-------|--------|
| 5 | P07384 CAN1_HUMAN  | R.KAPSDLYQIILK.A              |            | 2 | 2,6817 | 0,257 | -0,615 |
| 5 | Q9H307 PININ_HUMAN | E.GAVS#RLGGE.R                | S84:       | 2 | 2,6794 | 0,258 | -0,066 |
| 5 | Q8IYS0 GRM1C_HUMAN | E.SISRV#ETE.S                 | S251:      | 2 | 2,6791 | 0,306 | -0,449 |
| 5 | Q9UN86 G3BP2_HUMAN | E.QEERQPS#PEPVQE.N            | S163:      | 2 | 2,6786 | 0,311 | -0,448 |
| 5 | Q14676 MDC1_HUMAN  | E.GKAPQAVPLEK.S               |            | 2 | 2,6771 | 0,248 | -0,322 |
| 5 | Q96GY3 LIN37_HUMAN | E.RECSPSS#PLPLPEDEE.G         | S138:      | 2 | 2,6736 | 0,374 | -0,483 |
| 5 | Q6NZI2 PTRF_HUMAN  | E.SDAVLVDK.S                  |            | 2 | 2,6731 | 0,261 | 0,144  |
| 5 | Q09666 AHNK_HUMAN  | E.SEIKVPDVELK.S               |            | 3 | 2,6726 | 0,301 | 0,218  |
| 5 | Q9Y6N7 ROBO1_HUMAN | E.TYTDDLPPPPVPPPAIKS#PTAQSK.T | S1492:     | 3 | 2,6715 | 0,168 | -0,423 |
| 5 | Q9NRR5 UBQL4_HUMAN | R.RSS#GGGPGSPGAGE.G           | S139:      | 2 | 2,6708 | 0,299 | -0,306 |
| 5 | P07737 PROF1_HUMAN | K.DSPSVWAAVPGK.T              |            | 2 | 2,6699 | 0,392 | -0,101 |
| 5 | O75952 CABYR_HUMAN | E.AVGGLSCKPATPK.T             |            | 2 | 2,6647 | 0,403 | -0,402 |
| 5 | P49736 MCM2_HUMAN  | E.SFTM*ASS#PAQR.R             | S13:       | 2 | 2,6612 | 0,298 | -0,382 |
| 5 | Q6ZRS2 SRCAP_HUMAN | E.KNLSLT#PSAPSLTLE.A          | T2603:     | 2 | 2,6593 | 0,252 | -0,443 |
| 5 | Q8NBT0 WD51A_HUMAN | E.NQQLIMQR.A                  |            | 2 | 2,6555 | 0,188 | -0,118 |
| 5 | Q92614 MY18A_HUMAN | E.TSTPSEHSAAPS#PQVE.V         | S164:      | 2 | 2,6555 | 0,374 | -0,429 |
| 5 | Q15742 NAB2_HUMAN  | E.KLS#PLPGGPGAGDPR.I          | S171:      | 3 | 2,6535 | 0,151 | 0      |
| 5 | Q9UGU0 TCF20_HUMAN | E.NDTVITIS#PKQE.G             | S1522:     | 2 | 2,6515 | 0,361 | -0,279 |
| 5 | P13489 RINI_HUMAN  | E.LLPLLQCCQVVR.L              |            | 2 | 2,6513 | 0,477 | -0,249 |
| 5 | P22626 ROA2_HUMAN  | R.GGGNFGPGPGSNFR.G            |            | 2 | 2,6509 | 0,404 | 0,266  |
| 5 | Q00613 HSF1_HUMAN  | E.GRPPS#PPPTSTPE.K            | S363:      | 2 | 2,6473 | 0,238 | -0,523 |
| 5 | Q2NKX8 ERC6L_HUMAN | E.DSADNRQNFSS#QSLE.H          | S969:      | 2 | 2,6459 | 0,17  | -0,343 |
| 5 | Q2M2Z5 CT019_HUMAN | E.LNS#PLRE.R                  | S276:      | 2 | 2,6457 | 0,182 | 0      |
| 5 | Q96RG2 PASK_HUMAN  | R.SLS#DVAQAQE.L               | S1289:     | 2 | 2,6439 | 0,238 | 0      |
| 5 | Q6NSJ2 PHL3_HUMAN  | E.ASEVLAEPSSR.G               |            | 2 | 2,6433 | 0,284 | 0      |
| 5 | Q09666 AHNK_HUMAN  | E.SEIKVPDVELK.S               |            | 2 | 2,6433 | 0,305 | -0,097 |
| 5 | Q92667 AKAP1_HUMAN | E.TSS#SPRDKAIT#PPLPE.S        | S525:T533: | 2 | 2,6397 | 0,259 | -0,592 |
| 5 | P63218 GBG5_HUMAN  | K.VVQQLRLE.A                  |            | 2 | 2,6392 | 0,257 | -0,062 |
| 5 | P52948 NUP98_HUMAN | E.GSSEET#SFHDE.S              | T708:      | 2 | 2,6389 | 0,288 | -0,374 |
| 5 | Q86XZ4 SPAS2_HUMAN | E.TLS#IDARE.L                 | S155:      | 2 | 2,6374 | 0,256 | 0,124  |
| 5 | Q9NXG2 THUM1_HUMAN | E.YGDDMYGPEK.F                |            | 2 | 2,6359 | 0,44  | -0,104 |
| 5 | Q14839 CHD4_HUMAN  | E.KSAIDLT#PIVVE.D             | T1653:     | 2 | 2,6358 | 0,305 | -0,626 |
| 5 | Q5JSH3 WDR44_HUMAN | K.VGLSTFKETE.N                |            | 2 | 2,6333 | 0,331 | 0      |



|   |                    |                              |              |   |        |       |        |
|---|--------------------|------------------------------|--------------|---|--------|-------|--------|
| 5 | Q9UN86 G3BP2_HUMAN | E.ERQPS#PEPVQE.N             | S163:        | 2 | 2,6305 | 0,155 | -0,621 |
| 5 | Q8IX03 WWC1_HUMAN  | R.LIRTS#LDLE.L               | S988:        | 2 | 2,6292 | 0,142 | -0,107 |
| 5 | Q15942 ZYX_HUMAN   | R.EKVSS#IDLE.I               | S143:        | 2 | 2,6286 | 0,088 | -0,111 |
| 5 | Q8IUD2 RB6I2_HUMAN | E.AALEARAS#PE.M              | S730:        | 2 | 2,6244 | 0,174 | -0,223 |
| 5 | P30305 MPIP2_HUMAN | E.AFAQRPS#APD.L              | S230:        | 2 | 2,621  | 0,288 | -0,398 |
| 5 | Q69YH5 CDCA2_HUMAN | E.SMS#PIKE.T                 | S937:        | 2 | 2,6195 | 0,198 | 0      |
| 5 | Q13151 ROA0_HUMAN  | K.LFIGGLNVQTSE.S             |              | 2 | 2,6192 | 0,353 | -0,477 |
| 5 | Q6PGN9 PSRC1_HUMAN | E.QCALQDRES#AGE.G            | S98:         | 2 | 2,619  | 0,347 | -0,254 |
| 5 | Q9H2Y7 ZF106_HUMAN | E.QNPLETS#RSGCDE.V           | S1468:       | 2 | 2,6176 | 0,305 | -0,233 |
| 5 | Q8N9T8 KRI1_HUMAN  | D.SSS#DSS#SSESDSS#D.E        | S49:S51:S58: | 3 | 2,6175 | 0,129 | 1,507  |
| 5 | Q13428 TCOF_HUMAN  | K.LDSSPSVSTLAAKDDPD.G        |              | 2 | 2,61   | 0,324 | 0,406  |
| 5 | Q6IBW4 CNDH2_HUMAN | E.GM*SPM*EPAGVSPM*PGTQK.D    |              | 2 | 2,6046 | 0,299 | -0,462 |
| 5 | Q9NPF0 CD320_HUMAN | R.TSGLCVPLTWR.C              |              | 2 | 2,6037 | 0,262 | -0,378 |
| 5 | Q16512 PKN1_HUMAN  | E.GMGYGDRTST#FCGTPE.F        | T774:        | 2 | 2,6014 | 0,355 | -0,538 |
| 5 | Q9UKL3 C8AP2_HUMAN | E.ADTCKNS#PLDELEE.G          | S928:        | 2 | 2,6009 | 0,145 | -0,359 |
| 5 | O15446 RPA34_HUMAN | E.M*KPLES#PGGTM*APQQPE.G     | S359:        | 3 | 2,5996 | 0,095 | 0,096  |
| 5 | P49790 NU153_HUMAN | K.VQM*TSPSSTGSPM*FK.F        |              | 2 | 2,5987 | 0,314 | -0,604 |
| 5 | Q96JM3 ZN828_HUMAN | E.LQTPLPS#PEPSKPASVSSPEPPK.S | S173:        | 3 | 2,5974 | 0,163 | -0,373 |
| 5 | Q9Y4C1 JHD2A_HUMAN | E.HAPS#PSDVSNAPE.V           | S445:        | 2 | 2,5962 | 0,232 | -0,264 |
| 5 | Q9P0V3 SH3B4_HUMAN | E.M*GYIPSSYVQPLNYR.N         |              | 2 | 2,5937 | 0,437 | -0,203 |
| 5 | P04406 G3P_HUMAN   | R.VIISAPSADAPM*FVM*GVNHE.K   |              | 2 | 2,5924 | 0,182 | -1,383 |
| 5 | Q14137 BOP1_HUMAN  | E.EQVQAST#PCPR.T             | T106:        | 2 | 2,5917 | 0,397 | -0,451 |
| 5 | Q9NWH9 SLTM_HUMAN  | E.VSKPLPSEGS#LAE.A           | S217:        | 2 | 2,5916 | 0,16  | 0,263  |
| 5 | P42224 STAT1_HUMAN | E.IKS#LEDLQDE.Y              | S162:        | 2 | 2,5904 | 0,153 | -0,192 |
| 5 | Q9UPN4 AZI1_HUMAN  | E.AKLQSIM*S#FLDE.M           | S534:        | 2 | 2,5882 | 0,283 | -0,495 |
| 5 | P35527 K1C9_HUMAN  | K.STMQELNSR.L                |              | 2 | 2,5842 | 0,247 | -0,114 |
| 5 | O94804 STK10_HUMAN | K.ASQSRPNS#SALE.T            | S454:        | 2 | 2,5837 | 0,342 | -0,276 |
| 5 | Q99700 ATX2_HUMAN  | E.NKGIS#PVVSE.H              | S783:        | 2 | 2,5834 | 0,33  | -0,22  |
| 5 | P00558 PGK1_HUMAN  | K.ITLPVDFVTAD.K              |              | 2 | 2,5815 | 0,484 | -0,307 |
| 5 | Q86WR7 CJ047_HUMAN | R.AFSRGG#LE.S                | S31:         | 2 | 2,5792 | 0,155 | -0,182 |
| 5 | Q6S8J3 A26CA_HUMAN | E.M*ATAASSSLE.K              |              | 2 | 2,5766 | 0,262 | -0,456 |
| 5 | O95714 HERC2_HUMAN | E.GDMHLLSGPLS#PNE.S          | S368:        | 2 | 2,5718 | 0,285 | -0,237 |
| 5 | Q15573 TAF1A_HUMAN | E.LKGPVT#DDEEVE.T            | T13:         | 2 | 2,5685 | 0,083 | -0,432 |

|   |                    |                                  |            |   |        |       |        |
|---|--------------------|----------------------------------|------------|---|--------|-------|--------|
| 5 | Q92878 RAD50_HUMAN | E.NQSCCPVCQR.V                   |            | 2 | 2,5675 | 0,322 | -0,466 |
| 5 | Q00839 HNRPU_HUMAN | R.AKS#PQPPVEEE.D                 | S270:      | 2 | 2,5645 | 0,35  | -0,284 |
| 5 | Q9UJM3 ERRFI_HUMAN | E.DQVVCQFK.K                     |            | 2 | 2,5642 | 0,138 | -0,384 |
| 5 | P31942 HNRH3_HUMAN | R.DGM*DNQGGYGSVGR.M              |            | 2 | 2,5628 | 0,191 | -0,512 |
| 5 | Q16512 PKN1_HUMAN  | E.GM*GYGDRT#STFCGTPE.F           | T772:      | 2 | 2,5611 | 0,379 | -0,666 |
| 5 | Q14929 HAT1_HUMAN  | E.ISM*QHEQLEES#FQE.L             | S401:      | 2 | 2,5601 | 0,295 | -0,466 |
| 5 | Q9UMY4 SNX12_HUMAN | R.TNLPIFK.L                      |            | 2 | 2,555  | 0,093 | 0      |
| 5 | Q8N4C6 NIN_HUMAN   | E.NS#ILRNE.I                     | S1524:     | 2 | 2,5523 | 0,211 | -0,198 |
| 5 | O43572 AKA10_HUMAN | E.SSSTLTVASR.N                   |            | 2 | 2,5517 | 0,219 | -0,302 |
| 5 | P06493 CDC2_HUMAN  | E.GTY#GVVYK.G                    | Y15:       | 2 | 2,5506 | 0,178 | 0      |
| 5 | Q9HD15 SRA1_HUMAN  | E.TSPGPPPM*GPPPPSSK.A            |            | 2 | 2,5494 | 0,354 | -0,394 |
| 5 | P42566 EP15_HUMAN  | E.S#EPIHQESPARS#SPELLPSGVTDENE.V | S551:S562: | 3 | 2,5492 | 0,133 | -0,37  |
| 5 | Q86YZ3 HORN_HUMAN  | R.GPYESGSGHSSGLGHR.E             |            | 3 | 2,5459 | 0,345 | -0,346 |
| 5 | Q8NG31 CASCS_HUMAN | R.LVANDS#QLTPLEE.W               | S1039:     | 2 | 2,5451 | 0,178 | -0,323 |
| 5 | Q9NQS7 INCE_HUMAN  | E.QHVTQLMSTEPLR.T                |            | 2 | 2,5442 | 0,362 | -0,373 |
| 5 | Q96AQ6 PBIP1_HUMAN | E.GQSPPQS#LPS#TPK.A              | S129:S132: | 2 | 2,5421 | 0,255 | -0,658 |
| 5 | Q5H9R7 SAPS3_HUMAN | D.SLRSNS#PVEME.T                 | S740:      | 2 | 2,5413 | 0,235 | -0,367 |
| 5 | P20700 LMNB1_HUMAN | R.AGGPTT#PLS#PTRLSR.L            | T20:S23:   | 2 | 2,5412 | 0,206 | -0,219 |
| 5 | Q9UPN4 AZI1_HUMAN  | E.AKLQS#IM*SFLDE.M               | S531:      | 2 | 2,5407 | 0,325 | -0,495 |
| 5 | Q9H2U2 IPYR2_HUMAN | E.SVSSS#PNKESNEEE.Q              | S317:      | 2 | 2,5389 | 0,352 | -0,381 |
| 5 | P67809 YBOX1_HUMAN | R.NYQQNYQNS#ESGEKNE.G            | S165:      | 2 | 2,5331 | 0,201 | -0,546 |
| 5 | Q9UPN3 MACF1_HUMAN | R.RGS#DASDFDLLE.T                | S5372:     | 2 | 2,5293 | 0,266 | -0,347 |
| 5 | Q96AY2 EME1_HUMAN  | E.KIVVVDIS#DCEASCPPAPE.L         | S50:       | 2 | 2,5278 | 0,248 | -0,113 |
| 5 | P49327 FAS_HUMAN   | K.VGDPQELNGITR.A                 |            | 2 | 2,5277 | 0,362 | 0,188  |
| 5 | P32519 ELF1_HUMAN  | E.ASCHDGDDET#IETIE.A             | T95:       | 2 | 2,5276 | 0,102 | -0,074 |
| 5 | O94909 K0819_HUMAN | R.GPSQATSPIRS#PQE.S              | S300:      | 2 | 2,5251 | 0,331 | -0,954 |
| 5 | Q8IX90 CM003_HUMAN | E.NLLRT#PT#PPEVTKIPE.D           | T358:T360: | 3 | 2,5242 | 0,097 | -0,465 |
| 5 | Q02447 SP3_HUMAN   | R.TGERVS#PDINE.T                 | S317:      | 2 | 2,5223 | 0,109 | -0,282 |
| 5 | Q9Y5B0 CTDP1_HUMAN | E.NS#PAAFPDRE.G                  | S740:      | 2 | 2,52   | 0,52  | -0,103 |
| 5 | A7E2V4 K0913_HUMAN | E.SSPHS#PCEGLPSE.A               | S1092:     | 2 | 2,5182 | 0,286 | -0,417 |
| 5 | Q96DF8 DGC14_HUMAN | E.NT#PLRVE.G                     | T324:      | 2 | 2,5176 | 0,114 | 0      |
| 5 | Q14247 SRC8_HUMAN  | E.RLPSS#PVYE.D                   | S418:      | 2 | 2,5169 | 0,358 | 0      |
| 5 | Q6PEV8 CX039_HUMAN | E.RLS#GLFLNEE.V                  | S362:      | 2 | 2,5161 | 0,198 | -0,291 |

|   |                     |                                |            |   |        |       |        |
|---|---------------------|--------------------------------|------------|---|--------|-------|--------|
| 5 | B1ALK7 B1ALK7_HUMAN | E.TKS#NGQTVIEE.K               | S638:      | 2 | 2,5158 | 0,086 | -0,38  |
| 5 | Q8WXG6 MADD_HUMAN   | E.SDSRAS#SPNSTVSNTSTE.G        | S829:      | 2 | 2,5157 | 0,21  | -0,384 |
| 5 | P35658 NU214_HUMAN  | K.SPGS#TPTT#PTSSQAPQKLD.A      | S433:T437: | 2 | 2,5142 | 1     | -0,592 |
| 5 | P05783 K1C18_HUMAN  | E.STTVVTTQSAE.V                |            | 2 | 2,5097 | 0,39  | -0,109 |
| 5 | Q99733 NP1L4_HUMAN  | E.SEWHS#NEEEEE.K               | S125:      | 2 | 2,5082 | 0,16  | -0,575 |
| 5 | Q9BVJ6 UT14A_HUMAN  | E.LEAHGVS#ESE.G                | S405:      | 2 | 2,5078 | 0,205 | -0,214 |
| 5 | O75340 PDCD6_HUMAN  | R.LSDQFHDILIR.K                |            | 3 | 2,5066 | 0,263 | -0,404 |
| 5 | Q86V48 LUZP1_HUMAN  | E.STNSNAYTQR.S                 |            | 2 | 2,5042 | 0,223 | -0,534 |
| 5 | O43597 SPY2_HUMAN   | E.QRLLGSS#FSSGPVAD.G           | S139:      | 2 | 2,499  | 0,289 | -0,533 |
| 5 | Q14694 UBP10_HUMAN  | E.TKYS#PPAIS#PLVSEK.Q          | S365:S370: | 2 | 2,498  | 0,31  | -0,549 |
| 5 | Q8IWU2 LMTK2_HUMAN  | E.LSQLTALR.S                   |            | 2 | 2,4931 | 0,16  | -0,135 |
| 5 | Q15021 CND1_HUMAN   | E.FHLPLS#PEE.L                 | S13:       | 2 | 2,4879 | 0,215 | -0,85  |
| 5 | P51610 HCFC1_HUMAN  | E.LGHLS#AEGQE.G                | S1671:     | 2 | 2,4875 | 0,199 | -0,435 |
| 5 | Q7Z7E8 UB2Q1_HUMAN  | R.FRIAS#ACLDE.L                | S63:       | 2 | 2,4866 | 0,297 | -0,387 |
| 5 | Q9H7N4 SFR19_HUMAN  | R.AAKVPST#PPPK.A               | T976:      | 2 | 2,4833 | 0,183 | -0,416 |
| 5 | Q14980 NUMA1_HUMAN  | R.VSLEPHQPGT#PE.S              | T2000:     | 2 | 2,4826 | 0,24  | -0,342 |
| 5 | Q8TDZ2 MICA1_HUMAN  | R.QRLSS#LNLTDPDE.M             | S818:      | 2 | 2,482  | 0,232 | -0,236 |
| 5 | Q5VT52 K0460_HUMAN  | E.AASQS#TSAS#PANTTVSTIK.G      | S560:S564: | 2 | 2,4779 | 0,208 | -0,369 |
| 5 | P05556 ITB1_HUMAN   | K.NVLSLTKGE.V                  |            | 2 | 2,4721 | 0,157 | 0      |
| 5 | Q8N565 MREG_HUMAN   | E.LHYLPFPS#P.-                 | S213:      | 2 | 2,4682 | 0,324 | -0,424 |
| 5 | Q92628 K0232_HUMAN  | E.KALYS#PLFPASECE.E            | S1294:     | 2 | 2,4664 | 0,356 | -0,361 |
| 5 | Q5R372 Q5R372_HUMAN | E.ISTPRPSS#PGGLPE.E            | S119:      | 2 | 2,4661 | 0,23  | -0,414 |
| 5 | Q86UP2 KTN1_HUMAN   | E.IQNGNLHES#D.S                | S75:       | 2 | 2,4646 | 0,232 | -0,404 |
| 5 | Q02224 CENPE_HUMAN  | K.FQES#QEEIK.S                 | S1340:     | 2 | 2,4646 | 0,126 | -0,501 |
| 5 | Q8N201 INT1_HUMAN   | R.VAGDLGAGS#SPHPSLT#EEEDSQTE.L | S283:T290: | 3 | 2,4646 | 0,195 | -0,782 |
| 5 | O15027 SC16A_HUMAN  | E.ASGSFFKQIDS#SPVGGETDE.T      | S390:      | 3 | 2,4633 | 0,174 | -0,257 |
| 5 | Q86TI2 DPP9_HUMAN   | E.VIHVPS#PALE.E                | S292:      | 2 | 2,4614 | 0,316 | -0,214 |
| 5 | Q13426 XRCC4_HUMAN  | E.TLRNSS#PEDLFDEI.-            | S328:      | 2 | 2,4613 | 0,278 | -0,356 |
| 5 | Q9UBW7 ZMYM2_HUMAN  | E.LASQKGS#VSE.T                | S112:      | 2 | 2,4606 | 0,238 | -0,225 |
| 5 | P48681 NEST_HUMAN   | E.SLKS#AGQENLE.T               | S831:      | 2 | 2,4604 | 0,132 | -0,291 |
| 5 | Q8N655 CJ012_HUMAN  | E.AAQVNPIIM*PK.E               |            | 2 | 2,4578 | 0,333 | -0,225 |
| 5 | Q9UKV3 ACINU_HUMAN  | E.ASS#PPHPQLHS#EEE.I           | S425:S434: | 3 | 2,4574 | 0,145 | -0,508 |
| 5 | Q9Y519 T184B_HUMAN  | E.KTLLLS#SDDEF.-               | S402:      | 2 | 2,4544 | 0,266 | -0,453 |

|   |                     |                             |        |   |        |       |        |
|---|---------------------|-----------------------------|--------|---|--------|-------|--------|
| 5 | O43815 STRN_HUMAN   | E.LNQGDMKPPSYDS#DEGNE.T     | S137:  | 2 | 2,4538 | 0,203 | 0,118  |
| 5 | O14641 DVL2_HUMAN   | R.HLAGYESSS#TLMTSELE.S      | S196:  | 2 | 2,4499 | 0,319 | -0,252 |
| 5 | Q6IN85 SMEK1_HUMAN  | E.RFDDM*SS#PGLLEPSCE.L      | S127:  | 2 | 2,4493 | 0,189 | -0,504 |
| 5 | Q16630 CPSF6_HUMAN  | E.M*DTART#PLSEAE.F          | T407:  | 2 | 2,448  | 0,239 | -0,344 |
| 5 | P30622 CLIP1_HUMAN  | E.ANGLQTPASR.A              |        | 2 | 2,4476 | 0,415 | -0,219 |
| 5 | P61158 ARP3_HUMAN   | R.TLTGTVIDSGDGVTHVIPVAE.G   |        | 2 | 2,4427 | 0,327 | -0,352 |
| 5 | Q8IZT6 ASPM_HUMAN   | E.ENKIPIS#PISPAFNE.C        | S222:  | 2 | 2,4426 | 0,23  | -0,703 |
| 5 | Q96PK6 RBM14_HUMAN  | R.AQPSVSLGAPYR.G            |        | 2 | 2,4411 | 0,235 | -0,196 |
| 5 | Q6P0N0 CN106_HUMAN  | E.VAAAVGSR#PEE.C            | S914:  | 2 | 2,4409 | 0,29  | -0,487 |
| 5 | Q96KB5 TOPK_HUMAN   | K.SLNDLIEER.Y               |        | 2 | 2,437  | 0,161 | -0,112 |
| 5 | Q8WYP5 AHTF1_HUMAN  | E.TRIS#FVEE.D               | S1241: | 2 | 2,4364 | 0,162 | -0,115 |
| 5 | Q9UHD8 SEPT9_HUMAN  | R.NEKAPVDFGYVGID.S          |        | 2 | 2,4325 | 0,124 | -0,32  |
| 5 | P04406 G3P_HUMAN    | K.IKWGDAGAE.Y               |        | 2 | 2,4291 | 0,194 | 0,064  |
| 5 | P04264 K2C1_HUMAN   | K.SKAEAESLYQSK.Y            |        | 3 | 2,4272 | 0,09  | -0,068 |
| 5 | Q7Z4V5 HDGR2_HUMAN  | R.ARGDS#EALDEES.-           | S664:  | 2 | 2,4261 | 0,306 | -0,539 |
| 5 | O43149 ZZEF1_HUMAN  | E.VERPVS#SPGDPE.Q           | S2443: | 2 | 2,4237 | 0,316 | -0,452 |
| 5 | O75531 BAF_HUMAN    | R.DFVAEPMGEKPVGSLAGIGE.V    |        | 2 | 2,4233 | 0,417 | -0,305 |
| 5 | Q15418 KS6A1_HUMAN  | R.KLPS#TTL.-                | S732:  | 2 | 2,4222 | 0,404 | 0,073  |
| 5 | Q07021 C1QBP_HUMAN  | E.SDIFS#IRE.V               | S205:  | 2 | 2,4216 | 0,164 | -0,35  |
| 5 | Q9BXJ9 NARG1_HUMAN  | E.DMKITVNGDS#SAE.A          | S855:  | 2 | 2,4203 | 0,089 | 0,084  |
| 5 | O95361 TRI16_HUMAN  | E.LDLM*APGPLPR.A            |        | 2 | 2,4194 | 0,402 | -0,204 |
| 5 | Q10469 MGAT2_HUMAN  | E.ALAPPLDAEPAR.G            |        | 2 | 2,4193 | 0,441 | -0,457 |
| 5 | Q15836 VAMP3_HUMAN  | R.RLQQTQNQVDE.V             |        | 2 | 2,4177 | 0,297 | -0,449 |
| 5 | A4QPA1 A4QPA1_HUMAN | E.VATVVIQPTVLR.A            |        | 2 | 2,4173 | 0,13  | -0,282 |
| 5 | P14618 KPYM_HUMAN   | E.TAKGDYPLEAVR.M            |        | 3 | 2,4163 | 0,089 | 0,208  |
| 5 | Q6PJT7 ZC3HE_HUMAN  | E.TYS#PFFR.N                | S274:  | 2 | 2,4163 | 0,143 | -0,245 |
| 5 | Q13371 PHLP_HUMAN   | E.VLVLTSVR.N                |        | 2 | 2,4147 | 0,259 | -0,413 |
| 5 | Q6UN15 FIP1_HUMAN   | R.LVSELS#GGTGGDEEEE.W       | S14:   | 2 | 2,4137 | 0,124 | 0,434  |
| 5 | P11413 G6PD_HUMAN   | R.IIVEKPFGR.D               |        | 2 | 2,4091 | 0,104 | -0,115 |
| 5 | B2RA01 B2RA01_HUMAN | K.AQYEDIAQK.S               |        | 2 | 2,4084 | 0,19  | -0,343 |
| 5 | O75420 PERQ1_HUMAN  | K.LVASLQDSS#LEEE.Q          | S443:  | 2 | 2,408  | 0,173 | -0,407 |
| 5 | Q08211 DHX9_HUMAN   | E.IKSEEVPAFGVAS#PPPLTDTPD.T | S87:   | 3 | 2,4078 | 0,092 | 0,156  |
| 5 | Q92945 FUBP2_HUMAN  | K.VQIS#PDSGGLPE.R           | S181:  | 2 | 2,4062 | 0,165 | 0      |

|   |                      |                           |            |   |        |       |        |
|---|----------------------|---------------------------|------------|---|--------|-------|--------|
| 5 | P05362 ICAM1_HUMAN   | K.GTPM*KPNTQAT#PP.-       | T530:      | 2 | 2,4052 | 0,22  | -0,51  |
| 5 | P11766 ADHX_HUMAN    | E.FVTHNLS#FDE.I           | S351:      | 2 | 2,4019 | 0,208 | -0,189 |
| 5 | P05787 K2C8_HUMAN    | R.ISSSS#FSR.V             | S37:       | 2 | 2,3986 | 0,096 | 0,128  |
| 5 | Q9NUL3 STAU2_HUMAN   | K.GSSPT#PPCS#PVQPSKQLE.Y  | T488:S492: | 2 | 2,3975 | 0,303 | -0,475 |
| 5 | P48681 NEST_HUMAN    | E.YQESLRS#LEEE.G          | S934:      | 2 | 2,3932 | 0,405 | -0,334 |
| 5 | Q6NZI2 PTRF_HUMAN    | D.AVLVDKSDS#D.-           | S389:      | 2 | 2,3914 | 0,137 | -1,837 |
| 5 | Q9NQW6 ANLN_HUMAN    | E.LDMEKS#QEE.M            | S583:      | 2 | 2,3896 | 0,126 | -0,411 |
| 5 | O60307 MAST3_HUMAN   | E.RGPS#PSLLNTISLD.T       | S774:      | 2 | 2,3855 | 0,307 | -0,472 |
| 5 | Q9BVJ6 UT14A_HUMAN   | E.LEAHGVS#E.S             | S405:      | 2 | 2,3808 | 0,105 | 0      |
| 5 | O00625 PIR_HUMAN     | R.TPTLYLDFK.L             |            | 2 | 2,3805 | 0,231 | -0,222 |
| 5 | P54278 PMS2_HUMAN    | E.YAASS#PGDRGSQE.H        | S523:      | 2 | 2,3748 | 0,193 | -0,434 |
| 5 | Q14247 SRC8_HUMAN    | E.LSYRGPVSGTEPEPVY#SM*E.A | Y446:      | 2 | 2,3698 | 0,413 | -0,556 |
| 5 | Q13445 TMED1_HUMAN   | E.FTFLLPAGR.K             |            | 2 | 2,366  | 0,262 | -0,537 |
| 5 | Q13523 PRP4B_HUMAN   | E.TQS#LREQPE.M            | S8:        | 2 | 2,3658 | 0,233 | -0,313 |
| 5 | O43707 ACTN4_HUMAN   | E.M*NGTLEDQLSHLK.Q        |            | 3 | 2,3623 | 0,146 | 0,061  |
| 5 | P04637 P53_HUMAN     | K.LMFKTEGPDS#D.-          | S392:      | 2 | 2,3604 | 0,241 | -0,277 |
| 5 | Q8TD31 CCHCR_HUMAN   | E.AVCQGDNLDR.C            |            | 2 | 2,3589 | 0,195 | -0,106 |
| 5 | O15047 SET1A_HUMAN   | K.FSFLAS#DTEEEEE.N        | S508:      | 2 | 2,351  | 0,25  | 0,076  |
| 5 | Q7LBC6 JHD2B_HUMAN   | E.SLADSSS#RDS#FKQSLE.S    | S553:S556: | 3 | 2,349  | 0,183 | 0      |
| 5 | Q8N110 DOCK4_HUMAN   | E.SKT#PPPSVYE.R           | T1899:     | 2 | 2,3475 | 0,211 | -0,091 |
| 5 | Q9HD15 SRA1_HUMAN    | E.TSPGPPPMGPPPPSSK.A      |            | 2 | 2,346  | 0,303 | -0,558 |
| 5 | Q96T58 MINT_HUMAN    | E.SVRT#PGTYPE.D           | T638:      | 2 | 2,3432 | 0,131 | -0,103 |
| 5 | O15061 DMN_HUMAN     | K.GLQT#PVKD.A             | T598:      | 2 | 2,3422 | 0,196 | 0,26   |
| 5 | Q9BV73 CP250_HUMAN   | E.QAELSR#LE.A             | S1993:     | 2 | 2,3408 | 0,161 | -0,219 |
| 5 | P08047 SP1_HUMAN     | E.SQPSPLALLAATCSR.I       |            | 2 | 2,3403 | 0,31  | -0,466 |
| 5 | Q92667 AKAP1_HUMAN   | R.DKAIT#PPLPE.S           | T533:      | 2 | 2,3392 | 0,114 | 0      |
| 5 | Q4ZG04 Q4ZG04_HUMAN  | E.LLLSTLVR.E              |            | 2 | 2,3388 | 0,259 | -0,533 |
| 5 | Q00613 HSF1_HUMAN    | E.SEPAPAS#VTALTDAR.G      | S344:      | 2 | 2,3385 | 0,136 | -0,156 |
| 5 | ##Q96G01 BICD1_HUMAN | K.TT#KELS#TVQE.D          | T504:S508: | 2 | 2,3371 | 0,117 | -0,094 |
| 5 | P20700 LMNB1_HUMAN   | R.AGGPTT#PLS#PTR.L        | T20:S23:   | 2 | 2,331  | 0,308 | -0,557 |
| 5 | Q53HC9 TSSC1_HUMAN   | E.SGSHES#PDDSSSTAQTLE.L   | S112:      | 2 | 2,3301 | 0,475 | -0,637 |
| 5 | Q8WWI1 LMO7_HUMAN    | E.SGEGEIS#PQRE.V          | S1026:     | 2 | 2,329  | 0,326 | -0,385 |
| 5 | Q86U44 MTA70_HUMAN   | E.AALS#PTFR.S             | S43:       | 2 | 2,3287 | 0,259 | 0,065  |

|   |                    |                                       |              |   |        |       |        |
|---|--------------------|---------------------------------------|--------------|---|--------|-------|--------|
| 5 | Q9NWB7 IFT57_HUMAN | R.TRLLS#EVM*EE.L                      | S347:        | 2 | 2,3279 | 0,104 | -0,468 |
| 5 | Q09666 AHNK_HUMAN  | K.VEGDLKGPEVDIK.G                     |              | 3 | 2,3259 | 0,151 | -0,131 |
| 5 | P14174 MIF_HUMAN   | R.ASVPDGFLSE.L                        |              | 2 | 2,321  | 0,086 | 0,06   |
| 5 | P05362 ICAM1_HUMAN | E.LAPLPSWQPVGK.N                      |              | 2 | 2,3189 | 0,391 | -0,377 |
| 5 | P49792 RBP2_HUMAN  | E.SSINYFKT#PE.K                       | T2613:       | 2 | 2,314  | 0,198 | -0,089 |
| 5 | Q9UHV7 MED13_HUMAN | E.GFCS#PKPSE.I                        | S890:        | 2 | 2,3122 | 0,376 | -0,112 |
| 5 | Q6P996 PDXD1_HUMAN | E.RLSS#GPEQITL.E.A                    | S737:        | 2 | 2,309  | 0,156 | -0,346 |
| 5 | Q9NQY0 BIN3_HUMAN  | E.LRALS#IVADD.-                       | S248:        | 2 | 2,3081 | 0,132 | -0,423 |
| 5 | Q92797 SYMPK_HUMAN | E.ERS#PQTLAPVGE.D                     | S1243:       | 2 | 2,308  | 0,185 | 0      |
| 5 | Q6S8J3 A26CA_HUMAN | E.LPDGQVITIGNE.R                      |              | 2 | 2,3065 | 0,197 | -0,194 |
| 5 | Q04726 TLE3_HUMAN  | E.SSANNVS#PSESLR.A                    | S203:        | 2 | 2,3052 | 0,124 | -0,322 |
| 5 | Q9H118 ASCC2_HUMAN | R.GRLT#PSDM*PILLE.L                   | T233:        | 2 | 2,3043 | 0,085 | -0,257 |
| 5 | Q00839 HNRPU_HUMAN | K.DLPEHAVLK.M                         |              | 2 | 2,3033 | 0,221 | -0,179 |
| 5 | Q96JQ2 CLMN_HUMAN  | E.NDPM*DSHQSQES#PNLE.N                | S841:        | 2 | 2,303  | 0,229 | -0,381 |
| 5 | O94992 HEXI1_HUMAN | R.APLS#KFGD.-                         | S355:        | 2 | 2,3029 | 0,245 | -0,2   |
| 5 | Q9HB71 CYBP_HUMAN  | R.SFDLLVK.N                           |              | 2 | 2,3017 | 0,167 | 0,223  |
| 5 | Q9NQW6 ANLN_HUMAN  | E.SSLFSPM*PSEEK.A                     |              | 2 | 2,3006 | 0,353 | 0,09   |
| 5 | Q7Z6Z7 HUWE1_HUMAN | E.LLERDGGG#GNST#IIVSR.S               | S2362:T2366: | 2 | 2,2984 | 0,26  | -0,442 |
| 5 | P46776 RL27A_HUMAN | K.TGAAPIIDVVR.S                       |              | 2 | 2,2981 | 0,34  | -0,219 |
| 5 | Q9HD15 SRA1_HUMAN  | K.APRS#PPVGS GPASGVEPTSPFVESEAVM*E.D  | S87:         | 3 | 2,2971 | 0,088 | -0,247 |
| 5 | Q02952 AKA12_HUMAN | K.SPPS#PVERE.M                        | S1331:       | 2 | 2,2918 | 0,135 | 0,113  |
| 5 | Q9NQS7 INCE_HUMAN  | E.QHVTQLM*STEPLPR.T                   |              | 2 | 2,286  | 0,412 | -0,517 |
| 5 | Q9HD15 SRA1_HUMAN  | E.TSPGPPPM*GPPPPSSK.A                 |              | 3 | 2,286  | 0,201 | 0,236  |
| 5 | Q9H307 PININ_HUMAN | K.QQDS#QPEEVM DVLE.M                  | S381:        | 2 | 2,2819 | 0,296 | -0,283 |
| 5 | P18583 SON_HUMAN   | D.SFAAAPVPTTTLVLK.S                   |              | 2 | 2,2805 | 0,257 | -0,402 |
| 5 | Q16563 SYPL1_HUMAN | K.TVTATFGYPFRLNE.A                    |              | 2 | 2,2805 | 0,38  | -0,302 |
| 5 | P35612 ADDB_HUMAN  | E.AET#KSPLVS#PSKSLE.E                 | T611:S617:   | 2 | 2,2799 | 0,301 | -0,282 |
| 5 | Q15365 PCBP1_HUMAN | E.TLSQS#PQGR.V                        | S173:        | 2 | 2,2776 | 0,182 | -0,347 |
| 5 | Q63HQ0 CD016_HUMAN | E.SSCDLMTK.T                          |              | 2 | 2,2764 | 0,151 | -0,583 |
| 5 | Q15942 ZYX_HUMAN   | R.EKVSSIDLE.I                         |              | 2 | 2,2761 | 0,183 | 0,12   |
| 5 | Q8IX01 SFR14_HUMAN | E.ASGPS#PKPAGVDISEAPQTSSPCPSADIDM*K.T | S757:        | 3 | 2,2744 | 0,291 | -0,458 |
| 5 | P17612 KAPCA_HUMAN | E.EIRVS#INE.K                         | S339:        | 2 | 2,2739 | 0,181 | 0,117  |
| 5 | Q9H0E9 BRD8_HUMAN  | E.KM*DIAVS#YTGEELDFE.T                | S405:        | 2 | 2,273  | 0,121 | 0,251  |

|   |                     |                            |        |   |        |       |        |
|---|---------------------|----------------------------|--------|---|--------|-------|--------|
| 5 | Q8IVF2 AHNK2_HUMAN  | E.GDLHAAVGGAPVM*SPLS#PGE.R | S4897: | 2 | 2,2686 | 0,357 | -0,064 |
| 5 | O14686 MLL2_HUMAN   | R.LKS#TASSIE.T             | S1056: | 2 | 2,2658 | 0,104 | 0      |
| 5 | Q05655 KPCD_HUMAN   | E.SRAST#FCGTPDYIAPE.I      | T507:  | 2 | 2,2651 | 0,149 | -0,066 |
| 5 | Q9H307 PININ_HUMAN  | E.IAIVHS#D.A               | S347:  | 2 | 2,2644 | 0,09  | -0,073 |
| 5 | Q92974 ARHG2_HUMAN  | R.NRTL#VESLIDE.E           | S186:  | 2 | 2,263  | 0,211 | -0,503 |
| 5 | P49790 NU153_HUMAN  | K.VQM*TS#PSSTGSPMFK.F      | S516:  | 2 | 2,26   | 0,274 | 0,436  |
| 5 | P14625 ENPL_HUMAN   | R.SGYLLPDTK.A              |        | 2 | 2,2571 | 0,415 | -1,964 |
| 5 | Q07157 ZO1_HUMAN    | E.YSM*YSTDSR.H             |        | 2 | 2,2556 | 0,306 | -0,433 |
| 5 | P11498 PYC_HUMAN    | R.TSTAPAASPNVR.R           |        | 2 | 2,251  | 0,36  | -0,208 |
| 5 | O75676 KS6A4_HUMAN  | E.GFFLKS#VE.N              | S721:  | 2 | 2,2505 | 0,084 | -0,182 |
| 5 | Q9BXP5 ARS2_HUMAN   | E.CELS#PGVNRD.L            | S493:  | 2 | 2,25   | 0,091 | -0,398 |
| 5 | Q9BQS8 FYCO1_HUMAN  | E.ICLLKS#GE.L              | S1343: | 2 | 2,2489 | 0,132 | 0      |
| 5 | O15015 ZN646_HUMAN  | E.AAPARS#PPLQLSE.A         | S930:  | 2 | 2,2483 | 0,212 | -0,172 |
| 5 | P04637 P53_HUMAN    | K.LM*FKTEGPDS#D.-          | S392:  | 2 | 2,2483 | 0,143 | -0,183 |
| 5 | P13473 LAMP2_HUMAN  | R.IPLNDLFR.C               |        | 2 | 2,2439 | 0,234 | -0,185 |
| 5 | Q13115 DUS4_HUMAN   | E.AAS#PSGPLRE.R            | S345:  | 2 | 2,2436 | 0,365 | -0,115 |
| 5 | Q86V48 LUZP1_HUMAN  | R.HTSTS#NIQVGLAE.L         | S822:  | 2 | 2,2384 | 0,11  | -0,255 |
| 5 | Q3YEC7 PARF_HUMAN   | E.VAAPTKEGAPAPQQCS#EPE.T   | S492:  | 2 | 2,2383 | 0,404 | -0,424 |
| 5 | Q02952 AKA12_HUMAN  | K.VLSKPPGVVSE.V            |        | 2 | 2,2382 | 0,2   | -0,295 |
| 5 | P0C0S8 H2A1_HUMAN   | R.AGLQFPVGR.V              |        | 2 | 2,2358 | 0,309 | 0,065  |
| 5 | P45974 UBP5_HUMAN   | E.GRS#AADSISE.S            | S779:  | 2 | 2,2355 | 0,2   | -0,227 |
| 5 | P35527 K1C9_HUMAN   | K.TLLDIDNTR.M              |        | 2 | 2,2344 | 0,172 | 0      |
| 5 | O75531 BAF_HUMAN    | R.DFVAEPM*GEKPVGSLAGIGE.V  |        | 3 | 2,2343 | 0,111 | -0,181 |
| 5 | Q86SQ0 PHLB2_HUMAN  | E.LEKLQLS#DEE.S            | S489:  | 2 | 2,2304 | 0,223 | -0,285 |
| 5 | B2RDY9 B2RDY9_HUMAN | R.SALFAQINQGE.S            |        | 2 | 2,2302 | 0,221 | -0,104 |
| 5 | O95425 SVIL_HUMAN   | R.Y#QTQPVTLGEVE.Q          | Y850:  | 2 | 2,2294 | 0,236 | -0,253 |
| 5 | P42166 LAP2A_HUMAN  | R.SST#PLPTISSAE.N          | T160:  | 2 | 2,2283 | 0,165 | -0,36  |
| 5 | P10253 LYAG_HUMAN   | R.GAYTQVIFLAR.N            |        | 2 | 2,2161 | 0,17  | -0,197 |
| 5 | Q9BXK5 B2L13_HUMAN  | E.KSS#PATSLFVE.L           | S371:  | 2 | 2,214  | 0,135 | -0,196 |
| 5 | Q5T4S7 UBR4_HUMAN   | E.SAFQSEPRIS#E.S           | S1752: | 2 | 2,2138 | 0,126 | -0,183 |
| 5 | P16615 AT2A2_HUMAN  | E.KVGEAT#ETALTCLVE.K       | T441:  | 2 | 2,212  | 0,153 | -0,287 |
| 5 | O14745 NHERF_HUMAN  | E.AALES#PRPALVR.S          | S280:  | 3 | 2,2117 | 0,13  | 0      |
| 5 | Q2LD37 K1109_HUMAN  | E.GVSQHLS#PE.S             | S4308: | 2 | 2,2092 | 0,085 | -0,118 |

|   |                     |                          |        |   |        |       |        |
|---|---------------------|--------------------------|--------|---|--------|-------|--------|
| 5 | Q96L92 SNX27_HUMAN  | E.SGYGFNVR.G             |        | 2 | 2,2057 | 0,255 | 0      |
| 5 | Q03135 CAV1_HUMAN   | E.LS#EKQVYD.A            | S37:   | 2 | 2,1978 | 0,145 | -0,345 |
| 5 | Q8IYH0 Q8IYH0_HUMAN | K.TVDLGIS#DLEDDC.-       | S201:  | 2 | 2,1977 | 0,263 | -0,319 |
| 5 | Q9C0B1 FATSO_HUMAN  | R.VGM*GSSYNGQDE.V        |        | 2 | 2,1955 | 0,145 | -0,484 |
| 5 | O00358 FOX1_HUMAN   | R.VFGLVPERPLS#PE.L       | S231:  | 2 | 2,1937 | 0,259 | -0,482 |
| 5 | Q2KHR2 RFXD2_HUMAN  | E.QKLQS#PLPGE.S          | S225:  | 2 | 2,1933 | 0,2   | -0,518 |
| 5 | Q9UQ35 SRRM2_HUMAN  | R.VSGRTS#PPLLD.R         | S2398: | 2 | 2,1912 | 0,13  | 0      |
| 5 | Q5SYE7 NHSL1_HUMAN  | R.AVPSPT#TGEE.G          | T1235: | 2 | 2,1901 | 0,202 | -0,114 |
| 5 | Q5JSP0 FGD3_HUMAN   | K.DAERS#LE.L             | S327:  | 2 | 2,188  | 0,119 | 0,136  |
| 5 | Q96RK0 CIC_HUMAN    | E.RSM*#SETGTAAAPGVSS.E.L | S301:  | 2 | 2,1867 | 0,153 | -0,352 |
| 5 | P24666 PPAC_HUMAN   | E.LLGSYDPQK.Q            |        | 2 | 2,1848 | 0,122 | -0,119 |
| 5 | O00401 WASL_HUMAN   | E.TSKVIY#DFIE.K          | Y256:  | 2 | 2,1801 | 0,164 | -0,283 |
| 5 | P48681 NEST_HUMAN   | E.LQFPRT#PE.G            | T338:  | 2 | 2,177  | 0,207 | 0,114  |
| 5 | O94915 FRYL_HUMAN   | K.NPSVVFSS#NEDLE.V       | S2385: | 2 | 2,1766 | 0,179 | -0,08  |
| 5 | Q86W92 LIPB1_HUMAN  | E.DDMFKDFAAR.S           |        | 2 | 2,1753 | 0,218 | -0,401 |
| 5 | Q8WYP5 AHTF1_HUMAN  | E.LNHLS#PVQGTE.A         | S1411: | 2 | 2,17   | 0,17  | -0,383 |
| 5 | Q96R06 SPAG5_HUMAN  | E.VAPCM*GDRFS#E.V        | S183:  | 2 | 2,1699 | 0,184 | -0,358 |
| 5 | Q8IVF2 AHNK2_HUMAN  | E.SFS#PEEKEE.G           | S5741: | 2 | 2,1679 | 0,181 | -0,42  |
| 5 | P60981 DEST_HUMAN   | E.KLGG#LIVAFE.G          | S155:  | 2 | 2,1668 | 0,192 | -0,603 |
| 5 | Q6PKG0 LARP1_HUMAN  | R.AVTPVPTKTEE.V          |        | 2 | 2,1597 | 0,366 | -0,312 |
| 5 | P13798 ACPH_HUMAN   | K.ALDVSAS#DDE.I          | S187:  | 2 | 2,1509 | 0,173 | -0,111 |
| 5 | Q969F1 TF3C6_HUMAN  | E.DEEVAS#APDK.S          | S155:  | 2 | 2,1494 | 0,117 | -0,492 |
| 5 | P52815 RM12_HUMAN   | K.EYPPKIQLVQD.I          |        | 2 | 2,1478 | 0,236 | -0,251 |
| 5 | Q10471 GALT2_HUMAN  | R.VVSPIIDVINM*D.N        |        | 2 | 2,1467 | 0,252 | -0,642 |
| 5 | P13645 K1C10_HUMAN  | R.LAADDFR.L              |        | 2 | 2,1423 | 0,321 | 0,075  |
| 5 | P21333 FLNA_HUMAN   | K.YGGQPVPNFPSK.L         |        | 2 | 2,1416 | 0,135 | -0,189 |
| 5 | Q02952 AKA12_HUMAN  | E.VHVS#TVEE.R            | S422:  | 2 | 2,1405 | 0,131 | 0,187  |
| 5 | P04920 B3A2_HUMAN   | E.QALLPRVPT#DE.I         | T257:  | 2 | 2,1394 | 0,176 | -0,37  |
| 5 | P21333 FLNA_HUMAN   | R.ENGVYLIDVK.F           |        | 2 | 2,1386 | 0,29  | -0,318 |
| 5 | Q14202 ZMYM3_HUMAN  | E.TTSIATAR.R             |        | 2 | 2,1346 | 0,295 | 0,223  |
| 5 | Q15276 RAB1_HUMAN   | R.AIKAM*#PEQEE.T         | T480:  | 2 | 2,1323 | 0,096 | -0,636 |
| 5 | P43358 MAGA4_HUMAN  | R.QPNEGSSSQEEGPSTSPDAE.S |        | 2 | 2,1316 | 0,405 | -0,226 |
| 5 | Q15349 KS6A2_HUMAN  | R.AY#SFCGTIE.Y           | Y217:  | 2 | 2,1288 | 0,209 | -0,108 |



|   |                      |                         |        |   |        |       |        |
|---|----------------------|-------------------------|--------|---|--------|-------|--------|
| 5 | O43432 IF4G3_HUMAN   | E.HS#PVVYGTVE.S         | S192:  | 2 | 2,1245 | 0,256 | -0,313 |
| 5 | Q16543 CDC37_HUMAN   | K.TGDEKDVSV.-           |        | 2 | 2,1227 | 0,328 | 0,193  |
| 5 | Q68E09 Q68E09_HUMAN  | R.GAS#PPISAIEE.F        | S11:   | 2 | 2,1206 | 0,128 | -0,106 |
| 5 | Q9P2L0 WDR35_HUMAN   | E.GGEGKLPTCVATGS#PITE.Y | S1145: | 2 | 2,1192 | 0,167 | -0,395 |
| 5 | P81605 DCD_HUMAN     | K.ENAGEDPGLAR.Q         |        | 2 | 2,115  | 0,13  | -0,324 |
| 5 | Q8NBT0 WD51A_HUMAN   | E.NQQLIMQRAT#P.-        | T406:  | 2 | 2,1131 | 0,248 | -0,177 |
| 5 | Q14683 SMC1A_HUMAN   | R.ISSIYARE.A            |        | 2 | 2,1117 | 0,145 | 0,13   |
| 5 | Q14157 UBP2L_HUMAN   | E.AKGS#TTGSQFLE.Q       | S356:  | 2 | 2,1069 | 0,206 | 0,09   |
| 5 | Q9C0C2 TB182_HUMAN   | E.VSS#CVGSGGSEARE.S     | S1174: | 2 | 2,1054 | 0,321 | -0,315 |
| 5 | Q92628 K0232_HUMAN   | E.KALYS#PLFPASECEE.C    | S1294: | 2 | 2,1042 | 0,328 | -0,469 |
| 5 | Q9Y2U5 M3K2_HUMAN    | R.DRS#SPPPGYIPDE.L      | S163:  | 2 | 2,1026 | 0,204 | -0,566 |
| 5 | Q9BZZ5 API5_HUMAN    | K.T#GEALKTEENKIK.V      | T399:  | 2 | 2,102  | 0,19  | 1,029  |
| 5 | Q8NAV1 PR38A_HUMAN   | E.AEQLEPR.V             |        | 2 | 2,1018 | 0,089 | 0,072  |
| 5 | Q8N680 ZBTB2_HUMAN   | E.GRS#ILLGSGDSE.V       | S483:  | 2 | 2,1015 | 0,246 | 0      |
| 5 | P56537 IF6_HUMAN     | E.AQPSTIATSM*R.D        |        | 2 | 2,1006 | 0,269 | -0,414 |
| 5 | ##Q6ZMW3 EMALL_HUMAN | D.GNLAGS#YTIDE.K        | S1746: | 2 | 2,0951 | 0,232 | -0,5   |
| 5 | P53999 TCP4_HUMAN    | K.EQISDIDDAVR.K         |        | 2 | 2,0943 | 0,308 | 0,484  |
| 5 | Q99829 CPNE1_HUMAN   | R.DIVQFVPYR.R           |        | 2 | 2,0934 | 0,264 | -0,107 |
| 5 | P09874 PARP1_HUMAN   | K.AEPVEVVAPR.G          |        | 2 | 2,0913 | 0,157 | -0,343 |
| 5 | Q02878 RL6_HUMAN     | K.AVDSQILPK.I           |        | 2 | 2,0893 | 0,213 | 0,126  |
| 5 | P13010 KU86_HUMAN    | E.QGGAHFS#VSSLAE.G      | S577:  | 2 | 2,086  | 0,159 | -0,267 |
| 5 | Q9H8W4 PKHF2_HUMAN   | R.SDSYSQSLK.S           |        | 2 | 2,0817 | 0,127 | 0,12   |
| 5 | Q9H307 PININ_HUMAN   | E.IAIVHS#DAE.K          | S347:  | 2 | 2,0803 | 0,097 | 0,118  |
| 5 | O43143 DHX15_HUMAN   | E.LGSM*M*AEFPLDQLAK.M   |        | 2 | 2,0739 | 0,254 | -0,274 |
| 5 | Q96MF7 NSE2_HUMAN    | R.SSS#NSGSTGFISFGVE.S   | S7:    | 2 | 2,0705 | 0,262 | -0,423 |
| 5 | Q8NAV1 PR38A_HUMAN   | E.EAEQLEPR.V            |        | 2 | 2,07   | 0,161 | 0,063  |
| 5 | O95155 UBE4B_HUMAN   | E.TQSQSLR.S             |        | 2 | 2,0699 | 0,227 | -0,135 |
| 5 | Q8TEQ6 GEMI5_HUMAN   | R.EPVICTPVSSGFE.K       |        | 2 | 2,0631 | 0,106 | -0,515 |
| 5 | P62736 ACTA_HUMAN    | R.DLTDYLM*K.I           |        | 2 | 2,0597 | 0,179 | -0,06  |
| 5 | Q9UQ35 SRRM2_HUMAN   | E.FSAS#PM*LK.S          | S1124: | 2 | 2,0592 | 0,114 | -0,062 |
| 5 | Q96CV9 OPTN_HUMAN    | R.KNS#AIPSELNE.K        | S342:  | 2 | 2,0565 | 0,191 | -0,095 |
| 5 | O14686 MLL2_HUMAN    | D.GFLKPPAGSVPGPDS#PGE.L | S1880: | 2 | 2,0513 | 0,166 | -0,341 |
| 5 | O15417 TNC18_HUMAN   | E.RLS#PFLAE.S           | S263:  | 2 | 2,0422 | 0,084 | -0,301 |

|   |                     |                           |            |   |        |       |        |
|---|---------------------|---------------------------|------------|---|--------|-------|--------|
| 5 | Q9BZF3 OSBL6_HUMAN  | E.S#RLSM*SESVSE.F         | S484:      | 2 | 2,0415 | 0,162 | -0,466 |
| 5 | Q9BXJ9 NARG1_HUMAN  | K.ITVNGDS#SAEAE.L         | S855:      | 2 | 2,0339 | 0,217 | -0,087 |
| 5 | A8K7V5 A8K7V5_HUMAN | E.VSTAPAGTDM*PAAK.K       |            | 2 | 2,0336 | 0,316 | -0,549 |
| 5 | Q8IY67 RAVR1_HUMAN  | E.LVRPFGS#LE.R            | S157:      | 2 | 2,0203 | 0,094 | -0,556 |
| 5 | Q9HOW8 CS061_HUMAN  | E.SGHS#QPGLYGIE.R         | S7:        | 2 | 2,0131 | 0,209 | -0,276 |
| 5 | Q9UJX5 APC4_HUMAN   | K.IKEEVLS#ESEAE.N         | S777:      | 2 | 2,013  | 0,089 | 0,507  |
| 5 | P15880 RS2_HUMAN    | E.TVFTKS#PYQE.F           | S264:      | 2 | 2,0121 | 0,113 | -0,095 |
| 5 | Q12756 KIF1A_HUMAN  | E.SCPVVGM*SR.S            |            | 2 | 2,0092 | 0,341 | -0,121 |
| 5 | Q96RL1 UIMC1_HUMAN  | E.TGAFRVPS#PGMEE.A        | S653:      | 2 | 2,0091 | 0,146 | -0,418 |
| 5 | Q9H019 FA54B_HUMAN  | R.NAS#VPNLRGSEE.R         | S103:      | 2 | 2,0081 | 0,128 | 0      |
| 5 | Q5CZB5 Q5CZB5_HUMAN | E.GEGAAGAGDHDPS#LGAGE.A   | S114:      | 2 | 1,9996 | 0,15  | -0,618 |
| 5 | Q6Y7W6 PERQ2_HUMAN  | E.CGFYQRS#FDE.V           | S139:      | 2 | 1,9992 | 0,237 | -0,264 |
| 5 | Q8IX90 CM003_HUMAN  | E.NLLRT#PT#PPEVTKIPE.D    | T358:T360: | 2 | 1,9989 | 0,165 | -0,621 |
| 5 | Q86W92 LIPB1_HUMAN  | R.RSQSTT#FNPDMMSEPE.F     | T603:      | 2 | 1,9877 | 0,244 | -0,318 |
| 5 | Q6P2E9 EDC4_HUMAN   | R.GLLPGLLPAPADK.L         |            | 2 | 1,9853 | 0,21  | -0,58  |
| 5 | Q92797 SYMPK_HUMAN  | E.RS#PQTLAPVGE.D          | S1243:     | 2 | 1,9852 | 0,084 | -0,296 |
| 5 | Q9NRF2 SH2B1_HUMAN  | R.ASGSLSPPIPLS#PGAE.I     | S96:       | 2 | 1,9804 | 0,31  | -0,42  |
| 5 | P49736 MCM2_HUMAN   | E.LTAS#QRE.A              | S108:      | 2 | 1,9768 | 0,088 | 0,276  |
| 5 | P11498 PYC_HUMAN    | R.FIGPSPEVVR.K            |            | 2 | 1,9707 | 0,197 | -0,111 |
| 5 | Q63ZY3 KANK2_HUMAN  | E.IASM*LYSR.M             |            | 2 | 1,9688 | 0,102 | 0      |
| 5 | P30307 MPIP3_HUMAN  | E.QIALLVKDM*S#P.-         | S472:      | 2 | 1,9666 | 0,119 | -0,186 |
| 5 | Q02952 AKA12_HUMAN  | E.HDPGQGSSS#PEQAGSPTEGE.G | S743:      | 2 | 1,9642 | 0,222 | 0,48   |
| 5 | Q9Y4C1 JHD2A_HUMAN  | E.HAPSPS#DVSNAPE.V        | S447:      | 2 | 1,957  | 0,085 | -0,264 |
| 5 | Q8IWW6 RHG12_HUMAN  | E.LSSSSTEQIR.A            |            | 2 | 1,956  | 0,089 | -0,33  |
| 5 | Q13426 XRCC4_HUMAN  | R.NSS#PEDLFDEI.-          | S328:      | 2 | 1,9509 | 0,212 | -0,363 |
| 5 | Q9BQY9 DBND2_HUMAN  | E.LSLPVPTSDR.T            |            | 2 | 1,9408 | 0,085 | -0,112 |
| 5 | P35527 K1C9_HUMAN   | R.MTLDDFR.I               |            | 2 | 1,9398 | 0,308 | -0,068 |
| 5 | Q9BQG0 MBB1A_HUMAN  | E.QLM*TVLQAGK.A           |            | 2 | 1,9391 | 0,095 | -0,221 |
| 5 | Q14C86 GAPD1_HUMAN  | E.GISEGPSNR.S             |            | 2 | 1,9383 | 0,236 | -0,2   |
| 5 | Q15154 PCM1_HUMAN   | E.TASPVAVSLR.S            |            | 2 | 1,9266 | 0,101 | 0,244  |
| 5 | Q6PGP3 Q6PGP3_HUMAN | D.ESVKLIPKIE.F            |            | 2 | 1,9254 | 0,21  | -0,317 |
| 5 | Q02156 KPCE_HUMAN   | E.FKGF5#YFGE.D            | S729:      | 2 | 1,9231 | 0,093 | -0,315 |
| 5 | Q12888 TP53B_HUMAN  | E.DLFDQSNK.T              |            | 2 | 1,9189 | 0,192 | 0      |

|   |                    |                           |            |   |        |       |        |
|---|--------------------|---------------------------|------------|---|--------|-------|--------|
| 5 | Q5VT52 K0460_HUMAN | E.TRV#SSCLDLPDSTEE.K      | S1068:     | 2 | 1,9166 | 0,263 | -0,455 |
| 5 | Q969H8 CS010_HUMAN | R.ESDVPLKTE.E             |            | 2 | 1,9139 | 0,196 | -0,479 |
| 5 | O00584 RNT2_HUMAN  | R.SWPFNLEE.I              |            | 2 | 1,8924 | 0,125 | -0,239 |
| 5 | P06493 CDC2_HUMAN  | E.GT#YGVVYK.G             | T14:       | 2 | 1,8871 | 0,262 | -0,063 |
| 5 | Q9H773 XTP3A_HUMAN | R.FSFSPEPTLE.D            |            | 2 | 1,8866 | 0,234 | -0,317 |
| 5 | O75962 TRIO_HUMAN  | E.GLSSGTLK.S              |            | 2 | 1,8732 | 0,147 | 0,215  |
| 5 | Q14684 RRP1B_HUMAN | E.AIVDQSPFVPEETM*EEQK.T   |            | 2 | 1,8702 | 0,33  | -0,35  |
| 5 | Q96M96 FGD4_HUMAN  | R.TPGIGPVLPLEERGAETE.T    |            | 2 | 1,8701 | 0,149 | -0,327 |
| 5 | Q96JJ7 TXD10_HUMAN | R.YEVSKS#ENE.N            | S415:      | 2 | 1,8461 | 0,167 | -0,314 |
| 5 | P04264 K2C1_HUMAN  | K.SISISVAR.G              |            | 2 | 1,8391 | 0,114 | 1,172  |
| 5 | Q96A08 H2B1A_HUMAN | R.LLLPGELAK.H             |            | 2 | 1,8358 | 0,136 | -1,087 |
| 5 | Q13641 TPBG_HUMAN  | R.LTNLSSNS#DV.-           | S418:      | 2 | 1,8345 | 0,083 | -0,432 |
| 5 | O95425 SVIL_HUMAN  | E.KY#GSFEEAE.A            | Y966:      | 2 | 1,8294 | 0,157 | -0,321 |
| 5 | Q9UHX1 PUF60_HUMAN | K.LGLPPLTPE.Q             |            | 2 | 1,8207 | 0,158 | -0,13  |
| 5 | Q92628 K0232_HUMAN | E.KALYS#PLFPASE.C         | S1294:     | 2 | 1,8023 | 0,127 | -0,348 |
| 5 | O14818 PSA7_HUMAN  | R.AITVFSPDGHLFQVE.Y       |            | 2 | 1,7996 | 0,089 | -0,294 |
| 5 | Q14807 KIF22_HUMAN | K.LSSM*DPAM*LE.R          |            | 2 | 1,7995 | 0,137 | 0      |
| 5 | Q14202 ZMYM3_HUMAN | K.ASSDLCDLVSNQS#AEGLLE.D  | S960:      | 2 | 1,7976 | 0,278 | 0,117  |
| 5 | P10075 GLI4_HUMAN  | E.QAPRS#PGSQAPDE.G        | S86:       | 2 | 1,7939 | 0,257 | -0,43  |
| 5 | Q8IXT5 RB12B_HUMAN | R.GRPGSGTS#GVDLSLNFI.E.S  | S101:      | 2 | 1,7844 | 0,193 | -0,262 |
| 5 | O43572 AKA10_HUMAN | E.SSSTLTVASRNS#PAS#PLKE.L | S278:S281: | 2 | 1,7817 | 0,374 | 0,7    |
| 5 | P49792 RBP2_HUMAN  | E.TVFTPKT#SPE.N           | T1399:     | 2 | 1,7641 | 0,086 | -0,514 |
| 5 | Q8WZ73 RFFL_HUMAN  | R.RAS#LSDLTDLEDIE.G       | S240:      | 2 | 1,7596 | 0,175 | -0,515 |
| 5 | P06576 ATPB_HUMAN  | K.VVDLLAPYAK.G            |            | 2 | 1,7567 | 0,145 | -0,448 |
| 5 | P05423 RPC4_HUMAN  | K.DVSVAELLR.E             |            | 2 | 1,7551 | 0,114 | -0,061 |
| 5 | Q8WUF5 IASPP_HUMAN | E.AGDVDEGPVARPLS#PTR.L    | S489:      | 2 | 1,7509 | 0,323 | -0,269 |
| 5 | P08651 NFIC_HUMAN  | R.SFVGLGPR.D              |            | 2 | 1,724  | 0,164 | 0,146  |
| 5 | Q9UMN6 MLL4_HUMAN  | E.RS#PLLPLPE.D            | S2356:     | 2 | 1,7196 | 0,091 | -0,221 |
| 5 | P27816 MAP4_HUMAN  | E.ALNS#PHSE.S             | S197:      | 2 | 1,7164 | 0,239 | -0,131 |
| 5 | Q14684 RRP1B_HUMAN | K.VGDGDL#AEEIPENE.V       | S245:      | 2 | 1,714  | 0,093 | -0,148 |
| 5 | Q9NYL9 TMOD3_HUMAN | E.KVS#LDPELE.E            | S114:      | 2 | 1,7131 | 0,166 | 0      |
| 5 | P13473 LAMP2_HUMAN | E.NATCLYAK.W              |            | 2 | 1,7095 | 0,175 | -0,065 |
| 5 | Q03468 ERCC6_HUMAN | E.QLS#PQAATSRD.I          | S158:      | 2 | 1,7051 | 0,175 | -0,487 |

|   |                       |                           |                 |   |        |       |        |
|---|-----------------------|---------------------------|-----------------|---|--------|-------|--------|
| 5 | P61604 CH10_HUMAN     | K.VLLPEYGGTK.V            |                 | 2 | 1,6973 | 0,099 | 0      |
| 5 | Q9P260 K1468_HUMAN    | R.EPSTASGGGQLNR.A         |                 | 2 | 1,6838 | 0,156 | -0,192 |
| 5 | Q04637 IF4G1_HUMAN    | R.ALPSEELNR.Q             |                 | 2 | 1,6791 | 0,111 | -0,119 |
| 5 | Q9UQ35 SRRM2_HUMAN    | E.FSASPMLK.S              |                 | 2 | 1,675  | 0,082 | -0,208 |
| 5 | B2R5M6 B2R5M6_HUMAN   | E.EAGNGT#TT#ATVLAR.S      | T113:T115:      | 2 | 1,6664 | 0,112 | -1,363 |
| 5 | P11177 ODPB_HUMAN     | K.DFLIPIGK.A              |                 | 2 | 1,6646 | 0,083 | -0,068 |
| 5 | ##Q8NH5 HUS1B_HUMAN   | E.VAVTLSPR.R              |                 | 2 | 1,6375 | 0,086 | -1,158 |
| 5 | P18206 VINC_HUMAN     | R.DYLIDGSR.G              |                 | 2 | 1,6373 | 0,147 | 0      |
| 5 | Q3KQU3 MA7D1_HUMAN    | E.LGAGAPPAVVAR.T          |                 | 2 | 1,6301 | 0,153 | -0,113 |
| 5 | Q13873 BMPR2_HUMAN    | K.VFSFANR.Q               |                 | 2 | 1,6299 | 0,121 | 0,145  |
| 5 | Q7Z434 MAVS_HUMAN     | E.LSKPGVLASQVDS#PFSGCFE.D | S430:           | 2 | 1,6271 | 0,255 | -0,221 |
| 5 | Q8TE77 SSH3_HUMAN     | E.SLRPPS#AEPGGSSE.Q       | S259:           | 2 | 1,6145 | 0,088 | -0,42  |
| 5 | Q08999 RBL2_HUMAN     | E.ICIAGS#PLT#PRRVTE.V     | S639:T642:      | 2 | 1,6123 | 0,182 | -0,133 |
| 5 | Q9H6A9 PCX3_HUMAN     | E.RES#PAAQPLLE.H          | S2023:          | 2 | 1,6064 | 0,249 | -0,095 |
| 5 | P60709 ACTB_HUMAN     | E.ALFQPSFLGM*E.S          |                 | 2 | 1,5916 | 0,105 | -0,389 |
| 5 | Q8N543 OGFD1_HUMAN    | E.GTSHS#PPEPE.N           | S395:           | 2 | 1,588  | 0,117 | -0,437 |
| 5 | Q9Y6A5 TACC3_HUMAN    | E.QFGTS#SFKE.S            | S547:           | 2 | 1,5872 | 0,118 | -0,11  |
| 5 | Q99590 SFRIP_HUMAN    | E.SS#EGEIIQTVDR.Q         | S299:           | 2 | 1,5814 | 0,138 | -0,518 |
| 5 | P26447 S10A4_HUMAN    | R.ELPSFLGK.R              |                 | 2 | 1,5761 | 0,134 | -0,342 |
| 5 | P35908 K22E_HUMAN     | R.GFSSGSAAVVGSR.R         |                 | 2 | 1,5571 | 0,222 | -0,292 |
| 5 | Q13136 LIPA1_HUMAN    | E.T#SPPS#SPR.A            | T740:S744:      | 2 | 1,5363 | 0,11  | -0,308 |
| 5 | Q9UN86 G3BP2_HUMAN    | E.NANSGYYE.A              |                 | 2 | 1,5315 | 0,122 | -0,266 |
| 5 | Q16878 CDO1_HUMAN     | R.TLADLIR.I               |                 | 2 | 1,5293 | 0,246 | 0,076  |
| 5 | Q16531 DDB1_HUMAN     | R.TVPLYESPR.K             |                 | 2 | 1,4989 | 0,093 | -0,115 |
| 5 | O95425 SVIL_HUMAN     | R.S#LTQPITTEE.V           | S734:           | 2 | 1,4877 | 0,104 | 0,509  |
| 5 | Q96QE3 ATAD5_HUMAN    | K.SGYIS#ESENSE.I          | S306:           | 2 | 1,4871 | 0,093 | -0,476 |
| 5 | ##Q02763 TIE2_HUMAN   | E.GIVDQFK.I               |                 | 2 | 1,4707 | 0,208 | 0,529  |
| 5 | O43663 PRC1_HUMAN     | E.LDHTPDT#SFE.R           | T194:           | 2 | 1,433  | 0,091 | -0,295 |
| 5 | Q96QR8 PURB_HUMAN     | E.HYAQLGPS#SPEQLAAGAE.E.G | S100:           | 2 | 1,4135 | 0,37  | -0,24  |
| 5 | O14745 NHERF_HUMAN    | E.AALES#PRPALVR.S         | S280:           | 2 | 1,309  | 0,111 | 0,269  |
| 5 | Q7Z4H7 FA29A_HUMAN    | R.AVLS#DSPQLSE.G          | S550:           | 2 | 1,2498 | 0,121 | 0,1    |
| 5 | ##Q6ZTF7 Q6ZTF7_HUMAN | D.GWEVSFY#VAPS#AT#GRTK.R  | Y135:S139:T141: | 2 | 1,2234 | 0,146 | 1,979  |
| 5 | Q9UNX4 WDR3_HUMAN     | K.LLAVS#LLDCTVKIFY#VD.T   | S567:Y577:      | 2 | 1,1681 | 0,108 | -1,719 |

|   |                    |                                         |                 |   |        |       |        |
|---|--------------------|-----------------------------------------|-----------------|---|--------|-------|--------|
| 6 | P49840 GSK3A_HUMAN | R.ARTSS#FAEPGGGGGGGGGGPGGSASGPGGTGGGK.A | S21:            | 3 | 8,1999 | 0,472 | -0,467 |
| 6 | Q92734 TFG_HUMAN   | E.INKNVMSAFGLTDDQVSGPPSAPAEDR.S         |                 | 3 | 6,5207 | 0,494 | -0,52  |
| 6 | Q92734 TFG_HUMAN   | K.NVM*SAFGLTDDQVSGPPSAPAEDR.S           |                 | 3 | 6,0875 | 0,453 | -0,517 |
| 6 | Q92734 TFG_HUMAN   | E.INKNVM*SAFGLTDDQVSGPPSAPAEDR.S        |                 | 3 | 6,0348 | 0,464 | -0,258 |
| 6 | P18583 SON_HUMAN   | E.GQLNGETNTPIEGNQAGDAAASAR.S            |                 | 3 | 5,9714 | 0,556 | -0,078 |
| 6 | Q6PKG0 LARP1_HUMAN | E.TES#APGS#PRAVTPVPTKTEE.V              | S517:S521:      | 3 | 5,6097 | 0,382 | -0,165 |
| 6 | Q9P287 BCCIP_HUMAN | E.LTDLLIQQNHIGSVIK.Q                    |                 | 2 | 5,5086 | 0,503 | -0,681 |
| 6 | P43308 SSRB_HUMAN  | E.DGPVVIGSTSAPGQGGILAQRE.F              |                 | 3 | 5,4784 | 0,454 | -0,26  |
| 6 | P55072 TERA_HUMAN  | E.TDPSYCVIAPDTVIHCE.G                   |                 | 3 | 5,3934 | 0,466 | -0,176 |
| 6 | Q13263 TIF1B_HUMAN | E.TKPVLM*ALAEGPGAEGPR.L                 |                 | 3 | 5,276  | 0,306 | 0      |
| 6 | P02686 MBP_HUMAN   | E.LNAEKAS#TNS#ETNRGESE.K                | S16:S19:        | 3 | 5,2592 | 0,46  | -0,262 |
| 6 | Q14974 IMB1_HUMAN  | E.AIGYICQDIDPEQLQDKSNE.I                |                 | 3 | 5,1963 | 0,353 | -0,157 |
| 6 | P19338 NUCL_HUMAN  | E.SKTLVLSNLSYS#ATEE.T                   | S496:           | 2 | 5,1926 | 0,513 | -0,469 |
| 6 | P60174 TPIS_HUMAN  | E.LASQPDVDGFLVGGASLKPE.F                |                 | 2 | 5,1079 | 0,534 | -0,549 |
| 6 | P49327 FAS_HUMAN   | E.LACPT#PKEDGLAQQQTQLNLR.S              | T2204:          | 3 | 5,0639 | 0,278 | -0,297 |
| 6 | Q9UQ35 SRRM2_HUMAN | K.SKDSLQSCPGSLSLCAGVK.S                 |                 | 3 | 5,0625 | 0,46  | -0,262 |
| 6 | Q09666 AHNK_HUMAN  | K.LKGPQITGPSLEGDLGLK.G                  |                 | 3 | 4,9973 | 0,445 | -0,1   |
| 6 | P51610 HCFC1_HUMAN | E.AAASLVSTSTVGQQNGSVVR.V                |                 | 2 | 4,9869 | 0,36  | -0,331 |
| 6 | P61160 ARP2_HUMAN  | E.LLFNTIQAADIDTR.S                      |                 | 2 | 4,9764 | 0,426 | -0,383 |
| 6 | P08708 RS17_HUMAN  | D.FGS#LSNLQVTQPTVGM*NFK.T               | S113:           | 3 | 4,9574 | 0,27  | -0,676 |
| 6 | Q02790 FKBP4_HUMAN | E.SGAQSAPLPMEGVDISPKQDE.G               |                 | 3 | 4,9479 | 0,356 | 0      |
| 6 | P12270 TPR_HUMAN   | E.AM*QSEGPVEHVPVFGSTSGSVR.S             |                 | 3 | 4,933  | 0,407 | -0,241 |
| 6 | Q13263 TIF1B_HUMAN | E.GTSAPGGGPGTLDD#ATICR.V                | S624:           | 2 | 4,9237 | 0,547 | -0,619 |
| 6 | Q13263 TIF1B_HUMAN | R.VCQKPGDLVM*CNQCE.F                    |                 | 2 | 4,9214 | 0,474 | -0,724 |
| 6 | Q13263 TIF1B_HUMAN | E.TKPVLMALAEGPGAEGPR.L                  |                 | 3 | 4,9111 | 0,34  | -0,102 |
| 6 | Q6PKG0 LARP1_HUMAN | E.TES#APGS#PRAVT#PVPTKTEE.V             | S517:S521:T526: | 3 | 4,9011 | 0,379 | -0,159 |
| 6 | O95208 EPN2_HUMAN  | R.M*AQVATGM*GSNQITFGR.G                 |                 | 2 | 4,8791 | 0,446 | -0,339 |
| 6 | Q92615 LARP5_HUMAN | E.KFTSSQTQSPT#PPKPPS#PSFE.L             | T518:S524:      | 3 | 4,8775 | 0,222 | -0,376 |
| 6 | Q15424 SAFB1_HUMAN | E.LAEAPT#EAPS#PEAR.D                    | T340:S344:      | 2 | 4,8701 | 0,404 | -0,687 |
| 6 | Q96JM3 ZN828_HUMAN | E.SQKLAPVPS#PEPQKAPVPS#PE.S             | S204:S214:      | 3 | 4,8625 | 0,438 | 0,234  |
| 6 | P67809 YBOX1_HUMAN | E.TKAADPPAENSS#APEAEQGGAE.-             | S314:           | 3 | 4,8191 | 0,379 | 0      |
| 6 | P54105 ICLN_HUMAN  | E.VDTTPTVAGQFEDADVDH.-                  |                 | 2 | 4,7876 | 0,584 | -0,446 |
| 6 | Q96JM3 ZN828_HUMAN | K.LAPVPS#PEPQKAPVPS#PE.S                | S204:S214:      | 2 | 4,7783 | 0,445 | 0,366  |

|   |                    |                                         |              |   |        |       |        |
|---|--------------------|-----------------------------------------|--------------|---|--------|-------|--------|
| 6 | P98171 RHG04_HUMAN | E.KQVVGAGLQTAGESGSS#PE.G                | S824:        | 2 | 4,7688 | 0,611 | -0,519 |
| 6 | O75694 NU155_HUMAN | E.DQACATCLILACSTAACDRE.V                |              | 3 | 4,7675 | 0,451 | -0,08  |
| 6 | O14562 UBFD1_HUMAN | E.AEAAAGAAAEDSGAAR.G                    |              | 2 | 4,7547 | 0,573 | 0      |
| 6 | P21333 FLNA_HUMAN  | E.AIGDDVGTGLGFSVEGPSQAKIE.C             |              | 3 | 4,7546 | 0,303 | -0,501 |
| 6 | P61160 ARP2_HUMAN  | E.LLFNTIQAADIDTRSE.F                    |              | 2 | 4,7533 | 0,411 | -0,608 |
| 6 | P08729 K2C7_HUMAN  | E.LQSQISDTSVVLSMDNSR.S                  |              | 2 | 4,748  | 0,458 | -0,062 |
| 6 | P19338 NUCL_HUMAN  | E.SKTLVLSNLS#YSATEE.T                   | S494:        | 2 | 4,7394 | 0,511 | -0,402 |
| 6 | Q8WUA4 TF3C2_HUMAN | E.M*SLPTPLPGFEDS#PDQR.R                 | S63:         | 3 | 4,7121 | 0,384 | -0,369 |
| 6 | P35527 K1C9_HUMAN  | R.GSGSGSYGGGGSGGGYGGGSGSR.G             |              | 2 | 4,6882 | 0,428 | -0,613 |
| 6 | P60709 ACTB_HUMAN  | D.LYANTVLSGGTTM*YPGIADR.M               |              | 3 | 4,6876 | 0,379 | -0,432 |
| 6 | Q02952 AKA12_HUMAN | E.TCVSGEDPTQGADLS#PDEK.V                | S483:        | 2 | 4,6678 | 0,515 | -0,234 |
| 6 | O95208 EPN2_HUMAN  | R.M*AQVATGMGSNQITFGR.G                  |              | 2 | 4,663  | 0,561 | -0,41  |
| 6 | Q9P1Y5 K1543_HUMAN | E.ASKPPAPSEGS#PKAVAS#SPAATNSE.V         | S547:S553:   | 3 | 4,6201 | 1     | -0,439 |
| 6 | Q8IY17 PLPL6_HUMAN | R.CVS#M*PGDISGLQGGPR.S                  | S411:        | 2 | 4,5951 | 0,519 | 0,283  |
| 6 | O75179 ANR17_HUMAN | E.HYPVSSPSS#PS#PPAQPGGVS.R              | S2045:S2047: | 3 | 4,5724 | 1     | -0,244 |
| 6 | P19634 SL9A1_HUMAN | R.CLS#DPGPHPEPGEPEFFPKGQ.-              | S796:        | 3 | 4,5638 | 0,488 | -0,372 |
| 6 | Q9NZD8 SPG21_HUMAN | E.VQKGSGLIS#QEEQ.-                      | S304:        | 2 | 4,5544 | 0,332 | -0,494 |
| 6 | Q8WWK9 CKAP2_HUMAN | E.VSIEDTGVDDVDPEKLE.M                   |              | 2 | 4,5524 | 0,425 | -0,35  |
| 6 | P13645 K1C10_HUMAN | K.GSLGGGFSSGGFSGGSFSR.G                 |              | 2 | 4,5522 | 0,5   | -0,5   |
| 6 | P16989 DBPA_HUMAN  | E.AKAGEAPTENPAPPTQQSS#AE.-              | S370:        | 3 | 4,5338 | 0,291 | 0      |
| 6 | O95674 CDS2_HUMAN  | E.SEAKVDGETAS#DSE.S                     | S33:         | 2 | 4,5314 | 0,545 | -0,324 |
| 6 | Q9UBQ5 EIF3K_HUMAN | E.KIDFDSVSSIM*ASS#Q.-                   | S217:        | 2 | 4,5135 | 0,391 | -0,499 |
| 6 | Q4KMP7 TB10B_HUMAN | E.GLHPSLPS#PTGNST#PLGSSKE.T             | S432:T438:   | 3 | 4,475  | 0,191 | -0,165 |
| 6 | P05783 K1C18_HUMAN | R.STS#FRGGM*GSGGLATGIAGGLAGM*GGIQNEKE.T | S53:         | 3 | 4,4514 | 0,384 | -0,119 |
| 6 | O95232 CROP_HUMAN  | E.VNGTSEDIKSEGDTQS#N.-                  | S431:        | 2 | 4,4372 | 0,577 | -0,656 |
| 6 | Q68D10 SPT2_HUMAN  | E.YNHAES#EQEYEEE.Q                      | S139:        | 2 | 4,4367 | 0,361 | -0,422 |
| 6 | Q9NYL9 TMOD3_HUMAN | E.KVSLDPELEEALTSAS#DTE.L                | S127:        | 2 | 4,43   | 0,486 | -0,577 |
| 6 | O75674 TM1L1_HUMAN | E.ATNTTSEPSAPSQDLLDLS#PSPR.M            | S321:        | 3 | 4,4266 | 0,248 | -0,371 |
| 6 | Q92917 GPKOW_HUMAN | E.LHYDAICQYM*GPS#DTDDD.-                | S471:        | 3 | 4,3791 | 0,394 | -0,083 |
| 6 | P29374 ARI4A_HUMAN | E.SRS#VKS#ESDITIE.V                     | S1018:S1021: | 2 | 4,3728 | 0,53  | -0,606 |
| 6 | Q659C4 LARP2_HUMAN | E.TKLNPGENV#EDE.A                       | S60:         | 2 | 4,3688 | 0,477 | -0,311 |
| 6 | Q9UBQ5 EIF3K_HUMAN | E.KIDFDSVSSIMASS#Q.-                    | S217:        | 2 | 4,3269 | 0,285 | -0,792 |
| 6 | Q13367 AP3B2_HUMAN | E.NAEKAFYGS#EEDE.A                      | S272:        | 2 | 4,3227 | 0,405 | -0,078 |

|   |                     |                                    |              |   |        |       |        |
|---|---------------------|------------------------------------|--------------|---|--------|-------|--------|
| 6 | Q13428 TCOF_HUMAN   | K.LDSS#PSVSSTLAAKDDPDGKQE.A        | S1228:       | 3 | 4,3124 | 0,401 | -0,55  |
| 6 | Q8TEA8 DTD1_HUMAN   | E.DRSASS#GAEGDVSS#EREP.-           | S197:S205:   | 2 | 4,3111 | 0,39  | -0,428 |
| 6 | Q16204 CCDC6_HUMAN  | E.KLDQPV#APPS#PRDISME.I            | S240:S244:   | 3 | 4,31   | 0,263 | -0,258 |
| 6 | Q9NZ23 Q9NZ23_HUMAN | E.DQVVSSDIVNNTGHSIFD.A             |              | 2 | 4,3098 | 0,533 | -0,564 |
| 6 | Q9ULT8 HECD1_HUMAN  | E.GHDSLS#VGS#FEEDSKSE.F            | S2317:S2320: | 2 | 4,3053 | 0,306 | -0,372 |
| 6 | P54727 RD23B_HUMAN  | K.QEKPAEKPAETPVAT#SPTATDSTSGDSSR.S | T159:        | 3 | 4,3024 | 0,229 | -0,544 |
| 6 | Q96EB6 SIRT1_HUMAN  | E.RAGGAGFGT#DGDDQEAIN.E.A          | T719:        | 2 | 4,2959 | 0,481 | -0,498 |
| 6 | O00273 DFFA_HUMAN   | E.KQAPELSLS#SQDLE.L                | S256:        | 2 | 4,2893 | 0,435 | 0,15   |
| 6 | Q96QR8 PURB_HUMAN   | E.HYAQLGPSS#PEQLAAGAE.E.G          | S101:        | 2 | 4,287  | 0,499 | -0,6   |
| 6 | P31949 S10AB_HUMAN  | E.FLNLIIGLAM*ACHD.S                |              | 3 | 4,2791 | 0,356 | -0,236 |
| 6 | Q5VZL5 ZMYM4_HUMAN  | E.KDQGSTYS#GDLESE.A                | S1091:       | 2 | 4,2755 | 0,477 | -0,229 |
| 6 | Q8IWX3 ANKH1_HUMAN  | E.THPSSS#PTPTSSNTQEE.A             | S2069:       | 2 | 4,2683 | 0,485 | -0,784 |
| 6 | P53367 ARFP1_HUMAN  | K.NSAAEIPVTSNGEVDDSR.E.H           |              | 2 | 4,2678 | 0,371 | 0,307  |
| 6 | Q13263 TIF1B_HUMAN  | E.TKPVLM*ALAEPGAEGPR.L             |              | 2 | 4,2663 | 0,464 | -0,27  |
| 6 | P17275 JUNB_HUMAN   | E.ARS#RDAT#PPVSPINM*EDQE.R         | S251:T255:   | 3 | 4,2581 | 0,396 | -0,08  |
| 6 | P10636 TAU_HUMAN    | E.IVYKS#PVVSGDT#SPR.H              | S713:T720:   | 2 | 4,2575 | 0,417 | -0,277 |
| 6 | Q16204 CCDC6_HUMAN  | E.KLDQPV#APPS#PRDISM*E.I           | S240:S244:   | 3 | 4,2525 | 0,365 | 0,341  |
| 6 | P17275 JUNB_HUMAN   | E.ARS#RDAT#PPVSPINMEDQE.R          | S251:T255:   | 3 | 4,2499 | 0,209 | -0,322 |
| 6 | P35527 K1C9_HUMAN   | R.SGGGGGGGLGSGGSIR.S               |              | 2 | 4,2454 | 0,566 | -0,396 |
| 6 | Q9H000 MKR2_HUMAN   | R.KTQPSM*VSNPGSCSDPQPS#PE.M        | S139:        | 3 | 4,2324 | 0,361 | -0,472 |
| 6 | Q9HC35 EMAL4_HUMAN  | E.SRISS#PTLLENSLE.Q                | S919:        | 2 | 4,2231 | 0,377 | -0,427 |
| 6 | P78347 GTF2I_HUMAN  | E.SAEPQLEVPATEEIKE.T               |              | 2 | 4,2093 | 0,407 | -0,329 |
| 6 | Q02952 AKA12_HUMAN  | E.ESQLPGTGGPEDVLPVQR.A             |              | 2 | 4,1962 | 0,443 | -0,486 |
| 6 | P42166 LAP2A_HUMAN  | E.SRSST#PLPTISSAE.N                | T160:        | 2 | 4,1871 | 0,497 | -0,381 |
| 6 | P80723 BASP_HUMAN   | E.AAAAPAESAAPAAGEEPSKEE.G          |              | 2 | 4,1829 | 0,472 | -0,749 |
| 6 | P49321 NASP_HUMAN   | E.NKS#LQENEEEE.I                   | S503:        | 2 | 4,1812 | 0,4   | -0,512 |
| 6 | Q8TBC4 UBA3_HUMAN   | E.NCPACSQLPQNIQFSPSAK.L            |              | 3 | 4,1698 | 0,328 | -0,256 |
| 6 | P07355 ANXA2_HUMAN  | E.TVILGLLTPAQYDASE.L               |              | 2 | 4,1693 | 0,499 | -0,335 |
| 6 | O94915 FRYL_HUMAN   | E.SRYS#SSSGGSYEEE.K                | S1533:       | 2 | 4,1656 | 0,434 | -0,836 |
| 6 | Q9NZ53 PDXL2_HUMAN  | E.NGCHDNPTLDVAS#DSQSE.M            | S558:        | 2 | 4,1551 | 0,503 | -0,482 |
| 6 | Q8IWX9 CDAN1_HUMAN  | R.SKQLQQS#PTPTCPTPE.L              | S265:        | 2 | 4,1485 | 0,452 | -0,714 |
| 6 | P31943 HNRH1_HUMAN  | K.HTGPNSPDTANDGFVR.L               |              | 3 | 4,1478 | 0,32  | -0,109 |
| 6 | P08729 K2C7_HUMAN   | E.LQSQISDTSVLSM*DNSR.S             |              | 3 | 4,1416 | 0,254 | -0,275 |

|   |                    |                               |              |   |        |       |        |
|---|--------------------|-------------------------------|--------------|---|--------|-------|--------|
| 6 | P17029 ZKSC1_HUMAN | E.SREATGLS#PQAAQE.K           | S13:         | 2 | 4,1263 | 0,368 | -0,56  |
| 6 | P18615 NELFE_HUMAN | E.LGPDGEEAEGPGAGDGPPR.S       |              | 2 | 4,1178 | 0,533 | -0,48  |
| 6 | P46199 IF2M_HUMAN  | E.AILNIIDTYDASHECE.L          |              | 2 | 4,1023 | 0,434 | -0,72  |
| 6 | O75534 CSDE1_HUMAN | E.SKSPAAPGQS#PTGSVCYE.R       | S123:        | 2 | 4,0891 | 0,419 | -0,385 |
| 6 | Q8N2M8 SFR16_HUMAN | E.KITFITSFGGS#DEE.A           | S320:        | 2 | 4,0829 | 0,342 | -0,682 |
| 6 | Q96S66 CLCC1_HUMAN | E.SSQSAKPVSGQDTSNGTEGS#PAAE.K | S509:        | 3 | 4,0788 | 0,39  | -0,463 |
| 6 | Q9C0B5 ZDHC5_HUMAN | E.SVQAGPEPDPPLGYTS#PFLSAR.L   | S499:        | 3 | 4,0673 | 0,37  | -0,464 |
| 6 | Q8WWM7 ATX2L_HUMAN | E.VDGLLTSEPM*GSPVSSKTE.S      |              | 2 | 4,0647 | 0,49  | -0,188 |
| 6 | Q13263 TIF1B_HUMAN | R.VCQKPGDLVMCNQCE.F           |              | 2 | 4,0623 | 0,536 | -0,465 |
| 6 | Q92615 LARP5_HUMAN | E.KFTSSQTQS#PTPKPPS#PSFE.L    | S516:S524:   | 3 | 4,0599 | 0,092 | -0,301 |
| 6 | Q14160 LAP4_HUMAN  | R.LRVQS#PEPPAPERALS#PAE.L     | S1475:S1486: | 3 | 4,0581 | 0,245 | -0,332 |
| 6 | P02686 MBP_HUMAN   | E.LNAEKAS#TNS#ETNRGE.S        | S16:S19:     | 3 | 4,0554 | 0,426 | -0,292 |
| 6 | Q96J02 ITCH_HUMAN  | E.TRVSTNGS#DDPEDAGAGE.N       | S221:        | 2 | 4,0506 | 0,455 | -0,525 |
| 6 | Q9NPI1 BRD7_HUMAN  | E.LAQQVTPGDIVSTYGVR.K         |              | 2 | 4,0406 | 0,506 | -0,541 |
| 6 | Q6S8J3 A26CA_HUMAN | K.SYELPDGQVITIGNE.R           |              | 2 | 4,04   | 0,554 | -0,522 |
| 6 | P04920 B3A2_HUMAN  | E.RTS#PSS#PAPLPHQE.A          | S170:S173:   | 2 | 4,0379 | 0,473 | -0,367 |
| 6 | P39880 CUX1_HUMAN  | E.IQAGSQGQAGASDPSAR.S         |              | 2 | 4,0299 | 0,553 | -0,506 |
| 6 | Q7Z6Z7 HUWE1_HUMAN | E.AVGDTSAAGSSEQPR.A           |              | 2 | 4,0284 | 0,52  | -0,341 |
| 6 | Q14160 LAP4_HUMAN  | E.LRSLEPSPS#PGPQEE.D          | S1581:       | 2 | 4,0262 | 0,393 | -0,287 |
| 6 | Q14676 MDC1_HUMAN  | E.TQPQRLLAEDS#EEE.V           | S168:        | 2 | 4,0205 | 0,512 | -0,797 |
| 6 | Q92615 LARP5_HUMAN | E.EKFTSSQTQSPT#PPKPPS#PSFE.L  | T518:S524:   | 3 | 4,0168 | 0,305 | -0,143 |
| 6 | Q13263 TIF1B_HUMAN | E.TKPVLMALAEGPGAEGPR.L        |              | 2 | 4,0062 | 0,491 | -0,408 |
| 6 | P35908 K22E_HUMAN  | R.GSSSGGGYSSGSSSYGSGGR.Q      |              | 2 | 4,0038 | 0,418 | -0,35  |
| 6 | O75643 U520_HUMAN  | E.TM*DLDQGGREALAPR.Q          |              | 2 | 4,0019 | 0,511 | -0,328 |
| 6 | Q02790 FKBP4_HUMAN | E.EQKSNTAGS#QSQVETEA.-        | S451:        | 2 | 3,9976 | 0,429 | -0,521 |
| 6 | P04083 ANXA1_HUMAN | E.DFGVNEDLADSDAR.A            |              | 2 | 3,9951 | 0,482 | -0,32  |
| 6 | Q8TEA8 DTD1_HUMAN  | E.DRSASS#GAEGDVSSE.R          | S197:        | 2 | 3,9931 | 0,519 | -0,398 |
| 6 | Q02952 AKA12_HUMAN | E.ESQLPGTGGPEDVLQPVQRAE.A     |              | 3 | 3,9896 | 0,313 | -0,249 |
| 6 | Q96PK6 RBM14_HUMAN | R.TQSSASLAASYAAQQHPQAAAASYR.G |              | 3 | 3,9852 | 0,492 | -0,297 |
| 6 | P43308 SSRB_HUMAN  | E.DGPVVIGSTSAPGQGGILAQR.E     |              | 3 | 3,9842 | 0,22  | -0,277 |
| 6 | P68400 CSK21_HUMAN | E.FYHPGQEYNVR.V               |              | 3 | 3,9767 | 0,34  | -0,065 |
| 6 | Q16204 CCDC6_HUMAN | E.KLDQPV#APPS#PR.D            | S240:S244:   | 2 | 3,9761 | 0,389 | -0,393 |
| 6 | P31949 S10AB_HUMAN | E.FLNLIIGLAM*ACHD.S           |              | 2 | 3,9746 | 0,45  | -0,473 |



|   |                     |                            |              |   |        |       |        |
|---|---------------------|----------------------------|--------------|---|--------|-------|--------|
| 6 | P33991 MCM4_HUMAN   | E.NVGIDITEPLYM*QR.L        |              | 2 | 3,9741 | 0,441 | -0,366 |
| 6 | Q8N1G4 LRC47_HUMAN  | E.NKEEGSL#DTEAD.A          | S520:        | 2 | 3,9628 | 0,49  | -0,414 |
| 6 | P43308 SSRB_HUMAN   | E.DGPVVIGSTSAPGQGILAQRE.F  |              | 2 | 3,9616 | 0,58  | -0,347 |
| 6 | Q96T37 RBM15_HUMAN  | E.LGSQLSDEAVEDGLFHE.F      |              | 2 | 3,9588 | 0,518 | -0,33  |
| 6 | Q8WXI9 P66B_HUMAN   | R.GRLTPSPDIIVLS#DNE.A      | S129:        | 2 | 3,9577 | 0,408 | -0,743 |
| 6 | P06748 NPM_HUMAN    | D.NDENEHQLSLR.T            |              | 2 | 3,9567 | 0,352 | -0,45  |
| 6 | Q7Z6Z7 HUWE1_HUMAN  | E.EAVGDTSAAGSSEQPR.A       |              | 2 | 3,9513 | 0,533 | -0,234 |
| 6 | O60271 JIP4_HUMAN   | R.SAS#QSS#LDKLDQE.L        | S730:S733:   | 2 | 3,9367 | 0,409 | -0,467 |
| 6 | Q96JM3 ZN828_HUMAN  | E.YIKTDLAM*DIK.G           |              | 3 | 3,9273 | 0,285 | 0      |
| 6 | Q12888 TP53B_HUMAN  | E.TEPVEQDSS#QPSLPLVR.A     | S831:        | 2 | 3,9252 | 0,313 | -0,435 |
| 6 | P27816 MAP4_HUMAN   | E.AVAEPPQPTAVPLELAKE.I     |              | 2 | 3,9073 | 0,534 | -0,525 |
| 6 | Q9Y365 PCTL_HUMAN   | E.RM*GGAGGEGS#DDDTSLT.-    | S284:        | 2 | 3,9    | 0,535 | -0,709 |
| 6 | P30876 RPB2_HUMAN   | E.TVM*LAM*TPDDLQEKE.V      |              | 2 | 3,8928 | 0,202 | 0,557  |
| 6 | O95208 EPN2_HUMAN   | R.MAQVATGM*GSNQITFGR.G     |              | 2 | 3,8872 | 0,485 | -0,615 |
| 6 | P24534 EF1B_HUMAN   | E.DYVQSM*DVAAFNKI.-        |              | 2 | 3,8756 | 0,468 | -0,377 |
| 6 | O95208 EPN2_HUMAN   | R.M*AQVATGMGSNQITFGR.G     |              | 3 | 3,8721 | 0,313 | -0,205 |
| 6 | Q86UP2 KTN1_HUMAN   | E.IQNGNLHES#DSE.S          | S75:         | 2 | 3,8716 | 0,405 | -0,514 |
| 6 | Q9UNI6 DUS12_HUMAN  | E.LFAVDPTTVSQGLKDE.V       |              | 3 | 3,8713 | 0,207 | -0,425 |
| 6 | Q9H5H4 ZN768_HUMAN  | E.GYLRGNM*S#ENEEEE.I       | S33:         | 2 | 3,8689 | 0,361 | -0,626 |
| 6 | Q6DEN2 Q6DEN2_HUMAN | E.SREPAPAS#PAPAGVE.I       | S102:        | 2 | 3,8689 | 0,44  | -0,402 |
| 6 | P38398 BRCA1_HUMAN  | E.KAVLTS#QKS#SEYPISQNPE.G  | S1457:S1460: | 3 | 3,8672 | 0,312 | -0,323 |
| 6 | Q99550 MPP9_HUMAN   | E.KTFISLSSTDVS#PNQSNTSNE.M | S39:         | 3 | 3,8661 | 0,298 | -0,392 |
| 6 | Q86WC4 OSTM1_HUMAN  | R.LCQTCYPLFQQVVSK.M        |              | 2 | 3,8661 | 0,501 | -0,065 |
| 6 | Q8N1G4 LRC47_HUMAN  | E.NKEEGSL#DTE.A            | S520:        | 2 | 3,8615 | 0,325 | -1,041 |
| 6 | P12268 IMDH2_HUMAN  | E.DLVVAPAGITLKEANE.I       |              | 2 | 3,8607 | 0,496 | -0,372 |
| 6 | P08729 K2C7_HUMAN   | E.LQSQISDTSVVLSM*DNSR.S    |              | 2 | 3,8563 | 0,608 | -0,245 |
| 6 | P55036 PSMD4_HUMAN  | E.AGIATTGTEDSDDALLK.M      |              | 2 | 3,8501 | 0,478 | -0,218 |
| 6 | Q5VZL5 ZMYM4_HUMAN  | E.KDQGSTYS#GDLE.S          | S1091:       | 2 | 3,8432 | 0,427 | -0,265 |
| 6 | Q9HCD6 TANC2_HUMAN  | E.SFS#PPSSISNIAFYNK.T      | S1892:       | 2 | 3,8403 | 0,438 | -0,597 |
| 6 | Q99569 PKP4_HUMAN   | R.CRLGAES#PSIASTSSTE.K     | S75:         | 2 | 3,8304 | 0,333 | -0,399 |
| 6 | O60271 JIP4_HUMAN   | E.KFIEFEDS#QEQE.K          | S109:        | 2 | 3,8296 | 0,313 | -0,379 |
| 6 | P54920 SNAA_HUMAN   | K.KTIQGDEEDLR.-            |              | 3 | 3,8244 | 0,168 | 0,21   |
| 6 | P36578 RL4_HUMAN    | E.VPELPLVVEDKVE.G          |              | 2 | 3,8221 | 0,29  | -0,499 |

|   |                     |                                   |            |   |        |       |        |
|---|---------------------|-----------------------------------|------------|---|--------|-------|--------|
| 6 | Q8WUA4 TF3C2_HUMAN  | E.MSLPTPLPGFEDS#PDQR.R            | S63:       | 2 | 3,8196 | 0,329 | -0,558 |
| 6 | Q9Y5B0 CTDP1_HUMAN  | E.LAGAPEPQGSCAQGGR.V              |            | 3 | 3,8154 | 0,41  | 0      |
| 6 | O43432 IF4G3_HUMAN  | E.QKLDFIIESDS#PCSSE.A             | S1409:     | 2 | 3,8099 | 0,479 | -0,67  |
| 6 | P80723 BASP_HUMAN   | K.AQGPAASAEKPKPVEAPAANSQDTVTVKE.- |            | 3 | 3,8067 | 0,442 | -0,253 |
| 6 | Q14498 RBM39_HUMAN  | E.RTDASSASS#FLDSDELE.R            | S337:      | 2 | 3,8038 | 0,482 | -0,383 |
| 6 | Q6ZRV2 FA83H_HUMAN  | R.RLS#LGQGDSTEAAATEE.R            | S1003:     | 2 | 3,8016 | 0,437 | -0,42  |
| 6 | O95208 EPN2_HUMAN   | R.MAQVATGMGSNQITFGR.G             |            | 2 | 3,7781 | 0,536 | -0,276 |
| 6 | Q8WUA4 TF3C2_HUMAN  | E.M*SLPTPLPGFEDS#PDQR.R           | S63:       | 2 | 3,7767 | 0,368 | -0,615 |
| 6 | P55072 TERA_HUMAN   | E.VM*NSLAVTM*DDFR.W               |            | 2 | 3,7702 | 0,495 | -0,398 |
| 6 | P21333 FLNA_HUMAN   | E.AIGDDVGTGLGFSVEGPSQAK.I         |            | 2 | 3,7694 | 0,465 | -1,065 |
| 6 | Q9BZV1 UBXD1_HUMAN  | E.ATVSGSPEAPGTNNVSEPREE.G         |            | 2 | 3,7642 | 0,517 | -0,346 |
| 6 | A5YM69 A5YM69_HUMAN | E.HLDM*APFSSDLGS#EEEE.V           | S145:      | 2 | 3,759  | 0,542 | -0,491 |
| 6 | Q96ER3 SAAL1_HUMAN  | E.NTKSSS#DDEEQLTE.L               | S57:       | 2 | 3,7588 | 0,342 | -0,66  |
| 6 | Q76L83 ASXL2_HUMAN  | E.TNM*KEPLATLVDQS#PE.S            | S562:      | 2 | 3,7514 | 0,398 | -0,392 |
| 6 | Q86WC4 OSTM1_HUMAN  | R.LCQTCYPLFQQVSK.M                |            | 3 | 3,747  | 0,273 | -0,098 |
| 6 | Q16204 CCDC6_HUMAN  | E.KLDQPVS#APPSPRDIS#ME.I          | S240:S249: | 3 | 3,7363 | 0,3   | -0,43  |
| 6 | Q15365 PCBP1_HUMAN  | R.VM*TIPYQPM*PASS#PVICAGGQDR.C    | S190:      | 3 | 3,7325 | 0,265 | -0,566 |
| 6 | Q13435 SF3B2_HUMAN  | R.SRGSDS#PAADVEIE.Y               | S339:      | 2 | 3,7244 | 0,432 | -0,403 |
| 6 | Q8N1G2 K0082_HUMAN  | E.LALSLSST#SDDEPPSSVSHGAK.A       | T30:       | 3 | 3,7219 | 0,272 | -0,081 |
| 6 | Q7Z3K3 POGZ_HUMAN   | E.SLHQLFEGES#ETE.S                | S1392:     | 2 | 3,7195 | 0,47  | -0,462 |
| 6 | Q16204 CCDC6_HUMAN  | K.SGGIVIS#PFRLEE.L                | S52:       | 2 | 3,7193 | 0,374 | -0,658 |
| 6 | P04264 K2C1_HUMAN   | R.SLDLDSIIAEVK.A                  |            | 2 | 3,7193 | 0,395 | -0,655 |
| 6 | Q9BUF5 TBB6_HUMAN   | E.VISDEHGIDPAGGYVGDSALQLE.R       |            | 3 | 3,7178 | 0,361 | -0,312 |
| 6 | Q9UGP4 LIMD1_HUMAN  | R.TPS#VSAPLALSCPR.Q               | S296:      | 2 | 3,7169 | 0,485 | -0,238 |
| 6 | P12270 TPR_HUMAN    | E.AMQSEGPEVHPVFGSTSGSVR.S         |            | 3 | 3,7128 | 0,261 | -0,162 |
| 6 | P60174 TPIS_HUMAN   | E.LASQPDVDGFLVGGASLKPE.F          |            | 3 | 3,7084 | 0,338 | 0      |
| 6 | P18583 SON_HUMAN    | E.M*EHNTVCAAGTS#PVGE.I            | S1556:     | 2 | 3,7066 | 0,382 | -0,834 |
| 6 | O75674 TM1L1_HUMAN  | E.ATNTTSEPSAPSQDLLDLSPS#PR.M      | S323:      | 3 | 3,7054 | 0,469 | -0,297 |
| 6 | Q8N201 INT1_HUMAN   | R.VAGDLGAGSSPHPS#LTFEEDSQT#E.L    | S288:T297: | 3 | 3,7036 | 0,205 | -0,569 |
| 6 | Q6DN90 IQEC1_HUMAN  | E.GKQVSVTNDGSQLGALVS#PE.C         | S211:      | 2 | 3,6955 | 0,346 | -0,591 |
| 6 | Q9UKM9 RALY_HUMAN   | E.HSQDT#DADDGALQ.-                | T298:      | 2 | 3,6864 | 0,41  | -0,588 |
| 6 | Q9UNI6 DUS12_HUMAN  | E.LFAVDPTTVSQGLKDE.V              |            | 2 | 3,6854 | 0,425 | -0,284 |
| 6 | P08047 SP1_HUMAN    | E.SQPSPLALLAATCSR.I               |            | 2 | 3,6834 | 0,483 | -0,31  |

|   |                    |                                     |              |   |        |       |        |
|---|--------------------|-------------------------------------|--------------|---|--------|-------|--------|
| 6 | Q96EV8 DTBP1_HUMAN | R.REPIGS#M*SSM*E.V                  | S227:        | 2 | 3,6816 | 0,327 | -0,457 |
| 6 | Q92797 SYMPK_HUMAN | E.AALLDSS#LEGPLPK.E                 | S1222:       | 3 | 3,6775 | 0,258 | 0,184  |
| 6 | Q5JSH3 WDR44_HUMAN | E.NTAYKVGNES#PVQE.L                 | S50:         | 2 | 3,6683 | 0,314 | -0,227 |
| 6 | Q03164 HRX_HUMAN   | E.VHPPLPISQS#PENE.S                 | S518:        | 2 | 3,6648 | 0,459 | -0,376 |
| 6 | Q9C0C9 UBE2O_HUMAN | E.QLLTGS#PTS#PTVEPEKPTRE.K          | S836:S839:   | 3 | 3,6597 | 0,298 | -0,236 |
| 6 | Q92797 SYMPK_HUMAN | E.AALLDSS#LEGPLPK.E                 | S1222:       | 2 | 3,656  | 0,357 | -0,327 |
| 6 | Q9H6T3 RPAP3_HUMAN | E.VSDTSSLQPQASLKQDVCQSYSE.K         |              | 3 | 3,6552 | 0,288 | -0,429 |
| 6 | Q00613 HSF1_HUMAN  | R.VKEEPSS#PPQS#PRVEE.A              | S303:S307:   | 3 | 3,6543 | 0,245 | -0,372 |
| 6 | Q6UXH1 CREL2_HUMAN | E.CAAEPPPCSAAQFCK.N                 |              | 2 | 3,6491 | 0,277 | 0,216  |
| 6 | O95155 UBE4B_HUMAN | E.KSM*SQVDVDS#GIENM*E.V             | S124:        | 2 | 3,6471 | 0,402 | 0,389  |
| 6 | Q9BRP8 WIBG_HUMAN  | R.AAPTAASDQPD SAATTE.K              |              | 2 | 3,6434 | 0,563 | -0,38  |
| 6 | Q15022 SUZ12_HUMAN | E.KGESAS#PANEEITEE.Q                | S695:        | 2 | 3,6428 | 0,378 | -0,219 |
| 6 | Q02952 AKA12_HUMAN | E.TGTDGILAGSQEHDPGQSSSPEQAGSPTEGE.G |              | 3 | 3,6396 | 0,412 | -0,475 |
| 6 | Q00410 IMB3_HUMAN  | E.FVNLGDQQSFGIK.T                   |              | 2 | 3,6382 | 0,391 | -0,42  |
| 6 | Q92797 SYMPK_HUMAN | E.AALLDS#SLEGPLPK.E                 | S1221:       | 2 | 3,6345 | 0,411 | -0,082 |
| 6 | Q92841 DDX17_HUMAN | R.SSQSSSQFSGIGR.S                   |              | 2 | 3,6332 | 0,406 | -0,503 |
| 6 | Q09666 AHNK_HUMAN  | K.TVIRLPSGS#GAASPTGSAVDIR.A         | S212:        | 3 | 3,6329 | 0,257 | 0,167  |
| 6 | P35908 K22E_HUMAN  | R.FLEQQNQVLQTK.W                    |              | 2 | 3,6289 | 0,43  | -0,661 |
| 6 | Q8TD19 NEK9_HUMAN  | E.ASS#PRLNPAVTCAGK.G                | S869:        | 3 | 3,6275 | 0,324 | -0,227 |
| 6 | P55327 TPD52_HUMAN | E.VLNSAANASATTTEPLPEKTQE.S          |              | 3 | 3,6238 | 0,162 | -0,081 |
| 6 | Q9UBC2 EP15R_HUMAN | E.VTLSNLNLSM*PPPK.F                 |              | 2 | 3,622  | 0,466 | -0,24  |
| 6 | Q01804 OTUD4_HUMAN | K.TAAAAADVNGFKPLSGNE.Q              |              | 2 | 3,6178 | 0,471 | -0,141 |
| 6 | Q8NEF9 SRFB1_HUMAN | E.KEYFDDS#TEE.R                     | S264:        | 2 | 3,6165 | 0,44  | -0,182 |
| 6 | Q9H4A3 WNK1_HUMAN  | E.KQSSTPGSLFLS#PPAPAPK.N            | S19:         | 3 | 3,6133 | 0,296 | -0,827 |
| 6 | P26639 SYTC_HUMAN  | K.AS#SPSGKM*GGEEKPIGAGE.E           | S7:          | 3 | 3,6025 | 0,307 | -0,485 |
| 6 | Q9Y365 PCTL_HUMAN  | E.RMGGAGGEGS#DDDTSLT.-              | S284:        | 2 | 3,5922 | 0,524 | -0,143 |
| 6 | Q02790 FKBP4_HUMAN | E.SGAQSAPLPM*EGVDISPQ.Q             |              | 2 | 3,5891 | 0,328 | -0,474 |
| 6 | P55036 PSMD4_HUMAN | E.AGIATTGTEDSDDALLKM*TISQQE.F       |              | 3 | 3,5859 | 0,165 | -0,437 |
| 6 | Q96JM3 ZN828_HUMAN | E.YIKTDLAMDIAK.G                    |              | 3 | 3,5853 | 0,279 | 0,192  |
| 6 | Q6NZI2 PTRF_HUMAN  | R.RGS#S#PDVHALLE.I                  | S365:S366:   | 2 | 3,5838 | 0,5   | -0,423 |
| 6 | Q9BVJ6 UT14A_HUMAN | E.AHGVS#ES#EGEERPVAE.E              | S405:S407:   | 2 | 3,5795 | 0,481 | -0,331 |
| 6 | P60709 ACTB_HUMAN  | D.LYANTVLSGGTTM*YPGIADR.M           |              | 2 | 3,5775 | 0,552 | -0,115 |
| 6 | Q04721 NOTC2_HUMAN | E.AADIRRT#PSLALT#PPQAEQE.V          | T1802:T1808: | 3 | 3,5772 | 0,223 | -0,394 |

|   |                    |                             |            |   |        |       |        |
|---|--------------------|-----------------------------|------------|---|--------|-------|--------|
| 6 | P43351 RAD52_HUMAN | E.KDFLAGVT#QE.L             | T318:      | 2 | 3,5718 | 0,28  | -0,308 |
| 6 | Q8IW35 CEP97_HUMAN | E.HSS#PVQDCQISQE.S          | S331:      | 2 | 3,5714 | 0,331 | -0,153 |
| 6 | Q5HYI7 MTX3_HUMAN  | E.NNSFQRLS#P.-              | S311:      | 2 | 3,5691 | 0,349 | -0,107 |
| 6 | Q96N67 DOCK7_HUMAN | E.RSPS#GSAFGSQE.N           | S1432:     | 2 | 3,5583 | 0,48  | -0,284 |
| 6 | Q13033 STRN3_HUMAN | E.FDFLVTAEDGEGAGEAR.S       |            | 2 | 3,5566 | 0,483 | -0,547 |
| 6 | Q02952 AKA12_HUMAN | E.SQLPGTGGPEDVLQPVQR.A      |            | 3 | 3,5533 | 0,17  | -0,292 |
| 6 | Q10713 MPPA_HUMAN  | E.LEDLNLRPDPEPLLTE.M        |            | 2 | 3,5517 | 0,408 | -0,458 |
| 6 | P00558 PGK1_HUMAN  | E.M*IIGGGM*AFTFLK.V         |            | 2 | 3,5489 | 0,37  | -0,774 |
| 6 | P53582 AMPM1_HUMAN | E.VLDVAAGM*IKPGVTTEE.I      |            | 2 | 3,5455 | 0,488 | -0,419 |
| 6 | Q9H000 MKRN2_HUMAN | R.KTQPSMVSNPQSCSDPQPS#PE.M  | S139:      | 3 | 3,5435 | 0,365 | -0,317 |
| 6 | P31942 HNRH3_HUMAN | R.DGM*DNQGGYGSVGR.M         |            | 2 | 3,5402 | 0,498 | -0,512 |
| 6 | Q9Y2K5 R3HD2_HUMAN | E.VCNQVTSSQSVR.G            |            | 2 | 3,5388 | 0,359 | -0,358 |
| 6 | O94842 TOX4_HUMAN  | E.AHTVEAPS#PETICE.M         | S533:      | 2 | 3,5383 | 0,385 | -0,452 |
| 6 | P54132 BLM_HUMAN   | R.QISLQQQLIHVM*E.H          |            | 2 | 3,5189 | 0,417 | -0,308 |
| 6 | Q641Q2 FA21A_HUMAN | E.KAVAS#PEATVSQTDE.N        | S498:      | 2 | 3,5185 | 0,424 | -0,227 |
| 6 | Q8NCN4 RN169_HUMAN | E.RSVS#PESNDSISEE.L         | S368:      | 2 | 3,5178 | 0,369 | -0,453 |
| 6 | Q13451 FKBP5_HUMAN | E.GAKNNEES#PTATVAE.Q        | S13:       | 2 | 3,5159 | 0,412 | -0,687 |
| 6 | P55072 TERA_HUMAN  | E.M*FAQTLQQSR.G             |            | 2 | 3,5112 | 0,243 | -0,398 |
| 6 | Q5H9R7 SAPS3_HUMAN | E.RIQQFDDGGS#D.E            | S617:      | 2 | 3,5111 | 0,469 | -0,463 |
| 6 | Q14CW9 AT7L3_HUMAN | E.SSLDNDSFDM*TDSQALISR.L    |            | 2 | 3,5075 | 0,43  | -0,461 |
| 6 | O43447 PIIH_HUMAN  | R.KIENVPTGPNNKPK.L          |            | 3 | 3,498  | 0,101 | -0,238 |
| 6 | Q9NWW8 CS062_HUMAN | E.AASADDGSLNTSGAGPK.S       |            | 2 | 3,4945 | 0,584 | -0,482 |
| 6 | P49327 FAS_HUMAN   | E.TM*STNDTIVSGTLPQR.M       |            | 2 | 3,4926 | 0,436 | -0,492 |
| 6 | Q96B23 CR025_HUMAN | E.TAKEEDGS#VELE.S           | S34:       | 2 | 3,491  | 0,383 | -0,264 |
| 6 | Q00613 HSF1_HUMAN  | R.VKEEPPS#PPQS#PRVEE.A      | S303:S307: | 2 | 3,4908 | 0,39  | -0,559 |
| 6 | O94909 K0819_HUMAN | E.RGPS#QAT#SPIRSPQE.S       | S292:T295: | 2 | 3,4878 | 0,389 | -0,551 |
| 6 | P04083 ANXA1_HUMAN | E.VVLALLKTPAQFDADE.L        |            | 2 | 3,4826 | 0,454 | -0,494 |
| 6 | P39880 CUX1_HUMAN  | E.IQAGSQGQAGASDPSAR.S       |            | 3 | 3,4781 | 0,327 | 0      |
| 6 | Q92615 LARP5_HUMAN | E.KFTSSQT#QSPTPPKPPS#PSFE.L | T514:S524: | 3 | 3,4761 | 0,199 | -0,451 |
| 6 | P49321 NASP_HUMAN  | E.NDKTEEM*PNDS#VLE.N        | S497:      | 2 | 3,4751 | 0,195 | -0,497 |
| 6 | P04792 HSPB1_HUMAN | R.ALS#RQLS#SGVSE.I          | S78:S82:   | 2 | 3,4708 | 0,363 | -0,35  |
| 6 | Q13263 TIF1B_HUMAN | R.LAS#PSGS#TSSGLE.V         | S594:S598: | 2 | 3,4699 | 0,394 | -0,361 |
| 6 | P14618 KPYM_HUMAN  | K.KGVNLPGAADVLPVAVSE.K      |            | 2 | 3,4698 | 0,361 | -0,224 |

|   |                    |                                 |            |   |        |       |        |
|---|--------------------|---------------------------------|------------|---|--------|-------|--------|
| 6 | P53582 AMPM1_HUMAN | E.VLDVAAGMIKPGVTTEE.I           |            | 2 | 3,4637 | 0,454 | -0,353 |
| 6 | Q9UI12 VATH_HUMAN  | E.VSDDPQVLAVAAHDVGE.Y           |            | 2 | 3,4566 | 0,455 | -0,85  |
| 6 | Q12888 TP53B_HUMAN | E.TEPVEQDSS#QPSSLPLVR.A         | S831:      | 3 | 3,4556 | 0,244 | -0,466 |
| 6 | O75531 BAF_HUMAN   | R.DFVAEPMGEKPVGSLAGIGE.V        |            | 2 | 3,4551 | 0,407 | -0,365 |
| 6 | P61604 CH10_HUMAN  | K.VGDKVLLPEYGGTK.V              |            | 2 | 3,4518 | 0,313 | -0,248 |
| 6 | Q9UBQ5 EIF3K_HUMAN | E.KIDFDSVSSIM*ASS#Q.-           | S217:      | 3 | 3,4455 | 0,152 | -0,535 |
| 6 | Q12888 TP53B_HUMAN | E.IEPKNS#PEDLGLSLTGDSC.L        | S500:      | 3 | 3,4448 | 0,307 | -0,735 |
| 6 | Q8TB72 PUM2_HUMAN  | R.AGAGQRPLT#PNQGQQGQQA.E.S      | T396:      | 3 | 3,4416 | 0,16  | -0,086 |
| 6 | P11233 RALA_HUMAN  | E.DENVPFLLVGNKSDLE.D            |            | 2 | 3,44   | 0,273 | -0,477 |
| 6 | Q02952 AKA12_HUMAN | E.LVEM*DAEPQEAEPAAKE.L          |            | 2 | 3,4365 | 0,381 | -0,542 |
| 6 | O95872 BAT4_HUMAN  | E.NRSPT#PSLQYCE.N               | T212:      | 2 | 3,4285 | 0,36  | -0,478 |
| 6 | Q9HAU5 RENT2_HUMAN | E.NKEVSS#PDDLELE.L              | S514:      | 2 | 3,4271 | 0,382 | -0,314 |
| 6 | Q8IX90 CM003_HUMAN | E.KS#PRS#PQLSDFGLE.R            | S152:S155: | 2 | 3,4229 | 0,357 | -0,354 |
| 6 | Q01804 OTUD4_HUMAN | E.HVSLSNPAPLLVS#PE.V            | S578:      | 2 | 3,4226 | 0,406 | -0,595 |
| 6 | Q9NUQ3 TXLNG_HUMAN | E.NRNLVS#PAYCTQE.S              | S97:       | 2 | 3,4217 | 0,466 | -0,299 |
| 6 | Q13310 PABP4_HUMAN | E.AAQKVGAVAAATS#.-              | S644:      | 2 | 3,4168 | 0,393 | -0,398 |
| 6 | P26639 SYTC_HUMAN  | K.ASS#PSGKM*GGEEKPIGAGEE.K      | S8:        | 3 | 3,4138 | 0,257 | -0,273 |
| 6 | Q9UNE7 STUB1_HUMAN | R.LGAGGGS#PEKS#PSAQE.L          | S19:S23:   | 2 | 3,4098 | 0,438 | -0,374 |
| 6 | Q8N108 MIER1_HUMAN | E.LLSLYGYGSTVR.L                |            | 2 | 3,4076 | 0,473 | -0,367 |
| 6 | P61758 PFD3_HUMAN  | E.AVFVEDVDSFMKQPGNE.T           |            | 3 | 3,4071 | 0,288 | -0,574 |
| 6 | P27816 MAP4_HUMAN  | E.EGRPVSSTGNDITT#PPNKELPPS#PE.K | T687:S696: | 3 | 3,404  | 0,094 | 0,385  |
| 6 | P48960 CD97_HUMAN  | E.GSYDCVCSPGYEPVSGAK.T          |            | 2 | 3,399  | 0,506 | -0,316 |
| 6 | O43741 AAKB2_HUMAN | E.TSCRDLSSS#PPGPYQGE.M          | S184:      | 2 | 3,3969 | 0,528 | -0,573 |
| 6 | Q66K74 MAP1S_HUMAN | E.RAGGLGAEET#PPTSSE.S           | T782:      | 2 | 3,3968 | 0,391 | -0,14  |
| 6 | P49915 GUAA_HUMAN  | E.IFPLETPAFAIKE.Q               |            | 2 | 3,3959 | 0,251 | -0,248 |
| 6 | Q8NFD5 ARI1B_HUMAN | E.SSSHALSQS#PM*PQE.R            | S771:      | 2 | 3,386  | 0,409 | -0,654 |
| 6 | Q9P287 BCCIP_HUMAN | E.LTDLLIQQNHIGSVIK.Q            |            | 3 | 3,3857 | 0,303 | -0,102 |
| 6 | Q96HQ2 C2AIL_HUMAN | E.M*ADGIEVEDLPQFTTR.S           |            | 2 | 3,3834 | 0,347 | -0,531 |
| 6 | Q9H8W4 PKHF2_HUMAN | D.LLSAGDMATCQPAR.S              |            | 2 | 3,3829 | 0,282 | -0,246 |
| 6 | Q13283 G3BP1_HUMAN | K.SSS#PAPADIAQTVQE.D            | S232:      | 2 | 3,3826 | 0,336 | -0,154 |
| 6 | P26358 DNMT1_HUMAN | E.KLSIFDANES#GFESYE.A           | S394:      | 2 | 3,3777 | 0,376 | -0,573 |
| 6 | P35908 K22E_HUMAN  | R.NLDLDSIIAEVK.A                |            | 2 | 3,3752 | 0,431 | -0,367 |
| 6 | Q02790 FKBP4_HUMAN | E.EQKSNTAGSQS#QVETEA.-          | S453:      | 2 | 3,3718 | 0,447 | -0,456 |

|   |                    |                                  |              |   |        |       |        |
|---|--------------------|----------------------------------|--------------|---|--------|-------|--------|
| 6 | Q9BQY9 DBND2_HUMAN | E.SQRPPIGSISS#M*E.V              | S154:        | 2 | 3,3696 | 0,3   | -0,329 |
| 6 | Q8IZT6 ASPM_HUMAN  | E.NKIPISPIS#PAFNE.C              | S225:        | 2 | 3,367  | 0,367 | -0,38  |
| 6 | P26639 SYTC_HUMAN  | K.M*GGEEKPIGAGEE.K               |              | 2 | 3,3666 | 0,417 | -0,277 |
| 6 | Q02790 FKBP4_HUMAN | E.QKSNTAGS#QSQVETEA.-            | S451:        | 2 | 3,362  | 0,34  | -0,559 |
| 6 | P49189 AL9A1_HUMAN | R.IKIGDPLLEDTR.M                 |              | 3 | 3,3562 | 0,177 | 0      |
| 6 | P55072 TERA_HUMAN  | R.LGDVISIQPCPDVK.Y               |              | 2 | 3,3499 | 0,362 | -0,158 |
| 6 | Q86VP6 CAND1_HUMAN | E.SIQKDSS#STNLE.S                | S1220:       | 2 | 3,3497 | 0,325 | -0,264 |
| 6 | P02538 K2C6A_HUMAN | R.AIGGGLSSVGGGSSTIK.Y            |              | 2 | 3,3483 | 0,45  | 0,169  |
| 6 | P49790 NU153_HUMAN | K.VQM*TS#PSSTGSPM*FK.F           | S516:        | 2 | 3,3479 | 0,392 | -0,431 |
| 6 | P04264 K2C1_HUMAN  | K.WELLQQVDTSTR.T                 |              | 2 | 3,3445 | 0,349 | -0,165 |
| 6 | P22314 UBA1_HUMAN  | E.LCCNDESGEDVEVPYVR.Y            |              | 2 | 3,3383 | 0,458 | -0,418 |
| 6 | Q8TD26 CHD6_HUMAN  | E.AKCLAS#PSLNPGNE.S              | S1812:       | 2 | 3,337  | 0,388 | -0,397 |
| 6 | O75674 TM1L1_HUMAN | E.ATNTTSEPSAPSQDLLDLSPS#PRM*PR.A | S323:        | 3 | 3,3358 | 0,243 | -0,256 |
| 6 | P49790 NU153_HUMAN | E.GSVLDILKS#PGFASPK.I            | S614:        | 3 | 3,3312 | 0,18  | -0,431 |
| 6 | Q96TA1 NIBL1_HUMAN | K.AVDLGGPPKPSDQETGE.Q            |              | 2 | 3,3261 | 0,501 | -0,223 |
| 6 | Q9UQ35 SRRM2_HUMAN | E.NSFGS#PLEFR.N                  | S1329:       | 2 | 3,3247 | 0,441 | -0,198 |
| 6 | Q9COC2 TB182_HUMAN | E.ASQASPCPAVTPSAPSAALPDEGSR.H    |              | 3 | 3,3151 | 0,307 | -0,377 |
| 6 | Q01814 AT2B2_HUMAN | K.SATSS#SPGS#PIHSLE.T            | S1230:S1234: | 2 | 3,3149 | 1     | -0,226 |
| 6 | Q15149 PLEC1_HUMAN | R.SSS#VGSSSSYPISPAUSR.T          | S4386:       | 2 | 3,3135 | 0,499 | 0,266  |
| 6 | Q9UQ35 SRRM2_HUMAN | R.FQSDSSSYPTVDSNSLLGQSRLE.T      |              | 3 | 3,3134 | 0,246 | -0,436 |
| 6 | Q8TER5 SOLO_HUMAN  | E.HAGPSLPGLS#PGACS#LPARVEEE.A    | S1438:S1443: | 3 | 3,3125 | 0,105 | -0,441 |
| 6 | Q9H307 PININ_HUMAN | E.TNRVES#VEPSENE.A               | S413:        | 2 | 3,312  | 0,315 | 0,389  |
| 6 | P33991 MCM4_HUMAN  | E.NVGIDITEPLYMQR.L               |              | 2 | 3,3075 | 0,472 | -0,296 |
| 6 | Q9BZF3 OSBL6_HUMAN | R.QLLEPEPVPLSKE.A                |              | 2 | 3,3057 | 0,362 | -0,165 |
| 6 | Q02952 AKA12_HUMAN | E.QVSGSQGPSEEKPAPLATEVFDE.K      |              | 3 | 3,3052 | 0,264 | -0,533 |
| 6 | P04264 K2C1_HUMAN  | K.SLNNQFASFIDK.V                 |              | 2 | 3,3041 | 0,36  | -0,529 |
| 6 | P35612 ADDB_HUMAN  | E.TKS#PLVS#PSKSLE.E              | S613:S617:   | 2 | 3,3031 | 0,341 | -0,159 |
| 6 | Q9UQ35 SRRM2_HUMAN | E.KAGMSSNQSISS#PVLDA             | S1404:       | 2 | 3,3026 | 0,362 | -0,646 |
| 6 | Q9Y5B0 CTDP1_HUMAN | E.LAGAPEPQGSCAQGGR.V             |              | 2 | 3,3011 | 0,453 | -0,392 |
| 6 | Q14247 SRC8_HUMAN  | E.DVTQVSSAYQK.T                  |              | 2 | 3,3009 | 0,449 | -0,199 |
| 6 | Q6NZI2 PTRF_HUMAN  | E.SDAVLVDKSDS#D.-                | S389:        | 2 | 3,2984 | 0,31  | -0,367 |
| 6 | Q99714 HCD2_HUMAN  | R.GVIINTASVAAFE.G                |              | 2 | 3,2922 | 0,531 | -0,472 |
| 6 | Q9UPN4 AZI1_HUMAN  | K.ANNAGGGLPAAGPGDR.C             |              | 2 | 3,2921 | 0,464 | -0,525 |

|   |                     |                            |              |   |        |       |        |
|---|---------------------|----------------------------|--------------|---|--------|-------|--------|
| 6 | P42566 EP15_HUMAN   | E.SEPIHQES#PARSS#PE.L      | S558:S563:   | 2 | 3,2917 | 0,385 | -0,674 |
| 6 | P26639 SYTC_HUMAN   | K.MGGEEKPIGAGEE.K          |              | 2 | 3,2855 | 0,437 | -0,281 |
| 6 | P08651 NFIC_HUMAN   | R.TGM*GSDQEDSKPITLDTDFQE.S |              | 3 | 3,2837 | 0,19  | -0,376 |
| 6 | Q6GYQ0 GRIPE_HUMAN  | R.SQTPSPSTLNIDHM*E.Q       |              | 2 | 3,2804 | 0,429 | -0,365 |
| 6 | P12268 IMDH2_HUMAN  | E.DLVVAPAGITLKE.A          |              | 2 | 3,2782 | 0,305 | -0,46  |
| 6 | P35612 ADDB_HUMAN   | E.TKS#PLVS#PSKSLEE.G       | S613:S617:   | 2 | 3,2765 | 0,438 | -0,22  |
| 6 | Q7Z2T5 TRM1L_HUMAN  | E.SHVQS#ASEDTVTE.R         | S707:        | 2 | 3,2734 | 0,424 | -0,249 |
| 6 | Q9H4A3 WNK1_HUMAN   | E.LSEPSHLNGPSS#DPE.A       | S2012:       | 2 | 3,2703 | 0,278 | -0,371 |
| 6 | Q16563 SYPL1_HUMAN  | K.TVTATFGYPFR.L            |              | 2 | 3,2681 | 0,52  | -0,097 |
| 6 | P50851 LRBA_HUMAN   | E.TRNADDLEVS#SDIIE.A       | S1051:       | 2 | 3,2605 | 0,341 | -0,625 |
| 6 | Q15020 SART3_HUMAN  | E.NGPAAAPAVAAPAATEAPK.M    |              | 2 | 3,2579 | 0,45  | -0,146 |
| 6 | P54132 BLM_HUMAN    | E.LNPETS#TDCDAR.Q          | S358:        | 2 | 3,2573 | 0,361 | -0,585 |
| 6 | Q9H307 PININ_HUMAN  | E.TNRVESVEPS#ENE.A         | S417:        | 2 | 3,257  | 0,345 | -0,311 |
| 6 | Q8N1G2 K0082_HUMAN  | E.LALSLSSTSDDEPPSSVSHGAK.A |              | 3 | 3,2535 | 0,248 | -0,335 |
| 6 | P49790 NU153_HUMAN  | E.ITTSSPINSSQALTNK.V       |              | 2 | 3,2533 | 0,454 | -0,463 |
| 6 | Q02447 SP3_HUMAN    | E.TQAQNIQVSTAQPVVQHLQLQE.S |              | 3 | 3,2466 | 0,154 | -0,297 |
| 6 | Q9Y217 MTMR6_HUMAN  | E.FSKSEPAVVS#LE.Y          | S611:        | 2 | 3,2455 | 0,303 | -0,355 |
| 6 | Q02790 FKBP4_HUMAN  | K.SNTAGSQS#QVETEA.-        | S453:        | 2 | 3,2404 | 0,421 | -0,328 |
| 6 | Q8IWY8 ZSC29_HUMAN  | R.ARS#PDLGPQE.Q            | S152:        | 2 | 3,2399 | 0,318 | -0,106 |
| 6 | P18858 DNL1_HUMAN   | E.QATTSQAQVACLVR.K         |              | 2 | 3,2393 | 0,508 | -0,498 |
| 6 | P22314 UBA1_HUMAN   | E.LVALAQAVNAR.A            |              | 2 | 3,239  | 0,409 | -0,217 |
| 6 | Q9Y6A5 TACC3_HUMAN  | E.STAPT NHLVAGR.A          |              | 2 | 3,2371 | 0,394 | -0,1   |
| 6 | P20020 AT2B1_HUMAN  | E.MNKSATSS#SPGS#PLHSLE.T   | S1245:S1249: | 2 | 3,2221 | 0,267 | -0,061 |
| 6 | A5YM69 A5YM69_HUMAN | E.HLDMAPFSSDLGS#EEEE.V     | S145:        | 2 | 3,2219 | 0,578 | -0,557 |
| 6 | P46939 UTRO_HUMAN   | E.RTNGSFLTDSSS#TTGSVEDE.H  | S3217:       | 2 | 3,2183 | 0,485 | -0,225 |
| 6 | Q09666 AHNK_HUMAN   | E.GAKDIDISS#PE.F           | S177:        | 2 | 3,2146 | 0,132 | -0,302 |
| 6 | Q9ULR0 ISY1_HUMAN   | K.FIAHVPVPSQQEIEE.A        |              | 2 | 3,2105 | 0,4   | -0,496 |
| 6 | Q96R06 SPAG5_HUMAN  | E.SDEQLDPIPIQSSTPK.T       |              | 2 | 3,2093 | 0,374 | -0,198 |
| 6 | Q9H307 PININ_HUMAN  | E.TNRVES#VEPS#ENEASKE.L    | S413:S417:   | 3 | 3,2064 | 0,102 | -0,266 |
| 6 | Q13873 BMPR2_HUMAN  | R.LVRPGEEDNAAISEVGTIR.Y    |              | 3 | 3,2041 | 0,097 | -0,361 |
| 6 | Q02952 AKA12_HUMAN  | E.SDKAIT#PQAQEE.L          | T1760:       | 2 | 3,2013 | 0,38  | -0,524 |
| 6 | Q15022 SUZ12_HUMAN  | E.KGESAS#PANEEITE.E        | S695:        | 2 | 3,1967 | 0,355 | -0,396 |
| 6 | Q92854 SEM4D_HUMAN  | E.LKFADS#DADGD.-           | S857:        | 2 | 3,1854 | 0,357 | -0,198 |

|   |                    |                           |            |   |        |       |        |
|---|--------------------|---------------------------|------------|---|--------|-------|--------|
| 6 | Q16186 ADRM1_HUMAN | R.SQSAAVTPSSTTSSTR.A      |            | 2 | 3,1847 | 0,387 | -0,545 |
| 6 | P14618 KPYM_HUMAN  | E.SFASDPILYRPVAVALD.T     |            | 2 | 3,1837 | 0,434 | -0,399 |
| 6 | Q9BQY9 DBND2_HUMAN | E.SQRPPIGS#ISSME.V        | S151:      | 2 | 3,1836 | 0,36  | -0,249 |
| 6 | Q8TD16 BICD2_HUMAN | E.ARLLDQDYS#ELEEE.N       | S182:      | 2 | 3,1834 | 0,314 | -0,583 |
| 6 | Q5VZL5 ZMYM4_HUMAN | E.KDQGSTY#SGDLE.S         | Y1090:     | 2 | 3,1829 | 0,288 | -0,442 |
| 6 | Q02952 AKA12_HUMAN | E.AAPDTTADPAIAASDPATK.L   |            | 2 | 3,1803 | 0,303 | -0,068 |
| 6 | Q86YR5 GPSM1_HUMAN | E.DRIAQPSM*TAS#PQTEE.F    | S522:      | 2 | 3,1779 | 0,447 | -0,329 |
| 6 | Q9HC35 EMAL4_HUMAN | K.ATLLEDQQDPSPSS#.-       | S981:      | 2 | 3,1777 | 0,45  | -0,078 |
| 6 | Q15651 HMG3_HUMAN  | E.AQKTES#VDNEGE.-         | S93:       | 2 | 3,1773 | 0,327 | -0,528 |
| 6 | Q96J02 ITCH_HUMAN  | R.RPAS#VNGSPSATSE.S       | S269:      | 2 | 3,1704 | 0,377 | -0,339 |
| 6 | P21796 VDAC1_HUMAN | E.TTKVTGS#LE.T            | S57:       | 2 | 3,1702 | 0,232 | -0,18  |
| 6 | P31939 PUR9_HUMAN  | K.HVSPAGAAVGIPLSEDE.A     |            | 2 | 3,1678 | 0,504 | -0,444 |
| 6 | Q8IVF2 AHNK2_HUMAN | E.LQAGQLDVKLPEGPVPE.G     |            | 2 | 3,1657 | 0,274 | -0,341 |
| 6 | Q75369 FLNB_HUMAN  | E.DAGEGGLDLAIEGPSKAE.I    |            | 2 | 3,1639 | 0,486 | -0,071 |
| 6 | P84077 ARF1_HUMAN  | D.AVLLVFANKQDLPNAM*NAAE.I |            | 3 | 3,1544 | 0,223 | -0,426 |
| 6 | Q66K89 E4F1_HUMAN  | E.HAGELVIAS#PEGQLE.V      | S772:      | 2 | 3,151  | 0,414 | -0,299 |
| 6 | Q86XP3 DDX42_HUMAN | E.LEPGDGPVAVIVCPTR.E.L    |            | 2 | 3,1501 | 0,427 | -0,803 |
| 6 | Q9BQY9 DBND2_HUMAN | E.SQRPPIGS#ISSM*E.V       | S151:      | 2 | 3,1492 | 0,381 | -0,246 |
| 6 | Q16204 CCDC6_HUMAN | E.KLDQPV#APPS#PR.D        | S240:S244: | 3 | 3,1491 | 0,162 | 0      |
| 6 | Q75531 BAF_HUMAN   | R.DFVAEPM*GEKPVGSLAGIGE.V |            | 2 | 3,1442 | 0,485 | -0,483 |
| 6 | Q6NZI2 PTRF_HUMAN  | E.SDAVLVDKS#DS#D.-        | S387:S389: | 2 | 3,1433 | 0,298 | -0,432 |
| 6 | P05556 ITB1_HUMAN  | K.NVLSLTNKGEVFNE.L        |            | 2 | 3,1425 | 0,261 | -0,39  |
| 6 | Q9UQ35 SRRM2_HUMAN | E.LSNS#PLRE.N             | S1320:     | 2 | 3,1306 | 0,201 | 0,061  |
| 6 | Q99613 EIF3C_HUMAN | E.NILEESENLHNADQPLR.V     |            | 3 | 3,1298 | 0,238 | -0,367 |
| 6 | Q15149 PLEC1_HUMAN | R.CITDPQTGLCLLPLKE.K      |            | 2 | 3,1293 | 0,438 | -0,394 |
| 6 | Q8NEY8 PPHLN_HUMAN | E.KSDESNLPEIS#EYE.A       | S253:      | 2 | 3,1275 | 0,389 | -0,071 |
| 6 | Q86W42 THOC6_HUMAN | E.NSLILAGGDCQLHTM*DLE.T   |            | 2 | 3,1274 | 0,458 | -0,244 |
| 6 | P16403 H12_HUMAN   | R.KASGPPVSELITK.A         |            | 3 | 3,1255 | 0,316 | 0,276  |
| 6 | Q92917 GPKOW_HUMAN | E.NAGVDPTLAIM*IQK.G       |            | 2 | 3,1247 | 0,312 | -0,231 |
| 6 | Q9NQS7 INCE_HUMAN  | E.QHVTQLM*STEPLPR.T       |            | 3 | 3,1233 | 0,287 | -0,111 |
| 6 | P20674 COX5A_HUMAN | E.LGISTPEELGLDKV.-        |            | 2 | 3,1179 | 0,437 | -0,332 |
| 6 | Q8WZ82 OVCA2_HUMAN | E.ADVFSALEEPAVCR.G        |            | 3 | 3,1162 | 0,249 | -0,234 |
| 6 | Q5T200 ZC3HD_HUMAN | E.SRS#LS#PSHLTE.D         | S875:S877: | 2 | 3,1159 | 0,408 | -0,266 |



|   |                     |                          |                 |   |        |       |        |
|---|---------------------|--------------------------|-----------------|---|--------|-------|--------|
| 6 | P05362 ICAM1_HUMAN  | E.AQVHLALGDQR.L          |                 | 3 | 3,1135 | 0,357 | 0,227  |
| 6 | Q8TBC4 UBA3_HUMAN   | E.NCPACSQLPQNIQFSPSAK.L  |                 | 2 | 3,1094 | 0,383 | 0      |
| 6 | Q9UBC2 EP15R_HUMAN  | E.VTLSNLNLSM*PPPK.F      |                 | 3 | 3,108  | 0,27  | 0      |
| 6 | P25205 MCM3_HUMAN   | D.LLFIM*LDQM*DPEQDRE.I   |                 | 3 | 3,1064 | 0,239 | -0,271 |
| 6 | Q6NZI2 PTRF_HUMAN   | E.AGDLRRGS#\$#PDVHALLE.I | S365:S366:      | 3 | 3,1059 | 0,151 | -0,375 |
| 6 | O00401 WASL_HUMAN   | R.RVTNVGSLLLTPQENE.S     |                 | 2 | 3,1046 | 0,271 | -0,345 |
| 6 | P62753 RS6_HUMAN    | R.LSS#LRASTSKS#E.S       | S236:S244:      | 2 | 3,104  | 0,415 | -0,342 |
| 6 | Q6Y7W6 PERQ2_HUMAN  | E.M*GTFDSS#GAFLSLK.K     | S303:           | 2 | 3,0973 | 0,444 | -0,47  |
| 6 | Q9Y561 LRP12_HUMAN  | E.VTLKNETS#DDE.A         | S851:           | 2 | 3,0942 | 0,302 | -0,458 |
| 6 | P46937 YAP1_HUMAN   | E.STDSGLSMSSYSVPR.T      |                 | 2 | 3,0939 | 0,485 | -0,233 |
| 6 | Q02952 AKA12_HUMAN  | E.TGETLEPAGAHVLVE.E      |                 | 2 | 3,0927 | 0,209 | -0,318 |
| 6 | Q9BUA3 YK007_HUMAN  | E.GVALLQDVR.A            |                 | 2 | 3,0914 | 0,271 | -0,565 |
| 6 | Q02952 AKA12_HUMAN  | E.ARGDTVVS#EAELTPE.A     | S967:           | 2 | 3,0901 | 0,301 | -0,369 |
| 6 | Q16537 2A5E_HUMAN   | E.LTPLLLKDVPSSEQPE.L     |                 | 2 | 3,0901 | 0,349 | -0,589 |
| 6 | Q4V328 GRAP1_HUMAN  | R.TQTGDSSSIS#\$#FSYRE.I  | S668:S669:      | 2 | 3,0895 | 1     | 0      |
| 6 | Q92797 SYMPK_HUMAN  | E.AALLDSSLEGPLPK.E       |                 | 2 | 3,0884 | 0,393 | -0,432 |
| 6 | P42025 ACTY_HUMAN   | E.LLFQPDVGDSEGLHE.V      |                 | 2 | 3,0757 | 0,319 | -0,257 |
| 6 | Q4KMP7 TB10B_HUMAN  | R.RAS#AGPAPGPVVTAE.G     | S412:           | 2 | 3,0753 | 0,292 | -0,167 |
| 6 | Q9BVS4 RIOK2_HUMAN  | E.KAEVYGS#ENESE.R        | S350:           | 2 | 3,0748 | 0,196 | -0,343 |
| 6 | ##P49643 PRI2_HUMAN | R.EDS#QVAPLS#RAT#LALAK.S | S268:S274:T277: | 3 | 3,0748 | 0,162 | -1,911 |
| 6 | O43493 TGON2_HUMAN  | K.SSAEAQTPEDTPNKSGAE.A   |                 | 2 | 3,0732 | 0,306 | -0,47  |
| 6 | Q02952 AKA12_HUMAN  | E.ESQLPGTGGPEDVLQPVQR.A  |                 | 3 | 3,0717 | 0,206 | -0,091 |
| 6 | Q9UPS6 SET1B_HUMAN  | E.RSGPLAS#PVLLLE.T       | S1421:          | 2 | 3,0694 | 0,199 | -0,463 |
| 6 | Q5H9R7 SAPS3_HUMAN  | D.SLRSNS#PVEM*E.T        | S740:           | 2 | 3,0688 | 0,245 | -0,272 |
| 6 | P17812 PYRG1_HUMAN  | E.FDPTTSHPVVVDVDM*PE.H   |                 | 2 | 3,063  | 0,314 | -0,579 |
| 6 | Q13404 UB2V1_HUMAN  | E.NM*KLPQPPEGQCY#SN.-    | Y219:           | 2 | 3,0619 | 0,203 | -0,591 |
| 6 | P30622 CLIP1_HUMAN  | E.ANGLQTPAS#R.A          | S143:           | 2 | 3,0577 | 0,302 | -0,204 |
| 6 | P0C0S8 H2A1_HUMAN   | R.AGLQFPVGR.V            |                 | 2 | 3,0549 | 0,292 | 0,065  |
| 6 | P46937 YAP1_HUMAN   | E.STDSGLSM*SSYSVPR.T     |                 | 2 | 3,054  | 0,457 | -0,384 |
| 6 | O75665 OFD1_HUMAN   | E.AFKNITSSS#PE.R         | S686:           | 2 | 3,0505 | 0,369 | -0,581 |
| 6 | Q8NC51 PAIRB_HUMAN  | E.LTES#PKYIQK.Q          | S234:           | 2 | 3,0494 | 0,235 | -0,284 |
| 6 | Q9Y2K1 ZBTB1_HUMAN  | E.NM*RPPNNS\$#PVQE.D     | S412:           | 2 | 3,0486 | 0,366 | -0,39  |
| 6 | P62917 RL8_HUMAN    | K.GIVKDIHDPGR.G          |                 | 2 | 3,0453 | 0,223 | 0      |

|   |                     |                                  |              |   |        |       |        |
|---|---------------------|----------------------------------|--------------|---|--------|-------|--------|
| 6 | O43379 WDR62_HUMAN  | E.AGPGDQQGDSYLR.V                |              | 2 | 3,0352 | 0,358 | -0,626 |
| 6 | Q9NZL4 HPBP1_HUMAN  | E.KLLQTCFSS#PADDSM*D.R           | S354:        | 2 | 3,0344 | 0,448 | -0,447 |
| 6 | P35527 K1C9_HUMAN   | R.FSSSSGYGGSSR.V                 |              | 2 | 3,0301 | 0,413 | -0,494 |
| 6 | Q01105 SET_HUMAN    | E.IDRLNEQAS#EE.I                 | S63:         | 2 | 3,0298 | 0,348 | -0,264 |
| 6 | Q96QR8 PURB_HUMAN   | E.HYAQLGPPSS#PEQLAAGAE.E.G       | S101:        | 3 | 3,0296 | 0,121 | 0      |
| 6 | Q8TD19 NEK9_HUMAN   | E.ASS#PRLNPAVTCAGK.G             | S869:        | 2 | 3,0281 | 0,388 | -0,531 |
| 6 | O95571 ETHE1_HUMAN  | R.EAVLIDPVLETAPR.D               |              | 2 | 3,0263 | 0,275 | -0,32  |
| 6 | Q8WZ82 OVCA2_HUMAN  | E.ADVFSALEEPAVCR.G               |              | 2 | 3,026  | 0,441 | -0,468 |
| 6 | P62753 RS6_HUMAN    | R.LSS#LRASSTKS#E.S               | S236:S244:   | 3 | 3,0248 | 0,226 | -0,064 |
| 6 | O00566 MPP10_HUMAN  | E.VAPVSVSDAALLAPEEIKE.K          |              | 2 | 3,0224 | 0,449 | -0,378 |
| 6 | Q01433 AMPD2_HUMAN  | E.QGPDTPVSADAPVHPPALE.Q          |              | 2 | 3,0222 | 0,417 | -0,129 |
| 6 | Q02952 AKA12_HUMAN  | E.SQLPGTGGPEDVLQPVQRAE.A         |              | 3 | 3,0113 | 0,147 | -0,528 |
| 6 | Q7Z6Z7 HUWE1_HUMAN  | E.RDGG#GNS#TIIVSR.S              | S2362:S2365: | 2 | 3,0112 | 0,39  | -0,232 |
| 6 | Q04721 NOTC2_HUMAN  | R.RTPS#LALT#PPQAEQE.V            | S1804:T1808: | 2 | 3,0103 | 0,318 | -0,339 |
| 6 | Q70CQ2 UBP34_HUMAN  | E.MNATHIAQGS#QE.S                | S567:        | 2 | 3,0098 | 0,29  | -0,446 |
| 6 | Q00613 HSF1_HUMAN   | E.LAPAS#PM*ASPGGSIDERPLSSSPLVR.V | S275:        | 3 | 3,0097 | 0,174 | 0,068  |
| 6 | Q9NZB2 F120A_HUMAN  | E.RSS#PINPAQS#GSPNHVD.S          | S435:S442:   | 2 | 3,0083 | 0,346 | -0,381 |
| 6 | P61160 ARP2_HUMAN   | E.LLFNTIQAADIDTR.S               |              | 3 | 3,0076 | 0,285 | -0,115 |
| 6 | Q9NZ23 Q9NZ23_HUMAN | E.DQVVSSDIVNNTGHSIFD.A           |              | 3 | 3,007  | 0,244 | 0      |
| 6 | Q02952 AKA12_HUMAN  | E.LVEMDAEPQEAPEAKE.L             |              | 2 | 3,0069 | 0,376 | -0,478 |
| 6 | Q92917 GPKOW_HUMAN  | E.NAGVDPTLAIPMIQK.G              |              | 2 | 3,0052 | 0,389 | -0,467 |
| 6 | Q12888 TP53B_HUMAN  | R.ADDPLRLDQE.L                   |              | 2 | 3,0049 | 0,234 | -0,312 |
| 6 | P13639 EF2_HUMAN    | E.SQVAGTPMFVVK.A                 |              | 2 | 3,0036 | 0,296 | -0,386 |
| 6 | P62701 RS4X_HUMAN   | R.TIRYPDLIK.V                    |              | 3 | 3,0025 | 0,215 | 0,301  |
| 6 | Q5BKY9 F133B_HUMAN  | E.DKPLSSESL#E.S                  | S196:        | 2 | 3,0021 | 0,328 | -0,576 |
| 6 | P84077 ARF1_HUMAN   | D.AVLLVFANK.Q                    |              | 2 | 3,002  | 0,291 | 0      |
| 6 | P04792 HSPB1_HUMAN  | E.SPAVAAPAYS.R.A                 |              | 2 | 2,9995 | 0,364 | -0,336 |
| 6 | P30041 PRDX6_HUMAN  | E.LAILLGM*LDPAEKDE.K             |              | 2 | 2,9979 | 0,226 | -0,594 |
| 6 | O60447 EVI5_HUMAN   | E.TGVGFPLHGK.S                   |              | 2 | 2,9971 | 0,401 | 0,12   |
| 6 | Q9BXK5 B2L13_HUMAN  | E.VVPALEPTETLLSEKE.I             |              | 2 | 2,9968 | 0,385 | -0,417 |
| 6 | O00443 P3C2A_HUMAN  | E.KLLDDDS#FE.T                   | S108:        | 2 | 2,9954 | 0,308 | -0,316 |
| 6 | P52948 NUP98_HUMAN  | E.VVVYLLDDNQKPPVGE.G             |              | 3 | 2,992  | 0,35  | -0,109 |
| 6 | P04264 K2C1_HUMAN   | R.FVSTTYSGVTR.-                  |              | 2 | 2,9893 | 0,416 | 0      |

|   |                    |                              |            |   |        |       |        |
|---|--------------------|------------------------------|------------|---|--------|-------|--------|
| 6 | P36957 ODO2_HUMAN  | K.DDLVTVKTPAFAESVTE.G        |            | 2 | 2,9884 | 0,251 | -0,201 |
| 6 | Q13509 TBB3_HUMAN  | E.VISDEHGIDPSGNYVGSDLQLE.R   |            | 3 | 2,9881 | 0,317 | -0,521 |
| 6 | Q6S8J3 A26CA_HUMAN | E.M*ATAASSSSLEK.S            |            | 2 | 2,9819 | 0,392 | -0,407 |
| 6 | O95208 EPN2_HUMAN  | R.GSS#QPNLSTSHSEQE.Y         | S173:      | 2 | 2,9813 | 0,374 | -0,732 |
| 6 | P68104 EF1A1_HUMAN | E.TGVLKPGM*VVTFAPVNVVTE.V    |            | 3 | 2,9797 | 0,324 | -0,176 |
| 6 | P22626 ROA2_HUMAN  | R.GGGGNFGPGPSNFR.G           |            | 2 | 2,9766 | 0,445 | -0,443 |
| 6 | Q9H5H4 ZN768_HUMAN | E.LKTQS#PEFE.A               | S160:      | 2 | 2,9763 | 0,255 | -0,526 |
| 6 | P31948 STIP1_HUMAN | E.VQQIM*SDPAM*R.L            |            | 2 | 2,9756 | 0,39  | -0,373 |
| 6 | Q13873 BMPR2_HUMAN | R.YM*APEVLEGAVNLR.D          |            | 2 | 2,9716 | 0,4   | -1,16  |
| 6 | Q7Z5K2 WAPL_HUMAN  | E.STGDPFGFDS#DDESLPVSSK.N    | S77:       | 3 | 2,9705 | 0,099 | -0,169 |
| 6 | Q9UQ35 SRRM2_HUMAN | E.KAGM*SSNQSISS#PVLD.A       | S1404:     | 2 | 2,966  | 0,391 | -0,355 |
| 6 | Q9BYV8 CEP41_HUMAN | E.IQRLEDNDSAAAS#DPDAE.T      | S99:       | 2 | 2,9637 | 0,412 | -0,443 |
| 6 | P08758 ANXA5_HUMAN | R.GTVTDFPGFDERADAE.T         |            | 2 | 2,9619 | 0,467 | -0,424 |
| 6 | P24928 RPB1_HUMAN  | K.YSPTSPTYSPTSPK.Y           |            | 2 | 2,9588 | 0,277 | 0,081  |
| 6 | Q9P1Y6 K1542_HUMAN | R.GRECS#PTSSLE.R             | S1124:     | 2 | 2,9544 | 0,198 | -0,281 |
| 6 | O95361 TRI16_HUMAN | E.LDLM*APGPLPR.A             |            | 2 | 2,9508 | 0,388 | -0,204 |
| 6 | Q92797 SYMPK_HUMAN | K.ETAAGGLTLKEE.R             |            | 2 | 2,9501 | 0,35  | -0,601 |
| 6 | P51610 HCFC1_HUMAN | E.AAASLVSTVGGQQNGSVVR.V      |            | 3 | 2,9486 | 0,284 | -0,099 |
| 6 | Q92889 XPF_HUMAN   | E.ISS#S#PESCEPIKHEE.F        | S509:S510: | 3 | 2,9434 | 0,294 | -0,363 |
| 6 | P02545 LMNA_HUMAN  | R.LRLS#PS#PTSQR.S            | S390:S392: | 2 | 2,943  | 0,329 | -0,609 |
| 6 | P04181 OAT_HUMAN   | E.AGVVVPDPGYLM*GVRE.L        |            | 3 | 2,942  | 0,182 | -0,109 |
| 6 | Q6S8J3 A26CA_HUMAN | R.TTGIVM*DSGDGVTHTVPIYE.G    |            | 2 | 2,9411 | 0,369 | -0,232 |
| 6 | Q17RY0 CPEB4_HUMAN | E.KQQLS#PSPGQE.A             | S97:       | 2 | 2,9387 | 0,37  | -0,286 |
| 6 | Q7L014 DDX46_HUMAN | D.M*AAPGTSSVPAPTAGNAEKLE.I   |            | 2 | 2,9365 | 0,438 | -0,121 |
| 6 | P62753 RS6_HUMAN   | R.LSS#LRAS#TSKSE.S           | S236:S240: | 2 | 2,9353 | 0,414 | -0,513 |
| 6 | Q12849 GRSF1_HUMAN | E.VDDVFLIR.A                 |            | 2 | 2,9336 | 0,366 | -0,125 |
| 6 | P19338 NUCL_HUMAN  | K.TLVLSNLSYS#ATEE.T          | S496:      | 2 | 2,9284 | 0,167 | -0,304 |
| 6 | Q9UKI8 TLK1_HUMAN  | R.SLLNHT#PPSGRPR.E           | T38:       | 3 | 2,9265 | 0,239 | 0      |
| 6 | Q8IW35 CEP97_HUMAN | E.SHGIS#PPLQGE.I             | S825:      | 2 | 2,9257 | 0,396 | -0,203 |
| 6 | Q8WUA4 TF3C2_HUMAN | E.MSLPTPLPGFEDS#PDQR.R       | S63:       | 3 | 2,9244 | 0,412 | -0,465 |
| 6 | P04920 B3A2_HUMAN  | E.RTS#PS#SPAPLPHQE.A         | S170:S172: | 3 | 2,9243 | 0,154 | -0,22  |
| 6 | Q8WU79 SMAP2_HUMAN | D.LDLLASVPS#PSSSGSR.K        | S219:      | 2 | 2,9229 | 0,294 | -0,221 |
| 6 | Q92615 LARP5_HUMAN | E.EKFTSSQTQS#PTPPKPPS#PSFE.L | S516:S524: | 3 | 2,9226 | 0,161 | -0,285 |

|   |                     |                                      |            |   |        |       |        |
|---|---------------------|--------------------------------------|------------|---|--------|-------|--------|
| 6 | P49368 TCPG_HUMAN   | R.NVLLDPQLVPGGGASE.M                 |            | 2 | 2,9224 | 0,474 | -0,467 |
| 6 | Q9Y6M5 ZNT1_HUMAN   | E.KTPAVSIS#CLE.L                     | S468:      | 2 | 2,9196 | 0,147 | 0      |
| 6 | P13639 EF2_HUMAN    | E.ESQVAGTPMFVVK.A                    |            | 2 | 2,9161 | 0,245 | -0,438 |
| 6 | Q9Y6R0 NUMBL_HUMAN  | E.AAAAPTVPAPGPAQPGHVS#PTPATTSPGKGE.A | S263:      | 3 | 2,9159 | 0,18  | -0,375 |
| 6 | Q8NI08 NCOA7_HUMAN  | E.VDKQS#GS#PESRVE.N                  | S500:S502: | 2 | 2,914  | 0,416 | -0,387 |
| 6 | Q00610 CLH1_HUMAN   | R.FLRENPYYDSR.V                      |            | 3 | 2,9136 | 0,169 | -0,063 |
| 6 | Q8N7Q0 Q8N7Q0_HUMAN | K.NHEEEVKGL.-                        |            | 2 | 2,9117 | 0,371 | -0,231 |
| 6 | Q13868 EXOS2_HUMAN  | E.AGGFIANLEPVSLADRE.V                |            | 2 | 2,9066 | 0,434 | -0,555 |
| 6 | O43741 AAKB2_HUMAN  | R.DLSSS#PPGPYGQE.M                   | S184:      | 2 | 2,9057 | 0,372 | -0,173 |
| 6 | P35030 TRY3_HUMAN   | D.TLDNDIMLIK.L                       |            | 2 | 2,9034 | 0,302 | -0,415 |
| 6 | Q8IXT5 RB12B_HUMAN  | R.GRPGSGTSGVDS#LSNFIE.S              | S105:      | 2 | 2,9014 | 0,165 | -0,59  |
| 6 | Q02952 AKA12_HUMAN  | E.TCVSGEDPTQGADLS#PDEK.V             | S483:      | 3 | 2,8979 | 0,26  | 0      |
| 6 | O94804 STK10_HUMAN  | K.ASQS#RPNS#SALE.T                   | S450:S454: | 2 | 2,8978 | 0,297 | -0,26  |
| 6 | Q9BTV4 TMM43_HUMAN  | E.GLSLVVSPDSIHSVAPENE.G              |            | 2 | 2,8976 | 0,264 | -0,313 |
| 6 | P42167 LAP2B_HUMAN  | E.HNQS#YSQAGITE.T                    | S222:      | 2 | 2,8974 | 0,166 | -0,431 |
| 6 | Q8IYL3 CA174_HUMAN  | E.DVQKPPQLM*DNSVFLDDDS#NQPM*PVSR.F   | S189:      | 3 | 2,8945 | 0,299 | -0,345 |
| 6 | Q6ZS17 FA65A_HUMAN  | R.TLS#HIS#EASVDAALAE.A               | S453:S456: | 2 | 2,8905 | 0,419 | -0,619 |
| 6 | P18583 SON_HUMAN    | E.STS#PEPSKIM*LVEPPVAK.V             | S283:      | 3 | 2,887  | 0,207 | 0      |
| 6 | Q70CQ2 UBP34_HUMAN  | E.TRDSSIIDPGTEQDLPS#PE.N             | S3255:     | 2 | 2,8866 | 0,32  | -0,114 |
| 6 | P28066 PSA5_HUMAN   | E.YDRGVNTFS#PE.G                     | S16:       | 2 | 2,8866 | 0,293 | -0,358 |
| 6 | Q9Y490 TLN1_HUMAN   | E.LAVFCSPEPPAKTSTPE.D                |            | 2 | 2,8845 | 0,259 | -0,267 |
| 6 | Q92576 PHF3_HUMAN   | E.NNLQDNQTSNSS#PCR.S                 | S1614:     | 2 | 2,8845 | 0,321 | -0,336 |
| 6 | Q02952 AKA12_HUMAN  | E.SGEHTQVPADS#PDSQEE.Q               | S554:      | 2 | 2,8786 | 0,442 | -0,516 |
| 6 | Q02952 AKA12_HUMAN  | E.SQLPGTGGPEDVLQPVQRAE.A             |            | 2 | 2,878  | 0,457 | -0,235 |
| 6 | ##P07197 NFM_HUMAN  | R.ELS#EKT#GRVSE.L                    | S577:T580: | 2 | 2,8761 | 0,161 | -0,262 |
| 6 | Q14257 RCN2_HUMAN   | E.KANQDS#GPGLSLEE.F                  | S165:      | 2 | 2,876  | 0,325 | 0,08   |
| 6 | Q9HC35 EMAL4_HUMAN  | E.SRISS#PTLLE.N                      | S919:      | 2 | 2,8702 | 0,279 | -0,288 |
| 6 | Q16204 CCDC6_HUMAN  | E.KLDQPV#APPS#PRDISME.I              | S240:S244: | 2 | 2,8681 | 0,392 | -0,115 |
| 6 | Q9NX40 OCAD1_HUMAN  | E.SAPTGITDHIVQGPDPNLE.E              |            | 2 | 2,8656 | 0,302 | -0,249 |
| 6 | Q9UBC2 EP15R_HUMAN  | K.FHDTSS#PLM*VTPPSAE.A               | S108:      | 2 | 2,8635 | 0,322 | -0,337 |
| 6 | P05556 ITB1_HUMAN   | K.NVLSLTNKGE.V                       |            | 2 | 2,8632 | 0,156 | 0,113  |
| 6 | Q9Y282 ERG13_HUMAN  | E.VTVFDPDSLDPDRCE.S                  |            | 2 | 2,8627 | 0,331 | -0,277 |
| 6 | Q2I9M2 Q2I9M2_HUMAN | R.VSEPGTSSQQSDE.I                    |            | 2 | 2,8614 | 0,473 | -0,361 |

|   |                    |                                   |            |   |        |       |        |
|---|--------------------|-----------------------------------|------------|---|--------|-------|--------|
| 6 | Q5THK1 CV030_HUMAN | R.KSIVSLM*PEDQIS#PVSE.V           | S582:      | 2 | 2,8593 | 0,27  | -0,374 |
| 6 | Q9NXG2 THUM1_HUMAN | E.YGDDM*YGPEK.F                   |            | 2 | 2,8569 | 0,472 | -0,615 |
| 6 | Q9Y2K1 ZBTB1_HUMAN | E.NMRPPNNS#SPVQEDAE.N             | S411:      | 2 | 2,8498 | 0,385 | -0,131 |
| 6 | Q9UQ35 SRRM2_HUMAN | E.SYFGVSSLQLK.G                   |            | 2 | 2,8493 | 0,409 | -0,199 |
| 6 | Q9P258 RCC2_HUMAN  | K.TKDGQILPVPNVVVR.D               |            | 3 | 2,8482 | 0,26  | -0,224 |
| 6 | Q9UN86 G3BP2_HUMAN | E.RQPS#PEPVQE.N                   | S163:      | 2 | 2,848  | 0,307 | -0,098 |
| 6 | P19338 NUCL_HUMAN  | K.TLVLSNLS#YSATEE.T               | S494:      | 2 | 2,8476 | 0,258 | -0,304 |
| 6 | Q14353 GAMT_HUMAN  | E.VGFGM*AIAASK.V                  |            | 2 | 2,8456 | 0,386 | -0,228 |
| 6 | Q92785 REQU_HUMAN  | E.GEDKEDS#QPPT#PVSQR.S            | S244:T248: | 3 | 2,8445 | 0,175 | -0,19  |
| 6 | P52948 NUP98_HUMAN | E.VVVYLDDNQKPPVGE.G               |            | 2 | 2,8437 | 0,495 | -0,365 |
| 6 | Q01082 SPTB2_HUMAN | K.TALPAQSAATLPAR.T                |            | 2 | 2,8405 | 0,426 | -0,357 |
| 6 | P49368 TCPG_HUMAN  | R.NLQDAM*QVCR.N                   |            | 2 | 2,8352 | 0,415 | -0,488 |
| 6 | Q9BVS4 RIOK2_HUMAN | E.SADARS#FE.M                     | S390:      | 2 | 2,8322 | 0,288 | -0,127 |
| 6 | P05556 ITB1_HUMAN  | E.VNSEMDDAYCR.K                   |            | 2 | 2,8317 | 0,345 | -0,359 |
| 6 | P25788 PSA3_HUMAN  | E.SLKEEDES#D.D                    | S250:      | 2 | 2,8285 | 0,269 | -0,323 |
| 6 | Q02790 FKBP4_HUMAN | E.SGAQSAPLPMEGVDISPK.Q            |            | 2 | 2,8275 | 0,36  | -0,616 |
| 6 | Q92990 GLMN_HUMAN  | E.DFGLFQLAGQR.C                   |            | 2 | 2,8199 | 0,501 | -0,487 |
| 6 | Q02952 AKA12_HUMAN | E.QKGESSAS#SPEEPEE.I              | S568:      | 2 | 2,818  | 0,272 | -0,438 |
| 6 | Q6PGQ7 BORA_HUMAN  | E.NSHM*CM*#PLAE.S                 | S478:      | 2 | 2,8173 | 0,303 | -0,264 |
| 6 | P42167 LAP2B_HUMAN | E.HNQSYS#QAGITE.T                 | S224:      | 2 | 2,8143 | 0,324 | -0,345 |
| 6 | Q02952 AKA12_HUMAN | E.SQLPGTGGPEDVLQPVQR.A            |            | 2 | 2,8131 | 0,417 | -0,26  |
| 6 | P36578 RL4_HUMAN   | E.VPELPLVVEDKVE.G                 |            | 3 | 2,8104 | 0,095 | -0,125 |
| 6 | Q86UP2 KTN1_HUMAN  | R.DAVSNNTTNQLE.S                  |            | 2 | 2,8091 | 0,301 | -0,614 |
| 6 | Q02952 AKA12_HUMAN | E.TGETLEPAGAHLVLEE.K              |            | 2 | 2,809  | 0,199 | -0,513 |
| 6 | Q15459 SF3A1_HUMAN | E.DSAPSKPVVGIYPPPE.V              |            | 2 | 2,8054 | 0,227 | -0,276 |
| 6 | Q6S8J3 A26CA_HUMAN | E.MATAASSSSLEK.S                  |            | 2 | 2,8053 | 0,365 | -0,206 |
| 6 | Q16204 CCDC6_HUMAN | E.KLDQPV#APPS#PRDISM*E.I          | S240:S244: | 2 | 2,8048 | 0,324 | -0,114 |
| 6 | Q96JM3 ZN828_HUMAN | K.LAPVPS#PEPQKAPVPS#PE.S          | S204:S214: | 3 | 2,8048 | 0,17  | 0,457  |
| 6 | P61758 PFD3_HUMAN  | E.AVFVEDVDSFMK.Q                  |            | 2 | 2,8029 | 0,397 | -0,528 |
| 6 | P10809 CH60_HUMAN  | K.IGIEIHKR.T                      |            | 2 | 2,8028 | 0,147 | 0,065  |
| 6 | P31949 S10AB_HUMAN | E.FLNLIGGLAMACHD.S                |            | 2 | 2,8008 | 0,465 | -0,319 |
| 6 | Q75369 FLNB_HUMAN  | E.VGSLGFAIEGPSQAKIE.Y             |            | 2 | 2,7957 | 0,331 | -0,358 |
| 6 | Q00613 HSF1_HUMAN  | E.LAPAS#PM*ASPGGSIDERPLSSS#PLVR.V | S275:S292: | 3 | 2,7955 | 0,104 | -0,132 |

|   |                    |                                   |                 |   |        |       |        |
|---|--------------------|-----------------------------------|-----------------|---|--------|-------|--------|
| 6 | O95359 TACC2_HUMAN | E.TKFSS#PTEE.L                    | S2512:          | 2 | 2,7951 | 0,211 | -0,11  |
| 6 | Q8IWE2 NXP20_HUMAN | E.DQTVVSV DVAKVSEEE.T             |                 | 2 | 2,7932 | 0,399 | -0,422 |
| 6 | Q06265 EXOS9_HUMAN | E.KAPIDTS#DVEE.K                  | S306:           | 2 | 2,7897 | 0,451 | -0,38  |
| 6 | Q9H9R9 DBND1_HUMAN | R.RQPLSS#VSS#LEVHFD.L             | S64:S67:        | 3 | 2,7861 | 0,158 | -0,197 |
| 6 | P28290 SSFA2_HUMAN | E.LLREAS#AES#DVGKSSE.S            | S641:S644:      | 2 | 2,7858 | 0,253 | -0,066 |
| 6 | Q96AG4 LRC59_HUMAN | E.LDLSLSDLNEVPVKE.L               |                 | 2 | 2,7804 | 0,232 | -0,584 |
| 6 | P68104 EF1A1_HUMAN | E.TGV LKPGMVVTFAPVNV TTE.V        |                 | 3 | 2,7786 | 0,222 | -0,444 |
| 6 | P08729 K2C7_HUMAN  | D.TSVVLSM*DNSR.S                  |                 | 2 | 2,778  | 0,345 | -0,598 |
| 6 | P10253 LYAG_HUMAN  | R.GAYTQVIFLAR.N                   |                 | 2 | 2,7761 | 0,244 | -0,492 |
| 6 | Q9NR09 BIRC6_HUMAN | E.ADILVDGSLSK.G                   |                 | 2 | 2,774  | 0,157 | 0,109  |
| 6 | Q9H307 PININ_HUMAN | E.VPVEPVLTVHPE.S                  |                 | 2 | 2,7736 | 0,311 | -0,556 |
| 6 | Q6S8J3 A26CA_HUMAN | R.AVFPSIVGRPR.Q                   |                 | 2 | 2,7721 | 0,31  | -0,407 |
| 6 | Q99638 RAD9A_HUMAN | R.VLPSISLS#PGPQPPKS#PGPHS#EEEDE.A | S328:S336:S341: | 3 | 2,7719 | 0,179 | -0,372 |
| 6 | Q9BQ39 DDX50_HUMAN | E.GFNRLS#DE.F                     | S82:            | 2 | 2,7652 | 0,25  | -0,06  |
| 6 | P11766 ADHX_HUMAN  | E.FGATECINPQDFSKPIQE.V            |                 | 2 | 2,7628 | 0,394 | -0,352 |
| 6 | Q13029 PRDM2_HUMAN | E.RETVS#PPCFDE.Y                  | S796:           | 2 | 2,7597 | 0,264 | -0,172 |
| 6 | O95235 KI20A_HUMAN | E.HSLQVS#PSLE.K                   | S532:           | 2 | 2,754  | 0,197 | -0,311 |
| 6 | P11717 MPRI_HUMAN  | K.TAGNDGKGPVFTGE.V                |                 | 2 | 2,7485 | 0,396 | -0,252 |
| 6 | Q04637 IF4G1_HUMAN | E.FSSSPLQAPTPLASHTVE.I            |                 | 2 | 2,7482 | 0,419 | -0,522 |
| 6 | Q9H813 TM206_HUMAN | E.RSTS#YQELSEE.L                  | S9:             | 2 | 2,7476 | 0,217 | -0,433 |
| 6 | Q9ULH7 MKL2_HUMAN  | E.QLVDQGIM*PPLKS#PAAFHE.Q         | S66:            | 3 | 2,7472 | 0,13  | -0,252 |
| 6 | Q9BV44 THUM3_HUMAN | E.DVSTLIGDDLASCCKDE.T             |                 | 2 | 2,7469 | 0,341 | -0,421 |
| 6 | P48960 CD97_HUMAN  | R.CNPGFSSFSE.I                    |                 | 2 | 2,7455 | 0,334 | -0,108 |
| 6 | Q9Y624 JAM1_HUMAN  | E.FKQTSS#FLV.-                    | S296:           | 2 | 2,7446 | 0,458 | 0      |
| 6 | Q02952 AKA12_HUMAN | K.VLSKPPEGVVS#E.V                 | S498:           | 2 | 2,7365 | 0,118 | -0,185 |
| 6 | Q6P4Q7 CNNM4_HUMAN | E.DEQSNIVDILYVKD.L                |                 | 2 | 2,7353 | 0,333 | -0,443 |
| 6 | P46937 YAP1_HUMAN  | R.LQQLQM*EKE.R                    |                 | 2 | 2,7319 | 0,084 | -0,21  |
| 6 | Q14160 LAP4_HUMAN  | E.LRSLESPS#PGPQEEDGE.V            | S1581:          | 2 | 2,7304 | 0,391 | 0      |
| 6 | Q8TB72 PUM2_HUMAN  | R.AGAGQRPLT#PNQGQQGQQA.E.S        | T396:           | 2 | 2,7294 | 0,488 | -0,461 |
| 6 | Q9ULH7 MKL2_HUMAN  | E.QLVDQGIM PPLKS#PAAFHE.Q         | S66:            | 3 | 2,7281 | 0,118 | -0,254 |
| 6 | P06748 NPM_HUMAN   | K.M*SVQPTVSLGGFE.I                |                 | 2 | 2,7274 | 0,328 | -0,178 |
| 6 | P11766 ADHX_HUMAN  | E.FGATECINPQDFSKPIQE.V            |                 | 3 | 2,7257 | 0,101 | -0,176 |
| 6 | Q6ZRV2 FA83H_HUMAN | E.SKGS#PTSAYPE.R                  | S870:           | 2 | 2,7221 | 0,463 | -0,709 |

|   |                    |                               |              |   |        |       |        |
|---|--------------------|-------------------------------|--------------|---|--------|-------|--------|
| 6 | Q13409 DC1I2_HUMAN | E.GQIVIYDVGEQIAVPR.N          |              | 3 | 2,7217 | 0,23  | 0      |
| 6 | Q12792 TWF1_HUMAN  | R.LIRGPAETEATT#D.-            | T367:        | 2 | 2,7211 | 0,263 | -0,336 |
| 6 | P68104 EF1A1_HUMAN | R.LPLQDVYK.I                  |              | 2 | 2,7205 | 0,213 | -0,25  |
| 6 | P13667 PDIA4_HUMAN | E.NGVLVLNDANFDNFVADKD.T       |              | 3 | 2,7168 | 0,245 | -0,264 |
| 6 | Q96JM3 ZN828_HUMAN | E.YIKTDLDAM*DIK.G             |              | 2 | 2,7148 | 0,369 | -0,592 |
| 6 | P26651 TTP_HUMAN   | E.LCRTFS#E.S                  | S113:        | 2 | 2,7132 | 0,141 | -0,123 |
| 6 | Q96AG4 LRC59_HUMAN | E.LDLSLSDLNEVPVKE.L           |              | 3 | 2,7128 | 0,125 | -0,328 |
| 6 | Q9Y490 TLN1_HUMAN  | E.LAVFCSPEPPAK.T              |              | 2 | 2,7123 | 0,432 | -0,371 |
| 6 | Q02952 AKA12_HUMAN | E.HDPGQGSSSPEQAGS#PTEGE.G     | S749:        | 2 | 2,7075 | 0,532 | -0,24  |
| 6 | Q15121 PEA15_HUMAN | D.IIRQPS#EEE.I                | S116:        | 2 | 2,7065 | 0,257 | -0,413 |
| 6 | P04792 HSPB1_HUMAN | E.GTLTVEAPM*PK.L              |              | 2 | 2,7049 | 0,361 | -0,105 |
| 6 | P13645 K1C10_HUMAN | K.DAEAWFNEK.S                 |              | 2 | 2,7049 | 0,28  | -0,11  |
| 6 | Q9NXG2 THUM1_HUMAN | E.YGDDMYGPEK.F                |              | 2 | 2,7036 | 0,477 | -0,312 |
| 6 | Q9Y2L5 TRS85_HUMAN | K.NSDNNLLSLDGLDNE.V           |              | 2 | 2,7026 | 0,248 | -0,598 |
| 6 | Q9BVC6 TM109_HUMAN | R.RDFAPPGQK.R                 |              | 2 | 2,7006 | 0,173 | 0      |
| 6 | P51114 FXR1_HUMAN  | E.DGM*VPFVFGTKE.S             |              | 2 | 2,6944 | 0,28  | -0,423 |
| 6 | P68104 EF1A1_HUMAN | E.T#GVLKPGM*VVFAPVNVNTE.V     | T269:        | 2 | 2,6909 | 0,455 | 0,453  |
| 6 | P34932 HSP74_HUMAN | D.IVQLPTGLTGIK.V              |              | 2 | 2,6859 | 0,362 | -0,492 |
| 6 | Q99459 CDC5L_HUMAN | E.SDFSGVTPQR.Q                |              | 2 | 2,6831 | 0,335 | -0,112 |
| 6 | P46821 MAP1B_HUMAN | E.ATEPEPSGSIANPAASTS#PSLSHR.F | S25:         | 3 | 2,6786 | 0,308 | -0,299 |
| 6 | O75175 CNOT3_HUMAN | R.AAISSGIEDPVPTLHLTE.R        |              | 2 | 2,6779 | 0,377 | -0,264 |
| 6 | Q6NSJ2 PHLB3_HUMAN | E.ASEVLAEPSSR.G               |              | 2 | 2,6762 | 0,327 | -0,106 |
| 6 | P11021 GRP78_HUMAN | K.VYEGERPLTK.D                |              | 2 | 2,6729 | 0,376 | -0,205 |
| 6 | Q14444 CAPR1_HUMAN | E.AAAGAGAAAPASQHPATGTGAVQTE.A |              | 3 | 2,6673 | 0,237 | -0,254 |
| 6 | O75369 FLNB_HUMAN  | K.YADEEIPR.S                  |              | 2 | 2,664  | 0,295 | -0,246 |
| 6 | P56537 IF6_HUMAN   | E.LSSLLQVPLVAGTVNR.G          |              | 2 | 2,6618 | 0,425 | -0,512 |
| 6 | P55072 TERA_HUMAN  | E.MFAQTLQQSR.G                |              | 2 | 2,6604 | 0,094 | -0,403 |
| 6 | P06733 ENOA_HUMAN  | R.NFRNPLAK.-                  |              | 2 | 2,6584 | 0,145 | 0,191  |
| 6 | Q92889 XPF_HUMAN   | E.IS#SS#PESCP EEIKHEE.F       | S508:S510:   | 2 | 2,6562 | 0,458 | -0,484 |
| 6 | P30622 CLIP1_HUMAN | E.ANGLQTPASR.A                |              | 2 | 2,6522 | 0,405 | -0,219 |
| 6 | Q8TEW0 PARD3_HUMAN | E.GFGRQS#MSE.K                | S827:        | 2 | 2,6518 | 0,256 | -0,113 |
| 6 | Q15149 PLEC1_HUMAN | E.ILTDPSDDTKGFFDPNTEE.N       |              | 2 | 2,6509 | 0,542 | -0,342 |
| 6 | Q15648 MED1_HUMAN  | E.KSYQNS#PSS#DDGIRPLPE.Y      | S1479:S1482: | 3 | 2,6459 | 1     | -0,425 |

|   |                    |                          |            |   |        |       |        |
|---|--------------------|--------------------------|------------|---|--------|-------|--------|
| 6 | Q99613 EIF3C_HUMAN | R.GGYRQQQS#QTAY.-        | S909:      | 2 | 2,6458 | 0,25  | -0,499 |
| 6 | Q9UQ35 SRRM2_HUMAN | E.FSAS#PMLK.S            | S1124:     | 2 | 2,6431 | 0,163 | -0,063 |
| 6 | Q9Y2X9 ZN281_HUMAN | E.KQIYTTS#PLE.C          | S714:      | 2 | 2,6423 | 0,292 | -0,581 |
| 6 | Q6KC79 NIPBL_HUMAN | E.NDIPFNVQYPGQTSK.T      |            | 2 | 2,6418 | 0,376 | -0,429 |
| 6 | P67809 YBOX1_HUMAN | E.TKAADPPAENSS#APEAE.Q   | S314:      | 2 | 2,6403 | 0,378 | -0,553 |
| 6 | Q9BVJ6 UT14A_HUMAN | E.TKDSGS#QEVLSE.L        | S453:      | 2 | 2,639  | 0,169 | -0,718 |
| 6 | Q86VM9 ZCH18_HUMAN | E.LSRGPTSS#PCEEE.G       | S95:       | 2 | 2,6377 | 0,197 | -0,319 |
| 6 | Q9NW68 BSDC1_HUMAN | E.LMGISPIS#PK.E          | S235:      | 2 | 2,6357 | 0,233 | -0,109 |
| 6 | Q6P2E9 EDC4_HUMAN  | E.VEPLGLPQASPSR.T        |            | 2 | 2,6355 | 0,312 | -0,181 |
| 6 | Q8WXI9 P66B_HUMAN  | R.LTPSPDIIVLS#DNE.A      | S129:      | 2 | 2,6335 | 0,271 | 0      |
| 6 | Q5THJ4 VP13D_HUMAN | R.Y#IDTCM*VIFAPR.Y       | Y3390:     | 2 | 2,6325 | 0,12  | 1,234  |
| 6 | P55072 TERA_HUMAN  | E.TDPSPYCIVAPDTVIHCE.G   |            | 2 | 2,6319 | 0,543 | -0,706 |
| 6 | Q86SQ0 PHLB2_HUMAN | E.FYNRTAS#E.S            | S980:      | 2 | 2,6309 | 0,349 | -0,229 |
| 6 | Q02952 AKA12_HUMAN | K.SAVVHDITDDGQEETPE.I    |            | 2 | 2,6303 | 0,289 | -0,397 |
| 6 | Q7Z4V5 HDGR2_HUMAN | R.ARGDS#EALDEES.-        | S664:      | 2 | 2,6302 | 0,332 | -0,539 |
| 6 | P04406 G3P_HUMAN   | K.LVINGNPITIFQE.R        |            | 2 | 2,6264 | 0,299 | -0,418 |
| 6 | Q13404 UB2V1_HUMAN | E.NM*KLPQPPEGQCYS#N.-    | S220:      | 2 | 2,6263 | 0,157 | -0,525 |
| 6 | P62736 ACTA_HUMAN  | K.DSYVGDEAQSQR.G         |            | 2 | 2,6222 | 0,32  | -0,27  |
| 6 | Q9Y2J4 AMOL2_HUMAN | D.T#TLIRHSPQPS#PSSSFNE.G | T596:S606: | 3 | 2,622  | 0,156 | -0,341 |
| 6 | Q9Y519 T184B_HUMAN | E.KTLLLS#DDEF.-          | S403:      | 2 | 2,6178 | 0,364 | -0,453 |
| 6 | Q3L8U1 CHD9_HUMAN  | E.NLKEEPQS#SEEE.S        | S2058:     | 2 | 2,6151 | 0,124 | -0,244 |
| 6 | Q96TA1 NIBL1_HUMAN | K.AVDLGPPKPSDQE.T        |            | 2 | 2,6142 | 0,306 | -0,18  |
| 6 | Q8WU79 SMAP2_HUMAN | R.KVVGSM*PTAGSAGSVPE.N   |            | 2 | 2,6091 | 0,289 | -0,614 |
| 6 | P26358 DNMT1_HUMAN | E.KLSIFDANES#GFE.S       | S394:      | 2 | 2,6047 | 0,157 | 0      |
| 6 | Q01813 K6PP_HUMAN  | R.NVIFQPVAELK.K          |            | 2 | 2,6036 | 0,43  | -0,291 |
| 6 | Q92538 GBF1_HUMAN  | E.KSQSASVES#IPEVLEE.C    | S352:      | 2 | 2,6009 | 0,282 | -0,269 |
| 6 | P56537 IF6_HUMAN   | E.LSSLLQVPLVAGTVNR.G     |            | 3 | 2,5998 | 0,15  | -0,439 |
| 6 | Q66K74 MAP1S_HUMAN | E.LPLAASSIPRRT#PS#PE.S   | T638:S640: | 3 | 2,5995 | 0,117 | -0,094 |
| 6 | Q92609 TBCD5_HUMAN | E.FTGS#PPSSAT#KKD.S      | S554:T560: | 2 | 2,5983 | 0,178 | -0,494 |
| 6 | P13489 RINI_HUMAN  | E.LLPLLQQCQVVR.L         |            | 2 | 2,5974 | 0,367 | -0,333 |
| 6 | P26639 SYTC_HUMAN  | K.MGGEKPIGAGE.E          |            | 2 | 2,5965 | 0,355 | -0,312 |
| 6 | Q99700 ATX2_HUMAN  | E.NKGIS#PVVSE.H          | S783:      | 2 | 2,5961 | 0,226 | -0,33  |
| 6 | Q9Y2N3 PO121_HUMAN | E.TATKPQATSAPS#PAPK.Q    | S674:      | 2 | 2,5945 | 0,308 | -0,448 |



|   |                     |                                 |            |   |        |       |        |
|---|---------------------|---------------------------------|------------|---|--------|-------|--------|
| 6 | Q13561 DCTN2_HUMAN  | K.YADLPGIARNEPDVYE.T            |            | 2 | 2,5942 | 0,38  | -0,268 |
| 6 | Q96TA1 NIBL1_HUMAN  | E.ASS#PPAS#PLQHLLPGK.A          | S679:S683: | 3 | 2,5932 | 0,409 | -0,208 |
| 6 | Q7Z7E8 UB2Q1_HUMAN  | R.FRIAS#ACLDE.L                 | S63:       | 2 | 2,5911 | 0,28  | -0,29  |
| 6 | Q6PKG0 LARP1_HUMAN  | R.AVT#PVPTKTEE.V                | T526:      | 2 | 2,5879 | 0,337 | -0,487 |
| 6 | P31946 1433B_HUMAN  | D.STLIM*QLLR.D                  |            | 2 | 2,5846 | 0,19  | -0,112 |
| 6 | A8MVB1 A8MVB1_HUMAN | R.GAGFPSIPVGKS#PM*VE.Q          | S110:      | 2 | 2,5791 | 0,187 | -0,292 |
| 6 | P05556 ITB1_HUMAN   | E.VNSED*DAYCR.K                 |            | 2 | 2,5788 | 0,378 | -0,266 |
| 6 | Q00613 HSF1_HUMAN   | E.LAPASPMASPGGSIDERPLSS#SPLVR.V | S291:      | 3 | 2,5764 | 0,128 | -0,205 |
| 6 | Q8NG27 PJA1_HUMAN   | E.VREPS#LQEE.Q                  | S448:      | 2 | 2,5758 | 0,292 | -0,314 |
| 6 | Q16204 CCDC6_HUMAN  | K.SGGIVISPFRLLEE.L              |            | 2 | 2,5738 | 0,181 | -0,434 |
| 6 | P78332 RBM6_HUMAN   | E.KLQSFDS#PE.R                  | S1025:     | 2 | 2,5734 | 0,332 | -0,108 |
| 6 | Q5T4S7 UBR4_HUMAN   | K.LCTFTITQKE.F                  |            | 2 | 2,5715 | 0,168 | -0,197 |
| 6 | P35527 K1C9_HUMAN   | K.TLNDMRQEYEQLIAK.N             |            | 3 | 2,5698 | 0,36  | -0,296 |
| 6 | P61158 ARP3_HUMAN   | K.LSEELSGGR.L                   |            | 2 | 2,5686 | 0,169 | 0,129  |
| 6 | Q8N565 MREG_HUMAN   | E.LHYLPFPS#P.-                  | S213:      | 2 | 2,5673 | 0,389 | -0,318 |
| 6 | Q13367 AP3B2_HUMAN  | E.KAFYGS#EEDE.A                 | S272:      | 2 | 2,5649 | 0,334 | -0,292 |
| 6 | Q9BRP8 WIBG_HUMAN   | E.TAQLPSAPQGSR.A                |            | 2 | 2,5633 | 0,307 | -0,603 |
| 6 | P15586 GNS_HUMAN    | D.GM*SLLPILR.G                  |            | 2 | 2,5604 | 0,163 | -0,3   |
| 6 | P39880 CUX1_HUMAN   | E.LVQQPCPIEASK.D                |            | 2 | 2,5599 | 0,271 | -0,25  |
| 6 | Q6S8J3 A26CA_HUMAN  | E.M*ATAASSSSLE.K                |            | 2 | 2,5574 | 0,39  | -0,456 |
| 6 | O43896 KIF1C_HUMAN  | R.GALPAVSSPPAPVSPSSPT#T#HNGE.L  | T417:T418: | 3 | 2,5573 | 0,15  | -0,076 |
| 6 | P68104 EF1A1_HUMAN  | K.RYEEIVK.E                     |            | 2 | 2,5553 | 0,198 | 0,065  |
| 6 | P00533 EGFR_HUMAN   | E.DHFLSLQR.M                    |            | 2 | 2,5545 | 0,226 | -0,12  |
| 6 | P08195 4F2_HUMAN    | E.KQPM*NAASGAAM*S#LAGAE.K       | S33:       | 2 | 2,5534 | 0,252 | -0,47  |
| 6 | Q8NFC6 FA44A_HUMAN  | E.EFELPISSATTIK.C               |            | 2 | 2,5525 | 0,249 | -0,51  |
| 6 | O75970 MPDZ_HUMAN   | E.RTAPTALGITLSS#SPTSTPE.L       | S353:      | 2 | 2,5507 | 0,497 | -0,236 |
| 6 | Q9Y4L1 HYOU1_HUMAN  | E.AEAPVEDGSQPPPEPK.G            |            | 3 | 2,5494 | 0,093 | -0,524 |
| 6 | Q5TAX3 ZCH11_HUMAN  | E.KVPSS#PAEAE.K                 | S156:      | 2 | 2,5491 | 0,116 | -0,446 |
| 6 | Q8N9T8 KRI1_HUMAN   | E.GVHGPPVQLAVDDSS#DEGE.L        | S287:      | 2 | 2,5488 | 0,384 | -0,368 |
| 6 | Q9UPQ6 Q9UPQ6_HUMAN | E.SETRSESS#DFE.V                | S319:      | 2 | 2,5464 | 0,382 | -0,541 |
| 6 | Q14676 MDC1_HUMAN   | R.LLLAEDS#EEE.V                 | S168:      | 2 | 2,5446 | 0,221 | -0,199 |
| 6 | P42704 LPPRC_HUMAN  | E.DVALQILLACPVSK.E.D            |            | 2 | 2,5425 | 0,312 | -0,221 |
| 6 | Q07157 ZO1_HUMAN    | E.YSM*YSTDSR.H                  |            | 2 | 2,5425 | 0,175 | -0,542 |

|   |                     |                                  |            |   |        |       |        |
|---|---------------------|----------------------------------|------------|---|--------|-------|--------|
| 6 | P13639 EF2_HUMAN    | E.SQVAGTPM*FVVK.A                |            | 2 | 2,5391 | 0,256 | -0,191 |
| 6 | O15427 MOT4_HUMAN   | E.VVHTPETS#V.-                   | S464:      | 2 | 2,5389 | 0,515 | -0,233 |
| 6 | P00441 SODC_HUMAN   | K.AVCVLKGDGPVQGIINFE.Q           |            | 2 | 2,5387 | 0,402 | -0,255 |
| 6 | O60361 NDK8_HUMAN   | K.DRPFPPGLVK.Y                   |            | 2 | 2,5367 | 0,214 | -0,415 |
| 6 | Q9C0B5 ZDHC5_HUMAN  | R.SM*S#YSSKQAQPGVSE.T            | S636:      | 2 | 2,5361 | 0,329 | -0,435 |
| 6 | Q14202 ZMYM3_HUMAN  | E.LLGLGGLLYK.A                   |            | 2 | 2,5351 | 0,341 | -0,233 |
| 6 | P20645 MPRD_HUMAN   | K.SNGKETVVGR.L                   |            | 2 | 2,5329 | 0,319 | -0,35  |
| 6 | Q00613 HSF1_HUMAN   | E.LAPASPM*ASPGGSIDERPLS#SSPLVR.V | S290:      | 3 | 2,5295 | 0,308 | -0,476 |
| 6 | P11586 C1TC_HUMAN   | E.DSTVHGFLVQLPLDSE.N             |            | 2 | 2,5257 | 0,216 | -0,347 |
| 6 | P61604 CH10_HUMAN   | K.GGEIQPVSVK.V                   |            | 2 | 2,5244 | 0,142 | -0,12  |
| 6 | Q9UKV3 ACINU_HUMAN  | E.AS#SPPHPQLHS#EEE.I             | S424:S434: | 2 | 2,5241 | 0,224 | -0,542 |
| 6 | P61160 ARP2_HUMAN   | E.LLFNTIQAADIDTRSE.F             |            | 3 | 2,5228 | 0,269 | -0,506 |
| 6 | Q7Z333 SETX_HUMAN   | E.ARAFS#EGEQE.K                  | S2639:     | 2 | 2,52   | 0,24  | -0,507 |
| 6 | P08648 ITA5_HUMAN   | E.GQQLLYVTR.V                    |            | 2 | 2,5169 | 0,295 | 0      |
| 6 | Q9Y2K1 ZBTB1_HUMAN  | E.NM*RPPNNS#SPVQEDAE.N           | S411:      | 2 | 2,5159 | 0,336 | -0,13  |
| 6 | Q5T8D3 ACBD5_HUMAN  | E.DLGNVLTSTPNAK.T                |            | 2 | 2,5156 | 0,246 | -1,101 |
| 6 | Q9Y266 NUDC_HUMAN   | E.NSKLS#DLDSE.T                  | S277:      | 2 | 2,5125 | 0,157 | -0,103 |
| 6 | P12814 ACTN1_HUMAN  | E.DLQDTFIVHTIEE.I                |            | 2 | 2,5104 | 0,234 | -0,469 |
| 6 | O00273 DFFA_HUMAN   | E.KQAPELS#LSSQDLE.L              | S254:      | 2 | 2,5101 | 0,157 | 0      |
| 6 | Q14247 SRC8_HUMAN   | E.RLPSS#PVYE.D                   | S418:      | 2 | 2,5093 | 0,309 | 0      |
| 6 | P27816 MAP4_HUMAN   | K.CSLPAEEDSVLE.K                 |            | 2 | 2,5083 | 0,18  | -0,181 |
| 6 | Q96JM3 ZN828_HUMAN  | E.YIKTDLDAMDIK.G                 |            | 2 | 2,5078 | 0,215 | -1,283 |
| 6 | Q58FF8 H90B2_HUMAN  | K.YIDQEELNK.T                    |            | 2 | 2,506  | 0,133 | -0,318 |
| 6 | O94909 K0819_HUMAN  | E.LRVSE#EDEE.K                   | S274:      | 2 | 2,4973 | 0,131 | -0,115 |
| 6 | Q02790 FKBP4_HUMAN  | E.SGAQSAPLPM*EGVDISPKQDE.G       |            | 3 | 2,4917 | 0,081 | 0,084  |
| 6 | Q9H7N4 SFR19_HUMAN  | R.AAKVPST#PPPK.A                 | T976:      | 2 | 2,4793 | 0,103 | -0,312 |
| 6 | P21333 FLNA_HUMAN   | E.VVIQDPM*GQK.G                  |            | 2 | 2,4768 | 0,293 | -0,216 |
| 6 | Q9HCD6 TANC2_HUMAN  | K.TNNAQNGHLE.D                   |            | 2 | 2,4766 | 0,353 | -0,504 |
| 6 | Q13263 TIF1B_HUMAN  | R.VCQKPGDLVM*CNQCE.F             |            | 3 | 2,4765 | 0,232 | -0,197 |
| 6 | Q63ZY3 KANK2_HUMAN  | E.IASM*LYSR.M                    |            | 2 | 2,4735 | 0,221 | -0,191 |
| 6 | A8K7V5 A8K7V5_HUMAN | E.VSTAPAGTDM*PAAK.K              |            | 2 | 2,4728 | 0,355 | -0,458 |
| 6 | O95400 CD2B2_HUMAN  | R.ITPFNLQEE.M                    |            | 2 | 2,4713 | 0,179 | -0,224 |
| 6 | Q5VUA4 ZN318_HUMAN  | E.LLLHS#PAR.S                    | S1896:     | 2 | 2,4699 | 0,165 | -0,185 |

|   |                    |                             |            |   |        |       |        |
|---|--------------------|-----------------------------|------------|---|--------|-------|--------|
| 6 | Q9UKV3 ACINU_HUMAN | E.ASS#PPHPQLHS#EEE.I        | S425:S434: | 3 | 2,4659 | 0,133 | -0,508 |
| 6 | O60271 JIP4_HUMAN  | E.LSDVSQGGSK.A              |            | 2 | 2,4626 | 0,171 | -0,374 |
| 6 | P81605 DCD_HUMAN   | K.ENAGEDPGLAR.Q             |            | 2 | 2,4626 | 0,316 | -0,108 |
| 6 | O15231 ZN185_HUMAN | R.RESCGSS#VLTDFF.G          | S237:      | 2 | 2,4607 | 0,111 | -0,389 |
| 6 | O60884 DNJA2_HUMAN | E.LEDLLPSRPEVPNIIGE.T       |            | 2 | 2,4587 | 0,28  | -0,516 |
| 6 | Q9Y4L1 HYOU1_HUMAN | E.AEAPVEDGSQLPPPEPK.G       |            | 2 | 2,4541 | 0,369 | -0,489 |
| 6 | P02538 K2C6A_HUMAN | R.SGFSSVSVSR.S              |            | 2 | 2,4526 | 0,303 | -0,301 |
| 6 | O43149 ZZEF1_HUMAN | E.VERPVS#SPGDPE.Q           | S2443:     | 2 | 2,4516 | 0,339 | -0,452 |
| 6 | Q16563 SYPL1_HUMAN | K.TVTATFGYPFRLNE.A          |            | 2 | 2,4504 | 0,362 | -0,302 |
| 6 | P61604 CH10_HUMAN  | K.GGIM*LPEKSQGK.V           |            | 2 | 2,4488 | 0,163 | -0,581 |
| 6 | P49792 RBP2_HUMAN  | E.STTGFNFSFK.S              |            | 2 | 2,4481 | 0,369 | -0,322 |
| 6 | Q15018 K0157_HUMAN | R.LQQAVLSR.Q                |            | 2 | 2,4461 | 0,229 | -0,133 |
| 6 | P61758 PFD3_HUMAN  | E.AVFEVDVDSFM*KQPGNE.T      |            | 3 | 2,4433 | 0,15  | -0,095 |
| 6 | Q15149 PLEC1_HUMAN | E.ILTDPSDDTK.G              |            | 2 | 2,4428 | 0,28  | -0,11  |
| 6 | Q13263 TIF1B_HUMAN | E.KLSPPYSS#PQE.F            | S757:      | 2 | 2,4395 | 0,135 | -0,186 |
| 6 | Q13404 UB2V1_HUMAN | E.NMKLPQPPEGQCY#SN.-        | Y219:      | 2 | 2,4389 | 0,097 | -0,265 |
| 6 | Q04637 IF4G1_HUMAN | R.LSPEPTPLAEPILE.V          |            | 2 | 2,438  | 0,368 | -0,405 |
| 6 | Q6ZRV2 FA83H_HUMAN | R.LSLGQGDSTEAATEE.R         |            | 2 | 2,4375 | 0,262 | -0,162 |
| 6 | Q9UJ83 HACL1_HUMAN | E.RCM*#PPISM*AE.T           | S192:      | 2 | 2,4371 | 0,259 | -0,526 |
| 6 | Q63ZY3 KANK2_HUMAN | E.IASMLYSR.M                |            | 2 | 2,4319 | 0,276 | -0,065 |
| 6 | P31483 TIA1_HUMAN  | K.TLYVGNLSR.D               |            | 2 | 2,4303 | 0,286 | 0      |
| 6 | P50443 S26A2_HUMAN | E.LQRES#ST#DFKQFE.T         | S35:T37:   | 2 | 2,4301 | 0,168 | -0,275 |
| 6 | Q13404 UB2V1_HUMAN | K.YPEAPPFVR.F               |            | 2 | 2,4288 | 0,17  | 0,113  |
| 6 | P04406 G3P_HUMAN   | R.VPTANVSVVDLTCRLE.K        |            | 2 | 2,4286 | 0,163 | 0      |
| 6 | Q9NPI1 BRD7_HUMAN  | R.KAM*GISIPS#PVM*E.N        | S621:      | 2 | 2,4277 | 0,322 | -0,332 |
| 6 | P28838 AMPL_HUMAN  | K.GSDEPPVFLE.I              |            | 2 | 2,4268 | 0,27  | -0,336 |
| 6 | Q53T59 H1BP3_HUMAN | E.VDPDEGLFGPGR.K            |            | 2 | 2,425  | 0,237 | -0,388 |
| 6 | P42695 CNDD3_HUMAN | R.ASAGHVAVSS#PTPE.T         | S1329:     | 2 | 2,4195 | 0,314 | -0,176 |
| 6 | P31942 HNRH3_HUMAN | E.IVPNGITLTM*DYQGR.S        |            | 2 | 2,4192 | 0,518 | -0,648 |
| 6 | Q9H4G0 E41L1_HUMAN | E.FSRPAS#VSE.N              | S441:      | 2 | 2,4187 | 0,114 | -0,23  |
| 6 | P21333 FLNA_HUMAN  | R.TPCEEILVK.H               |            | 2 | 2,4175 | 0,306 | -0,112 |
| 6 | Q13263 TIF1B_HUMAN | E.KLSPPYSS#PQEFAQD.V        | S757:      | 2 | 2,4133 | 0,256 | -0,413 |
| 6 | Q9Y2D5 AKAP2_HUMAN | E.NSLADFSLPQTPQTDNPSEGRGE.G |            | 3 | 2,4094 | 0,249 | 0,074  |

|   |                      |                               |        |   |        |       |        |
|---|----------------------|-------------------------------|--------|---|--------|-------|--------|
| 6 | Q01082 SPTB2_HUMAN   | R.AQTLPTSVVITSE.S             |        | 2 | 2,4094 | 0,134 | -0,422 |
| 6 | P35221 CTNA1_HUMAN   | E.DDQLIAGQSAR.A               |        | 2 | 2,4087 | 0,193 | -0,416 |
| 6 | P06733 ENOA_HUMAN    | E.VDLFT#SKGLFR.A              | T26:   | 3 | 2,4065 | 0,175 | -0,268 |
| 6 | Q15149 PLEC1_HUMAN   | E.VQYLTGGLIPTDTPGRVPLDE.A     |        | 3 | 2,4044 | 0,113 | -0,726 |
| 6 | ##Q460N5 PAR14_HUMAN | R.KIES#QYFRAK.D               | S1039: | 2 | 2,4036 | 0,182 | 0,723  |
| 6 | Q9UIF9 BAZ2A_HUMAN   | E.LKM*CGYNGSVPS#VE.S          | S231:  | 2 | 2,4024 | 0,229 | -0,447 |
| 6 | Q9Y426 CU025_HUMAN   | E.VAIRQLS#E.S                 | S497:  | 2 | 2,402  | 0,1   | 0,306  |
| 6 | Q7Z5K2 WAPL_HUMAN    | E.TGGDEGGSGSSNYKIK.Y          |        | 3 | 2,4004 | 0,256 | -0,117 |
| 6 | Q9BZ95 NSD3_HUMAN    | E.HDPM*APVS#PE.Y              | S1415: | 2 | 2,3996 | 0,119 | -0,311 |
| 6 | Q03252 LMNB2_HUMAN   | R.AGGPATPLS#PTR.L             | S17:   | 2 | 2,3964 | 0,297 | -0,304 |
| 6 | Q5VTR2 BRE1A_HUMAN   | R.KALVVPEPEPDS#NQE.R          | S138:  | 2 | 2,3957 | 0,204 | 0,315  |
| 6 | P61586 RHOA_HUMAN    | K.LVIVGDGACGK.T               |        | 2 | 2,3946 | 0,32  | -0,112 |
| 6 | Q13371 PHLP_HUMAN    | E.VLVLTSVR.N                  |        | 2 | 2,3858 | 0,287 | 0,206  |
| 6 | P63104 1433Z_HUMAN   | E.KFLIPNAS#QAE.S              | S110:  | 2 | 2,3839 | 0,149 | -0,376 |
| 6 | Q14204 DYHC1_HUMAN   | E.IVLSAGSTPR.I                |        | 2 | 2,3827 | 0,297 | 0      |
| 6 | Q96G17 FA89A_HUMAN   | E.YKGACQAASS#PDCTYALE.N       | S130:  | 2 | 2,3739 | 0,443 | -0,236 |
| 6 | O60271 JIP4_HUMAN    | E.LLGEDLPLEPSVTKAE.R          |        | 2 | 2,3721 | 0,285 | -0,499 |
| 6 | Q00613 HSF1_HUMAN    | R.VKEEPPS#PPQSPRVEE.A         | S303:  | 3 | 2,371  | 0,13  | -0,582 |
| 6 | P61604 CH10_HUMAN    | K.GGIM*LPEK.S                 |        | 2 | 2,3708 | 0,108 | 0,354  |
| 6 | Q96PK6 RBM14_HUMAN   | R.TQPMTAQAASYR.A              |        | 2 | 2,3704 | 0,401 | -0,46  |
| 6 | P27816 MAP4_HUMAN    | K.KCSLPAEEDSVLE.K             |        | 2 | 2,3699 | 0,101 | -0,413 |
| 6 | Q9HC35 EMAL4_HUMAN   | E.SRISSPT#LLE.N               | T921:  | 2 | 2,3666 | 0,167 | -0,192 |
| 6 | Q9NPF0 CD320_HUMAN   | R.TSGLCVPLTWR.C               |        | 2 | 2,3597 | 0,364 | -0,473 |
| 6 | Q9P1Y6 K1542_HUMAN   | E.AS#PAPLAQGEPRDLPTRLPALGE.A  | S1202: | 3 | 2,3594 | 0,329 | -0,558 |
| 6 | P62834 RAP1A_HUMAN   | E.DVPM*ILVGNKCDLE.D           |        | 2 | 2,356  | 0,171 | -0,452 |
| 6 | P80723 BASP_HUMAN    | K.ETPAATEAPSSTPK.A            |        | 2 | 2,3542 | 0,386 | -0,528 |
| 6 | Q99459 CDC5L_HUMAN   | E.AQNLM*ALTNVDTPLKGLNT#PLHE.S | T385:  | 3 | 2,354  | 0,136 | -0,692 |
| 6 | P04181 OAT_HUMAN     | E.AGVVVPDPGYLM*GVRE.L         |        | 2 | 2,3506 | 0,288 | -0,364 |
| 6 | Q14493 SLBP_HUMAN    | R.HM*DSQVEDEFDLE.A            |        | 2 | 2,3502 | 0,195 | -1,213 |
| 6 | Q08AD1 CA1L1_HUMAN   | E.ALS#PCPSTVSTK.S             | S673:  | 2 | 2,3483 | 0,226 | -0,551 |
| 6 | Q4ZG04 Q4ZG04_HUMAN  | E.LLLSTLVR.E                  |        | 2 | 2,3479 | 0,241 | -0,2   |
| 6 | Q00526 CDK3_HUMAN    | E.TGQLVALK.K                  |        | 2 | 2,3476 | 0,246 | 0,294  |
| 6 | Q99549 MPP8_HUMAN    | R.VTAVPSAADS#TEE.L            | S20:   | 2 | 2,3418 | 0,126 | -0,503 |

|   |                     |                           |            |   |        |       |        |
|---|---------------------|---------------------------|------------|---|--------|-------|--------|
| 6 | B2RA01 B2RA01_HUMAN | K.AQYEDIAQK.S             |            | 2 | 2,3335 | 0,163 | 0      |
| 6 | Q04837 SSB_HUMAN    | R.VGQDPVLR.Q              |            | 2 | 2,3325 | 0,162 | 0,069  |
| 6 | Q9P258 RCC2_HUMAN   | K.DGQILPVPNVVVR.D         |            | 2 | 2,3308 | 0,177 | -0,521 |
| 6 | P49795 RGS19_HUMAN  | R.ALLLQGPSQSSS#EA.-       | S215:      | 2 | 2,3305 | 0,299 | -0,416 |
| 6 | Q15750 TAB1_HUMAN   | E.M*SQPTSPAPAAGGR.V       |            | 2 | 2,3282 | 0,146 | -0,339 |
| 6 | Q9UBC2 EP15R_HUMAN  | E.VTLSNLSMPPPK.F          |            | 2 | 2,325  | 0,326 | -0,565 |
| 6 | P26006 ITA3_HUMAN   | R.TGAVYLCPLTAHKDDCE.R     |            | 3 | 2,3225 | 0,122 | -0,281 |
| 6 | Q96TA1 NIBL1_HUMAN  | E.ASS#PPAS#PLQHLLPGK.A    | S679:S683: | 2 | 2,3208 | 0,143 | -0,485 |
| 6 | POC7M2 RA1L3_HUMAN  | K.SESPKEPEQLR.K           |            | 2 | 2,3197 | 0,153 | -0,282 |
| 6 | Q8NEB9 PK3C3_HUMAN  | K.TKEVPDGENLE.Q           |            | 2 | 2,314  | 0,117 | -0,396 |
| 6 | Q9NYL2 MLTK_HUMAN   | E.QKLTEQS#NTPLPSFE.I      | S326:      | 2 | 2,3105 | 0,219 | -0,064 |
| 6 | P49368 TCPG_HUMAN   | E.DIIQLKPDVVITE.K         |            | 2 | 2,3104 | 0,225 | -0,494 |
| 6 | Q15942 ZYX_HUMAN    | E.GGPEAPIPPPQPR.E         |            | 2 | 2,3102 | 0,324 | -0,519 |
| 6 | Q9NY61 AATF_HUMAN   | E.LLFQYPDTR.Y             |            | 2 | 2,3074 | 0,268 | -0,212 |
| 6 | P28799 GRN_HUMAN    | E.VSCPDGYTCCR.L           |            | 2 | 2,3056 | 0,444 | -0,444 |
| 6 | Q9NW68 BSDC1_HUMAN  | E.LM*GISPIS#PK.E          | S235:      | 2 | 2,3025 | 0,239 | 0      |
| 6 | Q5JRA6 MIA3_HUMAN   | R.GSS#PTRVLDE.G           | S1745:     | 2 | 2,3014 | 0,117 | 0,107  |
| 6 | Q02952 AKA12_HUMAN  | E.VVLPS#EEEGGGAGTK.S      | S1663:     | 2 | 2,3009 | 0,137 | -0,323 |
| 6 | P82663 RT25_HUMAN   | E.VEGQVPCPSLVLPLKE.M      |            | 2 | 2,2973 | 0,191 | -0,558 |
| 6 | Q12931 TRAP1_HUMAN  | R.AQLLQPTLEINPR.H         |            | 2 | 2,296  | 0,234 | -0,082 |
| 6 | Q96PK6 RBM14_HUMAN  | R.TQPM*TAQAASYR.A         |            | 2 | 2,2892 | 0,459 | -0,455 |
| 6 | P43246 MSH2_HUMAN   | E.ALLIQIGPK.E             |            | 2 | 2,2876 | 0,303 | -0,256 |
| 6 | Q6UWZ7 CCD98_HUMAN  | E.YSRS#PTF.-              | S406:      | 2 | 2,2856 | 0,358 | -0,325 |
| 6 | P49915 GUAA_HUMAN   | E.VFLAQGTLRPDLIE.S        |            | 2 | 2,2844 | 0,243 | 0      |
| 6 | Q9UKV3 ACINU_HUMAN  | K.AES#PAEKVPE.E           | S490:      | 2 | 2,283  | 0,242 | -0,322 |
| 6 | P53618 COPB_HUMAN   | K.EAELLEPLM*PAIR.A        |            | 2 | 2,2819 | 0,194 | -0,244 |
| 6 | O75531 BAF_HUMAN    | R.DFVAEPM*GEKPVGSLAGIGE.V |            | 3 | 2,2803 | 0,252 | 0      |
| 6 | P48643 TCPE_HUMAN   | R.DVDFELIKVE.G            |            | 2 | 2,2775 | 0,205 | -0,606 |
| 6 | Q9H3P7 GCP60_HUMAN  | E.VSVDGLTSPDPEERPGAE.G    |            | 2 | 2,2743 | 0,232 | -0,31  |
| 6 | Q5TAQ9 WD42A_HUMAN  | E.GRETSS#GIEVE.A          | S37:       | 2 | 2,2698 | 0,129 | -0,392 |
| 6 | Q99460 PSMD1_HUMAN  | E.ALQLMATYLPK.D           |            | 2 | 2,2692 | 0,082 | -0,293 |
| 6 | Q8N0S5 Q8N0S5_HUMAN | R.DGAAAEVGR.A             |            | 2 | 2,2668 | 0,151 | 0      |
| 6 | P38159 HNRPG_HUMAN  | K.LFIGLNTETNE.K           |            | 2 | 2,2666 | 0,112 | -0,187 |

|   |                    |                           |            |   |        |       |        |
|---|--------------------|---------------------------|------------|---|--------|-------|--------|
| 6 | Q66K74 MAP1S_HUMAN | E.TLVLLNPSDKSLYDE.L       |            | 2 | 2,2629 | 0,217 | -0,429 |
| 6 | P04264 K2C1_HUMAN  | K.YEELQITAGR.H            |            | 2 | 2,2604 | 0,281 | 0,103  |
| 6 | Q07157 ZO1_HUMAN   | E.YSMYSTDSR.H             |            | 2 | 2,2591 | 0,298 | -0,44  |
| 6 | O43670 ZN207_HUMAN | E.TIDAVPNAIPGRTDIELE.I    |            | 2 | 2,2566 | 0,351 | -0,38  |
| 6 | Q3T8J9 GON4L_HUMAN | E.LSPLSATVFPK.V           |            | 2 | 2,256  | 0,296 | -0,21  |
| 6 | Q6IA86 ELP2_HUMAN  | E.GATVPALGLSNK.A          |            | 2 | 2,2556 | 0,291 | -0,324 |
| 6 | POC7M2 RA1L3_HUMAN | K.SESPKEPEQLR.K           |            | 3 | 2,2551 | 0,168 | 0,07   |
| 6 | Q13188 STK3_HUMAN  | K.QVPVESDLQE.I            |            | 2 | 2,2545 | 0,208 | -0,32  |
| 6 | Q5JSH3 WDR44_HUMAN | E.GRVSPS#PSQE.S           | S563:      | 2 | 2,2515 | 0,198 | -0,109 |
| 6 | P61758 PFD3_HUMAN  | E.AVFVEDVDSFM*KQPGNE.T    |            | 2 | 2,2514 | 0,308 | -0,38  |
| 6 | Q96R06 SPAG5_HUMAN | E.KGVNTS#VM*LE.N          | S353:      | 2 | 2,2511 | 0,125 | -0,312 |
| 6 | P16949 STMN1_HUMAN | K.ESVPEFPLSPPK.K          |            | 2 | 2,2481 | 0,269 | -0,368 |
| 6 | Q10469 MGAT2_HUMAN | E.ALAPPLDAEPAR.G          |            | 2 | 2,2475 | 0,406 | -0,366 |
| 6 | Q70CQ2 UBP34_HUMAN | E.VLTPTSTSDNETR.D         |            | 2 | 2,243  | 0,28  | -0,086 |
| 6 | Q9H0H5 RGAP1_HUMAN | K.VSLLGPVTTPE.H           |            | 2 | 2,2419 | 0,224 | -0,11  |
| 6 | Q86YZ3 HORN_HUMAN  | R.GPYESGSGHSSGLGHR.E      |            | 3 | 2,2334 | 0,357 | -0,231 |
| 6 | Q7Z6Z7 HUWE1_HUMAN | E.NKGNdT#PLALE.S          | T1722:     | 2 | 2,2326 | 0,183 | -0,292 |
| 6 | P31948 STIP1_HUMAN | E.VQQIM*SDPAMR.L          |            | 2 | 2,2298 | 0,166 | -0,283 |
| 6 | Q13596 SNX1_HUMAN  | K.ITTSLLPINNGSKE.N        |            | 2 | 2,2266 | 0,234 | -0,41  |
| 6 | P46063 RECQ1_HUMAN | E.LKLIYVT#PE.K            | T190:      | 2 | 2,2242 | 0,239 | -0,211 |
| 6 | A6NJT0 UNC4_HUMAN  | R.HLHS#PGGLS#LHSAPSSD.S   | S221:S226: | 3 | 2,2242 | 0,14  | -0,984 |
| 6 | P52209 6PGD_HUMAN  | K.SFLEDIR.K               |            | 2 | 2,2233 | 0,087 | 0      |
| 6 | P11532 DMD_HUMAN   | R.SDSSQPM*LLR.V           |            | 2 | 2,2229 | 0,095 | 0      |
| 6 | Q14247 SRC8_HUMAN  | R.AKTQT#PPVS#PAPQPTEE.R   | T401:S405: | 2 | 2,2164 | 0,357 | -0,315 |
| 6 | P68104 EF1A1_HUMAN | K.IGGIGTVPVGR.V           |            | 2 | 2,214  | 0,144 | 0      |
| 6 | P50851 LRBA_HUMAN  | E.LKVEGS#PTEE.A           | S1118:     | 2 | 2,2095 | 0,192 | -0,313 |
| 6 | P53618 COPB_HUMAN  | R.SLGEIPIVESEIK.K         |            | 2 | 2,2029 | 0,272 | -0,518 |
| 6 | Q9UKM9 RALY_HUMAN  | E.GLLTHS#EEE.L            | S288:      | 2 | 2,1973 | 0,276 | 0      |
| 6 | Q92622 K0226_HUMAN | E.YLAIGNLDPR.G            |            | 2 | 2,1935 | 0,364 | 0      |
| 6 | Q5T6F2 UBAP2_HUMAN | K.LLQLPSTTIE.N            |            | 2 | 2,193  | 0,123 | -0,219 |
| 6 | Q7Z5K2 WAPL_HUMAN  | E.STGDPPGFDS#DDESLPVSSK.N | S77:       | 2 | 2,1923 | 0,353 | -0,676 |
| 6 | Q15910 EZH2_HUMAN  | R.GRLPNNS#SRPST#PTINVLE.S | S362:T367: | 3 | 2,1917 | 0,092 | -0,331 |
| 6 | P05783 K1C18_HUMAN | E.STTVVTTQSAE.V           |            | 2 | 2,1888 | 0,258 | -0,326 |

|   |                    |                         |            |   |        |       |        |
|---|--------------------|-------------------------|------------|---|--------|-------|--------|
| 6 | Q9UN86 G3BP2_HUMAN | E.ERQPS#PEPVQE.N        | S163:      | 2 | 2,1817 | 0,118 | -0,266 |
| 6 | O95163 ELP1_HUMAN  | R.IVGVQDLLDQE.S         |            | 2 | 2,1759 | 0,126 | -0,695 |
| 6 | P61758 PFD3_HUMAN  | E.AVFVEDVDSFMKQPGNE.T   |            | 2 | 2,1691 | 0,277 | -0,702 |
| 6 | P52948 NUP98_HUMAN | E.RFS#FLS#KPVDE.N       | S635:S638: | 2 | 2,1686 | 0,22  | -0,164 |
| 6 | Q9UJ41 RABX5_HUMAN | E.AKAPS#PSINR.Q         | S302:      | 2 | 2,1643 | 0,241 | -0,109 |
| 6 | P20700 LMNB1_HUMAN | R.LKLS#PS#PSSR.V        | S391:S393: | 2 | 2,1633 | 0,172 | -0,495 |
| 6 | Q8IWC1 MA7D3_HUMAN | E.AM*VKAS#PKT#SLE.A     | S449:T452: | 2 | 2,1632 | 0,25  | 0      |
| 6 | Q3KQU3 MA7D1_HUMAN | E.LGAGAPPAVVAR.T        |            | 2 | 2,1594 | 0,228 | -0,113 |
| 6 | P78310 CXAR_HUMAN  | K.TQYNQVPS#EDFE.R       | S323:      | 2 | 2,1501 | 0,12  | -0,079 |
| 6 | O60306 AQR_HUMAN   | K.KIVAPTVSQINAE.F       |            | 2 | 2,1499 | 0,278 | -0,267 |
| 6 | P12268 IMDH2_HUMAN | E.DLVVAPAGITLK.E        |            | 2 | 2,1491 | 0,089 | -0,102 |
| 6 | P09382 LEG1_HUMAN  | K.DSNLCLHFNPR.F         |            | 3 | 2,1486 | 0,196 | -0,062 |
| 6 | O14745 NHERF_HUMAN | E.AALES#PRPALVR.S       | S280:      | 3 | 2,1456 | 0,214 | -0,202 |
| 6 | Q8IWIJ2 GCC2_HUMAN | E.GKINS#LTEE.K          | S490:      | 2 | 2,1431 | 0,17  | -0,456 |
| 6 | Q15942 ZYX_HUMAN   | R.EKVS#SIDLE.I          | S142:      | 2 | 2,1403 | 0,141 | -0,111 |
| 6 | Q6PL24 TMED8_HUMAN | E.HTGAIDVLS#ADLE.S      | S137:      | 2 | 2,1318 | 0,181 | -0,429 |
| 6 | P46937 YAP1_HUMAN  | R.TPDDFLNSVDE.M         |            | 2 | 2,1315 | 0,264 | -0,097 |
| 6 | P21333 FLNA_HUMAN  | E.VVIQDPM*GQKGTVEPQLE.A |            | 2 | 2,1301 | 0,162 | -0,615 |
| 6 | Q7L7X3 TAOK1_HUMAN | R.LGFSNM*VLSNLS#PE.A    | S896:      | 2 | 2,1236 | 0,143 | -0,228 |
| 6 | P06576 ATPB_HUMAN  | E.LGIYPAVDPLDSTSR.I     |            | 2 | 2,1234 | 0,135 | -0,228 |
| 6 | P22626 ROA2_HUMAN  | D.TIEIITDR.Q            |            | 2 | 2,1219 | 0,126 | -0,063 |
| 6 | Q8IWE5 PKHM2_HUMAN | E.VLCQLKR.D             |            | 2 | 2,1199 | 0,161 | -0,266 |
| 6 | P60174 TPIS_HUMAN  | D.GFLVGGASLKPE.F        |            | 2 | 2,1195 | 0,117 | -0,104 |
| 6 | Q2KHR2 RFXD2_HUMAN | E.QKLQS#PLPGE.S         | S225:      | 2 | 2,1146 | 0,102 | -0,207 |
| 6 | P23588 IF4B_HUMAN  | E.SIKEFFR.G             |            | 2 | 2,1126 | 0,236 | -0,395 |
| 6 | P42566 EP15_HUMAN  | E.SEPIHQES#PARS#SPE.L   | S558:S562: | 3 | 2,1099 | 0,172 | -0,404 |
| 6 | P12814 ACTN1_HUMAN | E.GAM*EDLQDTFIVHTIEE.I  |            | 2 | 2,106  | 0,223 | -0,435 |
| 6 | Q99832 TCPH_HUMAN  | R.YNFFTGCPK.A           |            | 2 | 2,1024 | 0,253 | -0,323 |
| 6 | O60271 JIP4_HUMAN  | E.SELLEDLPLEPSVTKAE.R   |            | 2 | 2,0927 | 0,447 | -0,76  |
| 6 | Q13561 DCTN2_HUMAN | K.YADLPGIAR.N           |            | 2 | 2,0846 | 0,249 | -0,125 |
| 6 | Q9UUK6 NXT1_HUMAN  | K.TYVDQACR.A            |            | 2 | 2,084  | 0,16  | -0,361 |
| 6 | Q6PJF5 RHDF2_HUMAN | E.SPPLSASY#FR.G         | Y316:      | 2 | 2,0799 | 0,153 | -0,405 |
| 6 | A5A3E0 A26CB_HUMAN | R.VAPEEHPVLLTE.A        |            | 2 | 2,0785 | 0,088 | -0,183 |

|   |                      |                            |              |   |        |       |        |
|---|----------------------|----------------------------|--------------|---|--------|-------|--------|
| 6 | P36957 ODO2_HUMAN    | K.TPAFAESVTE.G             |              | 2 | 2,07   | 0,147 | 0      |
| 6 | P05455 LA_HUMAN      | E.YYFGDFNLPR.D             |              | 2 | 2,0688 | 0,278 | -0,378 |
| 6 | Q86U44 MTA70_HUMAN   | E.AALSPTFR.S               |              | 2 | 2,0678 | 0,205 | -0,424 |
| 6 | Q9NPI6 DCP1A_HUMAN   | R.KASS#PSPLTIGTPE.S        | S523:        | 2 | 2,0678 | 0,159 | -0,5   |
| 6 | P45974 UBP5_HUMAN    | D.SISESVPVGP.K.V           |              | 2 | 2,0677 | 0,154 | 0,665  |
| 6 | P27707 DCK_HUMAN     | E.FEELTM*S#QK.N            | S74:         | 2 | 2,0622 | 0,206 | -0,202 |
| 6 | Q9UQ35 SRRM2_HUMAN   | E.FSAS#PM*LK.S             | S1124:       | 2 | 2,0601 | 0,138 | -0,375 |
| 6 | P11021 GRP78_HUMAN   | K.LYGSAGPPPTGEEDTAE.K      |              | 2 | 2,0554 | 0,253 | 0,072  |
| 6 | P49189 AL9A1_HUMAN   | R.GGARVEPADASGTE.K         |              | 2 | 2,0529 | 0,168 | -0,278 |
| 6 | O43290 SNUT1_HUMAN   | R.RVS#EVEEEE.K             | S448:        | 2 | 2,051  | 0,084 | 0      |
| 6 | Q9Y5U2 TSSC4_HUMAN   | E.LAHLAGPGS#PE.A           | S265:        | 2 | 2,0491 | 0,37  | 0,108  |
| 6 | Q5VW32 BROX_HUMAN    | E.NGFIYFQK.I               |              | 2 | 2,0481 | 0,099 | 0,06   |
| 6 | P04792 HSPB1_HUMAN   | E.GTLTVEAPMPK.L            |              | 2 | 2,046  | 0,202 | -0,32  |
| 6 | P26639 SYTC_HUMAN    | K.ASSPS#GKM*GGEEKPIGAGEE.K | S10:         | 2 | 2,0457 | 0,455 | -0,545 |
| 6 | Q9H8W4 PKHF2_HUMAN   | R.SDSYSQSLK.S              |              | 2 | 2,045  | 0,307 | -0,06  |
| 6 | P51610 HCFC1_HUMAN   | R.QLLQSASTALM*GE.S         |              | 2 | 2,0445 | 0,151 | -0,536 |
| 6 | Q9BQY9 DBND2_HUMAN   | E.LSLPVPTSDR.T             |              | 2 | 2,0434 | 0,114 | -0,112 |
| 6 | ##Q0VDD8 DYH14_HUMAN | K.Y#HIIS#GTKNPLDMISVLD.I   | Y2866:S2870: | 3 | 2,0422 | 0,138 | -1,093 |
| 6 | P68104 EF1A1_HUMAN   | E.TGVLKPGM*VVTFAPVNVVTE.V  |              | 2 | 2,0365 | 0,399 | -0,823 |
| 6 | Q9H8Y5 ANKZ1_HUMAN   | R.RLAAQLGAPT#SPIPD.S       | T674:        | 2 | 2,0294 | 0,111 | -0,077 |
| 6 | Q09028 RBBP4_HUMAN   | E.FILATGSADK.T             |              | 2 | 2,0196 | 0,263 | -0,119 |
| 6 | P13645 K1C10_HUMAN   | K.VTMQNLNDR.L              |              | 2 | 2,0172 | 0,155 | -0,224 |
| 6 | Q5T8I3 F102B_HUMAN   | E.KILQSQDFSLDS#SAEEE.G     | S289:        | 2 | 2,0145 | 0,292 | -0,365 |
| 6 | P55082 MFAP3_HUMAN   | R.SNSPPGGSDDDGS#LNEQGQE.I  | S304:        | 2 | 2,0131 | 0,17  | -0,557 |
| 6 | Q7Z7H5 TMED4_HUMAN   | E.VFLPSTPGLGM*HVE.V        |              | 2 | 2,0112 | 0,14  | -0,325 |
| 6 | Q93009 UBP7_HUMAN    | E.VLQAVTDHDIPQQLVE.R       |              | 2 | 2,0105 | 0,174 | -0,135 |
| 6 | P30307 MPIP3_HUMAN   | E.TGHLDS#SGLQE.V           | S101:        | 2 | 2,0081 | 0,083 | -0,299 |
| 6 | P18583 SON_HUMAN     | E.SSITLTPVESAVVAEEHE.V     |              | 2 | 2,008  | 0,243 | -0,321 |
| 6 | Q7Z434 MAVS_HUMAN    | E.QALQTLS#PR.A             | S165:        | 2 | 2,0063 | 0,152 | -0,112 |
| 6 | Q3B820 YB032_HUMAN   | E.KVAQPAGASADLNTS#FSGVDE.H | S67:         | 2 | 2,0049 | 0,433 | -0,455 |
| 6 | P55084 ECHB_HUMAN    | E.AFSGQILANFK.A            |              | 2 | 2,0042 | 0,153 | -0,408 |
| 6 | Q9H7N4 SFR19_HUMAN   | K.VPST#PPP.K.A             | T976:        | 2 | 1,9998 | 0,315 | -0,068 |
| 6 | Q9BZF3 OSBL6_HUMAN   | E.SRLS#M*SESVSE.F          | S487:        | 2 | 1,9988 | 0,14  | -0,56  |



|   |                     |                          |            |   |        |       |        |
|---|---------------------|--------------------------|------------|---|--------|-------|--------|
| 6 | P46940 IQGA1_HUMAN  | R.YLDELM*KLK.A           |            | 2 | 1,9938 | 0,193 | -0,104 |
| 6 | Q86VP6 CAND1_HUMAN  | E.IISSASVVGLKPYVE.N      |            | 2 | 1,9912 | 0,234 | -0,547 |
| 6 | P35612 ADDB_HUMAN   | K.SAPASPVQSPAKEAE.T      |            | 2 | 1,9863 | 0,374 | -0,249 |
| 6 | P49915 GUAA_HUMAN   | E.EVFLAQGTLRPDLIE.S      |            | 2 | 1,9842 | 0,228 | -0,359 |
| 6 | Q6S8J3 A26CA_HUMAN  | K.SYELPDGQVITIGNER.F     |            | 2 | 1,9836 | 0,251 | -0,204 |
| 6 | P07355 ANXA2_HUMAN  | E.T#VILGLLK.T            | T97:       | 2 | 1,9749 | 0,089 | -0,195 |
| 6 | P35658 NU214_HUMAN  | K.SPGS#TPTTPT#SSQAPQK.L  | S433:T439: | 2 | 1,9706 | 0,099 | 0      |
| 6 | P06733 ENOA_HUMAN   | E.VDLFTS#KGLFR.A         | S27:       | 2 | 1,9595 | 0,159 | -0,358 |
| 6 | Q13445 TMED1_HUMAN  | E.FTFLLPAGR.K            |            | 2 | 1,9537 | 0,292 | -0,298 |
| 6 | Q9NR09 BIRC6_HUMAN  | E.GLTLVLPDIQK.T          |            | 2 | 1,9519 | 0,136 | -0,51  |
| 6 | Q9H211 CDT1_HUMAN   | R.LRLS#VDE.V             | S73:       | 2 | 1,9499 | 0,084 | -0,134 |
| 6 | Q2NKY5 Q2NKY5_HUMAN | E.VISDEHGID.Q            |            | 2 | 1,9447 | 0,252 | 0      |
| 6 | Q9BRK5 CAB45_HUMAN  | E.FEELIDSNHDGIVTAAE.L    |            | 2 | 1,9432 | 0,365 | -0,191 |
| 6 | P55795 HNRH2_HUMAN  | E.IVPNGM*TLPVDFQGR.S     |            | 2 | 1,9353 | 0,292 | -0,514 |
| 6 | Q16204 CCDC6_HUMAN  | K.SGGIVISPF.R            |            | 2 | 1,9345 | 0,164 | -0,236 |
| 6 | O14745 NHERF_HUMAN  | E.AALESPPALVR.S          |            | 2 | 1,9298 | 0,15  | -0,286 |
| 6 | P14618 KPYM_HUMAN   | K.GVNLPGAAVDLPVAVSE.K    |            | 2 | 1,9289 | 0,327 | -0,404 |
| 6 | P22570 ADRO_HUMAN   | E.DLPCGLVLSSIGYK.S       |            | 2 | 1,9267 | 0,33  | -0,401 |
| 6 | P61978 HNRPK_HUMAN  | K.DLAGSIIGK.G            |            | 2 | 1,9267 | 0,111 | -0,07  |
| 6 | Q9NZL4 HPBP1_HUMAN  | E.KLLQTCFSS#PADDSMD.R    | S354:      | 2 | 1,9242 | 0,128 | -0,322 |
| 6 | Q96A19 C102A_HUMAN  | K.GSLLTILGSPSPE.R        |            | 2 | 1,921  | 0,218 | -0,384 |
| 6 | P54707 AT12A_HUMAN  | K.LIIVEGCQR.Q            |            | 2 | 1,918  | 0,165 | -0,336 |
| 6 | P13639 EF2_HUMAN    | E.SFGFTADLR.S            |            | 2 | 1,9163 | 0,208 | -0,06  |
| 6 | P30533 AMRP_HUMAN   | E.AEFEEPR.V              |            | 2 | 1,904  | 0,081 | 0,139  |
| 6 | P28066 PSA5_HUMAN   | R.GVNTFS#PE.G            | S16:       | 2 | 1,9035 | 0,145 | 0,066  |
| 6 | Q8IX12 CCAR1_HUMAN  | R.LLLPTPTVKQE.S          |            | 2 | 1,9019 | 0,169 | -0,394 |
| 6 | P68104 EF1A1_HUMAN  | E.TGVLKPGMVVTFAPVNVVTE.V |            | 2 | 1,9014 | 0,412 | -0,711 |
| 6 | Q6PKG0 LARP1_HUMAN  | R.AVTPVPTKTEE.V          |            | 2 | 1,9011 | 0,266 | -0,208 |
| 6 | P00558 PGK1_HUMAN   | K.ITLPVDFVTAD.K          |            | 2 | 1,897  | 0,284 | -0,205 |
| 6 | P68431 H31_HUMAN    | K.STELLIR.K              |            | 2 | 1,8969 | 0,219 | 0      |
| 6 | Q92616 GCN1L_HUMAN  | E.SVASCLPPLVPAIKE.D      |            | 2 | 1,8961 | 0,134 | -0,617 |
| 6 | Q86UK7 ZN598_HUMAN  | E.LLVLLPDTAK.Q           |            | 2 | 1,8952 | 0,152 | -0,225 |
| 6 | P67809 YBOX1_HUMAN  | E.SGEKNEGS#ESAPE.G       | S174:      | 2 | 1,8947 | 0,133 | -0,348 |

|   |                     |                         |            |   |        |       |        |
|---|---------------------|-------------------------|------------|---|--------|-------|--------|
| 6 | P23396 RS3_HUMAN    | E.ILPPT#PISEQK.G        | T221:      | 2 | 1,88   | 0,169 | -0,28  |
| 6 | P35579 MYH9_HUMAN   | R.GDLPFVVR.R            |            | 2 | 1,8784 | 0,188 | 0      |
| 6 | P62745 RHOB_HUMAN   | K.LVVVGDGACGK.T         |            | 2 | 1,8722 | 0,208 | -0,113 |
| 6 | P14406 CX7A2_HUMAN  | E.DDEIPLYLKGGVAD.A      |            | 2 | 1,8689 | 0,199 | -0,162 |
| 6 | P21127 CD2L1_HUMAN  | K.YLPALQGCR.S           |            | 2 | 1,8678 | 0,108 | -0,113 |
| 6 | Q9UET6 RRMJ1_HUMAN  | E.YKYTPPTQPPI#PPYQE.A   | S271:      | 2 | 1,8668 | 0,238 | -0,351 |
| 6 | P54132 BLM_HUMAN    | R.QISLQQQLHVME.H        |            | 2 | 1,8666 | 0,101 | -0,234 |
| 6 | Q9P1Q0 VPS54_HUMAN  | E.LTPIAVDTTSQR.N        |            | 2 | 1,8594 | 0,197 | -0,375 |
| 6 | Q9Y3A5 SBDS_HUMAN   | E.IVCLIDPGCFR.E         |            | 2 | 1,8583 | 0,093 | -0,542 |
| 6 | P39880 CUX1_HUMAN   | E.LSLTGASR.S            |            | 2 | 1,852  | 0,091 | 0,379  |
| 6 | P15311 EZRI_HUMAN   | K.QRIDEFEAL.-           |            | 2 | 1,8512 | 0,208 | -0,218 |
| 6 | P68104 EF1A1_HUMAN  | D.AAIVDM*VPGKPM*CVE.S   |            | 2 | 1,8446 | 0,196 | 0,444  |
| 6 | Q9UMZ2 SYNG_HUMAN   | E.AS#PVPLTSNVGSTVK.G    | S720:      | 2 | 1,8395 | 0,167 | 0,238  |
| 6 | P62917 RL8_HUMAN    | K.DIIHDPGR.G            |            | 2 | 1,838  | 0,082 | -0,066 |
| 6 | Q8N1G4 LRC47_HUMAN  | K.DGPSLLVVE.Q           |            | 2 | 1,8365 | 0,103 | -0,263 |
| 6 | P19338 NUCL_HUMAN   | D.S#S#GEEVVIPQKK.G      | S41:S42:   | 2 | 1,834  | 0,092 | -0,418 |
| 6 | P51648 AL3A2_HUMAN  | E.IFGPILPIVPK.N         |            | 2 | 1,8297 | 0,224 | -0,472 |
| 6 | O95239 KIF4A_HUMAN  | E.VRGQVS#ES#EDSITKQIE.S | S810:S812: | 2 | 1,8275 | 0,27  | -0,236 |
| 6 | Q59H12 Q59H12_HUMAN | -.GWRT#APGGGR.G         | T4:        | 2 | 1,8242 | 0,084 | 0      |
| 6 | Q10471 GALT2_HUMAN  | R.VVSPIDVINM*D.N        |            | 2 | 1,8118 | 0,136 | -0,55  |
| 6 | P30622 CLIP1_HUMAN  | K.EPSATPPISNLTK.T       |            | 2 | 1,8109 | 0,222 | 0,09   |
| 6 | Q8WWY3 PRP31_HUMAN  | E.KSGLMS#T.-            | S498:      | 2 | 1,8071 | 0,381 | 0,379  |
| 6 | O75534 CSDE1_HUMAN  | K.VDFVIPK.E             |            | 2 | 1,8015 | 0,215 | 0,075  |
| 6 | P68104 EF1A1_HUMAN  | K.SGDAAIVDMVPGKPM*CVE.S |            | 2 | 1,8003 | 0,121 | -0,387 |
| 6 | P49588 SYAC_HUMAN   | R.FIDFFKR.N             |            | 2 | 1,796  | 0,094 | 0      |
| 6 | O15027 SC16A_HUMAN  | E.QVSSRPTS#PE.K         | S1263:     | 2 | 1,7959 | 0,105 | -0,418 |
| 6 | Q8WUA4 TF3C2_HUMAN  | R.RLPPEQE.S             |            | 2 | 1,7936 | 0,106 | 0,07   |
| 6 | Q96EV2 RBM33_HUMAN  | E.DDLLGEDLLSGK.K        |            | 2 | 1,7735 | 0,145 | -0,191 |
| 6 | P49023 PAXI_HUMAN   | K.TGSSS#PPGGPPKPGSQLD.S | S322:      | 2 | 1,7642 | 0,091 | -0,349 |
| 6 | P55265 DSRAD_HUMAN  | E.SQTTPSATSFFSGK.S      |            | 2 | 1,7615 | 0,117 | -0,316 |
| 6 | Q9NY30 BTG4_HUMAN   | D.FSHLGLPK.E            |            | 2 | 1,7567 | 0,106 | -0,068 |
| 6 | P35527 K1C9_HUMAN   | R.MTLDDFR.I             |            | 2 | 1,7508 | 0,313 | 0,136  |
| 6 | O95400 CD2B2_HUMAN  | E.AATLPSEGGVR.I         |            | 2 | 1,7503 | 0,137 | -0,231 |

|   |                     |                                         |                    |   |        |       |        |
|---|---------------------|-----------------------------------------|--------------------|---|--------|-------|--------|
| 6 | Q7Z4H7 FA29A_HUMAN  | E.EKVIS#DCE.C                           | S660:              | 2 | 1,7378 | 0,094 | -0,806 |
| 6 | Q96T23 RSF1_HUMAN   | K.AQIDPVLLK.N                           |                    | 2 | 1,7337 | 0,088 | 0      |
| 6 | Q9H9R9 DBND1_HUMAN  | R.RQPLSS#VS#SLEVFHD.L                   | S64:S66:           | 2 | 1,731  | 0,182 | -0,656 |
| 6 | P35658 NU214_HUMAN  | K.AAPGPGPSTFSFVPPSK.A                   |                    | 2 | 1,7301 | 0,117 | -0,223 |
| 6 | Q13405 RM49_HUMAN   | E.DFLSPLL GK.T                          |                    | 2 | 1,7225 | 0,166 | -0,37  |
| 6 | Q6P2E9 EDC4_HUMAN   | R.T#RSPDVISSASTALSQDIPE.I               | T727:              | 2 | 1,7158 | 0,174 | -0,453 |
| 6 | Q969V6 MKL1_HUMAN   | E.AIIVGQVNYPK.V                         |                    | 2 | 1,7138 | 0,346 | -0,102 |
| 6 | Q14914 LTB4D_HUMAN  | E.ALFLTVDPYM*R.V                        |                    | 2 | 1,7087 | 0,092 | 0,091  |
| 6 | Q15365 PCBP1_HUMAN  | E.LTIPNNLIGCIIGR.Q                      |                    | 2 | 1,7078 | 0,317 | -0,471 |
| 6 | Q9UCG5 Q9UCG5_HUMAN | -.DATNVGDEGGFAPNIX.-                    |                    | 2 | 1,7072 | 0,172 | -0,46  |
| 6 | P22102 PUR2_HUMAN   | E.VSCLCFTDGK.T                          |                    | 2 | 1,7069 | 0,217 | 1,542  |
| 6 | Q71U36 TBA1A_HUMAN  | K.TIGGGDDSFNTFFSE.T                     |                    | 2 | 1,7014 | 0,156 | -0,459 |
| 6 | P06576 ATPB_HUMAN   | K.LVPLKETIK.G                           |                    | 2 | 1,6886 | 0,091 | -0,117 |
| 6 | P11021 GRP78_HUMAN  | E.IVQPIISK.L                            |                    | 2 | 1,6864 | 0,139 | 0,136  |
| 6 | O00625 PIR_HUMAN    | R.TPTLYLDFK.L                           |                    | 2 | 1,679  | 0,086 | -0,222 |
| 6 | P08708 RS17_HUMAN   | D.FGS#LSNLQVTQPTVGM*NFK.T               | S113:              | 2 | 1,6705 | 0,242 | -0,451 |
| 6 | Q9UKK3 PARP4_HUMAN  | E.GSRCPVFAFQS#SDTESDE.L                 | S1520:             | 2 | 1,6679 | 0,381 | -0,233 |
| 6 | P05783 K1C18_HUMAN  | R.STFSTNYR.S                            |                    | 2 | 1,6655 | 0,303 | 0,063  |
| 6 | P49589 SYCC_HUMAN   | E.ALNVLPDVLTR.V                         |                    | 2 | 1,6579 | 0,149 | -0,466 |
| 6 | P07355 ANXA2_HUMAN  | K.TPAQYDASE.L                           |                    | 2 | 1,6547 | 0,104 | -0,062 |
| 6 | P49792 RBP2_HUMAN   | E.GFSIPVSADGFK.F                        |                    | 2 | 1,6494 | 0,118 | -0,1   |
| 6 | Q02790 FKBP4_HUMAN  | E.SGAQSAPLPM*EGVDISPKQDE.G              |                    | 2 | 1,6465 | 0,253 | -0,562 |
| 6 | Q92785 REQU_HUMAN   | E.GEDKEDS#QPPT#PVSQR.S                  | S244:T248:         | 2 | 1,6355 | 0,231 | -0,506 |
| 6 | O60678 ANM3_HUMAN   | K.QQTPCLFCNR.L                          |                    | 2 | 1,6345 | 0,138 | -0,184 |
| 6 | Q15149 PLEC1_HUMAN  | E.FADM*LSGNAGGFRS#R.S                   | S4382:             | 2 | 1,6268 | 0,293 | -0,508 |
| 6 | P55060 XPO2_HUMAN   | K.TLDPDPAIR.R                           |                    | 2 | 1,6144 | 0,206 | 0      |
| 6 | Q01484 ANK2_HUMAN   | R.QIQESVT#FAS#QVY#RE.I                  | T1279:S1282:Y1285: | 2 | 1,6125 | 0,087 | -1,567 |
| 6 | P15531 NDKA_HUMAN   | R.GLVGEIHK.R                            |                    | 2 | 1,6088 | 0,175 | 0,221  |
| 7 | Q92734 TFG_HUMAN    | E.INKNVM*SAFGLTDDQVSGPPSAPAEDR.S        |                    | 3 | 6,7787 | 0,548 | -0,258 |
| 7 | P49840 GSK3A_HUMAN  | R.ARTSS#FAEPGGGGGGGGGGPGGSASGPGGTGGGK.A | S21:               | 3 | 6,4845 | 0,49  | -0,401 |
| 7 | Q15642 CIP4_HUMAN   | E.DFSQPM*NRAPS#DSSLGTPSDGRPE.L          | S296:              | 3 | 6,2293 | 0,495 | -0,415 |
| 7 | Q8IY92 BTBDC_HUMAN  | E.GGS#PVSGQLLAGVQVQK.Q                  | S201:              | 2 | 5,9441 | 0,514 | -0,501 |
| 7 | P35611 ADDA_HUMAN   | E.AHRPPS#PTEAPTEAS#PEPAPDPAPVAEE.A      | S669:S678:         | 3 | 5,7333 | 0,547 | 0,426  |

|   |                    |                                   |              |   |        |       |        |
|---|--------------------|-----------------------------------|--------------|---|--------|-------|--------|
| 7 | Q01082 SPTB2_HUMAN | E.SQQQWDTSKGEQVSQNGLPAEQGS#PR.M   | S2138:       | 3 | 5,6237 | 0,275 | -0,188 |
| 7 | Q13263 TIF1B_HUMAN | E.TKPVLM*ALAEGPGAEGPR.L           |              | 3 | 5,4409 | 0,319 | 0      |
| 7 | Q15642 CIP4_HUMAN  | E.DFSQPMNRPAS#DSSLGTSPDGRPE.L     | S296:        | 3 | 5,3903 | 0,371 | -0,139 |
| 7 | Q9ULT8 HECD1_HUMAN | E.GHDSLS#VGS#FEEDSKSE.F           | S2317:S2320: | 2 | 5,3849 | 0,394 | -0,248 |
| 7 | P23443 KS6B1_HUMAN | E.GGQLNES#M*DHGGVGPYELGM*EHCE.K   | S53:         | 3 | 5,3505 | 0,356 | 0,472  |
| 7 | P18858 DNL1_HUMAN  | E.ALS#PAKGQKPALDCSQVS#PPRPATSPE.N | S76:S91:     | 3 | 5,2946 | 0,387 | 0,558  |
| 7 | Q8TEA8 DTD1_HUMAN  | E.DRSASS#GAEGDVS#SEREP.-          | S197:S204:   | 2 | 5,2485 | 0,53  | -0,306 |
| 7 | Q2QG07 ZXDC_HUMAN  | E.LLAPIKVEPDS#PSRPGAVGQQE.G       | S665:        | 3 | 5,2408 | 0,361 | 0,077  |
| 7 | Q96SB3 NEB2_HUMAN  | E.NGS#TVATAASPAPPEPKAQAPEKE.A     | S331:        | 3 | 5,2267 | 0,542 | -0,578 |
| 7 | P39880 CUX1_HUMAN  | E.IQAGSQGQAGASDS#PSAR.S           | S1321:       | 2 | 5,2192 | 0,587 | -0,621 |
| 7 | P19838 NFKB1_HUMAN | E.VIQAAS#SPVKTTQAHSLPLS#PASTR.Q   | S892:S907:   | 3 | 5,21   | 1     | 0,327  |
| 7 | Q53GS7 GLE1_HUMAN  | K.SPDASSAFSPAS#PAT#PNGTKGKDE.S    | S99:T102:    | 3 | 5,199  | 0,329 | -0,074 |
| 7 | O75061 AUX1_HUMAN  | E.DHAALVNQESEQS#DDE.L             | S456:        | 2 | 5,1888 | 0,526 | -0,588 |
| 7 | Q92734 TFG_HUMAN   | E.INKNVMSAFGLTDDQVSGPPSAPAEDR.S   |              | 3 | 5,1846 | 0,464 | -0,455 |
| 7 | O95817 BAG3_HUMAN  | E.VKVPPAPVPCPPSPGPSAVPSS#PK.S     | S386:        | 3 | 5,172  | 0,36  | -0,145 |
| 7 | Q9NYV4 CD2L7_HUMAN | E.TTSGTSTEPVKNSS#PAPPQPAPGKVE.S   | S1083:       | 3 | 5,1367 | 0,411 | -0,761 |
| 7 | O95208 EPN2_HUMAN  | R.M*AQVATGM*GSNQITFGR.G           |              | 2 | 5,1208 | 0,487 | 0,813  |
| 7 | O95817 BAG3_HUMAN  | E.VKVPPAPVPCPPSP#PGPSAVPSSPK.S    | S377:        | 3 | 5,0724 | 0,419 | -0,217 |
| 7 | P14625 ENPL_HUMAN  | E.AIQLDGLNASQIRE.L                |              | 3 | 4,9923 | 0,496 | 0,359  |
| 7 | Q53EZ4 CEP55_HUMAN | E.KVAAS#PKS#PTAALNE.S             | S425:S428:   | 2 | 4,9689 | 0,376 | -0,52  |
| 7 | Q86VP6 CAND1_HUMAN | E.TIVDTLCTNMLSDKE.Q               |              | 2 | 4,9467 | 0,4   | -0,491 |
| 7 | P98171 RHG04_HUMAN | E.KQVVGAGLQTAGESGSS#PE.G          | S824:        | 2 | 4,9241 | 0,612 | -0,583 |
| 7 | Q15477 SKIV2_HUMAN | E.NEAVGQPGGPRGDTVSASPCSAPLAR.A    |              | 3 | 4,8978 | 0,446 | -0,072 |
| 7 | Q12802 AKP13_HUMAN | E.NALSSGTLQEEQRT#PPPGQDTQQFHE.K   | T953:        | 3 | 4,8879 | 0,458 | -0,43  |
| 7 | P80723 BASP_HUMAN  | E.AAAAPAESAAPAAGEEPSKEE.G         |              | 3 | 4,8855 | 0,392 | -0,468 |
| 7 | Q00610 CLH1_HUMAN  | E.AIDSYIKADDPSSYM*E.V             |              | 2 | 4,8853 | 0,421 | -0,268 |
| 7 | O76021 RL1D1_HUMAN | K.ATNES#EDEIPQLVPIGKK.T           | S361:        | 3 | 4,839  | 0,426 | 0,089  |
| 7 | Q13813 SPTA2_HUMAN | E.NAEEDLTPVRCNSLEE.I              |              | 2 | 4,8302 | 0,496 | -0,368 |
| 7 | P50548 ERF_HUMAN   | R.RVS#SDLQHATAQLSLE.H             | S531:        | 2 | 4,8123 | 0,569 | -0,332 |
| 7 | P23443 KS6B1_HUMAN | E.GGQLNES#M*DHGGVGPYELGMEHCE.K    | S53:         | 3 | 4,7925 | 0,287 | -0,61  |
| 7 | Q13263 TIF1B_HUMAN | E.TKPVLM*ALAEGPGAEGPR.L           |              | 2 | 4,7703 | 0,448 | -0,404 |
| 7 | Q6XQN6 PNCB_HUMAN  | E.RLQALVNSLCAGQS#P.-              | S537:        | 2 | 4,7578 | 0,485 | -0,648 |
| 7 | P55072 TERA_HUMAN  | E.DNSVVLSLQPKM*DE.L               |              | 2 | 4,741  | 0,411 | -0,234 |

|   |                    |                                |              |   |        |       |        |
|---|--------------------|--------------------------------|--------------|---|--------|-------|--------|
| 7 | O00629 IMA4_HUMAN  | E.DSDIDGDYRVQNTSLE.A           |              | 2 | 4,7363 | 0,493 | 0,401  |
| 7 | Q7Z5L2 GIDRP_HUMAN | E.FKTEEQDDSGS#IE.F             | S538:        | 2 | 4,7132 | 0,344 | -0,234 |
| 7 | Q9GZR7 DDX24_HUMAN | E.LTDYQLVS#PAKNPSSLFSKE.A      | S60:         | 3 | 4,6824 | 0,452 | -0,238 |
| 7 | P35527 K1C9_HUMAN  | R.GSGSGSYGGGGSGGGYGGGSGSR.G    |              | 2 | 4,68   | 0,432 | -0,545 |
| 7 | Q02952 AKA12_HUMAN | E.HDPGQGSSSPEQAGS#PTEGE.G      | S749:        | 3 | 4,6557 | 0,291 | -0,45  |
| 7 | P13645 K1C10_HUMAN | K.GSLGGGFSSGGFSGGSFSR.G        |              | 2 | 4,6454 | 0,564 | 0,286  |
| 7 | P78527 PRKDC_HUMAN | E.DNSM*NVDQDGDPSDRM*E.V        |              | 2 | 4,6419 | 0,522 | -0,249 |
| 7 | Q9P287 BCCIP_HUMAN | E.LTDLLIQNHIGSVIK.Q            |              | 2 | 4,5966 | 0,484 | -0,204 |
| 7 | Q8N556 AFAP1_HUMAN | E.AYSGCSGPVDSECPSS#PVHKAEL     | S265:        | 3 | 4,5852 | 0,283 | -0,476 |
| 7 | Q99439 CNN2_HUMAN  | R.NFDDATM*KAGQCIVGLQM*GTNK.C   |              | 3 | 4,5734 | 0,298 | -0,301 |
| 7 | P55795 HNRH2_HUMAN | E.GRPSGEAFVELES#EEE.V          | S63:         | 2 | 4,555  | 0,51  | -0,463 |
| 7 | Q9Y3D7 TIM16_HUMAN | E.AQQILNVSKLS#PEEVQKNYE.H      | S69:         | 3 | 4,5531 | 0,235 | -0,305 |
| 7 | Q9ULT8 HECD1_HUMAN | E.GHDSLS#VGS#FEEDSKSE.F        | S2317:S2320: | 3 | 4,552  | 0,437 | 0      |
| 7 | Q8IW19 APLF_HUMAN  | E.DNILNETPKS#PVINLPHE.T        | S131:        | 3 | 4,546  | 0,404 | -0,347 |
| 7 | Q8IY92 BTBDC_HUMAN | E.GGS#PVSGQLLAGVQVQK.Q         | S201:        | 3 | 4,545  | 0,298 | -0,215 |
| 7 | Q9BTE6 AASD1_HUMAN | E.AQALLQDYISTQSAKE.-           |              | 2 | 4,5435 | 0,552 | -0,138 |
| 7 | Q8NC51 PAIRB_HUMAN | K.QIS#YNYSDLQSNVTEETPE.G       | S243:        | 3 | 4,5356 | 0,39  | 0      |
| 7 | Q86WC4 OSTM1_HUMAN | R.LCQTCYPLFQQVSK.M             |              | 3 | 4,5325 | 0,377 | -0,293 |
| 7 | Q05682 CALD1_HUMAN | E.KGNVFSS#PTAAGT#PNKE.T        | S724:T730:   | 2 | 4,5304 | 0,533 | -0,589 |
| 7 | P39880 CUX1_HUMAN  | E.IQAGSQGQAGASDS#PSAR.S        | S1321:       | 3 | 4,5265 | 0,341 | -0,31  |
| 7 | Q9NRL3 STRN4_HUMAN | E.FDFLGS#GEDGEGAPDPR.R         | S324:        | 2 | 4,5219 | 0,468 | -0,331 |
| 7 | Q5JRA6 MIA3_HUMAN  | E.ASGKPSPS#DPGSGTATM*M*NSSSR.G | S1727:       | 3 | 4,5162 | 0,404 | -0,552 |
| 7 | P31943 HNRH1_HUMAN | E.GRPSGEAFVELES#EDE.V          | S63:         | 2 | 4,5154 | 0,31  | -0,666 |
| 7 | Q15642 CIP4_HUMAN  | R.APS#DSSLGTPSDGRPE.L          | S296:        | 2 | 4,5139 | 0,543 | -0,369 |
| 7 | P80723 BASP_HUMAN  | E.AAAAPAESAAPAAGEEPSKEE.G      |              | 2 | 4,5044 | 0,49  | -0,624 |
| 7 | Q96SB3 NEB2_HUMAN  | E.NGSTVATAAS#PAPEEPKAAPEKE.A   | S338:        | 3 | 4,4902 | 0,419 | -0,506 |
| 7 | P09496 CLCA_HUMAN  | E.SNGPTDSYAAISQVDR.L           |              | 2 | 4,4507 | 0,508 | 0,508  |
| 7 | Q92615 LARP5_HUMAN | E.KFTSSQTQSPT#PPKPPS#PSFE.L    | T518:S524:   | 3 | 4,4261 | 1     | 0,301  |
| 7 | O94826 TOM70_HUMAN | E.GYALYAQALTDQQQFGKADE.M       |              | 3 | 4,4149 | 0,457 | -0,33  |
| 7 | Q9UNE7 STUB1_HUMAN | R.LGAGGGS#PEKS#PSAQE.L         | S19:S23:     | 2 | 4,4149 | 0,471 | -0,374 |
| 7 | Q2TAL8 QRIC1_HUMAN | E.AYNAVHVS#GSPTALAAVKLE.D      | S343:        | 3 | 4,4108 | 0,32  | 0,616  |
| 7 | Q9UD71 PPR1B_HUMAN | E.SHLQSIINLNENQAS#EEEDE.L      | S102:        | 3 | 4,3921 | 0,329 | -0,544 |
| 7 | Q96566 CLCC1_HUMAN | E.AAGSPDQGSTYS#PARGVAGPR.G     | S532:        | 3 | 4,3646 | 0,369 | -0,527 |

|   |                    |                                  |              |   |        |       |        |
|---|--------------------|----------------------------------|--------------|---|--------|-------|--------|
| 7 | O00505 IMA3_HUMAN  | E.DSDVDADFKAQNVTL.E.A            |              | 2 | 4,3533 | 0,443 | -0,345 |
| 7 | P39880 CUX1_HUMAN  | E.IQAGSQGQAGASDSPSAR.S           |              | 2 | 4,3416 | 0,594 | -0,506 |
| 7 | Q9BT25 NYS48_HUMAN | R.SFAQVLELSAEASK.E               |              | 2 | 4,3394 | 0,401 | -0,412 |
| 7 | Q8IZH2 XRN1_HUMAN  | E.AQSSQATPVQTSQPDSSNIVKVS#PRE.S  | S1645:       | 3 | 4,3376 | 0,344 | 0,649  |
| 7 | Q9C005 DPY30_HUMAN | E.GQTQVAENPHS#EYGLTDNVER.I       | S19:         | 3 | 4,3324 | 0,383 | 0,453  |
| 7 | O75821 EIF3G_HUMAN | E.LLKGIPLATGDTSPPE.L             |              | 2 | 4,3145 | 0,474 | -0,281 |
| 7 | O60271 JIP4_HUMAN  | E.TRNVS#TGS#AENEKSE.V            | S329:S332:   | 2 | 4,3114 | 0,525 | -0,45  |
| 7 | Q13263 TIF1B_HUMAN | E.TKPVLMALAEGPGAEGPR.L           |              | 3 | 4,3103 | 0,213 | 0      |
| 7 | Q07955 SFRS1_HUMAN | E.AGDVCYADVYRDGTGVVE.F           |              | 2 | 4,2805 | 0,533 | -0,627 |
| 7 | O75717 WDHD1_HUMAN | E.NRSNILSDNPDFS#DE.A             | S1041:       | 2 | 4,2764 | 0,547 | -0,88  |
| 7 | O60271 JIP4_HUMAN  | E.TRNVS#TGS#AENEKSE.V            | T330:S332:   | 3 | 4,2758 | 0,355 | 0      |
| 7 | O60271 JIP4_HUMAN  | E.TRNVS#TGS#AENEE.K              | S332:        | 2 | 4,265  | 0,38  | -0,331 |
| 7 | Q9H000 MKRN2_HUMAN | R.KTQPSM*VSNPGSCSDPQPS#PE.M      | S139:        | 3 | 4,2293 | 0,463 | -0,315 |
| 7 | Q53GS7 GLE1_HUMAN  | E.TSPSSTSASALDQPSFVVK.S          |              | 2 | 4,2291 | 0,479 | -0,32  |
| 7 | P31150 GDIA_HUMAN  | E.SQVFCSCSYDATTHFE.T             |              | 2 | 4,2194 | 0,562 | -0,189 |
| 7 | Q5TGY3 AHDC1_HUMAN | E.AACLSAPHLAS#PPAT#PKADKEPLE.M   | S1507:T1511: | 3 | 4,2172 | 0,362 | -0,417 |
| 7 | P11388 TOP2A_HUMAN | E.ADDVKGSVPLSSS#PPATHFPDETE.I    | S1393:       | 3 | 4,2153 | 0,461 | 0,214  |
| 7 | Q14C86 GAPD1_HUMAN | E.LPPAAAIGATSLSVAAPHS#SSSSPS#K.D | S946:S952:   | 3 | 4,1995 | 1     | 0,074  |
| 7 | P07954 FUMH_HUMAN  | E.NEPGSSIM*PGKVNPTQCE.A          |              | 2 | 4,1992 | 0,544 | -1,244 |
| 7 | Q659C4 LARP2_HUMAN | E.TKLNGPGENV#EDE.A               | S60:         | 2 | 4,1978 | 0,464 | -0,467 |
| 7 | Q9NYV4 CD2L7_HUMAN | E.TTSGTSTEPVKNSS#PAPPQPAPGK.V    | S1083:       | 3 | 4,1906 | 0,421 | -0,53  |
| 7 | Q02952 AKA12_HUMAN | E.DSIAGSGVEHS#TPDTEPGKEE.S       | S792:        | 3 | 4,1713 | 0,422 | -0,247 |
| 7 | Q96GX5 MASTL_HUMAN | E.KNQDPANILSACLS#E.T             | S240:        | 2 | 4,1603 | 0,49  | -0,421 |
| 7 | Q86WC4 OSTM1_HUMAN | R.LCQTCYPLFQQVSK.M               |              | 2 | 4,1552 | 0,447 | -0,326 |
| 7 | Q07065 CKAP4_HUMAN | E.GLGSSEADQDGLASTVR.S            |              | 2 | 4,1506 | 0,481 | 0,66   |
| 7 | Q9GZM8 NDEL1_HUMAN | E.VTRKS#APS#SPTLDCE.K            | S194:S197:   | 2 | 4,1404 | 1     | -0,54  |
| 7 | O94842 TOX4_HUMAN  | E.LVSGS#PVALS#PQPR.C             | S562:S567:   | 2 | 4,1359 | 0,295 | -0,233 |
| 7 | P23588 IF4B_HUMAN  | E.DGGTGGGSTYVSKPVSWADE.T         |              | 2 | 4,1324 | 0,482 | -0,557 |
| 7 | Q8NHZ8 CDC26_HUMAN | E.DVEVVGGS#DGEGAIGLSSDPK.S       | S42:         | 2 | 4,1304 | 0,544 | -0,118 |
| 7 | Q16643 DREB_HUMAN  | E.DGSDDLKLAASGEGGLQE.L           |              | 2 | 4,1238 | 0,476 | -0,554 |
| 7 | Q96T23 RSF1_HUMAN  | E.SEKPGS#PEAAET#SPPSNIIDHCE.K    | S612:T618:   | 3 | 4,1175 | 0,394 | 0,49   |
| 7 | Q9UNN5 FAF1_HUMAN  | E.VFGMASSALRKS#PM*M*PENAENE.G    | S320:        | 3 | 4,1039 | 0,408 | -0,292 |
| 7 | Q9H8Y8 GORS2_HUMAN | E.KPVSAAVDANASES#P.-             | S451:        | 2 | 4,101  | 0,422 | -0,08  |

|   |                     |                                |            |   |        |       |        |
|---|---------------------|--------------------------------|------------|---|--------|-------|--------|
| 7 | O95232 CROP_HUMAN   | E.VNGTSEDIKSEGDTQS#N.-         | S431:      | 2 | 4,0857 | 0,446 | -0,525 |
| 7 | O60271 JIP4_HUMAN   | E.TRNVS#TGSAENEE.K             | S329:      | 2 | 4,0633 | 0,393 | -0,248 |
| 7 | Q86VP6 CAND1_HUMAN  | E.TIVDTLCTNM*LSDKE.Q           |            | 2 | 4,0491 | 0,445 | -0,834 |
| 7 | Q9Y5S9 RBM8A_HUMAN  | E.DYDSVEQDGDDEPGPQR.S          |            | 2 | 4,0442 | 0,476 | -0,473 |
| 7 | Q15642 CIP4_HUMAN   | R.APSDS#SLGTPSDGRPE.L          | S298:      | 2 | 4,0376 | 0,463 | -0,295 |
| 7 | Q92922 SMRC1_HUMAN  | R.KHS#PS#PPPPTPTESR.K          | S328:S330: | 3 | 4,0374 | 0,265 | -0,103 |
| 7 | Q9C0C2 TB182_HUMAN  | E.RQQAGAQQPGS#ADLE.D           | S1073:     | 2 | 4,0366 | 0,372 | -0,156 |
| 7 | B1ALX9 B1ALX9_HUMAN | E.GDNYSATLLEPAASSLS#PDHKNM*E.I | S226:      | 3 | 4,0346 | 0,39  | -0,138 |
| 7 | P29353 SHC1_HUMAN   | K.YNPLRNES#LSSLEE.G            | S17:       | 2 | 4,034  | 0,333 | -0,423 |
| 7 | P04264 K2C1_HUMAN   | K.NKLNDLEDALQQAK.E             |            | 3 | 4,029  | 0,381 | -0,343 |
| 7 | Q6ZN18 AEBP2_HUMAN  | E.LSRLS#PLPPGS#PGSAAR.G        | S18:S24:   | 2 | 4,0245 | 0,448 | -0,469 |
| 7 | Q16881 TRXR1_HUMAN  | D.LIIIGGGSGGLAAAKE.A           |            | 2 | 4,0242 | 0,487 | -0,342 |
| 7 | P18858 DNL1_HUMAN   | K.GQKPALDCSQVS#PPRPATSPE.N     | S91:       | 3 | 4,0104 | 0,26  | 0      |
| 7 | P21333 FLNA_HUMAN   | E.AGAGGLAIAVEGPSKAE.I          |            | 3 | 4,0097 | 0,255 | 0,061  |
| 7 | Q9H0H5 RGAP1_HUMAN  | E.SGSILSDISFDKTDE.S            |            | 2 | 4,0089 | 0,421 | -0,529 |
| 7 | Q5T1M5 FKB15_HUMAN  | E.QSASASSGQPQAPLNR.E           |            | 3 | 4,001  | 0,347 | 0      |
| 7 | O75531 BAF_HUMAN    | R.DFVAEPM*GEKPVGSLAGIGE.V      |            | 2 | 3,991  | 0,537 | 0,544  |
| 7 | Q9Y4G8 RPGF2_HUMAN  | R.KGYTLAPSGTVDNFSDSGHSE.I      |            | 3 | 3,9899 | 0,309 | -0,169 |
| 7 | P18031 PTN1_HUMAN   | E.DNDYINASLIKMEE.A             |            | 2 | 3,9866 | 0,387 | -0,516 |
| 7 | Q16881 TRXR1_HUMAN  | D.LIIIGGG#GGLAAAKE.A           | S172:      | 2 | 3,9843 | 0,412 | -0,324 |
| 7 | P18583 SON_HUMAN    | E.HNTVCAAGTS#PVGE.I            | S1556:     | 2 | 3,9828 | 0,551 | -0,66  |
| 7 | P80723 BASP_HUMAN   | E.QAAPGPAAGGEAPKAAE.A          |            | 3 | 3,9703 | 0,383 | 0      |
| 7 | Q9Y478 AAKB1_HUMAN  | E.LSSS#PPGPYHQEPYVCKPE.E       | S182:      | 3 | 3,9675 | 0,335 | -0,406 |
| 7 | Q96G46 DUS3L_HUMAN  | E.NCGAQQVPAGPGTST#PPS#SPVR.T   | T273:S276: | 3 | 3,9621 | 0,388 | -0,236 |
| 7 | Q92598 HS105_HUMAN  | E.LNNTCEPVVTQPKPK.I            |            | 3 | 3,9539 | 0,443 | -0,424 |
| 7 | P05362 ICAM1_HUMAN  | E.AQVHLALGDQR.L                |            | 3 | 3,9448 | 0,37  | 0,454  |
| 7 | Q8TB72 PUM2_HUMAN   | R.AGAGQRPLT#PNQGQQGQQA.E.S     | T396:      | 3 | 3,943  | 0,322 | -0,432 |
| 7 | P35908 K22E_HUMAN   | R.LLRDYQELMNVK.L               |            | 3 | 3,9392 | 0,174 | 0,06   |
| 7 | Q14C86 GAPD1_HUMAN  | E.DTQFVDGYKQLGFQE.T            |            | 2 | 3,9286 | 0,36  | -0,344 |
| 7 | Q9Y6I3 EPN1_HUMAN   | R.SPGAFDM*SGVRGS#LAE.A         | S422:      | 2 | 3,9241 | 0,394 | 0,437  |
| 7 | P48960 CD97_HUMAN   | E.GSYDCVCSPGYEPVSGAK.T         |            | 2 | 3,9152 | 0,494 | 0,821  |
| 7 | P38398 BRCA1_HUMAN  | E.TKCSASLFSSQCS#E.L            | S1301:     | 2 | 3,9128 | 0,519 | -0,365 |
| 7 | P62834 RAP1A_HUMAN  | E.ILDTAGTEQFTAMRD.L            |            | 2 | 3,912  | 0,583 | -0,292 |

|   |                    |                                |              |   |        |       |        |
|---|--------------------|--------------------------------|--------------|---|--------|-------|--------|
| 7 | P49750 YLPM1_HUMAN | E.M*M*GSDASLDS#DQGLGGVMVLSQR.Q | S1243:       | 3 | 3,9101 | 0,133 | -0,668 |
| 7 | P05198 IF2A_HUMAN  | E.VACYGYEGIDAVKE.A             |              | 2 | 3,9038 | 0,485 | -0,155 |
| 7 | P29374 ARI4A_HUMAN | E.SRS#VKSES#DITIE.V            | S1018:S1023: | 2 | 3,903  | 0,457 | -0,53  |
| 7 | Q13029 PRDM2_HUMAN | E.KASQDTINSS#VVEE.N            | S471:        | 2 | 3,9002 | 0,471 | -0,154 |
| 7 | O75509 TNR21_HUMAN | E.NSALLTVEPS#PQDKNKGFFVDE.S    | S541:        | 3 | 3,8999 | 0,277 | -0,291 |
| 7 | P31946 1433B_HUMAN | E.ILNS#PEKACSLAK.T             | S186:        | 2 | 3,8995 | 0,247 | -0,646 |
| 7 | O95696 BRD1_HUMAN  | E.NQKQGEQQS#LIDE.D             | S209:        | 2 | 3,8992 | 0,313 | -0,306 |
| 7 | Q8TEA8 DTD1_HUMAN  | E.DRSASS#GAEGDVSS#EREP.-       | S197:S205:   | 3 | 3,8882 | 0,342 | -0,367 |
| 7 | Q01804 OTUD4_HUMAN | K.TAAAAADVNGFKPLSGNE.Q         |              | 2 | 3,8863 | 0,431 | -0,282 |
| 7 | P49792 RBP2_HUMAN  | E.T#TPKAVVSPKFFVFGSE.S         | T2503:       | 3 | 3,8818 | 0,237 | -0,293 |
| 7 | P46100 ATRX_HUMAN  | R.LAM*NQNTDKISGSGSNSDM*M*E.N   |              | 3 | 3,8812 | 0,23  | -0,402 |
| 7 | P55263 ADK_HUMAN   | E.VTAFVLDQDQKE.I               |              | 2 | 3,8804 | 0,323 | 0,333  |
| 7 | Q9UNS2 CSN3_HUMAN  | K.SMGS#QEDDSGNKPSSYS.-         | S410:        | 2 | 3,8796 | 0,416 | -0,329 |
| 7 | Q8I221 PHAR4_HUMAN | E.NSDS#FSEDSSTLGR.T            | S451:        | 2 | 3,8717 | 0,432 | -0,077 |
| 7 | P52272 HNRPM_HUMAN | R.M*GLAM*GGGGGASFDR.A          |              | 2 | 3,8689 | 0,386 | -0,431 |
| 7 | Q9UQ35 SRRM2_HUMAN | E.TKEQNSALPTSS#QDEE.L          | S1233:       | 2 | 3,868  | 0,398 | -0,397 |
| 7 | Q9NQS7 INCE_HUMAN  | E.QHVTQLM*STEPLPR.T            |              | 3 | 3,8659 | 0,28  | -0,553 |
| 7 | P08069 IGF1R_HUMAN | E.GFVIHDGECM*QECPSGFIR.N       |              | 3 | 3,8635 | 0,321 | -0,325 |
| 7 | Q72460 CLAP1_HUMAN | R.SSS#PGKLLGSGYGGLTGGSSR.G     | S688:        | 3 | 3,8622 | 0,192 | -0,182 |
| 7 | P55072 TERA_HUMAN  | E.DNS#VVLSQPK.M                | S37:         | 2 | 3,8621 | 0,454 | -0,487 |
| 7 | Q12888 TP53B_HUMAN | E.VLSTQEDLFDQSNK.T             |              | 2 | 3,8599 | 0,479 | 0      |
| 7 | P62834 RAP1A_HUMAN | E.ILDTAGTEQFTAM*RD.L           |              | 2 | 3,8577 | 0,594 | 0,652  |
| 7 | P49815 TSC2_HUMAN  | E.LQTLQDILGDPGDKADVGRSL#PE.V   | S1411:       | 3 | 3,8456 | 0,279 | -0,363 |
| 7 | Q15642 CIP4_HUMAN  | R.APSDSSLGT#PSDGRPE.L          | T302:        | 2 | 3,8416 | 0,327 | -0,443 |
| 7 | Q8ND56 LS14A_HUMAN | E.TSNSGTLQPSSAVGSAFTQDTR.S     |              | 3 | 3,8413 | 0,377 | -0,165 |
| 7 | Q15149 PLEC1_HUMAN | R.SSS#VGSSSYPIS#PAVSR.T        | S4386:S4396: | 2 | 3,8411 | 1     | -0,446 |
| 7 | Q15477 SKIV2_HUMAN | E.AVGQPGGPRGDTVSAAPCSAPLAR.A   |              | 3 | 3,835  | 0,282 | -0,396 |
| 7 | Q15149 PLEC1_HUMAN | E.GTSCIAGVFVDATKE.R            |              | 2 | 3,8348 | 0,459 | -0,471 |
| 7 | Q96JH7 VCIP1_HUMAN | E.TTDGCVADALGAFAFTR.S          |              | 2 | 3,8288 | 0,544 | -0,431 |
| 7 | Q03111 ENL_HUMAN   | E.STS#PKGGPPPPPPPPR.A          | S267:        | 3 | 3,8283 | 0,108 | -0,315 |
| 7 | P35908 K22E_HUMAN  | R.GSGGGGGSISGGGYGSGGGSGGR.Y    |              | 2 | 3,826  | 0,577 | -0,28  |
| 7 | P21333 FLNA_HUMAN  | E.AGAGGLAIAVEGPSKAE.I          |              | 2 | 3,8237 | 0,556 | 0,163  |
| 7 | P17706 PTN2_HUMAN  | E.DLSPAFDHS#PNKIMTE.K          | S304:        | 2 | 3,82   | 0,436 | -0,389 |



|   |                    |                                   |                 |   |        |       |        |
|---|--------------------|-----------------------------------|-----------------|---|--------|-------|--------|
| 7 | O43379 WDR62_HUMAN | E.VEAGPGDQQGDSYLR.V               |                 | 2 | 3,8186 | 0,521 | -0,766 |
| 7 | P46013 KI67_HUMAN  | E.LFQTPGHTEES#M*TDDKITE.V         | S1970:          | 3 | 3,8176 | 0,312 | -0,08  |
| 7 | Q03188 CENPC_HUMAN | E.ASLQFVVEPSEATNRS#VQAHE.V        | S110:           | 3 | 3,8112 | 0,415 | 0,308  |
| 7 | P04264 K2C1_HUMAN  | R.SGGGFSSGSAGIINYQR.R             |                 | 2 | 3,8106 | 0,51  | -0,294 |
| 7 | A0AVT1 UBA6_HUMAN  | E.FEVLDTTGEEPKE.I                 |                 | 2 | 3,8079 | 0,383 | -0,245 |
| 7 | P55072 TERA_HUMAN  | E.DNSVVSLSQPKMDE.L                |                 | 2 | 3,8047 | 0,433 | -0,158 |
| 7 | Q14694 UBP10_HUMAN | E.FILGCTASKIT#PDGITKE.A           | T100:           | 3 | 3,8025 | 0,352 | -0,09  |
| 7 | Q00613 HSF1_HUMAN  | R.VKEEPPS#PPQS#PRVEE.A            | S303:S307:      | 2 | 3,8019 | 0,313 | -0,373 |
| 7 | O75531 BAF_HUMAN   | R.DFVAEPMGEKPVGSLAGIGE.V          |                 | 2 | 3,7972 | 0,493 | -0,548 |
| 7 | P13693 TCTP_HUMAN  | E.NM*NPDGMVALLDYRE.D              |                 | 2 | 3,7971 | 0,45  | -0,557 |
| 7 | P35527 K1C9_HUMAN  | R.SGGGGGGGLGSGGSIR.S              |                 | 2 | 3,7864 | 0,506 | -0,198 |
| 7 | O95684 FR1OP_HUMAN | E.GALDLSDVHS#PPKSPE.G             | S156:           | 2 | 3,7824 | 0,342 | -0,282 |
| 7 | Q99614 TTC1_HUMAN  | E.DLLNGLKVTDTQE.A                 |                 | 2 | 3,7741 | 0,393 | 0,169  |
| 7 | P22626 ROA2_HUMAN  | D.FGNYNQQPSNYGPM*K.S              |                 | 2 | 3,7706 | 0,297 | -0,069 |
| 7 | P85037 FOXK1_HUMAN | R.SGGLQTPECLS#REGS#PIPHDPE.F      | S441:S445:      | 3 | 3,7671 | 0,171 | -0,29  |
| 7 | P55072 TERA_HUMAN  | E.DNSVVSL#QPKM*DE.L               | S42:            | 2 | 3,7656 | 0,449 | 0,371  |
| 7 | P50851 LRBA_HUMAN  | E.TRNADDEVS#SDIIE.A               | S1051:          | 2 | 3,76   | 0,428 | 0,486  |
| 7 | Q9Y478 AAKB1_HUMAN | E.LSSS#PPGPYHQEPYVCKPEE.R         | S182:           | 3 | 3,759  | 0,263 | -0,077 |
| 7 | P08559 ODPA_HUMAN  | E.NNRYGMGTS#VE.R                  | S232:           | 2 | 3,7579 | 0,329 | -0,187 |
| 7 | Q5VUA4 ZN318_HUMAN | E.VAILQVDDDSGDPLNLVK.A            |                 | 2 | 3,7523 | 0,477 | -0,447 |
| 7 | Q92619 HMHA1_HUMAN | E.SRVVSNDSDS#DLEE.A               | S1032:          | 2 | 3,7477 | 0,477 | -0,299 |
| 7 | Q92598 HS105_HUMAN | E.LNNTCEPVVTQPKPK.I               |                 | 2 | 3,7447 | 0,358 | -0,707 |
| 7 | Q6ZRS2 SRCAP_HUMAN | E.KYSDLLSLSLNQPLTSSK.A            |                 | 3 | 3,7364 | 0,283 | -0,273 |
| 7 | Q14247 SRC8_HUMAN  | R.AKTQT#PPVS#PAPQPTEERLPS#SPVYE.D | T401:S405:S417: | 3 | 3,7344 | 1     | -0,42  |
| 7 | Q9UKN8 TF3C4_HUMAN | K.ILLVDSPGMGNADDEQEE.G            |                 | 2 | 3,7311 | 0,522 | 0      |
| 7 | Q9Y6D5 BIG2_HUMAN  | E.IGDGKGLDMAR.R                   |                 | 2 | 3,7288 | 0,457 | -0,215 |
| 7 | P24534 EF1B_HUMAN  | E.DYVQSM*DVAAFNKI.-               |                 | 2 | 3,728  | 0,415 | -0,377 |
| 7 | O95865 DDAH2_HUMAN | E.NATLDGTDVLTGRE.F                |                 | 2 | 3,7271 | 0,474 | -0,303 |
| 7 | O75369 FLNB_HUMAN  | E.AGAGGLSIAVEGPSKAE.I             |                 | 2 | 3,7265 | 0,39  | -0,403 |
| 7 | P35908 K22E_HUMAN  | R.GSSSGGGYSSGSSSYGSGGR.Q          |                 | 2 | 3,7229 | 0,563 | -0,35  |
| 7 | P27694 RFA1_HUMAN  | E.GQALDGVVISDLK.S                 |                 | 2 | 3,7176 | 0,482 | 0      |
| 7 | P55263 ADK_HUMAN   | E.VTAFVLDQDQKE.I                  |                 | 3 | 3,7163 | 0,211 | 0,187  |
| 7 | Q07955 SFRS1_HUMAN | E.AGDVCYADVYR.D                   |                 | 2 | 3,7152 | 0,468 | -0,189 |

|   |                    |                                    |              |   |        |       |        |
|---|--------------------|------------------------------------|--------------|---|--------|-------|--------|
| 7 | P04264 K2C1_HUMAN  | R.LLRDYQELMNTK.L                   |              | 3 | 3,7097 | 0,2   | 0,18   |
| 7 | Q05682 CALD1_HUMAN | E.KGNVFSST#AAGT#PNKE.T             | T726:T730:   | 3 | 3,7076 | 0,343 | 0      |
| 7 | P23229 ITA6_HUMAN  | E.DGPYEVGGETEHEDE.S                |              | 2 | 3,7074 | 0,401 | -0,318 |
| 7 | P84090 ERH_HUMAN   | E.GRTYADYES#VNE.C                  | S24:         | 2 | 3,7009 | 0,367 | -0,576 |
| 7 | Q9H307 PININ_HUMAN | E.TNRVES#VEPS#ENEASKE.L            | S413:S417:   | 3 | 3,7    | 0,149 | -0,532 |
| 7 | P98164 LRP2_HUMAN  | K.CASGDKICIGVTNR.C                 |              | 3 | 3,6997 | 0,223 | 0,318  |
| 7 | Q00613 HSF1_HUMAN  | R.VKEEPPS#PPQS#PRVEE.A             | S303:S307:   | 3 | 3,6992 | 0,305 | -0,279 |
| 7 | P14625 ENPL_HUMAN  | E.AIQLDGLNASQIRE.L                 |              | 2 | 3,699  | 0,397 | -0,08  |
| 7 | Q8NFC6 FA44A_HUMAN | E.GSTASTS#PADHSALPNQSLTVRE.S       | S1318:       | 3 | 3,6966 | 0,209 | -0,608 |
| 7 | P09874 PARP1_HUMAN | R.GGS#DDSSKPIDVNYE.K               | S782:        | 2 | 3,6961 | 0,461 | -0,275 |
| 7 | Q92922 SMRC1_HUMAN | R.KHS#PS#PPPPTPE.S                 | S328:S330:   | 2 | 3,6932 | 0,431 | -0,319 |
| 7 | P47756 CAPZB_HUMAN | E.VEANNAFDQYRDLYFE.G               |              | 2 | 3,6879 | 0,354 | -0,306 |
| 7 | Q9UQ35 SRRM2_HUMAN | R.S#SGHSSSELS#PDAVE.K              | S1378:S1387: | 2 | 3,6835 | 1     | -0,444 |
| 7 | P60174 TPIS_HUMAN  | E.LIGTLNAAKVPADT#E.V               | T38:         | 2 | 3,6819 | 0,458 | -0,077 |
| 7 | P08107 HSP71_HUMAN | E.VISWLDANTLAEKDE.F                |              | 2 | 3,6793 | 0,469 | -0,358 |
| 7 | Q96RV3 PCX1_HUMAN  | E.SSKPLSGS#KES#LVE.N               | S325:S328:   | 2 | 3,6755 | 0,444 | -1,062 |
| 7 | Q02952 AKA12_HUMAN | E.DSIAGS#GVEHSTPDTEPGKEE.S         | S787:        | 3 | 3,6715 | 0,203 | -0,082 |
| 7 | P42166 LAP2A_HUMAN | E.SRSSTPLPTISS#AE.N                | S168:        | 2 | 3,6701 | 0,521 | -0,229 |
| 7 | Q2TAZ0 ATG2A_HUMAN | E.TRAQSS#PLEGQAE.G                 | S1630:       | 2 | 3,664  | 0,4   | -0,157 |
| 7 | Q92870 APBB2_HUMAN | E.QGQQDPNKNLS#PTAVINITSEKLE.G      | S123:        | 3 | 3,6638 | 0,299 | -0,406 |
| 7 | P54727 RD23B_HUMAN | K.QEKPAEKPAETPVAT#SPTATDSTSGDSSR.S | T159:        | 3 | 3,6606 | 1     | -0,907 |
| 7 | Q9COC2 TB182_HUMAN | R.RES#AASGLGGLLEEE.G               | S1473:       | 2 | 3,6606 | 0,238 | -0,382 |
| 7 | Q92576 PHF3_HUMAN  | E.DAGSSDISSDAACTNPNKTE.N           |              | 2 | 3,6488 | 0,51  | -1,077 |
| 7 | O00178 GTPB1_HUMAN | R.SRSAM*DSPVPASM*FAPEPSS#PGAAR.A   | S25:         | 3 | 3,6469 | 0,322 | -0,56  |
| 7 | Q6PL18 ATAD2_HUMAN | E.LRNNS#NTCNIENE.L                 | S1243:       | 2 | 3,6417 | 0,237 | -0,515 |
| 7 | P49736 MCM2_HUMAN  | E.SLVVNYEDLAARE.H                  |              | 2 | 3,6417 | 0,455 | 0,33   |
| 7 | P35908 K22E_HUMAN  | K.TLNKFAFIDK.V                     |              | 3 | 3,6401 | 0,235 | 0,065  |
| 7 | P35908 K22E_HUMAN  | R.HGGGGGGFGGGGFGSR.S               |              | 3 | 3,6391 | 0,221 | 0,277  |
| 7 | Q9Y6M4 KC1G3_HUMAN | K.QLPTPVGAVQQDPALSS#NRE.A          | S345:        | 3 | 3,636  | 0,233 | 0,084  |
| 7 | P18031 PTN1_HUMAN  | E.DNDYINASLIK*EE.A                 |              | 2 | 3,6358 | 0,353 | 0,511  |
| 7 | Q96SN8 CK5P2_HUMAN | E.KSQM*ACPDENV#SGE.L               | S255:        | 2 | 3,6356 | 0,463 | -0,352 |
| 7 | Q9BY44 EIF2A_HUMAN | R.S#DKSPDLAPTAPQSTPR.N             | S503:        | 3 | 3,6344 | 0,263 | -0,094 |
| 7 | P61160 ARP2_HUMAN  | E.LLFNTIQAADIDTRSE.F               |              | 2 | 3,6295 | 0,461 | 0,135  |

|   |                     |                                    |                 |   |        |       |        |
|---|---------------------|------------------------------------|-----------------|---|--------|-------|--------|
| 7 | P24534 EF1B_HUMAN   | E.DYVQSM*DVAAFNKI.-                |                 | 3 | 3,6225 | 0,318 | 0,226  |
| 7 | Q7KZF4 SND1_HUMAN   | E.YGM*IYLGKDTNGENIAE.S             |                 | 2 | 3,6215 | 0,444 | -0,449 |
| 7 | P29692 EF1D_HUMAN   | K.SLAGSSGPGASSGTSGDHGE.L           |                 | 2 | 3,6208 | 0,578 | -0,142 |
| 7 | Q9UHB6 LIMA1_HUMAN  | E.IGPGQLSSSTFDSEKNE.S              |                 | 2 | 3,6181 | 0,499 | -0,34  |
| 7 | P19634 SL9A1_HUMAN  | R.CLS#DPGPHPEPEGEPFFPKGQ.-         | S796:           | 3 | 3,615  | 0,338 | 0,149  |
| 7 | Q13242 SFRS9_HUMAN  | E.AGDVCYADVQKDGVMVE.Y              |                 | 2 | 3,6124 | 0,39  | -0,51  |
| 7 | P04264 K2C1_HUMAN   | R.LLRDYQELMNTK.L                   |                 | 2 | 3,6113 | 0,264 | -0,16  |
| 7 | Q13546 RIPK1_HUMAN  | R.S#NSATEQPGSLHSSQGLGM*GPVEE.S     | S333:           | 3 | 3,6052 | 0,333 | -0,587 |
| 7 | P28715 ERCC5_HUMAN  | E.SKFDSSLLSS#DDE.T                 | S563:           | 2 | 3,6048 | 0,426 | -0,162 |
| 7 | P35908 K22E_HUMAN   | R.GFSSGSAVVS GSR.R                 |                 | 2 | 3,6048 | 0,422 | -0,292 |
| 7 | Q9NZL9 MAT2B_HUMAN  | E.NQPDAASQLNVDASGNLAKE.A           |                 | 2 | 3,6023 | 0,621 | -0,359 |
| 7 | Q14721 KCNB1_HUMAN  | E.GQLLYSVDSS#PPKSLPGS#TSPK.F       | S773:S781:      | 3 | 3,6013 | 1     | -0,304 |
| 7 | P55265 DSRAD_HUMAN  | E.SEKTAESQT#PTPSATSFSGK.S          | T601:           | 3 | 3,6007 | 0,131 | 0      |
| 7 | Q09666 AHNK_HUMAN   | K.VKGDLDIAGPNLE.G                  |                 | 2 | 3,5993 | 0,24  | -0,364 |
| 7 | Q8NEZ4 MLL3_HUMAN   | E.GNAVACPVSSAQ#PPHSAGAPAAKGDSGNE.L | S3758:          | 3 | 3,5991 | 0,337 | -0,382 |
| 7 | Q86YP4 P66A_HUMAN   | E.ATAQKPTGSGVSTVTT#PPPLVR.G        | T189:           | 3 | 3,5952 | 0,209 | 0,244  |
| 7 | Q52LD0 Q52LD0_HUMAN | K.AGGS#PAS#YHGS#TSPR.V             | S192:S195:S199: | 2 | 3,5933 | 0,515 | -0,438 |
| 7 | P12004 PCNA_HUMAN   | K.LSQTSNVDKEEE.A                   |                 | 2 | 3,5866 | 0,349 | -0,088 |
| 7 | Q96Q42 ALS2_HUMAN   | E.NHASTALS#PSTE.T                  | S277:           | 2 | 3,5795 | 0,445 | -0,471 |
| 7 | Q15149 PLEC1_HUMAN  | E.FADM*LSGNAGGFR.S                 |                 | 2 | 3,5794 | 0,471 | 0      |
| 7 | P04264 K2C1_HUMAN   | R.TNAENEFVTIKK.D                   |                 | 2 | 3,5752 | 0,423 | -0,438 |
| 7 | Q969F1 TF3C6_HUMAN  | E.LSGIIDSDFLSKCE.N                 |                 | 2 | 3,5674 | 0,479 | -0,154 |
| 7 | Q12888 TP53B_HUMAN  | K.TVSSDGCSTPSREE.G                 |                 | 2 | 3,5629 | 0,412 | -0,565 |
| 7 | Q14004 CD2L5_HUMAN  | E.TQQQLNKINLPAGILATGEK.Q           |                 | 3 | 3,5617 | 0,135 | -0,257 |
| 7 | P18074 ERCC2_HUMAN  | E.TDAHLANPVLPEVLQE.A               |                 | 2 | 3,5586 | 0,272 | -0,328 |
| 7 | P21333 FLNA_HUMAN   | R.AGQSAAGAAPGGGVDTR.D              |                 | 2 | 3,5554 | 0,46  | -0,507 |
| 7 | P13645 K1C10_HUMAN  | R.LKYENEVALR.Q                     |                 | 3 | 3,555  | 0,194 | 0,518  |
| 7 | P35580 MYH10_HUMAN  | E.DQSILCTGESGAGKTE.N               |                 | 2 | 3,5482 | 0,532 | -0,148 |
| 7 | Q5T1M5 FKB15_HUMAN  | E.QSASASSGQPQAPLNR.E               |                 | 2 | 3,5478 | 0,41  | -0,61  |
| 7 | Q9UJZ1 STML2_HUMAN  | E.YAVTQLAQTTM*R.S                  |                 | 2 | 3,5472 | 0,451 | -0,087 |
| 7 | Q9UQ35 SRRM2_HUMAN  | R.S#SGHSSSELS#PDAVEK.A             | S1378:S1387:    | 2 | 3,5456 | 1     | -0,481 |
| 7 | Q9UHY7 ENOPH_HUMAN  | E.DAHLDGAVPIPAASNGVDD.L            |                 | 2 | 3,5449 | 0,47  | -0,258 |
| 7 | Q9UQ35 SRRM2_HUMAN  | E.KAGMSSNQSISS#PVL.D.A             | S1404:          | 2 | 3,5397 | 0,317 | -0,574 |

|   |                    |                            |            |   |        |       |        |
|---|--------------------|----------------------------|------------|---|--------|-------|--------|
| 7 | Q9NPI6 DCP1A_HUMAN | R.KASSPSPLTIGT#PE.S        | T531:      | 2 | 3,5394 | 0,446 | 0      |
| 7 | P35527 K1C9_HUMAN  | R.IKFEMEQLNR.Q             |            | 3 | 3,5371 | 0,084 | 0,07   |
| 7 | Q8N806 CN130_HUMAN | E.VKVEQNSEPCAGSSS#E.S      | S265:      | 2 | 3,5369 | 0,476 | -0,409 |
| 7 | O75531 BAF_HUMAN   | R.DFVAEPM*GEKPVGSLAGIGE.V  |            | 3 | 3,5364 | 0,419 | 0,181  |
| 7 | Q7Z6B7 SRGP1_HUMAN | E.KCMAGDDYCDSPYSE.H        | S717:      | 2 | 3,5363 | 0,462 | -0,52  |
| 7 | Q7Z6B7 SRGP1_HUMAN | E.KCM*AGDDYCDSPYSE.H       | S717:      | 2 | 3,5362 | 0,344 | -0,773 |
| 7 | Q92547 TOPB1_HUMAN | E.LQVDIQNLEDS#PFQKPLHDSE.I | S1183:     | 3 | 3,5333 | 0,198 | -0,289 |
| 7 | Q12888 TP53B_HUMAN | K.TVSSDGCST#PSREE.G        | T321:      | 2 | 3,5309 | 0,447 | -0,383 |
| 7 | Q4G0J3 LARP7_HUMAN | E.NRDIEIS#TEEE.K           | S337:      | 2 | 3,5292 | 0,346 | -0,259 |
| 7 | P18858 DNL1_HUMAN  | R.KQSQIQNQGEDS#GS#DPEDTY.- | S911:S913: | 3 | 3,5291 | 0,084 | -0,218 |
| 7 | P20810 ICAL_HUMAN  | E.DFSGPQNASSLKFE.D         |            | 2 | 3,5273 | 0,338 | -0,16  |
| 7 | Q15149 PLEC1_HUMAN | R.SSS#VGSSSYPISPAVSR.T     | S4386:     | 2 | 3,5264 | 0,523 | -0,266 |
| 7 | P18858 DNL1_HUMAN  | E.QATTSAQVACLYR.K          |            | 2 | 3,5221 | 0,541 | -0,249 |
| 7 | O95373 IPO7_HUMAN  | E.TENDDLTVNIQK.M           |            | 2 | 3,5219 | 0,399 | -0,176 |
| 7 | Q9UJU6 DBNL_HUMAN  | R.AM*S#TTSISSPQPGK.L       | S269:      | 2 | 3,5195 | 0,532 | -0,164 |
| 7 | Q9P2B4 CT2NL_HUMAN | E.DLASSCSSNTVVANGKDVE.L    |            | 2 | 3,5193 | 0,379 | 0      |
| 7 | Q99439 CNN2_HUMAN  | K.AGQCVIGLQM*GTNK.C        |            | 2 | 3,5187 | 0,384 | -0,163 |
| 7 | P80723 BASP_HUMAN  | E.AAAAPAESAAPAAGEEPSKE.E   |            | 2 | 3,5169 | 0,471 | -0,735 |
| 7 | O95155 UBE4B_HUMAN | E.KSM*SQVDVDS#GIE.N        | S124:      | 2 | 3,516  | 0,368 | -0,409 |
| 7 | Q7Z3B3 K1267_HUMAN | E.YSHGQS#PRS#PISPE.L       | S988:S991: | 2 | 3,5086 | 0,349 | -0,574 |
| 7 | Q15742 NAB2_HUMAN  | E.LGEKLS#PLPGGPGAGDPR.I    | S171:      | 2 | 3,5049 | 0,39  | 0,475  |
| 7 | Q14980 NUMA1_HUMAN | E.AATLAANNTQLQAR.V         |            | 2 | 3,502  | 0,35  | -0,423 |
| 7 | Q6NZI2 PTRF_HUMAN  | E.SDAVLVDKSDS#D.-          | S389:      | 2 | 3,4995 | 0,39  | -0,092 |
| 7 | Q9HC35 EMAL4_HUMAN | E.TVADTTLTKAPVSSTE.S       |            | 2 | 3,4993 | 0,577 | -0,376 |
| 7 | O60841 IF2P_HUMAN  | R.SRINSSGES#GDESDE.F       | S186:      | 2 | 3,496  | 0,408 | -0,592 |
| 7 | Q9Y266 NUDC_HUMAN  | R.FDGMILLAM*AQQHE.G        |            | 2 | 3,493  | 0,297 | -0,162 |
| 7 | P18858 DNL1_HUMAN  | K.TSKAET#PTESVSEPE.V       | T195:      | 2 | 3,4836 | 0,442 | -0,146 |
| 7 | Q16643 DREB_HUMAN  | E.LEQEQEPEPHLLTNGE.T       |            | 2 | 3,4781 | 0,376 | -0,196 |
| 7 | Q15631 TSN_HUMAN   | E.LQGFLAAEQDIREE.I         |            | 2 | 3,4775 | 0,363 | -0,528 |
| 7 | Q07065 CKAP4_HUMAN | E.DGVLSMQVASAR.Q           |            | 2 | 3,4748 | 0,451 | -0,297 |
| 7 | P55884 EIF3B_HUMAN | E.GLLRPAGPGAPEAAGTEASSEE.V |            | 2 | 3,4746 | 0,524 | -0,236 |
| 7 | Q53T59 H1BP3_HUMAN | E.FLGTRS#PGAAGLTSR.D       | S139:      | 3 | 3,4728 | 0,357 | 0      |
| 7 | Q9H6U6 BCAS3_HUMAN | E.TLSNSSGSTSGS#IPR.N       | S900:      | 2 | 3,4721 | 0,353 | -0,239 |

|   |                    |                            |              |   |        |       |        |
|---|--------------------|----------------------------|--------------|---|--------|-------|--------|
| 7 | Q99614 TTC1_HUMAN  | E.DLLNGLKVTDTQEAE.C        |              | 2 | 3,4703 | 0,36  | 0,222  |
| 7 | Q8WUA2 PPIL4_HUMAN | D.DPPDLLIPDRS#PEPTRE.Q     | S178:        | 3 | 3,4697 | 0,269 | 0,271  |
| 7 | Q02952 AKA12_HUMAN | E.KAPQVTES#IE.S            | S1129:       | 2 | 3,4656 | 0,399 | -0,206 |
| 7 | Q96L14 C170L_HUMAN | E.ALNNM*GFPS#AM*LPSPPKQK.S | S219:        | 3 | 3,4612 | 0,196 | 0      |
| 7 | Q9BQE3 TBA1C_HUMAN | E.KDYEEVGADS#AD.G          | S439:        | 2 | 3,4575 | 0,343 | -0,531 |
| 7 | Q8N1G4 LRC47_HUMAN | E.NKEEGSL#DTE.A            | S520:        | 2 | 3,4575 | 0,315 | -0,379 |
| 7 | P53396 ACLY_HUMAN  | R.TAS#FSEGRADE.V           | S455:        | 2 | 3,4543 | 0,436 | -0,667 |
| 7 | Q9C0C2 TB182_HUMAN | R.VSGAGFS#PSSKM*E.G        | S1138:       | 2 | 3,4524 | 0,399 | -0,088 |
| 7 | Q15149 PLEC1_HUMAN | R.SRSSS#VGS#SSSYPISPAVSR.T | S4386:S4389: | 3 | 3,45   | 1     | -0,17  |
| 7 | P21675 TAF1_HUMAN  | E.KVDFSSSS#DSESE.M         | S186:        | 2 | 3,4469 | 0,315 | 0      |
| 7 | Q92797 SYMPK_HUMAN | E.AALLDSS#LEGPLPK.E        | S1222:       | 2 | 3,4461 | 0,425 | -0,164 |
| 7 | Q92615 LARP5_HUMAN | R.TLSADASVNTLPVVVSR.E      |              | 2 | 3,4433 | 0,394 | -0,353 |
| 7 | Q06190 P2R3A_HUMAN | E.TDEPAS#PSEFGNK.S         | S1121:       | 2 | 3,4412 | 0,301 | -0,418 |
| 7 | P49321 NASP_HUMAN  | E.SSTSGFTPGGGSSVS#M*IASR.K | S692:        | 2 | 3,4406 | 0,458 | -0,12  |
| 7 | P17706 PTN2_HUMAN  | E.DLSPAFDHS#PNKIM*TE.K     | S304:        | 2 | 3,4382 | 0,37  | 0,45   |
| 7 | Q8N1G2 K0082_HUMAN | K.ASTTSLSGS#DSETE.G        | S53:         | 2 | 3,4353 | 0,348 | -0,42  |
| 7 | Q9NRL3 STRN4_HUMAN | E.FDFLGS#GEDGEGAPDRR.C     | S324:        | 3 | 3,4318 | 0,163 | -0,091 |
| 7 | P04264 K2C1_HUMAN  | K.QISNLQQSISDAEQR.G        |              | 3 | 3,4272 | 0,346 | -0,213 |
| 7 | P04264 K2C1_HUMAN  | K.WELLQQVDTSTR.T           |              | 2 | 3,4261 | 0,46  | -0,248 |
| 7 | Q9UPT8 ZC3H4_HUMAN | K.TGSGS#PFAGNS#PARE.G      | S1269:S1275: | 2 | 3,426  | 0,454 | -0,153 |
| 7 | P35908 K22E_HUMAN  | R.FLEQQNQVLQTK.W           |              | 2 | 3,4243 | 0,373 | -0,579 |
| 7 | Q9UBU7 DBF4A_HUMAN | E.AKFAQTLGRIS#PVPS#PE.S    | S103:S107:   | 2 | 3,424  | 0,237 | -0,062 |
| 7 | P04264 K2C1_HUMAN  | R.SLDLDSIIAEVK.A           |              | 2 | 3,4208 | 0,398 | -0,655 |
| 7 | Q9BV44 THUM3_HUMAN | E.DVSTLIGDDLASCCKDE.T      |              | 2 | 3,4191 | 0,391 | -0,562 |
| 7 | Q9UKF6 CPSF3_HUMAN | E.SDQLLIRPLGAGQE.V         |              | 2 | 3,4146 | 0,324 | 0      |
| 7 | Q9GZX9 TWSG1_HUMAN | E.CCDCVGM*CNPR.N           |              | 2 | 3,4136 | 0,373 | -0,253 |
| 7 | P42166 LAP2A_HUMAN | E.LTNEDLLDQLVK.Y           |              | 2 | 3,4134 | 0,355 | -0,435 |
| 7 | Q8NEF9 SRFB1_HUMAN | E.KEYFDDS#TEE.R            | S264:        | 2 | 3,4126 | 0,367 | -0,363 |
| 7 | Q13151 ROA0_HUMAN  | E.ADAAM*AASPHAVDGNTE.L     |              | 2 | 3,4021 | 0,383 | -0,28  |
| 7 | O75153 EIF3X_HUMAN | E.SKSEDPGQEQAGS#EEE.G      | S664:        | 2 | 3,4017 | 0,479 | -0,208 |
| 7 | Q03518 TAP1_HUMAN  | E.NIAYGLTQKPTM*EE.I        |              | 2 | 3,401  | 0,474 | -0,454 |
| 7 | P05386 RLA1_HUMAN  | E.LACIYSALILHDDE.V         |              | 2 | 3,4009 | 0,459 | -0,299 |
| 7 | Q9UQ35 SRRM2_HUMAN | E.NSFGS#PLEFR.N            | S1329:       | 2 | 3,3945 | 0,488 | -0,099 |

|   |                    |                               |            |   |        |       |        |
|---|--------------------|-------------------------------|------------|---|--------|-------|--------|
| 7 | P55072 TERA_HUMAN  | E.DNSVVS#LSQPKM*DE.L          | S40:       | 2 | 3,3939 | 0,469 | 0,816  |
| 7 | Q99439 CNN2_HUMAN  | K.AGQCVIGLQMGTK.C             |            | 2 | 3,3921 | 0,417 | -0,578 |
| 7 | P05362 ICAM1_HUMAN | E.AQVHLALGDQR.L               |            | 2 | 3,3913 | 0,442 | -0,101 |
| 7 | Q6NZI2 PTRF_HUMAN  | R.RGS#S#PDVHALLE.I            | S365:S366: | 2 | 3,3896 | 0,476 | 0      |
| 7 | O94915 FRYL_HUMAN  | E.SRYSSSSGGS#YEEE.K           | S1539:     | 2 | 3,3882 | 0,322 | -0,684 |
| 7 | P04264 K2C1_HUMAN  | R.LRSEIDNVKK.Q                |            | 3 | 3,3875 | 0,091 | 0,228  |
| 7 | Q5VT52 K0460_HUMAN | E.AASQSTSAS#PANTTVSTIK.G      | S564:      | 2 | 3,3821 | 0,301 | -0,385 |
| 7 | P60842 IF4A1_HUMAN | R.SRDNGPDGM*EPGVIE.S          |            | 2 | 3,3787 | 0,363 | -0,497 |
| 7 | O00512 BCL9_HUMAN  | R.AVTPVSGSNSSSADPK.A          |            | 2 | 3,3777 | 0,404 | -0,299 |
| 7 | Q71U36 TBA1A_HUMAN | E.ITNACFEPANQM*VK.C           |            | 2 | 3,3776 | 0,306 | -0,744 |
| 7 | Q15149 PLEC1_HUMAN | E.FADMLSGNAGGFR.S             |            | 2 | 3,3775 | 0,514 | 0      |
| 7 | Q13404 UB2V1_HUMAN | E.NM*KLPQPPEGQCYS#N.-         | S220:      | 2 | 3,3773 | 0,327 | -0,591 |
| 7 | P62191 PRS4_HUMAN  | E.IIDDNHAIVSTSVGSE.H          |            | 2 | 3,3755 | 0,498 | -0,368 |
| 7 | Q99549 MPP8_HUMAN  | E.KFVESQVES#E.S               | S264:      | 2 | 3,3754 | 0,285 | -0,29  |
| 7 | P28290 SSFA2_HUMAN | E.SKLDSDFNIS#HS#ELE.N         | S425:S427: | 2 | 3,3747 | 0,367 | -0,062 |
| 7 | P08559 ODPA_HUMAN  | E.NNRYGM*GTS#VE.R             | S232:      | 2 | 3,373  | 0,399 | -0,461 |
| 7 | Q9UJZ1 STML2_HUMAN | E.YAVTQLAQTTMR.S              |            | 2 | 3,3726 | 0,416 | 0      |
| 7 | Q13136 LIPA1_HUMAN | E.TDNSSQDALGLSK.L             |            | 2 | 3,3708 | 0,398 | -0,365 |
| 7 | Q8IZD4 DCP1B_HUMAN | E.TVEPPQTLHQQQQQQQQQE.K       |            | 3 | 3,3697 | 0,175 | -0,286 |
| 7 | O60506 HNRPQ_HUMAN | E.DGALAVLQQFKDSD.L            |            | 2 | 3,361  | 0,483 | -0,324 |
| 7 | Q5VWN6 CJ018_HUMAN | E.VDSSSASTTLGR.Q              |            | 2 | 3,361  | 0,507 | -0,31  |
| 7 | P55884 EIF3B_HUMAN | E.DAGGNEGRAAEAEPR.A           |            | 3 | 3,3606 | 0,237 | -0,183 |
| 7 | Q15154 PCM1_HUMAN  | E.TASPVAVSLRS#DGSENLCPTQQSR.T | S869:      | 3 | 3,3575 | 0,245 | -0,208 |
| 7 | P31689 DNJA1_HUMAN | E.TTYDVVLGVKPNATQEE.L         |            | 2 | 3,3567 | 0,569 | -0,253 |
| 7 | Q9UJU6 DBNL_HUMAN  | R.AM*STTSIS#SPQPGK.L          | S274:      | 2 | 3,3559 | 0,432 | -0,41  |
| 7 | O60506 HNRPQ_HUMAN | E.DGALAVLQQFKDSD.L            |            | 3 | 3,351  | 0,096 | -0,182 |
| 7 | Q8N2Y8 RUSC2_HUMAN | E.REGPAAS#PAENEE.G            | S1368:     | 2 | 3,35   | 0,399 | -0,594 |
| 7 | P60174 TPIS_HUMAN  | E.LIGTLNAAKVPADTE.V           |            | 2 | 3,3494 | 0,413 | -0,323 |
| 7 | Q12904 MCA1_HUMAN  | E.NVIQSTAVTTVSSGTKE.Q         |            | 3 | 3,3439 | 0,388 | -0,212 |
| 7 | P35568 IRS1_HUMAN  | E.QQQQQQPLLHPPEPK.S           |            | 3 | 3,3416 | 0,183 | 0      |
| 7 | Q92615 LARP5_HUMAN | R.LSREQST#PPKS#PQ.-           | T732:S736: | 2 | 3,3391 | 0,217 | -0,68  |
| 7 | Q9NX08 COMD8_HUMAN | E.IFQQLNQLNSLHQE.T            |            | 2 | 3,3355 | 0,32  | -0,356 |
| 7 | P54132 BLM_HUMAN   | E.DVLST#SKDLLSKPE.K           | T337:      | 3 | 3,3343 | 0,167 | 0,113  |

|   |                    |                                 |              |   |        |       |        |
|---|--------------------|---------------------------------|--------------|---|--------|-------|--------|
| 7 | Q9BY44 EIF2A_HUMAN | R.SDKS#PDLAPTAPQSTPR.N          | S506:        | 2 | 3,3325 | 0,419 | -0,439 |
| 7 | Q13242 SFRS9_HUMAN | E.AGDVCYADVQK.D                 |              | 2 | 3,3302 | 0,34  | -0,597 |
| 7 | P14618 KPYM_HUMAN  | E.ASDGIMVAR.G                   |              | 2 | 3,3295 | 0,324 | 0,066  |
| 7 | P35908 K22E_HUMAN  | R.SKEEAEALYHSK.Y                |              | 3 | 3,3292 | 0,165 | -0,197 |
| 7 | P46821 MAP1B_HUMAN | E.KVSPSKSPS#LSPSPPS#PLE.K       | S1258:S1265: | 3 | 3,328  | 0,226 | 0,264  |
| 7 | Q12857 NFIA_HUMAN  | E.M*DSPGEEPFYTGQGR.S            |              | 2 | 3,3245 | 0,411 | 0,723  |
| 7 | Q6S8J3 A26CA_HUMAN | E.KLCYVALDFEQE.M                |              | 2 | 3,3244 | 0,247 | -0,081 |
| 7 | Q9P2R6 RERE_HUMAN  | E.DDVVYRPGDCVYIE.S              |              | 2 | 3,3238 | 0,268 | 1,507  |
| 7 | Q86UP2 KTN1_HUMAN  | E.VIDLLKPDQVE.G                 |              | 2 | 3,3236 | 0,315 | -0,192 |
| 7 | P35568 IRS1_HUMAN  | E.QQQQQQLLHPPEPKS#PGEYVNI.E     | S892:        | 3 | 3,3211 | 0,094 | -0,192 |
| 7 | Q9UQ35 SRRM2_HUMAN | E.KAGM*SSNQSISS#PVL.D.A         | S1404:       | 2 | 3,3131 | 0,395 | -0,497 |
| 7 | Q4LE39 ARI4B_HUMAN | R.RLS#KPPFQTNPS#PE.M            | S666:S675:   | 2 | 3,3069 | 0,445 | -0,347 |
| 7 | Q6S8J3 A26CA_HUMAN | K.SYELPDGQVITIGNE.R             |              | 2 | 3,3047 | 0,445 | -0,373 |
| 7 | Q13546 RIPK1_HUMAN | R.SNS#ATEQPGSLHSSQGLGMGPVEE.S   | S335:        | 3 | 3,3005 | 0,26  | -0,074 |
| 7 | Q02952 AKA12_HUMAN | E.QVSGSQGPSEEKPAPLATE.V         |              | 2 | 3,3003 | 0,46  | -0,383 |
| 7 | Q86Y82 STX12_HUMAN | E.ADILDVNQIFKD.L                |              | 2 | 3,2989 | 0,237 | -0,526 |
| 7 | P31949 S10AB_HUMAN | E.FLNLIGGLAM*ACHD.S             |              | 2 | 3,297  | 0,342 | -0,394 |
| 7 | Q14247 SRC8_HUMAN  | E.EQARAKTQT#PPVS#PAPQPTEE.R     | T401:S405:   | 3 | 3,2914 | 0,169 | -0,453 |
| 7 | Q92754 AP2C_HUMAN  | K.SYM*NPGDQS#PADSNKTLE.K        | S434:        | 2 | 3,2911 | 0,498 | -0,476 |
| 7 | P30101 PDIA3_HUMAN | K.VVVAENFDEIVNNE.N              |              | 2 | 3,2899 | 0,344 | -0,383 |
| 7 | Q9Y4L1 HYOU1_HUMAN | E.DEGVGATTVMLKE.K               |              | 2 | 3,2894 | 0,32  | -0,271 |
| 7 | P62158 CALM_HUMAN  | E.AFS#LFDKDGDTITTKE.L           | S18:         | 3 | 3,2881 | 0,249 | 0      |
| 7 | P29317 EPHA2_HUMAN | E.DACQACSPGFFKFE.A              |              | 2 | 3,2873 | 0,327 | -0,367 |
| 7 | O95433 AHS1_HUMAN  | E.SVDPVGGPALKTEE.R              |              | 2 | 3,2856 | 0,399 | -0,083 |
| 7 | O60506 HNRPQ_HUMAN | E.NFQTLLDAGLPQK.V               |              | 2 | 3,2853 | 0,382 | -0,507 |
| 7 | Q8IVT2 CS021_HUMAN | E.SRIYAS#EEDD.-                 | S675:        | 2 | 3,2849 | 0,378 | -0,096 |
| 7 | Q01167 FOXK2_HUMAN | E.SLSREGS#PAPLEPEPGAAQPK.L      | S398:        | 3 | 3,2753 | 0,162 | -0,416 |
| 7 | Q96QE3 ATAD5_HUMAN | E.DSVIIIDSS#PTALKHPE.K          | S756:        | 3 | 3,2736 | 0,219 | 0,192  |
| 7 | P30622 CLIP1_HUMAN | E.ANGLQTPAS#R.A                 | S143:        | 2 | 3,2735 | 0,393 | -0,204 |
| 7 | P09874 PARP1_HUMAN | K.GFSLLATEDKE.A                 |              | 2 | 3,2733 | 0,378 | 0      |
| 7 | Q03188 CENPC_HUMAN | E.AS#LQFVVEPSEATNR.S            | S96:         | 2 | 3,273  | 0,434 | -0,282 |
| 7 | P19838 NFKB1_HUMAN | K.TTSAHSLPLS#PASTR.Q            | S907:        | 2 | 3,2714 | 0,423 | -0,493 |
| 7 | Q92754 AP2C_HUMAN  | E.ALIVIDKSYM*NPGDQS#PADSNKTLE.K | S434:        | 3 | 3,268  | 0,16  | -0,588 |

|   |                    |                               |            |   |        |       |        |
|---|--------------------|-------------------------------|------------|---|--------|-------|--------|
| 7 | Q5F1R6 DJC21_HUMAN | E.KEFGDGS#DENE.M              | S283:      | 2 | 3,2647 | 0,298 | -0,187 |
| 7 | Q12888 TP53B_HUMAN | E.VLSTQEDLFDQSNK.T            |            | 3 | 3,2643 | 0,226 | 0,113  |
| 7 | Q86UP2 KTN1_HUMAN  | E.IQNGNLHES#DSE.S             | S75:       | 2 | 3,2591 | 0,382 | -0,343 |
| 7 | Q5UIP0 RIF1_HUMAN  | E.SQES#PNENFK.T               | S1854:     | 2 | 3,2545 | 0,309 | -0,291 |
| 7 | P78332 RBM6_HUMAN  | E.KLQSFDS#PE.R                | S1025:     | 2 | 3,2506 | 0,302 | -0,108 |
| 7 | Q6GYQ0 GRIPE_HUMAN | R.SQTPSPSTLNIDHM*E.Q          |            | 2 | 3,2406 | 0,45  | 0,583  |
| 7 | Q8IUD2 RB6I2_HUMAN | D.LNQLFQQDSSSR.T              |            | 2 | 3,2354 | 0,389 | 0,514  |
| 7 | P36957 ODO2_HUMAN  | K.DDLVTVKTPAFAE.S             |            | 2 | 3,2346 | 0,398 | -0,347 |
| 7 | Q6NZI2 PTRF_HUMAN  | E.SDAVLVDKS#DS#D.-            | S387:S389: | 2 | 3,2331 | 0,237 | -0,173 |
| 7 | Q9UGP4 LIMD1_HUMAN | R.TPSVSAPLALSCPR.Q            |            | 2 | 3,232  | 0,505 | 0      |
| 7 | Q15149 PLEC1_HUMAN | E.QIQAM*PLADSQAVRE.Q          |            | 2 | 3,23   | 0,399 | 0,073  |
| 7 | P18858 DNL1_HUMAN  | E.QATTSAQVACLVR.K             |            | 3 | 3,228  | 0,214 | 0,125  |
| 7 | Q9Y2U8 MAN1_HUMAN  | E.TS#VQGGGLAM*NDR.A           | S309:      | 2 | 3,2158 | 0,341 | -0,335 |
| 7 | Q02952 AKA12_HUMAN | E.HTQVPADS#PDSQEE.Q           | S554:      | 2 | 3,2138 | 0,379 | 0,075  |
| 7 | Q9UBQ5 EIF3K_HUMAN | E.KIDFDSVSSIMASS#Q.-          | S217:      | 2 | 3,2129 | 0,301 | -0,72  |
| 7 | P43307 SSRA_HUMAN  | E.ASPSADTTILFVKGE.D           |            | 2 | 3,2123 | 0,397 | 0,238  |
| 7 | P08047 SP1_HUMAN   | E.KGVGGNNGGNGGGGAFSQAR.S      |            | 3 | 3,2121 | 0,289 | -0,195 |
| 7 | P55209 NP1L1_HUMAN | R.QLTVQM*M*QNPQILAALQE.R      |            | 3 | 3,2117 | 0,252 | -0,438 |
| 7 | P04264 K2C1_HUMAN  | K.QISNLQQSISDAEQR.G           |            | 2 | 3,2113 | 0,386 | -0,355 |
| 7 | P05556 ITB1_HUMAN  | R.SNGLICGGNGVCK.C             |            | 2 | 3,2107 | 0,424 | -0,457 |
| 7 | Q63ZY3 KANK2_HUMAN | E.RSCDGAAGLPEVPAESSSS#PPGSE.V | S428:      | 3 | 3,2101 | 0,191 | -0,302 |
| 7 | Q00613 HSF1_HUMAN  | E.SEPAPAS#VTALTDAR.G          | S344:      | 2 | 3,2097 | 0,484 | -0,312 |
| 7 | Q12888 TP53B_HUMAN | K.TVSS#DGCSTPSREE.G           | S316:      | 2 | 3,2093 | 0,478 | -0,383 |
| 7 | O60447 EVI5_HUMAN  | E.TGVGFPLHGK.S                |            | 2 | 3,2089 | 0,449 | 0,181  |
| 7 | O00505 IMA3_HUMAN  | E.ATQGGTYNFDPTANLQTK.E.F      |            | 2 | 3,2084 | 0,487 | -0,237 |
| 7 | P49736 MCM2_HUMAN  | E.NVDLTEPIISRFD.I             |            | 2 | 3,2043 | 0,498 | -0,241 |
| 7 | Q13151 ROA0_HUMAN  | E.ADAAMAASPHAVDGNTVE.L        |            | 2 | 3,2033 | 0,442 | -0,636 |
| 7 | P02768 ALBU_HUMAN  | K.KVPQVSTPTLVEVSR.N           |            | 3 | 3,2016 | 0,274 | 0,112  |
| 7 | Q92734 TFG_HUMAN   | K.NVMSAFGLTDDQVSGPPSAPAEDR.S  |            | 3 | 3,2012 | 0,193 | 0      |
| 7 | Q12756 KIF1A_HUMAN | E.SHGSSSASS#PLSAE.G           | S1430:     | 2 | 3,2011 | 0,437 | -0,529 |
| 7 | P30419 NMT1_HUMAN  | E.LFSVGQGPATM*EE.A            |            | 2 | 3,1993 | 0,442 | -0,162 |
| 7 | O76003 GLRX3_HUMAN | E.LPQVSFVKLE.A                |            | 2 | 3,1993 | 0,293 | -0,316 |
| 7 | P11142 HSP7C_HUMAN | K.NQVAM*NPTNTVFD.A            |            | 2 | 3,1966 | 0,407 | 0,166  |



|   |                    |                               |              |   |        |       |        |
|---|--------------------|-------------------------------|--------------|---|--------|-------|--------|
| 7 | Q15149 PLEC1_HUMAN | R.SSS#VGS#SSSYIPSPAVSR.T      | S4386:S4389: | 2 | 3,1953 | 1     | 0,573  |
| 7 | O95202 LETM1_HUMAN | E.IDILSDACSKLQE.Q             |              | 2 | 3,1941 | 0,292 | 0,409  |
| 7 | Q96C57 CL043_HUMAN | E.HEQDGNELQTT#PE.F            | T79:         | 2 | 3,194  | 0,231 | -0,619 |
| 7 | P14625 ENPL_HUMAN  | E.SDDPM*AYIHFTA.E.G           |              | 2 | 3,1937 | 0,396 | -0,242 |
| 7 | P67809 YBOX1_HUMAN | E.TKAADPPAENS#SAPEAE.Q        | S313:        | 2 | 3,1927 | 0,454 | -0,622 |
| 7 | P35611 ADDA_HUMAN  | R.AAVVTS#PPPTTAPHKE.R         | S12:         | 2 | 3,1924 | 0,362 | -0,507 |
| 7 | P06744 G6PI_HUMAN  | E.SSLFIIASK.T                 |              | 2 | 3,1923 | 0,36  | -0,316 |
| 7 | Q92615 LARP5_HUMAN | R.TLSADASVNTLPVVVSR.E         |              | 3 | 3,1912 | 0,231 | -0,106 |
| 7 | P62841 RS15_HUMAN  | E.MVGSM*VGVYNGK.T             |              | 2 | 3,1905 | 0,396 | 0,388  |
| 7 | P67870 CSK2B_HUMAN | E.DYIQDKFNLTGLNE.Q            |              | 2 | 3,1875 | 0,49  | -0,511 |
| 7 | P55072 TERA_HUMAN  | E.M*FAQTLQQR.G                |              | 2 | 3,185  | 0,313 | -0,398 |
| 7 | P14625 ENPL_HUMAN  | E.SDDPMAYIHFTA.E.G            |              | 2 | 3,1827 | 0,457 | -0,326 |
| 7 | P15170 ERF3A_HUMAN | E.ISEAEPGGGS#LGDGRPPEESAHE.M  | S36:         | 3 | 3,1809 | 0,237 | -0,543 |
| 7 | Q92785 REQU_HUMAN  | E.GEDKEDS#QPPT#PVSQR.S        | S244:T248:   | 3 | 3,1807 | 0,1   | -0,474 |
| 7 | P13645 K1C10_HUMAN | R.ALEESNYELEGK.I              |              | 2 | 3,1805 | 0,367 | -0,088 |
| 7 | Q9UKM9 RALY_HUMAN  | E.HS#QDTDADDGALQ.-            | S295:        | 2 | 3,18   | 0,238 | -0,588 |
| 7 | O76021 RL1D1_HUMAN | K.ATNES#EDEIPQLVPIGK.K        | S361:        | 2 | 3,1761 | 0,378 | -0,445 |
| 7 | Q9BQF6 SENP7_HUMAN | E.GNQLISAEPVIVSS#DEEGPVEHK.S  | S378:        | 3 | 3,1742 | 0,204 | -0,281 |
| 7 | P35908 K22E_HUMAN  | K.VDLLNQEIEFLK.V              |              | 2 | 3,1731 | 0,254 | -0,501 |
| 7 | Q9Y4B5 K0802_HUMAN | R.GRS#PS#PIGVGSE.M            | S1803:S1805: | 2 | 3,171  | 0,333 | -0,375 |
| 7 | P10809 CH60_HUMAN  | E.AGDGTTTATVLAR.S             |              | 2 | 3,1675 | 0,357 | -0,395 |
| 7 | Q32MZ4 LRRF1_HUMAN | E.LTYQNTDLSEIKE.E             |              | 2 | 3,1671 | 0,369 | -0,628 |
| 7 | Q9UBQ5 EIF3K_HUMAN | E.KIDFDSVSSIM*ASS#Q.-         | S217:        | 2 | 3,1666 | 0,198 | 0      |
| 7 | P55072 TERA_HUMAN  | E.DNSVVLSQPKM*DE.L            |              | 3 | 3,1637 | 0,095 | 0,117  |
| 7 | Q96RS0 TGS1_HUMAN  | E.KCQSVS#SAGELE.T             | S577:        | 2 | 3,1626 | 0,305 | -0,355 |
| 7 | P11142 HSP7C_HUMAN | E.LNADLFRGTLDPVE.K            |              | 2 | 3,162  | 0,346 | -0,469 |
| 7 | Q4G0J3 LARP7_HUMAN | R.SRPTSEGS#DIE.S              | S261:        | 2 | 3,1613 | 0,323 | -0,194 |
| 7 | Q9UNS2 CSN3_HUMAN  | K.SM*GSQEDDSGNKPSS#YS.-       | S421:        | 2 | 3,157  | 0,408 | -0,652 |
| 7 | Q96DF8 DGC14_HUMAN | E.NT#PLRVEGS#ETPYVDRTPGPAFK.I | T324:S331:   | 3 | 3,1534 | 0,229 | -0,408 |
| 7 | Q9P258 RCC2_HUMAN  | E.RCSSSSGGGS#SGDEDGLE.L       | S50:         | 2 | 3,1533 | 0,272 | -0,201 |
| 7 | Q8TDM6 DLG5_HUMAN  | E.QKCVPASGELS#PE.L            | S1146:       | 2 | 3,1516 | 0,269 | -0,165 |
| 7 | Q8WYA6 CTBL1_HUMAN | E.VLAILLQDNNDENRE.L           |              | 3 | 3,1492 | 0,3   | -0,111 |
| 7 | O43815 STRN_HUMAN  | E.VAPALSVFNDTKE.L             |              | 2 | 3,1461 | 0,424 | -0,351 |

|   |                    |                               |              |   |        |       |        |
|---|--------------------|-------------------------------|--------------|---|--------|-------|--------|
| 7 | O95208 EPN2_HUMAN  | R.MAQVATGM*GSNQITFGR.G        |              | 2 | 3,1461 | 0,462 | 0,205  |
| 7 | Q8WYA6 CTBL1_HUMAN | E.VLAILLQDNENRE.L             |              | 2 | 3,1446 | 0,351 | -0,52  |
| 7 | Q14247 SRC8_HUMAN  | E.LSYRGPVSGTEPEPVYSM*E.A      |              | 2 | 3,1438 | 0,464 | -0,231 |
| 7 | P27816 MAP4_HUMAN  | E.VALTEDQVPALKTEAPLAK.D       |              | 3 | 3,1398 | 0,388 | -0,092 |
| 7 | Q92734 TFG_HUMAN   | K.NVM*SAFGLTDDQVSGPPSAPAEDR.S |              | 3 | 3,1391 | 0,089 | 0,074  |
| 7 | P60174 TPIS_HUMAN  | D.GFLVGGASLKPE.F              |              | 2 | 3,1369 | 0,36  | 0,312  |
| 7 | Q92990 GLMN_HUMAN  | E.DFGLFQLAGQR.C               |              | 2 | 3,1357 | 0,451 | -0,487 |
| 7 | P23434 GCSH_HUMAN  | E.ALAENPGLVNK.S               |              | 2 | 3,1333 | 0,416 | -0,108 |
| 7 | Q96T58 MINT_HUMAN  | E.SGVVAVS#PEKS#ESPQKE.D       | S2120:S2124: | 3 | 3,1332 | 0,264 | -0,191 |
| 7 | P61160 ARP2_HUMAN  | E.LLFNTIQAADIDTR.S            |              | 2 | 3,1315 | 0,375 | -0,307 |
| 7 | Q96T23 RSF1_HUMAN  | K.VGS#PLDYSLVDLPSTNGQSPGK.A   | S1349:       | 3 | 3,1308 | 0,182 | -0,317 |
| 7 | O14983 AT2A1_HUMAN | E.IGIAM*GSGTAVAK.T            |              | 2 | 3,1306 | 0,37  | -0,102 |
| 7 | Q5T8D3 ACBD5_HUMAN | E.DLGNVLTSTPNAK.T             |              | 2 | 3,1272 | 0,387 | -0,367 |
| 7 | Q92888 ARHG1_HUMAN | R.GAASPGPS#RPGLVPVSIIGAED.E.D | S14:         | 3 | 3,1208 | 0,279 | -0,324 |
| 7 | P27816 MAP4_HUMAN  | E.KVALSS#ETE.V                | S440:        | 2 | 3,1198 | 0,185 | 0      |
| 7 | Q9BV68 RN126_HUMAN | E.SGFIEELPEETRSTE.N           |              | 2 | 3,1181 | 0,374 | 0,425  |
| 7 | P19838 NFKB1_HUMAN | K.TTS#QAHSPLS#PASTR.Q         | S899:S907:   | 3 | 3,1134 | 0,356 | -0,504 |
| 7 | Q2TAL8 QRIC1_HUMAN | E.FLDSLASKGPEALQE.F           |              | 2 | 3,1131 | 0,431 | -0,228 |
| 7 | Q9BVJ6 UT14A_HUMAN | E.TKDSGSQEVLS#E.L             | S458:        | 2 | 3,1104 | 0,283 | -0,09  |
| 7 | Q8IW35 CEP97_HUMAN | R.YGKESDLGDVSEE.H             |              | 2 | 3,1104 | 0,383 | -0,94  |
| 7 | P08238 HS90B_HUMAN | R.TLTLVDTGIGM*TK.A            |              | 2 | 3,1102 | 0,45  | -0,357 |
| 7 | P02686 MBP_HUMAN   | E.LNAEKAST#NS#ETNRGE.S        | T17:S19:     | 3 | 3,1084 | 0,391 | -0,486 |
| 7 | Q16531 DDB1_HUMAN  | E.NAFNLFVCQK.D                |              | 2 | 3,1066 | 0,339 | -0,098 |
| 7 | Q8WXI9 P66B_HUMAN  | E.RGRLT#PS#PDIIVLSDNE.A       | T120:S122:   | 3 | 3,1053 | 0,204 | 0,09   |
| 7 | P09874 PARP1_HUMAN | E.VAYSLLRGGS#DDSSKDPIDVNYE.K  | S782:        | 3 | 3,1053 | 0,211 | -0,425 |
| 7 | P13645 K1C10_HUMAN | K.IRENEIQTYR.S                |              | 3 | 3,1036 | 0,113 | 0,127  |
| 7 | P13645 K1C10_HUMAN | R.LENEIQTYR.S                 |              | 2 | 3,102  | 0,153 | -0,314 |
| 7 | Q9Y617 SERC_HUMAN  | E.LLDYKGVGISVLE.M             |              | 2 | 3,1017 | 0,393 | -0,434 |
| 7 | Q16643 DREB_HUMAN  | R.GPGS#PAEDLM*FM*E.S          | S416:        | 2 | 3,0987 | 0,133 | 0,817  |
| 7 | O95361 TRI16_HUMAN | E.LDLM*APGPLPR.A              |              | 2 | 3,098  | 0,376 | 0,102  |
| 7 | O00629 IMA4_HUMAN  | E.DSDIDGDYR.V                 |              | 2 | 3,0966 | 0,406 | -0,116 |
| 7 | Q8TAQ2 SMRC2_HUMAN | E.DLTKDM*DEPSVPPNVEE.V        |              | 2 | 3,0963 | 0,31  | 0,695  |
| 7 | Q14493 SLBP_HUMAN  | R.HM*DSQVEDEFDLE.A            |              | 2 | 3,0946 | 0,37  | -0,303 |

|   |                    |                            |            |   |        |       |        |
|---|--------------------|----------------------------|------------|---|--------|-------|--------|
| 7 | P19838 NFKB1_HUMAN | E.VIQAASSPVK.T             |            | 2 | 3,0936 | 0,384 | -0,244 |
| 7 | Q9BUA3 YK007_HUMAN | E.GVALLQDVR.A              |            | 2 | 3,0928 | 0,266 | -0,126 |
| 7 | Q16531 DDB1_HUMAN  | E.ATADDLIKVVVE.L           |            | 2 | 3,0879 | 0,258 | -0,094 |
| 7 | P14314 GLU2B_HUMAN | E.LQTHPELDTDGDGALSEAE.A    |            | 2 | 3,0877 | 0,322 | 0,611  |
| 7 | O15085 ARHGB_HUMAN | E.DLLVLLQKQDE.K            |            | 2 | 3,0873 | 0,216 | -0,557 |
| 7 | P14625 ENPL_HUMAN  | E.SDDPMAYIHFTAEGE.V        |            | 2 | 3,086  | 0,334 | -0,435 |
| 7 | P55072 TERA_HUMAN  | E.DNSVVVLSQPK.M            |            | 2 | 3,0837 | 0,481 | -0,416 |
| 7 | O15085 ARHGB_HUMAN | E.NDLLLDGDPLRE.R           |            | 2 | 3,0818 | 0,391 | -0,575 |
| 7 | O00232 PSD12_HUMAN | E.VDYSATVDQRLPE.C          |            | 2 | 3,075  | 0,35  | 0,082  |
| 7 | Q13283 G3BP1_HUMAN | K.S#SSPAPADIAQTVQEDLR.T    | S230:      | 2 | 3,0738 | 0,304 | -0,373 |
| 7 | P49810 PSN2_HUMAN  | E.RTSLM*#AES#PTPR.S        | S22:S25:   | 2 | 3,0728 | 0,272 | -0,379 |
| 7 | P13645 K1C10_HUMAN | R.SQYEQLAEQNRK.D           |            | 2 | 3,0714 | 0,343 | -0,49  |
| 7 | Q96124 FUBP3_HUMAN | E.LVQGSAPVGM*KAE.G         |            | 2 | 3,0698 | 0,488 | -0,256 |
| 7 | Q9Y5B0 CTDP1_HUMAN | E.LAGAPEPQGSCAQGGR.V       |            | 2 | 3,0694 | 0,451 | -0,47  |
| 7 | Q00610 CLH1_HUMAN  | E.AIDSIKADDPSSYME.V        |            | 2 | 3,0692 | 0,432 | -0,541 |
| 7 | P13645 K1C10_HUMAN | R.SLLEGEQSSGGGGR.G         |            | 2 | 3,0692 | 0,451 | -0,386 |
| 7 | Q9H583 HEAT1_HUMAN | E.AATIDRDTAFAIGCTGLEE.L    |            | 2 | 3,0685 | 0,456 | -0,425 |
| 7 | P38646 GRP75_HUMAN | E.QQIVIQSSGGLSKDDIE.N      |            | 2 | 3,0684 | 0,409 | -0,604 |
| 7 | Q9UNE7 STUB1_HUMAN | E.GGARLGAGGGS#PEKS#PSAQE.L | S19:S23:   | 3 | 3,0676 | 0,099 | 0,278  |
| 7 | Q9H8W4 PKHF2_HUMAN | D.LLSAGDM*ATCQPAR.S        |            | 2 | 3,0667 | 0,508 | -0,405 |
| 7 | O95433 AHSA1_HUMAN | E.AM*GIYISTLKTE.F          |            | 2 | 3,0663 | 0,315 | -0,182 |
| 7 | Q9BVS4 RIOK2_HUMAN | E.KAEVYGS#ENE.S            | S350:      | 2 | 3,0603 | 0,295 | -0,405 |
| 7 | Q9BSC4 NOL10_HUMAN | E.DQQTVLKPFYF.I            |            | 2 | 3,0574 | 0,275 | -0,163 |
| 7 | Q9UKJ3 GPTC8_HUMAN | E.SGLERGEEQEQS#E.T         | S762:      | 2 | 3,0509 | 0,373 | -0,783 |
| 7 | O43504 HBXIP_HUMAN | E.DTM*KNPSIVGLCTD.S        |            | 2 | 3,0503 | 0,349 | -0,366 |
| 7 | Q9UNS2 CSN3_HUMAN  | E.ITVNPQFVQK.S             |            | 2 | 3,0491 | 0,416 | -0,312 |
| 7 | Q04637 IF4G1_HUMAN | E.AVGDLLDAFKE.A            |            | 2 | 3,0478 | 0,335 | -0,414 |
| 7 | Q15293 RCN1_HUMAN  | E.FTAFHPEEFE.H             |            | 2 | 3,0461 | 0,455 | -0,446 |
| 7 | Q5T200 ZC3HD_HUMAN | E.SRS#LSPS#HLTE.D          | S875:S879: | 2 | 3,0457 | 0,316 | -0,622 |
| 7 | P49023 PAXI_HUMAN  | K.TGSSS#PPGGPPKPGSQLD.S    | S322:      | 2 | 3,044  | 0,407 | -0,489 |
| 7 | Q9UQ35 SRRM2_HUMAN | E.SYFGVSSLQLK.G            |            | 2 | 3,0424 | 0,451 | -0,099 |
| 7 | P36578 RL4_HUMAN   | E.LPLVVEDKVE.G             |            | 2 | 3,0412 | 0,282 | -0,214 |
| 7 | Q9NW82 WDR70_HUMAN | E.DSPYWVSPAYSK.T           |            | 2 | 3,0362 | 0,442 | -0,523 |

|   |                    |                              |              |   |        |       |        |
|---|--------------------|------------------------------|--------------|---|--------|-------|--------|
| 7 | Q9NSE4 SYIM_HUMAN  | E.STLLAQEPR.E                |              | 2 | 3,0332 | 0,386 | -0,18  |
| 7 | P60842 IF4A1_HUMAN | R.SRDNGPDGMEPEGVIE.S         |              | 2 | 3,033  | 0,369 | -0,072 |
| 7 | Q15477 SKIV2_HUMAN | R.GDTVSAASPCAPLAR.A          |              | 2 | 3,032  | 0,531 | -0,246 |
| 7 | Q96S66 CLCC1_HUMAN | E.AAGSPDQGSTYS#PAR.G         | S532:        | 2 | 3,031  | 0,401 | -0,395 |
| 7 | P41440 S19A1_HUMAN | K.LGLQCLPS#DGVQNVNQ.-        | S583:        | 2 | 3,03   | 0,359 | -0,469 |
| 7 | Q14247 SRC8_HUMAN  | K.TQT#PPVS#PAPQPTEER.L       | T401:S405:   | 2 | 3,0273 | 0,407 | 0,386  |
| 7 | O43242 PSMD3_HUMAN | E.LDTVLTLEDIKE.H             |              | 2 | 3,0266 | 0,362 | -0,478 |
| 7 | Q14204 DYHC1_HUMAN | E.SYDPVLNPVLNRE.V            |              | 2 | 3,0238 | 0,391 | -0,241 |
| 7 | P13645 K1C10_HUMAN | R.LKYENEVALR.Q               |              | 2 | 3,0229 | 0,295 | -0,198 |
| 7 | P07814 SYEP_HUMAN  | E.LAEPIAIRPTSE.T             |              | 2 | 3,0217 | 0,444 | -0,188 |
| 7 | Q8N1G2 K0082_HUMAN | E.LALSLSSTSDEPPSSVSHGAK.A    |              | 3 | 3,021  | 0,299 | -0,335 |
| 7 | O95359 TACC2_HUMAN | E.AGEVTPSDSGGQEDS#PAKGLSVR.L | S2256:       | 3 | 3,0187 | 0,16  | -0,236 |
| 7 | P05787 K2C8_HUMAN  | E.AAIADAEQRGE.L              |              | 2 | 3,0185 | 0,388 | -0,324 |
| 7 | O95340 PAPS2_HUMAN | E.AETLPSLSITKLD.L            |              | 2 | 3,018  | 0,355 | -0,088 |
| 7 | O60506 HNRPQ_HUMAN | E.DGALAVLQQFK.D              |              | 2 | 3,0151 | 0,429 | -0,41  |
| 7 | Q17RY0 CPEB4_HUMAN | E.KQQLSPS#PGQE.A             | S99:         | 2 | 3,014  | 0,347 | -0,477 |
| 7 | Q7Z2W4 ZCCHV_HUMAN | E.FLASASASAER.S              |              | 2 | 3,0139 | 0,466 | -0,22  |
| 7 | P04792 HSPB1_HUMAN | R.ALS#RQLSSGVSE.I            | S78:         | 2 | 3,0122 | 0,262 | -0,093 |
| 7 | P14625 ENPL_HUMAN  | E.SDDPM*AYIHFTAEGE.V         |              | 2 | 3,0109 | 0,435 | -0,575 |
| 7 | P56537 IF6_HUMAN   | E.TEEILADV LKVE.V            |              | 2 | 3,0105 | 0,259 | -0,449 |
| 7 | Q15648 MED1_HUMAN  | E.KSYQNS#PS#SDDGIRPLPE.Y     | S1479:S1481: | 3 | 3,0089 | 1     | 0,34   |
| 7 | P55072 TERA_HUMAN  | E.DNSVVLSLQPKMDE.L           |              | 3 | 3,0069 | 0,275 | 0,236  |
| 7 | P35908 K22E_HUMAN  | R.NLDLDSIIAEVK.A             |              | 2 | 3,0045 | 0,422 | -0,367 |
| 7 | Q9UNS2 CSN3_HUMAN  | K.S#M*GSQEDDSGNKPSSYS.-      | S407:        | 2 | 3,0019 | 0,336 | -0,391 |
| 7 | P21980 TGM2_HUMAN  | E.GDLSTKYDAPVFVAE.V          |              | 2 | 2,9986 | 0,353 | -0,588 |
| 7 | Q14204 DYHC1_HUMAN | E.DNSVVLGISSR.E              |              | 2 | 2,9977 | 0,333 | -0,745 |
| 7 | Q9NQW6 ANLN_HUMAN  | K.S#CSPSPVS#PQVQQAADTISD.S   | S95:S102:    | 3 | 2,9899 | 0,251 | 0,314  |
| 7 | Q6ZRV2 FA83H_HUMAN | R.RGS#LTLTISGESPK.A          | S936:        | 3 | 2,9887 | 0,274 | 0,06   |
| 7 | P35908 K22E_HUMAN  | R.YLDGLTAER.T                |              | 2 | 2,9884 | 0,309 | 0,118  |
| 7 | Q15642 CIP4_HUMAN  | R.APSDS#SLGTPSDGRPE.L        | S298:        | 3 | 2,9865 | 0,243 | -0,332 |
| 7 | P04264 K2C1_HUMAN  | K.YEELQITAGR.H               |              | 2 | 2,9864 | 0,222 | -0,207 |
| 7 | Q92794 MYST3_HUMAN | E.NKEQDSYS#VE.S              | S828:        | 2 | 2,9861 | 0,343 | -0,477 |
| 7 | P09874 PARP1_HUMAN | E.Y#SASQLKGFSLLATEDKE.A      | Y176:        | 3 | 2,9835 | 0,082 | -0,177 |

|   |                     |                               |            |   |        |       |        |
|---|---------------------|-------------------------------|------------|---|--------|-------|--------|
| 7 | P05556 ITB1_HUMAN   | E.VNSEDN*DAYCR.K              |            | 2 | 2,9822 | 0,423 | -0,177 |
| 7 | P11586 C1TC_HUMAN   | E.DSTVHGFLVQLPLDSE.N          |            | 2 | 2,9796 | 0,262 | -0,278 |
| 7 | Q9UNN5 FAF1_HUMAN   | E.VFGMASSALR.K                |            | 2 | 2,9788 | 0,391 | -0,117 |
| 7 | P04626 ERBB2_HUMAN  | R.EGPLPAARPAGAT#LE.R          | T1166:     | 2 | 2,9782 | 0,375 | 0,239  |
| 7 | P46821 MAP1B_HUMAN  | E.SEKPLTQSGGAPPPPGGK.Q        |            | 3 | 2,978  | 0,249 | -0,322 |
| 7 | Q9NQS7 INCE_HUMAN   | E.QHVTQLM*STEPLPR.T           |            | 2 | 2,9761 | 0,466 | -0,443 |
| 7 | P18583 SON_HUMAN    | E.SDSFLKFDSEPSAVAL.E.L        |            | 2 | 2,9752 | 0,337 | -0,331 |
| 7 | P49792 RBP2_HUMAN   | E.TT#PKAVVSPK.F               | T2504:     | 3 | 2,9749 | 0,105 | 0,379  |
| 7 | P49792 RBP2_HUMAN   | E.VM*VPSFCKSEEPDSITK.S        |            | 2 | 2,9731 | 0,383 | 0,062  |
| 7 | O00170 AIP_HUMAN    | E.LDPALAPVVSRE.L              |            | 2 | 2,9723 | 0,398 | -0,096 |
| 7 | P06730 IF4E_HUMAN   | E.TTPTPNPPTTEEEKTE.S          |            | 2 | 2,9722 | 0,365 | -0,275 |
| 7 | Q13561 DCTN2_HUMAN  | R.CDQDAQNPLSAGLQGACLM*E.T     |            | 3 | 2,9722 | 0,176 | -0,25  |
| 7 | Q15477 SKIV2_HUMAN  | R.ASS#LEDLVLKE.A              | S256:      | 2 | 2,9713 | 0,282 | -0,285 |
| 7 | P19838 NFKB1_HUMAN  | K.TTSTAQASHLPLS#PASTR.Q       | S907:      | 3 | 2,9683 | 0,231 | 0,105  |
| 7 | Q96QR8 PURB_HUMAN   | E.HYAQLGPS#PE.Q               | S101:      | 2 | 2,9674 | 0,148 | -0,193 |
| 7 | Q15742 NAB2_HUMAN   | E.LGEKLS#PLPGGPGAGDPR.I       | S171:      | 3 | 2,9668 | 0,15  | 0,203  |
| 7 | O60271 JIP4_HUMAN   | R.NVS#TGS#AENEKSE.V           | S329:S332: | 2 | 2,966  | 0,227 | 0      |
| 7 | B0QY74 B0QY74_HUMAN | E.LVSQGIMPLK#PAAFHE.Q         | S33:       | 2 | 2,9659 | 0,342 | -0,305 |
| 7 | P68104 EF1A1_HUMAN  | K.IGGIGTVPVGRVE.T             |            | 2 | 2,9649 | 0,388 | -0,097 |
| 7 | P48960 CD97_HUMAN   | R.CNPGFSSFSE.I                |            | 2 | 2,9641 | 0,253 | 0      |
| 7 | P14618 KPYM_HUMAN   | E.ASDGIM*VAR.G                |            | 2 | 2,9631 | 0,406 | -0,521 |
| 7 | Q9Y508 ZN313_HUMAN  | E.DM*M*NQVLQR.S               |            | 2 | 2,9625 | 0,215 | -0,314 |
| 7 | O94804 STK10_HUMAN  | K.ASQS#RPNS#SALE.T            | S450:S454: | 2 | 2,9621 | 0,317 | -0,434 |
| 7 | Q9C0C2 TB182_HUMAN  | E.VTCDPDSGGSQGLR.G            |            | 2 | 2,9619 | 0,38  | -0,589 |
| 7 | O15541 R113A_HUMAN  | E.VGS#DDEEIPFK.C              | S253:      | 2 | 2,9594 | 0,301 | -0,185 |
| 7 | O95352 ATG7_HUMAN   | E.DLTGLTLLHQE.T               |            | 2 | 2,9541 | 0,398 | 0      |
| 7 | Q09666 AHNK_HUMAN   | E.GAKDIDISS#PE.F              | S177:      | 2 | 2,9536 | 0,103 | -0,201 |
| 7 | Q13813 SPTA2_HUMAN  | E.LVLALYDYQEK#PRE.V           | S982:      | 3 | 2,9532 | 0,311 | -0,48  |
| 7 | Q6IE81 JADE1_HUMAN  | E.NGAPECS#PRNPLEPFASLEQNREE.A | S392:      | 3 | 2,9519 | 0,3   | -0,324 |
| 7 | Q9NXG2 THUM1_HUMAN  | E.YGDDM*YGPEK.F               |            | 2 | 2,9515 | 0,438 | -0,41  |
| 7 | Q9Y608 LRRF2_HUMAN  | R.RGS#GDTSSLIDPDTSLSE.L       | S328:      | 2 | 2,9484 | 0,43  | -0,255 |
| 7 | P33176 KINH_HUMAN   | E.IGIAVGNNDVKQPE.G            |            | 2 | 2,9463 | 0,302 | 0      |
| 7 | P35221 CTNA1_HUMAN  | E.M*DNYEPGVYTEK.V             |            | 2 | 2,9461 | 0,23  | 0,167  |

|   |                    |                                  |            |   |        |       |        |
|---|--------------------|----------------------------------|------------|---|--------|-------|--------|
| 7 | P20618 PSB1_HUMAN  | E.DFAIVASDTRLSE.G                |            | 2 | 2,9459 | 0,269 | -0,343 |
| 7 | Q9BRS8 LARP6_HUMAN | E.EGRLNCSTS#PE.I                 | S409:      | 2 | 2,943  | 0,324 | -0,734 |
| 7 | Q9C0C2 TB182_HUMAN | R.SYQFGIIGNDR.V                  |            | 2 | 2,9388 | 0,393 | 0,096  |
| 7 | Q9Y3L3 3BP1_HUMAN  | R.TESEVPPRPAS#PK.V               | S544:      | 2 | 2,9364 | 0,373 | -0,496 |
| 7 | Q9UMZ2 SYNG_HUMAN  | K.YDVFRQLS#LE.G                  | S752:      | 2 | 2,9349 | 0,197 | -0,452 |
| 7 | Q8TDY2 RBCC1_HUMAN | E.MSQTITDLLSEQK.A                |            | 2 | 2,9343 | 0,261 | -0,408 |
| 7 | O95551 TTRAP_HUMAN | K.ISPSEDTQQE.N                   |            | 2 | 2,9341 | 0,282 | -0,108 |
| 7 | P50454 SERPH_HUMAN | R.SAGLAFSLYQAM*AK.D              |            | 3 | 2,934  | 0,134 | -0,372 |
| 7 | Q32MZ4 LRRF1_HUMAN | E.HESPSQDIS#DACEAE.S             | S739:      | 2 | 2,9324 | 0,426 | -0,348 |
| 7 | A6NHG4 DDTL_HUMAN  | E.LDTNLPANRVPAGLE.K              |            | 2 | 2,9306 | 0,343 | -0,232 |
| 7 | Q9UHY7 ENOPH_HUMAN | E.DAHLDGAVPIPAASGNGVDD.L         |            | 3 | 2,9259 | 0,186 | 0      |
| 7 | Q53H82 LACB2_HUMAN | E.DLYDYMNSLKE.L                  |            | 2 | 2,9221 | 0,31  | -0,439 |
| 7 | Q04637 IF4G1_HUMAN | E.YTLGEESEAPGQR.A                |            | 2 | 2,9192 | 0,346 | -0,764 |
| 7 | Q9HB07 MYG1_HUMAN  | E.DSM*VGTLYDKM*YE.N              |            | 2 | 2,9182 | 0,097 | 0,154  |
| 7 | Q9UHD8 SEPT9_HUMAN | E.MIPFAVVGSDHE.Y                 |            | 2 | 2,9175 | 0,322 | -0,187 |
| 7 | Q9BVG4 CX026_HUMAN | E.DFNYGTLLR.L                    |            | 2 | 2,9174 | 0,323 | -0,111 |
| 7 | Q9C0C9 UBE2O_HUMAN | E.DGGPAPGEASQGSDS#EGGAQGLASASR.D | S1201:     | 3 | 2,9172 | 0,275 | -0,513 |
| 7 | O60271 JIP4_HUMAN  | E.TRNVS#TGS#AENEK.S              | S329:S332: | 2 | 2,9169 | 0,275 | -0,58  |
| 7 | Q15942 ZYX_HUMAN   | R.EKVSS#IDLE.I                   | S143:      | 2 | 2,9134 | 0,18  | 0,222  |
| 7 | Q96GA3 LTV1_HUMAN  | E.DDFILQANK.A                    |            | 2 | 2,9127 | 0,321 | 0,115  |
| 7 | Q8IVF2 AHNK2_HUMAN | R.KPDAEVLTVES#PEEE.A             | S5175:     | 2 | 2,9118 | 0,303 | 0,418  |
| 7 | P04792 HSPB1_HUMAN | E.SPAVAAPAYS.R                   |            | 2 | 2,9052 | 0,344 | -0,336 |
| 7 | P52272 HNRPM_HUMAN | R.MGPLGLDHMASSIE.R               |            | 2 | 2,9025 | 0,326 | -0,084 |
| 7 | Q9UJU6 DBNL_HUMAN  | R.AM*STTSIS#SPQPGKLR#PFLQK.Q     | S274:S283: | 3 | 2,9024 | 0,175 | -0,216 |
| 7 | O60506 HNRPQ_HUMAN | E.DGALAVLQQFKD.S                 |            | 2 | 2,8952 | 0,399 | -0,748 |
| 7 | Q16204 CCDC6_HUMAN | K.SGGIVIS#PFRLEE.L               | S52:       | 2 | 2,8949 | 0,272 | -0,411 |
| 7 | Q9BS16 CENPK_HUMAN | E.DVLITLGKEE.F                   |            | 2 | 2,8945 | 0,295 | 0,218  |
| 7 | Q96TA1 NIBL1_HUMAN | K.AVDLGPPKPSDQE.T                |            | 2 | 2,8944 | 0,454 | -1,172 |
| 7 | Q86V48 LUZP1_HUMAN | R.SS#TDFSELEQPR.S                | S957:      | 2 | 2,8926 | 0,237 | 0,248  |
| 7 | Q9NYV4 CD2L7_HUMAN | K.NSS#PAPPQPAPGKVE.S             | S1083:     | 2 | 2,8924 | 0,362 | -0,392 |
| 7 | O75531 BAF_HUMAN   | E.KPVGSLAGIGE.V                  |            | 2 | 2,8912 | 0,271 | -0,237 |
| 7 | Q9BQG0 MBB1A_HUMAN | E.SRDPAQPM*#S#PGE.A              | S11:       | 2 | 2,8904 | 0,236 | -0,446 |
| 7 | Q53H82 LACB2_HUMAN | E.DLYDYM*NSLKE.L                 |            | 2 | 2,8884 | 0,251 | -0,26  |

|   |                     |                           |              |   |        |       |        |
|---|---------------------|---------------------------|--------------|---|--------|-------|--------|
| 7 | P78364 PHC1_HUMAN   | E.IDGQALLLKE.E            |              | 2 | 2,8875 | 0,176 | -0,503 |
| 7 | P34932 HSP74_HUMAN  | D.ATQIAGLNCLR.L           |              | 2 | 2,8857 | 0,421 | -0,2   |
| 7 | Q8IWE2 NXP20_HUMAN  | E.DQTVVSDVAKVSEEE.T       |              | 2 | 2,8848 | 0,427 | -0,141 |
| 7 | O95202 LETM1_HUMAN  | E.IDILSDACSK.L            |              | 2 | 2,8839 | 0,36  | 0      |
| 7 | Q8WYP5 AHTF1_HUMAN  | E.HQEM*DEGS#QSLE.K        | S1304:       | 2 | 2,8812 | 0,317 | -0,328 |
| 7 | Q9H4L5 OSBL3_HUMAN  | K.SGDNLAENSRDE.N          |              | 2 | 2,8796 | 0,343 | -0,34  |
| 7 | P46100 ATRX_HUMAN   | E.IEDAS#PTKCPITTK.L       | S1527:       | 2 | 2,8791 | 0,405 | -0,446 |
| 7 | Q86V48 LUZP1_HUMAN  | E.LLDLQDKVIQAE.G          |              | 2 | 2,8791 | 0,241 | -0,264 |
| 7 | P04264 K2C1_HUMAN   | K.SKAEAESLYQSK.Y          |              | 3 | 2,872  | 0,19  | 0,068  |
| 7 | P04792 HSPB1_HUMAN  | R.ALS#RQLS#SGVSE.I        | S78:S82:     | 2 | 2,872  | 0,21  | 0      |
| 7 | Q8WWM7 ATX2L_HUMAN  | K.ISLAPTDVKE.L            |              | 2 | 2,8719 | 0,282 | 0      |
| 7 | O95684 FR1OP_HUMAN  | E.GALDLSDVHS#PPKS#PE.G    | S156:S160:   | 3 | 2,8718 | 0,196 | -0,607 |
| 7 | O43493 TGON2_HUMAN  | K.SSAEAQTPEDTPNKSGAE.A    |              | 2 | 2,8684 | 0,305 | -0,47  |
| 7 | Q9BQG0 MBB1A_HUMAN  | E.SRDPAQPMSPGE.A          | S11:         | 2 | 2,8656 | 0,272 | -0,361 |
| 7 | Q96R06 SPAG5_HUMAN  | E.VAAVSEKPIFQESPS#HLL.E   | S199:        | 3 | 2,8654 | 0,185 | -0,339 |
| 7 | Q9UPT8 ZC3H4_HUMAN  | K.TGSGS#PFAGNS#PAREGEQD.A | S1269:S1275: | 2 | 2,8634 | 0,411 | -0,422 |
| 7 | P12956 KU70_HUMAN   | E.QAVDLTLPKVE.A           |              | 2 | 2,8618 | 0,388 | 0      |
| 7 | P46821 MAP1B_HUMAN  | E.KVSPSKS#PSLSPSPS#PLE.K  | S1256:S1265: | 2 | 2,8617 | 1     | 0,586  |
| 7 | Q9Y478 AAKB1_HUMAN  | E.VFDALM*VDSQK.C          |              | 2 | 2,8615 | 0,263 | -0,288 |
| 7 | Q9NWS0 PIHD1_HUMAN  | E.STQIQPQPGFCIK.T         |              | 2 | 2,8605 | 0,382 | -0,324 |
| 7 | P61247 RS3A_HUMAN   | E.RADGYEPPVQES#V.-        | S263:        | 2 | 2,8595 | 0,319 | 0,4    |
| 7 | Q99714 HCD2_HUMAN   | R.GVIINTASVAAFE.G         |              | 2 | 2,8593 | 0,433 | -0,378 |
| 7 | P13647 K2C5_HUMAN   | R.ISISTSGGSFR.N           |              | 2 | 2,8578 | 0,33  | -0,329 |
| 7 | P31946 1433B_HUMAN  | D.STLIM*QLLR.D            |              | 2 | 2,8547 | 0,172 | -0,335 |
| 7 | Q13435 SF3B2_HUMAN  | R.SRGSDS#PAADVE.I         | S339:        | 2 | 2,8545 | 0,412 | -0,192 |
| 7 | Q8IUW5 RELL1_HUMAN  | E.KIELNS#VNE.N            | S109:        | 2 | 2,8508 | 0,248 | -0,295 |
| 7 | Q9Y6Y8 S23IP_HUMAN  | E.SLLM*CTVDDLKE.M         |              | 2 | 2,8483 | 0,239 | 0,424  |
| 7 | Q9UJZ1 STML2_HUMAN  | R.DVQGTDAASLDEE.L         |              | 2 | 2,8461 | 0,245 | -0,191 |
| 7 | P28070 PSB4_HUMAN   | R.TQNPM*VTGTSVLGVKFE.G    |              | 2 | 2,8446 | 0,387 | -0,201 |
| 7 | P15586 GNS_HUMAN    | D.GM*SLLPILR.G            |              | 2 | 2,8377 | 0,217 | -0,06  |
| 7 | P27708 PYR1_HUMAN   | E.SIVVAPSQTLNDRE.Y        |              | 2 | 2,8373 | 0,439 | -0,399 |
| 7 | P11021 GRP78_HUMAN  | E.IIANDQGNR.I             |              | 2 | 2,8364 | 0,297 | -0,244 |
| 7 | B0QY74 B0QY74_HUMAN | E.LVSQGIM*PPLKS#PAAFHE.Q  | S33:         | 3 | 2,8351 | 0,225 | -0,181 |

|   |                    |                          |              |   |        |       |        |
|---|--------------------|--------------------------|--------------|---|--------|-------|--------|
| 7 | O75943 RAD17_HUMAN | E.HGM*IDPDS#GDE.A        | S613:        | 2 | 2,8332 | 0,243 | -0,481 |
| 7 | Q15942 ZYX_HUMAN   | E.GGPEAPIPPPPQPR.E       |              | 2 | 2,8331 | 0,413 | -0,26  |
| 7 | A1L390 PKHG3_HUMAN | R.LVS#RSSSVLS#LE.G       | S636:S643:   | 2 | 2,8314 | 0,34  | -0,255 |
| 7 | P46087 NOL1_HUMAN  | K.TQASSS#FQDSSQPAGKAE.G  | S675:        | 2 | 2,8244 | 0,198 | -0,448 |
| 7 | Q9NQS7 INCE_HUMAN  | E.QHVTVLQMLSTEPLPR.T     |              | 3 | 2,8234 | 0,203 | 0      |
| 7 | Q01082 SPTB2_HUMAN | K.TALPAQSAATLPAR.T       |              | 2 | 2,8232 | 0,262 | 0,268  |
| 7 | Q9BQA1 MEP50_HUMAN | R.KET#PPPLVPPAARE.W      | T5:          | 2 | 2,822  | 0,182 | -0,386 |
| 7 | P20674 COX5A_HUMAN | E.LGISTPEELGLDKV.-       |              | 2 | 2,8183 | 0,424 | -0,166 |
| 7 | P11233 RALA_HUMAN  | E.NVPFLLVGNKSDLE.D       |              | 2 | 2,8162 | 0,391 | -0,474 |
| 7 | P04075 ALDOA_HUMAN | R.ALANSLACQGK.Y          |              | 2 | 2,8143 | 0,419 | -0,431 |
| 7 | Q9UMZ2 SYNG_HUMAN  | E.AS#PVPLTSNVGSTVK.G     | S720:        | 2 | 2,8139 | 0,461 | -0,397 |
| 7 | Q15149 PLEC1_HUMAN | E.FADM*LSGNAGGFR.S       |              | 3 | 2,8139 | 0,283 | 0,135  |
| 7 | O76003 GLRX3_HUMAN | E.LIGGLDIIKE.L           |              | 2 | 2,8125 | 0,226 | -0,114 |
| 7 | P49116 NR2C2_HUMAN | E.DGTVLLATDSKAE.T        |              | 2 | 2,8119 | 0,242 | 0,37   |
| 7 | Q96G46 DUS3L_HUMAN | R.TCGPLTDEDVVR.L         |              | 2 | 2,8113 | 0,424 | -0,179 |
| 7 | Q9Y6Q9 NCOA3_HUMAN | E.GVGTSLSTLSSPGPK.L      |              | 2 | 2,8104 | 0,373 | -0,244 |
| 7 | Q5W0B1 RN219_HUMAN | E.KTELNLS#KGS#LTNDQLE.N  | S592:S595:   | 2 | 2,8097 | 0,355 | -0,119 |
| 7 | Q9UBB9 TFP11_HUMAN | R.DM*VVNLFHE.L           |              | 2 | 2,8087 | 0,344 | -0,218 |
| 7 | Q16563 SYPL1_HUMAN | K.TVTATFGYPFR.L          |              | 2 | 2,8067 | 0,562 | -0,194 |
| 7 | P35527 K1C9_HUMAN  | R.FSSSSGYGGSSR.V         |              | 2 | 2,8045 | 0,403 | -0,296 |
| 7 | O75534 CSDE1_HUMAN | E.ILDGNQLHIADEVE.F       |              | 2 | 2,8039 | 0,16  | -0,312 |
| 7 | P04626 ERBB2_HUMAN | E.YVNQPDVRPQPPS#PR.E     | S1151:       | 3 | 2,8038 | 0,28  | -0,3   |
| 7 | P62841 RS15_HUMAN  | E.M*VGSM*VGVYNGK.T       |              | 2 | 2,803  | 0,466 | -0,287 |
| 7 | Q9UQ35 SRRM2_HUMAN | K.DKFS#PFPVQDRPE.S       | S1188:       | 3 | 2,8014 | 0,124 | 0,111  |
| 7 | Q92841 DDX17_HUMAN | R.GDGPICLVLAPTRE.L       |              | 2 | 2,7994 | 0,446 | -0,326 |
| 7 | Q15648 MED1_HUMAN  | E.KS#YQNSPS#SDDGIRPLPE.Y | S1475:S1481: | 3 | 2,7991 | 0,131 | -0,511 |
| 7 | P19838 NFKB1_HUMAN | E.VIQAASS#PVK.T          | S893:        | 2 | 2,7971 | 0,389 | -0,226 |
| 7 | P27987 IP3KB_HUMAN | E.KGIPAS#PRCGS#PTAM*E.I  | S264:S269:   | 2 | 2,7968 | 0,185 | -0,532 |
| 7 | Q14676 MDC1_HUMAN  | E.GKAPQAVPLEK.S          |              | 2 | 2,7952 | 0,222 | -0,322 |
| 7 | Q9UBQ7 GRHPR_HUMAN | E.VEQWDSDEPIPAKE.L       |              | 2 | 2,7938 | 0,185 | -0,149 |
| 7 | Q9P287 BCCIP_HUMAN | E.LTDLLIQQNHIGSVIK.Q     |              | 3 | 2,7932 | 0,228 | 0      |
| 7 | P55072 TERA_HUMAN  | E.DNSVVSLSQPKM*D.E       |              | 2 | 2,7917 | 0,419 | -0,255 |
| 7 | P27987 IP3KB_HUMAN | E.SQRQDSDALPS#PE.L       | S544:        | 2 | 2,7911 | 0,265 | -0,404 |



|   |                    |                          |            |   |        |       |        |
|---|--------------------|--------------------------|------------|---|--------|-------|--------|
| 7 | Q13200 PSMD2_HUMAN | E.NNRFGGS#GSQVD.S        | S361:      | 2 | 2,7898 | 0,399 | -0,278 |
| 7 | Q14789 GOGB1_HUMAN | E.DLNQVITIKD.S           |            | 2 | 2,7885 | 0,245 | -0,105 |
| 7 | Q9UBC2 EP15R_HUMAN | K.ALLFSNNTQE.L           |            | 2 | 2,7885 | 0,382 | 0,107  |
| 7 | Q14690 RRP5_HUMAN  | E.DDSLVDVYRE.G           |            | 2 | 2,7884 | 0,188 | -0,266 |
| 7 | P37802 TAGL2_HUMAN | K.NVIGLQM*GTNR.G         |            | 2 | 2,7884 | 0,48  | -0,4   |
| 7 | P04626 ERBB2_HUMAN | E.YVNQPDVRPQPPS#PR.E     | S1151:     | 2 | 2,7844 | 0,261 | -0,4   |
| 7 | P62191 PRS4_HUMAN  | E.SVELPLTHPEYEE.M        |            | 2 | 2,7841 | 0,337 | -0,215 |
| 7 | Q9UQ35 SRRM2_HUMAN | E.TKEQNSALPTS#SQDEE.L    | S1232:     | 2 | 2,7834 | 0,372 | -0,596 |
| 7 | Q14498 RBM39_HUMAN | E.RTDASSASSFLDS#DELE.R   | S341:      | 2 | 2,7824 | 0,349 | -0,256 |
| 7 | Q9Y490 TLN1_HUMAN  | E.TQVVLINAVKD.V          |            | 2 | 2,782  | 0,254 | -0,203 |
| 7 | Q13435 SF3B2_HUMAN | E.M*DDPSVGPKIPQALE.K     |            | 2 | 2,7815 | 0,342 | -0,076 |
| 7 | P13645 K1C10_HUMAN | R.QSVEADINGLR.R          |            | 2 | 2,7793 | 0,339 | -0,305 |
| 7 | P51692 STA5B_HUMAN | E.ANNGSS#PAGSLADAM*SQK.H | S128:      | 2 | 2,7781 | 0,328 | -0,88  |
| 7 | Q9NQS7 INCE_HUMAN  | E.QHVTQLMSTEPLPR.T       |            | 2 | 2,7763 | 0,437 | -0,224 |
| 7 | Q9ULR0 ISY1_HUMAN  | K.FIAHVPVPSQQEIEE.A      |            | 2 | 2,7762 | 0,315 | 0,212  |
| 7 | P51114 FXR1_HUMAN  | E.NGLVTVADYISRAE.S       |            | 2 | 2,776  | 0,41  | -0,162 |
| 7 | Q9UPU5 UBP24_HUMAN | E.SNSLCPAGIR.N           |            | 2 | 2,7756 | 0,3   | -0,227 |
| 7 | P35908 K22E_HUMAN  | K.YEELQVTVGR.H           |            | 2 | 2,7755 | 0,385 | 0,204  |
| 7 | Q13439 GOGA4_HUMAN | R.M*RS#RTSS#FTEQLDE.G    | S37:S41:   | 2 | 2,775  | 0,307 | -0,589 |
| 7 | Q08211 DHX9_HUMAN  | E.GETVEPYKVNLSQDLE.H     |            | 2 | 2,7734 | 0,303 | -0,469 |
| 7 | Q9NXG2 THUM1_HUMAN | E.YGDDMYGPEK.F           |            | 2 | 2,7731 | 0,378 | -0,104 |
| 7 | Q8IY17 PLPL6_HUMAN | E.ASGGSLAAPART#PTQEPR.E  | T455:      | 2 | 2,7709 | 0,116 | -0,528 |
| 7 | P31151 S10A7_HUMAN | K.GTNYLADVFEK.K          |            | 2 | 2,7703 | 0,401 | -0,291 |
| 7 | P08134 RHOC_HUMAN  | E.NYIADIEVDGKQVE.L       |            | 2 | 2,7676 | 0,343 | -0,536 |
| 7 | P42167 LAP2B_HUMAN | E.HNQSYS#QAGITE.T        | S224:      | 2 | 2,7673 | 0,27  | -0,172 |
| 7 | P60174 TPIS_HUMAN  | E.GLGVACIGEKLDE.R        |            | 2 | 2,7669 | 0,397 | -0,414 |
| 7 | Q9UNS2 CSN3_HUMAN  | K.SMGSEQEDDSGNKPSS#YS.-  | S421:      | 2 | 2,7665 | 0,358 | 0,92   |
| 7 | P09874 PARP1_HUMAN | E.DFLQDVSASTK.S          |            | 2 | 2,7646 | 0,379 | -0,202 |
| 7 | Q9P1Y6 K1542_HUMAN | E.DLPTRLPALGEAHVS#PE.V   | S1229:     | 2 | 2,7633 | 0,351 | -0,389 |
| 7 | Q8N1G4 LRC47_HUMAN | E.NKEEGSLSDT#EAD.A       | T522:      | 2 | 2,7625 | 0,306 | -0,496 |
| 7 | P07437 TBB5_HUMAN  | E.LTQQVFDK.N             |            | 2 | 2,7584 | 0,189 | 0,116  |
| 7 | Q92576 PHF3_HUMAN  | E.NAICDVPDQNSK.Q         |            | 2 | 2,7583 | 0,261 | -0,359 |
| 7 | P02545 LMNA_HUMAN  | R.LRLS#SPSTS#QR.S        | S390:S395: | 2 | 2,7579 | 0,148 | -0,435 |

|   |                    |                            |            |   |        |       |        |
|---|--------------------|----------------------------|------------|---|--------|-------|--------|
| 7 | P04264 K2C1_HUMAN  | R.TNAENEFVTIKK.D           |            | 3 | 2,7574 | 0,187 | 0,066  |
| 7 | Q14191 WRN_HUMAN   | E.YLSDIAYK.S               |            | 2 | 2,7571 | 0,288 | -0,063 |
| 7 | Q05524 ENO1B_HUMAN | D.LVVGLCTGQIK.T            |            | 2 | 2,7556 | 0,384 | -0,205 |
| 7 | P61158 ARP3_HUMAN  | E.DHYFLLTEPPLNTPE.N        |            | 2 | 2,7548 | 0,444 | -0,547 |
| 7 | Q9H299 SH3L3_HUMAN | R.VYSTSVTGSRE.I            |            | 2 | 2,7537 | 0,381 | -0,309 |
| 7 | O43684 BUB3_HUMAN  | E.GRVAVEYLDPS#PE.V         | S211:      | 2 | 2,7536 | 0,245 | -0,323 |
| 7 | Q9Y478 AAKB1_HUMAN | E.VFDALMVDSQK.C            |            | 2 | 2,7524 | 0,244 | 0,389  |
| 7 | Q9BZF3 OSBL6_HUMAN | E.SRLSM*SES#VSE.F          | S491:      | 2 | 2,7513 | 0,264 | -0,56  |
| 7 | Q8IWW6 RHG12_HUMAN | E.LSSSSTEQIR.A             |            | 2 | 2,7509 | 0,087 | -0,22  |
| 7 | A6NIH7 U119B_HUMAN | E.LLALDIRPE.H              |            | 2 | 2,7483 | 0,366 | 0      |
| 7 | P20618 PSB1_HUMAN  | E.DFAIVASDTR.L             |            | 2 | 2,7467 | 0,306 | 0      |
| 7 | Q99497 PARK7_HUMAN | D.GLILTS#RGPPTSFE.F        | S155:      | 2 | 2,7401 | 0,235 | -0,161 |
| 7 | O96028 NSD2_HUMAN  | E.M*KGIGTPPNT#TPIKNGS#PE.I | T114:S121: | 3 | 2,74   | 0,223 | -0,346 |
| 7 | P61160 ARP2_HUMAN  | E.ALFQPHLINVE.G            |            | 2 | 2,7398 | 0,294 | -0,286 |
| 7 | Q9H019 FA54B_HUMAN | K.ASS#FADM*M*GILKD.F       | S238:      | 2 | 2,737  | 0,237 | -0,081 |
| 7 | P18858 DNL1_HUMAN  | E.QATTSAQVACLVRK.Q         |            | 3 | 2,736  | 0,318 | -0,115 |
| 7 | P31946 1433B_HUMAN | E.LLDKYLIPNATQPE.S         |            | 2 | 2,7356 | 0,086 | 0,302  |
| 7 | P14868 SYDC_HUMAN  | E.IADTM*VQIFK.G            |            | 2 | 2,7352 | 0,28  | -0,31  |
| 7 | Q16204 CCDC6_HUMAN | K.SGGIVISPFRLLE.L          |            | 2 | 2,7346 | 0,187 | -0,608 |
| 7 | Q6DD88 ATLA3_HUMAN | E.VCGGEKPYLSPDILEE.K       |            | 2 | 2,7325 | 0,143 | -0,338 |
| 7 | P38919 IF4A3_HUMAN | E.VDVTPTFDTMGLRE.D         |            | 2 | 2,7314 | 0,365 | -0,309 |
| 7 | P80723 BASP_HUMAN  | E.QAAPGPAAGGEAPKAAE.A      |            | 2 | 2,7293 | 0,407 | -0,327 |
| 7 | Q3KQU3 MA7D1_HUMAN | K.SLSRT#PETLLPFAEAE.A      | T813:      | 2 | 2,7282 | 0,271 | -0,53  |
| 7 | Q03252 LMNB2_HUMAN | E.SLSYQLSGLQK.Q            |            | 2 | 2,7279 | 0,392 | -0,199 |
| 7 | Q14493 SLBP_HUMAN  | R.HM*DS#QVEDEFDLE.A        | S247:      | 2 | 2,7249 | 0,357 | -0,217 |
| 7 | Q7Z333 SETX_HUMAN  | K.SDTLTDSQIDRD.L           |            | 2 | 2,722  | 0,326 | -0,983 |
| 7 | P10809 CH60_HUMAN  | E.VVVTEIPKEE.K             |            | 2 | 2,7213 | 0,354 | -0,107 |
| 7 | Q96AG4 LRC59_HUMAN | D.LSLSDLNEVPVKE.L          |            | 2 | 2,7206 | 0,239 | -0,254 |
| 7 | P31930 QCR1_HUMAN  | E.TQVSLLDNGLR.V            |            | 2 | 2,7201 | 0,275 | -0,301 |
| 7 | Q99666 RGPD5_HUMAN | K.AVVS#PPKFVVFSE.S         | S1534:     | 2 | 2,7185 | 0,406 | -0,328 |
| 7 | Q92558 WASF1_HUMAN | E.NDVATILSR.R              |            | 2 | 2,7164 | 0,301 | 0,123  |
| 7 | P17050 NAGAB_HUMAN | E.AQDVYSGDIISGLRDE.T       |            | 2 | 2,7143 | 0,419 | -0,281 |
| 7 | P25205 MCM3_HUMAN  | E.AGAM*VLADR.G             |            | 2 | 2,7129 | 0,28  | -0,265 |

|   |                     |                                 |              |   |        |       |        |
|---|---------------------|---------------------------------|--------------|---|--------|-------|--------|
| 7 | Q96Q15 SMG1_HUMAN   | E.LRVNNVTS#PE.F                 | S111:        | 2 | 2,7105 | 0,246 | -0,303 |
| 7 | Q9UPU9 SAM4A_HUMAN  | E.LHQMILTPIK.A                  |              | 2 | 2,7063 | 0,365 | -0,102 |
| 7 | Q96T58 MINT_HUMAN   | E.KEDVSASGPS#PE.A               | S2159:       | 2 | 2,704  | 0,298 | -0,476 |
| 7 | Q8WWM7 ATX2L_HUMAN  | E.VDGLLTSEPM*GS#PVSSK.T         | S594:        | 2 | 2,6995 | 0,225 | -0,068 |
| 7 | Q9H9R9 DBND1_HUMAN  | R.RQPLSSVS#S#LEVHFD.L           | S66:S67:     | 3 | 2,6977 | 0,184 | -0,393 |
| 7 | O95202 LETM1_HUMAN  | R.VVAAPQRPGTEPQPE.M             |              | 2 | 2,6974 | 0,303 | -0,232 |
| 7 | P26006 ITA3_HUMAN   | R.TGAVYLCPLTAHKDDCE.R           |              | 3 | 2,6954 | 0,188 | -0,188 |
| 7 | Q13188 STK3_HUMAN   | E.DSLTKQPEEVFDVLE.K             |              | 2 | 2,6946 | 0,347 | -0,488 |
| 7 | P14406 CX7A2_HUMAN  | E.DDEIPLYLKGGVAD.A              |              | 2 | 2,6944 | 0,21  | -1,621 |
| 7 | O95208 EPN2_HUMAN   | R.GS#SQPNLSTSHSEQE.Y            | S172:        | 2 | 2,6942 | 0,249 | -0,512 |
| 7 | Q9Y6I9 TX264_HUMAN  | E.TSAATLSPGASSR.G               |              | 2 | 2,6919 | 0,451 | -0,607 |
| 7 | P10276 RARA_HUMAN   | E.GLDTLSGQPGGGGR.D              |              | 2 | 2,6905 | 0,356 | -0,288 |
| 7 | Q01518 CAP1_HUMAN   | K.AGAAPYVQAFD.S                 |              | 2 | 2,6876 | 0,32  | 0,33   |
| 7 | P60709 ACTB_HUMAN   | R.GYSFTTTAERE.I                 |              | 2 | 2,6859 | 0,45  | -0,193 |
| 7 | Q10567 AP1B1_HUMAN  | E.VVLAEKPLISEE.T                |              | 2 | 2,6858 | 0,421 | -0,368 |
| 7 | P08069 IGF1R_HUMAN  | E.RALPLQSST#C.-                 | T1366:       | 2 | 2,6855 | 0,318 | 0,466  |
| 7 | Q15370 ELOB_HUMAN   | D.DQLLDDGKTLGE.C                |              | 2 | 2,6852 | 0,169 | -0,281 |
| 7 | Q9P2K3 RCOR3_HUMAN  | K.SASNVPSGKST#DEEEE.A           | T376:        | 2 | 2,6817 | 0,267 | -0,349 |
| 7 | Q63HJ5 Q63HJ5_HUMAN | E.GTNLPDVPNK.S                  |              | 2 | 2,6801 | 0,328 | 0      |
| 7 | P13645 K1C10_HUMAN  | R.SQYEQLAEQNR.K                 |              | 2 | 2,6788 | 0,32  | -0,268 |
| 7 | Q9NTK5 OLA1_HUMAN   | E.M*IGPIIDKLE.K                 |              | 2 | 2,6771 | 0,182 | -0,32  |
| 7 | Q9BYT8 NEUL_HUMAN   | E.DDTFLVFSKAE.L                 |              | 2 | 2,6769 | 0,356 | -0,384 |
| 7 | Q9H9R9 DBND1_HUMAN  | R.RQPLSSVSS#LE.V                | S67:         | 2 | 2,6768 | 0,309 | -0,19  |
| 7 | Q9H307 PININ_HUMAN  | E.TNRVESVEPS#ENE.A              | S417:        | 2 | 2,676  | 0,21  | -0,466 |
| 7 | Q00613 HSF1_HUMAN   | E.LAPAS#PM*ASPGGSIDERPLSSPLVR.V | S275:        | 3 | 2,6757 | 0,4   | -0,136 |
| 7 | Q96JM3 ZN828_HUMAN  | E.IRSPAGS#PE.L                  | S436:        | 2 | 2,6753 | 0,309 | -0,246 |
| 7 | P17812 PYRG1_HUMAN  | E.NFCNIHVSLVPQPSSTGE.Q          |              | 2 | 2,6742 | 0,401 | -0,061 |
| 7 | Q9UQ35 SRRM2_HUMAN  | R.SSGHS#SELS#PDAVE.K            | S1382:S1387: | 2 | 2,6738 | 1     | -0,37  |
| 7 | Q13428 TCOF_HUMAN   | K.LDSSPSVSSTLAAK.D              |              | 2 | 2,6713 | 0,295 | -0,358 |
| 7 | Q9H7P9 PKHG2_HUMAN  | R.QLLGPNAALSR.Y                 |              | 2 | 2,6708 | 0,303 | 0      |
| 7 | Q99961 SH3G1_HUMAN  | K.IAASSS#FR.S                   | S288:        | 2 | 2,6696 | 0,403 | 0      |
| 7 | P27816 MAP4_HUMAN   | E.IEMASEERPPAQALE.I             |              | 2 | 2,6691 | 0,284 | 0,657  |
| 7 | P13645 K1C10_HUMAN  | R.VLDELTLTK.A                   |              | 2 | 2,6665 | 0,285 | -0,118 |

|   |                     |                          |            |   |        |       |        |
|---|---------------------|--------------------------|------------|---|--------|-------|--------|
| 7 | P07814 SYEP_HUMAN   | E.LAEPIAIRPTS#E.T        | S1122:     | 2 | 2,6652 | 0,235 | -0,886 |
| 7 | Q9H019 FA54B_HUMAN  | E.DDCVLSLK.A             |            | 2 | 2,6648 | 0,276 | 0,066  |
| 7 | O75531 BAF_HUMAN    | R.DFVAEPMGEKPVGSLAGIGE.V |            | 3 | 2,6638 | 0,216 | 0,274  |
| 7 | P20618 PSB1_HUMAN   | E.DFAIVAS#DTRLSE.G       | S53:       | 2 | 2,6598 | 0,214 | 0,406  |
| 7 | Q9HA05 Q9HA05_HUMAN | K.M*NSIVYQK.Q            |            | 2 | 2,6584 | 0,233 | -0,244 |
| 7 | P30419 NMT1_HUMAN   | E.LFSVQGQPAK.T           |            | 2 | 2,6565 | 0,092 | -0,243 |
| 7 | Q9NR09 BIRC6_HUMAN  | E.IDLSDVLSGNGK.V         |            | 2 | 2,6559 | 0,39  | -0,401 |
| 7 | Q16186 ADRM1_HUMAN  | R.SQSAAVTPSSTTSSTR.A     |            | 2 | 2,6557 | 0,272 | -0,311 |
| 7 | P52272 HNRPM_HUMAN  | R.M*GPLGLDHMASSIE.R      |            | 2 | 2,6512 | 0,21  | -0,331 |
| 7 | Q8TD16 BICD2_HUMAN  | E.GQGGAGRTS#PGGRTS#PE.A  | S568:S574: | 2 | 2,6508 | 0,426 | -0,282 |
| 7 | Q02952 AKA12_HUMAN  | E.ARGDTVVS#EAE.L         | S967:      | 2 | 2,6507 | 0,095 | -0,402 |
| 7 | O43290 SNUT1_HUMAN  | E.KEPVPQPLPSDDTR.V       |            | 3 | 2,6489 | 0,083 | -0,347 |
| 7 | Q8WWQ0 PHIP_HUMAN   | R.LSRGS#ISS#TSE.V        | S674:S677: | 2 | 2,6485 | 0,268 | -0,38  |
| 7 | P11388 TOP2A_HUMAN  | K.GSVPLSSS#PPATHFPDETE.I | S1393:     | 2 | 2,6473 | 0,462 | -0,54  |
| 7 | Q5T1M5 FKB15_HUMAN  | R.ERPES#PMVPSEQVVEE.A    | S979:      | 2 | 2,6394 | 0,294 | -0,254 |
| 7 | Q14004 CD2L5_HUMAN  | K.INLPAGILATGEK.Q        |            | 2 | 2,6388 | 0,393 | -0,282 |
| 7 | P52272 HNRPM_HUMAN  | R.M*GPLGLDHM*ASSIE.R     |            | 2 | 2,637  | 0,35  | -0,164 |
| 7 | Q6KB66 K2C80_HUMAN  | E.KYFSQESEVS#E.-         | S451:      | 2 | 2,6367 | 0,222 | -1,123 |
| 7 | P81605 DCD_HUMAN    | K.ENAGEDPGLAR.Q          |            | 2 | 2,6345 | 0,448 | -0,432 |
| 7 | Q9Y6I3 EPN1_HUMAN   | E.LLAGEVPAR.S            |            | 2 | 2,6317 | 0,29  | 0,198  |
| 7 | Q92622 K0226_HUMAN  | E.YLAIGNLDPR.G           |            | 2 | 2,6296 | 0,406 | 0      |
| 7 | O14939 PLD2_HUMAN   | E.DESLLPPLGSKE.G         |            | 2 | 2,6274 | 0,236 | 0      |
| 7 | P07384 CAN1_HUMAN   | E.YVVVPSTFEPNKE.G        |            | 2 | 2,627  | 0,358 | -0,162 |
| 7 | O00566 MPP10_HUMAN  | D.AALLAPEEIKE.K          |            | 2 | 2,6266 | 0,197 | -0,309 |
| 7 | P08648 ITA5_HUMAN   | E.GQQLLYVTR.V            |            | 2 | 2,626  | 0,374 | 0,453  |
| 7 | Q9UGC6 RGS17_HUMAN  | E.DYISILSPKE.V           |            | 2 | 2,6256 | 0,296 | -0,314 |
| 7 | P13645 K1C10_HUMAN  | K.VTMQNLNDR.L            |            | 2 | 2,624  | 0,188 | -0,224 |
| 7 | Q96EV2 RBM33_HUMAN  | E.DDLLGEDLLSGK.K         |            | 2 | 2,6225 | 0,328 | -0,383 |
| 7 | P60174 TPIS_HUMAN   | E.LIGT#LNAAK.V           | T28:       | 2 | 2,6225 | 0,187 | 0,124  |
| 7 | Q6S8J3 A26CA_HUMAN  | K.AGFAGDDAPR.A           |            | 2 | 2,6175 | 0,293 | -0,125 |
| 7 | Q14914 LTB4D_HUMAN  | E.GDTMMGQQVAK.V          |            | 2 | 2,6173 | 0,292 | -0,314 |
| 7 | P07814 SYEP_HUMAN   | E.DIQVTLFTR.A            |            | 2 | 2,616  | 0,245 | -0,112 |
| 7 | Q9Y3L3 3BP1_HUMAN   | K.VTRS#PPETAAPVED.M      | S550:      | 2 | 2,6155 | 0,326 | -0,236 |

|   |                    |                          |            |   |        |       |        |
|---|--------------------|--------------------------|------------|---|--------|-------|--------|
| 7 | Q5QJE6 TDIF2_HUMAN | E.SHTEAIS#DAE.T          | S184:      | 2 | 2,6141 | 0,273 | -0,321 |
| 7 | Q96JM3 ZN828_HUMAN | K.LAPVPS#PEPQKPAVVS#PE.S | S204:S214: | 2 | 2,6137 | 0,219 | -0,732 |
| 7 | P49356 FNTB_HUMAN  | E.LKDE TSAEPAT#D.-       | T436:      | 2 | 2,6124 | 0,311 | -0,09  |
| 7 | Q96PK6 RBM14_HUMAN | R.AQPSVSLGAPYR.G         |            | 2 | 2,6103 | 0,427 | -0,196 |
| 7 | P28347 TEAD1_HUMAN | R.M*SDSADKPIDNDAE.G      |            | 2 | 2,6051 | 0,137 | -0,4   |
| 7 | O14744 ANM5_HUMAN  | E.YTSFLAPISSSK.L         |            | 2 | 2,6044 | 0,458 | 0,094  |
| 7 | P36776 LONM_HUMAN  | D.IIALNPLYRE.S           |            | 2 | 2,6018 | 0,18  | -0,203 |
| 7 | P78364 PHC1_HUMAN  | E.ALSPTS#PGPLSVR.A       | S898:      | 2 | 2,6006 | 0,279 | -0,179 |
| 7 | P80723 BASP_HUMAN  | E.AAAAPAESAAPAAGEEPSKE.E |            | 3 | 2,5996 | 0,144 | -0,301 |
| 7 | Q9Y508 ZN313_HUMAN | E.DM*MNQVLQR.S           |            | 2 | 2,5996 | 0,228 | 0      |
| 7 | Q13263 TIF1B_HUMAN | R.LAS#PSGSTSSGLEVVAPE.G  | S594:      | 2 | 2,5989 | 0,17  | -0,138 |
| 7 | Q9GZM8 NDEL1_HUMAN | E.VTRKS#APSS#PTLDCE.K    | S194:S198: | 3 | 2,5987 | 0,156 | -0,101 |
| 7 | Q9UPN3 MACF1_HUMAN | E.SPGIDPSIIK.Q           |            | 2 | 2,5979 | 0,183 | 0      |
| 7 | Q8WX92 NELFB_HUMAN | E.TLTNCTEPLKAIE.Q        |            | 2 | 2,5974 | 0,186 | 0,082  |
| 7 | Q9C073 F117A_HUMAN | E.LASTPNDKASS#PGHPAFLE.D | S306:      | 3 | 2,5973 | 0,122 | -0,272 |
| 7 | P04792 HSPB1_HUMAN | E.GTLTVEAPMPK.L          |            | 2 | 2,597  | 0,28  | 0,107  |
| 7 | P56537 IF6_HUMAN   | E.AQPSTIATSM*R.D         |            | 2 | 2,5958 | 0,467 | -0,31  |
| 7 | Q9C0D5 TANC1_HUMAN | R.SQPSSSVPSYIR.N         |            | 2 | 2,5954 | 0,376 | -0,087 |
| 7 | Q07065 CKAP4_HUMAN | E.DGVLSM*QVASAR.Q        |            | 2 | 2,5932 | 0,459 | -0,586 |
| 7 | Q9H7N4 SFR19_HUMAN | R.AAKVPST#PPPK.A         | T976:      | 2 | 2,592  | 0,164 | 0      |
| 7 | Q96S82 UBL7_HUMAN  | E.GLS#DDEDDFHPNTR.S      | S230:      | 2 | 2,5902 | 0,388 | 0,072  |
| 7 | P20700 LMNB1_HUMAN | R.AGGPTT#PLS#PTR.L       | T20:S23:   | 2 | 2,5898 | 0,316 | -0,464 |
| 7 | Q8TD16 BICD2_HUMAN | E.GQGGAGRT#SPGGRTS#PE.A  | T567:S574: | 3 | 2,5891 | 0,145 | -0,211 |
| 7 | Q14204 DYHC1_HUMAN | E.SYDPVLNPNVLR.V         |            | 3 | 2,5884 | 0,218 | 0,121  |
| 7 | Q9Y2K1 ZBTB1_HUMAN | E.NM*RPPNNS#PVQE.D       | S412:      | 2 | 2,5868 | 0,323 | -0,623 |
| 7 | Q9NX46 ARHL2_HUMAN | E.LLDQASVTRREEVSE.L      |            | 2 | 2,5851 | 0,263 | -0,146 |
| 7 | Q9UNN5 FAF1_HUMAN  | E.VFGM*ASSALR.K          |            | 2 | 2,584  | 0,296 | 0      |
| 7 | P56537 IF6_HUMAN   | E.EILADVLKVE.V           |            | 2 | 2,5804 | 0,272 | -0,432 |
| 7 | Q9Y2N3 PO121_HUMAN | E.TATKPQATSAPS#PAPK.Q    | S674:      | 3 | 2,5779 | 0,332 | 0,112  |
| 7 | Q9Y4L1 HYOU1_HUMAN | E.DEGVGATTVM*LKE.K       |            | 2 | 2,5764 | 0,339 | 0,357  |
| 7 | Q00341 VIGLN_HUMAN | E.VIINFDPAPQKSD.I        |            | 2 | 2,5737 | 0,309 | -0,169 |
| 7 | Q9NR00 CH004_HUMAN | R.VSPS#IHGYHFD.T         | S21:       | 2 | 2,5727 | 0,308 | -0,091 |
| 7 | Q9Y490 TLN1_HUMAN  | R.GVGAAATAVTQALNE.L      |            | 2 | 2,5691 | 0,242 | 0,444  |

|   |                    |                             |            |   |        |       |        |
|---|--------------------|-----------------------------|------------|---|--------|-------|--------|
| 7 | P55072 TERA_HUMAN  | E.DNS#VVVLSQPKM*DE.L        | S37:       | 2 | 2,5687 | 0,328 | -0,445 |
| 7 | Q86V81 THOC4_HUMAN | E.LDAQLDAYNAR.M             |            | 2 | 2,5681 | 0,338 | 0,39   |
| 7 | P20700 LMNB1_HUMAN | R.AGGPTT#PLS#PTRLSR.L       | T20:S23:   | 2 | 2,565  | 0,254 | -0,292 |
| 7 | Q8IY17 PLPL6_HUMAN | E.ASGGSLAAPART#PTQEPR.E     | T455:      | 3 | 2,5648 | 0,273 | -0,594 |
| 7 | P98170 BIRC4_HUMAN | E.VLVADLVNAQK.D             |            | 2 | 2,5635 | 0,414 | -0,313 |
| 7 | Q8NB90 SPAT5_HUMAN | E.IIELPLKQPE.L              |            | 2 | 2,5592 | 0,237 | -0,207 |
| 7 | P31949 S10AB_HUMAN | K.ISSPTETERCIE.S            |            | 2 | 2,5573 | 0,329 | -0,172 |
| 7 | Q5VT52 K0460_HUMAN | R.NLPSSAQPFIPK.S            |            | 2 | 2,5515 | 0,136 | -0,094 |
| 7 | Q12888 TP53B_HUMAN | R.ADDPLRLDQE.L              |            | 2 | 2,5476 | 0,296 | 0,312  |
| 7 | Q14254 FLOT2_HUMAN | E.IVVLSGDNSK.V              |            | 2 | 2,5474 | 0,167 | -0,118 |
| 7 | Q14566 MCM6_HUMAN  | E.SAQAGDKCDFGTGLIVVPD.V     |            | 3 | 2,5467 | 0,098 | -0,092 |
| 7 | O75781 PALM_HUMAN  | E.NAAAPS#PVRAPAPSPAKEE.R    | S116:      | 3 | 2,5462 | 0,34  | -0,283 |
| 7 | P13645 K1C10_HUMAN | K.DAEAWFNEK.S               |            | 2 | 2,546  | 0,351 | -0,11  |
| 7 | P00492 HPRT_HUMAN  | D.LFCIPNHYAEDLE.R           |            | 2 | 2,5445 | 0,172 | -0,452 |
| 7 | P63104 1433Z_HUMAN | K.GIVDQSQQAYQE.A            |            | 2 | 2,5434 | 0,203 | -1,518 |
| 7 | Q13242 SFRS9_HUMAN | R.IYVGNLPTDVRE.K            |            | 2 | 2,5412 | 0,269 | -0,089 |
| 7 | O15027 SC16A_HUMAN | E.NFDGKFANLT#PSR.T          | T1876:     | 3 | 2,5406 | 0,313 | -0,118 |
| 7 | P14618 KPYM_HUMAN  | R.GIFPVLCKDPVQE.A           |            | 2 | 2,5396 | 0,38  | -0,487 |
| 7 | Q03405 UPAR_HUMAN  | E.LENLPQNGR.Q               |            | 2 | 2,536  | 0,255 | -0,234 |
| 7 | Q9Y4L1 HYOU1_HUMAN | E.DAEPSEPEKVE.T             |            | 2 | 2,5354 | 0,329 | -0,273 |
| 7 | P62753 RS6_HUMAN   | R.LSS#LRASTSKS#E.S          | S236:S244: | 2 | 2,534  | 0,346 | -0,513 |
| 7 | Q99567 NUP88_HUMAN | R.NVVVFLGGGE.L              |            | 2 | 2,5332 | 0,334 | 0,068  |
| 7 | Q02952 AKA12_HUMAN | E.HTQVPADSPDS#QEE.Q         | S557:      | 2 | 2,5263 | 0,374 | -0,603 |
| 7 | P55072 TERA_HUMAN  | E.VDIGIPDATGRLE.I           |            | 2 | 2,5254 | 0,349 | -0,27  |
| 7 | O75674 TM1L1_HUMAN | D.LLDLSPS#PR.M              | S323:      | 2 | 2,525  | 0,201 | 0      |
| 7 | Q01518 CAP1_HUMAN  | R.SGPKPFSAPKQT#SPS#PK.R     | T307:S310: | 3 | 2,5246 | 0,177 | -0,275 |
| 7 | O60506 HNRPQ_HUMAN | E.NFQTLLDAGLPQKVAE.K        |            | 2 | 2,5243 | 0,292 | -0,35  |
| 7 | P07602 SAP_HUMAN   | R.LGPGM*ADICK.N             |            | 2 | 2,5237 | 0,175 | -0,226 |
| 7 | P21127 CD2L1_HUMAN | E.GDYVPDS#PALS#PIELKQELPK.Y | S410:S414: | 3 | 2,523  | 0,208 | -0,372 |
| 7 | Q9NY61 AATF_HUMAN  | E.LLFQYPDTR.Y               |            | 2 | 2,5211 | 0,268 | -0,106 |
| 7 | Q66K74 MAP1S_HUMAN | E.LPLAASSIPRPT#PS#PE.S      | T638:S640: | 3 | 2,5211 | 0,179 | -0,563 |
| 7 | Q9GZM8 NDEL1_HUMAN | E.VTRKS#APSS#PTLD.C         | S194:S198: | 2 | 2,5193 | 0,393 | -0,321 |
| 7 | O95433 AHSA1_HUMAN | E.LVQAFTHPATLE.A            |            | 2 | 2,5165 | 0,145 | 0,349  |

|   |                     |                           |            |   |        |       |        |
|---|---------------------|---------------------------|------------|---|--------|-------|--------|
| 7 | Q92917 GPKOW_HUMAN  | E.DVLSPTDCVCRTDE.G        |            | 2 | 2,5147 | 0,453 | 0,146  |
| 7 | P35527 K1C9_HUMAN   | K.STMQELNSR.L             |            | 2 | 2,5144 | 0,186 | -0,229 |
| 7 | Q58FF8 H90B2_HUMAN  | K.SLVSVTKE.G              |            | 2 | 2,5122 | 0,181 | 0,283  |
| 7 | Q7KZF4 SND1_HUMAN   | E.YGMIYLGK.D              |            | 2 | 2,5105 | 0,298 | -0,516 |
| 7 | P49815 TSC2_HUMAN   | K.ADVGRLS#PE.V            | S1411:     | 2 | 2,5102 | 0,081 | 0      |
| 7 | P36776 LONM_HUMAN   | E.NLQDFVGKPVFTVE.R        |            | 2 | 2,5089 | 0,245 | -0,536 |
| 7 | P43686 PRS6B_HUMAN  | E.AVELPLTHFE.L            |            | 2 | 2,5065 | 0,212 | -0,211 |
| 7 | Q7Z3K3 POGZ_HUMAN   | R.SSPEETIEPE.S            |            | 2 | 2,5064 | 0,161 | -0,218 |
| 7 | Q86XJ1 GA2L3_HUMAN  | R.HGPGLANVCQYDE.W         |            | 2 | 2,5034 | 0,343 | 0      |
| 7 | Q9NWH9 SLTM_HUMAN   | R.DRFVQGS#E.G             | S800:      | 2 | 2,5031 | 0,171 | -0,12  |
| 7 | Q13371 PHLP_HUMAN   | E.VLVLTSVR.N              |            | 2 | 2,5006 | 0,202 | -1,1   |
| 7 | Q9Y639 NPTN_HUMAN   | E.YHCVYHFVSAPK.A          |            | 3 | 2,5002 | 0,158 | 0,061  |
| 7 | Q8IYB3 SRRM1_HUMAN  | K.VKEPSVQE.A              |            | 2 | 2,4957 | 0,097 | -0,067 |
| 7 | Q8NI08 NCOA7_HUMAN  | E.VDKQS#GS#PESRVE.N       | S500:S502: | 2 | 2,4923 | 0,35  | -0,464 |
| 7 | Q6PKG0 LARP1_HUMAN  | R.AVT#PVPTKTEE.V          | T526:      | 2 | 2,492  | 0,294 | -0,292 |
| 7 | Q8N163 K1967_HUMAN  | E.VRSVASNQS#EME.F         | S681:      | 2 | 2,4914 | 0,144 | -0,431 |
| 7 | P52701 MSH6_HUMAN   | E.DLM*VVPDKISE.V          |            | 2 | 2,4908 | 0,234 | 0      |
| 7 | Q13283 G3BP1_HUMAN  | K.SSSPAPADIAQTVQE.D       |            | 2 | 2,4907 | 0,251 | 0,081  |
| 7 | B2RA01 B2RA01_HUMAN | K.AQYEDIAQK.S             |            | 2 | 2,4906 | 0,185 | -0,114 |
| 7 | Q9H307 PININ_HUMAN  | K.S#LSPGKENVSALDMEKE.S    | S441:      | 2 | 2,4891 | 0,179 | -0,446 |
| 7 | Q15942 ZYG_HUMAN    | E.GGPEAPIPPPPQPR.E        |            | 3 | 2,4888 | 0,096 | -0,519 |
| 7 | Q15154 PCM1_HUMAN   | E.TAS#PVAVSLR.S           | S861:      | 2 | 2,4815 | 0,226 | -0,113 |
| 7 | P49792 RBP2_HUMAN   | K.AVVSPPKFVFGSE.S         |            | 2 | 2,4782 | 0,212 | -0,089 |
| 7 | P78364 PHC1_HUMAN   | R.AGHGERDLGNPNT#APPT#PE.L | T918:T922: | 3 | 2,4752 | 0,129 | -0,613 |
| 7 | O14744 ANM5_HUMAN   | E.IADTLGAVAK.Q            |            | 2 | 2,4714 | 0,406 | 0      |
| 7 | Q9NTK5 OLA1_HUMAN   | E.MIGPIIDKLE.K            |            | 2 | 2,4684 | 0,201 | -0,324 |
| 7 | ##Q8N4C6 NIN_HUMAN  | E.NRLIS#NE.Q              | S567:      | 2 | 2,4658 | 0,263 | 0,132  |
| 7 | P26640 SYVC_HUMAN   | R.AASGYPVKVPLEVQE.A       |            | 2 | 2,4658 | 0,33  | -0,384 |
| 7 | Q9Y490 TLN1_HUMAN   | E.FGDAISTASK.A            |            | 2 | 2,4617 | 0,115 | -0,061 |
| 7 | Q96LZ7 FA82A_HUMAN  | K.AFNTRVEE.L              |            | 2 | 2,4602 | 0,204 | 0,063  |
| 7 | P24534 EF1B_HUMAN   | E.DYVQS#M*DVAAFNKI.-      | S216:      | 2 | 2,4595 | 0,121 | -0,431 |
| 7 | P27816 MAP4_HUMAN   | K.NVVLPTETE.V             |            | 2 | 2,4592 | 0,382 | 0,061  |
| 7 | P63027 VAMP2_HUMAN  | R.LQQTQAQVDE.V            |            | 2 | 2,458  | 0,219 | -0,421 |

|   |                    |                               |              |   |        |       |        |
|---|--------------------|-------------------------------|--------------|---|--------|-------|--------|
| 7 | P35612 ADDB_HUMAN  | E.TAPEEPGSPA#APASPVQSPAKE.A   | S596:        | 3 | 2,4577 | 0,112 | -0,379 |
| 7 | Q99543 DNJC2_HUMAN | R.NRNAS#ASFQE.L               | S47:         | 2 | 2,4565 | 0,233 | -0,203 |
| 7 | Q5UIP0 RIF1_HUMAN  | E.SQES#PNENFKTVGPCLGDSK.N     | S1854:       | 3 | 2,4558 | 0,111 | 0,241  |
| 7 | P30622 CLIP1_HUMAN | E.ANGLQTPASR.A                |              | 2 | 2,454  | 0,347 | -0,328 |
| 7 | Q13263 TIF1B_HUMAN | R.STAPSAASASASAAAASSPAGGGAE.A |              | 2 | 2,4534 | 0,362 | -0,426 |
| 7 | Q9UBS4 DJB11_HUMAN | E.VVCDECPNVK.L                |              | 2 | 2,4512 | 0,333 | -0,4   |
| 7 | Q16643 DREB_HUMAN  | E.TQEPSPILDSEETR.A            |              | 2 | 2,4489 | 0,206 | 0,381  |
| 7 | Q43609 SPY1_HUMAN  | E.IQPTAILS LDQIK.A            |              | 2 | 2,4472 | 0,374 | -0,678 |
| 7 | Q02790 FKBP4_HUMAN | E.QKSNTAGS#QSQVETEA.-         | S451:        | 3 | 2,4471 | 0,384 | -0,105 |
| 7 | Q16643 DREB_HUMAN  | E.NAEPVGTTYQK.T               |              | 2 | 2,4357 | 0,158 | -0,404 |
| 7 | P35612 ADDB_HUMAN  | K.SAPASPVQSPAKE.A             |              | 2 | 2,4342 | 0,444 | -0,385 |
| 7 | P53621 COPA_HUMAN  | E.NSTYDLYTIPK.D               |              | 2 | 2,4339 | 0,28  | -0,093 |
| 7 | Q92754 AP2C_HUMAN  | K.SYMNPGDQS#PADSNKTLE.K       | S434:        | 2 | 2,4332 | 0,267 | 0,54   |
| 7 | Q6PKG0 LARP1_HUMAN | R.AVTPVPTKTEE.V               |              | 2 | 2,4321 | 0,373 | -0,416 |
| 7 | Q02952 AKA12_HUMAN | E.TLEPAGAHVLEE.K              |              | 2 | 2,431  | 0,239 | 0,354  |
| 7 | P14618 KPYM_HUMAN  | K.KGVNLPAAVDLPVAVSE.K         |              | 2 | 2,4295 | 0,271 | -0,149 |
| 7 | Q15742 NAB2_HUMAN  | E.KLS#PLPGGPGAGDPR.I          | S171:        | 3 | 2,4279 | 0,096 | -0,122 |
| 7 | Q9GZZ9 UBA5_HUMAN  | E.VIQEEEEIIHE.D               |              | 2 | 2,4277 | 0,26  | -0,178 |
| 7 | Q96TA1 NIBL1_HUMAN | E.AS#SPPAS#PLQHLLPGK.A        | S678:S683:   | 2 | 2,4269 | 0,222 | -0,624 |
| 7 | Q9Y6D5 BIG2_HUMAN  | E.IGDGKGLDM*AR.R              |              | 2 | 2,4256 | 0,363 | -0,319 |
| 7 | Q15942 ZYG_HUMAN   | R.EKVS#SIDLE.I                | S142:        | 2 | 2,4254 | 0,107 | 0      |
| 7 | Q969V6 MKL1_HUMAN  | E.SQGSVPS#PLEAR.V             | S139:        | 2 | 2,4252 | 0,239 | 0      |
| 7 | Q86UP2 KTN1_HUMAN  | E.ALCVVDLLKE.K                |              | 2 | 2,4247 | 0,388 | -0,421 |
| 7 | O00410 IMB3_HUMAN  | E.CISLIGLAVGKE.K              |              | 2 | 2,4245 | 0,381 | -0,387 |
| 7 | Q86TC9 MYPN_HUMAN  | E.RTPVDES#DDE.I               | S928:        | 2 | 2,4235 | 0,335 | -0,589 |
| 7 | Q8WYP5 AHTF1_HUMAN | E.DLLKLPFTDTEQE.C             |              | 2 | 2,4215 | 0,356 | -0,473 |
| 7 | P39060 COIA1_HUMAN | D.DM*EGS#GGPFWS#TAR.S         | S1032:S1038: | 2 | 2,419  | 0,094 | 1,895  |
| 7 | Q13523 PRP4B_HUMAN | E.DSNM*SVPSESPQSSTR.T         |              | 2 | 2,4186 | 0,24  | -0,511 |
| 7 | P09525 ANXA4_HUMAN | K.AASGFNAM*E.D                |              | 2 | 2,4175 | 0,221 | 0,067  |
| 7 | Q14247 SRC8_HUMAN  | R.AKT#QTPPV#PAPQPTEE.R        | T399:S405:   | 3 | 2,4171 | 0,138 | 0      |
| 7 | Q2VYF4 LETM2_HUMAN | E.QATKHPQVT#S#PQATK.E         | T103:S104:   | 3 | 2,4161 | 0,189 | 0,308  |
| 7 | Q96TA1 NIBL1_HUMAN | E.ASS#PPAS#PLQHLLPGK.A        | S679:S683:   | 3 | 2,4151 | 0,427 | -0,104 |
| 7 | P38159 HNRPG_HUMAN | E.RGLPPS#M*E.R                | S352:        | 2 | 2,415  | 0,289 | -0,621 |



|   |                     |                                |            |   |        |       |        |
|---|---------------------|--------------------------------|------------|---|--------|-------|--------|
| 7 | Q9H8Y8 GORS2_HUMAN  | E.SEDLFLIETHE.A                |            | 2 | 2,4148 | 0,358 | -0,258 |
| 7 | Q9HBW0 LPAR2_HUMAN  | E.NGHPLM*DST#L.-               | T350:      | 2 | 2,4141 | 0,335 | -0,207 |
| 7 | P35527 K1C9_HUMAN   | K.TLNDMRQEYEQLIAK.N            |            | 2 | 2,414  | 0,176 | -0,264 |
| 7 | P26045 PTN3_HUMAN   | E.TEDVFYTYK.G                  |            | 2 | 2,4139 | 0,256 | -0,209 |
| 7 | Q8IY67 RAVR1_HUMAN  | D.VSVTHRPLS#PK.S               | S14:       | 3 | 2,4115 | 0,264 | -0,065 |
| 7 | P20700 LMNB1_HUMAN  | R.AGGPTT#PLS#PTRLSR.L          | T20:S23:   | 3 | 2,4081 | 0,174 | 0,109  |
| 7 | P51114 FXR1_HUMAN   | E.LDEDTGTFR.I                  |            | 2 | 2,4062 | 0,373 | -0,347 |
| 7 | Q16643 DREB_HUMAN   | E.NAEPVGTTYQKTDAAVE.M          |            | 2 | 2,4061 | 0,291 | -0,544 |
| 7 | Q86WR7 CJ047_HUMAN  | E.RM*AGNEALS#PTS#PFRE.G        | S212:S215: | 2 | 2,4059 | 0,32  | -0,189 |
| 7 | Q16543 CDC37_HUMAN  | D.HIEVS#DDEDE.T                | S13:       | 2 | 2,4041 | 0,157 | -0,385 |
| 7 | Q9NX40 OCAD1_HUMAN  | E.SAPTGITDHIVQGPDPNLE.E        |            | 2 | 2,4037 | 0,201 | -0,124 |
| 7 | P42166 LAP2A_HUMAN  | E.ATQILSVPKVDDE.I              |            | 2 | 2,4028 | 0,149 | -0,086 |
| 7 | Q9UJZ1 STML2_HUMAN  | E.YAVTQLAQTTM*RSE.L            |            | 2 | 2,3969 | 0,412 | 0      |
| 7 | Q02447 SP3_HUMAN    | E.VLSATPTTIKDE.A               |            | 2 | 2,3966 | 0,248 | -0,096 |
| 7 | Q96N67 DOCK7_HUMAN  | E.RSPSGSAFGS#QE.N              | S1438:     | 2 | 2,393  | 0,247 | -0,473 |
| 7 | Q15742 NAB2_HUMAN   | E.GTGAGGLAAGGTGGGPDRLEPE.M     |            | 2 | 2,3867 | 0,337 | -0,193 |
| 7 | P07951 TPM2_HUMAN   | E.KTIDDLE.D                    |            | 2 | 2,3854 | 0,115 | 0,219  |
| 7 | Q96TA1 NIBL1_HUMAN  | E.ASS#PPAS#PLQHLLPGK.A         | S679:S683: | 2 | 2,3852 | 0,199 | -0,555 |
| 7 | Q9P0W5 SCHI1_HUMAN  | E.TSLDTPLS#PM*SK.Q             | S330:      | 2 | 2,3844 | 0,354 | 0,533  |
| 7 | Q9HD42 CHM1A_HUMAN  | E.QQVQNLVDHTSVM*E.D            |            | 2 | 2,3825 | 0,405 | -0,445 |
| 7 | Q9H6Z4 RANB3_HUMAN  | R.VLS#PPKLNE.V                 | S333:      | 2 | 2,3822 | 0,124 | -0,113 |
| 7 | Q10469 MGAT2_HUMAN  | E.ALAPPLDAEPAR.G               |            | 2 | 2,3818 | 0,524 | -0,183 |
| 7 | Q02952 AKA12_HUMAN  | E.TLEPAGAHVLE.E                |            | 2 | 2,3816 | 0,282 | 0,195  |
| 7 | Q9UJZ1 STML2_HUMAN  | K.APVPGT#PDSLSSGSSR.D          | T327:      | 2 | 2,3754 | 0,345 | -0,535 |
| 7 | Q9UNP9 PIIE_HUMAN   | R.VLYVGGLAE.V                  |            | 2 | 2,3729 | 0,247 | 0,232  |
| 7 | Q7Z4M8 Q7Z4M8_HUMAN | E.ISGALPVAS#PASSRTDLVKSE.L     | S171:      | 3 | 2,3722 | 0,085 | -0,084 |
| 7 | Q86Y56 HEAT2_HUMAN  | E.GSGLFPDLLVRE.T               |            | 2 | 2,3717 | 0,31  | -0,375 |
| 7 | Q5JRA6 MIA3_HUMAN   | R.GSS#PTRVLDE.G                | S1745:     | 2 | 2,3682 | 0,182 | 0,107  |
| 7 | P35998 PRS7_HUMAN   | E.VVETPLLHPE.R                 |            | 2 | 2,3659 | 0,321 | 0      |
| 7 | Q8N2Y8 RUSC2_HUMAN  | E.REGPAAS#PAENE.E              | S1368:     | 2 | 2,3621 | 0,193 | -0,466 |
| 7 | Q96G28 CC104_HUMAN  | K.THTSQAILQPVLAAE.D            |            | 2 | 2,362  | 0,279 | -0,309 |
| 7 | Q9Y2W1 TR150_HUMAN  | E.AQVNVRM*DS#FDEDLARPSGLLAQE.R | S575:      | 3 | 2,3579 | 0,21  | -0,265 |
| 7 | Q6ZRV2 FA83H_HUMAN  | R.RLS#LGQGDSTE.A               | S1003:     | 2 | 2,3563 | 0,393 | -1,08  |

|   |                    |                                |              |   |        |       |        |
|---|--------------------|--------------------------------|--------------|---|--------|-------|--------|
| 7 | Q9Y265 RUVB1_HUMAN | E.IIQDVTLHDL.D.V               |              | 2 | 2,3534 | 0,186 | 0,286  |
| 7 | Q9UJX2 CDC23_HUMAN | R.RVS#PLNLSVTP.#P.-            | S582:T590:   | 2 | 2,3532 | 0,324 | -0,341 |
| 7 | Q14BN4 SLMAP_HUMAN | E.SDFSDTLS#PSKEK.S             | S452:        | 2 | 2,3491 | 0,202 | -0,802 |
| 7 | P61758 PFD3_HUMAN  | E.DLDFLRDQFTTTE.V              |              | 2 | 2,349  | 0,22  | -0,61  |
| 7 | P35527 K1C9_HUMAN  | R.QGVDADINGLR.Q                |              | 2 | 2,3446 | 0,319 | -0,632 |
| 7 | P04264 K2C1_HUMAN  | R.TLLEGEESR.M                  |              | 2 | 2,342  | 0,326 | -0,118 |
| 7 | P17706 PTN2_HUMAN  | E.DLSPAFDHS#PNKIMTE.K          | S304:        | 3 | 2,3403 | 0,2   | 0,097  |
| 7 | Q9ULR0 ISY1_HUMAN  | K.FIAHVPVPSQQE.I               |              | 2 | 2,3377 | 0,134 | -0,18  |
| 7 | P62191 PRS4_HUMAN  | E.SVELPLTHPE.Y                 |              | 2 | 2,3361 | 0,341 | -0,109 |
| 7 | Q9Y490 TLN1_HUMAN  | D.TASDVLDKASSLIEE.A            |              | 2 | 2,3357 | 0,265 | -0,232 |
| 7 | Q9Y2L5 TRS85_HUMAN | K.NSDNNLLSLDGLDNE.V            |              | 2 | 2,3352 | 0,261 | -0,523 |
| 7 | Q13439 GOGA4_HUMAN | R.TSS#FTEQLDE.G                | S41:         | 2 | 2,335  | 0,156 | 0,197  |
| 7 | Q6ZRV2 FA83H_HUMAN | R.RLSLGQGDSTE.A                |              | 2 | 2,3334 | 0,21  | 0      |
| 7 | Q6GYQ0 GRIPE_HUMAN | E.SAS#PVHS#PLGSR.S             | S990:S994:   | 3 | 2,3325 | 0,161 | -0,067 |
| 7 | Q9NR31 SAR1A_HUMAN | E.TISNVPILILGNK.I              |              | 2 | 2,3309 | 0,368 | -0,441 |
| 7 | O15047 SET1A_HUMAN | E.NSSMVLGAR.D                  |              | 2 | 2,3299 | 0,214 | 0,065  |
| 7 | P54105 ICLN_HUMAN  | K.GLGTGLTYIAE.S                |              | 2 | 2,3296 | 0,134 | -0,111 |
| 7 | Q15650 TRIP4_HUMAN | E.SDSPFVFICK.N                 |              | 2 | 2,3294 | 0,311 | -0,102 |
| 7 | Q07157 ZO1_HUMAN   | E.YSM*YSTDSR.H                 |              | 2 | 2,3292 | 0,26  | -0,217 |
| 7 | Q6ZS17 FA65A_HUMAN | R.T#LSHS#EASVDAALAE.A          | T451:S456:   | 2 | 2,3272 | 0,244 | -0,275 |
| 7 | P11142 HSP7C_HUMAN | K.NQVAMNPTNTVFD.A              |              | 2 | 2,3229 | 0,336 | 0,336  |
| 7 | O14497 ARI1A_HUMAN | E.YEVDGPGQR.T                  |              | 2 | 2,3228 | 0,266 | -0,06  |
| 7 | Q13480 GAB1_HUMAN  | E.NYVPM*NPNS#PPRQHSSSFTEPIQE.A | S454:        | 3 | 2,322  | 0,172 | -0,577 |
| 7 | O43237 DC1L2_HUMAN | R.RGPLTSGSDEE.N                |              | 2 | 2,322  | 0,282 | -0,213 |
| 7 | Q5SW79 CE170_HUMAN | R.TRLGS#LSARS#DSE.A            | S1160:S1165: | 2 | 2,3211 | 0,379 | 0,238  |
| 7 | Q14C86 GAPD1_HUMAN | E.LESCSGLGSTSDDTDVRE.V         |              | 2 | 2,3197 | 0,322 | -0,19  |
| 7 | Q5VZK9 LR16A_HUMAN | E.NRFGLGT#PE.K                 | T1228:       | 2 | 2,3192 | 0,262 | 0      |
| 7 | Q9UPQ0 LIMC1_HUMAN | R.VTVKS#LDY#SRKLN.N            | S116:Y119:   | 3 | 2,3188 | 0,105 | -1,186 |
| 7 | Q9UPU9 SAM4A_HUMAN | E.LHQM*ILTPIK.A                |              | 2 | 2,3145 | 0,336 | 0      |
| 7 | P11171 41_HUMAN    | E.VKEES#PQS#KAETE.L            | S188:S191:   | 2 | 2,3142 | 0,131 | -0,752 |
| 7 | Q9UNX4 WDR3_HUMAN  | E.IEDPEEPDPK.K                 |              | 2 | 2,3125 | 0,101 | 0,104  |
| 7 | Q9P246 STIM2_HUMAN | E.TKS#M*IFSPASK.V              | S661:        | 2 | 2,3123 | 0,192 | -0,472 |
| 7 | Q96GE4 CCD45_HUMAN | K.SRTS#FVEDTE.T                | S234:        | 2 | 2,3121 | 0,15  | -0,195 |

|   |                     |                                 |            |   |        |       |        |
|---|---------------------|---------------------------------|------------|---|--------|-------|--------|
| 7 | Q9HC35 EMAL4_HUMAN  | E.IEVPDQYGTIR.A                 |            | 2 | 2,3114 | 0,132 | -0,284 |
| 7 | O94804 STK10_HUMAN  | E.AECPNPST#PSK.A                | T952:      | 2 | 2,311  | 0,347 | -0,674 |
| 7 | O75955 FLOT1_HUMAN  | E.VLDILTRLPE.S                  |            | 2 | 2,3105 | 0,189 | -0,417 |
| 7 | P55072 TERA_HUMAN   | E.DNSVVV#LSQPKMDE.L             | S40:       | 2 | 2,3087 | 0,232 | -0,225 |
| 7 | P35527 K1C9_HUMAN   | R.IKFEMEQLNR.Q                  |            | 2 | 2,3085 | 0,152 | 0,093  |
| 7 | Q9Y4P8 WIPI2_HUMAN  | K.GTYVPSS#PTR.L                 | S413:      | 2 | 2,3083 | 0,109 | -0,107 |
| 7 | Q9UQ35 SRRM2_HUMAN  | R.GEFSAS#PMLK.S                 | S1124:     | 2 | 2,3056 | 0,21  | -0,106 |
| 7 | P42166 LAP2A_HUMAN  | E.ATQILSVPK.V                   |            | 2 | 2,305  | 0,175 | -0,127 |
| 7 | Q9UPU9 SAM4A_HUMAN  | K.AYSS#PSTT#PE.A                | S231:T235: | 2 | 2,304  | 0,174 | -0,305 |
| 7 | Q9UBB9 TFP11_HUMAN  | R.DMVVNLFHE.L                   |            | 2 | 2,304  | 0,277 | -0,221 |
| 7 | Q13523 PRP4B_HUMAN  | R.TRSPSPDDILE.R                 |            | 2 | 2,3022 | 0,162 | -0,198 |
| 7 | P35908 K22E_HUMAN   | K.DVDNAYMIK.V                   |            | 2 | 2,3006 | 0,188 | 0      |
| 7 | P35658 NU214_HUMAN  | K.SSVLPS#PSGR.S                 | S646:      | 2 | 2,2992 | 0,096 | -0,457 |
| 7 | P62937 PIIA_HUMAN   | D.IAVDGEPLGR.V                  |            | 2 | 2,2961 | 0,217 | 0      |
| 7 | A8K7V5 A8K7V5_HUMAN | E.VSTAPAGTDM*PAAK.K             |            | 2 | 2,295  | 0,31  | -0,275 |
| 7 | Q12888 TP53B_HUMAN  | E.IEPKNS#PEDLGLSLTGDSC.L        | S500:      | 3 | 2,2931 | 0,089 | 0,327  |
| 7 | Q9H4L7 SMRCD_HUMAN  | E.VSRANT#PDS#DITEKTE.D          | T54:S57:   | 2 | 2,2924 | 0,219 | -0,571 |
| 7 | P11142 HSP7C_HUMAN  | K.VCNPIITK.L                    |            | 2 | 2,2921 | 0,194 | 0,258  |
| 7 | Q6P0N0 CN106_HUMAN  | E.KDYFNSNSDS#A.-                | S1131:     | 2 | 2,2906 | 0,297 | -0,089 |
| 7 | Q3KQU3 MA7D1_HUMAN  | E.LGAGAPPVVAR.T                 |            | 2 | 2,2888 | 0,362 | -0,226 |
| 7 | Q9Y2K5 R3HD2_HUMAN  | K.ASS#FSGISILTR.G               | S349:      | 2 | 2,2883 | 0,283 | -0,463 |
| 7 | P45880 VDAC2_HUMAN  | E.FSTSGSSNTDTGKVTGTLE.T         |            | 2 | 2,2881 | 0,165 | -0,388 |
| 7 | Q969Y2 GTPB3_HUMAN  | E.VEGLADLIHAETE.A               |            | 2 | 2,286  | 0,258 | -0,437 |
| 7 | Q8N1F7 NUP93_HUMAN  | E.SEPSYISDVGPPGR.S              |            | 2 | 2,2857 | 0,128 | 0,251  |
| 7 | Q66K74 MAP1S_HUMAN  | E.LGPIPAGEEKALE.L               |            | 2 | 2,2855 | 0,145 | -0,276 |
| 7 | O15355 PPM1G_HUMAN  | E.DAFLAIDAK.L                   |            | 2 | 2,2812 | 0,209 | -0,316 |
| 7 | Q5T230 UTF1_HUMAN   | E.LGLPVS#PGSAQR.T               | S54:       | 2 | 2,2811 | 0,276 | -0,193 |
| 7 | Q14157 UBP2L_HUMAN  | K.STSAPQM*SPGS#SDNQSSSPQPAQQK.L | S470:      | 3 | 2,2799 | 0,212 | -0,209 |
| 7 | Q13188 STK3_HUMAN   | E.SGQVVAIK.Q                    |            | 2 | 2,2797 | 0,376 | 0,304  |
| 7 | Q96L91 EP400_HUMAN  | K.ALS#PVTSR.T                   | S736:      | 2 | 2,2784 | 0,13  | 0,067  |
| 7 | Q13586 STIM1_HUMAN  | R.SHS#PSSPDPDTPSPVGD.S          | S618:      | 2 | 2,2776 | 0,338 | -0,832 |
| 7 | P20700 LMNB1_HUMAN  | R.LKLS#PS#PSSR.V                | S391:S393: | 2 | 2,2774 | 0,242 | -0,297 |
| 7 | P38159 HNRPG_HUMAN  | E.RGLPPS#ME.R                   | S352:      | 2 | 2,2767 | 0,119 | -0,126 |

|   |                    |                        |        |   |        |       |        |
|---|--------------------|------------------------|--------|---|--------|-------|--------|
| 7 | P50402 EMD_HUMAN   | E.DALLYQSK.G           |        | 2 | 2,2752 | 0,261 | -0,585 |
| 7 | Q16352 AINX_HUMAN  | E.YQDLLNVK.M           |        | 2 | 2,2751 | 0,158 | -0,061 |
| 7 | O60841 IF2P_HUMAN  | E.GNTVHIEVK.E          |        | 2 | 2,2743 | 0,09  | -0,428 |
| 7 | P33176 KINH_HUMAN  | D.KDITLTND.K           |        | 2 | 2,2734 | 0,188 | -0,133 |
| 7 | P20700 LMNB1_HUMAN | R.AGGPTTPLS#PTR.L      | S23:   | 2 | 2,2733 | 0,285 | -0,198 |
| 7 | P52597 HNRPF_HUMAN | E.DVQNFSLSDCTIHD.G     |        | 2 | 2,2725 | 0,097 | 0,078  |
| 7 | Q9Y266 NUDC_HUMAN  | R.FDGMLLAMAQQHE.G      |        | 2 | 2,2706 | 0,396 | -0,573 |
| 7 | Q8WYP5 AHTF1_HUMAN | E.ARNLS#FNE.L          | S1550: | 2 | 2,2678 | 0,09  | -0,118 |
| 7 | Q9UHX1 PUF60_HUMAN | K.LGLPPLTPEQQE.A       |        | 2 | 2,266  | 0,249 | -0,092 |
| 7 | P42166 LAP2A_HUMAN | E.DLLDQLVK.Y           |        | 2 | 2,2651 | 0,169 | -0,646 |
| 7 | Q9Y3F4 STRAP_HUMAN | E.IASENSDCIFPSAPDVKA.- |        | 2 | 2,2594 | 0,528 | -0,508 |
| 7 | P61218 RPAB2_HUMAN | E.GETDPLLIAMKE.L       |        | 2 | 2,2576 | 0,181 | -0,463 |
| 7 | Q12906 ILF3_HUMAN  | E.TEAKPAVVAPAPVVE.A    |        | 2 | 2,2558 | 0,3   | -0,495 |
| 7 | Q3KQU3 MA7D1_HUMAN | E.NGFSTNGPSGDK.S       |        | 2 | 2,2544 | 0,23  | -0,413 |
| 7 | Q7Z4K8 TRI46_HUMAN | E.SFQGAPDVISPR.Y       |        | 2 | 2,2536 | 0,321 | -0,192 |
| 7 | O00418 EF2K_HUMAN  | E.GVDGGQSPR.A          |        | 2 | 2,2532 | 0,149 | -0,07  |
| 7 | Q8TDY2 RBCC1_HUMAN | K.SVEHVS#PDTADAE.S     | S266:  | 2 | 2,2528 | 0,173 | 0      |
| 7 | P17812 PYRG1_HUMAN | D.VSSIYRVPLLEE.Q       |        | 2 | 2,2523 | 0,158 | -0,321 |
| 7 | O43264 ZW10_HUMAN  | R.DSVVLSLLK.Q          |        | 2 | 2,2505 | 0,226 | -0,313 |
| 7 | O15027 SC16A_HUMAN | K.FANLT#PSR.T          | T1876: | 2 | 2,2503 | 0,101 | 0      |
| 7 | P00533 EGFR_HUMAN  | E.DHFLSLQR.M           |        | 2 | 2,2491 | 0,215 | -0,36  |
| 7 | P46821 MAP1B_HUMAN | E.DYVM*AVVDKAAE.A      |        | 2 | 2,249  | 0,213 | -0,368 |
| 7 | Q9BTX1 NDC1_HUMAN  | R.VSSSYVPEPK.K         |        | 2 | 2,2487 | 0,206 | -0,446 |
| 7 | P10809 CH60_HUMAN  | R.GYISPYFINTSK.G       |        | 2 | 2,2475 | 0,11  | 0      |
| 7 | P10599 THIO_HUMAN  | E.ALDAAGDKLVVVD.F      |        | 2 | 2,2471 | 0,395 | -0,095 |
| 7 | Q9UHD8 SEPT9_HUMAN | E.M*IPFAVVGSDHE.Y      |        | 2 | 2,2468 | 0,221 | 0,093  |
| 7 | P60174 TPIS_HUMAN  | E.LIGTLNAAK.V          |        | 2 | 2,2467 | 0,241 | 0,068  |
| 7 | P38159 HNRPG_HUMAN | K.LFIGGLNTE.T          |        | 2 | 2,2455 | 0,129 | -0,19  |
| 7 | P13645 K1C10_HUMAN | K.NHEEEMKDLR.N         |        | 3 | 2,2432 | 0,208 | 0,07   |
| 7 | P61086 UBE2K_HUMAN | E.IAGPPDTPYEGGR.Y      |        | 2 | 2,2409 | 0,429 | -0,459 |
| 7 | Q8IVF2 AHNK2_HUMAN | E.GIAPTPEPLQPSKR.K     |        | 2 | 2,2406 | 0,276 | -0,298 |
| 7 | Q9HD15 SRA1_HUMAN  | E.TSPGPPPM*GPPPPSSK.A  |        | 2 | 2,2353 | 0,398 | -0,473 |
| 7 | Q9H8W4 PKHF2_HUMAN | R.SDSYSQSLK.S          |        | 2 | 2,2349 | 0,378 | -0,421 |

|   |                     |                                  |                 |   |        |       |        |
|---|---------------------|----------------------------------|-----------------|---|--------|-------|--------|
| 7 | Q15642 CIP4_HUMAN   | E.DFSQPMNR.A                     |                 | 2 | 2,2343 | 0,193 | 0,061  |
| 7 | P08559 ODPA_HUMAN   | E.EGPPVTVLTRE.D                  |                 | 2 | 2,2332 | 0,319 | -0,282 |
| 7 | P61978 HNRPK_HUMAN  | D.LISES#PIKGR.A                  | S216:           | 2 | 2,2317 | 0,223 | -0,103 |
| 7 | P09525 ANXA4_HUMAN  | E.GNYLDDALVRQDAQDLYE.A           |                 | 3 | 2,2309 | 0,092 | 0,087  |
| 7 | Q14789 GGOGB1_HUMAN | E.DSYNQVQSFSK.A                  |                 | 2 | 2,229  | 0,324 | -0,936 |
| 7 | P17301 ITA2_HUMAN   | E.IKAIASIPTE.Y                   |                 | 2 | 2,2254 | 0,235 | 0,203  |
| 7 | O15514 RPB4_HUMAN   | E.DASQLIFPKEFE.T                 |                 | 2 | 2,221  | 0,277 | -0,343 |
| 7 | Q9Y371 SHLB1_HUMAN  | E.VLLQPNPNAR.I                   |                 | 2 | 2,2163 | 0,25  | -0,435 |
| 7 | Q13523 PRP4B_HUMAN  | R.TRSPS#PDDILE.R                 | S580:           | 2 | 2,212  | 0,124 | -0,186 |
| 7 | O14964 HGS_HUMAN    | E.SDAM*FAAER.A                   |                 | 2 | 2,2111 | 0,296 | -0,241 |
| 7 | Q86SQ0 PHLB2_HUMAN  | E.YTKPDSRSL#T#GTTVE.D            | S468:T469:      | 2 | 2,2085 | 0,194 | -0,269 |
| 7 | Q9UNX4 WDR3_HUMAN   | E.KLILTLT#.-                     | T943:           | 2 | 2,2075 | 0,307 | 0,069  |
| 7 | P20839 IMDH1_HUMAN  | E.LVVAPAGVTLKE.A                 |                 | 2 | 2,2048 | 0,198 | -0,102 |
| 7 | Q9NPF0 CD320_HUMAN  | R.TSGLCVPLTWR.C                  |                 | 2 | 2,2039 | 0,089 | -0,473 |
| 7 | Q9UKV3 ACINU_HUMAN  | E.AS#SPPPHPQLHS#EEE.I            | S424:S434:      | 2 | 2,2026 | 0,228 | -0,406 |
| 7 | Q9UBT2 SAE2_HUMAN   | E.FEVVGDAPKVGPK.Q                |                 | 3 | 2,2025 | 0,3   | -0,124 |
| 7 | P49790 NU153_HUMAN  | E.GSVLDILKS#PGFASPK.I            | S614:           | 3 | 2,2019 | 0,095 | -0,216 |
| 7 | Q96SB3 NEB2_HUMAN   | E.LFPVELEKDSE.G                  |                 | 2 | 2,2019 | 0,134 | 0,467  |
| 7 | P04264 K2C1_HUMAN   | R.DYQELMNTK.L                    |                 | 2 | 2,1958 | 0,266 | -0,427 |
| 7 | Q14BN4 SLMAP_HUMAN  | E.SDFSDTLS#PSKEK.S               | S452:           | 3 | 2,1956 | 0,086 | -0,361 |
| 7 | P35908 K22E_HUMAN   | K.IEISELNR.V                     |                 | 2 | 2,193  | 0,197 | -0,125 |
| 7 | Q12797 ASPH_HUMAN   | E.FLM*ATDVDDRFE.T                |                 | 2 | 2,1908 | 0,137 | 1,075  |
| 7 | Q08752 PPID_HUMAN   | E.LFADIVPK.T                     |                 | 2 | 2,1908 | 0,205 | -0,135 |
| 7 | A1L390 PKHG3_HUMAN  | R.FFFNPSAVSQR.T                  |                 | 2 | 2,1893 | 0,148 | -0,094 |
| 7 | P85037 FOXK1_HUMAN  | R.TPFGPLSSR.S                    |                 | 2 | 2,189  | 0,259 | -0,063 |
| 7 | O75531 BAF_HUMAN    | D.FVAEPM*GEKPVGSLAGIGE.V         |                 | 2 | 2,1833 | 0,105 | 0      |
| 7 | Q00613 HSF1_HUMAN   | E.LAPASPM*AS#PGGSIDERPLSSSPLVR.V | S279:           | 3 | 2,1819 | 0,158 | -0,408 |
| 7 | P04264 K2C1_HUMAN   | K.SLNNQFASFIDKVR.F               |                 | 2 | 2,1805 | 0,314 | -0,447 |
| 7 | Q9HCM1 CL035_HUMAN  | K.NM*ETPSTSNVSGR.V               |                 | 2 | 2,1782 | 0,103 | -0,262 |
| 7 | Q9HCS7 SYF1_HUMAN   | E.QQSVPAAVFGSLKED.-              |                 | 2 | 2,1767 | 0,265 | -0,465 |
| 7 | P53611 PGTB2_HUMAN  | D.VIIKSDAPDTLLLE.K               |                 | 2 | 2,1765 | 0,184 | 0,08   |
| 7 | P62753 RS6_HUMAN    | R.RLS#S#LRAST#SKSE.S             | S235:S236:T241: | 3 | 2,1752 | 0,158 | 0      |
| 7 | Q96S90 LYSM1_HUMAN  | R.SYGSLVQSACS#PVRE.R             | S33:            | 2 | 2,1751 | 0,209 | 0,497  |

|   |                      |                         |              |   |        |       |        |
|---|----------------------|-------------------------|--------------|---|--------|-------|--------|
| 7 | Q9BYT8 NEUL_HUMAN    | E.DDTFLVFSK.A           |              | 2 | 2,1748 | 0,228 | -0,114 |
| 7 | P54652 HSP72_HUMAN   | E.LNADLFR.G             |              | 2 | 2,1716 | 0,167 | 0,072  |
| 7 | Q4ZG04 Q4ZG04_HUMAN  | E.LLLSTLVR.E            |              | 2 | 2,1674 | 0,234 | -0,133 |
| 7 | O95361 TRI16_HUMAN   | E.LDLMAPGPLPR.A         |              | 2 | 2,1644 | 0,297 | -0,414 |
| 7 | P35527 K1C9_HUMAN    | K.TLLDIDNTR.M           |              | 2 | 2,1631 | 0,238 | 0      |
| 7 | P16949 STMN1_HUMAN   | E.SVPEFPLS#PPK.K        | S38:         | 2 | 2,1619 | 0,139 | 0,668  |
| 7 | O75531 BAF_HUMAN     | D.FVAEPMGEKPVGSLAGIGE.V |              | 2 | 2,1616 | 0,243 | 0      |
| 7 | P27987 IP3KB_HUMAN   | E.KGIPAS#PR.C           | S264:        | 2 | 2,1604 | 0,176 | -0,269 |
| 7 | Q9UBG0 MRC2_HUMAN    | E.GARYS#RSS#SSPTEATE.K  | S1453:S1456: | 2 | 2,1592 | 0,416 | -0,397 |
| 7 | Q2KHR3 QSER1_HUMAN   | E.LDGLPSDQFAK.G         |              | 2 | 2,1592 | 0,231 | -0,41  |
| 7 | Q9Y2W1 TR150_HUMAN   | E.KDNIQPTT#E.-          | T954:        | 2 | 2,1571 | 0,102 | -0,108 |
| 7 | P04264 K2C1_HUMAN    | K.SISISVAR.G            |              | 2 | 2,1568 | 0,17  | 1,318  |
| 7 | Q9BS91 S35A5_HUMAN   | R.LTKPKS#DES#DEDTF.-    | S416:S419:   | 2 | 2,1562 | 0,097 | -0,551 |
| 7 | Q99700 ATX2_HUMAN    | E.NKGIS#PVVSE.H         | S783:        | 2 | 2,1534 | 0,328 | -0,22  |
| 7 | Q5SW79 CE170_HUMAN   | R.QGSFT#IEKPSNPIE.L     | T840:        | 2 | 2,1521 | 0,227 | -0,332 |
| 7 | P19105 MLRM_HUMAN    | E.LLTTM*GDR.F           |              | 2 | 2,1508 | 0,23  | 0      |
| 7 | P09874 PARP1_HUMAN   | E.VAYSLLR.G             |              | 2 | 2,1492 | 0,186 | 0,223  |
| 7 | Q14257 RCN2_HUMAN    | E.FIAFEHPPEVDYM*TE.F    |              | 2 | 2,1485 | 0,187 | -0,651 |
| 7 | Q9P1Y6 K1542_HUMAN   | E.DLPTRLPALGEAHVS#PE.V  | S1229:       | 3 | 2,1445 | 0,084 | -0,097 |
| 7 | P14406 CX7A2_HUMAN   | E.DDEIPLYLK.G           |              | 2 | 2,1428 | 0,219 | 0,11   |
| 7 | Q16625 OCLN_HUMAN    | E.LPLTSPVDDFRQPR.Y      |              | 3 | 2,142  | 0,171 | 0      |
| 7 | ##Q5XG92 ESTHL_HUMAN | E.EVVLPVQEK.T           |              | 2 | 2,1404 | 0,112 | 0      |
| 7 | Q15642 CIP4_HUMAN    | E.DFSQPM*NR.A           |              | 2 | 2,1396 | 0,13  | 0,121  |
| 7 | P51784 UBP11_HUMAN   | E.DIVVPVYLRE.R          |              | 2 | 2,1367 | 0,302 | -0,304 |
| 7 | Q8WWY3 PRP31_HUMAN   | E.KSGLMS#T.-            | S498:        | 2 | 2,136  | 0,305 | 0,379  |
| 7 | P29401 TKT_HUMAN     | E.AM*AFASIYKLD.N        |              | 2 | 2,1314 | 0,207 | 0,49   |
| 7 | P11142 HSP7C_HUMAN   | E.ELNADLFRGTLDPVE.K     |              | 2 | 2,1275 | 0,157 | -0,361 |
| 7 | P08621 RU17_HUMAN    | E.LRGGGGDM*AEPS#EAGD.A  | S320:        | 2 | 2,1255 | 0,179 | -0,756 |
| 7 | O15231 ZN185_HUMAN   | R.RESCGS#SVLTDFE.G      | S236:        | 2 | 2,1252 | 0,138 | -0,311 |
| 7 | Q12824 SNF5_HUMAN    | E.VLVPIRLDM*E.I         |              | 2 | 2,1246 | 0,249 | 0      |
| 7 | P07237 PDIA1_HUMAN   | E.VAVIGFFK.D            |              | 2 | 2,1228 | 0,145 | 0,138  |
| 7 | Q9ULD5 ZN777_HUMAN   | K.RLAPSVHGE.R           |              | 2 | 2,1201 | 0,201 | -0,253 |
| 7 | P21127 CD2L1_HUMAN   | K.YLPALQGCR.S           |              | 2 | 2,1175 | 0,349 | -0,113 |

|   |                    |                          |              |   |        |       |        |
|---|--------------------|--------------------------|--------------|---|--------|-------|--------|
| 7 | O00487 PSDE_HUMAN  | E.AVDPVFQAK.M            |              | 2 | 2,1133 | 0,27  | -0,063 |
| 7 | Q9H7P9 PKHG2_HUMAN | E.LFS#GSGNPGK.L          | S714:        | 2 | 2,113  | 0,178 | 0,247  |
| 7 | P22314 UBA1_HUMAN  | E.SGEDVEVPYVR.Y          |              | 2 | 2,1124 | 0,196 | 0,098  |
| 7 | Q8NDB6 FA156_HUMAN | K.RNPASPSKS#SPM*TAAE.T   | S15:         | 3 | 2,1119 | 0,166 | -0,424 |
| 7 | Q9BQY9 DBND2_HUMAN | E.LSLPVPTSDR.T           |              | 2 | 2,11   | 0,205 | 0,112  |
| 7 | P13645 K1C10_HUMAN | R.LAADDFR.L              |              | 2 | 2,11   | 0,347 | 0,302  |
| 7 | P57737 CORO7_HUMAN | E.LLNAM*VAK.L            |              | 2 | 2,1096 | 0,145 | 0,139  |
| 7 | P04406 G3P_HUMAN   | K.VGVNGFGR.I             |              | 2 | 2,1096 | 0,224 | -0,303 |
| 7 | P49368 TCPG_HUMAN  | R.NVLLDPQLVPGGGASE.M     |              | 2 | 2,1069 | 0,295 | -0,39  |
| 7 | P51948 MAT1_HUMAN  | E.SCVDLLFVR.G            |              | 2 | 2,1049 | 0,251 | -0,33  |
| 7 | Q8WWQ0 PHIP_HUMAN  | E.AGISNTR.L              |              | 2 | 2,0961 | 0,247 | 0,076  |
| 7 | O15417 TNC18_HUMAN | R.KEEAPENVVE.K           |              | 2 | 2,0941 | 0,159 | -0,213 |
| 7 | Q96CW1 AP2M1_HUMAN | R.LSKFDS#E.R             | S259:        | 2 | 2,0938 | 0,091 | 0,067  |
| 7 | Q9Y446 PKP3_HUMAN  | E.QLEPAATSTYR.A          |              | 2 | 2,0915 | 0,259 | -0,197 |
| 7 | P07237 PDIA1_HUMAN | E.VAVIGFFKDVE.S          |              | 2 | 2,0898 | 0,323 | -0,299 |
| 7 | Q9NSD9 SYFB_HUMAN  | D.LLFQALGR.T             |              | 2 | 2,089  | 0,293 | 0,066  |
| 7 | Q14683 SMC1A_HUMAN | R.ISSIYARE.A             |              | 2 | 2,0832 | 0,102 | 0,13   |
| 7 | Q14202 ZMYM3_HUMAN | E.TTSIATAR.R             |              | 2 | 2,0781 | 0,173 | 0,149  |
| 7 | Q5T4S7 UBR4_HUMAN  | K.LCTFTITQKE.F           |              | 2 | 2,0764 | 0,218 | -0,098 |
| 7 | O95208 EPN2_HUMAN  | R.GSS#QPNLSTSHSEQE.Y     | S173:        | 2 | 2,0713 | 0,213 | -0,658 |
| 7 | Q01814 AT2B2_HUMAN | K.SATSSSPGS#PIHSLETS#L.- | S1234:S1242: | 2 | 2,0686 | 0,378 | -0,318 |
| 7 | P21333 FLNA_HUMAN  | E.TSSVFVDSLTK.A          |              | 2 | 2,0668 | 0,331 | -0,103 |
| 7 | Q03518 TAP1_HUMAN  | E.ALSAM*PTVR.S           |              | 2 | 2,0651 | 0,328 | -0,19  |
| 7 | Q96AE4 FUBP1_HUMAN | E.RSCM*LTGT#PE.S         | T153:        | 2 | 2,0651 | 0,113 | -0,196 |
| 7 | P04264 K2C1_HUMAN  | K.DVDGAYMTK.V            |              | 2 | 2,0615 | 0,277 | 0,183  |
| 7 | P49368 TCPG_HUMAN  | D.IIQLKPDVVITE.K         |              | 2 | 2,0609 | 0,388 | 0,089  |
| 7 | Q8WY36 BBX_HUMAN   | K.QCQTSALFQFAE.I         |              | 2 | 2,06   | 0,257 | -0,341 |
| 7 | P15927 RFA2_HUMAN  | D.MTAAPM*DVR.Q           |              | 2 | 2,0595 | 0,148 | 0,121  |
| 7 | Q9UHB6 LIMA1_HUMAN | K.VGVLAASM*E.A           |              | 2 | 2,0574 | 0,272 | 0,205  |
| 7 | Q13561 DCTN2_HUMAN | E.QAM*QFGQLLTHLD.T       |              | 2 | 2,0572 | 0,165 | -0,321 |
| 7 | Q13464 ROCK1_HUMAN | E.SDIEQLR.A              |              | 2 | 2,0568 | 0,084 | 0,071  |
| 7 | P53618 COPB_HUMAN  | E.ITVGPVQK.L             |              | 2 | 2,054  | 0,217 | 0,217  |
| 7 | P04406 G3P_HUMAN   | K.LVINGNPITIFQE.R        |              | 2 | 2,0535 | 0,248 | -0,335 |

|   |                     |                        |        |   |        |       |        |
|---|---------------------|------------------------|--------|---|--------|-------|--------|
| 7 | P49792 RBP2_HUMAN   | K.AVVS#PPKFVFGSE.S     | S2510: | 2 | 2,0524 | 0,342 | -0,338 |
| 7 | P35908 K22E_HUMAN   | K.FASFIDKVR.F          |        | 2 | 2,0515 | 0,199 | 0      |
| 7 | P49792 RBP2_HUMAN   | E.TT#PKAVVSPPK.F       | T2504: | 2 | 2,0429 | 0,214 | -0,608 |
| 7 | P05062 ALDOB_HUMAN  | R.YASICQQNGLVPIVEPE.V  |        | 2 | 2,0414 | 0,153 | -0,7   |
| 7 | P35908 K22E_HUMAN   | R.SLVGLGGTK.S          |        | 2 | 2,0388 | 0,15  | 0,293  |
| 7 | P15924 DESP_HUMAN   | E.TGLCLLPLKE.K         |        | 2 | 2,036  | 0,168 | -0,213 |
| 7 | P11142 HSP7C_HUMAN  | E.TKSFYPEE.V           |        | 2 | 2,0328 | 0,243 | -0,244 |
| 7 | Q6PJG2 CN043_HUMAN  | E.AT#PVSIEPR.I         | T715:  | 2 | 2,0325 | 0,303 | -0,232 |
| 7 | Q7Z434 MAVS_HUMAN   | R.NPDGGPLESSD.L        |        | 2 | 2,0322 | 0,193 | -0,312 |
| 7 | P27816 MAP4_HUMAN   | E.TVGKTDYIPLLDVDE.K    |        | 2 | 2,0318 | 0,225 | -0,436 |
| 7 | Q68D38 Q68D38_HUMAN | E.DISTTVVYRM*E.S       |        | 2 | 2,0259 | 0,293 | 0      |
| 7 | Q9NQP4 PFD4_HUMAN   | K.KAAAEDVNVTFE.D       |        | 2 | 2,025  | 0,161 | 0,283  |
| 7 | A8K710 A8K710_HUMAN | E.QSNTPLLLPLAAR.M      |        | 2 | 2,0198 | 0,234 | -0,35  |
| 7 | O00139 KIF2A_HUMAN  | E.VSPQLFTFHE.A         |        | 2 | 2,0185 | 0,136 | -0,405 |
| 7 | Q9UQ80 PA2G4_HUMAN  | R.LVKPGNQNTQVTE.A      |        | 2 | 2,0179 | 0,219 | -0,342 |
| 7 | P36915 GNL1_HUMAN   | R.NPYALLGEDEC.-        |        | 2 | 2,0151 | 0,252 | 0      |
| 7 | O60271 JIP4_HUMAN   | E.DLPLEPSVTKAE.R       |        | 2 | 2,0118 | 0,31  | -0,094 |
| 7 | P52701 MSH6_HUMAN   | E.DLMVVPDKISE.V        |        | 2 | 2,0069 | 0,12  | -0,098 |
| 7 | Q9Y230 RUVB2_HUMAN  | E.M*ETIYDLGTK.M        |        | 2 | 1,9985 | 0,238 | 0,206  |
| 7 | P18858 DNL1_HUMAN   | E.QAT TSAQVACL YRK.Q   |        | 2 | 1,9963 | 0,09  | -0,764 |
| 7 | P51610 HCFC1_HUMAN  | R.VCSNPPCETHE.T        |        | 2 | 1,9959 | 0,132 | -0,55  |
| 7 | Q9UBT2 SAE2_HUMAN   | E.FEVVGDAPEK.V         |        | 2 | 1,9957 | 0,206 | -0,224 |
| 7 | Q9Y4P1 ATG4B_HUMAN  | E.RFFDS#EDE.D          | S383:  | 2 | 1,9921 | 0,261 | 0,108  |
| 7 | Q9UKM9 RALY_HUMAN   | E.AGLPQGEAR.T          |        | 2 | 1,9917 | 0,254 | -0,475 |
| 7 | Q9H4A3 WNK1_HUMAN   | K.SIS#NPPGSNLR.T       | S2372: | 2 | 1,9868 | 0,149 | -0,1   |
| 7 | Q12873 CHD3_HUMAN   | R.KIPLEDEVPGVPE.M      |        | 2 | 1,981  | 0,153 | -0,33  |
| 7 | O94804 STK10_HUMAN  | K.FFPYSSADAS.-         |        | 2 | 1,9757 | 0,344 | 0,223  |
| 7 | Q16531 DDB1_HUMAN   | E.ATADDLIK.V           |        | 2 | 1,9721 | 0,227 | 0,072  |
| 7 | P35568 IRS1_HUMAN   | K.S#PGEYVNIE.F         | S892:  | 2 | 1,962  | 0,14  | -0,112 |
| 7 | P49792 RBP2_HUMAN   | E.TT#PKAVVSPPKFVFGSE.S | T2504: | 2 | 1,9606 | 0,282 | -0,326 |
| 7 | Q00610 CLH1_HUMAN   | E.AIDSYIK.A            |        | 2 | 1,9562 | 0,184 | 0,602  |
| 7 | O75955 FLOT1_HUMAN  | E.ISGPLTSANK.I         |        | 2 | 1,9505 | 0,139 | 0,185  |
| 7 | P49792 RBP2_HUMAN   | E.DIHFEPIVSLPE.V       |        | 2 | 1,9407 | 0,155 | -0,437 |



|   |                      |                        |       |   |        |       |        |
|---|----------------------|------------------------|-------|---|--------|-------|--------|
| 7 | Q71RC2 LARP4_HUMAN   | E.IAPGNTDATPVTHGTE.S   |       | 2 | 1,9312 | 0,529 | -0,386 |
| 7 | Q14980 NUMA1_HUMAN   | R.SAPASQASLR.A         |       | 2 | 1,9273 | 0,247 | 0,185  |
| 7 | O94762 RECQ5_HUMAN   | E.DGSEPLPGPR.G         |       | 2 | 1,925  | 0,231 | 0,119  |
| 7 | Q5UIP0 RIF1_HUMAN    | K.TVGPCLGDSK.N         |       | 2 | 1,9227 | 0,135 | 0      |
| 7 | P07954 FUMH_HUMAN    | E.NEPGSSIMPGK.V        |       | 2 | 1,9213 | 0,214 | -0,218 |
| 7 | ##Q96P64 CTLF1_HUMAN | K.IT#STQLDIE.K         | T350: | 2 | 1,9209 | 0,108 | -0,333 |
| 7 | O96019 ACL6A_HUMAN   | E.DCPKVDFTAIGM*VVE.R   |       | 2 | 1,9201 | 0,206 | -0,34  |
| 7 | Q9Y4P8 WIPI2_HUMAN   | R.LAYTDDLGAVGGACLEDE.A |       | 2 | 1,9187 | 0,193 | -0,457 |
| 7 | P30153 2AAA_HUMAN    | E.NVIM*SQILPCKE.L      |       | 2 | 1,9169 | 0,228 | -0,469 |
| 7 | P49792 RBP2_HUMAN    | E.STTGFNFSFK.S         |       | 2 | 1,9103 | 0,338 | -0,322 |
| 7 | P25205 MCM3_HUMAN    | E.AGAMVLADR.G          |       | 2 | 1,9066 | 0,101 | 0      |
| 7 | Q9BZK7 TBL1R_HUMAN   | E.DGTLFDGRPIE.S        |       | 2 | 1,9046 | 0,257 | -0,2   |
| 7 | Q14C86 GAPD1_HUMAN   | E.DTQFVDGYK.Q          |       | 2 | 1,9005 | 0,349 | 0      |
| 7 | P46459 NSF_HUMAN     | E.SNFPFIK.I            |       | 2 | 1,8871 | 0,098 | 0,286  |
| 7 | P35222 CTNB1_HUMAN   | E.LTSSLFR.T            |       | 2 | 1,8839 | 0,148 | 0,074  |
| 7 | P40763 STAT3_HUMAN   | E.ADPGSAAPYLK.T        |       | 2 | 1,8824 | 0,311 | 0      |
| 7 | Q13546 RIPK1_HUMAN   | D.CVAVPSSR.S           |       | 2 | 1,8787 | 0,186 | -0,348 |
| 7 | Q6ZRV2 FA83H_HUMAN   | R.GSPVPPVPER.R         |       | 2 | 1,8782 | 0,265 | -0,118 |
| 7 | Q15942 ZYX_HUMAN     | K.VSS#IDLE.I           | S143: | 2 | 1,8755 | 0,102 | 0,145  |
| 7 | O95340 PAPS2_HUMAN   | E.TLPSLSITKLD.L        |       | 2 | 1,8707 | 0,229 | 0      |
| 7 | P49915 GUAA_HUMAN    | E.VFLAQGTLRPDLIE.S     |       | 2 | 1,844  | 0,196 | -0,621 |
| 7 | P05783 K1C18_HUMAN   | R.STFSTNYR.S           |       | 2 | 1,8407 | 0,209 | 0      |
| 7 | P85037 FOXK1_HUMAN   | R.S#APASPTHPLM*SPR.S   | S416: | 2 | 1,8404 | 0,326 | -0,305 |
| 7 | P30622 CLIP1_HUMAN   | K.EPSATPPISNLTK.T      |       | 2 | 1,8396 | 0,237 | -0,09  |
| 7 | P49795 RGS19_HUMAN   | E.DYVSILSPKE.V         |       | 2 | 1,8361 | 0,107 | 0,212  |
| 7 | O43237 DC1L2_HUMAN   | R.GPLTSGSDEE.N         |       | 2 | 1,8349 | 0,205 | 0,062  |
| 7 | Q96T23 RSF1_HUMAN    | K.AQIDPVLLK.N          |       | 2 | 1,834  | 0,144 | -0,184 |
| 7 | Q58FF8 H90B2_HUMAN   | E.SKEQVANSFAVE.Q       |       | 2 | 1,8296 | 0,114 | -0,28  |
| 7 | Q9HAW4 CLSPN_HUMAN   | E.LLNLCSGK.F           |       | 2 | 1,8212 | 0,116 | -0,067 |
| 7 | Q9NZN5 ARHGC_HUMAN   | E.DILVLLQK.Q           |       | 2 | 1,8165 | 0,17  | -0,194 |
| 7 | P78310 CXAR_HUMAN    | R.TPQS#PTLPPAK.V       | S332: | 2 | 1,816  | 0,167 | -0,201 |
| 7 | P46821 MAP1B_HUMAN   | K.SDISLTPR.E           |       | 2 | 1,8126 | 0,098 | 1,237  |
| 7 | A4D0Z9 A4D0Z9_HUMAN  | E.DALPGLGLYR.T         |       | 2 | 1,8112 | 0,15  | 0      |

|   |                    |                        |        |   |        |       |        |
|---|--------------------|------------------------|--------|---|--------|-------|--------|
| 7 | P04264 K2C1_HUMAN  | R.SLVNLGGSK.S          |        | 2 | 1,8105 | 0,171 | -0,558 |
| 7 | P04264 K2C1_HUMAN  | K.NMQDMVEDYR.N         |        | 2 | 1,8017 | 0,161 | -0,281 |
| 7 | Q9P258 RCC2_HUMAN  | K.GNLYSFGCPE.Y         |        | 2 | 1,8015 | 0,116 | 0,107  |
| 7 | P14618 KPYM_HUMAN  | R.GDLGIEIPAE.K         |        | 2 | 1,8    | 0,083 | -0,06  |
| 7 | Q71U36 TBA1A_HUMAN | K.TIGGGDDSFNTFFSE.T    |        | 2 | 1,7977 | 0,169 | -0,459 |
| 7 | Q9HCF4 ALO17_HUMAN | K.FCSQCGER.L           |        | 2 | 1,7968 | 0,304 | -0,234 |
| 7 | Q53T59 H1BP3_HUMAN | E.FLGTRS#PGAAGLTSR.D   | S139:  | 2 | 1,7931 | 0,229 | -0,155 |
| 7 | Q9NWS0 PIHD1_HUMAN | E.LGDLYTPAPGRAE.S      |        | 2 | 1,7814 | 0,311 | -0,897 |
| 7 | P07814 SYEP_HUMAN  | E.IVFEDPKIPGE.K        |        | 2 | 1,7804 | 0,259 | -0,392 |
| 7 | Q9H4L7 SMRCD_HUMAN | E.SQGLPTM*AR.R         |        | 2 | 1,7783 | 0,109 | 0,125  |
| 7 | Q9HC35 EMAL4_HUMAN | E.TVADTTLTK.A          |        | 2 | 1,7781 | 0,326 | -0,128 |
| 7 | O43164 PJA2_HUMAN  | E.LDSVPLVK.S           |        | 2 | 1,7702 | 0,17  | 0,21   |
| 7 | P49792 RBP2_HUMAN  | K.SEEPDSITK.S          |        | 2 | 1,765  | 0,217 | 0,061  |
| 7 | Q13435 SF3B2_HUMAN | E.MDDPSVGPK.I          |        | 2 | 1,7623 | 0,101 | -0,064 |
| 7 | Q9HB40 RISC_HUMAN  | E.DFMKPVISIVDE.L       |        | 2 | 1,7613 | 0,12  | -0,438 |
| 7 | Q8TDY2 RBCC1_HUMAN | E.SLLTSFPK.S           |        | 2 | 1,7575 | 0,132 | 0      |
| 7 | P35527 K1C9_HUMAN  | R.MTLDDFR.I            |        | 2 | 1,756  | 0,308 | -0,136 |
| 7 | Q13404 UB2V1_HUMAN | E.NM*KLPQPPEGQCY#SN.-  | Y219:  | 2 | 1,754  | 0,133 | -0,197 |
| 7 | P19105 MLRM_HUMAN  | E.LLTTMGDR.F           |        | 2 | 1,7423 | 0,25  | 0      |
| 7 | P49792 RBP2_HUMAN  | K.SISSPS#VSSE.T        | S2807: | 2 | 1,7365 | 0,097 | 0      |
| 7 | Q6S8J3 A26CA_HUMAN | E.KM*TQIMFE.T          |        | 2 | 1,735  | 0,194 | 0      |
| 7 | P30533 AMRP_HUMAN  | E.AEFEEPR.V            |        | 2 | 1,7318 | 0,135 | 0,139  |
| 7 | Q15386 UBE3C_HUMAN | E.LYPAFCIHNGGSDLE.R    |        | 2 | 1,7311 | 0,094 | -0,144 |
| 7 | Q16851 UGPA_HUMAN  | K.DVSYSGENTE.A         |        | 2 | 1,7305 | 0,114 | -0,332 |
| 7 | Q8IVF2 AHNK2_HUMAN | E.VQAGQVDVK.L          |        | 2 | 1,7235 | 0,107 | -0,065 |
| 7 | P42677 RS27_HUMAN  | K.DLLHPSPEEE.K         |        | 2 | 1,723  | 0,161 | -0,523 |
| 7 | P14618 KPYM_HUMAN  | K.GVNLPGAAVDLPVSE.K    |        | 2 | 1,7207 | 0,223 | -0,243 |
| 7 | Q04323 SAKS1_HUMAN | E.LGLVPSAVLIVAK.K      |        | 2 | 1,707  | 0,152 | -0,572 |
| 7 | Q03252 LMNB2_HUMAN | R.AGGPATPLSPTR.L       |        | 2 | 1,6966 | 0,211 | -0,217 |
| 7 | Q13206 DDX10_HUMAN | E.VFDVSKLPIPE.Y        |        | 2 | 1,6877 | 0,14  | -0,294 |
| 7 | Q9HD15 SRA1_HUMAN  | E.TSPGPPPMGPPPPSSK.A   |        | 2 | 1,6844 | 0,19  | -0,478 |
| 7 | P04792 HSPB1_HUMAN | E.GTLTVEAPM*PK.L       |        | 2 | 1,6786 | 0,131 | -0,21  |
| 7 | P40222 TXLNA_HUMAN | E.AGPEGAQERPSQAAPAVE.A |        | 2 | 1,6724 | 0,158 | -0,415 |

|   |                     |                                       |              |   |        |       |        |
|---|---------------------|---------------------------------------|--------------|---|--------|-------|--------|
| 7 | Q7RTZ1 OVCH2_HUMAN  | K.SDQGSPGIFTD.I                       |              | 2 | 1,6684 | 0,169 | 1,411  |
| 7 | O94842 TOX4_HUMAN   | R.SGCENPPIVSK.D                       |              | 2 | 1,6572 | 0,205 | -0,308 |
| 7 | P20042 IF2B_HUMAN   | E.VEPEPTEDKDLE.A                      |              | 2 | 1,6546 | 0,093 | -0,261 |
| 7 | Q7L7V1 DHX32_HUMAN  | E.GLECPNSSSEK.R                       |              | 2 | 1,6542 | 0,252 | 0,202  |
| 7 | Q9BYG5 PAR6B_HUMAN  | E.DNGVPQQIPK.A                        |              | 2 | 1,6509 | 0,232 | -0,111 |
| 7 | Q5T1M5 FKB15_HUMAN  | R.ERPES#PM*VPSEQVVEE.A                | S979:        | 2 | 1,6508 | 0,201 | -0,567 |
| 7 | P20645 MPRD_HUMAN   | K.SNGKETVVGR.L                        |              | 2 | 1,6372 | 0,243 | -0,35  |
| 7 | P78371 TCPB_HUMAN   | E.ACTIVLR.G                           |              | 2 | 1,6271 | 0,087 | 0,22   |
| 7 | P80723 BASP_HUMAN   | E.QAAPGPAAGGEAPK.A                    |              | 2 | 1,6223 | 0,118 | -0,3   |
| 7 | P30153 2AAA_HUMAN   | E.ALVMPTLR.Q                          |              | 2 | 1,6202 | 0,082 | 0,135  |
| 7 | P46821 MAP1B_HUMAN  | E.QYGFLTPTK.Q                         |              | 2 | 1,6201 | 0,362 | -0,106 |
| 7 | Q15942 ZYX_HUMAN    | E.APIPPPQPR.E                         |              | 2 | 1,5974 | 0,127 | -0,228 |
| 7 | Q13445 TMED1_HUMAN  | E.FTFLLPAGR.K                         |              | 2 | 1,5769 | 0,165 | -0,477 |
| 7 | Q86TC9 MYPN_HUMAN   | R.SSVPIPIPADTRDNE.V                   |              | 2 | 1,5413 | 0,142 | -0,303 |
| 7 | Q92616 GCN1L_HUMAN  | E.DALCTVLHLTE.R                       |              | 2 | 1,5389 | 0,151 | -0,384 |
| 7 | P62263 RS14_HUMAN   | E.DVTPIPSDSTR.R                       |              | 2 | 1,5117 | 0,102 | -0,514 |
| 7 | Q15149 PLEC1_HUMAN  | E.LQLVTYK.A                           |              | 2 | 1,5014 | 0,117 | 0,212  |
| 7 | Q6DKJ4 NXN_HUMAN    | E.VIAGPLLR.N                          |              | 2 | 1,4862 | 0,099 | 0,073  |
| 7 | Q9H5Y7 SLIK6_HUMAN  | K.VLSPSGLLIHCQE.R                     |              | 2 | 1,4519 | 0,086 | 0,588  |
| 7 | Q14247 SRC8_HUMAN   | R.AKT#QTPPV#PAPQPTEER.L               | T399:S405:   | 2 | 1,4322 | 0,21  | -0,233 |
| 7 | P30153 2AAA_HUMAN   | E.ALVM*PTLR.Q                         |              | 2 | 1,413  | 0,25  | 0      |
| 7 | Q92785 REQU_HUMAN   | E.GEDKEDS#QPPTPVS#QR.S                | S244:S251:   | 2 | 1,4022 | 0,305 | -0,443 |
| 7 | P07954 FUMH_HUMAN   | E.NEPGSSIMPGKVNPTQCE.A                |              | 2 | 1,3817 | 0,082 | -0,251 |
| 7 | Q01813 K6PP_HUMAN   | E.HVQPWS#V.-                          | S783:        | 2 | 1,3559 | 0,275 | -0,131 |
| 8 | Q92734 TFG_HUMAN    | E.INKNVM*SAFGLTDDQVSGPPSAPAEDR.S      |              | 3 | 6,35   | 0,509 | -0,517 |
| 8 | Q92734 TFG_HUMAN    | E.INKNVMSAFGLTDDQVSGPPSAPAEDR.S       |              | 3 | 6,2298 | 0,511 | -0,52  |
| 8 | Q00839 HNRPU_HUMAN  | E.AGGRPAMEPGNGS#LDLGGDSAGR.S          | S59:         | 3 | 5,8893 | 0,512 | -0,412 |
| 8 | Q00839 HNRPU_HUMAN  | E.AGGRPAM*EPGNGSLDLGGDS#AGRSGAGLEQE.A | S66:         | 3 | 5,6874 | 0,421 | -0,365 |
| 8 | Q12893 TM115_HUMAN  | E.SGAKVDS#PLPSDKAPT#PPGKGAPE.S        | S320:T329:   | 3 | 5,6041 | 0,221 | -0,433 |
| 8 | A8K6V7 A8K6V7_HUMAN | E.LEEK#TT#PPPAEPVSLPQEPPKPR.V         | S225:T227:   | 3 | 5,6012 | 0,458 | -0,46  |
| 8 | O95817 BAG3_HUMAN   | E.VKVPPAPVPCPPS#PGPSAVPSSPK.S         | S377:        | 3 | 5,586  | 0,437 | 0      |
| 8 | Q01082 SPTB2_HUMAN  | E.SQQQWDTSKGEQVS#QNGLPAEQGSPR.M       | S2128:       | 3 | 5,4081 | 0,275 | 0,063  |
| 8 | Q9ULT8 HECD1_HUMAN  | E.GHDSLS#VGS#FEEDSKSE.F               | S2317:S2320: | 2 | 5,3568 | 0,475 | -0,372 |

|   |                     |                                   |                 |   |        |       |        |
|---|---------------------|-----------------------------------|-----------------|---|--------|-------|--------|
| 8 | Q9UK76 HN1_HUMAN    | R.RNS#SEASSGDFLDLKG.E.G           | S87:            | 2 | 5,343  | 0,601 | -0,516 |
| 8 | Q13263 TIF1B_HUMAN  | E.TKPVLM*ALAEGPGAEGPR.L           |                 | 3 | 5,2498 | 0,347 | 0      |
| 8 | P55196 AFAD_HUMAN   | K.ITSVSTGNLCTEEQT#PPRPE.A         | T1194:          | 3 | 5,1878 | 0,446 | -0,153 |
| 8 | P42566 EP15_HUMAN   | E.SEPHQESPARSS#PELLPSGVTDENE.V    | S563:           | 3 | 5,1464 | 0,494 | -0,381 |
| 8 | Q92734 TFG_HUMAN    | K.NVM*SAFGLTDDQVSGPPSAPAEDR.S     |                 | 3 | 5,1088 | 0,346 | -0,443 |
| 8 | Q5UIP0 RIF1_HUMAN   | E.NRPFS#PSPLNNISSTVTVK.N          | S1236:          | 3 | 5,0827 | 0,326 | -0,257 |
| 8 | P51991 ROA3_HUMAN   | D.FGNYSGQQQSNYGPMK.G              |                 | 2 | 5,0638 | 0,511 | -0,405 |
| 8 | Q13111 CAF1A_HUMAN  | D.ILAVRPPQIKS#LPAT#PQGK.N         | S237:T241:      | 3 | 5,0418 | 0,39  | -0,505 |
| 8 | Q9H832 UBE2Z_HUMAN  | E.NAEM*DSDSSSS#GTETDLHGSLRV.-     | S342:           | 3 | 5,0348 | 0,558 | -0,367 |
| 8 | Q9UGU0 TCF20_HUMAN  | E.ATS#PGAKDM*PLSSDGNPKVNE.K       | S583:           | 3 | 5,0178 | 0,392 | -0,165 |
| 8 | Q13501 SQSTM_HUMAN  | E.SSSTEKSSS#QPSSCCSDPSKPGGNVE.G   | S284:           | 3 | 4,9785 | 0,441 | -0,379 |
| 8 | P51991 ROA3_HUMAN   | D.FGNYSGQQQSNYGPM*K.G             |                 | 2 | 4,9781 | 0,474 | -0,268 |
| 8 | Q8WXI9 P66B_HUMAN   | E.RGRLT#PS#PDIIVLS#DNEASSPR.S     | T120:S122:S129: | 3 | 4,9584 | 0,33  | -0,419 |
| 8 | Q8WVT3 TTC15_HUMAN  | E.AARPEQEPPVAEPVPVCTIFSQR.A       |                 | 3 | 4,9304 | 0,301 | -0,426 |
| 8 | Q96T23 RSF1_HUMAN   | E.SEKPGS#PEAAETSPPSNIIDHCE.K      | S612:           | 3 | 4,9117 | 0,436 | -0,361 |
| 8 | P13667 PDIA4_HUMAN  | E.SDPAYQQYQDAANNLRE.D             |                 | 2 | 4,8942 | 0,522 | -0,308 |
| 8 | Q7Z2W4 ZCCHV_HUMAN  | E.FLASASASAERSCT#PS#PDQISHR.A     | T273:S275:      | 3 | 4,8681 | 1     | -0,139 |
| 8 | Q92797 SYMPK_HUMAN  | E.DAMKTPS#PAAEDAREPE.A            | S1259:          | 3 | 4,8225 | 0,445 | -0,097 |
| 8 | P42345 FRAP_HUMAN   | E.SIHS#FIGDGLVKPE.A               | S2481:          | 3 | 4,8121 | 0,323 | 0      |
| 8 | O60271 JIP4_HUMAN   | E.TRNVS#TGS#AENEKSE.V             | S329:S332:      | 2 | 4,8057 | 0,55  | -0,579 |
| 8 | Q00839 HNRPU_HUMAN  | E.AGGRPAM*EPGNLS#LDLGGDSAGR.S     | S59:            | 3 | 4,8031 | 0,536 | 0,082  |
| 8 | Q9UGU0 TCF20_HUMAN  | E.AT#SPGAKDMPLSSDGNPKVNE.K        | T582:           | 3 | 4,7959 | 0,455 | -0,25  |
| 8 | B2CI53 B2CI53_HUMAN | R.NGILASPQS#APGNLNSK.S            | S263:           | 2 | 4,7324 | 0,492 | -0,327 |
| 8 | Q13263 TIF1B_HUMAN  | E.TKPVLMALAEGPGAEGPR.L            |                 | 2 | 4,7262 | 0,516 | -0,408 |
| 8 | Q969F1 TF3C6_HUMAN  | E.IQM*NDS#SNLSCEQEKPMHLE.I        | S173:           | 3 | 4,6924 | 0,459 | -0,294 |
| 8 | Q8NFC6 FA44A_HUMAN  | E.DKS#PETGTAGGSSTASYSAGR.G        | S2475:          | 3 | 4,6689 | 0,45  | -0,354 |
| 8 | Q92797 SYMPK_HUMAN  | E.DAM*KTPS#PAAEDAREPE.A           | S1259:          | 3 | 4,6577 | 0,454 | -0,096 |
| 8 | P27816 MAP4_HUMAN   | K.TDYIPLLDVDEKTGNS#E.S            | S60:            | 2 | 4,6531 | 0,472 | -0,123 |
| 8 | Q13263 TIF1B_HUMAN  | E.TKPVLMALAEGPGAEGPR.L            |                 | 3 | 4,6506 | 0,311 | 0      |
| 8 | Q96IZ7 RSRC1_HUMAN  | E.IEAIES#DSFVQQTFR.S              | S237:           | 2 | 4,6185 | 0,546 | -0,396 |
| 8 | P40189 IL6RB_HUMAN  | E.GHSSGIGGSSCM*SSSRPS#ISS#SDENE.S | S740:S743:      | 3 | 4,6162 | 1     | -0,33  |
| 8 | P31946 1433B_HUMAN  | E.VASGDNKQTTVSNSQQAYQE.A          |                 | 3 | 4,5765 | 0,491 | -0,17  |
| 8 | Q09666 AHNK_HUMAN   | K.TVIRLPS#GSGAAS#PTGSAVDIR.A      | S210:S216:      | 3 | 4,5725 | 0,3   | -0,081 |

|   |                    |                                 |            |   |        |       |        |
|---|--------------------|---------------------------------|------------|---|--------|-------|--------|
| 8 | Q9Y2K5 R3HD2_HUMAN | E.TQDIIQLHISCPS#DKEEE.K         | S109:      | 3 | 4,5545 | 0,382 | -0,082 |
| 8 | Q15390 MTFR1_HUMAN | E.KAPS#RQIS#LPDLSQEEPQLK.T      | S115:S119: | 3 | 4,4863 | 0,297 | -0,226 |
| 8 | Q9UPN3 MACF1_HUMAN | E.LATSGGQSPT#GEQIPQFQQR.Q       | T3636:     | 3 | 4,4605 | 0,373 | 0,083  |
| 8 | Q92615 LARP5_HUMAN | E.KFTSSQTQSPT#PPKPPS#PSFE.L     | T518:S524: | 3 | 4,4461 | 1     | -0,15  |
| 8 | Q14694 UBP10_HUMAN | E.TKY#SPPAISPLVSEK.Q            | Y364:      | 3 | 4,4356 | 0,26  | 0      |
| 8 | Q13263 TIF1B_HUMAN | E.TKPVLM*ALAEGPGAEGPR.L         |            | 2 | 4,4081 | 0,52  | -0,202 |
| 8 | Q9H0E9 BRD8_HUMAN  | K.GDETPLTNVKTEAS#PE.S           | S579:      | 2 | 4,3964 | 0,491 | -0,207 |
| 8 | Q14694 UBP10_HUMAN | E.T#KYSPPAISPLVSEKQVE.V         | T362:      | 3 | 4,3909 | 0,307 | -0,178 |
| 8 | P22314 UBA1_HUMAN  | E.LQSANASVDDSRLEE.L             |            | 2 | 4,3901 | 0,419 | -0,523 |
| 8 | O75179 ANR17_HUMAN | E.HYPVSS#PSSPSPAQPGGVSR.N       | S2042:     | 3 | 4,388  | 0,33  | -0,337 |
| 8 | Q5VT52 K0460_HUMAN | E.AASQSTSAS#PANTTVSTIK.G        | S564:      | 2 | 4,3857 | 0,409 | -0,385 |
| 8 | P35527 K1C9_HUMAN  | R.GSGSGSYGGGGSGGGYGGGSGSR.G     |            | 2 | 4,3803 | 0,428 | -0,409 |
| 8 | P13645 K1C10_HUMAN | K.GSLGGGFSSGGFSGGSFSR.G         |            | 2 | 4,3635 | 0,612 | -0,357 |
| 8 | Q6S8J3 A26CA_HUMAN | E.KS#YELPDGQVITIGNE.R           | S939:      | 2 | 4,3615 | 0,389 | -0,331 |
| 8 | Q6IQ49 CA055_HUMAN | K.LQES#QPGNAVIDKE.T             | S373:      | 2 | 4,3382 | 0,447 | -0,228 |
| 8 | Q04917 1433F_HUMAN | E.DSYKDSTLIM*QLLR.D             |            | 3 | 4,3364 | 0,141 | 0,215  |
| 8 | P49023 PAXI_HUMAN  | R.VTSTQQQTRIS#ASSATRE.L         | S258:      | 3 | 4,323  | 0,437 | -0,45  |
| 8 | O15234 CASC3_HUMAN | E.QTSVRDPS#PEADAPVLGSPEKE.E     | S363:      | 3 | 4,3142 | 0,434 | -0,153 |
| 8 | P0C7M2 RA1L3_HUMAN | D.FGNYNQSSNFGPMK.G              |            | 2 | 4,3048 | 0,401 | -0,358 |
| 8 | Q9UGU0 TCF20_HUMAN | E.ATS#PGAKDMLPSSDGNPKVNE.K      | S583:      | 3 | 4,3011 | 0,321 | -0,25  |
| 8 | Q16531 DDB1_HUMAN  | E.VQDTSGGTTALRPSASTQALSSSVSSK.L |            | 3 | 4,2964 | 0,421 | -0,068 |
| 8 | O60271 JIP4_HUMAN  | E.TRNVS#TGS#AENEKSE.V           | S329:S332: | 3 | 4,2963 | 0,377 | -0,096 |
| 8 | Q92538 GBF1_HUMAN  | E.GTHVEKSQSAS#VES#IPEVLEE.C     | S349:S352: | 3 | 4,2896 | 0,313 | -0,455 |
| 8 | P13994 CC130_HUMAN | E.EAAQDRPM*S#PGDCPPETTETPK.C    | S332:      | 3 | 4,28   | 0,271 | -0,219 |
| 8 | P11388 TOP2A_HUMAN | E.ADDVKGSVPLSSS#PPATHFPDE.T     | S1393:     | 3 | 4,272  | 0,368 | -0,392 |
| 8 | P39880 CUX1_HUMAN  | E.IQAGSQGQAGASDPSAR.S           |            | 3 | 4,2708 | 0,357 | 0      |
| 8 | Q12873 CHD3_HUMAN  | E.ASATNS#PCTSKPATPAPSEKGE.G     | S1549:     | 3 | 4,2685 | 0,192 | -0,403 |
| 8 | Q02952 AKA12_HUMAN | K.GALNGQGALNSQEEEE.V            |            | 2 | 4,2616 | 0,444 | -0,297 |
| 8 | Q9H3S7 PTN23_HUMAN | E.SQHGGT#QSPGGGQPLLQPTKVDAAE.G  | T1131:     | 3 | 4,2568 | 0,258 | -0,216 |
| 8 | P48960 CD97_HUMAN  | E.GSYDCVCSPGYEPVSGAK.T          |            | 2 | 4,2398 | 0,432 | -0,063 |
| 8 | O75970 MPDZ_HUMAN  | E.DVTKDADLS#PVNASIIKE.N         | S483:      | 2 | 4,2362 | 0,459 | -0,183 |
| 8 | Q96DT7 ZBT10_HUMAN | E.GASLGDGS#GAEGGSCSSSR.R        | S197:      | 2 | 4,2313 | 0,537 | -0,48  |
| 8 | Q8WXI9 P66B_HUMAN  | R.LQQQAALS#PTTAPAVSSVSKQE.T     | S486:      | 3 | 4,2054 | 0,355 | 0      |

|   |                    |                                    |                    |   |        |       |        |
|---|--------------------|------------------------------------|--------------------|---|--------|-------|--------|
| 8 | Q8IV48 THEX1_HUMAN | E.GGEEPPRPS#PEETQQCKFDGQE.T        | S34:               | 3 | 4,2047 | 0,419 | -0,496 |
| 8 | Q92797 SYMPK_HUMAN | E.DAMKTPS#PAAEDAREPE.A             | S1259:             | 2 | 4,198  | 0,437 | -0,58  |
| 8 | P51991 ROA3_HUMAN  | D.FGNYSGQQSNYGPM*KGGSFGR.S         |                    | 3 | 4,1888 | 0,356 | -0,15  |
| 8 | P80723 BASP_HUMAN  | E.GT#PKESEPOAAAEPAAEKE.G           | T36:               | 3 | 4,184  | 0,146 | -0,634 |
| 8 | Q86U44 MTA70_HUMAN | E.IDACM*DSEAPGSKDHTPS#QE.L         | S350:              | 3 | 4,178  | 0,411 | -0,161 |
| 8 | Q9UNS2 CSN3_HUMAN  | K.SMGSQEDDSGNKPSSY#S.-             | Y422:              | 2 | 4,1696 | 0,566 | -0,592 |
| 8 | Q15424 SAFB1_HUMAN | E.LAEAPTEAPS#PEAR.D                | S344:              | 2 | 4,1598 | 0,43  | -0,482 |
| 8 | Q01804 OTUD4_HUMAN | K.TAAAAADVNGFKPLSGNE.Q             |                    | 2 | 4,1368 | 0,539 | -0,141 |
| 8 | Q08945 SSRP1_HUMAN | E.IPLSNVSQCTTGKNE.V                |                    | 2 | 4,1309 | 0,416 | -0,37  |
| 8 | P35527 K1C9_HUMAN  | R.SGGGGGGGLGSGGSIR.S               |                    | 2 | 4,1223 | 0,586 | 0,198  |
| 8 | Q8N201 INT1_HUMAN  | R.VAGDLGAGSSPHPS#LTEEEDSQTE.L      | S288:              | 3 | 4,121  | 0,346 | -0,22  |
| 8 | P04264 K2C1_HUMAN  | R.SLDLDSIAEVK.A                    |                    | 2 | 4,1195 | 0,43  | -0,375 |
| 8 | Q6S8J3 A26CA_HUMAN | E.KSY#ELPDGQVITIGNE.R              | Y940:              | 2 | 4,1073 | 0,46  | -0,397 |
| 8 | Q14247 SRC8_HUMAN  | R.AKTQT#PPVS#PAPQPTTEERLPSS#PVYE.D | T401:S405:S418:    | 3 | 4,0876 | 1     | -0,42  |
| 8 | Q969F1 TF3C6_HUMAN | E.IQM*NDS#SNLSCEQEKPM*HLE.I        | S173:              | 3 | 4,0814 | 0,312 | -0,366 |
| 8 | O95359 TACC2_HUMAN | E.KLDNTPAS#PPRS#PAEPNDIPIAK.G      | S2317:S2321:       | 3 | 4,0801 | 0,127 | -0,141 |
| 8 | Q13136 LIPA1_HUMAN | E.AEGPPGGGGHSGSGS#PSQPDADSHFE.Q    | S26:               | 3 | 4,0798 | 0,334 | -0,222 |
| 8 | Q5UIP0 RIF1_HUMAN  | E.SQES#PNENFKTVGPCLGDSK.N          | S1854:             | 3 | 4,0783 | 0,383 | -0,161 |
| 8 | Q6S8J3 A26CA_HUMAN | E.KSYELPDGQVIT#IGNE.R              | T949:              | 2 | 4,0652 | 0,364 | -0,132 |
| 8 | O43633 CHM2A_HUMAN | E.LSNLPSTGGS#LSVAAGGK.K            | S188:              | 2 | 4,0637 | 0,509 | -0,432 |
| 8 | P13798 ACPH_HUMAN  | E.DDCFGCLSWHSE.T                   |                    | 2 | 4,0634 | 0,355 | -0,381 |
| 8 | Q12756 KIF1A_HUMAN | E.GRYGATDLRT#PQPCS#RPAS#PEPE.L     | T1523:S1528:S1532: | 3 | 4,059  | 0,2   | -0,395 |
| 8 | Q02952 AKA12_HUMAN | E.GGGAGTKS#VPEDDGHALLAE.R          | S1674:             | 2 | 4,0544 | 0,434 | -0,187 |
| 8 | Q99590 SFRIP_HUMAN | E.NSVTHCS#ENNM*PSSDLADEKVE.T       | S438:              | 3 | 4,0303 | 0,197 | -0,071 |
| 8 | Q5VUA4 ZN318_HUMAN | E.VILKGS#PEEKVVLAE.K               | S1420:             | 2 | 4,0303 | 0,471 | -0,216 |
| 8 | P42345 FRAP_HUMAN  | E.SIHS#FIGDGLVKPE.A                | S2481:             | 2 | 4,0164 | 0,397 | -0,541 |
| 8 | P39880 CUX1_HUMAN  | E.IQAGSQGQAGASDSPSAR.S             |                    | 2 | 4,011  | 0,53  | -0,578 |
| 8 | Q8NHZ8 CDC26_HUMAN | E.DVEVVGGS#DGEGAIGLSSDPK.S         | S42:               | 3 | 4,0031 | 0,322 | -0,177 |
| 8 | Q92576 PHF3_HUMAN  | E.NNLQDNQTSNSS#PCR.S               | S1614:             | 2 | 4,002  | 0,511 | -0,605 |
| 8 | P46821 MAP1B_HUMAN | R.KLGDVS#PTQIDVVSQFGSFKE.D         | S1501:             | 3 | 3,9999 | 0,33  | 0      |
| 8 | Q92576 PHF3_HUMAN  | R.SNVGKGNIDGNVSCSE.N               |                    | 2 | 3,9905 | 0,508 | -0,298 |
| 8 | O94842 TOX4_HUMAN  | E.LVSGS#PVALS#PQPR.C               | S562:S567:         | 2 | 3,9864 | 0,334 | -0,311 |
| 8 | Q99613 EIF3C_HUMAN | E.LVTKPVGGNYGKQPLLS#EDEE.D         | S39:               | 3 | 3,9656 | 0,306 | -0,519 |

|   |                     |                                      |              |   |        |       |        |
|---|---------------------|--------------------------------------|--------------|---|--------|-------|--------|
| 8 | POC7M2 RA1L3_HUMAN  | D.FGNYNQSSNFGPM*K.G                  |              | 2 | 3,9647 | 0,37  | -0,354 |
| 8 | Q8NHZ8 CDC26_HUMAN  | E.VVGG#DGEGAIGLSSDPK.S               | S42:         | 2 | 3,9646 | 0,41  | -0,283 |
| 8 | Q7Z6E9 RBBP6_HUMAN  | E.GSSSTLVDTSTSTGG#PVRKSEE.K          | S1277:       | 3 | 3,9421 | 0,373 | -0,282 |
| 8 | Q8NG31 CASC5_HUMAN  | R.KSLGT#PTVICT#PTEE.S                | T1011:T1017: | 2 | 3,9404 | 0,421 | -0,408 |
| 8 | P55072 TERA_HUMAN   | E.CQANFISIKGPE.L                     |              | 2 | 3,9284 | 0,374 | 0      |
| 8 | P10809 CH60_HUMAN   | E.IAQVATISANGDKE.I                   |              | 2 | 3,9192 | 0,411 | -0,086 |
| 8 | Q08J23 NSUN2_HUMAN  | R.AGEPNS#PDAEEANS#PDVTAGCDPAGVHPPR.- | S743:S751:   | 3 | 3,9057 | 0,404 | -0,115 |
| 8 | Q99728 BARD1_HUMAN  | E.VSLPLAEQIES#PDTK.S                 | S288:        | 2 | 3,9048 | 0,49  | -0,429 |
| 8 | P36507 MP2K2_HUMAN  | R.RKPVLPALTINPTIAEGPS#PTSE.G         | S23:         | 3 | 3,9016 | 0,477 | -0,519 |
| 8 | P18858 DNL1_HUMAN   | E.QATTSQAQVACLYR.K                   |              | 3 | 3,8891 | 0,369 | 0,125  |
| 8 | A8K6V7 A8K6V7_HUMAN | E.LEEK#T#TPPPAEPVSLPQEPKPR.V         | S225:T226:   | 3 | 3,8797 | 0,294 | -0,46  |
| 8 | Q13439 GOGA4_HUMAN  | E.QQLQALAPAQASSNSST#PTR.M            | T31:         | 3 | 3,8792 | 0,226 | 0,076  |
| 8 | Q8N3D4 EH1L1_HUMAN  | E.AQVASGAGAGAPR.A                    |              | 2 | 3,8621 | 0,39  | -0,329 |
| 8 | Q96QU8 XPO6_HUMAN   | E.TVWDKHSVTAAT#PPPS#PTSGE.S          | T204:S208:   | 3 | 3,8619 | 0,348 | 0,708  |
| 8 | P49281 NRAM2_HUMAN  | K.MSDDSVS#GDHGE.S                    | S15:         | 2 | 3,8617 | 0,316 | -0,464 |
| 8 | P22314 UBA1_HUMAN   | K.NGSEADIDEGLYSR.Q                   |              | 2 | 3,8568 | 0,518 | -0,08  |
| 8 | P08670 VIME_HUMAN   | E.AANYQDTIGRLQDE.I                   |              | 2 | 3,8501 | 0,373 | -0,23  |
| 8 | Q8IZ21 PHAR4_HUMAN  | E.NSDSFEDSSTLGR.T                    |              | 2 | 3,8481 | 0,533 | -0,731 |
| 8 | P49454 CENPF_HUMAN  | K.NSAILQNRVDSLE.F                    |              | 2 | 3,83   | 0,488 | -0,084 |
| 8 | O75381 PEX14_HUMAN  | E.GHS#PEGSTVTYHLLGPQEE.G             | S282:        | 2 | 3,8287 | 0,51  | -0,346 |
| 8 | Q6S8J3 A26CA_HUMAN  | E.KSYELPDGQVITIGNE.R                 |              | 2 | 3,8146 | 0,442 | -0,484 |
| 8 | Q9UGU0 TCF20_HUMAN  | E.SLDGGCSS#SSEDQGER.V                | S525:        | 2 | 3,8136 | 0,488 | -0,07  |
| 8 | Q92922 SMRC1_HUMAN  | R.KHS#PS#PPPPTPE.S                   | S328:S330:   | 2 | 3,811  | 0,393 | -0,398 |
| 8 | Q00653 NFKB2_HUMAN  | E.YDDFKLNS#SIVEPKEPAPE.T             | S22:         | 3 | 3,8093 | 0,164 | -0,081 |
| 8 | Q99459 CDC5L_HUMAN  | E.YNVTNNSVALRT#PRT#PASQDRILQE.A      | T352:T355:   | 3 | 3,8075 | 0,239 | -0,244 |
| 8 | P49454 CENPF_HUMAN  | E.ADQS#PKNSAILQNRVDSLE.F             | S821:        | 3 | 3,8046 | 0,226 | -0,169 |
| 8 | Q7Z2W4 ZCCHV_HUMAN  | R.SCT#PS#PDQISHR.A                   | T273:S275:   | 3 | 3,7979 | 0,33  | -0,118 |
| 8 | O00231 PSD11_HUMAN  | R.DIQENDEEAVQVK.E                    |              | 2 | 3,7929 | 0,407 | -0,241 |
| 8 | Q9NPI6 DCP1A_HUMAN  | E.RKAS#SPS#PLTIGTPE.S                | S522:S525:   | 2 | 3,7923 | 0,488 | -0,43  |
| 8 | P11388 TOP2A_HUMAN  | E.ADDVKGSVPLSS#PPATHFPDETE.I         | S1393:       | 3 | 3,7902 | 0,333 | -0,357 |
| 8 | Q969F1 TF3C6_HUMAN  | E.IQMNDSSNLS#CEQEKPMHLE.I            | S177:        | 3 | 3,7896 | 0,411 | -0,296 |
| 8 | O75381 PEX14_HUMAN  | K.SPSPS#SPAAVNHHSSSDISPVSNE.S        | S251:        | 3 | 3,788  | 0,262 | -0,222 |
| 8 | Q92615 LARP5_HUMAN  | R.SPS#PAHLPPDDPKVAE.K                | S601:        | 3 | 3,7865 | 0,3   | -0,112 |

|   |                    |                               |            |   |        |       |        |
|---|--------------------|-------------------------------|------------|---|--------|-------|--------|
| 8 | O76021 RL1D1_HUMAN | K.ATNES#EDEIPQLVPIGKK.T       | S361:      | 3 | 3,7853 | 0,268 | -0,268 |
| 8 | P31946 1433B_HUMAN | E.ILNS#PEKACSLAK.T            | S186:      | 2 | 3,7807 | 0,235 | -0,242 |
| 8 | Q15185 TEBP_HUMAN  | E.FCVEDSKDVNVNFE.K            |            | 2 | 3,7712 | 0,327 | -0,072 |
| 8 | P22234 PUR6_HUMAN  | E.LFFKDDANNDPQWSEE.Q          |            | 2 | 3,7552 | 0,405 | -0,374 |
| 8 | O75781 PALM_HUMAN  | E.NAAAPS#PVRAPAPSPAKE.E       | S116:      | 2 | 3,7527 | 0,324 | -0,404 |
| 8 | Q96A33 CCD47_HUMAN | E.SNFTLVGDDGTNKE.A            |            | 2 | 3,7507 | 0,415 | -0,082 |
| 8 | P30281 CCND3_HUMAN | R.GSSSQGPSQTST#PTDVTAIHL.-    | T283:      | 3 | 3,7295 | 0,092 | -0,425 |
| 8 | Q14149 MORC3_HUMAN | E.SINGKSES#PDHMVSQYQQALEE.I   | S765:      | 3 | 3,7248 | 0,251 | -0,429 |
| 8 | Q12888 TP53B_HUMAN | K.NSPEDLGLSLTGDSCCK.L         |            | 2 | 3,7239 | 0,517 | -0,216 |
| 8 | O75531 BAF_HUMAN   | R.DFVAEPMGEKPVGSLAGIGE.V      |            | 2 | 3,7167 | 0,495 | -0,426 |
| 8 | Q99459 CDC5L_HUMAN | E.YNVNT#NNSVALRTPRT#PASQDR.I  | T344:T355: | 3 | 3,7162 | 1     | 0,145  |
| 8 | Q15424 SAFB1_HUMAN | E.LAEAPTEAPS#PEARD.S          | S344:      | 2 | 3,7148 | 0,481 | -0,373 |
| 8 | P43487 RANG_HUMAN  | E.SNHDPQFEPIVSLPEQE.I         |            | 2 | 3,7065 | 0,486 | -0,434 |
| 8 | Q7Z6Z7 HUWE1_HUMAN | E.LLERDGGG#GNSTIIVSR.S        | S2362:     | 3 | 3,7047 | 0,316 | -0,197 |
| 8 | P49023 PAXI_HUMAN  | E.MSS#PQRVTSTQQQTR.I          | S244:      | 3 | 3,6946 | 0,37  | 0      |
| 8 | Q96T37 RBM15_HUMAN | E.FSQQLDLS#PAKALAK.S          | S935:      | 2 | 3,688  | 0,418 | -0,634 |
| 8 | P35611 ADDA_HUMAN  | R.AAVVTS#PPPTTAPHKE.R         | S12:       | 2 | 3,6736 | 0,38  | -0,362 |
| 8 | Q6Y7W6 PERQ2_HUMAN | E.ASEETPQTSSSARPGT#PSDHQSQE.A | T382:      | 3 | 3,6734 | 0,399 | -0,478 |
| 8 | Q9BY44 EIF2A_HUMAN | E.ARS#DKS#PDLAPTAPQSTPR.N     | S503:S506: | 3 | 3,6697 | 0,169 | -0,731 |
| 8 | Q9UQ35 SRRM2_HUMAN | K.SGMS#PEQSRFQSD.S            | S1132:     | 2 | 3,6685 | 0,417 | -0,159 |
| 8 | O94885 SASH1_HUMAN | E.VEKPDAS#PTSLQLR.S           | S101:      | 3 | 3,6672 | 0,349 | 0,226  |
| 8 | Q00839 HNRPU_HUMAN | D.ENGHGEQQPQPATQQQQPQQQR.G    |            | 3 | 3,6662 | 0,388 | -0,208 |
| 8 | P11172 PYR5_HUMAN  | E.NVFVAANHNGS#PLSIKE.A        | S214:      | 2 | 3,6622 | 0,353 | -0,715 |
| 8 | Q4KMQ1 CI075_HUMAN | R.QSVELPKGDLGPAS#PSQE.L       | S362:      | 2 | 3,6571 | 0,375 | 0,191  |
| 8 | Q9GZX9 TWSG1_HUMAN | E.CCDCVGM*CNPR.N              |            | 2 | 3,6567 | 0,472 | -0,422 |
| 8 | Q9Y2K5 R3HD2_HUMAN | D.IIQLHISCPS#DKEEE.K          | S109:      | 2 | 3,6563 | 0,304 | -0,26  |
| 8 | P49792 RBP2_HUMAN  | K.AVVS#PPKFVFGSE.S            | S2510:     | 2 | 3,6552 | 0,336 | -0,085 |
| 8 | Q96HC4 PDLI5_HUMAN | E.VVKPVPTS#PAVSK.V            | S111:      | 3 | 3,6527 | 0,366 | 0      |
| 8 | P42704 LPPRC_HUMAN | E.NGCLSDSDMFSQAGLRSE.A        |            | 2 | 3,649  | 0,514 | -0,556 |
| 8 | Q9H0E9 BRD8_HUMAN  | E.ADVAIGKGETPLTNVK.T          |            | 3 | 3,6476 | 0,327 | 0,212  |
| 8 | P55265 DSRAD_HUMAN | K.ALHGEATNS#M*AS#DNQPE.G      | S687:S690: | 2 | 3,6469 | 0,51  | -0,376 |
| 8 | O75554 WBP4_HUMAN  | E.NEYVS#TSEADGGGEPK.V         | S323:      | 2 | 3,6377 | 0,425 | -0,142 |
| 8 | P30305 MPIP2_HUMAN | E.AFAQRPS#APDLMCLS#PDRKM*E.V  | S230:S238: | 3 | 3,6367 | 0,275 | -0,068 |



|   |                     |                                 |              |   |        |       |        |
|---|---------------------|---------------------------------|--------------|---|--------|-------|--------|
| 8 | P11831 SRF_HUMAN    | E.LQVVNLDTAHSTKS#E.-            | S507:        | 2 | 3,634  | 0,344 | -0,638 |
| 8 | P62829 RL23_HUMAN   | E.DNAGVIVNNKGE.M                |              | 2 | 3,6185 | 0,441 | -0,198 |
| 8 | Q5CZB5 Q5CZB5_HUMAN | E.GEGAAGAGDHQDPSLGAGE.A         |              | 2 | 3,6173 | 0,494 | -0,504 |
| 8 | O75970 MPDZ_HUMAN   | E.DVTKDADLS#PVNASIIKE.N         | S483:        | 3 | 3,6149 | 0,229 | 0,092  |
| 8 | Q71F56 MD13L_HUMAN  | E.VEDGLGS#PKPEEIKD.F            | S923:        | 2 | 3,6055 | 0,327 | -0,216 |
| 8 | O60716 CTND1_HUMAN  | E.DGYPGGSDNYGS#LSR.V            | S230:        | 3 | 3,601  | 0,426 | 0,113  |
| 8 | Q02952 AKA12_HUMAN  | E.KEPSKSAES#PTS#PVTSE.T         | S283:S286:   | 2 | 3,6008 | 1     | -0,254 |
| 8 | Q86U44 MTA70_HUMAN  | E.IDACMDSEAPGSKDHTPS#QE.L       | S350:        | 3 | 3,5999 | 0,296 | -0,243 |
| 8 | Q02880 TOP2B_HUMAN  | E.LKVKAS#PIT#NDGEDE.F           | S1400:T1403: | 2 | 3,5996 | 0,489 | -0,275 |
| 8 | Q92797 SYMPK_HUMAN  | E.AALLDSSLEGPLPK.E              |              | 2 | 3,5991 | 0,437 | -0,086 |
| 8 | P18858 DNL1_HUMAN   | K.TSKAET#PTESVSEPE.V            | T195:        | 2 | 3,599  | 0,512 | -0,073 |
| 8 | P30101 PDIA3_HUMAN  | E.SNDGPVKVVAENFDE.I             |              | 2 | 3,5903 | 0,296 | -0,355 |
| 8 | P78371 TCPB_HUMAN   | E.ALLS#SAVDHGSDE.V              | S143:        | 2 | 3,5878 | 0,362 | -0,442 |
| 8 | Q96SB3 NEB2_HUMAN   | E.NGSTVATAAS#PAPEEPK.A          | S338:        | 2 | 3,5866 | 0,475 | -0,572 |
| 8 | P39880 CUX1_HUMAN   | E.IQAGSQGQAGASDS#PSAR.S         | S1321:       | 2 | 3,5825 | 0,423 | -0,276 |
| 8 | Q86V81 THOC4_HUMAN  | E.LDAQLDAYNAR.M                 |              | 2 | 3,5784 | 0,505 | 0,098  |
| 8 | O60716 CTND1_HUMAN  | E.DGYPGGSDNYGS#LSR.V            | S230:        | 2 | 3,5755 | 0,52  | -0,225 |
| 8 | P04844 RPN2_HUMAN   | E.IEDLVARLDE.L                  |              | 2 | 3,574  | 0,24  | 0,52   |
| 8 | Q9UKI8 TLK1_HUMAN   | E.SS#NHSFGSLGSLSDKESETPE.K      | S94:         | 3 | 3,5717 | 0,392 | -0,483 |
| 8 | Q9UQ35 SRRM2_HUMAN  | R.M*SCFSRPSM*S#PTPLDR.C         | S2123:       | 3 | 3,5678 | 0,286 | -0,369 |
| 8 | P04264 K2C1_HUMAN   | K.WELLQQVDTSTR.T                |              | 2 | 3,566  | 0,441 | -0,165 |
| 8 | Q92562 SAC3_HUMAN   | E.GS#VSQRST#PVKM*TDAGDSAK.V     | S771:T777:   | 3 | 3,5655 | 0,35  | -0,416 |
| 8 | O60238 BNI3L_HUMAN  | K.NGGLEHVPS#SSSIHNGDM*E.K       | S62:         | 3 | 3,563  | 0,229 | -0,177 |
| 8 | Q02952 AKA12_HUMAN  | E.MDAEPQEAEPKE.L                |              | 2 | 3,5587 | 0,427 | -0,507 |
| 8 | P14314 GLU2B_HUMAN  | E.LQTHPELDTDGDGALSE.A           |              | 2 | 3,5547 | 0,342 | -0,475 |
| 8 | P46013 KI67_HUMAN   | E.LFQT#PVCTDKPTTHE.K            | T1476:       | 3 | 3,5544 | 0,32  | -0,099 |
| 8 | Q92797 SYMPK_HUMAN  | K.TPS#PAAEDAREPE.A              | S1259:       | 2 | 3,5514 | 0,483 | -0,337 |
| 8 | O15164 TIF1A_HUMAN  | E.WLDPSQKS#PLHVGE.T             | S811:        | 2 | 3,5496 | 0,478 | -0,438 |
| 8 | Q00653 NFKB2_HUMAN  | D.DFKLNS#SIVEPKEPAPE.T          | S22:         | 2 | 3,5482 | 0,341 | -0,185 |
| 8 | Q9UN86 G3BP2_HUMAN  | E.AHPVTNGIEEPLEES#SHEPEPEPESE.T | S192:        | 3 | 3,5433 | 0,372 | -0,372 |
| 8 | P52272 HNRPM_HUMAN  | R.M*GS#VERM*GSGIE.R             | S446:        | 2 | 3,5366 | 0,44  | -0,447 |
| 8 | Q92598 HS105_HUMAN  | E.LNNTCEPVVTQPKPK.I             |              | 3 | 3,5331 | 0,357 | -0,106 |
| 8 | O75179 ANR17_HUMAN  | E.HYPVSSPSS#SPPPAQPGGVS.R.N     | S2045:       | 3 | 3,5288 | 0,154 | -0,337 |

|   |                    |                                    |              |   |        |       |        |
|---|--------------------|------------------------------------|--------------|---|--------|-------|--------|
| 8 | Q9NQX3 GEPH_HUMAN  | E.LEDLPS#PPPPLS#PPPTTSPHK.Q        | S188:S194:   | 3 | 3,5282 | 0,18  | -0,31  |
| 8 | Q9BUG6 ZSCA5_HUMAN | R.ESPGQAGM*NSIHS#PGPAS#PVSHPDGQE.A | S335:S340:   | 3 | 3,5266 | 0,327 | 0      |
| 8 | P04264 K2C1_HUMAN  | K.SKAEAESLYQSK.Y                   |              | 3 | 3,5245 | 0,207 | -0,136 |
| 8 | P12004 PCNA_HUMAN  | E.LGNNGNIKLS#QTSNVDKEEE.A          | S183:        | 3 | 3,5228 | 0,252 | -0,34  |
| 8 | P31943 HNRH1_HUMAN | E.GRPSGEAFVELES#EDE.V              | S63:         | 2 | 3,5188 | 0,298 | -0,8   |
| 8 | Q14694 UBP10_HUMAN | E.TKY#SPPAISPLVSEK.Q               | Y364:        | 2 | 3,5154 | 0,387 | -0,503 |
| 8 | P30101 PDIA3_HUMAN | E.STAGEIPVVAIR.T                   |              | 2 | 3,5142 | 0,382 | 0,101  |
| 8 | P11021 GRP78_HUMAN | K.ELEEIVQPIISK.L                   |              | 2 | 3,5134 | 0,289 | -0,087 |
| 8 | P02545 LMNA_HUMAN  | R.SGAQASSTPLS#PTR.I                | S22:         | 2 | 3,5118 | 0,58  | -0,339 |
| 8 | P04264 K2C1_HUMAN  | K.SLNNQFASFIDK.V                   |              | 2 | 3,5091 | 0,402 | -0,088 |
| 8 | P31948 STIP1_HUMAN | E.IAT#PPPPPPPKKE.T                 | T198:        | 3 | 3,5055 | 0,332 | -0,252 |
| 8 | O15541 R113A_HUMAN | E.NYEVGS#DDEEIPFK.C                | S253:        | 2 | 3,5044 | 0,318 | -0,425 |
| 8 | Q14247 SRC8_HUMAN  | R.AKTQT#PPVS#PAPQPTEE.R            | T401:S405:   | 3 | 3,4984 | 0,216 | 0,378  |
| 8 | Q4G0F5 VP26B_HUMAN | R.TPSQLSDNNCRQ.-                   |              | 2 | 3,4973 | 0,369 | -0,43  |
| 8 | Q96JM3 ZN828_HUMAN | K.LAPVPS#PEPQKPAPVSPE.S            | S204:        | 2 | 3,4927 | 0,405 | -0,508 |
| 8 | O75179 ANR17_HUMAN | E.HYPVSSPSS#PS#PPAQPGGVSR.N        | S2045:S2047: | 3 | 3,4897 | 1     | -0,244 |
| 8 | Q9UK76 HN1_HUMAN   | R.RNSS#EASSGDFDLKGE.G              | S88:         | 3 | 3,4881 | 0,261 | 0,097  |
| 8 | Q9C0C9 UBE2O_HUMAN | E.QLLTGSPTS#PTVEPEKPTRE.K          | S839:        | 3 | 3,4867 | 0,366 | 0      |
| 8 | Q12888 TP53B_HUMAN | K.TVSS#DGCSTPSREE.G                | S316:        | 2 | 3,4835 | 0,533 | -0,307 |
| 8 | P27348 1433T_HUMAN | E.LLDKYLIANATNPE.S                 |              | 2 | 3,4832 | 0,242 | -0,775 |
| 8 | Q14160 LAP4_HUMAN  | R.LRVQS#PEPPAPERALS#PAELR.A        | S1475:S1486: | 3 | 3,4812 | 0,421 | -0,444 |
| 8 | Q7Z6Z7 HUWE1_HUMAN | E.RDGG#GNST#IIVSR.S                | S2362:T2366: | 2 | 3,4723 | 0,468 | -0,464 |
| 8 | O00257 CBX4_HUMAN  | E.VSGVSDPQPQDAGSR.K                |              | 2 | 3,4719 | 0,443 | -0,244 |
| 8 | P02545 LMNA_HUMAN  | R.SVGGSGGGSFGDNLVTR.S              |              | 2 | 3,4685 | 0,532 | -0,389 |
| 8 | Q5UIP0 RIF1_HUMAN  | E.LIIEDNNAS#PQK.L                  | S2144:       | 2 | 3,4675 | 0,266 | -0,343 |
| 8 | O94915 FRYL_HUMAN  | E.SRYSSSSGGS#YEEE.K                | S1539:       | 2 | 3,467  | 0,347 | -0,532 |
| 8 | Q14444 CAPR1_HUMAN | E.LQYVLDKLGDDE.V                   |              | 2 | 3,4652 | 0,445 | -0,26  |
| 8 | Q05682 CALD1_HUMAN | E.KGNVFSS#PTAAGT#PNKE.T            | S724:T730:   | 2 | 3,4651 | 0,479 | -0,393 |
| 8 | Q15742 NAB2_HUMAN  | E.KLSPLPGGPGAGDPR.I                |              | 3 | 3,4627 | 0,248 | 0      |
| 8 | O75179 ANR17_HUMAN | E.HYPVSSPSSPS#PPAQPGGVSR.N         | S2047:       | 3 | 3,4573 | 0,151 | -0,253 |
| 8 | Q8WYL5 SSH1_HUMAN  | E.STRPDS#PALFVDKPTGE.R             | S237:        | 3 | 3,4447 | 0,156 | 0      |
| 8 | Q6NYC8 PHTNS_HUMAN | E.VESRLS#PGESAYQK.L                | S224:        | 2 | 3,4375 | 0,285 | 0,224  |
| 8 | O95425 SVIL_HUMAN  | E.GLLDS#PSKTMSIKE.R                | S1120:       | 2 | 3,4375 | 0,412 | -0,231 |

|   |                    |                                       |              |   |        |       |        |
|---|--------------------|---------------------------------------|--------------|---|--------|-------|--------|
| 8 | P14314 GLU2B_HUMAN | E.TM*VTSTTEPSRCE.Y                    |              | 2 | 3,4325 | 0,507 | -0,644 |
| 8 | Q7Z2W4 ZCCHV_HUMAN | E.FLASASASAER.S                       |              | 2 | 3,4319 | 0,468 | -0,44  |
| 8 | P51858 HDGF_HUMAN  | E.VERPLPMEVEK.N                       |              | 3 | 3,4218 | 0,431 | 0      |
| 8 | Q8N3V7 SYNPO_HUMAN | E.ASNFQQEPAPR.D                       |              | 2 | 3,4171 | 0,278 | 0,098  |
| 8 | O00303 EIF3F_HUMAN | E.VTNCFSVPHNESEDE.V                   |              | 2 | 3,4166 | 0,414 | -0,277 |
| 8 | Q8NG31 CASC5_HUMAN | K.SLGT#PTVICT#PTEE.S                  | T1011:T1017: | 2 | 3,4137 | 0,362 | -0,22  |
| 8 | Q15742 NAB2_HUMAN  | E.KLS#PLPGGPGAGDPR.I                  | S171:        | 3 | 3,41   | 0,34  | 0,427  |
| 8 | Q96EV2 RBM33_HUMAN | K.VKPAS#PVAQPKEE.A                    | S775:        | 3 | 3,4094 | 0,286 | -0,063 |
| 8 | Q13573 SNW1_HUMAN  | R.LFNQS#KGM*DSGFAGGEDE.I              | S415:        | 2 | 3,408  | 0,412 | -0,061 |
| 8 | Q9BQ67 GRWD1_HUMAN | E.SGDTS#SEGPAQVYLPGRGPPLRE.G          | S25:         | 3 | 3,3939 | 0,201 | -0,149 |
| 8 | O75531 BAF_HUMAN   | R.DFVAEPM*GEKPVGSLAGIGE.V             |              | 2 | 3,391  | 0,459 | -0,483 |
| 8 | Q9P1Y5 K1543_HUMAN | E.ASKPPAPSEGS#PKAVASSPAATNSE.V        | S547:        | 3 | 3,3907 | 0,266 | -0,378 |
| 8 | Q14839 CHD4_HUMAN  | E.VM*LQNGETPKDLNDE.K                  |              | 2 | 3,3872 | 0,294 | -0,497 |
| 8 | O94842 TOX4_HUMAN  | R.SGCENPPIVSKDWDNE.Y                  |              | 2 | 3,3833 | 0,476 | -0,396 |
| 8 | P04792 HSPB1_HUMAN | E.SPAVAAPAYSRAALSRLS#SGVSE.I          | S82:         | 3 | 3,3832 | 0,309 | -0,921 |
| 8 | Q9Y613 FHOD1_HUMAN | E.TLAGAM*PNEAGGHPDAR.Q                |              | 2 | 3,381  | 0,404 | -0,363 |
| 8 | Q14974 IMB1_HUMAN  | E.AYTGIVQGLKGDQE.N                    |              | 2 | 3,3788 | 0,456 | -0,165 |
| 8 | P21333 FLNA_HUMAN  | E.ISIQDMTAQVTS#PSGK.T                 | S2180:       | 2 | 3,3765 | 0,495 | -0,56  |
| 8 | P30040 ERP29_HUMAN | E.VGISDYGDKLNME.L                     |              | 2 | 3,3748 | 0,305 | -0,762 |
| 8 | Q14247 SRC8_HUMAN  | R.AKTQT#PPVS#PAPQPTEER.L              | T401:S405:   | 3 | 3,3747 | 0,26  | -0,612 |
| 8 | P35527 K1C9_HUMAN  | K.TLNDMRQEYEQLIAK.N                   |              | 3 | 3,3712 | 0,294 | -0,296 |
| 8 | P78371 TCPB_HUMAN  | E.ALLSS#AVDHGSDE.V                    | S144:        | 2 | 3,3711 | 0,403 | -0,353 |
| 8 | Q15427 SF3B4_HUMAN | E.FLSEEDADYAIK.I                      |              | 2 | 3,3691 | 0,389 | 0      |
| 8 | P46379 BAT3_HUMAN  | E.VLGAAATTDYNNNHE.G                   |              | 2 | 3,3681 | 0,369 | -0,077 |
| 8 | Q9H6U6 BCAS3_HUMAN | E.TLSNSSGSTSGSIPR.N                   |              | 2 | 3,3677 | 0,483 | -0,168 |
| 8 | Q96TA1 NIBL1_HUMAN | R.GLLAQGLRPES#PPPAGPLLNGAPAGES#PQPK.A | S652:S668:   | 3 | 3,3648 | 0,183 | -0,23  |
| 8 | O14745 NHERF_HUMAN | E.AALESPPALVRSASS#DTSEE.L             | S291:        | 3 | 3,3645 | 0,226 | -0,244 |
| 8 | P51991 ROA3_HUMAN  | D.FGNYSQQQSNGYPM*K.G                  |              | 3 | 3,3634 | 0,241 | 0,1    |
| 8 | Q9Y2K5 R3HD2_HUMAN | D.IIQLHISCPS#DKEEE.K                  | S109:        | 3 | 3,36   | 0,208 | 0      |
| 8 | P05787 K2C8_HUMAN  | E.SGMQNMSIHTK.T                       |              | 3 | 3,3598 | 0,302 | 0,37   |
| 8 | Q8WVM8 SCFD1_HUMAN | E.DDMFVLCNQNKE.L                      |              | 2 | 3,359  | 0,315 | -0,323 |
| 8 | Q68EM7 RHG17_HUMAN | K.QNPSLPAPQTLAGGNPE.T                 |              | 2 | 3,3533 | 0,379 | -0,144 |
| 8 | O75781 PALM_HUMAN  | E.NAAAPSPVRAPAPS#PAKE.E               | S124:        | 2 | 3,3509 | 0,379 | -0,472 |

|   |                    |                                 |            |   |        |       |        |
|---|--------------------|---------------------------------|------------|---|--------|-------|--------|
| 8 | Q12873 CHD3_HUMAN  | E.LDDILKFGTEE.L                 |            | 2 | 3,3475 | 0,314 | -0,286 |
| 8 | P35908 K22E_HUMAN  | R.NLDLDSIIAEVK.A                |            | 2 | 3,3445 | 0,44  | -0,275 |
| 8 | Q96T58 MINT_HUMAN  | E.SGVVAVS#PEKSESPQKE.D          | S2120:     | 2 | 3,3433 | 0,421 | 0,066  |
| 8 | Q9BPX7 CG025_HUMAN | E.ALATPLPKDYTT#DSEH.-           | T417:      | 2 | 3,3373 | 0,273 | -0,398 |
| 8 | Q969F1 TF3C6_HUMAN | E.IQM*NDSSNLS#CEQEKPM*HLE.I     | S177:      | 3 | 3,3337 | 0,248 | -0,731 |
| 8 | P68104 EF1A1_HUMAN | E.S#FSDYPPLGR.F                 | S414:      | 2 | 3,3289 | 0,475 | -0,1   |
| 8 | P78310 CXAR_HUMAN  | R.TSTARS#YIGSNHSSLGSM*SPSNM*E.G | S293:      | 3 | 3,3285 | 0,167 | -0,56  |
| 8 | Q9Y3F4 STRAP_HUMAN | E.NSDCIFSPAPDVKA.-              |            | 2 | 3,325  | 0,42  | -0,241 |
| 8 | Q9NQS7 INCE_HUMAN  | E.QHVTQLM*STEPLPR.T             |            | 3 | 3,3245 | 0,342 | -0,332 |
| 8 | Q6P4R8 NFRKB_HUMAN | K.AVSTVVVTTAPS#PK.Q             | S1291:     | 2 | 3,3224 | 0,408 | 0,085  |
| 8 | P27816 MAP4_HUMAN  | E.EGRPVVSGTGNDITT#PPNKELPPSPE.K | T687:      | 3 | 3,319  | 0,321 | -0,264 |
| 8 | Q4KMP7 TB10B_HUMAN | R.RAS#AGPAPGPVVTAE.G            | S412:      | 2 | 3,3167 | 0,468 | -0,501 |
| 8 | O43896 KIF1C_HUMAN | R.GALPAVSSPPAPVSPS#SPTTHNGE.L   | S414:      | 3 | 3,3134 | 0,406 | 0      |
| 8 | Q15773 MLF2_HUMAN  | E.RQDYINLDES#E.A                | S187:      | 2 | 3,312  | 0,225 | -0,25  |
| 8 | Q14247 SRC8_HUMAN  | E.EQARAKTQT#PPVS#PAPQPTEE.R     | T401:S405: | 3 | 3,3106 | 0,266 | -0,227 |
| 8 | Q9HBD1 RC3H2_HUMAN | K.IGSPPKTPVS#NVAATSAGPSNVGTE.L  | S556:      | 3 | 3,3061 | 0,258 | -0,303 |
| 8 | P30837 AL1B1_HUMAN | E.LDTQQGPQVDKE.Q                |            | 2 | 3,2997 | 0,348 | -0,449 |
| 8 | Q969F1 TF3C6_HUMAN | E.IQMNDSSNLS#CEQEKPM*HLE.I      | S177:      | 3 | 3,2963 | 0,266 | -0,074 |
| 8 | Q9UPV0 CE164_HUMAN | E.NNAS#PHFEPDLHIE.D             | S1054:     | 3 | 3,2948 | 0,385 | -0,215 |
| 8 | O14617 AP3D1_HUMAN | R.ALDIDLKPLADSE.K               |            | 2 | 3,2946 | 0,464 | 0      |
| 8 | Q99459 CDC5L_HUMAN | E.YNVTNNS#VALRTPRT#PASQDR.I     | S347:T355: | 3 | 3,2936 | 0,242 | -0,073 |
| 8 | P55072 TERA_HUMAN  | E.DNSVVVLSQPKM*DE.L             |            | 2 | 3,2923 | 0,374 | -0,078 |
| 8 | Q96N67 DOCK7_HUMAN | R.SAVRPASLNLNR.S                |            | 3 | 3,2914 | 0,215 | -0,07  |
| 8 | P42166 LAP2A_HUMAN | R.SST#PLPTISSAENTR.Q            | T160:      | 2 | 3,2876 | 0,436 | -0,212 |
| 8 | Q9BZF3 OSBL6_HUMAN | R.QLLEPEPVPLSKE.A               |            | 2 | 3,2868 | 0,319 | -0,082 |
| 8 | Q14676 MDC1_HUMAN  | E.GKAPQAVPLEK.S                 |            | 2 | 3,2815 | 0,346 | -0,858 |
| 8 | Q9UGU0 TCF20_HUMAN | K.DMPLSSDGNPKVNE.K              |            | 2 | 3,2687 | 0,332 | -0,162 |
| 8 | Q9Y619 TX264_HUMAN | E.TSAATLSPGASSR.G               |            | 2 | 3,2668 | 0,412 | -0,405 |
| 8 | Q08J23 NSUN2_HUMAN | E.SAASTGQPNDVTEGQR.A            |            | 2 | 3,2665 | 0,435 | -0,493 |
| 8 | Q96G46 DUS3L_HUMAN | R.TCGPLTDEDVVR.L                |            | 2 | 3,2664 | 0,434 | -0,09  |
| 8 | Q9Y2I7 FYV1_HUMAN  | R.TYVRTETTEDE.R                 |            | 2 | 3,2661 | 0,402 | -0,272 |
| 8 | P10809 CH60_HUMAN  | E.IAQVATISANGDKE.I              |            | 3 | 3,2516 | 0,314 | 0      |
| 8 | Q9Y2U8 MAN1_HUMAN  | E.TSVQGGGGLAM*NDR.A             |            | 2 | 3,2479 | 0,442 | -0,354 |

|   |                    |                           |              |   |        |       |        |
|---|--------------------|---------------------------|--------------|---|--------|-------|--------|
| 8 | Q9Y2D8 ADIP_HUMAN  | K.LTKS#LPAS#PSTSDFCQTR.S  | S536:S540:   | 3 | 3,2478 | 0,373 | -0,339 |
| 8 | Q08379 GOGA2_HUMAN | E.GSPRDNPT#AAQIM*QLLRE.M  | T947:        | 3 | 3,2437 | 0,199 | 0,17   |
| 8 | O95684 FR1OP_HUMAN | E.GALDLSDVHSPPKS#PE.G     | S160:        | 2 | 3,2414 | 0,429 | -0,494 |
| 8 | Q8NG31 CASC5_HUMAN | K.SLGTPT#VICT#PTEE.S      | T1013:T1017: | 2 | 3,2333 | 0,226 | -0,293 |
| 8 | P35908 K22E_HUMAN  | R.FLEQQNQVLQTK.W          |              | 2 | 3,2315 | 0,207 | -0,331 |
| 8 | Q9BUA3 YK007_HUMAN | E.GGLPRAES#PSPAPPPGLR.G   | S308:        | 3 | 3,2296 | 0,163 | 0      |
| 8 | Q00613 HSF1_HUMAN  | E.SEPAPASVTALTDAR.G       |              | 2 | 3,2288 | 0,517 | -0,575 |
| 8 | Q13111 CAF1A_HUMAN | D.ILAVRPPQIK.S            |              | 2 | 3,226  | 0,364 | -0,107 |
| 8 | P25054 APC_HUMAN   | R.SGRS#PTGNTPPVIDSVSE.K   | S2674:       | 2 | 3,2247 | 0,446 | -0,584 |
| 8 | Q6NZI2 PTRF_HUMAN  | E.AGDLRRGS#S#PDVHALLE.I   | S365:S366:   | 3 | 3,2227 | 0,114 | -0,281 |
| 8 | O43504 HBXIP_HUMAN | E.DTM*KNPSIVGVLCTD.S      |              | 2 | 3,2198 | 0,268 | -0,586 |
| 8 | Q3V6T2 GRDN_HUMAN  | E.LSEAPQKS#LGHEVNE.L      | S449:        | 2 | 3,2131 | 0,426 | -0,355 |
| 8 | Q14247 SRC8_HUMAN  | R.AKTQT#PPVS#PAPQPTEE.R   | T401:S405:   | 2 | 3,2127 | 0,375 | 1,385  |
| 8 | P52788 SPSY_HUMAN  | D.EVVYDEDESPYQNIK.I       |              | 2 | 3,2127 | 0,34  | 0      |
| 8 | Q9UPT8 ZC3H4_HUMAN | K.TGSGS#PFAGNS#PARE.G     | S1269:S1275: | 2 | 3,2117 | 0,423 | -0,612 |
| 8 | Q01082 SPTB2_HUMAN | K.TALPAQSAAT#LPAR.T       | T2187:       | 2 | 3,2093 | 0,378 | -0,084 |
| 8 | Q01970 PLCB3_HUMAN | E.VGLEKPSLEPQKS#LGDE.G    | S537:        | 2 | 3,2011 | 0,317 | -0,576 |
| 8 | O15231 ZN185_HUMAN | R.RES#CGSSVLTDFE.G        | S233:        | 2 | 3,2002 | 0,374 | -0,311 |
| 8 | P18858 DNL1_HUMAN  | E.DEALS#PAKGQKPALD.C      | S76:         | 2 | 3,1994 | 0,296 | -0,226 |
| 8 | P53396 ACLY_HUMAN  | R.TAS#FSESRADE.V          | S455:        | 2 | 3,1942 | 0,432 | -0,381 |
| 8 | P05787 K2C8_HUMAN  | R.VTQKS#YKVSTSGPR.A       | S9:          | 2 | 3,1909 | 0,345 | -0,452 |
| 8 | P07355 ANXA2_HUMAN | E.GDHS#TPPSAYGSVK.A       | S18:         | 3 | 3,1853 | 0,296 | -0,123 |
| 8 | O60341 LSD1_HUMAN  | R.IADQFLGAM*YTLPR.Q       |              | 2 | 3,1826 | 0,335 | -0,53  |
| 8 | P78371 TCPB_HUMAN  | E.ALLSSAVDHGSDE.V         |              | 2 | 3,1824 | 0,507 | -0,281 |
| 8 | Q8N108 MIER1_HUMAN | E.LLSLYGYGSTVR.L          |              | 2 | 3,1765 | 0,379 | -0,459 |
| 8 | O75449 KTNA1_HUMAN | D.S#TPLKAAQHDLPASEGE.V    | S80:         | 2 | 3,1761 | 0,43  | -0,333 |
| 8 | Q16643 DREB_HUMAN  | E.DGSDDLKLAASGE.G         |              | 2 | 3,1753 | 0,439 | 0,095  |
| 8 | Q8WVC0 LEO1_HUMAN  | E.VEIPKVNTDLGND.L         |              | 2 | 3,1731 | 0,399 | -0,173 |
| 8 | Q9H7Z6 MYST1_HUMAN | E.GTAPS#PGRVSPPTPARGEPE.V | S37:         | 3 | 3,1646 | 0,281 | -0,179 |
| 8 | Q2NKX8 ERC6L_HUMAN | E.LCTNSSLGMEKS#FATKNE.A   | S835:        | 3 | 3,1578 | 0,305 | -0,349 |
| 8 | Q4G0F5 VP26B_HUMAN | R.TPSQLSDNNCRQ.-          |              | 3 | 3,1554 | 0,269 | 0      |
| 8 | Q09472 EP300_HUMAN | E.VNSQAIAEKQPS#QEVKM*E.A  | S973:        | 3 | 3,1531 | 0,258 | -0,173 |
| 8 | P31946 1433B_HUMAN | K.QTTVSNSQQAYQE.A         |              | 2 | 3,1529 | 0,281 | -0,576 |

|   |                    |                                  |            |   |        |       |        |
|---|--------------------|----------------------------------|------------|---|--------|-------|--------|
| 8 | P05787 K2C8_HUMAN  | E.SGM*QNMSIHTK.T                 |            | 3 | 3,1524 | 0,211 | 0,293  |
| 8 | Q86WC4 OSTM1_HUMAN | K.RLKSST#S#FANIQE.N              | T324:S325: | 2 | 3,1521 | 0,343 | -0,446 |
| 8 | Q9UPT8 ZC3H4_HUMAN | E.GSLHSS#PVGPSSSK.G              | S908:      | 2 | 3,1498 | 0,283 | -0,347 |
| 8 | O94909 K0819_HUMAN | E.RGPSQATS#PIRS#PQE.S            | S296:S300: | 2 | 3,1484 | 0,351 | 0      |
| 8 | O94876 TMCC1_HUMAN | R.SSS#TTDAPTGSAM*M*E.I           | S158:      | 2 | 3,1431 | 0,367 | -0,462 |
| 8 | P13645 K1C10_HUMAN | R.ALEESNYELEGK.I                 |            | 2 | 3,1394 | 0,346 | 0,353  |
| 8 | Q14493 SLBP_HUMAN  | R.HM*DSQVEDEFDLE.A               |            | 2 | 3,1375 | 0,339 | -0,152 |
| 8 | Q96B23 CR025_HUMAN | E.LRRDS#S#ESQLASTE.S             | S66:S67:   | 2 | 3,1374 | 0,384 | -0,491 |
| 8 | Q09666 AHNK_HUMAN  | E.GPEVDVNLPK.A                   |            | 2 | 3,1364 | 0,481 | -0,114 |
| 8 | Q14247 SRC8_HUMAN  | R.AKTQT#PPVSPAPQPTEE.R           | T401:      | 2 | 3,1358 | 0,372 | -0,591 |
| 8 | Q9BTT0 AN32E_HUMAN | E.IEGLNDFKELE.F                  |            | 2 | 3,1316 | 0,263 | -0,173 |
| 8 | P05362 ICAM1_HUMAN | E.AQVHLALGDQR.L                  |            | 3 | 3,1312 | 0,258 | 0,151  |
| 8 | Q96EV2 RBM33_HUMAN | K.VKPAS#PVAQPKEE.A               | S775:      | 2 | 3,1302 | 0,46  | -0,585 |
| 8 | Q16204 CCDC6_HUMAN | K.SGGIVISPRLEE.L                 |            | 2 | 3,1292 | 0,27  | -0,087 |
| 8 | Q99733 NP1L4_HUMAN | E.RLDNVPH#PSS#YIE.T              | T51:S54:   | 2 | 3,128  | 0,45  | -0,341 |
| 8 | Q5UIP0 RIF1_HUMAN  | E.SQES#PNENFK.T                  | S1854:     | 2 | 3,1248 | 0,262 | -0,291 |
| 8 | Q5VUA4 ZN318_HUMAN | E.VILKGS#PEEKVVLA.E.K            | S1420:     | 3 | 3,1228 | 0,184 | -0,216 |
| 8 | Q9UQ35 SRRM2_HUMAN | E.NSFGS#PLEFR.N                  | S1329:     | 2 | 3,1213 | 0,418 | -0,198 |
| 8 | Q9C0C2 TB182_HUMAN | E.ASQASPCPAVTPSAPSAALPDEGSR.H    |            | 3 | 3,12   | 0,279 | -0,377 |
| 8 | Q13263 TIF1B_HUMAN | R.STAPSAASASASAAASS#PAGGGAEALE.L | S50:       | 3 | 3,1167 | 0,114 | -0,076 |
| 8 | Q9UNE7 STUB1_HUMAN | R.LGAGGGS#PEKS#PSAQE.L           | S19:S23:   | 2 | 3,1155 | 0,33  | -0,449 |
| 8 | Q9Y639 NPTN_HUMAN  | E.YHCVYHFVSAPK.A                 |            | 3 | 3,1133 | 0,276 | 0,061  |
| 8 | Q60271 JIP4_HUMAN  | E.TRNVTGS#AENEEKSE.V             | S332:      | 3 | 3,1125 | 0,265 | -0,604 |
| 8 | P08670 VIME_HUMAN  | R.QDVDNAS#LARLDLE.R              | S214:      | 2 | 3,1091 | 0,342 | -0,521 |
| 8 | Q92628 K0232_HUMAN | E.TTQVCNES#PHGDGYSSGVIKD.I       | S814:      | 3 | 3,1083 | 0,239 | -0,235 |
| 8 | Q6NYC8 PHTNS_HUMAN | E.VESRLS#PGESAYQK.L              | S224:      | 3 | 3,1077 | 0,206 | 0,336  |
| 8 | Q9Y6D5 BIG2_HUMAN  | R.ERGSS#LSGTDDGAQE.V             | S277:      | 2 | 3,1068 | 0,343 | -0,154 |
| 8 | Q5T200 ZC3HD_HUMAN | E.SRS#LS#PSHLTE.D                | S875:S877: | 2 | 3,0977 | 0,358 | -0,178 |
| 8 | Q8NBJ4 GOLM1_HUMAN | E.NNDQRQLQALSEPQPR.L             |            | 3 | 3,0962 | 0,097 | 0,271  |
| 8 | Q13283 G3BP1_HUMAN | K.SSS#PAPADIAQTVQEDLR.T          | S232:      | 2 | 3,0927 | 0,366 | -0,062 |
| 8 | Q96T23 RSF1_HUMAN  | D.AQRSL#PIPEEVPKSTLE.S           | S594:      | 2 | 3,0883 | 0,431 | -0,556 |
| 8 | Q9NYH9 UTP6_HUMAN  | E.IES#QTEEQPTTK.Q                | S286:      | 2 | 3,0855 | 0,406 | -0,498 |
| 8 | Q9Y2J4 AMOL2_HUMAN | R.TLLAIQQALR.G                   |            | 2 | 3,0855 | 0,34  | 0,097  |

|   |                    |                                      |              |   |        |       |        |
|---|--------------------|--------------------------------------|--------------|---|--------|-------|--------|
| 8 | Q9BUA3 YK007_HUMAN | R.AES#PSPAPPPGLR.G                   | S308:        | 2 | 3,0837 | 0,422 | -0,45  |
| 8 | O94992 HEX11_HUMAN | E.AELLAQPCHDSE.A                     |              | 2 | 3,0824 | 0,213 | -0,356 |
| 8 | Q99590 SFRIP_HUMAN | E.NNM*PSSDLADEKVE.T                  |              | 2 | 3,0817 | 0,266 | -0,39  |
| 8 | P35527 K1C9_HUMAN  | R.IKFEMEQLNR.Q                       |              | 3 | 3,0811 | 0,087 | 0,07   |
| 8 | Q01105 SET_HUMAN   | D.FYFDENPYFENK.V                     |              | 2 | 3,0811 | 0,395 | -0,605 |
| 8 | P49321 NASP_HUMAN  | E.NKS#LQENEEEE.I                     | S503:        | 2 | 3,0783 | 0,331 | -0,427 |
| 8 | Q13283 G3BP1_HUMAN | E.IQE EKPEPVLEE.T                    |              | 2 | 3,078  | 0,172 | -0,339 |
| 8 | Q5JRA6 MIA3_HUMAN  | E.ASGKPSPSDPGSGTATMM*NSS#SRGS#SPTR.V | S1740:S1744: | 3 | 3,0779 | 1     | 0,062  |
| 8 | Q02790 FKBP4_HUMAN | E.DLTEEEDGGIIR.R                     |              | 2 | 3,0544 | 0,398 | -0,272 |
| 8 | Q14247 SRC8_HUMAN  | K.T#QTPPVVS#PAPQPTEE.R               | T399:S405:   | 2 | 3,0513 | 0,366 | -0,21  |
| 8 | Q14789 GOGB1_HUMAN | E.ISIVDIANKR.S                       |              | 2 | 3,0507 | 0,314 | -0,108 |
| 8 | P18858 DNL1_HUMAN  | E.QATTSQAQVACLVR.K                   |              | 2 | 3,0503 | 0,58  | -0,249 |
| 8 | Q8N0S6 CENPL_HUMAN | E.DYFIGAT#PLQK.R                     | T25:         | 2 | 3,0397 | 0,447 | -0,366 |
| 8 | Q9H9J4 UBP42_HUMAN | E.DAAAPKAPGPS#PAKE.K                 | S936:        | 2 | 3,0376 | 0,17  | -0,246 |
| 8 | Q02952 AKA12_HUMAN | E.REVIAEEEEPPTVTEPLPE.N              |              | 2 | 3,0358 | 0,419 | -0,24  |
| 8 | P60174 TPIS_HUMAN  | E.FVDIINAKQ.-                        |              | 2 | 3,0343 | 0,219 | 0,116  |
| 8 | Q14160 LAP4_HUMAN  | R.ALS#PAELRALE.A                     | S1486:       | 2 | 3,0277 | 0,297 | -0,195 |
| 8 | P28360 MSX1_HUMAN  | E.DALVKAES#PEKPE.R                   | S130:        | 2 | 3,0245 | 0,267 | 0,082  |
| 8 | P08195 4F2_HUMAN   | D.LLQIDPNFGSKE.D                     |              | 2 | 3,0237 | 0,33  | -0,448 |
| 8 | Q9Y5S2 MRCKB_HUMAN | E.YFNTAPLAHDLTFR.T                   |              | 2 | 3,0202 | 0,489 | -0,659 |
| 8 | Q14247 SRC8_HUMAN  | R.QDSAAVGFYKE.K                      |              | 2 | 3,0189 | 0,304 | -0,275 |
| 8 | P05556 ITB1_HUMAN  | E.VNSEDMDAYCR.K                      |              | 2 | 3,0158 | 0,464 | -0,269 |
| 8 | Q66K74 MAP1S_HUMAN | E.LPLAASS#IPRRTPS#PE.S               | S632:S640:   | 3 | 3,0102 | 0,146 | -0,188 |
| 8 | Q8IY17 PLPL6_HUMAN | E.ASGGSLAAPAR.T                      |              | 2 | 3,0096 | 0,391 | -0,318 |
| 8 | Q02952 AKA12_HUMAN | E.GSIDTGITVS#REKVTE.V                | S1295:       | 2 | 3,0048 | 0,304 | -0,344 |
| 8 | Q13371 PHLP_HUMAN  | R.NSATCHSEDS#DLE.I                   | S296:        | 2 | 3,0047 | 0,252 | -0,316 |
| 8 | P60981 DEST_HUMAN  | E.COANGPEDLNR.A                      |              | 2 | 3,0003 | 0,337 | -0,67  |
| 8 | Q14247 SRC8_HUMAN  | R.AKTQT#PPVS#PAPQPTE.E               | T401:S405:   | 2 | 2,9991 | 0,301 | -0,54  |
| 8 | Q92922 SMRC1_HUMAN | R.KHS#PS#PPPPTPTESR.K                | S328:S330:   | 3 | 2,999  | 0,274 | -0,103 |
| 8 | O15085 ARHGB_HUMAN | K.SLGGESS#GGTTPVGSFHTE.A             | S1458:       | 2 | 2,9988 | 0,388 | -0,453 |
| 8 | Q96T23 RSF1_HUMAN  | D.AQRLS#PIPEEVPKSTLE.S               | S594:        | 3 | 2,9984 | 0,146 | -0,093 |
| 8 | P98082 DAB2_HUMAN  | K.LIGIDDPDARGD.K                     |              | 2 | 2,9974 | 0,366 | -0,09  |
| 8 | Q96JM3 ZN828_HUMAN | E.LLAS#PKKLE.D                       | S603:        | 2 | 2,9934 | 0,159 | 0      |

|   |                     |                                |                    |   |        |       |        |
|---|---------------------|--------------------------------|--------------------|---|--------|-------|--------|
| 8 | Q9HAZ2 PRD16_HUMAN  | E.NAPVSQLPGVLTNHLGTSASS#PTSE.S | S1054:             | 3 | 2,9931 | 0,406 | -0,427 |
| 8 | P55072 TERA_HUMAN   | E.M*FAQTLQQR.G                 |                    | 2 | 2,9911 | 0,192 | -0,199 |
| 8 | P09493 TPM1_HUMAN   | R.LAT#ALQKLEE.A                | T108:              | 2 | 2,9875 | 0,232 | -0,204 |
| 8 | P54727 RD23B_HUMAN  | E.YLLM*GIPGDRE.S               |                    | 2 | 2,9875 | 0,337 | -0,095 |
| 8 | Q12888 TP53B_HUMAN  | R.QSQQPM*KPIS#PVKDPVS#PASQK.M  | S1094:S1101:       | 3 | 2,9871 | 0,132 | -0,287 |
| 8 | Q15149 PLEC1_HUMAN  | R.SRSSS#VGSSSSYPISPAVSR.T      | S4386:             | 3 | 2,987  | 0,277 | -0,176 |
| 8 | P98164 LRP2_HUMAN   | K.CASGDKCIGVTNR.C              |                    | 3 | 2,9854 | 0,193 | -0,064 |
| 8 | Q9UQ35 SRRM2_HUMAN  | E.SYFGVSSLQLK.G                |                    | 2 | 2,9834 | 0,393 | -0,298 |
| 8 | P04792 HSPB1_HUMAN  | E.SPAAVAAPAYS.R                |                    | 2 | 2,9829 | 0,276 | -0,336 |
| 8 | Q71U36 TBA1A_HUMAN  | E.DMAALEKDYEE.V                |                    | 2 | 2,9806 | 0,245 | -0,186 |
| 8 | P48960 CD97_HUMAN   | R.CNPGFSSFSE.I                 |                    | 2 | 2,9782 | 0,27  | 0      |
| 8 | Q9BUA3 YK007_HUMAN  | E.GVALLQDVR.A                  |                    | 2 | 2,9753 | 0,244 | 0      |
| 8 | O15042 SR140_HUMAN  | E.SLCDS#PHQNLRSRPLE.N          | S67:               | 3 | 2,971  | 0,238 | 0      |
| 8 | Q9NUU7 DD19A_HUMAN  | E.VLQRDPNS#PLYSVK.S            | S85:               | 3 | 2,9663 | 0,272 | -0,324 |
| 8 | P06748 NPM_HUMAN    | D.M*SPLRPQNYLFGCE.L            |                    | 2 | 2,966  | 0,309 | -0,424 |
| 8 | Q9H074 PAIP1_HUMAN  | E.VPAS#PQRPSRPGALPE.Q          | S77:               | 3 | 2,9654 | 0,338 | 0      |
| 8 | Q16881 TRXR1_HUMAN  | R.VVGFHVLGPNAGE.V              |                    | 2 | 2,9645 | 0,417 | -0,188 |
| 8 | P55265 DSRAD_HUMAN  | E.NGQEPVIKLE.N                 |                    | 2 | 2,9636 | 0,323 | -0,217 |
| 8 | Q9BYW2 SETD2_HUMAN  | E.IGDTLSTAEES#PPKSRVE.L        | S131:              | 3 | 2,9627 | 0,222 | -0,088 |
| 8 | P10809 CH60_HUMAN   | E.VVVTEIPKEE.K                 |                    | 2 | 2,9611 | 0,38  | -0,107 |
| 8 | Q03252 LMNB2_HUMAN  | R.AGGPAT#PLS#PTR.L             | T14:S17:           | 2 | 2,9606 | 0,493 | -0,285 |
| 8 | P05787 K2C8_HUMAN   | R.TEM*ENEFVLIK.K               |                    | 2 | 2,9578 | 0,417 | -0,535 |
| 8 | P56537 IF6_HUMAN    | E.ILADVLIKVE.V                 |                    | 2 | 2,9557 | 0,341 | -0,061 |
| 8 | Q01082 SPTB2_HUMAN  | R.T#SS#KESSIPS#PTSDRK.A        | T2159:S2161:S2169: | 3 | 2,9532 | 1     | -0,448 |
| 8 | Q15942 ZYX_HUMAN    | R.EKVSS#IDLE.I                 | S143:              | 2 | 2,9525 | 0,082 | -0,111 |
| 8 | P49792 RBP2_HUMAN   | K.IIDSDSNLSVVK.K               |                    | 2 | 2,9503 | 0,265 | -0,087 |
| 8 | Q9Y490 TLN1_HUMAN   | E.SALQLLYTAKE.A                |                    | 2 | 2,9479 | 0,363 | 0      |
| 8 | P21359 NF1_HUMAN    | E.GYLAATYPTVGQTS#PR.A          | S2515:             | 2 | 2,9466 | 0,299 | 1,177  |
| 8 | Q13428 TCOF_HUMAN   | K.LDSSPSVSSTLAAK.D             |                    | 2 | 2,9459 | 0,451 | -0,269 |
| 8 | B2RMQ4 B2RMQ4_HUMAN | E.VVARPAS#LSNDKLME.K           | S327:              | 3 | 2,9458 | 0,085 | -0,107 |
| 8 | P35030 TRY3_HUMAN   | D.TLDNDIMLIK.L                 |                    | 2 | 2,9452 | 0,325 | -0,83  |
| 8 | P30101 PDIA3_HUMAN  | E.LSDFISYLQRE.A                |                    | 2 | 2,9441 | 0,409 | -0,089 |
| 8 | P27816 MAP4_HUMAN   | K.KCS#LPAEEDSVLE.K             | S636:              | 2 | 2,9441 | 0,29  | -0,235 |



|   |                    |                                   |              |   |        |       |        |
|---|--------------------|-----------------------------------|--------------|---|--------|-------|--------|
| 8 | Q86W92 LIPB1_HUMAN | E.DDM*FKDFAAR.S                   |              | 3 | 2,9389 | 0,208 | 0,52   |
| 8 | Q9UPN4 AZI1_HUMAN  | K.ANNAGGLPAAGPGDR.C               |              | 2 | 2,9386 | 0,415 | -0,437 |
| 8 | P04792 HSPB1_HUMAN | R.ALS#RQLSSGVSE.I                 | S78:         | 2 | 2,9385 | 0,216 | -0,186 |
| 8 | Q02952 AKA12_HUMAN | K.ERPPAPS#SFVFQEE.T               | S1225:       | 2 | 2,9364 | 0,107 | -0,287 |
| 8 | P04792 HSPB1_HUMAN | E.SPAAVAAPAYSRLSR.Q               |              | 2 | 2,9347 | 0,3   | -0,402 |
| 8 | P14618 KPYM_HUMAN  | R.AGKPVICATQM*LE.S                |              | 2 | 2,9341 | 0,31  | -0,255 |
| 8 | P18858 DNL1_HUMAN  | E.GEDGDQPTT#PPKPLK.T              | T183:        | 2 | 2,9322 | 0,322 | 0,294  |
| 8 | Q96T37 RBM15_HUMAN | E.FSQQFLDS#PAKALAKSEE.D           | S935:        | 3 | 2,9316 | 0,124 | -0,264 |
| 8 | P62306 RUXF_HUMAN  | E.EYIDGALSGHLGE.V                 |              | 2 | 2,9307 | 0,427 | -0,269 |
| 8 | P61158 ARP3_HUMAN  | E.DHYFLLTEPPLNTPE.N               |              | 2 | 2,93   | 0,35  | -0,547 |
| 8 | P15822 ZEP1_HUMAN  | E.SVS#PKKPLFLQPSE.L               | S130:        | 2 | 2,929  | 0,366 | -0,484 |
| 8 | O14974 MYPT1_HUMAN | E.TSSTSAGDRYDSSLGR.S              |              | 2 | 2,9254 | 0,308 | -0,289 |
| 8 | P10644 KAPO_HUMAN  | E.DGQKIVVQGEPGDE.F                |              | 2 | 2,9221 | 0,463 | -0,332 |
| 8 | O00154 BACH_HUMAN  | E.VPPVVYSRQEQUEE.G                |              | 2 | 2,9182 | 0,209 | -0,433 |
| 8 | Q8NI08 NCOA7_HUMAN | E.STLDNSCQGAQM*DNKSE.V            |              | 3 | 2,9171 | 0,112 | -0,385 |
| 8 | Q15836 VAMP3_HUMAN | R.RLQQTQNVDE.V                    |              | 2 | 2,9153 | 0,282 | -0,628 |
| 8 | P49327 FAS_HUMAN   | E.AIVDGGINPDSLR.G                 |              | 2 | 2,9143 | 0,286 | -0,184 |
| 8 | Q7Z2W4 ZCCHV_HUMAN | R.SCTPSPDQIS#HRASLEDAPVDD.L       | S280:        | 3 | 2,9142 | 0,157 | -0,295 |
| 8 | P18858 DNL1_HUMAN  | E.ALS#PAKGQKPAIDCSQVS#PPRPATSPE.N | S76:S91:     | 3 | 2,9127 | 0,197 | -0,558 |
| 8 | Q9Y613 FHOD1_HUMAN | E.TLAGAM*PNEAGGHPDAR.Q            |              | 3 | 2,9062 | 0,437 | 0      |
| 8 | P49023 PAXI_HUMAN  | K.TGSSS#PPGGPPKPGSQLD.S           | S322:        | 2 | 2,9046 | 0,314 | -0,419 |
| 8 | Q9UGU0 TCF20_HUMAN | K.DM*PLSSDGNPKVNE.K               |              | 2 | 2,8975 | 0,171 | 0,161  |
| 8 | Q96DF8 DGC14_HUMAN | K.M*SREPPPPYVTPAT#FET#PE.V        | T107:T110:   | 3 | 2,8962 | 0,12  | -0,315 |
| 8 | Q71U36 TBA1A_HUMAN | E.DM*AALEKDYEE.V                  |              | 2 | 2,8928 | 0,218 | -0,092 |
| 8 | O95359 TACC2_HUMAN | K.TSSKTPS#S#PSKSPASFEIPASAME.A    | S2389:S2390: | 3 | 2,8913 | 1     | -0,92  |
| 8 | P51149 RAB7A_HUMAN | E.FLIQASPRDPE.N                   |              | 2 | 2,8903 | 0,15  | 0,288  |
| 8 | Q9P287 BCCIP_HUMAN | E.LTDLLIQNHIGSVIK.Q               |              | 3 | 2,8883 | 0,265 | -0,102 |
| 8 | P80723 BASP_HUMAN  | E.SAAPAAGEEPSKEE.G                |              | 2 | 2,8868 | 0,458 | -0,355 |
| 8 | O00712 NFIB_HUMAN  | E.QDSGQSGSPS#HNDPAKNPPGYLE.D      | S196:        | 3 | 2,8866 | 0,114 | 0      |
| 8 | Q9NQ57 INCE_HUMAN  | E.QHVTQLMSTEPLPR.T                |              | 3 | 2,8862 | 0,114 | -0,112 |
| 8 | Q8IX90 CM003_HUMAN | E.NLLRTPT#PPEVTKIPE.D             | T360:        | 3 | 2,8837 | 0,258 | -0,097 |
| 8 | Q9BT25 NYS48_HUMAN | R.SFAQVLELSAEASK.E                |              | 2 | 2,8788 | 0,348 | 0,082  |
| 8 | Q14247 SRC8_HUMAN  | K.TQT#PPVS#PAPQPTTEE.R            | T401:S405:   | 2 | 2,8776 | 0,231 | -0,281 |

|   |                       |                             |            |   |        |       |        |
|---|-----------------------|-----------------------------|------------|---|--------|-------|--------|
| 8 | P63241 IF5A1_HUMAN    | E.IEQKYDCGEE.I              |            | 2 | 2,8774 | 0,245 | -0,288 |
| 8 | Q07021 C1QBP_HUMAN    | E.AESDIFSIRE.V              |            | 2 | 2,8755 | 0,338 | -0,105 |
| 8 | P06756 ITAV_HUMAN     | D.GIDDFVSGVPR.A             |            | 2 | 2,8751 | 0,371 | -0,21  |
| 8 | Q92797 SYMPK_HUMAN    | E.AALLDS#SLEGPLPK.E         | S1221:     | 2 | 2,8751 | 0,283 | -0,082 |
| 8 | P49368 TCPG_HUMAN     | E.TGTLVDM*KE.L              |            | 2 | 2,8736 | 0,257 | -0,121 |
| 8 | Q66K74 MAP1S_HUMAN    | E.LPLAASSIPRPR.T            |            | 2 | 2,8729 | 0,287 | -0,286 |
| 8 | Q9UNN5 FAF1_HUMAN     | E.VFGMASSALR.K              |            | 2 | 2,8697 | 0,329 | -0,117 |
| 8 | Q16563 SYPL1_HUMAN    | K.TVTATFGYPFR.L             |            | 2 | 2,8693 | 0,403 | -0,194 |
| 8 | Q5UIP0 RIF1_HUMAN     | E.LIIEDNNAS#PQKLRE.L        | S2144:     | 2 | 2,8691 | 0,212 | -0,603 |
| 8 | P61158 ARP3_HUMAN     | R.YSYVCPDLVKE.F             |            | 2 | 2,8687 | 0,314 | -0,267 |
| 8 | Q2NKX8 ERC6L_HUMAN    | E.NS#LCGSAPNSR.A            | S980:      | 2 | 2,8648 | 0,495 | -0,393 |
| 8 | P50748 KNTC1_HUMAN    | E.DYSNSSLVADLRE.Q           |            | 2 | 2,864  | 0,374 | 0      |
| 8 | P78364 PHC1_HUMAN     | E.ALS#PTS#PGPLSVR.A         | S895:S898: | 2 | 2,8638 | 0,251 | -0,508 |
| 8 | Q9Y2N3 PO121_HUMAN    | E.TATKPQATSAPS#PAPK.Q       | S674:      | 2 | 2,8636 | 0,358 | -0,448 |
| 8 | Q9Y6D5 BIG2_HUMAN     | R.GSS#LSGTDDGAQE.V          | S277:      | 2 | 2,8617 | 0,218 | -0,281 |
| 8 | P43358 MAGA4_HUMAN    | E.LGVMGVYDGRE.H             |            | 2 | 2,8587 | 0,443 | -0,204 |
| 8 | Q969F1 TF3C6_HUMAN    | E.IQM*NDSSNLS#CEQEKPMHLE.I  | S177:      | 3 | 2,8587 | 0,202 | -0,221 |
| 8 | Q8N4Q1 MIA40_HUMAN    | E.DHETPSSAELVADDPNDPYEE.H   |            | 3 | 2,8555 | 0,144 | -0,236 |
| 8 | Q8N5U6 RNF10_HUMAN    | K.GQQPPRS#ASAGPAGE.S        | S39:       | 2 | 2,8504 | 0,237 | -0,409 |
| 8 | P00966 ASSY_HUMAN     | K.TQDPAKAPNTPDILEIE.F       |            | 2 | 2,8502 | 0,311 | -0,329 |
| 8 | Q9Y3L3 3BP1_HUMAN     | E.SEVPPRPAS#PK.V            | S544:      | 2 | 2,8497 | 0,174 | -0,49  |
| 8 | P26639 SYTC_HUMAN     | K.M*GGEKPIGAGEE.K           |            | 2 | 2,8463 | 0,331 | -0,462 |
| 8 | Q16625 OCLN_HUMAN     | E.LPLTS#PVDDFRQPR.Y         | S358:      | 3 | 2,844  | 0,118 | -0,213 |
| 8 | ##Q6MZX7 Q6MZX7_HUMAN | K.LSPT#YYPTGSY#SVTGIWE.L    | T389:Y396: | 3 | 2,8395 | 0,123 | -0,503 |
| 8 | O14979 HNRDL_HUMAN    | E.NIELPM*DTKTNE.R           |            | 2 | 2,8382 | 0,271 | -0,258 |
| 8 | Q71F56 MD13L_HUMAN    | E.LGAVS#PALR.S              | S826:      | 2 | 2,8375 | 0,241 | -0,127 |
| 8 | Q9UNZ2 NSF1C_HUMAN    | K.LGSTAPQVLSTSSPAQAENE.A    |            | 2 | 2,8366 | 0,436 | -0,231 |
| 8 | Q7Z2W4 ZCCHV_HUMAN    | R.SCT#PS#PDQISHR.A          | T273:S275: | 2 | 2,8354 | 0,213 | -0,711 |
| 8 | P11831 SRF_HUMAN      | E.LQVVNLDTAHSTKS#E.-        | S507:      | 3 | 2,8343 | 0,237 | 0      |
| 8 | Q8WZ73 RFFL_HUMAN     | R.RAS#LSDLTDLE.D            | S240:      | 2 | 2,8337 | 0,416 | -0,188 |
| 8 | A8K9W7 A8K9W7_HUMAN   | E.SEDPDYYQYNIQGS#HHSSEGNE.G | S256:      | 3 | 2,8306 | 0,333 | -0,347 |
| 8 | P05787 K2C8_HUMAN     | E.AAIADAEQRGE.L             |            | 2 | 2,8303 | 0,405 | -0,216 |
| 8 | P11586 C1TC_HUMAN     | E.VNKGDILVVATGQPE.M         |            | 2 | 2,8292 | 0,318 | -0,238 |

|   |                    |                                 |              |   |        |       |        |
|---|--------------------|---------------------------------|--------------|---|--------|-------|--------|
| 8 | O76003 GLRX3_HUMAN | E.LVGGLDIVKE.L                  |              | 2 | 2,8285 | 0,254 | 0,234  |
| 8 | Q9UQ35 SRRM2_HUMAN | R.SGSES#SVDQKTVAR.T             | S1521:       | 3 | 2,8281 | 0,139 | 0,239  |
| 8 | Q9UQ35 SRRM2_HUMAN | R.SSGHS#SSELS#PDAVE.K           | S1382:S1387: | 2 | 2,8278 | 1     | -0,37  |
| 8 | Q86XJ1 GA2L3_HUMAN | R.HGPGLANVCQYDE.W               |              | 2 | 2,8264 | 0,387 | -0,084 |
| 8 | Q7Z6Z7 HUWE1_HUMAN | E.VANCCIRIALPAPR.G              |              | 3 | 2,8249 | 0,214 | 1,022  |
| 8 | P30040 ERP29_HUMAN | E.VGSDYGDKLNLM*E.L              |              | 2 | 2,8234 | 0,418 | -0,084 |
| 8 | Q8NB78 AOF1_HUMAN  | R.AAATGNAS#PGKLE.H              | S247:        | 2 | 2,8212 | 0,349 | -0,193 |
| 8 | Q9BXJ9 NARG1_HUMAN | E.ALYDGLDCKE.A                  |              | 2 | 2,82   | 0,368 | -0,184 |
| 8 | P56385 ATP5I_HUMAN | E.LAEDDSILK.-                   |              | 2 | 2,8189 | 0,332 | -0,243 |
| 8 | P27816 MAP4_HUMAN  | E.AGAPTSASGLNGHPTLS#GGGDQRE.A   | S1132:       | 3 | 2,816  | 0,328 | -0,395 |
| 8 | Q12802 AKP13_HUMAN | E.CSTPLPEDCS#PT#HSPR.V          | S2398:T2400: | 3 | 2,8139 | 0,192 | -0,457 |
| 8 | Q15003 CND2_HUMAN  | E.GTEDLSDVLR.Q                  |              | 2 | 2,8134 | 0,272 | -0,101 |
| 8 | P54727 RD23B_HUMAN | E.YLLMGIPGDRE.S                 |              | 2 | 2,8121 | 0,324 | -0,29  |
| 8 | O15085 ARHGB_HUMAN | K.SLGGESSGGTT#PVGSFHTE.A        | T1462:       | 2 | 2,8116 | 0,343 | -0,388 |
| 8 | Q9NXG2 THUM1_HUMAN | E.YGDDM*YGPEK.F                 |              | 2 | 2,8109 | 0,469 | -0,41  |
| 8 | Q01813 K6PP_HUMAN  | R.NVIFQPVAELK.K                 |              | 2 | 2,8075 | 0,366 | -0,194 |
| 8 | P09382 LEG1_HUMAN  | D.QANLTVKLPDGYE.F               |              | 2 | 2,8067 | 0,383 | -0,421 |
| 8 | Q8WYQ5 DGCR8_HUMAN | E.QSSDLTPSGDVS#PVKPLSR.S        | S377:        | 3 | 2,8012 | 0,143 | -0,089 |
| 8 | Q14157 UBP2L_HUMAN | K.STSAPQM*SPGS#SDNQSSSPQPAQQK.L | S470:        | 3 | 2,801  | 0,178 | -0,348 |
| 8 | Q6NYC8 PHTNS_HUMAN | K.LLES#PGVEAGEGAE.K             | S368:        | 2 | 2,8006 | 0,164 | -0,389 |
| 8 | Q71F56 MD13L_HUMAN | E.VEDGLGS#PKPEEIKD.F            | S923:        | 3 | 2,7995 | 0,15  | 0,108  |
| 8 | P07355 ANXA2_HUMAN | E.GDHST#PPSAYGSVK.A             | T19:         | 2 | 2,7979 | 0,222 | -0,741 |
| 8 | Q8N3X1 FNBP4_HUMAN | E.VEES#PEKIK.V                  | S508:        | 2 | 2,7964 | 0,1   | -0,214 |
| 8 | Q7Z6E9 RBBP6_HUMAN | E.GSSSTLVDYTSTSTGG#PVRK.S       | S1277:       | 3 | 2,7961 | 0,139 | -0,162 |
| 8 | O94804 STK10_HUMAN | K.ASQS#RPNS#SALE.T              | S450:S454:   | 2 | 2,7954 | 0,221 | -0,173 |
| 8 | Q9GZR2 REXO4_HUMAN | E.TS#PQVKGEEMPAGKDQE.A          | S111:        | 3 | 2,7933 | 0,173 | -0,191 |
| 8 | P15822 ZEP1_HUMAN  | K.ISVGRLS#PQQE.S                | S1734:       | 2 | 2,7928 | 0,318 | -0,094 |
| 8 | P60709 ACTB_HUMAN  | R.GYSFTTTAERE.I                 |              | 2 | 2,792  | 0,443 | -0,58  |
| 8 | Q8WVM8 SCFD1_HUMAN | E.DDM*FVLCNQNK.E.L              |              | 2 | 2,791  | 0,32  | -0,239 |
| 8 | O95208 EPN2_HUMAN  | R.GSS#QPNLSTSHSEQE.Y            | S173:        | 2 | 2,788  | 0,228 | -0,585 |
| 8 | P15170 ERF3A_HUMAN | E.ISEAEPGGGS#LGDGRPPEESAHE.M    | S36:         | 3 | 2,7853 | 0,228 | -0,31  |
| 8 | O94909 K0819_HUMAN | E.GEPLSLTPRS#PSDRE.L            | S546:        | 2 | 2,7821 | 0,342 | -0,268 |
| 8 | P27482 CALL3_HUMAN | R.SLGQNPTAE.L                   |              | 2 | 2,7817 | 0,199 | 0      |

|   |                     |                              |            |   |        |       |        |
|---|---------------------|------------------------------|------------|---|--------|-------|--------|
| 8 | Q8WWM7 ATX2L_HUMAN  | K.ISLAPTDVKE.L               |            | 2 | 2,7809 | 0,299 | 0,227  |
| 8 | P21333 FLNA_HUMAN   | E.ISIQDM*TAQVTS#PSGKTHE.A    | S2180:     | 3 | 2,7792 | 0,097 | 0      |
| 8 | Q9HA05 Q9HA05_HUMAN | K.M*NSIVYQK.Q                |            | 2 | 2,7786 | 0,223 | -0,122 |
| 8 | Q9NXG2 THUM1_HUMAN  | E.YGDDMYGPEK.F               |            | 2 | 2,7758 | 0,449 | -0,104 |
| 8 | P49411 EFTU_HUMAN   | E.AQVYILSKEE.G               |            | 2 | 2,7747 | 0,362 | -0,103 |
| 8 | O43303 CE110_HUMAN  | E.GFNS#PKQCSSNISHVENE.A      | S170:      | 3 | 2,773  | 0,14  | -0,492 |
| 8 | P63218 GBG5_HUMAN   | K.VVQQLRLE.A                 |            | 2 | 2,7708 | 0,269 | -0,495 |
| 8 | P52272 HNRPM_HUMAN  | R.M*GSVERM*GS#GIE.R          | S452:      | 2 | 2,7659 | 0,373 | -0,358 |
| 8 | P31946 1433B_HUMAN  | E.VASGDNKQTTVSNSQQAYQE.A     |            | 2 | 2,7622 | 0,496 | -0,793 |
| 8 | Q9UNS2 CSN3_HUMAN   | E.ITVNPQFVQK.S               |            | 2 | 2,7591 | 0,391 | 0      |
| 8 | Q9UQ35 SRRM2_HUMAN  | K.THTTALAGRS#PS#PASGR.R      | S295:S297: | 3 | 2,7569 | 0,209 | -0,2   |
| 8 | Q9H3P7 GCP60_HUMAN  | E.VVVAGSSLPTSSK.V            |            | 2 | 2,7532 | 0,386 | 0      |
| 8 | P05556 ITB1_HUMAN   | E.VNSEDM*DAYCR.K             |            | 2 | 2,7516 | 0,423 | -0,266 |
| 8 | Q9H6U6 BCAS3_HUMAN  | R.NFDGYRS#PLPTNE.S           | S910:      | 2 | 2,7501 | 0,228 | 0      |
| 8 | P30622 CLIP1_HUMAN  | E.ANGLQTPASR.A               |            | 2 | 2,7455 | 0,355 | -0,328 |
| 8 | Q2TAA2 IAH1_HUMAN   | E.LSLLGDGDH.-                |            | 2 | 2,7447 | 0,287 | 0,132  |
| 8 | Q9Y3L3 3BP1_HUMAN   | K.VTRS#PPETAAPVED.M          | S550:      | 2 | 2,7444 | 0,429 | -0,551 |
| 8 | Q9BRX5 PSF3_HUMAN   | E.DTSALVARLDE.M              |            | 2 | 2,7432 | 0,225 | 0,103  |
| 8 | Q9UPT8 ZC3H4_HUMAN  | K.GSGPPPTEEEEGE.R            |            | 2 | 2,7428 | 0,299 | -0,371 |
| 8 | P04075 ALDOA_HUMAN  | K.YTPSGQAGAAASE.S            |            | 2 | 2,7375 | 0,4   | -0,101 |
| 8 | P35269 T2FA_HUMAN   | R.LRLDTGPQSLS#GKST#PQPPSGK.T | S433:T437: | 3 | 2,7295 | 0,309 | -0,152 |
| 8 | Q9Y608 LRRF2_HUMAN  | R.RGS#GDTSSLIDPDTSLSE.L      | S328:      | 2 | 2,717  | 0,447 | -0,127 |
| 8 | Q7Z2K8 GRIN1_HUMAN  | R.GSLACPSPTCFSPQES#PSKE.T    | S104:      | 3 | 2,7163 | 0,104 | -0,326 |
| 8 | Q6NZI2 PTRF_HUMAN   | E.SDAVLVDKS#DS#D.-           | S387:S389: | 2 | 2,7159 | 0,117 | -0,346 |
| 8 | Q9NY61 AATF_HUMAN   | E.LLFQYPDTR.Y                |            | 2 | 2,715  | 0,303 | -0,106 |
| 8 | Q8NG31 CASC5_HUMAN  | K.DSGIGSVAGK.L               |            | 2 | 2,7135 | 0,223 | 0      |
| 8 | P30101 PDIA3_HUMAN  | E.STAGEIPVVAIR.T             |            | 3 | 2,7112 | 0,122 | 0,603  |
| 8 | P08238 HS90B_HUMAN  | E.LFSELAEDKE.N               |            | 2 | 2,7105 | 0,211 | -0,103 |
| 8 | Q8WXI9 P66B_HUMAN   | E.RGRLT#PSPDIIVLS#DNE.A      | T120:S129: | 3 | 2,7092 | 0,157 | -0,269 |
| 8 | Q2NKX8 ERC6L_HUMAN  | E.LCTNSSLGM*EKS#FATKNE.A     | S835:      | 3 | 2,7068 | 0,263 | -0,173 |
| 8 | Q641Q2 FA21A_HUMAN  | E.DQNIIQAPQKE.V              |            | 2 | 2,7042 | 0,358 | -0,19  |
| 8 | Q6PJF5 RHDF2_HUMAN  | E.SPPLSASYFR.G               |            | 2 | 2,7019 | 0,342 | -0,108 |
| 8 | Q6NZI2 PTRF_HUMAN   | R.GSS#PDVHALLE.I             | S366:      | 2 | 2,7009 | 0,255 | 0      |

|   |                     |                         |        |   |        |       |        |
|---|---------------------|-------------------------|--------|---|--------|-------|--------|
| 8 | Q9UPV0 CE164_HUMAN  | E.NNAS#PHFEPDLHIE.D     | S1054: | 2 | 2,6962 | 0,321 | -0,79  |
| 8 | P07919 QCR6_HUMAN   | E.LVDPLTTVRE.Q          |        | 2 | 2,6943 | 0,358 | -0,107 |
| 8 | P29966 MARCS_HUMAN  | E.AGASPVEKEAPEAGE.A     |        | 2 | 2,6938 | 0,396 | -0,508 |
| 8 | P13645 K1C10_HUMAN  | K.DAEAWFNEK.S           |        | 2 | 2,6856 | 0,163 | -0,22  |
| 8 | P22695 QCR2_HUMAN   | E.QNGDSLVAHAAFAE.S      |        | 2 | 2,6851 | 0,383 | -0,335 |
| 8 | Q15424 SAFB1_HUMAN  | E.LAEAPTEAPS#PEAR.D     | S344:  | 3 | 2,6816 | 0,228 | -0,361 |
| 8 | P01112 RASH_HUMAN   | E.DAFYTLVRE.I           |        | 2 | 2,6807 | 0,342 | -0,11  |
| 8 | Q14789 GOGB1_HUMAN  | R.DQLLSQVKE.L           |        | 2 | 2,6805 | 0,187 | 0,115  |
| 8 | O43395 PRPF3_HUMAN  | E.VFGDDSEISKE.S         |        | 2 | 2,6787 | 0,315 | -0,299 |
| 8 | P62256 UBE2H_HUMAN  | R.MDTDVVKLIE.S          |        | 2 | 2,6766 | 0,231 | -0,21  |
| 8 | Q92622 K0226_HUMAN  | E.YLAIGNLDPR.G          |        | 2 | 2,6721 | 0,136 | 0      |
| 8 | P17987 TCPA_HUMAN   | E.AAITILRIDD.L          |        | 2 | 2,6698 | 0,28  | -0,222 |
| 8 | P06576 ATPB_HUMAN   | D.S#GAPIKIPVGPE.T       | S128:  | 2 | 2,6635 | 0,221 | -0,196 |
| 8 | A6NNK3 A6NNK3_HUMAN | E.SGDIVSLIHD.-          |        | 2 | 2,6627 | 0,268 | -0,116 |
| 8 | Q01518 CAP1_HUMAN   | K.AGAAPYVQAFD.S         |        | 2 | 2,6616 | 0,425 | 0,11   |
| 8 | Q8N163 K1967_HUMAN  | E.LLLLRDDGEEE.F         |        | 2 | 2,661  | 0,341 | -0,562 |
| 8 | Q02952 AKA12_HUMAN  | E.GS#IDTGITVSR.E        | S1287: | 2 | 2,6579 | 0,127 | -0,103 |
| 8 | P05556 ITB1_HUMAN   | K.NVLSLTNKGE.V          |        | 2 | 2,6571 | 0,256 | 0,34   |
| 8 | Q14160 LAP4_HUMAN   | E.NAVTITPLRPEDDYS#PRE.R | S835:  | 3 | 2,6531 | 0,109 | -0,085 |
| 8 | Q09666 AHNK_HUMAN   | K.GDVDVSVPEVEGK.L       |        | 2 | 2,6528 | 0,292 | -0,183 |
| 8 | P18858 DNL1_HUMAN   | E.ALS#PAKGQKPALD.C      | S76:   | 2 | 2,6526 | 0,358 | -0,443 |
| 8 | Q9NQW7 XPP1_HUMAN   | E.DGAFGIRIE.N           |        | 2 | 2,6517 | 0,277 | -0,187 |
| 8 | Q03405 UPAR_HUMAN   | E.LENLPQNGR.Q           |        | 2 | 2,6513 | 0,246 | -0,117 |
| 8 | Q9H7E2 TDRD3_HUMAN  | E.SQTS#IPDYFYDRK.S      | S448:  | 3 | 2,651  | 0,131 | -0,323 |
| 8 | Q15424 SAFB1_HUMAN  | E.LAEAPTEAPSPPEAR.D     |        | 2 | 2,6496 | 0,294 | 0      |
| 8 | Q07157 ZO1_HUMAN    | E.YSM*YSTDSR.H          |        | 2 | 2,6471 | 0,363 | -0,217 |
| 8 | Q96T58 MINT_HUMAN   | E.SGVVAVSPEKSES#PQKE.D  | S2126: | 2 | 2,6462 | 0,186 | 0,398  |
| 8 | P49591 SYSC_HUMAN   | E.NRLQNM*EVT#DA.-       | T512:  | 2 | 2,646  | 0,312 | -0,528 |
| 8 | Q9GZZ9 UBA5_HUMAN   | E.GITVAYTIPK.K          |        | 2 | 2,6454 | 0,488 | 0      |
| 8 | P30101 PDIA3_HUMAN  | E.SNDGPVKVVVAE.N        |        | 2 | 2,639  | 0,208 | 0      |
| 8 | P80723 BASP_HUMAN   | K.KTEAPAAPAAQE.T        |        | 2 | 2,6378 | 0,325 | 0,206  |
| 8 | P43358 MAGA4_HUMAN  | E.LGVM*GVYDGRE.H        |        | 2 | 2,6375 | 0,355 | -0,201 |
| 8 | O43572 AKA10_HUMAN  | R.NSPAS#PLKE.L          | S281:  | 2 | 2,6362 | 0,305 | 0      |

|   |                    |                                  |          |   |        |       |        |
|---|--------------------|----------------------------------|----------|---|--------|-------|--------|
| 8 | Q00613 HSF1_HUMAN  | E.LAPAS#PM*ASPGGSIDERPLSSSPLVR.V | S275:    | 3 | 2,6338 | 0,095 | -0,272 |
| 8 | Q86WB0 NIPA_HUMAN  | R.LPLVPES#PRR.M                  | S321:    | 3 | 2,6336 | 0,144 | 0      |
| 8 | Q5VWG9 TAF3_HUMAN  | K.QIQT#PPDAGKLNSE.N              | T364:    | 2 | 2,6289 | 0,319 | -0,309 |
| 8 | Q8IXM2 CQ049_HUMAN | E.DSGIPLPAES#PKKGPK.K            | S96:     | 2 | 2,6236 | 0,202 | -0,215 |
| 8 | P08708 RS17_HUMAN  | E.IIEVDPDTKE.M                   |          | 2 | 2,6233 | 0,279 | 0      |
| 8 | Q05639 EF1A2_HUMAN | E.S#FSQYPLGR.F                   | S414:    | 2 | 2,6207 | 0,307 | -0,396 |
| 8 | P04792 HSPB1_HUMAN | R.ALS#RQLS#SGVSE.I               | S78:S82: | 2 | 2,6181 | 0,287 | -0,175 |
| 8 | Q03252 LMNB2_HUMAN | R.AGGPAT#PLS#PTRLSR.L            | T14:S17: | 3 | 2,6143 | 0,266 | 0      |
| 8 | P08133 ANXA6_HUMAN | E.IADTPSGDKTSLE.T                |          | 2 | 2,6141 | 0,279 | -0,732 |
| 8 | P07339 CATD_HUMAN  | E.VASGLTLCKE.G                   |          | 2 | 2,6125 | 0,191 | 0,453  |
| 8 | Q96PZ0 PUS7_HUMAN  | E.DVPRPPDTVSTGK.G                |          | 2 | 2,6108 | 0,371 | -0,446 |
| 8 | Q9GZR2 REXO4_HUMAN | E.TS#PQVKGEEMPAGKDQE.A           | S111:    | 2 | 2,6095 | 0,117 | -0,575 |
| 8 | Q09666 AHNK_HUMAN  | K.ASLGS#LEGEAEAE.A               | S5752:   | 2 | 2,6076 | 0,088 | -0,182 |
| 8 | Q96QF0 RAB31_HUMAN | E.LPTQPVYSS#PR.R                 | S87:     | 2 | 2,6007 | 0,22  | -0,46  |
| 8 | Q15836 VAMP3_HUMAN | R.LQQTQNQVDE.V                   |          | 2 | 2,6004 | 0,195 | -0,304 |
| 8 | P22392 NDKB_HUMAN  | E.ISLWFKPEE.L                    |          | 2 | 2,5978 | 0,308 | -0,212 |
| 8 | O43242 PSMD3_HUMAN | E.AATGGGSTGEADGKTA AAAAE.H       |          | 2 | 2,5973 | 0,341 | -0,346 |
| 8 | P49792 RBP2_HUMAN  | R.FALVT#PKKE.G                   | T1412:   | 2 | 2,5939 | 0,101 | -0,11  |
| 8 | Q9Y6I3 EPN1_HUMAN  | E.AVGSPPPAATPTPTPTR.K            | S429:    | 2 | 2,5898 | 0,381 | -0,34  |
| 8 | Q15149 PLEC1_HUMAN | E.FADM*LSGNAGGFR.S               |          | 2 | 2,5877 | 0,252 | -0,359 |
| 8 | O95817 BAG3_HUMAN  | R.SQS#PLRGM*PE.T                 | S136:    | 2 | 2,5874 | 0,353 | -0,204 |
| 8 | Q96B23 CRO25_HUMAN | E.LRRDS#SES#QLASTE.S             | S66:S69: | 2 | 2,5825 | 0,427 | -0,491 |
| 8 | O00267 SPT5H_HUMAN | R.ISS#PM*HPSAGGQR.G              | S671:    | 3 | 2,5813 | 0,141 | -0,129 |
| 8 | Q13162 PRDX4_HUMAN | E.GTAVIDGEFKE.L                  |          | 2 | 2,5785 | 0,211 | -0,209 |
| 8 | P07195 LDHB_HUMAN  | E.KLIAPVAEEE.A                   |          | 2 | 2,5783 | 0,177 | -0,111 |
| 8 | Q01813 K6PP_HUMAN  | E.CVQM*TQDVQKAM*DE.R             |          | 2 | 2,5763 | 0,339 | -0,427 |
| 8 | P81605 DCD_HUMAN   | K.ENAGEDPGLAR.Q                  |          | 2 | 2,5749 | 0,393 | -0,216 |
| 8 | Q71RC2 LARP4_HUMAN | E.IAATSGAHPEGNAE.L               |          | 2 | 2,5739 | 0,385 | -0,184 |
| 8 | P52701 MSH6_HUMAN  | E.SDSIGLTPGEKSE.L                |          | 2 | 2,5711 | 0,376 | -0,185 |
| 8 | Q9NV70 EXOC1_HUMAN | E.AEDLDGGTSLR.Q                  |          | 2 | 2,5698 | 0,298 | 0,323  |
| 8 | Q5FWF4 ZRAB3_HUMAN | K.TAARDIIDYES#DVEPE.T            | S569:    | 2 | 2,5658 | 0,185 | -1,154 |
| 8 | Q9UGU0 TCF20_HUMAN | E.ATS#PGAKDMPLSSDGNPK.V          | S583:    | 2 | 2,5643 | 0,282 | -0,198 |
| 8 | Q8NBS9 TXND5_HUMAN | E.QLALGLEHSE.T                   |          | 2 | 2,5642 | 0,219 | 0,222  |

|   |                     |                          |                 |   |        |       |        |
|---|---------------------|--------------------------|-----------------|---|--------|-------|--------|
| 8 | P51957 NEK4_HUMAN   | R.RLS#SDCSVTQE.R         | S661:           | 2 | 2,564  | 0,385 | -0,358 |
| 8 | Q96AQ6 PBIP1_HUMAN  | E.GQSPPQS#LPSTPK.A       | S129:           | 2 | 2,5622 | 0,166 | -0,261 |
| 8 | P27816 MAP4_HUMAN   | R.AS#PIKM*DLAPSKD.M      | S358:           | 3 | 2,562  | 0,119 | 0,062  |
| 8 | P11388 TOP2A_HUMAN  | E.LKPQKS#VVS#DLE.A       | S1374:S1377:    | 2 | 2,5565 | 0,304 | -0,649 |
| 8 | B2RA01 B2RA01_HUMAN | K.AQYEDIAQK.S            |                 | 2 | 2,5559 | 0,143 | -0,229 |
| 8 | O00273 DFFA_HUMAN   | E.VDAVDTGISRE.T          |                 | 2 | 2,5555 | 0,409 | -0,315 |
| 8 | P40189 IL6RB_HUMAN  | K.SY#LPQTVR.Q            | Y905:           | 2 | 2,5526 | 0,146 | 0,117  |
| 8 | P27708 PYR1_HUMAN   | E.IGEHVAPSEAAANSLE.Q     |                 | 2 | 2,5526 | 0,177 | -0,881 |
| 8 | P63244 GBLP_HUMAN   | K.IIVDELKQE.V            |                 | 2 | 2,5516 | 0,241 | 0      |
| 8 | P23588 IF4B_HUMAN   | K.VAPAQPSEEGPGRKDE.N     |                 | 2 | 2,5512 | 0,337 | -0,293 |
| 8 | Q9BTT0 AN32E_HUMAN  | E.VGLSYLMKEE.I           |                 | 2 | 2,5494 | 0,215 | -1,357 |
| 8 | P00533 EGFR_HUMAN   | E.DHFLSLQR.M             |                 | 2 | 2,5383 | 0,175 | 0      |
| 8 | Q9GZR2 REXO4_HUMAN  | E.TS#PQVKGEEM*PAGKDQE.A  | S111:           | 3 | 2,5382 | 0,118 | 0      |
| 8 | Q01082 SPTB2_HUMAN  | K.TALPAQSAATLPAR.T       |                 | 2 | 2,538  | 0,3   | -0,178 |
| 8 | Q08J23 NSUN2_HUMAN  | E.SAASTGQPDNDVTEGQR.A    |                 | 3 | 2,5369 | 0,199 | -0,106 |
| 8 | Q9H426 RIMS4_HUMAN  | E.TGLAVEMPSR.T           |                 | 2 | 2,5364 | 0,13  | 0,115  |
| 8 | P14314 GLU2B_HUMAN  | E.LQTHPELDTDGDGALSEAE.A  |                 | 2 | 2,5326 | 0,517 | -0,183 |
| 8 | Q58FF7 H90B3_HUMAN  | E.DLPLNIS#RE.M           | S333:           | 2 | 2,5326 | 0,313 | 0      |
| 8 | P18858 DNL1_HUMAN   | E.ALS#PAKGQKPALD.C       | S76:            | 3 | 2,5318 | 0,137 | 0,133  |
| 8 | P14927 QCR7_HUMAN   | E.NFYLEPYLKE.V           |                 | 2 | 2,5305 | 0,225 | 0,093  |
| 8 | Q8NFH5 NUP53_HUMAN  | K.TLGTPTQPGSTPR.I        |                 | 2 | 2,5287 | 0,418 | -0,465 |
| 8 | P04264 K2C1_HUMAN   | R.NKYEDEINKR.T           |                 | 3 | 2,5277 | 0,129 | 0,21   |
| 8 | P08670 VIME_HUMAN   | E.AANYQDTIGRLQDE.I       |                 | 3 | 2,5262 | 0,188 | 0      |
| 8 | P68104 EF1A1_HUMAN  | E.SFS#DYPPPLGR.F         | S416:           | 2 | 2,5216 | 0,297 | 0,3    |
| 8 | Q9ULT8 HECD1_HUMAN  | E.GHDSLS#VGS#FEEDSKSE.F  | S2317:S2320:    | 3 | 2,5216 | 0,102 | -0,371 |
| 8 | P31946 1433B_HUMAN  | E.LLDKYLIPNATQPE.S       |                 | 2 | 2,5196 | 0,329 | -0,227 |
| 8 | Q15366 PCBP2_HUMAN  | K.IANPVEGSTDR.Q          |                 | 2 | 2,5184 | 0,31  | 0      |
| 8 | P62753 RS6_HUMAN    | R.LS#SLRASTS#KS#ESSQK.-  | S235:S242:S244: | 3 | 2,5166 | 0,093 | -0,283 |
| 8 | P48634 BAT2_HUMAN   | E.SDLAPS#DKEAFTPKE.G     | S1120:          | 2 | 2,5164 | 0,251 | 0,073  |
| 8 | Q03164 HRX_HUMAN    | K.NALKESS#PAS#PLQIE.S    | S2543:S2546:    | 2 | 2,5162 | 0,174 | -0,28  |
| 8 | Q9Y2N3 PO121_HUMAN  | E.TATKPQATSAPS#PAPK.Q    | S674:           | 3 | 2,5157 | 0,361 | 0,112  |
| 8 | P22626 ROA2_HUMAN   | R.GGGGNFGPGPSNFR.G       |                 | 2 | 2,5155 | 0,233 | -0,177 |
| 8 | Q01518 CAP1_HUMAN   | R.SGPKPFSAPKQPT#SPS#PK.R | T307:S310:      | 3 | 2,513  | 0,148 | -0,458 |

|   |                    |                              |            |   |        |       |        |
|---|--------------------|------------------------------|------------|---|--------|-------|--------|
| 8 | P06576 ATPB_HUMAN  | D.SGAPIKIPVGPE.T             |            | 2 | 2,5125 | 0,332 | 0,209  |
| 8 | Q6PKG0 LARP1_HUMAN | R.AVT#PVPTKTEE.V             | T526:      | 2 | 2,5124 | 0,335 | -0,585 |
| 8 | P55884 EIF3B_HUMAN | E.DAGGNEGRAAEAEPR.A          |            | 3 | 2,5097 | 0,155 | -0,366 |
| 8 | P04264 K2C1_HUMAN  | K.SLNNQFASFIDKVR.F           |            | 3 | 2,5084 | 0,149 | 0      |
| 8 | Q16531 DDB1_HUMAN  | K.LFSSSTAPHETS#FGEEVE.V      | S781:      | 2 | 2,5077 | 0,344 | -0,3   |
| 8 | P38159 HNRPG_HUMAN | R.DVYLS#PRDDGYSTKD.S         | S208:      | 2 | 2,5073 | 0,283 | -0,337 |
| 8 | O94842 TOX4_HUMAN  | R.SGCENPPIVSK.D              |            | 2 | 2,5039 | 0,212 | -0,308 |
| 8 | Q96RK0 CIC_HUMAN   | E.T#RERS#M*SETGTAAAPGVSS.E.L | T295:S299: | 3 | 2,501  | 0,124 | -0,333 |
| 8 | P11177 ODPB_HUMAN  | E.DNSIPQVKD.I                |            | 2 | 2,4995 | 0,338 | 0      |
| 8 | P05787 K2C8_HUMAN  | E.VDPNIQAVR.T                |            | 2 | 2,4986 | 0,235 | -0,301 |
| 8 | P37802 TAGL2_HUMAN | K.IEKQYDADLE.Q               |            | 2 | 2,4939 | 0,255 | -0,199 |
| 8 | P06400 RB_HUMAN    | E.GLPT#PTKM*T#PR.S           | T821:T826: | 2 | 2,4916 | 0,301 | -0,266 |
| 8 | P35580 MYH10_HUMAN | E.LEEILHDLE.S                |            | 2 | 2,4908 | 0,132 | -0,11  |
| 8 | Q86UW6 N4BP2_HUMAN | E.LCAYSCEDR.S                |            | 2 | 2,4907 | 0,259 | -0,208 |
| 8 | P08473 NEP_HUMAN   | E.DLIAQIRE.V                 |            | 2 | 2,4837 | 0,156 | 0      |
| 8 | P35527 K1C9_HUMAN  | K.STMQELNSR.L                |            | 2 | 2,4826 | 0,227 | -0,229 |
| 8 | P05783 K1C18_HUMAN | E.QLNGILLHLE.S               |            | 2 | 2,4799 | 0,35  | -0,212 |
| 8 | Q9Y2W1 TR150_HUMAN | E.DLARPSGLLAQE.R             |            | 2 | 2,4785 | 0,197 | -0,192 |
| 8 | P30049 ATPD_HUMAN  | D.M*LDLGA.A                  |            | 2 | 2,478  | 0,135 | 0,073  |
| 8 | P06744 G6PI_HUMAN  | E.LQAAGKSPEDLE.R             |            | 2 | 2,4734 | 0,1   | -0,291 |
| 8 | Q9NWS8 RMND1_HUMAN | E.DLMHCTAFATADE.Y            |            | 2 | 2,4726 | 0,199 | -0,082 |
| 8 | Q9UMS0 NFU1_HUMAN  | E.DGGDVYIKGFE.D              |            | 2 | 2,4686 | 0,381 | 0,305  |
| 8 | P05386 RLA1_HUMAN  | E.S#DDDM*GFGLFD.-            | S104:      | 2 | 2,4672 | 0,178 | -0,093 |
| 8 | O95425 SVIL_HUMAN  | E.GLLDS#PSKTMSIKE.R          | S1120:     | 3 | 2,466  | 0,196 | 0      |
| 8 | O43303 CE110_HUMAN | K.GKEQAM*DLIIQDTDE.N         |            | 2 | 2,4659 | 0,164 | -0,283 |
| 8 | P54132 BLM_HUMAN   | E.DFS#FSEPLPNTTNQQR.V        | S72:       | 2 | 2,4652 | 0,239 | 0      |
| 8 | Q14160 LAP4_HUMAN  | R.LRVQS#PEPPAPER.A           | S1475:     | 3 | 2,463  | 0,088 | -0,235 |
| 8 | Q9P107 GMIP_HUMAN  | R.GRGPS#PAAASPE.G            | S914:      | 2 | 2,4628 | 0,15  | -0,104 |
| 8 | Q9H7N4 SFR19_HUMAN | R.AAKVPST#PPPK.A             | T976:      | 2 | 2,4554 | 0,264 | 0      |
| 8 | O43572 AKA10_HUMAN | E.SSSTLTVASR.N               |            | 2 | 2,4552 | 0,262 | -0,544 |
| 8 | Q15020 SART3_HUMAN | E.DWDIAVQKTE.T               |            | 2 | 2,4541 | 0,25  | 0      |
| 8 | Q15149 PLEC1_HUMAN | E.AQQPTFDALRDE.L             |            | 2 | 2,4532 | 0,356 | -0,263 |
| 8 | Q13439 GOGA4_HUMAN | K.LQLRVPS#VE.S               | S71:       | 2 | 2,4532 | 0,234 | -0,109 |



|   |                     |                              |            |   |        |       |        |
|---|---------------------|------------------------------|------------|---|--------|-------|--------|
| 8 | P35244 RFA3_HUMAN   | E.DSHPFDLGLYNE.A             |            | 2 | 2,4515 | 0,3   | -0,087 |
| 8 | Q15942 ZYX_HUMAN    | R.GPPASS#PAPAPKFSPT#PK.F     | S259:T270: | 3 | 2,4504 | 0,094 | -0,367 |
| 8 | O95793 STAU1_HUMAN  | E.LDQQSTEMPR.T               |            | 2 | 2,4488 | 0,271 | -0,101 |
| 8 | P12814 ACTN1_HUMAN  | E.DYEKLASDLLE.W              |            | 2 | 2,4427 | 0,262 | -0,094 |
| 8 | P52789 HXK2_HUMAN   | E.DIM*RGSG#GTQLFDHIAE.C      | S122:      | 2 | 2,4415 | 0,419 | -0,518 |
| 8 | Q14493 SLBP_HUMAN   | R.HMDSQVEDEFDLE.A            |            | 2 | 2,4405 | 0,313 | -0,536 |
| 8 | Q72736 PKHH3_HUMAN  | E.VTLTQPVR.S                 |            | 2 | 2,4387 | 0,217 | 0      |
| 8 | Q9NS56 TOPRS_HUMAN  | R.NASVYSPSGPVNR.R            |            | 2 | 2,4375 | 0,228 | -0,272 |
| 8 | Q14149 MORC3_HUMAN  | E.SINGKSESPDHM*VS#QYQQALEE.I | S771:      | 3 | 2,437  | 0,096 | -0,356 |
| 8 | P09936 UCHL1_HUMAN  | -.MQLKPMINPE.M               |            | 2 | 2,4369 | 0,187 | -0,275 |
| 8 | Q12888 TP53B_HUMAN  | K.TVSSDGCST#PSREE.G          | T321:      | 2 | 2,4364 | 0,221 | -0,46  |
| 8 | Q99755 PI51A_HUMAN  | E.VEPGVHLGRPDVLPQT#PPLLEE.I  | T516:      | 3 | 2,4337 | 0,11  | -0,155 |
| 8 | Q6S8J3 A26CA_HUMAN  | E.KM*TQIMFE.T                |            | 2 | 2,4323 | 0,192 | 0      |
| 8 | Q8NI08 NCOA7_HUMAN  | E.STLDNSCQGAQM*DNKSE.V       |            | 2 | 2,4314 | 0,409 | -0,064 |
| 8 | P22626 ROA2_HUMAN   | D.TIEIITDR.Q                 |            | 2 | 2,4307 | 0,291 | 0,127  |
| 8 | Q99961 SH3G1_HUMAN  | K.IAASSS#FR.S                | S288:      | 2 | 2,429  | 0,408 | 0      |
| 8 | Q16881 TRXR1_HUMAN  | D.STIGIHPVCAE.V              |            | 2 | 2,4235 | 0,469 | 0      |
| 8 | Q5T1M5 FKB15_HUMAN  | E.LSCIPSHR.V                 |            | 2 | 2,4209 | 0,099 | 0,126  |
| 8 | Q15631 TSN_HUMAN    | E.ILGIEPDRE.K                |            | 2 | 2,4186 | 0,131 | -0,117 |
| 8 | Q5UIP0 RIF1_HUMAN   | K.TVGPCLGDSKNVSQE.S          |            | 2 | 2,4173 | 0,264 | -0,46  |
| 8 | Q9C0G0 ZN407_HUMAN  | E.FQIISGQPSDTLK.S            |            | 2 | 2,4159 | 0,224 | -1,021 |
| 8 | Q9UGU0 TCF20_HUMAN  | E.ATS#PGAKDM*PLSSDGNPK.V     | S583:      | 2 | 2,4077 | 0,241 | -0,457 |
| 8 | P35527 K1C9_HUMAN   | R.QGVDADINGLR.Q              |            | 2 | 2,4066 | 0,331 | -0,211 |
| 8 | P09936 UCHL1_HUMAN  | E.DGS#VLKQFLSE.T             | S112:      | 2 | 2,4045 | 0,323 | 0      |
| 8 | O75534 CSDE1_HUMAN  | E.DISIEHFE.G                 |            | 2 | 2,401  | 0,171 | 0      |
| 8 | Q6ZS30 NBEL1_HUMAN  | K.SFSVHSDRE.S                |            | 2 | 2,4005 | 0,275 | 0,229  |
| 8 | P35611 ADDA_HUMAN   | R.AAVVTS#PPPTTAPHKE.R        | S12:       | 3 | 2,3969 | 0,105 | 0,109  |
| 8 | Q9Y5B0 CTDP1_HUMAN  | E.LAGAPEPQGSCAQGGR.V         |            | 2 | 2,391  | 0,439 | -0,235 |
| 8 | O43504 HBXIP_HUMAN  | E.DTMKNPSIVGVLCTD.S          |            | 2 | 2,3896 | 0,142 | -0,148 |
| 8 | Q9C0B0 UNK_HUMAN    | D.LSALLCR.N                  |            | 2 | 2,3893 | 0,222 | 0,513  |
| 8 | Q8WYH8 ING5_HUMAN   | K.TLS#PDQRVE.R               | S57:       | 2 | 2,3879 | 0,306 | -0,108 |
| 8 | P09936 UCHL1_HUMAN  | -.MQLKPM*EINPE.M             |            | 2 | 2,3845 | 0,2   | -0,272 |
| 8 | Q9HA05 Q9HA05_HUMAN | K.MNSIVYQK.Q                 |            | 2 | 2,3818 | 0,252 | 0      |

|   |                     |                                    |            |   |        |       |        |
|---|---------------------|------------------------------------|------------|---|--------|-------|--------|
| 8 | P11172 PYR5_HUMAN   | D.AIVLLDRE.Q                       |            | 2 | 2,3734 | 0,158 | 0      |
| 8 | Q13371 PHLP_HUMAN   | E.VLVLTSVR.N                       |            | 2 | 2,3726 | 0,276 | 0,275  |
| 8 | Q9UBT2 SAE2_HUMAN   | E.VVGDAPEKVGPK.Q                   |            | 2 | 2,3723 | 0,213 | -0,408 |
| 8 | Q5VWN6 CJ018_HUMAN  | K.TGTLQDLIQHGS#PINNE.C             | S1025:     | 2 | 2,3722 | 0,218 | -0,382 |
| 8 | P18031 PTN1_HUMAN   | E.DTNLKLTLISE.D                    |            | 2 | 2,3712 | 0,244 | -0,098 |
| 8 | Q4ZG04 Q4ZG04_HUMAN | E.LLLSTLVR.E                       |            | 2 | 2,3708 | 0,31  | 0,133  |
| 8 | O94804 STK10_HUMAN  | E.QGGDLS#PAANR.S                   | S438:      | 2 | 2,3664 | 0,287 | -0,314 |
| 8 | O94979 SC31A_HUMAN  | R.AQGEPVAGHES#PKIPIYE.K            | S799:      | 3 | 2,3594 | 0,236 | -0,194 |
| 8 | P18583 SON_HUMAN    | E.SDQTLAALLS#PK.E                  | S1697:     | 2 | 2,3562 | 0,249 | -0,092 |
| 8 | Q9Y6D5 BIG2_HUMAN   | E.IGDGKGLDM*AR.R                   |            | 2 | 2,3535 | 0,251 | -0,849 |
| 8 | P09936 UCHL1_HUMAN  | E.DGSVLKQFLSE.T                    |            | 2 | 2,3533 | 0,332 | -0,1   |
| 8 | O94909 K0819_HUMAN  | E.GEPLSLPTPR.S                     |            | 2 | 2,3527 | 0,207 | 0,114  |
| 8 | P28066 PSA5_HUMAN   | E.LEEVIKDI.-                       |            | 2 | 2,352  | 0,167 | -0,254 |
| 8 | Q6S8J3 A26CA_HUMAN  | K.AGFAGDDAPR.A                     |            | 2 | 2,3443 | 0,371 | 0,062  |
| 8 | Q14676 MDC1_HUMAN   | K.APQAVPLEK.S                      |            | 2 | 2,3441 | 0,37  | 0      |
| 8 | P31946 1433B_HUMAN  | R.YDDMAAAM*K.A                     |            | 2 | 2,3425 | 0,081 | -0,355 |
| 8 | Q14789 G0GB1_HUMAN  | E.ISIVDIANK.R                      |            | 2 | 2,3421 | 0,224 | -0,251 |
| 8 | Q8IXM2 CQ049_HUMAN  | E.GLGET#PPAK.K                     | T161:      | 2 | 2,341  | 0,168 | 0,064  |
| 8 | A8K7V5 A8K7V5_HUMAN | E.VSTAPAGTDM*PAAK.K                |            | 2 | 2,3393 | 0,357 | -0,275 |
| 8 | Q9NQS7 INCE_HUMAN   | E.QHVTQLM*STEPLPR.T                |            | 2 | 2,3381 | 0,338 | -0,443 |
| 8 | Q9NS56 TOPRS_HUMAN  | R.RTTT#PPDSGVLFE.G                 | T205:      | 2 | 2,326  | 0,235 | -0,244 |
| 8 | P0C1Z6 TFPT_HUMAN   | R.GPDKLLPYPTLASPAS#D.-             | S252:      | 2 | 2,3246 | 0,266 | -0,335 |
| 8 | Q96TA1 NIBL1_HUMAN  | E.ASS#PPAS#PLQHLLPGK.A             | S679:S683: | 3 | 2,3224 | 0,141 | 0      |
| 8 | Q12888 TP53B_HUMAN  | E.DLFDQSNK.T                       |            | 2 | 2,3217 | 0,331 | -0,694 |
| 8 | Q14194 DPYL1_HUMAN  | E.DGLIKQIGE.N                      |            | 2 | 2,3216 | 0,228 | -0,063 |
| 8 | Q96I24 FUBP3_HUMAN  | E.SSGIPERPCVLTGTPE.S               |            | 2 | 2,3209 | 0,233 | 0      |
| 8 | P04792 HSPB1_HUMAN  | R.ALSRQLS#SGVSE.I                  | S82:       | 2 | 2,3179 | 0,181 | -0,186 |
| 8 | P43897 EFTS_HUMAN   | E.LSGLPAGPDRE.G                    |            | 2 | 2,3169 | 0,232 | -0,219 |
| 8 | Q92615 LARP5_HUMAN  | R.S#PSPAHLPPDDPKVAE.K              | S599:      | 2 | 2,3168 | 0,195 | -0,074 |
| 8 | P18846 ATF1_HUMAN   | E.TAPQPGSAVQGAHISHIAQQVSSLS#ESEE.S | S36:       | 3 | 2,3159 | 0,342 | -0,302 |
| 8 | P07355 ANXA2_HUMAN  | K.AYTDFDAE.R                       |            | 2 | 2,3144 | 0,174 | 0,262  |
| 8 | P05387 RLA2_HUMAN   | E.DVIAQGIGK.L                      |            | 2 | 2,3131 | 0,172 | 0,068  |
| 8 | P48643 TCPE_HUMAN   | R.DVDFELIKVE.G                     |            | 2 | 2,3112 | 0,234 | -0,101 |

|   |                    |                             |            |   |        |       |        |
|---|--------------------|-----------------------------|------------|---|--------|-------|--------|
| 8 | P49023 PAXI_HUMAN  | E.M*SS#PQRVTSTQQQTR.I       | S244:      | 3 | 2,3091 | 0,09  | -0,4   |
| 8 | Q96GY3 LIN37_HUMAN | R.SRIPS#PLQPE.M             | S182:      | 2 | 2,3075 | 0,219 | -0,405 |
| 8 | P21333 FLNA_HUMAN  | E.ISIQDM*TAQVTS#PSGKTHE.A   | S2180:     | 2 | 2,3056 | 0,342 | 0,459  |
| 8 | P19338 NUCL_HUMAN  | E.DGEIDGNKVTLD.W            |            | 2 | 2,3055 | 0,267 | 0      |
| 8 | O94909 K0819_HUMAN | K.TSTPLAPLPVQSQSDTK.D       |            | 2 | 2,3054 | 0,194 | -0,414 |
| 8 | Q9NP77 SSU72_HUMAN | R.VAVVCSSNQNR.S             |            | 2 | 2,3022 | 0,217 | 0      |
| 8 | O14745 NHERF_HUMAN | E.AALES#PRPALVR.S           | S280:      | 3 | 2,3005 | 0,184 | -0,134 |
| 8 | Q8TF05 PP4R1_HUMAN | E.LTAPDSNDDVKTE.A           |            | 2 | 2,2995 | 0,133 | -0,087 |
| 8 | Q8TEX9 IPO4_HUMAN  | E.NAFFDEKEDTCAAVGE.I        |            | 2 | 2,2983 | 0,311 | -0,541 |
| 8 | Q8ND30 LIPB2_HUMAN | R.CSS#PTVGPPPLPQK.S         | S363:      | 2 | 2,2963 | 0,148 | -0,395 |
| 8 | Q15942 ZYX_HUMAN   | E.GGPEAPIPPPPQPR.E          |            | 2 | 2,296  | 0,276 | -0,26  |
| 8 | P53990 K0174_HUMAN | E.IADYLAAGKDE.R             |            | 2 | 2,2933 | 0,227 | 0,209  |
| 8 | P35527 K1C9_HUMAN  | K.TLLDIDNTR.M               |            | 2 | 2,2921 | 0,273 | -0,115 |
| 8 | Q00839 HNRPU_HUMAN | E.LGEENGAAGAAD.S            |            | 2 | 2,2859 | 0,172 | 0,114  |
| 8 | Q96RK0 CIC_HUMAN   | E.TRERSMS#ETGT#AAAPGVSSSE.L | S301:T305: | 3 | 2,2817 | 0,088 | -0,168 |
| 8 | Q13596 SNX1_HUMAN  | K.ITTSLLPINNGSKE.N          |            | 2 | 2,2801 | 0,109 | -0,246 |
| 8 | P04406 G3P_HUMAN   | E.FGYSNRVVD.L               |            | 2 | 2,2793 | 0,373 | 0,115  |
| 8 | Q92665 RT31_HUMAN  | E.AGFDDDGSEFHE.H            |            | 2 | 2,2791 | 0,14  | 0      |
| 8 | Q13127 REST_HUMAN  | E.SVSTEDLSPPS#PPLPK.E       | S864:      | 2 | 2,2742 | 0,24  | -0,493 |
| 8 | Q9H2Y7 ZF106_HUMAN | E.TQTVISSIK.G               |            | 2 | 2,2735 | 0,298 | 0,062  |
| 8 | P27816 MAP4_HUMAN  | R.AS#PIKMDLAPSKD.M          | S358:      | 3 | 2,2718 | 0,191 | 0,378  |
| 8 | P61247 RS3A_HUMAN  | E.RADGYEPPVQES#V.-          | S263:      | 2 | 2,2708 | 0,101 | 0      |
| 8 | Q9Y2U5 M3K2_HUMAN  | R.LSIIGPTR.D                |            | 2 | 2,2691 | 0,246 | 0      |
| 8 | P46821 MAP1B_HUMAN | E.SEKPLTQSGGAPPPPGGK.Q      |            | 3 | 2,2679 | 0,103 | -0,107 |
| 8 | Q99728 BARD1_HUMAN | E.VSLPLAEQIES#PDTKSRNE.V    | S288:      | 3 | 2,2669 | 0,197 | -0,167 |
| 8 | Q86W92 LIPB1_HUMAN | E.DDM*FKDFAAR.S             |            | 2 | 2,265  | 0,218 | -0,198 |
| 8 | Q58FF7 H90B3_HUMAN | E.DLPLNISRE.M               |            | 2 | 2,2633 | 0,319 | -0,231 |
| 8 | Q9UJ14 GGT7_HUMAN  | E.DAFLGDPDTPDPSFLK.S        |            | 2 | 2,2621 | 0,252 | 0,278  |
| 8 | P31948 STIP1_HUMAN | R.LAYINPDLALEE.K            |            | 2 | 2,2608 | 0,153 | 0      |
| 8 | Q9H7N4 SFR19_HUMAN | K.AAPPPALTDPDS#QTVDSCKTPE.V | S992:      | 3 | 2,2597 | 0,161 | -0,374 |
| 8 | Q96SB4 SRPK1_HUMAN | E.SSTIGQDQTLM*ERDTE.G       |            | 2 | 2,2566 | 0,245 | -0,2   |
| 8 | P50454 SERPH_HUMAN | E.WAAQTTDGKLPE.V            |            | 2 | 2,2551 | 0,271 | 0,093  |
| 8 | Q32MZ4 LRRF1_HUMAN | R.RGS#GDTSISIDTE.A          | S120:      | 2 | 2,254  | 0,132 | -0,086 |

|   |                     |                                |            |   |        |       |        |
|---|---------------------|--------------------------------|------------|---|--------|-------|--------|
| 8 | P22061 PIMT_HUMAN   | E.LLFDQLHE.G                   |            | 2 | 2,2531 | 0,141 | -0,12  |
| 8 | Q8IXM2 CQ049_HUMAN  | K.KLNFDQA.-                    |            | 2 | 2,2529 | 0,294 | 0,073  |
| 8 | P35908 K22E_HUMAN   | K.IEISELNR.V                   |            | 2 | 2,2515 | 0,106 | 0,063  |
| 8 | Q9Y2V2 CHSP1_HUMAN  | E.YVPVEGDEVTYK.M               |            | 2 | 2,2513 | 0,364 | -0,087 |
| 8 | P20700 LMNB1_HUMAN  | R.AGGPTT#PLSPTR.L              | T20:       | 2 | 2,2417 | 0,23  | 0,494  |
| 8 | Q9P1Y6 K1542_HUMAN  | E.DLPTRLPALGEAHVS#PE.V         | S1229:     | 3 | 2,239  | 0,121 | -0,194 |
| 8 | P21333 FLNA_HUMAN   | E.VVIQDPM*GQK.G                |            | 2 | 2,2383 | 0,324 | -0,216 |
| 8 | P68104 EF1A1_HUMAN  | E.SFSDYPPLGR.F                 |            | 2 | 2,238  | 0,242 | -0,107 |
| 8 | Q8NG31 CASC5_HUMAN  | K.LNLS#PSQYINEE.N              | S1732:     | 2 | 2,2374 | 0,135 | -0,328 |
| 8 | P61081 UBC12_HUMAN  | E.TMVYHPNIDLE.G                |            | 2 | 2,2361 | 0,17  | -0,092 |
| 8 | P05787 K2C8_HUMAN   | E.SGMQNM*SIHTK.T               |            | 3 | 2,2313 | 0,117 | 0,366  |
| 8 | Q86Y23 HORN_HUMAN   | R.GPYESGSGHSSGLGHR.E           |            | 3 | 2,2208 | 0,184 | -0,346 |
| 8 | Q96B36 AKTS1_HUMAN  | E.AEDTQVFGDLPRPR.L             |            | 3 | 2,2191 | 0,203 | 0      |
| 8 | P49023 PAXI_HUMAN   | E.MS#SPQRVSTTQQQTRIS#ASSATRE.L | S243:S258: | 3 | 2,2157 | 0,083 | -0,327 |
| 8 | Q9Y3T9 NOC2L_HUMAN  | R.GILRPLSTR.H                  |            | 2 | 2,212  | 0,155 | 0,06   |
| 8 | P60174 TPIS_HUMAN   | E.FVDIINAK.Q                   |            | 2 | 2,2084 | 0,134 | 0      |
| 8 | Q5JRA6 MIA3_HUMAN   | R.GSS#PTRVLDE.G                | S1745:     | 2 | 2,2073 | 0,094 | 0      |
| 8 | Q8ND04 CQ071_HUMAN  | E.S#SPAPPDSDADKLKE.K           | S667:      | 2 | 2,1948 | 0,233 | 0,298  |
| 8 | Q92797 SYMPK_HUMAN  | E.TAAGGLTLK.E                  |            | 2 | 2,1904 | 0,171 | 0,22   |
| 8 | Q6P0N0 CN106_HUMAN  | E.NQVAM*SFYK.H                 |            | 2 | 2,1883 | 0,177 | 0      |
| 8 | Q9UKM9 RALY_HUMAN   | E.HSQDT#DADDGALQ.-             | T298:      | 2 | 2,1875 | 0,115 | -0,504 |
| 8 | Q14160 LAP4_HUMAN   | R.ALS#PAELR.A                  | S1486:     | 2 | 2,1851 | 0,137 | 0,065  |
| 8 | P28065 PSB9_HUMAN   | R.VILGNELPK.F                  |            | 2 | 2,1846 | 0,215 | -0,31  |
| 8 | Q04695 K1C17_HUMAN  | R.TIVEEVQDGK.V                 |            | 2 | 2,184  | 0,241 | -0,109 |
| 8 | P55072 TERA_HUMAN   | E.DNSVVLSQPK.M                 |            | 2 | 2,1836 | 0,36  | 0      |
| 8 | Q9BUH8 BEGIN_HUMAN  | K.ATAVAAPLEAE.V                |            | 2 | 2,1802 | 0,192 | -0,11  |
| 8 | Q9UGP4 LIMD1_HUMAN  | R.TPSVSAPLALSCPR.Q             |            | 2 | 2,1775 | 0,299 | -0,251 |
| 8 | Q9UKM9 RALY_HUMAN   | E.AGLPQGEAR.T                  |            | 2 | 2,1768 | 0,274 | -0,339 |
| 8 | Q92615 LARP5_HUMAN  | R.SPS#PAHLPPDPKVAE.K           | S601:      | 2 | 2,1761 | 0,245 | -0,298 |
| 8 | P05787 K2C8_HUMAN   | K.SYKVS#TSGPR.A                | S13:       | 2 | 2,1756 | 0,116 | -0,105 |
| 8 | A6H8Y1 BDP1_HUMAN   | E.M*ETDLNATGR.E                |            | 2 | 2,1713 | 0,283 | -0,326 |
| 8 | ##P54840 GYS2_HUMAN | D.INAACLYR.G                   |            | 2 | 2,1673 | 0,189 | 0      |
| 8 | P30281 CCND3_HUMAN  | R.GSSSQGPSQTST#PTDVTAIHL.-     | T283:      | 2 | 2,1641 | 0,293 | -0,34  |

|   |                    |                         |            |   |        |       |        |
|---|--------------------|-------------------------|------------|---|--------|-------|--------|
| 8 | Q02952 AKA12_HUMAN | K.SPSP#PVERE.M          | S1331:     | 2 | 2,1638 | 0,149 | 0      |
| 8 | P62736 ACTA_HUMAN  | R.DLTDYLM*K.I           |            | 2 | 2,159  | 0,283 | -0,06  |
| 8 | P42025 ACTY_HUMAN  | E.GDLFIGPK.A            |            | 2 | 2,1575 | 0,259 | 0,072  |
| 8 | Q58FG1 HS904_HUMAN | K.TLVSVTKE.D            |            | 2 | 2,1534 | 0,1   | 0,278  |
| 8 | Q9P260 K1468_HUMAN | R.EPSTASGGGQLNR.A       |            | 2 | 2,1529 | 0,347 | -0,192 |
| 8 | Q9UNS2 CSN3_HUMAN  | K.SM*GSQEDDSGNKPSSYS#.- | S423:      | 2 | 2,1517 | 0,37  | -0,326 |
| 8 | O95817 BAG3_HUMAN  | R.SQS#PLRGMPE.T         | S136:      | 2 | 2,1501 | 0,199 | 0      |
| 8 | Q7Z6Z7 HUWE1_HUMAN | E.VANCCIR.I             |            | 2 | 2,1442 | 0,085 | -0,137 |
| 8 | Q08050 FOXM1_HUMAN | K.SVLPRT#PE.S           | T620:      | 2 | 2,1432 | 0,156 | -0,062 |
| 8 | P27482 CALL3_HUMAN | E.LGTVM*RS#LGQNPTAE.L   | S39:       | 2 | 2,1413 | 0,135 | -0,203 |
| 8 | Q13642 FHL1_HUMAN  | E.DFYCVTCHE.T           |            | 2 | 2,1334 | 0,219 | -0,099 |
| 8 | P04264 K2C1_HUMAN  | K.SISISVAR.G            |            | 2 | 2,1327 | 0,135 | 1,465  |
| 8 | Q9HD15 SRA1_HUMAN  | E.DVLRPLEQALE.D         |            | 2 | 2,1274 | 0,168 | -0,095 |
| 8 | Q8NCA5 FA98A_HUMAN | E.DLGYKGPLLE.D          |            | 2 | 2,1259 | 0,209 | -0,442 |
| 8 | Q8NEY8 PPHLN_HUMAN | E.KLEKS#DES#NLPE.I      | S244:S247: | 2 | 2,122  | 0,102 | 0,394  |
| 8 | Q5QJE6 TDIF2_HUMAN | E.AES#HVS#GISR.I        | S145:S148: | 2 | 2,121  | 0,334 | -0,406 |
| 8 | O95359 TACC2_HUMAN | E.SVDPFKTSSK.T          |            | 2 | 2,1208 | 0,139 | 0      |
| 8 | P31350 RIR2_HUMAN  | E.NT#PPALSGTR.V         | T33:       | 2 | 2,1203 | 0,198 | 0      |
| 8 | Q7Z333 SETX_HUMAN  | E.ASSPT#FSKEPM*KVQD.S   | T644:      | 2 | 2,1187 | 0,162 | 0,209  |
| 8 | Q14694 UBP10_HUMAN | E.TKYS#PPAISPLVSEKQVE.V | S365:      | 2 | 2,118  | 0,433 | -0,238 |
| 8 | P10398 ARAF_HUMAN  | E.LLTPQGPS#PR.T         | S186:      | 2 | 2,1116 | 0,122 | -0,213 |
| 8 | Q9Y467 SALL2_HUMAN | R.SS#SPASALT#PEGE.A     | S873:T880: | 2 | 2,1064 | 0,227 | -0,438 |
| 8 | P29692 EF1D_HUMAN  | E.QM*NGPVAGASR.Q        |            | 2 | 2,1049 | 0,272 | -0,332 |
| 8 | Q29983 MICA_HUMAN  | R.SSQHFYYDGE.L          |            | 2 | 2,1045 | 0,211 | -0,297 |
| 8 | Q14191 WRN_HUMAN   | E.YLSDIAYK.S            |            | 2 | 2,0962 | 0,179 | -0,376 |
| 8 | Q8NI08 NCOA7_HUMAN | E.VDKQS#GS#PESRVE.N     | S500:S502: | 2 | 2,096  | 0,26  | -0,309 |
| 8 | P04264 K2C1_HUMAN  | K.DVDGAYMTK.V           |            | 2 | 2,0943 | 0,199 | -0,061 |
| 8 | Q96PK6 RBM14_HUMAN | R.AQPSVSLGAPYR.G        |            | 2 | 2,0914 | 0,442 | 0,098  |
| 8 | Q8N3V7 SYNPO_HUMAN | R.DRAS#PAAAEVVP.E.W     | S685:      | 2 | 2,0897 | 0,185 | -0,08  |
| 8 | P48637 GSHB_HUMAN  | E.NCLLRPGS#PAR.V        | S415:      | 2 | 2,0877 | 0,192 | -0,462 |
| 8 | Q96S94 CCNL2_HUMAN | D.GTSGFSPAPK.L          |            | 2 | 2,0825 | 0,227 | 0      |
| 8 | P27708 PYR1_HUMAN  | E.NLDPLGIHTGE.S         |            | 2 | 2,0776 | 0,312 | -0,105 |
| 8 | P09936 UCHL1_HUMAN | -.M*QLKPMEinPE.M        |            | 2 | 2,0775 | 0,15  | 0,091  |

|   |                       |                           |            |   |        |       |        |
|---|-----------------------|---------------------------|------------|---|--------|-------|--------|
| 8 | P62273 RS29_HUMAN     | D.IGFIKLD.-               |            | 2 | 2,0774 | 0,155 | 0,076  |
| 8 | O43633 CHM2A_HUMAN    | E.LSNLPST#GGSLVAAGGK.K    | T185:      | 2 | 2,0762 | 0,084 | 0,144  |
| 8 | Q16719 KYNU_HUMAN     | E.DILEVIEKE.G             |            | 2 | 2,0715 | 0,255 | -0,336 |
| 8 | P27348 1433T_HUMAN    | D.S#AGEECDAAEGAEN.-       | S232:      | 2 | 2,0629 | 0,186 | -0,573 |
| 8 | Q14683 SMC1A_HUMAN    | E.GSS#QGEDSVSGSQR.I       | S957:      | 2 | 2,0617 | 0,227 | -0,251 |
| 8 | O14979 HNRDL_HUMAN    | K.DAASVDKMLE.L            |            | 2 | 2,06   | 0,234 | -0,35  |
| 8 | Q9Y3S1 WINK2_HUMAN    | R.FSVVSTQDE.W             |            | 2 | 2,059  | 0,114 | -0,121 |
| 8 | P13645 K1C10_HUMAN    | R.LAADDFR.L               |            | 2 | 2,053  | 0,339 | 0,302  |
| 8 | P31948 STIP1_HUMAN    | E.IAT#PPPPPPKKE.T         | T198:      | 2 | 2,0467 | 0,158 | -0,337 |
| 8 | P61081 UBC12_HUMAN    | K.LVICPDEGFYK.S           |            | 2 | 2,0437 | 0,154 | -0,182 |
| 8 | Q8WYP5 AHTF1_HUMAN    | K.KCAVPVETE.W             |            | 2 | 2,0411 | 0,164 | 0,118  |
| 8 | Q14247 SRC8_HUMAN     | R.AKT#QTPPV#PAPQPTEE.R    | T399:S405: | 2 | 2,0379 | 0,162 | -0,504 |
| 8 | P15170 ERF3A_HUMAN    | E.AEPGGGS#LGDGRPPEESAHE.M | S36:       | 2 | 2,0379 | 0,321 | 0,361  |
| 8 | P55072 TERA_HUMAN     | E.AEKNAPAIIFIDE.L         |            | 2 | 2,0374 | 0,141 | -0,512 |
| 8 | Q15814 TBCC_HUMAN     | E.SVSCSAAAVR.T            |            | 2 | 2,0303 | 0,252 | -0,061 |
| 8 | P31946 1433B_HUMAN    | R.NLLSVAYK.N              |            | 2 | 2,0299 | 0,141 | 0      |
| 8 | Q02952 AKA12_HUMAN    | K.S#AVVHDITDDGQEETPE.I    | S128:      | 2 | 2,0221 | 0,09  | -0,127 |
| 8 | P08195 4F2_HUMAN      | D.LLQIDPNFGSK.E           |            | 2 | 2,0175 | 0,131 | -0,693 |
| 8 | Q9NPR2 SEM4B_HUMAN    | E.SEKRPLS#IQDS#FVE.V      | S804:S808: | 2 | 2,0114 | 0,2   | -0,544 |
| 8 | P10809 CH60_HUMAN     | K.LSDGVAVLK.V             |            | 2 | 2,0092 | 0,219 | -0,068 |
| 8 | Q9Y2H9 MAST1_HUMAN    | R.SPAVRPRS#R.S            | S159:      | 2 | 2,0085 | 0,201 | 0,772  |
| 8 | Q9UHX1 PUF60_HUMAN    | K.LGLPPLTPEQQE.A          |            | 2 | 2,007  | 0,139 | -0,092 |
| 8 | O95831 AIFM1_HUMAN    | E.IDSDFGGFR.V             |            | 2 | 1,9939 | 0,129 | 0,361  |
| 8 | ##A6PYA4 A6PYA4_HUMAN | -.LLFPIK.M                |            | 2 | 1,9859 | 0,12  | 0,289  |
| 8 | Q99536 VAT1_HUMAN     | E.AATGEDASSPPPKTE.A       |            | 2 | 1,981  | 0,216 | -0,251 |
| 8 | Q5VWN6 CJ018_HUMAN    | E.ILSPLFPR.N              |            | 2 | 1,9774 | 0,136 | 0      |
| 8 | Q8N4Q1 MIA40_HUMAN    | E.TAPIEATATKEEE.G         |            | 2 | 1,9773 | 0,159 | -0,088 |
| 8 | P52272 HNRPM_HUMAN    | R.MGLVMDR.M               |            | 2 | 1,9761 | 0,202 | 0,371  |
| 8 | Q8N3V7 SYNPO_HUMAN    | K.YPTNAPGAFR.V            |            | 2 | 1,976  | 0,139 | -0,112 |
| 8 | Q63ZY3 KANK2_HUMAN    | E.IASMLYSR.M              |            | 2 | 1,9728 | 0,111 | 0,194  |
| 8 | O94909 K0819_HUMAN    | E.ATVPS#PTQS#PIRFQPAPAK.T | S414:S418: | 2 | 1,972  | 0,401 | 0,113  |
| 8 | Q9Y3X0 CCDC9_HUMAN    | R.TTHLAGALSPGE.A          |            | 2 | 1,9702 | 0,209 | -0,211 |
| 8 | Q9BQY9 DBND2_HUMAN    | E.LSLPVPTSDR.T            |            | 2 | 1,9686 | 0,223 | 0,112  |

|   |                      |                        |        |   |        |       |        |
|---|----------------------|------------------------|--------|---|--------|-------|--------|
| 8 | P27816 MAP4_HUMAN    | E.ATPVPIKDM*E.I        |        | 2 | 1,9613 | 0,315 | 0      |
| 8 | P52272 HNRPM_HUMAN   | R.MGLVM*DR.M           |        | 2 | 1,9601 | 0,356 | 0      |
| 8 | P54652 HSP72_HUMAN   | E.LNADLFR.G            |        | 2 | 1,9567 | 0,151 | 0,359  |
| 8 | P48643 TCPE_HUMAN    | R.DVDFELIK.V           |        | 2 | 1,953  | 0,224 | 0      |
| 8 | O75915 PRAF3_HUMAN   | E.EGINRLTDYISKVK.E     |        | 2 | 1,9514 | 0,084 | -0,373 |
| 8 | O75122 CLAP2_HUMAN   | K.ASSLPGSLQR.S         |        | 2 | 1,9493 | 0,107 | 0      |
| 8 | Q9Y265 RUVB1_HUMAN   | K.TALALAIQE.L          |        | 2 | 1,9441 | 0,145 | 0,122  |
| 8 | P38159 HNRPG_HUMAN   | E.RGLPPS#M*E.R         | S352:  | 2 | 1,9305 | 0,174 | 0,248  |
| 8 | P52272 HNRPM_HUMAN   | R.M*GLVMDR.M           |        | 2 | 1,9282 | 0,224 | 0,073  |
| 8 | P56192 SYMC_HUMAN    | E.TVTTAKPQQIQALMDE.V   |        | 2 | 1,9213 | 0,203 | -0,206 |
| 8 | Q9Y6D9 MD1L1_HUMAN   | K.MQETLVGLELE.N        |        | 2 | 1,9208 | 0,085 | -0,773 |
| 8 | ##Q96NL0 RUN3B_HUMAN | D.MLFPPGVNEPTSSE.S     |        | 2 | 1,9205 | 0,1   | -0,243 |
| 8 | Q9HAV7 GRPE1_HUMAN   | E.DM*GQSEQKADPPATE.K   |        | 2 | 1,9119 | 0,213 | -0,527 |
| 8 | P49454 CENPF_HUMAN   | E.ADQS#PKNSAILQNR.V    | S821:  | 2 | 1,9    | 0,233 | 0,451  |
| 8 | Q58FG1 HS904_HUMAN   | E.YLNFIR.G             |        | 2 | 1,8975 | 0,156 | 0,148  |
| 8 | Q86UP2 KTN1_HUMAN    | E.LTTLIHQLE.K          |        | 2 | 1,8889 | 0,2   | 0,306  |
| 8 | P49023 PAXI_HUMAN    | R.IS#ASSATRE.L         | S258:  | 2 | 1,8797 | 0,154 | -0,731 |
| 8 | P27816 MAP4_HUMAN    | R.AS#PIKMDLAPSKD.M     | S358:  | 2 | 1,8779 | 0,124 | -0,084 |
| 8 | Q7Z6Z7 HUWE1_HUMAN   | E.LLERDGGG#GNSTIIVSR.S | S2362: | 2 | 1,8771 | 0,128 | -0,132 |
| 8 | P60842 IF4A1_HUMAN   | R.SRDNGPDGMEPE.G       |        | 2 | 1,8726 | 0,111 | -0,561 |
| 8 | P62910 RL32_HUMAN    | E.VLLMCNK.S            |        | 2 | 1,8466 | 0,227 | -0,069 |
| 8 | Q13445 TMED1_HUMAN   | E.FTFLLPAGR.K          |        | 2 | 1,8442 | 0,19  | -0,179 |
| 8 | Q9UPT8 ZC3H4_HUMAN   | R.QQTSSRPPASVGE.L      |        | 2 | 1,8392 | 0,334 | -0,182 |
| 8 | Q92667 AKAP1_HUMAN   | K.AITPPLPE.S           |        | 2 | 1,8386 | 0,183 | 0,146  |
| 8 | O14979 HNRDL_HUMAN   | E.NIELPMDTK.T          |        | 2 | 1,8377 | 0,152 | -0,115 |
| 8 | P04075 ALDOA_HUMAN   | R.ALQASALK.A           |        | 2 | 1,8294 | 0,143 | -0,532 |
| 8 | P15531 NDKA_HUMAN    | E.IGLWFHPEE.L          |        | 2 | 1,8254 | 0,106 | -0,216 |
| 8 | P49792 RBP2_HUMAN    | K.NLFASFPTEE.S         |        | 2 | 1,8076 | 0,151 | 0,211  |
| 8 | Q96EQ0 SGTB_HUMAN    | E.DTHLAVSQPLTE.M       |        | 2 | 1,7884 | 0,256 | 0      |
| 8 | Q7Z434 MAVS_HUMAN    | E.QALQTLS#PR.A         | S165:  | 2 | 1,7798 | 0,085 | -0,112 |
| 8 | Q9UKY7 CDV3_HUMAN    | E.VDYSGLR.V            |        | 2 | 1,7747 | 0,15  | 0,301  |
| 8 | P49736 MCM2_HUMAN    | E.SFTM*ASS#PAQR.R      | S13:   | 2 | 1,7528 | 0,269 | -0,668 |
| 8 | Q96DG6 CMBL_HUMAN    | E.DCSPADKPYIDE.A       |        | 2 | 1,7514 | 0,111 | -0,26  |

|   |                     |                                  |            |   |        |       |        |
|---|---------------------|----------------------------------|------------|---|--------|-------|--------|
| 8 | Q9UQ35 SRRM2_HUMAN  | R.GEFSAS#PM*LK.S                 | S1124:     | 2 | 1,7507 | 0,142 | -0,21  |
| 8 | Q96T23 RSF1_HUMAN   | K.AQIDPVLLK.N                    |            | 2 | 1,7494 | 0,217 | 0      |
| 8 | Q01081 U2AF1_HUMAN  | E.LSPVTDFRE.A                    |            | 2 | 1,7294 | 0,178 | 0      |
| 8 | Q6GMW9 FTHL3_HUMAN  | K.APAAAPAPR.S                    |            | 2 | 1,7158 | 0,183 | 0,297  |
| 8 | P05386 RLA1_HUMAN   | D.DDMGFGLFD.-                    |            | 2 | 1,7106 | 0,207 | -0,18  |
| 8 | P09936 UCHL1_HUMAN  | E.DGSVLKQFLSETE.K                |            | 2 | 1,7089 | 0,091 | -0,084 |
| 8 | Q13136 LIPA1_HUMAN  | R.QLNTALPQE.F                    |            | 2 | 1,7072 | 0,099 | 0      |
| 9 | Q12893 TM115_HUMAN  | E.SGAKVDS#PLPSDKAPT#PPGKGAAP.E.S | S320:T329: | 3 | 6,4006 | 0,395 | -0,361 |
| 9 | Q53EZ4 CEP55_HUMAN  | E.KVAASPKS#PTAALNES#LVECPK.C     | S428:S436: | 3 | 6,3247 | 0,499 | -0,447 |
| 9 | B2CI53 B2CI53_HUMAN | R.NGILASPQS#APGNLDNSK.S          | S263:      | 2 | 6,1398 | 0,591 | -0,524 |
| 9 | Q8N108 MIER1_HUMAN  | E.SAASSRAPS#PPPTASNSSNSQSEKE.D   | S401:      | 3 | 5,9184 | 0,394 | -0,43  |
| 9 | Q8WXI9 P66B_HUMAN   | R.GRLT#PSPDIIVLS#DNEASSPR.S      | T120:S129: | 3 | 5,4137 | 0,273 | -0,23  |
| 9 | Q9H3S7 PTN23_HUMAN  | E.SQHGGTQS#PGGGQPLLQPTKVDAAE.G   | S1133:     | 3 | 5,2957 | 0,362 | -0,576 |
| 9 | O94887 FARP2_HUMAN  | E.FKDSSSLTDPQVSYVKS#PAAE.R       | S439:      | 3 | 5,217  | 0,429 | -0,529 |
| 9 | Q5UIP0 RIF1_HUMAN   | E.NRPFS#PSPLNNISSTVTVK.N         | S1236:     | 3 | 5,0671 | 0,365 | -0,77  |
| 9 | P29692 EF1D_HUMAN   | E.NIQKS#LAGSSGPGASSGTSGDHGE.L    | S60:       | 3 | 4,9148 | 0,401 | -0,561 |
| 9 | Q99598 TSNAX_HUMAN  | E.GKDVNSSS#PVM*LAFK.S            | S33:       | 2 | 4,9143 | 0,392 | -0,801 |
| 9 | P13645 K1C10_HUMAN  | K.GSLGGGFSSGGFSGGSFSR.G          |            | 2 | 4,7691 | 0,565 | -0,571 |
| 9 | P41236 IPP2_HUMAN   | E.TADGESM*NTEES#NQGSTPSDQQNK.L   | S188:      | 3 | 4,7536 | 0,422 | -0,658 |
| 9 | Q09666 AHNK_HUMAN   | K.TVIRLPSGS#GAAS#PTGSAVDIR.A     | S212:S216: | 3 | 4,6433 | 0,395 | -0,322 |
| 9 | Q92576 PHF3_HUMAN   | R.SNVGKGNIDGNVSCSE.N             |            | 2 | 4,634  | 0,455 | -0,596 |
| 9 | Q13415 ORC1_HUMAN   | E.TGLSYTEDDKKAS#PE.H             | S311:      | 2 | 4,6318 | 0,441 | -0,496 |
| 9 | P55884 EIF3B_HUMAN  | R.SDS#RAQAVSEDAGGNE.G            | S119:      | 2 | 4,6268 | 0,513 | -0,292 |
| 9 | A8K1U6 A8K1U6_HUMAN | E.TGVFVINHFTCRS#.-               | S523:      | 2 | 4,6194 | 0,34  | -0,452 |
| 9 | P35527 K1C9_HUMAN   | R.GSGGSGYGGGGSGGGYGGGSGSR.G      |            | 2 | 4,5974 | 0,468 | -0,136 |
| 9 | P17706 PTN2_HUMAN   | E.LSKEDLS#PAFDHS#PNKIM*TE.K      | S298:S304: | 3 | 4,5243 | 0,396 | -0,451 |
| 9 | O60271 JIP4_HUMAN   | E.TRNVS#TGS#AENEKSE.V            | S329:S332: | 3 | 4,4766 | 0,221 | -0,386 |
| 9 | O43683 BUB1_HUMAN   | E.NM*VVPSRDGKFS#PIQE.K           | S655:      | 2 | 4,4621 | 0,328 | -0,385 |
| 9 | P39880 CUX1_HUMAN   | E.IQAGSQGQAGASDS#PSAR.S          | S1321:     | 2 | 4,4585 | 0,448 | -0,345 |
| 9 | Q92597 NDRG1_HUMAN  | E.GAHLDITPNSGAAGNSAGPK.S         |            | 2 | 4,4573 | 0,509 | -0,798 |
| 9 | Q8WVT3 TTC15_HUMAN  | E.SVLISDSPNSEGDAGDLGR.V          |            | 2 | 4,4309 | 0,573 | -0,194 |
| 9 | Q9UK76 HN1_HUMAN    | R.RNS#SEASSGDFLDLKG.E.G          | S87:       | 2 | 4,3955 | 0,543 | -0,451 |
| 9 | Q04837 SSB_HUMAN    | E.GKNPVTIFSLATNE.M               |            | 2 | 4,3615 | 0,512 | -0,573 |



|   |                     |                               |              |   |        |       |        |
|---|---------------------|-------------------------------|--------------|---|--------|-------|--------|
| 9 | Q9H832 UBE2Z_HUMAN  | E.NAEM*DSDSSSS#GTETDLHGSLRV.- | S342:        | 3 | 4,3204 | 0,364 | -0,588 |
| 9 | Q92576 PHF3_HUMAN   | E.NNLQDNQTSNSS#PCR.S          | S1614:       | 3 | 4,3196 | 0,502 | -0,302 |
| 9 | Q8NHZ8 CDC26_HUMAN  | E.VVGG#DGEGAIGLSSDPK.S        | S42:         | 2 | 4,2965 | 0,344 | -0,212 |
| 9 | Q9UGU0 TCF20_HUMAN  | E.SLDGGCSSSEDQGER.V           |              | 2 | 4,2942 | 0,542 | -0,219 |
| 9 | P39880 CUX1_HUMAN   | E.IQAGSQGQAGASDS#PSAR.S       | S1321:       | 3 | 4,2924 | 0,293 | -0,31  |
| 9 | Q5UIP0 RIF1_HUMAN   | E.DVSIKS#PICEKQDE.S           | S1616:       | 2 | 4,2843 | 0,414 | -0,494 |
| 9 | Q9H4A3 WNK1_HUMAN   | E.KQSSTPGSLFLSPPAPAPK.N       |              | 3 | 4,1517 | 0,278 | -0,287 |
| 9 | P19634 SL9A1_HUMAN  | R.CLS#DPGPHPEPEGEGEPFFPKGQ.-  | S796:        | 3 | 4,1482 | 0,304 | -0,521 |
| 9 | Q58FF8 H90B2_HUMAN  | E.FDGKS#LVSVTKE.G             | S305:        | 3 | 4,1458 | 0,236 | -0,066 |
| 9 | O75531 BAF_HUMAN    | R.DFVAEPM*GEKPVGSLAGIGE.V     |              | 2 | 4,1393 | 0,584 | -0,604 |
| 9 | P49815 TSC2_HUMAN   | E.GGRPSVDLSFQPSQLSK.S         |              | 2 | 4,1085 | 0,354 | -0,514 |
| 9 | P04264 K2C1_HUMAN   | K.SKAEAESLYQSK.Y              |              | 2 | 4,0944 | 0,309 | -0,182 |
| 9 | Q8NI35 INADL_HUMAN  | E.SCYILHSS#SNEDKTE.F          | S788:        | 2 | 4,0675 | 0,387 | -0,264 |
| 9 | Q7Z2W4 ZCCHV_HUMAN  | E.FLASASASAERSCT#PS#PDQISHR.A | T273:S275:   | 3 | 4,0641 | 0,344 | -0,347 |
| 9 | P27816 MAP4_HUMAN   | E.VALAKDMES#PTKLD.V           | S280:        | 2 | 4,0612 | 0,461 | -0,305 |
| 9 | Q92576 PHF3_HUMAN   | E.NNLQDNQTSNSS#PCR.S          | S1614:       | 2 | 4,0486 | 0,498 | -0,74  |
| 9 | P98196 AT11A_HUMAN  | E.SSGIDM*IDSS#PSVNGR.E        | S459:        | 2 | 4,014  | 0,46  | -0,497 |
| 9 | Q99598 TSNAX_HUMAN  | E.GKDVNSSS#PVMLAFK.S          | S33:         | 2 | 3,9997 | 0,42  | -1,029 |
| 9 | Q9H4A3 WNK1_HUMAN   | E.KQSSTPGSLFLSPPAPAPK.N       |              | 2 | 3,9969 | 0,513 | -0,511 |
| 9 | P02545 LMNA_HUMAN   | R.SGAQASST#PLS#PTR.I          | T19:S22:     | 2 | 3,9952 | 1     | -0,401 |
| 9 | P98196 AT11A_HUMAN  | E.SSGIDMIDSS#PSVNGR.E         | S459:        | 2 | 3,9863 | 0,416 | -0,072 |
| 9 | P16070 CD44_HUMAN   | E.M*VHLVNKES#SETPDQFM*TADE.T  | S717:        | 3 | 3,9768 | 0,226 | -0,218 |
| 9 | Q2QG7 ZXDC_HUMAN    | E.GSHGLPQSTLPS#PAEQHGAQDTE.L  | S688:        | 3 | 3,9404 | 0,337 | -0,075 |
| 9 | Q9H307 PININ_HUMAN  | E.IAIVHS#DAEKEQE.E            | S347:        | 2 | 3,9258 | 0,379 | -0,394 |
| 9 | P39880 CUX1_HUMAN   | E.IQAGSQGQAGASDPSAR.S         |              | 2 | 3,9243 | 0,491 | -0,145 |
| 9 | P07355 ANXA2_HUMAN  | E.GDHSTPPSAYGS#VK.A           | S26:         | 2 | 3,8891 | 0,479 | -0,494 |
| 9 | P43358 MAGA4_HUMAN  | K.SQHCKPEEGVEAQEE.A           |              | 2 | 3,8856 | 0,481 | -0,556 |
| 9 | Q15424 SAFB1_HUMAN  | E.LAEAPTEAPS#PEAR.D           | S344:        | 2 | 3,8797 | 0,339 | -0,402 |
| 9 | Q6NZI2 PTRF_HUMAN   | R.RGS#S#PDVHALLE.I            | S365:S366:   | 2 | 3,878  | 0,484 | -0,085 |
| 9 | Q59FE8 Q59FE8_HUMAN | R.STPAEDDS#PGDSQVKSE.V        | S352:        | 2 | 3,8754 | 0,531 | -0,734 |
| 9 | Q8N108 MIER1_HUMAN  | R.APSPPPT#ASNSSNSQSEKE.D      | T405:        | 3 | 3,8753 | 0,356 | -0,458 |
| 9 | P46821 MAP1B_HUMAN  | E.KSGKQGS#PDQVS#PVSE.M        | S1438:S1443: | 2 | 3,8646 | 0,428 | -0,682 |
| 9 | Q7LBC6 JHD2B_HUMAN  | E.SLADSSS#RDSFKQSLE.S         | S553:        | 2 | 3,8561 | 0,519 | -0,625 |

|   |                    |                                    |            |   |        |       |        |
|---|--------------------|------------------------------------|------------|---|--------|-------|--------|
| 9 | P35908 K22E_HUMAN  | R.FLEQQNQVLQTK.W                   |            | 2 | 3,8535 | 0,388 | -0,744 |
| 9 | Q96T23 RSF1_HUMAN  | E.SEKPGS#PEAAETS#PPSNIIDHCEK.L     | S612:S619: | 3 | 3,8484 | 0,341 | -0,334 |
| 9 | Q9C0C2 TB182_HUMAN | R.NM*APGAVCS#PGESKE.L              | S1297:     | 2 | 3,8354 | 0,384 | -0,524 |
| 9 | Q6ZSR9 YJ005_HUMAN | R.DGPSSNSS#FHSSEEE.G               | S39:       | 2 | 3,8238 | 0,279 | -0,291 |
| 9 | Q13765 NACA_HUMAN  | E.AKIEDLSQQAQLAAAE.K               |            | 2 | 3,82   | 0,447 | -0,796 |
| 9 | P35611 ADDA_HUMAN  | E.AHRPPS#PTEAPTEASPEPAPDPAPVAEE.A  | S669:      | 3 | 3,8118 | 0,323 | -0,563 |
| 9 | Q58FF8 H90B2_HUMAN | E.FDGKS#LVSVTKE.G                  | S305:      | 2 | 3,8057 | 0,326 | -0,439 |
| 9 | O15061 DMN_HUMAN   | K.GLQT#PVKDAGGGTGR.E               | T598:      | 2 | 3,7982 | 0,397 | -0,408 |
| 9 | Q9Y618 NCOR2_HUMAN | E.AAKPPEPEKPV#PPPIE.S              | S215:      | 2 | 3,7969 | 0,411 | -0,327 |
| 9 | Q13506 NAB1_HUMAN  | E.SEHSLSPADLGPAS#PKESSE.A          | S183:      | 3 | 3,7956 | 0,191 | -0,501 |
| 9 | Q6PGN9 PSRC1_HUMAN | E.TFVLKDS#PVRD.L                   | S122:      | 2 | 3,777  | 0,372 | -0,45  |
| 9 | Q96RU3 FNBP1_HUMAN | R.TVS#DNS#LSNSRGE.G                | S296:S299: | 2 | 3,769  | 0,45  | -0,16  |
| 9 | Q5UIP0 RIF1_HUMAN  | E.LIIEDNNAS#PQKLRE.L               | S2144:     | 2 | 3,7651 | 0,386 | -0,335 |
| 9 | O60271 JIP4_HUMAN  | R.SAS#QSS#LDKLDQE.L                | S730:S733: | 2 | 3,7638 | 0,41  | -0,389 |
| 9 | Q4V328 GRAP1_HUMAN | R.TQTGDSSS#ISSFSYRE.I              | S666:      | 2 | 3,7629 | 0,294 | -0,466 |
| 9 | Q92560 BAP1_HUMAN  | E.GGKGS#PSIRPIQSGSSS#PVEKEVVE.A    | S583:S597: | 3 | 3,7437 | 0,101 | -0,249 |
| 9 | Q92878 RAD50_HUMAN | E.DKLFVCGSQDFE.S                   |            | 2 | 3,7391 | 0,359 | -0,704 |
| 9 | Q92615 LARP5_HUMAN | E.KFTSSQTQSPTPKPPS#PSFE.L          | S524:      | 3 | 3,7377 | 0,188 | -0,466 |
| 9 | Q9HAV7 GRPE1_HUMAN | K.NSGQNLEEDM*GQSE.Q                |            | 2 | 3,73   | 0,384 | -0,314 |
| 9 | P31948 STIP1_HUMAN | E.IAT#PPPPPPPKKE.T                 | T198:      | 3 | 3,7133 | 0,172 | -0,063 |
| 9 | Q9UQ35 SRRM2_HUMAN | E.KSATRPS#PS#PERSSTGPEPPAPTPLLAE.R | S351:S353: | 3 | 3,7086 | 1     | -0,546 |
| 9 | Q6PJT7 ZC3HE_HUMAN | E.VVQGQS#RTPRIS#PPIKEEE.T          | S403:S409: | 3 | 3,6598 | 0,393 | -0,396 |
| 9 | Q9NR45 SIAS_HUMAN  | E.RALGS#PTKQLLPCEMACNE.K           | S275:      | 3 | 3,6567 | 0,488 | -0,811 |
| 9 | P17275 JUNB_HUMAN  | R.SRDAT#PPVS#PINMEDQE.R            | T255:S259: | 3 | 3,6526 | 0,237 | -0,358 |
| 9 | Q6S8J3 A26CA_HUMAN | E.KLCYVALDFEQE.M                   |            | 2 | 3,6509 | 0,349 | -0,242 |
| 9 | P29966 MARCS_HUMAN | E.AAAERPGEA AVASSPS#KANGQE.N       | S29:       | 3 | 3,6469 | 0,287 | -0,252 |
| 9 | O60271 JIP4_HUMAN  | R.TKLHQLS#GS#DQLE.S                | S183:S185: | 2 | 3,6432 | 0,456 | -0,453 |
| 9 | Q9H307 PININ_HUMAN | E.IAIVHS#DAEKEQEE.E                | S347:      | 3 | 3,6237 | 0,239 | -0,327 |
| 9 | Q04721 NOTC2_HUMAN | R.RTPS#LALTPPAEQE.V                | S1804:     | 2 | 3,6005 | 0,482 | -0,639 |
| 9 | Q00613 HSF1_HUMAN  | R.VKEEPPS#PPQS#PRVEE.A             | S303:S307: | 2 | 3,5975 | 0,503 | -0,186 |
| 9 | P40222 TXLNA_HUMAN | D.LSAGGQGLTDSGPER.R                |            | 2 | 3,5879 | 0,485 | -0,398 |
| 9 | Q4KMP7 TB10B_HUMAN | E.GLHPSLPS#PTGNSTPLGSSKE.T         | S432:      | 3 | 3,5824 | 0,222 | -0,512 |
| 9 | P49815 TSC2_HUMAN  | E.GGRPSVDLSFQPSQPLSK.S             |            | 3 | 3,5723 | 0,208 | -0,096 |

|   |                    |                              |              |   |        |       |        |
|---|--------------------|------------------------------|--------------|---|--------|-------|--------|
| 9 | Q9P2E9 RRBP1_HUMAN | R.NTDVAQS#PEAPKQE.A          | S615:        | 2 | 3,5597 | 0,342 | -0,765 |
| 9 | Q7L1V2 MON1B_HUMAN | E.TGSKDKDQPPS#PS#PPPQSE.A    | S59:S61:     | 3 | 3,5552 | 0,246 | -0,428 |
| 9 | P13645 K1C10_HUMAN | K.IRLENIQTYR.S               |              | 3 | 3,5502 | 0,152 | -0,064 |
| 9 | Q7L2J0 MEPCE_HUMAN | E.SHPVPPTAPLT#PLLHGE.G       | T291:        | 3 | 3,5468 | 0,366 | -0,496 |
| 9 | P08670 VIME_HUMAN  | E.AANYQDTIGRLQDE.I           |              | 2 | 3,5413 | 0,369 | -0,536 |
| 9 | Q7Z2W4 ZCCHV_HUMAN | R.SCT#PS#PDQISHR.A           | T273:S275:   | 2 | 3,5391 | 0,364 | -0,316 |
| 9 | Q9NWH9 SLTM_HUMAN  | K.DGQDAIAQS#PEKE.S           | S289:        | 2 | 3,5336 | 0,432 | -0,332 |
| 9 | O60216 RAD21_HUMAN | E.NDFGDFGMDDRE.I             |              | 2 | 3,5285 | 0,545 | -0,258 |
| 9 | P35658 NU214_HUMAN | R.SAQGSSSPVPSM*VQK.S         |              | 2 | 3,5263 | 0,365 | -0,405 |
| 9 | P04264 K2C1_HUMAN  | R.SLDLDSIIAEVK.A             |              | 2 | 3,524  | 0,381 | -0,468 |
| 9 | O60716 CTND1_HUMAN | E.GAM*SVVSVETS#DDGTTR.R      | S129:        | 2 | 3,523  | 0,421 | -0,27  |
| 9 | Q5THK1 CV030_HUMAN | K.AACPCPQSS#PPEQKE.A         | S1994:       | 2 | 3,517  | 0,201 | -0,345 |
| 9 | Q9Y6M7 S4A7_HUMAN  | R.M*LQDDDDT#VHLPFE.G         | T1167:       | 2 | 3,5159 | 0,301 | -0,551 |
| 9 | Q9H307 PININ_HUMAN | E.IAIVHS#DAEKEQEE.E          | S347:        | 2 | 3,5146 | 0,355 | -0,582 |
| 9 | Q16204 CCDC6_HUMAN | E.KLDQPVSAAPS#PR.D           | S244:        | 2 | 3,5146 | 0,347 | -0,497 |
| 9 | Q9HB96 FANCE_HUMAN | K.TGEDGSNLDDAKGLAE.S         |              | 2 | 3,51   | 0,521 | -0,613 |
| 9 | Q15149 PLEC1_HUMAN | E.FADM*LSGNAGGFR.S           |              | 2 | 3,5047 | 0,484 | -0,449 |
| 9 | Q5VZ89 DEN4C_HUMAN | E.SYM*NLKS#PLGSK.S           | S1008:       | 2 | 3,4963 | 0,418 | -0,515 |
| 9 | Q9HAV7 GRPE1_HUMAN | K.QKNSGQNLEEDMGQSE.Q         |              | 2 | 3,4876 | 0,469 | -0,544 |
| 9 | Q9H4H8 FA83D_HUMAN | E.SSTVS#EEDYFSSHRDE.L        | S369:        | 2 | 3,472  | 0,49  | -0,624 |
| 9 | P07195 LDHB_HUMAN  | K.LIAPVAEEEEATVPNNK.I        |              | 2 | 3,4719 | 0,398 | -0,504 |
| 9 | Q9UGV2 NDRG3_HUMAN | E.SCES#PDVLDLRHQT*E.V        | S361:        | 2 | 3,4677 | 0,458 | -0,578 |
| 9 | Q9UKV3 ACINU_HUMAN | R.GS#PKKCEAEEAEPAAATQPQTSE.T | S729:        | 3 | 3,4633 | 0,38  | -0,363 |
| 9 | P04264 K2C1_HUMAN  | K.SLNNQFASFIDK.V             |              | 2 | 3,4606 | 0,437 | -0,529 |
| 9 | Q14247 SRC8_HUMAN  | R.AKTQT#PPVS#PAPQPTEE.R      | T401:S405:   | 2 | 3,459  | 0,49  | -0,756 |
| 9 | Q96I24 FUBP3_HUMAN | R.QQVAFYGQTLGQAQAH#QE.Q.-    | S569:        | 3 | 3,4453 | 0,385 | -0,637 |
| 9 | O43166 SI1L1_HUMAN | E.NHRPLS#AAS#NSDQLE.D        | S1708:S1711: | 2 | 3,4439 | 0,511 | -0,543 |
| 9 | O00443 P3C2A_HUMAN | E.ITDSKVSNLQVS#PKSE.D        | S259:        | 2 | 3,44   | 0,276 | -0,741 |
| 9 | P30414 NKTR_HUMAN  | E.ICTPDRS#SPAKVEE.T          | S1137:       | 2 | 3,4397 | 0,28  | -0,366 |
| 9 | Q96L14 C170L_HUMAN | E.ALNNM*GFPSAM*LPSPPK.Q      |              | 2 | 3,4364 | 0,411 | -0,271 |
| 9 | O14617 AP3D1_HUMAN | R.ALDIDLKPLADSE.K            |              | 2 | 3,4246 | 0,439 | -0,483 |
| 9 | Q92692 PVRL2_HUMAN | E.HS#PLKTPYFDAGASCTE.Q       | S433:        | 2 | 3,4138 | 0,516 | -0,56  |
| 9 | P05556 ITB1_HUMAN  | K.FCECDNFNCDR.S              |              | 2 | 3,4137 | 0,441 | -0,476 |

|   |                    |                              |            |   |        |       |        |
|---|--------------------|------------------------------|------------|---|--------|-------|--------|
| 9 | Q15819 UB2V2_HUMAN | E.NMKLPQPPEGQTYNN.-          |            | 2 | 3,402  | 0,311 | -0,352 |
| 9 | Q9Y3A4 ZG14_HUMAN  | E.LQEKPDLAES#PKE.S           | S99:       | 3 | 3,3928 | 0,282 | -0,351 |
| 9 | Q92785 REQU_HUMAN  | E.GEDKEDS#QPPTPVSR.S         | S244:      | 2 | 3,3723 | 0,382 | -0,66  |
| 9 | Q9ULR0 ISY1_HUMAN  | K.FIAHVPVPSQQEIEE.A          |            | 2 | 3,3715 | 0,293 | -0,425 |
| 9 | O60271 JIP4_HUMAN  | E.TRNVS#TGS#AENEKSE.V        | S329:S332: | 2 | 3,3699 | 0,472 | -0,579 |
| 9 | Q9UEY8 ADDG_HUMAN  | E.ITIKS#PEKIEE.V             | S664:      | 2 | 3,3691 | 0,334 | -0,446 |
| 9 | O75531 BAF_HUMAN   | R.DFVAEPMGEKPVGSLAGIGE.V     |            | 2 | 3,3597 | 0,531 | -0,365 |
| 9 | P27816 MAP4_HUMAN  | E.VALAKDM*ES#PTKLD.V         | S280:      | 2 | 3,3554 | 0,426 | -0,529 |
| 9 | Q12888 TP53B_HUMAN | R.GNLLHFPSS#QGEEE.K          | S1068:     | 2 | 3,3539 | 0,491 | -0,526 |
| 9 | Q8N655 CJ012_HUMAN | E.GGGDVS#PRKEPQEPE.V         | S273:      | 2 | 3,3531 | 0,396 | -0,514 |
| 9 | Q9UPU9 SAM4A_HUMAN | E.LHQM*ILTPIK.A              |            | 3 | 3,3488 | 0,163 | 0,302  |
| 9 | Q14676 MDC1_HUMAN  | E.GKAPQAVPLEK.S              |            | 2 | 3,3482 | 0,326 | -0,429 |
| 9 | Q9Y639 NPTN_HUMAN  | E.YHCYVHFVSAPK.A             |            | 2 | 3,3481 | 0,406 | -0,89  |
| 9 | Q9UGV2 NDRG3_HUMAN | E.SCES#PDVLDLRHQTM*E.V       | S361:      | 3 | 3,3475 | 0,254 | -0,289 |
| 9 | Q7LBC6 JHD2B_HUMAN | E.SLADDSS#SRDSFK.Q           | S552:      | 2 | 3,3451 | 0,324 | -0,163 |
| 9 | Q9NYF8 BCLF1_HUMAN | E.ALDYFS#DKESGK.Q            | S385:      | 2 | 3,3449 | 0,402 | -0,424 |
| 9 | Q9H3P2 NELFA_HUMAN | E.ASRPPEEPSAPS#PTLPAQFK.Q    | S384:      | 3 | 3,3344 | 0,236 | -0,502 |
| 9 | Q8TF05 PP4R1_HUMAN | E.SEGVPVSS#PNITMATR.K        | S496:      | 2 | 3,3251 | 0,399 | -0,212 |
| 9 | P42166 LAP2A_HUMAN | R.SST#PLPTISSAENTR.Q         | T160:      | 2 | 3,3154 | 0,364 | -0,282 |
| 9 | Q9Y3A4 ZG14_HUMAN  | E.LQEKPDLAES#PKE.S           | S99:       | 2 | 3,3117 | 0,25  | -0,624 |
| 9 | Q99590 SFRIP_HUMAN | E.IIQTVDRQSVKS#PE.V          | S314:      | 2 | 3,3074 | 0,328 | -0,508 |
| 9 | P62256 UBE2H_HUMAN | R.RM*DTDVVVKLIE.S            |            | 3 | 3,2962 | 0,215 | -0,137 |
| 9 | Q9Y3E2 BOLA1_HUMAN | E.NSQLDTSPPCLGGNKK.T         |            | 2 | 3,2866 | 0,325 | -0,711 |
| 9 | Q09666 AHNK_HUMAN  | K.GPKVDIDTPDINIE.G           |            | 2 | 3,2864 | 0,344 | -0,64  |
| 9 | O75691 UTP20_HUMAN | K.SLSDNGQPGT#PDPADSGGTSAKE.S | T1741:     | 3 | 3,2815 | 0,424 | -0,323 |
| 9 | P04264 K2C1_HUMAN  | K.WELLQQVDTSTR.T             |            | 2 | 3,2795 | 0,422 | -0,496 |
| 9 | P30622 CLIP1_HUMAN | E.ANGLQTPASR.A               |            | 2 | 3,2735 | 0,311 | -0,328 |
| 9 | P53396 ACLY_HUMAN  | R.TAS#FSESRADE.V             | S455:      | 2 | 3,2566 | 0,407 | -0,572 |
| 9 | Q13404 UB2V1_HUMAN | E.NM*KLPQPPEGQCYSN.-         |            | 2 | 3,2551 | 0,188 | -0,754 |
| 9 | O60841 IF2P_HUMAN  | E.TVAVKPTENNEEE.F            |            | 2 | 3,252  | 0,348 | -0,501 |
| 9 | Q9H7P9 PKHG2_HUMAN | E.MDERGSP#PLHVLE.G           | S610:      | 3 | 3,2437 | 0,152 | -0,586 |
| 9 | Q02952 AKA12_HUMAN | K.SAVVHDIT#DDGQEETPE.I       | T135:      | 2 | 3,2415 | 0,427 | -0,635 |
| 9 | P13645 K1C10_HUMAN | R.SQYEQLAEQNRK.D             |            | 2 | 3,2342 | 0,385 | -0,49  |

|   |                    |                                |            |   |        |       |        |
|---|--------------------|--------------------------------|------------|---|--------|-------|--------|
| 9 | Q7Z2W4 ZCCHV_HUMAN | E.FLASASASAER.S                |            | 2 | 3,234  | 0,49  | -0,22  |
| 9 | Q96L14 C170L_HUMAN | E.ALNNM*GFPS#AM*LPSPPKQK.S     | S219:      | 3 | 3,2308 | 0,229 | -0,256 |
| 9 | Q14444 CAPR1_HUMAN | E.TQFTSGEKEQVDE.W              |            | 2 | 3,2303 | 0,349 | -0,326 |
| 9 | O60264 SMCA5_HUMAN | E.IFDDAS#PGKQKE.I              | S66:       | 2 | 3,2237 | 0,363 | -0,604 |
| 9 | Q04917 1433F_HUMAN | E.DSYKDSTLIM*QLLR.D            |            | 3 | 3,2174 | 0,231 | 0,431  |
| 9 | P55327 TPD52_HUMAN | E.DVKNS#PTFKSFEE.K             | S131:      | 2 | 3,2154 | 0,348 | -0,379 |
| 9 | P49023 PAXI_HUMAN  | K.TSSVSNPQDSVGS#PCSR.V         | S106:      | 2 | 3,2115 | 0,283 | -0,132 |
| 9 | Q6NZI2 PTRF_HUMAN  | E.SDAVLVDKS#DS#D.-             | S387:S389: | 2 | 3,2065 | 0,27  | -0,432 |
| 9 | P60709 ACTB_HUMAN  | R.GYSFTTTAERE.I                |            | 2 | 3,2052 | 0,553 | -0,29  |
| 9 | Q5VUA4 ZN318_HUMAN | E.DQLSEGRNS#PEKAE.N            | S1243:     | 2 | 3,1922 | 0,324 | -0,67  |
| 9 | Q9BZE4 NOG1_HUMAN  | E.DDQKIFTDLQSE.G               |            | 2 | 3,1913 | 0,407 | 1,781  |
| 9 | Q13596 SNX1_HUMAN  | K.ITTSLLPINNGSKE.N             |            | 2 | 3,1868 | 0,461 | -0,328 |
| 9 | Q9NQW6 ANLN_HUMAN  | K.SCS#PSPVSPQVQQAADTISD.S      | S97:       | 3 | 3,1814 | 0,111 | -0,325 |
| 9 | P05787 K2C8_HUMAN  | E.AAIADAEQRGE.L                |            | 2 | 3,1812 | 0,466 | -0,432 |
| 9 | Q9HAV7 GRPE1_HUMAN | K.QKNSGQNLEEDM*GQSE.Q          |            | 2 | 3,1808 | 0,454 | -0,674 |
| 9 | P27816 MAP4_HUMAN  | E.EGRPVVSGTGNDITPPNKELPPS#PE.K | S696:      | 3 | 3,1774 | 0,1   | -0,397 |
| 9 | Q92576 PHF3_HUMAN  | E.NNLQDNQTSNSS#PCRSNVGK.G      | S1614:     | 3 | 3,1682 | 0,183 | -0,477 |
| 9 | Q8WWM7 ATX2L_HUMAN | E.VDGLLTSEPM*GSPVSSK.T         |            | 2 | 3,1675 | 0,456 | -0,638 |
| 9 | Q02790 FKBP4_HUMAN | E.ASSGDHPT#DTEMKEE.Q           | T436:      | 2 | 3,1598 | 0,27  | -0,285 |
| 9 | Q8N108 MIER1_HUMAN | R.APS#PPPTASNSNSQSEKE.D        | S401:      | 2 | 3,1596 | 0,474 | -0,306 |
| 9 | Q14674 ESPL1_HUMAN | E.ILRGS#DGEDSASGGKTPAPGPE.A    | S1508:     | 3 | 3,1583 | 0,209 | -0,42  |
| 9 | P22626 ROA2_HUMAN  | R.GGGGNFGPGPSNFR.G             |            | 2 | 3,1473 | 0,508 | -0,443 |
| 9 | P48681 NEST_HUMAN  | E.DHASLAPPLS#PDHSSLE.A         | S471:      | 2 | 3,1445 | 0,382 | -0,724 |
| 9 | Q15311 RBP1_HUMAN  | E.IASLS#KEDVSKEE.M             | S463:      | 2 | 3,1437 | 0,317 | -0,322 |
| 9 | P14923 PLAK_HUMAN  | K.GIM*EEDEACGR.Q               |            | 2 | 3,1426 | 0,389 | -0,285 |
| 9 | O43303 CE110_HUMAN | E.GFNS#PKQCDSNSHIVENE.A        | S170:      | 3 | 3,1333 | 0,225 | -0,492 |
| 9 | Q9NVI7 ATD3A_HUMAN | E.DQLKQQQLLEE.N                |            | 2 | 3,1272 | 0,189 | -0,328 |
| 9 | P35527 K1C9_HUMAN  | R.FSSSSGYGGGSSR.V              |            | 2 | 3,1055 | 0,459 | -0,79  |
| 9 | O14617 AP3D1_HUMAN | E.TSKS#PEKDVPVPM*VE.K          | S829:      | 2 | 3,1025 | 0,461 | -0,316 |
| 9 | P62829 RL23_HUMAN  | E.DNAGVIVNKNKGE.M              |            | 2 | 3,1017 | 0,19  | -0,198 |
| 9 | Q5H9R7 SAPS3_HUMAN | K.DSLRSNS#PVEM*E.T             | S740:      | 2 | 3,0961 | 0,349 | -0,334 |
| 9 | Q09666 AHNK_HUMAN  | E.VGFHGAAPDISVK.G              |            | 3 | 3,0937 | 0,421 | 0,211  |
| 9 | Q92797 SYMPK_HUMAN | E.AALLDSSLEGPLPK.E             |            | 2 | 3,0937 | 0,326 | -0,519 |

|   |                     |                              |            |   |        |       |        |
|---|---------------------|------------------------------|------------|---|--------|-------|--------|
| 9 | O75145 LIPA3_HUMAN  | R.GEGPAIPGDT#PPPT#PR.S       | T714:T718: | 2 | 3,0937 | 0,198 | 0,497  |
| 9 | Q86W92 LIPB1_HUMAN  | E.DDM*FKDFAAR.S              |            | 3 | 3,0905 | 0,211 | 0,371  |
| 9 | P29692 EF1D_HUMAN   | E.LQQAISKLE.A                |            | 2 | 3,0886 | 0,186 | -0,355 |
| 9 | P19634 SL9A1_HUMAN  | R.CLS#DPGPHPEPGEPEFFPK.G     | S796:      | 3 | 3,0882 | 0,216 | -0,241 |
| 9 | P14618 KPYM_HUMAN   | K.KGVNLPGAAVDLPVASE.K        |            | 2 | 3,0862 | 0,33  | -0,373 |
| 9 | Q9BUA3 YK007_HUMAN  | E.GVALLQDVR.A                |            | 2 | 3,0763 | 0,29  | -0,188 |
| 9 | P04792 HSPB1_HUMAN  | E.SPAVAAPAYS.R.A             |            | 2 | 3,0727 | 0,355 | -0,224 |
| 9 | Q14126 DSG2_HUMAN   | R.NYFTDKAAS#YTEEDE.N         | S782:      | 2 | 3,0676 | 0,335 | -0,655 |
| 9 | O60271 JIP4_HUMAN   | D.VAGLDTEGSKQR.S             |            | 2 | 3,0635 | 0,285 | -0,194 |
| 9 | Q96SB4 SRPK1_HUMAN  | E.DLHNANDCDVQNLNQE.S         |            | 2 | 3,0628 | 0,22  | -0,514 |
| 9 | Q02952 AKA12_HUMAN  | E.SGEHTQVPADSPDSQEE.Q        |            | 2 | 3,0624 | 0,347 | -0,269 |
| 9 | P29966 MARCS_HUMAN  | E.AAAERPGEAAVASS#PSK.A       | S27:       | 3 | 3,0615 | 0,219 | -0,218 |
| 9 | Q8WU90 ZC3HF_HUMAN  | R.FSTYTS#DKDENKLSE.A         | S360:      | 2 | 3,0493 | 0,408 | -0,331 |
| 9 | Q53T59 H1BP3_HUMAN  | R.SPGAAGLTSR.D               |            | 2 | 3,0482 | 0,336 | 0      |
| 9 | Q02952 AKA12_HUMAN  | E.KEPSKSAES#PTS#PVTSE.T      | S283:S286: | 2 | 3,036  | 0,459 | -0,318 |
| 9 | Q02952 AKA12_HUMAN  | K.ERPPAPSS#FVFQEE.T          | S1226:     | 2 | 3,0327 | 0,208 | -0,502 |
| 9 | O14617 AP3D1_HUMAN  | E.TSKS#PEKDVPVME.K           | S829:      | 2 | 3,0238 | 0,326 | -0,16  |
| 9 | P04075 ALDOA_HUMAN  | K.RLQSIGTENTEE.N             |            | 2 | 3,0235 | 0,437 | -0,443 |
| 9 | P62256 UBE2H_HUMAN  | R.RMDTDVVKLIE.S              |            | 3 | 3,0212 | 0,197 | 0,069  |
| 9 | Q15819 UB2V2_HUMAN  | E.NM*KLPQPPEGQTYNN.-         |            | 2 | 3,0153 | 0,302 | -0,629 |
| 9 | O75381 PEX14_HUMAN  | K.SPSPSSPAAVNHSSSDIS#PVSNE.S | S265:      | 3 | 3,015  | 0,155 | -0,667 |
| 9 | Q9UER7 DAXX_HUMAN   | R.KQS#EEPFTTVLE.N            | S593:      | 2 | 3,0143 | 0,29  | -0,328 |
| 9 | Q59FE8 Q59FE8_HUMAN | R.STPAEDDS#PGDSQVK.S         | S352:      | 2 | 3,0132 | 0,416 | -0,303 |
| 9 | Q9H4A3 WNK1_HUMAN   | E.KQSSTPGSLFLS#PPAPAPK.N     | S19:       | 3 | 3,0107 | 0,186 | -0,46  |
| 9 | O60216 RAD21_HUMAN  | E.NDFGDFGM*DDRE.I            |            | 2 | 3,0072 | 0,248 | -0,34  |
| 9 | Q96RR4 KKCC2_HUMAN  | R.SQGGLAAGSLDM*NGR.C         |            | 2 | 3,0062 | 0,419 | -0,567 |
| 9 | Q8NEC7 GSTCD_HUMAN  | K.AIKKS#LTEEE.Y              | S7:        | 2 | 3,0047 | 0,206 | 0,099  |
| 9 | P42566 EP15_HUMAN   | E.SEPIHQES#PARSSPE.L         | S558:      | 2 | 3,0046 | 0,402 | -0,352 |
| 9 | Q9UQ35 SRRM2_HUMAN  | E.LDVKPSAS#PQERSE.S          | S1552:     | 3 | 3,001  | 0,179 | 0,113  |
| 9 | P63208 SKP1_HUMAN   | K.NDFTEEEEAQVR.K             |            | 3 | 3,0003 | 0,28  | 0,312  |
| 9 | Q8TF05 PP4R1_HUMAN  | E.SEGVPVSS#PNITM*ATR.K       | S496:      | 2 | 2,9925 | 0,297 | 0      |
| 9 | P67936 TPM4_HUMAN   | E.NVGLHQTLDTLNE.L            |            | 2 | 2,9861 | 0,151 | -0,54  |
| 9 | Q7Z2W4 ZCCHV_HUMAN  | R.SCTPSPDQISHRAS#LE.D        | S284:      | 2 | 2,9791 | 0,517 | -0,458 |

|   |                     |                        |            |   |        |       |        |
|---|---------------------|------------------------|------------|---|--------|-------|--------|
| 9 | P49757 NUMB_HUMAN   | R.VTTATEQAEREE.I       |            | 2 | 2,9718 | 0,416 | -0,537 |
| 9 | Q9UPN3 MACF1_HUMAN  | K.SM*DAMSS#PTKTE.T     | S2429:     | 2 | 2,9591 | 0,204 | -0,619 |
| 9 | Q68EM7 RHG17_HUMAN  | K.QNPSLPAPQTLAGGNPE.T  |            | 2 | 2,9523 | 0,288 | -0,794 |
| 9 | P49023 PAXI_HUMAN   | K.TSS#VSNPQDSVSGPCSR.V | S96:       | 2 | 2,9511 | 0,438 | -0,595 |
| 9 | O94913 PCF11_HUMAN  | E.LQEPCDS#PKVKEE.R     | S1520:     | 2 | 2,949  | 0,173 | -0,298 |
| 9 | Q99959 PKP2_HUMAN   | E.NDFVGGRS#PVPK.T      | S102:      | 2 | 2,945  | 0,191 | -0,541 |
| 9 | P18858 DNL1_HUMAN   | E.QATTSAQVACLVR.K      |            | 2 | 2,9432 | 0,542 | -0,498 |
| 9 | P52948 NUP98_HUMAN  | E.NGERFS#FLSKPVDE.N    | S635:      | 2 | 2,9427 | 0,273 | -0,573 |
| 9 | Q02952 AKA12_HUMAN  | K.SPFS#PVERE.M         | S1331:     | 2 | 2,9411 | 0,196 | -0,226 |
| 9 | P16615 AT2A2_HUMAN  | E.DSANFIKYE.T          |            | 2 | 2,9396 | 0,225 | -0,449 |
| 9 | Q71U36 TBA1A_HUMAN  | E.HGIQPDGQM*PSDK.T     |            | 2 | 2,9265 | 0,3   | -0,257 |
| 9 | Q76L83 ASXL2_HUMAN  | E.ALQM*#SPGRKEECE.S    | S439:      | 2 | 2,9262 | 0,386 | -0,213 |
| 9 | Q52LD0 Q52LD0_HUMAN | K.AGGS#PAS#YHGSTSPR.V  | S192:S195: | 2 | 2,9243 | 0,433 | -0,537 |
| 9 | Q15149 PLEC1_HUMAN  | R.SSS#VGSSSYPISPAVSR.T | S4386:     | 2 | 2,9225 | 0,458 | -0,465 |
| 9 | P17987 TCPA_HUMAN   | E.LADLQDKE.V           |            | 2 | 2,9206 | 0,194 | 0,065  |
| 9 | Q93009 UBP7_HUMAN   | E.DQFCGHQGNM*YDEE.K    |            | 2 | 2,9198 | 0,389 | -0,459 |
| 9 | P54578 UBP14_HUMAN  | E.AIEDDSVKE.T          |            | 2 | 2,914  | 0,289 | -0,182 |
| 9 | B01T5 B01T5_HUMAN   | E.SSVDCLKES#PNKQQE.R   | S1205:     | 2 | 2,9118 | 0,209 | -0,2   |
| 9 | Q5H9R7 SAPS3_HUMAN  | K.DSLRSNS#PVEME.T      | S740:      | 2 | 2,9115 | 0,371 | -0,507 |
| 9 | Q96RL1 UIMC1_HUMAN  | R.DLNES#PVKSFVISE.A    | S677:      | 2 | 2,9056 | 0,336 | -0,352 |
| 9 | Q8NEY8 PPHLN_HUMAN  | E.KLEKS#DES#NLPE.I     | S244:S247: | 2 | 2,895  | 0,176 | -0,315 |
| 9 | P46821 MAP1B_HUMAN  | E.SFLSADDKASGR.G       |            | 2 | 2,8935 | 0,412 | -0,778 |
| 9 | P24534 EF1B_HUMAN   | E.DDKVGTDM*LEE.Q       |            | 2 | 2,8845 | 0,398 | -0,481 |
| 9 | P35908 K22E_HUMAN   | R.NLDLDSIIAEVK.A       |            | 2 | 2,8783 | 0,415 | -0,642 |
| 9 | Q8WU20 FRS2_HUMAN   | E.NVTVPAS#AHKIE.Y      | S403:      | 2 | 2,8756 | 0,358 | -0,363 |
| 9 | P05556 ITB1_HUMAN   | R.SNGLICGGNGVCK.C      |            | 2 | 2,8669 | 0,312 | -0,548 |
| 9 | Q9Y490 TLN1_HUMAN   | K.VLVQNAAGSQE.K        |            | 2 | 2,8539 | 0,322 | -0,219 |
| 9 | P18615 NELFE_HUMAN  | E.KGPVPTFQPFQR.S       |            | 2 | 2,841  | 0,331 | -0,522 |
| 9 | Q99590 SFRIP_HUMAN  | E.GEIIQTVDR.Q          |            | 2 | 2,8407 | 0,197 | -0,71  |
| 9 | Q14683 SMC1A_HUMAN  | E.GSSQGEDSVSGS#QR.I    | S966:      | 2 | 2,8365 | 0,304 | 0,167  |
| 9 | Q15599 NHRF2_HUMAN  | E.SGLHLS#PTAAEAKE.K    | S303:      | 2 | 2,8325 | 0,282 | -0,246 |
| 9 | O43663 PRC1_HUMAN   | K.SDATSGILNSTNIQS.-    |            | 2 | 2,8314 | 0,231 | -0,485 |
| 9 | Q9C0C2 TB182_HUMAN  | R.NMAPGAVCS#PGESKE.L   | S1297:     | 2 | 2,8298 | 0,382 | -0,227 |

|   |                     |                        |            |   |        |       |        |
|---|---------------------|------------------------|------------|---|--------|-------|--------|
| 9 | Q6PKG0 LARP1_HUMAN  | R.AVT#PVPTKTEE.V       | T526:      | 2 | 2,8258 | 0,397 | -0,39  |
| 9 | P38646 GRP75_HUMAN  | E.TGVDLTKD.N           |            | 2 | 2,8222 | 0,189 | 0      |
| 9 | P29966 MARCS_HUMAN  | E.AAAERPGEAAVASS#PSK.A | S27:       | 2 | 2,78   | 0,348 | -0,218 |
| 9 | P27816 MAP4_HUMAN   | K.GISEDS#HLE.S         | S605:      | 2 | 2,7792 | 0,28  | 0,229  |
| 9 | Q16658 FSCN1_HUMAN  | E.DRLSCFAQTVSPA.E.K    |            | 2 | 2,7694 | 0,206 | -0,54  |
| 9 | Q9Y6D5 BIG2_HUMAN   | E.IGDGGKGLDMAR.R       |            | 2 | 2,76   | 0,286 | -0,538 |
| 9 | Q13185 CBX3_HUMAN   | K.KVEEAPEEFVVE.K       |            | 2 | 2,7559 | 0,315 | -0,239 |
| 9 | Q9H2G2 SLK_HUMAN    | E.VRS#VVADTDQK.A       | S655:      | 2 | 2,7518 | 0,24  | -0,376 |
| 9 | P78364 PHC1_HUMAN   | E.ALS#PTS#PGPLSVR.A    | S895:S898: | 2 | 2,7503 | 0,44  | -0,592 |
| 9 | Q96D46 NMD3_HUMAN   | E.DLHISQDATGEE.G       |            | 2 | 2,7472 | 0,306 | -0,557 |
| 9 | Q8N655 CJ012_HUMAN  | E.NTLQCPKT#PLRQDLE.A   | T65:       | 2 | 2,7442 | 0,319 | -0,58  |
| 9 | Q9H5V8 CDCP1_HUMAN  | K.LATEEPPRS#PPESE.S    | S797:      | 2 | 2,7423 | 0,341 | -0,213 |
| 9 | P46940 IQGA1_HUMAN  | K.LGNFFSPK.V           |            | 2 | 2,7359 | 0,373 | -0,067 |
| 9 | Q9H7P9 PKHG2_HUMAN  | E.M*DERGPS#PLHVLE.G    | S610:      | 2 | 2,7342 | 0,193 | -0,387 |
| 9 | Q02952 AKA12_HUMAN  | E.VALKGEGTEE.A         |            | 2 | 2,7323 | 0,293 | -0,354 |
| 9 | A8MWW4 A8MWW4_HUMAN | -.PLAKDLLHPS#PEEE.K    | S10:       | 2 | 2,7299 | 0,222 | -0,59  |
| 9 | Q16204 CCDC6_HUMAN  | K.SGGIVISPFRL.E.L      |            | 2 | 2,7286 | 0,177 | -0,434 |
| 9 | P24534 EF1B_HUMAN   | E.DDKVGTDM*LE.E        |            | 2 | 2,7262 | 0,335 | -0,214 |
| 9 | P51858 HDGF_HUMAN   | E.DAEAPGIRDHES#L.-     | S239:      | 2 | 2,7231 | 0,401 | -0,246 |
| 9 | P21266 GSTM3_HUMAN  | K.CLDEFNLK.A           |            | 2 | 2,7219 | 0,266 | -0,322 |
| 9 | Q08499 PDE4D_HUMAN  | E.VEIPS#PTQKEKE.K      | S348:      | 2 | 2,7113 | 0,17  | -0,583 |
| 9 | Q09666 AHNK_HUMAN   | E.LKS#AKMIDVDPDVE.V    | S856:      | 2 | 2,7103 | 0,256 | -0,521 |
| 9 | Q58FF7 H90B3_HUMAN  | E.LKIDIIPNPQE.R        |            | 2 | 2,7102 | 0,206 | -0,477 |
| 9 | P19338 NUCL_HUMAN   | E.SKTLVLSNLSYSATEE.T   |            | 2 | 2,7077 | 0,38  | -0,7   |
| 9 | P35244 RFA3_HUMAN   | E.DSHPFDLGLYNE.A       |            | 2 | 2,7032 | 0,201 | -0,434 |
| 9 | Q13509 TBB3_HUMAN   | E.HGIDPSGNYVGDSLQLE.R  |            | 2 | 2,7031 | 0,424 | -0,509 |
| 9 | Q9Y5Y5 PEX16_HUMAN  | E.TQAQPPDGDHS#PGNHE.Q  | S158:      | 2 | 2,6926 | 0,427 | 0      |
| 9 | Q9UPN4 AZI1_HUMAN   | K.ANNAGGGLPAAGPGDR.C   |            | 2 | 2,6868 | 0,422 | -0,612 |
| 9 | Q9NZW5 MPP6_HUMAN   | E.AHDIVASK.C           |            | 2 | 2,6825 | 0,21  | 0,29   |
| 9 | O95707 RPP29_HUMAN  | E.ANDSDVQPSGAQRAE.A    |            | 2 | 2,6726 | 0,254 | 0,316  |
| 9 | P81605 DCD_HUMAN    | K.ENAGEDPGLAR.Q        |            | 2 | 2,6692 | 0,306 | -0,216 |
| 9 | Q9Y6A5 TACC3_HUMAN  | R.AM*TLS#PQEE.V        | S317:      | 2 | 2,6685 | 0,173 | -0,332 |
| 9 | Q9UKM9 RALY_HUMAN   | E.LEHSQDTDADDGALQ.-    |            | 2 | 2,6649 | 0,306 | -0,529 |



|   |                     |                          |                    |   |        |       |        |
|---|---------------------|--------------------------|--------------------|---|--------|-------|--------|
| 9 | Q02952 AKA12_HUMAN  | E.KEPSKSAESPT#S#PVTSE.T  | T285:S286:         | 2 | 2,6621 | 0,495 | -0,254 |
| 9 | P04075 ALDOA_HUMAN  | R.LQSIGTENTEE.N          |                    | 2 | 2,6537 | 0,318 | -0,3   |
| 9 | Q6BDS2 URFB1_HUMAN  | E.LKSDASS#DQGPASPEK.V    | S922:              | 2 | 2,65   | 0,275 | -0,072 |
| 9 | Q9Y6D5 BIG2_HUMAN   | E.IGDGGKGLDM*AR.R        |                    | 2 | 2,6461 | 0,327 | -0,212 |
| 9 | Q00613 HSF1_HUMAN   | E.SEPAPASVTALTDAR.G      |                    | 2 | 2,6432 | 0,392 | -0,493 |
| 9 | Q58FF7 H90B3_HUMAN  | E.YCVQQLKE.F             |                    | 2 | 2,636  | 0,126 | -0,343 |
| 9 | P00558 PGK1_HUMAN   | E.KACANPAAGSVILLE.N      |                    | 2 | 2,6335 | 0,229 | -0,403 |
| 9 | P24534 EF1B_HUMAN   | E.DDKVGTDMLE.E           |                    | 2 | 2,6219 | 0,21  | -0,109 |
| 9 | Q96PK2 MACF4_HUMAN  | E.DTQKLDNFLGE.V          |                    | 2 | 2,6152 | 0,206 | -0,286 |
| 9 | P46459 NSF_HUMAN    | E.NDIKPAFGTNQE.D         |                    | 2 | 2,6142 | 0,317 | -0,64  |
| 9 | P35612 ADDB_HUMAN   | E.AETKS#PLVSPSK.S        | S613:              | 2 | 2,6141 | 0,209 | -0,276 |
| 9 | P42166 LAP2A_HUMAN  | R.NRPPLPAGTNSK.G         |                    | 2 | 2,6128 | 0,278 | -0,487 |
| 9 | Q16186 ADRM1_HUMAN  | R.SQSAAVTPSSTTSSTR.A     |                    | 2 | 2,6127 | 0,378 | -0,311 |
| 9 | P0C0S8 H2A1_HUMAN   | R.NDEELNK.L              |                    | 2 | 2,6122 | 0,093 | 0,142  |
| 9 | Q07021 C1QBP_HUMAN  | E.SDIFSIRE.V             |                    | 2 | 2,6094 | 0,3   | 0,315  |
| 9 | P13645 K1C10_HUMAN  | K.VTMQNLNDR.L            |                    | 2 | 2,6048 | 0,164 | -0,447 |
| 9 | Q99590 SFRIP_HUMAN  | E.GEIIQTVDRQSVKS#PE.V    | S314:              | 2 | 2,6043 | 0,219 | -0,392 |
| 9 | Q9UGP4 LIMD1_HUMAN  | R.TPSVSAPLALSCPR.Q       |                    | 2 | 2,6037 | 0,455 | -0,587 |
| 9 | P00558 PGK1_HUMAN   | E.GKVLPGVDALSNI.-        |                    | 2 | 2,5974 | 0,372 | -0,285 |
| 9 | P04264 K2C1_HUMAN   | K.YEELQITAGR.H           |                    | 2 | 2,5956 | 0,189 | -0,31  |
| 9 | P23396 RS3_HUMAN    | E.LNEFLTRE.L             |                    | 2 | 2,5929 | 0,138 | 0,06   |
| 9 | P62753 RS6_HUMAN    | R.LSS#LRAST#SKSE.S       | S236:T241:         | 2 | 2,5918 | 0,139 | -0,513 |
| 9 | O75179 ANR17_HUMAN  | R.NSPLDCGSASPKN.V        |                    | 2 | 2,5904 | 0,346 | -0,453 |
| 9 | Q58EX2 SDK2_HUMAN   | E.MEY#NGNPES#VGY#KIK.Y   | Y1123:S1129:Y1132: | 2 | 2,5853 | 0,165 | -0,62  |
| 9 | P09211 GSTP1_HUMAN  | E.YVNLPIGNGKQ.-          |                    | 2 | 2,5746 | 0,242 | -0,371 |
| 9 | B2RA01 B2RA01_HUMAN | K.AQYEDIAQK.S            |                    | 2 | 2,5738 | 0,167 | -0,229 |
| 9 | Q7L2J0 MEPCE_HUMAN  | E.SHPVPPTAPLT#PLLHGE.G   | T291:              | 2 | 2,5671 | 0,241 | -0,331 |
| 9 | P40222 TXLNA_HUMAN  | R.RPEGPGAQAPSS#PR.V      | S515:              | 2 | 2,5651 | 0,196 | -0,328 |
| 9 | P17275 JUNB_HUMAN   | R.SRDAT#PPVS#PINM*EDQE.R | T255:S259:         | 2 | 2,564  | 0,326 | -0,355 |
| 9 | P16949 STMN1_HUMAN  | K.AIEENNNFSK.M           |                    | 2 | 2,5527 | 0,256 | -0,523 |
| 9 | P17987 TCPA_HUMAN   | E.DAVHSGALND.-           |                    | 2 | 2,5466 | 0,406 | -0,122 |
| 9 | P27708 PYR1_HUMAN   | E.ATAGNPGGQTVRE.R        |                    | 2 | 2,545  | 0,329 | -0,194 |
| 9 | O75044 FNBP2_HUMAN  | R.GGSM*EDYCDS#PHGE.T     | S702:              | 2 | 2,5438 | 0,222 | -0,447 |

|   |                    |                         |        |   |        |       |        |
|---|--------------------|-------------------------|--------|---|--------|-------|--------|
| 9 | Q96JM3 ZN828_HUMAN | K.LAPVPSPEPQKPAPVS#PE.S | S214:  | 2 | 2,5436 | 0,206 | -0,572 |
| 9 | P00558 PGK1_HUMAN  | E.GKVLPGVDALS#NI.-      | S415:  | 2 | 2,5396 | 0,304 | -0,537 |
| 9 | Q9Y4A5 TRRAP_HUMAN | E.LAPGDQTST#PKTKE.L     | T2573: | 2 | 2,5374 | 0,371 | -0,55  |
| 9 | Q29983 MICA_HUMAN  | R.SSQHFYYDGE.L          |        | 2 | 2,5355 | 0,153 | -0,594 |
| 9 | P49755 TMEDA_HUMAN | K.NYEEIAKVE.K           |        | 2 | 2,5328 | 0,27  | 0      |
| 9 | Q8IVF2 AHNK2_HUMAN | E.GDLSLADKD.V           |        | 2 | 2,527  | 0,276 | -0,196 |
| 9 | P13645 K1C10_HUMAN | K.DAEAWFNEK.S           |        | 2 | 2,5265 | 0,323 | -0,33  |
| 9 | Q14257 RCN2_HUMAN  | K.KIDLSDGFLTE.S         |        | 2 | 2,5228 | 0,264 | -0,18  |
| 9 | P13645 K1C10_HUMAN | R.ALEESNYELEGK.I        |        | 2 | 2,5225 | 0,341 | -0,088 |
| 9 | Q9H307 PININ_HUMAN | R.GFS#DSGGGPPAK.Q       | S66:   | 2 | 2,5216 | 0,178 | -0,316 |
| 9 | P49023 PAXI_HUMAN  | K.TGSSS#PPGGPPKPGSQLD.S | S322:  | 2 | 2,5185 | 0,314 | -0,629 |
| 9 | P49023 PAXI_HUMAN  | E.HVYSFPNK.Q            |        | 2 | 2,5142 | 0,407 | -0,184 |
| 9 | Q9H7P9 PKHG2_HUMAN | E.MDERGPS#PLHVL.E.G     | S610:  | 2 | 2,5105 | 0,238 | -1,251 |
| 9 | P31948 STIP1_HUMAN | E.TKPEPM*EEDLPE.N       |        | 2 | 2,5084 | 0,152 | -0,341 |
| 9 | Q15365 PCBP1_HUMAN | K.IANPVEGSSGR.Q         |        | 2 | 2,5076 | 0,216 | 0,224  |
| 9 | P13645 K1C10_HUMAN | R.VLDELTLTK.A           |        | 2 | 2,502  | 0,234 | 0      |
| 9 | O15061 DMN_HUMAN   | K.GLQT#PVKDAGGGTGRE.A   | T598:  | 2 | 2,4965 | 0,243 | -0,075 |
| 9 | P07355 ANXA2_HUMAN | E.GDHSTPPSAY#GSVK.A     | Y24:   | 2 | 2,4957 | 0,378 | -0,329 |
| 9 | P31948 STIP1_HUMAN | E.FQLALKDCEE.C          |        | 2 | 2,4833 | 0,144 | -0,389 |
| 9 | P62256 UBE2H_HUMAN | R.RMDTDVVK.L            |        | 2 | 2,477  | 0,133 | -0,19  |
| 9 | Q9Y6M7 S4A7_HUMAN  | R.MLQDDDDT#VHLPFE.G     | T1167: | 2 | 2,477  | 0,182 | -0,209 |
| 9 | Q8IVF2 AHNK2_HUMAN | E.DSKLS#LVLDKDE.V       | S4987: | 2 | 2,4663 | 0,101 | -1,438 |
| 9 | O43237 DC1L2_HUMAN | R.RGPLTSGSDEE.N         |        | 2 | 2,4611 | 0,308 | -0,531 |
| 9 | P51991 ROA3_HUMAN  | K.EDTEEYNLR.D           |        | 2 | 2,4595 | 0,315 | -0,418 |
| 9 | P13639 EF2_HUMAN   | E.GALCEENMR.G           |        | 2 | 2,4574 | 0,23  | -0,113 |
| 9 | O60832 DKC1_HUMAN  | E.VVKAPQVVAE.A          |        | 2 | 2,4538 | 0,233 | -0,352 |
| 9 | Q8NAP3 ZBT38_HUMAN | R.SPQPAAVLTR.S          |        | 2 | 2,4417 | 0,282 | -0,235 |
| 9 | Q07157 ZO1_HUMAN   | E.YSM*YSTDSR.H          |        | 2 | 2,4345 | 0,23  | -0,433 |
| 9 | P40227 TCPZ_HUMAN  | K.SETDTSLIR.G           |        | 2 | 2,4341 | 0,22  | -0,119 |
| 9 | P60709 ACTB_HUMAN  | E.TTFNSIM*KCD.V         |        | 2 | 2,4299 | 0,273 | -0,198 |
| 9 | P19338 NUCL_HUMAN  | E.FASFEDAKE.A           |        | 2 | 2,4269 | 0,28  | -0,351 |
| 9 | Q99460 PSMD1_HUMAN | E.SVDKIEVLYEDE.G        |        | 2 | 2,4225 | 0,146 | -0,339 |
| 9 | Q15084 PDIA6_HUMAN | E.LDDLKDEL.-            |        | 2 | 2,4186 | 0,132 | 0      |

|   |                     |                         |            |   |        |       |        |
|---|---------------------|-------------------------|------------|---|--------|-------|--------|
| 9 | Q7Z2W4 ZCCHV_HUMAN  | R.SCTPS#PDQISHR.A       | S275:      | 2 | 2,4096 | 0,102 | -0,167 |
| 9 | P22626 ROA2_HUMAN   | D.TIEITDR.Q             |            | 2 | 2,4003 | 0,259 | -0,063 |
| 9 | Q02790 FKBP4_HUMAN  | E.GVDISPKQDE.G          |            | 2 | 2,3969 | 0,159 | -0,336 |
| 9 | Q9H6Z4 RANB3_HUMAN  | R.VLS#PPKLE.V           | S333:      | 2 | 2,3965 | 0,224 | -0,227 |
| 9 | Q00613 HSF1_HUMAN   | E.GRPPS#PPPTST#PEK.C    | S363:T369: | 2 | 2,3962 | 0,201 | -0,152 |
| 9 | Q9BPX3 CND3_HUMAN   | E.NCITLQDFNR.A          |            | 2 | 2,3852 | 0,318 | -0,476 |
| 9 | O43663 PRC1_HUMAN   | E.SLLQLHDAE.I           |            | 2 | 2,382  | 0,192 | 0,119  |
| 9 | P05362 ICAM1_HUMAN  | E.SVTVTRDLE.G           |            | 2 | 2,3772 | 0,126 | -1,256 |
| 9 | P27816 MAP4_HUMAN   | K.KCS#LPAEEDSVLE.K      | S636:      | 2 | 2,3757 | 0,225 | -0,313 |
| 9 | Q92576 PHF3_HUMAN   | K.GNIDGNVSCSE.N         |            | 2 | 2,3689 | 0,223 | -0,212 |
| 9 | Q9Y3T9 NOC2L_HUMAN  | R.GILRPLSTR.H           |            | 2 | 2,368  | 0,212 | -0,06  |
| 9 | Q8N108 MIER1_HUMAN  | E.LLSLYGYGSTVR.L        |            | 2 | 2,3656 | 0,301 | 0,092  |
| 9 | Q12904 MCA1_HUMAN   | E.QIQPDLHTNDE.C         |            | 2 | 2,3431 | 0,257 | -0,373 |
| 9 | Q9UKV3 ACINU_HUMAN  | K.KCEAEEAEPAAATQPQTSE.T |            | 2 | 2,3372 | 0,429 | -0,353 |
| 9 | O00401 WASL_HUMAN   | K.VIY#DFIEK.T           | Y256:      | 2 | 2,3321 | 0,195 | -0,22  |
| 9 | Q96TA1 NIBL1_HUMAN  | R.FEEVLSK.V             |            | 2 | 2,3287 | 0,137 | -0,072 |
| 9 | A8K7V5 A8K7V5_HUMAN | E.VSTAPAGTDM*PAAK.K     |            | 2 | 2,3244 | 0,301 | -0,366 |
| 9 | Q9UPU9 SAM4A_HUMAN  | E.LHQM*ILTPIK.A         |            | 2 | 2,324  | 0,161 | -0,605 |
| 9 | Q15843 NEDD8_HUMAN  | K.TLTGKEID.I            |            | 2 | 2,3179 | 0,243 | -0,109 |
| 9 | Q93009 UBP7_HUMAN   | K.AGEQQLS#EPEDM*E.M     | S18:       | 2 | 2,3152 | 0,284 | -0,235 |
| 9 | Q12906 ILF3_HUMAN   | D.M*GLPTGAEGR.D         |            | 2 | 2,3063 | 0,349 | -0,182 |
| 9 | P00533 EGFR_HUMAN   | E.DHFLSLQR.M            |            | 2 | 2,3045 | 0,219 | 0,12   |
| 9 | Q14683 SMC1A_HUMAN  | R.ISSIYARE.A            |            | 2 | 2,302  | 0,12  | -0,26  |
| 9 | Q9NTK5 OLA1_HUMAN   | E.DDDITHVE.G            |            | 2 | 2,2994 | 0,176 | -0,065 |
| 9 | O75376 NCOR1_HUMAN  | E.AVKPSEDS#PENATSR.G    | S737:      | 2 | 2,299  | 0,242 | -0,219 |
| 9 | P19338 NUCL_HUMAN   | E.SAEDLEKALE.L          |            | 2 | 2,2982 | 0,197 | -0,11  |
| 9 | P62256 UBE2H_HUMAN  | R.M*DTDVVK.L            |            | 2 | 2,2917 | 0,136 | 0,074  |
| 9 | Q58FF7 H90B3_HUMAN  | K.EDQTEYLEER.R          |            | 2 | 2,2815 | 0,295 | -0,372 |
| 9 | P11387 TOP1_HUMAN   | E.FDFLGKD.S             |            | 2 | 2,2811 | 0,132 | 0      |
| 9 | P05386 RLA1_HUMAN   | E.ES#DDDM*GFGLFD.-      | S104:      | 2 | 2,2782 | 0,254 | -0,423 |
| 9 | P30566 PUR8_HUMAN   | E.GGDNDLIER.I           |            | 2 | 2,2721 | 0,189 | -0,123 |
| 9 | Q5VTB9 CA164_HUMAN  | R.GSGFIM*CSGK.E         |            | 2 | 2,2714 | 0,34  | -0,115 |
| 9 | P11142 HSP7C_HUMAN  | E.KVCNPIITK.L           |            | 2 | 2,2587 | 0,121 | -0,227 |

|   |                       |                            |            |   |        |       |        |
|---|-----------------------|----------------------------|------------|---|--------|-------|--------|
| 9 | P34932 HSP74_HUMAN    | E.NQLLWQIDRE.M             |            | 2 | 2,2581 | 0,185 | -0,371 |
| 9 | P63244 GBLP_HUMAN     | K.IWDLEGK.I                |            | 2 | 2,2567 | 0,14  | 0,142  |
| 9 | P62256 UBE2H_HUMAN    | R.MDTDVVK.L                |            | 2 | 2,249  | 0,183 | 0,075  |
| 9 | P56192 SYMC_HUMAN     | K.TS#PKPAVVE.T             | S825:      | 2 | 2,2469 | 0,136 | -0,182 |
| 9 | Q02952 AKA12_HUMAN    | K.SAES#PTS#PVTSE.T         | S283:S286: | 2 | 2,246  | 0,23  | -0,451 |
| 9 | P11177 ODPB_HUMAN     | E.DNSIPQVKD.I              |            | 2 | 2,2436 | 0,254 | -0,12  |
| 9 | Q16563 SYPL1_HUMAN    | K.TVTATFGYPFR.L            |            | 2 | 2,2433 | 0,294 | -0,097 |
| 9 | P62256 UBE2H_HUMAN    | R.MDTDVVKLIE.S             |            | 2 | 2,2411 | 0,245 | -0,105 |
| 9 | P27816 MAP4_HUMAN     | K.DM*ES#PTKLD.V            | S280:      | 2 | 2,2359 | 0,184 | -0,216 |
| 9 | O95816 BAG2_HUMAN     | K.FLDDLGNK.S               |            | 2 | 2,233  | 0,116 | -0,123 |
| 9 | Q6NZI2 PTRF_HUMAN     | E.SEALPEKE.G               |            | 2 | 2,2305 | 0,123 | 0,135  |
| 9 | Q02952 AKA12_HUMAN    | E.STAVGQAHS#DISKDM*SE.A    | S1628:     | 2 | 2,2301 | 0,187 | -0,263 |
| 9 | P35908 K22E_HUMAN     | K.KYEDEINKR.T              |            | 2 | 2,225  | 0,131 | -0,408 |
| 9 | P30048 PRDX3_HUMAN    | E.IVAFSDKANE.F             |            | 2 | 2,2241 | 0,239 | -0,446 |
| 9 | O75410 TACC1_HUMAN    | E.LGEESRS#SPLKLE.F         | S315:      | 2 | 2,2186 | 0,107 | 0,08   |
| 9 | Q13885 TBB2A_HUMAN    | D.SDLQLER.I                |            | 2 | 2,2184 | 0,116 | 0,213  |
| 9 | Q9UQ35 SRRM2_HUMAN    | R.SSTGPEPPAPTLLAE.R        |            | 2 | 2,2172 | 0,152 | -0,312 |
| 9 | Q9NY27 PP4R2_HUMAN    | E.NEGPVSSSSDCRE.T          |            | 2 | 2,2135 | 0,269 | -0,242 |
| 9 | P80723 BASP_HUMAN     | K.KTEAAPAAAE.T             |            | 2 | 2,1898 | 0,151 | -0,103 |
| 9 | Q9Y6H1 CHCH2_HUMAN    | E.CAQNQGDIKLCE.G           |            | 2 | 2,1892 | 0,281 | -0,765 |
| 9 | P98179 RBM3_HUMAN     | E.DHFSSFGPISE.V            |            | 2 | 2,1831 | 0,259 | -0,399 |
| 9 | P05386 RLA1_HUMAN     | E.S#DDDM*GFGLFD.-          | S104:      | 2 | 2,1821 | 0,241 | -0,464 |
| 9 | P46087 NOL1_HUMAN     | R.LGSVEAPK.T               |            | 2 | 2,1809 | 0,262 | 0,381  |
| 9 | P04406 G3P_HUMAN      | K.VIHDNFGIVE.G             |            | 2 | 2,1802 | 0,217 | -0,534 |
| 9 | Q9UQ35 SRRM2_HUMAN    | E.LDVKPSAS#PQERSE.S        | S1552:     | 2 | 2,1754 | 0,395 | 0      |
| 9 | O94804 STK10_HUMAN    | E.QGGDLS#PAANR.S           | S438:      | 2 | 2,1753 | 0,303 | -0,209 |
| 9 | Q9Y2F5 K0947_HUMAN    | E.LCSS#PLGKRPLNE.L         | S533:      | 2 | 2,1718 | 0,144 | -0,393 |
| 9 | O75691 UTP20_HUMAN    | K.SLSDNGQPGT#PDPADSGGTSK.E | T1741:     | 2 | 2,1653 | 0,3   | -0,342 |
| 9 | ##Q9HAE1 Q9HAE1_HUMAN | K.YEIEVRM*.-               |            | 2 | 2,1628 | 0,293 | -0,255 |
| 9 | Q14004 CD2L5_HUMAN    | K.LADFGLAR.L               |            | 2 | 2,1574 | 0,138 | 0,071  |
| 9 | O43572 AKA10_HUMAN    | E.SSSTLTVASR.N             |            | 2 | 2,144  | 0,25  | -0,181 |
| 9 | Q8WWM7 ATX2L_HUMAN    | E.IESS#PQYR.L              | S306:      | 2 | 2,1344 | 0,087 | -0,23  |
| 9 | P68431 H31_HUMAN      | E.IAQDFKTD.L               |            | 2 | 2,1323 | 0,131 | 0,065  |

|    |                     |                                   |              |   |        |       |        |
|----|---------------------|-----------------------------------|--------------|---|--------|-------|--------|
| 9  | Q9UQ35 SRRM2_HUMAN  | E.LDVKPSAS#PQER.S                 | S1552:       | 2 | 2,1311 | 0,092 | -0,607 |
| 9  | Q96TA1 NIBL1_HUMAN  | E.ASSPPAS#PLQHLLPGK.A             | S683:        | 2 | 2,1276 | 0,126 | -0,436 |
| 9  | P62256 UBE2H_HUMAN  | R.RM*DTDVVKLIE.S                  |              | 2 | 2,1267 | 0,123 | -0,548 |
| 9  | P33316 DUT_HUMAN    | E.VQALDDTER.G                     |              | 2 | 2,1266 | 0,132 | -0,35  |
| 9  | ##P06340 2DOA_HUMAN | K.LDVSFLQE.E                      |              | 2 | 2,1253 | 0,164 | 0,257  |
| 9  | P52272 HNRPM_HUMAN  | R.GCAVVEFK.M                      |              | 2 | 2,124  | 0,117 | 0      |
| 9  | Q12906 ILF3_HUMAN   | D.MGLPTGAEGR.D                    |              | 2 | 2,114  | 0,335 | 0,062  |
| 9  | P62256 UBE2H_HUMAN  | R.RMDTDVVKLIE.S                   |              | 2 | 2,1106 | 0,194 | -0,277 |
| 9  | P00558 PGK1_HUMAN   | K.VLPGVDALSNI.-                   |              | 2 | 2,1069 | 0,345 | -0,222 |
| 9  | Q9UBT2 SAE2_HUMAN   | E.VVGDAPEKVGPK.Q                  |              | 2 | 2,1046 | 0,203 | -0,51  |
| 10 | P46821 MAP1B_HUMAN  | E.KVSPSKS#PSLSPSPS#PLEKTPLGE.R    | S1256:S1265: | 3 | 6,1013 | 1     | -0,608 |
| 10 | Q8WUD4 CCD12_HUMAN  | R.LKGQEDSLASAVDAATEQK.T           |              | 2 | 6,0899 | 0,609 | -0,373 |
| 10 | P35527 K1C9_HUMAN   | R.HGVQELEIELQSQLSKK.A             |              | 3 | 6,0134 | 0,369 | -0,558 |
| 10 | Q8WXI9 P66B_HUMAN   | R.GRLTPSPDIIVLS#DNEASS#PR.S       | S129:S135:   | 3 | 5,6842 | 0,378 | -0,23  |
| 10 | P60709 ACTB_HUMAN   | D.LYANTVLSGGTTM*YPGIADR.M         |              | 3 | 5,5065 | 0,419 | -0,346 |
| 10 | Q5JT44 Q5JT44_HUMAN | E.GDNLET#PSQS#PQLFHDDTHSRIE.Q     | T124:S128:   | 3 | 5,3212 | 0,469 | -0,329 |
| 10 | Q14126 DSG2_HUMAN   | R.NYFTDKAAS#YTEEDE.N              | S782:        | 2 | 5,3018 | 0,464 | -0,393 |
| 10 | Q76L83 ASXL2_HUMAN  | E.GKQSDGQT#GSPQNSNSFFSSSVKVE.N    | T222:        | 3 | 5,2877 | 0,471 | -0,488 |
| 10 | Q14247 SRC8_HUMAN   | R.AKTQT#PPVSPAPQPTEERLPSS#PVYE.D  | T401:S418:   | 3 | 5,2012 | 1     | -0,555 |
| 10 | Q9UHB6 LIMA1_HUMAN  | E.VQQPVHPKPLSPDS#RASS#LSE.S       | S365:S369:   | 3 | 5,126  | 1     | -0,378 |
| 10 | Q92804 RBP56_HUMAN  | K.QSSYSQQPYNNQGQQNM*E.S           |              | 3 | 5,1148 | 0,534 | -0,241 |
| 10 | Q9UQ35 SRRM2_HUMAN  | E.KAGMSSNQSISS#PVLDAVPRT#PSRE.R   | S1404:T1413: | 3 | 5,1073 | 1     | -0,594 |
| 10 | P42166 LAP2A_HUMAN  | E.HSAMLVSTAAS#PSLIKE.T            | S310:        | 2 | 5,0646 | 0,559 | -0,402 |
| 10 | P46821 MAP1B_HUMAN  | E.GEKL#PKSDISPLT#PRE.S            | S1779:T1788: | 3 | 5,0183 | 0,303 | -0,272 |
| 10 | Q9UHR5 S30BP_HUMAN  | E.KGGLVSDAYGEDDFSR.L              |              | 2 | 5,0073 | 0,501 | -0,142 |
| 10 | P35611 ADDA_HUMAN   | E.AHRPPS#PTEAPTEASPEPAPDPAPVAEE.A | S669:        | 3 | 4,9178 | 0,432 | -0,25  |
| 10 | Q9P265 DIP2B_HUMAN  | R.QAALSAALQQSLQNAE.S              |              | 2 | 4,9122 | 0,469 | -0,668 |
| 10 | Q9BY44 EIF2A_HUMAN  | E.ARSDKS#PDLAPTAPQSTPR.N          | S506:        | 3 | 4,8365 | 0,346 | -0,253 |
| 10 | Q15464 SHB_HUMAN    | E.GQSVDS#DSESTVSPR.L              | S310:        | 2 | 4,8029 | 0,443 | -0,748 |
| 10 | Q92619 HMHA1_HUMAN  | R.KSS#FNVSDFVARPE.A               | S578:        | 2 | 4,7374 | 0,48  | -0,402 |
| 10 | Q8ND56 LS14A_HUMAN  | E.TSNSGTLPQSSAVGSAFTQDTR.S        |              | 3 | 4,7369 | 0,468 | -0,331 |
| 10 | Q14C86 GAPD1_HUMAN  | E.LPPAAAIGATSLVAAPHSSS#SSPSK.D    | S948:        | 3 | 4,7093 | 0,358 | -0,691 |
| 10 | Q8WVT3 TTC15_HUMAN  | E.SVLISDSPNS#EGDAGDLGR.V          | S78:         | 2 | 4,6983 | 0,484 | 0,372  |

|    |                    |                                  |                 |   |        |       |        |
|----|--------------------|----------------------------------|-----------------|---|--------|-------|--------|
| 10 | P51636 CAV2_HUMAN  | E.KADVQLFMDDSYS#HHS#GLE.Y        | S20:S23:        | 3 | 4,6941 | 0,195 | -0,596 |
| 10 | Q14498 RBM39_HUMAN | E.RTDASSASSFLDSDELE.R            |                 | 2 | 4,687  | 0,507 | -0,267 |
| 10 | Q9C0C2 TB182_HUMAN | R.RES#AAS#GLGGLLEEE.G            | S1473:S1476:    | 2 | 4,6643 | 0,548 | -0,291 |
| 10 | Q96JM3 ZN828_HUMAN | E.LRKPGPPLS#PEIRS#PAGS#PE.L      | S427:S432:S436: | 3 | 4,6539 | 0,322 | -0,472 |
| 10 | P19838 NFKB1_HUMAN | E.VIQAASS#PVKTTTQAHSPLSPASTR.Q   | S893:           | 3 | 4,6527 | 0,411 | -0,202 |
| 10 | P35527 K1C9_HUMAN  | R.GGSGGSYGGGGSGGGYGGGSGSR.G      |                 | 2 | 4,5981 | 0,391 | -0,34  |
| 10 | P42166 LAP2A_HUMAN | E.HSAM*LVSTAAS#PSLIKE.T          | S310:           | 2 | 4,5823 | 0,411 | -0,465 |
| 10 | P55786 PSA_HUMAN   | E.LDALDNSHPIEVSVGHPSEVDE.I       |                 | 3 | 4,5274 | 0,387 | -0,465 |
| 10 | Q8WXI9 P66B_HUMAN  | R.GRLT#PSPDIIVLS#DNEASSPR.S      | T120:S129:      | 3 | 4,4485 | 0,251 | -0,384 |
| 10 | Q92597 NDRG1_HUMAN | E.GAHLDITPNSGAAGNSAGPKS#M*E.V    | S389:           | 3 | 4,44   | 0,284 | -0,402 |
| 10 | Q92560 BAP1_HUMAN  | E.GGKGSS#PSIRPIQGSQSSS#PVEKE.V   | S583:S597:      | 3 | 4,4283 | 1     | -0,559 |
| 10 | Q13506 NAB1_HUMAN  | E.HSLSPADLGSPAS#PKESSE.A         | S183:           | 2 | 4,3906 | 0,54  | -0,247 |
| 10 | O00139 KIF2A_HUMAN | E.INKS#LLALKE.C                  | S484:           | 3 | 4,3759 | 0,173 | 0,454  |
| 10 | Q9UQ35 SRRM2_HUMAN | E.KAGM*SSNQSISS#PVLDAVPRT#PSRE.R | S1404:T1413:    | 3 | 4,3721 | 0,082 | -0,197 |
| 10 | O60499 STX10_HUMAN | E.ILAGKPAAQKSPS#DLLDASAVSATSR.Y  | S134:           | 3 | 4,342  | 0,34  | -0,208 |
| 10 | Q9H1B7 EAP1_HUMAN  | E.VGVGAGGKRPGS#VSS#TDQERE.L      | S334:S337:      | 3 | 4,3339 | 0,527 | -0,492 |
| 10 | Q6ZSR9 YJ005_HUMAN | R.DGPSSNSFHS#SEEE.G              | S42:            | 2 | 4,3284 | 0,328 | -0,582 |
| 10 | Q5W0V3 K1600_HUMAN | E.WLSSS#PPAT#PDHPKNDGKTE.V       | S549:T553:      | 3 | 4,315  | 0,306 | -0,551 |
| 10 | Q92615 LARP5_HUMAN | E.KFTSSQTSPTPPKPPS#PSFE.L        | S524:           | 3 | 4,3102 | 0,298 | -0,466 |
| 10 | Q9UK76 HN1_HUMAN   | R.RNS#SEASSGDFDLKGE.G            | S87:            | 2 | 4,3025 | 0,511 | -0,645 |
| 10 | Q9H8Y8 GORS2_HUMAN | E.DRVGDSTPVSEKPVSAAVDANASES#P.-  | S451:           | 3 | 4,2849 | 0,306 | -0,275 |
| 10 | O75531 BAF_HUMAN   | R.DFVAEPM*GEKPVGSLAGIGE.V        |                 | 2 | 4,2775 | 0,522 | -0,786 |
| 10 | P80723 BASP_HUMAN  | E.T#KSDGAPASDSKPGSSE.A           | T162:           | 2 | 4,2765 | 0,552 | -0,502 |
| 10 | Q8N201 INT1_HUMAN  | R.VAGDLGAGSSPHPSLTHEEDS#QTE.L    | S295:           | 3 | 4,2636 | 0,279 | -0,22  |
| 10 | Q7Z2T5 TRM1L_HUMAN | E.SHVQS#ASEDTVTERVE.M            | S707:           | 2 | 4,2233 | 0,502 | -0,263 |
| 10 | P25054 APC_HUMAN   | E.NRLNS#FIQVDAPDQKGTE.I          | S2724:          | 3 | 4,2107 | 0,196 | -0,346 |
| 10 | O43765 SGTA_HUMAN  | R.SRTPS#ASNDDQQE.-               | S305:           | 2 | 4,2071 | 0,459 | -0,564 |
| 10 | P25205 MCM3_HUMAN  | E.MPVVHT#PKTADS#QETKE.S          | T722:S728:      | 3 | 4,2051 | 0,26  | -0,438 |
| 10 | Q9UK76 HN1_HUMAN   | R.RNS#S#EASSGDFDLKGE.G           | S87:S88:        | 2 | 4,2008 | 0,519 | 0,124  |
| 10 | Q9NZL4 HPBP1_HUMAN | E.KLLQTCFSSPADDS#M*DR.-          | S359:           | 3 | 4,1986 | 0,327 | -0,62  |
| 10 | Q9ULT8 HECD1_HUMAN | E.GHDSLS#VGS#FEEDSKSE.F          | S2317:S2320:    | 2 | 4,1976 | 0,501 | -0,496 |
| 10 | P78347 GTF2I_HUMAN | R.KINSS#PNVNTTASGVE.D            | S831:           | 2 | 4,1957 | 0,568 | -0,647 |
| 10 | P13645 K1C10_HUMAN | K.GSLGGGFSSGGFSGGFSR.G           |                 | 2 | 4,1924 | 0,546 | -0,571 |

|    |                     |                                |                 |   |        |       |        |
|----|---------------------|--------------------------------|-----------------|---|--------|-------|--------|
| 10 | Q02880 TOP2B_HUMAN  | K.VKAS#PITNDGEDE.F             | S1400:          | 2 | 4,1697 | 0,449 | -0,168 |
| 10 | Q9NX63 CHCH3_HUMAN  | K.SQRYS#GAYGASVSDEE.L          | S50:            | 2 | 4,1607 | 0,534 | -0,752 |
| 10 | A8K1U6 A8K1U6_HUMAN | E.TGVFVINHFTCRS#.-             | S523:           | 2 | 4,1396 | 0,431 | -0,151 |
| 10 | P31943 HNRH1_HUMAN  | E.GRPSGEAFVELESEDE.V           |                 | 2 | 4,1317 | 0,399 | -0,488 |
| 10 | Q9NWW8 CS062_HUMAN  | R.AVGAQASVGSRS#EGEGE.A         | S49:            | 2 | 4,1293 | 0,468 | -0,292 |
| 10 | P39880 CUX1_HUMAN   | E.IQAGSQGQAGASDSPSAR.S         |                 | 3 | 4,1273 | 0,282 | -0,217 |
| 10 | P02545 LMNA_HUMAN   | R.SGAQASST#PLS#PTR.I           | T19:S22:        | 2 | 4,1047 | 1     | -0,562 |
| 10 | Q59HC3 Q59HC3_HUMAN | E.GDNM*ETPAS#S#PQLSHDDTHSRIE.H | S1113:S1114:    | 3 | 4,0847 | 0,369 | -0,271 |
| 10 | P35908 K22E_HUMAN   | R.FLEQQNQVLQTK.W               |                 | 2 | 4,0739 | 0,322 | -0,165 |
| 10 | Q6NZI2 PTRF_HUMAN   | E.AGDLRRGS#S#PDVHALLE.I        | S365:S366:      | 3 | 4,0674 | 0,259 | -0,562 |
| 10 | B2CI53 B2CI53_HUMAN | E.RNGILASPQS#APGNLDNSKSGE.I    | S263:           | 3 | 4,0672 | 0,237 | -0,479 |
| 10 | P20700 LMNB1_HUMAN  | E.NARLSS#EM*NTSTVNSAREE.L      | S279:           | 3 | 4,0631 | 0,362 | -0,334 |
| 10 | P07195 LDHB_HUMAN   | K.EKLIAPVAEEEEATVPNNK.I        |                 | 2 | 4,0588 | 0,488 | -0,5   |
| 10 | Q9NPI6 DCP1A_HUMAN  | E.RKASS#PSPLTIGT#PE.S          | S523:T531:      | 2 | 4,0533 | 0,429 | -0,43  |
| 10 | Q14247 SRC8_HUMAN   | R.AKTQT#PPVSPAPQPTEE.R         | T401:           | 2 | 4,0522 | 0,5   | -0,657 |
| 10 | Q96T23 RSF1_HUMAN   | E.IKLS#DDFDS#PVKGPLCK.S        | S382:S387:      | 3 | 4,0512 | 0,364 | -0,44  |
| 10 | Q9NTI5 PDS5B_HUMAN  | K.GRLDS#SEM*DHS#ENE.D          | S1176:S1182:    | 2 | 4,0337 | 0,461 | -0,479 |
| 10 | P49454 CENPF_HUMAN  | E.VKILNDDS#GLLHGE.L            | S1353:          | 2 | 4,0297 | 0,211 | -0,46  |
| 10 | P29558 RBMS1_HUMAN  | E.TSNDHS#PYTFQPNK.-            | S398:           | 2 | 4,0231 | 0,248 | -0,213 |
| 10 | P85037 FOXK1_HUMAN  | E.CLSREGS#PIPHDPE.F            | S445:           | 3 | 3,9962 | 0,218 | -0,219 |
| 10 | P05787 K2C8_HUMAN   | R.AFSSRS#YTSGPGSR.I            | S24:            | 3 | 3,9918 | 0,455 | 0,119  |
| 10 | P29692 EF1D_HUMAN   | K.SLAGSSGPGASSGT#SGDHGE.L      | T73:            | 2 | 3,9839 | 0,505 | -0,679 |
| 10 | P55036 PSMD4_HUMAN  | E.KVNVDIINFGEEE.V              |                 | 2 | 3,9788 | 0,45  | -0,648 |
| 10 | P62753 RS6_HUMAN    | R.RLS#S#LRAS#TSKSE.S           | S235:S236:S240: | 3 | 3,9646 | 0,248 | 0      |
| 10 | Q14247 SRC8_HUMAN   | R.AKTQT#PPVS#PAPQPTEE.R        | T401:S405:      | 2 | 3,9636 | 0,521 | -0,881 |
| 10 | Q6NZI2 PTRF_HUMAN   | R.RGS#S#PDVHALLE.I             | S365:S366:      | 2 | 3,9557 | 0,521 | 0,085  |
| 10 | P25205 MCM3_HUMAN   | E.M*PQVHT#PKTADSQE.T           | T722:           | 2 | 3,9524 | 0,499 | -0,66  |
| 10 | Q52LD0 Q52LD0_HUMAN | K.AGGS#PAS#YHGSTSPR.V          | S192:S195:      | 2 | 3,9503 | 0,504 | -0,537 |
| 10 | Q9UER7 DAXX_HUMAN   | K.DGDKS#PMSSLQISNE.K           | S495:           | 2 | 3,9501 | 0,273 | -0,361 |
| 10 | Q7L7X3 TAOK1_HUMAN  | E.GDHTVM*S#NSS#VIHLKPEEE.N     | S392:S395:      | 3 | 3,9453 | 0,204 | -0,48  |
| 10 | Q9UPS8 ANR26_HUMAN  | R.NVGMPVAHMES#PE.R             | S489:           | 2 | 3,9267 | 0,503 | -0,33  |
| 10 | P17275 JUNB_HUMAN   | R.SRDAT#PPVS#PINM*E.D          | T255:S259:      | 2 | 3,9113 | 0,549 | -0,361 |
| 10 | Q6KC79 NIPBL_HUMAN  | E.KAAMYDIISS#PSKD.S            | S350:           | 2 | 3,9056 | 0,569 | -0,532 |

|    |                     |                                    |              |   |        |       |        |
|----|---------------------|------------------------------------|--------------|---|--------|-------|--------|
| 10 | P25205 MCM3_HUMAN   | E.MPQVHT#PKTADSQE.T                | T722:        | 2 | 3,8892 | 0,416 | -0,296 |
| 10 | P29558 RBMS1_HUMAN  | E.TSNDHS#PYTFQPNK.-                | S398:        | 3 | 3,8759 | 0,373 | -0,213 |
| 10 | O60238 BNI3L_HUMAN  | R.GSSHCDSPSPQEDGQIMFDVE.M          | S95:         | 3 | 3,8651 | 0,417 | -0,457 |
| 10 | P35527 K1C9_HUMAN   | R.SGGGGGGGLGSGGSIR.S               |              | 2 | 3,8527 | 0,548 | -0,297 |
| 10 | O75943 RAD17_HUMAN  | E.HGM*IDPDS#GDEAQLNGGHSAAE.S       | S613:        | 3 | 3,8506 | 0,25  | -0,542 |
| 10 | P21333 FLNA_HUMAN   | E.TRGAGTGGLGLAVEGPSE.A             |              | 2 | 3,8477 | 0,512 | -0,449 |
| 10 | P05023 AT1A1_HUMAN  | R.SPFTNENPLETR.N                   |              | 2 | 3,8368 | 0,44  | -0,321 |
| 10 | P04264 K2C1_HUMAN   | R.SLDLSIIAEVK.A                    |              | 2 | 3,8352 | 0,408 | -0,468 |
| 10 | Q92576 PHF3_HUMAN   | E.NNLQDNQTSNSSPCR.S                |              | 2 | 3,8178 | 0,449 | -0,563 |
| 10 | P46821 MAP1B_HUMAN  | E.GEKLSPKSDIS#PLTPRE.S             | S1779:S1785: | 3 | 3,8067 | 0,314 | -0,727 |
| 10 | Q8WUD4 CCD12_HUMAN  | R.LKGQEDSLASAVDAATEQK.T            |              | 3 | 3,7962 | 0,18  | -0,56  |
| 10 | Q8NAP3 ZBT38_HUMAN  | E.VNQERS#PQPAVLTR.S                | S297:        | 2 | 3,7847 | 0,451 | -0,489 |
| 10 | Q02952 AKA12_HUMAN  | E.LQTQAHVIKADS#QD.A                | S1587:       | 2 | 3,7692 | 0,391 | -0,299 |
| 10 | Q6NZI2 PTRF_HUMAN   | D.LRRGS#S#PDVHALLE.I               | S365:S366:   | 3 | 3,7683 | 0,246 | -0,535 |
| 10 | B2RDY9 B2RDY9_HUMAN | E.SAS#RSALFAQINQGE.S               | S253:        | 2 | 3,7676 | 0,528 | -0,294 |
| 10 | Q92597 NDRG1_HUMAN  | E.GAHLDITPNSGAAGNSAGPK.S           |              | 3 | 3,7633 | 0,176 | -0,498 |
| 10 | Q99873 ANM1_HUMAN   | K.DVAIKEPLVDVDPK.Q                 |              | 3 | 3,7633 | 0,324 | -0,335 |
| 10 | P60709 ACTB_HUMAN   | D.LYANTVLSGGTTM*YPGIADRM*QKE.I     |              | 3 | 3,7505 | 1     | -0,276 |
| 10 | Q9UER7 DAXX_HUMAN   | K.DGDKS#PM*SSLQISNE.K              | S495:        | 2 | 3,7504 | 0,351 | -0,286 |
| 10 | O60238 BNI3L_HUMAN  | R.GSSHCDSPSPQEDGQIM*FDVE.M         | S97:         | 3 | 3,7498 | 0,288 | -0,454 |
| 10 | Q9BV73 CP250_HUMAN  | E.KAQDLALSQAQTK.A                  |              | 2 | 3,7491 | 0,329 | -0,616 |
| 10 | O60271 JIP4_HUMAN   | R.SAS#QSSLDKLDQE.L                 | S730:        | 2 | 3,748  | 0,358 | -0,246 |
| 10 | P50443 S26A2_HUMAN  | E.LQRESS#TDFKQFE.T                 | S36:         | 3 | 3,74   | 0,312 | -0,432 |
| 10 | Q92785 REQU_HUMAN   | E.GEDKEDSQPPT#PVSQR.S              | T248:        | 2 | 3,737  | 0,287 | -0,594 |
| 10 | Q12888 TP53B_HUMAN  | R.GNLLHFPSS#QGEEE.K                | S1068:       | 2 | 3,7303 | 0,367 | -0,451 |
| 10 | P78347 GTF2I_HUMAN  | R.KINSS#PNVNTTASGVED.L             | S831:        | 2 | 3,7279 | 0,558 | -0,606 |
| 10 | P78347 GTF2I_HUMAN  | E.STSSKS#PPRKINSS#PNVNTTASGVE.D    | S823:S831:   | 3 | 3,7273 | 0,132 | -0,609 |
| 10 | Q9NZL4 HPBP1_HUMAN  | E.KLLQTCFSSPADDS#MDR.-             | S359:        | 3 | 3,7129 | 0,172 | -0,892 |
| 10 | P49023 PAXI_HUMAN   | K.TSSVSNPQDSVGS#PCSR.V             | S106:        | 2 | 3,7022 | 0,365 | -0,727 |
| 10 | Q9UQ35 SRRM2_HUMAN  | E.KSATRPS#PS#PERSSTGPEPPAPTPLLAE.R | S351:S353:   | 3 | 3,6975 | 1     | -0,849 |
| 10 | O60264 SMCA5_HUMAN  | E.IFDDAS#PGKQKE.I                  | S66:         | 2 | 3,6947 | 0,376 | -0,69  |
| 10 | Q00613 HSF1_HUMAN   | R.VKEEPSP#PPQS#PRVEE.A             | S303:S307:   | 2 | 3,6839 | 0,261 | -0,435 |
| 10 | P23443 KS6B1_HUMAN  | E.SIHGTVTHT#FCGTIE.Y               | T252:        | 2 | 3,6665 | 0,515 | -0,46  |



|    |                    |                            |            |   |        |       |        |
|----|--------------------|----------------------------|------------|---|--------|-------|--------|
| 10 | Q9H307 PININ_HUMAN | K.SLS#PGKENVSALDME.K       | S443:      | 2 | 3,6609 | 0,399 | -0,295 |
| 10 | Q9H307 PININ_HUMAN | E.CKSLS#PGKENVSALDM*E.K    | S443:      | 2 | 3,641  | 0,404 | -0,373 |
| 10 | O60271 JIP4_HUMAN  | E.TRNVS#TGS#AENEEKSE.V     | S329:S332: | 2 | 3,6391 | 0,496 | -0,579 |
| 10 | Q9BVS4 RIOK2_HUMAN | R.SSGDPEQIKEDS#LSEE.S      | S380:      | 2 | 3,6384 | 0,405 | -0,467 |
| 10 | Q08J23 NSUN2_HUMAN | E.GKPTDPSKLES#PSFTGTGDTE.I | S473:      | 3 | 3,6362 | 0,163 | -0,082 |
| 10 | Q96RU3 FNBP1_HUMAN | R.TVS#DNS#LSNSRGE.G        | S296:S299: | 2 | 3,6276 | 0,407 | -0,48  |
| 10 | Q92616 GCN1L_HUMAN | E.NKAYS#FKEQIIE.L          | S800:      | 2 | 3,6246 | 0,265 | -0,63  |
| 10 | P60709 ACTB_HUMAN  | D.LYANTVLSGGTTMYPGIADR.M   |            | 3 | 3,6111 | 0,223 | -0,61  |
| 10 | Q9UNE7 STUB1_HUMAN | R.LGAGGGS#PEKSPSAQE.L      | S19:       | 2 | 3,6099 | 0,409 | -0,157 |
| 10 | Q14247 SRC8_HUMAN  | R.AKTQT#PPVSPAPQPTTEER.L   | T401:      | 3 | 3,5982 | 0,274 | -0,272 |
| 10 | P80723 BASP_HUMAN  | E.TKS#DGAPASDSKPGSSE.A     | S164:      | 3 | 3,5886 | 0,221 | -0,538 |
| 10 | Q9Y490 TLN1_HUMAN  | E.KM*VGGIAQIIAAQEE.M       |            | 2 | 3,5864 | 0,346 | -0,233 |
| 10 | Q15742 NAB2_HUMAN  | E.KLSPLPGGPGAGDPR.I        |            | 3 | 3,5841 | 0,402 | 0,064  |
| 10 | P55209 NP1L1_HUMAN | E.FHFEPNEYFTNE.V           |            | 2 | 3,583  | 0,314 | -0,388 |
| 10 | Q9Y2J4 AMOL2_HUMAN | R.TLLAIQQQALR.G            |            | 2 | 3,5728 | 0,358 | -0,486 |
| 10 | Q9H869 YYAP1_HUMAN | E.HS#PGPPPVDKQCQE.G        | S724:      | 2 | 3,5708 | 0,452 | -0,442 |
| 10 | Q9NUG6 PDRG1_HUMAN | E.LKGFNLNPLNQDE.L          |            | 2 | 3,564  | 0,338 | -0,325 |
| 10 | Q99590 SFRIP_HUMAN | E.IIQTVDRQSVKS#PE.V        | S314:      | 2 | 3,5588 | 0,326 | -0,436 |
| 10 | P35579 MYH9_HUMAN  | E.AKIAQLEEQLDNE.T          |            | 2 | 3,5577 | 0,307 | -0,569 |
| 10 | P39880 CUX1_HUMAN  | E.IQAGSQGQAGASDPSAR.S      |            | 2 | 3,5541 | 0,459 | -0,578 |
| 10 | O14617 AP3D1_HUMAN | R.ALDIDLKPLADSE.K          |            | 2 | 3,5438 | 0,456 | -0,483 |
| 10 | O60566 BUB1B_HUMAN | E.DQQTACGTIYSQTLSIK.K      |            | 2 | 3,5212 | 0,357 | -0,574 |
| 10 | Q14493 SLBP_HUMAN  | R.HM*DSQVEDEFDLE.A         |            | 2 | 3,5178 | 0,394 | -0,455 |
| 10 | Q8N6H7 ARFG2_HUMAN | E.HGPNTDLLGTS#PK.A         | S201:      | 2 | 3,5156 | 0,468 | -0,258 |
| 10 | Q14978 NOLC1_HUMAN | R.GGSISVQVNSIKFDS#E.-      | S698:      | 2 | 3,5123 | 0,476 | -0,349 |
| 10 | Q8TE77 SSH3_HUMAN  | E.LHGDQTDGFGGSQS#PQKQEE.Q  | S87:       | 3 | 3,5009 | 0,153 | -0,717 |
| 10 | Q6NZI2 PTRF_HUMAN  | E.SDAVLVDKS#DS#D.-         | S387:S389: | 2 | 3,5007 | 0,267 | -0,346 |
| 10 | Q96D46 NMD3_HUMAN  | E.STDRS#PGHILCCE.C         | S11:       | 2 | 3,4977 | 0,498 | -0,303 |
| 10 | P41236 IPP2_HUMAN  | E.M*NILATYHPADKDYGLM*K.I   |            | 3 | 3,4949 | 0,255 | -0,519 |
| 10 | Q8TCS8 PNPT1_HUMAN | E.ICKDDQEQLE.F             |            | 2 | 3,4898 | 0,174 | -0,694 |
| 10 | P56211 ARP19_HUMAN | E.DKVTS#PEKAEE.A           | S23:       | 2 | 3,4874 | 0,317 | -0,279 |
| 10 | Q14692 BMS1_HUMAN  | K.AGLS#PANCQSDRVNLE.K      | S552:      | 2 | 3,4802 | 0,352 | -0,472 |
| 10 | O60664 M6PBP_HUMAN | R.GLDKLEENLPILQQPTEK.V     |            | 3 | 3,4787 | 0,135 | -0,354 |

|    |                    |                                 |            |   |        |       |        |
|----|--------------------|---------------------------------|------------|---|--------|-------|--------|
| 10 | Q01814 AT2B2_HUMAN | K.SATSSSPGS#PIHSLE.T            | S1234:     | 2 | 3,4783 | 1     | -0,476 |
| 10 | P35527 K1C9_HUMAN  | R.HGVQELEIELQSQLSK.K            |            | 3 | 3,4738 | 0,197 | -0,398 |
| 10 | P04264 K2C1_HUMAN  | K.SKAEAESLYQSK.Y                |            | 2 | 3,4713 | 0,434 | -0,364 |
| 10 | O15355 PPM1G_HUMAN | K.AYTGFS#NSERGTE.A              | S216:      | 2 | 3,4629 | 0,439 | -0,231 |
| 10 | Q9Y6M5 ZNT1_HUMAN  | R.VKSTRPGS#SDINVPAGEQGPQEE.T    | S172:      | 3 | 3,4602 | 0,268 | -0,213 |
| 10 | P52597 HNRPF_HUMAN | R.M*RPGAYSTGYGGYEE.Y            |            | 2 | 3,4495 | 0,477 | -0,443 |
| 10 | P53004 BIEA_HUMAN  | K.FGVVVVGVGR.A                  |            | 2 | 3,4478 | 0,411 | -0,308 |
| 10 | Q7L7X3 TAOK1_HUMAN | E.GDHTVMS#NSS#VIHLKPEEE.N       | S392:S395: | 3 | 3,4455 | 0,264 | -0,645 |
| 10 | Q15723 ELF2_HUMAN  | D.S#GGTILELSS#NGVENQEESK.V      | S8:S17:    | 3 | 3,4419 | 0,123 | 0,232  |
| 10 | O95202 LETM1_HUMAN | E.SKLTSLAAALDE.N                |            | 2 | 3,4395 | 0,474 | -0,601 |
| 10 | P35908 K22E_HUMAN  | R.NLDLDSIIAEVK.A                |            | 2 | 3,4386 | 0,381 | -0,642 |
| 10 | Q8WXI9 P66B_HUMAN  | R.GRLTPSPDIIVLS#DNEASS#PRSSSR.M | S129:S135: | 3 | 3,4303 | 0,141 | -0,457 |
| 10 | Q6WCQ1 MRIP_HUMAN  | E.TNAVGPS#PSSDTR.Q              | S325:      | 2 | 3,4227 | 0,337 | -0,713 |
| 10 | Q08J23 NSUN2_HUMAN | D.AEEANS#PDVTAGCDPAGVHPPR.-     | S751:      | 3 | 3,4202 | 0,183 | -0,629 |
| 10 | Q5TAQ9 WD42A_HUMAN | E.ASDLSLSLTGDDGGPNR.T           |            | 2 | 3,403  | 0,456 | -0,51  |
| 10 | O75531 BAF_HUMAN   | R.DFVAEPMGEKPVGSLAGIGE.V        |            | 2 | 3,4008 | 0,505 | -0,853 |
| 10 | P38398 BRCA1_HUMAN | E.NFEEHSM*#PERE.M               | S1009:     | 2 | 3,4004 | 0,381 | -0,461 |
| 10 | Q9NX63 CHCH3_HUMAN | E.SSPSGSKSQRY#GAYGASVSDEE.L     | S50:       | 3 | 3,3959 | 0,222 | -0,909 |
| 10 | Q99700 ATX2_HUMAN  | E.NIKPNETS#PSFSKAE.N            | S771:      | 3 | 3,3888 | 0,262 | -0,212 |
| 10 | Q96S66 CLCC1_HUMAN | R.DVDLRFQTGNKS#PE.V             | S438:      | 2 | 3,371  | 0,348 | -0,507 |
| 10 | Q5TAX3 ZCH11_HUMAN | E.SSHQSVCTDTSATSCNCK.A          |            | 3 | 3,3595 | 0,148 | -0,27  |
| 10 | Q58FF8 H90B2_HUMAN | E.S#KEQVANS AFVE.Q              | S266:      | 2 | 3,3566 | 0,36  | -0,439 |
| 10 | Q99700 ATX2_HUMAN  | E.NIKPNETS#PSFSKAE.N            | S771:      | 2 | 3,3553 | 0,353 | -0,565 |
| 10 | P42566 EP15_HUMAN  | K.AQLEPLQQHLQDS#QQE.I           | S485:      | 2 | 3,352  | 0,349 | -0,248 |
| 10 | Q8WWQ0 PHIP_HUMAN  | R.LSRGS#ISSTSE.V                | S674:      | 2 | 3,3507 | 0,338 | -0,608 |
| 10 | Q58FF8 H90B2_HUMAN | E.SKEQVANS AFVE.Q               |            | 2 | 3,3464 | 0,384 | -0,466 |
| 10 | Q01082 SPTB2_HUMAN | K.AKTALPAQSAATL PAR.T           |            | 3 | 3,3369 | 0,188 | -0,117 |
| 10 | P42166 LAP2A_HUMAN | E.SRSSTPLPTISSAE.N              |            | 2 | 3,3336 | 0,491 | -0,08  |
| 10 | O75694 NU155_HUMAN | K.KPGPPVLSSDPNMLSNEE.A          |            | 2 | 3,3322 | 0,334 | -0,319 |
| 10 | Q69YH5 CDCA2_HUMAN | E.ERVASDS#PKPALTLQQGQE.F        | S727:      | 3 | 3,3244 | 0,159 | -0,343 |
| 10 | P67775 PP2AA_HUMAN | E.SRQITQVYGFYDE.C               |            | 2 | 3,322  | 0,425 | -0,38  |
| 10 | O75152 ZC11A_HUMAN | R.RLS#SAS#TGKPLSVEDDFE.K        | S758:S761: | 3 | 3,3147 | 0,233 | -0,417 |
| 10 | Q9UNE7 STUB1_HUMAN | E.GGARLGAGGGS#PEKSPSAQE.L       | S19:       | 2 | 3,3134 | 0,36  | -0,58  |

|    |                     |                            |              |   |        |       |        |
|----|---------------------|----------------------------|--------------|---|--------|-------|--------|
| 10 | P55327 TPD52_HUMAN  | E.DVKNS#PTFKSFEE.K         | S131:        | 2 | 3,3134 | 0,145 | -0,455 |
| 10 | Q5JYT3 Q5JYT3_HUMAN | R.DGPQTSNSS#M*KLQNaN.-     | S1187:       | 2 | 3,3103 | 0,432 | -0,546 |
| 10 | O00139 KIF2A_HUMAN  | E.INKS#LLALKE.C            | S484:        | 2 | 3,2976 | 0,324 | -0,202 |
| 10 | Q14974 IMB1_HUMAN   | E.VKNYVLQTLGTE.T           |              | 2 | 3,2856 | 0,405 | -0,268 |
| 10 | P04264 K2C1_HUMAN   | K.WELLQQVDTSTR.T           |              | 2 | 3,2827 | 0,486 | -0,413 |
| 10 | Q8TEA8 DTD1_HUMAN   | E.DRSASS#GAEGDVSSEREP.-    | S197:        | 2 | 3,2799 | 0,445 | -0,637 |
| 10 | Q02952 AKA12_HUMAN  | E.KGLAEVQQDGEAEE.G         |              | 2 | 3,2794 | 0,315 | -0,568 |
| 10 | Q58FG0 HS905_HUMAN  | E.TKDQVANS AFVE.C          |              | 2 | 3,276  | 0,4   | -0,093 |
| 10 | P12270 TPR_HUMAN    | E.ASDQVSDDTVEM*PLPK.K      |              | 2 | 3,2727 | 0,51  | -0,558 |
| 10 | P46821 MAP1B_HUMAN  | E.KSGKQGS#PDQVS#PVSE.M     | S1438:S1443: | 2 | 3,2718 | 0,298 | -0,545 |
| 10 | Q9C0C9 UBE2O_HUMAN  | E.KAQALPNGVPK.A            |              | 2 | 3,2692 | 0,354 | -0,435 |
| 10 | P37802 TAGL2_HUMAN  | E.GKNVIGLQM*GTNR.G         |              | 2 | 3,2482 | 0,387 | -0,695 |
| 10 | Q96I24 FUBP3_HUMAN  | R.IQFKPDDGIS#PE.R          | S296:        | 2 | 3,2461 | 0,308 | -0,685 |
| 10 | Q9UER7 DAXX_HUMAN   | E.AAAGKDGDKS#PM*SSLQISNE.K | S495:        | 3 | 3,2399 | 0,31  | -0,435 |
| 10 | Q14980 NUMA1_HUMAN  | E.KQAAS#PLEPKELEE.L        | S271:        | 2 | 3,2394 | 0,445 | -0,37  |
| 10 | Q96TA1 NIBL1_HUMAN  | E.ASS#PPASPLQHLLPGK.A      | S679:        | 2 | 3,2368 | 0,308 | -0,508 |
| 10 | Q92785 REQU_HUMAN   | E.GEDKEDS#QPPTPVSR.S       | S244:        | 2 | 3,236  | 0,308 | -0,264 |
| 10 | Q9NZL4 HPBP1_HUMAN  | E.KLLQTCFSS#PADDSM*DR.-    | S354:        | 3 | 3,231  | 0,163 | -0,443 |
| 10 | O14530 TXND9_HUMAN  | E.IQKLDQM*DEDE.L           |              | 2 | 3,2277 | 0,206 | -0,707 |
| 10 | Q9HCG8 NCM_HUMAN    | R.NSS#PEDRYEEQE.R          | S28:         | 2 | 3,2239 | 0,337 | -0,546 |
| 10 | Q9UPN4 AZI1_HUMAN   | E.ATGPGGSQAINNLR.R         |              | 2 | 3,212  | 0,492 | -0,36  |
| 10 | Q6S8J3 A26CA_HUMAN  | E.KLCYVALDFEQE.M           |              | 2 | 3,2096 | 0,38  | -0,403 |
| 10 | Q9H6K1 CF106_HUMAN  | E.GNFPFAS#PQK.N            | S215:        | 2 | 3,207  | 0,369 | -0,569 |
| 10 | P49321 NASP_HUMAN   | E.NKS#LQENEEEE.I           | S503:        | 2 | 3,2002 | 0,361 | -0,512 |
| 10 | Q8N6T3 ARFG1_HUMAN  | E.GATKFGSQAS#QKASE.L       | S237:        | 3 | 3,1969 | 0,28  | 0,232  |
| 10 | P35527 K1C9_HUMAN   | R.FSSSSGYGGGSSR.V          |              | 2 | 3,1945 | 0,463 | -0,494 |
| 10 | Q15652 JHD2C_HUMAN  | E.TTKS#PLIIDKNE.H          | S701:        | 2 | 3,192  | 0,436 | -0,509 |
| 10 | P35749 MYH11_HUMAN  | E.MKTQLEEELEDE.L           |              | 2 | 3,1878 | 0,201 | -0,626 |
| 10 | O43583 DENR_HUMAN   | E.FAKLTVENS#PKQE.A         | S73:         | 2 | 3,1839 | 0,278 | -0,388 |
| 10 | P04075 ALDOA_HUMAN  | K.RLQS#IGTENTEE.N          | S46:         | 2 | 3,1791 | 0,367 | -0,419 |
| 10 | P05783 K1C18_HUMAN  | E.LDKYWSQQIEE.S            |              | 2 | 3,1745 | 0,25  | -0,339 |
| 10 | Q96N67 DOCK7_HUMAN  | R.SAVRPASLNLNR.S           |              | 3 | 3,1715 | 0,256 | 0,07   |
| 10 | Q8TBEO BAHD1_HUMAN  | E.GKLS#PVAAPHEE.G          | S405:        | 2 | 3,1712 | 0,391 | -0,557 |

|    |                     |                            |            |   |        |       |        |
|----|---------------------|----------------------------|------------|---|--------|-------|--------|
| 10 | Q8IVF2 AHNK2_HUMAN  | R.DAHDVS#PTSTDTE.A         | S294:      | 2 | 3,1597 | 0,373 | -0,335 |
| 10 | P84098 RL19_HUMAN   | E.IIKTLS#KEEE.T            | S189:      | 2 | 3,1515 | 0,267 | -0,672 |
| 10 | O94986 CE152_HUMAN  | K.LGIHPSDS#EGELNIE.L       | S404:      | 2 | 3,1509 | 0,28  | -0,433 |
| 10 | P04264 K2C1_HUMAN   | R.TNAENEFVTIK.K            |            | 2 | 3,1477 | 0,298 | -0,771 |
| 10 | O43166 SI1L1_HUMAN  | E.LGKSS#DLEDNRSE.D         | S311:      | 2 | 3,1423 | 0,403 | -1,037 |
| 10 | O15231 ZN185_HUMAN  | R.RES#CGSSVLTDFE.G         | S233:      | 2 | 3,1398 | 0,351 | -0,311 |
| 10 | Q9H307 PININ_HUMAN  | E.CKSLS#PGKENVSALDM*E.K    | S443:      | 3 | 3,1389 | 0,208 | -0,373 |
| 10 | Q9H869 YYAP1_HUMAN  | E.HS#PGPPPVDKQCQE.G        | S724:      | 3 | 3,1368 | 0,101 | -0,11  |
| 10 | Q7Z309 F122B_HUMAN  | R.SSS#APLIHGLSD.L          | S25:       | 2 | 3,1347 | 0,453 | -0,097 |
| 10 | P12004 PCNA_HUMAN   | E.MKLMDLVE.Q               |            | 2 | 3,134  | 0,224 | -0,446 |
| 10 | Q15648 MED1_HUMAN   | E.KSYQNS#PSSDDGIRPLPE.Y    | S1479:     | 3 | 3,1331 | 0,267 | -1,06  |
| 10 | Q08J23 NSUN2_HUMAN  | E.GKPTDPSKLESPS#FTGTGDTE.I | S475:      | 3 | 3,1184 | 0,166 | -0,41  |
| 10 | Q6P996 PDXD1_HUMAN  | E.GHPGAPS#PQHTDQTE.A       | S757:      | 2 | 3,1135 | 0,345 | -0,596 |
| 10 | P25205 MCM3_HUMAN   | E.M*PQVHT#PKTADS#QETKE.S   | T722:S728: | 3 | 3,1131 | 0,103 | -0,261 |
| 10 | Q9UPS8 ANR26_HUMAN  | R.NVGMPVAHM*ES#PE.R        | S489:      | 2 | 3,1066 | 0,246 | -0,408 |
| 10 | P18858 DNL1_HUMAN   | E.QATTSAQVACLVR.K          |            | 2 | 3,102  | 0,474 | -0,664 |
| 10 | B2RDY9 B2RDY9_HUMAN | R.SALFAQINQGE.S            |            | 2 | 3,1002 | 0,236 | -0,621 |
| 10 | B2RDY9 B2RDY9_HUMAN | E.SASRSALFAQINQGE.S        |            | 2 | 3,0994 | 0,349 | -0,464 |
| 10 | Q6ZRV2 FA83H_HUMAN  | R.KGS#PTPGFSTR.R           | S881:      | 2 | 3,0991 | 0,255 | -0,301 |
| 10 | P26368 U2AF2_HUMAN  | K.SIEIPRPVDGVEVPGCGK.I     |            | 3 | 3,0973 | 0,205 | 0      |
| 10 | Q8TEA8 DTD1_HUMAN   | R.SASS#GAEGDVSSEREP.-      | S197:      | 2 | 3,0955 | 0,225 | -0,297 |
| 10 | Q14676 MDC1_HUMAN   | E.GKAPQAVPLEK.S            |            | 2 | 3,0953 | 0,346 | -0,536 |
| 10 | P27694 RFA1_HUMAN   | E.GQALDGVISDLK.S           |            | 2 | 3,0924 | 0,35  | -0,843 |
| 10 | Q02535 ID3_HUMAN    | -.M*KALS#PVRGCYE.A         | S5:        | 2 | 3,0915 | 0,133 | -0,324 |
| 10 | P04406 G3P_HUMAN    | E.FGYS#NRVVD.L             | S321:      | 2 | 3,0904 | 0,429 | -0,429 |
| 10 | P52948 NUP98_HUMAN  | E.RFS#FLSKPVDE.N           | S635:      | 3 | 3,0873 | 0,129 | 0,065  |
| 10 | P0C1Z6 TFPT_HUMAN   | R.GPDKLLPYPTLASPAS#D.-     | S252:      | 2 | 3,0814 | 0,386 | -0,268 |
| 10 | P51003 PAPOA_HUMAN  | R.VVS#STRLVNPPPR.S         | S617:      | 3 | 3,0798 | 0,281 | 0,122  |
| 10 | Q969R5 LMBL2_HUMAN  | E.HLDVASPKAS#SPELVSVE.N    | S688:      | 2 | 3,0796 | 0,576 | -0,339 |
| 10 | P08133 ANXA6_HUMAN  | E.IKDAISGIGTDE.K           |            | 2 | 3,0739 | 0,415 | -0,5   |
| 10 | Q8N6T3 ARFG1_HUMAN  | E.GATKFGSQAS#QKASE.L       | S237:      | 2 | 3,0689 | 0,364 | 0      |
| 10 | Q96S82 UBL7_HUMAN   | E.GLS#DDEDDFHPNTR.S        | S230:      | 3 | 3,0645 | 0,168 | 0      |
| 10 | Q8N6H7 ARFG2_HUMAN  | E.HGPNTDLLGTS#PKASLE.L     | S201:      | 2 | 3,056  | 0,48  | -0,47  |

|    |                    |                                    |              |   |        |       |        |
|----|--------------------|------------------------------------|--------------|---|--------|-------|--------|
| 10 | O95831 AIFM1_HUMAN | R.SLS#AIDRAGAE.V                   | S268:        | 2 | 3,055  | 0,249 | -0,417 |
| 10 | P04264 K2C1_HUMAN  | R.LRSEIDNVKK.Q                     |              | 3 | 3,0541 | 0,106 | 0,38   |
| 10 | P39687 AN32A_HUMAN | E.GKLEGLTDEFEE.L                   |              | 2 | 3,0527 | 0,31  | -0,536 |
| 10 | O75694 NU155_HUMAN | K.AAPQS#PSVPPKPGPPVLSSDPNM*LSNEE.A | S992:        | 3 | 3,0523 | 0,281 | -0,37  |
| 10 | P55327 TPD52_HUMAN | E.DVKNS#PTFKSFE.E                  | S131:        | 2 | 3,0485 | 0,221 | -0,33  |
| 10 | Q9Y3A4 ZG14_HUMAN  | E.LQEKPDLAES#PKE.S                 | S99:         | 2 | 3,0481 | 0,28  | -0,546 |
| 10 | Q9C0C2 TB182_HUMAN | K.AVARRES#AAS#GLGGLLEEE.G          | S1473:S1476: | 3 | 3,047  | 0,166 | -0,441 |
| 10 | Q00610 CLH1_HUMAN  | E.KIVLDNS#VFSE.H                   | S1016:       | 2 | 3,0452 | 0,299 | -0,458 |
| 10 | Q6KC79 NIPBL_HUMAN | E.KAAM*YDISS#PSKD.S                | S350:        | 2 | 3,0434 | 0,312 | -0,226 |
| 10 | O43166 SI1L1_HUMAN | E.NHRPLS#AAS#NSDQLE.D              | S1708:S1711: | 2 | 3,0416 | 0,473 | -0,271 |
| 10 | Q71U36 TBA1A_HUMAN | E.HSDCAF*VDNEAIYD.I                |              | 2 | 3,0411 | 0,392 | -0,541 |
| 10 | Q96ST2 IWS1_HUMAN  | E.TRKLPGS#DS#ENEE.L                | S131:S133:   | 2 | 3,0407 | 0,327 | -0,903 |
| 10 | Q9NW82 WDR70_HUMAN | E.DSPYWVSPAYSK.T                   |              | 2 | 3,0388 | 0,567 | -0,436 |
| 10 | P30086 PEBP1_HUMAN | E.LRAPVAGTCYQAE.W                  |              | 2 | 3,0356 | 0,409 | -0,425 |
| 10 | Q9BT25 NYS48_HUMAN | R.SFAQVLELSAEASK.E                 |              | 2 | 3,0347 | 0,376 | -0,412 |
| 10 | P08133 ANXA6_HUMAN | E.GGENLDQARE.D                     |              | 2 | 3,0332 | 0,209 | -0,336 |
| 10 | P04264 K2C1_HUMAN  | R.TNAENEFVTIKK.D                   |              | 3 | 3,033  | 0,317 | 0,131  |
| 10 | Q8TEA8 DTD1_HUMAN  | E.DRSAS#SGAEGDVSSEREP.-            | S196:        | 3 | 3,0325 | 0,251 | -0,286 |
| 10 | Q92804 RBP56_HUMAN | K.QSSYSQQPYNNQGGQQNME.S            |              | 3 | 3,0305 | 0,135 | -0,324 |
| 10 | P85037 FOXK1_HUMAN | E.CLSREGS#PIPHDPE.F                | S445:        | 2 | 3,0287 | 0,349 | -0,437 |
| 10 | O00231 PSD11_HUMAN | R.AQS#LLSTDRE.A                    | S14:         | 2 | 3,0273 | 0,329 | -0,305 |
| 10 | P50443 S26A2_HUMAN | E.LQRESS#TDFKQFE.T                 | S36:         | 2 | 3,0268 | 0,31  | -0,792 |
| 10 | Q14694 UBP10_HUMAN | E.NDGVSGGLGQRE.R                   |              | 2 | 3,0253 | 0,396 | -0,513 |
| 10 | Q9UKV3 ACINU_HUMAN | E.VATPPVQLQVCEPK.E                 |              | 3 | 3,0169 | 0,218 | -0,22  |
| 10 | P04264 K2C1_HUMAN  | K.SLNNQFASFIDKVR.F                 |              | 2 | 3,0154 | 0,327 | -0,372 |
| 10 | P49321 NASP_HUMAN  | E.DKVQJAANEE.T                     |              | 2 | 3,0124 | 0,317 | -0,328 |
| 10 | P62753 RS6_HUMAN   | R.LSS#LRASTKSE.S                   | S236:        | 2 | 3,0057 | 0,434 | -0,816 |
| 10 | Q53EZ4 CEP55_HUMAN | E.KVAAS#PKSPTAALNE.S               | S425:        | 2 | 3,0057 | 0,358 | -0,468 |
| 10 | Q02790 FKBP4_HUMAN | E.EQKSNTAGSQSQVETEA.-              |              | 2 | 2,9974 | 0,4   | -0,476 |
| 10 | P04920 B3A2_HUMAN  | E.RTS#PSSAPLPHQE.A                 | S170:        | 2 | 2,9954 | 0,345 | -0,231 |
| 10 | Q9NWH9 SLTM_HUMAN  | E.VSKPLPS#EGS#LAEADHTAHEE.M        | S214:S217:   | 3 | 2,9946 | 0,391 | -0,464 |
| 10 | P04264 K2C1_HUMAN  | K.SLNNQFASFIDK.V                   |              | 2 | 2,9932 | 0,428 | -0,529 |
| 10 | O75531 BAF_HUMAN   | R.DFVAEPM*GEKPVGSLAGIGE.V          |              | 3 | 2,9864 | 0,257 | -0,272 |

|    |                    |                         |              |   |        |       |        |
|----|--------------------|-------------------------|--------------|---|--------|-------|--------|
| 10 | O75947 ATP5H_HUMAN | E.DKYTAQVDAEE.K         |              | 2 | 2,9851 | 0,367 | -0,769 |
| 10 | P39023 RL3_HUMAN   | E.RLEQQVPVNQVFGQDE.M    |              | 2 | 2,9806 | 0,482 | -0,259 |
| 10 | Q92616 GCN1L_HUMAN | K.AYS#FKEQIIE.L         | S800:        | 2 | 2,9759 | 0,282 | -0,373 |
| 10 | O75937 DNJC8_HUMAN | E.GKPTIVEEDDPE.L        |              | 2 | 2,9676 | 0,413 | 0,092  |
| 10 | Q9UGU0 TCF20_HUMAN | R.LNAS#PAAREE.A         | S574:        | 2 | 2,9646 | 0,231 | -0,322 |
| 10 | P13645 K1C10_HUMAN | R.SLLEGEGSSGGGGR.G      |              | 2 | 2,9634 | 0,438 | -0,483 |
| 10 | P05556 ITB1_HUMAN  | R.SNGLICGGNGVCK.C       |              | 2 | 2,9554 | 0,287 | -0,457 |
| 10 | Q5W0B1 RN219_HUMAN | E.KTELNLS#KGLTNDQLE.N   | S592:        | 2 | 2,954  | 0,203 | -0,31  |
| 10 | Q14566 MCM6_HUMAN  | E.IKYLQLAEE.L           |              | 2 | 2,9499 | 0,129 | -0,11  |
| 10 | Q08AD1 CA1L1_HUMAN | E.KLNSS#LHFLQQE.M       | S901:        | 2 | 2,9498 | 0,099 | -0,721 |
| 10 | Q01814 AT2B2_HUMAN | K.SATSSS#PGSPIHSLE.T    | S1231:       | 2 | 2,9483 | 0,27  | -0,397 |
| 10 | P04264 K2C1_HUMAN  | R.SLVNLGGSKISISVAR.G    |              | 3 | 2,9443 | 0,259 | -0,975 |
| 10 | P35580 MYH10_HUMAN | E.LQGALARGDDE.T         |              | 2 | 2,9441 | 0,223 | 0      |
| 10 | Q9C0C2 TB182_HUMAN | E.AADSDAHLFQDSTEPR.A    |              | 3 | 2,9379 | 0,297 | -0,312 |
| 10 | P15924 DESP_HUMAN  | R.NLTIRS#SS#FSDTLEE.S   | S2606:S2608: | 2 | 2,9369 | 0,21  | -0,459 |
| 10 | Q16555 DPYL2_HUMAN | K.DRFQLTDCQIYE.V        |              | 2 | 2,9366 | 0,481 | -0,384 |
| 10 | Q8IXM2 CQ049_HUMAN | E.DSGIPLPAES#PKKGPK.K   | S96:         | 2 | 2,9349 | 0,349 | -0,43  |
| 10 | P61160 ARP2_HUMAN  | E.IKDLMVGDEASE.L        |              | 2 | 2,9339 | 0,346 | -0,467 |
| 10 | P42166 LAP2A_HUMAN | R.NRPPLPAGTNSK.G        |              | 2 | 2,9329 | 0,443 | -0,585 |
| 10 | Q8TEA8 DTD1_HUMAN  | E.DRSAS#SGAEGDVSSEREP.- | S196:        | 2 | 2,9284 | 0,394 | -0,446 |
| 10 | Q9H583 HEAT1_HUMAN | K.AVSFNKSES#QEE.M       | S1492:       | 2 | 2,926  | 0,274 | -0,255 |
| 10 | P62988 UBIQ_HUMAN  | R.TLS#DYNIQKE.S         | S57:         | 2 | 2,9214 | 0,306 | -0,284 |
| 10 | P14618 KPYM_HUMAN  | D.NAYM*EKUDE.N          |              | 2 | 2,9207 | 0,311 | -0,519 |
| 10 | Q09666 AHNK_HUMAN  | K.GPQITGPSLEGDLGLK.G    |              | 2 | 2,9181 | 0,438 | -0,386 |
| 10 | P39687 AN32A_HUMAN | E.LSDNRVSGGLE.V         |              | 2 | 2,9139 | 0,283 | -0,425 |
| 10 | Q12905 ILF2_HUMAN  | R.VKPAPDETS#FSE.A       | S52:         | 2 | 2,9133 | 0,37  | -0,352 |
| 10 | Q96S66 CLCC1_HUMAN | R.DVDLRFQTGNKS#PE.V     | S438:        | 3 | 2,9129 | 0,285 | -0,217 |
| 10 | Q00610 CLH1_HUMAN  | E.KIVLDNSVFSE.H         |              | 2 | 2,9113 | 0,39  | -0,195 |
| 10 | P52732 KIF11_HUMAN | E.DKLIQNLE.L            |              | 2 | 2,9103 | 0,096 | 0      |
| 10 | Q13490 BIRC2_HUMAN | R.NSFAHSLS#PTLE.H       | S140:        | 2 | 2,902  | 0,274 | -0,353 |
| 10 | P61160 ARP2_HUMAN  | E.IKDLM*VGDE.A          |              | 2 | 2,9017 | 0,297 | -0,236 |
| 10 | Q15050 RRS1_HUMAN  | E.LLAKAEQDE.A           |              | 2 | 2,8999 | 0,266 | -0,12  |
| 10 | Q9NZI8 IF2B1_HUMAN | E.TKITISSLQD.L          |              | 2 | 2,8997 | 0,282 | -0,221 |

|    |                     |                          |              |   |        |       |        |
|----|---------------------|--------------------------|--------------|---|--------|-------|--------|
| 10 | P42566 EP15_HUMAN   | E.SEPIHQESPARSS#PE.L     | S563:        | 2 | 2,8996 | 0,262 | -0,493 |
| 10 | P35658 NU214_HUMAN  | R.ITPPAAKPGS#PQAK.S      | S678:        | 2 | 2,8986 | 0,17  | -0,254 |
| 10 | O94804 STK10_HUMAN  | K.ASQSRPNS#SALE.T        | S454:        | 2 | 2,8971 | 0,312 | -0,276 |
| 10 | Q9H4G0 E41L1_HUMAN  | E.DVLLKHQAS#INE.L        | S510:        | 2 | 2,8964 | 0,36  | -0,506 |
| 10 | Q12888 TP53B_HUMAN  | E.QLQSVTTNSGYTR.L        |              | 2 | 2,8935 | 0,414 | -0,419 |
| 10 | Q01814 AT2B2_HUMAN  | K.SATSSSPGSPHISLETS#L.-  | S1242:       | 2 | 2,8876 | 0,415 | -0,73  |
| 10 | Q14257 RCN2_HUMAN   | E.KANQDSGPGLSLEE.F       |              | 2 | 2,8844 | 0,263 | -0,591 |
| 10 | Q9UPS8 ANR26_HUMAN  | R.NVGM*PVAHM*ES#PE.R     | S489:        | 2 | 2,8766 | 0,295 | -0,566 |
| 10 | Q92597 NDRG1_HUMAN  | E.GAHLDITPNSGAAGNSAGPK.S |              | 2 | 2,8755 | 0,412 | -0,598 |
| 10 | P63241 IF5A1_HUMAN  | E.IEQKYDCGEE.I           |              | 2 | 2,8696 | 0,267 | -0,288 |
| 10 | B2CI53 B2CI53_HUMAN | E.RNGILASPQS#APGNLDNSK.S | S263:        | 3 | 2,8626 | 0,123 | -0,272 |
| 10 | O95359 TACC2_HUMAN  | K.TPSS#PS#KSPASFE.I      | S2390:S2392: | 2 | 2,8587 | 1     | -0,412 |
| 10 | Q9BTA9 WAC_HUMAN    | R.STCSLTPALAAHFSE.N      |              | 2 | 2,8531 | 0,338 | -0,46  |
| 10 | Q9UHR5 S30BP_HUMAN  | E.KLIQFCAIDE.L           |              | 2 | 2,8526 | 0,358 | -0,493 |
| 10 | Q13614 MTMR2_HUMAN  | R.AS#SPAQCVPVQTVV.-      | S630:        | 2 | 2,8504 | 0,409 | -0,451 |
| 10 | Q92688 AN32B_HUMAN  | E.NRIFGGLDM*LAE.K        |              | 2 | 2,8498 | 0,353 | -0,541 |
| 10 | Q92499 DDX1_HUMAN   | E.LKFNFGEEE.F            |              | 2 | 2,848  | 0,214 | -0,767 |
| 10 | P21796 VDAC1_HUMAN  | E.FQLHTNVNDGTE.F         |              | 2 | 2,8467 | 0,327 | -0,444 |
| 10 | Q92797 SYMPK_HUMAN  | E.AALLDSSLEGPLPK.E       |              | 2 | 2,843  | 0,343 | -0,346 |
| 10 | P31943 HNRH1_HUMAN  | K.HTGPNS#PDTAND.G        | S104:        | 2 | 2,8375 | 0,506 | -0,467 |
| 10 | P04792 HSPB1_HUMAN  | E.SPAAAPAYS.R.A          |              | 2 | 2,8316 | 0,344 | -0,448 |
| 10 | Q5T200 ZC3HD_HUMAN  | E.DNKLSQSSIQQE.L         |              | 2 | 2,8238 | 0,21  | -0,532 |
| 10 | P04075 ALDOA_HUMAN  | K.RLQSIGTENTEE.N         |              | 2 | 2,8228 | 0,348 | -0,443 |
| 10 | Q5T200 ZC3HD_HUMAN  | E.STSRDS#LALDKE.R        | S1409:       | 2 | 2,8227 | 0,193 | -0,435 |
| 10 | P02545 LMNA_HUMAN   | R.SGAQAS#ST#PLSPTRITR.L  | S17:T19:     | 3 | 2,812  | 0,13  | -0,387 |
| 10 | Q71RC2 LARP4_HUMAN  | E.LRSNVVS#PTKNEDNGAPE.N  | S647:        | 2 | 2,8112 | 0,306 | -0,547 |
| 10 | Q06323 PSME1_HUMAN  | E.DKGPPCGPVNCNE.K        |              | 2 | 2,8074 | 0,229 | -0,761 |
| 10 | P42224 STAT1_HUMAN  | E.IKSLEDLQDE.Y           |              | 2 | 2,8069 | 0,274 | -0,308 |
| 10 | P20700 LMNB1_HUMAN  | R.LKLS#PS#PSSR.V         | S391:S393:   | 2 | 2,8054 | 0,377 | -0,396 |
| 10 | Q15742 NAB2_HUMAN   | E.KLSPLPGGPGAGDPR.I      |              | 2 | 2,8054 | 0,343 | -0,516 |
| 10 | Q96ST2 IWS1_HUMAN   | R.KLPGS#DS#ENEE.L        | S131:S133:   | 2 | 2,8028 | 0,319 | -0,626 |
| 10 | Q00613 HSF1_HUMAN   | E.SEPAPASVTALTDAR.G      |              | 2 | 2,8018 | 0,39  | -0,493 |
| 10 | P35613 BASI_HUMAN   | E.FKVDSDDQWGE.Y          |              | 2 | 2,8002 | 0,32  | -0,46  |

|    |                     |                               |            |   |        |       |        |
|----|---------------------|-------------------------------|------------|---|--------|-------|--------|
| 10 | O95684 FR1OP_HUMAN  | E.KGPTTGEGALDLSDVHS#PPKS#PE.G | S156:S160: | 3 | 2,7972 | 0,29  | -0,664 |
| 10 | Q9P2B4 CT2NL_HUMAN  | K.THSQAASLTAE.D               |            | 2 | 2,7954 | 0,225 | -0,201 |
| 10 | Q00839 HNRPU_HUMAN  | R.AKS#PQPPVEEE.D              | S270:      | 2 | 2,7952 | 0,355 | -0,473 |
| 10 | Q13596 SNX1_HUMAN   | K.ITTSLLPINNGSKE.N            |            | 2 | 2,7938 | 0,445 | -0,492 |
| 10 | Q02952 AKA12_HUMAN  | K.SAVVHDITDDGQEET#PE.I        | T142:      | 2 | 2,7905 | 0,356 | -0,254 |
| 10 | O15320 CTGE5_HUMAN  | E.SSLKDAS#FEKEATE.A           | S116:      | 2 | 2,7898 | 0,274 | -1,279 |
| 10 | O75943 RAD17_HUMAN  | E.HGMIDPDS#GDEAQLNGGHSAAE.S   | S613:      | 3 | 2,7858 | 0,1   | -0,39  |
| 10 | P21333 FLNA_HUMAN   | K.GTVEPQLEAR.G                |            | 2 | 2,7797 | 0,366 | -0,444 |
| 10 | Q86SQ0 PHLB2_HUMAN  | E.YTKPDSRSL#TGTTVE.D          | S468:      | 2 | 2,7795 | 0,348 | -0,703 |
| 10 | P54132 BLM_HUMAN    | E.SDS#LKTHLE.D                | S257:      | 2 | 2,777  | 0,224 | -0,33  |
| 10 | P61247 RS3A_HUMAN   | E.VQTNDLKE.V                  |            | 2 | 2,7725 | 0,143 | -0,258 |
| 10 | Q9HA05 Q9HA05_HUMAN | K.M*NSIVYQK.Q                 |            | 2 | 2,7656 | 0,196 | -0,366 |
| 10 | Q02952 AKA12_HUMAN  | E.KEPSKSAESPT#S#PVTSE.T       | T285:S286: | 2 | 2,7654 | 0,347 | -0,318 |
| 10 | Q6S8J3 A26CA_HUMAN  | K.SYELPDGQVITIGNER.F          |            | 2 | 2,7651 | 0,375 | -0,409 |
| 10 | Q9P2M7 CING_HUMAN   | E.DSKQALQQLQAQLE.D            |            | 2 | 2,7624 | 0,239 | -0,381 |
| 10 | P30101 PDIA3_HUMAN  | E.SRISDTGSAGLM*LVE.F          |            | 2 | 2,761  | 0,329 | -0,472 |
| 10 | Q96G46 DUS3L_HUMAN  | R.TCGPLTDEDVVR.L              |            | 2 | 2,7544 | 0,363 | -0,448 |
| 10 | Q9NYV4 CD2L7_HUMAN  | E.SKGS#PVFLPR.K               | S423:      | 2 | 2,754  | 0,263 | -0,313 |
| 10 | Q6PJG2 CN043_HUMAN  | E.SNAPGS#AGGQASEKPRE.G        | S996:      | 2 | 2,7511 | 0,241 | -0,496 |
| 10 | Q9NTI5 PDS5B_HUMAN  | E.TVSNASSSSNPS#SPGRIK.G       | S1165:     | 2 | 2,75   | 0,281 | -0,657 |
| 10 | Q13200 PSMD2_HUMAN  | E.LSEEDKQLQDE.L               |            | 2 | 2,7477 | 0,148 | -0,366 |
| 10 | Q9NXG2 THUM1_HUMAN  | E.AYLLNEYGDDM*YGPEK.F         |            | 2 | 2,7472 | 0,407 | -0,678 |
| 10 | P78310 CXAR_HUMAN   | R.SYIGSNHSSLGMS#PSNM*E.G      | S306:      | 2 | 2,7402 | 0,362 | -0,117 |
| 10 | Q02952 AKA12_HUMAN  | E.KEPSKSAES#PTSPVT#SE.T       | S283:T289: | 2 | 2,7351 | 0,349 | -0,508 |
| 10 | P20810 ICAL_HUMAN   | E.SKAAAPAPVSE.A               |            | 2 | 2,7314 | 0,345 | -0,119 |
| 10 | P05023 AT1A1_HUMAN  | E.LKDAFQAYLE.L                |            | 2 | 2,7301 | 0,151 | -0,465 |
| 10 | Q9H0E9 BRD8_HUMAN   | R.SGVAEAPVGS#KAPS#IDGKEE.L    | S383:S387: | 2 | 2,7291 | 0,459 | 0,234  |
| 10 | P61160 ARP2_HUMAN   | E.IKDLM*VGDEASE.L             |            | 2 | 2,7282 | 0,323 | -0,461 |
| 10 | O43237 DC1L2_HUMAN  | R.RGPLTSGSDEE.N               |            | 2 | 2,7276 | 0,337 | -0,319 |
| 10 | P51858 HDGF_HUMAN   | E.DAEAPGIRDHES#L.-            | S239:      | 2 | 2,7246 | 0,403 | -0,491 |
| 10 | O94804 STK10_HUMAN  | K.ASQS#RPNS#SALE.T            | S450:S454: | 2 | 2,7214 | 0,255 | -0,607 |
| 10 | P35030 TRY3_HUMAN   | D.TLDNDIMLIK.L                |            | 2 | 2,7197 | 0,28  | -0,622 |
| 10 | P07195 LDHB_HUMAN   | E.KLIAPVAEEA                  |            | 2 | 2,7187 | 0,292 | -0,666 |



|    |                    |                                 |          |   |        |       |        |
|----|--------------------|---------------------------------|----------|---|--------|-------|--------|
| 10 | Q15477 SKIV2_HUMAN | R.ASS#LEDLVLKE.A                | S256:    | 2 | 2,7182 | 0,131 | -0,475 |
| 10 | P49796 RGS3_HUMAN  | E.VRLDSTYSQK.A                  |          | 2 | 2,7177 | 0,279 | -0,408 |
| 10 | Q02952 AKA12_HUMAN | E.VALKGEGTEE.A                  |          | 2 | 2,7065 | 0,398 | -0,118 |
| 10 | Q14562 DHX8_HUMAN  | D.M*S#PIKIVK.N                  | S460:    | 2 | 2,7065 | 0,205 | -0,241 |
| 10 | P39687 AN32A_HUMAN | E.NLKSLDLFNCE.V                 |          | 2 | 2,7064 | 0,303 | -0,18  |
| 10 | Q01082 SPTB2_HUMAN | K.TALPAQSAATLPAR.T              |          | 2 | 2,7055 | 0,394 | -0,535 |
| 10 | O60281 ZN292_HUMAN | R.SPAFLPNTFPR.S                 |          | 2 | 2,7034 | 0,269 | -0,391 |
| 10 | Q9H9A7 RMI1_HUMAN  | E.VVNYVQK.R                     |          | 2 | 2,7031 | 0,288 | 0,144  |
| 10 | Q9UQ35 SRRM2_HUMAN | E.SYFGVSSLQLK.G                 |          | 2 | 2,7003 | 0,38  | -0,496 |
| 10 | Q68EM7 RHG17_HUMAN | E.QGPSPGDGS#PPKPKDPVSAAVPAPGR.N | S575:    | 3 | 2,6995 | 0,191 | 0,072  |
| 10 | Q15424 SAFB1_HUMAN | E.NEKILDILGE.T                  |          | 2 | 2,6938 | 0,13  | -0,213 |
| 10 | Q9Y6K9 NEMO_HUMAN  | E.DLKQQLQQAEE.A                 |          | 2 | 2,6933 | 0,218 | -0,275 |
| 10 | Q9NR45 SIAS_HUMAN  | E.RALGS#PTKQLLPCE.M             | S275:    | 2 | 2,69   | 0,247 | -0,666 |
| 10 | O75369 FLNB_HUMAN  | R.TSRAPS#VATVGSICD.L            | S2107:   | 2 | 2,6899 | 0,402 | -0,457 |
| 10 | Q99638 RAD9A_HUMAN | D.GHFVLATLSDTDSHSQDLGS#PE.R     | S277:    | 3 | 2,6882 | 0,305 | -0,612 |
| 10 | Q71U36 TBA1A_HUMAN | E.HSDCAFMDNEAIYD.I              |          | 2 | 2,6853 | 0,404 | -0,615 |
| 10 | Q7Z2W4 ZCCHV_HUMAN | E.FLASASASAER.S                 |          | 2 | 2,6844 | 0,36  | -0,33  |
| 10 | P12004 PCNA_HUMAN  | E.ALKDLIN.A                     |          | 2 | 2,6823 | 0,235 | -0,133 |
| 10 | P55786 PSA_HUMAN   | E.IHATGFNYQNEDE.K               |          | 2 | 2,6799 | 0,255 | -0,317 |
| 10 | Q9UGN5 PARP2_HUMAN | E.SLKS#PLKPE.S                  | S226:    | 2 | 2,6794 | 0,354 | -0,339 |
| 10 | Q02952 AKA12_HUMAN | E.SDKAITPQAQEE.L                |          | 2 | 2,6781 | 0,357 | -0,185 |
| 10 | P27816 MAP4_HUMAN  | E.TERAS#PIKMD.L                 | S358:    | 3 | 2,677  | 0,243 | 0,149  |
| 10 | Q92621 NU205_HUMAN | E.NRS#VSGFLHFD.T                | S1165:   | 2 | 2,6733 | 0,308 | -0,539 |
| 10 | Q9UNE7 STUB1_HUMAN | R.LGAGGGS#PEKS#PSAQELKE.Q       | S19:S23: | 2 | 2,6717 | 0,328 | -0,549 |
| 10 | Q9BX63 FANCI_HUMAN | E.NSASS#PPRFKTE.K               | S1032:   | 2 | 2,6714 | 0,419 | -0,261 |
| 10 | Q96T23 RSF1_HUMAN  | E.SYS#PSKDRNIITE.G              | S463:    | 2 | 2,6701 | 0,441 | -0,691 |
| 10 | O95905 SGT1_HUMAN  | E.LAHTCISKS#FTTR.N              | S561:    | 3 | 2,665  | 0,208 | -0,228 |
| 10 | P37275 ZEB1_HUMAN  | E.NNQANLASKEQE.T                |          | 2 | 2,6627 | 0,204 | -0,363 |
| 10 | P37802 TAGL2_HUMAN | E.GKNVIGLQM*GTNR.G              |          | 3 | 2,6621 | 0,102 | -0,456 |
| 10 | O95817 BAG3_HUMAN  | E.KVQGLEQAVDNFE.G               |          | 2 | 2,6613 | 0,294 | -0,33  |
| 10 | Q6GYQ0 GRIPE_HUMAN | E.SLKEPEPLHS#PDSE.R             | S1478:   | 2 | 2,6594 | 0,112 | -0,445 |
| 10 | Q969H4 CNKR1_HUMAN | R.TSFGSLTDSSEEAL.E.G            |          | 2 | 2,6593 | 0,324 | -0,465 |
| 10 | Q9UHB7 AFF4_HUMAN  | E.SNRT#PVKPSVVEE.D              | T674:    | 2 | 2,654  | 0,271 | -0,298 |

|    |                     |                                 |            |   |        |       |        |
|----|---------------------|---------------------------------|------------|---|--------|-------|--------|
| 10 | Q6KC79 NIPBL_HUMAN  | E.KAAM*YDISS#PSKD.S             | S350:      | 3 | 2,6529 | 0,209 | -0,677 |
| 10 | Q13439 GOGA4_HUMAN  | E.SLFRS#PIKE.S                  | S78:       | 2 | 2,651  | 0,19  | -0,422 |
| 10 | Q08J23 NSUN2_HUMAN  | D.VTAGCDPAGVHPPR.-              |            | 3 | 2,6462 | 0,117 | -0,319 |
| 10 | Q86VP6 CAND1_HUMAN  | D.SIKLDDDSE.R                   |            | 2 | 2,6451 | 0,266 | 0      |
| 10 | O00154 BACH_HUMAN   | E.RTDFLSPMCIGE.V                |            | 2 | 2,6429 | 0,336 | -0,342 |
| 10 | Q9UGU0 TCF20_HUMAN  | E.KAGSS#PAQGAQNEPRLNAS#PAAREE.A | S559:S574: | 3 | 2,6425 | 0,179 | -0,459 |
| 10 | P16144 ITB4_HUMAN   | E.AGGS#LTRHVTQE.F               | S1791:     | 2 | 2,6424 | 0,2   | -0,548 |
| 10 | Q86YT6 MIB1_HUMAN   | E.KVSGQVGSRSPS#M*ISNDSETLEE.C   | S807:      | 3 | 2,6363 | 0,151 | -0,506 |
| 10 | Q96TA1 NIBL1_HUMAN  | K.AVDLGPPKPSDQE.T               |            | 2 | 2,6319 | 0,317 | -0,541 |
| 10 | Q06830 PRDX1_HUMAN  | D.YGVLKADE.G                    |            | 2 | 2,6266 | 0,135 | 0      |
| 10 | P13645 K1C10_HUMAN  | K.DAEAWFNEK.S                   |            | 2 | 2,6228 | 0,254 | -0,22  |
| 10 | Q96S82 UBL7_HUMAN   | E.GLS#DDEDDFHPNTR.S             | S230:      | 2 | 2,6217 | 0,428 | -0,647 |
| 10 | Q9UQ35 SRRM2_HUMAN  | E.LDVKPSAS#PQERSE.S             | S1552:     | 2 | 2,62   | 0,32  | -0,451 |
| 10 | Q3V6T2 GRDN_HUMAN   | E.SNKLTSVQIK.S                  |            | 2 | 2,6187 | 0,254 | -0,327 |
| 10 | P63104 1433Z_HUMAN  | E.KFLIPNAS#QAE.S                | S110:      | 2 | 2,6184 | 0,124 | -0,846 |
| 10 | P30622 CLIP1_HUMAN  | E.ANGLQTPASR.A                  |            | 2 | 2,6183 | 0,448 | -0,219 |
| 10 | B0AZS1 B0AZS1_HUMAN | E.DDRNS#FTLKE.D                 | S20:       | 3 | 2,6174 | 0,151 | -0,064 |
| 10 | Q5VUA4 ZN318_HUMAN  | E.DQLSEGRNS#PEKAE.N             | S1243:     | 2 | 2,6158 | 0,206 | -0,223 |
| 10 | Q9UQ35 SRRM2_HUMAN  | E.LDVKPSAS#PQERSE.S             | S1552:     | 3 | 2,6141 | 0,093 | -0,338 |
| 10 | P14618 KPYM_HUMAN   | K.KGVNLPAAVDLPVASE.K            |            | 2 | 2,6055 | 0,36  | -0,447 |
| 10 | P04844 RPN2_HUMAN   | E.TKDLLLAAVSE.D                 |            | 2 | 2,6018 | 0,124 | -0,526 |
| 10 | P08107 HSP71_HUMAN  | E.TKAFYPEE.I                    |            | 2 | 2,6013 | 0,329 | -0,062 |
| 10 | Q9UJ14 GGT7_HUMAN   | E.DAFLGDPDTPDSFLK.S             |            | 2 | 2,6009 | 0,378 | -0,278 |
| 10 | O75822 EIF3J_HUMAN  | E.AEVKPEVKIS#E.K                | S72:       | 2 | 2,5992 | 0,137 | -0,466 |
| 10 | P08238 HS90B_HUMAN  | E.TQKSIYYITGE.S                 |            | 2 | 2,5936 | 0,265 | -0,562 |
| 10 | P52948 NUP98_HUMAN  | E.RFS#FLSKPVDE.N                | S635:      | 2 | 2,5924 | 0,39  | -0,608 |
| 10 | Q9HCG8 NCM_HUMAN    | R.NSS#PEDRYEE.Q                 | S28:       | 2 | 2,5897 | 0,305 | -0,374 |
| 10 | Q6S8J3 A26CA_HUMAN  | E.HGIITNWDDM*E.K                |            | 2 | 2,589  | 0,255 | -0,544 |
| 10 | P13473 LAMP2_HUMAN  | E.DKGILTVD.E.L                  |            | 2 | 2,5817 | 0,123 | 0,37   |
| 10 | Q92785 REQU_HUMAN   | E.GEDKEDSQPPT#PVSQR.S           | T248:      | 3 | 2,5756 | 0,086 | -0,198 |
| 10 | Q16891 IMMT_HUMAN   | E.QNLSEKLSEQE.L                 |            | 2 | 2,5732 | 0,165 | -0,467 |
| 10 | Q6ZS30 NBEL1_HUMAN  | K.SFSVHSDRE.S                   |            | 2 | 2,5714 | 0,183 | -0,115 |
| 10 | Q16204 CCDC6_HUMAN  | K.SGGIVISPFRL.EE.L              |            | 2 | 2,5682 | 0,257 | -0,261 |

|    |                     |                            |            |   |        |       |        |
|----|---------------------|----------------------------|------------|---|--------|-------|--------|
| 10 | Q96B23 CR025_HUMAN  | E.LRRDS#SES#QLASTE.S       | S66:S69:   | 2 | 2,5663 | 0,393 | -0,491 |
| 10 | A8MXP9 A8MXP9_HUMAN | E.GFVT#LDEVGDE.E           | T728:      | 2 | 2,5622 | 0,293 | 0,774  |
| 10 | Q13242 SFRS9_HUMAN  | R.GS#PHYFSPFRPY.-          | S211:      | 3 | 2,5564 | 0,124 | -0,357 |
| 10 | P43487 RANG_HUMAN   | E.NTDESNHDPQFPIVSLPEQEIK.T |            | 3 | 2,5554 | 0,132 | -0,549 |
| 10 | O43852 CALU_HUMAN   | E.AKTFDQLTPEES#KE.R        | S69:       | 2 | 2,5478 | 0,41  | -0,645 |
| 10 | P30279 CCND2_HUMAN  | E.AVLLNSLQQYR.Q            |            | 2 | 2,5475 | 0,285 | -0,467 |
| 10 | Q99700 ATX2_HUMAN   | E.NIKPNET#SPSFSK.A         | T770:      | 2 | 2,5449 | 0,333 | -0,16  |
| 10 | P49792 RBP2_HUMAN   | E.KVELVTGEEDE.K            |            | 2 | 2,5409 | 0,149 | -0,684 |
| 10 | O43765 SGTA_HUMAN   | R.S#QIRSRT#PSASNDDQQE.-    | S297:T303: | 3 | 2,5407 | 0,181 | -0,352 |
| 10 | P37802 TAGL2_HUMAN  | K.NVIGLQMG TNR.G           |            | 2 | 2,5385 | 0,376 | -0,406 |
| 10 | O75150 BRE1B_HUMAN  | E.GGPGPVST#PDNRKE.M        | T557:      | 2 | 2,5382 | 0,234 | -0,082 |
| 10 | Q3T8J9 GON4L_HUMAN  | E.LSPLSATVFPK.V            |            | 2 | 2,5374 | 0,414 | -0,316 |
| 10 | Q8N3V7 SYNPO_HUMAN  | R.AAATTPT#KVYSE.V          | T463:      | 2 | 2,5343 | 0,194 | -0,463 |
| 10 | Q96GQ7 DDX27_HUMAN  | E.KDVYAVLQLE.A             |            | 2 | 2,5314 | 0,163 | -0,414 |
| 10 | Q5UIP0 RIF1_HUMAN   | E.DNNAS#PQKLRE.L           | S2144:     | 2 | 2,5311 | 0,269 | -0,451 |
| 10 | Q8TEW0 PARD3_HUMAN  | E.GSM*ALNARPQS#PRE.G       | S1116:     | 3 | 2,5298 | 0,376 | -0,341 |
| 10 | P46013 KI67_HUMAN   | K.ATKIPCES#PPLE.V          | S2708:     | 2 | 2,5292 | 0,327 | -0,515 |
| 10 | P82673 RT35_HUMAN   | E.NSISQYKE.S               |            | 2 | 2,5247 | 0,156 | -0,063 |
| 10 | Q9UBC2 EP15R_HUMAN  | E.LQNDLDRE.T               |            | 2 | 2,5235 | 0,266 | 0      |
| 10 | Q9UBT2 SAE2_HUMAN   | E.VVGDAPEKVGPK.Q           |            | 2 | 2,5205 | 0,273 | -0,408 |
| 10 | Q16891 IMMT_HUMAN   | E.GKPTPALSEE.A             |            | 2 | 2,52   | 0,16  | -0,356 |
| 10 | P49023 PAXI_HUMAN   | E.HVYSFPNK.Q               |            | 2 | 2,5073 | 0,387 | -0,062 |
| 10 | O75410 TACC1_HUMAN  | E.NTS#PLLGDAR.F            | S276:      | 2 | 2,5056 | 0,25  | -0,543 |
| 10 | P60709 ACTB_HUMAN   | D.LYANTVLSGGTTMYPGIADR.M   |            | 2 | 2,502  | 0,331 | -0,465 |
| 10 | P08651 NFIC_HUMAN   | E.GGISS#PVKKTE.M           | S323:      | 2 | 2,5011 | 0,184 | -0,413 |
| 10 | P27816 MAP4_HUMAN   | K.KCS#LPAAE.D              | S636:      | 2 | 2,5002 | 0,106 | -0,12  |
| 10 | Q05D04 Q05D04_HUMAN | E.IKDSLAEVEE.K             |            | 2 | 2,4961 | 0,235 | -0,431 |
| 10 | A8K7V5 A8K7V5_HUMAN | E.VSTAPAGTDM*PAAK.K        |            | 2 | 2,4961 | 0,328 | -0,366 |
| 10 | O43583 DENR_HUMAN   | K.LTVENS#PKQE.A            | S73:       | 2 | 2,4961 | 0,22  | -0,697 |
| 10 | Q86W92 LIPB1_HUMAN  | E.DDM*FKDFAAR.S            |            | 3 | 2,4937 | 0,186 | 0,52   |
| 10 | P27695 APEX1_HUMAN  | E.NKLPAELQE.L              |            | 2 | 2,4906 | 0,104 | -0,234 |
| 10 | Q6PKG0 LARP1_HUMAN  | R.AVT#PVPTKTEE.V           | T526:      | 2 | 2,4885 | 0,23  | -0,585 |
| 10 | P37802 TAGL2_HUMAN  | K.NVIGLQM*GTNR.G           |            | 2 | 2,4846 | 0,342 | -0,4   |

|    |                    |                            |                 |   |        |       |        |
|----|--------------------|----------------------------|-----------------|---|--------|-------|--------|
| 10 | Q9UPU5 UBP24_HUMAN | E.SNSLCPAGIR.N             |                 | 2 | 2,4841 | 0,244 | -0,227 |
| 10 | O43583 DENR_HUMAN  | E.FAKLTVENS#PKQE.A         | S73:            | 3 | 2,4839 | 0,122 | 0,116  |
| 10 | P05787 K2C8_HUMAN  | R.ISSS#SFSRVGS#SNFR.G      | S36:S43:        | 2 | 2,4839 | 1     | -0,412 |
| 10 | Q96GS4 CQ059_HUMAN | R.RAT#ISSPLELE.G           | T62:            | 2 | 2,4815 | 0,19  | -0,377 |
| 10 | P48960 CD97_HUMAN  | R.CNPGFSSFSE.I             |                 | 2 | 2,4797 | 0,16  | -0,108 |
| 10 | Q6S8J3 A26CA_HUMAN | E.KLCYVALDFE.Q             |                 | 2 | 2,4778 | 0,22  | -0,291 |
| 10 | Q01804 OTUD4_HUMAN | K.TAAAAADVNGFKPLSGNE.Q     |                 | 2 | 2,4763 | 0,276 | 0      |
| 10 | Q13200 PSMD2_HUMAN | E.DKQLQDELE.M              |                 | 2 | 2,4753 | 0,092 | -0,218 |
| 10 | P14618 KPYM_HUMAN  | D.NAYMEKCDE.N              |                 | 2 | 2,474  | 0,387 | -0,105 |
| 10 | Q9UGV2 NDRG3_HUMAN | E.SCESPDVLDLRHQT*EVS#C.-   | S374:           | 3 | 2,472  | 0,188 | -0,57  |
| 10 | Q14247 SRC8_HUMAN  | E.EQARAKT#QTPPVSPAPQPTEE.R | T399:           | 3 | 2,4708 | 0,143 | -0,391 |
| 10 | Q06124 PTN11_HUMAN | E.NVGLMQQQK.S              |                 | 2 | 2,4653 | 0,208 | 0      |
| 10 | Q9UQ35 SRRM2_HUMAN | R.S#SGHSSSELSPDAVE.K       | S1378:          | 2 | 2,464  | 0,234 | -0,311 |
| 10 | P05023 AT1A1_HUMAN | E.LCCGSVKE.M               |                 | 2 | 2,4606 | 0,229 | 0      |
| 10 | Q02952 AKA12_HUMAN | E.LQTQAHVIKADS#QD.A        | S1587:          | 3 | 2,4604 | 0,209 | -0,224 |
| 10 | Q01082 SPTB2_HUMAN | E.S#SPIPS#PTSDRK.A         | S2164:S2169:    | 2 | 2,4572 | 0,329 | -0,596 |
| 10 | O95235 KI20A_HUMAN | E.DKQQVPSEDSM*E.K          |                 | 2 | 2,4562 | 0,292 | -0,173 |
| 10 | Q15942 ZYX_HUMAN   | E.GGPEAPIPPPQPR.E          |                 | 2 | 2,4555 | 0,321 | -0,433 |
| 10 | P62256 UBE2H_HUMAN | R.RMDTDVVKLIE.S            |                 | 2 | 2,4542 | 0,209 | -0,462 |
| 10 | Q2PPJ7 AS250_HUMAN | E.NAPAAGSGHLTVGQQQQVLR.S   |                 | 2 | 2,448  | 0,434 | -0,12  |
| 10 | Q01804 OTUD4_HUMAN | E.SNYFGLS#PEERRE.K         | S443:           | 3 | 2,4463 | 0,237 | -0,33  |
| 10 | Q9UJZ1 STML2_HUMAN | K.APVPGTDSLSSGSSR.D        |                 | 2 | 2,4453 | 0,33  | -0,403 |
| 10 | Q9Y490 TLN1_HUMAN  | E.KMVGGIAQIIAAQEE.M        |                 | 2 | 2,4437 | 0,244 | -0,392 |
| 10 | Q9GZT8 NIF3L_HUMAN | E.NKINIILSE.T              |                 | 2 | 2,4385 | 0,108 | 0,117  |
| 10 | Q15424 SAFB1_HUMAN | E.KILDILGE.T               |                 | 2 | 2,4361 | 0,13  | -0,474 |
| 10 | Q01105 SET_HUMAN   | E.IDRLNEQASEE.I            |                 | 2 | 2,436  | 0,265 | -0,655 |
| 10 | Q69YH5 CDCA2_HUMAN | E.RVASDS#PKPALTLQQGQE.F    | S727:           | 2 | 2,4347 | 0,317 | -0,122 |
| 10 | P14136 GFAP_HUMAN  | K.LALDIEIATYR.K            |                 | 2 | 2,4312 | 0,289 | -0,191 |
| 10 | O43765 SGTA_HUMAN  | R.SQIRS#RT#PS#ASNDQQE.-    | S301:T303:S305: | 2 | 2,4285 | 0,321 | -0,339 |
| 10 | P62249 RS16_HUMAN  | E.IKDILIQYD.R              |                 | 2 | 2,4281 | 0,178 | -0,327 |
| 10 | Q13263 TIF1B_HUMAN | E.KLSPPYSSPQE.F            |                 | 2 | 2,4265 | 0,315 | -0,297 |
| 10 | P55327 TPD52_HUMAN | K.NSPTFKS#FEE.K            | S136:           | 2 | 2,4256 | 0,29  | -0,675 |
| 10 | P49959 MRE11_HUMAN | E.KNVQLSLLTE.R             |                 | 2 | 2,4244 | 0,182 | -0,32  |

|    |                     |                           |        |   |        |       |        |
|----|---------------------|---------------------------|--------|---|--------|-------|--------|
| 10 | P11177 ODPB_HUMAN   | E.KVFLGEE.V               |        | 2 | 2,4234 | 0,196 | -0,065 |
| 10 | Q6ZSR9 YJ005_HUMAN  | K.LGGAVPFAPPEVS#PE.Q      | S93:   | 2 | 2,4223 | 0,248 | -0,315 |
| 10 | Q7Z4V5 HDGR2_HUMAN  | E.GFS#M*DRKVE.K           | S458:  | 2 | 2,4222 | 0,197 | -0,314 |
| 10 | P55327 TPD52_HUMAN  | E.DVKNSPTFKS#FEE.K        | S136:  | 2 | 2,4163 | 0,265 | -0,304 |
| 10 | P35527 K1C9_HUMAN   | K.STMQELNSR.L             |        | 2 | 2,4156 | 0,26  | -0,229 |
| 10 | Q16543 CDC37_HUMAN  | E.AVPKT#GDEKDVSV.-        | T370:  | 2 | 2,4152 | 0,244 | -0,257 |
| 10 | Q09666 AHNK_HUMAN   | K.APKIS#MPDFD.L           | S2580: | 2 | 2,415  | 0,237 | -0,406 |
| 10 | P54105 ICLN_HUMAN   | E.DSIRDYEDGM*E.V          |        | 2 | 2,414  | 0,148 | 0      |
| 10 | Q92841 DDX17_HUMAN  | E.NKTIIFVE.T              |        | 2 | 2,4134 | 0,135 | 0      |
| 10 | O96028 NSD2_HUMAN   | E.M*KIGITPPNTTPIKNGS#PE.I | S121:  | 2 | 2,4125 | 0,391 | -0,3   |
| 10 | B1AK87 B1AK87_HUMAN | E.ALKNDLVE.A              |        | 2 | 2,4107 | 0,206 | -0,135 |
| 10 | P63104 1433Z_HUMAN  | E.KFLIPNASQAE.S           |        | 2 | 2,4079 | 0,221 | -0,501 |
| 10 | P19838 NFKB1_HUMAN  | E.VIQAASSPVK.T            |        | 2 | 2,4061 | 0,284 | -0,183 |
| 10 | Q92615 LARP5_HUMAN  | E.NRLSS#LIIGPSKE.R        | S556:  | 2 | 2,4029 | 0,221 | -0,49  |
| 10 | P98179 RBM3_HUMAN   | E.DHFSSFGPISE.V           |        | 2 | 2,4018 | 0,285 | -0,499 |
| 10 | P13647 K2C5_HUMAN   | R.ISISTSGGSFR.N           |        | 2 | 2,3977 | 0,229 | -0,329 |
| 10 | O75351 VPS4B_HUMAN  | E.NKPSIFIDE.I             |        | 2 | 2,3973 | 0,11  | -0,415 |
| 10 | P11142 HSP7C_HUMAN  | D.NNLLGKFE.L              |        | 2 | 2,3951 | 0,125 | 0,065  |
| 10 | P60660 MYL6_HUMAN   | K.VLGNPKS#DE.M            | S57:   | 2 | 2,3931 | 0,092 | -0,235 |
| 10 | Q05086 UBE3A_HUMAN  | E.NGDKIPITNE.N            |        | 2 | 2,3916 | 0,203 | -0,332 |
| 10 | Q06124 PTN11_HUMAN  | E.NVGLMQQKS#FR.-          | S595:  | 2 | 2,3896 | 0,161 | -0,322 |
| 10 | P62873 GBB1_HUMAN   | E.LDQLRQE.A               |        | 2 | 2,3871 | 0,081 | -0,135 |
| 10 | Q6S8J3 A26CA_HUMAN  | E.KSYELPDGQVITIGNE.R      |        | 2 | 2,3857 | 0,301 | -0,415 |
| 10 | Q6S8J3 A26CA_HUMAN  | R.TTGIVM*DSGDGVTHTVPIYE.G |        | 2 | 2,382  | 0,344 | -0,579 |
| 10 | Q6I9Y2 THOC7_HUMAN  | E.NDEKLSEVEE.A            |        | 2 | 2,3784 | 0,196 | -0,512 |
| 10 | Q12888 TP53B_HUMAN  | R.ADDPLRLDQE.L            |        | 2 | 2,3777 | 0,208 | -0,416 |
| 10 | Q15149 PLEC1_HUMAN  | E.VTASQVAATK.T            |        | 2 | 2,3764 | 0,351 | -0,25  |
| 10 | Q9H6Z4 RANB3_HUMAN  | R.VLS#PPKLNE.V            | S333:  | 2 | 2,3762 | 0,147 | -0,34  |
| 10 | P17987 TCPA_HUMAN   | E.DAVHSGALND.-            |        | 2 | 2,3757 | 0,246 | 0      |
| 10 | P07384 CAN1_HUMAN   | E.NAIKYLGDYDYE.Q          |        | 2 | 2,3755 | 0,202 | -0,464 |
| 10 | Q14444 CAPR1_HUMAN  | E.SRLAQPNQVPVQPE.A        |        | 2 | 2,3746 | 0,309 | -0,312 |
| 10 | Q68EM7 RHG17_HUMAN  | K.DPVSAAVPAPGR.N          |        | 2 | 2,3695 | 0,085 | -0,322 |
| 10 | P35244 RFA3_HUMAN   | D.SHPFDLGLYNE.A           |        | 2 | 2,3664 | 0,194 | -0,378 |

|    |                    |                          |              |   |        |       |        |
|----|--------------------|--------------------------|--------------|---|--------|-------|--------|
| 10 | Q9Y383 LC7L2_HUMAN | D.LALRADYE.I             |              | 2 | 2,3645 | 0,188 | 0      |
| 10 | P51991 ROA3_HUMAN  | E.YNLRDYFE.K             |              | 2 | 2,3618 | 0,156 | -0,218 |
| 10 | P04264 K2C1_HUMAN  | R.SLVNLGGSK.S            |              | 2 | 2,3614 | 0,191 | -0,418 |
| 10 | O96000 NDUBA_HUMAN | E.GQNYQQNCIKE.V          |              | 2 | 2,3587 | 0,131 | -0,177 |
| 10 | P13645 K1C10_HUMAN | K.VTMQNLNDR.L            |              | 2 | 2,3552 | 0,143 | -0,224 |
| 10 | O00273 DFFA_HUMAN  | E.GSLLSKQEE.S            |              | 2 | 2,3536 | 0,116 | -0,062 |
| 10 | P20700 LMNB1_HUMAN | R.LKLSPPSS#R.V           | S396:        | 2 | 2,353  | 0,123 | -0,741 |
| 10 | Q7Z6Z7 HUWE1_HUMAN | E.RDGG#GNSTIIVSR.S       | S2362:       | 2 | 2,3455 | 0,347 | -0,57  |
| 10 | P04406 G3P_HUMAN   | E.FGYSNRVVD.L            |              | 2 | 2,3428 | 0,419 | 0,115  |
| 10 | Q9Y4F5 K0284_HUMAN | R.TSFSGRS#VE.L           | S1199:       | 2 | 2,3424 | 0,168 | -0,465 |
| 10 | Q9UMZ2 SYNG_HUMAN  | E.ASPVPLTSNVGSTVK.G      |              | 2 | 2,334  | 0,257 | -0,419 |
| 10 | P48643 TCPE_HUMAN  | E.ADKCPTLE.Q             |              | 2 | 2,3335 | 0,098 | -0,196 |
| 10 | P26038 MOES_HUMAN  | K.QRIDEFESM*.-           |              | 2 | 2,3303 | 0,374 | -0,417 |
| 10 | Q9H6Z4 RANB3_HUMAN | E.KVEVITGEEAE.S          |              | 2 | 2,3293 | 0,3   | -0,203 |
| 10 | P13639 EF2_HUMAN   | E.ICLKDLEED.H            |              | 2 | 2,3292 | 0,288 | -0,323 |
| 10 | Q86WB0 NIPA_HUMAN  | R.SM*GTGDT#PGLE.V        | T387:        | 2 | 2,3281 | 0,248 | -0,526 |
| 10 | Q92545 TM131_HUMAN | R.HS#SESDITSIE.A         | S1292:       | 2 | 2,3272 | 0,246 | -0,081 |
| 10 | Q92804 RBP56_HUMAN | K.QSSYSQQPYNNQGGQQNM*E.S |              | 2 | 2,3265 | 0,433 | -0,215 |
| 10 | Q494U1 PKHN1_HUMAN | D.LTQLHRLS#LE.S          | S488:        | 2 | 2,3249 | 0,27  | -0,567 |
| 10 | Q86SQ0 PHLB2_HUMAN | E.YTKPDSRSL#TGTTVED.V    | S468:        | 2 | 2,3247 | 0,275 | -0,791 |
| 10 | P52948 NUP98_HUMAN | E.NGERFS#FLSKPVDE.N      | S635:        | 2 | 2,3195 | 0,212 | -0,358 |
| 10 | Q9Y608 LRRF2_HUMAN | R.RGS#GDTSSLIDPDTSLSE.L  | S328:        | 2 | 2,3191 | 0,223 | -0,446 |
| 10 | Q86V48 LUZP1_HUMAN | K.AIGALASSR.R            |              | 2 | 2,3188 | 0,203 | 0,216  |
| 10 | Q8TEX9 IPO4_HUMAN  | E.NAFFDEKE.D             |              | 2 | 2,3187 | 0,216 | -0,244 |
| 10 | Q92733 PRCC_HUMAN  | K.SAALQVTK.Q             |              | 2 | 2,3185 | 0,209 | 0      |
| 10 | Q9GZR7 DDX24_HUMAN | E.AGAETRS#PGKAEAE.S      | S287:        | 2 | 2,3146 | 0,237 | -0,504 |
| 10 | P17987 TCPA_HUMAN  | E.SKSVVPGGGAVE.A         |              | 2 | 2,3135 | 0,301 | -0,449 |
| 10 | Q9C0C2 TB182_HUMAN | R.RES#AAS#GLGGLLE.E      | S1473:S1476: | 2 | 2,3114 | 0,138 | -0,43  |
| 10 | Q01082 SPTB2_HUMAN | R.TQETPSAQME.G           |              | 2 | 2,3082 | 0,287 | -0,217 |
| 10 | Q02790 FKBP4_HUMAN | E.AHLAVNDFE.L            |              | 2 | 2,308  | 0,199 | -0,3   |
| 10 | Q6PL24 TMED8_HUMAN | E.HTGAIDVLSADLE.S        |              | 2 | 2,3064 | 0,314 | -0,273 |
| 10 | O43752 STX6_HUMAN  | E.LQRANS#HFIEE.Q         | S152:        | 2 | 2,3021 | 0,112 | -0,257 |
| 10 | Q9H307 PININ_HUMAN | E.CKSL#PGKENVSALDME.K    | S443:        | 2 | 2,3016 | 0,171 | -0,063 |

|    |                    |                         |        |   |        |       |        |
|----|--------------------|-------------------------|--------|---|--------|-------|--------|
| 10 | Q92844 TANK_HUMAN  | R.SLGS#PLLHE.R          | S129:  | 2 | 2,2994 | 0,274 | -0,118 |
| 10 | P35908 K22E_HUMAN  | R.GFSSGSAAVVGSR.R       |        | 2 | 2,2955 | 0,197 | -0,486 |
| 10 | P63104 1433Z_HUMAN | E.TELRDICND.V           |        | 2 | 2,2938 | 0,228 | -0,322 |
| 10 | Q9Y3T9 NOC2L_HUMAN | R.GILRPLSTR.H           |        | 2 | 2,2927 | 0,159 | -0,241 |
| 10 | Q02952 AKA12_HUMAN | K.AITPQAQEE.L           |        | 2 | 2,2891 | 0,206 | -0,124 |
| 10 | Q6S8J3 A26CA_HUMAN | E.KM*TQIMFE.T           |        | 2 | 2,284  | 0,217 | -0,701 |
| 10 | Q9UNS2 CSN3_HUMAN  | K.SM*GSQEDDSGNKPSSYS.-  |        | 2 | 2,2827 | 0,252 | -0,409 |
| 10 | Q02952 AKA12_HUMAN | K.SAVVHDIT#DDGQEETPE.I  | T135:  | 2 | 2,2801 | 0,164 | 0,254  |
| 10 | P02545 LMNA_HUMAN  | E.VSGIKAAYE.A           |        | 2 | 2,2758 | 0,286 | 0      |
| 10 | P05787 K2C8_HUMAN  | R.ISS#SSFSR.V           | S35:   | 2 | 2,2756 | 0,114 | 0,064  |
| 10 | Q9UMX0 UBQL1_HUMAN | E.NSSVQQFKEE.I          |        | 2 | 2,2751 | 0,146 | -0,51  |
| 10 | Q03405 UPAR_HUMAN  | E.LENLPQNGR.Q           |        | 2 | 2,2671 | 0,223 | -0,117 |
| 10 | P81605 DCD_HUMAN   | K.ENAGEDPGLAR.Q         |        | 2 | 2,265  | 0,195 | -0,324 |
| 10 | P23528 COF1_HUMAN  | E.KLGGSAVISLE.G         |        | 2 | 2,2636 | 0,126 | -0,114 |
| 10 | P29692 EF1D_HUMAN  | E.NQSLRGVVQE.L          |        | 2 | 2,2497 | 0,22  | -0,216 |
| 10 | P13984 T2FB_HUMAN  | E.SSSDKLSLE.G           |        | 2 | 2,247  | 0,114 | -0,253 |
| 10 | Q13206 DDX10_HUMAN | E.LVLHLLRSQS#.-         | S875:  | 2 | 2,2416 | 0,356 | -0,685 |
| 10 | Q8WUM9 S20A1_HUMAN | R.ERLPS#VDLKEE.T        | S335:  | 2 | 2,2386 | 0,11  | -0,35  |
| 10 | P05787 K2C8_HUMAN  | R.AFSSRS#YTSGPGR.I      | S24:   | 2 | 2,2316 | 0,391 | -0,238 |
| 10 | Q9HAV4 XPO5_HUMAN  | E.IQKDSLQFD.C           |        | 2 | 2,2292 | 0,317 | -0,202 |
| 10 | O94826 TOM70_HUMAN | E.IDNKCDFAYE.T          |        | 2 | 2,2291 | 0,231 | -0,479 |
| 10 | P18583 SON_HUMAN   | R.AGIEGPLLASDVGR.D      |        | 2 | 2,2282 | 0,255 | -0,63  |
| 10 | Q01105 SET_HUMAN   | E.AIEHIDE.V             |        | 2 | 2,228  | 0,178 | -0,148 |
| 10 | O00425 IF2B3_HUMAN | E.KSITILSTPE.G          |        | 2 | 2,2271 | 0,128 | -0,336 |
| 10 | Q9Y6X9 MORC2_HUMAN | R.LM*KPPS#PE.H          | S856:  | 2 | 2,2256 | 0,122 | 0,061  |
| 10 | Q96NJ6 ZFP3_HUMAN  | E.NKEVIPKE.E            |        | 2 | 2,2225 | 0,158 | 0      |
| 10 | Q9H6K1 CF106_HUMAN | E.GNFNPFAS#PQKNR.Q      | S215:  | 2 | 2,2216 | 0,274 | -0,549 |
| 10 | O14980 XPO1_HUMAN  | E.IALRQADEE.K           |        | 2 | 2,2176 | 0,151 | -0,584 |
| 10 | P30153 2AAA_HUMAN  | E.VRLNIISNLDCVNE.V      |        | 2 | 2,213  | 0,321 | -0,441 |
| 10 | Q15648 MED1_HUMAN  | E.KSYQNSPS#SDDGIRPLPE.Y | S1481: | 2 | 2,2104 | 0,305 | -0,707 |
| 10 | Q9UKV3 ACINU_HUMAN | E.VATPPVPLQVCEPK.E      |        | 2 | 2,2044 | 0,378 | -0,367 |
| 10 | O75643 U520_HUMAN  | E.KDLIPYLE.K            |        | 2 | 2,2028 | 0,102 | -0,492 |
| 10 | Q5JTD0 TJAP1_HUMAN | R.GS#PEEELPLPAFE.K      | S300:  | 2 | 2,2012 | 0,299 | -0,245 |

|    |                      |                        |            |   |        |       |        |
|----|----------------------|------------------------|------------|---|--------|-------|--------|
| 10 | P21333 FLNA_HUMAN    | E.VVIQDPM*GQK.G        |            | 2 | 2,1958 | 0,308 | -0,324 |
| 10 | A1L390 PKHG3_HUMAN   | E.M*DSYYPNR.Y          |            | 2 | 2,1955 | 0,154 | -0,919 |
| 10 | O43390 HNRPR_HUMAN   | E.M*NGKEIEGEEIE.I      |            | 2 | 2,188  | 0,111 | -0,175 |
| 10 | Q96PM5 ZN363_HUMAN   | E.SYNTAQAGGR.R         |            | 2 | 2,1869 | 0,316 | -0,357 |
| 10 | Q14498 RBM39_HUMAN   | E.IKDDVIEE.C           |            | 2 | 2,1864 | 0,184 | 0,19   |
| 10 | P13639 EF2_HUMAN     | E.S#GEHIIAGAGE.L       | S541:      | 2 | 2,1847 | 0,175 | -0,327 |
| 10 | Q9UKK9 NUDT5_HUMAN   | E.TGYKGDIAE.C          |            | 2 | 2,1833 | 0,13  | -0,192 |
| 10 | Q9NWS0 PIHD1_HUMAN   | E.DKYNLQLNPE.W         |            | 2 | 2,1792 | 0,123 | -0,395 |
| 10 | Q6P0N0 CN106_HUMAN   | E.NQVAM*SFYK.H         |            | 2 | 2,1778 | 0,153 | -0,442 |
| 10 | P48643 TCPE_HUMAN    | E.KLGFAGLVQE.I         |            | 2 | 2,1765 | 0,1   | -0,23  |
| 10 | Q9Y266 NUDC_HUMAN    | E.TSGPQIKE.L           |            | 2 | 2,1758 | 0,171 | 0,071  |
| 10 | P35527 K1C9_HUMAN    | K.TLNDMRQEYEQLIAK.N    |            | 2 | 2,1653 | 0,31  | -0,527 |
| 10 | Q9Y570 PPME1_HUMAN   | K.VKNPEDLSAE.T         |            | 2 | 2,1605 | 0,238 | -0,332 |
| 10 | P16949 STMN1_HUMAN   | E.LILS#PRSKE.S         | S25:       | 2 | 2,1595 | 0,09  | -0,326 |
| 10 | Q99829 CPNE1_HUMAN   | E.LRDDDFLGGAE.C        |            | 2 | 2,1591 | 0,149 | -0,202 |
| 10 | A6NK10 A6NK10_HUMAN  | E.VELGGNGLKR.T         |            | 2 | 2,1581 | 0,119 | -0,117 |
| 10 | P05362 ICAM1_HUMAN   | R.SFSCSATLE.V          |            | 2 | 2,1577 | 0,161 | -0,122 |
| 10 | Q8N6T3 ARFG1_HUMAN   | E.TFGSAEPTK.T          |            | 2 | 2,156  | 0,333 | -0,065 |
| 10 | Q15061 WDR43_HUMAN   | K.VRT#PVMNSE.A         | T394:      | 2 | 2,1554 | 0,158 | -0,11  |
| 10 | Q15185 TEBP_HUMAN    | E.DSKDVNVNFE.K         |            | 2 | 2,1554 | 0,146 | -0,314 |
| 10 | Q12756 KIF1A_HUMAN   | E.DGGTLGVFS#PK.K       | S487:      | 2 | 2,1522 | 0,218 | -0,316 |
| 10 | Q02790 FKBP4_HUMAN   | E.MNSEEKLE.Q           |            | 2 | 2,1518 | 0,144 | -0,311 |
| 10 | P78310 CXAR_HUMAN    | E.RTPQS#PTLPPAK.V      | S332:      | 2 | 2,1512 | 0,169 | -0,267 |
| 10 | Q9H2P0 ADNP_HUMAN    | E.TIHLTEEPTK.L         |            | 2 | 2,1507 | 0,15  | -0,313 |
| 10 | P35527 K1C9_HUMAN    | K.TLLDIDNTR.M          |            | 2 | 2,1491 | 0,152 | -0,345 |
| 10 | P43243 MATR3_HUMAN   | E.SGYDRM*DYE.D         |            | 2 | 2,1478 | 0,229 | -0,65  |
| 10 | Q9UQ35 SRRM2_HUMAN   | R.SSTGPEPPAPTLLAE.R    |            | 2 | 2,1451 | 0,116 | -0,468 |
| 10 | P20700 LMNB1_HUMAN   | R.LKLS#PSPSSRVTV#VSR.A | S391:T399: | 2 | 2,134  | 0,33  | -0,344 |
| 10 | Q8IX90 CMO03_HUMAN   | R.SPQLSDFGLE.R         |            | 2 | 2,1336 | 0,221 | -0,335 |
| 10 | P10599 THIO_HUMAN    | E.KYSNVIFLE.V          |            | 2 | 2,1327 | 0,1   | -0,438 |
| 10 | ##Q5VW38 GP107_HUMAN | E.MVGS#TTVVSEMELD.E    | S28:       | 2 | 2,1322 | 0,091 | -0,077 |
| 10 | P21980 TGM2_HUMAN    | E.KSVPLCILYE.K         |            | 2 | 2,132  | 0,108 | -0,3   |
| 10 | O43715 TRIA1_HUMAN   | E.KEIPIEGLE.F          |            | 2 | 2,1196 | 0,131 | -0,119 |



|    |                    |                           |            |   |        |       |        |
|----|--------------------|---------------------------|------------|---|--------|-------|--------|
| 10 | Q14204 DYHC1_HUMAN | E.ISDAIRE.K               |            | 2 | 2,1168 | 0,089 | 0,303  |
| 10 | Q9ULR0 ISY1_HUMAN  | K.FIAHVPVPSQQEIEE.A       |            | 2 | 2,1123 | 0,149 | -0,637 |
| 10 | P08670 VIME_HUMAN  | E.QQNKILLAELE.Q           |            | 2 | 2,1101 | 0,231 | -0,564 |
| 10 | P49790 NU153_HUMAN | E.DHLVYADEE.S             |            | 2 | 2,1048 | 0,22  | -0,224 |
| 10 | P27816 MAP4_HUMAN  | E.EGRPVVSGTGNDITT#PPNKE.L | T687:      | 2 | 2,093  | 0,248 | -0,227 |
| 10 | Q58FF7 H90B3_HUMAN | E.YCVQQLKE.F              |            | 2 | 2,0905 | 0,157 | -1,142 |
| 10 | P04843 RPN1_HUMAN  | E.GSDLCDRVSE.M            |            | 2 | 2,0882 | 0,328 | 0,107  |
| 10 | P68104 EF1A1_HUMAN | K.IGGIGTVPVGRVE.T         |            | 2 | 2,0858 | 0,223 | -0,389 |
| 10 | P05386 RLA1_HUMAN  | E.ES#DDDM*GFGLFD.-        | S104:      | 2 | 2,0848 | 0,186 | -0,338 |
| 10 | Q9NZL4 HPBP1_HUMAN | E.KLLQTCFSS#PADDSM*DR.-   | S354:      | 2 | 2,0844 | 0,305 | -0,472 |
| 10 | O60313 OPA1_HUMAN  | E.EHPAYLASDE.I            |            | 2 | 2,0842 | 0,187 | -0,539 |
| 10 | O75694 NU155_HUMAN | E.DRM*YPDLSE.L            |            | 2 | 2,0838 | 0,243 | -0,214 |
| 10 | O75694 NU155_HUMAN | K.AAPQSPS#VPK.K           | S994:      | 2 | 2,0812 | 0,211 | -0,115 |
| 10 | Q96KB5 TOPK_HUMAN  | E.GISNFKTPSKLS#E.K        | S14:       | 2 | 2,0791 | 0,14  | -0,492 |
| 10 | P06576 ATPB_HUMAN  | E.GNDLYHE.M               |            | 2 | 2,0749 | 0,284 | 0,072  |
| 10 | P14618 KPYM_HUMAN  | E.TAKGDYPLE.A             |            | 2 | 2,0747 | 0,148 | -0,061 |
| 10 | Q8NE71 ABCF1_HUMAN | E.NASDIKLE.K              |            | 2 | 2,0699 | 0,189 | -0,137 |
| 10 | Q96QR8 PURB_HUMAN  | E.FRDSLGFIE.H             |            | 2 | 2,0679 | 0,176 | -0,102 |
| 10 | Q92622 K0226_HUMAN | E.YLAIGNLDPR.G            |            | 2 | 2,0636 | 0,178 | -0,108 |
| 10 | Q6S8J3 A26CA_HUMAN | E.HGIITNWDDME.K           |            | 2 | 2,0551 | 0,234 | -0,642 |
| 10 | P63241 IF5A1_HUMAN | E.GDLGKEIE.Q              |            | 2 | 2,0538 | 0,134 | -0,071 |
| 10 | Q96JI7 SPTCS_HUMAN | E.LLEEEAPDIPLR.R          |            | 2 | 2,0517 | 0,127 | -0,437 |
| 10 | P35658 NU214_HUMAN | K.S#PRITPPAAKPGS#PQAK.S   | S666:S678: | 2 | 2,0508 | 0,202 | -0,458 |
| 10 | Q92688 AN32B_HUMAN | R.IFGGLDLMLAE.K           |            | 2 | 2,0493 | 0,119 | -0,229 |
| 10 | Q01518 CAP1_HUMAN  | E.NKLSDLLAPISE.Q          |            | 2 | 2,0476 | 0,321 | -0,375 |
| 10 | Q92797 SYMPK_HUMAN | D.SSLEGPLPK.E             |            | 2 | 2,0455 | 0,238 | 0,131  |
| 10 | Q6PKG0 LARP1_HUMAN | R.AVTPVPTKTEE.V           |            | 2 | 2,0416 | 0,229 | -0,416 |
| 10 | P38646 GRP75_HUMAN | E.DKVIAYVD.L              |            | 2 | 2,0408 | 0,142 | 0,132  |
| 10 | P33993 MCM7_HUMAN  | E.SGAGELTREE.L            |            | 2 | 2,0394 | 0,167 | 0      |
| 10 | Q8N350 DOS_HUMAN   | R.FLSTSSTGR.R             |            | 2 | 2,0354 | 0,29  | -0,638 |
| 10 | Q15942 ZYX_HUMAN   | R.EKVSSIDLE.I             |            | 2 | 2,0245 | 0,157 | -0,06  |
| 10 | P55084 ECHB_HUMAN  | E.KAGLTMNDIDAFE.F         |            | 2 | 2,0183 | 0,156 | -0,428 |
| 10 | Q9UKM9 RALY_HUMAN  | E.AGLPQGEAR.T             |            | 2 | 2,01   | 0,288 | -0,882 |

|    |                     |                           |              |   |        |       |        |
|----|---------------------|---------------------------|--------------|---|--------|-------|--------|
| 10 | P00533 EGFR_HUMAN   | E.DHFLSLQR.M              |              | 2 | 2,007  | 0,201 | -0,12  |
| 10 | Q9H792 SG269_HUMAN  | E.FNNCLNR.G               |              | 2 | 1,9996 | 0,102 | 0      |
| 10 | Q9NZW5 MPP6_HUMAN   | E.AHDIVASK.C              |              | 2 | 1,9966 | 0,333 | 0,145  |
| 10 | Q15149 PLEC1_HUMAN  | E.SYSALM*RE.L             |              | 2 | 1,9935 | 0,185 | 0,313  |
| 10 | B2RA01 B2RA01_HUMAN | K.AQYEDIAQK.S             |              | 2 | 1,9864 | 0,146 | -0,229 |
| 10 | Q01082 SPTB2_HUMAN  | E.SS#PIPS#PTSDR.K         | S2165:S2169: | 2 | 1,9803 | 0,086 | -0,468 |
| 10 | P05787 K2C8_HUMAN   | R.SLDMDSIIAE.V            |              | 2 | 1,9801 | 0,144 | -0,335 |
| 10 | P46379 BAT3_HUMAN   | E.VQGAERAS#PEPQRE.N       | S964:        | 2 | 1,9793 | 0,201 | -0,373 |
| 10 | P18754 RCC1_HUMAN   | E.QGQLGRVPE.L             |              | 2 | 1,9724 | 0,272 | -0,186 |
| 10 | P49368 TCPG_HUMAN   | E.KIPGGIIE.D              |              | 2 | 1,9723 | 0,277 | 0,074  |
| 10 | Q9BTT0 AN32E_HUMAN  | E.GLNDFKE.L               |              | 2 | 1,9686 | 0,247 | 0,066  |
| 10 | Q9UER7 DAXX_HUMAN   | K.TSVATQCDPEEIVLS#DSD.-   | S737:        | 2 | 1,9677 | 0,133 | 0,113  |
| 10 | O95202 LETM1_HUMAN  | E.VAKDFEPE.R              |              | 2 | 1,9661 | 0,296 | 0      |
| 10 | Q9NX63 CHCH3_HUMAN  | E.FYRVTTTE.Q              |              | 2 | 1,9645 | 0,081 | -0,133 |
| 10 | Q6S8J3 A26CA_HUMAN  | E.KM*TMQIM*FE.T           |              | 2 | 1,9643 | 0,114 | 0      |
| 10 | P11021 GRP78_HUMAN  | E.GEKNILVFD.L             |              | 2 | 1,964  | 0,121 | -0,118 |
| 10 | Q9NTI5 PDS5B_HUMAN  | K.TPS#PSQPK.K             | S1383:       | 2 | 1,9591 | 0,107 | -0,132 |
| 10 | P27816 MAP4_HUMAN   | E.TERAS#PIKMD.L           | S358:        | 2 | 1,9525 | 0,257 | -0,199 |
| 10 | P52292 IMA2_HUMAN   | E.CGGLDKIE.A              |              | 2 | 1,9483 | 0,081 | -0,137 |
| 10 | O43776 SYNC_HUMAN   | E.LYVSDRE.G               |              | 2 | 1,9472 | 0,204 | 0      |
| 10 | Q92622 K0226_HUMAN  | E.SQLSSVLR.R              |              | 2 | 1,9431 | 0,087 | -0,206 |
| 10 | P30281 CCND3_HUMAN  | R.GSSSQGQSQTSTPTDVTAIHL.- |              | 2 | 1,9275 | 0,408 | -0,353 |
| 10 | Q09666 AHNK_HUMAN   | K.AGLRVS#APE.V            | S332:        | 2 | 1,9156 | 0,13  | 0,125  |
| 10 | P55072 TERA_HUMAN   | E.VDIGIPDATGRLE.I         |              | 2 | 1,9085 | 0,191 | -0,63  |
| 10 | P25787 PSA2_HUMAN   | E.VKDYLAIA.-              |              | 2 | 1,9072 | 0,271 | 0,127  |
| 10 | P55265 DSRAD_HUMAN  | E.KICDYLFNVSD.S           |              | 2 | 1,9032 | 0,201 | -0,355 |
| 10 | Q96RU3 FNBP1_HUMAN  | E.DYTQPMKR.T              |              | 2 | 1,8957 | 0,106 | -0,587 |
| 10 | Q6ZRV2 FA83H_HUMAN  | R.RLS#LGQGDSTE.A          | S1003:       | 2 | 1,8886 | 0,339 | -0,589 |
| 10 | P21333 FLNA_HUMAN   | E.VSVKFNE.E               |              | 2 | 1,8799 | 0,082 | 0,148  |
| 10 | Q4ZG04 Q4ZG04_HUMAN | E.LLLSTLVR.E              |              | 2 | 1,8674 | 0,11  | -0,267 |
| 10 | P39687 AN32A_HUMAN  | E.LS#DNRVSGGLE.V          | S72:         | 2 | 1,8666 | 0,164 | -0,398 |
| 10 | Q9ULR0 ISY1_HUMAN   | K.FIAHVPVPSQQE.I          |              | 2 | 1,8622 | 0,172 | -0,541 |
| 10 | Q8WUM4 PDC6I_HUMAN  | E.NDLKSVNFD.M             |              | 2 | 1,8584 | 0,124 | -0,232 |

|    |                      |                              |              |   |        |       |        |
|----|----------------------|------------------------------|--------------|---|--------|-------|--------|
| 10 | P60709 ACTB_HUMAN    | R.GYSFTTTAERE.I              |              | 2 | 1,8582 | 0,248 | -0,29  |
| 10 | P04264 K2C1_HUMAN    | R.TLLEGEESR.M                |              | 2 | 1,855  | 0,182 | -0,236 |
| 10 | O75153 EIF3X_HUMAN   | R.FNPDIFSPGVR.F              |              | 2 | 1,8523 | 0,237 | -0,293 |
| 10 | O75822 EIF3J_HUMAN   | E.KSLYYASFLE.V               |              | 2 | 1,8519 | 0,111 | -0,4   |
| 10 | P46940 IQGA1_HUMAN   | E.LQDKFNVDE.Y                |              | 2 | 1,8489 | 0,139 | -0,881 |
| 10 | Q9NXH9 TRM1_HUMAN    | R.VSADAAPDCPE.T              |              | 2 | 1,8472 | 0,207 | -0,323 |
| 10 | P13667 PDIA4_HUMAN   | E.VAKDFPE.Y                  |              | 2 | 1,8447 | 0,164 | 0,151  |
| 10 | Q9BTT0 AN32E_HUMAN   | E.DYRESIFE.L                 |              | 2 | 1,8427 | 0,104 | -0,115 |
| 10 | P13010 KU86_HUMAN    | E.AIKFSEE.Q                  |              | 2 | 1,8335 | 0,154 | 0,148  |
| 10 | Q9Y6D5 BIG2_HUMAN    | E.IGDGKGLDM*AR.R             |              | 2 | 1,8294 | 0,17  | -0,531 |
| 10 | P04264 K2C1_HUMAN    | K.DVDGAYMTK.V                |              | 2 | 1,8287 | 0,179 | -0,244 |
| 10 | P05787 K2C8_HUMAN    | R.VGS#SNFR.G                 | S43:         | 2 | 1,8263 | 0,222 | 0      |
| 10 | Q58FF8 H90B2_HUMAN   | K.YIDQEELNK.T                |              | 2 | 1,8209 | 0,144 | -0,635 |
| 10 | Q8N108 MIER1_HUMAN   | E.LLSLYGYGSTVR.L             |              | 2 | 1,8204 | 0,155 | -0,459 |
| 10 | Q9HCM7 AUT2L_HUMAN   | R.TTPLGGLPGGEAR.D            |              | 2 | 1,8203 | 0,182 | -0,398 |
| 10 | Q05519 SFR11_HUMAN   | E.CS#VEKGTGDSLRE.S           | S456:        | 2 | 1,8196 | 0,513 | -0,402 |
| 10 | P04264 K2C1_HUMAN    | K.SISISVAR.G                 |              | 2 | 1,8138 | 0,112 | 1,098  |
| 10 | P11021 GRP78_HUMAN   | E.KNILVFD.L                  |              | 2 | 1,8113 | 0,087 | -0,287 |
| 10 | O95817 BAG3_HUMAN    | R.SSVQGASS#RE.G              | S275:        | 2 | 1,8098 | 0,194 | -0,336 |
| 10 | Q12756 KIF1A_HUMAN   | R.TPQPCS#RPAS#PEPELLPE.A     | S1528:S1532: | 2 | 1,7973 | 0,147 | -0,564 |
| 10 | P15924 DESP_HUMAN    | K.ISTISSVR.N                 |              | 2 | 1,782  | 0,15  | 0,212  |
| 10 | O15417 TNC18_HUMAN   | R.KEEAPENVVE.K               |              | 2 | 1,7591 | 0,159 | -0,213 |
| 10 | P12814 ACTN1_HUMAN   | E.KLASDLLE.W                 |              | 2 | 1,752  | 0,1   | 0      |
| 10 | P30837 AL1B1_HUMAN   | R.DRVYLASLE.T                |              | 2 | 1,7509 | 0,108 | -0,114 |
| 10 | P35221 CTNA1_HUMAN   | E.DFDVRS#RTSVQTE.D           | S652:        | 2 | 1,7481 | 0,196 | -0,603 |
| 10 | Q15154 PCM1_HUMAN    | E.VYDGPKNVR.S                |              | 2 | 1,7381 | 0,11  | -0,233 |
| 10 | Q71U36 TBA1A_HUMAN   | E.KDYEEVGVD.S                |              | 2 | 1,7372 | 0,095 | -0,116 |
| 10 | O75691 UTP20_HUMAN   | K.SLSDNGQPGT#PDPADSGGTSAKE.S | T1741:       | 2 | 1,7363 | 0,38  | -0,323 |
| 10 | Q8TE77 SSH3_HUMAN    | E.QKVGGVS#PEEHPAPE.V         | S484:        | 2 | 1,7335 | 0,139 | -0,223 |
| 10 | Q15149 PLEC1_HUMAN   | K.VLALPEPSPAAPTLR.S          |              | 2 | 1,7322 | 0,177 | -0,478 |
| 10 | P21333 FLNA_HUMAN    | E.GLHSVDTVYD.G               |              | 2 | 1,726  | 0,108 | 0      |
| 10 | P06753 TPM3_HUMAN    | E.GDLERTEE.R                 |              | 2 | 1,7059 | 0,089 | -0,193 |
| 10 | ##P07942 LAMB1_HUMAN | K.AT#SNSQSTTDSLK.V           | T506:        | 2 | 1,7003 | 0,098 | 1,375  |

|    |                     |                                      |              |   |        |       |        |
|----|---------------------|--------------------------------------|--------------|---|--------|-------|--------|
| 10 | P62753 RS6_HUMAN    | R.LSSLRAS#TSKSE.S                    | S240:        | 2 | 1,6992 | 0,094 | -0,453 |
| 10 | P56537 IF6_HUMAN    | E.SVFKLNE.A                          |              | 2 | 1,6639 | 0,084 | 0,073  |
| 10 | P85037 FOXK1_HUMAN  | R.EGS#PIPHDPE.F                      | S445:        | 2 | 1,6598 | 0,102 | -0,316 |
| 10 | P49790 NU153_HUMAN  | D.TSEVPRWPE.N                        |              | 2 | 1,6553 | 0,176 | -0,222 |
| 10 | P39748 FEN1_HUMAN   | E.AHQLFLEPE.V                        |              | 2 | 1,6344 | 0,131 | -0,338 |
| 10 | ##Q15173 2A5B_HUMAN | K.YSAT#LEDFLK.G                      | T58:         | 2 | 1,6337 | 0,093 | -1,83  |
| 10 | Q9Y5Z4 HEBP2_HUMAN  | E.DGKVFDE.K                          |              | 2 | 1,6134 | 0,164 | 0,151  |
| 10 | Q9Y6D5 BIG2_HUMAN   | E.GS#LKGHTLAGEE.F                    | S1024:       | 2 | 1,5646 | 0,13  | -0,477 |
| 10 | Q9NWX4 CD027_HUMAN  | E.KT#T#DVKK#K.F                      | T20:T21:S26: | 2 | 1,5054 | 0,236 | 0,479  |
| 10 | Q07666 KHDR1_HUMAN  | E.YDYGHGE.V                          |              | 2 | 1,5026 | 0,091 | -0,182 |
| 10 | P62753 RS6_HUMAN    | R.LSS#LRASTK.S                       | S236:        | 2 | 1,456  | 0,306 | -0,324 |
| 10 | O75096 LRP4_HUMAN   | K.IERANLDGSE.R                       |              | 2 | 1,4187 | 0,094 | 0,442  |
| 11 | Q2TAL8 QRIC1_HUMAN  | E.AYNAVHVSGS#PTALAAVKLEDDKE.K        | S345:        | 3 | 6,5779 | 0,475 | -0,285 |
| 11 | B2CI53 B2CI53_HUMAN | E.RNGILAS PQS#APGNLDNSKSGE.I         | S263:        | 3 | 6,0125 | 0,395 | -0,479 |
| 11 | Q9UQ35 SRRM2_HUMAN  | R.SSGHSSSELS#PDAVEK.A                | S1387:       | 2 | 5,9792 | 0,447 | -0,647 |
| 11 | P40189 IL6RB_HUMAN  | E.GHSSGIGGSSCM*SSSRPS#ISSSDENE.S     | S740:        | 3 | 5,8967 | 0,509 | 0,068  |
| 11 | O14617 AP3D1_HUMAN  | K.HRPSEADEELAR.R                     |              | 3 | 5,5891 | 0,43  | -0,594 |
| 11 | A8K6V7 A8K6V7_HUMAN | E.LEEKSTT#PPPAEPVSLPQEPKPR.V         | T227:        | 3 | 5,583  | 0,392 | -0,541 |
| 11 | Q08J23 NSUN2_HUMAN  | R.AGEPNS#PDAAEANS#PDVTAGCDPAGVHPPR.- | S743:S751:   | 3 | 5,5483 | 0,555 | -0,346 |
| 11 | Q9ULT8 HECD1_HUMAN  | E.GHDSL SVGS#FEEDSKSE.F              | S2320:       | 2 | 5,4685 | 0,543 | -0,646 |
| 11 | P55884 EIF3B_HUMAN  | R.S#DSRAQAVSE DAGGNE.G               | S117:        | 2 | 5,2798 | 0,602 | -0,511 |
| 11 | Q9H1B7 EAP1_HUMAN   | E.VGVGAGGKRP GS#VSS#TDQERE.L         | S334:S337:   | 3 | 5,2095 | 0,458 | -0,573 |
| 11 | P49792 RBP2_HUMAN   | E.DALDDSVSSSVHAS#PLASS#PVRK.N        | S2246:S2251: | 3 | 5,2013 | 1     | -0,498 |
| 11 | Q92797 SYMPK_HUMAN  | K.LKPGGVGAPSSSS#PSPS#PSARPGPPPSEE.A  | S1171:S1175: | 3 | 5,153  | 1     | -0,701 |
| 11 | B2CI53 B2CI53_HUMAN | R.NGILAS PQSAPGNLDNSK.S              |              | 2 | 4,9875 | 0,534 | -0,479 |
| 11 | P13645 K1C10_HUMAN  | K.GSLGGGFSSGGFSGGSFSR.G              |              | 2 | 4,9846 | 0,567 | -0,429 |
| 11 | Q9H4A3 WNK1_HUMAN   | K.DRPVSQPSLVGSKEPPPAR.S              |              | 3 | 4,9602 | 0,325 | -0,938 |
| 11 | Q92598 HS105_HUMAN  | E.LNNTCEPVVTQPKPKIES#PKLE.R          | S809:        | 3 | 4,945  | 0,377 | -0,563 |
| 11 | Q09666 AHNK_HUMAN   | K.TVIRLPSGS#GAASPTGSAVDIR.A          | S212:        | 3 | 4,9443 | 0,359 | -0,417 |
| 11 | Q15398 DLG7_HUMAN   | E.RM*S#LPLLAGGVADDINTNKK.E           | S725:        | 3 | 4,9414 | 0,407 | -0,083 |
| 11 | Q9UK76 HN1_HUMAN    | R.RNS#SEAS#SGDFLDLKG.E               | S87:S91:     | 2 | 4,9001 | 0,558 | -0,248 |
| 11 | P41227 ARD1A_HUMAN  | E.SKGNS#PPSSGEACREE.K                | S186:        | 3 | 4,8867 | 0,252 | -0,206 |
| 11 | Q09666 AHNK_HUMAN   | E.TQSGKTVIRLPS#GSGAASPTGSAVDIR.A     | S210:        | 3 | 4,7978 | 0,345 | -0,136 |

|    |                     |                                     |              |   |        |       |        |
|----|---------------------|-------------------------------------|--------------|---|--------|-------|--------|
| 11 | Q8IYB3 SRRM1_HUMAN  | E.ATSTSDILKVPKPEPIPEPEPS#PE.K       | S260:        | 3 | 4,7907 | 0,341 | -0,463 |
| 11 | Q9H8G2 CI082_HUMAN  | E.KELFLAEHS#DLEE.G                  | S120:        | 2 | 4,786  | 0,353 | -0,298 |
| 11 | Q9NZT2 OGFR_HUMAN   | E.GAGDAAVASGGAQTLALAGS#PAPSGHPK.A   | S484:        | 3 | 4,7809 | 0,39  | -0,283 |
| 11 | P49792 RBP2_HUMAN   | R.CVACQNPDKPS#PSTSVAPASF.K          | S1573:       | 3 | 4,7582 | 0,3   | -0,072 |
| 11 | Q05682 CALD1_HUMAN  | E.KGNVFSPTAAGT#PNKE.T               | T730:        | 2 | 4,7439 | 0,559 | -0,684 |
| 11 | P38398 BRCA1_HUMAN  | E.LEDLTANTNTQDPFLIGSSK.Q            |              | 3 | 4,6875 | 0,266 | -0,507 |
| 11 | P27816 MAP4_HUMAN   | E.VALAKDMES#PTKLDVTLAK.D            | S280:        | 3 | 4,6797 | 0,573 | -0,347 |
| 11 | Q9ULT8 HECD1_HUMAN  | E.GHDSLVSQS#FEEDSKSE.F              | S2320:       | 3 | 4,6536 | 0,346 | -0,387 |
| 11 | P04183 KITH_HUMAN   | R.KLFAPQQLQCS#PAN.-                 | S231:        | 2 | 4,6237 | 0,445 | -0,748 |
| 11 | Q09666 AHNK_HUMAN   | K.SSKAS#LGS#LEGEAEAE.A              | S5749:S5752: | 2 | 4,5802 | 0,578 | 0,141  |
| 11 | Q8NG31 CASC5_HUMAN  | R.KSLGTPTVICT#PTEE.S                | T1017:       | 2 | 4,5701 | 0,464 | -0,499 |
| 11 | Q92598 HS105_HUMAN  | E.LNNTCEPVVTQPKPK.I                 |              | 3 | 4,5649 | 0,417 | -0,106 |
| 11 | Q15365 PCBP1_HUMAN  | R.VM*TIPYQPM*PASSPVICAGGQDR.C       |              | 3 | 4,5337 | 0,459 | -0,438 |
| 11 | Q13263 TIF1B_HUMAN  | E.DGSLSLDGADSTGVVAKLS#PANQR.K       | S697:        | 3 | 4,5231 | 0,377 | -0,6   |
| 11 | P55884 EIF3B_HUMAN  | R.S#DSRAQAVSEDAGGNEGR.A             | S117:        | 3 | 4,4927 | 0,35  | -0,679 |
| 11 | Q9HCD6 TANC2_HUMAN  | E.ARPSQGLPVIQS#PPSS#PPHRD.S         | S1442:S1446: | 3 | 4,491  | 0,166 | -0,307 |
| 11 | Q9UHR5 S30BP_HUMAN  | E.KGGLVSDAYGEDDFSR.L                |              | 3 | 4,4819 | 0,419 | -0,107 |
| 11 | Q9Y4M2 Q9Y4M2_HUMAN | K.SSFLS#SPERAVNPHLPR.Q              | S133:        | 3 | 4,473  | 0,305 | -0,371 |
| 11 | Q9HCD6 TANC2_HUMAN  | E.ARPSQGLPVIQS#PPS#SPPHRD.S         | S1442:S1445: | 3 | 4,4431 | 0,206 | -0,307 |
| 11 | Q9UK76 HN1_HUMAN    | R.RNSSEAS#S#GDFLDLKG.E              | S91:S92:     | 3 | 4,4388 | 0,341 | -0,649 |
| 11 | O75531 BAF_HUMAN    | R.DFVAEPM*GEKPVGSLAGIGE.V           |              | 2 | 4,4146 | 0,56  | -0,725 |
| 11 | Q15365 PCBP1_HUMAN  | R.VMTIPYQPM*PASSPVICAGGQDR.C        |              | 3 | 4,4088 | 0,388 | -0,294 |
| 11 | Q14247 SRC8_HUMAN   | R.AKTQTPPV#PAPQPTTEERLPS#SPVYE.D    | S405:S417:   | 3 | 4,389  | 1     | -0,555 |
| 11 | P27816 MAP4_HUMAN   | K.DMES#PTKLDVTLAK.D                 | S280:        | 2 | 4,3768 | 0,374 | -0,375 |
| 11 | Q02880 TOP2B_HUMAN  | E.LKVKAS#PITNDGEDE.F                | S1400:       | 2 | 4,3688 | 0,549 | -0,647 |
| 11 | P35527 K1C9_HUMAN   | R.GSGSGSYGGGGSGGGYGGGSGSR.G         |              | 2 | 4,3646 | 0,522 | -0,136 |
| 11 | Q02952 AKA12_HUMAN  | E.HTQVPADSPDS#QEEQKGE.S             | S557:        | 3 | 4,3456 | 0,269 | -0,532 |
| 11 | P35606 COPB2_HUMAN  | E.LDGKPAS#PTPVIVASHTANKEE.K         | S859:        | 3 | 4,3376 | 0,409 | 0,078  |
| 11 | Q15365 PCBP1_HUMAN  | R.VM*TIPYQMPASSPVICAGGQDR.C         |              | 3 | 4,3307 | 0,338 | -0,367 |
| 11 | P08047 SP1_HUMAN    | R.SSSTGSSSTGGGGQESQPS#PLALLAATCSR.I | S59:         | 3 | 4,3293 | 1     | -0,426 |
| 11 | P08559 ODPA_HUMAN   | E.NNRYGMGT#VER.A                    | S232:        | 3 | 4,3285 | 0,372 | -0,125 |
| 11 | Q9UQ35 SRRM2_HUMAN  | R.GEFSAS#PM*LKSGMS#PE.Q             | S1124:S1132: | 2 | 4,3091 | 0,442 | -0,933 |
| 11 | O75717 WDHD1_HUMAN  | E.NRSNILSDNPDFSDE.A                 |              | 2 | 4,2883 | 0,569 | -0,354 |

|    |                     |                                  |              |   |        |       |        |
|----|---------------------|----------------------------------|--------------|---|--------|-------|--------|
| 11 | P84103 SFRS3_HUMAN  | K.VYVGNLGNNGNKTELE.R             |              | 2 | 4,2876 | 0,447 | -0,567 |
| 11 | P51858 HDGF_HUMAN   | E.VERPLPM*EVEKNST#PSEPGSGR.G     | T200:        | 3 | 4,2613 | 0,32  | -0,954 |
| 11 | Q9BQE6 CK048_HUMAN  | E.DSHGSGS#PFKASQD.-              | S282:        | 2 | 4,2544 | 0,508 | -0,895 |
| 11 | Q05682 CALD1_HUMAN  | E.KGNVFSS#PTAAGTPNKE.T           | S724:        | 2 | 4,2297 | 0,443 | -0,82  |
| 11 | Q5VZL5 ZMYM4_HUMAN  | K.CGGVEQASS#PRSDPLGSTQDHALSQE.S  | S1241:       | 3 | 4,2147 | 0,235 | -0,254 |
| 11 | Q6Y7W6 PERQ2_HUMAN  | E.MGTFDSS#GAFSLK.K               | S303:        | 2 | 4,2142 | 0,447 | -0,713 |
| 11 | Q14247 SRC8_HUMAN   | R.AKTQT#PPVSPAPQPTTEE.R          | T401:        | 2 | 4,1965 | 0,523 | -0,722 |
| 11 | Q02040 SF17A_HUMAN  | R.CPGGVLSCIPDNNQQPK.G            |              | 2 | 4,1792 | 0,397 | -0,518 |
| 11 | P27816 MAP4_HUMAN   | E.VALAKDM*ES#PTKLDVTLAK.D        | S280:        | 3 | 4,1748 | 0,491 | -0,258 |
| 11 | Q6NZI2 PTRF_HUMAN   | R.RGS#S#PDVHALLE.I               | S365:S366:   | 2 | 4,1729 | 0,506 | -0,254 |
| 11 | Q8N556 AFAP1_HUMAN  | K.KLS#SERPSS#DGEGVVE.N           | S277:S283:   | 2 | 4,1687 | 0,465 | -1,927 |
| 11 | Q6NZI2 PTRF_HUMAN   | E.AGDLRRGS#S#PDVHALLE.I          | S365:S366:   | 3 | 4,167  | 0,304 | -0,468 |
| 11 | P49368 TCPG_HUMAN   | E.KIPGGIIEDSCVLR.G               |              | 3 | 4,1636 | 0,298 | 0,117  |
| 11 | O94964 CT117_HUMAN  | R.NVCGRAP#PTSSAGEE.G             | S432:        | 2 | 4,1497 | 0,464 | -0,503 |
| 11 | Q9Y608 LRRF2_HUMAN  | R.RGS#GDTSSLIDPDTSLSE.L          | S328:        | 2 | 4,1465 | 0,518 | -0,509 |
| 11 | Q53EZ4 CEP55_HUMAN  | E.KVAASPKSPT#AALNE.S             | T430:        | 2 | 4,1283 | 0,371 | -1,326 |
| 11 | Q9Y580 RBM7_HUMAN   | E.RTM*DNMTSSAQIQR.S              |              | 3 | 4,1131 | 0,3   | -0,517 |
| 11 | Q99575 POP1_HUMAN   | R.VQAYEEPSVASS#PNGKE.S           | S730:        | 2 | 4,1099 | 0,487 | -0,847 |
| 11 | Q9ULH0 ARMS_HUMAN   | R.S#SPHSTYIM*GQSSSGGSIHSNLE.Q    | S1410:       | 3 | 4,1015 | 0,236 | -0,292 |
| 11 | A8K6V7 A8K6V7_HUMAN | E.LEEKSTT#PPPAEPVSLPQEPKPRVE.A   | T227:        | 3 | 4,0884 | 0,435 | -0,437 |
| 11 | Q9C0C2 TB182_HUMAN  | E.AADSDAHLFQDSTEPR.A             |              | 2 | 4,0846 | 0,515 | -0,624 |
| 11 | P50458 LHX2_HUMAN   | E.GHEPHS#PSQTTLTNLF.-            | S396:        | 2 | 4,081  | 0,378 | -0,463 |
| 11 | P04183 KITH_HUMAN   | R.KLFAPQQILQCS#PAN.-             | S231:        | 3 | 4,0602 | 0,31  | -0,306 |
| 11 | Q66K74 MAP1S_HUMAN  | E.LPLAASSIRPRT#PSPES#HRSPAEGSE.R | T638:S643:   | 3 | 4,058  | 1     | -0,429 |
| 11 | Q02880 TOP2B_HUMAN  | K.VKAS#PITNDGEDE.F               | S1400:       | 2 | 4,0551 | 0,481 | -1,258 |
| 11 | Q9C0C2 TB182_HUMAN  | K.RDS#LGAYASQDANE.Q              | S893:        | 2 | 4,0524 | 0,524 | -0,387 |
| 11 | P04844 RPN2_HUMAN   | E.DQVIQLM*NAIFSK.K               |              | 2 | 4,0516 | 0,453 | -0,481 |
| 11 | Q6P6C2 ALKB5_HUMAN  | E.AAAAAAAAAAAAAAAAAAAAEPPVSGAK.R |              | 3 | 4,0417 | 0,378 | -0,236 |
| 11 | Q9Y2X3 NOL5_HUMAN   | E.KLNLSCIHS#PVVNE.L              | S109:        | 2 | 4,0278 | 0,351 | -1,083 |
| 11 | Q9UQ35 SRRM2_HUMAN  | E.SYFGVSSLQLKGQSQT#SPDHR.S       | T1063:       | 3 | 4,0125 | 0,333 | -0,152 |
| 11 | Q59HC3 Q59HC3_HUMAN | E.GDNM*ET#PASS#PQLSHDDTHSRIE.H   | T1110:S1114: | 3 | 4,0102 | 0,165 | -0,61  |
| 11 | P12270 TPR_HUMAN    | E.ASDQVSDDTVEM*PLPK.K            |              | 2 | 3,9971 | 0,44  | -0,419 |
| 11 | Q09666 AHNK_HUMAN   | R.LPS#GSGAASPTGSAVDIR.A          | S210:        | 2 | 3,9949 | 0,499 | -0,283 |

|    |                     |                                   |            |   |        |       |        |
|----|---------------------|-----------------------------------|------------|---|--------|-------|--------|
| 11 | Q9NRL3 STRN4_HUMAN  | E.FDFLGS#GEDGEGAPDPRR.C           | S324:      | 3 | 3,9856 | 0,313 | -0,548 |
| 11 | P12270 TPR_HUMAN    | E.LAAM*S#PTAAAVAK.I               | S379:      | 2 | 3,983  | 0,331 | -0,47  |
| 11 | Q71RC2 LARP4_HUMAN  | E.LRSNVVS#PTKNEDNGAPE.N           | S647:      | 2 | 3,9769 | 0,267 | 0,365  |
| 11 | P80723 BASP_HUMAN   | K.AQGPAASAEKPKPVEAPAANSQDTVTVKE.- |            | 3 | 3,9576 | 0,257 | -0,569 |
| 11 | Q12996 CSTF3_HUMAN  | E.LAVEGNPVESNAVLTK.A              |            | 2 | 3,9569 | 0,487 | -0,503 |
| 11 | Q9BRZ2 TRI56_HUMAN  | E.RQGGVQPQAGDGAQT#PKEE.K          | T418:      | 3 | 3,9554 | 0,291 | -0,54  |
| 11 | Q8TEA8 DTD1_HUMAN   | R.SASS#GAEGDVSSEREP.-             | S197:      | 2 | 3,94   | 0,504 | 0,297  |
| 11 | P08047 SP1_HUMAN    | E.KGVGGNNGGNGNGGGAFSQAR.S         |            | 3 | 3,934  | 0,313 | -0,293 |
| 11 | Q9P260 K1468_HUMAN  | R.AGS#ISTLDSLDFAR.Y               | S180:      | 2 | 3,9247 | 0,45  | -0,478 |
| 11 | O94842 TOX4_HUMAN   | E.LVSGS#PVALSPQPR.C               | S562:      | 2 | 3,9215 | 0,429 | -0,41  |
| 11 | P67809 YBOX1_HUMAN  | R.NYQQNYQNS#ESGEKNE.G             | S165:      | 2 | 3,9209 | 0,34  | -0,425 |
| 11 | Q8TEA8 DTD1_HUMAN   | E.DRSASSGAEGDVSS#EREP.-           | S205:      | 2 | 3,9205 | 0,553 | -0,573 |
| 11 | Q6Y7W6 PERQ2_HUMAN  | E.M*GTFDSS#GAFLSLK.K              | S303:      | 2 | 3,9123 | 0,495 | -0,392 |
| 11 | P54578 UBP14_HUMAN  | E.KGEQQYLQDANE.C                  |            | 2 | 3,9107 | 0,374 | 0,152  |
| 11 | Q9UK76 HN1_HUMAN    | R.RNSS#EASS#GDFLDLKG.E            | S88:S92:   | 3 | 3,9085 | 0,32  | -0,278 |
| 11 | Q5M775 SPEC1_HUMAN  | E.KLIYLEHS#PNSE.G                 | S260:      | 2 | 3,8982 | 0,307 | -0,404 |
| 11 | O75179 ANR17_HUMAN  | E.HYPVSSPSSPPAQPGGVS.R            |            | 3 | 3,8852 | 0,337 | -0,525 |
| 11 | P84103 SFRS3_HUMAN  | K.VYVGNLGNNGNKTE.L                |            | 2 | 3,872  | 0,329 | -0,33  |
| 11 | Q6ZRV2 FA83H_HUMAN  | R.RLS#LGQGDS TEAATEE.R            | S1003:     | 2 | 3,8537 | 0,382 | -0,42  |
| 11 | O75145 LIPA3_HUMAN  | R.RGS#ALGPDEAGGELE.R              | S17:       | 2 | 3,8508 | 0,464 | -0,476 |
| 11 | P05783 K1C18_HUMAN  | R.GGM*GSGGLATGIAGGLAGM*GGIQNE.K   |            | 3 | 3,8503 | 0,333 | -0,676 |
| 11 | P48634 BAT2_HUMAN   | R.RAAAKS#PDLSNQNSDQANEE.W         | S1306:     | 3 | 3,8444 | 0,225 | -0,247 |
| 11 | P35527 K1C9_HUMAN   | R.HGVQELEIELQSQLSK.K              |            | 3 | 3,8431 | 0,266 | -0,1   |
| 11 | Q92598 HS105_HUMAN  | E.LNNTCEPVVTQPKPK.I               |            | 2 | 3,8377 | 0,371 | -1,98  |
| 11 | B2RXH1 B2RXH1_HUMAN | E.KSSLGEKAES#VANVNANTPSSE.L       | S685:      | 3 | 3,8372 | 0,318 | 0      |
| 11 | Q7Z417 NUFP2_HUMAN  | E.LEKRTS#PQVLGSILK.S              | S572:      | 3 | 3,8362 | 0,173 | -0,314 |
| 11 | Q96LR5 UB2E2_HUMAN  | R.VDDSPSTSGGS#SDGDQRE.S           | S18:       | 2 | 3,8273 | 0,439 | -0,455 |
| 11 | P41227 ARD1A_HUMAN  | E.SKGNs#PPSSGEACREE.K             | S186:      | 2 | 3,8237 | 0,488 | -0,482 |
| 11 | Q9P2R6 RERE_HUMAN   | E.DIRS#SGRNS#PSAASTSSNDSKAE.T     | S608:S613: | 3 | 3,8127 | 0,174 | -0,368 |
| 11 | P04920 B3A2_HUMAN   | E.RTSPSS#PAPLPHQE.A               | S173:      | 2 | 3,8087 | 0,445 | -0,077 |
| 11 | Q96N67 DOCK7_HUMAN  | R.SAVRPASLNLNR.S                  |            | 3 | 3,7904 | 0,248 | 0      |
| 11 | POC7M2 RA1L3_HUMAN  | R.KLFIGGLSFETTDE.S                |            | 2 | 3,7842 | 0,544 | -0,627 |
| 11 | Q15691 MARE1_HUMAN  | E.TAVAPSLVAPALNKPK.K              |            | 2 | 3,7797 | 0,287 | -0,464 |

|    |                    |                                       |              |   |        |       |        |
|----|--------------------|---------------------------------------|--------------|---|--------|-------|--------|
| 11 | P35908 K22E_HUMAN  | R.FLEQQNQVLQTK.W                      |              | 2 | 3,773  | 0,388 | -0,496 |
| 11 | P51858 HDGF_HUMAN  | E.VERPLPM*EVEK.N                      |              | 3 | 3,7724 | 0,404 | -0,272 |
| 11 | Q8N6T3 ARFG1_HUMAN | E.DWLNDLGSYQGAQGNR.Y                  |              | 3 | 3,7698 | 0,317 | -0,192 |
| 11 | Q04917 1433F_HUMAN | E.DSYKDSTLIM*QLLR.D                   |              | 3 | 3,7674 | 0,16  | -0,108 |
| 11 | Q5TAX3 ZCH11_HUMAN | E.LSQNCIDLKSKS#PDPDKSTGTDCR.S         | S841:        | 3 | 3,7573 | 0,285 | -0,129 |
| 11 | Q8TEA8 DTD1_HUMAN  | E.DRSASSGAEGDVSS#EREP.-               | S205:        | 3 | 3,7525 | 0,349 | -0,191 |
| 11 | Q5JSH3 WDR44_HUMAN | E.DVHLGGGYPVGS#PGKVGSLTFKE.T          | S27:         | 3 | 3,741  | 0,325 | -0,615 |
| 11 | O75531 BAF_HUMAN   | R.DFVAEPMGEKPVGSLAGIGE.V              |              | 2 | 3,7346 | 0,477 | -0,487 |
| 11 | P05783 K1C18_HUMAN | R.STS#FRGGM*GSGGLATGIAGGLAGM*GGIQNE.K | S53:         | 3 | 3,7328 | 0,125 | -0,648 |
| 11 | Q8WVT3 TTC15_HUMAN | E.SVLISDSPNSEGDAGDLGR.V               |              | 2 | 3,7236 | 0,447 | -0,129 |
| 11 | Q9H3S7 PTN23_HUMAN | R.RGAAAADLLSSS#PE.S                   | S1123:       | 2 | 3,721  | 0,324 | -0,343 |
| 11 | P49674 KC1E_HUMAN  | E.VSRIPAS#QTS#VPFDHLGK.-              | S405:S408:   | 3 | 3,711  | 0,24  | -0,436 |
| 11 | Q86WB0 NIPA_HUMAN  | R.QLIDEGIAPEEGVDK.D                   |              | 2 | 3,7054 | 0,499 | -0,35  |
| 11 | Q7Z417 NUFP2_HUMAN | K.RTS#PQVLGSILK.S                     | S572:        | 3 | 3,6961 | 0,271 | -0,199 |
| 11 | Q13439 GOGA4_HUMAN | R.TSS#FTEQLDEGTPNRE.S                 | S41:         | 2 | 3,6934 | 0,466 | -0,129 |
| 11 | O43166 SI1L1_HUMAN | K.KLIDLES#PTPE.S                      | S1549:       | 2 | 3,6905 | 0,34  | -0,646 |
| 11 | Q9UNE7 STUB1_HUMAN | R.LGAGGGS#PEKSPSAQE.L                 | S19:         | 2 | 3,6888 | 0,412 | -0,55  |
| 11 | Q9UK76 HN1_HUMAN   | R.RNS#SEASSGDFLD.L                    | S87:         | 2 | 3,6838 | 0,442 | -0,416 |
| 11 | Q00839 HNRPU_HUMAN | R.AKS#PQPPVEEDE.H                     | S270:        | 2 | 3,6784 | 0,428 | 0,079  |
| 11 | Q8TE77 SSH3_HUMAN  | E.LHGDQTDGFGQSQS#PQKQEE.Q             | S87:         | 3 | 3,672  | 0,336 | 0      |
| 11 | Q5QJE6 TDIF2_HUMAN | E.LQDTS#LQQLVSQR.H                    | S330:        | 2 | 3,6701 | 0,429 | -0,459 |
| 11 | Q05682 CALD1_HUMAN | E.KQS#VDKVT#PTKV.-                    | S783:S789:   | 3 | 3,6685 | 0,217 | -0,116 |
| 11 | Q8NEL9 DDHD1_HUMAN | E.NEGISTIPS#PVT#SPVLSRR.H             | S723:T726:   | 3 | 3,6669 | 0,212 | -0,337 |
| 11 | Q96T58 MINT_HUMAN  | R.LLSVKGS#PKVDE.K                     | S1287:       | 2 | 3,6639 | 0,354 | -0,632 |
| 11 | P40222 TXLNA_HUMAN | D.LSAGGQGSALTDSGPER.R                 |              | 2 | 3,6575 | 0,453 | -0,08  |
| 11 | Q6Y7W6 PERQ2_HUMAN | E.M*GTFDSS#GAFLSLKK.V                 | S303:        | 2 | 3,655  | 0,416 | -0,217 |
| 11 | P55884 EIF3B_HUMAN | R.SDSRAQAVSEDAGGNE.G                  |              | 2 | 3,6434 | 0,422 | -0,306 |
| 11 | O75531 BAF_HUMAN   | K.HRDFVAEPM*GEKPVGSLAGIGE.V           |              | 3 | 3,6383 | 0,411 | -0,475 |
| 11 | P46821 MAP1B_HUMAN | E.KSGKQGS#PDQVS#PVSE.M                | S1438:S1443: | 2 | 3,6376 | 0,291 | -0,818 |
| 11 | Q00839 HNRPU_HUMAN | K.S#SGPSTLFAVTVAPPGAR.Q               | S187:        | 2 | 3,6362 | 0,268 | -0,544 |
| 11 | P39748 FEN1_HUMAN  | E.KQLQQAQAAGAEQE.V                    |              | 2 | 3,6346 | 0,31  | -0,407 |
| 11 | P42566 EP15_HUMAN  | K.NIIGSS#PVADFSAIKE.L                 | S324:        | 2 | 3,6141 | 0,454 | -0,706 |
| 11 | P48681 NEST_HUMAN  | E.NLRS#PEEVDKE.S                      | S905:        | 3 | 3,6112 | 0,186 | -0,066 |



|    |                    |                                 |            |   |        |       |        |
|----|--------------------|---------------------------------|------------|---|--------|-------|--------|
| 11 | Q9UQ35 SRRM2_HUMAN | K.DKFSFPVQDRPE.S                |            | 2 | 3,6102 | 0,319 | 0,156  |
| 11 | Q6Y7W6 PERQ2_HUMAN | K.KVQKEPIEEQE.M                 |            | 2 | 3,5882 | 0,202 | -0,587 |
| 11 | Q9Y6D5 BIG2_HUMAN  | R.ERGSS#LSGTDDGAQE.V            | S277:      | 2 | 3,5843 | 0,449 | -0,307 |
| 11 | Q6NZI2 PTRF_HUMAN  | D.LRRGS#S#PDVHALLE.I            | S365:S366: | 3 | 3,5836 | 0,119 | -0,214 |
| 11 | Q5JSH3 WDR44_HUMAN | E.DVHLGGGY#PVGSPGKVGGLSTFKETE.N | Y23:       | 3 | 3,5755 | 0,341 | -0,21  |
| 11 | Q9UQN3 CHM2B_HUMAN | R.SLPSASTSKATIS#DEEIE.R         | S199:      | 2 | 3,5705 | 0,423 | -0,314 |
| 11 | Q9NTI5 PDS5B_HUMAN | E.TVSNASSSSNPS#SPGRIK.G         | S1165:     | 2 | 3,5702 | 0,355 | -0,592 |
| 11 | Q92547 TOPB1_HUMAN | R.NAVALSAS#PQLKE.A              | S888:      | 2 | 3,5697 | 0,451 | -0,433 |
| 11 | Q6S8J3 A26CA_HUMAN | E.KLCYVALDFEQE.M                |            | 2 | 3,5569 | 0,329 | -0,161 |
| 11 | P35579 MYH9_HUMAN  | E.LDDLLVDLDHQR.Q                |            | 2 | 3,5536 | 0,318 | -0,336 |
| 11 | Q13838 UAP56_HUMAN | K.NCPHIVVGTGPR.I                |            | 3 | 3,5535 | 0,29  | -0,14  |
| 11 | Q13546 RIPK1_HUMAN | R.M*QS#LQLDCVAVPSSR.S           | S320:      | 2 | 3,552  | 0,422 | -0,341 |
| 11 | Q8IX90 CM003_HUMAN | E.KSPRS#PQLSDFGLE.R             | S155:      | 2 | 3,5453 | 0,568 | -0,669 |
| 11 | P04075 ALDOA_HUMAN | K.RLQS#IGTENTEE.N               | S46:       | 2 | 3,5432 | 0,433 | -0,251 |
| 11 | Q04917 1433F_HUMAN | E.DSYKDSTLIM*QLLR.D             |            | 2 | 3,542  | 0,374 | -0,574 |
| 11 | P11021 GRP78_HUMAN | E.VVATNGDTHLGGEDFDQRVME.H       |            | 3 | 3,5384 | 0,183 | -0,799 |
| 11 | Q14966 ZN638_HUMAN | E.KES#PGLKNSPIDE.S              | S1100:     | 2 | 3,5364 | 0,347 | -0,898 |
| 11 | Q16555 DPYL2_HUMAN | K.TVT#PASSAKTS#PAKQQAPPVR.N     | T514:S522: | 3 | 3,5313 | 1     | -0,641 |
| 11 | Q9Y613 FHOD1_HUMAN | E.IM*DLLVQSVTKSS#PR.A           | S1119:     | 2 | 3,5291 | 0,321 | -0,551 |
| 11 | Q9NQW6 ANLN_HUMAN  | K.TPIS#PLKTGVSKPIVK.S           | S323:      | 3 | 3,5262 | 0,437 | -0,21  |
| 11 | Q6ZN18 AEBP2_HUMAN | R.SLS#PGAASSSSGDGDGKE.G         | S141:      | 2 | 3,5155 | 0,479 | -0,65  |
| 11 | Q15365 PCBP1_HUMAN | R.CSDAAGYPHATHDLE.G             |            | 2 | 3,5074 | 0,479 | -0,52  |
| 11 | P27816 MAP4_HUMAN  | K.DM*ES#PTKLDVTLAK.D            | S280:      | 2 | 3,502  | 0,348 | -0,445 |
| 11 | O15014 ZN609_HUMAN | E.SSKELES#PLT#PGKVCR.A          | S743:T746: | 3 | 3,5009 | 0,207 | -0,188 |
| 11 | Q14676 MDC1_HUMAN  | E.LQPSTSTDQPVT#PEPTSQATR.G      | T1466:     | 3 | 3,5007 | 0,292 | -1,025 |
| 11 | P14618 KPYM_HUMAN  | K.KGVNLPGAAVDLPVAVSE.K          |            | 2 | 3,495  | 0,473 | -0,373 |
| 11 | P07384 CAN1_HUMAN  | R.KAPSDLYQIILK.A                |            | 3 | 3,4932 | 0,105 | -0,066 |
| 11 | P54577 SYYC_HUMAN  | R.QVEPLDPPAGSAPGEHVFK.G         |            | 3 | 3,4923 | 0,292 | 0      |
| 11 | Q9H2Y7 ZF106_HUMAN | D.FSLITTGIQEPQTDETRNS#PTQK.T    | S400:      | 3 | 3,4882 | 0,187 | -0,411 |
| 11 | Q6ZN18 AEBP2_HUMAN | E.TRS#LSPGAASSSSGDGDGKE.G       | S139:      | 3 | 3,4848 | 0,253 | -0,564 |
| 11 | Q13596 SNX1_HUMAN  | K.ITTSLLPINNGSKE.N              |            | 2 | 3,4815 | 0,437 | -0,656 |
| 11 | Q16543 CDC37_HUMAN | E.AVPKTGDEKDV#V.-               | S377:      | 2 | 3,4794 | 0,552 | -0,171 |
| 11 | Q96RR4 KKCC2_HUMAN | R.SQGGLAAGGSLDM*NGR.C           |            | 2 | 3,4793 | 0,482 | -0,567 |

|    |                      |                                    |              |   |        |       |        |
|----|----------------------|------------------------------------|--------------|---|--------|-------|--------|
| 11 | Q08J23 NSUN2_HUMAN   | E.GKPTDPSKLESPTS#FTGTGDTE.I        | S475:        | 3 | 3,4786 | 0,238 | 0      |
| 11 | Q14980 NUMA1_HUMAN   | E.AERKNS#LISSLEEE.V                | S1225:       | 2 | 3,4712 | 0,377 | -0,724 |
| 11 | Q9UQ35 SRRM2_HUMAN   | E.KSATRPS#PS#PERSSTGPEPPAPTPLLAE.R | S351:S353:   | 3 | 3,4663 | 1     | -0,546 |
| 11 | O43166 SI1L1_HUMAN   | K.DS#SPTLASKVDQLE.G                | S1733:       | 2 | 3,458  | 0,372 | -0,777 |
| 11 | O15530 PDPK1_HUMAN   | R.ANS#FVGTAYVVSPE.L                | S241:        | 2 | 3,4576 | 0,438 | -0,315 |
| 11 | Q9Y580 RBM7_HUMAN    | E.RTM*DNM*TSSAQIIQR.S              |              | 3 | 3,4542 | 0,314 | -0,308 |
| 11 | P21333 FLNA_HUMAN    | E.EHIPDSPFVVPVAS#PSGDAR.R          | S2327:       | 3 | 3,4521 | 0,142 | -0,17  |
| 11 | P11717 MPRI_HUMAN    | K.ALSSLHGDDQDS#EDE.V               | S2409:       | 2 | 3,447  | 0,478 | -0,575 |
| 11 | ##Q9NVR2 INT10_HUMAN | K.S#PEEQS#KGGDQIPLVMYCMLD.L        | S173:S178:   | 3 | 3,4424 | 0,087 | -0,787 |
| 11 | P04264 K2C1_HUMAN    | R.SLDLDSIIAEVK.A                   |              | 2 | 3,4421 | 0,426 | -0,655 |
| 11 | O76021 RL1D1_HUMAN   | K.ATNESEDEIPQLVPIGK.K              |              | 2 | 3,4406 | 0,325 | -0,199 |
| 11 | P49023 PAXI_HUMAN    | K.QKS#AEPS#PTVMSTSLGSLSE.L         | S126:S130:   | 3 | 3,4376 | 0,182 | -0,713 |
| 11 | Q52LD0 Q52LD0_HUMAN  | K.AGGS#PAS#YHGSTSPR.V              | S192:S195:   | 2 | 3,429  | 0,46  | -0,307 |
| 11 | Q02952 AKA12_HUMAN   | E.DSIAGSGVEHSTPDTEPGKEE.S          |              | 3 | 3,427  | 0,29  | -0,598 |
| 11 | Q9Y4B5 K0802_HUMAN   | R.GRS#PS#PIGVGSEMCREE.G            | S1803:S1805: | 3 | 3,4253 | 0,224 | -0,364 |
| 11 | Q9UKL0 RCOR1_HUMAN   | E.TNGPSNQKPVKS#PDNSIK.M            | S457:        | 3 | 3,4146 | 0,259 | -0,459 |
| 11 | P02794 FRIH_HUMAN    | E.YLFDKHTLGDS#DNES.-               | S179:        | 2 | 3,4111 | 0,536 | -0,737 |
| 11 | P51858 HDGF_HUMAN    | E.VERPLPMEVEK.N                    |              | 3 | 3,4056 | 0,326 | 0      |
| 11 | Q5VVJ2 MYSM1_HUMAN   | E.LS#SQTPQKNSSDLLLLDFPNSK.M        | S233:        | 3 | 3,4055 | 0,081 | -0,442 |
| 11 | P84103 SFRS3_HUMAN   | K.VYVGNLGNNGNKTELE.R               |              | 3 | 3,405  | 0,225 | -1,063 |
| 11 | P09622 DLDH_HUMAN    | E.DTIVSSTGALSLK.K                  |              | 2 | 3,4035 | 0,367 | -0,283 |
| 11 | O95239 KIF4A_HUMAN   | E.VRGQVSESEDS#ITKQIE.S             | S815:        | 2 | 3,3977 | 0,547 | -0,369 |
| 11 | Q9ULH0 ARMS_HUMAN    | R.SSPHS#TYYM*GQSSSGSIHSNLEQE.K     | S1414:       | 3 | 3,3922 | 0,114 | -0,265 |
| 11 | Q9UQ35 SRRM2_HUMAN   | R.QDRGEFSAS#PM*LK.S                | S1124:       | 3 | 3,3864 | 0,216 | -0,117 |
| 11 | P61289 PSME3_HUMAN   | E.LDSFLKEPILNIHD.L                 |              | 3 | 3,3855 | 0,344 | -0,332 |
| 11 | P35579 MYH9_HUMAN    | E.AKIAQLEEQLDNE.T                  |              | 2 | 3,3824 | 0,338 | -0,244 |
| 11 | Q03188 CENPC_HUMAN   | E.NIHTS#HITQDE.F                   | S447:        | 2 | 3,3817 | 0,34  | -0,266 |
| 11 | P49368 TCPG_HUMAN    | K.IPGGIIEDSCVLR.G                  |              | 2 | 3,3808 | 0,213 | -0,768 |
| 11 | Q14980 NUMA1_HUMAN   | R.KNS#LISSLEEE.V                   | S1225:       | 2 | 3,3777 | 0,377 | -0,367 |
| 11 | P18858 DNL1_HUMAN    | E.QATTSAQVACLVR.K                  |              | 2 | 3,3775 | 0,518 | -0,581 |
| 11 | P42696 RBM34_HUMAN   | R.LGQVASSLFR.G                     |              | 2 | 3,3606 | 0,402 | -0,226 |
| 11 | Q9H6F5 CCD86_HUMAN   | E.YSPES#PRCQPKPSEEAPK.C            | S113:        | 3 | 3,3581 | 0,363 | -0,422 |
| 11 | P11831 SRF_HUMAN     | K.ALIQTCLNSPDS#PPRSDPTDQR.M        | S224:        | 3 | 3,3567 | 0,231 | -0,414 |

|    |                     |                             |                 |   |        |       |        |
|----|---------------------|-----------------------------|-----------------|---|--------|-------|--------|
| 11 | P42224 STAT1_HUMAN  | R.LQTTDNLPM*S#PEEFDE.V      | S727:           | 3 | 3,3534 | 0,107 | -0,176 |
| 11 | Q9BT25 NYS48_HUMAN  | R.SFAQVLELSAEASK.E          |                 | 2 | 3,3521 | 0,334 | -0,412 |
| 11 | Q96JM3 ZN828_HUMAN  | E.LRKPGPPLS#PEIRS#PAGS#PE.L | S427:S432:S436: | 3 | 3,3511 | 0,194 | -0,315 |
| 11 | P49327 FAS_HUMAN    | K.VGDPQELNGITR.A            |                 | 2 | 3,3427 | 0,399 | -0,188 |
| 11 | Q14247 SRC8_HUMAN   | R.AKTQT#PPVSPAPQPTEE.R      | T401:           | 3 | 3,3386 | 0,265 | 0,098  |
| 11 | Q9UKV3 ACINU_HUMAN  | E.VAT#PPVPQLQVCEPK.E        | T682:           | 2 | 3,3362 | 0,449 | -0,42  |
| 11 | Q8TEA8 DTD1_HUMAN   | R.SASSGAEGDVSS#EREP.-       | S205:           | 2 | 3,3295 | 0,286 | -0,445 |
| 11 | Q99733 NP1L4_HUMAN  | E.RLDNVPHTPS#SYIE.T         | S53:            | 2 | 3,3289 | 0,22  | -0,357 |
| 11 | Q8IVF2 AHNK2_HUMAN  | R.DAHDVS#PTSTDTE.A          | S294:           | 2 | 3,3262 | 0,441 | -0,503 |
| 11 | Q9UJU6 DBNL_HUMAN   | R.AM*S#TTSISSPQPGK.L        | S269:           | 2 | 3,3238 | 0,432 | -0,492 |
| 11 | O15320 CTGE5_HUMAN  | K.LNRS#NSELEDE.I            | S137:           | 2 | 3,3152 | 0,177 | 0      |
| 11 | P62750 RL23A_HUMAN  | E.DNNTLVFIVDVK.A            |                 | 2 | 3,3132 | 0,37  | -0,532 |
| 11 | P15880 RS2_HUMAN    | K.SPYQEFTDHLVK.T            |                 | 3 | 3,3078 | 0,314 | 0,062  |
| 11 | Q9H4A3 WNK1_HUMAN   | K.DRPVSQPSLVGSK.E           |                 | 2 | 3,3053 | 0,292 | -0,623 |
| 11 | Q14974 IMB1_HUMAN   | E.DDIVPHVLPFIKE.H           |                 | 3 | 3,3032 | 0,229 | -0,3   |
| 11 | O75531 BAF_HUMAN    | R.DFVAEPM*GEKPVGSLAGIGE.V   |                 | 3 | 3,3014 | 0,377 | -0,272 |
| 11 | O15085 ARHGB_HUMAN  | R.SRS#DVDM*DAAAE.A          | S635:           | 2 | 3,2995 | 0,409 | -0,537 |
| 11 | P20700 LMNB1_HUMAN  | E.IRDQM*QQQLNDYE.Q          |                 | 2 | 3,2994 | 0,153 | -1,007 |
| 11 | Q9NPI6 DCP1A_HUMAN  | E.RKASSPS#PLTIGT#PE.S       | S525:T531:      | 2 | 3,2981 | 0,357 | -0,502 |
| 11 | P18858 DNL1_HUMAN   | K.TSKAET#PTESVSEPE.V        | T195:           | 2 | 3,2969 | 0,363 | -0,584 |
| 11 | P00558 PGK1_HUMAN   | K.SLLGKDVFLK.D              |                 | 2 | 3,2915 | 0,248 | -0,396 |
| 11 | Q4ZG04 Q4ZG04_HUMAN | E.SSQRTLQNSQFLLTR.L         |                 | 2 | 3,2894 | 0,364 | -0,418 |
| 11 | Q8N163 K1967_HUMAN  | R.NAET#PEATTQQE.T           | T484:           | 2 | 3,2885 | 0,334 | -0,262 |
| 11 | Q9NYF8 BCLF1_HUMAN  | D.SADLRHDIRR.R              |                 | 3 | 3,2879 | 0,149 | -0,473 |
| 11 | Q92878 RAD50_HUMAN  | R.ILELDQELIK.A              |                 | 2 | 3,2857 | 0,156 | -0,301 |
| 11 | Q9UHB6 LIMA1_HUMAN  | R.KIS#ENSYSLDDLE.I          | S225:           | 2 | 3,2835 | 0,423 | -0,383 |
| 11 | P39880 CUX1_HUMAN   | E.IQAGSQGQAGASDSPSAR.S      |                 | 2 | 3,28   | 0,516 | -0,289 |
| 11 | Q8N6T3 ARFG1_HUMAN  | E.DWLNDLGLSYQGAQGNR.Y       |                 | 2 | 3,2757 | 0,417 | -0,192 |
| 11 | Q8TEA8 DTD1_HUMAN   | E.DRSASS#GAEGDVSSEREP.-     | S197:           | 2 | 3,2712 | 0,512 | -0,446 |
| 11 | Q9H165 BC11A_HUMAN  | E.KAVDKPPS#PSPIE.M          | S86:            | 2 | 3,2627 | 0,369 | -0,422 |
| 11 | P12036 NFH_HUMAN    | E.TKSPPAEEAAS#PEKE.A        | S511:           | 3 | 3,2558 | 0,259 | -0,332 |
| 11 | P35908 K22E_HUMAN   | R.NLDLDSIIAEVK.A            |                 | 2 | 3,2536 | 0,441 | -0,642 |
| 11 | P07384 CAN1_HUMAN   | R.KAPSDLYQIILK.A            |                 | 2 | 3,2471 | 0,298 | -0,439 |

|    |                    |                             |            |   |        |       |        |
|----|--------------------|-----------------------------|------------|---|--------|-------|--------|
| 11 | P53618 COPB_HUMAN  | E.DQFQLSLLAAM*GNTQR.K       |            | 2 | 3,246  | 0,361 | 0      |
| 11 | O75717 WDHD1_HUMAN | R.SNILSDNPDFSDE.A           |            | 2 | 3,243  | 0,235 | -0,504 |
| 11 | Q8IXM2 CQ049_HUMAN | E.DSGIPLPAES#PKKGPK.K       | S96:       | 2 | 3,243  | 0,238 | -0,574 |
| 11 | P40222 TXLNA_HUMAN | R.TAQSGALRDVS#EE.L          | S72:       | 2 | 3,2429 | 0,293 | -0,254 |
| 11 | Q8NEL9 DDHD1_HUMAN | E.GISTIPS#PVTS#PVLSR.R      | S723:S727: | 2 | 3,2397 | 0,171 | -0,758 |
| 11 | O15355 PPM1G_HUMAN | K.AYTGFSNSERGETE.A          |            | 2 | 3,2256 | 0,504 | -0,567 |
| 11 | P21333 FLNA_HUMAN  | R.AGQSAAGAAPGGGVDTR.D       |            | 2 | 3,2252 | 0,474 | -0,507 |
| 11 | Q7Z698 SPRE2_HUMAN | E.LGDDDVFTTATDSSSNSSQKR.E   |            | 3 | 3,2248 | 0,265 | -0,328 |
| 11 | Q9Y639 NPTN_HUMAN  | E.YHCVYHFVSAPK.A            |            | 3 | 3,217  | 0,366 | -0,303 |
| 11 | P19484 TFEB_HUMAN  | R.VHGLPTTS#PSGMNM*AE.L      | S332:      | 2 | 3,215  | 0,4   | 0,071  |
| 11 | Q8N6H7 ARFG2_HUMAN | E.HGPNTDLLGTS#PKASLE.L      | S201:      | 2 | 3,2124 | 0,496 | 0,537  |
| 11 | Q9Y2D8 ADIP_HUMAN  | E.IKPNQVGGECTNQK.W          |            | 3 | 3,2123 | 0,203 | -0,349 |
| 11 | O75369 FLNB_HUMAN  | K.FNDEHIPESPYLVPVIAPSDDAR.R |            | 3 | 3,212  | 0,192 | -0,284 |
| 11 | P48634 BAT2_HUMAN  | E.ALTTVTVAPAPR.R            |            | 2 | 3,2114 | 0,435 | -0,102 |
| 11 | Q04917 1433F_HUMAN | E.DSYKDSTLIMQLLR.D          |            | 3 | 3,2105 | 0,134 | -0,217 |
| 11 | Q14247 SRC8_HUMAN  | R.AKTQTPPV#PAPQPTEE.R       | S405:      | 2 | 3,2084 | 0,383 | -0,394 |
| 11 | Q5VT52 K0460_HUMAN | E.M*MDKPTSSSVDTM*SLLSK.I    |            | 3 | 3,1987 | 0,218 | -1,287 |
| 11 | O94979 SC31A_HUMAN | E.NGNIIYDPSKIIAGDKE.V       |            | 3 | 3,1958 | 0,233 | -0,28  |
| 11 | O15027 SC16A_HUMAN | E.NFDGKFANLTPSR.T           |            | 3 | 3,193  | 0,381 | -0,125 |
| 11 | P15260 INGR1_HUMAN | E.SSSPLSSNQSEPGSIALNSYHSR.N |            | 3 | 3,1884 | 0,122 | -0,532 |
| 11 | P38398 BRCA1_HUMAN | E.NNS#PEHLKDE.V             | S114:      | 2 | 3,1844 | 0,281 | -0,29  |
| 11 | P26006 ITA3_HUMAN  | R.TGAVYLCLPTAHK.D           |            | 3 | 3,1833 | 0,24  | -0,192 |
| 11 | Q8N3Z6 ZCHC7_HUMAN | E.NAHGLSSSLQSNE.L           |            | 2 | 3,1753 | 0,282 | -0,635 |
| 11 | Q01082 SPTB2_HUMAN | K.TALPAQSAAT#LPAR.T         | T2187:     | 2 | 3,1624 | 0,434 | -0,253 |
| 11 | Q99700 ATX2_HUMAN  | E.NIKPNETS#PSFSKAE.N        | S771:      | 2 | 3,1523 | 0,265 | -1,411 |
| 11 | Q09666 AHNK_HUMAN  | E.SEIKVPDVELK.S             |            | 2 | 3,1523 | 0,232 | 0      |
| 11 | ##Q6T4R5 NHS_HUMAN | D.STNS#NNPDDLDAVTST#FSNAR.H | S936:T949: | 3 | 3,1458 | 0,096 | -1,83  |
| 11 | Q09666 AHNK_HUMAN  | K.VESEIKVPDVELK.S           |            | 3 | 3,1385 | 0,26  | 0,246  |
| 11 | P62256 UBE2H_HUMAN | R.RMDTDVVKLIE.S             |            | 3 | 3,1369 | 0,201 | 0,208  |
| 11 | Q15047 SETB1_HUMAN | E.SSRNYGYNPS#PVKPE.G        | S1066:     | 2 | 3,1363 | 0,377 | -0,894 |
| 11 | P51858 HDGF_HUMAN  | E.VERPLPMEVEK.N             |            | 2 | 3,1359 | 0,347 | -0,368 |
| 11 | P00558 PGK1_HUMAN  | K.SLLGKDVLFKLD.C            |            | 2 | 3,1289 | 0,252 | -0,634 |
| 11 | Q9C0C2 TB182_HUMAN | E.FGKRDS#LGAYASQDANE.Q      | S893:      | 3 | 3,1273 | 0,27  | -0,096 |

|    |                     |                              |            |   |        |       |        |
|----|---------------------|------------------------------|------------|---|--------|-------|--------|
| 11 | P49023 PAXI_HUMAN   | K.QKS#AEPS#PTVM*STSLGSNLSE.L | S126:S130: | 3 | 3,1256 | 0,261 | -0,236 |
| 11 | Q5T200 ZC3HD_HUMAN  | E.SRSL#PSHLTE.D              | S877:      | 2 | 3,1242 | 0,282 | -0,377 |
| 11 | Q9H307 PININ_HUMAN  | E.TNRVESVEPS#ENEASKE.L       | S417:      | 3 | 3,1213 | 0,218 | -0,276 |
| 11 | Q9C0C2 TB182_HUMAN  | E.AADSDAHLFQDSTEPR.A         |            | 3 | 3,1197 | 0,39  | -0,104 |
| 11 | Q8N6T3 ARFG1_HUMAN  | R.VSGQPQSVTASSDKAFE.D        |            | 2 | 3,1192 | 0,366 | -0,211 |
| 11 | Q02790 FKBP4_HUMAN  | E.QKSNTAGSQSQVETEA.-         |            | 2 | 3,1137 | 0,363 | -0,366 |
| 11 | P04792 HSPB1_HUMAN  | R.ALSRQLS#SGVSE.I            | S82:       | 2 | 3,1129 | 0,389 | -0,279 |
| 11 | P49748 ACADV_HUMAN  | K.TPVTDPATGAVKEK.I           |            | 3 | 3,1122 | 0,302 | 0,129  |
| 11 | Q8NEL9 DDHD1_HUMAN  | E.NEGISTIPS#PVTSPVLS#RR.H    | S723:S731: | 3 | 3,11   | 0,163 | -0,421 |
| 11 | Q8WXI9 P66B_HUMAN   | E.RGRLT#PSPDIIVLSDNE.A       | T120:      | 3 | 3,1099 | 0,29  | -0,466 |
| 11 | Q15365 PCBP1_HUMAN  | R.CSDAAGYPHATHD.L            |            | 3 | 3,1078 | 0,325 | 0,196  |
| 11 | Q6NZI2 PTRF_HUMAN   | E.SDAVLVDKS#DS#D.-           | S387:S389: | 2 | 3,1072 | 0,263 | -0,346 |
| 11 | P27708 PYR1_HUMAN   | E.NM*AVIDCFASDHAPHTLEE.K     |            | 3 | 3,1069 | 0,251 | -0,505 |
| 11 | Q9UPN4 AZI1_HUMAN   | K.ANNAGGGLPAAGPGDR.C         |            | 2 | 3,1056 | 0,355 | -0,087 |
| 11 | O95297 MPZL1_HUMAN  | E.SVVY#ADIRKN.-              | Y263:      | 2 | 3,104  | 0,246 | -0,196 |
| 11 | P48643 TCPE_HUMAN   | E.ANHLLQNNLPAVR.W            |            | 3 | 3,1013 | 0,252 | -0,116 |
| 11 | O43683 BUB1_HUMAN   | E.TSHEDLPAS#QERSE.V          | S314:      | 3 | 3,1009 | 0,142 | 0      |
| 11 | O60502 NCOAT_HUMAN  | E.LKPM*DTDKES#IAE.S          | S505:      | 2 | 3,0962 | 0,387 | -0,621 |
| 11 | P08559 ODPA_HUMAN   | E.NNRYGM*GTS#VER.A           | S232:      | 3 | 3,0946 | 0,336 | -0,062 |
| 11 | Q7Z7K6 PRR6_HUMAN   | R.RSS#PRAQEEGPGEPPPPE.L      | S70:       | 3 | 3,093  | 0,306 | -0,641 |
| 11 | Q5T5U3 RHG21_HUMAN  | R.LRTS#TSDLRGE.I             | S1860:     | 2 | 3,0885 | 0,542 | -0,609 |
| 11 | A8K2B4 A8K2B4_HUMAN | R.TNTMNGSKS#PVISRPK.S        | S508:      | 3 | 3,0846 | 0,353 | -0,713 |
| 11 | Q9UJ14 GGT7_HUMAN   | E.DAFLGDPDTPDSFLK.S          |            | 2 | 3,0814 | 0,465 | -0,696 |
| 11 | Q9UKT4 FBX5_HUMAN   | E.NQHVVQQLNSTNE.I            |            | 2 | 3,0767 | 0,378 | -0,484 |
| 11 | Q14126 DSG2_HUMAN   | E.ATM*KGSS#S#ASIVKGQHE.M     | S700:S701: | 2 | 3,0738 | 1     | -0,387 |
| 11 | Q7Z7K6 PRR6_HUMAN   | R.RSS#PRAQEEGPGEPPPPE.L      | S70:       | 2 | 3,0713 | 0,356 | -0,061 |
| 11 | O75475 PSIP1_HUMAN  | R.DFKPGDLIFAK.M              |            | 3 | 3,0703 | 0,181 | 0,292  |
| 11 | Q9NPR2 SEM4B_HUMAN  | E.SEKRPLS#IQDSFVE.V          | S804:      | 2 | 3,0615 | 0,235 | -0,356 |
| 11 | P27816 MAP4_HUMAN   | K.DM*ES#PTKLDVTLAK.D         | S280:      | 3 | 3,061  | 0,211 | -0,111 |
| 11 | Q96TA1 NIBL1_HUMAN  | K.AVDLGPPKPSDQE.T            |            | 2 | 3,0471 | 0,437 | -0,721 |
| 11 | O95359 TACC2_HUMAN  | K.TPSSPS#KSPASFEIPASAM*E.A   | S2392:     | 2 | 3,0438 | 0,432 | -0,346 |
| 11 | Q15942 ZYG_HUMAN    | R.S#PGAPGPLTLKE.V            | S344:      | 2 | 3,0422 | 0,333 | -0,391 |
| 11 | P38398 BRCA1_HUMAN  | E.LEDLTANTNTQDPFLIGSSK.Q     |            | 2 | 3,037  | 0,55  | -0,338 |

|    |                     |                             |        |   |        |       |        |
|----|---------------------|-----------------------------|--------|---|--------|-------|--------|
| 11 | Q08EQ4 TMSL1_HUMAN  | E.KNPLPS#KETIEQE.K          | S31:   | 2 | 3,0331 | 0,301 | -0,613 |
| 11 | Q5VUB5 CJ038_HUMAN  | E.HLYPAPSS#PEKE.Q           | S525:  | 2 | 3,0323 | 0,416 | -0,34  |
| 11 | Q9Y4M2 Q9Y4M2_HUMAN | E.RCTM*PDEPLVR.A            |        | 3 | 3,024  | 0,257 | -0,197 |
| 11 | Q5VT52 K0460_HUMAN  | E.M*M*DKPTSSSVDTMSLLSK.I    |        | 3 | 3,0238 | 0,221 | -0,46  |
| 11 | Q5W0B1 RN219_HUMAN  | K.SSQGSEFLEEPDKLEE.K        |        | 2 | 3,0227 | 0,334 | -0,468 |
| 11 | Q8TEA8 DTD1_HUMAN   | E.DRSAS#SGAEGDVSSEREP.-     | S196:  | 3 | 3,0223 | 0,297 | 0,095  |
| 11 | Q15075 EEA1_HUMAN   | E.NKLQQQLTQAAQE.L           |        | 2 | 3,0211 | 0,408 | -0,407 |
| 11 | Q9NQS7 INCE_HUMAN   | R.VLAPILPDNFSTPTGSR.T       |        | 2 | 3,0207 | 0,331 | -0,752 |
| 11 | Q15047 SETB1_HUMAN  | R.NYGYNPS#PVKPE.G           | S1066: | 2 | 3,0205 | 0,282 | -0,169 |
| 11 | Q5VVJ2 MYSM1_HUMAN  | K.NSSDLLLDFPNSK.M           |        | 2 | 3,0191 | 0,336 | -0,397 |
| 11 | P09493 TPM1_HUMAN   | E.NALDRAEQAE.A              |        | 2 | 3,0177 | 0,305 | -0,218 |
| 11 | P06748 NPM_HUMAN    | E.KGGS#LPKVE.A              | S260:  | 2 | 3,0173 | 0,191 | -0,307 |
| 11 | Q58FF8 H90B2_HUMAN  | K.YIDQEELNK.T               |        | 2 | 3,0163 | 0,218 | -0,424 |
| 11 | P54259 ATN1_HUMAN   | R.GRAS#PGGVSTSSSDGKAE.K     | S34:   | 2 | 3,0116 | 0,353 | 0      |
| 11 | O95777 LSM8_HUMAN   | E.TDSALDLGNIRAEP LNVAH.-    |        | 3 | 3,011  | 0,337 | -0,437 |
| 11 | Q00839 HNRPU_HUMAN  | R.AKS#PQPPVEEE.D            | S270:  | 2 | 3,0099 | 0,299 | -0,378 |
| 11 | Q8N3R9 MPP5_HUMAN   | E.M*AVDCPGDLGTR.M           |        | 2 | 3,0062 | 0,387 | -0,373 |
| 11 | Q6Y7W6 PERQ2_HUMAN  | K.VQKEPIPEEQE.M             |        | 2 | 3,0021 | 0,292 | -0,552 |
| 11 | Q8NI08 NCOA7_HUMAN  | E.VDKQSGS#PESRVE.N          | S502:  | 2 | 3,001  | 0,349 | -0,407 |
| 11 | B2RBN7 B2RBN7_HUMAN | R.RPSRCT#GGVVVRPQAVTE.Q     | T17:   | 3 | 3,0002 | 0,13  | -0,536 |
| 11 | Q15052 ARHG6_HUMAN  | R.M*S#GFIYQGK.I             | S488:  | 2 | 2,9762 | 0,21  | -0,217 |
| 11 | P15170 ERF3A_HUMAN  | E.ISEAEPGGGSLGDGRPPEESAHE.M |        | 3 | 2,9761 | 0,177 | -0,482 |
| 11 | P14618 KPYM_HUMAN   | E.TAKGDYPLEAVR.M            |        | 3 | 2,9724 | 0,132 | 0,069  |
| 11 | Q9BWU0 NADAP_HUMAN  | K.TTSLCAGPSASKNE.Y          |        | 2 | 2,9719 | 0,38  | -0,6   |
| 11 | P35030 TRY3_HUMAN   | D.TLDNDIMLIK.L              |        | 2 | 2,9713 | 0,321 | -0,622 |
| 11 | Q969V6 MKL1_HUMAN   | R.AGSCCLS#PGGRAE.L          | S511:  | 2 | 2,9702 | 0,428 | -0,435 |
| 11 | Q05519 SFR11_HUMAN  | E.CSVEKGTGDS#LRE.S          | S464:  | 2 | 2,9701 | 0,147 | -0,643 |
| 11 | Q9H6F5 CCD86_HUMAN  | E.FESNPEETREPGS#PPSVQR.A    | S47:   | 3 | 2,9642 | 0,184 | -0,411 |
| 11 | Q14247 SRC8_HUMAN   | E.QARAKTQT#PPVSPAPQPTEE.R   | T401:  | 3 | 2,9584 | 0,243 | -0,165 |
| 11 | Q14493 SLBP_HUMAN   | R.HM*DSQVEDEFDLE.A          |        | 2 | 2,9558 | 0,225 | -0,455 |
| 11 | Q13439 GOGA4_HUMAN  | R.SRTSS#FTEQLDE.G           | S41:   | 2 | 2,9555 | 0,249 | -0,247 |
| 11 | Q9Y266 NUDC_HUMAN   | E.NSKLSDLSE.T               |        | 2 | 2,9554 | 0,405 | -0,11  |
| 11 | Q16204 CCDC6_HUMAN  | K.SGGIVISPRLEE.L            |        | 2 | 2,9545 | 0,312 | -0,348 |

|    |                     |                            |              |   |        |       |        |
|----|---------------------|----------------------------|--------------|---|--------|-------|--------|
| 11 | P12036 NFH_HUMAN    | E.TKSPPAEEAAS#PEKE.A       | S511:        | 2 | 2,951  | 0,234 | -0,37  |
| 11 | B2RCX0 B2RCX0_HUMAN | E.LNSNHGGADET#SEKE.Q       | T23:         | 3 | 2,95   | 0,144 | -0,424 |
| 11 | O15027 SC16A_HUMAN  | R.CSS#MSSLSRE.V            | S2117:       | 2 | 2,9465 | 0,323 | -0,399 |
| 11 | Q9UQ35 SRRM2_HUMAN  | E.SYFGVSSLQLK.G            |              | 2 | 2,9465 | 0,34  | -0,298 |
| 11 | Q71U36 TBA1A_HUMAN  | E.HSDCAFM*VDNE.A           |              | 2 | 2,9463 | 0,335 | -0,546 |
| 11 | P49736 MCM2_HUMAN   | R.RGNDPLTSS#PGR.S          | S27:         | 2 | 2,9417 | 0,238 | -0,73  |
| 11 | Q14493 SLBP_HUMAN   | R.HMDSQVEDEFDLE.A          |              | 2 | 2,9411 | 0,383 | -0,536 |
| 11 | Q9Y6M7 S4A7_HUMAN   | E.IKNGSGGS#RENST#VDFSKVD.M | S403:T408:   | 3 | 2,9403 | 0,309 | 0      |
| 11 | Q9GZU1 MCLN1_HUMAN  | E.LQAYIAQCQDS#PTSGKFR.R    | S547:        | 3 | 2,9355 | 0,161 | -0,34  |
| 11 | P05556 ITB1_HUMAN   | R.SNGLICGGNGVCK.C          |              | 2 | 2,9342 | 0,249 | -0,639 |
| 11 | Q9UQ35 SRRM2_HUMAN  | R.RSCFESS#PDPE.L           | S876:        | 2 | 2,9294 | 0,255 | -0,526 |
| 11 | Q3SYE8 HMG4L_HUMAN  | K.STNPGISIGDVAK.K          |              | 2 | 2,9258 | 0,45  | -0,388 |
| 11 | Q8WXI9 P66B_HUMAN   | E.RGRLT#PSPDIIVLSDNE.A     | T120:        | 2 | 2,9223 | 0,434 | -0,435 |
| 11 | Q14257 RCN2_HUMAN   | E.KANQDSGPGLSLEE.F         |              | 2 | 2,9209 | 0,312 | -0,338 |
| 11 | Q92621 NU205_HUMAN  | E.NRS#VSGFLHFD.T           | S1165:       | 2 | 2,9176 | 0,396 | -0,449 |
| 11 | P46100 ATRX_HUMAN   | E.KCGLGQENS#DNEHLVE.N      | S634:        | 2 | 2,9142 | 0,348 | -0,575 |
| 11 | Q9P2D6 F135A_HUMAN  | E.GLDPTICGYNFDPK.T         |              | 2 | 2,9098 | 0,379 | -0,535 |
| 11 | Q15477 SKIV2_HUMAN  | R.ASS#LEDLVLKE.A           | S256:        | 2 | 2,9085 | 0,193 | -0,475 |
| 11 | Q8WY36 BBX_HUMAN    | E.LRQKS#PLFQFAE.I          | S243:        | 2 | 2,9076 | 0,336 | -0,553 |
| 11 | Q15942 ZYX_HUMAN    | R.S#PGAPGPLTLKEVEE.L       | S344:        | 2 | 2,9073 | 0,228 | -0,076 |
| 11 | P05787 K2C8_HUMAN   | R.TEM*ENEFVLIKK.D          |              | 3 | 2,9058 | 0,242 | 0,183  |
| 11 | P09874 PARP1_HUMAN  | K.NREELGFRPE.Y             |              | 3 | 2,8964 | 0,138 | 0      |
| 11 | Q53EP0 FND3B_HUMAN  | R.ARSS#PKSNDSDLQEYE.L      | S254:        | 2 | 2,8913 | 0,468 | -0,64  |
| 11 | Q9H2G2 SLK_HUMAN    | E.NQM*RDLQLQCE.A           |              | 2 | 2,8878 | 0,251 | -0,505 |
| 11 | O15143 ARC1B_HUMAN  | R.FQNLDKKAS#SE.G           | S310:        | 2 | 2,8788 | 0,353 | -0,725 |
| 11 | P19484 TFEB_HUMAN   | R.VHGLPTTS#PSGM*NMAE.L     | S332:        | 2 | 2,8783 | 0,182 | 0      |
| 11 | Q6NZI2 PTRF_HUMAN   | R.GSS#PDVHALLE.I           | S366:        | 2 | 2,8744 | 0,422 | -0,304 |
| 11 | Q9H6Z4 RANB3_HUMAN  | R.VLS#PPKLNE.V             | S333:        | 2 | 2,8741 | 0,263 | -0,453 |
| 11 | Q02952 AKA12_HUMAN  | E.LQSHAKS#PPS#PVERE.M      | S1328:S1331: | 3 | 2,864  | 0,123 | -0,502 |
| 11 | Q9UHD8 SEPT9_HUMAN  | R.ATVASSTQKFQD.L           |              | 2 | 2,8616 | 0,363 | -0,19  |
| 11 | O75223 CG024_HUMAN  | K.VSEEIEDIIK.K             |              | 2 | 2,8558 | 0,237 | -0,312 |
| 11 | Q15047 SETB1_HUMAN  | E.SSRNYGYNPS#PVKPE.G       | S1066:       | 3 | 2,8547 | 0,086 | -1,649 |
| 11 | Q9C0C9 UBE2O_HUMAN  | E.KAQALPNGVPA.A            |              | 2 | 2,8536 | 0,247 | -0,109 |

|    |                    |                             |            |   |        |       |        |
|----|--------------------|-----------------------------|------------|---|--------|-------|--------|
| 11 | Q02790 FKBP4_HUMAN | E.M*KEEQKS#NTAGSQSQVETEA.-  | S446:      | 3 | 2,8489 | 0,251 | -0,642 |
| 11 | Q9NZW5 MPP6_HUMAN  | E.AHDIVASK.C                |            | 2 | 2,8483 | 0,201 | 0,218  |
| 11 | Q8N568 DCLK2_HUMAN | R.CIS#PEGVNGNR.C            | S375:      | 2 | 2,8459 | 0,197 | -0,476 |
| 11 | O15085 ARHGB_HUMAN | R.SRS#DVIDMDAAAE.A          | S635:      | 2 | 2,8435 | 0,306 | -0,453 |
| 11 | Q9H6F5 CCD86_HUMAN | R.AGLGS#PERPKTSPGS#PR.L     | S58:S69:   | 3 | 2,8384 | 0,222 | -0,094 |
| 11 | O75153 EIF3X_HUMAN | E.SKSEDPGQAEAGSEEE.G        |            | 2 | 2,8373 | 0,384 | -0,291 |
| 11 | Q01433 AMPD2_HUMAN | E.RQIS#QDVKLEPD.I           | S168:      | 2 | 2,8367 | 0,428 | -0,405 |
| 11 | Q6ZU35 K1211_HUMAN | E.NVSVSVQPGSSSVSR.A         |            | 2 | 2,8331 | 0,487 | -0,573 |
| 11 | Q02952 AKA12_HUMAN | E.KEPSKSAESPT#S#PVTSE.T     | T285:S286: | 2 | 2,8317 | 0,397 | -0,508 |
| 11 | P55145 ARMET_HUMAN | E.NRLCYIGATDD.A             |            | 2 | 2,828  | 0,354 | 0,167  |
| 11 | Q14676 MDC1_HUMAN  | E.GKAPQAVPLEK.S             |            | 2 | 2,8213 | 0,26  | -0,214 |
| 11 | Q71UI9 H2AV_HUMAN  | R.GDEELSLIK.A               |            | 2 | 2,8191 | 0,233 | -0,109 |
| 11 | Q8IZD2 MLL5_HUMAN  | E.NSAILHRFNS#PCQE.R         | S837:      | 2 | 2,8185 | 0,358 | -0,418 |
| 11 | Q9UQ35 SRRM2_HUMAN | R.SS#GHSSSELSPEAVE.K        | S1379:     | 2 | 2,8174 | 0,373 | -0,467 |
| 11 | P04264 K2C1_HUMAN  | R.TNAENEFVTIKK.D            |            | 3 | 2,8153 | 0,3   | 0      |
| 11 | P49023 PAXI_HUMAN  | E.HVYSFPNK.Q                |            | 2 | 2,8139 | 0,411 | -0,246 |
| 11 | Q01082 SPTB2_HUMAN | K.TALPAQSAATLPAR.T          |            | 2 | 2,8134 | 0,336 | -0,357 |
| 11 | Q14974 IMB1_HUMAN  | E.DDIVPHVLPFIKE.H           |            | 2 | 2,8123 | 0,326 | -0,882 |
| 11 | Q92598 HS105_HUMAN | K.IES#PKLE.R                | S809:      | 2 | 2,8106 | 0,082 | -1,566 |
| 11 | Q9Y6A5 TACC3_HUMAN | E.NCDFLFSPEVTGR.S           |            | 2 | 2,8105 | 0,317 | -0,298 |
| 11 | P11388 TOP2A_HUMAN | K.TQLEHILLRPD.T             |            | 3 | 2,8097 | 0,25  | -0,068 |
| 11 | P05387 RLA2_HUMAN  | K.DIKKILDSVGIE.A            |            | 2 | 2,8049 | 0,231 | -0,092 |
| 11 | Q15149 PLEC1_HUMAN | R.VPDVQDGV.R.A              |            | 2 | 2,804  | 0,3   | -0,124 |
| 11 | Q6P996 PDXD1_HUMAN | E.KVERLS#SGPEQITL.A         | S736:      | 2 | 2,8012 | 0,496 | -0,345 |
| 11 | Q9UQ35 SRRM2_HUMAN | R.GEFSAS#PMLK.S             | S1124:     | 2 | 2,7983 | 0,123 | -0,319 |
| 11 | Q86XJ1 GA2L3_HUMAN | R.HGPGLANVCQYDE.W           |            | 2 | 2,7954 | 0,474 | -0,334 |
| 11 | P15927 RFA2_HUMAN  | E.VINAHMVL.SK.A             |            | 2 | 2,7949 | 0,288 | -0,11  |
| 11 | Q9H6F5 CCD86_HUMAN | R.CQPKPSEEAPKCSQDQGV.LASE.L |            | 3 | 2,7886 | 0,144 | -1,048 |
| 11 | P62256 UBE2H_HUMAN | R.MDTDVVKLIE.S              |            | 2 | 2,7885 | 0,343 | -0,42  |
| 11 | P21333 FLNA_HUMAN  | R.RAPS#VANVGSHCD.L          | S2152:     | 2 | 2,781  | 0,342 | -0,673 |
| 11 | P27816 MAP4_HUMAN  | R.KPCNSQPSEL.SSE.T          |            | 2 | 2,7805 | 0,185 | -0,584 |
| 11 | P19484 TFEB_HUMAN  | R.VHGLPTTS#PSGM*NM*AE.L     | S332:      | 2 | 2,776  | 0,359 | -0,491 |
| 11 | Q01518 CAP1_HUMAN  | R.SGPKPFSAPKPQT#SPS#PK.R    | T307:S310: | 3 | 2,7755 | 0,096 | -0,641 |



|    |                     |                               |            |   |        |       |        |
|----|---------------------|-------------------------------|------------|---|--------|-------|--------|
| 11 | Q15365 PCBP1_HUMAN  | R.CSDAAGYPHATHDLE.G           |            | 3 | 2,7716 | 0,165 | -0,556 |
| 11 | O95684 FR1OP_HUMAN  | E.KGPTTGEGALDLSDVHS#PPKS#PE.G | S156:S160: | 3 | 2,7667 | 0,223 | -0,812 |
| 11 | Q9NQ57 INCE_HUMAN   | R.VLAPILPDNFSTPTGSR.T         |            | 3 | 2,7661 | 0,304 | -0,41  |
| 11 | P04264 K2C1_HUMAN   | K.LALDLEIATYR.T               |            | 2 | 2,7646 | 0,379 | -0,477 |
| 11 | P62736 ACTA_HUMAN   | D.LAGRDLTDYLM*K.I             |            | 3 | 2,7642 | 0,114 | 0,13   |
| 11 | Q96BS2 TESC_HUMAN   | E.NFNNVPDLELNPIR.S            |            | 2 | 2,7639 | 0,364 | -0,295 |
| 11 | A6NFM4 A6NFM4_HUMAN | E.FSEEPFGVIVR.R               |            | 2 | 2,7608 | 0,313 | -0,477 |
| 11 | Q8IWC1 MA7D3_HUMAN  | K.ESVKGS#PKESMEAS#PE.A        | S433:S441: | 2 | 2,7579 | 0,319 | -0,593 |
| 11 | Q5QJE6 TDIF2_HUMAN  | K.NAVSVHSNLNSE.A              |            | 2 | 2,7531 | 0,325 | -0,192 |
| 11 | Q8IWC1 MA7D3_HUMAN  | K.ESVKGS#PKESM*EAS#PE.A       | S433:S441: | 2 | 2,7525 | 0,259 | -0,392 |
| 11 | Q9UQ35 SRRM2_HUMAN  | K.DKFSPFPVQDRPE.S             |            | 3 | 2,7468 | 0,172 | 0      |
| 11 | O15231 ZN185_HUMAN  | R.RES#CGSSVLTDGE.G            | S233:      | 2 | 2,7463 | 0,375 | -0,545 |
| 11 | P35527 K1C9_HUMAN   | R.IKFEMEQLNR.Q                |            | 3 | 2,7433 | 0,105 | -0,07  |
| 11 | P49790 NU153_HUMAN  | E.NKSSFNLGTIE.T               |            | 2 | 2,743  | 0,4   | -0,202 |
| 11 | Q14997 PSME4_HUMAN  | K.NPSINQILLS#PEKIKE.G         | S1121:     | 3 | 2,7328 | 0,143 | -0,384 |
| 11 | P37802 TAGL2_HUMAN  | E.GKNVIGLQM*GTNR.G            |            | 3 | 2,7326 | 0,203 | 0,13   |
| 11 | O60502 NCOAT_HUMAN  | E.LKPMDDTKES#IAE.S            | S505:      | 2 | 2,731  | 0,353 | -0,627 |
| 11 | P08559 ODPA_HUMAN   | R.YGM*GT#SVER.A               | T231:      | 2 | 2,7309 | 0,214 | -0,445 |
| 11 | P53985 MOT1_HUMAN   | E.SKEEETS#IDVAGKPNE.V         | S467:      | 2 | 2,7308 | 0,27  | -0,538 |
| 11 | Q7Z3E1 PARPT_HUMAN  | E.SGSLDGVFR.S                 |            | 2 | 2,7289 | 0,266 | -0,195 |
| 11 | P18858 DNL1_HUMAN   | E.GEDGDQPTT#PPKPLK.T          | T183:      | 2 | 2,7281 | 0,3   | -0,662 |
| 11 | Q86U90 YRDC_HUMAN   | R.LLRLPGSGAVQAASPE.R          |            | 2 | 2,7275 | 0,346 | -0,312 |
| 11 | Q5VZL5 ZMYM4_HUMAN  | K.AKSEDS#DVELSD.-             | S1542:     | 2 | 2,7265 | 0,245 | -0,532 |
| 11 | P11142 HSP7C_HUMAN  | E.TKSFYPEE.V                  |            | 2 | 2,7251 | 0,36  | -0,305 |
| 11 | Q07157 ZO1_HUMAN    | R.IDS#PGFKPASQQKAE.A          | S912:      | 2 | 2,7246 | 0,377 | -0,362 |
| 11 | P35222 CTNB1_HUMAN  | R.RTS#M*GGTQQQFVE.G           | S552:      | 2 | 2,7179 | 0,213 | -1,481 |
| 11 | P49321 NASP_HUMAN   | E.SEAAGDGVDTK.V               |            | 2 | 2,7168 | 0,377 | -0,349 |
| 11 | B2RCX0 B2RCX0_HUMAN | E.LNSNHDGADETS#EKE.Q          | S24:       | 2 | 2,7164 | 0,424 | -0,424 |
| 11 | P20700 LMNB1_HUMAN  | R.AGGPTT#PLS#PTR.L            | T20:S23:   | 2 | 2,7162 | 0,207 | -0,186 |
| 11 | Q9P2R3 ANFY1_HUMAN  | E.NNEPTACFLIR.S               |            | 2 | 2,715  | 0,339 | -0,366 |
| 11 | Q9UET6 RRMJ1_HUMAN  | E.IRPQDCPISR.V                |            | 3 | 2,7143 | 0,213 | 0,368  |
| 11 | Q96S82 UBL7_HUMAN   | E.GLS#DDEDDFHPNTR.S           | S230:      | 2 | 2,7119 | 0,545 | -0,287 |
| 11 | Q96A49 SYAP1_HUMAN  | D.GIIDKTIIGDFQKE.Q            |            | 3 | 2,7111 | 0,205 | -0,116 |

|    |                     |                                |              |   |        |       |        |
|----|---------------------|--------------------------------|--------------|---|--------|-------|--------|
| 11 | Q8WWM7 ATX2L_HUMAN  | E.FNPTKPLLSVNK.S               |              | 2 | 2,7031 | 0,146 | -0,449 |
| 11 | Q5T4S7 UBR4_HUMAN   | K.NVFIAQNVASLQE.L              |              | 2 | 2,7    | 0,185 | -0,255 |
| 11 | P08621 RU17_HUMAN   | R.RQQEVETELK.M                 |              | 2 | 2,6929 | 0,146 | -0,387 |
| 11 | Q8N3R9 MPP5_HUMAN   | E.MAVDCPGDLGTR.M               |              | 2 | 2,691  | 0,356 | -0,756 |
| 11 | Q02952 AKA12_HUMAN  | K.SATLSS#TESTASE.M             | S645:        | 2 | 2,6889 | 0,245 | -0,542 |
| 11 | Q6NZI2 PTRF_HUMAN   | D.LRRGS#S#PDVHALLE.I           | S365:S366:   | 2 | 2,6881 | 0,25  | -0,428 |
| 11 | P18858 DNL1_HUMAN   | E.GEDGDQPTT#PPKPLK.T           | T183:        | 3 | 2,6879 | 0,252 | -0,22  |
| 11 | Q13111 CAF1A_HUMAN  | D.ILAVRPPQIK.S                 |              | 2 | 2,6795 | 0,128 | 0      |
| 11 | P40926 MDHM_HUMAN   | R.VNVVPVIGGHAGK.T              |              | 2 | 2,6769 | 0,292 | 0      |
| 11 | P78310 CXAR_HUMAN   | R.TPQS#PTLPPAK.V               | S332:        | 2 | 2,6738 | 0,319 | -0,201 |
| 11 | Q07157 ZO1_HUMAN    | R.IDS#PGFKPASQK.A              | S912:        | 2 | 2,6721 | 0,337 | 0,082  |
| 11 | Q14974 IMB1_HUMAN   | E.KTVS#PDRLE.L                 | S12:         | 2 | 2,6717 | 0,199 | 0,217  |
| 11 | O60504 VINEX_HUMAN  | R.DFVYPSSTRDPSASNGGGS#PARREE.K | S373:        | 3 | 2,6688 | 0,347 | -0,202 |
| 11 | Q9Y536 PAL4B_HUMAN  | E.NFRALSTGE.K                  |              | 2 | 2,6677 | 0,241 | -0,307 |
| 11 | O43707 ACTN4_HUMAN  | E.M*NGTLEDQLSHLK.Q             |              | 3 | 2,6663 | 0,083 | 0,061  |
| 11 | Q15785 TOM34_HUMAN  | K.NRVPS#AGDVE.K                | S186:        | 2 | 2,6645 | 0,319 | -0,217 |
| 11 | Q52LD0 Q52LD0_HUMAN | E.YGKAGGS#PAS#YHGSTSPR.V       | S192:S195:   | 3 | 2,6633 | 0,293 | -0,377 |
| 11 | P48960 CD97_HUMAN   | R.CNPGFSSFSE.I                 |              | 2 | 2,6569 | 0,321 | -0,108 |
| 11 | Q8IX12 CCAR1_HUMAN  | R.LLLPTPTVKQE.S                |              | 2 | 2,6548 | 0,311 | -0,394 |
| 11 | A1L390 PKHG3_HUMAN  | R.FFFNPSAVSQR.T                |              | 2 | 2,6461 | 0,386 | -0,375 |
| 11 | Q00610 CLH1_HUMAN   | D.M*NDPSNPIR.R                 |              | 2 | 2,6444 | 0,262 | -0,46  |
| 11 | P50990 TCPQ_HUMAN   | E.GNKNVGLDIE.A                 |              | 2 | 2,6439 | 0,289 | -0,115 |
| 11 | P35527 K1C9_HUMAN   | K.TLNDRMQEYQLIAK.N             |              | 3 | 2,6331 | 0,138 | -0,494 |
| 11 | B0I1T5 B0I1T5_HUMAN | E.GDLQFSPK.I                   |              | 2 | 2,6299 | 0,289 | -0,062 |
| 11 | Q9UQ35 SRRM2_HUMAN  | E.LNNKCLT#PQRE.R               | T1511:       | 3 | 2,6292 | 0,15  | -0,063 |
| 11 | P43121 MUC18_HUMAN  | E.VKS#DKLPEE.M                 | S614:        | 2 | 2,6292 | 0,13  | -0,434 |
| 11 | P13645 K1C10_HUMAN  | K.DAEAWFNEK.S                  |              | 2 | 2,6281 | 0,174 | 0      |
| 11 | Q02790 FKBP4_HUMAN  | E.FKGEDLTEEE.D                 |              | 2 | 2,6267 | 0,228 | -0,204 |
| 11 | P00558 PGK1_HUMAN   | K.SLLGKDVLFLKD.C               |              | 3 | 2,6261 | 0,222 | -0,068 |
| 11 | P16949 STMN1_HUMAN  | E.NNNFSKMAEE.K                 |              | 2 | 2,6213 | 0,216 | -0,515 |
| 11 | Q5VZL5 ZMYM4_HUMAN  | K.AKSEDS#DVELS#D.-             | S1542:S1547: | 2 | 2,619  | 0,114 | 0,084  |
| 11 | Q6WKZ4 RFIP1_HUMAN  | E.KDTAAVVS.R                   |              | 2 | 2,6189 | 0,293 | -0,193 |
| 11 | Q9UBG0 MRC2_HUMAN   | R.CLTALPYICK.R                 |              | 2 | 2,6119 | 0,246 | -0,098 |

|    |                    |                           |            |   |        |       |        |
|----|--------------------|---------------------------|------------|---|--------|-------|--------|
| 11 | P61956 SUMO2_HUMAN | R.FRFDGQPINETDTPAQLE.M    |            | 2 | 2,6118 | 0,424 | -0,352 |
| 11 | Q9UQ35 SRRM2_HUMAN | E.VRQSHSESPSLQSK.S        |            | 3 | 2,6079 | 0,131 | -0,116 |
| 11 | Q9H3P2 NELFA_HUMAN | K.KNLSLTRE.Q              |            | 2 | 2,6074 | 0,105 | -0,127 |
| 11 | P35527 K1C9_HUMAN  | R.FSSSSGYGGGSSR.V         |            | 2 | 2,6051 | 0,394 | -0,494 |
| 11 | Q13136 LIPA1_HUMAN | R.VTSSMSS#PSM*QPK.K       | S1172:     | 2 | 2,6051 | 0,198 | -0,5   |
| 11 | Q9BTL3 F103A_HUMAN | E.YLKRPPES#PPIVEE.W       | S36:       | 2 | 2,6017 | 0,32  | -0,422 |
| 11 | Q16555 DPYL2_HUMAN | R.NLHQSGFSLSGAQIDD.N      |            | 2 | 2,6012 | 0,152 | -0,144 |
| 11 | Q12905 ILF2_HUMAN  | R.VKPAPDETSFSE.A          |            | 2 | 2,6009 | 0,377 | -0,28  |
| 11 | Q04695 K1C17_HUMAN | R.TIVEEVQDGK.V            |            | 2 | 2,5998 | 0,374 | -0,218 |
| 11 | Q14152 EIF3A_HUMAN | R.RVPPPALS.R.D            |            | 2 | 2,5986 | 0,168 | -0,061 |
| 11 | P48681 NEST_HUMAN  | E.NLRS#PEEVDKE.S          | S905:      | 2 | 2,5963 | 0,276 | -0,437 |
| 11 | Q9BR76 COR1B_HUMAN | R.DADPILISLRE.A           |            | 2 | 2,5939 | 0,349 | -0,491 |
| 11 | Q14676 MDC1_HUMAN  | R.SSVKT#PETVVPTAPE.L      | T1321:     | 2 | 2,5924 | 0,204 | -0,602 |
| 11 | P21333 FLNA_HUMAN  | R.ENGVYLIDVK.F            |            | 2 | 2,5921 | 0,166 | -0,53  |
| 11 | Q96F45 ZN503_HUMAN | R.VPSATCQPFTPR.T          |            | 2 | 2,5901 | 0,418 | -0,359 |
| 11 | Q15942 ZYX_HUMAN   | R.S#PGAPGPLTK.E           | S344:      | 2 | 2,5893 | 0,351 | -0,218 |
| 11 | P49736 MCM2_HUMAN  | R.GNDPLTSS#PGR.S          | S27:       | 2 | 2,5842 | 0,22  | -0,517 |
| 11 | Q13242 SFRS9_HUMAN | R.IYVGNLPTDVRE.K          |            | 2 | 2,578  | 0,325 | 0      |
| 11 | P14618 KPYM_HUMAN  | K.GVNLPGAAVDLPVSE.K       |            | 2 | 2,574  | 0,43  | -0,404 |
| 11 | Q01105 SET_HUMAN   | E.IDRLNEQASEE.I           |            | 2 | 2,5704 | 0,323 | -0,655 |
| 11 | O75643 U520_HUMAN  | E.VTGPVIAPLFPQK.R         |            | 2 | 2,5675 | 0,312 | -0,178 |
| 11 | A6NDB9 PALM3_HUMAN | E.GRVGEAKGGGVVS#VVWEGLR.A | S219:      | 3 | 2,5659 | 0,143 | -1,749 |
| 11 | P38646 GRP75_HUMAN | E.FKDQLPADE.C             |            | 2 | 2,5655 | 0,217 | -0,23  |
| 11 | Q14204 DYHC1_HUMAN | E.KSLLQALNE.V             |            | 2 | 2,5619 | 0,201 | -0,72  |
| 11 | Q8WY36 BBX_HUMAN   | R.QKS#PLFQFAE.I           | S243:      | 2 | 2,5574 | 0,323 | -0,67  |
| 11 | Q96ST2 IWS1_HUMAN  | E.TRKLPGS#DS#ENEE.L       | S131:S133: | 2 | 2,5562 | 0,35  | -0,677 |
| 11 | P61254 RL26_HUMAN  | R.HFNAPSHIR.R             |            | 2 | 2,5546 | 0,088 | -0,452 |
| 11 | Q09666 AHNK_HUMAN  | E.SEIKVPDVELK.S           |            | 3 | 2,5522 | 0,257 | 0,364  |
| 11 | Q09666 AHNK_HUMAN  | K.M*EGDLKGPEVDIK.G        |            | 3 | 2,5499 | 0,165 | 0,063  |
| 11 | A6NGB9 WIPF3_HUMAN | K.TISGPLIPPAS#PR.L        | S149:      | 2 | 2,5475 | 0,344 | -0,264 |
| 11 | P63313 TYB10_HUMAN | E.TIEQEKRS#EIS.-          | S41:       | 2 | 2,5463 | 0,343 | -0,872 |
| 11 | P62753 RS6_HUMAN   | R.RLS#S#LRASTKSE.S        | S235:S236: | 2 | 2,5455 | 0,272 | -0,386 |
| 11 | Q9UNX4 WDR3_HUMAN  | K.IKGSS#PGIQDTLEAEDGAFE.T | S241:      | 2 | 2,5435 | 0,257 | -0,114 |

|    |                     |                               |            |   |        |       |        |
|----|---------------------|-------------------------------|------------|---|--------|-------|--------|
| 11 | Q969J2 ZKSC4_HUMAN  | E.VRAPCS#PARGPE.R             | S44:       | 3 | 2,5433 | 0,193 | 0,266  |
| 11 | P15927 RFA2_HUMAN   | E.VINAHM*VLSK.A               |            | 2 | 2,5373 | 0,243 | -0,433 |
| 11 | Q96AG4 LRC59_HUMAN  | R.LEVEREAEK.K                 |            | 2 | 2,5361 | 0,105 | -0,332 |
| 11 | P18858 DNL1_HUMAN   | K.TSKAETPTESVSEPE.V           |            | 2 | 2,5359 | 0,354 | -0,307 |
| 11 | O43237 DC1L2_HUMAN  | R.RGPLTS#GSDEE.N              | S203:      | 2 | 2,5357 | 0,278 | -0,298 |
| 11 | Q15742 NAB2_HUMAN   | R.SFS#PKS#PLELGE.K            | S159:S162: | 2 | 2,534  | 0,081 | -0,252 |
| 11 | Q14694 UBP10_HUMAN  | K.KLLS#PSNE.K                 | S547:      | 2 | 2,5333 | 0,221 | -0,252 |
| 11 | Q02809 PLOD1_HUMAN  | R.CRIFQNLGDALDE.V             |            | 2 | 2,5328 | 0,197 | -0,551 |
| 11 | P21333 FLNA_HUMAN   | K.YGGQPVPNFPSK.L              |            | 2 | 2,5304 | 0,358 | -0,378 |
| 11 | P21333 FLNA_HUMAN   | R.RLTVSSLQE.S                 |            | 2 | 2,5296 | 0,109 | 0      |
| 11 | A8K2B4 A8K2B4_HUMAN | R.TNTM*NGSKS#PVISRPK.S        | S508:      | 3 | 2,5296 | 0,251 | -0,101 |
| 11 | Q96TA1 NIBL1_HUMAN  | K.AAPEASS#PPAS#PLQHLLPGK.A    | S679:S683: | 3 | 2,528  | 0,207 | -0,344 |
| 11 | Q8N8S7 ENAH_HUMAN   | K.STPLSQPSANGVQTE.G           |            | 2 | 2,5241 | 0,287 | -0,322 |
| 11 | Q92733 PRCC_HUMAN   | K.SAALQVTK.Q                  |            | 2 | 2,5235 | 0,31  | 0,447  |
| 11 | P51858 HDGF_HUMAN   | E.VERPLPM*EVEK.N              |            | 2 | 2,5221 | 0,114 | -0,363 |
| 11 | Q9UQ35 SRRM2_HUMAN  | E.LNNKCLT#PQRE.R              | T1511:     | 2 | 2,519  | 0,314 | -0,504 |
| 11 | Q10471 GALT2_HUMAN  | R.VVSPIIDVINM*D.N             |            | 2 | 2,5175 | 0,393 | -0,367 |
| 11 | Q08J23 NSUN2_HUMAN  | E.LRNVLNNSE.K                 |            | 2 | 2,5169 | 0,157 | -0,52  |
| 11 | A8K7V5 A8K7V5_HUMAN | E.VSTAPAGTDM*PAAK.K           |            | 2 | 2,5166 | 0,47  | -0,366 |
| 11 | Q9H6Z4 RANB3_HUMAN  | R.SVLRPAVLQAPQPK.A            |            | 3 | 2,5148 | 0,15  | -0,243 |
| 11 | P30048 PRDX3_HUMAN  | R.GLFIIDPNGVIK.H              |            | 2 | 2,5143 | 0,214 | -0,095 |
| 11 | Q9UKV3 ACINU_HUMAN  | E.VAT#PPVPQLQVCEPKER.T        | T682:      | 3 | 2,5108 | 0,343 | -0,541 |
| 11 | Q66K14 TBC9B_HUMAN  | E.RQFSTAS#DHEQPGVSG.-         | S1241:     | 2 | 2,5106 | 0,294 | -0,547 |
| 11 | P28070 PSB4_HUMAN   | E.KQPVLSQTE.A                 |            | 2 | 2,509  | 0,16  | 0      |
| 11 | A1L390 PKHG3_HUMAN  | E.M*DSYYPNR.Y                 |            | 2 | 2,5076 | 0,294 | -0,23  |
| 11 | P05787 K2C8_HUMAN   | E.SRLEGLTDE.I                 |            | 2 | 2,5058 | 0,138 | -0,179 |
| 11 | O43583 DENR_HUMAN   | K.LTVENS#PKQE.A               | S73:       | 2 | 2,5052 | 0,143 | -0,398 |
| 11 | Q9Y2D5 AKAP2_HUMAN  | E.KVKPPPS#PTTEGPSLQPDLAPEE.A  | S778:      | 3 | 2,5037 | 0,115 | -0,22  |
| 11 | Q92797 SYMPK_HUMAN  | K.ETAAGGLTLKEERS#PQTLAPVGE.D  | S1243:     | 3 | 2,5026 | 0,105 | -0,451 |
| 11 | P36957 ODO2_HUMAN   | E.KAVGDTVAEDE.V               |            | 2 | 2,5001 | 0,224 | -0,43  |
| 11 | A1L390 PKHG3_HUMAN  | E.SATAS#PESSS#PTEGRSPAHLARE.L | S865:S870: | 3 | 2,4989 | 1     | -0,442 |
| 11 | Q9HAV7 GRPE1_HUMAN  | K.NSGQNLEEDM*GQSEQKADPPATE.K  |            | 3 | 2,4983 | 0,266 | 0,073  |
| 11 | P08559 ODPA_HUMAN   | E.NNRYGM*GTS#VER.A            | S232:      | 2 | 2,4961 | 0,326 | -0,412 |

|    |                     |                           |       |   |        |       |        |
|----|---------------------|---------------------------|-------|---|--------|-------|--------|
| 11 | Q499L7 Q499L7_HUMAN | E.NKSVAQQASLTE.Q          |       | 2 | 2,496  | 0,113 | -0,382 |
| 11 | P62256 UBE2H_HUMAN  | R.M*DTDVVKLIE.S           |       | 2 | 2,4959 | 0,265 | -0,31  |
| 11 | Q6P2E9 EDC4_HUMAN   | E.KSCQAM*FQQIND.S         |       | 2 | 2,4934 | 0,211 | 0,164  |
| 11 | O95429 BAG4_HUMAN   | R.HNFPCSVHQYE.S           |       | 2 | 2,4897 | 0,312 | -0,258 |
| 11 | Q8N6T3 ARFG1_HUMAN  | R.YVGFNT#PPPQKKE.D        | T189: | 2 | 2,4891 | 0,316 | -0,446 |
| 11 | Q07157 ZO1_HUMAN    | E.YSM*YSTDSR.H            |       | 2 | 2,4884 | 0,221 | -0,217 |
| 11 | Q12982 BNIP2_HUMAN  | R.KGS#ITEYTAAEE.K         | S114: | 2 | 2,4873 | 0,169 | -0,088 |
| 11 | O95425 SVIL_HUMAN   | R.QAHDSL#PAAE.S           | S221: | 2 | 2,486  | 0,185 | -0,436 |
| 11 | Q9UPN4 AZI1_HUMAN   | R.TQDVLAQDAAGDNLE.M       |       | 2 | 2,4847 | 0,319 | -0,547 |
| 11 | O15027 SC16A_HUMAN  | K.FANLTPSR.T              |       | 2 | 2,4845 | 0,146 | 0      |
| 11 | P35527 K1C9_HUMAN   | R.SGGGGGGGLSGGSIR.S       |       | 2 | 2,4789 | 0,384 | -0,891 |
| 11 | Q09666 AHNK_HUMAN   | K.TGTCRIS#MSE.V           | S570: | 2 | 2,4752 | 0,24  | -1,198 |
| 11 | Q14839 CHD4_HUMAN   | E.RMLLCR.Q                |       | 2 | 2,4742 | 0,194 | 0,072  |
| 11 | P51858 HDGF_HUMAN   | E.IENNPTVK.A              |       | 2 | 2,4726 | 0,102 | -0,267 |
| 11 | Q9NYP9 CU045_HUMAN  | E.SKLS#FATCKS.-           | S227: | 2 | 2,4701 | 0,235 | -0,303 |
| 11 | O75340 PDCD6_HUMAN  | R.LSDQFHDILIR.K           |       | 3 | 2,4647 | 0,235 | -0,202 |
| 11 | P20700 LMNB1_HUMAN  | E.IRDQM*QQQLND.Y          |       | 2 | 2,4621 | 0,214 | -0,521 |
| 11 | P37802 TAGL2_HUMAN  | E.GKNVIGLQMGTR.G          |       | 3 | 2,4597 | 0,112 | 0,066  |
| 11 | Q9UMY4 SNX12_HUMAN  | R.TNLPIFK.L               |       | 2 | 2,4597 | 0,099 | 0,22   |
| 11 | Q9UJU6 DBNL_HUMAN   | R.AM*STTSIS#SPQPGK.L      | S274: | 2 | 2,4531 | 0,218 | -0,246 |
| 11 | Q00839 HNRPU_HUMAN  | E.RLQAALDDEE.A            |       | 2 | 2,451  | 0,228 | -1,578 |
| 11 | Q13409 DC1I2_HUMAN  | E.INANRADAEEE.A           |       | 2 | 2,4489 | 0,15  | -0,297 |
| 11 | Q02809 PLOD1_HUMAN  | R.IFQNLGDALDE.V           |       | 2 | 2,448  | 0,096 | -0,593 |
| 11 | Q6P996 PDXD1_HUMAN  | E.GHPGAPS#PQHTDQTE.A      | S757: | 2 | 2,446  | 0,345 | -0,298 |
| 11 | A4FTV3 A4FTV3_HUMAN | E.GLAAVDIGSER.G           |       | 2 | 2,4447 | 0,422 | -0,224 |
| 11 | P10809 CH60_HUMAN   | E.GLTNLNLEDVQPHDLGKVG.E.V |       | 3 | 2,4442 | 0,168 | 0      |
| 11 | Q71U36 TBA1A_HUMAN  | E.GEFSEARE.D              |       | 2 | 2,441  | 0,287 | 0,132  |
| 11 | P16949 STMN1_HUMAN  | E.NNNFSKM*AEE.K           |       | 2 | 2,438  | 0,251 | -0,305 |
| 11 | Q9H3Q1 BORG4_HUMAN  | R.DSSSLSSCTSGILEE.R       |       | 2 | 2,4376 | 0,182 | -0,31  |
| 11 | Q12931 TRAP1_HUMAN  | R.AQLLQPTLEINPR.H         |       | 2 | 2,4372 | 0,175 | -0,654 |
| 11 | P38432 P80C_HUMAN   | E.ARNS#SEKLPTE.L          | S271: | 2 | 2,435  | 0,321 | -0,558 |
| 11 | O75410 TACC1_HUMAN  | E.SRS#SPLKLE.F            | S315: | 2 | 2,4331 | 0,176 | -0,667 |
| 11 | Q9NQ55 SSF1_HUMAN   | R.VGGS#DEEASGIPSR.T       | S359: | 2 | 2,4326 | 0,203 | -0,254 |

|    |                    |                          |            |   |        |       |        |
|----|--------------------|--------------------------|------------|---|--------|-------|--------|
| 11 | P07951 TPM2_HUMAN  | E.KTIDDLE.D              |            | 2 | 2,4324 | 0,106 | -0,512 |
| 11 | Q9UBT2 SAE2_HUMAN  | E.VVGDAPEKVGPK.Q         |            | 2 | 2,432  | 0,246 | -0,51  |
| 11 | POC7M2 RA1L3_HUMAN | K.SES#PKEPEQLRK.L        | S6:        | 3 | 2,4316 | 0,233 | -0,243 |
| 11 | Q6P0N0 CN106_HUMAN | E.NQVAM*SFYK.H           |            | 2 | 2,4262 | 0,27  | -0,111 |
| 11 | Q9UPN3 MACF1_HUMAN | R.RGS#DASDFDLLE.T        | S5372:     | 2 | 2,4251 | 0,338 | -0,347 |
| 11 | P63165 SUMO1_HUMAN | K.VIGQDSSEIHFV.V         |            | 3 | 2,4116 | 0,197 | -0,134 |
| 11 | Q9P107 GMIP_HUMAN  | E.TPITSVPR.G             |            | 2 | 2,4094 | 0,298 | 0,07   |
| 11 | P52815 RM12_HUMAN  | K.KLVESLPQEIK.A          |            | 2 | 2,4091 | 0,104 | -0,475 |
| 11 | O75369 FLNB_HUMAN  | K.VFGPGIEGK.D            |            | 2 | 2,4013 | 0,307 | 0,202  |
| 11 | Q01433 AMPD2_HUMAN | E.RQIS#QDVKLEPD.I        | S168:      | 3 | 2,4012 | 0,253 | -0,121 |
| 11 | P05783 K1C18_HUMAN | E.NSLREVE.A              |            | 2 | 2,4007 | 0,204 | 0,288  |
| 11 | Q13206 DDX10_HUMAN | E.LVLHLLR.S              |            | 2 | 2,3962 | 0,2   | 0      |
| 11 | Q3KQU3 MA7D1_HUMAN | E.AKS#RGPT#PPAM*GPR.D    | S93:T97:   | 3 | 2,3934 | 0,13  | -0,343 |
| 11 | Q8N6T3 ARFG1_HUMAN | R.YVGFNT#PPPQKKE.D       | T189:      | 3 | 2,393  | 0,092 | -0,223 |
| 11 | Q9UK61 CC063_HUMAN | E.LINLIQCR.K             |            | 2 | 2,3921 | 0,149 | 0,118  |
| 11 | P11388 TOP2A_HUMAN | E.LKPQKS#VVSLE.A         | S1374:     | 2 | 2,3905 | 0,279 | -0,257 |
| 11 | Q9Y613 FHOD1_HUMAN | E.IM*DLLVQSVTKS#SPR.A    | S1118:     | 3 | 2,3896 | 0,17  | -0,31  |
| 11 | P45974 UBP5_HUMAN  | E.FSTNRQDAQE.F           |            | 2 | 2,3768 | 0,187 | -0,276 |
| 11 | P16949 STMN1_HUMAN | E.LEKRAS#GQAFE.L         | S16:       | 2 | 2,3766 | 0,422 | -0,371 |
| 11 | P54920 SNAA_HUMAN  | E.AHEEQNVDSYTE.S         |            | 2 | 2,3676 | 0,318 | -0,686 |
| 11 | Q5W0B1 RN219_HUMAN | K.SLDLDGLSK.S            |            | 2 | 2,3673 | 0,116 | 1,094  |
| 11 | Q8TF76 HASP_HUMAN  | K.TFEEILPEIISK.E         |            | 2 | 2,3664 | 0,363 | -0,319 |
| 11 | Q92973 TNPO1_HUMAN | K.YSDIDIILLK.G           |            | 2 | 2,3658 | 0,296 | -0,307 |
| 11 | Q9NZT2 OGFR_HUMAN  | E.DRPEPLS#PKE.S          | S378:      | 2 | 2,3649 | 0,126 | -1,369 |
| 11 | Q8N3X1 FNBP4_HUMAN | K.VQTPKVEEE.Q            |            | 2 | 2,3616 | 0,266 | -0,631 |
| 11 | Q14247 SRC8_HUMAN  | R.AKTQT#PPVS#PAPQPTEE.R  | T401:S405: | 2 | 2,3608 | 0,466 | 0,315  |
| 11 | P67936 TPM4_HUMAN  | E.LKCGDLEEE.L            |            | 2 | 2,3582 | 0,208 | -0,223 |
| 11 | P27816 MAP4_HUMAN  | R.AS#PIKMDLAPSKDMGPPKE.N | S358:      | 3 | 2,3558 | 0,294 | -0,787 |
| 11 | P05386 RLA1_HUMAN  | E.S#DDDM*GFGLFD.-        | S104:      | 2 | 2,3545 | 0,19  | -0,65  |
| 11 | Q9H477 RBSK_HUMAN  | E.NLKQNDISTE.F           |            | 2 | 2,3545 | 0,144 | -0,105 |
| 11 | P50990 TCPQ_HUMAN  | E.KLFVTND.A              |            | 2 | 2,354  | 0,146 | 0,219  |
| 11 | Q9ULV3 CIZ1_HUMAN  | R.IPSTDTQVQPK.L          |            | 2 | 2,3521 | 0,199 | -0,703 |
| 11 | O60716 CTND1_HUMAN | R.GSLASLDS#LRK.G         | S352:      | 3 | 2,3509 | 0,134 | 0,522  |

|    |                     |                              |            |   |        |       |        |
|----|---------------------|------------------------------|------------|---|--------|-------|--------|
| 11 | Q9UQ35 SRRM2_HUMAN  | E.LASRS#PIRQDR.G             | S1112:     | 3 | 2,3503 | 0,27  | 0,066  |
| 11 | Q9UNE7 STUB1_HUMAN  | R.LGAGGGS#PEKS#PSAQELKE.Q    | S19:S23:   | 2 | 2,3499 | 0,243 | -0,427 |
| 11 | Q4KMQ2 TM16F_HUMAN  | E.AVDNLRPKS#E.-              | S909:      | 2 | 2,3476 | 0,409 | -0,461 |
| 11 | Q6NZI2 PTRF_HUMAN   | E.AGDLRRGS#S#PDVHALLE.I      | S365:S366: | 2 | 2,3466 | 0,161 | -0,5   |
| 11 | Q8IUL5 Q8IUL5_HUMAN | E.GSS#SPRSHLSPE.Q            | S160:      | 2 | 2,3454 | 0,125 | -0,647 |
| 11 | Q5UIP0 RIF1_HUMAN   | E.DNNAS#PQKLRE.L             | S2144:     | 2 | 2,3429 | 0,33  | -0,361 |
| 11 | P30044 PRDX5_HUMAN  | K.THLPGFVEQAE.A              |            | 2 | 2,3415 | 0,334 | -0,199 |
| 11 | Q8NFP7 NUD10_HUMAN  | K.LGGS#PTNGNSM*APSSPDSDP.-   | S148:      | 2 | 2,3371 | 0,176 | -0,308 |
| 11 | P18858 DNL1_HUMAN   | E.GEDGDQPTT#PPKPLKTSK.A      | T183:      | 3 | 2,3349 | 0,191 | -1,851 |
| 11 | Q8NI08 NCOA7_HUMAN  | E.VDKQSGS#PESRVE.N           | S502:      | 3 | 2,3307 | 0,197 | 0      |
| 11 | Q9NRL3 STRN4_HUMAN  | E.FDFLGS#GEDGEGAPDPR.R       | S324:      | 2 | 2,33   | 0,188 | -0,661 |
| 11 | Q15435 PP1R7_HUMAN  | E.NNNKLTM*LD.I               |            | 2 | 2,3261 | 0,234 | -0,226 |
| 11 | Q9Y2D5 AKAP2_HUMAN  | R.DALGDSLQVPVS#PSSTTSSR.C    | S152:      | 2 | 2,3247 | 0,478 | -0,351 |
| 11 | Q2M2I8 AAK1_HUMAN   | K.VQTTPPPAVQGQK.V            |            | 2 | 2,321  | 0,251 | -0,542 |
| 11 | P11413 G6PD_HUMAN   | R.IIVEKPFGR.D                |            | 2 | 2,3204 | 0,137 | 0      |
| 11 | Q9C0B5 ZDHC5_HUMAN  | K.KVSGVGGTTYE.I              |            | 2 | 2,314  | 0,256 | 0,333  |
| 11 | Q05524 ENO1B_HUMAN  | R.YISPDQLADLYK.G             |            | 2 | 2,3124 | 0,262 | -0,428 |
| 11 | P30260 CDC27_HUMAN  | R.LFTSDSSTTKE.N              |            | 2 | 2,3107 | 0,348 | -0,502 |
| 11 | Q9UQ35 SRRM2_HUMAN  | E.AVEVPSM*ASSWGGPHFS#PEHKE.L | S1311:     | 3 | 2,3097 | 0,082 | -0,297 |
| 11 | Q8N1G2 K0082_HUMAN  | E.LALSLSSTSDEPPSSVSHGAK.A    |            | 3 | 2,3069 | 0,131 | -0,502 |
| 11 | Q68EM7 RHG17_HUMAN  | K.QNPSLPAPQTLAGGNPE.T        |            | 2 | 2,3057 | 0,183 | -0,433 |
| 11 | P78527 PRKDC_HUMAN  | E.KITAQSIEE.L                |            | 2 | 2,3056 | 0,177 | -0,12  |
| 11 | P62256 UBE2H_HUMAN  | R.RMDTDVVKLIE.S              |            | 2 | 2,3043 | 0,285 | -0,74  |
| 11 | O15320 CTGE5_HUMAN  | E.SSLKDas#FEKE.A             | S116:      | 2 | 2,2995 | 0,264 | -0,554 |
| 11 | P36952 SPB5_HUMAN   | K.IIELPFQNK.H                |            | 2 | 2,2946 | 0,118 | -0,332 |
| 11 | Q9NQS7 INCE_HUMAN   | K.YSLVAKQE.S                 |            | 2 | 2,2942 | 0,215 | -0,065 |
| 11 | P78364 PHC1_HUMAN   | E.ALSPTS#PGPLSVR.A           | S898:      | 2 | 2,2907 | 0,291 | -0,09  |
| 11 | Q2M2I8 AAK1_HUMAN   | K.VGSLT#PPSS#PKTQR.A         | T620:S624: | 2 | 2,2885 | 0,312 | -0,378 |
| 11 | Q99567 NUP88_HUMAN  | R.NVVFGLGGE.L                |            | 2 | 2,287  | 0,165 | 0,137  |
| 11 | A8MSX0 A8MSX0_HUMAN | E.LSQPRS#HTS#LKDE.L          | S99:S102:  | 2 | 2,2852 | 0,139 | -0,883 |
| 11 | P28066 PSA5_HUMAN   | E.EKLNATNIE.L                |            | 2 | 2,2825 | 0,083 | -0,236 |
| 11 | P81605 DCD_HUMAN    | K.ENAGEDPGLAR.Q              |            | 2 | 2,2805 | 0,108 | -0,324 |
| 11 | Q12888 TP53B_HUMAN  | K.M*VIQGPSS#PQGE.A           | S1114:     | 2 | 2,2735 | 0,18  | -0,46  |

|    |                     |                         |              |   |        |       |        |
|----|---------------------|-------------------------|--------------|---|--------|-------|--------|
| 11 | P02545 LMNA_HUMAN   | R.LRLSPS#PTSQR.S        | S392:        | 2 | 2,2603 | 0,119 | -1,384 |
| 11 | Q14126 DSG2_HUMAN   | E.ATM*KGS#SSAS#IVKQHE.M | S699:S703:   | 3 | 2,2601 | 0,205 | -0,29  |
| 11 | P80723 BASP_HUMAN   | K.ETPAATEAPSSTPK.A      |              | 2 | 2,2538 | 0,37  | -0,264 |
| 11 | O95429 BAG4_HUMAN   | R.HNFPCSVHQYE.S         |              | 3 | 2,2534 | 0,135 | 0,064  |
| 11 | P00558 PGK1_HUMAN   | K.AEKNGVKITLPVDFVTAD.K  |              | 3 | 2,2531 | 0,21  | -0,477 |
| 11 | P10809 CH60_HUMAN   | K.LSDGVAVLK.V           |              | 2 | 2,2504 | 0,311 | -0,068 |
| 11 | P30084 ECHM_HUMAN   | E.KAQFAQPE.I            |              | 2 | 2,2503 | 0,11  | 0,133  |
| 11 | Q9HB71 CYBP_HUMAN   | R.SFDLLVK.N             |              | 2 | 2,247  | 0,202 | 0,445  |
| 11 | Q16881 TRXR1_HUMAN  | E.KFGEENIE.V            |              | 2 | 2,2463 | 0,157 | -0,189 |
| 11 | Q6P2E9 EDC4_HUMAN   | R.GLLPGLLPAPADK.L       |              | 2 | 2,2421 | 0,139 | -0,677 |
| 11 | Q02878 RL6_HUMAN    | K.AVDSQILPK.I           |              | 2 | 2,2409 | 0,211 | 0,063  |
| 11 | P20700 LMNB1_HUMAN  | R.AGGPTT#PLS#PTRLSR.L   | T20:S23:     | 3 | 2,2403 | 0,189 | -0,328 |
| 11 | Q01082 SPTB2_HUMAN  | E.SS#PIPSPT#SDRK.A      | S2165:T2171: | 2 | 2,2315 | 0,169 | -0,596 |
| 11 | Q9UJ41 RABX5_HUMAN  | E.AKAPSPSINRQTS#IE.T    | S310:        | 3 | 2,2312 | 0,123 | -0,327 |
| 11 | Q86UP2 KTN1_HUMAN   | R.DFKLSDALAVE.D         |              | 2 | 2,2291 | 0,317 | -0,404 |
| 11 | Q86UU1 PHLB1_HUMAN  | E.DFSLTLGAR.G           |              | 2 | 2,2278 | 0,101 | 0,062  |
| 11 | P62701 RS4X_HUMAN   | R.IGVITNRE.R            |              | 2 | 2,2229 | 0,157 | 0,068  |
| 11 | P04264 K2C1_HUMAN   | R.TNAENEFVTIK.K         |              | 2 | 2,2161 | 0,276 | -0,096 |
| 11 | O00541 PESC_HUMAN   | E.GDYVPPEKLL.L          |              | 2 | 2,2141 | 0,105 | -0,319 |
| 11 | Q5T200 ZC3HD_HUMAN  | R.SLS#PSHLTE.D          | S877:        | 2 | 2,2132 | 0,122 | -0,232 |
| 11 | Q15365 PCBP1_HUMAN  | E.TLSQS#PQGR.V          | S173:        | 2 | 2,2118 | 0,145 | 0      |
| 11 | P13861 KAP2_HUMAN   | R.APASVLPAAATPR.Q       |              | 2 | 2,2114 | 0,273 | -0,106 |
| 11 | P22102 PUR2_HUMAN   | E.FNCRFGDPE.C           |              | 2 | 2,1992 | 0,18  | 0      |
| 11 | P61604 CH10_HUMAN   | K.VGDKVLLPE.Y           |              | 2 | 2,1945 | 0,212 | 0      |
| 11 | Q00839 HNRPU_HUMAN  | K.DLPEHAVLK.M           |              | 2 | 2,1907 | 0,231 | -0,358 |
| 11 | Q49A39 Q49A39_HUMAN | E.KQPS#PEEIRE.R         | S257:        | 2 | 2,1861 | 0,192 | -0,472 |
| 11 | P07195 LDHB_HUMAN   | E.KLIAPVAEEE.A          |              | 2 | 2,1812 | 0,251 | -0,333 |
| 11 | O95433 AHSA1_HUMAN  | E.GRGIPAPEEE.R          |              | 2 | 2,1811 | 0,137 | -0,116 |
| 11 | P61247 RS3A_HUMAN   | K.VERADGYEPPVQES#V.-    | S263:        | 2 | 2,1811 | 0,21  | -0,487 |
| 11 | P13473 LAMP2_HUMAN  | R.IPLNDLFR.C            |              | 2 | 2,1791 | 0,203 | -0,185 |
| 11 | Q9UKM9 RALY_HUMAN   | E.AGLPQGEAR.T           |              | 2 | 2,172  | 0,228 | -0,407 |
| 11 | P30622 CLIP1_HUMAN  | E.SISNLS#EAGS#IKKGERE.L | S200:S204:   | 2 | 2,1687 | 0,344 | -0,559 |
| 11 | P46821 MAP1B_HUMAN  | K.SDISLTPR.E            |              | 2 | 2,165  | 0,263 | 0,186  |



|    |                      |                                   |                 |   |        |       |        |
|----|----------------------|-----------------------------------|-----------------|---|--------|-------|--------|
| 11 | Q9NY27 PP4R2_HUMAN   | K.VSLSAPM*TTNGLPE.S               |                 | 2 | 2,1633 | 0,119 | 0,085  |
| 11 | Q15942 ZYX_HUMAN     | R.EKVSS#IDLE.I                    | S143:           | 2 | 2,1617 | 0,106 | -0,333 |
| 11 | O75496 GEMI_HUMAN    | E.NKNLGGVTQE.S                    |                 | 2 | 2,1554 | 0,175 | -0,345 |
| 11 | P04792 HSPB1_HUMAN   | D.VNHFAPDE.L                      |                 | 2 | 2,1546 | 0,109 | 0,066  |
| 11 | P37802 TAGL2_HUMAN   | E.KQYDADLE.Q                      |                 | 2 | 2,1544 | 0,194 | -0,186 |
| 11 | O00505 IMA3_HUMAN    | E.RDDNPSLQFE.A                    |                 | 2 | 2,1544 | 0,221 | -0,6   |
| 11 | Q9BTL3 F103A_HUMAN   | K.RPPES#PPIVEE.W                  | S36:            | 2 | 2,153  | 0,219 | -0,092 |
| 11 | P07355 ANXA2_HUMAN   | K.AYTNFDAERDALNIE.T               |                 | 2 | 2,1519 | 0,103 | -0,56  |
| 11 | Q9Y6D5 BIG2_HUMAN    | R.GSS#LSGTTDDGAQE.V               | S277:           | 2 | 2,1495 | 0,259 | -0,561 |
| 11 | ##Q15560 TCEA2_HUMAN | K.M*DTNGVDR.F                     |                 | 2 | 2,1489 | 0,095 | 0,726  |
| 11 | P22626 ROA2_HUMAN    | R.GGGGNFGPGPSNFR.G                |                 | 2 | 2,1402 | 0,404 | -0,266 |
| 11 | Q96KB5 TOPK_HUMAN    | K.SLNDLIEER.Y                     |                 | 2 | 2,1369 | 0,121 | -0,448 |
| 11 | Q09666 AHNK_HUMAN    | K.TGTCRIS#M*SE.V                  | S570:           | 2 | 2,1363 | 0,217 | -0,394 |
| 11 | O75143 K0652_HUMAN   | E.GRAS#PHDVLE.T                   | S361:           | 2 | 2,1347 | 0,277 | -0,841 |
| 11 | P38398 BRCA1_HUMAN   | K.VNNIPSQSTR.H                    |                 | 2 | 2,1292 | 0,212 | -0,328 |
| 11 | Q13586 STIM1_HUMAN   | R.S#HSPSSPDPDTPSPVGD.S            | S616:           | 2 | 2,1272 | 0,2   | -1,179 |
| 11 | P05387 RLA2_HUMAN    | E.DVIAQGIGK.L                     |                 | 2 | 2,1268 | 0,223 | -1,422 |
| 11 | P13667 PDIA4_HUMAN   | E.VKDLGLSE.S                      |                 | 2 | 2,1251 | 0,142 | -0,213 |
| 11 | Q12986 NFX1_HUMAN    | E.SGTDLREHS#PSESE.K               | S150:           | 2 | 2,121  | 0,322 | -0,53  |
| 11 | Q9H792 SG269_HUMAN   | E.FNNCLNR.G                       |                 | 2 | 2,1185 | 0,246 | 0,325  |
| 11 | Q99829 CPNE1_HUMAN   | R.DIVQFVPIR.R                     |                 | 2 | 2,1105 | 0,197 | -0,107 |
| 11 | P28331 NDUS1_HUMAN   | R.FEAPLFNAR.I                     |                 | 2 | 2,1056 | 0,181 | -0,115 |
| 11 | P11940 PABP1_HUMAN   | K.GYGFVHFE.T                      |                 | 2 | 2,105  | 0,101 | -0,064 |
| 12 | Q5JRA6 MIA3_HUMAN    | E.ASGKPSDPGSGTATM*M*NSSSR.G       |                 | 3 | 5,8658 | 0,57  | -0,408 |
| 12 | Q9NZT2 OGFR_HUMAN    | E.GAGDAAVASGGAQTLALAGSPAPS#GHPK.A | S488:           | 3 | 5,8118 | 0,446 | -0,496 |
| 12 | Q8WXI9 P66B_HUMAN    | E.RGRLT#PS#PDIIVLS#DNEASSPR.S     | T120:S122:S129: | 3 | 5,4799 | 0,335 | -0,559 |
| 12 | Q9UHK0 NUFP1_HUMAN   | E.NQVLDSSAPKS#PSQDVK.A            | S403:           | 2 | 5,3937 | 0,495 | -0,325 |
| 12 | A8K6V7 A8K6V7_HUMAN  | E.KST#TPPPAEPVSLPQEPKPR.V         | T226:           | 3 | 5,3363 | 0,401 | -0,392 |
| 12 | Q92625 ANS1A_HUMAN   | R.S#LSKSDSDLTCSPTEDATM*GSR.S      | S622:           | 3 | 5,2859 | 0,404 | -0,788 |
| 12 | Q8ND56 LS14A_HUMAN   | E.TSNSGTLQPSSAVGSAFTQDTR.S        |                 | 3 | 5,1969 | 0,516 | -0,248 |
| 12 | Q01082 SPTB2_HUMAN   | E.TVDTSEM*VNGATEQR.T              |                 | 2 | 5,0936 | 0,46  | -0,516 |
| 12 | Q12893 TM115_HUMAN   | E.SGAKVDSPLPSDKAPT#PPGKGAAP.E.S   | T329:           | 3 | 5,0564 | 0,343 | -0,671 |
| 12 | Q5T4S7 UBR4_HUMAN    | E.KAAPPPPPPPPLESS#PR.V            | S620:           | 3 | 5,0248 | 0,373 | -0,287 |

|    |                    |                                  |              |   |        |       |        |
|----|--------------------|----------------------------------|--------------|---|--------|-------|--------|
| 12 | P84103 SFRS3_HUMAN | K.VYVGNLGNNGNKTELE.R             |              | 2 | 5,0203 | 0,458 | -0,354 |
| 12 | Q92615 LARP5_HUMAN | E.THS#VDRLPSALTATAACK.S          | S620:        | 3 | 5,0068 | 0,393 | -0,671 |
| 12 | Q8NDX5 PHC3_HUMAN  | R.M*DRT#PPPTLS#PAAITVGR.G        | T609:S616:   | 3 | 4,9488 | 0,253 | -0,17  |
| 12 | P35606 COPB2_HUMAN | E.LDGKPAS#PTPVIVASHTANKE.E       | S859:        | 3 | 4,9376 | 0,351 | -0,413 |
| 12 | Q9C0C2 TB182_HUMAN | E.M*EASSSQDQSKVSAPGVLTAQDR.V     |              | 3 | 4,8954 | 0,448 | -0,228 |
| 12 | P02545 LMNA_HUMAN  | R.SVGGSGGGS#FGDNLVTR.S           | S636:        | 2 | 4,8652 | 0,564 | -0,593 |
| 12 | O14617 AP3D1_HUMAN | K.HRPSEADEEELAR.R                |              | 3 | 4,8444 | 0,418 | -0,357 |
| 12 | P35606 COPB2_HUMAN | E.LDGKPAS#PTPVIVASHTANKEE.K      | S859:        | 3 | 4,8355 | 0,411 | -0,391 |
| 12 | Q658Y4 F91A1_HUMAN | D.LQHLCGYVTM*LNASSQLADR.K        |              | 3 | 4,8172 | 0,335 | -0,479 |
| 12 | Q9UHR5 S30BP_HUMAN | E.KGGLVSDAYGEDDFSR.L             |              | 2 | 4,7867 | 0,518 | -0,64  |
| 12 | Q15648 MED1_HUMAN  | E.RGSPS#HSKS#PAYTPQNLDSESE.S     | S1449:S1453: | 3 | 4,7818 | 1     | -0,361 |
| 12 | Q5JRA6 MIA3_HUMAN  | E.ASGKPSDPGSGTATMM*NSSSR.G       |              | 3 | 4,7698 | 0,423 | -0,575 |
| 12 | Q9H4A3 WNK1_HUMAN  | K.DRPVVSQPSLVGSKEPPPAR.S         |              | 3 | 4,7536 | 0,359 | -0,426 |
| 12 | Q9NVM9 CL011_HUMAN | E.AEIIKSDSPDS#PEPPNKKPLVE.M      | S626:        | 3 | 4,7439 | 0,324 | -0,307 |
| 12 | P17706 PTN2_HUMAN  | E.LSKEDLSPAFDHS#PNKIM*TE.K       | S304:        | 3 | 4,7239 | 0,331 | -0,699 |
| 12 | Q96JG6 CC132_HUMAN | E.FKFM*EQSRS#PSVS#PSKQPVSTSSK.T  | S494:S498:   | 3 | 4,7127 | 1     | -0,646 |
| 12 | Q9H2U1 DHX36_HUMAN | E.EQIVQLLNSVQAK.N                |              | 2 | 4,6888 | 0,372 | -0,332 |
| 12 | Q15942 ZYG_HUMAN   | E.ALSAGTGS#PQPPSFTYAQQR.E        | S308:        | 3 | 4,6883 | 0,385 | -0,256 |
| 12 | Q8NCF5 NF2IP_HUMAN | E.VLSRDS#PLKTLMSHYEE.A           | S369:        | 3 | 4,6649 | 0,464 | -0,337 |
| 12 | Q9UHR5 S30BP_HUMAN | E.KGGLVSDAYGEDDFSR.L             |              | 3 | 4,6334 | 0,457 | -0,426 |
| 12 | Q71RC2 LARP4_HUMAN | R.AS#TASPCNNNINAATAVALQEPR.K     | S594:        | 3 | 4,5976 | 0,32  | 0,373  |
| 12 | P02545 LMNA_HUMAN  | R.SYRS#VGGSGGGSFGDNLVTR.S        | S628:        | 3 | 4,5544 | 0,401 | -0,624 |
| 12 | Q9UQ35 SRRM2_HUMAN | K.SKDSLVSQSCPGSLSLQAGVK.S        |              | 3 | 4,5356 | 0,377 | -0,699 |
| 12 | Q96EV2 RBM33_HUMAN | R.CSATPSAQVKPIVSAS#PPSR.A        | S751:        | 3 | 4,4853 | 0,413 | -0,345 |
| 12 | Q8NCF5 NF2IP_HUMAN | E.VLSRDS#PLKTL*SHYEE.A           | S369:        | 3 | 4,4755 | 0,292 | -0,585 |
| 12 | Q15061 DMN_HUMAN   | E.VSAGGDLQAAS#PTGASR.S           | S1163:       | 2 | 4,4584 | 0,457 | -0,428 |
| 12 | Q66K74 MAP1S_HUMAN | E.LPLAASSIPRPT#PSPES#HRSPAEGSE.R | T638:S643:   | 3 | 4,4497 | 1     | -0,49  |
| 12 | P05783 K1C18_HUMAN | R.GGM*GSGGLATGIAGGLAGM*GGIQNE.K  |              | 3 | 4,4477 | 0,151 | -0,338 |
| 12 | P62158 CALM_HUMAN  | E.AFSLFDKDGDTITTKE.L             |              | 3 | 4,4423 | 0,342 | 0      |
| 12 | Q8ND56 LS14A_HUMAN | K.TQLSQGRSS#PQLDPLRKS#PTM*E.Q    | S183:S192:   | 3 | 4,4423 | 0,264 | -0,348 |
| 12 | Q09666 AHNK_HUMAN  | K.LKGPQITGPSLEGDLGLK.G           |              | 3 | 4,4345 | 0,333 | -0,502 |
| 12 | Q99497 PARK7_HUMAN | E.DAKKEGPPYDVVVLPGGNLGAQNLSE.S   |              | 3 | 4,3964 | 0,396 | -0,427 |
| 12 | Q9H1A4 APC1_HUMAN  | E.LRDS#SKLHDS#LYNE.D             | S563:S569:   | 2 | 4,3942 | 0,54  | -0,598 |

|    |                     |                                     |              |   |        |       |        |
|----|---------------------|-------------------------------------|--------------|---|--------|-------|--------|
| 12 | Q96JH7 VCIP1_HUMAN  | E.TTDGCVADALGAAFATR.S               |              | 2 | 4,3823 | 0,498 | -0,719 |
| 12 | Q8WWM7 ATX2L_HUMAN  | R.GQSTGKGGPPQS#PVFE.G               | S111:        | 2 | 4,3291 | 0,419 | -0,535 |
| 12 | Q6NZI2 PTRF_HUMAN   | R.RGS#S#PDVHALLE.I                  | S365:S366:   | 2 | 4,3038 | 0,47  | -0,339 |
| 12 | P18858 DNL1_HUMAN   | K.GQKPALDCSQVS#PPRPATSPE.N          | S91:         | 3 | 4,303  | 0,294 | -0,556 |
| 12 | Q02952 AKA12_HUMAN  | E.KEPSKSAESPTS#PVTSE.T              | S286:        | 2 | 4,2961 | 0,418 | -0,928 |
| 12 | A8K6V7 A8K6V7_HUMAN | E.KST#TPPPAEPVSLPQEPKPRVE.A         | T226:        | 3 | 4,2837 | 0,282 | -0,143 |
| 12 | Q9ULH0 ARMS_HUMAN   | K.AYNLNRTPTST#VTLNNSAPANR.A         | T1682:       | 3 | 4,2808 | 0,285 | 0      |
| 12 | O60271 JIP4_HUMAN   | E.TRNVTGS#AENEEKSE.V                | S332:        | 3 | 4,266  | 0,38  | -0,402 |
| 12 | Q9C0C2 TB182_HUMAN  | R.RES#AASGLGGLLEE.G                 | S1473:       | 2 | 4,2493 | 0,448 | -0,687 |
| 12 | O75376 NCOR1_HUMAN  | E.VSQASQLLQQQQQLR.R                 |              | 2 | 4,2445 | 0,442 | -0,425 |
| 12 | Q5UIP0 RIF1_HUMAN   | E.TKKADVQAPVS#PSETSQANPYSE.G        | S1772:       | 3 | 4,2391 | 0,494 | -0,655 |
| 12 | Q12893 TM115_HUMAN  | E.SGAKVDS#PLPSDKAPTPPGKGAPE.S       | S320:        | 3 | 4,2213 | 0,298 | -0,149 |
| 12 | Q9UKV3 ACINU_HUMAN  | E.KSKS#PS#PPRLTE.D                  | S386:S388:   | 3 | 4,2035 | 0,212 | -0,615 |
| 12 | Q9Y2X7 GIT1_HUMAN   | R.ARS#M*DSSDLSDGAVTLQE.Y            | S410:        | 2 | 4,2034 | 0,476 | -0,062 |
| 12 | Q5VUA4 ZN318_HUMAN  | R.TKSSDTSSTS#PLNSSASQEE.L           | S1616:       | 2 | 4,2019 | 1     | -0,345 |
| 12 | Q96JM3 ZN828_HUMAN  | E.LRKPGPPLS#PEIRS#PAGSPE.L          | S427:S432:   | 3 | 4,2016 | 0,293 | -0,489 |
| 12 | Q15366 PCBP2_HUMAN  | K.GVTIPYRPKPSS#SPVIFAGGQDR.Y        | S188:        | 3 | 4,1991 | 0,348 | -1,385 |
| 12 | O60271 JIP4_HUMAN   | E.TRNVTGS#AENEEKSE.V                | S332:        | 2 | 4,1956 | 0,532 | -0,94  |
| 12 | P11172 PYR5_HUMAN   | E.NVFVAANHNGS#PLSIK.E               | S214:        | 2 | 4,1894 | 0,467 | -0,349 |
| 12 | P18615 NELFE_HUMAN  | K.LKDPEKGPVPTFQPFQR.S               |              | 3 | 4,1782 | 0,385 | -0,553 |
| 12 | Q9NZT2 OGFR_HUMAN   | E.GAGDAAVASGGAQTLALAGSPAPSGHPK.A    |              | 3 | 4,1749 | 0,453 | -0,585 |
| 12 | Q96KP4 CNDP2_HUMAN  | K.NVM*LLPVGSAADDGAHSQNE.K           |              | 2 | 4,162  | 0,37  | -0,124 |
| 12 | P19525 E2AK2_HUMAN  | E.KKAVS#PLLLTTNSSE.G                | S83:         | 2 | 4,1611 | 0,39  | -0,966 |
| 12 | B2CI53 B2CI53_HUMAN | R.NGILASPQS#APGNLNSK.S              | S263:        | 2 | 4,1149 | 0,477 | -0,589 |
| 12 | Q92797 SYMPK_HUMAN  | K.LKPGGVGAPSSSS#PSPS#PSARPGPPPSEE.A | S1171:S1175: | 3 | 4,1139 | 1     | -0,509 |
| 12 | P62158 CALM_HUMAN   | E.AFSLFDKDGDTITTK.E.L               |              | 2 | 4,1123 | 0,497 | -0,661 |
| 12 | Q09666 AHNK_HUMAN   | K.TVIRLPS#GSGAASPTGSAVDIR.A         | S210:        | 3 | 4,1084 | 0,304 | -0,501 |
| 12 | P02545 LMNA_HUMAN   | R.SVGGG#GGGSFGDNLVTR.S              | S632:        | 2 | 4,0964 | 0,571 | -0,37  |
| 12 | P11388 TOP2A_HUMAN  | K.SVVS#DLEADDVK.G                   | S1377:       | 2 | 4,0823 | 0,483 | -0,36  |
| 12 | O60271 JIP4_HUMAN   | E.TRNVS#TGS#AENEEKSE.V              | S329:S332:   | 2 | 4,062  | 0,502 | -0,514 |
| 12 | Q99471 PFD5_HUMAN   | E.AKDCLNVLNKS#NE.G                  | S56:         | 2 | 4,0611 | 0,342 | -0,539 |
| 12 | Q5QJE6 TDIF2_HUMAN  | E.LQDTS#LQQLVSQR.H                  | S330:        | 2 | 4,0487 | 0,373 | -0,306 |
| 12 | P35908 K22E_HUMAN   | R.FLEQQNQVLQTK.W                    |              | 2 | 4,0478 | 0,358 | -1,24  |

|    |                     |                                     |              |   |        |       |        |
|----|---------------------|-------------------------------------|--------------|---|--------|-------|--------|
| 12 | Q09666 AHNK_HUMAN   | K.M*DAEVPDVNIEGPDAL.L               |              | 2 | 4,0311 | 0,326 | -0,924 |
| 12 | Q02952 AKA12_HUMAN  | E.KEPSKSAES#PTSPVTSE.T              | S283:        | 2 | 4,0285 | 0,479 | -0,464 |
| 12 | Q14195 DPYL3_HUMAN  | R.NLHQSGFSLSGTQVDE.G                |              | 2 | 4,028  | 0,534 | -0,71  |
| 12 | P00558 PGK1_HUMAN   | E.SPERPFLAILGGAK.V                  |              | 3 | 4,025  | 0,369 | -0,314 |
| 12 | Q09666 AHNK_HUMAN   | R.LPSGSGAAS#PTGSAVDIR.A             | S216:        | 2 | 4,0175 | 0,416 | -0,283 |
| 12 | P02545 LMNA_HUMAN   | R.SGAQASSTPLS#PTR.I                 | S22:         | 2 | 4,0065 | 0,529 | -0,254 |
| 12 | O60271 JIP4_HUMAN   | R.NVSTGS#AENEKSE.V                  | S332:        | 2 | 4,0014 | 0,395 | -0,391 |
| 12 | Q9HCD6 TANC2_HUMAN  | E.ARPSQGLPVIQS#PPSS#PPHRD.S         | S1442:S1446: | 3 | 3,9925 | 0,187 | 0,154  |
| 12 | P46821 MAP1B_HUMAN  | E.HCAS#PEDKTLE.V                    | S1312:       | 2 | 3,9885 | 0,441 | -0,536 |
| 12 | P13645 K1C10_HUMAN  | K.GSLGGGFSSGGFSGGSFSR.G             |              | 2 | 3,9876 | 0,569 | -0,786 |
| 12 | Q71U36 TBA1A_HUMAN  | E.HGIQPDGQMPSDK.T                   |              | 2 | 3,9847 | 0,456 | -0,519 |
| 12 | P18583 SON_HUMAN    | R.AGIEGPLLASDVGR.D                  |              | 2 | 3,9718 | 0,327 | -0,36  |
| 12 | O15061 DMN_HUMAN    | R.HVTLPGQGS#PLSRE.V                 | S1181:       | 2 | 3,9603 | 0,531 | -0,157 |
| 12 | P55884 EIF3B_HUMAN  | R.SDSRAQAVSEDAGGNE.G                |              | 2 | 3,9528 | 0,465 | -0,46  |
| 12 | Q01082 SPTB2_HUMAN  | E.TVDTSEMVNGATEQR.T                 |              | 2 | 3,9514 | 0,359 | -0,521 |
| 12 | Q02880 TOP2B_HUMAN  | E.LKVKAS#PITNDGEDE.F                | S1400:       | 2 | 3,9364 | 0,443 | -0,288 |
| 12 | Q32MZ4 LRRF1_HUMAN  | R.NM*PGLSAATLASLGGTSSR.R            |              | 2 | 3,9361 | 0,42  | -0,338 |
| 12 | Q9NTK5 OLA1_HUMAN   | E.GSVDPIRDIEIHEE.L                  |              | 3 | 3,9352 | 0,204 | -0,319 |
| 12 | Q9UQ35 SRRM2_HUMAN  | E.KSATRPS#PS#PERSSTGPEPPAPTPLLA.E.R | S351:S353:   | 3 | 3,9256 | 1     | -0,425 |
| 12 | P55884 EIF3B_HUMAN  | R.SDS#RAQAVSEDAGGNEGR.A             | S119:        | 3 | 3,9218 | 0,305 | -0,388 |
| 12 | O60271 JIP4_HUMAN   | R.TKLHQLS#GSDQLE.S                  | S183:        | 2 | 3,9118 | 0,513 | -0,397 |
| 12 | Q70E73 RAPH1_HUMAN  | E.SQPLKVPANVAPQS#PPAVK.A            | S946:        | 3 | 3,9052 | 0,282 | -0,261 |
| 12 | Q02952 AKA12_HUMAN  | E.LQSHAKS#PPS#PVERE.M               | S1328:S1331: | 3 | 3,903  | 0,209 | -0,402 |
| 12 | O00257 CBX4_HUMAN   | E.VILLDS#DLDEPIDLR.S                | S465:        | 2 | 3,8551 | 0,476 | -0,54  |
| 12 | P30101 PDIA3_HUMAN  | E.STAGEIPVVAIR.T                    |              | 2 | 3,8424 | 0,407 | -0,302 |
| 12 | Q12893 TM115_HUMAN  | E.SGAKVDS#PLPSDKAPTPPGK.G           | S320:        | 3 | 3,8373 | 0,276 | -0,451 |
| 12 | O43663 PRC1_HUMAN   | K.ASKSDATSGILNST#NIQS.-             | T616:        | 2 | 3,8368 | 0,47  | -0,326 |
| 12 | O60220 TIM8A_HUMAN  | K.SKPVFSESLSD.-                     | S96:         | 2 | 3,8309 | 0,419 | -0,478 |
| 12 | A8K6V7 A8K6V7_HUMAN | E.KSTT#PPPAEPVSLPQEPKPR.V           | T227:        | 3 | 3,8251 | 0,274 | -0,784 |
| 12 | A0MZ66 SHOT1_HUMAN  | E.NKEDS#IENVRE.T                    | S619:        | 3 | 3,8215 | 0,158 | -0,259 |
| 12 | Q92598 HS105_HUMAN  | E.LNNTCEPVVTQPKPK.I                 |              | 2 | 3,8193 | 0,268 | -0,212 |
| 12 | Q9UNX4 WDR3_HUMAN   | K.KIKGSS#PGIQDTLE.A                 | S241:        | 2 | 3,8003 | 0,361 | -0,157 |
| 12 | Q9NZQ3 SPN90_HUMAN  | R.RGTHTTVSQVQPPPSK.A                |              | 3 | 3,7953 | 0,338 | -0,213 |

|    |                     |                                       |              |   |        |       |        |
|----|---------------------|---------------------------------------|--------------|---|--------|-------|--------|
| 12 | Q6P2E9 EDC4_HUMAN   | E.LGSEGLGSAAHGS#QPDLRR.I              | S565:        | 3 | 3,7952 | 0,407 | -0,736 |
| 12 | Q8WYP5 AHTF1_HUMAN  | E.TRIS#FVEEDVHPK.W                    | S1241:       | 3 | 3,7924 | 0,339 | 0      |
| 12 | P35527 K1C9_HUMAN   | R.GGSGGSYGGGGSGGGYGGGSGSR.G           |              | 2 | 3,783  | 0,447 | -0,477 |
| 12 | Q15149 PLEC1_HUMAN  | R.SSS#VGSSSSYPISPAVSR.T               | S4386:       | 2 | 3,7812 | 0,371 | -0,332 |
| 12 | P35611 ADDA_HUMAN   | E.DGHRTS#TSAVPNLFVPLNTNPK.E           | S481:        | 3 | 3,7806 | 0,138 | -0,374 |
| 12 | O95785 WIZ_HUMAN    | K.NPEDKSPQLSLS#PRPAS#PK.A             | S1012:S1017: | 3 | 3,7798 | 0,266 | -0,249 |
| 12 | Q71RC2 LARP4_HUMAN  | R.ASTASPCNNNINAATAVALQEPR.K           |              | 3 | 3,7772 | 0,37  | -0,772 |
| 12 | Q58FF8 H90B2_HUMAN  | E.LISNASDALDKIRYE.S                   |              | 2 | 3,7684 | 0,489 | -0,643 |
| 12 | Q6S8J3 A26CA_HUMAN  | R.TTGIVM*DSGDGVTHTVPIYE.G             |              | 2 | 3,7661 | 0,403 | -0,81  |
| 12 | O94876 TMCC1_HUMAN  | R.NKFGS#ADNIPNLKDSLEE.G               | S382:        | 3 | 3,7514 | 0,216 | -0,618 |
| 12 | Q6NZI2 PTRF_HUMAN   | E.AGDLRRGS#S#PDVHALLE.I               | S365:S366:   | 3 | 3,7455 | 0,345 | -0,187 |
| 12 | Q9HCD5 NCOA5_HUMAN  | E.RLM*RSS#TDS#LPGPISR.Q               | S378:S381:   | 3 | 3,7357 | 0,337 | -0,469 |
| 12 | Q71U36 TBA1A_HUMAN  | K.TIGGGDDSFNTFFSE.T                   |              | 2 | 3,7252 | 0,417 | -0,536 |
| 12 | Q9H3P2 NELFA_HUMAN  | E.ASRPPEEPSAPSPTLPAQFK.Q              |              | 3 | 3,7224 | 0,366 | -0,26  |
| 12 | Q92615 LARP5_HUMAN  | E.RTLSADASVNTLPVVVSR.E                |              | 3 | 3,7199 | 0,15  | -0,388 |
| 12 | B2CI53 B2CI53_HUMAN | R.NGILASPQSAPGNLDNSK.S                |              | 2 | 3,7145 | 0,47  | -0,479 |
| 12 | P08670 VIME_HUMAN   | E.NTLQSFQRQVDNASLAR.L                 |              | 3 | 3,7076 | 0,207 | -0,851 |
| 12 | Q12756 KIF1A_HUMAN  | R.YGATDLRTPQPCS#RPAS#PEPE.L           | S1528:S1532: | 3 | 3,7035 | 0,277 | -0,441 |
| 12 | O43149 ZZEF1_HUMAN  | E.KESPGDLTRS#PE.M                     | S240:        | 2 | 3,6936 | 0,35  | -0,35  |
| 12 | O15061 DMN_HUMAN    | E.VSAGGDLS#QAAS#PTGASR.S              | S1159:S1163: | 2 | 3,6885 | 0,439 | -0,477 |
| 12 | Q12756 KIF1A_HUMAN  | E.GRYGATDLRTPQPCS#RPAS#PEPE.L         | S1528:S1532: | 3 | 3,6884 | 0,345 | -0,609 |
| 12 | Q08EQ4 TMSL1_HUMAN  | E.KNPLPSKET#IEQE.K                    | T34:         | 2 | 3,6718 | 0,203 | -0,306 |
| 12 | O75381 PEX14_HUMAN  | E.STSSSPGKEGHS#PEGSTVTYHLLGPQEE.G     | S282:        | 3 | 3,6703 | 0,433 | -0,307 |
| 12 | A8K6V7 A8K6V7_HUMAN | E.KSTT#PPPAEPVSLPQEPKPRVE.A           | T227:        | 3 | 3,6645 | 0,256 | -0,214 |
| 12 | P35908 K22E_HUMAN   | R.NLDLDSIIAEVK.A                      |              | 2 | 3,6631 | 0,414 | -0,459 |
| 12 | P14136 GFAP_HUMAN   | K.LALDIEIATYR.K                       |              | 2 | 3,6621 | 0,501 | -0,573 |
| 12 | Q92613 JADE3_HUMAN  | E.TDQQPHS#PDSSSSVHSIR.N               | S566:        | 3 | 3,6618 | 0,29  | -0,626 |
| 12 | P05783 K1C18_HUMAN  | R.S#TSFRGGM*GSGGLATGIAGGLAGM*GGIQNE.K | S51:         | 3 | 3,6612 | 0,315 | -0,389 |
| 12 | Q9UQ35 SRRM2_HUMAN  | K.DKFS#PPFPVQDRPE.S                   | S1188:       | 2 | 3,659  | 0,336 | -0,297 |
| 12 | Q96JG6 CC132_HUMAN  | E.FKFMEQSR#PSVS#PSKQPVSTSSK.T         | S494:S498:   | 3 | 3,651  | 0,12  | -0,195 |
| 12 | P61106 RAB14_HUMAN  | K.KIYQNIQDGS#LDLNAAE.S                | S180:        | 2 | 3,6501 | 0,332 | -0,186 |
| 12 | Q9Y394 DHRS7_HUMAN  | E.KDILVPLDLTDTGSHE.A                  |              | 3 | 3,6499 | 0,314 | -0,392 |
| 12 | P62263 RS14_HUMAN   | E.SSPYAAM*LAAQDVAQR.C                 |              | 2 | 3,6464 | 0,47  | -0,576 |

|    |                     |                            |              |   |        |       |        |
|----|---------------------|----------------------------|--------------|---|--------|-------|--------|
| 12 | Q9NQG5 CT077_HUMAN  | K.LSM*EDSKS#PPPKATEE.K     | S134:        | 3 | 3,6408 | 0,194 | -0,199 |
| 12 | Q02790 FKBP4_HUMAN  | E.M*KEEQKSNTAGSQS#QVETEA.- | S453:        | 3 | 3,6374 | 0,392 | -0,482 |
| 12 | P25787 PSA2_HUMAN   | E.DAIHTAILTLKE.S           |              | 3 | 3,6332 | 0,215 | 0,276  |
| 12 | P29375 JAD1A_HUMAN  | K.AAANPDLQGHLPFQQSAFNR.V   |              | 3 | 3,6327 | 0,331 | -0,403 |
| 12 | O76021 RL1D1_HUMAN  | K.ATNES#EDEIPQLVPIGKK.T    | S361:        | 3 | 3,6326 | 0,274 | -0,715 |
| 12 | P61604 CH10_HUMAN   | K.VGDKVLLPEYGGTK.V         |              | 2 | 3,6309 | 0,345 | -0,496 |
| 12 | O00257 CBX4_HUMAN   | E.VSGVSDPQPQDAGSR.K        |              | 2 | 3,627  | 0,457 | -0,488 |
| 12 | Q9NQ84 GPC5C_HUMAN  | K.VPSEGAYDIILPR.A          |              | 2 | 3,6226 | 0,436 | -0,256 |
| 12 | Q15365 PCBP1_HUMAN  | R.CSDAAGYPHATHDLE.G        |              | 2 | 3,6208 | 0,519 | -0,445 |
| 12 | P46821 MAP1B_HUMAN  | E.KSGKQGS#PDQVSPVSE.M      | S1438:       | 2 | 3,613  | 0,366 | -0,571 |
| 12 | O75061 AUXI_HUMAN   | E.DVFHPSGPASTQSTPR.R       |              | 3 | 3,5997 | 0,384 | -0,434 |
| 12 | Q14247 SRC8_HUMAN   | R.AKTQT#PPVS#PAPQPTEE.R    | T401:S405:   | 2 | 3,5929 | 0,471 | -0,378 |
| 12 | Q52LD0 Q52LD0_HUMAN | K.AGGS#PAS#YHGSTSPR.V      | S192:S195:   | 2 | 3,5901 | 0,457 | -0,537 |
| 12 | P00966 ASSY_HUMAN   | K.APNTPDILEIEFKK.G         |              | 3 | 3,5801 | 0,379 | -0,34  |
| 12 | O75362 ZN217_HUMAN  | R.TKADVT#PPPDGSTTHNLE.V    | T648:        | 3 | 3,5791 | 0,358 | 0      |
| 12 | P31943 HNRH1_HUMAN  | K.HTGPNSPDTANDGFVR.L       |              | 3 | 3,578  | 0,258 | -0,326 |
| 12 | P84103 SFRS3_HUMAN  | K.VYVGNLGNNGNKTE.L         |              | 2 | 3,5744 | 0,324 | -0,495 |
| 12 | P49189 AL9A1_HUMAN  | R.IKIGDPLLEDTR.M           |              | 3 | 3,5726 | 0,188 | 0,133  |
| 12 | Q9C0C2 TB182_HUMAN  | R.RES#AAS#GLGGLLEE.G       | S1473:S1476: | 2 | 3,5631 | 0,441 | -0,364 |
| 12 | Q13085 ACACA_HUMAN  | R.FIIGSVSEDNS#EDE.I        | S29:         | 2 | 3,5497 | 0,433 | -0,602 |
| 12 | Q14126 DSG2_HUMAN   | E.ATM*KGSS#SAS#IVKGQHE.M   | S700:S703:   | 3 | 3,5475 | 0,175 | -0,773 |
| 12 | P08651 NFIC_HUMAN   | R.TGMGSDQEDSKPITLDTDFQE.S  |              | 3 | 3,5379 | 0,306 | -0,758 |
| 12 | Q9H6T3 RPAP3_HUMAN  | E.NNPINLANVIAATGTTSK.K     |              | 2 | 3,5299 | 0,48  | -0,475 |
| 12 | Q4KMP7 TB10B_HUMAN  | R.RAS#AGPAPGPVVTAE.G       | S412:        | 2 | 3,523  | 0,479 | -0,334 |
| 12 | Q96JG6 CC132_HUMAN  | R.DYVDEQTDGDPVK.S          |              | 2 | 3,5209 | 0,468 | -0,343 |
| 12 | Q03164 HRX_HUMAN    | E.NRTIAHS#PTSFTE.S         | S2098:       | 2 | 3,5183 | 0,474 | -0,396 |
| 12 | Q9Y6D5 BIG2_HUMAN   | E.IGDGKGLDMAR.R            |              | 2 | 3,5182 | 0,497 | -0,215 |
| 12 | Q13017 RHG05_HUMAN  | K.IRNS#FVNNTQGDEE.N        | S1124:       | 2 | 3,5142 | 0,487 | -0,43  |
| 12 | P51858 HDGF_HUMAN   | E.VERPLPM*EVEK.N           |              | 3 | 3,5111 | 0,285 | -0,204 |
| 12 | Q8NCM9 Q8NCM9_HUMAN | R.SSDITSDLGNVLTSTPNAK.T    |              | 2 | 3,5049 | 0,471 | -0,699 |
| 12 | Q15149 PLEC1_HUMAN  | R.SRSSS#VGSSSSYPISPAVSR.T  | S4386:       | 3 | 3,4917 | 0,283 | -0,352 |
| 12 | Q04917 1433F_HUMAN  | E.DSYKDSTLIM*QLLR.D        |              | 3 | 3,4902 | 0,152 | -0,538 |
| 12 | P62263 RS14_HUMAN   | E.SSPYAAM*LAAQDVAQR.C      |              | 3 | 3,4891 | 0,35  | -0,54  |

|    |                    |                           |            |   |        |       |        |
|----|--------------------|---------------------------|------------|---|--------|-------|--------|
| 12 | P55884 EIF3B_HUMAN | E.RSDS#RAQAVSEDAGGNE.G    | S119:      | 2 | 3,4737 | 0,458 | -0,667 |
| 12 | Q14966 ZN638_HUMAN | E.KESPLKNS#PIDE.S         | S1106:     | 2 | 3,4716 | 0,255 | -0,49  |
| 12 | Q9H6F5 CCD86_HUMAN | E.FESNPEETREPGS#PPSVQR.A  | S47:       | 3 | 3,4695 | 0,222 | -0,247 |
| 12 | Q8NEM2 SHCBP_HUMAN | E.KGLFQDEDS#CSDCSYR.D     | S42:       | 3 | 3,467  | 0,352 | -0,626 |
| 12 | Q9UKG1 DP13A_HUMAN | E.SLRPAAGQSRPPTAR.T       |            | 3 | 3,467  | 0,323 | -0,584 |
| 12 | Q9Y639 NPTN_HUMAN  | E.YHCVYHFVSAPK.A          |            | 3 | 3,4662 | 0,432 | -0,243 |
| 12 | P18615 NELFE_HUMAN | K.DPEKGPVPTFQPFQR.S       |            | 3 | 3,461  | 0,202 | -0,63  |
| 12 | P62917 RL8_HUMAN   | K.GIVKDIHDPGR.G           |            | 2 | 3,4552 | 0,289 | 0      |
| 12 | P21359 NF1_HUMAN   | E.GYLAATYPTVGQTS#PR.A     | S2515:     | 2 | 3,4545 | 0,55  | -0,623 |
| 12 | Q9NPR2 SEM4B_HUMAN | E.KRPLS#IQDSFVE.V         | S804:      | 2 | 3,4528 | 0,378 | -0,407 |
| 12 | O60271 JIP4_HUMAN  | R.SAS#QSS#LDKLDQE.L       | S730:S733: | 2 | 3,4502 | 0,296 | -0,467 |
| 12 | P41208 CETN2_HUMAN | K.M*NFGDFLTM*TQK.M        |            | 2 | 3,4413 | 0,365 | -0,702 |
| 12 | O14983 AT2A1_HUMAN | E.ITAM*TG DG VNDAPALK.K   |            | 2 | 3,4398 | 0,361 | -0,384 |
| 12 | Q9BVG4 CX026_HUMAN | E.TLRIDVLDPEELKSE.S       |            | 3 | 3,4343 | 0,2   | -0,312 |
| 12 | P13994 CC130_HUMAN | E.GSRQDKPLS#PAGSSQE.A     | S362:      | 2 | 3,4319 | 0,501 | -0,283 |
| 12 | Q9Y6M7 S4A7_HUMAN  | R.KIPTGAEASNVLVGE.V       |            | 2 | 3,4312 | 0,395 | -0,575 |
| 12 | O14974 MYPT1_HUMAN | R.RST#QGVTLTDLQE.A        | T696:      | 2 | 3,4268 | 0,443 | -0,559 |
| 12 | O75531 BAF_HUMAN   | R.DFVAEPM*GEKPVGSLAGIGE.V |            | 2 | 3,4235 | 0,501 | -0,604 |
| 12 | Q7L1V2 MON1B_HUMAN | E.TGSKDKDQPPS#PSPPPQSE.A  | S59:       | 3 | 3,4206 | 0,277 | -0,533 |
| 12 | P09874 PARP1_HUMAN | K.GFSLLATEDKE.A           |            | 2 | 3,4161 | 0,38  | -0,403 |
| 12 | Q71U36 TBA1A_HUMAN | E.HGIQPDGQM*PSDK.T        |            | 2 | 3,4149 | 0,384 | -0,342 |
| 12 | Q9UFC0 LRWD1_HUMAN | K.RPDDVPLSLSPS#KR.A       | S245:      | 3 | 3,4094 | 0,184 | -0,222 |
| 12 | Q9Y2U8 MAN1_HUMAN  | E.TSVQGGGGLAMNDR.A        |            | 2 | 3,4086 | 0,438 | -0,269 |
| 12 | Q01082 SPTB2_HUMAN | K.TALPAQSAAT#LPAR.T       | T2187:     | 2 | 3,406  | 0,363 | -0,337 |
| 12 | Q12888 TP53B_HUMAN | R.GNLLHFSSQGE.E.K         |            | 2 | 3,4052 | 0,345 | -0,79  |
| 12 | P04183 KITH_HUMAN  | R.KLFAPQQILQCS#PAN.-      | S231:      | 2 | 3,4034 | 0,369 | -0,476 |
| 12 | O15534 PER1_HUMAN  | R.LRGLDSSSTAPS#ALGE.R     | S815:      | 2 | 3,3982 | 0,377 | -0,52  |
| 12 | Q02790 FKBP4_HUMAN | K.SNTAGS#QSQVETEA.-       | S451:      | 2 | 3,3973 | 0,437 | -0,574 |
| 12 | P78527 PRKDC_HUMAN | K.CLM*DQATDPNILGR.T       |            | 2 | 3,3945 | 0,512 | -0,075 |
| 12 | Q9UQ35 SRRM2_HUMAN | R.SSGHSSSELS#PDAVE.K      | S1387:     | 2 | 3,3899 | 0,36  | -0,467 |
| 12 | P04264 K2C1_HUMAN  | K.SLNNQFASFIDK.V          |            | 2 | 3,3899 | 0,37  | -0,441 |
| 12 | Q14157 UBP2L_HUMAN | R.RYPSS#ISS#SPQKD.L       | S605:S608: | 2 | 3,3873 | 1     | -0,454 |
| 12 | Q96JH7 VCIP1_HUMAN | E.TTDGCVADALGAAFATR.S     |            | 3 | 3,3811 | 0,272 | -0,323 |

|    |                     |                             |                 |   |        |       |        |
|----|---------------------|-----------------------------|-----------------|---|--------|-------|--------|
| 12 | Q9Y5M8 SRPRB_HUMAN  | K.GGRGDVGS#ADIQDLE.K        | S257:           | 2 | 3,3772 | 0,187 | -0,855 |
| 12 | P31323 KAP3_HUMAN   | E.AAPADAGAFNAPVINR.F        |                 | 2 | 3,3762 | 0,482 | -0,471 |
| 12 | Q00613 HSF1_HUMAN   | K.CLSVACLKNE.L              |                 | 2 | 3,3561 | 0,318 | -0,652 |
| 12 | P10809 CH60_HUMAN   | R.CIPALDSLTPANEDQK.I        |                 | 2 | 3,3553 | 0,341 | -0,482 |
| 12 | Q01469 FABP5_HUMAN  | K.TTQFSCTLGEKFEE.T          |                 | 2 | 3,3536 | 0,28  | -0,655 |
| 12 | P04792 HSPB1_HUMAN  | E.SRAQLGGPEAAKS#DE.T        | S199:           | 2 | 3,3485 | 0,416 | -0,688 |
| 12 | P05787 K2C8_HUMAN   | R.TEM*ENEFVLIKK.D           |                 | 3 | 3,3472 | 0,421 | 0      |
| 12 | P42166 LAP2A_HUMAN  | R.NRPPLPAGTNSK.G            |                 | 2 | 3,3471 | 0,43  | -0,682 |
| 12 | Q9Y2U8 MAN1_HUMAN   | E.TSVQGGGGLAM*NDR.A         |                 | 2 | 3,3423 | 0,382 | -0,531 |
| 12 | P31689 DNJA1_HUMAN  | R.GKNVVHQLS#VTLE.D          | S112:           | 2 | 3,3407 | 0,35  | -0,649 |
| 12 | Q9Y608 LRRF2_HUMAN  | R.NSASATTPLSGNSR.R          |                 | 2 | 3,3391 | 0,541 | -0,589 |
| 12 | Q9H8Y8 GORS2_HUMAN  | K.ISLPGQM*AGT#PIT#PLKDGFE.V | T222:T225:      | 3 | 3,332  | 0,225 | -0,545 |
| 12 | Q2KHR3 QSER1_HUMAN  | E.SSKPIELDGLPSDQFAK.G       |                 | 2 | 3,3307 | 0,413 | -0,599 |
| 12 | A8K933 A8K933_HUMAN | E.LCHHSSS#S#TPLAADRE.S      | S201:S202:      | 3 | 3,3306 | 0,167 | -0,474 |
| 12 | A6NMQ1 A6NMQ1_HUMAN | E.IGASALS#DSGS#FVSSR.A      | S17:S21:        | 2 | 3,3264 | 0,412 | -0,072 |
| 12 | P10809 CH60_HUMAN   | E.AGDGTTTATVLAR.S           |                 | 2 | 3,3241 | 0,451 | -0,593 |
| 12 | Q9P260 K1468_HUMAN  | R.AGS#ISTLDSLDFAR.Y         | S180:           | 2 | 3,3225 | 0,507 | -0,557 |
| 12 | P08651 NFIC_HUMAN   | R.TGM*GSDQEDSKPITLDTTDFQE.S |                 | 3 | 3,3204 | 0,217 | -0,452 |
| 12 | Q09666 AHNK_HUMAN   | K.VESEIKVPDVELK.S           |                 | 3 | 3,3199 | 0,225 | 0,185  |
| 12 | P04792 HSPB1_HUMAN  | E.SRAQLGGPEAAKS#DE.T        | S199:           | 3 | 3,3144 | 0,301 | -0,344 |
| 12 | P18858 DNL1_HUMAN   | E.QATTSQAQVACLVR.K          |                 | 2 | 3,3088 | 0,528 | -0,748 |
| 12 | Q96MU7 YTDC1_HUMAN  | R.RAKS#PT#PDGSEIRGLE.V      | S146:T148:      | 3 | 3,3052 | 0,244 | -0,293 |
| 12 | Q9UPZ3 HPS5_HUMAN   | E.LILKFEPLDSACSS#R.R        | S433:           | 3 | 3,2993 | 0,201 | -0,302 |
| 12 | P07355 ANXA2_HUMAN  | E.VTIVNILTNR.S              |                 | 2 | 3,2989 | 0,427 | -0,534 |
| 12 | Q6S8J3 A26CA_HUMAN  | E.KLCYVALDFEQE.M            |                 | 2 | 3,2983 | 0,309 | -0,322 |
| 12 | P49368 TCPG_HUMAN   | K.IPGGIIEDSCVLR.G           |                 | 2 | 3,2983 | 0,391 | -0,598 |
| 12 | O00469 PLOD2_HUMAN  | K.CKIFQTLNGAVDE.V           |                 | 2 | 3,2982 | 0,352 | -0,735 |
| 12 | P19525 E2AK2_HUMAN  | K.AVS#PLLLTTNSSE.G          | S83:            | 2 | 3,2976 | 0,412 | -0,484 |
| 12 | Q96JM3 ZN828_HUMAN  | E.LRKPGPPLS#PEIRS#PAGS#PE.L | S427:S432:S436: | 3 | 3,2972 | 0,228 | -0,472 |
| 12 | O60841 IF2P_HUMAN   | R.IPGMLIIDTPGHE.S           |                 | 2 | 3,2935 | 0,331 | -0,35  |
| 12 | Q14676 MDC1_HUMAN   | R.SSVKT#PETVVPTAPE.L        | T1321:          | 2 | 3,2934 | 0,274 | -0,527 |
| 12 | Q02790 FKBP4_HUMAN  | K.SNTAGSQS#QVETEA.-         | S453:           | 2 | 3,2917 | 0,431 | -0,328 |
| 12 | Q9Y426 CU025_HUMAN  | E.KDISVQAIACR.S             |                 | 3 | 3,2915 | 0,111 | 0,363  |



|    |                    |                                |             |   |        |       |        |
|----|--------------------|--------------------------------|-------------|---|--------|-------|--------|
| 12 | Q8N556 AFAP1_HUMAN | K.KLS#SERPSS#DGEGVVE.N         | S277:S283:  | 2 | 3,2871 | 0,494 | -0,864 |
| 12 | O60271 JIP4_HUMAN  | E.TRNVS#TGSAENEEKSE.V          | S329:       | 2 | 3,2867 | 0,411 | -0,604 |
| 12 | Q5VT52 K0460_HUMAN | R.GPTSTSIDNIDGT#PVRDER.S       | T723:       | 3 | 3,2804 | 0,316 | -0,26  |
| 12 | Q9Y6M7 S4A7_HUMAN  | E.NS#TVDFSKVDMNFM*R.K          | S407:       | 3 | 3,2787 | 0,31  | -0,485 |
| 12 | P35527 K1C9_HUMAN  | R.SGGGGGGGLGSGGSIR.S           |             | 2 | 3,2772 | 0,494 | -0,495 |
| 12 | Q9H7N4 SFR19_HUMAN | K.AAPPPALT#PDSQTVDSCKT#PE.V    | T989:T1001: | 3 | 3,2658 | 0,306 | -0,507 |
| 12 | Q16555 DPYL2_HUMAN | R.NLHQSGFSLGAQIDD.N            |             | 2 | 3,2632 | 0,343 | -0,433 |
| 12 | P35579 MYH9_HUMAN  | E.LDDLLVDLDHQR.Q               |             | 3 | 3,261  | 0,161 | -0,063 |
| 12 | P26006 ITA3_HUMAN  | R.TGAVYLCPLTAHK.D              |             | 3 | 3,2593 | 0,394 | 0,256  |
| 12 | Q9Y613 FHOD1_HUMAN | R.TPQS#PAPCVLLR.A              | S498:       | 2 | 3,2545 | 0,401 | -0,516 |
| 12 | Q14980 NUMA1_HUMAN | R.TQPDGTSVPGEPAS#PISQR.L       | S1757:      | 2 | 3,2532 | 0,398 | -0,244 |
| 12 | Q9UQ35 SRRM2_HUMAN | E.SYFGVSSLQLK.G                |             | 2 | 3,2489 | 0,403 | -0,397 |
| 12 | P04264 K2C1_HUMAN  | K.WELLQQVDTSTR.T               |             | 2 | 3,2486 | 0,433 | -0,413 |
| 12 | O94888 UBXD7_HUMAN | E.HGQLDGLSSS#PPKK.C            | S270:       | 3 | 3,2486 | 0,149 | -0,239 |
| 12 | Q96L14 C170L_HUMAN | E.ALNNM*GFPSAM*LPSPPK.Q        |             | 3 | 3,2396 | 0,299 | -0,608 |
| 12 | Q96T23 RSF1_HUMAN  | E.SEKPGS#PEAAET#SPPSNIIDHCEK.L | S612:T618:  | 3 | 3,2322 | 0,317 | -0,2   |
| 12 | P15559 NQO1_HUMAN  | E.SDLYAM*NFNPIISR.K            |             | 2 | 3,2252 | 0,25  | -0,221 |
| 12 | Q96T23 RSF1_HUMAN  | E.IKLS#DDFDSVPKGPLCK.S         | S382:       | 3 | 3,222  | 0,127 | -0,366 |
| 12 | Q9UNX4 WDR3_HUMAN  | K.IKGSS#PGIQDTLE.A             | S241:       | 2 | 3,2195 | 0,422 | -0,428 |
| 12 | P09525 ANXA4_HUMAN | E.DAIISVLAYR.N                 |             | 2 | 3,2104 | 0,532 | -0,218 |
| 12 | Q5VZK9 LR16A_HUMAN | E.KRS#SGFISELPSEE.G            | S967:       | 2 | 3,2046 | 0,365 | -0,667 |
| 12 | Q02952 AKA12_HUMAN | E.SAHEPRLS#AEYE.K              | S371:       | 2 | 3,1957 | 0,314 | -0,415 |
| 12 | Q13409 DC112_HUMAN | K.EAVAPVQEESDLEK.K             |             | 2 | 3,1901 | 0,367 | -0,474 |
| 12 | Q02952 AKA12_HUMAN | K.ERPPAPSSVFQEE.T              |             | 2 | 3,1878 | 0,275 | -0,603 |
| 12 | Q8IXM2 CQ049_HUMAN | E.DSGIPLPAES#PKKGPK.K          | S96:        | 2 | 3,1872 | 0,326 | -0,502 |
| 12 | Q96S82 UBL7_HUMAN  | E.GLS#DDEDDFHPNTR.S            | S230:       | 2 | 3,1859 | 0,546 | -0,575 |
| 12 | Q7Z5K2 WAPL_HUMAN  | K.RPES#PSEIS#PIKGSVR.T         | S221:S226:  | 3 | 3,1802 | 0,277 | -0,193 |
| 12 | P35606 COPB2_HUMAN | D.GKPAS#PTPVIVASHTANKEE.K      | S859:       | 3 | 3,1749 | 0,381 | -0,606 |
| 12 | A0MZ66 SHOT1_HUMAN | E.NKEDS#IENVRE.T               | S619:       | 2 | 3,1696 | 0,355 | 0      |
| 12 | Q02952 AKA12_HUMAN | K.SAESPTS#PVTSE.T              | S286:       | 2 | 3,168  | 0,301 | -0,384 |
| 12 | P31947 1433S_HUMAN | K.GAVEKGEELSCEE.R              |             | 2 | 3,1653 | 0,315 | -0,425 |
| 12 | P16949 STMN1_HUMAN | E.SVPEFPLS#PPKKK.D             | S38:        | 2 | 3,1637 | 0,359 | -0,716 |
| 12 | Q05397 FAK1_HUMAN  | K.LQPQEIS#PPPTANLDR.S          | S910:       | 2 | 3,1568 | 0,369 | -0,526 |

|    |                    |                                   |                    |   |        |       |        |
|----|--------------------|-----------------------------------|--------------------|---|--------|-------|--------|
| 12 | Q01082 SPTB2_HUMAN | R.TSS#KES#SPIPS#PTSDR.K           | S2161:S2164:S2169: | 2 | 3,1548 | 1     | -0,637 |
| 12 | P11413 G6PD_HUMAN  | R.GGYFDEFGIIR.D                   |                    | 2 | 3,1517 | 0,285 | -0,383 |
| 12 | P60174 TPIS_HUMAN  | E.GLGVACIGEK.L                    |                    | 2 | 3,1514 | 0,253 | -0,765 |
| 12 | Q9NPR2 SEM4B_HUMAN | E.TRPLNGLGPPST#PLDHR.G            | T775:              | 3 | 3,1468 | 0,229 | -0,575 |
| 12 | P28074 PSB5_HUMAN  | R.VSSDNVADLHE.K                   |                    | 2 | 3,1454 | 0,308 | -0,514 |
| 12 | P13645 K1C10_HUMAN | R.LKYENEVALR.Q                    |                    | 3 | 3,1412 | 0,204 | 0,222  |
| 12 | Q9BRX2 PELO_HUMAN  | E.AIDFDSQACQLR.V                  |                    | 2 | 3,1401 | 0,384 | -0,771 |
| 12 | O60841 IF2P_HUMAN  | R.IPGM*LIIDTPGHE.S                |                    | 2 | 3,1372 | 0,389 | -0,52  |
| 12 | P02545 LMNA_HUMAN  | R.SGAQASST#PLSPTR.I               | T19:               | 2 | 3,1343 | 0,341 | -0,593 |
| 12 | P46013 KI67_HUMAN  | K.AM*LT#PKPAGGDE.K                | T1176:             | 2 | 3,1341 | 0,384 | -0,856 |
| 12 | Q5T1M5 FKB15_HUMAN | E.SLAAS#PM*AAKPDNPSGK.V           | S1065:             | 2 | 3,1338 | 0,376 | -0,491 |
| 12 | Q8IYB3 SRRM1_HUMAN | E.KT#PELPEPSVK.V                  | T220:              | 2 | 3,1314 | 0,199 | -0,28  |
| 12 | O43823 AKAP8_HUMAN | R.GGS#GGGGEGIQDRE.S               | S112:              | 2 | 3,1304 | 0,32  | -0,45  |
| 12 | Q13596 SNX1_HUMAN  | K.ITTSLLPINNGSKE.N                |                    | 2 | 3,1289 | 0,442 | -0,738 |
| 12 | Q71U36 TBA1A_HUMAN | E.HGIQPDGQM*PSDKTIGGGDDSFNTFFSE.T |                    | 3 | 3,1279 | 0,217 | -0,549 |
| 12 | P62256 UBE2H_HUMAN | R.RM*DTDVVKLIE.S                  |                    | 3 | 3,1268 | 0,143 | 0,205  |
| 12 | O15530 PDPK1_HUMAN | R.ANS#FVGTAQYVSPE.L               | S241:              | 2 | 3,1256 | 0,239 | -0,472 |
| 12 | Q02241 KIF23_HUMAN | K.LVQAPLDADGDNVLQE.K              |                    | 2 | 3,1232 | 0,421 | -0,288 |
| 12 | Q13439 GOGA4_HUMAN | E.QQQLQQALAPAQASSNSSTPTR.M        |                    | 3 | 3,1226 | 0,204 | 0      |
| 12 | P04792 HSPB1_HUMAN | R.ALS#RQLS#SGVSE.I                | S78:S82:           | 2 | 3,1194 | 0,319 | -0,35  |
| 12 | O60271 JIP4_HUMAN  | E.TRNVS#TGSAENEEKSE.V             | S329:              | 3 | 3,1162 | 0,268 | -0,201 |
| 12 | Q15056 IF4H_HUMAN  | R.GSNMDFREPTEEE.R                 |                    | 2 | 3,1142 | 0,273 | -0,317 |
| 12 | Q13616 CUL1_HUMAN  | E.DDAFAKGPPLTVYKE.S               |                    | 3 | 3,1128 | 0,246 | -0,111 |
| 12 | P26358 DNMT1_HUMAN | R.VARPLPAEPPER.A                  |                    | 3 | 3,1092 | 0,145 | -0,067 |
| 12 | Q8NEY8 PPHLN_HUMAN | E.KLEKS#DESNLPE.I                 | S244:              | 2 | 3,1078 | 0,276 | -0,415 |
| 12 | Q96JM3 ZN828_HUMAN | E.LRKPGPPLS#PEIR.S                | S427:              | 3 | 3,0968 | 0,236 | 0,119  |
| 12 | Q12888 TP53B_HUMAN | R.SEDPPTT#PIRGNLLHFPSSQGEEE.K     | T1056:             | 3 | 3,0934 | 0,266 | -0,337 |
| 12 | P61604 CH10_HUMAN  | K.GKGGEIQPVSVK.V                  |                    | 2 | 3,0869 | 0,355 | -0,407 |
| 12 | Q96PK6 RBM14_HUMAN | R.ASYVAPLTAQPATYR.A               |                    | 2 | 3,0806 | 0,469 | -0,758 |
| 12 | Q04637 IF4G1_HUMAN | R.SRERPSQPEGLR.K                  |                    | 3 | 3,0798 | 0,21  | -0,13  |
| 12 | P61247 RS3A_HUMAN  | E.VVNKLIPDSIGKDIE.K               |                    | 2 | 3,0784 | 0,259 | -0,744 |
| 12 | Q00613 HSF1_HUMAN  | E.SEPAPASVTALTDAR.G               |                    | 2 | 3,0761 | 0,52  | -0,575 |
| 12 | P41236 IPP2_HUMAN  | E.M*NILATYHPADKDYGLM*K.I          |                    | 3 | 3,0757 | 0,251 | -1,299 |

|    |                      |                           |              |   |        |       |        |
|----|----------------------|---------------------------|--------------|---|--------|-------|--------|
| 12 | P08670 VIME_HUMAN    | R.QDVDNASLARLDLE.R        |              | 2 | 3,0702 | 0,285 | -0,704 |
| 12 | Q09666 AHNK_HUMAN    | K.SSKAS#LGS#LEGEAEAE.A    | S5749:S5752: | 2 | 3,0691 | 0,42  | -0,283 |
| 12 | Q5VWN6 CJ018_HUMAN   | E.NKVDILDAAVQTK.T         |              | 2 | 3,0687 | 0,239 | -0,517 |
| 12 | Q14C86 GAPD1_HUMAN   | E.ITHGAHQLT#PPSQSE.S      | S816:        | 2 | 3,0675 | 0,272 | -0,62  |
| 12 | Q15365 PCBP1_HUMAN   | R.CSDAAGYPHATHDLE.G       |              | 3 | 3,0643 | 0,187 | -0,445 |
| 12 | P15880 RS2_HUMAN     | K.SPYQEFTDHLVK.T          |              | 3 | 3,0623 | 0,223 | -0,437 |
| 12 | Q13428 TCOF_HUMAN    | R.KSAEPSANTTLVS#ETEEE.G   | S171:        | 2 | 3,0559 | 0,408 | 0,061  |
| 12 | P53985 MOT1_HUMAN    | E.TSIDVAGKPNEVTK.A        |              | 2 | 3,0552 | 0,422 | -0,502 |
| 12 | P62917 RL8_HUMAN     | K.GIVKDIIHDPGR.G          |              | 3 | 3,047  | 0,24  | -0,208 |
| 12 | Q9C0C2 TB182_HUMAN   | E.AADSDAHLFQDSTEPR.A      |              | 2 | 3,0438 | 0,456 | -0,555 |
| 12 | Q70L73 Q70L73_HUMAN  | R.RVS#R#SS#FSSDPDESE.G    | S60:S63:     | 2 | 3,0425 | 1     | -0,463 |
| 12 | Q9UPN9 TRI33_HUMAN   | E.DAGSSSLDNLLSR.Y         |              | 2 | 3,0425 | 0,316 | -0,274 |
| 12 | Q06413 MEF2C_HUMAN   | R.NSPGILLVSPGNLNK.N       |              | 2 | 3,0412 | 0,297 | -0,433 |
| 12 | P61247 RS3A_HUMAN    | E.VVNKLIPDSIGKDIE.K       |              | 3 | 3,0412 | 0,229 | 0      |
| 12 | P68104 EF1A1_HUMAN   | K.IGGIGTVPVGRVE.T         |              | 2 | 3,0384 | 0,414 | -0,389 |
| 12 | Q9UKV3 ACINU_HUMAN   | E.KS#KSPS#PPRLTE.D        | S384:S388:   | 3 | 3,0368 | 0,168 | -0,308 |
| 12 | P02545 LMNA_HUMAN    | R.LRLS#SPPTS#QR.S         | S390:S395:   | 2 | 3,0349 | 0,221 | -0,609 |
| 12 | Q9BZF3 OSBL6_HUMAN   | R.QLLEPEPVPLSKE.A         |              | 2 | 3,0331 | 0,342 | -0,825 |
| 12 | Q9UK76 HN1_HUMAN     | R.RNS#SEASSGDFDLKGE.G     | S87:         | 2 | 3,0329 | 0,322 | -0,451 |
| 12 | Q9NYF8 BCLF1_HUMAN   | D.SADLRHDIDRR.R           |              | 3 | 3,0328 | 0,139 | 0,135  |
| 12 | Q7Z4H7 FA29A_HUMAN   | E.EDILNKS#LDAKEPPSDLTR.-  | S943:        | 3 | 3,0321 | 0,129 | -0,329 |
| 12 | P35579 MYH9_HUMAN    | R.RGDLPFVVPR.R            |              | 2 | 3,0292 | 0,183 | -0,317 |
| 12 | P48643 TCPE_HUMAN    | E.ANHLLQNNLPAVR.W         |              | 3 | 3,0264 | 0,163 | -0,116 |
| 12 | Q92945 FUBP2_HUMAN   | R.IGGGIDVPVPR.H           |              | 2 | 3,0237 | 0,391 | -0,226 |
| 12 | P06748 NPM_HUMAN     | D.NDENEHQLSLR.T           |              | 2 | 3,0227 | 0,283 | -0,54  |
| 12 | Q99439 CNN2_HUMAN    | E.GLTGLSIGPDFQK.G         |              | 2 | 3,0211 | 0,425 | -0,549 |
| 12 | Q9NY27 PP4R2_HUMAN   | R.MNGVM*FPGNS#PSYTE.R     | S159:        | 2 | 3,0142 | 0,215 | -0,565 |
| 12 | Q9Y2K5 R3HD2_HUMAN   | K.ASS#FSGISILTR.G         | S349:        | 2 | 3,0085 | 0,297 | -0,555 |
| 12 | ##Q6IE36 OVOS2_HUMAN | E.IS#PVM*NYVSEAS#LQQE.S   | S829:S839:   | 3 | 3,0065 | 0,277 | 0,186  |
| 12 | Q9UEY8 ADDG_HUMAN    | E.DDTVPLS#PLKYM*AQR.Q     | S423:        | 2 | 3,0052 | 0,329 | -0,6   |
| 12 | P40818 UBP8_HUMAN    | R.STKPVVFS#PTLM*LTDEE.K   | S452:        | 2 | 3,0017 | 0,492 | -0,368 |
| 12 | Q9H3P2 NELFA_HUMAN   | E.ASRPPEEPSAPS#PTLPAQFK.Q | S384:        | 3 | 3,0014 | 0,198 | -0,586 |
| 12 | Q13200 PSMD2_HUMAN   | E.NNRFGGSGSQVD.S          |              | 2 | 2,9998 | 0,484 | -0,394 |

|    |                    |                               |              |   |        |       |        |
|----|--------------------|-------------------------------|--------------|---|--------|-------|--------|
| 12 | O43663 PRC1_HUMAN  | K.SDATSGILNST#NIQS.-          | T616:        | 2 | 2,9955 | 0,451 | -0,538 |
| 12 | P55884 EIF3B_HUMAN | R.SDS#RAQAVSEDAAGNEGR.A       | S119:        | 2 | 2,9955 | 0,519 | -0,388 |
| 12 | Q14247 SRC8_HUMAN  | R.AKTQTPPV#PAPQPTEE.R         | S405:        | 2 | 2,9937 | 0,454 | -0,46  |
| 12 | P84103 SFRS3_HUMAN | K.VYVGNLGNNGNK.T              |              | 2 | 2,9906 | 0,351 | -0,488 |
| 12 | Q5PRF9 SAM4B_HUMAN | E.HALGDGTDKTST#I.-            | T693:        | 2 | 2,9885 | 0,358 | -0,175 |
| 12 | P05787 K2C8_HUMAN  | R.VTQKS#YKVSTSGPR.A           | S9:          | 3 | 2,9882 | 0,39  | -0,113 |
| 12 | Q76FK4 NOL8_HUMAN  | E.TDHRNSS#PGEASLLE.K          | S1099:       | 2 | 2,9882 | 0,393 | -0,432 |
| 12 | Q9UHB6 LIMA1_HUMAN | E.VQQPVHPKPLS#PDSR.A          | S362:        | 2 | 2,9875 | 0,197 | -0,484 |
| 12 | Q9Y2I7 FYV1_HUMAN  | E.GLPTNSTSDSRPK.S             |              | 2 | 2,9868 | 0,429 | -0,449 |
| 12 | Q8ND56 LS14A_HUMAN | R.S#SPQLDPLRKS#PTM*E.Q        | S182:S192:   | 2 | 2,9821 | 0,36  | -0,328 |
| 12 | Q12756 KIF1A_HUMAN | R.TPQPCS#RPAS#PEPE.L          | S1528:S1532: | 2 | 2,9806 | 0,275 | -0,997 |
| 12 | P12004 PCNA_HUMAN  | K.LSQTSNVDKEEE.A              |              | 2 | 2,9788 | 0,232 | -0,442 |
| 12 | Q8NC51 PAIRB_HUMAN | E.LTES#PKYIQK.Q               | S234:        | 2 | 2,9783 | 0,328 | -0,379 |
| 12 | Q09666 AHNK_HUMAN  | K.SSKAS#LGS#LEGEAE.A          | S5749:S5752: | 2 | 2,9753 | 0,294 | -0,32  |
| 12 | P50548 ERF_HUMAN   | R.RVS#SDLQHATAQLSLE.H         | S531:        | 2 | 2,9746 | 0,399 | -0,399 |
| 12 | P18858 DNL1_HUMAN  | K.TSKAET#PTESVSEPE.V          | T195:        | 2 | 2,9744 | 0,374 | -0,146 |
| 12 | O14497 ARI1A_HUMAN | K.VSS#PAPM*EGEEEE.L           | S1755:       | 2 | 2,9681 | 0,293 | -0,219 |
| 12 | Q5JTV8 TOIP1_HUMAN | E.ASS#QTDLSQTISKK.T           | S164:        | 2 | 2,9649 | 0,399 | -0,543 |
| 12 | Q5T8D3 ACBD5_HUMAN | R.GGETDEFSNVR.R               |              | 2 | 2,9627 | 0,386 | -0,202 |
| 12 | Q96L14 C170L_HUMAN | E.ALNNMGFPSAM*LPSPPK.Q        |              | 2 | 2,9613 | 0,238 | -0,409 |
| 12 | P10809 CH60_HUMAN  | R.GYISPYFINTSK.G              |              | 2 | 2,9572 | 0,408 | -0,439 |
| 12 | Q09666 AHNK_HUMAN  | K.AEAPLPS#PKLE.G              | S5110:       | 2 | 2,9505 | 0,333 | -0,495 |
| 12 | O75152 ZC11A_HUMAN | R.RLS#SAST#GKPLSVEDDFE.K      | S758:T762:   | 3 | 2,949  | 0,203 | -0,333 |
| 12 | Q9UBR2 CATZ_HUMAN  | R.VGDYGSLSGRE.K               |              | 2 | 2,9486 | 0,443 | -0,214 |
| 12 | Q96L14 C170L_HUMAN | E.ALNNM*GFPSAM*LPSPPK.Q       |              | 2 | 2,944  | 0,463 | -1,285 |
| 12 | O75152 ZC11A_HUMAN | R.RLSS#AS#TGKPLSVEDDFE.K      | S759:S761:   | 3 | 2,9411 | 0,242 | -0,5   |
| 12 | Q92609 TBCD5_HUMAN | E.VGIDPLSSYSNK.S              |              | 2 | 2,9373 | 0,344 | -0,381 |
| 12 | Q16204 CCDC6_HUMAN | K.SGGIVISPFRLLE.L             |              | 2 | 2,9249 | 0,213 | -0,348 |
| 12 | O43765 SGTA_HUMAN  | R.S#QIRS#RTPSASNDDQQE.-       | S297:S301:   | 3 | 2,9247 | 0,216 | -0,264 |
| 12 | Q14152 EIF3A_HUMAN | R.QRELEIEER.E                 |              | 3 | 2,9216 | 0,142 | 0,609  |
| 12 | Q5M775 SPEC1_HUMAN | E.TPSRPLSSTSNPFK.S            |              | 3 | 2,9163 | 0,308 | -0,06  |
| 12 | Q86YS7 K0528_HUMAN | E.IIGS#PIPEPR.Q               | S643:        | 2 | 2,9162 | 0,364 | -0,316 |
| 12 | Q9BVC5 ASHWN_HUMAN | R.KLSNS#SSSVPLILSSNLPVNNKTE.H | S145:        | 3 | 2,9108 | 0,168 | -0,339 |

|    |                     |                              |              |   |        |       |        |
|----|---------------------|------------------------------|--------------|---|--------|-------|--------|
| 12 | Q12905 ILF2_HUMAN   | R.KLDPELHLDIK.V              |              | 3 | 2,9104 | 0,176 | -0,208 |
| 12 | P04264 K2C1_HUMAN   | R.SLDLDSIIAEVK.A             |              | 2 | 2,9077 | 0,332 | -0,562 |
| 12 | O95340 PAPS2_HUMAN  | K.TNLSTVSDCVHQVVE.L          |              | 2 | 2,9058 | 0,276 | -0,723 |
| 12 | Q6NZI2 PTRF_HUMAN   | E.SDAVLVDKS#DS#D.-           | S387:S389:   | 2 | 2,9058 | 0,108 | -0,346 |
| 12 | P35527 K1C9_HUMAN   | R.IKFEMEQLNR.Q               |              | 3 | 2,904  | 0,145 | 0,419  |
| 12 | P35658 NU214_HUMAN  | R.SAQGSSSPVPSMVQK.S          |              | 2 | 2,9033 | 0,29  | -0,328 |
| 12 | Q96A49 SYAP1_HUMAN  | E.AVRPKT#PPVVIK.S            | T248:        | 3 | 2,9025 | 0,265 | 0      |
| 12 | Q5VZL5 ZMYM4_HUMAN  | E.TLHTHLPQT#PE.T             | T217:        | 2 | 2,9022 | 0,282 | -0,631 |
| 12 | Q12931 TRAP1_HUMAN  | R.AQLLQPTLEINPR.H            |              | 2 | 2,9008 | 0,329 | -0,817 |
| 12 | Q9UPT8 ZC3H4_HUMAN  | K.TGSGS#PFAGNS#PARE.G        | S1269:S1275: | 2 | 2,8988 | 0,321 | -0,153 |
| 12 | P49023 PAXI_HUMAN   | R.ISASSATRELDE.L             |              | 2 | 2,8987 | 0,3   | -0,286 |
| 12 | P60174 TPIS_HUMAN   | E.GLGVACIGEKLDERE.A          |              | 3 | 2,8955 | 0,376 | -0,208 |
| 12 | Q86YP4 P66A_HUMAN   | R.VNGLTTVALKE.T              |              | 2 | 2,8925 | 0,369 | -0,213 |
| 12 | Q13523 PRP4B_HUMAN  | R.TKLDDLALLEDE.K             |              | 2 | 2,889  | 0,313 | -0,41  |
| 12 | Q8IW19 MGAP_HUMAN   | E.SKVM*PTLAPVVAK.L           |              | 2 | 2,8874 | 0,27  | -0,36  |
| 12 | Q9NZN5 ARHGC_HUMAN  | E.STHQQQS#PQNTSDGAIS#PFTPE.F | S1457:S1468: | 3 | 2,885  | 0,081 | -0,59  |
| 12 | Q01813 K6PP_HUMAN   | R.NVIFQPVAELK.K              |              | 2 | 2,8776 | 0,432 | -0,388 |
| 12 | P25787 PSA2_HUMAN   | E.LEDAIHTAILTLKE.S           |              | 3 | 2,8754 | 0,217 | 0      |
| 12 | O43765 SGTA_HUMAN   | R.SPART#PPSEEDSAE.A          | T81:         | 2 | 2,8753 | 0,289 | -0,314 |
| 12 | P49915 GUAA_HUMAN   | E.VVLLTHGDSVDKVAD.G          |              | 3 | 2,8735 | 0,367 | -0,233 |
| 12 | Q9BPX5 ARP5L_HUMAN  | E.NKFVDEQEE.A                |              | 2 | 2,871  | 0,292 | -0,536 |
| 12 | Q12840 KIF5A_HUMAN  | R.S#HSIFLINIKQENMET#E.Q      | S205:T220:   | 3 | 2,8694 | 0,126 | -0,918 |
| 12 | Q12765 SCRN1_HUMAN  | E.DANSCHSFQSAYLIVDRDE.A      |              | 3 | 2,8654 | 0,171 | -0,493 |
| 12 | P22626 ROA2_HUMAN   | R.GGGGNFGPGPSNFR.G           |              | 2 | 2,8636 | 0,43  | -0,354 |
| 12 | O75475 PSIP1_HUMAN  | K.QSNASS#DVEVEEKE.T          | S106:        | 2 | 2,861  | 0,262 | -0,299 |
| 12 | Q5JUX1 Q5JUX1_HUMAN | R.GALSS#SLRDLSDAGVCY.-       | S937:        | 2 | 2,8537 | 0,403 | -0,527 |
| 12 | Q32MZ4 LRRF1_HUMAN  | E.TSDTLNNGVYGPTK.M           |              | 2 | 2,8523 | 0,239 | -0,535 |
| 12 | Q9HA05 Q9HA05_HUMAN | K.M*NSIVYQK.Q                |              | 2 | 2,8506 | 0,101 | -0,244 |
| 12 | P0C0S8 H2A1_HUMAN   | R.NDEELNKLK.V                |              | 2 | 2,8397 | 0,178 | -0,192 |
| 12 | P46940 IQGA1_HUMAN  | K.TLQALQIPAAKLE.G            |              | 2 | 2,8351 | 0,327 | -0,524 |
| 12 | Q7L1V2 MON1B_HUMAN  | E.TGSKDKDQPPSPS#PPPQSE.A     | S61:         | 3 | 2,8317 | 0,224 | -0,444 |
| 12 | Q99661 KIF2C_HUMAN  | K.GKEIDFDDVAAINPE.L          |              | 2 | 2,8298 | 0,285 | -0,523 |
| 12 | Q9Y6M7 S4A7_HUMAN   | E.NST#VDFSKVDM*NFM*R.K       | T408:        | 2 | 2,8287 | 0,422 | -0,256 |

|    |                    |                               |              |   |        |       |        |
|----|--------------------|-------------------------------|--------------|---|--------|-------|--------|
| 12 | P78310 CXAR_HUMAN  | R.M*GAIPVM*IPAQSK.D           |              | 2 | 2,8273 | 0,313 | -0,444 |
| 12 | P84103 SFRS3_HUMAN | K.VYVGNLGNNGNKTE.L            |              | 3 | 2,8265 | 0,179 | -0,185 |
| 12 | O15061 DMN_HUMAN   | R.HVTLPGGQS#PLSRE.V           | S1181:       | 3 | 2,8243 | 0,224 | 0,117  |
| 12 | P06748 NPM_HUMAN   | E.KT#PKT#PKGPPSSVE.D          | T234:T237:   | 2 | 2,8214 | 0,29  | -0,644 |
| 12 | Q00613 HSF1_HUMAN  | R.GHTDTEGRPPS#PPPTST#PEK.C    | S363:T369:   | 3 | 2,817  | 0,253 | -0,488 |
| 12 | P55196 AFAD_HUMAN  | E.TTFDLGGDIHSGTALPTS.K.S      |              | 2 | 2,8152 | 0,503 | -0,382 |
| 12 | P55884 EIF3B_HUMAN | E.RSDS#RAQAVSEDAGGNE.G        | S119:        | 3 | 2,8028 | 0,148 | -0,7   |
| 12 | Q02952 AKA12_HUMAN | E.LQSHAKS#PPS#PVERE.M         | S1328:S1331: | 2 | 2,7968 | 0,257 | -0,268 |
| 12 | O95251 MYST2_HUMAN | E.TKNTADHDES#PPRT#PTGNAPSSE.S | S124:T128:   | 3 | 2,7913 | 0,233 | -0,499 |
| 12 | Q9Y295 DRG1_HUMAN  | R.IGFVGFPSVGK.S               |              | 2 | 2,7913 | 0,303 | -0,551 |
| 12 | Q96PY6 NEK1_HUMAN  | R.SVISVTSALKE.V               |              | 2 | 2,7845 | 0,367 | -0,323 |
| 12 | O95684 FR1OP_HUMAN | E.KGPPTGEGALDLSDVHS#PPKS#PE.G | S156:S160:   | 3 | 2,781  | 0,231 | -0,664 |
| 12 | O60812 HNRCL_HUMAN | R.VFIGNLNTLVVK.K              |              | 2 | 2,7769 | 0,165 | -0,278 |
| 12 | Q9Y6A5 TACC3_HUMAN | E.NCDFLFS#PPEVTGR.S           | S25:         | 2 | 2,7769 | 0,401 | -0,568 |
| 12 | A0FGR8 ESYT2_HUMAN | E.KAQPEAGPQGLHDLGR.S          |              | 3 | 2,7715 | 0,194 | -0,723 |
| 12 | Q9NQS7 INCE_HUMAN  | R.VLAPILPDNFSTPTGSR.T         |              | 2 | 2,768  | 0,311 | -0,478 |
| 12 | Q02952 AKA12_HUMAN | E.KEPSKAESPTS#PVTSE.T         | S286:        | 3 | 2,7675 | 0,316 | -0,298 |
| 12 | P68104 EF1A1_HUMAN | R.LPLQDVYK.I                  |              | 2 | 2,7667 | 0,192 | -0,063 |
| 12 | Q9UUP1 PHF8_HUMAN  | K.LGNGSGAGGILDLLK.A           |              | 2 | 2,7664 | 0,375 | -0,352 |
| 12 | P04075 ALDOA_HUMAN | R.ALANSLACQGK.Y               |              | 2 | 2,7648 | 0,315 | -0,646 |
| 12 | P04264 K2C1_HUMAN  | K.YEELQITAGR.H                |              | 2 | 2,7642 | 0,262 | -0,31  |
| 12 | P42166 LAP2A_HUMAN | R.SST#PLPTISSAENTR.Q          | T160:        | 2 | 2,7613 | 0,249 | -0,424 |
| 12 | Q9H6F5 CCD86_HUMAN | R.AGLGS#PERPPKT#SPGSPR.L      | S58:T65:     | 2 | 2,7589 | 0,118 | -0,563 |
| 12 | P15531 NDKA_HUMAN  | R.TFIAIKPDGVQR.G              |              | 2 | 2,7568 | 0,178 | -0,544 |
| 12 | Q9BZE9 ASPC1_HUMAN | E.HAISPSAADVLVAR.Y            |              | 3 | 2,7547 | 0,116 | -0,13  |
| 12 | Q15056 IF4H_HUMAN  | R.GSNM*DFREPTEEE.R            |              | 2 | 2,7527 | 0,384 | -0,549 |
| 12 | Q5QP82 WDR32_HUMAN | R.RPGAPSLSPAPR.S              |              | 2 | 2,749  | 0,278 | -0,506 |
| 12 | Q96KP4 CNDP2_HUMAN | K.NVMLLPVGSAADDGAHSQNE.K      |              | 2 | 2,7462 | 0,217 | -0,062 |
| 12 | Q96TA1 NIBL1_HUMAN | K.AVDLGPPKPSDQE.T             |              | 2 | 2,7456 | 0,379 | -0,18  |
| 12 | Q58FF8 H90B2_HUMAN | K.YIDQEELNK.T                 |              | 2 | 2,7451 | 0,151 | -0,53  |
| 12 | Q3V6T2 GRDN_HUMAN  | K.DSNPYATLPR.A                |              | 2 | 2,7433 | 0,357 | -0,43  |
| 12 | Q92574 TSC1_HUMAN  | E.ASASIPTTVGS#LPSSK.S         | S1080:       | 2 | 2,7387 | 0,178 | -0,617 |
| 12 | Q96MU7 YTDC1_HUMAN | R.RAKS#PT#PDGSEIRIGLE.V       | S146:T148:   | 2 | 2,7351 | 0,34  | -0,391 |

|    |                     |                             |            |   |        |       |        |
|----|---------------------|-----------------------------|------------|---|--------|-------|--------|
| 12 | P08621 RU17_HUMAN   | R.RQQEVETELK.M              |            | 2 | 2,7347 | 0,166 | -0,387 |
| 12 | P78364 PHC1_HUMAN   | E.ALSPTS#PGPLSVR.A          | S898:      | 2 | 2,7296 | 0,16  | -0,537 |
| 12 | P15408 FOSL2_HUMAN  | R.RSSS#SGDQSSDSLNS#PTLLAL.- | S309:S320: | 3 | 2,7277 | 0,172 | -0,401 |
| 12 | Q9HCD6 TANC2_HUMAN  | R.SSS#QLGSPDVSHLIR.R        | S1740:     | 2 | 2,7273 | 0,252 | -0,66  |
| 12 | P61158 ARP3_HUMAN   | E.DHYFLLTEPPLNTPENRE.Y      |            | 3 | 2,726  | 0,219 | -0,251 |
| 12 | Q5JU85 IQEC2_HUMAN  | E.DTYGAGDGLKR.G             |            | 2 | 2,721  | 0,371 | -0,317 |
| 12 | Q9C0C2 TB182_HUMAN  | R.SPSQDFSFIEDTE.I           |            | 2 | 2,7208 | 0,211 | -0,406 |
| 12 | Q9UPU9 SAM4A_HUMAN  | E.HALGDGVDRTST#I.-          | T528:      | 2 | 2,718  | 0,305 | -0,772 |
| 12 | Q9H9R9 DBND1_HUMAN  | E.RRQPLS#SVSS#LE.V          | S63:S67:   | 2 | 2,7175 | 0,192 | -0,562 |
| 12 | B2RBN7 B2RBN7_HUMAN | R.CTGGVVVRPQAVTE.Q          |            | 2 | 2,7144 | 0,279 | -0,166 |
| 12 | Q9H6F5 CCD86_HUMAN  | R.AGLGSPERPPT#SPGS#PR.L     | T65:S69:   | 3 | 2,7136 | 0,244 | -0,469 |
| 12 | P62256 UBE2H_HUMAN  | R.RMDTDVVKLIE.S             |            | 3 | 2,7113 | 0,113 | 0,139  |
| 12 | P52701 MSH6_HUMAN   | E.DYSQNVAVR.L               |            | 2 | 2,7103 | 0,373 | -0,348 |
| 12 | Q01082 SPTB2_HUMAN  | K.TALPAQSAATLPAR.T          |            | 2 | 2,7062 | 0,395 | -0,535 |
| 12 | Q6VY07 PACS1_HUMAN  | K.TDLQGSAS#PSKVE.G          | S495:      | 2 | 2,7055 | 0,255 | -0,262 |
| 12 | Q99459 CDC5L_HUMAN  | E.YNVTNNSVALR.T             |            | 2 | 2,705  | 0,312 | -0,39  |
| 12 | P49321 NASP_HUMAN   | K.SLQENEEEE.I               |            | 2 | 2,7016 | 0,214 | -0,11  |
| 12 | Q09666 AHNK_HUMAN   | K.VKGS#LGATGE.I             | S5464:     | 2 | 2,6968 | 0,268 | -0,427 |
| 12 | O00257 CBX4_HUMAN   | R.KLS#PTKE.A                | S347:      | 2 | 2,6955 | 0,123 | 0      |
| 12 | Q9Y6M5 ZNT1_HUMAN   | E.IKNM*PNKQPES#SL.-         | S505:      | 2 | 2,6941 | 0,356 | -0,231 |
| 12 | Q9Y3Q8 T22D4_HUMAN  | R.SFTGGLGQLVVPSK.A          |            | 2 | 2,6834 | 0,235 | -0,088 |
| 12 | Q9BT25 NYS48_HUMAN  | R.SFAQVLELSAEASK.E          |            | 2 | 2,6831 | 0,402 | -0,495 |
| 12 | Q96AG4 LRC59_HUMAN  | R.LEVEREAEK.K               |            | 2 | 2,6831 | 0,185 | -0,553 |
| 12 | Q02952 AKA12_HUMAN  | K.QLLQTVNVPIIDGAKE.V        |            | 2 | 2,6825 | 0,28  | -1,264 |
| 12 | O76021 RL1D1_HUMAN  | R.RLLPSLIGR.H               |            | 2 | 2,6755 | 0,137 | -0,238 |
| 12 | Q6ZRV2 FA83H_HUMAN  | R.RLS#LGQGDSTE.A            | S1003:     | 2 | 2,6734 | 0,35  | -0,196 |
| 12 | Q86YS7 K0528_HUMAN  | R.LLRSQS#ESS#DEVTE.L        | S659:S662: | 2 | 2,668  | 0,396 | -0,351 |
| 12 | P20700 LMNB1_HUMAN  | E.NRCQSLTEDLE.F             |            | 2 | 2,6676 | 0,366 | -1,073 |
| 12 | P35658 NU214_HUMAN  | R.SAQGSSSPVPSM*VQK.S        |            | 2 | 2,6664 | 0,207 | -0,567 |
| 12 | P05787 K2C8_HUMAN   | R.TEM*ENEFVLIK.K            |            | 2 | 2,6656 | 0,123 | -0,535 |
| 12 | Q3KQU3 MA7D1_HUMAN  | E.ARS#PGLQKE.A              | S753:      | 2 | 2,6653 | 0,198 | -0,343 |
| 12 | Q8NDX5 PHC3_HUMAN   | R.GEDLTSEHPLLE.Q            |            | 2 | 2,6601 | 0,395 | -0,546 |
| 12 | P48643 TCPE_HUMAN   | K.ISDSVLVDIK.D              |            | 2 | 2,6596 | 0,271 | -0,784 |

|    |                    |                          |            |   |        |       |        |
|----|--------------------|--------------------------|------------|---|--------|-------|--------|
| 12 | Q8NEM2 SHCBP_HUMAN | E.KGLFQDEDS#CSDCSYR.D    | S42:       | 2 | 2,6574 | 0,474 | -0,298 |
| 12 | P19532 TFE3_HUMAN  | K.ASS#RRSS#FSM*EE.E      | S564:S568: | 2 | 2,6572 | 0,259 | -0,472 |
| 12 | O00512 BCL9_HUMAN  | R.STAPLNTQISALR.N        |            | 2 | 2,6528 | 0,304 | -0,534 |
| 12 | Q6S8J3 A26CA_HUMAN | R.AVFPSIVGRPR.Q          |            | 2 | 2,6525 | 0,313 | -0,611 |
| 12 | Q5VT52 K0460_HUMAN | R.GPTSTSIDNIDGT#PVRDER.S | T723:      | 2 | 2,6515 | 0,241 | -0,347 |
| 12 | Q9Y6D5 BIG2_HUMAN  | E.IGDGGKGLDM*AR.R        |            | 2 | 2,6489 | 0,389 | -0,531 |
| 12 | P10809 CH60_HUMAN  | K.LSDGVAVLK.V            |            | 2 | 2,6457 | 0,268 | 0,135  |
| 12 | Q9UGU0 TCF20_HUMAN | R.QLSGQSTSSDTTYKGGASE.K  |            | 2 | 2,6333 | 0,2   | -0,769 |
| 12 | Q14152 EIF3A_HUMAN | R.RVPPPALS.R             |            | 2 | 2,6333 | 0,224 | -0,246 |
| 12 | Q6UWE0 LRSM1_HUMAN | E.HTQLLQSS#SQKDE.I       | S289:      | 2 | 2,6316 | 0,364 | -0,571 |
| 12 | P02545 LMNA_HUMAN  | R.S#GAQASSTPLS#PTR.I     | S12:S22:   | 2 | 2,631  | 0,263 | -0,482 |
| 12 | P21266 GSTM3_HUMAN | K.CLDEFNLK.A             |            | 2 | 2,6256 | 0,375 | -0,43  |
| 12 | Q9NY61 AATF_HUMAN  | E.LLFQYPDTR.Y            |            | 2 | 2,6214 | 0,214 | -0,529 |
| 12 | O15027 SC16A_HUMAN | E.VSHLQSGSHLANNS#DPE.S   | S118:      | 2 | 2,6186 | 0,255 | -0,652 |
| 12 | P21980 TGM2_HUMAN  | R.DLYLENPEIK.I           |            | 2 | 2,6184 | 0,097 | -0,593 |
| 12 | Q99733 NP1L4_HUMAN | E.RLDNVPHTPSS#YIE.T      | S54:       | 2 | 2,6179 | 0,241 | -0,714 |
| 12 | P54278 PMS2_HUMAN  | E.KQDQS#PSLRTGEE.K       | S403:      | 2 | 2,617  | 0,212 | -0,392 |
| 12 | Q8NEM2 SHCBP_HUMAN | R.DKPGSSLQSFM*PE.G       |            | 2 | 2,6119 | 0,318 | -0,509 |
| 12 | P05386 RLA1_HUMAN  | E.S#DDDM*GFGLFD.-        | S104:      | 2 | 2,6101 | 0,192 | -0,464 |
| 12 | Q09666 AHNK_HUMAN  | K.VGVEVPDVNIEGPEGK.L     |            | 2 | 2,6091 | 0,401 | -0,074 |
| 12 | P22059 OSBP1_HUMAN | R.GATVLPANTPGNVGSGK.D    |            | 2 | 2,6091 | 0,337 | -0,158 |
| 12 | P81605 DCD_HUMAN   | K.ENAGEDPGLAR.Q          |            | 2 | 2,6088 | 0,324 | -0,756 |
| 12 | P16949 STMN1_HUMAN | E.LEKRAS#GQAFE.L         | S16:       | 2 | 2,6079 | 0,303 | -0,556 |
| 12 | Q15942 ZYX_HUMAN   | R.S#PGAPGLTLKE.V         | S344:      | 2 | 2,6    | 0,385 | -0,489 |
| 12 | P46940 IQGA1_HUMAN | R.YLDELM*KLK.A           |            | 2 | 2,5991 | 0,307 | -0,522 |
| 12 | Q9UQ35 SRRM2_HUMAN | R.GEFSAS#PM*LK.S         | S1124:     | 2 | 2,5956 | 0,335 | -0,21  |
| 12 | Q6SZW1 SARM1_HUMAN | R.EVS#PGAGTEVQDALE.R     | S54:       | 2 | 2,5898 | 0,215 | -0,463 |
| 12 | O95429 BAG4_HUMAN  | R.HNFPCSVHQYE.S          |            | 2 | 2,589  | 0,359 | -0,516 |
| 12 | P62736 ACTA_HUMAN  | K.DSYVGDEAQSKR.G         |            | 2 | 2,5862 | 0,39  | -0,63  |
| 12 | P42167 LAP2B_HUMAN | E.HNQSYSQAGITE.T         |            | 2 | 2,5829 | 0,227 | -0,366 |
| 12 | P49419 AL7A1_HUMAN | R.M*IGGPILPSER.S         |            | 2 | 2,5828 | 0,172 | -0,309 |
| 12 | Q9Y608 LRRF2_HUMAN | R.RGS#GDTSSLIDPDTSLSE.L  | S328:      | 2 | 2,5816 | 0,532 | -0,7   |
| 12 | Q96AE4 FUBP1_HUMAN | R.IGGNEGIDVPIPR.F        |            | 2 | 2,5815 | 0,337 | -0,913 |



|    |                    |                        |            |   |        |       |        |
|----|--------------------|------------------------|------------|---|--------|-------|--------|
| 12 | P62750 RL23A_HUMAN | K.VNTLIRPDGE.K         |            | 2 | 2,5811 | 0,253 | -0,11  |
| 12 | Q9UKV3 ACINU_HUMAN | D.LHADDSRIS#EDE.T      | S898:      | 2 | 2,5803 | 0,506 | -0,416 |
| 12 | P52756 RBM5_HUMAN  | R.NGDEENPLKR.G         |            | 2 | 2,5799 | 0,19  | -0,208 |
| 12 | P62988 UBIQ_HUMAN  | K.TITLEVPSDTIENVK.A    |            | 2 | 2,5791 | 0,346 | -0,546 |
| 12 | Q96AE4 FUBP1_HUMAN | R.FAVGIVIGR.N          |            | 2 | 2,5791 | 0,342 | -0,196 |
| 12 | P54577 SYYC_HUMAN  | R.TVVSGLVQFVPKEE.L     |            | 2 | 2,5704 | 0,334 | -0,319 |
| 12 | Q05524 ENO1B_HUMAN | R.YISPDQLADLYK.G       |            | 2 | 2,5701 | 0,272 | 1,112  |
| 12 | P48643 TCPE_HUMAN  | R.DVDFELIKVE.G         |            | 2 | 2,5536 | 0,278 | -0,606 |
| 12 | O76021 RL1D1_HUMAN | K.ATNES#EDEIPQLVPIGK.K | S361:      | 2 | 2,553  | 0,275 | -0,381 |
| 12 | Q9NXG2 THUM1_HUMAN | E.YGDDM*YGPEK.F        |            | 2 | 2,5515 | 0,469 | -0,615 |
| 12 | P35030 TRY3_HUMAN  | D.TLDNDIMLIK.L         |            | 2 | 2,5468 | 0,319 | -0,311 |
| 12 | O75362 ZN217_HUMAN | E.TQANNLICR.T          |            | 2 | 2,541  | 0,241 | -0,336 |
| 12 | O15061 DMN_HUMAN   | K.GLQTPVKDAGGGTGR.E    |            | 2 | 2,536  | 0,259 | -0,604 |
| 12 | P25942 TNR5_HUMAN  | E.DGKESRIS#VQE.R       | S272:      | 2 | 2,5359 | 0,191 | -0,368 |
| 12 | P02794 FRIH_HUMAN  | E.YLFDKHTLGDS#DNES.-   | S179:      | 2 | 2,5335 | 0,232 | -0,469 |
| 12 | P42338 PK3CB_HUMAN | E.NNNPFQIVLVK.G        |            | 2 | 2,533  | 0,229 | -0,379 |
| 12 | P62256 UBE2H_HUMAN | R.M*DTDVVKLIE.S        |            | 2 | 2,5287 | 0,219 | -0,621 |
| 12 | P08670 VIME_HUMAN  | E.NTLQSFQRQVDNASLAR.L  |            | 2 | 2,5271 | 0,423 | -0,631 |
| 12 | Q13523 PRP4B_HUMAN | R.TKLDDLALLE.D         |            | 2 | 2,5252 | 0,219 | -0,216 |
| 12 | O94964 CT117_HUMAN | R.TKS#VSS#M*SEFE.S     | S55:S58:   | 2 | 2,5238 | 0,306 | -0,347 |
| 12 | A1L390 PKHG3_HUMAN | R.FFFNPSAVSQR.T        |            | 2 | 2,5196 | 0,374 | -0,282 |
| 12 | O75369 FLNB_HUMAN  | K.YADEEIPR.S           |            | 2 | 2,518  | 0,26  | -0,123 |
| 12 | P62753 RS6_HUMAN   | R.RLS#S#LRASSTK.S      | S235:S236: | 2 | 2,5144 | 0,426 | -0,625 |
| 12 | Q8ND56 LS14A_HUMAN | R.SSPQLDPLRKS#PTM*E.Q  | S192:      | 2 | 2,5139 | 0,308 | -0,068 |
| 12 | Q8N2M8 SFR16_HUMAN | E.KKAS#IGYTYE.D        | S147:      | 2 | 2,5137 | 0,18  | -0,394 |
| 12 | Q9Y6I9 TX264_HUMAN | E.TSAATLSPGASSR.G      |            | 2 | 2,5135 | 0,331 | -0,405 |
| 12 | O95571 ETHE1_HUMAN | R.EAVLIDPVLETAPR.D     |            | 2 | 2,512  | 0,318 | -0,481 |
| 12 | Q9UNX4 WDR3_HUMAN  | K.GSS#PGIQDTLE.A       | S241:      | 2 | 2,5099 | 0,234 | -0,309 |
| 12 | Q9NPR2 SEM4B_HUMAN | K.RPLSIQDS#FVE.V       | S808:      | 2 | 2,5083 | 0,194 | -0,801 |
| 12 | Q6ZRV2 FA83H_HUMAN | R.APAGDLLPSAFR.V       |            | 2 | 2,5077 | 0,243 | -0,402 |
| 12 | P40926 MDHM_HUMAN  | R.VNVPVIGGHAGK.T       |            | 2 | 2,5042 | 0,167 | -0,531 |
| 12 | P32004 L1CAM_HUMAN | R.LVVFPDDISLK.C        |            | 2 | 2,502  | 0,224 | -0,362 |
| 12 | P12081 SYHC_HUMAN  | E.TQVLVASAQK.K         |            | 2 | 2,4988 | 0,234 | -0,35  |

|    |                    |                        |            |   |        |       |        |
|----|--------------------|------------------------|------------|---|--------|-------|--------|
| 12 | Q13428 TCOF_HUMAN  | K.TGPTVTQVK.A          |            | 2 | 2,4973 | 0,281 | -0,328 |
| 12 | P61158 ARP3_HUMAN  | K.LSEELSGGR.L          |            | 2 | 2,4905 | 0,176 | -0,129 |
| 12 | Q86UU1 PHLB1_HUMAN | E.DFSLTLGAR.G          |            | 2 | 2,4836 | 0,268 | 0,622  |
| 12 | P11766 ADHX_HUMAN  | K.LKAGDTVIPLYIPQCGE.C  |            | 2 | 2,4803 | 0,331 | -0,391 |
| 12 | O00299 CLIC1_HUMAN | K.NSNPALNDNLEK.G       |            | 2 | 2,4795 | 0,244 | 0,643  |
| 12 | Q99848 EBP2_HUMAN  | K.AVDPEDDFQRE.M        |            | 2 | 2,4776 | 0,117 | -0,092 |
| 12 | P61604 CH10_HUMAN  | K.GGEIQPVSVK.V         |            | 2 | 2,4737 | 0,195 | -0,12  |
| 12 | Q16181 SEPT7_HUMAN | E.KVNIPLIAK.A          |            | 2 | 2,4726 | 0,137 | -0,66  |
| 12 | P60174 TPIS_HUMAN  | E.GLGVACIGEKLDERE.A    |            | 2 | 2,4708 | 0,476 | -0,347 |
| 12 | Q8IVF2 AHNK2_HUMAN | E.GIRPRPQGS#SPVYE.Y    | S55:       | 2 | 2,4538 | 0,203 | -0,677 |
| 12 | P11142 HSP7C_HUMAN | K.NQVAM*NPTNTVFD.A     |            | 2 | 2,4502 | 0,251 | -0,25  |
| 12 | O75874 IDHC_HUMAN  | R.ATDFVVPGPQVE.I       |            | 2 | 2,4465 | 0,239 | -0,742 |
| 12 | P05787 K2C8_HUMAN  | R.NIS#RLQAE.I          | S315:      | 2 | 2,4457 | 0,125 | -0,06  |
| 12 | P06748 NPM_HUMAN   | E.KT#PKT#PKGSSVED.I    | T234:T237: | 2 | 2,4444 | 0,257 | -0,598 |
| 12 | Q02241 KIF23_HUMAN | E.KYM*LTHQELAS#DGEIE.T | S867:      | 2 | 2,4424 | 0,32  | -0,187 |
| 12 | P18615 NELFE_HUMAN | K.GPVPTFQPFQR.S        |            | 2 | 2,4417 | 0,216 | -0,383 |
| 12 | Q8NFA0 UBP32_HUMAN | E.QQGIDYAQFLPK.T       |            | 2 | 2,4407 | 0,277 | -0,433 |
| 12 | P35241 RADI_HUMAN  | R.KALELDQER.K          |            | 2 | 2,4406 | 0,128 | -0,443 |
| 12 | P49736 MCM2_HUMAN  | E.SFTM*ASS#PAQR.R      | S13:       | 2 | 2,4384 | 0,333 | -0,572 |
| 12 | P61586 RHOA_HUMAN  | K.LVIVGDGACGK.T        |            | 2 | 2,4368 | 0,364 | -0,336 |
| 12 | P04264 K2C1_HUMAN  | R.TNAENEFVTIK.K        |            | 2 | 2,4318 | 0,33  | -0,578 |
| 12 | P20700 LMNB1_HUMAN | R.LKLS#PS#PSSR.V       | S391:S393: | 2 | 2,4293 | 0,098 | -0,396 |
| 12 | Q96T23 RSF1_HUMAN  | K.LASEKEVVE.C          |            | 2 | 2,428  | 0,343 | -0,486 |
| 12 | P50990 TCPQ_HUMAN  | E.GAKHFS#GLEE.A        | S23:       | 2 | 2,4279 | 0,172 | -0,423 |
| 12 | P18615 NELFE_HUMAN | R.SIS#ADDDLQE.S        | S115:      | 2 | 2,4228 | 0,187 | -0,208 |
| 12 | Q9BRQ0 PYGO2_HUMAN | E.GGGGPAPPPAPPSTGR.K   |            | 2 | 2,4212 | 0,376 | 0,089  |
| 12 | Q9NPR2 SEM4B_HUMAN | E.SEKRPLSIQDS#FVE.V    | S808:      | 2 | 2,4192 | 0,18  | -0,64  |
| 12 | Q86XP3 DDX42_HUMAN | K.IIDPLPPIDHSE.I       |            | 2 | 2,4144 | 0,264 | -0,544 |
| 12 | Q9H6A9 PCX3_HUMAN  | R.CSSQHSVFGFNQVSE.L    |            | 2 | 2,4125 | 0,22  | -0,784 |
| 12 | Q5T200 ZC3HD_HUMAN | E.SRSL#PSHLTE.D        | S877:      | 2 | 2,4124 | 0,13  | -0,377 |
| 12 | P26885 FKBP2_HUMAN | K.LVIPSELGYGER.G       |            | 2 | 2,4115 | 0,329 | -0,549 |
| 12 | O00541 PESC_HUMAN  | E.GDYVPPEKLL.L         |            | 2 | 2,4045 | 0,167 | -0,213 |
| 12 | P52701 MSH6_HUMAN  | E.LGLVFM*K.G           |            | 2 | 2,4028 | 0,113 | 0,148  |

|    |                     |                          |            |   |        |       |        |
|----|---------------------|--------------------------|------------|---|--------|-------|--------|
| 12 | Q9NXG2 THUM1_HUMAN  | E.YGDDMYGPEK.F           |            | 2 | 2,4026 | 0,34  | -0,208 |
| 12 | Q13137 CACO2_HUMAN  | E.DHVFCHS#L.-            | S445:      | 2 | 2,3952 | 0,224 | -0,446 |
| 12 | P36507 MP2K2_HUMAN  | R.LNQPQT#PTR.T           | T394:      | 2 | 2,3942 | 0,102 | -0,229 |
| 12 | A8K7V5 A8K7V5_HUMAN | E.VSTAPAGTDM*PAAK.K      |            | 2 | 2,3927 | 0,372 | -0,366 |
| 12 | P02545 LMNA_HUMAN   | R.SVGGSGGGSGFDNLVTR.S    |            | 2 | 2,3926 | 0,172 | -0,545 |
| 12 | P06576 ATPB_HUMAN   | K.AHGGYSVFAGVGE.R        |            | 2 | 2,3926 | 0,128 | -0,585 |
| 12 | Q10471 GALT2_HUMAN  | R.VVSPIIDVINM*D.N        |            | 2 | 2,3921 | 0,226 | -0,367 |
| 12 | Q9P258 RCC2_HUMAN   | K.DGQILPVPNVVVR.D        |            | 2 | 2,3909 | 0,322 | -0,347 |
| 12 | P08670 VIME_HUMAN   | R.QDVDNASLAR.L           |            | 2 | 2,39   | 0,34  | -0,336 |
| 12 | Q8NCF5 NF2IP_HUMAN  | E.VLSRDS#PLK.T           | S369:      | 2 | 2,3783 | 0,265 | -0,516 |
| 12 | P08107 HSP71_HUMAN  | K.NQVALNPQNTVFD.A        |            | 2 | 2,3732 | 0,24  | -0,585 |
| 12 | Q13428 TCOF_HUMAN   | R.LASTNSSVLGADLPSSM*KE.K |            | 2 | 2,3617 | 0,218 | -0,254 |
| 12 | O60506 HNRPQ_HUMAN  | E.NFQTLLDAGLPQK.V        |            | 2 | 2,3548 | 0,117 | -0,507 |
| 12 | P49792 RBP2_HUMAN   | K.NLFASFPTEE.S           |            | 2 | 2,3525 | 0,291 | -0,317 |
| 12 | Q9H4A3 WNK1_HUMAN   | K.DRPVSQPSLVGSK.E        |            | 2 | 2,3509 | 0,178 | -0,445 |
| 12 | Q96JM3 ZN828_HUMAN  | K.SSFFIEPQKPVFPE.T       |            | 2 | 2,3437 | 0,237 | -0,443 |
| 12 | Q5T4S7 UBR4_HUMAN   | E.DGSCALVK.R             |            | 2 | 2,343  | 0,161 | 0,063  |
| 12 | O00522 KRIT1_HUMAN  | E.DAYVAVIRPK.N           |            | 2 | 2,3375 | 0,207 | -0,216 |
| 12 | Q9H6F5 CCD86_HUMAN  | K.CSQDQGVLAASE.L         |            | 2 | 2,3363 | 0,234 | -0,409 |
| 12 | P35527 K1C9_HUMAN   | K.STMQELNSR.L            |            | 2 | 2,3289 | 0,249 | 0,229  |
| 12 | Q9C0C2 TB182_HUMAN  | K.VSAPGVLTQAQDR.V        |            | 2 | 2,3274 | 0,405 | 0,502  |
| 12 | Q9NQS7 INCE_HUMAN   | K.YSLVAKQE.S             |            | 2 | 2,3255 | 0,177 | -0,26  |
| 12 | P42704 LPPRC_HUMAN  | E.AVFSALVTGHAR.A         |            | 2 | 2,323  | 0,428 | -0,298 |
| 12 | Q9P260 K1468_HUMAN  | R.EPSTASGGGQLNR.A        |            | 2 | 2,3214 | 0,32  | -0,192 |
| 12 | Q09666 AHNK_HUMAN   | K.ADIKSPSLDVTVPE.A       |            | 2 | 2,3173 | 0,194 | -0,498 |
| 12 | Q9UKV3 ACINU_HUMAN  | E.KSKS#PSPRLT#E.D        | S386:T393: | 2 | 2,3165 | 0,26  | -0,328 |
| 12 | P09382 LEG1_HUMAN   | K.FPNRLNLE.A             |            | 2 | 2,3147 | 0,086 | -0,122 |
| 12 | Q04637 IF4G1_HUMAN  | R.SFS#KEVEER.S           | S1188:     | 2 | 2,3126 | 0,185 | -0,307 |
| 12 | Q04637 IF4G1_HUMAN  | R.ERPSQPEGLR.K           |            | 2 | 2,3053 | 0,26  | -0,313 |
| 12 | P13647 K2C5_HUMAN   | R.ISISTSGGSFR.N          |            | 2 | 2,3021 | 0,201 | -0,219 |
| 12 | Q6S8J3 A26CA_HUMAN  | K.SYELPDGQVITIGNER.F     |            | 2 | 2,2991 | 0,338 | -0,477 |
| 12 | P21333 FLNA_HUMAN   | E.TSSVFDVSLTK.A          |            | 2 | 2,2986 | 0,366 | -0,206 |
| 12 | Q14152 EIF3A_HUMAN  | R.ILQEHEQIK.K            |            | 2 | 2,2962 | 0,124 | -0,322 |

|    |                     |                          |       |   |        |       |        |
|----|---------------------|--------------------------|-------|---|--------|-------|--------|
| 12 | P49591 SYSC_HUMAN   | K.YAGLSTCFR.Q            |       | 2 | 2,2959 | 0,375 | -0,454 |
| 12 | P63218 GBG5_HUMAN   | K.VVQQLRLE.A             |       | 2 | 2,2891 | 0,159 | 0,248  |
| 12 | Q9Y3T9 NOC2L_HUMAN  | R.GILRPLSTR.H            |       | 2 | 2,2877 | 0,289 | -0,421 |
| 12 | P62256 UBE2H_HUMAN  | R.MDTDVVKLIE.S           |       | 2 | 2,2855 | 0,222 | -0,315 |
| 12 | P08670 VIME_HUMAN   | E.AANYQDTIGR.L           |       | 2 | 2,2848 | 0,174 | 1,43   |
| 12 | O43318 M3K7_HUMAN   | E.GKRMS#ADM*SEIE.A       | S389: | 2 | 2,2797 | 0,177 | -0,505 |
| 12 | Q9H3P7 GCP60_HUMAN  | E.VVVAGSSLPTSSK.V        |       | 2 | 2,277  | 0,201 | -0,198 |
| 12 | P05787 K2C8_HUMAN   | K.SYKVS#TSGPR.A          | S13:  | 2 | 2,2712 | 0,295 | -0,315 |
| 12 | Q7Z3C6 ATG9A_HUMAN  | R.SFSPLQPGQAPTGR.A       |       | 2 | 2,2662 | 0,188 | -0,507 |
| 12 | Q9HA05 Q9HA05_HUMAN | K.MNSIVYQK.Q             |       | 2 | 2,2615 | 0,169 | -0,062 |
| 12 | Q9H7N4 SFR19_HUMAN  | R.RVFFVVGTEAE.A          |       | 2 | 2,2598 | 0,255 | -0,22  |
| 12 | Q02952 AKA12_HUMAN  | K.SAESPT#SPVTSE.T        | T285: | 2 | 2,2544 | 0,223 | -0,384 |
| 12 | P31150 GDIA_HUMAN   | K.QLICDPSYIPDR.V         |       | 2 | 2,2512 | 0,144 | 0      |
| 12 | O75410 TACC1_HUMAN  | E.NTS#PLLGDAR.F          | S276: | 2 | 2,2478 | 0,255 | -0,434 |
| 12 | Q6S8J3 A26CA_HUMAN  | K.AGFAGDDAPR.A           |       | 2 | 2,2474 | 0,353 | 0      |
| 12 | P62136 PP1A_HUMAN   | E.SNYLFLGDYVDR.G         |       | 2 | 2,2434 | 0,347 | -0,417 |
| 12 | P19338 NUCL_HUMAN   | E.LQGPRGS#PNAR.S         | S563: | 2 | 2,2413 | 0,193 | -0,297 |
| 12 | Q7Z3K3 POGZ_HUMAN   | R.TVPVSSNDT#PPSALQE.A    | T707: | 2 | 2,2403 | 0,147 | -0,354 |
| 12 | Q12923 PTN13_HUMAN  | K.RFES#SSGLPGVDE.T       | S442: | 2 | 2,2391 | 0,249 | -0,585 |
| 12 | O75152 ZC11A_HUMAN  | R.RLS#SASTGKPPLSVEDDFE.K | S758: | 2 | 2,2378 | 0,401 | -0,577 |
| 12 | P35658 NU214_HUMAN  | R.ITPPAAKPGS#PQAK.S      | S678: | 2 | 2,2378 | 0,138 | -0,507 |
| 12 | P50395 GDIB_HUMAN   | R.TYDATTHFE.T            |       | 2 | 2,2371 | 0,337 | -0,337 |
| 12 | Q4G148 GL8D3_HUMAN  | R.SLLKPLELE.L            |       | 2 | 2,2358 | 0,164 | -0,234 |
| 12 | Q14152 EIF3A_HUMAN  | R.QRELEIEER.E            |       | 2 | 2,2331 | 0,113 | -0,508 |
| 12 | Q9UHI6 DDX20_HUMAN  | R.RSS#FRLQTE.A           | S743: | 2 | 2,231  | 0,18  | -0,304 |
| 12 | Q15417 CNN3_HUMAN   | R.DYQYSDQGIDY.-          |       | 2 | 2,2292 | 0,263 | -0,446 |
| 12 | P35232 PHB_HUMAN    | E.DIAYQLSR.S             |       | 2 | 2,2283 | 0,316 | 0,126  |
| 12 | Q6ZS30 NBEL1_HUMAN  | K.SFSVHSDRE.S            |       | 2 | 2,2281 | 0,114 | 0,229  |
| 12 | Q93074 MED12_HUMAN  | R.QQQQQQILR.Q            |       | 2 | 2,2261 | 0,141 | -0,626 |
| 12 | Q15149 PLEC1_HUMAN  | E.TGLCLLPLTDK.A          |       | 2 | 2,2258 | 0,195 | -0,297 |
| 12 | P23396 RS3_HUMAN    | K.DEILPTTPISEQK.G        |       | 2 | 2,2245 | 0,131 | -0,415 |
| 12 | O60361 NDK8_HUMAN   | K.DRPFPPGLVK.Y           |       | 2 | 2,2229 | 0,188 | -0,726 |
| 12 | O75534 CSDE1_HUMAN  | K.VDFVIPK.E              |       | 2 | 2,222  | 0,27  | 0,224  |

|    |                    |                         |            |   |        |       |        |
|----|--------------------|-------------------------|------------|---|--------|-------|--------|
| 12 | Q92934 BAD_HUMAN   | E.LRRM*S#DEFVD.S        | S118:      | 2 | 2,2185 | 0,153 | 0,447  |
| 12 | O14980 XPO1_HUMAN  | K.NVDILKDPE.T           |            | 2 | 2,215  | 0,126 | 0,468  |
| 12 | Q9NWH9 SLTM_HUMAN  | R.IVQISGNS#M*PR.G       | S1014:     | 2 | 2,2149 | 0,212 | 0,094  |
| 12 | Q9BWU0 NADAP_HUMAN | R.KINAGS#QDDE.M         | S329:      | 2 | 2,2105 | 0,278 | -0,316 |
| 12 | P22626 ROA2_HUMAN  | D.TIEIITDR.Q            |            | 2 | 2,2082 | 0,2   | -0,063 |
| 12 | Q15418 KS6A1_HUMAN | R.KLPS#TTL.-            | S732:      | 2 | 2,1967 | 0,348 | 0,218  |
| 12 | Q6U841 S4A10_HUMAN | E.NS#TVDFSK.G           | S280:      | 2 | 2,1933 | 0,288 | -0,125 |
| 12 | Q13547 HDAC1_HUMAN | R.ISICSSDKR.I           |            | 2 | 2,1902 | 0,164 | -0,458 |
| 12 | Q9H4L7 SMRCD_HUMAN | R.KASISYFK.N            |            | 2 | 2,1897 | 0,113 | -0,711 |
| 12 | P98082 DAB2_HUMAN  | K.INEPKAPR.Q            |            | 2 | 2,1834 | 0,195 | -0,436 |
| 12 | Q32MZ4 LRRF1_HUMAN | R.RGSGDT#SISIDTE.A      | T123:      | 2 | 2,1821 | 0,163 | -0,258 |
| 12 | Q09666 AHNK_HUMAN  | K.ADIKSPSLDVTVPEAE.L    |            | 2 | 2,182  | 0,275 | -0,657 |
| 12 | Q9Y6D5 BIG2_HUMAN  | R.RCS#VTS#ME.S          | S614:S617: | 2 | 2,1817 | 0,194 | -0,324 |
| 12 | Q9NZN3 EHD3_HUMAN  | E.IFYTLS#PVDGK.I        | S456:      | 2 | 2,18   | 0,162 | -0,277 |
| 12 | P43243 MATR3_HUMAN | R.GNLGAGNGNLQGPR.H      |            | 2 | 2,1797 | 0,198 | -0,829 |
| 12 | P52907 CAZA1_HUMAN | R.LLLNNDNLLRE.G         |            | 2 | 2,1747 | 0,162 | -1,103 |
| 12 | Q01082 SPTB2_HUMAN | R.TQETPSAQME.G          |            | 2 | 2,1714 | 0,311 | -0,217 |
| 12 | Q16531 DDB1_HUMAN  | E.DLNLLIAK.N            |            | 2 | 2,1712 | 0,089 | -0,136 |
| 12 | P04792 HSPB1_HUMAN | R.AQLGGPEAAKS#DE.T      | S199:      | 2 | 2,1687 | 0,141 | -0,451 |
| 12 | P52594 NUPL_HUMAN  | K.GTPSQS#PVVGR.S        | S181:      | 2 | 2,1673 | 0,308 | -0,419 |
| 12 | P07355 ANXA2_HUMAN | K.AYTNFDAERDALNIE.T     |            | 2 | 2,1662 | 0,194 | -0,49  |
| 12 | Q9UBG0 MRC2_HUMAN  | R.CLTALPYICK.R          |            | 2 | 2,1604 | 0,165 | -0,197 |
| 12 | Q53F19 CQ085_HUMAN | E.LKM*ISTPS#PK.K        | S415:      | 2 | 2,1573 | 0,19  | 1,731  |
| 12 | Q15149 PLEC1_HUMAN | K.ELIPTEEALR.L          |            | 2 | 2,1554 | 0,228 | -0,417 |
| 12 | Q4KMP7 TB10B_HUMAN | R.QQPPLGPSSLLSLPGLK.S   |            | 2 | 2,1428 | 0,404 | -0,402 |
| 12 | P45974 UBP5_HUMAN  | D.SISESVPVGPV.V         |            | 2 | 2,1422 | 0,177 | 0,665  |
| 12 | P26038 MOES_HUMAN  | K.QRIDEFESM*.-          |            | 2 | 2,1353 | 0,325 | -0,208 |
| 12 | P35568 IRS1_HUMAN  | E.YGSSPCDFR.S           |            | 2 | 2,1338 | 0,19  | -0,224 |
| 12 | O15061 DMN_HUMAN   | K.GLQTPVKDAGGGTGREA.E.A |            | 2 | 2,1316 | 0,177 | -0,07  |
| 12 | P49736 MCM2_HUMAN  | R.RGNDPLTSS#PGR.S       | S27:       | 2 | 2,1219 | 0,228 | -0,456 |
| 12 | P05455 LA_HUMAN    | E.YYFGDFNLPR.D          |            | 2 | 2,1144 | 0,329 | -0,472 |
| 12 | Q9Y2U5 M3K2_HUMAN  | R.NGS#FTSINSE.G         | S182:      | 2 | 2,1098 | 0,123 | -0,215 |
| 12 | P29374 ARI4A_HUMAN | K.EVDILNPE.S            |            | 2 | 2,1062 | 0,141 | -0,117 |

|    |                     |                           |       |   |        |       |        |
|----|---------------------|---------------------------|-------|---|--------|-------|--------|
| 12 | Q9UCG5 Q9UCG5_HUMAN | -.DATNVGDEGGFAPNIX.-      |       | 2 | 2,1017 | 0,219 | -0,384 |
| 12 | P23528 COF1_HUMAN   | K.VFNDM*KVR.K             |       | 2 | 2,0999 | 0,193 | -0,238 |
| 12 | P49736 MCM2_HUMAN   | R.GNDPLTSS#PGR.S          | S27:  | 2 | 2,0922 | 0,251 | -0,723 |
| 12 | P59998 ARPC4_HUMAN  | E.LLLQPVTISR.N            |       | 2 | 2,0886 | 0,14  | -0,428 |
| 12 | Q13404 UB2V1_HUMAN  | K.YPEAPPFVR.F             |       | 2 | 2,0829 | 0,108 | -0,34  |
| 12 | O60684 IMA7_HUMAN   | K.SYKNNALNPEE.M           |       | 2 | 2,0777 | 0,248 | -0,477 |
| 12 | Q58FF7 H90B3_HUMAN  | R.APFDLFENK.K             |       | 2 | 2,0752 | 0,122 | -0,339 |
| 12 | P00533 EGFR_HUMAN   | E.DHFLSLQR.M              |       | 2 | 2,0734 | 0,11  | -0,18  |
| 12 | A8K7V5 A8K7V5_HUMAN | E.VSTAPAGTDMPPAAK.K       |       | 2 | 2,073  | 0,293 | -0,648 |
| 12 | P05787 K2C8_HUMAN   | E.GLKQGRAS#LE.A           | S330: | 2 | 2,0714 | 0,246 | -0,214 |
| 12 | Q15149 PLEC1_HUMAN  | E.FADM*LSGNAGGFR.S        |       | 2 | 2,071  | 0,291 | -0,269 |
| 12 | P54707 AT12A_HUMAN  | K.LIIVEGCQR.Q             |       | 2 | 2,0672 | 0,213 | -0,336 |
| 12 | Q02952 AKA12_HUMAN  | K.STPVIVSATTK.K           |       | 2 | 2,0665 | 0,112 | -0,663 |
| 12 | P16949 STMN1_HUMAN  | K.ESVPEFPLSPPK.K          |       | 2 | 2,0659 | 0,316 | -0,276 |
| 12 | P11413 G6PD_HUMAN   | R.IIVEKPFGR.D             |       | 2 | 2,0634 | 0,171 | -0,346 |
| 12 | Q96L91 EP400_HUMAN  | K.ALS#PVTSR.T             | S736: | 2 | 2,0633 | 0,094 | 0,067  |
| 12 | P04264 K2C1_HUMAN   | K.SISISVAR.G              |       | 2 | 2,0629 | 0,181 | 1,245  |
| 12 | P08758 ANXA5_HUMAN  | E.SILTLLTSR.S             |       | 2 | 2,0622 | 0,249 | -0,061 |
| 12 | P37802 TAGL2_HUMAN  | K.IQASTMAFK.Q             |       | 2 | 2,0616 | 0,18  | 0      |
| 12 | P05387 RLA2_HUMAN   | E.DVIAQGIGK.L             |       | 2 | 2,0594 | 0,225 | -1,151 |
| 12 | Q15942 ZYG_HUMAN    | E.ALSAGTGS#PQPPSFTYAQQR.E | S308: | 2 | 2,0586 | 0,499 | -0,114 |
| 12 | Q13242 SFRS9_HUMAN  | R.GS#PHYFSPFRPY.-         | S211: | 2 | 2,0558 | 0,087 | -0,318 |
| 12 | Q9NZN8 CNOT2_HUMAN  | R.SSPSIICM*PK.Q           |       | 2 | 2,0329 | 0,276 | -0,43  |
| 12 | P62861 RS30_HUMAN   | R.FVNVVPTFGK.K            |       | 2 | 2,0267 | 0,172 | -0,22  |
| 12 | Q8WWI1 LMO7_HUMAN   | R.SLTSCSSDITLR.G          |       | 2 | 2,0247 | 0,292 | -0,273 |
| 12 | Q0ZGT2 NEXN_HUMAN   | R.RIEQDM*LEK.R            |       | 2 | 2,0241 | 0,095 | -0,414 |
| 12 | O43447 PPIH_HUMAN   | E.NFRQFCTGE.F             |       | 2 | 2,0225 | 0,314 | -0,526 |
| 12 | P05787 K2C8_HUMAN   | E.LGNM*QGLVEDFK.N         |       | 2 | 2,0219 | 0,208 | -0,357 |
| 12 | P07195 LDHB_HUMAN   | E.KLIAPVAEEE.A            |       | 2 | 2,0203 | 0,144 | 0      |
| 12 | Q6P0N0 CN106_HUMAN  | E.NQVAM*SFYK.H            |       | 2 | 2,0182 | 0,116 | -0,221 |
| 12 | P62753 RS6_HUMAN    | K.LIEVDDER.K              |       | 2 | 2,0158 | 0,159 | -0,432 |
| 12 | P08670 VIME_HUMAN   | R.QVQS#LTCE.V             | S325: | 2 | 2,0137 | 0,131 | 0      |
| 12 | O94876 TMCC1_HUMAN  | R.NKFGSADNIPNLKDS#LEE.G   | S392: | 2 | 2,0074 | 0,197 | -0,236 |

|    |                      |                                   |                 |   |        |       |        |
|----|----------------------|-----------------------------------|-----------------|---|--------|-------|--------|
| 12 | ##P39880 CUX1_HUMAN  | K.EM*RKM*DMLKE.V                  |                 | 2 | 1,9894 | 0,155 | -0,727 |
| 12 | Q13017 RHG05_HUMAN   | E.IYVVPDDSQNR.I                   |                 | 2 | 1,9759 | 0,152 | -0,467 |
| 12 | P61247 RS3A_HUMAN    | K.LIPDSIGKDIE.K                   |                 | 2 | 1,9746 | 0,084 | -0,203 |
| 12 | Q9NPI6 DCP1A_HUMAN   | R.QRS#PLLNQPVE.L                  | S353:           | 2 | 1,9695 | 0,098 | -0,084 |
| 12 | P53618 COPB_HUMAN    | R.SLGEIPIVESEIK.K                 |                 | 2 | 1,9628 | 0,171 | -0,431 |
| 12 | Q9C0B5 ZDHC5_HUMAN   | R.GDSLKEPT#SIAE.S                 | T385:           | 2 | 1,9624 | 0,114 | -0,644 |
| 12 | Q66K74 MAP1S_HUMAN   | E.LGPIPAGEEK.A                    |                 | 2 | 1,9623 | 0,233 | -0,06  |
| 12 | P11142 HSP7C_HUMAN   | K.NQVAMNPTNTVFD.A                 |                 | 2 | 1,9466 | 0,083 | -0,589 |
| 12 | Q9UPM8 AP4E1_HUMAN   | E.LKKFS#LTSE.L                    | S847:           | 2 | 1,9443 | 0,131 | -0,754 |
| 12 | P80723 BASP_HUMAN    | K.ETPAATEAPSSTPK.A                |                 | 2 | 1,9436 | 0,269 | -0,528 |
| 12 | P62736 ACTA_HUMAN    | R.GILTLKYPIE.H                    |                 | 2 | 1,9386 | 0,293 | -0,213 |
| 12 | ##Q63HK3 ZKSC2_HUMAN | R.T#ERLIDLFT#KT#E.E               | T453:T461:T463: | 2 | 1,9334 | 0,13  | -1,574 |
| 12 | Q6S8J3 A26CA_HUMAN   | E.KMTQIMFE.T                      |                 | 2 | 1,9281 | 0,104 | 0,237  |
| 12 | P48634 BAT2_HUMAN    | E.ALTTVTVAPAPR.R                  |                 | 2 | 1,9096 | 0,183 | -0,102 |
| 13 | Q70E73 RAPH1_HUMAN   | E.SQSNHSNQSDSGVSDTQPAGHVR.S       |                 | 3 | 6,6285 | 0,429 | -0,764 |
| 13 | Q02078 MEF2A_HUMAN   | E.HRGCD#PDPDTSY#VLTPHTEE.K        | S98:Y105:       | 3 | 5,7878 | 1     | -0,427 |
| 13 | Q92598 HS105_HUMAN   | E.CLNQRPPENPDTDKNVQQDNSE.A        |                 | 3 | 5,625  | 0,22  | -0,493 |
| 13 | Q9BY44 EIF2A_HUMAN   | E.ARSDKS#PDLAPTPAQSTPR.N          | S506:           | 3 | 5,3005 | 0,306 | -0,337 |
| 13 | O95684 FR1OP_HUMAN   | E.KGPTTGEGALDLSDVHS#PPKSPE.G      | S156:           | 3 | 5,2635 | 0,42  | -0,61  |
| 13 | Q7Z417 NUFP2_HUMAN   | E.LEKRTS#PQVLGSILKSGTTSE.S        | S572:           | 3 | 5,2537 | 0,413 | -0,554 |
| 13 | P80723 BASP_HUMAN    | K.AQGPAASAEKPKPVEAPAANSQTVTVKE.-  |                 | 3 | 5,1488 | 0,487 | -0,19  |
| 13 | Q14247 SRC8_HUMAN    | R.AKTQTPPVSPAPQPTTEERLPSS#PVYE.D  | S418:           | 3 | 5,0066 | 0,444 | -0,444 |
| 13 | Q02040 SF17A_HUMAN   | E.VQSSCRVVPEDGS#PEKR.C            | S537:           | 3 | 4,9947 | 0,372 | -0,455 |
| 13 | Q6P6C2 ALKB5_HUMAN   | E.AAAAAAAAAAAAAAAAAAAAAEYPVSGAK.R |                 | 3 | 4,9406 | 0,405 | -0,157 |
| 13 | Q9UHR5 S30BP_HUMAN   | E.KGGLVSDAYGEDDFSR.L              |                 | 2 | 4,925  | 0,499 | -0,569 |
| 13 | Q14789 GOGB1_HUMAN   | E.LRSSSQTQPLKVQYQR.Q              |                 | 3 | 4,8368 | 0,399 | -0,638 |
| 13 | Q8WXI9 P66B_HUMAN    | R.GRLTPSPDIIVLS#DNEASSPR.S        | S129:           | 3 | 4,83   | 0,312 | -0,159 |
| 13 | Q9NWH9 SLTM_HUMAN    | E.ASKPKDGQDAIAQS#PEKE.S           | S289:           | 3 | 4,6846 | 0,304 | -0,555 |
| 13 | Q9NQW6 ANLN_HUMAN    | R.LFKQDTSSSTT#HLAQQLKQE.R         | T421:           | 3 | 4,6819 | 0,278 | -0,618 |
| 13 | Q53HL2 BOREA_HUMAN   | R.IYNISGNGS#PLADSKE.I             | S219:           | 2 | 4,6409 | 0,489 | -0,28  |
| 13 | Q9P0K8 FOXJ2_HUMAN   | K.CSPGS#PTDPNATLSKDE.A            | S46:            | 2 | 4,6287 | 0,498 | -0,329 |
| 13 | Q9NQW6 ANLN_HUMAN    | R.LFKQDTSSS#TTHLAQQLKQE.R         | S419:           | 3 | 4,5687 | 0,281 | -0,463 |
| 13 | P29692 EF1D_HUMAN    | K.SLAGSSGPGASSGTSGDHGE.L          |                 | 2 | 4,5137 | 0,581 | -0,355 |

|    |                     |                                 |            |   |        |       |        |
|----|---------------------|---------------------------------|------------|---|--------|-------|--------|
| 13 | O15085 ARHGB_HUMAN  | E.LDDSDVVFHGEPEPEELPGGTGSQQR.V  |            | 3 | 4,4833 | 0,225 | -0,543 |
| 13 | Q8IUW5 RELL1_HUMAN  | E.KVEKIELNDS#VNE.N              | S109:      | 2 | 4,4375 | 0,425 | -0,535 |
| 13 | P49023 PAXI_HUMAN   | E.M*SS#PQRVTSTQQQTR.I           | S244:      | 3 | 4,4155 | 0,463 | -0,4   |
| 13 | Q09666 AHNK_HUMAN   | K.SSKAS#LGSLEGEAEAE.A           | S5749:     | 2 | 4,4016 | 0,449 | -0,445 |
| 13 | P55884 EIF3B_HUMAN  | R.SDSRAQAVSEDAGGNEGR.A          |            | 3 | 4,3775 | 0,365 | -0,203 |
| 13 | P78347 GTF2I_HUMAN  | E.STSS#KSPPRKINSSPNVNTTASGVED.L | S821:      | 3 | 4,3009 | 0,46  | -0,868 |
| 13 | Q9Y490 TLN1_HUMAN   | K.KSTVLQQQYNR.V                 |            | 3 | 4,281  | 0,161 | -0,201 |
| 13 | Q9UHB6 LIMA1_HUMAN  | E.VQQPVHPKPLS#PDSRASSLSE.S      | S362:      | 3 | 4,2756 | 0,256 | -0,782 |
| 13 | P63241 IF5A1_HUMAN  | E.DLRLPEGDLGKE.I                |            | 3 | 4,2677 | 0,383 | 0      |
| 13 | Q9Y6G9 DC1L1_HUMAN  | E.LDRITRKPVTVS#PTTPTS#PTEGEAS.- | S510:S516: | 3 | 4,2222 | 1     | -0,588 |
| 13 | Q13428 TCOF_HUMAN   | R.LAST#NSSVLGADLPSSM*KE.K       | T108:      | 2 | 4,2049 | 0,471 | -0,792 |
| 13 | Q96T23 RSF1_HUMAN   | E.SEKPGS#PEAAETS#PPSNIIDHCEK.L  | S612:S619: | 3 | 4,2035 | 0,394 | -0,534 |
| 13 | Q59HC3 Q59HC3_HUMAN | E.GDNM*ETPASS#PQLSHDDTHSRIE.H   | S1114:     | 3 | 4,1936 | 0,288 | -0,698 |
| 13 | Q9P0K8 FOXJ2_HUMAN  | R.KCSPGS#PTDPNATLSKDE.A         | S46:       | 2 | 4,1857 | 0,507 | -0,431 |
| 13 | Q9NZT2 OGFR_HUMAN   | K.AGHSSENGVEEDTEGR.T            |            | 3 | 4,1646 | 0,296 | -0,115 |
| 13 | Q5VUA4 ZN318_HUMAN  | R.SVRIPS#PNILKTGLTE.N           | S2101:     | 3 | 4,1473 | 0,285 | -0,101 |
| 13 | O15320 CTGE5_HUMAN  | E.KLNRS#NSELEDE.I               | S137:      | 2 | 4,139  | 0,332 | -0,645 |
| 13 | Q9NQW6 ANLN_HUMAN   | K.TPIS#PLKTGVSKPIVK.S           | S323:      | 3 | 4,121  | 0,314 | -0,419 |
| 13 | Q9NXH9 TRM1_HUMAN   | E.GTCQRGDQCCYSHS#PPTPR.V        | S625:      | 3 | 4,1105 | 0,277 | -0,234 |
| 13 | P17706 PTN2_HUMAN   | E.LSKEDLSPAFDHS#PNKIMTE.K       | S304:      | 3 | 4,0995 | 0,304 | -0,704 |
| 13 | Q15418 KS6A1_HUMAN  | E.KKAYS#FCGTVE.Y                | S221:      | 2 | 4,0976 | 0,538 | -0,623 |
| 13 | O14641 DVL2_HUMAN   | E.RHLAGYESS#STLM*TSE.L          | S195:      | 2 | 4,0966 | 0,55  | -0,523 |
| 13 | Q86UE4 LYRIC_HUMAN  | E.KSVKLSSQIS#AGEE.K             | S298:      | 2 | 4,0944 | 0,366 | -0,474 |
| 13 | Q9UHB6 LIMA1_HUMAN  | E.VQQPVHPKPLS#PDSR.A            | S362:      | 2 | 4,0864 | 0,417 | -0,83  |
| 13 | Q7L2J0 MEPCE_HUMAN  | R.TLNAET#PKSS#PLPAK.G           | T213:S217: | 2 | 4,0852 | 0,278 | -1,353 |
| 13 | Q9H6F5 CCD86_HUMAN  | E.FESNPEETREPGSPPSVQR.A         |            | 3 | 4,0757 | 0,214 | -0,598 |
| 13 | Q9NWW8 CS062_HUMAN  | R.AVGAQASVGSRSEGEGE.A           |            | 2 | 4,0712 | 0,464 | -0,46  |
| 13 | P22087 FBRL_HUMAN   | E.NM*KPQEQLTLEPYERD.H           |            | 3 | 4,066  | 0,306 | -0,365 |
| 13 | P49023 PAXI_HUMAN   | R.VTSTQQQTRIS#ASSATRE.L         | S258:      | 3 | 4,0499 | 0,404 | -0,36  |
| 13 | Q02952 AKA12_HUMAN  | E.KEPSKSAESPT#SPVTSE.T          | T285:      | 2 | 4,0477 | 0,43  | -0,53  |
| 13 | Q6NZI2 PTRF_HUMAN   | R.RGS#S#PDVHALLE.I              | S365:S366: | 2 | 4,0407 | 0,478 | -0,339 |
| 13 | Q15293 RCN1_HUMAN   | E.LGERPPEDNQSFQYDHE.A           |            | 3 | 4,0278 | 0,243 | -0,178 |
| 13 | O95684 FR1OP_HUMAN  | E.KGPTTGEGALDLSVDHSPPKS#PE.G    | S160:      | 3 | 4,0195 | 0,317 | -0,686 |



|    |                    |                                   |        |   |        |       |        |
|----|--------------------|-----------------------------------|--------|---|--------|-------|--------|
| 13 | P17706 PTN2_HUMAN  | E.LSKEDLSPAFDHS#PNKIM*TE.K        | S304:  | 3 | 4,0192 | 0,339 | -0,388 |
| 13 | P46821 MAP1B_HUMAN | E.GEKLS#PKSDISPLTPRE.S            | S1779: | 3 | 4,0124 | 0,196 | -0,378 |
| 13 | Q9C0C2 TB182_HUMAN | R.RES#AASGLGGLLEEE.G              | S1473: | 2 | 4,0107 | 0,406 | -0,305 |
| 13 | Q09666 AHNK_HUMAN  | K.FKAEAPLPS#PKLE.G                | S5110: | 2 | 4,0079 | 0,416 | -0,648 |
| 13 | O95425 SVIL_HUMAN  | E.IKTPTGEGLLDS#PSKTM*SIKE.R       | S1120: | 3 | 3,992  | 0,263 | -0,471 |
| 13 | Q9UHB7 AFF4_HUMAN  | E.KDLLPS#PAGPVPSKDPKTE.H          | S814:  | 3 | 3,9809 | 0,383 | -0,445 |
| 13 | Q96L14 C170L_HUMAN | E.ARALHPAAVSAAEFENAES#E.A         | S269:  | 3 | 3,9729 | 0,466 | -0,329 |
| 13 | Q9NZT2 OGFR_HUMAN  | E.GAGDAAVASGGAQTLALAGS#PAPSGHPK.A | S484:  | 3 | 3,9728 | 0,398 | 0      |
| 13 | Q15424 SAFB1_HUMAN | K.ILDILGETCKS#EPVKEE.S            | S227:  | 3 | 3,9535 | 0,422 | -0,359 |
| 13 | O15047 SET1A_HUMAN | K.FSFLAS#DTEEEEEE.N               | S508:  | 2 | 3,9527 | 0,311 | -0,454 |
| 13 | P68371 TBB2C_HUMAN | E.IVHLQAGQCGNQIGAK.F              |        | 3 | 3,9354 | 0,358 | -0,54  |
| 13 | P55884 EIF3B_HUMAN | R.SDSRAQAVSEDAGGNE.G              |        | 2 | 3,9116 | 0,401 | -0,306 |
| 13 | Q8WYL5 SSH1_HUMAN  | E.STRPDS#PALFVDKPTGERTE.R         | S237:  | 3 | 3,9086 | 0,275 | -0,531 |
| 13 | Q14721 KCNB1_HUMAN | K.TQS#QPILNTKE.S                  | S541:  | 2 | 3,9037 | 0,403 | -0,364 |
| 13 | Q9UHR5 S30BP_HUMAN | E.KGGLVSDAYGEDDFSR.L              |        | 3 | 3,8959 | 0,36  | -0,533 |
| 13 | P02649 APOE_HUMAN  | E.KVQAAVGTSAAPVPSDNH.-            |        | 2 | 3,892  | 0,478 | -0,628 |
| 13 | Q9UK76 HN1_HUMAN   | R.RNS#SEASSGDFDLKGE.G             | S87:   | 2 | 3,8827 | 0,408 | -0,451 |
| 13 | P49023 PAXI_HUMAN  | E.MSS#PQRVTSTQQQTR.I              | S244:  | 3 | 3,868  | 0,462 | -0,302 |
| 13 | P78347 GTF2I_HUMAN | R.KINSSPNVNTTASGVE.D              |        | 2 | 3,8617 | 0,56  | -0,98  |
| 13 | Q02952 AKA12_HUMAN | K.SAVVHDITDDGQEETPE.I             |        | 2 | 3,8472 | 0,431 | -0,331 |
| 13 | P35606 COPB2_HUMAN | D.GKPAS#PTPVIVASHTANKEE.K         | S859:  | 3 | 3,8445 | 0,143 | -0,433 |
| 13 | P28074 PSB5_HUMAN  | R.VSSDNVADLHEKYSGST#P.-           | T262:  | 2 | 3,8361 | 0,437 | -0,307 |
| 13 | O43166 SI1L1_HUMAN | E.NHRPLS#AASNSDQLE.D              | S1708: | 2 | 3,8087 | 0,396 | -0,284 |
| 13 | Q96L14 C170L_HUMAN | R.ALHPAAVSAAEFENAES#E.A           | S269:  | 2 | 3,8067 | 0,448 | -0,184 |
| 13 | Q9UBC2 EP15R_HUMAN | E.RGS#FGAM*DDPFKNK.A              | S593:  | 3 | 3,8066 | 0,289 | 0      |
| 13 | Q9UN86 G3BP2_HUMAN | R.NSSYVHGGVDASGKPQEAVYGQND.I      |        | 3 | 3,8045 | 0,404 | -0,295 |
| 13 | P61956 SUMO2_HUMAN | E.NNDHINLKVAGQD.G                 |        | 2 | 3,7974 | 0,381 | -0,17  |
| 13 | Q9NZT2 OGFR_HUMAN  | E.GAGDAAVASGGAQTLALAGSPAPSGHPK.A  |        | 3 | 3,7968 | 0,422 | -0,439 |
| 13 | Q14676 MDC1_HUMAN  | E.LQPSTSTDQPVTPEPTSQATR.G         |        | 3 | 3,781  | 0,173 | 0      |
| 13 | Q8NI35 INADL_HUMAN | E.KLEKVPDS#PENE.L                 | S522:  | 2 | 3,7732 | 0,285 | -0,666 |
| 13 | Q8N6T3 ARFG1_HUMAN | R.VSQPQSVTASSDK.A                 |        | 2 | 3,7704 | 0,429 | -0,439 |
| 13 | Q5JSZ5 K0515_HUMAN | R.HIISATSLSTS#PTE.L               | S226:  | 2 | 3,7568 | 0,555 | -0,56  |
| 13 | Q9C0C2 TB182_HUMAN | E.ASSSQDQSKVSAPGVLTAAQDR.V        |        | 3 | 3,7559 | 0,366 | -0,515 |

|    |                     |                               |            |   |        |       |        |
|----|---------------------|-------------------------------|------------|---|--------|-------|--------|
| 13 | Q68CQ4 DEF_HUMAN    | E.SGDNSSLKAS#QDPFLQHVNKE.L    | S186:      | 3 | 3,755  | 0,287 | -0,461 |
| 13 | Q68DX9 Q68DX9_HUMAN | R.IDS#PGFKPASQQVYR.K          | S491:      | 3 | 3,7543 | 0,384 | -0,619 |
| 13 | Q96HC4 PDLI5_HUMAN  | K.KANNSQEPS#PQLASSVASTR.S     | S313:      | 3 | 3,7517 | 0,298 | -1,275 |
| 13 | Q9UKL3 C8AP2_HUMAN  | E.GSSIEDAQTS#QHATLKPER.S      | S1278:     | 3 | 3,7466 | 0,35  | -0,343 |
| 13 | P78347 GTF2I_HUMAN  | R.KINSSPNVNTTASGVED.L         |            | 2 | 3,7457 | 0,528 | -0,634 |
| 13 | P35527 K1C9_HUMAN   | R.SGGGGGGGLGSGGSIR.S          |            | 2 | 3,7398 | 0,508 | -0,297 |
| 13 | P52948 NUP98_HUMAN  | E.S#AGNKHSNSNS#VDDTIVALNM*R.A | S673:S683: | 3 | 3,7339 | 0,221 | -1,168 |
| 13 | Q16555 DPYL2_HUMAN  | R.NLHQSGFSLGAQIDD.N           |            | 2 | 3,731  | 0,367 | -0,433 |
| 13 | Q96FW1 OTUB1_HUMAN  | E.YAEDDNIYQQK.I               |            | 2 | 3,7173 | 0,405 | -0,616 |
| 13 | Q9BTU6 P4K2A_HUMAN  | R.VAAAAGSGPS#PPGS#PGHDRE.R    | S47:S51:   | 2 | 3,7166 | 0,406 | -0,555 |
| 13 | P12004 PCNA_HUMAN   | E.LGNNGNIKLSQTSNVDKEEE.A      |            | 3 | 3,7141 | 0,352 | -0,617 |
| 13 | Q02952 AKA12_HUMAN  | E.LQSHAKSPPS#PVERE.M          | S1331:     | 2 | 3,7131 | 0,554 | -0,63  |
| 13 | Q9NWH9 SLTM_HUMAN   | E.VSKPLPSEGS#LAEADHTAHEE.M    | S217:      | 3 | 3,7081 | 0,354 | -0,481 |
| 13 | Q8NI08 NCOA7_HUMAN  | E.TSHGS#PTVTKLSKEPSDTSSAFE.S  | S384:      | 3 | 3,7046 | 0,385 | -0,666 |
| 13 | Q9UQ35 SRRM2_HUMAN  | R.VSGRTS#PPLDR.A              | S2398:     | 2 | 3,7043 | 0,273 | -0,443 |
| 13 | Q05682 CALD1_HUMAN  | E.KQSVDKVTS#PTKV.-            | S789:      | 3 | 3,7014 | 0,223 | -0,122 |
| 13 | Q12888 TP53B_HUMAN  | E.GRQDKPM*DT#SVLSEE.G         | T394:      | 2 | 3,7002 | 0,419 | -0,478 |
| 13 | Q969K3 RNF34_HUMAN  | R.VRAS#LSDLSSLDDVE.G          | S254:      | 2 | 3,6981 | 0,399 | -0,507 |
| 13 | Q9Y3F4 STRAP_HUMAN  | K.LYKYDYNSGEELE.S             |            | 2 | 3,6892 | 0,327 | -0,677 |
| 13 | Q9BTU6 P4K2A_HUMAN  | R.VAAAAGSGPS#PPGS#PGHDRE.R    | S47:S51:   | 3 | 3,6855 | 0,366 | -0,463 |
| 13 | Q6BDS2 URFB1_HUMAN  | R.LKPSASFGS#PVQSE.A           | S758:      | 2 | 3,683  | 0,379 | -0,242 |
| 13 | P55884 EIF3B_HUMAN  | R.AQAVSEDAGGNEGRAAE.A         |            | 2 | 3,6757 | 0,553 | -0,748 |
| 13 | Q13416 ORC2_HUMAN   | E.LAKT#PQKSVSFLKNDPE.I        | T116:      | 3 | 3,6726 | 0,374 | 0      |
| 13 | Q13112 CAF1B_HUMAN  | E.IQSETPGDAQGS#PPELK.R        | S538:      | 2 | 3,6617 | 0,489 | -0,466 |
| 13 | Q9NWH9 SLTM_HUMAN   | K.DGQDAIAQS#PEKE.S            | S289:      | 2 | 3,6603 | 0,361 | -0,499 |
| 13 | Q5JSZ5 K0515_HUMAN  | E.GGGRHIISATSLSTS#PTE.L       | S226:      | 2 | 3,6425 | 0,456 | -0,593 |
| 13 | P49023 PAXI_HUMAN   | K.S#AEPSPTVM*STSLGSLNSE.L     | S126:      | 2 | 3,6367 | 0,502 | -0,491 |
| 13 | Q9P0K8 FOXJ2_HUMAN  | R.KCSPGS#PTDPNATLSKDE.A       | S46:       | 3 | 3,6346 | 0,323 | -0,461 |
| 13 | Q96A49 SYAP1_HUMAN  | E.AVRPKT#PPVVIK.S             | T248:      | 3 | 3,6265 | 0,185 | -0,726 |
| 13 | O00139 KIF2A_HUMAN  | E.DGKQQVQVGLQERE.V            |            | 3 | 3,6216 | 0,31  | -0,107 |
| 13 | Q6NZI2 PTRF_HUMAN   | E.AGDLRRGS#S#PDVHALLE.I       | S365:S366: | 3 | 3,6148 | 0,23  | -0,562 |
| 13 | Q96T23 RSF1_HUMAN   | E.IKLSDDFDS#PVKGPLCK.S        | S387:      | 3 | 3,6147 | 0,309 | -0,549 |
| 13 | P46821 MAP1B_HUMAN  | E.KSGKQGSPDQVS#PVSE.M         | S1443:     | 2 | 3,6057 | 0,437 | 0,071  |

|    |                     |                               |              |   |        |       |        |
|----|---------------------|-------------------------------|--------------|---|--------|-------|--------|
| 13 | O60271 JIP4_HUMAN   | R.TKLHQLSGS#DQLE.S            | S185:        | 2 | 3,5945 | 0,513 | -0,238 |
| 13 | Q14974 IMB1_HUMAN   | E.NVHPDVM*LVQPR.V             |              | 3 | 3,5864 | 0,124 | -0,193 |
| 13 | P41236 IPP2_HUMAN   | E.M*NILATYHPADKDYGLM*K.I      |              | 3 | 3,5839 | 0,219 | -0,346 |
| 13 | Q13765 NACA_HUMAN   | E.KFKVQGEAVS#NIQE.N           | S151:        | 2 | 3,5758 | 0,254 | -0,81  |
| 13 | Q9UKV3 ACINU_HUMAN  | E.KSKS#PS#PPRLTE.D            | S386:S388:   | 3 | 3,5669 | 0,308 | -0,062 |
| 13 | Q9Y6G9 DC1L1_HUMAN  | R.KPVTVS#PTTPTS#PTEGEAS.-     | S510:S516:   | 2 | 3,5628 | 1     | -0,835 |
| 13 | O95208 EPN2_HUMAN   | E.RM*AQVATGM*GSNQITFGR.G      |              | 3 | 3,5573 | 0,413 | 0      |
| 13 | Q9UHB6 LIMA1_HUMAN  | R.ETPHS#PGVEDAPIAK.V          | S490:        | 3 | 3,5543 | 0,322 | 0      |
| 13 | O60271 JIP4_HUMAN   | E.NKAFDRNTES#LFEE.L           | S381:        | 2 | 3,5509 | 0,385 | -0,617 |
| 13 | Q01082 SPTB2_HUMAN  | K.TALPAQSAATLPARTQETPSAQM*E.G |              | 3 | 3,5464 | 0,403 | -0,221 |
| 13 | Q00536 PCTK1_HUMAN  | E.DINKRLS#LPADIRLPE.G         | S119:        | 3 | 3,5374 | 0,155 | -0,758 |
| 13 | P22087 FBRL_HUMAN   | E.NMKPQEQLTLEPYERD.H          |              | 3 | 3,5221 | 0,116 | -0,276 |
| 13 | Q99613 EIF3C_HUMAN  | E.SHITSYKQNPEQS#ADE.D         | S166:        | 2 | 3,5213 | 0,51  | -0,574 |
| 13 | Q8N655 CJ012_HUMAN  | E.DVISRPHS#PPEIVSRE.E         | S381:        | 3 | 3,5166 | 0,361 | -0,289 |
| 13 | Q14203 DCTN1_HUMAN  | E.DGADTTSPET#PDSSASK.V        | T108:        | 2 | 3,5029 | 0,443 | -0,489 |
| 13 | Q96RU3 FNBP1_HUMAN  | R.TVS#DNSLSNSRGE.G            | S296:        | 2 | 3,5023 | 0,445 | -0,338 |
| 13 | Q15398 DLG7_HUMAN   | E.RM*S#LPLLAGGVADDINTNKKE.G   | S725:        | 3 | 3,5017 | 0,169 | -0,391 |
| 13 | Q7Z417 NUFP2_HUMAN  | E.LEKRTS#PQVLGSILK.S          | S572:        | 2 | 3,499  | 0,256 | -0,349 |
| 13 | P02545 LMNA_HUMAN   | R.SGAQASST#PLS#PTR.I          | T19:S22:     | 2 | 3,4964 | 0,361 | -0,803 |
| 13 | O75554 WBP4_HUMAN   | E.KSIQKQNS#LGSNEE.K           | S277:        | 2 | 3,4878 | 0,445 | -0,594 |
| 13 | Q96PZ0 PUS7_HUMAN   | E.DVPRPPDVTSTGK.G             |              | 2 | 3,4801 | 0,182 | -1,069 |
| 13 | P41227 ARD1A_HUMAN  | E.NKVES#KGNS#PPSSGEACRE.E     | S182:S186:   | 3 | 3,4795 | 0,101 | -0,501 |
| 13 | Q9NTI5 PDS5B_HUMAN  | K.GRLDS#SEM*DHSENE.D          | S1176:       | 2 | 3,4738 | 0,374 | -0,358 |
| 13 | P80723 BASP_HUMAN   | E.AAPSSKETPAATEAPSSTPK.A      |              | 3 | 3,4674 | 0,278 | -0,379 |
| 13 | Q9H7N4 SFR19_HUMAN  | R.VFVVGTEAEACRE.G             |              | 2 | 3,4641 | 0,429 | -0,333 |
| 13 | Q9BQC3 DPH2_HUMAN   | R.RGIAIAYEDEGS#G.-            | S488:        | 2 | 3,4581 | 0,474 | -0,516 |
| 13 | O75145 LIPA3_HUMAN  | E.AGAPRGEPAIPGDT#PPPTPR.S     | T714:        | 3 | 3,4573 | 0,122 | -0,35  |
| 13 | Q14247 SRC8_HUMAN   | R.AKTQT#PPVS#PAPQPTEE.R       | T401:S405:   | 2 | 3,4554 | 0,503 | -0,693 |
| 13 | P18583 SON_HUMAN    | R.LTSLRAGIEGPLLASDVGR.D       |              | 3 | 3,454  | 0,267 | -0,285 |
| 13 | Q7Z2Z1 CO042_HUMAN  | R.LQKS#PAKM*T#PTKQAAFKE.S     | S1141:T1146: | 3 | 3,4472 | 0,164 | -0,503 |
| 13 | Q09666 AHNK_HUMAN   | K.SKGHYEVTGS#DDE.T            | S5841:       | 2 | 3,4466 | 0,495 | -0,568 |
| 13 | P05787 K2C8_HUMAN   | E.TRDGKLV#ESS#DVLPK.-         | S475:S478:   | 3 | 3,4413 | 0,316 | -0,387 |
| 13 | B2CI53 B2CI53_HUMAN | R.NGILASPQS#APGNLDNSK.S       | S263:        | 2 | 3,4371 | 0,425 | -0,589 |

|    |                    |                                 |              |   |        |       |        |
|----|--------------------|---------------------------------|--------------|---|--------|-------|--------|
| 13 | Q9UHB6 LIMA1_HUMAN | E.VQQPVHPKPLS#PDSR.A            | S362:        | 3 | 3,4319 | 0,167 | -0,207 |
| 13 | Q9NYJ8 TAB2_HUMAN  | R.TLTHSIS#DGQLQGGQSNSE.L        | S108:        | 2 | 3,4282 | 0,455 | -0,898 |
| 13 | O60256 KPRB_HUMAN  | E.SDLVDGRHS#PPM*VR.S            | S227:        | 3 | 3,4258 | 0,137 | -0,44  |
| 13 | O94888 UBXD7_HUMAN | E.HGQLDGLSSS#PPKK.C             | S270:        | 3 | 3,4192 | 0,273 | -0,179 |
| 13 | P25788 PSA3_HUMAN  | E.VAKIIVHDE.V                   |              | 3 | 3,4185 | 0,181 | 0      |
| 13 | Q6UN15 FIP1_HUMAN  | E.RDHS#PTPSVFNSDEE.R            | S492:        | 2 | 3,4144 | 0,416 | -0,543 |
| 13 | Q9Y6G9 DC1L1_HUMAN | R.ITRKPVTVSPPT#PT#SPTEGEAS.-    | T513:T515:   | 3 | 3,4125 | 1     | -0,53  |
| 13 | Q15424 SAFB1_HUMAN | E.LAEAPTEAPS#PEAR.D             | S344:        | 2 | 3,412  | 0,357 | -0,402 |
| 13 | P26440 IVD_HUMAN   | E.DCKIPAANILGHE.N               |              | 3 | 3,407  | 0,109 | -0,191 |
| 13 | Q9Y608 LRRF2_HUMAN | R.NSASATTPLSGNSSR.R             |              | 2 | 3,4051 | 0,448 | -0,673 |
| 13 | Q92766 RREB1_HUMAN | E.NGGSPQGIKS#PSKPPGPNR.I        | S42:         | 3 | 3,4038 | 0,153 | -0,936 |
| 13 | O75064 DEN4B_HUMAN | E.SLQEQPGALPVPGPS#RSAPSS#PAPR.R | S730:S736:   | 3 | 3,3997 | 0,3   | -0,346 |
| 13 | Q9UHB6 LIMA1_HUMAN | E.VQQPVHPKPLS#PD.S              | S362:        | 2 | 3,3964 | 0,434 | -0,721 |
| 13 | Q02952 AKA12_HUMAN | E.LQSHAKS#PPS#PVERE.M           | S1328:S1331: | 3 | 3,386  | 0,215 | -0,402 |
| 13 | Q9Y608 LRRF2_HUMAN | R.RGS#GDTSSLIDPDTSLSE.L         | S328:        | 2 | 3,3855 | 0,49  | 0      |
| 13 | Q92576 PHF3_HUMAN  | E.NNLQDNQTSNSSPCR.S             |              | 2 | 3,3813 | 0,455 | -0,492 |
| 13 | O15427 MOT4_HUMAN  | E.KNGEVVHTPET#SV.-              | T463:        | 2 | 3,3794 | 0,354 | -0,248 |
| 13 | P19338 NUCL_HUMAN  | K.TLFVKGLSEDTTEE.T              |              | 2 | 3,3787 | 0,426 | -0,389 |
| 13 | Q92598 HS105_HUMAN | E.LNNTCEPVVTQPKPK.I             |              | 3 | 3,3755 | 0,302 | -0,212 |
| 13 | P41236 IPP2_HUMAN  | E.MNILATYHPADKDYGLM*K.I         |              | 3 | 3,3698 | 0,203 | -0,523 |
| 13 | P49916 DNL3_HUMAN  | E.KLATKSS#PVKVGE.K              | S826:        | 3 | 3,3622 | 0,186 | -0,193 |
| 13 | P08651 NFIC_HUMAN  | R.TGM*GSDQEDSKPITLDTTDFQE.S     |              | 3 | 3,3618 | 0,273 | -0,452 |
| 13 | Q02952 AKA12_HUMAN | E.LQSHAKSPPS#PVERE.M            | S1331:       | 3 | 3,3602 | 0,239 | -0,315 |
| 13 | Q00839 HNRPU_HUMAN | R.AKS#PQPPVEEED.H               | S270:        | 2 | 3,3568 | 0,364 | -0,397 |
| 13 | Q9NY27 PP4R2_HUMAN | K.NKHPDEDAVEAE.G                |              | 2 | 3,3562 | 0,339 | -0,541 |
| 13 | Q96MU7 YTDC1_HUMAN | R.RAKS#PT#PDGSERIGLE.V          | S146:T148:   | 3 | 3,3552 | 0,095 | -0,488 |
| 13 | Q9BY44 EIF2A_HUMAN | R.SDKS#PDLAPTAPQSTPR.N          | S506:        | 3 | 3,355  | 0,148 | -0,47  |
| 13 | P43686 PRS6B_HUMAN | E.DYVARPDKISGADINSICQE.S        |              | 3 | 3,3544 | 0,357 | -0,65  |
| 13 | Q9NYV4 CD2L7_HUMAN | E.SKGS#PVFLPRKE.N               | S423:        | 3 | 3,3482 | 0,344 | -0,963 |
| 13 | P04406 G3P_HUMAN   | E.HQVVSSDFNSDTHSSTFDAGAGIALND.H |              | 3 | 3,344  | 0,37  | -0,131 |
| 13 | O14641 DVL2_HUMAN  | E.RHLAGYES#SSTLMTSE.L           | S194:        | 2 | 3,3437 | 0,457 | -0,594 |
| 13 | P08670 VIME_HUMAN  | E.NTLQSFQRQVDNASLAR.L           |              | 3 | 3,3407 | 0,163 | -0,567 |
| 13 | P24928 RPB1_HUMAN  | E.DLVKDVLNAHIQNE.L              |              | 2 | 3,3343 | 0,333 | -0,36  |

|    |                     |                                  |            |   |        |       |        |
|----|---------------------|----------------------------------|------------|---|--------|-------|--------|
| 13 | Q9NSM8 Q9NSM8_HUMAN | E.GQEKPS#PATVR.S                 | S690:      | 2 | 3,3167 | 0,39  | -0,39  |
| 13 | Q01082 SPTB2_HUMAN  | K.AKTALPAQSAATLPAR.T             |            | 3 | 3,3159 | 0,305 | -0,233 |
| 13 | O60271 JIP4_HUMAN   | R.SAS#QSS#LDKLDQE.L              | S730:S733: | 2 | 3,3131 | 0,273 | -0,311 |
| 13 | Q96HC4 PDLI5_HUMAN  | E.SEADNTKKANNSQEPS#PQLASSVASTR.S | S313:      | 3 | 3,3102 | 0,189 | -0,316 |
| 13 | P51858 HDGF_HUMAN   | E.VERPLPM*EVEK.N                 |            | 3 | 3,3093 | 0,37  | -0,068 |
| 13 | P22234 PUR6_HUMAN   | R.VVVLMM*GSTSDLGHCE.K            |            | 2 | 3,3083 | 0,381 | -0,603 |
| 13 | Q12905 ILF2_HUMAN   | R.VKPAPDETSFSE.A                 |            | 2 | 3,2993 | 0,415 | -0,373 |
| 13 | Q9UHI6 DDX20_HUMAN  | K.ATS#PKELGCDRQSE.E              | S532:      | 3 | 3,2977 | 0,286 | 0      |
| 13 | Q7Z417 NUFP2_HUMAN  | E.LEKRTS#PQVLGSILK.S             | S572:      | 3 | 3,2977 | 0,289 | -0,418 |
| 13 | A1L4Q4 A1L4Q4_HUMAN | E.SSAPQHSS#PSRSALKLLTSVE.V       | S35:       | 3 | 3,2973 | 0,176 | 0      |
| 13 | Q8N2M8 SFR16_HUMAN  | E.KLTRPAAS#PAVGE.K               | S532:      | 2 | 3,2888 | 0,338 | -0,886 |
| 13 | Q01082 SPTB2_HUMAN  | K.TALPAQSAATLPAR.T               |            | 2 | 3,2852 | 0,491 | -0,713 |
| 13 | Q9Y6G9 DC1L1_HUMAN  | R.ITRKPVTVS#PTTPTS#PTEGEAS.-     | S510:S516: | 3 | 3,2787 | 1     | -0,757 |
| 13 | P37802 TAGL2_HUMAN  | E.GKNVIGLQM*GTNR.G               |            | 3 | 3,2749 | 0,279 | -0,391 |
| 13 | Q6PJT7 ZC3HE_HUMAN  | R.TPRIS#PPIKEEE.T                | S409:      | 2 | 3,2678 | 0,383 | -0,661 |
| 13 | O75781 PALM_HUMAN   | E.VVM*NSQQT#PVGTT#PKDKR.V        | T141:T145: | 3 | 3,2653 | 0,269 | -0,355 |
| 13 | P29966 MARCS_HUMAN  | E.NGHVKVNGDAS#PAAAE.S            | S46:       | 2 | 3,2539 | 0,43  | -0,528 |
| 13 | Q8N6T3 ARFG1_HUMAN  | R.VSGQPQSVTASSDKAFE.D            |            | 2 | 3,2511 | 0,478 | -0,702 |
| 13 | Q9H6F5 CCD86_HUMAN  | E.FESNPEETREPGS#PPSVQR.A         | S47:       | 3 | 3,2507 | 0,26  | -0,411 |
| 13 | Q8NI08 NCOA7_HUMAN  | K.LSKEPSDTSSAFE.S                |            | 2 | 3,2501 | 0,4   | -0,524 |
| 13 | O60832 DKC1_HUMAN   | E.RKS#LPEEDVAE.I                 | S21:       | 2 | 3,2486 | 0,384 | -0,541 |
| 13 | Q9NPI6 DCP1A_HUMAN  | E.RKASSPS#PLTIGTPE.S             | S525:      | 2 | 3,246  | 0,367 | -0,151 |
| 13 | P49736 MCM2_HUMAN   | E.DVKM*ITSLSKDQQIGE.K            |            | 3 | 3,2444 | 0,128 | -0,405 |
| 13 | P37840 SYUA_HUMAN   | E.GAGS#IAAATGFVKKDQLGKNEE.G      | S87:       | 3 | 3,2425 | 0,26  | -0,564 |
| 13 | Q9H4A3 WNK1_HUMAN   | E.HSSSGAQHASVS#LE.T              | S1677:     | 2 | 3,2416 | 0,393 | -0,33  |
| 13 | Q9UK76 HN1_HUMAN    | R.RNSSEASS#GDFLDLKG.E            | S92:       | 3 | 3,2403 | 0,234 | -0,193 |
| 13 | P78347 GTF2I_HUMAN  | K.INSSPNVNTTASGVED.L             |            | 2 | 3,2397 | 0,372 | -0,152 |
| 13 | O95359 TACC2_HUMAN  | E.SVDPFKTSSKTPS#SPSKSPASFE.I     | S2389:     | 3 | 3,237  | 0,288 | -0,517 |
| 13 | Q9UHI6 DDX20_HUMAN  | E.KATS#PKELGCDRQSE.E             | S532:      | 3 | 3,2318 | 0,237 | -0,205 |
| 13 | Q8N655 CJ012_HUMAN  | E.ITSHEEGGGDVS#PRKEPQEPE.V       | S273:      | 3 | 3,2278 | 0,11  | -0,621 |
| 13 | Q14789 GOGB1_HUMAN  | R.SSSSQTQPLKVQYQR.Q              |            | 3 | 3,2104 | 0,337 | -0,316 |
| 13 | Q09666 AHNK_HUMAN   | K.VKGDLDIAGPNLE.G                |            | 2 | 3,2078 | 0,333 | -0,546 |
| 13 | Q9Y3P9 RBGP1_HUMAN  | K.IVGNNGSEQQLKE.L                |            | 2 | 3,2067 | 0,411 | -0,683 |

|    |                     |                                |              |   |        |       |        |
|----|---------------------|--------------------------------|--------------|---|--------|-------|--------|
| 13 | Q9H3M3 Q9H3M3_HUMAN | E.KATDATTATFFK.M               |              | 2 | 3,2026 | 0,323 | -0,187 |
| 13 | P68104 EF1A1_HUMAN  | R.GNVAGDSKNDPPM*E.A            |              | 2 | 3,2023 | 0,305 | -0,59  |
| 13 | Q8TAQ2 SMRC2_HUMAN  | E.DKNNASHVVYPVPGNLEEEE.W       |              | 3 | 3,1952 | 0,122 | -0,408 |
| 13 | P98164 LRP2_HUMAN   | E.SVAAT#PPPS#PSLPAKPKPPSR.R    | T4612:S4616: | 3 | 3,194  | 0,328 | -0,49  |
| 13 | Q01518 CAP1_HUMAN   | E.M*NDAAM*FYTNR.V              |              | 2 | 3,1923 | 0,331 | -0,447 |
| 13 | P46821 MAP1B_HUMAN  | E.SEKPLTQSGGAPPPPGGK.Q         |              | 2 | 3,1917 | 0,349 | -0,572 |
| 13 | Q14BN4 SLMAP_HUMAN  | E.VM*GNQLQACSK.N               |              | 2 | 3,1846 | 0,342 | -0,487 |
| 13 | Q01082 SPTB2_HUMAN  | K.TALPAQSAATLPARTQETPSAQME.G   |              | 3 | 3,1802 | 0,343 | -0,444 |
| 13 | Q12888 TP53B_HUMAN  | R.GNLLHFPSS#QGEEE.K            | S1068:       | 2 | 3,1743 | 0,354 | -0,451 |
| 13 | P17706 PTN2_HUMAN   | E.LSKEDLS#PAFDHSPNKIM*TE.K     | S298:        | 3 | 3,1742 | 0,207 | 0,078  |
| 13 | P22059 OSBP1_HUMAN  | R.AFRGATVLPANTPGNVGSGK.D       |              | 3 | 3,1735 | 0,156 | -0,573 |
| 13 | O43765 SGTA_HUMAN   | R.SQIRS#RTPS#ASNDDQQE.-        | S301:S305:   | 3 | 3,172  | 0,194 | -0,176 |
| 13 | Q96N67 DOCK7_HUMAN  | R.SAVRPASLNLNR.S               |              | 3 | 3,1706 | 0,178 | 0,07   |
| 13 | P02545 LMNA_HUMAN   | E.GDLIAAQARLKDLE.A             |              | 2 | 3,1686 | 0,387 | -0,403 |
| 13 | P17812 PYRG1_HUMAN  | E.DHPFFVGVQYHPE.F              |              | 2 | 3,1677 | 0,497 | -0,543 |
| 13 | Q9C0C2 TB182_HUMAN  | E.AADSDAHLFQDSTEPR.A           |              | 2 | 3,1667 | 0,371 | -0,347 |
| 13 | Q12888 TP53B_HUMAN  | R.GNLLHFPSS#SQGEEE.K           | S1067:       | 2 | 3,1647 | 0,362 | -0,601 |
| 13 | Q6UB99 ANR11_HUMAN  | E.KKS#PFLSSAE.G                | S610:        | 2 | 3,1625 | 0,22  | -0,624 |
| 13 | P50990 TCPQ_HUMAN   | E.VGDTQVVVFKHE.K               |              | 2 | 3,1623 | 0,266 | 0      |
| 13 | P06748 NPM_HUMAN    | E.DVKLLSISGKR.S                |              | 3 | 3,1538 | 0,21  | 0,451  |
| 13 | P62937 PIIA_HUMAN   | K.KITIADCGQLE.-                |              | 2 | 3,1513 | 0,326 | -0,391 |
| 13 | P05787 K2C8_HUMAN   | E.TRDGKLVSES#S#DVLPK.-         | S477:S478:   | 3 | 3,15   | 0,143 | -0,387 |
| 13 | P02545 LMNA_HUMAN   | R.SGAQASST#PLSPTR.I            | T19:         | 2 | 3,145  | 0,391 | -0,508 |
| 13 | Q5UIP0 RIF1_HUMAN   | E.TKKADVQAPVSPSET#SQANPYSE.G   | T1776:       | 3 | 3,1388 | 0,173 | -0,291 |
| 13 | Q9UBR2 CATZ_HUMAN   | R.VGDYGSLSGRE.K                |              | 2 | 3,1376 | 0,442 | -0,321 |
| 13 | Q9UBU7 DBF4A_HUMAN  | E.KKLLFIS#EPIPHPS#NE.L         | S413:S420:   | 3 | 3,1341 | 0,127 | -0,455 |
| 13 | Q5UIP0 RIF1_HUMAN   | E.HLEKSS#LSNNE.C               | S1149:       | 2 | 3,1335 | 0,283 | -0,638 |
| 13 | Q9Y4X0 AMER1_HUMAN  | K.QKLSS#SPPSGSGGGGASSSSHCSGE.S | S15:         | 3 | 3,1315 | 0,28  | -0,226 |
| 13 | Q96T23 RSF1_HUMAN   | E.IKLSDDFDS#PVKGPLCK.S         | S387:        | 2 | 3,1312 | 0,376 | -0,427 |
| 13 | P40855 PEX19_HUMAN  | R.S#PGDTAKDALFASQE.K           | S54:         | 2 | 3,13   | 0,138 | -0,453 |
| 13 | P08559 ODPA_HUMAN   | R.YHGHSM*S#DPGVSYRT#REE.I      | S295:T303:   | 3 | 3,1287 | 0,158 | -0,401 |
| 13 | P98171 RHG04_HUMAN  | E.LVHRPEPCTS#PE.A              | S842:        | 2 | 3,1201 | 0,268 | -0,569 |
| 13 | Q15149 PLEC1_HUMAN  | E.AQAASGFLLDPVR.N              |              | 2 | 3,1191 | 0,34  | -0,363 |

|    |                     |                              |        |   |        |       |        |
|----|---------------------|------------------------------|--------|---|--------|-------|--------|
| 13 | P46821 MAP1B_HUMAN  | E.KEVPSKEEPS#PVKAE.V         | S614:  | 3 | 3,1143 | 0,194 | -0,211 |
| 13 | P22234 PUR6_HUMAN   | R.VVVLMGSTSDLGHCE.K          |        | 2 | 3,1101 | 0,469 | -0,609 |
| 13 | P28074 PSB5_HUMAN   | R.VSSDNVADLHE.K              |        | 2 | 3,1099 | 0,442 | -0,514 |
| 13 | Q09666 AHNK_HUMAN   | E.LNLKS#PKVKGLDIAGPNLE.G     | S3426: | 3 | 3,1087 | 0,245 | -0,499 |
| 13 | P52272 HNRPM_HUMAN  | K.GCGVVKFES#PEVAE.R          | S701:  | 2 | 3,106  | 0,258 | -0,384 |
| 13 | Q15942 ZYX_HUMAN    | K.FTPVASKFS#PGAPGGSGSQPNQK.L | S281:  | 3 | 3,1055 | 0,226 | -0,315 |
| 13 | Q86TC9 MYPN_HUMAN   | K.TPEPS#SPVKEPPPVLAKPKLD.S   | S643:  | 3 | 3,1028 | 0,151 | -0,397 |
| 13 | P04637 P53_HUMAN    | K.KLM*FKTEGPDS#D.-           | S392:  | 2 | 3,1021 | 0,179 | -0,583 |
| 13 | Q5H9R7 SAPS3_HUMAN  | E.AKCAAPRPPSS#SPEQR.T        | S852:  | 3 | 3,101  | 0,185 | -0,402 |
| 13 | Q02952 AKA12_HUMAN  | E.STAVGQAHSDISKDM*SE.A       |        | 3 | 3,0943 | 0,225 | -0,411 |
| 13 | P62910 RL32_HUMAN   | R.AAQLAIRVTNPNAR.L           |        | 3 | 3,0935 | 0,258 | 0      |
| 13 | Q9BT25 NYS48_HUMAN  | R.SFAQVLELSAEASK.E           |        | 2 | 3,0908 | 0,383 | -0,659 |
| 13 | P02794 FRIH_HUMAN   | E.YLFDKHTLGDS#DNES.-         | S179:  | 2 | 3,0908 | 0,394 | -0,335 |
| 13 | Q5H9R7 SAPS3_HUMAN  | E.AKCAAPRPPS#SSPEQR.T        | S851:  | 3 | 3,0903 | 0,245 | -0,603 |
| 13 | Q00839 HNRPU_HUMAN  | R.AKS#PQPPVEEE.D             | S270:  | 2 | 3,0835 | 0,289 | -0,378 |
| 13 | Q9UHB6 LIMA1_HUMAN  | E.ILERPAQLANAR.E             |        | 2 | 3,0803 | 0,21  | -1,083 |
| 13 | Q13177 PAK2_HUMAN   | E.KERPEIS#PPSDFE.H           | S75:   | 2 | 3,0792 | 0,386 | -0,454 |
| 13 | O15320 CTGE5_HUMAN  | E.KLNRS#NSELE.D              | S137:  | 2 | 3,0752 | 0,154 | 0      |
| 13 | Q9NVM9 CL011_HUMAN  | E.IIKDSPDS#PEPPNKKPLVE.M     | S626:  | 3 | 3,0728 | 0,101 | -0,419 |
| 13 | Q5H9R7 SAPS3_HUMAN  | E.AKCAAPRPPSSS#PEQR.T        | S853:  | 3 | 3,0725 | 0,207 | -0,503 |
| 13 | P31947 1433S_HUMAN  | E.DM*AAFMKGAVEKGEE.L         |        | 3 | 3,0687 | 0,131 | -0,449 |
| 13 | Q02952 AKA12_HUMAN  | E.KEPSKSAESPTS#PVTSE.T       | S286:  | 2 | 3,0685 | 0,364 | -0,729 |
| 13 | Q01082 SPTB2_HUMAN  | K.AKTALPAQSAATLPAR.T         |        | 2 | 3,0685 | 0,429 | -0,701 |
| 13 | Q9COC2 TB182_HUMAN  | R.RGAGAELKDTQSPSTCSE.G       |        | 3 | 3,0657 | 0,353 | -0,579 |
| 13 | Q14676 MDC1_HUMAN   | E.GKAPQAVPLEK.S              |        | 2 | 3,0633 | 0,19  | -0,858 |
| 13 | Q15691 MARE1_HUMAN  | E.TAVAPSLVAPALNKPK.K         |        | 2 | 3,0608 | 0,333 | -0,542 |
| 13 | Q13596 SNX1_HUMAN   | K.ITTSLLPINNGSKE.N           |        | 2 | 3,0531 | 0,447 | -0,574 |
| 13 | P14618 KPYM_HUMAN   | K.KGVNLPGAAVDLPVAVSE.K       |        | 2 | 3,0501 | 0,338 | -0,224 |
| 13 | P13639 EF2_HUMAN    | E.SGEHIIAGAGELHLE.I          |        | 3 | 3,0488 | 0,125 | -0,179 |
| 13 | P37802 TAGL2_HUMAN  | E.GKNVIGLQM*GTNR.G           |        | 2 | 3,0444 | 0,325 | -0,869 |
| 13 | P61247 RS3A_HUMAN   | E.VVNKLIPDSIGKDIE.K          |        | 3 | 3,0421 | 0,258 | -0,223 |
| 13 | Q2NL66 Q2NL66_HUMAN | R.GPS#TPKKPLEQSC.-           | S225:  | 3 | 3,0399 | 0,413 | -0,121 |
| 13 | P50990 TCPQ_HUMAN   | E.VGDTQVVVFKHE.K             |        | 3 | 3,0358 | 0,433 | 0,067  |

|    |                    |                               |            |   |        |       |        |
|----|--------------------|-------------------------------|------------|---|--------|-------|--------|
| 13 | P05787 K2C8_HUMAN  | E.TRDGKLV#ESS#DVLPK.-         | S475:S478: | 2 | 3,0345 | 0,304 | -0,516 |
| 13 | Q9NWW8 CS062_HUMAN | R.TRS#NPEGAEDRAVGAQASVGS.R.S  | S29:       | 3 | 3,0295 | 0,428 | -0,558 |
| 13 | Q5VUA4 ZN318_HUMAN | R.SVRIPS#PNILKTGLTE.N         | S2101:     | 2 | 3,0257 | 0,374 | -0,608 |
| 13 | Q99729 ROAA_HUMAN  | K.DAASVEKVLQDQKE.H            |            | 2 | 3,0219 | 0,32  | -0,682 |
| 13 | Q5VZK9 LR16A_HUMAN | R.RYGVQVM*GSGLLAE.M           |            | 2 | 3,0213 | 0,407 | -0,571 |
| 13 | Q9P2K3 RCOR3_HUMAN | E.THPM*DGND#DYDPKKE.A         | S171:      | 3 | 3,0169 | 0,274 | -0,282 |
| 13 | Q05682 CALD1_HUMAN | E.KQSVDKVT#SPTKV.-            | T788:      | 2 | 3,0132 | 0,156 | -0,652 |
| 13 | P30622 CLIP1_HUMAN | E.ANGLQTPASR.A                |            | 2 | 3,0089 | 0,409 | -0,328 |
| 13 | P55327 TPD52_HUMAN | E.DVKNS#PTFK.S                | S131:      | 2 | 3,0087 | 0,235 | -0,328 |
| 13 | P49736 MCM2_HUMAN  | K.MITSLSKDQQIGE.K             |            | 2 | 3,0068 | 0,321 | -0,505 |
| 13 | Q9UPU5 UBP24_HUMAN | E.SSSQSSKS#PSSLKQHQPSASSILE.S | S391:      | 3 | 3,0019 | 0,158 | -0,263 |
| 13 | P62753 RS6_HUMAN   | R.RLS#S#LRASTSKSE.S           | S235:S236: | 3 | 3,0009 | 0,282 | -0,694 |
| 13 | Q9UQ35 SRRM2_HUMAN | R.VSGRTS#PPLDR.A              | S2398:     | 3 | 2,9974 | 0,189 | -0,265 |
| 13 | Q5VZK9 LR16A_HUMAN | R.YGVQVMGSGLLAE.M             |            | 2 | 2,9938 | 0,339 | -0,461 |
| 13 | Q02040 SF17A_HUMAN | R.VVPEDGS#PEKR.C              | S537:      | 2 | 2,9933 | 0,395 | -0,661 |
| 13 | P05387 RLA2_HUMAN  | K.NIEDVIAQGIGK.L              |            | 2 | 2,9845 | 0,287 | -0,485 |
| 13 | Q14247 SRC8_HUMAN  | R.AKTQTPPVSPAPQPTTEER.L       |            | 3 | 2,9835 | 0,209 | -0,473 |
| 13 | Q7Z417 NUFP2_HUMAN | K.RTS#PQVLGSILK.S             | S572:      | 2 | 2,9753 | 0,184 | -0,531 |
| 13 | P07900 HS90A_HUMAN | E.LISNSSDALDKIRYE.S           |            | 2 | 2,9721 | 0,438 | -0,708 |
| 13 | Q5SW79 CE170_HUMAN | E.S#SKSLVRQGSFTIEKPSNPIE.L    | S829:      | 3 | 2,9683 | 0,22  | -0,212 |
| 13 | Q6NWX9 PR40B_HUMAN | E.LQQAELPNRS#PGFGIKKE.K       | S832:      | 3 | 2,9682 | 0,224 | -0,525 |
| 13 | Q9H0G5 CCD55_HUMAN | R.AKDKFLDQE.R                 |            | 2 | 2,9634 | 0,263 | -0,446 |
| 13 | P07355 ANXA2_HUMAN | E.LASALKSALSGLHE.T            |            | 2 | 2,9633 | 0,339 | -0,349 |
| 13 | Q02040 SF17A_HUMAN | R.CPGGVLSCIPDNNQQPK.G         |            | 2 | 2,9594 | 0,348 | -0,389 |
| 13 | Q99729 ROAA_HUMAN  | K.DAASVEKVLQDQKE.H            |            | 3 | 2,9545 | 0,307 | -0,064 |
| 13 | Q9NTI5 PDS5B_HUMAN | E.TVSNASSSNPSS#PGRIK.G        | S1166:     | 2 | 2,954  | 0,364 | -0,526 |
| 13 | Q9H0E9 BRD8_HUMAN  | R.SGVAEAPVGSKAPS#IDGKEE.L     | S387:      | 3 | 2,9538 | 0,101 | -0,364 |
| 13 | P52756 RBM5_HUMAN  | E.LVRNGDEENPLKR.G             |            | 3 | 2,9493 | 0,247 | 0      |
| 13 | O00522 KRIT1_HUMAN | E.DAYVAVIRPK.N                |            | 2 | 2,9476 | 0,346 | -0,323 |
| 13 | Q92609 TBCD5_HUMAN | E.VGIDPLSSYSNK.S              |            | 2 | 2,945  | 0,336 | -0,477 |
| 13 | Q9H9R9 DBND1_HUMAN | E.RRQPLS#SVSS#LE.V            | S63:S67:   | 2 | 2,942  | 0,374 | -0,402 |
| 13 | Q8NC51 PAIRB_HUMAN | E.LTESPKYIQK.Q                |            | 2 | 2,9417 | 0,163 | -0,404 |
| 13 | P19338 NUCL_HUMAN  | K.GLSEDTTEETLKE.S             |            | 2 | 2,9373 | 0,368 | -0,756 |



|    |                     |                                    |              |   |        |       |        |
|----|---------------------|------------------------------------|--------------|---|--------|-------|--------|
| 13 | Q9Y618 NCOR2_HUMAN  | E.GVEPVS#PVSS#PSLTHDKGLPK.H        | S2057:S2061: | 3 | 2,9365 | 0,203 | 0      |
| 13 | Q59H55 Q59H55_HUMAN | E.NNAAGDSCGPGTLK.M                 |              | 2 | 2,9356 | 0,267 | -0,627 |
| 13 | Q96JM3 ZN828_HUMAN  | R.NVLQFTEEKE.A                     |              | 2 | 2,9339 | 0,278 | -0,197 |
| 13 | Q32MZ4 LRRF1_HUMAN  | K.IDGATQSSPAEPK.S                  |              | 2 | 2,9328 | 0,37  | -0,563 |
| 13 | Q9UHB6 LIMA1_HUMAN  | E.VQQPVHPKPLSPDSR.A                |              | 3 | 2,9268 | 0,223 | -0,326 |
| 13 | Q9COC2 TB182_HUMAN  | K.VSAPGVLTAQDR.V                   |              | 2 | 2,926  | 0,501 | -0,301 |
| 13 | Q86V48 LUZP1_HUMAN  | E.RHTS#TSNIQVGLAE.L                | S820:        | 2 | 2,9204 | 0,387 | -0,46  |
| 13 | Q5JSZ5 K0515_HUMAN  | E.GGGRHIISATSLSTS#PTE.L            | S226:        | 3 | 2,9174 | 0,293 | -0,593 |
| 13 | P63104 1433Z_HUMAN  | K.GIVDQSQQAYQE.A                   |              | 2 | 2,9134 | 0,371 | -0,536 |
| 13 | Q96PZ0 PUS7_HUMAN   | E.DVPRPPDVTSTGKGGK.N               |              | 2 | 2,9131 | 0,249 | -0,53  |
| 13 | Q9HCM4 E41L5_HUMAN  | E.DSLLSHKNANVQDAATNSAVLNE.N        |              | 3 | 2,9113 | 0,175 | -0,531 |
| 13 | O15067 PUR4_HUMAN   | K.FCDNSSAIQGKE.V                   |              | 2 | 2,9111 | 0,332 | 0,09   |
| 13 | P55196 AFAD_HUMAN   | R.RQES#RTQDASGPSELIPASIE.F         | S573:        | 3 | 2,9108 | 0,172 | -0,462 |
| 13 | P60900 PSA6_HUMAN   | E.AEIDAHLVALAERD.-                 |              | 3 | 2,9103 | 0,265 | 0,42   |
| 13 | P08670 VIME_HUMAN   | E.NTLQSFQRQVDNASLARLD.L            |              | 3 | 2,9098 | 0,324 | -0,423 |
| 13 | Q9UPU5 UBP24_HUMAN  | E.NGDRHLQQGSSE#PMM*IGE.L           | S1854:       | 3 | 2,9056 | 0,124 | -1,142 |
| 13 | Q12888 TP53B_HUMAN  | E.GRQDKPMDTS#VLSEE.G               | S395:        | 2 | 2,9043 | 0,225 | -0,689 |
| 13 | Q147X3 MAK3_HUMAN   | R.LLSSSLTADCSLRSPS#GRE.V           | S201:        | 3 | 2,8939 | 0,177 | -0,778 |
| 13 | Q02952 AKA12_HUMAN  | E.GSIDTGITVSR.E                    |              | 2 | 2,8861 | 0,347 | -0,221 |
| 13 | Q8ND56 LS14A_HUMAN  | E.TSNSGTLPQSSAVGSAFTQDTR.S         |              | 3 | 2,8852 | 0,17  | -0,496 |
| 13 | P56182 RRP1_HUMAN   | K.RSEKPPAGSICR.A                   |              | 3 | 2,8813 | 0,285 | 0,067  |
| 13 | A4LAA3 A4LAA3_HUMAN | E.VSRM*SHSSSS#DTDINE.I             | S750:        | 2 | 2,8763 | 0,203 | -0,33  |
| 13 | P06748 NPM_HUMAN    | E.DVKLLSISGKR.S                    |              | 2 | 2,8758 | 0,325 | -0,401 |
| 13 | Q9NQ55 SSF1_HUMAN   | R.VGGS#DEEASGIPSR.T                | S359:        | 2 | 2,8743 | 0,418 | -0,423 |
| 13 | Q09666 AHNK_HUMAN   | K.FKAEAPLPS#PKLE.G                 | S5110:       | 3 | 2,874  | 0,247 | -0,243 |
| 13 | P23229 ITA6_HUMAN   | E.GNQDKFSYLPKQK.G                  |              | 3 | 2,8735 | 0,148 | 0,357  |
| 13 | P05787 K2C8_HUMAN   | R.AFSSRS#YTSGPGRS.I                | S24:         | 2 | 2,8718 | 0,282 | -0,555 |
| 13 | O43765 SGTA_HUMAN   | R.SQIRS#RT#PSASNDDQQE.-            | S301:T303:   | 3 | 2,8648 | 0,15  | -0,528 |
| 13 | Q9H6F5 CCD86_HUMAN  | R.LQQGAGLESPQGPPEGAAS#PQRQQDLHLE.S | S91:         | 3 | 2,8564 | 0,193 | -0,451 |
| 13 | Q8TEX9 IPO4_HUMAN   | E.LCGVLKAVLQR.K                    |              | 2 | 2,8552 | 0,136 | -0,679 |
| 13 | Q14980 NUMA1_HUMAN  | R.TQPDGTSVPGEPASPIS#QR.L           | S1760:       | 2 | 2,8526 | 0,341 | -0,548 |
| 13 | Q9Y6G9 DC1L1_HUMAN  | R.ITRKPVTVS#PT#TPTSPTEGEAS.-       | S510:T512:   | 3 | 2,8519 | 0,132 | -0,454 |
| 13 | O60884 DNJA2_HUMAN  | E.DM*M*HPLKVSLE.D                  |              | 3 | 2,8494 | 0,262 | 0,069  |

|    |                     |                                  |              |   |        |       |        |
|----|---------------------|----------------------------------|--------------|---|--------|-------|--------|
| 13 | Q5TBA9 FRY_HUMAN    | E.SM*DNFNWGV.R                   |              | 2 | 2,8439 | 0,258 | -0,982 |
| 13 | Q9NYV4 CD2L7_HUMAN  | E.SKGS#PVFLPR.K                  | S423:        | 2 | 2,8436 | 0,293 | -0,731 |
| 13 | Q53F19 CQ085_HUMAN  | E.LKM*IST#PS#PKK.S               | T413:S415:   | 2 | 2,8379 | 0,082 | -0,521 |
| 13 | Q9UQ49 NEUR3_HUMAN  | E.ILSHLQGDCTS#PGRNPSQFKS.-       | S417:        | 3 | 2,8377 | 0,25  | -0,58  |
| 13 | Q2NKX8 ERC6L_HUMAN  | E.NS#LCGSAPNSR.A                 | S980:        | 2 | 2,8353 | 0,424 | -0,491 |
| 13 | P18858 DNL1_HUMAN   | K.TSKAETPTESVSEPE.V              |              | 2 | 2,8325 | 0,496 | -0,536 |
| 13 | Q9Y2L9 LRCH1_HUMAN  | E.NS#PAVS#PTTNSTAPFGLKPR.S       | S532:S536:   | 3 | 2,8315 | 0,215 | -0,997 |
| 13 | Q9UPR3 SMG5_HUMAN   | R.SEAPDSLNGPLGPSE.A              |              | 2 | 2,8296 | 0,316 | -0,415 |
| 13 | Q86WB0 NIPA_HUMAN   | R.QLIDEGIAPEEGGVDK.D             |              | 2 | 2,8283 | 0,482 | -0,631 |
| 13 | Q9P0K8 FOXJ2_HUMAN  | E.KLGSASQAGPPGSSR.K              |              | 3 | 2,8213 | 0,149 | -0,261 |
| 13 | P49916 DNL3_HUMAN   | E.KLATKSS#PVKVE.K                | S826:        | 2 | 2,8193 | 0,395 | -0,343 |
| 13 | Q15788 NCOA1_HUMAN  | R.KGS#PCDTLASSTE.K               | S22:         | 2 | 2,819  | 0,362 | -0,766 |
| 13 | Q9UQ35 SRRM2_HUMAN  | R.ARS#RT#PPSAPSQSR.M             | S2407:T2409: | 2 | 2,8188 | 0,288 | -0,515 |
| 13 | Q9Y2L9 LRCH1_HUMAN  | E.DSCHRLS#PVKGE.F                | S370:        | 3 | 2,8162 | 0,164 | -0,25  |
| 13 | Q13459 MYO9B_HUMAN  | K.RRY#SDPPTYCLPPASGQTNG.-        | Y2141:       | 3 | 2,815  | 0,206 | -0,395 |
| 13 | Q96RE7 BTB14_HUMAN  | E.SDSVQCM*PVAK.R                 |              | 2 | 2,814  | 0,431 | -0,197 |
| 13 | Q9UQ35 SRRM2_HUMAN  | E.KSATRPSPS#PERSSTGPEPPAPTLLAE.R | S353:        | 3 | 2,8095 | 0,135 | -0,561 |
| 13 | P23919 KTHY_HUMAN   | E.DAIRTATEKPLGE.L                |              | 3 | 2,8063 | 0,264 | 0      |
| 13 | Q02952 AKA12_HUMAN  | K.SPSS#PVERE.M                   | S1331:       | 2 | 2,8045 | 0,187 | -0,453 |
| 13 | Q9UFC0 LRWD1_HUMAN  | R.TQVQKANS#PEKPPE.A              | S212:        | 2 | 2,8042 | 0,103 | -0,374 |
| 13 | Q16643 DREB_HUMAN   | R.VASASAGSCDVPS#PFNHRPGSHLD.S    | S312:        | 3 | 2,803  | 0,1   | -1,078 |
| 13 | Q6WCQ1 MRIP_HUMAN   | E.GRSKT#FDWAE.F                  | T541:        | 2 | 2,8016 | 0,309 | -0,478 |
| 13 | P13639 EF2_HUMAN    | E.SGEHIIAGAGELHLE.I              |              | 2 | 2,8005 | 0,304 | -0,557 |
| 13 | Q9UQ49 NEUR3_HUMAN  | E.ILSHLQGDCTS#PGRNPSQFK.S        | S417:        | 3 | 2,8    | 0,151 | -0,709 |
| 13 | Q5W0B1 RN219_HUMAN  | K.SSQGSEFLEEPDKLEE.K             |              | 2 | 2,7952 | 0,16  | -0,334 |
| 13 | Q9UHB6 LIMA1_HUMAN  | E.ILERPAQLANAR.E                 |              | 3 | 2,795  | 0,193 | -1,15  |
| 13 | P30260 CDC27_HUMAN  | R.LFTSDSSTTKE.N                  |              | 2 | 2,7934 | 0,344 | -0,602 |
| 13 | P49023 PAXI_HUMAN   | R.ISASSATRE.L                    |              | 2 | 2,7923 | 0,335 | 0      |
| 13 | Q15942 ZYX_HUMAN    | K.FS#PGAPGGSGSQPNQK.L            | S281:        | 2 | 2,783  | 0,334 | -0,535 |
| 13 | Q9HCD6 TANC2_HUMAN  | E.TSVSQLPGRPKS#PLSK.M            | S1579:       | 3 | 2,7813 | 0,177 | -0,415 |
| 13 | Q2NL66 Q2NL66_HUMAN | R.GPST#PKKPLEQSC.-               | T226:        | 2 | 2,779  | 0,373 | -0,809 |
| 13 | P42166 LAP2A_HUMAN  | R.NRPPLPAGTNSK.G                 |              | 2 | 2,7787 | 0,39  | -0,39  |
| 13 | P49736 MCM2_HUMAN   | K.M*ITSLSKDQQIGE.K               |              | 2 | 2,7781 | 0,388 | -0,083 |

|    |                     |                              |              |   |        |       |        |
|----|---------------------|------------------------------|--------------|---|--------|-------|--------|
| 13 | P52272 HNRPM_HUMAN  | K.GCGVVKFESPEVAE.R           |              | 2 | 2,7738 | 0,206 | -0,89  |
| 13 | P09960 LKHA4_HUMAN  | R.SLVLDTKDLTIE.K             |              | 2 | 2,7708 | 0,268 | -0,453 |
| 13 | Q14676 MDC1_HUMAN   | R.SSVKT#PETVVPTAPE.L         | T1321:       | 2 | 2,7679 | 0,33  | -0,451 |
| 13 | Q71RC2 LARP4_HUMAN  | R.AST#ASPCNNNINAATAVALQEPR.K | T595:        | 3 | 2,7635 | 0,186 | 0      |
| 13 | Q96B23 CR025_HUMAN  | E.LRRDS#SESQLASTE.S          | S66:         | 2 | 2,7607 | 0,483 | -0,515 |
| 13 | Q9H6F5 CCD86_HUMAN  | R.AGLGSPERPPKTS#PGSPR.L      | S66:         | 3 | 2,7603 | 0,195 | -0,489 |
| 13 | Q9H078 CLPB_HUMAN   | E.DSDKQLLKSPQLPSPQAE.K       |              | 3 | 2,7578 | 0,222 | -0,461 |
| 13 | Q9UQ35 SRRM2_HUMAN  | K.DKFSFPVQDRPE.S             |              | 3 | 2,7479 | 0,24  | -0,117 |
| 13 | Q9COH5 K1688_HUMAN  | R.SRRPSGS#QHS#PSLQTFAPE.A    | S248:S251:   | 3 | 2,744  | 0,196 | -0,164 |
| 13 | Q16555 DPYL2_HUMAN  | K.TVT#PASSAKTS#PAKQQAPPVR.N  | T514:S522:   | 3 | 2,7432 | 0,231 | -0,481 |
| 13 | Q8WWM7 ATX2L_HUMAN  | R.GQSTGKGPQS#PVFE.G          | S111:        | 2 | 2,742  | 0,089 | -0,535 |
| 13 | Q9UIF9 BAZ2A_HUMAN  | E.M*EGPEECLGR.R              |              | 2 | 2,7417 | 0,282 | -0,613 |
| 13 | P56537 IF6_HUMAN    | D.YVALVHPDLDRPE.T            |              | 2 | 2,7407 | 0,301 | -0,598 |
| 13 | P00519 ABL1_HUMAN   | E.SDPLDHEPAVS#PLLPRKE.R      | S569:        | 3 | 2,7405 | 0,141 | -0,44  |
| 13 | O60869 EDF1_HUMAN   | K.INEKPVVIADYE.S             |              | 2 | 2,7366 | 0,245 | -0,774 |
| 13 | Q9UKV3 ACINU_HUMAN  | E.VATPPVQLQVCEPK.E           |              | 3 | 2,7342 | 0,15  | -0,33  |
| 13 | Q9UHI6 DDX20_HUMAN  | K.AT#SPKELGCDRQSEE.Q         | T531:        | 3 | 2,732  | 0,278 | -0,512 |
| 13 | Q5VY92 Q5VY92_HUMAN | E.GSSRLS#PPHS#PRDFTR.M       | S956:S960:   | 3 | 2,7299 | 0,085 | -0,28  |
| 13 | P52907 CAZA1_HUMAN  | E.DGNVQLVSHKDVQD.S           |              | 2 | 2,7278 | 0,29  | -1,021 |
| 13 | P13861 KAP2_HUMAN   | E.DLEVVPVSRFNRRVS#VCAE.T     | S99:         | 3 | 2,7262 | 0,175 | -0,554 |
| 13 | Q8TEW8 PAR3L_HUMAN  | K.KSSS#LES#LQTAVAE.V         | S746:S749:   | 2 | 2,7217 | 0,304 | -0,531 |
| 13 | Q9UNF0 PACN2_HUMAN  | R.ALYDYEGQEHDE.L             |              | 2 | 2,7181 | 0,358 | -0,498 |
| 13 | Q14697 GANAB_HUMAN  | R.LSVSGRDENSVE.L             |              | 2 | 2,7121 | 0,259 | -0,661 |
| 13 | Q00613 HSF1_HUMAN   | R.VKEEPPS#PPQSPRVEE.A        | S303:        | 3 | 2,7087 | 0,298 | -0,194 |
| 13 | Q13263 TIF1B_HUMAN  | D.GADSTGVVAKLS#PANQR.K       | S697:        | 3 | 2,7067 | 0,22  | -0,313 |
| 13 | Q66K64 DCA15_HUMAN  | R.SS#GSPEPSPAIAK.A           | S308:        | 2 | 2,7041 | 0,13  | -0,84  |
| 13 | Q12873 CHD3_HUMAN   | E.TEADAPS#PAPS#LGERLEPR.K    | S1601:S1605: | 3 | 2,7029 | 0,148 | 0,34   |
| 13 | Q8NHH9 ATLA2_HUMAN  | E.ANNLAAVAGAR.D              |              | 2 | 2,7007 | 0,287 | -0,356 |
| 13 | Q9H078 CLPB_HUMAN   | E.DSDKQLLKSPQLPSPQAE.K       |              | 2 | 2,7001 | 0,207 | -0,431 |
| 13 | P46821 MAP1B_HUMAN  | E.SEKPLTQSGGAPPPPGGK.Q       |              | 3 | 2,695  | 0,277 | -0,644 |
| 13 | P37802 TAGL2_HUMAN  | E.GKNVIGLQMGTR.G             |              | 2 | 2,6936 | 0,166 | -0,439 |
| 13 | P02545 LMNA_HUMAN   | R.SGAQASST#PLS#PTRITR.L      | T19:S22:     | 2 | 2,6913 | 0,125 | -0,452 |
| 13 | Q5H9R7 SAPS3_HUMAN  | R.TGQPSAPGDTSVNGPV.-         |              | 2 | 2,6901 | 0,407 | -0,411 |

|    |                    |                                  |            |   |        |       |        |
|----|--------------------|----------------------------------|------------|---|--------|-------|--------|
| 13 | Q8IXM2 CQ049_HUMAN | E.DSGIPLPAES#PKKGP.K             | S96:       | 2 | 2,6857 | 0,201 | -0,646 |
| 13 | P48960 CD97_HUMAN  | R.CNPGFSSFSE.I                   |            | 2 | 2,6853 | 0,263 | -0,323 |
| 13 | Q02952 AKA12_HUMAN | E.DDGHALLAERIE.K                 |            | 2 | 2,6819 | 0,284 | -0,547 |
| 13 | P22626 ROA2_HUMAN  | R.GGGGNFGPGPSNFR.G               |            | 2 | 2,6795 | 0,358 | -0,531 |
| 13 | P06748 NPM_HUMAN   | E.KT#PKT#PKGSSVE.D               | T234:T237: | 2 | 2,6784 | 0,238 | -0,644 |
| 13 | O95429 BAG4_HUMAN  | R.HNFPCSVHQYE.S                  |            | 2 | 2,6776 | 0,318 | -0,344 |
| 13 | P30279 CCND2_HUMAN | E.AVLLNSLQQYRQDQR.D              |            | 3 | 2,6736 | 0,18  | -0,2   |
| 13 | P25786 PSA1_HUMAN  | K.NVSIGIVGKDL.F                  |            | 2 | 2,6673 | 0,318 | 0,392  |
| 13 | Q99613 EIF3C_HUMAN | E.SHITSYKQNPEQS#ADE.D            | S166:      | 3 | 2,6662 | 0,238 | -0,478 |
| 13 | Q9BSJ8 ESYT1_HUMAN | E.TDLSQGVAR.W                    |            | 2 | 2,6643 | 0,083 | -0,387 |
| 13 | Q12774 ARHG5_HUMAN | E.SLSETPGPSS#PRQPR.K             | S48:       | 2 | 2,6633 | 0,269 | -0,582 |
| 13 | Q96BK5 PINX1_HUMAN | E.KKS#FSLEE.K                    | S110:      | 2 | 2,6632 | 0,088 | -0,931 |
| 13 | Q12996 CSTF3_HUMAN | E.GNGPVESNAVLTK.A                |            | 2 | 2,6618 | 0,387 | -0,664 |
| 13 | Q99536 VAT1_HUMAN  | E.NGVTHPIDYHTTDYVDE.I            |            | 2 | 2,6592 | 0,349 | -0,247 |
| 13 | Q14195 DPYL3_HUMAN | R.NLHQSGFSLSGTQVDE.G             |            | 2 | 2,6545 | 0,267 | -0,355 |
| 13 | Q96PU5 NED4L_HUMAN | R.LRS#CSVTDVAE.Q                 | S340:      | 2 | 2,6529 | 0,263 | -0,088 |
| 13 | P07814 SYEP_HUMAN  | E.TSAPFKERPTPSLNNNCTTSE.D        |            | 3 | 2,6505 | 0,267 | 0,233  |
| 13 | P25398 RS12_HUMAN  | E.HQINLIKVDD.N                   |            | 2 | 2,6504 | 0,193 | -0,613 |
| 13 | O75427 LRCH4_HUMAN | E.AAATTSVPGS#PGLPGRR.S           | S25:       | 3 | 2,6501 | 0,111 | -0,328 |
| 13 | Q9UKV3 ACINU_HUMAN | R.RLS#QPESAE.K                   | S710:      | 2 | 2,6479 | 0,291 | -0,334 |
| 13 | Q12888 TP53B_HUMAN | E.ARSEDPPTT#PIRGNLLHFPSSQGE.EE.K | T1056:     | 3 | 2,6455 | 0,21  | -0,062 |
| 13 | P19338 NUCL_HUMAN  | K.GLSEDTTEE.T                    |            | 2 | 2,6436 | 0,263 | -0,249 |
| 13 | P49023 PAXI_HUMAN  | R.ISASS#ATRE.L                   | S261:      | 2 | 2,6427 | 0,153 | -0,122 |
| 13 | P68104 EF1A1_HUMAN | E.SFSDYPPLGR.F                   |            | 2 | 2,6409 | 0,324 | -0,536 |
| 13 | O00571 DDX3X_HUMAN | E.KYDDIPVEATGNCCPPHIE.S          |            | 3 | 2,6386 | 0,3   | -0,675 |
| 13 | P52907 CAZA1_HUMAN | E.DGNVQLVSHKDVQD.S               |            | 3 | 2,6368 | 0,246 | -0,235 |
| 13 | Q9Y6G9 DC1L1_HUMAN | R.KPVTVSPT#TPTSPT#EGEAS.-        | T512:T518: | 3 | 2,6347 | 0,118 | -0,358 |
| 13 | P49736 MCM2_HUMAN  | E.SFTM*AS#SPAQR.R                | S12:       | 2 | 2,6321 | 0,209 | -0,286 |
| 13 | Q9NWH9 SLTM_HUMAN  | E.ASKPKDGQDAIAQS#PEKE.S          | S289:      | 2 | 2,6319 | 0,322 | -0,308 |
| 13 | P14373 TRI27_HUMAN | E.DQM*PICVCDR.S                  |            | 2 | 2,6238 | 0,299 | -0,433 |
| 13 | P31947 1433S_HUMAN | E.DM*AAFMM*KGAVEKGEE.L           |            | 3 | 2,6228 | 0,195 | -0,111 |
| 13 | Q5VUA4 ZN318_HUMAN | R.SVRIPS#PNILK.T                 | S2101:     | 2 | 2,6192 | 0,082 | -0,468 |
| 13 | Q8N9B5 JMY_HUMAN   | E.ATASATLVR#PGPRR.S              | S101:      | 3 | 2,6179 | 0,161 | -0,339 |

|    |                     |                              |              |   |        |       |        |
|----|---------------------|------------------------------|--------------|---|--------|-------|--------|
| 13 | P78559 MAP1A_HUMAN  | R.FHTSTYDLPGPE.G             |              | 2 | 2,6114 | 0,308 | -0,537 |
| 13 | P05787 K2C8_HUMAN   | K.SYKVSTSGPR.A               |              | 2 | 2,6082 | 0,314 | -0,451 |
| 13 | P49023 PAXI_HUMAN   | K.TGSSS#PPGGPPKPGSQLD.S      | S322:        | 2 | 2,6082 | 0,165 | -0,559 |
| 13 | Q96T23 RSF1_HUMAN   | K.LSDDFDS#PVKGPLCK.S         | S387:        | 2 | 2,6075 | 0,206 | 0,069  |
| 13 | Q14203 DCTN1_HUMAN  | E.DGADTTS#PETPDSSASK.V       | S105:        | 2 | 2,6074 | 0,418 | -0,28  |
| 13 | Q9UQ35 SRRM2_HUMAN  | E.SYFGVSSLQLK.G              |              | 2 | 2,6074 | 0,282 | -0,596 |
| 13 | O14974 MYPT1_HUMAN  | R.LSSSLDNKE.K                |              | 2 | 2,6056 | 0,104 | -0,307 |
| 13 | P31947 1433S_HUMAN  | E.DM*AAFMKGAVEKGEE.L         |              | 2 | 2,605  | 0,303 | -0,3   |
| 13 | Q8NI27 THOC2_HUMAN  | E.NVKGGKEKT#PVSGSLKS#PVPR.S  | T1270:S1278: | 3 | 2,6048 | 0,123 | -0,333 |
| 13 | P52907 CAZA1_HUMAN  | E.ASDPQPEEADGGLK.S           |              | 2 | 2,5989 | 0,158 | -0,345 |
| 13 | Q9NVP1 DDX18_HUMAN  | E.AVGNIKVTKS#PQK.S           | S86:         | 3 | 2,5885 | 0,353 | -1,324 |
| 13 | P62753 RS6_HUMAN    | R.RLS#S#LRASTKSE.S           | S235:S236:   | 2 | 2,5815 | 0,231 | -0,617 |
| 13 | Q9COC2 TB182_HUMAN  | R.SYQFGIIGNDR.V              |              | 2 | 2,5785 | 0,446 | 0,096  |
| 13 | Q96JM3 ZN828_HUMAN  | E.LRKPGPPLS#PE.I             | S427:        | 2 | 2,5783 | 0,206 | -0,864 |
| 13 | ##O60284 ST18_HUMAN | E.KTPT#MKVGGKRARPCGSLSR.H    | T245:        | 3 | 2,5745 | 0,234 | 0,403  |
| 13 | Q14671 PUM1_HUMAN   | E.YVLSSS#PGDSCLR.K           | S229:        | 2 | 2,5713 | 0,209 | -0,241 |
| 13 | O95359 TACC2_HUMAN  | K.TPSS#PSKSPASFE.I           | S2390:       | 2 | 2,5705 | 0,206 | -0,261 |
| 13 | Q9UPS6 SET1B_HUMAN  | E.S#SPAGPEKPHDSLDSRIE.M      | S487:        | 2 | 2,5701 | 0,245 | -0,488 |
| 13 | Q9Y608 LRRF2_HUMAN  | E.NYTRPSSRNS#ASATTPLSGNSSR.R | S312:        | 3 | 2,5674 | 0,192 | -0,441 |
| 13 | Q00613 HSF1_HUMAN   | E.SEPAPASVTALTDAR.G          |              | 2 | 2,5663 | 0,381 | -0,657 |
| 13 | Q09666 AHNK_HUMAN   | K.GDLDIAGPNLE.G              |              | 2 | 2,5603 | 0,202 | -0,329 |
| 13 | Q9UNE7 STUB1_HUMAN  | R.LGAGGGGS#PEKSPSAQE.L       | S19:         | 2 | 2,5569 | 0,316 | -0,079 |
| 13 | P49023 PAXI_HUMAN   | E.HVYSFPNK.Q                 |              | 2 | 2,5534 | 0,345 | -0,799 |
| 13 | P14618 KPYM_HUMAN   | K.GVNLPGAAVDLPVSE.K          |              | 2 | 2,5532 | 0,397 | -0,243 |
| 13 | Q5VZL5 ZMYM4_HUMAN  | K.AKSESDVELS#D.-             | S1547:       | 2 | 2,5471 | 0,287 | -0,444 |
| 13 | P37802 TAGL2_HUMAN  | E.GKNVIGLQMGTR.G             |              | 3 | 2,5471 | 0,18  | 0,066  |
| 13 | Q8NI27 THOC2_HUMAN  | K.RVPSIDVLCNE.F              |              | 2 | 2,5458 | 0,306 | -0,843 |
| 13 | O00401 WASL_HUMAN   | E.TSKVIY#DFIEK.T             | Y256:        | 2 | 2,5444 | 0,202 | -0,343 |
| 13 | P35658 NU214_HUMAN  | R.ITPPAAKPGS#PQAK.S          | S678:        | 2 | 2,5394 | 0,279 | -0,846 |
| 13 | Q13416 ORC2_HUMAN   | K.SVSFSLKNDPE.I              |              | 2 | 2,5375 | 0,337 | -0,399 |
| 13 | Q9UPN9 TRI33_HUMAN  | E.DAGSSSLDNLLSR.Y            |              | 2 | 2,5281 | 0,263 | -0,823 |
| 13 | Q15311 RBP1_HUMAN   | E.HGSGLTRTPS#SEE.I           | S29:         | 2 | 2,5253 | 0,319 | -0,679 |
| 13 | P42684 ABL2_HUMAN   | R.AGKPTASDDTSKPFPR.S         |              | 3 | 2,524  | 0,147 | -0,546 |

|    |                     |                            |                    |   |        |       |        |
|----|---------------------|----------------------------|--------------------|---|--------|-------|--------|
| 13 | A5A3E0 A26CB_HUMAN  | E.LRVAPEEHPVLLTE.A         |                    | 2 | 2,523  | 0,272 | -0,913 |
| 13 | Q8WUA2 PPIL4_HUMAN  | E.DYM*PIKNTNQDIYRE.M       |                    | 3 | 2,5222 | 0,151 | -0,095 |
| 13 | P62256 UBE2H_HUMAN  | R.M*DTDVVKLIE.S            |                    | 2 | 2,5221 | 0,265 | -0,621 |
| 13 | Q01082 SPTB2_HUMAN  | R.TSS#KES#SPIPSPTS#DRKAK.T | S2161:S2164:S2172: | 3 | 2,5193 | 1     | -0,653 |
| 13 | P34931 HS71L_HUMAN  | E.GIDFYTSITR.A             |                    | 2 | 2,5164 | 0,278 | -0,416 |
| 13 | P22314 UBA1_HUMAN   | R.YDGQVAVFGSDLQE.K         |                    | 2 | 2,5148 | 0,274 | -0,639 |
| 13 | P07355 ANXA2_HUMAN  | E.GDHSTPPSAYGSVK.A         |                    | 2 | 2,5138 | 0,339 | -0,783 |
| 13 | P18858 DNL1_HUMAN   | E.QATTSQAQVACLXR.K         |                    | 2 | 2,5088 | 0,372 | -0,249 |
| 13 | Q14978 NOLC1_HUMAN  | R.VADNS#FDAKR.G            | S643:              | 3 | 2,5087 | 0,221 | 0,304  |
| 13 | P25705 ATPA_HUMAN   | K.RTGAIVDVPVGEE.L          |                    | 2 | 2,4962 | 0,242 | -0,455 |
| 13 | P49736 MCM2_HUMAN   | R.GNDPLTSS#PGR.S           | S27:               | 2 | 2,4961 | 0,285 | -0,62  |
| 13 | P07355 ANXA2_HUMAN  | E.VTIVNILTNR.S             |                    | 2 | 2,4922 | 0,38  | -0,427 |
| 13 | P30279 CCND2_HUMAN  | E.AVLLNSLQQYR.Q            |                    | 2 | 2,4909 | 0,325 | -0,467 |
| 13 | Q9NQG5 CT077_HUMAN  | R.QKIASLPQEVQD.V           |                    | 2 | 2,4908 | 0,223 | -0,45  |
| 13 | Q07955 SFRS1_HUMAN  | R.VKVDGPRS#PS#YGR.S        | S199:S201:         | 3 | 2,4879 | 0,163 | -0,232 |
| 13 | P55072 TERA_HUMAN   | K.LAIRES#IESE.I            | S702:              | 2 | 2,4873 | 0,144 | -0,497 |
| 13 | Q86V48 LUZP1_HUMAN  | E.RHT#STSNIQVGLAE.L        | T819:              | 3 | 2,4859 | 0,133 | 0,115  |
| 13 | O15381 NVL_HUMAN    | K.TGSIPLKT#PAKDSE.G        | T164:              | 2 | 2,485  | 0,232 | -0,801 |
| 13 | A9CQZ4 A9CQZ4_HUMAN | R.QKFCGM*FCPVEGSSE.N       |                    | 2 | 2,4843 | 0,134 | -0,549 |
| 13 | Q01082 SPTB2_HUMAN  | R.TQETPSAQME.G             |                    | 2 | 2,4819 | 0,385 | -0,652 |
| 13 | Q9P246 STIM2_HUMAN  | E.IYQTLSPR.K               |                    | 2 | 2,4817 | 0,224 | -0,062 |
| 13 | P28074 PSB5_HUMAN   | R.VSSDNVADLHEKYSGST#P.-    | T262:              | 3 | 2,4809 | 0,132 | -0,276 |
| 13 | Q05655 KPCD_HUMAN   | E.ALNQVTQR.A               |                    | 2 | 2,4775 | 0,261 | -0,066 |
| 13 | O75531 BAF_HUMAN    | R.DFVAEPM*GEKPVGSLAGIGE.V  |                    | 2 | 2,4754 | 0,361 | -0,242 |
| 13 | P13693 TCTP_HUMAN   | -.M*IIYRDLISHDE.M          |                    | 3 | 2,4751 | 0,191 | -0,361 |
| 13 | Q14151 SAFB2_HUMAN  | R.CYGFVTM*STSDE.A          |                    | 2 | 2,4737 | 0,318 | -0,345 |
| 13 | P46821 MAP1B_HUMAN  | K.SDISPLTPR.E              |                    | 2 | 2,4734 | 0,246 | 0      |
| 13 | Q2NKX8 ERC6L_HUMAN  | E.AEALS#PEQAAHYLR.Y        | S14:               | 2 | 2,4632 | 0,35  | -0,298 |
| 13 | Q96SB4 SRPK1_HUMAN  | E.SES#PVERPLKENPPNKM*TQE.K | S482:              | 3 | 2,4592 | 0,095 | -0,76  |
| 13 | P62736 ACTA_HUMAN   | R.GILTLYPIE.H              |                    | 2 | 2,4589 | 0,333 | -0,532 |
| 13 | Q9P2E9 RRBP1_HUMAN  | K.KADS#VANQGTVKE.G         | S552:              | 2 | 2,4549 | 0,123 | -0,171 |
| 13 | O60506 HNRPQ_HUMAN  | R.TGYTLDVTTGQR.K           |                    | 2 | 2,4548 | 0,379 | -0,651 |
| 13 | Q15424 SAFB1_HUMAN  | R.CYGFVTM*STAE.E.A         |                    | 2 | 2,4529 | 0,389 | -0,692 |

|    |                     |                            |            |   |        |       |        |
|----|---------------------|----------------------------|------------|---|--------|-------|--------|
| 13 | Q9Y4H2 IRS2_HUMAN   | E.TFSSTTTVTPVS#PSFAHNP.K.R | S1162:     | 3 | 2,4525 | 0,148 | -0,335 |
| 13 | A1L4Q4 A1L4Q4_HUMAN | R.SALKLLTSVE.V             |            | 2 | 2,4509 | 0,238 | -0,115 |
| 13 | Q2NKX8 ERC6L_HUMAN  | E.ALS#PEQAAHYLR.Y          | S14:       | 2 | 2,4476 | 0,132 | -0,51  |
| 13 | Q96TA1 NIBL1_HUMAN  | E.DQYGVALFNSM*RHE.I        |            | 2 | 2,4463 | 0,113 | -0,652 |
| 13 | P49757 NUMB_HUMAN   | E.WGQSSGAAS#PGLFQAGHR.R    | S425:      | 3 | 2,4419 | 0,106 | -0,483 |
| 13 | Q86YS7 K0528_HUMAN  | E.IIGS#PIPEPR.Q            | S643:      | 2 | 2,4337 | 0,286 | -0,316 |
| 13 | P29692 EF1D_HUMAN   | R.ATAPQTQHVSPM*R.Q         |            | 2 | 2,4326 | 0,357 | -0,424 |
| 13 | O94804 STK10_HUMAN  | K.ASQSRPNSSALE.T           |            | 2 | 2,4323 | 0,277 | -0,391 |
| 13 | Q09666 AHNK_HUMAN   | K.AEAPLPS#PKLE.G           | S5110:     | 2 | 2,427  | 0,281 | -0,198 |
| 13 | P02545 LMNA_HUMAN   | R.SGAQASST#PLS#PTRITR.L    | T19:S22:   | 3 | 2,4264 | 0,145 | -0,387 |
| 13 | Q13435 SF3B2_HUMAN  | R.SRGSDS#PAADVE.I          | S339:      | 2 | 2,4224 | 0,272 | -0,48  |
| 13 | Q96MU7 YTDC1_HUMAN  | R.RAKS#PT#PDGSEIRIGLE.V    | S146:T148: | 2 | 2,4145 | 0,292 | -0,391 |
| 13 | Q08J23 NSUN2_HUMAN  | E.GKPTDPSKLESPFTGTGDTE.I   |            | 3 | 2,4142 | 0,143 | -0,34  |
| 13 | Q9UPU5 UBP24_HUMAN  | K.QQHQPSSASSILE.S          |            | 2 | 2,4138 | 0,15  | -0,276 |
| 13 | Q9UHI6 DDX20_HUMAN  | K.ATS#PKELGCDRQSE.E        | S532:      | 2 | 2,4106 | 0,458 | -0,368 |
| 13 | O75427 LRCH4_HUMAN  | E.AAATTSVPGS#PGLPGRR.S     | S25:       | 2 | 2,4084 | 0,314 | -0,437 |
| 13 | P07355 ANXA2_HUMAN  | E.GDHSTPPSAYGSVK.A         |            | 3 | 2,4036 | 0,124 | -0,065 |
| 13 | Q5H9R7 SAPS3_HUMAN  | E.AKCAAPRPPS#SSPEQR.T      | S851:      | 2 | 2,4012 | 0,147 | -0,537 |
| 13 | P60709 ACTB_HUMAN   | E.GYALPHAILRLD.L           |            | 2 | 2,4005 | 0,247 | -0,547 |
| 13 | Q02952 AKA12_HUMAN  | R.GDTVVS#EAELTPE.A         | S967:      | 2 | 2,3975 | 0,159 | -0,513 |
| 13 | P51858 HDGF_HUMAN   | E.VERPLPMEVEK.N            |            | 3 | 2,3948 | 0,2   | 0,138  |
| 13 | P55196 AFAD_HUMAN   | E.TTFDLGGDIHSGTALPTSK.S    |            | 3 | 2,3885 | 0,279 | -0,381 |
| 13 | Q86VW2 GEFT_HUMAN   | R.LAKLDEDEL.-              |            | 2 | 2,3852 | 0,124 | -0,233 |
| 13 | P23588 IF4B_HUMAN   | K.VAPAQPSEEGPGRKDE.N       |            | 2 | 2,3795 | 0,316 | -0,586 |
| 13 | P35221 CTNA1_HUMAN  | E.DDQLIAGQSAR.A            |            | 2 | 2,3794 | 0,227 | -0,831 |
| 13 | P08670 VIME_HUMAN   | R.DNLAEDIM*R.L             |            | 2 | 2,3741 | 0,157 | -0,112 |
| 13 | Q9H4A3 WNK1_HUMAN   | R.DVDDGSGSPHSPHQLSSK.S     |            | 3 | 2,374  | 0,138 | -0,297 |
| 13 | Q9H6F5 CCD86_HUMAN  | R.AGLGS#PERPPKTS#PGSPR.L   | S58:S66:   | 3 | 2,3739 | 0,245 | -0,656 |
| 13 | P25788 PSA3_HUMAN   | E.NSSTAIGIR.C              |            | 2 | 2,3717 | 0,243 | -0,133 |
| 13 | Q9H6Z4 RANB3_HUMAN  | R.ERTS#SLTQFPSPQSEE.R      | S125:      | 2 | 2,3712 | 0,257 | -0,449 |
| 13 | O15231 ZN185_HUMAN  | R.RES#CGSSVLTDFE.G         | S233:      | 2 | 2,3708 | 0,24  | -0,311 |
| 13 | B2RAI3 B2RAI3_HUMAN | D.FKFMAQGK.T               |            | 2 | 2,3707 | 0,172 | -0,255 |
| 13 | Q9UQ35 SRRM2_HUMAN  | R.SSTGPEPPAPTPLLA.E.R      |            | 2 | 2,3698 | 0,221 | -0,078 |

|    |                     |                           |              |   |        |       |        |
|----|---------------------|---------------------------|--------------|---|--------|-------|--------|
| 13 | O60784 TOM1_HUMAN   | E.FDM*FALTR.G             |              | 2 | 2,3679 | 0,221 | -0,54  |
| 13 | Q13416 ORC2_HUMAN   | E.LAKT#PQKSVSFLK.N        | T116:        | 3 | 2,3627 | 0,086 | -0,68  |
| 13 | P06748 NPM_HUMAN    | R.TVSLGAGAKDE.L           |              | 2 | 2,3622 | 0,183 | -0,233 |
| 13 | Q8TEX9 IPO4_HUMAN   | E.LCGVLKAVLQR.K           |              | 3 | 2,3619 | 0,124 | 0,145  |
| 13 | Q9UPN4 AZI1_HUMAN   | E.ATGPGGSQAINNLR.R        |              | 2 | 2,3615 | 0,341 | 0,09   |
| 13 | Q8WWY3 PRP31_HUMAN  | E.DLGFSLGHLGK.S           |              | 2 | 2,354  | 0,263 | 0,213  |
| 13 | Q9H3C7 GGNB2_HUMAN  | E.NTSCTCPSSGNLLGS#PK.I    | S450:        | 2 | 2,3529 | 0,328 | 0      |
| 13 | P05783 K1C18_HUMAN  | R.IVDGKVVSE.T             |              | 2 | 2,3369 | 0,221 | -0,129 |
| 13 | Q7Z417 NUFP2_HUMAN  | R.T#SPQVLGSILKSGTTSE.S    | T571:        | 2 | 2,3367 | 0,173 | -0,205 |
| 13 | Q96RL1 UIMC1_HUMAN  | R.DLNES#PVKSFVISE.A       | S677:        | 2 | 2,3352 | 0,212 | -0,282 |
| 13 | P62256 UBE2H_HUMAN  | R.RM*DTDVVKLIE.S          |              | 3 | 2,3335 | 0,125 | -0,616 |
| 13 | Q02952 AKA12_HUMAN  | E.KEPSKSAESPTS#PVTSE.T    | S286:        | 3 | 2,331  | 0,223 | -0,298 |
| 13 | Q8WUB8 PHF10_HUMAN  | E.YYKRY#PDE.L             | S182:        | 2 | 2,3301 | 0,204 | -0,563 |
| 13 | P62256 UBE2H_HUMAN  | R.MDTDVVKLIE.S            |              | 2 | 2,3144 | 0,291 | -0,525 |
| 13 | Q9NY27 PP4R2_HUMAN  | E.VSSVS#PLK.N             | S226:        | 2 | 2,3103 | 0,146 | 0,068  |
| 13 | P68104 EF1A1_HUMAN  | K.IGGIGTVPVGR.V           |              | 2 | 2,303  | 0,376 | -0,119 |
| 13 | Q7L014 DDX46_HUMAN  | R.YAGDIKALE.L             |              | 2 | 2,3026 | 0,203 | -0,446 |
| 13 | P34932 HSP74_HUMAN  | E.DQPKQVYVDKLA.E.L        |              | 2 | 2,2982 | 0,185 | -0,318 |
| 13 | Q9UKY7 CDV3_HUMAN   | K.TAPVQAPPVIVTE.T         |              | 2 | 2,2946 | 0,326 | -0,328 |
| 13 | Q9UQ35 SRRM2_HUMAN  | R.SRT#PPSAPSQSR.M         | T2409:       | 3 | 2,2895 | 0,201 | 0      |
| 13 | P52594 NUPL_HUMAN   | D.SAPTLHLNK.G             |              | 2 | 2,2893 | 0,149 | -0,373 |
| 13 | Q13112 CAF1B_HUMAN  | E.IQSET#PGDAQGSPPELKRPR.L | T531:        | 3 | 2,2892 | 0,179 | -0,326 |
| 13 | P13861 KAP2_HUMAN   | R.RVS#VCAE.T              | S99:         | 2 | 2,2884 | 0,275 | -0,068 |
| 13 | Q13112 CAF1B_HUMAN  | E.IQSETPGDAQGS#PPELKRPR.L | S538:        | 3 | 2,2861 | 0,321 | -0,245 |
| 13 | A9CQZ4 A9CQZ4_HUMAN | R.QKFCGMFCPVEGSSE.N       |              | 2 | 2,2842 | 0,204 | -0,554 |
| 13 | Q6DN90 IQEC1_HUMAN  | R.SALS#SSLRDLSE.A         | S923:        | 2 | 2,2601 | 0,105 | -0,726 |
| 13 | P46821 MAP1B_HUMAN  | E.RKLGDV#PTQID.V          | S1501:       | 2 | 2,2595 | 0,278 | -0,26  |
| 13 | Q9H6F5 CCD86_HUMAN  | E.SNPEETREPGS#PPSVQR.A    | S47:         | 3 | 2,2579 | 0,236 | -0,564 |
| 13 | P46100 ATRX_HUMAN   | K.SCGLNPKLE.K             |              | 2 | 2,2572 | 0,193 | -0,18  |
| 13 | Q86V48 LUZP1_HUMAN  | K.AIGALASSR.R             |              | 2 | 2,2498 | 0,242 | 0,072  |
| 13 | Q14160 LAP4_HUMAN   | R.VQS#PEPPAPERALS#PAE.L   | S1475:S1486: | 2 | 2,2493 | 0,303 | -0,315 |
| 13 | P04183 KITH_HUMAN   | K.LFAPQQILQCS#PAN.-       | S231:        | 2 | 2,2454 | 0,283 | -0,586 |
| 13 | Q96QZ7 MAGI1_HUMAN  | E.GTRS#ADNT#LERRE.K       | S1361:T1365: | 3 | 2,2411 | 0,21  | -0,33  |



|    |                     |                                     |                 |   |        |       |        |
|----|---------------------|-------------------------------------|-----------------|---|--------|-------|--------|
| 13 | Q6QNY0 BL1S3_HUMAN  | E.LYLGPSGPTR.G                      |                 | 2 | 2,2379 | 0,245 | -0,345 |
| 13 | Q9UQ35 SRRM2_HUMAN  | R.GEFSAS#PMLK.S                     | S1124:          | 2 | 2,232  | 0,123 | -0,957 |
| 13 | Q7Z3B4 NUP54_HUMAN  | E.TIHIRGGVFS#.-                     | S507:           | 2 | 2,2317 | 0,328 | -0,418 |
| 13 | Q9H6Z4 RANB3_HUMAN  | E.DGNYCPPVKR.E                      |                 | 2 | 2,2315 | 0,202 | -0,506 |
| 13 | O15067 PUR4_HUMAN   | E.SSNPNVLK.F                        |                 | 2 | 2,2248 | 0,089 | -0,439 |
| 13 | O15061 DMN_HUMAN    | R.QRSPAPGS#PDEE.G                   | S1049:          | 2 | 2,2237 | 0,3   | -0,362 |
| 13 | P20700 LMNB1_HUMAN  | E.LFHQQGT#PR.A                      | T575:           | 2 | 2,2221 | 0,222 | -1,048 |
| 13 | P05783 K1C18_HUMAN  | R.RIVDGKVVSE.T                      |                 | 2 | 2,2197 | 0,217 | -0,775 |
| 13 | Q9NZT2 OGFR_HUMAN   | R.EQPPTPEPGQS#ASEVE.K               | S403:           | 2 | 2,2196 | 0,212 | -0,208 |
| 13 | Q96DN6 MBD6_HUMAN   | R.KY#NPT#RNSNSSRQDITLEPS#PTAR.A     | Y957:T960:S975: | 3 | 2,2152 | 0,099 | -0,739 |
| 13 | Q15942 ZYX_HUMAN    | K.FSPGAPGSGSQPNQK.L                 |                 | 2 | 2,2114 | 0,136 | -0,644 |
| 13 | Q9UQ35 SRRM2_HUMAN  | K.SGM*S#PEQSRFQSD.S                 | S1132:          | 2 | 2,2108 | 0,22  | -1,651 |
| 13 | Q14980 NUMA1_HUMAN  | E.GTPLSITSKLPR.T                    |                 | 2 | 2,208  | 0,233 | -0,288 |
| 13 | Q9NZT2 OGFR_HUMAN   | R.SVEPQDAGPLER.S                    |                 | 2 | 2,1994 | 0,226 | -0,282 |
| 13 | Q15424 SAFB1_HUMAN  | K.ILDILGETCKS#EPVKEE.S              | S227:           | 2 | 2,1983 | 0,134 | -0,419 |
| 13 | P46821 MAP1B_HUMAN  | R.QCDET#PPTSVE.S                    | T2145:          | 2 | 2,1982 | 0,21  | -0,512 |
| 13 | P07355 ANXA2_HUMAN  | E.LAS#ALKSALSGHLE.T                 | S85:            | 2 | 2,1975 | 0,109 | -0,496 |
| 13 | Q08J23 NSUN2_HUMAN  | R.AGEPNSPDAAEANS#PDVTAGCDPAGVHPPR.- | S751:           | 3 | 2,1947 | 0,328 | 0      |
| 13 | Q9NXH9 TRM1_HUMAN   | R.GDQCCYSHS#PPTPR.V                 | S625:           | 3 | 2,1923 | 0,163 | -0,315 |
| 13 | O43847 NRDC_HUMAN   | R.RGS#LSNAGDPE.I                    | S94:            | 2 | 2,1884 | 0,271 | -0,516 |
| 13 | P05787 K2C8_HUMAN   | R.ISSSS#FSR.V                       | S37:            | 2 | 2,184  | 0,107 | -0,064 |
| 13 | Q9UKV3 ACINU_HUMAN  | E.KSKS#PSPRLT#E.D                   | S386:T393:      | 2 | 2,1784 | 0,18  | -0,738 |
| 13 | P48637 GSHB_HUMAN   | E.NCLLRPGSPARVVQCISE.L              |                 | 3 | 2,1765 | 0,083 | -0,445 |
| 13 | Q9BTT0 AN32E_HUMAN  | E.LRNRS#PEEVTE.L                    | S15:            | 2 | 2,1642 | 0,34  | -0,952 |
| 13 | P22087 FBRL_HUMAN   | E.NM*KPQEQLTLEPYERD.H               |                 | 2 | 2,1632 | 0,263 | -0,243 |
| 13 | Q6PJT7 ZC3HE_HUMAN  | R.TPRIS#PPIKEEE.T                   | S409:           | 3 | 2,1618 | 0,091 | 0,186  |
| 13 | Q00610 CLH1_HUMAN   | E.GCEEPATHNALAK.I                   |                 | 3 | 2,16   | 0,209 | -0,196 |
| 13 | P55347 PKNX1_HUMAN  | E.GVS#PPPVESQT#PM*DVDK.Q            | S41:T49:        | 2 | 2,154  | 0,087 | -0,436 |
| 13 | Q13233 M3K1_HUMAN   | R.ASSSGFPGAR.A                      |                 | 2 | 2,1531 | 0,263 | -0,065 |
| 13 | A9CQZ4 A9CQZ4_HUMAN | K.FCGM*FCPVEGSSE.N                  |                 | 2 | 2,1522 | 0,309 | -0,561 |
| 13 | Q7RTP8 Q7RTP8_HUMAN | R.ASS#LNVLNVGGK.A                   | S596:           | 2 | 2,1474 | 0,183 | -0,098 |
| 13 | P31483 TIA1_HUMAN   | K.TLYVGNLSR.D                       |                 | 2 | 2,1473 | 0,347 | 0      |
| 13 | O60684 IMA7_HUMAN   | K.SYKNNALNPEE.M                     |                 | 2 | 2,1337 | 0,083 | -0,763 |

|    |                      |                          |       |   |        |       |        |
|----|----------------------|--------------------------|-------|---|--------|-------|--------|
| 13 | P80723 BASP_HUMAN    | E.GTPKESEPQAAAEPAAEAKE.G |       | 3 | 2,1267 | 0,225 | -0,566 |
| 13 | Q13242 SFRS9_HUMAN   | R.IYVGNLPTDVRE.K         |       | 2 | 2,1253 | 0,174 | -0,532 |
| 13 | P52272 HNRPM_HUMAN   | K.GCGVVKFESPE.V          |       | 2 | 2,1144 | 0,177 | -0,404 |
| 13 | Q02952 AKA12_HUMAN   | E.STAVGQAHSDISKDMSE.A    |       | 3 | 2,1093 | 0,233 | -0,208 |
| 13 | O75781 PALM_HUMAN    | E.VVM*NSQQTVPVGT#PKDKR.V | T145: | 3 | 2,1078 | 0,109 | -0,369 |
| 13 | Q9H299 SH3L3_HUMAN   | K.ATPPQIVNGDQYCGDYE.L    |       | 2 | 2,1061 | 0,328 | -0,127 |
| 13 | Q9ULU4 PKCB1_HUMAN   | E.KADPGAVKDKAS#PEPE.K    | S668: | 2 | 2,1043 | 0,129 | -0,284 |
| 13 | Q6ZRV2 FA83H_HUMAN   | E.RRS#SPVPPVPE.R         | S924: | 2 | 2,1009 | 0,091 | -0,375 |
| 13 | Q6QNY0 BL1S3_HUMAN   | R.DLPLLVVQRE.S           |       | 2 | 2,1008 | 0,425 | -0,314 |
| 13 | Q5VZK9 LR16A_HUMAN   | R.YGVQVM*GSGLLAE.M       |       | 2 | 2,095  | 0,229 | -0,546 |
| 13 | Q12888 TP53B_HUMAN   | R.KGVSQTGTPVCEE.D        |       | 2 | 2,0943 | 0,16  | -0,877 |
| 13 | Q13523 PRP4B_HUMAN   | E.DKFKGSL#E.G            | S509: | 2 | 2,0943 | 0,259 | -0,336 |
| 13 | Q02952 AKA12_HUMAN   | K.SAESPTS#PVTSE.T        | S286: | 2 | 2,0931 | 0,16  | -0,576 |
| 13 | Q9UKM9 RALY_HUMAN    | E.AGLPQGEAR.T            |       | 2 | 2,0922 | 0,287 | -0,543 |
| 13 | Q9H2Y7 ZF106_HUMAN   | K.IGTLGSATTE.L           |       | 2 | 2,0865 | 0,151 | -0,064 |
| 13 | P52701 MSH6_HUMAN    | E.FKPDTKKEGS#SDE.I       | S274: | 2 | 2,0853 | 0,13  | -0,63  |
| 13 | ##Q8IUR0 TPPC5_HUMAN | E.RAVLADLVR.A            |       | 2 | 2,075  | 0,089 | -0,482 |
| 13 | Q14157 UBP2L_HUMAN   | R.LAQM*ISDHNDADFEE.K     |       | 2 | 2,0745 | 0,185 | -0,697 |
| 13 | Q86UU1 PHLB1_HUMAN   | E.DFSLTLGAR.G            |       | 2 | 2,0716 | 0,286 | 0      |
| 13 | Q15942 ZYX_HUMAN     | R.GPPASS#PAPAPK.F        | S259: | 2 | 2,0672 | 0,147 | -0,105 |
| 13 | Q9BTX1 NDC1_HUMAN    | R.VSSYPVEPK.K            |       | 2 | 2,0633 | 0,205 | -0,446 |
| 13 | Q9NQG5 CT077_HUMAN   | K.IASLPQEVQD.V           |       | 2 | 2,06   | 0,235 | -0,222 |
| 13 | P62937 PPIA_HUMAN    | K.ITIADCGLE.-            |       | 2 | 2,0587 | 0,199 | -0,436 |
| 13 | P22059 OSBP1_HUMAN   | R.GATVLPANTPGNVGSGK.D    |       | 2 | 2,0569 | 0,126 | -0,079 |
| 13 | P06748 NPM_HUMAN     | E.DVKLLSISGK.R           |       | 2 | 2,0567 | 0,134 | 0,115  |
| 13 | O43298 ZBT43_HUMAN   | E.GNPTVLCQK.L            |       | 2 | 2,0515 | 0,322 | 0      |
| 13 | Q8WWM7 ATX2L_HUMAN   | E.IESS#PQYR.L            | S306: | 2 | 2,0482 | 0,104 | -0,576 |
| 13 | Q7Z3C6 ATG9A_HUMAN   | R.SAS#YPCAAPRPGAPE.T     | S761: | 2 | 2,0416 | 0,113 | 1,439  |
| 13 | Q8IYW5 RN168_HUMAN   | E.GSISAS#PLNSR.K         | S197: | 2 | 2,041  | 0,244 | -0,313 |
| 13 | P31947 1433S_HUMAN   | E.DM*AAFM*KGAVEKGEE.L    |       | 2 | 2,0379 | 0,124 | -0,297 |
| 13 | Q9UBT2 SAE2_HUMAN    | R.KLDEKENLSAK.R          |       | 3 | 2,0327 | 0,171 | -0,215 |
| 13 | P04637 P53_HUMAN     | R.ALPNNTSSS#PQPK.K       | S315: | 2 | 2,0325 | 0,366 | -0,429 |
| 13 | P42166 LAP2A_HUMAN   | R.NRPPLPAGTNSK.G         |       | 3 | 2,0284 | 0,209 | 0,073  |

|    |                    |                        |            |   |        |       |        |
|----|--------------------|------------------------|------------|---|--------|-------|--------|
| 13 | Q9UHV9 PFD2_HUMAN  | E.TLTQQLQAK.G          |            | 2 | 2,0264 | 0,136 | -0,237 |
| 13 | Q9UKV3 ACINU_HUMAN | E.VATPPVPQLQVCEPK.E    |            | 2 | 2,0257 | 0,347 | -0,587 |
| 13 | P07355 ANXA2_HUMAN | K.AYTNFDAERD.A         |            | 2 | 2,0142 | 0,249 | -0,406 |
| 13 | P05387 RLA2_HUMAN  | E.DVIAQGIGK.L          |            | 2 | 2,0002 | 0,099 | 0      |
| 13 | Q86VS8 HOOK3_HUMAN | R.HLQLQTQLE.Q          |            | 2 | 1,993  | 0,131 | -0,44  |
| 13 | P28290 SSFA2_HUMAN | R.NIM*TQQKDS#FE.M      | S466:      | 2 | 1,9885 | 0,17  | -0,849 |
| 13 | Q14974 IMB1_HUMAN  | E.NVHPDVM*LVQPR.V      |            | 2 | 1,9858 | 0,116 | -0,601 |
| 13 | Q03135 CAV1_HUMAN  | K.AMADELS#EKQVYD.A     | S37:       | 2 | 1,9658 | 0,225 | -0,85  |
| 13 | Q92622 K0226_HUMAN | E.YLAIGNLDPR.G         |            | 2 | 1,9587 | 0,137 | -0,539 |
| 13 | Q6P0N0 CN106_HUMAN | E.NQVAM*SFYK.H         |            | 2 | 1,9513 | 0,184 | -0,995 |
| 13 | P49023 PAXI_HUMAN  | E.M*S#SPQRVTSTQQQTR.I  | S243:      | 2 | 1,9453 | 0,391 | -1,066 |
| 13 | O60271 JIP4_HUMAN  | K.QRS#ASQSS#LDKLDQE.L  | S728:S733: | 2 | 1,9386 | 0,18  | -0,395 |
| 13 | P98164 LRP2_HUMAN  | R.RDPTPTYSATE.D        |            | 2 | 1,9292 | 0,333 | -0,394 |
| 13 | Q9Y490 TLN1_HUMAN  | E.DVIATANLSR.R         |            | 2 | 1,9277 | 0,227 | 0      |
| 13 | P08670 VIME_HUMAN  | R.SYVTTSTR.T           |            | 2 | 1,9267 | 0,29  | -0,2   |
| 13 | P04075 ALDOA_HUMAN | R.ALQASALK.A           |            | 2 | 1,9253 | 0,148 | 0,304  |
| 13 | Q96C19 EFHD2_HUMAN | R.VFNPHYTEFKE.F        |            | 2 | 1,9252 | 0,215 | 0,192  |
| 13 | O15355 PPM1G_HUMAN | E.VVDFIQSK.I           |            | 2 | 1,9158 | 0,179 | -0,261 |
| 13 | P25788 PSA3_HUMAN  | R.CKDGVVFGVE.K         |            | 2 | 1,8949 | 0,114 | -0,33  |
| 13 | Q9BRQ6 CHCH6_HUMAN | E.GRRVS#FGVDEEE.R      | S13:       | 2 | 1,8945 | 0,444 | -0,084 |
| 13 | Q9H6Z4 RANB3_HUMAN | R.ERTSS#LTQFPPSQSEE.R  | S126:      | 2 | 1,8881 | 0,161 | 0,385  |
| 13 | Q9UKS6 PACN3_HUMAN | E.VTLTSIVPTR.D         |            | 2 | 1,8716 | 0,35  | -0,224 |
| 13 | O43765 SGTA_HUMAN  | R.SPART#PPSEEDSAE.A    | T81:       | 2 | 1,8642 | 0,135 | -0,471 |
| 13 | Q13263 TIF1B_HUMAN | D.GADSTGVVAKLS#PANQR.K | S697:      | 2 | 1,8602 | 0,183 | -0,07  |
| 13 | Q9H6Z4 RANB3_HUMAN | R.ERT#SSLTQFPPSQSEE.R  | T124:      | 2 | 1,8588 | 0,265 | -0,064 |
| 13 | Q9UHB6 LIMA1_HUMAN | R.ETPHS#PGVE.D         | S490:      | 2 | 1,8577 | 0,098 | -0,118 |
| 13 | Q14247 SRC8_HUMAN  | E.DVTQVSSAYQK.T        |            | 2 | 1,8558 | 0,19  | -0,796 |
| 13 | Q8N6T3 ARFG1_HUMAN | E.TFGSAEPTK.T          |            | 2 | 1,8507 | 0,19  | -0,195 |
| 13 | P78364 PHC1_HUMAN  | E.ALSPTSPGPLSVR.A      |            | 2 | 1,8423 | 0,115 | -0,571 |
| 13 | Q9H6F5 CCD86_HUMAN | R.RLGGLRPES#PE.S       | S18:       | 2 | 1,8394 | 0,138 | -0,473 |
| 13 | Q9P246 STIM2_HUMAN | R.KIS#RDEVSLE.D        | S626:      | 2 | 1,8385 | 0,158 | -0,194 |
| 13 | Q9H1A4 APC1_HUMAN  | E.GSLS#PVIAPK.K        | S688:      | 2 | 1,8368 | 0,104 | -0,465 |
| 13 | P68104 EF1A1_HUMAN | E.S#FSDYPLGR.F         | S414:      | 2 | 1,8343 | 0,205 | -0,4   |

|    |                      |                          |        |   |        |       |        |
|----|----------------------|--------------------------|--------|---|--------|-------|--------|
| 13 | ##Q9BXX2 AN30B_HUMAN | K.EEWTIKR.S              |        | 2 | 1,8326 | 0,113 | -0,254 |
| 13 | Q8IXM2 CQ049_HUMAN   | E.DSGIPLPAES#PK.K        | S96:   | 2 | 1,8234 | 0,112 | -0,284 |
| 13 | A6NK10 A6NK10_HUMAN  | E.VELGGNGLKR.T           |        | 2 | 1,8179 | 0,101 | -0,117 |
| 13 | Q96T23 RSF1_HUMAN    | D.S#PVKGPLCK.S           | S387:  | 2 | 1,8121 | 0,175 | -0,114 |
| 13 | P18754 RCC1_HUMAN    | K.SGQVVSFGCNDE.G         |        | 2 | 1,807  | 0,084 | -0,537 |
| 13 | P51149 RAB7A_HUMAN   | D.VTAPNTFK.T             |        | 2 | 1,8063 | 0,153 | 0,069  |
| 13 | Q5W0B1 RN219_HUMAN   | K.SLDLDGLSK.S            |        | 2 | 1,7694 | 0,082 | -1,609 |
| 13 | Q9UHB7 AFF4_HUMAN    | E.KDLLPS#PAGPVPSKDPKTE.H | S814:  | 2 | 1,7611 | 0,143 | -0,119 |
| 13 | Q9P2C4 TM181_HUMAN   | E.EM*PLQNGQAIR.A         |        | 2 | 1,7604 | 0,217 | -0,383 |
| 13 | Q7L2J0 MEPCE_HUMAN   | K.DITDPLSLNTCTDE.G       |        | 2 | 1,7469 | 0,175 | -0,612 |
| 13 | P13861 KAP2_HUMAN    | E.DLEVPVPSR.F            |        | 2 | 1,7361 | 0,101 | -0,422 |
| 13 | P05787 K2C8_HUMAN    | E.VDPNIQAVR.T            |        | 2 | 1,7351 | 0,087 | -0,301 |
| 13 | Q9BPX5 ARP5L_HUMAN   | R.RVDIDEFDE.N            |        | 2 | 1,7323 | 0,126 | -0,429 |
| 13 | Q9UBB9 TFP11_HUMAN   | R.RM*QPDCS#NPLTLDE.C     | S392:  | 2 | 1,722  | 0,094 | -0,344 |
| 13 | Q96JM3 ZN828_HUMAN   | R.KTS#PASLDFPE.S         | S459:  | 2 | 1,7187 | 0,196 | -0,384 |
| 13 | Q86UP2 KTN1_HUMAN    | K.QNDQVSFASLVEE.L        |        | 2 | 1,7094 | 0,176 | -0,583 |
| 13 | Q8WW12 PCNP_HUMAN    | K.ETVPTLAPK.T            |        | 2 | 1,6839 | 0,111 | 0      |
| 13 | Q9UHB6 LIMA1_HUMAN   | R.ETPHS#PGVEDAPIAK.V     | S490:  | 2 | 1,6833 | 0,153 | -0,525 |
| 13 | P05783 K1C18_HUMAN   | E.DFNLDALDSSNSM*QTIQK.T  |        | 2 | 1,6818 | 0,368 | -0,349 |
| 13 | P46934 NEDD4_HUMAN   | R.RGS#LQAYTFE.E          | S428:  | 2 | 1,674  | 0,14  | -0,682 |
| 13 | Q9C0C2 TB182_HUMAN   | K.AVARRES#AASGLGGLLEEE.G | S1473: | 2 | 1,6697 | 0,092 | -0,489 |
| 13 | P49411 EFTU_HUMAN    | E.HVVVVVNK.A             |        | 2 | 1,6676 | 0,22  | -0,255 |
| 13 | O76003 GLRX3_HUMAN   | E.LDTICPK.A              |        | 2 | 1,6551 | 0,191 | 0,216  |
| 13 | O94804 STK10_HUMAN   | E.QGGDLS#PAANR.S         | S438:  | 2 | 1,6361 | 0,194 | -0,314 |
| 13 | Q9NQ55 SSF1_HUMAN    | R.VGGS#DEEASGIPSRASLE.L  | S359:  | 2 | 1,6326 | 0,259 | -0,377 |
| 13 | Q93074 MED12_HUMAN   | R.QQQQQQILR.Q            |        | 2 | 1,6241 | 0,156 | -0,626 |
| 13 | Q9NXH9 TRM1_HUMAN    | R.VSADAAPDCPE.T          |        | 2 | 1,6069 | 0,158 | -0,323 |
| 13 | Q13011 ECH1_HUMAN    | E.ALGSGLVSR.V            |        | 2 | 1,6011 | 0,21  | 0,142  |
| 13 | Q9UQ35 SRRM2_HUMAN   | R.GEFSASPMLK.S           |        | 2 | 1,5891 | 0,15  | -0,343 |
| 13 | P08670 VIME_HUMAN    | E.NTLQSFR.Q              |        | 2 | 1,5846 | 0,104 | -0,07  |
| 13 | Q96P47 CENG3_HUMAN   | E.LHRSPS#LL.-            | S873:  | 2 | 1,4884 | 0,09  | -0,182 |
| 13 | Q96PK6 RBM14_HUMAN   | R.QPT#PPFFGR.D           | T206:  | 2 | 1,4672 | 0,147 | -0,433 |
| 13 | P49736 MCM2_HUMAN    | E.TIYQNYQR.I             |        | 2 | 1,4249 | 0,089 | -0,449 |

|    |                     |                                     |          |   |        |       |        |
|----|---------------------|-------------------------------------|----------|---|--------|-------|--------|
| 13 | P49023 PAXI_HUMAN   | E.MS#SPQVRTSTQQQTR.I                | S243:    | 2 | 1,4103 | 0,329 | -0,471 |
| 13 | Q9UQ35 SRRM2_HUMAN  | R.GEFSASPM*LK.S                     |          | 2 | 1,3086 | 0,11  | -0,225 |
| 13 | P63104 1433Z_HUMAN  | E.VAAGDDKKGIVDQSQQAYQE.A            |          | 2 | 1,0191 | 0,34  | -0,341 |
| 14 | Q13263 TIF1B_HUMAN  | E.KRSTAPSAASASASAAAASS#PAGGGAE.A    | S50:     | 3 | 6,7929 | 0,553 | -0,386 |
| 14 | Q13263 TIF1B_HUMAN  | E.KRSTAPSAASASASAAAAS#SPAGGGAEALE.L | S49:     | 3 | 6,2125 | 0,46  | -0,477 |
| 14 | Q5SYE7 NHSL1_HUMAN  | E.NLGHLGGASGTGTLRPKS#QE.L           | S388:    | 3 | 5,6932 | 0,515 | -0,337 |
| 14 | Q92797 SYMPK_HUMAN  | K.LKPGGVGAPSSSSPS#PSPSARPGPPPSEE.A  | S1173:   | 3 | 5,6519 | 0,422 | -0,328 |
| 14 | Q9UK76 HN1_HUMAN    | R.RNS#SEASSGDFLDLKG.E               | S87:     | 2 | 5,6283 | 0,606 | -0,645 |
| 14 | B2CI53 B2CI53_HUMAN | E.RNGILASPQS#APGNLDNSK.S            | S263:    | 2 | 5,5896 | 0,449 | -0,423 |
| 14 | A0FGR8 ESYT2_HUMAN  | E.KAQPEAGPQGLHDLGR.S                |          | 3 | 5,5825 | 0,439 | -0,207 |
| 14 | Q9Y490 TLN1_HUMAN   | E.STMLEDSVS#PKKSTVLQQQYNR.V         | S425:    | 3 | 5,5773 | 0,427 | -0,279 |
| 14 | P49792 RBP2_HUMAN   | E.DALDDSVSSSVHASPLAS#SPVRK.N        | S2250:   | 3 | 5,4347 | 0,402 | -0,44  |
| 14 | O95905 SGT1_HUMAN   | R.NQVEPVSQTTDNNNS#DEEDSGTGE.S       | S579:    | 3 | 5,393  | 0,494 | -0,217 |
| 14 | P49023 PAXI_HUMAN   | R.FIHQQPQSSS#PVYGSSAK.T             | S85:     | 3 | 5,346  | 0,294 | -0,18  |
| 14 | Q8IWW6 RHG12_HUMAN  | E.KTSFSQEQSCDSAGEGSEI.I             |          | 3 | 5,1515 | 0,491 | -0,438 |
| 14 | Q3MHD2 LSM12_HUMAN  | E.VEIINDRTET#PPPLASLNVSK.L          | T75:     | 3 | 5,1372 | 0,397 | -0,385 |
| 14 | P49792 RBP2_HUMAN   | E.DALDDSVSSSVHAS#PLASSPVRK.N        | S2246:   | 3 | 5,099  | 0,479 | 0,661  |
| 14 | Q9UK76 HN1_HUMAN    | R.RNS#SEASSGDFLDLKG.E               | S87:     | 3 | 5,0547 | 0,434 | 0,097  |
| 14 | Q9H307 PININ_HUMAN  | K.SLS#PGKENVSALDMEKE.S              | S443:    | 3 | 5,0517 | 0,299 | -0,191 |
| 14 | P49643 PRI2_HUMAN   | K.TKDASSALASLNSS#LE.M               | S493:    | 2 | 4,9468 | 0,456 | -0,219 |
| 14 | P60709 ACTB_HUMAN   | D.LYANTVLSGGTTM*YPGIADR.M           |          | 3 | 4,9446 | 0,374 | -0,346 |
| 14 | P11532 DMD_HUMAN    | E.HKGLSPLSPPEM*M*PTS#PQSPR.D        | S3549:   | 3 | 4,9378 | 0,381 | -0,074 |
| 14 | P16949 STMN1_HUMAN  | K.RAS#GQAFELILS#PR.S                | S16:S25: | 2 | 4,9271 | 0,39  | -0,501 |
| 14 | Q9UK76 HN1_HUMAN    | R.NS#SEASSGDFLDLKG                  | S87:     | 2 | 4,8876 | 0,452 | -0,866 |
| 14 | Q9Y6A5 TACC3_HUMAN  | E.CRHGGVCAPAAVATS#PPGAIPK.E         | S250:    | 3 | 4,8798 | 0,379 | -0,081 |
| 14 | Q9NX40 OCAD1_HUMAN  | E.SAPTGITDHIVQGPDNLEES#PKRK.N       | S191:    | 3 | 4,8689 | 0,273 | -0,463 |
| 14 | Q9UHR5 S30BP_HUMAN  | E.KGGLVSDAYGEDDFSR.L                |          | 2 | 4,859  | 0,518 | -0,782 |
| 14 | Q9H4A3 WINK1_HUMAN  | K.DRPVSQLVSGSKEEPPPAR.S             |          | 3 | 4,8383 | 0,344 | -0,341 |
| 14 | P25205 MCM3_HUMAN   | E.MPQVHT#PKTADSQETKE.S              | T722:    | 3 | 4,8236 | 0,375 | -0,638 |
| 14 | Q96T37 RBM15_HUMAN  | R.LHSYSS#PSTKNSSGGGE.S              | S128:    | 2 | 4,8166 | 0,522 | -0,344 |
| 14 | Q96RR4 KKCC2_HUMAN  | E.RSQGGLAAGGSLDM*NGR.C              |          | 3 | 4,8121 | 0,421 | 0      |
| 14 | Q5SW79 CE170_HUMAN  | K.SASAKS#IDSKVADAATE.V              | S138:    | 2 | 4,8098 | 0,547 | -0,564 |
| 14 | Q92615 LARP5_HUMAN  | E.RSPS#PAHLPPDPKVAE.K               | S601:    | 3 | 4,8058 | 0,281 | 0      |

|    |                     |                                     |            |   |        |       |        |
|----|---------------------|-------------------------------------|------------|---|--------|-------|--------|
| 14 | P16949 STMN1_HUMAN  | R.SKESVPEFPLS#PPKKK.D               | S38:       | 3 | 4,797  | 0,389 | -0,195 |
| 14 | Q9UK76 HN1_HUMAN    | R.RNS#SEASSGDFLDLK.G                | S87:       | 2 | 4,7932 | 0,483 | -0,429 |
| 14 | Q9UK76 HN1_HUMAN    | R.NSSEASSGDFLDLKGE.G                |            | 2 | 4,7724 | 0,445 | -0,221 |
| 14 | Q71RC2 LARP4_HUMAN  | R.ASTASPCNNNINAATAVALQEPR.K         |            | 3 | 4,7689 | 0,32  | -0,386 |
| 14 | P16949 STMN1_HUMAN  | E.LEKRAS#GQAFELILS#PR.S             | S16:S25:   | 3 | 4,765  | 0,26  | -0,705 |
| 14 | Q9BWU0 NADAP_HUMAN  | E.TLASQDLSGDFKPPALPVS#PAAR.S        | S82:       | 3 | 4,732  | 0,461 | -0,373 |
| 14 | Q13263 TIF1B_HUMAN  | E.KRSTAPSAASASASAAAASS#PAGGGAEALE.L | S50:       | 3 | 4,731  | 0,417 | -0,546 |
| 14 | Q9P0K8 FOXJ2_HUMAN  | K.CSPGS#PTDPNATLSKDE.A              | S46:       | 2 | 4,7165 | 0,572 | -0,197 |
| 14 | Q9NZT2 OGFR_HUMAN   | K.AGHSNGVEEDTEGR.T                  |            | 3 | 4,688  | 0,332 | 0,115  |
| 14 | P26639 SYTC_HUMAN   | E.KAS#SPSGKM*GGEKPIGAGE.E           | S7:        | 3 | 4,659  | 0,515 | -0,454 |
| 14 | Q86TC9 MYPN_HUMAN   | K.TPEPSS#PVKEPPPVLAKPK.L            | S644:      | 3 | 4,643  | 0,368 | -0,088 |
| 14 | Q9H8Y8 GORS2_HUMAN  | K.ISLPGQM*AGTPT#PLKDGFTV.V          | T225:      | 3 | 4,6428 | 0,333 | -0,323 |
| 14 | P27816 MAP4_HUMAN   | E.TERAS#PIKMDLAPSKD.M               | S358:      | 3 | 4,6359 | 0,456 | -0,199 |
| 14 | P40189 IL6RB_HUMAN  | E.DLQLVDHVDGGDGILPR.Q               |            | 2 | 4,632  | 0,497 | -0,402 |
| 14 | P22059 OSBP1_HUMAN  | K.RTGS#NIS#GASSDISLDE.Q             | S379:S382: | 2 | 4,6279 | 1     | -0,783 |
| 14 | Q8WU17 RN139_HUMAN  | E.RNGVIQHTGAAAEFNDT#D.-             | T663:      | 3 | 4,6083 | 0,446 | -0,327 |
| 14 | Q16555 DPYL2_HUMAN  | K.TVT#PASSAKT#SPAKQQAPPVR.N         | T514:T521: | 3 | 4,5946 | 1     | -0,401 |
| 14 | Q9UK76 HN1_HUMAN    | R.NS#SEASSGDFLDLKGE.G               | S87:       | 2 | 4,5876 | 0,518 | -0,281 |
| 14 | Q13546 RIPK1_HUMAN  | R.S#NSATEQPGSLHSSQGLGM*GPVEE.S      | S333:      | 3 | 4,5822 | 0,464 | -0,293 |
| 14 | A5PKX8 A5PKX8_HUMAN | E.NGQELS#PIALEPGPEPHR.A             | S288:      | 3 | 4,5298 | 0,423 | -0,091 |
| 14 | Q9NZT2 OGFR_HUMAN   | E.GAGDAAVASGGAQTLALAGSPAPSGHPK.A    |            | 3 | 4,522  | 0,47  | -0,512 |
| 14 | O94925 GLSK_HUMAN   | E.DDKPHNPM*VNAGAIVVTSLIK.Q          |            | 3 | 4,5079 | 0,384 | -0,409 |
| 14 | P05556 ITB1_HUMAN   | E.CSTDEVNSEMDAYCR.K                 |            | 2 | 4,4724 | 0,561 | -0,188 |
| 14 | Q15464 SHB_HUMAN    | E.SAAGGGAGDPLGGACAGGR.T             |            | 2 | 4,4658 | 0,57  | -0,157 |
| 14 | Q9H307 PININ_HUMAN  | K.SLS#PGKENVSALDM*EKE.S             | S443:      | 3 | 4,4491 | 0,347 | -0,095 |
| 14 | Q6P0Q8 MAST2_HUMAN  | R.NQSLGQS#APSLTAGLKE.L              | S148:      | 2 | 4,4476 | 0,492 | -0,411 |
| 14 | P05783 K1C18_HUMAN  | E.DGEDFNLDALDSSNS#M*QTIQK.T         | S401:      | 3 | 4,4288 | 0,354 | -0,59  |
| 14 | P33316 DUT_HUMAN    | R.ARPAEVGGM*QLR.F                   |            | 3 | 4,4068 | 0,086 | 0,141  |
| 14 | Q86T35 Q86T35_HUMAN | E.ANKTPLEKEPHS#PADQPEQQA.E.S        | S265:      | 3 | 4,4042 | 0,328 | -0,507 |
| 14 | P35579 MYH9_HUMAN   | K.IAQLEEQLDNETKE.R                  |            | 2 | 4,4035 | 0,391 | -0,441 |
| 14 | Q9UK76 HN1_HUMAN    | E.EKPVPAAPVPSVPAPVPSR.R             |            | 3 | 4,4031 | 0,32  | -0,532 |
| 14 | O95831 AIFM1_HUMAN  | R.SLS#AIDRAGAE.V                    | S268:      | 2 | 4,3885 | 0,468 | -0,104 |
| 14 | Q9H8Y8 GORS2_HUMAN  | K.ISLPGQM*AGT#PITPLKDGFTV.V         | T222:      | 3 | 4,3714 | 0,351 | -0,242 |

|    |                    |                                 |            |   |        |       |        |
|----|--------------------|---------------------------------|------------|---|--------|-------|--------|
| 14 | Q14195 DPYL3_HUMAN | R.NLHQSGFSLSGTQVDE.G            |            | 2 | 4,3507 | 0,504 | -0,71  |
| 14 | Q9BY44 EIF2A_HUMAN | E.ARSDKS#PDLAPTAPQSTPR.N        | S506:      | 3 | 4,3144 | 0,082 | 0,084  |
| 14 | P60709 ACTB_HUMAN  | E.LRVAPEEHPVLLTEAPLNPK.A        |            | 3 | 4,3102 | 0,412 | -0,329 |
| 14 | Q9UHR5 S30BP_HUMAN | E.KGGLVSDAYGEDDFSR.L            |            | 3 | 4,2983 | 0,341 | -0,32  |
| 14 | P33316 DUT_HUMAN   | R.ARPAEVGGMQLR.F                |            | 3 | 4,2958 | 0,208 | 0,142  |
| 14 | P29375 JAD1A_HUMAN | K.AAANPDLQGHLPSPFQQSAFNR.V      |            | 3 | 4,2863 | 0,357 | -0,403 |
| 14 | Q96PK6 RBM14_HUMAN | R.SPTRAS#YVAPLTAQPATYR.A        | S225:      | 3 | 4,2631 | 0,319 | -0,344 |
| 14 | O43432 IF4G3_HUMAN | R.GGS#SKDLLDNQSQE.E             | S1156:     | 2 | 4,2466 | 0,434 | -1,018 |
| 14 | O43432 IF4G3_HUMAN | R.GGS#SKDLLDNQSQEE.Q            | S1156:     | 2 | 4,245  | 0,461 | -0,362 |
| 14 | Q8IZD4 DCP1B_HUMAN | K.AHQGTGAGIS#PVILNSGEGKE.V      | S147:      | 3 | 4,2437 | 0,298 | -0,435 |
| 14 | P68104 EF1A1_HUMAN | E.DGPKFLKSGDAAIVDM*VPGKPM*CVE.S |            | 3 | 4,221  | 0,268 | -0,136 |
| 14 | Q9P260 K1468_HUMAN | R.AGS#ISTLDSLDFAR.Y             | S180:      | 2 | 4,221  | 0,468 | -0,557 |
| 14 | Q92794 MYST3_HUMAN | E.HNSPISSVQSHPSQSVR.S           |            | 3 | 4,2116 | 0,418 | -0,297 |
| 14 | Q02952 AKA12_HUMAN | K.LTASEQAHPQEPAESAEHPRLS#AEYE.K | S371:      | 3 | 4,2092 | 0,393 | -0,557 |
| 14 | Q9NQW6 ANLN_HUMAN  | K.ALSSSADDASLVNASISSSVK.A       |            | 2 | 4,2063 | 0,55  | -0,729 |
| 14 | Q6NZI2 PTRF_HUMAN  | E.AGDLRRGS#S#PDVHALLE.I         | S365:S366: | 3 | 4,2022 | 0,297 | -1,311 |
| 14 | Q9C073 F117A_HUMAN | E.RGS#PLLDGHAVR.G               | S178:      | 3 | 4,1959 | 0,411 | 0      |
| 14 | Q29RF7 PDS5A_HUMAN | E.AAETGVS#ENEENPVR.I            | S1195:     | 2 | 4,1955 | 0,421 | -0,363 |
| 14 | Q9BX66 SRBS1_HUMAN | R.RVGEQDSAPTQEKP#SPGKAIE.K      | T349:      | 3 | 4,1944 | 0,225 | -0,532 |
| 14 | Q02790 FKBP4_HUMAN | E.HSIVYLKPSYAFGS#VGKE.K         | S229:      | 3 | 4,1676 | 0,361 | -0,355 |
| 14 | Q9H4A3 WNK1_HUMAN  | K.KEGPVAS#PPFM*DLE.Q            | S1978:     | 2 | 4,1672 | 0,458 | -0,454 |
| 14 | Q9H4A3 WNK1_HUMAN  | K.KEGPVAS#PPFMDLE.Q             | S1978:     | 2 | 4,1534 | 0,4   | -0,688 |
| 14 | Q9BWD1 THIC_HUMAN  | E.DQDKVAVLSQNRTE.N              |            | 2 | 4,1394 | 0,495 | -0,304 |
| 14 | O60271 JIP4_HUMAN  | R.SAS#QSS#LDKLDQE.L             | S730:S733: | 2 | 4,1375 | 0,377 | -0,311 |
| 14 | Q9Y4B5 K0802_HUMAN | R.GRS#PPERPVPGT#PKEPSLGE.Q      | S297:T306: | 3 | 4,1338 | 0,329 | -0,081 |
| 14 | Q9Y6G9 DC1L1_HUMAN | R.ITRKPVTVSPTT#PTS#PTEGEAS.-    | T513:S516: | 3 | 4,1327 | 1     | -0,227 |
| 14 | P51858 HDGF_HUMAN  | E.VERPLPM*EVEKNST#PSEPGSGR.G    | T200:      | 3 | 4,1225 | 0,141 | -0,367 |
| 14 | Q8TF01 SFR18_HUMAN | R.DRQRS#PIALPVKQEPQID.A         | S211:      | 3 | 4,1095 | 0,339 | -0,565 |
| 14 | Q86TC9 MYPN_HUMAN  | K.TPEPSS#PVKEPPPVLAKPKLD.S      | S644:      | 3 | 4,1015 | 0,428 | -0,397 |
| 14 | Q9H1B7 EAP1_HUMAN  | E.VGVGAGGKRPGS#VSSTDQERE.L      | S334:      | 3 | 4,1009 | 0,327 | -0,425 |
| 14 | Q2TB10 ZN800_HUMAN | E.IKVKVEPADSVESPPSITHS#PQNE.L   | S426:      | 3 | 4,0954 | 0,206 | -0,398 |
| 14 | Q9ULU4 PKCB1_HUMAN | E.LKSTS#PAS#EKADPGAVKDK.A       | S652:S655: | 3 | 4,0904 | 0,322 | -0,35  |
| 14 | P10768 ESTD_HUMAN  | E.HGLVVIAPDTS#PR.G              | S84:       | 2 | 4,0876 | 0,579 | -0,254 |

|    |                     |                                    |              |   |        |       |        |
|----|---------------------|------------------------------------|--------------|---|--------|-------|--------|
| 14 | Q92797 SYMPK_HUMAN  | K.LKPGGVGAPSSSS#PSPSPSARPGPPPSEE.A | S1171:       | 3 | 4,0793 | 0,281 | -0,393 |
| 14 | Q96GQ7 DDX27_HUMAN  | R.SADFNPDFVFTEKE.G                 |              | 2 | 4,0573 | 0,52  | -0,519 |
| 14 | A9CQZ4 A9CQZ4_HUMAN | E.NKTIDFDSL#VGR.G                  | S56:         | 2 | 4,0535 | 0,416 | 0,159  |
| 14 | P20073 ANXA7_HUMAN  | R.LYQAGEGRLGTDE.S                  |              | 2 | 4,0524 | 0,375 | -0,52  |
| 14 | Q9Y5Z4 HEBP2_HUMAN  | E.KVYYTAGYNS#PVK.L                 | S181:        | 2 | 4,0467 | 0,4   | -0,389 |
| 14 | P40818 UBP8_HUMAN   | R.STKPVVFSPTLM*LTDEE.K             |              | 2 | 4,0376 | 0,423 | -0,319 |
| 14 | Q6NZI2 PTRF_HUMAN   | R.RGS#S#PDVHALLE.I                 | S365:S366:   | 2 | 4,0364 | 0,479 | -0,254 |
| 14 | Q9GZU1 MCLN1_HUMAN  | E.LQAYIAQCQDSPTSGK.F               |              | 2 | 4,034  | 0,547 | -0,552 |
| 14 | P46821 MAP1B_HUMAN  | R.TPEEGYSYDISEK.T                  |              | 2 | 4,0333 | 0,482 | -0,232 |
| 14 | P55884 EIF3B_HUMAN  | R.AQAVSEDAGGNEGRAAE.A              |              | 2 | 4,0311 | 0,615 | -0,972 |
| 14 | Q86TC9 MYPN_HUMAN   | K.TPEPS#SPVKEPPPVLAKPK.L           | S643:        | 3 | 4,0299 | 0,26  | -0,088 |
| 14 | Q12789 TF3C1_HUMAN  | D.LQCVCLNTPLGVVR.C                 |              | 2 | 4,0282 | 0,477 | -0,225 |
| 14 | Q9Y490 TLN1_HUMAN   | E.STM*LEDSVS#PKKSTVLQQQYNR.V       | S425:        | 3 | 4,0179 | 0,36  | -0,555 |
| 14 | Q71RC2 LARP4_HUMAN  | R.AS#TASPCNNNINAATAVALQEPR.K       | S594:        | 3 | 3,9901 | 0,397 | -0,523 |
| 14 | Q9UK76 HN1_HUMAN    | R.RNSS#EASSGDFDLKGE.G              | S88:         | 3 | 3,9892 | 0,28  | 0      |
| 14 | Q9C0C2 TB182_HUMAN  | E.HGVGGV#QCPEPGLR.H                |              | 2 | 3,9862 | 0,506 | -0,315 |
| 14 | P68371 TBB2C_HUMAN  | E.HGIDPTGTYHGSDLQLE.R              |              | 2 | 3,98   | 0,517 | -0,687 |
| 14 | Q15149 PLEC1_HUMAN  | K.GYYPYSVSGSGSTAGSR.T              |              | 2 | 3,9798 | 0,6   | -0,547 |
| 14 | Q9UQ35 SRRM2_HUMAN  | E.KM*ALPPQEDATAS#PPRQKD.K          | S1179:       | 3 | 3,9739 | 0,286 | -0,252 |
| 14 | P46937 YAP1_HUMAN   | R.TMTTNS#SDPFLNSGTYHSRDE.S         | S331:        | 3 | 3,9723 | 0,307 | -0,975 |
| 14 | Q96JN8 K1787_HUMAN  | E.GNNQVSPSS#PSSGAGGSDLR.F          | S707:        | 2 | 3,9704 | 0,439 | 0      |
| 14 | Q2TB10 ZN800_HUMAN  | E.IKVKEPADSVES#PPSITHSPQNE.L       | S419:        | 3 | 3,9655 | 0,223 | -0,266 |
| 14 | P30153 2AAA_HUMAN   | E.KLTQDQDQVDVK.Y                   |              | 3 | 3,9535 | 0,271 | 0,213  |
| 14 | Q12792 TWF1_HUMAN   | K.KYLLSQSS#PAPLTAEEEE.L            | S161:        | 2 | 3,9417 | 0,494 | -0,606 |
| 14 | P28799 GRN_HUMAN    | E.KAPAHLSLPDPQALK.R                |              | 3 | 3,9408 | 0,267 | -1,384 |
| 14 | O94762 RECQ5_HUMAN  | R.GEVPGGSAHYGGPS#PE.K              | S727:        | 2 | 3,9344 | 0,459 | -0,387 |
| 14 | Q9Y490 TLN1_HUMAN   | K.KSTVLQQQYNR.V                    |              | 3 | 3,9253 | 0,249 | -0,737 |
| 14 | Q9P270 SLAI2_HUMAN  | R.LQQPRLS#LQGHPTDLQTSNVKNEE.K      | S391:        | 3 | 3,925  | 0,423 | -0,39  |
| 14 | Q9UQ35 SRRM2_HUMAN  | R.HGGSPQPLATTPLSQEPVNPPEASPTR.D    |              | 3 | 3,9232 | 0,396 | -0,513 |
| 14 | Q5VZL5 ZMYM4_HUMAN  | E.KKTLS#QGQSQT#EHE.L               | S1064:S1071: | 3 | 3,9225 | 0,301 | -1,385 |
| 14 | P22234 PUR6_HUMAN   | E.LLDS#PGKVLLQSKDQITAGNAAR.K       | S27:         | 3 | 3,9081 | 0,336 | -0,591 |
| 14 | Q5VSL9 FA40A_HUMAN  | R.AAS#PPASASDLIE.Q                 | S335:        | 2 | 3,8965 | 0,29  | -0,186 |
| 14 | Q96PK6 RBM14_HUMAN  | R.ASYVAPLTAQPATYR.A                |              | 2 | 3,8922 | 0,332 | -0,758 |



|    |                    |                                        |                    |   |        |       |        |
|----|--------------------|----------------------------------------|--------------------|---|--------|-------|--------|
| 14 | Q96A49 SYAP1_HUMAN | E.AVRPKT#PPVVIK.S                      | T248:              | 3 | 3,8913 | 0,251 | -0,396 |
| 14 | O75531 BAF_HUMAN   | R.DFVAEPMGEKPVGSLAGIGE.V               |                    | 2 | 3,8816 | 0,412 | -0,244 |
| 14 | Q9UQ35 SRRM2_HUMAN | R.DRS#PPKS#PEKLPQSSSE.S                | S404:S408:         | 3 | 3,8728 | 0,26  | -0,346 |
| 14 | Q7L2J0 MEPCE_HUMAN | R.TLNAET#PKSS#PLPAK.G                  | T213:S217:         | 2 | 3,8714 | 0,268 | -0,356 |
| 14 | P49792 RBP2_HUMAN  | E.KDSLITPHVSR#S#T#PRESPCGK.I           | S2456:S2457:T2458: | 3 | 3,8617 | 1     | -0,068 |
| 14 | Q14203 DCTN1_HUMAN | E.DGADTTS#PETPDSSASK.V                 | S105:              | 2 | 3,8596 | 0,507 | -0,769 |
| 14 | Q32MZ4 LRRF1_HUMAN | D.NAKIDGATQSSPAEPK.S                   |                    | 2 | 3,8467 | 0,345 | -0,378 |
| 14 | P55327 TPD52_HUMAN | K.NSPTFKS#FEEKVE.N                     | S136:              | 2 | 3,8394 | 0,395 | -0,527 |
| 14 | Q96HC4 PDLI5_HUMAN | E.VVKPVPITSPAVS#K.V                    | S115:              | 3 | 3,8386 | 0,338 | -0,244 |
| 14 | Q5VUA4 ZN318_HUMAN | R.SVRIPS#PNILKTGLTE.N                  | S2101:             | 3 | 3,8318 | 0,181 | -0,405 |
| 14 | Q86UE8 TLK2_HUMAN  | R.RVEQPLYGLDGSAAK.E                    |                    | 3 | 3,826  | 0,357 | 0      |
| 14 | Q13523 PRP4B_HUMAN | R.TKLDDLALLEDE.K                       |                    | 2 | 3,8235 | 0,33  | -0,492 |
| 14 | P49454 CENPF_HUMAN | E.LNDS#RSECITATR.K                     | S1324:             | 3 | 3,8164 | 0,362 | 0,114  |
| 14 | Q9NT99 LRC4B_HUMAN | K.GPPGLNSIHEPLLFK.S                    |                    | 2 | 3,8108 | 0,364 | -0,452 |
| 14 | P05783 K1C18_HUMAN | R.STS#FRGGM*GSGGLATGIAGLAGM*GGIQNEKE.T | S53:               | 3 | 3,8081 | 0,478 | -0,475 |
| 14 | Q9UQ35 SRRM2_HUMAN | K.DKFSFPVQDRPE.S                       |                    | 2 | 3,8075 | 0,369 | -0,547 |
| 14 | Q6S8J3 A26CA_HUMAN | E.KSYELPDGQVITIGNE.R                   |                    | 2 | 3,8041 | 0,373 | -0,484 |
| 14 | P02545 LMNA_HUMAN  | R.SGAQASST#PLS#PTR.I                   | T19:S22:           | 2 | 3,7991 | 0,395 | -0,803 |
| 14 | P68104 EF1A1_HUMAN | K.SGDAAIVDMVPGKPM*CVE.S                |                    | 3 | 3,7983 | 0,337 | 0      |
| 14 | P40189 IL6RB_HUMAN | E.DLQLVDHVDGGDILPR.Q                   |                    | 3 | 3,7946 | 0,298 | 0      |
| 14 | Q6P6C2 ALKB5_HUMAN | E.AAAAAAAAAAAAAAAAAAAEPYPVSGAK.R       |                    | 3 | 3,7917 | 0,498 | -0,315 |
| 14 | P52948 NUP98_HUMAN | K.NLNNSNLFSPVNR.D                      |                    | 2 | 3,7876 | 0,261 | -0,574 |
| 14 | Q9H9B1 EHMT1_HUMAN | E.DDKLQGAASHVPE.G                      |                    | 3 | 3,7749 | 0,234 | 0      |
| 14 | Q9BT25 NYS48_HUMAN | R.SFAQVLELSAEASK.E                     |                    | 2 | 3,7745 | 0,431 | -0,659 |
| 14 | P78347 GTF2I_HUMAN | R.KINSSPNVNTTASGVE.D                   |                    | 2 | 3,7684 | 0,574 | -0,754 |
| 14 | Q92545 TM131_HUMAN | E.RLS#PAPLAHPSHPE.R                    | S1273:             | 3 | 3,7608 | 0,356 | 0      |
| 14 | O75151 PHF2_HUMAN  | K.ALRPPTS#PGVFGALQNFKE.D               | S655:              | 3 | 3,7607 | 0,326 | -0,26  |
| 14 | P19525 E2AK2_HUMAN | E.KKAVSPLLLTTNS#SE.G                   | S92:               | 2 | 3,7456 | 0,52  | -0,414 |
| 14 | Q9NYZ3 GTSE1_HUMAN | E.IPAS#PSRTKIPAEKE.S                   | S243:              | 3 | 3,7436 | 0,252 | -0,107 |
| 14 | P27816 MAP4_HUMAN  | E.VALAKDM*ES#PTKLDVTLAK.D              | S280:              | 3 | 3,7361 | 0,339 | -0,172 |
| 14 | Q9UQ35 SRRM2_HUMAN | E.KMALPPQEDATAS#PPRQKD.K               | S1179:             | 3 | 3,7268 | 0,303 | -0,423 |
| 14 | Q8N1I0 DOCK4_HUMAN | R.MLFNHIGDGALPR.S                      |                    | 3 | 3,726  | 0,394 | -0,063 |
| 14 | Q9UKV3 ACINU_HUMAN | E.KSKS#PS#PPRLTE.D                     | S386:S388:         | 3 | 3,7231 | 0,153 | -0,184 |

|    |                    |                                     |            |   |        |       |        |
|----|--------------------|-------------------------------------|------------|---|--------|-------|--------|
| 14 | P27816 MAP4_HUMAN  | E.TERAS#PIKM*DLAPSKD.M              | S358:      | 3 | 3,7227 | 0,34  | -0,296 |
| 14 | P19338 NUCL_HUMAN  | E.LKTGISDVFAKND.L                   |            | 2 | 3,7163 | 0,368 | -0,433 |
| 14 | P07108 ACBP_HUMAN  | E.DAM*KAYINKVEE.L                   |            | 3 | 3,7159 | 0,257 | 0,32   |
| 14 | Q9HC38 GLOD4_HUMAN | K.LLDDAMAADKSDE.W                   |            | 2 | 3,7147 | 0,317 | -0,175 |
| 14 | Q86UE8 TLK2_HUMAN  | R.SSPQHS#LSNPLPR.R                  | S115:      | 3 | 3,707  | 0,186 | -0,061 |
| 14 | Q9Y266 NUDC_HUMAN  | K.LKPNLNGADLPNYR.W                  |            | 3 | 3,7056 | 0,278 | 0,111  |
| 14 | Q9H6F5 CCD86_HUMAN | R.LQQGAGLESPQGQPEPGAAS#PQRQDLHLE.S  | S91:       | 3 | 3,6988 | 0,374 | -0,225 |
| 14 | Q86UE8 TLK2_HUMAN  | R.RVEQPLYGLDGSAAKE.A                |            | 2 | 3,6977 | 0,439 | 0,07   |
| 14 | O95785 WIZ_HUMAN   | K.NPEDKSPQLSLSPRPAS#PK.A            | S1017:     | 3 | 3,6922 | 0,393 | -0,086 |
| 14 | P26639 SYTC_HUMAN  | K.MGEEKPIGAGEEK.Q                   |            | 2 | 3,6788 | 0,294 | -0,426 |
| 14 | Q9UK76 HN1_HUMAN   | R.RNSS#EASSGDFLDLK.G                | S88:       | 3 | 3,6677 | 0,257 | -0,107 |
| 14 | P00441 SODC_HUMAN  | E.DSVISLSGDHCIIGR.T                 |            | 2 | 3,6542 | 0,526 | -0,599 |
| 14 | Q15545 TAF7_HUMAN  | E.NQGLDISS#PGM*SGHRQGHDSLE.H        | S201:      | 3 | 3,6529 | 0,392 | -0,53  |
| 14 | Q14676 MDC1_HUMAN  | R.DAEEDM*PQRVLLQR.S                 |            | 3 | 3,6522 | 0,268 | 0      |
| 14 | Q01082 SPTB2_HUMAN | K.TALPAQSAATLPARTQE.T               |            | 2 | 3,6507 | 0,548 | -0,283 |
| 14 | Q86SQ0 PHLB2_HUMAN | K.AHLPLGQSNS#CGSVLPPSLAAM*AK.D      | S934:      | 3 | 3,6501 | 0,19  | 0      |
| 14 | Q71RC2 LARP4_HUMAN | E.DSSVQKDGLNQTTIPVS#PPSTTKPSR.A     | S583:      | 3 | 3,6446 | 0,28  | -0,26  |
| 14 | P10809 CH60_HUMAN  | E.DVQPHDLGKVGE.V                    |            | 2 | 3,6377 | 0,386 | -0,283 |
| 14 | Q13428 TCOF_HUMAN  | E.AKPQQAAGM*LS#PK.T                 | S1257:     | 3 | 3,636  | 0,271 | -0,064 |
| 14 | Q99729 ROAA_HUMAN  | K.DLKDYFTKFE.V                      |            | 2 | 3,6325 | 0,359 | -0,537 |
| 14 | P49790 NU153_HUMAN | R.LM*T#PKPVSIATNR.S                 | T369:      | 3 | 3,6271 | 0,132 | -0,12  |
| 14 | Q9NQW6 ANLN_HUMAN  | K.ATS#PVKSTTSITDAK.S                | S295:      | 3 | 3,6257 | 0,415 | 0      |
| 14 | Q1KMD3 HNRL2_HUMAN | E.AAAEPDASEKPAEATAGSGGVNGGEEQGLGK.R |            | 3 | 3,6239 | 0,179 | 0      |
| 14 | Q96AQ6 PBIP1_HUMAN | R.ALQAPHS#PSKTDGKE.L                | S43:       | 2 | 3,6202 | 0,362 | -1,038 |
| 14 | P78347 GTF2I_HUMAN | R.KINSSPNVNTTASGVED.L               |            | 2 | 3,6127 | 0,556 | -0,493 |
| 14 | Q16512 PKN1_HUMAN  | E.KLNLGTSDSSPQK.S                   |            | 2 | 3,611  | 0,254 | -0,082 |
| 14 | Q9Y6G9 DC1L1_HUMAN | R.KPVTVSPTTPT#S#PTEGEAS.-           | T515:S516: | 2 | 3,6083 | 1     | -0,716 |
| 14 | Q5VT52 K0460_HUMAN | R.GPTSTSIDNIDGT#PVRDER.S            | T723:      | 3 | 3,6057 | 0,142 | -0,173 |
| 14 | Q9C037 TRIM4_HUMAN | E.DDQRPVCLVCRE.S                    |            | 3 | 3,6036 | 0,148 | -0,236 |
| 14 | Q6NZI2 PTRF_HUMAN  | R.RGS#SPDVHALLE.I                   | S365:      | 2 | 3,603  | 0,462 | -1,076 |
| 14 | Q01105 SET_HUMAN   | D.FYFDENPYFENK.V                    |            | 2 | 3,6021 | 0,369 | -0,605 |
| 14 | Q02790 FKBP4_HUMAN | E.DLTEEEDGGIIR.R                    |            | 2 | 3,599  | 0,403 | -0,725 |
| 14 | O14545 TRAD1_HUMAN | E.ADQSHGGPRS#LSDIKGAADE.I           | S278:      | 3 | 3,5899 | 0,297 | -0,175 |

|    |                     |                               |              |   |        |       |        |
|----|---------------------|-------------------------------|--------------|---|--------|-------|--------|
| 14 | P41250 SYG_HUMAN    | E.DKAPQVDVDKAVAE.L            |              | 3 | 3,5896 | 0,319 | -0,185 |
| 14 | P26639 SYTC_HUMAN   | K.MGGEEKPIGAGEE.K             |              | 2 | 3,5857 | 0,374 | -0,374 |
| 14 | P56182 RRP1_HUMAN   | R.SEKPPAGSICR.A               |              | 3 | 3,5845 | 0,405 | 0,532  |
| 14 | Q14974 IMB1_HUMAN   | E.LM*KDPSVVVRD.T              |              | 3 | 3,5785 | 0,204 | -0,072 |
| 14 | Q9HAV4 XPO5_HUMAN   | E.VMDLITVCCVSK.K              |              | 2 | 3,5723 | 0,322 | -0,514 |
| 14 | Q9H307 PININ_HUMAN  | K.S#LSPGKENVSALDMEKE.S        | S441:        | 2 | 3,571  | 0,487 | -0,574 |
| 14 | P40855 PEX19_HUMAN  | R.S#PGDTAKDALFASQE.K          | S54:         | 2 | 3,5653 | 0,324 | -1,509 |
| 14 | Q5QJE6 TDIF2_HUMAN  | E.LQDTSLQQLVSQR.H             |              | 3 | 3,5575 | 0,245 | 0,121  |
| 14 | Q9UK76 HN1_HUMAN    | R.RNSSEAS#SGDFLDLKG.E         | S91:         | 3 | 3,5513 | 0,142 | -0,097 |
| 14 | P46937 YAP1_HUMAN   | E.LRTM*TTNS#SDPFLNSGTYHSRDE.S | S331:        | 3 | 3,551  | 0,341 | -0,47  |
| 14 | P54277 PMS1_HUMAN   | E.NNKTDVSAADIVLSK.T           |              | 3 | 3,5491 | 0,285 | 0      |
| 14 | Q13546 RIPK1_HUMAN  | R.M*QSLQLDCVAVPSSR.S          |              | 2 | 3,545  | 0,486 | -0,357 |
| 14 | P04406 G3P_HUMAN    | K.LVINGNPITIFQER.D            |              | 2 | 3,5436 | 0,313 | -0,605 |
| 14 | Q9H307 PININ_HUMAN  | K.S#LSPGKENVSALDM*EKE.S       | S441:        | 2 | 3,5417 | 0,373 | -0,759 |
| 14 | P13639 EF2_HUMAN    | R.LAKS#DPMVQCIIEE.S           | S530:        | 2 | 3,5398 | 0,42  | -0,356 |
| 14 | A9CQZ4 A9CQZ4_HUMAN | K.TIDFDSLS#VGR.G              | S56:         | 2 | 3,5397 | 0,312 | -0,189 |
| 14 | P00558 PGK1_HUMAN   | D.KIQLINNMLDKVNE.M            |              | 3 | 3,5335 | 0,213 | -0,219 |
| 14 | Q14676 MDC1_HUMAN   | E.LQPSTSTDQPVTSEPTSQVTR.G     |              | 3 | 3,5296 | 0,252 | -0,162 |
| 14 | Q16555 DPYL2_HUMAN  | K.TVTPASS#AKTSPAKQQAPPVR.N    | S518:        | 3 | 3,5237 | 0,322 | -0,415 |
| 14 | Q58FF8 H90B2_HUMAN  | E.FDGKSLVSVTKE.G              |              | 3 | 3,5224 | 0,244 | 0,07   |
| 14 | P18858 DNL1_HUMAN   | K.TSKAETPTESVSEPE.V           |              | 2 | 3,5198 | 0,471 | -0,536 |
| 14 | P30153 2AAA_HUMAN   | E.KLTQDQDQVDVKYFAQE.A         |              | 2 | 3,5136 | 0,472 | -1,583 |
| 14 | P26639 SYTC_HUMAN   | K.AS#SPSGKM*GGEEKPIGAGEEK.Q   | S7:          | 3 | 3,5122 | 0,149 | -0,427 |
| 14 | Q9H000 MKRN2_HUMAN  | E.RKTQPSMVSNPGSCSDPQPS#PE.M   | S139:        | 3 | 3,5112 | 0,085 | -0,445 |
| 14 | P02765 FETUA_HUMAN  | K.CDSSPDAEDVR.K               |              | 2 | 3,5069 | 0,354 | -0,456 |
| 14 | Q6S8J3 A26CA_HUMAN  | E.KSYELPDGQVITIGNER.F         |              | 3 | 3,5046 | 0,226 | -0,286 |
| 14 | O94854 K0754_HUMAN  | E.SSSALTESS#GHLDHREPQSE.S     | S43:         | 3 | 3,4959 | 0,227 | -0,246 |
| 14 | Q9NQS7 INCE_HUMAN   | E.QHVTQLMSTEPLPR.T            |              | 3 | 3,4876 | 0,284 | -0,112 |
| 14 | Q9UK76 HN1_HUMAN    | R.RNSS#EASSGDFLDLKG.E         | S88:         | 2 | 3,4842 | 0,563 | -0,322 |
| 14 | Q02952 AKA12_HUMAN  | E.LQSHAKS#PPS#PVERE.M         | S1328:S1331: | 3 | 3,4777 | 0,271 | -0,402 |
| 14 | Q09666 AHNK_HUMAN   | K.SSKASLGS#LEGEAEAE.A         | S5752:       | 2 | 3,4754 | 0,501 | -0,371 |
| 14 | P63241 IF5A1_HUMAN  | E.DICPSTHNMDVPNIK.R           |              | 2 | 3,4732 | 0,164 | -0,631 |
| 14 | P40763 STAT3_HUMAN  | E.NLQDDDFDNYK.T               |              | 2 | 3,4727 | 0,121 | -0,086 |

|    |                     |                          |            |   |        |       |        |
|----|---------------------|--------------------------|------------|---|--------|-------|--------|
| 14 | Q9NQ55 SSF1_HUMAN   | R.VGGS#DEEASGIPSR.T      | S359:      | 2 | 3,4587 | 0,359 | -0,508 |
| 14 | Q9UGU0 TCF20_HUMAN  | E.KAGSSPAQGAQNEPPR.L     |            | 3 | 3,4515 | 0,147 | -0,229 |
| 14 | P55265 DSRAD_HUMAN  | R.TM*LLLSRS#PE.A         | S825:      | 2 | 3,4508 | 0,255 | -0,294 |
| 14 | Q9HC38 GLOD4_HUMAN  | K.LLDDAM*AADKSDE.W       |            | 2 | 3,4451 | 0,522 | -0,087 |
| 14 | Q9Y3Z3 SAMH1_HUMAN  | R.CDDS#PRT#PSNTPSAE.A    | S18:T21:   | 2 | 3,4451 | 0,269 | -0,544 |
| 14 | Q8IXT5 RB12B_HUMAN  | E.DFRFPPEDFRHS#PE.D      | S575:      | 3 | 3,4448 | 0,107 | -0,493 |
| 14 | Q14978 NOLC1_HUMAN  | R.VADNS#FDAKR.G          | S643:      | 2 | 3,4316 | 0,431 | -0,507 |
| 14 | O95819 M4K4_HUMAN   | R.VLEPPVPSRSES#FSNGNSE.S | S602:      | 2 | 3,4316 | 0,42  | -0,347 |
| 14 | O43166 SI1L1_HUMAN  | E.NHRPLSAAS#NSDQLE.D     | S1711:     | 2 | 3,4297 | 0,489 | 0,071  |
| 14 | Q13045 FLII_HUMAN   | E.AVLQS#PGLSGK.V         | S856:      | 2 | 3,4271 | 0,493 | -0,107 |
| 14 | Q58FF8 H90B2_HUMAN  | E.SLTDPS#KLDSGKE.L       | S63:       | 2 | 3,426  | 0,428 | -0,502 |
| 14 | Q15424 SAFB1_HUMAN  | E.LAEAPTEAPS#PEAR.D      | S344:      | 2 | 3,4242 | 0,367 | -0,241 |
| 14 | P68104 EF1A1_HUMAN  | K.SGDAAIVDM*VPGKPMCVE.S  |            | 2 | 3,4217 | 0,453 | -0,645 |
| 14 | O14893 GEMI2_HUMAN  | E.AAQCPDVVVAQIDPK.K      |            | 2 | 3,4179 | 0,318 | -1,287 |
| 14 | Q9H4A3 WNK1_HUMAN   | R.DVDDGSGSPHS#PHQLSSK.S  | S2032:     | 3 | 3,4166 | 0,34  | -0,474 |
| 14 | O94842 TOX4_HUMAN   | E.LVSGS#PVALS#PQPR.C     | S562:S567: | 2 | 3,4138 | 0,333 | -0,311 |
| 14 | P16949 STMN1_HUMAN  | K.RAS#GQAFELILS#PR.S     | S16:S25:   | 3 | 3,4135 | 0,092 | -0,215 |
| 14 | Q92609 TBCD5_HUMAN  | E.VGIDPLSSYSNK.S         |            | 2 | 3,4093 | 0,406 | -0,191 |
| 14 | O43852 CALU_HUMAN   | E.AKTFDQLTPEESKE.R       |            | 2 | 3,4066 | 0,444 | -0,15  |
| 14 | P49792 RBP2_HUMAN   | E.KDSLITPHVSR.S          |            | 3 | 3,4051 | 0,439 | 0,219  |
| 14 | P05556 ITB1_HUMAN   | K.NVLSLTNKGEVFNE.L       |            | 2 | 3,4033 | 0,338 | -0,39  |
| 14 | P14618 KPYM_HUMAN   | R.NTGIICTIGPASR.S        |            | 2 | 3,4023 | 0,378 | 0      |
| 14 | A9CQZ4 A9CQZ4_HUMAN | R.QKFCGMFCPVEGSSE.N      |            | 2 | 3,399  | 0,493 | -0,623 |
| 14 | P41250 SYG_HUMAN    | E.DKAPQVDVDKAVAE.L       |            | 2 | 3,3985 | 0,399 | -0,411 |
| 14 | Q96T23 RSF1_HUMAN   | E.IKLSDDFDS#PVKGPLCK.S   | S387:      | 3 | 3,3985 | 0,194 | -0,458 |
| 14 | Q92598 HS105_HUMAN  | E.LNNTCEPVVTQPKPK.I      |            | 3 | 3,3978 | 0,327 | -0,106 |
| 14 | A8MW92 P20LX_HUMAN  | E.DLTLVSQLSSSVINK.T      |            | 2 | 3,395  | 0,329 | -0,228 |
| 14 | Q5VT52 K0460_HUMAN  | R.LSSSPGLFGAFSVR.G       |            | 2 | 3,3944 | 0,55  | -0,514 |
| 14 | Q96T37 RBM15_HUMAN  | R.LHSY#SSPSTKNSSGGGE.S   | Y126:      | 3 | 3,3923 | 0,289 | 0,103  |
| 14 | Q58FF8 H90B2_HUMAN  | E.SLTDPSKLDSGKE.L        |            | 2 | 3,3914 | 0,368 | -0,532 |
| 14 | Q6ZRV2 FA83H_HUMAN  | E.RRGS#LTLTISGESPK.A     | S936:      | 3 | 3,3911 | 0,25  | 0      |
| 14 | Q9Y490 TLN1_HUMAN   | K.KSTVLQQQYNR.V          |            | 2 | 3,3877 | 0,388 | -0,983 |
| 14 | Q9Y426 CU025_HUMAN  | E.KDISVQAIACR.S          |            | 2 | 3,3866 | 0,358 | -0,194 |

|    |                     |                                |            |   |        |       |        |
|----|---------------------|--------------------------------|------------|---|--------|-------|--------|
| 14 | P07942 LAMB1_HUMAN  | K.ATGQCLCLPNVIGQNCDR.C         |            | 3 | 3,3862 | 0,43  | -0,176 |
| 14 | P46934 NEDD4_HUMAN  | E.NGNIQLQAQR.A                 |            | 2 | 3,3828 | 0,281 | -0,214 |
| 14 | P68104 EF1A1_HUMAN  | K.SGDAAIVDMVPGKPM*CVE.S        |            | 2 | 3,3788 | 0,55  | -0,645 |
| 14 | Q8N655 CJ012_HUMAN  | K.IKPNLSSS#PRSEE.T             | S295:      | 3 | 3,3779 | 0,296 | 0,12   |
| 14 | Q7L2J0 MEPCE_HUMAN  | R.TLNAET#PKS#SPLPAKGRDPVE.I    | T213:S216: | 3 | 3,3745 | 0,1   | -0,309 |
| 14 | Q86UE8 TLK2_HUMAN   | E.DNSQFKDHPTLND.R              |            | 2 | 3,3739 | 0,403 | -0,558 |
| 14 | Q13439 GOGA4_HUMAN  | R.TSS#FTEQLDEGTPNRE.S          | S41:       | 2 | 3,3692 | 0,342 | -0,258 |
| 14 | Q15545 TAF7_HUMAN   | E.NQGLDISS#PGM*SGHR.Q          | S201:      | 2 | 3,3633 | 0,363 | 0      |
| 14 | Q6UXH1 CREL2_HUMAN  | E.KTLSKYES#SE.I                | S70:       | 2 | 3,363  | 0,356 | -0,195 |
| 14 | P00558 PGK1_HUMAN   | D.KIQLINNM*LDKVNE.M            |            | 3 | 3,362  | 0,265 | -0,108 |
| 14 | P26639 SYTC_HUMAN   | K.M*GGEEKPIGAGEE.K             |            | 2 | 3,3603 | 0,424 | -0,277 |
| 14 | Q5VSL9 FA40A_HUMAN  | R.NM*RAAS#PPASASDLIE.Q         | S335:      | 2 | 3,3582 | 0,527 | -0,566 |
| 14 | O75083 WDR1_HUMAN   | E.AKGPVTDVAYSHD.G              |            | 3 | 3,3561 | 0,365 | -0,067 |
| 14 | Q5EBL4 RIPL1_HUMAN  | E.NRIPQPPIAHPR.T               |            | 3 | 3,3543 | 0,231 | -0,061 |
| 14 | P40855 PEX19_HUMAN  | D.ASGPQKRS#PGDTAKDALFASQE.K    | S54:       | 3 | 3,3539 | 0,245 | 0,156  |
| 14 | Q8TEX9 IPO4_HUMAN   | E.LCGVLKAVLQR.K                |            | 3 | 3,3535 | 0,21  | 0,436  |
| 14 | O94888 UBXD7_HUMAN  | E.HGQLDGLSSS#PPKK.C            | S270:      | 3 | 3,3383 | 0,155 | -0,179 |
| 14 | P31943 HNRH1_HUMAN  | R.LRGLPFGCSKEE.I               |            | 3 | 3,3366 | 0,278 | 0      |
| 14 | Q9HCK8 CHD8_HUMAN   | E.HRVLDNFS#DIVE.G              | S1400:     | 2 | 3,3354 | 0,274 | -0,801 |
| 14 | Q6NV74 CB055_HUMAN  | R.GPQDSGDRAAS#PAGPR.K          | S646:      | 3 | 3,3327 | 0,11  | -0,113 |
| 14 | Q9NQW6 ANLN_HUMAN   | K.ATS#PVKSTTSITDAK.S           | S295:      | 2 | 3,3291 | 0,468 | -0,461 |
| 14 | P55265 DSRAD_HUMAN  | R.TMLLSRS#PE.A                 | S825:      | 2 | 3,3282 | 0,256 | 0,099  |
| 14 | O14646 CHD1_HUMAN   | R.S#KKSSVSDAPVHITASGEPVPISEE.S | S1381:     | 3 | 3,3264 | 0,085 | -1,182 |
| 14 | Q99650 OSMR_HUMAN   | K.IQFLGTRKS#LTETE.L            | S826:      | 2 | 3,3244 | 0,321 | -0,43  |
| 14 | Q9Y2W1 TR150_HUMAN  | E.M*KS#PREPGYKAE.G             | S698:      | 3 | 3,3211 | 0,357 | -0,369 |
| 14 | Q9Y6G9 DC1L1_HUMAN  | K.SGQKPVLDVHAE.L               |            | 3 | 3,3192 | 0,12  | -0,071 |
| 14 | P53985 MOT1_HUMAN   | E.TSIDVAGKPNEVTK.A             |            | 2 | 3,3185 | 0,364 | -0,502 |
| 14 | Q8WXV6 Q8WXV6_HUMAN | R.KRTS#SEDNLYLAVLR.A           | S20:       | 3 | 3,3153 | 0,111 | -0,198 |
| 14 | Q9C0C2 TB182_HUMAN  | E.AADSDAHLFQDSTEPR.A           |            | 3 | 3,3148 | 0,348 | 0,208  |
| 14 | Q8N4C8 MINK1_HUMAN  | R.NLAAFPASHDPDPAIPAPTATPSAR.G  |            | 3 | 3,3124 | 0,218 | -0,515 |
| 14 | A6NJLO A6NJLO_HUMAN | R.M*LDQTLIDLNEM*.-             |            | 2 | 3,3106 | 0,355 | -0,249 |
| 14 | P61026 RAB10_HUMAN  | E.DILRKT#PVKEPNSE.N            | T174:      | 3 | 3,3083 | 0,232 | -0,214 |
| 14 | Q9H4A3 WNK1_HUMAN   | K.EGPVAS#PPFMDLE.Q             | S1978:     | 2 | 3,3072 | 0,307 | -0,332 |

|    |                     |                                |              |   |        |       |        |
|----|---------------------|--------------------------------|--------------|---|--------|-------|--------|
| 14 | Q96N67 DOCK7_HUMAN  | R.SAVRPASLNLNR.S               |              | 3 | 3,3063 | 0,313 | 0,07   |
| 14 | A8K7W5 A8K7W5_HUMAN | E.KLNIGTDSOSSPQK.S             |              | 3 | 3,304  | 0,352 | 0,307  |
| 14 | P16949 STMN1_HUMAN  | R.SKESVPEFPLS#PPKKK.D          | S38:         | 2 | 3,3034 | 0,331 | -0,26  |
| 14 | P16949 STMN1_HUMAN  | R.SKESVPEFPLS#PPK.K            | S38:         | 3 | 3,3033 | 0,112 | 0      |
| 14 | Q9UJK3 PARP4_HUMAN  | E.SCKPTATEPLFK.K               |              | 3 | 3,3011 | 0,356 | 0      |
| 14 | Q9BZE9 ASPC1_HUMAN  | E.HAISPSAADVLVAR.Y             |              | 3 | 3,3005 | 0,244 | -0,325 |
| 14 | Q9BWU0 NADAP_HUMAN  | E.TLASQDLGDFK.K                |              | 2 | 3,2971 | 0,434 | -0,19  |
| 14 | P27694 RFA1_HUMAN   | K.SKDSLVDIIGICK.S              |              | 3 | 3,2959 | 0,219 | -0,568 |
| 14 | Q9NSK0 KLC4_HUMAN   | E.WSGDGSGLQR.S                 |              | 2 | 3,2928 | 0,346 | -0,419 |
| 14 | P68104 EF1A1_HUMAN  | K.SGDAAIVDMVPGKPMCVE.S         |              | 2 | 3,2868 | 0,519 | -0,39  |
| 14 | P49792 RBP2_HUMAN   | E.SSINYTFKT#PEKAKE.K           | T2613:       | 2 | 3,2824 | 0,492 | -0,602 |
| 14 | Q9ULH0 ARMS_HUMAN   | E.YLSDALLDKK.D                 |              | 2 | 3,2799 | 0,313 | -0,837 |
| 14 | P78316 NOP14_HUMAN  | E.LTHYGQSLADIEK.H              |              | 2 | 3,2795 | 0,297 | -0,496 |
| 14 | P05787 K2C8_HUMAN   | E.SGMQNMSIHTK.T                |              | 3 | 3,2714 | 0,346 | 0,222  |
| 14 | P68104 EF1A1_HUMAN  | E.DGPKFLKSGDAAIVDMVPGKPM*CVE.S |              | 3 | 3,2707 | 0,161 | -0,068 |
| 14 | P52756 RBM5_HUMAN   | R.GLVAAYSIGDS#DNEEE.L          | S624:        | 2 | 3,2639 | 0,315 | -0,298 |
| 14 | Q01082 SPTB2_HUMAN  | K.TALPAQSAAT#LPAR.T            | T2187:       | 2 | 3,2609 | 0,383 | -0,421 |
| 14 | P62256 UBE2H_HUMAN  | R.RMDTDVVKLIE.S                |              | 3 | 3,2609 | 0,133 | 0,347  |
| 14 | P82650 RT22_HUMAN   | R.DRM*IQVYFPKE.G               |              | 3 | 3,2562 | 0,129 | 0,127  |
| 14 | Q15648 MED1_HUMAN   | K.NYGS#PLISGST#PKHE.R          | S1433:T1440: | 2 | 3,2553 | 0,372 | -0,419 |
| 14 | Q9UKV3 ACINU_HUMAN  | E.TKDPSSGQEVAT#PPVPQLQVCEPK.E  | T682:        | 3 | 3,2546 | 0,221 | -0,479 |
| 14 | P37802 TAGL2_HUMAN  | E.GKNVIGLQMGTR.G               |              | 3 | 3,2532 | 0,184 | 0,329  |
| 14 | P68104 EF1A1_HUMAN  | K.SGDAAIVDM*VPGKPM*CVE.S       |              | 2 | 3,2484 | 0,469 | -0,767 |
| 14 | A5PKX8 A5PKX8_HUMAN | E.NGQELS#PIALEPGPEPHR.A        | S288:        | 2 | 3,2476 | 0,456 | -0,302 |
| 14 | Q15942 ZYX_HUMAN    | K.FTPVASKFS#PGAPGGSGSQPNQK.L   | S281:        | 3 | 3,2474 | 0,087 | -0,079 |
| 14 | P31949 S10AB_HUMAN  | K.KLDTNSDGQLDFSE.F             |              | 2 | 3,2456 | 0,431 | -0,467 |
| 14 | Q9C0C2 TB182_HUMAN  | E.HGVGGVSQCPEPGLR.H            |              | 3 | 3,238  | 0,244 | -0,118 |
| 14 | P56182 RRP1_HUMAN   | K.RSEKPPAGSICR.A               |              | 3 | 3,2374 | 0,296 | -0,202 |
| 14 | Q7Z417 NUFP2_HUMAN  | K.RTS#PQVLGSILK.S              | S572:        | 2 | 3,2369 | 0,344 | -0,531 |
| 14 | P11021 GRP78_HUMAN  | E.SYAYSILKNQIGDKE.K            |              | 3 | 3,2353 | 0,406 | 0,226  |
| 14 | Q96AQ6 PBIP1_HUMAN  | R.ALQAPHS#PSKTDGKE.L           | S43:         | 3 | 3,2353 | 0,223 | -0,444 |
| 14 | Q96Q45 AL2S4_HUMAN  | E.GLAQTAGRRPS#EGNEPSTKE.L      | S86:         | 3 | 3,2291 | 0,271 | -0,169 |
| 14 | Q9NZT2 OGFR_HUMAN   | R.SQGDEAGHGEDRPEPLS#PKE.S      | S378:        | 3 | 3,2205 | 0,2   | -0,483 |

|    |                     |                               |                    |   |        |       |        |
|----|---------------------|-------------------------------|--------------------|---|--------|-------|--------|
| 14 | Q9Y4W2 LAS1L_HUMAN  | D.SLYWSVKPASSFGSEAK.A         |                    | 3 | 3,2199 | 0,289 | -0,379 |
| 14 | O95816 BAG2_HUMAN   | E.MIHSIQNSQDM*R.Q             |                    | 3 | 3,2152 | 0,236 | 0      |
| 14 | Q01538 MYT1_HUMAN   | R.HSSTSAPSSSM*TSPQSSQASR.Q    |                    | 3 | 3,2137 | 0,16  | -0,431 |
| 14 | Q9C0C2 TB182_HUMAN  | E.RSYQFGIIGNDR.V              |                    | 2 | 3,2117 | 0,333 | -1,198 |
| 14 | O76094 SRP72_HUMAN  | R.SLSEDTDGTEEDPQAE.L          |                    | 2 | 3,2106 | 0,402 | -0,283 |
| 14 | A9CQZ4 A9CQZ4_HUMAN | E.DEEVPAFFKNLGS#GSPKPR.Q      | S25:               | 3 | 3,2104 | 0,14  | -0,34  |
| 14 | P62158 CALM_HUMAN   | R.VFDKDGNGYISAAE.L            |                    | 2 | 3,21   | 0,474 | -0,657 |
| 14 | Q52LD0 Q52LD0_HUMAN | K.AGGS#PASYHGSTSPR.V          | S192:              | 2 | 3,2088 | 0,442 | -0,565 |
| 14 | Q15149 PLEC1_HUMAN  | K.AQLEPVAS#PAKKPK.V           | S1435:             | 2 | 3,2075 | 0,247 | -0,711 |
| 14 | Q96PZ0 PUS7_HUMAN   | E.DVPRPPDTVSTGK.G             |                    | 2 | 3,2059 | 0,179 | -0,535 |
| 14 | Q9Y426 CU025_HUMAN  | E.KDISVQAIACR.S               |                    | 3 | 3,2025 | 0,186 | 0,435  |
| 14 | Q15691 MARE1_HUMAN  | E.TAVAPSLVAPALNKPK.K          |                    | 2 | 3,2023 | 0,23  | -0,309 |
| 14 | Q8NFC6 FA44A_HUMAN  | R.KLS#VLGKDGKPVSE.Y           | S800:              | 3 | 3,202  | 0,319 | -0,119 |
| 14 | Q5EBL4 RIPL1_HUMAN  | R.IPQPPPIAHPR.T               |                    | 3 | 3,1967 | 0,341 | 0,374  |
| 14 | O00418 EF2K_HUMAN   | K.LLQSAKT#ILRGTEE.K           | T348:              | 2 | 3,1909 | 0,371 | -0,372 |
| 14 | Q8TEH3 DEN1A_HUMAN  | E.AALQPLGQAKS#LEDLRAPK.D      | S592:              | 3 | 3,1894 | 0,225 | -0,438 |
| 14 | P78316 NOP14_HUMAN  | E.LTHYQQLADIEK.H              |                    | 3 | 3,1881 | 0,091 | 0      |
| 14 | Q12756 KIF1A_HUMAN  | R.SDS#LILDHQWE.L              | S1370:             | 2 | 3,1865 | 0,333 | -0,429 |
| 14 | P22234 PUR6_HUMAN   | E.LLDS#PGKVLLQSK.D            | S27:               | 2 | 3,1848 | 0,277 | -0,33  |
| 14 | Q8IXM2 CQ049_HUMAN  | E.DSGIPLPAES#PKKGPK.K         | S96:               | 2 | 3,1804 | 0,208 | -0,574 |
| 14 | Q8WXV6 Q8WXV6_HUMAN | R.TSS#EDNLYLAVLR.A            | S21:               | 2 | 3,18   | 0,334 | -0,703 |
| 14 | Q14157 UBP2L_HUMAN  | D.LKNPSDSAVHS#PFTK.R          | S416:              | 3 | 3,177  | 0,118 | -0,214 |
| 14 | P11940 PABP1_HUMAN  | R.SKGFVFCFSSPEE.A             |                    | 2 | 3,1733 | 0,448 | -0,541 |
| 14 | Q9UQ35 SRRM2_HUMAN  | E.SSLVFKDTRLRT#PPRE.R         | T1208:             | 3 | 3,1728 | 0,271 | -0,2   |
| 14 | Q8N1I0 DOCK4_HUMAN  | R.M*LFNHIGDGALPR.S            |                    | 3 | 3,1725 | 0,281 | -0,188 |
| 14 | P68104 EF1A1_HUMAN  | K.IGGIGTVPVGRVE.T             |                    | 2 | 3,1695 | 0,343 | -0,389 |
| 14 | Q9Y3F4 STRAP_HUMAN  | E.DFKLYKYDYNSGEE.L            |                    | 2 | 3,1591 | 0,356 | -0,551 |
| 14 | Q9C0C2 TB182_HUMAN  | E.FGKRDS#LGTYSR.D             | S872:              | 3 | 3,1549 | 0,187 | 0      |
| 14 | Q9UBF8 PI4KB_HUMAN  | R.IRS#TRS#VENLPE.C            | S425:S428:         | 2 | 3,1538 | 0,264 | -0,156 |
| 14 | Q86W56 PARG_HUMAN   | E.NVSQLSLDKS#PTEK.S           | S137:              | 2 | 3,1499 | 0,31  | -0,525 |
| 14 | Q9H4A4 AMPB_HUMAN   | R.RPLHSAQAVDVASASNFR.A        |                    | 3 | 3,1472 | 0,389 | -0,19  |
| 14 | Q01082 SPTB2_HUMAN  | R.TSS#KESS#PIPS#PTSDRK.A      | S2161:S2165:S2169: | 2 | 3,1453 | 1     | -0,298 |
| 14 | Q02952 AKA12_HUMAN  | E.VAS#EKLTASEQAHPQEPESAHEPR.L | S347:              | 3 | 3,1447 | 0,206 | -0,527 |

|    |                    |                              |            |   |        |       |        |
|----|--------------------|------------------------------|------------|---|--------|-------|--------|
| 14 | Q9Y618 NCOR2_HUMAN | K.SRS#PAPPADKE.A             | S1025:     | 2 | 3,1434 | 0,268 | -0,099 |
| 14 | P35527 K1C9_HUMAN  | R.FSSSSGYGGSSR.V             |            | 2 | 3,1422 | 0,476 | -0,79  |
| 14 | Q8NCN4 RN169_HUMAN | K.TLS#KATLTSLAPE.M           | S448:      | 2 | 3,1381 | 0,287 | -0,518 |
| 14 | Q03252 LMNB2_HUMAN | R.LES#LSYQLSGLQK.Q           | S296:      | 2 | 3,1367 | 0,399 | -0,552 |
| 14 | O94964 CT117_HUMAN | R.TKS#VSSM*SEFE.S            | S55:       | 2 | 3,1365 | 0,235 | -0,459 |
| 14 | Q13546 RIPK1_HUMAN | R.MQSLQLDCVAVPSSR.S          |            | 2 | 3,1291 | 0,4   | -0,433 |
| 14 | O75152 ZC11A_HUMAN | R.RLS#SASTGKPLSVEDDFE.K      | S758:      | 3 | 3,1285 | 0,344 | -0,259 |
| 14 | Q9UKA4 AKA11_HUMAN | E.KLS#PLTGQACR.Y             | S1580:     | 3 | 3,124  | 0,198 | 0,139  |
| 14 | P05787 K2C8_HUMAN  | E.TRDGKLV#ESS#DVLPK.-        | S475:S478: | 3 | 3,1239 | 0,189 | -0,193 |
| 14 | Q6GYQ0 GRIPE_HUMAN | E.DFAAQVFSAPYHHLPSDADH.-     |            | 3 | 3,1189 | 0,164 | -0,079 |
| 14 | Q9UK61 CC063_HUMAN | E.LINLIQCR.K                 |            | 2 | 3,118  | 0,247 | -0,118 |
| 14 | Q96SN8 CK5P2_HUMAN | E.LVHFVQNTS#FSKPHDE.L        | S841:      | 3 | 3,1105 | 0,162 | 0      |
| 14 | P07108 ACBP_HUMAN  | E.DAM*KAYINKVEE.L            |            | 2 | 3,1102 | 0,318 | -0,513 |
| 14 | P63241 IF5A1_HUMAN | E.DLRLPEGDLGKE.I             |            | 2 | 3,1101 | 0,142 | -1,636 |
| 14 | P36776 LONM_HUMAN  | E.NLQDFVGKPVFTVE.R           |            | 2 | 3,102  | 0,401 | -0,383 |
| 14 | P78371 TCPB_HUMAN  | E.DKLIHFSGVALGE.A            |            | 2 | 3,0966 | 0,358 | -0,616 |
| 14 | Q9H6Z4 RANB3_HUMAN | R.SVLRPAVLQAPQPK.A           |            | 2 | 3,094  | 0,249 | -0,162 |
| 14 | O00116 ADAS_HUMAN  | R.RAASAATAAPTATPAAQE.S       |            | 2 | 3,0912 | 0,259 | -0,221 |
| 14 | Q14195 DPYL3_HUMAN | R.NLHQSGFSLSGTQVDE.G         |            | 3 | 3,0879 | 0,234 | -0,213 |
| 14 | Q9Y608 LRRF2_HUMAN | R.NSASATPLSGNSS#R.R          | S324:      | 2 | 3,084  | 0,515 | -0,479 |
| 14 | P27694 RFA1_HUMAN  | E.NKSKDS#LVDIIGICK.S         | S315:      | 3 | 3,0837 | 0,285 | -0,103 |
| 14 | Q93073 K0256_HUMAN | K.HSNNQPAAGALRNPDSGTM*NHVE.S |            | 3 | 3,0814 | 0,258 | -0,451 |
| 14 | O75475 PSIP1_HUMAN | K.VKFSSQQAATK.Q              |            | 2 | 3,0812 | 0,317 | -0,408 |
| 14 | P46013 KI67_HUMAN  | K.IPKSS#PELE.D               | S2828:     | 2 | 3,0744 | 0,249 | -0,295 |
| 14 | Q6S8J3 A26CA_HUMAN | E.KLCYVALDFEQE.M             |            | 2 | 3,0713 | 0,301 | -0,403 |
| 14 | Q12965 MYO1E_HUMAN | R.NFIGDYIGMEEHPE.L           |            | 2 | 3,0664 | 0,259 | -0,443 |
| 14 | Q6NZI2 PTRF_HUMAN  | R.GSS#PDVHALLE.I             | S366:      | 2 | 3,0656 | 0,426 | -0,405 |
| 14 | Q05209 PTN12_HUMAN | R.SCLVEGDAKEE.I              |            | 2 | 3,0622 | 0,349 | -0,395 |
| 14 | Q9BZE9 ASPC1_HUMAN | E.HAISPSAADVLVAR.Y           |            | 2 | 3,0617 | 0,44  | -0,52  |
| 14 | Q9BWD1 THIC_HUMAN  | E.DQDKVAVLSQNRTE.N           |            | 3 | 3,0577 | 0,163 | 0,114  |
| 14 | P08195 4F2_HUMAN   | D.LLQIDPNFGSKE.D             |            | 2 | 3,0573 | 0,315 | -0,538 |
| 14 | Q9H5J0 ZBTB3_HUMAN | R.APHPPVADVSLAS#PSSSTE.T     | S271:      | 2 | 3,0533 | 0,276 | -0,38  |
| 14 | Q9BVL2 NUPL1_HUMAN | R.TQKT#PPGLQHE.Y             | T331:      | 2 | 3,0532 | 0,408 | -0,371 |



|    |                      |                               |                    |   |        |       |        |
|----|----------------------|-------------------------------|--------------------|---|--------|-------|--------|
| 14 | Q15742 NAB2_HUMAN    | R.SFSPKS#PLELGE.K             | S162:              | 2 | 3,0523 | 0,251 | -0,534 |
| 14 | O75531 BAF_HUMAN     | R.DFVAEPM*GEKPVGSLAGIGE.V     |                    | 2 | 3,0503 | 0,56  | -0,423 |
| 14 | Q9NTI5 PDS5B_HUMAN   | K.GRLDSSEMDHS#ENE.D           | S1182:             | 2 | 3,0466 | 0,371 | -0,362 |
| 14 | Q32MZ4 LRRF1_HUMAN   | K.IDGATQSSPAEPK.S             |                    | 2 | 3,0455 | 0,397 | -0,375 |
| 14 | Q12905 ILF2_HUMAN    | E.ISTWDGVIVTPSEK.A            |                    | 2 | 3,0447 | 0,32  | -0,239 |
| 14 | Q01082 SPTB2_HUMAN   | R.T#SSKES#SPIPS#PTSDRKAK.T    | T2159:S2164:S2169: | 3 | 3,0443 | 1     | -0,571 |
| 14 | Q96C34 RUND1_HUMAN   | E.ATAEPGAAPGS#PPDS#PGR.T      | S71:S75:           | 2 | 3,0423 | 0,448 | -0,19  |
| 14 | Q9NVN8 GNL3L_HUMAN   | E.IKLLHS#PMTK.I               | S465:              | 3 | 3,0418 | 0,161 | 0      |
| 14 | Q9H6Z4 RANB3_HUMAN   | K.NLSDSGEPRGE.A               |                    | 2 | 3,0418 | 0,486 | -0,568 |
| 14 | P36578 RL4_HUMAN     | E.SSGKNVTLPAVFK.A             |                    | 2 | 3,0406 | 0,254 | -0,362 |
| 14 | Q8N108 MIER1_HUMAN   | E.DKVIIFLKD.A                 |                    | 2 | 3,0385 | 0,146 | -0,112 |
| 14 | Q9UQ35 SRRM2_HUMAN   | K.DKFSPFPVQDRPE.S             |                    | 3 | 3,0385 | 0,285 | 0,117  |
| 14 | Q5VUA4 ZN318_HUMAN   | R.IPS#PNILK.T                 | S2101:             | 2 | 3,0347 | 0,214 | -0,761 |
| 14 | Q9ULU4 PKCB1_HUMAN   | K.TSTTGSILNLDLDR.S            |                    | 2 | 3,0323 | 0,292 | -0,324 |
| 14 | Q9UQ35 SRRM2_HUMAN   | E.VRQSHSESPSLQSK.S            |                    | 3 | 3,0277 | 0,134 | 0,233  |
| 14 | Q9Y608 LRRF2_HUMAN   | R.NSASATT#PLSGNSSR.R          | T317:              | 2 | 3,027  | 0,277 | -0,957 |
| 14 | P60709 ACTB_HUMAN    | E.EHPVLLTEAPLNPK.A            |                    | 3 | 3,0237 | 0,284 | 0,117  |
| 14 | Q9UPW0 FOXJ3_HUMAN   | K.NALLDPNTTLDQEE.V            |                    | 2 | 3,0221 | 0,401 | -0,31  |
| 14 | P55010 IF5_HUMAN     | K.VLTLS#DDLERTIEE.R           | S229:              | 2 | 3,0147 | 0,415 | -0,285 |
| 14 | Q9UMZ2 SYNG_HUMAN    | K.FDFLVATSQSK.M               |                    | 2 | 3,0119 | 0,337 | 0      |
| 14 | Q9BZE9 ASPC1_HUMAN   | R.AAGS#PSPLPAPDPAPK.S         | S500:              | 2 | 3,0046 | 0,362 | 0,079  |
| 14 | Q8WYQ5 DGCR8_HUMAN   | E.REQSSDLTPSGDVS#PVKPLSR.S    | S377:              | 3 | 3,0007 | 0,235 | -1,097 |
| 14 | Q9NTI5 PDS5B_HUMAN   | R.LDSSEMDHS#ENE.D             | S1182:             | 2 | 3,0007 | 0,257 | -0,249 |
| 14 | P04264 K2C1_HUMAN    | R.SLDLDSIIAEVK.A              |                    | 2 | 2,9957 | 0,359 | -0,468 |
| 14 | Q9P0K7 RAI14_HUMAN   | E.NAGIQSLLSK.I                |                    | 2 | 2,9952 | 0,271 | -0,107 |
| 14 | ##Q9NR82 KCNQ5_HUMAN | D.TS#EGAKCISQS#SRSRGRTRLS#D.S | S13:S22:S31:       | 3 | 2,9949 | 0,135 | -1,378 |
| 14 | Q9H6Z4 RANB3_HUMAN   | R.SVLRPAVLQAPQPK.A            |                    | 3 | 2,9949 | 0,148 | -0,061 |
| 14 | O95067 CCNB2_HUMAN   | K.GPS#PTPEDVSMKEE.N           | S92:               | 2 | 2,9835 | 0,379 | -0,462 |
| 14 | Q5VUA4 ZN318_HUMAN   | R.SVRIPS#PNILK.T              | S2101:             | 2 | 2,9826 | 0,178 | -0,374 |
| 14 | P53041 PPP5_HUMAN    | E.DGKVTISFM*KE.L              |                    | 3 | 2,9822 | 0,109 | 0,576  |
| 14 | Q13136 LIPA1_HUMAN   | R.VTSSMSS#PSMQPK.K            | S1172:             | 2 | 2,9798 | 0,32  | -0,337 |
| 14 | P13797 PLST_HUMAN    | K.INNFSAIDK.D.S               |                    | 2 | 2,9751 | 0,232 | -0,107 |
| 14 | P49792 RBP2_HUMAN    | E.NKGSQTGAAGASDTTIKPNPE.N     |                    | 3 | 2,9716 | 0,165 | -0,464 |

|    |                     |                               |              |   |        |       |        |
|----|---------------------|-------------------------------|--------------|---|--------|-------|--------|
| 14 | Q13136 LIPA1_HUMAN  | R.VTSSMS#SPSM*QPK.K           | S1171:       | 2 | 2,9706 | 0,137 | -0,5   |
| 14 | Q12802 AKP13_HUMAN  | E.NYNFLPHS#PSKKDSE.W          | S1731:       | 3 | 2,9705 | 0,181 | 0,099  |
| 14 | Q13610 PWP1_HUMAN   | K.LQEEGGGS#DEEE.T             | S50:         | 2 | 2,9675 | 0,315 | -0,629 |
| 14 | O15231 ZN185_HUMAN  | R.RES#CGSSVLTDFE.G            | S233:        | 2 | 2,966  | 0,395 | -0,311 |
| 14 | Q9BTA9 WAC_HUMAN    | R.STCSLTPALAAHFSE.N           |              | 2 | 2,9655 | 0,457 | -0,307 |
| 14 | Q9HAV4 XPO5_HUMAN   | E.VM*DLITVCCVSK.K             |              | 2 | 2,9648 | 0,315 | -0,339 |
| 14 | A8K1N6 A8K1N6_HUMAN | K.KGSLLPTS#PR.L               | S284:        | 2 | 2,963  | 0,276 | -0,215 |
| 14 | Q12888 TP53B_HUMAN  | R.QSQQPM*KPIS#PVKDPVS#PASQK.M | S1094:S1101: | 3 | 2,9617 | 0,206 | -0,573 |
| 14 | Q96RL1 UIMC1_HUMAN  | R.DLNES#PVKSFVSISE.A          | S677:        | 2 | 2,961  | 0,271 | -0,493 |
| 14 | P05787 K2C8_HUMAN   | R.TEM*ENEFVLIK.K              |              | 2 | 2,9589 | 0,355 | -0,446 |
| 14 | P15336 ATF2_HUMAN   | E.DDIKKM*PLDLS#PLATPIIR.S     | S94:         | 3 | 2,9586 | 0,158 | -0,492 |
| 14 | P26639 SYTC_HUMAN   | K.M*GGEEKPIGAGE.E             |              | 2 | 2,953  | 0,331 | -0,41  |
| 14 | P35998 PRS7_HUMAN   | E.DDIQQLLK.K                  |              | 2 | 2,9523 | 0,175 | -0,439 |
| 14 | Q6P2E9 EDC4_HUMAN   | E.GLGSAAHGS#QPDLR.R.I         | S565:        | 3 | 2,9509 | 0,255 | 0      |
| 14 | Q09666 AHNK_HUMAN   | K.FKAEAPLPS#PKLE.G            | S5110:       | 2 | 2,9478 | 0,335 | -0,567 |
| 14 | Q9UKS6 PACN3_HUMAN  | R.VRALYDYAGQEAD.E.L           |              | 2 | 2,9475 | 0,307 | -0,153 |
| 14 | Q9NTI5 PDS5B_HUMAN  | E.TVSNASSSSNPSS#PGRIK.G       | S1166:       | 2 | 2,9465 | 0,382 | -0,723 |
| 14 | P08670 VIME_HUMAN   | R.SLYASS#PGGVYATR.S           | S56:         | 2 | 2,9462 | 0,357 | -0,566 |
| 14 | P27695 APEX1_HUMAN  | E.GYSGVGLLSR.Q                |              | 2 | 2,9383 | 0,327 | -0,423 |
| 14 | Q96PU5 NED4L_HUMAN  | R.S#LSSPTVTLSPLE.G            | S446:        | 2 | 2,9368 | 0,36  | -0,412 |
| 14 | Q05639 EF1A2_HUMAN  | R.GNVCGDSKSDPPQE.A            |              | 2 | 2,9366 | 0,434 | -1,802 |
| 14 | P22059 OSBP1_HUMAN  | R.TGS#NIS#GASSDISLDE.Q        | S379:S382:   | 2 | 2,9357 | 0,111 | -0,499 |
| 14 | Q13206 DDX10_HUMAN  | R.SQADKVIEPR.A                |              | 2 | 2,9353 | 0,304 | -0,32  |
| 14 | P68104 EF1A1_HUMAN  | R.RGNVAGDSKNDPPM*E.A          |              | 3 | 2,9329 | 0,266 | 0      |
| 14 | Q01082 SPTB2_HUMAN  | K.AKTALPAQSAATLPAR.T          |              | 3 | 2,9304 | 0,285 | -0,233 |
| 14 | O95067 CCNB2_HUMAN  | K.GPS#PTPEDVSM*KEE.N          | S92:         | 2 | 2,9298 | 0,393 | -0,382 |
| 14 | Q9H2G2 SLK_HUMAN    | R.RDS#FIGTPYWM*APE.V          | S189:        | 2 | 2,9292 | 0,276 | -0,76  |
| 14 | P15260 INGR1_HUMAN  | E.SSSPLSSNQSEPGSIALNSYHSR.N   |              | 3 | 2,9282 | 0,277 | -0,304 |
| 14 | P10109 ADX_HUMAN    | R.SSS#EDKITVHFIR.D            | S63:         | 3 | 2,928  | 0,171 | -0,427 |
| 14 | O43765 SGTA_HUMAN   | R.SQIRS#RTPS#ASNDDQQE.-       | S301:S305:   | 3 | 2,9273 | 0,2   | -0,792 |
| 14 | A9CQZ4 A9CQZ4_HUMAN | K.TIDFDSL#VGRGSGQVVAQQRD.V    | S56:         | 3 | 2,9266 | 0,205 | -0,682 |
| 14 | Q14676 MDC1_HUMAN   | R.DAEEDMPQRVLLQR.S            |              | 3 | 2,9251 | 0,133 | 0      |
| 14 | P08670 VIME_HUMAN   | E.VDALKGTNES#LER.Q            | S339:        | 2 | 2,9209 | 0,168 | -0,484 |

|    |                    |                                |            |   |        |       |        |
|----|--------------------|--------------------------------|------------|---|--------|-------|--------|
| 14 | Q6NZI2 PTRF_HUMAN  | E.AGDLRRGS#S#PDVHALLE.I        | S365:S366: | 2 | 2,9101 | 0,177 | -1,749 |
| 14 | Q9H000 MKR2_HUMAN  | E.RKTQPSM*VSNPGSCSDPQPS#PE.M   | S139:      | 3 | 2,9087 | 0,264 | -0,369 |
| 14 | Q15154 PCM1_HUMAN  | E.SDKRVTNDIS#PE.S              | S65:       | 2 | 2,9064 | 0,272 | -0,169 |
| 14 | P35908 K22E_HUMAN  | R.NLDLDSIIAEVK.A               |            | 2 | 2,9005 | 0,36  | -0,275 |
| 14 | P68104 EF1A1_HUMAN | K.FLKSGDAAIVDM*VPGKPMCVE.S     |            | 3 | 2,8998 | 0,176 | -0,481 |
| 14 | Q5VUA4 ZN318_HUMAN | R.SVRIPS#PNILKTGLTE.N          | S2101:     | 2 | 2,8995 | 0,257 | -0,406 |
| 14 | P51858 HDGF_HUMAN  | E.VERPLPMEVEK.N                |            | 3 | 2,8977 | 0,333 | 0,069  |
| 14 | Q13177 PAK2_HUMAN  | R.LLQTSNITKLE.Q                |            | 2 | 2,8974 | 0,232 | -0,29  |
| 14 | Q9BWD1 THIC_HUMAN  | K.VAVLSQNRTE.N                 |            | 2 | 2,8971 | 0,343 | -0,109 |
| 14 | P14618 KPYM_HUMAN  | R.GDLGIEIPAEK.V                |            | 2 | 2,8966 | 0,363 | -0,214 |
| 14 | Q8NC51 PAIRB_HUMAN | E.LT#ESPKEYIQK.Q               | T232:      | 2 | 2,8962 | 0,184 | -0,379 |
| 14 | P27348 1433T_HUMAN | R.KQTIDNSQGAYQE.A              |            | 2 | 2,896  | 0,327 | -0,329 |
| 14 | Q96Q45 AL2S4_HUMAN | R.RPS#EGNEPSTKE.L              | S86:       | 2 | 2,8959 | 0,378 | -0,432 |
| 14 | O60934 NBN_HUMAN   | E.NEPVDTNSDNNLFTDTDLK.S        |            | 2 | 2,8936 | 0,449 | 0,794  |
| 14 | P08195 4F2_HUMAN   | D.LLQIDPNFGSK.E                |            | 2 | 2,8933 | 0,216 | -0,198 |
| 14 | Q09666 AHNK_HUMAN  | K.ASLGS#LEGEAEAE.A             | S5752:     | 2 | 2,8893 | 0,31  | -0,273 |
| 14 | Q9UHR4 BI2L1_HUMAN | E.LDVKYM*NAT#LKR.Y             | T118:      | 3 | 2,8892 | 0,224 | 0      |
| 14 | Q9NYF8 BCLF1_HUMAN | E.GEPQEE#PLKSK.S               | S177:      | 2 | 2,8861 | 0,298 | -0,52  |
| 14 | P49792 RBP2_HUMAN  | E.SSINYTFK#PEKAKE.K            | T2613:     | 3 | 2,8858 | 0,27  | -0,201 |
| 14 | Q92882 OSTF1_HUMAN | D.M*ATNAACASLLKK.K             |            | 2 | 2,8839 | 0,316 | -0,7   |
| 14 | Q53EZ4 CEP55_HUMAN | K.VAAS#PKSPT#AALNE.S           | S425:T430: | 2 | 2,8771 | 0,182 | -0,644 |
| 14 | Q9H4A3 Wnk1_HUMAN  | K.EGPVAS#PPFM*DLE.Q            | S1978:     | 2 | 2,8769 | 0,42  | -0,247 |
| 14 | Q5QJE6 TDIF2_HUMAN | K.NAVSVHSNLNSE.A               |            | 2 | 2,8753 | 0,389 | -0,192 |
| 14 | Q13043 STK4_HUMAN  | R.LLALDPMM*EQE.I               |            | 2 | 2,8745 | 0,283 | -0,374 |
| 14 | Q02952 AKA12_HUMAN | E.STAVGQAHSDISKDM*SE.A         |            | 3 | 2,8735 | 0,307 | -0,411 |
| 14 | Q9Y613 FHOD1_HUMAN | R.TPQS#PAPCVLLR.A              | S498:      | 2 | 2,8724 | 0,333 | -0,344 |
| 14 | Q2YD98 K1530_HUMAN | E.VSDPTSAAAQLR.Q               |            | 2 | 2,872  | 0,335 | -0,301 |
| 14 | Q92598 HS105_HUMAN | E.LNNTCEPVVTQPKPK.I            |            | 2 | 2,8701 | 0,311 | 0,283  |
| 14 | P04406 G3P_HUMAN   | K.LVINGNPITIFQER.D             |            | 3 | 2,8693 | 0,126 | -0,113 |
| 14 | P62736 ACTA_HUMAN  | R.GILTLYPIE.H                  |            | 2 | 2,8692 | 0,449 | -0,532 |
| 14 | Q9UBR2 CATZ_HUMAN  | R.VGDYGSLSGRE.K                |            | 2 | 2,8672 | 0,317 | -0,107 |
| 14 | Q8TDD1 DDX54_HUMAN | R.KLGPGRPLPTFPTS#ECTSDVEPDRE.M | S71:       | 3 | 2,867  | 0,358 | -0,493 |
| 14 | P51784 UBP11_HUMAN | K.AAYVLFYQR.Q                  |            | 2 | 2,8649 | 0,265 | -0,108 |

|    |                    |                             |        |   |        |       |        |
|----|--------------------|-----------------------------|--------|---|--------|-------|--------|
| 14 | Q8WXI9 P66B_HUMAN  | R.LTPSPDIIVLS#DNE.A         | S129:  | 2 | 2,8628 | 0,213 | -0,46  |
| 14 | Q9H4A3 WVK1_HUMAN  | K.DRPVQPSLVGSK.E            |        | 2 | 2,8603 | 0,396 | -0,267 |
| 14 | P05787 K2C8_HUMAN  | R.VGS#SNFR.G                | S43:   | 2 | 2,8603 | 0,241 | -0,576 |
| 14 | Q9NPR2 SEM4B_HUMAN | E.KRPLSIQDS#FVE.V           | S808:  | 2 | 2,8588 | 0,45  | -0,488 |
| 14 | Q9UMZ2 SYNG_HUMAN  | K.ISKFDLTVATSQSK.M          |        | 3 | 2,8588 | 0,126 | -0,116 |
| 14 | Q96JM3 ZN828_HUMAN | R.KPALFPEPAK.T              |        | 2 | 2,8586 | 0,307 | -0,222 |
| 14 | P11142 HSP7C_HUMAN | K.DNNLLGKFE.L               |        | 2 | 2,8584 | 0,324 | -0,116 |
| 14 | Q5JSH3 WDR44_HUMAN | R.SNS#GRELTDEE.I            | S344:  | 2 | 2,8578 | 0,327 | -0,371 |
| 14 | Q7L7X3 TAOK1_HUMAN | E.GDHTVMSNSS#VIHLKPEEE.N    | S395:  | 3 | 2,8536 | 0,234 | -0,167 |
| 14 | P22626 ROA2_HUMAN  | R.GGGGNFGPGPSNFR.G          |        | 2 | 2,851  | 0,47  | -0,266 |
| 14 | P11021 GRP78_HUMAN | R.LIGDAAKNQLTSNPE.N         |        | 2 | 2,8459 | 0,318 | 0,311  |
| 14 | P00558 PGK1_HUMAN  | E.KACANPAAGSVILLE.N         |        | 2 | 2,8453 | 0,227 | -0,484 |
| 14 | P68431 H31_HUMAN   | E.DTNLCAIHAK.R              |        | 2 | 2,8424 | 0,329 | 0      |
| 14 | P68104 EF1A1_HUMAN | R.GNVAGDSKNDPPM*E.A         |        | 2 | 2,8414 | 0,39  | -0,675 |
| 14 | O94826 TOM70_HUMAN | E.GRAS#PAPGSGHPEGPAHLD.M    | S91:   | 2 | 2,8408 | 0,372 | -0,376 |
| 14 | P62988 UBIQ_HUMAN  | R.TLSDYNIQKE.S              |        | 2 | 2,8391 | 0,224 | -0,302 |
| 14 | P60900 PSA6_HUMAN  | E.IDAHLVALAERD.-            |        | 3 | 2,8354 | 0,298 | 0,207  |
| 14 | Q96HC4 PDLI5_HUMAN | E.VVKVPITS#PAVSK.V          | S111:  | 2 | 2,8351 | 0,335 | -0,244 |
| 14 | O15127 SCAM2_HUMAN | E.FSQGIFSSR.T               |        | 2 | 2,8345 | 0,28  | 0,119  |
| 14 | P18858 DNL1_HUMAN  | E.QATTSAQVACLVR.K           |        | 2 | 2,8345 | 0,391 | -0,083 |
| 14 | Q04917 1433F_HUMAN | E.DSYKDSTLIM*QLLR.D         |        | 3 | 2,832  | 0,159 | -0,108 |
| 14 | P09874 PARP1_HUMAN | K.M*VDPEKPQLGM*ID.R         |        | 2 | 2,8319 | 0,323 | -0,324 |
| 14 | P49792 RBP2_HUMAN  | R.FALVT#PKKE.G              | T1412: | 2 | 2,8315 | 0,242 | -0,11  |
| 14 | Q09666 AHNK_HUMAN  | K.SSKASLGS#LEGEAE.A         | S5752: | 2 | 2,8305 | 0,357 | -0,084 |
| 14 | P02765 FETUA_HUMAN | K.CDSSPDSAEDVRK.V           |        | 3 | 2,8281 | 0,274 | -0,062 |
| 14 | P49327 FAS_HUMAN   | E.AIVDGGINPDSLR.G           |        | 2 | 2,8265 | 0,303 | -0,276 |
| 14 | Q99714 HCD2_HUMAN  | K.LGNNCVFAPADVTSE.K         |        | 2 | 2,8252 | 0,361 | -0,23  |
| 14 | O43847 NRDC_HUMAN  | R.RGS#LSNAGDPE.I            | S94:   | 2 | 2,825  | 0,299 | -0,825 |
| 14 | Q66K74 MAP1S_HUMAN | R.LSLS#PLRGGE.A             | S657:  | 2 | 2,8239 | 0,199 | -0,11  |
| 14 | P68104 EF1A1_HUMAN | K.FLKSGDAAIVDM*VPGKPM*CVE.S |        | 3 | 2,8225 | 0,272 | -0,398 |
| 14 | P05023 AT1A1_HUMAN | E.VSMDDHKLSDLDE.L           |        | 2 | 2,8139 | 0,372 | -0,703 |
| 14 | O95292 VAPB_HUMAN  | E.LPAENDKPHDVE.I            |        | 2 | 2,8124 | 0,374 | -0,537 |
| 14 | Q9C0C2 TB182_HUMAN | R.RGAGAELKDTQS#PSTCSE.G     | S712:  | 3 | 2,8109 | 0,276 | -0,463 |

|    |                    |                           |                 |   |        |       |        |
|----|--------------------|---------------------------|-----------------|---|--------|-------|--------|
| 14 | Q6NZI2 PTRF_HUMAN  | R.RGSS#PDVHALLE.I         | S366:           | 2 | 2,8103 | 0,345 | -0,628 |
| 14 | Q8N122 RPTOR_HUMAN | R.SVSS#YGNIR.A            | S722:           | 2 | 2,8091 | 0,264 | 0,115  |
| 14 | Q07955 SFRS1_HUMAN | R.VKVDGPR#PS#YGRS#R.S     | S199:S201:S205: | 3 | 2,8083 | 0,116 | -0,385 |
| 14 | Q5VUA4 ZN318_HUMAN | R.IPS#PNILKTGLTE.N        | S2101:          | 2 | 2,8058 | 0,321 | -0,167 |
| 14 | P05787 K2C8_HUMAN  | E.AAIADAEQRGE.L           |                 | 2 | 2,8047 | 0,523 | -0,324 |
| 14 | P23284 PPIB_HUMAN  | E.VEKPFIAIKE.-            |                 | 2 | 2,8038 | 0,15  | -0,108 |
| 14 | Q14676 MDC1_HUMAN  | R.SSVKT#PEPVVPTAPE.L      | T1157:          | 2 | 2,8025 | 0,169 | -0,452 |
| 14 | P06748 NPM_HUMAN   | E.KT#PKT#PKGPSVE.D        | T234:T237:      | 2 | 2,7972 | 0,151 | -0,402 |
| 14 | Q09666 AHNK_HUMAN  | K.FAGGLHFS#GPKVE.G        | S5620:          | 2 | 2,7951 | 0,233 | -0,428 |
| 14 | Q2NKX8 ERC6L_HUMAN | E.NSLCGSAPNSR.A           |                 | 2 | 2,7948 | 0,293 | -0,105 |
| 14 | Q58FF8 H90B2_HUMAN | E.SLT#DPSKLDGKE.L         | T60:            | 2 | 2,7948 | 0,448 | -0,419 |
| 14 | Q13136 LIPA1_HUMAN | R.SSDGS#LS#HEEDLAKVIE.L   | S242:S244:      | 2 | 2,793  | 0,26  | -0,371 |
| 14 | Q6GYQ0 GRIPE_HUMAN | R.VRHFS#QSEE.T            | S773:           | 2 | 2,7923 | 0,294 | -0,509 |
| 14 | O00231 PSD11_HUMAN | R.DIQENDEEAVQVK.E         |                 | 2 | 2,7921 | 0,271 | -0,724 |
| 14 | P08107 HSP71_HUMAN | K.DNNLLGRFE.L             |                 | 2 | 2,7919 | 0,195 | -0,905 |
| 14 | Q12830 BPTF_HUMAN  | E.TKSHLLSSS#DAE.G         | S1478:          | 2 | 2,7863 | 0,226 | -0,27  |
| 14 | O95785 WIZ_HUMAN   | E.ARSPSDLHIS#PLAK.K       | S1134:          | 3 | 2,7852 | 0,118 | -0,698 |
| 14 | Q02952 AKA12_HUMAN | E.DFAAHPGEDAVPTGPDCAK.S   |                 | 3 | 2,7843 | 0,107 | -0,176 |
| 14 | P49023 PAXI_HUMAN  | E.HVYSFPNK.Q              |                 | 2 | 2,782  | 0,457 | -0,123 |
| 14 | O14924 RGS12_HUMAN | E.NPSLCASNSEPLKQ.Q        |                 | 3 | 2,7813 | 0,216 | -0,11  |
| 14 | Q8IVF2 AHNK2_HUMAN | K.LSLVLDKDE.V             |                 | 2 | 2,781  | 0,244 | 0      |
| 14 | Q13043 STK4_HUMAN  | R.LLALDPM*MEQE.I          |                 | 2 | 2,7808 | 0,187 | -0,28  |
| 14 | O15355 PPM1G_HUMAN | D.IKVLTLTDDHE.F           |                 | 3 | 2,7807 | 0,151 | 0,071  |
| 14 | P30153 2AAA_HUMAN  | E.KLTQDQDQDVK.Y           |                 | 2 | 2,7775 | 0,2   | -0,379 |
| 14 | P16949 STMN1_HUMAN | R.SKESVPEFPLS#PPK.K       | S38:            | 2 | 2,7772 | 0,334 | 0      |
| 14 | Q71RC2 LARP4_HUMAN | K.DGLNQTTIPVS#PPSTTKPSR.A | S583:           | 3 | 2,7771 | 0,22  | -0,336 |
| 14 | Q14247 SRC8_HUMAN  | R.AKTQTPPVSPAPQPTTEE.R    |                 | 2 | 2,7771 | 0,423 | -0,274 |
| 14 | Q9H8Y8 GORS2_HUMAN | K.ISLPGQMAGTPIT#PLKDGFE.V | T225:           | 3 | 2,7765 | 0,225 | -0,325 |
| 14 | P04792 HSPB1_HUMAN | E.SPAAVAPAYS.R            |                 | 2 | 2,773  | 0,271 | -0,336 |
| 14 | P07355 ANXA2_HUMAN | E.VTIVNILTNR.S            |                 | 2 | 2,7718 | 0,198 | -0,107 |
| 14 | P28749 RBL1_HUMAN  | R.DM*QPLS#PISVHE.R        | S640:           | 2 | 2,7697 | 0,143 | -0,337 |
| 14 | Q9UQ35 SRRM2_HUMAN | E.SYFGVSSSLQLK.G          |                 | 2 | 2,769  | 0,449 | 0      |
| 14 | Q5W0B1 RN219_HUMAN | K.SSQGSEFLEEPDKLEE.K      |                 | 2 | 2,7689 | 0,307 | -0,401 |

|    |                     |                                |            |   |        |       |        |
|----|---------------------|--------------------------------|------------|---|--------|-------|--------|
| 14 | B2CI53 B2CI53_HUMAN | R.NGILASPQSAPGNLDNSK.S         |            | 2 | 2,7684 | 0,227 | -0,205 |
| 14 | Q96C34 RUND1_HUMAN  | E.ATAEPGAAPGS#PPDS#PGRTRLRR.L  | S71:S75:   | 3 | 2,7682 | 0,182 | 0,224  |
| 14 | Q5VZK9 LR16A_HUMAN  | R.YGVQVMGSGLLAE.M              |            | 2 | 2,768  | 0,333 | -0,553 |
| 14 | Q5H9R7 SAPS3_HUMAN  | E.KHIAFT#PE.S                  | T631:      | 2 | 2,7613 | 0,312 | -0,298 |
| 14 | Q9UPN9 TRI33_HUMAN  | R.SACM*LSSPESSLT#PPLSTNLHLE.S  | T815:      | 3 | 2,7609 | 0,143 | -0,499 |
| 14 | P55072 TERA_HUMAN   | K.GVLFYGGPPGCGK.T              |            | 2 | 2,7608 | 0,428 | -0,292 |
| 14 | Q9UKS6 PACN3_HUMAN  | E.VTLTSIVPTR.D                 |            | 2 | 2,7603 | 0,34  | -0,224 |
| 14 | Q01813 K6PP_HUMAN   | R.NVIFQPVAELK.K                |            | 2 | 2,7591 | 0,368 | -0,194 |
| 14 | Q14247 SRC8_HUMAN   | R.AKTQT#PPVS#PAPQPTEE.R        | T401:S405: | 2 | 2,7589 | 0,449 | -0,252 |
| 14 | O15014 ZN609_HUMAN  | K.SKDAEQLVKE.G                 |            | 2 | 2,7579 | 0,307 | -0,213 |
| 14 | Q14676 MDC1_HUMAN   | R.DAEEDMPQR.V                  |            | 2 | 2,7549 | 0,208 | -0,224 |
| 14 | P37802 TAGL2_HUMAN  | E.GKNVIGLQM*GTNR.G             |            | 2 | 2,7539 | 0,395 | -0,608 |
| 14 | Q9Y613 FHOD1_HUMAN  | R.TPQSPAPCVLLR.A               |            | 2 | 2,7509 | 0,325 | -0,547 |
| 14 | Q9Y6D5 BIG2_HUMAN   | E.IGDGKGLDM*AR.R               |            | 2 | 2,7465 | 0,461 | -0,743 |
| 14 | Q6NV74 CB055_HUMAN  | R.GPQDSGDRAAS#PAGPR.K          | S646:      | 2 | 2,7465 | 0,29  | -0,528 |
| 14 | P37802 TAGL2_HUMAN  | E.GKNVIGLQM*GTNR.G             |            | 3 | 2,743  | 0,229 | 0      |
| 14 | Q6P0N0 CN106_HUMAN  | K.SKKDT#FVLE.S                 | T267:      | 2 | 2,7424 | 0,16  | -0,425 |
| 14 | O00418 EF2K_HUMAN   | K.LLQSAKT#ILRGTEE.K            | T348:      | 3 | 2,7414 | 0,243 | -0,112 |
| 14 | P60900 PSA6_HUMAN   | D.SSTVTHLFK.I                  |            | 2 | 2,7403 | 0,254 | -0,299 |
| 14 | Q9UGU0 TCF20_HUMAN  | E.KAGSSPAQGAQNEPRLNAS#PAAREE.A | S574:      | 3 | 2,7339 | 0,279 | -0,135 |
| 14 | Q13242 SFRS9_HUMAN  | R.IYVGNLPTDVRE.K               |            | 2 | 2,7306 | 0,382 | 0,089  |
| 14 | Q13439 GOGA4_HUMAN  | K.LQLRVPS#VE.S                 | S71:       | 2 | 2,7296 | 0,238 | -0,327 |
| 14 | O00592 PODXL_HUMAN  | E.KKVVS#LNGE.L                 | S499:      | 2 | 2,7279 | 0,414 | -0,116 |
| 14 | Q01518 CAP1_HUMAN   | R.SGPKPFSAPKPQT#SPSPK.R        | T307:      | 3 | 2,7235 | 0,109 | -0,381 |
| 14 | P35998 PRS7_HUMAN   | E.DDIQQLLKKINE.L               |            | 2 | 2,7225 | 0,082 | -0,586 |
| 14 | Q9Y266 NUDC_HUMAN   | E.DGKVVTVHLE.K                 |            | 2 | 2,7196 | 0,273 | -0,222 |
| 14 | Q9UQ35 SRRM2_HUMAN  | K.RVPS#PTPAPKE.A               | S2581:     | 2 | 2,7185 | 0,315 | -0,678 |
| 14 | Q9UI15 TAGL3_HUMAN  | K.IEQKYDADLE.N                 |            | 2 | 2,718  | 0,303 | -0,199 |
| 14 | O15371 EIF3D_HUMAN  | E.GKYLILKDPNK.Q                |            | 3 | 2,7129 | 0,122 | 0,213  |
| 14 | Q09666 AHNK_HUMAN   | E.GPEVDVNLPK.A                 |            | 2 | 2,7118 | 0,318 | 0,114  |
| 14 | Q86YS7 K0528_HUMAN  | E.IIGS#PIPEPR.Q                | S643:      | 2 | 2,7113 | 0,353 | -0,105 |
| 14 | P30101 PDIA3_HUMAN  | E.STAGEIPVVAIR.T               |            | 2 | 2,7064 | 0,362 | 0      |
| 14 | O95817 BAG3_HUMAN   | R.GYISIPVIHE.Q                 |            | 2 | 2,7061 | 0,27  | -0,108 |

|    |                    |                             |            |   |        |       |        |
|----|--------------------|-----------------------------|------------|---|--------|-------|--------|
| 14 | Q9NWS0 PIHD1_HUMAN | R.LVM*GGPQQLYHLD.A          |            | 2 | 2,706  | 0,38  | -0,574 |
| 14 | O43847 NRDC_HUMAN  | E.GRRGS#LSNAGDPE.I          | S94:       | 2 | 2,7049 | 0,33  | -1,224 |
| 14 | P62256 UBE2H_HUMAN | R.MDTDVVKLIE.S              |            | 2 | 2,703  | 0,321 | -0,42  |
| 14 | P53355 DAPK1_HUMAN | R.LSRSFLSRSNMS#VARS#DDTLD.E | S329:S333: | 3 | 2,7027 | 0,098 | 1,381  |
| 14 | P30050 RL12_HUMAN  | E.ILGTAQSVGCNVDGR.H         |            | 2 | 2,7016 | 0,367 | -0,079 |
| 14 | Q13506 NAB1_HUMAN  | R.IKVEDGFPDFQD.S            |            | 2 | 2,7008 | 0,275 | 0      |
| 14 | Q8NHQ8 RASF8_HUMAN | R.ILQNPISSGFNPE.G           |            | 2 | 2,6994 | 0,386 | -0,258 |
| 14 | Q9Y2W6 TDRKH_HUMAN | K.SSGEITHTLS#CLS#LSE.A      | S539:S542: | 2 | 2,698  | 0,109 | -0,519 |
| 14 | Q09666 AHNK_HUMAN  | E.ASISGSKGDLK.S             |            | 2 | 2,6979 | 0,196 | -0,115 |
| 14 | P68104 EF1A1_HUMAN | K.SGDAAIVDM*VPGKPM*CVE.S    |            | 3 | 2,6953 | 0,106 | -0,096 |
| 14 | Q12931 TRAP1_HUMAN | E.DKEEPLHSIISSTE.S          |            | 2 | 2,6942 | 0,35  | -0,385 |
| 14 | P42166 LAP2A_HUMAN | R.SSTPLPTISSAENTR.Q         |            | 2 | 2,6934 | 0,373 | -0,666 |
| 14 | Q14676 MDC1_HUMAN  | R.DAEEDM*PQR.V              |            | 2 | 2,6929 | 0,359 | -0,331 |
| 14 | O43852 CALU_HUMAN  | E.AKTFDQLTPESKE.R           |            | 3 | 2,6912 | 0,111 | -0,113 |
| 14 | P52907 CAZA1_HUMAN | R.LLLNNDNLLRE.G             |            | 2 | 2,6909 | 0,104 | -0,276 |
| 14 | P60709 ACTB_HUMAN  | E.GYALPHAILRLD.L            |            | 2 | 2,6901 | 0,306 | -0,638 |
| 14 | Q9UKV8 I2C2_HUMAN  | R.SAS#FNTDPYVRE.F           | S379:      | 2 | 2,689  | 0,314 | -0,499 |
| 14 | P62753 RS6_HUMAN   | R.RLS#S#LRASTKSE.S          | S235:S236: | 2 | 2,6889 | 0,314 | -0,54  |
| 14 | P52788 SPSY_HUMAN  | D.EVVYDEDSPYQNIK.I          |            | 2 | 2,6888 | 0,281 | -0,287 |
| 14 | P49588 SYAC_HUMAN  | E.NTVATVMALR.R              |            | 2 | 2,6875 | 0,278 | 0      |
| 14 | P06733 ENOA_HUMAN  | E.KSCNCLLLK.V               |            | 2 | 2,686  | 0,171 | -0,537 |
| 14 | P41091 IF2G_HUMAN  | E.IEVRPGIVSKDSE.G           |            | 3 | 2,6857 | 0,206 | 0,128  |
| 14 | Q04917 1433F_HUMAN | E.DRNLLSVAYK.N              |            | 2 | 2,6856 | 0,273 | -0,207 |
| 14 | Q9UKI8 TLK1_HUMAN  | E.YQGGNGSS#PVRGIPPAIR.S     | S159:      | 3 | 2,6805 | 0,104 | -0,192 |
| 14 | P05556 ITB1_HUMAN  | K.CTDPKFQGTCE.M             |            | 2 | 2,6788 | 0,274 | -0,581 |
| 14 | Q9NRY4 GRLF1_HUMAN | E.NIYSVPHDSTQGK.I           |            | 2 | 2,6758 | 0,421 | -0,422 |
| 14 | P06748 NPM_HUMAN   | R.TVSLGAGAKDE.L             |            | 2 | 2,6743 | 0,391 | 0      |
| 14 | P62906 RL10A_HUMAN | E.AKAVDIPHMDIE.A            |            | 2 | 2,6731 | 0,363 | -0,182 |
| 14 | P27824 CALX_HUMAN  | E.VEDSKPDTTAPPSSPK.V        |            | 3 | 2,6728 | 0,089 | -0,663 |
| 14 | O95831 AIFM1_HUMAN | E.KCLIATGGTPR.S             |            | 2 | 2,6725 | 0,229 | -0,208 |
| 14 | Q00839 HNRPU_HUMAN | K.LKVSELKEE.L               |            | 2 | 2,6717 | 0,238 | -0,227 |
| 14 | P62701 RS4X_HUMAN  | K.ITDFIKFD.T                |            | 2 | 2,671  | 0,3   | -0,244 |
| 14 | P07942 LAMB1_HUMAN | K.ATGQCLCLPNVIGQNCDR.C      |            | 2 | 2,6697 | 0,577 | -0,118 |

|    |                     |                              |              |   |        |       |        |
|----|---------------------|------------------------------|--------------|---|--------|-------|--------|
| 14 | Q58FF7 H90B3_HUMAN  | E.YCVQQLKE.F                 |              | 2 | 2,6691 | 0,13  | -0,571 |
| 14 | Q92882 OSTF1_HUMAN  | D.MATNAACASLLK.K             |              | 2 | 2,6687 | 0,266 | -0,098 |
| 14 | P10809 CH60_HUMAN   | R.KPLVIIAEDVDGE.A            |              | 2 | 2,6671 | 0,219 | -0,349 |
| 14 | P27816 MAP4_HUMAN   | R.LATNTSAPDLK.N              |              | 2 | 2,6668 | 0,337 | -0,108 |
| 14 | P30050 RL12_HUMAN   | R.HPHDIIDDINSGAVECPAS.-      |              | 2 | 2,6652 | 0,381 | -0,477 |
| 14 | P49790 NU153_HUMAN  | R.SVYFKPSLT#PSGE.F           | T388:        | 2 | 2,6646 | 0,382 | 0      |
| 14 | O43809 CPSF5_HUMAN  | K.YIQQTKPLTLE.R              |              | 2 | 2,6637 | 0,285 | -0,64  |
| 14 | P08670 VIME_HUMAN   | E.RKVES#LQEE.I               | S226:        | 2 | 2,6618 | 0,254 | -0,407 |
| 14 | P30101 PDIA3_HUMAN  | E.STAGEIPVVAIR.T             |              | 3 | 2,66   | 0,144 | 0,377  |
| 14 | P07814 SYEP_HUMAN   | E.DLKTHMVVANTME.D            |              | 2 | 2,6592 | 0,202 | -0,492 |
| 14 | A9CQZ4 A9CQZ4_HUMAN | R.QKFCGM*FCPVEGSSE.N         |              | 2 | 2,6572 | 0,352 | -0,549 |
| 14 | Q5VUA4 ZN318_HUMAN  | R.SVRIPS#PNILK.T             | S2101:       | 3 | 2,6547 | 0,261 | -0,07  |
| 14 | Q9UPT5 EXOC7_HUMAN  | E.DFADNIKNDPDKE.Y            |              | 2 | 2,6483 | 0,41  | -0,401 |
| 14 | Q969S3 ZN622_HUMAN  | D.AM*NAAIQQAIA.A             |              | 2 | 2,648  | 0,32  | -0,312 |
| 14 | P09211 GSTP1_HUMAN  | K.LKAFLASPE.Y                |              | 2 | 2,6478 | 0,149 | -1,438 |
| 14 | Q05524 ENO1B_HUMAN  | K.VNQIGSVTE.S                |              | 2 | 2,6455 | 0,278 | -0,193 |
| 14 | P35030 TRY3_HUMAN   | D.TLDNDIMLIK.L               |              | 2 | 2,645  | 0,302 | -1,037 |
| 14 | P04264 K2C1_HUMAN   | K.WELLQQVDTSTR.T             |              | 2 | 2,633  | 0,375 | -0,496 |
| 14 | Q14676 MDC1_HUMAN   | R.SSVKTPET#VVPTAPE.L         | T1324:       | 2 | 2,633  | 0,13  | -0,301 |
| 14 | O75475 PSIP1_HUMAN  | K.FSSQQAATK.Q                |              | 2 | 2,6287 | 0,254 | -0,189 |
| 14 | P68104 EF1A1_HUMAN  | K.FLKSGDAAIVDMVPGKPM*CVE.S   |              | 3 | 2,6283 | 0,155 | -0,802 |
| 14 | Q12888 TP53B_HUMAN  | R.QSQQPMKPIS#PVKDPVS#PASQK.M | S1094:S1101: | 3 | 2,628  | 0,214 | -0,433 |
| 14 | P55072 TERA_HUMAN   | E.DIGGLEDVKRE.L              |              | 2 | 2,6273 | 0,356 | -0,198 |
| 14 | P00966 ASSY_HUMAN   | K.TQDPAKAPNTPDILEIE.F        |              | 2 | 2,6263 | 0,175 | -0,329 |
| 14 | P06396 GELS_HUMAN   | E.DCFILDHGKD.G               |              | 3 | 2,6258 | 0,176 | -0,15  |
| 14 | P28062 PSB8_HUMAN   | E.STDVSDLLHQYR.E             |              | 3 | 2,6235 | 0,328 | 0      |
| 14 | Q8N1G2 K0082_HUMAN  | E.LALSLSSTSDEPPSSVSHGAK.A    |              | 3 | 2,6188 | 0,209 | -0,586 |
| 14 | P05556 ITB1_HUMAN   | E.VNSEDN*DAYCR.K             |              | 2 | 2,6185 | 0,323 | -0,621 |
| 14 | Q58FF8 H90B2_HUMAN  | E.SLTDPSKILDS#GKE.L          | S67:         | 2 | 2,6178 | 0,225 | -0,502 |
| 14 | Q86UU1 PHLB1_HUMAN  | E.DFSLTLGAR.G                |              | 2 | 2,6167 | 0,191 | 0,062  |
| 14 | Q9UNN5 FAF1_HUMAN   | R.IRTPS#GEFLE.R              | S582:        | 2 | 2,6151 | 0,254 | -1,39  |
| 14 | P49755 TMEDA_HUMAN  | K.GKFAFTE.D                  |              | 2 | 2,6129 | 0,286 | 0,271  |
| 14 | O95816 BAG2_HUMAN   | E.MIHSIQNSQDMR.Q             |              | 3 | 2,6115 | 0,26  | -0,125 |



|    |                     |                             |            |   |        |       |        |
|----|---------------------|-----------------------------|------------|---|--------|-------|--------|
| 14 | Q5EBL4 RIPL1_HUMAN  | E.NRIPQPPPIAHPR.T           |            | 2 | 2,6104 | 0,082 | -0,49  |
| 14 | Q9HA05 Q9HA05_HUMAN | K.M*NSIVYQK.Q               |            | 2 | 2,6104 | 0,188 | -0,366 |
| 14 | Q92882 OSTF1_HUMAN  | D.M*ATNAACASLLK.K           |            | 2 | 2,6089 | 0,455 | -0,193 |
| 14 | P08670 VIME_HUMAN   | E.VDALKGTNE.S               |            | 2 | 2,6086 | 0,289 | -0,129 |
| 14 | Q6S8J3 A26CA_HUMAN  | K.SYELPDGQVITIGNE.R         |            | 2 | 2,6081 | 0,342 | -0,373 |
| 14 | P49750 YLPM1_HUMAN  | K.SQLLAPPPPSAPPGNK.T        |            | 2 | 2,606  | 0,189 | -0,155 |
| 14 | Q5W0B1 RN219_HUMAN  | K.SLDLDGLSK.S               |            | 2 | 2,6033 | 0,25  | -0,45  |
| 14 | Q27J81 INF2_HUMAN   | E.GLEDAVHSR.G               |            | 2 | 2,6007 | 0,268 | -0,248 |
| 14 | Q9H6F5 CCD86_HUMAN  | R.AGLGS#PERPPKTSPPGSPR.L    | S58:       | 3 | 2,6001 | 0,219 | 0      |
| 14 | A1L390 PKHG3_HUMAN  | R.HGSATDSLSCQLSPE.V         |            | 2 | 2,5997 | 0,206 | 0,845  |
| 14 | P26639 SYTC_HUMAN   | E.KAS#SPSGKM*GGEEKPIGAGEE.K | S7:        | 3 | 2,5995 | 0,196 | -0,342 |
| 14 | Q9UQ80 PA2G4_HUMAN  | R.LVKPGNQNTQVTE.A           |            | 2 | 2,5995 | 0,171 | -0,513 |
| 14 | Q16890 TPD53_HUMAN  | R.NSPTFKS#FEERVE.T          | S149:      | 2 | 2,5992 | 0,312 | -0,444 |
| 14 | P80723 BASP_HUMAN   | K.ETPAATEAPSSTPK.A          |            | 2 | 2,5985 | 0,29  | -0,264 |
| 14 | Q96RK0 CIC_HUMAN    | E.GGALAATGRPPLLTR.A         |            | 3 | 2,5974 | 0,154 | -0,118 |
| 14 | P52756 RBM5_HUMAN   | R.NGDEENPLKR.G              |            | 2 | 2,5953 | 0,117 | -0,416 |
| 14 | Q13136 LIPA1_HUMAN  | K.KM*QM*DGNVSGTQRLD.S       |            | 3 | 2,5951 | 0,208 | -0,641 |
| 14 | P07814 SYEP_HUMAN   | E.DLKTHM*VVANTM*E.D         |            | 2 | 2,5942 | 0,254 | -0,321 |
| 14 | Q9UQ35 SRRM2_HUMAN  | K.THTTALAGRS#PS#PASGR.R     | S295:S297: | 3 | 2,5897 | 0,258 | -0,601 |
| 14 | Q9UPS6 SET1B_HUMAN  | E.DHPPHT#PGLCGSLAK.S        | T1320:     | 3 | 2,5888 | 0,098 | -0,219 |
| 14 | O95785 WIZ_HUMAN    | R.SPSDLHISPLAK.K            |            | 2 | 2,5857 | 0,33  | -0,289 |
| 14 | Q53F19 CQ085_HUMAN  | E.LKM*IST#PS#PKK.S          | T413:S415: | 2 | 2,5826 | 0,2   | -0,347 |
| 14 | P07737 PROF1_HUMAN  | K.TLVLLM*GKE.G              |            | 2 | 2,5796 | 0,189 | 0,12   |
| 14 | P13693 TCTP_HUMAN   | -.M*IIYRDLISHDE.M           |            | 3 | 2,5784 | 0,198 | 0      |
| 14 | Q53F19 CQ085_HUMAN  | E.NKAGSFITGIDVTSKE.A        |            | 3 | 2,5777 | 0,168 | 0      |
| 14 | Q96A49 SYAP1_HUMAN  | E.AVRPKT#PPVVIK.S           | T248:      | 2 | 2,5763 | 0,113 | -0,969 |
| 14 | P51858 HDGF_HUMAN   | K.LVIDEPAKE.K               |            | 2 | 2,5719 | 0,382 | -0,361 |
| 14 | Q86UE8 TLK2_HUMAN   | E.FAGGSAPGTS#PGR.S          | S99:       | 2 | 2,5683 | 0,247 | -0,589 |
| 14 | P31943 HNRH1_HUMAN  | R.GLPFGCSKEE.I              |            | 2 | 2,5682 | 0,361 | -0,217 |
| 14 | P42166 LAP2A_HUMAN  | R.QNGSNDSDRYS#DNEE.G        | S184:      | 2 | 2,5645 | 0,34  | -0,472 |
| 14 | P04406 G3P_HUMAN    | E.NGKLVINGNPITIFQER.D       |            | 3 | 2,563  | 0,143 | -0,191 |
| 14 | P28070 PSB4_HUMAN   | R.SYNRFQIATVTE.K            |            | 2 | 2,5617 | 0,216 | -0,427 |
| 14 | Q15365 PCBP1_HUMAN  | R.CSDAAGYPHATHDLE.G         |            | 3 | 2,5604 | 0,198 | -0,334 |

|    |                     |                          |       |   |        |       |        |
|----|---------------------|--------------------------|-------|---|--------|-------|--------|
| 14 | P51858 HDGF_HUMAN   | E.DAEAPGIRDHESL.-        |       | 2 | 2,5593 | 0,319 | -0,433 |
| 14 | Q86YV5 SG223_HUMAN  | E.DAPVVYLGSR.G           |       | 2 | 2,5584 | 0,372 | -0,399 |
| 14 | Q14978 NOLC1_HUMAN  | R.VADNS#FDAKR.G          | S643: | 3 | 2,5583 | 0,415 | 0,38   |
| 14 | P05787 K2C8_HUMAN   | E.LAIKDANAKLSELE.A       |       | 3 | 2,5579 | 0,153 | 0,06   |
| 14 | Q9Y3Q8 T22D4_HUMAN  | R.SFTGGLGQLVPSK.A        |       | 2 | 2,5576 | 0,237 | -0,263 |
| 14 | Q8WUA4 TF3C2_HUMAN  | E.LSTALPAPVSCPEGPK.V     |       | 2 | 2,5571 | 0,223 | -0,225 |
| 14 | P20700 LMNB1_HUMAN  | K.VILKNSQGEE.V           |       | 2 | 2,556  | 0,274 | -0,328 |
| 14 | O60684 IMA7_HUMAN   | K.SYKNNALNPEE.M          |       | 2 | 2,555  | 0,272 | -0,572 |
| 14 | P05455 LA_HUMAN     | E.DLHILFSNHGE.I          |       | 3 | 2,5544 | 0,11  | -0,428 |
| 14 | O94804 STK10_HUMAN  | K.ASQSRPNS#SALE.T        | S454: | 2 | 2,5537 | 0,214 | -0,552 |
| 14 | Q9NVN8 GNL3L_HUMAN  | E.IKLLHS#PM*TK.I         | S465: | 3 | 2,5509 | 0,146 | 0,145  |
| 14 | P55197 AF10_HUMAN   | R.SPVSSLQIR.Y            |       | 2 | 2,5494 | 0,137 | 0,68   |
| 14 | P49588 SYAC_HUMAN   | E.NTVATVM*ALR.R          |       | 2 | 2,5475 | 0,182 | 0,112  |
| 14 | Q13523 PRP4B_HUMAN  | R.TKLDDLALLE.D           |       | 2 | 2,5455 | 0,204 | -0,431 |
| 14 | Q9Y2U5 M3K2_HUMAN   | K.KRLS#IIGPTSR.D         | S153: | 3 | 2,5453 | 0,219 | 0      |
| 14 | Q8IYA6 CKP2L_HUMAN  | E.VQDM*KFIT#PVRR.S       | T685: | 3 | 2,5425 | 0,248 | -1,73  |
| 14 | Q9NWK9 CA181_HUMAN  | E.GVRLS#PEPGREGVR.D      | S25:  | 3 | 2,5416 | 0,284 | -0,23  |
| 14 | P34932 HSP74_HUMAN  | R.NSFTLKLE.D             |       | 2 | 2,5404 | 0,288 | -0,256 |
| 14 | Q9Y6D5 BIG2_HUMAN   | R.RCS#VTSME.S            | S614: | 2 | 2,5393 | 0,266 | -0,116 |
| 14 | Q9P0K8 FOXJ2_HUMAN  | R.KCSPGS#PTDPNATLSKDE.A  | S46:  | 3 | 2,5379 | 0,242 | -0,277 |
| 14 | P05556 ITB1_HUMAN   | E.KTVM*PYISTTPAK.L       |       | 2 | 2,5323 | 0,277 | -0,336 |
| 14 | P62701 RS4X_HUMAN   | R.IGVITNRE.R             |       | 2 | 2,5321 | 0,212 | 0      |
| 14 | P05787 K2C8_HUMAN   | R.ISS#SSFSSR.V           | S35:  | 2 | 2,5319 | 0,146 | 0,192  |
| 14 | A9CQZ4 A9CQZ4_HUMAN | K.FCGMFCPVEGSSE.N        |       | 2 | 2,5293 | 0,322 | 0,486  |
| 14 | Q99714 HCD2_HUMAN   | K.KLGNNCVFAPADVTSE.K     |       | 2 | 2,5281 | 0,405 | -0,496 |
| 14 | Q9NUQ3 TXLNG_HUMAN  | R.SAVQKPPS#TGSAPAIESVD.- | S517: | 2 | 2,5264 | 0,401 | -0,254 |
| 14 | Q86YS7 K0528_HUMAN  | E.LDLS#HGKKDAFVLE.I      | S671: | 2 | 2,5262 | 0,09  | -0,591 |
| 14 | Q6Q0C0 TRAF7_HUMAN  | E.TTFGPAFSAVTTITK.A      |       | 2 | 2,526  | 0,441 | -0,475 |
| 14 | O75663 TIPRL_HUMAN  | R.IQHSGSGFIE.F           |       | 2 | 2,5255 | 0,183 | -0,117 |
| 14 | O75351 VPS4B_HUMAN  | K.LQNQLQGAIVIE.R         |       | 2 | 2,5248 | 0,171 | -0,276 |
| 14 | Q13263 TIF1B_HUMAN  | E.DGSLSLDGADSTGVVAK.L    |       | 2 | 2,5246 | 0,391 | -0,383 |
| 14 | P12081 SYHC_HUMAN   | E.DSKLIYDLKDQGGGE.L      |       | 2 | 2,523  | 0,202 | 0,695  |
| 14 | Q02952 AKA12_HUMAN  | E.LQTQAHVIK.A            |       | 2 | 2,5226 | 0,228 | -0,118 |

|    |                     |                           |        |   |        |       |        |
|----|---------------------|---------------------------|--------|---|--------|-------|--------|
| 14 | P60174 TPIS_HUMAN   | E.FVDIINAK.Q              |        | 2 | 2,5163 | 0,155 | -0,199 |
| 14 | P68104 EF1A1_HUMAN  | K.FLKSGDAAIVD.M           |        | 2 | 2,5153 | 0,347 | -0,322 |
| 14 | Q9P260 K1468_HUMAN  | E.ADSTIPKENS#PNSFPRRE.R   | S453:  | 3 | 2,5138 | 0,291 | -0,172 |
| 14 | Q8N655 CJ012_HUMAN  | K.IKPNLSS#SPRSEE.T        | S294:  | 2 | 2,5136 | 0,18  | -0,4   |
| 14 | Q9UHB6 LIMA1_HUMAN  | R.ETPHS#PGVEDAPIAK.V      | S490:  | 3 | 2,5122 | 0,164 | 0,337  |
| 14 | Q09666 AHNK_HUMAN   | K.LQGGVSLASK.K            |        | 2 | 2,5113 | 0,251 | -0,35  |
| 14 | O14713 ITBP1_HUMAN  | K.SVDSSLGGLSR.S           |        | 2 | 2,5113 | 0,351 | 0,226  |
| 14 | P22681 CBL_HUMAN    | E.IKGTEPIVDPFDPR.G        |        | 3 | 2,5106 | 0,12  | 0      |
| 14 | P04406 G3P_HUMAN    | E.GLMTTVHAITATQK.T        |        | 3 | 2,5092 | 0,274 | 0,311  |
| 14 | Q8NI08 NCOA7_HUMAN  | K.LSKEPSDTSSAFE.S         |        | 2 | 2,5088 | 0,254 | -0,436 |
| 14 | Q8IWC1 MA7D3_HUMAN  | E.VAPKESVKGS#PKESM*E.A    | S433:  | 3 | 2,5042 | 0,262 | -0,712 |
| 14 | A9CQZ4 A9CQZ4_HUMAN | K.FCGM*FCPVEGSSE.N        |        | 2 | 2,5017 | 0,313 | -1,522 |
| 14 | Q9C0C2 TB182_HUMAN  | R.VVGKPAQLGTQR.S          |        | 3 | 2,4999 | 0,306 | 0,292  |
| 14 | Q8N655 CJ012_HUMAN  | E.ITSHEEGGDVS#PRKEPQEPE.V | S273:  | 3 | 2,4989 | 0,175 | -0,543 |
| 14 | O00566 MPP10_HUMAN  | E.DTGVLNVK.K              |        | 2 | 2,497  | 0,213 | 0,144  |
| 14 | Q96JM3 ZN828_HUMAN  | R.KTS#PASLDFPE.S          | S459:  | 2 | 2,4954 | 0,218 | -0,288 |
| 14 | Q01082 SPTB2_HUMAN  | K.TALPAQSAATLPAR.T        |        | 2 | 2,4908 | 0,288 | -0,535 |
| 14 | Q99497 PARK7_HUMAN  | E.KDGLILTSR.G             |        | 2 | 2,4889 | 0,296 | 0      |
| 14 | O75179 ANR17_HUMAN  | R.KVPVPIGTE.R             |        | 2 | 2,4876 | 0,271 | 0      |
| 14 | P00558 PGK1_HUMAN   | K.VLPGVDALSNI.-           |        | 2 | 2,4827 | 0,294 | -0,444 |
| 14 | Q86WR7 CJ047_HUMAN  | R.SRS#FTLDDE.S            | S43:   | 2 | 2,4827 | 0,241 | -0,106 |
| 14 | Q9BSJ8 ESYT1_HUMAN  | E.TDLSQGVAR.W             |        | 2 | 2,4791 | 0,086 | 0      |
| 14 | P52272 HNRPM_HUMAN  | E.CGHVLYADIKM*E.N         |        | 3 | 2,4778 | 0,132 | -0,126 |
| 14 | Q9UQ35 SRRM2_HUMAN  | R.VSGRTS#PPLDR.A          | S2398: | 3 | 2,4745 | 0,119 | -0,796 |
| 14 | P05556 ITB1_HUMAN   | K.NVLSLTNKGE.V            |        | 2 | 2,4709 | 0,164 | 0,113  |
| 14 | Q07157 ZO1_HUMAN    | R.IDSPGFKPASQQK.A         |        | 2 | 2,4701 | 0,236 | -0,348 |
| 14 | P51858 HDGF_HUMAN   | E.DAEAPGIRDHE.S           |        | 2 | 2,4683 | 0,224 | -0,403 |
| 14 | P55769 NH2L1_HUMAN  | D.LVQQSCNYK.Q             |        | 2 | 2,4654 | 0,21  | -0,428 |
| 14 | P00558 PGK1_HUMAN   | E.DKVSHVSTGGGASLE.L       |        | 2 | 2,464  | 0,137 | 0,676  |
| 14 | Q14693 LPIN1_HUMAN  | E.VAALYFPK.N              |        | 2 | 2,464  | 0,24  | -0,067 |
| 14 | Q15648 MED1_HUMAN   | E.GLRPQMASSK.N            |        | 2 | 2,4624 | 0,223 | -0,227 |
| 14 | P46063 RECQ1_HUMAN  | K.STQNS#FRAE.S            | S597:  | 2 | 2,4624 | 0,274 | -0,109 |
| 14 | Q9Y5K6 CD2AP_HUMAN  | D.SANLKPSELKK.D           |        | 3 | 2,462  | 0,103 | 0,376  |

|    |                    |                            |            |   |        |       |        |
|----|--------------------|----------------------------|------------|---|--------|-------|--------|
| 14 | P42704 LPPRC_HUMAN | K.TVQLTSSELE.S             |            | 2 | 2,4619 | 0,147 | 0      |
| 14 | Q9UQ35 SRRM2_HUMAN | K.FSPFPVQDRPE.S            |            | 2 | 2,4601 | 0,265 | -0,185 |
| 14 | O14974 MYPT1_HUMAN | R.LSSSLDNKE.K              |            | 2 | 2,4563 | 0,283 | 0      |
| 14 | P30041 PRDX6_HUMAN | K.DINAYNCEEPTE.K           |            | 2 | 2,4526 | 0,313 | 0      |
| 14 | Q6ZRV2 FA83H_HUMAN | R.KGSPT#PGFSTR.R           | T883:      | 3 | 2,4522 | 0,219 | 0,677  |
| 14 | P13861 KAP2_HUMAN  | R.QSLGHPPPEPGPDR.V         |            | 3 | 2,4519 | 0,165 | 0,37   |
| 14 | O75410 TACC1_HUMAN | E.NTSPLLGDAR.F             |            | 2 | 2,4472 | 0,34  | -0,351 |
| 14 | Q9UKL0 RCOR1_HUMAN | R.VGPQYQAVVPDFDPAK.L       |            | 2 | 2,4468 | 0,195 | -0,282 |
| 14 | P08651 NFIC_HUMAN  | R.TGMGSDQEDSKPITLD.T       |            | 2 | 2,4466 | 0,312 | -0,144 |
| 14 | Q9C0C2 TB182_HUMAN | K.RDS#LGTYSRR.D            | S872:      | 2 | 2,4416 | 0,206 | -0,399 |
| 14 | P05787 K2C8_HUMAN  | E.LAIKDANAK.L              |            | 2 | 2,4413 | 0,273 | 0,065  |
| 14 | P11021 GRP78_HUMAN | K.ELEEIVQPIISK.L           |            | 2 | 2,4398 | 0,255 | -0,175 |
| 14 | Q96C01 F136A_HUMAN | E.DSQASM*KQVHQICIE.R       |            | 2 | 2,4388 | 0,156 | -0,582 |
| 14 | P78347 GTF2I_HUMAN | K.INSSPNVNTTASGVED.L       |            | 2 | 2,437  | 0,098 | -1,064 |
| 14 | Q71U36 TBA1A_HUMAN | R.AVFVDLEPTVIDE.V          |            | 2 | 2,4359 | 0,213 | -0,337 |
| 14 | Q12888 TP53B_HUMAN | E.VSPSQTGGSSGDLGDISSFSSK.A |            | 2 | 2,435  | 0,465 | -0,116 |
| 14 | P02765 FETUA_HUMAN | K.CDSSPDS#AEDVRK.V         | S138:      | 3 | 2,4327 | 0,096 | -0,592 |
| 14 | Q9H2G2 SLK_HUMAN   | K.LADFGVSAK.N              |            | 2 | 2,4322 | 0,295 | 0,134  |
| 14 | Q8ND56 LS14A_HUMAN | R.RS#PVSTRPLPSASQK.A       | S216:      | 3 | 2,4276 | 0,1   | -0,433 |
| 14 | P11021 GRP78_HUMAN | K.NQLTSNPE.N               |            | 2 | 2,4275 | 0,191 | 0,135  |
| 14 | P36578 RL4_HUMAN   | E.SSGKNVTLPAVFK.A          |            | 3 | 2,4224 | 0,092 | 0,068  |
| 14 | Q9H6F5 CCD86_HUMAN | E.SNPEETREPGS#PPSVQR.A     | S47:       | 3 | 2,4206 | 0,276 | -0,564 |
| 14 | Q684P5 RPGP2_HUMAN | E.TSS#NPSS#PEICPNKEKPFMK.L | S609:S613: | 3 | 2,4124 | 0,144 | -0,3   |
| 14 | P42704 LPPRC_HUMAN | E.SKNLDFQK.T               |            | 2 | 2,4123 | 0,117 | 0      |
| 14 | Q16531 DDB1_HUMAN  | E.SFLDISRPK.M              |            | 2 | 2,4121 | 0,136 | -0,115 |
| 14 | Q08AD1 CA1L1_HUMAN | E.SVEGFLS#PSR.C            | S1319:     | 2 | 2,4108 | 0,256 | -0,211 |
| 14 | Q13123 RED_HUMAN   | K.GPLGRWDFDTQEE.Y          |            | 2 | 2,4082 | 0,233 | -0,394 |
| 14 | Q13547 HDAC1_HUMAN | R.ISICSSDKR.I              |            | 2 | 2,4075 | 0,128 | -0,229 |
| 14 | Q9C0B5 ZDHC5_HUMAN | K.SFHFDPLSSGSR.S           |            | 3 | 2,4069 | 0,186 | -0,068 |
| 14 | O15371 EIF3D_HUMAN | E.GKYLILKDPNK.Q            |            | 2 | 2,4035 | 0,228 | -0,284 |
| 14 | Q07955 SFRS1_HUMAN | R.VKVDGPRS#PS#YGR.S        | S199:S201: | 3 | 2,4004 | 0,126 | -0,232 |
| 14 | P05783 K1C18_HUMAN | E.DFNLGDALDSSNSM*QTIQK.T   |            | 3 | 2,3973 | 0,13  | -0,261 |
| 14 | P50990 TCPQ_HUMAN  | E.KLFVTNDAATILRE.L         |            | 3 | 2,397  | 0,135 | 0,115  |

|    |                     |                            |              |   |        |       |        |
|----|---------------------|----------------------------|--------------|---|--------|-------|--------|
| 14 | Q7Z5L9 I2BP2_HUMAN  | K.DILLQQQQQLGHGGPE.A       |              | 2 | 2,3958 | 0,109 | -1,594 |
| 14 | Q92615 LARP5_HUMAN  | E.RS#PSPAHLPPDDPKVAE.K     | S599:        | 2 | 2,3954 | 0,16  | -0,951 |
| 14 | P05787 K2C8_HUMAN   | E.FVLIKKDVDE.A             |              | 2 | 2,393  | 0,149 | -0,202 |
| 14 | Q9Y3F4 STRAP_HUMAN  | K.LYKYDYNSGEE.L            |              | 2 | 2,3905 | 0,166 | -0,53  |
| 14 | A8K1N6 A8K1N6_HUMAN | K.GSLLPTS#PRLVNE.S         | S284:        | 2 | 2,3901 | 0,306 | -0,751 |
| 14 | Q9Y295 DRG1_HUMAN   | R.IGFVGFPSVGK.S            |              | 2 | 2,389  | 0,225 | -0,551 |
| 14 | P63167 DYL1_HUMAN   | K.AVIKNADM*SEE.M           |              | 2 | 2,3873 | 0,33  | -0,2   |
| 14 | Q9Y3L3 3BP1_HUMAN   | K.VTRS#PPETAAPVED.M        | S550:        | 2 | 2,386  | 0,284 | -0,551 |
| 14 | Q96FW1 OTUB1_HUMAN  | E.DDNIYQQK.I               |              | 2 | 2,3831 | 0,179 | -0,238 |
| 14 | Q8IWC1 MA7D3_HUMAN  | E.VAPKESVKG#PKESM*E.A      | S433:        | 2 | 2,3809 | 0,229 | -0,543 |
| 14 | Q99661 KIF2C_HUMAN  | K.GKEIDFDDVAAINPE.L        |              | 2 | 2,3768 | 0,129 | -0,448 |
| 14 | Q5T1M5 FKB15_HUMAN  | K.KDDVTSSTGPHKE.L          |              | 3 | 2,3755 | 0,222 | -0,196 |
| 14 | P42167 LAP2B_HUMAN  | E.HFRIDGPVIS#E.S           | S276:        | 2 | 2,3751 | 0,441 | -0,633 |
| 14 | Q12888 TP53B_HUMAN  | R.KGVSQTGTPVCEE.D          |              | 2 | 2,3746 | 0,418 | -0,351 |
| 14 | P84103 SFRS3_HUMAN  | E.FEDPRDAADAVRE.L          |              | 3 | 2,3743 | 0,217 | -0,368 |
| 14 | Q15648 MED1_HUMAN   | K.NYGS#PLISGS#TPKHE.R      | S1433:S1439: | 2 | 2,3717 | 0,282 | -0,14  |
| 14 | Q9C0C2 TB182_HUMAN  | R.VSGAGFSPSS#KME.G         | S1141:       | 2 | 2,3666 | 0,09  | -0,179 |
| 14 | Q05682 CALD1_HUMAN  | E.KQSVDKVTS#PTKV.-         | S789:        | 3 | 2,3661 | 0,091 | 0,122  |
| 14 | Q9Y3U8 RL36_HUMAN   | E.VCGFAPYER.R              |              | 2 | 2,3656 | 0,331 | 0      |
| 14 | Q9Y608 LRRF2_HUMAN  | R.RGSGDTS#LIDPDTSLSE.L     | S333:        | 2 | 2,3655 | 0,218 | -0,573 |
| 14 | P98082 DAB2_HUMAN   | K.LIGIDVDPARGD.K           |              | 2 | 2,365  | 0,306 | -0,18  |
| 14 | P63241 IF5A1_HUMAN  | E.DICPSTHNM*DVPNIKR.N      |              | 3 | 2,3642 | 0,132 | -0,382 |
| 14 | Q9Y490 TLN1_HUMAN   | E.STM*LEDSVS#PK.K          | S425:        | 2 | 2,3636 | 0,319 | -0,378 |
| 14 | Q12756 KIF1A_HUMAN  | E.DGGTLGVFSPK.K            |              | 2 | 2,3618 | 0,273 | -0,113 |
| 14 | P49790 NU153_HUMAN  | R.SHLNFSM*LE.S             |              | 2 | 2,361  | 0,259 | -0,112 |
| 14 | Q58FF8 H90B2_HUMAN  | K.SLVSVTKE.G               |              | 2 | 2,3586 | 0,194 | -0,778 |
| 14 | Q02952 AKA12_HUMAN  | E.QAHPQEPAESAHEPRLS#AEYE.K | S371:        | 3 | 2,3585 | 0,28  | 0      |
| 14 | Q9BZE9 ASPC1_HUMAN  | R.AAGSPS#PLPAPDPAPK.S      | S502:        | 2 | 2,3574 | 0,121 | -0,314 |
| 14 | P54886 P5CS_HUMAN   | K.M*IDLIIPR.G              |              | 2 | 2,3558 | 0,187 | -0,247 |
| 14 | Q58FF8 H90B2_HUMAN  | E.SLTDPSKLDGKE.L           |              | 3 | 2,3549 | 0,153 | -0,73  |
| 14 | A2AJT9 CX023_HUMAN  | E.HRS#PS#PNIRNSLE.N        | S78:S80:     | 2 | 2,3542 | 0,165 | 0      |
| 14 | Q5VT52 K0460_HUMAN  | R.GPTSTSIDNIDGTPVRDER.S    |              | 3 | 2,3539 | 0,261 | 0      |
| 14 | Q9UKV3 ACINU_HUMAN  | K.HST#PHAAFQPNSEQEE.M      | T116:        | 2 | 2,3532 | 0,278 | 0,063  |

|    |                    |                          |          |   |        |       |        |
|----|--------------------|--------------------------|----------|---|--------|-------|--------|
| 14 | Q86YS7 K0528_HUMAN | E.IIGSPIPEPR.Q           |          | 2 | 2,3531 | 0,32  | -0,339 |
| 14 | P20700 LMNB1_HUMAN | R.LKLS#PSPSSR.V          | S391:    | 2 | 2,353  | 0,27  | -0,318 |
| 14 | Q9Y3D0 FA96B_HUMAN | E.NANPLIYQR.S            |          | 2 | 2,3523 | 0,239 | 0,112  |
| 14 | Q6R327 RICTR_HUMAN | K.NSFHLLR.Q              |          | 2 | 2,352  | 0,177 | 0      |
| 14 | Q9BXS6 NUSAP_HUMAN | K.VPS#PPDEHQE.A          | S135:    | 2 | 2,3482 | 0,191 | -0,904 |
| 14 | P10809 CH60_HUMAN  | E.DVQPHDLGK.V            |          | 2 | 2,3459 | 0,173 | -0,544 |
| 14 | Q9UQ35 SRRM2_HUMAN | R.GEFSASPMLK.S           |          | 2 | 2,3432 | 0,158 | -0,114 |
| 14 | P10809 CH60_HUMAN  | E.VVVTEIPKEE.K           |          | 2 | 2,3418 | 0,353 | -0,427 |
| 14 | Q96I59 SYNM_HUMAN  | E.VQGQLIKS#PSKR.Q        | S101:    | 2 | 2,3407 | 0,189 | -0,601 |
| 14 | Q15942 ZYX_HUMAN   | K.FSPGAPGGSGSQPNQK.L     |          | 2 | 2,3354 | 0,236 | -0,241 |
| 14 | Q9UHV9 PFD2_HUMAN  | E.TLTQQQLQAK.G           |          | 2 | 2,3341 | 0,22  | 0      |
| 14 | P29692 EF1D_HUMAN  | E.NGAS#VILRDIAR.A        | S44:     | 3 | 2,334  | 0,234 | -0,134 |
| 14 | P35749 MYH11_HUMAN | K.ATDKSFVE.K             |          | 2 | 2,3331 | 0,256 | 0,136  |
| 14 | P45974 UBP5_HUMAN  | E.ALLSADSASR.K           |          | 2 | 2,3314 | 0,293 | -0,062 |
| 14 | Q86WB0 NIPA_HUMAN  | R.LPLVPS#PRR.M           | S321:    | 3 | 2,3311 | 0,183 | 0      |
| 14 | O60684 IMA7_HUMAN  | K.SYKNNALNPE.E           |          | 2 | 2,3286 | 0,213 | -0,318 |
| 14 | Q96M11 HYLS1_HUMAN | R.KLPFPLS#PS.-           | S297:    | 2 | 2,3281 | 0,298 | -0,114 |
| 14 | P46063 RECQ1_HUMAN | E.AHAITMQVTK.S           |          | 2 | 2,327  | 0,216 | -0,444 |
| 14 | Q7Z3K3 POGZ_HUMAN  | R.SSPEETIEPE.S           |          | 2 | 2,3195 | 0,123 | -0,109 |
| 14 | P13861 KAP2_HUMAN  | R.APASVLPAATPR.Q         |          | 2 | 2,319  | 0,27  | -0,106 |
| 14 | P07900 HS90A_HUMAN | E.M*VS#LKDYCTR.M         | S476:    | 2 | 2,3169 | 0,31  | -0,535 |
| 14 | P27816 MAP4_HUMAN  | E.TERAS#PIKMDLAPSKD.M    | S358:    | 2 | 2,3159 | 0,286 | -0,464 |
| 14 | Q9H6F5 CCD86_HUMAN | R.AGLGSPERPPKT#SPGS#PR.L | T65:S69: | 3 | 2,3141 | 0,189 | -0,375 |
| 14 | P49792 RBP2_HUMAN  | E.TSSVAQS#GSESKVEPK.K    | S2566:   | 3 | 2,3119 | 0,085 | -0,323 |
| 14 | P07814 SYEP_HUMAN  | E.DLKTHMVVANTM*E.D       |          | 2 | 2,3111 | 0,264 | -0,162 |
| 14 | Q06830 PRDX1_HUMAN | D.YGVLKADE.G             |          | 2 | 2,3109 | 0,098 | 0,068  |
| 14 | P26639 SYTC_HUMAN  | K.MGGEEKPIGAGE.E         |          | 2 | 2,3079 | 0,193 | -0,312 |
| 14 | P60953 CDC42_HUMAN | R.GLKNVFDE.A             |          | 2 | 2,3061 | 0,158 | -0,529 |
| 14 | O60256 KPRB_HUMAN  | R.SVAAIHPSLE.I           |          | 2 | 2,3061 | 0,25  | -0,119 |
| 14 | P54252 ATX3_HUMAN  | R.AIQLSM*QGSSR.N         |          | 2 | 2,3016 | 0,292 | -0,307 |
| 14 | Q9HC35 EMAL4_HUMAN | R.ASPS#PQPSSQLQIHR.Q     | S146:    | 2 | 2,2992 | 0,155 | -0,337 |
| 14 | P60953 CDC42_HUMAN | R.LRPLSYPQTD.V           |          | 2 | 2,2979 | 0,398 | -0,308 |
| 14 | P22681 CBL_HUMAN   | K.GTEPIVDPFDPR.G         |          | 2 | 2,2976 | 0,12  | -0,592 |

|    |                    |                           |            |   |        |       |        |
|----|--------------------|---------------------------|------------|---|--------|-------|--------|
| 14 | P62753 RS6_HUMAN   | R.RLS#S#LRASTSKSE.S       | S235:S236: | 3 | 2,2916 | 0,232 | 0,116  |
| 14 | Q05655 KPCD_HUMAN  | R.GKT#LVQKKPTM*YPE.W      | T43:       | 3 | 2,288  | 0,193 | -0,32  |
| 14 | P60900 PSA6_HUMAN  | K.CDPAGYYCGFK.A           |            | 2 | 2,2875 | 0,131 | -0,73  |
| 14 | P13693 TCTP_HUMAN  | -.MIIYRDLISHDE.M          |            | 3 | 2,2869 | 0,174 | -0,061 |
| 14 | Q9BQF6 SEN7_HUMAN  | E.DVHVQS#PLSK.F           | S46:       | 2 | 2,2851 | 0,259 | -0,103 |
| 14 | Q9UQ35 SRRM2_HUMAN | E.SSLVFKDT#LRTPPRER.S     | T1205:     | 3 | 2,2841 | 0,194 | -0,554 |
| 14 | O15061 DMN_HUMAN   | R.TFS#PTYGLLR.N           | S429:      | 2 | 2,2818 | 0,28  | -0,494 |
| 14 | Q86WB0 NIPA_HUMAN  | E.RLPLVPES#PRR.M          | S321:      | 3 | 2,2799 | 0,171 | 0,065  |
| 14 | Q14004 CD2L5_HUMAN | R.KDLSLGLDDSR.T           |            | 3 | 2,277  | 0,083 | 0,15   |
| 14 | Q5VUA4 ZN318_HUMAN | D.LVDFVTR.T               |            | 2 | 2,2761 | 0,13  | 0,144  |
| 14 | O95785 WIZ_HUMAN   | R.SPSDLHISPLAK.K          |            | 3 | 2,2754 | 0,159 | 0,289  |
| 14 | O95831 AIFM1_HUMAN | K.CLIATGGTPR.S            |            | 2 | 2,2753 | 0,273 | -0,117 |
| 14 | Q8NC44 F134A_HUMAN | E.DFELLDQGE.L             |            | 2 | 2,2752 | 0,11  | 0,229  |
| 14 | P05387 RLA2_HUMAN  | E.DVIAQGIGK.L             |            | 2 | 2,2744 | 0,108 | 0      |
| 14 | Q8IX90 CM003_HUMAN | R.SPQLSDFGLE.R            |            | 2 | 2,2742 | 0,299 | -0,112 |
| 14 | Q9BZE9 ASPC1_HUMAN | E.HAISPSAADVLVARYM*SR.A   |            | 3 | 2,2698 | 0,267 | -0,467 |
| 14 | Q5SYE7 NHSL1_HUMAN | R.ATM*PQVPGGSVKPK.I       |            | 3 | 2,2693 | 0,13  | -0,194 |
| 14 | P52594 NUPL_HUMAN  | K.SLLGDSAPTLLHNK.G        |            | 3 | 2,2685 | 0,104 | 0,062  |
| 14 | P68431 H31_HUMAN   | E.IAQDFKTDLR.F            |            | 3 | 2,2679 | 0,203 | 0,379  |
| 14 | P25205 MCM3_HUMAN  | E.M*PQVHT#PKTADSQETKE.S   | T722:      | 2 | 2,2671 | 0,32  | -0,543 |
| 14 | Q92879 CELF1_HUMAN | E.GCSS#PMVVK.F            | S179:      | 2 | 2,267  | 0,295 | 0      |
| 14 | Q53HC9 TSSC1_HUMAN | K.NVLLHQAGE.I             |            | 2 | 2,2615 | 0,268 | -0,187 |
| 14 | POC7M2 RA1L3_HUMAN | R.KLFIGGLSFE.T            |            | 2 | 2,2596 | 0,138 | -0,329 |
| 14 | P49006 MRP_HUMAN   | K.SNGDLSPKGEGESPPVNGTDE.A |            | 2 | 2,2594 | 0,308 | -0,234 |
| 14 | P31949 S10AB_HUMAN | E.SLIAVFQK.Y              |            | 2 | 2,258  | 0,286 | 0,067  |
| 14 | P05204 HMGN2_HUMAN | E.GNNPAENGDAKTDQAQKAE.G   |            | 3 | 2,2579 | 0,191 | -1,121 |
| 14 | Q04637 IF4G1_HUMAN | R.FSALQQAVPTSTDNRR.V      |            | 3 | 2,2579 | 0,114 | -0,191 |
| 14 | O15226 NKRF_HUMAN  | E.DNIGNQLLR.K             |            | 2 | 2,2576 | 0,174 | -0,117 |
| 14 | P06400 RB_HUMAN    | D.S#GPEDLPLVRLE.F         | S37:       | 2 | 2,2558 | 0,226 | -0,434 |
| 14 | Q9H4L7 SMRCD_HUMAN | R.KASISYFK.N              |            | 2 | 2,255  | 0,239 | -0,194 |
| 14 | Q12888 TP53B_HUMAN | K.M*VIQGPSS#PQGE.A        | S1114:     | 2 | 2,2549 | 0,235 | -0,368 |
| 14 | Q00839 HNRPU_HUMAN | K.SSGPSTLFAVTVAPPGAR.Q    |            | 2 | 2,253  | 0,299 | -0,498 |
| 14 | Q9UKA4 AKA11_HUMAN | R.YCDLKE.L                |            | 2 | 2,2515 | 0,121 | 0,221  |

|    |                    |                          |        |   |        |       |        |
|----|--------------------|--------------------------|--------|---|--------|-------|--------|
| 14 | Q0ZGT2 NEXN_HUMAN  | K.LKLTFFEELE.R           |        | 2 | 2,2492 | 0,109 | -1,522 |
| 14 | Q15149 PLEC1_HUMAN | K.AQLEPVAS#PAK.K         | S1435: | 2 | 2,2477 | 0,194 | -0,41  |
| 14 | Q9UQ35 SRRM2_HUMAN | K.RVPS#PTPAPK.E          | S2581: | 2 | 2,2426 | 0,154 | -0,324 |
| 14 | Q92547 TOPB1_HUMAN | E.DSPFQKPLHDSE.I         |        | 2 | 2,2388 | 0,178 | 0,087  |
| 14 | P61081 UBC12_HUMAN | R.SM*RGGYIGSTYFE.R       |        | 2 | 2,236  | 0,142 | -0,082 |
| 14 | P10599 THIO_HUMAN  | E.KYSNVIFLE.V            |        | 2 | 2,2356 | 0,14  | -0,329 |
| 14 | O75116 ROCK2_HUMAN | R.NLTLKIEQE.T            |        | 2 | 2,235  | 0,115 | -0,336 |
| 14 | Q99538 LGMN_HUMAN  | K.VMQFQGMK.R             |        | 2 | 2,2348 | 0,175 | 0,378  |
| 14 | Q14116 IL18_HUMAN  | R.TIFIISM*YKD.S          |        | 2 | 2,2339 | 0,367 | -0,294 |
| 14 | P62937 PPIA_HUMAN  | K.KITIADCGQLE.-          |        | 2 | 2,2245 | 0,081 | -0,587 |
| 14 | Q9BWF3 RBM4_HUMAN  | R.RATAPVPTVGE.G          |        | 2 | 2,2203 | 0,238 | -0,222 |
| 14 | Q02790 FKBP4_HUMAN | E.ASSGDHPTDTEMKE.E       |        | 2 | 2,2165 | 0,144 | -0,243 |
| 14 | Q13813 SPTA2_HUMAN | R.QQVAPTDDDETGKE.L       |        | 2 | 2,2161 | 0,403 | -0,172 |
| 14 | Q7L7X3 TAOK1_HUMAN | E.GDHTVM*#NSSVIHLKPEEE.N | S392:  | 3 | 2,2145 | 0,121 | -0,332 |
| 14 | Q9Y5U5 TNR18_HUMAN | R.LLLGTGT DAR.C          |        | 2 | 2,2114 | 0,263 | -0,18  |
| 14 | Q9UMN6 MLL4_HUMAN  | K.QISDRGPVRS#EDE.S       | S844:  | 3 | 2,2113 | 0,252 | -0,467 |
| 14 | O75152 ZC11A_HUMAN | R.RLS#SASTGKPLSVEDDFE.K  | S758:  | 2 | 2,2055 | 0,443 | -0,115 |
| 14 | Q8N3D4 EH1L1_HUMAN | E.M*KVLES#PENKSGTFK.A    | S964:  | 3 | 2,2038 | 0,139 | -0,306 |
| 14 | Q9NY93 DDX56_HUMAN | R.GPILLPYQFR.M           |        | 2 | 2,1998 | 0,271 | -0,507 |
| 14 | Q9UKV3 ACINU_HUMAN | R.RLS#QPESAE.K           | S710:  | 2 | 2,1994 | 0,113 | -1,001 |
| 14 | P07237 PDIA1_HUMAN | E.DHVLVLR.K              |        | 2 | 2,1987 | 0,089 | 0,143  |
| 14 | O60318 MCM3A_HUMAN | E.DAPFQHS#PLGK.A         | S538:  | 2 | 2,1982 | 0,179 | -0,478 |
| 14 | Q9Y2H6 FND3A_HUMAN | R.VVVVPQAPE.F            |        | 2 | 2,1967 | 0,22  | 0      |
| 14 | O95905 SGT1_HUMAN  | E.LAHTCISK.S             |        | 2 | 2,196  | 0,257 | 0      |
| 14 | P41250 SYG_HUMAN   | E.DKAPQVDVDK.A           |        | 2 | 2,1941 | 0,104 | -0,547 |
| 14 | P54652 HSP72_HUMAN | K.STAGDTHLGGEDFDNR.M     |        | 3 | 2,1919 | 0,15  | -0,757 |
| 14 | P28065 PSB9_HUMAN  | R.VILGNELPK.F            |        | 2 | 2,1913 | 0,248 | 0      |
| 14 | O43681 ARSA1_HUMAN | E.DNMLSMGKK.M            |        | 2 | 2,1856 | 0,148 | 0      |
| 14 | O60313 OPA1_HUMAN  | R.VIQHNALE.D             |        | 2 | 2,1836 | 0,127 | 0      |
| 14 | P42285 SK2L2_HUMAN | E.GTDEPIFGK.K            |        | 2 | 2,1829 | 0,459 | -0,063 |
| 14 | Q15149 PLEC1_HUMAN | R.GAYRDCLGR LD.L         |        | 3 | 2,1821 | 0,188 | -0,071 |
| 14 | Q99832 TCPH_HUMAN  | R.TATQLAVNK.I            |        | 2 | 2,1806 | 0,101 | -0,516 |
| 14 | Q99961 SH3G1_HUMAN | K.IAASSS#FR.S            | S288:  | 2 | 2,1804 | 0,218 | -0,398 |



|    |                    |                        |            |   |        |       |        |
|----|--------------------|------------------------|------------|---|--------|-------|--------|
| 14 | P40926 MDHM_HUMAN  | K.M*ISDAIPELK.A        |            | 2 | 2,1802 | 0,119 | -0,108 |
| 14 | Q01518 CAP1_HUMAN  | R.ATKKEPAVLE.L         |            | 2 | 2,1796 | 0,167 | -0,225 |
| 14 | Q15545 TAF7_HUMAN  | E.NQGLDIS#SPGMSGHR.Q   | S200:      | 3 | 2,1789 | 0,121 | 0,112  |
| 14 | O43681 ARSA1_HUMAN | E.DNMLSMGK.K           |            | 2 | 2,178  | 0,208 | -0,068 |
| 14 | Q9H0H5 RGAP1_HUMAN | R.LHDFVSK.T            |            | 2 | 2,1769 | 0,158 | 0      |
| 14 | P63241 IF5A1_HUMAN | K.RNDFQLIGIQD.G        |            | 2 | 2,1759 | 0,098 | -0,37  |
| 14 | P00441 SODC_HUMAN  | E.DSVISLSGDHCIIGR.T    |            | 3 | 2,1756 | 0,232 | 0,112  |
| 14 | P30048 PRDX3_HUMAN | R.GLFIIDPNGVIK.H       |            | 2 | 2,1735 | 0,134 | 0,095  |
| 14 | Q9H6K1 CF106_HUMAN | E.GNFNPFASPQK.N        |            | 2 | 2,1715 | 0,274 | -0,404 |
| 14 | Q14978 NOLC1_HUMAN | K.RGAAGDWGE.R          |            | 2 | 2,1692 | 0,188 | -0,266 |
| 14 | Q13523 PRP4B_HUMAN | K.KLLAPDMFTE.S         |            | 2 | 2,1687 | 0,274 | -0,209 |
| 14 | P27816 MAP4_HUMAN  | E.TERAS#PIKM*DLAPSKD.M | S358:      | 2 | 2,1684 | 0,25  | -0,526 |
| 14 | Q86WB0 NIPA_HUMAN  | R.SQDATFS#PGSEQAE.K    | S335:      | 2 | 2,1679 | 0,139 | -0,875 |
| 14 | Q9HC35 EMAL4_HUMAN | R.AS#PS#PQPSSQPLQIHR.Q | S144:S146: | 2 | 2,1678 | 0,241 | -0,516 |
| 14 | Q9P107 GMIP_HUMAN  | E.TPITSVPR.G           |            | 2 | 2,1665 | 0,132 | -0,07  |
| 14 | P27816 MAP4_HUMAN  | K.IVPAKDLVLLSE.I       |            | 2 | 2,1662 | 0,202 | -0,376 |
| 14 | Q13043 STK4_HUMAN  | R.LLALDPMMEQE.I        |            | 2 | 2,1632 | 0,13  | -0,567 |
| 14 | P60709 ACTB_HUMAN  | E.GYALPHAILR.L         |            | 2 | 2,1595 | 0,25  | -0,329 |
| 14 | Q86WN2 IFNE1_HUMAN | E.KLSGT#LGSNDLR.L      | T134:      | 2 | 2,1595 | 0,12  | -0,546 |
| 14 | Q16719 KYNV_HUMAN  | E.DILEVIEKE.G          |            | 2 | 2,1593 | 0,099 | -0,561 |
| 14 | Q15149 PLEC1_HUMAN | R.GAYRDCLGRD.L         |            | 2 | 2,1572 | 0,227 | -0,282 |
| 14 | P62256 UBE2H_HUMAN | R.RM*DTDVVKLIE.S       |            | 3 | 2,1565 | 0,093 | 0,137  |
| 14 | Q71U36 TBA1A_HUMAN | R.GHYTIGKE.I           |            | 2 | 2,1527 | 0,282 | -0,27  |
| 14 | Q5SYE7 NHSL1_HUMAN | R.ATM*PQVPGGSVKPK.I    |            | 2 | 2,1514 | 0,095 | -0,518 |
| 14 | P81605 DCD_HUMAN   | K.ENAGEDPGLAR.Q        |            | 2 | 2,151  | 0,304 | -0,216 |
| 14 | Q9Y3T9 NOC2L_HUMAN | R.GILRPLSTR.H          |            | 2 | 2,1508 | 0,149 | 0,12   |
| 14 | Q9NWK9 CA181_HUMAN | E.GVRLS#PEPGR.E        | S25:       | 2 | 2,1505 | 0,082 | -1,063 |
| 14 | Q5VT52 K0460_HUMAN | R.RM*S#GEPIQTV.E.S     | S1099:     | 2 | 2,1505 | 0,128 | -0,818 |
| 14 | P11142 HSP7C_HUMAN | R.AM*TKDNNLLGKFE.L     |            | 2 | 2,1497 | 0,214 | -0,326 |
| 14 | Q9Y5S9 RBM8A_HUMAN | E.ATEEDIHDKFAE.Y       |            | 2 | 2,1478 | 0,148 | 0,174  |
| 14 | Q8N6T3 ARFG1_HUMAN | E.TFGSAEPTK.T          |            | 2 | 2,146  | 0,329 | 0,13   |
| 14 | Q9P107 GMIP_HUMAN  | E.FLPSLNSSPLDIR.K      |            | 2 | 2,1438 | 0,214 | -0,585 |
| 14 | P08240 SRPR_HUMAN  | K.GTLGGM*FGM*LK.G      |            | 2 | 2,1426 | 0,32  | -0,64  |

|    |                      |                                |                 |   |        |       |        |
|----|----------------------|--------------------------------|-----------------|---|--------|-------|--------|
| 14 | Q05639 EF1A2_HUMAN   | K.SLKSGDAAIVE.M                |                 | 2 | 2,142  | 0,264 | -0,448 |
| 14 | P48643 TCPE_HUMAN    | R.DVDFELIK.V                   |                 | 2 | 2,1408 | 0,222 | 0,062  |
| 14 | P53041 PPP5_HUMAN    | E.ENNLDYIIR.S                  |                 | 2 | 2,1347 | 0,228 | -0,424 |
| 14 | Q6S8J3 A26CA_HUMAN   | E.KM*TQIM*FE.T                 |                 | 2 | 2,1345 | 0,143 | 0      |
| 14 | Q02952 AKA12_HUMAN   | K.STPVIVSATTK.K                |                 | 2 | 2,1339 | 0,455 | -0,111 |
| 14 | P46821 MAP1B_HUMAN   | K.SDISPLTPR.E                  |                 | 2 | 2,1338 | 0,135 | 0,309  |
| 14 | P02545 LMNA_HUMAN    | R.LRLS#PS#PTSQR.S              | S390:S392:      | 2 | 2,1318 | 0,195 | -0,522 |
| 14 | Q9UQ35 SRRM2_HUMAN   | K.TVART#PLGQR.S                | T1531:          | 2 | 2,1299 | 0,187 | -0,414 |
| 14 | Q99538 LGMN_HUMAN    | K.VMQFQGM*K.R                  |                 | 2 | 2,1273 | 0,137 | 0      |
| 14 | Q8TEW0 PARD3_HUMAN   | D.NARSS#LSASHPM*VGK.W          | S221:           | 3 | 2,1245 | 0,248 | -0,223 |
| 14 | P04406 G3P_HUMAN     | R.GALQNIIPASTGAAK.A            |                 | 2 | 2,124  | 0,094 | -0,346 |
| 14 | P08670 VIME_HUMAN    | R.QVQS#LTCE.V                  | S325:           | 2 | 2,1215 | 0,115 | 0,117  |
| 14 | P62081 RS7_HUMAN     | E.LEM*NSDLKAQLRE.L             |                 | 3 | 2,121  | 0,135 | 0,234  |
| 14 | ##Q92610 ZN592_HUMAN | K.IRVKPIAPPSS#AAVSPSGKS#S#SD.S | S901:S910:S911: | 3 | 2,1197 | 0,082 | 0,591  |
| 14 | P24539 AT5F1_HUMAN   | K.QASIQHIQNAIDTE.K             |                 | 2 | 2,1189 | 0,186 | 0,545  |
| 14 | Q92615 LARP5_HUMAN   | E.RSPS#PAHLPPDPKVAE.K          | S601:           | 2 | 2,1077 | 0,187 | -0,679 |
| 14 | P12755 SKI_HUMAN     | R.APEPLATCTQPR.K               |                 | 2 | 2,1025 | 0,277 | -0,182 |
| 14 | P06756 ITAV_HUMAN    | D.GIDDFVSGVPR.A                |                 | 2 | 2,1015 | 0,178 | -0,315 |
| 14 | Q8WZA9 IRGQ_HUMAN    | E.GLQQVVGMM.K                  |                 | 2 | 2,0934 | 0,276 | -0,064 |
| 14 | Q01082 SPTB2_HUMAN   | R.TQETPSAQME.G                 |                 | 2 | 2,0921 | 0,415 | 0      |
| 14 | P11142 HSP7C_HUMAN   | E.VSSM*VLTK.M                  |                 | 2 | 2,091  | 0,287 | -0,346 |
| 14 | Q9UPX8 SHAN2_HUMAN   | K.APFLGIPR.G                   |                 | 2 | 2,0891 | 0,267 | 0      |
| 14 | Q9UQ35 SRRM2_HUMAN   | E.KSEEPAGQILSHLSSE.L           |                 | 3 | 2,088  | 0,124 | -0,214 |
| 14 | Q9UKV3 ACINU_HUMAN   | E.KSKS#PS#PPRLTE.D             | S386:S388:      | 2 | 2,088  | 0,201 | -0,164 |
| 14 | P08670 VIME_HUMAN    | R.TYSLGSALRPSTSR.S             |                 | 3 | 2,0838 | 0,086 | -0,122 |
| 14 | Q6QNY0 BL1S3_HUMAN   | E.LYLGPSGPTR.G                 |                 | 2 | 2,0806 | 0,163 | -0,115 |
| 14 | Q8WWN8 CEND3_HUMAN   | K.SLDQPFLSK.S                  |                 | 2 | 2,0799 | 0,122 | -0,236 |
| 14 | Q9H410 DSN1_HUMAN    | R.IHLGSS#PK.K                  | S58:            | 2 | 2,0798 | 0,133 | 0      |
| 14 | Q09028 RBBP4_HUMAN   | E.DVSWHLLHE.S                  |                 | 2 | 2,0795 | 0,301 | -0,215 |
| 14 | P10809 CH60_HUMAN    | R.GYISPYFINTSK.G               |                 | 2 | 2,0757 | 0,192 | -0,263 |
| 14 | P08670 VIME_HUMAN    | R.TYSLGS#ALRPSTSR.S            | S42:            | 3 | 2,0668 | 0,15  | 0      |
| 14 | Q8ND24 RN214_HUMAN   | K.QKNS#PLLSVSSQTITKE.N         | S47:            | 2 | 2,0667 | 0,226 | -0,755 |
| 14 | Q8IXT5 RB12B_HUMAN   | E.DFRFPEDFRHS#PE.D             | S575:           | 2 | 2,0661 | 0,226 | -0,592 |

|    |                     |                       |       |   |        |       |        |
|----|---------------------|-----------------------|-------|---|--------|-------|--------|
| 14 | P78371 TCPB_HUMAN   | R.QVLLSAAEAAE.V       |       | 2 | 2,0653 | 0,195 | 0,111  |
| 14 | P13645 K1C10_HUMAN  | R.LAADDFR.L           |       | 2 | 2,0643 | 0,25  | 0,227  |
| 14 | Q96T23 RSF1_HUMAN   | K.AQIDPVLLK.N         |       | 2 | 2,0635 | 0,166 | -0,184 |
| 14 | P05783 K1C18_HUMAN  | R.IVDGKVVSE.T         |       | 2 | 2,063  | 0,097 | 0,129  |
| 14 | P22570 ADRO_HUMAN   | K.RGPTGVIATTM*TD.S    |       | 2 | 2,0623 | 0,255 | 0      |
| 14 | A8K1N6 A8K1N6_HUMAN | K.GSLLPTS#PR.L        | S284: | 2 | 2,0614 | 0,23  | 0      |
| 14 | P07602 SAP_HUMAN    | K.LVGYLDR.N           |       | 2 | 2,0586 | 0,227 | 0,146  |
| 14 | Q9NXG2 THUM1_HUMAN  | E.YGDDMYGPEK.F        |       | 2 | 2,0498 | 0,231 | -0,208 |
| 14 | Q09028 RBBP4_HUMAN  | E.TILASSGTDR.R        |       | 2 | 2,0481 | 0,185 | 0      |
| 14 | Q9H0A0 NAT10_HUMAN  | D.EAAAIPLPLVK.S       |       | 2 | 2,0478 | 0,224 | -0,326 |
| 14 | P15336 ATF2_HUMAN   | R.SKIEEPSVVE.T        |       | 2 | 2,0471 | 0,182 | -0,328 |
| 14 | P84103 SFRS3_HUMAN  | R.DSCPLDCK.V          |       | 2 | 2,0453 | 0,257 | 0      |
| 14 | Q8NC51 PAIRB_HUMAN  | E.LTES#PKYIQK.Q       | S234: | 3 | 2,0415 | 0,176 | 0,142  |
| 14 | O15127 SCAM2_HUMAN  | R.AASS#AAQGAFQGN.-    | S320: | 2 | 2,0413 | 0,255 | -0,291 |
| 14 | P55036 PSMD4_HUMAN  | R.NGDFLPTR.L          |       | 2 | 2,0405 | 0,131 | -0,597 |
| 14 | Q53G15 Q53G15_HUMAN | K.QYRAS#PSFEE.R       | S378: | 2 | 2,0392 | 0,212 | -0,377 |
| 14 | Q96JJ3 ELMO2_HUMAN  | E.DFNKVMQVVRE.Q       |       | 3 | 2,0369 | 0,122 | 0,335  |
| 14 | Q9NPI6 DCP1A_HUMAN  | R.QRS#PLLNPVPE.L      | S353: | 2 | 2,0325 | 0,161 | -0,586 |
| 14 | P11021 GRP78_HUMAN  | E.ISAM*VLTK.M         |       | 2 | 2,0294 | 0,15  | 0,208  |
| 14 | Q6K0P9 IFIX_HUMAN   | K.VLNINLK.R           |       | 2 | 2,0262 | 0,108 | 0,075  |
| 14 | P11142 HSP7C_HUMAN  | E.KVCNPIITK.L         |       | 2 | 2,0229 | 0,197 | -0,455 |
| 14 | P67936 TPM4_HUMAN   | E.GDVAALNR.R          |       | 2 | 2,022  | 0,12  | 0,299  |
| 14 | A9CQZ4 A9CQZ4_HUMAN | E.DEEVPAFFK.N         |       | 2 | 2,0194 | 0,093 | -0,113 |
| 14 | P14174 MIF_HUMAN    | R.SYSKLLCGLLAE.R      |       | 2 | 2,0189 | 0,22  | -0,36  |
| 14 | Q9NPR2 SEM4B_HUMAN  | R.LGS#EIRDSVV.-       | S825: | 2 | 2,0177 | 0,266 | -0,423 |
| 14 | P09211 GSTP1_HUMAN  | K.YISLIYTNYE.A        |       | 2 | 2,014  | 0,212 | -0,477 |
| 14 | P04637 P53_HUMAN    | R.ALPNNTSSS#PQPK.K    | S315: | 2 | 2,0114 | 0,352 | -0,515 |
| 14 | Q15022 SUZ12_HUMAN  | E.NKPGS#VKPTQTIAVKE.S | S393: | 3 | 2,0109 | 0,199 | -0,309 |
| 14 | Q6S8J3 A26CA_HUMAN  | E.TTFNSIM*K.S         |       | 2 | 2,0075 | 0,264 | 0      |
| 14 | Q58FF7 H90B3_HUMAN  | E.DLPLNISRE.M         |       | 2 | 2,004  | 0,122 | -0,231 |
| 14 | P05787 K2C8_HUMAN   | E.VDPNIQAVR.T         |       | 2 | 2,004  | 0,096 | -0,06  |
| 14 | P11021 GRP78_HUMAN  | E.ISAMVLTK.M          |       | 2 | 2,0024 | 0,314 | 0,071  |
| 14 | Q9UJZ1 STML2_HUMAN  | R.NTVVLFVPPQE.A       |       | 2 | 2,0014 | 0,221 | -0,192 |

|    |                      |                      |            |   |        |       |        |
|----|----------------------|----------------------|------------|---|--------|-------|--------|
| 14 | Q29RF7 PDS5A_HUMAN   | R.IISVTPVK.N         |            | 2 | 1,9979 | 0,108 | 0      |
| 14 | P35527 K1C9_HUMAN    | R.SGGGGGGGLGSGGSIR.S |            | 2 | 1,9973 | 0,127 | -0,198 |
| 14 | Q08AE8 SPIR1_HUMAN   | R.KLRPVS#PEE.I       | S228:      | 2 | 1,9902 | 0,115 | -0,43  |
| 14 | P49321 NASP_HUMAN    | E.SEAAGDGVDTK.V      |            | 2 | 1,9804 | 0,372 | -0,116 |
| 14 | P78347 GTF2I_HUMAN   | K.INSSPNVNTTASGVE.D  |            | 2 | 1,9773 | 0,11  | -1,065 |
| 14 | Q15742 NAB2_HUMAN    | R.SFS#PKSPL.E        | S159:      | 2 | 1,9741 | 0,118 | -0,228 |
| 14 | P07942 LAMB1_HUMAN   | D.MVKEALEEAEK.A      |            | 2 | 1,9637 | 0,203 | -0,096 |
| 14 | A6NKT7 RGPD3_HUMAN   | K.ILDDSDSNLSVVK.K    |            | 2 | 1,9633 | 0,138 | -0,521 |
| 14 | Q9H1A4 APC1_HUMAN    | E.GSL#PVIAPK.K       | S688:      | 2 | 1,9585 | 0,297 | -0,116 |
| 14 | Q9Y2H6 FND3A_HUMAN   | R.RVVVVPQAPE.F       |            | 2 | 1,9574 | 0,114 | 0      |
| 14 | P55072 TERA_HUMAN    | K.DVDLEFLAK.M        |            | 2 | 1,9468 | 0,222 | -0,116 |
| 14 | Q15149 PLEC1_HUMAN   | E.LQLVTYK.A          |            | 2 | 1,9462 | 0,113 | -0,987 |
| 14 | P68104 EF1A1_HUMAN   | E.DGPKFLKSGDAAIVD.M  |            | 2 | 1,9426 | 0,199 | -0,637 |
| 14 | Q07955 SFRS1_HUMAN   | E.DM*TYAVR.K         |            | 2 | 1,9372 | 0,15  | -0,14  |
| 14 | P06733 ENOA_HUMAN    | R.HIADLAGNSE.V       |            | 2 | 1,937  | 0,111 | -0,119 |
| 14 | P00533 EGFR_HUMAN    | E.DHFLSLQR.M         |            | 2 | 1,929  | 0,224 | 0,06   |
| 14 | Q02952 AKA12_HUMAN   | E.NREARGDTVVS#EAE.L  | S967:      | 2 | 1,9257 | 0,12  | -0,454 |
| 14 | Q9NPR2 SEM4B_HUMAN   | R.VRLGS#EIRDSVV.-    | S825:      | 2 | 1,9252 | 0,367 | -0,173 |
| 14 | Q8IWC1 MA7D3_HUMAN   | K.ESVKGS#PKESME.A    | S433:      | 2 | 1,9227 | 0,303 | -0,44  |
| 14 | P31943 HNRH1_HUMAN   | K.HTGPNSPDTAND.G     |            | 2 | 1,9176 | 0,16  | -0,398 |
| 14 | Q99747 SNAG_HUMAN    | K.LGLSLVPPGGGIK.K    |            | 2 | 1,9169 | 0,23  | -0,403 |
| 14 | Q9UKV3 ACINU_HUMAN   | R.SAQPLPLKIEE.L      |            | 2 | 1,9134 | 0,211 | 0,299  |
| 14 | P27824 CALX_HUMAN    | K.VTYKAPVPTGE.V      |            | 2 | 1,9123 | 0,086 | -0,42  |
| 14 | P62249 RS16_HUMAN    | R.TLLVADPR.R         |            | 2 | 1,9116 | 0,266 | 0      |
| 14 | P31327 CPSM_HUMAN    | K.IALGIPLPEIK.N      |            | 2 | 1,9072 | 0,225 | -0,21  |
| 14 | ##Q96FN4 CPNE2_HUMAN | D.NLLLLPR.T          |            | 2 | 1,9065 | 0,147 | 0      |
| 14 | Q68DN6 RGPD1_HUMAN   | K.NIFRFDE.S          |            | 2 | 1,9038 | 0,15  | 0      |
| 14 | P00558 PGK1_HUMAN    | K.ITLPVDFVTAD.K      |            | 2 | 1,8955 | 0,407 | -0,307 |
| 14 | Q5VZK9 LR16A_HUMAN   | E.KRSS#GFISE.L       | S968:      | 2 | 1,884  | 0,169 | -0,224 |
| 14 | P20700 LMNB1_HUMAN   | R.LKLSPSPS#S#R.V     | S395:S396: | 2 | 1,8788 | 0,18  | -0,396 |
| 14 | Q9HAU6 FKSG2_HUMAN   | E.MFSDIYK.I          |            | 2 | 1,8767 | 0,091 | 0      |
| 14 | Q14697 GANAB_HUMAN   | R.LSVSRDE.N          |            | 2 | 1,8702 | 0,108 | 0      |
| 14 | P78347 GTF2I_HUMAN   | R.GREFSFE.A          |            | 2 | 1,8683 | 0,142 | 0,07   |

|    |                     |                       |            |   |        |       |        |
|----|---------------------|-----------------------|------------|---|--------|-------|--------|
| 14 | P19338 NUCL_HUMAN   | E.LKTGISDVFAK.N       |            | 2 | 1,8622 | 0,286 | -0,103 |
| 14 | Q9BQY9 DBND2_HUMAN  | E.LSLPVPTSDR.T        |            | 2 | 1,86   | 0,171 | 0,112  |
| 14 | Q9UBG0 MRC2_HUMAN   | R.DCSIALPYVCK.K       |            | 2 | 1,8551 | 0,171 | -0,276 |
| 14 | Q9UKV3 ACINU_HUMAN  | E.VATPPVPQLQVCEPK.E   |            | 2 | 1,8528 | 0,157 | -0,22  |
| 14 | Q14562 DHX8_HUMAN   | E.IELVEEPPFLR.G       |            | 2 | 1,8486 | 0,136 | -1,161 |
| 14 | Q9NQW6 ANLN_HUMAN   | R.DGDASLNK.A          |            | 2 | 1,8447 | 0,332 | 0,446  |
| 14 | Q9UKY7 CDV3_HUMAN   | E.VDYSGLR.V           |            | 2 | 1,8424 | 0,097 | -0,603 |
| 14 | Q8NEL9 DDHD1_HUMAN  | E.GISTIPS#PVTSPVLSR.R | S723:      | 2 | 1,8422 | 0,112 | -0,866 |
| 14 | Q86UE8 TLK2_HUMAN   | E.FAGGSAPGTSPGR.S     |            | 2 | 1,8404 | 0,149 | 0,105  |
| 14 | P49588 SYAC_HUMAN   | K.NVGCLQE.A           |            | 2 | 1,8335 | 0,135 | 0,595  |
| 14 | Q58FF8 H90B2_HUMAN  | E.FDGLSVSVTKE.G       |            | 2 | 1,8307 | 0,236 | -0,186 |
| 14 | Q07955 SFRS1_HUMAN  | E.DMTYAVR.K           |            | 2 | 1,8291 | 0,199 | 0,214  |
| 14 | P13693 TCTP_HUMAN   | R.DLISHDE.M           |            | 2 | 1,8263 | 0,16  | 0      |
| 14 | Q9HA05 Q9HA05_HUMAN | R.STTPTSSPFR.A        |            | 2 | 1,804  | 0,21  | -0,226 |
| 14 | P05787 K2C8_HUMAN   | R.ISSSSFSR.V          |            | 2 | 1,7828 | 0,102 | -0,84  |
| 14 | Q9UKJ3 GPTC8_HUMAN  | E.RKPS#VSEE.V         | S694:      | 2 | 1,765  | 0,171 | -0,121 |
| 14 | O94804 STK10_HUMAN  | K.ASQSRPNSSALE.T      |            | 2 | 1,7649 | 0,091 | -0,685 |
| 14 | Q07666 KHDR1_HUMAN  | K.FLVPDM*M*DDICQE.Q   |            | 2 | 1,7627 | 0,095 | -0,297 |
| 14 | Q9NTI5 PDS5B_HUMAN  | E.TVSNASSSNPSSPGR.I   |            | 2 | 1,7531 | 0,105 | -0,795 |
| 14 | Q96PK6 RBM14_HUMAN  | R.DRS#PLRRS#PPR.A     | S215:S220: | 2 | 1,75   | 0,089 | -0,978 |
| 14 | P60709 ACTB_HUMAN   | R.GYSFTTTAERE.I       |            | 2 | 1,7458 | 0,236 | 0,29   |
| 14 | O43583 DENR_HUMAN   | E.YM*PDVAK.C          |            | 2 | 1,7439 | 0,106 | 0,145  |
| 14 | Q15154 PCM1_HUMAN   | K.RVTNDIS#PE.S        | S65:       | 2 | 1,7408 | 0,117 | -0,22  |
| 14 | P13804 ETFA_HUMAN   | E.VAPISDIIAK.S        |            | 2 | 1,7407 | 0,304 | -0,321 |
| 14 | Q9UKV3 ACINU_HUMAN  | E.KSKS#PSPRLT#E.D     | S386:T393: | 2 | 1,7339 | 0,12  | -0,246 |
| 14 | Q8TEH3 DEN1A_HUMAN  | E.GRRT#SVPSPE.Q       | T519:      | 2 | 1,7234 | 0,146 | -0,105 |
| 14 | Q02750 MP2K1_HUMAN  | E.GDAAETPPRPR.T       |            | 2 | 1,7186 | 0,161 | -0,627 |
| 14 | A6NKT7 RGPD3_HUMAN  | K.VKNLS#ASFPTEE.S     | S1622:     | 2 | 1,7106 | 0,089 | -0,435 |
| 14 | Q9BS26 TXND4_HUMAN  | E.NQVVFAR.V           |            | 2 | 1,7091 | 0,103 | 0,512  |
| 14 | Q6S8J3 A26CA_HUMAN  | E.LPDGQVITIGNE.R      |            | 2 | 1,7034 | 0,083 | -0,097 |
| 14 | Q03135 CAV1_HUMAN   | E.LS#EKQVYDAHTKE.I    | S37:       | 2 | 1,7009 | 0,27  | -0,749 |
| 14 | P51149 RAB7A_HUMAN  | E.QAFQTIAR.N          |            | 2 | 1,7003 | 0,228 | 0      |
| 14 | Q5VY92 Q5VY92_HUMAN | R.M*QDIPEETE.S        |            | 2 | 1,6979 | 0,088 | -0,22  |

|    |                     |                          |       |   |        |       |        |
|----|---------------------|--------------------------|-------|---|--------|-------|--------|
| 14 | Q9NPR2 SEM4B_HUMAN  | R.VRLGS#EIRD.S           | S825: | 2 | 1,6972 | 0,149 | 0,108  |
| 14 | O43491 E41L2_HUMAN  | E.VRS#PTKAPHLQIE.G       | S598: | 2 | 1,6959 | 0,516 | -1,535 |
| 14 | P36578 RL4_HUMAN    | K.NVTLPVFK.A             |       | 2 | 1,6671 | 0,169 | -0,37  |
| 14 | Q8IYM0 CLO25_HUMAN  | E.VSVDSPGPSE.E           |       | 2 | 1,6556 | 0,176 | -0,324 |
| 14 | Q02952 AKA12_HUMAN  | K.KGLSSDLE.G             |       | 2 | 1,6514 | 0,172 | 0,575  |
| 14 | Q17RV1 Q17RV1_HUMAN | K.HLNSLPR.N              |       | 2 | 1,6512 | 0,129 | 0      |
| 14 | P31415 CASQ1_HUMAN  | D.DM*DGIHIVAFEE.A        |       | 2 | 1,6469 | 0,102 | -0,167 |
| 14 | P20700 LMNB1_HUMAN  | R.AGGPTT#PLSPTR.L        | T20:  | 2 | 1,6449 | 0,218 | -0,494 |
| 14 | Q99729 ROAA_HUMAN   | K.DYFTKFE.V              |       | 2 | 1,6414 | 0,311 | -0,061 |
| 14 | Q96PK6 RBM14_HUMAN  | R.QPT#PPFFGR.D           | T206: | 2 | 1,6348 | 0,346 | -0,217 |
| 14 | A6NG32 A6NG32_HUMAN | E.LASDGVPR.R             |       | 2 | 1,6252 | 0,133 | 0,15   |
| 14 | P11177 ODPB_HUMAN   | K.DFLPIGK.A              |       | 2 | 1,6163 | 0,149 | -0,068 |
| 14 | Q9H4A6 GOLP3_HUMAN  | E.VLLLGLKDRE.G           |       | 2 | 1,6107 | 0,147 | -0,317 |
| 14 | Q8IWT6 LRC8A_HUMAN  | E.ATVPM*LQR.T            |       | 2 | 1,6088 | 0,165 | -0,262 |
| 14 | P34931 HS71L_HUMAN  | E.ISSMVLTK.L             |       | 2 | 1,5953 | 0,142 | 0,278  |
| 14 | Q9H5J0 ZBTB3_HUMAN  | E.VDAPHLR.A              |       | 2 | 1,593  | 0,12  | -0,226 |
| 14 | P34931 HS71L_HUMAN  | E.ISSM*VLTK.L            |       | 2 | 1,5885 | 0,104 | 0      |
| 14 | Q9Y490 TLN1_HUMAN   | E.HGSVALPAIMR.S          |       | 2 | 1,5762 | 0,127 | -0,106 |
| 14 | Q16555 DPYL2_HUMAN  | K.T#SPAKQQAPPVR.N        | T521: | 2 | 1,5738 | 0,273 | -0,807 |
| 14 | P13010 KU86_HUMAN   | K.TLFPLIEAK.K            |       | 2 | 1,5575 | 0,186 | -0,355 |
| 14 | P15924 DESP_HUMAN   | K.ISTISSVR.N             |       | 2 | 1,539  | 0,113 | 0,141  |
| 14 | P25205 MCM3_HUMAN   | E.MPQVHT#PKTADSQETKE.S   | T722: | 2 | 1,5373 | 0,233 | 0      |
| 14 | P14406 CX7A2_HUMAN  | E.LAVASFPK.K             |       | 2 | 1,5351 | 0,222 | 0,073  |
| 14 | P06493 CDC2_HUMAN   | E.DYTKIEK.I              |       | 2 | 1,533  | 0,086 | -0,068 |
| 14 | P05787 K2C8_HUMAN   | R.AFSSRS#YTSGPSR.I       | S24:  | 2 | 1,5297 | 0,312 | -0,555 |
| 14 | P36957 ODO2_HUMAN   | R.GLVVPVIR.N             |       | 2 | 1,5283 | 0,154 | 0,072  |
| 14 | Q9UKF6 CPSF3_HUMAN  | R.NGVIIAGYCV.E.G         |       | 2 | 1,5232 | 0,123 | -0,204 |
| 14 | P11021 GRP78_HUMAN  | E.SYAYSLK.N              |       | 2 | 1,5041 | 0,105 | 0,147  |
| 14 | Q9COC2 TB182_HUMAN  | E.FGKRDS#LGTYSR.D        | S872: | 2 | 1,4999 | 0,265 | -0,393 |
| 14 | Q9NSK0 KLC4_HUMAN   | R.SGS#LGKIRD.V           | S554: | 2 | 1,4997 | 0,286 | -0,301 |
| 14 | A6NJL0 A6NJL0_HUMAN | E.EHLCTQR.M              |       | 2 | 1,4589 | 0,124 | 0      |
| 14 | Q02952 AKA12_HUMAN  | E.DFAAHPGEDAVPTGPDCQAK.S |       | 2 | 1,2257 | 0,173 | 0,117  |
| 15 | Q9UHB6 LIMA1_HUMAN  | R.SRPFTVAASFQSTSVKS#PK.T | S604: | 3 | 6,2653 | 0,541 | -0,174 |

|    |                     |                                     |            |   |        |       |        |
|----|---------------------|-------------------------------------|------------|---|--------|-------|--------|
| 15 | P46821 MAP1B_HUMAN  | E.RKLGDVS#PTQIDVVSQFGSFKE.D         | S1501:     | 3 | 6,1875 | 0,45  | -0,605 |
| 15 | Q8WXI9 P66B_HUMAN   | E.RGRLT#PSPDIIVLS#DNEASSPR.S        | T120:S129: | 3 | 5,8097 | 0,347 | -0,504 |
| 15 | Q86WB0 NIPA_HUMAN   | R.SQDATFS#PGSEQAEKS#PGPIVSR.T       | S335:S344: | 3 | 5,7277 | 0,44  | -0,144 |
| 15 | Q9Y2X7 GIT1_HUMAN   | R.ARS#MDSDDLSDGAVTLQE.Y             | S410:      | 2 | 5,7128 | 0,465 | -0,684 |
| 15 | Q8ND56 LS14A_HUMAN  | K.TQLSQGRS#SPQLDPLRKS#PTME.Q        | S182:S192: | 3 | 5,6891 | 0,353 | -0,42  |
| 15 | P05556 ITB1_HUMAN   | E.CSTDEVNSEDMDAYCR.K                |            | 2 | 5,5173 | 0,567 | -0,625 |
| 15 | Q9H0D6 XRN2_HUMAN   | R.M*QNNSSPSISPNTSFTSDGSPSPLGGIKR.K  |            | 3 | 5,3194 | 0,569 | -0,737 |
| 15 | Q9UK76 HN1_HUMAN    | R.RNS#SEASSGDFLDLKG.E               | S87:       | 2 | 5,2283 | 0,587 | -0,645 |
| 15 | Q8NFC6 FA44A_HUMAN  | E.GKDKDVTLS#PVKAGPATTTSSE.T         | S1531:     | 3 | 5,1557 | 0,419 | -0,161 |
| 15 | Q96EV2 RBM33_HUMAN  | E.VKVKPAS#PVAQPKEE.A                | S775:      | 3 | 5,1468 | 0,357 | 0      |
| 15 | A6NMQ1 A6NMQ1_HUMAN | E.IGASALS#DSGSFVSSR.A               | S17:       | 2 | 5,1147 | 0,546 | -0,602 |
| 15 | Q9H4A3 WNK1_HUMAN   | K.DRPVSQLVGSKEEPPPAR.S              |            | 3 | 5,1132 | 0,363 | -0,511 |
| 15 | Q8NFC6 FA44A_HUMAN  | E.GKDKDVTLS#PVK.A                   | S1531:     | 3 | 4,9793 | 0,377 | 0,067  |
| 15 | Q71RC2 LARP4_HUMAN  | R.ASTAS#PCNNNINAATAVALQEPR.K        | S597:      | 3 | 4,9767 | 0,407 | -0,523 |
| 15 | O15061 DMN_HUMAN    | E.VSAGGDLSQLAAS#PTGASR.S            | S1163:     | 2 | 4,9683 | 0,49  | 0,071  |
| 15 | Q9BWU0 NADAP_HUMAN  | E.TLASQDLSGDFKKPALPVS#PAAR.S        | S82:       | 3 | 4,951  | 0,379 | -0,224 |
| 15 | Q8ND56 LS14A_HUMAN  | K.TQLSQGRS#SPQLDPLRKS#PTM*E.Q       | S182:S192: | 3 | 4,9499 | 0,286 | -0,417 |
| 15 | Q9UKV3 ACINU_HUMAN  | E.TKDPSSGQEVAT#PPVPQLQVCEPK.E       | T682:      | 3 | 4,9096 | 0,378 | -0,342 |
| 15 | P14618 KPYM_HUMAN   | E.KDIQDLKFGVEQD.V                   |            | 2 | 4,8908 | 0,387 | -0,238 |
| 15 | Q6P6C2 ALKB5_HUMAN  | E.AAAAAAAAAAAAAAAAAAAAAAEPYPVSGAK.R |            | 3 | 4,8854 | 0,544 | -0,157 |
| 15 | Q12996 CSTF3_HUMAN  | E.LAVEGNGPVESNAVLTK.A               |            | 2 | 4,8684 | 0,499 | -0,575 |
| 15 | Q9C0B5 ZDHC5_HUMAN  | K.YRPGYSSSSTAAM*PHSSSAK.L           |            | 3 | 4,8672 | 0,414 | -0,168 |
| 15 | Q6ZUT9 RA61L_HUMAN  | R.RLS#ITSLTGKNNKPNAGQIQE.G          | S1076:     | 3 | 4,8637 | 0,374 | -0,467 |
| 15 | Q9UHB6 LIMA1_HUMAN  | R.SRPFTVAASFQSTSVMK.S               |            | 3 | 4,815  | 0,537 | -0,214 |
| 15 | Q12982 BNIP2_HUMAN  | R.KGS#ITEYTAEEKE.D                  | S114:      | 2 | 4,8109 | 0,428 | -0,224 |
| 15 | Q96JM3 ZN828_HUMAN  | E.LRKPSGS#PDLWKLS#PDQR.K            | S445:S452: | 3 | 4,8078 | 0,354 | -0,572 |
| 15 | Q9ULU4 PKCB1_HUMAN  | K.TDKTSTTGSILNLDLDR.S               |            | 2 | 4,8061 | 0,505 | -0,462 |
| 15 | P07814 SYEP_HUMAN   | E.KTGKEYIPGQPLSQSSDSS#PTR.N         | S886:      | 3 | 4,7713 | 0,37  | -0,288 |
| 15 | O14617 AP3D1_HUMAN  | K.HRPSEADEEELAR.R                   |            | 3 | 4,7708 | 0,43  | -0,119 |
| 15 | Q9Y6G9 DC1L1_HUMAN  | R.KPVTVSPTTPTS#PTEGEAS.-            | S516:      | 2 | 4,7564 | 0,566 | -0,559 |
| 15 | Q9Y490 TLN1_HUMAN   | E.STM*LEDSVS#PKKSTVLQQQYNR.V        | S425:      | 3 | 4,7433 | 0,512 | -0,486 |
| 15 | Q15942 ZYG_HUMAN    | E.KQHPVPPPAQNNQVR.S                 |            | 3 | 4,7433 | 0,354 | -0,1   |
| 15 | Q8ND56 LS14A_HUMAN  | R.SLKTQLSQGRSS#PQLDPLRKS#PTM*E.Q    | S183:S192: | 3 | 4,7236 | 1     | -0,247 |

|    |                     |                                  |                 |   |        |       |        |
|----|---------------------|----------------------------------|-----------------|---|--------|-------|--------|
| 15 | P29590 PML_HUMAN    | K.AVS#PPHLDGPPS#PRS#PVIQSE.V     | S518:S527:S530: | 3 | 4,6935 | 0,426 | -0,47  |
| 15 | P40189 IL6RB_HUMAN  | E.DLQLVDHVDGGDILPR.Q             |                 | 3 | 4,6381 | 0,436 | -0,302 |
| 15 | Q29RF7 PDS5A_HUMAN  | R.IISVT#PVKNIDPVKNKE.I           | T1208:          | 3 | 4,6366 | 0,344 | -0,556 |
| 15 | P27816 MAP4_HUMAN   | E.RAS#PIKMDLAPSKD.M              | S358:           | 3 | 4,6278 | 0,495 | 0,341  |
| 15 | Q9ULU4 PKCB1_HUMAN  | K.TGQAGSLSGS#PKPFSPLSAPITTK.T    | S490:           | 3 | 4,5985 | 0,425 | -0,433 |
| 15 | B2CI53 B2CI53_HUMAN | E.RNGILASPQS#APGNLDNSK.S         | S263:           | 2 | 4,5959 | 0,427 | -0,242 |
| 15 | P28066 PSA5_HUMAN   | E.KRIT#SPLMEPSSIEKIVE.I          | T55:            | 3 | 4,5891 | 0,234 | -0,514 |
| 15 | A0FGR8 ESYT2_HUMAN  | E.KAQPEAGPQGLHDLGR.S             |                 | 3 | 4,5889 | 0,536 | -0,103 |
| 15 | Q9GZR7 DDX24_HUMAN  | E.LTDYQLVS#PAKNPSSLFSK.E         | S60:            | 3 | 4,5783 | 0,463 | -0,421 |
| 15 | B2CI53 B2CI53_HUMAN | R.NGILASPQSAPGNLDNSK.S           |                 | 2 | 4,5526 | 0,527 | -0,342 |
| 15 | Q02952 AKA12_HUMAN  | E.KQEKEPSKSAESPT#S#PVTSE.T       | T285:S286:      | 3 | 4,5457 | 0,364 | -0,397 |
| 15 | Q9P260 K1468_HUMAN  | R.KNY#KSSPEIQEPIKPLE.K           | Y241:           | 3 | 4,5236 | 0,244 | -0,176 |
| 15 | Q9UQ35 SRRM2_HUMAN  | K.SKDSLQSCPGSLSLCAGVK.S          |                 | 3 | 4,5025 | 0,272 | 0,175  |
| 15 | Q05209 PTN12_HUMAN  | E.NM*ISSIEPEKQDS#PPPKPPR.T       | S332:           | 3 | 4,486  | 0,273 | -0,625 |
| 15 | Q14980 NUMA1_HUMAN  | K.APVPSTCSSTFPEELS#PPSHQAK.R     | S169:           | 3 | 4,4792 | 0,398 | -0,65  |
| 15 | O60271 JIP4_HUMAN   | R.SAS#QSS#LDKLDQE.L              | S730:S733:      | 2 | 4,4727 | 0,408 | -0,233 |
| 15 | Q14980 NUMA1_HUMAN  | K.APVPSTCSSTFPEELS#PPSHQAKRE.I   | S169:           | 3 | 4,4658 | 0,301 | -0,389 |
| 15 | Q9NWH9 SLTM_HUMAN   | R.AGAGMITQHSSNAS#PINR.I          | S1002:          | 3 | 4,4628 | 0,432 | -0,387 |
| 15 | O00178 GTPB1_HUMAN  | R.SAM*DSPVPSMFAPEPSS#PGAAR.A     | S25:            | 3 | 4,4442 | 0,371 | -0,466 |
| 15 | P14209 CD99_HUMAN   | E.NAEQGEVDMES#HRNANAEPVQR.T      | S168:           | 3 | 4,4    | 0,368 | 0,487  |
| 15 | Q9UHR5 S30BP_HUMAN  | E.KGGLVSDAYGEDDFSR.L             |                 | 2 | 4,397  | 0,543 | -0,498 |
| 15 | Q9NWH9 SLTM_HUMAN   | R.AGAGMITQHSSNAS#PINR.I          | S1002:          | 2 | 4,3962 | 0,486 | -0,387 |
| 15 | Q02952 AKA12_HUMAN  | E.LQSHAKSPS#PVERE.M              | S1331:          | 2 | 4,3878 | 0,486 | -0,56  |
| 15 | P68104 EF1A1_HUMAN  | K.SGDAIVDMVPGKPMCVE.S            |                 | 2 | 4,3678 | 0,494 | -0,585 |
| 15 | Q12756 KIF1A_HUMAN  | E.SHGSSSASS#PLSAEGRPS#PLEAPNER.Q | S1430:S1439:    | 3 | 4,3615 | 0,48  | -0,198 |
| 15 | Q32MZ4 LRRF1_HUMAN  | R.NM*PGLSAATLASLGGTSS#R.R        | S116:           | 2 | 4,3603 | 0,49  | -0,647 |
| 15 | Q9BQA1 MEP50_HUMAN  | -.M*RKET#PPPLVPPAARE.W           | T5:             | 3 | 4,3501 | 0,253 | -0,097 |
| 15 | Q9C0C2 TB182_HUMAN  | R.RES#AASGLGGLLEEE.G             | S1473:          | 2 | 4,3448 | 0,446 | -0,534 |
| 15 | Q9UK76 HN1_HUMAN    | R.RNS#SEASSGDFDLKGE.G            | S87:            | 3 | 4,3415 | 0,364 | -0,097 |
| 15 | Q92560 BAP1_HUMAN   | E.GGKGSSPSIRPIQGSQGS#SSPVEKE.V   | S595:           | 3 | 4,3328 | 0,316 | -0,505 |
| 15 | Q13263 TIF1B_HUMAN  | E.DGSLSLDGADSTGVVAK.L            |                 | 2 | 4,3321 | 0,534 | -0,307 |
| 15 | Q9NQW6 ANLN_HUMAN   | K.ALSSSADDASLVNASISSSVK.A        |                 | 2 | 4,3248 | 0,515 | -0,243 |
| 15 | P22059 OSBP1_HUMAN  | K.RTGS#NIS#GASSDISLDE.Q          | S379:S382:      | 2 | 4,3161 | 0,394 | -0,588 |



|    |                     |                                 |                 |   |        |       |        |
|----|---------------------|---------------------------------|-----------------|---|--------|-------|--------|
| 15 | Q9UKV3 ACINU_HUMAN  | E.KSKS#PS#PPRLTE.D              | S386:S388:      | 3 | 4,3002 | 0,257 | -0,123 |
| 15 | Q8ND56 LS14A_HUMAN  | K.TQLS#QGRS#SPQLDPLRKS#PTME.Q   | S178:S182:S192: | 3 | 4,298  | 0,209 | -0,611 |
| 15 | P68104 EF1A1_HUMAN  | K.SGDAAIVDM*VPGKPMCVE.S         |                 | 2 | 4,2964 | 0,411 | -0,709 |
| 15 | Q9H0D6 XRN2_HUMAN   | R.MQNNSSPSPNTSFTSDGSPSPLGGIKR.K |                 | 3 | 4,2941 | 0,425 | -0,432 |
| 15 | P49585 PCY1A_HUMAN  | R.HKAAAYDIS#EDEED.-             | S362:           | 2 | 4,2933 | 0,472 | -0,146 |
| 15 | Q9Y490 TLN1_HUMAN   | E.STMLEDSVS#PKKSTVLQQQYNR.V     | S425:           | 3 | 4,2916 | 0,475 | -0,559 |
| 15 | Q9Y608 LRRF2_HUMAN  | R.RGS#GDTSSLIDPDTSLSE.L         | S328:           | 2 | 4,253  | 0,515 | -0,827 |
| 15 | Q9Y2W1 TR150_HUMAN  | R.SPALKS#PLQSVVVR.R             | S253:           | 3 | 4,2517 | 0,432 | -0,234 |
| 15 | Q16555 DPYL2_HUMAN  | K.TVT#PASSAKTS#PAKQQAPPVR.N     | T514:S522:      | 3 | 4,2509 | 1     | 0,08   |
| 15 | Q05209 PTN12_HUMAN  | E.NMISSIEPEKQDS#PPPKPPR.T       | S332:           | 3 | 4,2257 | 0,258 | -0,629 |
| 15 | Q32MZ4 LRRF1_HUMAN  | R.DEKPIKTEVPGS#PAGTEGNCQE.A     | S521:           | 3 | 4,2161 | 0,254 | -0,227 |
| 15 | Q9H3C7 GGNB2_HUMAN  | E.NTSCTCPSSGNLLGS#PK.I          | S450:           | 2 | 4,2133 | 0,45  | 0,066  |
| 15 | Q12802 AKP13_HUMAN  | E.NYNFLPHS#PSKKDSE.W            | S1731:          | 3 | 4,2025 | 0,359 | 0      |
| 15 | Q7L014 DDX46_HUMAN  | R.KLEPVDHGKIE.Y                 |                 | 3 | 4,1957 | 0,317 | 0      |
| 15 | Q8WU60 Q8WU60_HUMAN | R.KVAS#PSPSGSVLFTDE.G           | S98:            | 2 | 4,1846 | 0,534 | -0,359 |
| 15 | Q9UGU5 HM2L1_HUMAN  | K.SPPTM*LLPAS#PAKAPE.T          | S512:           | 2 | 4,1649 | 0,421 | -0,744 |
| 15 | Q6ZVM7 TM1L2_HUMAN  | K.TVTYEDPQAVGGLASALDNR.K        |                 | 3 | 4,1645 | 0,424 | -0,528 |
| 15 | P68104 EF1A1_HUMAN  | K.SGDAAIVDM*VPGKPM*CVE.S        |                 | 2 | 4,1336 | 0,408 | -0,703 |
| 15 | O14497 ARI1A_HUMAN  | E.RGEDPPPDIFAAADSK.K            |                 | 3 | 4,1168 | 0,327 | -0,217 |
| 15 | Q9UHR5 S30BP_HUMAN  | E.KGGLVSDAYGEDDFSR.L            |                 | 3 | 4,1087 | 0,419 | -0,32  |
| 15 | Q13428 TCOF_HUMAN   | R.KSAEPSANTTLVS#ETEEE.G         | S171:           | 2 | 4,1032 | 0,524 | -0,427 |
| 15 | Q02952 AKA12_HUMAN  | E.KQEKEPSKSAES#PTS#PVTSE.T      | S283:S286:      | 3 | 4,0936 | 0,396 | -0,317 |
| 15 | O14497 ARI1A_HUMAN  | E.RGEDPPPDIFAAADSKK.S           |                 | 3 | 4,091  | 0,35  | -0,504 |
| 15 | Q92598 HS105_HUMAN  | E.LNNTCEPVVTQPKPK.I             |                 | 2 | 4,0826 | 0,352 | -0,354 |
| 15 | P18583 SON_HUMAN    | R.AGIEGPLLASDVGR.D              |                 | 2 | 4,0744 | 0,325 | -0,54  |
| 15 | Q68DK2 ZFY26_HUMAN  | E.ISSRS#PPEKPKQE.S              | S703:           | 3 | 4,059  | 0,4   | -0,117 |
| 15 | Q86W56 PARG_HUMAN   | E.NVSQLSLDKS#PTEK.S             | S137:           | 2 | 4,0585 | 0,318 | -0,45  |
| 15 | Q15398 DLG7_HUMAN   | K.LFSGLSVSSEGPSQR.L             |                 | 2 | 4,0408 | 0,554 | -0,472 |
| 15 | Q6NZI2 PTRF_HUMAN   | R.RGS#S#PDVHALLE.I              | S365:S366:      | 2 | 4,04   | 0,48  | -0,339 |
| 15 | O75152 ZC11A_HUMAN  | R.LSSASTGKPLSVEDDFE.K           |                 | 2 | 4,0385 | 0,482 | -0,519 |
| 15 | O94925 GLSK_HUMAN   | E.DDKPHNPM*VNAGAIIVTSLIK.Q      |                 | 3 | 4,032  | 0,164 | -0,327 |
| 15 | Q9UQ35 SRRM2_HUMAN  | K.DKFS#PPVQDRPE.S               | S1188:          | 2 | 4,0233 | 0,322 | -0,669 |
| 15 | P13861 KAP2_HUMAN   | E.ARAPASVLPAAATPR.Q             |                 | 2 | 4,0194 | 0,398 | -0,797 |

|    |                     |                                 |              |   |        |       |        |
|----|---------------------|---------------------------------|--------------|---|--------|-------|--------|
| 15 | P68104 EF1A1_HUMAN  | K.SGDAAIVDMVPGKPM*CVE.S         |              | 3 | 4,0089 | 0,333 | -0,29  |
| 15 | Q13428 TCOF_HUMAN   | E.AKQQQAAGM*LS#PK.T             | S1257:       | 3 | 4,0071 | 0,398 | -0,321 |
| 15 | Q9C0C2 TB182_HUMAN  | E.HGVGGVSVQCPEPGLR.H            |              | 2 | 4,0049 | 0,511 | -0,551 |
| 15 | Q96PK6 RBM14_HUMAN  | R.SPTRAS#YVAPLTAQPATYR.A        | S225:        | 3 | 4,0038 | 0,337 | -0,602 |
| 15 | Q9UQ35 SRRM2_HUMAN  | K.DSLVQSCPGSLSLCAGVK.S          |              | 3 | 4,0006 | 0,41  | -0,584 |
| 15 | Q02952 AKA12_HUMAN  | K.LTASEQAHPQEPAESAEHPRLS#AEYE.K | S371:        | 3 | 3,9999 | 0,382 | -0,557 |
| 15 | Q01130 SFRS2_HUMAN  | E.GMTSLKVDNLTyrTS#PDTLR.R       | S26:         | 3 | 3,9775 | 0,365 | -0,467 |
| 15 | Q14126 DSG2_HUMAN   | E.ATM*KGSSAS#IVKGQHE.M          | S703:        | 2 | 3,9747 | 0,465 | -0,605 |
| 15 | Q13561 DCTN2_HUMAN  | K.GGSGGKTTGT#PPDSSLVTYE.L       | T198:        | 2 | 3,9669 | 0,388 | -0,674 |
| 15 | Q96EV2 RBM33_HUMAN  | K.VKPAS#PVAQPKEE.A              | S775:        | 3 | 3,9486 | 0,234 | -0,188 |
| 15 | P35579 MYH9_HUMAN   | E.LDNVTGLLSQSDSK.S              |              | 2 | 3,9471 | 0,487 | -0,578 |
| 15 | Q9UK76 HN1_HUMAN    | R.RNS#SEASSGDFDLK.G             | S87:         | 2 | 3,9397 | 0,31  | -0,143 |
| 15 | B2CI53 B2CI53_HUMAN | E.RNGILASPQS#APGNLDNSK.S        | S263:        | 3 | 3,9161 | 0,404 | -0,272 |
| 15 | Q9UQ35 SRRM2_HUMAN  | K.DSLVQSCPGSLSLCAGVK.S          |              | 2 | 3,9141 | 0,524 | -0,65  |
| 15 | Q96PK6 RBM14_HUMAN  | R.ASYVAPLTAQPATYR.A             |              | 2 | 3,9121 | 0,4   | -0,455 |
| 15 | B2CI53 B2CI53_HUMAN | R.SNM*S#PDKPVS#VKISFE.D         | S1105:S1111: | 3 | 3,9102 | 0,249 | -0,377 |
| 15 | Q6NZI2 PTRF_HUMAN   | E.AGDLRRGS#S#PDVHALLE.I         | S365:S366:   | 3 | 3,9102 | 0,158 | -0,468 |
| 15 | P28066 PSA5_HUMAN   | E.KRITS#PLM*EPSSIEKIVE.I        | S56:         | 3 | 3,9057 | 0,251 | -0,34  |
| 15 | Q96CN9 GCC1_HUMAN   | E.NKTLALAASSRS#PLDSHGEE.S       | S416:        | 3 | 3,8929 | 0,288 | -0,507 |
| 15 | Q6IAA8 CK059_HUMAN  | R.KLLLDPSS#PPTK.A               | S27:         | 2 | 3,8743 | 0,389 | -0,443 |
| 15 | Q9NQS7 INCE_HUMAN   | E.QHVTQLM*STEPLPR.T             |              | 3 | 3,8721 | 0,387 | -0,221 |
| 15 | Q02952 AKA12_HUMAN  | E.LQSHAKSPPS#PVERE.M            | S1331:       | 3 | 3,8721 | 0,33  | -0,105 |
| 15 | Q9Y2X7 GIT1_HUMAN   | R.ARS#M*DSSDLSGAVTLQE.Y         | S410:        | 2 | 3,8677 | 0,424 | -0,617 |
| 15 | Q9UK76 HN1_HUMAN    | R.NS#SEASSGDFDLKGE.G            | S87:         | 2 | 3,8671 | 0,458 | -0,562 |
| 15 | Q14671 PUM1_HUMAN   | R.RDS#LTGSSDLYKR.T              | S709:        | 3 | 3,8589 | 0,373 | 0,232  |
| 15 | Q16555 DPYL2_HUMAN  | R.NLHQSGFSLGAQIDD.N             |              | 2 | 3,8578 | 0,494 | -0,722 |
| 15 | P13645 K1C10_HUMAN  | K.GSLGGGFSSGGFSGGSFSR.G         |              | 2 | 3,8495 | 0,511 | -1,572 |
| 15 | Q6NZI2 PTRF_HUMAN   | E.VKLPKLS#ISKS#LKE.S            | S167:S171:   | 2 | 3,8396 | 0,507 | -0,881 |
| 15 | O60287 NPA1P_HUMAN  | E.THLVTQQPTKS#PGKE.R            | S1143:       | 3 | 3,8393 | 0,353 | -0,211 |
| 15 | Q75874 IDHC_HUMAN   | E.LDLHSYDLGIENR.D               |              | 3 | 3,8332 | 0,135 | -0,237 |
| 15 | Q9Y266 NUDC_HUMAN   | K.LKPNLGNADLPNYR.W              |              | 3 | 3,8281 | 0,335 | -0,223 |
| 15 | Q96S38 KS6C1_HUMAN  | E.LKFFPNDPEAVSSPR.T             |              | 3 | 3,8266 | 0,159 | -0,503 |
| 15 | Q9P260 K1468_HUMAN  | R.AGS#ISTLDSLDFAR.Y             | S180:        | 2 | 3,8252 | 0,399 | -0,478 |

|    |                     |                                     |            |   |        |       |        |
|----|---------------------|-------------------------------------|------------|---|--------|-------|--------|
| 15 | O75475 PSIP1_HUMAN  | E.AGVVTTATASVNLKVS#PK.R             | S177:      | 2 | 3,8186 | 0,55  | -1,004 |
| 15 | O43294 TGF1_HUMAN   | E.DKKRPS#LPS#SPSPGLPK.A             | S137:S140: | 3 | 3,8143 | 0,195 | -0,281 |
| 15 | Q9UK76 HN1_HUMAN    | E.EKPVPAAPVPS#PVAPAPVPSR.R          | S131:      | 3 | 3,8033 | 0,219 | -0,256 |
| 15 | P48634 BAT2_HUMAN   | R.GSEGKPSLTLPASAPGPEEALTTVTVAPAPR.R |            | 3 | 3,8008 | 0,276 | -0,305 |
| 15 | Q5QJE6 TDIF2_HUMAN  | E.LQDTS#LQQLVSQR.H                  | S330:      | 2 | 3,7998 | 0,397 | -0,382 |
| 15 | Q96Q42 ALS2_HUMAN   | K.SSS#LVDIREETE.G                   | S466:      | 2 | 3,7953 | 0,454 | -0,31  |
| 15 | P27816 MAP4_HUMAN   | E.RAS#PIKM*DLAPSKD.M                | S358:      | 3 | 3,7944 | 0,439 | 0      |
| 15 | Q9UKV0 HDAC9_HUMAN  | R.SDSSACVDDTLGQVGAVK.V              |            | 2 | 3,7931 | 0,388 | -0,202 |
| 15 | P12036 NFH_HUMAN    | E.VKS#PVKEEEKPQE.V                  | S828:      | 3 | 3,763  | 0,321 | 0      |
| 15 | P22059 OSBP1_HUMAN  | R.TGS#NIS#GASSDISLDE.Q              | S379:S382: | 2 | 3,7588 | 0,269 | -0,427 |
| 15 | Q96RT1 LAP2_HUMAN   | E.TSQSPNRT#EPHSDSCSVDLGISK.S        | T836:      | 3 | 3,7546 | 0,364 | -0,631 |
| 15 | Q07157 ZO1_HUMAN    | K.SHSLAQPFDFSGVE.T                  |            | 2 | 3,7501 | 0,407 | -0,534 |
| 15 | Q13131 AAPK1_HUMAN  | E.AKSGTAT#PQRSGS#VSNYR.S            | T481:S487: | 3 | 3,745  | 1     | -0,18  |
| 15 | Q9NQS7 INCE_HUMAN   | E.RVLAPILPDNFSTPTGSR.T              |            | 3 | 3,7428 | 0,373 | -0,565 |
| 15 | Q96N67 DOCK7_HUMAN  | R.SAVRPASLNLNR.S                    |            | 3 | 3,7369 | 0,174 | 0,564  |
| 15 | P38919 IF4A3_HUMAN  | R.LLKEEDM*TKVE.F                    |            | 2 | 3,7313 | 0,293 | 0,09   |
| 15 | Q8NCM9 Q8NCM9_HUMAN | R.SSDITSDLGNVLTST#PNAK.T            | T84:       | 2 | 3,7234 | 0,547 | -0,671 |
| 15 | Q5UIP0 RIF1_HUMAN   | E.LDPSLVSANDS#PSGM*QTR.C            | S2161:     | 2 | 3,7181 | 0,281 | 0,248  |
| 15 | Q5UIP0 RIF1_HUMAN   | K.ATSEEDVSIKS#PICE.K                | S1616:     | 2 | 3,7119 | 0,338 | -0,35  |
| 15 | P82979 HCC1_HUMAN   | R.FGLNVSS#ISR.K                     | S163:      | 2 | 3,7102 | 0,346 | -0,105 |
| 15 | Q9UGV2 NDRG3_HUMAN  | R.SRTHST#SSSLGSGESPFGR.S            | T332:      | 3 | 3,6898 | 0,314 | -0,894 |
| 15 | O00418 EF2K_HUMAN   | K.LLQSAKT#ILRGTEE.K                 | T348:      | 2 | 3,6864 | 0,375 | -0,372 |
| 15 | P04264 K2C1_HUMAN   | K.SLNNQFASFIDK.V                    |            | 2 | 3,6762 | 0,453 | -0,441 |
| 15 | Q8IU81 I2BP1_HUMAN  | E.ALGHS#PKDPGGGGPVR.A               | S436:      | 3 | 3,6728 | 0,257 | -0,223 |
| 15 | Q9NYF8 BCLF1_HUMAN  | K.LKDLFDYS#PPLHK.N                  | S512:      | 2 | 3,6703 | 0,472 | -0,443 |
| 15 | Q15029 U5S1_HUMAN   | E.TIVQEEDT#QLTEPIIKPVK.T            | T86:       | 3 | 3,6615 | 0,242 | -0,388 |
| 15 | Q6IEG0 CF151_HUMAN  | E.NSDSLFVDLAAK.I                    |            | 2 | 3,658  | 0,488 | -0,56  |
| 15 | P31949 S10AB_HUMAN  | K.KLDTNSDGLDFSE.F                   |            | 2 | 3,658  | 0,383 | -0,311 |
| 15 | O94888 UBXD7_HUMAN  | E.HGQLDGLSSS#PPKK.C                 | S270:      | 3 | 3,6508 | 0,234 | -0,239 |
| 15 | Q96GQ7 DDX27_HUMAN  | R.SADFNPDFVFTEKE.G                  |            | 2 | 3,6385 | 0,374 | -0,371 |
| 15 | Q17RQ6 Q17RQ6_HUMAN | E.IRQQILDEKPKGEGS#SSFLSE.T          | S1145:     | 3 | 3,6355 | 0,116 | -0,603 |
| 15 | Q9UHB6 LIMA1_HUMAN  | R.KIS#ENSYSLDDLE.I                  | S225:      | 2 | 3,6332 | 0,376 | -0,383 |
| 15 | Q12789 TF3C1_HUMAN  | D.LQCVCLNTPLGVVR.C                  |            | 2 | 3,6292 | 0,486 | -0,524 |

|    |                     |                              |              |   |        |       |        |
|----|---------------------|------------------------------|--------------|---|--------|-------|--------|
| 15 | Q86TV6 TTC7B_HUMAN  | E.KLPISS#TSNLHVDRE.Q         | S58:         | 3 | 3,6259 | 0,287 | -0,295 |
| 15 | Q9Y2W1 TR150_HUMAN  | R.SPALKSPLQSVVVR.R           |              | 3 | 3,6246 | 0,293 | 0,123  |
| 15 | Q7RTP8 Q7RTP8_HUMAN | R.ASS#LNLVNLVGGK.A           | S596:        | 2 | 3,6225 | 0,393 | -0,295 |
| 15 | Q9Y2W1 TR150_HUMAN  | R.SPALKS#PLQSVVVR.R          | S253:        | 2 | 3,6196 | 0,276 | -0,469 |
| 15 | P54578 UBP14_HUMAN  | R.YAGALRAS#GE.M              | S143:        | 2 | 3,6177 | 0,421 | -0,114 |
| 15 | O43166 SI1L1_HUMAN  | R.HSAS#PVVFTSARSS#PKEE.L     | S1433:S1443: | 3 | 3,6108 | 0,258 | -0,352 |
| 15 | Q9NZC9 SMAL1_HUMAN  | E.AKTAKASPS#GQNISYIHSSSE.S   | S200:        | 3 | 3,6028 | 0,124 | -0,245 |
| 15 | P04049 RAF1_HUMAN   | R.STS#TPNVHVMVSTTLPVDSR.M    | S259:        | 3 | 3,5981 | 0,227 | -0,434 |
| 15 | Q9Y608 LRRF2_HUMAN  | R.RGS#GDTSS#LIDPDTSLSE.L     | S328:S333:   | 2 | 3,5915 | 0,535 | -0,55  |
| 15 | Q6ZVM7 TM1L2_HUMAN  | K.TVTYEDPQAVGGLASALDNR.K     |              | 2 | 3,5905 | 0,543 | -0,47  |
| 15 | Q9UQ35 SRRM2_HUMAN  | E.KMALPPQEDATAS#PPRQK.D      | S1179:       | 3 | 3,5886 | 0,263 | -0,358 |
| 15 | Q15398 DLG7_HUMAN   | R.LGT#PKS#VNKAQSQRNE.M       | T639:S642:   | 3 | 3,5884 | 0,236 | -0,37  |
| 15 | Q8IYB3 SRRM1_HUMAN  | R.HRPS#PPAT#PPP.K.T          | S402:T406:   | 3 | 3,5765 | 0,255 | 0,063  |
| 15 | P52756 RBM5_HUMAN   | E.LVRNGDEENPLKR.G            |              | 3 | 3,5692 | 0,264 | -0,119 |
| 15 | P31943 HNRH1_HUMAN  | K.HTGPNS#PDTANDGFVR.L        | S104:        | 2 | 3,5688 | 0,438 | -0,484 |
| 15 | Q09666 AHNK_HUMAN   | K.FKAEAPLPS#PKLE.G           | S5110:       | 2 | 3,5625 | 0,393 | -0,486 |
| 15 | O94842 TOX4_HUMAN   | E.LVS#GSPVALS#PQPR.C         | S560:S567:   | 2 | 3,5545 | 0,186 | -0,233 |
| 15 | P35527 K1C9_HUMAN   | R.SGGGGGGGLGSGGSIR.S         |              | 2 | 3,5544 | 0,523 | 0,099  |
| 15 | Q9UHV9 PFD2_HUMAN   | E.HSLVIDTLKEVDE.T            |              | 2 | 3,5531 | 0,461 | -0,652 |
| 15 | P50443 S26A2_HUMAN  | E.QHNVSPRDS#AEGNDSYPSGIHLE.L | S16:         | 3 | 3,5463 | 0,415 | -0,424 |
| 15 | P02545 LMNA_HUMAN   | R.SGAQASSTPLS#PTR.I          | S22:         | 2 | 3,5428 | 0,51  | -0,339 |
| 15 | Q9NZT2 OGFR_HUMAN   | R.SQGDEAGGHGEDRPEPLS#PKE.S   | S378:        | 3 | 3,5382 | 0,406 | -0,483 |
| 15 | Q5VT06 CE350_HUMAN  | E.DLSGHSVSVSSDKGR.S          |              | 3 | 3,5377 | 0,507 | -0,299 |
| 15 | Q9P2R6 RERE_HUMAN   | R.SSGRNS#PSAASTSSNDSKAE.T    | S613:        | 3 | 3,5371 | 0,347 | -0,362 |
| 15 | Q14161 GIT2_HUMAN   | R.QKS#LSDLSGDPVTVQE.F        | S415:        | 2 | 3,537  | 0,365 | -0,579 |
| 15 | B2CI53 B2CI53_HUMAN | R.NGILASPQS#APGNLDNSK.S      | S263:        | 2 | 3,5323 | 0,144 | -1,637 |
| 15 | Q14126 DSG2_HUMAN   | E.ATM*KGSSS#ASIVKGQHE.M      | S701:        | 2 | 3,5239 | 0,43  | 0,202  |
| 15 | Q9HC35 EMAL4_HUMAN  | R.ASPSPQPSSQPLQIHR.Q         |              | 2 | 3,523  | 0,466 | -0,494 |
| 15 | Q8NI08 NCOA7_HUMAN  | E.CLS#LDPEER.K               | S441:        | 2 | 3,5227 | 0,322 | -0,305 |
| 15 | Q8ND24 RN214_HUMAN  | K.NSPLLSVSS#QTITKE.N         | S54:         | 2 | 3,5219 | 0,428 | -0,435 |
| 15 | P04181 OAT_HUMAN    | E.NADKLGILRNE.L              |              | 3 | 3,5201 | 0,254 | -0,472 |
| 15 | Q96EV2 RBM33_HUMAN  | K.VKPAS#PVAQPKEE.A           | S775:        | 2 | 3,5179 | 0,485 | -0,669 |
| 15 | Q96PK6 RBM14_HUMAN  | E.SQLSFRRS#PTKSSLD.Y         | S627:        | 3 | 3,5157 | 0,247 | -0,102 |

|    |                     |                             |                 |   |        |       |        |
|----|---------------------|-----------------------------|-----------------|---|--------|-------|--------|
| 15 | Q8NI08 NCOA7_HUMAN  | K.STGHT#PTKPSGSSVSE.K       | T358:           | 2 | 3,5128 | 0,423 | -0,447 |
| 15 | Q15149 PLEC1_HUMAN  | E.AQAATGFLVDPVR.N           |                 | 2 | 3,4996 | 0,405 | -0,544 |
| 15 | P34932 HSP74_HUMAN  | E.KMQVDQEEPHVEE.Q           |                 | 2 | 3,4955 | 0,312 | -0,611 |
| 15 | Q9H2G2 SLK_HUMAN    | D.GDIKLADFGVSAK.N           |                 | 3 | 3,4885 | 0,474 | 0,138  |
| 15 | Q9BY44 EIF2A_HUMAN  | E.ARSDKS#PDLAPTAPQSTPR.N    | S506:           | 3 | 3,4881 | 0,154 | -0,421 |
| 15 | P04181 OAT_HUMAN    | E.NADKLGII LRNE.L           |                 | 2 | 3,4877 | 0,356 | -0,63  |
| 15 | Q9BT25 NYS48_HUMAN  | R.SFAQVLELSAEASK.E          |                 | 2 | 3,4804 | 0,379 | 0,082  |
| 15 | P17301 ITA2_HUMAN   | E.NRM*GDVYKCPVDLSTATCE.K    |                 | 3 | 3,4762 | 0,385 | -0,246 |
| 15 | Q9UQ35 SRRM2_HUMAN  | K.DKFSPFPVQDRPE.S           |                 | 2 | 3,4759 | 0,293 | -0,391 |
| 15 | B2CI53 B2CI53_HUMAN | R.SNM*S#PDKPVS#VKISFE.D     | S1105:S1111:    | 2 | 3,4717 | 0,383 | -0,754 |
| 15 | P62753 RS6_HUMAN    | R.RLS#S#LRAST#SKSESSQK.-    | S235:S236:T241: | 3 | 3,4687 | 0,354 | -0,175 |
| 15 | O95785 WIZ_HUMAN    | E.ARS#PSDLHISPLAK.K         | S1127:          | 3 | 3,4674 | 0,292 | -0,349 |
| 15 | Q92614 MY18A_HUMAN  | R.RVS#SSS#ELDLPSGDHCE.A     | S1067:S1070:    | 2 | 3,4621 | 0,503 | -0,18  |
| 15 | Q09666 AHNK_HUMAN   | K.ADIKS#PSLDVTVPE.A         | S4993:          | 2 | 3,4597 | 0,306 | -0,315 |
| 15 | P38919 IF4A3_HUMAN  | R.LLKEEDMTKVE.F             |                 | 2 | 3,4515 | 0,411 | -1,188 |
| 15 | Q9UGU5 HM2L1_HUMAN  | K.SPPTTMLLPAS#PAKAPE.T      | S512:           | 2 | 3,4508 | 0,394 | -0,478 |
| 15 | Q15149 PLEC1_HUMAN  | K.RAS#FAEKTAQLE.R           | S1721:          | 2 | 3,4444 | 0,391 | -0,597 |
| 15 | Q9H4A3 WNK1_HUMAN   | R.SGS#GGGSAKEPQEE.R         | S185:           | 2 | 3,4423 | 0,407 | 0      |
| 15 | Q96S94 CCNL2_HUMAN  | R.GLLPGGTQVLDGTSGFSPAPK.L   |                 | 2 | 3,4388 | 0,387 | -0,427 |
| 15 | Q00536 PCTK1_HUMAN  | R.GPLSS#APEIVHE.D           | S65:            | 2 | 3,4378 | 0,433 | 0,185  |
| 15 | Q9UK76 HN1_HUMAN    | R.RNSS#EASSGDFDLK.G         | S88:            | 3 | 3,4339 | 0,24  | -0,429 |
| 15 | Q92615 LARP5_HUMAN  | E.RSPS#PAHLPDDPKVAE.K       | S601:           | 3 | 3,4315 | 0,119 | -1,018 |
| 15 | Q9P206 K1522_HUMAN  | R.RST#VLGLPQHVKQE.L         | T162:           | 3 | 3,4308 | 0,338 | -0,109 |
| 15 | P04406 G3P_HUMAN    | R.VIISAPSADAPM*FVM*GVNHE.K  |                 | 3 | 3,4287 | 0,388 | -0,691 |
| 15 | Q09666 AHNK_HUMAN   | K.FKAEAPLSPKLE.G            |                 | 2 | 3,4202 | 0,421 | -0,855 |
| 15 | Q8NCE2 MTMRE_HUMAN  | R.RKDRGST#TS#LGSDFLVM*E.S   | T439:S441:      | 3 | 3,4192 | 0,302 | -0,566 |
| 15 | Q9Y6G9 DC1L1_HUMAN  | R.ITRKPVTVSPTTPTS#PTEGEAS.- | S516:           | 3 | 3,4175 | 0,414 | -0,313 |
| 15 | Q9UGU5 HM2L1_HUMAN  | K.VKASSVGVLS#PQKK.S         | S497:           | 3 | 3,406  | 0,376 | 0      |
| 15 | P51858 HDGF_HUMAN   | R.AGDLLLED#PKRPK.E          | S165:           | 3 | 3,4046 | 0,339 | -0,121 |
| 15 | Q5W0B1 RN219_HUMAN  | E.STSKADLNCS#KNKDLYQE.Q     | S339:           | 3 | 3,397  | 0,249 | -0,419 |
| 15 | Q9H4A3 WNK1_HUMAN   | K.DRPVQSQPSLVGSK.E          |                 | 2 | 3,3947 | 0,345 | -0,534 |
| 15 | Q68DX9 Q68DX9_HUMAN | R.IDS#PGFKPASQQVYR.K        | S491:           | 3 | 3,3939 | 0,297 | 0      |
| 15 | P46821 MAP1B_HUMAN  | E.KEVPSKEEPS#PVKAE.V        | S614:           | 3 | 3,3928 | 0,108 | -0,211 |

|    |                    |                                  |            |   |        |       |        |
|----|--------------------|----------------------------------|------------|---|--------|-------|--------|
| 15 | Q6ULP2 AFTIN_HUMAN | K.GRKPLSTHSTEYNLDSVPS#PAEE.F     | S226:      | 3 | 3,3914 | 0,37  | -0,423 |
| 15 | Q9UQ35 SRRM2_HUMAN | E.KM*ALPPQEDATAS#PPRQK.D         | S1179:     | 3 | 3,3852 | 0,253 | -0,178 |
| 15 | Q32MZ4 LRRF1_HUMAN | R.NMPGLSAATLASLGGT#SSR.R         | T114:      | 2 | 3,3802 | 0,456 | -0,522 |
| 15 | Q71U36 TBA1A_HUMAN | E.ITNACFEPANQMVK.C               |            | 2 | 3,3735 | 0,437 | -0,601 |
| 15 | P40189 IL6RB_HUMAN | E.DLQLVDHVDGGDILPR.Q             |            | 2 | 3,3729 | 0,456 | -0,537 |
| 15 | O60256 KPRB_HUMAN  | E.SDLVDGRHS#PPMVR.S              | S227:      | 3 | 3,3711 | 0,204 | -0,222 |
| 15 | Q8TDM6 DLG5_HUMAN  | R.LGS#SSNLQFKAE.R                | S1263:     | 2 | 3,3674 | 0,427 | -0,359 |
| 15 | Q12802 AKP13_HUMAN | E.NYNFLPHSPS#KKDSE.W             | S1733:     | 3 | 3,3664 | 0,229 | -0,199 |
| 15 | Q96A49 SYAP1_HUMAN | E.AVRPKT#PPVVIK.S                | T248:      | 3 | 3,3642 | 0,205 | -0,132 |
| 15 | O43395 PRPF3_HUMAN | K.QLSFISPTPQPK.T                 |            | 2 | 3,3628 | 0,361 | -0,424 |
| 15 | P28066 PSA5_HUMAN  | R.ITS#PLM*EPSSIEK.I              | S56:       | 2 | 3,3588 | 0,393 | -0,319 |
| 15 | Q9NZT2 OGFR_HUMAN  | E.GAGDAAVASGGAQTLALAGSPAPSGHPK.A |            | 3 | 3,3554 | 0,333 | -0,804 |
| 15 | O75152 ZC11A_HUMAN | E.VKASQLSVQQNK.L                 |            | 3 | 3,3514 | 0,16  | 0,069  |
| 15 | Q8NFC6 FA44A_HUMAN | R.KLS#VLGKDGKPVSE.Y              | S800:      | 3 | 3,347  | 0,433 | 0,238  |
| 15 | P49792 RBP2_HUMAN  | R.QQS#LPATSIPTASFK.F             | S1509:     | 2 | 3,345  | 0,487 | -0,626 |
| 15 | Q9ULU4 PKCB1_HUMAN | K.ILM*SKPVLSGGTGR.R              |            | 3 | 3,3413 | 0,308 | -0,128 |
| 15 | O43303 CE110_HUMAN | E.DQCKTDGIDLAR.D                 |            | 3 | 3,3404 | 0,173 | 0,066  |
| 15 | Q9BYW2 SETD2_HUMAN | K.KLDELPIFKSE.F                  |            | 2 | 3,3403 | 0,223 | -0,462 |
| 15 | Q8IWW6 RHG12_HUMAN | E.KTSFSQEQCDS#AGEGSER.I          | S201:      | 3 | 3,3386 | 0,248 | -0,422 |
| 15 | Q99961 SH3G1_HUMAN | K.IAASSS#FRSSDKPIR.T             | S288:      | 3 | 3,3367 | 0,346 | -0,322 |
| 15 | Q92615 LARP5_HUMAN | R.TSKEPPSS#PLQPQKE.Q             | S664:      | 3 | 3,3344 | 0,242 | 0      |
| 15 | Q14676 MDC1_HUMAN  | R.SSVKT#PESIVPIAPE.L             | T1567:     | 2 | 3,331  | 0,269 | -0,597 |
| 15 | Q9Y2W1 TR150_HUMAN | E.KGSFS#DTGLGDGKM*KSD.S          | S379:      | 3 | 3,3282 | 0,492 | -0,2   |
| 15 | Q6ULP2 AFTIN_HUMAN | E.TVNPQGTDDLNDVADSK.G            |            | 2 | 3,3253 | 0,528 | -0,477 |
| 15 | P84103 SFRS3_HUMAN | K.VYVGNLGNNGNKTELE.R             |            | 2 | 3,3209 | 0,374 | -0,284 |
| 15 | P27694 RFA1_HUMAN  | K.SKDS#LVDIIGICK.S               | S315:      | 2 | 3,3128 | 0,496 | -0,559 |
| 15 | P55884 EIF3B_HUMAN | R.AQAVSEDAGGNEGRAAE.A            |            | 2 | 3,3126 | 0,394 | -0,523 |
| 15 | P12036 NFH_HUMAN   | E.VKS#PVKEEEKPQE.V               | S828:      | 2 | 3,3118 | 0,383 | 0,152  |
| 15 | Q71RC2 LARP4_HUMAN | E.KDLIEDSSVQK.D                  |            | 2 | 3,3063 | 0,323 | -0,483 |
| 15 | P12694 ODBA_HUMAN  | R.IGHHS#TSDSSAYRS#VDE.V          | S337:S347: | 3 | 3,3057 | 0,22  | 0,862  |
| 15 | P22314 UBA1_HUMAN  | K.SGVKIHVS#DQE.L                 | S810:      | 2 | 3,3037 | 0,353 | -0,382 |
| 15 | Q96AD5 PLPL2_HUMAN | R.VQS#LPSVPLSCAAYRE.A            | S404:      | 3 | 3,303  | 0,11  | -0,197 |
| 15 | Q9NYV4 CD2L7_HUMAN | E.TDDYGKAQVAKS#SSKE.S            | S169:      | 3 | 3,2997 | 0,397 | -0,102 |

|    |                     |                               |              |   |        |       |        |
|----|---------------------|-------------------------------|--------------|---|--------|-------|--------|
| 15 | P31949 S10AB_HUMAN  | K.LDTNSDGQLDFSE.F             |              | 2 | 3,2992 | 0,266 | -0,254 |
| 15 | Q8NCN4 RN169_HUMAN  | E.DRQLALQLQR.M                |              | 3 | 3,2991 | 0,116 | 0,221  |
| 15 | Q86T74 Q86T74_HUMAN | R.NINPSTANS#PKCQE.L           | S233:        | 2 | 3,297  | 0,402 | -0,298 |
| 15 | Q32MZ4 LRRF1_HUMAN  | K.IDGATQSS#PAEPK.S            | S714:        | 2 | 3,2956 | 0,376 | -0,353 |
| 15 | P62937 PPIA_HUMAN   | K.KITIADCGQLE.-               |              | 2 | 3,2944 | 0,394 | -0,391 |
| 15 | P08670 VIME_HUMAN   | E.TRDGQVINET#SQHHDDLE.-       | T458:        | 3 | 3,2937 | 0,179 | 0,505  |
| 15 | Q9NWH9 SLTM_HUMAN   | E.DCVKGDPEVEKE.A              |              | 3 | 3,2936 | 0,138 | 0      |
| 15 | Q02952 AKA12_HUMAN  | E.LQSHAKS#PPSPVERE.M          | S1328:       | 3 | 3,2886 | 0,256 | -0,315 |
| 15 | Q96JM3 ZN828_HUMAN  | E.LRKPGPPLS#PEIR.S            | S427:        | 3 | 3,2882 | 0,241 | 0,238  |
| 15 | Q9H3Q1 BORG4_HUMAN  | R.RNGAAGPHS#PDPLLDE.Q         | S174:        | 2 | 3,2864 | 0,416 | -0,212 |
| 15 | P52272 HNRPM_HUMAN  | K.GCGVVKFESPEVAE.R            |              | 2 | 3,2836 | 0,42  | -0,485 |
| 15 | O76021 RL1D1_HUMAN  | K.ATNES#EDEIPQLVPIGKK.T       | S361:        | 3 | 3,2826 | 0,283 | 0,804  |
| 15 | P13861 KAP2_HUMAN   | R.APASVLPAAATPR.Q             |              | 2 | 3,2794 | 0,43  | -0,106 |
| 15 | P04264 K2C1_HUMAN   | R.SLDLDSIAEVK.A               |              | 2 | 3,278  | 0,349 | -0,468 |
| 15 | P34932 HSP74_HUMAN  | E.KMQVDQEEPHVEE.Q             |              | 3 | 3,2739 | 0,085 | -0,229 |
| 15 | Q9Y520 Q9Y520_HUMAN | E.SENSCNKEEPPVFR.Q            |              | 2 | 3,2737 | 0,321 | -0,468 |
| 15 | O15400 STX7_HUMAN   | R.VRAS#SRVS#GSFPEDSSKE.R      | S125:S129:   | 3 | 3,2724 | 0,273 | -0,351 |
| 15 | Q9UKS6 PACN3_HUMAN  | R.SPDEVTLTSIVPTR.D            |              | 2 | 3,2723 | 0,285 | -0,161 |
| 15 | P53985 MOT1_HUMAN   | E.TSIDVAGKPNEVTK.A            |              | 2 | 3,2694 | 0,443 | -0,669 |
| 15 | O75569 PRKRA_HUMAN  | R.HRAEAPPLERE.D               |              | 2 | 3,2687 | 0,402 | -0,374 |
| 15 | P04181 OAT_HUMAN    | E.NADKLGILR.N                 |              | 2 | 3,2602 | 0,261 | -0,329 |
| 15 | Q12888 TP53B_HUMAN  | R.QSQQPM*KPIS#PVKDPVS#PASQK.M | S1094:S1101: | 3 | 3,2587 | 0,134 | -0,215 |
| 15 | Q9BX68 HINT2_HUMAN  | E.DQQLLGHLLLVAK.Q             |              | 2 | 3,2585 | 0,28  | -0,59  |
| 15 | Q9UK76 HN1_HUMAN    | R.RNSS#EASSGDFLDLKG.E.G       | S88:         | 3 | 3,2542 | 0,133 | -0,387 |
| 15 | Q4KMQ1 CI075_HUMAN  | R.WQRPSS#PPPFLPAASEE.A        | S418:        | 2 | 3,2494 | 0,341 | -0,556 |
| 15 | Q3MHD2 LSM12_HUMAN  | E.VEIINDRTET#PPPLASLNVSK.L    | T75:         | 3 | 3,2473 | 0,22  | -0,694 |
| 15 | Q8NCM9 Q8NCM9_HUMAN | R.SSDITSDLGNVLTSTPNAK.T       |              | 2 | 3,2467 | 0,461 | -0,318 |
| 15 | Q92560 BAP1_HUMAN   | K.GSSPSIRPIQGSQGS#SSPVEKE.V   | S595:        | 3 | 3,242  | 0,341 | -0,797 |
| 15 | Q15283 RASA2_HUMAN  | R.KSQFQVEEEDIE.K              |              | 2 | 3,2373 | 0,24  | -0,247 |
| 15 | Q58FG1 HS904_HUMAN  | E.GKTLVSVTKE.D                |              | 2 | 3,2349 | 0,314 | -0,115 |
| 15 | O94888 UBXD7_HUMAN  | R.SESLIDASEDS#QLE.A           | S288:        | 2 | 3,2338 | 0,334 | -0,304 |
| 15 | Q9NYF8 BCLF1_HUMAN  | D.SADLRHDIDRR.R               |              | 3 | 3,2337 | 0,22  | -0,068 |
| 15 | P78371 TCPB_HUMAN   | E.DKLIHFGVALGE.A              |              | 2 | 3,2296 | 0,211 | -0,528 |

|    |                     |                             |                    |   |        |       |        |
|----|---------------------|-----------------------------|--------------------|---|--------|-------|--------|
| 15 | P24752 THIL_HUMAN   | E.DLIVKDGLTDVYNK.I          |                    | 2 | 3,2175 | 0,23  | -0,536 |
| 15 | Q8NC51 PAIRB_HUMAN  | E.LT#ESPKEYIQK.Q            | T232:              | 2 | 3,2146 | 0,281 | -0,379 |
| 15 | P14618 KPYM_HUMAN   | R.AGKPVICATQM*LE.S          |                    | 2 | 3,2109 | 0,363 | -0,425 |
| 15 | O43395 PRPF3_HUMAN  | K.QLSFISPT#PQPK.T           | T167:              | 2 | 3,2079 | 0,096 | -0,401 |
| 15 | Q9UMZ2 SYNG_HUMAN   | K.FDFLVATSQSK.M             |                    | 2 | 3,2001 | 0,346 | -0,687 |
| 15 | Q9BQA1 MEP50_HUMAN  | -.MRKET#PPPLVPPAARE.W       | T5:                | 3 | 3,1995 | 0,257 | -0,098 |
| 15 | Q9ULU4 PKCB1_HUMAN  | K.TDKTSTTGSILNLDLDR.S       |                    | 3 | 3,1968 | 0,184 | -0,396 |
| 15 | P38919 IF4A3_HUMAN  | R.LLKEEDMTKVE.F             |                    | 3 | 3,1916 | 0,308 | -0,068 |
| 15 | Q9H6F5 CCD86_HUMAN  | R.LGGLRPES#PE.S             | S18:               | 2 | 3,1905 | 0,261 | -0,215 |
| 15 | Q9UKL0 RCOR1_HUMAN  | R.VGPQYQAVVPDFDPAK.L        |                    | 2 | 3,1871 | 0,435 | -0,564 |
| 15 | Q58FG1 HS904_HUMAN  | R.TLTIVDTGIGM*TK.A          |                    | 2 | 3,1834 | 0,448 | -0,625 |
| 15 | P04049 RAF1_HUMAN   | R.STS#TPNVHM*VSTTLPVDSR.M   | S259:              | 3 | 3,1832 | 0,194 | -0,43  |
| 15 | Q01082 SPTB2_HUMAN  | R.T#SSKES#SPIPS#PTSDRKAK.T  | T2159:S2164:S2169: | 3 | 3,1829 | 0,123 | -0,408 |
| 15 | Q14103 HNRPD_HUMAN  | E.SESVDKVMQKE.H             |                    | 2 | 3,1799 | 0,29  | -0,525 |
| 15 | O14497 ARI1A_HUMAN  | R.SHAPM*S#PGSSGGGQPLAR.T    | S363:              | 3 | 3,1792 | 0,174 | -0,277 |
| 15 | Q13177 PAK2_HUMAN   | K.YLS#FTPPEKD.G             | S141:              | 2 | 3,1742 | 0,36  | -0,478 |
| 15 | P05787 K2C8_HUMAN   | R.AFSSRS#YTSGPGSR.I         | S24:               | 3 | 3,1711 | 0,139 | -0,238 |
| 15 | Q9BWU0 NADAP_HUMAN  | R.SKAPASSSNPEEVQKE.G        |                    | 2 | 3,1691 | 0,342 | 0,344  |
| 15 | P04406 G3P_HUMAN    | K.LVINGNPITIFQER.D          |                    | 2 | 3,1682 | 0,404 | -0,454 |
| 15 | Q9UQ35 SRRM2_HUMAN  | K.DKFS#PFVQDRPE.S           | S1188:             | 3 | 3,159  | 0,191 | -0,223 |
| 15 | P28066 PSA5_HUMAN   | E.KRITS#PLM*EPSSIEK.I       | S56:               | 3 | 3,1573 | 0,215 | -0,101 |
| 15 | Q01130 SFRS2_HUMAN  | E.GM*TSLKVDNLT#YRTSPDTLR.R  | T22:               | 3 | 3,15   | 0,299 | -0,619 |
| 15 | Q9Y2X9 ZN281_HUMAN  | E.SQKEDPFNIAEPR.V           |                    | 3 | 3,1487 | 0,187 | 0,06   |
| 15 | O94964 CT117_HUMAN  | R.TKS#VSSMSEFE.S            | S55:               | 2 | 3,1468 | 0,384 | -0,558 |
| 15 | Q66K74 MAP1S_HUMAN  | R.ARRS#AS#PHDVDLCLVSPCEFE.H | S729:S731:         | 3 | 3,1443 | 0,162 | -0,351 |
| 15 | Q9NZC9 SMAL1_HUMAN  | K.AS#PSGQNISYIHSSSE.S       | S198:              | 2 | 3,1418 | 0,412 | -0,98  |
| 15 | B2RDE1 B2RDE1_HUMAN | R.KIQVLQQQADDAEE.R          |                    | 2 | 3,1399 | 0,487 | -0,453 |
| 15 | Q71RC2 LARP4_HUMAN  | E.KDLIEDSSVQK.D             |                    | 3 | 3,1314 | 0,268 | 0,217  |
| 15 | A9CQZ4 A9CQZ4_HUMAN | R.QKFCGMFCPVEGSSE.N         |                    | 2 | 3,131  | 0,454 | -0,692 |
| 15 | Q70CQ4 UBP31_HUMAN  | E.AADDKVSISCFGLR.N          |                    | 3 | 3,1237 | 0,281 | -0,225 |
| 15 | Q9H2G2 SLK_HUMAN    | D.GDIKLADFGVSAK.N           |                    | 2 | 3,1231 | 0,423 | -0,554 |
| 15 | P27694 RFA1_HUMAN   | K.VIDQQNGLYRCE.K            |                    | 2 | 3,1221 | 0,411 | -0,653 |
| 15 | Q96AD5 PLPL2_HUMAN  | R.VQS#LPSVPLSCAAYRE.A       | S404:              | 2 | 3,1186 | 0,336 | -0,92  |



|    |                    |                                  |        |   |        |       |        |
|----|--------------------|----------------------------------|--------|---|--------|-------|--------|
| 15 | Q6NZI2 PTRF_HUMAN  | E.AGDLRRGS#SPDVHALLE.I           | S365:  | 3 | 3,1184 | 0,104 | -0,488 |
| 15 | P11388 TOP2A_HUMAN | K.SVVSLEADDVK.G                  |        | 2 | 3,118  | 0,446 | -0,382 |
| 15 | P49792 RBP2_HUMAN  | E.KDSLITPHVSR.S                  |        | 3 | 3,1128 | 0,336 | 0,146  |
| 15 | P28066 PSA5_HUMAN  | E.KRITS#PLMEPSSIEK.I             | S56:   | 3 | 3,1125 | 0,135 | -0,306 |
| 15 | Q9Y6M7 S4A7_HUMAN  | R.KIPTGAEASNVLVGE.V              |        | 2 | 3,1088 | 0,385 | -0,246 |
| 15 | P41214 LIGA_HUMAN  | E.DKSLSEAPEDTSTR.G               |        | 3 | 3,1026 | 0,206 | 0,119  |
| 15 | P08133 ANXA6_HUMAN | K.YRGSIHDFPGFDPNQDAE.A           |        | 3 | 3,0988 | 0,22  | -0,443 |
| 15 | O75152 ZC11A_HUMAN | K.LSVQSNPS#PQLR.S                | S132:  | 2 | 3,0951 | 0,248 | 0,087  |
| 15 | Q9HCD5 NCOA5_HUMAN | E.TDKIINYLR.E                    |        | 3 | 3,0912 | 0,268 | -0,289 |
| 15 | Q13428 TCOF_HUMAN  | E.AKPQQAAGMLS#PK.T               | S1257: | 2 | 3,084  | 0,088 | -0,52  |
| 15 | Q9UQ35 SRRM2_HUMAN | E.SSLVFKDTRLRT#PPR.E             | T1208: | 3 | 3,0798 | 0,255 | -0,216 |
| 15 | Q9H8U3 ZFAN3_HUMAN | E.CGPCTDTAHVSLIT#PTKR.S          | T112:  | 3 | 3,0697 | 0,43  | -0,087 |
| 15 | Q9H3Q1 BORG4_HUMAN | R.NGAAGPHS#PDPLLDE.Q             | S174:  | 2 | 3,0689 | 0,386 | -0,155 |
| 15 | Q9UPN9 TRI33_HUMAN | E.DAGSSSLDNLLSR.Y                |        | 2 | 3,0675 | 0,276 | -0,183 |
| 15 | Q5JSH3 WDR44_HUMAN | R.SNS#GRELTDEE.I                 | S344:  | 2 | 3,0674 | 0,249 | 0      |
| 15 | P60709 ACTB_HUMAN  | E.EHPVLLTEAPLNPK.A               |        | 3 | 3,0649 | 0,133 | -0,117 |
| 15 | Q7Z5L9 I2BP2_HUMAN | R.AAASLAAVSGTAAASLGSAQPTDLGAHK.R |        | 3 | 3,0649 | 0,105 | -0,44  |
| 15 | Q92598 HS105_HUMAN | E.LNNTCEPVVTQPKPK.I              |        | 3 | 3,0613 | 0,301 | 0,106  |
| 15 | P14618 KPYM_HUMAN  | R.AGKPVICATQMLE.S                |        | 2 | 3,058  | 0,432 | -0,258 |
| 15 | Q9ULU4 PKCB1_HUMAN | K.TSTTGSILNLDLDR.S               |        | 2 | 3,0578 | 0,316 | -0,486 |
| 15 | P35579 MYH9_HUMAN  | R.RGDLPFVPR.R                    |        | 2 | 3,056  | 0,294 | -0,422 |
| 15 | Q9H2Y7 ZF106_HUMAN | E.GVSISSPGLAR.K                  |        | 2 | 3,0535 | 0,308 | -0,108 |
| 15 | P07737 PROF1_HUMAN | K.CSVIRDSLLQDGE.F                |        | 2 | 3,0516 | 0,406 | -0,409 |
| 15 | O75152 ZC11A_HUMAN | R.RLS#SASTGKPPLSVEDDFE.K         | S758:  | 3 | 3,0504 | 0,144 | 0      |
| 15 | O00418 EF2K_HUMAN  | K.LLQSAKT#ILRGTEE.K              | T348:  | 3 | 3,0473 | 0,25  | -0,223 |
| 15 | P30414 NKTR_HUMAN  | E.NIPVIPLSDS#PPPSR.W             | S613:  | 2 | 3,0472 | 0,345 | -0,512 |
| 15 | P04075 ALDOA_HUMAN | K.RLQSIGTENTEE.N                 |        | 2 | 3,0446 | 0,473 | -0,443 |
| 15 | Q8WWY3 PRP31_HUMAN | R.DRSS#GTASSVAFTPLQGLE.I         | S446:  | 2 | 3,0417 | 0,335 | -1,584 |
| 15 | Q12802 AKP13_HUMAN | E.NYNFLPHS#PSKKDSE.W             | S1731: | 2 | 3,0415 | 0,315 | -0,199 |
| 15 | Q15545 TAF7_HUMAN  | E.NQGLDIS#SPGM*SGHRQGHDSLE.H     | S200:  | 3 | 3,0398 | 0,124 | -0,303 |
| 15 | Q14103 HNRPD_HUMAN | E.SESVDKVM*DQKE.H                |        | 2 | 3,0392 | 0,231 | -0,519 |
| 15 | P63151 ZABA_HUMAN  | R.VVIFQQEQE.N                    |        | 2 | 3,0381 | 0,17  | -0,327 |
| 15 | Q9UMZ2 SYNG_HUMAN  | K.ISKFDLTVATSQSK.M               |        | 3 | 3,0375 | 0,233 | -0,466 |

|    |                     |                               |              |   |        |       |        |
|----|---------------------|-------------------------------|--------------|---|--------|-------|--------|
| 15 | Q16204 CCDC6_HUMAN  | K.SGGIVISPRLEE.L              |              | 2 | 3,0361 | 0,322 | -0,348 |
| 15 | Q9BQA1 MEP50_HUMAN  | -.MRKET#PPPLVPPAAR.E          | T5:          | 3 | 3,0337 | 0,118 | -0,315 |
| 15 | Q5W0B1 RN219_HUMAN  | R.TSS#EASMDAAYLDKISE.L        | S526:        | 2 | 3,0316 | 0,365 | -0,321 |
| 15 | Q13136 LIPA1_HUMAN  | R.LAS#LSSHVTE.L               | S275:        | 2 | 3,0282 | 0,314 | -0,217 |
| 15 | Q9NYF8 BCLF1_HUMAN  | K.LKDLFDYS#PPLHK.N            | S512:        | 3 | 3,0266 | 0,27  | -0,553 |
| 15 | Q9C0C2 TB182_HUMAN  | E.HGVGGVSQLCPEPLR.H           |              | 3 | 3,0254 | 0,263 | -0,118 |
| 15 | O75531 BAF_HUMAN    | R.DFVAEPMGEKPVGSLAGIGE.V      |              | 2 | 3,0247 | 0,461 | -0,365 |
| 15 | Q9UQ35 SRRM2_HUMAN  | E.SYFGVSSLQLK.G               |              | 2 | 3,024  | 0,473 | -0,397 |
| 15 | Q16555 DPYL2_HUMAN  | R.NLHQSGFSLGAQIDDNIPR.R       |              | 3 | 3,0235 | 0,122 | -0,337 |
| 15 | Q09666 AHNK_HUMAN   | K.ADIKS#PSLDVTVPEAE.L         | S4993:       | 2 | 3,0232 | 0,389 | -0,557 |
| 15 | P20020 AT2B1_HUMAN  | R.NSS#PPPS#PNKNNAVDSGIHLTIE.M | S1216:S1220: | 3 | 3,023  | 0,203 | -0,687 |
| 15 | P84103 SFRS3_HUMAN  | K.VYVGNLGNNGNKTE.L            |              | 2 | 3,0228 | 0,233 | -0,33  |
| 15 | Q01082 SPTB2_HUMAN  | K.TALPAQSAATLPAR.T            |              | 2 | 3,0207 | 0,45  | -0,624 |
| 15 | Q6UB99 ANR11_HUMAN  | E.NASQAPARPLSTNLYR.S          |              | 2 | 3,0205 | 0,232 | -0,208 |
| 15 | B2RMZ9 B2RMZ9_HUMAN | R.RLNSS#PRAPVS#PLKFSPFE.G     | S417:S423:   | 3 | 3,019  | 0,258 | -0,48  |
| 15 | Q9UQ84 EXO1_HUMAN   | R.TPSPSPSTALQQFR.R            |              | 2 | 3,0163 | 0,309 | -0,563 |
| 15 | Q9H6F5 CCD86_HUMAN  | R.AGLGSPERPPKTS#PGSPR.L       | S66:         | 3 | 3,0158 | 0,287 | -0,098 |
| 15 | Q2YD98 K1530_HUMAN  | E.SLGMASGMSDALR.S             |              | 2 | 3,0146 | 0,457 | -0,188 |
| 15 | O00178 GTPB1_HUMAN  | R.SAMDSPVPASMFAPPESS#PGAAR.A  | S25:         | 3 | 3,0124 | 0,239 | -0,235 |
| 15 | P51784 UBP11_HUMAN  | E.SKAAYVLFYQR.Q               |              | 3 | 3,012  | 0,165 | -0,272 |
| 15 | Q8WTW3 COG1_HUMAN   | E.LESSTSNS#PSNKHIHFE.Y        | S459:        | 3 | 3,0116 | 0,105 | -0,183 |
| 15 | Q96T23 RSF1_HUMAN   | E.IKLSDDFDS#PVKGPLCK.S        | S387:        | 3 | 3,0103 | 0,218 | -0,549 |
| 15 | Q14247 SRC8_HUMAN   | R.AKTQT#PPVS#PAPQPTEE.R       | T401:S405:   | 2 | 3,0072 | 0,323 | -0,315 |
| 15 | Q9H7N4 SFR19_HUMAN  | E.SRS#PFLKPPER.A              | S874:        | 3 | 3,007  | 0,19  | 0,194  |
| 15 | P51858 HDGF_HUMAN   | E.VERPLPM*EVEK.N              |              | 3 | 2,9967 | 0,366 | 0,136  |
| 15 | P35579 MYH9_HUMAN   | E.VKVLLQGKGDSE.H              |              | 3 | 2,9961 | 0,143 | 0,287  |
| 15 | Q02952 AKA12_HUMAN  | K.LTASEQAHPQEAESAHEPRLS#AE.Y  | S371:        | 3 | 2,9959 | 0,202 | -0,275 |
| 15 | Q9H6F5 CCD86_HUMAN  | R.AGLGSPERPPK.T               |              | 2 | 2,9929 | 0,272 | -0,55  |
| 15 | Q9UKV5 AMFR2_HUMAN  | R.SDSIRPALNSPVERPS#SDQEEGE.T  | S522:        | 3 | 2,9926 | 0,319 | -0,213 |
| 15 | O60256 KPRB_HUMAN   | E.SDLVDGRHS#PPM*VR.S          | S227:        | 3 | 2,9905 | 0,269 | -0,44  |
| 15 | Q6ZRV2 FA83H_HUMAN  | E.VRHGS#DPAFAPGPR.G           | S523:        | 3 | 2,9894 | 0,184 | -0,237 |
| 15 | Q71RC2 LARP4_HUMAN  | K.DGLNQTTIPVS#PPSTTKPSR.A     | S583:        | 3 | 2,9882 | 0,154 | -0,42  |
| 15 | P28749 RBL1_HUMAN   | R.DM*QPLS#PISVHE.R            | S640:        | 2 | 2,988  | 0,361 | -0,337 |

|    |                    |                               |            |   |        |       |        |
|----|--------------------|-------------------------------|------------|---|--------|-------|--------|
| 15 | Q92625 ANS1A_HUMAN | R.SLSKS#DSDLLTCSPT.E.D        | S626:      | 2 | 2,9813 | 0,214 | -0,737 |
| 15 | P12814 ACTN1_HUMAN | R.FAIQDISVEETSAK.E            |            | 2 | 2,981  | 0,247 | -0,317 |
| 15 | Q9UBU7 DBF4A_HUMAN | K.LLFIS#EPIPHPSNE.L           | S413:      | 2 | 2,9791 | 0,371 | -0,438 |
| 15 | O75531 BAF_HUMAN   | R.DFVAEPM*GEKPVGSLAGIGE.V     |            | 2 | 2,9749 | 0,511 | -0,604 |
| 15 | Q9Y2D5 AKAP2_HUMAN | R.DALGDSLQVPVSPSSTTSSR.C      |            | 2 | 2,9708 | 0,356 | -0,426 |
| 15 | Q9NP61 ARFG3_HUMAN | R.SVISHSVTSDMQTIEQE.S         |            | 2 | 2,9701 | 0,452 | -0,516 |
| 15 | Q9Y6G9 DC1L1_HUMAN | R.KPVTVS#PTTPTSPTEGEAS.-      | S510:      | 2 | 2,97   | 0,231 | -0,559 |
| 15 | P07237 PDIA1_HUMAN | K.VLVGKNFEDVAFDE.K            |            | 2 | 2,9695 | 0,337 | -0,386 |
| 15 | O75061 AUXI_HUMAN  | E.DVFHPSGPASTQSTPR.R          |            | 3 | 2,9665 | 0,298 | -0,217 |
| 15 | Q9NWH9 SLTM_HUMAN  | R.IVQISGNSM*PR.G              |            | 2 | 2,9623 | 0,331 | -0,2   |
| 15 | A0FGR8 ESYT2_HUMAN | R.SSSSLLASPGHISVK.E           |            | 2 | 2,9587 | 0,299 | -0,415 |
| 15 | Q96T23 RSF1_HUMAN  | E.IKLS#DDFDSPVKGPLCK.S        | S382:      | 3 | 2,9582 | 0,259 | -0,366 |
| 15 | Q9UQ35 SRRM2_HUMAN | R.SGAGSS#PETKEQNSALPTSSQDEE.L | S1219:     | 3 | 2,957  | 0,331 | -0,509 |
| 15 | Q9UGU0 TCF20_HUMAN | R.QLSGQSTSSDTTYKGGASEK.A      |            | 3 | 2,9563 | 0,154 | -0,27  |
| 15 | P33316 DUT_HUMAN   | R.ARPAEVGGMQLR.F              |            | 2 | 2,9559 | 0,372 | -0,38  |
| 15 | P11216 PYGB_HUMAN  | R.GLAGLGDVAE.V                |            | 2 | 2,9554 | 0,3   | 0,135  |
| 15 | Q9UQ35 SRRM2_HUMAN | K.DKFSFPVQDRPE.S              |            | 3 | 2,9549 | 0,236 | -0,117 |
| 15 | Q8WX92 NELFB_HUMAN | R.KPS#PAQAAETPALE.L           | S557:      | 2 | 2,9526 | 0,389 | -0,737 |
| 15 | P48634 BAT2_HUMAN  | R.RGDKEAPPPVLLTPK.A           |            | 3 | 2,9521 | 0,118 | 0      |
| 15 | Q6UWZ7 CCD98_HUMAN | K.GFGEYSRS#PTF.-              | S406:      | 2 | 2,9501 | 0,361 | -0,368 |
| 15 | Q09666 AHNK_HUMAN  | K.LSGPS#LKM*PSLE.I            | S4903:     | 2 | 2,9409 | 0,315 | -0,63  |
| 15 | Q5VZK9 LR16A_HUMAN | R.YGVQVMGSGLLAE.M             |            | 2 | 2,9345 | 0,302 | -0,461 |
| 15 | P10809 CH60_HUMAN  | R.GYISPYFINTSK.G              |            | 2 | 2,9315 | 0,233 | -0,351 |
| 15 | Q09666 AHNK_HUMAN  | E.GDLRGPDKLE.G                |            | 3 | 2,9263 | 0,318 | 0,305  |
| 15 | P35908 K22E_HUMAN  | R.FLEQQNQVLQTK.W              |            | 2 | 2,9212 | 0,131 | -0,909 |
| 15 | P27816 MAP4_HUMAN  | E.RAS#PIKMDLAPSKD.M           | S358:      | 2 | 2,9199 | 0,418 | -0,227 |
| 15 | Q6NZI2 PTRF_HUMAN  | E.VKLPKLS#ISKS#LKE.S          | S167:S171: | 3 | 2,9143 | 0,172 | -0,508 |
| 15 | Q9UK61 CC063_HUMAN | E.KLNTIIK.A                   |            | 2 | 2,9091 | 0,115 | 0,194  |
| 15 | P56524 HDAC4_HUMAN | E.AHAQAGVQVK.Q                |            | 2 | 2,9088 | 0,356 | -0,06  |
| 15 | Q9UQ35 SRRM2_HUMAN | R.VSGRTS#PPLDR.A              | S2398:     | 3 | 2,9088 | 0,104 | 0,265  |
| 15 | P11142 HSP7C_HUMAN | K.DAGTIAGLNVLR.I              |            | 2 | 2,9076 | 0,239 | -0,203 |
| 15 | P41236 IPP2_HUMAN  | K.LAAAEGLPEK.Y                |            | 2 | 2,9068 | 0,297 | -0,122 |
| 15 | P17301 ITA2_HUMAN  | R.MGDVYKCPVDLSTATCE.K         |            | 2 | 2,9036 | 0,477 | -0,564 |

|    |                    |                             |        |   |        |       |        |
|----|--------------------|-----------------------------|--------|---|--------|-------|--------|
| 15 | Q9UBG0 MRC2_HUMAN  | R.CLTALPYICK.R              |        | 2 | 2,9023 | 0,253 | -0,591 |
| 15 | P78316 NOP14_HUMAN | E.LTHYGQSLADIEK.H           |        | 3 | 2,902  | 0,148 | 0      |
| 15 | Q86YS7 K0528_HUMAN | E.IIGS#PIPEPR.Q             | S643:  | 2 | 2,8959 | 0,241 | -0,105 |
| 15 | P51858 HDGF_HUMAN  | E.VERPLPMEVEK.N             |        | 3 | 2,8956 | 0,213 | 0,138  |
| 15 | P68431 H31_HUMAN   | E.DTNLCAIHAK.R              |        | 2 | 2,8934 | 0,247 | -0,213 |
| 15 | Q9Y3M8 STA13_HUMAN | K.AMQCIQIPNGDLQNS#PPPACRK.G | S314:  | 3 | 2,8922 | 0,157 | -0,284 |
| 15 | Q9NZM1 MYOF_HUMAN  | R.HTIIPAKS#PE.K             | S1915: | 2 | 2,8908 | 0,409 | -0,312 |
| 15 | Q9UQ35 SRRM2_HUMAN | K.DKFSPPFVQD.R              |        | 2 | 2,8891 | 0,218 | -0,414 |
| 15 | P54652 HSP72_HUMAN | R.ARFEELNADLFR.G            |        | 3 | 2,8884 | 0,123 | -0,123 |
| 15 | Q9NQS7 INCE_HUMAN  | E.QHVTQLMSTEPLR.T           |        | 2 | 2,8882 | 0,507 | -0,373 |
| 15 | P52756 RBM5_HUMAN  | R.GLVAAYSQSGS#DNEEE.L       | S624:  | 2 | 2,8856 | 0,34  | -0,373 |
| 15 | P52701 MSH6_HUMAN  | R.QSTLYSFFPKS#PALSDANK.A    | S14:   | 3 | 2,8849 | 0,098 | -0,419 |
| 15 | P51784 UBP11_HUMAN | K.AAYVLFYQR.Q               |        | 2 | 2,8847 | 0,317 | -0,324 |
| 15 | O15042 SR140_HUMAN | R.NCGFVAFMNR.R              |        | 2 | 2,8842 | 0,443 | -0,401 |
| 15 | Q13813 SPTA2_HUMAN | R.SSLSSAQADFNQLAE.L         |        | 2 | 2,8836 | 0,413 | -0,233 |
| 15 | Q71U36 TBA1A_HUMAN | E.ITNACFEPANQM*VK.C         |        | 2 | 2,882  | 0,345 | -0,521 |
| 15 | P35527 K1C9_HUMAN  | K.TLNDMRQEYEQLIAK.N         |        | 3 | 2,8803 | 0,301 | -0,494 |
| 15 | Q92598 HS105_HUMAN | E.GKM*IMQDKLE.K             |        | 3 | 2,8786 | 0,137 | 0,529  |
| 15 | Q14789 GOGB1_HUMAN | E.KNTLLSQISTK.D             |        | 3 | 2,8786 | 0,134 | -0,074 |
| 15 | P26639 SYTC_HUMAN  | K.MGGEEKPIGAGE.E            |        | 2 | 2,8772 | 0,317 | -0,208 |
| 15 | Q13439 GOGA4_HUMAN | K.LQLRVPS#VE.S              | S71:   | 2 | 2,877  | 0,3   | -0,327 |
| 15 | Q13077 TRAF1_HUMAN | K.CRGEDLQISIS#PGSR.L        | S66:   | 3 | 2,876  | 0,11  | -0,446 |
| 15 | Q9NYV4 CD2L7_HUMAN | E.NNSDKNS#GPQGPRRTPTMPQEE.A | S1236: | 3 | 2,873  | 0,328 | 0,145  |
| 15 | O94915 FRYL_HUMAN  | R.S#LDSIDKGDTPSLQE.Y        | S2454: | 2 | 2,8722 | 0,283 | -0,652 |
| 15 | Q6ULP2 AFTIN_HUMAN | R.KPLSTHSTEYNLDSVPS#PAEE.F  | S226:  | 3 | 2,8708 | 0,264 | -0,307 |
| 15 | P35579 MYH9_HUMAN  | E.VKVLLQGKGDSE.H            |        | 2 | 2,8698 | 0,305 | -0,288 |
| 15 | Q86YS7 K0528_HUMAN | R.QSS#SSDTDLSLTPK.T         | S305:  | 2 | 2,8682 | 0,304 | -0,237 |
| 15 | Q8NFG4 FLCN_HUMAN  | R.MRAHS#PAEGASVE.S          | S62:   | 2 | 2,8672 | 0,303 | -0,601 |
| 15 | Q9NRY4 GRLF1_HUMAN | E.NIYSVPHDSTQGK.I           |        | 2 | 2,8644 | 0,405 | -0,338 |
| 15 | Q6AI39 K0240_HUMAN | E.MTCNNSFQDK.S              |        | 2 | 2,8605 | 0,311 | -0,49  |
| 15 | Q8N201 INT1_HUMAN  | R.AIS#PSIKEPSVVPIE.V        | S104:  | 2 | 2,8603 | 0,348 | -0,371 |
| 15 | Q8IXM2 CQ049_HUMAN | E.DSGIPLPAES#PKKGP.K        | S96:   | 2 | 2,8542 | 0,284 | -0,574 |
| 15 | Q9H6Z4 RANB3_HUMAN | R.SVLRPAVLQAPQPK.A          |        | 3 | 2,8508 | 0,157 | -0,061 |

|    |                     |                            |            |   |        |       |        |
|----|---------------------|----------------------------|------------|---|--------|-------|--------|
| 15 | Q5H9R7 SAPS3_HUMAN  | E.KHIAFT#PE.S              | T631:      | 2 | 2,8478 | 0,239 | -0,119 |
| 15 | Q9Y2I7 FYV1_HUMAN   | R.SASITNLSLDR.S            |            | 2 | 2,8478 | 0,436 | -0,311 |
| 15 | Q13510 ASAH1_HUMAN  | E.QLKPLTVNLDFQR.N          |            | 3 | 2,844  | 0,243 | -0,465 |
| 15 | P40855 PEX19_HUMAN  | R.S#PGDTAKDALFASQE.K       | S54:       | 2 | 2,8435 | 0,389 | -0,981 |
| 15 | P28290 SSFA2_HUMAN  | E.FTQYTTTHILK.S            |            | 3 | 2,8411 | 0,102 | 0,132  |
| 15 | P05186 PPBT_HUMAN   | K.GFFLLVEGGR.I             |            | 2 | 2,8404 | 0,268 | -0,334 |
| 15 | Q9UFC0 LRWD1_HUMAN  | R.TQVQKANS#PEKPPE.A        | S212:      | 3 | 2,8393 | 0,282 | -0,448 |
| 15 | Q96AG4 LRC59_HUMAN  | R.LEVEREAEK.K              |            | 2 | 2,8361 | 0,193 | -0,442 |
| 15 | P13639 EF2_HUMAN    | E.DIDKGEVSARQE.L           |            | 2 | 2,8325 | 0,365 | -0,543 |
| 15 | A9CQZ4 A9CQZ4_HUMAN | K.FCGMFCPVEGSSE.N          |            | 2 | 2,8307 | 0,368 | -0,486 |
| 15 | O75781 PALM_HUMAN   | E.VVM*NSQQTTPVGT#PKDKR.V   | T145:      | 3 | 2,8291 | 0,264 | -0,554 |
| 15 | Q86YS7 K0528_HUMAN  | E.IIGSPIPEPR.Q             |            | 2 | 2,8291 | 0,363 | -0,452 |
| 15 | P29692 EF1D_HUMAN   | R.ATAPQTQHVSPM*R.Q         |            | 2 | 2,8289 | 0,305 | -0,254 |
| 15 | Q14195 DPYL3_HUMAN  | R.NLHQSGFSLSGTQVDE.G       |            | 2 | 2,8243 | 0,357 | -0,568 |
| 15 | Q08AE8 SPIR1_HUMAN  | E.NGLSTSQQVPAQR.K          |            | 2 | 2,8219 | 0,125 | 0,352  |
| 15 | Q32MZ4 LRRF1_HUMAN  | E.TGLRDEKPIKTEVPGS#PAGTE.G | S521:      | 3 | 2,8191 | 0,26  | -0,404 |
| 15 | Q08257 QOR_HUMAN    | K.IVLQNGAHE.V              |            | 2 | 2,8177 | 0,236 | -0,187 |
| 15 | Q9Y608 LRRF2_HUMAN  | R.RGS#GDTSSLIDPDT#SLSE.L   | S328:T339: | 2 | 2,8162 | 1     | -0,55  |
| 15 | Q9UBU7 DBF4A_HUMAN  | E.KKLLFIS#EPIPHPSNE.L      | S413:      | 3 | 2,8144 | 0,082 | -0,474 |
| 15 | Q13123 RED_HUMAN    | K.QLGDFFGMSNSYAE.C         |            | 2 | 2,8136 | 0,436 | -0,545 |
| 15 | P68104 EF1A1_HUMAN  | R.GNVAGDSKNDPPM*E.A        |            | 2 | 2,8108 | 0,347 | -0,169 |
| 15 | Q9NY33 DPP3_HUMAN   | K.LAQDFLDSQNLSAYNTR.L      |            | 2 | 2,8083 | 0,281 | -0,437 |
| 15 | Q14562 DHX8_HUMAN   | E.IELVEEPPFLR.G            |            | 2 | 2,8076 | 0,323 | -0,332 |
| 15 | O15400 STX7_HUMAN   | R.ASS#RVS#GSFPEDSSKE.R     | S126:S129: | 2 | 2,8066 | 0,246 | -0,4   |
| 15 | P35579 MYH9_HUMAN   | K.LTKDFSALE.S              |            | 2 | 2,8061 | 0,268 | -0,119 |
| 15 | P49023 PAXI_HUMAN   | E.HVYSFPNK.Q               |            | 2 | 2,8055 | 0,439 | -0,307 |
| 15 | Q9UBR2 CATZ_HUMAN   | R.VGDYGSLSGRE.K            |            | 2 | 2,8032 | 0,335 | -0,535 |
| 15 | Q96EV2 RBM33_HUMAN  | R.CSATPSAQVKPIVSAS#PPSR.A  | S751:      | 3 | 2,8016 | 0,108 | -0,086 |
| 15 | Q92609 TBCD5_HUMAN  | E.VGIDPLSSYSNK.S           |            | 2 | 2,8002 | 0,448 | -0,858 |
| 15 | Q00610 CLH1_HUMAN   | E.YLTKVDKLDASE.S           |            | 2 | 2,7969 | 0,405 | -0,53  |
| 15 | Q32MZ4 LRRF1_HUMAN  | K.IDGATQSSPAEPK.S          |            | 2 | 2,7931 | 0,422 | -0,281 |
| 15 | P18858 DNL1_HUMAN   | E.QATTSAQVACLXR.K          |            | 2 | 2,7926 | 0,408 | -0,083 |
| 15 | Q6NZI2 PTRF_HUMAN   | E.SDAVLVDKS#DS#D.-         | S387:S389: | 2 | 2,7915 | 0,212 | -0,173 |

|    |                     |                             |              |   |        |       |        |
|----|---------------------|-----------------------------|--------------|---|--------|-------|--------|
| 15 | P35241 RADI_HUMAN   | R.KALELDQER.K               |              | 2 | 2,7897 | 0,132 | -0,332 |
| 15 | Q96JG6 CC132_HUMAN  | R.DYVDEQTDGDPVK.S           |              | 2 | 2,7896 | 0,436 | -0,171 |
| 15 | P40855 PEX19_HUMAN  | R.SPGDTAKDALFASQE.K         |              | 2 | 2,7835 | 0,352 | -0,318 |
| 15 | O00231 PSD11_HUMAN  | R.AQSLLSTDRE.A              |              | 2 | 2,7827 | 0,401 | -0,109 |
| 15 | Q13464 ROCK1_HUMAN  | K.VSQNSQLANE.K              |              | 2 | 2,7788 | 0,304 | -0,224 |
| 15 | Q7Z4C7 Q7Z4C7_HUMAN | R.KLKLTFEE.L                |              | 2 | 2,7785 | 0,152 | -0,242 |
| 15 | Q8NFC6 FA44A_HUMAN  | E.GKDKDVTLS#PVK.A           | S1531:       | 2 | 2,7778 | 0,251 | 0      |
| 15 | P28066 PSA5_HUMAN   | E.KRIT#SPLMEPSSIEK.I        | T55:         | 2 | 2,7761 | 0,364 | -0,272 |
| 15 | Q9H6A9 PCX3_HUMAN   | R.CSSQHSVFGFNQVSE.L         |              | 2 | 2,7758 | 0,364 | -0,712 |
| 15 | P04406 G3P_HUMAN    | E.RDPS#KIKWGDAGA EYVVE.S    | S83:         | 3 | 2,7756 | 0,274 | -0,523 |
| 15 | P46939 UTRO_HUMAN   | E.HYDPS#QSPQLFHDDTHS#RIE.Q  | S3180:S3192: | 3 | 2,7696 | 0,152 | -0,285 |
| 15 | P15260 INGR1_HUMAN  | E.SSSPLSSNQSEPGSIALNSYHSR.N |              | 3 | 2,7669 | 0,091 | -0,304 |
| 15 | Q5VY92 Q5VY92_HUMAN | R.M*QDIPEETESR.D            |              | 2 | 2,7644 | 0,133 | 0,723  |
| 15 | P04181 OAT_HUMAN    | K.LGIILRNE.L                |              | 2 | 2,7633 | 0,251 | 0      |
| 15 | Q9P275 UBP36_HUMAN  | E.GGLHQDPLRHS#CSPM*GDGDPE.A | S937:        | 3 | 2,7551 | 0,106 | -0,466 |
| 15 | Q15029 U5S1_HUMAN   | E.DT#QPLTEPIIKPVK.T         | T86:         | 2 | 2,7531 | 0,28  | -0,441 |
| 15 | P62736 ACTA_HUMAN   | R.GILTLYPIE.H               |              | 2 | 2,7531 | 0,387 | -0,425 |
| 15 | B2RMZ9 B2RMZ9_HUMAN | R.APVS#PLKFSPFE.G           | S423:        | 2 | 2,7517 | 0,368 | -0,262 |
| 15 | P12270 TPR_HUMAN    | E.AIHS#PQVAGVPR.F           | S2141:       | 2 | 2,7507 | 0,325 | -0,372 |
| 15 | Q8TDM6 DLG5_HUMAN   | E.MRATHGSNS#LPSSAR.L        | S1254:       | 3 | 2,7506 | 0,179 | 0      |
| 15 | Q9Y2I7 FYV1_HUMAN   | K.SSS#PIRLPE.M              | S1714:       | 2 | 2,748  | 0,307 | 0,229  |
| 15 | Q9UMZ2 SYNG_HUMAN   | K.ISKFDLVLATSQSK.M          |              | 2 | 2,7473 | 0,226 | -0,621 |
| 15 | Q15398 DLG7_HUMAN   | K.LFSGLSVSSEGPSQR.L         |              | 3 | 2,7471 | 0,131 | -0,118 |
| 15 | P07814 SYEP_HUMAN   | K.EYIPGQPPLSQSSDSS#PTR.N    | S886:        | 2 | 2,7466 | 0,306 | -0,459 |
| 15 | P04049 RAF1_HUMAN   | R.QRSTS#TPNVH MVSTTLPVDSR.M | S259:        | 3 | 2,7464 | 0,205 | -0,076 |
| 15 | P61247 RS3A_HUMAN   | E.LHGECS#SSGKATGDETGAKVE.R  | S236:        | 3 | 2,7445 | 0,307 | -0,436 |
| 15 | Q9Y2N3 PO121_HUMAN  | E.LCHHSSS#STPLAADKE.S       | S443:        | 3 | 2,743  | 0,189 | -0,302 |
| 15 | P15408 FOSL2_HUMAN  | R.RSSSSGDQSS#DSLNSPT#LLAL.- | S315:T322:   | 3 | 2,742  | 0,153 | -0,16  |
| 15 | Q5VZK9 LR16A_HUMAN  | R.YGVQVM*GSGLLAE.M          |              | 2 | 2,7411 | 0,256 | -0,546 |
| 15 | B2RDE1 B2RDE1_HUMAN | R.M*LDQTLDDL NEM*.-         |              | 2 | 2,7402 | 0,372 | -0,416 |
| 15 | P04049 RAF1_HUMAN   | R.S#TSTPNVH MVSTTLPVDSR.M   | S257:        | 2 | 2,7398 | 0,429 | -0,347 |
| 15 | Q6NZI2 PTRF_HUMAN   | R.GSS#PDVHALLE.I            | S366:        | 2 | 2,7397 | 0,348 | -0,405 |
| 15 | Q14126 DSG2_HUMAN   | E.ATM*KGS#SSASIVKQHE.M      | S699:        | 3 | 2,7372 | 0,341 | 0,303  |

|    |                     |                                |              |   |        |       |        |
|----|---------------------|--------------------------------|--------------|---|--------|-------|--------|
| 15 | Q8ND56 LS14A_HUMAN  | R.S#SPQLDPLRKS#PTM*E.Q         | S182:S192:   | 2 | 2,7348 | 0,308 | -0,524 |
| 15 | Q9H6Z4 RANB3_HUMAN  | R.SVLRPAVLQAPQPK.A             |              | 2 | 2,7333 | 0,14  | -0,487 |
| 15 | O60256 KPRB_HUMAN   | R.SVAAIHPSLE.I                 |              | 2 | 2,7275 | 0,241 | -0,596 |
| 15 | B2CI53 B2CI53_HUMAN | R.SNMS#PDKPVS#VKISFE.D         | S1105:S1111: | 3 | 2,7233 | 0,113 | -0,57  |
| 15 | Q8NCE2 MTMRE_HUMAN  | K.DRGST#T#SLGSDFLVM*E.S        | T439:T440:   | 2 | 2,7227 | 0,085 | -0,308 |
| 15 | O00178 GTPB1_HUMAN  | R.SAM*DSPVPASM*FAPEPSS#PGAAR.A | S25:         | 3 | 2,7217 | 0,227 | -0,231 |
| 15 | P28749 RBL1_HUMAN   | R.DMQPLS#PISVHE.R              | S640:        | 2 | 2,7208 | 0,371 | -0,681 |
| 15 | Q7Z6E9 RBBP6_HUMAN  | E.SSGNIS#KDLKDKIVE.K           | S1662:       | 3 | 2,7205 | 0,155 | -0,32  |
| 15 | Q9NQS7 INCE_HUMAN   | E.QHVTQLM*STEPLPR.T            |              | 2 | 2,72   | 0,443 | -0,369 |
| 15 | Q9UKV5 AMFR2_HUMAN  | E.GRIQVPFPTQR.S                |              | 2 | 2,7187 | 0,244 | -0,47  |
| 15 | P80723 BASP_HUMAN   | E.AKAEPKPEQE.Q                 |              | 2 | 2,7183 | 0,438 | -0,565 |
| 15 | Q05524 ENO1B_HUMAN  | K.DATNVGDEGGFAPNILE.N          |              | 2 | 2,7106 | 0,358 | -0,639 |
| 15 | Q9NTK5 OLA1_HUMAN   | E.DGDIIFFK.F                   |              | 2 | 2,7087 | 0,385 | -0,319 |
| 15 | Q13185 CBX3_HUMAN   | K.KVEEAPEEFVVE.K               |              | 2 | 2,7056 | 0,287 | -0,398 |
| 15 | P19338 NUCL_HUMAN   | E.LKTGISDVFAKND.L              |              | 3 | 2,701  | 0,17  | -0,065 |
| 15 | Q9UQ35 SRRM2_HUMAN  | R.VSGRT#SPLLDR.A               | T2397:       | 2 | 2,7003 | 0,248 | -0,708 |
| 15 | P56182 RRP1_HUMAN   | R.SEKPPAGSICR.A                |              | 3 | 2,6984 | 0,148 | 0,609  |
| 15 | Q6NZI2 PTRF_HUMAN   | R.RGSS#PDVHALLE.I              | S366:        | 2 | 2,6958 | 0,339 | -0,269 |
| 15 | Q6NWFY9 PR40B_HUMAN | E.LPNRS#PGFGIKKE.K             | S832:        | 3 | 2,6946 | 0,2   | -0,24  |
| 15 | Q12756 KIF1A_HUMAN  | R.TPQPCSRPAS#PEPE.L            | S1532:       | 2 | 2,6858 | 0,192 | -0,448 |
| 15 | P12956 KU70_HUMAN   | R.DSLIFLVDASK.A                |              | 2 | 2,6836 | 0,445 | -0,404 |
| 15 | P52756 RBM5_HUMAN   | R.NGDEENPLKR.G                 |              | 2 | 2,6801 | 0,095 | -0,521 |
| 15 | P37802 TAGL2_HUMAN  | E.GKNVIGLQM*GTNR.G             |              | 3 | 2,6738 | 0,157 | 0,261  |
| 15 | Q9UK61 CC063_HUMAN  | E.LINLIQCR.K                   |              | 2 | 2,6676 | 0,193 | 0      |
| 15 | O15061 DMN_HUMAN    | R.HVTLGPGQSPLSR.E              |              | 2 | 2,6656 | 0,293 | -0,181 |
| 15 | Q09666 AHNK_HUMAN   | K.ADIKSPS#LDVTVPE.A            | S4995:       | 2 | 2,6646 | 0,199 | -0,393 |
| 15 | Q6XZF7 DNMBP_HUMAN  | E.NTLGVVEQRHETS#DHE.A          | S342:        | 3 | 2,6608 | 0,246 | -0,28  |
| 15 | O15145 ARPC3_HUMAN  | R.AYLQQLRQE.T                  |              | 2 | 2,6605 | 0,317 | -0,106 |
| 15 | O14497 ARI1A_HUMAN  | R.SHHAPMS#PGSSGGGGQPLAR.T      | S363:        | 3 | 2,6586 | 0,23  | -0,279 |
| 15 | Q15424 SAFB1_HUMAN  | K.ADSLAVVK.R                   |              | 2 | 2,6582 | 0,33  | 0,067  |
| 15 | Q76I76 SSH2_HUMAN   | E.KMDPLPVACRLPHSSS#SE.N        | S1217:       | 3 | 2,6578 | 0,088 | -0,35  |
| 15 | Q29RF7 PDS5A_HUMAN  | R.IISVT#PVKNIDPVKNKE.I         | T1208:       | 2 | 2,6533 | 0,401 | -0,742 |
| 15 | Q96S59 RANB9_HUMAN  | K.GSTAHFSGFE.S                 |              | 2 | 2,6484 | 0,129 | -0,587 |

|    |                    |                             |            |   |        |       |        |
|----|--------------------|-----------------------------|------------|---|--------|-------|--------|
| 15 | P27816 MAP4_HUMAN  | E.RAS#PIKM*DLAPSKD.M        | S358:      | 2 | 2,6473 | 0,296 | 0,375  |
| 15 | Q9UKV3 ACINU_HUMAN | K.KCEAEAEAPPAATQPQTSE.T     |            | 2 | 2,6469 | 0,47  | -0,471 |
| 15 | Q53EZ4 CEP55_HUMAN | K.VAAS#PKS#PTAALNE.S        | S425:S428: | 2 | 2,6468 | 0,094 | -0,402 |
| 15 | Q08211 DHX9_HUMAN  | E.QDHDLQAILQERE.L           |            | 3 | 2,641  | 0,096 | 0,229  |
| 15 | Q6P1L5 AL2SC_HUMAN | E.GSEESPCSADDLLVDPR.D       |            | 2 | 2,641  | 0,312 | -0,396 |
| 15 | Q96AT1 K1143_HUMAN | R.NQVSYVRPAEPAFLAR.F        |            | 3 | 2,6396 | 0,14  | -0,604 |
| 15 | Q2M1Z3 CDGAP_HUMAN | K.NRPSS#LNLDPAIPIAD.L       | S1106:     | 2 | 2,6375 | 0,34  | -0,551 |
| 15 | Q96A49 SYAP1_HUMAN | E.AVRPKT#PPVVIK.S           | T248:      | 2 | 2,636  | 0,139 | -0,44  |
| 15 | Q9BTA9 WAC_HUMAN   | R.STCSLTPALAAHFSE.N         |            | 2 | 2,6356 | 0,335 | -0,46  |
| 15 | P18621 RL17_HUMAN  | E.KEQIVPKPEEE.V             |            | 2 | 2,6352 | 0,151 | 0      |
| 15 | P05556 ITB1_HUMAN  | E.VNSEDMDAYCR.K             |            | 2 | 2,6322 | 0,38  | -0,359 |
| 15 | Q9UIF9 BAZ2A_HUMAN | E.M*EGPEECLGR.R             |            | 2 | 2,6296 | 0,332 | -0,204 |
| 15 | Q12905 ILF2_HUMAN  | E.ISTWDGVIVTPSEK.A          |            | 2 | 2,6274 | 0,343 | -0,478 |
| 15 | Q96EV2 RBM33_HUMAN | E.VKVKPAS#PVAQPK.E          | S775:      | 3 | 2,6268 | 0,199 | -0,192 |
| 15 | P37802 TAGL2_HUMAN | E.GKNVIGLQMGTR.G            |            | 3 | 2,6241 | 0,273 | 0,198  |
| 15 | Q13490 BIRC2_HUMAN | R.NSFAHLS#PTLE.H            | S140:      | 2 | 2,6205 | 0,218 | -0,441 |
| 15 | P22059 OSBP1_HUMAN | K.M*LAES#DES#GDEE.S         | S190:S193: | 2 | 2,6136 | 0,128 | -0,41  |
| 15 | Q7Z589 EMSY_HUMAN  | E.SCSS#PSTVGSSLTTR.K        | S1213:     | 2 | 2,6083 | 0,299 | -0,759 |
| 15 | Q9H0H5 RGAP1_HUMAN | R.QGNFFAS#PMLK.-            | S628:      | 2 | 2,6028 | 0,325 | -0,277 |
| 15 | Q5W0B1 RN219_HUMAN | R.TS#SEASM*DAAYLDKISE.L     | S525:      | 2 | 2,5976 | 0,256 | -0,51  |
| 15 | P68104 EF1A1_HUMAN | K.SGDAAIIVDMVPGKPMCVE.S     |            | 3 | 2,5939 | 0,155 | -0,293 |
| 15 | Q96C19 EFHD2_HUMAN | E.DFDSKLSFRE.F              |            | 2 | 2,5934 | 0,314 | -1,275 |
| 15 | Q9UK76 HN1_HUMAN   | E.EKPVPAAPVPS#PVAPAPVPSRR.N | S131:      | 3 | 2,5917 | 0,157 | -0,557 |
| 15 | P04264 K2C1_HUMAN  | R.TNAENEFVTIKK.D            |            | 3 | 2,5895 | 0,351 | 0,197  |
| 15 | Q9C0B5 ZDHC5_HUMAN | K.SFHFDPLSSGSR.S            |            | 3 | 2,5865 | 0,147 | 0      |
| 15 | Q86UU1 PHLB1_HUMAN | E.DFSLTLGAR.G               |            | 2 | 2,5843 | 0,334 | -0,124 |
| 15 | Q09666 AHNK_HUMAN  | E.LNLKS#PKVKGDLD.I          | S3426:     | 3 | 2,5833 | 0,083 | -0,182 |
| 15 | Q1L5Z9 LONF2_HUMAN | K.KDLS#PQRS#PNSETEE.S       | S425:S429: | 2 | 2,5799 | 0,19  | -0,585 |
| 15 | Q9BYW2 SETD2_HUMAN | K.LDELPIFKSE.F              |            | 2 | 2,5721 | 0,245 | -0,41  |
| 15 | P49755 TMEDA_HUMAN | K.NYEEIAKVE.K               |            | 2 | 2,5716 | 0,311 | 0,111  |
| 15 | Q02952 AKA12_HUMAN | K.SPPS#PVERE.M              | S1331:     | 2 | 2,5699 | 0,154 | -0,453 |
| 15 | O75362 ZN217_HUMAN | E.TQANNLICR.T               |            | 2 | 2,5696 | 0,287 | 0      |
| 15 | P02545 LMNA_HUMAN  | K.TLDS#VAKE.R               | S94:       | 2 | 2,5684 | 0,219 | 0      |



|    |                     |                                      |            |   |        |       |        |
|----|---------------------|--------------------------------------|------------|---|--------|-------|--------|
| 15 | Q96ST2 IWS1_HUMAN   | R.GKHMDFLSDFE.M                      |            | 2 | 2,5658 | 0,266 | -0,644 |
| 15 | Q07021 C1QBP_HUMAN  | E.DLKSFKVKSQ.-                       |            | 2 | 2,5624 | 0,352 | -0,348 |
| 15 | Q04637 IF4G1_HUMAN  | R.FSALQQAVPTSTDNRR.V                 |            | 3 | 2,5525 | 0,217 | -0,191 |
| 15 | P06753 TPM3_HUMAN   | R.KLVIIEGDLE.R                       |            | 2 | 2,5516 | 0,228 | -0,432 |
| 15 | Q13428 TCOF_HUMAN   | K.TVANLLSGKS#PRK.S                   | S156:      | 2 | 2,5481 | 0,219 | -0,757 |
| 15 | Q6ULP2 AFTIN_HUMAN  | K.GAVASGHLQE.S                       |            | 2 | 2,5446 | 0,205 | -0,252 |
| 15 | Q13523 PRP4B_HUMAN  | R.TKLDDLALLE.D                       |            | 2 | 2,5421 | 0,198 | -0,431 |
| 15 | Q9H2G2 SLK_HUMAN    | K.LADFGVSAK.N                        |            | 2 | 2,5388 | 0,356 | 0,067  |
| 15 | P54136 SYRC_HUMAN   | K.VIVDFSSPNIAKE.M                    |            | 2 | 2,5386 | 0,091 | -0,258 |
| 15 | Q9UGU5 HM2L1_HUMAN  | K.ASSVGVLSPPQKKS#PPTTMLLPAS#PAKAPE.T | S502:S512: | 3 | 2,537  | 0,174 | -0,42  |
| 15 | Q13459 MYO9B_HUMAN  | E.KEILIER.I                          |            | 2 | 2,5354 | 0,081 | 0,068  |
| 15 | Q6S8J3 A26CA_HUMAN  | K.AGFAGDDAPR.A                       |            | 2 | 2,5351 | 0,29  | -0,062 |
| 15 | Q13263 TIF1B_HUMAN  | R.KVPRVS#LE.R                        | S489:      | 2 | 2,535  | 0,279 | -0,847 |
| 15 | P51858 HDGF_HUMAN   | E.DAEAPGIRDHE.S                      |            | 2 | 2,5323 | 0,161 | -0,504 |
| 15 | Q5T6F2 UBAP2_HUMAN  | R.EKPKISAAQSTQPQK.Q                  |            | 3 | 2,5295 | 0,248 | -0,223 |
| 15 | P02545 LMNA_HUMAN   | R.LVEIDNGKQR.E                       |            | 2 | 2,5276 | 0,156 | -0,312 |
| 15 | P23588 IF4B_HUMAN   | K.VAPAQPSEEGPGRKDE.N                 |            | 2 | 2,525  | 0,333 | -0,439 |
| 15 | Q13435 SF3B2_HUMAN  | K.IDIDYQKLHD.A                       |            | 3 | 2,5247 | 0,184 | 0,145  |
| 15 | Q9UQ35 SRRM2_HUMAN  | K.FSPFPVQDRPE.S                      |            | 2 | 2,5197 | 0,165 | -0,463 |
| 15 | Q68DH5 LMBD2_HUMAN  | R.YLSM*S#RSDFNDV.-                   | S687:      | 2 | 2,5166 | 0,205 | -0,52  |
| 15 | P68104 EF1A1_HUMAN  | K.SGDAAIVDMVPGKPM*CVE.S              |            | 2 | 2,5151 | 0,411 | -0,645 |
| 15 | A9CQZ4 A9CQZ4_HUMAN | K.FCGM*FCPVEGSSE.N                   |            | 2 | 2,515  | 0,344 | -0,721 |
| 15 | O60524 SDCG1_HUMAN  | K.LQTNHVTM*LLR.N                     |            | 3 | 2,5114 | 0,205 | -0,136 |
| 15 | Q8NI08 NCOA7_HUMAN  | E.CLS#LDPEERKAE.S                    | S441:      | 3 | 2,5066 | 0,288 | 0,221  |
| 15 | Q9UBT2 SAE2_HUMAN   | E.QKEELDDVIALD.-                     |            | 2 | 2,5057 | 0,15  | -0,615 |
| 15 | Q9UQ35 SRRM2_HUMAN  | R.GEFSAS#PMLK.S                      | S1124:     | 2 | 2,5045 | 0,185 | -0,213 |
| 15 | O75526 HNRGT_HUMAN  | E.VLLMKDRE.T                         |            | 2 | 2,5015 | 0,18  | -0,061 |
| 15 | Q52LD0 Q52LD0_HUMAN | K.AGGS#PAS#YHGSTSPR.V                | S192:S195: | 2 | 2,5008 | 0,348 | -0,153 |
| 15 | A9CQZ4 A9CQZ4_HUMAN | K.AAEDEEVPAFFK.N                     |            | 2 | 2,5008 | 0,217 | -0,812 |
| 15 | Q6NZI2 PTRF_HUMAN   | E.AGDLRRGS#\$#PDVHALLE.I             | S365:S366: | 2 | 2,5005 | 0,129 | -0,562 |
| 15 | Q6NZI2 PTRF_HUMAN   | R.RGS#SPDVHALLE.I                    | S365:      | 2 | 2,4901 | 0,226 | -0,717 |
| 15 | Q9NZI8 IF2B1_HUMAN  | K.VSYIPDEQIAQGPE.N                   |            | 2 | 2,4879 | 0,416 | -0,395 |
| 15 | Q9Y3Q8 T22D4_HUMAN  | R.SFTGGLGQLVVPK.A                    |            | 2 | 2,4879 | 0,164 | -0,263 |

|    |                    |                       |        |   |        |       |        |
|----|--------------------|-----------------------|--------|---|--------|-------|--------|
| 15 | P48960 CD97_HUMAN  | R.CNPGFSSFSE.I        |        | 2 | 2,4873 | 0,162 | -0,323 |
| 15 | P23396 RS3_HUMAN   | E.LNEFLTR.E           |        | 2 | 2,4795 | 0,107 | -0,068 |
| 15 | Q4KMP7 TB10B_HUMAN | R.RAS#AGPAPGPVVTAE.G  | S412:  | 2 | 2,4772 | 0,309 | -0,585 |
| 15 | Q13464 ROCK1_HUMAN | K.SQTDKDYQLQAILE.A    |        | 2 | 2,4757 | 0,345 | -0,269 |
| 15 | Q09666 AHNK_HUMAN  | K.LQSGSVSLASK.K       |        | 2 | 2,4747 | 0,316 | -0,35  |
| 15 | Q9H0B6 KLC2_HUMAN  | R.ASS#LNFLNK.S        | S582:  | 2 | 2,4745 | 0,25  | -0,454 |
| 15 | Q0ZGT2 NEXN_HUMAN  | K.LKLTFFEE.L          |        | 2 | 2,4744 | 0,117 | -0,069 |
| 15 | Q7LBC6 JHD2B_HUMAN | E.NKAPFEAVK.R         |        | 2 | 2,4741 | 0,119 | 0,122  |
| 15 | Q5VT52 K0460_HUMAN | R.LSSSPGLFGAFSVR.G    |        | 2 | 2,4674 | 0,385 | -0,342 |
| 15 | P04792 HSPB1_HUMAN | E.SPAAVAPAYS.R        |        | 2 | 2,4666 | 0,272 | 0      |
| 15 | P51451 BLK_HUMAN   | K.IADFGLAR.I          |        | 2 | 2,4643 | 0,232 | -0,071 |
| 15 | Q9Y282 ERGI3_HUMAN | K.CCNTCEDVRE.A        |        | 2 | 2,4629 | 0,396 | -0,454 |
| 15 | P35030 TRY3_HUMAN  | D.TLDNDIMLIK.L        |        | 2 | 2,4627 | 0,209 | -0,519 |
| 15 | Q01082 SPTB2_HUMAN | K.TALPAQS#AATLPAR.T   | S2184: | 2 | 2,4626 | 0,16  | -0,084 |
| 15 | P33527 MRP1_HUMAN  | E.NGMLVTDSDAGK.Q      |        | 2 | 2,4618 | 0,295 | -0,335 |
| 15 | Q93045 STMN2_HUMAN | K.ALEENNNFSK.M        |        | 2 | 2,4551 | 0,103 | -0,837 |
| 15 | Q6ZUT9 RA61L_HUMAN | K.NNKPAGQIQE.G        |        | 2 | 2,4529 | 0,087 | -0,503 |
| 15 | P62736 ACTA_HUMAN  | R.GILT#LKYPIE.H       | T68:   | 2 | 2,4522 | 0,342 | -0,398 |
| 15 | O94763 RMP_HUMAN   | K.KLLPLSVTPE.A        |        | 2 | 2,4495 | 0,352 | -0,222 |
| 15 | P05787 K2C8_HUMAN  | K.SYKVSTSGPR.A        |        | 2 | 2,4481 | 0,29  | -0,451 |
| 15 | P41236 IPP2_HUMAN  | R.KLAAAEGLEPK.Y       |        | 2 | 2,4453 | 0,29  | -0,541 |
| 15 | O60296 TRAK2_HUMAN | R.QHASDALS#PVLAAE.T   | S84:   | 2 | 2,444  | 0,162 | -0,552 |
| 15 | P55072 TERA_HUMAN  | R.LIVDEAINE.D         |        | 2 | 2,4414 | 0,2   | -0,06  |
| 15 | Q14444 CAPR1_HUMAN | K.GKLDDYQER.M         |        | 2 | 2,4373 | 0,321 | -0,651 |
| 15 | Q9BTC0 DIDO1_HUMAN | K.VTVDDLPR.M          |        | 2 | 2,4354 | 0,335 | -0,119 |
| 15 | Q13547 HDAC1_HUMAN | R.ISICSSDKR.I         |        | 2 | 2,4275 | 0,209 | 0,114  |
| 15 | Q01970 PLCB3_HUMAN | R.KRPLEQNS#ALSE.S     | S492:  | 2 | 2,4207 | 0,279 | -0,317 |
| 15 | Q68DH5 LMBD2_HUMAN | R.YLSMSRS#DIFNDV.-    | S689:  | 2 | 2,4185 | 0,207 | -0,225 |
| 15 | Q14166 TTL12_HUMAN | R.S#SPGQTPEEGAQALAE.F | S15:   | 2 | 2,415  | 0,373 | -0,443 |
| 15 | P82979 HCC1_HUMAN  | R.FGLNVSSIRKS#EDDE.K  | S168:  | 2 | 2,4149 | 0,2   | -0,458 |
| 15 | Q13573 SNW1_HUMAN  | R.GLQTVHINE.N         |        | 2 | 2,4133 | 0,31  | 0      |
| 15 | Q8ND56 LS14A_HUMAN | R.SSPQLDPLRKS#PTME.Q  | S192:  | 2 | 2,4121 | 0,264 | -0,345 |
| 15 | Q9C0C2 TB182_HUMAN | R.SPSQDFSIEDTE.I      |        | 2 | 2,4021 | 0,165 | -0,406 |

|    |                    |                           |       |   |        |       |        |
|----|--------------------|---------------------------|-------|---|--------|-------|--------|
| 15 | Q9Y490 TLN1_HUMAN  | E.STM*LEDSVS#PK.K         | S425: | 2 | 2,3991 | 0,293 | -0,284 |
| 15 | P80723 BASP_HUMAN  | K.KTEAPAAPAAQE.T          |       | 2 | 2,3966 | 0,34  | -0,412 |
| 15 | Q32MZ4 LRRF1_HUMAN | K.IDGATQSS#PAEPKSE.D      | S714: | 2 | 2,3961 | 0,394 | -0,611 |
| 15 | Q68CZ2 TENS3_HUMAN | R.FPGDQVVNGAGPE.L         |       | 2 | 2,3956 | 0,221 | -0,284 |
| 15 | P35579 MYH9_HUMAN  | K.VLLQGKGDSE.H            |       | 2 | 2,395  | 0,185 | -0,35  |
| 15 | O95817 BAG3_HUMAN  | R.GYISIPVIHE.Q            |       | 2 | 2,3899 | 0,217 | -0,324 |
| 15 | Q58FG1 HS904_HUMAN | K.TLVSVTKE.D              |       | 2 | 2,3888 | 0,108 | 0,139  |
| 15 | P41236 IPP2_HUMAN  | E.AM*APDILAR.K            |       | 2 | 2,3831 | 0,286 | -0,063 |
| 15 | O76021 RL1D1_HUMAN | K.AT#NESEDEIPQLVPIGK.K    | T358: | 2 | 2,3824 | 0,22  | -0,254 |
| 15 | P48643 TCPE_HUMAN  | E.DYKALQKYE.K             |       | 2 | 2,3755 | 0,363 | 0      |
| 15 | P22626 ROA2_HUMAN  | D.TIEITDR.Q               |       | 2 | 2,3734 | 0,217 | 0,063  |
| 15 | P53041 PPP5_HUMAN  | E.NNLDYIIR.S              |       | 2 | 2,3732 | 0,166 | -0,06  |
| 15 | P31949 S10AB_HUMAN | E.SLIAVFQK.Y              |       | 2 | 2,373  | 0,206 | -0,067 |
| 15 | Q9H0H5 RGAP1_HUMAN | R.LHDFVSK.T               |       | 2 | 2,3704 | 0,226 | 0,072  |
| 15 | Q8N543 OGFD1_HUMAN | E.SNSLALVYR.D             |       | 2 | 2,3699 | 0,322 | -0,298 |
| 15 | Q6PKG0 LARP1_HUMAN | R.AVT#PVPTKTEE.V          | T526: | 2 | 2,3614 | 0,264 | 0,097  |
| 15 | Q7L1V2 MON1B_HUMAN | R.KHVFVLSE.A              |       | 2 | 2,359  | 0,156 | 1,209  |
| 15 | Q09028 RBBP4_HUMAN | E.DVSWHLLHE.S             |       | 2 | 2,3577 | 0,278 | -0,322 |
| 15 | Q9BYD6 RM01_HUMAN  | E.GLLLKIDPLPK.E           |       | 2 | 2,3497 | 0,137 | -0,37  |
| 15 | P61978 HNRPK_HUMAN | E.CLNYQHYK.G              |       | 2 | 2,3495 | 0,275 | 0,217  |
| 15 | Q92615 LARP5_HUMAN | R.TSKEPPS#SPLQPQKE.Q      | S663: | 2 | 2,3454 | 0,284 | 0,282  |
| 15 | Q96FV9 THOC1_HUMAN | R.DKPVGTGEQIE.V           |       | 2 | 2,3454 | 0,276 | 0      |
| 15 | P35080 PROF2_HUMAN | E.IDMIVGKDRE.G            |       | 2 | 2,3434 | 0,131 | -0,415 |
| 15 | P06493 CDC2_HUMAN  | E.GTY#GVVYK.G             | Y15:  | 2 | 2,337  | 0,37  | -0,442 |
| 15 | Q6PKG0 LARP1_HUMAN | R.SLPTTVPE\$#PNYR.N       | S774: | 2 | 2,3366 | 0,265 | -0,396 |
| 15 | P31943 HNRH1_HUMAN | E.M*DWVLK.H               |       | 2 | 2,3351 | 0,132 | 0,302  |
| 15 | P49588 SYAC_HUMAN  | K.QFIDSNPNQPLVILE.M       |       | 2 | 2,3317 | 0,257 | -0,283 |
| 15 | Q9H6F5 CCD86_HUMAN | R.RLGGLRPES#PE.S          | S18:  | 2 | 2,3316 | 0,148 | -0,473 |
| 15 | P49006 MRP_HUMAN   | K.SNGDLSPKGEGESPPVNGTDE.A |       | 2 | 2,3271 | 0,4   | -0,585 |
| 15 | P68104 EF1A1_HUMAN | K.IGGIGTVPVGRVE.T         |       | 2 | 2,3271 | 0,188 | -0,389 |
| 15 | P11387 TOP1_HUMAN  | E.FDFLGKD.S               |       | 2 | 2,324  | 0,114 | 0      |
| 15 | Q9COB5 ZDHC5_HUMAN | K.LSRGDS#LKEPTSIAE.S      | S380: | 2 | 2,3229 | 0,341 | -0,362 |
| 15 | Q15149 PLEC1_HUMAN | R.GCLDEETS.R              |       | 2 | 2,3218 | 0,307 | -0,343 |

|    |                    |                            |          |   |        |       |        |
|----|--------------------|----------------------------|----------|---|--------|-------|--------|
| 15 | O75528 TAD3L_HUMAN | E.NIISPMEDSPIPDM*SGK.E     |          | 2 | 2,3205 | 0,239 | -0,595 |
| 15 | P35251 RFC1_HUMAN  | E.AHLTPYSLQAIK.A           |          | 2 | 2,3181 | 0,314 | -0,636 |
| 15 | P98174 FGD1_HUMAN  | R.CLFLAPGPR.D              |          | 2 | 2,3178 | 0,152 | -0,427 |
| 15 | Q66K74 MAP1S_HUMAN | E.AGLSLPLR.G               |          | 2 | 2,3164 | 0,085 | 0,148  |
| 15 | Q96JH7 VCIP1_HUMAN | D.ALGAAFATR.S              |          | 2 | 2,314  | 0,268 | -0,069 |
| 15 | Q68DA7 FMN1_HUMAN  | K.TTAEPQHQS#PPGISSE.G      | S620:    | 2 | 2,3065 | 0,099 | -0,21  |
| 15 | Q92615 LARP5_HUMAN | R.TSKEPPSS#PLQPQKE.Q       | S664:    | 2 | 2,3063 | 0,317 | -0,634 |
| 15 | P46013 KI67_HUMAN  | D.ILQMICKS.R               |          | 2 | 2,3058 | 0,191 | -0,123 |
| 15 | P06493 CDC2_HUMAN  | E.GT#YGVVYK.G              | T14:     | 2 | 2,3055 | 0,395 | 0,063  |
| 15 | P35527 K1C9_HUMAN  | K.TLLDIDNTR.M              |          | 2 | 2,2998 | 0,181 | -0,345 |
| 15 | Q14493 SLBP_HUMAN  | K.LLINDFGR.E               |          | 2 | 2,2953 | 0,089 | -0,193 |
| 15 | Q9C0B5 ZDHC5_HUMAN | K.SFHFDPLSSGSR.S           |          | 2 | 2,2947 | 0,137 | -0,73  |
| 15 | Q9UIF9 BAZ2A_HUMAN | E.MEGPEECLGR.R             |          | 2 | 2,2944 | 0,31  | -0,207 |
| 15 | Q99961 SH3G1_HUMAN | K.IAASSS#FR.S              | S288:    | 2 | 2,2896 | 0,21  | 0,066  |
| 15 | Q15637 SF01_HUMAN  | R.ILRPWQSSE.T              |          | 2 | 2,2871 | 0,163 | -0,219 |
| 15 | Q8WWI1 LMO7_HUMAN  | E.ASSGFLPGDR.N             |          | 2 | 2,2862 | 0,254 | 0,121  |
| 15 | P04406 G3P_HUMAN   | K.VIHDNFGIVE.G             |          | 2 | 2,286  | 0,186 | -0,427 |
| 15 | P41236 IPP2_HUMAN  | E.AMAPDILAR.K              |          | 2 | 2,2857 | 0,284 | -0,764 |
| 15 | O94992 HEX11_HUMAN | R.AFPQLGGRPGPEGEGS#LE.S    | S66:     | 2 | 2,2853 | 0,282 | -0,325 |
| 15 | Q96JC9 EAF1_HUMAN  | R.APTKPPVGP.K.T            |          | 2 | 2,2833 | 0,249 | -0,246 |
| 15 | Q9UQ35 SRRM2_HUMAN | E.SSLVFKDTRL.T             |          | 2 | 2,2823 | 0,279 | -0,209 |
| 15 | Q12888 TP53B_HUMAN | K.MVIQGPSS#PQGE.A          | S1114:   | 2 | 2,2822 | 0,204 | -0,838 |
| 15 | P05787 K2C8_HUMAN  | R.AFS#SRSY#TSGPGSR.I       | S21:Y25: | 2 | 2,2761 | 0,241 | -0,527 |
| 15 | Q9H0G5 CCD55_HUMAN | R.AKDKFLDQE.R              |          | 2 | 2,2708 | 0,149 | -0,558 |
| 15 | Q6ZUT9 RA61L_HUMAN | E.LMTSASDEDLVK.Q           |          | 2 | 2,2692 | 0,267 | -0,28  |
| 15 | Q9UK76 HN1_HUMAN   | E.EKPVPAAPVPS#PVAPAPVPSR.R | S131:    | 2 | 2,2689 | 0,335 | -0,342 |
| 15 | Q9Y217 MTMR6_HUMAN | K.KYLNPLYSS.S              |          | 2 | 2,2671 | 0,231 | -0,201 |
| 15 | Q6ZUT9 RA61L_HUMAN | R.RLS#ITSLTGK.N            | S1076:   | 2 | 2,2617 | 0,339 | -0,422 |
| 15 | Q14161 GIT2_HUMAN  | K.S#LSDSLSDGVPVTVQE.F      | S415:    | 2 | 2,2609 | 0,166 | -0,297 |
| 15 | Q96ST2 IWS1_HUMAN  | R.GKHM*DFLSDFE.M           |          | 2 | 2,2593 | 0,201 | -0,636 |
| 15 | Q9BT25 NYS48_HUMAN | E.STS#FSAPR.K              | S131:    | 2 | 2,2578 | 0,254 | 0      |
| 15 | Q9Y2W2 WBP11_HUMAN | E.LTPLQAM*MLR.M            |          | 2 | 2,2565 | 0,339 | -0,41  |
| 15 | Q9UQ35 SRRM2_HUMAN | R.GEFSASPMLK.S             |          | 2 | 2,2545 | 0,222 | -0,229 |

|    |                      |                         |            |   |        |       |        |
|----|----------------------|-------------------------|------------|---|--------|-------|--------|
| 15 | Q13136 LIPA1_HUMAN   | R.SSDGS#LS#HEEDLAKVIE.L | S242:S244: | 2 | 2,2537 | 0,123 | -0,247 |
| 15 | P54652 HSP72_HUMAN   | R.FEELNADLFR.G          |            | 2 | 2,2462 | 0,232 | -0,486 |
| 15 | Q7Z417 NUFP2_HUMAN   | R.TSPQVLGSILK.S         |            | 2 | 2,2414 | 0,256 | -0,534 |
| 15 | P18206 VINC_HUMAN    | E.DLVTYTK.N             |            | 2 | 2,2412 | 0,122 | 0,363  |
| 15 | Q13045 FLII_HUMAN    | E.AVLQS#PGLSGK.V        | S856:      | 2 | 2,2412 | 0,245 | -0,215 |
| 15 | Q9BWF3 RBM4_HUMAN    | R.RATAPVPTVGE.G         |            | 2 | 2,2409 | 0,12  | 0      |
| 15 | Q14693 LPIN1_HUMAN   | E.VAALYFPK.N            |            | 2 | 2,2379 | 0,198 | -0,201 |
| 15 | Q96I24 FUBP3_HUMAN   | K.SINQQSGAHVE.L         |            | 2 | 2,2363 | 0,106 | 0,104  |
| 15 | Q9P246 STIM2_HUMAN   | E.IYQTLS#PR.K           | S621:      | 2 | 2,2356 | 0,245 | -0,115 |
| 15 | Q15942 ZYG_HUMAN     | K.FSPGAPGGSGSQPNQK.L    |            | 2 | 2,2303 | 0,288 | 0,08   |
| 15 | ##Q8TBK2 SETD6_HUMAN | E.EGVM*ELK.C            |            | 2 | 2,229  | 0,119 | 0,297  |
| 15 | P35080 PROF2_HUMAN   | E.IDM*IVGKDRE.G         |            | 2 | 2,2288 | 0,235 | -0,512 |
| 15 | A9CQZ4 A9CQZ4_HUMAN  | E.DEEVPAFFK.N           |            | 2 | 2,2219 | 0,112 | -0,338 |
| 15 | Q8N6R0 K0859_HUMAN   | K.DSVLAGLK.A            |            | 2 | 2,2203 | 0,145 | 0,304  |
| 15 | O94964 CT117_HUMAN   | R.TKS#VSSM*SEFE.S       | S55:       | 2 | 2,2192 | 0,248 | -0,551 |
| 15 | ##P12111 CO6A3_HUMAN | D.LDLLNLR.L             |            | 2 | 2,2109 | 0,087 | 0,071  |
| 15 | P35579 MYH9_HUMAN    | K.LKDVLLQVDDE.R         |            | 2 | 2,2098 | 0,097 | -0,379 |
| 15 | Q96Q45 AL2S4_HUMAN   | K.SSSSLLRNE.N           |            | 2 | 2,2088 | 0,223 | -0,113 |
| 15 | Q9NZM5 GSCR2_HUMAN   | E.DHQTLSSAAHE.V         |            | 2 | 2,2088 | 0,303 | -0,3   |
| 15 | P08670 VIME_HUMAN    | R.QVQS#LTCE.V           | S325:      | 2 | 2,2077 | 0,162 | -0,234 |
| 15 | P26373 RL13_HUMAN    | E.SLQANVQR.L            |            | 2 | 2,2043 | 0,182 | 0,067  |
| 15 | P42166 LAP2A_HUMAN   | R.NRPPLPAGTNSK.G        |            | 2 | 2,2012 | 0,257 | -0,195 |
| 15 | P02545 LMNA_HUMAN    | R.SGAQASSTPLSPTR.I      |            | 2 | 2,1993 | 0,332 | -0,359 |
| 15 | Q8N4B4 FBX39_HUMAN   | R.LDYLNLK.G             |            | 2 | 2,1975 | 0,087 | 0,139  |
| 15 | P02545 LMNA_HUMAN    | R.LVEIDNGK.Q            |            | 2 | 2,195  | 0,118 | 0,206  |
| 15 | Q9H773 XTP3A_HUMAN   | R.SSS#RKYTELPHGAISE.D   | S138:      | 2 | 2,1875 | 0,421 | -0,331 |
| 15 | Q9Y2W6 TDRKH_HUMAN   | K.SSGEITHTLS#CLS#LSE.A  | S539:S542: | 2 | 2,1874 | 0,162 | -0,584 |
| 15 | P07339 CATD_HUMAN    | E.LM*LGGTDSK.Y          |            | 2 | 2,1834 | 0,106 | -0,26  |
| 15 | O15027 SC16A_HUMAN   | R.YGPLPGPAVPR.H         |            | 2 | 2,1831 | 0,403 | -0,543 |
| 15 | Q6ZUT9 RA61L_HUMAN   | E.LM*TSASDEDLVK.Q       |            | 2 | 2,1788 | 0,118 | -0,368 |
| 15 | Q7Z6Z7 HUWE1_HUMAN   | R.IVNQPSSSLFGSK.S       |            | 2 | 2,1772 | 0,196 | -0,478 |
| 15 | P24534 EF1B_HUMAN    | E.KASLPGVK.K            |            | 2 | 2,1768 | 0,216 | 0,152  |
| 15 | P84103 SFRS3_HUMAN   | R.DSCPLDCK.V            |            | 2 | 2,1759 | 0,275 | 0,061  |

|    |                     |                          |            |   |        |       |        |
|----|---------------------|--------------------------|------------|---|--------|-------|--------|
| 15 | Q9UKS6 PACN3_HUMAN  | R.LCGDLVSCFQE.R          |            | 2 | 2,1755 | 0,228 | -0,551 |
| 15 | P42684 ABL2_HUMAN   | E.NSASSLAPGFIR.G         |            | 2 | 2,1744 | 0,341 | -0,7   |
| 15 | A6NJL0 A6NJL0_HUMAN | R.MLDQTLIDLNEM*.-        |            | 2 | 2,1725 | 0,161 | -0,252 |
| 15 | Q13123 RED_HUMAN    | K.QLGDDFFGM*SNSYAE.C     |            | 2 | 2,1685 | 0,351 | -0,386 |
| 15 | P02545 LMNA_HUMAN   | R.LRLS#PS#PTSQR.S        | S390:S392: | 2 | 2,1659 | 0,244 | 0,957  |
| 15 | Q96JM3 ZN828_HUMAN  | R.KTS#PASLDFPE.S         | S459:      | 2 | 2,1638 | 0,307 | -0,384 |
| 15 | P05387 RLA2_HUMAN   | E.DVIAQGIGK.L            |            | 2 | 2,1633 | 0,211 | 0      |
| 15 | P02545 LMNA_HUMAN   | R.SGAQASSTPLS#PTRITR.L   | S22:       | 2 | 2,1599 | 0,192 | -0,27  |
| 15 | A1L390 PKHG3_HUMAN  | R.FFFNPSAVSQR.T          |            | 2 | 2,1569 | 0,096 | -0,282 |
| 15 | P00558 PGK1_HUMAN   | K.VSHVSTGGGASLE.L        |            | 2 | 2,1564 | 0,177 | 0      |
| 15 | Q15843 NEDD8_HUMAN  | K.TLTGKEID.I             |            | 2 | 2,1549 | 0,206 | -0,327 |
| 15 | Q16555 DPYL2_HUMAN  | K.T#SPAKQQAPPVR.N        | T521:      | 2 | 2,1546 | 0,148 | -0,628 |
| 15 | Q96JM3 ZN828_HUMAN  | R.KT#SPASLDFPE.S         | T458:      | 2 | 2,15   | 0,255 | -0,384 |
| 15 | Q9UKY7 CDV3_HUMAN   | K.TAPVQAPPAPVIVTE.T      |            | 2 | 2,1385 | 0,3   | -0,409 |
| 15 | Q14126 DSG2_HUMAN   | K.GSSS#ASIVKGQHE.M       | S701:      | 2 | 2,1365 | 0,199 | -0,446 |
| 15 | Q5VY92 Q5VY92_HUMAN | E.GSSRLS#PPHS#PRDFTR.M   | S956:S960: | 2 | 2,1278 | 0,116 | -0,312 |
| 15 | Q9UKV3 ACINU_HUMAN  | E.KSKS#PS#PPRLTE.D       | S386:S388: | 2 | 2,1271 | 0,241 | -0,246 |
| 15 | P36507 MP2K2_HUMAN  | E.HM*DGGSLDQVLKE.A       |            | 2 | 2,1259 | 0,275 | -0,169 |
| 15 | A9Z1X7 A9Z1X7_HUMAN | R.WQS#PVTK.S             | S547:      | 2 | 2,124  | 0,176 | 0,066  |
| 15 | O75643 U520_HUMAN   | E.KDTLGLFLRE.G           |            | 2 | 2,1222 | 0,176 | -0,512 |
| 15 | O75528 TAD3L_HUMAN  | E.NIISPMEDSPIPMSGK.E     |            | 2 | 2,1216 | 0,288 | -0,466 |
| 15 | O75607 NPM3_HUMAN   | D.DFQLQPPVTFR.L          |            | 2 | 2,1216 | 0,145 | -0,272 |
| 15 | Q6ZVM7 TM1L2_HUMAN  | R.KQSS#EGIPVAQPSVMDDIE.V | S424:      | 2 | 2,1202 | 0,366 | -0,463 |
| 15 | Q9UGU5 HM2L1_HUMAN  | K.ASSVGVLSPQKK.S         | S497:      | 2 | 2,1117 | 0,157 | -0,19  |
| 15 | P49790 NU153_HUMAN  | K.NTSLPPLWSPE.A          |            | 2 | 2,1067 | 0,088 | 0,098  |
| 15 | Q8ND56 LS14A_HUMAN  | R.SLKTQLSQGR.S           |            | 2 | 2,1054 | 0,198 | 0      |
| 15 | P24941 CDK2_HUMAN   | E.GTYGVVY#KAR.N          | Y19:       | 2 | 2,1036 | 0,209 | -0,409 |
| 15 | O00299 CLIC1_HUMAN  | R.KFLDGNE.L              |            | 2 | 2,103  | 0,144 | 0,148  |
| 15 | Q9C0B5 ZDHC5_HUMAN  | R.GDS#LKEPTSIAE.S        | S380:      | 2 | 2,0993 | 0,091 | -0,276 |
| 15 | Q9UQ35 SRRM2_HUMAN  | R.GEFSASPM*LK.S          |            | 2 | 2,089  | 0,234 | -0,225 |
| 15 | Q8WWI1 LMO7_HUMAN   | E.ASSGFLPGDRNK.S         |            | 2 | 2,0878 | 0,163 | -0,586 |
| 15 | P37802 TAGL2_HUMAN  | E.GKNVIGLQM*GTNR.G       |            | 2 | 2,0832 | 0,124 | -0,348 |
| 15 | A9CQZ4 A9CQZ4_HUMAN | R.QKFCGM*FCPVEGSSE.N     |            | 2 | 2,0741 | 0,179 | -0,549 |

|    |                     |                          |              |   |        |       |        |
|----|---------------------|--------------------------|--------------|---|--------|-------|--------|
| 15 | P13645 K1C10_HUMAN  | R.LAADDFR.L              |              | 2 | 2,0708 | 0,253 | 0,227  |
| 15 | Q09666 AHNK_HUMAN   | K.LKGPQITGPSLE.G         |              | 2 | 2,0628 | 0,174 | -0,295 |
| 15 | Q6RFH5 WDR74_HUMAN  | E.DGIFQGQR.H             |              | 2 | 2,0621 | 0,142 | 0,132  |
| 15 | Q9BQY9 DBND2_HUMAN  | E.LSLPVPTSDR.T           |              | 2 | 2,0612 | 0,145 | -0,225 |
| 15 | Q86YS7 K0528_HUMAN  | R.LLRSQS#ESS#DEVTE.L     | S659:S662:   | 2 | 2,0609 | 0,199 | 0,912  |
| 15 | Q32M68 Q32M68_HUMAN | K.IMCSSICK.C             |              | 2 | 2,0597 | 0,323 | -0,061 |
| 15 | Q14587 ZN268_HUMAN  | E.SIES#GKTVNK.K          | S254:        | 2 | 2,0584 | 0,115 | 1,921  |
| 15 | Q92841 DDX17_HUMAN  | K.GPQIRDLE.R             |              | 2 | 2,0583 | 0,242 | -0,197 |
| 15 | Q02952 AKA12_HUMAN  | K.KGLSSDLE.G             |              | 2 | 2,0574 | 0,274 | 0,216  |
| 15 | Q68DH5 LMBD2_HUMAN  | R.YLS#M*SRSDIFNDV.-      | S685:        | 2 | 2,0553 | 0,141 | -0,371 |
| 15 | Q96FV9 THOC1_HUMAN  | E.NES#PDVRR.D            | S560:        | 2 | 2,0525 | 0,147 | -0,348 |
| 15 | B2CI53 B2CI53_HUMAN | R.S#NMSPDKPVS#VKISFE.D   | S1102:S1111: | 2 | 2,0522 | 0,251 | -0,57  |
| 15 | Q15233 NONO_HUMAN   | E.GFKGTFPDAR.E           |              | 2 | 2,0504 | 0,303 | -0,334 |
| 15 | Q66K74 MAP1S_HUMAN  | R.LSLS#PLR.G             | S657:        | 2 | 2,0499 | 0,098 | 0,282  |
| 15 | P05787 K2C8_HUMAN   | R.AFSSRS#YTSGPGSR.I      | S24:         | 2 | 2,0464 | 0,299 | -0,317 |
| 15 | P49023 PAXI_HUMAN   | K.SAEPSPTVMSTSLGSNLS#E.L | S143:        | 2 | 2,0461 | 0,348 | -0,556 |
| 15 | P11216 PYGB_HUMAN   | K.QIS#VRGLAGLDVAE.V      | S15:         | 2 | 2,0446 | 0,241 | -0,468 |
| 15 | P35908 K22E_HUMAN   | R.NLDLDSIIAEVK.A         |              | 2 | 2,0394 | 0,191 | -1,835 |
| 15 | P62937 PPIA_HUMAN   | K.SIYGKFEDE.N            |              | 2 | 2,0331 | 0,18  | -0,201 |
| 15 | P24666 PPAC_HUMAN   | R.KLVTDQNISE.N           |              | 2 | 2,0312 | 0,092 | -0,638 |
| 15 | Q5VWK5 IL23R_HUMAN  | E.IKEIFIPE.H             |              | 2 | 2,0297 | 0,085 | -0,185 |
| 15 | Q9UHB6 LIMA1_HUMAN  | K.GWSMSEQSEE.S           |              | 2 | 2,0258 | 0,121 | -0,209 |
| 15 | P35527 K1C9_HUMAN   | K.TLNDRMRQEYQLIAK.N      |              | 2 | 2,0246 | 0,158 | -0,527 |
| 15 | Q9Y2V2 CHSP1_HUMAN  | R.TRT#FSATVR.A           | T50:         | 2 | 2,0164 | 0,154 | -0,545 |
| 15 | P78527 PRKDC_HUMAN  | K.YFEGVSPK.S             |              | 2 | 2,0157 | 0,127 | -0,066 |
| 15 | Q9Y2W2 WBP11_HUMAN  | E.LTPLQAMM*LR.M          |              | 2 | 2,0089 | 0,399 | -0,41  |
| 15 | Q7Z309 F122B_HUMAN  | R.SSS#APLIHGLSD.L        | S25:         | 2 | 2,0084 | 0,221 | -0,579 |
| 15 | Q9H5Y7 SLIK6_HUMAN  | E.NHS#PLTGSNMK.Y         | S728:        | 2 | 2,0049 | 0,153 | -0,386 |
| 15 | Q9UHB6 LIMA1_HUMAN  | K.TVSPPIRK.G             |              | 2 | 2,0021 | 0,107 | -0,068 |
| 15 | Q02952 AKA12_HUMAN  | K.SAES#PT#SPVTSE.T       | S283:T285:   | 2 | 2,0007 | 0,161 | -0,361 |
| 15 | Q9Y4B4 ARIP4_HUMAN  | R.HSASS#PKAPDPE.G        | S1155:       | 2 | 1,9965 | 0,207 | -0,375 |
| 15 | Q8N122 RPTOR_HUMAN  | R.SVSS#YGNIIR.A          | S722:        | 2 | 1,9843 | 0,137 | 0      |
| 15 | O75569 PRKRA_HUMAN  | R.AEAPPLERE.D            |              | 2 | 1,9813 | 0,227 | 0,181  |

|    |                      |                        |            |   |        |       |        |
|----|----------------------|------------------------|------------|---|--------|-------|--------|
| 15 | Q13185 CBX3_HUMAN    | E.AFLNSQK.A            |            | 2 | 1,9802 | 0,103 | 0,075  |
| 15 | P37802 TAGL2_HUMAN   | K.NVIGLQMG TNR.G       |            | 2 | 1,9799 | 0,082 | -0,203 |
| 15 | P05556 ITB1_HUMAN    | K.IRPLGFTEE.V          |            | 2 | 1,9665 | 0,129 | -0,46  |
| 15 | Q96T23 RSF1_HUMAN    | K.AQIDPVLLK.N          |            | 2 | 1,9663 | 0,258 | -0,245 |
| 15 | Q15181 IPYR_HUMAN    | K.HTGCCGDNDPIDVCE.I    |            | 2 | 1,9533 | 0,155 | -0,488 |
| 15 | P34931 HS71L_HUMAN   | K.DAGVIAGLNVLR.I       |            | 2 | 1,9461 | 0,175 | -0,509 |
| 15 | Q9H0S4 DDX47_HUMAN   | K.DLGVTDVLCE.A         |            | 2 | 1,9351 | 0,185 | -0,218 |
| 15 | Q15785 TOM34_HUMAN   | R.ALCYLVLK.Q           |            | 2 | 1,9345 | 0,13  | -0,249 |
| 15 | Q8IXM2 CQ049_HUMAN   | K.KLNFDQA.-            |            | 2 | 1,928  | 0,28  | 0,292  |
| 15 | Q9Y570 PPME1_HUMAN   | R.VSMVGQVK.Q           |            | 2 | 1,9251 | 0,183 | 0      |
| 15 | Q86UP2 KTN1_HUMAN    | E.KAQQLSITSK.V         |            | 2 | 1,9241 | 0,242 | -0,221 |
| 15 | P11940 PABP1_HUMAN   | K.GYGFVHFE.T           |            | 2 | 1,9221 | 0,155 | -0,128 |
| 15 | Q9NWS1 CL048_HUMAN   | K.IYDDFLK.N            |            | 2 | 1,919  | 0,22  | -0,067 |
| 15 | P00533 EGFR_HUMAN    | E.DHFSLQR.M            |            | 2 | 1,9175 | 0,128 | -0,24  |
| 15 | Q9UKV3 ACINU_HUMAN   | E.KS#KSPSPRLT#E.D      | S384:T393: | 2 | 1,9113 | 0,126 | -0,492 |
| 15 | P07602 SAP_HUMAN     | K.LVGYLDR.N            |            | 2 | 1,9026 | 0,098 | 0,365  |
| 15 | P35241 RADI_HUMAN    | K.ALELDQER.K           |            | 2 | 1,9024 | 0,126 | 0      |
| 15 | P41208 CETN2_HUMAN   | K.AFKLFDDDE.T          |            | 2 | 1,8968 | 0,272 | -0,444 |
| 15 | P30837 AL1B1_HUMAN   | K.TFPTVNPTTGEVIGHVAE.G |            | 2 | 1,895  | 0,243 | -0,653 |
| 15 | P37802 TAGL2_HUMAN   | K.IEKQYDADLE.Q         |            | 2 | 1,8911 | 0,12  | -0,299 |
| 15 | P55786 PSA_HUMAN     | E.SIHQYLLQR.K          |            | 2 | 1,8908 | 0,326 | -0,316 |
| 15 | Q8WUX9 CHMP7_HUMAN   | R.QLEPTLKPL.-          |            | 2 | 1,886  | 0,283 | -0,352 |
| 15 | P14618 KPYM_HUMAN    | K.GVNLPGAAVDLPVSE.K    |            | 2 | 1,8787 | 0,216 | -0,243 |
| 15 | Q8WUX9 CHMP7_HUMAN   | K.RQLEPTLKPL.-         |            | 2 | 1,8786 | 0,102 | -0,204 |
| 15 | Q9NPR2 SEM4B_HUMAN   | R.VRLGS#EIRDSVV.-      | S825:      | 2 | 1,8767 | 0,318 | -0,26  |
| 15 | Q5T5U3 RHG21_HUMAN   | E.SVGPPSLDAQPNSK.T     |            | 2 | 1,8666 | 0,168 | -0,087 |
| 15 | Q9Y3Z3 SAMH1_HUMAN   | R.VQLFKDDPM.-          |            | 2 | 1,8649 | 0,107 | -0,335 |
| 15 | Q8N6T3 ARFG1_HUMAN   | E.TFGSAEPTK.T          |            | 2 | 1,8621 | 0,261 | 0,065  |
| 15 | Q86YS7 K0528_HUMAN   | R.LLRSQS#ESSDE.V       | S659:      | 2 | 1,8583 | 0,27  | -0,183 |
| 15 | Q9UKY7 CDV3_HUMAN    | E.VDYSGLR.V            |            | 2 | 1,8542 | 0,082 | -0,226 |
| 15 | P22455 FGFR4_HUMAN   | D.KVLLAVS#EE.Y         | S751:      | 2 | 1,8463 | 0,113 | 1,942  |
| 15 | Q02952 AKA12_HUMAN   | K.STPVIVSATTK.K        |            | 2 | 1,8447 | 0,332 | -0,111 |
| 15 | ##P52630 STAT2_HUMAN | R.NSVVILR.H            |            | 2 | 1,8418 | 0,184 | 0,152  |



|    |                      |                                  |            |   |        |       |        |
|----|----------------------|----------------------------------|------------|---|--------|-------|--------|
| 15 | Q8NI35 INADL_HUMAN   | E.VPPPFTLVCCR.R                  |            | 2 | 1,841  | 0,126 | -0,453 |
| 15 | P39880 CUX1_HUMAN    | R.VVLAPEEKE.A                    |            | 2 | 1,8398 | 0,188 | -0,06  |
| 15 | P17812 PYRG1_HUMAN   | R.FEVNPVWK.K                     |            | 2 | 1,8357 | 0,091 | 0,239  |
| 15 | Q9H2J4 PDCL3_HUMAN   | E.DVLLSSVR.R                     |            | 2 | 1,8291 | 0,146 | -0,137 |
| 15 | P35579 MYH9_HUMAN    | R.GDLPFVVR.R                     |            | 2 | 1,8279 | 0,254 | -0,244 |
| 15 | Q8IV76 PASD1_HUMAN   | R.TQLLQQLYTSKAVS#D.E             | S191:      | 2 | 1,8184 | 0,147 | -1,237 |
| 15 | Q9HCN4 GPN1_HUMAN    | K.DSLSPVLHPSDLILTR.G             |            | 2 | 1,8104 | 0,197 | -0,623 |
| 15 | P46013 KI67_HUMAN    | D.ILQM*ICSK.R                    |            | 2 | 1,8075 | 0,089 | -0,121 |
| 15 | Q9Y5S2 MRCKB_HUMAN   | R.SQPLEGLEQPACDT.-               |            | 2 | 1,8074 | 0,103 | -0,442 |
| 15 | P52594 NUPL_HUMAN    | K.GTPSQSPVGR.S                   |            | 2 | 1,8061 | 0,248 | 0,112  |
| 15 | P46821 MAP1B_HUMAN   | K.SDISPLTPR.E                    |            | 2 | 1,805  | 0,23  | 0,247  |
| 15 | P35527 K1C9_HUMAN    | R.MTLDDFR.I                      |            | 2 | 1,8011 | 0,28  | 0,068  |
| 15 | P05787 K2C8_HUMAN    | R.ISSSSFSR.V                     |            | 2 | 1,8002 | 0,152 | -0,14  |
| 15 | P04264 K2C1_HUMAN    | R.GSGGGSSGGSIGGR.G               |            | 2 | 1,772  | 0,329 | -0,335 |
| 15 | O95071 UBR5_HUMAN    | E.DVGAEPGSILT#E.L                | T2213:     | 2 | 1,7645 | 0,124 | -1,54  |
| 15 | P08670 VIME_HUMAN    | R.SYVTTSTR.T                     |            | 2 | 1,76   | 0,195 | 0      |
| 15 | Q2YD98 K1530_HUMAN   | E.SLGM*ASGM*SDALR.S              |            | 2 | 1,7568 | 0,282 | 0      |
| 15 | Q8N6T3 ARFG1_HUMAN   | E.TFGSAEPTKTR.K                  |            | 2 | 1,755  | 0,134 | -0,408 |
| 15 | Q13595 TRA2A_HUMAN   | R.RRS#PSPY#YSR.Y                 | S260:Y264: | 2 | 1,7512 | 0,144 | -0,342 |
| 15 | ##Q9BVK6 TMED9_HUMAN | E.SLKDKAAIE.A                    |            | 2 | 1,7432 | 0,101 | -0,375 |
| 15 | Q9Y217 MTMR6_HUMAN   | K.YLNPLYSSE.S                    |            | 2 | 1,7399 | 0,18  | -0,449 |
| 15 | Q86UU1 PHLB1_HUMAN   | R.RALS#PLPTR.T                   | S470:      | 2 | 1,7388 | 0,105 | -0,112 |
| 15 | Q69YN4 VIR_HUMAN     | E.DQFNGS#PPRPQPR.G               | S173:      | 2 | 1,723  | 0,132 | -0,465 |
| 15 | Q9Y5K6 CD2AP_HUMAN   | K.ANTTAFLE.PLE.I                 |            | 2 | 1,7139 | 0,154 | -0,311 |
| 15 | Q9UKV5 AMFR2_HUMAN   | R.IQVPFPTQR.S                    |            | 2 | 1,7038 | 0,138 | -0,112 |
| 15 | Q96PK6 RBM14_HUMAN   | E.SQLSFRR.S                      |            | 2 | 1,7014 | 0,123 | 0,068  |
| 15 | Q5TDH0 DDI2_HUMAN    | R.IDFSSIAVPGTSS#PR.Q             | S106:      | 2 | 1,7003 | 0,127 | -0,68  |
| 16 | P52594 NUPL_HUMAN    | K.SLLGDSAPTLLHNLKGT#PSQS#PVVGR.S | T177:S181: | 3 | 5,9948 | 0,391 | -0,748 |
| 16 | Q12830 BPTF_HUMAN    | E.TKSHLLSSS#DAEGNYRDSLE.T        | S1478:     | 3 | 5,7171 | 0,413 | -0,639 |
| 16 | Q3V6T2 GRDN_HUMAN    | R.DGLHFLPHASSSAQS#PCGSPGM*K.R    | S233:      | 3 | 5,6551 | 0,463 | -0,52  |
| 16 | Q9NWH9 SLTM_HUMAN    | E.ASKPKDQDAIAQS#PEKE.S           | S289:      | 3 | 5,6074 | 0,341 | -0,832 |
| 16 | P78332 RBM6_HUMAN    | E.HESPADFQNSQS#PVQDQDK.S         | S362:      | 3 | 5,4883 | 0,35  | -0,654 |
| 16 | Q92625 ANS1A_HUMAN   | R.SLS#KSDSDLTCSPTEDATM*GSR.S     | S624:      | 3 | 5,3231 | 0,417 | -0,358 |

|    |                    |                              |            |   |        |       |        |
|----|--------------------|------------------------------|------------|---|--------|-------|--------|
| 16 | Q13428 TCOF_HUMAN  | R.KSAEPSANTTLVS#ETEEE.G      | S171:      | 2 | 5,2159 | 0,539 | -0,061 |
| 16 | Q7Z3C6 ATG9A_HUMAN | R.HPEPVPEEGS#EDELPPQVHKV.-   | S828:      | 3 | 5,1629 | 0,372 | -0,226 |
| 16 | P28749 RBL1_HUMAN  | E.SKVKS#PVSLTAHSLIGAS#PK.Q   | S749:S762: | 3 | 5,0467 | 0,404 | -0,169 |
| 16 | P06493 CDC2_HUMAN  | E.KIGEGT#Y#GVVYK.G           | T14:Y15:   | 2 | 4,9792 | 0,371 | -0,745 |
| 16 | Q9UHB6 LIMA1_HUMAN | R.SRPFTVAASFQSTS#PK.T        | S604:      | 3 | 4,9153 | 0,366 | -0,435 |
| 16 | Q9Y6D5 BIG2_HUMAN  | E.LEKPIQSKPQS#PVIQAAAVS#PK.F | S218:S227: | 3 | 4,8349 | 0,338 | -0,296 |
| 16 | P13645 K1C10_HUMAN | K.GSLGGGFSSGGFSGGSFSR.G      |            | 2 | 4,7564 | 0,539 | -0,214 |
| 16 | Q15042 RB3GP_HUMAN | E.GKKT#ASDVTNIYPGDAGK.A      | S537:      | 3 | 4,7517 | 0,376 | -0,46  |
| 16 | P05783 K1C18_HUMAN | E.DGEDFNLDALDSSNSM*QTIQK.T   |            | 3 | 4,724  | 0,493 | -0,533 |
| 16 | Q86W92 LIPB1_HUMAN | D.TQLCDKLLTSSLQK.S           |            | 2 | 4,7067 | 0,478 | -0,597 |
| 16 | Q9UQ35 SRRM2_HUMAN | K.SKDSLQVQSCPGSLCAGVK.S      |            | 3 | 4,6938 | 0,301 | -0,35  |
| 16 | P16591 FER_HUMAN   | E.NDGKEPPPVVNYEEDAR.S        |            | 3 | 4,6728 | 0,381 | -0,474 |
| 16 | Q15648 MED1_HUMAN  | E.HHSGS#QGPLLTGDLGKE.K       | S953:      | 3 | 4,6198 | 0,329 | -0,382 |
| 16 | O96013 PAK4_HUMAN  | R.DKRPLS#GPDVGTQPAGLASGAK.L  | S181:      | 3 | 4,6085 | 0,303 | -0,159 |
| 16 | Q8WYQ5 DGCR8_HUMAN | R.EQS#PPPLQTSSEAE.V          | S35:       | 2 | 4,6049 | 0,485 | -0,456 |
| 16 | Q9UK76 HN1_HUMAN   | R.RNS#SEASSGDFDLKGE.G        | S87:       | 2 | 4,5964 | 0,536 | -0,516 |
| 16 | Q9UHR5 S30BP_HUMAN | E.KGGLVSDAYGEDDFSR.L         |            | 2 | 4,5804 | 0,52  | -0,711 |
| 16 | P05783 K1C18_HUMAN | E.DFNLDALDSSNSM*QTIQK.T      |            | 3 | 4,566  | 0,441 | -0,261 |
| 16 | Q9NYJ8 TAB2_HUMAN  | R.TLTHSIS#DGQLQGGQSNSE.L     | S108:      | 3 | 4,5436 | 0,33  | -0,179 |
| 16 | P13861 KAP2_HUMAN  | E.ARAPASVLPAAATPR.Q          |            | 2 | 4,5384 | 0,402 | -0,531 |
| 16 | Q02952 AKA12_HUMAN | E.LQSHAKSPPS#PVERE.M         | S1331:     | 3 | 4,5074 | 0,461 | -0,63  |
| 16 | P00558 PGK1_HUMAN  | E.DKVSHVSTGGGASLE.L          |            | 2 | 4,4905 | 0,498 | -0,591 |
| 16 | O60271 JIP4_HUMAN  | R.S#ASQSS#LDKLDQE.L          | S728:S733: | 2 | 4,4758 | 0,361 | -0,389 |
| 16 | Q9H5J8 JOSD3_HUMAN | R.YKFLDDDGSIS#PIEE.S         | S206:      | 2 | 4,359  | 0,411 | -0,54  |
| 16 | P05787 K2C8_HUMAN  | E.TRDGKLV#ESSDVLPK.-         | S475:      | 2 | 4,3579 | 0,313 | -0,269 |
| 16 | Q92619 HMHA1_HUMAN | R.KSS#FNVSVDVARPE.A          | S578:      | 2 | 4,3509 | 0,525 | -1,127 |
| 16 | O14617 AP3D1_HUMAN | K.HRPSEADEEELAR.R            |            | 3 | 4,3218 | 0,395 | -0,238 |
| 16 | Q9H1B7 EAP1_HUMAN  | E.EGPPPELNQSPNS#SSAAASVASR.R | S218:      | 3 | 4,3034 | 0,237 | -0,459 |
| 16 | P04264 K2C1_HUMAN  | R.SGGGFSSGSAGIINYQR.R        |            | 2 | 4,3015 | 0,428 | -0,736 |
| 16 | Q8NFC6 FA44A_HUMAN | E.KNVLLNSLQKEDKS#PE.T        | S2475:     | 3 | 4,285  | 0,307 | -0,19  |
| 16 | Q12789 TF3C1_HUMAN | D.LQCVCLNTPLGVVR.C           |            | 2 | 4,2778 | 0,398 | -0,449 |
| 16 | Q3V6T2 GRDN_HUMAN  | R.DGLHFLPHASSAQS#PCGSPGMK.R  | S233:      | 3 | 4,2742 | 0,271 | -0,448 |
| 16 | Q6NZI2 PTRF_HUMAN  | E.AGDLRRGS#S#PDVHALLE.I      | S365:S366: | 3 | 4,2635 | 0,361 | -0,375 |

|    |                    |                              |              |   |        |       |        |
|----|--------------------|------------------------------|--------------|---|--------|-------|--------|
| 16 | P07437 TBB5_HUMAN  | E.HGIDPTGTYHGSDLQLDR.I       |              | 3 | 4,2441 | 0,481 | -0,262 |
| 16 | O75386 TULP3_HUMAN | R.CRLS#PSGDSVFHEE.M          | S9:          | 3 | 4,2304 | 0,309 | -0,215 |
| 16 | Q9UHB6 LIMA1_HUMAN | R.SRPFTVAASFQSTSVK.S         |              | 3 | 4,2236 | 0,421 | -0,641 |
| 16 | Q9UQ35 SRRM2_HUMAN | K.DKFS#PFVPVQDRPE.S          | S1188:       | 2 | 4,2213 | 0,376 | -0,743 |
| 16 | P22059 OSBP1_HUMAN | K.RTGS#NIS#GASSDISLDE.Q      | S379:S382:   | 2 | 4,2158 | 0,338 | -0,392 |
| 16 | Q71RC2 LARP4_HUMAN | R.ASTASPCNNNINAATAVALQEPR.K  |              | 3 | 4,1873 | 0,255 | -0,54  |
| 16 | Q96KN1 FA84B_HUMAN | E.LATHLHPAEPEEGDSNVAR.T      |              | 3 | 4,1428 | 0,355 | -0,627 |
| 16 | P35527 K1C9_HUMAN  | R.GGSGGSGYGGGGSGGGYGGGSGSR.G |              | 2 | 4,127  | 0,378 | -0,272 |
| 16 | Q9H3C7 GGNB2_HUMAN | E.NTSCTCPSSGNLLGSPK.I        |              | 2 | 4,1244 | 0,483 | -0,343 |
| 16 | P35579 MYH9_HUMAN  | E.LDNVTGLLSQSDSK.S           |              | 2 | 4,1197 | 0,548 | -0,578 |
| 16 | P28749 RBL1_HUMAN  | K.VKS#PVSLTAHSLIGAS#PK.Q     | S749:S762:   | 3 | 4,0953 | 0,322 | -0,562 |
| 16 | P40763 STAT3_HUMAN | K.SQGDM*QDLNGNNSVTR.Q        |              | 2 | 4,087  | 0,367 | -0,454 |
| 16 | Q14676 MDC1_HUMAN  | E.LQPSTSTDQPVT#PEPTSR.A      | T1548:       | 2 | 4,08   | 0,517 | -0,181 |
| 16 | P18583 SON_HUMAN   | R.AGIEGPLLASDVGR.D           |              | 2 | 4,0618 | 0,333 | -0,36  |
| 16 | Q9NQS7 INCE_HUMAN  | E.QHVTQLM*STEPLPR.T          |              | 3 | 4,059  | 0,383 | -0,221 |
| 16 | P05023 AT1A1_HUMAN | R.SPFTNENPLETR.N             |              | 2 | 4,0556 | 0,358 | -0,722 |
| 16 | P49792 RBP2_HUMAN  | E.KDSLIT#PHVSRST#PRESPCGK.I  | T2450:T2458: | 3 | 4,053  | 1     | -0,634 |
| 16 | Q9H009 NACA2_HUMAN | R.ALKNNS#NDIVNAIM*E.L        | S203:        | 2 | 4,0378 | 0,317 | -0,63  |
| 16 | Q12888 TP53B_HUMAN | K.LGKPSAHASQS#FCE.S          | S894:        | 2 | 4,0208 | 0,493 | -0,687 |
| 16 | O94888 UBXD7_HUMAN | E.HGQLDGLSSPPKK.C            |              | 3 | 4,0182 | 0,486 | -0,252 |
| 16 | Q99471 PFD5_HUMAN  | E.AKDCLNVLNKS#NEGKE.L        | S56:         | 3 | 4,0172 | 0,346 | -0,578 |
| 16 | Q9ULW0 TPX2_HUMAN  | E.IKSSDQPLTPVVS#PK.F         | S738:        | 2 | 4,0115 | 0,45  | -0,582 |
| 16 | P35527 K1C9_HUMAN  | R.SGGGGGGGLGSGGSIR.S         |              | 2 | 4,0078 | 0,522 | -0,297 |
| 16 | P05787 K2C8_HUMAN  | E.TRDGKLVS#ESSDVLPK.-        | S475:        | 3 | 3,9896 | 0,191 | -0,101 |
| 16 | O60271 JIP4_HUMAN  | R.SAS#QSS#LDKLDQELKE.Q       | S730:S733:   | 3 | 3,9894 | 0,285 | -0,472 |
| 16 | Q29RF7 PDS5A_HUMAN | R.IISVT#PVKNIDPVKNKE.I       | T1208:       | 3 | 3,9829 | 0,166 | -0,556 |
| 16 | Q49MG5 MAP9_HUMAN  | E.VFSTTLAYTKS#PK.V           | S15:         | 2 | 3,9826 | 0,394 | -0,561 |
| 16 | Q99873 ANM1_HUMAN  | K.DVAIKEPLVDVDPK.Q           |              | 3 | 3,9787 | 0,296 | 0      |
| 16 | Q01581 HMCS1_HUMAN | E.GVGLVHSNIATEHIPS#PAKK.V    | S495:        | 3 | 3,977  | 0,315 | -0,343 |
| 16 | Q09666 AHNK_HUMAN  | K.GHYEVTGS#DDE.T             | S5841:       | 2 | 3,9748 | 0,443 | -0,473 |
| 16 | Q96K21 ZFY19_HUMAN | E.HQTSAYS#PPRAGQEH.-         | S463:        | 2 | 3,9589 | 0,547 | -0,699 |
| 16 | Q5T4S7 UBR4_HUMAN  | E.KMQSSGIPNGGHIRQES#QEQSE.V  | S2756:       | 3 | 3,9556 | 0,245 | -0,657 |
| 16 | Q9NYJ8 TAB2_HUMAN  | R.TLTHS#ISDGQLQGGQSNSE.L     | S106:        | 2 | 3,9502 | 0,458 | -1,017 |

|    |                     |                                       |                 |   |        |       |        |
|----|---------------------|---------------------------------------|-----------------|---|--------|-------|--------|
| 16 | Q9UGV2 NDRG3_HUMAN  | R.SRTHST#SSS#LGSGESPFSSR.S            | T332:S335:      | 3 | 3,9487 | 1     | -0,086 |
| 16 | Q8WXV6 Q8WXV6_HUMAN | R.KRTSS#EDNLYLAVLR.A                  | S21:            | 3 | 3,9445 | 0,165 | -0,496 |
| 16 | Q9P246 STIM2_HUMAN  | E.KSCS#M*NQLSSGIPVPKPR.H              | S680:           | 3 | 3,9333 | 0,383 | -0,439 |
| 16 | Q9UHR5 S30BP_HUMAN  | E.KGGLVSDAYGEDDFSR.L                  |                 | 3 | 3,9323 | 0,39  | -0,533 |
| 16 | Q9C0C2 TB182_HUMAN  | E.AADSDAHLFQDSTEPR.A                  |                 | 2 | 3,9236 | 0,404 | 0      |
| 16 | Q92625 ANS1A_HUMAN  | R.SLSKS#DSDLLTCSPTEDATMGSR.S          | S626:           | 3 | 3,9112 | 0,3   | -0,288 |
| 16 | P04075 ALDOA_HUMAN  | E.GTLLKPNMVTPGHACTQK.F                |                 | 3 | 3,9074 | 0,193 | -0,375 |
| 16 | Q6PKG0 LARP1_HUMAN  | K.ETES#APGS#PRAVT#PVPTKTEE.V          | S517:S521:T526: | 3 | 3,8929 | 0,219 | -0,378 |
| 16 | Q02952 AKA12_HUMAN  | E.KQEKEPSKSAES#PTS#PVTSE.T            | S283:S286:      | 3 | 3,8919 | 0,394 | -0,555 |
| 16 | O60271 JIP4_HUMAN   | R.SAS#QSSLDKLDQE.L                    | S730:           | 2 | 3,8904 | 0,363 | -0,246 |
| 16 | Q15149 PLEC1_HUMAN  | K.GYYSPYSVSGSGSTAGSR.T                |                 | 2 | 3,8878 | 0,428 | 0      |
| 16 | Q9UQ35 SRRM2_HUMAN  | K.DKFSPFPVQDRPE.S                     |                 | 2 | 3,8671 | 0,35  | -0,547 |
| 16 | Q7Z417 NUFP2_HUMAN  | E.KRT#SPQVLGSILK.S                    | T571:           | 3 | 3,8666 | 0,293 | -0,182 |
| 16 | P49916 DNL3_HUMAN   | E.KLATKSS#PVKVGE.K                    | S826:           | 3 | 3,8619 | 0,366 | -0,835 |
| 16 | Q9C0B5 ZDHC5_HUMAN  | K.YRPGYSSSSTAAM*PHSSSAK.L             |                 | 3 | 3,8493 | 0,264 | -0,421 |
| 16 | O94888 UBXD7_HUMAN  | E.HGQLDGLSSSPK.K                      |                 | 2 | 3,8411 | 0,497 | -0,553 |
| 16 | Q02952 AKA12_HUMAN  | E.LQSHAKS#PPSPVERE.M                  | S1328:          | 2 | 3,8304 | 0,467 | -1,261 |
| 16 | Q14247 SRC8_HUMAN   | R.AKT#QTPPVVS#PAPQPTEE.R              | T399:S405:      | 2 | 3,828  | 0,545 | -0,441 |
| 16 | Q9NQ57 INCE_HUMAN   | R.TLSPTPASATAPTSQGIPTS#DEES#TPKKS.K.A | S214:S218:      | 3 | 3,8276 | 1     | -0,346 |
| 16 | Q6NZI2 PTRF_HUMAN   | R.RGS#S#PDVHALLE.I                    | S365:S366:      | 2 | 3,8127 | 0,471 | -0,423 |
| 16 | Q09666 AHNK_HUMAN   | K.SKGHYEVTS#DDE.T                     | S5841:          | 2 | 3,7998 | 0,536 | -0,487 |
| 16 | Q9Y2X7 GIT1_HUMAN   | R.ARS#M*DSSDLSGAVTLQE.Y               | S410:           | 2 | 3,7946 | 0,44  | -0,555 |
| 16 | Q96T23 RSF1_HUMAN   | E.IKLSDDFDSPVKGPLCK.S                 |                 | 3 | 3,7944 | 0,298 | -0,477 |
| 16 | Q14195 DPYL3_HUMAN  | R.NLHQSGFSLSGTQVDE.G                  |                 | 2 | 3,7933 | 0,514 | -0,71  |
| 16 | Q9P270 SLAI2_HUMAN  | R.LSLQGHPTDLQTSNVKNEE.K               |                 | 3 | 3,7928 | 0,157 | 0,173  |
| 16 | B2CI53 B2CI53_HUMAN | E.RNGILASPQS#APGNLNSK.S               | S263:           | 3 | 3,7911 | 0,275 | -0,181 |
| 16 | Q13428 TCOF_HUMAN   | K.TVANLLSGKS#PR.K                     | S156:           | 2 | 3,7905 | 0,385 | -0,553 |
| 16 | P19338 NUCL_HUMAN   | K.TLFVKGLSEDTEE.T                     |                 | 2 | 3,7813 | 0,51  | -0,389 |
| 16 | Q9UJX5 APC4_HUMAN   | K.IKEEVLS#ESEAE.N                     | S777:           | 2 | 3,7749 | 0,475 | -0,338 |
| 16 | Q14004 CD2L5_HUMAN  | E.KTKPLT#PSIGAKE.K                    | T588:           | 3 | 3,7743 | 0,165 | 0      |
| 16 | Q92734 TFG_HUMAN    | K.QSTQVM*AASM*SAFDPLKNQDE.I           |                 | 3 | 3,7724 | 0,295 | 0,471  |
| 16 | Q9UPZ3 HPS5_HUMAN   | E.LILKFEPLDSACSSR.R                   |                 | 3 | 3,7708 | 0,276 | -0,632 |
| 16 | Q9Y5J1 UTP18_HUMAN  | E.LVFGDVENDEALLR.R                    |                 | 2 | 3,7689 | 0,41  | -0,429 |

|    |                     |                                 |            |   |        |       |        |
|----|---------------------|---------------------------------|------------|---|--------|-------|--------|
| 16 | Q13627 DYR1A_HUMAN  | R.QGADREESPM*TGVCVQQS#PVASS.-   | S758:      | 3 | 3,7594 | 0,48  | -0,436 |
| 16 | Q8TEW0 PARD3_HUMAN  | E.TKLNTVDDQKAGSPS#RD.V          | S875:      | 3 | 3,7531 | 0,269 | -0,574 |
| 16 | Q9UK76 HN1_HUMAN    | R.RNSSEAS#SGDFLDLKG.E           | S91:       | 3 | 3,753  | 0,229 | -0,483 |
| 16 | P04264 K2C1_HUMAN   | R.SLDLDSIIAEVK.A                |            | 2 | 3,7516 | 0,384 | -0,562 |
| 16 | Q92734 TFG_HUMAN    | K.QSTQVMAASM*SAFDPLKNQDE.I      |            | 3 | 3,7369 | 0,289 | -0,395 |
| 16 | Q6NUN7 CK063_HUMAN  | R.ISKDSLES#DSESLTQE.I           | S45:       | 2 | 3,7333 | 0,4   | -0,462 |
| 16 | Q9P246 STIM2_HUMAN  | E.KSCS#MNQLSSGIPVVKPR.H         | S680:      | 3 | 3,7274 | 0,192 | -0,531 |
| 16 | Q86W56 PARG_HUMAN   | K.LANAKQTTEDEQARE.A             |            | 3 | 3,7121 | 0,423 | -0,644 |
| 16 | P42166 LAP2A_HUMAN  | K.LREQGT#ESRSST#PLPTISSAE.N     | T154:T160: | 3 | 3,7036 | 1     | -0,147 |
| 16 | P49757 NUMB_HUMAN   | E.WGQSSGAASPLGFQAGHR.R          |            | 3 | 3,6948 | 0,319 | -0,101 |
| 16 | Q96T23 RSF1_HUMAN   | E.IKLSDDFDSPVKGPLCK.S           |            | 2 | 3,6875 | 0,515 | -0,381 |
| 16 | P05783 K1C18_HUMAN  | E.DGEDFNLDALDSSNSMQTIQK.T       |            | 3 | 3,6631 | 0,401 | -0,537 |
| 16 | O94888 UBXD7_HUMAN  | E.HGQLDGLSSS#PPKK.C             | S270:      | 3 | 3,663  | 0,295 | -0,239 |
| 16 | Q9NWH9 SLTM_HUMAN   | E.ASKPKDGQDAIAQS#PEKE.S         | S289:      | 2 | 3,6439 | 0,49  | -0,925 |
| 16 | Q05682 CALD1_HUMAN  | E.KQSVDKVTS#PTKV.-              | S789:      | 2 | 3,6247 | 0,339 | -0,734 |
| 16 | Q9Y5M8 SRPRB_HUMAN  | K.GGRGDVGSADIQDLE.K             |            | 2 | 3,6199 | 0,339 | -0,737 |
| 16 | Q9Y520 Q9Y520_HUMAN | E.SENSCNKEEPEVFTR.Q             |            | 3 | 3,6199 | 0,322 | -0,401 |
| 16 | P60709 ACTB_HUMAN   | E.EHPVLLTEAPLNPK.A              |            | 3 | 3,6189 | 0,264 | -0,117 |
| 16 | O95453 PARN_HUMAN   | R.SQANGAGALSYVS#PNTSK.C         | S163:      | 2 | 3,6082 | 0,47  | -0,333 |
| 16 | O43719 HTSF1_HUMAN  | E.TATGM*AFEPIDEK.K              |            | 2 | 3,6073 | 0,348 | -0,235 |
| 16 | Q9C0C2 TB182_HUMAN  | R.RES#AASGLGGLLEEE.G            | S1473:     | 2 | 3,6018 | 0,446 | -0,458 |
| 16 | Q9ULW0 TPX2_HUMAN   | E.IKSSDQPLTPVVS#PK.F            | S738:      | 3 | 3,5991 | 0,205 | -0,109 |
| 16 | Q9BRR8 GPTC1_HUMAN  | R.SKAEPKQSS#PLVNKEEE.H          | S715:      | 3 | 3,5942 | 0,114 | -0,415 |
| 16 | Q9Y2J4 AMOL2_HUMAN  | R.NQQGPPLRGPPAEGPE.S            |            | 2 | 3,5916 | 0,277 | -0,594 |
| 16 | Q9BQE6 CK048_HUMAN  | K.TPPADPACPEREDSHGSGS#PFKASQD.- | S282:      | 3 | 3,5911 | 0,362 | 0,13   |
| 16 | Q13459 MYO9B_HUMAN  | R.VQEKPD#PPGGSTQIQR.Y           | S1290:     | 3 | 3,5873 | 0,312 | -0,81  |
| 16 | Q9NYV4 CD2L7_HUMAN  | E.SKGS#PVFLPRKE.N               | S423:      | 3 | 3,5721 | 0,23  | -0,128 |
| 16 | Q9NYF8 BCLF1_HUMAN  | K.LKDLFDYS#PPLHK.N              | S512:      | 3 | 3,5666 | 0,28  | -0,553 |
| 16 | P08670 VIME_HUMAN   | E.TNLDS#LPLVDTHSKR.T            | S430:      | 3 | 3,5639 | 0,226 | -0,309 |
| 16 | P49916 DNL3_HUMAN   | E.KLATKSS#PVKVGE.K              | S826:      | 2 | 3,5574 | 0,408 | -0,857 |
| 16 | O43719 HTSF1_HUMAN  | E.TATGMAFEPIDEK.K               |            | 2 | 3,5568 | 0,358 | -0,238 |
| 16 | P21127 CD2L1_HUMAN  | R.GTS#PRPPEGGLGYSQLGDDDLKE.T    | S752:      | 3 | 3,5528 | 0,201 | -0,815 |
| 16 | Q92609 TBCD5_HUMAN  | E.VGIDPLSSYSNK.S                |            | 2 | 3,5501 | 0,445 | -0,667 |

|    |                    |                               |                 |   |        |       |        |
|----|--------------------|-------------------------------|-----------------|---|--------|-------|--------|
| 16 | Q9UKV3 ACINU_HUMAN | E.KSKS#PS#PPRLTE.D            | S386:S388:      | 3 | 3,5477 | 0,145 | 0,062  |
| 16 | Q9ULU4 PKCB1_HUMAN | E.KADPGAVKDKAS#PEPE.K         | S668:           | 2 | 3,544  | 0,299 | -0,639 |
| 16 | Q5T4S7 UBR4_HUMAN  | E.KM*QSSGIPNGGHIRQES#QEQSE.V  | S2756:          | 3 | 3,5401 | 0,244 | -0,725 |
| 16 | P05787 K2C8_HUMAN  | R.AFSSRS#YTSGPGSR.I           | S24:            | 3 | 3,5376 | 0,284 | -0,119 |
| 16 | Q8NFC6 FA44A_HUMAN | E.GKDKDVTLS#PVKAGPATTSSE.T    | S1531:          | 3 | 3,5347 | 0,35  | -0,323 |
| 16 | Q9H1A4 APC1_HUMAN  | E.LRDS#SKLHDSLYNE.D           | S563:           | 2 | 3,5332 | 0,439 | -0,486 |
| 16 | Q9NWW8 CS062_HUMAN | R.SNPEGAEDRAVGAQASVGS.R       |                 | 3 | 3,5223 | 0,366 | -0,467 |
| 16 | Q9BRK4 LZTS2_HUMAN | R.AAAGVGG#LRAQVE.R            | S570:           | 2 | 3,5213 | 0,486 | -0,268 |
| 16 | Q9NXD2 MTMRA_HUMAN | R.RNS#LILKPKDPAAQQTDSQNSDTE.Q | S525:           | 3 | 3,5138 | 0,248 | -0,331 |
| 16 | Q6GYQ0 GRIPE_HUMAN | E.SLKEPELHS#PDSER.S           | S1478:          | 3 | 3,5097 | 0,279 | -0,305 |
| 16 | Q9Y490 TLN1_HUMAN  | K.KSTVLQQYNR.V                |                 | 2 | 3,5055 | 0,383 | -1,162 |
| 16 | Q13627 DYR1A_HUMAN | R.QGADREESPMTGVCVQQS#PVASS.-  | S758:           | 3 | 3,5047 | 0,307 | -0,22  |
| 16 | Q9NYJ8 TAB2_HUMAN  | R.TLTHSIS#DGQLQGGQSNSE.L      | S108:           | 2 | 3,5013 | 0,363 | -0,598 |
| 16 | P26368 U2AF2_HUMAN | K.SIEIPRPVDGVEVPGCGK.I        |                 | 3 | 3,497  | 0,243 | -0,383 |
| 16 | Q7Z6Z7 HUWE1_HUMAN | E.T#LSPDGLPEEQPQTTK.L         | T3660:          | 2 | 3,4893 | 0,492 | -0,402 |
| 16 | P04264 K2C1_HUMAN  | K.WELLQQVDTSTR.T              |                 | 2 | 3,4887 | 0,417 | -0,413 |
| 16 | Q9UHB6 LIMA1_HUMAN | R.KIS#ENSYSLDDLE.I            | S225:           | 2 | 3,4868 | 0,372 | -0,766 |
| 16 | Q8IVF2 AHNK2_HUMAN | K.FQGPKLS#TSGFE.W             | S4634:          | 2 | 3,4803 | 0,287 | -0,443 |
| 16 | Q32MZ4 LRRF1_HUMAN | R.NM*PGLSAATLASLGGTSSR.R      |                 | 2 | 3,4747 | 0,442 | -0,135 |
| 16 | Q9P2K3 RCOR3_HUMAN | E.THPM*DGND#DYDPKKE.A         | S171:           | 3 | 3,4717 | 0,285 | -0,658 |
| 16 | Q14676 MDC1_HUMAN  | E.LQPSTSTDQPVT#PEPTSR.A       | T1548:          | 3 | 3,4681 | 0,383 | -0,362 |
| 16 | Q12888 TP53B_HUMAN | R.QSQPM*KPIS#PVKDPVS#PASQK.M  | S1094:S1101:    | 3 | 3,4673 | 0,275 | -0,502 |
| 16 | Q9NRA8 4ET_HUMAN   | E.NLLSSSVPSADRDS#SPTTNSK.L    | S751:           | 3 | 3,4597 | 0,338 | -0,393 |
| 16 | Q01469 FABP5_HUMAN | R.KTQTCVCFDGLVQHQE.W          |                 | 3 | 3,4586 | 0,14  | -0,088 |
| 16 | Q8ND56 LS14A_HUMAN | K.TQLS#QGRSS#PQLDPLRKS#PTME.Q | S178:S183:S192: | 3 | 3,457  | 0,174 | -0,543 |
| 16 | Q9Y2H0 DLGP4_HUMAN | R.NLS#YGDNSDPALE.A            | S760:           | 2 | 3,4554 | 0,33  | -0,579 |
| 16 | Q13586 STIM1_HUMAN | E.IVSPISM*QSPSLQSSVR.Q        |                 | 2 | 3,4491 | 0,411 | -0,266 |
| 16 | Q01581 HMCS1_HUMAN | E.GVGLVHSNIATEHIPS#PAK.K      | S495:           | 3 | 3,4487 | 0,298 | -0,456 |
| 16 | Q9Y2W1 TR150_HUMAN | E.SEFDDEPKFMSK.V              |                 | 2 | 3,4481 | 0,371 | -0,167 |
| 16 | Q9BTA9 WAC_HUMAN   | R.STCSLTPALAAHFSE.N           |                 | 2 | 3,448  | 0,545 | -0,46  |
| 16 | Q7Z589 EMSY_HUMAN  | K.RHS#PES#PSIAVVE.S           | S818:S821:      | 2 | 3,4458 | 0,417 | -0,311 |
| 16 | Q9UQ35 SRRM2_HUMAN | R.VSGRTS#PPLDR.A              | S2398:          | 2 | 3,4421 | 0,226 | -1,062 |
| 16 | P46777 RL5_HUMAN   | E.DEDAYKKQFSQYIK.N            |                 | 3 | 3,4389 | 0,36  | -0,415 |

|    |                    |                              |            |   |        |       |        |
|----|--------------------|------------------------------|------------|---|--------|-------|--------|
| 16 | A0MZ66 SHOT1_HUMAN | E.SKS#M*PVLGSVSSVTK.T        | S506:      | 2 | 3,4372 | 0,453 | 0,304  |
| 16 | Q76FK4 NOL8_HUMAN  | E.TDHRNSS#PGEASLLEKE.T       | S1099:     | 3 | 3,4301 | 0,301 | -0,375 |
| 16 | P49792 RBP2_HUMAN  | E.KDSLITPHVSR.S              |            | 2 | 3,4263 | 0,327 | -0,487 |
| 16 | P80723 BASP_HUMAN  | K.AEPPKAPEQEQAAPGPAAGGEAPK.A |            | 3 | 3,4166 | 0,282 | -0,398 |
| 16 | Q15691 MARE1_HUMAN | E.TAVAPSLVAPALNKPK.K         |            | 2 | 3,4136 | 0,266 | -0,619 |
| 16 | P23258 TBG1_HUMAN  | R.KDVFFYQADDE.H              |            | 2 | 3,4119 | 0,438 | -0,177 |
| 16 | P12694 ODBA_HUMAN  | R.IGHHSTS#DDSSAYRS#VDE.V     | S339:S347: | 3 | 3,4115 | 0,146 | -0,172 |
| 16 | P51858 HDGF_HUMAN  | R.AGDLLLEDSPKRPK.E           | S165:      | 3 | 3,4009 | 0,285 | -0,121 |
| 16 | Q96GQ7 DDX27_HUMAN | R.SADFNPDFVFTEKE.G           |            | 2 | 3,3931 | 0,387 | -0,593 |
| 16 | Q8WVC0 LEO1_HUMAN  | K.KLT#SDEEGEPSGKR.K          | T629:      | 3 | 3,3823 | 0,102 | -1,021 |
| 16 | Q66K74 MAP1S_HUMAN | R.KAVPM*APAPAS#PGSSNDSSAR.S  | S759:      | 3 | 3,3752 | 0,184 | -0,524 |
| 16 | O14617 AP3D1_HUMAN | K.HRPS#EADEEELAR.R           | S658:      | 3 | 3,3739 | 0,338 | -0,452 |
| 16 | Q01082 SPTB2_HUMAN | K.AKTALPAQSAATLPAR.T         |            | 3 | 3,3667 | 0,095 | -0,117 |
| 16 | P35579 MYH9_HUMAN  | R.RGDLPFVVR.R                |            | 2 | 3,3627 | 0,165 | -0,422 |
| 16 | P40763 STAT3_HUMAN | E.NLQDDDFNYK.T               |            | 2 | 3,3539 | 0,37  | -0,43  |
| 16 | Q9P2K3 RCOR3_HUMAN | E.THPMDGNDSDYDPKKE.A         | S171:      | 3 | 3,3535 | 0,341 | -0,569 |
| 16 | P50548 ERF_HUMAN   | R.RVS#SDLQHATAQLSLE.H        | S531:      | 2 | 3,3384 | 0,461 | -0,266 |
| 16 | Q2NL82 TSR1_HUMAN  | K.QIDAPGDPFPLNPR.G           |            | 2 | 3,3347 | 0,466 | -0,397 |
| 16 | Q6PKG0 LARP1_HUMAN | R.AVT#PVPTKTEE.V             | T526:      | 2 | 3,3303 | 0,431 | -0,487 |
| 16 | Q86Y13 DZIP3_HUMAN | R.LIKDDAS#DVQE.D             | S707:      | 2 | 3,33   | 0,21  | -0,465 |
| 16 | Q9Y2W1 TR150_HUMAN | R.SIFQHIQSAQSQR.S            |            | 2 | 3,33   | 0,312 | -0,399 |
| 16 | Q9Y450 HBS1L_HUMAN | E.SSNS#VSNHQLSGFDQAR.L       | S67:       | 3 | 3,3276 | 0,254 | -0,382 |
| 16 | Q13177 PAK2_HUMAN  | K.YLS#FTPPEKD.G              | S141:      | 2 | 3,3269 | 0,306 | -0,382 |
| 16 | P27816 MAP4_HUMAN  | E.TERAS#PIKMDLAPSK.D         | S358:      | 3 | 3,3209 | 0,311 | -0,424 |
| 16 | Q9Y2X7 GIT1_HUMAN  | R.ARS#MDSDDLSDGAVTLQE.Y      | S410:      | 2 | 3,3116 | 0,379 | -0,249 |
| 16 | P49736 MCM2_HUMAN  | R.RGNDPLTSS#PGR.S            | S27:       | 2 | 3,309  | 0,362 | -0,548 |
| 16 | Q71RC2 LARP4_HUMAN | E.KDLIEDSSVQK.D              |            | 2 | 3,3088 | 0,221 | -0,387 |
| 16 | P49959 MRE11_HUMAN | E.SDVEEDIFPTTSK.T            |            | 2 | 3,3056 | 0,422 | -0,582 |
| 16 | Q8TEW0 PAR3_HUMAN  | E.TKLNTVDDQKAGSPSR.D         |            | 3 | 3,3055 | 0,459 | -0,746 |
| 16 | P13861 KAP2_HUMAN  | R.APASVLPAATPR.Q             |            | 2 | 3,3054 | 0,52  | -0,212 |
| 16 | P08670 VIME_HUMAN  | E.TNLDS#LPLVDTHSKR.T         | S430:      | 2 | 3,3049 | 0,271 | -0,412 |
| 16 | P19174 PLCG1_HUMAN | R.GSDASGQLFHGR.A             |            | 2 | 3,304  | 0,345 | -0,297 |
| 16 | Q9NRG0 CHRC1_HUMAN | K.VLTYSDLANTAQQSE.T          |            | 2 | 3,302  | 0,49  | -0,446 |

|    |                    |                            |            |   |        |       |        |
|----|--------------------|----------------------------|------------|---|--------|-------|--------|
| 16 | P35908 K22E_HUMAN  | R.FLEQQNQVLQTK.W           |            | 2 | 3,3001 | 0,391 | -0,579 |
| 16 | Q96A49 SYAP1_HUMAN | E.AVRPKT#PPVVIK.S          | T248:      | 3 | 3,2913 | 0,104 | 0,132  |
| 16 | P43487 RANG_HUMAN  | E.NTDESNHDPQFEPVSLPEQEIK.T |            | 3 | 3,2896 | 0,272 | -0,137 |
| 16 | P38919 IF4A3_HUMAN | R.LLKEEDMTKVE.F            |            | 3 | 3,2856 | 0,323 | 0      |
| 16 | Q9UHI6 DDX20_HUMAN | E.KATS#PKELGCDRQSE.E       | S532:      | 3 | 3,2828 | 0,358 | -0,41  |
| 16 | P52272 HNRPM_HUMAN | K.GCGVVKFES#PEVAE.R        | S701:      | 2 | 3,2817 | 0,339 | -0,538 |
| 16 | Q09666 AHNK_HUMAN  | K.FKAEAPLPSPKLE.G          |            | 2 | 3,2815 | 0,333 | 0,086  |
| 16 | P38919 IF4A3_HUMAN | R.LLKEEDM*TKVE.F           |            | 2 | 3,2809 | 0,258 | -0,452 |
| 16 | Q05209 PTN12_HUMAN | E.NM*ISSIEPEKQDS#PPPKPPR.T | S332:      | 3 | 3,2803 | 0,108 | -0,39  |
| 16 | P42166 LAP2A_HUMAN | E.SRSSTPLPTISSAENTR.Q      |            | 3 | 3,2803 | 0,255 | -0,29  |
| 16 | P55265 DSRAD_HUMAN | E.M*PSFYSHGLPR.C           |            | 2 | 3,2802 | 0,405 | -0,56  |
| 16 | Q7Z333 SETX_HUMAN  | K.HGS#PATDDACPLNQCD.S      | S1430:     | 2 | 3,277  | 0,448 | -0,465 |
| 16 | P49023 PAXI_HUMAN  | K.TSSVSNPQDSVGSPCR.V       |            | 2 | 3,2753 | 0,359 | -0,553 |
| 16 | Q9Y3Z3 SAMH1_HUMAN | R.CDDS#PRTPSNTPSAE.A       | S18:       | 2 | 3,2694 | 0,476 | -0,427 |
| 16 | Q15424 SAFB1_HUMAN | E.LAEAPTEAPS#PEAR.D        | S344:      | 2 | 3,2644 | 0,382 | -0,884 |
| 16 | Q71U36 TBA1A_HUMAN | E.ITNACFEPANQM*VK.C        |            | 2 | 3,2603 | 0,226 | -0,372 |
| 16 | Q9H6F5 CCD86_HUMAN | R.LGGLRPES#PE.S            | S18:       | 2 | 3,2592 | 0,307 | -0,43  |
| 16 | P04075 ALDOA_HUMAN | E.GTLLKPNM*VTPGHACTQK.F    |            | 3 | 3,2558 | 0,225 | -0,372 |
| 16 | Q9Y2I7 FYV1_HUMAN  | R.SAS#ITNLSLDR.S           | S307:      | 2 | 3,2494 | 0,456 | -0,291 |
| 16 | Q9UKV3 ACINU_HUMAN | E.KS#KSPS#PPRLTE.D         | S384:S388: | 3 | 3,2493 | 0,226 | 0,062  |
| 16 | Q14671 PUM1_HUMAN  | E.YVLSSS#PGDSCLR.K         | S229:      | 2 | 3,2488 | 0,354 | -0,562 |
| 16 | Q12968 NFAC3_HUMAN | R.KTS#EDQAAILPGKLE.L       | S344:      | 3 | 3,2458 | 0,081 | -0,218 |
| 16 | Q8N6T3 ARFG1_HUMAN | K.TRKS#PSSDSWTCADTSTER.R   | S343:      | 3 | 3,2437 | 0,307 | -0,325 |
| 16 | P38919 IF4A3_HUMAN | R.LLKEEDMTKVE.F            |            | 2 | 3,2373 | 0,327 | -0,731 |
| 16 | P19338 NUCL_HUMAN  | K.GFGFVDFNSEEDAK.A         |            | 2 | 3,2279 | 0,348 | -0,391 |
| 16 | Q9NYV4 CD2L7_HUMAN | E.SKGS#PVFLPR.K            | S423:      | 2 | 3,2219 | 0,283 | -0,418 |
| 16 | P02545 LMNA_HUMAN  | R.SGAQASSTPLS#PTR.I        | S22:       | 2 | 3,2155 | 0,395 | 0      |
| 16 | Q9Y4B4 ARIP4_HUMAN | R.HSASS#PKAPDPE.G          | S1155:     | 2 | 3,2133 | 0,406 | -0,936 |
| 16 | Q9UQ35 SRRM2_HUMAN | K.THTTALAGRS#PS#PASGR.R    | S295:S297: | 3 | 3,2101 | 0,277 | -0,701 |
| 16 | Q7Z5J4 RAI1_HUMAN  | R.GLKGAGGS#PVGVEE.G        | S1374:     | 2 | 3,2087 | 0,349 | -0,183 |
| 16 | Q9Y4K4 M4K5_HUMAN  | R.RQSS#PSCGPVAE.T          | S434:      | 2 | 3,1938 | 0,423 | -0,54  |
| 16 | Q9NQG5 CT077_HUMAN | E.RSVYGGEFIQLK.L           |            | 3 | 3,1933 | 0,277 | 0      |
| 16 | Q15424 SAFB1_HUMAN | R.KFDFDACNEVPPAPK.E        |            | 2 | 3,1911 | 0,353 | -0,633 |



|    |                    |                              |              |   |        |       |        |
|----|--------------------|------------------------------|--------------|---|--------|-------|--------|
| 16 | P12694 ODBA_HUMAN  | R.IGHHS#TSSDSSAYRS#VDE.V     | S337:S347:   | 2 | 3,1827 | 0,523 | -0,69  |
| 16 | Q7LBC6 JHD2B_HUMAN | E.NKAPFEAVKRF#LDE.R          | S798:        | 3 | 3,1765 | 0,181 | -0,599 |
| 16 | POC7M2 RA1L3_HUMAN | K.SES#PKEPEQLRK.L            | S6:          | 3 | 3,172  | 0,239 | 0      |
| 16 | P56182 RRP1_HUMAN  | R.SEKPPAGSICR.A              |              | 3 | 3,1698 | 0,348 | 0,38   |
| 16 | Q9Y450 HBS1L_HUMAN | E.SSNS#VSNHQLSGFDQAR.L       | S67:         | 2 | 3,1691 | 0,24  | -0,446 |
| 16 | Q9UQ35 SRRM2_HUMAN | K.DKFS#PPFVQDRPE.S           | S1188:       | 3 | 3,167  | 0,193 | -0,334 |
| 16 | Q9ULV4 COR1C_HUMAN | E.IKSIKDTICNQDE.R            |              | 2 | 3,1603 | 0,275 | -0,936 |
| 16 | Q96T23 RSF1_HUMAN  | E.IKLSDDFDS#PVKGPLCK.S       | S387:        | 3 | 3,1599 | 0,35  | -0,549 |
| 16 | Q9NQS1 AVEN_HUMAN  | K.SVAAGCPVLLGK.D             |              | 2 | 3,1578 | 0,453 | -0,208 |
| 16 | Q9H6F5 CCD86_HUMAN | R.LQQGAGLESPQQPEPGAASPQR.Q   |              | 3 | 3,1524 | 0,253 | -0,159 |
| 16 | Q9HC35 EMAL4_HUMAN | R.ASPSPQPSSQPLQIHR.Q         |              | 2 | 3,1484 | 0,339 | -0,423 |
| 16 | O43852 CALU_HUMAN  | R.VHHEPQLSDKVHND.A           |              | 3 | 3,1396 | 0,249 | -0,995 |
| 16 | Q15149 PLEC1_HUMAN | E.AQAASGFLLDPVR.N            |              | 2 | 3,1344 | 0,33  | -0,363 |
| 16 | Q9BVV6 K0586_HUMAN | E.DIGLYLTNLDNS#LS#STLHDAVE.M | S1260:S1262: | 3 | 3,133  | 0,148 | 0,646  |
| 16 | Q5T8D3 ACBD5_HUMAN | K.RGGETDEFSNRRR.G            |              | 3 | 3,1326 | 0,198 | -0,12  |
| 16 | Q14157 UBP2L_HUMAN | D.LKNPSDSAVHS#PFTKR.Q        | S416:        | 3 | 3,1266 | 0,271 | -0,491 |
| 16 | Q15424 SAFB1_HUMAN | K.GVPVISVKTS#GSKE.R          | S580:        | 2 | 3,1265 | 0,37  | -0,831 |
| 16 | Q9HB20 PKHA3_HUMAN | K.KQS#ESEDTLPSFSS.-          | S289:        | 2 | 3,1234 | 0,457 | -0,451 |
| 16 | Q14157 UBP2L_HUMAN | D.LKNPSDSAVHS#PFTK.R         | S416:        | 3 | 3,1227 | 0,136 | -0,321 |
| 16 | Q12888 TP53B_HUMAN | R.GNLLHFPSSQGEKEE.K          |              | 3 | 3,1227 | 0,216 | -0,406 |
| 16 | Q9Y490 TLN1_HUMAN  | E.DSVS#PKKSTVLQQYNR.V        | S425:        | 3 | 3,1213 | 0,149 | -0,356 |
| 16 | Q96PK6 RBM14_HUMAN | R.ASYVAPLTAQPATYR.A          |              | 2 | 3,1166 | 0,431 | -0,531 |
| 16 | Q9NQS7 INCE_HUMAN  | E.QHVTQLMSTEPLR.T            |              | 2 | 3,1164 | 0,483 | -0,373 |
| 16 | P55072 TERA_HUMAN  | K.LADDVDLEQVANE.T            |              | 2 | 3,1119 | 0,323 | -0,512 |
| 16 | P08670 VIME_HUMAN  | E.TNLD#LPLVDTHSK.R           | S430:        | 3 | 3,1109 | 0,239 | -0,339 |
| 16 | Q16555 DPYL2_HUMAN | K.TVTPASS#AKTSPAKQQAPPVR.N   | S518:        | 3 | 3,1048 | 0,254 | -0,665 |
| 16 | Q12968 NFAC3_HUMAN | R.KTS#EDQAAIILPGKLE.L        | S344:        | 2 | 3,1031 | 0,297 | -0,436 |
| 16 | O15062 ZBTB5_HUMAN | R.VVVKSEPLS#S#PEPQDE.V       | S335:S336:   | 2 | 3,1026 | 0,215 | -0,321 |
| 16 | P53004 BIEA_HUMAN  | K.FGVVVVGVGR.A               |              | 2 | 3,1016 | 0,308 | -0,37  |
| 16 | P27816 MAP4_HUMAN  | E.TERAS#PIKM*DLAPSK.D        | S358:        | 3 | 3,0999 | 0,322 | -0,42  |
| 16 | Q13131 AAPK1_HUMAN | E.AKS#GTATPQRSGS#VSNYR.S     | S477:S487:   | 3 | 3,0968 | 0,353 | -0,451 |
| 16 | P04406 G3P_HUMAN   | E.GLM*TTVHAITAT#QKTVDGPSGK.L | T184:        | 3 | 3,0951 | 0,233 | 0,555  |
| 16 | Q9Y2D5 AKAP2_HUMAN | R.DALGDSLQVPVS#PSSTSSR.C     | S152:        | 3 | 3,091  | 0,322 | -0,439 |

|    |                    |                           |                 |   |        |       |        |
|----|--------------------|---------------------------|-----------------|---|--------|-------|--------|
| 16 | O60934 NBN_HUMAN   | R.MLS#QDAPTVKE.S          | S397:           | 2 | 3,0903 | 0,216 | -0,282 |
| 16 | Q9UQ35 SRRM2_HUMAN | K.DKFSFPVQDRPE.S          |                 | 3 | 3,0887 | 0,259 | -0,117 |
| 16 | Q9HC52 CBX8_HUMAN  | K.FPAGHSVIQLAR.R          |                 | 3 | 3,0797 | 0,204 | 0,071  |
| 16 | Q13485 SMAD4_HUMAN | E.GHSIQTIQHPPSNRAS#TE.T   | S191:           | 3 | 3,0792 | 0,398 | -0,448 |
| 16 | P62753 RS6_HUMAN   | R.RLS#S#LRASTKSE.S        | S235:S236:      | 3 | 3,077  | 0,318 | -0,231 |
| 16 | Q15436 SC23A_HUMAN | R.HLLQAPVDDAQE.I          |                 | 2 | 3,0762 | 0,407 | -0,731 |
| 16 | Q8ND56 LS14A_HUMAN | E.QAVQTASAHLPAPAAVGR.R    |                 | 2 | 3,073  | 0,501 | -0,35  |
| 16 | Q8NC51 PAIRB_HUMAN | R.RFEKPLEEKGE.G           |                 | 3 | 3,0607 | 0,096 | -0,269 |
| 16 | Q14161 GIT2_HUMAN  | K.SLSDLS#DGPVTVQE.F       | S421:           | 2 | 3,0495 | 0,116 | -0,372 |
| 16 | Q9Y2W1 TR150_HUMAN | R.SPALKS#PLQSVVVR.R       | S253:           | 3 | 3,0439 | 0,194 | -0,234 |
| 16 | P55072 TERA_HUMAN  | K.NM*KLADDVDLEQVANE.T     |                 | 2 | 3,0412 | 0,28  | -0,402 |
| 16 | Q9P2M4 TBC14_HUMAN | E.IGNPEPVPCSAVHVR.R       |                 | 2 | 3,0411 | 0,331 | -0,374 |
| 16 | Q01082 SPTB2_HUMAN | K.TALPAQSAATLPAR.T        |                 | 2 | 3,0368 | 0,464 | -0,624 |
| 16 | P14868 SYDC_HUMAN  | R.LPLQLDDAVRPE.A          |                 | 2 | 3,0329 | 0,401 | -0,536 |
| 16 | P05787 K2C8_HUMAN  | K.LLEGEES#RLE.S           | S400:           | 2 | 3,0327 | 0,334 | -0,389 |
| 16 | Q6NZI2 PTRF_HUMAN  | E.VKLPKLS#ISKS#LKE.S      | S167:S171:      | 3 | 3,0319 | 0,317 | -0,406 |
| 16 | Q9Y2W1 TR150_HUMAN | R.ERS#PALKSPLQSVVVR.R     | S248:           | 3 | 3,0307 | 0,378 | -0,297 |
| 16 | Q07955 SFRS1_HUMAN | R.VKVDGPRS#PS#YGRS#R.S    | S199:S201:S205: | 3 | 3,021  | 0,143 | -0,096 |
| 16 | P14618 KPYM_HUMAN  | R.AGKPVICATQM*LE.S        |                 | 2 | 3,0166 | 0,421 | -0,425 |
| 16 | P25398 RS12_HUMAN  | E.HQINLIKVDD.N            |                 | 2 | 3,0158 | 0,201 | -0,613 |
| 16 | O94842 TOX4_HUMAN  | E.LVSGS#PVALS#PQPR.C      | S562:S567:      | 2 | 3,0147 | 0,187 | -0,233 |
| 16 | Q02952 AKA12_HUMAN | E.KQEKEPS#KSAESPTSPVTSE.T | S278:           | 3 | 3,0146 | 0,091 | -0,411 |
| 16 | P10809 CH60_HUMAN  | R.KPLVIAEDVDGE.A          |                 | 2 | 3,0133 | 0,392 | -0,262 |
| 16 | Q9Y2X9 ZN281_HUMAN | E.SQKEDPFNIAEPR.V         |                 | 3 | 3,0121 | 0,09  | 0,06   |
| 16 | Q9NWH9 SLTM_HUMAN  | K.DGQDAIAQS#PEKE.S        | S289:           | 2 | 3,0113 | 0,358 | -0,665 |
| 16 | P40189 IL6RB_HUMAN | E.DLQLVDHVDGGDGILPR.Q     |                 | 3 | 3,0073 | 0,104 | -0,402 |
| 16 | Q8IXM3 RM41_HUMAN  | E.KDFKDGTFDPDNLE.K        |                 | 2 | 2,999  | 0,294 | -0,669 |
| 16 | Q9Y266 NUDC_HUMAN  | K.LKPNLNGADLPNYR.W        |                 | 3 | 2,9976 | 0,2   | -0,446 |
| 16 | P62081 RS7_HUMAN   | E.M*NSDLKAQLRE.L          |                 | 2 | 2,9961 | 0,391 | -0,369 |
| 16 | O15305 PMM2_HUMAN  | K.TIYFFGDKTM*PGGNDHE.I    |                 | 2 | 2,9943 | 0,409 | -0,251 |
| 16 | Q53F19 CQ085_HUMAN | E.LKM*ISTPS#PK.K          | S415:           | 2 | 2,9929 | 0,392 | -0,407 |
| 16 | Q8ND82 Z280C_HUMAN | K.GIKSEPHS#PGIPE.I        | S80:            | 2 | 2,9918 | 0,37  | -1,282 |
| 16 | Q5UIP0 RIF1_HUMAN  | K.ATSEEDVSIKS#PICE.K      | S1616:          | 2 | 2,9904 | 0,332 | -0,28  |

|    |                     |                            |            |   |        |       |        |
|----|---------------------|----------------------------|------------|---|--------|-------|--------|
| 16 | Q15424 SAFB1_HUMAN  | K.SKGVVIS#VKTSGSKE.R       | S576:      | 3 | 2,9859 | 0,176 | -0,109 |
| 16 | Q53F19 CQ085_HUMAN  | E.LKM*ISTPS#PKK.S          | S415:      | 2 | 2,9795 | 0,09  | -0,276 |
| 16 | Q9Y3D7 TIM16_HUMAN  | E.LKIQAQEDRE.K             |            | 3 | 2,9751 | 0,177 | 0,297  |
| 16 | P35030 TRY3_HUMAN   | D.TLDNDIMLIK.L             |            | 2 | 2,9744 | 0,243 | -0,622 |
| 16 | Q96T23 RSF1_HUMAN   | K.LSDDFDSVPKGPLCK.S        |            | 2 | 2,973  | 0,311 | -0,364 |
| 16 | Q9UNE7 STUB1_HUMAN  | R.LGAGGGS#PEKSPSAQE.L      | S19:       | 2 | 2,9727 | 0,339 | -0,629 |
| 16 | P55072 TERA_HUMAN   | K.GVLFYGPPEGCK.T           |            | 2 | 2,9714 | 0,373 | -0,487 |
| 16 | Q9Y608 LRRF2_HUMAN  | R.NSASATTPSGNSSR.R         |            | 2 | 2,9705 | 0,356 | -0,926 |
| 16 | P17812 PYRG1_HUMAN  | K.TVQVPHITDAIQE.W          |            | 2 | 2,9646 | 0,375 | -0,315 |
| 16 | Q6DN90 IQEC1_HUMAN  | R.SALSSS#LRDLSE.A          | S925:      | 2 | 2,9637 | 0,356 | -0,272 |
| 16 | Q99471 PFD5_HUMAN   | E.AKDCLNVLNK.S             |            | 2 | 2,958  | 0,208 | -0,415 |
| 16 | Q9H6F5 CCD86_HUMAN  | R.AGLGSPERPPTS#PGSPR.L     | S66:       | 3 | 2,956  | 0,358 | -0,489 |
| 16 | P68104 EF1A1_HUMAN  | R.GNVAGDSKNDPPME.A         |            | 2 | 2,945  | 0,248 | -0,426 |
| 16 | Q58FG1 HS904_HUMAN  | R.TLTIVDTGIGM*TK.A         |            | 2 | 2,9398 | 0,498 | -0,715 |
| 16 | P60660 MYL6_HUMAN   | K.NKDQGTIEDYVE.G           |            | 2 | 2,9357 | 0,384 | -0,251 |
| 16 | O14713 ITBP1_HUMAN  | R.SSTVAS#LDTDSTK.S         | S41:       | 2 | 2,9354 | 0,348 | -0,526 |
| 16 | Q00610 CLH1_HUMAN   | E.SDKFICIRE.K              |            | 2 | 2,9347 | 0,296 | -0,522 |
| 16 | O75386 TULP3_HUMAN  | R.CRLS#PSGDSVFHEE.M        | S9:        | 2 | 2,9323 | 0,24  | -0,574 |
| 16 | Q9Y520 Q9Y520_HUMAN | E.NSCNKEEVPVFR.Q           |            | 3 | 2,9316 | 0,088 | -0,114 |
| 16 | Q58FF8 H90B2_HUMAN  | K.ADLINNLGTIAK.F           |            | 2 | 2,9269 | 0,38  | -0,393 |
| 16 | Q02952 AKA12_HUMAN  | E.KQEKEPSKSAES#PT#SPVTSE.T | S283:T285: | 3 | 2,9266 | 0,181 | -0,397 |
| 16 | Q32MZ4 LRRF1_HUMAN  | K.IDGATQSSPAEPK.S          |            | 2 | 2,9259 | 0,33  | -0,563 |
| 16 | Q6NZI2 PTRF_HUMAN   | E.VKLPAKLS#ISKSLKE.S       | S167:S171: | 2 | 2,9228 | 0,153 | -0,61  |
| 16 | O96028 NSD2_HUMAN   | E.SHPDIGKST#PQKTAE.A       | T422:      | 2 | 2,9204 | 0,475 | -0,582 |
| 16 | Q8NCM9 Q8NCM9_HUMAN | R.SSDITSDLGNVLTSTPNAK.T    |            | 2 | 2,919  | 0,406 | -0,191 |
| 16 | P52272 HNRPM_HUMAN  | K.GCGVVKFESPEVAE.R         |            | 2 | 2,9173 | 0,378 | -0,647 |
| 16 | Q53EN3 Q53EN3_HUMAN | R.RIS#AHQPGPEGQEE.S        | S289:      | 2 | 2,9131 | 0,406 | -0,453 |
| 16 | Q14676 MDC1_HUMAN   | R.SSVKT#PEPVPTAPE.L        | T1157:     | 2 | 2,9006 | 0,237 | -0,226 |
| 16 | Q9Y6G9 DC1L1_HUMAN  | R.KPVTVSPPTPTS#PTEGEAS.-   | S516:      | 2 | 2,8999 | 0,437 | -0,248 |
| 16 | Q9NQ57 INCE_HUMAN   | E.QHVTQLMSTEPLPR.T         |            | 3 | 2,8959 | 0,188 | -0,112 |
| 16 | Q9UQ35 SRRM2_HUMAN  | E.SYFGVSSLQLK.G            |            | 2 | 2,892  | 0,222 | -0,397 |
| 16 | Q9HC35 EMAL4_HUMAN  | R.ASPS#PQPSSQLQIHR.Q       | S146:      | 2 | 2,8917 | 0,418 | -0,472 |
| 16 | Q9ULU4 PKCB1_HUMAN  | E.KADPGAVKDKAS#PEPE.K      | S668:      | 3 | 2,8907 | 0,185 | -0,319 |

|    |                     |                          |            |   |        |       |        |
|----|---------------------|--------------------------|------------|---|--------|-------|--------|
| 16 | B1ALK7 B1ALK7_HUMAN | R.KES#APQVLLPEEE.K       | S619:      | 2 | 2,8869 | 0,309 | -0,551 |
| 16 | Q7Z2W4 ZCCHV_HUMAN  | E.RSCTPSPDQISHRAS#LE.D   | S284:      | 3 | 2,886  | 0,192 | -0,362 |
| 16 | Q99741 CDC6_HUMAN   | D.NQLTIKS#PSKRE.L        | S106:      | 2 | 2,8812 | 0,105 | -0,494 |
| 16 | O95425 SVIL_HUMAN   | R.DSSFTEVPRS#PK.H        | S245:      | 2 | 2,8802 | 0,25  | -0,427 |
| 16 | O14974 MYPT1_HUMAN  | R.SAS#S#PRLSSSLDNKE.K    | S472:S473: | 2 | 2,8797 | 0,373 | -0,351 |
| 16 | Q9Y490 TLN1_HUMAN   | K.STVLQQQYNR.V           |            | 2 | 2,879  | 0,191 | -0,296 |
| 16 | Q96PK6 RBM14_HUMAN  | R.ASYVAPLTAQPATYR.A      |            | 3 | 2,8778 | 0,388 | -0,114 |
| 16 | P07900 HS90A_HUMAN  | R.GVVDELDLPLNISR.E       |            | 2 | 2,8745 | 0,227 | -0,242 |
| 16 | P49321 NASP_HUMAN   | R.MAVLNEQVKE.A           |            | 2 | 2,8726 | 0,153 | -0,105 |
| 16 | Q86YS7 K0528_HUMAN  | E.IIGS#PIPEPR.Q          | S643:      | 2 | 2,8725 | 0,284 | -0,421 |
| 16 | P08621 RU17_HUMAN   | R.RQQEVETELK.M           |            | 3 | 2,8711 | 0,221 | 0,29   |
| 16 | Q15393 SF3B3_HUMAN  | E.DHDFQHV.E.M            |            | 2 | 2,8695 | 0,395 | -0,416 |
| 16 | P41250 SYG_HUMAN    | E.LALQPKDDIVDR.A         |            | 3 | 2,8674 | 0,314 | 0      |
| 16 | Q99961 SH3G1_HUMAN  | K.IAASS#SFRSSDKPIR.T     | S287:      | 3 | 2,8662 | 0,211 | -0,322 |
| 16 | Q58FF8 H90B2_HUMAN  | K.YIDQEELNK.T            |            | 2 | 2,8641 | 0,21  | -0,424 |
| 16 | Q8WUA4 TF3C2_HUMAN  | K.IRQPAACPGGEE.V         |            | 2 | 2,8639 | 0,252 | -0,57  |
| 16 | P14618 KPYM_HUMAN   | D.VDM*VFASFIR.K          |            | 2 | 2,8612 | 0,439 | -0,305 |
| 16 | A0MZ66 SHOT1_HUMAN  | E.SKS#M*PVLGSVSSVTK.T    | S506:      | 3 | 2,8586 | 0,172 | -0,342 |
| 16 | Q9P2K3 RCOR3_HUMAN  | E.THPM*DGNDSDYDPKKE.A    | S171:      | 2 | 2,8582 | 0,374 | -0,565 |
| 16 | P05783 K1C18_HUMAN  | K.IM*ADIRAQYDE.L         |            | 2 | 2,855  | 0,383 | -0,637 |
| 16 | Q14161 GIT2_HUMAN   | R.QKSLDSDLSDGDPVTVQE.F   | S421:      | 2 | 2,854  | 0,319 | -0,45  |
| 16 | Q56NI9 ESCO2_HUMAN  | K.STVYPIFASVNSK.R        |            | 2 | 2,8534 | 0,371 | -0,308 |
| 16 | P62988 UBIQ_HUMAN   | K.TITLEVEPSDTIENVK.A     |            | 2 | 2,8472 | 0,349 | -0,136 |
| 16 | P35527 K1C9_HUMAN   | R.FSSSSGYGGSSR.V         |            | 2 | 2,8429 | 0,471 | -0,79  |
| 16 | Q8ND56 LS14A_HUMAN  | R.RS#PVSTRPLPSASQK.A     | S216:      | 3 | 2,8379 | 0,217 | -1,082 |
| 16 | Q8ND56 LS14A_HUMAN  | E.QAVQTASAHLPAAPAVGR.R   |            | 3 | 2,836  | 0,384 | 0      |
| 16 | Q13242 SFRS9_HUMAN  | R.IYVGNLPTDVR.E          |            | 2 | 2,8349 | 0,303 | -0,294 |
| 16 | Q9Y2W1 TR150_HUMAN  | R.SPALKS#PLQSVVVR.R      | S253:      | 2 | 2,8329 | 0,423 | -0,469 |
| 16 | Q9UQ35 SRRM2_HUMAN  | R.VSGRTS#PPLDR.A         | S2398:     | 3 | 2,8326 | 0,184 | -1,526 |
| 16 | P54578 UBP14_HUMAN  | R.YAGALRAS#GE.M          | S143:      | 2 | 2,8248 | 0,312 | -0,341 |
| 16 | Q8N4C8 MINK1_HUMAN  | E.RSDSVLPASHGHPQAGS#LE.R | S763:      | 3 | 2,8207 | 0,333 | -0,428 |
| 16 | P49321 NASP_HUMAN   | R.M*AVLNEQVKE.A          |            | 2 | 2,82   | 0,21  | -0,518 |
| 16 | O00193 SMAP_HUMAN   | R.SAS#PDDDLGSSNWE.A      | S17:       | 2 | 2,8171 | 0,326 | -0,548 |

|    |                    |                            |        |   |        |       |        |
|----|--------------------|----------------------------|--------|---|--------|-------|--------|
| 16 | P68104 EF1A1_HUMAN | R.GNVAGDSKNDPPM*.E.A       |        | 2 | 2,8108 | 0,396 | -0,928 |
| 16 | Q9UPZ3 HPS5_HUMAN  | E.LILKFEPLDSACSSR.R        |        | 2 | 2,8095 | 0,373 | -0,562 |
| 16 | Q9NRA8 4ET_HUMAN   | R.SSCSTPLSQANR.Y           |        | 2 | 2,8077 | 0,344 | -0,466 |
| 16 | Q14865 ARI5B_HUMAN | E.DLDLVIAGK.K              |        | 2 | 2,8053 | 0,26  | -0,194 |
| 16 | Q01082 SPTB2_HUMAN | K.TALPAQSAAT#LPAR.T        | T2187: | 2 | 2,8036 | 0,283 | -0,843 |
| 16 | P52292 IMA2_HUMAN  | R.NVSSFPDDATS#PLQE.N       | S62:   | 2 | 2,8013 | 0,432 | -0,362 |
| 16 | P62937 PPIA_HUMAN  | K.KITIADCGQLE.-            |        | 2 | 2,8002 | 0,4   | -0,489 |
| 16 | O60934 NBN_HUMAN   | R.M*LS#QDAPTVKE.S          | S397:  | 2 | 2,7973 | 0,181 | -0,464 |
| 16 | Q9Y5A7 NUB1_HUMAN  | R.KNFQLEEEEQNE.A           |        | 2 | 2,7942 | 0,101 | -0,635 |
| 16 | Q96CT7 CC124_HUMAN | R.RLDQLER.K                |        | 2 | 2,7941 | 0,082 | -1,509 |
| 16 | P34932 HSP74_HUMAN | E.SEERPCLFEE.L             |        | 2 | 2,7836 | 0,341 | -0,386 |
| 16 | O43852 CALU_HUMAN  | K.IDGDKDGFVTVDE.L          |        | 2 | 2,7763 | 0,249 | -0,952 |
| 16 | P78347 GTF2I_HUMAN | E.LVISYLPPGM*ASK.I         |        | 2 | 2,7747 | 0,271 | -0,701 |
| 16 | Q13112 CAF1B_HUMAN | R.LDENKGGTESLDP.-          |        | 2 | 2,7747 | 0,276 | -0,089 |
| 16 | P35269 T2FA_HUMAN  | R.LRLDTGPQSL#GK.S          | S433:  | 2 | 2,7741 | 0,292 | -0,504 |
| 16 | P35579 MYH9_HUMAN  | E.KVAAYDKLE.K              |        | 2 | 2,771  | 0,325 | -0,235 |
| 16 | Q12802 AKP13_HUMAN | R.SLS#RPSSLIEQE.K          | S2563: | 2 | 2,7677 | 0,209 | -0,342 |
| 16 | Q72309 F122B_HUMAN | D.LSQVFQPYTLR.T            |        | 2 | 2,7596 | 0,297 | -0,451 |
| 16 | Q8WUA4 TF3C2_HUMAN | E.LSTALPAPVSCPEGPK.V       |        | 2 | 2,7557 | 0,319 | -0,301 |
| 16 | Q9BSJ6 FA64A_HUMAN | R.QGFILKDVYAS#P.-          | S247:  | 2 | 2,7541 | 0,469 | -0,43  |
| 16 | O43865 SAHH2_HUMAN | K.KKIQFADDM*QE.F           |        | 2 | 2,7517 | 0,229 | -0,446 |
| 16 | P08670 VIME_HUMAN  | E.TNLDS#LPLVDTHSK.R        | S430:  | 2 | 2,7489 | 0,47  | -0,452 |
| 16 | P08621 RU17_HUMAN  | R.RQQEVETELK.M             |        | 2 | 2,7472 | 0,227 | -0,29  |
| 16 | Q9Y2K5 R3HD2_HUMAN | K.ASS#FSGISILTR.G          | S349:  | 2 | 2,7382 | 0,349 | -0,648 |
| 16 | Q14676 MDC1_HUMAN  | R.SSVKT#PESIVPIAPE.L       | T1567: | 2 | 2,7368 | 0,353 | -0,448 |
| 16 | P51957 NEK4_HUMAN  | K.DQSLALS#PKLE.C           | S461:  | 2 | 2,7367 | 0,39  | -0,095 |
| 16 | Q15154 PCM1_HUMAN  | R.NKKLPREEVE.S             |        | 2 | 2,7347 | 0,117 | -1,105 |
| 16 | P04406 G3P_HUMAN   | R.VIISAPSADAPM*FVM*GVNHE.K |        | 2 | 2,7344 | 0,481 | -0,461 |
| 16 | P48960 CD97_HUMAN  | R.CNPGFSSFSE.I             |        | 2 | 2,7311 | 0,203 | -0,216 |
| 16 | Q9BSJ8 ESYT1_HUMAN | E.TDLSQGVAR.W              |        | 2 | 2,7293 | 0,143 | -0,644 |
| 16 | P62937 PPIA_HUMAN  | K.SIYGKEFEDE.N             |        | 2 | 2,7222 | 0,339 | -0,1   |
| 16 | Q9UGU5 HM2L1_HUMAN | E.TLTLREPDGLK.M            |        | 2 | 2,7161 | 0,204 | -0,196 |
| 16 | Q12792 TWF1_HUMAN  | K.YLLSQSSPAPLTAEEEE.L      |        | 2 | 2,71   | 0,379 | -0,338 |

|    |                    |                          |        |   |        |       |        |
|----|--------------------|--------------------------|--------|---|--------|-------|--------|
| 16 | Q8N573 OXR1_HUMAN  | E.SLPIDIDQLSGR.D         |        | 2 | 2,7004 | 0,32  | -0,557 |
| 16 | Q9UQ35 SRRM2_HUMAN | R.SRT#PPSAPSQSR.M        | T2409: | 2 | 2,6999 | 0,255 | -0,632 |
| 16 | Q9UQ35 SRRM2_HUMAN | E.SSLVFKDTLR.T           |        | 2 | 2,6981 | 0,192 | -0,314 |
| 16 | P16591 FER_HUMAN   | R.SVTS#MERKE.R           | S411:  | 2 | 2,698  | 0,247 | -0,319 |
| 16 | Q86UU1 PHLB1_HUMAN | E.DFSLTLGAR.G            |        | 2 | 2,6966 | 0,324 | -0,187 |
| 16 | P02545 LMNA_HUMAN  | R.SGAQASST#PLSPTR.I      | T19:   | 2 | 2,6925 | 0,279 | -1,017 |
| 16 | Q9BTC0 DIDO1_HUMAN | K.VTVDDLPR.M             |        | 2 | 2,6922 | 0,257 | -0,119 |
| 16 | P00558 PGK1_HUMAN  | K.ITLPVDFVTADKFDE.N      |        | 2 | 2,6914 | 0,299 | -0,285 |
| 16 | Q8N556 AFAP1_HUMAN | K.LSSERPSS#DGEGVVE.N     | S283:  | 2 | 2,6872 | 0,221 | -0,375 |
| 16 | Q8N4C8 MINK1_HUMAN | E.RSDSVLPASHGHLQAGS#LE.R | S763:  | 2 | 2,6859 | 0,501 | -0,342 |
| 16 | Q15029 U5S1_HUMAN  | E.DKKYYPTAEE.V           |        | 2 | 2,6852 | 0,17  | -0,49  |
| 16 | P04259 K2C6B_HUMAN | R.SGFSSISVSR.S           |        | 2 | 2,6788 | 0,24  | 0      |
| 16 | P52272 HNRPM_HUMAN | K.GCGVVKFESPE.V          |        | 2 | 2,677  | 0,247 | -0,303 |
| 16 | P08238 HS90B_HUMAN | R.TLTLVDTGIGM*TK.A       |        | 2 | 2,6748 | 0,344 | -0,268 |
| 16 | P27824 CALX_HUMAN  | K.AEEDEILNR.S            |        | 2 | 2,6741 | 0,252 | -0,56  |
| 16 | Q8WYQ5 DGCR8_HUMAN | R.ARPFQALPR.E            |        | 2 | 2,6708 | 0,224 | -0,116 |
| 16 | Q9H0G5 CCD55_HUMAN | R.AKDKFLDQE.R            |        | 2 | 2,6666 | 0,224 | -0,781 |
| 16 | Q9NRY4 GRLF1_HUMAN | E.NIYSVPHDSTQGK.I        |        | 2 | 2,6661 | 0,285 | -0,338 |
| 16 | Q9Y2W1 TR150_HUMAN | K.SPLQSVVVR.R            |        | 2 | 2,6655 | 0,196 | 0,186  |
| 16 | Q9UPS6 SET1B_HUMAN | K.LLFLREPDSDT#ELQM*E.G   | T524:  | 2 | 2,661  | 0,347 | -0,12  |
| 16 | Q6ZN30 BNC2_HUMAN  | R.TRS#PSLLAHLE.N         | S294:  | 2 | 2,6568 | 0,174 | -0,655 |
| 16 | Q86SQ0 PHLB2_HUMAN | E.GLYLSDTLPR.K           |        | 2 | 2,6548 | 0,158 | -0,86  |
| 16 | Q96L91 EP400_HUMAN | E.SSLDSGMSGR.K           |        | 2 | 2,6525 | 0,34  | -0,306 |
| 16 | Q15424 SAFB1_HUMAN | R.KFDFDACNE.V            |        | 2 | 2,6509 | 0,247 | -0,213 |
| 16 | P04075 ALDOA_HUMAN | R.IVAPGKGILAADE.S        |        | 2 | 2,6487 | 0,32  | -0,389 |
| 16 | O95239 KIF4A_HUMAN | E.AQVETS#PETS.R.S        | S501:  | 2 | 2,6439 | 0,309 | -0,855 |
| 16 | P11586 C1TC_HUMAN  | K.THLSLHNPE.Q            |        | 2 | 2,6411 | 0,268 | -0,537 |
| 16 | P62070 RRAS2_HUMAN | R.AARLDILDITAGQEE.F      |        | 2 | 2,641  | 0,288 | -0,65  |
| 16 | Q9Y608 LRRF2_HUMAN | R.RGS#GDTSSLIDPDTSLSE.L  | S328:  | 2 | 2,6366 | 0,454 | -0,573 |
| 16 | P46459 NSF_HUMAN   | R.KLFADAEQEE.Q           |        | 2 | 2,6361 | 0,171 | 0      |
| 16 | Q8N556 AFAP1_HUMAN | K.KLSSERPSS#DGEGVVE.N    | S282:  | 2 | 2,6347 | 0,178 | -0,486 |
| 16 | Q96ST2 IWS1_HUMAN  | R.GKHM*DFLSDFE.M         |        | 2 | 2,6279 | 0,259 | -0,455 |
| 16 | Q13428 TCOF_HUMAN  | K.AGPVAVQVK.A            |        | 2 | 2,6262 | 0,212 | 0      |

|    |                    |                       |        |   |        |       |        |
|----|--------------------|-----------------------|--------|---|--------|-------|--------|
| 16 | O43719 HTSF1_HUMAN | K.RGFEGSCS#QKESEE.G   | S481:  | 2 | 2,6255 | 0,285 | -0,357 |
| 16 | Q9NQS7 INCE_HUMAN  | E.QHVTQLM*STEPLPR.T   |        | 2 | 2,619  | 0,421 | -0,59  |
| 16 | P55072 TERA_HUMAN  | K.LAIRES#IESE.I       | S702:  | 2 | 2,6139 | 0,181 | -0,298 |
| 16 | Q14444 CAPR1_HUMAN | K.GKLDDYQER.M         |        | 2 | 2,6133 | 0,339 | -0,868 |
| 16 | P12814 ACTN1_HUMAN | R.FAIQDISVEETSAK.E    |        | 2 | 2,611  | 0,293 | -0,635 |
| 16 | P13645 K1C10_HUMAN | K.DAEAWFNEK.S         |        | 2 | 2,6081 | 0,251 | -0,22  |
| 16 | Q15042 RB3GP_HUMAN | K.AGDQLVPDNLKE.T      |        | 2 | 2,6067 | 0,134 | -0,376 |
| 16 | Q9UQE7 SMC3_HUMAN  | E.DQKRVDALNDE.I       |        | 2 | 2,6033 | 0,192 | -0,468 |
| 16 | P42684 ABL2_HUMAN  | R.DKS#PSSLLE.D        | S631:  | 2 | 2,5942 | 0,188 | 0      |
| 16 | Q9C0B5 ZDHC5_HUMAN | R.GDS#LKEPTSIAE.S     | S380:  | 2 | 2,593  | 0,158 | -0,368 |
| 16 | Q9NZZ2 OGFR_HUMAN  | E.AGGHGEDRPEPLS#PKE.S | S378:  | 2 | 2,5897 | 0,25  | -0,486 |
| 16 | Q14865 ARI5B_HUMAN | R.AVS#PLDPSKE.V       | S1032: | 2 | 2,5883 | 0,317 | -0,326 |
| 16 | P49736 MCM2_HUMAN  | E.SFTM*AS#SPAQR.R     | S12:   | 2 | 2,5855 | 0,349 | -0,382 |
| 16 | Q13428 TCOF_HUMAN  | K.TVANLLSGK.S         |        | 2 | 2,5842 | 0,298 | -0,135 |
| 16 | Q8NDI1 EHBP1_HUMAN | K.LGYSYSRDL.L         |        | 2 | 2,5815 | 0,323 | -0,41  |
| 16 | Q9C0B5 ZDHC5_HUMAN | R.SSS#LKSAQGTGFE.L    | S429:  | 2 | 2,5785 | 0,233 | -0,708 |
| 16 | Q12996 CSTF3_HUMAN | E.GNGPVESNAVLTK.A     |        | 2 | 2,578  | 0,376 | -0,379 |
| 16 | P17174 AATC_HUMAN  | K.IANDNSLNHE.Y        |        | 2 | 2,576  | 0,272 | -0,217 |
| 16 | P05783 K1C18_HUMAN | R.IVDGKVVSE.T         |        | 2 | 2,5723 | 0,275 | -0,258 |
| 16 | P42684 ABL2_HUMAN  | R.GAQASSGS#PALPR.K    | S620:  | 2 | 2,5712 | 0,323 | -0,477 |
| 16 | Q8IVM0 CCD50_HUMAN | E.DHTLAHSLQEQE.I      |        | 2 | 2,5691 | 0,323 | -0,433 |
| 16 | P04264 K2C1_HUMAN  | K.SLNNQFASFIDK.V      |        | 2 | 2,5661 | 0,4   | -0,353 |
| 16 | Q02241 KIF23_HUMAN | E.DKNHNM*YVAGCTE.V    |        | 2 | 2,5656 | 0,281 | -0,392 |
| 16 | Q9NS87 KIF15_HUMAN | K.AQKEPCLFANTE.K      |        | 2 | 2,5592 | 0,134 | -0,52  |
| 16 | Q14980 NUMA1_HUMAN | R.KNSLISSLEEE.V       |        | 2 | 2,5549 | 0,192 | -0,488 |
| 16 | Q02952 AKA12_HUMAN | K.SPSS#PVERE.M        | S1331: | 2 | 2,5459 | 0,208 | -0,453 |
| 16 | Q15428 SF3A2_HUMAN | E.CKLCLTLHNNE.G       |        | 2 | 2,5321 | 0,086 | -0,174 |
| 16 | Q8TDY2 RBCC1_HUMAN | R.STELVLS#PDM*PR.T    | S243:  | 2 | 2,5308 | 0,194 | -0,339 |
| 16 | P19338 NUCL_HUMAN  | K.GLSEDTTEE.T         |        | 2 | 2,5294 | 0,216 | -0,871 |
| 16 | P35527 K1C9_HUMAN  | K.TLLDIDNTR.M         |        | 2 | 2,5241 | 0,249 | -0,345 |
| 16 | Q86W92 LIPB1_HUMAN | K.SSS#LGNLKE.T        | S466:  | 2 | 2,5212 | 0,212 | -0,213 |
| 16 | P23588 IF4B_HUMAN  | K.VAPAQPSEEGPGRKDE.N  |        | 2 | 2,5202 | 0,381 | -0,439 |
| 16 | P42356 PI4KA_HUMAN | K.RKTS#SVSSISQVSPE.R  | S198:  | 2 | 2,5199 | 0,236 | -0,584 |

|    |                     |                       |              |   |        |       |        |
|----|---------------------|-----------------------|--------------|---|--------|-------|--------|
| 16 | Q13595 TRA2A_HUMAN  | R.RRS#PSPY#YSR.Y      | S260:Y264:   | 2 | 2,5183 | 0,173 | -0,427 |
| 16 | P42166 LAP2A_HUMAN  | R.SSTPLPTISSSAENTR.Q  |              | 2 | 2,518  | 0,226 | -0,37  |
| 16 | Q13136 LIPA1_HUMAN  | R.DRLLDTLRE.T         |              | 2 | 2,5175 | 0,263 | -0,216 |
| 16 | P13647 K2C5_HUMAN   | R.ISISTSGGSFR.N       |              | 2 | 2,5173 | 0,388 | -0,329 |
| 16 | Q8WXE1 ATRIP_HUMAN  | R.KNPSVVIKPE.A        |              | 2 | 2,5161 | 0,204 | -0,549 |
| 16 | Q08AE8 SPIR1_HUMAN  | E.NGLSTSQQVPAQR.K     |              | 2 | 2,5089 | 0,266 | -0,792 |
| 16 | P07737 PROF1_HUMAN  | K.CSVIRDSLLQDGE.F     |              | 2 | 2,5081 | 0,224 | -0,491 |
| 16 | Q96JM3 ZN828_HUMAN  | K.TAPTLS#PEHWK.A      | S405:        | 2 | 2,5012 | 0,377 | -0,453 |
| 16 | Q53F19 CQ085_HUMAN  | E.LKMISTPS#PK.K       | S415:        | 2 | 2,4982 | 0,4   | -0,206 |
| 16 | Q9ULV4 COR1C_HUMAN  | K.SIKDTCNQDE.R        |              | 2 | 2,4979 | 0,274 | -0,369 |
| 16 | Q9UBU7 DBF4A_HUMAN  | K.LLFISEPIPHPS#NE.L   | S420:        | 2 | 2,4905 | 0,211 | -0,365 |
| 16 | Q86V48 LUZP1_HUMAN  | K.AIGALASSR.R         |              | 2 | 2,4894 | 0,217 | 0,144  |
| 16 | P06748 NPM_HUMAN    | K.TPKGPSSVED.I        |              | 2 | 2,4847 | 0,288 | -0,24  |
| 16 | P31327 CPSM_HUMAN   | E.DRQLFSDKLINE.I      |              | 2 | 2,4819 | 0,29  | -0,179 |
| 16 | Q6ZRV2 FA83H_HUMAN  | R.RGS#PVPVPER.R       | S914:        | 2 | 2,4818 | 0,159 | -0,384 |
| 16 | Q9UKV3 ACINU_HUMAN  | K.TTS#PLEEEERE.I      | S365:        | 2 | 2,4774 | 0,271 | -0,436 |
| 16 | P04731 MT1A_HUMAN   | K.CAQGCICK.G          |              | 2 | 2,4762 | 0,284 | -0,184 |
| 16 | O14908 GIPC1_HUMAN  | R.SRGPATVEDLPSAFEE.K  |              | 2 | 2,4719 | 0,174 | -0,215 |
| 16 | Q9BRQ0 PYGO2_HUMAN  | E.GGGGPAPPPAPPSTGR.K  |              | 2 | 2,4716 | 0,381 | -0,444 |
| 16 | P51114 FXR1_HUMAN   | E.NGLVTVADYISR.A      |              | 2 | 2,4631 | 0,279 | -0,56  |
| 16 | A7E2F7 A7E2F7_HUMAN | R.RY#SLIDPSSAPE.L     | Y937:        | 2 | 2,4617 | 0,281 | -0,517 |
| 16 | Q9UQ35 SRRM2_HUMAN  | E.HKELS#NS#PLRE.N     | S1318:S1320: | 2 | 2,4616 | 0,303 | -0,415 |
| 16 | Q86SQ0 PHLB2_HUMAN  | R.RNFSCGS#VEFDEADLE.S | S387:        | 2 | 2,4578 | 0,351 | -0,374 |
| 16 | A9CQZ4 A9CQZ4_HUMAN | K.AAEDEEVPAFFK.N      |              | 2 | 2,4571 | 0,378 | -0,721 |
| 16 | P19338 NUCL_HUMAN   | K.TLFVKGLSEDTE.E      |              | 2 | 2,4548 | 0,221 | -0,085 |
| 16 | Q16555 DPYL2_HUMAN  | E.GHVLSRPEEVEAE.A     |              | 2 | 2,4539 | 0,331 | -0,336 |
| 16 | Q14676 MDC1_HUMAN   | E.GKAPQAVPLEK.S       |              | 2 | 2,4506 | 0,126 | -0,429 |
| 16 | Q9Y2W2 WBP11_HUMAN  | E.LTPLQAMM*LR.M       |              | 2 | 2,4497 | 0,247 | -0,41  |
| 16 | P46821 MAP1B_HUMAN  | E.KEVPSKEEPS#PVKAE.V  | S614:        | 2 | 2,4497 | 0,208 | -0,352 |
| 16 | Q8TEX9 IPO4_HUMAN   | E.LCGVLKAVLQR.K       |              | 2 | 2,4487 | 0,241 | -0,388 |
| 16 | P01112 RASH_HUMAN   | R.KQVVIDGE.T          |              | 2 | 2,4481 | 0,17  | 0,069  |
| 16 | Q8IYB3 SRRM1_HUMAN  | K.VKEPSVQE.A          |              | 2 | 2,4443 | 0,164 | -0,266 |
| 16 | Q9Y4B6 VPRBP_HUMAN  | R.KLS#SEPLLPDEE.A     | S202:        | 2 | 2,4331 | 0,239 | -0,315 |



|    |                    |                           |        |   |        |       |        |
|----|--------------------|---------------------------|--------|---|--------|-------|--------|
| 16 | Q5JSH3 WDR44_HUMAN | R.SNS#GRELTDEE.I          | S344:  | 2 | 2,4255 | 0,249 | -0,371 |
| 16 | P49736 MCM2_HUMAN  | R.RRGNDPLTS#SPGR.S        | S26:   | 2 | 2,4252 | 0,286 | -0,409 |
| 16 | P46379 BAT3_HUMAN  | K.AAGARPLTS#PE.S          | S1081: | 2 | 2,4245 | 0,223 | -0,106 |
| 16 | Q96PZ0 PUS7_HUMAN  | E.DVPRPPDVTSTGK.G         |        | 2 | 2,4239 | 0,219 | -0,624 |
| 16 | Q32MZ4 LRRF1_HUMAN | R.KALDS#NSLE.N            | S766:  | 2 | 2,4151 | 0,142 | -0,115 |
| 16 | P06748 NPM_HUMAN   | K.GPSSVEDIK.A             |        | 2 | 2,4146 | 0,215 | -0,131 |
| 16 | Q9Y2D5 AKAP2_HUMAN | R.DALGDSLQVPVS#PSSTTSSR.C | S152:  | 2 | 2,4093 | 0,468 | -0,703 |
| 16 | Q92598 HS105_HUMAN | K.SLDQDPVVR.A             |        | 2 | 2,409  | 0,181 | -0,237 |
| 16 | Q6P597 KLC3_HUMAN  | R.TLSAST#QDLSPH.-         | T498:  | 2 | 2,4087 | 0,248 | -0,548 |
| 16 | Q8N0Z3 CCD52_HUMAN | K.CSTVS#PVSGINTR.R        | S800:  | 2 | 2,4068 | 0,251 | -0,418 |
| 16 | P62070 RRAS2_HUMAN | R.LDILDTAGQEE.F           |        | 2 | 2,3976 | 0,304 | -0,304 |
| 16 | P35527 K1C9_HUMAN  | R.QGVDADINGLR.Q           |        | 2 | 2,3972 | 0,204 | -0,316 |
| 16 | Q01433 AMPD2_HUMAN | R.QIS#QDVKLEPD.I          | S168:  | 2 | 2,3969 | 0,296 | -0,361 |
| 16 | Q9Y2H9 MAST1_HUMAN | R.FSALLEPSR.F             |        | 2 | 2,3928 | 0,224 | -0,06  |
| 16 | P42356 PI4KA_HUMAN | R.KTS#SVSSISQVSPE.R       | S198:  | 2 | 2,3927 | 0,135 | -0,08  |
| 16 | Q96RS6 NUDC1_HUMAN | E.GKLYSSIDHE.S            |        | 2 | 2,3915 | 0,211 | -0,425 |
| 16 | P04406 G3P_HUMAN   | K.LISWYDNE.F              |        | 2 | 2,3889 | 0,177 | -0,117 |
| 16 | O60812 HNRCL_HUMAN | R.VFIGNLNTLVVK.K          |        | 2 | 2,386  | 0,304 | -0,371 |
| 16 | Q99961 SH3G1_HUMAN | K.IAASSS#FR.S             | S288:  | 2 | 2,383  | 0,314 | -0,066 |
| 16 | Q96JM3 ZN828_HUMAN | K.SSFFIEPQKPVFPE.T        |        | 2 | 2,3823 | 0,364 | -0,295 |
| 16 | Q8N6T3 ARFG1_HUMAN | E.TFGSAEPTK.T             |        | 2 | 2,3807 | 0,266 | -0,26  |
| 16 | Q96TC7 FA82C_HUMAN | R.KDS#LDLEEE.A            | S212:  | 2 | 2,3777 | 0,1   | -0,632 |
| 16 | Q15418 KS6A1_HUMAN | K.KAYS#FCGTVE.Y           | S221:  | 2 | 2,3761 | 0,193 | -0,295 |
| 16 | P06733 ENOA_HUMAN  | E.KSCNCLLLK.V             |        | 2 | 2,3654 | 0,101 | -0,215 |
| 16 | Q9UHI6 DDX20_HUMAN | R.RSS#FRLQTE.A            | S743:  | 2 | 2,3649 | 0,267 | -0,405 |
| 16 | P26038 MOES_HUMAN  | K.QRIDEFESM*.-            |        | 2 | 2,3645 | 0,397 | -0,417 |
| 16 | P49792 RBP2_HUMAN  | E.KDSLITPHVS#R.S          | S2454: | 2 | 2,3629 | 0,206 | -0,915 |
| 16 | P43686 PRS6B_HUMAN | R.YIVLAKDFE.K             |        | 2 | 2,359  | 0,242 | -0,222 |
| 16 | Q8IV50 LYSM2_HUMAN | R.APRPSAPS#PPPR.S         | S24:   | 2 | 2,3545 | 0,165 | -0,093 |
| 16 | P05783 K1C18_HUMAN | R.RIVDGKVVSE.T            |        | 2 | 2,3521 | 0,172 | -0,554 |
| 16 | P11142 HSP7C_HUMAN | K.DAGTIAGLNVLR.I          |        | 2 | 2,3498 | 0,234 | -0,305 |
| 16 | P49736 MCM2_HUMAN  | R.GNDPLTSS#PGR.S          | S27:   | 2 | 2,3446 | 0,343 | -0,413 |
| 16 | Q12888 TP53B_HUMAN | K.M*VIQGPSS#PQGE.A        | S1114: | 2 | 2,3417 | 0,381 | -0,276 |

|    |                     |                           |            |   |        |       |        |
|----|---------------------|---------------------------|------------|---|--------|-------|--------|
| 16 | Q13561 DCTN2_HUMAN  | K.GGSGGKTTGT#PPDSSLVTYE.L | T198:      | 2 | 2,3393 | 0,393 | -0,368 |
| 16 | P43358 MAGA4_HUMAN  | R.KLLTQDWVQE.N            |            | 2 | 2,3348 | 0,193 | -0,871 |
| 16 | P51858 HDGF_HUMAN   | R.AGDLLLEDSPKRPK.E        | S165:      | 2 | 2,3288 | 0,11  | -0,324 |
| 16 | Q7Z2W4 ZCCHV_HUMAN  | K.TVFS#PTLPAAR.S          | S378:      | 2 | 2,3264 | 0,201 | -0,098 |
| 16 | O95425 SVIL_HUMAN   | E.SSSTFSFSGR.D            |            | 2 | 2,3226 | 0,33  | -0,115 |
| 16 | P22626 ROA2_HUMAN   | R.GGGGNFGPGPSNFR.G        |            | 2 | 2,3198 | 0,357 | -0,531 |
| 16 | Q9Y2W1 TR150_HUMAN  | E.SEFDDEPKFM*SK.V         |            | 2 | 2,3196 | 0,163 | -0,248 |
| 16 | Q9BUQ8 DDX23_HUMAN  | K.M*LEDPQER.E             |            | 2 | 2,3195 | 0,093 | 0      |
| 16 | P62937 PPIA_HUMAN   | K.ITIADCGQLE.-            |            | 2 | 2,3194 | 0,291 | -0,436 |
| 16 | P29590 PML_HUMAN    | K.AVS#PPHLDGPPS#PR.S      | S518:S527: | 2 | 2,3188 | 0,177 | -0,538 |
| 16 | Q9HA05 Q9HA05_HUMAN | K.M*NSIVYQK.Q             |            | 2 | 2,318  | 0,158 | -0,122 |
| 16 | P20962 PTMS_HUMAN   | E.LSAKDLKE.K              |            | 2 | 2,3171 | 0,081 | 0,135  |
| 16 | Q9NZI8 IF2B1_HUMAN  | E.KAISVHSTPE.G            |            | 2 | 2,3156 | 0,32  | 0,114  |
| 16 | Q9NZN5 ARHGC_HUMAN  | E.AETDPGDVLR.T            |            | 2 | 2,3107 | 0,296 | -0,324 |
| 16 | P68104 EF1A1_HUMAN  | K.IGGIGTVPVGRVE.T         |            | 2 | 2,3106 | 0,271 | -0,389 |
| 16 | P35251 RFC1_HUMAN   | K.NKPLS#PIKLT#PTSVLD.Y    | S156:T161: | 2 | 2,3053 | 0,205 | -0,194 |
| 16 | Q9H0G5 CCD55_HUMAN  | K.CILQTDVK.V              |            | 2 | 2,3051 | 0,193 | -0,624 |
| 16 | Q13428 TCOF_HUMAN   | K.TVANLLSGKS#PRK.S        | S156:      | 2 | 2,305  | 0,13  | -0,925 |
| 16 | P78347 GTF2I_HUMAN  | E.LVISYLPFGMASK.I         |            | 2 | 2,3041 | 0,199 | -0,532 |
| 16 | P61086 UBE2K_HUMAN  | K.NQIKVDLVDE.N            |            | 2 | 2,2948 | 0,142 | -0,52  |
| 16 | Q15942 ZYX_HUMAN    | K.FSPGAPGGSGSQPNQK.L      |            | 2 | 2,2944 | 0,338 | -0,402 |
| 16 | Q09666 AHNK_HUMAN   | K.LQGGVSLASK.K            |            | 2 | 2,2942 | 0,358 | -0,35  |
| 16 | P05387 RLA2_HUMAN   | E.DVIAQGIGK.L             |            | 2 | 2,2942 | 0,176 | -0,068 |
| 16 | P20700 LMNB1_HUMAN  | E.YKLAQALHE.M             |            | 2 | 2,2929 | 0,187 | -0,227 |
| 16 | P46459 NSF_HUMAN    | E.KMGIGGLDKE.F            |            | 2 | 2,2927 | 0,207 | -0,699 |
| 16 | Q9HCE0 K1632_HUMAN  | K.CQGAAVTVQFE.G           |            | 2 | 2,2916 | 0,195 | -0,559 |
| 16 | Q16555 DPYL2_HUMAN  | R.NLHQSGFSLSGAQIDD.N      |            | 2 | 2,2914 | 0,136 | -0,722 |
| 16 | O95302 FKBP9_HUMAN  | R.ISQSGDFLR.Y             |            | 2 | 2,2835 | 0,303 | 0,06   |
| 16 | P62736 ACTA_HUMAN   | R.GILTLYPIE.H             |            | 2 | 2,2793 | 0,309 | -0,319 |
| 16 | Q9H6F5 CCD86_HUMAN  | R.AGLGSPERPPK.T           |            | 2 | 2,2698 | 0,224 | -0,99  |
| 16 | P17480 UBF1_HUMAN   | R.GKLPES#PKRAEE.I         | S484:      | 2 | 2,267  | 0,278 | -0,687 |
| 16 | O75044 FNBP2_HUMAN  | R.KQDSSQAIPLVVE.S         |            | 2 | 2,2669 | 0,195 | -0,431 |
| 16 | Q09666 AHNK_HUMAN   | K.AS#LGSLEGAEAE.A         | S5749:     | 2 | 2,2634 | 0,086 | -0,545 |

|    |                     |                     |        |   |        |       |        |
|----|---------------------|---------------------|--------|---|--------|-------|--------|
| 16 | Q92945 FUBP2_HUMAN  | K.VQIS#PDSGGLPE.R   | S181:  | 2 | 2,2609 | 0,118 | -0,477 |
| 16 | Q96JM3 ZN828_HUMAN  | R.GGS#PDLWK.S       | S476:  | 2 | 2,2605 | 0,083 | -0,13  |
| 16 | P35251 RFC1_HUMAN   | E.AHLTPYSLQAIK.A    |        | 2 | 2,255  | 0,203 | -0,727 |
| 16 | Q9Y266 NUDC_HUMAN   | R.QKS#M*GLPTSDE.Q   | S298:  | 2 | 2,2538 | 0,229 | -0,379 |
| 16 | O14974 MYPT1_HUMAN  | R.LAYVAPTIPR.R      |        | 2 | 2,2512 | 0,176 | -0,443 |
| 16 | P35908 K22E_HUMAN   | K.IEISELNR.V        |        | 2 | 2,2454 | 0,126 | 0,188  |
| 16 | Q9UHI6 DDX20_HUMAN  | E.KAT#SPKELGCDR.Q   | T531:  | 2 | 2,2424 | 0,253 | -1,015 |
| 16 | O95817 BAG3_HUMAN   | R.GYISIPVIHE.Q      |        | 2 | 2,2401 | 0,186 | -0,324 |
| 16 | Q96SB4 SRPK1_HUMAN  | K.MTQEKLEE.S        |        | 2 | 2,238  | 0,267 | -0,363 |
| 16 | P05787 K2C8_HUMAN   | R.AFSSRS#YTSGPGSR.I | S24:   | 2 | 2,2361 | 0,506 | -0,317 |
| 16 | ##Q13177 PAK2_HUMAN | D.SPPS#IEPRE.K      | S450:  | 2 | 2,236  | 0,172 | -0,112 |
| 16 | Q07065 CKAP4_HUMAN  | K.GLLDDLND.L        |        | 2 | 2,2276 | 0,319 | -0,828 |
| 16 | P18206 VINC_HUMAN   | R.DM*PPAFIKVE.N     |        | 2 | 2,2274 | 0,267 | -0,21  |
| 16 | Q15149 PLEC1_HUMAN  | E.HVAVAQLREE.A      |        | 2 | 2,2257 | 0,271 | -0,318 |
| 16 | Q9Y232 CDYL1_HUMAN  | K.ILVPKS#PVK.S      | S201:  | 2 | 2,2243 | 0,194 | -0,23  |
| 16 | Q9UKM9 RALY_HUMAN   | E.AGLPQGEAR.T       |        | 2 | 2,2236 | 0,154 | -0,068 |
| 16 | ##Q96DX8 RTP4_HUMAN | D.LQLNGDLK.L        |        | 2 | 2,217  | 0,182 | 0      |
| 16 | Q09666 AHNK_HUMAN   | K.ADIKSPS#LDVTVPE.A | S4995: | 2 | 2,2126 | 0,125 | -0,551 |
| 16 | Q14562 DHX8_HUMAN   | E.IELVEEPPFLR.G     |        | 2 | 2,2119 | 0,282 | -0,249 |
| 16 | Q9H204 MED28_HUMAN  | K.KPADIPQGSLAYLE.Q  |        | 2 | 2,2119 | 0,306 | -0,325 |
| 16 | Q96DR7 SGEF_HUMAN   | E.NAVLYQNYK.E       |        | 2 | 2,2073 | 0,178 | -0,219 |
| 16 | P12956 KU70_HUMAN   | K.VEYSEELK.T        |        | 2 | 2,2071 | 0,336 | -0,433 |
| 16 | Q9ULW0 TPX2_HUMAN   | K.SSDQPLTPVVS#PK.F  | S738:  | 2 | 2,2044 | 0,202 | -0,68  |
| 16 | Q9NYF8 BCLF1_HUMAN  | K.LKDLFDYS#PPLHK.N  | S512:  | 2 | 2,2038 | 0,334 | -0,369 |
| 16 | Q8WVV5 BT2A2_HUMAN  | R.VGTHQS#L.-        | S522:  | 2 | 2,1944 | 0,253 | 0,223  |
| 16 | P05787 K2C8_HUMAN   | K.SYKVSTSGPR.A      |        | 2 | 2,192  | 0,352 | -0,338 |
| 16 | O14979 HNRDL_HUMAN  | E.IKVAQPKE.V        |        | 2 | 2,1912 | 0,114 | -0,334 |
| 16 | O14893 GEMI2_HUMAN  | E.AAQCPDVVVAQIDPK.K |        | 2 | 2,1873 | 0,2   | -0,682 |
| 16 | B2RP66 B2RP66_HUMAN | K.GLKDIRIDEE.V      |        | 2 | 2,1809 | 0,201 | 0,103  |
| 16 | Q9Y224 CN166_HUMAN  | D.KHILGFDTGDAVLNE.A |        | 2 | 2,178  | 0,259 | -0,3   |
| 16 | Q12888 TP53B_HUMAN  | K.MVIQGPSS#PQGE.A   | S1114: | 2 | 2,1776 | 0,139 | -0,373 |
| 16 | Q96GY3 LIN37_HUMAN  | R.SRIPS#PLQPE.M     | S182:  | 2 | 2,1729 | 0,102 | -0,304 |
| 16 | Q01518 CAP1_HUMAN   | R.ATKKEPAVLE.L      |        | 2 | 2,1522 | 0,094 | -0,337 |

|    |                     |                      |            |   |        |       |        |
|----|---------------------|----------------------|------------|---|--------|-------|--------|
| 16 | P13489 RINI_HUMAN   | R.DLCGIVASK.A        |            | 2 | 2,1517 | 0,285 | 0,127  |
| 16 | P68104 EF1A1_HUMAN  | R.RGNVAGDSKNDPPME.A  |            | 2 | 2,1463 | 0,165 | -0,615 |
| 16 | P98174 FGD1_HUMAN   | R.CLFLAPGPR.D        |            | 2 | 2,1412 | 0,216 | -0,32  |
| 16 | Q9UQ35 SRRM2_HUMAN  | K.FSPFPVQDRPE.S      |            | 2 | 2,1381 | 0,146 | -0,463 |
| 16 | Q86YS7 K0528_HUMAN  | E.IIGSPIPEPR.Q       |            | 2 | 2,1334 | 0,292 | -0,226 |
| 16 | P18206 VINC_HUMAN   | R.DMPPAFIKVE.N       |            | 2 | 2,118  | 0,186 | -0,319 |
| 16 | P55072 TERA_HUMAN   | R.SVSDNDIRKYE.M      |            | 2 | 2,1081 | 0,321 | -0,46  |
| 16 | P46777 RL5_HUMAN    | E.DEDAYKKQFSQYIK.N   |            | 2 | 2,1037 | 0,283 | -0,484 |
| 16 | P42695 CNDD3_HUMAN  | R.NSSAFSYQR.Q        |            | 2 | 2,0973 | 0,273 | -0,345 |
| 16 | O95239 KIF4A_HUMAN  | R.RRT#FS#LTE.V       | T799:S801: | 2 | 2,096  | 0,164 | -0,313 |
| 16 | Q8ND56 LS14A_HUMAN  | R.RSPVS#TRPLPSASQK.A | S219:      | 2 | 2,095  | 0,311 | -0,577 |
| 16 | P05787 K2C8_HUMAN   | R.ISS#SSFSR.V        | S35:       | 2 | 2,0909 | 0,081 | -0,128 |
| 16 | Q9Y5Q9 TF3C3_HUMAN  | K.ISFEFER.R          |            | 2 | 2,0846 | 0,222 | -0,231 |
| 16 | P11142 HSP7C_HUMAN  | D.M*KHWPFM*VVND.A    |            | 2 | 2,0831 | 0,084 | -0,51  |
| 16 | Q07954 LRP1_HUMAN   | R.ILQDDLTCR.A        |            | 2 | 2,083  | 0,208 | -0,323 |
| 16 | P52292 IMA2_HUMAN   | R.NVSSFPDDAT#SPLQE.N | T61:       | 2 | 2,0782 | 0,159 | -0,579 |
| 16 | Q96JM3 ZN828_HUMAN  | R.KTS#PASLDFPE.S     | S459:      | 2 | 2,0702 | 0,277 | -0,384 |
| 16 | Q9Y3T9 NOC2L_HUMAN  | R.GILRPLSTR.H        |            | 2 | 2,0679 | 0,092 | -0,181 |
| 16 | Q3V6T2 GRDN_HUMAN   | E.FSLLHDHE.A         |            | 2 | 2,0624 | 0,184 | -0,122 |
| 16 | Q9H6F5 CCD86_HUMAN  | R.RLGGLRPES#PE.S     | S18:       | 2 | 2,0609 | 0,125 | -0,189 |
| 16 | O94864 ST65G_HUMAN  | K.IKEEPVSDITFPVSEE.L |            | 2 | 2,0603 | 0,229 | -0,335 |
| 16 | P13639 EF2_HUMAN    | E.DHACIPIK.K         |            | 2 | 2,0579 | 0,168 | 0      |
| 16 | P13645 K1C10_HUMAN  | R.LAADDFR.L          |            | 2 | 2,0488 | 0,216 | 0,302  |
| 16 | P04637 P53_HUMAN    | R.ALPNNTSSS#PQPK.K   | S315:      | 2 | 2,0455 | 0,38  | -0,429 |
| 16 | Q5VT52 K0460_HUMAN  | R.LSSSPGLFGAFSVR.G   |            | 2 | 2,0385 | 0,367 | -0,257 |
| 16 | Q15424 SAFB1_HUMAN  | K.ADSLAVVK.R         |            | 2 | 2,0376 | 0,291 | -0,2   |
| 16 | O95218 ZRAB2_HUMAN  | E.S#DGEYDEFGR.K      | S120:      | 2 | 2,0325 | 0,153 | -0,097 |
| 16 | Q14980 NUMA1_HUMAN  | K.NSLISSLEEE.V       |            | 2 | 2,032  | 0,089 | -0,218 |
| 16 | B2RDE1 B2RDE1_HUMAN | R.M*LDQTLNEM*.-      |            | 2 | 2,0248 | 0,179 | -0,332 |
| 16 | P37802 TAGL2_HUMAN  | K.IQASTMAFK.Q        |            | 2 | 2,0229 | 0,122 | -0,061 |
| 16 | Q13541 4EBP1_HUMAN  | R.AGGEESQFE.M        |            | 2 | 2,0174 | 0,146 | 0      |
| 16 | Q8IWZ8 SF04_HUMAN   | K.QNQVAS#PQPPHPGE.I  | S61:       | 2 | 2,0029 | 0,195 | 0,078  |
| 16 | P10809 CH60_HUMAN   | K.LSDGVAVLK.V        |            | 2 | 2,0008 | 0,103 | 0      |

|    |                     |                            |            |   |        |       |        |
|----|---------------------|----------------------------|------------|---|--------|-------|--------|
| 16 | P07602 SAP_HUMAN    | K.LVGYLDR.N                |            | 2 | 1,9976 | 0,246 | 0,219  |
| 16 | P09211 GSTP1_HUMAN  | K.ALPGQLKPF.E              |            | 2 | 1,9949 | 0,371 | -0,333 |
| 16 | Q9Y2W1 TR150_HUMAN  | R.ERS#PALKSPLQSVVVR.R      | S248:      | 2 | 1,9914 | 0,367 | -0,463 |
| 16 | P05783 K1C18_HUMAN  | E.DFNLGDALDSSNSM*QTIQK.T   |            | 2 | 1,9877 | 0,486 | -0,465 |
| 16 | P49006 MRP_HUMAN    | K.SNGDLS#PKGEGESPPVNGTDE.A | S41:       | 2 | 1,9847 | 0,248 | -0,338 |
| 16 | Q6PJT7 ZC3HE_HUMAN  | R.LQIDPVM*AE.T             |            | 2 | 1,9838 | 0,132 | -0,236 |
| 16 | O15231 ZN185_HUMAN  | R.RESCGSS#VLTDFE.G         | S237:      | 2 | 1,9838 | 0,259 | -0,467 |
| 16 | A9CQZ4 A9CQZ4_HUMAN | K.FCGM*FCPVEGSSE.N         |            | 2 | 1,9807 | 0,124 | -0,401 |
| 16 | P22314 UBA1_HUMAN   | R.VSGPDPKPGSNCSQAQSVLSE.V  |            | 2 | 1,9791 | 0,237 | -0,231 |
| 16 | Q96FV9 THOC1_HUMAN  | R.DKPVTGEQIE.V             |            | 2 | 1,9791 | 0,212 | -0,437 |
| 16 | Q9UKV3 ACINU_HUMAN  | E.KSKS#PS#PPRLTE.D         | S386:S388: | 2 | 1,9754 | 0,178 | -0,41  |
| 16 | Q9Y2W2 WBP11_HUMAN  | E.LTPLQAM*M*LR.M           |            | 2 | 1,9662 | 0,193 | -0,506 |
| 16 | P46777 RL5_HUMAN    | K.NSVTPDM*M*EE.M           |            | 2 | 1,9655 | 0,27  | -0,721 |
| 16 | A9CQZ4 A9CQZ4_HUMAN | R.QKFCGM*FCPVEGSSE.N       |            | 2 | 1,9575 | 0,119 | -0,549 |
| 16 | ##P34972 CNR2_HUMAN | E.TVS#SRPAEEKAE.S          | S25:       | 2 | 1,9497 | 0,088 | -0,353 |
| 16 | P11021 GRP78_HUMAN  | K.ITITNDQNR.L              |            | 2 | 1,938  | 0,154 | -0,227 |
| 16 | Q9UHI6 DDX20_HUMAN  | E.KAT#SPKELGCDRQSE.E       | T531:      | 2 | 1,9354 | 0,146 | -0,547 |
| 16 | P68104 EF1A1_HUMAN  | K.IGGIGTVPVGR.V            |            | 2 | 1,9291 | 0,224 | 0      |
| 16 | P60981 DEST_HUMAN   | R.YALYDASFE.T              |            | 2 | 1,9281 | 0,088 | -0,226 |
| 16 | Q96T23 RSF1_HUMAN   | K.AQIDPVLLK.N              |            | 2 | 1,9268 | 0,221 | -0,184 |
| 16 | P62256 UBE2H_HUMAN  | R.RMDTDVVKLIE.S            |            | 2 | 1,9249 | 0,123 | -0,462 |
| 16 | Q01082 SPTB2_HUMAN  | R.TQETPSAQME.G             |            | 2 | 1,9183 | 0,22  | -0,326 |
| 16 | Q92620 PRP16_HUMAN  | E.DASIHRL.E                |            | 2 | 1,9143 | 0,209 | 0,324  |
| 16 | P49023 PAXI_HUMAN   | E.HVYSFPNK.Q               |            | 2 | 1,905  | 0,294 | -0,307 |
| 16 | Q53GS9 SNUT2_HUMAN  | R.EAPASVVPFVR.V            |            | 2 | 1,8992 | 0,191 | -0,416 |
| 16 | P31948 STIP1_HUMAN  | K.ALSVGNIDDALQCYSE.A       |            | 2 | 1,8989 | 0,27  | -0,417 |
| 16 | Q15742 NAB2_HUMAN   | R.SFSPKS#PLELGE.K          | S162:      | 2 | 1,8965 | 0,088 | -0,356 |
| 16 | P16949 STMN1_HUMAN  | E.SVPEFPLSPPK.K            |            | 2 | 1,8941 | 0,332 | -0,204 |
| 16 | Q8NEY8 PPHLN_HUMAN  | R.DNTFFRE.S                |            | 2 | 1,8848 | 0,166 | -0,131 |
| 16 | Q9P2M4 TBC14_HUMAN  | R.RKQS#DSDLIPE.R           | S91:       | 2 | 1,8806 | 0,138 | -0,446 |
| 16 | Q9GZS3 WDR61_HUMAN  | E.TVVTGSLDDLK.V            |            | 2 | 1,8768 | 0,174 | -0,294 |
| 16 | P24534 EF1B_HUMAN   | E.KASLPGVK.K               |            | 2 | 1,8687 | 0,12  | 0,229  |
| 16 | O43765 SGTA_HUMAN   | R.SQIRS#RTPSASNDQQE.-      | S301:      | 2 | 1,8657 | 0,346 | -0,732 |

|    |                     |                        |        |   |        |       |        |
|----|---------------------|------------------------|--------|---|--------|-------|--------|
| 16 | Q99961 SH3G1_HUMAN  | E.QSNGGFPCTTAPK.I      |        | 2 | 1,8649 | 0,195 | -0,089 |
| 16 | Q96HP0 DOCK6_HUMAN  | R.RCS#SSLGVPLTE.V      | S40:   | 2 | 1,8591 | 0,254 | -0,44  |
| 16 | P08670 VIME_HUMAN   | R.QVQSLTCE.V           |        | 2 | 1,8498 | 0,133 | -0,126 |
| 16 | Q99961 SH3G1_HUMAN  | K.ALYDFEPENDGE.L       |        | 2 | 1,8473 | 0,256 | -0,698 |
| 16 | Q9Y5U2 TSSC4_HUMAN  | R.SPVEGLGR.A           |        | 2 | 1,8301 | 0,083 | 0,15   |
| 16 | P10768 ESTD_HUMAN   | D.NFIAACTE.K           |        | 2 | 1,8247 | 0,083 | -0,132 |
| 16 | P34931 HS71L_HUMAN  | R.TTPSYVAFTDTER.L      |        | 2 | 1,8209 | 0,195 | -0,738 |
| 16 | Q96T23 RSF1_HUMAN   | E.IKLSDDFDS#PVKGPLCK.S | S387:  | 2 | 1,8188 | 0,227 | -0,183 |
| 16 | Q9Y2H0 DLGP4_HUMAN  | R.SLPDCTPHPNISIDAGPR.Q |        | 2 | 1,8176 | 0,375 | -0,06  |
| 16 | P46777 RL5_HUMAN    | K.QFSQYIK.N            |        | 2 | 1,8086 | 0,121 | -0,534 |
| 16 | P61923 COPZ1_HUMAN  | R.VALRGEDVPLTE.Q       |        | 2 | 1,8022 | 0,14  | -0,47  |
| 16 | P23588 IF4B_HUMAN   | K.VMPAPPKE.N           |        | 2 | 1,7973 | 0,276 | 0      |
| 16 | Q69YN4 VIR_HUMAN    | E.DQFNGS#PPRPQPR.G     | S173:  | 2 | 1,7949 | 0,113 | -0,542 |
| 16 | Q9H2J4 PDCL3_HUMAN  | E.DVLLSSVR.R           |        | 2 | 1,7941 | 0,152 | 0,069  |
| 16 | P35527 K1C9_HUMAN   | R.MTLDDFR.I            |        | 2 | 1,7906 | 0,225 | -0,136 |
| 16 | Q14694 UBP10_HUMAN  | E.KLTISNGPK.N          |        | 2 | 1,7803 | 0,108 | -0,509 |
| 16 | Q9BZE9 ASPC1_HUMAN  | R.RQDFNPCEYD.L         |        | 2 | 1,7725 | 0,137 | -0,636 |
| 16 | P11310 ACADM_HUMAN  | E.DVKVPKE.N            |        | 2 | 1,7681 | 0,118 | 0,075  |
| 16 | P36578 RL4_HUMAN    | K.NVTLPVFK.A           |        | 2 | 1,7667 | 0,157 | -0,617 |
| 16 | Q9Y2L9 LRCH1_HUMAN  | E.DSCHRLS#PVKGE.F      | S370:  | 2 | 1,766  | 0,091 | -0,833 |
| 16 | A9CQZ4 A9CQZ4_HUMAN | R.QKFCGMFCPVEGSSE.N    |        | 2 | 1,7645 | 0,099 | -0,761 |
| 16 | Q9Y3Q8 T22D4_HUMAN  | R.GASGGAGGRS#LDSRLE.L  | S123:  | 2 | 1,7543 | 0,111 | -0,622 |
| 16 | P35579 MYH9_HUMAN   | R.GDLPFVVPR.R          |        | 2 | 1,7477 | 0,181 | -0,366 |
| 16 | Q8TEW0 PAR3_HUMAN   | R.DVGPSLGLK.K          |        | 2 | 1,7475 | 0,182 | 0,069  |
| 16 | P04637 P53_HUMAN    | R.ALPNNTSS#SPQPK.K     | S314:  | 2 | 1,7469 | 0,121 | -0,687 |
| 16 | Q8IV63 VRK3_HUMAN   | R.LSLFSDGDSSESE.D      |        | 2 | 1,7397 | 0,083 | -0,444 |
| 16 | Q05209 PTN12_HUMAN  | E.STIEQIDK.K           |        | 2 | 1,723  | 0,161 | -0,196 |
| 16 | Q9UKY7 CDV3_HUMAN   | E.VDYSGLR.V            |        | 2 | 1,7185 | 0,134 | 0,301  |
| 16 | Q9NP74 PALMD_HUMAN  | R.ETIFGKSE.H           |        | 2 | 1,7038 | 0,122 | 0      |
| 16 | P13073 COX41_HUMAN  | E.DFSLPAYMDR.R         |        | 2 | 1,6975 | 0,106 | -0,402 |
| 16 | P43243 MATR3_HUMAN  | R.IGPYQPNVPVIGID.Y     |        | 2 | 1,6901 | 0,162 | -0,267 |
| 16 | Q9UQ35 SRRM2_HUMAN  | R.TS#PPLDR.A           | S2398: | 2 | 1,674  | 0,097 | -0,062 |
| 16 | Q16555 DPYL2_HUMAN  | K.T#SPAKQQAPPVR.N      | T521:  | 2 | 1,6718 | 0,205 | -0,987 |

|    |                     |                                  |              |   |        |       |        |
|----|---------------------|----------------------------------|--------------|---|--------|-------|--------|
| 16 | P08621 RU17_HUMAN   | R.QQEVETELK.M                    |              | 2 | 1,6451 | 0,219 | -0,332 |
| 16 | P12956 KU70_HUMAN   | E.DLRVHFEE.S                     |              | 2 | 1,6372 | 0,092 | -0,234 |
| 16 | P05186 PPBT_HUMAN   | K.SVGIVTTTR.V                    |              | 2 | 1,6197 | 0,125 | -0,261 |
| 16 | Q6PD62 CTR9_HUMAN   | K.NILM*FTGETE.A                  |              | 2 | 1,6134 | 0,21  | -0,521 |
| 16 | O43847 NRDC_HUMAN   | K.AKST#CSCPDLPNGQDLGE.N          | T59:         | 2 | 1,5984 | 0,187 | -0,226 |
| 16 | Q13523 PRP4B_HUMAN  | R.TKLDDLALLE.D                   |              | 2 | 1,5908 | 0,11  | -0,324 |
| 16 | P13861 KAP2_HUMAN   | R.QSLGHPPPEPGPDR.V               |              | 2 | 1,5789 | 0,177 | -0,576 |
| 16 | Q53H80 CF166_HUMAN  | D.FDLLSPAS#PK.R                  | S21:         | 2 | 1,5646 | 0,153 | -0,195 |
| 16 | Q5VWN6 CJ018_HUMAN  | R.S#RSPLLTVVE.S                  | S2035:       | 2 | 1,5619 | 0,107 | -0,381 |
| 16 | O95678 K2C75_HUMAN  | E.VKAQYEDIANRS#RAE.A             | S334:        | 2 | 1,496  | 0,264 | -0,667 |
| 16 | A6H8Y1 BDP1_HUMAN   | E.IEVPS#S#AVPEHR.M               | S1633:S1634: | 2 | 1,4727 | 0,164 | 0,659  |
| 16 | Q4KMQ1 CI075_HUMAN  | R.FDPPAAPR.R                     |              | 2 | 1,4173 | 0,141 | 0,07   |
| 16 | Q00535 CDK5_HUMAN   | E.GT#YGTVFK.A                    | T14:         | 2 | 1,3833 | 0,172 | 0,128  |
| 17 | Q8WUD4 CCD12_HUMAN  | K.GQEDSLASAVDAATEQKTCDS#D.-      | S165:        | 3 | 6,4156 | 0,486 | -0,462 |
| 17 | Q99439 CNN2_HUMAN   | R.NFDDATM*KAGQCQVIGLQM*GTNK.C    |              | 3 | 5,5243 | 0,439 | -0,301 |
| 17 | P28749 RBL1_HUMAN   | E.SKVKS#PVSLTAHSLIGAS#PK.Q       | S749:S762:   | 3 | 5,5155 | 1     | -0,506 |
| 17 | A6H8W4 A6H8W4_HUMAN | R.VGVASEETPQTSSSARPGT#PSDHQSQE.A | T403:        | 3 | 5,3061 | 0,3   | -0,187 |
| 17 | Q9Y6D5 BIG2_HUMAN   | E.LEKPIQSKPQS#PVIQAAAVS#PK.F     | S218:S227:   | 3 | 5,252  | 0,393 | -0,222 |
| 17 | Q9UK76 HN1_HUMAN    | R.RNS#SEASSGDFLDLK.G             | S87:         | 2 | 5,2203 | 0,486 | -0,644 |
| 17 | Q8WUD4 CCD12_HUMAN  | K.GQEDSLASAVDAATEQK.T            |              | 2 | 5,1397 | 0,538 | -0,426 |
| 17 | P38919 IF4A3_HUMAN  | R.KLDYQGQHVVAGT#PGRVFD.M         | T163:        | 3 | 5,0756 | 0,403 | -0,449 |
| 17 | O60271 JIP4_HUMAN   | R.SHTSLKVSNS#PEPQKAVEQEDE.L      | S251:        | 3 | 5,0682 | 0,414 | -0,581 |
| 17 | Q9UHB6 LIMA1_HUMAN  | R.SRPFTVAASFQSTSVKS#PK.T         | S604:        | 3 | 5,0492 | 0,419 | -0,521 |
| 17 | P27816 MAP4_HUMAN   | K.VGS#LDNVGHLPAGGAVKTE.G         | S1073:       | 3 | 4,9961 | 0,376 | -0,289 |
| 17 | Q9P0K8 FOXJ2_HUMAN  | R.KCSPGS#PTDPNATLSKDE.A          | S46:         | 3 | 4,9762 | 0,362 | -0,645 |
| 17 | Q9UQ35 SRRM2_HUMAN  | K.SKDSLQSCPGSLSLQAGVK.S          |              | 3 | 4,9404 | 0,346 | -0,35  |
| 17 | Q15942 ZYX_HUMAN    | E.KQHPVPPPAQNQNQVR.S             |              | 3 | 4,8525 | 0,365 | -0,498 |
| 17 | Q00839 HNRPU_HUMAN  | E.NGHGEQQPQPATQQQQPQQQR.G        |              | 3 | 4,7946 | 0,32  | -0,437 |
| 17 | Q13428 TCOF_HUMAN   | R.KSAEPSANTTLVSETEEE.G           |              | 2 | 4,7312 | 0,585 | -0,317 |
| 17 | P49591 SYSC_HUMAN   | E.KYLIATSEQPIAALHRDE.W           |              | 3 | 4,6942 | 0,442 | -0,356 |
| 17 | P18615 NELFE_HUMAN  | K.DPEKGPVPTFQPFQR.S              |              | 3 | 4,6863 | 0,411 | -0,42  |
| 17 | Q9UHR5 S30BP_HUMAN  | E.KGGLVSDAYGEDDFSR.L             |              | 2 | 4,6775 | 0,524 | -0,213 |
| 17 | Q9UHB6 LIMA1_HUMAN  | R.SRPFTVAASFQSTSVK.S             |              | 3 | 4,6692 | 0,472 | -0,214 |

|    |                     |                                   |            |   |        |       |        |
|----|---------------------|-----------------------------------|------------|---|--------|-------|--------|
| 17 | P42224 STAT1_HUMAN  | E.NAQRFNQAQSGNIQSTVM*LDK.Q        |            | 3 | 4,6672 | 0,405 | -0,232 |
| 17 | O14617 AP3D1_HUMAN  | K.HRPSEADEEELAR.R                 |            | 3 | 4,6618 | 0,407 | -0,475 |
| 17 | Q9HCD6 TANC2_HUMAN  | E.RSSS#QLGSPDVSHLIR.R             | S1740:     | 3 | 4,5159 | 0,387 | -0,402 |
| 17 | P19174 PLCG1_HUMAN  | E.RGS#DASGQLFHGR.A                | S1233:     | 3 | 4,5127 | 0,302 | -0,374 |
| 17 | Q5VZ89 DEN4C_HUMAN  | E.RRSS#LPLDHGSPAQENPESE.K         | S1042:     | 3 | 4,4485 | 0,465 | -0,48  |
| 17 | Q9GZR7 DDX24_HUMAN  | E.LTDYQLV#PAKNPSSLFSK.E           | S60:       | 3 | 4,4364 | 0,317 | -0,673 |
| 17 | Q02952 AKA12_HUMAN  | E.KQEKEPSKSAESPTS#PVTSE.T         | S286:      | 3 | 4,4332 | 0,456 | -0,657 |
| 17 | Q16206 ENOX2_HUMAN  | R.LRPPS#PPPVVHYSDE.C              | S240:      | 3 | 4,4252 | 0,273 | -0,48  |
| 17 | Q86UP2 KTN1_HUMAN   | K.KVEPVPVTKQPT#PPSE.A             | T153:      | 2 | 4,4119 | 0,478 | -0,606 |
| 17 | O60271 JIP4_HUMAN   | R.SAS#QSSLDKLDQE.L                | S730:      | 2 | 4,3585 | 0,438 | -0,328 |
| 17 | P22059 OSBP1_HUMAN  | K.RTGS#NISGASSDISLDE.Q            | S379:      | 2 | 4,356  | 0,313 | -0,614 |
| 17 | Q86UP2 KTN1_HUMAN   | K.KVEPVPVTKQPT#PPSE.A             | T153:      | 3 | 4,3542 | 0,148 | -0,303 |
| 17 | Q9P0K8 FOXJ2_HUMAN  | E.KLGSASQAGPPGSSR.K               |            | 2 | 4,3182 | 0,371 | -0,697 |
| 17 | O43765 SGTA_HUMAN   | R.SRTPS#ASNDDQQE.-                | S305:      | 2 | 4,3087 | 0,477 | -0,403 |
| 17 | Q96BT3 CENPT_HUMAN  | R.KTQSSGPGQLQKNS#PGKPAQFLAGEAEE.V | S288:      | 3 | 4,3087 | 0,308 | -0,258 |
| 17 | P22059 OSBP1_HUMAN  | R.TGS#NISGASSDISLDE.Q             | S379:      | 2 | 4,3019 | 0,446 | -0,672 |
| 17 | P52272 HNRPM_HUMAN  | K.GCGVVKFES#PEVAE.R               | S701:      | 2 | 4,2679 | 0,422 | -0,692 |
| 17 | Q6FIF0 ZFAN6_HUMAN  | R.QNSSNGRIS#PPATSVSSLSE.S         | S49:       | 3 | 4,2477 | 0,188 | -0,436 |
| 17 | P42858 HD_HUMAN     | E.LIAGGGSSCS#PVLRS.K              | S434:      | 2 | 4,2363 | 0,43  | -0,396 |
| 17 | Q9ULW0 TPX2_HUMAN   | E.IKSSDQPLTPVVS#PK.F              | S738:      | 2 | 4,228  | 0,448 | -0,51  |
| 17 | P18615 NELFE_HUMAN  | E.GKLDPEKGPVPTFQPFQR.S            |            | 3 | 4,2278 | 0,398 | -0,59  |
| 17 | Q9Y2W1 TR150_HUMAN  | K.SPPSTGSTYGSSQKEE.S              |            | 2 | 4,2264 | 0,624 | -0,52  |
| 17 | P18615 NELFE_HUMAN  | K.LKDPEKGPVPTFQPFQR.S             |            | 3 | 4,2262 | 0,333 | -0,553 |
| 17 | O60271 JIP4_HUMAN   | R.SAS#QSS#LDKLDQE.L               | S730:S733: | 2 | 4,2239 | 0,402 | -0,467 |
| 17 | Q13136 LIPA1_HUMAN  | R.SSDGSL#HEEDLAKVIE.L             | S244:      | 3 | 4,2235 | 0,345 | -0,386 |
| 17 | Q9GZR7 DDX24_HUMAN  | E.LTDYQLVSPAKNPSSLFSK.E           |            | 3 | 4,2154 | 0,281 | -0,611 |
| 17 | Q14195 DPYL3_HUMAN  | R.NLHQSGFSLSGTQVDE.G              |            | 2 | 4,2082 | 0,459 | -0,71  |
| 17 | A1L390 PKHG3_HUMAN  | R.HGS#ATDSLSCQLSPE.V              | S656:      | 2 | 4,1909 | 0,512 | -0,731 |
| 17 | Q02952 AKA12_HUMAN  | E.LQSHAKSPPS#PVERE.M              | S1331:     | 3 | 4,1888 | 0,369 | -0,63  |
| 17 | Q8WUD4 CCD12_HUMAN  | K.GQEDSLASAVDAATEQK.T             |            | 3 | 4,1884 | 0,365 | -0,319 |
| 17 | Q86UL3 PLCF_HUMAN   | R.SGS#SKALDNTPEFE.L               | S100:      | 2 | 4,1767 | 0,399 | -0,625 |
| 17 | P05787 K2C8_HUMAN   | E.TRDGKLVSESS#DVLPK.-             | S478:      | 3 | 4,1736 | 0,275 | -0,202 |
| 17 | Q7RTP8 Q7RTP8_HUMAN | K.RASS#LNVLNVGGK.A                | S596:      | 2 | 4,1538 | 0,385 | -0,525 |



|    |                     |                             |              |   |        |       |        |
|----|---------------------|-----------------------------|--------------|---|--------|-------|--------|
| 17 | Q9BY77 PDIP3_HUMAN  | K.CNLHM*NGNVITSDQPILLR.L    |              | 3 | 4,1478 | 0,167 | 0,165  |
| 17 | P40222 TXLNA_HUMAN  | R.VQDLSAGGQGSILTDSGPER.R    |              | 2 | 4,129  | 0,578 | -0,586 |
| 17 | P33316 DUT_HUMAN    | R.ARPAEVGGM*QLR.F           |              | 3 | 4,1156 | 0,156 | 0,211  |
| 17 | Q13136 LIPA1_HUMAN  | R.SSDGS#LSHEEDLAKVIE.L      | S242:        | 2 | 4,1108 | 0,323 | -0,644 |
| 17 | Q9UKA4 AKA11_HUMAN  | K.VKNPCLNVQSQR.S            |              | 3 | 4,11   | 0,329 | -0,76  |
| 17 | Q6NZI2 PTRF_HUMAN   | R.RGS#S#PDVHALLE.I          | S365:S366:   | 2 | 4,0894 | 0,52  | -0,593 |
| 17 | P14618 KPYM_HUMAN   | R.LDIDS#PPITAR.N            | S37:         | 2 | 4,0804 | 0,325 | -0,668 |
| 17 | P23246 SFPQ_HUMAN   | E.RFGQGGAGPVGGQGPR.G        |              | 3 | 4,0774 | 0,42  | 0      |
| 17 | P35527 K1C9_HUMAN   | R.GSGSGSYGGGGSGGGYGGGSGSR.G |              | 2 | 4,0718 | 0,303 | -0,477 |
| 17 | Q96A49 SYAP1_HUMAN  | E.AVRPKT#PPVVIK.S           | T248:        | 3 | 4,0418 | 0,239 | -1,254 |
| 17 | P15880 RS2_HUMAN    | K.SPYQEFTDHLVK.T            |              | 3 | 4,0416 | 0,36  | -0,312 |
| 17 | Q71F23 CENPU_HUMAN  | E.FSKHCGLSLSST#PPGKE.A      | T98:         | 3 | 4,0385 | 0,376 | -0,67  |
| 17 | Q7Z2K8 GRIN1_HUMAN  | E.GKVGSLPLEKGS#PVTTTK.A     | S615:        | 3 | 4,0246 | 0,437 | -0,389 |
| 17 | Q9UK76 HN1_HUMAN    | R.RNSS#EASSGDFDLK.G         | S88:         | 3 | 4,0193 | 0,345 | -0,429 |
| 17 | P42224 STAT1_HUMAN  | R.FNQAQSGNIQSTVM*LDK.Q      |              | 2 | 3,9892 | 0,557 | -0,129 |
| 17 | Q5VT52 K0460_HUMAN  | E.KGAPIETLGYHSASNR.R        |              | 3 | 3,9531 | 0,49  | -0,323 |
| 17 | Q6NZI2 PTRF_HUMAN   | E.AGDLRRGS#S#PDVHALLE.I     | S365:S366:   | 3 | 3,9424 | 0,356 | -0,281 |
| 17 | Q9UHR5 S30BP_HUMAN  | E.KGGLVSDAYGEDDFSR.L        |              | 3 | 3,9418 | 0,37  | 0      |
| 17 | Q13263 TIF1B_HUMAN  | E.GYGFGSGDDPYSSAEPHVSGVK.R  |              | 3 | 3,9383 | 0,42  | -0,744 |
| 17 | P05787 K2C8_HUMAN   | R.AFSSRS#YTSGPGR.I          | S24:         | 3 | 3,9137 | 0,346 | 0      |
| 17 | Q00839 HNRPU_HUMAN  | R.AKS#PQPPVEEDE.H           | S270:        | 2 | 3,8914 | 0,402 | -0,556 |
| 17 | P06748 NPM_HUMAN    | K.M*QAS#IEKGGSLPKVE.A       | S254:        | 2 | 3,8819 | 0,47  | -0,219 |
| 17 | Q13263 TIF1B_HUMAN  | E.GYGFGSGDDPYSSAEPHVSGVKR.S |              | 3 | 3,8779 | 0,347 | -0,541 |
| 17 | Q6P0N0 CN106_HUMAN  | E.KKAPLHNLTYELPTLNQEQE.N    | T218:        | 3 | 3,8585 | 0,28  | -0,673 |
| 17 | Q9P246 STIM2_HUMAN  | E.KSCS#M*NQLSSGIPVPKPR.H    | S680:        | 3 | 3,858  | 0,371 | -0,351 |
| 17 | Q8NI27 THOC2_HUMAN  | E.NVKGGEKT#PVSGSLKS#PVPR.S  | T1270:S1278: | 3 | 3,8465 | 0,2   | -0,416 |
| 17 | Q8NCM9 Q8NCM9_HUMAN | R.SSDITSDLGNVLTSTPNAK.T     |              | 2 | 3,8463 | 0,588 | -0,508 |
| 17 | Q9NVU7 SDA1_HUMAN   | K.YIEIDS#DEEPRGE.L          | S585:        | 2 | 3,8451 | 0,454 | -0,598 |
| 17 | Q05682 CALD1_HUMAN  | E.KQSVDKVTS#PTKV.-          | S789:        | 3 | 3,8238 | 0,313 | -0,183 |
| 17 | P63241 IF5A1_HUMAN  | E.DICPSTHNM*DVPNIKR.N       |              | 2 | 3,8137 | 0,358 | -0,765 |
| 17 | P13645 K1C10_HUMAN  | K.GSLGGGFSSGGFSGGSFSR.G     |              | 2 | 3,8051 | 0,594 | -0,5   |
| 17 | P27816 MAP4_HUMAN   | K.VGS#LDNVGHLPAAGGAVKTE.G   | S1073:       | 2 | 3,7928 | 0,533 | -0,642 |
| 17 | P10768 ESTD_HUMAN   | E.HGLVVIAPDTSR.G            |              | 2 | 3,7803 | 0,349 | -1,075 |

|    |                     |                             |          |   |        |       |        |
|----|---------------------|-----------------------------|----------|---|--------|-------|--------|
| 17 | P46013 KI67_HUMAN   | R.ASQPDLVDT#PTSSKPQPK.R     | T1747:   | 2 | 3,7718 | 0,306 | -0,247 |
| 17 | O60293 CC131_HUMAN  | K.AKEQQNIS#PVVEEPE.F        | S998:    | 2 | 3,7689 | 0,396 | -0,32  |
| 17 | Q9P0K8 FOXJ2_HUMAN  | K.CSPGS#PTDPNATLSKDE.A      | S46:     | 2 | 3,7681 | 0,512 | -0,394 |
| 17 | P10809 CH60_HUMAN   | R.KPLVIIAEDVDGE.A           |          | 2 | 3,7663 | 0,391 | -0,611 |
| 17 | Q6ZRS2 SRCAP_HUMAN  | E.TQGANHTPVISAHQTR.S        |          | 3 | 3,7628 | 0,279 | -0,319 |
| 17 | P35908 K22E_HUMAN   | R.FLEQQNQVLQTK.W            |          | 2 | 3,7491 | 0,407 | -0,496 |
| 17 | Q9H2P0 ADNP_HUMAN   | K.ISNDNPEEHVLK.V            |          | 2 | 3,7396 | 0,353 | -0,962 |
| 17 | P46013 KI67_HUMAN   | E.VHSQFSTGHANS#PCTIIIIGK.A  | S713:    | 3 | 3,7391 | 0,319 | -0,573 |
| 17 | Q8N3Z6 ZCHC7_HUMAN  | E.VITLS#DEDSIYR.C           | S94:     | 2 | 3,7374 | 0,368 | -0,655 |
| 17 | P02545 LMNA_HUMAN   | R.SGAQASST#PLS#PTR.I        | T19:S22: | 2 | 3,731  | 0,469 | -0,562 |
| 17 | Q9Y608 LRRF2_HUMAN  | R.NSASATTPLSGNSSR.R         |          | 2 | 3,7238 | 0,513 | -0,589 |
| 17 | Q5VT52 K0460_HUMAN  | E.KGAPIETLGYHSASNR.R        |          | 2 | 3,7198 | 0,507 | -0,932 |
| 17 | Q14669 TRIPC_HUMAN  | R.KPNPLANSNTSGYSE.S         |          | 2 | 3,712  | 0,462 | -0,618 |
| 17 | Q7RTP8 Q7RTP8_HUMAN | R.ASS#LNVLNVGGK.A           | S596:    | 2 | 3,6884 | 0,491 | -1,083 |
| 17 | P06748 NPM_HUMAN    | K.M*QAS#IEKGGSLPKVE.A       | S254:    | 3 | 3,6801 | 0,207 | -0,11  |
| 17 | Q9BVJ6 UT14A_HUMAN  | R.KRS#ELSQDAEPAGSQE.T       | S434:    | 2 | 3,6746 | 0,481 | -0,269 |
| 17 | P19338 NUCL_HUMAN   | R.DARTLLAKNLPYKVTQDE.L      |          | 3 | 3,6665 | 0,213 | -0,882 |
| 17 | Q3KQU3 MA7D1_HUMAN  | R.RSSQPSPT#AVPASDSPPTKQE.V  | T118:    | 3 | 3,6634 | 0,227 | -0,488 |
| 17 | O60271 JIP4_HUMAN   | E.GSKQRSASQSS#LDKLDQE.L     | S733:    | 3 | 3,6632 | 0,266 | -0,895 |
| 17 | P04264 K2C1_HUMAN   | R.SLDLDSIIAEVK.A            |          | 2 | 3,6543 | 0,368 | -0,562 |
| 17 | Q6P597 KLC3_HUMAN   | R.TLSTASTQDLS#PH.-          | S502:    | 2 | 3,6533 | 0,515 | -0,456 |
| 17 | Q9UKL0 RCOR1_HUMAN  | R.VGPQYQAVVPDFDPAK.L        |          | 2 | 3,6326 | 0,402 | -0,493 |
| 17 | Q92576 PHF3_HUMAN   | E.NLVANTARS#PQFINLK.R       | S1642:   | 3 | 3,6302 | 0,478 | -0,49  |
| 17 | Q8IU81 I2BP1_HUMAN  | R.AGGAS#PAASSTAQPPTQHR.L    | S453:    | 3 | 3,6259 | 0,292 | -0,195 |
| 17 | Q9UK76 HN1_HUMAN    | R.RNS#SEASSGDFLDLKG.E       | S87:     | 2 | 3,6257 | 0,515 | -0,774 |
| 17 | P11717 MPRI_HUMAN   | K.ALSSLHGDDQDS#EDE.V        | S2409:   | 2 | 3,6183 | 0,455 | -0,287 |
| 17 | Q01082 SPTB2_HUMAN  | K.TALPAQSAATLPAR.T          |          | 2 | 3,6144 | 0,411 | -0,803 |
| 17 | P00558 PGK1_HUMAN   | K.SLLGKDVFLK.D              |          | 2 | 3,6118 | 0,21  | -0,594 |
| 17 | P37840 SYUA_HUMAN   | E.GAGSIAAATGFVK.K           |          | 2 | 3,5923 | 0,465 | -0,212 |
| 17 | Q02952 AKA12_HUMAN  | E.KQEKEPSKSAES#PTSPVTSE.T   | S283:    | 3 | 3,5764 | 0,366 | -0,575 |
| 17 | Q01518 CAP1_HUMAN   | R.GYADS#PSKAGAAPYVQAFD.S    | S34:     | 2 | 3,5749 | 0,422 | -0,367 |
| 17 | Q9UKV3 ACINU_HUMAN  | E.KSKSPS#PPRLTE.D           | S388:    | 3 | 3,5734 | 0,232 | 0      |
| 17 | P49790 NU153_HUMAN  | E.IKDSTSQHDDDNISTTS#GFSSR.A | S185:    | 3 | 3,5625 | 0,355 | -0,443 |

|    |                    |                             |            |   |        |       |        |
|----|--------------------|-----------------------------|------------|---|--------|-------|--------|
| 17 | O76021 RL1D1_HUMAN | K.ATNES#EDEIPQLVPIGKK.T     | S361:      | 3 | 3,5484 | 0,174 | -0,625 |
| 17 | Q99439 CNN2_HUMAN  | K.AGQCVIGLQM*GTNK.C         |            | 2 | 3,5479 | 0,401 | -0,572 |
| 17 | P63241 IF5A1_HUMAN | E.DICPSTHNM*DVPNIK.R        |            | 2 | 3,5456 | 0,306 | -0,833 |
| 17 | Q9Y2W1 TR150_HUMAN | R.SPALKSPLQSVVVR.R          |            | 3 | 3,5416 | 0,418 | -0,062 |
| 17 | Q9Y2X7 GIT1_HUMAN  | R.ARS#M*DSSDLSDGAVTLQE.Y    | S410:      | 2 | 3,5378 | 0,44  | -0,185 |
| 17 | P11388 TOP2A_HUMAN | K.TLAVSGLGVVGR.D            |            | 2 | 3,536  | 0,285 | -0,54  |
| 17 | Q9NZT2 OGFR_HUMAN  | R.SQGDEAGGHGEDRPEPLS#PKE.S  | S378:      | 3 | 3,5312 | 0,265 | -0,322 |
| 17 | Q9Y2H0 DLGP4_HUMAN | D.CTPHPNSISIDAGPR.Q         |            | 3 | 3,5307 | 0,299 | -0,677 |
| 17 | P12429 ANXA3_HUMAN | K.SLGDDISSETSGDFR.K         |            | 2 | 3,5235 | 0,49  | -0,769 |
| 17 | Q7KZI7 MARK2_HUMAN | R.KASSTAKVPAS#PLPGLR.R      | S456:      | 2 | 3,5102 | 0,402 | -0,493 |
| 17 | P60709 ACTB_HUMAN  | E.EHPVLLTEAPLNPK.A          |            | 2 | 3,4985 | 0,481 | -0,548 |
| 17 | P46821 MAP1B_HUMAN | R.TTKS#PSDSGYSYE.T          | S1915:     | 2 | 3,4955 | 0,335 | -0,569 |
| 17 | P18583 SON_HUMAN   | R.AGIEGPLLASDVGR.D          |            | 2 | 3,4947 | 0,383 | -0,36  |
| 17 | O60293 CC131_HUMAN | R.RIS#TSDILSEK.K            | S352:      | 2 | 3,4935 | 0,362 | -0,643 |
| 17 | O43707 ACTN4_HUMAN | E.M*NGTLEDQLSHLK.Q          |            | 2 | 3,4896 | 0,341 | -0,487 |
| 17 | Q9NYJ8 TAB2_HUMAN  | R.TLTHSIS#DGQLQGGQSNSE.L    | S108:      | 2 | 3,4862 | 0,436 | -0,18  |
| 17 | P35251 RFC1_HUMAN  | E.AHLTPYSLQAIK.A            |            | 3 | 3,4844 | 0,09  | 0,068  |
| 17 | P35527 K1C9_HUMAN  | R.SGGGGGGGLGSGGSIR.S        |            | 2 | 3,4829 | 0,453 | -0,594 |
| 17 | P06748 NPM_HUMAN   | K.MQAS#IEKGGSLPKVE.A        | S254:      | 3 | 3,4795 | 0,101 | -0,221 |
| 17 | Q9UQN3 CHM2B_HUMAN | R.SLPSASTSKATIS#DEEIE.R     | S199:      | 2 | 3,4782 | 0,392 | -0,502 |
| 17 | O60271 JIP4_HUMAN  | R.SASQSS#LDKLDQE.L          | S733:      | 2 | 3,4681 | 0,298 | -0,574 |
| 17 | Q05682 CALD1_HUMAN | E.KQSVDKVT#SPTKV.-          | T788:      | 2 | 3,4676 | 0,351 | -0,897 |
| 17 | Q9NVR2 INT10_HUMAN | E.NQHQGAQDTSDLMS#PSKR.S     | S231:      | 3 | 3,4637 | 0,236 | -0,352 |
| 17 | Q09666 AHNK_HUMAN  | K.FKAEAPLPS#PKLE.G          | S5110:     | 2 | 3,4617 | 0,444 | -0,729 |
| 17 | Q96A49 SYAP1_HUMAN | K.SQLKTQEDEEE.I             |            | 2 | 3,4614 | 0,276 | -0,457 |
| 17 | Q15424 SAFB1_HUMAN | E.LAEAPTEAPS#PEAR.D         | S344:      | 2 | 3,4587 | 0,342 | -0,723 |
| 17 | P54578 UBP14_HUMAN | R.YAGALRAS#GE.M             | S143:      | 2 | 3,4497 | 0,418 | -0,341 |
| 17 | O60271 JIP4_HUMAN  | K.VSNS#PEPQKAVEQEDE.L       | S251:      | 2 | 3,4475 | 0,468 | -0,392 |
| 17 | Q86UP2 KTN1_HUMAN  | K.VEPVPVTKQPT#PPSE.A        | T153:      | 3 | 3,4474 | 0,248 | 0,326  |
| 17 | P18615 NELFE_HUMAN | K.LKDPEKGPVPTFQPFQR.S       |            | 2 | 3,4428 | 0,326 | -0,615 |
| 17 | Q13136 LIPA1_HUMAN | R.SSDGSL#HEEDLAKVIE.L       | S244:      | 2 | 3,4399 | 0,257 | -0,579 |
| 17 | Q16555 DPYL2_HUMAN | K.TVTPASSAKTS#PAKQQAPPVR.N  | S522:      | 3 | 3,4349 | 0,352 | -0,831 |
| 17 | P29590 PML_HUMAN   | K.AVSPPHLDGPPS#PRS#PVIQSE.V | S527:S530: | 3 | 3,4225 | 0,314 | -0,649 |

|    |                     |                               |            |   |        |       |        |
|----|---------------------|-------------------------------|------------|---|--------|-------|--------|
| 17 | O94888 UBXD7_HUMAN  | E.HGQLDGLSSS#PPKK.C           | S270:      | 3 | 3,4111 | 0,204 | 0      |
| 17 | P60709 ACTB_HUMAN   | E.EHPVLLTEAPLNPK.A            |            | 3 | 3,4069 | 0,352 | -0,235 |
| 17 | Q9Y490 TLN1_HUMAN   | K.KSTVLQQQYNR.V               |            | 3 | 3,4055 | 0,21  | -0,268 |
| 17 | Q5QJE6 TDIF2_HUMAN  | E.KQIVGTPVNSESDSTR.Q          |            | 3 | 3,4013 | 0,224 | -0,733 |
| 17 | P00558 PGK1_HUMAN   | K.SLLGKDVLFKLD.C              |            | 2 | 3,386  | 0,372 | -0,634 |
| 17 | Q9H3N1 TXND1_HUMAN  | E.GTNKDFPQNAIR.Q              |            | 3 | 3,3836 | 0,225 | 0,067  |
| 17 | Q9NVR2 INT10_HUMAN  | E.NQHQAQDTSGLM*S#PSKR.S       | S231:      | 3 | 3,3833 | 0,393 | -0,524 |
| 17 | Q09666 AHNK_HUMAN   | R.LKS#EDGVEGLGE.T             | S135:      | 2 | 3,3808 | 0,466 | -0,427 |
| 17 | Q9UK76 HN1_HUMAN    | R.NS#SEASSGDFLDLK.G           | S87:       | 2 | 3,3777 | 0,421 | -0,315 |
| 17 | Q9UQ35 SRRM2_HUMAN  | R.VSGRTS#PPLDR.A              | S2398:     | 2 | 3,3731 | 0,281 | -0,62  |
| 17 | Q8TEW0 PAR3_HUMAN   | K.AGS#PSRDVGPSLGLKK.S         | S873:      | 3 | 3,3704 | 0,203 | -0,333 |
| 17 | Q13136 LIPA1_HUMAN  | R.SS#DGSLSHEDLAK.V            | S239:      | 2 | 3,3664 | 0,3   | -0,549 |
| 17 | P49368 TCPG_HUMAN   | E.KIPGGIIEDSCVLR.G            |            | 3 | 3,3658 | 0,218 | 0,235  |
| 17 | P14618 KPYM_HUMAN   | R.NTGIICTIGPASR.S             |            | 2 | 3,3595 | 0,458 | -0,628 |
| 17 | B2CI53 B2CI53_HUMAN | E.RNGILASPQS#APGNLDNSK.S      | S263:      | 3 | 3,3529 | 0,126 | -0,634 |
| 17 | P0C0S8 H2A1_HUMAN   | R.NDEELNLLGK.V                |            | 2 | 3,3524 | 0,269 | -0,383 |
| 17 | P33316 DUT_HUMAN    | R.ARPAEVGGMQLR.F              |            | 3 | 3,3477 | 0,144 | 0,142  |
| 17 | O94888 UBXD7_HUMAN  | R.SESLIDASEDSQLE.A            |            | 2 | 3,3391 | 0,438 | -0,721 |
| 17 | Q9Y266 NUDC_HUMAN   | K.LKPNLNGADLPNYR.W            |            | 3 | 3,338  | 0,29  | -0,334 |
| 17 | Q14814 MEF2D_HUMAN  | K.KGFNGCDS#PEPDGDSLE.Q        | S98:       | 2 | 3,336  | 0,429 | -0,78  |
| 17 | Q12888 TP53B_HUMAN  | K.LGKPSAHASQS#FCE.S           | S894:      | 2 | 3,336  | 0,453 | -0,61  |
| 17 | Q15942 ZYX_HUMAN    | R.S#PGAPGPLTLKEVEE.L          | S344:      | 2 | 3,3357 | 0,421 | -0,761 |
| 17 | Q09666 AHNK_HUMAN   | K.FKAEAPLPS#PKLE.G            | S5110:     | 3 | 3,3208 | 0,203 | -0,789 |
| 17 | Q86WB0 NIPA_HUMAN   | R.SQDATFS#PGSEQAEKS#PGPIVSR.T | S335:S344: | 3 | 3,3114 | 0,313 | -0,217 |
| 17 | Q96JG6 CC132_HUMAN  | R.DYVDEQTGDGPVK.S             |            | 2 | 3,3067 | 0,488 | -0,514 |
| 17 | Q32MZ4 LRRF1_HUMAN  | K.DNAKIDGATQSSPAEPK.S         |            | 3 | 3,3001 | 0,2   | -0,212 |
| 17 | Q8NI27 THOC2_HUMAN  | E.KTPVSGSLKS#PVPR.S           | S1278:     | 3 | 3,2902 | 0,186 | -0,537 |
| 17 | P60709 ACTB_HUMAN   | E.TTFNSIM*KCDVDIRKD.L         |            | 3 | 3,2869 | 0,263 | -0,187 |
| 17 | Q9UQ35 SRRM2_HUMAN  | E.SYFGVSSLLQLK.G              |            | 2 | 3,2828 | 0,404 | -0,695 |
| 17 | P27816 MAP4_HUMAN   | K.VGS#LDNVGHLPAGGAVK.T        | S1073:     | 2 | 3,2811 | 0,455 | -0,657 |
| 17 | Q13428 TCOF_HUMAN   | K.TVANLLSGKS#PR.K             | S156:      | 2 | 3,2768 | 0,413 | -0,461 |
| 17 | P37802 TAGL2_HUMAN  | K.IQASTM*AFKQM*E.Q            |            | 2 | 3,2719 | 0,313 | -0,431 |
| 17 | Q92878 RAD50_HUMAN  | R.ILELDQELIK.A                |            | 2 | 3,2619 | 0,14  | -0,502 |

|    |                     |                                  |                 |   |        |       |        |
|----|---------------------|----------------------------------|-----------------|---|--------|-------|--------|
| 17 | Q32MZ4 LRRF1_HUMAN  | K.IDGATQSSPAEPK.S                |                 | 2 | 3,2534 | 0,363 | -0,469 |
| 17 | O60583 CCNT2_HUMAN  | E.QQHKQGQSQAASSSSVTS#PIK.M       | S480:           | 3 | 3,2534 | 0,206 | -0,566 |
| 17 | Q02880 TOP2B_HUMAN  | E.FSGAPVEGAGEEALT#PSVPINKGPKPK.R | T1292:          | 3 | 3,2523 | 0,286 | -0,664 |
| 17 | P30040 ERP29_HUMAN  | K.SLNILTAFAQK.K                  |                 | 2 | 3,2502 | 0,316 | -0,43  |
| 17 | Q9Y4G6 TLN2_HUMAN   | K.KSTILQQQFN.R.T                 |                 | 3 | 3,2393 | 0,153 | 0      |
| 17 | P49327 FAS_HUMAN    | K.VGDPQELNGITR.A                 |                 | 2 | 3,2255 | 0,471 | -0,376 |
| 17 | P07900 HS90A_HUMAN  | E.NQKHIYYITGE.T                  |                 | 2 | 3,2198 | 0,425 | -0,357 |
| 17 | Q13077 TRAF1_HUMAN  | K.CRGEDLQSSIS#PGSR.L             | S66:            | 3 | 3,2154 | 0,235 | -0,111 |
| 17 | O75475 PSIP1_HUMAN  | K.QSNASS#DVEVEEKE.T              | S106:           | 2 | 3,2134 | 0,347 | -0,673 |
| 17 | Q96EU6 CF153_HUMAN  | K.TYKQLVAGNS#PK.K                | S73:            | 2 | 3,2065 | 0,272 | -0,44  |
| 17 | Q9NZM1 MYOF_HUMAN   | E.DRDHYIPNTLNPVFGFR.M            |                 | 3 | 3,1989 | 0,178 | -0,287 |
| 17 | Q9UHD8 SEPT9_HUMAN  | R.NEKAPVDFGYVGID.S               |                 | 2 | 3,1838 | 0,338 | -0,32  |
| 17 | P62753 RS6_HUMAN    | R.RLS#S#LRAS#TSKSE.S             | S235:S236:S240: | 2 | 3,1832 | 0,297 | -0,441 |
| 17 | Q8TE77 SSH3_HUMAN   | E.QGQGQGQGEPCISSTPR.F            |                 | 2 | 3,1809 | 0,359 | -0,546 |
| 17 | Q5W0B1 RN219_HUMAN  | R.FAVAALQSK.V                    |                 | 2 | 3,1792 | 0,194 | -0,196 |
| 17 | Q09666 AHNK_HUMAN   | E.SEIKVPDVELK.S                  |                 | 2 | 3,1788 | 0,244 | -0,485 |
| 17 | Q8N3Z6 ZCHC7_HUMAN  | K.KLIVLS#DSE.V                   | S77:            | 2 | 3,1764 | 0,214 | -0,563 |
| 17 | Q32MZ4 LRRF1_HUMAN  | K.IDGATQSS#PAEPKSEDADR.C         | S714:           | 3 | 3,1734 | 0,169 | -0,445 |
| 17 | Q12792 TWF1_HUMAN   | K.YLLSQSSPAPLTAEEEE.L            |                 | 2 | 3,1732 | 0,508 | -0,676 |
| 17 | O75340 PDCD6_HUMAN  | R.LSDQFHDILIR.K                  |                 | 2 | 3,1722 | 0,31  | -0,45  |
| 17 | Q01082 SPTB2_HUMAN  | K.TALPAQSAAT#LPAR.T              | T2187:          | 2 | 3,1717 | 0,368 | -0,253 |
| 17 | P49736 MCM2_HUMAN   | R.GNDPLTSS#PGR.S                 | S27:            | 2 | 3,169  | 0,318 | -0,517 |
| 17 | P15880 RS2_HUMAN    | K.SPYQEFTDHLVK.T                 |                 | 2 | 3,1636 | 0,299 | -0,917 |
| 17 | Q9Y4B4 ARIP4_HUMAN  | R.HSASS#PKAPDPE.G                | S1155:          | 2 | 3,1583 | 0,442 | -0,562 |
| 17 | O75531 BAF_HUMAN    | R.DFVAEPM*GEKPVGSLAGIGE.V        |                 | 2 | 3,1551 | 0,466 | -0,604 |
| 17 | P40222 TXLNA_HUMAN  | K.RVQDLSAGGQGS LTDSGPER.R        |                 | 3 | 3,1531 | 0,242 | -0,27  |
| 17 | P35527 K1C9_HUMAN   | R.QGVDADINGLR.Q                  |                 | 2 | 3,151  | 0,377 | -0,316 |
| 17 | P06576 ATPB_HUMAN   | E.AVAKADKLAEEHSS#.-              | S529:           | 2 | 3,1442 | 0,412 | -0,635 |
| 17 | P63241 IF5A1_HUMAN  | E.DICPSTHNMDVPMK.R               |                 | 2 | 3,1432 | 0,306 | -0,561 |
| 17 | Q15154 PCM1_HUMAN   | R.STSAPSASVGLAPVVNGE.S           |                 | 2 | 3,1421 | 0,317 | -0,297 |
| 17 | O60583 CCNT2_HUMAN  | K.QGQSQAASSSSVTS#PIKM*KIPIANTE.K | S480:           | 3 | 3,1396 | 0,289 | -0,531 |
| 17 | Q8IZM8 ZN654_HUMAN  | K.KCQTLFGFDS#DDESA.-             | S576:           | 2 | 3,1384 | 0,285 | -0,61  |
| 17 | B2CI53 B2CI53_HUMAN | E.RNGILASPQSAPGNL DNSK.S         |                 | 3 | 3,1338 | 0,248 | -0,283 |

|    |                    |                           |            |   |        |       |        |
|----|--------------------|---------------------------|------------|---|--------|-------|--------|
| 17 | Q9ULH0 ARMS_HUMAN  | E.YLSDALLDKK.D            |            | 2 | 3,1323 | 0,326 | 0      |
| 17 | P35908 K22E_HUMAN  | R.NLDLDSIIAEVK.A          |            | 2 | 3,1296 | 0,387 | -0,367 |
| 17 | Q92614 MY18A_HUMAN | R.RVS#SSSELDLPSGDHCE.A    | S1067:     | 2 | 3,1264 | 0,235 | -0,187 |
| 17 | Q16555 DPYL2_HUMAN | R.NLHQSGFSLGAQIDDNIPR.R   |            | 3 | 3,1224 | 0,199 | -0,759 |
| 17 | Q8IX03 WWC1_HUMAN  | E.TNTET#PAPS#PTVVRPK.D    | T895:S899: | 3 | 3,1204 | 0,226 | -0,493 |
| 17 | P62701 RS4X_HUMAN  | R.TIRYPDPLIK.V            |            | 3 | 3,1189 | 0,225 | 0,226  |
| 17 | P35527 K1C9_HUMAN  | R.FSSSSGYGGGSSR.V         |            | 2 | 3,1086 | 0,412 | -0,691 |
| 17 | Q3V6T2 GRDN_HUMAN  | E.DISPQGVSDSSTGSR.V       |            | 2 | 3,1037 | 0,529 | -0,683 |
| 17 | Q9GZR7 DDX24_HUMAN | E.LTDYQLVSPAK.N           |            | 2 | 3,1018 | 0,369 | -0,395 |
| 17 | Q9NUQ6 SPS2L_HUMAN | K.AKTS#PVKSNTPAAHLE.I     | S195:      | 3 | 3,0956 | 0,127 | -0,317 |
| 17 | O60684 IMA7_HUMAN  | R.M*KS#YKNNALNPEE.M       | S16:       | 2 | 3,0948 | 0,282 | -0,075 |
| 17 | Q6DN90 IQEC1_HUMAN | R.SALSSS#LRDLSE.A         | S925:      | 2 | 3,0948 | 0,401 | -0,363 |
| 17 | P51114 FXR1_HUMAN  | R.EDGM*VPFVFGTKE.S        |            | 2 | 3,0903 | 0,421 | -0,544 |
| 17 | Q4G0J3 LARP7_HUMAN | R.SRPTS#EGS#DIE.S         | S258:S261: | 2 | 3,0893 | 0,208 | -0,365 |
| 17 | O14497 ARI1A_HUMAN | R.SHHAPM*S#PGSSGGGQPLAR.T | S363:      | 3 | 3,089  | 0,287 | -0,553 |
| 17 | Q3SYE8 HMG4L_HUMAN | K.STNPGISIGDVAK.K         |            | 2 | 3,083  | 0,506 | -0,581 |
| 17 | Q12846 STX4_HUMAN  | E.ADENYNS#VNTR.M          | S117:      | 2 | 3,0622 | 0,323 | -0,627 |
| 17 | P06748 NPM_HUMAN   | E.KT#PKTPKGPS#SVEDIK.A    | T234:S242: | 2 | 3,0608 | 0,256 | -0,521 |
| 17 | O75376 NCOR1_HUMAN | E.AAKPPEPEKPV#PPPVEQK.H   | S224:      | 3 | 3,0585 | 0,212 | -0,695 |
| 17 | Q8IXM2 CQ049_HUMAN | E.DSGIPLPAES#PKKGPK.K     | S96:       | 2 | 3,0534 | 0,406 | -0,717 |
| 17 | Q8NEY8 PPHLN_HUMAN | E.LFEDS#QLTTR.S           | S285:      | 2 | 3,0475 | 0,319 | -0,662 |
| 17 | Q76I76 SSH2_HUMAN  | E.SISQGVGQIQLK.G          |            | 2 | 3,045  | 0,22  | -0,582 |
| 17 | Q5VSL9 FA40A_HUMAN | R.KDS#EGYSESPDLE.F        | S59:       | 2 | 3,0337 | 0,295 | -0,715 |
| 17 | Q76FK4 NOL8_HUMAN  | R.TCDSITPSKSS#PVPVSD.T    | S268:      | 2 | 3,0337 | 0,438 | -0,657 |
| 17 | P61604 CH10_HUMAN  | K.VGDKVLLPEYGGTK.V        |            | 2 | 3,0293 | 0,217 | -0,496 |
| 17 | P60174 TPIS_HUMAN  | R.KQS#LGELIGTLNAAK.V      | S21:       | 2 | 3,0277 | 0,469 | -0,376 |
| 17 | Q9UHB6 LIMA1_HUMAN | K.FQAPARETCVE.C           |            | 2 | 3,0221 | 0,221 | -0,373 |
| 17 | P18669 PGAM1_HUMAN | K.NLKPIKPMQFLGDEE.T       |            | 2 | 3,0216 | 0,36  | -0,694 |
| 17 | P51858 HDGF_HUMAN  | R.AGDLLLED#PKRPK.E        | S165:      | 3 | 3,0207 | 0,148 | -0,121 |
| 17 | O43719 HTSF1_HUMAN | R.GFEGSCS#QKESEE.G        | S481:      | 2 | 3,02   | 0,345 | -0,55  |
| 17 | Q14195 DPYL3_HUMAN | R.NLHQSGFSLSGTQVD.E       |            | 2 | 3,0175 | 0,472 | -0,307 |
| 17 | P05556 ITB1_HUMAN  | R.SNGLICGGNGVCK.C         |            | 2 | 3,0158 | 0,372 | -0,639 |
| 17 | P06576 ATPB_HUMAN  | E.AVAKADKLAEEHSS#.-       | S529:      | 3 | 3,0134 | 0,338 | -0,595 |

|    |                     |                            |            |   |        |       |        |
|----|---------------------|----------------------------|------------|---|--------|-------|--------|
| 17 | Q14676 MDC1_HUMAN   | R.GRQTVDKVM*GIPKE.T        |            | 3 | 3,0101 | 0,212 | -0,116 |
| 17 | Q9UHB6 LIMA1_HUMAN  | R.KIS#ENSYSLDDLE.I         | S225:      | 2 | 2,9981 | 0,413 | -0,613 |
| 17 | Q9NQG5 CT077_HUMAN  | E.RSVYGGFEFIQQLK.L         |            | 3 | 2,9966 | 0,089 | -0,06  |
| 17 | Q9P2D1 CHD7_HUMAN   | E.LKGVEVGADTGSK.S          |            | 3 | 2,9936 | 0,116 | -0,363 |
| 17 | P52272 HNRPM_HUMAN  | K.SKGCQVVKFESPE.V          |            | 2 | 2,9919 | 0,215 | -0,171 |
| 17 | Q99426 TBCB_HUMAN   | E.DALLGSYPVDDGCR.I         |            | 2 | 2,9762 | 0,489 | -1,111 |
| 17 | Q09666 AHNK_HUMAN   | K.VESEIKVPDVELK.S          |            | 3 | 2,9703 | 0,289 | 0,185  |
| 17 | Q08AM6 VAC14_HUMAN  | K.SQKADSPSIDYAE.L          |            | 2 | 2,9695 | 0,342 | -0,432 |
| 17 | B1ALK7 B1ALK7_HUMAN | R.KES#APQVLLPEEE.K         | S619:      | 2 | 2,9689 | 0,325 | -0,394 |
| 17 | Q8IX03 WWC1_HUMAN   | E.TNT#ETPAPS#PTVVRPK.D     | T893:S899: | 2 | 2,9618 | 0,134 | -0,658 |
| 17 | Q6PKG0 LARP1_HUMAN  | R.AVT#PVPTKTEE.V           | T526:      | 2 | 2,9614 | 0,379 | -0,487 |
| 17 | Q12802 AKP13_HUMAN  | E.M*DSITEVPANCSVLR.S       |            | 2 | 2,9604 | 0,496 | -0,714 |
| 17 | P27816 MAP4_HUMAN   | E.RAS#PIKM*DLAPSK.D        | S358:      | 3 | 2,9595 | 0,106 | 0      |
| 17 | Q9Y2W1 TR150_HUMAN  | E.MKS#PREPGYKAE.G          | S698:      | 3 | 2,9559 | 0,302 | -0,683 |
| 17 | Q7Z2K8 GRIN1_HUMAN  | R.KALGSARS#PEGARGSE.G      | S737:      | 3 | 2,9551 | 0,174 | -0,553 |
| 17 | Q9UQ35 SRRM2_HUMAN  | R.SRTPPS#APSQSR.M          | S2412:     | 3 | 2,9535 | 0,247 | -0,068 |
| 17 | Q92598 HS105_HUMAN  | E.NKIPDADKANE.K            |            | 3 | 2,9522 | 0,288 | -0,753 |
| 17 | P00558 PGK1_HUMAN   | K.SLLGKDVLFKLD.C           |            | 3 | 2,9513 | 0,28  | -0,068 |
| 17 | Q02952 AKA12_HUMAN  | E.KQEKEPSKSAESPT#S#PVTSE.T | T285:S286: | 3 | 2,9509 | 0,238 | -0,635 |
| 17 | P18669 PGAM1_HUMAN  | K.NLKPIKPMQFLGDEE.T        |            | 3 | 2,9498 | 0,243 | -0,728 |
| 17 | O43166 SI1L1_HUMAN  | R.HSASPVVFTSAR.S           |            | 3 | 2,9494 | 0,134 | 0,218  |
| 17 | P49792 RBP2_HUMAN   | E.KDSLITPHVSR.S            |            | 2 | 2,9491 | 0,21  | -0,487 |
| 17 | Q15942 ZYX_HUMAN    | E.KQHPVPPPAQNNQVR.S        |            | 2 | 2,949  | 0,287 | -0,73  |
| 17 | Q7KZI7 MARK2_HUMAN  | K.ASSTAKVPAS#PLPGLR        | S456:      | 2 | 2,9465 | 0,436 | -1,14  |
| 17 | P30101 PDIA3_HUMAN  | E.KLSKDPNIVIAK.M           |            | 3 | 2,9458 | 0,221 | 0,138  |
| 17 | Q9Y2F5 K0947_HUMAN  | E.NLKEKS#PFRE.T            | S1303:     | 2 | 2,9431 | 0,34  | -0,459 |
| 17 | P62937 PPIA_HUMAN   | K.KITIADCGQLE.-            |            | 2 | 2,9355 | 0,381 | -0,489 |
| 17 | Q9NVD7 PARVA_HUMAN  | K.S#PSVPKSPPKS#PPSR.K      | S8:S19:    | 3 | 2,9334 | 0,152 | -0,202 |
| 17 | P18615 NELFE_HUMAN  | R.SIS#ADDDLQE.S            | S115:      | 2 | 2,9316 | 0,316 | -0,416 |
| 17 | Q5VZ89 DEN4C_HUMAN  | E.RRSS#LPLDHGSPAQENPE.S    | S1042:     | 3 | 2,9254 | 0,224 | -0,619 |
| 17 | Q9Y2W1 TR150_HUMAN  | R.ERS#PALKSPLQSVVVR.R      | S248:      | 3 | 2,923  | 0,318 | -0,297 |
| 17 | O60271 JIP4_HUMAN   | K.VTDAPNKS#EISKHIE.V       | S311:      | 3 | 2,9186 | 0,089 | -0,209 |
| 17 | Q9UHB6 LIMA1_HUMAN  | E.VQQPVHPKPLS#PDSR.A       | S362:      | 3 | 2,9171 | 0,09  | -0,311 |

|    |                    |                          |            |   |        |       |        |
|----|--------------------|--------------------------|------------|---|--------|-------|--------|
| 17 | Q5VZK9 LR16A_HUMAN | R.YGVQVMGSGLLAE.M        |            | 2 | 2,9131 | 0,375 | -0,461 |
| 17 | Q09666 AHNK_HUMAN  | K.VEGDLKGPEVDIK.G        |            | 3 | 2,9127 | 0,304 | -0,654 |
| 17 | P13861 KAP2_HUMAN  | E.ARAPASVLPAAATPR.Q      |            | 2 | 2,9098 | 0,295 | -0,354 |
| 17 | Q9NQ55 SSF1_HUMAN  | R.VGGS#DEEASGIPSR.T      | S359:      | 2 | 2,9085 | 0,269 | -0,339 |
| 17 | Q8TEW0 PARD3_HUMAN | E.TKLNTVDDQKAGSPS#R.D    | S875:      | 3 | 2,9043 | 0,284 | -0,611 |
| 17 | Q4G0J3 LARP7_HUMAN | E.NMDTSNTSISK.M          |            | 2 | 2,9029 | 0,328 | -0,713 |
| 17 | P22626 ROA2_HUMAN  | R.GGGGNFGPGPSNFR.G       |            | 2 | 2,9006 | 0,421 | -0,354 |
| 17 | Q96JM3 ZN828_HUMAN | E.TRKPGSPGSPSES#PKAASD.I | S507:      | 3 | 2,8997 | 0,327 | -0,594 |
| 17 | Q9HC35 EMAL4_HUMAN | R.ASPS#PQPSSQLQIHR.Q     | S146:      | 2 | 2,8877 | 0,194 | -0,674 |
| 17 | Q8WWY3 PRP31_HUMAN | E.DLGFSLGHLGK.S          |            | 2 | 2,8863 | 0,485 | -0,64  |
| 17 | Q5T4S7 UBR4_HUMAN  | K.VTISDGKVADEE.K         |            | 2 | 2,8857 | 0,421 | -0,29  |
| 17 | Q13838 UAP56_HUMAN | K.NCPHIVVGTGPR.I         |            | 3 | 2,8856 | 0,311 | 0,21   |
| 17 | Q53F19 CQ085_HUMAN | E.LKM*ISTPS#PK.K         | S415:      | 2 | 2,8757 | 0,313 | -0,509 |
| 17 | Q01813 K6PP_HUMAN  | E.GAIDTQNKPIITSEK.I      |            | 2 | 2,8757 | 0,281 | -0,65  |
| 17 | P0C0S8 H2A1_HUMAN  | R.HLQLAIRNDEE.L          |            | 2 | 2,8657 | 0,292 | -0,638 |
| 17 | Q9Y2D9 ZN652_HUMAN | E.SGS#PYSVLVDTK.M        | S57:       | 2 | 2,8639 | 0,373 | -0,275 |
| 17 | Q9H3N1 TXND1_HUMAN | E.GTNKDFPQNAIR.Q         |            | 2 | 2,8637 | 0,18  | -0,717 |
| 17 | P21333 FLNA_HUMAN  | R.FLPREEGPYEVE.V         |            | 2 | 2,8634 | 0,302 | -0,5   |
| 17 | P35251 RFC1_HUMAN  | E.AHLTPYSLQAIKASR.H      |            | 3 | 2,8587 | 0,32  | -0,331 |
| 17 | O00148 DDX39_HUMAN | K.NCPHVVVGTPGR.I         |            | 2 | 2,857  | 0,342 | -0,377 |
| 17 | P11388 TOP2A_HUMAN | K.TQLEHILLRPD.T          |            | 3 | 2,8551 | 0,38  | 0      |
| 17 | Q14C86 GAPD1_HUMAN | K.RTS#PSDGAM*ANYE.S      | S1044:     | 2 | 2,853  | 0,302 | -0,49  |
| 17 | Q8WU90 ZC3HF_HUMAN | E.KIDKLEQDM*E.R          |            | 2 | 2,8505 | 0,209 | -0,772 |
| 17 | Q96T58 MINT_HUMAN  | E.KFGS#PKKDVDE.Y         | S1194:     | 2 | 2,8459 | 0,248 | -0,459 |
| 17 | P51858 HDGF_HUMAN  | R.RAGDLLEDS#PKRPK.E      | S165:      | 3 | 2,8446 | 0,295 | -0,22  |
| 17 | P52272 HNRPM_HUMAN | K.GCGVVKFESPE.V          |            | 2 | 2,8432 | 0,351 | -0,404 |
| 17 | Q15154 PCM1_HUMAN  | E.LHTLRDQHLNNS#S#SPQR.S  | S429:S430: | 3 | 2,837  | 0,113 | -0,488 |
| 17 | P02545 LMNA_HUMAN  | R.LVEIDNGKQR.E           |            | 2 | 2,8366 | 0,349 | -0,52  |
| 17 | P05787 K2C8_HUMAN  | R.TEM*ENEFVLIKK.D        |            | 3 | 2,8352 | 0,291 | -0,183 |
| 17 | P14618 KPYM_HUMAN  | E.TAKGDYPLEAVR.M         |            | 2 | 2,8332 | 0,239 | -0,185 |
| 17 | Q14C86 GAPD1_HUMAN | R.NAIKRTS#PSDGAM*ANYE.S  | S1044:     | 2 | 2,8305 | 0,496 | -0,635 |
| 17 | P49736 MCM2_HUMAN  | E.SFTM*ASS#PAQR.R        | S13:       | 2 | 2,8282 | 0,447 | -0,572 |
| 17 | P02545 LMNA_HUMAN  | R.LRLS#PS#PTSQR.S        | S390:S392: | 2 | 2,827  | 0,357 | -0,696 |



|    |                     |                           |              |   |        |       |        |
|----|---------------------|---------------------------|--------------|---|--------|-------|--------|
| 17 | Q12846 STX4_HUMAN   | R.KTQHGVLSSQFVE.L         |              | 2 | 2,8201 | 0,372 | -1,138 |
| 17 | O75475 PSIP1_HUMAN  | R.DFKPGDLIFAK.M           |              | 3 | 2,8176 | 0,169 | 0,292  |
| 17 | P46821 MAP1B_HUMAN  | E.SETIPTDKTVTYK.H         |              | 2 | 2,817  | 0,29  | -0,74  |
| 17 | P40222 TXLNA_HUMAN  | R.RPEGPGAQAPSS#PR.V       | S515:        | 2 | 2,814  | 0,238 | -0,492 |
| 17 | P63241 IF5A1_HUMAN  | E.DICPSTHNMDVPNIKRND.F    |              | 3 | 2,8126 | 0,176 | 0,086  |
| 17 | Q9UJM3 ERRFI_HUMAN  | E.DSTLSDFKYDVPGR.R.S      |              | 3 | 2,8107 | 0,246 | 0      |
| 17 | Q02952 AKA12_HUMAN  | E.KQEKEPSKSAESPT#SPVTSE.T | T285:        | 3 | 2,8104 | 0,172 | -0,575 |
| 17 | P13861 KAP2_HUMAN   | R.APASVLPAAATPR.Q         |              | 2 | 2,8095 | 0,358 | -0,212 |
| 17 | Q15942 ZYG_HUMAN    | R.S#PGAPGPLTLK.E          | S344:        | 2 | 2,8026 | 0,284 | -0,546 |
| 17 | P48634 BAT2_HUMAN   | K.IQT#PPPKEPPKEE.T        | T878:        | 3 | 2,8    | 0,128 | -0,323 |
| 17 | P05783 K1C18_HUMAN  | E.DFNLDGALDSSNSM*QTIQK.T  |              | 3 | 2,7992 | 0,092 | -0,261 |
| 17 | P60709 ACTB_HUMAN   | E.EHPVLLTEAPLNPKANRE.K    |              | 3 | 2,7923 | 0,191 | -0,541 |
| 17 | O43719 HTSF1_HUMAN  | K.RGFEGSCS#QKESEE.G       | S481:        | 3 | 2,7919 | 0,373 | -0,428 |
| 17 | P04075 ALDOA_HUMAN  | R.ALANSLACQGK.Y           |              | 2 | 2,7912 | 0,333 | -0,431 |
| 17 | Q15185 TEBP_HUMAN   | K.LTFSCGGSDNFK.H          |              | 2 | 2,7826 | 0,457 | -0,338 |
| 17 | P63241 IF5A1_HUMAN  | E.DICPSTHNMDVPNIKR.N      |              | 2 | 2,7796 | 0,368 | -0,579 |
| 17 | Q99569 PKP4_HUMAN   | E.GQTLVQPSVANR.A          |              | 2 | 2,7792 | 0,357 | -0,865 |
| 17 | A6NFM4 A6NFM4_HUMAN | E.FSEEPFGVIVR.R           |              | 2 | 2,7771 | 0,278 | -0,572 |
| 17 | P13861 KAP2_HUMAN   | E.ARAPASVLPAAATPR.Q       |              | 3 | 2,772  | 0,192 | 0,199  |
| 17 | Q86YP4 P66A_HUMAN   | E.GLVGDGPVDMR.T           |              | 2 | 2,7718 | 0,416 | -0,109 |
| 17 | Q9NZZ2 OGFR_HUMAN   | R.SVEPQDAGPLER.S          |              | 2 | 2,7697 | 0,413 | -0,47  |
| 17 | Q9ULQ0 FA40B_HUMAN  | R.RES#EGSVDCPTLE.F        | S42:         | 2 | 2,7696 | 0,258 | -0,704 |
| 17 | Q8N5A5 ZGPAT_HUMAN  | E.GRVEPIHAVLPR.G          |              | 3 | 2,7665 | 0,09  | 0,127  |
| 17 | Q14152 EIF3A_HUMAN  | R.RGPEEDRFSR.R            |              | 3 | 2,7664 | 0,276 | 0,439  |
| 17 | Q01804 OTUD4_HUMAN  | E.NITDDKYATVSSPS#KSK.K    | S548:        | 3 | 2,7616 | 0,17  | -0,381 |
| 17 | Q9ULU4 PKCB1_HUMAN  | E.KADPGAVKDKAS#PEPE.K     | S668:        | 2 | 2,7611 | 0,176 | -0,497 |
| 17 | Q9HAW4 CLSPN_HUMAN  | K.QSDIRPS#PGDSSVLQQE.S    | S421:        | 2 | 2,7604 | 0,354 | -0,444 |
| 17 | O43581 SYT7_HUMAN   | R.SS#VSDLVNSLTSE.M        | S102:        | 2 | 2,7585 | 0,331 | -0,344 |
| 17 | Q14789 GOGB1_HUMAN  | E.DNCSVLKQDLR.Q           |              | 2 | 2,7572 | 0,298 | -0,543 |
| 17 | Q9Y3F4 STRAP_HUMAN  | E.DKQILSADDKTVR.L         |              | 3 | 2,7556 | 0,288 | -0,368 |
| 17 | Q9UQ35 SRRM2_HUMAN  | E.HKELS#NS#PLRE.N         | S1318:S1320: | 2 | 2,7545 | 0,473 | -0,332 |
| 17 | P68104 EF1A1_HUMAN  | R.GNVAGDSKNDPPM*E.A       |              | 2 | 2,7516 | 0,376 | -0,675 |
| 17 | Q96ST2 IWS1_HUMAN   | R.GKHM*DFLSDFE.M          |              | 2 | 2,751  | 0,349 | -0,727 |

|    |                    |                            |            |   |        |       |        |
|----|--------------------|----------------------------|------------|---|--------|-------|--------|
| 17 | Q96PK6 RBM14_HUMAN | R.ASYVAPLTAQPATYR.A        |            | 2 | 2,751  | 0,373 | -0,455 |
| 17 | Q9Y4B5 K0802_HUMAN | R.GRS#PPERVPVPGTPKEPSLGE.Q | S297:      | 3 | 2,7457 | 0,108 | -0,253 |
| 17 | Q6NZI2 PTRF_HUMAN  | E.VKLPAKLS#ISKS#LKE.S      | S167:S171: | 3 | 2,7448 | 0,177 | -0,508 |
| 17 | P06748 NPM_HUMAN   | E.KT#PKTPKGPSS#VEDIK.A     | T234:S243: | 2 | 2,7429 | 0,261 | -0,652 |
| 17 | P62736 ACTA_HUMAN  | K.DSYVGDEAQSKR.G           |            | 3 | 2,7414 | 0,194 | 0,067  |
| 17 | O00299 CLIC1_HUMAN | K.NSNPALNDNLEK.G           |            | 2 | 2,74   | 0,401 | -0,459 |
| 17 | O43852 CALU_HUMAN  | K.IDGDKDGFVTVDE.L          |            | 2 | 2,7395 | 0,28  | -0,519 |
| 17 | Q9H3N1 TXND1_HUMAN | R.QRS#LGPSLATDKS.-         | S270:      | 3 | 2,7366 | 0,287 | -0,254 |
| 17 | Q86UP2 KTN1_HUMAN  | K.VEPVPVTKQPT#PPSE.A       | T153:      | 2 | 2,7346 | 0,396 | -0,579 |
| 17 | Q969S3 ZN622_HUMAN | E.FADFYDFR.S               |            | 2 | 2,7318 | 0,294 | -0,451 |
| 17 | Q9H6F5 CCD86_HUMAN | R.APGS#PRGQHEPSKPPPAGE.T   | S188:      | 3 | 2,7314 | 0,183 | -0,555 |
| 17 | Q9H3N1 TXND1_HUMAN | R.S#LGPSLATDKS.-           | S270:      | 2 | 2,7307 | 0,423 | -0,211 |
| 17 | Q9UKV3 ACINU_HUMAN | K.SPS#PPRLTE.D             | S388:      | 2 | 2,729  | 0,162 | 0      |
| 17 | Q10471 GALT2_HUMAN | R.VVSPIIDVINM*D.N          |            | 2 | 2,7259 | 0,421 | -0,458 |
| 17 | P81605 DCD_HUMAN   | K.ENAGEDPGLAR.Q            |            | 2 | 2,7243 | 0,286 | -0,432 |
| 17 | Q9BTC0 DIDO1_HUMAN | E.AKVTVDDLPRN.M            |            | 2 | 2,7232 | 0,339 | -0,397 |
| 17 | P35611 ADDA_HUMAN  | K.RVS#M*ILQSPAFCEE.L       | S59:       | 2 | 2,7203 | 0,378 | -0,208 |
| 17 | Q04695 K1C17_HUMAN | R.TIVEEVQDGK.V             |            | 2 | 2,7196 | 0,399 | -0,109 |
| 17 | Q9UQ35 SRRM2_HUMAN | E.SSLVFKDTRL.T             |            | 2 | 2,7191 | 0,207 | -0,419 |
| 17 | P52815 RM12_HUMAN  | K.KLVESLPQEIK.A            |            | 2 | 2,717  | 0,132 | -0,76  |
| 17 | P08107 HSP71_HUMAN | R.TLSSSTQASLE.I            |            | 2 | 2,7144 | 0,36  | -0,326 |
| 17 | P33527 MRP1_HUMAN  | E.NGM*LVTDSAGK.Q           |            | 2 | 2,7103 | 0,345 | -0,55  |
| 17 | Q9BRQ0 PYGO2_HUMAN | E.GGGGPAPPPAPPSTGRK.Q      |            | 2 | 2,7093 | 0,282 | -0,569 |
| 17 | Q9NWB6 ARGL1_HUMAN | R.ASS#PPDRIDIFGR.T         | S77:       | 3 | 2,7025 | 0,252 | -0,242 |
| 17 | Q09666 AHNK_HUMAN  | K.AEAPLPS#PKLE.G           | S5110:     | 2 | 2,6984 | 0,213 | -0,495 |
| 17 | Q9C0C2 TB182_HUMAN | E.AGKEEPPPLT#PPAR.C        | T131:      | 3 | 2,6982 | 0,099 | -0,475 |
| 17 | Q6ULP2 AFTIN_HUMAN | E.KLDLLTSK.C               |            | 2 | 2,6981 | 0,12  | 0,066  |
| 17 | O00148 DDX39_HUMAN | K.NCPHVVVGTPGR.I           |            | 3 | 2,6947 | 0,224 | 0,141  |
| 17 | Q14151 SAFB2_HUMAN | K.SKGEPVISVK.T             |            | 2 | 2,6904 | 0,239 | -0,351 |
| 17 | P06748 NPM_HUMAN   | K.MQAS#IEKGGSLPKVE.A       | S254:      | 2 | 2,6847 | 0,163 | -0,516 |
| 17 | P60709 ACTB_HUMAN  | E.TTFNSIM*KCDVDIR.K        |            | 3 | 2,6801 | 0,169 | -0,426 |
| 17 | P62736 ACTA_HUMAN  | D.SYVGDEAQSKR.G            |            | 2 | 2,6769 | 0,352 | -0,689 |
| 17 | Q9Y217 MTMR6_HUMAN | E.LLHSVHPES#PNLK.T         | S561:      | 3 | 2,6678 | 0,189 | -0,354 |

|    |                    |                           |                 |   |        |       |        |
|----|--------------------|---------------------------|-----------------|---|--------|-------|--------|
| 17 | Q9Y2D5 AKAP2_HUMAN | R.DALGDSLQVPVS#PSSTSSR.C  | S152:           | 3 | 2,6674 | 0,357 | -0,176 |
| 17 | Q9UKV3 ACINU_HUMAN | E.KSKSPS#PPRLTE.D         | S388:           | 2 | 2,6646 | 0,316 | -0,52  |
| 17 | P56182 RRP1_HUMAN  | R.SEKPPAGSICR.A           |                 | 3 | 2,6635 | 0,157 | 0,304  |
| 17 | Q8N3X1 FNBP4_HUMAN | K.VQTT#PKVEEE.Q           | T517:           | 2 | 2,663  | 0,326 | -0,59  |
| 17 | O96017 CHK2_HUMAN  | E.STALPQVLAQPSTS#R.K      | S518:           | 2 | 2,6617 | 0,186 | -0,597 |
| 17 | P42224 STAT1_HUMAN | R.FNQAQSGNIQSTVM*LDKQKE.L |                 | 3 | 2,6609 | 0,101 | -0,321 |
| 17 | Q13428 TCOF_HUMAN  | R.KSAEPSANTTLVSE.T        |                 | 2 | 2,6582 | 0,396 | -0,681 |
| 17 | Q8WYP5 AHTF1_HUMAN | R.LKS#SQLLEPAVEE.T        | S1855:          | 2 | 2,6578 | 0,123 | -0,481 |
| 17 | Q9Y608 LRRF2_HUMAN | R.RGS#GDTSSLIDPDTSLSE.L   | S328:           | 2 | 2,6576 | 0,454 | -0,764 |
| 17 | Q9UIF9 BAZ2A_HUMAN | E.M*EGPEECLGR.R           |                 | 2 | 2,6574 | 0,111 | 0      |
| 17 | Q9UK59 DBR1_HUMAN  | E.SGNGEDLTKVPLK.R         |                 | 3 | 2,6542 | 0,278 | 0,067  |
| 17 | P05387 RLA2_HUMAN  | K.DIKKILDSVGIE.A          |                 | 2 | 2,6495 | 0,232 | -0,367 |
| 17 | Q9BRQ0 PYGO2_HUMAN | E.GGGGPAPPPAPPSTGR.K      |                 | 2 | 2,6466 | 0,432 | -0,444 |
| 17 | O75569 PRKRA_HUMAN | K.TPIQVLHE.Y              |                 | 2 | 2,646  | 0,276 | -0,326 |
| 17 | P50990 TCPQ_HUMAN  | K.M*IVM*ASHM*QEQE.V       |                 | 2 | 2,6446 | 0,335 | -0,412 |
| 17 | Q96RT1 LAP2_HUMAN  | R.TMSVDFNYSR.T            |                 | 2 | 2,6387 | 0,367 | -0,28  |
| 17 | Q58FF8 H90B2_HUMAN | K.YIDQEELNK.T             |                 | 2 | 2,6371 | 0,202 | -0,635 |
| 17 | P17844 DDX5_HUMAN  | R.LIDFLECGK.T             |                 | 2 | 2,636  | 0,274 | -0,334 |
| 17 | P42858 HD_HUMAN    | K.GKVLLGEEE.A             |                 | 2 | 2,6299 | 0,174 | -0,125 |
| 17 | Q9Y6D5 BIG2_HUMAN  | E.LAQLIGTVK.T             |                 | 2 | 2,6293 | 0,197 | -0,061 |
| 17 | O75528 TAD3L_HUMAN | R.NQNKPFVPHTK.S           |                 | 3 | 2,6285 | 0,136 | 0      |
| 17 | Q8NI27 THOC2_HUMAN | E.KTPVS#GSLKSPVPR.S       | S1273:          | 2 | 2,6284 | 0,224 | -0,796 |
| 17 | Q9NQW6 ANLN_HUMAN  | K.TQS#LPVTEKVTE.N         | S485:           | 2 | 2,628  | 0,349 | -0,259 |
| 17 | Q1KMD3 HNRL2_HUMAN | R.SKS#PLPPEEE.A           | S228:           | 2 | 2,6257 | 0,262 | -0,511 |
| 17 | Q9UQ35 SRRM2_HUMAN | R.VPS#PTPAPK.E            | S2581:          | 2 | 2,6255 | 0,234 | -0,313 |
| 17 | Q14444 CAPR1_HUMAN | K.GKLDDYQER.M             |                 | 2 | 2,6244 | 0,181 | -0,76  |
| 17 | Q96AG4 LRC59_HUMAN | R.LEVEREAEK.K             |                 | 2 | 2,6155 | 0,167 | -0,442 |
| 17 | Q02878 RL6_HUMAN   | K.AVDSQILPK.I             |                 | 2 | 2,6141 | 0,328 | 0      |
| 17 | P63165 SUMO1_HUMAN | K.VIGQDSSEIHFV.V          |                 | 3 | 2,6118 | 0,357 | 0,067  |
| 17 | O75223 CG024_HUMAN | K.VSEEIEDIHK.K            |                 | 2 | 2,6109 | 0,241 | 1,142  |
| 17 | Q9BTA9 WAC_HUMAN   | R.STCSLTPALAAHFSE.N       |                 | 2 | 2,6095 | 0,374 | -0,613 |
| 17 | P69905 HBA_HUMAN   | K.FLASVS#T#VLTSKY#R.-     | S134:T135:Y141: | 3 | 2,6047 | 0,169 | 0,909  |
| 17 | Q8TDJ6 DMXL2_HUMAN | K.SNM*LARKS#VVE.G         | S1310:          | 2 | 2,6037 | 0,251 | -0,55  |

|    |                    |                         |                 |   |        |       |        |
|----|--------------------|-------------------------|-----------------|---|--------|-------|--------|
| 17 | Q96L73 NSD1_HUMAN  | E.SRHGAVKS#PFLPLAPQTE.T | S224:           | 3 | 2,5985 | 0,131 | -0,272 |
| 17 | P63241 IF5A1_HUMAN | E.DICPSTHNM*DVPNIKRND.F |                 | 3 | 2,5894 | 0,219 | -0,598 |
| 17 | Q5T4S7 UBR4_HUMAN  | K.VTISDGKVADE.E         |                 | 2 | 2,5853 | 0,358 | -0,215 |
| 17 | Q15149 PLEC1_HUMAN | R.VPDVQDGVR.A           |                 | 2 | 2,5841 | 0,262 | -0,124 |
| 17 | Q9Y2W1 TR150_HUMAN | E.KGSFS#DTGLGDGKM*K.S   | S379:           | 3 | 2,5839 | 0,141 | -0,113 |
| 17 | Q99961 SH3G1_HUMAN | K.ALYDFEPENDGE.L        |                 | 2 | 2,5821 | 0,294 | -0,611 |
| 17 | Q9HCD5 NCOA5_HUMAN | R.LM*RSS#TDS#LPGPISR.Q  | S378:S381:      | 2 | 2,5817 | 0,26  | -0,612 |
| 17 | P06748 NPM_HUMAN   | E.KT#PKTPKGPSSVE.D      | T234:           | 3 | 2,5808 | 0,117 | -0,446 |
| 17 | O43847 NRDC_HUMAN  | K.STCS#CPDLQPNGQDLGE.N  | S61:            | 2 | 2,5796 | 0,334 | -0,81  |
| 17 | Q15424 SAFB1_HUMAN | R.KDFDFACNE.V           |                 | 2 | 2,5792 | 0,273 | -0,639 |
| 17 | Q8TE77 SSH3_HUMAN  | R.QAS#VHDS#GEEGEA.-     | S649:S653:      | 2 | 2,5772 | 0,349 | -0,579 |
| 17 | P49368 TCPG_HUMAN  | E.KIPGGIIEDSCVLR.G      |                 | 2 | 2,577  | 0,423 | -0,078 |
| 17 | P31949 S10AB_HUMAN | K.KLDTNSDGQLDFSE.F      |                 | 2 | 2,5764 | 0,301 | -0,233 |
| 17 | Q9ULU4 PKCB1_HUMAN | E.KADPGAVKDKAS#PEPE.K   | S668:           | 3 | 2,575  | 0,137 | -0,426 |
| 17 | Q8WUA4 TF3C2_HUMAN | K.IRQPAACPGGEE.V        |                 | 2 | 2,5748 | 0,288 | -0,855 |
| 17 | Q9UKA4 AKA11_HUMAN | R.SVS#PTFLNPSDE.N       | S1242:          | 2 | 2,5681 | 0,209 | -0,622 |
| 17 | Q8WXH0 SYNE2_HUMAN | R.RGS#M*SYLAAVEEEVEE.S  | S4108:          | 2 | 2,5679 | 0,35  | -0,515 |
| 17 | P38646 GRP75_HUMAN | E.TGVDLTKDNM*ALQR.V     |                 | 3 | 2,5623 | 0,255 | 0      |
| 17 | P38398 BRCA1_HUMAN | K.KQS#PKVTFE.C          | S896:           | 2 | 2,5594 | 0,107 | -0,533 |
| 17 | Q15418 KS6A1_HUMAN | E.NILLDEEGHIK.L         |                 | 2 | 2,5534 | 0,136 | -0,571 |
| 17 | P22059 OSBP1_HUMAN | R.GATVLPANTPGNVGSGK.D   |                 | 2 | 2,5531 | 0,449 | -0,396 |
| 17 | P55884 EIF3B_HUMAN | R.VTLM*QLPTRQE.I        |                 | 2 | 2,5491 | 0,329 | -0,55  |
| 17 | Q07955 SFRS1_HUMAN | R.VKVDGPRS#PS#YGRS#R.S  | S199:S201:S205: | 3 | 2,5476 | 0,129 | -0,385 |
| 17 | Q9P0K8 FOXJ2_HUMAN | R.KCSPGS#PTDPNATLSKDE.A | S46:            | 2 | 2,5473 | 0,396 | -0,246 |
| 17 | P13473 LAMP2_HUMAN | R.IPLNDLFR.C            |                 | 2 | 2,547  | 0,116 | -0,432 |
| 17 | Q14195 DPYL3_HUMAN | R.NLHQSGFSLSGTQVDE.G    |                 | 3 | 2,546  | 0,294 | -0,213 |
| 17 | Q14247 SRC8_HUMAN  | R.AKTQT#PPVS#PAPQPTEE.R | T401:S405:      | 2 | 2,5447 | 0,288 | -0,378 |
| 17 | Q15057 CENB2_HUMAN | K.KSS#PSTGSLDSGNE.S     | S379:           | 2 | 2,5431 | 0,256 | -0,338 |
| 17 | P23588 IF4B_HUMAN  | K.VAPAQPSEEGPGRKDE.N    |                 | 2 | 2,5416 | 0,312 | -0,512 |
| 17 | P40227 TCPZ_HUMAN  | K.DGNVLLHE.M            |                 | 2 | 2,5408 | 0,137 | 0,204  |
| 17 | P21333 FLNA_HUMAN  | K.YGGQPVPNFPSK.L        |                 | 2 | 2,54   | 0,317 | -0,662 |
| 17 | P07384 CAN1_HUMAN  | R.KAPSDLYQIILK.A        |                 | 2 | 2,5396 | 0,288 | -0,527 |
| 17 | P02545 LMNA_HUMAN  | R.SGAQASST#PLS#PTRITR.L | T19:S22:        | 2 | 2,536  | 0,085 | -0,452 |

|    |                    |                                    |            |   |        |       |        |
|----|--------------------|------------------------------------|------------|---|--------|-------|--------|
| 17 | P06400 RB_HUMAN    | E.SACPLNLPLQNNHTAADM*YLS#PVRS#PK.K | S608:S612: | 3 | 2,535  | 0,172 | -0,577 |
| 17 | Q9Y2F5 K0947_HUMAN | E.NLKEKS#PFRE.T                    | S1303:     | 3 | 2,5341 | 0,125 | 0      |
| 17 | O43719 HTSF1_HUMAN | K.RGFEGSCS#QKESEE.G                | S481:      | 2 | 2,5339 | 0,28  | -0,5   |
| 17 | P35613 BASI_HUMAN  | R.FFVSSSQGR.S                      |            | 2 | 2,5316 | 0,288 | 0,421  |
| 17 | Q12996 CSTF3_HUMAN | E.GNGPVESNAVLTK.A                  |            | 2 | 2,5294 | 0,406 | -0,474 |
| 17 | Q86UE4 LYRIC_HUMAN | E.GEAVRT#PQSVTAK.Q                 | T143:      | 2 | 2,5222 | 0,187 | -0,514 |
| 17 | P55072 TERA_HUMAN  | E.THGHVGDLAALCSE.A                 |            | 2 | 2,5114 | 0,439 | 0      |
| 17 | O43684 BUB3_HUMAN  | E.M*DDTEHPEDGIFIR.Q                |            | 3 | 2,5104 | 0,199 | -0,541 |
| 17 | O43237 DC1L2_HUMAN | R.RGPLTSGSDEE.N                    |            | 2 | 2,5099 | 0,329 | -0,425 |
| 17 | Q14814 MEF2D_HUMAN | K.GFNGCDS#PEPDGEDSLE.Q             | S98:       | 2 | 2,5043 | 0,318 | -0,577 |
| 17 | Q9UMY4 SNX12_HUMAN | R.TNLPIFK.L                        |            | 2 | 2,4969 | 0,09  | 0,293  |
| 17 | P18615 NELFE_HUMAN | K.DPEKGPVPTFQPFQR.S                |            | 2 | 2,4934 | 0,319 | -0,56  |
| 17 | O76021 RL1D1_HUMAN | K.ATNES#EDEIPQLVPIGK.K             | S361:      | 2 | 2,4921 | 0,242 | -0,508 |
| 17 | Q9H0H5 RGAP1_HUMAN | K.SALAFNR.G                        |            | 2 | 2,4895 | 0,294 | -0,821 |
| 17 | P49736 MCM2_HUMAN  | R.RGNDPLTSS#PGR.S                  | S27:       | 2 | 2,4891 | 0,311 | -0,548 |
| 17 | P62736 ACTA_HUMAN  | D.LAGRDLTDYLM*K.I                  |            | 3 | 2,4889 | 0,177 | -0,13  |
| 17 | Q8IYA6 CKP2L_HUMAN | K.SCLS#PKERE.Q                     | S638:      | 2 | 2,4869 | 0,182 | -0,617 |
| 17 | P21333 FLNA_HUMAN  | R.ENGVYLIDVK.F                     |            | 2 | 2,4855 | 0,247 | -0,53  |
| 17 | Q12905 ILF2_HUMAN  | R.VKPAPDETSFSE.A                   |            | 2 | 2,4739 | 0,373 | -0,56  |
| 17 | Q09666 AHNK_HUMAN  | K.LQGGVSLASK.K                     |            | 2 | 2,4736 | 0,348 | -0,583 |
| 17 | Q86YP4 P66A_HUMAN  | R.VNGLTTVALKE.T                    |            | 2 | 2,4657 | 0,236 | -0,213 |
| 17 | P35527 K1C9_HUMAN  | R.HGVQELEIELQSQLSK.K               |            | 3 | 2,4634 | 0,197 | -0,597 |
| 17 | P55072 TERA_HUMAN  | K.NM*KLADDVDLE.Q                   |            | 2 | 2,4624 | 0,147 | -0,763 |
| 17 | Q86XP3 DDX42_HUMAN | K.DSNFAGDLVR.N                     |            | 2 | 2,4618 | 0,267 | -0,223 |
| 17 | O95149 SPN1_HUMAN  | E.LEHLST#PKLK.G                    | T341:      | 3 | 2,4539 | 0,2   | 0,073  |
| 17 | Q5W0B1 RN219_HUMAN | E.VDNRS#PQKFGR.F                   | S210:      | 3 | 2,4539 | 0,117 | 0,066  |
| 17 | Q92598 HS105_HUMAN | E.LNNTCEPVVTQPKPK.I                |            | 3 | 2,4512 | 0,263 | -0,318 |
| 17 | P50914 RL14_HUMAN  | K.AALLKAS#PK.K                     | S139:      | 2 | 2,4463 | 0,266 | -0,436 |
| 17 | Q9BTC0 DIDO1_HUMAN | R.RNS#VERPAEPVAGAATPSLVE.Q         | S1456:     | 3 | 2,4435 | 0,155 | -0,574 |
| 17 | Q86WB0 NIPA_HUMAN  | R.SQDATFSPGSEQAEKS#PGPIVSR.T       | S344:      | 3 | 2,4421 | 0,092 | -0,894 |
| 17 | Q12872 SFRS8_HUMAN | E.NDLLPLEK.N                       |            | 2 | 2,434  | 0,087 | -1,425 |
| 17 | O76021 RL1D1_HUMAN | K.ATNESEDEIPQLVPIGKK.T             |            | 3 | 2,4323 | 0,173 | -0,372 |
| 17 | P68104 EF1A1_HUMAN | R.GNVAGDSKNDPPME.A                 |            | 2 | 2,4172 | 0,331 | -0,426 |

|    |                     |                          |        |   |        |       |        |
|----|---------------------|--------------------------|--------|---|--------|-------|--------|
| 17 | Q8WUA4 TF3C2_HUMAN  | E.LSTALPAPVSCPEGPK.V     |        | 2 | 2,4156 | 0,344 | -0,15  |
| 17 | Q9UQ35 SRRM2_HUMAN  | K.RVPS#PTPAPK.E          | S2581: | 2 | 2,4114 | 0,205 | -0,756 |
| 17 | Q14676 MDC1_HUMAN   | K.RGAGNGVVPAGVILE.R      |        | 2 | 2,4066 | 0,195 | -0,52  |
| 17 | O00231 PSD11_HUMAN  | E.ASIDILHSIVK.R          |        | 2 | 2,4023 | 0,099 | -0,51  |
| 17 | Q96KB5 TOPK_HUMAN   | K.SLNDLIEER.Y            |        | 2 | 2,4018 | 0,119 | -0,896 |
| 17 | P05783 K1C18_HUMAN  | E.DFNLGDALDSSNSM*QTIQK.T |        | 2 | 2,3987 | 0,328 | -0,697 |
| 17 | Q9Y2W6 TDRKH_HUMAN  | K.SSGEITHLTLSCLS#LSE.A   | S542:  | 2 | 2,3958 | 0,352 | -0,271 |
| 17 | A9CQZ4 A9CQZ4_HUMAN | K.AAEDEEVPAFFK.N         |        | 2 | 2,3931 | 0,27  | -0,721 |
| 17 | Q08AE8 SPIR1_HUMAN  | E.NGLSTSQQVPAQR.K        |        | 2 | 2,3761 | 0,291 | -0,44  |
| 17 | P98082 DAB2_HUMAN   | K.IIDEKTGVIE.H           |        | 2 | 2,3754 | 0,198 | 0      |
| 17 | Q99547 MPH6_HUMAN   | E.NGDIT#PIKAK.K          | T147:  | 2 | 2,3726 | 0,286 | -0,429 |
| 17 | Q13428 TCOF_HUMAN   | K.TVANLLSGKS#PRK.S       | S156:  | 2 | 2,3709 | 0,27  | -0,504 |
| 17 | P06576 ATPB_HUMAN   | K.ADKLAEHSS#.-           | S529:  | 2 | 2,3687 | 0,222 | -0,418 |
| 17 | Q96JM3 ZN828_HUMAN  | R.KTS#PASLDFPE.S         | S459:  | 2 | 2,3683 | 0,215 | -1,055 |
| 17 | P52272 HNRPM_HUMAN  | K.GCGVVKFE.S             |        | 2 | 2,368  | 0,163 | 0,204  |
| 17 | Q01518 CAP1_HUMAN   | R.ATKKEPAVLE.L           |        | 2 | 2,3677 | 0,216 | -0,562 |
| 17 | Q09666 AHNK_HUMAN   | K.M*EGDLKGPEVDIK.G       |        | 3 | 2,3676 | 0,322 | -0,063 |
| 17 | P55072 TERA_HUMAN   | K.LAIRES#IESE.I          | S702:  | 2 | 2,3675 | 0,117 | -0,298 |
| 17 | P19338 NUCL_HUMAN   | K.NLPYKVTQDE.L           |        | 2 | 2,3672 | 0,297 | -0,505 |
| 17 | P13645 K1C10_HUMAN  | R.SLLEGE GSSGGGGR.G      |        | 2 | 2,3613 | 0,339 | 0,193  |
| 17 | P42704 LPPRC_HUMAN  | E.KDVLIKD.T              |        | 2 | 2,359  | 0,165 | 0,147  |
| 17 | P15408 FOSL2_HUMAN  | E.FM*LVAHGVPVCK.I        |        | 3 | 2,3524 | 0,178 | 0,072  |
| 17 | Q92598 HS105_HUMAN  | E.NKIPDADKANE.K          |        | 2 | 2,35   | 0,244 | -0,402 |
| 17 | P49418 AMPH_HUMAN   | D.TYLGQFPDIK.N           |        | 2 | 2,3471 | 0,327 | -0,413 |
| 17 | P49411 EFTU_HUMAN   | R.GITINAAHVE.Y           |        | 2 | 2,3451 | 0,19  | -0,119 |
| 17 | Q9Y5B6 GCFC_HUMAN   | R.IVFSVKE.K              |        | 2 | 2,345  | 0,143 | 0,371  |
| 17 | Q13144 EI2BE_HUMAN  | K.GYNPAEVGAAGK.G         |        | 2 | 2,3422 | 0,379 | -0,323 |
| 17 | P38398 BRCA1_HUMAN  | E.CATFSAHSGSLK.K         |        | 3 | 2,3415 | 0,378 | 0,433  |
| 17 | Q02952 AKA12_HUMAN  | K.SPSP#PVERE.M           | S1331: | 2 | 2,3353 | 0,205 | -0,113 |
| 17 | Q9H0G5 CCD55_HUMAN  | R.AKDKFLDQE.R            |        | 2 | 2,3335 | 0,178 | -0,446 |
| 17 | Q9UKV3 ACINU_HUMAN  | E.KSKSPSPRRLT#E.D        | T393:  | 2 | 2,3259 | 0,149 | -0,607 |
| 17 | P42167 LAP2B_HUMAN  | E.HFRIDGPVISE.S          |        | 2 | 2,321  | 0,251 | -0,192 |
| 17 | P0C0S8 H2A1_HUMAN   | R.AGLQFPVGR.V            |        | 2 | 2,3177 | 0,203 | 0,194  |

|    |                      |                         |            |   |        |       |        |
|----|----------------------|-------------------------|------------|---|--------|-------|--------|
| 17 | Q9Y2S0 RPAC2_HUMAN   | R.YM*IM*KNPEVE.F        |            | 2 | 2,3172 | 0,24  | -0,38  |
| 17 | P62736 ACTA_HUMAN    | R.GILTLYPIE.H           |            | 2 | 2,3163 | 0,455 | -0,532 |
| 17 | Q13428 TCOF_HUMAN    | K.GSLGS#QGAKDEPEEE.L    | S1410:     | 2 | 2,3137 | 0,118 | -0,303 |
| 17 | Q9UK59 DBR1_HUMAN    | K.RLS#DEHEPE.Q          | S514:      | 2 | 2,312  | 0,233 | -0,512 |
| 17 | P30307 MPIP3_HUMAN   | R.SGLYRS#PSM*PE.N       | S214:      | 2 | 2,3089 | 0,179 | -0,555 |
| 17 | O43290 SNUT1_HUMAN   | E.GERPHS#FRLE.Q         | S348:      | 3 | 2,3088 | 0,096 | 0,07   |
| 17 | Q9UQ35 SRRM2_HUMAN   | K.THTTALAGRS#PS#PASGR.R | S295:S297: | 3 | 2,3075 | 0,224 | -0,501 |
| 17 | P21980 TGM2_HUMAN    | D.LYLENPEIK.I           |            | 2 | 2,3041 | 0,143 | -0,218 |
| 17 | Q5VZY8 Q5VZY8_HUMAN  | E.VNGTPGSQLSTPR.S       |            | 2 | 2,3029 | 0,266 | -0,371 |
| 17 | Q9NTI5 PDS5B_HUMAN   | E.TVSNASSSSNPSS#PGRIK.G | S1166:     | 3 | 2,3025 | 0,108 | -0,69  |
| 17 | Q9NPR2 SEM4B_HUMAN   | R.LGS#EIRDSVV.-         | S825:      | 2 | 2,3008 | 0,389 | -0,634 |
| 17 | Q9Y2W2 WBP11_HUMAN   | E.LTPLQAM*M*LR.M        |            | 2 | 2,294  | 0,361 | -0,607 |
| 17 | Q9NPR2 SEM4B_HUMAN   | R.CPFDPNFK.S            |            | 2 | 2,2927 | 0,123 | -0,119 |
| 17 | P36543 VATE1_HUMAN   | K.AEEEFNIEK.G           |            | 2 | 2,2917 | 0,089 | 0,11   |
| 17 | Q14562 DHX8_HUMAN    | E.LVEEPPFLR.G           |            | 2 | 2,2856 | 0,278 | -0,596 |
| 17 | Q9BQQ5 Q9BQQ5_HUMAN  | K.TGAAPIDVVRS.-         |            | 2 | 2,2826 | 0,162 | -0,203 |
| 17 | P55265 DSRAD_HUMAN   | R.TMLLSRS#PE.A          | S825:      | 2 | 2,2759 | 0,132 | -0,398 |
| 17 | Q96RS0 TGS1_HUMAN    | K.LYNLGLK.G             |            | 2 | 2,2742 | 0,087 | 0,223  |
| 17 | Q9Y2W2 WBP11_HUMAN   | E.LTPLQAMM*LR.M         |            | 2 | 2,2738 | 0,264 | -0,513 |
| 17 | Q8N6T3 ARFG1_HUMAN   | E.TFGSAEPTKTR.K         |            | 2 | 2,2637 | 0,306 | -0,51  |
| 17 | Q9UPT6 JIP3_HUMAN    | K.NYADQIS#RLEE.R        | S148:      | 2 | 2,2622 | 0,187 | -0,774 |
| 17 | ##Q9P244 LRFN1_HUMAN | R.LFLGDPPLK.H           |            | 2 | 2,2591 | 0,118 | -0,122 |
| 17 | Q8IZM8 ZN654_HUMAN   | K.CQTLFGFDS#DDESA.-     | S576:      | 2 | 2,2584 | 0,377 | -0,511 |
| 17 | Q15843 NEDD8_HUMAN   | R.LIYSGKQM*NDE.K        |            | 2 | 2,2554 | 0,174 | -0,279 |
| 17 | P37802 TAGL2_HUMAN   | K.IQASTM*AFK.Q          |            | 2 | 2,255  | 0,175 | -0,12  |
| 17 | O00625 PIR_HUMAN     | R.TPTLYLDFK.L           |            | 2 | 2,2545 | 0,282 | -0,444 |
| 17 | P05556 ITB1_HUMAN    | E.VNSEDMDAYCR.K         |            | 2 | 2,2537 | 0,251 | -0,449 |
| 17 | Q12872 SFRS8_HUMAN   | E.NDLLPLEKNR.V          |            | 2 | 2,2533 | 0,172 | -0,604 |
| 17 | P06576 ATPB_HUMAN    | K.VVDLLAPYAK.G          |            | 2 | 2,2454 | 0,231 | -0,784 |
| 17 | Q96JM3 ZN828_HUMAN   | K.TSPASLDFPE.S          |            | 2 | 2,2421 | 0,252 | -0,115 |
| 17 | B2RA01 B2RA01_HUMAN  | K.AQYEDIAQK.S           |            | 2 | 2,2324 | 0,221 | -0,114 |
| 17 | P02545 LMNA_HUMAN    | R.LVEIDNGK.Q            |            | 2 | 2,23   | 0,154 | -0,412 |
| 17 | P35579 MYH9_HUMAN    | R.GDLPFVPR.R            |            | 2 | 2,2245 | 0,172 | -0,549 |

|    |                    |                         |        |   |        |       |        |
|----|--------------------|-------------------------|--------|---|--------|-------|--------|
| 17 | P35908 K22E_HUMAN  | K.AQYEEIAQR.S           |        | 2 | 2,2231 | 0,084 | -0,11  |
| 17 | Q9C0C2 TB182_HUMAN | K.VSAPGVLTQAQDR.V       |        | 2 | 2,2204 | 0,341 | -0,101 |
| 17 | Q6ZU65 K2030_HUMAN | R.VAFISLS#PVR.R         | S13:   | 2 | 2,2187 | 0,136 | -0,313 |
| 17 | Q09666 AHNK_HUMAN  | K.LQSGSVSLASKK.S        |        | 2 | 2,217  | 0,155 | -0,104 |
| 17 | Q71U36 TBA1A_HUMAN | R.AVFVDLEPTVIDE.V       |        | 2 | 2,2154 | 0,226 | -0,506 |
| 17 | Q9UKM9 RALY_HUMAN  | E.AGLPQGEAR.T           |        | 2 | 2,2142 | 0,211 | -0,068 |
| 17 | Q8NI27 THOC2_HUMAN | K.TPVSGSLKS#PVPR.S      | S1278: | 2 | 2,2112 | 0,166 | -0,347 |
| 17 | P11498 PYC_HUMAN   | R.TSTAPAASPNVR.R        |        | 2 | 2,2061 | 0,376 | -0,729 |
| 17 | O15231 ZN185_HUMAN | E.HSYVLSAAK.K           |        | 2 | 2,2044 | 0,307 | -0,063 |
| 17 | P62736 ACTA_HUMAN  | R.DLTDYLM*K.I           |        | 2 | 2,2032 | 0,216 | -0,361 |
| 17 | P61978 HNRPK_HUMAN | K.DLAGSIIGK.G           |        | 2 | 2,2016 | 0,213 | 0      |
| 17 | P53999 TCP4_HUMAN  | K.EQISDIDDAVR.K         |        | 2 | 2,1998 | 0,365 | -0,484 |
| 17 | Q15942 ZYX_HUMAN   | K.FSPGAPGGSGSQPNQK.L    |        | 2 | 2,1983 | 0,219 | -0,322 |
| 17 | Q6PKG0 LARP1_HUMAN | R.AVTPVPTKTEE.V         |        | 2 | 2,1962 | 0,336 | -0,104 |
| 17 | Q494U1 PKHN1_HUMAN | R.VTDVIRGLEE.F          |        | 2 | 2,1945 | 0,149 | -0,659 |
| 17 | Q09472 EP300_HUMAN | E.DQPSTSATQSS#PAPGQSK.K | S1038: | 2 | 2,1938 | 0,384 | -0,592 |
| 17 | P63220 RS21_HUMAN  | E.SDDSIILR.L            |        | 2 | 2,1934 | 0,141 | 0,076  |
| 17 | O76021 RL1D1_HUMAN | K.ATNESEDEIPQLVPIGK.K   |        | 2 | 2,1934 | 0,159 | -0,398 |
| 17 | P04075 ALDOA_HUMAN | E.ILPDGDHDLKR.C         |        | 2 | 2,191  | 0,245 | -0,477 |
| 17 | Q8N5K1 CISD2_HUMAN | E.LTGDNVGPLICL.K        |        | 2 | 2,188  | 0,223 | -0,492 |
| 17 | Q15029 U5S1_HUMAN  | R.EGPLCDELIR.N          |        | 2 | 2,1868 | 0,241 | 0,203  |
| 17 | P07814 SYEP_HUMAN  | R.NSEPAGLETPEAK.V       |        | 2 | 2,1831 | 0,173 | -0,363 |
| 17 | P46776 RL27A_HUMAN | K.TGAAPIIDVVR.S         |        | 2 | 2,1818 | 0,103 | -0,219 |
| 17 | P35579 MYH9_HUMAN  | D.QINTDLNLER.S          |        | 2 | 2,1803 | 0,19  | -0,301 |
| 17 | P46777 RL5_HUMAN   | K.NSVTPDM*M*EE.M        |        | 2 | 2,1799 | 0,182 | -0,412 |
| 17 | P49736 MCM2_HUMAN  | E.SFTMASS#PAQR.R        | S13:   | 2 | 2,1782 | 0,485 | -0,29  |
| 17 | Q99615 DNJC7_HUMAN | E.AFTILSDPK.K           |        | 2 | 2,1715 | 0,234 | -0,738 |
| 17 | P05186 PPBT_HUMAN  | R.DIDVIM*GGGR.K         |        | 2 | 2,17   | 0,27  | -0,116 |
| 17 | P18615 NELFE_HUMAN | K.GPVPTFQPFQR.S         |        | 2 | 2,1696 | 0,307 | -0,575 |
| 17 | Q9H7N4 SFR19_HUMAN | R.TITVGRLDK.S           |        | 2 | 2,1666 | 0,22  | -0,061 |
| 17 | Q13428 TCOF_HUMAN  | K.TVANLLSGK.S           |        | 2 | 2,1657 | 0,244 | 0,135  |
| 17 | P11137 MAP2_HUMAN  | R.RKS#VPSETVVE.D        | S833:  | 2 | 2,1656 | 0,179 | -0,651 |
| 17 | Q99829 CPNE1_HUMAN | R.DIVQFVPPYR.R          |        | 2 | 2,1654 | 0,251 | -0,644 |



|    |                      |                        |              |   |        |       |        |
|----|----------------------|------------------------|--------------|---|--------|-------|--------|
| 17 | Q96JM3 ZN828_HUMAN   | R.KTSPASLDFPE.S        |              | 2 | 2,1599 | 0,167 | -0,409 |
| 17 | Q13523 PRP4B_HUMAN   | E.DKFKGSLSE.G          |              | 2 | 2,1575 | 0,153 | -0,241 |
| 17 | Q8N6T3 ARFG1_HUMAN   | E.TFGSAEPTK.T          |              | 2 | 2,1451 | 0,282 | -0,39  |
| 17 | P35251 RFC1_HUMAN    | K.NKPLS#PIKLTPTSVDL.Y  | S156:        | 2 | 2,1446 | 0,082 | -0,541 |
| 17 | O00299 CLIC1_HUMAN   | R.KFLDGNE.L            |              | 2 | 2,1446 | 0,157 | -0,741 |
| 17 | Q6FIF0 ZFAN6_HUMAN   | R.IS#PPATSVSSLSE.S     | S49:         | 2 | 2,142  | 0,205 | -0,45  |
| 17 | P00558 PGK1_HUMAN    | E.NLRFHVEEE.G          |              | 2 | 2,1416 | 0,202 | -0,104 |
| 17 | O43237 DC1L2_HUMAN   | R.GPLTSGSDEE.N         |              | 2 | 2,1393 | 0,219 | 0,123  |
| 17 | P35251 RFC1_HUMAN    | E.AHLTPYSLQAIK.A       |              | 2 | 2,1334 | 0,15  | -0,545 |
| 17 | Q9ULH0 ARMS_HUMAN    | R.RTPS#LSSLNSQDS#SIE.I | S1359:S1368: | 2 | 2,1298 | 0,095 | -0,519 |
| 17 | P11498 PYC_HUMAN     | R.FIGPSPEVVR.K         |              | 2 | 2,1295 | 0,128 | -0,443 |
| 17 | P13639 EF2_HUMAN     | E.DHACIPIK.K           |              | 2 | 2,1227 | 0,082 | 0      |
| 17 | P52732 KIF11_HUMAN   | K.SYLYPSTLVR.T         |              | 2 | 2,1193 | 0,285 | -0,509 |
| 17 | P62888 RL30_HUMAN    | K.TGVHHYSGNIE.L        |              | 2 | 2,1176 | 0,168 | -0,459 |
| 17 | P35527 K1C9_HUMAN    | K.TLLDIDNTR.M          |              | 2 | 2,1117 | 0,291 | -0,345 |
| 17 | Q96BK5 PINX1_HUMAN   | D.LDCIFGK.R            |              | 2 | 2,1116 | 0,293 | 0,215  |
| 17 | P51858 HDGF_HUMAN    | R.AGDLLDES#PKRPK.E     | S165:        | 2 | 2,1094 | 0,16  | -0,405 |
| 17 | P04264 K2C1_HUMAN    | K.SISISVAR.G           |              | 2 | 2,1073 | 0,118 | 1,172  |
| 17 | O95817 BAG3_HUMAN    | R.GYISIPVIHE.Q         |              | 2 | 2,0895 | 0,197 | -0,433 |
| 17 | P06748 NPM_HUMAN     | E.KTPKT#PKGSSVE.D      | T237:        | 2 | 2,0803 | 0,11  | -0,68  |
| 17 | P28331 NDUS1_HUMAN   | R.FEAPLFNAR.I          |              | 2 | 2,0785 | 0,168 | -0,229 |
| 17 | Q969H8 CS010_HUMAN   | R.ESDVPLKTE.E          |              | 2 | 2,0702 | 0,17  | -0,36  |
| 17 | P50990 TCPQ_HUMAN    | E.GAKHFSGLEE.A         |              | 2 | 2,0662 | 0,177 | -0,227 |
| 17 | Q9H410 DSN1_HUMAN    | R.IHLGSS#PK.K          | S58:         | 2 | 2,062  | 0,132 | 0,133  |
| 17 | Q8TCY9 URG4_HUMAN    | E.VELGKGHSDLGE.V       |              | 2 | 2,0529 | 0,111 | -0,36  |
| 17 | Q86UP2 KTN1_HUMAN    | E.SDASKIPGK.K          |              | 2 | 2,0525 | 0,113 | -0,203 |
| 17 | P48960 CD97_HUMAN    | R.CNPGFSSFSE.I         |              | 2 | 2,0503 | 0,131 | -0,323 |
| 17 | Q9HB71 CYBP_HUMAN    | R.SFDLLVK.N            |              | 2 | 2,0397 | 0,172 | 0,519  |
| 17 | P62888 RL30_HUMAN    | E.YYAM*LAK.T           |              | 2 | 2,0344 | 0,321 | 0      |
| 17 | P18206 VINC_HUMAN    | R.DYLIDGSR.G           |              | 2 | 2,0323 | 0,145 | 0      |
| 17 | Q9Y217 MTMR6_HUMAN   | K.TSLCFKE.Q            |              | 2 | 2,0292 | 0,181 | 0      |
| 17 | P60709 ACTB_HUMAN    | K.CDVIDIRKD.L          |              | 2 | 2,0279 | 0,192 | -0,179 |
| 17 | ##Q9GZM5 YIPF3_HUMAN | D.AADADVEEER.L         |              | 2 | 2,0262 | 0,098 | -0,663 |

|    |                     |                        |            |   |        |       |        |
|----|---------------------|------------------------|------------|---|--------|-------|--------|
| 17 | P84103 SFRS3_HUMAN  | R.DSCPLDCK.V           |            | 2 | 2,0258 | 0,223 | -0,061 |
| 17 | Q5VUA4 ZN318_HUMAN  | R.FLDPEFRE.L           |            | 2 | 2,0207 | 0,115 | -0,116 |
| 17 | P37802 TAGL2_HUMAN  | K.IQASTMAFK.Q          |            | 2 | 2,0171 | 0,12  | 0,061  |
| 17 | Q9BUF5 TBB6_HUMAN   | R.SGPFQQLFRPD.N        |            | 2 | 2,0047 | 0,257 | -0,6   |
| 17 | P43686 PRS6B_HUMAN  | E.DLEDLYSR.Y           |            | 2 | 1,987  | 0,181 | 0      |
| 17 | Q99856 ARI3A_HUMAN  | R.AQM*AALAAM*R.A       |            | 2 | 1,9773 | 0,083 | -0,114 |
| 17 | P78527 PRKDC_HUMAN  | K.LTPLPEDNSM*NVD.Q     |            | 2 | 1,9671 | 0,126 | -0,752 |
| 17 | P61978 HNRPK_HUMAN  | R.AQPYDPNFYDE.T        |            | 2 | 1,9627 | 0,11  | -0,808 |
| 17 | P04920 B3A2_HUMAN   | E.LPPPAPPAGITR.S       |            | 2 | 1,9586 | 0,31  | -0,411 |
| 17 | Q9Y2S0 RPAC2_HUMAN  | E.DHTLGNSLR.Y          |            | 2 | 1,9577 | 0,181 | -0,181 |
| 17 | P23588 IF4B_HUMAN   | K.VM*PAPPPKE.N         |            | 2 | 1,9521 | 0,147 | -0,124 |
| 17 | O00244 ATOX1_HUMAN  | K.YDIDLPNKK.V          |            | 2 | 1,9514 | 0,14  | -0,221 |
| 17 | Q8N488 RYBP_HUMAN   | R.SSTPKGDM*SAVNDES#F.- | S227:      | 2 | 1,9463 | 0,155 | -0,414 |
| 17 | Q12792 TWf1_HUMAN   | E.DVSLHGYKK.Y          |            | 2 | 1,9428 | 0,096 | -0,466 |
| 17 | P05362 ICAM1_HUMAN  | E.VTTTVLVR.R           |            | 2 | 1,9405 | 0,346 | -0,137 |
| 17 | P46459 NSF_HUMAN    | E.NSSLNLIGK.A          |            | 2 | 1,9282 | 0,177 | 0,193  |
| 17 | P08670 VIME_HUMAN   | R.DNLAEDIM*R.L         |            | 2 | 1,9222 | 0,173 | 0      |
| 17 | P00558 PGK1_HUMAN   | K.ITLPVDFVTAD.K        |            | 2 | 1,9179 | 0,294 | -0,41  |
| 17 | Q6UN15 FIP1_HUMAN   | E.GKEAGSEPAPE.Q        |            | 2 | 1,9178 | 0,125 | -0,114 |
| 17 | Q9UKV3 ACINU_HUMAN  | E.KSKS#PS#PPRLTE.D     | S386:S388: | 2 | 1,9138 | 0,224 | -0,41  |
| 17 | Q16401 PSMD5_HUMAN  | E.LTGEDVLVR.A          |            | 2 | 1,9115 | 0,087 | -0,061 |
| 17 | Q6S8J3 A26CA_HUMAN  | E.TTFNSIM*K.S          |            | 2 | 1,9006 | 0,333 | -0,573 |
| 17 | P08670 VIME_HUMAN   | R.SYVTTSTR.T           |            | 2 | 1,8966 | 0,118 | -0,067 |
| 17 | Q9Y3T9 NOC2L_HUMAN  | R.GILRPLSTR.H          |            | 2 | 1,8913 | 0,167 | -0,241 |
| 17 | O75376 NCOR1_HUMAN  | R.SIVQIYDE.N           |            | 2 | 1,889  | 0,154 | -0,339 |
| 17 | P19634 SL9A1_HUMAN  | R.ILPALSKDKEEE.I       |            | 2 | 1,8859 | 0,195 | -0,445 |
| 17 | Q6S8J3 A26CA_HUMAN  | E.TTFNSIMK.S           |            | 2 | 1,8705 | 0,2   | -0,324 |
| 17 | Q15464 SHB_HUMAN    | K.GIQLYDTPYEPE.G       |            | 2 | 1,8686 | 0,185 | -0,514 |
| 17 | Q8TAT6 NPL4_HUMAN   | E.NHTVADRFLD.F         |            | 2 | 1,8667 | 0,303 | -0,205 |
| 17 | P02549 SPTA1_HUMAN  | K.DIKGVSEE.T           |            | 2 | 1,8583 | 0,092 | 0,139  |
| 17 | P37108 SRP14_HUMAN  | E.GFEPADNKCLR.A        |            | 2 | 1,8508 | 0,223 | -0,172 |
| 17 | ##Q9Y3R5 DOP2_HUMAN | K.TAGLLDVPR.K          |            | 2 | 1,8456 | 0,159 | -0,324 |
| 17 | Q16555 DPYL2_HUMAN  | K.T#SPAKQQAPPVR.N      | T521:      | 2 | 1,8384 | 0,168 | -0,718 |

|    |                    |                             |        |   |        |       |        |
|----|--------------------|-----------------------------|--------|---|--------|-------|--------|
| 17 | Q9BRQ0 PYGO2_HUMAN | K.AGLQMK#PE.K               | S40:   | 2 | 1,8342 | 0,16  | -0,469 |
| 17 | P07602 SAP_HUMAN   | K.LVGYLDR.N                 |        | 2 | 1,7949 | 0,292 | -0,073 |
| 17 | Q9UKY7 CDV3_HUMAN  | E.VDYSGLR.V                 |        | 2 | 1,7897 | 0,275 | 0,301  |
| 17 | Q9Y4B6 VPRBP_HUMAN | R.KLSS#EPLLPLDEE.A          | S203:  | 2 | 1,7823 | 0,317 | -0,394 |
| 17 | Q5W0B1 RN219_HUMAN | R.FAVAALQSKVE.Q             |        | 2 | 1,7755 | 0,165 | -0,525 |
| 17 | P46777 RL5_HUMAN   | K.QFSQYIK.N                 |        | 2 | 1,7749 | 0,148 | -1,268 |
| 17 | P13645 K1C10_HUMAN | R.LAADDFR.L                 |        | 2 | 1,7676 | 0,136 | 0,151  |
| 17 | Q9NPR2 SEM4B_HUMAN | R.VRLGS#EIRDSVV.-           | S825:  | 2 | 1,7669 | 0,451 | -0,346 |
| 17 | P11177 ODPB_HUMAN  | K.DFLPIGK.A                 |        | 2 | 1,7558 | 0,115 | 0      |
| 17 | O75044 FNBP2_HUMAN | R.KQDSSQAIPLVVE.S           |        | 2 | 1,7487 | 0,108 | -0,259 |
| 17 | P50991 TCPD_HUMAN  | K.TIGTKPVAHID.Q             |        | 2 | 1,7453 | 0,117 | -0,424 |
| 17 | Q13153 PAK1_HUMAN  | R.SVIEPLVTPTR.D             |        | 2 | 1,7392 | 0,196 | -0,559 |
| 17 | Q8NDI1 EHBP1_HUMAN | K.LGYSYSR.D                 |        | 2 | 1,7205 | 0,109 | 0,072  |
| 17 | P05787 K2C8_HUMAN  | R.AFSSRS#YTSGPGSR.I         | S24:   | 2 | 1,7178 | 0,277 | -0,396 |
| 17 | P11310 ACADM_HUMAN | K.TGEYPVPLIR.R              |        | 2 | 1,6995 | 0,128 | -0,213 |
| 17 | Q96JY6 PDLI2_HUMAN | R.QSS#FRLLQE.A              | S241:  | 2 | 1,6945 | 0,095 | -0,67  |
| 17 | P09211 GSTP1_HUMAN | K.ALPGQLKPF.T               |        | 2 | 1,6923 | 0,326 | -0,333 |
| 17 | P00558 PGK1_HUMAN  | K.ITLPVDFVTADKFDE.N         |        | 2 | 1,6922 | 0,132 | -0,214 |
| 17 | P11021 GRP78_HUMAN | K.ITITNDQNR.L               |        | 2 | 1,6841 | 0,126 | -0,227 |
| 17 | O60568 PLOD3_HUMAN | R.LYLDPGLR.E                |        | 2 | 1,6763 | 0,185 | -0,064 |
| 17 | Q15819 UB2V2_HUMAN | R.IYSLKVE.C                 |        | 2 | 1,6694 | 0,144 | 0,501  |
| 17 | P33316 DUT_HUMAN   | R.ARPAEVGGM*QLR.F           |        | 2 | 1,6566 | 0,108 | -0,563 |
| 17 | P05787 K2C8_HUMAN  | R.ISSSSFSR.V                |        | 2 | 1,6501 | 0,126 | -0,07  |
| 17 | P55209 NP1L1_HUMAN | E.IGHFLRE.R                 |        | 2 | 1,6415 | 0,141 | 0,21   |
| 17 | Q9UQ35 SRRM2_HUMAN | E.SSLVFKDTRLT#PPRER.S       | T1208: | 2 | 1,6356 | 0,169 | -0,677 |
| 17 | Q9NPR2 SEM4B_HUMAN | R.LGSEIRDSVV.-              |        | 2 | 1,6324 | 0,19  | -0,227 |
| 17 | Q86YS7 K0528_HUMAN | E.IIGSPIPEPR.Q              |        | 2 | 1,61   | 0,288 | -0,226 |
| 17 | P08621 RU17_HUMAN  | R.QQEVETELK.M               |        | 2 | 1,5901 | 0,191 | -0,442 |
| 17 | P35527 K1C9_HUMAN  | R.MTLDDFR.I                 |        | 2 | 1,5652 | 0,215 | 0,068  |
| 17 | Q7Z417 NUFP2_HUMAN | R.TSPQVLGSILK.S             |        | 2 | 1,5553 | 0,15  | -0,534 |
| 17 | Q1L5Z9 LONF2_HUMAN | E.SILPTAPSAGLK.R            |        | 2 | 1,5411 | 0,091 | -0,211 |
| 17 | Q9Y2D5 AKAP2_HUMAN | R.DALGDSLQVPVSPSS#TTSSR.C   | S155:  | 2 | 1,5119 | 0,19  | -0,82  |
| 18 | O60271 JIP4_HUMAN  | R.SHTSLKVSNS#PEPQKAVEQEDE.L | S251:  | 3 | 5,9703 | 0,414 | -0,218 |

|    |                     |                                     |            |   |        |       |        |
|----|---------------------|-------------------------------------|------------|---|--------|-------|--------|
| 18 | Q15942 ZYX_HUMAN    | E.KQHPVPPPAQNQNQVR.S                |            | 3 | 5,822  | 0,423 | -1,095 |
| 18 | P60709 ACTB_HUMAN   | E.LRVAPEEHPVLLTEAPLNPK.A            |            | 3 | 5,5862 | 0,31  | -0,494 |
| 18 | Q8ND56 LS14A_HUMAN  | K.TQLSQGRS#SPQLDPLRKS#PTME.Q        | S182:S192: | 3 | 5,5806 | 0,371 | -0,699 |
| 18 | Q86WB0 NIPA_HUMAN   | R.SQDATFS#PGSEQAEKS#PGPIVSR.T       | S335:S344: | 3 | 5,551  | 0,362 | -0,505 |
| 18 | Q9UK76 HN1_HUMAN    | R.RNS#SEASSGDFLDLKG.E.G             | S87:       | 2 | 5,5331 | 0,602 | -0,387 |
| 18 | A4D186 A4D186_HUMAN | K.IQVLQQQADDAEERAE.R                |            | 2 | 5,5324 | 0,358 | -0,199 |
| 18 | Q9Y6D5 BIG2_HUMAN   | E.LEKPIQSKPQS#PVIQAAAVS#PK.F        | S218:S227: | 3 | 5,4672 | 0,381 | -0,443 |
| 18 | P22234 PUR6_HUMAN   | E.LLDS#PGKVLQSKDQITAGNAAR.K         | S27:       | 3 | 5,4568 | 0,486 | -0,37  |
| 18 | Q6ZUT9 RA61L_HUMAN  | R.RLS#ITSLTGKNNKPNAGQIQE.G          | S1076:     | 3 | 5,3372 | 0,554 | -0,234 |
| 18 | P52594 NUPL_HUMAN   | K.SLLGDSAPTLHLNKGTPSQS#PVVGR.S      | S181:      | 3 | 5,21   | 0,391 | -0,35  |
| 18 | O76080 ZFAN5_HUMAN  | R.QQNSGRM*SPM*GT#ASGSNSPTSDSASVQR.A | T52:       | 3 | 5,2065 | 0,534 | -0,249 |
| 18 | P50748 KNTC1_HUMAN  | K.HKPGSTPEPIAAEVRS#PSM*E.S          | S1045:     | 3 | 5,1958 | 0,386 | -0,083 |
| 18 | Q9UQ35 SRRM2_HUMAN  | E.KM*ALPPQEDATAS#PPRQK.D            | S1179:     | 3 | 5,1218 | 0,461 | -0,444 |
| 18 | Q13428 TCOF_HUMAN   | R.KSAEPSANTTLVS#ETEEE.G             | S171:      | 2 | 5,0973 | 0,529 | -0,549 |
| 18 | P13645 K1C10_HUMAN  | K.GSLGGGFSSGGFSGGSFSR.G             |            | 2 | 5,0659 | 0,564 | -0,5   |
| 18 | P50552 VASP_HUMAN   | K.RQQPGPSEHIER.R                    |            | 3 | 4,9722 | 0,33  | -0,446 |
| 18 | Q12888 TP53B_HUMAN  | R.QSQQPMKIPSPVKDPVSPASQK.M          |            | 3 | 4,9491 | 0,421 | -0,616 |
| 18 | Q32MZ4 LRRF1_HUMAN  | E.KGSRNM*PGLSAATLASLGGTSSR.R        |            | 3 | 4,94   | 0,39  | -0,573 |
| 18 | Q9H019 FA54B_HUMAN  | E.HKAACSSSEEDDCVLSK.A               |            | 3 | 4,8891 | 0,501 | -0,546 |
| 18 | P24941 CDK2_HUMAN   | E.NFQKVEKIGEGT#Y#GVVYK.A            | T14:Y15:   | 3 | 4,8683 | 0,216 | -0,33  |
| 18 | Q9Y6D5 BIG2_HUMAN   | E.LEKPIQSKPQSPVIQAAAVS#PK.F         | S227:      | 3 | 4,8044 | 0,392 | -0,84  |
| 18 | Q8ND56 LS14A_HUMAN  | R.SLKTQLSQGRS#SPQLDPLRKS#PTM*E.Q    | S182:S192: | 3 | 4,8043 | 1     | -0,68  |
| 18 | P60709 ACTB_HUMAN   | R.KDLYANTVLSSGTTM*YPGIADR.M         |            | 3 | 4,781  | 0,449 | -0,31  |
| 18 | O00116 ADAS_HUMAN   | R.RAAS#AATAAPTATPAAQE.S             | S65:       | 2 | 4,7623 | 0,502 | -0,703 |
| 18 | O43741 AAKB2_HUMAN  | E.HKIM*VGS#TDDPSVFLPDSK.L           | S39:       | 3 | 4,7158 | 0,465 | -0,405 |
| 18 | P50748 KNTC1_HUMAN  | K.HKPGSTPEPIAAEVRS#PSME.S           | S1045:     | 3 | 4,7113 | 0,264 | -0,333 |
| 18 | Q9UHR5 S30BP_HUMAN  | E.KGGLVSDAYGEDDFSR.L                |            | 2 | 4,6935 | 0,517 | -0,498 |
| 18 | Q8ND56 LS14A_HUMAN  | K.TQLSQGRS#SPQLDPLRKS#PTM*E.Q       | S182:S192: | 3 | 4,6588 | 0,254 | -0,487 |
| 18 | P08559 ODPA_HUMAN   | R.YHGHS#MSDPGVSYRT#REEIQE.V         | S293:T303: | 3 | 4,6433 | 0,33  | -0,485 |
| 18 | Q9UHR5 S30BP_HUMAN  | E.KGGLVSDAYGEDDFSR.L                |            | 3 | 4,6326 | 0,388 | -0,213 |
| 18 | Q96PU5 NED4L_HUMAN  | R.RLQITPDSNGEQFSSLIQR.E             |            | 3 | 4,6293 | 0,316 | -0,418 |
| 18 | Q9UHB6 LIMA1_HUMAN  | R.SRPFTVAASFQSTS VKS#PK.T           | S604:      | 3 | 4,5779 | 0,392 | -0,521 |
| 18 | Q9UK76 HN1_HUMAN    | R.RNSS#EASSGDFLDLKG.E.G             | S88:       | 3 | 4,5659 | 0,239 | -0,193 |

|    |                     |                                      |                 |   |        |       |        |
|----|---------------------|--------------------------------------|-----------------|---|--------|-------|--------|
| 18 | Q12888 TP53B_HUMAN  | R.QSQQPM*KPISPVKDPVSPASQK.M          |                 | 3 | 4,5617 | 0,381 | 0,153  |
| 18 | P35606 COPB2_HUMAN  | R.STAQQELDGGKPNAS#PTPVIVASHTANKEE.K  | S859:           | 3 | 4,559  | 0,459 | -0,49  |
| 18 | P19174 PLCG1_HUMAN  | E.RGS#DASGQLFHGR.A                   | S1233:          | 3 | 4,5342 | 0,41  | -0,062 |
| 18 | Q15154 PCM1_HUMAN   | E.YM*AFPKPFESS#SIGAEKPR.N            | S1186:          | 3 | 4,4907 | 0,244 | -0,393 |
| 18 | P33316 DUT_HUMAN    | R.ARPAEVGGM*QLR.F                    |                 | 3 | 4,4843 | 0,156 | 0,07   |
| 18 | Q9UQ35 SRRM2_HUMAN  | E.KMALPPQEDATAS#PPRQK.D              | S1179:          | 3 | 4,4831 | 0,378 | -0,358 |
| 18 | Q9UQ35 SRRM2_HUMAN  | K.SKDSLQVQSCPGSLSLCAGVK.S            |                 | 3 | 4,4584 | 0,428 | -0,612 |
| 18 | Q15652 JHD2C_HUMAN  | R.VASSSSS#PKSHIIKQDM*DVE.R           | S1058:          | 3 | 4,4434 | 0,347 | -0,327 |
| 18 | Q02952 AKA12_HUMAN  | E.KQEKEPSKSAESPTS#PVTSE.T            | S286:           | 3 | 4,4428 | 0,524 | -0,493 |
| 18 | P18615 NELFE_HUMAN  | K.LKDPEKGPVPTFQPFQR.S                |                 | 3 | 4,4276 | 0,48  | -0,553 |
| 18 | P22059 OSBP1_HUMAN  | K.RTGSNIS#GASSDISLDE.Q               | S382:           | 2 | 4,4155 | 0,468 | -0,273 |
| 18 | Q6Y7W6 PERQ2_HUMAN  | R.VGVEASEETPQTSSSARPGT#PSDHQSQE.A    | T382:           | 3 | 4,4127 | 0,548 | -0,537 |
| 18 | Q9Y2W1 TR150_HUMAN  | K.SPVGKS#PPSTGSTYGSSQKEE.S           | S320:           | 3 | 4,4014 | 0,355 | -0,501 |
| 18 | Q6NZI2 PTRF_HUMAN   | E.AGDLRRGS#\$#PDVHALLE.I             | S365:S366:      | 3 | 4,3999 | 0,327 | -0,281 |
| 18 | P28749 RBL1_HUMAN   | E.SKVKS#PVSLTAHSLIGAS#PK.Q           | S749:S762:      | 3 | 4,3827 | 0,346 | -0,253 |
| 18 | Q9Y5X1 SNX9_HUMAN   | R.ASS#SSM*KIPLNKFPGFAKPGTE.Q         | S198:           | 3 | 4,3791 | 0,207 | -0,612 |
| 18 | Q05209 PTN12_HUMAN  | E.NM*ISSIEPEKQDS#PPPKPPR.T           | S332:           | 3 | 4,3699 | 0,311 | -0,547 |
| 18 | Q3MHD2 LSM12_HUMAN  | E.VEIINDRTET#PPPLASLNVSK.L           | T75:            | 3 | 4,3676 | 0,298 | -0,154 |
| 18 | O15427 MOT4_HUMAN   | E.HFLKAEPEKNGEVVHT#PET#SV.-          | T460:T463:      | 3 | 4,3581 | 0,349 | -0,511 |
| 18 | P22234 PUR6_HUMAN   | E.LLDS#PGKVLLQSK.D                   | S27:            | 2 | 4,3551 | 0,414 | -0,495 |
| 18 | Q14676 MDC1_HUMAN   | E.LQPSTSTDQPVTSEPTYQATR.G            |                 | 3 | 4,3509 | 0,476 | -0,396 |
| 18 | Q86TC9 MYPN_HUMAN   | K.TPEPSS#PVKEPPPVLAKPKLD.S           | S644:           | 3 | 4,3396 | 0,401 | -0,476 |
| 18 | Q8NCM9 Q8NCM9_HUMAN | R.SSDITSDLGNVLTSTPNAK.T              |                 | 2 | 4,3357 | 0,506 | -0,381 |
| 18 | Q02952 AKA12_HUMAN  | E.LQSHAKSPPS#PVERE.M                 | S1331:          | 3 | 4,3102 | 0,379 | -0,21  |
| 18 | Q32MZ4 LRRF1_HUMAN  | R.NM*PGLSAATLASLGGTSSR.R             |                 | 2 | 4,2919 | 0,392 | -0,608 |
| 18 | Q9HCH0 K1602_HUMAN  | E.KSPSPGGPQLS#PQLPR.N                | S473:           | 3 | 4,2857 | 0,309 | -0,424 |
| 18 | P24534 EF1B_HUMAN   | K.YGPADVEDTTGSGATDSK.D               |                 | 2 | 4,2799 | 0,514 | -0,413 |
| 18 | Q09666 AHNK_HUMAN   | K.LKGPQITGPSLEGDLGLK.G               |                 | 3 | 4,2629 | 0,37  | -0,502 |
| 18 | Q9Y6D5 BIG2_HUMAN   | E.LEKPIQS#KPQS#PVIQAAAVS#PK.F        | S214:S218:S227: | 3 | 4,2614 | 0,199 | -0,072 |
| 18 | Q12802 AKP13_HUMAN  | K.ALQLSNS#PGASSAFLKAE.T              | S983:           | 2 | 4,2596 | 0,511 | -0,587 |
| 18 | Q9Y5B6 GCFC_HUMAN   | E.LGDFTPHDNEPGKGR.L                  |                 | 3 | 4,2563 | 0,362 | -0,112 |
| 18 | Q6ZRV2 FA83H_HUMAN  | R.RGS#PTTGFIQKGS#PTSAYPER.R          | S892:S903:      | 3 | 4,2501 | 1     | -0,507 |
| 18 | A0FGR8 ESYT2_HUMAN  | K.SHMSG#PGPGGSNTAPSTPVIGGSDKPGM*EE.K | S693:           | 3 | 4,236  | 0,435 | -0,485 |

|    |                     |                                 |            |   |        |       |        |
|----|---------------------|---------------------------------|------------|---|--------|-------|--------|
| 18 | P31943 HNRH1_HUMAN  | K.HTGPNS#PDTANDGFVR.L           | S104:      | 2 | 4,2333 | 0,406 | -0,346 |
| 18 | Q01804 OTUD4_HUMAN  | E.NITDDKYATVSS#PSK.S            | S546:      | 2 | 4,226  | 0,407 | 0,072  |
| 18 | O14980 XPO1_HUMAN   | E.FM*KDTDSINLYK.N               |            | 3 | 4,2243 | 0,239 | 0      |
| 18 | Q9UNZ2 NSF1C_HUMAN  | R.KKS#PNELVDDLK.G               | S114:      | 3 | 4,2135 | 0,231 | -0,68  |
| 18 | Q96T58 MINT_HUMAN   | E.KQSEKPHST#PPQSCTSDLK.I        | T2393:     | 3 | 4,2045 | 0,186 | -0,788 |
| 18 | Q6ZS25 ARHG1_HUMAN  | R.HSPAPPPDPGFAPPS#PPPADSPSE.G   | S1124:     | 3 | 4,1914 | 0,295 | -0,377 |
| 18 | P33316 DUT_HUMAN    | R.ARPAEVGGMQLR.F                |            | 3 | 4,1909 | 0,248 | 0,213  |
| 18 | Q14676 MDC1_HUMAN   | E.LQPSTSTDQPVTSPTSQVTR.G        |            | 3 | 4,1876 | 0,382 | -0,324 |
| 18 | Q05209 PTN12_HUMAN  | E.NMISSIEPEKQDS#PPPKPPR.T       | S332:      | 3 | 4,1854 | 0,214 | -0,472 |
| 18 | P13861 KAP2_HUMAN   | E.ARAPASVLPAAATPR.Q             |            | 2 | 4,1716 | 0,441 | -0,708 |
| 18 | Q58FF7 H90B3_HUMAN  | K.HSQFIGYPITLYLEK.E             |            | 2 | 4,1594 | 0,415 | -0,27  |
| 18 | Q99733 NP1L4_HUMAN  | R.KYAALYQLFDK.R                 |            | 2 | 4,1545 | 0,446 | -0,586 |
| 18 | Q9UKL0 RCOR1_HUMAN  | R.VGPQYQAVVPDFDPAK.L            |            | 2 | 4,1503 | 0,316 | -0,423 |
| 18 | B2CI53 B2CI53_HUMAN | R.SNM*S#PDKPVSVKISFE.D          | S1105:     | 2 | 4,1482 | 0,375 | -0,328 |
| 18 | Q9NYF8 BCLF1_HUMAN  | K.KAEGEPQES#PLKSK.S             | S177:      | 3 | 4,1448 | 0,199 | -0,421 |
| 18 | Q14157 UBP2L_HUMAN  | K.STSAPQM*S#PGSSDNQSSSPQPAQQK.L | S467:      | 3 | 4,1315 | 0,421 | -0,348 |
| 18 | Q5VUA4 ZN318_HUMAN  | R.SVRIPS#PNILKTGLTE.N           | S2101:     | 3 | 4,1267 | 0,34  | -0,304 |
| 18 | O15027 SC16A_HUMAN  | E.HRPASALVNPLARGDS#PE.N         | S164:      | 3 | 4,1166 | 0,324 | -0,837 |
| 18 | Q9Y2W1 TR150_HUMAN  | K.KSPVGKS#PPSTGTYGSSQKEE.S      | S320:      | 3 | 4,1127 | 0,274 | -0,474 |
| 18 | O14908 GIPC1_HUMAN  | R.SRGPATVEDLPSAFEE.K            |            | 2 | 4,1041 | 0,451 | 0,072  |
| 18 | O43741 AAKB2_HUMAN  | E.HKIMVGS#TDDPSVFLPDSK.L        | S39:       | 3 | 4,0986 | 0,157 | -0,49  |
| 18 | P08238 HS90B_HUMAN  | K.HSQFIGYPITLYLEKER.E           |            | 3 | 4,0954 | 0,426 | -0,611 |
| 18 | Q05655 KPCD_HUMAN   | R.RSDS#ASSEPVGIYQGFEEK.T        | S304:      | 3 | 4,0792 | 0,259 | -0,169 |
| 18 | P52594 NUPL_HUMAN   | E.VKPLKSLGDSAPTLHLNK.G          |            | 3 | 4,071  | 0,34  | -0,72  |
| 18 | Q15185 TEBP_HUMAN   | D.S#DEDM*SNFDRFSE.M             | S113:      | 2 | 4,0631 | 0,377 | -0,437 |
| 18 | P46937 YAP1_HUMAN   | K.SHS#RQAST#DAGTAGALTPQHVR.A    | S105:T110: | 3 | 4,0605 | 1     | 0,228  |
| 18 | Q9Y2W1 TR150_HUMAN  | K.SPPSTGTYGSSQKEE.S             |            | 2 | 4,055  | 0,552 | -0,52  |
| 18 | O14893 GEMI2_HUMAN  | K.RKQS#VNISLSGCQPAPE.G          | S81:       | 2 | 4,0509 | 0,467 | -0,125 |
| 18 | Q9NUQ6 SPS2L_HUMAN  | R.LLQQKLS#LDGNPKPIHGTTE.R       | S159:      | 3 | 4,0494 | 0,443 | -0,806 |
| 18 | Q86W56 PARG_HUMAN   | K.LANAKQTTEDEQARE.A             |            | 3 | 4,0449 | 0,427 | -0,322 |
| 18 | Q13283 G3BP1_HUMAN  | D.SHQLFIGNLPHEVDKSE.L           |            | 3 | 4,0443 | 0,361 | -0,375 |
| 18 | O14497 ARI1A_HUMAN  | R.SHHAPM*S#PGSSGGGGQPLAR.T      | S363:      | 3 | 4,0333 | 0,425 | -0,369 |
| 18 | Q00839 HNRPU_HUMAN  | R.AKS#PQPPVEEDE.H               | S270:      | 2 | 4,0324 | 0,455 | -0,397 |

|    |                     |                                  |            |   |        |       |        |
|----|---------------------|----------------------------------|------------|---|--------|-------|--------|
| 18 | Q9H1B7 EAP1_HUMAN   | E.LNRQS#PNSSAAAASVASR.R          | S215:      | 3 | 4,0239 | 0,176 | -0,291 |
| 18 | P11717 MPRI_HUMAN   | K.ALSSLHGDDQDS#EDE.V             | S2409:     | 2 | 4,0237 | 0,449 | -0,575 |
| 18 | Q14692 BMS1_HUMAN   | K.AGLS#PANCQSDRVNLE.K            | S552:      | 2 | 4,0205 | 0,445 | -0,472 |
| 18 | P46013 KI67_HUMAN   | K.SGGSGHAVAEPAS#PEQE.L           | S308:      | 2 | 4,0078 | 0,361 | -0,578 |
| 18 | P23588 IF4B_HUMAN   | E.DCHS#PTSKPPKPDQPLKVM*PAPPPKE.N | S459:      | 3 | 4,0048 | 0,247 | -0,308 |
| 18 | Q8IU81 I2BP1_HUMAN  | E.ALGHS#PKDPGGGGPVR.A            | S436:      | 3 | 4,0003 | 0,256 | -0,223 |
| 18 | Q9ULW0 TPX2_HUMAN   | E.AAISRKT#PAQPQR.R               | T113:      | 3 | 3,9956 | 0,249 | -0,304 |
| 18 | Q9UPY3 DICER_HUMAN  | R.TLLSES#PGKLHVE.V               | S1150:     | 2 | 3,9908 | 0,347 | -0,409 |
| 18 | Q16555 DPYL2_HUMAN  | R.NLHQSGFSLGAQIDDNIPR.R          |            | 3 | 3,9782 | 0,27  | -0,506 |
| 18 | O15015 ZN646_HUMAN  | R.HHQSQSSGTTADKAPS#PLGVAGDAM*E.M | S991:      | 3 | 3,9736 | 0,337 | -0,342 |
| 18 | Q9Y2H0 DLGP4_HUMAN  | D.CTPHPNSISIDAGPR.Q              |            | 3 | 3,9696 | 0,283 | -0,226 |
| 18 | Q12756 KIF1A_HUMAN  | E.SHGSSASSPLS#AEGRPSLEAPNER.Q    | S1433:     | 3 | 3,9675 | 0,338 | -0,545 |
| 18 | Q15019 SEPT2_HUMAN  | K.IYHLPDAES#DEDE.D               | S218:      | 2 | 3,9642 | 0,333 | -0,454 |
| 18 | Q14676 MDC1_HUMAN   | R.TNM*SSVKT#PETVVPTAPE.L         | T1321:     | 2 | 3,9489 | 0,373 | -0,246 |
| 18 | P06748 NPM_HUMAN    | E.KT#PKT#PKGPSSVEDIK.A           | T234:T237: | 3 | 3,9422 | 0,156 | -0,293 |
| 18 | P52594 NUPL_HUMAN   | K.SLLGDSAPTLLHNLK.G              |            | 2 | 3,9416 | 0,454 | -0,832 |
| 18 | B2CI53 B2CI53_HUMAN | R.SNM*S#PDKPVSVKISFE.D           | S1105:     | 3 | 3,9387 | 0,232 | -0,295 |
| 18 | O14893 GEMI2_HUMAN  | E.AAQCPDVVVAQIDPKK.L             |            | 2 | 3,9346 | 0,44  | -0,421 |
| 18 | O94888 UBXD7_HUMAN  | E.HGQLDGLSSPPKK.C                |            | 3 | 3,9256 | 0,393 | -0,441 |
| 18 | Q13813 SPTA2_HUMAN  | R.LM*VHTVATFNSIKE.L              |            | 3 | 3,9188 | 0,255 | -0,114 |
| 18 | Q9UQ35 SRRM2_HUMAN  | K.DKFSFPVQDRPE.S                 |            | 2 | 3,9095 | 0,359 | -0,937 |
| 18 | P27987 IP3KB_HUMAN  | E.AHIQAQSSAIQAPRS#PR.L           | S166:      | 3 | 3,9017 | 0,412 | -0,385 |
| 18 | P60709 ACTB_HUMAN   | R.VAPEEHPVLLTEAPLNPK.A           |            | 2 | 3,9006 | 0,422 | -0,562 |
| 18 | P22314 UBA1_HUMAN   | R.QNRYDGQVAVFGSDLQE.K            |            | 2 | 3,8991 | 0,383 | -0,76  |
| 18 | P40222 TXLNA_HUMAN  | R.VQDLSAGGQGS LTDSGPER.R         |            | 2 | 3,8987 | 0,509 | -0,326 |
| 18 | Q9UQ35 SRRM2_HUMAN  | E.KDVNPGGKEETPGQRPAVTE.T         |            | 3 | 3,8934 | 0,304 | -0,434 |
| 18 | P62937 PPIA_HUMAN   | E.KFEDENFILK.H                   |            | 3 | 3,8871 | 0,234 | 0,214  |
| 18 | P24941 CDK2_HUMAN   | K.IGEGT#Y#GVVYKAR.N              | T14:Y15:   | 3 | 3,8861 | 0,245 | 0      |
| 18 | O14893 GEMI2_HUMAN  | E.AAQCPDVVVAQIDPK.K              |            | 2 | 3,8855 | 0,378 | -0,606 |
| 18 | P10809 CH60_HUMAN   | R.KPLVIAEDVDGE.A                 |            | 2 | 3,8801 | 0,444 | -0,524 |
| 18 | Q8IU81 I2BP1_HUMAN  | R.AGGAS#PAASSTAQPPTQHR.L         | S453:      | 3 | 3,8801 | 0,303 | -0,489 |
| 18 | Q7RTP8 Q7RTP8_HUMAN | K.RASS#LNVLVGGK.A                | S596:      | 2 | 3,8623 | 0,421 | -0,35  |
| 18 | O14893 GEMI2_HUMAN  | R.KQS#VNISLSGCQPAPE.G            | S81:       | 2 | 3,862  | 0,456 | -0,68  |

|    |                     |                                |            |   |        |       |        |
|----|---------------------|--------------------------------|------------|---|--------|-------|--------|
| 18 | O94888 UBXD7_HUMAN  | E.HGQLDGLSSS#PPKK.C            | S270:      | 3 | 3,8606 | 0,315 | 0      |
| 18 | P60709 ACTB_HUMAN   | K.DLYANTVLSGGTTM*YPGIADR.M     |            | 3 | 3,8597 | 0,288 | -0,41  |
| 18 | P07900 HS90A_HUMAN  | E.NQKHIIYITGETK.D              |            | 3 | 3,8575 | 0,521 | 0      |
| 18 | O95466 FMNL_HUMAN   | E.AGADTPGKGEPPAPKS#PPKAR.R     | S1031:     | 3 | 3,8571 | 0,287 | -0,694 |
| 18 | Q86WB0 NIPA_HUMAN   | R.SQDATFSPGSEQAEKS#PGPIVSR.T   | S344:      | 3 | 3,8521 | 0,382 | -0,373 |
| 18 | Q6NZI2 PTRF_HUMAN   | R.RGS#S#PDVHALLE.I             | S365:S366: | 2 | 3,8434 | 0,452 | -0,423 |
| 18 | Q02952 AKA12_HUMAN  | E.KQEKEPSKSAES#PTS#PVTSE.T     | S283:S286: | 3 | 3,8381 | 0,338 | -1,507 |
| 18 | Q5T5U3 RHG21_HUMAN  | E.TGSDSGTLLSTSSQASLAR.F        |            | 2 | 3,824  | 0,414 | -0,265 |
| 18 | Q09666 AHNK_HUMAN   | K.SKGHYEVTGS#DDE.T             | S5841:     | 2 | 3,8072 | 0,457 | -0,568 |
| 18 | Q86T74 Q86T74_HUMAN | R.NINPSTANS#PKCQE.L            | S233:      | 2 | 3,8056 | 0,424 | 0,818  |
| 18 | Q7Z333 SETX_HUMAN   | E.M*KNSCNVLHPQSPNNS#NR.Q       | S1667:     | 3 | 3,7728 | 0,168 | -0,584 |
| 18 | P35251 RFC1_HUMAN   | E.AHLTPYSLQAIKASR.H            |            | 3 | 3,7712 | 0,465 | -0,331 |
| 18 | P18615 NELFE_HUMAN  | K.DPEKGPVPTFQPFQR.S            |            | 3 | 3,7654 | 0,243 | -0,42  |
| 18 | Q86U90 YRDC_HUMAN   | R.LLRLPGSGAVQAAS#PE.R          | S60:       | 2 | 3,7652 | 0,466 | -0,445 |
| 18 | Q8IU81 I2BP1_HUMAN  | R.AGGAS#PAASSTAQPPTQHR.L       | S453:      | 2 | 3,746  | 0,466 | -0,521 |
| 18 | Q9Y520 Q9Y520_HUMAN | E.SENSCNKEEVPVFR.Q             |            | 2 | 3,7349 | 0,388 | -0,401 |
| 18 | Q15185 TEBP_HUMAN   | D.S#DEDMSNDFRFE.M              | S113:      | 2 | 3,7342 | 0,54  | -0,883 |
| 18 | Q14789 GOGB1_HUMAN  | K.QDGDKS#LSAVPDIGQCHQDE.L      | S671:      | 3 | 3,7314 | 0,13  | -0,722 |
| 18 | Q92625 ANS1A_HUMAN  | R.SLSKSDS#DLLTCSPTE DATM*GSR.S | S628:      | 3 | 3,7235 | 0,31  | 0      |
| 18 | Q8N4C6 NIN_HUMAN    | R.RHVLS#DLEDDE.V               | S1145:     | 2 | 3,7204 | 0,268 | -0,52  |
| 18 | P06493 CDC2_HUMAN   | K.IGEGT#Y#GVVYK.G              | T14:Y15:   | 2 | 3,7136 | 0,394 | -0,363 |
| 18 | P31943 HNRH1_HUMAN  | R.LRGLPFGCSKEE.I               |            | 3 | 3,713  | 0,337 | 0,066  |
| 18 | Q9H4G0 E41L1_HUMAN  | R.SLDGAEFS#RPAS#VSE.N          | S437:S441: | 2 | 3,7112 | 0,449 | -0,214 |
| 18 | Q06830 PRDX1_HUMAN  | R.TIAQDYGVLKADE.G              |            | 2 | 3,7068 | 0,354 | -0,772 |
| 18 | Q9NZT2 OGFR_HUMAN   | R.KVEEEGS#PGDPDHE.A            | S315:      | 2 | 3,7054 | 0,38  | -0,76  |
| 18 | Q12789 TF3C1_HUMAN  | D.LQCVCLNTPLGVVR.C             |            | 2 | 3,7034 | 0,325 | -0,374 |
| 18 | Q5QJE6 TDIF2_HUMAN  | E.LQDTSLQQLVSQR.H              |            | 2 | 3,7026 | 0,474 | -0,644 |
| 18 | Q15424 SAFB1_HUMAN  | R.KFDFDACNEVPPAPK.E            |            | 2 | 3,6968 | 0,424 | -0,985 |
| 18 | P13667 PDIA4_HUMAN  | K.FAM*EPEEFSDTLRE.F            |            | 2 | 3,6957 | 0,385 | -0,666 |
| 18 | Q99547 MPH6_HUMAN   | E.NGDIT#PIKAK.K                | T147:      | 2 | 3,6873 | 0,429 | -0,215 |
| 18 | Q9NYJ8 TAB2_HUMAN   | R.TSSTSSVNSQTLNR.N             |            | 2 | 3,6863 | 0,414 | -0,389 |
| 18 | Q12802 AKP13_HUMAN  | K.SVS#IQNITGVGNDE.N            | S1906:     | 2 | 3,6861 | 0,327 | -0,726 |
| 18 | P13639 EF2_HUMAN    | R.LAKSDPM*VQCIEE.S             |            | 2 | 3,6821 | 0,283 | 0      |



|    |                     |                                |                    |   |        |       |        |
|----|---------------------|--------------------------------|--------------------|---|--------|-------|--------|
| 18 | Q8NEF9 SRFB1_HUMAN  | K.AVTIANS#PSKPSEK.D            | S203:              | 2 | 3,6791 | 0,367 | -0,728 |
| 18 | Q6PJT7 ZC3HE_HUMAN  | E.CAYHHPIS#PCKAFPNC.F          | S620:              | 3 | 3,6787 | 0,411 | 0,084  |
| 18 | Q9Y520 Q9Y520_HUMAN | E.SENSCNKEEVPVFR.Q             |                    | 3 | 3,6781 | 0,377 | -0,2   |
| 18 | P15927 RFA2_HUMAN   | E.GHIYSTVDDDDHFKSTDAE.-        |                    | 3 | 3,6777 | 0,406 | -0,18  |
| 18 | Q14847 LASP1_HUMAN  | K.GKGFVSVVADT#PE.L             | T104:              | 2 | 3,6661 | 0,474 | -0,569 |
| 18 | Q6IPR3 TYW3_HUMAN   | R.AQCITKES#DEELE.N             | S236:              | 2 | 3,6586 | 0,268 | -0,523 |
| 18 | A0JLU0 A0JLU0_HUMAN | E.GPATQVDSAVGTLPATSPQSTSVQAK.G | S1073:             | 3 | 3,6473 | 0,157 | -0,284 |
| 18 | P05455 LA_HUMAN     | K.FSGDLDDQTCRE.D               |                    | 2 | 3,6472 | 0,385 | -0,338 |
| 18 | O95785 WIZ_HUMAN    | E.ARSPDLHISPLAK.K              |                    | 3 | 3,629  | 0,235 | 0,061  |
| 18 | Q53HL2 BOREA_HUMAN  | R.IYNISGNNGS#PLADSKE.I         | S219:              | 2 | 3,6224 | 0,38  | -0,559 |
| 18 | P60709 ACTB_HUMAN   | R.VAPEEHPVLLTEAPLNPK.A         |                    | 3 | 3,6171 | 0,303 | -0,187 |
| 18 | P04406 G3P_HUMAN    | E.GLM*TTVHAITATQK.T            |                    | 2 | 3,6093 | 0,491 | -0,246 |
| 18 | Q14BN4 SLMAP_HUMAN  | K.VSLLKDDLQGAQSE.I             |                    | 2 | 3,6005 | 0,291 | -0,325 |
| 18 | Q9C0C2 TB182_HUMAN  | E.AGKEEPPLT#PPAR.C             | T131:              | 3 | 3,5943 | 0,205 | 0,119  |
| 18 | Q15154 PCM1_HUMAN   | R.KPFNPLM*QINTNK.S             |                    | 3 | 3,5915 | 0,237 | -0,214 |
| 18 | P23588 IF4B_HUMAN   | E.DCHS#PTSKPPKPDQPLK.V         | S459:              | 3 | 3,5837 | 0,395 | -0,546 |
| 18 | B2CI53 B2CI53_HUMAN | R.SNM*S#PDKPVSVK.I             | S1105:             | 2 | 3,5822 | 0,222 | -0,529 |
| 18 | Q14152 EIF3A_HUMAN  | R.KERLES#LNIQRE.K              | S584:              | 3 | 3,5769 | 0,375 | -0,115 |
| 18 | Q9NYU2 UGGG1_HUMAN  | E.VNSILGIDSAYDR.N              |                    | 2 | 3,5767 | 0,413 | -0,6   |
| 18 | O96017 CHK2_HUMAN   | E.STALPQVLAQPS#TSR.K           | S516:              | 2 | 3,5744 | 0,372 | -0,522 |
| 18 | O94888 UBXD7_HUMAN  | E.HGQLDGLSSPPK.K               |                    | 2 | 3,5701 | 0,431 | 0      |
| 18 | Q6R327 RICTR_HUMAN  | R.SQS#FNTDTTSGISSM*SSSPSRE.T   | S1219:             | 3 | 3,5682 | 0,411 | -0,073 |
| 18 | Q96EP0 RNF31_HUMAN  | R.RLS#APLPSSCGDPE.K            | S466:              | 2 | 3,5641 | 0,506 | -0,545 |
| 18 | P51858 HDGF_HUMAN   | R.RAGDLLEDS#PKRPK.E            | S165:              | 3 | 3,5631 | 0,298 | -0,11  |
| 18 | O75179 ANR17_HUMAN  | K.S#GPSPLS#S#PNGKLTVASPKRGQK.R | S1693:S1699:S1700: | 3 | 3,5575 | 0,266 | 0,433  |
| 18 | Q70E73 RAPH1_HUMAN  | R.RTAS#AGTVSDAE.V              | S192:              | 2 | 3,5574 | 0,321 | -0,49  |
| 18 | Q9NR30 DDX21_HUMAN  | K.LKNGFPHPEPCNPSEAASEESNSE.I   |                    | 3 | 3,5543 | 0,298 | -0,2   |
| 18 | Q9UHB6 LIMA1_HUMAN  | R.SRPFTVAASFQSTSVK.S           |                    | 2 | 3,5496 | 0,301 | -0,783 |
| 18 | Q96GQ7 DDX27_HUMAN  | R.SADFNPDFVFTEKE.G             |                    | 2 | 3,5487 | 0,467 | -0,667 |
| 18 | Q14320 FA50A_HUMAN  | R.KISSLS#FTLEEEEE.G            | S121:              | 2 | 3,5478 | 0,267 | -0,284 |
| 18 | O96013 PAK4_HUMAN   | R.DKRPLS#GPDVGTQPAGLASGAK.L    | S181:              | 3 | 3,5414 | 0,316 | -0,477 |
| 18 | P63261 ACTG_HUMAN   | E.IAALVIDNGSGM*CK.A            |                    | 2 | 3,539  | 0,456 | -0,25  |
| 18 | Q9P246 STIM2_HUMAN  | E.KSCS#M*NQLSSGIPVPKPR.H       | S680:              | 3 | 3,5382 | 0,211 | -0,527 |

|    |                      |                                 |                 |   |        |       |        |
|----|----------------------|---------------------------------|-----------------|---|--------|-------|--------|
| 18 | P02794 FRIH_HUMAN    | E.YLFDKHTLGDS#DNES.-            | S179:           | 2 | 3,5345 | 0,44  | -0,603 |
| 18 | Q5VSL9 FA40A_HUMAN   | R.KDS#EGYSESPDLE.F              | S59:            | 2 | 3,5338 | 0,366 | 0,079  |
| 18 | Q9NYF8 BCLF1_HUMAN   | K.LKDLFDYS#PPLHK.N              | S512:           | 3 | 3,5337 | 0,347 | -0,553 |
| 18 | Q9BUT9 CP014_HUMAN   | R.RAPSTSPS#FEGTQE.T             | S82:            | 2 | 3,5232 | 0,404 | 0,233  |
| 18 | Q8IU81 I2BP1_HUMAN   | E.GRS#PGPPALKHPATK.D            | S66:            | 3 | 3,5216 | 0,353 | -0,229 |
| 18 | ##Q96PP4 TSG13_HUMAN | E.KDQQTISCPPNNT#M*ILLT#KDQD.Y   | T176:T181:      | 3 | 3,5158 | 0,179 | -1,033 |
| 18 | Q02952 AKA12_HUMAN   | K.LTASEQAHPQEPAESAEHPRLS#AEYE.K | S371:           | 3 | 3,5046 | 0,356 | -0,557 |
| 18 | Q15154 PCM1_HUMAN    | R.KPS#ASERLPDEKVE.L             | S384:           | 3 | 3,504  | 0,209 | -0,11  |
| 18 | Q9UKS6 PACN3_HUMAN   | R.SPDEVTLTSIVPTR.D              |                 | 2 | 3,5006 | 0,383 | 0,161  |
| 18 | P22314 UBA1_HUMAN    | R.YDGQVAVFGSDLQE.K              |                 | 2 | 3,4985 | 0,308 | -0,399 |
| 18 | Q15149 PLEC1_HUMAN   | R.GYLNKDTHDQLSEPSEVR.S          |                 | 3 | 3,4938 | 0,334 | -0,088 |
| 18 | Q9H8Y8 GORS2_HUMAN   | K.LYVYNTD TDNCRE.V              |                 | 2 | 3,4905 | 0,464 | -0,66  |
| 18 | Q70E73 RAPH1_HUMAN   | E.DTKPLVTNQHR.R                 |                 | 3 | 3,4844 | 0,185 | -0,07  |
| 18 | P04264 K2C1_HUMAN    | R.SLDLDSIIAEVK.A                |                 | 2 | 3,4759 | 0,39  | -0,655 |
| 18 | Q5M775 SPEC1_HUMAN   | K.T#PRSPSGIPVR.T                | T844:           | 3 | 3,4754 | 0,248 | 0,134  |
| 18 | P60709 ACTB_HUMAN    | E.TTFNSIM*KCDVDIRKD.L           |                 | 3 | 3,4721 | 0,355 | -0,467 |
| 18 | Q92576 PHF3_HUMAN    | E.NLVANTARS#PQFINLK.R           | S1642:          | 2 | 3,4672 | 0,446 | -0,523 |
| 18 | O43166 SI1L1_HUMAN   | R.HSASPVVFT#SARSS#PKEE.L        | T1438:S1443:    | 3 | 3,4662 | 0,283 | -0,352 |
| 18 | P68104 EF1A1_HUMAN   | K.YYVTIIDAPGHR.D                |                 | 3 | 3,464  | 0,401 | -0,065 |
| 18 | Q96JG6 CC132_HUMAN   | R.DYVDEQTGDGPVK.S               |                 | 2 | 3,4551 | 0,471 | -0,257 |
| 18 | Q96I24 FUBP3_HUMAN   | R.IQFKPDDGIS#PE.R               | S296:           | 2 | 3,455  | 0,331 | -0,342 |
| 18 | Q86YP4 P66A_HUMAN    | R.RPPS#PDVIVLSDNEQPSS#PR.V      | S100:S114:      | 3 | 3,4529 | 0,164 | -1,168 |
| 18 | O43660 PLRG1_HUMAN   | E.KGPQNATDSYVHK.Q               |                 | 3 | 3,4459 | 0,328 | 0,127  |
| 18 | P10636 TAU_HUMAN     | E.DHAGTYGLGDRK.D                |                 | 3 | 3,4427 | 0,315 | 0,142  |
| 18 | Q05209 PTN12_HUMAN   | R.SCLVEGDAKEE.I                 |                 | 2 | 3,4385 | 0,399 | -0,493 |
| 18 | Q8TE77 SSH3_HUMAN    | E.QGQGQGQGEPCISSTPR.F           |                 | 2 | 3,4343 | 0,433 | -0,341 |
| 18 | P08670 VIME_HUMAN    | E.TNLDLPLVDTHSKR.T              |                 | 2 | 3,4308 | 0,393 | -0,432 |
| 18 | A9CQZ4 A9CQZ4_HUMAN  | K.AAEDEEVPAFFK.N                |                 | 2 | 3,4308 | 0,471 | -0,361 |
| 18 | P43490 NAMPT_HUMAN   | E.KYDGHLPPIEK.A                 |                 | 3 | 3,4285 | 0,084 | 0      |
| 18 | Q00839 HNRPU_HUMAN   | R.AKS#PQPPVEEE.D                | S270:           | 2 | 3,4164 | 0,365 | -0,473 |
| 18 | Q9Y2W1 TR150_HUMAN   | K.KSPVGKS#PPSTGSTYGSSQK.E       | S320:           | 3 | 3,416  | 0,096 | -0,622 |
| 18 | O14497 ARI1A_HUMAN   | R.SHHAPMS#PGSSGGGGQPLAR.T       | S363:           | 3 | 3,413  | 0,347 | -0,465 |
| 18 | Q16555 DPYL2_HUMAN   | K.T#VTPAS#SAKT#SPAKQQAPPVR.N    | T512:S517:T521: | 3 | 3,4103 | 1     | -0,387 |

|    |                     |                                |            |   |        |       |        |
|----|---------------------|--------------------------------|------------|---|--------|-------|--------|
| 18 | Q9UNZ2 NSF1C_HUMAN  | R.KKS#PNELVDDLFLK.G            | S114:      | 2 | 3,4046 | 0,308 | -0,529 |
| 18 | Q5VZL5 ZMYM4_HUMAN  | K.TLSQGESQTS#EHE.L             | S1071:     | 2 | 3,3997 | 0,4   | -0,726 |
| 18 | Q06587 RING1_HUMAN  | E.LHRTPEAIMDGTGTEIAVS#PR.S     | S38:       | 3 | 3,3985 | 0,226 | -0,398 |
| 18 | Q7Z2K8 GRIN1_HUMAN  | E.GKVGSLPLEKGS#PVTTTK.A        | S615:      | 3 | 3,3915 | 0,259 | -0,389 |
| 18 | Q12846 STX4_HUMAN   | R.KTQHGVLSQLQFVE.L             |            | 2 | 3,3911 | 0,358 | -0,488 |
| 18 | Q9NVU7 SDA1_HUMAN   | K.YIEIDS#DEEPRGE.L             | S585:      | 2 | 3,3895 | 0,285 | -0,449 |
| 18 | Q8ND76 CCNY_HUMAN   | R.ASTIFLSKS#QTDVRE.K           | S73:       | 2 | 3,3834 | 0,371 | -0,692 |
| 18 | Q9BY89 K1671_HUMAN  | E.RRS#PTVEPSTLPR.E             | S1224:     | 3 | 3,3804 | 0,236 | -0,116 |
| 18 | Q15545 TAF7_HUMAN   | E.NQGLDIS#SPGM*SGHR.Q          | S200:      | 2 | 3,3795 | 0,46  | 0      |
| 18 | P08670 VIME_HUMAN   | E.VERDNLAEDIM*R.L              |            | 3 | 3,3757 | 0,149 | -0,124 |
| 18 | Q8N2Y8 RUSC2_HUMAN  | E.GQVYTNTPPNLSTGR.Q            |            | 2 | 3,3755 | 0,369 | -0,288 |
| 18 | O75376 NCOR1_HUMAN  | E.AAKPPEPEKPVSPPPVEQK.H        | S224:      | 3 | 3,3749 | 0,26  | 0,087  |
| 18 | O60271 JIP4_HUMAN   | K.VSNS#PEPQKAVEQEDE.L          | S251:      | 2 | 3,3672 | 0,463 | 0,458  |
| 18 | Q96A49 SYAP1_HUMAN  | E.AVRPKT#PPVVIK.S              | T248:      | 3 | 3,3663 | 0,178 | 0,132  |
| 18 | P35579 MYH9_HUMAN   | R.RGDLPFVVPR.R                 |            | 2 | 3,3655 | 0,242 | -0,211 |
| 18 | P19338 NUCL_HUMAN   | K.GLSEDTTEETLKE.S              |            | 2 | 3,3648 | 0,427 | -0,42  |
| 18 | O95433 AHSA1_HUMAN  | K.GHVEIPNLSDENSVDE.V           |            | 2 | 3,3631 | 0,405 | -0,487 |
| 18 | P35222 CTNB1_HUMAN  | R.HAIM*RS#PQMVSAIVR.T          | S191:      | 3 | 3,3585 | 0,184 | -0,51  |
| 18 | Q49AM3 TTC31_HUMAN  | K.VQASPGLLAAALQQSQE.L          |            | 2 | 3,3502 | 0,166 | -0,214 |
| 18 | P22626 ROA2_HUMAN   | R.SRGFGVFTFSSM*AE.V            |            | 2 | 3,3467 | 0,462 | -0,555 |
| 18 | P51572 BAP31_HUMAN  | K.GAAVDGGKLDVGNAE.V            |            | 2 | 3,3456 | 0,44  | 0,178  |
| 18 | P49411 EFTU_HUMAN   | R.AEAGDNLGALVR.G               |            | 2 | 3,3378 | 0,189 | -0,411 |
| 18 | Q9H4I2 ZHX3_HUMAN   | R.KVS#PIKINLKNLRVTE.A          | S723:      | 3 | 3,3352 | 0,347 | -0,473 |
| 18 | P04406 G3P_HUMAN    | K.IISNASCTTNCLAPLAK.V          |            | 2 | 3,3333 | 0,446 | -0,466 |
| 18 | P42684 ABL2_HUMAN   | R.DKSPSS#LLEDAKE.T             | S634:      | 3 | 3,3324 | 0,136 | -0,183 |
| 18 | Q8ND56 LS14A_HUMAN  | R.SLKTQLS#QGRSSQLDPLRKS#PTME.Q | S178:S192: | 3 | 3,3212 | 0,163 | 0,249  |
| 18 | Q9GZR7 DDX24_HUMAN  | E.LTDYQLVS#PAKNPSSLFSK.E       | S60:       | 3 | 3,3171 | 0,21  | -0,505 |
| 18 | Q9UPS6 SET1B_HUMAN  | K.LLFLREPDS#DTE.L              | S522:      | 2 | 3,3149 | 0,344 | -0,483 |
| 18 | Q92615 LARP5_HUMAN  | R.LSREQST#PPKS#PQ.-            | T732:S736: | 2 | 3,314  | 0,119 | -0,604 |
| 18 | P33316 DUT_HUMAN    | R.ARPAEVGGMQLR.F               |            | 2 | 3,3111 | 0,404 | 0,095  |
| 18 | Q9Y2U5 M3K2_HUMAN   | E.DLDNTVFGAER.K                |            | 2 | 3,3107 | 0,411 | -0,395 |
| 18 | B2CI53 B2CI53_HUMAN | E.RNGILASPQS#APGNLDNSK.S       | S263:      | 3 | 3,3092 | 0,192 | -0,453 |
| 18 | Q8IU81 I2BP1_HUMAN  | E.ALGHS#PKDPGGGGPVR.A          | S436:      | 2 | 3,3013 | 0,407 | -0,596 |

|    |                    |                              |              |   |        |       |        |
|----|--------------------|------------------------------|--------------|---|--------|-------|--------|
| 18 | Q58FF8 H90B2_HUMAN | K.HSQFLGYPITLYLEK.E          |              | 3 | 3,3012 | 0,298 | -0,607 |
| 18 | Q9UKS6 PACN3_HUMAN | E.KGGRS#PDEVTLTSIVPTR.D      | S319:        | 3 | 3,3011 | 0,328 | -0,826 |
| 18 | Q9Y2U5 M3K2_HUMAN  | K.KRLS#IIGPTSR.D             | S153:        | 3 | 3,3009 | 0,28  | 0,07   |
| 18 | Q9Y5X1 SNX9_HUMAN  | K.IPLNKFPGFAKPGTE.Q          |              | 3 | 3,2994 | 0,225 | 0      |
| 18 | O95239 KIF4A_HUMAN | R.RRT#FS#LTEVRGQVSE.S        | T799:S801:   | 3 | 3,2992 | 0,239 | -0,38  |
| 18 | P22626 ROA2_HUMAN  | K.LFVGGIKEDTEE.H             |              | 2 | 3,297  | 0,32  | -0,639 |
| 18 | Q9Y4E8 UBP15_HUMAN | R.FSKADTIDTIEKE.I            |              | 3 | 3,2966 | 0,209 | -0,061 |
| 18 | P06748 NPM_HUMAN   | E.KT#PKTPKGPSS#VEDIK.A       | T234:S243:   | 2 | 3,296  | 0,2   | -0,326 |
| 18 | Q8ND82 Z280C_HUMAN | E.ISSSKPAISNILNR.G           |              | 3 | 3,295  | 0,24  | -0,061 |
| 18 | P42684 ABL2_HUMAN  | R.DKS#PSSLLEDAKE.T           | S631:        | 2 | 3,2927 | 0,35  | -0,407 |
| 18 | Q86YP4 P66A_HUMAN  | R.GEGLVGDGPVDMR.T            |              | 2 | 3,2925 | 0,516 | -0,656 |
| 18 | Q15942 ZYX_HUMAN   | R.S#PGAPGPLTLKEVEE.L         | S344:        | 2 | 3,2862 | 0,422 | -0,761 |
| 18 | Q96D71 REPS1_HUMAN | R.TGSDHTNPTS#PLLVKPSDLLEE.N  | S430:        | 3 | 3,2812 | 0,102 | -0,452 |
| 18 | P62937 PPIA_HUMAN  | E.KFEDENFILK.H               |              | 2 | 3,2779 | 0,211 | -0,475 |
| 18 | P55072 TERA_HUMAN  | R.LGDVISIQPCPDVK.Y           |              | 2 | 3,275  | 0,351 | -0,396 |
| 18 | O43741 AAKB2_HUMAN | K.IM*VGS#TDDPSVFLPDSK.L      | S39:         | 2 | 3,2729 | 0,341 | 0,123  |
| 18 | Q15032 R3HD1_HUMAN | R.DRIFS#QDLSCSQE.N           | S299:        | 2 | 3,2728 | 0,448 | -0,66  |
| 18 | Q6PL18 ATAD2_HUMAN | K.IACNGDASSSQIIHIS#DENEGKE.M | S1283:       | 3 | 3,2723 | 0,285 | -0,143 |
| 18 | Q8ND56 LS14A_HUMAN | R.SSPQLDPLRKS#PTM*E.Q        | S192:        | 2 | 3,2718 | 0,435 | -0,274 |
| 18 | Q9H4I2 ZHX3_HUMAN  | R.KVS#PIKINLK.N              | S723:        | 3 | 3,271  | 0,241 | 0,3    |
| 18 | P41567 EIF1_HUMAN  | E.IGLAKDDQLKVHGF.-           |              | 3 | 3,2635 | 0,282 | 0,475  |
| 18 | P35269 T2FA_HUMAN  | R.LRLDTGPQSLSGK.S            |              | 2 | 3,2633 | 0,44  | -0,445 |
| 18 | Q86YP4 P66A_HUMAN  | R.GEGLVGDGPVDM*R.T           |              | 2 | 3,2626 | 0,476 | -0,463 |
| 18 | P49790 NU153_HUMAN | R.SGIDITDFQAK.R              |              | 2 | 3,2562 | 0,341 | -0,408 |
| 18 | Q02241 KIF23_HUMAN | R.RSS#TVAPAQPDGAESE.W        | S912:        | 2 | 3,2402 | 0,459 | -0,943 |
| 18 | P38571 LICH_HUMAN  | E.DGYILCLNRIPHGR.K           |              | 3 | 3,2397 | 0,365 | -0,217 |
| 18 | Q9UQ35 SRRM2_HUMAN | E.HKELS#NS#PLRE.N            | S1318:S1320: | 2 | 3,2379 | 0,359 | -0,747 |
| 18 | Q9NR30 DDX21_HUMAN | K.LKNGFPHPEPDCNPSEAASEE.S    |              | 3 | 3,2368 | 0,395 | -0,079 |
| 18 | P35222 CTNB1_HUMAN | R.HAIMRS#PQM*VSAIVR.T        | S191:        | 3 | 3,2362 | 0,236 | -0,408 |
| 18 | P42694 HELZ_HUMAN  | R.RISSS#SVQPCSEE.V           | S1765:       | 2 | 3,2358 | 0,294 | -0,316 |
| 18 | Q04206 TF65_HUMAN  | R.VNRNS#GSCLGGDE.I           | S203:        | 2 | 3,2326 | 0,454 | -0,338 |
| 18 | Q04917 1433F_HUMAN | E.DSYKDSTLIM*QLLR.D          |              | 3 | 3,2291 | 0,203 | -0,431 |
| 18 | Q9Y2W1 TR150_HUMAN | K.SPLQSVVVR.R                |              | 2 | 3,2211 | 0,347 | 0,062  |

|    |                      |                                |                    |   |        |       |        |
|----|----------------------|--------------------------------|--------------------|---|--------|-------|--------|
| 18 | Q9UQ35 SRRM2_HUMAN   | K.DKFSPFPVQDRPE.S              |                    | 3 | 3,2205 | 0,306 | -0,351 |
| 18 | P11940 PABP1_HUMAN   | R.IVATKPLYVALAQR.K             |                    | 3 | 3,22   | 0,15  | -0,119 |
| 18 | Q01804 OTUD4_HUMAN   | K.TAADVVSPGANSVDSR.V           |                    | 2 | 3,2193 | 0,26  | 0,395  |
| 18 | Q92945 FUBP2_HUMAN   | R.IGGGIDVPVPR.H                |                    | 2 | 3,2114 | 0,291 | -0,113 |
| 18 | Q9UBR2 CATZ_HUMAN    | R.VGDYGSLSGRE.K                |                    | 2 | 3,2089 | 0,441 | -0,214 |
| 18 | Q9UBR2 CATZ_HUMAN    | R.VGDYGSLSGR.E                 |                    | 2 | 3,208  | 0,471 | 0,06   |
| 18 | Q13136 LIPA1_HUMAN   | K.TLTDGVLINHEQE.N              |                    | 2 | 3,2062 | 0,463 | -0,385 |
| 18 | P29590 PML_HUMAN     | K.AVS#PPHLDGPPS#PRS#PVIQSE.V   | S518:S527:S530:    | 3 | 3,2024 | 0,152 | -0,47  |
| 18 | Q9H6A9 PCX3_HUMAN    | R.VLSM*DGAGGDVLRPPLAGCKAE.L    |                    | 3 | 3,2005 | 0,188 | -0,328 |
| 18 | Q8NEM7 FA48A_HUMAN   | K.M*SHSSSGSASLSQVS#PGKETDQTE.T | S437:              | 3 | 3,1995 | 0,155 | 0,433  |
| 18 | Q8WXH0 SYNE2_HUMAN   | R.RGS#MSYLAAVEEE.V             | S4108:             | 2 | 3,1978 | 0,292 | -0,401 |
| 18 | Q5TCQ9 MAGI3_HUMAN   | R.AEVPARPAPQEPYDVVLQR.K        |                    | 3 | 3,1967 | 0,29  | -0,514 |
| 18 | Q04637 IF4G1_HUMAN   | R.FSALQQAVPTSTDNR.R            |                    | 2 | 3,1884 | 0,459 | -0,692 |
| 18 | P33176 KINH_HUMAN    | K.LITDLQDQNKQKM*M*LE.Q         |                    | 2 | 3,188  | 0,198 | -0,395 |
| 18 | Q9H0B6 KLC2_HUMAN    | R.ASS#LNFLNK.S                 | S582:              | 2 | 3,1724 | 0,249 | -0,227 |
| 18 | Q8WUM9 S20A1_HUMAN   | R.LPS#VDLKEE.T                 | S335:              | 2 | 3,1719 | 0,376 | -0,11  |
| 18 | Q8ND56 LS14A_HUMAN   | R.S#SPQLDPLRS#PTME.Q           | S182:S192:         | 2 | 3,1676 | 0,436 | -0,397 |
| 18 | P21333 FLNA_HUMAN    | K.AGNNMLLVGVHGPR.T             |                    | 3 | 3,1653 | 0,254 | -0,191 |
| 18 | O75179 ANR17_HUMAN   | K.SGSP#PLSS#PNGKLTVAS#PK.R     | S1696:S1700:S1709: | 3 | 3,1649 | 0,151 | -0,798 |
| 18 | Q9H0B6 KLC2_HUMAN    | K.SVEEPTQPGGTGLSDSR.T          |                    | 2 | 3,1646 | 0,431 | -0,497 |
| 18 | P68104 EF1A1_HUMAN   | D.M*RQTVAVGVK.A                |                    | 3 | 3,1623 | 0,158 | 0,225  |
| 18 | Q05209 PTN12_HUMAN   | R.TRSCLEVEDAKEE.I              |                    | 2 | 3,1608 | 0,304 | -0,735 |
| 18 | Q96SB4 SRPK1_HUMAN   | K.STAGNFLVNPPEPK.N             |                    | 2 | 3,1541 | 0,258 | -0,492 |
| 18 | Q9Y618 NCOR2_HUMAN   | R.SAVYPLLYRDGEQTEPSR.M         |                    | 3 | 3,1526 | 0,294 | -0,176 |
| 18 | P13667 PDIA4_HUMAN   | K.FAMEPEEFSDTLRE.F             |                    | 2 | 3,152  | 0,451 | -0,538 |
| 18 | Q7KZJ3 Q7KZJ3_HUMAN  | R.SGDLGDM*EPLKGT#TPLM*QKI.-    | T603:              | 3 | 3,1492 | 0,089 | -0,652 |
| 18 | P08559 ODPA_HUMAN    | R.YHGHS#MSDPGVS#YR.T           | S293:S300:         | 3 | 3,1379 | 0,134 | 0      |
| 18 | ##POC221 YN004_HUMAN | K.DLEKKKQYT#E.M                | T574:              | 2 | 3,1374 | 0,138 | 1,433  |
| 18 | Q8TD16 BICD2_HUMAN   | R.GRRS#PILLPKGLLAPE.A          | S582:              | 3 | 3,1353 | 0,136 | -0,509 |
| 18 | P13861 KAP2_HUMAN    | R.APASVLPAAATPR.Q              |                    | 2 | 3,1323 | 0,39  | -0,106 |
| 18 | Q92878 RAD50_HUMAN   | R.LM*RQDIDTQKIQE.R             |                    | 3 | 3,1242 | 0,162 | -0,336 |
| 18 | P22059 OSBP1_HUMAN   | R.TGSNIS#GASSDISLDE.Q          | S382:              | 2 | 3,124  | 0,36  | -0,523 |
| 18 | Q9Y2D5 AKAP2_HUMAN   | R.DALGDSLQVPVSPSSTSSR.C        |                    | 3 | 3,1237 | 0,244 | -0,274 |

|    |                    |                           |        |   |        |       |        |
|----|--------------------|---------------------------|--------|---|--------|-------|--------|
| 18 | P35908 K22E_HUMAN  | R.NLDLDSIIAEVK.A          |        | 2 | 3,1227 | 0,33  | -0,183 |
| 18 | P08238 HS90B_HUMAN | K.TKPIWTRNPDDITQEE.Y      |        | 2 | 3,1208 | 0,309 | -0,314 |
| 18 | P84103 SFRS3_HUMAN | K.VYVGNLGNNGNKTE.L        |        | 2 | 3,1161 | 0,261 | -0,165 |
| 18 | P49790 NU153_HUMAN | K.CIACQAAKLS#PR.D         | S687:  | 3 | 3,107  | 0,324 | -0,063 |
| 18 | Q6ZSR9 YJ005_HUMAN | E.SDVFLRAPFTK.K           |        | 2 | 3,1054 | 0,268 | -0,381 |
| 18 | P46013 KI67_HUMAN  | E.SFGGNVFFSAQNAAK.Q       |        | 2 | 3,105  | 0,251 | -0,079 |
| 18 | Q9UBW7 ZMYM2_HUMAN | E.NLHYDQGCQTSR.T          |        | 3 | 3,1043 | 0,206 | -0,247 |
| 18 | Q8WXH0 SYNE2_HUMAN | R.RGS#M*SYLAAVEEE.V       | S4108: | 2 | 3,1033 | 0,246 | -0,555 |
| 18 | Q71U36 TBA1A_HUMAN | R.AVFVDLEPTVIDE.V         |        | 2 | 3,1004 | 0,365 | -0,337 |
| 18 | P55265 DSRAD_HUMAN | R.TMLLSRS#PE.A            | S825:  | 2 | 3,0976 | 0,199 | -0,398 |
| 18 | P21333 FLNA_HUMAN  | K.AGNM*LLVGVHGPR.T        |        | 3 | 3,094  | 0,367 | -0,126 |
| 18 | Q9P258 RCC2_HUMAN  | K.DGQILPVPNVVVRD.V        |        | 2 | 3,0917 | 0,321 | -0,08  |
| 18 | P10809 CH60_HUMAN  | D.DAM*LLKGKGDKAQIE.K      |        | 3 | 3,0898 | 0,198 | -0,112 |
| 18 | Q13459 MYO9B_HUMAN | R.VQEKPDS#PGGSTQIQR.Y     | S1290: | 2 | 3,0895 | 0,329 | -0,338 |
| 18 | Q9Y266 NUDC_HUMAN  | K.LKPNLGNLADLPNYR.W       |        | 2 | 3,0851 | 0,403 | -0,594 |
| 18 | P78524 ST5_HUMAN   | K.SSLPAVNPVPPKPK.R        |        | 3 | 3,0802 | 0,247 | -0,063 |
| 18 | P62937 PIIA_HUMAN  | K.KITIADCGQLE.-           |        | 2 | 3,0784 | 0,445 | -0,489 |
| 18 | Q06203 PUR1_HUMAN  | E.SAGIVTSDGSSVPTFK.S      |        | 2 | 3,0772 | 0,429 | -0,314 |
| 18 | Q8WYP5 AHTF1_HUMAN | R.LKSS#QLLEPAVEE.T        | S1856: | 2 | 3,073  | 0,203 | -0,401 |
| 18 | Q00610 CLH1_HUMAN  | E.SLRKEEQATE.T            |        | 2 | 3,0686 | 0,292 | -0,555 |
| 18 | Q01804 OTUD4_HUMAN | E.NITDDKYATVSSPS#KSK.K    | S548:  | 3 | 3,0665 | 0,192 | -0,286 |
| 18 | P31943 HNRH1_HUMAN | R.LRGLPFGCSKEE.I          |        | 2 | 3,0559 | 0,415 | -0,35  |
| 18 | Q9BVJ6 UT14A_HUMAN | K.RSELS#QDAEPAGSQE.T      | S437:  | 2 | 3,0543 | 0,376 | -0,29  |
| 18 | Q01082 SPTB2_HUMAN | K.AKTALPAQSAATLPAR.T      |        | 3 | 3,054  | 0,256 | -0,117 |
| 18 | P48634 BAT2_HUMAN  | R.RGDKEAPPPVLLTPK.A       |        | 3 | 3,0538 | 0,081 | -0,226 |
| 18 | Q13572 ITPK1_HUMAN | R.LGCNAGVSPSFQQHCVASLTK.A |        | 3 | 3,0502 | 0,305 | -0,941 |
| 18 | P04406 G3P_HUMAN   | R.VIISAPSADAPMFVM*GVNHE.K |        | 3 | 3,0499 | 0,241 | -0,348 |
| 18 | Q9H019 FA54B_HUMAN | K.ASS#FADMM*GILKD.F       | S238:  | 2 | 3,0472 | 0,314 | -0,576 |
| 18 | Q9BTA9 WAC_HUMAN   | R.STCSLTPALAAHFSE.N       |        | 2 | 3,0467 | 0,457 | -0,613 |
| 18 | P41250 SYG_HUMAN   | K.TSGHVDFKFAFM*VK.D       |        | 3 | 3,0464 | 0,134 | -0,114 |
| 18 | O60271 JIP4_HUMAN  | R.SASQS#SLDKLDQE.L        | S732:  | 2 | 3,0452 | 0,253 | -0,082 |
| 18 | P62736 ACTA_HUMAN  | R.GILTLYKPIE.H            |        | 2 | 3,0448 | 0,435 | -0,532 |
| 18 | P18583 SON_HUMAN   | E.SKTKS#HDDGNIDLE.S       | S142:  | 2 | 3,0441 | 0,349 | -0,521 |

|    |                    |                                 |                 |   |        |       |        |
|----|--------------------|---------------------------------|-----------------|---|--------|-------|--------|
| 18 | P08069 IGF1R_HUMAN | E.SVPLDPSASSSS#LPLPDR.H         | S1313:          | 2 | 3,0434 | 0,482 | -0,384 |
| 18 | Q9P2B4 CT2NL_HUMAN | K.VSSPLSPLSPGIKS#PTIPR.A        | S568:           | 2 | 3,0423 | 0,377 | -0,485 |
| 18 | Q8IWC1 MA7D3_HUMAN | E.M*DKQALIPIAK.K                |                 | 2 | 3,0417 | 0,182 | -0,687 |
| 18 | Q9HC38 GLOD4_HUMAN | K.TM*VGFGPEDDHFAE.L             |                 | 2 | 3,0373 | 0,357 | -0,732 |
| 18 | Q96JM3 ZN828_HUMAN | K.AASDIWKPVLSIDTEPR.K           |                 | 3 | 3,0367 | 0,378 | -0,482 |
| 18 | P63000 RAC1_HUMAN  | E.KKLTPIITYPQGLAM*AK.E          |                 | 3 | 3,0366 | 0,248 | 0      |
| 18 | Q9BQE6 CK048_HUMAN | E.REDSHGSGS#PFKASQD.-           | S282:           | 3 | 3,0357 | 0,273 | -0,307 |
| 18 | P27816 MAP4_HUMAN  | K.VGS#LDNVGHLPAGGAVKTE.G        | S1073:          | 2 | 3,0351 | 0,362 | -0,128 |
| 18 | Q8NI27 THOC2_HUMAN | K.LYINHT#PPPLSKS#KERE.M         | T1328:S1335:    | 3 | 3,0316 | 0,324 | -0,506 |
| 18 | O94979 SC31A_HUMAN | R.AQGEPVAGHES#PKIPIYE.K         | S799:           | 3 | 3,0306 | 0,287 | -0,387 |
| 18 | P07942 LAMB1_HUMAN | R.KCVCNYLGTVQE.H                |                 | 2 | 3,03   | 0,257 | -0,166 |
| 18 | Q96JP5 ZFP91_HUMAN | R.SKTGSLQLICK.S                 |                 | 2 | 3,0259 | 0,397 | -0,395 |
| 18 | Q15545 TAF7_HUMAN  | E.NQGLDISS#PGM*SGHRQGHDSLEHDE.L | S201:           | 3 | 3,0238 | 0,123 | 0,131  |
| 18 | P22626 ROA2_HUMAN  | R.GGGGNFPGPGSNFR.G              |                 | 2 | 3,0188 | 0,447 | -0,443 |
| 18 | Q9H078 CLPB_HUMAN  | K.LKQCPNAVVLFDV.V               |                 | 2 | 3,018  | 0,195 | -0,398 |
| 18 | P62701 RS4X_HUMAN  | R.TIRYPDLIK.V                   |                 | 3 | 3,011  | 0,31  | 0,15   |
| 18 | Q15019 SEPT2_HUMAN | K.IYHLPDAES#DE.D                | S218:           | 2 | 3,0064 | 0,231 | -0,713 |
| 18 | O00193 SMAP_HUMAN  | R.S#ASPDDDLGSSNWE.A             | S15:            | 2 | 3,0052 | 0,15  | -0,313 |
| 18 | Q92615 LARP5_HUMAN | K.RLS#REQST#PPKS#PQ.-           | S727:T732:S736: | 2 | 3,004  | 0,387 | -0,527 |
| 18 | Q9UBW7 ZMYM2_HUMAN | E.NLHYDQGCQTSR.T                |                 | 2 | 3,0026 | 0,345 | -0,742 |
| 18 | P04264 K2C1_HUMAN  | K.SLNNQFASFIDK.V                |                 | 2 | 2,9979 | 0,394 | -0,529 |
| 18 | Q9BYG3 MK67I_HUMAN | E.KTVDSQGPTPVCTPTFLER.R         |                 | 3 | 2,9956 | 0,141 | -0,429 |
| 18 | Q96JM3 ZN828_HUMAN | R.KPALFPEPAK.T                  |                 | 2 | 2,9955 | 0,315 | -0,222 |
| 18 | Q9Y2H9 MAST1_HUMAN | E.SEDDTSYFDTR.S                 |                 | 2 | 2,9951 | 0,415 | -0,365 |
| 18 | Q96RR4 KKCC2_HUMAN | E.CEPCAVDLGLAR.D                |                 | 2 | 2,991  | 0,397 | -0,688 |
| 18 | Q15032 R3HD1_HUMAN | R.IFS#QDSLCSQE.N                | S299:           | 2 | 2,9908 | 0,246 | -0,35  |
| 18 | Q15185 TEBP_HUMAN  | K.LTFSCLGGSDFNFH.H              |                 | 2 | 2,9835 | 0,341 | -0,928 |
| 18 | Q9UJM3 ERRFI_HUMAN | E.DSTLSDFKYDVPGR.R              |                 | 2 | 2,9834 | 0,365 | 0      |
| 18 | Q9NQS7 INCE_HUMAN  | E.QHVTQLM*STEPLPR.T             |                 | 3 | 2,9827 | 0,239 | 0      |
| 18 | Q9UNZ2 NSF1C_HUMAN | E.DFVKPKGAFKAFTGE.G             |                 | 3 | 2,9819 | 0,24  | -0,111 |
| 18 | P16949 STMN1_HUMAN | R.ASGQAFELILS#PR.S              | S25:            | 2 | 2,9809 | 0,305 | -0,332 |
| 18 | Q8NCE2 MTMRE_HUMAN | K.DRGSTT#SLGSDFLVM*E.S          | T440:           | 2 | 2,9785 | 0,414 | -0,386 |
| 18 | Q96PU5 NED4L_HUMAN | R.SLS#SPTVTLAPLEGAK.D           | S448:           | 2 | 2,9778 | 0,419 | -0,421 |

|    |                     |                               |            |   |        |       |        |
|----|---------------------|-------------------------------|------------|---|--------|-------|--------|
| 18 | Q6T4R5 NHS_HUMAN    | E.GESFVGDHER.T                |            | 2 | 2,9728 | 0,31  | -0,431 |
| 18 | B2CI53 B2CI53_HUMAN | R.SNMS#PDKPVSVK.I             | S1105:     | 2 | 2,9711 | 0,178 | -0,535 |
| 18 | P30520 PURA2_HUMAN  | K.VVDLLAQDADIVCR.C            |            | 2 | 2,9703 | 0,43  | -0,538 |
| 18 | Q9H019 FA54B_HUMAN  | K.ASS#FADM*MGILKD.F           | S238:      | 2 | 2,9698 | 0,273 | -0,494 |
| 18 | Q15942 ZYX_HUMAN    | R.S#PGAPGPLTLKE.V             | S344:      | 2 | 2,9688 | 0,406 | -0,489 |
| 18 | Q9UHY7 ENOPH_HUMAN  | E.FFADVVP AVR.K               |            | 2 | 2,9662 | 0,129 | -0,327 |
| 18 | Q7L2J0 MEPCE_HUMAN  | R.ESPGAAATSSSGPQAQQHR.G       |            | 2 | 2,9653 | 0,439 | -0,196 |
| 18 | P26639 SYTC_HUMAN   | D.SKPIKVTL PDGK.Q             |            | 3 | 2,9643 | 0,133 | 0      |
| 18 | P29692 EF1D_HUMAN   | R.ATAPQTQHVS#PMR.Q            | S133:      | 2 | 2,964  | 0,344 | -0,487 |
| 18 | Q53HL2 BOREA_HUMAN  | K.TPGLRT#PAAGER.I             | T204:      | 3 | 2,9601 | 0,256 | 0,07   |
| 18 | Q8NEF9 SRFB1_HUMAN  | K.AVTIANS#PSKPSEKDSVVSLE.S    | S203:      | 3 | 2,9555 | 0,24  | -0,245 |
| 18 | Q7L2J0 MEPCE_HUMAN  | R.CAPSAGS#PAAAVGR.E           | S60:       | 2 | 2,9525 | 0,411 | -0,451 |
| 18 | Q9Y6M7 S4A7_HUMAN   | R.KKYVDAETS#L.-               | S1213:     | 2 | 2,9502 | 0,408 | -0,198 |
| 18 | Q14514 BAI1_HUMAN   | E.NVATLSVSSLER.R              |            | 2 | 2,9499 | 0,406 | -0,478 |
| 18 | Q9UMY1 NOL7_HUMAN   | E.KLTTASQTNK.K                |            | 2 | 2,9495 | 0,344 | -0,506 |
| 18 | Q01518 CAP1_HUMAN   | R.SGPKPFSAPKQT#SPS#PK.R       | T307:S310: | 3 | 2,9483 | 0,112 | -0,275 |
| 18 | Q9UQ35 SRRM2_HUMAN  | E.SYFGVSSLQLK.G               |            | 2 | 2,9449 | 0,368 | -0,496 |
| 18 | Q99733 NP1L4_HUMAN  | K.YAALYQPLFDK.R               |            | 2 | 2,9448 | 0,177 | -0,551 |
| 18 | Q32MZ4 LRRF1_HUMAN  | K.IDGATQSSPAEPK.S             |            | 2 | 2,9391 | 0,361 | -0,563 |
| 18 | Q6NZI2 PTRF_HUMAN   | K.LSIS#KSLKE.S                | S169:      | 2 | 2,9346 | 0,092 | -0,112 |
| 18 | Q13435 SF3B2_HUMAN  | R.SRGSDS#PAADVEIE.Y           | S339:      | 2 | 2,9341 | 0,275 | -0,484 |
| 18 | P49585 PCY1A_HUMAN  | R.M*LQAISPKQS#PSSS#PTRE.R     | S319:S323: | 3 | 2,9298 | 0,094 | -0,086 |
| 18 | Q9Y4B6 VPRBP_HUMAN  | R.KLSSEPLLPLDEEAVDM*D.Y       |            | 2 | 2,9292 | 0,49  | -0,726 |
| 18 | Q14676 MDC1_HUMAN   | R.SSVKT#PESIVPIAPE.L          | T1567:     | 2 | 2,9277 | 0,21  | -1,12  |
| 18 | Q9P258 RCC2_HUMAN   | K.DGQILPVPNVVVR.D             |            | 2 | 2,9269 | 0,176 | -0,434 |
| 18 | P28290 SSFA2_HUMAN  | K.STIFIS#PSSVKKE.E            | S803:      | 2 | 2,9226 | 0,267 | -0,731 |
| 18 | P38571 LICH_HUMAN   | E.TEDGYILCLNR.I               |            | 2 | 2,9223 | 0,422 | -0,451 |
| 18 | Q14157 UBP2L_HUMAN  | K.KAS#LTSKIPALAVE.M           | S493:      | 2 | 2,9186 | 0,336 | -0,566 |
| 18 | Q5VUA4 ZN318_HUMAN  | R.SVRIPS#PNILKTGLTE.N         | S2101:     | 2 | 2,9183 | 0,342 | -0,406 |
| 18 | Q92615 LARP5_HUMAN  | R.LSREQST#PPKS#PQ.-           | T732:S736: | 3 | 2,9172 | 0,105 | -0,113 |
| 18 | Q96JP5 ZFP91_HUMAN  | K.TGSLQLICK.S                 |            | 2 | 2,9164 | 0,308 | -0,12  |
| 18 | Q9UQ35 SRRM2_HUMAN  | R.SGAGSS#PETKEQNSALPTSSQDEE.L | S1219:     | 3 | 2,9147 | 0,2   | 0,291  |
| 18 | Q9Y266 NUDC_HUMAN   | K.LKPNLNGADLPNYR.W            |            | 3 | 2,9144 | 0,196 | -0,111 |



|    |                     |                            |            |   |        |       |        |
|----|---------------------|----------------------------|------------|---|--------|-------|--------|
| 18 | Q9Y2D5 AKAP2_HUMAN  | R.DALGDSLQVPVSPSSTTSSR.C   |            | 2 | 2,9114 | 0,425 | -0,487 |
| 18 | P55072 TERA_HUMAN   | K.GDDLSTAILK.Q             |            | 2 | 2,9107 | 0,292 | 0,354  |
| 18 | Q9NZN5 ARHGC_HUMAN  | R.IYLEENPEKSE.T            |            | 2 | 2,9099 | 0,233 | 0      |
| 18 | Q15424 SAFB1_HUMAN  | E.LAEAPTEAPS#PEAR.D        | S344:      | 2 | 2,9094 | 0,294 | 0,08   |
| 18 | Q14980 NUMA1_HUMAN  | R.LDFVCSFLQK.N             |            | 2 | 2,9081 | 0,268 | -0,679 |
| 18 | Q9UJV9 DDX41_HUMAN  | K.VPPVLQVLHCGDE.S          |            | 2 | 2,8981 | 0,27  | -1,084 |
| 18 | Q9Y2H0 DLGP4_HUMAN  | K.RNLS#YGDNSDPALE.A        | S760:      | 2 | 2,8946 | 0,356 | -0,15  |
| 18 | B2RMZ9 B2RMZ9_HUMAN | R.APVS#PLKFSFFE.G          | S423:      | 2 | 2,893  | 0,313 | -0,349 |
| 18 | P35222 CTNB1_HUMAN  | E.GVATYAAAVLFR.M           |            | 2 | 2,8857 | 0,324 | -0,394 |
| 18 | Q05519 SFR11_HUMAN  | E.KKPIET#GSPKT#KECSVE.K    | T447:T452: | 3 | 2,8834 | 0,158 | -0,704 |
| 18 | Q08999 RBL2_HUMAN   | R.GILLEDGSES#PAKR.I        | S1112:     | 2 | 2,8826 | 0,259 | -0,472 |
| 18 | Q15154 PCM1_HUMAN   | E.YMAFPKPFESS#SSIGAEEKPR.N | S1185:     | 3 | 2,8802 | 0,196 | 0,475  |
| 18 | Q14676 MDC1_HUMAN   | R.SSVKT#PEPVPTAPE.L        | T1157:     | 2 | 2,8795 | 0,337 | -0,377 |
| 18 | P15880 RS2_HUMAN    | K.SPYQEFTDHLVK.T           |            | 3 | 2,8775 | 0,326 | -0,437 |
| 18 | Q02952 AKA12_HUMAN  | K.EPSKSAESPTS#PVTSE.T      | S286:      | 2 | 2,8768 | 0,437 | -0,356 |
| 18 | Q53SB6 Q53SB6_HUMAN | R.GAMQVAMNGK.A             |            | 2 | 2,8736 | 0,347 | 0,061  |
| 18 | Q8WUA4 TF3C2_HUMAN  | R.QPAACPGGEEVDGAPRDE.D     |            | 2 | 2,8711 | 0,43  | -0,329 |
| 18 | Q9Y2W1 TR150_HUMAN  | R.ERS#PALKSPLQSVVVR.R      | S248:      | 3 | 2,8711 | 0,341 | -0,297 |
| 18 | P78371 TCPB_HUMAN   | R.VRVDS#TAKVAE.I           | S260:      | 3 | 2,8689 | 0,334 | 0,291  |
| 18 | Q07157 ZO1_HUMAN    | K.SHSLAQPPFDSGVE.T         |            | 2 | 2,8687 | 0,428 | -0,381 |
| 18 | Q53GS9 SNUT2_HUMAN  | R.EAPASVVPFVR.V            |            | 2 | 2,8634 | 0,491 | -0,416 |
| 18 | P15531 NDKA_HUMAN   | E.RTFIAIKPDGVQR.G          |            | 3 | 2,8591 | 0,178 | 0,122  |
| 18 | Q6S8J3 A26CA_HUMAN  | K.AGFAGDDAPR.A             |            | 2 | 2,8581 | 0,3   | -0,125 |
| 18 | Q01804 OTUD4_HUMAN  | K.KLECPSPAEQKPAE.H         |            | 3 | 2,8545 | 0,164 | 0,115  |
| 18 | P27816 MAP4_HUMAN   | R.KPCNS#QPSELSSE.T         | S656:      | 2 | 2,849  | 0,274 | -0,712 |
| 18 | Q00839 HNRPU_HUMAN  | R.AKS#PQPPVEEED.E          | S270:      | 2 | 2,8489 | 0,304 | -0,607 |
| 18 | Q96PK6 RBM14_HUMAN  | R.ASYVAPLTAQPATYR.A        |            | 2 | 2,8464 | 0,32  | -0,379 |
| 18 | Q9P0B6 CF129_HUMAN  | R.LHSRELS#PE.A             | S42:       | 2 | 2,8446 | 0,221 | -0,106 |
| 18 | Q9Y5J1 UTP18_HUMAN  | R.TGNFISTSTSLPR.G          |            | 2 | 2,8405 | 0,317 | -0,53  |
| 18 | Q6UWZ7 CCD98_HUMAN  | K.GFGEYSRS#PTF.-           | S406:      | 2 | 2,8381 | 0,242 | -0,184 |
| 18 | P49736 MCM2_HUMAN   | R.GNDPLTSS#PGR.S           | S27:       | 2 | 2,8358 | 0,324 | -0,31  |
| 18 | Q9Y6M7 S4A7_HUMAN   | R.SFADIGKKHS#DPHLLR.R      | S242:      | 3 | 2,8358 | 0,216 | 0      |
| 18 | P49736 MCM2_HUMAN   | E.SFTM*AS#SPAQR.R          | S12:       | 2 | 2,8318 | 0,441 | -0,382 |

|    |                    |                                  |            |   |        |       |        |
|----|--------------------|----------------------------------|------------|---|--------|-------|--------|
| 18 | Q01082 SPTB2_HUMAN | K.TALPAQSAATLPAR.T               |            | 2 | 2,8274 | 0,372 | -0,446 |
| 18 | O43194 GPR39_HUMAN | R.FVQRPLL FAS#R.R                | S396:      | 3 | 2,8221 | 0,087 | -0,065 |
| 18 | Q9UK58 CCNL1_HUMAN | E.KS#PISINVK.T                   | S352:      | 2 | 2,8207 | 0,327 | -0,229 |
| 18 | P49959 MRE11_HUMAN | R.ALRS#QSEE.S                    | S531:      | 2 | 2,817  | 0,165 | -0,122 |
| 18 | P62937 PPIA_HUMAN  | K.ITIADCGQLE.-                   |            | 2 | 2,8162 | 0,428 | 0      |
| 18 | P18615 NELFE_HUMAN | K.SGAISAIKAE.T                   |            | 2 | 2,8134 | 0,184 | -0,064 |
| 18 | Q6ZUT9 RA61L_HUMAN | E.LM*TSASDEDLVK.Q                |            | 2 | 2,811  | 0,381 | 0,092  |
| 18 | P35269 T2FA_HUMAN  | R.LRLDTGPPQSLSGK.S               |            | 3 | 2,8106 | 0,166 | 0      |
| 18 | Q9UPW6 SATB2_HUMAN | R.SGS#PDVKGPPPVK.V               | S20:       | 3 | 2,8104 | 0,157 | 0,136  |
| 18 | Q14157 UBP2L_HUMAN | K.STSAPQM*SPGSS#DNQSSS#PQPAQQK.L | S471:S477: | 3 | 2,8087 | 0,355 | -0,811 |
| 18 | Q5VUA4 ZN318_HUMAN | R.SVRIPS#PNILK.T                 | S2101:     | 2 | 2,8062 | 0,088 | -0,281 |
| 18 | P22626 ROA2_HUMAN  | R.GFGFVTFSSM*AE.V                |            | 2 | 2,8037 | 0,447 | -0,753 |
| 18 | P51858 HDGF_HUMAN  | R.AGDLLED S#PKRPK.E              | S165:      | 2 | 2,7927 | 0,327 | -0,567 |
| 18 | P56182 RRP1_HUMAN  | R.SEKPPAGSICR.A                  |            | 3 | 2,7917 | 0,243 | 0,076  |
| 18 | Q32MZ4 LRRF1_HUMAN | R.NM*PGLSAATLASLGGTSSR.R         |            | 3 | 2,7913 | 0,118 | 0      |
| 18 | Q9ULU4 PKCB1_HUMAN | K.ILM*SKPVL SGGTGR.R             |            | 3 | 2,7906 | 0,322 | 0,128  |
| 18 | P35813 PPM1A_HUMAN | E.HLLDHITNNQDFK.G                |            | 3 | 2,7902 | 0,277 | -0,229 |
| 18 | P06748 NPM_HUMAN   | D.YHFKVDNDENE.H                  |            | 2 | 2,7899 | 0,282 | -0,433 |
| 18 | O14893 GEMI2_HUMAN | E.AAQCPDVVVAQIDPK.K              |            | 3 | 2,7898 | 0,107 | -0,227 |
| 18 | Q09666 AHNK_HUMAN  | K.VGVEVPDVNIEGPEGK.L             |            | 2 | 2,7875 | 0,185 | -0,298 |
| 18 | O75531 BAF_HUMAN   | R.DFVAEPM*GEKPVGSLAGIGE.V        |            | 2 | 2,7864 | 0,446 | -0,363 |
| 18 | P46013 KI67_HUMAN  | R.LKIS#LGKVG VKEE.V              | S2002:     | 3 | 2,7824 | 0,111 | -0,062 |
| 18 | O43719 HTSF1_HUMAN | R.GFEGSCS#QKE.S                  | S481:      | 2 | 2,782  | 0,281 | -0,505 |
| 18 | Q9Y608 LRRF2_HUMAN | R.RGS#GDTSSLIDPDTSLSE.L          | S328:      | 2 | 2,7782 | 0,332 | -0,318 |
| 18 | Q8WUA4 TF3C2_HUMAN | E.LSTALPAPVSCPEGPK.V             |            | 3 | 2,7772 | 0,147 | 0      |
| 18 | Q9Y5B6 GCFC_HUMAN  | E.LGDFTPHDNEPGK.G                |            | 3 | 2,7745 | 0,257 | -0,064 |
| 18 | P19338 NUCL_HUMAN  | K.TVT#PAKAVTT#PGKK.G             | T99:T106:  | 3 | 2,7734 | 0,153 | -0,117 |
| 18 | P46013 KI67_HUMAN  | K.AQALEDLAGFKE.L                 |            | 2 | 2,7708 | 0,405 | -0,661 |
| 18 | P41250 SYG_HUMAN   | E.IDCTM*LTPEPVLK.T               |            | 2 | 2,7707 | 0,108 | -0,239 |
| 18 | Q96ST2 IWS1_HUMAN  | R.GKHMDFLSDFE.M                  |            | 2 | 2,7663 | 0,126 | -0,46  |
| 18 | Q14C86 GAPD1_HUMAN | K.RTS#PSDGAM*ANYE.S              | S1044:     | 2 | 2,7649 | 0,293 | -0,49  |
| 18 | P10809 CH60_HUMAN  | E.IANHRKPLVIIAEDVDGE.A           |            | 3 | 2,7636 | 0,238 | -0,355 |
| 18 | P49736 MCM2_HUMAN  | E.SFTMASS#PAQR.R                 | S13:       | 2 | 2,7589 | 0,522 | -0,386 |

|    |                     |                             |        |   |        |       |        |
|----|---------------------|-----------------------------|--------|---|--------|-------|--------|
| 18 | Q13042 CDC16_HUMAN  | R.KTPDSRPS#LEETFE.I         | S595:  | 2 | 2,7566 | 0,178 | -0,284 |
| 18 | Q9UQ35 SRRM2_HUMAN  | K.FSPFPVQDRPE.S             |        | 2 | 2,7502 | 0,256 | -0,37  |
| 18 | P43686 PRS6B_HUMAN  | E.DLEDLYSR.Y                |        | 2 | 2,7483 | 0,15  | 0,302  |
| 18 | A8MVJ6 A8MVJ6_HUMAN | D.VKQLIVGVNK.M              |        | 2 | 2,7481 | 0,22  | -0,111 |
| 18 | Q99618 CDCA3_HUMAN  | K.TSSGDPPS#PLVKQLSE.V       | S87:   | 2 | 2,7455 | 0,227 | -0,425 |
| 18 | P00491 PNPH_HUMAN   | R.DHINLPGFSGQNPLR.G         |        | 3 | 2,7423 | 0,193 | -0,549 |
| 18 | Q15398 DLG7_HUMAN   | K.FNNLIKLEE.S               |        | 2 | 2,7421 | 0,131 | -0,218 |
| 18 | P42684 ABL2_HUMAN   | E.NSASSLAPGFIR.G            |        | 2 | 2,7398 | 0,466 | -0,3   |
| 18 | P22059 OSBP1_HUMAN  | R.GATVLPANTPGNVGSGK.D       |        | 2 | 2,7392 | 0,383 | -0,317 |
| 18 | Q96JP5 ZFP91_HUMAN  | R.SKTGSLQLICK.S             |        | 3 | 2,7355 | 0,22  | 0,296  |
| 18 | P16157 ANK1_HUMAN   | R.ITHS#PTVSQVTE.R           | S1686: | 2 | 2,7352 | 0,346 | 0,088  |
| 18 | P52272 HNRPM_HUMAN  | K.GCGVVKFESPEVAE.R          |        | 2 | 2,7305 | 0,348 | -0,728 |
| 18 | O15231 ZN185_HUMAN  | R.RESCGSS#VLTDGE.G          | S237:  | 2 | 2,7301 | 0,242 | -0,389 |
| 18 | O15231 ZN185_HUMAN  | E.VVEEDGPSEKSDPPALAR.S      |        | 3 | 2,7301 | 0,093 | -0,362 |
| 18 | P62736 ACTA_HUMAN   | E.AQSKRGILTLYPIE.H          |        | 2 | 2,7238 | 0,148 | -0,426 |
| 18 | P22314 UBA1_HUMAN   | R.QNRYDGQVAVFGSDLQE.K       |        | 3 | 2,7233 | 0,35  | -0,19  |
| 18 | P21266 GSTM3_HUMAN  | K.CLDEFPNLK.A               |        | 2 | 2,7232 | 0,263 | -1,504 |
| 18 | Q15464 SHB_HUMAN    | K.GIQLYDTPYEPE.G            |        | 2 | 2,7227 | 0,253 | -0,514 |
| 18 | Q9UNZ2 NSF1C_HUMAN  | R.SGQQIVGPPR.K              |        | 2 | 2,722  | 0,241 | 0      |
| 18 | P13667 PDIA4_HUMAN  | K.RSPPIPLAK.V               |        | 2 | 2,7217 | 0,169 | -0,062 |
| 18 | P09960 LKHA4_HUMAN  | D.LAAFDKSHDQAVR.T           |        | 3 | 2,7211 | 0,277 | 0,125  |
| 18 | Q96RV3 PCX1_HUMAN   | K.NSCASDKRT#SSEKIAM*E.A     | T449:  | 3 | 2,7201 | 0,27  | -0,182 |
| 18 | Q7KZ85 SPT6H_HUMAN  | R.KKLPGYTDAALQE.A           |        | 2 | 2,718  | 0,168 | -0,255 |
| 18 | Q8WUM4 PDC6I_HUMAN  | R.DTIVLLCKPEPE.L            |        | 2 | 2,7112 | 0,27  | -0,518 |
| 18 | P49736 MCM2_HUMAN   | R.RRGNDPLT#SSPGR.S          | T25:   | 2 | 2,7081 | 0,087 | -0,654 |
| 18 | P51858 HDGF_HUMAN   | R.AGDLLS#PKRPK.E            | S165:  | 3 | 2,7075 | 0,214 | -0,182 |
| 18 | Q9UNF1 MAGD2_HUMAN  | K.KQNADPQAVTM*PATE.T        |        | 2 | 2,707  | 0,447 | -0,302 |
| 18 | O15085 ARHGB_HUMAN  | R.NSVLSDPGLDSPRT#SPVIM*AR.V | T254:  | 3 | 2,7038 | 0,123 | -0,159 |
| 18 | O14974 MYPT1_HUMAN  | R.LAYVAPTIPR.R              |        | 2 | 2,7029 | 0,345 | -0,111 |
| 18 | O43166 SI1L1_HUMAN  | R.HSAS#PVVFTSAR.S           | S1433: | 2 | 2,7016 | 0,417 | 0,091  |
| 18 | P60709 ACTB_HUMAN   | E.TTFNSIMKCDVDIRKD.L        |        | 3 | 2,7002 | 0,248 | -0,471 |
| 18 | Q7Z460 CLAP1_HUMAN  | K.NSDSIVSLPQSDR.S           |        | 2 | 2,6992 | 0,385 | -0,602 |
| 18 | P35030 TRY3_HUMAN   | D.TLDNDIMLIK.L              |        | 2 | 2,6989 | 0,255 | -0,415 |

|    |                     |                             |                    |   |        |       |        |
|----|---------------------|-----------------------------|--------------------|---|--------|-------|--------|
| 18 | O75179 ANR17_HUMAN  | K.SGPS#PLSS#PNGKLTVAS#PKR.G | S1696:S1700:S1709: | 3 | 2,6979 | 0,206 | -0,082 |
| 18 | Q9H019 FA54B_HUMAN  | K.AS#SFADMMGILKD.F          | S237:              | 2 | 2,6974 | 0,354 | -0,499 |
| 18 | O96019 ACL6A_HUMAN  | K.QGGPTYIDTNALR.V           |                    | 2 | 2,694  | 0,232 | -0,078 |
| 18 | P60709 ACTB_HUMAN   | E.EHPVLLTEAPLNPK.A          |                    | 3 | 2,6933 | 0,263 | -0,117 |
| 18 | Q9UQ35 SRRM2_HUMAN  | K.DKFSPFPVQD.R              |                    | 2 | 2,6909 | 0,308 | -0,414 |
| 18 | Q99733 NP1L4_HUMAN  | R.KYAALYQPLFDKR.R           |                    | 3 | 2,6892 | 0,208 | -0,113 |
| 18 | Q9NW13 RBM28_HUMAN  | K.GCAFAQFM*TQE.A            |                    | 2 | 2,6863 | 0,162 | -0,374 |
| 18 | Q494U1 PKHN1_HUMAN  | R.VTDVRLGLEE.F              |                    | 2 | 2,6759 | 0,221 | -0,419 |
| 18 | Q7Z6Z7 HUWE1_HUMAN  | K.YICQKPSIQK.A              |                    | 2 | 2,6723 | 0,274 | -0,482 |
| 18 | P05787 K2C8_HUMAN   | R.AFSSRS#YTSGPSR.I          | S24:               | 3 | 2,6712 | 0,212 | 0      |
| 18 | O95571 ETHE1_HUMAN  | R.EAVLIDPVLETAPR.D          |                    | 2 | 2,6684 | 0,194 | -0,561 |
| 18 | Q15545 TAF7_HUMAN   | E.NQGLDISSPGM*SGHR.Q        |                    | 3 | 2,6679 | 0,287 | -0,116 |
| 18 | P08133 ANXA6_HUMAN  | E.AILDIITSR.S               |                    | 2 | 2,6638 | 0,15  | -0,122 |
| 18 | Q9UDI2 Q9UDI2_HUMAN | E.AILAALPEPEK.-             |                    | 2 | 2,6633 | 0,363 | -0,488 |
| 18 | Q9H0B6 KLC2_HUMAN   | K.RASS#LNFLNK.S             | S582:              | 2 | 2,6622 | 0,276 | -0,099 |
| 18 | P78371 TCPB_HUMAN   | R.VRVDS#TAKVAE.I            | S260:              | 2 | 2,6622 | 0,346 | 0,097  |
| 18 | P02545 LMNA_HUMAN   | R.SGAQASSTPLSPTR.I          |                    | 2 | 2,6618 | 0,334 | -0,179 |
| 18 | Q9UQ35 SRRM2_HUMAN  | R.VSGRTS#PPLDR.A            | S2398:             | 3 | 2,6616 | 0,12  | 0,265  |
| 18 | Q99426 TBCB_HUMAN   | E.DALLGSYPVDDGCR.I          |                    | 2 | 2,6573 | 0,402 | -0,555 |
| 18 | A8K8Z5 A8K8Z5_HUMAN | R.QGVDDAFYTLVRE.I           |                    | 2 | 2,6563 | 0,374 | -0,484 |
| 18 | Q9UGU5 HM2L1_HUMAN  | K.LILS#PKEKGSSSVDEE.S       | S197:              | 2 | 2,656  | 0,304 | -0,136 |
| 18 | Q96DX5 ASB9_HUMAN   | K.ISHLGTPLYLACE.N           |                    | 2 | 2,6556 | 0,264 | 0,083  |
| 18 | Q15398 DLG7_HUMAN   | E.DVIHKFNLIKLEE.S           |                    | 3 | 2,6509 | 0,192 | -0,427 |
| 18 | Q12846 STX4_HUMAN   | K.TQHGVLSQQFVE.L            |                    | 2 | 2,6501 | 0,23  | -0,355 |
| 18 | Q9UQ35 SRRM2_HUMAN  | E.SSLVFKDTRL.T              |                    | 2 | 2,6478 | 0,227 | -0,209 |
| 18 | Q9UGU5 HM2L1_HUMAN  | E.TLTLREPDGLK.M             |                    | 2 | 2,647  | 0,166 | -0,491 |
| 18 | Q99618 CDCA3_HUMAN  | R.TPM*KTSSGDPPS#PLVK.Q      | S87:               | 2 | 2,645  | 0,36  | 0,421  |
| 18 | Q9Y5X1 SNX9_HUMAN   | R.ASSSS#MKIPLNKFPGFAKPGTE.Q | S200:              | 3 | 2,644  | 0,138 | -0,539 |
| 18 | P68104 EF1A1_HUMAN  | R.LPLQDVYK.I                |                    | 2 | 2,6438 | 0,206 | -0,188 |
| 18 | Q6ZSR9 YJ005_HUMAN  | E.ESDVFLRAPFTK.K            |                    | 2 | 2,6384 | 0,335 | -0,433 |
| 18 | Q13098 CSN1_HUMAN   | R.NQIHVKS#PPREGSQGE.L       | S448:              | 3 | 2,6359 | 0,105 | -0,298 |
| 18 | Q9BYP7 WVK3_HUMAN   | R.FCINQTI.R.N               |                    | 2 | 2,6352 | 0,3   | -0,348 |
| 18 | O14733 MP2K7_HUMAN  | R.HM*LGLPSTLFTPR.S          |                    | 2 | 2,6345 | 0,384 | -0,493 |

|    |                     |                                        |            |   |        |       |        |
|----|---------------------|----------------------------------------|------------|---|--------|-------|--------|
| 18 | P81605 DCD_HUMAN    | K.ENAGEDPGLAR.Q                        |            | 2 | 2,6328 | 0,361 | -0,324 |
| 18 | Q8ND56 LS14A_HUMAN  | R.S#SPQLDPLRKS#PTM*E.Q                 | S182:S192: | 2 | 2,6325 | 0,363 | -0,786 |
| 18 | P51858 HDGF_HUMAN   | R.AGDLLDS#PK.R                         | S165:      | 2 | 2,6323 | 0,191 | -0,325 |
| 18 | P62736 ACTA_HUMAN   | K.DSYVGDEAQSKR.G                       |            | 2 | 2,6323 | 0,422 | -0,36  |
| 18 | Q9NRX4 PHP14_HUMAN  | E.YHADIYDKVSGDMQK.Q                    |            | 3 | 2,6307 | 0,206 | -0,62  |
| 18 | P52292 IMA2_HUMAN   | R.NVSSFPDDATSPLQE.N                    |            | 2 | 2,627  | 0,336 | -0,456 |
| 18 | Q9H3N1 TXND1_HUMAN  | E.GTNKDFPQNAIR.Q                       |            | 3 | 2,6253 | 0,098 | 0,067  |
| 18 | Q6PID6 TTC33_HUMAN  | K.SEAPAEVTHFS#PK.S                     | S197:      | 2 | 2,6246 | 0,17  | -0,495 |
| 18 | Q99733 NP1L4_HUMAN  | R.KYAALYQPLFDK.R                       |            | 3 | 2,6238 | 0,133 | 0,063  |
| 18 | Q10471 GALT2_HUMAN  | R.VVSPIIDVINM*D.N                      |            | 2 | 2,623  | 0,386 | -0,458 |
| 18 | P11387 TOP1_HUMAN   | E.HINLHPE.L                            |            | 2 | 2,6221 | 0,141 | 0,071  |
| 18 | A0FGR8 ESYT2_HUMAN  | K.SHM*S#GSPGPGGSNTAPSTPVIGGSDKPGM*EE.K | S691:      | 3 | 2,6215 | 0,251 | -0,422 |
| 18 | O15075 DCLK1_HUMAN  | R.SSQHGGSSSTSLASTK.V                   |            | 3 | 2,6198 | 0,201 | -0,255 |
| 18 | P09936 UCHL1_HUMAN  | E.DTLLKDAAK.V                          |            | 2 | 2,6186 | 0,151 | -0,188 |
| 18 | P33993 MCM7_HUMAN   | R.DPGM*VRS#PQNQYPAE.L                  | S121:      | 2 | 2,6156 | 0,085 | 0,82   |
| 18 | P29692 EF1D_HUMAN   | R.ATAPQTQHVSPMR.Q                      |            | 2 | 2,6139 | 0,265 | -0,514 |
| 18 | P24539 AT5F1_HUMAN  | E.KHVVSISTQQE.K                        |            | 2 | 2,6136 | 0,315 | -0,441 |
| 18 | P38646 GRP75_HUMAN  | E.DFDQALLR.H                           |            | 2 | 2,6113 | 0,196 | 0      |
| 18 | Q9Y4B5 K0802_HUMAN  | R.DHAPSPTS#PFGDSLE.S                   | S613:      | 2 | 2,6109 | 0,301 | -0,628 |
| 18 | Q6ULP2 AFTIN_HUMAN  | R.KSS#GTGTEPVAK.L                      | S518:      | 2 | 2,6102 | 0,206 | -0,589 |
| 18 | P35527 K1C9_HUMAN   | K.TLNDMRQEYEQLIAK.N                    |            | 3 | 2,6093 | 0,098 | -0,494 |
| 18 | Q14157 UBP2L_HUMAN  | R.RYPS#SISS#PQKD.L                     | S604:S609: | 2 | 2,6078 | 1     | -0,303 |
| 18 | Q6S8J3 A26CA_HUMAN  | K.SYELPDGQVITIGNER.F                   |            | 2 | 2,6055 | 0,3   | -0,341 |
| 18 | Q6ULP2 AFTIN_HUMAN  | E.KLDLLTSK.C                           |            | 2 | 2,6033 | 0,111 | 0      |
| 18 | P23588 IF4B_HUMAN   | K.GKTIS#LTDFLAE.D                      | S16:       | 2 | 2,6025 | 0,191 | -0,621 |
| 18 | P04264 K2C1_HUMAN   | K.YEELQITAGR.H                         |            | 2 | 2,6022 | 0,35  | -0,517 |
| 18 | P28066 PSA5_HUMAN   | R.ITSPLMEPSSIEK.I                      |            | 2 | 2,6011 | 0,384 | -0,511 |
| 18 | Q13153 PAK1_HUMAN   | R.SVIEPLVTPTR.D                        |            | 2 | 2,6004 | 0,37  | -0,652 |
| 18 | P37802 TAGL2_HUMAN  | R.TLM*NLGGLAVAR.D                      |            | 2 | 2,6002 | 0,336 | 0,99   |
| 18 | P11310 ACADM_HUMAN  | R.QREPGLGFSFE.F                        |            | 2 | 2,5965 | 0,24  | -0,385 |
| 18 | B2CI53 B2CI53_HUMAN | R.S#NMSPDKPVSVKISFE.D                  | S1102:     | 2 | 2,5952 | 0,307 | -0,463 |
| 18 | Q6P597 KLC3_HUMAN   | R.AMS#LNTLNVDAPR.A                     | S466:      | 2 | 2,5911 | 0,351 | 0,329  |
| 18 | P08559 ODPA_HUMAN   | R.YHGHS#M*SDPGVS#YR.T                  | S293:S300: | 2 | 2,5897 | 0,324 | -0,414 |

|    |                     |                           |                 |   |        |       |        |
|----|---------------------|---------------------------|-----------------|---|--------|-------|--------|
| 18 | P28290 SSFA2_HUMAN  | K.STIFIS#PSSVK.K          | S803:           | 2 | 2,5888 | 0,387 | -0,294 |
| 18 | Q04637 IF4G1_HUMAN  | R.FSALQQAVPTTESTDNRR.V    |                 | 3 | 2,5842 | 0,273 | -0,191 |
| 18 | P29692 EF1D_HUMAN   | R.ATAPQTQHVSPMR.Q         |                 | 3 | 2,5842 | 0,274 | 0,064  |
| 18 | Q14676 MDC1_HUMAN   | R.SSVKT#PETVVPTAPE.L      | T1321:          | 2 | 2,5817 | 0,175 | -0,376 |
| 18 | Q00341 VIGLN_HUMAN  | R.RCDIIISGR.K             |                 | 2 | 2,5815 | 0,187 | -0,913 |
| 18 | Q01518 CAP1_HUMAN   | R.ATKKEPAVLE.L            |                 | 2 | 2,5809 | 0,235 | -0,449 |
| 18 | Q13428 TCOF_HUMAN   | K.TVANLLSGKS#PR.K         | S156:           | 2 | 2,5788 | 0,32  | -0,553 |
| 18 | P62736 ACTA_HUMAN   | K.RGILTLYPIE.H            |                 | 2 | 2,5764 | 0,281 | -0,094 |
| 18 | Q99856 ARI3A_HUMAN  | R.AQM*AALAAM*R.A          |                 | 2 | 2,5762 | 0,343 | -0,572 |
| 18 | P52594 NUPL_HUMAN   | K.GTPSQS#PVVGR.S          | S181:           | 2 | 2,5724 | 0,389 | -0,419 |
| 18 | P68104 EF1A1_HUMAN  | D.SGKSTTT#GHLIY#KCGGIDK.R | T24:Y29:        | 3 | 2,5701 | 0,094 | 1,508  |
| 18 | Q15942 ZYX_HUMAN    | E.KQHPVPPPAQNNQVR.S       |                 | 2 | 2,5677 | 0,295 | -1,328 |
| 18 | P15151 PVR_HUMAN    | R.MFGLRVEDE.G             |                 | 2 | 2,5631 | 0,277 | -0,223 |
| 18 | P48643 TCPE_HUMAN   | R.DVDFELIKVE.G            |                 | 2 | 2,5617 | 0,261 | -0,606 |
| 18 | Q13136 LIPA1_HUMAN  | K.TLTDGVLDINHE.Q          |                 | 2 | 2,5593 | 0,364 | -0,276 |
| 18 | Q8N556 AFAP1_HUMAN  | K.LSSERPSS#DGEVVE.N       | S283:           | 2 | 2,5587 | 0,265 | 0,375  |
| 18 | A9CQZ4 A9CQZ4_HUMAN | K.AAEDEEVPAFFKNLGS#PKPR.Q | S27:            | 3 | 2,5537 | 0,228 | -0,603 |
| 18 | Q15029 U5S1_HUMAN   | E.DTQPLTEPIIKPVK.T        |                 | 2 | 2,5508 | 0,183 | -0,309 |
| 18 | Q6WKZ4 RFIP1_HUMAN  | R.TAST#DLKQLNQNFTLPKKE.G  | T281:           | 3 | 2,5487 | 0,136 | -0,466 |
| 18 | P13639 EF2_HUMAN    | R.LAKSDPMVQCIIEE.S        |                 | 2 | 2,5465 | 0,219 | -0,672 |
| 18 | Q86SQ0 PHLB2_HUMAN  | E.GLYLSDT#LPR.K           | T898:           | 2 | 2,5463 | 0,336 | -0,402 |
| 18 | Q86X27 RGPS2_HUMAN  | E.FKSAT#FPNAGPR.H         | T361:           | 2 | 2,5462 | 0,144 | -0,267 |
| 18 | Q15424 SAFB1_HUMAN  | R.KFDFDACNEVPPAPKE.S      |                 | 2 | 2,5432 | 0,216 | 0,458  |
| 18 | Q9UCG5 Q9UCG5_HUMAN | -.DATNVGDEGGFAPNIX.-      |                 | 2 | 2,5403 | 0,424 | -0,46  |
| 18 | Q86YS7 K0528_HUMAN  | R.LLRS#QSESSDE.V          | S657:           | 2 | 2,5402 | 0,262 | -0,55  |
| 18 | P35269 T2FA_HUMAN   | R.LDTGPQSLSGK.S           |                 | 2 | 2,5399 | 0,368 | -0,332 |
| 18 | Q32MZ4 LRRF1_HUMAN  | R.RGS#GDTSIDTE.A          | S120:           | 2 | 2,5373 | 0,226 | -0,43  |
| 18 | Q969E8 TSR2_HUMAN   | E.MASCITQR.K              |                 | 2 | 2,5347 | 0,313 | -0,063 |
| 18 | P46087 NOL1_HUMAN   | K.GPQPPTVS#PIR.S          | S786:           | 2 | 2,5331 | 0,212 | -0,298 |
| 18 | P62753 RS6_HUMAN    | R.RLS#S#LRAS#TSKSE.S      | S235:S236:S240: | 2 | 2,5302 | 0,194 | -0,441 |
| 18 | Q6S8J3 A26CA_HUMAN  | R.AVFPSIVGRPR.Q           |                 | 2 | 2,5281 | 0,224 | -0,509 |
| 18 | P07942 LAMB1_HUMAN  | K.CVCNYLGTVQE.H           |                 | 2 | 2,5263 | 0,168 | -0,273 |
| 18 | Q14814 MEF2D_HUMAN  | K.VIPAKS#PPPPHSTQLGAPSR.K | S251:           | 3 | 2,5256 | 0,223 | -0,165 |

|    |                     |                                    |            |   |        |       |        |
|----|---------------------|------------------------------------|------------|---|--------|-------|--------|
| 18 | P51991 ROA3_HUMAN   | E.DSVKPGAHLTVK.K                   |            | 3 | 2,5245 | 0,101 | 0      |
| 18 | Q86X95 CIR_HUMAN    | R.NSGFALKR.N                       |            | 2 | 2,5241 | 0,294 | -0,205 |
| 18 | Q8NFJ5 RAI3_HUMAN   | D.AFCKPQLVK.K                      |            | 2 | 2,5222 | 0,265 | 0      |
| 18 | Q9BW61 DDA1_HUMAN   | R.TDS#PDMHEDT.-                    | S95:       | 2 | 2,5215 | 0,27  | -0,497 |
| 18 | Q8WVWY3 PRP31_HUMAN | K.QANRMS#FGEIEE.D                  | S379:      | 2 | 2,5118 | 0,162 | -0,491 |
| 18 | O15231 ZN185_HUMAN  | E.DYKKLAPYNIR.R                    |            | 3 | 2,5117 | 0,3   | -0,066 |
| 18 | Q5VZY8 Q5VZY8_HUMAN | E.VNGTPGSQLSTPR.S                  |            | 2 | 2,5086 | 0,311 | -0,371 |
| 18 | Q9UQ35 SRRM2_HUMAN  | E.KSATRPS#PS#PERSSTGPEPPAPTPLLAE.R | S351:S353: | 3 | 2,5076 | 0,114 | -0,91  |
| 18 | P05787 K2C8_HUMAN   | K.SYKVSTSGPR.A                     |            | 2 | 2,5074 | 0,301 | -0,451 |
| 18 | Q9Y6M7 S4A7_HUMAN   | K.KYVDAETS#L.-                     | S1213:     | 2 | 2,5023 | 0,21  | -0,11  |
| 18 | Q8WXE1 ATRIP_HUMAN  | R.KNPSVVIKPE.A                     |            | 2 | 2,5012 | 0,218 | -0,329 |
| 18 | Q14934 NFAC4_HUMAN  | R.SEEPASCNGKLPLGAE.E.S             |            | 2 | 2,4994 | 0,223 | -0,205 |
| 18 | P29692 EF1D_HUMAN   | R.ATAPQQTQHVSPM*R.Q                |            | 2 | 2,4956 | 0,304 | -0,847 |
| 18 | Q9NWWV8 CS062_HUMAN | R.TRS#NPEGAEDRAVGAQASVGS.R.S       | S29:       | 3 | 2,4932 | 0,298 | -0,399 |
| 18 | P18669 PGAM1_HUMAN  | E.RHY#GGTLGLNKAE.T                 | Y92:       | 3 | 2,4917 | 0,153 | -0,183 |
| 18 | P12004 PCNA_HUMAN   | K.YYLAPKIEDEEGS.-                  |            | 2 | 2,4917 | 0,449 | -0,564 |
| 18 | Q6Q0C0 TRAF7_HUMAN  | E.TTFGPAFSAVTTITK.A                |            | 2 | 2,4912 | 0,282 | -0,712 |
| 18 | Q15154 PCM1_HUMAN   | R.STSAPSASVGLAPVVNGE.S             |            | 2 | 2,4884 | 0,283 | -0,297 |
| 18 | P48960 CD97_HUMAN   | R.CNPGFSSFSE.I                     |            | 2 | 2,4863 | 0,118 | -0,323 |
| 18 | A9CQZ4 A9CQZ4_HUMAN | K.FCGMFCPVEGSSE.N                  |            | 2 | 2,485  | 0,404 | -0,324 |
| 18 | Q9UPX8 SHAN2_HUMAN  | K.SASLAPRS#PE.I                    | S1065:     | 2 | 2,4841 | 0,169 | -0,334 |
| 18 | P06748 NPM_HUMAN    | K.MQAS#IEKGGSLPKVE.A               | S254:      | 3 | 2,4816 | 0,104 | -0,221 |
| 18 | Q5VUA4 ZN318_HUMAN  | R.IPS#PNILKTGLTE.N                 | S2101:     | 2 | 2,4783 | 0,276 | 0,5    |
| 18 | Q9NTI5 PDS5B_HUMAN  | E.DYTMSS#PLPGK.K                   | S1191:     | 2 | 2,4731 | 0,199 | -0,191 |
| 18 | O60684 IMA7_HUMAN   | E.TMAS#PGKDNYS.M                   | S6:        | 2 | 2,4709 | 0,254 | -0,37  |
| 18 | P35251 RFC1_HUMAN   | K.NKPLS#PIKLTPTSVDL.Y              | S156:      | 2 | 2,4691 | 0,212 | -0,677 |
| 18 | P23588 IF4B_HUMAN   | K.VAPAQPSEEGPGRKDE.N               |            | 2 | 2,4675 | 0,379 | -0,878 |
| 18 | Q5TFE4 NT5D1_HUMAN  | K.LANNGTVLR.A                      |            | 2 | 2,4638 | 0,286 | -0,064 |
| 18 | Q8IWA0 WDR75_HUMAN  | K.VQDTSNTGLGEDIIHQLSK.S            |            | 3 | 2,463  | 0,213 | -0,712 |
| 18 | P35222 CTNB1_HUMAN  | R.HAIM*RS#PQM*VSAIVR.T             | S191:      | 3 | 2,4602 | 0,283 | -0,405 |
| 18 | Q13642 FHL1_HUMAN   | K.AIVAGDQNV.E.Y                    |            | 2 | 2,4591 | 0,32  | 0      |
| 18 | Q8ND56 LS14A_HUMAN  | R.SLKTQLSQGR.S                     |            | 2 | 2,4545 | 0,324 | -0,218 |
| 18 | Q9HC38 GLOD4_HUMAN  | K.TMVGFPGPEDDHFAE.L                |            | 2 | 2,4517 | 0,27  | -0,443 |

|    |                     |                                  |            |   |        |       |        |
|----|---------------------|----------------------------------|------------|---|--------|-------|--------|
| 18 | Q9UQ35 SRRM2_HUMAN  | K.TVART#PLGQR.S                  | T1531:     | 2 | 2,4499 | 0,141 | -0,414 |
| 18 | O60315 ZEB2_HUMAN   | K.VYQYSNSRS#PSLE.R               | S705:      | 2 | 2,4498 | 0,149 | -0,152 |
| 18 | O96020 CCNE2_HUMAN  | E.VNYINTFR.K                     |            | 2 | 2,4474 | 0,28  | 0      |
| 18 | P49591 SYSC_HUMAN   | K.GGDPALIRE.T                    |            | 2 | 2,4471 | 0,219 | -0,131 |
| 18 | Q5TZA2 CROCC_HUMAN  | E.SGVQLSGSER.T                   |            | 2 | 2,4452 | 0,199 | -0,239 |
| 18 | Q14157 UBP2L_HUMAN  | K.ASLTSKIPALAVE.M                |            | 2 | 2,4441 | 0,289 | -0,469 |
| 18 | P49736 MCM2_HUMAN   | R.TDALTSS#PGRDLPPFEDE.S          | S41:       | 2 | 2,4432 | 0,127 | -0,301 |
| 18 | A8K6N1 A8K6N1_HUMAN | E.Y#EKECS#FSLVLE.E               | Y616:S621: | 2 | 2,4418 | 0,147 | 0,513  |
| 18 | Q99618 CDCA3_HUMAN  | K.HAQDSDPRS#PTLGIAR.T            | S68:       | 2 | 2,4393 | 0,374 | -0,339 |
| 18 | Q9Y2K5 R3HD2_HUMAN  | K.ASSFSGISILTR.G                 |            | 2 | 2,4388 | 0,374 | -0,394 |
| 18 | Q9Y2H0 DLGP4_HUMAN  | D.CTPHPNSISIDAGPR.Q              |            | 2 | 2,437  | 0,316 | -0,226 |
| 18 | Q7L014 DDX46_HUMAN  | E.INDFPQTAR.W                    |            | 2 | 2,4342 | 0,261 | -0,23  |
| 18 | Q02952 AKA12_HUMAN  | E.ALICVGSSK.K                    |            | 2 | 2,4306 | 0,307 | -0,065 |
| 18 | P27824 CALX_HUMAN   | E.VVFADSFDR.G                    |            | 2 | 2,4303 | 0,203 | -0,327 |
| 18 | Q9UQ35 SRRM2_HUMAN  | K.SATRPS#PS#PERSSTGPEPPAPTLLAE.R | S351:S353: | 3 | 2,4289 | 1     | -0,38  |
| 18 | P40222 TXLNA_HUMAN  | R.RPEGPGAQAPS#SPRVTE.A           | S514:      | 2 | 2,4279 | 0,274 | -0,605 |
| 18 | Q9H0H5 RGAP1_HUMAN  | K.SALAFLNR.G                     |            | 2 | 2,426  | 0,316 | 0,068  |
| 18 | P07602 SAP_HUMAN    | K.KLVGYLDR.N                     |            | 2 | 2,423  | 0,228 | -0,569 |
| 18 | P26641 EF1G_HUMAN   | E.KKAAAPAEPEE.M                  |            | 2 | 2,4188 | 0,213 | -0,535 |
| 18 | Q15843 NEDD8_HUMAN  | R.LIYSGKQM*NDE.K                 |            | 2 | 2,4185 | 0,24  | -0,371 |
| 18 | Q16555 DPYL2_HUMAN  | K.T#SPAKQQAPPVR.N                | T521:      | 3 | 2,417  | 0,247 | 0,067  |
| 18 | P00558 PGK1_HUMAN   | K.ITLPVDFVTAD.K                  |            | 2 | 2,4168 | 0,386 | -0,307 |
| 18 | P17301 ITA2_HUMAN   | R.VVFNLNITYK.T                   |            | 2 | 2,4143 | 0,317 | 0      |
| 18 | P11021 GRP78_HUMAN  | K.ITITNDQNR.L                    |            | 2 | 2,4127 | 0,161 | 0,113  |
| 18 | Q9UQ35 SRRM2_HUMAN  | R.VSGRTS#PPLDR.A                 | S2398:     | 2 | 2,4122 | 0,121 | -0,354 |
| 18 | P49189 AL9A1_HUMAN  | R.IKIGDPLLE.D                    |            | 2 | 2,4079 | 0,241 | -0,061 |
| 18 | O60256 KPRB_HUMAN   | R.SVAAIHPSLE.I                   |            | 2 | 2,4048 | 0,222 | -0,119 |
| 18 | P10636 TAU_HUMAN    | E.DHAGTYGLGDR.K                  |            | 2 | 2,4039 | 0,207 | -0,315 |
| 18 | P50454 SERPH_HUMAN  | K.AVLSAEQLRDEE.V                 |            | 2 | 2,4025 | 0,273 | -0,449 |
| 18 | P08670 VIME_HUMAN   | E.TNLDSLPLVDTHSK.R               |            | 3 | 2,4017 | 0,198 | 0      |
| 18 | P21333 FLNA_HUMAN   | R.TPCEEILVK.H                    |            | 2 | 2,4013 | 0,116 | -0,336 |
| 18 | Q9BVJ6 UT14A_HUMAN  | R.KRSELS#QDAEPAGSQE.T            | S437:      | 2 | 2,3998 | 0,301 | -0,471 |
| 18 | P83731 RL24_HUMAN   | K.VFQFLNAK.C                     |            | 2 | 2,3983 | 0,245 | -0,063 |



|    |                     |                            |            |   |        |       |        |
|----|---------------------|----------------------------|------------|---|--------|-------|--------|
| 18 | Q00839 HNRPU_HUMAN  | E.YTFIQNVPLEDR.V           |            | 2 | 2,3948 | 0,251 | -0,571 |
| 18 | P35251 RFC1_HUMAN   | E.AHLTPYSLQAIK.A           |            | 2 | 2,3941 | 0,36  | -0,636 |
| 18 | P21333 FLNA_HUMAN   | K.IQQNTFTR.W               |            | 2 | 2,3921 | 0,165 | -0,545 |
| 18 | P42695 CNDD3_HUMAN  | R.NSSAFSYQR.Q              |            | 2 | 2,3898 | 0,305 | 0      |
| 18 | Q9UKV3 ACINU_HUMAN  | K.ASLVALPEQTAS#EEE.T       | S410:      | 2 | 2,3875 | 0,18  | -0,516 |
| 18 | P35579 MYH9_HUMAN   | R.GDLPFVVR.R               |            | 2 | 2,3867 | 0,366 | -0,488 |
| 18 | A9CQZ4 A9CQZ4_HUMAN | R.QKFCGMFCPVEGSSE.N        |            | 2 | 2,3833 | 0,382 | -0,554 |
| 18 | O94888 UBXD7_HUMAN  | R.SES#LIDASEDSQLE.A        | S280:      | 2 | 2,3833 | 0,225 | -0,381 |
| 18 | P42704 LPPRC_HUMAN  | E.FYAQLR.K                 |            | 2 | 2,3829 | 0,108 | 0,066  |
| 18 | P02545 LMNA_HUMAN   | R.LRLS#PS#PTSQR.S          | S390:S392: | 2 | 2,38   | 0,159 | -0,609 |
| 18 | A9CQZ4 A9CQZ4_HUMAN | R.QKFCGM*FCPVEGSSE.N       |            | 2 | 2,3741 | 0,245 | -0,549 |
| 18 | Q8N6T3 ARFG1_HUMAN  | E.TFGSAEPTK.T              |            | 2 | 2,3719 | 0,356 | -0,065 |
| 18 | Q8WXE1 ATRIP_HUMAN  | K.LAAPSVSHVS#PR.K          | S224:      | 2 | 2,3709 | 0,165 | -0,469 |
| 18 | Q86YS7 K0528_HUMAN  | E.IIGSPIPEPR.Q             |            | 2 | 2,3702 | 0,283 | -0,339 |
| 18 | Q9H875 PKRI1_HUMAN  | E.QGS#SSSAEASGTEEEEE.V     | S162:      | 2 | 2,3689 | 0,148 | -0,884 |
| 18 | Q9NW13 RBM28_HUMAN  | K.GCAFAQFMTQE.A            |            | 2 | 2,3681 | 0,197 | -0,473 |
| 18 | Q13523 PRP4B_HUMAN  | R.TKLDDLALLE.D             |            | 2 | 2,3621 | 0,226 | -0,539 |
| 18 | P55060 XPO2_HUMAN   | K.LLTECPPM*M*DTE.Y         |            | 2 | 2,3601 | 0,21  | -0,498 |
| 18 | P34932 HSP74_HUMAN  | E.M*RDKLSGEYE.K            |            | 2 | 2,3594 | 0,344 | -1,177 |
| 18 | P29692 EF1D_HUMAN   | R.ATAPQTQHVS#PM*R.Q        | S133:      | 2 | 2,359  | 0,281 | -0,562 |
| 18 | Q96FV9 THOC1_HUMAN  | R.DKPVTGEQIE.V             |            | 2 | 2,3542 | 0,263 | 0,109  |
| 18 | Q9UKV3 ACINU_HUMAN  | E.KSKS#PS#PPRLTE.D         | S386:S388: | 2 | 2,3514 | 0,267 | 0,328  |
| 18 | Q5QJE6 TDIF2_HUMAN  | K.SPIKASDLTK.F             |            | 2 | 2,3508 | 0,286 | -0,575 |
| 18 | P04406 G3P_HUMAN    | R.VIISAPSADAPM*FVM*GVNHE.K |            | 2 | 2,3497 | 0,482 | -0,461 |
| 18 | O75436 VP26A_HUMAN  | E.KHYLFYDGE.S              |            | 2 | 2,3464 | 0,252 | -0,312 |
| 18 | Q7Z417 NUFP2_HUMAN  | R.TSPQVLGSILK.S            |            | 2 | 2,3434 | 0,468 | -0,32  |
| 18 | Q9Y2I7 FYV1_HUMAN   | K.ASGMLSFFR.G              |            | 2 | 2,3434 | 0,263 | -0,36  |
| 18 | Q8NI08 NCOA7_HUMAN  | K.STGHT#PTKPSGSSVSE.K      | T358:      | 2 | 2,3419 | 0,158 | -0,744 |
| 18 | Q58FG0 HS905_HUMAN  | K.HIYYITGETK.D             |            | 2 | 2,3329 | 0,405 | -0,1   |
| 18 | P08670 VIME_HUMAN   | K.SRLGDLYEEE.M             |            | 2 | 2,3308 | 0,331 | -0,504 |
| 18 | Q58FG0 HS905_HUMAN  | K.DQVANSFVE.C              |            | 2 | 2,323  | 0,323 | -0,226 |
| 18 | Q02952 AKA12_HUMAN  | K.SPPS#PVERE.M             | S1331:     | 2 | 2,3134 | 0,137 | -0,34  |
| 18 | Q5H9R7 SAPS3_HUMAN  | E.KHIAFTPE.S               |            | 2 | 2,312  | 0,239 | -0,065 |

|    |                     |                           |              |   |        |       |        |
|----|---------------------|---------------------------|--------------|---|--------|-------|--------|
| 18 | P40222 TXLNA_HUMAN  | K.QS#NPKSSPGQPEAGPE.G     | S14:         | 2 | 2,3103 | 0,107 | -0,578 |
| 18 | Q9NZQ3 SPN90_HUMAN  | R.QHS#LPSSE.H             | S147:        | 2 | 2,3063 | 0,137 | -0,063 |
| 18 | P51858 HDGF_HUMAN   | R.RAGDLLEDS#PKRPK.E       | S165:        | 2 | 2,2886 | 0,231 | -0,514 |
| 18 | P38571 LICH_HUMAN   | E.DGYILCLNR.I             |              | 2 | 2,2879 | 0,296 | -0,326 |
| 18 | Q1KMD3 HNRL2_HUMAN  | R.SKS#PLPPEEE.A           | S228:        | 2 | 2,2829 | 0,188 | -0,307 |
| 18 | P06748 NPM_HUMAN    | K.GPSSVEDIK.A             |              | 2 | 2,2823 | 0,241 | -0,131 |
| 18 | Q9H792 SG269_HUMAN  | R.ATQEPVAKIE.G            |              | 2 | 2,2822 | 0,323 | -0,225 |
| 18 | Q8NG31 CASC5_HUMAN  | K.SNCIM*DVLEDE.S          |              | 2 | 2,2814 | 0,139 | -0,364 |
| 18 | P35222 CTNB1_HUMAN  | R.S#PQMVSAIVR.T           | S191:        | 2 | 2,2808 | 0,267 | -0,104 |
| 18 | Q96JM3 ZN828_HUMAN  | R.KTS#PASLDFPE.S          | S459:        | 2 | 2,2802 | 0,195 | -0,384 |
| 18 | Q96BK5 PINX1_HUMAN  | D.LDCIFGK.R               |              | 2 | 2,2799 | 0,202 | 0,072  |
| 18 | Q9Y2K5 R3HD2_HUMAN  | K.ASS#FSGSILTR.G          | S349:        | 2 | 2,2793 | 0,289 | -0,463 |
| 18 | Q9H792 SG269_HUMAN  | E.FNNCLNR.G               |              | 2 | 2,2792 | 0,222 | 0      |
| 18 | O60271 JIP4_HUMAN   | K.NLPVPVYLRPLDE.K         |              | 2 | 2,2758 | 0,247 | -0,64  |
| 18 | P28066 PSA5_HUMAN   | R.ITSPLM*EPSSIEK.I        |              | 2 | 2,2753 | 0,295 | -0,421 |
| 18 | Q8TE77 SSH3_HUMAN   | R.QAS#VHDS#GEEGEA.-       | S649:S653:   | 2 | 2,27   | 0,259 | -0,496 |
| 18 | Q6ZSZ5 ARHG1_HUMAN  | R.SLS#PILPGR.H            | S1103:       | 2 | 2,2675 | 0,306 | -0,239 |
| 18 | Q9Y3T9 NOC2L_HUMAN  | R.GILRPLSTR.H             |              | 2 | 2,2643 | 0,261 | -0,12  |
| 18 | O75608 LYPA1_HUMAN  | K.TLVNAPANVTFK.T          |              | 2 | 2,2607 | 0,097 | -0,608 |
| 18 | P04264 K2C1_HUMAN   | K.WELLQQVDTSTR.T          |              | 2 | 2,259  | 0,248 | -0,496 |
| 18 | O14497 ARI1A_HUMAN  | R.TPQPSSPMDQMGK.M         |              | 2 | 2,253  | 0,326 | -0,087 |
| 18 | Q71U36 TBA1A_HUMAN  | R.GHYTIGKE.I              |              | 2 | 2,2526 | 0,272 | 0      |
| 18 | P68104 EF1A1_HUMAN  | D.M*RQTVAVGVIA.A          |              | 2 | 2,2503 | 0,158 | -0,501 |
| 18 | Q96RI3 Q96RI3_HUMAN | K.GKGDKAQLE.K             |              | 2 | 2,2482 | 0,164 | -0,258 |
| 18 | P04083 ANXA1_HUMAN  | E.ATIIDILTK.R             |              | 2 | 2,2412 | 0,2   | -0,309 |
| 18 | Q09666 AHNK_HUMAN   | R.LSSSS#SNDS#GNKVGIQLPE.V | S5866:S5870: | 2 | 2,2384 | 0,325 | -0,352 |
| 18 | Q86UU1 PHLB1_HUMAN  | E.DFSLTGARG.G             |              | 2 | 2,2352 | 0,242 | 0,062  |
| 18 | Q9UJM3 ERRFI_HUMAN  | E.DSTLSDFKYDVPGRR.S       |              | 2 | 2,2349 | 0,092 | -0,417 |
| 18 | P23246 SFPQ_HUMAN   | E.HQANLLRQD.L             |              | 2 | 2,2342 | 0,279 | -0,334 |
| 18 | Q13144 EI2BE_HUMAN  | K.GYNPAEVGAAGK.G          |              | 2 | 2,2339 | 0,311 | -0,43  |
| 18 | Q7L804 RFIP2_HUMAN  | R.TLS#FDTSKM*NQPSIVDE.G   | S277:        | 2 | 2,2326 | 0,151 | -0,46  |
| 18 | O14983 AT2A1_HUMAN  | K.STTLRVDQSILTGE.S        |              | 2 | 2,2315 | 0,253 | -0,963 |
| 18 | Q9Y237 PIN4_HUMAN   | R.GSM*VGPFQE.A            |              | 2 | 2,2306 | 0,101 | -0,063 |

|    |                    |                            |                    |   |        |       |        |
|----|--------------------|----------------------------|--------------------|---|--------|-------|--------|
| 18 | Q9Y2W2 WBP11_HUMAN | E.LTPLQAMM*LR.M            |                    | 2 | 2,2287 | 0,301 | -0,41  |
| 18 | Q12756 KIF1A_HUMAN | R.LLVPDIQE.I               |                    | 2 | 2,2269 | 0,233 | -0,197 |
| 18 | Q04837 SSB_HUMAN   | R.VGQDPVLR.Q               |                    | 2 | 2,2248 | 0,131 | 0,069  |
| 18 | Q8WUM0 NU133_HUMAN | R.MFPHHSITE.S              |                    | 2 | 2,2225 | 0,24  | 0      |
| 18 | Q96RS0 TGS1_HUMAN  | K.LYNLGLK.G                |                    | 2 | 2,2198 | 0,107 | -0,074 |
| 18 | Q9Y5U2 TSSC4_HUMAN | R.VPPVPDYVAHPE.R           |                    | 2 | 2,2184 | 0,357 | -0,37  |
| 18 | Q86SQ0 PHLB2_HUMAN | E.GLYLSDTLPR.K             |                    | 2 | 2,217  | 0,18  | -0,322 |
| 18 | Q9BTC0 DIDO1_HUMAN | R.APAPLQFGGLR.G            |                    | 2 | 2,2169 | 0,118 | -0,217 |
| 18 | Q9NQS7 INCE_HUMAN  | K.YSLVAKQE.S               |                    | 2 | 2,2128 | 0,196 | -0,13  |
| 18 | P53041 PPP5_HUMAN  | R.SLAYLRTE.C               |                    | 2 | 2,21   | 0,23  | -0,32  |
| 18 | P24534 EF1B_HUMAN  | E.KASLPGVK.K               |                    | 2 | 2,209  | 0,099 | -0,152 |
| 18 | P42765 THIM_HUMAN  | K.YALQSQQR.W               |                    | 2 | 2,2032 | 0,208 | 0,061  |
| 18 | P26641 EF1G_HUMAN  | K.AKDPFAHLPK.S             |                    | 2 | 2,1959 | 0,151 | -0,217 |
| 18 | Q15942 ZYX_HUMAN   | R.S#PGAPGPLTLK.E           | S344:              | 2 | 2,1955 | 0,296 | -0,437 |
| 18 | Q99547 MPH6_HUMAN  | K.MFLKPQD.-                |                    | 2 | 2,1944 | 0,123 | 0      |
| 18 | Q99547 MPH6_HUMAN  | K.M*FLKPQD.-               |                    | 2 | 2,1887 | 0,175 | 0,068  |
| 18 | P22626 ROA2_HUMAN  | D.TIEIITDR.Q               |                    | 2 | 2,1841 | 0,207 | 0      |
| 18 | P62913 RL11_HUMAN  | K.YDGILPGK.-               |                    | 2 | 2,1834 | 0,365 | -0,063 |
| 18 | Q9H974 QTRD1_HUMAN | R.LISGVSRPDEVLE.C          |                    | 2 | 2,1818 | 0,172 | -0,518 |
| 18 | P07602 SAP_HUMAN   | K.LVGYLDR.N                |                    | 2 | 2,181  | 0,374 | 0      |
| 18 | Q9BRA2 TXD17_HUMAN | K.TIFAYFTGSK.D             |                    | 2 | 2,1792 | 0,364 | -0,43  |
| 18 | O60303 K0556_HUMAN | E.LGLGCS#PPAETLADAK.L      | S660:              | 2 | 2,1786 | 0,174 | -0,218 |
| 18 | Q9BZL4 PP12C_HUMAN | E.KISLQDLSK.E              |                    | 2 | 2,1775 | 0,225 | -0,473 |
| 18 | Q8NG31 CASC5_HUMAN | K.SNCIMDVLEDE.S            |                    | 2 | 2,1768 | 0,234 | -0,553 |
| 18 | Q9UPN3 MACF1_HUMAN | R.RGS#DASDFDLLE.T          | S5372:             | 2 | 2,1766 | 0,153 | -0,608 |
| 18 | P31943 HNRH1_HUMAN | E.M*DWVLK.H                |                    | 2 | 2,1739 | 0,109 | 0,075  |
| 18 | O75179 ANR17_HUMAN | K.S#GPSPLSS#PNGKLTVAS#PK.R | S1693:S1700:S1709: | 2 | 2,1736 | 0,242 | -0,709 |
| 18 | Q8ND56 LS14A_HUMAN | R.SLKTQLS#QGR.S            | S178:              | 2 | 2,1732 | 0,15  | -0,306 |
| 18 | Q9NZN5 ARHGC_HUMAN | E.AETDPGDVLGR.T            |                    | 2 | 2,1721 | 0,241 | -0,324 |
| 18 | Q8NDI1 EHBP1_HUMAN | K.LGYSYSRD.L               |                    | 2 | 2,1671 | 0,309 | -0,063 |
| 18 | P49736 MCM2_HUMAN  | R.RGNDPLTSS#PGR.S          | S27:               | 2 | 2,1659 | 0,179 | -0,639 |
| 18 | Q15773 MLF2_HUMAN  | R.LAIQGPEDS#PSR.Q          | S238:              | 2 | 2,1629 | 0,265 | 0      |
| 18 | Q00341 VIGLN_HUMAN | E.YGGVMVSFPR.S             |                    | 2 | 2,1547 | 0,185 | -0,329 |

|    |                     |                         |            |   |        |       |        |
|----|---------------------|-------------------------|------------|---|--------|-------|--------|
| 18 | A9CQZ4 A9CQZ4_HUMAN | K.FCGM*FCPVEGSSE.N      |            | 2 | 2,1516 | 0,249 | -0,481 |
| 18 | P30414 NKTR_HUMAN   | E.NIPVIPLSDSPPPS#R.W    | S617:      | 2 | 2,1497 | 0,097 | -0,439 |
| 18 | Q9Y2X7 GIT1_HUMAN   | R.ARS#MDSDDLSDGAVTLQE.Y | S410:      | 2 | 2,1485 | 0,111 | 0,187  |
| 18 | P02545 LMNA_HUMAN   | K.LLEGEER.L             |            | 2 | 2,1476 | 0,103 | 0,188  |
| 18 | Q5VZK9 LR16A_HUMAN  | K.VALLPPVLK.K           |            | 2 | 2,1475 | 0,104 | -0,321 |
| 18 | Q14C86 GAPD1_HUMAN  | R.SNS#VSSLDLE.G         | S585:      | 2 | 2,1465 | 0,253 | -0,324 |
| 18 | O95071 UBR5_HUMAN   | R.IGFSVQPDRLE.L         |            | 2 | 2,145  | 0,107 | -0,484 |
| 18 | Q8TEW0 PARD3_HUMAN  | D.ASQLDFVK.T            |            | 2 | 2,1431 | 0,154 | 0      |
| 18 | Q6PKG0 LARP1_HUMAN  | R.S#LPPTVPES#PNYR.N     | S766:S774: | 2 | 2,133  | 0,208 | -0,527 |
| 18 | P25705 ATPA_HUMAN   | K.QVAGTMKLE.L           |            | 2 | 2,132  | 0,157 | 0,312  |
| 18 | Q92878 RAD50_HUMAN  | R.QDIDTQKIQE.R          |            | 2 | 2,1305 | 0,158 | -0,301 |
| 18 | O75909 CCNK_HUMAN   | K.DLAHTPSQLE.G          |            | 2 | 2,1296 | 0,147 | -0,22  |
| 18 | Q9Y618 NCOR2_HUMAN  | R.SAVYPLLYR.D           |            | 2 | 2,1291 | 0,372 | 0      |
| 18 | P30038 AL4A1_HUMAN  | K.VANEPVLAFTQGS#PE.R    | S44:       | 2 | 2,1241 | 0,098 | -0,447 |
| 18 | Q9Y5S2 MRCKB_HUMAN  | R.SQLPLEGLEQPACDT.-     |            | 2 | 2,1144 | 0,145 | -0,589 |
| 18 | P42285 SK2L2_HUMAN  | E.GTDEPIFGK.K           |            | 2 | 2,114  | 0,371 | -0,19  |
| 18 | Q9H307 PININ_HUMAN  | R.DLIQDQNM*DE.K         |            | 2 | 2,1139 | 0,151 | -0,197 |
| 18 | P10809 CH60_HUMAN   | K.LSDGVAVLK.V           |            | 2 | 2,1119 | 0,296 | 0,135  |
| 18 | Q14980 NUMA1_HUMAN  | R.IDRLALLNE.K           |            | 2 | 2,108  | 0,088 | 0      |
| 18 | P35527 K1C9_HUMAN   | R.SGGGGGGGLGSGGSIR.S    |            | 2 | 2,1027 | 0,222 | -0,198 |
| 18 | Q5VT52 K0460_HUMAN  | R.LSSSPGLFGAFSVR.G      |            | 2 | 2,099  | 0,273 | -0,514 |
| 18 | Q14694 UBP10_HUMAN  | K.NIEYPVDLE.I           |            | 2 | 2,0949 | 0,128 | -0,559 |
| 18 | Q6PJT7 ZC3HE_HUMAN  | E.CAYHHPI#PCK.A         | S620:      | 2 | 2,0931 | 0,152 | 0      |
| 18 | Q99623 PHB2_HUMAN   | K.IVQAEGEAE.A           |            | 2 | 2,0918 | 0,092 | 0      |
| 18 | P54259 ATN1_HUMAN   | K.TATPPGYKPGS#PPSFR.T   | S656:      | 2 | 2,0915 | 0,26  | -0,351 |
| 18 | Q06830 PRDX1_HUMAN  | R.LVQAFQFTDK.H          |            | 2 | 2,0904 | 0,191 | -0,408 |
| 18 | Q99856 ARI3A_HUMAN  | R.AQMAALAAM*R.A         |            | 2 | 2,0904 | 0,266 | 0,697  |
| 18 | Q96JM3 ZN828_HUMAN  | K.TSPASLDFPE.S          |            | 2 | 2,089  | 0,156 | -0,115 |
| 18 | O60684 IMA7_HUMAN   | K.SYKNNALNPEE.M         |            | 2 | 2,0869 | 0,22  | -0,572 |
| 18 | Q04637 IF4G1_HUMAN  | K.EAVGDLLDAFKE.A        |            | 2 | 2,0853 | 0,21  | -0,467 |
| 18 | Q5T4S7 UBR4_HUMAN   | R.HVTLP#SPR.S           | S2718:     | 2 | 2,0844 | 0,223 | -1,022 |
| 18 | Q99536 VAT1_HUMAN   | K.VLLVPGPEKEN.-         |            | 2 | 2,0829 | 0,236 | -0,306 |
| 18 | Q92805 GOGA1_HUMAN  | R.EDLSSQLLR.R           |            | 2 | 2,0822 | 0,095 | -0,46  |

|    |                    |                         |       |   |        |       |        |
|----|--------------------|-------------------------|-------|---|--------|-------|--------|
| 18 | Q6PKG0 LARP1_HUMAN | R.SLPTTVPES#PNYR.N      | S774: | 2 | 2,0802 | 0,25  | -0,475 |
| 18 | P62861 RS30_HUMAN  | R.FVNVVPTFGK.K          |       | 2 | 2,0731 | 0,18  | -0,11  |
| 18 | Q09666 AHNK_HUMAN  | K.ADIKSPSLDVTVPEAE.L    |       | 2 | 2,073  | 0,198 | -0,292 |
| 18 | Q13428 TCOF_HUMAN  | K.TVANLLSGK.S           |       | 2 | 2,0728 | 0,267 | -0,878 |
| 18 | Q96T23 RSF1_HUMAN  | K.AQIDPVLLK.N           |       | 2 | 2,0701 | 0,103 | -0,184 |
| 18 | Q08J23 NSUN2_HUMAN | E.KFHQFLVSE.T           |       | 2 | 2,0686 | 0,158 | 0,322  |
| 18 | Q53H80 CF166_HUMAN | D.FDPLLSPAS#PK.R        | S21:  | 2 | 2,0641 | 0,203 | -0,39  |
| 18 | O14974 MYPT1_HUMAN | R.KTGS#YGALAE.I         | S445: | 2 | 2,0632 | 0,155 | 0      |
| 18 | Q8ND56 LS14A_HUMAN | R.SSPQLDPLRKS#PTME.Q    | S192: | 2 | 2,0588 | 0,152 | 0      |
| 18 | Q9NVR2 INT10_HUMAN | R.SSQKYIIE.G            |       | 2 | 2,0576 | 0,113 | -0,063 |
| 18 | P08238 HS90B_HUMAN | R.NPDDITQEE.Y           |       | 2 | 2,0524 | 0,155 | -0,46  |
| 18 | Q8WUA4 TF3C2_HUMAN | E.LSTALPAPVSCPEGPK.V    |       | 2 | 2,0523 | 0,255 | -0,451 |
| 18 | P18615 NELFE_HUMAN | K.GPVPTFQPFQR.S         |       | 2 | 2,0482 | 0,096 | -0,575 |
| 18 | Q6KC79 NIPBL_HUMAN | E.DYLHMVHR.L            |       | 2 | 2,046  | 0,118 | -0,342 |
| 18 | Q9BRT8 CBWD1_HUMAN | K.GKFDYILLE.T           |       | 2 | 2,0315 | 0,089 | -0,333 |
| 18 | Q06413 MEF2C_HUMAN | R.NSPGLLVSPGNLNK.N      |       | 2 | 2,0301 | 0,193 | -1,038 |
| 18 | P41236 IPP2_HUMAN  | R.KLAAAEGLEPK.Y         |       | 2 | 2,0266 | 0,098 | -0,217 |
| 18 | Q8IU81 I2BP1_HUMAN | R.ATSSGRLPLPSALE.Y      |       | 2 | 2,023  | 0,085 | -0,326 |
| 18 | Q9NR30 DDX21_HUMAN | K.NGFPHPEPDCNPSEAASEE.S |       | 2 | 2,0225 | 0,47  | -0,351 |
| 18 | Q9UJ41 RABX5_HUMAN | E.AKAPSPSINR.Q          |       | 2 | 2,0169 | 0,138 | 0,234  |
| 18 | Q9UKY7 CDV3_HUMAN  | E.VDYSGLR.V             |       | 2 | 2,0131 | 0,129 | 0,377  |
| 18 | P31943 HNRH1_HUMAN | R.GLPFGCSKEE.I          |       | 2 | 2,0114 | 0,224 | -0,109 |
| 18 | O95453 PARN_HUMAN  | R.NNSFTAPSTVGK.R        |       | 2 | 2,0078 | 0,274 | -0,499 |
| 18 | P46013 KI67_HUMAN  | E.TQLLVS.R.K            |       | 2 | 2,0057 | 0,137 | 0,299  |
| 18 | Q9Y265 RUVB1_HUMAN | R.CDTYATEFDLEAEE.Y      |       | 2 | 2,0036 | 0,155 | -0,216 |
| 18 | P13639 EF2_HUMAN   | K.SDPMVQCIIEE.S         |       | 2 | 2,0035 | 0,144 | -0,462 |
| 18 | Q9H410 DSN1_HUMAN  | R.IHLGSS#PK.K           | S58:  | 2 | 2,001  | 0,081 | 0      |
| 18 | Q8IYB5 SMAP1_HUMAN | K.KAAEPTVDLLGLD.G       |       | 2 | 1,9988 | 0,189 | -0,455 |
| 18 | Q99615 DNJC7_HUMAN | E.AFTILSDPK.K           |       | 2 | 1,9938 | 0,282 | -0,061 |
| 18 | Q8N6T3 ARFG1_HUMAN | E.TFGSAEPTKTR.K         |       | 2 | 1,9933 | 0,378 | -0,51  |
| 18 | Q16881 TRXR1_HUMAN | E.TDLPVVFVK.Q           |       | 2 | 1,9901 | 0,182 | -0,24  |
| 18 | Q14376 GALE_HUMAN  | K.SKFFIEE.M             |       | 2 | 1,9871 | 0,097 | 0,203  |
| 18 | O14776 TCRG1_HUMAN | R.YLVLDVCVPE.E          |       | 2 | 1,979  | 0,112 | -0,33  |

|    |                     |                        |        |   |        |       |        |
|----|---------------------|------------------------|--------|---|--------|-------|--------|
| 18 | Q16891 IMMT_HUMAN   | K.QKGDTPASATAPTE.A     |        | 2 | 1,9781 | 0,256 | -0,533 |
| 18 | Q9UNZ2 NSF1C_HUMAN  | K.S#PNELVDDLFK.G       | S114:  | 2 | 1,9756 | 0,179 | -0,45  |
| 18 | O75533 SF3B1_HUMAN  | K.TEILPPFFK.H          |        | 2 | 1,9686 | 0,101 | -0,223 |
| 18 | Q9Y5W9 SNX11_HUMAN  | K.SCCFLPR.S            |        | 2 | 1,9647 | 0,239 | 0      |
| 18 | Q9Y2U5 M3K2_HUMAN   | K.RLS#IIGPISR.D        | S153:  | 2 | 1,9632 | 0,081 | -0,414 |
| 18 | Q9UKM9 RALY_HUMAN   | E.AGLPQGEAR.T          |        | 2 | 1,9601 | 0,152 | 0,068  |
| 18 | P33316 DUT_HUMAN    | R.ARPAEVGGM*QLR.F      |        | 2 | 1,9564 | 0,388 | -0,563 |
| 18 | P05787 K2C8_HUMAN   | R.AFSSRS#YTSGPGRS.I    | S24:   | 2 | 1,9546 | 0,458 | -0,238 |
| 18 | Q9BX67 JAM3_HUMAN   | R.HKS#SFVI.-           | S306:  | 2 | 1,945  | 0,231 | -0,408 |
| 18 | Q3ZCQ8 TIM50_HUMAN  | E.DDPLAAFK.Q           |        | 2 | 1,9365 | 0,206 | -0,209 |
| 18 | O75400 PR40A_HUMAN  | E.DVLFFLSK.K           |        | 2 | 1,9353 | 0,206 | -0,504 |
| 18 | Q9NP74 PALMD_HUMAN  | R.ETIFGKSE.H           |        | 2 | 1,9343 | 0,251 | -0,067 |
| 18 | A8K333 A8K333_HUMAN | K.KAVEPTVDLLGLD.G      |        | 2 | 1,9277 | 0,185 | -0,445 |
| 18 | P53396 ACLY_HUMAN   | R.TAS#FSESR.A          | S455:  | 2 | 1,9229 | 0,127 | 0      |
| 18 | Q9Y4L1 HYOU1_HUMAN  | K.TVLSANADHM*AQIE.G    |        | 2 | 1,9211 | 0,186 | 0,241  |
| 18 | P60709 ACTB_HUMAN   | E.EHPVLLTEAPLNPK.A     |        | 2 | 1,9186 | 0,13  | -0,157 |
| 18 | Q6PKG0 LARP1_HUMAN  | R.FYPVVE.G             |        | 2 | 1,9142 | 0,164 | 0,069  |
| 18 | P43686 PRS6B_HUMAN  | K.RFDAQTGADRE.V        |        | 2 | 1,9121 | 0,116 | -0,578 |
| 18 | Q8N556 AFAP1_HUMAN  | E.KKLSSERPSS#DGEGVVE.N | S283:  | 2 | 1,9114 | 0,201 | -0,259 |
| 18 | P07814 SYEP_HUMAN   | K.SLCIPFKPLCE.L        |        | 2 | 1,9088 | 0,285 | -0,626 |
| 18 | Q96A08 H2B1A_HUMAN  | R.LLLPGELAK.H          |        | 2 | 1,9076 | 0,185 | -0,256 |
| 18 | Q9NTI5 PDS5B_HUMAN  | E.DYTM*SS#PLPGKK.S     | S1191: | 2 | 1,9    | 0,189 | -0,601 |
| 18 | Q92625 ANS1A_HUMAN  | R.SES#LSNCSIGK.K       | S647:  | 2 | 1,8979 | 0,283 | -0,29  |
| 18 | Q9NYF8 BCLF1_HUMAN  | R.SSSSSASPS#SPSSREE.K  | S759:  | 2 | 1,8979 | 0,114 | -0,518 |
| 18 | P27816 MAP4_HUMAN   | K.IVPAKDLVLLSE.I       |        | 2 | 1,8919 | 0,189 | -0,47  |
| 18 | Q15149 PLEC1_HUMAN  | E.FADMLSGNAGGFR.S      |        | 2 | 1,8741 | 0,085 | -0,182 |
| 18 | P62256 UBE2H_HUMAN  | R.M*DTDVVKLIE.S        |        | 2 | 1,854  | 0,125 | -0,103 |
| 18 | Q9Y2S0 RPAC2_HUMAN  | E.DHTLGNLSR.Y          |        | 2 | 1,8511 | 0,413 | -0,181 |
| 18 | O75362 ZN217_HUMAN  | K.TSVS#PAPDKTKRPE.T    | S848:  | 2 | 1,8415 | 0,239 | -0,613 |
| 18 | O95817 BAG3_HUMAN   | R.GYISIPVIHE.Q         |        | 2 | 1,838  | 0,268 | -0,324 |
| 18 | P04264 K2C1_HUMAN   | K.SISISVAR.G           |        | 2 | 1,8364 | 0,142 | 1,025  |
| 18 | P10809 CH60_HUMAN   | K.GANPVEIR.R           |        | 2 | 1,8363 | 0,183 | -0,071 |
| 18 | Q00341 VIGLN_HUMAN  | R.SGLVPQQIK.V          |        | 2 | 1,8248 | 0,102 | 0,063  |

|    |                      |                                 |              |   |        |       |        |
|----|----------------------|---------------------------------|--------------|---|--------|-------|--------|
| 18 | Q96MG7 MAGG1_HUMAN   | R.AQAAPAVGPR.S                  |              | 2 | 1,82   | 0,127 | 0,195  |
| 18 | Q00839 HNRPU_HUMAN   | R.AKS#PQPPVEE.E                 | S270:        | 2 | 1,8034 | 0,133 | -0,315 |
| 18 | Q02952 AKA12_HUMAN   | K.STPVIVSATTK.K                 |              | 2 | 1,8034 | 0,162 | -0,221 |
| 18 | P02545 LMNA_HUMAN    | R.TSGRVAVEEVDEE.G               |              | 2 | 1,8012 | 0,108 | -0,601 |
| 18 | Q04760 LGUL_HUMAN    | R.GFGHIGIAVPD.V                 |              | 2 | 1,7963 | 0,201 | -0,338 |
| 18 | Q99618 CDCA3_HUMAN   | R.S#PTLGIAR.T                   | S68:         | 2 | 1,787  | 0,203 | -0,068 |
| 18 | O60828 PQBP1_HUMAN   | E.AT#RLEGLPPS#WY#K.V            | T43:S51:Y53: | 2 | 1,7807 | 0,086 | 1,249  |
| 18 | P40925 MDHC_HUMAN    | R.DIWFGTPE.G                    |              | 2 | 1,7802 | 0,225 | -0,316 |
| 18 | Q92698 RAD54_HUMAN   | E.DWQPGLVTPR.K                  |              | 2 | 1,7746 | 0,202 | -0,104 |
| 18 | ##POCOP6 NPS_HUMAN   | K.M*GTGVGNRFSR.K                |              | 2 | 1,7721 | 0,1   | -1,12  |
| 18 | Q99618 CDCA3_HUMAN   | K.TSSGDPPSPLVK.Q                |              | 2 | 1,7643 | 0,1   | -0,206 |
| 18 | P04075 ALDOA_HUMAN   | R.ALQASALK.A                    |              | 2 | 1,7472 | 0,155 | -0,076 |
| 18 | P62753 RS6_HUMAN     | R.RLS#S#LRASTSKSE.S             | S235:S236:   | 2 | 1,7415 | 0,092 | 0,154  |
| 18 | Q96ST2 IWS1_HUMAN    | K.HM*DFLSDFE.M                  |              | 2 | 1,74   | 0,099 | -0,527 |
| 18 | P46934 NEDD4_HUMAN   | R.RGS#LQAYTFE.E                 | S428:        | 2 | 1,7326 | 0,163 | -0,487 |
| 18 | ##Q8TEV9 SMCR8_HUMAN | E.ELS#SS#PPRDQSPK.S             | S536:S538:   | 2 | 1,7297 | 0,096 | 1,69   |
| 18 | P23588 IF4B_HUMAN    | K.VMPAPPKE.N                    |              | 2 | 1,7204 | 0,179 | 0,063  |
| 19 | O75351 VPS4B_HUMAN   | K.KLQNQLQGAIVIERPNVK.W          |              | 3 | 6,6949 | 0,374 | -0,268 |
| 19 | P14625 ENPL_HUMAN    | E.KNLLHVTDGTGVMTREE.L           |              | 3 | 6,1786 | 0,488 | -0,289 |
| 19 | Q9UHB6 LIMA1_HUMAN   | R.SRPFTVAASFQSTS VKS#PK.T       | S604:        | 3 | 6,1483 | 0,421 | -0,782 |
| 19 | O43318 M3K7_HUMAN    | R.RRS#IQDLTGTGTEPGQVSSR.S       | S439:        | 3 | 5,6066 | 0,46  | -0,242 |
| 19 | P28799 GRN_HUMAN     | E.DHIHCCPAGFTCDTQKGTCE.Q        |              | 3 | 5,6048 | 0,529 | -0,535 |
| 19 | P23193 TCEA1_HUMAN   | K.KKEPAITSQNS#PEAREE.S          | S100:        | 3 | 5,5324 | 0,417 | -0,459 |
| 19 | Q14676 MDC1_HUMAN    | E.LQASASTDQPVTSPTS.R            |              | 2 | 5,4861 | 0,476 | 0,521  |
| 19 | P60709 ACTB_HUMAN    | E.LRVAPPEHPVLLTEAPLNPK.A        |              | 3 | 5,4557 | 0,363 | -0,329 |
| 19 | Q9Y6D5 BIG2_HUMAN    | E.LEKPIQSKPQSPVIAAAVS#PK.F      | S227:        | 3 | 5,4138 | 0,436 | -0,534 |
| 19 | P21127 CD2L1_HUMAN   | R.GTS#PRPPEGGLGYS#QLGDDDLKE.T   | S752:S763:   | 3 | 5,2956 | 0,408 | -0,574 |
| 19 | Q9Y6D5 BIG2_HUMAN    | E.LEKPIQSKPQS#PVIQAAAVS#PK.F    | S218:S227:   | 3 | 5,295  | 0,492 | -0,369 |
| 19 | O14617 AP3D1_HUMAN   | K.HRPSEADEEELAR.R               |              | 3 | 5,2361 | 0,437 | 0      |
| 19 | O94776 MTA2_HUMAN    | R.QKLN PADAPNPVVFVATKD.T        |              | 3 | 5,2002 | 0,329 | -0,361 |
| 19 | Q9UQR0 SCML2_HUMAN   | R.SPQQTVPYVVPLS#PKLPK.T         | S511:        | 3 | 5,1612 | 0,319 | -0,356 |
| 19 | Q99439 CNN2_HUMAN    | R.NFDDATM*KAGQCIVGLQM*GTNK.C    |              | 3 | 5,1221 | 0,393 | -0,602 |
| 19 | Q96SU4 OSBL9_HUMAN   | R.LIDSSGSASVLTHSSS#GNSLKRPDTE.S | S326:        | 3 | 4,9971 | 0,462 | -0,518 |

|    |                     |                                 |            |   |        |       |        |
|----|---------------------|---------------------------------|------------|---|--------|-------|--------|
| 19 | Q9UHR5 S30BP_HUMAN  | E.KGGLVSDAYGEDDFSR.L            |            | 2 | 4,9258 | 0,498 | -0,071 |
| 19 | P49585 PCY1A_HUMAN  | R.HKAAAYDIS#EDEED.-             | S362:      | 2 | 4,891  | 0,534 | 0,146  |
| 19 | Q96SU4 OSBL9_HUMAN  | R.LIDSSGSASVLTHSSSGNS#LKRPDTE.S | S329:      | 3 | 4,8853 | 0,407 | -0,388 |
| 19 | Q13200 PSMD2_HUMAN  | K.APVQPQQS#PAAAPGGTDEKPSGKE.R   | S16:       | 3 | 4,8786 | 0,307 | -0,452 |
| 19 | Q13200 PSMD2_HUMAN  | R.DKAPVQPQQS#PAAAPGGTDEKPSGKE.R | S16:       | 3 | 4,8558 | 0,348 | -0,548 |
| 19 | Q9BXB4 OSB11_HUMAN  | R.RPS#QNAISFFNVGHSK.L           | S189:      | 3 | 4,8475 | 0,438 | -0,196 |
| 19 | Q9NYA4 MTMR4_HUMAN  | K.TRS#MDDLSSACDTSSPLTR.T        | S610:      | 3 | 4,8369 | 0,395 | -0,332 |
| 19 | P05362 ICAM1_HUMAN  | E.LKREPAVGEPAEVTTTTVLVR.R       |            | 3 | 4,8223 | 0,495 | -0,338 |
| 19 | Q14157 UBP2L_HUMAN  | K.STSAPQM*SPGSSDNQSSSPQPAQQK.L  |            | 3 | 4,7781 | 0,362 | 0,287  |
| 19 | Q8N1G1 REXO1_HUMAN  | R.ALS#HADLFGDES#EDE.A           | S517:S526: | 2 | 4,7469 | 0,521 | -1,088 |
| 19 | Q16555 DPYL2_HUMAN  | K.TVT#PASSAKTS#PAKQQAPPVR.N     | T514:S522: | 3 | 4,7175 | 1     | -0,802 |
| 19 | Q3KQU3 MA7D1_HUMAN  | R.RSS#QPSPTAVPASDSPPTKQE.V      | S113:      | 3 | 4,6849 | 0,212 | 0,081  |
| 19 | Q969S3 ZN622_HUMAN  | E.KGLGVDSVDKDAM*NAAIQQAIK.A     |            | 3 | 4,6718 | 0,381 | -0,24  |
| 19 | Q8TDD1 DDX54_HUMAN  | K.LGPGRPLPTFPTSECTS#DVEPDTRE.M  | S75:       | 3 | 4,6682 | 0,499 | -0,451 |
| 19 | P11717 MPRI_HUMAN   | K.ALSSLHGDDQDS#EDE.V            | S2409:     | 2 | 4,6086 | 0,507 | 0,216  |
| 19 | Q8TDD1 DDX54_HUMAN  | R.KLGPGRPLPTFPTSECTS#DVEPDTRE.M | S75:       | 3 | 4,5752 | 0,393 | -0,617 |
| 19 | Q9NYA4 MTMR4_HUMAN  | K.T#RSM*DDLSSACDTSSPLTR.T       | T608:      | 3 | 4,5692 | 0,33  | -0,494 |
| 19 | Q07002 PCTK3_HUMAN  | R.RAS#LSDIGFGKLE.T              | S130:      | 2 | 4,557  | 0,421 | 0,166  |
| 19 | Q9P246 STIM2_HUMAN  | E.KS#CSMNQLSSGIPVPKPR.H         | S678:      | 3 | 4,5215 | 0,303 | -0,531 |
| 19 | P18887 XRCC1_HUMAN  | E.SANSLRPGALFFSR.I              |            | 3 | 4,51   | 0,362 | -0,06  |
| 19 | P08651 NFIC_HUMAN   | E.LQGHLAYDLNPASTGLR.R           |            | 2 | 4,4754 | 0,475 | -0,601 |
| 19 | Q9NYZ3 GTSE1_HUMAN  | R.VPQALNFSPEESDSTFSK.S          |            | 2 | 4,4733 | 0,453 | -0,369 |
| 19 | Q15942 ZYX_HUMAN    | E.KQHPVPPPAQNNQVR.S             |            | 3 | 4,464  | 0,384 | -0,199 |
| 19 | P13645 K1C10_HUMAN  | K.GSLGGGFSSGGFSGGSFSR.G         |            | 2 | 4,4491 | 0,475 | -0,5   |
| 19 | Q03252 LMNB2_HUMAN  | K.LSSDQNDKAASAAREE.L            |            | 2 | 4,4328 | 0,473 | 0,288  |
| 19 | P10809 CH60_HUMAN   | K.NQLKDMAIATGGAVFGEE.G          |            | 2 | 4,4324 | 0,571 | -0,791 |
| 19 | Q8WXV6 Q8WXV6_HUMAN | R.KRTSS#EDNLYLAVLR.A            | S21:       | 3 | 4,413  | 0,299 | -0,099 |
| 19 | O14893 GEMI2_HUMAN  | R.KQS#VNISLSGCQPAPE.G           | S81:       | 2 | 4,4099 | 0,451 | -0,544 |
| 19 | P00558 PGK1_HUMAN   | E.SPERPFLAILGGAK.V              |            | 3 | 4,3995 | 0,261 | -0,063 |
| 19 | P98174 FGD1_HUMAN   | K.S#LSLDPGQSLEPHPE.G            | S114:      | 2 | 4,3754 | 0,355 | -0,507 |
| 19 | Q6P1L5 AL2SC_HUMAN  | R.TSPTVATQTGASATSTR.G           |            | 2 | 4,3513 | 0,553 | -0,149 |
| 19 | P16401 H15_HUMAN    | E.TAPAETATPAPVEKS#PAK.K         | S18:       | 2 | 4,3394 | 0,476 | -0,529 |
| 19 | Q7Z478 DHX29_HUMAN  | K.FQSPQIQATIS#PPLQPK.T          | S200:      | 3 | 4,3167 | 0,324 | -0,28  |



|    |                     |                                   |                    |   |        |       |        |
|----|---------------------|-----------------------------------|--------------------|---|--------|-------|--------|
| 19 | Q9NYF8 BCLF1_HUMAN  | K.LKDLFDYS#PPLHK.N                | S512:              | 2 | 4,3132 | 0,527 | -0,96  |
| 19 | Q99439 CNN2_HUMAN   | R.NFDDATM*KAGQCIVIGLQMGTNK.C      |                    | 3 | 4,3124 | 0,413 | -0,455 |
| 19 | P22314 UBA1_HUMAN   | R.QNRYDGQVAVFGSDLQE.K             |                    | 2 | 4,3104 | 0,343 | -0,633 |
| 19 | P23588 IF4B_HUMAN   | E.TLNKEEDCHS#PTSKPPKPDQPLK.V      | S459:              | 3 | 4,2899 | 0,367 | -0,604 |
| 19 | Q9NYF8 BCLF1_HUMAN  | K.SEKLDLFDYS#PPLHK.N              | S512:              | 3 | 4,2833 | 0,301 | -0,824 |
| 19 | Q86XN8 MEX3D_HUMAN  | R.SSGAGT#PRHS#PTLPEPGGLRLE.L      | T510:S514:         | 3 | 4,2619 | 0,218 | -0,385 |
| 19 | Q3KQU3 MA7D1_HUMAN  | R.RS#SQPS#PTAVPASDSPPT#KQE.V      | S112:S116:T128:    | 3 | 4,2592 | 1     | 0,304  |
| 19 | Q96PK6 RBM14_HUMAN  | R.SPPRASY#VAPLTAQPATYR.A          | Y226:              | 3 | 4,2443 | 0,445 | -0,43  |
| 19 | P10809 CH60_HUMAN   | R.KNQLKDMAIATGGAVFGEE.G           |                    | 2 | 4,2401 | 0,533 | -0,432 |
| 19 | Q16555 DPYL2_HUMAN  | R.NLHQSGFSLSGAQIDDNIPR.R          |                    | 3 | 4,2346 | 0,445 | -0,253 |
| 19 | Q58FF7 H90B3_HUMAN  | E.DHLAVKHFSVEGQLE.F               |                    | 2 | 4,2112 | 0,391 | -0,428 |
| 19 | O15056 SYNJ2_HUMAN  | E.LGGDDLSDVPGPTALAPPSKSPALT#K.K   | T1060:             | 3 | 4,2109 | 0,341 | -0,566 |
| 19 | Q96RT6 CTGE2_HUMAN  | E.DSKVHAEQVLNDKE.N                |                    | 3 | 4,207  | 0,28  | -0,113 |
| 19 | O43399 TPD54_HUMAN  | K.VVGDRENGSDNLPSAGS#GDKPLSDPAPF.- | S195:              | 3 | 4,1982 | 0,148 | -0,432 |
| 19 | P60903 S10AA_HUMAN  | E.NQKDPLAVDKIM*KD.L               |                    | 3 | 4,19   | 0,249 | -0,112 |
| 19 | Q99439 CNN2_HUMAN   | K.AGQCIVIGLQM*GTNK.C              |                    | 2 | 4,1858 | 0,428 | -0,409 |
| 19 | O14974 MYPT1_HUMAN  | R.SAS#SPRLSSSLDNKE.K              | S472:              | 3 | 4,1746 | 0,399 | -0,11  |
| 19 | Q86UD0 CI140_HUMAN  | R.RHT#IASGVDCGLLK.Q               | T219:              | 3 | 4,1665 | 0,301 | -0,228 |
| 19 | Q8WXV6 Q8WXV6_HUMAN | R.KRT#SSEDNLYLAVLR.A              | T19:               | 3 | 4,1607 | 0,311 | -0,991 |
| 19 | P28799 GRN_HUMAN    | E.DHIHCCPAGFTCDTQK.G              |                    | 3 | 4,1511 | 0,41  | -0,47  |
| 19 | Q9BY89 K1671_HUMAN  | R.KIT#PPSS#PHSLTSTLVSLGHEE.A      | T1059:S1063:       | 3 | 4,1486 | 0,396 | -0,517 |
| 19 | P46939 UTRO_HUMAN   | E.HYDPSQS#PQLFHDDTHSRIE.Q         | S3182:             | 3 | 4,1454 | 0,315 | -0,294 |
| 19 | Q13813 SPTA2_HUMAN  | R.LM*VHTVATFNSIKE.L               |                    | 2 | 4,1426 | 0,469 | -0,38  |
| 19 | Q8IYB3 SRRM1_HUMAN  | E.KKEKT#PELPEPSVK.V               | T220:              | 3 | 4,1238 | 0,276 | -0,108 |
| 19 | P08559 ODPA_HUMAN   | R.YHGHS#MSDPGVS#YR.T              | S293:S300:         | 2 | 4,107  | 0,512 | -0,418 |
| 19 | Q9Y4U1 MMAC_HUMAN   | R.SWLSRVS#PPAS#PGP.-              | S275:S279:         | 2 | 4,1027 | 0,543 | -0,864 |
| 19 | P28749 RBL1_HUMAN   | K.SPVSLTAHSLIGAS#PK.Q             | S762:              | 2 | 4,1009 | 0,448 | -0,223 |
| 19 | Q8WXV6 Q8WXV6_HUMAN | R.TSS#EDNLYLAVLR.A                | S21:               | 3 | 4,0987 | 0,207 | -0,234 |
| 19 | P60903 S10AA_HUMAN  | E.NQKDPLAVDKIMKD.L                |                    | 3 | 4,094  | 0,384 | -0,566 |
| 19 | P26358 DNMT1_HUMAN  | R.VARPLPAEPPERAK.S                |                    | 3 | 4,0761 | 0,26  | -0,117 |
| 19 | O75179 ANR17_HUMAN  | K.SGSP#PLSS#PNGKLTVAS#PK.R        | S1696:S1700:S1709: | 3 | 4,0698 | 0,261 | -0,62  |
| 19 | P18583 SON_HUMAN    | R.AGIEGPLLASDVGR.D                |                    | 2 | 4,0229 | 0,279 | 0,09   |
| 19 | P18615 NELFE_HUMAN  | K.LKDPEKGPVPTFQPFQR.S             |                    | 3 | 4,0219 | 0,409 | -0,092 |

|    |                    |                                     |                    |   |        |       |        |
|----|--------------------|-------------------------------------|--------------------|---|--------|-------|--------|
| 19 | P28749 RBL1_HUMAN  | K.SPVSLTAHSLIGAS#PK.Q               | S762:              | 3 | 4,0063 | 0,324 | 0,111  |
| 19 | Q96D31 CRCM1_HUMAN | R.LQDQLDHRGDHPLT#PGS#HYA.-          | T295:S298:         | 3 | 4,0048 | 0,348 | -0,303 |
| 19 | P54259 ATN1_HUMAN  | R.GRAS#PGGVST#SSSDGKAE.K            | S34:T40:           | 2 | 4,0047 | 1     | 0,27   |
| 19 | P62753 RS6_HUMAN   | R.RLS#S#LRAS#TSKSE.S                | S235:S236:S240:    | 2 | 4,0045 | 0,398 | -0,294 |
| 19 | P42858 HD_HUMAN    | E.LIAGGGSSCS#PVLRSR.K               | S434:              | 2 | 4,0039 | 0,405 | -0,238 |
| 19 | Q96SB3 NEB2_HUMAN  | K.IKPVEVEESGES#EAE.S                | S307:              | 2 | 3,9985 | 0,409 | -0,641 |
| 19 | P16401 H15_HUMAN   | E.TAPAETATPAPVEKS#PAKK.K            | S18:               | 2 | 3,9936 | 0,357 | -0,556 |
| 19 | Q8IYB3 SRRM1_HUMAN | E.ATSTSDILKVPKPEPIPEK.E             |                    | 3 | 3,9898 | 0,228 | -0,426 |
| 19 | P06748 NPM_HUMAN   | K.MQAS#IEKGGSLPKVE.A                | S254:              | 2 | 3,9846 | 0,444 | -0,516 |
| 19 | P48634 BAT2_HUMAN  | R.GSEGKPSLTLPASAPGPEEALTTVTVAPAPR.R |                    | 3 | 3,9841 | 0,368 | -0,61  |
| 19 | P27694 RFA1_HUMAN  | K.SKDSLVDIIGICK.S                   |                    | 2 | 3,9775 | 0,516 | -0,421 |
| 19 | P51572 BAP31_HUMAN | K.LDVGNAEVKLEEE.N                   |                    | 2 | 3,9695 | 0,384 | -0,507 |
| 19 | Q6P158 DHX57_HUMAN | R.DLQEQDADAGSER.G                   |                    | 2 | 3,9616 | 0,49  | -0,425 |
| 19 | Q9C0C2 TB182_HUMAN | R.SKS#CKVPLGKPLTLPPKPE.K            | S1689:             | 3 | 3,959  | 0,19  | -0,413 |
| 19 | P50851 LRBA_HUMAN  | E.LKAS#PNVEAPQPHRVLE.I              | S1261:             | 3 | 3,949  | 0,232 | -0,609 |
| 19 | Q12789 TF3C1_HUMAN | D.LQCVCLNTPLGVVR.C                  |                    | 2 | 3,9485 | 0,463 | -0,15  |
| 19 | Q99549 MPP8_HUMAN  | R.GLWST#DSAEDKE.T                   | T401:              | 2 | 3,9392 | 0,362 | -0,789 |
| 19 | Q92597 NDRG1_HUMAN | E.AFKYFVQGM*GYM*PSASM*TR.L          |                    | 3 | 3,9371 | 0,3   | -0,659 |
| 19 | Q969S3 ZN622_HUMAN | K.GLGVDSVDKDAMNAIQAIK.A             |                    | 3 | 3,9364 | 0,132 | -0,683 |
| 19 | Q09161 NCBP1_HUMAN | R.KTS#DANETEDHLE.S                  | S22:               | 2 | 3,9348 | 0,354 | -0,156 |
| 19 | P50851 LRBA_HUMAN  | E.LKAS#PNVEAPQPHR.H                 | S1261:             | 3 | 3,9289 | 0,136 | -0,45  |
| 19 | POC7M2 RA1L3_HUMAN | K.KIFVGGIKEDTEE.H                   |                    | 2 | 3,9282 | 0,371 | -0,666 |
| 19 | Q8N9N5 BANP_HUMAN  | E.NHVVT#DEDEPALKR.Q                 | T58:               | 3 | 3,9262 | 0,239 | 0      |
| 19 | O75179 ANR17_HUMAN | K.SGPS#PLSS#PNGKLTVAS#PK.R          | S1696:S1700:S1709: | 2 | 3,9224 | 0,352 | -0,709 |
| 19 | Q96SB3 NEB2_HUMAN  | K.IKPVEVEES#GESEAE.S                | S304:              | 2 | 3,9218 | 0,492 | -0,641 |
| 19 | Q9UQ35 SRRM2_HUMAN | K.DKFSFPVQDRPE.S                    |                    | 2 | 3,9151 | 0,311 | -0,234 |
| 19 | Q6ZRV2 FA83H_HUMAN | R.RGS#PTTGFIQKGS#PTSAYPER.R         | S892:S903:         | 3 | 3,9142 | 0,268 | -0,29  |
| 19 | Q02241 KIF23_HUMAN | R.RSS#TVAPAQPDGAESE.W               | S912:              | 2 | 3,9105 | 0,553 | -0,508 |
| 19 | Q08999 RBL2_HUMAN  | E.KIFYFNS#PSK.R                     | S1080:             | 2 | 3,9079 | 0,311 | -0,547 |
| 19 | Q9Y2J4 AMOL2_HUMAN | R.NQQGPPLRGPPAEGPE.S                |                    | 2 | 3,9073 | 0,451 | -0,445 |
| 19 | Q68CZ2 TENS3_HUMAN | R.KLS#LGQYDNDAGGQLPFSK.C            | S776:              | 2 | 3,9049 | 0,497 | 0,576  |
| 19 | O43852 CALU_HUMAN  | R.VHHEPQLSDKVHND.A                  |                    | 3 | 3,899  | 0,338 | -0,111 |
| 19 | Q8NCF5 NF2IP_HUMAN | R.SCLS#PKPPQGQEQGQDE.V              | S234:              | 3 | 3,896  | 0,306 | -0,412 |

|    |                     |                             |            |   |        |       |        |
|----|---------------------|-----------------------------|------------|---|--------|-------|--------|
| 19 | P29401 TKT_HUMAN    | R.IIALDGDTKNSTFSE.I         |            | 2 | 3,8911 | 0,358 | -0,379 |
| 19 | O94842 TOX4_HUMAN   | E.LVSGS#PVALS#PQPR.C        | S562:S567: | 2 | 3,888  | 0,277 | 0,233  |
| 19 | Q9ULW0 TPX2_HUMAN   | K.ANLQQAIVT#PLKPVDNTYYKE.A  | T72:       | 3 | 3,8854 | 0,266 | -0,294 |
| 19 | O95400 CD2B2_HUMAN  | E.GHFDADGNYFLNR.D           |            | 2 | 3,8798 | 0,507 | -0,32  |
| 19 | Q96B23 CR025_HUMAN  | E.TAVEGDPSGVSGATVGR.K       |            | 2 | 3,8729 | 0,545 | -0,626 |
| 19 | Q9UHR5 S30BP_HUMAN  | E.KGGLVSDAYGEDDFSR.L        |            | 3 | 3,8724 | 0,3   | -0,107 |
| 19 | Q09666 AHNK_HUMAN   | K.VGIDT#PDIDIHGPE.G         | T4564:     | 2 | 3,8674 | 0,477 | -0,47  |
| 19 | Q9C0C2 TB182_HUMAN  | E.AADSDAHLFQDSTEPR.A        |            | 2 | 3,8622 | 0,537 | -0,208 |
| 19 | P35659 DEK_HUMAN    | K.LKKPPTDEELKE.T            |            | 3 | 3,8596 | 0,283 | -0,256 |
| 19 | Q8IU81 I2BP1_HUMAN  | E.GRS#PGPPALKHPATKD.L       | S66:       | 3 | 3,8578 | 0,381 | -0,214 |
| 19 | Q9NQ55 SSF1_HUMAN   | R.VGGS#DEEASGIPSR.T         | S359:      | 2 | 3,8454 | 0,453 | 0,085  |
| 19 | Q8TE77 SSH3_HUMAN   | E.QGQGQGQGEPCISSTPR.F       |            | 2 | 3,8452 | 0,44  | -0,478 |
| 19 | O94888 UBXD7_HUMAN  | E.HGQLDGLSSSPKK.C           |            | 3 | 3,8421 | 0,379 | -0,315 |
| 19 | P10809 CH60_HUMAN   | R.KNQLKDM*AIATGGAVFGEE.G    |            | 2 | 3,8408 | 0,649 | -0,428 |
| 19 | P60660 MYL6_HUMAN   | E.IRHVLVTLGEK.M             |            | 3 | 3,8389 | 0,319 | 0,072  |
| 19 | P24534 EF1B_HUMAN   | K.ALKGYGPADVEDTTGSGATD.S    |            | 2 | 3,8199 | 0,398 | -0,887 |
| 19 | P17812 PYRG1_HUMAN  | R.HRFEVNPVWK.K              |            | 3 | 3,8178 | 0,219 | 0,209  |
| 19 | Q9Y2W1 TR150_HUMAN  | K.SPPSTGSTYGSSQKEE.S        |            | 2 | 3,8109 | 0,535 | -0,966 |
| 19 | Q9Y520 Q9Y520_HUMAN | E.SENSCNKEEVPVFR.Q          |            | 2 | 3,8051 | 0,418 | -0,067 |
| 19 | Q6VY07 PACS1_HUMAN  | K.STWIKNQDDS#LTE.T          | S451:      | 2 | 3,8021 | 0,428 | -0,377 |
| 19 | Q9UQR0 SCML2_HUMAN  | K.RSPQQTVPYVVPLS#PK.L       | S511:      | 2 | 3,7986 | 0,359 | -0,455 |
| 19 | P63208 SKP1_HUMAN   | K.TFNIKNDFTEEEE.A           |            | 2 | 3,7906 | 0,375 | -0,151 |
| 19 | Q9UQR0 SCML2_HUMAN  | R.SPQQTVPYVVPLS#PK.L        | S511:      | 3 | 3,7878 | 0,223 | -0,213 |
| 19 | Q6NZI2 PTRF_HUMAN   | R.RGS#S#PDVHALLE.I          | S365:S366: | 2 | 3,7825 | 0,467 | -0,254 |
| 19 | O96019 ACL6A_HUMAN  | K.QGGPTYIYIDTNALR.V         |            | 2 | 3,7791 | 0,393 | -0,233 |
| 19 | P19105 MLRM_HUMAN   | R.ATSNVFAM*FDQSQIQE.F       |            | 2 | 3,7789 | 0,447 | -0,466 |
| 19 | Q15154 PCM1_HUMAN   | R.KPFNFLPM*QINTNK.S         |            | 3 | 3,7682 | 0,255 | -0,107 |
| 19 | Q8NCM9 Q8NCM9_HUMAN | R.SSDITSDLGNVLTSTPNAK.T     |            | 2 | 3,7653 | 0,485 | 0,254  |
| 19 | P48643 TCPE_HUMAN   | E.HLDKISDSVLVDIKD.T         |            | 3 | 3,7629 | 0,295 | -0,108 |
| 19 | Q6UN15 FIP1_HUMAN   | R.DHS#PTPSVFNNSDEE.R        | S492:      | 2 | 3,7606 | 0,467 | -0,595 |
| 19 | Q92530 PSMF1_HUMAN  | E.KANVSS#PHREFPPATARE.V     | S153:      | 3 | 3,7596 | 0,235 | -0,529 |
| 19 | O96013 PAK4_HUMAN   | R.DKRPLS#GPDVGTQPAGLASGAK.L | S181:      | 3 | 3,7568 | 0,209 | -0,159 |
| 19 | Q15154 PCM1_HUMAN   | R.STSAPSASVGLAPVVNGE.S      |            | 2 | 3,7504 | 0,41  | -0,446 |

|    |                     |                                   |        |   |        |       |        |
|----|---------------------|-----------------------------------|--------|---|--------|-------|--------|
| 19 | P82979 HCC1_HUMAN   | R.FGLNVSSISR.K                    |        | 2 | 3,7468 | 0,296 | 0      |
| 19 | Q9UHD1 CHRD1_HUMAN  | R.RKT#SDFNTFLAQE.G                | T199:  | 2 | 3,7424 | 0,223 | -0,447 |
| 19 | Q9Y520 Q9Y520_HUMAN | E.NSCNKKEEVPVFR.Q                 |        | 2 | 3,7356 | 0,423 | -0,227 |
| 19 | Q8ND82 Z280C_HUMAN  | E.ISSSKPAISNILNR.G                |        | 2 | 3,734  | 0,321 | -0,244 |
| 19 | Q09666 AHNK_HUMAN   | R.LS#SSSSNDSGNKVGIQLPE.V          | S5863: | 2 | 3,7338 | 0,401 | -0,305 |
| 19 | P49591 SYSC_HUMAN   | R.FKDPGLVDQLVK.A                  |        | 3 | 3,7321 | 0,229 | -0,202 |
| 19 | Q71U36 TBA1A_HUMAN  | E.ITNACFEPANQM*VK.C               |        | 2 | 3,7308 | 0,525 | -0,447 |
| 19 | Q15185 TEBP_HUMAN   | E.IDLFHCIDPNDSK.H                 |        | 3 | 3,7241 | 0,126 | -0,116 |
| 19 | O00571 DDX3X_HUMAN  | E.NALGLDQQFAGLDLNS#SDNQSGGSTASK.G | S23:   | 3 | 3,7155 | 0,506 | -0,255 |
| 19 | Q9H299 SH3L3_HUMAN  | R.IQYQLVDISQDNALRDE.M             |        | 2 | 3,7151 | 0,388 | -0,725 |
| 19 | Q9Y266 NUDC_HUMAN   | K.LKPNLNGADLPNYR.W                |        | 3 | 3,7128 | 0,333 | -0,223 |
| 19 | Q9Y2H0 DLGP4_HUMAN  | E.RSLPDCTPHPNSISIDAGPR.Q          |        | 3 | 3,7107 | 0,309 | -0,501 |
| 19 | P35579 MYH9_HUMAN   | R.RGDLPFVVPR.R                    |        | 2 | 3,7033 | 0,286 | 0      |
| 19 | Q9NR30 DDX21_HUMAN  | R.SDAGLES#DTAMKKGE.T              | S13:   | 2 | 3,6991 | 0,443 | 0,151  |
| 19 | P09661 RU2A_HUMAN   | R.LKGLLQSGQIPGR.E                 |        | 3 | 3,6979 | 0,286 | -0,736 |
| 19 | Q96FZ2 DC12_HUMAN   | R.MLQWLATKS#PKKE.D                | S295:  | 3 | 3,6973 | 0,289 | -0,112 |
| 19 | Q71U36 TBA1A_HUMAN  | E.ITNACFEPANQMVK.C                |        | 2 | 3,6926 | 0,442 | -0,526 |
| 19 | Q71U36 TBA1A_HUMAN  | E.ITNACFEPANQM*VK.C               |        | 3 | 3,6884 | 0,097 | 0,112  |
| 19 | P04264 K2C1_HUMAN   | R.SLDLDSIAEVK.A                   |        | 2 | 3,6865 | 0,408 | -0,562 |
| 19 | Q12846 STX4_HUMAN   | R.KTQHGVLQQFVE.L                  |        | 2 | 3,6827 | 0,373 | -0,488 |
| 19 | Q9NYF8 BCLF1_HUMAN  | K.LKDLFDYS#PPLHK.N                | S512:  | 3 | 3,6825 | 0,461 | 0,111  |
| 19 | Q96FZ2 DC12_HUMAN   | R.M*LQWLATKS#PKKE.D               | S295:  | 3 | 3,6795 | 0,13  | 0      |
| 19 | Q9UHB6 LIMA1_HUMAN  | R.KIS#ENSYSLDDLE.I                | S225:  | 2 | 3,6773 | 0,389 | -0,536 |
| 19 | Q6ULP2 AFTIN_HUMAN  | K.CAHLCDMSVK.T                    |        | 3 | 3,6768 | 0,218 | 0,449  |
| 19 | Q92598 HS105_HUMAN  | R.FVVQNVSAQKDGE.K                 |        | 2 | 3,6765 | 0,461 | -0,515 |
| 19 | P31946 1433B_HUMAN  | E.SYKDSTLIM*QLLR.D                |        | 3 | 3,6744 | 0,176 | -0,231 |
| 19 | P27987 IP3KB_HUMAN  | E.AHIQAQSSAIQAPRS#PR.L            | S166:  | 3 | 3,6742 | 0,424 | -0,482 |
| 19 | Q13459 MYO9B_HUMAN  | R.VQEKPDSPGGSTQIQR.Y              |        | 3 | 3,6709 | 0,358 | -0,212 |
| 19 | Q8N7R7 CCYL1_HUMAN  | R.SFS#ADNFIGIQR.S                 | S344:  | 2 | 3,6638 | 0,336 | -0,425 |
| 19 | Q15154 PCM1_HUMAN   | E.LHTLRDQHLNNSSSS#PQR.S           | S431:  | 3 | 3,6623 | 0,361 | -0,59  |
| 19 | P51858 HDGF_HUMAN   | E.GKLVIDEPAKEKNE.K                |        | 2 | 3,657  | 0,414 | -0,311 |
| 19 | Q8IYH0 Q8IYH0_HUMAN | R.TIKTVDLGIS#DLEDDC.-             | S201:  | 2 | 3,6539 | 0,417 | -0,391 |
| 19 | Q9GZR1 SENPG_HUMAN  | K.IRLNYSDES#PE.A                  | S919:  | 2 | 3,652  | 0,455 | -0,348 |

|    |                     |                                  |              |   |        |       |        |
|----|---------------------|----------------------------------|--------------|---|--------|-------|--------|
| 19 | O15355 PPM1G_HUMAN  | R.KLEEVLS#TEGAEE.N               | S527:        | 2 | 3,637  | 0,431 | -0,403 |
| 19 | O75909 CCNK_HUMAN   | E.DICHQILDLYSQGK.Q               |              | 3 | 3,6356 | 0,254 | -0,433 |
| 19 | Q96F22 DC12_HUMAN   | R.MLQWLATKS#PK.K                 | S295:        | 2 | 3,6305 | 0,271 | -0,353 |
| 19 | Q9NYZ3 GTSE1_HUMAN  | R.LVDVS#PDRGS#PPSRVPQALNFSPEE.S  | S575:S580:   | 3 | 3,6298 | 0,342 | 0      |
| 19 | Q13428 TCOF_HUMAN   | R.KSAEPSANTTLVS#E.T              | S171:        | 2 | 3,6209 | 0,413 | 0,484  |
| 19 | Q9Y3F4 STRAP_HUMAN  | E.DKQILSADDKTVR.L                |              | 2 | 3,6191 | 0,355 | -0,492 |
| 19 | Q8WXV6 Q8WXV6_HUMAN | K.RTSS#EDONLYLAVLR.A             | S21:         | 2 | 3,6142 | 0,327 | -0,426 |
| 19 | P29590 PML_HUMAN    | K.AVS#PPHLDGPPS#PRSPVIGSE.V      | S518:S527:   | 3 | 3,6136 | 0,273 | -0,243 |
| 19 | Q7Z422 CA144_HUMAN  | R.KS#KSPPKVPVIVIQDDSLPAGPPPQIR.I | S37:         | 3 | 3,6093 | 0,332 | -0,064 |
| 19 | Q09666 AHNK_HUMAN   | K.ISM*PDLDLHLKS#PK.A             | S2397:       | 3 | 3,6059 | 0,284 | 0      |
| 19 | O14908 GIPC1_HUMAN  | R.SRGPATVEDLPSAFEE.K             |              | 2 | 3,6042 | 0,432 | -0,429 |
| 19 | Q9H0B6 KLC2_HUMAN   | K.SVEEPTQPGGTGLSDSR.T            |              | 2 | 3,6025 | 0,545 | -0,355 |
| 19 | Q8N1G1 REXO1_HUMAN  | R.ALSHADLFGDES#EDE.A             | S526:        | 2 | 3,6021 | 0,485 | -0,285 |
| 19 | Q96JM3 ZN828_HUMAN  | K.AASDIWKPVLSIDTEPR.K            |              | 3 | 3,602  | 0,404 | -1,06  |
| 19 | Q8IYH0 Q8IYH0_HUMAN | K.TVDLGIS#DLEDDC.-               | S201:        | 2 | 3,6001 | 0,405 | -0,478 |
| 19 | Q9UKS6 PACN3_HUMAN  | R.SPDEVTLSIVPTR.D                |              | 2 | 3,5892 | 0,502 | -0,483 |
| 19 | O14617 AP3D1_HUMAN  | K.HRPSEADEEELAR.R                |              | 2 | 3,5793 | 0,304 | -0,317 |
| 19 | Q9ULU4 PKCB1_HUMAN  | K.TDKTSTTGSILNLNLDLDR.S          |              | 3 | 3,5785 | 0,254 | -0,396 |
| 19 | P27694 RFA1_HUMAN   | K.SKDSLVDIIGICK.S                |              | 3 | 3,578  | 0,444 | -0,189 |
| 19 | P54136 SYRC_HUMAN   | K.VIVDFSSPNIAKE.M                |              | 2 | 3,5755 | 0,365 | -0,172 |
| 19 | Q8WYP5 AHTF1_HUMAN  | E.IRLIS#PLAS#PADGVK.S            | S2231:S2235: | 2 | 3,5751 | 0,331 | 0,216  |
| 19 | Q9Y2W2 WBP11_HUMAN  | K.SGPSVPVSVQTKDDVYE.A            |              | 2 | 3,5749 | 0,334 | -0,743 |
| 19 | P62750 RL23A_HUMAN  | E.DNNTLVFIVDVK.A                 |              | 2 | 3,5649 | 0,401 | -0,62  |
| 19 | Q9Y2X7 GIT1_HUMAN   | R.ARS#M*DSSDLSDGAVTLQE.Y         | S410:        | 2 | 3,5646 | 0,449 | -0,185 |
| 19 | Q13428 TCOF_HUMAN   | D.SAVGTLPATPS#PQSTSVQAK.G        | S1111:       | 2 | 3,5631 | 0,309 | -0,639 |
| 19 | P04406 G3P_HUMAN    | R.VVDLMAHMASKE.-                 |              | 2 | 3,562  | 0,443 | -0,367 |
| 19 | Q8WYP5 AHTF1_HUMAN  | E.IRLIS#PLAS#PADGVK.S            | S2231:S2235: | 3 | 3,5606 | 0,13  | 0,108  |
| 19 | Q03252 LMNB2_HUMAN  | K.LSSDQNDKAASAAREE.L             |              | 3 | 3,5606 | 0,289 | 0      |
| 19 | O75909 CCNK_HUMAN   | E.DICHQILDLYSQGK.Q               |              | 2 | 3,5541 | 0,482 | -0,578 |
| 19 | P11021 GRP78_HUMAN  | K.TKPYIQVDIGGGQTK.T              |              | 3 | 3,5464 | 0,289 | 0,57   |
| 19 | Q86WB0 NIPA_HUMAN   | R.SQDATFSPGSEQAEKS#PGPIVSR.T     | S344:        | 3 | 3,5341 | 0,375 | -0,745 |
| 19 | Q2KHR3 QSER1_HUMAN  | K.SVSTPLTTLDATSDKK.K             |              | 2 | 3,5332 | 0,469 | -0,367 |
| 19 | P10809 CH60_HUMAN   | K.NQLKDM*AIATGGAVFGEE.G          |              | 2 | 3,5276 | 0,478 | -0,588 |

|    |                    |                                |                 |   |        |       |        |
|----|--------------------|--------------------------------|-----------------|---|--------|-------|--------|
| 19 | Q14444 CAPR1_HUMAN | R.LNQDQLDAVSKYQE.V             |                 | 2 | 3,5272 | 0,404 | -0,37  |
| 19 | Q9NYF8 BCLF1_HUMAN | K.SEKLDLFDYS#PPLHK.N           | S512:           | 2 | 3,527  | 0,422 | -0,428 |
| 19 | Q9C0C2 TB182_HUMAN | R.RFS#EGVLQS#PSQDQE.K          | S429:S435:      | 2 | 3,5258 | 0,374 | -0,327 |
| 19 | Q15596 NCOA2_HUMAN | E.VTIKQEPVS#PKKKE.N            | S736:           | 3 | 3,5236 | 0,15  | -0,433 |
| 19 | Q6ULP2 AFTIN_HUMAN | K.TSDDEVGS#PKEE.S              | S382:           | 2 | 3,5226 | 0,442 | -0,267 |
| 19 | Q9NYF8 BCLF1_HUMAN | K.DLFDYS#PPLHK.N               | S512:           | 2 | 3,5137 | 0,372 | 0      |
| 19 | P31946 1433B_HUMAN | E.SYKDSTLIM*QLLR.D             |                 | 2 | 3,5112 | 0,427 | -0,154 |
| 19 | Q9C0C2 TB182_HUMAN | R.GSGGLFS#PSTAHVPDGalGQR.D     | S1029:          | 3 | 3,5097 | 0,242 | -0,437 |
| 19 | P11413 G6PD_HUMAN  | E.DQIYRIDHYLGKE.M              |                 | 3 | 3,5059 | 0,27  | -0,222 |
| 19 | Q9Y6G9 DC1L1_HUMAN | R.SVSSNVASVS#PIPAGSK.K         | S421:           | 2 | 3,5026 | 0,377 | -0,22  |
| 19 | Q9P275 UBP36_HUMAN | R.RGS#S#SSSPEHSASSDSTKAPQTPR.S | S610:S611:      | 3 | 3,5018 | 1     | -0,492 |
| 19 | Q9H6F5 CCD86_HUMAN | R.LGGLRPES#PE.S                | S18:            | 2 | 3,4835 | 0,338 | -0,645 |
| 19 | P51858 HDGF_HUMAN  | R.RAGDLLEDS#PKRPK.E            | S165:           | 3 | 3,4811 | 0,315 | -0,44  |
| 19 | Q5QJE6 TDIF2_HUMAN | E.IVS#EAES#HVS#GISR.I          | S141:S145:S148: | 2 | 3,4802 | 0,243 | -0,071 |
| 19 | Q09666 AHNK_HUMAN  | R.RVTAYTVDVTGR.E               |                 | 3 | 3,4801 | 0,368 | 0,068  |
| 19 | Q15424 SAFB1_HUMAN | E.LAEAPTEAPS#PEAR.D            | S344:           | 2 | 3,4793 | 0,355 | -0,482 |
| 19 | P37802 TAGL2_HUMAN | D.DGLFSGDPNWFPK.K              |                 | 2 | 3,4772 | 0,382 | -0,412 |
| 19 | Q13428 TCOF_HUMAN  | R.KSAEPSANTTLVS#ETEEE.G        | S171:           | 2 | 3,4731 | 0,515 | -0,731 |
| 19 | Q13442 HAP28_HUMAN | R.KGVEGLIDIENPNR.V             |                 | 3 | 3,473  | 0,174 | -0,235 |
| 19 | P30040 ERP29_HUMAN | K.SLNILTAFAQ.K                 |                 | 2 | 3,4711 | 0,276 | -0,645 |
| 19 | Q92597 NDRG1_HUMAN | R.SRT#AS#GSSVTSLDGTR.S         | T328:S330:      | 2 | 3,4692 | 1     | -0,42  |
| 19 | Q9Y2W2 WBP11_HUMAN | R.RRDEDMLYS#PE.L               | S237:           | 2 | 3,4676 | 0,255 | -0,737 |
| 19 | Q9NQ55 SSF1_HUMAN  | K.ARVGGS#DEEASGIPSR.T          | S359:           | 3 | 3,4642 | 0,205 | 0,11   |
| 19 | Q9HC38 GLOD4_HUMAN | K.TM*VGFGPEDDHFAE.L            |                 | 2 | 3,4599 | 0,32  | -0,439 |
| 19 | Q9BSE4 HERP2_HUMAN | E.YHM*VHLVCTSRTPPSS#PK.S       | T90:S94:        | 3 | 3,4563 | 0,151 | -0,563 |
| 19 | Q9BY89 K1671_HUMAN | E.KAKLDPEPEKAAES#PS#PR.L       | S402:S404:      | 3 | 3,4548 | 0,211 | -0,607 |
| 19 | Q96PU5 NED4L_HUMAN | R.RLQITPDSNGEQFSSLIQR.E        |                 | 3 | 3,4524 | 0,187 | -0,251 |
| 19 | P06748 NPM_HUMAN   | K.M*QAS#IEKGGSLPKVE.A          | S254:           | 3 | 3,4482 | 0,26  | 0      |
| 19 | Q96MU7 YTDC1_HUMAN | R.AKS#PT#PDGSEIRIGLE.V         | S146:T148:      | 2 | 3,448  | 0,296 | -0,497 |
| 19 | Q13263 TIF1B_HUMAN | E.TKPVLMALAEPGAEGPR.L          |                 | 3 | 3,4457 | 0,213 | 0      |
| 19 | P24534 EF1B_HUMAN  | K.YGPADVEDTTGSGATDSK.D         |                 | 2 | 3,443  | 0,5   | 0,138  |
| 19 | Q9UHD1 CHRD1_HUMAN | E.HIIQAPKPVEAIK.R              |                 | 3 | 3,4422 | 0,215 | -0,063 |
| 19 | Q13136 LIPA1_HUMAN | R.VGSGSLDNLGR.F                |                 | 2 | 3,4316 | 0,32  | -0,113 |

|    |                    |                                |                    |   |        |       |        |
|----|--------------------|--------------------------------|--------------------|---|--------|-------|--------|
| 19 | Q92530 PSMF1_HUMAN | E.KANVS#SPHREFPPATARE.V        | S152:              | 3 | 3,4283 | 0,285 | -0,441 |
| 19 | Q00839 HNRPU_HUMAN | E.YTFIQNVPLEDR.V               |                    | 2 | 3,427  | 0,397 | -0,49  |
| 19 | P52701 MSH6_HUMAN  | K.IHNVGS#PLKSQNHPPDSR.A        | S830:              | 3 | 3,4269 | 0,263 | -0,465 |
| 19 | Q58FG0 HS905_HUMAN | K.HSQFIGYPITLFVEK.K            |                    | 3 | 3,4261 | 0,24  | -0,308 |
| 19 | P09874 PARP1_HUMAN | K.AQNDLIWNIKDE.L               |                    | 2 | 3,4258 | 0,309 | -0,502 |
| 19 | P49792 RBP2_HUMAN  | E.KDSLITPHVSR.S                |                    | 3 | 3,4172 | 0,262 | 0,219  |
| 19 | Q8NI27 THOC2_HUMAN | K.TPVSGSLKS#PVPR.S             | S1278:             | 3 | 3,4156 | 0,198 | -0,13  |
| 19 | Q96T58 MINT_HUMAN  | R.LLSVKGS#PKVDE.K              | S1287:             | 2 | 3,4126 | 0,265 | -0,632 |
| 19 | P63241 IF5A1_HUMAN | K.VHLVGIDIFTGK.K               |                    | 2 | 3,4079 | 0,325 | -0,282 |
| 19 | P30038 AL4A1_HUMAN | K.VANEPVLAFTQGSPE.R            |                    | 2 | 3,4078 | 0,443 | 0,157  |
| 19 | Q53EP0 FND3B_HUMAN | R.S#SPKSNDSDLQEYE.L            | S253:              | 2 | 3,4065 | 0,39  | -0,581 |
| 19 | Q9UKV3 ACINU_HUMAN | K.HSTPHAAFQPNSEQIGEE.M         |                    | 2 | 3,4005 | 0,453 | -0,264 |
| 19 | P60903 S10AA_HUMAN | E.NQKDPLAVDKIMKD.L             |                    | 2 | 3,3977 | 0,243 | -0,529 |
| 19 | Q07666 KHDR1_HUMAN | R.SSGRSGS#MDPSGAHPSVR.Q        | S20:               | 3 | 3,3976 | 0,331 | -0,296 |
| 19 | P28290 SSFA2_HUMAN | E.VQSTEGEAPHVPATYQLGLTK.S      |                    | 3 | 3,3869 | 0,13  | -0,247 |
| 19 | Q9C0C2 TB182_HUMAN | E.AADSDAHLFQDSTEPR.A           |                    | 3 | 3,3857 | 0,487 | -0,208 |
| 19 | P23193 TCEA1_HUMAN | K.KKEPAITSQNS#PEAREE.S         | S100:              | 2 | 3,3768 | 0,485 | -0,245 |
| 19 | P13639 EF2_HUMAN   | K.KSDPVVSYRETVSEE.S            |                    | 2 | 3,3746 | 0,172 | -0,283 |
| 19 | Q92619 HMHA1_HUMAN | R.KSS#FNVSDVARPE.A             | S578:              | 2 | 3,3679 | 0,3   | -1,288 |
| 19 | Q09666 AHNK_HUMAN  | R.RVTAYTVDVTGR.E               |                    | 2 | 3,3651 | 0,344 | -0,729 |
| 19 | Q9UQR0 SCML2_HUMAN | R.SPQQTVPYVVPLS#PK.L           | S511:              | 2 | 3,365  | 0,352 | -0,497 |
| 19 | Q9H7N4 SFR19_HUMAN | K.DAASAGLGSIGVK.F              |                    | 2 | 3,3635 | 0,425 | 0      |
| 19 | O75179 ANR17_HUMAN | K.SGPS#PLSS#PNGKLTVAS#PKRGQK.R | S1696:S1700:S1709: | 3 | 3,3603 | 0,126 | -0,217 |
| 19 | P10809 CH60_HUMAN  | R.KNQLKDMAIATGGAVFGEE.G        |                    | 3 | 3,3579 | 0,399 | -0,462 |
| 19 | Q7Z3T8 ZFY16_HUMAN | E.DRKIDPDQTVIRAE.S             |                    | 3 | 3,3578 | 0,228 | -0,221 |
| 19 | Q58FF7 H90B3_HUMAN | K.VILHLKEDQTEYLEE.R            |                    | 2 | 3,3559 | 0,329 | -0,131 |
| 19 | O95239 KIF4A_HUMAN | K.ILAQDVAQLKE.K                |                    | 2 | 3,3544 | 0,345 | -0,298 |
| 19 | Q15424 SAFB1_HUMAN | R.KFDFDACNEVPPAPK.E            |                    | 2 | 3,3524 | 0,368 | -0,492 |
| 19 | Q04637 IF4G1_HUMAN | R.FSALQQAVPTSTDNR.R            |                    | 2 | 3,3522 | 0,244 | -0,415 |
| 19 | Q9UBF8 PI4KB_HUMAN | E.SKEPVFIAAGDIR.R              |                    | 2 | 3,3519 | 0,429 | -0,435 |
| 19 | Q96FZ2 DC12_HUMAN  | R.MLQWLATKS#PK.K               | S295:              | 3 | 3,3517 | 0,293 | 0      |
| 19 | P14618 KPYM_HUMAN  | R.NTGIICTIGPASR.S              |                    | 2 | 3,3475 | 0,404 | 0,538  |
| 19 | Q8IZL8 PELP1_HUMAN | K.LRSPRGS#PDGS#LQTGKPSAPK.K    | S481:S485:         | 3 | 3,3448 | 0,177 | -0,717 |

|    |                    |                                 |                    |   |        |       |        |
|----|--------------------|---------------------------------|--------------------|---|--------|-------|--------|
| 19 | Q9Y4B6 VPRBP_HUMAN | R.KLSSEPLLPLDEEAVD.M            |                    | 2 | 3,3398 | 0,438 | -0,417 |
| 19 | P04264 K2C1_HUMAN  | K.WELLQQVDTSTR.T                |                    | 2 | 3,3372 | 0,286 | -0,331 |
| 19 | O60716 CTND1_HUMAN | R.VRV#PQDANPLM*ANGTLTR.R        | S47:               | 3 | 3,3367 | 0,21  | -0,257 |
| 19 | Q86U90 YRDC_HUMAN  | R.LLRLPGSGAVQAASPE.R            |                    | 2 | 3,335  | 0,398 | -0,467 |
| 19 | P29590 PML_HUMAN   | K.AVS#PPHLDGPPS#PRS#PVIQSE.V    | S518:S527:S530:    | 3 | 3,3312 | 0,169 | -0,392 |
| 19 | P10809 CH60_HUMAN  | K.DMAIATGGAVFGEE.G              |                    | 2 | 3,3305 | 0,458 | -0,268 |
| 19 | P28749 RBL1_HUMAN  | R.DM*QPLS#PISVHE.R              | S640:              | 2 | 3,3283 | 0,415 | -0,253 |
| 19 | Q14157 UBP2L_HUMAN | K.STSAPQM*S#PGSSDNQSSSPQPAQQK.L | S467:              | 3 | 3,3271 | 0,268 | 0,278  |
| 19 | P06753 TPM3_HUMAN  | E.IKILTDKLE.A                   |                    | 3 | 3,3269 | 0,221 | 0,609  |
| 19 | P10809 CH60_HUMAN  | E.VIVTKDDAMLLK.G                |                    | 2 | 3,3245 | 0,392 | -0,453 |
| 19 | Q9Y2W1 TR150_HUMAN | R.SPALKS#PLQSVVVR.R             | S253:              | 2 | 3,3235 | 0,397 | -0,547 |
| 19 | Q9NRL2 BAZ1A_HUMAN | K.KKDAIDPLLFK.Y                 |                    | 3 | 3,3222 | 0,181 | 0,071  |
| 19 | O43379 WDR62_HUMAN | E.KLPSVM*AGVPAR.R               |                    | 3 | 3,3198 | 0,118 | 0,442  |
| 19 | O14497 ARI1A_HUMAN | R.SHHAPMS#PGSSGGGQPLAR.T        | S363:              | 3 | 3,3149 | 0,282 | -0,186 |
| 19 | Q66GS9 CP135_HUMAN | R.HGLAT#PPLSSTLRS#PSHS#PE.H     | T1121:S1130:S1134: | 3 | 3,3143 | 1     | -0,317 |
| 19 | P06493 CDC2_HUMAN  | K.IGEGT#Y#GVVYK.G               | T14:Y15:           | 2 | 3,3139 | 0,268 | -0,363 |
| 19 | P21796 VDAC1_HUMAN | R.VTQSNFAVGKYTDE.F              |                    | 2 | 3,3132 | 0,424 | -0,47  |
| 19 | Q32MZ4 LRRF1_HUMAN | R.NM*PGLSAATLASLGGTSSR.R        |                    | 2 | 3,3057 | 0,42  | -0,203 |
| 19 | Q92598 HS105_HUMAN | E.LNNTCEPVVTQPKPK.I             |                    | 3 | 3,3028 | 0,314 | -0,424 |
| 19 | Q08999 RBL2_HUMAN  | E.KIFYYSNS#PSKR.L               | S1080:             | 3 | 3,2999 | 0,243 | 0,107  |
| 19 | Q9UQ35 SRRM2_HUMAN | R.HAS#SS#PESPKPAPAPGSHRE.I      | S435:S437:         | 3 | 3,2996 | 0,244 | 0,251  |
| 19 | P62937 PIIA_HUMAN  | K.KITIADCGQLE.-                 |                    | 2 | 3,2984 | 0,436 | -0,293 |
| 19 | P22314 UBA1_HUMAN  | R.YDQVAVFGSDLQE.K               |                    | 2 | 3,2964 | 0,33  | -0,08  |
| 19 | Q9NYF8 BCLF1_HUMAN | K.LKDLFDYSPPLHK.N               |                    | 2 | 3,2961 | 0,335 | -0,078 |
| 19 | O60716 CTND1_HUMAN | R.VRV#PQDANPLMANGTLTR.R         | S47:               | 3 | 3,2952 | 0,202 | -0,345 |
| 19 | Q92615 LARP5_HUMAN | R.LSREQST#PPKS#PQ.-             | T732:S736:         | 2 | 3,2933 | 0,15  | 0,302  |
| 19 | Q99961 SH3G1_HUMAN | K.ALYDFEPENDGELGFHE.G           |                    | 2 | 3,2901 | 0,373 | -0,492 |
| 19 | P08559 ODPA_HUMAN  | R.YHGSM*S#DPGVS#YRTREE.I        | S295:S300:         | 3 | 3,2886 | 0,319 | -0,32  |
| 19 | Q8N3X1 FNBP4_HUMAN | R.RPILQLS#PPGPR.G               | S18:               | 3 | 3,2846 | 0,173 | 0      |
| 19 | P49321 NASP_HUMAN  | K.HLVM*GDIPAAVNAFQE.A           |                    | 2 | 3,2831 | 0,411 | -0,353 |
| 19 | P12277 KCRB_HUMAN  | E.VFKDLFDPIIEDR.H               |                    | 3 | 3,2787 | 0,308 | -0,114 |
| 19 | O95678 K2C75_HUMAN | E.VKAQYEDIANR.S                 |                    | 3 | 3,2781 | 0,203 | 0,14   |
| 19 | P26373 RL13_HUMAN  | E.LKLATQLTGPVM*PVR.N            |                    | 3 | 3,2778 | 0,241 | 0,223  |



|    |                     |                                    |            |   |        |       |        |
|----|---------------------|------------------------------------|------------|---|--------|-------|--------|
| 19 | Q9BSE4 HERP2_HUMAN  | E.YHMOVHLVCTSR.T                   |            | 3 | 3,2737 | 0,301 | 0,326  |
| 19 | Q9H009 NACA2_HUMAN  | R.ALKNNSNDIVNAIM*E.L               |            | 2 | 3,2721 | 0,361 | -0,587 |
| 19 | P06748 NPM_HUMAN    | K.GPSSVEDIKAK.M                    |            | 2 | 3,2678 | 0,353 | -0,431 |
| 19 | O60271 JIP4_HUMAN   | K.LHQLSGS#DQLE.S                   | S185:      | 2 | 3,267  | 0,327 | -0,187 |
| 19 | P11171 41_HUMAN     | R.SLDGAAAVDSADRSPRPTSAPAITQGQVAE.G |            | 3 | 3,2658 | 0,285 | -0,187 |
| 19 | P14136 GFAP_HUMAN   | K.LALDIEIATYR.K                    |            | 2 | 3,2657 | 0,409 | -0,286 |
| 19 | Q15154 PCM1_HUMAN   | E.YM*AFPKPFSSSS#IGAEPKPR.N         | S1187:     | 3 | 3,2648 | 0,176 | -0,472 |
| 19 | Q9UKV3 ACINU_HUMAN  | E.KSKS#PS#PPRLTE.D                 | S386:S388: | 3 | 3,2632 | 0,139 | 0,123  |
| 19 | O75190 DNJB6_HUMAN  | R.APGPWDPLASAAGLKE.G               |            | 2 | 3,2632 | 0,378 | -0,463 |
| 19 | P68104 EF1A1_HUMAN  | K.YYVTIIDAPGHR.D                   |            | 3 | 3,2617 | 0,304 | 0,065  |
| 19 | Q8TEW0 PAR3_HUMAN   | E.TKLNTVDDQKAGSPSR.D               |            | 3 | 3,2561 | 0,392 | -0,107 |
| 19 | B2RMZ9 B2RMZ9_HUMAN | R.RLNSS#PRAPVS#PLKFSPFE.G          | S417:S423: | 3 | 3,2536 | 0,207 | -0,559 |
| 19 | Q96AQ6 PBIP1_HUMAN  | R.ALQAPHS#PSKTDGKE.L               | S43:       | 3 | 3,2512 | 0,285 | -0,222 |
| 19 | Q9BW61 DDA1_HUMAN   | R.TDS#PDMHEDT.-                    | S95:       | 2 | 3,2462 | 0,398 | -0,099 |
| 19 | Q9UIG0 BAZ1B_HUMAN  | E.DKIISNVPADSLIR.T                 |            | 3 | 3,2459 | 0,133 | 0      |
| 19 | Q8NCD3 HJURP_HUMAN  | K.YCLKS#PGQM*TVPLCIGVSTDK.A        | S595:      | 3 | 3,2397 | 0,187 | -0,299 |
| 19 | Q7Z478 DHX29_HUMAN  | K.FQSPQIQATIS#PPLQPK.T             | S200:      | 2 | 3,2381 | 0,338 | -0,56  |
| 19 | Q8TD19 NEK9_HUMAN   | R.SST#VTEAPIAVVTSR.T               | T333:      | 2 | 3,232  | 0,306 | -0,229 |
| 19 | P55196 AFAD_HUMAN   | K.QGAIYHGLATLLNQPS#PM*M*QR.I       | S1090:     | 3 | 3,2312 | 0,099 | -0,375 |
| 19 | O60271 JIP4_HUMAN   | R.SAS#QSS#LDKLDQE.L                | S730:S733: | 2 | 3,2277 | 0,3   | -0,467 |
| 19 | O43583 DENR_HUMAN   | R.NSAKLDADYPLR.V                   |            | 3 | 3,2273 | 0,202 | 0,201  |
| 19 | Q86XZ4 SPAS2_HUMAN  | K.NFAPGETPAAIANSSGQPYQPLRE.V       |            | 3 | 3,226  | 0,311 | -0,582 |
| 19 | Q9Y266 NUDC_HUMAN   | K.LKPNLGNGADLPNYR.W                |            | 2 | 3,2228 | 0,333 | -0,372 |
| 19 | P14618 KPYM_HUMAN   | E.HMCRLDIDSPITAR.N                 |            | 3 | 3,221  | 0,199 | -0,103 |
| 19 | Q9H6Z4 RANB3_HUMAN  | E.EKPAIAPPVVFVQK.D                 |            | 3 | 3,2189 | 0,148 | -0,116 |
| 19 | P48643 TCPE_HUMAN   | K.IAILTCPFEPKPK.T                  |            | 2 | 3,2171 | 0,307 | -0,53  |
| 19 | P63241 IF5A1_HUMAN  | K.VHLVGIDIFTGK.K                   |            | 3 | 3,211  | 0,241 | -0,352 |
| 19 | POC7M2 RA1L3_HUMAN  | K.IFVGGIKEDTEE.H                   |            | 2 | 3,2022 | 0,299 | -0,365 |
| 19 | P68431 H31_HUMAN    | E.DTNLCAIHAK.R                     |            | 2 | 3,2009 | 0,321 | 0      |
| 19 | Q5VV41 ARHGG_HUMAN  | R.HQS#FGAAVLSRE.A                  | S107:      | 2 | 3,2003 | 0,399 | -0,618 |
| 19 | Q09666 AHNK_HUMAN   | K.FKAEAPLPS#PKLE.G                 | S5110:     | 2 | 3,2001 | 0,393 | -0,486 |
| 19 | Q14157 UBP2L_HUMAN  | R.RYPS#SISSS#PQKD.L                | S604:S609: | 2 | 3,1989 | 0,221 | 0,151  |
| 19 | Q69YH5 CDCA2_HUMAN  | E.GLSACQQSGFPAVLSSK.R              |            | 2 | 3,1978 | 0,466 | -0,351 |

|    |                     |                             |            |   |        |       |        |
|----|---------------------|-----------------------------|------------|---|--------|-------|--------|
| 19 | Q15154 PCM1_HUMAN   | R.KPFNFLPMQINTNK.S          |            | 3 | 3,1956 | 0,155 | -0,54  |
| 19 | Q9H410 DSN1_HUMAN   | R.IHLGSS#PKKGGNCDLSHQE.R    | S58:       | 3 | 3,1934 | 0,242 | -0,597 |
| 19 | O75909 CCNK_HUMAN   | K.DPQQPAQQQPAQQPK.K         |            | 2 | 3,1929 | 0,277 | 0,269  |
| 19 | P37802 TAGL2_HUMAN  | E.QILIQWITTQCR.K            |            | 2 | 3,1915 | 0,36  | -0,469 |
| 19 | Q14157 UBP2L_HUMAN  | R.RYPSS#ISSS#PQKD.L         | S605:S609: | 2 | 3,1909 | 0,321 | -0,606 |
| 19 | O95202 LETM1_HUMAN  | E.NKDGKVNIDDLVK.V           |            | 3 | 3,1896 | 0,183 | 0      |
| 19 | Q01804 OTUD4_HUMAN  | K.TAADVVSPGANSVDSR.V        |            | 2 | 3,1861 | 0,2   | -0,474 |
| 19 | Q9UKV3 ACINU_HUMAN  | K.SKS#PS#PPRLTE.D           | S386:S388: | 3 | 3,1848 | 0,252 | 0,202  |
| 19 | P78371 TCPB_HUMAN   | E.DKLIHFSGVALGE.A           |            | 2 | 3,1834 | 0,353 | -0,264 |
| 19 | Q9UKV3 ACINU_HUMAN  | E.KS#KSPS#PPRLTE.D          | S384:S388: | 3 | 3,1834 | 0,183 | 0,184  |
| 19 | Q8WUA4 TF3C2_HUMAN  | R.AHFNAMFQPSS#PTR.R         | S893:      | 2 | 3,1834 | 0,357 | -0,073 |
| 19 | P10809 CH60_HUMAN   | K.NQLKDMAIATGGAVFGEE.G      |            | 3 | 3,1755 | 0,319 | -0,099 |
| 19 | P31939 PUR9_HUMAN   | R.SGVAYIAAPSGSAADKVVIE.A    |            | 2 | 3,1748 | 0,35  | -0,576 |
| 19 | O95685 PPR3D_HUMAN  | R.SLS#CLSDLGGALEPR.A        | S25:       | 2 | 3,1747 | 0,333 | -0,261 |
| 19 | Q9Y3L3 3BP1_HUMAN   | R.VYGVSLATHLQE.L            |            | 2 | 3,1713 | 0,35  | -0,278 |
| 19 | P10809 CH60_HUMAN   | E.VIVTKDDAM*LLK.G           |            | 2 | 3,1695 | 0,423 | -0,717 |
| 19 | Q15742 NAB2_HUMAN   | R.SFS#PKS#PLELGE.K          | S159:S162: | 2 | 3,1685 | 0,294 | -0,505 |
| 19 | O95425 SVIL_HUMAN   | R.DSSFTEVPRS#PK.H           | S245:      | 2 | 3,1611 | 0,26  | -0,171 |
| 19 | P11310 ACADM_HUMAN  | R.QREPGLGFSFE.F             |            | 2 | 3,1591 | 0,316 | -0,385 |
| 19 | Q8WXV6 Q8WXV6_HUMAN | R.TSS#EDNLYLAVLR.A          | S21:       | 2 | 3,1578 | 0,352 | -0,547 |
| 19 | P05787 K2C8_HUMAN   | R.AFSSRS#YTSGPSGR.I         | S24:       | 3 | 3,1528 | 0,246 | 0,119  |
| 19 | Q9UIG0 BAZ1B_HUMAN  | E.DKIISNVPADSLIR.T          |            | 2 | 3,1479 | 0,192 | -0,396 |
| 19 | P63313 TYB10_HUMAN  | E.IAS#FDKAK.L               | S12:       | 2 | 3,146  | 0,318 | 0,445  |
| 19 | P50991 TCPD_HUMAN   | K.MIQDGKGDVTITND.G          |            | 2 | 3,1453 | 0,46  | -0,405 |
| 19 | Q9NRY4 GRLF1_HUMAN  | R.KVS#IVSKPVLVR.T           | S1150:     | 3 | 3,1443 | 0,255 | -0,187 |
| 19 | Q969J3 L12R1_HUMAN  | R.NVSNPDVVIKLQE.I           |            | 2 | 3,1442 | 0,272 | -0,415 |
| 19 | Q5UIP0 RIF1_HUMAN   | E.DHHTSQKVEEPSQCLASGTAISE.L |            | 3 | 3,1431 | 0,372 | -0,51  |
| 19 | Q9UBR2 CATZ_HUMAN   | R.VGDYGSLSGR.E              |            | 2 | 3,143  | 0,458 | -0,241 |
| 19 | Q9NYF8 BCLF1_HUMAN  | E.TQS#PEQVKSEK.L            | S496:      | 2 | 3,1425 | 0,267 | -0,546 |
| 19 | O95785 WIZ_HUMAN    | K.KTPLALAGSPTPK.N           |            | 3 | 3,1378 | 0,21  | 0,143  |
| 19 | Q8TDM6 DLG5_HUMAN   | R.LGS#SSNLQFKAE.R           | S1263:     | 2 | 3,1369 | 0,294 | -0,179 |
| 19 | O14777 NDC80_HUMAN  | K.RT#SGHGS#RNSQLGIFSSSE.K   | T61:S66:   | 3 | 3,1342 | 0,376 | -0,675 |
| 19 | P26358 DNMT1_HUMAN  | R.VARPLPAEPPER.A            |            | 3 | 3,1307 | 0,206 | 0,402  |

|    |                     |                             |            |   |        |       |        |
|----|---------------------|-----------------------------|------------|---|--------|-------|--------|
| 19 | Q58FF8 H90B2_HUMAN  | K.HSQFLGYPITLYLEK.E         |            | 3 | 3,1273 | 0,22  | -0,506 |
| 19 | Q9NZ71 RTEL1_HUMAN  | E.AKS#PGPFSTR.K             | S779:      | 3 | 3,1266 | 0,229 | 0,072  |
| 19 | Q04917 1433F_HUMAN  | E.DSYKDSTLIM*QLLR.D         |            | 3 | 3,119  | 0,203 | -0,108 |
| 19 | P04264 K2C1_HUMAN   | K.SLNNQFASFIDK.V            |            | 2 | 3,1154 | 0,286 | -0,441 |
| 19 | P22314 UBA1_HUMAN   | R.QNRYDGQVAVFGSDLQE.K       |            | 3 | 3,1153 | 0,237 | 0      |
| 19 | Q9NZM1 MYOF_HUMAN   | R.HTIIPAKS#PEK.C            | S1915:     | 3 | 3,1109 | 0,256 | 1,124  |
| 19 | P49736 MCM2_HUMAN   | R.GNDPLTSSPGR.S             |            | 2 | 3,1063 | 0,405 | -0,111 |
| 19 | Q53G15 Q53G15_HUMAN | K.ALKQYRAS#PSFEE.R          | S378:      | 2 | 3,1007 | 0,263 | -0,608 |
| 19 | Q96PN7 TREF1_HUMAN  | K.SSPS#HSTTSGETDPTTIFPCKE.C | S1072:     | 3 | 3,1007 | 0,132 | -0,224 |
| 19 | Q92597 NDRG1_HUMAN  | K.YFVQGM*GYM*PSASMTR.L      |            | 2 | 3,0989 | 0,358 | -0,591 |
| 19 | Q06830 PRDX1_HUMAN  | E.VCPAGWKPGSDTIKPDVQK.S     |            | 3 | 3,0978 | 0,332 | -0,176 |
| 19 | Q9NYF8 BCLF1_HUMAN  | K.LKDLFDY#SPPLHK.N          | Y511:      | 2 | 3,097  | 0,395 | -1,255 |
| 19 | Q7Z309 F122B_HUMAN  | D.LSQVFQPYTLR.T             |            | 2 | 3,0959 | 0,399 | -0,361 |
| 19 | P49790 NU153_HUMAN  | E.KQQEPVTSTSLVFGK.K         |            | 3 | 3,0942 | 0,231 | -0,222 |
| 19 | Q96GQ7 DDX27_HUMAN  | R.SADFNPDFVFTEKE.G          |            | 2 | 3,0922 | 0,301 | -0,519 |
| 19 | P35908 K22E_HUMAN   | R.NLDLDSIIAEVK.A            |            | 2 | 3,0884 | 0,34  | -0,367 |
| 19 | Q9P2N5 RBM27_HUMAN  | E.DCQJFSTPGHPK.M            |            | 3 | 3,0874 | 0,194 | -0,066 |
| 19 | Q53ET0 CRTC2_HUMAN  | E.FQS#PLHS#PLDSSR.S         | S86:S90:   | 2 | 3,086  | 0,463 | -0,449 |
| 19 | Q9Y2W2 WBP11_HUMAN  | R.KVGFALDLPPR.R             |            | 2 | 3,0833 | 0,363 | -0,302 |
| 19 | Q09666 AHNK_HUMAN   | R.EGAKDIDISS#PE.F           | S177:      | 2 | 3,079  | 0,152 | -0,091 |
| 19 | P02545 LMNA_HUMAN   | R.SGAQASSTPLS#PTR.I         | S22:       | 2 | 3,0747 | 0,439 | -0,424 |
| 19 | P10809 CH60_HUMAN   | R.KPLVIIAEDVDGE.A           |            | 2 | 3,0692 | 0,425 | -0,698 |
| 19 | P08670 VIME_HUMAN   | E.NTLQSFQRQVDNASLAR.L       |            | 3 | 3,0643 | 0,143 | -0,284 |
| 19 | Q58FF8 H90B2_HUMAN  | K.YIDQEELNKTPIWTR.N         |            | 3 | 3,0534 | 0,316 | -0,63  |
| 19 | P08559 ODPA_HUMAN   | R.YHGHS#MSDPGVS#YR.T        | S293:S300: | 3 | 3,0511 | 0,177 | 0      |
| 19 | Q8NEF9 SRFB1_HUMAN  | K.AVTIANS#PSKPSEKDSVVSLE.S  | S203:      | 3 | 3,0507 | 0,102 | -0,572 |
| 19 | Q13415 ORC1_HUMAN   | R.SQPKLQTL#PALKAPEK.T       | S287:      | 3 | 3,0482 | 0,303 | -1,261 |
| 19 | Q7KZI7 MARK2_HUMAN  | K.TTPTSTNSVLSTSTNR.S        |            | 2 | 3,047  | 0,398 | -0,623 |
| 19 | O43865 SAHH2_HUMAN  | K.KQIQFADDM*QE.F            |            | 2 | 3,0463 | 0,195 | -0,267 |
| 19 | P52272 HNRPM_HUMAN  | K.GCGVVKFESPEVAE.R          |            | 2 | 3,0449 | 0,259 | -0,485 |
| 19 | Q9NQ55 SSF1_HUMAN   | K.ARVGGS#DEEASGIPSR.T       | S359:      | 2 | 3,044  | 0,602 | 0,293  |
| 19 | Q9H0B6 KLC2_HUMAN   | K.KLQGGTPQEPPNPR.M          |            | 2 | 3,0435 | 0,253 | -0,482 |
| 19 | P24534 EF1B_HUMAN   | K.YGPADVEDTTGSGATDSKD.D     |            | 2 | 3,0428 | 0,459 | 0,259  |

|    |                     |                          |        |   |        |       |        |
|----|---------------------|--------------------------|--------|---|--------|-------|--------|
| 19 | Q9BSE4 HERP2_HUMAN  | E.YHM*VHLVCTSR.T         |        | 3 | 3,0422 | 0,204 | 0      |
| 19 | O15143 ARC1B_HUMAN  | E.RFQNLDKKAS#SE.G        | S310:  | 3 | 3,0402 | 0,097 | -0,061 |
| 19 | P10809 CH60_HUMAN   | R.VTDALNATR.A            |        | 2 | 3,036  | 0,37  | -0,19  |
| 19 | P08559 ODPA_HUMAN   | R.YHGHS#M*SDPGVSYR.T     | S293:  | 3 | 3,0346 | 0,255 | -0,108 |
| 19 | P51587 BRCA2_HUMAN  | E.NIHVLGKEQAS#PK.N       | S2186: | 3 | 3,034  | 0,252 | -0,122 |
| 19 | Q8WTT2 NOC3L_HUMAN  | K.FLQGDSFLNE.D           |        | 2 | 3,0281 | 0,221 | 0      |
| 19 | Q12888 TP53B_HUMAN  | K.TSGTEPADFALPSSR.G      |        | 2 | 3,0279 | 0,416 | -0,318 |
| 19 | A9CQZ4 A9CQZ4_HUMAN | R.QKFCGMFCPVEGSSE.N      |        | 2 | 3,0218 | 0,32  | -0,415 |
| 19 | P02545 LMNA_HUMAN   | R.IRIDSLSAQLSQLQK.Q      |        | 3 | 3,0191 | 0,218 | 0      |
| 19 | P06748 NPM_HUMAN    | K.M*QAS#IEKGGSLPKVE.A    | S254:  | 2 | 3,0151 | 0,245 | -0,292 |
| 19 | Q9NS87 KIF15_HUMAN  | K.AQKEPCLFANTE.K         |        | 2 | 3,0143 | 0,474 | -0,26  |
| 19 | P49736 MCM2_HUMAN   | R.TDALTSS#PGRDLPPFEDE.S  | S41:   | 2 | 3,0128 | 0,458 | -0,722 |
| 19 | P54819 KAD2_HUMAN   | E.FNPPKEPM*KDDITGEPLIR.R |        | 3 | 3,0106 | 0,144 | -0,496 |
| 19 | O43615 TIM44_HUMAN  | R.KGFLSGLLDNVKQE.L       |        | 3 | 3,0103 | 0,158 | -0,473 |
| 19 | P31948 STIP1_HUMAN  | E.CFQKGDYPOAMK.H         |        | 3 | 3,0092 | 0,277 | -0,062 |
| 19 | P61604 CH10_HUMAN   | K.VLQATVVAVGS#GSK.G      | S51:   | 2 | 3,0092 | 0,316 | -0,35  |
| 19 | Q8NCN4 RN169_HUMAN  | D.GRVLS#PLIIK.S          | S403:  | 2 | 3,0088 | 0,241 | -0,207 |
| 19 | Q8TDM6 DLG5_HUMAN   | K.SCEDELTSQKVDE.L        |        | 2 | 3,0056 | 0,357 | -0,4   |
| 19 | P29401 TKT_HUMAN    | K.LGHASDRIIALDGDTK.N     |        | 3 | 3,0051 | 0,423 | -0,326 |
| 19 | P56182 RRP1_HUMAN   | R.SEKPPAGSICR.A          |        | 3 | 3,0045 | 0,384 | 0,456  |
| 19 | Q9UKS6 PACN3_HUMAN  | R.VRALYDYAGQEADE.L       |        | 2 | 3,0034 | 0,389 | -0,61  |
| 19 | P49736 MCM2_HUMAN   | R.GNDPLTSS#PGR.S         | S27:   | 2 | 3,0016 | 0,369 | -0,103 |
| 19 | P08670 VIME_HUMAN   | R.SLYASSPGGVY#ATR.S      | Y61:   | 2 | 3,0001 | 0,308 | -0,97  |
| 19 | P49736 MCM2_HUMAN   | R.RRGNDPLTS#SPGR.S       | S26:   | 2 | 2,9982 | 0,378 | -0,654 |
| 19 | Q15942 ZYX_HUMAN    | R.SPGAPGPLTLKEVEE.L      |        | 2 | 2,9956 | 0,262 | -0,48  |
| 19 | Q9Y2W2 WBP11_HUMAN  | R.KVGFALDLPPR.R          |        | 3 | 2,9931 | 0,205 | 0,377  |
| 19 | P10809 CH60_HUMAN   | R.KNQLKDM*AIATGGAVFGEE.G |        | 3 | 2,9919 | 0,386 | -0,275 |
| 19 | P37802 TAGL2_HUMAN  | D.DGLFSGDPNWFPPK.S       |        | 2 | 2,9909 | 0,324 | -0,152 |
| 19 | P13639 EF2_HUMAN    | K.SDPVVSURETVSEE.S       |        | 2 | 2,986  | 0,48  | -0,688 |
| 19 | Q9UIF9 BAZ2A_HUMAN  | E.M*EGPEECLGR.R          |        | 2 | 2,9812 | 0,337 | 0      |
| 19 | Q9Y2X7 GIT1_HUMAN   | R.SM*DSSDLSGAVTLQE.Y     |        | 2 | 2,9788 | 0,215 | -0,584 |
| 19 | Q92598 HS105_HUMAN  | K.IKVNVVELPIE.A          |        | 2 | 2,9783 | 0,322 | -0,876 |
| 19 | Q99549 MPP8_HUMAN   | E.KLM*PVSAQTPK.G         |        | 2 | 2,9775 | 0,259 | -0,502 |

|    |                     |                                   |            |   |        |       |        |
|----|---------------------|-----------------------------------|------------|---|--------|-------|--------|
| 19 | Q9Y2W1 TR150_HUMAN  | K.SPLQSVVVR.R                     |            | 2 | 2,9745 | 0,248 | 0      |
| 19 | Q10567 AP1B1_HUMAN  | K.S#LPPRTASSES#AESPE.T            | S592:S602: | 2 | 2,9712 | 1     | 0,135  |
| 19 | P09661 RU2A_HUMAN   | R.LKGLLQSGQIPGR.E                 |            | 2 | 2,9712 | 0,334 | -0,535 |
| 19 | P30042 ES1_HUMAN    | K.NKVVTTPAFMCE.T                  |            | 2 | 2,97   | 0,424 | -0,262 |
| 19 | Q96AT1 K1143_HUMAN  | K.NS#SLLSFDNEDENE.-               | S142:      | 2 | 2,9666 | 0,283 | -0,288 |
| 19 | Q02241 KIF23_HUMAN  | R.RSS#TVAPAQPDGAE.S               | S912:      | 2 | 2,9623 | 0,348 | -0,666 |
| 19 | P04406 G3P_HUMAN    | E.GLM*TTVHAITATQK.T               |            | 2 | 2,9603 | 0,334 | -0,492 |
| 19 | P62736 ACTA_HUMAN   | K.YPIEHGIITNWDDM*E.K              |            | 2 | 2,9591 | 0,309 | -0,396 |
| 19 | Q9H6Z4 RANB3_HUMAN  | E.EKPAIAPPVVFVQK.D                |            | 2 | 2,9587 | 0,284 | -0,388 |
| 19 | P19105 MLRM_HUMAN   | R.ATS#NVFAM*FDQSQIQE.F            | S19:       | 2 | 2,9582 | 0,368 | -0,255 |
| 19 | Q8IWA0 WDR75_HUMAN  | K.VQDTSNTGLGEDIIHQLSK.S           |            | 2 | 2,9534 | 0,461 | -0,475 |
| 19 | P50991 TCPD_HUMAN   | K.M*IQDGKGDVTITND.G               |            | 2 | 2,9529 | 0,305 | -0,561 |
| 19 | Q2M2I8 AAK1_HUMAN   | K.VGSLT#PPS#SPKTQR.A              | T620:S623: | 3 | 2,9503 | 0,182 | -0,34  |
| 19 | Q9H0B6 KLC2_HUMAN   | K.RAS#SLNFLNK.S                   | S581:      | 2 | 2,9485 | 0,342 | -0,496 |
| 19 | Q8N6T3 ARFG1_HUMAN  | R.KSPSSDSWTCADTSTER.R             |            | 2 | 2,9481 | 0,47  | -0,382 |
| 19 | Q8TDN6 BXDC2_HUMAN  | K.RNEIDAEPKAKR.H                  |            | 3 | 2,9443 | 0,222 | 0,262  |
| 19 | Q8NI27 THOC2_HUMAN  | K.TPVSGSLKS#PVPR.S                | S1278:     | 2 | 2,9393 | 0,299 | -0,434 |
| 19 | Q4G0J3 LARP7_HUMAN  | E.NMDTSNTSISK.M                   |            | 2 | 2,9356 | 0,28  | -0,204 |
| 19 | P05198 IF2A_HUMAN   | E.KRGVFNVMQMEPK.V                 |            | 3 | 2,9341 | 0,118 | -0,128 |
| 19 | P09936 UCHL1_HUMAN  | E.DTLKDAAKVCRE.F                  |            | 3 | 2,9335 | 0,281 | -0,783 |
| 19 | Q8NCN4 RN169_HUMAN  | K.NNSYSLAFLAGK.L                  |            | 2 | 2,9331 | 0,266 | -0,475 |
| 19 | P10809 CH60_HUMAN   | K.NQLKDM*AIATGGAVFGEE.G           |            | 3 | 2,9293 | 0,325 | -0,098 |
| 19 | Q8IWS0 PHF6_HUMAN   | K.CGFCVHVEEENEAR.G                |            | 3 | 2,9291 | 0,149 | -0,108 |
| 19 | A9CQZ4 A9CQZ4_HUMAN | R.QKFCGM*FCPVEGSSE.N              |            | 2 | 2,923  | 0,287 | -0,617 |
| 19 | Q9UNZ2 NSF1C_HUMAN  | R.KKS#PNELVDDLK.G                 | S114:      | 3 | 2,9205 | 0,156 | -0,34  |
| 19 | Q9Y2W1 TR150_HUMAN  | R.ERS#PALKSPLQSVVVR.R             | S248:      | 3 | 2,9193 | 0,375 | -0,099 |
| 19 | O14617 AP3D1_HUMAN  | R.ASCILQLVK.H                     |            | 2 | 2,9182 | 0,286 | -0,591 |
| 19 | Q8IYB3 SRRM1_HUMAN  | E.ATSTSDILKVPKPEPIPEPEPS#PEKNSK.K | S260:      | 3 | 2,9181 | 0,44  | -0,114 |
| 19 | O75376 NCOR1_HUMAN  | E.SFEDGLKYPK.Q                    |            | 2 | 2,9174 | 0,43  | -0,618 |
| 19 | P49790 NU153_HUMAN  | R.SGIDITDFQAK.R                   |            | 2 | 2,9169 | 0,342 | -0,408 |
| 19 | Q01081 U2AF1_HUMAN  | E.M*NVCNDLGDHLVGNVYVK.F           |            | 3 | 2,9168 | 0,116 | 0      |
| 19 | Q9BSE4 HERP2_HUMAN  | E.YHMHVHLVCT#SRTPPS#SPK.S         | T87:S93:   | 3 | 2,9168 | 0,178 | -0,324 |
| 19 | Q9UPY3 DICER_HUMAN  | R.TLLS#ESPGKLHVE.V                | S1148:     | 2 | 2,9168 | 0,31  | -0,328 |

|    |                    |                             |            |   |        |       |        |
|----|--------------------|-----------------------------|------------|---|--------|-------|--------|
| 19 | P07942 LAMB1_HUMAN | K.CFICNSQDPYHE.T            |            | 2 | 2,9145 | 0,474 | -0,311 |
| 19 | Q9Y6Y0 NS1BP_HUMAN | K.QISSST#GCLSSPNATVQSPKHE.W | T272:      | 3 | 2,9042 | 0,238 | -0,295 |
| 19 | P08559 ODPA_HUMAN  | R.YHGHS#MSDPGV#YRTR.E       | S293:S300: | 3 | 2,8993 | 0,213 | 0,091  |
| 19 | Q9NQW6 ANLN_HUMAN  | E.TERPS#IKQVIVR.K           | S688:      | 3 | 2,8987 | 0,086 | 0,364  |
| 19 | Q8TAP8 CG047_HUMAN | E.AAAVPGPPPEPQVQLR.A        |            | 2 | 2,8959 | 0,308 | -0,495 |
| 19 | P17174 AATC_HUMAN  | R.LALGDDSPALKE.K            |            | 2 | 2,8954 | 0,335 | -0,199 |
| 19 | Q9Y4F1 FARP1_HUMAN | K.VSAGEPGSHPS#PAPR.R        | S427:      | 2 | 2,8914 | 0,324 | 0,16   |
| 19 | Q96ST2 IWS1_HUMAN  | R.GKHMDFLSDFE.M             |            | 2 | 2,889  | 0,331 | -0,184 |
| 19 | Q9UQ35 SRRM2_HUMAN | E.SYFGVSSLQLK.G             |            | 2 | 2,8859 | 0,384 | -0,199 |
| 19 | Q9UK58 CCNL1_HUMAN | E.KS#PISINVK.T              | S352:      | 2 | 2,8845 | 0,265 | -0,114 |
| 19 | O75223 CG024_HUMAN | K.AIEPNDYTGKVSEE.I          |            | 2 | 2,8821 | 0,307 | -0,236 |
| 19 | Q9NVI7 ATD3A_HUMAN | K.DKWSNFDPTGLE.R            |            | 2 | 2,8808 | 0,361 | -0,606 |
| 19 | O95678 K2C75_HUMAN | E.VKAQYEDIANR.S             |            | 2 | 2,8804 | 0,428 | -0,187 |
| 19 | P38919 IF4A3_HUMAN | R.LLKEEDMTKVE.F             |            | 3 | 2,88   | 0,271 | 0      |
| 19 | O15372 EIF3H_HUMAN | K.NLQLLLMDRVDE.M            |            | 2 | 2,8779 | 0,213 | -0,453 |
| 19 | Q14320 FA50A_HUMAN | R.KISSLS#FTLE.E             | S121:      | 2 | 2,8768 | 0,242 | -0,608 |
| 19 | Q96JP5 ZFP91_HUMAN | K.TGSLQLICK.S               |            | 2 | 2,8762 | 0,366 | -0,239 |
| 19 | P16435 NCPR_HUMAN  | K.NPFLAAVTTNR.K             |            | 2 | 2,8653 | 0,104 | -0,405 |
| 19 | P12270 TPR_HUMAN   | R.LTIHAPPQE.L               |            | 2 | 2,8567 | 0,138 | -0,243 |
| 19 | Q86U90 YRDC_HUMAN  | R.LFRPPS#PAPAAPGAR.L        | S37:       | 3 | 2,8554 | 0,165 | 0      |
| 19 | P28749 RBL1_HUMAN  | R.DMQPLS#PISVHE.R           | S640:      | 2 | 2,8534 | 0,458 | -0,511 |
| 19 | Q00610 CLH1_HUMAN  | K.DSLYKDAMQYASE.S           |            | 2 | 2,8526 | 0,327 | -0,562 |
| 19 | Q7Z6Z7 HUWE1_HUMAN | K.YICQKPSIQK.A              |            | 2 | 2,85   | 0,206 | -0,289 |
| 19 | Q13428 TCOF_HUMAN  | R.NPQNSTVLAR.G              |            | 2 | 2,8489 | 0,391 | 0      |
| 19 | Q7Z6Z7 HUWE1_HUMAN | K.ADGTATAPPPR.S             |            | 2 | 2,846  | 0,385 | 0      |
| 19 | Q9NTK5 OLA1_HUMAN  | E.DGDIIFFK.F                |            | 2 | 2,845  | 0,277 | -0,319 |
| 19 | Q99549 MPP8_HUMAN  | E.KLMPVSAQTPK.G             |            | 2 | 2,8446 | 0,118 | -0,813 |
| 19 | Q9UKV3 ACINU_HUMAN | K.SKS#PS#PPRLTE.D           | S386:S388: | 2 | 2,8387 | 0,252 | 0,09   |
| 19 | Q9H3P7 GCP60_HUMAN | E.VGFFDVLGNDR.R             |            | 2 | 2,8369 | 0,284 | -0,492 |
| 19 | Q07002 PCTK3_HUMAN | R.RAS#LSDIGFGKLE.T          | S130:      | 3 | 2,8363 | 0,109 | -0,062 |
| 19 | O14907 TX1B3_HUMAN | E.DKTDKGIYVTR.V             |            | 3 | 2,8352 | 0,27  | 0,071  |
| 19 | Q6WCQ1 MRIP_HUMAN  | E.KSPDSATVSGYDIMK.S         |            | 3 | 2,8347 | 0,153 | -0,343 |
| 19 | Q6Q0C0 TRAF7_HUMAN | E.TTFGPAFSAVTTITK.A         |            | 2 | 2,8338 | 0,399 | -0,475 |

|    |                      |                              |            |   |        |       |        |
|----|----------------------|------------------------------|------------|---|--------|-------|--------|
| 19 | P61204 ARF3_HUMAN    | E.GLDWLANQLK.N               |            | 2 | 2,8325 | 0,32  | -0,316 |
| 19 | P08238 HS90B_HUMAN   | E.AFSKNLKLGIHE.D             |            | 3 | 2,8324 | 0,372 | -0,337 |
| 19 | P23528 COF1_HUMAN    | K.KAVLFCLSE.D                |            | 2 | 2,8321 | 0,335 | 0,343  |
| 19 | ##Q9C0C9 UBE2O_HUMAN | D.ETNMS#CRAGNSLK.L           | S1062:     | 2 | 2,8292 | 0,142 | -0,394 |
| 19 | P10809 CH60_HUMAN    | R.GYISPYFINTSK.G             |            | 2 | 2,8245 | 0,308 | -0,966 |
| 19 | Q96GS4 CQ059_HUMAN   | R.LQDSRS#LDGLSE.A            | S34:       | 2 | 2,8221 | 0,224 | -0,261 |
| 19 | Q96RU3 FNBP1_HUMAN   | R.TVS#DNSLSNSRGEKPKDLK.F     | S296:      | 3 | 2,8209 | 0,231 | 0      |
| 19 | Q14166 TTL12_HUMAN   | R.RPAERSS#PGQTPEEGAQALAE.F   | S16:       | 3 | 2,8182 | 0,247 | -0,243 |
| 19 | Q14157 UBP2L_HUMAN   | K.KAS#LTSKIPALAVE.M          | S493:      | 2 | 2,8181 | 0,371 | -0,405 |
| 19 | Q9NR48 ASH1L_HUMAN   | E.GFSRKS#PSAISTGTLVSK.R      | S22:       | 3 | 2,8164 | 0,215 | -0,288 |
| 19 | P14625 ENPL_HUMAN    | E.KNLLHVTDTGVGM*TR.E         |            | 3 | 2,8162 | 0,294 | 0      |
| 19 | P18583 SON_HUMAN     | R.LTDLDKAQLLE.I              |            | 2 | 2,8155 | 0,217 | -0,291 |
| 19 | Q09666 AHNK_HUMAN    | K.MPFSSIS#PK.V               | S3412:     | 2 | 2,8151 | 0,198 | -0,206 |
| 19 | Q12802 AKP13_HUMAN   | E.VPANCSVLR.S                |            | 2 | 2,8129 | 0,399 | -0,06  |
| 19 | Q99549 MPP8_HUMAN    | R.WKGYTS#DDDTWEPE.I          | S85:       | 2 | 2,8112 | 0,239 | -0,337 |
| 19 | Q10567 AP1B1_HUMAN   | K.SLPRTAS#SES#AESPE.T        | S599:S602: | 2 | 2,8099 | 0,311 | 0      |
| 19 | Q17RY0 CPEB4_HUMAN   | K.IRIES#PVLTFDYQE.A          | S137:      | 2 | 2,8073 | 0,287 | -0,198 |
| 19 | P48643 TCPE_HUMAN    | E.M*NPALGIDCLHK.G            |            | 2 | 2,8052 | 0,17  | -0,529 |
| 19 | Q96CT7 CC124_HUMAN   | R.RLDQLER.K                  |            | 2 | 2,8036 | 0,085 | -0,197 |
| 19 | O15155 BET1_HUMAN    | K.SLS#IEIGHE.V               | S50:       | 2 | 2,7984 | 0,331 | -0,115 |
| 19 | P46013 KI67_HUMAN    | R.LKIS#LGKVGKKEE.V           | S2002:     | 3 | 2,7932 | 0,135 | 0,124  |
| 19 | Q05682 CALD1_HUMAN   | E.DGLSDDKKPKFK.C             |            | 3 | 2,7927 | 0,301 | 0,293  |
| 19 | Q58FF7 H90B3_HUMAN   | K.VILHLKEDQTE.Y              |            | 2 | 2,7912 | 0,303 | -0,829 |
| 19 | Q9Y2W1 TR150_HUMAN   | E.RSPALKS#PLQSVVVR.R         | S253:      | 3 | 2,7907 | 0,082 | -0,426 |
| 19 | Q09666 AHNK_HUMAN    | R.VTAYTVDVTGR.E              |            | 2 | 2,79   | 0,425 | -0,516 |
| 19 | P54819 KAD2_HUMAN    | E.FNPPKEPMKDDITGEPLIR.R      |            | 3 | 2,7897 | 0,273 | -0,416 |
| 19 | P60903 S10AA_HUMAN   | E.NQKDPLAVDKIM*KD.L          |            | 2 | 2,789  | 0,33  | -0,075 |
| 19 | P52701 MSH6_HUMAN    | R.SVAPAAPTSCDFSPGDLVWAKM*E.G |            | 3 | 2,7882 | 0,115 | -0,298 |
| 19 | Q96JM3 ZN828_HUMAN   | E.LRKPSGS#PDLWK.L            | S445:      | 3 | 2,788  | 0,107 | -0,187 |
| 19 | P63241 IF5A1_HUMAN   | E.TGDAGASATFPMQCSALR.K       |            | 2 | 2,7862 | 0,399 | -0,53  |
| 19 | Q9UQ35 SRRM2_HUMAN   | R.VSGRTS#PPLDR.A             | S2398:     | 3 | 2,7854 | 0,243 | 0      |
| 19 | P11021 GRP78_HUMAN   | E.IDVNGILR.V                 |            | 2 | 2,7844 | 0,177 | -0,068 |
| 19 | Q9UKV3 ACINU_HUMAN   | R.KIS#VVSATK.G               | S825:      | 2 | 2,7822 | 0,153 | -0,482 |

|    |                     |                                   |        |   |        |       |        |
|----|---------------------|-----------------------------------|--------|---|--------|-------|--------|
| 19 | Q6NZI2 PTRF_HUMAN   | K.LSISKS#LKE.S                    | S171:  | 2 | 2,7808 | 0,212 | -0,225 |
| 19 | Q9NR30 DDX21_HUMAN  | R.SDAGLES#DTAM*KKGE.T             | S13:   | 2 | 2,778  | 0,27  | -0,597 |
| 19 | P51858 HDGF_HUMAN   | R.AGDLLS#PKRPK.E                  | S165:  | 3 | 2,7755 | 0,209 | -0,85  |
| 19 | P53396 ACLY_HUMAN   | R.TASFSESRADE.V                   |        | 2 | 2,7734 | 0,358 | -0,407 |
| 19 | Q55W79 CE170_HUMAN  | R.IDLLAQPR.R                      |        | 2 | 2,7717 | 0,288 | -0,263 |
| 19 | Q96T23 RSF1_HUMAN   | E.TLALLKAQIDPVLLK.N               |        | 2 | 2,7663 | 0,355 | -0,447 |
| 19 | O75362 ZN217_HUMAN  | K.APLTSGIDSSTLAPSNLK.S            |        | 2 | 2,7658 | 0,263 | -0,069 |
| 19 | P27694 RFA1_HUMAN   | K.DSLVDIIGICK.S                   |        | 2 | 2,7658 | 0,479 | -0,396 |
| 19 | P06400 RB_HUMAN     | K.LRFDIEGS#DEAD.G                 | S882:  | 2 | 2,7649 | 0,317 | -0,253 |
| 19 | Q15942 ZYX_HUMAN    | R.SPGAGPLTLKE.V                   |        | 2 | 2,7643 | 0,398 | 0,418  |
| 19 | P49454 CENPF_HUMAN  | K.VAQRS#PVDSGTILREPTTK.S          | S3150: | 3 | 2,763  | 0,161 | -0,343 |
| 19 | Q96EP5 DAZP1_HUMAN  | E.DEQSVDQAVNM*HFHDIMGK.K          |        | 3 | 2,7579 | 0,119 | -0,33  |
| 19 | Q96H55 MYO19_HUMAN  | R.LIHVT#SSAFTGLG.-                | T962:  | 2 | 2,7549 | 0,411 | -0,353 |
| 19 | Q04637 IF4G1_HUMAN  | R.FSALQQAVPTSTDNRR.V              |        | 3 | 2,7543 | 0,28  | -0,286 |
| 19 | P13639 EF2_HUMAN    | E.DHACIPIKK.S                     |        | 2 | 2,7518 | 0,278 | -0,113 |
| 19 | Q9H0D6 XRN2_HUMAN   | R.MQNNSSPSISPNTSFTSDGSPSPLGGIKR.K |        | 3 | 2,7516 | 0,181 | -0,679 |
| 19 | P08651 NFIC_HUMAN   | E.LQGHLAYDLNPASTGLR.R             |        | 3 | 2,7512 | 0,162 | -0,2   |
| 19 | P10109 ADX_HUMAN    | E.DKITVHFINDRGE.T                 |        | 3 | 2,7491 | 0,32  | -0,474 |
| 19 | Q16555 DPYL2_HUMAN  | K.TS#PAKQQAPPVR.N                 | S522:  | 3 | 2,7476 | 0,389 | -0,269 |
| 19 | Q6ULP2 AFTIN_HUMAN  | E.KLDLLTSK.C                      |        | 2 | 2,7467 | 0,117 | -0,332 |
| 19 | Q9NZM1 MYOF_HUMAN   | R.YGGRDYSLDEFE.A                  |        | 2 | 2,7448 | 0,123 | -0,505 |
| 19 | P78347 GTF2I_HUMAN  | E.LVISYLPPGM*ASK.I                |        | 2 | 2,7443 | 0,306 | -0,438 |
| 19 | Q5T5Y3 CAMP1_HUMAN  | K.REQS#PSQHKGKDPASLLASE.L         | S862:  | 3 | 2,7433 | 0,172 | -0,691 |
| 19 | P12277 KCRB_HUMAN   | E.VFKDLFDPIIEDR.H                 |        | 2 | 2,7424 | 0,382 | -0,076 |
| 19 | Q01082 SPTB2_HUMAN  | K.TALPAQSAATLPAR.T                |        | 2 | 2,7424 | 0,521 | -0,624 |
| 19 | O14979 HNRDL_HUMAN  | K.VFVGGLSPDTSEEQIKE.Y             |        | 2 | 2,7422 | 0,336 | -0,332 |
| 19 | O14974 MYPT1_HUMAN  | R.LSSSLDNKE.K                     |        | 2 | 2,7399 | 0,227 | -0,43  |
| 19 | P35269 T2FA_HUMAN   | R.LRLDTGPQSLSGK.S                 |        | 3 | 2,7391 | 0,178 | 0,067  |
| 19 | Q8N3V7 SYNPO_HUMAN  | R.HIM*SR#PMVE.R                   | S536:  | 2 | 2,7389 | 0,221 | -0,476 |
| 19 | Q86XF2 Q86XF2_HUMAN | K.ASPGLLAAALQQSQE.L               |        | 2 | 2,7299 | 0,248 | -1,398 |
| 19 | P68104 EF1A1_HUMAN  | E.HALLAYTLGVK.Q                   |        | 2 | 2,7292 | 0,233 | 0      |
| 19 | O60256 KPRB_HUMAN   | R.SVAAIHPSLE.I                    |        | 2 | 2,7282 | 0,232 | -0,119 |
| 19 | Q4G0J3 LARP7_HUMAN  | R.SRPTSEGS#DIE.S                  | S261:  | 2 | 2,7276 | 0,12  | -0,291 |



|    |                     |                                   |            |   |        |       |        |
|----|---------------------|-----------------------------------|------------|---|--------|-------|--------|
| 19 | Q9BTA9 WAC_HUMAN    | R.STCSLTPALAAHFSE.N               |            | 2 | 2,7274 | 0,419 | -0,536 |
| 19 | Q9Y2W1 TR150_HUMAN  | R.IDIS#PSTFR.K                    | S682:      | 2 | 2,7241 | 0,084 | -0,219 |
| 19 | Q14152 EIF3A_HUMAN  | R.QRELEIEER.E                     |            | 3 | 2,7231 | 0,106 | 0,152  |
| 19 | P31948 STIP1_HUMAN  | K.ALDLDSSCKE.A                    |            | 2 | 2,7217 | 0,218 | 0      |
| 19 | Q9UQR0 SCML2_HUMAN  | R.S#PQQTVPYVPLSPK.L               | S499:      | 2 | 2,7214 | 0,312 | -0,355 |
| 19 | P48436 SOX9_HUMAN   | K.TDVQPGKADLKRE.G                 |            | 3 | 2,7202 | 0,195 | 0,314  |
| 19 | Q9H0B6 KLC2_HUMAN   | R.ASS#LNFLNK.S                    | S582:      | 2 | 2,7202 | 0,245 | -0,341 |
| 19 | Q8N6T3 ARFG1_HUMAN  | E.TFGSAEPTKTR.K                   |            | 2 | 2,719  | 0,352 | -0,408 |
| 19 | Q09666 AHNK_HUMAN   | K.FKAEAPLPS#PKLE.G                | S5110:     | 3 | 2,7176 | 0,117 | 0,182  |
| 19 | Q9UN36 NDRG2_HUMAN  | R.SRTAS#LTSAAASVDGNR.S            | S332:      | 2 | 2,7176 | 0,313 | -0,656 |
| 19 | P54136 SYRC_HUMAN   | K.KVIVDFSSPNIAKE.M                |            | 3 | 2,7142 | 0,2   | 0      |
| 19 | Q3V6T2 GRDN_HUMAN   | R.RTS#IHDFLTKDSR.L                | S1820:     | 3 | 2,7137 | 0,286 | -0,221 |
| 19 | Q02241 KIF23_HUMAN  | R.KRRSS#TVAPAQPDGAESE.W           | S912:      | 3 | 2,7123 | 0,179 | -0,186 |
| 19 | Q5T670 Q5T670_HUMAN | R.LQKS#PEKS#PRPPLKE.R             | S150:S154: | 3 | 2,7123 | 0,106 | -0,579 |
| 19 | Q7KZ85 SPT6H_HUMAN  | R.KKLPGYTDAALQE.A                 |            | 2 | 2,7118 | 0,2   | -0,681 |
| 19 | Q8TD19 NEK9_HUMAN   | E.KVTLNAPT.K                      |            | 2 | 2,7108 | 0,301 | -0,45  |
| 19 | Q9UQ35 SRRM2_HUMAN  | K.SATRPS#PS#PERSSTGPEPPAPTPLLAE.R | S351:S353: | 3 | 2,7077 | 1     | -0,443 |
| 19 | O95400 CD2B2_HUMAN  | E.GHFDADGNYFLNR.D                 |            | 3 | 2,7068 | 0,136 | 0,12   |
| 19 | Q9H2P0 ADNP_HUMAN   | K.ISNDNPEEHVLK.V                  |            | 2 | 2,7036 | 0,225 | -0,612 |
| 19 | P06733 ENOA_HUMAN   | R.HIADLAGNSE.V                    |            | 2 | 2,7015 | 0,279 | -0,238 |
| 19 | Q9NQZ2 SAS10_HUMAN  | R.KKLYYDTDYGSK.S                  |            | 3 | 2,7012 | 0,104 | -0,432 |
| 19 | P08559 ODPA_HUMAN   | R.YHGHS#M*SDPGVSYRT#R.E           | S293:T303: | 3 | 2,7006 | 0,13  | 0      |
| 19 | Q03164 HRX_HUMAN    | E.IVTVGDPLLSSGLR.S                |            | 2 | 2,6997 | 0,445 | -0,427 |
| 19 | Q99618 CDCA3_HUMAN  | K.HAQDSDPRS#PTLGIAR.T             | S68:       | 2 | 2,6997 | 0,404 | 0,474  |
| 19 | Q9NQ55 SSF1_HUMAN   | R.VGGSDEEASGIPSR.T                |            | 2 | 2,6967 | 0,188 | -0,269 |
| 19 | Q9H0B6 KLC2_HUMAN   | K.KLQGGTPQEPPNPR.M                |            | 3 | 2,6956 | 0,183 | -0,06  |
| 19 | P04259 K2C6B_HUMAN  | R.SGFSSISVSR.S                    |            | 2 | 2,6939 | 0,233 | -0,238 |
| 19 | P04264 K2C1_HUMAN   | R.TNAENEFVTIKK.D                  |            | 3 | 2,6892 | 0,245 | -0,197 |
| 19 | O60701 UGDH_HUMAN   | K.NLFFSTNIDDAIKE.A                |            | 2 | 2,688  | 0,307 | -0,45  |
| 19 | Q9UQ35 SRRM2_HUMAN  | E.RVSGRT#SPLLDR.A                 | T2397:     | 3 | 2,6854 | 0,183 | -0,537 |
| 19 | Q13153 PAK1_HUMAN   | K.YMS#FTDKSAE.D                   | S144:      | 2 | 2,6849 | 0,412 | -0,388 |
| 19 | P35611 ADDA_HUMAN   | R.VSMILQS#PAFCEE.L                | S64:       | 2 | 2,6844 | 0,32  | -0,307 |
| 19 | Q96JP5 ZFP91_HUMAN  | R.SKTGSLQLICK.S                   |            | 3 | 2,6743 | 0,092 | 0,518  |

|    |                     |                                |            |   |        |       |        |
|----|---------------------|--------------------------------|------------|---|--------|-------|--------|
| 19 | Q49A88 CCD14_HUMAN  | R.AATTQLVSNGLAVSGKE.N          |            | 2 | 2,6697 | 0,406 | -0,704 |
| 19 | Q15149 PLEC1_HUMAN  | E.FADMLSGNAGGFR.S              |            | 2 | 2,6675 | 0,39  | -0,273 |
| 19 | Q96FZ2 DC12_HUMAN   | R.M*LQWLATK.S                  |            | 2 | 2,6651 | 0,168 | -0,242 |
| 19 | Q8N3D4 EH1L1_HUMAN  | E.SRPAEVP AEGLVNGAGAPGGGGV.R.L |            | 3 | 2,6643 | 0,104 | -0,336 |
| 19 | P04637 P53_HUMAN    | K.RALPNNTSSS#PQPK.K            | S315:      | 3 | 2,6619 | 0,206 | -0,116 |
| 19 | Q5T1M5 FKB15_HUMAN  | R.ERPES#PMVPSEQVVEE.A          | S979:      | 2 | 2,6601 | 0,447 | -0,444 |
| 19 | Q86WR7 CJ047_HUMAN  | R.SRS#FTLDDE.S                 | S43:       | 2 | 2,6597 | 0,284 | -0,212 |
| 19 | Q9Y520 Q9Y520_HUMAN | E.NSCNKEEPPVFR.Q               |            | 3 | 2,6583 | 0,104 | 0      |
| 19 | Q13435 SF3B2_HUMAN  | R.SRGSDS#PAADVE.I              | S339:      | 2 | 2,657  | 0,24  | -0,192 |
| 19 | Q16881 TRXR1_HUMAN  | K.QLDSTIGHVCAE.V               |            | 2 | 2,6568 | 0,451 | -0,396 |
| 19 | Q75T46 Q75T46_HUMAN | R.RFS#NVGLVHTSE.R              | S45:       | 2 | 2,6562 | 0,173 | 0,086  |
| 19 | O95785 WIZ_HUMAN    | R.SPSDLHISPLAK.K               |            | 3 | 2,6543 | 0,248 | 0,145  |
| 19 | Q9Y4B6 VPRBP_HUMAN  | R.KLSSEPLPLDEE.A               |            | 2 | 2,6542 | 0,373 | -0,581 |
| 19 | Q16204 CCDC6_HUMAN  | K.SGGIVISPFRL.EE.L             |            | 2 | 2,6515 | 0,202 | -0,261 |
| 19 | P04406 G3P_HUMAN    | K.IKWGDAGAEYVVE.S              |            | 2 | 2,6513 | 0,226 | -0,679 |
| 19 | Q8IY57 YAF2_HUMAN   | D.LTVITDFKEK.T                 |            | 3 | 2,6496 | 0,307 | -0,07  |
| 19 | Q14157 UBP2L_HUMAN  | R.RYPSSISS#SPQKDLTQAK.N        | S608:      | 3 | 2,6485 | 0,167 | -0,353 |
| 19 | O94833 BPAAE_HUMAN  | R.RGS#DASDFDISE.I              | S5111:     | 2 | 2,6461 | 0,199 | -0,354 |
| 19 | Q8TAD8 SNIP1_HUMAN  | E.RLS#PEVAPPAHR.R              | S35:       | 3 | 2,6446 | 0,086 | 0,259  |
| 19 | Q8TDJ6 DMXL2_HUMAN  | E.VAIVRDPDAGEGTR.H             |            | 3 | 2,6399 | 0,246 | -0,231 |
| 19 | Q14157 UBP2L_HUMAN  | K.ASLTSKIPALAVE.M              |            | 2 | 2,6349 | 0,363 | -0,845 |
| 19 | Q9BT78 CSN4_HUMAN   | R.MLATLFKDE.R                  |            | 2 | 2,6243 | 0,296 | 0      |
| 19 | Q96ST2 IWS1_HUMAN   | R.GKHM*DFLSDFE.M               |            | 2 | 2,6239 | 0,299 | -0,909 |
| 19 | P08559 ODPA_HUMAN   | R.YHGHS#M*SDPGVS#YR.T          | S293:S300: | 3 | 2,6218 | 0,243 | -0,517 |
| 19 | A9CQZ4 A9CQZ4_HUMAN | K.AAEDEEVPAFFK.N               |            | 2 | 2,6198 | 0,399 | -0,721 |
| 19 | P00367 DHE3_HUMAN   | E.DFKLQHGSILGFPK.A             |            | 3 | 2,6184 | 0,318 | 0,346  |
| 19 | Q9P0K7 RAI14_HUMAN  | E.NAGIQSLLLSK.I                |            | 2 | 2,6176 | 0,304 | -0,746 |
| 19 | Q96FZ2 DC12_HUMAN   | R.MLQWLATK.S                   |            | 2 | 2,6173 | 0,287 | 0      |
| 19 | Q01433 AMPD2_HUMAN  | K.HFPLDLRTS#M*DGK.C            | S118:      | 3 | 2,6171 | 0,234 | -0,454 |
| 19 | P48634 BAT2_HUMAN   | R.RGDKEAPPPVLLTPK.A            |            | 3 | 2,6167 | 0,106 | -0,226 |
| 19 | Q09666 AHNK_HUMAN   | K.ISMPDLDLHLKS#PKAKGE.V        | S2397:     | 3 | 2,6142 | 0,1   | 0,267  |
| 19 | P13056 NR2C1_HUMAN  | K.DLRS#PLTATPTFVTDSE.S         | S215:      | 2 | 2,6097 | 0,302 | -0,316 |
| 19 | O94888 UBXD7_HUMAN  | R.SESLIDAS#EDSQL.E.A           | S285:      | 2 | 2,6055 | 0,258 | -0,228 |

|    |                     |                         |            |   |        |       |        |
|----|---------------------|-------------------------|------------|---|--------|-------|--------|
| 19 | P49321 NASP_HUMAN   | R.AKLVPS#QEE.T          | S421:      | 2 | 2,6    | 0,21  | 0      |
| 19 | Q7RTP8 Q7RTP8_HUMAN | K.AAEDRFQE.R            |            | 2 | 2,5982 | 0,225 | 0,253  |
| 19 | Q9UQ84 EXO1_HUMAN   | E.DDLSQYLSFTK.K         |            | 2 | 2,5979 | 0,425 | -0,241 |
| 19 | Q9Y2L9 LRCH1_HUMAN  | E.DSCHRLS#PVKGEFHQE.F   | S370:      | 2 | 2,5973 | 0,372 | -0,365 |
| 19 | P50548 ERF_HUMAN    | R.RVS#SDLQHATAQLSLE.H   | S531:      | 2 | 2,5972 | 0,354 | 0,133  |
| 19 | P11142 HSP7C_HUMAN  | R.AM*TKDNNLLGKFE.L      |            | 3 | 2,597  | 0,083 | -0,061 |
| 19 | P31946 1433B_HUMAN  | K.DSTLIM*QLLR.D         |            | 2 | 2,5967 | 0,102 | -0,405 |
| 19 | O43379 WDR62_HUMAN  | R.GQSS#PPPAPPICLR.R     | S33:       | 2 | 2,5964 | 0,174 | -0,313 |
| 19 | Q9UMZ2 SYNG_HUMAN   | K.ISKFDFLVATSQSK.M      |            | 3 | 2,5946 | 0,14  | 0,116  |
| 19 | Q6WCQ1 MRIP_HUMAN   | K.SKS#NPDFLKKD.R        | S992:      | 3 | 2,5888 | 0,285 | -0,067 |
| 19 | Q04721 NOTC2_HUMAN  | K.STMPTSLPNLAKE.A       |            | 2 | 2,5877 | 0,27  | -0,351 |
| 19 | Q86YS7 K0528_HUMAN  | E.IIGSPIPEPR.Q          |            | 2 | 2,585  | 0,348 | -0,113 |
| 19 | Q8TAP8 CG047_HUMAN  | E.AAAVPGPPPEPQVPQLR.A   |            | 3 | 2,5849 | 0,11  | -0,212 |
| 19 | Q8NBJ4 GOLM1_HUMAN  | R.DTINLLDQR.E           |            | 2 | 2,5811 | 0,183 | -0,112 |
| 19 | O75400 PR40A_HUMAN  | K.NRES#FQIFLDE.L        | S613:      | 2 | 2,5782 | 0,086 | -0,33  |
| 19 | O95684 FR1OP_HUMAN  | K.SSLHLLSHE.T           |            | 2 | 2,5782 | 0,24  | -0,298 |
| 19 | O15372 EIF3H_HUMAN  | K.NLQLLM*DRVDE.M        |            | 2 | 2,5777 | 0,295 | -0,09  |
| 19 | P49023 PAXI_HUMAN   | R.GLEDVRPSVE.S          |            | 2 | 2,577  | 0,246 | -0,222 |
| 19 | Q9HCG8 NCM_HUMAN    | R.DRDYFDYSR.S           |            | 3 | 2,5755 | 0,184 | 0,37   |
| 19 | Q01433 AMPD2_HUMAN  | E.RQIS#QDVKLEPDILLR.A   | S168:      | 3 | 2,5749 | 0,103 | -0,365 |
| 19 | Q14738 2A5D_HUMAN   | R.RQS#S#SRFNLSK.N       | S88:S89:   | 2 | 2,5749 | 0,387 | -0,249 |
| 19 | Q9P1Y6 K1542_HUMAN  | E.NPS#PLFSIK.K          | S814:      | 2 | 2,5747 | 0,154 | 0,225  |
| 19 | Q9Y6X9 MORC2_HUMAN  | K.KTES#PIKLSPATPSR.K    | S725:      | 3 | 2,5742 | 0,172 | 0,216  |
| 19 | Q07157 ZO1_HUMAN    | K.SHSLAQPPFDSGVE.T      |            | 2 | 2,5733 | 0,259 | -0,763 |
| 19 | Q9BWU0 NADAP_HUMAN  | R.KINAGSQDDE.M          |            | 2 | 2,5721 | 0,28  | -0,113 |
| 19 | P53814 SMTN_HUMAN   | R.SLS#VLSPR.Q           | S301:      | 2 | 2,5721 | 0,173 | -0,13  |
| 19 | Q53GS9 SNUT2_HUMAN  | E.FEPAS#AREAPASVVPFVR.V | S58:       | 3 | 2,5705 | 0,134 | -0,091 |
| 19 | P08133 ANXA6_HUMAN  | E.AILDIITSR.S           |            | 2 | 2,5675 | 0,217 | -0,244 |
| 19 | Q6ZUT9 RA61L_HUMAN  | R.RLSITSLTGK.N          |            | 2 | 2,5674 | 0,122 | -0,227 |
| 19 | O75607 NPM3_HUMAN   | R.AGGVGGLRVPAPVTM*D.S   |            | 2 | 2,5644 | 0,318 | -0,081 |
| 19 | Q9HD42 CHM1A_HUMAN  | E.SS#VRSQEDQLSRR.L      | S179:      | 3 | 2,5643 | 0,185 | -0,449 |
| 19 | Q9BSJ8 ESYT1_HUMAN  | E.AHSHSYSHSSSS#LSEEPE.L | S933:      | 2 | 2,5621 | 0,381 | -0,359 |
| 19 | O75616 ERAL_HUMAN   | R.CLTKY#SQIPS#VLVM*NK.V | Y226:S231: | 3 | 2,5584 | 0,141 | 1,334  |

|    |                    |                                   |              |   |        |       |        |
|----|--------------------|-----------------------------------|--------------|---|--------|-------|--------|
| 19 | Q9P266 K1462_HUMAN | R.QM*S#DGDGERLFQD.L               | S200:        | 2 | 2,5583 | 0,212 | -0,306 |
| 19 | O14640 DVL1_HUMAN  | K.AYTVVGGPPGPPVRE.L               |              | 2 | 2,557  | 0,259 | -0,079 |
| 19 | Q02952 AKA12_HUMAN | E.ALICVSSK.K                      |              | 2 | 2,5557 | 0,384 | 0      |
| 19 | Q9Y2D5 AKAP2_HUMAN | R.DALGDSLQVPVSPSTSSR.C            |              | 2 | 2,5552 | 0,297 | -0,548 |
| 19 | Q9UK58 CCNL1_HUMAN | K.GLNPDGTPALST#LGGFSPASKPSS#PR.E  | T330:S342:   | 3 | 2,5549 | 0,276 | 0,479  |
| 19 | Q9BUL5 PHF23_HUMAN | R.RLGGPPKS#GEP.-                  | S400:        | 2 | 2,5517 | 0,351 | -0,415 |
| 19 | Q13428 TCOF_HUMAN  | R.KSAEPSANTTLVS#ETEE.E            | S171:        | 2 | 2,549  | 0,317 | -0,977 |
| 19 | P09211 GSTP1_HUMAN | K.LKAFLASPE.Y                     |              | 2 | 2,5489 | 0,246 | -0,25  |
| 19 | Q13428 TCOF_HUMAN  | K.TVANLLSGKS#PR.K                 | S156:        | 2 | 2,5466 | 0,201 | -0,277 |
| 19 | P21333 FLNA_HUMAN  | K.AGNNMLLVGVHGPR.T                |              | 3 | 2,5415 | 0,261 | -0,191 |
| 19 | Q9Y5B0 CTDP1_HUMAN | R.GPPAPSSSLPIR.Q                  |              | 2 | 2,5387 | 0,304 | -0,414 |
| 19 | P49736 MCM2_HUMAN  | R.RGNDPLTSS#PGR.S                 | S27:         | 2 | 2,5346 | 0,266 | -0,548 |
| 19 | Q13409 DC1I2_HUMAN | K.EAVAPVQEESDLEK.K                |              | 2 | 2,5309 | 0,27  | -0,474 |
| 19 | P02545 LMNA_HUMAN  | R.LVEIDNGKQR.E                    |              | 2 | 2,5301 | 0,271 | -0,416 |
| 19 | P43358 MAGA4_HUMAN | R.KLLTQDWVQE.N                    |              | 2 | 2,5286 | 0,272 | -0,484 |
| 19 | P09936 UCHL1_HUMAN | E.DTLLKDAAK.V                     |              | 2 | 2,5269 | 0,167 | -0,751 |
| 19 | O95071 UBR5_HUMAN  | E.DISYFGYPSFR.R                   |              | 2 | 2,5251 | 0,399 | -0,271 |
| 19 | P31689 DNJA1_HUMAN | K.NVVHQLS#VTLE.D                  | S112:        | 2 | 2,5241 | 0,295 | -0,37  |
| 19 | Q9BZL4 PP12C_HUMAN | E.KISLQDLSK.E                     |              | 2 | 2,5224 | 0,121 | -0,709 |
| 19 | P11142 HSP7C_HUMAN | K.DNNLLGKFE.L                     |              | 2 | 2,5223 | 0,293 | -0,116 |
| 19 | P04075 ALDOA_HUMAN | R.ALANSLACQGK.Y                   |              | 2 | 2,5201 | 0,304 | -0,108 |
| 19 | Q96T37 RBM15_HUMAN | E.RPS#PIRRRGS#LE.K                | S700:S708:   | 3 | 2,5154 | 0,207 | -0,323 |
| 19 | Q99613 EIF3C_HUMAN | R.GGYRQQQS#QTAY.-                 | S909:        | 2 | 2,5149 | 0,437 | -0,333 |
| 19 | P43490 NAMPT_HUMAN | E.YGQDLLHTVFK.N                   |              | 3 | 2,5139 | 0,213 | -0,277 |
| 19 | Q8NBJ4 GOLM1_HUMAN | R.DTINLLDQRE.K                    |              | 2 | 2,5112 | 0,177 | -0,1   |
| 19 | Q9Y3T9 NOC2L_HUMAN | K.NSVPVTVAMVE.R                   |              | 2 | 2,5108 | 0,343 | -0,319 |
| 19 | P10636 TAU_HUMAN   | E.DHAGTYGLGDRK.D                  |              | 3 | 2,5097 | 0,086 | 0,213  |
| 19 | Q9H501 ESF1_HUMAN  | E.NKTDLDNSIGIK.K                  |              | 2 | 2,5092 | 0,307 | -0,185 |
| 19 | Q9H0D6 XRN2_HUMAN  | R.M*QNNSSPSISPNTSFTSDGSPSPGGIKR.K |              | 3 | 2,5082 | 0,263 | -0,43  |
| 19 | Q55W79 CE170_HUMAN | R.LGS#LSARS#DSE.A                 | S1160:S1165: | 2 | 2,5048 | 0,373 | -0,666 |
| 19 | O75531 BAF_HUMAN   | R.DFVAEPMGEKPVGSLAGIGE.V          |              | 2 | 2,5037 | 0,332 | -0,244 |
| 19 | Q15019 SEPT2_HUMAN | E.TPGYVGFANLPNQVHR.K              |              | 3 | 2,5028 | 0,191 | -0,31  |
| 19 | Q9NQ55 SSF1_HUMAN  | K.ARVGGS#DEE.A                    | S359:        | 2 | 2,4952 | 0,173 | -0,183 |

|    |                    |                            |        |   |        |       |        |
|----|--------------------|----------------------------|--------|---|--------|-------|--------|
| 19 | P04406 G3P_HUMAN   | R.VIISAPSADAPM*FVM*GVNHE.K |        | 2 | 2,491  | 0,388 | -0,461 |
| 19 | P07814 SYEP_HUMAN  | K.SLCIPFKPLCE.L            |        | 2 | 2,4909 | 0,428 | -0,089 |
| 19 | Q9Y618 NCOR2_HUMAN | R.SAVYPLLYR.D              |        | 2 | 2,4903 | 0,423 | -0,113 |
| 19 | Q01850 CDR2_HUMAN  | E.YGLVLKE.N                |        | 2 | 2,4856 | 0,139 | 0,297  |
| 19 | P46379 BAT3_HUMAN  | E.HM*PVGPDAILR.Y           |        | 2 | 2,4849 | 0,259 | -0,1   |
| 19 | Q9Y265 RUVB1_HUMAN | R.CDYATEFDLE.A             |        | 2 | 2,4827 | 0,227 | 0,089  |
| 19 | P08107 HSP71_HUMAN | K.DNNLLGRFE.L              |        | 2 | 2,4823 | 0,25  | -0,226 |
| 19 | O75044 FNBP2_HUMAN | R.SPDSTANVRIEE.K           |        | 2 | 2,4808 | 0,281 | 0,463  |
| 19 | Q16881 TRXR1_HUMAN | K.IICNTKDNE.R              |        | 2 | 2,4802 | 0,243 | -0,22  |
| 19 | P04406 G3P_HUMAN   | R.VVDLM*AHMASKE.-          |        | 2 | 2,4657 | 0,34  | -0,181 |
| 19 | Q5JSZ5 K0515_HUMAN | K.QAEKEVPWS#PSAE.K         | S556:  | 2 | 2,4618 | 0,097 | -0,317 |
| 19 | O95785 WIZ_HUMAN   | K.TPLALAGSPTPK.N           |        | 2 | 2,4604 | 0,156 | -0,317 |
| 19 | Q13242 SFRS9_HUMAN | R.IYVGNLPTDVRE.K           |        | 2 | 2,4591 | 0,293 | -0,532 |
| 19 | Q9C0C2 TB182_HUMAN | R.SLPSDLAFNGDLAK.A         |        | 2 | 2,4578 | 0,429 | -0,421 |
| 19 | Q9UHY1 NRBP_HUMAN  | R.HLSCDLMPNENIPE.L         |        | 2 | 2,4557 | 0,226 | -0,439 |
| 19 | Q00341 VIGLN_HUMAN | R.RCDIIISGR.K              |        | 2 | 2,4527 | 0,172 | 0,304  |
| 19 | Q6NWX9 PR40B_HUMAN | R.TLLQQLDHQA.-             |        | 2 | 2,4511 | 0,35  | -0,302 |
| 19 | Q6PJF5 RHDF2_HUMAN | K.SVS#LQEPR.S              | S90:   | 2 | 2,45   | 0,121 | 0,061  |
| 19 | P23511 NFYA_HUMAN  | K.EKDS#PHMQDPNQADEE.A      | S326:  | 2 | 2,4486 | 0,288 | -0,375 |
| 19 | Q15003 CND2_HUMAN  | R.KAPLNIPGTPVLE.D          |        | 2 | 2,4464 | 0,275 | -0,814 |
| 19 | Q7Z417 NUFP2_HUMAN | R.GLERNDS#WGSFD.L          | S652:  | 2 | 2,4432 | 0,227 | -0,334 |
| 19 | Q7L014 DDX46_HUMAN | K.LNYVPLEKQEEE.R           |        | 2 | 2,4419 | 0,23  | -0,573 |
| 19 | P24534 EF1B_HUMAN  | E.KASLPGVK.K               |        | 2 | 2,4417 | 0,209 | -0,839 |
| 19 | Q15418 KS6A1_HUMAN | R.KLPS#TTL.-               | S732:  | 2 | 2,4399 | 0,341 | 0,073  |
| 19 | Q86X95 CIR_HUMAN   | R.NSGFALKR.N               |        | 2 | 2,4383 | 0,233 | -0,137 |
| 19 | Q09666 AHNK_HUMAN  | K.ISM*PDLDLHLKS#PK.A       | S2397: | 2 | 2,4356 | 0,286 | -0,505 |
| 19 | ##Q12979 ABR_HUMAN | D.VIENNDKNVK.T             |        | 2 | 2,4335 | 0,098 | -0,416 |
| 19 | P08238 HS90B_HUMAN | K.NLKLGIHE.D               |        | 2 | 2,4321 | 0,149 | 0,066  |
| 19 | P46459 NSF_HUMAN   | E.NSSLNLIGK.A              |        | 2 | 2,4293 | 0,38  | 0,193  |
| 19 | Q7Z589 EMSY_HUMAN  | E.KRHSPES#PSIAVVE.S        | S821:  | 2 | 2,4288 | 0,109 | -0,227 |
| 19 | Q16555 DPYL2_HUMAN | R.NLHQSGFSLGAQIDDNIPR.R    |        | 2 | 2,4252 | 0,479 | -0,563 |
| 19 | P31948 STIP1_HUMAN | K.AMDVYQK.A                |        | 2 | 2,4219 | 0,327 | 0      |
| 19 | Q07021 C1QBP_HUMAN | K.ALVLDCHYPEDE.V           |        | 2 | 2,4217 | 0,299 | -0,418 |

|    |                     |                         |        |   |        |       |        |
|----|---------------------|-------------------------|--------|---|--------|-------|--------|
| 19 | P29692 EF1D_HUMAN   | R.ATAPQTQHVSPM*R.Q      |        | 2 | 2,4209 | 0,244 | 0,169  |
| 19 | Q09666 AHNK_HUMAN   | K.LQSGVSLASK.K          |        | 2 | 2,4173 | 0,255 | -0,466 |
| 19 | Q9C0B5 ZDHC5_HUMAN  | R.GVGSPEPGPTAPYLGR.S    |        | 2 | 2,4156 | 0,287 | -0,314 |
| 19 | Q9H501 ESF1_HUMAN   | E.KKNIVQHTTDS#LEE.K     | S180:  | 2 | 2,4138 | 0,297 | -0,067 |
| 19 | O14974 MYPT1_HUMAN  | R.LAYVAPTIPR.R          |        | 2 | 2,4119 | 0,329 | -0,111 |
| 19 | P16402 H13_HUMAN    | E.TAPLAPTIPAPAECT#PVK.K | T18:   | 2 | 2,4112 | 0,099 | -0,583 |
| 19 | ##Q9GZU2 PEG3_HUMAN | E.GPVS#KQPKAR.F         | S682:  | 2 | 2,4109 | 0,182 | -0,319 |
| 19 | O14908 GIPC1_HUMAN  | R.GPATVEDLPSAFEE.K      |        | 2 | 2,4106 | 0,369 | -0,083 |
| 19 | O14733 MP2K7_HUMAN  | R.HM*LGLPSTLFTPR.S      |        | 2 | 2,4052 | 0,357 | 0      |
| 19 | Q9BRA2 TXD17_HUMAN  | K.TIFAYFTGSK.D          |        | 2 | 2,4017 | 0,354 | -0,215 |
| 19 | Q00610 CLH1_HUMAN   | R.VKNFLKE.A             |        | 2 | 2,4005 | 0,089 | 0      |
| 19 | Q6ZVD8 PHLPL_HUMAN  | R.QNS#VNSGMILLPMSK.D    | S1210: | 2 | 2,3984 | 0,109 | -0,385 |
| 19 | Q01433 AMPD2_HUMAN  | R.S#LPGPAPCLK.H         | S100:  | 2 | 2,3984 | 0,301 | -0,109 |
| 19 | P29692 EF1D_HUMAN   | R.ATAPQTQHVS#PM*R.Q     | S133:  | 2 | 2,3982 | 0,337 | 0      |
| 19 | O43166 SI1L1_HUMAN  | E.GTINSVGFMDTR.K        |        | 2 | 2,3952 | 0,245 | -0,188 |
| 19 | P63241 IF5A1_HUMAN  | E.TGDAGASATFPM*QCSALR.K |        | 2 | 2,3914 | 0,384 | -0,394 |
| 19 | O15042 SR140_HUMAN  | D.ASGPSDSDMPSR.T        |        | 2 | 2,3907 | 0,183 | -0,404 |
| 19 | P07900 HS90A_HUMAN  | E.M*VSLKDYCTR.M         |        | 2 | 2,3897 | 0,214 | -0,189 |
| 19 | P54819 KAD2_HUMAN   | E.M*LDDLMEK.R           |        | 2 | 2,3877 | 0,124 | -0,06  |
| 19 | P29692 EF1D_HUMAN   | R.ATAPQTQHVS#PMR.Q      | S133:  | 2 | 2,3872 | 0,357 | -0,649 |
| 19 | Q8WXH0 SYNE2_HUMAN  | R.RGS#MSYLAAVEEEVEE.S   | S4108: | 2 | 2,3836 | 0,328 | -0,26  |
| 19 | Q6IAA8 CK059_HUMAN  | K.LLLDPSS#PPTK.A        | S27:   | 2 | 2,3835 | 0,238 | -0,293 |
| 19 | P13010 KU86_HUMAN   | K.DKPSGDT#AAVFEE.G      | T715:  | 2 | 2,3825 | 0,177 | -0,506 |
| 19 | Q14669 TRIPC_HUMAN  | E.RYLVVR.G              |        | 2 | 2,3806 | 0,137 | -1,589 |
| 19 | Q00839 HNRPU_HUMAN  | K.S#SGPTSLFAVTVAPPGAR.Q | S187:  | 2 | 2,3786 | 0,24  | -0,272 |
| 19 | Q03001 BPA1_HUMAN   | K.WKVISPTGNE.A          |        | 2 | 2,374  | 0,27  | -0,324 |
| 19 | Q8N108 MIER1_HUMAN  | E.DKVIFLKD.A            |        | 2 | 2,3734 | 0,158 | -0,112 |
| 19 | Q14152 EIF3A_HUMAN  | R.RVPPALSR.D            |        | 2 | 2,373  | 0,1   | -0,123 |
| 19 | Q969E8 TSR2_HUMAN   | E.MASCITQR.K            |        | 2 | 2,3729 | 0,3   | -0,505 |
| 19 | P62256 UBE2H_HUMAN  | R.MDTDVVKLIE.S          |        | 2 | 2,3723 | 0,176 | -0,21  |
| 19 | P06748 NPM_HUMAN    | R.TVSLGAGAKDE.L         |        | 2 | 2,3677 | 0,324 | -0,233 |
| 19 | Q9UPZ3 HPS5_HUMAN   | E.KIGTLHTS#PDLK.V       | S563:  | 2 | 2,359  | 0,158 | 0      |
| 19 | Q12770 SCAP_HUMAN   | R.GPPPPSLFGDQPD.L       |        | 2 | 2,357  | 0,233 | -0,184 |

|    |                     |                        |            |   |        |       |        |
|----|---------------------|------------------------|------------|---|--------|-------|--------|
| 19 | P04264 K2C1_HUMAN   | R.SGGGFSSGSAGIINYQR.R  |            | 2 | 2,3543 | 0,207 | -0,589 |
| 19 | Q13523 PRP4B_HUMAN  | R.TKLDDLALLE.D         |            | 2 | 2,3515 | 0,174 | -0,324 |
| 19 | Q8N8S7 ENAH_HUMAN   | E.DKGEDSEPVTSK.A       |            | 2 | 2,3469 | 0,272 | -0,472 |
| 19 | Q9UMX0 UBQL1_HUMAN  | D.GLTVHLVIK.T          |            | 2 | 2,344  | 0,343 | -0,062 |
| 19 | Q14493 SLBP_HUMAN   | K.LLINDFGR.E           |            | 2 | 2,3431 | 0,142 | -0,064 |
| 19 | B2RMZ9 B2RMZ9_HUMAN | R.APVS#PLKFSPFE.G      | S423:      | 2 | 2,343  | 0,223 | -0,436 |
| 19 | Q86YP4 P66A_HUMAN   | R.VNGLTTVALKE.T        |            | 2 | 2,3396 | 0,189 | -0,213 |
| 19 | P13639 EF2_HUMAN    | E.DHACIPIK.K           |            | 2 | 2,3378 | 0,113 | 0      |
| 19 | P02545 LMNA_HUMAN   | R.NSNLVGAAHEE.L        |            | 2 | 2,3351 | 0,261 | -0,428 |
| 19 | Q9UBQ7 GRHPR_HUMAN  | E.GLCNKDFQK.M          |            | 2 | 2,3347 | 0,208 | -0,679 |
| 19 | Q66K74 MAP1S_HUMAN  | E.AGLSLPLR.G           |            | 2 | 2,3333 | 0,088 | 0,148  |
| 19 | O15047 SET1A_HUMAN  | R.KTVSFAIE.V           |            | 2 | 2,3317 | 0,115 | 0      |
| 19 | Q07157 ZO1_HUMAN    | K.S#HSLAQPPFEDSGVE.T   | S1577:     | 2 | 2,3293 | 0,205 | -0,581 |
| 19 | O95400 CD2B2_HUMAN  | K.LVDPVAGSGGPGSR.F     |            | 2 | 2,3274 | 0,214 | -0,385 |
| 19 | A0JNW5 UH1BL_HUMAN  | R.CPPNLAPLCVSYK.N      |            | 2 | 2,3265 | 0,279 | -0,402 |
| 19 | Q9Y224 CN166_HUMAN  | E.AIVAVQAIADPK.T       |            | 2 | 2,3227 | 0,259 | -0,093 |
| 19 | P31150 GDIA_HUMAN   | E.CILSGIMSVNGK.K       |            | 2 | 2,322  | 0,207 | 0,095  |
| 19 | Q14444 CAPR1_HUMAN  | K.GKLDDYQER.M          |            | 2 | 2,322  | 0,345 | -0,326 |
| 19 | Q14684 RRP1B_HUMAN  | K.SILVS#PTGPSRVAFDPE.Q | S706:      | 2 | 2,3212 | 0,279 | -0,198 |
| 19 | Q9UNZ2 NSF1C_HUMAN  | R.KKS#PNELVDDLFK.G     | S114:      | 2 | 2,321  | 0,114 | -0,454 |
| 19 | P13861 KAP2_HUMAN   | R.APASVLPAAATPR.Q      |            | 2 | 2,3197 | 0,302 | -0,212 |
| 19 | P38646 GRP75_HUMAN  | K.NAVITVPAYFNDSQR.Q    |            | 2 | 2,3162 | 0,267 | -0,504 |
| 19 | Q9NZ71 RTEL1_HUMAN  | E.AKS#PGPFSTR.K        | S779:      | 2 | 2,3149 | 0,299 | -0,191 |
| 19 | P13797 PLST_HUMAN   | K.KLTPFIIQE.N          |            | 2 | 2,3092 | 0,087 | 0      |
| 19 | Q10567 AP1B1_HUMAN  | K.SLPRT#ASSE#AESPE.T   | T597:S602: | 2 | 2,3067 | 0,2   | 0,406  |
| 19 | O95817 BAG3_HUMAN   | R.GYISIPVIHE.Q         |            | 2 | 2,3043 | 0,181 | -0,108 |
| 19 | P68104 EF1A1_HUMAN  | K.DGNASGTTLLE.A        |            | 2 | 2,3035 | 0,333 | 0,113  |
| 19 | Q9NQW6 ANLN_HUMAN   | K.TQS#LPVTEKVTE.N      | S485:      | 2 | 2,3004 | 0,246 | -0,259 |
| 19 | Q7KZ85 SPT6H_HUMAN  | K.KLPGYTDAALQE.A       |            | 2 | 2,2999 | 0,098 | -0,187 |
| 19 | Q2M2I8 AAK1_HUMAN   | R.ILS#DVTHSAVFGVPASK.S | S637:      | 2 | 2,2969 | 0,423 | -0,472 |
| 19 | P11021 GRP78_HUMAN  | K.ITITNDQNR.L          |            | 2 | 2,2932 | 0,251 | 0      |
| 19 | Q969S3 ZN622_HUMAN  | E.FADFYDFR.S           |            | 2 | 2,2918 | 0,326 | -0,226 |
| 19 | Q92733 PRCC_HUMAN   | K.TILQGSSE.G           |            | 2 | 2,2915 | 0,211 | -0,073 |

|    |                    |                       |        |   |        |       |        |
|----|--------------------|-----------------------|--------|---|--------|-------|--------|
| 19 | P49411 EFTU_HUMAN  | E.AGDNLGALVR.G        |        | 2 | 2,2884 | 0,139 | -0,371 |
| 19 | Q09666 AHNK_HUMAN  | K.FKMPFLSISS#PK.V     | S3412: | 2 | 2,2866 | 0,218 | -0,167 |
| 19 | P21333 FLNA_HUMAN  | R.ANLPQSFQVD.T        |        | 2 | 2,2839 | 0,291 | -0,218 |
| 19 | Q9UBG0 MRC2_HUMAN  | R.CLTALPYICK.R        |        | 2 | 2,2822 | 0,164 | -0,394 |
| 19 | P83881 RL36A_HUMAN | K.HFELGGDK.K          |        | 2 | 2,2803 | 0,162 | 0      |
| 19 | O60749 SNX2_HUMAN  | E.DAQITLLK.K          |        | 2 | 2,2789 | 0,13  | -0,068 |
| 19 | P39880 CUX1_HUMAN  | E.YSQGAS#PQPQHQLK.K   | S1237: | 2 | 2,2767 | 0,177 | -0,444 |
| 19 | P49327 FAS_HUMAN   | K.DTVTISGPQAPVFE.F    |        | 2 | 2,2759 | 0,161 | -0,501 |
| 19 | P29401 TKT_HUMAN   | K.NMAEQIIQE.I         |        | 2 | 2,2722 | 0,156 | 0,113  |
| 19 | Q96AG4 LRC59_HUMAN | K.GGNLRDKLDGNE.L      |        | 2 | 2,2717 | 0,14  | -0,095 |
| 19 | Q9Y2W1 TR150_HUMAN | R.ERS#PALKSPLQSVVVR.R | S248:  | 2 | 2,2705 | 0,57  | -0,595 |
| 19 | Q13428 TCOF_HUMAN  | K.TVANLLSGK.S         |        | 2 | 2,2665 | 0,322 | -0,203 |
| 19 | P49736 MCM2_HUMAN  | E.SFTMAS#SPAQR.R      | S12:   | 2 | 2,2663 | 0,435 | 0      |
| 19 | P82094 TMF1_HUMAN  | E.TKDIALEPK.E         |        | 2 | 2,2653 | 0,117 | -0,601 |
| 19 | P78347 GTF2I_HUMAN | E.LVISYLPFGMASK.I     |        | 2 | 2,2646 | 0,184 | -0,355 |
| 19 | O95218 ZRAB2_HUMAN | K.AVGPA SILKE.V       |        | 2 | 2,2633 | 0,299 | -0,062 |
| 19 | Q6P1L5 AL2SC_HUMAN | E.GSEESPCSADLLVDPR.D  |        | 2 | 2,2499 | 0,182 | -0,462 |
| 19 | P60660 MYL6_HUMAN  | E.IRHVLVTLGEK.M       |        | 2 | 2,2496 | 0,094 | -0,386 |
| 19 | Q04721 NOTC2_HUMAN | K.STM*PTSLPNLAKE.A    |        | 2 | 2,2442 | 0,27  | -0,434 |
| 19 | P25440 BRD2_HUMAN  | R.IRKPS#LLYE.G        | S37:   | 2 | 2,2437 | 0,117 | -0,204 |
| 19 | Q9H6F5 CCD86_HUMAN | R.RLGGLRPES#PE.S      | S18:   | 2 | 2,2431 | 0,188 | -0,378 |
| 19 | Q9Y2Z0 SUGT1_HUMAN | R.AMNKS#FM*E.S        | S331:  | 2 | 2,2418 | 0,266 | 0      |
| 19 | Q15424 SAFB1_HUMAN | K.ADSSLAVVK.R         |        | 2 | 2,2395 | 0,334 | 0      |
| 19 | Q15942 ZYX_HUMAN   | R.SPGAPGPLTK.E        |        | 2 | 2,2369 | 0,192 | 0      |
| 19 | P78559 MAP1A_HUMAN | E.GGPY#SPLGKDYR.K     | Y1902: | 2 | 2,2357 | 0,159 | -0,79  |
| 19 | P50454 SERPH_HUMAN | R.SALQSINE.W          |        | 2 | 2,2285 | 0,094 | 0,212  |
| 19 | Q05524 ENO1B_HUMAN | E.KGVPLYR.H           |        | 2 | 2,2264 | 0,196 | -0,439 |
| 19 | Q7RTP6 MICA3_HUMAN | E.NAPAQSIGIR.R        |        | 2 | 2,226  | 0,348 | -0,119 |
| 19 | Q14116 IL18_HUMAN  | K.SDIIFQ.R.S          |        | 2 | 2,2258 | 0,325 | -0,119 |
| 19 | P14618 KPYM_HUMAN  | R.LDIDSPITAR.N        |        | 2 | 2,2248 | 0,14  | -0,102 |
| 19 | Q58FF7 H90B3_HUMAN | D.NSTMGYMMAK.K        |        | 2 | 2,2236 | 0,313 | -0,323 |
| 19 | P63241 IF5A1_HUMAN | R.KNGFVVLK.G          |        | 2 | 2,2216 | 0,109 | 0,135  |
| 19 | Q15742 NAB2_HUMAN  | R.SFSPKS#PLELGE.K     | S162:  | 2 | 2,2197 | 0,221 | -0,445 |



|    |                    |                            |            |   |        |       |        |
|----|--------------------|----------------------------|------------|---|--------|-------|--------|
| 19 | Q9UN36 NDRG2_HUMAN | R.T#ASL TSAASVDG NR.S      | T330:      | 2 | 2,2146 | 0,088 | 0,085  |
| 19 | Q9Y3E2 BOLA1_HUMAN | R.LVHAALAE.L               |            | 2 | 2,2125 | 0,202 | 0      |
| 19 | Q9Y2W2 WBP11_HUMAN | E.LTPLQAMM*LR.M            |            | 2 | 2,2121 | 0,223 | -0,308 |
| 19 | P08133 ANXA6_HUMAN | E.DTIIDIITHR.S             |            | 2 | 2,2105 | 0,258 | -0,51  |
| 19 | P04083 ANXA1_HUMAN | E.ATIIDILTK.R              |            | 2 | 2,2039 | 0,263 | -0,185 |
| 19 | Q4G0J3 LARP7_HUMAN | E.NM*DTSNTSISK.M           |            | 2 | 2,2031 | 0,244 | -0,402 |
| 19 | Q13242 SFRS9_HUMAN | R.GS#PHYFS#PFRPY.-         | S211:S216: | 2 | 2,2031 | 0,218 | -0,227 |
| 19 | Q14151 SAFB2_HUMAN | K.SKGE PVISVK.T            |            | 2 | 2,2027 | 0,11  | 0      |
| 19 | Q86YP4 P66A_HUMAN  | R.GEGLVGDGPVDMR.T          |            | 2 | 2,2006 | 0,316 | -0,375 |
| 19 | P46013 KI67_HUMAN  | K.LDLLGNLPGSK.R            |            | 2 | 2,1969 | 0,224 | -0,108 |
| 19 | P04264 K2C1_HUMAN  | R.GSGGGSSGSGSIGGR.G        |            | 2 | 2,1955 | 0,288 | -0,447 |
| 19 | P51858 HDGF_HUMAN  | R.RAGDLLEDS#PKRPK.E        | S165:      | 2 | 2,1879 | 0,185 | -0,808 |
| 19 | O95793 STAU1_HUMAN | K.VTFE PEGSGDENGT SNKEDE.F |            | 2 | 2,1852 | 0,24  | -0,452 |
| 19 | Q15650 TRIP4_HUMAN | K.FVNLYTRE.G               |            | 2 | 2,1847 | 0,157 | -0,117 |
| 19 | Q99618 CDCA3_HUMAN | R.TPM*KTSSGDPPS#PLVK.Q     | S87:       | 2 | 2,1837 | 0,17  | -0,351 |
| 19 | Q9H074 PAIP1_HUMAN | K.APGFLQPPPLR.Q            |            | 2 | 2,1831 | 0,138 | -0,614 |
| 19 | Q69YN4 VIR_HUMAN   | R.AYGETS#PHTFQLD.L         | S63:       | 2 | 2,1801 | 0,153 | -0,631 |
| 19 | Q9Y2W2 WBP11_HUMAN | R.RRDEDM*LYS#PE.L          | S237:      | 2 | 2,1765 | 0,136 | -0,162 |
| 19 | P62736 ACTA_HUMAN  | R.GILTLKYPIE.H             |            | 2 | 2,1747 | 0,322 | -0,425 |
| 19 | Q96RS0 TGS1_HUMAN  | K.LYNLGLK.G                |            | 2 | 2,1705 | 0,097 | -0,371 |
| 19 | O00299 CLIC1_HUMAN | R.KFLDGNE.L                |            | 2 | 2,1693 | 0,162 | 0,296  |
| 19 | Q86V48 LUZP1_HUMAN | R.VGPSSGDAPEPSSR.R         |            | 2 | 2,1683 | 0,198 | -0,273 |
| 19 | Q01518 CAP1_HUMAN  | R.ATKKEPAVLE.L             |            | 2 | 2,1666 | 0,109 | -0,337 |
| 19 | P35221 CTNA1_HUMAN | R.KAVLMIR.T                |            | 2 | 2,1654 | 0,097 | 0,073  |
| 19 | Q96KM6 Z512B_HUMAN | R.TSAQVAVFHLQE.I           |            | 2 | 2,162  | 0,116 | -0,459 |
| 19 | Q9UQ35 SRRM2_HUMAN | K.FSPFPVQDRPE.S            |            | 2 | 2,1618 | 0,087 | -0,185 |
| 19 | P40818 UBP8_HUMAN  | R.SYSS#PDITQAIQE.E         | S719:      | 2 | 2,1434 | 0,099 | -0,241 |
| 19 | P04637 P53_HUMAN   | R.ALPNNTSSS#PQPK.K         | S315:      | 2 | 2,1429 | 0,433 | -0,343 |
| 19 | O95433 AHSA1_HUMAN | K.GKLIF FYE.W              |            | 2 | 2,142  | 0,208 | -0,24  |
| 19 | Q14684 RRP1B_HUMAN | K.SILVS#PTGPSR.V           | S706:      | 2 | 2,141  | 0,196 | -0,409 |
| 19 | Q9UKY7 CDV3_HUMAN  | E.VDYSGLR.V                |            | 2 | 2,1384 | 0,171 | 0,226  |
| 19 | P30101 PDIA3_HUMAN | K.QAGPASVPLRTEEE.F         |            | 2 | 2,1373 | 0,219 | -0,576 |
| 19 | Q8IYT4 KATL2_HUMAN | K.GLLLYGPPGTGK.T           |            | 2 | 2,1369 | 0,329 | -0,104 |

|    |                    |                       |            |   |        |       |        |
|----|--------------------|-----------------------|------------|---|--------|-------|--------|
| 19 | P04406 G3P_HUMAN   | R.VVDLMAHM*ASKE.-     |            | 2 | 2,1341 | 0,156 | -0,634 |
| 19 | Q9P107 GMIP_HUMAN  | E.TPITSVPR.G          |            | 2 | 2,1326 | 0,273 | 0,07   |
| 19 | Q9Y230 RUVB2_HUMAN | R.GLGLDDALEPR.Q       |            | 2 | 2,132  | 0,243 | -0,317 |
| 19 | Q9UHY1 NRBP_HUMAN  | R.HLSCDLM*PNENIPE.L   |            | 2 | 2,129  | 0,081 | -0,362 |
| 19 | Q6ZUT9 RA61L_HUMAN | R.LSITSLTGK.N         |            | 2 | 2,1258 | 0,177 | 0      |
| 19 | Q9Y4B6 VPRBP_HUMAN | R.KLSSEPLLPLDE.E      |            | 2 | 2,1236 | 0,201 | -0,455 |
| 19 | P38571 LICH_HUMAN  | E.DGYILCLNR.I         |            | 2 | 2,12   | 0,189 | -0,109 |
| 19 | Q9H0G5 CCD55_HUMAN | R.AKDKFLDQE.R         |            | 2 | 2,1189 | 0,095 | 0      |
| 19 | P11021 GRP78_HUMAN | R.ALSSQHQARIE.I       |            | 2 | 2,1162 | 0,159 | -0,689 |
| 19 | Q96ST2 IWS1_HUMAN  | K.HM*DFLSDFE.M        |            | 2 | 2,1152 | 0,098 | -0,633 |
| 19 | Q8WWM7 ATX2L_HUMAN | E.NSLDPFPPR.I         |            | 2 | 2,1142 | 0,124 | 0      |
| 19 | Q9UQ35 SRRM2_HUMAN | R.VSGRTS#PPLDR.A      | S2398:     | 2 | 2,1128 | 0,126 | -0,443 |
| 19 | Q92576 PHF3_HUMAN  | K.AKPVGS#PLFK.F       | S283:      | 2 | 2,112  | 0,118 | -0,434 |
| 19 | P04637 P53_HUMAN   | R.ALPNNTSS#SPQPK.K    | S314:      | 2 | 2,1045 | 0,345 | -0,343 |
| 19 | P07602 SAP_HUMAN   | K.LVGYLDR.N           |            | 2 | 2,1033 | 0,332 | 0,073  |
| 19 | Q8N3V7 SYNPO_HUMAN | R.HIMSRS#PMVE.R       | S536:      | 2 | 2,1018 | 0,161 | -0,193 |
| 19 | Q4V328 GRAP1_HUMAN | K.TISSLKQE.V          |            | 2 | 2,1017 | 0,136 | 0,269  |
| 19 | O60828 PQBP1_HUMAN | R.REELAPYPK.S         |            | 2 | 2,0994 | 0,204 | -0,221 |
| 19 | P26373 RL13_HUMAN  | K.LATQLTGPVM*PVR.N    |            | 2 | 2,099  | 0,084 | -0,436 |
| 19 | Q96T23 RSF1_HUMAN  | K.AQIDPVLLK.N         |            | 2 | 2,0988 | 0,292 | -0,245 |
| 19 | Q9Y3E2 BOLA1_HUMAN | E.GLS#PLQR.H          | S81:       | 2 | 2,0984 | 0,185 | 0      |
| 19 | Q15102 PA1B3_HUMAN | R.VVVLGLLPR.G         |            | 2 | 2,0948 | 0,336 | 0,126  |
| 19 | O76021 RL1D1_HUMAN | K.ATNES#EDEIPLVPIGK.K | S361:      | 2 | 2,0942 | 0,147 | -0,572 |
| 19 | P82650 RT22_HUMAN  | K.ILTPHIFKEE.N        |            | 2 | 2,0921 | 0,233 | -0,304 |
| 19 | Q14152 EIF3A_HUMAN | R.LGDSSLSR.K          |            | 2 | 2,0892 | 0,217 | 0,073  |
| 19 | O60749 SNX2_HUMAN  | R.KLHVSVE.A           |            | 2 | 2,0887 | 0,09  | 0,15   |
| 19 | Q13111 CAF1A_HUMAN | K.FAPFEIKE.H          |            | 2 | 2,0862 | 0,099 | -0,187 |
| 19 | Q2M2I8 AAK1_HUMAN  | K.VQTTPPPAVQGQK.V     |            | 2 | 2,085  | 0,253 | -0,452 |
| 19 | Q5QJE6 TDIF2_HUMAN | K.FGDCGS#DDEEE.S      | S397:      | 2 | 2,0814 | 0,104 | -0,786 |
| 19 | Q6NZI2 PTRF_HUMAN  | E.SDAVLVDKS#DS#D.-    | S387:S389: | 2 | 2,0757 | 0,083 | -0,259 |
| 19 | O95425 SVIL_HUMAN  | R.DSSFTEVPR.S         |            | 2 | 2,0682 | 0,187 | 0      |
| 19 | Q9BUL5 PHF23_HUMAN | R.LGGPPKS#GEP.-       | S400:      | 2 | 2,0665 | 0,242 | -0,239 |
| 19 | Q56NI9 ESCO2_HUMAN | K.CDSLHFTE.N          |            | 2 | 2,0653 | 0,249 | -0,544 |

|    |                    |                           |        |   |        |       |        |
|----|--------------------|---------------------------|--------|---|--------|-------|--------|
| 19 | Q562F6 SGOL2_HUMAN | K.DLPFVEE.I               |        | 2 | 2,0642 | 0,188 | 0,144  |
| 19 | Q969S3 ZN622_HUMAN | K.KAPPAPAKE.A             |        | 2 | 2,0625 | 0,086 | -0,134 |
| 19 | P19338 NUCL_HUMAN  | K.GLSEDTTEETLKE.S         |        | 2 | 2,0613 | 0,089 | -0,084 |
| 19 | Q8WWI1 LMO7_HUMAN  | R.MY#SFDDVLE.E            | Y804:  | 2 | 2,0584 | 0,202 | -0,407 |
| 19 | Q709C8 VP13C_HUMAN | R.LLRPQLPS.-              |        | 2 | 2,0573 | 0,3   | 0,066  |
| 19 | Q8N6T3 ARFG1_HUMAN | E.TFGSAEPTK.T             |        | 2 | 2,0564 | 0,227 | 0,065  |
| 19 | P07237 PDIA1_HUMAN | E.DHVLVLR.K               |        | 2 | 2,0559 | 0,087 | -1,002 |
| 19 | P35527 K1C9_HUMAN  | R.FSSSSGYGGGSSR.V         |        | 2 | 2,0553 | 0,279 | -0,296 |
| 19 | Q7Z6E9 RBBP6_HUMAN | R.FLPLNIRNS#PFTR.G        | S873:  | 2 | 2,052  | 0,286 | -0,369 |
| 19 | Q9Y2W2 WBP11_HUMAN | E.LTPLQAM*M*LR.M          |        | 2 | 2,0494 | 0,304 | -0,506 |
| 19 | Q58FF7 H90B3_HUMAN | D.NSTM*GYMM*AK.K          |        | 2 | 2,0487 | 0,278 | -0,523 |
| 19 | P35241 RADI_HUMAN  | K.ALELDQER.K              |        | 2 | 2,039  | 0,149 | -0,063 |
| 19 | P06493 CDC2_HUMAN  | E.GT#YGVVYK.G             | T14:   | 2 | 2,0328 | 0,327 | 0,063  |
| 19 | Q9Y2D5 AKAP2_HUMAN | R.DALGDSLQVPVS#PSSTTSSR.C | S152:  | 2 | 2,0321 | 0,416 | -0,468 |
| 19 | O14744 ANM5_HUMAN  | K.CLLDRVPEEE.K            |        | 2 | 2,0312 | 0,145 | -0,291 |
| 19 | Q9HCG8 NCM_HUMAN   | R.DYFDYSRSDYE.H           |        | 2 | 2,0312 | 0,257 | -0,334 |
| 19 | Q6ZUT9 RA61L_HUMAN | K.NNKPNAQIQE.G            |        | 2 | 2,0294 | 0,153 | -0,402 |
| 19 | A4D1P6 WDR91_HUMAN | R.VGFLSLLPQSK.K           |        | 2 | 2,0294 | 0,166 | -0,574 |
| 19 | Q96JM3 ZN828_HUMAN | K.TSPASLDFPE.S            |        | 2 | 2,0281 | 0,185 | 0      |
| 19 | Q8WXH0 SYNE2_HUMAN | R.RGS#M*SYLAAVEEEVEE.S    | S4108: | 2 | 2,0235 | 0,313 | -0,708 |
| 19 | Q9Y262 IF3EI_HUMAN | R.MQKGDQPQVYEE.L          |        | 2 | 2,018  | 0,126 | -0,092 |
| 19 | Q9H501 ESF1_HUMAN  | R.TLDSGTSEIVKS#PRIE.C     | S198:  | 2 | 2,0177 | 0,214 | -0,269 |
| 19 | Q9UBF8 PI4KB_HUMAN | R.STRS#VENLPE.C           | S428:  | 2 | 2,0159 | 0,152 | 0,101  |
| 19 | P10809 CH60_HUMAN  | K.DM*AIATGGAVFGEE.G       |        | 2 | 2,0154 | 0,118 | -0,176 |
| 19 | P35251 RFC1_HUMAN  | K.NKPLSPIKLT#PTSVLD.Y     | T161:  | 2 | 2,0143 | 0,129 | -0,271 |
| 19 | Q9NY61 AATF_HUMAN  | K.ALLTTNQLPQPD.V          |        | 2 | 2,0099 | 0,151 | -0,093 |
| 19 | P53597 SUCA_HUMAN  | K.IICQGFTGK.Q             |        | 2 | 2,0019 | 0,139 | 0,119  |
| 19 | P49736 MCM2_HUMAN  | E.SFTM*ASSPAQR.R          |        | 2 | 2,001  | 0,256 | -0,407 |
| 19 | Q01433 AMPD2_HUMAN | K.HFPLDLR.T               |        | 2 | 1,9991 | 0,176 | -0,068 |
| 19 | Q5VZK9 LR16A_HUMAN | K.VALLPPVLK.K             |        | 2 | 1,9979 | 0,164 | -0,193 |
| 19 | Q96BK5 PINX1_HUMAN | D.LDCIFGK.R               |        | 2 | 1,9962 | 0,233 | 0,215  |
| 19 | Q99618 CDCA3_HUMAN | K.TSSGDPPS#PLVKQLSE.V     | S87:   | 2 | 1,9956 | 0,258 | -0,496 |
| 19 | Q9HAU0 PKHA5_HUMAN | K.INS#VKLNSLPSEYE.S       | S343:  | 2 | 1,9938 | 0,091 | 0      |

|    |                    |                          |       |   |        |       |        |
|----|--------------------|--------------------------|-------|---|--------|-------|--------|
| 19 | P37802 TAGL2_HUMAN | R.NFSDNQLQE.G            |       | 2 | 1,9937 | 0,143 | -0,557 |
| 19 | P62158 CALM_HUMAN  | E.FLTM*MAR.K             |       | 2 | 1,9866 | 0,083 | 0,138  |
| 19 | P23229 ITA6_HUMAN  | R.LLLVGAPR.G             |       | 2 | 1,9825 | 0,216 | 0      |
| 19 | P12956 KU70_HUMAN  | K.RPKVEYS#EEE.L          | S560: | 2 | 1,9823 | 0,296 | -0,363 |
| 19 | P23588 IF4B_HUMAN  | K.GKTIS#LTDFLAE.D        | S16:  | 2 | 1,981  | 0,13  | -0,266 |
| 19 | P07900 HS90A_HUMAN | E.MVSLKDYCTR.M           |       | 2 | 1,9746 | 0,238 | -0,288 |
| 19 | P54819 KAD2_HUMAN  | E.MLDDLMEK.R             |       | 2 | 1,9728 | 0,146 | -0,061 |
| 19 | P08670 VIME_HUMAN  | R.SYVTTSTR.T             |       | 2 | 1,97   | 0,121 | 0,133  |
| 19 | Q5TZA2 CROCC_HUMAN | E.SGVQLSGSER.T           |       | 2 | 1,9696 | 0,18  | -0,12  |
| 19 | Q53HC0 CCD92_HUMAN | K.NLLFLQRE.H             |       | 2 | 1,9651 | 0,131 | 0,118  |
| 19 | Q86X29 LSR_HUMAN   | R.GPALTPIRDEE.W          |       | 2 | 1,9635 | 0,266 | -0,306 |
| 19 | Q96T83 SL9A7_HUMAN | R.RT#KSSSEEVLE.R         | T691: | 2 | 1,9614 | 0,134 | -0,363 |
| 19 | P18858 DNL1_HUMAN  | R.VLGSEGEED.E.A          |       | 2 | 1,9563 | 0,155 | -0,511 |
| 19 | P46821 MAP1B_HUMAN | R.SALRDAYCSE.V           |       | 2 | 1,9562 | 0,205 | -0,416 |
| 19 | Q16881 TRXR1_HUMAN | E.TDLPVVFVK.Q            |       | 2 | 1,9553 | 0,148 | 0,18   |
| 19 | Q8IYB3 SRRM1_HUMAN | E.ATSTSDILK.V            |       | 2 | 1,9544 | 0,13  | 0      |
| 19 | Q14697 GANAB_HUMAN | E.LRNLGLYVK.T            |       | 2 | 1,9527 | 0,111 | 0,227  |
| 19 | P06753 TPM3_HUMAN  | K.ILTDKLKEAE.T           |       | 2 | 1,9524 | 0,173 | -0,316 |
| 19 | Q8NDI1 EHBP1_HUMAN | K.ALATSSINM*K.Q          |       | 2 | 1,9522 | 0,113 | -0,232 |
| 19 | P35579 MYH9_HUMAN  | R.GDLPFVVR.R             |       | 2 | 1,9488 | 0,308 | -0,122 |
| 19 | Q9Y490 TLN1_HUMAN  | R.TLREQGVEE.H            |       | 2 | 1,948  | 0,218 | -0,23  |
| 19 | Q6S8J3 A26CA_HUMAN | R.AVFPSIVGRPR.Q          |       | 2 | 1,9445 | 0,329 | -0,509 |
| 19 | Q9NYF8 BCLF1_HUMAN | K.TIAPQNAPRDE.S          |       | 2 | 1,9378 | 0,22  | -0,503 |
| 19 | P51003 PAPOA_HUMAN | K.IPTPIVGVK.R            |       | 2 | 1,9366 | 0,113 | -0,462 |
| 19 | Q9H6Y2 WDR55_HUMAN | K.AIHVLDVE.Q             |       | 2 | 1,9299 | 0,155 | 0      |
| 19 | Q15424 SAFB1_HUMAN | R.VIDLRAE.L              |       | 2 | 1,9272 | 0,2   | -0,075 |
| 19 | Q9NQ55 SSF1_HUMAN  | R.VGGS#DEEASGIPSRTASLE.L | S359: | 2 | 1,917  | 0,36  | -0,126 |
| 19 | Q5VZK9 LR16A_HUMAN | R.RYGVQVMGSGLLAE.M       |       | 2 | 1,9125 | 0,103 | 0,165  |
| 19 | Q86UU1 PHLB1_HUMAN | R.GLLTDSPAATVLAE.A       |       | 2 | 1,9092 | 0,155 | -0,359 |
| 19 | Q55W79 CE170_HUMAN | R.TLPQLPNEEKSLE.S        |       | 2 | 1,9064 | 0,218 | -0,489 |
| 19 | Q96PU5 NED4L_HUMAN | R.SLSS#PTVTLAPLEGAK.D    | S449: | 2 | 1,9055 | 0,309 | 0,281  |
| 19 | Q8IZ21 PHAR4_HUMAN | E.GSHRAHS#LLFE.N         | S443: | 2 | 1,9044 | 0,093 | -0,823 |
| 19 | P35251 RFC1_HUMAN  | E.AHLTPYSLQAIK.A         |       | 2 | 1,8967 | 0,222 | -0,091 |

|    |                     |                         |            |   |        |       |        |
|----|---------------------|-------------------------|------------|---|--------|-------|--------|
| 19 | ##P18583 SON_HUMAN  | R.DRGVDSALLPGEIGAR.L    |            | 2 | 1,8941 | 0,085 | -0,075 |
| 19 | Q6ZSZ5 ARHG1_HUMAN  | R.SLS#PILPGR.H          | S1103:     | 2 | 1,8911 | 0,202 | -0,12  |
| 19 | Q58FF8 H90B2_HUMAN  | K.EKYIDQEELNK.T         |            | 2 | 1,8867 | 0,238 | -0,26  |
| 19 | Q66K64 DCA15_HUMAN  | R.AHS#EPLALCGE.T        | S359:      | 2 | 1,8861 | 0,143 | -0,193 |
| 19 | Q8WXV6 Q8WXV6_HUMAN | R.KRTS#SEDNLYLAVLR.A    | S20:       | 2 | 1,8844 | 0,376 | -0,86  |
| 19 | Q10567 AP1B1_HUMAN  | K.SLPPRTASS#ES#AESPE.T  | S600:S602: | 2 | 1,8831 | 0,1   | -0,135 |
| 19 | O43583 DENR_HUMAN   | K.LDADYPLR.V            |            | 2 | 1,8795 | 0,152 | -0,063 |
| 19 | Q9H6F5 CCD86_HUMAN  | R.LGGLRPESPE.S          |            | 2 | 1,8737 | 0,09  | 0,116  |
| 19 | Q96JM3 ZN828_HUMAN  | E.DTLFPSSK.K            |            | 2 | 1,8712 | 0,175 | -0,068 |
| 19 | P51858 HDGF_HUMAN   | R.AGDLLDES#PKRPK.E      | S165:      | 2 | 1,8703 | 0,103 | -0,486 |
| 19 | P63173 RL38_HUMAN   | K.QLPPLGAVKE.L          |            | 2 | 1,8699 | 0,256 | 0      |
| 19 | Q9Y5W9 SNX11_HUMAN  | K.SCCFLPR.S             |            | 2 | 1,8698 | 0,248 | -0,13  |
| 19 | P49023 PAXI_HUMAN   | K.RPVFLSE.E             |            | 2 | 1,8533 | 0,099 | 0,288  |
| 19 | Q96HI0 SENP5_HUMAN  | K.GSSFLGKELSLDE.A       |            | 2 | 1,8468 | 0,16  | -0,441 |
| 19 | O75533 SF3B1_HUMAN  | R.TYMDVMRE.Q            |            | 2 | 1,8381 | 0,275 | 0,117  |
| 19 | P35527 K1C9_HUMAN   | K.TLLDIDNTR.M           |            | 2 | 1,8373 | 0,277 | 0,115  |
| 19 | Q5T5Y3 CAMP1_HUMAN  | E.SCPAPLTTWR.Q          |            | 2 | 1,8341 | 0,223 | -0,308 |
| 19 | Q14444 CAPR1_HUMAN  | R.LNQDQLDAVSK.Y         |            | 2 | 1,8307 | 0,15  | 0,099  |
| 19 | Q9UQ80 PA2G4_HUMAN  | K.SDQDYILKE.G           |            | 2 | 1,8267 | 0,108 | -1,208 |
| 19 | P78559 MAP1A_HUMAN  | E.GGPYS#PLGKDYR.K       | S1903:     | 2 | 1,826  | 0,089 | -0,79  |
| 19 | Q00610 CLH1_HUMAN   | R.IAAYLFK.G             |            | 2 | 1,826  | 0,149 | -0,295 |
| 19 | O94833 BPAAE_HUMAN  | E.ALQTIQLFLAK.H         |            | 2 | 1,8189 | 0,1   | -0,392 |
| 19 | P08107 HSP71_HUMAN  | R.LVNHVVEE.F            |            | 2 | 1,8178 | 0,145 | -0,124 |
| 19 | Q9UQ35 SRRM2_HUMAN  | R.SLSYS#PVER.R          | S2694:     | 2 | 1,815  | 0,164 | 0,109  |
| 19 | Q13427 PPIG_HUMAN   | E.KIRS#SVEKE.N          | S716:      | 2 | 1,8099 | 0,093 | -0,211 |
| 19 | P05787 K2C8_HUMAN   | R.AFSSRS#YTSGPGSR.I     | S24:       | 2 | 1,8046 | 0,342 | 0,634  |
| 19 | P13639 EF2_HUMAN    | K.SDPVVSYR.E            |            | 2 | 1,7997 | 0,283 | 0      |
| 19 | Q66K74 MAP1S_HUMAN  | R.S#ASPHDVDLCLVSPCEFE.H | S729:      | 2 | 1,799  | 0,242 | -0,342 |
| 19 | Q9P1Y6 K1542_HUMAN  | E.NPS#PLFSIKK.T         | S814:      | 2 | 1,7961 | 0,099 | -0,403 |
| 19 | P62158 CALM_HUMAN   | E.FLTM*M*AR.K           |            | 2 | 1,7944 | 0,165 | -0,203 |
| 19 | Q99618 CDCA3_HUMAN  | K.TSSGDPPS#PLVK.Q       | S87:       | 2 | 1,7852 | 0,12  | 0      |
| 19 | P42356 PI4KA_HUMAN  | R.SILPSNLLTVQCQE.G      |            | 2 | 1,7848 | 0,243 | -0,579 |
| 19 | Q01105 SET_HUMAN    | K.KPRPPPALGPEE.T        |            | 2 | 1,7826 | 0,106 | -0,474 |

|    |                      |                              |            |   |        |       |        |
|----|----------------------|------------------------------|------------|---|--------|-------|--------|
| 19 | P42166 LAP2A_HUMAN   | R.NLFISCK.S                  |            | 2 | 1,7735 | 0,148 | 0,069  |
| 19 | Q9P107 GMIP_HUMAN    | E.ETPITSVPR.G                |            | 2 | 1,7696 | 0,265 | -0,122 |
| 19 | P23588 IF4B_HUMAN    | K.VM*PAPPPKE.N               |            | 2 | 1,755  | 0,129 | 0,062  |
| 19 | O14974 MYPT1_HUMAN   | R.SAS#SPRLSSSLDNKE.K         | S472:      | 2 | 1,7533 | 0,209 | -0,368 |
| 19 | P62158 CALM_HUMAN    | E.FLTMMAR.K                  |            | 2 | 1,7489 | 0,129 | 0,07   |
| 19 | P49792 RBP2_HUMAN    | K.LPPTFFCYK.N                |            | 2 | 1,7477 | 0,112 | -0,312 |
| 19 | P19823 ITIH2_HUMAN   | R.AKGKT#AGLVRS#SALD.M        | T151:S157: | 2 | 1,7409 | 0,09  | 0,075  |
| 19 | P05362 ICAM1_HUMAN   | E.VTTTVLVR.R                 |            | 2 | 1,7389 | 0,24  | -0,412 |
| 19 | Q53GS9 SNUT2_HUMAN   | R.EAPASVVPFVR.V              |            | 2 | 1,7367 | 0,207 | -0,312 |
| 19 | Q9BXF6 RFIP5_HUMAN   | R.SSLIALSSGLE.K              |            | 2 | 1,7243 | 0,182 | -0,314 |
| 19 | Q01433 AMPD2_HUMAN   | E.RQIS#QDVKLEPDILLR.A        | S168:      | 2 | 1,72   | 0,154 | -0,365 |
| 19 | P24534 EF1B_HUMAN    | K.ASLPGVKK.A                 |            | 2 | 1,7158 | 0,176 | 0,229  |
| 19 | O94776 MTA2_HUMAN    | K.LNPADAPNPVVFVATKD.T        |            | 2 | 1,7152 | 0,181 | -0,276 |
| 19 | O75153 EIF3X_HUMAN   | R.TCFSLHLD.G                 |            | 2 | 1,7149 | 0,175 | -0,061 |
| 19 | Q9UQ35 SRRM2_HUMAN   | R.SLSYSPVER.R                |            | 2 | 1,6927 | 0,118 | -0,118 |
| 19 | P43243 MATR3_HUMAN   | E.EGPTLSYGR.D                |            | 2 | 1,6902 | 0,307 | 0      |
| 19 | Q9BVG4 CX026_HUMAN   | K.AVYISVQDK.E                |            | 2 | 1,6895 | 0,145 | -0,06  |
| 19 | O95425 SVIL_HUMAN    | E.SSSTFSFSGR.D               |            | 2 | 1,6891 | 0,085 | -0,115 |
| 19 | Q8N1G1 REXO1_HUMAN   | E.YDPLSNYSAR.H               |            | 2 | 1,6844 | 0,111 | -0,103 |
| 19 | Q13442 HAP28_HUMAN   | R.KGVEGLIDIE.N               |            | 2 | 1,6841 | 0,145 | 0,455  |
| 19 | Q14103 HNRPD_HUMAN   | R.GFCFITFKE.E                |            | 2 | 1,6777 | 0,172 | -0,531 |
| 19 | Q9NYL9 TMOD3_HUMAN   | E.NALLPAGFR.Q                |            | 2 | 1,6701 | 0,1   | -0,064 |
| 19 | ##Q8NHY5 HUS1B_HUMAN | E.VAVTLSPR.R                 |            | 2 | 1,6506 | 0,091 | -1,085 |
| 19 | O75962 TRIO_HUMAN    | R.ASLGTLPLGKPR.A             |            | 2 | 1,6014 | 0,089 | -0,504 |
| 20 | Q4LE39 ARI4B_HUMAN   | E.NKVHADLVISKPVSKS#PE.R      | S778:      | 3 | 6,1867 | 0,387 | -0,18  |
| 20 | P21127 CD2L1_HUMAN   | R.GTS#PRPPEGGLGYSQLGDDDLKE.T | S752:      | 3 | 5,679  | 0,352 | -0,445 |
| 20 | Q9Y6D5 BIG2_HUMAN    | E.LEKPIQSKPQS#PVIQAAAVS#PK.F | S218:S227: | 3 | 5,3362 | 0,387 | -0,148 |
| 20 | Q53HL2 BOREA_HUMAN   | R.IYNISGNGS#PLADSKE.I        | S219:      | 2 | 5,2079 | 0,402 | -0,42  |
| 20 | P05362 ICAM1_HUMAN   | E.LKREPAVGEPAEVTTTVLVR.R     |            | 3 | 5,1773 | 0,422 | -0,253 |
| 20 | Q92625 ANS1A_HUMAN   | R.SLS#KSDSDLTCSPTEDATM*GSR.S | S624:      | 3 | 5,0782 | 0,345 | -0,43  |
| 20 | O00567 NOL5A_HUMAN   | R.LAALALASSESSST#PEECE.E.M   | T468:      | 3 | 4,9551 | 0,404 | -0,322 |
| 20 | Q32MZ4 LRRF1_HUMAN   | R.NM*PGLSAATLASLGGTSSR.R     |            | 2 | 4,9145 | 0,441 | -0,405 |
| 20 | P23588 IF4B_HUMAN    | E.TLNKEEDCHS#PTSKPPKPDQPLK.V | S459:      | 3 | 4,9075 | 0,307 | -0,134 |

|    |                     |                                     |              |   |        |       |        |
|----|---------------------|-------------------------------------|--------------|---|--------|-------|--------|
| 20 | Q00537 PCTK2_HUMAN  | E.KLQINS#PPFDQPM*SR.R               | S165:        | 3 | 4,8378 | 0,377 | -0,789 |
| 20 | Q9BVG4 CX026_HUMAN  | E.GYNKAVYISVQDKEGK.G                |              | 3 | 4,8305 | 0,401 | -0,095 |
| 20 | Q96F86 EDC3_HUMAN   | K.SQDVAVS#PQQQCSK.S                 | S131:        | 2 | 4,7694 | 0,44  | 0,069  |
| 20 | Q13442 HAP28_HUMAN  | R.KGVEGLIDIENPNR.V                  |              | 2 | 4,757  | 0,355 | -0,55  |
| 20 | P08651 NFIC_HUMAN   | E.LQGHLAYDLNPASTGLR.R               |              | 2 | 4,7555 | 0,428 | -0,601 |
| 20 | Q13263 TIF1B_HUMAN  | E.TKPVLM*ALAEGPGAEGPR.L             |              | 3 | 4,7528 | 0,181 | -0,303 |
| 20 | Q03164 HRX_HUMAN    | D.GVDDGTES#DTSVTATTR.K              | S2726:       | 2 | 4,7111 | 0,525 | -0,545 |
| 20 | Q09472 EP300_HUMAN  | E.IKEEEDQPSTSATQSS#PAPGQSK.K        | S1038:       | 3 | 4,688  | 0,466 | 0,221  |
| 20 | Q9Y6D5 BIG2_HUMAN   | E.LEKPIQSKPQSPVIAAAVS#PK.F          | S227:        | 3 | 4,6186 | 0,439 | -0,534 |
| 20 | B2RDE1 B2RDE1_HUMAN | R.KIQVLQQADDAEE.R                   |              | 2 | 4,613  | 0,426 | -0,529 |
| 20 | Q8NCM9 Q8NCM9_HUMAN | R.SSDITSDLGNVLTSTPNAK.T             |              | 2 | 4,6095 | 0,563 | -0,445 |
| 20 | Q9UER7 DAXX_HUMAN   | E.AAAQPGPSHPLPNAAS#PGAEPSSSEPHGAR.G | S33:         | 3 | 4,5709 | 0,344 | -0,122 |
| 20 | Q92882 OSTF1_HUMAN  | K.LAFDM*ATNAACASLLK.K               |              | 2 | 4,5634 | 0,564 | -0,499 |
| 20 | Q14980 NUMA1_HUMAN  | K.RVS#LEPHQGPGT#PE.S                | S1991:T2000: | 2 | 4,5101 | 0,443 | -0,44  |
| 20 | Q96B23 CRO25_HUMAN  | E.TAVEGDPGSGVSGATVGR.K              |              | 2 | 4,4959 | 0,537 | -0,626 |
| 20 | Q4LE39 ARI4B_HUMAN  | K.VHADLVISKPVSKS#PE.R               | S778:        | 3 | 4,4827 | 0,388 | -0,102 |
| 20 | A4D186 A4D186_HUMAN | K.IQVLQQADDAEERAE.R                 |              | 2 | 4,4737 | 0,238 | -0,397 |
| 20 | Q9UHR5 S30BP_HUMAN  | E.KGGLVSDAYGEDDFSR.L                |              | 2 | 4,4694 | 0,487 | -0,569 |
| 20 | Q9NYJ8 TAB2_HUMAN   | R.KLS#M*GSDDAAYTQALLVHQB.A          | S524:        | 3 | 4,4575 | 0,3   | -0,564 |
| 20 | Q9UK76 HN1_HUMAN    | R.RNS#SEASSGDFDLKGE.G               | S87:         | 2 | 4,4417 | 0,441 | -0,322 |
| 20 | P42166 LAP2A_HUMAN  | R.SHISDQS#PLSSKR.K                  | S351:        | 2 | 4,4005 | 0,442 | -0,401 |
| 20 | Q5T1M5 FKB15_HUMAN  | R.RPS#QEQSASASSGQPQAPLNR.E          | S956:        | 3 | 4,3966 | 0,327 | -0,482 |
| 20 | Q8IYB3 SRRM1_HUMAN  | E.KKEKT#PELPEPSVK.V                 | T220:        | 3 | 4,3569 | 0,258 | -0,216 |
| 20 | O00499 BIN1_HUMAN   | K.GNKS#PSPPDGSPAATPE.I              | S296:        | 2 | 4,3043 | 0,406 | -0,289 |
| 20 | O43166 SI1L1_HUMAN  | R.TLS#DESIYNSQRE.H                  | S1585:       | 2 | 4,2668 | 0,511 | -0,226 |
| 20 | P27816 MAP4_HUMAN   | K.VGSLDNVGHLPAGGAVKTE.G             |              | 3 | 4,2057 | 0,421 | -0,301 |
| 20 | Q13428 TCOF_HUMAN   | R.KSAEPSANTTLVS#ETEEE.G             | S171:        | 2 | 4,1957 | 0,46  | -0,366 |
| 20 | O60271 JIP4_HUMAN   | R.SAS#QSS#LDKLDQE.L                 | S730:S733:   | 2 | 4,19   | 0,355 | -0,467 |
| 20 | P06748 NPM_HUMAN    | E.DVKLLSISGKR.S                     |              | 3 | 4,1726 | 0,257 | 0,451  |
| 20 | Q01804 OTUD4_HUMAN  | K.TAADVVSPGANSVDSR.V                |              | 2 | 4,1603 | 0,294 | -0,474 |
| 20 | Q3KQU3 MA7D1_HUMAN  | R.RS#SQPSPTAVPASDS#PPTKQE.V         | S112:S125:   | 3 | 4,1544 | 0,179 | -0,865 |
| 20 | P23588 IF4B_HUMAN   | R.SSNPPARSQS#S#DTEQQSPTS GGGK.V     | S497:S498:   | 3 | 4,1358 | 1     | -0,43  |
| 20 | Q15424 SAFB1_HUMAN  | R.KFDFDACNEVPPAPK.E                 |              | 2 | 4,1189 | 0,389 | -0,844 |

|    |                     |                               |                 |   |        |       |        |
|----|---------------------|-------------------------------|-----------------|---|--------|-------|--------|
| 20 | Q8NEY1 NAV1_HUMAN   | K.AKAVALDSDNISLK.S            |                 | 2 | 4,1121 | 0,484 | -0,338 |
| 20 | O00567 NOL5A_HUMAN  | R.LAALALASSENSSS#TPEECEE.M    | S467:           | 3 | 4,1089 | 0,401 | -0,322 |
| 20 | Q9Y490 TLN1_HUMAN   | K.QAAASATQTIAAAQHAASPK.A      |                 | 3 | 4,0697 | 0,22  | -0,367 |
| 20 | Q92882 OSTF1_HUMAN  | K.LAFDMATNAACASLLK.K          |                 | 2 | 4,0644 | 0,528 | -0,216 |
| 20 | O75179 ANR17_HUMAN  | K.SGPS#PLSS#PNGKLTVASPK.R     | S1696:S1700:    | 2 | 4,0437 | 0,374 | -0,184 |
| 20 | Q7Z6E9 RBBP6_HUMAN  | E.HSNKLGVLVS#PPQQR.R          | S516:           | 3 | 4,0367 | 0,263 | -0,477 |
| 20 | Q7RTQ0 Q7RTQ0_HUMAN | E.SGPDGGEEDGTGSLKR.S          |                 | 2 | 4,0339 | 0,453 | 0,156  |
| 20 | Q7L7X3 TAOK1_HUMAN  | R.GSSM*GVRNS#PQALR.R          | S965:           | 3 | 4,027  | 0,314 | -0,235 |
| 20 | P35908 K22E_HUMAN   | R.FLEQQNQVLQTK.W              |                 | 2 | 4,0209 | 0,336 | -0,661 |
| 20 | Q15057 CENB2_HUMAN  | R.KFVDKYSISLS#PPEQQK.K        | S521:           | 3 | 4,0177 | 0,28  | -0,441 |
| 20 | Q99543 DNJC2_HUMAN  | R.NRNAS#AS#FQELE.D            | S47:S49:        | 2 | 4,01   | 0,332 | -0,56  |
| 20 | Q01804 OTUD4_HUMAN  | K.TAADVVS#PGANSVDSR.V         | S1006:          | 2 | 4,0025 | 0,314 | -0,675 |
| 20 | Q9UN36 NDRG2_HUMAN  | R.SRTAS#LTSASVDGNR.S          | S332:           | 2 | 3,9971 | 0,548 | -0,292 |
| 20 | Q96CV9 OPTN_HUMAN   | R.HGART#SDSDQQAYLVQR.G        | T525:           | 3 | 3,9937 | 0,212 | -0,364 |
| 20 | Q8IUD2 RB6I2_HUMAN  | E.DNLNDSSQQLQDSL.R.K          |                 | 2 | 3,987  | 0,475 | -0,774 |
| 20 | Q9BUH6 CI142_HUMAN  | R.KS#PRPAGPQLFLPDPDPQR.G      | S152:           | 3 | 3,9468 | 0,36  | -0,5   |
| 20 | Q9C0D2 K1731_HUMAN  | R.LKLS#PNKYQPIQIQTSL.L        | S654:           | 3 | 3,9236 | 0,168 | -0,507 |
| 20 | Q8NEY1 NAV1_HUMAN   | K.AKAVALDSDNISLK.S            |                 | 3 | 3,9132 | 0,419 | 0      |
| 20 | Q92625 ANS1A_HUMAN  | R.SLSKS#DSDLTCSPTEDATMGSR.S   | S626:           | 3 | 3,9124 | 0,358 | -0,577 |
| 20 | P11717 MPRI_HUMAN   | K.ALSSLHGDDQDS#EDE.V          | S2409:          | 2 | 3,9056 | 0,482 | -0,791 |
| 20 | P42166 LAP2A_HUMAN  | K.LREQGTERSS#S#T#PLPTISSAE.N  | S158:S159:T160: | 3 | 3,89   | 0,292 | -0,284 |
| 20 | Q92597 NDRG1_HUMAN  | R.SRT#AS#GSSVTSLDGTR.S        | T328:S330:      | 2 | 3,8867 | 1     | -0,42  |
| 20 | Q5T1M5 FKB15_HUMAN  | R.ERPES#PMVPSEQVVEE.A         | S979:           | 2 | 3,8696 | 0,351 | -0,508 |
| 20 | Q7Z2K8 GRIN1_HUMAN  | E.GKVGSLPLEKGS#PVTTTK.A       | S615:           | 3 | 3,8626 | 0,397 | -0,584 |
| 20 | Q3V6T2 GRDN_HUMAN   | E.RDGLHFLPHASSAQS#PCGS#PGMK.R | S233:S237:      | 3 | 3,8616 | 0,376 | -0,545 |
| 20 | Q6NZI2 PTRF_HUMAN   | E.AGDLRRGS#S#PDVHALLE.I       | S365:S366:      | 3 | 3,8443 | 0,306 | -0,281 |
| 20 | Q07157 ZO1_HUMAN    | E.TAHKPDLSKTPPTS#PK.T         | S1570:          | 3 | 3,842  | 0,397 | -0,309 |
| 20 | Q9NWH9 SLTM_HUMAN   | K.DGQDAIAQS#PEKE.S            | S289:           | 2 | 3,8376 | 0,451 | 0      |
| 20 | Q15424 SAFB1_HUMAN  | E.LAEAPTEAPS#PEAR.D           | S344:           | 2 | 3,8375 | 0,279 | -0,321 |
| 20 | POC7M2 RA1L3_HUMAN  | K.KIFVGGIKEDTEE.H             |                 | 2 | 3,7924 | 0,417 | -0,25  |
| 20 | P40222 TXLNA_HUMAN  | R.VQDLSAGGQGLTDSGPER.R        |                 | 2 | 3,7587 | 0,571 | -0,456 |
| 20 | Q9C0C2 TB182_HUMAN  | E.AADSDAHLFQDSTEPR.A          |                 | 3 | 3,7441 | 0,28  | 0,104  |
| 20 | Q5H9R7 SAPS3_HUMAN  | E.TNKRNTVDLVTTCHIHSS#DDE.I    | S525:           | 3 | 3,7377 | 0,288 | -0,631 |



|    |                    |                                  |            |   |        |       |        |
|----|--------------------|----------------------------------|------------|---|--------|-------|--------|
| 20 | Q9H0B6 KLC2_HUMAN  | E.KQHLLFM*SQIR.K                 |            | 3 | 3,7274 | 0,27  | 0      |
| 20 | P42166 LAP2A_HUMAN | R.SHISDQS#PLSSK.R                | S351:      | 2 | 3,7227 | 0,544 | -0,179 |
| 20 | P05787 K2C8_HUMAN  | R.AFSSRS#YTSGPSGR.I              | S24:       | 3 | 3,7011 | 0,311 | -0,119 |
| 20 | P46013 KI67_HUMAN  | K.AQALEDLAGFKE.L                 |            | 2 | 3,6989 | 0,348 | -0,755 |
| 20 | Q9UQ35 SRRM2_HUMAN | K.SKDSLQVQSCPGSLSLCAGVK.S        |            | 3 | 3,69   | 0,206 | -0,262 |
| 20 | Q8IUD2 RB6I2_HUMAN | E.DNLNDSSQQLQDSL.R.K             |            | 3 | 3,6896 | 0,252 | -0,106 |
| 20 | Q9UHR5 S30BP_HUMAN | E.KGGLVSDAYGEDDFSR.L             |            | 3 | 3,6896 | 0,305 | -0,32  |
| 20 | Q8IU81 I2BP1_HUMAN | R.AGGAS#PAASSTAQPPTQHR.L         | S453:      | 3 | 3,6779 | 0,332 | -0,293 |
| 20 | Q03188 CENPC_HUMAN | E.KSLANDFSTNSTK.S                |            | 2 | 3,6768 | 0,414 | -0,518 |
| 20 | Q9NYF8 BCLF1_HUMAN | K.KAEGEPQEES#PLKSK.S             | S177:      | 3 | 3,6671 | 0,301 | 0      |
| 20 | Q9NRL2 BAZ1A_HUMAN | K.KKDAIDPLLFK.Y                  |            | 3 | 3,6616 | 0,257 | 0,071  |
| 20 | Q15057 CENB2_HUMAN | R.KFVDKYSISLS#PPEQKK.F           | S521:      | 3 | 3,6566 | 0,383 | -0,582 |
| 20 | O15355 PPM1G_HUMAN | R.KLEEVLS#TEGAE.E.N              | S527:      | 2 | 3,6547 | 0,403 | -0,484 |
| 20 | Q9Y266 NUDC_HUMAN  | K.LKPNLNGADLPNYR.W               |            | 3 | 3,6449 | 0,27  | -0,334 |
| 20 | Q9HC38 GLOD4_HUMAN | R.ALLGYADNQCKLE.L                |            | 2 | 3,6393 | 0,204 | -0,571 |
| 20 | Q8NI27 THOC2_HUMAN | K.LYINHTPPPLSKS#KERE.M           | S1335:     | 3 | 3,6383 | 0,385 | -0,263 |
| 20 | Q8IU81 I2BP1_HUMAN | E.GRS#PGPPALKHPATKD.L            | S66:       | 3 | 3,6317 | 0,342 | -0,107 |
| 20 | P08559 ODPA_HUMAN  | R.YHGHS#M*SDPGVSYR.T             | S293:      | 3 | 3,6275 | 0,284 | -0,217 |
| 20 | P35527 K1C9_HUMAN  | R.SGGGGGGGLGSGGSIR.S             |            | 2 | 3,5941 | 0,474 | 0,099  |
| 20 | Q8TDD1 DDX54_HUMAN | R.KLGPGRPLPTFPTSECTS#DVEPDTR.E.M | S75:       | 3 | 3,569  | 0,34  | -0,308 |
| 20 | Q15021 CND1_HUMAN  | E.KNPRES#TGNM*VTGQTVCK.N         | S585:      | 3 | 3,5678 | 0,237 | -0,348 |
| 20 | P06748 NPM_HUMAN   | K.GPSSVEDIKAK.M                  |            | 2 | 3,5542 | 0,384 | -0,324 |
| 20 | Q3V6T2 GRDN_HUMAN  | E.RDGLHFLPHASS#SAQSPCGS#PGM*K.R  | S229:S237: | 3 | 3,5527 | 0,229 | -0,407 |
| 20 | Q14157 UBP2L_HUMAN | R.RYPSS#ISSS#PQKD.L              | S605:S609: | 2 | 3,5397 | 1     | -0,53  |
| 20 | O75122 CLAP2_HUMAN | R.SRS#DIDVNAAAAGAK.A             | S370:      | 2 | 3,5325 | 0,319 | -0,671 |
| 20 | O43237 DC1L2_HUMAN | K.DFQDYM*EPEEGCQGS#PQRR.G        | S194:      | 3 | 3,5315 | 0,208 | -0,226 |
| 20 | Q9Y266 NUDC_HUMAN  | K.LKPNLNGADLPNYR.W               |            | 2 | 3,5314 | 0,418 | -0,594 |
| 20 | P13645 K1C10_HUMAN | K.GSLGGGFSSGGFSGGFSR.G           |            | 2 | 3,5274 | 0,544 | -0,357 |
| 20 | Q13442 HAP28_HUMAN | K.RKGVEGLIDIENPNR.V              |            | 3 | 3,5149 | 0,16  | -0,214 |
| 20 | Q02790 FKBP4_HUMAN | E.DLTEEEDGGIIR.R                 |            | 2 | 3,5109 | 0,337 | -0,543 |
| 20 | Q15084 PDIA6_HUMAN | K.LAAVDATVNVQLASR.Y              |            | 2 | 3,5107 | 0,474 | -0,319 |
| 20 | Q9Y3F4 STRAP_HUMAN | E.DKQILSADDKTVR.L                |            | 3 | 3,4976 | 0,318 | -0,368 |
| 20 | O94888 UBXD7_HUMAN | E.HGQLDGLSSS#PPKK.C              | S270:      | 3 | 3,4963 | 0,225 | -0,119 |

|    |                     |                               |            |   |        |       |        |
|----|---------------------|-------------------------------|------------|---|--------|-------|--------|
| 20 | O94888 UBXD7_HUMAN  | E.HGQLDGLSSS#PPKK.C           | S270:      | 2 | 3,4955 | 0,371 | -0,797 |
| 20 | Q5T670 Q5T670_HUMAN | R.LQKS#PEKS#PRPPLKE.R         | S150:S154: | 3 | 3,4869 | 0,205 | -0,29  |
| 20 | Q04637 IF4G1_HUMAN  | R.FSALQQAVPTSTDNR.R           |            | 2 | 3,4772 | 0,46  | -0,692 |
| 20 | Q15121 PEA15_HUMAN  | K.DIIRQPS#EEE.I               | S116:      | 2 | 3,4768 | 0,36  | -0,282 |
| 20 | Q96SK2 TM209_HUMAN  | R.YRS#SPTVYNSPTDKE.D          | S221:      | 3 | 3,474  | 0,125 | -0,702 |
| 20 | P62917 RL8_HUMAN    | R.ASGNYATVISHNPE.T            |            | 2 | 3,4725 | 0,387 | -0,084 |
| 20 | P05362 ICAM1_HUMAN  | E.AQVHLALGDQR.L               |            | 3 | 3,4721 | 0,347 | 0,757  |
| 20 | Q00537 PCTK2_HUMAN  | E.KLQINS#PPFDQPMSR.R          | S165:      | 3 | 3,4713 | 0,273 | -0,299 |
| 20 | Q86Y04 Q86Y04_HUMAN | K.KVDLTLIS#PKSE.N             | S239:      | 2 | 3,4647 | 0,331 | -0,173 |
| 20 | O15427 MOT4_HUMAN   | E.HFLKAEPEKNGEVVHTPET#SV.-    | T463:      | 3 | 3,4636 | 0,31  | -0,075 |
| 20 | P62753 RS6_HUMAN    | R.LSS#LRAS#TSKSE.S            | S236:S240: | 2 | 3,4632 | 0,469 | -0,171 |
| 20 | Q14194 DPYL1_HUMAN  | R.NLHQSNFSLSGAQIDDNNPR.R      |            | 3 | 3,4599 | 0,203 | -0,575 |
| 20 | Q96MW1 CCD43_HUMAN  | R.KAALLAQYADVT#DE.E           | T139:      | 2 | 3,4591 | 0,37  | -0,384 |
| 20 | Q71U36 TBA1A_HUMAN  | E.ITNACFEPANQMVK.C            |            | 2 | 3,456  | 0,416 | -0,376 |
| 20 | P04264 K2C1_HUMAN   | K.WELLQQVDTSTR.T              |            | 2 | 3,4521 | 0,432 | -0,331 |
| 20 | Q68E01 INT3_HUMAN   | E.AAFS#DDEEDLNSK.G            | S537:      | 2 | 3,4518 | 0,346 | -0,562 |
| 20 | Q9ULW0 TPX2_HUMAN   | E.AAISRKT#PAQPQR.R            | T113:      | 3 | 3,4503 | 0,26  | -0,182 |
| 20 | Q8TDJ6 DMXL2_HUMAN  | E.VAIVRDPDAGEGTKR.H           |            | 3 | 3,4486 | 0,392 | -0,115 |
| 20 | P63208 SKP1_HUMAN   | K.TFNIKNDFTTEEE.A             |            | 2 | 3,4382 | 0,365 | -0,529 |
| 20 | Q14847 LASP1_HUMAN  | K.GKGFVAVDT#PE.L              | T104:      | 2 | 3,4225 | 0,395 | -0,664 |
| 20 | Q4VXC3 Q4VXC3_HUMAN | K.AKEPVGAGVSSTSE.N            |            | 2 | 3,4189 | 0,353 | -0,555 |
| 20 | Q2LD37 K1109_HUMAN  | R.KTQHLSLQVPLR.S              |            | 3 | 3,4162 | 0,216 | -0,129 |
| 20 | Q96A49 SYAP1_HUMAN  | E.AVRPKT#PPVVIK.S             | T248:      | 3 | 3,411  | 0,18  | -0,066 |
| 20 | Q9UHB6 LIMA1_HUMAN  | E.VQQPVHPKPLS#PDSR.A          | S362:      | 2 | 3,402  | 0,503 | -0,553 |
| 20 | P10809 CH60_HUMAN   | K.NQLKDM*AIATGGAVFGEE.G       |            | 2 | 3,3959 | 0,427 | -0,261 |
| 20 | P27448 MARK3_HUMAN  | K.SSTVPSSNTASGGM*TR.R         |            | 2 | 3,3951 | 0,443 | -0,392 |
| 20 | Q02790 FKBP4_HUMAN  | K.DKFSFDLGKGE.V               |            | 2 | 3,3946 | 0,266 | -0,589 |
| 20 | Q92733 PRCC_HUMAN   | K.TSSLAPVVGTTTTTSPSAIK.A      |            | 2 | 3,3916 | 0,491 | -0,303 |
| 20 | Q6NZI2 PTRF_HUMAN   | R.RGS#S#PDVHALLE.I            | S365:S366: | 2 | 3,3872 | 0,358 | -0,508 |
| 20 | Q9Y6Y0 NS1BP_HUMAN  | K.QJSSSTGCLSS#PNATVQSPKHE.W   | S277:      | 3 | 3,3745 | 0,312 | -0,369 |
| 20 | Q15424 SAFB1_HUMAN  | R.KFDFDACNEVPPAPK.E           |            | 3 | 3,3702 | 0,18  | -0,316 |
| 20 | Q71U36 TBA1A_HUMAN  | E.ITNACFEPANQM*VK.C           |            | 2 | 3,3671 | 0,476 | -0,447 |
| 20 | P22681 CBL_HUMAN    | R.KAGSCQQGSGPAASAATASPQLSSE.I |            | 3 | 3,3657 | 0,205 | 0,701  |

|    |                     |                               |            |   |        |       |        |
|----|---------------------|-------------------------------|------------|---|--------|-------|--------|
| 20 | Q9H6F5 CCD86_HUMAN  | R.LGGLRPES#PE.S               | S18:       | 2 | 3,3581 | 0,316 | -0,43  |
| 20 | Q9BVG4 CX026_HUMAN  | E.GYNKAVYISVQDK.E             |            | 3 | 3,353  | 0,178 | -0,062 |
| 20 | Q86WB0 NIPA_HUMAN   | R.SQDATFS#PGSEQAEKS#PGPIVSR.T | S335:S344: | 3 | 3,3483 | 0,177 | -0,217 |
| 20 | Q14C86 GAPD1_HUMAN  | R.SRS#SDIVSSVR.R              | S902:      | 2 | 3,3433 | 0,381 | -0,192 |
| 20 | Q9NYJ8 TAB2_HUMAN   | E.TRKLSM*GS#DDAAYTQALLVHQB.A  | S527:      | 3 | 3,3326 | 0,186 | -0,506 |
| 20 | P04264 K2C1_HUMAN   | K.SLNNQFASFIDK.V              |            | 2 | 3,3299 | 0,406 | -0,529 |
| 20 | Q9Y259 CHKB_HUMAN   | E.ATAVAGSGAVGGCLAK.D          |            | 2 | 3,3173 | 0,335 | 0,79   |
| 20 | Q9NQW6 ANLN_HUMAN   | K.TQS#LPVTEKVTE.N             | S485:      | 2 | 3,3018 | 0,344 | -0,259 |
| 20 | Q96BK5 PINX1_HUMAN  | R.SKTDLDCIFGK.R               |            | 3 | 3,301  | 0,174 | 0,071  |
| 20 | Q07021 C1QBP_HUMAN  | K.ALVLDCHYPEDE.V              |            | 2 | 3,2986 | 0,499 | -0,752 |
| 20 | Q00341 VIGLN_HUMAN  | R.CDIIISGR.K                  |            | 2 | 3,2969 | 0,239 | -0,35  |
| 20 | Q13442 HAP28_HUMAN  | R.KGVEGLIDIENPNR.V            |            | 3 | 3,2924 | 0,099 | -0,353 |
| 20 | Q9BPX3 CND3_HUMAN   | E.IRAPIVTVGVNNDPADVR.K        |            | 3 | 3,2797 | 0,266 | -0,672 |
| 20 | Q9BYG9 Q9BYG9_HUMAN | K.MQAS#IEKAH.-                | S254:      | 2 | 3,2711 | 0,403 | 0      |
| 20 | Q9BVC5 ASHWN_HUMAN  | R.KSPSPGVKS#PPLS#PVGTTPVK.L   | S189:S193: | 3 | 3,2644 | 0,261 | -0,659 |
| 20 | P62937 PIIA_HUMAN   | K.KITIADCGQLE.-               |            | 2 | 3,2572 | 0,377 | -0,293 |
| 20 | Q53G15 Q53G15_HUMAN | K.ALKQYRAS#PSFEE.R            | S378:      | 2 | 3,2546 | 0,33  | -0,532 |
| 20 | Q9Y2U5 M3K2_HUMAN   | R.RGS#DIDNPTLTVM*D.I          | S331:      | 2 | 3,2532 | 0,343 | -0,524 |
| 20 | Q13428 TCOF_HUMAN   | R.KSAEPSANTT#LVS#ETEEE.G      | T168:S171: | 2 | 3,2532 | 0,553 | -0,117 |
| 20 | Q86VP6 CAND1_HUMAN  | K.CLDVVSTRHE.M                |            | 2 | 3,2443 | 0,384 | -0,095 |
| 20 | Q92882 OSTF1_HUMAN  | K.LAFDM*ATNAACASLLK.K         |            | 3 | 3,2416 | 0,261 | -0,641 |
| 20 | Q9NYF8 BCLF1_HUMAN  | E.KS#TFREES#PLRIK.M           | S525:S531: | 3 | 3,2316 | 0,216 | -0,522 |
| 20 | P35527 K1C9_HUMAN   | R.IKFEMEQLNR.Q                |            | 3 | 3,2304 | 0,171 | -0,07  |
| 20 | Q96T58 MINT_HUMAN   | R.HGS#FHEDEDPIGSPR.L          | S1268:     | 3 | 3,2295 | 0,217 | -0,312 |
| 20 | Q8IU81 I2BP1_HUMAN  | E.ALGHSPKDPGGGGGPVR.A         |            | 3 | 3,2289 | 0,335 | -0,587 |
| 20 | Q01082 SPTB2_HUMAN  | K.TALPAQSAATLPAR.T            |            | 2 | 3,2191 | 0,404 | -0,268 |
| 20 | P10599 THIO_HUMAN   | E.VKCM*PTFQFFK.K              |            | 3 | 3,216  | 0,131 | 0      |
| 20 | Q15121 PEA15_HUMAN  | K.YKDIIRQPS#EEE.I             | S116:      | 2 | 3,2148 | 0,377 | 0      |
| 20 | P02545 LMNA_HUMAN   | R.NSNLVGAAHEE.L               |            | 2 | 3,2087 | 0,381 | -0,428 |
| 20 | P49756 RBM25_HUMAN  | R.KKLPVDSVFNKFE.D             |            | 3 | 3,2063 | 0,219 | -0,354 |
| 20 | Q15149 PLEC1_HUMAN  | K.GYSPYSVSGSGTAGSR.T          |            | 2 | 3,2036 | 0,314 | -1,574 |
| 20 | P18615 NELFE_HUMAN  | R.TQIVYSDDVYKE.N              |            | 2 | 3,2015 | 0,241 | -0,334 |
| 20 | Q96QZ7 MAGI1_HUMAN  | K.VITTDALHSLQSGSK.Q           |            | 2 | 3,2006 | 0,372 | -0,47  |

|    |                    |                                    |              |   |        |       |        |
|----|--------------------|------------------------------------|--------------|---|--------|-------|--------|
| 20 | P49736 MCM2_HUMAN  | R.GNDPLTSS#PGR.S                   | S27:         | 2 | 3,1996 | 0,389 | -0,31  |
| 20 | O95999 BCL10_HUMAN | K.CSSCEFPFDGATNNLSR.S              |              | 2 | 3,1966 | 0,464 | -0,319 |
| 20 | P04264 K2C1_HUMAN  | R.SGGGFSSGSAGIINYQR.R              |              | 2 | 3,1902 | 0,44  | -0,221 |
| 20 | P31949 S10AB_HUMAN | K.KLDTNSDGQLDFSE.F                 |              | 2 | 3,19   | 0,308 | -0,544 |
| 20 | Q9UN36 NDRG2_HUMAN | R.TAS#LTSAAVDGMR.S                 | S332:        | 2 | 3,1878 | 0,488 | 0,597  |
| 20 | P29590 PML_HUMAN   | R.LQDLSSCITQGK.D                   |              | 2 | 3,1812 | 0,311 | 0,09   |
| 20 | P04264 K2C1_HUMAN  | R.SLDLDSIIAEVK.A                   |              | 2 | 3,1801 | 0,412 | -0,468 |
| 20 | Q13428 TCOF_HUMAN  | K.TVANLLSGKS#PR.K                  | S156:        | 2 | 3,1768 | 0,381 | -0,461 |
| 20 | Q2PPJ7 AS250_HUMAN | E.LDLKDDLQQTQGK.C                  |              | 3 | 3,1678 | 0,189 | -0,061 |
| 20 | Q9UPN3 MACF1_HUMAN | R.SGGRKSL#QPTPPM*PILSQSE.A         | S5011:       | 3 | 3,1604 | 0,23  | -0,765 |
| 20 | Q9NTJ3 SMC4_HUMAN  | K.AQDSVLRTE.K                      |              | 2 | 3,1587 | 0,256 | -0,12  |
| 20 | Q92597 NDRG1_HUMAN | R.TAS#GSS#VTSLDGTR.S               | S330:S333:   | 2 | 3,143  | 0,412 | -0,326 |
| 20 | Q7Z2K8 GRIN1_HUMAN | R.SPS#GAGEGASCSDGPR.G              | S75:         | 2 | 3,1401 | 0,354 | -0,466 |
| 20 | Q92597 NDRG1_HUMAN | E.AFKYFVQGM*GYM*PSASM*TR.L         |              | 3 | 3,1341 | 0,224 | -0,824 |
| 20 | Q86WB0 NIPA_HUMAN  | R.SQDATFSPGSEQAEKS#PGPIVSR.T       | S344:        | 3 | 3,1332 | 0,205 | -0,373 |
| 20 | Q9H0B6 KLC2_HUMAN  | K.SVEEPTQPGGTGLSDSR.T              |              | 2 | 3,132  | 0,461 | 0,426  |
| 20 | Q8WVC0 LEO1_HUMAN  | K.KLTS#DEEGEPSGKR.K                | S630:        | 3 | 3,1297 | 0,187 | -0,454 |
| 20 | Q8ND56 LS14A_HUMAN | K.SFFDNISCDNRE.R                   |              | 2 | 3,1286 | 0,523 | -0,528 |
| 20 | Q6PKG0 LARP1_HUMAN | R.CPS#QSSSRPAAM*IS#QPPTPPTGQPVRE.D | S1056:S1067: | 3 | 3,1282 | 0,112 | -0,843 |
| 20 | Q92598 HS105_HUMAN | K.IKVNVNELPIE.A                    |              | 2 | 3,1279 | 0,267 | -0,682 |
| 20 | Q96AT1 K1143_HUMAN | K.NSSLFSFDNEDENE.-                 |              | 2 | 3,125  | 0,338 | -0,53  |
| 20 | P51572 BAP31_HUMAN | K.LDVGNAEVKLEEE.N                  |              | 2 | 3,1234 | 0,262 | -0,507 |
| 20 | Q9Y4F1 FARP1_HUMAN | K.VSAGEPGSHPS#PAPR.R               | S427:        | 2 | 3,1214 | 0,412 | 0,16   |
| 20 | Q3KQU3 MA7D1_HUMAN | R.RSS#QPS#PTAVPASDSPPTKQE.V        | S113:S116:   | 3 | 3,1116 | 0,101 | -0,393 |
| 20 | Q15154 PCM1_HUMAN  | R.KPFNFLPM*QINTNK.S                |              | 3 | 3,1074 | 0,25  | -0,428 |
| 20 | P51858 HDGF_HUMAN  | R.AGDLLDS#PKRPK.E                  | S165:        | 2 | 3,1066 | 0,282 | -0,324 |
| 20 | P23396 RS3_HUMAN   | K.FVADGIFKAE.L                     |              | 2 | 3,105  | 0,232 | -0,111 |
| 20 | Q9H4L4 SENP3_HUMAN | K.AGQHS#PLREEHVTCVQSILDE.F         | S307:        | 3 | 3,1035 | 0,201 | -0,368 |
| 20 | P04264 K2C1_HUMAN  | K.YEELQITAGR.H                     |              | 2 | 3,1011 | 0,265 | -0,31  |
| 20 | Q16643 DREB_HUMAN  | R.M*APTIPIRSPS#DSSTAST#PVAE.Q      | S339:T346:   | 3 | 3,0999 | 1     | -0,443 |
| 20 | Q9Y2W1 TR150_HUMAN | K.SPLQSVVVR.R                      |              | 2 | 3,0986 | 0,181 | 0      |
| 20 | Q9UQ35 SRRM2_HUMAN | R.HASS#S#PESPKPAPAPGSHRE.I         | S436:S437:   | 3 | 3,0958 | 0,233 | -0,418 |
| 20 | P35908 K22E_HUMAN  | R.NLDLDSIIAEVK.A                   |              | 2 | 3,0947 | 0,377 | -0,459 |

|    |                     |                               |        |   |        |       |        |
|----|---------------------|-------------------------------|--------|---|--------|-------|--------|
| 20 | Q9P258 RCC2_HUMAN   | K.AGGAAVITEPEHTKE.R           |        | 3 | 3,09   | 0,23  | -0,227 |
| 20 | P49916 DNL3_HUMAN   | K.LTTT#GQVTSVPKVGASFVTSTNPR.K | T118:  | 3 | 3,0884 | 0,192 | -0,301 |
| 20 | Q96AJ1 CLUA1_HUMAN  | R.KSEPLDES#DNDF.-             | S409:  | 2 | 3,0862 | 0,375 | -0,909 |
| 20 | Q9UHI6 DDX20_HUMAN  | E.KYQES#PGIQM*K.T             | S714:  | 2 | 3,0749 | 0,284 | 0,087  |
| 20 | Q15742 NAB2_HUMAN   | R.SFSPKS#PLELGE.K             | S162:  | 2 | 3,0741 | 0,322 | -0,178 |
| 20 | Q00537 PCTK2_HUMAN  | E.KLQINS#PPFDQPMSR.R          | S165:  | 2 | 3,0736 | 0,34  | -0,199 |
| 20 | P46937 YAP1_HUMAN   | R.QAS#TDAGTAGALTPQHVR.A       | S109:  | 3 | 3,0691 | 0,349 | -0,295 |
| 20 | Q9UNS1 TIM_HUMAN    | E.DAVGKEPLKAAPK.K             |        | 3 | 3,0664 | 0,286 | -0,967 |
| 20 | P68431 H31_HUMAN    | E.DTNLCAIHAK.R                |        | 2 | 3,0648 | 0,282 | 0      |
| 20 | Q04637 IF4G1_HUMAN  | R.FSALQQAVPTESDNR.R           |        | 3 | 3,0619 | 0,244 | -0,191 |
| 20 | Q96QT6 PHF12_HUMAN  | E.KLSLKP HQGPVLR.S            |        | 3 | 3,0597 | 0,217 | 0,248  |
| 20 | Q8ND82 Z280C_HUMAN  | E.ISSSKPAISNILNR.G            |        | 3 | 3,0588 | 0,217 | -0,122 |
| 20 | Q9H6Z4 RANB3_HUMAN  | E.KPAIAPPVVFVQK.D             |        | 3 | 3,0574 | 0,239 | -0,19  |
| 20 | Q7RTP8 Q7RTP8_HUMAN | R.ASS#LNVLNVGGK.A             | S596:  | 2 | 3,0546 | 0,191 | -0,394 |
| 20 | O95400 CD2B2_HUMAN  | K.LVDPVAGSGGPGSR.F            |        | 2 | 3,0519 | 0,443 | -0,096 |
| 20 | Q86V48 LUZP1_HUMAN  | K.ASHMGVSTDSGTQE.T            |        | 2 | 3,0456 | 0,277 | 0,434  |
| 20 | Q7Z6E9 RBBP6_HUMAN  | K.LGYLVS#PPQQIR.R             | S516:  | 2 | 3,045  | 0,176 | -0,841 |
| 20 | P35908 K22E_HUMAN   | R.HGGGGGGFGGGGFGSR.S          |        | 3 | 3,0439 | 0,105 | 0,277  |
| 20 | A6N1L1 ZS5L1_HUMAN  | R.SKPDASSISQEEPQGE.A          |        | 2 | 3,0438 | 0,333 | -0,795 |
| 20 | P31949 S10AB_HUMAN  | K.LDTNSDGQLDFSE.F             |        | 2 | 3,0423 | 0,34  | -0,339 |
| 20 | Q96BK5 PINX1_HUMAN  | R.SKTDLDCIFGK.R               |        | 2 | 3,0415 | 0,299 | -0,19  |
| 20 | Q71U36 TBA1A_HUMAN  | E.ITNACFEPANQM*VK.C           |        | 3 | 3,0398 | 0,092 | -0,335 |
| 20 | Q92597 NDRG1_HUMAN  | R.TAS#GSSVTSLDGTR.S           | S330:  | 2 | 3,0368 | 0,472 | -0,172 |
| 20 | Q6ZW31 SYDE1_HUMAN  | E.S EGLAPQGAAPAS#PPTK.A       | S149:  | 2 | 3,0355 | 0,348 | 0,441  |
| 20 | Q00765 REEP5_HUMAN  | K.ATVNULLGEEKS#T.-            | S188:  | 2 | 3,0313 | 0,346 | -0,249 |
| 20 | Q8TEA8 DTD1_HUMAN   | R.SASS#GAEGDVSSEREP.-         | S197:  | 2 | 3,0256 | 0,403 | -0,445 |
| 20 | Q01082 SPTB2_HUMAN  | K.TALPAQSAAT#LPAR.T           | T2187: | 2 | 3,0253 | 0,352 | -0,169 |
| 20 | P51858 HDGF_HUMAN   | R.RAGDLLEDS#PKRPK.E           | S165:  | 3 | 3,0231 | 0,2   | -0,22  |
| 20 | Q96T88 UHRF1_HUMAN  | R.KAPS#RDEPCSSTSRPALE.E       | S165:  | 3 | 3,0221 | 0,176 | -0,531 |
| 20 | P36542 ATPG_HUMAN   | R.THSDQFLVAFKE.V              |        | 3 | 3,0215 | 0,128 | 0      |
| 20 | P49736 MCM2_HUMAN   | E.SFTM*ASSPAQR.R              |        | 2 | 3,0195 | 0,496 | 0,102  |
| 20 | Q9UNS1 TIM_HUMAN    | E.DAVGKEPLKAAPK.K             |        | 2 | 3,0136 | 0,37  | -0,461 |
| 20 | O43166 SI1L1_HUMAN  | R.HSASPVVFTSAR.S              |        | 3 | 3,0129 | 0,231 | 0,29   |

|    |                    |                           |            |   |        |       |        |
|----|--------------------|---------------------------|------------|---|--------|-------|--------|
| 20 | Q9UKV3 ACINU_HUMAN | K.SKS#PS#PPRLTE.D         | S386:S388: | 2 | 3,011  | 0,397 | -0,09  |
| 20 | Q02952 AKA12_HUMAN | E.M*KGS#VEEPKPEEPK.R      | S660:      | 3 | 3,0096 | 0,161 | -0,109 |
| 20 | Q9GZR1 SENP6_HUMAN | K.IRLNYSDES#PE.A          | S919:      | 2 | 3,0082 | 0,385 | 0      |
| 20 | P13861 KAP2_HUMAN  | E.ARAPASVLPAAATPR.Q       |            | 2 | 3,0036 | 0,29  | 0      |
| 20 | P51858 HDGF_HUMAN  | R.AGDLLDES#PKRPK.E        | S165:      | 3 | 3,0029 | 0,179 | -0,364 |
| 20 | O43166 SI1L1_HUMAN | E.GTINSVGFMDTR.K          |            | 2 | 3,002  | 0,419 | -0,564 |
| 20 | Q92766 RREB1_HUMAN | E.NGGS#PQGIKS#PSKPPGPNR.I | S36:S42:   | 3 | 3,0018 | 0,225 | -0,449 |
| 20 | Q09666 AHNK_HUMAN  | K.GEVDVDVVKLE.G           |            | 2 | 3,0015 | 0,406 | -0,305 |
| 20 | Q96JP5 ZFP91_HUMAN | R.SKTGSLQLICK.S           |            | 2 | 2,9953 | 0,234 | -0,296 |
| 20 | P49736 MCM2_HUMAN  | R.GNDPLTSSPGR.S           |            | 2 | 2,9936 | 0,408 | -0,222 |
| 20 | Q96T58 MINT_HUMAN  | R.LLSVKGS#PKVDE.K         | S1287:     | 3 | 2,9923 | 0,276 | 0,135  |
| 20 | Q86X29 LSR_HUMAN   | R.ARS#VDALDDLT#PPSTAE.S   | S493:T501: | 2 | 2,9907 | 0,406 | -1,145 |
| 20 | P49790 NU153_HUMAN | D.NKCIACQAAKLS#PR.D       | S687:      | 3 | 2,9905 | 0,189 | -0,108 |
| 20 | P27816 MAP4_HUMAN  | K.VGSLDNVGHLPAGGAVK.T     |            | 3 | 2,9877 | 0,233 | -0,115 |
| 20 | Q00341 VIGLN_HUMAN | R.RCDIIISGR.K             |            | 2 | 2,9867 | 0,231 | -0,608 |
| 20 | Q9UBR2 CATZ_HUMAN  | R.VGDYGSLSGRE.K           |            | 2 | 2,9853 | 0,46  | -0,428 |
| 20 | P00441 SODC_HUMAN  | E.FGDNTAGCTSAGPHFNPLSR.K  |            | 3 | 2,9788 | 0,141 | -0,521 |
| 20 | Q9Y2U5 M3K2_HUMAN  | R.RRGS#DIDNPTLTVM*D.I     | S331:      | 2 | 2,9768 | 0,518 | 0,068  |
| 20 | Q9P275 UBP36_HUMAN | K.TFVGEPQRLGSE.T          |            | 2 | 2,9757 | 0,359 | -0,185 |
| 20 | Q9UHI6 DDX20_HUMAN | E.KYQES#PGIQMK.T          | S714:      | 2 | 2,9724 | 0,296 | -0,527 |
| 20 | Q09666 AHNK_HUMAN  | R.VTAYTVDVTGR.E           |            | 2 | 2,9701 | 0,381 | -0,206 |
| 20 | Q8IYB3 SRRM1_HUMAN | K.VKEPS#VQE.A             | S234:      | 2 | 2,9672 | 0,204 | -0,061 |
| 20 | Q3KQU3 MA7D1_HUMAN | K.EANANGSS#PEPVKAVE.A     | S742:      | 2 | 2,9664 | 0,281 | -0,363 |
| 20 | Q7Z422 CA144_HUMAN | K.RILGSAS#PEEE.Q          | S107:      | 2 | 2,9655 | 0,391 | 0      |
| 20 | P46459 NSF_HUMAN   | R.GHQLLSADVDIKE.L         |            | 2 | 2,9612 | 0,292 | -0,257 |
| 20 | P04637 P53_HUMAN   | K.RALPNNTSSS#PQPK.K       | S315:      | 2 | 2,9598 | 0,168 | -0,696 |
| 20 | Q9H910 HN1L_HUMAN  | K.TSDIFGS#PVTATSR.L       | S97:       | 2 | 2,958  | 0,356 | -0,562 |
| 20 | Q9Y490 TLN1_HUMAN  | K.STVLQQQYNR.V            |            | 2 | 2,9578 | 0,183 | -0,296 |
| 20 | Q13442 HAP28_HUMAN | K.KVTQLDLDGPK.E.L         |            | 2 | 2,9578 | 0,325 | -0,273 |
| 20 | P06748 NPM_HUMAN   | E.KTPKT#PKGPSSVEDIK.A     | T237:      | 3 | 2,9575 | 0,199 | -0,612 |
| 20 | Q9NYF8 BCLF1_HUMAN | K.LKDLFDYS#PPLHK.N        | S512:      | 3 | 2,9561 | 0,331 | -0,332 |
| 20 | Q07157 ZO1_HUMAN   | K.SHSLAQPFDSGVE.T         |            | 2 | 2,9449 | 0,356 | -0,458 |
| 20 | Q13427 PPIG_HUMAN  | K.KADRQDS#PFSKIK.Q        | S687:      | 3 | 2,9398 | 0,206 | -0,114 |

|    |                     |                          |              |   |        |       |        |
|----|---------------------|--------------------------|--------------|---|--------|-------|--------|
| 20 | Q9GZN8 CT027_HUMAN  | R.VRS#IRFAAGHDAE.G       | S14:         | 3 | 2,9337 | 0,173 | -0,061 |
| 20 | Q05CK9 Q05CK9_HUMAN | R.VSRNPISDRIS#PPQPNGE.I  | S25:         | 3 | 2,9321 | 0,161 | -0,342 |
| 20 | Q9NWX64 RBM22_HUMAN | R.APGPIHYPSQDPQR.M       |              | 3 | 2,9316 | 0,267 | -0,234 |
| 20 | P46013 KI67_HUMAN   | R.LKIS#LGKVGKKEE.V       | S2002:       | 3 | 2,9315 | 0,1   | -0,247 |
| 20 | P14618 KPYM_HUMAN   | R.NTGIICTIGPASR.S        |              | 2 | 2,9286 | 0,139 | 1,166  |
| 20 | Q9ULJ3 ZN295_HUMAN  | R.SFS#ASQSTDREGAS#PVTE.V | S411:S422:   | 2 | 2,9267 | 0,328 | 0,182  |
| 20 | O95049 ZO3_HUMAN    | E.LSQAPPSHIPPPR.H        |              | 3 | 2,922  | 0,144 | 0      |
| 20 | Q9H6Z4 RANB3_HUMAN  | E.EKPAIAPPVVFVQK.D       |              | 3 | 2,9171 | 0,139 | -0,233 |
| 20 | P20700 LMNB1_HUMAN  | E.HDQLLLNYAK.K           |              | 2 | 2,9091 | 0,16  | -0,502 |
| 20 | P16401 H15_HUMAN    | E.TATPAPVEKS#PAK.K       | S18:         | 2 | 2,9082 | 0,234 | -0,532 |
| 20 | Q15019 SEPT2_HUMAN  | K.IYHLPDAES#DED.E        | S218:        | 2 | 2,9063 | 0,35  | -0,493 |
| 20 | P47756 CAPZB_HUMAN  | D.HGFAGVILIK.K           |              | 2 | 2,9056 | 0,323 | -0,231 |
| 20 | Q6ZUT9 RA61L_HUMAN  | K.NNKPNAGQIQE.G          |              | 2 | 2,9029 | 0,214 | 0,201  |
| 20 | P78536 ADA17_HUMAN  | E.KAAS#FKLQR.Q           | S808:        | 2 | 2,9014 | 0,301 | -0,324 |
| 20 | Q9H501 ESF1_HUMAN   | E.NKTDLDNSIGIK.K         |              | 2 | 2,8973 | 0,318 | 0,463  |
| 20 | Q1PBM3 Q1PBM3_HUMAN | E.NSLSGSCQSLDPSFR.K      |              | 2 | 2,8868 | 0,435 | -0,56  |
| 20 | Q8TEW0 PARD3_HUMAN  | K.SKS#M*DLGIAD.E         | S852:        | 2 | 2,8803 | 0,174 | -0,193 |
| 20 | Q14980 NUMA1_HUMAN  | R.KRVS#LEPHQPGGT#PE.S    | S1991:T2000: | 2 | 2,8802 | 0,439 | -0,477 |
| 20 | A4D186 A4D186_HUMAN | K.IQVLQQQADDAEERAE.R     |              | 3 | 2,8797 | 0,225 | 0      |
| 20 | P07814 SYEP_HUMAN   | E.HLITKPVLGKDE.D         |              | 3 | 2,8789 | 0,333 | 0,203  |
| 20 | Q641Q2 FA21A_HUMAN  | K.AKS#PM*FPALGE.A        | S1169:       | 2 | 2,8764 | 0,265 | -0,196 |
| 20 | Q8NEY1 NAV1_HUMAN   | K.AVALSDSNISLK.S         |              | 2 | 2,8745 | 0,368 | -0,392 |
| 20 | Q8N3U4 STAG2_HUMAN  | R.RGTS#LM*EDDEEPIVE.D    | S1161:       | 2 | 2,8664 | 0,307 | -0,672 |
| 20 | P68104 EF1A1_HUMAN  | E.HALLAYTLGVK.Q          |              | 2 | 2,8642 | 0,172 | -0,514 |
| 20 | Q58FF8 H90B2_HUMAN  | K.YIDQEELNK.T            |              | 2 | 2,8634 | 0,2   | -0,424 |
| 20 | Q13459 MYO9B_HUMAN  | R.VQEKPD#SPGGSTQIQR.Y    | S1290:       | 3 | 2,8603 | 0,3   | -0,405 |
| 20 | O75569 PRKRA_HUMAN  | K.TPIQVLHE.Y             |              | 2 | 2,8598 | 0,344 | -0,195 |
| 20 | Q58FF7 H90B3_HUMAN  | E.DHLAVKHFSVE.G          |              | 2 | 2,8582 | 0,332 | -0,095 |
| 20 | Q9UHB6 LIMA1_HUMAN  | E.VQQPVHPKPLS#PDSR.A     | S362:        | 3 | 2,8568 | 0,198 | -0,207 |
| 20 | Q96EP5 DAZP1_HUMAN  | K.IFVGGIPHNCGETE.L       |              | 2 | 2,8561 | 0,142 | -0,319 |
| 20 | P35030 TRY3_HUMAN   | D.TLDNDIMLIK.L           |              | 2 | 2,8407 | 0,33  | -0,726 |
| 20 | Q8NFC6 FA44A_HUMAN  | E.RKLS#VLGKDGKPVSE.Y     | S800:        | 3 | 2,8405 | 0,267 | -0,108 |
| 20 | O75113 N4BP1_HUMAN  | K.KQFS#LENVQE.G          | S300:        | 2 | 2,8392 | 0,148 | -0,469 |

|    |                     |                            |            |   |        |       |        |
|----|---------------------|----------------------------|------------|---|--------|-------|--------|
| 20 | O60271 JIP4_HUMAN   | R.SASQSS#LDKLDQELKE.Q      | S733:      | 3 | 2,8378 | 0,121 | -0,295 |
| 20 | Q13442 HAP28_HUMAN  | K.GVEGLIDIENPNR.V          |            | 2 | 2,8348 | 0,318 | -0,428 |
| 20 | Q13045 FLII_HUMAN   | E.HLSVSHNNLTTLHGE.L        |            | 3 | 2,8326 | 0,258 | -0,221 |
| 20 | Q9UN36 NDRG2_HUMAN  | R.TASLTSAAASVDGNR.S        |            | 2 | 2,8306 | 0,355 | -0,181 |
| 20 | O95453 PARN_HUMAN   | R.NNSFTAPSTVGK.R           |            | 2 | 2,8213 | 0,217 | -0,299 |
| 20 | P38571 LICH_HUMAN   | E.TEDGYILCLNR.I            |            | 2 | 2,8193 | 0,322 | -0,27  |
| 20 | Q17R89 RICH2_HUMAN  | E.LGSTLRLS#PLEHM*R.R       | S793:      | 3 | 2,8133 | 0,277 | -0,536 |
| 20 | Q15652 JHD2C_HUMAN  | K.ATYVNSQATGE.R            |            | 2 | 2,8055 | 0,432 | -0,107 |
| 20 | ##Q6ZN28 7A5_HUMAN  | D.ELSLHS#YGLVDALVKWDY#VK.E | S179:Y191: | 3 | 2,8031 | 0,132 | 0,807  |
| 20 | Q96BK5 PINX1_HUMAN  | R.SKTDLDCIFGKR.Q           |            | 3 | 2,79   | 0,202 | -0,508 |
| 20 | P49756 RBM25_HUMAN  | K.LPVDSVFNKFE.D            |            | 2 | 2,7884 | 0,237 | -0,565 |
| 20 | Q86Y04 Q86Y04_HUMAN | K.GSDSLNKVLDLTLSS#PKSE.N   | S239:      | 3 | 2,7848 | 0,131 | -0,607 |
| 20 | Q2KHR3 QSER1_HUMAN  | K.SVSTPLTTLDATSDKK.K       |            | 2 | 2,7848 | 0,29  | -0,367 |
| 20 | Q9ULJ3 ZN295_HUMAN  | E.KTALDDRPQVLQPHR.L        |            | 3 | 2,7824 | 0,197 | -0,412 |
| 20 | Q9UHB6 LIMA1_HUMAN  | R.ASSLSES#SPPKAM*KK.F      | S373:      | 2 | 2,7819 | 0,163 | -0,594 |
| 20 | Q13442 HAP28_HUMAN  | K.KVTQLDLDPKE.L            |            | 3 | 2,7787 | 0,098 | 0      |
| 20 | Q86YS7 K0528_HUMAN  | E.IIGS#PIPEPR.Q            | S643:      | 2 | 2,7783 | 0,272 | -0,421 |
| 20 | P49792 RBP2_HUMAN   | E.SSINYTFKT#PEKAK.E        | T2613:     | 3 | 2,7779 | 0,152 | -0,324 |
| 20 | Q9BZF1 OSBL8_HUMAN  | D.LHQPSLSPAS#PHSQGFER.G    | S68:       | 3 | 2,7728 | 0,198 | -0,267 |
| 20 | Q9NY61 AATF_HUMAN   | E.LLFQYPDTR.Y              |            | 2 | 2,7721 | 0,289 | -0,529 |
| 20 | Q05CK9 Q05CK9_HUMAN | R.NPIPSDRIS#PPQPNGE.I      | S25:       | 2 | 2,7697 | 0,323 | -0,136 |
| 20 | P06748 NPM_HUMAN    | K.TPKGPSSVEDIK.A           |            | 3 | 2,7681 | 0,2   | 0,509  |
| 20 | P23396 RS3_HUMAN    | R.KFVADGIFKAE.L            |            | 2 | 2,7663 | 0,19  | -0,398 |
| 20 | Q99460 PSMD1_HUMAN  | K.YKQAIGIALE.T             |            | 2 | 2,7651 | 0,09  | -0,552 |
| 20 | Q96A72 MGN2_HUMAN   | R.IIDDSEITKE.D             |            | 2 | 2,7642 | 0,378 | -0,42  |
| 20 | Q96ST2 IWS1_HUMAN   | R.GKHMDFLSDFE.M            |            | 2 | 2,7628 | 0,223 | -0,46  |
| 20 | P13645 K1C10_HUMAN  | K.DAEAWFNEK.S              |            | 2 | 2,7606 | 0,305 | -0,33  |
| 20 | Q9UQ35 SRRM2_HUMAN  | E.SYFGVSSLQLK.G            |            | 2 | 2,7605 | 0,455 | -0,596 |
| 20 | P35579 MYH9_HUMAN   | R.RGDLPFVVPR.R             |            | 2 | 2,7598 | 0,207 | -0,317 |
| 20 | Q9NYF8 BCLF1_HUMAN  | K.LKDLFDYSPPLHK.N          |            | 3 | 2,759  | 0,108 | -0,233 |
| 20 | P52272 HNRPM_HUMAN  | K.GCGVVKFESPE.V            |            | 2 | 2,7553 | 0,249 | -0,404 |
| 20 | Q9NYZ3 GTSE1_HUMAN  | K.STATEVAREE.A             |            | 2 | 2,7549 | 0,399 | -0,335 |
| 20 | P49903 SPS1_HUMAN   | K.IKLVVTQEDVE.L            |            | 2 | 2,7537 | 0,337 | -0,192 |



|    |                     |                                |                 |   |        |       |        |
|----|---------------------|--------------------------------|-----------------|---|--------|-------|--------|
| 20 | P06400 RB_HUMAN     | D.M*YLSPVRS#PK.K               | S612:           | 2 | 2,7507 | 0,251 | -0,67  |
| 20 | P09211 GSTP1_HUMAN  | K.LKAFLASPE.Y                  |                 | 2 | 2,7432 | 0,169 | -0,188 |
| 20 | P42575 CASP2_HUMAN  | K.M*FFIQACR.G                  |                 | 2 | 2,7413 | 0,339 | -0,336 |
| 20 | P04264 K2C1_HUMAN   | R.TNAENEFVTIKK.D               |                 | 3 | 2,7383 | 0,281 | 0      |
| 20 | Q05519 SFR11_HUMAN  | E.KKPIET#GSPKTKECSVE.K         | T447:           | 3 | 2,7372 | 0,227 | -0,824 |
| 20 | Q16643 DREB_HUMAN   | R.M*APTIPIPTRS#PSDSSTASTPVAE.Q | S337:           | 3 | 2,7369 | 0,24  | -0,305 |
| 20 | Q9UN36 NDRG2_HUMAN  | R.SRT#ASLTSAAASVDGNR.S         | T330:           | 3 | 2,7353 | 0,139 | -0,109 |
| 20 | Q9Y3R0 GRIP1_HUMAN  | R.RQS#IPEEFKGSTVVE.L           | S43:            | 2 | 2,7339 | 0,379 | -0,683 |
| 20 | Q9H501 ESF1_HUMAN   | R.TLDSGTSEIVKS#PRIE.C          | S198:           | 3 | 2,7338 | 0,23  | -0,303 |
| 20 | Q6UB98 ANR12_HUMAN  | K.IKDEDHS#PTFE.N               | S630:           | 2 | 2,7327 | 0,227 | -0,611 |
| 20 | P29692 EF1D_HUMAN   | R.ATAPQTOHVSPM*R.Q             |                 | 2 | 2,73   | 0,376 | -0,932 |
| 20 | P06400 RB_HUMAN     | K.LRFDIEGS#DEAD.G              | S882:           | 2 | 2,7235 | 0,286 | -0,422 |
| 20 | P06748 NPM_HUMAN    | K.M*QAS#IEKGGSLPKVE.A          | S254:           | 2 | 2,7232 | 0,294 | 0,438  |
| 20 | Q96PK6 RBM14_HUMAN  | R.ASYVAPLTAQPATYR.A            |                 | 2 | 2,7223 | 0,318 | -0,455 |
| 20 | Q2NKP9 Q2NKP9_HUMAN | E.NLVASTAKTDFGPDDDTYR.S        |                 | 3 | 2,7201 | 0,235 | -0,263 |
| 20 | P04406 G3P_HUMAN    | K.QASEGPLKGILGYTE.H            |                 | 2 | 2,7148 | 0,336 | -0,468 |
| 20 | P12270 TPR_HUMAN    | R.LTIHAPPQE.L                  |                 | 2 | 2,712  | 0,253 | -0,121 |
| 20 | P31948 STIP1_HUMAN  | K.ALDLDSSCKE.A                 |                 | 2 | 2,7096 | 0,211 | -0,214 |
| 20 | O60610 DIAP1_HUMAN  | R.NS#SASYGDDPTAQLQDVSD.E.Q     | S62:            | 2 | 2,709  | 0,312 | -0,323 |
| 20 | Q7Z4V5 HDGR2_HUMAN  | R.ARGDS#EALDEES.-              | S664:           | 2 | 2,7088 | 0,278 | -0,09  |
| 20 | Q15003 CND2_HUMAN   | R.KAPLNIPGT#PVLE.D             | T49:            | 2 | 2,7054 | 0,324 | -0,427 |
| 20 | Q9NYF8 BCLF1_HUMAN  | K.LKDLFDYS#PPLHK.N             | S512:           | 2 | 2,7012 | 0,234 | -0,517 |
| 20 | Q8NCD3 HJURP_HUMAN  | K.SVS#PSKTLSPDKE.V             | S557:           | 2 | 2,6982 | 0,249 | -0,55  |
| 20 | Q6ULP2 AFTIN_HUMAN  | E.KLDLLTSK.C                   |                 | 2 | 2,6943 | 0,118 | 0,199  |
| 20 | Q96ST2 IWS1_HUMAN   | R.GKHM*DFLSDFE.M               |                 | 2 | 2,6931 | 0,214 | -0,455 |
| 20 | P29590 PML_HUMAN    | K.AVSPPHLDGPPS#PRS#PVIQSE.V    | S527:S530:      | 3 | 2,6922 | 0,124 | -0,405 |
| 20 | P85037 FOXK1_HUMAN  | R.NS#SQGS#VDLSMGLSSFIS#RR.H    | S129:S133:S145: | 3 | 2,6913 | 0,122 | 1,932  |
| 20 | Q02952 AKA12_HUMAN  | E.ALICVSSK.K                   |                 | 2 | 2,6893 | 0,406 | -0,065 |
| 20 | Q5H9R7 SAPS3_HUMAN  | R.NTVDLVTTCHIHSS#SDDE.I        | S524:           | 2 | 2,6892 | 0,364 | -0,463 |
| 20 | O43399 TPD54_HUMAN  | R.NSATFKS#FE.D                 | S166:           | 2 | 2,6887 | 0,226 | -0,439 |
| 20 | Q6NWDY9 PR40B_HUMAN | R.TLLQQLDDHQ.-                 |                 | 2 | 2,687  | 0,213 | -0,504 |
| 20 | Q99700 ATX2_HUMAN   | R.DLIKDKIEPSAK.D               |                 | 2 | 2,6855 | 0,136 | -0,27  |
| 20 | A9CQZ4 A9CQZ4_HUMAN | R.QKFCGMFCPVEGSSE.N            |                 | 2 | 2,6834 | 0,277 | -0,484 |

|    |                     |                                  |                 |   |        |       |        |
|----|---------------------|----------------------------------|-----------------|---|--------|-------|--------|
| 20 | Q13045 FLII_HUMAN   | E.AVLQS#PGLSGK.V                 | S856:           | 2 | 2,6797 | 0,338 | -0,107 |
| 20 | Q9UHB6 LIMA1_HUMAN  | R.ASSLSES#SPPKAMK.K              | S373:           | 2 | 2,6785 | 0,087 | -1,301 |
| 20 | Q9UKS6 PACN3_HUMAN  | R.SPDEVTLSIVPTR.D                |                 | 2 | 2,6776 | 0,361 | -0,322 |
| 20 | P05787 K2C8_HUMAN   | R.AFSSRS#YTSGPGSR.I              | S24:            | 2 | 2,6737 | 0,583 | -0,713 |
| 20 | Q9UQ35 SRRM2_HUMAN  | E.SSLVFKDTLR.T                   |                 | 2 | 2,6726 | 0,25  | -0,314 |
| 20 | Q9UK76 HN1_HUMAN    | R.RNSS#EASSGDFLDLKG.E            | S88:            | 3 | 2,6721 | 0,192 | -0,387 |
| 20 | Q8N3U4 STAG2_HUMAN  | R.GTS#LM*EDDEEPIVE.D             | S1161:          | 2 | 2,672  | 0,321 | -0,809 |
| 20 | O95218 ZRAB2_HUMAN  | E.S#DGEYDEFGR.K                  | S120:           | 2 | 2,6657 | 0,272 | -0,292 |
| 20 | Q5SW79 CE170_HUMAN  | R.IDLLAQPR.R                     |                 | 2 | 2,6642 | 0,273 | -0,132 |
| 20 | Q7L7X3 TAOK1_HUMAN  | R.GSSMGVRNS#PQALR.R              | S965:           | 3 | 2,6636 | 0,279 | -0,356 |
| 20 | P09874 PARP1_HUMAN  | K.GDEVDGVDEVAK.K                 |                 | 2 | 2,6624 | 0,28  | -0,198 |
| 20 | Q15418 KS6A1_HUMAN  | R.KLPS#TTL.-                     | S732:           | 2 | 2,6602 | 0,361 | 0,218  |
| 20 | Q86Y04 Q86Y04_HUMAN | K.VDLTLLS#PKSE.N                 | S239:           | 2 | 2,6601 | 0,116 | -0,571 |
| 20 | P49585 PCY1A_HUMAN  | R.M*LQAISPK.Q                    |                 | 2 | 2,6588 | 0,096 | 0,135  |
| 20 | Q3MHD2 LSM12_HUMAN  | E.GQQLFQTIHK.T                   |                 | 2 | 2,6559 | 0,131 | -0,305 |
| 20 | Q3KQU3 MA7D1_HUMAN  | E.AKS#RGPTPPAM*GPR.D             | S93:            | 3 | 2,6558 | 0,186 | 0,06   |
| 20 | P62753 RS6_HUMAN    | R.RLS#S#LRAS#TSKSESSQK.-         | S235:S236:S240: | 3 | 2,6526 | 0,249 | -0,35  |
| 20 | Q03188 CENPC_HUMAN  | R.KIKDTCIQS#PSKE.C               | S73:            | 3 | 2,6485 | 0,12  | 0      |
| 20 | O95425 SVIL_HUMAN   | R.DSSFTEVPRS#PK.H                | S245:           | 2 | 2,6451 | 0,211 | -0,171 |
| 20 | Q3V6T2 GRDN_HUMAN   | E.RDGLHFLPHASSS#AQSPCGS#PGM*KR.T | S230:S237:      | 3 | 2,6444 | 0,105 | -0,256 |
| 20 | O75083 WDR1_HUMAN   | R.IAVVGEGR.K                     |                 | 2 | 2,6443 | 0,19  | 0,066  |
| 20 | Q8NCM9 Q8NCM9_HUMAN | R.SSDITSDLGNVLTSTPNAK.T          |                 | 3 | 2,6417 | 0,158 | -0,572 |
| 20 | P49736 MCM2_HUMAN   | R.RGNDPLTS#SPGR.S                | S26:            | 2 | 2,6401 | 0,23  | -0,456 |
| 20 | P49023 PAXI_HUMAN   | R.GLEDVRPSVE.S                   |                 | 2 | 2,6358 | 0,261 | -0,111 |
| 20 | P15559 NQO1_HUMAN   | R.ALIVLAHSE.R                    |                 | 2 | 2,6348 | 0,313 | -0,128 |
| 20 | Q9ULH0 ARMS_HUMAN   | E.YLSDALLDKK.D                   |                 | 2 | 2,6332 | 0,238 | -0,314 |
| 20 | Q9UHB6 LIMA1_HUMAN  | R.SRPFTVAASFQSTSVK.S             |                 | 3 | 2,6328 | 0,229 | -0,32  |
| 20 | P60903 S10AA_HUMAN  | K.FAGDKGYLTKE.D                  |                 | 2 | 2,6316 | 0,196 | -0,298 |
| 20 | P10809 CH60_HUMAN   | R.GYISPYFINTSK.G                 |                 | 2 | 2,6309 | 0,358 | -0,351 |
| 20 | Q12906 ILF3_HUMAN   | K.VLQDM*GLPTGAEGR.D              |                 | 2 | 2,6297 | 0,201 | -0,418 |
| 20 | Q9Y2U5 M3K2_HUMAN   | R.DRS#SPPPGYIPDE.L               | S163:           | 2 | 2,6277 | 0,232 | -0,566 |
| 20 | Q9Y2H0 DLGP4_HUMAN  | R.NLS#YGDNSDPALE.A               | S760:           | 2 | 2,6255 | 0,128 | -0,331 |
| 20 | P46821 MAP1B_HUMAN  | D.LTGQVPTPVVK.Q                  |                 | 2 | 2,621  | 0,277 | -0,107 |

|    |                    |                                      |            |   |        |       |        |
|----|--------------------|--------------------------------------|------------|---|--------|-------|--------|
| 20 | P62753 RS6_HUMAN   | R.RLS#S#LRASTSKSE.S                  | S235:S236: | 2 | 2,6182 | 0,207 | -0,617 |
| 20 | P13639 EF2_HUMAN   | E.DHACIPIKK.S                        |            | 2 | 2,618  | 0,291 | -0,451 |
| 20 | O00499 BIN1_HUMAN  | K.AQPSDNAPAKGNKS#PS#PPDGSPAATPE.I    | S296:S298: | 3 | 2,6169 | 0,11  | -0,666 |
| 20 | Q9Y2U5 M3K2_HUMAN  | R.KKRLS#IIGPTSR.D                    | S153:      | 3 | 2,6127 | 0,09  | -0,127 |
| 20 | Q14151 SAFB2_HUMAN | K.SKGEPPVISVK.T                      |            | 2 | 2,6068 | 0,247 | 0      |
| 20 | P49757 NUMB_HUMAN  | R.TNPS#PTNPFSSDLQK.T                 | S634:      | 2 | 2,6063 | 0,39  | -0,57  |
| 20 | Q9Y2X7 GIT1_HUMAN  | R.ARS#M*DSSDLSDGAVTLQE.Y             | S410:      | 2 | 2,6053 | 0,307 | -0,679 |
| 20 | P13639 EF2_HUMAN   | K.KSDPVVSYRE.T                       |            | 2 | 2,601  | 0,243 | -0,517 |
| 20 | Q01082 SPTB2_HUMAN | K.TALPAQSAATLPAR.T                   |            | 3 | 2,6003 | 0,276 | 0,267  |
| 20 | P29692 EF1D_HUMAN  | R.ATAPQTQHVSPMR.Q                    |            | 2 | 2,6002 | 0,315 | -0,685 |
| 20 | Q14157 UBP2L_HUMAN | K.QLIDITGKNQDE.C                     |            | 2 | 2,5977 | 0,21  | -0,622 |
| 20 | Q9H0B6 KLC2_HUMAN  | E.KQHLLFMSQIR.K                      |            | 3 | 2,5965 | 0,148 | -0,326 |
| 20 | Q9UHB6 LIMA1_HUMAN | R.ASS#LSESS#PPKAM*KK.F               | S369:S374: | 3 | 2,5947 | 0,149 | -0,318 |
| 20 | P98175 RBM10_HUMAN | E.RQHTSMDLPK.L                       |            | 3 | 2,5946 | 0,186 | 0,452  |
| 20 | P50548 ERF_HUMAN   | R.GEGPGEAGGPLT#PR.R                  | T526:      | 2 | 2,5929 | 0,276 | -0,355 |
| 20 | P22626 ROA2_HUMAN  | R.GFGFVTFSSM*AE.V                    |            | 2 | 2,5925 | 0,303 | -0,377 |
| 20 | Q13136 LIPA1_HUMAN | R.VGSGSLDNLGR.F                      |            | 2 | 2,5912 | 0,364 | 0,113  |
| 20 | Q9UQ35 SRRM2_HUMAN | K.SATRPS#PS#PERSSTGPEPPAPTPLLA.E.R   | S351:S353: | 3 | 2,5869 | 1     | -0,317 |
| 20 | Q5H9R7 SAPS3_HUMAN | R.NTVDLVTTCHIHS#SSDDE.I              | S523:      | 2 | 2,585  | 0,473 | -0,81  |
| 20 | P13647 K2C5_HUMAN  | R.ISISTSGGSFR.N                      |            | 2 | 2,5825 | 0,305 | -0,329 |
| 20 | P04264 K2C1_HUMAN  | R.TNAENEFVTIK.K                      |            | 2 | 2,5821 | 0,382 | -0,482 |
| 20 | P02545 LMNA_HUMAN  | R.LRLS#PS#PTSQR.S                    | S390:S392: | 2 | 2,5812 | 0,239 | -0,522 |
| 20 | P68104 EF1A1_HUMAN | K.STTTGHLIYK.C                       |            | 2 | 2,5788 | 0,339 | -0,109 |
| 20 | Q99623 PHB2_HUMAN  | E.SFTRGS#DSLIIK.G                    | S291:      | 2 | 2,5767 | 0,161 | -0,567 |
| 20 | A0FGR8 ESYT2_HUMAN | K.SHM*SGSPGPGGSNTAPSTPVIGGSDKPGMEE.K |            | 3 | 2,5741 | 0,154 | -0,249 |
| 20 | O60343 TBCD4_HUMAN | R.GRLGS#VDSFE.R                      | S588:      | 2 | 2,573  | 0,236 | -0,213 |
| 20 | P54577 SYYC_HUMAN  | E.SKIDLLDRKE.D                       |            | 2 | 2,5712 | 0,262 | 0,702  |
| 20 | Q6IBW4 CNDH2_HUMAN | E.S#RSPQQSAALPR.R                    | S282:      | 3 | 2,5712 | 0,144 | -0,066 |
| 20 | Q9H074 PAIP1_HUMAN | K.APGFLQPPPLR.Q                      |            | 2 | 2,5702 | 0,196 | -0,409 |
| 20 | Q13442 HAP28_HUMAN | K.GVEGLIDIENPNRVAQTTK.K              |            | 3 | 2,5695 | 0,293 | -0,445 |
| 20 | P52272 HNRPM_HUMAN | K.GCGVVKFESPEVAE.R                   |            | 2 | 2,5689 | 0,267 | -0,809 |
| 20 | P46087 NOL1_HUMAN  | K.GPQSLFNAPR.G                       |            | 2 | 2,5685 | 0,328 | 0,112  |
| 20 | Q12830 BPTF_HUMAN  | K.NLSES#PVITK.A                      | S1092:     | 2 | 2,5672 | 0,088 | -0,418 |

|    |                     |                           |            |   |        |       |        |
|----|---------------------|---------------------------|------------|---|--------|-------|--------|
| 20 | Q9Y2I7 FYV1_HUMAN   | K.ASGM*LSFFR.G            |            | 2 | 2,5601 | 0,279 | -0,236 |
| 20 | P27816 MAP4_HUMAN   | K.VGSLDNVGHLPAGGAVK.T     |            | 2 | 2,5592 | 0,124 | -0,307 |
| 20 | Q14676 MDC1_HUMAN   | R.SSVKTPEPVVPTAPE.L       |            | 2 | 2,5591 | 0,239 | -0,317 |
| 20 | P02545 LMNA_HUMAN   | R.LRLSPS#PTSQR.S          | S392:      | 2 | 2,555  | 0,323 | -0,369 |
| 20 | Q14966 ZN638_HUMAN  | K.TSILAVSDVSSSKPSIK.A     |            | 3 | 2,5495 | 0,18  | -0,213 |
| 20 | Q9H6Z4 RANB3_HUMAN  | E.EKPAIAPPVVFVQK.D        |            | 2 | 2,5481 | 0,207 | -0,621 |
| 20 | A0AUZ9 CB067_HUMAN  | K.DVQIILDS#NIT#K.D        | S155:T158: | 3 | 2,5457 | 0,09  | -1,084 |
| 20 | P34932 HSP74_HUMAN  | K.VKTSTVDLPIE.N           |            | 2 | 2,5434 | 0,176 | -0,507 |
| 20 | Q8IWS0 PHF6_HUMAN   | K.CGFCHVGEEENE.A          |            | 2 | 2,5364 | 0,171 | -0,25  |
| 20 | Q00839 HNRPU_HUMAN  | K.SSGPTSLFAVTVAPPGAR.Q    |            | 2 | 2,5361 | 0,385 | -0,356 |
| 20 | Q6NV74 CB055_HUMAN  | K.RYS#AEVRLE.R            | S710:      | 2 | 2,5344 | 0,174 | 0,203  |
| 20 | P11586 C1TC_HUMAN   | E.HGAFDAVK.C              |            | 2 | 2,5269 | 0,27  | -0,217 |
| 20 | P04075 ALDOA_HUMAN  | K.ADDGRFPQVIK.S           |            | 3 | 2,5243 | 0,21  | 0,068  |
| 20 | Q9UQ35 SRRM2_HUMAN  | R.VSGRTS#PPLDR.A          | S2398:     | 2 | 2,5236 | 0,096 | 0      |
| 20 | Q6ZUT9 RA61L_HUMAN  | R.RLS#ITSLTGK.N           | S1076:     | 2 | 2,5201 | 0,406 | -0,422 |
| 20 | O60361 NDK8_HUMAN   | R.GDFCIQVGR.N             |            | 2 | 2,5172 | 0,374 | 0      |
| 20 | Q3T8J9 GON4L_HUMAN  | R.TLFHQPEEE.I             |            | 2 | 2,5169 | 0,263 | -0,432 |
| 20 | Q5QJE6 TDIF2_HUMAN  | E.IVS#EAES#HVSGISR.I      | S141:S145: | 2 | 2,5153 | 0,329 | -0,075 |
| 20 | P06748 NPM_HUMAN    | K.TPKGSSVEDIK.A           |            | 2 | 2,5142 | 0,201 | -0,291 |
| 20 | Q9UHB6 LIMA1_HUMAN  | R.ASSLSESS#PPKAM*K.K      | S374:      | 2 | 2,5134 | 0,179 | 0,161  |
| 20 | Q71U36 TBA1A_HUMAN  | R.GHYTIGKE.I              |            | 2 | 2,5099 | 0,296 | 0,067  |
| 20 | P11216 PYGB_HUMAN   | R.GLAGLGDVAE.V            |            | 2 | 2,5089 | 0,259 | 0      |
| 20 | A9CQZ4 A9CQZ4_HUMAN | K.AAEDEEVPAFFK.N          |            | 2 | 2,5053 | 0,326 | -0,361 |
| 20 | P29692 EF1D_HUMAN   | R.ATAPQTQHVS#PMRQVEPPAK.K | S133:      | 3 | 2,5038 | 0,147 | -0,731 |
| 20 | P17980 PRS6A_HUMAN  | E.KLKPGDLVGVNKD.S         |            | 3 | 2,4943 | 0,195 | -0,066 |
| 20 | P31949 S10AB_HUMAN  | K.NQKDPGVLDR.M            |            | 2 | 2,491  | 0,118 | -0,321 |
| 20 | Q07955 SFRS1_HUMAN  | R.VKVDGPRS#PS#YGR.S       | S199:S201: | 3 | 2,4902 | 0,202 | 0,232  |
| 20 | O43237 DC1L2_HUMAN  | R.RGPLTSGSDEE.N           |            | 2 | 2,4858 | 0,335 | -0,531 |
| 20 | Q02790 FKBP4_HUMAN  | E.GYYKDKLFDQRE.L          |            | 3 | 2,48   | 0,37  | -0,117 |
| 20 | Q5H9R7 SAPS3_HUMAN  | R.NTVDLVT#TCHIHSSSDDE.I   | T517:      | 3 | 2,4784 | 0,203 | -0,434 |
| 20 | Q92622 K0226_HUMAN  | E.GQTLTVTSGAK.K           |            | 2 | 2,4778 | 0,357 | -0,115 |
| 20 | Q15424 SAFB1_HUMAN  | R.SVVS#FDKVKPR.K          | S604:      | 3 | 2,4747 | 0,165 | 0      |
| 20 | Q13496 MTM1_HUMAN   | R.DGVNRDLTE.A             |            | 2 | 2,4723 | 0,23  | -0,12  |

|    |                     |                             |              |   |        |       |        |
|----|---------------------|-----------------------------|--------------|---|--------|-------|--------|
| 20 | Q9NTI5 PDS5B_HUMAN  | E.DYTMSS#PLPGK.K            | S1191:       | 2 | 2,4706 | 0,259 | -0,096 |
| 20 | P60174 TPIS_HUMAN   | R.RHVFGESEDE.L              |              | 2 | 2,4681 | 0,347 | -0,227 |
| 20 | P41212 ETV6_HUMAN   | R.S#RSPITTNHRPS#PDPE.Q      | S182:S193:   | 2 | 2,4679 | 0,368 | 0,5    |
| 20 | O15213 WDR46_HUMAN  | E.TVPTTAGAS#PGPPR.N         | S41:         | 2 | 2,4607 | 0,401 | -0,615 |
| 20 | P14868 SYDC_HUMAN   | R.EIM*DAAEDYAKE.R           |              | 2 | 2,4568 | 0,151 | -0,348 |
| 20 | Q86VP6 CAND1_HUMAN  | K.CLDAVVSTRHE.M             |              | 3 | 2,4531 | 0,208 | 0,213  |
| 20 | P49736 MCM2_HUMAN   | E.SFTMASSPAQR.R             |              | 2 | 2,4527 | 0,453 | -0,413 |
| 20 | Q09666 AHNK_HUMAN   | K.AKGEVDVDVPKLE.G           |              | 2 | 2,4494 | 0,123 | -0,698 |
| 20 | P13639 EF2_HUMAN    | K.SDPVVSYRE.T               |              | 2 | 2,4465 | 0,423 | -0,348 |
| 20 | Q9Y2W1 TR150_HUMAN  | R.ERS#PALKS#PLQSVVVR.R      | S248:S253:   | 3 | 2,4457 | 0,258 | -0,475 |
| 20 | A9CQZ4 A9CQZ4_HUMAN | R.QKFCGM*FCPVEGSSE.N        |              | 2 | 2,4444 | 0,344 | -0,343 |
| 20 | Q9NQ92 CQ079_HUMAN  | R.GTQSIPNDS#PARGEGTHS#EEE.G | S66:S75:     | 3 | 2,4428 | 0,202 | -0,31  |
| 20 | Q9Y3T9 NOC2L_HUMAN  | R.GILRPLSTR.H               |              | 2 | 2,4412 | 0,238 | -0,181 |
| 20 | Q9UQ35 SRRM2_HUMAN  | E.HKELS#NS#PLRE.N           | S1318:S1320: | 2 | 2,4388 | 0,148 | -0,415 |
| 20 | O14974 MYPT1_HUMAN  | R.LAYVAPTIPR.R              |              | 2 | 2,4315 | 0,226 | -0,332 |
| 20 | O43379 WDR62_HUMAN  | R.RGQSS#PPPAPPICLR.R        | S33:         | 3 | 2,4308 | 0,162 | -0,427 |
| 20 | Q8N6T3 ARFG1_HUMAN  | E.TFGSAEPTKTR.K             |              | 2 | 2,4292 | 0,313 | -0,102 |
| 20 | Q8IYB3 SRRM1_HUMAN  | E.KKEKT#PELPEPSVK.V         | T220:        | 2 | 2,4247 | 0,173 | -0,289 |
| 20 | P19338 NUCL_HUMAN   | K.SKGYAFIE.F                |              | 2 | 2,4236 | 0,21  | -0,267 |
| 20 | P06748 NPM_HUMAN    | E.DVKLLS#ISGKR.S            | S137:        | 2 | 2,423  | 0,124 | -0,565 |
| 20 | P23588 IF4B_HUMAN   | K.VAPAQPSEEGPGRKDE.N        |              | 2 | 2,4186 | 0,251 | -0,878 |
| 20 | P06748 NPM_HUMAN    | E.DVKLLS#ISGK.R             | S137:        | 2 | 2,4163 | 0,379 | -0,535 |
| 20 | P42704 LPPRC_HUMAN  | E.FYAQQLR.K                 |              | 2 | 2,4126 | 0,106 | -0,198 |
| 20 | P38571 LICH_HUMAN   | E.DGYILCLNR.I               |              | 2 | 2,4117 | 0,256 | -0,434 |
| 20 | Q9NQW6 ANLN_HUMAN   | R.STPHRT#PIIT#PNTK.A        | T397:T401:   | 3 | 2,4116 | 0,161 | -0,425 |
| 20 | Q4G0A6 U526_HUMAN   | K.NQLLPSDKVDGE.L            |              | 2 | 2,4109 | 0,096 | -0,649 |
| 20 | P35908 K22E_HUMAN   | K.YEELQVTVGR.H              |              | 2 | 2,405  | 0,4   | -0,307 |
| 20 | Q99590 SFRIP_HUMAN  | K.TEELIES#PKLE.S            | S293:        | 2 | 2,4042 | 0,099 | -0,624 |
| 20 | Q14676 MDC1_HUMAN   | R.SSVKT#PEPVVPTAPE.L        | T1157:       | 2 | 2,4036 | 0,314 | -0,226 |
| 20 | P48960 CD97_HUMAN   | R.CNPGFSSFSE.I              |              | 2 | 2,4028 | 0,316 | -0,216 |
| 20 | O43379 WDR62_HUMAN  | R.GQSS#PPPAPPICLR.R         | S33:         | 2 | 2,3974 | 0,106 | -0,47  |
| 20 | Q71U36 TBA1A_HUMAN  | E.QLITGKEDAANNYAR.G         |              | 2 | 2,3971 | 0,296 | -0,293 |
| 20 | Q9C0H5 K1688_HUMAN  | K.QGPPS#PCQQLVLT.K.Q        | S366:        | 2 | 2,3921 | 0,166 | -0,075 |

|    |                    |                                  |            |   |        |       |        |
|----|--------------------|----------------------------------|------------|---|--------|-------|--------|
| 20 | P26640 SYVC_HUMAN  | K.AVLVALKE.R                     |            | 2 | 2,3897 | 0,198 | 0,289  |
| 20 | P49790 NU153_HUMAN | K.CIACQAAKLS#PR.D                | S687:      | 2 | 2,3861 | 0,323 | -0,503 |
| 20 | Q9Y5T5 UBP16_HUMAN | E.SFLDLSLPVLDDQSGKK.S            |            | 3 | 2,3832 | 0,24  | -0,589 |
| 20 | Q05524 ENO1B_HUMAN | E.KGVPLYR.H                      |            | 2 | 2,3797 | 0,17  | 0,22   |
| 20 | Q99615 DNJC7_HUMAN | E.AFTILSDPK.K                    |            | 2 | 2,3791 | 0,414 | -0,369 |
| 20 | Q53GS9 SNUT2_HUMAN | E.APASVVPFVR.V                   |            | 2 | 2,3789 | 0,277 | -0,234 |
| 20 | P34932 HSP74_HUMAN | K.LKKEDIYAVE.I                   |            | 2 | 2,3782 | 0,15  | -0,505 |
| 20 | Q9H3N1 TXND1_HUMAN | R.SLGPSLATDKS.-                  |            | 2 | 2,3763 | 0,427 | -1,247 |
| 20 | Q06830 PRDX1_HUMAN | R.TIAQDYGVLKADE.G                |            | 2 | 2,3755 | 0,299 | -0,429 |
| 20 | P62937 PPIA_HUMAN  | K.ITIADCGLE.-                    |            | 2 | 2,3753 | 0,312 | -0,218 |
| 20 | Q9BSI4 TINF2_HUMAN | R.ALKENPVDLPATE.Q                |            | 2 | 2,3687 | 0,392 | -0,524 |
| 20 | Q92625 ANS1A_HUMAN | R.SES#LSNCSIGKK.R                | S647:      | 3 | 2,3667 | 0,152 | -0,066 |
| 20 | P22626 ROA2_HUMAN  | R.GGGGNFGPGPSNFR.G               |            | 2 | 2,3637 | 0,296 | -0,177 |
| 20 | P51991 ROA3_HUMAN  | R.GFAFVTFDDHDTVDKIVVQK.Y         |            | 3 | 2,362  | 0,1   | -0,561 |
| 20 | Q8WXH0 SYNE2_HUMAN | R.RGS#M*SYLAAVEEE.V              | S4108:     | 2 | 2,3613 | 0,166 | -0,555 |
| 20 | P35527 K1C9_HUMAN  | K.STMQELNSR.L                    |            | 2 | 2,3498 | 0,168 | -0,114 |
| 20 | Q9H7L9 SDS3_HUMAN  | K.RPAS#PSS#PEHLPATPAESPAQRFE.A   | S234:S237: | 3 | 2,3494 | 0,19  | -0,74  |
| 20 | Q9NPA5 ZF64A_HUMAN | E.NQTATVISLPAK.S                 |            | 2 | 2,3469 | 0,224 | -0,393 |
| 20 | Q9HC35 EMAL4_HUMAN | K.SIKRPS#PAE.K                   | S176:      | 2 | 2,3402 | 0,151 | 0      |
| 20 | Q9NYF8 BCLF1_HUMAN | K.TIAPQNAPRDE.S                  |            | 2 | 2,3393 | 0,29  | -0,201 |
| 20 | Q9H6H4 REEP4_HUMAN | R.RPPIGYR.A                      |            | 2 | 2,3381 | 0,097 | 0,142  |
| 20 | Q6P0Q8 MAST2_HUMAN | R.SRS#LS#PGRSPVFDSE.I            | S299:S301: | 2 | 2,3322 | 0,208 | -0,653 |
| 20 | O14745 NHERF_HUMAN | E.GKQHGDVVSAIR.A                 |            | 3 | 2,3265 | 0,18  | -0,216 |
| 20 | Q9NRA8 4ET_HUMAN   | E.FGDS#KRVFGER.R                 | S201:      | 3 | 2,3259 | 0,223 | -0,066 |
| 20 | Q15424 SAFB1_HUMAN | K.FDFDACNEVPPAPK.E               |            | 2 | 2,3247 | 0,149 | -0,683 |
| 20 | P02686 MBP_HUMAN   | E.SLDVM*ASQK.R                   |            | 2 | 2,316  | 0,317 | -0,123 |
| 20 | Q92576 PHF3_HUMAN  | R.RGS#AVATSHFE.V                 | S1758:     | 2 | 2,3157 | 0,323 | -0,295 |
| 20 | O00499 BIN1_HUMAN  | K.AQPSDNAPAKGNKS#PSPDPGSPAATPE.I | S296:      | 3 | 2,3025 | 0,089 | -0,206 |
| 20 | Q3KQU3 MA7D1_HUMAN | K.RQS#LPAS#PR.A                  | S442:S446: | 2 | 2,3013 | 0,277 | -0,208 |
| 20 | Q9BRK5 CAB45_HUMAN | E.NQNHHLEPEEVLKYSE.F             |            | 3 | 2,299  | 0,236 | -0,279 |
| 20 | P46087 NOL1_HUMAN  | E.GEALLPIER.A                    |            | 2 | 2,2982 | 0,168 | -0,061 |
| 20 | P29692 EF1D_HUMAN  | R.ATAPQTQHVS#PM*R.Q              | S133:      | 2 | 2,2982 | 0,261 | -0,562 |
| 20 | Q92733 PRCC_HUMAN  | K.TILQGSSE.G                     |            | 2 | 2,2963 | 0,154 | -0,804 |

|    |                     |                           |              |   |        |       |        |
|----|---------------------|---------------------------|--------------|---|--------|-------|--------|
| 20 | Q96AJ1 CLUA1_HUMAN  | R.VRKSEPLDES#DNDF.-       | S409:        | 2 | 2,295  | 0,269 | -0,564 |
| 20 | P07602 SAP_HUMAN    | K.KLVGYLDR.N              |              | 2 | 2,2866 | 0,123 | 0,443  |
| 20 | Q8IZP0 ABI1_HUMAN   | E.NNYIQATDKR.K            |              | 3 | 2,2856 | 0,272 | 0,299  |
| 20 | P22102 PUR2_HUMAN   | K.KGLAAIKFE.G             |              | 2 | 2,2805 | 0,161 | 0      |
| 20 | Q3KQU3 MA7D1_HUMAN  | K.SRGPT#PPAMGPR.D         | T97:         | 2 | 2,2781 | 0,167 | -0,281 |
| 20 | P30101 PDIA3_HUMAN  | K.QAGPASVPLRTEEE.F        |              | 2 | 2,2739 | 0,363 | -0,329 |
| 20 | Q14669 TRIPC_HUMAN  | E.RYLVVR.G                |              | 2 | 2,2735 | 0,168 | 0,227  |
| 20 | Q9NTI5 PDS5B_HUMAN  | E.DYTMSS#PLPGKK.S         | S1191:       | 2 | 2,2699 | 0,182 | -0,435 |
| 20 | P11021 GRP78_HUMAN  | K.ITITNDQNR.L             |              | 2 | 2,2663 | 0,262 | 0,113  |
| 20 | O75179 ANR17_HUMAN  | K.SGPS#PLSS#PNGKLTVASPK.R | S1696:S1700: | 3 | 2,2636 | 0,101 | -0,369 |
| 20 | P81605 DCD_HUMAN    | K.ENAGEDPGLAR.Q           |              | 2 | 2,2614 | 0,265 | -0,648 |
| 20 | Q86U90 YRDC_HUMAN   | R.LFRPPS#PAPAAPGAR.L      | S37:         | 3 | 2,2602 | 0,087 | 0      |
| 20 | Q92597 NDRG1_HUMAN  | R.S#RTAS#GSSVTSLDGTR.S    | S326:S330:   | 3 | 2,2601 | 0,081 | -0,21  |
| 20 | P13639 EF2_HUMAN    | K.SDPVVSYPRETSEE.S        |              | 2 | 2,2586 | 0,134 | -0,688 |
| 20 | P49674 KC1E_HUMAN   | R.SAAEPVASTPASR.I         |              | 2 | 2,2574 | 0,335 | -0,294 |
| 20 | Q15424 SAFB1_HUMAN  | R.SVVS#FDKVK.E            | S604:        | 2 | 2,2569 | 0,086 | -0,336 |
| 20 | Q8TDJ6 DMXL2_HUMAN  | R.TIS#VSGSTAKE.T          | S1400:       | 2 | 2,2516 | 0,263 | -0,105 |
| 20 | Q2KHR3 QSER1_HUMAN  | K.SVSTPLTTLDATSDK.K       |              | 2 | 2,249  | 0,363 | -0,556 |
| 20 | Q9BRA2 TXD17_HUMAN  | K.TIFAYTGSK.D             |              | 2 | 2,2478 | 0,355 | -0,43  |
| 20 | P04406 G3P_HUMAN    | K.IKWGDAGAEYVVE.S         |              | 2 | 2,2457 | 0,213 | -0,255 |
| 20 | P25440 BRD2_HUMAN   | R.IRKPS#LLYE.G            | S37:         | 2 | 2,2432 | 0,119 | -0,305 |
| 20 | P12956 KU70_HUMAN   | R.TFNTSTGGLLPSDTKR.S      |              | 2 | 2,2418 | 0,358 | -0,607 |
| 20 | Q9P2N6 K1310_HUMAN  | K.SSQIGSSQLLK.R           |              | 2 | 2,2391 | 0,131 | -0,213 |
| 20 | P82094 TMF1_HUMAN   | E.TKDIALEPK.E             |              | 2 | 2,2366 | 0,169 | -0,3   |
| 20 | A9CQZ4 A9CQZ4_HUMAN | K.FCGM*FCPVEGSSE.N        |              | 2 | 2,2353 | 0,213 | -0,641 |
| 20 | O15427 MOT4_HUMAN   | K.AEPEKNGEVVHTPET#SV.-    | T463:        | 2 | 2,2337 | 0,194 | 0,769  |
| 20 | Q9BZZ5 API5_HUMAN   | K.YSSNLGNFNHYGE.R         |              | 2 | 2,228  | 0,13  | -0,536 |
| 20 | Q9NTI5 PDS5B_HUMAN  | E.M*KSFFT#PGKPK.T         | T1121:       | 3 | 2,2268 | 0,136 | 0,201  |
| 20 | Q5TAX3 ZCH11_HUMAN  | K.NKQNDICIE.K             |              | 2 | 2,2244 | 0,144 | -0,323 |
| 20 | Q92945 FUBP2_HUMAN  | K.LASQGDSISSQLGPIHPPPR.T  |              | 3 | 2,2227 | 0,148 | -0,534 |
| 20 | P63313 TYB10_HUMAN  | E.IAS#FDKAK.L             | S12:         | 2 | 2,2225 | 0,312 | 0      |
| 20 | Q12849 GRSF1_HUMAN  | E.M*ANQALLK.H             |              | 2 | 2,2221 | 0,192 | -0,135 |
| 20 | P68104 EF1A1_HUMAN  | R.KDGNASGTTLLE.A          |              | 2 | 2,216  | 0,246 | -0,101 |

|    |                    |                            |            |   |        |       |        |
|----|--------------------|----------------------------|------------|---|--------|-------|--------|
| 20 | P13639 EF2_HUMAN   | E.DHACIPIK.K               |            | 2 | 2,214  | 0,212 | -0,192 |
| 20 | P46937 YAP1_HUMAN  | D.SFFKPPEPK.S              |            | 2 | 2,2123 | 0,159 | -0,113 |
| 20 | Q08AE8 SPIR1_HUMAN | K.FLPIST#PQPE.R            | T350:      | 2 | 2,2101 | 0,217 | -0,377 |
| 20 | P25705 ATPA_HUMAN  | K.AVDSLVIPIGR.G            |            | 2 | 2,2084 | 0,344 | -0,119 |
| 20 | P09493 TPM1_HUMAN  | K.MQM*LKLDKE.N             |            | 2 | 2,203  | 0,095 | 0      |
| 20 | Q8N3V7 SYNPO_HUMAN | E.KAPAPQPPSLPDRS#PRPQR.H   | S525:      | 3 | 2,2029 | 0,149 | -0,168 |
| 20 | Q8WYP5 AHTF1_HUMAN | R.TTSFFLNS#PEKE.H          | S1292:     | 2 | 2,2021 | 0,099 | -0,495 |
| 20 | Q8N111 CEND_HUMAN  | K.SAS#SPKPDTKVPQVTTE.A     | S9:        | 2 | 2,2    | 0,269 | 0,527  |
| 20 | Q01518 CAP1_HUMAN  | R.ATKKEPAVLE.L             |            | 2 | 2,1989 | 0,227 | -0,562 |
| 20 | Q8N6T3 ARFG1_HUMAN | E.TFGSAEPTK.T              |            | 2 | 2,1988 | 0,291 | -0,26  |
| 20 | O00567 NOL5A_HUMAN | R.LAALALASSESSS#TPEECE.E.M | S467:      | 2 | 2,1949 | 0,404 | -0,322 |
| 20 | Q92598 HS105_HUMAN | K.KLM*SSNSTDLPLNIE.C       |            | 2 | 2,1946 | 0,235 | -0,436 |
| 20 | P62753 RS6_HUMAN   | R.RLS#S#LRASTSK.S          | S235:S236: | 2 | 2,1921 | 0,267 | -0,625 |
| 20 | Q58FF7 H90B3_HUMAN | E.DHLAVKHFS#VE.G           | S264:      | 3 | 2,1885 | 0,161 | 0,134  |
| 20 | P19105 MLRM_HUMAN  | R.ATS#NVFAM*FD.Q           | S19:       | 2 | 2,1828 | 0,348 | -0,407 |
| 20 | Q9NW13 RBM28_HUMAN | R.KLPSDVNE.G               |            | 2 | 2,1788 | 0,117 | 0      |
| 20 | Q3KQU3 MA7D1_HUMAN | R.GPT#PPAMGPR.D            | T97:       | 2 | 2,1776 | 0,236 | 0      |
| 20 | P08670 VIME_HUMAN  | K.SRLGDLYEEE.M             |            | 2 | 2,1754 | 0,274 | -0,302 |
| 20 | Q6KC79 NIPBL_HUMAN | K.AITSLGGGS#PK.N           | S2658:     | 2 | 2,1719 | 0,248 | -0,413 |
| 20 | P04264 K2C1_HUMAN  | K.SISISVAR.G               |            | 2 | 2,1714 | 0,093 | 1,538  |
| 20 | Q9UQ35 SRRM2_HUMAN | K.THTTALAGRS#PS#PASGR.R    | S295:S297: | 3 | 2,1704 | 0,218 | 0,1    |
| 20 | P04083 ANXA1_HUMAN | K.ALTGHLEE.V               |            | 2 | 2,1645 | 0,202 | 0,14   |
| 20 | Q6ZTU2 E400N_HUMAN | K.KLEEIPPAS#PE.M           | S347:      | 2 | 2,163  | 0,184 | -0,284 |
| 20 | O95235 KI20A_HUMAN | E.LSLCDLAGSER.C            |            | 2 | 2,1568 | 0,365 | -0,4   |
| 20 | P51858 HDGF_HUMAN  | R.RAGDLLEDS#PKRPK.E        | S165:      | 2 | 2,1518 | 0,113 | -0,734 |
| 20 | Q7Z3K3 POGZ_HUMAN  | R.TVPVSSNDTPPS#ALQE.A      | S710:      | 2 | 2,1444 | 0,194 | -0,779 |
| 20 | Q53G59 SNUT2_HUMAN | R.EAPASVVPFVR.V            |            | 2 | 2,1416 | 0,376 | -0,208 |
| 20 | Q15742 NAB2_HUMAN  | R.SFS#PKSPLE.L             | S159:      | 2 | 2,1404 | 0,164 | -0,228 |
| 20 | Q6T4R5 NHS_HUMAN   | E.STLTAAALSPSK.I           |            | 2 | 2,137  | 0,27  | -0,518 |
| 20 | O96028 NSD2_HUMAN  | R.ASTAASSALGFSK.S          |            | 2 | 2,1369 | 0,2   | -0,407 |
| 20 | Q9UQ35 SRRM2_HUMAN | R.VSGRTS#PPLDR.A           | S2398:     | 3 | 2,1328 | 0,191 | 0,133  |
| 20 | P35579 MYH9_HUMAN  | R.GDLPFVVR.R               |            | 2 | 2,127  | 0,335 | -0,427 |
| 20 | Q6ZW31 SYDE1_HUMAN | E.GLAPQGAAPAS#PPTK.A       | S149:      | 2 | 2,1254 | 0,317 | -0,085 |



|    |                    |                           |        |   |        |       |        |
|----|--------------------|---------------------------|--------|---|--------|-------|--------|
| 20 | Q9Y4B6 VPRBP_HUMAN | R.KLSSEPLLPLDEE.A         |        | 2 | 2,1242 | 0,24  | -0,498 |
| 20 | Q08378 GOGA3_HUMAN | K.HLVQALQASLE.K           |        | 2 | 2,124  | 0,124 | -0,404 |
| 20 | Q58FF7 H90B3_HUMAN | E.DHLAVKHFS#VE.G          | S264:  | 2 | 2,1227 | 0,138 | 0,448  |
| 20 | Q15418 KS6A1_HUMAN | K.LTDFGLSKE.A             |        | 2 | 2,1172 | 0,225 | -0,544 |
| 20 | O43707 ACTN4_HUMAN | R.KDDPVTNLNNAFE.V         |        | 2 | 2,1161 | 0,092 | -0,826 |
| 20 | Q9BVG4 CX026_HUMAN | K.AVVISVQDK.E             |        | 2 | 2,1117 | 0,23  | 0,119  |
| 20 | P31689 DNJA1_HUMAN | K.NVICDKCE.G              |        | 2 | 2,1068 | 0,352 | -0,353 |
| 20 | Q684P5 RPGP2_HUMAN | R.AALLDNLHDE.L            |        | 2 | 2,1057 | 0,231 | -0,22  |
| 20 | Q99618 CDCA3_HUMAN | K.TSSGDPPSPLVK.Q          |        | 2 | 2,1056 | 0,188 | -0,515 |
| 20 | O75151 PHF2_HUMAN  | K.FSFSFSNK.K              |        | 2 | 2,0983 | 0,114 | -0,19  |
| 20 | Q9UHB6 LIMA1_HUMAN | R.KISENS#YSLDDLE.I        | S228:  | 2 | 2,0955 | 0,245 | -0,46  |
| 20 | Q9UQ35 SRRM2_HUMAN | R.SSTGPEPPAPTLLAE.R       |        | 2 | 2,0934 | 0,099 | -0,234 |
| 20 | O43379 WDR62_HUMAN | R.RGQSS#PPPAPPICLR.R      | S33:   | 2 | 2,0878 | 0,151 | -0,499 |
| 20 | P06733 ENOA_HUMAN  | R.HIADLAGNSE.V            |        | 2 | 2,085  | 0,231 | -0,119 |
| 20 | Q01082 SPTB2_HUMAN | R.TQETPSAQME.G            |        | 2 | 2,0841 | 0,223 | -0,326 |
| 20 | O00567 NOL5A_HUMAN | R.LAALALASSESSST#PEECEE.M | T468:  | 2 | 2,0789 | 0,321 | -0,322 |
| 20 | Q13642 FHL1_HUMAN  | K.CLHPLANE.T              |        | 2 | 2,0784 | 0,163 | -0,128 |
| 20 | Q9UMZ2 SYNG_HUMAN  | R.SLS#LGDKE.I             | S1075: | 2 | 2,0762 | 0,117 | -0,197 |
| 20 | P05387 RLA2_HUMAN  | E.DVIAQGIGK.L             |        | 2 | 2,076  | 0,092 | 0,068  |
| 20 | P08651 NFIC_HUMAN  | D.LNPASTGLR.R             |        | 2 | 2,0741 | 0,21  | 0,066  |
| 20 | Q9H501 ESF1_HUMAN  | R.TLDSGTSEIVKS#PRIE.C     | S198:  | 2 | 2,0705 | 0,133 | -0,404 |
| 20 | Q9Y2W2 WBP11_HUMAN | E.LTPLQAM*MLR.M           |        | 2 | 2,0696 | 0,243 | -0,615 |
| 20 | Q9Y2I7 FYV1_HUMAN  | K.ASGMLSFFR.G             |        | 2 | 2,0686 | 0,245 | -0,36  |
| 20 | P60903 S10AA_HUMAN | K.FAGDKGYLTKE.D           |        | 3 | 2,0664 | 0,157 | -0,149 |
| 20 | O43237 DC1L2_HUMAN | R.GPLTSGSDEE.N            |        | 2 | 2,0644 | 0,174 | 0,062  |
| 20 | P62312 LSM6_HUMAN  | R.GNNVLYISTQK.R           |        | 2 | 2,0626 | 0,273 | -0,296 |
| 20 | P35527 K1C9_HUMAN  | K.TLLDIDNTR.M             |        | 2 | 2,0598 | 0,247 | -0,345 |
| 20 | P22626 ROA2_HUMAN  | D.TIEIITDR.Q              |        | 2 | 2,0549 | 0,127 | 0,063  |
| 20 | Q9UKM9 RALY_HUMAN  | E.AGLPQGEAR.T             |        | 2 | 2,0538 | 0,213 | 0      |
| 20 | Q14247 SRC8_HUMAN  | E.KLQLHES#QKDYK.T         | S261:  | 3 | 2,0467 | 0,111 | -0,573 |
| 20 | Q15185 TEBP_HUMAN  | K.LTFSCLGGSDFK.H          |        | 2 | 2,0422 | 0,315 | -0,338 |
| 20 | O43166 SI1L1_HUMAN | E.GTINSVGFMDTR.K          |        | 2 | 2,0408 | 0,135 | -0,371 |
| 20 | P35527 K1C9_HUMAN  | R.IKFEMEQLR.Q             |        | 2 | 2,0358 | 0,212 | -0,28  |

|    |                     |                        |            |   |        |       |        |
|----|---------------------|------------------------|------------|---|--------|-------|--------|
| 20 | O43395 PRPF3_HUMAN  | K.QLSFISPTPQPK.T       |            | 2 | 2,0357 | 0,181 | -0,339 |
| 20 | Q96MU7 YTDC1_HUMAN  | R.GIS#PIVFDR.S         | S308:      | 2 | 2,0315 | 0,223 | -0,225 |
| 20 | Q8WXH0 SYNE2_HUMAN  | R.RGSM*SY#LAAVEEE.V    | Y4111:     | 2 | 2,0312 | 0,15  | -0,397 |
| 20 | P09874 PARP1_HUMAN  | K.VCSTNDLKE.L          |            | 2 | 2,029  | 0,159 | -0,229 |
| 20 | Q96SB4 SRPK1_HUMAN  | K.STAGNFLVNPPEPK.N     |            | 2 | 2,0284 | 0,1   | -0,41  |
| 20 | Q6PKG0 LARP1_HUMAN  | R.SLPTTVES#PNYR.N      | S774:      | 2 | 2,027  | 0,139 | -0,633 |
| 20 | P35527 K1C9_HUMAN   | R.QGVDADINGLR.Q        |            | 2 | 2,0265 | 0,271 | -0,421 |
| 20 | Q96B23 CR025_HUMAN  | E.TAVEGDPSGVSGATVGRK.S |            | 3 | 2,0245 | 0,136 | -0,108 |
| 20 | Q15942 ZYX_HUMAN    | R.CSVCSEPIM*PEPGRDE.T  |            | 2 | 2,0236 | 0,127 | 0,39   |
| 20 | Q15121 PEA15_HUMAN  | E.LDTKLTR.I            |            | 2 | 2,0165 | 0,146 | 0,36   |
| 20 | Q5QJE6 TDIF2_HUMAN  | K.FGDCGS#DDEEE.S       | S397:      | 2 | 2,0155 | 0,157 | -0,349 |
| 20 | O75376 NCOR1_HUMAN  | K.RES#PPIRAFE.G        | S1322:     | 2 | 2,0137 | 0,203 | -0,857 |
| 20 | Q9NTI5 PDS5B_HUMAN  | E.DYTM*SS#PLPGK.K      | S1191:     | 2 | 2,0132 | 0,206 | -0,378 |
| 20 | Q9BWG6 SCNM1_HUMAN  | R.ALDHYLTR.S           |            | 2 | 2,0124 | 0,189 | -0,332 |
| 20 | P49903 SPS1_HUMAN   | K.LVVQTQEDVE.L         |            | 2 | 2,0018 | 0,172 | -0,236 |
| 20 | P37088 SCNNA_HUMAN  | D.SSPPQST#PGLM*K.G     | T17:       | 3 | 2,0017 | 0,185 | 1,862  |
| 20 | P68104 EF1A1_HUMAN  | K.DGNASGTTLE.A         |            | 2 | 1,994  | 0,155 | -0,226 |
| 20 | P34932 HSP74_HUMAN  | K.LM*SANASDLPLSIE.C    |            | 2 | 1,9931 | 0,233 | -0,413 |
| 20 | Q7Z589 EMSY_HUMAN   | E.KRHSPES#PSIAVVE.S    | S821:      | 2 | 1,9927 | 0,198 | 0,755  |
| 20 | B2RA01 B2RA01_HUMAN | K.AQYEDIAQK.S          |            | 2 | 1,9922 | 0,166 | -0,114 |
| 20 | Q9P275 UBP36_HUMAN  | K.KTFVGEQRLGSE.T       |            | 2 | 1,9907 | 0,144 | 0,421  |
| 20 | Q02790 FKBP4_HUMAN  | E.GYYKDKLFDQRE.L       |            | 2 | 1,987  | 0,129 | -0,469 |
| 20 | Q15742 NAB2_HUMAN   | R.SFS#PKS#PLE.L        | S159:S162: | 2 | 1,9832 | 0,081 | -0,53  |
| 20 | Q641Q2 FA21A_HUMAN  | R.S#RPT#SFADE.L        | S284:T287: | 2 | 1,9818 | 0,134 | -0,104 |
| 20 | Q86YS7 K0528_HUMAN  | E.IIGSPIPEPR.Q         |            | 2 | 1,9732 | 0,275 | -0,339 |
| 20 | Q9P275 UBP36_HUMAN  | K.KTFVGEQRL.L          |            | 2 | 1,9702 | 0,144 | 0      |
| 20 | Q86SQ0 PHLB2_HUMAN  | E.EALM*S#PDTR.Y        | S501:      | 2 | 1,9669 | 0,113 | -0,109 |
| 20 | P13645 K1C10_HUMAN  | R.LAADDFR.L            |            | 2 | 1,9638 | 0,38  | 0,151  |
| 20 | Q16643 DREB_HUMAN   | R.M*APTPIPTR.S         |            | 2 | 1,9594 | 0,226 | -0,061 |
| 20 | Q04695 K1C17_HUMAN  | R.TIVEEVQDGK.V         |            | 2 | 1,9484 | 0,305 | -0,109 |
| 20 | Q96S59 RANB9_HUMAN  | K.GSTAHFSGFE.S         |            | 2 | 1,9465 | 0,086 | -0,352 |
| 20 | Q02952 AKA12_HUMAN  | K.STPVIVSATTK.K        |            | 2 | 1,929  | 0,207 | -0,221 |
| 20 | O75947 ATP5H_HUMAN  | K.FNALKVPVPE.D         |            | 2 | 1,9118 | 0,162 | -0,657 |

|    |                      |                          |        |   |        |       |        |
|----|----------------------|--------------------------|--------|---|--------|-------|--------|
| 20 | P08107 HSP71_HUMAN   | K.DNNLLGRFE.L            |        | 2 | 1,9104 | 0,142 | -0,566 |
| 20 | O96020 CCNE2_HUMAN   | E.VNYINTFR.K             |        | 2 | 1,9082 | 0,175 | -0,238 |
| 20 | Q02790 FKBP4_HUMAN   | K.LYANM*FER.L            |        | 2 | 1,9044 | 0,088 | -0,115 |
| 20 | Q9Y5W9 SNX11_HUMAN   | K.SCCFLPR.S              |        | 2 | 1,9014 | 0,238 | -0,13  |
| 20 | Q96ST2 IWS1_HUMAN    | R.GKHM*DFLS#DFE.M        | S527:  | 2 | 1,8948 | 0,168 | -0,429 |
| 20 | Q5VZY8 Q5VZY8_HUMAN  | E.VNGTPGSQQLSTPR.S       |        | 2 | 1,8935 | 0,116 | -0,093 |
| 20 | Q9UHB6 LIMA1_HUMAN   | R.ASSLSESS#PPK.A         | S374:  | 2 | 1,8905 | 0,156 | -0,417 |
| 20 | Q13428 TCOF_HUMAN    | K.TVANLLSGK.S            |        | 2 | 1,8888 | 0,361 | 0      |
| 20 | Q9UPN3 MACF1_HUMAN   | R.RGS#DASDFDLLE.T        | S5372: | 2 | 1,8839 | 0,241 | -0,434 |
| 20 | Q9Y3A2 UTP11_HUMAN   | E.TVNS#PAIYK.F           | S241:  | 2 | 1,8814 | 0,18  | -0,114 |
| 20 | Q92934 BAD_HUMAN     | E.GM*GEEPSPFR.G          |        | 2 | 1,8747 | 0,126 | 0      |
| 20 | Q8IWB9 TEX2_HUMAN    | R.SFFKVPE.M              |        | 2 | 1,8741 | 0,208 | 0,071  |
| 20 | O15446 RPA34_HUMAN   | R.SALAPNLLTS#GK.K        | S172:  | 2 | 1,8722 | 0,092 | -0,487 |
| 20 | Q9Y2W2 WBP11_HUMAN   | E.LTPLQAM*M*LR.M         |        | 2 | 1,8701 | 0,219 | -0,405 |
| 20 | P12081 SYHC_HUMAN    | K.VFDVIIR.C              |        | 2 | 1,8682 | 0,25  | 0      |
| 20 | Q9BUB4 ADAT1_HUMAN   | K.SGPIS#PGIHSCDLTVE.G    | S227:  | 2 | 1,8654 | 0,111 | -0,558 |
| 20 | Q13242 SFRS9_HUMAN   | R.GS#PHYFSPFRPY.-        | S211:  | 2 | 1,8623 | 0,361 | -0,477 |
| 20 | P21333 FLNA_HUMAN    | E.VVIQDPM*GQK.G          |        | 2 | 1,8586 | 0,083 | -0,108 |
| 20 | P48637 GSHB_HUMAN    | R.RLFVDGQE.I             |        | 2 | 1,8436 | 0,158 | -0,063 |
| 20 | P27824 CALX_HUMAN    | K.AEEDEILNRS#PR.N        | S583:  | 2 | 1,8339 | 0,171 | -0,162 |
| 20 | Q9Y2U5 M3K2_HUMAN    | K.RLS#IIGPISR.D          | S153:  | 2 | 1,8307 | 0,13  | -0,31  |
| 20 | P34932 HSP74_HUMAN   | K.KLM*SANASDLPLSIE.C     |        | 2 | 1,8269 | 0,141 | -0,456 |
| 20 | Q9Y2D5 AKAP2_HUMAN   | R.DALGDSLQVPVSPSSTTSSR.C |        | 2 | 1,8257 | 0,207 | -0,731 |
| 20 | P22102 PUR2_HUMAN    | K.GLAAIKFE.G             |        | 2 | 1,824  | 0,125 | 0,144  |
| 20 | A6ZJA4 A6ZJA4_HUMAN  | R.TSVLFCK.S              |        | 2 | 1,8035 | 0,233 | 0,143  |
| 20 | P49589 SYCC_HUMAN    | R.LHLYNSLTR.N            |        | 2 | 1,8001 | 0,152 | -0,218 |
| 20 | ##Q5T197 DCST1_HUMAN | D.YTQGFNGEVPINR.C        |        | 2 | 1,7956 | 0,111 | 0,369  |
| 20 | Q99729 ROAA_HUMAN    | K.DLKDYFTK.F             |        | 2 | 1,7912 | 0,097 | -0,355 |
| 20 | P04637 P53_HUMAN     | R.ALPNNTSS#SPQPK.K       | S314:  | 2 | 1,7894 | 0,245 | 0      |
| 20 | Q3B726 RPA43_HUMAN   | E.AEFTPLKCS#PK.R         | S328:  | 2 | 1,7885 | 0,132 | -0,252 |
| 20 | Q14568 HS902_HUMAN   | E.SSAGGSFTVR.T           |        | 2 | 1,7836 | 0,154 | -1,007 |
| 20 | P62158 CALM_HUMAN    | E.FLTM*M*AR.K            |        | 2 | 1,7774 | 0,096 | -0,271 |
| 20 | Q3KR37 GRM1B_HUMAN   | R.STPACSPILR.K           |        | 2 | 1,7759 | 0,416 | -0,221 |

|    |                    |                                |            |   |        |       |        |
|----|--------------------|--------------------------------|------------|---|--------|-------|--------|
| 20 | P04264 K2C1_HUMAN  | R.SLVNLGGSK.S                  |            | 2 | 1,7616 | 0,164 | -0,418 |
| 20 | Q9Y4B6 VPRBP_HUMAN | R.KLSS#EPLLPDEE.A              | S203:      | 2 | 1,7506 | 0,115 | -0,315 |
| 20 | P23588 IF4B_HUMAN  | K.VAPAQPSEEGPGR.K              |            | 2 | 1,7403 | 0,207 | 0,188  |
| 20 | Q641Q2 FA21A_HUMAN | K.RS#RPTS#FADE.L               | S284:S288: | 2 | 1,7267 | 0,288 | -0,276 |
| 20 | P42684 ABL2_HUMAN  | E.NSASSLAPGFIR.G               |            | 2 | 1,7254 | 0,142 | -0,5   |
| 20 | P35527 K1C9_HUMAN  | R.MTLDDFR.I                    |            | 2 | 1,7241 | 0,288 | -0,136 |
| 20 | P49321 NASP_HUMAN  | R.AKLVPS#QEE.T                 | S421:      | 2 | 1,7217 | 0,155 | 0      |
| 20 | Q96MF7 NSE2_HUMAN  | K.FLALQSK.N                    |            | 2 | 1,7164 | 0,117 | 0,756  |
| 20 | P04264 K2C1_HUMAN  | R.TLLEGEESR.M                  |            | 2 | 1,7089 | 0,109 | 0      |
| 20 | Q9Y2U5 M3K2_HUMAN  | R.RGS#DIDNPTLTVMD.I            | S331:      | 2 | 1,6983 | 0,152 | -0,529 |
| 20 | P46937 YAP1_HUMAN  | R.QAST#DAGTAGALTPQHVR.A        | T110:      | 2 | 1,6713 | 0,194 | 0,328  |
| 20 | Q9Y2W2 WBP11_HUMAN | E.LTPLQAMM*LR.M                |            | 2 | 1,6654 | 0,146 | -0,513 |
| 20 | Q14157 UBP2L_HUMAN | K.ASLTSKIPALAVE.M              |            | 2 | 1,6636 | 0,101 | -0,469 |
| 20 | O95239 KIF4A_HUMAN | R.RRTFS#LTE.V                  | S801:      | 2 | 1,6581 | 0,114 | 0,112  |
| 20 | P62913 RL11_HUMAN  | K.YDGIILPGK.-                  |            | 2 | 1,6574 | 0,157 | -0,25  |
| 20 | Q9HCD6 TANC2_HUMAN | K.RPFVESNV.-                   |            | 2 | 1,6418 | 0,232 | -0,45  |
| 20 | Q8N3U4 STAG2_HUMAN | R.RGTS#LMEDDEEPIVE.D           | S1161:     | 2 | 1,6291 | 0,108 | -0,813 |
| 20 | Q9BXF6 RFIP5_HUMAN | R.SSLSIALS#SGLE.K              | S553:      | 2 | 1,615  | 0,199 | -0,49  |
| 20 | Q92466 DDB2_HUMAN  | R.NKRS#RS#PLELEPE.A            | S24:S26:   | 2 | 1,6032 | 0,213 | -0,569 |
| 20 | Q9Y2W2 WBP11_HUMAN | E.LTPLQAMMLR.M                 |            | 2 | 1,5802 | 0,207 | -0,52  |
| 20 | O95425 SVIL_HUMAN  | E.SSSTFSFSGR.D                 |            | 2 | 1,5026 | 0,091 | -0,115 |
| 20 | P83881 RL36A_HUMAN | R.KGQVIQF.-                    |            | 2 | 1,4444 | 0,096 | 0,149  |
| 20 | Q9NQ88 CL005_HUMAN | R.FALTVVR.H                    |            | 2 | 1,4347 | 0,19  | 0,227  |
| 20 | P49790 NU153_HUMAN | K.QTGIETPNK.S                  |            | 2 | 1,3935 | 0,201 | 0      |
| 20 | Q96ST2 IWS1_HUMAN  | K.HMDFLSDFE.M                  |            | 2 | 1,3745 | 0,095 | -0,642 |
| 20 | Q9P107 GMIP_HUMAN  | E.ETPITSVPR.G                  |            | 2 | 1,3628 | 0,081 | 0      |
| 20 | Q6DN90 IQEC1_HUMAN | K.SLPREEPE.L                   |            | 2 | 1,3276 | 0,083 | -0,127 |
| 20 | P21127 CD2L1_HUMAN | E.GT#YGVVYR.A                  | T448:      | 2 | 1,2661 | 0,25  | -0,061 |
| 20 | P68104 EF1A1_HUMAN | R.QTVAVGVIK.A                  |            | 2 | 1,2627 | 0,19  | -0,133 |
| 21 | Q58FF8 H90B2_HUMAN | K.HSQFLGYPITLYLEKER.E          |            | 3 | 6,87   | 0,55  | -0,437 |
| 21 | Q7Z422 CA144_HUMAN | K.SKS#PPKVPIVIQDDSLPAGPPPQIR.I | S39:       | 3 | 6,2824 | 0,569 | -0,539 |
| 21 | P21127 CD2L1_HUMAN | R.GTS#PRPPEGGLGYSQLGDDDLKE.T   | S752:      | 3 | 6,0158 | 0,411 | -0,297 |
| 21 | P08238 HS90B_HUMAN | E.VVKKHSQFIGYPITLYLEKER.E      |            | 3 | 6,01   | 0,417 | -0,574 |

|    |                    |                                 |            |   |        |       |        |
|----|--------------------|---------------------------------|------------|---|--------|-------|--------|
| 21 | P07900 HS90A_HUMAN | K.HSQFIGYPITLFVEKER.D           |            | 3 | 5,8143 | 0,49  | -0,443 |
| 21 | P08651 NFIC_HUMAN  | E.LQGHLAYDLNPASTGLR.R           |            | 2 | 5,5452 | 0,571 | -0,334 |
| 21 | Q9UBF8 PI4KB_HUMAN | R.SKS#DATASISLSSNLKR.T          | S277:      | 3 | 5,5084 | 0,545 | -0,496 |
| 21 | Q58FF8 H90B2_HUMAN | E.KHSQFLGYPITLYLEKER.E          |            | 3 | 5,4967 | 0,476 | -0,659 |
| 21 | Q9UQ35 SRRM2_HUMAN | K.SKDSLQVQSCPGSLSLCAGVK.S       |            | 3 | 5,4178 | 0,403 | -0,35  |
| 21 | Q7Z460 CLAP1_HUMAN | R.SRS#DIDVNAASAK.S              | S600:      | 2 | 5,3606 | 0,514 | -0,493 |
| 21 | P04406 G3P_HUMAN   | K.RVIISAPSADAPM*FVM*GVNHE.K     |            | 3 | 5,2454 | 0,461 | -0,161 |
| 21 | Q58FF8 H90B2_HUMAN | E.KHSQFLGYPITLYLEK.E            |            | 3 | 5,2173 | 0,398 | -0,283 |
| 21 | Q58FG0 HS905_HUMAN | K.HSQFIGYPITLFVEK.K             |            | 2 | 5,1968 | 0,55  | -0,617 |
| 21 | Q8IYB3 SRRM1_HUMAN | E.ATSTSDILKVPKPEIPEKPEPS#PEK.N  | S260:      | 3 | 5,1301 | 0,5   | -0,19  |
| 21 | Q00536 PCTK1_HUMAN | E.KLTLNS#PIFDKPLSR.R            | S138:      | 3 | 5,1233 | 0,327 | -0,506 |
| 21 | P36578 RL4_HUMAN   | K.APIRPDIVNFVHTNLR.K            |            | 3 | 5,0953 | 0,351 | -0,589 |
| 21 | P16401 H15_HUMAN   | E.TAPAETATPAPVEKS#PAK.K         | S18:       | 2 | 5,0745 | 0,45  | -0,397 |
| 21 | Q92625 ANS1A_HUMAN | R.STKEVDKT#PPPQPPLISSMDSISQK.S  | T318:      | 3 | 5,0678 | 0,414 | -0,656 |
| 21 | Q6PKG0 LARP1_HUMAN | R.CPS#QSSSRPAAMISQPPTPTGQPVRE.D | S1056:     | 3 | 5,0583 | 0,346 | -0,373 |
| 21 | P13645 K1C10_HUMAN | K.GSLGGGFSSGGFSGGSFSR.G         |            | 2 | 5,0439 | 0,521 | -0,714 |
| 21 | P46100 ATRX_HUMAN  | K.TTPLRRPTETNPVTSNS#DEECNE.T    | S677:      | 3 | 5,0231 | 0,51  | 0,47   |
| 21 | Q58FF7 H90B3_HUMAN | K.HSQFIGYPITLYLEK.E             |            | 2 | 5,0208 | 0,55  | -1,079 |
| 21 | Q9NYZ3 GTSE1_HUMAN | R.VPQALNFSPEESDSTFSK.S          |            | 2 | 4,9971 | 0,483 | -0,554 |
| 21 | Q58FG0 HS905_HUMAN | K.KHSQFIGYPITLFVEK.K            |            | 3 | 4,9773 | 0,356 | -0,48  |
| 21 | Q9Y6D5 BIG2_HUMAN  | E.LEKPIQSKPQS#PVIQAAAVS#PK.F    | S218:S227: | 3 | 4,9599 | 0,444 | -0,665 |
| 21 | O95684 FR1OP_HUMAN | K.ANDEANQSDTSVSLSEPK.S          |            | 2 | 4,9461 | 0,443 | 0,645  |
| 21 | Q9UFC0 LRWD1_HUMAN | R.LAALKRPDDVPLSLS#PSKR.A        | S243:      | 3 | 4,9329 | 0,391 | -0,512 |
| 21 | Q13442 HAP28_HUMAN | R.KGVEGLIDIENPNR.V              |            | 2 | 4,9303 | 0,455 | -0,393 |
| 21 | P25786 PSA1_HUMAN  | R.KAQPAQPADEPAEKADEPM*EH.-      |            | 3 | 4,9208 | 0,355 | 0,317  |
| 21 | P04406 G3P_HUMAN   | R.VIISAPSADAPM*FVM*GVNHE.K      |            | 3 | 4,8955 | 0,532 | -0,432 |
| 21 | Q5VZK9 LR16A_HUMAN | R.TASRPDDIPDSPSS#PKVALLPPVLK.K  | S1291:     | 3 | 4,877  | 0,278 | -0,546 |
| 21 | O75122 CLAP2_HUMAN | R.SRS#DIDVNAAGAK.A              | S370:      | 2 | 4,8744 | 0,412 | 0,252  |
| 21 | O60264 SMCA5_HUMAN | E.LFAHFIQPAAQKTPT#S#PLK.M       | T115:S116: | 3 | 4,8513 | 0,421 | -0,487 |
| 21 | P05783 K1C18_HUMAN | E.DGEDFNLDALDSSNSM*QTIQK.T      |            | 3 | 4,8495 | 0,46  | -0,305 |
| 21 | O14617 AP3D1_HUMAN | K.HRPSEADEEELAR.R               |            | 3 | 4,8494 | 0,356 | -0,238 |
| 21 | P40222 TXLNA_HUMAN | R.VQDLSAGGQGSILTDSGPER.R        |            | 2 | 4,8339 | 0,418 | 0      |
| 21 | Q96F86 EDC3_HUMAN  | K.SQDVAVS#PQQQCCSK.S            | S131:      | 2 | 4,8159 | 0,443 | -0,276 |

|    |                     |                                 |              |   |        |       |        |
|----|---------------------|---------------------------------|--------------|---|--------|-------|--------|
| 21 | P05362 ICAM1_HUMAN  | E.LKREPAVGEPAEVTTTTVLVR.R       |              | 3 | 4,7964 | 0,395 | -0,422 |
| 21 | Q15424 SAFB1_HUMAN  | R.KFDFDACNEVPPAPK.E             |              | 2 | 4,7876 | 0,417 | -0,492 |
| 21 | Q9BY89 K1671_HUMAN  | R.KIT#PPSSPHSLTSTLVSLGHEE.A     | T1059:       | 3 | 4,7764 | 0,477 | -0,458 |
| 21 | P51116 FXR2_HUMAN   | R.RTGGPAYGPSDDVSTAS#ETE.S       | S453:        | 2 | 4,7759 | 0,561 | 0,596  |
| 21 | P04406 G3P_HUMAN    | R.VIISAPSADAPMFVMGVNHE.K        |              | 3 | 4,773  | 0,416 | -0,351 |
| 21 | Q13428 TCOF_HUMAN   | R.KSAEPSANTTLVS#ETEEE.G         | S171:        | 2 | 4,7634 | 0,524 | -0,427 |
| 21 | Q12756 KIF1A_HUMAN  | R.RQDIVLSGHFIKE.E               |              | 3 | 4,7554 | 0,399 | 0      |
| 21 | O60506 HNRPQ_HUMAN  | E.DGALAVLQQFKDSDLSHVQNK.S       |              | 3 | 4,7211 | 0,347 | -0,158 |
| 21 | Q9UHR5 S30BP_HUMAN  | E.KGGLVSDAYGEDDFSR.L            |              | 2 | 4,7167 | 0,525 | -0,498 |
| 21 | P16401 H15_HUMAN    | E.TAPAETAT#PAPVEKS#PAK.K        | T11:S18:     | 2 | 4,6773 | 0,442 | 0,507  |
| 21 | Q92882 OSTF1_HUMAN  | K.LAFDM*ATNAACASLLK.K           |              | 2 | 4,668  | 0,541 | -0,285 |
| 21 | Q13442 HAP28_HUMAN  | R.KGVEGLIDIENPNRVAQTTK.K        |              | 3 | 4,6632 | 0,377 | -0,335 |
| 21 | Q8WUA4 TF3C2_HUMAN  | R.AHFNAM*FQPSS#PTR.R            | S893:        | 2 | 4,6609 | 0,386 | -0,579 |
| 21 | Q8NCM9 Q8NCM9_HUMAN | R.SSDITSDLGNVLTSTPNAK.T         |              | 2 | 4,653  | 0,519 | -0,381 |
| 21 | Q15154 PCM1_HUMAN   | E.NRKPFNFLPMQINTNK.S            |              | 3 | 4,6226 | 0,373 | -0,186 |
| 21 | O00429 DNM1L_HUMAN  | K.GHAVNLLDVPVVAR.K              |              | 2 | 4,6139 | 0,457 | -0,392 |
| 21 | Q9UHB6 LIMA1_HUMAN  | R.KIS#ENS#YSLDDLE.I             | S225:S228:   | 2 | 4,6008 | 0,377 | -0,656 |
| 21 | Q6WKZ4 RFIP1_HUMAN  | K.RTAS#TDLKQLNQVNFTLPK.K        | S280:        | 3 | 4,6003 | 0,228 | -0,812 |
| 21 | Q9NYF8 BCLF1_HUMAN  | E.KLKLDFDYS#PPLHK.N             | S512:        | 3 | 4,5987 | 0,462 | -0,513 |
| 21 | P04406 G3P_HUMAN    | R.VIISAPSADAPMFVM*GVNHE.K       |              | 3 | 4,5957 | 0,489 | -0,087 |
| 21 | Q9UNZ2 NSF1C_HUMAN  | R.KKS#PNELVDDLK.G               | S114:        | 3 | 4,5915 | 0,257 | -0,34  |
| 21 | Q96B36 AKTS1_HUMAN  | R.LNT#SDFQKLK.R                 | T246:        | 3 | 4,5912 | 0,283 | -0,144 |
| 21 | Q8NI27 THOC2_HUMAN  | K.LYINHTPPPLSKS#KERE.M          | S1335:       | 3 | 4,5783 | 0,333 | -0,088 |
| 21 | Q8IYB3 SRRM1_HUMAN  | E.KKEKT#PELPEPSVK.V             | T220:        | 3 | 4,5588 | 0,242 | 0      |
| 21 | Q92785 REQU_HUMAN   | K.KGPDGLALPNNYCDFCLGDSK.I       |              | 3 | 4,5528 | 0,371 | -0,313 |
| 21 | Q5VZK9 LR16A_HUMAN  | R.TASRPDDIPDS#PS#SPKVALLPPVLK.K | S1288:S1290: | 3 | 4,5209 | 0,426 | -0,398 |
| 21 | Q9BUH6 CI142_HUMAN  | R.KS#PRPAGPQLFLPDPDPQR.G        | S152:        | 3 | 4,52   | 0,31  | -0,25  |
| 21 | Q8IY57 YAF2_HUMAN   | K.SPPASSAASADQHSQSGSSDNTER.G    |              | 3 | 4,485  | 0,491 | -0,52  |
| 21 | Q6WKZ4 RFIP1_HUMAN  | R.TAS#TDLKQLNQVNFTLPK.K         | S280:        | 3 | 4,4787 | 0,256 | -0,349 |
| 21 | Q06830 PRDX1_HUMAN  | D.SHFCHLAWVNTPK.K               |              | 2 | 4,4668 | 0,404 | -0,611 |
| 21 | O75376 NCOR1_HUMAN  | R.SHVSSEPYEPIS#PPQVPVVHE.K      | S2151:       | 3 | 4,4535 | 0,429 | -0,611 |
| 21 | Q86WB0 NIPA_HUMAN   | R.SQDATFS#PGSEQAEKS#PGPIVSR.T   | S335:S344:   | 3 | 4,452  | 0,365 | 0,577  |
| 21 | Q15154 PCM1_HUMAN   | R.KPFNFLPMQINTNK.S              |              | 3 | 4,447  | 0,186 | -0,216 |

|    |                    |                                    |              |   |        |       |        |
|----|--------------------|------------------------------------|--------------|---|--------|-------|--------|
| 21 | Q9BRS8 LARP6_HUMAN | R.KMQTADGLPVGVL.R.L                |              | 2 | 4,4413 | 0,458 | -0,329 |
| 21 | P28370 SMCA1_HUMAN | E.LFAHFIQPSAQKS#PTS#PLNMK.L        | S116:S119:   | 3 | 4,4227 | 0,21  | -0,512 |
| 21 | Q66GS9 CP135_HUMAN | R.HGLATPPLSSTLRS#PSHS#PE.H         | S1130:S1134: | 3 | 4,401  | 1     | -0,328 |
| 21 | Q9UQ35 SRRM2_HUMAN | K.SATRPS#PS#PERSSTGPEPPAPTPLLA.E.R | S351:S353:   | 3 | 4,3903 | 1     | -0,317 |
| 21 | P28370 SMCA1_HUMAN | E.LFAHFIQPSAQKS#PT#SPLNM*K.L       | S116:T118:   | 3 | 4,3524 | 0,33  | -0,654 |
| 21 | Q09666 AHNK_HUMAN  | R.LKS#EDGVEGDLGE.T                 | S135:        | 2 | 4,3416 | 0,494 | -0,427 |
| 21 | P28290 SSFA2_HUMAN | E.GEAPHVPATYQLGLTK.S               |              | 3 | 4,3333 | 0,451 | 0,109  |
| 21 | Q7Z5Y7 KCD20_HUMAN | R.SKS#LTNLVAAGDDVLE.D              | S374:        | 2 | 4,3174 | 0,507 | -0,57  |
| 21 | Q15154 PCM1_HUMAN  | R.KPFNFLPMQINTNK.S                 |              | 2 | 4,296  | 0,346 | -0,793 |
| 21 | P04406 G3P_HUMAN   | K.RVIISAPSADAPMFVM*GVNHE.K         |              | 3 | 4,2953 | 0,297 | -0,324 |
| 21 | Q8WUA4 TF3C2_HUMAN | E.SRAHFNAMFQPSS#PTR.R              | S893:        | 3 | 4,2876 | 0,198 | -0,478 |
| 21 | Q58FG0 HS905_HUMAN | K.HSQFIGYPITLVEK.K                 |              | 3 | 4,2825 | 0,358 | -0,308 |
| 21 | Q58FF7 H90B3_HUMAN | E.VVKKHSQFIGYPITLYLEK.E            |              | 3 | 4,2679 | 0,393 | -0,566 |
| 21 | Q15154 PCM1_HUMAN  | R.KPFNFLPM*QINTNK.S                |              | 2 | 4,2485 | 0,276 | -0,714 |
| 21 | Q8IYB3 SRRM1_HUMAN | E.ATSTSDILKVPKPEIPEPK.E            |              | 3 | 4,2483 | 0,405 | -0,426 |
| 21 | O94903 PROSC_HUMAN | K.CAADVKAPLEVAQEH.-                |              | 3 | 4,2474 | 0,468 | -0,447 |
| 21 | Q15185 TEBP_HUMAN  | K.LTFSCLGGSDNFKHLNE.I              |              | 2 | 4,2405 | 0,494 | -0,818 |
| 21 | P49643 PRI2_HUMAN  | K.TKDASSALASLNSS#LE.M              | S493:        | 2 | 4,2342 | 0,503 | -0,364 |
| 21 | P54259 ATN1_HUMAN  | R.GRAS#PGGVSTSSSDGKAE.K            | S34:         | 2 | 4,2305 | 0,564 | 0,353  |
| 21 | Q9UNZ2 NSF1C_HUMAN | R.KKS#PNELVDDLFK.G                 | S114:        | 2 | 4,2292 | 0,386 | -0,605 |
| 21 | P24539 AT5F1_HUMAN | E.KHVVSQISTQQEKE.T                 |              | 2 | 4,2287 | 0,466 | -0,818 |
| 21 | O15446 RPA34_HUMAN | E.M*PGPPLNSES#GEEAPTGR.D           | S490:        | 2 | 4,2224 | 0,307 | -0,063 |
| 21 | Q9UBB9 TFP11_HUMAN | R.ARDYSAPVNFISAGLK.K               |              | 3 | 4,2113 | 0,306 | -0,321 |
| 21 | Q14738 2A5D_HUMAN  | R.RKS#ELPQDVYTIK.A                 | S573:        | 2 | 4,2112 | 0,281 | 0,221  |
| 21 | POC7M2 RA1L3_HUMAN | K.KIFVGGIKEDTEE.H                  |              | 2 | 4,207  | 0,346 | -0,833 |
| 21 | Q00341 VIGLN_HUMAN | R.RCDIIISGRKE.K                    |              | 3 | 4,1954 | 0,1   | -0,438 |
| 21 | P22087 FBRL_HUMAN  | D.HAVVVGVYRPPPK.V                  |              | 3 | 4,1761 | 0,454 | -0,064 |
| 21 | P52701 MSH6_HUMAN  | K.AGFDS#DYDQALADIRE.N              | S935:        | 2 | 4,1634 | 0,468 | -0,589 |
| 21 | P19105 MLRM_HUMAN  | R.ATSNVFAM*FDQSQIQE.F              |              | 2 | 4,1632 | 0,483 | -0,599 |
| 21 | Q13428 TCOF_HUMAN  | R.KSAEPSANTTLVSETEEE.G             |              | 2 | 4,1581 | 0,561 | -0,508 |
| 21 | Q9UEY8 ADDG_HUMAN  | R.VTQILQS#PAFREDLE.C               | S64:         | 2 | 4,1486 | 0,451 | -0,601 |
| 21 | Q9H910 HN1L_HUMAN  | K.TSDIFGS#PVTATSR.L                | S97:         | 2 | 4,137  | 0,357 | -0,241 |
| 21 | P83916 CBX1_HUMAN  | R.GLEPERIIGATDSSGE.L               |              | 2 | 4,1358 | 0,523 | -0,598 |

|    |                     |                                        |            |   |        |       |        |
|----|---------------------|----------------------------------------|------------|---|--------|-------|--------|
| 21 | Q92619 HMHA1_HUMAN  | R.KSS#FNVSDVARPE.A                     | S578:      | 2 | 4,1357 | 0,387 | -0,644 |
| 21 | O15446 RPA34_HUMAN  | E.MPGPPLNS#ESGEEAPTGR.D                | S488:      | 2 | 4,1332 | 0,327 | -0,512 |
| 21 | Q71F56 MD13L_HUMAN  | E.DGDIKIYIFTANKK.C                     |            | 3 | 4,1326 | 0,425 | -0,06  |
| 21 | Q14676 MDC1_HUMAN   | E.LQASASTDQPVTSPTSRT                   |            | 2 | 4,1297 | 0,533 | -0,456 |
| 21 | P06748 NPM_HUMAN    | K.GPSS#VEDIKAK.M                       | S243:      | 2 | 4,1266 | 0,416 | 0      |
| 21 | Q6PJP8 DCR1A_HUMAN  | K.SLS#DLEFDASTLHE.S                    | S608:      | 2 | 4,1127 | 0,386 | -0,371 |
| 21 | Q9UHR5 S30BP_HUMAN  | E.KGGLVSDAYGEDDFSR.L                   |            | 3 | 4,0967 | 0,396 | -0,107 |
| 21 | Q3KQU3 MA7D1_HUMAN  | R.RS#SQPS#PTAVPASDPSPTKQE.V            | S112:S116: | 3 | 4,0964 | 0,243 | -0,157 |
| 21 | Q14738 2A5D_HUMAN   | R.RKS#ELPQDVYTIK.A                     | S573:      | 3 | 4,0883 | 0,252 | 0      |
| 21 | Q6PKG0 LARP1_HUMAN  | R.CPS#QSSSRPAAM*ISQPPTPTGQPVRE.D       | S1056:     | 3 | 4,0868 | 0,176 | 0,185  |
| 21 | Q96S94 CCNL2_HUMAN  | R.GLLPGGTQVLDGTSGFSPAPK.L              |            | 2 | 4,0803 | 0,448 | -0,488 |
| 21 | A0FGR8 ESYT2_HUMAN  | K.SHM*SGS#PGPGGSNTAPSTPVIGGSDKPGM*EE.K | S693:      | 3 | 4,0771 | 0,314 | -0,422 |
| 21 | Q76M58 Q76M58_HUMAN | R.QAHLCLVLANCDEPM*YVK.L                |            | 3 | 4,068  | 0,343 | -0,085 |
| 21 | Q9NVU7 SDA1_HUMAN   | K.YIEIDS#DEEPRGE.L                     | S585:      | 2 | 4,0617 | 0,453 | 0,299  |
| 21 | Q86TC9 MYPN_HUMAN   | K.HSPNLSFEPNFCQDNPRS#PTSSK.E           | S124:      | 3 | 4,0559 | 0,421 | -0,537 |
| 21 | Q02952 AKA12_HUMAN  | E.M*KGSVEEPKPEEPK.R                    |            | 2 | 4,0558 | 0,257 | -0,457 |
| 21 | Q9ULH0 ARMS_HUMAN   | R.GIPHSLSGLQDPPIAR.M                   |            | 3 | 4,0514 | 0,276 | 0,109  |
| 21 | Q16875 F263_HUMAN   | R.RNS#VTPLASPEPTKKPR.I                 | S461:      | 3 | 4,0338 | 0,373 | 0,093  |
| 21 | O14745 NHERF_HUMAN  | E.GKQHGDVVSAIR.A                       |            | 3 | 4,0331 | 0,308 | -0,072 |
| 21 | Q9UHB6 LIMA1_HUMAN  | R.KIS#ENSYSLDDLE.I                     | S225:      | 2 | 4,0303 | 0,401 | -0,919 |
| 21 | P19174 PLCG1_HUMAN  | E.RGSDASGQLFHGR.A                      |            | 3 | 4,0278 | 0,316 | -0,066 |
| 21 | P08559 ODPA_HUMAN   | R.YHGHSMS#DPGVSYR.T                    | S295:      | 3 | 4,0273 | 0,256 | -0,219 |
| 21 | P61769 B2MG_HUMAN   | K.SNFLNCYVSGFHPSDIE.V                  |            | 2 | 4,0155 | 0,39  | -0,246 |
| 21 | Q9NYF8 BCLF1_HUMAN  | K.LKDLFDYS#PPLHK.N                     | S512:      | 2 | 4,0096 | 0,536 | -0,369 |
| 21 | Q04917 1433F_HUMAN  | E.DSYKDSTLIM*QLLR.D                    |            | 3 | 4,0072 | 0,269 | -0,215 |
| 21 | O95685 PPR3D_HUMAN  | R.S#LSCLSDLGGVALEPR.A                  | S23:       | 2 | 3,9735 | 0,438 | -0,457 |
| 21 | Q15154 PCM1_HUMAN   | R.KPFNFLPM*QINTNK.S                    |            | 3 | 3,9697 | 0,327 | -0,214 |
| 21 | Q15554 TERF2_HUMAN  | K.DLVLPQTALPAS#PALK.N                  | S323:      | 2 | 3,9691 | 0,35  | -0,356 |
| 21 | P04406 G3P_HUMAN    | R.VIISAPSADAPM*FVMGVNHE.K              |            | 3 | 3,9583 | 0,443 | -0,087 |
| 21 | Q9H0D6 XRN2_HUMAN   | R.MQNNSSPSISPNTSFTSDGSPSPLGGIKR.K      |            | 3 | 3,9482 | 0,211 | -0,062 |
| 21 | O14974 MYPT1_HUMAN  | R.RLAS#TS#DIEEKE.N                     | S507:S509: | 2 | 3,9379 | 0,375 | 0,238  |
| 21 | Q8NDI1 EHBP1_HUMAN  | E.AFVTIKDS#PPQSTK.R                    | S335:      | 2 | 3,9273 | 0,49  | 0,382  |
| 21 | Q9Y2X7 GIT1_HUMAN   | R.HGS#GADSDY#ENTQSGDPLLGLE.G           | S592:Y598: | 3 | 3,9214 | 0,256 | -0,227 |



|    |                     |                                |          |   |        |       |        |
|----|---------------------|--------------------------------|----------|---|--------|-------|--------|
| 21 | O43852 CALU_HUMAN   | R.VHHEPQLSDKVHND.A             |          | 3 | 3,9185 | 0,365 | -0,111 |
| 21 | P19105 MLRM_HUMAN   | K.KRPQRAT#S#NVFAMFDQSQIQE.F    | T18:S19: | 3 | 3,9075 | 0,24  | -0,623 |
| 21 | P06748 NPM_HUMAN    | E.DVKLLSISGKR.S                |          | 3 | 3,9072 | 0,396 | 0,226  |
| 21 | Q96BK5 PINX1_HUMAN  | R.SKTDLDCIFGK.R                |          | 3 | 3,9046 | 0,321 | 0,214  |
| 21 | Q8TB03 CX038_HUMAN  | E.DMQKLDLCLHQQ.L               |          | 3 | 3,8925 | 0,363 | 0,113  |
| 21 | Q68CZ2 TENS3_HUMAN  | E.VLHTQGPVDGSLYAK.V            |          | 3 | 3,8866 | 0,339 | -0,115 |
| 21 | Q9ULW0 TPX2_HUMAN   | K.GCTIVKPFNLSQGK.K             |          | 2 | 3,8833 | 0,443 | -0,394 |
| 21 | Q9NYF8 BCLF1_HUMAN  | K.DLFDYS#PPLHK.N               | S512:    | 2 | 3,8782 | 0,318 | -0,518 |
| 21 | P11021 GRP78_HUMAN  | K.TKPYIQVDIGGGQTK.T            |          | 3 | 3,8756 | 0,187 | 0      |
| 21 | Q8IWZ8 SF04_HUMAN   | E.DYKDNPAFAFLHDK.N             |          | 3 | 3,8754 | 0,31  | -0,109 |
| 21 | Q9UI08 EVL_HUMAN    | R.SNS#VEKPVSSILSR.T            | S331:    | 3 | 3,8749 | 0,329 | -0,116 |
| 21 | P45974 UBP5_HUMAN   | E.HLSHFGIDM*LK.M               |          | 3 | 3,8707 | 0,379 | 0,209  |
| 21 | Q8WU60 Q8WU60_HUMAN | K.KQS#PPKNVVEPKE.R             | S53:     | 3 | 3,87   | 0,217 | -0,117 |
| 21 | O95295 S25BP_HUMAN  | R.AMLDSGIYPPGS#PGK.-           | S133:    | 2 | 3,8697 | 0,415 | -0,233 |
| 21 | Q92625 ANS1A_HUMAN  | K.EVDKT#PPPQPPLISSMDSISQK.S    | T318:    | 3 | 3,8614 | 0,292 | -0,518 |
| 21 | O15131 IMA5_HUMAN   | R.RREEEGIQLR.K                 |          | 3 | 3,8571 | 0,212 | -0,213 |
| 21 | Q96B23 CR025_HUMAN  | E.TAVEGDPSGVSGATVGR.K          |          | 2 | 3,8361 | 0,564 | 0,156  |
| 21 | Q8WVV9 HNRL1_HUMAN  | E.AGGS#HHKVSVPVHVR.G           | S68:     | 3 | 3,8211 | 0,213 | -0,299 |
| 21 | Q5JVS0 HABP4_HUMAN  | R.KSLPAPVAQRPDS#PGGGLQAPGQK.R  | S108:    | 3 | 3,8152 | 0,431 | -0,075 |
| 21 | Q8WXV6 Q8WXV6_HUMAN | R.KRTS#SEDNLYLAVLR.A           | S20:     | 3 | 3,815  | 0,238 | -0,297 |
| 21 | Q71U36 TBA1A_HUMAN  | E.ITNACFEPANQM*VK.C            |          | 2 | 3,8114 | 0,348 | 0      |
| 21 | P37802 TAGL2_HUMAN  | R.DDGLFSGDPNWFPK.K             |          | 2 | 3,811  | 0,288 | -0,535 |
| 21 | P35244 RFA3_HUMAN   | K.MFILSDGEGKNGTIE.L            |          | 2 | 3,7997 | 0,453 | -0,985 |
| 21 | Q9NYF8 BCLF1_HUMAN  | E.KLKDLFDYS#PPLHK.N            | S512:    | 2 | 3,7979 | 0,301 | -0,48  |
| 21 | P19105 MLRM_HUMAN   | K.KRPQRAT#S#NVFAM*FDQSQIQE.F   | T18:S19: | 3 | 3,7974 | 0,345 | -0,344 |
| 21 | Q9H2J4 PDCL3_HUMAN  | E.ENPKKPIEDVLLSSVR.R           |          | 3 | 3,7968 | 0,221 | -0,802 |
| 21 | P24539 AT5F1_HUMAN  | E.KHVVSISTQQEKE.T              |          | 3 | 3,7911 | 0,315 | -0,334 |
| 21 | O15211 RGL2_HUMAN   | E.SSPSLHSPADPSHLSPPAS#SPRPSR.G | S606:    | 3 | 3,7887 | 0,192 | 0,904  |
| 21 | P04406 G3P_HUMAN    | K.RVIISAPSADAPM*FVMGVNHE.K     |          | 3 | 3,7843 | 0,106 | -0,405 |
| 21 | Q7L2J0 MEPCE_HUMAN  | K.GFQRPVYLFHK.A                |          | 3 | 3,7838 | 0,362 | 0,066  |
| 21 | Q58FF7 H90B3_HUMAN  | K.HSQFIGYPITLYLEK.E            |          | 3 | 3,7723 | 0,34  | 0,202  |
| 21 | P07686 HEXB_HUMAN   | K.YYKVEPLDFGGTQK.Q             |          | 3 | 3,7714 | 0,193 | -0,111 |
| 21 | Q6PID6 TTC33_HUMAN  | K.KSEAPAEVTHFS#PK.S            | S197:    | 2 | 3,766  | 0,385 | 0,076  |

|    |                    |                               |                 |   |        |       |        |
|----|--------------------|-------------------------------|-----------------|---|--------|-------|--------|
| 21 | P60174 TPIS_HUMAN  | K.SNVSDAVAQSTR.I              |                 | 2 | 3,7626 | 0,438 | -0,296 |
| 21 | Q13501 SQSTM_HUMAN | R.SRLT#PVS#PESSSTEE.K         | T269:S272:      | 2 | 3,7618 | 0,406 | 0,207  |
| 21 | O15446 RPA34_HUMAN | E.MPGPPLNSE#GEEAPTGR.D        | S490:           | 2 | 3,7608 | 0,427 | -0,448 |
| 21 | Q9C0C2 TB182_HUMAN | R.GSGGLFS#PSTAHVPDGLGQR.D     | S1029:          | 3 | 3,7573 | 0,208 | -0,787 |
| 21 | P09525 ANXA4_HUMAN | K.STIGRDLIDDLKSE.L            |                 | 3 | 3,7516 | 0,374 | -0,117 |
| 21 | Q5VUA4 ZN318_HUMAN | R.TKS#PKPAESQSATK.Q           | S1037:          | 3 | 3,7442 | 0,318 | -0,112 |
| 21 | Q8N7R7 CCYL1_HUMAN | R.SFS#ADNFIGIQR.S             | S344:           | 2 | 3,7438 | 0,373 | -0,595 |
| 21 | P26358 DNMT1_HUMAN | R.VARPLPAEERAK.S              |                 | 3 | 3,7423 | 0,312 | -1,17  |
| 21 | Q15084 PDIA6_HUMAN | K.LAAVDATVNQVLASR.Y           |                 | 2 | 3,7383 | 0,427 | -0,08  |
| 21 | P20042 IF2B_HUMAN  | K.KPFM*LDEEGDTQTEE.T          |                 | 2 | 3,7359 | 0,505 | -0,342 |
| 21 | Q9NR30 DDX21_HUMAN | K.LKNGFPHPEPDCNPSEAAESEENSE.I |                 | 3 | 3,7352 | 0,265 | -0,4   |
| 21 | P42166 LAP2A_HUMAN | K.LREQGTESTRS#S#T#PLPTISSAE.N | S158:S159:T160: | 3 | 3,7316 | 0,214 | 0,284  |
| 21 | O43707 ACTN4_HUMAN | R.HRPELIEYDKLR.K              |                 | 3 | 3,7295 | 0,255 | 0      |
| 21 | O94776 MTA2_HUMAN  | K.LNPADAPNPVVFVATKD.T         |                 | 2 | 3,718  | 0,427 | -0,759 |
| 21 | O75531 BAF_HUMAN   | R.DFVAEPMGEKPVGSLAGIGE.V      |                 | 2 | 3,7177 | 0,39  | -0,305 |
| 21 | P08651 NFIC_HUMAN  | E.LQGHLAYDLNPASTGLR.R         |                 | 3 | 3,7113 | 0,225 | -0,1   |
| 21 | Q9UPY3 DICER_HUMAN | R.TLLSESPGKLHVE.V             |                 | 2 | 3,7066 | 0,326 | -0,433 |
| 21 | Q99700 ATX2_HUMAN  | R.LQDQRQNS#PAGNKE.N           | S757:           | 3 | 3,7019 | 0,18  | -0,22  |
| 21 | P25705 ATPA_HUMAN  | R.GYLDKLEPSKITKFE.N           |                 | 3 | 3,7016 | 0,343 | -1,241 |
| 21 | P18887 XRCC1_HUMAN | E.KKT#PSKPPAQLS#PSVPK.R       | T257:S266:      | 3 | 3,7015 | 0,28  | -0,281 |
| 21 | Q9BSJ8 ESYT1_HUMAN | K.HLS#PYATLTVGDSSHK.T         | S820:           | 3 | 3,6955 | 0,17  | 0      |
| 21 | P22626 ROA2_HUMAN  | E.VDAAMAARPHS#IDGR.V          | S85:            | 3 | 3,6886 | 0,422 | -0,333 |
| 21 | P35244 RFA3_HUMAN  | K.M*FILSDGEGKNGTIE.L          |                 | 2 | 3,6885 | 0,241 | -0,45  |
| 21 | POC7M2 RA1L3_HUMAN | K.KIFVGGIKEDTE.E              |                 | 2 | 3,6755 | 0,472 | -0,365 |
| 21 | P11586 C1TC_HUMAN  | E.IGIKATHIKLPR.T              |                 | 3 | 3,6752 | 0,313 | 0      |
| 21 | P05362 ICAM1_HUMAN | R.EPAVGEPAEVTTTVLVR.R         |                 | 2 | 3,6736 | 0,494 | -0,966 |
| 21 | Q8NCF5 NF2IP_HUMAN | R.LVLDPGEAPLVPVYSGK.V         |                 | 2 | 3,6734 | 0,389 | -0,348 |
| 21 | Q58FF8 H90B2_HUMAN | E.KHSQFLGYPITLYLEK.E          |                 | 2 | 3,666  | 0,623 | -0,882 |
| 21 | Q58FF8 H90B2_HUMAN | K.YIDQEELNKTKPIWTR.N          |                 | 3 | 3,6616 | 0,375 | -0,36  |
| 21 | O60264 SMCA5_HUMAN | E.LFAHFIQPAAQK.T              |                 | 3 | 3,6592 | 0,211 | 0,333  |
| 21 | O75526 HNRGT_HUMAN | R.GFAFVTFESPADAK.A            |                 | 2 | 3,6494 | 0,435 | -0,821 |
| 21 | Q86WB0 NIPA_HUMAN  | R.SQDATFSPGSEQAES#PGPIVSR.T   | S344:           | 3 | 3,6474 | 0,316 | -0,447 |
| 21 | Q02241 KIF23_HUMAN | R.RSS#TVAPAQPDGAESE.W         | S912:           | 2 | 3,6448 | 0,53  | 0,363  |

|    |                    |                                 |            |   |        |       |        |
|----|--------------------|---------------------------------|------------|---|--------|-------|--------|
| 21 | Q8IYB3 SRRM1_HUMAN | K.VPKPEPIPEPEPS#PEK.N           | S260:      | 3 | 3,6395 | 0,175 | -0,185 |
| 21 | P42166 LAP2A_HUMAN | K.LREQGTES#RSS#TPLPTISSSAE.N    | S156:S159: | 3 | 3,6311 | 1     | -0,367 |
| 21 | Q6NZI2 PTRF_HUMAN  | R.RGS#S#PDVHALLE.I              | S365:S366: | 2 | 3,6307 | 0,484 | -0,254 |
| 21 | P43358 MAGA4_HUMAN | K.SQHCKPEEGVEAQEE.A             |            | 2 | 3,6271 | 0,48  | -0,486 |
| 21 | P67936 TPM4_HUMAN  | R.KIQALQQQADE.A                 |            | 2 | 3,6236 | 0,338 | -0,288 |
| 21 | Q15121 PEA15_HUMAN | K.YKDIIRQPSEEE.I                |            | 2 | 3,6216 | 0,294 | -0,243 |
| 21 | Q92733 PRCC_HUMAN  | K.TSSLAPVVGTTTTTSPSAIK.A        |            | 2 | 3,6155 | 0,442 | -0,484 |
| 21 | Q8NI08 NCOA7_HUMAN | K.KGEPLPVKLNSS#TEANVIKE.A       | S596:      | 3 | 3,6092 | 0,203 | -0,328 |
| 21 | Q8TB03 CX038_HUMAN | E.DM*QKLDLCLHQB.L               |            | 3 | 3,6081 | 0,265 | -0,224 |
| 21 | O75446 SAP30_HUMAN | E.KDTLTYFIYSVK.N                |            | 3 | 3,6073 | 0,215 | 0,247  |
| 21 | Q96BK5 PINX1_HUMAN | R.SKTDLDCIFGKR.Q                |            | 3 | 3,6065 | 0,458 | 0      |
| 21 | P78347 GTF2I_HUMAN | K.ANELPQPPVPEPANAGK.R           |            | 2 | 3,6039 | 0,431 | -0,282 |
| 21 | P09622 DLDH_HUMAN  | R.VLGAHILGPGAGEM*VNE.A          |            | 2 | 3,6003 | 0,314 | -0,436 |
| 21 | Q6PKG0 LARP1_HUMAN | R.CPSQSSS#RPAAMISQPPTPTGQPVRE.D | S1060:     | 3 | 3,5963 | 0,09  | -0,373 |
| 21 | P55196 AFAD_HUMAN  | K.QGAIYHGLATLLNQPS#PM*M*QR.I    | S1090:     | 3 | 3,5962 | 0,102 | -0,3   |
| 21 | Q58FF8 H90B2_HUMAN | K.HSQFLGYPTLYLEK.E              |            | 2 | 3,5778 | 0,42  | -0,944 |
| 21 | Q13428 TCOF_HUMAN  | K.TVANLLSGKS#PR.K               | S156:      | 2 | 3,5725 | 0,335 | -0,092 |
| 21 | Q7KZF4 SND1_HUMAN  | K.IHVFYIDYGNRE.V                |            | 2 | 3,57   | 0,465 | -0,72  |
| 21 | P08559 ODPA_HUMAN  | R.YHGHS#M*SDPGVSYR.T            | S293:      | 2 | 3,5652 | 0,463 | 0,217  |
| 21 | P17812 PYRG1_HUMAN | E.HSALAINHKLE.I                 |            | 3 | 3,5592 | 0,269 | 0,519  |
| 21 | Q969J3 L12R1_HUMAN | R.AKM*DDIVVVAQGSQASR.N          |            | 3 | 3,5568 | 0,177 | -0,102 |
| 21 | Q8WVC0 LEO1_HUMAN  | K.KLTS#DEEGEPSGKR.K             | S630:      | 3 | 3,55   | 0,242 | -0,227 |
| 21 | Q8ND30 LIPB2_HUMAN | K.KLSCS#LEDLRSE.S               | S387:      | 3 | 3,5443 | 0,146 | 0,181  |
| 21 | Q99733 NP1L4_HUMAN | K.YAALYQPLFDKR.R                |            | 2 | 3,5417 | 0,248 | -0,575 |
| 21 | P26639 SYTC_HUMAN  | K.MGGEKPIGAGEEK.Q               |            | 2 | 3,5401 | 0,323 | -0,256 |
| 21 | P58546 MTPN_HUMAN  | K.GADKTVKGPDGLTAFE.A            |            | 2 | 3,5387 | 0,43  | -0,076 |
| 21 | Q02952 AKA12_HUMAN | E.M*KGSVEEPKPEPKR.K             |            | 3 | 3,5367 | 0,198 | 0,208  |
| 21 | P23588 IF4B_HUMAN  | R.SQSS#DTEQQSPTSGGGK.V          | S498:      | 2 | 3,536  | 0,472 | -0,346 |
| 21 | P42166 LAP2A_HUMAN | K.LREQGT#ESRSST#PLPTISSSAE.N    | T154:T160: | 3 | 3,534  | 1     | -0,22  |
| 21 | P08559 ODPA_HUMAN  | R.YHGHS#MSDPGVSYR.T             | S293:      | 2 | 3,5319 | 0,49  | -0,365 |
| 21 | P04264 K2C1_HUMAN  | K.WELLQQVDTSTR.T                |            | 2 | 3,5306 | 0,449 | -0,496 |
| 21 | Q00537 PCTK2_HUMAN | E.KLQINSPFPDQPMSR.R             |            | 3 | 3,5287 | 0,312 | 0      |
| 21 | Q13427 PPIG_HUMAN  | R.FLM*RKS#PPKADE.K              | S290:      | 3 | 3,5268 | 0,152 | -1,207 |

|    |                     |                           |            |   |        |       |        |
|----|---------------------|---------------------------|------------|---|--------|-------|--------|
| 21 | O75376 NCOR1_HUMAN  | R.RTS#YEPFHGPGSPVDHDSLE.S | S88:       | 3 | 3,5267 | 0,213 | 0,078  |
| 21 | P68104 EF1A1_HUMAN  | D.M*RQTVAVGVK.A           |            | 3 | 3,5214 | 0,168 | -0,45  |
| 21 | P48634 BAT2_HUMAN   | R.RGDKEAPPPVLLTPK.A       |            | 3 | 3,5211 | 0,295 | -0,565 |
| 21 | Q6PID6 TTC33_HUMAN  | K.SEAPAEVTHFS#PK.S        | S197:      | 2 | 3,51   | 0,407 | -0,495 |
| 21 | P48730 KC1D_HUMAN   | R.GAPVNISSDLTGRQD.T       |            | 2 | 3,5098 | 0,38  | -0,302 |
| 21 | Q05CK9 Q05CK9_HUMAN | R.NPIPSDRIS#PPQPNGE.I     | S25:       | 2 | 3,5086 | 0,268 | -0,204 |
| 21 | P04920 B3A2_HUMAN   | E.RELPPPAPPAGITR.S        |            | 2 | 3,5084 | 0,256 | -0,663 |
| 21 | P16401 H15_HUMAN    | E.TAPAETATPAPVEKS#PAKK.K  | S18:       | 2 | 3,5047 | 0,388 | 0,309  |
| 21 | Q5VZK9 LR16A_HUMAN  | R.TASRPDDIPDSPSSPK.V      |            | 2 | 3,503  | 0,404 | -0,146 |
| 21 | P37802 TAGL2_HUMAN  | R.TLM*NLGGLAVAR.D         |            | 2 | 3,4988 | 0,367 | -0,198 |
| 21 | Q92576 PHF3_HUMAN   | R.SNVGKGNIDGNVSCSE.N      |            | 2 | 3,4914 | 0,397 | -0,149 |
| 21 | Q7RTQ0 Q7RTQ0_HUMAN | E.SGPDGGEEDGTGSLKR.S      |            | 2 | 3,4885 | 0,354 | 0,234  |
| 21 | O75044 FNBP2_HUMAN  | E.HHTS#DDECEPIEIAK.F      | S724:      | 3 | 3,4876 | 0,181 | -0,189 |
| 21 | Q14157 UBP2L_HUMAN  | R.RYPSS#ISSS#PQKD.L       | S605:S609: | 2 | 3,4779 | 1     | -0,151 |
| 21 | P29374 ARI4A_HUMAN  | R.TYKWSFQLNE.L            |            | 2 | 3,4714 | 0,317 | -0,649 |
| 21 | Q9Y266 NUDC_HUMAN   | K.LKPNLNGADLPNYR.W        |            | 3 | 3,4706 | 0,356 | 0      |
| 21 | O95782 AP2A1_HUMAN  | R.GLAVFISDIR.N            |            | 2 | 3,4703 | 0,394 | -0,559 |
| 21 | O75531 BAF_HUMAN    | R.DFVAEPM*GEKPVGSLAGIGE.V |            | 2 | 3,4676 | 0,513 | -0,363 |
| 21 | Q9H6Z4 RANB3_HUMAN  | E.KPAIAPPVVFQK.D          |            | 3 | 3,4674 | 0,199 | -0,317 |
| 21 | Q96ST2 IWS1_HUMAN   | R.KAAVLS#DS#EDEE.K        | S398:S400: | 2 | 3,4674 | 0,237 | -0,42  |
| 21 | Q8IZ21 PHAR4_HUMAN  | E.IRHQIGNTLIR.R           |            | 3 | 3,4658 | 0,25  | 0,208  |
| 21 | P20042 IF2B_HUMAN   | K.KPFMLDEEGDTQTEE.T       |            | 2 | 3,4586 | 0,472 | -0,483 |
| 21 | Q9UHD8 SEPT9_HUMAN  | R.LGDSSGPAKRS#FEVEE.V     | S30:       | 3 | 3,4558 | 0,156 | 0      |
| 21 | Q86SQ0 PHLB2_HUMAN  | R.KMSIQDS#LALQPK.L        | S216:      | 3 | 3,4544 | 0,186 | 0      |
| 21 | P04406 G3P_HUMAN    | K.RVIISAPSADAPMFVMGVNHE.K |            | 3 | 3,4508 | 0,303 | -0,408 |
| 21 | Q9NYF8 BCLF1_HUMAN  | K.KAEGEPQEE#PLKSK.S       | S177:      | 3 | 3,4423 | 0,223 | -0,527 |
| 21 | Q8ND82 Z280C_HUMAN  | E.ISSSKPAISNILNR.G        |            | 2 | 3,4378 | 0,35  | -0,407 |
| 21 | P21580 TNAP3_HUMAN  | E.NKHFAAASGKVS#PTASR.F    | S645:      | 3 | 3,4275 | 0,389 | -0,101 |
| 21 | Q99700 ATX2_HUMAN   | R.LQDQRQNS#PAGNKE.N       | S757:      | 2 | 3,4267 | 0,309 | -0,44  |
| 21 | Q9Y4E5 ZN451_HUMAN  | E.GNKDPSSDLHLLLDQSK.F     |            | 3 | 3,4262 | 0,329 | -0,196 |
| 21 | Q8WUA4 TF3C2_HUMAN  | R.QPAACPGGEEVDGAPRDE.D    |            | 2 | 3,426  | 0,483 | -0,46  |
| 21 | Q969H8 CS010_HUMAN  | K.SYLYFTQFKAE.V           |            | 2 | 3,4259 | 0,38  | -0,437 |
| 21 | Q06830 PRDX1_HUMAN  | R.TIAQDYGVLKADE.G         |            | 2 | 3,4246 | 0,237 | -0,429 |

|    |                    |                                  |            |   |        |       |        |
|----|--------------------|----------------------------------|------------|---|--------|-------|--------|
| 21 | P45974 UBP5_HUMAN  | E.HLSHFGIDMLK.M                  |            | 3 | 3,4234 | 0,33  | 0,352  |
| 21 | Q9ULH0 ARMS_HUMAN  | R.GIPHSLSLQDPPIAR.M              |            | 2 | 3,4207 | 0,23  | 1,166  |
| 21 | Q3KQU3 MA7D1_HUMAN | K.EANANGSS#PEPVKAVE.A            | S742:      | 2 | 3,4177 | 0,44  | 0,436  |
| 21 | Q8IUD2 RB6I2_HUMAN | R.SVGKVEPSSQS#PGRSPR.L           | S17:       | 2 | 3,4079 | 0,339 | -0,066 |
| 21 | O14617 AP3D1_HUMAN | K.HRPSEADEEELAR.R                |            | 2 | 3,4065 | 0,326 | 0,079  |
| 21 | P35568 IRS1_HUMAN  | R.THS#AGTS#PTITHQKTPSQSSVASIEE.Y | S527:S531: | 3 | 3,4056 | 0,193 | -0,515 |
| 21 | Q15185 TEBP_HUMAN  | E.IDLFHCIDPNDK.H                 |            | 3 | 3,4049 | 0,098 | -0,349 |
| 21 | Q02952 AKA12_HUMAN | D.KTEKPDTVQLLTVK.K               |            | 3 | 3,4014 | 0,148 | -0,229 |
| 21 | Q8WUA4 TF3C2_HUMAN | R.AHFNAMFQPSS#PTR.R              | S893:      | 2 | 3,3988 | 0,457 | 0,292  |
| 21 | Q58FF8 H90B2_HUMAN | K.HSQFLGYPTLYLEK.E               |            | 3 | 3,3969 | 0,218 | -0,607 |
| 21 | Q8ND30 LIPB2_HUMAN | K.KLSCS#LEDLRSE.S                | S387:      | 2 | 3,3963 | 0,399 | 0,161  |
| 21 | Q96A65 EXOC4_HUMAN | K.DPSGLLISVIR.T                  |            | 2 | 3,3947 | 0,398 | -0,521 |
| 21 | P48637 GSHB_HUMAN  | K.CPDIAQLAGTKK.V                 |            | 3 | 3,3939 | 0,307 | -0,912 |
| 21 | Q8N556 AFAP1_HUMAN | E.NS#PISSCDT#\$DTEGVPVNSAAVLKK.S | S679:T686: | 3 | 3,39   | 0,321 | -0,323 |
| 21 | Q9P275 UBP36_HUMAN | R.GSSSSPEHS#ASSDSTKAPQTPR.S      | S618:      | 3 | 3,3841 | 1     | -0,155 |
| 21 | P38571 LICH_HUMAN  | E.TEDGYILCLNRIPHGR.K             |            | 3 | 3,3824 | 0,349 | -0,096 |
| 21 | P35579 MYH9_HUMAN  | K.LKDVLLQVDDE.R                  |            | 2 | 3,381  | 0,293 | -0,095 |
| 21 | P19623 SPEE_HUMAN  | K.VLIIGGGDGGVLR.V                |            | 2 | 3,3785 | 0,496 | -0,27  |
| 21 | Q9BRS8 LARP6_HUMAN | R.KM*QTADGLPVGVLR.L              |            | 2 | 3,376  | 0,358 | -0,406 |
| 21 | P62753 RS6_HUMAN   | R.LSS#LRAS#TSKSE.S               | S236:S240: | 2 | 3,3723 | 0,423 | 0      |
| 21 | Q9UHD8 SEPT9_HUMAN | R.LGDSSGPALKRS#FEVEE.V           | S30:       | 2 | 3,372  | 0,374 | 0      |
| 21 | P78318 IGBP1_HUMAN | D.LKYLLVPAFQGALTM*K.Q            |            | 3 | 3,3719 | 0,24  | -0,202 |
| 21 | Q96B36 AKTS1_HUMAN | R.LNT#SDFQK.L                    | T246:      | 2 | 3,3675 | 0,245 | 0,354  |
| 21 | P62070 RRAS2_HUMAN | R.KFQEQECPPS#PEPTRKE.K           | S186:      | 3 | 3,3641 | 0,178 | 0      |
| 21 | Q06830 PRDX1_HUMAN | K.QGGLGPM*NIPLVSDPK.R            |            | 2 | 3,3605 | 0,418 | -0,744 |
| 21 | P63241 IF5A1_HUMAN | K.VHLVGIDIFTGK.K                 |            | 3 | 3,3568 | 0,332 | 0,141  |
| 21 | Q8N3X1 FNBP4_HUMAN | R.RPILQLSPPGPR.G                 |            | 2 | 3,3532 | 0,403 | -0,275 |
| 21 | Q9UNF0 PACN2_HUMAN | R.LCSDLMNCLHE.R                  |            | 2 | 3,3434 | 0,479 | 0      |
| 21 | Q63HN8 RN213_HUMAN | E.DSGLHIIAACNPYR.K               |            | 3 | 3,3386 | 0,256 | 0,346  |
| 21 | P51991 ROA3_HUMAN  | E.DSVKPGAHLTVKK.I                |            | 3 | 3,3301 | 0,202 | 0,199  |
| 21 | Q8NEY8 PPHLN_HUMAN | R.DNTFFRES#PVGR.K                | S133:      | 3 | 3,3287 | 0,292 | 0,304  |
| 21 | P04406 G3P_HUMAN   | E.GLM*TTVHAITATQK.T              |            | 2 | 3,3253 | 0,361 | -0,246 |
| 21 | Q86X29 LSR_HUMAN   | R.ARS#VDALDDLTPSTAE.S            | S493:      | 2 | 3,318  | 0,432 | -0,398 |

|    |                    |                       |          |   |        |       |        |
|----|--------------------|-----------------------|----------|---|--------|-------|--------|
| 21 | Q99729 ROAA_HUMAN  | K.DLKDYFTKFG.E.V      |          | 2 | 3,3175 | 0,401 | -0,537 |
| 21 | Q8IVM0 CCD50_HUMAN | R.YKDLEQQDCE.I        |          | 2 | 3,3164 | 0,234 | 0      |
| 21 | P53367 ARFP1_HUMAN | R.DLKHSLS#GLGLSE.T    | S39:     | 2 | 3,3162 | 0,428 | -0,398 |
| 21 | Q53ET0 CRTC2_HUMAN | E.FQSPLHS#PLDSSR.S    | S90:     | 3 | 3,3139 | 0,2   | 0      |
| 21 | Q00839 HNRPU_HUMAN | E.YTFIQNVPLEDR.V      |          | 2 | 3,3072 | 0,41  | -0,245 |
| 21 | Q8N8S7 ENAH_HUMAN  | E.DKGEDSEPVTSK.A      |          | 2 | 3,303  | 0,392 | -0,472 |
| 21 | Q9Y3B9 RRP15_HUMAN | R.GVVQLFNAVQK.H       |          | 2 | 3,3008 | 0,384 | -0,304 |
| 21 | Q9BZD4 NUF2_HUMAN  | K.IVDS#PEKLN          | S247:    | 2 | 3,3003 | 0,299 | -0,44  |
| 21 | Q9H501 ESF1_HUMAN  | E.NKTDLDNSIGIKK.M     |          | 3 | 3,2974 | 0,289 | -0,063 |
| 21 | P37802 TAGL2_HUMAN | R.TLMNLGGLAVAR.D      |          | 2 | 3,2958 | 0,316 | -0,401 |
| 21 | Q8NCN4 RN169_HUMAN | K.NNSYSLAFLAGK.L      |          | 2 | 3,2953 | 0,376 | -0,475 |
| 21 | Q9BX63 FANCI_HUMAN | E.IKNFKPS#PSK.N       | S1237:   | 3 | 3,2945 | 0,17  | 0,224  |
| 21 | P08670 VIME_HUMAN  | E.VERDNLAEDIMR.L      |          | 3 | 3,2929 | 0,278 | -0,063 |
| 21 | Q01813 K6PP_HUMAN  | R.MLAIYDGFDFGFAK.G    |          | 2 | 3,2919 | 0,396 | -0,758 |
| 21 | O60524 SDCG1_HUMAN | K.KKLPS#DSGDLEALE.G   | S831:    | 2 | 3,2906 | 0,355 | 0,077  |
| 21 | Q15185 TEBP_HUMAN  | K.LTFSCLOGSDNFK.H     |          | 2 | 3,2894 | 0,503 | -0,844 |
| 21 | Q8N3F8 MILK1_HUMAN | R.KDPPWITLVQAEPK.K    |          | 3 | 3,2884 | 0,171 | -0,226 |
| 21 | P49674 KC1E_HUMAN  | R.GAPANVSSDLTGRQE.V   |          | 2 | 3,2862 | 0,486 | -0,307 |
| 21 | P22626 ROA2_HUMAN  | E.VDAAM*AARPHS#IDGR.V | S85:     | 3 | 3,2861 | 0,335 | 0      |
| 21 | Q09666 AHNK_HUMAN  | K.VGIDTPDIDIHGPE.G    |          | 2 | 3,2845 | 0,487 | -0,578 |
| 21 | Q9NRL2 BAZ1A_HUMAN | K.KKDAIDPLLFK.Y       |          | 3 | 3,2813 | 0,142 | 0,426  |
| 21 | P46087 NOL1_HUMAN  | K.KGPQSLFNAPR.G       |          | 2 | 3,2809 | 0,424 | -0,402 |
| 21 | Q15154 PCM1_HUMAN  | E.NRKPFNFLPM*QINTNK.S |          | 3 | 3,278  | 0,18  | -0,277 |
| 21 | Q9POV9 SEP10_HUMAN | E.IFHS#QSFLATGSNLRK.D | S432:    | 3 | 3,2776 | 0,29  | -0,194 |
| 21 | Q00653 NFKB2_HUMAN | R.DKLPST#AEVKE.D      | T859:    | 2 | 3,2772 | 0,333 | 0      |
| 21 | P06493 CDC2_HUMAN  | K.IGEGT#Y#GVVYKGR.H   | T14:Y15: | 2 | 3,2738 | 0,391 | 0      |
| 21 | Q01105 SET_HUMAN   | K.KPRPPPALGPEE.T      |          | 2 | 3,2733 | 0,396 | -0,568 |
| 21 | Q00341 VIGLN_HUMAN | R.RCDIIISGR.K         |          | 2 | 3,2725 | 0,207 | -0,203 |
| 21 | Q8TEA8 DTD1_HUMAN  | R.SASS#GAEGDVSSEREP.- | S197:    | 2 | 3,2717 | 0,42  | 0,148  |
| 21 | Q8TDN6 BXDC2_HUMAN | K.RNEIDAEPKAKR.H      |          | 3 | 3,2677 | 0,22  | 0,197  |
| 21 | Q13136 LIPA1_HUMAN | R.VGSGSLDNLGR.F       |          | 2 | 3,266  | 0,411 | 0,227  |
| 21 | P06493 CDC2_HUMAN  | K.IGEGT#Y#GVVYK.G     | T14:Y15: | 2 | 3,2647 | 0,303 | -0,272 |
| 21 | Q9C0B5 ZDHC5_HUMAN | R.GVGS#PEPGPTAPYLGR.S | S621:    | 2 | 3,2632 | 0,152 | -0,522 |

|    |                     |                                 |            |   |        |       |        |
|----|---------------------|---------------------------------|------------|---|--------|-------|--------|
| 21 | Q01804 OTUD4_HUMAN  | K.TAADVVS#PGANSVDSR.V           | S1006:     | 2 | 3,2577 | 0,314 | 0,3    |
| 21 | A9CQZ4 A9CQZ4_HUMAN | K.AAEDEEVPAFFK.N                |            | 2 | 3,2542 | 0,473 | -0,451 |
| 21 | Q96AT1 K1143_HUMAN  | K.NSSLFSFDNEDENE.-              |            | 2 | 3,2522 | 0,366 | -0,454 |
| 21 | P50548 ERF_HUMAN    | R.APPAPPKPEPGEAPGASQCM*PLK.L    |            | 3 | 3,2493 | 0,277 | 0,312  |
| 21 | Q9BZD4 NUF2_HUMAN   | K.IVDS#PEKLKNYKE.K              | S247:      | 2 | 3,2489 | 0,354 | -0,297 |
| 21 | P40818 UBP8_HUMAN   | K.RSYS#SPDITQAIQE.E             | S718:      | 2 | 3,2487 | 0,341 | -0,437 |
| 21 | Q9NTJ3 SMC4_HUMAN   | R.TESPATAAETASEE.L              |            | 2 | 3,2463 | 0,525 | 0      |
| 21 | Q9NTM9 CUTC_HUMAN   | R.IPS#GKAGAANGFLM*E.V           | S17:       | 2 | 3,2453 | 0,394 | -0,47  |
| 21 | Q9BW83 RAYL_HUMAN   | R.SQAPGISLPGVLVGNK.T            |            | 2 | 3,2426 | 0,468 | -0,556 |
| 21 | Q99733 NP1L4_HUMAN  | K.YAALYQPLFDK.R                 |            | 2 | 3,2401 | 0,275 | -0,367 |
| 21 | P22626 ROA2_HUMAN   | E.VDAAMAARPHS#IDGRVVEPK.R       | S85:       | 3 | 3,2398 | 0,325 | -0,333 |
| 21 | Q8ND82 Z280C_HUMAN  | E.ISSSKPAISNILNR.G              |            | 3 | 3,2362 | 0,281 | -0,183 |
| 21 | Q8NCF5 NF2IP_HUMAN  | R.LVLDPGEAPLVPVYSGK.V           |            | 3 | 3,2339 | 0,223 | -0,104 |
| 21 | P12270 TPR_HUMAN    | R.NQHLSVQKQKDPDTEE.Y            |            | 2 | 3,2305 | 0,365 | 0,345  |
| 21 | Q9HAW4 CLSPN_HUMAN  | R.NFVFHTLS#PVKAE.A              | S1289:     | 2 | 3,2303 | 0,369 | -0,855 |
| 21 | Q9Y490 TLN1_HUMAN   | R.TLREQVVEEHE.T                 |            | 3 | 3,2296 | 0,202 | 0      |
| 21 | Q99733 NP1L4_HUMAN  | R.KYAALYQPLFDK.R                |            | 2 | 3,2274 | 0,427 | -0,251 |
| 21 | Q6Y7W6 PERQ2_HUMAN  | R.SGS#GSIDDDRDSLPE.W            | S275:      | 2 | 3,2212 | 0,37  | -0,374 |
| 21 | Q9C0B5 ZDHC5_HUMAN  | R.GVGSPEPGPTAPYLGR.S            |            | 2 | 3,22   | 0,388 | -0,314 |
| 21 | Q14157 UBP2L_HUMAN  | R.RYPSSISSS#PQKD.L              | S609:      | 2 | 3,2192 | 0,254 | -0,717 |
| 21 | O60524 SDCG1_HUMAN  | K.KLPS#DSGDLEALE.G              | S831:      | 2 | 3,2153 | 0,274 | -0,252 |
| 21 | Q10713 MPPA_HUMAN   | R.GKPAVAALGLDLDLPTYE.H          |            | 2 | 3,2153 | 0,357 | -0,533 |
| 21 | Q92615 LARP5_HUMAN  | R.LSREQST#PPKS#PQ.-             | T732:S736: | 3 | 3,2121 | 0,167 | 0,113  |
| 21 | P02545 LMNA_HUMAN   | R.NSNLVGAAHEE.L                 |            | 2 | 3,2083 | 0,279 | 0      |
| 21 | Q06830 PRDX1_HUMAN  | D.SHFCHLAWVNTPK.K               |            | 3 | 3,2066 | 0,348 | -0,115 |
| 21 | O95400 CD2B2_HUMAN  | R.LSGLADQM*VAR.G                |            | 2 | 3,2056 | 0,318 | -0,311 |
| 21 | P13010 KU86_HUMAN   | E.IFQDNHEDGPTAK.K               |            | 2 | 3,2053 | 0,297 | 0,58   |
| 21 | Q9UHV7 MED13_HUMAN  | R.KYS#ASSGGLCEE.A               | S395:      | 2 | 3,2045 | 0,467 | 0      |
| 21 | Q86SQ0 PHLB2_HUMAN  | R.KDS#LPDADLASCGLSQQSSASFFTPR.S | S513:      | 3 | 3,2025 | 0,156 | -0,518 |
| 21 | Q14692 BMS1_HUMAN   | K.LGPQNFIDETS#DIE.N             | S639:      | 2 | 3,1984 | 0,512 | -0,589 |
| 21 | Q9UPN9 TRI33_HUMAN  | K.QSGLSSLVNGKS#PIR.S            | S862:      | 3 | 3,1978 | 0,384 | 0      |
| 21 | Q7Z422 CA144_HUMAN  | K.SKS#PPKVPIVIQDD.S             | S39:       | 2 | 3,1941 | 0,206 | 0,152  |
| 21 | O75717 WDHD1_HUMAN  | K.LSAFAFKQE.-                   |            | 2 | 3,193  | 0,255 | 0,234  |

|    |                      |                            |                 |   |        |       |        |
|----|----------------------|----------------------------|-----------------|---|--------|-------|--------|
| 21 | Q15742 NAB2_HUMAN    | R.SFS#PKS#PLELGE.K         | S159:S162:      | 2 | 3,193  | 0,297 | -0,925 |
| 21 | P06748 NPM_HUMAN     | K.GPSSVEDIKAK.M            |                 | 2 | 3,1898 | 0,335 | -0,755 |
| 21 | Q06830 PRDX1_HUMAN   | K.QGGLGPMNIPLVSDPKR.T      |                 | 3 | 3,1893 | 0,39  | -0,206 |
| 21 | Q76L83 ASXL2_HUMAN   | K.KLT#ASPSDPKVK.K          | T393:           | 3 | 3,1892 | 0,1   | -0,068 |
| 21 | O95433 AHSA1_HUMAN   | K.FHMVDGNVSGE.F            |                 | 2 | 3,1887 | 0,322 | -0,614 |
| 21 | P46100 ATRX_HUMAN    | R.RPTETNPVTSNS#DEECNE.T    | S677:           | 3 | 3,1877 | 0,139 | 0,169  |
| 21 | A8MQ02 A8MQ02_HUMAN  | R.LFS#QQQDVSNNKVK.A        | S1799:          | 2 | 3,1852 | 0,269 | 0,239  |
| 21 | ##Q8N7X4 MAGB6_HUMAN | R.KFIIAKQS#AS#VS#E.E       | S227:S229:S231: | 3 | 3,179  | 0,206 | 0,555  |
| 21 | P09525 ANXA4_HUMAN   | K.STIGRDLIDDLKSE.L         |                 | 2 | 3,1765 | 0,238 | -0,703 |
| 21 | P26639 SYTC_HUMAN    | K.MGGEKPIGAGEEK.Q          |                 | 3 | 3,1751 | 0,352 | 0      |
| 21 | Q9UNZ2 NSF1C_HUMAN   | K.SPNELVDDLK.G             |                 | 2 | 3,1718 | 0,343 | -0,669 |
| 21 | P19105 MLRM_HUMAN    | R.ATSNVFMFDQSQIQE.F        |                 | 2 | 3,1714 | 0,462 | -0,47  |
| 21 | P09622 DLDH_HUMAN    | R.VLGAHILGPGAGEMVNE.A      |                 | 2 | 3,1707 | 0,398 | -0,513 |
| 21 | Q92597 NDRG1_HUMAN   | R.TAS#GSSVTSLDGTR.S        | S330:           | 2 | 3,169  | 0,512 | -0,344 |
| 21 | P51114 FXR1_HUMAN    | K.AINGPTSAS#GDDISLQR.T     | S587:           | 2 | 3,1677 | 0,388 | -0,319 |
| 21 | O15116 LSM1_HUMAN    | R.GLS#IPRADLDEY.-          | S123:           | 2 | 3,1666 | 0,415 | -0,319 |
| 21 | Q86UP2 KTN1_HUMAN    | K.QM*QSSFTSSEQE.L          |                 | 2 | 3,1656 | 0,241 | 0      |
| 21 | Q92882 OSTF1_HUMAN   | K.LAFDM*ATNAACASLLK.K      |                 | 3 | 3,1646 | 0,189 | 0,107  |
| 21 | P14316 IRF2_HUMAN    | K.HIKQEPVSSLGLSNGVSDLSPE.Y |                 | 3 | 3,1645 | 0,375 | -0,302 |
| 21 | Q7Z309 F122B_HUMAN   | K.CIRPSVLGPLK.R            |                 | 3 | 3,1597 | 0,236 | 0,369  |
| 21 | Q8NE71 ABCF1_HUMAN   | K.LSVPT#S#DEEDEVPAKPR.G    | T108:S109:      | 3 | 3,1559 | 0,298 | -0,172 |
| 21 | Q9H2Y7 ZF106_HUMAN   | R.RHS#AQLSSDHIIPLMHLAK.D   | S937:           | 3 | 3,1524 | 0,176 | -0,491 |
| 21 | P09874 PARP1_HUMAN   | K.GDEVGDVDEVAK.K           |                 | 2 | 3,1491 | 0,372 | 0      |
| 21 | Q7Z333 SETX_HUMAN    | E.DFSLKDDALAK.T            |                 | 2 | 3,148  | 0,312 | -0,499 |
| 21 | O95400 CD2B2_HUMAN   | K.LVDPVAGSGGPGSR.F         |                 | 2 | 3,1461 | 0,494 | 0,192  |
| 21 | Q14694 UBP10_HUMAN   | R.QADFVQTPITGIFGGHIR.S     |                 | 3 | 3,1455 | 0,088 | -0,374 |
| 21 | P40818 UBP8_HUMAN    | R.SYS#SPDITQAIQE.E         | S718:           | 2 | 3,142  | 0,239 | -0,08  |
| 21 | POC7M2 RA1L3_HUMAN   | E.DSQRPGAHLTVK.K           |                 | 3 | 3,1419 | 0,305 | -0,698 |
| 21 | Q14157 UBP2L_HUMAN   | R.RYPSSISS#SPQKD.L         | S608:           | 3 | 3,1411 | 0,369 | -0,179 |
| 21 | Q6WKZ4 RFIP1_HUMAN   | K.QLNQVNFTLPKKE.G          |                 | 3 | 3,141  | 0,158 | 0,352  |
| 21 | Q15631 TSN_HUMAN     | E.ILTLQGVHQGAGFQDIPK.R     |                 | 3 | 3,138  | 0,288 | -0,36  |
| 21 | Q00839 HNRPU_HUMAN   | E.EYTFIQNVPLEDR.V          |                 | 2 | 3,1357 | 0,373 | -0,601 |
| 21 | Q99733 NP1L4_HUMAN   | E.RKYAALYQPLFDK.R          |                 | 3 | 3,1287 | 0,255 | 0,113  |



|    |                     |                               |            |   |        |       |        |
|----|---------------------|-------------------------------|------------|---|--------|-------|--------|
| 21 | Q15424 SAFB1_HUMAN  | R.KFDFDACNEVPPAPK.E           |            | 3 | 3,1197 | 0,112 | -0,316 |
| 21 | Q7Z460 CLAP1_HUMAN  | R.SRS#DIDVNAASAK.S            | S600:      | 3 | 3,1194 | 0,204 | -0,185 |
| 21 | Q07157 ZO1_HUMAN    | K.SHSLAQPFEDSGVE.T            |            | 2 | 3,1164 | 0,329 | -0,381 |
| 21 | P38571 LICH_HUMAN   | E.DGYILCLNRIPHGR.K            |            | 3 | 3,1161 | 0,219 | 0      |
| 21 | Q9BRS8 LARP6_HUMAN  | K.M*QTADGLPVGVL.R.L           |            | 2 | 3,1152 | 0,356 | -0,267 |
| 21 | Q8NE71 ABCF1_HUMAN  | K.LSVPTS#DEEDEVPAKPR.G        | S109:      | 3 | 3,1148 | 0,242 | 0,089  |
| 21 | O43379 WDR62_HUMAN  | R.AGTGYAS#PDRTHVLAAGKAE.T     | S1144:     | 3 | 3,1142 | 0,304 | 0,252  |
| 21 | Q92882 OSTF1_HUMAN  | K.LAFDMATNAACASLLK.K          |            | 2 | 3,1132 | 0,443 | -0,431 |
| 21 | P26358 DNMT1_HUMAN  | R.VARPLPAEPPER.A              |            | 3 | 3,1129 | 0,116 | 0      |
| 21 | Q5JWF2 GNAS1_HUMAN  | R.ILHVNGFNGEGGEDPQAAR.S       |            | 3 | 3,1106 | 0,149 | 0,087  |
| 21 | Q9P265 DIP2B_HUMAN  | R.QAALSAALQQSLQNAE.S          |            | 2 | 3,1096 | 0,429 | -0,446 |
| 21 | O60343 TBCD4_HUMAN  | R.TM*LFQVGRFE.I               |            | 2 | 3,1093 | 0,362 | -0,392 |
| 21 | Q15208 STK38_HUMAN  | R.RQLAFS#VTGTPDYIAPE.V        | S281:      | 2 | 3,109  | 0,157 | -0,941 |
| 21 | Q00341 VIGLN_HUMAN  | R.CDIIISGR.K                  |            | 2 | 3,1088 | 0,288 | 0,117  |
| 21 | Q8N163 K1967_HUMAN  | K.ALVSHNGSLINVGSLQ.R.A        |            | 3 | 3,1085 | 0,174 | -0,39  |
| 21 | P04406 G3P_HUMAN    | R.VIISAPSADAPM*FVM*GVNHE.K    |            | 2 | 3,1071 | 0,562 | -1,037 |
| 21 | P42704 LPPRC_HUMAN  | E.KGDIDHVKQTLE.K              |            | 2 | 3,1058 | 0,391 | -0,441 |
| 21 | Q5UIP0 RIF1_HUMAN   | K.SPLHIKDDVLPK.Q              |            | 3 | 3,1055 | 0,197 | 0      |
| 21 | P35579 MYH9_HUMAN   | R.RGDLPFVVR.R                 |            | 2 | 3,1055 | 0,263 | -0,106 |
| 21 | Q58FF8 H90B2_HUMAN  | K.YIDQEELNK.T                 |            | 2 | 3,1053 | 0,179 | -0,424 |
| 21 | Q9UN79 SOX13_HUMAN  | R.ASQDSADPQAPAQGNFR.G         |            | 2 | 3,1048 | 0,486 | 0,971  |
| 21 | Q9UJM3 ERRFI_HUMAN  | E.TNGGAQIQPLPADCGISSATEKPSK.T |            | 3 | 3,1046 | 0,333 | 0      |
| 21 | Q58FF8 H90B2_HUMAN  | K.EKYIDQEELNK.T               |            | 2 | 3,1028 | 0,358 | 0,087  |
| 21 | P51858 HDGF_HUMAN   | E.YKCGDLVFAK.M                |            | 2 | 3,1012 | 0,309 | 0,102  |
| 21 | P29692 EF1D_HUMAN   | R.ATAPQTOHVS#PMRQVEPPAK.K     | S133:      | 3 | 3,0976 | 0,2   | 0,162  |
| 21 | Q5VUA4 ZN318_HUMAN  | R.RLS#DRLGS#PVDNLE.D          | S168:S173: | 2 | 3,0958 | 0,336 | -0,352 |
| 21 | Q76M58 Q76M58_HUMAN | R.QAHLCVLASNCDEPM*YVKLVE.A    |            | 3 | 3,093  | 0,116 | -0,147 |
| 21 | Q96RK0 CIC_HUMAN    | R.AFS#HSGVHS#LDGGEVDSQALQE.L  | S356:S362: | 3 | 3,0893 | 0,212 | 0      |
| 21 | Q8NCF5 NF2IP_HUMAN  | E.FLDLNSPLSPPS#PR.T           | S204:      | 2 | 3,0887 | 0,336 | -0,492 |
| 21 | Q7L804 RFIP2_HUMAN  | R.TLS#FDTSKMNPDSIVDE.G        | S277:      | 2 | 3,0886 | 0,536 | -0,463 |
| 21 | Q96KM6 Z512B_HUMAN  | R.TSAQVAVFHLQE.I              |            | 2 | 3,0869 | 0,305 | -0,183 |
| 21 | P13667 PDIA4_HUMAN  | E.DYKFHHTFSTE.I               |            | 2 | 3,0844 | 0,422 | -0,346 |
| 21 | Q08211 DHX9_HUMAN   | R.LNQYFQKE.K                  |            | 2 | 3,0808 | 0,206 | -0,228 |

|    |                     |                            |          |   |        |       |        |
|----|---------------------|----------------------------|----------|---|--------|-------|--------|
| 21 | Q9NYF8 BCLF1_HUMAN  | K.LKDLFDYS#PPLHK.N         | S512:    | 3 | 3,0787 | 0,36  | -0,332 |
| 21 | O95400 CD2B2_HUMAN  | K.KLVDPVAGSGGPGSR.F        |          | 2 | 3,0763 | 0,307 | 0,175  |
| 21 | P06493 CDC2_HUMAN   | K.IGEGT#Y#GVVYKGR.H        | T14:Y15: | 3 | 3,0753 | 0,359 | -0,235 |
| 21 | O95425 SVIL_HUMAN   | R.DSSFTEVPRS#PK.H          | S245:    | 2 | 3,0743 | 0,261 | 0      |
| 21 | Q09666 AHNK_HUMAN   | K.GGKPGTLIQAPQLE.V         |          | 2 | 3,0725 | 0,409 | -0,346 |
| 21 | P68104 EF1A1_HUMAN  | D.MRQTVAVGVK.A             |          | 2 | 3,0722 | 0,143 | -0,406 |
| 21 | P21359 NF1_HUMAN    | E.NVELS#PTTGHCNSGR.T       | S2802:   | 2 | 3,0707 | 0,399 | 0,214  |
| 21 | Q15154 PCM1_HUMAN   | R.INFSDLDQR.S              |          | 2 | 3,0666 | 0,323 | -0,11  |
| 21 | Q9HCE3 ZN532_HUMAN  | K.LSSCIAAIAALSAK.K         |          | 2 | 3,0645 | 0,512 | -0,355 |
| 21 | P49736 MCM2_HUMAN   | E.SFTM*ASSPAQR.R           |          | 2 | 3,062  | 0,424 | 0,102  |
| 21 | O95239 KIF4A_HUMAN  | K.LTLLQVASR.Q              |          | 2 | 3,0613 | 0,331 | -0,548 |
| 21 | Q00341 VIGLN_HUMAN  | R.CDIIISGRKE.K             |          | 2 | 3,061  | 0,118 | -0,187 |
| 21 | Q02952 AKA12_HUMAN  | E.MKGSVEEPKPEEPKRK.V       |          | 3 | 3,0609 | 0,149 | -0,196 |
| 21 | O95425 SVIL_HUMAN   | R.DSGM*EKYGS#FEEAE.A       | S968:    | 2 | 3,0592 | 0,344 | -0,51  |
| 21 | P06748 NPM_HUMAN    | K.M*QAS#IEKGGSLPKVE.A      | S254:    | 2 | 3,0591 | 0,363 | -0,438 |
| 21 | Q14166 TTL12_HUMAN  | R.RPAERSS#PGQTPEEGAQALAE.F | S16:     | 3 | 3,0582 | 0,208 | 0,162  |
| 21 | Q71U36 TBA1A_HUMAN  | E.ITNACFEPANQMVK.C         |          | 2 | 3,0578 | 0,437 | -0,226 |
| 21 | O43852 CALU_HUMAN   | R.VHHEPQLSDKVHND.A         |          | 2 | 3,0564 | 0,482 | -0,516 |
| 21 | Q76M58 Q76M58_HUMAN | R.QAHLCLVLANCDEPMYVK.L     |          | 3 | 3,0541 | 0,139 | -0,171 |
| 21 | Q13813 SPTA2_HUMAN  | R.LKDINKVAEDLE.S           |          | 2 | 3,0507 | 0,3   | -0,704 |
| 21 | P06748 NPM_HUMAN    | K.TPKGPS#SVEDIKAK.M        | S242:    | 2 | 3,0503 | 0,277 | 0,159  |
| 21 | Q92945 FUBP2_HUMAN  | K.MMLDDIVSR.G              |          | 2 | 3,0501 | 0,276 | -0,565 |
| 21 | P06493 CDC2_HUMAN   | K.IEKIGEGT#Y#GVVYK.G       | T14:Y15: | 2 | 3,0486 | 0,259 | 0,284  |
| 21 | P22626 ROA2_HUMAN   | K.LFVGGIKEDTEE.H           |          | 2 | 3,0474 | 0,347 | -0,456 |
| 21 | P36578 RL4_HUMAN    | K.APIRPDIVNFVHTNLR.K       |          | 2 | 3,0466 | 0,402 | -0,328 |
| 21 | Q9H6Z4 RANB3_HUMAN  | E.EKPAIAPPVVFVQK.D         |          | 3 | 3,0442 | 0,193 | -0,233 |
| 21 | Q15742 NAB2_HUMAN   | R.VGRLS#PCVPAKPPLAEFE.E    | S479:    | 3 | 3,0423 | 0,107 | -0,447 |
| 21 | Q9Y383 LC7L2_HUMAN  | K.SHLLNCCPHDVLGTR.M        |          | 3 | 3,0405 | 0,273 | -0,392 |
| 21 | Q9BZL6 KPCD2_HUMAN  | K.AQSSLGYIPLMR.V           |          | 2 | 3,0402 | 0,354 | -0,365 |
| 21 | O75821 EIF3G_HUMAN  | R.VTNLSEDTRE.T             |          | 2 | 3,0372 | 0,223 | -0,314 |
| 21 | P15336 ATF2_HUMAN   | K.QLLLAHKDCPV TAM*QK.K     |          | 3 | 3,0359 | 0,179 | -0,196 |
| 21 | P68104 EF1A1_HUMAN  | R.GNVAGDSKNDPPME.A         |          | 2 | 3,0345 | 0,418 | 0      |
| 21 | O95295 S25BP_HUMAN  | R.AM*LDSGIYPPGS#PGK.-      | S133:    | 2 | 3,0324 | 0,369 | -0,462 |

|    |                    |                             |            |   |        |       |        |
|----|--------------------|-----------------------------|------------|---|--------|-------|--------|
| 21 | P06748 NPM_HUMAN   | K.TPKGSS#VEDIKAK.M          | S243:      | 3 | 3,0266 | 0,272 | -0,119 |
| 21 | Q9H4L4 SENP3_HUMAN | K.SGGGFGPDPGSGTTVPAR.R      |            | 2 | 3,0264 | 0,407 | -0,151 |
| 21 | Q13442 HAP28_HUMAN | K.GVEGLIDIENPNR.V           |            | 3 | 3,0263 | 0,23  | -0,128 |
| 21 | Q92688 AN32B_HUMAN | E.KLPNLTHLNLSGNK.L          |            | 3 | 3,0247 | 0,22  | 0,236  |
| 21 | Q96QF0 RAB31_HUMAN | K.TLVLSSSPTSPTQEPLPGGK.T    |            | 2 | 3,0241 | 0,458 | -0,428 |
| 21 | Q13586 STIM1_HUMAN | R.SHS#PSSPDPDTPSPVGD SR.A   | S618:      | 3 | 3,0235 | 0,102 | -0,457 |
| 21 | P58546 MTPN_HUMAN  | R.KPLHYAADCGLE.I            |            | 2 | 3,0232 | 0,423 | 0,325  |
| 21 | O75486 SUPT3_HUMAN | R.QKIAQDFLNSIDQTGE.L        |            | 2 | 3,0221 | 0,198 | -0,405 |
| 21 | P04406 G3P_HUMAN   | K.QASEGPLKGILGYTE.H         |            | 2 | 3,0198 | 0,384 | -0,39  |
| 21 | Q9NQW6 ANLN_HUMAN  | K.TQS#LPVTEKVTE.N           | S485:      | 2 | 3,0115 | 0,259 | -0,259 |
| 21 | Q02241 KIF23_HUMAN | R.RSSTVAPAQPDGAESE.W        |            | 2 | 3,0103 | 0,266 | 0,228  |
| 21 | P35030 TRY3_HUMAN  | D.TLDNDIMLIK.L              |            | 2 | 3,0091 | 0,324 | -0,311 |
| 21 | P46013 KI67_HUMAN  | K.IACKS#PQPDPVDT PASTK.Q    | S2344:     | 3 | 3,0068 | 0,119 | -0,551 |
| 21 | Q00341 VIGLN_HUMAN | R.CDIIISGRKE.K              |            | 3 | 3,006  | 0,2   | 0,28   |
| 21 | Q8NI27 THOC2_HUMAN | K.LYINHT#PPPLSK.S           | T1328:     | 2 | 3,002  | 0,283 | -0,251 |
| 21 | Q9BZD4 NUF2_HUMAN  | K.IVDS#PEKLKNYKE.K          | S247:      | 3 | 2,9982 | 0,208 | -0,334 |
| 21 | Q9Y266 NUDC_HUMAN  | K.LKPNLNGADLPNYR.W          |            | 2 | 2,9975 | 0,382 | -0,446 |
| 21 | Q13442 HAP28_HUMAN | K.GVEGLIDIENPNR.V           |            | 2 | 2,9956 | 0,373 | -0,342 |
| 21 | Q9Y2D5 AKAP2_HUMAN | E.SDVM*VGPFK.L              |            | 2 | 2,9902 | 0,301 | 0,061  |
| 21 | P17812 PYRG1_HUMAN | R.HRFEVNPVWK.K              |            | 3 | 2,9892 | 0,189 | 0,209  |
| 21 | Q9UQ35 SRRM2_HUMAN | K.DKFSFPVQDRPE.S            |            | 3 | 2,9889 | 0,231 | 0      |
| 21 | Q9H009 NACA2_HUMAN | R.ALKNNSNDIVNAIM*E.L        |            | 2 | 2,9875 | 0,26  | -0,587 |
| 21 | Q02952 AKA12_HUMAN | E.M*KGSVEEPKPEPKR.K         |            | 2 | 2,9838 | 0,349 | 0,139  |
| 21 | Q16537 2A5E_HUMAN  | R.SQGKPIELTPLLK.D           |            | 3 | 2,9828 | 0,143 | -0,336 |
| 21 | P38159 HNRPG_HUMAN | R.GFAFVTFESPADAKDAAR.D      |            | 3 | 2,9823 | 0,249 | -0,385 |
| 21 | Q15032 R3HD1_HUMAN | K.ASS#FSGISVLTR.G           | S381:      | 2 | 2,9821 | 0,321 | -0,374 |
| 21 | Q9Y2W2 WBP11_HUMAN | R.AQLSQYF DAVK.N            |            | 2 | 2,981  | 0,372 | -0,865 |
| 21 | Q8IWS0 PHF6_HUMAN  | K.CMLFSSALVSSHSDNE.S        |            | 2 | 2,9804 | 0,36  | -0,616 |
| 21 | O95239 KIF4A_HUMAN | R.TFS#LTEVRGQVSE.S          | S801:      | 2 | 2,9786 | 0,33  | 0,159  |
| 21 | Q9Y2R4 DDX52_HUMAN | E.VLQGLDFFGNK.K             |            | 2 | 2,9781 | 0,347 | -0,591 |
| 21 | P42166 LAP2A_HUMAN | K.LREQGTESRSS#T#PLPTISSAE.N | S159:T160: | 3 | 2,9771 | 0,24  | -0,44  |
| 21 | P35908 K22E_HUMAN  | R.NLDLDSIIAEVK.A            |            | 2 | 2,977  | 0,371 | -0,367 |
| 21 | Q8WU20 FRS2_HUMAN  | R.TSVHVPLEARVS#NAE.S        | S221:      | 2 | 2,9765 | 0,208 | -0,578 |

|    |                    |                         |            |   |        |       |        |
|----|--------------------|-------------------------|------------|---|--------|-------|--------|
| 21 | O95425 SVIL_HUMAN  | R.DSGMEKYGS#FEEAE.A     | S968:      | 2 | 2,9764 | 0,199 | -0,441 |
| 21 | P51858 HDGF_HUMAN  | R.RAGDLLEDS#PKRPK.E     | S165:      | 3 | 2,9754 | 0,198 | 0,11   |
| 21 | Q96B36 AKTS1_HUMAN | E.AEDTQVFGDLRPR.L       |            | 2 | 2,9731 | 0,316 | -0,457 |
| 21 | O15446 RPA34_HUMAN | E.QINTEPLEDTVLSPT#K.K   | T287:      | 2 | 2,9718 | 0,325 | -0,85  |
| 21 | O15446 RPA34_HUMAN | E.QINTEPLEDT#VLSPTKKR.K | T282:      | 3 | 2,9653 | 0,398 | -0,34  |
| 21 | O94766 B3GA3_HUMAN | E.SLLSHLVDPKDLEPR.A     |            | 3 | 2,9642 | 0,363 | -0,405 |
| 21 | P35612 ADDB_HUMAN  | R.VTMILQS#PSFREE.L      | S60:       | 2 | 2,9623 | 0,383 | -0,453 |
| 21 | Q02790 FKBP4_HUMAN | E.GYYKDKLFDQRE.L        |            | 3 | 2,9622 | 0,367 | 0,468  |
| 21 | Q8IYB3 SRRM1_HUMAN | K.RES#PSPAPKPR.K        | S450:      | 3 | 2,9603 | 0,168 | 0      |
| 21 | P34059 GALNS_HUMAN | K.LPLIFHLGRDPGE.R       |            | 2 | 2,9602 | 0,404 | -0,333 |
| 21 | P06748 NPM_HUMAN   | K.MQAS#IEKGGSLPKVE.A    | S254:      | 2 | 2,9582 | 0,509 | -0,369 |
| 21 | P02545 LMNA_HUMAN  | R.LRLSPS#PTSQR.S        | S392:      | 2 | 2,9582 | 0,359 | 0,185  |
| 21 | Q02241 KIF23_HUMAN | R.RS#STVAPAQPDGAE.S     | S911:      | 2 | 2,957  | 0,437 | -1,082 |
| 21 | Q9NYF8 BCLF1_HUMAN | K.LKDLFDYSPPLHK.N       |            | 3 | 2,9482 | 0,223 | 0      |
| 21 | Q9UPN3 MACF1_HUMAN | R.RMLS#SSDAITQE.F       | S1376:     | 2 | 2,9469 | 0,123 | 0,258  |
| 21 | P35221 CTNA1_HUMAN | K.KHVNPVQALSE.F         |            | 2 | 2,9436 | 0,351 | -0,1   |
| 21 | P46734 MP2K3_HUMAN | R.TFITIGDRNFE.V         |            | 2 | 2,9435 | 0,388 | -0,465 |
| 21 | P62753 RS6_HUMAN   | R.LSS#LRASTSKS#E.S      | S236:S244: | 2 | 2,9418 | 0,375 | -0,685 |
| 21 | P48637 GSHB_HUMAN  | K.CPDIAQLAGTKK.V        |            | 2 | 2,9415 | 0,31  | -0,087 |
| 21 | Q02241 KIF23_HUMAN | K.SNDRNS#MDIQCE.V       | S160:      | 2 | 2,9414 | 0,282 | -0,551 |
| 21 | P49790 NU153_HUMAN | K.CIACQAAKLS#PR.D       | S687:      | 2 | 2,9413 | 0,367 | 0,168  |
| 21 | Q5VSL9 FA40A_HUMAN | K.ALIKQDNLDAFNE.R       |            | 2 | 2,9408 | 0,235 | -0,327 |
| 21 | P13984 T2FB_HUMAN  | E.YRHYQGEEKS#D.-        | S248:      | 3 | 2,9367 | 0,318 | -0,061 |
| 21 | Q9BRS8 LARP6_HUMAN | K.MQTADGLPVGVLR.L       |            | 2 | 2,936  | 0,491 | -0,27  |
| 21 | P61163 ACTZ_HUMAN  | E.EHPVLLTEAPLNPR.K      |            | 3 | 2,9343 | 0,246 | 0,115  |
| 21 | Q96MU7 YTDC1_HUMAN | R.GIS#PIVFDR.S          | S308:      | 2 | 2,9298 | 0,38  | -0,45  |
| 21 | O60264 SMCA5_HUMAN | E.LFAHFIQPAAQK.T        |            | 2 | 2,9296 | 0,288 | -0,445 |
| 21 | Q13616 CUL1_HUMAN  | K.YNALVM*SAFNND.A       |            | 2 | 2,9293 | 0,334 | -0,089 |
| 21 | P18615 NELFE_HUMAN | R.S#LSEQPVM*DTATATE.Q   | S49:       | 2 | 2,9293 | 0,428 | 0,073  |
| 21 | Q01105 SET_HUMAN   | K.KKPRPPPALGPEE.T       |            | 2 | 2,9225 | 0,348 | -0,517 |
| 21 | Q969J3 L12R1_HUMAN | R.NVSNDPDIKLE.I         |            | 2 | 2,9225 | 0,255 | -0,415 |
| 21 | P49755 TMEDA_HUMAN | E.ISDQSGGAGGLR.S        |            | 2 | 2,9214 | 0,359 | -0,327 |
| 21 | P49736 MCM2_HUMAN  | R.QINIHNLSAFYDSE.L      |            | 2 | 2,9211 | 0,454 | -0,37  |

|    |                      |                               |            |   |        |       |        |
|----|----------------------|-------------------------------|------------|---|--------|-------|--------|
| 21 | P13639 EF2_HUMAN     | K.ARPFPDGLAEDIDKGE.V          |            | 3 | 2,9168 | 0,24  | -0,106 |
| 21 | Q9H6S3 ES8L2_HUMAN   | R.QSILPPPQGPAPIPFQHR.G        |            | 3 | 2,915  | 0,378 | -0,554 |
| 21 | Q96A49 SYAP1_HUMAN   | E.AVRPKT#PPVVIK.S             | T248:      | 3 | 2,9121 | 0,18  | 0,198  |
| 21 | P10074 ZBT48_HUMAN   | R.GSHS#PQRQLHSPAQSE.G         | S171:      | 3 | 2,9106 | 0,095 | -0,571 |
| 21 | P60174 TPIS_HUMAN    | R.KFFVGGNWK.M                 |            | 2 | 2,9104 | 0,188 | -0,338 |
| 21 | Q01804 OTUD4_HUMAN   | K.TAADVVSPGANSVDSR.V          |            | 2 | 2,9103 | 0,191 | 0,237  |
| 21 | Q12888 TP53B_HUMAN   | K.TSGTEPADFALPSSR.G           |            | 2 | 2,91   | 0,472 | -0,397 |
| 21 | Q8NE71 ABCF1_HUMAN   | K.LSVPTS#DEEDEVPAKPR.G        | S109:      | 2 | 2,9091 | 0,344 | 0,656  |
| 21 | Q9Y2R4 DDX52_HUMAN   | E.VLQGLDFGNKK.S               |            | 2 | 2,9073 | 0,267 | -0,625 |
| 21 | Q15554 TERF2_HUMAN   | K.LDQKDLVLPQALPAS#PALK.N      | S323:      | 3 | 2,9015 | 0,184 | -0,416 |
| 21 | P63241 IF5A1_HUMAN   | K.VHLVGIDIFTGK.K              |            | 2 | 2,8981 | 0,365 | -0,376 |
| 21 | P26038 MOES_HUMAN    | K.SGYLAGDKLLPQR.V             |            | 3 | 2,8973 | 0,21  | 0,258  |
| 21 | Q15121 PEA15_HUMAN   | K.DIIRQPSEEE.I                |            | 2 | 2,8967 | 0,254 | -0,201 |
| 21 | P06396 GELS_HUMAN    | E.DCFILDHGKDGK.I              |            | 2 | 2,8954 | 0,35  | 0      |
| 21 | P04406 G3P_HUMAN     | R.VIISAPSADAPMFVMGVNHE.K      |            | 2 | 2,8908 | 0,575 | -0,819 |
| 21 | Q96B01 R51A1_HUMAN   | E.VKVKS#PVEKKE.K              | S241:      | 3 | 2,8859 | 0,19  | 0      |
| 21 | Q9BQ52 RNZ2_HUMAN    | E.TM*TVYQIPIHSEQR.R           |            | 2 | 2,8817 | 0,37  | -0,568 |
| 21 | P01008 ANT3_HUMAN    | E.KTSDQIHFFFAK.L              |            | 3 | 2,8795 | 0,311 | -0,125 |
| 21 | P12268 IMDH2_HUMAN   | K.FVPYLIAGIQHSCQD.I           |            | 2 | 2,8781 | 0,453 | -0,558 |
| 21 | Q96ST2 IWS1_HUMAN    | R.GKHMDFLSDFE.M               |            | 2 | 2,8773 | 0,312 | -0,276 |
| 21 | P23588 IF4B_HUMAN    | K.GKTISLTDFLAE.D              |            | 2 | 2,8771 | 0,273 | -0,565 |
| 21 | P31948 STIP1_HUMAN   | R.IGNSYFKEE.K                 |            | 2 | 2,8748 | 0,346 | -0,337 |
| 21 | Q05DM8 Q05DM8_HUMAN  | K.YATLSLFNTYK.G               |            | 2 | 2,8745 | 0,344 | -0,462 |
| 21 | Q9Y2D5 AKAP2_HUMAN   | E.SDVMVGPFK.L                 |            | 2 | 2,8706 | 0,3   | -0,125 |
| 21 | Q7RTV0 PHF5A_HUMAN   | K.IVNLGSSKTDLFYE.R            |            | 2 | 2,8677 | 0,415 | -0,462 |
| 21 | Q16643 DREB_HUMAN    | R.M*APTPIPTRSPS#DSSTASTPVAE.Q | S339:      | 3 | 2,8668 | 0,227 | -0,076 |
| 21 | P35612 ADDB_HUMAN    | R.VTMILQSPS#FREE.L            | S62:       | 2 | 2,8651 | 0,43  | 0,075  |
| 21 | P04264 K2C1_HUMAN    | R.SGGGFSSGSAGIINYQR.R         |            | 2 | 2,861  | 0,269 | -0,662 |
| 21 | ##Q9Y4R8 TELO2_HUMAN | K.ALEVS#VERTATPSRY#VLGE.L     | S285:Y295: | 3 | 2,8571 | 0,111 | -0,082 |
| 21 | Q9NSM8 Q9NSM8_HUMAN  | K.LPDLS#PVENKE.H              | S652:      | 2 | 2,8565 | 0,321 | -0,277 |
| 21 | P38571 LICH_HUMAN    | E.TEDGYILCLNR.I               |            | 2 | 2,8541 | 0,362 | -0,09  |
| 21 | Q70EL1 UBP54_HUMAN   | E.SLNIDSIFSK.D                |            | 2 | 2,8529 | 0,392 | -0,651 |
| 21 | Q15424 SAFB1_HUMAN   | K.FDFDACNEVPPAPK.E            |            | 2 | 2,8503 | 0,141 | -0,38  |

|    |                     |                          |            |   |        |       |        |
|----|---------------------|--------------------------|------------|---|--------|-------|--------|
| 21 | O00170 AIP_HUMAN    | E.GRGELPDFQDGTK.A        |            | 3 | 2,8491 | 0,223 | -0,064 |
| 21 | Q5T5C0 STXB5_HUMAN  | R.KLS#LPTDLKPDLD.V       | S759:      | 2 | 2,8483 | 0,372 | -0,238 |
| 21 | Q9UNZ2 NSF1C_HUMAN  | R.SGQQIVGPPR.K           |            | 2 | 2,8479 | 0,268 | -0,117 |
| 21 | P78347 GTF2I_HUMAN  | K.ANELPQPPVPEPANAGKR.K   |            | 2 | 2,8447 | 0,19  | -0,194 |
| 21 | P07602 SAP_HUMAN    | K.LVGYLDRNLEK.N          |            | 2 | 2,8432 | 0,297 | -0,277 |
| 21 | Q9H6F5 CCD86_HUMAN  | R.RLGGLRPES#PES#LTSVSR.T | S18:S21:   | 3 | 2,842  | 0,324 | -0,435 |
| 21 | P09661 RU2A_HUMAN   | R.LKGLLQSGQIPGR.E        |            | 2 | 2,8407 | 0,319 | -0,714 |
| 21 | Q96B36 AKTS1_HUMAN  | E.DTQVFGDLRPR.L          |            | 2 | 2,8403 | 0,396 | -0,523 |
| 21 | P62753 RS6_HUMAN    | R.RLS#SLRAS#TSKSE.S      | S235:S240: | 2 | 2,8385 | 0,277 | 0,077  |
| 21 | Q92598 HS105_HUMAN  | K.IKVVNVELPIE.A          |            | 2 | 2,8361 | 0,314 | -0,974 |
| 21 | Q8WXV6 Q8WXV6_HUMAN | R.TSS#EDNLYLAVLR.A       | S21:       | 2 | 2,8338 | 0,296 | -0,625 |
| 21 | Q01082 SPTB2_HUMAN  | R.QNLLSQSHAYQQFLR.D      |            | 3 | 2,8322 | 0,297 | -0,299 |
| 21 | O60361 NDK8_HUMAN   | R.GDFCIQVGR.N            |            | 2 | 2,8314 | 0,321 | -0,348 |
| 21 | P04264 K2C1_HUMAN   | R.SLDLDSIIAEVK.A         |            | 2 | 2,8284 | 0,401 | -0,562 |
| 21 | Q13242 SFRS9_HUMAN  | R.GS#PHYFSPFRPY.-        | S211:      | 3 | 2,8267 | 0,139 | -0,238 |
| 21 | Q00341 VIGLN_HUMAN  | R.RCDIIISGRKE.K          |            | 2 | 2,8263 | 0,344 | -0,585 |
| 21 | Q16643 DREB_HUMAN   | R.SPDSST#ASTPVAE.Q       | T343:      | 2 | 2,8242 | 0,249 | 0,259  |
| 21 | Q96QC0 PP1RA_HUMAN  | E.GLGFLDALNSAPVPGIK.I    |            | 2 | 2,8212 | 0,4   | -0,365 |
| 21 | P06748 NPM_HUMAN    | K.KQEKT#PKT#PKGSSVE.D    | T234:T237: | 3 | 2,8212 | 0,105 | -0,385 |
| 21 | A8K9D9 A8K9D9_HUMAN | R.DKLPS#TEVKE.D          | S858:      | 2 | 2,8195 | 0,106 | -0,498 |
| 21 | Q13409 DC1I2_HUMAN  | K.EAVAPVQEEEDLEK.K       |            | 2 | 2,8184 | 0,283 | -0,711 |
| 21 | P13639 EF2_HUMAN    | E.QVVGGIYGLNR.K          |            | 2 | 2,8177 | 0,375 | -0,287 |
| 21 | P40227 TCPZ_HUMAN   | K.GIDPFSLDALSKE.G        |            | 2 | 2,816  | 0,32  | -0,789 |
| 21 | Q06830 PRDX1_HUMAN  | K.QGGLGPM*NIPLVSDPKR.T   |            | 3 | 2,8153 | 0,314 | 0      |
| 21 | Q92698 RAD54_HUMAN  | R.SCDDEDWQPLVTPR.K       |            | 2 | 2,8138 | 0,283 | -0,275 |
| 21 | Q14847 LASP1_HUMAN  | K.QSFTM*VADT#PE.N        | T68:       | 2 | 2,8132 | 0,143 | -0,554 |
| 21 | P46937 YAP1_HUMAN   | R.KLPDSFFKPPPEPK.S       |            | 3 | 2,8132 | 0,18  | 0,179  |
| 21 | Q13427 PIIG_HUMAN   | R.FLMRKS#PPKADE.K        | S290:      | 3 | 2,8098 | 0,095 | 0      |
| 21 | Q9NSK0 KLC4_HUMAN   | E.WSGDGSGLQR.S           |            | 2 | 2,8054 | 0,372 | -0,629 |
| 21 | O15355 PPM1G_HUMAN  | K.AYTGFSNSERGTE.A        |            | 2 | 2,8049 | 0,35  | -0,405 |
| 21 | P48643 TCPE_HUMAN   | K.IAILTCPFEPKPK.T        |            | 2 | 2,8042 | 0,265 | -0,757 |
| 21 | P51948 MAT1_HUMAN   | K.NKQAFLELE.S            |            | 2 | 2,803  | 0,217 | -0,708 |
| 21 | Q99729 ROAA_HUMAN   | R.GFVFITFKEEEPVKK.V      |            | 3 | 2,8024 | 0,202 | -0,407 |

|    |                    |                            |          |   |        |       |        |
|----|--------------------|----------------------------|----------|---|--------|-------|--------|
| 21 | Q9UBG0 MRC2_HUMAN  | R.CLTALPYICK.R             |          | 2 | 2,7995 | 0,255 | -0,197 |
| 21 | Q99459 CDC5L_HUMAN | R.SKLVLPAPQIS#DAELQE.V     | S303:    | 2 | 2,7991 | 0,304 | -0,318 |
| 21 | Q9NPI1 BRD7_HUMAN  | K.QSIDFMADLQK.T            |          | 2 | 2,7984 | 0,377 | -0,377 |
| 21 | P12532 KCRU_HUMAN  | R.GQDIRIPTVVIHTK.H         |          | 3 | 2,7974 | 0,297 | 0,116  |
| 21 | P57764 GSDC1_HUMAN | D.LDVLLFPDKK.Q             |          | 2 | 2,7941 | 0,179 | -0,308 |
| 21 | O95696 BRD1_HUMAN  | R.LDAGLTNGFGGAR.S          |          | 2 | 2,7934 | 0,447 | -0,488 |
| 21 | P51991 ROA3_HUMAN  | E.DSVKPGAHLTVK.K           |          | 3 | 2,7924 | 0,199 | -1,46  |
| 21 | Q9P0K7 RAI14_HUMAN | E.NAGIQSLLSK.I             |          | 2 | 2,7919 | 0,332 | -0,107 |
| 21 | O60506 HNRPQ_HUMAN | E.DGALAVLQQFK.D            |          | 2 | 2,7891 | 0,33  | -0,308 |
| 21 | P53367 ARFP1_HUMAN | R.DLKHS#LPSGLGLSE.T        | S36:     | 2 | 2,7891 | 0,219 | -0,478 |
| 21 | Q8IYB3 SRRM1_HUMAN | E.KKEKT#PELPEPSVK.V        | T220:    | 2 | 2,789  | 0,288 | 0,072  |
| 21 | P49454 CENPF_HUMAN | K.VAQRS#PVDSGTILREPTTK.S   | S3150:   | 3 | 2,789  | 0,164 | -0,6   |
| 21 | Q01813 K6PP_HUMAN  | R.M*LAIYDGFDFGFAK.G        |          | 2 | 2,7889 | 0,172 | -0,667 |
| 21 | Q16204 CCDC6_HUMAN | K.SGGIVISPFRLLEE.L         |          | 2 | 2,7868 | 0,242 | -0,521 |
| 21 | Q13442 HAP28_HUMAN | K.KVTQLDLDPKE.L            |          | 2 | 2,7838 | 0,322 | -0,273 |
| 21 | A0JNW5 UH1BL_HUMAN | R.CPPNLAPLCVSYK.N          |          | 2 | 2,782  | 0,41  | -0,161 |
| 21 | Q01433 AMPD2_HUMAN | R.QIS#QDVKLEPD.I           | S168:    | 2 | 2,7819 | 0,324 | -0,271 |
| 21 | P51858 HDGF_HUMAN  | R.AGDLLEDSE#PKRPK.E        | S165:    | 2 | 2,7799 | 0,292 | -0,567 |
| 21 | Q8IWA0 WDR75_HUMAN | K.VQDTSNTGLGEDIIHQLSK.S    |          | 3 | 2,7796 | 0,213 | -0,623 |
| 21 | Q8NEY8 PPHLN_HUMAN | R.DNTFFRES#PVGR.K          | S133:    | 2 | 2,7776 | 0,209 | -0,243 |
| 21 | Q02952 AKA12_HUMAN | R.KVDTSVS#WE.A             | S678:    | 2 | 2,7769 | 0,214 | -0,216 |
| 21 | Q8IUD2 RB6I2_HUMAN | R.SVGKVEPSSQSPGRS#PR.L     | S21:     | 3 | 2,7755 | 0,269 | -0,299 |
| 21 | Q01082 SPTB2_HUMAN | R.AQTLPTS SVTITSESS#PGKR.E | S2341:   | 2 | 2,7716 | 0,398 | -0,342 |
| 21 | Q9NYB0 TE2IP_HUMAN | K.YLLGDAPVS#PSSQK.L        | S203:    | 2 | 2,7711 | 0,144 | -0,633 |
| 21 | O94811 TPPP_HUMAN  | K.AANRT#PPKS#PGDPSKDR.A    | T14:S18: | 3 | 2,7704 | 0,121 | 0,281  |
| 21 | Q8WXH0 SYNE2_HUMAN | R.RGS#M*SYLAAVEEEVEE.S     | S4108:   | 2 | 2,7683 | 0,395 | -0,58  |
| 21 | P58546 MTPN_HUMAN  | E.GGRKPLHYAADCGQLE.I       |          | 2 | 2,7666 | 0,384 | -0,62  |
| 21 | Q9H6Z4 RANB3_HUMAN | E.EKPAIAPPVVFVQK.D         |          | 2 | 2,7655 | 0,297 | -0,466 |
| 21 | Q15287 RNPS1_HUMAN | K.HMDGGQIDGQE.I            |          | 2 | 2,7627 | 0,225 | -0,103 |
| 21 | P48643 TCPE_HUMAN  | K.IAILTCPFEPKPK.T          |          | 3 | 2,7625 | 0,238 | 0      |
| 21 | Q03164 HRX_HUMAN   | R.RVHTSTPS#DKNLLDITYNTE.L  | S2816:   | 3 | 2,7595 | 0,178 | -0,161 |
| 21 | Q15233 NONO_HUMAN  | K.GFGFIRLE.T               |          | 2 | 2,7591 | 0,226 | 0      |
| 21 | Q9BXF6 RFIP5_HUMAN | R.ALLDLQGHLD.A             |          | 2 | 2,7564 | 0,409 | -0,334 |

|    |                    |                       |            |   |        |       |        |
|----|--------------------|-----------------------|------------|---|--------|-------|--------|
| 21 | P02545 LMNA_HUMAN  | R.LRLSPSPTSQR.S       |            | 2 | 2,7564 | 0,193 | -0,589 |
| 21 | P15336 ATF2_HUMAN  | K.QLLLAHKDCPVTAMQK.K  |            | 3 | 2,7529 | 0,151 | -0,296 |
| 21 | P29692 EF1D_HUMAN  | R.ATAPQTQHVSPM*R.Q    |            | 2 | 2,7528 | 0,286 | -0,169 |
| 21 | P49750 YLPM1_HUMAN | E.DYLQLPDDYDTR.A      |            | 2 | 2,7524 | 0,282 | -0,564 |
| 21 | Q86TM6 SYVN1_HUMAN | R.LQKLES#PVAH.-       | S613:      | 2 | 2,7518 | 0,167 | -0,812 |
| 21 | P98175 RBM10_HUMAN | E.RQHTSMDLPK.L        |            | 3 | 2,7514 | 0,249 | -0,301 |
| 21 | Q9UQ35 SRRM2_HUMAN | E.SYFGVSSLQLK.G       |            | 2 | 2,7488 | 0,426 | -0,397 |
| 21 | P30042 ES1_HUMAN   | K.NLSTFAVDGKDCK.V     |            | 2 | 2,7452 | 0,369 | -0,335 |
| 21 | Q8NC56 LEMD2_HUMAN | R.VAGEDMLVWR.W        |            | 2 | 2,7448 | 0,337 | -0,415 |
| 21 | Q96ST2 IWS1_HUMAN  | R.MNS#TGGQT#PRRDLE.K  | S720:T725: | 2 | 2,7442 | 0,254 | -0,213 |
| 21 | Q99543 DNJC2_HUMAN | R.NRNAS#AS#FQE.L      | S47:S49:   | 2 | 2,7401 | 0,252 | -0,095 |
| 21 | Q13616 CUL1_HUMAN  | K.YNALVMSAFNND.A      |            | 2 | 2,7397 | 0,24  | -0,359 |
| 21 | Q9COC2 TB182_HUMAN | D.AHLRPTSLVQR.R       |            | 3 | 2,7391 | 0,37  | 0,358  |
| 21 | P56182 RRP1_HUMAN  | R.SEKPPAGSICR.A       |            | 3 | 2,736  | 0,294 | -1,445 |
| 21 | P06733 ENOA_HUMAN  | E.HINKTIAPALVSK.K     |            | 3 | 2,7344 | 0,373 | 0      |
| 21 | O43303 CE110_HUMAN | K.IAGILPLDNEDQCK.T    |            | 2 | 2,7339 | 0,153 | 0,308  |
| 21 | P29692 EF1D_HUMAN  | R.ATAPQTQHVSPMR.Q     |            | 2 | 2,7337 | 0,284 | -0,514 |
| 21 | Q76FK4 NOL8_HUMAN  | K.LM*DLQSHFGTDDR.F    |            | 3 | 2,7334 | 0,257 | -0,118 |
| 21 | Q05682 CALD1_HUMAN | E.DGLSDDKKPFK.C       |            | 3 | 2,7324 | 0,295 | 0,146  |
| 21 | P51991 ROA3_HUMAN  | R.GFGFVTYSCVEE.V      |            | 2 | 2,7298 | 0,232 | -0,262 |
| 21 | Q9Y6M7 S4A7_HUMAN  | R.IPLVRS#FADIGK.K     | S233:      | 2 | 2,7295 | 0,191 | -0,437 |
| 21 | Q49A88 CCD14_HUMAN | R.AATTQLVSNGLAVSGKE.N |            | 2 | 2,7282 | 0,286 | -0,211 |
| 21 | P13639 EF2_HUMAN   | E.QVVGGIYGV LNR.K     |            | 3 | 2,7266 | 0,203 | 0,287  |
| 21 | P02545 LMNA_HUMAN  | R.LRLS#PSPTS#QR.S     | S390:S395: | 2 | 2,7244 | 0,23  | -0,087 |
| 21 | Q14160 LAP4_HUMAN  | R.LPLLPES#PGPLR.Q     | S853:      | 2 | 2,7223 | 0,187 | -0,499 |
| 21 | O43379 WDR62_HUMAN | R.GQSS#PPPAPPICLR.R   | S33:       | 2 | 2,717  | 0,213 | -0,157 |
| 21 | Q7Z3T8 ZFY16_HUMAN | E.HKDNIQDAVTIHEE.I    |            | 3 | 2,7154 | 0,14  | -0,666 |
| 21 | Q96A65 EXOC4_HUMAN | K.SKDPSGLLISVIR.T     |            | 2 | 2,7153 | 0,19  | -0,44  |
| 21 | Q06830 PRDX1_HUMAN | K.KQGGLGPMNIPLVSDPK.R |            | 3 | 2,7103 | 0,123 | -0,418 |
| 21 | Q8TCG1 K1524_HUMAN | K.CLT#PHLKDGVPLNIEE.L | T585:      | 3 | 2,7077 | 0,112 | -0,835 |
| 21 | P62736 ACTA_HUMAN  | R.GILTLKYPPIE.H       |            | 2 | 2,7077 | 0,404 | -0,532 |
| 21 | P46087 NOL1_HUMAN  | K.GPQSLFNAPR.G        |            | 2 | 2,7071 | 0,264 | 1,235  |
| 21 | P31949 S10AB_HUMAN | K.KLDTNSDGQLDFSE.F    |            | 2 | 2,7067 | 0,275 | -0,389 |



|    |                     |                          |                 |   |        |       |        |
|----|---------------------|--------------------------|-----------------|---|--------|-------|--------|
| 21 | Q9UQ84 EXO1_HUMAN   | E.DDLSQYLSFTK.K          |                 | 2 | 2,7055 | 0,325 | -0,402 |
| 21 | Q53GS9 SNUT2_HUMAN  | E.FEPASAREAPASVVPFVR.V   |                 | 3 | 2,7043 | 0,263 | -0,474 |
| 21 | O60343 TBCD4_HUMAN  | R.TMLFQVGRFE.I           |                 | 2 | 2,7032 | 0,322 | -1,192 |
| 21 | P49023 PAXI_HUMAN   | K.TGSSS#PPGGPPKPGSQLD.S  | S322:           | 2 | 2,7025 | 0,206 | 0,21   |
| 21 | O60271 JIP4_HUMAN   | R.SAS#QSS#LDKLDQE.L      | S730:S733:      | 2 | 2,7018 | 0,223 | -0,311 |
| 21 | Q8N2Y8 RUSC2_HUMAN  | R.SPPVRLGS#LE.R          | S513:           | 2 | 2,7018 | 0,25  | -0,215 |
| 21 | Q92878 RAD50_HUMAN  | R.ARDSLIQSLATQLE.L       |                 | 2 | 2,701  | 0,291 | -0,711 |
| 21 | Q15185 TEBP_HUMAN   | E.IDLFHCIDPNSK.H         |                 | 2 | 2,6987 | 0,198 | -0,62  |
| 21 | Q8TDN4 CABL1_HUMAN  | R.LIS#QRSS#LETLEDIEE.N   | S287:S291:      | 2 | 2,6987 | 0,408 | -0,543 |
| 21 | Q92945 FUBP2_HUMAN  | K.MM*LDDIVSR.G           |                 | 2 | 2,6967 | 0,349 | -0,334 |
| 21 | P04264 K2C1_HUMAN   | R.GSGGGSSGGSIGGR.G       |                 | 2 | 2,6939 | 0,287 | -0,558 |
| 21 | P26639 SYTC_HUMAN   | E.KDSKPIKVTLPDGK.Q       |                 | 3 | 2,6938 | 0,086 | 0,12   |
| 21 | Q9UEY8 ADDG_HUMAN   | R.VTQILQS#PAFREDLE.C     | S64:            | 3 | 2,6917 | 0,127 | -0,501 |
| 21 | Q9UBT2 SAE2_HUMAN   | K.LDEKENLSAK.R           |                 | 2 | 2,6882 | 0,32  | -0,425 |
| 21 | P04406 G3P_HUMAN    | K.IKWGDAGAE.Y            |                 | 2 | 2,6876 | 0,231 | 0,064  |
| 21 | P11021 GRP78_HUMAN  | E.KKTKPYIQVDIGGGQTK.T    |                 | 3 | 2,687  | 0,124 | -0,197 |
| 21 | Q9H0C8 ILKAP_HUMAN  | K.HAALSLSKE.H            |                 | 2 | 2,6852 | 0,406 | 0,128  |
| 21 | Q8NE71 ABCF1_HUMAN  | K.TKGGNVFAALIQQDS#EEEE.E | S140:           | 2 | 2,6849 | 0,332 | -0,228 |
| 21 | P49790 NU153_HUMAN  | K.CIACQAAKLS#PR.D        | S687:           | 3 | 2,6843 | 0,175 | 0,189  |
| 21 | P62753 RS6_HUMAN    | R.RLS#S#LRAS#TSKSE.S     | S235:S236:S240: | 2 | 2,6831 | 0,129 | 0,587  |
| 21 | O00231 PSD11_HUMAN  | R.KLSQMILDKK.F           |                 | 3 | 2,6827 | 0,152 | 0,152  |
| 21 | O94827 PKHG5_HUMAN  | R.TPVQLLSCPPHLLK.S       |                 | 3 | 2,6822 | 0,119 | -0,114 |
| 21 | P62841 RS15_HUMAN   | K.KEAPPM*EKPEVVK.T       |                 | 3 | 2,6816 | 0,189 | -0,183 |
| 21 | Q9BZD4 NUF2_HUMAN   | K.TKIVDS#PEKLN.N         | S247:           | 3 | 2,6813 | 0,198 | -0,205 |
| 21 | P14618 KPYM_HUMAN   | R.AGKPVICATQMLE.S        |                 | 2 | 2,677  | 0,346 | -0,43  |
| 21 | O43237 DC1L2_HUMAN  | R.GPLTSGSDEE.N           |                 | 2 | 2,6735 | 0,439 | 0,123  |
| 21 | Q8NCM9 Q8NCM9_HUMAN | R.SSDITSDLGNVLTSTPNAK.T  |                 | 3 | 2,6689 | 0,271 | -0,286 |
| 21 | P63208 SKP1_HUMAN   | K.RTDDIPVWDQE.F          |                 | 2 | 2,666  | 0,159 | -0,355 |
| 21 | Q8NE71 ABCF1_HUMAN  | K.LSVPT#S#DEEDEVPAKPR.G  | T108:S109:      | 2 | 2,6654 | 0,311 | -0,23  |
| 21 | P49736 MCM2_HUMAN   | E.SFTM*AS#SPAQR.R        | S12:            | 2 | 2,6622 | 0,383 | -1,049 |
| 21 | Q9BWH2 FUND2_HUMAN  | K.IRKS#NQIPTEV.R         | S151:           | 3 | 2,6579 | 0,17  | 0,06   |
| 21 | Q9UNP9 PIIE_HUMAN   | K.QKVIIADCGEYV.-         |                 | 2 | 2,656  | 0,172 | 0,175  |
| 21 | P31939 PUR9_HUMAN   | K.TLHPAVHAGILAR.N        |                 | 3 | 2,656  | 0,336 | 0,202  |

|    |                    |                          |            |   |        |       |        |
|----|--------------------|--------------------------|------------|---|--------|-------|--------|
| 21 | Q07157 ZO1_HUMAN   | R.KFES#PKFNHLLPSE.T      | S1545:     | 2 | 2,6542 | 0,148 | -0,261 |
| 21 | Q9UNP9 PIIE_HUMAN  | K.VIIADCGEYV.-           |            | 2 | 2,6518 | 0,477 | 0      |
| 21 | P02545 LMNA_HUMAN  | R.LRLS#PSPTSQR.S         | S390:      | 2 | 2,6517 | 0,28  | 0      |
| 21 | Q07666 KHDR1_HUMAN | E.NYLDLFSHK.N            |            | 2 | 2,6468 | 0,15  | -0,322 |
| 21 | Q13308 PTK7_HUMAN  | R.SSLQPITTLGKSE.F        |            | 2 | 2,6468 | 0,34  | -0,448 |
| 21 | P37837 TALDO_HUMAN | K.FAADAVKLE.R            |            | 2 | 2,6464 | 0,188 | 0      |
| 21 | P34059 GALNS_HUMAN | K.LPLIFHLGR.D            |            | 2 | 2,6459 | 0,285 | -0,343 |
| 21 | P09429 HMGB1_HUMAN | K.MSSYAFFVQTCRE.E        |            | 2 | 2,6424 | 0,388 | -0,45  |
| 21 | Q9UKG1 DP13A_HUMAN | R.YCFQITSFDGKK.S         |            | 3 | 2,6417 | 0,266 | -0,061 |
| 21 | P51858 HDGF_HUMAN  | R.AGDLLDES#PKRPK.E       | S165:      | 3 | 2,6375 | 0,202 | -0,121 |
| 21 | Q9BZL4 PP12C_HUMAN | R.SYQMPVRDEESE.S         |            | 2 | 2,6298 | 0,202 | -0,249 |
| 21 | P07602 SAP_HUMAN   | K.KLVGYLDR.N             |            | 2 | 2,6266 | 0,224 | -0,633 |
| 21 | Q09666 AHNK_HUMAN  | K.LQSGSVLASKK.S          |            | 2 | 2,6266 | 0,125 | 0      |
| 21 | Q13442 HAP28_HUMAN | K.GVEGLIDIENPNRVAQTTK.K  |            | 3 | 2,6265 | 0,274 | -0,267 |
| 21 | Q8NEY8 PPHLN_HUMAN | R.DNTFFRES#PVGRK.D       | S133:      | 3 | 2,6237 | 0,186 | -0,448 |
| 21 | Q6WKZ4 RFIP1_HUMAN | R.TAS#TDLKQLNQNFTLPKKE.G | S280:      | 3 | 2,6196 | 0,414 | -1,087 |
| 21 | Q14151 SAFB2_HUMAN | E.KDIKPIIKDE.K           |            | 3 | 2,6178 | 0,158 | 0,152  |
| 21 | Q00613 HSF1_HUMAN  | R.KVTS#VSTLKSE.D         | S121:      | 2 | 2,6174 | 0,257 | -0,581 |
| 21 | Q9UPN3 MACF1_HUMAN | R.RGS#DASDFDLLE.T        | S5372:     | 2 | 2,6129 | 0,27  | -0,434 |
| 21 | A6NHG4 DDTL_HUMAN  | R.SHSAHFFE.F             |            | 2 | 2,612  | 0,204 | -0,507 |
| 21 | Q13428 TCOF_HUMAN  | R.NPQNSTVLAR.G           |            | 2 | 2,6097 | 0,439 | -0,444 |
| 21 | Q4KMP7 TB10B_HUMAN | R.QQPPLGPSSLLSLPGLK.S    |            | 2 | 2,6079 | 0,472 | -0,805 |
| 21 | Q14152 EIF3A_HUMAN | R.QRELEIEER.E            |            | 3 | 2,6077 | 0,097 | 0,228  |
| 21 | O43432 IF4G3_HUMAN | R.LVLSGEKKEQE.G          |            | 2 | 2,6051 | 0,224 | -1,065 |
| 21 | Q9NWH9 SLTM_HUMAN  | R.ISS#KS#PGHM*VILD.Q     | S551:S553: | 2 | 2,6028 | 0,407 | -0,235 |
| 21 | P26639 SYTC_HUMAN  | K.M*GGEEKPIGAGEEK.Q      |            | 3 | 2,6012 | 0,178 | 0,253  |
| 21 | P17480 UBF1_HUMAN  | K.RPVSAMFIFSEE.K         |            | 2 | 2,6008 | 0,124 | -0,691 |
| 21 | Q7KZF4 SND1_HUMAN  | K.IHVFYIDYGNRE.V         |            | 3 | 2,6005 | 0,099 | -0,24  |
| 21 | P31937 3HIDH_HUMAN | K.GSLLIDSTIDPAVSKE.L     |            | 2 | 2,5997 | 0,222 | -0,352 |
| 21 | Q96GS4 CQ059_HUMAN | R.LQDSRS#LDGLSE.A        | S34:       | 2 | 2,5997 | 0,27  | -0,784 |
| 21 | Q6ZUT9 RA61L_HUMAN | R.RLSITSLTGK.N           |            | 2 | 2,5983 | 0,211 | -0,567 |
| 21 | O75794 CD123_HUMAN | E.DAHKLIDFLK.L           |            | 3 | 2,5974 | 0,175 | 0      |
| 21 | Q9Y2W1 TR150_HUMAN | K.SPLQSVVVR.R            |            | 2 | 2,5957 | 0,297 | 0,248  |

|    |                    |                            |              |   |        |       |        |
|----|--------------------|----------------------------|--------------|---|--------|-------|--------|
| 21 | P78345 RPP38_HUMAN | E.LLDTS#FEDLSKPK.R         | S235:        | 3 | 2,5954 | 0,121 | 0      |
| 21 | Q15424 SAFB1_HUMAN | R.SVVS#FDKVKKEPR.K         | S604:        | 3 | 2,595  | 0,134 | 0,062  |
| 21 | Q9H7N4 SFR19_HUMAN | R.LDKSDPRGPS#PAPASS#PKRE.V | S719:S725:   | 3 | 2,5926 | 0,12  | -0,812 |
| 21 | P78318 IGBP1_HUMAN | K.YLLVPAFQGALTM*K.Q        |              | 2 | 2,5877 | 0,224 | -0,545 |
| 21 | P51114 FXR1_HUMAN  | R.TPGEEKINTLKEE.N          |              | 3 | 2,5852 | 0,16  | -0,307 |
| 21 | Q01081 U2AF1_HUMAN | R.GGFCNFMHLKPISR.E         |              | 3 | 2,5844 | 0,25  | -0,33  |
| 21 | Q09666 AHNK_HUMAN  | R.LKSEMGVEGDLGE.T          |              | 2 | 2,581  | 0,266 | 0,091  |
| 21 | Q8IYB5 SMAP1_HUMAN | K.KAAEPTVDLLGLD.G          |              | 2 | 2,5803 | 0,305 | -0,273 |
| 21 | P51991 ROA3_HUMAN  | E.DSVKPGAHLTVK.K           |              | 2 | 2,5787 | 0,232 | -0,097 |
| 21 | P40818 UBP8_HUMAN  | R.SYSS#PDITQAIQEE.E        | S719:        | 2 | 2,5783 | 0,272 | -0,222 |
| 21 | P40227 TCPZ_HUMAN  | K.SETDTS#LIRGLVLD.H        | S205:        | 2 | 2,5781 | 0,248 | -0,534 |
| 21 | P29692 EF1D_HUMAN  | R.ATAPQQTQHVSPM*RQVEPPAK.K | S133:        | 3 | 2,5746 | 0,132 | 0      |
| 21 | Q9BQK8 LPIN3_HUMAN | K.RSQHLGSPDIYLLDPLSLDSE.N  |              | 3 | 2,5739 | 0,225 | -0,621 |
| 21 | O14974 MYPT1_HUMAN | R.LAYVAPTIPR.R             |              | 2 | 2,5733 | 0,284 | -0,554 |
| 21 | Q96EB6 SIRT1_HUMAN | R.RDGPGLERS#PGEPGGAPE.R    | S47:         | 2 | 2,5715 | 0,222 | 0,38   |
| 21 | P51116 FXR2_HUMAN  | R.TGGPAYGSSDVTASET#E.S     | T455:        | 2 | 2,5712 | 0,193 | -0,193 |
| 21 | Q9UQ35 SRRM2_HUMAN | K.SKDSLQSCPGSLSLCAGVK.S    |              | 2 | 2,566  | 0,434 | -0,35  |
| 21 | P48960 CD97_HUMAN  | R.CNPGFSSFSE.I             |              | 2 | 2,5653 | 0,302 | -0,216 |
| 21 | Q13586 STIM1_HUMAN | E.IVSPLSMQSPSLQSSVR.Q      |              | 2 | 2,5649 | 0,347 | -0,605 |
| 21 | P53999 TCP4_HUMAN  | K.GISLNPEQWSQLKE.Q         |              | 2 | 2,5646 | 0,106 | -0,225 |
| 21 | Q53GS9 SNUT2_HUMAN | R.EAPASVVPFVR.V            |              | 2 | 2,5636 | 0,45  | -0,833 |
| 21 | O43399 TPD54_HUMAN | R.NSATFKS#FEDRVGTIK.S      | S166:        | 3 | 2,5636 | 0,231 | -0,195 |
| 21 | O95793 STAU1_HUMAN | R.KVTFEPGSGDE.N            |              | 2 | 2,563  | 0,244 | 0      |
| 21 | Q8N108 MIER1_HUMAN | E.GLHINGPTGGNK.K           |              | 2 | 2,5616 | 0,216 | -0,209 |
| 21 | Q96EB6 SIRT1_HUMAN | R.DGPGLERS#PGEPGGAPE.R     | S47:         | 2 | 2,5613 | 0,351 | 0,275  |
| 21 | P48634 BAT2_HUMAN  | E.ALTTVTVAPAPR.R           |              | 2 | 2,5543 | 0,312 | -0,204 |
| 21 | Q8WVM8 SCFD1_HUMAN | R.LKSIM*GLEGEDE.G          |              | 2 | 2,553  | 0,21  | -0,274 |
| 21 | Q9NWH9 SLTM_HUMAN  | K.DGQDAIAQS#PEKE.S         | S289:        | 2 | 2,5523 | 0,167 | 0,166  |
| 21 | Q9UKA4 AKA11_HUMAN | R.NVIPDT#PPS#TPLVPSR.A     | T1100:S1103: | 2 | 2,5522 | 0,315 | -0,396 |
| 21 | Q8NBJ4 GOLM1_HUMAN | R.DTINLLDQR.E              |              | 2 | 2,5506 | 0,22  | -0,336 |
| 21 | Q16875 F263_HUMAN  | R.RNS#VTPLAS#PEPTKKPR.I    | S461:S467:   | 3 | 2,5494 | 0,237 | 0,18   |
| 21 | Q15181 IPYR_HUMAN  | R.YKVPDGKPENE.F            |              | 3 | 2,5465 | 0,276 | 0,287  |
| 21 | O75152 ZC11A_HUMAN | R.YVDGLFLPPSK.T            |              | 2 | 2,5463 | 0,27  | -0,395 |

|    |                    |                         |        |   |        |       |        |
|----|--------------------|-------------------------|--------|---|--------|-------|--------|
| 21 | O60828 PQBP1_HUMAN | R.REELAPYPK.S           |        | 2 | 2,5454 | 0,188 | -0,442 |
| 21 | P43243 MATR3_HUMAN | R.CRDDS#FFGE.T          | S234:  | 2 | 2,5446 | 0,238 | -0,302 |
| 21 | Q09666 AHNK_HUMAN  | D.AALKVDVKS#PK.T        | S5077: | 3 | 2,5437 | 0,237 | 0,148  |
| 21 | P26368 U2AF2_HUMAN | R.GAKEEHGGLIRS#PR.H     | S79:   | 3 | 2,5433 | 0,207 | 0      |
| 21 | Q96ST2 IWS1_HUMAN  | R.GKHM*DFLSDFE.M        |        | 2 | 2,5415 | 0,279 | -0,818 |
| 21 | Q9NYF8 BCLF1_HUMAN | R.IDIS#PSTLR.K          | S658:  | 2 | 2,5413 | 0,172 | -0,113 |
| 21 | Q8NDI1 EHBP1_HUMAN | K.YLYADSSKTE.E          |        | 2 | 2,5408 | 0,439 | -0,207 |
| 21 | Q14847 LASP1_HUMAN | K.GKGFVADTPE.L          |        | 2 | 2,5389 | 0,36  | -0,404 |
| 21 | Q99733 NP1L4_HUMAN | K.YAALYQPLFDKR.R        |        | 3 | 2,5373 | 0,366 | -0,062 |
| 21 | Q8NI27 THOC2_HUMAN | K.LYINHT#PPPLSK.S       | T1328: | 3 | 2,5372 | 0,135 | 0,125  |
| 21 | P54259 ATN1_HUMAN  | R.GRAS#PGGVSTSSSDGKAE.K | S34:   | 3 | 2,5367 | 0,252 | 0      |
| 21 | Q86TI2 DPP9_HUMAN  | E.NSLLYSEIPK.K          |        | 2 | 2,5363 | 0,36  | -0,105 |
| 21 | P23588 IF4B_HUMAN  | K.GKTIS#LTDFLAE.D       | S16:   | 2 | 2,5339 | 0,253 | -0,71  |
| 21 | Q969H8 CS010_HUMAN | K.SYLYFTQFK.A           |        | 2 | 2,5315 | 0,378 | -0,51  |
| 21 | Q5JTV8 TOIP1_HUMAN | R.SQPAILLLTAAR.D        |        | 2 | 2,5292 | 0,396 | -0,486 |
| 21 | Q04637 IF4G1_HUMAN | R.FSALQQAVPTSTDNRR.V    |        | 3 | 2,5285 | 0,264 | 0      |
| 21 | O60231 DHX16_HUMAN | R.LLEDSEES#SEE.T        | S106:  | 2 | 2,5273 | 0,144 | 0,091  |
| 21 | Q13242 SFRS9_HUMAN | R.GSPHYFSPFRPY.-        |        | 2 | 2,5266 | 0,413 | -0,922 |
| 21 | Q7Z333 SETX_HUMAN  | E.DFSLKDDALAK.T         |        | 3 | 2,5248 | 0,153 | 0,374  |
| 21 | P18858 DNL1_HUMAN  | E.QAT TSAQVACLYR.K      |        | 2 | 2,5223 | 0,355 | -0,249 |
| 21 | O43379 WDR62_HUMAN | R.NDAGEKLPSVM*AGVPAR.R  |        | 3 | 2,5223 | 0,173 | -0,212 |
| 21 | P62820 RAB1A_HUMAN | K.KVVDYTTAKE.F          |        | 2 | 2,5188 | 0,192 | -0,211 |
| 21 | P45974 UBP5_HUMAN  | E.ALLSVLPTIR.V          |        | 2 | 2,5161 | 0,237 | -0,451 |
| 21 | Q86TI2 DPP9_HUMAN  | E.NSLLYSEIPK.V          |        | 2 | 2,5142 | 0,22  | -0,283 |
| 21 | P11216 PYGB_HUMAN  | R.GLAGLGDVAE.V          |        | 2 | 2,5136 | 0,264 | 0,068  |
| 21 | Q8NCN4 RN169_HUMAN | R.VLS#PLIIK.S           | S403:  | 2 | 2,5132 | 0,173 | -0,38  |
| 21 | P46013 KI67_HUMAN  | K.LDLLGNLPGSK.R         |        | 2 | 2,51   | 0,271 | -0,217 |
| 21 | Q9NR30 DDX21_HUMAN | K.LKNGFPHPDCNPSEAASEE.S |        | 3 | 2,5099 | 0,137 | -0,551 |
| 21 | Q06830 PRDX1_HUMAN | K.KQGGLGPM*NIPLVSDPK.R  |        | 2 | 2,5084 | 0,223 | -0,345 |
| 21 | Q05682 CALD1_HUMAN | E.DGLSDDKKPKF.C         |        | 2 | 2,5077 | 0,099 | -0,293 |
| 21 | P38571 LICH_HUMAN  | D.GYLCLNR.I             |        | 2 | 2,5058 | 0,275 | -0,121 |
| 21 | Q13428 TCOF_HUMAN  | K.TVANLLSGKS#PRK.S      | S156:  | 2 | 2,5053 | 0,209 | -0,084 |
| 21 | P49454 CENPF_HUMAN | K.LALSPLSLGKE.N         |        | 2 | 2,4986 | 0,138 | -0,324 |

|    |                    |                                |            |   |        |       |        |
|----|--------------------|--------------------------------|------------|---|--------|-------|--------|
| 21 | P14618 KP YM_HUMAN | R.LNFSHGTHE.Y                  |            | 2 | 2,4977 | 0,243 | 0      |
| 21 | P04264 K2C1_HUMAN  | K.SLNNQFASFDKVR.F              |            | 3 | 2,4962 | 0,196 | -0,67  |
| 21 | Q9NWH9 SLTM_HUMAN  | R.ISS#KS#PGHMVILD.Q            | S551:S553: | 2 | 2,4959 | 0,156 | -0,316 |
| 21 | O94885 SASH1_HUMAN | R.TCS#FGGFDLTNR.S              | S407:      | 2 | 2,4941 | 0,254 | -0,168 |
| 21 | Q16643 DREB_HUMAN  | R.RM*APTIPT#RSPSPDSSTASTPVAE.Q | T335:      | 3 | 2,4937 | 0,084 | -0,215 |
| 21 | P49736 MCM2_HUMAN  | R.RGNDPLTSS#PGR.S              | S27:       | 2 | 2,4936 | 0,094 | -1,734 |
| 21 | P48634 BAT2_HUMAN  | K.YSSLNLFDTYK.G                |            | 2 | 2,4922 | 0,363 | -0,722 |
| 21 | P42166 LAP2A_HUMAN | R.SST#PLPTISSAE.N              | T160:      | 2 | 2,4916 | 0,328 | -0,36  |
| 21 | P05783 K1C18_HUMAN | K.VIDDTNITR.L                  |            | 2 | 2,4855 | 0,263 | 0,117  |
| 21 | P09874 PARP1_HUMAN | E.VKAEPVEVVAPR.G               |            | 2 | 2,4853 | 0,311 | -0,283 |
| 21 | P49903 SPS1_HUMAN  | K.IKLVVTQE.D                   |            | 2 | 2,4832 | 0,186 | -0,066 |
| 21 | Q96HP4 OXND1_HUMAN | E.NNHVPKEHICFE.K               |            | 3 | 2,483  | 0,125 | -0,18  |
| 21 | P62937 PIIA_HUMAN  | K.KITIADCGQLE.-                |            | 2 | 2,4803 | 0,218 | -0,196 |
| 21 | Q9NTJ3 SMC4_HUMAN  | R.GKVLDAIIQE.K                 |            | 2 | 2,4778 | 0,204 | 0,112  |
| 21 | Q9HB21 PKHA1_HUMAN | R.SNS#LVSTFTM*E.K              | S332:      | 2 | 2,4766 | 0,254 | -0,186 |
| 21 | Q9UBR2 CATZ_HUMAN  | R.VGDYGSLSGR.E                 |            | 2 | 2,476  | 0,434 | -0,06  |
| 21 | P12270 TPR_HUMAN   | R.LTIHAPPQE.L                  |            | 2 | 2,4692 | 0,221 | -0,182 |
| 21 | P50502 F10A1_HUMAN | E.SM*GGKVPPATQK.A              |            | 3 | 2,4638 | 0,17  | 0,075  |
| 21 | Q4KMP7 TB10B_HUMAN | R.RQQPPLGPSSLSLPLGLK.S         |            | 3 | 2,4606 | 0,177 | -0,556 |
| 21 | P49736 MCM2_HUMAN  | E.SFTMASSPAQR.R                |            | 2 | 2,4595 | 0,431 | -0,309 |
| 21 | Q9NX63 CHCH3_HUMAN | K.CSALATQYMHCNVHAK.Q           |            | 3 | 2,4591 | 0,171 | -0,193 |
| 21 | Q86UP2 KTN1_HUMAN  | K.QMQSSFTSSEQE.L               |            | 2 | 2,4577 | 0,241 | 0      |
| 21 | P16401 H15_HUMAN   | E.TAPAET#ATPAPVEKS#PAKK.K      | T9:S18:    | 2 | 2,4574 | 0,378 | 0      |
| 21 | Q9UNZ2 NSF1C_HUMAN | K.S#PNELVDDLFK.G               | S114:      | 2 | 2,4544 | 0,266 | -0,36  |
| 21 | P23528 COF1_HUMAN  | K.KAVLFCLSE.D                  |            | 2 | 2,4539 | 0,297 | -0,343 |
| 21 | Q15418 KS6A1_HUMAN | K.NLVFSDGYVVKE.T               |            | 2 | 2,4523 | 0,115 | 0,445  |
| 21 | P06748 NPM_HUMAN   | K.GPSS#VEDIKAK.M               | S243:      | 3 | 2,45   | 0,182 | 0,529  |
| 21 | Q14493 SLBP_HUMAN  | R.KLLINDFGR.E                  |            | 2 | 2,4497 | 0,161 | -0,454 |
| 21 | Q6U841 S4A10_HUMAN | R.IPIVRS#FAD.I                 | S238:      | 2 | 2,4477 | 0,175 | -0,778 |
| 21 | P46937 YAP1_HUMAN  | R.QASTDAGTAGALTPQHVR.A         |            | 2 | 2,4463 | 0,4   | 0,48   |
| 21 | Q13177 PAK2_HUMAN  | R.HKIISIFS#GTE.K               | S58:       | 2 | 2,4457 | 0,158 | -0,279 |
| 21 | Q15751 HERC1_HUMAN | E.SRLVHTSPNYR.L                |            | 3 | 2,4425 | 0,155 | 0      |
| 21 | Q96PK6 RBM14_HUMAN | R.RSPT#KSSLDYR.R               | T629:      | 3 | 2,4395 | 0,215 | -0,197 |

|    |                     |                                   |            |   |        |       |        |
|----|---------------------|-----------------------------------|------------|---|--------|-------|--------|
| 21 | P04843 RPN1_HUMAN   | R.TVDLSSHLAK.V                    |            | 2 | 2,4383 | 0,268 | -0,228 |
| 21 | Q5TZA2 CROCC_HUMAN  | E.SGVQLSGSER.T                    |            | 2 | 2,4368 | 0,154 | -0,239 |
| 21 | Q00839 HNRPU_HUMAN  | E.YTFIQNVPLEDRVR.G                |            | 3 | 2,4364 | 0,218 | -0,209 |
| 21 | P52948 NUP98_HUMAN  | R.SLVGGLLQSK.F                    |            | 2 | 2,4341 | 0,291 | -0,122 |
| 21 | Q71U36 TBA1A_HUMAN  | R.AFVHWYVVGEGMEE.G                |            | 2 | 2,4319 | 0,37  | -0,393 |
| 21 | Q9NTM9 CUTC_HUMAN   | K.AGAANGFLM*E.V                   |            | 2 | 2,4294 | 0,232 | 0      |
| 21 | P50549 ETV1_HUMAN   | E.SLAFHGLPLK.I                    |            | 2 | 2,4293 | 0,208 | 0      |
| 21 | P62753 RS6_HUMAN    | R.RLS#S#LRASTSKSE.S               | S235:S236: | 3 | 2,4262 | 0,342 | 0,116  |
| 21 | Q8IZ21 PHAR4_HUMAN  | E.IRHQIGNTLIR.R                   |            | 2 | 2,4259 | 0,351 | -0,277 |
| 21 | P24928 RPB1_HUMAN   | K.ILLS#PERVHE.I                   | S217:      | 2 | 2,4246 | 0,249 | -0,192 |
| 21 | Q9UN36 NDRG2_HUMAN  | R.SRTAS#LTSAAVDGNR.S              | S332:      | 2 | 2,4245 | 0,321 | 0,583  |
| 21 | P12532 KCRU_HUMAN   | R.GTGGVDTAATGGVDFISNLDR.L         |            | 2 | 2,4243 | 0,451 | -0,181 |
| 21 | Q8WUF5 IASPP_HUMAN  | R.VLAEIPRPLK.R                    |            | 2 | 2,4237 | 0,207 | -0,107 |
| 21 | Q3KQU3 MA7D1_HUMAN  | K.SRGPT#PPAMGPR.D                 | T97:       | 2 | 2,4226 | 0,134 | -0,094 |
| 21 | Q8WUA4 TF3C2_HUMAN  | R.RAAQVALLYLQE.L                  |            | 2 | 2,4188 | 0,257 | -0,355 |
| 21 | O95926 SYF2_HUMAN   | R.LKLPANWE.A                      |            | 2 | 2,4181 | 0,159 | -0,314 |
| 21 | P19105 MLRM_HUMAN   | R.AT#SNVFAM*FD.Q                  | T18:       | 2 | 2,4162 | 0,426 | -0,305 |
| 21 | Q9UQ35 SRRM2_HUMAN  | K.THTT#ALAGRSPS#PASGR.R           | T289:S297: | 3 | 2,4156 | 0,119 | -0,2   |
| 21 | P68104 EF1A1_HUMAN  | K.IGGIGTVPVGRVE.T                 |            | 2 | 2,4141 | 0,375 | -0,389 |
| 21 | Q5T9W8 Q5T9W8_HUMAN | K.HSQFIGYPITLY.-                  |            | 2 | 2,413  | 0,276 | -0,509 |
| 21 | P11021 GRP78_HUMAN  | K.ITITNDQNR.L                     |            | 2 | 2,4106 | 0,261 | 0      |
| 21 | O00429 DNM1L_HUMAN  | K.SKPIPIM*PAS#PQKGHAVNLLDVPVVAR.K | S616:      | 3 | 2,4103 | 0,153 | -0,363 |
| 21 | P08754 GNAI3_HUMAN  | K.IIHEDGYSEDE.C                   |            | 2 | 2,4102 | 0,111 | -0,56  |
| 21 | Q56P03 EAPP_HUMAN   | E.VDVLLHGT#PDQK.R                 | T37:       | 3 | 2,4092 | 0,248 | 0,196  |
| 21 | Q9UH99 UN84B_HUMAN  | K.RLS#PAPQLGPSSDAHTSYSE.S         | S54:       | 3 | 2,409  | 0,112 | -0,547 |
| 21 | Q9H6Z4 RANB3_HUMAN  | E.KPAIAPPVVFVQK.D                 |            | 2 | 2,4056 | 0,249 | -0,508 |
| 21 | Q5JVS0 HABP4_HUMAN  | R.KPANDITSQLE.I                   |            | 2 | 2,4018 | 0,107 | -0,602 |
| 21 | Q99459 CDC5L_HUMAN  | R.SKLVLPAPQISDAELQE.V             |            | 2 | 2,3992 | 0,33  | -0,332 |
| 21 | P31949 S10AB_HUMAN  | K.KLDTNSDGQLD.F                   |            | 2 | 2,3978 | 0,101 | -0,405 |
| 21 | Q9UMY4 SNX12_HUMAN  | R.TNLPIFK.L                       |            | 2 | 2,3974 | 0,101 | 0,146  |
| 21 | Q96B36 AKTS1_HUMAN  | E.AEDTQVFGDLPRPR.L                |            | 3 | 2,3969 | 0,221 | 0,343  |
| 21 | P06748 NPM_HUMAN    | K.KQEKT#PKT#PKGSSVE.D             | T234:T237: | 2 | 2,3969 | 0,297 | -0,257 |
| 21 | Q99459 CDC5L_HUMAN  | K.LVLPAPQISDAELQE.V               |            | 2 | 2,3959 | 0,219 | -0,526 |

|    |                    |                            |       |   |        |       |        |
|----|--------------------|----------------------------|-------|---|--------|-------|--------|
| 21 | O43379 WDR62_HUMAN | R.RGQS#SPPPAPPICLR.R       | S32:  | 2 | 2,3933 | 0,183 | -0,499 |
| 21 | Q676U5 A16L1_HUMAN | R.S#VSSFVPVQDNVDTHPGSGKE.V | S287: | 3 | 2,3918 | 0,368 | -0,404 |
| 21 | Q9Y6A5 TACC3_HUMAN | R.ILS#PSMASKLE.A           | S71:  | 2 | 2,3905 | 0,293 | -0,194 |
| 21 | Q8NGI8 O5AN1_HUMAN | E.IKDALKR.L                |       | 2 | 2,3874 | 0,092 | 0      |
| 21 | Q2M3G4 SHRM1_HUMAN | E.LRMS#LPAR.L              | S166: | 2 | 2,3865 | 0,204 | 0,119  |
| 21 | P20042 IF2B_HUMAN  | K.NVKFPDEDEILE.K           |       | 2 | 2,3848 | 0,248 | -0,253 |
| 21 | Q06830 PRDX1_HUMAN | K.KQGGLGPM*NIPLVSDPK.R     |       | 3 | 2,3841 | 0,109 | 0      |
| 21 | P78362 SRPK2_HUMAN | R.AADLLVNPLDPR.A           |       | 2 | 2,3817 | 0,109 | 0,189  |
| 21 | Q9GZT3 SLIRP_HUMAN | R.SINQPVAFVR.R             |       | 2 | 2,3789 | 0,282 | -0,108 |
| 21 | Q14103 HNRPD_HUMAN | R.GFCFITFKE.E              |       | 2 | 2,3744 | 0,202 | -0,425 |
| 21 | Q15424 SAFB1_HUMAN | K.ADLLAVVK.R               |       | 2 | 2,3685 | 0,296 | 0,067  |
| 21 | Q99848 EBP2_HUMAN  | K.GFSDKLDFLE.G             |       | 2 | 2,3681 | 0,262 | -0,417 |
| 21 | O43303 CE110_HUMAN | R.TSSACHILINNPINACE.L      |       | 2 | 2,3674 | 0,217 | -0,191 |
| 21 | Q9Y2I7 FYV1_HUMAN  | K.ASGMLSFFR.G              |       | 2 | 2,3639 | 0,397 | -0,12  |
| 21 | P35579 MYH9_HUMAN  | K.DVLLQVDDE.R              |       | 2 | 2,3588 | 0,243 | 0      |
| 21 | Q6ZWE6 PKHM3_HUMAN | E.ASTFNFFNICQR.R           |       | 2 | 2,3587 | 0,244 | -0,567 |
| 21 | Q7Z2K8 GRIN1_HUMAN | R.GSLACPSPTCFSPQESPSKE.T   |       | 2 | 2,3572 | 0,473 | -0,338 |
| 21 | Q9Y5J1 UTP18_HUMAN | E.NDEDALLR.R               |       | 2 | 2,3568 | 0,102 | 0      |
| 21 | Q9UBB9 TFP11_HUMAN | R.DYSAPVNFISAGLK.K         |       | 2 | 2,3554 | 0,098 | -0,741 |
| 21 | Q92597 NDRG1_HUMAN | R.SRTAS#GSSVTSLDGTR.S      | S330: | 2 | 2,3549 | 0,347 | -0,294 |
| 21 | Q9UPT5 EXOC7_HUMAN | E.KNLPVFQPGVK.L            |       | 3 | 2,3546 | 0,198 | 0,298  |
| 21 | P45974 UBP5_HUMAN  | E.ALLSVLPTIRVPK.A          |       | 2 | 2,3523 | 0,088 | -0,78  |
| 21 | Q14152 EIF3A_HUMAN | R.RVPPPALS.R               |       | 2 | 2,3517 | 0,261 | 0,123  |
| 21 | P38571 LICH_HUMAN  | E.DGYILCLNR.I              |       | 2 | 2,3512 | 0,341 | -0,543 |
| 21 | Q5VZK9 LR16A_HUMAN | R.TASRPDDIPDSPSSPK.V       |       | 3 | 2,3489 | 0,105 | -0,219 |
| 21 | P40692 MLH1_HUMAN  | E.DLFYNIATR.R              |       | 2 | 2,3485 | 0,289 | -0,219 |
| 21 | Q9NWB6 ARGL1_HUMAN | E.RAS#SPPDRIDIFGR.T        | S76:  | 2 | 2,3473 | 0,172 | -0,366 |
| 21 | P13639 EF2_HUMAN   | K.SDPVVSURE.T              |       | 2 | 2,3461 | 0,35  | 0,116  |
| 21 | Q8TDN6 BXDC2_HUMAN | K.RNEIDAEPK.R              |       | 2 | 2,3455 | 0,143 | -0,394 |
| 21 | O60841 IF2P_HUMAN  | E.GNTVHIEVK.E              |       | 2 | 2,3442 | 0,237 | 0,489  |
| 21 | P81274 GPSM2_HUMAN | E.IDSSLNGVRPK.L            |       | 2 | 2,3431 | 0,163 | -0,206 |
| 21 | Q3V6T2 GRDN_HUMAN  | K.SLSVSSDFLGK.D            |       | 2 | 2,3429 | 0,326 | -0,321 |
| 21 | Q8WUA4 TF3C2_HUMAN | K.IRQPAACPGE.V             |       | 2 | 2,3425 | 0,195 | -0,095 |

|    |                    |                        |            |   |        |       |        |
|----|--------------------|------------------------|------------|---|--------|-------|--------|
| 21 | Q9HCG8 NCM_HUMAN   | R.DYFDYSRSDYE.H        |            | 2 | 2,3416 | 0,139 | -0,334 |
| 21 | Q15642 CIP4_HUMAN  | E.DFSHLPPEQQR.K        |            | 3 | 2,3414 | 0,086 | 0,135  |
| 21 | O15446 RPA34_HUMAN | R.QKGTEGMEPEEGVTV.E.S  |            | 2 | 2,338  | 0,226 | -0,426 |
| 21 | Q9P2N6 K1310_HUMAN | K.SSQIGSSQLLK.R        |            | 2 | 2,3357 | 0,115 | -0,531 |
| 21 | Q9Y5Y2 NUBP2_HUMAN | R.GWAPVFLDRE.Q         |            | 2 | 2,3355 | 0,245 | -0,615 |
| 21 | P49736 MCM2_HUMAN  | E.SFTMASS#PAQR.R       | S13:       | 2 | 2,334  | 0,337 | 0,097  |
| 21 | P11233 RALA_HUMAN  | R.ANVDKVFFDLM*RE.I     |            | 2 | 2,3336 | 0,282 | -0,153 |
| 21 | P20810 ICAL_HUMAN  | E.SVAGITAISGKPGDK.K    |            | 2 | 2,3335 | 0,271 | -0,348 |
| 21 | P45974 UBP5_HUMAN  | E.EALLSVLPTIR.V        |            | 2 | 2,3325 | 0,268 | -0,403 |
| 21 | Q5TC12 ATPF1_HUMAN | K.DKTLSSIFNIE.M        |            | 2 | 2,3321 | 0,177 | -0,385 |
| 21 | Q8IYB3 SRRM1_HUMAN | E.KKEKTPELPEPS#VK.V    | S227:      | 2 | 2,3306 | 0,105 | 0      |
| 21 | P82673 RT35_HUMAN  | K.SVVSLKNEEENE.N       |            | 2 | 2,3271 | 0,242 | -0,354 |
| 21 | Q53GS9 SNUT2_HUMAN | E.APASVVPFVR.V         |            | 2 | 2,3268 | 0,271 | -0,117 |
| 21 | Q02952 AKA12_HUMAN | K.RKVDTSVS#WE.A        | S678:      | 2 | 2,3261 | 0,283 | -0,19  |
| 21 | O60784 TOM1_HUMAN  | R.FHVLVASQDFVE.S       |            | 2 | 2,3258 | 0,189 | -0,526 |
| 21 | Q02952 AKA12_HUMAN | E.ALICVGSSE.K          |            | 2 | 2,3255 | 0,411 | -0,457 |
| 21 | Q15424 SAFB1_HUMAN | K.SKGVPVISVK.T         |            | 2 | 2,3251 | 0,169 | 0,301  |
| 21 | P27824 CALX_HUMAN  | K.AEEDILNRS#PR.N       | S583:      | 3 | 2,3228 | 0,122 | -0,303 |
| 21 | Q66K74 MAP1S_HUMAN | E.AGLSLPLR.G           |            | 2 | 2,3208 | 0,089 | 0,295  |
| 21 | Q15121 PEA15_HUMAN | K.YKDIIRQPS#EEE.I      | S116:      | 2 | 2,3207 | 0,236 | 0,154  |
| 21 | P34931 HS71L_HUMAN | K.ILDKCNE.L            |            | 2 | 2,3196 | 0,114 | 0,205  |
| 21 | Q8WWM7 ATX2L_HUMAN | K.LQPSSS#PENSLDPFPPR.I | S559:      | 2 | 2,3181 | 0,083 | -0,814 |
| 21 | P35568 IRS1_HUMAN  | E.AASAADLNRFR.K        |            | 2 | 2,3158 | 0,335 | 0,187  |
| 21 | P22626 ROA2_HUMAN  | R.GGGGNFGPGPSNFR.G     |            | 2 | 2,3142 | 0,389 | -0,443 |
| 21 | Q13242 SFRS9_HUMAN | R.GS#PHYFS#PFRPY.-     | S211:S216: | 2 | 2,3134 | 0,152 | -0,529 |
| 21 | P07355 ANXA2_HUMAN | E.VTIVNILTNR.S         |            | 2 | 2,3127 | 0,182 | -0,213 |
| 21 | Q92615 LARP5_HUMAN | E.SPSIFNFTADR.L        |            | 2 | 2,3115 | 0,204 | -0,583 |
| 21 | P12036 NFH_HUMAN   | K.TLDVKSPE.A           |            | 2 | 2,31   | 0,219 | 0,069  |
| 21 | P17480 UBF1_HUMAN  | K.RPVSAM*FIFSEE.K      |            | 2 | 2,308  | 0,156 | -0,512 |
| 21 | O00231 PSD11_HUMAN | K.FHGILDQGE.G          |            | 2 | 2,3079 | 0,108 | -0,6   |
| 21 | Q8NEM0 MCPH1_HUMAN | R.TVDITNFTAK.T         |            | 2 | 2,3064 | 0,181 | -0,11  |
| 21 | P13639 EF2_HUMAN   | K.KSDPVVSYRE.T         |            | 2 | 2,3063 | 0,244 | -0,517 |
| 21 | P07237 PDIA1_HUMAN | K.VLVGKNFEDVAFDE.K     |            | 2 | 2,3027 | 0,269 | -1,697 |



|    |                    |                           |              |   |        |       |        |
|----|--------------------|---------------------------|--------------|---|--------|-------|--------|
| 21 | P98175 RBM10_HUMAN | E.RQHTSM*DLPK.L           |              | 3 | 2,3004 | 0,195 | 0,298  |
| 21 | P13639 EF2_HUMAN   | E.SNVLCLSK.S              |              | 2 | 2,2935 | 0,25  | 0      |
| 21 | Q02952 AKA12_HUMAN | E.ALICVGS#SK.K            | S687:        | 2 | 2,2931 | 0,214 | -0,481 |
| 21 | P46013 KI67_HUMAN  | E.TQLLSR.K                |              | 2 | 2,2877 | 0,129 | -0,896 |
| 21 | Q05519 SFR11_HUMAN | E.KKPIETGS#PK.T           | S449:        | 2 | 2,2866 | 0,267 | -0,524 |
| 21 | Q13435 SF3B2_HUMAN | R.SRGSDS#PAADVEIE.Y       | S339:        | 2 | 2,281  | 0,179 | -0,484 |
| 21 | Q86X27 RGPS2_HUMAN | K.CHS#LGYNFIHK.M          | S343:        | 3 | 2,2792 | 0,106 | -0,188 |
| 21 | P12270 TPR_HUMAN   | R.NQHLVSQQKDPDTEE.Y       |              | 3 | 2,2788 | 0,175 | 0      |
| 21 | Q13427 PPIG_HUMAN  | E.IKENQRS#PVRVKE.R        | S397:        | 3 | 2,2774 | 0,081 | 0      |
| 21 | Q14103 HNRPD_HUMAN | R.RGFCFITFKE.E            |              | 2 | 2,2671 | 0,085 | -0,28  |
| 21 | O14974 MYPT1_HUMAN | R.RLAS#TSDIEE.K           | S507:        | 2 | 2,2646 | 0,133 | -0,102 |
| 21 | Q96AX9 MIB2_HUMAN  | K.CLLDTDVLR.E             |              | 2 | 2,2618 | 0,208 | -0,297 |
| 21 | Q96G75 RMD5B_HUMAN | D.IHS#S#VS#RVGKAIDRNFSE.I | S84:S85:S87: | 3 | 2,2615 | 0,167 | 1,164  |
| 21 | Q04637 IF4G1_HUMAN | R.SFS#KEVEE.R             | S1188:       | 2 | 2,2605 | 0,085 | 0      |
| 21 | Q9C0C2 TB182_HUMAN | K.VNLFPGSPALK.A           |              | 2 | 2,2604 | 0,32  | 0      |
| 21 | P22626 ROA2_HUMAN  | K.LFVGGIKED.T             |              | 2 | 2,2599 | 0,256 | 0,187  |
| 21 | Q9UKA4 AKA11_HUMAN | R.DRNVIPDT#PPS#TPLVPSR.A  | T1100:S1103: | 3 | 2,2564 | 0,301 | -0,345 |
| 21 | Q8IVF2 AHNK2_HUMAN | K.LDLKS#PKAE.V            | S1112:       | 2 | 2,2559 | 0,351 | 0,226  |
| 21 | Q9NZ71 RTEL1_HUMAN | K.SLDLHVPSLK.Q            |              | 2 | 2,2533 | 0,203 | -0,11  |
| 21 | P22626 ROA2_HUMAN  | R.GFGFVTFSSM*AE.V         |              | 2 | 2,2531 | 0,272 | -0,471 |
| 21 | P61599 NAT5_HUMAN  | K.SIIPHPVVRPEDIE.-        |              | 2 | 2,2522 | 0,314 | -0,784 |
| 21 | Q9NW13 RBM28_HUMAN | R.KLPSDVNE.G              |              | 2 | 2,2507 | 0,084 | 0,068  |
| 21 | P23588 IF4B_HUMAN  | K.VAPAQPSEEGPGRKDE.N      |              | 2 | 2,2504 | 0,248 | -1,171 |
| 21 | Q96BK5 PINX1_HUMAN | R.SKTDLDCIFGKR.Q          |              | 2 | 2,2483 | 0,257 | -0,424 |
| 21 | P46781 RS9_HUMAN   | K.HIDFSLR.S               |              | 2 | 2,2465 | 0,133 | 0      |
| 21 | Q8WYA6 CTBL1_HUMAN | E.LLSYQPNR.G              |              | 2 | 2,2409 | 0,209 | -0,246 |
| 21 | P06748 NPM_HUMAN   | D.VKLLS#ISGK.R            | S137:        | 2 | 2,2406 | 0,251 | 0,238  |
| 21 | P67936 TPM4_HUMAN  | K.IQALQQQADE.A            |              | 2 | 2,2381 | 0,232 | -0,107 |
| 21 | Q8IY81 RRMJ3_HUMAN | K.QQLPQT#PPSCLKTE.I       | T573:        | 2 | 2,2381 | 0,299 | -0,357 |
| 21 | Q9Y2D5 AKAP2_HUMAN | R.DALGDSLQVPVS#PSSTSSR.C  | S152:        | 2 | 2,235  | 0,407 | -0,351 |
| 21 | Q9NYF8 BCLF1_HUMAN | K.TIAPQNAPRDE.S           |              | 2 | 2,2338 | 0,322 | -0,705 |
| 21 | Q9HAW4 CLSPN_HUMAN | R.NFVFHTLS#PVKAE.A        | S1289:       | 3 | 2,2268 | 0,268 | -0,466 |
| 21 | P06748 NPM_HUMAN   | E.DVKLLSISGK.R            |              | 2 | 2,2256 | 0,155 | -0,345 |

|    |                     |                                    |            |   |        |       |        |
|----|---------------------|------------------------------------|------------|---|--------|-------|--------|
| 21 | P35568 IRS1_HUMAN   | K.TPSQSSVASIEEYTE.M                |            | 2 | 2,2245 | 0,202 | 0      |
| 21 | Q9NQW7 XPP1_HUMAN   | R.CCMPYTPICIAK.A                   |            | 2 | 2,2184 | 0,321 | -0,322 |
| 21 | P06748 NPM_HUMAN    | K.GPSSVEDIK.A                      |            | 2 | 2,2173 | 0,389 | -0,065 |
| 21 | Q9BQ52 RNZ2_HUMAN   | K.IQTQLNLIHPD.I                    |            | 2 | 2,2172 | 0,168 | -0,378 |
| 21 | Q86VI3 IQGA3_HUMAN  | R.HRS#LTAHSLPLAE.K                 | S1424:     | 2 | 2,217  | 0,184 | -0,375 |
| 21 | Q68CZ2 TENS3_HUMAN  | E.VLHTQGPVDGSLYAK.V                |            | 2 | 2,2134 | 0,179 | -0,462 |
| 21 | Q92733 PRCC_HUMAN   | K.TILQGSSE.G                       |            | 2 | 2,2122 | 0,221 | 0,731  |
| 21 | P52272 HNRPM_HUMAN  | K.GCGVVKFESPE.V                    |            | 2 | 2,2118 | 0,295 | 0      |
| 21 | Q70E73 RAPH1_HUMAN  | K.RPSVDSLVSF.F                     |            | 2 | 2,2117 | 0,231 | -0,112 |
| 21 | O95208 EPN2_HUMAN   | K.QLVALLKDEE.R                     |            | 2 | 2,2114 | 0,316 | -0,211 |
| 21 | Q9Y2W2 WBP11_HUMAN  | K.SGPSVPVSVQTKDDVYE.A              |            | 2 | 2,2107 | 0,173 | -0,675 |
| 21 | Q9Y3B8 ORN_HUMAN    | K.IIENGENEKTVS.-                   |            | 2 | 2,2104 | 0,22  | -0,092 |
| 21 | Q06830 PRDX1_HUMAN  | K.QGGLGPMNIPLVSDPK.R               |            | 2 | 2,2097 | 0,266 | -0,526 |
| 21 | P45974 UBP5_HUMAN   | E.HLSHFGIDMLK.M                    |            | 2 | 2,1986 | 0,222 | 0,094  |
| 21 | Q9NV70 EXOC1_HUMAN  | K.SKVGILPFVAE.F                    |            | 2 | 2,1975 | 0,176 | -0,421 |
| 21 | Q96S66 CLCC1_HUMAN  | K.ETGGILGEGT#PKESSTE.S             | T482:      | 2 | 2,1945 | 0,121 | -0,62  |
| 21 | Q13242 SFRS9_HUMAN  | R.GS#PHYFSPFRPY.-                  | S211:      | 2 | 2,1937 | 0,361 | -0,397 |
| 21 | Q32MZ4 LRRF1_HUMAN  | E.KHAHSILQFQFAE.V                  |            | 2 | 2,1915 | 0,264 | -0,392 |
| 21 | P16383 GCF_HUMAN    | R.ELPVPGSAAEEPPSGGGR.A             |            | 2 | 2,1914 | 0,174 | -0,346 |
| 21 | Q9Y5B6 GCFC_HUMAN   | R.IVFSVKE.K                        |            | 2 | 2,1872 | 0,082 | 0,371  |
| 21 | O15085 ARHGB_HUMAN  | K.SSSQSTFHIPLS#PVE.V               | S556:      | 2 | 2,1858 | 0,242 | -0,504 |
| 21 | P21580 TNAP3_HUMAN  | R.FQNTIPCLGRE.C                    |            | 2 | 2,1857 | 0,186 | -0,091 |
| 21 | P14625 ENPL_HUMAN   | K.LIINSLYK.N                       |            | 2 | 2,1842 | 0,23  | -0,063 |
| 21 | P35611 ADDA_HUMAN   | R.TSTSAVPNLFVPLNTNPK.E             |            | 2 | 2,183  | 0,345 | -0,835 |
| 21 | P42858 HD_HUMAN     | R.NSSMALQQAHLK.N                   |            | 3 | 2,1792 | 0,303 | 0,19   |
| 21 | Q96B23 CR025_HUMAN  | E.TAVEGDPSGVSGATVGRK.S             |            | 3 | 2,1791 | 0,12  | 0      |
| 21 | Q9Y230 RUVB2_HUMAN  | R.GLGLDDALEPR.Q                    |            | 2 | 2,1783 | 0,392 | 0      |
| 21 | P09622 DLDH_HUMAN   | E.TLGGTCLNVGCIPSK.A                |            | 2 | 2,1777 | 0,255 | 0,077  |
| 21 | Q9Y2K7 JHD1A_HUMAN  | R.SCDEPLT#PPPHS#PTSM*LQLIHDPVSPR.G | T713:S718: | 3 | 2,1777 | 0,096 | 0,23   |
| 21 | P49757 NUMB_HUMAN   | R.KKDYYVPE.A                       |            | 2 | 2,177  | 0,176 | -0,437 |
| 21 | P07602 SAP_HUMAN    | K.LVGYLDR.N                        |            | 2 | 2,1769 | 0,316 | -0,803 |
| 21 | Q9UDI2 Q9UDI2_HUMAN | E.AILAALEPPEPK.-                   |            | 2 | 2,1764 | 0,268 | -0,684 |
| 21 | Q9Y2W2 WBP11_HUMAN  | E.LTPLQAMM*LR.M                    |            | 2 | 2,1758 | 0,438 | -0,308 |

|    |                      |                                 |              |   |        |       |        |
|----|----------------------|---------------------------------|--------------|---|--------|-------|--------|
| 21 | O43683 BUB1_HUMAN    | R.LPS#KPKKEEVPHAAE.F            | S563:        | 2 | 2,1753 | 0,309 | 0,146  |
| 21 | Q14011 CIRBP_HUMAN   | R.DSYDSYATHNE.-                 |              | 2 | 2,1686 | 0,337 | -0,094 |
| 21 | Q9UQ35 SRRM2_HUMAN   | R.SSTGPEPPAPTLLAE.R             |              | 2 | 2,1676 | 0,131 | -0,624 |
| 21 | Q96ST2 IWS1_HUMAN    | R.GKHM*DFLS#DFE.M               | S527:        | 2 | 2,1666 | 0,253 | -0,429 |
| 21 | Q6PID6 TTC33_HUMAN   | K.SIPDYDFE.S                    |              | 2 | 2,1655 | 0,143 | 0      |
| 21 | Q9H074 PAIP1_HUMAN   | K.APGFLQPPPLR.Q                 |              | 2 | 2,1639 | 0,101 | -0,409 |
| 21 | Q6WCQ1 MRIP_HUMAN    | R.STEPSVTPDLLNFK.K              |              | 2 | 2,1579 | 0,285 | -0,552 |
| 21 | Q9NYZ3 GTSE1_HUMAN   | K.STATEVAREE.A                  |              | 2 | 2,1528 | 0,365 | -0,223 |
| 21 | Q9UN36 NDRG2_HUMAN   | R.TASLTAASVDGNR.S               |              | 2 | 2,1515 | 0,272 | 0      |
| 21 | P23193 TCEA1_HUMAN   | R.SADEPM*TTFVVCNE.C             |              | 2 | 2,1483 | 0,211 | -0,151 |
| 21 | Q16543 CDC37_HUMAN   | E.KSMPWNVDTLSK.D                |              | 2 | 2,1478 | 0,122 | 1,822  |
| 21 | Q14257 RCN2_HUMAN    | K.KIDLSDGFLTE.S                 |              | 2 | 2,1471 | 0,172 | -0,451 |
| 21 | P56537 IF6_HUMAN     | R.NSLPDTVQIR.R                  |              | 2 | 2,1467 | 0,094 | 0      |
| 21 | Q02750 MP2K1_HUMAN   | R.DVKPSNILVNSR.G                |              | 2 | 2,1461 | 0,09  | -0,455 |
| 21 | Q5VZK9 LR16A_HUMAN   | K.VALLPPVLK.K                   |              | 2 | 2,145  | 0,161 | -0,449 |
| 21 | O76021 RL1D1_HUMAN   | K.AT#NESEDEIPQLVPIGK.K          | T358:        | 2 | 2,1447 | 0,252 | -0,381 |
| 21 | Q01469 FABP5_HUMAN   | R.LVDSKGFDE.Y                   |              | 2 | 2,1446 | 0,162 | -0,181 |
| 21 | Q9UQ35 SRRM2_HUMAN   | E.HKELS#NS#PLRE.N               | S1318:S1320: | 2 | 2,1432 | 0,138 | 0,166  |
| 21 | P29692 EF1D_HUMAN    | R.ATAPQTQHVSPMR.Q               |              | 3 | 2,1426 | 0,149 | -1,027 |
| 21 | Q9BR76 COR1B_HUMAN   | R.DADPILISLRE.A                 |              | 2 | 2,1417 | 0,285 | -0,295 |
| 21 | Q14669 TRIPC_HUMAN   | E.RYLVVR.G                      |              | 2 | 2,1382 | 0,132 | 0,227  |
| 21 | Q13885 TBB2A_HUMAN   | K.AFLHWYTGEGM*DE.M              |              | 2 | 2,1379 | 0,232 | -0,078 |
| 21 | Q96SU4 OSBL9_HUMAN   | R.LIDSSGSASVLTHSSS#GNSLKRPDTE.S | S326:        | 3 | 2,1356 | 0,088 | 0,324  |
| 21 | Q96B36 AKTS1_HUMAN   | E.DTQVFGDLPRPR.L                |              | 3 | 2,1311 | 0,142 | 0,131  |
| 21 | Q12802 AKP13_HUMAN   | E.VPANCSVLR.S                   |              | 2 | 2,1302 | 0,375 | 0,12   |
| 21 | ##Q86Y30 BAGE2_HUMAN | R.KVANSLPE.L                    |              | 2 | 2,1267 | 0,112 | 0,142  |
| 21 | P07814 SYEP_HUMAN    | K.SLCIPFKPLCE.L                 |              | 2 | 2,1254 | 0,247 | -0,447 |
| 21 | A6NHG4 DDTL_HUMAN    | E.DNRSHSAHFFE.F                 |              | 2 | 2,1236 | 0,205 | -0,453 |
| 21 | O43290 SNUT1_HUMAN   | R.ADDLLPLGDQTQDGDGFSR.L         |              | 2 | 2,1146 | 0,244 | -0,302 |
| 21 | Q9BYT8 NEUL_HUMAN    | R.LSRFDIE.M                     |              | 2 | 2,1128 | 0,184 | 0      |
| 21 | Q68EM7 RHG17_HUMAN   | K.LPLTALAQNMQE.A                |              | 2 | 2,1126 | 0,272 | -0,275 |
| 21 | P19525 E2AK2_HUMAN   | D.FGLVTSLK.N                    |              | 2 | 2,1124 | 0,156 | 0,353  |
| 21 | Q9UJM3 ERRFI_HUMAN   | R.KHLSYVVS#P.-                  | S461:        | 2 | 2,1121 | 0,234 | -0,44  |

|    |                    |                            |            |   |        |       |        |
|----|--------------------|----------------------------|------------|---|--------|-------|--------|
| 21 | Q13242 SFRS9_HUMAN | R.GSPHYFSPFRPY.-           |            | 3 | 2,1086 | 0,301 | -0,126 |
| 21 | O95817 BAG3_HUMAN  | R.S#STPLHS#PSPIR.V         | S283:S289: | 2 | 2,1079 | 0,332 | 0      |
| 21 | P52292 IMA2_HUMAN  | R.NVSSFPDDATS#PLQE.N       | S62:       | 2 | 2,1076 | 0,178 | -0,289 |
| 21 | Q86UU1 PHLB1_HUMAN | R.GLLTDSPAATVLAE.A         |            | 2 | 2,1017 | 0,26  | -0,09  |
| 21 | Q9NQ92 CQ079_HUMAN | R.GTQSIPNDSPARGEGTHS#EEE.G | S75:       | 3 | 2,1009 | 0,247 | -0,321 |
| 21 | P15170 ERF3A_HUMAN | K.HLIVLINK.M               |            | 2 | 2,0999 | 0,198 | -0,128 |
| 21 | P49643 PRI2_HUMAN  | K.DASSALASLNSSLE.M         |            | 2 | 2,0981 | 0,244 | -0,179 |
| 21 | A1L390 PKHG3_HUMAN | R.FFFNPSAVSQR.T            |            | 2 | 2,0953 | 0,262 | -0,375 |
| 21 | O75531 BAF_HUMAN   | R.DCFGCLRE.W               |            | 2 | 2,0892 | 0,224 | 0      |
| 21 | Q96S94 CCNL2_HUMAN | R.GLLPGGTQVLDGTSGFS#PAPK.L | S330:      | 2 | 2,0879 | 0,301 | -0,704 |
| 21 | Q12888 TP53B_HUMAN | R.KGVSQTGTPVCEE.D          |            | 2 | 2,0878 | 0,255 | 0,351  |
| 21 | Q9UQ84 EXO1_HUMAN  | K.FATFLQR.K                |            | 2 | 2,0872 | 0,128 | 0,069  |
| 21 | P37802 TAGL2_HUMAN | K.NVIGLQM*GTNR.G           |            | 2 | 2,087  | 0,25  | -0,1   |
| 21 | Q96PU8 QKI_HUMAN   | R.SAELPDAVGPIVQLQE.K       |            | 2 | 2,0844 | 0,138 | -0,659 |
| 21 | Q13242 SFRS9_HUMAN | R.IYVGNLPTDVR.E            |            | 2 | 2,0839 | 0,268 | -0,196 |
| 21 | P09429 HMGB1_HUMAN | K.MSSYAFFVQTCREE.H         |            | 2 | 2,0822 | 0,103 | -0,487 |
| 21 | P31946 1433B_HUMAN | D.STLIM*QLLR.D             |            | 2 | 2,0813 | 0,276 | -0,224 |
| 21 | P68104 EF1A1_HUMAN | R.GNVAGDSKNDPPM*E.A        |            | 2 | 2,081  | 0,256 | 1,518  |
| 21 | P68871 HBB_HUMAN   | E.LHCDKLHVDPE.N            |            | 2 | 2,0807 | 0,268 | -0,627 |
| 21 | Q15424 SAFB1_HUMAN | E.LAEAPTEAPS#PEAR.D        | S344:      | 2 | 2,0783 | 0,166 | 0,482  |
| 21 | Q9Y2W1 TR150_HUMAN | R.ERS#PALKS#PLQSVVVR.R     | S248:S253: | 2 | 2,0783 | 0,184 | -0,38  |
| 21 | Q02218 ODO1_HUMAN  | R.LNVLANVIR.K              |            | 2 | 2,0769 | 0,147 | -0,784 |
| 21 | P20645 MPRD_HUMAN  | R.HTLADNFNPVSEE.R          |            | 2 | 2,0758 | 0,167 | -0,331 |
| 21 | Q9Y5W9 SNX11_HUMAN | K.SCCFLPR.S                |            | 2 | 2,0746 | 0,241 | -0,065 |
| 21 | P48643 TCPE_HUMAN  | K.HKLDVTSVE.D              |            | 2 | 2,0737 | 0,169 | 0      |
| 21 | P30041 PRDX6_HUMAN | K.LPFPIIDDR.N              |            | 2 | 2,0676 | 0,233 | -0,112 |
| 21 | P06748 NPM_HUMAN   | K.LLSISGKR.S               |            | 2 | 2,0622 | 0,095 | -1,047 |
| 21 | O75486 SUPT3_HUMAN | K.IAQDFLNSIDQTGE.L         |            | 2 | 2,0614 | 0,316 | -0,708 |
| 21 | Q6ZUT9 RA61L_HUMAN | R.LSITSLTGK.N              |            | 2 | 2,0614 | 0,174 | -0,066 |
| 21 | Q6NWX9 PR40B_HUMAN | R.TLLQQLDHQA.-             |            | 2 | 2,0611 | 0,126 | -0,101 |
| 21 | Q9NVI7 ATD3A_HUMAN | K.DKWSNFDPTGLE.R           |            | 2 | 2,0605 | 0,278 | -0,866 |
| 21 | P35269 T2FA_HUMAN  | E.ASSALFMAK.K              |            | 2 | 2,0593 | 0,121 | 0,198  |
| 21 | Q92576 PHF3_HUMAN  | K.AKPVGS#PLFK.F            | S283:      | 2 | 2,0509 | 0,165 | -0,217 |

|    |                    |                        |        |   |        |       |        |
|----|--------------------|------------------------|--------|---|--------|-------|--------|
| 21 | P06737 PYGL_HUMAN  | R.QIS#IRGIVGVENVAE.L   | S15:   | 2 | 2,0455 | 0,273 | -0,66  |
| 21 | Q6P0N0 CN106_HUMAN | K.AYILVT#PLK.S         | T653:  | 2 | 2,0438 | 0,128 | -0,222 |
| 21 | Q7Z739 YTHD3_HUMAN | R.GAGFNQNNAGSE.N       |        | 2 | 2,0423 | 0,256 | -0,299 |
| 21 | Q9H7D0 DOCK5_HUMAN | R.VEDLSLREE.N          |        | 2 | 2,0382 | 0,186 | -0,224 |
| 21 | Q8N3X1 FNBP4_HUMAN | R.RPILQLS#PPGPR.G      | S18:   | 2 | 2,0381 | 0,193 | -0,086 |
| 21 | Q6PKG0 LARP1_HUMAN | R.AVT#PVPTKTEE.V       | T526:  | 2 | 2,0366 | 0,154 | 1,169  |
| 21 | P05787 K2C8_HUMAN  | R.AFSSRS#YTSGPGSR.I    | S24:   | 2 | 2,0361 | 0,352 | -0,396 |
| 21 | Q6P6C2 ALKB5_HUMAN | R.SVLLPTHR.R           |        | 2 | 2,036  | 0,243 | 0,066  |
| 21 | Q9UHD1 CHRD1_HUMAN | K.TSDFNTFLAQE.G        |        | 2 | 2,0352 | 0,213 | -0,288 |
| 21 | Q9BSJ8 ESYT1_HUMAN | K.HLS#PYATLTVGDSSHK.T  | S820:  | 2 | 2,033  | 0,226 | -0,544 |
| 21 | Q12931 TRAP1_HUMAN | K.LLDIVAR.S            |        | 2 | 2,0327 | 0,088 | 0      |
| 21 | Q09666 AHNK_HUMAN  | K.IGFSGPKLE.G          |        | 2 | 2,0284 | 0,083 | 0,064  |
| 21 | P50851 LRBA_HUMAN  | R.STVFRIPE.F           |        | 2 | 2,0268 | 0,192 | 0      |
| 21 | P11717 MPRI_HUMAN  | K.LVSFHDDS#DEDLLHI.-   | S2484: | 2 | 2,024  | 0,242 | -0,465 |
| 21 | Q5VUA4 ZN318_HUMAN | R.FLDPEFRE.L           |        | 2 | 2,0234 | 0,088 | 0      |
| 21 | P23588 IF4B_HUMAN  | K.GKT#ISLTDFLAE.D      | T14:   | 2 | 2,0195 | 0,082 | -0,621 |
| 21 | Q71U36 TBA1A_HUMAN | R.AFVHWYVGE.G          |        | 2 | 2,0187 | 0,116 | -0,33  |
| 21 | P68431 H31_HUMAN   | K.STELLIR.K            |        | 2 | 2,0161 | 0,132 | 0,44   |
| 21 | Q96QT6 PHF12_HUMAN | E.LGHVNGLVDK.S         |        | 2 | 2,0146 | 0,163 | 0,232  |
| 21 | O15446 RPA34_HUMAN | R.QKGTEGM*EPEEGVTV.E.S |        | 2 | 2,0146 | 0,235 | 0,422  |
| 21 | P51858 HDGF_HUMAN  | R.RAGDLLEDS#PKRPK.E    | S165:  | 2 | 2,0137 | 0,092 | 0,514  |
| 21 | Q96PU5 NED4L_HUMAN | R.SLS#SPTVTLAPLEGAK.D  | S448:  | 2 | 2,0062 | 0,252 | -0,211 |
| 21 | Q96RK0 CIC_HUMAN   | R.TQS#LSALPK.E         | S173:  | 2 | 2,0049 | 0,13  | -0,119 |
| 21 | Q9BZL6 KPCD2_HUMAN | K.AQS#SLGYIPLMR.V      | S374:  | 2 | 2,0048 | 0,239 | -0,345 |
| 21 | Q3KQU3 MA7D1_HUMAN | R.GPT#PPAMGPR.D        | T97:   | 2 | 2,0004 | 0,118 | 0,23   |
| 21 | Q9Y2T2 AP3M1_HUMAN | K.SVVSQSVCDYFFE.A      |        | 2 | 1,9968 | 0,211 | -0,311 |
| 21 | P22626 ROA2_HUMAN  | E.VDAAMAARPHS#IDGR.V   | S85:   | 2 | 1,9962 | 0,099 | -0,445 |
| 21 | Q9P289 MST4_HUMAN  | E.WSFTT#VR.K           | T328:  | 2 | 1,996  | 0,167 | -0,187 |
| 21 | Q7Z4S6 KI21A_HUMAN | R.EKELS#PPPGLPSK.I     | S1212: | 2 | 1,9934 | 0,144 | -0,502 |
| 21 | O75909 CCNK_HUMAN  | K.DLAHTPSQLE.G         |        | 2 | 1,9919 | 0,143 | -0,22  |
| 21 | Q13523 PRP4B_HUMAN | K.KLLAPDMFTE.S         |        | 2 | 1,9903 | 0,259 | -0,314 |
| 21 | Q9NQW6 ANLN_HUMAN  | K.TQS#LPVTEK.V         | S485:  | 2 | 1,9875 | 0,102 | -0,225 |
| 21 | Q96PK6 RBM14_HUMAN | R.RLPDAHSDYAR.Y        |        | 2 | 1,9787 | 0,132 | 0,188  |

|    |                      |                          |        |   |        |       |        |
|----|----------------------|--------------------------|--------|---|--------|-------|--------|
| 21 | Q9BSQ5 CCM2_HUMAN    | R.GIITDS#FGR.H           | S384:  | 2 | 1,9655 | 0,086 | -0,35  |
| 21 | Q02241 KIF23_HUMAN   | R.RSSTVAPAQPDGAE.S       |        | 2 | 1,9595 | 0,24  | -0,44  |
| 21 | ##O75771 RA51D_HUMAN | R.LLQIM*EE.T             |        | 2 | 1,9581 | 0,13  | 0,137  |
| 21 | Q13363 CTBP1_HUMAN   | R.GAALDVHE.S             |        | 2 | 1,9548 | 0,183 | 0,15   |
| 21 | P62750 RL23A_HUMAN   | K.IRTSPT#FR.R            | T45:   | 2 | 1,9544 | 0,199 | 0,346  |
| 21 | Q15435 PP1R7_HUMAN   | K.VM*LALPSVR.Q           |        | 2 | 1,9541 | 0,085 | -0,122 |
| 21 | Q14677 EPN4_HUMAN    | K.SAFPFSDKLG.E.L         |        | 2 | 1,953  | 0,26  | -0,611 |
| 21 | A0MZ66 SHOT1_HUMAN   | R.KVTAEADSS#SPTGILATSE.S | S493:  | 2 | 1,949  | 0,115 | -0,063 |
| 21 | Q13769 THOC5_HUMAN   | R.RRPT#LGVQLD.D          | T328:  | 2 | 1,9472 | 0,148 | -0,494 |
| 21 | P35579 MYH9_HUMAN    | D.LPFVVPR.R              |        | 2 | 1,9446 | 0,29  | 0,074  |
| 21 | P04083 ANXA1_HUMAN   | E.ATIIDILTK.R            |        | 2 | 1,9429 | 0,376 | -0,185 |
| 21 | Q6ZRY4 RBPS2_HUMAN   | -.MSNLKPDGE.H            |        | 2 | 1,9403 | 0,093 | -1,97  |
| 21 | Q4KMP7 TB10B_HUMAN   | R.QQPPLGSSSLLS#LPGLK.S   | S386:  | 2 | 1,9175 | 0,323 | -0,45  |
| 21 | Q9UQ35 SRRM2_HUMAN   | R.T#SPPLLD.R.A           | T2397: | 2 | 1,9099 | 0,213 | -0,062 |
| 21 | Q5VVQ6 OTU1_HUMAN    | R.GASSYVRE.T             |        | 2 | 1,9092 | 0,088 | 0,211  |
| 21 | O94967 WDR47_HUMAN   | K.QFVCINILE.D            |        | 2 | 1,9089 | 0,107 | -0,43  |
| 21 | Q9Y383 LC7L2_HUMAN   | R.IKFSDDR.V              |        | 2 | 1,9026 | 0,172 | -0,069 |
| 21 | P13798 ACPH_HUMAN    | R.VPFKQGM*E.Y            |        | 2 | 1,8952 | 0,27  | 0      |
| 21 | Q14103 HNRPD_HUMAN   | E.SIELPM*DNK.T           |        | 2 | 1,8909 | 0,202 | 0,23   |
| 21 | Q9Y6X9 MORC2_HUMAN   | R.S#PPLPAVIR.N           | S615:  | 2 | 1,8905 | 0,357 | 0      |
| 21 | Q4VC31 CCD58_HUMAN   | R.EKNLDDLTLK.Q           |        | 2 | 1,8867 | 0,14  | -0,375 |
| 21 | P46100 ATRX_HUMAN    | R.RPTETNPVTSNS#DEECNE.T  | S677:  | 2 | 1,8801 | 0,352 | 0,791  |
| 21 | Q7RTV0 PHF5A_HUMAN   | K.IVNLGSSK.T             |        | 2 | 1,8749 | 0,146 | 0,373  |
| 21 | Q9BRA2 TXD17_HUMAN   | K.TIFAYFTGSK.D           |        | 2 | 1,8739 | 0,144 | -0,215 |
| 21 | P06737 PYGL_HUMAN    | R.GIVGVENVAE.L           |        | 2 | 1,8703 | 0,124 | -0,433 |
| 21 | Q96AT1 K1143_HUMAN   | K.NSSLLS#FDNEDENE.-      | S146:  | 2 | 1,87   | 0,144 | -0,505 |
| 21 | Q96ST2 IWS1_HUMAN    | K.HM*DFLSDFE.M           |        | 2 | 1,8681 | 0,142 | -0,527 |
| 21 | B2RD09 B2RD09_HUMAN  | R.VEVPSSASQAK.A          |        | 2 | 1,8612 | 0,287 | -0,111 |
| 21 | Q92945 FUBP2_HUMAN   | K.M*M*LDDIVSR.G          |        | 2 | 1,8597 | 0,1   | -0,768 |
| 21 | P60174 TPIS_HUMAN    | K.FFVGGNWK.M             |        | 2 | 1,8574 | 0,148 | -0,894 |
| 21 | O14730 RIOK3_HUMAN   | R.KAAS#FLKDDGDPPLLYDE.-  | S505:  | 2 | 1,8573 | 0,491 | -0,235 |
| 21 | Q96ST2 IWS1_HUMAN    | K.HMDFLS#DFE.M           | S527:  | 2 | 1,8556 | 0,227 | -0,4   |
| 21 | Q15459 SF3A1_HUMAN   | K.FNFLNPNDPYHAYR.H       |        | 2 | 1,843  | 0,233 | 0,126  |

|    |                     |                       |            |   |        |       |        |
|----|---------------------|-----------------------|------------|---|--------|-------|--------|
| 21 | P13667 PDIA4_HUMAN  | K.YGIVDYM*IE.Q        |            | 2 | 1,8393 | 0,123 | -0,327 |
| 21 | Q9UMY1 NOL7_HUMAN   | K.LTTASQTNIK.K        |            | 2 | 1,8381 | 0,407 | 0,113  |
| 21 | Q96ST2 IWS1_HUMAN   | R.GKHMDFLS#DFE.M      | S527:      | 2 | 1,8364 | 0,193 | -0,521 |
| 21 | P33176 KINH_HUMAN   | K.QISSLRDEVE.A        |            | 2 | 1,8337 | 0,086 | -0,311 |
| 21 | O75569 PRKRA_HUMAN  | K.TPIQVLHE.Y          |            | 2 | 1,8308 | 0,217 | -0,13  |
| 21 | Q9H0C8 ILKAP_HUMAN  | R.GSADNVTVM*VVR.I     |            | 2 | 1,8307 | 0,126 | -0,483 |
| 21 | P26045 PTN3_HUMAN   | E.IRKPRHS#S#ADNLANE.M | S394:S395: | 2 | 1,8302 | 0,244 | 0,196  |
| 21 | Q15393 SF3B3_HUMAN  | K.LVYILNRD.A          |            | 2 | 1,8282 | 0,089 | 0,061  |
| 21 | Q8NBU5 ATAD1_HUMAN  | K.DAAFQNVLTHVCLD.-    |            | 2 | 1,8206 | 0,178 | -0,457 |
| 21 | Q9ULH1 DDEF1_HUMAN  | K.LALPGFSTPR.D        |            | 2 | 1,82   | 0,225 | 0      |
| 21 | Q15149 PLEC1_HUMAN  | R.SKGIYQSLE.G         |            | 2 | 1,8125 | 0,089 | -0,238 |
| 21 | Q8IVF2 AHNK2_HUMAN  | K.VALKGPQVDVK.G       |            | 2 | 1,8091 | 0,114 | -0,317 |
| 21 | O60506 HNRPQ_HUMAN  | R.LFVGSIPK.S          |            | 2 | 1,805  | 0,236 | -0,071 |
| 21 | Q96ST2 IWS1_HUMAN   | K.HMDFLSDFE.M         |            | 2 | 1,7964 | 0,099 | -0,642 |
| 21 | P13639 EF2_HUMAN    | E.DHACIPIKK.S         |            | 2 | 1,7889 | 0,237 | -0,338 |
| 21 | Q96B97 SH3K1_HUMAN  | K.LRPRS#IEVE.N        | S230:      | 2 | 1,7864 | 0,162 | -0,414 |
| 21 | O95819 M4K4_HUMAN   | R.S#SSKSEGPSQRLE.N    | S708:      | 2 | 1,7831 | 0,174 | 0,078  |
| 21 | P55210 CASP7_HUMAN  | R.SSFVPSLFSK.K        |            | 2 | 1,7824 | 0,184 | -0,222 |
| 21 | Q86X29 LSR_HUMAN    | R.GPALTPIRDEE.W       |            | 2 | 1,7803 | 0,169 | -0,407 |
| 21 | Q6T4R5 NHS_HUMAN    | K.VGAKPSAYEE.G        |            | 2 | 1,776  | 0,102 | 0      |
| 21 | O00148 DDX39_HUMAN  | R.DFLLKPE.L           |            | 2 | 1,7743 | 0,084 | 0,212  |
| 21 | Q9BST9 RTKN_HUMAN   | R.VCISDLR.I           |            | 2 | 1,7719 | 0,199 | 0,283  |
| 21 | Q86WH2 RASF3_HUMAN  | E.DFFFT#AR.T          | T18:       | 2 | 1,7526 | 0,081 | -0,31  |
| 21 | P05455 LA_HUMAN     | K.IRRS#PSKPLPE.V      | S92:       | 2 | 1,7473 | 0,348 | -0,179 |
| 21 | P41162 ETV3_HUMAN   | E.STQFSIK.L           |            | 2 | 1,7435 | 0,095 | 0,301  |
| 21 | P11586 C1TC_HUMAN   | K.VVGDVAYDEAKE.R      |            | 2 | 1,7193 | 0,215 | -0,283 |
| 21 | A8K2B5 A8K2B5_HUMAN | R.SRLDVTTPPE.S        |            | 2 | 1,7005 | 0,247 | 0,3    |
| 21 | Q14693 LPIN1_HUMAN  | K.SHFAQIHSE.S         |            | 2 | 1,6965 | 0,154 | -1,502 |
| 21 | P43243 MATR3_HUMAN  | E.NLPQILLQLK.R        |            | 2 | 1,6921 | 0,222 | -0,517 |
| 21 | Q9H307 PININ_HUMAN  | R.RGFS#DSGGGPPAK.Q    | S66:       | 2 | 1,6792 | 0,23  | -0,186 |
| 21 | P40818 UBP8_HUMAN   | K.RSYS#SPDITQAIQEEE.K | S718:      | 2 | 1,6725 | 0,172 | -0,442 |
| 21 | P10599 THIO_HUMAN   | K.CMPTFQFFK.K         |            | 2 | 1,6702 | 0,115 | -0,405 |
| 21 | Q8NCN4 RN169_HUMAN  | R.VLSPLIK.S           |            | 2 | 1,6467 | 0,081 | 0,069  |

|    |                     |                                  |              |   |        |       |        |
|----|---------------------|----------------------------------|--------------|---|--------|-------|--------|
| 21 | Q9NYF8 BCLF1_HUMAN  | K.TIAPQNAPR.D                    |              | 2 | 1,6442 | 0,131 | -0,126 |
| 21 | P08238 HS90B_HUMAN  | K.HSQFIGYPITLYLEKER.E            |              | 2 | 1,6264 | 0,424 | -0,583 |
| 21 | O95425 SVIL_HUMAN   | R.DSSFTEVPR.S                    |              | 2 | 1,6156 | 0,199 | -0,588 |
| 21 | P01033 TIMP1_HUMAN  | E.SVCGYFHR.S                     |              | 2 | 1,6043 | 0,105 | -0,238 |
| 21 | Q00537 PCTK2_HUMAN  | R.RLS#LTLR.G                     | S9:          | 2 | 1,5961 | 0,265 | -0,195 |
| 21 | Q5VUA4 ZN318_HUMAN  | R.RRS#PGLCSDSLE.K                | S136:        | 2 | 1,5839 | 0,155 | 0      |
| 21 | P31949 S10AB_HUMAN  | E.SLIAVFQK.Y                     |              | 2 | 1,5798 | 0,186 | -0,808 |
| 21 | Q9Y536 PAL4B_HUMAN  | R.IIPGFM*CQGGDFTR.H              |              | 2 | 1,5759 | 0,375 | -0,604 |
| 21 | Q7L590 MCM10_HUMAN  | E.LDVPALPR.T                     |              | 2 | 1,5662 | 0,119 | 0,208  |
| 21 | ##Q3LXA3 DHAK_HUMAN | R.ASS#IYSARGAGAE.M               | S28:         | 2 | 1,5513 | 0,164 | 0,74   |
| 21 | Q9UQ35 SRRM2_HUMAN  | R.SLSYSPVER.R                    |              | 2 | 1,5308 | 0,162 | 0,353  |
| 21 | Q7L014 DDX46_HUMAN  | K.VVTVVTTK.K                     |              | 2 | 1,519  | 0,237 | 0,144  |
| 21 | Q9Y2W2 WBP11_HUMAN  | E.LTPLQAMMLR.M                   |              | 2 | 1,4886 | 0,122 | -0,416 |
| 21 | P83881 RL36A_HUMAN  | R.KGQVIQF.-                      |              | 2 | 1,4728 | 0,23  | -0,149 |
| 21 | Q06830 PRDX1_HUMAN  | K.QGGLGPMNIPVSDPKR.T             |              | 2 | 1,4554 | 0,247 | -0,274 |
| 22 | Q13813 SPTA2_HUMAN  | E.KNQALNTDNYGHDLASVQALQR.K       |              | 3 | 6,202  | 0,486 | -0,447 |
| 22 | O60264 SMCA5_HUMAN  | E.LFAHFIQPAAQKT#PTS#PLK.M        | T113:S116:   | 3 | 6,0357 | 0,482 | -0,487 |
| 22 | P07900 HS90A_HUMAN  | K.HSQFIGYPITLFVEKER.D            |              | 3 | 5,6485 | 0,442 | -0,532 |
| 22 | P23193 TCEA1_HUMAN  | K.KKEPAITSQNS#PEAREE.S           | S100:        | 3 | 5,6389 | 0,391 | 0,092  |
| 22 | Q9Y6D5 BIG2_HUMAN   | E.LEKPIQSKPQS#PVIQAAAVS#PK.F     | S218:S227:   | 3 | 5,5984 | 0,434 | -0,443 |
| 22 | P40222 TXLNA_HUMAN  | R.VQDLSAGGQGS LTDSGPER.R         |              | 2 | 5,5741 | 0,586 | -0,456 |
| 22 | Q5JVS0 HABP4_HUMAN  | R.KSLPAPVAQR PDS#PGGGLQAPGQK.R   | S108:        | 3 | 5,5535 | 0,481 | -0,526 |
| 22 | Q8IWS0 PHF6_HUMAN   | K.CM*LFSSALVSSH#DNE.S            | S57:         | 2 | 5,4457 | 0,572 | -0,454 |
| 22 | P46013 KI67_HUMAN   | K.IACRS#PQPDPVGT#PTIFKPQSK.R     | S2223:T2231: | 3 | 5,3775 | 0,382 | -0,425 |
| 22 | P35527 K1C9_HUMAN   | R.HGVQELEIELQSLSK.A              |              | 3 | 5,3379 | 0,38  | -0,558 |
| 22 | O00499 BIN1_HUMAN   | E.IRVNHEPEPAGGATPGATLPKS#PSQLR.K | S331:        | 3 | 5,2614 | 0,476 | -0,064 |
| 22 | P21359 NF1_HUMAN    | K.RRM*S#HVS#GGGSIDLSDTDSLQE.W    | S818:S821:   | 3 | 5,1995 | 0,378 | -0,363 |
| 22 | Q8NI27 THOC2_HUMAN  | R.KIDTHPS#PSHSSTVKDSLIE.L        | S1302:       | 3 | 5,1365 | 0,408 | -0,81  |
| 22 | Q9UFC0 LRWD1_HUMAN  | K.RPDDVPLSLS#PSKR.A              | S243:        | 3 | 5,1206 | 0,465 | -0,333 |
| 22 | Q8IY57 YAF2_HUMAN   | K.SPPASSAASADQHSQSGSSDNTER.G     |              | 3 | 5,1112 | 0,487 | 0      |
| 22 | Q9UQ35 SRRM2_HUMAN  | K.SKDSLQSCPGSLSLCAGVK.S          |              | 3 | 5,0061 | 0,3   | -0,087 |
| 22 | Q13442 HAP28_HUMAN  | R.KGVEGLIDIENPNRVAQTTK.K         |              | 3 | 4,9862 | 0,447 | -0,335 |
| 22 | P21359 NF1_HUMAN    | R.RM*S#HVS#GGGSIDLSDTDSLQE.W     | S818:S821:   | 3 | 4,9848 | 0,457 | -0,386 |



|    |                     |                                    |            |   |        |       |        |
|----|---------------------|------------------------------------|------------|---|--------|-------|--------|
| 22 | Q7Z5Y7 KCD20_HUMAN  | R.SKS#LTNLVAAGDDVLE.D              | S374:      | 2 | 4,9655 | 0,437 | -0,784 |
| 22 | Q8NCM9 Q8NCM9_HUMAN | R.SSDITSDLGNVLTSTPNAK.T            |            | 2 | 4,9311 | 0,538 | -0,381 |
| 22 | P55196 AFAD_HUMAN   | K.QGAIYHGLATLLNQPS#PM*M*QR.I       | S1090:     | 3 | 4,9239 | 0,267 | -0,525 |
| 22 | Q86TC9 MYPN_HUMAN   | K.HSPNLSFEPNFCQDNPR.S              |            | 3 | 4,9036 | 0,318 | -0,267 |
| 22 | Q01804 OTUD4_HUMAN  | K.TAADVVS#PGANSVDSR.V              | S1006:     | 2 | 4,8934 | 0,456 | -0,825 |
| 22 | Q58FG0 HS905_HUMAN  | K.KHSQFIGYPITLFVEK.K               |            | 3 | 4,8864 | 0,278 | -0,671 |
| 22 | Q9UJM3 ERRFI_HUMAN  | E.AEETNGGAQIQPLPADCGISSATEKPD SK.T |            | 3 | 4,8749 | 0,488 | -0,246 |
| 22 | Q96QC0 PP1RA_HUMAN  | E.LM*DTASLEPGALDAKPVES#PGDPNQLTR.K | S382:      | 3 | 4,8652 | 0,545 | -0,424 |
| 22 | Q8WXV6 Q8WXV6_HUMAN | R.KRTSS#EDNLYLAVLR.A               | S21:       | 3 | 4,852  | 0,252 | -0,496 |
| 22 | Q15642 CIP4_HUMAN   | R.HARPPDPPASAPPDSSNSASQDTKE.S      |            | 3 | 4,8404 | 0,44  | -0,484 |
| 22 | Q9UER7 DAXX_HUMAN   | E.KKQTGSGPLGNSYVER.Q               |            | 3 | 4,8041 | 0,44  | -0,319 |
| 22 | Q58FG0 HS905_HUMAN  | K.HSQFIGYPITLFVEK.K                |            | 2 | 4,804  | 0,493 | -0,617 |
| 22 | P16401 H15_HUMAN    | E.TAPAETATPAPVEKS#PAK.K            | S18:       | 2 | 4,7772 | 0,456 | -0,661 |
| 22 | O15355 PPM1G_HUMAN  | K.AYTGFSNSERGTE.A                  |            | 2 | 4,7528 | 0,508 | -0,567 |
| 22 | Q13200 PSMD2_HUMAN  | R.DKAPVQPQQSPAAAPGGTDEKPSGK.E      |            | 3 | 4,6895 | 0,395 | -0,372 |
| 22 | Q13442 HAP28_HUMAN  | K.RKGV EGLIDIENPNR.V               |            | 3 | 4,6759 | 0,236 | -0,321 |
| 22 | O43707 ACTN4_HUMAN  | R.HRPELIEYDKLR.K                   |            | 3 | 4,6336 | 0,328 | 0,117  |
| 22 | P61586 RHOA_HUMAN   | E.VKHFPCNVPIILVGNK.K               |            | 3 | 4,6199 | 0,271 | -0,299 |
| 22 | P28290 SSFA2_HUMAN  | E.GEAPHVPATYQLGLTK.S               |            | 3 | 4,6182 | 0,341 | 0      |
| 22 | Q14C86 GAPD1_HUMAN  | R.FSLCSDNLEGISEGPSNR.S             |            | 2 | 4,6088 | 0,52  | -0,308 |
| 22 | Q0VAX7 Q0VAX7_HUMAN | E.KAVNPFLADV DKLK.L                |            | 3 | 4,6025 | 0,385 | -0,587 |
| 22 | Q9BSD7 CA057_HUMAN  | E.NRNHLLPDIVTCVQSSR.K              |            | 3 | 4,5958 | 0,266 | -0,091 |
| 22 | Q15554 TERF2_HUMAN  | K.DLVLP TQALPAS#PALK.N             | S323:      | 2 | 4,5826 | 0,42  | -0,641 |
| 22 | P22626 ROA2_HUMAN   | K.KLFVGGIKEDTEE.H                  |            | 2 | 4,5812 | 0,426 | -0,416 |
| 22 | Q7Z4S6 KI21A_HUMAN  | R.KLS#SSDAPAQDTGSSAAAVE.T          | S853:      | 2 | 4,5808 | 0,517 | -0,186 |
| 22 | P06748 NPM_HUMAN    | K.TPKGPSSVEDIKAK.M                 |            | 3 | 4,5562 | 0,306 | 0      |
| 22 | Q13442 HAP28_HUMAN  | K.KVTQLDL DGPKE.L                  |            | 3 | 4,5371 | 0,181 | -1,225 |
| 22 | Q9UFC0 LRWD1_HUMAN  | R.LAALKRPDDVPLSLS#PSKR.A           | S243:      | 3 | 4,532  | 0,394 | -0,341 |
| 22 | P13645 K1C10_HUMAN  | K.GSLGGGFSSGGFSGGSFSR.G            |            | 2 | 4,5239 | 0,546 | -0,571 |
| 22 | Q58FG0 HS905_HUMAN  | K.HSQFIGYPITLFVEK.K                |            | 3 | 4,5118 | 0,41  | -0,308 |
| 22 | O14545 TRAD1_HUMAN  | E.GIPRLDS#QPQETS#PELPR.R           | S409:S415: | 3 | 4,5087 | 0,145 | -0,42  |
| 22 | O00193 SMAP_HUMAN   | R.S#ASPD DDLGSSNWE.A               | S15:       | 2 | 4,4898 | 0,566 | -0,391 |
| 22 | P42166 LAP2A_HUMAN  | K.LREQGTESRS#ST#PLPTISSSAE.N       | S158:T160: | 3 | 4,4701 | 1     | -0,294 |

|    |                     |                                |            |   |        |       |        |
|----|---------------------|--------------------------------|------------|---|--------|-------|--------|
| 22 | P52292 IMA2_HUMAN   | R.RNVSSFDDATS#PLQE.N           | S62:       | 2 | 4,4508 | 0,392 | -0,132 |
| 22 | Q14241 ELOA1_HUMAN  | K.TNLDRKS#LGLSPKVEE.T          | S384:      | 3 | 4,4034 | 0,474 | -0,294 |
| 22 | Q8TEM1 PO210_HUMAN  | K.KLHGLQAILVHE.A               |            | 3 | 4,3809 | 0,403 | -0,269 |
| 22 | Q8N7R7 CCYL1_HUMAN  | R.SFS#ADNFIGIQR.S              | S344:      | 2 | 4,3783 | 0,33  | -0,595 |
| 22 | O14545 TRAD1_HUMAN  | R.VRHQGDLSGGYLDDTKQE.T         |            | 3 | 4,37   | 0,35  | -0,447 |
| 22 | Q6KC79 NIPBL_HUMAN  | R.NKAITSLGSGS#PK.N             | S2658:     | 2 | 4,3617 | 0,324 | -0,514 |
| 22 | A8K630 A8K630_HUMAN | R.LQQQHSEQPPLQSPVTTRR.G        |            | 3 | 4,3543 | 0,398 | -0,314 |
| 22 | Q9UFC0 LRWD1_HUMAN  | R.LAALKRPDDVPLSL#PSK.R         | S243:      | 3 | 4,3414 | 0,36  | -0,368 |
| 22 | P35527 K1C9_HUMAN   | R.GSGSGSYGGGGSGGGYGGGSGSR.G    |            | 2 | 4,338  | 0,494 | 0,409  |
| 22 | Q5T5Y3 CAMP1_HUMAN  | K.TRPAS#QPTPFALHHAASCE.V       | S470:      | 3 | 4,3197 | 0,438 | -0,339 |
| 22 | P05362 ICAM1_HUMAN  | E.LKREPAVGEPAEVTTTTLVLR.R      |            | 3 | 4,3084 | 0,358 | -0,76  |
| 22 | Q3KQU3 MA7D1_HUMAN  | R.RSS#QPSPTAVPASDSPPTKQE.V     | S113:      | 3 | 4,3073 | 0,165 | -0,407 |
| 22 | Q9UHR5 S30BP_HUMAN  | E.KGGLVSDAYGEDDFSR.L           |            | 2 | 4,296  | 0,435 | -0,569 |
| 22 | O95425 SVIL_HUMAN   | E.MEKS#FDEQNVPK.R              | S707:      | 3 | 4,2929 | 0,136 | -0,06  |
| 22 | Q9Y6Y0 NS1BP_HUMAN  | E.VFGSDDDHQFVQK.K              |            | 2 | 4,2826 | 0,362 | -0,448 |
| 22 | Q03188 CENPC_HUMAN  | K.IKDTCIQS#PSKE.C              | S73:       | 3 | 4,2817 | 0,31  | -0,123 |
| 22 | Q16875 F263_HUMAN   | R.RNS#VTPLASPEPTKKPR.I         | S461:      | 3 | 4,2708 | 0,441 | -0,467 |
| 22 | O00193 SMAP_HUMAN   | K.RSAS#PDDDLGSSNWE.A           | S17:       | 2 | 4,2693 | 0,545 | -0,356 |
| 22 | Q9NZZ3 CHMP5_HUMAN  | K.QVKIDQIEDLQDQLE.D            |            | 2 | 4,2622 | 0,336 | -0,673 |
| 22 | Q9H910 HN1L_HUMAN   | K.TSDIFGS#PVTATSR.L            | S97:       | 2 | 4,259  | 0,384 | -0,482 |
| 22 | Q96B23 CR025_HUMAN  | E.TAVEGDPGVSATVGR.K            |            | 2 | 4,2405 | 0,509 | -0,704 |
| 22 | P48643 TCPE_HUMAN   | K.GVIVDKDFSHQMPK.K             |            | 2 | 4,239  | 0,395 | -0,359 |
| 22 | Q15554 TERF2_HUMAN  | K.LDQKDLVLPQALPAS#PALKNK.R     | S323:      | 3 | 4,2201 | 0,345 | -0,375 |
| 22 | Q6NZI2 PTRF_HUMAN   | R.RGS#S#PDVHALLE.I             | S365:S366: | 2 | 4,2162 | 0,468 | -0,423 |
| 22 | Q92820 GGH_HUMAN    | K.FFNVLTTNTDGKIE.F             |            | 2 | 4,2095 | 0,427 | -0,382 |
| 22 | Q8IWS0 PHF6_HUMAN   | K.CMLFSSALVSSH#DNE.S           | S57:       | 2 | 4,2006 | 0,478 | -0,393 |
| 22 | Q02952 AKA12_HUMAN  | K.LTASEQAHPQEPAESAEPRLS#AEYE.K | S371:      | 3 | 4,1903 | 0,455 | -0,619 |
| 22 | Q03188 CENPC_HUMAN  | E.KSLANDFSTNSTK.S              |            | 2 | 4,1769 | 0,494 | -0,432 |
| 22 | Q8N1G1 REXO1_HUMAN  | R.ALSHADLFGDES#EDE.A           | S526:      | 2 | 4,1702 | 0,493 | -0,64  |
| 22 | Q9UNZ2 NSF1C_HUMAN  | R.KKS#PNELVDDLFK.G             | S114:      | 3 | 4,1382 | 0,129 | -0,113 |
| 22 | A4D186 A4D186_HUMAN | K.IQVLQQQADDAEERAE.R           |            | 2 | 4,1378 | 0,346 | -0,662 |
| 22 | P22626 ROA2_HUMAN   | D.DHDPVDKIVLQK.Y               |            | 3 | 4,1069 | 0,365 | 0,065  |
| 22 | Q15061 WDR43_HUMAN  | E.YVPSAHLSTCTCLAWAPAR.L        |            | 3 | 4,1054 | 0,302 | -0,33  |

|    |                    |                             |            |   |        |       |        |
|----|--------------------|-----------------------------|------------|---|--------|-------|--------|
| 22 | Q92859 NEO1_HUMAN  | E.LKPIDKSPDPNPIMTDTPIPR.N   |            | 3 | 4,0794 | 0,282 | -0,234 |
| 22 | Q96B23 CRO25_HUMAN | E.TAVEGDPSPGVSGATVGRK.S     |            | 2 | 4,0621 | 0,415 | -0,506 |
| 22 | Q13200 PSMD2_HUMAN | K.APVQPQQSPAAAPGGTDEKPSGK.E |            | 3 | 4,0581 | 0,278 | 0      |
| 22 | Q9BSJ8 ESYT1_HUMAN | K.HLSPYATLTVGDSSHK.T        |            | 3 | 4,047  | 0,426 | -0,534 |
| 22 | Q13206 DDX10_HUMAN | K.RHNVFGLDLKDE.K            |            | 3 | 4,0448 | 0,306 | -0,127 |
| 22 | O95425 SVIL_HUMAN  | E.M*EKS#FDEQNVPK.R          | S707:      | 3 | 4,0443 | 0,175 | 0,118  |
| 22 | Q96H12 CIO30_HUMAN | R.SVS#PLLSTHVLGKE.K         | S98:       | 2 | 4,0429 | 0,479 | -0,473 |
| 22 | O75616 ERAL_HUMAN  | E.TQVILLDTPGIISPGK.Q        |            | 2 | 4,0375 | 0,335 | -0,443 |
| 22 | Q15424 SAFB1_HUMAN | R.KFDFDACNEVPPAPK.E         |            | 2 | 4,0366 | 0,386 | -0,563 |
| 22 | Q9UHB6 LIMA1_HUMAN | R.KIS#ENSYSLDDLE.I          | S225:      | 2 | 4,0332 | 0,372 | -0,383 |
| 22 | Q8WXE0 CSKI2_HUMAN | R.SHS#LSRPGPTEGDAEGE.A      | S800:      | 2 | 4,0315 | 0,469 | -0,473 |
| 22 | O14974 MYPT1_HUMAN | R.RLAS#TSDIEEKE.N           | S507:      | 2 | 4,0297 | 0,332 | -0,502 |
| 22 | Q15554 TERF2_HUMAN | K.LDQKDLVLPQALPAS#PALK.N    | S323:      | 3 | 4,0198 | 0,213 | -0,666 |
| 22 | O75526 HNRGT_HUMAN | R.GFAFVTFESPADAK.A          |            | 2 | 4,016  | 0,467 | -0,492 |
| 22 | P48643 TCPE_HUMAN  | E.YGRPFLLIKDQDR.K           |            | 3 | 4,0149 | 0,168 | -0,113 |
| 22 | P18669 PGAM1_HUMAN | E.RHYGGLTGLNK.A             |            | 3 | 4,007  | 0,284 | 0,376  |
| 22 | O95400 CD2B2_HUMAN | K.KKLVDPVAGSGGPGSR.F        |            | 3 | 3,9873 | 0,394 | 0      |
| 22 | P42166 LAP2A_HUMAN | K.LREQGTESRSS#T#PLPTISSAE.N | S159:T160: | 3 | 3,9867 | 0,317 | -0,66  |
| 22 | P08107 HSP71_HUMAN | D.M*KHWPQVINDGDKPK.V        |            | 3 | 3,9638 | 0,221 | -0,468 |
| 22 | P33176 KINH_HUMAN  | R.GGGAFVQNSQPVAVR.G         |            | 2 | 3,961  | 0,433 | -0,492 |
| 22 | Q9NYF8 BCLF1_HUMAN | K.LKDLFDYS#PPLHK.N          | S512:      | 2 | 3,9591 | 0,493 | -0,664 |
| 22 | O60271 JIP4_HUMAN  | R.SAS#QSS#LDKLDQE.L         | S730:S733: | 2 | 3,9573 | 0,256 | -0,156 |
| 22 | P35908 K22E_HUMAN  | R.FLEQQNQVLQTK.W            |            | 2 | 3,9503 | 0,41  | -0,413 |
| 22 | P62979 RS27A_HUMAN | K.CCLTYCFNKPEDK.-           |            | 3 | 3,943  | 0,252 | -0,211 |
| 22 | Q9Y2X7 GIT1_HUMAN  | R.ARS#M*DSSDLSDGAVTLQE.Y    | S410:      | 2 | 3,9354 | 0,396 | -0,679 |
| 22 | O00429 DNM1L_HUMAN | K.GHAVNLLDVPVVAR.K          |            | 2 | 3,9229 | 0,473 | -0,627 |
| 22 | P07910 HNRPC_HUMAN | R.M*IAGQVLDINLAAEPK.V       |            | 2 | 3,9222 | 0,41  | -0,574 |
| 22 | Q9UQ80 PA2G4_HUMAN | E.KTIIQNPTDQKKDHE.K         |            | 2 | 3,8801 | 0,391 | 0,381  |
| 22 | O00193 SMAP_HUMAN  | R.SAS#PDDDLGSSNWE.A         | S17:       | 2 | 3,8795 | 0,452 | -0,469 |
| 22 | Q9UK76 HN1_HUMAN   | R.RNS#SEASSGDFLDLKGGE.G     | S87:       | 3 | 3,8702 | 0,251 | -1,547 |
| 22 | P62979 RS27A_HUMAN | K.CCLTYCFNKPEDK.-           |            | 2 | 3,8648 | 0,404 | -0,703 |
| 22 | P51114 FXR1_HUMAN  | R.RGPNYTSGYGT#NSE.L         | T401:      | 2 | 3,862  | 0,35  | -0,077 |
| 22 | Q9UPZ3 HPS5_HUMAN  | E.LILKFEPLDSACSSR.R         |            | 3 | 3,8604 | 0,295 | -0,105 |

|    |                    |                                 |        |   |        |       |        |
|----|--------------------|---------------------------------|--------|---|--------|-------|--------|
| 22 | O95793 STAU1_HUMAN | K.VTFFEPGSGDENGTSNKE.D          |        | 2 | 3,8599 | 0,37  | -0,637 |
| 22 | P42684 ABL2_HUMAN  | R.DKS#PSSLLEDAKE.T              | S631:  | 2 | 3,8554 | 0,421 | -0,57  |
| 22 | P18615 NELFE_HUMAN | E.LGPDGEEAEGPGAGDGPPR.S         |        | 2 | 3,8524 | 0,494 | -0,48  |
| 22 | Q8WUF8 CE021_HUMAN | K.IHVQSSSDS#SDEPAEKRE.R         | S219:  | 3 | 3,8514 | 0,386 | -0,879 |
| 22 | Q7L2J0 MEPCE_HUMAN | K.GFQRPVYLFHK.A                 |        | 3 | 3,8499 | 0,315 | -0,197 |
| 22 | Q66K74 MAP1S_HUMAN | K.AVPM*APAPAS#PGSSNDSSAR.S      | S759:  | 2 | 3,8309 | 0,301 | -0,745 |
| 22 | O15014 ZN609_HUMAN | K.ALDILQQHASHYK.S               |        | 2 | 3,8269 | 0,374 | -1,041 |
| 22 | Q09666 AHNK_HUMAN  | R.LKSEdGVEGDLGE.T               |        | 2 | 3,8248 | 0,334 | -0,362 |
| 22 | P11388 TOP2A_HUMAN | E.SDDFHMDFDsAVAPR.A             |        | 3 | 3,8198 | 0,213 | -0,321 |
| 22 | Q13442 HAP28_HUMAN | K.RKGVEGLIDIENPNR.V             |        | 2 | 3,8188 | 0,332 | -0,499 |
| 22 | P19105 MLRM_HUMAN  | R.AT#SNVFAM*FDQSQIQE.F          | T18:   | 3 | 3,8178 | 0,185 | -0,478 |
| 22 | Q6NV74 CB055_HUMAN | R.SKS#FLITPVKPAVDR.K            | S881:  | 3 | 3,8166 | 0,33  | -0,421 |
| 22 | O43290 SNUT1_HUMAN | D.LLPLGDQTQDGFGR.L              |        | 2 | 3,8126 | 0,491 | -0,426 |
| 22 | Q9Y2W1 TR150_HUMAN | E.HHFGSSGM*TLHE.R               |        | 3 | 3,808  | 0,18  | 0,067  |
| 22 | P52597 HNRPF_HUMAN | E.LGSEDDVKMALKK.D               |        | 3 | 3,804  | 0,332 | -0,319 |
| 22 | P05787 K2C8_HUMAN  | R.AFSSRS#YTSGPSR.I              | S24:   | 3 | 3,7919 | 0,407 | 0      |
| 22 | P52292 IMA2_HUMAN  | R.NVSSFPDDATS#PLQE.N            | S62:   | 2 | 3,788  | 0,34  | -0,434 |
| 22 | P00338 LDHA_HUMAN  | K.KSADTLWGIQKE.L                |        | 3 | 3,7788 | 0,105 | -0,066 |
| 22 | Q9UQ80 PA2G4_HUMAN | E.KTIQNPtdQqK.K                 |        | 2 | 3,7766 | 0,297 | -0,518 |
| 22 | Q9Y4C1 JHD2A_HUMAN | E.VVHDNLVTCGNSAR.I              |        | 2 | 3,7761 | 0,536 | -0,317 |
| 22 | Q8N556 AFAP1_HUMAN | E.NSPISSCDTS#DTEGPVpVNSAAVLKK.S | S687:  | 3 | 3,7745 | 0,399 | -0,332 |
| 22 | Q9H089 LSG1_HUMAN  | K.FGHSSFDQAEISHS#E.S            | S281:  | 2 | 3,765  | 0,421 | -0,416 |
| 22 | P04264 K2C1_HUMAN  | R.SGGGFSSGSAGIINYQR.R           |        | 2 | 3,7611 | 0,455 | -0,515 |
| 22 | P48643 TCPE_HUMAN  | K.GVIVDKDFSHpQM*PK.K            |        | 3 | 3,7565 | 0,392 | -0,427 |
| 22 | P39687 AN32A_HUMAN | E.KCPNLTHLNLsgNK.I              |        | 2 | 3,7548 | 0,43  | -0,382 |
| 22 | Q14676 MDC1_HUMAN  | E.LQASASTDQpVTSEpTSR.T          |        | 2 | 3,7525 | 0,435 | -0,325 |
| 22 | P38159 HNRPG_HUMAN | R.GFAFVTFES#PADAKDAAR.D         | S58:   | 3 | 3,7513 | 0,333 | -0,462 |
| 22 | O14639 ABLM1_HUMAN | R.ST#SQGSINSPVYSR.H             | T451:  | 2 | 3,7506 | 0,411 | -0,39  |
| 22 | O15211 RGL2_HUMAN  | E.VKLQS#PLEPHSK.K               | S409:  | 3 | 3,7471 | 0,34  | -0,19  |
| 22 | O43491 E41L2_HUMAN | R.ITPLSLQTQGS#SHE.T             | S682:  | 2 | 3,7457 | 0,356 | -0,541 |
| 22 | P46100 ATRX_HUMAN  | K.KLDDSCSGSVTYSALIVPK.E         |        | 3 | 3,7455 | 0,232 | -0,08  |
| 22 | P46013 KI67_HUMAN  | E.VSCKs#PQPDPVKTPtSSK.Q         | S1983: | 3 | 3,742  | 0,131 | 0      |
| 22 | Q8WYP5 AHTF1_HUMAN | R.TTSFFLNS#PEKEHQE.M            | S1292: | 2 | 3,7332 | 0,442 | -0,391 |

|    |                     |                                   |            |   |        |       |        |
|----|---------------------|-----------------------------------|------------|---|--------|-------|--------|
| 22 | Q9NYB0 TE2IP_HUMAN  | E.HKYLLGDAPVS#PSSQK.L             | S203:      | 3 | 3,7316 | 0,202 | -0,202 |
| 22 | Q9H4G0 E41L1_HUMAN  | R.SLDGAEFS#RPAS#VSE.N             | S437:S441: | 2 | 3,7313 | 0,434 | -0,428 |
| 22 | Q9Y2W1 TR150_HUMAN  | E.HHFGSSGMTLHE.R                  |            | 3 | 3,7302 | 0,367 | 0,205  |
| 22 | O95671 ASML_HUMAN   | E.HSVFTGVAIVHCSSK.D               |            | 3 | 3,7292 | 0,207 | -0,225 |
| 22 | Q15942 ZYX_HUMAN    | E.DCGKPLSIEADDNGCFPLDGHVLCR.K     |            | 3 | 3,727  | 0,546 | -0,514 |
| 22 | P40818 UBP8_HUMAN   | K.RSYS#SPDITQAIQE.E               | S718:      | 2 | 3,7179 | 0,379 | -0,656 |
| 22 | Q58FF7 H90B3_HUMAN  | K.HSQFIGYPITLYLEK.E               |            | 3 | 3,7169 | 0,433 | -0,506 |
| 22 | Q9H6F5 CCD86_HUMAN  | R.LGGLRPES#PESLTSVSR.T            | S18:       | 3 | 3,7116 | 0,284 | -0,294 |
| 22 | P40818 UBP8_HUMAN   | R.SYS#SPDITQAIQE.E                | S718:      | 2 | 3,7103 | 0,419 | -0,161 |
| 22 | O43242 PSMD3_HUMAN  | K.AKPPPGGGEQEP PPPAPQDVEM*KEE.A   |            | 3 | 3,7092 | 0,169 | -0,336 |
| 22 | P23193 TCEA1_HUMAN  | K.KKEPAITSQNS#PEAREE.S            | S100:      | 2 | 3,7068 | 0,431 | 0,673  |
| 22 | Q13442 HAP28_HUMAN  | R.KGVEGLIDIENPNR.V                |            | 3 | 3,7028 | 0,126 | -0,471 |
| 22 | A8K630 A8K630_HUMAN | R.LQQQHSEQPPLQPS#PVTRRR.G         | S22:       | 3 | 3,698  | 0,24  | -0,152 |
| 22 | Q58FF8 H90B2_HUMAN  | K.HSQFLGY PITLYLEK.E              |            | 2 | 3,6917 | 0,481 | -0,472 |
| 22 | Q86UK7 ZN598_HUMAN  | R.TQGEGPGPKETSTNGPVSQE.A          |            | 2 | 3,6905 | 0,511 | 0,549  |
| 22 | Q13620 CUL4B_HUMAN  | R.SATDGNTSTT#PPTSAK.K             | T31:       | 2 | 3,6883 | 0,508 | -0,151 |
| 22 | P09429 HMGB1_HUMAN  | K.M*SSYAFFVQTCRE.E                |            | 2 | 3,6864 | 0,512 | -0,372 |
| 22 | P48643 TCPE_HUMAN   | K.GVIVDKDFSHQMPK.K                |            | 3 | 3,6828 | 0,34  | -0,108 |
| 22 | P35579 MYH9_HUMAN   | R.RGDLPFV VPR.R                   |            | 2 | 3,6804 | 0,214 | -0,317 |
| 22 | Q03188 CENPC_HUMAN  | R.KIKDTCIQS#PSKE.C                | S73:       | 3 | 3,6802 | 0,209 | 0,113  |
| 22 | P28370 SMCA1_HUMAN  | E.LFAHQPSAQKS#PTS#PLNM*K.L        | S116:S119: | 3 | 3,6793 | 0,265 | -0,363 |
| 22 | Q9UHR5 S30BP_HUMAN  | E.KGGLVSDAYGEDDFSR.L              |            | 3 | 3,674  | 0,278 | -0,107 |
| 22 | P06748 NPM_HUMAN    | E.DVKLLSISGKR.S                   |            | 3 | 3,6731 | 0,291 | -0,977 |
| 22 | Q96QC0 PP1RA_HUMAN  | E.LMDTASLEPGALDAKPVES#PGDPNQLTR.K | S382:      | 3 | 3,6719 | 0,249 | -0,914 |
| 22 | Q9ULV4 COR1C_HUMAN  | E.GKNADPILISLK.H                  |            | 3 | 3,6715 | 0,102 | 0,144  |
| 22 | Q7RTQ0 Q7RTQ0_HUMAN | E.SGPDGGEEDGTGSLKR.S              |            | 2 | 3,6641 | 0,405 | 0,156  |
| 22 | Q9BVG4 CX026_HUMAN  | K.AVYISVQDKEGK.G                  |            | 2 | 3,6599 | 0,334 | -0,666 |
| 22 | Q96S94 CCNL2_HUMAN  | R.GLLPGGTQVLDGTSGFSPAPK.L         |            | 2 | 3,6558 | 0,421 | -0,244 |
| 22 | Q6PJG2 CN043_HUMAN  | E.DGKGPEQNPAEHKPSVIVTR.R          |            | 3 | 3,6406 | 0,264 | -0,678 |
| 22 | Q9UQE7 SMC3_HUMAN   | R.SEDLDNS#IDKTE.A                 | S886:      | 2 | 3,6402 | 0,309 | -0,084 |
| 22 | Q7Z4V5 HDGR2_HUMAN  | K.LAGEELAGEEAPQEK.A               |            | 2 | 3,6366 | 0,338 | -0,699 |
| 22 | O43852 CALU_HUMAN   | R.VHHEPQLSDKVHND.A                |            | 3 | 3,628  | 0,294 | -0,332 |
| 22 | O94967 WDR47_HUMAN  | E.HSVIKPPLGDS#PGSLSR.S            | S578:      | 3 | 3,6252 | 0,339 | -0,2   |

|    |                    |                                 |            |   |        |       |        |
|----|--------------------|---------------------------------|------------|---|--------|-------|--------|
| 22 | P33981 TTK_HUMAN   | R.VPVNLLNSPDCVK.T               |            | 2 | 3,6115 | 0,29  | -0,311 |
| 22 | Q6KC79 NIPBL_HUMAN | K.AITSLGGGS#PK.N                | S2658:     | 2 | 3,6113 | 0,407 | -0,207 |
| 22 | Q7Z422 CA144_HUMAN | R.ILGASAS#PEEEQEKPIILDRPTR.I    | S107:      | 3 | 3,6076 | 0,366 | -0,374 |
| 22 | Q96A49 SYAP1_HUMAN | E.AVRPKT#PPVVIK.S               | T248:      | 3 | 3,6053 | 0,231 | 0,33   |
| 22 | Q7Z628 ARHG8_HUMAN | R.RAS#TVSSVTQVEVDE.N            | S539:      | 2 | 3,6026 | 0,476 | -0,145 |
| 22 | Q9NZQ3 SPN90_HUMAN | E.HLGADGGLYQIPLPSSQIPPQPR.R     |            | 3 | 3,6005 | 0,447 | -0,3   |
| 22 | Q13442 HAP28_HUMAN | K.GVEGLIDIENPNR.V               |            | 3 | 3,5945 | 0,288 | 0,256  |
| 22 | P31948 STIP1_HUMAN | R.CM*M*AQYNRHDS#PEDVKR.R        | S481:      | 3 | 3,591  | 0,099 | 0,163  |
| 22 | P30084 ECHM_HUMAN  | E.KKLFYSTFATDDR.K               |            | 3 | 3,5889 | 0,255 | -0,46  |
| 22 | Q9Y266 NUDC_HUMAN  | K.LKPNLNGADLPNYR.W              |            | 3 | 3,5797 | 0,251 | -0,111 |
| 22 | Q9ULH7 MKL2_HUMAN  | R.TREQLVDQGIM*PPLKS#PAAFHE.Q    | S66:       | 3 | 3,5747 | 0,24  | 0      |
| 22 | Q9Y4C1 JHD2A_HUMAN | E.VVHDNLVTCGNSAR.I              |            | 3 | 3,5707 | 0,253 | -0,119 |
| 22 | P52594 NUPL_HUMAN  | K.SLLGDSAPTLHLNKGT#PSQS#PVVGR.S | T177:S181: | 3 | 3,563  | 0,216 | -0,136 |
| 22 | Q15554 TERF2_HUMAN | K.DLVLPTQALPAS#PALKNK.R         | S323:      | 2 | 3,5503 | 0,34  | -0,374 |
| 22 | O14974 MYPT1_HUMAN | R.RLASTS#DIEEKE.N               | S509:      | 2 | 3,5501 | 0,272 | -0,418 |
| 22 | Q8N7R7 CCYL1_HUMAN | R.RS#FSADNFIGIQR.S              | S342:      | 3 | 3,5486 | 0,215 | -0,23  |
| 22 | P48643 TCPE_HUMAN  | E.DAKIAILTCPEPPKPK.T            |            | 3 | 3,5484 | 0,239 | -0,38  |
| 22 | P12036 NFH_HUMAN   | K.KVPT#PEKEAPAKVE.V             | T911:      | 3 | 3,5466 | 0,238 | -0,342 |
| 22 | Q9UBF8 PI4KB_HUMAN | R.SKS#DATASISLSSNLKR.T          | S277:      | 3 | 3,5425 | 0,347 | -0,297 |
| 22 | O15131 IMA5_HUMAN  | R.RREEEGIQLR.K                  |            | 3 | 3,539  | 0,184 | 0,213  |
| 22 | P04264 K2C1_HUMAN  | K.SLNNQFASFIDK.V                |            | 2 | 3,5387 | 0,418 | -0,617 |
| 22 | P62937 PIIA_HUMAN  | E.WLDGKHVVFGK.V                 |            | 2 | 3,537  | 0,427 | -0,379 |
| 22 | Q13177 PAK2_HUMAN  | K.ERPEIS#PPSDFE.H               | S75:       | 2 | 3,5358 | 0,48  | -0,494 |
| 22 | P18615 NELFE_HUMAN | R.TQIVYSDDVYKE.N                |            | 2 | 3,5357 | 0,307 | -0,501 |
| 22 | O43390 HNRPR_HUMAN | K.LKDYAFVHFE.D                  |            | 2 | 3,5332 | 0,358 | -0,385 |
| 22 | P39687 AN32A_HUMAN | E.KCPNLTHLNLGSK.I               |            | 3 | 3,5312 | 0,426 | -0,458 |
| 22 | Q58FF7 H90B3_HUMAN | K.VILHLKEDQTEYLEE.R             |            | 2 | 3,5206 | 0,34  | -0,394 |
| 22 | P78347 GTF2I_HUMAN | K.ANELPQPPVPEPANAGK.R           |            | 2 | 3,5177 | 0,389 | -0,706 |
| 22 | POC7M2 RA1L3_HUMAN | K.KIFVGGIKEDTE.E                |            | 2 | 3,5144 | 0,438 | -0,457 |
| 22 | Q70EL4 UBP43_HUMAN | R.RPRS#TSQSIVSLLTGAGEDE.K       | S845:      | 3 | 3,5139 | 0,128 | -0,481 |
| 22 | Q6NZI2 PTRF_HUMAN  | E.AGDLRRGS#S#PDVHALLE.I         | S365:S366: | 3 | 3,5096 | 0,24  | -0,281 |
| 22 | O95793 STAU1_HUMAN | R.KVTFEFPGS#GDE.N               | S390:      | 2 | 3,5053 | 0,287 | -0,613 |
| 22 | P15170 ERF3A_HUMAN | K.HFTILDAPGHK.S                 |            | 3 | 3,5043 | 0,18  | 0,37   |

|    |                       |                               |                 |   |        |       |        |
|----|-----------------------|-------------------------------|-----------------|---|--------|-------|--------|
| 22 | Q14671 PUM1_HUMAN     | E.YVLSS#PGDSCLRK.G            | S229:           | 2 | 3,5013 | 0,361 | -0,444 |
| 22 | P00519 ABL1_HUMAN     | R.SCS#ASCVPHGAKDTE.W          | S718:           | 2 | 3,4975 | 0,462 | -0,072 |
| 22 | P09874 PARP1_HUMAN    | E.VKAEPVEVVAPR.G              |                 | 3 | 3,4958 | 0,144 | 0,141  |
| 22 | P49915 GUAA_HUMAN     | E.GKVIEPLKDFHKDE.V            |                 | 2 | 3,4889 | 0,4   | -0,59  |
| 22 | Q9HAW4 CLSPN_HUMAN    | R.NFVFHTLS#PVKAEAAKE.S        | S1289:          | 3 | 3,4876 | 0,2   | -0,465 |
| 22 | O94885 SASH1_HUMAN    | R.TCS#FGGFDLTNR.S             | S407:           | 2 | 3,4812 | 0,357 | -0,252 |
| 22 | Q13428 TCOF_HUMAN     | R.KSAEPSANTTLVS#ETEEE.G       | S171:           | 2 | 3,4799 | 0,552 | -0,67  |
| 22 | POC7M2 RA1L3_HUMAN    | K.IFVGGIKEDTEE.H              |                 | 2 | 3,4795 | 0,346 | -0,456 |
| 22 | Q9ULW0 TPX2_HUMAN     | K.GCTIVKPFNLSQGK.K            |                 | 2 | 3,4783 | 0,318 | -0,551 |
| 22 | ##A0A594 A0A594_HUMAN | R.GS#PRGSKDRQADSQSY#T#LVE.S   | S36:Y50:T51:    | 3 | 3,4772 | 0,133 | 1,889  |
| 22 | Q15185 TEBP_HUMAN     | K.SKLTFSCLGGSDNFK.H           |                 | 3 | 3,4748 | 0,293 | -0,33  |
| 22 | Q8NCF5 NF2IP_HUMAN    | E.FLDLNSPLSPPS#PR.T           | S204:           | 2 | 3,4728 | 0,341 | -0,422 |
| 22 | Q9UI08 EVL_HUMAN      | R.SNS#VEKPVSSILSR.T           | S331:           | 3 | 3,4727 | 0,09  | -0,116 |
| 22 | Q14684 RRP1B_HUMAN    | E.QKPLHGVLT#PTSS#PASS#PLVAK.K | T728:S732:S736: | 3 | 3,4683 | 0,24  | -0,354 |
| 22 | P48643 TCPE_HUMAN     | K.GVIVDKDFSHPM*PK.K           |                 | 2 | 3,4648 | 0,342 | -0,641 |
| 22 | P00390 GSHR_HUMAN     | K.LGGTCVNVGCVPK.K             |                 | 2 | 3,4633 | 0,41  | -0,269 |
| 22 | O14974 MYPT1_HUMAN    | R.RST#QGVTLTDLQE.A            | T696:           | 2 | 3,4575 | 0,371 | -0,319 |
| 22 | Q9BZD4 NUF2_HUMAN     | K.IVDS#PEKLNKYKE.K            | S247:           | 3 | 3,4509 | 0,262 | -0,334 |
| 22 | O43166 SI1L1_HUMAN    | K.FHALS#SPQSPFPSTPSR.R        | S1564:          | 3 | 3,45   | 0,192 | -0,271 |
| 22 | P30084 ECHM_HUMAN     | K.LFYSTFATDDR.K               |                 | 2 | 3,4495 | 0,44  | -0,457 |
| 22 | O43572 AKA10_HUMAN    | R.TLRPDGPGPAMSFFR.R           |                 | 3 | 3,4495 | 0,198 | -0,115 |
| 22 | Q15185 TEBP_HUMAN     | E.IDLFHCIDPNSK.H              |                 | 3 | 3,4446 | 0,099 | 0,232  |
| 22 | Q5SW79 CE170_HUMAN    | R.TPLT#S#ADEHVHVKLE.G         | T1058:S1059:    | 3 | 3,444  | 0,234 | -0,201 |
| 22 | Q00537 PCTK2_HUMAN    | E.KLQINS#PPFDQPMSR.R          | S165:           | 3 | 3,4417 | 0,24  | -0,398 |
| 22 | P51572 BAP31_HUMAN    | K.LQAAVDGPMKKEE.-             |                 | 2 | 3,435  | 0,411 | -0,478 |
| 22 | O14974 MYPT1_HUMAN    | E.RKDESPATWR.L                |                 | 3 | 3,4349 | 0,402 | -0,073 |
| 22 | P28370 SMCA1_HUMAN    | E.LFAHFIQPSAQKS#PTSPLNM*K.L   | S116:           | 3 | 3,426  | 0,273 | -0,6   |
| 22 | Q01082 SPTB2_HUMAN    | R.RPPS#PEPSTKVSEAE.S          | S2102:          | 2 | 3,4254 | 0,292 | -0,469 |
| 22 | Q13151 ROA0_HUMAN     | K.LFVGGLKGDVAE.G              |                 | 2 | 3,4245 | 0,234 | -0,304 |
| 22 | P04264 K2C1_HUMAN     | K.WELLQQVDTSTR.T              |                 | 2 | 3,4232 | 0,423 | -0,413 |
| 22 | P30086 PEBP1_HUMAN    | K.LYTLVLTDPDAPSR.K            |                 | 2 | 3,4108 | 0,313 | -0,469 |
| 22 | P16989 DBPA_HUMAN     | R.KYLR#VGDGETVE.F             | S134:           | 2 | 3,4103 | 0,447 | -0,478 |
| 22 | Q13535 ATR_HUMAN      | R.RLS#SSLNPSKR.A              | S435:           | 3 | 3,4102 | 0,369 | 0,069  |

|    |                     |                              |                 |   |        |       |        |
|----|---------------------|------------------------------|-----------------|---|--------|-------|--------|
| 22 | O95425 SVIL_HUMAN   | E.M*EKS#FDEQNVPK.R           | S707:           | 2 | 3,4041 | 0,249 | -0,236 |
| 22 | A8K630 A8K630_HUMAN | R.LQQQHSEQPPLQPS#PVTTTR.R    | S22:            | 3 | 3,4019 | 0,23  | -0,488 |
| 22 | Q9NYF8 BCLF1_HUMAN  | K.SEKLDLFDYS#PPLHK.N         | S512:           | 3 | 3,3999 | 0,281 | -0,916 |
| 22 | Q9C0B5 ZDHC5_HUMAN  | R.GVGSPEPGPTAPYLGR.S         |                 | 2 | 3,3985 | 0,361 | -0,549 |
| 22 | Q9BR76 COR1B_HUMAN  | K.FRHVFGQPVK.N               |                 | 3 | 3,3983 | 0,1   | 0,376  |
| 22 | O60264 SMCA5_HUMAN  | E.LFAHFIQPAAQK.T             |                 | 2 | 3,3953 | 0,28  | -0,445 |
| 22 | P16401 H15_HUMAN    | E.TAPAETATPAPVEKS#PAKK.K     | S18:            | 2 | 3,3934 | 0,4   | -0,865 |
| 22 | Q13442 HAP28_HUMAN  | K.KVTQLDLDPKE.L              |                 | 2 | 3,3925 | 0,394 | -0,818 |
| 22 | Q8N7R7 CCYL1_HUMAN  | R.S#FSADNFIGIQR.S            | S342:           | 3 | 3,3925 | 0,098 | -0,127 |
| 22 | Q68CZ2 TENS3_HUMAN  | E.VLHTQGPVDGSLYAK.V          |                 | 2 | 3,3901 | 0,495 | -0,693 |
| 22 | Q96EP5 DAZP1_HUMAN  | K.IFVGGIPHNCGETE.L           |                 | 2 | 3,382  | 0,405 | -0,478 |
| 22 | P61586 RHOA_HUMAN   | E.VKHFPCNPVPIILVGNKK.D       |                 | 3 | 3,3815 | 0,289 | -0,28  |
| 22 | Q96BK5 PINX1_HUMAN  | R.SKTDLDCIFGK.R              |                 | 3 | 3,3773 | 0,222 | 0,427  |
| 22 | P35908 K22E_HUMAN   | R.NLDLDSIIAEVK.A             |                 | 2 | 3,3737 | 0,42  | -0,55  |
| 22 | Q00341 VIGLN_HUMAN  | R.RCDIIISGR.K                |                 | 2 | 3,3715 | 0,221 | -0,507 |
| 22 | Q15121 PEA15_HUMAN  | K.YKDIIRQPSEEE.I             |                 | 2 | 3,3628 | 0,266 | -0,405 |
| 22 | Q99614 TTC1_HUMAN   | R.LKEEGNEQFK.K               |                 | 3 | 3,3579 | 0,133 | 0,15   |
| 22 | P00441 SODC_HUMAN   | E.FGDNTAGCTSAGPHFNPLSR.K     |                 | 3 | 3,3562 | 0,447 | -0,261 |
| 22 | P08670 VIME_HUMAN   | E.RDNLAEDIM*R.L              |                 | 3 | 3,3561 | 0,326 | 0,366  |
| 22 | O15027 SC16A_HUMAN  | E.HRPASALVNPLAR.G            |                 | 3 | 3,3535 | 0,163 | -0,065 |
| 22 | Q58FF7 H90B3_HUMAN  | K.KHSQFIGYPITLYLEK.E         |                 | 3 | 3,3446 | 0,243 | -0,472 |
| 22 | Q66K74 MAP1S_HUMAN  | K.AVPM*APAPAS#PGSSNDSSAR.S   | S759:           | 3 | 3,3433 | 0,096 | -0,186 |
| 22 | Q6S8J3 A26CA_HUMAN  | E.KIWHHTFYNE.L               |                 | 2 | 3,3353 | 0,35  | -0,71  |
| 22 | Q92667 AKAP1_HUMAN  | K.LPAEPPALLQTHPPCR.R         |                 | 3 | 3,334  | 0,232 | -0,509 |
| 22 | Q9BZZ5 API5_HUMAN   | R.ASEDTTSGS#PPKSSAGPKR.D     | S464:           | 3 | 3,3335 | 0,272 | -0,442 |
| 22 | Q8TCN5 ZN507_HUMAN  | K.AQQCVS#PSSSLCR.K           | S91:            | 2 | 3,3304 | 0,501 | -0,391 |
| 22 | O43166 SI1L1_HUMAN  | R.TLS#DESIYNSQRE.H           | S1585:          | 2 | 3,3261 | 0,474 | -0,527 |
| 22 | Q14738 2A5D_HUMAN   | R.RKSELPQDVYTIK.A            |                 | 3 | 3,3259 | 0,127 | 0      |
| 22 | Q92499 DDX1_HUMAN   | E.HKM*DQAIIFCR.T             |                 | 3 | 3,3253 | 0,121 | -0,382 |
| 22 | Q01804 OTUD4_HUMAN  | K.TAADVVSPGANSVDSR.V         |                 | 2 | 3,3214 | 0,198 | -0,237 |
| 22 | P30101 PDIA3_HUMAN  | E.VRGFPTIYFSPANK.K           |                 | 3 | 3,3196 | 0,12  | -0,115 |
| 22 | P46940 IQGA1_HUMAN  | E.VAQHYQDTLIR.A              |                 | 3 | 3,3195 | 0,396 | -0,068 |
| 22 | Q9BVC5 ASHWN_HUMAN  | R.KSPS#GPVKSPPLS#PVGTT#PVK.L | S184:S193:T198: | 3 | 3,3193 | 0,153 | -0,398 |



|    |                     |                                  |              |   |        |       |        |
|----|---------------------|----------------------------------|--------------|---|--------|-------|--------|
| 22 | P51858 HDGF_HUMAN   | E.YKCGDLVFAK.M                   |              | 3 | 3,3142 | 0,126 | 0,305  |
| 22 | Q9UQ80 PA2G4_HUMAN  | E.KTIIQNPTDQKK.D                 |              | 3 | 3,3078 | 0,329 | -0,237 |
| 22 | Q5VV41 ARHGG_HUMAN  | R.HQS#FGAAVLSRE.A                | S107:        | 2 | 3,3014 | 0,393 | -0,441 |
| 22 | P49773 HINT1_HUMAN  | K.AQVARPGGDTIFGK.I               |              | 2 | 3,3009 | 0,231 | -0,517 |
| 22 | P09661 RU2A_HUMAN   | R.LKGLLQSGQIPGR.E                |              | 3 | 3,299  | 0,199 | -0,535 |
| 22 | P31949 S10AB_HUMAN  | K.KLDTNSDGQLDFSE.F               |              | 2 | 3,2939 | 0,317 | -0,233 |
| 22 | O43719 HTSF1_HUMAN  | R.HFS#EHPSTSKM*NAQE.T            | S403:        | 3 | 3,2902 | 0,112 | -0,301 |
| 22 | P42166 LAP2A_HUMAN  | K.LREQGT#ESRSSTPLPTISSAE.N       | T154:        | 3 | 3,2894 | 0,229 | -0,379 |
| 22 | Q02790 FKBP4_HUMAN  | D.GTKFDSSLDRK.D                  |              | 3 | 3,2881 | 0,173 | 0,219  |
| 22 | P48643 TCPE_HUMAN   | K.IAILTCPFEPKPK.T                |              | 2 | 3,2877 | 0,345 | -0,909 |
| 22 | Q9UQ35 SRRM2_HUMAN  | K.SATRPS#PS#PERSSTGPEPPAPTLLAE.R | S351:S353:   | 3 | 3,287  | 0,23  | -0,38  |
| 22 | Q13045 FLII_HUMAN   | E.AVLQS#PGLSGK.V                 | S856:        | 2 | 3,2857 | 0,335 | -0,429 |
| 22 | Q15554 TERF2_HUMAN  | D.QKDLVLPTQALPAS#PALK.N          | S323:        | 3 | 3,2822 | 0,183 | -0,464 |
| 22 | Q9H6Z4 RANB3_HUMAN  | E.EKPAIAPPVVFVQK.D               |              | 3 | 3,2798 | 0,245 | -0,116 |
| 22 | Q14980 NUMA1_HUMAN  | K.LKAVQAQGGESQQE.A               |              | 2 | 3,2758 | 0,366 | -0,083 |
| 22 | O60610 DIAP1_HUMAN  | R.NSSASYGDDPTAQSLOQDVSDE.Q       |              | 2 | 3,2747 | 0,499 | -0,447 |
| 22 | O60506 HNRPQ_HUMAN  | K.LKDYAFIHFE.R                   |              | 2 | 3,2726 | 0,327 | -0,611 |
| 22 | Q9UM11 FZR_HUMAN    | K.DATSDNGKDGLAYSALLKNE.L         |              | 3 | 3,2701 | 0,097 | -0,264 |
| 22 | Q96CV9 OPTN_HUMAN   | R.SRS#ADGAKNYFE.H                | S218:        | 2 | 3,2668 | 0,416 | -0,428 |
| 22 | Q9Y4W6 AFG32_HUMAN  | R.KLASLTPGFSGADVANCNE.A          |              | 2 | 3,2622 | 0,614 | -0,238 |
| 22 | Q66GS9 CP135_HUMAN  | R.HGLATPPLSSTLRS#PSHS#PE.H       | S1130:S1134: | 3 | 3,2586 | 0,11  | -0,656 |
| 22 | P20042 IF2B_HUMAN   | K.KPFMLDEEGDTQTEE.T              |              | 2 | 3,2559 | 0,392 | -0,483 |
| 22 | Q8NI27 THOC2_HUMAN  | R.RKIDTHPS#PSHSSTVKDSLIE.L       | S1302:       | 3 | 3,2553 | 0,289 | -0,303 |
| 22 | Q9Y2W2 WBP11_HUMAN  | K.VGFALDLPPR.R                   |              | 2 | 3,2522 | 0,309 | -0,337 |
| 22 | Q5VTR2 BRE1A_HUMAN  | K.ALVVPEPEPDSDS#NQER.K           | S138:        | 2 | 3,24   | 0,424 | -0,56  |
| 22 | Q9BVW5 TIPIN_HUMAN  | K.LLSNSQTLGNDM*LMNTPR.A          |              | 3 | 3,2368 | 0,33  | -0,453 |
| 22 | O00170 AIP_HUMAN    | E.GRGELPDFQDGTK.A                |              | 3 | 3,2349 | 0,091 | 0,129  |
| 22 | P35527 K1C9_HUMAN   | R.HGVQELEIELQSLSK.K              |              | 3 | 3,233  | 0,086 | -0,498 |
| 22 | Q53S49 Q53S49_HUMAN | R.KVNNKT#LYS#S#MLAE.S            | T88:S91:S92: | 3 | 3,233  | 0,207 | 1,095  |
| 22 | P41227 ARD1A_HUMAN  | R.HVVLGAIENKVES#KGNS#PPSSGE.A    | S182:S186:   | 3 | 3,2214 | 0,298 | -0,22  |
| 22 | P07910 HNRPC_HUMAN  | K.LKGDLLQAIKKE.L                 |              | 3 | 3,2203 | 0,197 | 0,337  |
| 22 | Q86UU1 PHLB1_HUMAN  | R.GLLTDSPAATVLAE.A               |              | 2 | 3,2194 | 0,322 | -0,539 |
| 22 | Q13523 PRP4B_HUMAN  | K.ARS#PTDDKVKIE.D                | S257:        | 3 | 3,2183 | 0,265 | -0,127 |

|    |                    |                          |            |   |        |       |        |
|----|--------------------|--------------------------|------------|---|--------|-------|--------|
| 22 | Q9NYF8 BCLF1_HUMAN | K.KAEGEPQEE#PLKSK.S      | S177:      | 3 | 3,2182 | 0,254 | -0,211 |
| 22 | Q9H2Y7 ZF106_HUMAN | R.NRENS#PSSQSAGLSSINKE.G | S1279:     | 3 | 3,2167 | 0,168 | -0,526 |
| 22 | Q5T5C0 STXB5_HUMAN | R.KLS#LPTDLKPDLDVKD.N    | S759:      | 3 | 3,2166 | 0,154 | -0,585 |
| 22 | P13639 EF2_HUMAN   | K.ARPFPDGLAEDIDKGE.V     |            | 3 | 3,2162 | 0,255 | -0,317 |
| 22 | Q13428 TCOF_HUMAN  | K.TVANLLSGKS#PR.K        | S156:      | 2 | 3,2083 | 0,324 | -0,461 |
| 22 | Q53EZ4 CEP55_HUMAN | K.CYNDLLASAKKDLE.V       |            | 3 | 3,208  | 0,286 | -0,112 |
| 22 | Q9NZZ3 CHMP5_HUMAN | K.IDQIEDLQDQLE.D         |            | 2 | 3,2064 | 0,123 | -0,502 |
| 22 | POC7M2 RA1L3_HUMAN | E.DSQRPGAHLTVK.K         |            | 3 | 3,206  | 0,345 | -0,629 |
| 22 | Q86TI2 DPP9_HUMAN  | K.APHDFQFVQKTDE.S        |            | 3 | 3,2056 | 0,164 | 0,585  |
| 22 | P06748 NPM_HUMAN   | K.M*QAS#IEKGGSLPKVE.A    | S254:      | 3 | 3,2052 | 0,26  | -0,11  |
| 22 | P63241 IF5A1_HUMAN | K.VHLVGIDIFTGK.K         |            | 2 | 3,2052 | 0,462 | -0,564 |
| 22 | Q15154 PCM1_HUMAN  | R.KPFNFLPMQINTNK.S       |            | 3 | 3,2046 | 0,222 | -0,324 |
| 22 | Q9Y4W6 AFG32_HUMAN | R.KLASLTPGFSGADVANCNE.A  |            | 3 | 3,2012 | 0,3   | 0,089  |
| 22 | Q9NYB0 TE2IP_HUMAN | K.YLLGDAPVS#PSSQK.L      | S203:      | 2 | 3,2003 | 0,376 | -0,237 |
| 22 | P51991 ROA3_HUMAN  | R.GFAFVTDDHDTVDKIVVQK.Y  |            | 3 | 3,1963 | 0,195 | -0,481 |
| 22 | Q02952 AKA12_HUMAN | E.M*KGSVEEPKPEPKR.K      |            | 3 | 3,1957 | 0,279 | -1,562 |
| 22 | Q02241 KIF23_HUMAN | R.RS#STVAPAQPDGAESE.W    | S911:      | 2 | 3,193  | 0,432 | 0      |
| 22 | Q71U36 TBA1A_HUMAN | E.ITNACFEPANQM*VK.C      |            | 2 | 3,1929 | 0,326 | -0,372 |
| 22 | P31948 STIP1_HUMAN | K.TVDLKPDPWGKGYSR.K      |            | 3 | 3,1918 | 0,32  | -0,226 |
| 22 | O76024 WFS1_HUMAN  | E.HDGGAQPGVPVKS#LQK.Q    | S222:      | 3 | 3,1903 | 0,332 | -0,431 |
| 22 | P06748 NPM_HUMAN   | K.TPKGSSVEDIK.A          |            | 3 | 3,1877 | 0,285 | 0,218  |
| 22 | Q9BY44 EIF2A_HUMAN | R.SDKS#PDLAPTAPQSTPR.N   | S506:      | 2 | 3,1786 | 0,407 | -0,376 |
| 22 | Q01850 CDR2_HUMAN  | R.S#PGKCDQEKPAFACKLE.L   | S145:      | 3 | 3,1755 | 0,209 | -0,164 |
| 22 | P31948 STIP1_HUMAN | K.DFDTALKHYDK.A          |            | 2 | 3,173  | 0,353 | -0,451 |
| 22 | O15355 PPM1G_HUMAN | R.NKNLPPEEQMISALPD.I     |            | 2 | 3,1651 | 0,344 | -0,611 |
| 22 | Q3KQU3 MA7D1_HUMAN | K.SRGPTPPAMGPR.D         |            | 3 | 3,165  | 0,158 | 0,373  |
| 22 | Q53F19 CQ085_HUMAN | E.YHEELPALKQPR.E         |            | 3 | 3,1615 | 0,162 | -0,062 |
| 22 | Q9Y3U8 RL36_HUMAN  | E.LSNVLAAM*R.K           |            | 2 | 3,1533 | 0,422 | 0      |
| 22 | O15357 SHIP2_HUMAN | E.GVPHQLLPPEPPSPAR.A     |            | 3 | 3,1504 | 0,238 | -0,216 |
| 22 | P78347 GTF2I_HUMAN | K.ANELPQPPVPEPANAGKR.K   |            | 2 | 3,1487 | 0,267 | -0,583 |
| 22 | Q13573 SNW1_HUMAN  | R.GPPS#PPAPVMHS#PSR.K    | S224:S232: | 2 | 3,147  | 0,338 | -0,437 |
| 22 | Q9UFC0 LRWD1_HUMAN | K.RPDDVPLSLS#PSKR.A      | S243:      | 2 | 3,1459 | 0,205 | -0,37  |
| 22 | Q8WXH0 SYNE2_HUMAN | R.RGS#MSYLAAVEEEVEE.S    | S4108:     | 2 | 3,1458 | 0,422 | -0,325 |

|    |                     |                          |            |   |        |       |        |
|----|---------------------|--------------------------|------------|---|--------|-------|--------|
| 22 | Q13185 CBX3_HUMAN   | K.KVEEAPEEFVVE.K         |            | 2 | 3,1438 | 0,317 | -0,398 |
| 22 | P48643 TCPE_HUMAN   | K.IAILTCPFPPPK.T         |            | 3 | 3,142  | 0,409 | -0,341 |
| 22 | Q8IWW6 RHG12_HUMAN  | R.SFGHFPGPFLDVE.K        |            | 2 | 3,1404 | 0,255 | -0,696 |
| 22 | Q9UFW8 CGBP1_HUMAN  | K.QRPLTASLQCNSTAQTE.K    |            | 2 | 3,1359 | 0,389 | -0,256 |
| 22 | Q9Y490 TLN1_HUMAN   | K.KSTVLQQYNR.V           |            | 3 | 3,1327 | 0,192 | 0      |
| 22 | Q9UHB6 LIMA1_HUMAN  | R.KISENSYSLDDLE.I        |            | 2 | 3,1326 | 0,372 | -0,242 |
| 22 | Q9BT25 NYS48_HUMAN  | R.SFAQVLELSAEASK.E       |            | 2 | 3,1281 | 0,292 | -0,659 |
| 22 | Q96AT1 K1143_HUMAN  | K.NSSLFSFDNEDENE.-       |            | 2 | 3,1271 | 0,31  | -0,681 |
| 22 | Q96TA1 NIBL1_HUMAN  | R.DSM*VM*HNS#DPNLHLLAE.G | S561:      | 3 | 3,1266 | 0,196 | -0,27  |
| 22 | Q92499 DDX1_HUMAN   | K.MDQAIIFCR.T            |            | 2 | 3,1265 | 0,286 | -0,211 |
| 22 | Q8WXH0 SYNE2_HUMAN  | R.RGS#M*SYLAAVEEEVEE.S   | S4108:     | 2 | 3,1258 | 0,396 | -0,451 |
| 22 | Q96D71 REPS1_HUMAN  | R.LKS#EDELPE.V           | S657:      | 2 | 3,1219 | 0,425 | -0,377 |
| 22 | Q96QT4 TRPM7_HUMAN  | R.VSS#LAGFTDCHR.T        | S1477:     | 3 | 3,1217 | 0,207 | 0,064  |
| 22 | Q13573 SNW1_HUMAN   | R.GPPS#PPAPVMHS#PSR.K    | S224:S232: | 3 | 3,1175 | 0,279 | -0,109 |
| 22 | Q86Y04 Q86Y04_HUMAN | K.KVDLTLIS#PKSE.N        | S239:      | 2 | 3,1115 | 0,323 | -0,606 |
| 22 | Q9POV9 SEP10_HUMAN  | R.HLLFQSHM*ATK.T         |            | 3 | 3,1107 | 0,328 | 0,069  |
| 22 | Q9BR76 COR1B_HUMAN  | R.HVFGQPVKNDQCYE.D       |            | 2 | 3,1107 | 0,345 | -1,063 |
| 22 | P42166 LAP2A_HUMAN  | R.SHISDQSPLSSK.R         |            | 2 | 3,1106 | 0,375 | -0,759 |
| 22 | Q14157 UBP2L_HUMAN  | R.RYPSS#ISSS#PQKD.L      | S605:S609: | 2 | 3,1102 | 0,333 | -0,378 |
| 22 | Q9UJM3 ERRFI_HUMAN  | R.KHLSYVVS#P.-           | S461:      | 2 | 3,1058 | 0,29  | -0,66  |
| 22 | Q8IWS0 PHF6_HUMAN   | K.CGFCHVGEEENE.A         |            | 2 | 3,1029 | 0,349 | -0,416 |
| 22 | Q01082 SPTB2_HUMAN  | R.RPPS#PEPSTKVSEE.A      | S2102:     | 2 | 3,1027 | 0,31  | 0,075  |
| 22 | Q04206 TF65_HUMAN   | R.CIHSFQNLGIQCVK.K       |            | 3 | 3,102  | 0,147 | -0,322 |
| 22 | P45974 UBP5_HUMAN   | E.HLSHFGIDM*LK.M         |            | 3 | 3,1009 | 0,196 | 0      |
| 22 | Q13428 TCOF_HUMAN   | K.GSLGS#QGAKDEPEEE.L     | S1410:     | 2 | 3,0957 | 0,369 | -0,605 |
| 22 | Q15477 SKIV2_HUMAN  | K.FKKDPPLAAVTTAVQE.L     |            | 2 | 3,0938 | 0,175 | -0,569 |
| 22 | Q86UX6 ST32C_HUMAN  | R.SQDLPRELPAPE.S         |            | 2 | 3,0865 | 0,243 | -0,589 |
| 22 | P38159 HNRPG_HUMAN  | R.GFAFVTFESPADAKDAAR.D   |            | 3 | 3,0857 | 0,397 | -0,578 |
| 22 | Q9NYF8 BCLF1_HUMAN  | K.LKDLFDYS#PPLHK.N       | S512:      | 3 | 3,0856 | 0,343 | -0,111 |
| 22 | Q13442 HAP28_HUMAN  | K.GVEGLIDIENPNR.V        |            | 2 | 3,0841 | 0,416 | -0,342 |
| 22 | P84157 MXRA7_HUMAN  | E.GFSFKY#SPGKLR.G        | Y143:      | 2 | 3,0817 | 0,37  | -0,499 |
| 22 | Q13206 DDX10_HUMAN  | R.HNVFGLDLKDE.K          |            | 2 | 3,081  | 0,437 | -0,284 |
| 22 | Q96AJ1 CLUA1_HUMAN  | R.KSEPLDES#DNDF.-        | S409:      | 2 | 3,0794 | 0,344 | -0,496 |

|    |                     |                         |            |   |        |       |        |
|----|---------------------|-------------------------|------------|---|--------|-------|--------|
| 22 | Q96PU4 UHRF2_HUMAN  | R.LIDPGFGIYKVNE.L       |            | 2 | 3,0755 | 0,282 | -0,583 |
| 22 | Q96T58 MINT_HUMAN   | R.HGSFHEDEDPIGSPR.L     |            | 3 | 3,0753 | 0,195 | -0,544 |
| 22 | Q9Y3U8 RL36_HUMAN   | E.LSNVLAAMR.K           |            | 2 | 3,0739 | 0,406 | -0,063 |
| 22 | P62937 PPIA_HUMAN   | K.KITIADCGQLE.-         |            | 2 | 3,0727 | 0,42  | -0,391 |
| 22 | Q9H1K1 ISCU_HUMAN   | E.DAIKAALADYK.L         |            | 2 | 3,0711 | 0,394 | -0,207 |
| 22 | Q92615 LARP5_HUMAN  | R.LSREQST#PPKS#PQ.-     | T732:S736: | 2 | 3,0699 | 0,104 | -0,378 |
| 22 | P49736 MCM2_HUMAN   | R.GNDPLTSS#PGR.S        | S27:       | 2 | 3,0672 | 0,447 | -0,207 |
| 22 | O14974 MYPT1_HUMAN  | R.LAS#TSDIEEKE.N        | S507:      | 2 | 3,0671 | 0,291 | -0,469 |
| 22 | Q15154 PCM1_HUMAN   | R.KPFNFLPM*QINTNK.S     |            | 3 | 3,0668 | 0,206 | -0,321 |
| 22 | Q9H6F5 CCD86_HUMAN  | R.RLGGLRPES#PESLTSVSR.T | S18:       | 3 | 3,065  | 0,174 | -0,543 |
| 22 | Q99733 NP1L4_HUMAN  | K.YAALYQPLFDK.R         |            | 2 | 3,0631 | 0,172 | -0,459 |
| 22 | P06748 NPM_HUMAN    | K.MQAS#IEKGGSLPKVE.A    | S254:      | 2 | 3,0612 | 0,339 | -0,443 |
| 22 | O75554 WBP4_HUMAN   | E.KTVTSLGVM*ADGVAPVFK.K |            | 3 | 3,0534 | 0,165 | -0,199 |
| 22 | Q9Y2W1 TR150_HUMAN  | K.SPLQSVVVR.R           |            | 2 | 3,0526 | 0,309 | 0      |
| 22 | Q13442 HAP28_HUMAN  | K.GVEGLIDIENPNRVAQTTK.K |            | 2 | 3,0507 | 0,4   | 0,238  |
| 22 | P04264 K2C1_HUMAN   | R.SLDLDSIIAEVK.A        |            | 2 | 3,0498 | 0,367 | -0,562 |
| 22 | P46087 NOL1_HUMAN   | K.GISAGAVQTAGK.K        |            | 2 | 3,0455 | 0,374 | -0,575 |
| 22 | P31689 DNJA1_HUMAN  | R.TIVITSHPGQIVK.H       |            | 2 | 3,0441 | 0,282 | -0,35  |
| 22 | Q15185 TEBP_HUMAN   | K.LTFSCLOGGSDNFK.H      |            | 2 | 3,0425 | 0,495 | -0,675 |
| 22 | Q9POV9 SEP10_HUMAN  | R.HLLFQSHMATK.T         |            | 3 | 3,0415 | 0,191 | -0,07  |
| 22 | P51858 HDGF_HUMAN   | R.RAGDLLEDS#PKRPK.E     | S165:      | 3 | 3,0373 | 0,16  | -0,33  |
| 22 | Q9UEU0 VTI1B_HUMAN  | K.LIRDFDEKQQE.A         |            | 3 | 3,0358 | 0,247 | -0,064 |
| 22 | Q14004 CD2L5_HUMAN  | K.TKPPLQVTKVE.N         |            | 3 | 3,0344 | 0,183 | 0,369  |
| 22 | Q9NQW6 ANLN_HUMAN   | K.TQS#LPVTEKVTE.N       | S485:      | 2 | 3,0339 | 0,275 | -0,432 |
| 22 | A8K630 A8K630_HUMAN | R.LQQQHSEQPPLQSPVTTTR.R |            | 3 | 3,0333 | 0,312 | -0,674 |
| 22 | P05362 ICAM1_HUMAN  | K.REPAVGEPAEVTTTVLVR.R  |            | 3 | 3,0225 | 0,244 | -0,19  |
| 22 | P00338 LDHA_HUMAN   | K.KSADTLWGIQKE.L        |            | 2 | 3,0185 | 0,303 | -0,089 |
| 22 | O95425 SVIL_HUMAN   | R.LQDRSLT#QPITTEE.V     | T736:      | 2 | 3,0172 | 0,443 | -0,357 |
| 22 | O43707 ACTN4_HUMAN  | R.HRPELIEYDK.L          |            | 2 | 3,0168 | 0,249 | -0,282 |
| 22 | P00558 PGK1_HUMAN   | R.AHSSM*VGVNLPQK.A      |            | 3 | 3,0158 | 0,15  | 0,198  |
| 22 | Q9UNZ2 NSF1C_HUMAN  | K.SPNELVDDLFGK.G        |            | 2 | 3,0144 | 0,257 | -0,573 |
| 22 | P18583 SON_HUMAN    | R.AGIEGPLLASDVGR.D      |            | 2 | 3,0114 | 0,315 | -0,09  |
| 22 | Q6VY07 PACS1_HUMAN  | K.TDLQGSAS#PSKVE.G      | S495:      | 2 | 3,0105 | 0,277 | -0,436 |

|    |                    |                         |            |   |        |       |        |
|----|--------------------|-------------------------|------------|---|--------|-------|--------|
| 22 | Q14247 SRC8_HUMAN  | R.AKTQT#PPVS#PAPQPTEE.R | T401:S405: | 2 | 3,0066 | 0,381 | -0,693 |
| 22 | P40227 TCPZ_HUMAN  | K.GIDPFSLDALSKE.G       |            | 2 | 3,0046 | 0,372 | -1,49  |
| 22 | O75694 NU155_HUMAN | K.HGEPEEDIVGLQAFQE.R    |            | 2 | 2,9997 | 0,263 | -0,407 |
| 22 | Q15185 TEBP_HUMAN  | K.LTFSCLLGGSDNFKHLNE.I  |            | 2 | 2,9908 | 0,465 | -0,755 |
| 22 | Q13442 HAP28_HUMAN | R.M*QS#LSLNK.-          | S176:      | 2 | 2,9892 | 0,179 | -0,3   |
| 22 | Q9UK76 HN1_HUMAN   | R.RNS#SEASSGDFLDLKGGE.G | S87:       | 2 | 2,9873 | 0,335 | -0,193 |
| 22 | Q8WUA2 PPIL4_HUMAN | K.QDTKYDLILDEQAE.D      |            | 2 | 2,9858 | 0,313 | -0,363 |
| 22 | Q05D32 CTSL2_HUMAN | R.DIDNNLITSTPR.A        |            | 2 | 2,9838 | 0,393 | -0,449 |
| 22 | Q5T5Y3 CAMP1_HUMAN | K.APVHFVEPLS#PTGVAGHR.K | S1080:     | 3 | 2,9833 | 0,144 | -0,281 |
| 22 | P02545 LMNA_HUMAN  | R.LRLSPSPTSQR.S         |            | 2 | 2,9805 | 0,318 | -0,491 |
| 22 | P36542 ATPG_HUMAN  | R.THSDQFLVAFKE.V        |            | 2 | 2,9804 | 0,226 | -0,172 |
| 22 | Q9UQ35 SRRM2_HUMAN | R.VSGRTS#PPLDR.A        | S2398:     | 2 | 2,9767 | 0,172 | -0,531 |
| 22 | P68104 EF1A1_HUMAN | K.IGGIGTVPVGRVE.T       |            | 2 | 2,9762 | 0,412 | -0,389 |
| 22 | O60264 SMCA5_HUMAN | E.LFAHQIQAQK.T          |            | 3 | 2,971  | 0,235 | 0,067  |
| 22 | Q9ULQ1 TPC1_HUMAN  | R.YQQHSMVFLGR.R         |            | 3 | 2,9689 | 0,294 | 0,067  |
| 22 | Q7Z2K8 GRIN1_HUMAN | E.DLGS LGKVDPLCSSK.T    |            | 3 | 2,9678 | 0,368 | 0      |
| 22 | Q92597 NDRG1_HUMAN | R.SRT#AS#GSSVTSLDGTR.S  | T328:S330: | 2 | 2,9667 | 0,401 | -0,42  |
| 22 | P04264 K2C1_HUMAN  | R.TNAENEFVTIKK.D        |            | 3 | 2,9621 | 0,344 | 0,328  |
| 22 | Q93052 LPP_HUMAN   | R.CSVCKEPIM*PAPGQEE.T   |            | 2 | 2,9619 | 0,481 | -0,66  |
| 22 | Q15154 PCM1_HUMAN  | R.INFSDLDQR.S           |            | 2 | 2,9611 | 0,376 | -0,11  |
| 22 | P52597 HNRPF_HUMAN | E.LGSEDDVKM*ALKK.D      |            | 3 | 2,9608 | 0,45  | 0,063  |
| 22 | P46087 NOL1_HUMAN  | K.KGPQSLFNAPR.G         |            | 3 | 2,9596 | 0,347 | 0,075  |
| 22 | P59074 CG301_HUMAN | K.AAHDNMDIDKVDE.L       |            | 2 | 2,9575 | 0,357 | 0      |
| 22 | Q92609 TBCD5_HUMAN | E.VGIDPLSSYSNK.S        |            | 2 | 2,9562 | 0,361 | -0,286 |
| 22 | P51991 ROA3_HUMAN  | E.DSVKPGAHLTVK.K        |            | 3 | 2,9559 | 0,246 | 0,146  |
| 22 | P62805 H4_HUMAN    | R.DNIQGITKPAIR.R        |            | 2 | 2,9519 | 0,163 | -0,276 |
| 22 | O76021 RL1D1_HUMAN | K.ATNES#EDEIPQLVPIGK.K  | S361:      | 2 | 2,9517 | 0,31  | -0,381 |
| 22 | P42224 STAT1_HUMAN | E.NNFLLQHNR.K           |            | 2 | 2,9498 | 0,341 | -0,385 |
| 22 | O94766 B3GA3_HUMAN | E.SLLSHLVDPKDLEPR.A     |            | 3 | 2,9494 | 0,193 | -0,608 |
| 22 | O94888 UBXD7_HUMAN | R.SIFDGRDFQTE.T         |            | 2 | 2,9474 | 0,374 | -0,584 |
| 22 | Q5JTV8 TOIP1_HUMAN | R.SQPAILLTAARDAEE.A     |            | 2 | 2,9466 | 0,432 | -0,503 |
| 22 | Q9NWS0 PIHD1_HUMAN | K.NRPFM*GSISQQNIR.S     |            | 3 | 2,9409 | 0,143 | -0,22  |
| 22 | Q9NVI7 ATD3A_HUMAN | K.DALNLAQM*QE.Q         |            | 2 | 2,9404 | 0,085 | -0,212 |

|    |                     |                                   |            |   |        |       |        |
|----|---------------------|-----------------------------------|------------|---|--------|-------|--------|
| 22 | P23588 IF4B_HUMAN   | K.GKTISLTDFLAE.D                  |            | 2 | 2,9388 | 0,43  | -0,565 |
| 22 | Q00341 VIGLN_HUMAN  | R.CDIIISGR.K                      |            | 2 | 2,9383 | 0,253 | -0,35  |
| 22 | P13639 EF2_HUMAN    | R.FDVHDTVTLHAD.A                  |            | 3 | 2,9297 | 0,212 | 0,504  |
| 22 | Q13442 HAP28_HUMAN  | K.GVEGLIDIENPNRVAQTTK.K           |            | 3 | 2,9294 | 0,3   | -0,267 |
| 22 | Q8NCN4 RN169_HUMAN  | R.RKGS#VDQYLLR.S                  | S693:      | 3 | 2,9294 | 0,143 | -0,129 |
| 22 | Q8NCF5 NF2IP_HUMAN  | R.LVLDPGEAPLVPVYSGK.V             |            | 2 | 2,9277 | 0,397 | -0,348 |
| 22 | P09497 CLCB_HUMAN   | E.KVAQLCDFNPK.S                   |            | 2 | 2,9271 | 0,349 | -0,462 |
| 22 | Q96D71 REPS1_HUMAN  | R.RLKS#EDEL RPE.V                 | S657:      | 3 | 2,9267 | 0,286 | -0,189 |
| 22 | P49736 MCM2_HUMAN   | E.SFTM*ASSPAQR.R                  |            | 2 | 2,9242 | 0,468 | 0,102  |
| 22 | P26641 EF1G_HUMAN   | K.KAAAPAPEEEM*DE.C                |            | 2 | 2,9218 | 0,327 | -0,087 |
| 22 | P27695 APEX1_HUMAN  | K.GAVAEDGDEL R TEPE.A             |            | 2 | 2,9171 | 0,312 | -0,692 |
| 22 | Q92597 NDRG1_HUMAN  | R.TAS#GSSVTSLDGTR.S               | S330:      | 2 | 2,9156 | 0,452 | -0,43  |
| 22 | Q9NWH9 SLTM_HUMAN   | R.ISS#KS#PGHM*VILD.Q              | S551:S553: | 2 | 2,9148 | 0,368 | -0,86  |
| 22 | P07954 FUMH_HUMAN   | E.SLM*LVTALNPHIGYDK.A             |            | 3 | 2,9088 | 0,182 | -0,614 |
| 22 | Q02241 KIF23_HUMAN  | R.RSS#TVAPAQPDGAE.S               | S912:      | 2 | 2,9066 | 0,339 | -0,083 |
| 22 | P52597 HNRPF_HUMAN  | E.LGSEDDVKM*ALKK.D                |            | 2 | 2,9033 | 0,225 | -0,084 |
| 22 | Q5TZA2 CROCC_HUMAN  | E.SGVQLSGSER.T                    |            | 2 | 2,9008 | 0,292 | 0      |
| 22 | P51858 HDGF_HUMAN   | E.YKCGDLVFAK.M                    |            | 2 | 2,8995 | 0,302 | -0,203 |
| 22 | Q15139 KPCD1_HUMAN  | R.TIS#PSTSNNIPLM*R.V              | S397:      | 2 | 2,8993 | 0,285 | -0,45  |
| 22 | P34932 HSP74_HUMAN  | K.VKTSTVDLPIE.N                   |            | 2 | 2,8981 | 0,267 | -0,406 |
| 22 | P13639 EF2_HUMAN    | K.STLTDSLVCAGIIASAR.A             |            | 3 | 2,8963 | 0,164 | -0,491 |
| 22 | P84077 ARF1_HUMAN   | E.ITDKLGLHSLR.H                   |            | 3 | 2,8952 | 0,418 | 0,584  |
| 22 | Q9ULV4 COR1C_HUMAN  | E.SPYVHYLNTFSSK.E                 |            | 3 | 2,8888 | 0,19  | 0,119  |
| 22 | P35527 K1C9_HUMAN   | K.TLNDRMRQEYEQLIAK.N              |            | 3 | 2,8858 | 0,254 | -0,593 |
| 22 | P57078 RIPK4_HUMAN  | K.FQGGHGPAATLLR.R                 |            | 2 | 2,8856 | 0,363 | -0,46  |
| 22 | P27816 MAP4_HUMAN   | E.TERAS#PIKMDLAPSK.D              | S358:      | 3 | 2,8847 | 0,204 | -1,273 |
| 22 | Q00765 REEP5_HUMAN  | K.ATVNLLGEEK.K                    |            | 2 | 2,8847 | 0,246 | 0      |
| 22 | O95817 BAG3_HUMAN   | R.SSVQGAS#SREGS#PARSSTPLHSPSPIR.V | S274:S279: | 3 | 2,8818 | 0,343 | -0,442 |
| 22 | P20042 IF2B_HUMAN   | K.NVKFPDEDEILE.K                  |            | 2 | 2,8783 | 0,24  | -0,337 |
| 22 | P04264 K2C1_HUMAN   | R.TNAENEFVTIK.K                   |            | 2 | 2,8767 | 0,406 | -0,482 |
| 22 | Q16537 2A5E_HUMAN   | R.SQSS#S#QFRSQGKPIE.L             | S33:S34:   | 3 | 2,8763 | 0,285 | -0,301 |
| 22 | Q13442 HAP28_HUMAN  | K.GVEGLIDIENPNRVAQTTK.V           |            | 3 | 2,8741 | 0,286 | -0,419 |
| 22 | Q5VY92 Q5VY92_HUMAN | R.QLAALGQTEPLPAEAPWAR.R           |            | 3 | 2,8677 | 0,274 | -0,725 |

|    |                     |                              |                 |   |        |       |        |
|----|---------------------|------------------------------|-----------------|---|--------|-------|--------|
| 22 | O60825 F262_HUMAN   | R.NYS#VGSRPLKPLSPLR.A        | S483:           | 3 | 2,8643 | 0,305 | -0,294 |
| 22 | P62753 RS6_HUMAN    | R.RLS#S#LRAS#TSKSE.S         | S235:S236:S240: | 2 | 2,8636 | 0,215 | -0,661 |
| 22 | O75170 SAPS2_HUMAN  | R.NTVDLVSTHHLHS#SSEDEDIE.G   | S542:           | 3 | 2,8619 | 0,111 | -0,449 |
| 22 | Q9BZD4 NUF2_HUMAN   | K.IVDS#PEKLN.N               | S247:           | 2 | 2,858  | 0,235 | -0,11  |
| 22 | Q9Y5K6 CD2AP_HUMAN  | R.TSS#SETEEEKPEKPLILQSLGPK.T | S233:           | 3 | 2,8564 | 0,315 | -1,334 |
| 22 | O14730 RIOK3_HUMAN  | K.AASFLKDDGDPPLLYDE.-        |                 | 2 | 2,8556 | 0,426 | -0,327 |
| 22 | Q15020 SART3_HUMAN  | K.LFISGLPFSCTKEE.L           |                 | 2 | 2,8546 | 0,37  | -0,525 |
| 22 | P08865 RSSA_HUMAN   | K.SDGIYIINLK.R               |                 | 2 | 2,8531 | 0,224 | -0,322 |
| 22 | P45974 UBP5_HUMAN   | E.HLSHFGIDMLK.M              |                 | 3 | 2,8521 | 0,178 | 0      |
| 22 | Q9UER7 DAXX_HUMAN   | K.QTGSGLGNSYVER.Q            |                 | 2 | 2,8498 | 0,394 | -0,583 |
| 22 | Q5JTV8 TOIP1_HUMAN  | R.SQPAILLLTAAR.D             |                 | 2 | 2,8488 | 0,395 | -0,584 |
| 22 | O15014 ZN609_HUMAN  | E.SKALDILQQHASHYK.S          |                 | 3 | 2,8456 | 0,337 | -0,631 |
| 22 | Q02790 FKBP4_HUMAN  | K.DKFSFDLGKGE.V              |                 | 2 | 2,8451 | 0,272 | -0,393 |
| 22 | Q9UK61 CC063_HUMAN  | E.LINLIQCR.K                 |                 | 2 | 2,845  | 0,227 | -0,118 |
| 22 | P49773 HINT1_HUMAN  | K.CAADLGLNK.G                |                 | 2 | 2,8412 | 0,409 | -0,317 |
| 22 | Q6P0Q8 MAST2_HUMAN  | R.SLS#PGRSPVFDSE.I           | S301:           | 2 | 2,8407 | 0,172 | -0,395 |
| 22 | P29692 EF1D_HUMAN   | R.ATAPQTQHVSPMR.Q            |                 | 2 | 2,8373 | 0,399 | -1,285 |
| 22 | Q9UKA4 AKA11_HUMAN  | R.DRNVIPDT#PPSTPLVPSR.A      | T1100:          | 3 | 2,8364 | 0,132 | -0,179 |
| 22 | Q9NWW8 CS062_HUMAN  | R.TRS#NPEGAEDRAVGAQASVGSR.S  | S29:            | 3 | 2,8356 | 0,407 | 0,08   |
| 22 | P14136 GFAP_HUMAN   | K.LALDIEIATYR.K              |                 | 2 | 2,8295 | 0,313 | -0,477 |
| 22 | Q13416 ORC2_HUMAN   | E.DTNAVIFSQK.I               |                 | 2 | 2,8291 | 0,37  | -0,543 |
| 22 | O43399 TPD54_HUMAN  | R.NSATFKS#FEDRVGTIK.S        | S166:           | 2 | 2,8289 | 0,508 | -0,714 |
| 22 | O60927 PP1RB_HUMAN  | K.CCCIEKPR.A                 |                 | 3 | 2,8259 | 0,328 | 0,071  |
| 22 | Q96PK6 RBM14_HUMAN  | R.TRLS#PPRASYDDPYKK.A        | S582:           | 3 | 2,8258 | 0,148 | -0,463 |
| 22 | P49736 MCM2_HUMAN   | R.GNDPLTSSPGR.S              |                 | 2 | 2,8257 | 0,427 | 0,111  |
| 22 | P35611 ADDA_HUMAN   | R.TSTSAVPNLFVPLNTNPK.E       |                 | 2 | 2,8253 | 0,435 | -0,385 |
| 22 | P23528 COF1_HUMAN   | K.KAVLFCLSE.D                |                 | 2 | 2,8251 | 0,32  | -0,229 |
| 22 | Q12834 CDC20_HUMAN  | K.VQT#TPSKPGGDRYIPHR.S       | T69:            | 3 | 2,8249 | 0,189 | -0,552 |
| 22 | Q16204 CCDC6_HUMAN  | K.SGGIVISPFRLLE.L            |                 | 2 | 2,8244 | 0,37  | -0,261 |
| 22 | Q96FF9 CDCA5_HUMAN  | R.SQRKS#GSELPSILPE.I         | S33:            | 2 | 2,8238 | 0,129 | 0,143  |
| 22 | Q86WV7 Q86WV7_HUMAN | R.NTNVEDVLNAR.K              |                 | 2 | 2,8235 | 0,248 | -0,49  |
| 22 | Q96D71 REPS1_HUMAN  | R.RLKS#EDELPE.V              | S657:           | 2 | 2,8222 | 0,318 | -0,42  |
| 22 | Q9BQ52 RNZ2_HUMAN   | E.TM*TVYQIPIHSEQR.R          |                 | 3 | 2,8193 | 0,31  | -0,106 |

|    |                     |                             |            |   |        |       |        |
|----|---------------------|-----------------------------|------------|---|--------|-------|--------|
| 22 | O60343 TBCD4_HUMAN  | R.TM*LFQVGRFE.I             |            | 2 | 2,8178 | 0,247 | -0,49  |
| 22 | Q3V6T2 GRDN_HUMAN   | K.SLSVSSDFLGK.D             |            | 2 | 2,8174 | 0,339 | -0,321 |
| 22 | P15170 ERF3A_HUMAN  | K.SFVPMNIGGASQAD.L          |            | 2 | 2,8165 | 0,403 | -0,35  |
| 22 | Q9Y224 CN166_HUMAN  | R.DVNCPFKIQDRQE.A           |            | 3 | 2,8133 | 0,143 | -0,444 |
| 22 | P46821 MAP1B_HUMAN  | E.SLKPAAKPLPSK.S            |            | 3 | 2,8132 | 0,121 | 0,074  |
| 22 | Q14C86 GAPD1_HUMAN  | K.TLRFS#LCS#DNLE.G          | S566:S569: | 2 | 2,8119 | 0,273 | -0,529 |
| 22 | Q8WXV6 Q8WXV6_HUMAN | R.TSS#EDNLYLAVLR.A          | S21:       | 2 | 2,8032 | 0,354 | -0,547 |
| 22 | Q66K74 MAP1S_HUMAN  | K.AVPMAPAPAS#PGSSNDSSAR.S   | S759:      | 2 | 2,8007 | 0,315 | -0,688 |
| 22 | P09429 HMGB1_HUMAN  | R.GKM*SSYAFFVQTCREE.H       |            | 3 | 2,8001 | 0,173 | 0,094  |
| 22 | Q15185 TEBP_HUMAN   | E.IDLFHCIDPNDSK.H           |            | 2 | 2,7988 | 0,128 | -0,465 |
| 22 | P51858 HDGF_HUMAN   | R.AGDLLS#PKRPKE.A           | S165:      | 3 | 2,7988 | 0,209 | -0,336 |
| 22 | A9CQZ4 A9CQZ4_HUMAN | K.AAEDEEVPAFFK.N            |            | 2 | 2,7984 | 0,35  | -0,451 |
| 22 | Q96ST3 SIN3A_HUMAN  | K.LLFSNTAAQK.L              |            | 2 | 2,7952 | 0,346 | -0,112 |
| 22 | P98171 RHG04_HUMAN  | R.GPGAPAS#PSASHPQGLDTPKPH.- | S930:      | 3 | 2,7907 | 0,176 | -0,4   |
| 22 | Q8NCM9 Q8NCM9_HUMAN | R.SSDITSDLGNVLTSTPNAK.T     |            | 3 | 2,7898 | 0,213 | -0,286 |
| 22 | Q66K74 MAP1S_HUMAN  | R.KAVPM*APAPAS#PGSSNDSSAR.S | S759:      | 3 | 2,7896 | 0,278 | -0,349 |
| 22 | Q14697 GANAB_HUMAN  | R.YRVPDVLVADPPIAR.L         |            | 3 | 2,7888 | 0,149 | -0,435 |
| 22 | Q9H6Z4 RANB3_HUMAN  | E.KPAIAPPVVFVQK.D           |            | 3 | 2,7885 | 0,114 | -0,19  |
| 22 | Q01082 SPTB2_HUMAN  | R.AQTLPTS SVTITSESS#PGKR.E  | S2341:     | 2 | 2,7866 | 0,42  | -0,228 |
| 22 | P04637 P53_HUMAN    | R.CSDSDGLAPPQHILIRVE.G      |            | 3 | 2,7864 | 0,221 | -0,29  |
| 22 | P05787 K2C8_HUMAN   | E.LQS#LAGKHGDDLRR.T         | S291:      | 3 | 2,7841 | 0,446 | -0,333 |
| 22 | P04049 RAF1_HUMAN   | E.LLQHSLPK.I                |            | 2 | 2,782  | 0,196 | -0,065 |
| 22 | POC7M2 RA1L3_HUMAN  | K.KIFVGGIKE.D               |            | 2 | 2,7815 | 0,145 | 0,062  |
| 22 | Q32MZ4 LRRF1_HUMAN  | K.KAM*VSNAQLDNE.K           |            | 2 | 2,7771 | 0,313 | -0,365 |
| 22 | Q7Z5Y7 KCD20_HUMAN  | R.SKS#LTNLVAAGDDVLEDQE.I    | S374:      | 2 | 2,7761 | 0,362 | -0,585 |
| 22 | Q14103 HNRPD_HUMAN  | R.GFCFITFKE.E               |            | 2 | 2,7755 | 0,39  | -0,531 |
| 22 | Q9BRQ6 CHCH6_HUMAN  | R.RRDT#FYKEQLE.R            | T153:      | 3 | 2,7732 | 0,095 | -0,234 |
| 22 | O95400 CD2B2_HUMAN  | K.LVDPVAGSGGPGSR.F          |            | 2 | 2,7721 | 0,437 | -0,577 |
| 22 | Q96H12 CI030_HUMAN  | R.SVS#PLLSTHVLGKE.K         | S98:       | 3 | 2,7709 | 0,211 | -0,473 |
| 22 | Q9UBF8 PI4KB_HUMAN  | R.S#KSDATASISLSSNLKR.T      | S275:      | 2 | 2,7678 | 0,205 | 0      |
| 22 | Q8N2Y8 RUSC2_HUMAN  | R.KKTGGSGS#PPLRVSVGDSSQE.F  | S559:      | 3 | 2,7653 | 0,102 | -0,68  |
| 22 | Q9H6F5 CCD86_HUMAN  | R.LGGLRPES#PESLTSVSR.T      | S18:       | 2 | 2,7614 | 0,41  | -0,589 |
| 22 | Q13523 PRP4B_HUMAN  | R.ALIKAELDNE.L              |            | 2 | 2,7597 | 0,341 | -0,547 |



|    |                    |                              |            |   |        |       |        |
|----|--------------------|------------------------------|------------|---|--------|-------|--------|
| 22 | Q15742 NAB2_HUMAN  | R.SFSPKS#PLELGE.K            | S162:      | 2 | 2,7597 | 0,259 | -0,089 |
| 22 | Q5QJE6 TDIF2_HUMAN | K.SPIKASDLTK.F               |            | 2 | 2,7584 | 0,144 | -0,115 |
| 22 | Q96MU7 YTDC1_HUMAN | R.LS#SSASREPYKNQPE.K         | S118:      | 2 | 2,7581 | 0,218 | 0,138  |
| 22 | Q9UBR2 CATZ_HUMAN  | R.VGDYGSLSGRE.K              |            | 2 | 2,7527 | 0,461 | -0,428 |
| 22 | P13639 EF2_HUMAN   | R.GVRFVDVHDTVTLHAD.A         |            | 3 | 2,7515 | 0,24  | -0,116 |
| 22 | O60716 CTND1_HUMAN | R.SQSSHSYDDSTLPLIDR.N        |            | 2 | 2,7508 | 0,21  | 1,08   |
| 22 | Q7Z3C6 ATG9A_HUMAN | R.SASYPCAAPRPGAPE.T          |            | 2 | 2,7502 | 0,345 | -0,319 |
| 22 | P14868 SYDC_HUMAN  | R.EIMDAAEDYAKE.R             |            | 2 | 2,7495 | 0,33  | -0,441 |
| 22 | P48730 KC1D_HUMAN  | R.GAPVNISSDLTGR.Q            |            | 2 | 2,7493 | 0,257 | -0,266 |
| 22 | P06748 NPM_HUMAN   | D.VKLLSISGKR.S               |            | 2 | 2,7487 | 0,247 | -0,554 |
| 22 | P00338 LDHA_HUMAN  | K.SADTLWGIQKE.L              |            | 2 | 2,7484 | 0,421 | -0,391 |
| 22 | Q32MZ4 LRRF1_HUMAN | K.AM*VSNAQLDNE.K             |            | 2 | 2,7466 | 0,325 | -0,101 |
| 22 | Q14C86 GAPD1_HUMAN | E.HEQATTQDNLDDKLR.K          |            | 3 | 2,7393 | 0,178 | -1,435 |
| 22 | O75531 BAF_HUMAN   | R.DFVAEPMGEKPVGSLAGIGE.V     |            | 2 | 2,7359 | 0,389 | -0,67  |
| 22 | Q14980 NUMA1_HUMAN | R.VSLEPHQPGT#PE.S            | T2000:     | 2 | 2,7356 | 0,279 | -0,513 |
| 22 | Q05682 CALD1_HUMAN | K.SAKPTKPAASDLVPAEGVR.N      |            | 3 | 2,7347 | 0,084 | -0,184 |
| 22 | Q15121 PEA15_HUMAN | K.DIIRQPSEEE.I               |            | 2 | 2,7263 | 0,235 | -0,301 |
| 22 | Q04637 IF4G1_HUMAN | R.SRERPSQPEGLR.K             |            | 3 | 2,7252 | 0,169 | -0,13  |
| 22 | Q6U841 S4A10_HUMAN | R.IPIVRS#FAD.I               | S238:      | 2 | 2,7245 | 0,218 | -0,444 |
| 22 | Q9Y2X7 GIT1_HUMAN  | R.HGSGADS#DY#ENTQSGDPLLGLE.G | S596:Y598: | 3 | 2,7148 | 0,332 | -0,227 |
| 22 | P19105 MLRM_HUMAN  | R.AT#SNVFAM*FD.Q             | T18:       | 2 | 2,7147 | 0,338 | -0,611 |
| 22 | Q5VUA4 ZN318_HUMAN | E.LDKVAQILGINIFDK.S          |            | 3 | 2,7075 | 0,093 | -0,325 |
| 22 | P06493 CDC2_HUMAN  | K.IGEGT#Y#GVVYKGR.H          | T14:Y15:   | 2 | 2,7073 | 0,273 | -0,47  |
| 22 | P49915 GUAA_HUMAN  | E.GKVIEPLKDFHKDE.V           |            | 3 | 2,7038 | 0,255 | -0,111 |
| 22 | Q32MZ4 LRRF1_HUMAN | K.AMVSNAQLDNE.K              |            | 2 | 2,7019 | 0,222 | -0,307 |
| 22 | Q86WB0 NIPA_HUMAN  | R.SQDATFSPGSEQAEKS#PGPIVSR.T | S344:      | 3 | 2,7016 | 0,251 | 1,863  |
| 22 | P27635 RL10_HUMAN  | K.VDEFPLCGHM*VSDE.Y          |            | 2 | 2,7004 | 0,221 | -0,296 |
| 22 | P60174 TPIS_HUMAN  | R.KFFVGGNWK.M                |            | 2 | 2,6998 | 0,192 | -0,338 |
| 22 | P46734 MP2K3_HUMAN | R.TFITIGDRNFE.V              |            | 2 | 2,6941 | 0,221 | -0,65  |
| 22 | P31948 STIP1_HUMAN | E.EKYKDAIHFYNK.S             |            | 3 | 2,6898 | 0,117 | -0,47  |
| 22 | P06748 NPM_HUMAN   | K.M*QAS#IEKGGSLPKVE.A        | S254:      | 2 | 2,6887 | 0,345 | -0,219 |
| 22 | Q6ZRV2 FA83H_HUMAN | R.AVPAPSPGPTHNS#PE.L         | S1068:     | 2 | 2,6884 | 0,248 | -0,873 |
| 22 | P02545 LMNA_HUMAN  | R.LRLS#PS#PTSQR.S            | S390:S392: | 2 | 2,6884 | 0,237 | -0,435 |

|    |                     |                           |            |   |        |       |        |
|----|---------------------|---------------------------|------------|---|--------|-------|--------|
| 22 | Q1MSJ5 CSPP1_HUMAN  | E.RLLHMDS#DDEIPIR.K       | S931:      | 3 | 2,6805 | 0,291 | 0,204  |
| 22 | O15446 RPA34_HUMAN  | E.QINTEPLEDTVLSPTK.K      |            | 2 | 2,679  | 0,45  | -0,342 |
| 22 | Q7L804 RFIP2_HUMAN  | K.KPFLGQR.L               |            | 2 | 2,679  | 0,24  | -0,347 |
| 22 | Q14493 SLBP_HUMAN   | R.KLLINDFGR.E             |            | 2 | 2,6788 | 0,118 | -0,113 |
| 22 | P40818 UBP8_HUMAN   | K.RSYS#SPDITQAIQEE.E      | S718:      | 2 | 2,6784 | 0,341 | 0,203  |
| 22 | Q9H0H5 RGAP1_HUMAN  | E.SLDWDSS#LVK.T           | S170:      | 2 | 2,6745 | 0,207 | -0,496 |
| 22 | P49757 NUMB_HUMAN   | R.TNPSPTNPFSSDLQK.T       |            | 2 | 2,6734 | 0,314 | -0,523 |
| 22 | P46087 NOL1_HUMAN   | K.KGPQSLFNAPR.G           |            | 2 | 2,672  | 0,206 | -0,602 |
| 22 | Q5VY92 Q5VY92_HUMAN | R.QLAALGQTEPLPAEAPWAR.R   |            | 2 | 2,6716 | 0,463 | -0,483 |
| 22 | Q96EB6 SIRT1_HUMAN  | R.RDGPGLERS#PGEPGGAPE.R   | S47:       | 2 | 2,6686 | 0,159 | -0,19  |
| 22 | Q6S8J3 A26CA_HUMAN  | E.KLCYVALDFEQE.M          |            | 2 | 2,6634 | 0,133 | -0,322 |
| 22 | O75717 WDHD1_HUMAN  | R.STNILDNMGK.S            |            | 2 | 2,6634 | 0,271 | -0,223 |
| 22 | P61978 HNRPK_HUMAN  | K.ALRTDYNASVSPDSSGPE.R    |            | 2 | 2,6609 | 0,405 | -0,31  |
| 22 | Q7KZF4 SND1_HUMAN   | R.YGDFRADDADE.F           |            | 2 | 2,66   | 0,336 | -0,192 |
| 22 | Q13435 SF3B2_HUMAN  | R.SRGSDS#PAADVE.I         | S339:      | 2 | 2,6587 | 0,338 | -0,48  |
| 22 | P46777 RL5_HUMAN    | K.KAHAAIRENPVYE.K         |            | 2 | 2,6565 | 0,256 | -0,814 |
| 22 | P13645 K1C10_HUMAN  | K.DAEAWFNEK.S             |            | 2 | 2,6559 | 0,283 | -0,22  |
| 22 | Q03188 CENPC_HUMAN  | R.KIKDTCIQS#PSKE.C        | S73:       | 2 | 2,6549 | 0,173 | 0,302  |
| 22 | P78347 GTF2I_HUMAN  | E.VTIEDDDYS#PPSKRPK.A     | S319:      | 3 | 2,6544 | 0,27  | -0,095 |
| 22 | Q2Y0W8 S4A8_HUMAN   | R.NNLIPIVRS#FAE.V         | S237:      | 2 | 2,6541 | 0,16  | -0,588 |
| 22 | P23588 IF4B_HUMAN   | K.VAPAQPSEEGPGRKDE.N      |            | 2 | 2,6511 | 0,277 | -0,22  |
| 22 | Q16875 F263_HUMAN   | R.RNS#VTPLASPEPTK.K       | S461:      | 2 | 2,6509 | 0,322 | -0,774 |
| 22 | P62753 RS6_HUMAN    | R.LSS#LRASTSKSE.S         | S236:      | 3 | 2,6507 | 0,215 | -0,068 |
| 22 | Q04637 IF4G1_HUMAN  | R.KIIATVLM*TE.D           |            | 2 | 2,6495 | 0,27  | -0,107 |
| 22 | Q01082 SPTB2_HUMAN  | R.RPPS#PEPSTKVSE.E        | S2102:     | 2 | 2,6487 | 0,173 | -0,082 |
| 22 | Q02952 AKA12_HUMAN  | E.GVTPWAS#FKKM*VT#PK.K    | S612:T618: | 2 | 2,6455 | 0,304 | -0,461 |
| 22 | Q16537 2A5E_HUMAN   | R.SQGKPIELTPLLLK.D        |            | 3 | 2,6444 | 0,093 | -0,336 |
| 22 | Q96QR8 PURB_HUMAN   | K.YYLDLKE.N               |            | 2 | 2,6431 | 0,241 | -0,258 |
| 22 | Q66GS9 CP135_HUMAN  | R.HGLATPPLS#STLRSPSHSPE.H | S1125:     | 3 | 2,6381 | 0,187 | -0,51  |
| 22 | Q96124 FUBP3_HUMAN  | R.NGPGFHNDIDSNSTIQE.I     |            | 2 | 2,633  | 0,197 | -0,265 |
| 22 | Q13136 LIPA1_HUMAN  | K.RLS#DTVDKLLSE.S         | S448:      | 2 | 2,6327 | 0,184 | -0,503 |
| 22 | P62805 H4_HUMAN     | R.DNIQGITKPAIR.R          |            | 3 | 2,6284 | 0,188 | -0,069 |
| 22 | P09874 PARP1_HUMAN  | E.VKAEPVEVVAPR.G          |            | 2 | 2,6272 | 0,236 | -0,377 |

|    |                    |                        |            |   |        |       |        |
|----|--------------------|------------------------|------------|---|--------|-------|--------|
| 22 | Q8IUD2 RB6I2_HUMAN | R.SVGKVEPSSQSPGRS#PR.L | S21:       | 3 | 2,6265 | 0,269 | -0,199 |
| 22 | P63279 UBC9_HUMAN  | K.DHPFGFVAVPTK.N       |            | 2 | 2,6256 | 0,408 | -0,093 |
| 22 | Q01082 SPTB2_HUMAN | R.KRRPPS#PEPSTKVSE.E   | S2102:     | 3 | 2,6226 | 0,135 | -0,309 |
| 22 | POC7M2 RA1L3_HUMAN | E.DSQRPGAHLTVK.K       |            | 2 | 2,6167 | 0,227 | -0,373 |
| 22 | P62937 PPIA_HUMAN  | E.WLDGKHVVFGK.V        |            | 3 | 2,6159 | 0,216 | -0,071 |
| 22 | Q9H6S3 ES8L2_HUMAN | R.QSILPPPQGPAPIPFQHR.G |            | 3 | 2,6137 | 0,206 | -0,277 |
| 22 | O95817 BAG3_HUMAN  | R.VHTVVDRPQQPM*THRE.T  |            | 3 | 2,6137 | 0,259 | -0,47  |
| 22 | Q14980 NUMA1_HUMAN | K.LADSDQASKVQQQK.L     |            | 3 | 2,6128 | 0,324 | -0,71  |
| 22 | P09429 HMGB1_HUMAN | K.MSSYAFFVQTCREE.H     |            | 2 | 2,6107 | 0,364 | -0,556 |
| 22 | Q8IY81 RRMJ3_HUMAN | K.QQLPQT#PPSCLKTE.I    | T573:      | 2 | 2,6102 | 0,42  | -0,429 |
| 22 | P10809 CH60_HUMAN  | E.IGNIISDAM*KK.V       |            | 3 | 2,6077 | 0,185 | 0,076  |
| 22 | P62841 RS15_HUMAN  | K.KEAPPMKPEVVK.T       |            | 3 | 2,6071 | 0,102 | -0,37  |
| 22 | P24534 EF1B_HUMAN  | K.SSILLDVKPWDDE.T      |            | 2 | 2,6052 | 0,218 | -0,643 |
| 22 | Q8NG27 PJA1_HUMAN  | K.IRNLAS#PNCVKPK.I     | S265:      | 3 | 2,6045 | 0,099 | -0,116 |
| 22 | P46821 MAP1B_HUMAN | K.DLTGQVPTPVVK.Q       |            | 2 | 2,6028 | 0,243 | -0,389 |
| 22 | O95239 KIF4A_HUMAN | K.HLPKDTLLSPDSS#FE.Y   | S1017:     | 2 | 2,593  | 0,249 | -0,484 |
| 22 | Q14980 NUMA1_HUMAN | K.LADSDQASKVQQQK.L     |            | 2 | 2,5929 | 0,289 | -0,237 |
| 22 | Q9ULW0 TPX2_HUMAN  | R.S#LRLS#AQKDLEQKE.K   | S121:S125: | 2 | 2,5923 | 0,312 | -0,27  |
| 22 | O95684 FR1OP_HUMAN | K.SSLHLLSHE.T          |            | 2 | 2,5896 | 0,285 | -0,298 |
| 22 | O60293 CC131_HUMAN | R.SSSSSGGGLLPYPR.R     |            | 2 | 2,5879 | 0,259 | -0,588 |
| 22 | P62633 CNBP_HUMAN  | E.QCCYNCGKPGHLAR.D     |            | 3 | 2,5866 | 0,254 | -0,319 |
| 22 | Q9UBQ7 GRHPR_HUMAN | R.VGYTPDVLDTTAE.L      |            | 2 | 2,5864 | 0,278 | -0,494 |
| 22 | Q96Q15 SMG1_HUMAN  | K.NLATSADTPPSTVPGTGK.S |            | 2 | 2,585  | 0,261 | -0,427 |
| 22 | Q9H307 PININ_HUMAN | R.RGFS#DSGGGPPAK.Q     | S66:       | 2 | 2,5829 | 0,426 | -0,465 |
| 22 | Q8WXH0 SYNE2_HUMAN | R.RGS#MSYLAAVEEE.V     | S4108:     | 2 | 2,5794 | 0,318 | -1,042 |
| 22 | P20839 IMDH1_HUMAN | K.GKLPIVNDCDE.L        |            | 2 | 2,5785 | 0,294 | -0,194 |
| 22 | P12268 IMDH2_HUMAN | K.GKLPIVNEDDE.L        |            | 2 | 2,5783 | 0,292 | -0,298 |
| 22 | Q96HC4 PDLI5_HUMAN | R.ILAQITGTEHLKE.S      |            | 3 | 2,5778 | 0,1   | 0,252  |
| 22 | Q02952 AKA12_HUMAN | E.ALICVGSSK.K          |            | 2 | 2,5777 | 0,473 | -1,109 |
| 22 | Q9BR76 COR1B_HUMAN | R.HVFGQPVK.N           |            | 2 | 2,5761 | 0,44  | 0,067  |
| 22 | Q9NYF8 BCLF1_HUMAN | R.IDIS#PSTLR.K         | S658:      | 2 | 2,5759 | 0,248 | -0,226 |
| 22 | O60885 BRD4_HUMAN  | R.SEPFS#PSLRPEPPKHPE.S | S1126:     | 3 | 2,5734 | 0,197 | -0,182 |
| 22 | Q15650 TRIP4_HUMAN | K.FVNLYTRE.G           |            | 2 | 2,5722 | 0,222 | -0,234 |

|    |                    |                         |        |   |        |       |        |
|----|--------------------|-------------------------|--------|---|--------|-------|--------|
| 22 | P46087 NOL1_HUMAN  | K.GPQSLFNAPR.G          |        | 2 | 2,5706 | 0,297 | 1,347  |
| 22 | Q13136 LIPA1_HUMAN | K.RLS#DTVDKLLSESNE.R    | S448:  | 2 | 2,5706 | 0,296 | -1,093 |
| 22 | P04259 K2C6B_HUMAN | R.SGFSSISVSR.S          |        | 2 | 2,5685 | 0,378 | -0,475 |
| 22 | Q8NE71 ABCF1_HUMAN | K.LSVPTS#DEEDEVPAKPR.G  | S109:  | 2 | 2,562  | 0,371 | -0,477 |
| 22 | P09622 DLDH_HUMAN  | R.VLGAHILGPGAGE.M       |        | 2 | 2,5593 | 0,222 | -0,307 |
| 22 | O95235 KI20A_HUMAN | E.LSLCDLAGSER.C         |        | 2 | 2,5584 | 0,331 | 0,1    |
| 22 | P51114 FXR1_HUMAN  | R.TPGEEKINTLKEE.N       |        | 3 | 2,5583 | 0,158 | -0,123 |
| 22 | P04264 K2C1_HUMAN  | K.YEELQITAGR.H          |        | 2 | 2,5574 | 0,288 | -0,207 |
| 22 | P06748 NPM_HUMAN   | D.VKLLSISGK.R           |        | 2 | 2,5557 | 0,208 | -0,452 |
| 22 | P14625 ENPL_HUMAN  | K.IYFM*AGSSR.K          |        | 2 | 2,5552 | 0,368 | -0,466 |
| 22 | Q96ST2 IWS1_HUMAN  | R.GKHMDFLSDFE.M         |        | 2 | 2,5549 | 0,251 | -0,46  |
| 22 | Q8WUA2 PPIL4_HUMAN | K.QDTKYDLILDE.Q         |        | 2 | 2,5499 | 0,177 | -0,271 |
| 22 | Q96ST2 IWS1_HUMAN  | R.GKHM*DFLSDFE.M        |        | 2 | 2,5488 | 0,309 | -1,091 |
| 22 | O15446 RPA34_HUMAN | E.QINTEPLEDTVLS#PTKKR.K | S285:  | 3 | 2,5481 | 0,143 | -0,426 |
| 22 | P51858 HDGF_HUMAN  | R.AGDLLDES#PKRPK.E      | S165:  | 2 | 2,5468 | 0,269 | -0,405 |
| 22 | Q9ULJ3 ZN295_HUMAN | R.SFS#ASQSTDRE.G        | S411:  | 2 | 2,5459 | 0,36  | 0,094  |
| 22 | Q96BK5 PINX1_HUMAN | R.SKTDLDCIFGKR.Q        |        | 3 | 2,542  | 0,317 | -0,254 |
| 22 | Q7Z333 SETX_HUMAN  | E.DFSLKDDALAK.T         |        | 3 | 2,5402 | 0,184 | 0,299  |
| 22 | P13639 EF2_HUMAN   | R.FDVHDTVTLHAD.A        |        | 2 | 2,5402 | 0,28  | -0,192 |
| 22 | Q00537 PCTK2_HUMAN | E.KLQINS#PPFDQPM*SR.R   | S165:  | 2 | 2,5383 | 0,167 | 0,132  |
| 22 | O95639 CPSF4_HUMAN | K.GHLAFLSGQ.-           |        | 2 | 2,5344 | 0,113 | -0,131 |
| 22 | P30153 2AAA_HUMAN  | R.YMVADKFTE.L           |        | 2 | 2,5339 | 0,271 | -0,553 |
| 22 | P31948 STIP1_HUMAN | K.TVDLKP DWGK.G         |        | 2 | 2,533  | 0,281 | -0,211 |
| 22 | Q02952 AKA12_HUMAN | K.SPSS#PVERE.M          | S1331: | 2 | 2,5326 | 0,154 | -0,453 |
| 22 | P27708 PYR1_HUMAN  | R.RGIPGLPDGR.F          |        | 2 | 2,5315 | 0,29  | 0      |
| 22 | Q99459 CDC5L_HUMAN | E.NYQALDADFRK.L         |        | 2 | 2,5295 | 0,247 | -0,546 |
| 22 | Q8WWM7 ATX2L_HUMAN | E.NSLDPFPPR.I           |        | 2 | 2,5281 | 0,207 | -0,351 |
| 22 | Q15149 PLEC1_HUMAN | R.LRLPLDKEPARE.C        |        | 3 | 2,5265 | 0,262 | -0,445 |
| 22 | P11388 TOP2A_HUMAN | E.SDDFHM*DFDSAVAPR.A    |        | 3 | 2,5239 | 0,194 | -0,212 |
| 22 | Q9UM11 FZR_HUMAN   | K.DGLAYSALLKNE.L        |        | 2 | 2,5224 | 0,232 | -0,377 |
| 22 | P16989 DBPA_HUMAN  | E.DVFBVHQTAIKK.N        |        | 2 | 2,5209 | 0,219 | 0,095  |
| 22 | P30084 ECHM_HUMAN  | E.KKLFYSTFATDDR.K       |        | 2 | 2,5206 | 0,27  | -0,383 |
| 22 | Q13895 BYST_HUMAN  | E.AEHGTGDKPAAPR.E       |        | 3 | 2,5181 | 0,185 | 0,21   |

|    |                     |                       |       |   |        |       |        |
|----|---------------------|-----------------------|-------|---|--------|-------|--------|
| 22 | Q9Y2W1 TR150_HUMAN  | R.IDIS#PSTFR.K        | S682: | 2 | 2,5168 | 0,147 | -0,109 |
| 22 | O14974 MYPT1_HUMAN  | R.LAYVAPTIPR.R        |       | 2 | 2,5133 | 0,338 | -0,886 |
| 22 | Q9NRL2 BAZ1A_HUMAN  | K.KKDAIDPLLFK.Y       |       | 3 | 2,5115 | 0,126 | 0,071  |
| 22 | Q93052 LPP_HUMAN    | R.CSVCKEPIMPAPGQEE.T  |       | 2 | 2,5111 | 0,454 | -0,266 |
| 22 | Q9BST9 RTKN_HUMAN   | R.TFS#LDAVPPDHSPR.A   | S520: | 2 | 2,5099 | 0,409 | -0,226 |
| 22 | P40818 UBP8_HUMAN   | E.M*APSSAPPSTPPTHK.A  |       | 3 | 2,5079 | 0,097 | -0,421 |
| 22 | P23193 TCEA1_HUMAN  | K.EPAITSQNS#PEAREE.S  | S100: | 2 | 2,5077 | 0,329 | -0,421 |
| 22 | Q6UB98 ANR12_HUMAN  | K.IKDEDHS#PTFE.N      | S630: | 2 | 2,5055 | 0,229 | -0,611 |
| 22 | Q92598 HS105_HUMAN  | K.IKVNVVELPIE.A       |       | 2 | 2,5035 | 0,236 | -0,682 |
| 22 | Q13642 FHL1_HUMAN   | K.AIVAGDQNV.E.Y       |       | 2 | 2,4997 | 0,354 | 0,06   |
| 22 | P49736 MCM2_HUMAN   | R.RRGNDPLTS#SPGR.S    | S26:  | 2 | 2,4983 | 0,22  | -0,572 |
| 22 | P05455 LA_HUMAN     | K.IRRS#PSKPLPEVTDE.Y  | S92:  | 3 | 2,4975 | 0,184 | -0,203 |
| 22 | Q96T37 RBM15_HUMAN  | R.SLS#PGGAALGYR.D     | S294: | 2 | 2,4965 | 0,466 | -0,397 |
| 22 | P27824 CALX_HUMAN   | K.AEEDEILNR.S         |       | 2 | 2,4959 | 0,274 | -0,336 |
| 22 | P09429 HMGB1_HUMAN  | K.MSSYAFFVQTCRE.E     |       | 2 | 2,4953 | 0,432 | -0,45  |
| 22 | Q15020 SART3_HUMAN  | K.LFISGLPFSTCK.E      |       | 2 | 2,4951 | 0,292 | -0,445 |
| 22 | Q05519 SFR11_HUMAN  | E.KKPIETGS#PKTKE.C    | S449: | 3 | 2,4935 | 0,188 | 0,18   |
| 22 | P14868 SYDC_HUMAN   | E.KVFSIGPVFR.A        |       | 2 | 2,4926 | 0,277 | -0,53  |
| 22 | B2RDE1 B2RDE1_HUMAN | R.M*LDQTLNEM*.-       |       | 2 | 2,4917 | 0,284 | -0,416 |
| 22 | Q99829 CPNE1_HUMAN  | K.DFLGKSDPFLE.F       |       | 2 | 2,491  | 0,229 | -0,577 |
| 22 | O60524 SDCG1_HUMAN  | K.KLPS#DSGDLE.A       | S831: | 2 | 2,4874 | 0,194 | -0,214 |
| 22 | P84090 ERH_HUMAN    | E.KIYVLLR.R           |       | 2 | 2,4871 | 0,116 | 0,202  |
| 22 | Q3KQU3 MA7D1_HUMAN  | K.SRGPTPPAM*GPR.D     |       | 3 | 2,4802 | 0,115 | 0,295  |
| 22 | P51858 HDGF_HUMAN   | R.AGDLLDS#PKRPK.E     | S165: | 3 | 2,4799 | 0,168 | 0      |
| 22 | P22307 NLTP_HUMAN   | K.IGGIFAFK.V          |       | 2 | 2,4792 | 0,225 | 0      |
| 22 | O00571 DDX3X_HUMAN  | K.HAIPIKE.K           |       | 2 | 2,4787 | 0,3   | 0,066  |
| 22 | P14625 ENPL_HUMAN   | K.IYFMAGSSR.K         |       | 2 | 2,4765 | 0,286 | -0,118 |
| 22 | Q15056 IF4H_HUMAN   | R.GSNMDFREPTEEE.R     |       | 2 | 2,4748 | 0,269 | -0,238 |
| 22 | Q9Y6M7 S4A7_HUMAN   | R.SFADIGKKHS#DPHLLR.R | S242: | 3 | 2,4723 | 0,157 | -0,488 |
| 22 | Q6WKZ4 RFIP1_HUMAN  | K.VANCSLGTATIISE.N    |       | 2 | 2,4716 | 0,281 | -0,085 |
| 22 | Q5SW79 CE170_HUMAN  | R.IDLLAQPR.R          |       | 2 | 2,4679 | 0,286 | -0,395 |
| 22 | Q9H6Z4 RANB3_HUMAN  | E.EKPAIAPPVVFQK.D     |       | 2 | 2,4674 | 0,323 | -0,544 |
| 22 | Q9UQ80 PA2G4_HUMAN  | E.KTIQNPTDQQKDH.E.K   |       | 3 | 2,4671 | 0,11  | -0,095 |

|    |                     |                            |        |   |        |       |        |
|----|---------------------|----------------------------|--------|---|--------|-------|--------|
| 22 | P09661 RU2A_HUMAN   | K.GLLQSQIPIGR.E            |        | 2 | 2,4661 | 0,173 | -0,433 |
| 22 | Q86WJ1 CHD1L_HUMAN  | R.KRVLS#PEELE.D            | S636:  | 2 | 2,4653 | 0,181 | -0,381 |
| 22 | P29692 EF1D_HUMAN   | R.ATAPQTQHVS#PM*R.Q        | S133:  | 2 | 2,465  | 0,305 | 0      |
| 22 | Q15021 CND1_HUMAN   | R.ESTGNMVTGQTVCK.N         |        | 2 | 2,4644 | 0,218 | -0,161 |
| 22 | P57764 GSDC1_HUMAN  | D.VLLFPDKK.Q               |        | 2 | 2,462  | 0,178 | -0,254 |
| 22 | Q6NWX9 PR40B_HUMAN  | R.TLLQQLDDHQ.-             |        | 2 | 2,462  | 0,194 | -0,302 |
| 22 | O00429 DNM1L_HUMAN  | K.GHAVNLLDVPVVAR.K         |        | 3 | 2,4617 | 0,105 | -0,235 |
| 22 | P25398 RS12_HUMAN   | E.HQINLIK.V                |        | 2 | 2,46   | 0,111 | 0,07   |
| 22 | Q9Y2X9 ZN281_HUMAN  | K.RKPS#ASSKPSLVGDGE.G      | S238:  | 3 | 2,4548 | 0,081 | -0,108 |
| 22 | P0C0S8 H2A1_HUMAN   | R.HLQLAIR.N                |        | 2 | 2,4527 | 0,143 | -0,072 |
| 22 | P09429 HMGB1_HUMAN  | K.MSSYAFFVQTCR.E           |        | 2 | 2,447  | 0,32  | -0,408 |
| 22 | P31150 GDIA_HUMAN   | K.RKQNDVFGEAEQ.-           |        | 2 | 2,4444 | 0,17  | -0,172 |
| 22 | P84098 RL19_HUMAN   | K.RLASSVLR.C               |        | 2 | 2,4346 | 0,121 | -0,068 |
| 22 | Q86Y04 Q86Y04_HUMAN | K.VDLTLLS#PKSE.N           | S239:  | 2 | 2,4317 | 0,316 | -0,476 |
| 22 | O00499 BIN1_HUMAN   | R.KGPPVPPPK.H              |        | 2 | 2,4312 | 0,29  | -0,12  |
| 22 | O95149 SPN1_HUMAN   | K.LKGSSHS#PDHPGCLM*EN.-    | S350:  | 2 | 2,428  | 0,154 | -0,311 |
| 22 | Q8IWS0 PHF6_HUMAN   | K.CGFCHVGEEE.N             |        | 2 | 2,4267 | 0,15  | -0,698 |
| 22 | Q9UNZ2 NSF1C_HUMAN  | R.SGQQIVGPPR.K             |        | 2 | 2,419  | 0,124 | -0,117 |
| 22 | Q9ULH0 ARMS_HUMAN   | E.YLSDALLDKK.D             |        | 2 | 2,4153 | 0,299 | 0      |
| 22 | Q01082 SPTB2_HUMAN  | R.RPPS#PEPSTKVSEAE.S       | S2102: | 3 | 2,4132 | 0,141 | -1,307 |
| 22 | Q13242 SFRS9_HUMAN  | R.GSPHYFSPFRPY.-           |        | 2 | 2,4111 | 0,321 | -0,755 |
| 22 | Q14980 NUMA1_HUMAN  | K.RVSLEPHQGPGT#PE.S        | T2000: | 2 | 2,4097 | 0,327 | -0,231 |
| 22 | Q96S94 CCNL2_HUMAN  | R.GLLPGGTQVLDGTSGFS#PAPK.L | S330:  | 3 | 2,4086 | 0,157 | -0,616 |
| 22 | O15355 PPM1G_HUMAN  | R.NKNLPPEEQM*ISALPD.I      |        | 2 | 2,4062 | 0,172 | -0,539 |
| 22 | P25398 RS12_HUMAN   | E.HQINLIKVDDNK.K           |        | 3 | 2,4022 | 0,115 | -0,191 |
| 22 | Q92622 K0226_HUMAN  | E.GQTLTVTSGAK.K            |        | 2 | 2,4017 | 0,176 | -0,23  |
| 22 | P41250 SYG_HUMAN    | K.TVNVVQFEPK.G             |        | 2 | 2,4011 | 0,209 | -0,489 |
| 22 | O95831 AIFM1_HUMAN  | R.VLIVSEDPPELPM*RPPLSKE.L  |        | 3 | 2,3997 | 0,135 | -0,629 |
| 22 | Q15773 MLF2_HUMAN   | R.LAIQGPEDS#PSR.Q          | S238:  | 2 | 2,3966 | 0,228 | -0,452 |
| 22 | P06748 NPM_HUMAN    | K.GPSSVEDIK.A              |        | 2 | 2,3965 | 0,382 | -0,785 |
| 22 | Q96TA1 NIBL1_HUMAN  | R.DSMVMHNS#DPNLHLLAE.G     | S561:  | 2 | 2,3964 | 0,437 | -0,426 |
| 22 | Q86VI3 IQGA3_HUMAN  | R.HRS#LTAHLLPLAE.K         | S1424: | 2 | 2,3962 | 0,24  | -0,526 |
| 22 | P49023 PAXI_HUMAN   | K.TGSSS#PPGGPPKPGSQLD.S    | S322:  | 2 | 2,3942 | 0,313 | -0,21  |

|    |                    |                      |              |   |        |       |        |
|----|--------------------|----------------------|--------------|---|--------|-------|--------|
| 22 | Q9UNZ2 NSF1C_HUMAN | R.KKS#PNELVDDLFK.G   | S114:        | 2 | 2,3914 | 0,214 | -0,605 |
| 22 | O60524 SDCG1_HUMAN | K.KKLPS#DSGDLE.A     | S831:        | 2 | 2,3899 | 0,141 | -0,385 |
| 22 | O75431 MTX2_HUMAN  | K.NYSNLLAFCR.R       |              | 2 | 2,3895 | 0,285 | -0,388 |
| 22 | P11172 PYR5_HUMAN  | K.FADIGNTVK.K        |              | 2 | 2,389  | 0,138 | -0,19  |
| 22 | Q9NYF8 BCLF1_HUMAN | K.TIAPQNAPRDE.S      |              | 2 | 2,3888 | 0,263 | -0,805 |
| 22 | O95340 PAPS2_HUMAN | E.FDFISGTR.M         |              | 2 | 2,3881 | 0,226 | 0,065  |
| 22 | Q13509 TBB3_HUMAN  | R.YLTVATVFR.G        |              | 2 | 2,388  | 0,297 | -0,57  |
| 22 | O00567 NOL5A_HUMAN | K.SFSKEELMSS#DLEE.T  | S520:        | 2 | 2,3879 | 0,332 | -0,143 |
| 22 | Q13428 TCOF_HUMAN  | R.KSAEPSANTTLVSE.T   |              | 2 | 2,3879 | 0,309 | -0,596 |
| 22 | P68371 TBB2C_HUMAN | R.YLTVAAVFR.G        |              | 2 | 2,3867 | 0,22  | -0,235 |
| 22 | O95391 SLU7_HUMAN  | R.QRPDDPMASFLGQ.-    |              | 2 | 2,3859 | 0,13  | -1,168 |
| 22 | Q9Y2L9 LRCH1_HUMAN | E.DSCHRLS#PVKGE.F    | S370:        | 3 | 2,3839 | 0,113 | -0,437 |
| 22 | Q9Y3U8 RL36_HUMAN  | E.LSNVLAAM*RK.A      |              | 2 | 2,3821 | 0,176 | -0,218 |
| 22 | Q9Y4F5 K0284_HUMAN | R.LDILAM*PR.K        |              | 2 | 2,3799 | 0,148 | 0      |
| 22 | Q567U6 CCD93_HUMAN | R.DQLNDQYLE.L        |              | 2 | 2,3745 | 0,173 | -0,322 |
| 22 | Q09666 AHNK_HUMAN  | K.LQGGVSLASK.K       |              | 2 | 2,3703 | 0,369 | 0      |
| 22 | O15042 SR140_HUMAN | E.HHLYSNPIKEE.M      |              | 3 | 2,3693 | 0,121 | 0      |
| 22 | P11717 MPRI_HUMAN  | K.LVSFHDDS#DEDLLHI.- | S2484:       | 2 | 2,3664 | 0,163 | -0,598 |
| 22 | P38571 LICH_HUMAN  | D.GYILCLNR.I         |              | 2 | 2,3592 | 0,316 | 0      |
| 22 | O43290 SNUT1_HUMAN | R.KGAIVFNATSE.F      |              | 2 | 2,3582 | 0,379 | -0,107 |
| 22 | P06748 NPM_HUMAN   | K.LLSISGKR.S         |              | 2 | 2,3579 | 0,211 | -0,837 |
| 22 | O60343 TBCD4_HUMAN | R.TMLFQVGRFE.I       |              | 2 | 2,3555 | 0,283 | -0,298 |
| 22 | P07602 SAP_HUMAN   | K.KLVGYLDR.N         |              | 2 | 2,3547 | 0,201 | -0,316 |
| 22 | Q04637 IF4G1_HUMAN | R.VVQRSS#LS#RERGE.K  | S1146:S1148: | 3 | 2,3542 | 0,082 | -0,99  |
| 22 | P19174 PLCG1_HUMAN | R.GSDASGQLFHGR.A     |              | 3 | 2,354  | 0,28  | -0,52  |
| 22 | Q9NU22 MDN1_HUMAN  | E.SNFIAQLASQK.H      |              | 2 | 2,3512 | 0,255 | -1,011 |
| 22 | Q9NVI7 ATD3A_HUMAN | R.LKLAQFD.Y          |              | 2 | 2,3509 | 0,114 | 0,146  |
| 22 | P38571 LICH_HUMAN  | E.DGYILCLNR.I        |              | 2 | 2,3474 | 0,308 | -0,434 |
| 22 | P84157 MXRA7_HUMAN | E.GFSFKYS#PGKLR.G    | S144:        | 3 | 2,344  | 0,247 | 0,062  |
| 22 | Q86YS7 K0528_HUMAN | E.IIGSPIPEPR.Q       |              | 2 | 2,3404 | 0,315 | -0,565 |
| 22 | Q07666 KHDR1_HUMAN | R.SGS#M*DPSGAHPSVR.Q | S20:         | 2 | 2,34   | 0,275 | -0,33  |
| 22 | P13639 EF2_HUMAN   | K.STLTDSLVC.A        |              | 2 | 2,3375 | 0,34  | -0,109 |
| 22 | P78347 GTF2I_HUMAN | E.VTIEDDDYS#PPSK.R   | S319:        | 2 | 2,3348 | 0,149 | -0,158 |

|    |                    |                        |        |   |        |       |        |
|----|--------------------|------------------------|--------|---|--------|-------|--------|
| 22 | Q52LJ0 FA98B_HUMAN | E.M*ACPYSVLISGDIKDR.L  |        | 3 | 2,3343 | 0,195 | 0      |
| 22 | Q08357 S20A2_HUMAN | K.SPISNGTFGFDGHTR.S    |        | 3 | 2,3324 | 0,114 | 0      |
| 22 | P21333 FLNA_HUMAN  | R.LVSNHSLHE.T          |        | 2 | 2,3304 | 0,193 | 0,353  |
| 22 | Q5VUA4 ZN318_HUMAN | K.VAQILGINIFDK.S       |        | 2 | 2,3255 | 0,351 | -0,275 |
| 22 | P83881 RL36A_HUMAN | K.HFELGGDK.K           |        | 2 | 2,3251 | 0,182 | 0,068  |
| 22 | Q9UQ35 SRRM2_HUMAN | E.SYFGVSSLQLK.G        |        | 2 | 2,3239 | 0,292 | -0,596 |
| 22 | P62937 PPIA_HUMAN  | K.ITIADCGLE.-          |        | 2 | 2,3226 | 0,398 | -0,218 |
| 22 | Q14683 SMC1A_HUMAN | K.SGVISGGASDLK.A       |        | 2 | 2,3205 | 0,242 | -0,447 |
| 22 | P23528 COF1_HUMAN  | K.AVLFCLSEDKK.N        |        | 2 | 2,3183 | 0,294 | -0,652 |
| 22 | P06748 NPM_HUMAN   | E.DVKLLSISGK.R         |        | 2 | 2,3172 | 0,274 | -0,575 |
| 22 | Q92879 CELF1_HUMAN | K.LFIGM*ISK.K          |        | 2 | 2,3167 | 0,148 | 0      |
| 22 | Q9BVG9 PTSS2_HUMAN | R.DAGGPRPES#PVPAGR.A   | S16:   | 3 | 2,3128 | 0,113 | 0,119  |
| 22 | P35568 IRS1_HUMAN  | E.AASAADLNRFR.K        |        | 2 | 2,3122 | 0,221 | -0,373 |
| 22 | Q9NUQ6 SPS2L_HUMAN | R.TPCSSLLPLNAHAATSGK.Q |        | 3 | 2,3109 | 0,157 | -0,566 |
| 22 | Q9UMY4 SNX12_HUMAN | R.TNLPIFK.L            |        | 2 | 2,3071 | 0,083 | 0,22   |
| 22 | O15042 SR140_HUMAN | E.TEAFVEEPSKK.G        |        | 3 | 2,3056 | 0,227 | 0,145  |
| 22 | P61586 RHOA_HUMAN  | K.HFCPNVPIILVGNK.K     |        | 3 | 2,3032 | 0,087 | -0,227 |
| 22 | Q7Z2K8 GRIN1_HUMAN | R.KT#ESPSLGKVVPLSLE.K  | T702:  | 2 | 2,3029 | 0,254 | -0,622 |
| 22 | P30153 2AAA_HUMAN  | R.VRYM*VADKFTE.L       |        | 2 | 2,3028 | 0,16  | -0,532 |
| 22 | Q53GS9 SNUT2_HUMAN | R.EAPASVVPFVR.V        |        | 2 | 2,2969 | 0,351 | -0,312 |
| 22 | Q96TA1 NIBL1_HUMAN | R.AKQVSVVQDEE.V        |        | 2 | 2,2951 | 0,143 | -0,642 |
| 22 | Q76FK4 NOL8_HUMAN  | K.NPISRPLE.G           |        | 2 | 2,2948 | 0,187 | 0,066  |
| 22 | POC7M2 RA1L3_HUMAN | K.IFVGGIKEDTE.E        |        | 2 | 2,2946 | 0,144 | -0,202 |
| 22 | Q9BVG4 CX026_HUMAN | E.GYNKAVYISVQDKEGK.G   |        | 3 | 2,294  | 0,116 | -0,285 |
| 22 | Q9NYF8 BCLF1_HUMAN | K.DLFDYS#PPLHK.N       | S512:  | 2 | 2,2926 | 0,238 | -0,346 |
| 22 | Q9Y383 LC7L2_HUMAN | R.IKFSDDR.V            |        | 2 | 2,2916 | 0,169 | 0,069  |
| 22 | Q96N67 DOCK7_HUMAN | R.M*NS#LTFKK.S         | S1383: | 2 | 2,2913 | 0,135 | 0      |
| 22 | O95425 SVIL_HUMAN  | R.SLT#QPITTEE.V        | T736:  | 2 | 2,2912 | 0,238 | -0,102 |
| 22 | P78347 GTF2I_HUMAN | K.ANELPQPPVPEPANAGKR.K |        | 3 | 2,2896 | 0,149 | -0,194 |
| 22 | P27635 RL10_HUMAN  | K.VDEFPLCGHMVSDE.Y     |        | 2 | 2,2881 | 0,229 | -0,672 |
| 22 | Q09028 RBBP4_HUMAN | R.LVLGTHTSDE.Q         |        | 2 | 2,2872 | 0,336 | 0,114  |
| 22 | Q9UQ35 SRRM2_HUMAN | R.SSTGPEPPAPTPLLA.E.R  |        | 2 | 2,2868 | 0,253 | -0,468 |
| 22 | P34931 HS71L_HUMAN | K.ILDKCNE.L            |        | 2 | 2,2854 | 0,081 | -0,205 |



|    |                    |                     |        |   |        |       |        |
|----|--------------------|---------------------|--------|---|--------|-------|--------|
| 22 | Q14966 ZN638_HUMAN | K.SKEEPLFPFNLDE.F   |        | 2 | 2,2818 | 0,25  | -0,468 |
| 22 | P25398 RS12_HUMAN  | E.HQINLIKVDD.N      |        | 2 | 2,2784 | 0,277 | -0,306 |
| 22 | P35580 MYH10_HUMAN | K.FSKVEDMAE.L       |        | 2 | 2,2754 | 0,209 | -0,462 |
| 22 | P25942 TNR5_HUMAN  | K.YCDPNLGLR.V       |        | 2 | 2,2753 | 0,132 | -0,33  |
| 22 | Q86U86 PB1_HUMAN   | E.LGPLPDDDDM*ASPK.L |        | 2 | 2,2727 | 0,386 | -0,41  |
| 22 | Q12906 ILF3_HUMAN  | K.VLQDMGLPTGAEGR.D  |        | 2 | 2,2712 | 0,241 | 0,084  |
| 22 | Q9Y5W9 SNX11_HUMAN | K.SCCFLPR.S         |        | 2 | 2,2703 | 0,265 | 0,065  |
| 22 | Q6NVY1 HIBCH_HUMAN | K.IAPVFFREE.Y       |        | 2 | 2,2684 | 0,254 | -0,991 |
| 22 | Q04637 IF4G1_HUMAN | R.SFS#KEVEE.R       | S1188: | 2 | 2,2584 | 0,146 | -0,118 |
| 22 | O00487 PSDE_HUMAN  | K.M*LLNLHKK.S       |        | 2 | 2,2574 | 0,103 | -0,903 |
| 22 | P23528 COF1_HUMAN  | K.AVLFCLSEDK.K      |        | 2 | 2,256  | 0,286 | -0,619 |
| 22 | Q9Y230 RUVB2_HUMAN | R.GLGLDDALEPR.Q     |        | 2 | 2,2556 | 0,187 | -0,317 |
| 22 | P31948 STIP1_HUMAN | R.CMMAQYNR.H        |        | 2 | 2,2543 | 0,367 | -0,227 |
| 22 | Q9NRX4 PHP14_HUMAN | K.AKYPDYE.V         |        | 2 | 2,2522 | 0,197 | 0,275  |
| 22 | Q8NEY8 PPHLN_HUMAN | R.DNTFFRES#PVGR.K   | S133:  | 2 | 2,2508 | 0,115 | -0,243 |
| 22 | O94915 FRYL_HUMAN  | E.LVDLKLPTAR.R      |        | 3 | 2,25   | 0,231 | 0,149  |
| 22 | Q9UHD1 CHRD1_HUMAN | K.TSDFNTFLAQE.G     |        | 2 | 2,2492 | 0,116 | -0,479 |
| 22 | Q9BZL6 KPCD2_HUMAN | K.AQSSLGYIPLMR.V    |        | 2 | 2,2485 | 0,235 | -0,274 |
| 22 | Q15121 PEA15_HUMAN | K.YKDIIRQPS#EEE.I   | S116:  | 2 | 2,2475 | 0,236 | -0,308 |
| 22 | Q15424 SAFB1_HUMAN | K.ADSLAVVK.R        |        | 2 | 2,2462 | 0,276 | -0,067 |
| 22 | Q92466 DDB2_HUMAN  | K.RSRS#PLELEPE.A    | S26:   | 2 | 2,2438 | 0,151 | -0,263 |
| 22 | Q53HC0 CCD92_HUMAN | K.TLAVDQVNGGK.V     |        | 2 | 2,2431 | 0,16  | -0,111 |
| 22 | Q96T37 RBM15_HUMAN | R.LLLERPS#PIRDR.R   | S700:  | 3 | 2,2431 | 0,134 | 0      |
| 22 | P30153 2AAA_HUMAN  | R.YM*VADKFTE.L      |        | 2 | 2,2413 | 0,281 | -0,218 |
| 22 | P21333 FLNA_HUMAN  | K.AHEPTYFTVDCAE.A   |        | 2 | 2,2386 | 0,223 | -0,158 |
| 22 | P06396 GELS_HUMAN  | E.DCFILDHGKDGK.I    |        | 2 | 2,2371 | 0,322 | -0,695 |
| 22 | Q8N3U4 STAG2_HUMAN | E.HHQTPLDYNR.R      |        | 3 | 2,2354 | 0,093 | 0      |
| 22 | P29692 EF1D_HUMAN  | R.ATAPQTQHVSPMR.Q   |        | 3 | 2,2353 | 0,29  | -0,963 |
| 22 | O95817 BAG3_HUMAN  | R.SSTPLHSPSPIR.V    |        | 2 | 2,2345 | 0,1   | -0,095 |
| 22 | O60506 HNRPQ_HUMAN | K.SAFLCGVMK.T       |        | 2 | 2,2339 | 0,333 | -0,241 |
| 22 | Q9ULJ3 ZN295_HUMAN | R.LRSFS#ASQSTDRE.G  | S411:  | 3 | 2,2322 | 0,132 | 0      |
| 22 | Q15393 SF3B3_HUMAN | E.DTPQLYVACGR.G     |        | 2 | 2,2313 | 0,339 | -0,477 |
| 22 | Q13098 CSN1_HUMAN  | E.KLDTDLKNYK.G      |        | 3 | 2,2312 | 0,144 | 0,96   |

|    |                     |                            |                 |   |        |       |        |
|----|---------------------|----------------------------|-----------------|---|--------|-------|--------|
| 22 | O43399 TPD54_HUMAN  | R.NSATFKS#FEDR.V           | S166:           | 3 | 2,2308 | 0,102 | -0,132 |
| 22 | O14497 ARI1A_HUMAN  | E.IGGLTQVNK.N              |                 | 2 | 2,2235 | 0,201 | -0,197 |
| 22 | Q02952 AKA12_HUMAN  | E.ALICVGS#SK.K             | S687:           | 2 | 2,223  | 0,286 | -0,06  |
| 22 | Q99700 ATX2_HUMAN   | R.DLIKDKIEPSAK.D           |                 | 3 | 2,2167 | 0,193 | 0,27   |
| 22 | P23528 COF1_HUMAN   | K.AVLFLCLSE.D              |                 | 2 | 2,2147 | 0,098 | -0,26  |
| 22 | P12956 KU70_HUMAN   | K.FTVPMLKE.A               |                 | 2 | 2,2146 | 0,082 | -0,253 |
| 22 | Q13428 TCOF_HUMAN   | K.TVANLLSGK.S              |                 | 2 | 2,2121 | 0,396 | -1,621 |
| 22 | Q9BR76 COR1B_HUMAN  | K.FRHVFGQPVK.N             |                 | 2 | 2,2118 | 0,158 | -0,402 |
| 22 | Q96FF9 CDCA5_HUMAN  | K.SGS#ELPSILPE.I           | S35:            | 2 | 2,2117 | 0,102 | -0,202 |
| 22 | Q3KQU3 MA7D1_HUMAN  | R.ARLS#ASTASE.L            | S452:           | 2 | 2,2076 | 0,203 | -0,569 |
| 22 | Q86UU0 BCL9L_HUMAN  | K.NPQAGVPPFSSLK.G          |                 | 2 | 2,2048 | 0,121 | -0,364 |
| 22 | Q92499 DDX1_HUMAN   | K.M*DQAIIFCR.T             |                 | 2 | 2,2016 | 0,306 | -0,521 |
| 22 | P11717 MPRI_HUMAN   | K.LVSFHDDS#DEDLLHI.-       | S2484:          | 3 | 2,1995 | 0,103 | -0,299 |
| 22 | Q4VXC3 Q4VXC3_HUMAN | R.RQFS#APNLK.A             | S1141:          | 2 | 2,1971 | 0,26  | -0,107 |
| 22 | Q9P210 CPSF2_HUMAN  | R.QLIIVHGPPPEASQDLAE.C     |                 | 2 | 2,1934 | 0,184 | -0,47  |
| 22 | P23634 AT2B4_HUMAN  | K.AKTQDGVALE.I             |                 | 2 | 2,1924 | 0,18  | 0,118  |
| 22 | Q15056 IF4H_HUMAN   | R.GSNM*DFREPTEEE.R         |                 | 2 | 2,1915 | 0,32  | -0,078 |
| 22 | Q9C0C2 TB182_HUMAN  | K.GDAHLRPTSLVQR.R          |                 | 3 | 2,1887 | 0,12  | -0,063 |
| 22 | P62753 RS6_HUMAN    | R.RLS#S#LRAST#SKSE.S       | S235:S236:T241: | 3 | 2,1863 | 0,268 | -0,22  |
| 22 | Q3KQU3 MA7D1_HUMAN  | K.SRGPT#PPAM*GPR.D         | T97:            | 3 | 2,1856 | 0,124 | -0,208 |
| 22 | Q14980 NUMA1_HUMAN  | R.KRVSLEPHQGPQT#PE.S       | T2000:          | 2 | 2,1855 | 0,45  | -0,428 |
| 22 | Q99729 ROAA_HUMAN   | R.GFVFITFKE.E              |                 | 2 | 2,1842 | 0,314 | -0,224 |
| 22 | O75396 SC22B_HUMAN  | E.FDTFIQK.T                |                 | 2 | 2,1841 | 0,139 | -0,136 |
| 22 | P57078 RIPK4_HUMAN  | K.FQGGHGPAATLLR.R          |                 | 3 | 2,184  | 0,226 | 0,138  |
| 22 | Q00341 VIGLN_HUMAN  | R.CDIIISGRKE.K             |                 | 3 | 2,18   | 0,09  | 0,14   |
| 22 | P61160 ARP2_HUMAN   | K.ILLTEPPM*NPTK.N          |                 | 2 | 2,1792 | 0,118 | -0,356 |
| 22 | Q5T200 ZC3HD_HUMAN  | E.DGQVFS#PK.K              | S993:           | 2 | 2,1789 | 0,101 | -0,191 |
| 22 | P16402 H13_HUMAN    | E.TAPLAPTIPAPAECT#PVK.K    | T18:            | 2 | 2,1787 | 0,348 | -0,454 |
| 22 | P35527 K1C9_HUMAN   | K.TLNDRMQEYEQLIAK.N        |                 | 2 | 2,1784 | 0,197 | -0,593 |
| 22 | Q9Y2U5 M3K2_HUMAN   | R.LSIIGPTSR.D              |                 | 2 | 2,1782 | 0,203 | -0,129 |
| 22 | Q96S94 CCNL2_HUMAN  | R.GLLPGGTQVLDTGTSGF#PAPK.L | S330:           | 2 | 2,177  | 0,183 | -0,704 |
| 22 | O43237 DC1L2_HUMAN  | E.DFIVKPPVR.K              |                 | 2 | 2,175  | 0,192 | -0,228 |
| 22 | Q92733 PRCC_HUMAN   | K.KTILQGSSE.G              |                 | 2 | 2,1747 | 0,144 | -0,19  |

|    |                      |                             |            |   |        |       |        |
|----|----------------------|-----------------------------|------------|---|--------|-------|--------|
| 22 | Q70EL1 UBP54_HUMAN   | E.SLNIDSIFSK.D              |            | 2 | 2,1737 | 0,13  | -0,434 |
| 22 | Q9Y2D4 EXC6B_HUMAN   | K.KDAYIIFDTE.I              |            | 2 | 2,1724 | 0,108 | -0,201 |
| 22 | Q92879 CELF1_HUMAN   | K.LFIGMISK.K                |            | 2 | 2,1711 | 0,148 | -0,067 |
| 22 | O75569 PRKRA_HUMAN   | K.TPIQVLHE.Y                |            | 2 | 2,1706 | 0,091 | -1,042 |
| 22 | Q9BPZ7 SIN1_HUMAN    | K.QSILSVRLE.Q               |            | 2 | 2,1685 | 0,221 | -0,233 |
| 22 | ##O75747 P3C2G_HUMAN | R.QLILSLE.N                 |            | 2 | 2,1671 | 0,105 | 0,299  |
| 22 | P35527 K1C9_HUMAN    | K.TLLDIDNTR.M               |            | 2 | 2,1653 | 0,135 | 0      |
| 22 | P08670 VIME_HUMAN    | E.RDNLAEDIM*R.L             |            | 2 | 2,1632 | 0,196 | -0,098 |
| 22 | Q0VAX7 Q0VAX7_HUMAN  | E.KAVNPFLADVDK.L            |            | 3 | 2,1621 | 0,152 | 0,139  |
| 22 | P51003 PAPOA_HUMAN   | K.IPTPIVGVK.R               |            | 2 | 2,1601 | 0,147 | -0,792 |
| 22 | P20700 LMNB1_HUMAN   | R.LKLS#PS#PSSR.V            | S391:S393: | 2 | 2,1589 | 0,151 | -0,594 |
| 22 | Q5VZK9 LR16A_HUMAN   | K.VALLPPVLK.K               |            | 2 | 2,1555 | 0,203 | -0,321 |
| 22 | P06753 TPM3_HUMAN    | R.ALKDEEKM*E.L              |            | 2 | 2,1536 | 0,228 | -0,55  |
| 22 | P53667 LIMK1_HUMAN   | R.IFRPSDLIHGE.V             |            | 3 | 2,1524 | 0,195 | 0      |
| 22 | Q2KHN1 RN151_HUMAN   | R.KTIGRLE.V                 |            | 2 | 2,1499 | 0,152 | 0      |
| 22 | Q5T200 ZC3HD_HUMAN   | R.LLS#QVVRPQE.S             | S865:      | 2 | 2,1479 | 0,363 | -0,293 |
| 22 | P29375 JAD1A_HUMAN   | E.VLSTDTQTS#PEPGTRM*NILPK.R | S204:      | 3 | 2,1459 | 0,167 | -0,231 |
| 22 | O43399 TPD54_HUMAN   | R.NSATFKS#FEDRVGTIK.S       | S166:      | 3 | 2,1408 | 0,295 | -0,292 |
| 22 | Q16643 DREB_HUMAN    | R.LSS#PVLHR.L               | S142:      | 2 | 2,1377 | 0,161 | -0,062 |
| 22 | Q9BVG4 CX026_HUMAN   | K.AVYISVQDK.E               |            | 2 | 2,1354 | 0,265 | -0,656 |
| 22 | P16989 DBPA_HUMAN    | E.DVFBVHQTAIK.K             |            | 2 | 2,1347 | 0,306 | -0,316 |
| 22 | P49736 MCM2_HUMAN    | R.RGNDPLTSS#PGR.S           | S27:       | 2 | 2,1347 | 0,233 | -0,73  |
| 22 | P06748 NPM_HUMAN     | E.EDVKLLSISGK.R             |            | 2 | 2,1317 | 0,114 | -0,308 |
| 22 | O00567 NOL5A_HUMAN   | E.NGM*EDPSISFSKPK.K         |            | 3 | 2,1279 | 0,263 | -0,236 |
| 22 | O15144 ARPC2_HUMAN   | R.AVIHYRDDE.T               |            | 2 | 2,1268 | 0,266 | -0,109 |
| 22 | B2RA01 B2RA01_HUMAN  | K.AQYEDIAQK.S               |            | 2 | 2,125  | 0,229 | 0      |
| 22 | Q68DD2 PA24F_HUMAN   | R.LQYYTQELGVRE.R            |            | 3 | 2,1246 | 0,117 | -0,061 |
| 22 | Q9Y536 PAL4B_HUMAN   | R.IIPGFMCQGGDFTR.H          |            | 2 | 2,1231 | 0,212 | -0,458 |
| 22 | P08107 HSP71_HUMAN   | K.VQVSYKGE.T                |            | 2 | 2,1206 | 0,307 | 0      |
| 22 | Q96MU7 YTDC1_HUMAN   | R.GIS#PIVFDR.S              | S308:      | 2 | 2,1184 | 0,203 | -0,675 |
| 22 | Q9Y4B6 VPRBP_HUMAN   | R.KLSSEPLLPLDEE.A           |            | 2 | 2,1182 | 0,24  | -0,581 |
| 22 | Q04637 IF4G1_HUMAN   | R.ERPSQPEGLR.K              |            | 2 | 2,1176 | 0,174 | -0,104 |
| 22 | Q5VUA4 ZN318_HUMAN   | R.RRS#PGLCSDSLE.K           | S136:      | 2 | 2,1172 | 0,321 | -0,335 |

|    |                    |                              |       |   |        |       |        |
|----|--------------------|------------------------------|-------|---|--------|-------|--------|
| 22 | Q9BY89 K1671_HUMAN | K.RRPVS#AIFTE.S              | S244: | 2 | 2,1144 | 0,311 | -0,486 |
| 22 | O15173 PGRC2_HUMAN | E.KYDYVGR.L                  |       | 2 | 2,1115 | 0,239 | -0,339 |
| 22 | P29692 EF1D_HUMAN  | R.ATAPQQTQHV#PMR.Q           | S133: | 2 | 2,1082 | 0,299 | -0,487 |
| 22 | Q9NYF8 BCLF1_HUMAN | R.RIDIS#PSTLRK.H             | S658: | 2 | 2,1071 | 0,224 | -0,536 |
| 22 | P02545 LMNA_HUMAN  | R.LRLSPS#PTSQR.S             | S392: | 2 | 2,1058 | 0,184 | -0,738 |
| 22 | Q9COC2 TB182_HUMAN | E.AKGD AHLRPTSLVQR.R         |       | 3 | 2,1044 | 0,177 | 0      |
| 22 | Q13242 SFRS9_HUMAN | R.GS#PHYFSPFRPY.-            | S211: | 2 | 2,1006 | 0,332 | -0,795 |
| 22 | P58107 EPIPL_HUMAN | R.YRAGTLTVEE.L               |       | 2 | 2,0996 | 0,097 | 0,107  |
| 22 | P39023 RL3_HUMAN   | K.AFMGPLKK.D                 |       | 2 | 2,098  | 0,19  | -0,137 |
| 22 | Q58FF8 H90B2_HUMAN | K.YIDQEELNK.T                |       | 2 | 2,0979 | 0,167 | -0,53  |
| 22 | Q5SW79 CE170_HUMAN | R.TLPQLPNEEKSLE.S            |       | 2 | 2,0976 | 0,205 | -0,407 |
| 22 | Q9HB19 PKHA2_HUMAN | K.EKPFM*FNLDDE.N             |       | 2 | 2,0905 | 0,146 | -0,348 |
| 22 | Q9BQG0 MBB1A_HUMAN | E.SRDPAQPMS#PGEATQSGARPADR.Y | S11:  | 3 | 2,0849 | 0,16  | -0,223 |
| 22 | Q86TI2 DPP9_HUMAN  | E.NSLLYSEIPK.K               |       | 2 | 2,0823 | 0,135 | -0,524 |
| 22 | Q9H7D0 DOCK5_HUMAN | K.SLQLMDNR.L                 |       | 2 | 2,0805 | 0,236 | 0,062  |
| 22 | Q9BY89 K1671_HUMAN | R.RPV#AIFTE.S                | S244: | 2 | 2,0774 | 0,107 | -0,333 |
| 22 | Q8N4N3 CP044_HUMAN | R.VSRPYKIS#E.S               | S17:  | 2 | 2,0711 | 0,103 | -0,211 |
| 22 | Q05519 SFR11_HUMAN | E.KKPIETGS#PK.T              | S449: | 2 | 2,0694 | 0,228 | -0,209 |
| 22 | Q86UE4 LYRIC_HUMAN | R.DKVLTDS#GSLDSTIPGIE.N      | S214: | 2 | 2,0679 | 0,372 | -0,57  |
| 22 | Q9Y2U5 M3K2_HUMAN  | K.RLS#IIGPTRS.D              | S153: | 2 | 2,0648 | 0,343 | -0,31  |
| 22 | Q96JM3 ZN828_HUMAN | K.SSFFIEPQKPVFPE.T           |       | 2 | 2,0643 | 0,287 | -0,295 |
| 22 | P48739 PIPNB_HUMAN | K.RGS#VRG TSAADV.-           | S262: | 2 | 2,0638 | 0,271 | -0,389 |
| 22 | Q15121 PEA15_HUMAN | K.DNLSYIEHIFE.I              |       | 2 | 2,0556 | 0,215 | -0,354 |
| 22 | Q9Y2U5 M3K2_HUMAN  | R.DRS#SPPPGYIPDE.L           | S163: | 2 | 2,051  | 0,242 | -0,646 |
| 22 | P57740 NU107_HUMAN | R.VLLQASQDE.N                |       | 2 | 2,0488 | 0,235 | 0      |
| 22 | P17480 UBF1_HUMAN  | R.GKLPES#PKRAEE.I            | S484: | 3 | 2,0485 | 0,179 | -0,772 |
| 22 | Q13242 SFRS9_HUMAN | R.GSPHYFSPFRPY.-             |       | 3 | 2,0473 | 0,166 | 0,063  |
| 22 | Q8WU20 FRS2_HUMAN  | R.TAAMSNLQK.A                |       | 2 | 2,0452 | 0,302 | 0,759  |
| 22 | Q86WH2 RASF3_HUMAN | E.DFFFT#AR.T                 | T18:  | 2 | 2,044  | 0,157 | -0,31  |
| 22 | Q16658 FSCN1_HUMAN | K.VAFRDCE.G                  |       | 2 | 2,0385 | 0,239 | 0,136  |
| 22 | Q9BQ52 RNZ2_HUMAN  | E.TMTVYQIPIHSEQR.R           |       | 3 | 2,0366 | 0,289 | -0,215 |
| 22 | P19105 MLRM_HUMAN  | R.ATSNVFAM*FDQSQIQE.F        |       | 2 | 2,0348 | 0,257 | -0,4   |
| 22 | Q92466 DDB2_HUMAN  | R.SRS#PLELEPE.A              | S26:  | 2 | 2,034  | 0,166 | -0,493 |

|    |                    |                          |            |   |        |       |        |
|----|--------------------|--------------------------|------------|---|--------|-------|--------|
| 22 | P05787 K2C8_HUMAN  | R.AFSSRS#YTSGPGSR.I      | S24:       | 2 | 2,0297 | 0,377 | -0,238 |
| 22 | Q92499 DDX1_HUMAN  | E.HKM*DQAIIFCR.T         |            | 2 | 2,027  | 0,272 | -0,51  |
| 22 | Q6ZV73 FGD6_HUMAN  | R.HSLPATGVLK.K           |            | 2 | 2,0239 | 0,149 | -0,119 |
| 22 | Q96SB4 SRPK1_HUMAN | K.MTQEKLEE.S             |            | 2 | 2,0236 | 0,251 | -0,061 |
| 22 | Q01469 FABP5_HUMAN | R.LVDSKGFDE.Y            |            | 2 | 2,0233 | 0,101 | -0,181 |
| 22 | Q9Y3T9 NOC2L_HUMAN | R.GILRPLSTR.H            |            | 2 | 2,0223 | 0,206 | -0,241 |
| 22 | O15116 LSM1_HUMAN  | K.HLVLLRD.G              |            | 2 | 2,0187 | 0,223 | 0,07   |
| 22 | P43243 MATR3_HUMAN | E.NLPQILLQLK.R           |            | 2 | 2,0118 | 0,105 | -0,414 |
| 22 | P57076 CU059_HUMAN | R.GQGAPAREPIISSEE.Q      |            | 2 | 2,0104 | 0,123 | -0,792 |
| 22 | Q6UN15 FIP1_HUMAN  | R.ERDHS#PTPSVFNS#DEE.R   | S492:S500: | 2 | 2,0092 | 0,245 | -0,182 |
| 22 | Q8WU20 FRS2_HUMAN  | R.DCTPTVFNFDIR.R         |            | 2 | 2,0087 | 0,233 | -0,575 |
| 22 | Q16875 F263_HUMAN  | K.KGPNPLMR.R             |            | 2 | 2,0067 | 0,129 | -0,067 |
| 22 | Q4KMP7 TB10B_HUMAN | R.RAS#AGPAPGPVVTAE.G     | S412:      | 2 | 2,0066 | 0,114 | -0,251 |
| 22 | Q8IYB3 SRRM1_HUMAN | R.KAQS#PQS.-             | S901:      | 2 | 2,005  | 0,207 | -0,066 |
| 22 | Q96RK0 CIC_HUMAN   | E.IQLPLPPGK.R            |            | 2 | 2,0027 | 0,159 | -0,063 |
| 22 | P13645 K1C10_HUMAN | R.ALEESNYELEGK.I         |            | 2 | 2,0018 | 0,088 | 0,441  |
| 22 | Q4KMP7 TB10B_HUMAN | R.QQPPLGPSSSLLSLPGLK.S   |            | 2 | 1,999  | 0,44  | -0,402 |
| 22 | P81274 GPSM2_HUMAN | E.IDSSLNGVRPK.L          |            | 2 | 1,9944 | 0,087 | -0,206 |
| 22 | P62753 RS6_HUMAN   | R.RLS#SLRAS#TSKSE.S      | S235:S240: | 2 | 1,9938 | 0,113 | -0,309 |
| 22 | Q9HD15 SRA1_HUMAN  | R.SLMVDHVTE.V            |            | 2 | 1,9933 | 0,23  | 0      |
| 22 | Q96QF0 RAB3I_HUMAN | K.TLVLSSSPTSPTQEPLPGGK.T |            | 2 | 1,9926 | 0,389 | -0,183 |
| 22 | O95817 BAG3_HUMAN  | R.GYISIPVIHE.Q           |            | 2 | 1,9904 | 0,099 | -0,108 |
| 22 | Q9HCD6 TANC2_HUMAN | K.RPFVESNV.-             |            | 2 | 1,9866 | 0,105 | -0,386 |
| 22 | P21333 FLNA_HUMAN  | K.IQQNTFTR.W             |            | 2 | 1,9853 | 0,116 | 0,182  |
| 22 | Q9UHB6 LIMA1_HUMAN | E.DVDLDLKK.L             |            | 2 | 1,9801 | 0,112 | -0,322 |
| 22 | P33991 MCM4_HUMAN  | R.QLISYPQE.V             |            | 2 | 1,9796 | 0,117 | -0,25  |
| 22 | Q96HS1 PGAM5_HUMAN | R.EPLSLINVR.K            |            | 2 | 1,9766 | 0,285 | -0,117 |
| 22 | P31150 GDIA_HUMAN  | R.KQNDVFGAEQ.-           |            | 2 | 1,9697 | 0,288 | -0,386 |
| 22 | P51884 LUM_HUMAN   | E.SVGPLPKSLED.L          |            | 2 | 1,9692 | 0,123 | -0,641 |
| 22 | Q96ST2 IWS1_HUMAN  | K.HM*DFLSDFE.M           |            | 2 | 1,9634 | 0,108 | -0,422 |
| 22 | O15355 PPM1G_HUMAN | K.VLTLTDDHE.F            |            | 2 | 1,9622 | 0,143 | -0,117 |
| 22 | P11388 TOP2A_HUMAN | K.YLEES#DEDDL.F.-        | S1525:     | 2 | 1,951  | 0,396 | -0,419 |
| 22 | P31948 STIP1_HUMAN | E.HLKNPVIAQK.I           |            | 2 | 1,9508 | 0,148 | 0      |

|    |                     |                        |        |   |        |       |        |
|----|---------------------|------------------------|--------|---|--------|-------|--------|
| 22 | P07602 SAP_HUMAN    | K.LVGYLDR.N            |        | 2 | 1,9497 | 0,36  | -0,219 |
| 22 | O95817 BAG3_HUMAN   | R.SSTPLHS#PSPIR.V      | S289:  | 2 | 1,9465 | 0,112 | -0,539 |
| 22 | Q86V48 LUZP1_HUMAN  | K.VTSSITIYPSDSSSPR.A   |        | 2 | 1,9425 | 0,12  | -0,288 |
| 22 | Q99536 VAT1_HUMAN   | K.VLLVPGPEKEN.-        |        | 2 | 1,9387 | 0,175 | -0,817 |
| 22 | Q92994 TF3B_HUMAN   | K.INYSVLR.G            |        | 2 | 1,9353 | 0,133 | 0      |
| 22 | O43396 TXNL1_HUMAN  | E.HGFDNCLR.K           |        | 2 | 1,9347 | 0,222 | 0,06   |
| 22 | Q13242 SFRS9_HUMAN  | R.HGLVPPFAFVR.F        |        | 2 | 1,9322 | 0,239 | -0,534 |
| 22 | P54253 ATX1_HUMAN   | E.KM*GLPAAPFLTK.I      |        | 2 | 1,932  | 0,111 | -0,662 |
| 22 | Q9BY44 EIF2A_HUMAN  | R.NTVSQSISGDPE.I       |        | 2 | 1,9312 | 0,128 | 1,978  |
| 22 | P24539 AT5F1_HUMAN  | R.HYLFDVQR.N           |        | 2 | 1,9259 | 0,161 | -0,905 |
| 22 | Q9NZM1 MYOF_HUMAN   | K.LDLPNRPE.T           |        | 2 | 1,9245 | 0,224 | 0,064  |
| 22 | P62937 PPIA_HUMAN   | K.SIYGKFE.D            |        | 2 | 1,9122 | 0,107 | -0,439 |
| 22 | Q9ULW0 TPX2_HUMAN   | K.VLPITVPKS#PAFALK.N   | S486:  | 2 | 1,9084 | 0,096 | -0,588 |
| 22 | P98171 RHG04_HUMAN  | R.CLVPAS#PEQHVE.V      | S860:  | 2 | 1,9059 | 0,081 | -0,506 |
| 22 | Q15742 NAB2_HUMAN   | R.SFS#PKSPL.E          | S159:  | 2 | 1,9057 | 0,223 | -0,114 |
| 22 | Q14677 EPN4_HUMAN   | K.SAFPFSDKLGE.L        |        | 2 | 1,9047 | 0,324 | -0,407 |
| 22 | A0JNW5 UH1BL_HUMAN  | R.CPPNLAPLCVSYK.N      |        | 2 | 1,9037 | 0,158 | -0,241 |
| 22 | P02545 LMNA_HUMAN   | R.NSNLVGAAHEE.L        |        | 2 | 1,9037 | 0,15  | -0,535 |
| 22 | P35527 K1C9_HUMAN   | R.MTLDDFR.I            |        | 2 | 1,9022 | 0,243 | -0,068 |
| 22 | O60506 HNRPQ_HUMAN  | R.LFVGSIPK.S           |        | 2 | 1,9021 | 0,098 | 1,063  |
| 22 | Q8WXH0 SYNE2_HUMAN  | R.RGSM*S#YLAAVEEEVEE.S | S4110: | 2 | 1,901  | 0,314 | -0,708 |
| 22 | Q9C0B5 ZDHC5_HUMAN  | K.SKGS#LEITE.S         | S299:  | 2 | 1,8984 | 0,092 | -0,234 |
| 22 | P48739 PIPNB_HUMAN  | R.GS#VRGTSAADV.-       | S262:  | 2 | 1,8969 | 0,316 | -0,111 |
| 22 | P18858 DNL1_HUMAN   | R.VLGSEGEED.E.A        |        | 2 | 1,8951 | 0,1   | -0,307 |
| 22 | Q8WU90 ZC3HF_HUMAN  | K.ALVISGRE.V           |        | 2 | 1,8893 | 0,101 | 0,217  |
| 22 | Q7Z4V5 HDGR2_HUMAN  | R.ARGDS#EALDEES.-      | S664:  | 2 | 1,8837 | 0,227 | -0,449 |
| 22 | P26368 U2AF2_HUMAN  | E.HGGLIRS#PRHE.K       | S79:   | 2 | 1,8836 | 0,375 | -0,456 |
| 22 | Q674X7 KAZRN_HUMAN  | K.NLHNPIVQSLE.D        |        | 2 | 1,8728 | 0,081 | -0,386 |
| 22 | P23588 IF4B_HUMAN   | R.HPS#WRSEE.T          | S406:  | 2 | 1,8697 | 0,112 | -0,441 |
| 22 | P20042 IF2B_HUMAN   | K.KPFM*LDEEGDTQTEE.T   |        | 2 | 1,8687 | 0,394 | -0,273 |
| 22 | Q9NQW6 ANLN_HUMAN   | K.TQSLPVTEKVTE.N       |        | 2 | 1,8639 | 0,209 | -0,275 |
| 22 | Q7RTP8 Q7RTP8_HUMAN | R.AS#SLNLVNVGGK.A      | S595:  | 2 | 1,8617 | 0,128 | -0,492 |
| 22 | Q71U36 TBA1A_HUMAN  | R.AFVHWYVGE.G          |        | 2 | 1,8614 | 0,134 | -0,44  |

|    |                     |                          |            |   |        |       |        |
|----|---------------------|--------------------------|------------|---|--------|-------|--------|
| 22 | Q96S55 WRIP1_HUMAN  | R.AKGPS#PPGAK.R          | S65:       | 2 | 1,8599 | 0,159 | -0,246 |
| 22 | P50914 RL14_HUMAN   | K.AALLKAS#PK.K           | S139:      | 2 | 1,8468 | 0,15  | -0,249 |
| 22 | Q9BTA9 WAC_HUMAN    | R.STCSLTPALAAHFSE.N      |            | 2 | 1,8445 | 0,096 | -0,307 |
| 22 | Q05193 DYN1_HUMAN   | R.GYIGVVNR.S             |            | 2 | 1,8391 | 0,149 | -0,208 |
| 22 | P62736 ACTA_HUMAN   | R.GILTLYKPIE.H           |            | 2 | 1,8305 | 0,171 | -0,638 |
| 22 | P40818 UBP8_HUMAN   | R.SYSS#PDITQAIQEEE.K     | S719:      | 2 | 1,8272 | 0,21  | -0,549 |
| 22 | Q96A65 EXOC4_HUMAN  | E.EDFIRAAFVK.E           |            | 2 | 1,815  | 0,16  | -0,529 |
| 22 | Q8WY36 BBX_HUMAN    | K.EMPQAPVLISCADQ.-       |            | 2 | 1,813  | 0,111 | -0,078 |
| 22 | O60506 HNRPQ_HUMAN  | K.SAFLCGVM*K.T           |            | 2 | 1,8089 | 0,103 | -0,356 |
| 22 | Q92616 GCN1L_HUMAN  | K.KLASQADSTEQVDDTILT.-   |            | 2 | 1,8045 | 0,135 | -0,441 |
| 22 | Q8WWZ1 IL1FA_HUMAN  | -.M*CSLPM*AR.Y           |            | 2 | 1,804  | 0,104 | 0,061  |
| 22 | Q14C86 GAPD1_HUMAN  | R.SSDIVSSVR.R            |            | 2 | 1,8026 | 0,123 | -0,128 |
| 22 | P51452 DUS3_HUMAN   | K.DSGITYLGIK.A           |            | 2 | 1,8024 | 0,167 | 0      |
| 22 | O60502 NCOAT_HUMAN  | E.LNTYLYAPK.D            |            | 2 | 1,7975 | 0,158 | -0,225 |
| 22 | Q53EZ4 CEP55_HUMAN  | K.CYNDLLASAK.K           |            | 2 | 1,7951 | 0,119 | -0,634 |
| 22 | Q13595 TRA2A_HUMAN  | R.RRS#PSPY#YSR.Y         | S260:Y264: | 2 | 1,7943 | 0,138 | -0,085 |
| 22 | P84077 ARF1_HUMAN   | E.ITDKLGLHSLR.H          |            | 2 | 1,7925 | 0,114 | -0,584 |
| 22 | P43243 MATR3_HUMAN  | R.CRDDSFGE.T             |            | 2 | 1,782  | 0,102 | -0,323 |
| 22 | O43303 CE110_HUMAN  | R.TSSACHILINNPINACE.L    |            | 2 | 1,7801 | 0,109 | -0,701 |
| 22 | Q9Y2W2 WBP11_HUMAN  | E.LTPLQAMM*LR.M          |            | 2 | 1,7782 | 0,296 | -0,513 |
| 22 | O43148 MCES_HUMAN   | R.KIALEDVPE.K            |            | 2 | 1,7737 | 0,162 | -0,06  |
| 22 | Q02952 AKA12_HUMAN  | E.GVTPWAS#FK.K           | S612:      | 2 | 1,7699 | 0,163 | -0,341 |
| 22 | Q9BR76 COR1B_HUMAN  | R.DADPILISLRE.A          |            | 2 | 1,7636 | 0,172 | -0,491 |
| 22 | Q96HE9 PRR11_HUMAN  | K.ARNPLVTVSD.L           |            | 2 | 1,7608 | 0,18  | 0      |
| 22 | P18615 NELFE_HUMAN  | R.SFDWGYEER.S            |            | 2 | 1,7584 | 0,154 | -0,308 |
| 22 | ##Q00888 PSG4_HUMAN | E.SKPECTFT#LVDK.N        | T161:      | 2 | 1,7497 | 0,111 | 1,216  |
| 22 | P40763 STAT3_HUMAN  | E.NLQDDDFNYK.T           |            | 2 | 1,7409 | 0,09  | -0,344 |
| 22 | Q8IWZ3 ANKH1_HUMAN  | K.LNLTS#PK.R             | S1679:     | 2 | 1,7348 | 0,1   | 0,072  |
| 22 | Q8N6T3 ARFG1_HUMAN  | E.TFGSAEPTK.T            |            | 2 | 1,725  | 0,31  | -0,39  |
| 22 | Q9Y2W2 WBP11_HUMAN  | E.LTPLQAMMLR.M           |            | 2 | 1,7244 | 0,376 | -0,312 |
| 22 | Q9Y224 CN166_HUMAN  | R.DVNCPEK.I              |            | 2 | 1,7229 | 0,183 | 0,139  |
| 22 | O95793 STAU1_HUMAN  | K.VTFFEPGSGDENGTSNKEDE.F |            | 2 | 1,713  | 0,215 | -0,678 |
| 22 | Q9UHB6 LIMA1_HUMAN  | E.DVDLDLK.K              |            | 2 | 1,711  | 0,086 | 0,298  |

|    |                      |                                |          |   |        |       |        |
|----|----------------------|--------------------------------|----------|---|--------|-------|--------|
| 22 | Q9ULH1 DDEF1_HUMAN   | K.LALPGFSTPR.D                 |          | 2 | 1,7062 | 0,183 | 0,115  |
| 22 | P50552 VASP_HUMAN    | K.NSTT#LPR.M                   | T316:    | 2 | 1,6988 | 0,163 | 0,07   |
| 22 | P09496 CLCA_HUMAN    | R.LCDFNPK.S                    |          | 2 | 1,6877 | 0,236 | 0,955  |
| 22 | Q99543 DNJC2_HUMAN   | R.NRNAS#AS#FQE.L               | S47:S49: | 2 | 1,6797 | 0,12  | -0,665 |
| 22 | ##Q86W28 NALP8_HUMAN | E.VEVHQIE.L                    |          | 2 | 1,6412 | 0,148 | 0      |
| 22 | P18206 VINC_HUMAN    | R.DM*PPAFIKVE.N                |          | 2 | 1,6176 | 0,084 | -0,42  |
| 22 | Q9BRA2 TXD17_HUMAN   | K.TIFAYFTGSK.D                 |          | 2 | 1,6152 | 0,205 | -0,215 |
| 22 | Q13442 HAP28_HUMAN   | R.KGVEGLIDIENPNRVAQTTK.K       |          | 2 | 1,6084 | 0,265 | -0,447 |
| 22 | P09211 GSTP1_HUMAN   | K.ALPGQLKPF.T                  |          | 2 | 1,5692 | 0,096 | -0,333 |
| 22 | P78371 TCPB_HUMAN    | D.LM*NIAGTTLSSK.L              |          | 2 | 1,5679 | 0,133 | -0,195 |
| 22 | Q9UKY7 CDV3_HUMAN    | E.VDYSGLR.V                    |          | 2 | 1,5628 | 0,186 | 0,226  |
| 22 | Q16643 DREB_HUMAN    | R.M*APTPIPTR.S                 |          | 2 | 1,5305 | 0,091 | 0,122  |
| 22 | Q96T88 UHRF1_HUMAN   | K.VEPYSLTAQQSSLIRE.D           |          | 2 | 1,5267 | 0,215 | -0,603 |
| 22 | P68104 EF1A1_HUMAN   | R.QTVAVGVIK.A                  |          | 2 | 1,504  | 0,181 | 0,133  |
| 22 | P02545 LMNA_HUMAN    | R.LRLS#PSPTSQR.S               | S390:    | 2 | 1,5024 | 0,134 | -0,277 |
| 22 | Q66K74 MAP1S_HUMAN   | R.KAVPM*APAPAS#PGSSNDSSAR.S    | S759:    | 2 | 1,4615 | 0,143 | 0,583  |
| 22 | P33991 MCM4_HUMAN    | R.ATPAQTPR.S                   |          | 2 | 1,4506 | 0,173 | 0,362  |
| 22 | B2RD09 B2RD09_HUMAN  | R.AAAGACT#PPCT.-               | T462:    | 2 | 1,3346 | 0,232 | -0,527 |
| 22 | Q3KQU3 MA7D1_HUMAN   | R.GTPPPAM*GPR.D                |          | 2 | 1,3254 | 0,116 | -0,122 |
| 22 | Q9UM11 FZR_HUMAN     | K.DATSDNGKDGLAYSALLKNE.L       |          | 2 | 1,2653 | 0,273 | -0,352 |
| 22 | A8K630 A8K630_HUMAN  | R.LQQQHSEQPPLQSPVTTR.R         |          | 2 | 1,2296 | 0,216 | -0,45  |
| 22 | Q3KQU3 MA7D1_HUMAN   | R.QSLPASPR.A                   |          | 2 | 1,1399 | 0,198 | 0,143  |
| 23 | P35527 K1C9_HUMAN    | R.GSRGGSGGSYGGGGSGGGYGGGSGSR.G |          | 3 | 6,092  | 0,47  | -0,175 |
| 23 | O00629 IMA4_HUMAN    | D.S#DIDGDYRVQNTSLE.A           | S60:     | 2 | 5,0217 | 0,504 | -0,545 |
| 23 | Q8IWS0 PHF6_HUMAN    | K.CGFCHVGEENEAR.G              |          | 3 | 4,7002 | 0,39  | -0,108 |
| 23 | Q09161 NCBP1_HUMAN   | R.KTS#DANETEDHLE.S             | S22:     | 2 | 4,5915 | 0,382 | -0,544 |
| 23 | P46100 ATRX_HUMAN    | K.TTPLRRPTETNPVTSNS#DEECNE.T   | S677:    | 3 | 4,4324 | 0,394 | -0,537 |
| 23 | Q9NYF8 BCLF1_HUMAN   | K.KAEGEPQEE#PLKSK.S            | S177:    | 3 | 4,4285 | 0,341 | -0,421 |
| 23 | P13645 K1C10_HUMAN   | K.GSLGGGFSSGGFSGGSFSR.G        |          | 2 | 4,347  | 0,516 | -0,429 |
| 23 | O43707 ACTN4_HUMAN   | R.HRPELIEYDK.L                 |          | 3 | 4,284  | 0,257 | 0,07   |
| 23 | Q01804 OTUD4_HUMAN   | K.TAADVVS#PGANSVDSR.V          | S1006:   | 2 | 4,2708 | 0,424 | 0      |
| 23 | Q9NPI6 DCP1A_HUMAN   | R.DKQS#PSQANGCSDHRPIDILE.M     | S142:    | 3 | 4,2437 | 0,161 | -0,449 |
| 23 | Q92890 UFD1_HUMAN    | K.KKGVEPS#PIKPGDIKR.G          | S247:    | 3 | 4,2223 | 0,327 | -0,727 |



|    |                    |                               |                 |   |        |       |        |
|----|--------------------|-------------------------------|-----------------|---|--------|-------|--------|
| 23 | P35527 K1C9_HUMAN  | R.HGVQELEIELQSQLSKK.A         |                 | 3 | 4,212  | 0,415 | -0,372 |
| 23 | Q03188 CENPC_HUMAN | K.ILATDVSSKNT#PDSK.K          | T130:           | 2 | 4,2051 | 0,264 | -0,81  |
| 23 | Q8IYB3 SRRM1_HUMAN | D.ILKVPKPEPIPEPKEPS#PEK.N     | S260:           | 3 | 4,1611 | 0,219 | -0,628 |
| 23 | Q9UFC0 LRWD1_HUMAN | R.LAALKRPDDVPLSLS#PSKR.A      | S243:           | 3 | 4,1454 | 0,225 | -0,256 |
| 23 | P28799 GRN_HUMAN   | E.DRQHCCPAGYTCNVK.A           |                 | 3 | 4,1105 | 0,282 | -0,588 |
| 23 | P21333 FLNA_HUMAN  | R.RAPS#VANVGSCHCD.L           | S2152:          | 2 | 4,1004 | 0,547 | -0,337 |
| 23 | O43852 CALU_HUMAN  | R.VHHEPQLSDKVHND.A            |                 | 3 | 4,0426 | 0,289 | -0,332 |
| 23 | O60271 JIP4_HUMAN  | R.SAS#QSS#LDKLDQE.L           | S730:S733:      | 2 | 4,0116 | 0,248 | -0,156 |
| 23 | P07355 ANXA2_HUMAN | E.KDIISDTSGDFRK.L             |                 | 3 | 4,0028 | 0,398 | -0,062 |
| 23 | P30837 AL1B1_HUMAN | R.KVGNPFELDTQQGPQVDKE.Q       |                 | 3 | 3,9634 | 0,173 | -0,516 |
| 23 | O75400 PR40A_HUMAN | R.RRT#LLEQLDDDQ.-             | T948:           | 2 | 3,9599 | 0,399 | -0,463 |
| 23 | P02538 K2C6A_HUMAN | R.AIGGGLSSVGGGSSTIK.Y         |                 | 2 | 3,9549 | 0,458 | -0,421 |
| 23 | P62841 RS15_HUMAN  | K.KEAPPMKPEVVK.T              |                 | 3 | 3,9399 | 0,249 | 0      |
| 23 | Q13573 SNW1_HUMAN  | R.GPPS#PPAPVMHS#PSR.K         | S224:S232:      | 3 | 3,9388 | 0,489 | -0,109 |
| 23 | P02538 K2C6A_HUMAN | R.AIGGGLSSVGGGSSTIKYTTTSSSR.K |                 | 3 | 3,9238 | 0,339 | -0,454 |
| 23 | Q8NC51 PAIRB_HUMAN | R.KNPLPPSVGVVDKKEE.T          |                 | 3 | 3,9135 | 0,153 | -0,211 |
| 23 | Q6NZI2 PTRF_HUMAN  | R.RGS#S#PDVHALLE.I            | S365:S366:      | 2 | 3,8871 | 0,465 | -0,508 |
| 23 | Q9UHR5 S30BP_HUMAN | E.KGGLVSDAYGEDDFSR.L          |                 | 3 | 3,8852 | 0,299 | -0,426 |
| 23 | Q8TEA8 DTD1_HUMAN  | R.SASS#GAEGDVSSEREP.-         | S197:           | 2 | 3,8817 | 0,54  | -0,593 |
| 23 | Q99614 TTC1_HUMAN  | R.LKEEGNEQFK.K                |                 | 3 | 3,8788 | 0,118 | 0,299  |
| 23 | Q9UHR5 S30BP_HUMAN | E.KGGLVSDAYGEDDFSR.L          |                 | 2 | 3,8591 | 0,477 | -0,284 |
| 23 | Q96MU7 YTDC1_HUMAN | R.AKS#PT#PDGSERIGLE.V         | S146:T148:      | 2 | 3,828  | 0,416 | -0,284 |
| 23 | Q8NI27 THOC2_HUMAN | R.KIDTHPS#PSHSSTVKDSLIE.L     | S1302:          | 3 | 3,7863 | 0,259 | -0,324 |
| 23 | P35251 RFC1_HUMAN  | K.RIIYDS#DS#ESEE.T            | S69:S71:        | 2 | 3,7729 | 0,501 | -0,685 |
| 23 | Q96MU7 YTDC1_HUMAN | R.AKS#PT#PDGSERIGLE.V         | S146:T148:      | 3 | 3,7636 | 0,324 | -0,213 |
| 23 | P28749 RBL1_HUMAN  | R.VIAIDS#DAES#PAKR.V          | S1037:S1041:    | 2 | 3,7589 | 0,409 | 0,075  |
| 23 | P62753 RS6_HUMAN   | R.RLSS#LRAS#TSKS#E.S          | S236:S240:S244: | 2 | 3,7273 | 0,288 | -0,661 |
| 23 | O14974 MYPT1_HUMAN | R.RST#QGVTLTDLQE.A            | T696:           | 2 | 3,71   | 0,397 | -0,479 |
| 23 | Q9H7N4 SFR19_HUMAN | E.VLYDS#EGLS#GEER.G           | S734:S738:      | 2 | 3,7097 | 0,344 | -0,529 |
| 23 | P00558 PGK1_HUMAN  | R.AHSSM*VGVNLPQK.A            |                 | 3 | 3,7078 | 0,225 | -0,264 |
| 23 | Q9NYB0 TE2IP_HUMAN | E.HKYLLGDAPVSPSS#QK.L         | S206:           | 3 | 3,7063 | 0,197 | 0,101  |
| 23 | O60307 MAST3_HUMAN | R.SRS#LS#PGRATGTFDNE.I        | S155:S157:      | 2 | 3,6971 | 0,369 | -0,724 |
| 23 | O75937 DNJC8_HUMAN | R.ALDVIQAGKE.Y                |                 | 2 | 3,6952 | 0,31  | 0      |

|    |                     |                             |            |   |        |       |        |
|----|---------------------|-----------------------------|------------|---|--------|-------|--------|
| 23 | Q8TF15 Q8TF15_HUMAN | R.KKKPPVS#PPLLLVQDSE.T      | S155:      | 3 | 3,6897 | 0,284 | -0,561 |
| 23 | P62937 PPIA_HUMAN   | E.KFEDENFILK.H              |            | 3 | 3,6876 | 0,084 | 0,071  |
| 23 | Q6UX04 SDC10_HUMAN  | R.KVKDASM*QSDSTFE.I         |            | 2 | 3,6786 | 0,459 | -0,453 |
| 23 | P46013 KI67_HUMAN   | K.IACRS#PQPDPVGTPTIFKPQSK.R | S2223:     | 3 | 3,6764 | 0,105 | -0,658 |
| 23 | Q9P2D6 F135A_HUMAN  | R.RSS#DDCHDHQTTPSLGVR.T     | S640:      | 3 | 3,6738 | 0,283 | -0,17  |
| 23 | P62263 RS14_HUMAN   | K.KEEQVIS#LGPQVAE.G         | S16:       | 2 | 3,6083 | 0,372 | -0,683 |
| 23 | Q6UN15 FIP1_HUMAN   | R.DHS#PTPSVFNSDEE.R         | S492:      | 2 | 3,6057 | 0,32  | -0,669 |
| 23 | Q01804 OTUD4_HUMAN  | K.TAADVSPGANSVDSR.V         |            | 2 | 3,6005 | 0,282 | -0,631 |
| 23 | Q8IWS0 PHF6_HUMAN   | K.CGFCHVGEENE.A             |            | 2 | 3,5888 | 0,445 | -0,499 |
| 23 | Q12756 KIF1A_HUMAN  | E.LSLCHVADAGS#PGM*QR.R      | S1337:     | 2 | 3,5843 | 0,369 | -0,34  |
| 23 | Q9UKV3 ACINU_HUMAN  | E.KSKS#PS#PPRLTE.D          | S386:S388: | 3 | 3,5819 | 0,18  | 0,246  |
| 23 | Q6NZI2 PTRF_HUMAN   | E.AGDLRRGS#\$#PDVHALLE.I    | S365:S366: | 3 | 3,5814 | 0,288 | -0,468 |
| 23 | Q9Y2W1 TR150_HUMAN  | E.KGSFSDTGLGDGK.M           |            | 2 | 3,5615 | 0,383 | -0,577 |
| 23 | A8K630 A8K630_HUMAN | R.LQQQHSEQPPLQPS#PVTTRR.G   | S22:       | 3 | 3,5533 | 0,273 | -0,456 |
| 23 | Q96B01 R51A1_HUMAN  | K.MALDDKLYQRDLE.V           |            | 2 | 3,5497 | 0,378 | -0,682 |
| 23 | Q96B23 CRO25_HUMAN  | E.GDPSGVSGATVGR.K           |            | 2 | 3,5404 | 0,292 | -0,421 |
| 23 | Q14847 LASP1_HUMAN  | K.TQDQISNIKYHEE.F           |            | 2 | 3,522  | 0,481 | -0,152 |
| 23 | Q7L7X3 TAOK1_HUMAN  | R.ASDPQS#PPQVSR.H           | S421:      | 2 | 3,5034 | 0,33  | -0,543 |
| 23 | Q9Y2W1 TR150_HUMAN  | E.KGSFS#DTGLGDGKM*K.S       | S379:      | 3 | 3,4965 | 0,34  | 0      |
| 23 | P35527 K1C9_HUMAN   | R.SGGGGGGGLGSGGSIR.S        |            | 2 | 3,4952 | 0,489 | -0,297 |
| 23 | Q13535 ATR_HUMAN    | R.RLSS\$#LNPSKR.A           | S437:      | 3 | 3,4906 | 0,142 | 0      |
| 23 | P68431 H31_HUMAN    | E.DTNLCAIHAK.R              |            | 2 | 3,4834 | 0,305 | -0,32  |
| 23 | P04264 K2C1_HUMAN   | K.YEELQITAGR.H              |            | 2 | 3,4764 | 0,213 | -0,414 |
| 23 | Q96B01 R51A1_HUMAN  | K.MALDDKLYQR.D              |            | 2 | 3,4759 | 0,282 | -0,487 |
| 23 | P35580 MYH10_HUMAN  | R.KLDGETTDLQDQIAE.L         |            | 2 | 3,4666 | 0,372 | -0,582 |
| 23 | Q14527 HLTF_HUMAN   | R.KTAVQYIESS#DSEE.I         | S398:      | 2 | 3,4661 | 0,45  | -0,293 |
| 23 | P35527 K1C9_HUMAN   | R.HGVQELEIELQSQLSK.K        |            | 3 | 3,4657 | 0,139 | -0,498 |
| 23 | O14974 MYPT1_HUMAN  | R.RLAS#TSDIEEKE.N           | S507:      | 2 | 3,4644 | 0,328 | -0,669 |
| 23 | Q5T5U3 RHG21_HUMAN  | R.FKSDSGSLGDAKNE.K          |            | 3 | 3,4584 | 0,161 | 0      |
| 23 | P25398 RS12_HUMAN   | R.KVVGCSVCVVVK.D            |            | 2 | 3,4511 | 0,33  | -0,395 |
| 23 | P01106 MYC_HUMAN    | E.SGS#PSAGGHSKPPHS#PLVLKR.C | S281:S293: | 3 | 3,4496 | 0,304 | -0,324 |
| 23 | Q14677 EPN4_HUMAN   | E.LSDKIGSTIDDTISK.F         |            | 2 | 3,448  | 0,441 | -0,689 |
| 23 | P04264 K2C1_HUMAN   | R.SLVNLGGSKSISISVAR.G       |            | 2 | 3,4414 | 0,315 | -0,723 |

|    |                     |                           |            |   |        |       |        |
|----|---------------------|---------------------------|------------|---|--------|-------|--------|
| 23 | Q15154 PCM1_HUMAN   | R.VTNDIS#PESS#PGVGR.R     | S65:S69:   | 2 | 3,4414 | 0,407 | -0,219 |
| 23 | Q6UX04 SDC10_HUMAN  | K.VKDASM*QSDTFE.I         |            | 2 | 3,4312 | 0,335 | -0,738 |
| 23 | Q9Y2X7 GIT1_HUMAN   | E.HSLDPAQVQSGR.R          |            | 3 | 3,4157 | 0,18  | 0,065  |
| 23 | P51858 HDGF_HUMAN   | R.AGDLLLED#PKRPK.E        | S165:      | 2 | 3,405  | 0,183 | -0,81  |
| 23 | Q14C86 GAPD1_HUMAN  | R.SRS#SDIVSSVR.R          | S902:      | 2 | 3,4033 | 0,412 | -0,383 |
| 23 | P04264 K2C1_HUMAN   | R.SGGGFSSGSAGIINYQR.R     |            | 2 | 3,4021 | 0,386 | -0,294 |
| 23 | P04264 K2C1_HUMAN   | R.SGYRSGGGFSSGSAGIINYQR.R |            | 3 | 3,3989 | 0,411 | -0,517 |
| 23 | Q8TAT6 NPL4_HUMAN   | R.NKDTYFLSSEE.C           |            | 2 | 3,3881 | 0,394 | -0,549 |
| 23 | O43852 CALU_HUMAN   | R.VHHEPQLSDKVHND.A        |            | 2 | 3,3866 | 0,427 | -0,369 |
| 23 | Q6UX04 SDC10_HUMAN  | K.VKDASMQSDTFE.I          |            | 2 | 3,3826 | 0,312 | -0,994 |
| 23 | Q7Z460 CLAP1_HUMAN  | E.KFSFRS#QEDLNEPIKR.D     | S1196:     | 3 | 3,3783 | 0,129 | -0,441 |
| 23 | O43852 CALU_HUMAN   | K.KDRVHHEPQLSDKVHND.A     |            | 3 | 3,3702 | 0,237 | 0      |
| 23 | Q14676 MDC1_HUMAN   | R.SLATM*DS#PPHQKQPQRGE.V  | S1820:     | 3 | 3,3701 | 0,225 | -0,261 |
| 23 | Q12756 KIF1A_HUMAN  | E.LSLCHVADAGS#PGM*QR.R    | S1337:     | 3 | 3,3618 | 0,236 | -0,306 |
| 23 | Q99460 PSMD1_HUMAN  | E.KVSTAVLSITAK.A          |            | 2 | 3,3609 | 0,411 | -0,401 |
| 23 | P00568 KAD1_HUMAN   | K.IIFVVGPGSGK.G           |            | 2 | 3,3547 | 0,277 | -0,216 |
| 23 | Q09161 NCBP1_HUMAN  | K.TSDANETEDHLE.S          |            | 2 | 3,3481 | 0,494 | -0,448 |
| 23 | Q9BZ23 PANK2_HUMAN  | R.RASS#ASVPAVGASAE.G      | S169:      | 2 | 3,3296 | 0,418 | -0,424 |
| 23 | P35527 K1C9_HUMAN   | R.IKFEMEQLNR.Q            |            | 3 | 3,329  | 0,148 | 0,14   |
| 23 | Q9Y2X3 NOL5_HUMAN   | E.VKTYDPSGDSTLPTCSK.K     |            | 2 | 3,3258 | 0,218 | -0,526 |
| 23 | Q96T23 RSF1_HUMAN   | K.KKPDS#PPKVLEPE.N        | S738:      | 2 | 3,3183 | 0,292 | -0,474 |
| 23 | Q9Y2X3 NOL5_HUMAN   | E.VKTYDPSGDSTLPTCSK.K     |            | 3 | 3,3158 | 0,105 | -0,394 |
| 23 | Q52LJ0 FA98B_HUMAN  | E.LQASQILQNK.K            |            | 2 | 3,3147 | 0,216 | -0,32  |
| 23 | Q71U36 TBA1A_HUMAN  | E.ITNACFEPANQM*VK.C       |            | 2 | 3,311  | 0,293 | -0,372 |
| 23 | O43290 SNUT1_HUMAN  | K.KKPDYLPYAEDE.S          |            | 2 | 3,3047 | 0,338 | -0,582 |
| 23 | Q12756 KIF1A_HUMAN  | E.LSLCHVADAGS#PGMQR.R     | S1337:     | 3 | 3,2933 | 0,21  | -0,514 |
| 23 | POC7M2 RA1L3_HUMAN  | E.DSQRPGAHLTVK.K          |            | 3 | 3,2889 | 0,365 | 0,279  |
| 23 | Q8NHZ8 CDC26_HUMAN  | K.QKEDVEVVGGS#DGE.G       | S42:       | 2 | 3,2778 | 0,26  | 1,917  |
| 23 | Q96MU7 YTDC1_HUMAN  | R.AKS#PTPDGS#ERIGLE.V     | S146:S152: | 2 | 3,263  | 0,173 | -0,142 |
| 23 | P26358 DNMT1_HUMAN  | R.VARPLPAEPPER.A          |            | 3 | 3,2619 | 0,213 | 0,067  |
| 23 | B2RD09 B2RD09_HUMAN | E.RVEVPSSASQAK.A          |            | 2 | 3,2613 | 0,344 | -0,678 |
| 23 | Q8IUD2 RB612_HUMAN  | R.SVGKVEPSSQS#PGRS#PR.L   | S17:S21:   | 3 | 3,2584 | 0,317 | -0,287 |
| 23 | Q13177 PAK2_HUMAN   | K.ERPEIS#PPSDFE.H         | S75:       | 2 | 3,248  | 0,404 | -0,494 |

|    |                     |                            |            |   |        |       |        |
|----|---------------------|----------------------------|------------|---|--------|-------|--------|
| 23 | P21333 FLNA_HUMAN   | R.APS#VANVGSCHCD.L         | S2152:     | 2 | 3,2469 | 0,371 | -0,471 |
| 23 | Q96T37 RBM15_HUMAN  | R.SLS#PGGAALGYRD.Y         | S294:      | 2 | 3,241  | 0,393 | -0,545 |
| 23 | O60927 PP1RB_HUMAN  | K.CCIIYEKPR.A              |            | 2 | 3,2278 | 0,415 | -0,474 |
| 23 | Q15424 SAFB1_HUMAN  | E.KRS#VVSFDKVK.E           | S601:      | 3 | 3,2195 | 0,153 | -0,067 |
| 23 | P45974 UBP5_HUMAN   | E.HLSHFGIDM*LK.M           |            | 3 | 3,2127 | 0,196 | -0,209 |
| 23 | P62263 RS14_HUMAN   | K.EKKEEQVIS#LGPQVAE.G      | S16:       | 2 | 3,209  | 0,448 | -0,655 |
| 23 | Q96T58 MINT_HUMAN   | E.NRS#PVKEPVEQPR.V         | S1918:     | 3 | 3,2012 | 0,313 | 0      |
| 23 | P18615 NELFE_HUMAN  | R.TQIVYSDDVYKE.N           |            | 2 | 3,1963 | 0,357 | -0,418 |
| 23 | Q96B01 R51A1_HUMAN  | K.M*ALDDKLYQRDLE.V         |            | 2 | 3,1936 | 0,191 | -0,45  |
| 23 | P07355 ANXA2_HUMAN  | E.KDIISDTSGDFRK.L          |            | 2 | 3,1914 | 0,273 | -0,659 |
| 23 | Q13151 ROA0_HUMAN   | K.LFVGGLKGDVAE.G           |            | 2 | 3,1873 | 0,361 | -0,304 |
| 23 | O95684 FR1OP_HUMAN  | E.GALDLS#DVHSPPKS#PEGK.T   | S152:S160: | 3 | 3,1862 | 0,193 | -0,275 |
| 23 | Q9UPN9 TRI33_HUMAN  | R.LKS#DERPVHIK.-           | S1119:     | 3 | 3,1785 | 0,251 | -0,065 |
| 23 | Q96T23 RSF1_HUMAN   | K.KPDS#PPKVLEPE.N          | S738:      | 2 | 3,1539 | 0,241 | -0,345 |
| 23 | P62753 RS6_HUMAN    | R.RLS#S#LRASTKSE.S         | S235:S236: | 3 | 3,1312 | 0,242 | -0,231 |
| 23 | P62937 PPIA_HUMAN   | K.KITIADCGQLE.-            |            | 2 | 3,13   | 0,434 | -0,489 |
| 23 | Q13769 THOC5_HUMAN  | R.RRPT#LGVQLDDK.R          | T328:      | 3 | 3,1295 | 0,256 | -0,124 |
| 23 | Q00341 VIGLN_HUMAN  | R.RCDIIISGR.K              |            | 2 | 3,129  | 0,164 | -0,507 |
| 23 | P13645 K1C10_HUMAN  | R.ALEESNYELEGK.I           |            | 2 | 3,1283 | 0,306 | -0,353 |
| 23 | P10809 CH60_HUMAN   | R.KPLVIAEDVDGE.A           |            | 2 | 3,126  | 0,32  | -0,436 |
| 23 | P04637 P53_HUMAN    | K.LMFKTEGPDS#D.-           | S392:      | 2 | 3,1189 | 0,375 | -0,555 |
| 23 | Q9Y6W5 WASF2_HUMAN  | E.KRDVVGNDVATILSR.R        |            | 3 | 3,1172 | 0,255 | -0,334 |
| 23 | Q9C0C2 TB182_HUMAN  | R.DSLGAYASQDANEQGQDLGKR.D  |            | 3 | 3,1139 | 0,344 | -0,329 |
| 23 | P52292 IMA2_HUMAN   | R.NVSSFPDDATSPLQE.N        |            | 2 | 3,1031 | 0,376 | -0,531 |
| 23 | A8K630 A8K630_HUMAN | R.LQQQHSEQPPLQSPVTTR.R     |            | 3 | 3,1024 | 0,277 | -0,506 |
| 23 | Q8IUD2 RB6I2_HUMAN  | R.SVGKVEPS#SQSPGRSPR.L     | S14:       | 2 | 3,0992 | 0,236 | -0,532 |
| 23 | Q14671 PUM1_HUMAN   | E.YVLSS#PGDSCLRK.G         | S229:      | 2 | 3,0983 | 0,416 | -0,518 |
| 23 | P35579 MYH9_HUMAN   | R.RGDLPFVVR.R              |            | 2 | 3,0956 | 0,175 | -0,528 |
| 23 | P43307 SSRA_HUMAN   | E.TLNQINKAS#PR.R           | S268:      | 2 | 3,094  | 0,397 | -0,646 |
| 23 | P07910 HNRPC_HUMAN  | K.LKGDDLQAIKKE.L           |            | 3 | 3,0932 | 0,165 | 0,067  |
| 23 | P01106 MYC_HUMAN    | E.S#GSPSAGGHSKPPHS#PLVLK.R | S279:S293: | 3 | 3,0914 | 0,159 | -0,436 |
| 23 | P21333 FLNA_HUMAN   | R.RRAPS#VANVGSCHCD.L       | S2152:     | 3 | 3,0909 | 0,413 | -0,569 |
| 23 | POC7M2 RA1L3_HUMAN  | K.IFVGGIKEDTEE.H           |            | 2 | 3,0889 | 0,123 | -0,73  |

|    |                    |                                 |            |   |        |       |        |
|----|--------------------|---------------------------------|------------|---|--------|-------|--------|
| 23 | P04264 K2C1_HUMAN  | R.SLDLDSIIAEVK.A                |            | 2 | 3,0889 | 0,364 | -0,749 |
| 23 | P62753 RS6_HUMAN   | R.RLSS#LRAS#TSKSE.S             | S236:S240: | 2 | 3,0876 | 0,516 | -0,926 |
| 23 | Q9NU22 MDN1_HUMAN  | E.SNFIAQLASQK.H                 |            | 2 | 3,0842 | 0,431 | -0,809 |
| 23 | Q96EQ0 SGTB_HUMAN  | R.SRS#FSSSAEEHS.-               | S295:      | 2 | 3,0804 | 0,268 | -0,175 |
| 23 | Q9P275 UBP36_HUMAN | R.LGSETRLPQHIRE.A               |            | 3 | 3,0759 | 0,366 | -0,119 |
| 23 | P04264 K2C1_HUMAN  | K.WELLQQVDTSTR.T                |            | 2 | 3,069  | 0,348 | -0,413 |
| 23 | Q9NZT2 OGFR_HUMAN  | R.SQGDEAGGHGEDRPEPLS#PKE.S      | S378:      | 3 | 3,067  | 0,248 | -0,322 |
| 23 | Q13573 SNW1_HUMAN  | R.GPPS#PPAPVM*HS#PSR.K          | S224:S232: | 3 | 3,0654 | 0,274 | -0,216 |
| 23 | P09874 PARP1_HUMAN | E.VKAEPVEVVAPR.G                |            | 3 | 3,0625 | 0,152 | 0,424  |
| 23 | Q5T5C0 STXB5_HUMAN | K.SRQPSGAGLCDISE.G              |            | 2 | 3,0558 | 0,287 | 0,083  |
| 23 | P49674 KC1E_HUMAN  | R.GAPANVSSSDLTGRQE.V            |            | 2 | 3,0503 | 0,459 | -0,691 |
| 23 | Q14677 EPN4_HUMAN  | E.LSDKIGSTIDDTISKFR.R           |            | 3 | 3,0483 | 0,305 | -0,579 |
| 23 | P04264 K2C1_HUMAN  | K.SLNNQFASFIDK.V                |            | 2 | 3,0481 | 0,444 | -0,529 |
| 23 | O75794 CD123_HUMAN | E.DAHKLIDFLK.L                  |            | 3 | 3,0457 | 0,15  | 0,152  |
| 23 | Q14671 PUM1_HUMAN  | E.YVLSSS#PGDSCLR.K              | S229:      | 2 | 3,0389 | 0,247 | -0,481 |
| 23 | Q96EQ0 SGTB_HUMAN  | R.SRSFS#SSAAEHS.-               | S297:      | 2 | 3,0362 | 0,335 | -0,614 |
| 23 | Q8IYB3 SRRM1_HUMAN | K.RES#PSPAPKPR.K                | S450:      | 3 | 3,0292 | 0,292 | 0,07   |
| 23 | P62258 1433E_HUMAN | R.IISSIEQKEE.N                  |            | 2 | 3,0268 | 0,313 | -0,207 |
| 23 | Q6UN15 FIP1_HUMAN  | R.ERDHS#PTPSVFNSDEE.R           | S492:      | 2 | 3,0252 | 0,494 | -0,38  |
| 23 | Q15181 IPYR_HUMAN  | E.FKDKDFAIDI.K.S                |            | 3 | 3,0206 | 0,151 | -0,503 |
| 23 | P62753 RS6_HUMAN   | R.LSS#LRASTS#KSE.S              | S236:S242: | 2 | 3,0203 | 0,316 | -0,342 |
| 23 | P63104 1433Z_HUMAN | R.VVSSIEQKTE.G                  |            | 2 | 3,0122 | 0,34  | 0      |
| 23 | Q9UHD8 SEPT9_HUMAN | R.LGDSSGPAKRS#FEVEE.V           | S30:       | 3 | 3,012  | 0,086 | -0,77  |
| 23 | Q96MU7 YTDC1_HUMAN | R.RAKS#PT#PDGSEIRIGLE.V         | S146:T148: | 2 | 3,01   | 0,294 | -0,326 |
| 23 | O95373 IPO7_HUMAN  | K.QLQDIATLADQR.R                |            | 2 | 3,0093 | 0,399 | -0,622 |
| 23 | Q8N3D4 EH1L1_HUMAN | R.LRNS#SSFSM*DDPDAGAM*GAAAAE.G  | S1293:     | 3 | 3,0091 | 0,304 | -1,305 |
| 23 | Q99627 CSN8_HUMAN  | R.KPVAGALDVSNK.F                |            | 3 | 3,0085 | 0,141 | -0,136 |
| 23 | Q9BVA0 KTNB1_HUMAN | R.IYERPSTTCSKPQR.V              |            | 3 | 3,0056 | 0,258 | 0,212  |
| 23 | O15027 SC16A_HUMAN | E.HRPASALVNPLAR.G               |            | 3 | 3,0044 | 0,118 | 0,13   |
| 23 | Q9Y2H6 FND3A_HUMAN | K.M*SS#PPSPQKCPSPINE.H          | S139:S149: | 2 | 3,0042 | 0,368 | 0,121  |
| 23 | Q9Y2H6 FND3A_HUMAN | R.QGT#QKDKM*SSPPS#SPQKCPSPINE.H | T132:S142: | 3 | 3,0007 | 0,12  | -0,718 |
| 23 | Q14966 ZN638_HUMAN | K.SDSNLGGHSIR.C                 |            | 2 | 2,9937 | 0,186 | -0,213 |
| 23 | Q8TAD8 SNIP1_HUMAN | E.RLS#PEVAPPAHR.R               | S35:       | 3 | 2,9934 | 0,122 | 0,065  |

|    |                    |                            |            |   |        |       |        |
|----|--------------------|----------------------------|------------|---|--------|-------|--------|
| 23 | Q69YN4 VIR_HUMAN   | R.SFLSEPSS#PGR.T           | S1579:     | 2 | 2,9908 | 0,441 | -0,589 |
| 23 | Q9NYF8 BCLF1_HUMAN | K.SFATASHRNTEEE.G          |            | 2 | 2,9856 | 0,354 | -0,495 |
| 23 | Q9H7N4 SFR19_HUMAN | E.VLYDS#EGLS#GEERGGK.S     | S734:S738: | 2 | 2,9809 | 0,398 | -0,329 |
| 23 | Q9Y2W1 TR150_HUMAN | E.KGSFS#DTGLGDGK.M         | S379:      | 2 | 2,9807 | 0,428 | -0,362 |
| 23 | P18858 DNL1_HUMAN  | E.NNASLSDTSPM*DS#SPSGIPK.R | S113:      | 2 | 2,9799 | 0,479 | -1,278 |
| 23 | Q96J02 ITCH_HUMAN  | R.RPASVNGSPSATSE.S         |            | 2 | 2,975  | 0,42  | -0,897 |
| 23 | Q6P2E9 EDC4_HUMAN  | K.SLAFHRPPYHLLQQR.D        |            | 3 | 2,965  | 0,266 | -0,589 |
| 23 | Q5T200 ZC3HD_HUMAN | R.AQDIIGHHQS#EDRE.T        | S943:      | 2 | 2,9581 | 0,322 | -0,356 |
| 23 | Q9BUQ8 DDX23_HUMAN | E.LANHPDAQHKPGTILTK.K      |            | 3 | 2,9551 | 0,182 | 0,099  |
| 23 | Q5T200 ZC3HD_HUMAN | R.AQDIIGHHQS#EDRE.T        | S943:      | 3 | 2,9466 | 0,282 | -0,213 |
| 23 | Q5T4S7 UBR4_HUMAN  | K.VTISDGKVADEEKPK.K        |            | 3 | 2,9465 | 0,269 | -0,113 |
| 23 | P06493 CDC2_HUMAN  | E.KIGEGT#Y#GVVYKGR.H       | T14:Y15:   | 3 | 2,9448 | 0,106 | -0,325 |
| 23 | Q8IYB3 SRRM1_HUMAN | D.ILKVPKPEPIPEKPS#PEKNSK.K | S260:      | 3 | 2,9404 | 0,269 | -0,344 |
| 23 | P12814 ACTN1_HUMAN | R.HRPELIDYGK.L             |            | 3 | 2,9403 | 0,244 | -0,521 |
| 23 | P00558 PGK1_HUMAN  | K.DASGNKVKAEPAKIE.A        |            | 3 | 2,9364 | 0,11  | -0,117 |
| 23 | Q13573 SNW1_HUMAN  | R.GPPS#PPAPVM*HS#PSR.K     | S224:S232: | 2 | 2,9345 | 0,408 | -0,505 |
| 23 | P09874 PARP1_HUMAN | E.VKAEPEVVAPR.G            |            | 2 | 2,9322 | 0,314 | -0,189 |
| 23 | Q12756 KIF1A_HUMAN | R.VLDTSVAYVRGEE.N          |            | 2 | 2,9275 | 0,442 | -0,339 |
| 23 | P04264 K2C1_HUMAN  | R.TNAENEFVTIKK.D           |            | 3 | 2,9257 | 0,319 | 0,197  |
| 23 | Q7Z4V5 HDGR2_HUMAN | R.CGSESDELHDSVR.E          |            | 2 | 2,9253 | 0,32  | -0,358 |
| 23 | Q8TDN4 CABL1_HUMAN | R.LIS#QRSSLE.T             | S287:      | 2 | 2,9248 | 0,178 | -0,767 |
| 23 | P31946 1433B_HUMAN | R.VISSIEQKTE.R             |            | 2 | 2,924  | 0,232 | -0,108 |
| 23 | Q9H6Z4 RANB3_HUMAN | E.EKPAIAPPVVFVQK.D         |            | 3 | 2,9207 | 0,122 | -0,233 |
| 23 | P02545 LMNA_HUMAN  | R.LRLS#PS#PTSQR.S          | S390:S392: | 2 | 2,9193 | 0,316 | -0,696 |
| 23 | P51858 HDGF_HUMAN  | R.AGDILLED#PKRPK.E         | S165:      | 3 | 2,9173 | 0,231 | -0,364 |
| 23 | Q13573 SNW1_HUMAN  | R.GPPS#PPAPVM*HSPS#R.K     | S224:S234: | 2 | 2,9124 | 0,265 | -0,578 |
| 23 | Q53F19 CQ085_HUMAN | R.ALINM*SSLPAQDK.I         |            | 2 | 2,9097 | 0,24  | -0,434 |
| 23 | P29692 EF1D_HUMAN  | R.ATAPQQTQHV#PM*RQVEPPAK.K | S133:      | 3 | 2,9079 | 0,265 | -0,564 |
| 23 | Q9Y2W1 TR150_HUMAN | E.KGSFSDTGLGDGK.M          |            | 3 | 2,9076 | 0,285 | 0,504  |
| 23 | P04637 P53_HUMAN   | K.LM*FKTEGPDS#D.-          | S392:      | 2 | 2,9069 | 0,315 | -0,457 |
| 23 | Q13535 ATR_HUMAN   | E.NLSSNSDGIS#PK.R          | S428:      | 2 | 2,9048 | 0,276 | -0,376 |
| 23 | Q5VTR2 BRE1A_HUMAN | K.ALVVPEPEPDS#DSNQR.K      | S136:      | 3 | 2,902  | 0,247 | -0,373 |
| 23 | Q8WXX5 DNJC9_HUMAN | E.GVDSLKAAIQSR.Q           |            | 2 | 2,8991 | 0,154 | -0,49  |

|    |                     |                             |                 |   |        |       |        |
|----|---------------------|-----------------------------|-----------------|---|--------|-------|--------|
| 23 | P49902 5NTC_HUMAN   | R.TSVDFKDTDYKR.H            |                 | 3 | 2,8987 | 0,418 | 0,31   |
| 23 | P46013 KI67_HUMAN   | R.NAADPISGDFKE.I            |                 | 2 | 2,8921 | 0,374 | -0,772 |
| 23 | Q92922 SMRC1_HUMAN  | R.KHS#PS#PPPPTPTESR.K       | S328:S330:      | 3 | 2,8909 | 0,154 | -0,515 |
| 23 | Q9H1E3 NUCKS_HUMAN  | R.LKATVTPS#PVKKG.G          | S181:           | 3 | 2,8873 | 0,364 | 0,065  |
| 23 | Q03164 HRX_HUMAN    | K.DKEGT#PPLTKE.D            | T337:           | 2 | 2,8869 | 0,234 | -0,565 |
| 23 | P31949 S10AB_HUMAN  | K.KLDTNSDGQLDFSE.F          |                 | 2 | 2,884  | 0,235 | -0,778 |
| 23 | Q53F64 Q53F64_HUMAN | K.IFVGGLNPEATEE.K           |                 | 2 | 2,8832 | 0,267 | -0,266 |
| 23 | O75794 CD123_HUMAN  | E.DAHKLIDFLK.L              |                 | 2 | 2,8821 | 0,263 | -0,61  |
| 23 | Q96B01 R51A1_HUMAN  | K.MALDDKLYQR.D              |                 | 3 | 2,882  | 0,325 | 0,073  |
| 23 | P35908 K22E_HUMAN   | K.YEELQVTVGR.H              |                 | 2 | 2,8808 | 0,263 | -0,307 |
| 23 | Q9UHB6 LIMA1_HUMAN  | R.KIS#ENSYSLDDLE.I          | S225:           | 2 | 2,8802 | 0,155 | -0,23  |
| 23 | Q96B01 R51A1_HUMAN  | K.M*ALDDKLYQR.D             |                 | 2 | 2,878  | 0,335 | -0,481 |
| 23 | P62753 RS6_HUMAN    | R.RLS#S#LRAS#TSKSESSQK.-    | S235:S236:S240: | 3 | 2,8766 | 0,263 | -0,437 |
| 23 | P30622 CLIP1_HUMAN  | K.VEDLQFRVEEE.S             |                 | 2 | 2,8759 | 0,314 | -0,438 |
| 23 | P42166 LAP2A_HUMAN  | K.LREQGTES#RSS#TPLPTISSAE.N | S156:S159:      | 3 | 2,874  | 0,219 | -0,367 |
| 23 | Q08378 GOGA3_HUMAN  | R.LGS#DLTSAQKE.M            | S983:           | 2 | 2,8718 | 0,233 | -0,397 |
| 23 | Q6NXG5 Q6NXG5_HUMAN | R.SPSTTYLHTPTPSE.D          |                 | 2 | 2,8696 | 0,445 | -0,482 |
| 23 | P09429 HMGB1_HUMAN  | K.KHPDAS#VNFSE.F            | S35:            | 2 | 2,8682 | 0,33  | -0,372 |
| 23 | Q70IA6 MOB2_HUMAN   | R.ITDFQFKE.L                |                 | 2 | 2,8602 | 0,138 | -0,593 |
| 23 | P49411 EFTU_HUMAN   | R.GLVM*VKPGSIKPHQK.V        |                 | 3 | 2,8588 | 0,244 | -0,112 |
| 23 | Q6ICG6 CV009_HUMAN  | R.NNRPAFFSPS#LK.R           | S306:           | 3 | 2,858  | 0,241 | -0,439 |
| 23 | Q9BRQ0 PYGO2_HUMAN  | R.RKS#NTQGPAYSHLTE.F        | S48:            | 2 | 2,8567 | 0,415 | -0,621 |
| 23 | Q96KR1 ZFR_HUMAN    | R.RDS#DGVDFEAE.G            | S1054:          | 2 | 2,8557 | 0,368 | -0,532 |
| 23 | Q5VUA4 ZN318_HUMAN  | R.RRS#FPDIEDE.E             | S527:           | 2 | 2,855  | 0,326 | -0,545 |
| 23 | P02545 LMNA_HUMAN   | R.LRLSPSPTSQR.S             |                 | 2 | 2,849  | 0,27  | -0,688 |
| 23 | P81605 DCD_HUMAN    | K.DAVEDLESVGK.G             |                 | 2 | 2,836  | 0,397 | -0,525 |
| 23 | Q96AG4 LRC59_HUMAN  | K.GGNLRDKLDGNE.L            |                 | 2 | 2,8295 | 0,319 | -0,568 |
| 23 | P27348 1433T_HUMAN  | K.KLQLIKDYRE.K              |                 | 3 | 2,8286 | 0,215 | 0,21   |
| 23 | P09874 PARP1_HUMAN  | K.GDEVDGVDEVAK.K            |                 | 2 | 2,8257 | 0,37  | -0,297 |
| 23 | Q69YN4 VIR_HUMAN    | R.SFLSEPPS#PGRTK.T          | S1579:          | 2 | 2,823  | 0,386 | -0,497 |
| 23 | P63241 IF5A1_HUMAN  | K.VHLVGIDIFTGK.K            |                 | 3 | 2,8195 | 0,243 | 0,141  |
| 23 | P13647 K2C5_HUMAN   | R.SFSTASAITPSVSR.T          |                 | 2 | 2,812  | 0,458 | -0,432 |
| 23 | P35527 K1C9_HUMAN   | K.TLNDM*RQEYEQLIAK.N        |                 | 3 | 2,803  | 0,282 | -0,685 |

|    |                     |                              |            |   |        |       |        |
|----|---------------------|------------------------------|------------|---|--------|-------|--------|
| 23 | P13647 K2C5_HUMAN   | R.ISISTSGGSFR.N              |            | 2 | 2,7964 | 0,322 | -0,658 |
| 23 | Q00341 VIGLN_HUMAN  | K.KQLLHLAE.K                 |            | 2 | 2,7934 | 0,211 | -0,226 |
| 23 | Q9NSM8 Q9NSM8_HUMAN | K.LPDLS#PVENKE.H             | S652:      | 2 | 2,793  | 0,261 | -0,831 |
| 23 | P21333 FLNA_HUMAN   | R.RAPS#VANVGSHCD.L           | S2152:     | 3 | 2,7895 | 0,158 | 0,126  |
| 23 | Q6UN15 FIP1_HUMAN   | R.ERDHSPT#PSVFNS#DEE.R       | T494:S500: | 3 | 2,7858 | 0,145 | -0,274 |
| 23 | Q9BZL6 KPCD2_HUMAN  | R.RLS#S#TSLASGHSVR.L         | S197:S198: | 3 | 2,7827 | 0,346 | -0,113 |
| 23 | Q96G74 OTUD5_HUMAN  | R.RQAPGVGAVGGGS#PEREE.V      | S165:      | 2 | 2,7808 | 0,428 | -0,599 |
| 23 | P78310 CXAR_HUMAN   | R.SYIGSNHSSLGS#M*SPSNM*E.G   | S304:      | 2 | 2,7749 | 0,286 | -0,116 |
| 23 | P27824 CALX_HUMAN   | K.AEEDEILNR.S                |            | 2 | 2,7728 | 0,288 | 0      |
| 23 | Q96EP5 DAZP1_HUMAN  | K.IFVGGIPHNCGETE.L           |            | 2 | 2,7717 | 0,294 | -0,877 |
| 23 | O94833 BPAAE_HUMAN  | R.RGS#DASDFDISE.I            | S5111:     | 2 | 2,7709 | 0,204 | -0,442 |
| 23 | P23588 IF4B_HUMAN   | K.YAALS#VDGEDENE.G           | S597:      | 2 | 2,7661 | 0,122 | -0,491 |
| 23 | Q7Z4V5 HDGR2_HUMAN  | R.CGSSDLHDSVR.E              |            | 3 | 2,7653 | 0,363 | 0,134  |
| 23 | Q9GZT3 SLIRP_HUMAN  | K.LPQTS#DDEKKDF.-            | S102:      | 2 | 2,7642 | 0,26  | -0,568 |
| 23 | P34932 HSP74_HUMAN  | K.VKTSTVDLPIE.N              |            | 2 | 2,7632 | 0,144 | -0,812 |
| 23 | Q5VTR2 BRE1A_HUMAN  | K.ALVVPEPEPDS#NQR.K          | S138:      | 2 | 2,7628 | 0,402 | -0,622 |
| 23 | Q9Y2W1 TR150_HUMAN  | R.YKLRDDFE.K                 |            | 2 | 2,7627 | 0,217 | 0      |
| 23 | Q99613 EIF3C_HUMAN  | R.VFDHKQGTGGYFR.D            |            | 3 | 2,7562 | 0,315 | -0,437 |
| 23 | Q6UN15 FIP1_HUMAN   | R.ERDHS#PTSPVFNS#DEE.R       | S492:S500: | 2 | 2,7544 | 0,414 | 0      |
| 23 | O95793 STAU1_HUMAN  | E.LSVGGQQFNGK.G              |            | 2 | 2,7505 | 0,285 | -0,322 |
| 23 | Q13185 CBX3_HUMAN   | K.RKS#LSDSE.S                | S93:       | 2 | 2,7503 | 0,162 | -0,426 |
| 23 | Q96G74 OTUD5_HUMAN  | R.QAPGVGAVGGGS#PEREE.V       | S165:      | 2 | 2,7477 | 0,426 | -0,728 |
| 23 | P05455 LA_HUMAN     | R.SPSKPLPEVTDE.Y             |            | 2 | 2,7435 | 0,257 | -0,939 |
| 23 | P23528 COF1_HUMAN   | K.KAVLFCLSE.D                |            | 2 | 2,7425 | 0,298 | -0,457 |
| 23 | P63241 IF5A1_HUMAN  | K.VHLVGIDIFTGK.K             |            | 2 | 2,7424 | 0,36  | -0,376 |
| 23 | Q01518 CAP1_HUMAN   | R.GSKLFNHLSAVSE.S            |            | 2 | 2,7376 | 0,325 | -0,527 |
| 23 | Q9UQ80 PA2G4_HUMAN  | E.KTIIQNPTDQKK.D             |            | 3 | 2,732  | 0,103 | 0      |
| 23 | P13647 K2C5_HUMAN   | R.GLVGFGSGGSSSSVK.F          |            | 2 | 2,7308 | 0,326 | -0,424 |
| 23 | Q96T58 MINT_HUMAN   | E.NRS#PVKEPVEQPR.V           | S1918:     | 2 | 2,7228 | 0,239 | -0,378 |
| 23 | Q9UDI3 Q9UDI3_HUMAN | -.PDYLGADQR.K                |            | 2 | 2,7191 | 0,287 | 0      |
| 23 | Q9UPN3 MACF1_HUMAN  | R.RMLS#SSDAITQE.F            | S1376:     | 2 | 2,7144 | 0,305 | -0,516 |
| 23 | P02538 K2C6A_HUMAN  | R.SGFSSVSVSR.S               |            | 2 | 2,711  | 0,408 | -0,12  |
| 23 | Q8N3D4 EH1L1_HUMAN  | R.NS#SSFSM*DDPDAGAM*GAAAAE.G | S1293:     | 2 | 2,7099 | 0,302 | 0      |



|    |                    |                           |            |   |        |       |        |
|----|--------------------|---------------------------|------------|---|--------|-------|--------|
| 23 | P17980 PRS6A_HUMAN | R.KMNVSPDVNYEE.L          |            | 2 | 2,7058 | 0,185 | -0,343 |
| 23 | Q02952 AKA12_HUMAN | E.ALICVGS#SK.K            | S687:      | 2 | 2,7039 | 0,427 | -0,06  |
| 23 | Q9H410 DSN1_HUMAN  | K.SLHLS#PQEQSASYQDRR.Q    | S81:       | 3 | 2,7022 | 0,217 | -0,527 |
| 23 | Q86T82 UBP37_HUMAN | R.MIS#TGSELNE.D           | S210:      | 2 | 2,6988 | 0,087 | -0,315 |
| 23 | Q8WWM7 ATX2L_HUMAN | R.QGS#GRESPLASRE.G        | S335:      | 3 | 2,6955 | 0,22  | 0      |
| 23 | Q00341 VIGLN_HUMAN | R.CDIIISGR.K              |            | 2 | 2,6896 | 0,144 | -0,583 |
| 23 | Q8NCD3 HJURP_HUMAN | K.S#VSPSKTLSVPDKEVPGHGR.N | S555:      | 3 | 2,6883 | 0,105 | -0,254 |
| 23 | P35221 CTNA1_HUMAN | K.KHVNPVQALSE.F           |            | 2 | 2,6836 | 0,298 | -0,899 |
| 23 | Q99417 MYCBP_HUMAN | K.AKLAQYEPPEE.K           |            | 2 | 2,6783 | 0,304 | -0,348 |
| 23 | Q8WUD4 CCD12_HUMAN | R.RVPQAKPVAVEE.K          |            | 2 | 2,678  | 0,198 | -0,369 |
| 23 | P13645 K1C10_HUMAN | K.DAEAWFNEK.S             |            | 2 | 2,6779 | 0,321 | -0,55  |
| 23 | P68104 EF1A1_HUMAN | K.IGGIGTVPVGR.V           |            | 2 | 2,6773 | 0,359 | 0      |
| 23 | P35527 K1C9_HUMAN  | R.SGGGGGGGLGSGGSIRSSYSR.F |            | 3 | 2,6733 | 0,26  | -0,404 |
| 23 | P50914 RL14_HUMAN  | K.AALLKAS#PK.K            | S139:      | 2 | 2,67   | 0,364 | -0,249 |
| 23 | Q9Y5L4 TIM13_HUMAN | K.CIGKPGGSLDNSE.Q         |            | 2 | 2,6682 | 0,259 | -0,457 |
| 23 | Q9Y3T9 NOC2L_HUMAN | E.AARS#PDKPGGSPS#ASR.R    | S49:S58:   | 2 | 2,6665 | 0,215 | -0,502 |
| 23 | P35527 K1C9_HUMAN  | K.TLNDMRQEYEQLIAK.N       |            | 3 | 2,6647 | 0,135 | -0,593 |
| 23 | Q96T58 MINT_HUMAN  | R.TLQHGLYYASR.S           |            | 3 | 2,6603 | 0,231 | 0,349  |
| 23 | Q8N6G5 CGAT2_HUMAN | D.KAEVSIGAK.L             |            | 2 | 2,6582 | 0,103 | -0,068 |
| 23 | Q04721 NOTC2_HUMAN | K.STM*PTS#LPNLAKE.A       | S2115:     | 2 | 2,6539 | 0,294 | -0,411 |
| 23 | O15347 HMGB3_HUMAN | K.KKNPEVPVNF AE.F         |            | 2 | 2,6468 | 0,137 | -0,622 |
| 23 | Q99460 PSMD1_HUMAN | K.VSTAVLSITAK.A           |            | 2 | 2,6443 | 0,41  | -0,224 |
| 23 | Q96RK0 CIC_HUMAN   | R.TQS#LSALPK.E            | S173:      | 2 | 2,6354 | 0,208 | 0,357  |
| 23 | P35527 K1C9_HUMAN  | K.IGLGRRGGSGGSYGR.G       |            | 2 | 2,6319 | 0,235 | -0,632 |
| 23 | P46100 ATRX_HUMAN  | R.IPNTKDFDSS#EDE.K        | S850:      | 2 | 2,6266 | 0,367 | -1,083 |
| 23 | Q96SB3 NEB2_HUMAN  | K.IKPVEVEESGES#EAE.S      | S307:      | 2 | 2,624  | 0,233 | -0,428 |
| 23 | P50570 DYN2_HUMAN  | K.FTDFDEV RQE.I           |            | 2 | 2,6202 | 0,212 | 0      |
| 23 | P35908 K22E_HUMAN  | R.NLDLDSIIAEVK.A          |            | 2 | 2,6122 | 0,42  | -0,55  |
| 23 | Q8NC51 PAIRB_HUMAN | R.SSFHSHYGLKHE.D          |            | 2 | 2,6101 | 0,278 | -0,619 |
| 23 | Q9NWH9 SLTM_HUMAN  | R.IS#SKS#PGHM*VILD.Q      | S550:S553: | 2 | 2,6082 | 0,172 | -0,469 |
| 23 | Q9UQ35 SRRM2_HUMAN | E.SYFGVSSLQLK.G           |            | 2 | 2,6058 | 0,351 | -0,596 |
| 23 | Q92616 GCN1L_HUMAN | E.M*M*AALTD AIQDKK.N      |            | 3 | 2,6044 | 0,171 | 0,249  |
| 23 | P29692 EF1D_HUMAN  | R.ATAPQTQHVSPM*R.Q        |            | 2 | 2,6006 | 0,284 | 0,169  |

|    |                    |                       |                 |   |        |       |        |
|----|--------------------|-----------------------|-----------------|---|--------|-------|--------|
| 23 | P14314 GLU2B_HUMAN | R.GVSLTNHHFYDE.S      |                 | 2 | 2,5971 | 0,254 | -0,774 |
| 23 | P62753 RS6_HUMAN   | R.RLS#S#LRAST#SKSE.S  | S235:S236:T241: | 3 | 2,5968 | 0,232 | -0,11  |
| 23 | Q865Q0 PHLB2_HUMAN | K.SHDNVVYS#LGGLE.G    | S163:           | 2 | 2,5965 | 0,343 | -0,623 |
| 23 | Q9UHD8 SEPT9_HUMAN | R.LGDSSGPALKR.S       |                 | 2 | 2,5963 | 0,116 | -0,443 |
| 23 | Q15424 SAFB1_HUMAN | R.SVVSFDKVKKEPR.K     |                 | 3 | 2,5961 | 0,288 | 0,066  |
| 23 | Q9BZJ0 CRNL1_HUMAN | R.GIEDIIVSK.R         |                 | 2 | 2,5941 | 0,379 | -0,313 |
| 23 | O75400 PR40A_HUMAN | R.TLLEQLDDDQ.-        |                 | 2 | 2,5908 | 0,215 | -0,718 |
| 23 | Q8WU79 SMAP2_HUMAN | R.KSS#PKSTAPVMD.L     | S177:           | 2 | 2,5888 | 0,309 | -0,368 |
| 23 | P62937 PPIA_HUMAN  | K.ITIADCGQLE.-        |                 | 2 | 2,5886 | 0,433 | -0,327 |
| 23 | P38159 HNRPG_HUMAN | R.DGYGGSRD#YSSSR.S    | S326:           | 3 | 2,5832 | 0,255 | -0,232 |
| 23 | Q14677 EPN4_HUMAN  | E.LSDKIGSTIDDTISK.F   |                 | 3 | 2,5823 | 0,172 | -0,344 |
| 23 | Q71F23 CENPU_HUMAN | R.KLRPISDDS#ESIEE.S   | S139:           | 2 | 2,5811 | 0,382 | -0,216 |
| 23 | Q92890 UFD1_HUMAN  | K.KKGVEPS#PIKPGDIK.R  | S247:           | 3 | 2,5769 | 0,175 | -0,295 |
| 23 | P56182 RRP1_HUMAN  | R.SEKPPAGSICR.A       |                 | 3 | 2,5713 | 0,133 | -0,456 |
| 23 | P29401 TKT_HUMAN   | R.GITGVEDKE.S         |                 | 2 | 2,5664 | 0,24  | 0,257  |
| 23 | Q8WVC0 LEO1_HUMAN  | K.KLTS#DEEGEPSGKR.K   | S630:           | 3 | 2,555  | 0,208 | -0,113 |
| 23 | P35527 K1C9_HUMAN  | K.STMQELNSR.L         |                 | 2 | 2,5537 | 0,125 | 0,114  |
| 23 | Q9Y3B8 ORN_HUMAN   | K.IIENGENEKTVS.-      |                 | 2 | 2,553  | 0,344 | -0,549 |
| 23 | Q9H173 SIL1_HUMAN  | K.RLDINTNTYTSQD.L     |                 | 2 | 2,5519 | 0,203 | -0,238 |
| 23 | P26641 EF1G_HUMAN  | K.KAAAPAPEEEM*DE.C    |                 | 2 | 2,5511 | 0,188 | -0,435 |
| 23 | Q7Z589 EMSY_HUMAN  | R.RRTNS#SSS#SPVVLKE.V | S209:S212:      | 2 | 2,5492 | 0,305 | -0,135 |
| 23 | Q9Y2W1 TR150_HUMAN | K.SPLQSVVVR.R         |                 | 2 | 2,5475 | 0,217 | 0,062  |
| 23 | P22626 ROA2_HUMAN  | R.GGGGNFGPGPSNFR.G    |                 | 2 | 2,5304 | 0,405 | -0,266 |
| 23 | P35579 MYH9_HUMAN  | K.VIQYLAYVASSHK.S     |                 | 3 | 2,5287 | 0,146 | -0,371 |
| 23 | Q86YS7 K0528_HUMAN | E.IIGSPIPEPR.Q        |                 | 2 | 2,526  | 0,253 | -0,113 |
| 23 | Q9BRQ0 PYGO2_HUMAN | K.S#NTQGPAYSHLTE.F    | S48:            | 2 | 2,5224 | 0,275 | -0,329 |
| 23 | P18754 RCC1_HUMAN  | K.RRS#PPADAIPK.S      | S11:            | 3 | 2,522  | 0,178 | 0,071  |
| 23 | O94909 K0819_HUMAN | R.RPDS#PTRPTLR.G      | S789:           | 3 | 2,5162 | 0,203 | 0,066  |
| 23 | P35580 MYH10_HUMAN | K.FSKVEDMAE.L         |                 | 2 | 2,5148 | 0,167 | -0,231 |
| 23 | Q14966 ZN638_HUMAN | K.AVVTEPAKGEE.A       |                 | 2 | 2,5147 | 0,349 | -0,108 |
| 23 | Q9H7E2 TDRD3_HUMAN | R.SGKGPSFAE.A         |                 | 2 | 2,5135 | 0,23  | 0,139  |
| 23 | Q9Y2W1 TR150_HUMAN | R.ERS#PALKSPLQSVVVR.R | S248:           | 3 | 2,5124 | 0,118 | -0,495 |
| 23 | P35030 TRY3_HUMAN  | D.TLDNDIMLIK.L        |                 | 2 | 2,5104 | 0,327 | -0,622 |

|    |                    |                         |                 |   |        |       |        |
|----|--------------------|-------------------------|-----------------|---|--------|-------|--------|
| 23 | P68104 EF1A1_HUMAN | D.M*RQTVAVGVK.A         |                 | 2 | 2,5045 | 0,157 | -0,501 |
| 23 | Q9BQ39 DDX50_HUMAN | E.NGVTDLDLDPK.A         |                 | 2 | 2,5024 | 0,39  | -0,213 |
| 23 | Q8IYB3 SRRM1_HUMAN | D.ILKVPKPEPIPEPK.E      |                 | 3 | 2,501  | 0,122 | -0,231 |
| 23 | Q02952 AKA12_HUMAN | E.ALICVGSSK.K           |                 | 2 | 2,4993 | 0,434 | -1,696 |
| 23 | P62917 RL8_HUMAN   | R.ASGNYATVISHNPE.T      |                 | 2 | 2,4984 | 0,285 | -0,251 |
| 23 | P46100 ATRX_HUMAN  | R.RPTETNPVTSNS#DEECNE.T | S677:           | 2 | 2,4983 | 0,321 | -0,565 |
| 23 | Q9NYB0 TE2IP_HUMAN | K.YLLGDAPVS#PSSQK.L     | S203:           | 2 | 2,4965 | 0,137 | -0,237 |
| 23 | P54578 UBP14_HUMAN | D.LQAVLTHQGR.S          |                 | 2 | 2,4947 | 0,278 | 0,217  |
| 23 | ##P25054 APC_HUMAN | E.SQKIEDE.I             |                 | 2 | 2,4938 | 0,118 | 0,144  |
| 23 | Q13573 SNW1_HUMAN  | E.M*QKDPM*EPPRFK.I      |                 | 3 | 2,4927 | 0,098 | 0      |
| 23 | Q9Y2U5 M3K2_HUMAN  | R.YHVSYHHQE.Y           |                 | 3 | 2,4904 | 0,199 | 0,305  |
| 23 | P62753 RS6_HUMAN   | R.LSS#LRAS#TSKS#E.S     | S236:S240:S244: | 2 | 2,4899 | 0,29  | -0,891 |
| 23 | P27635 RL10_HUMAN  | K.VDEFPLCGHM*VSDE.Y     |                 | 2 | 2,4883 | 0,269 | -0,591 |
| 23 | P06748 NPM_HUMAN   | K.TPKGPSSVEDIK.A        |                 | 3 | 2,4879 | 0,113 | 0,218  |
| 23 | P33992 MCM5_HUMAN  | R.RFAIGSQVSE.H          |                 | 2 | 2,4879 | 0,261 | 0      |
| 23 | P68371 TBB2C_HUMAN | R.YLTVAAVFR.G           |                 | 2 | 2,4874 | 0,25  | -0,235 |
| 23 | Q9Y2W1 TR150_HUMAN | K.GSFSDTGLGDGK.M        |                 | 2 | 2,4858 | 0,373 | -0,214 |
| 23 | P62805 H4_HUMAN    | R.DNIQGITKPAIR.R        |                 | 2 | 2,4853 | 0,107 | -0,46  |
| 23 | Q5T200 ZC3HD_HUMAN | R.LLSQVVRPQE.S          |                 | 2 | 2,4829 | 0,252 | -0,209 |
| 23 | Q8IWS0 PHF6_HUMAN  | K.CGFSCHVGEEN           |                 | 2 | 2,4797 | 0,367 | -0,698 |
| 23 | O43432 IF4G3_HUMAN | R.RS#PVPAQIAITVPK.T     | S495:           | 2 | 2,4723 | 0,105 | -0,548 |
| 23 | Q6ZU65 K2030_HUMAN | K.LIHTEDPFNDE.H         |                 | 2 | 2,4705 | 0,212 | -0,734 |
| 23 | Q9UBF8 PI4KB_HUMAN | R.ELPSLSPAPDTGLSPSK.R   |                 | 2 | 2,4665 | 0,438 | -0,647 |
| 23 | Q14151 SAFB2_HUMAN | K.LSSVDRHHS#VEIK.I      | S513:           | 3 | 2,4596 | 0,257 | 0      |
| 23 | Q13523 PRP4B_HUMAN | K.ARS#PTDDKVKIE.D       | S257:           | 3 | 2,4574 | 0,11  | -0,064 |
| 23 | Q86VI3 IQGA3_HUMAN | R.HRS#LTAHLLPLAE.K      | S1424:          | 2 | 2,4561 | 0,142 | -0,3   |
| 23 | P00558 PGK1_HUMAN  | R.AHSSM*VGVNLPQK.A      |                 | 2 | 2,4541 | 0,285 | -0,441 |
| 23 | Q14527 HLTF_HUMAN  | K.TAVQYIESS#DSEE.I      | S398:           | 2 | 2,4525 | 0,232 | -0,159 |
| 23 | Q15773 MLF2_HUMAN  | R.LAIQGPEDS#PSR.Q       | S238:           | 2 | 2,4521 | 0,328 | -0,181 |
| 23 | P18124 RL7_HUMAN   | K.KKEVPAVPETLKK.K       |                 | 3 | 2,4484 | 0,106 | -0,062 |
| 23 | Q14C86 GAPD1_HUMAN | R.SSDIVSSVR.R           |                 | 2 | 2,4484 | 0,187 | -0,514 |
| 23 | Q7Z333 SETX_HUMAN  | E.DFSLKDDALAK.T         |                 | 2 | 2,4478 | 0,294 | -0,299 |
| 23 | P46013 KI67_HUMAN  | R.RES#VNLGKSE.G         | S374:           | 2 | 2,4451 | 0,457 | -0,305 |

|    |                     |                                              |                 |   |        |       |        |
|----|---------------------|----------------------------------------------|-----------------|---|--------|-------|--------|
| 23 | P35527 K1C9_HUMAN   | R.GGSGGSHGGGSGFGGESGGSYGGGEEASGSGGGYGGGSGK.S |                 | 3 | 2,4442 | 0,391 | -0,341 |
| 23 | Q92598 HS105_HUMAN  | K.IKVNVNELPIE.A                              |                 | 2 | 2,4411 | 0,144 | -0,779 |
| 23 | Q7L412 RSRC2_HUMAN  | E.KLNFGNKDQNVK.F                             |                 | 3 | 2,4405 | 0,159 | -0,26  |
| 23 | Q13442 HAP28_HUMAN  | R.M*QSLSLNK.-                                |                 | 2 | 2,4343 | 0,092 | -0,065 |
| 23 | P62753 RS6_HUMAN    | R.RLS#S#LRASTSK.S                            | S235:S236:      | 2 | 2,4314 | 0,438 | -0,893 |
| 23 | P0C0S8 H2A1_HUMAN   | R.AGLQFPVGR.V                                |                 | 2 | 2,4246 | 0,142 | -0,194 |
| 23 | Q8NEY8 PPHLN_HUMAN  | E.GNPERDKERPVSQSLK.T                         |                 | 3 | 2,4236 | 0,221 | -0,104 |
| 23 | P04259 K2C6B_HUMAN  | R.SGFSSISVSR.S                               |                 | 2 | 2,4148 | 0,327 | -0,119 |
| 23 | Q9H0A0 NAT10_HUMAN  | K.AGPNASIISLK.S                              |                 | 2 | 2,4133 | 0,415 | -0,456 |
| 23 | P35527 K1C9_HUMAN   | R.IKFEMEQLNR.Q                               |                 | 2 | 2,4064 | 0,126 | -0,466 |
| 23 | Q9UBT2 SAE2_HUMAN   | R.KLDEKENLSAK.R                              |                 | 3 | 2,4048 | 0,095 | 0,215  |
| 23 | Q6UX04 SDC10_HUMAN  | R.KVKDASMQSDTFE.I                            |                 | 2 | 2,4026 | 0,223 | -0,991 |
| 23 | Q7Z3C6 ATG9A_HUMAN  | R.SASYPCAAPRPGAPE.T                          |                 | 2 | 2,4003 | 0,381 | -0,717 |
| 23 | P46013 KI67_HUMAN   | K.AQPLEDLAQLKE.L                             |                 | 2 | 2,3966 | 0,201 | -0,57  |
| 23 | Q15154 PCM1_HUMAN   | R.INFSDLDQR.S                                |                 | 2 | 2,3962 | 0,253 | -0,22  |
| 23 | Q14847 LASP1_HUMAN  | K.TQDQISNIK.Y                                |                 | 2 | 2,395  | 0,254 | 0,233  |
| 23 | Q9Y490 TLN1_HUMAN   | K.AGFLDLKD.F                                 |                 | 2 | 2,3949 | 0,172 | -0,833 |
| 23 | O00193 SMAP_HUMAN   | R.S#ASPDDDLGSSNWE.A                          | S15:            | 2 | 2,3927 | 0,319 | -0,548 |
| 23 | P62753 RS6_HUMAN    | R.RLS#SLRAS#T#SKSE.S                         | S235:S240:T241: | 2 | 2,3923 | 0,275 | -0,147 |
| 23 | Q14151 SAFB2_HUMAN  | K.SKGEPVISVK.T                               |                 | 2 | 2,3922 | 0,242 | -0,117 |
| 23 | P41212 ETV6_HUMAN   | R.SPLDNM*IR.R                                |                 | 2 | 2,392  | 0,149 | -0,254 |
| 23 | Q13428 TCOF_HUMAN   | K.GSLGSQGAKEPEEE.L                           |                 | 2 | 2,3894 | 0,322 | -0,398 |
| 23 | O43491 E41L2_HUMAN  | K.GQVLFDKVCE.H                               |                 | 2 | 2,3877 | 0,212 | -0,204 |
| 23 | Q13573 SNW1_HUMAN   | R.GPPS#PPAPVMHSPS#RK.M                       | S224:S234:      | 3 | 2,385  | 0,082 | -0,203 |
| 23 | P13645 K1C10_HUMAN  | R.LKYENEVALR.Q                               |                 | 3 | 2,3849 | 0,147 | 0,37   |
| 23 | O15347 HMGB3_HUMAN  | K.KNPEVPVNFAE.F                              |                 | 2 | 2,3829 | 0,168 | -0,49  |
| 23 | P33992 MCM5_HUMAN   | R.FAIGSQVSE.H                                |                 | 2 | 2,3827 | 0,101 | -0,52  |
| 23 | Q6P2G2 Q6P2G2_HUMAN | K.SLGLPGPPT#PRSPK.A                          | T213:           | 2 | 2,3767 | 0,191 | -0,575 |
| 23 | P68104 EF1A1_HUMAN  | K.IGGIGTVPVGRVE.T                            |                 | 2 | 2,3745 | 0,168 | -0,486 |
| 23 | P23193 TCEA1_HUMAN  | K.NAAGALDLLKE.L                              |                 | 2 | 2,3739 | 0,206 | -0,328 |
| 23 | Q15054 DPOD3_HUMAN  | K.RVALS#DDE.T                                | S307:           | 2 | 2,3723 | 0,21  | -0,062 |
| 23 | P62753 RS6_HUMAN    | R.RLS#S#LRASTSKSE.S                          | S235:S236:      | 2 | 2,3694 | 0,306 | -1,003 |
| 23 | P49902 5NTC_HUMAN   | E.M*ESPLATR.N                                |                 | 2 | 2,3625 | 0,169 | 0      |

|    |                    |                           |            |   |        |       |        |
|----|--------------------|---------------------------|------------|---|--------|-------|--------|
| 23 | Q13185 CBX3_HUMAN  | K.KVEEAPEEFVVE.K          |            | 2 | 2,3618 | 0,346 | -0,398 |
| 23 | P19174 PLCG1_HUMAN | K.LRYPINEE.A              |            | 2 | 2,3595 | 0,148 | -0,118 |
| 23 | P42704 LPPRC_HUMAN | K.LQDAINILKE.M            |            | 2 | 2,3587 | 0,107 | -0,316 |
| 23 | P27635 RL10_HUMAN  | K.AKVDEFPLCGHM*VSDE.Y     |            | 2 | 2,3553 | 0,281 | -0,462 |
| 23 | Q8NEJ9 NGDN_HUMAN  | R.ALSSSVIRE.L             |            | 2 | 2,3521 | 0,185 | -0,127 |
| 23 | O14979 HNRDL_HUMAN | K.VFVGGLSPDTSEEQIKE.Y     |            | 2 | 2,3519 | 0,127 | -0,399 |
| 23 | Q9UPN3 MACF1_HUMAN | R.RM*LS#SSDAITQE.F        | S1376:     | 2 | 2,3502 | 0,172 | -0,17  |
| 23 | A0AVK6 E2F8_HUMAN  | R.KINSAPSS#PIKTNKAE.S     | S417:      | 3 | 2,3467 | 0,17  | -0,622 |
| 23 | Q9Y2W1 TR150_HUMAN | R.RIDISPS#TFR.K           | S684:      | 2 | 2,3445 | 0,224 | -0,767 |
| 23 | Q13442 HAP28_HUMAN | K.GVEGLIDIENPNR.V         |            | 2 | 2,3439 | 0,281 | -0,513 |
| 23 | Q08211 DHX9_HUMAN  | E.DCIQMTHFVPPPK.D         |            | 3 | 2,3428 | 0,18  | -0,699 |
| 23 | Q86VQ1 GLCI1_HUMAN | R.SAS#WGSADQLKE.Q         | S223:      | 2 | 2,3413 | 0,202 | -0,628 |
| 23 | Q8NC51 PAIRB_HUMAN | R.SFSHYSGLKHE.D           |            | 3 | 2,3411 | 0,227 | -0,133 |
| 23 | Q13045 FLII_HUMAN  | E.AVLQSPGLSGK.V           |            | 2 | 2,3366 | 0,306 | -0,346 |
| 23 | Q05D32 CTSL2_HUMAN | D.NNLITSTPR.A             |            | 2 | 2,3297 | 0,27  | -0,3   |
| 23 | Q9BZL6 KPCD2_HUMAN | R.RLS#S#TSLASGHSVR.L      | S197:S198: | 2 | 2,3286 | 0,182 | -0,151 |
| 23 | Q13501 SQSTM_HUMAN | R.SRLTPVS#PE.S            | S272:      | 2 | 2,3285 | 0,095 | -0,114 |
| 23 | P17980 PRS6A_HUMAN | R.KM*NVSPDVNYEE.L         |            | 2 | 2,3264 | 0,127 | -0,254 |
| 23 | Q15424 SAFB1_HUMAN | K.SKGVVISVK.T             |            | 2 | 2,3234 | 0,214 | -0,12  |
| 23 | Q02952 AKA12_HUMAN | E.ALICVGSS#K.K            | S688:      | 2 | 2,3187 | 0,259 | 0      |
| 23 | P18858 DNL1_HUMAN  | E.NNASLSDTSPMDSS#PSGIPK.R | S114:      | 2 | 2,3169 | 0,425 | -0,351 |
| 23 | Q9Y6M7 S4A7_HUMAN  | R.IPLVRS#FADIGK.K         | S233:      | 2 | 2,313  | 0,197 | -0,612 |
| 23 | Q9H1E3 NUCKS_HUMAN | R.LKATVTPS#PVKKGK.G       | S181:      | 2 | 2,3104 | 0,228 | -0,174 |
| 23 | Q96T23 RSF1_HUMAN  | R.KKKPDS#PPKVLEPE.N       | S738:      | 3 | 2,3077 | 0,157 | -0,328 |
| 23 | Q15185 TEBP_HUMAN  | D.S#DEDM*SNFDRFSE.M       | S113:      | 2 | 2,3002 | 0,172 | -0,51  |
| 23 | Q6ICG6 CV009_HUMAN | R.NNRPAFFS#PSLK.R         | S304:      | 2 | 2,2958 | 0,135 | -0,753 |
| 23 | P52292 IMA2_HUMAN  | R.NVSSFPDDATS#PLQE.N      | S62:       | 2 | 2,2955 | 0,309 | -0,362 |
| 23 | Q12906 ILF3_HUMAN  | R.IFVNDDRHMV*AK.H         |            | 3 | 2,2948 | 0,219 | 0,063  |
| 23 | Q9NZT2 OGFR_HUMAN  | R.SVEPQDAGPLER.S          |            | 2 | 2,2929 | 0,287 | -0,282 |
| 23 | Q9H3P7 GCP60_HUMAN | K.NANKPLLDE.I             |            | 2 | 2,2844 | 0,353 | 0      |
| 23 | Q13535 ATR_HUMAN   | R.RLS#SSLNPSK.R           | S435:      | 2 | 2,2839 | 0,275 | -0,313 |
| 23 | Q8IY81 RRMJ3_HUMAN | K.QQLPQT#PPSCLKTE.I       | T573:      | 2 | 2,2774 | 0,213 | -0,429 |
| 23 | Q9Y3C1 U384_HUMAN  | E.M*GLAVDPNR.A            |            | 2 | 2,2752 | 0,209 | -0,247 |

|    |                     |                         |        |   |        |       |        |
|----|---------------------|-------------------------|--------|---|--------|-------|--------|
| 23 | P35908 K22E_HUMAN   | R.GFSSGSVVSGSR.R        |        | 2 | 2,2742 | 0,167 | -0,681 |
| 23 | P35527 K1C9_HUMAN   | K.TLLDIDNTR.M           |        | 2 | 2,2684 | 0,209 | -0,345 |
| 23 | Q3B820 YB032_HUMAN  | K.VRCPT#PDFEDLPE.R      | T428:  | 2 | 2,2615 | 0,395 | -0,516 |
| 23 | O15226 NKRF_HUMAN   | K.KKDIKDLVVYE.N         |        | 2 | 2,26   | 0,117 | -0,542 |
| 23 | Q12756 KIF1A_HUMAN  | E.LSLCHVADAGS#PGMQR.R   | S1337: | 2 | 2,2551 | 0,139 | -0,412 |
| 23 | Q9UHI6 DDX20_HUMAN  | R.RSS#FRLQTE.A          | S743:  | 2 | 2,2546 | 0,362 | -0,101 |
| 23 | P26373 RL13_HUMAN   | R.SKLLFPR.K             |        | 2 | 2,2513 | 0,135 | -0,313 |
| 23 | Q7Z4V5 HDGR2_HUMAN  | R.EGPDLDPRGSDRQE.R      |        | 3 | 2,251  | 0,106 | -0,116 |
| 23 | Q92609 TBCD5_HUMAN  | D.SFFSNISR.S            |        | 2 | 2,2492 | 0,223 | -0,7   |
| 23 | Q96ST2 IWS1_HUMAN   | R.GKHM*DFLSDFE.M        |        | 2 | 2,2463 | 0,284 | -0,636 |
| 23 | Q8IY81 RRMJ3_HUMAN  | K.QQLPQTPPSCLKTE.I      |        | 2 | 2,229  | 0,148 | 0      |
| 23 | Q96L14 C170L_HUMAN  | R.SGDPRPQAAEPPDHLTITR.R |        | 3 | 2,228  | 0,184 | -0,622 |
| 23 | P14136 GFAP_HUMAN   | K.LALDIEIATYR.K         |        | 2 | 2,2279 | 0,238 | -0,477 |
| 23 | Q9UGU5 HM2L1_HUMAN  | R.KHSS#DDYYYGDISSLE.S   | S80:   | 2 | 2,226  | 0,181 | -0,436 |
| 23 | Q9Y2U5 M3K2_HUMAN   | R.LSIIGPTSR.D           |        | 2 | 2,224  | 0,145 | -0,065 |
| 23 | O14578 CTRO_HUMAN   | R.QQIAM*SAIVR.S         |        | 2 | 2,2163 | 0,229 | -0,538 |
| 23 | O00170 AIP_HUMAN    | R.FRGIFSH.-             |        | 2 | 2,2126 | 0,216 | 0,071  |
| 23 | P49023 PAXI_HUMAN   | R.GLEDVRPSVE.S          |        | 2 | 2,2108 | 0,154 | -0,222 |
| 23 | Q13151 ROA0_HUMAN   | K.LFVGGLKGD.V           |        | 2 | 2,2053 | 0,173 | -0,337 |
| 23 | Q9Y2U5 M3K2_HUMAN   | R.DRSS#PPPGYIPDE.L      | S164:  | 2 | 2,2044 | 0,136 | -0,162 |
| 23 | Q6KC79 NIPBL_HUMAN  | K.AITSLGGGS#PK.N        | S2658: | 2 | 2,2026 | 0,282 | -0,62  |
| 23 | P35908 K22E_HUMAN   | K.IEISELNR.V            |        | 2 | 2,1954 | 0,133 | -0,125 |
| 23 | Q8NFC6 FA44A_HUMAN  | R.RTS#TPVIM*E.G         | S659:  | 2 | 2,1928 | 0,278 | -0,216 |
| 23 | P35527 K1C9_HUMAN   | R.QGVDADINGLR.Q         |        | 2 | 2,1924 | 0,274 | -0,421 |
| 23 | Q9Y5W9 SNX11_HUMAN  | K.SCCFLPR.S             |        | 2 | 2,1906 | 0,244 | -0,195 |
| 23 | P20248 CCNA2_HUMAN  | R.VAPLKDLPVNDE.H        |        | 2 | 2,1892 | 0,24  | -0,559 |
| 23 | P23588 IF4B_HUMAN   | K.VAPAQPSEEGPGRKDE.N    |        | 2 | 2,1878 | 0,236 | -0,512 |
| 23 | Q8IWW6 RHG12_HUMAN  | R.SFGHFPGPE.F           |        | 2 | 2,1728 | 0,169 | -0,188 |
| 23 | P04264 K2C1_HUMAN   | R.SLVNLGGSK.S           |        | 2 | 2,1679 | 0,211 | -0,558 |
| 23 | Q13769 THOC5_HUMAN  | R.RPTLGVQLDDK.R         |        | 2 | 2,1591 | 0,087 | 0,295  |
| 23 | P22234 PUR6_HUMAN   | K.ACGNFGIPCELR.V        |        | 2 | 2,1576 | 0,239 | -0,438 |
| 23 | A8K630 A8K630_HUMAN | R.LQQQHSEQPPLQSPVTTR.R  |        | 2 | 2,1549 | 0,315 | 0      |
| 23 | P06748 NPM_HUMAN    | K.GPSSVEDIK.A           |        | 2 | 2,1535 | 0,166 | -0,131 |

|    |                     |                         |            |   |        |       |        |
|----|---------------------|-------------------------|------------|---|--------|-------|--------|
| 23 | Q01518 CAP1_HUMAN   | K.LFNHLSAVSE.S          |            | 2 | 2,1477 | 0,272 | -0,546 |
| 23 | P62753 RS6_HUMAN    | R.LS#SLRAS#TSKSE.S      | S235:S240: | 2 | 2,1462 | 0,309 | -0,513 |
| 23 | P42285 SK2L2_HUMAN  | R.FDGKQLQSE.S           |            | 2 | 2,1329 | 0,136 | 0,132  |
| 23 | Q14676 MDC1_HUMAN   | E.LQASASTDQPVTSEPTSR.T  |            | 2 | 2,1289 | 0,311 | -0,521 |
| 23 | Q96MU7 YTDC1_HUMAN  | R.GIS#PIVFDR.S          | S308:      | 2 | 2,1273 | 0,129 | -0,45  |
| 23 | Q14493 SLBP_HUMAN   | R.KLLINDFGR.E           |            | 2 | 2,1251 | 0,105 | -0,454 |
| 23 | P02545 LMNA_HUMAN   | R.LRLS#PSPTSQR.S        | S390:      | 2 | 2,1204 | 0,198 | -0,369 |
| 23 | ##Q5T5P2 SKT_HUMAN  | E.TKY#ESTRSAD.S         | Y709:      | 2 | 2,109  | 0,099 | 1,676  |
| 23 | P35269 T2FA_HUMAN   | E.ASSALFM*AK.K          |            | 2 | 2,109  | 0,27  | 0,065  |
| 23 | O60524 SDCG1_HUMAN  | K.KLPDSGDLE.A           |            | 2 | 2,1067 | 0,096 | 0      |
| 23 | P22626 ROA2_HUMAN   | E.HHLRDYFEE.Y           |            | 2 | 2,1047 | 0,144 | -0,392 |
| 23 | Q13573 SNW1_HUMAN   | R.GPPS#PPAPVM*HSPS#RK.M | S224:S234: | 2 | 2,0915 | 0,126 | -0,268 |
| 23 | P27348 1433T_HUMAN  | K.KLQLIKDYRE.K          |            | 2 | 2,0906 | 0,116 | -0,28  |
| 23 | Q9P275 UBP36_HUMAN  | K.TFVGEPQR.L            |            | 2 | 2,0823 | 0,296 | -0,131 |
| 23 | P23528 COF1_HUMAN   | K.AVLFCLSE.D            |            | 2 | 2,0815 | 0,198 | -0,325 |
| 23 | Q8N2M8 SFR16_HUMAN  | K.KAS#IGTYE.D           | S147:      | 2 | 2,0771 | 0,293 | -0,11  |
| 23 | P35269 T2FA_HUMAN   | E.ASSALFMAK.K           |            | 2 | 2,0695 | 0,295 | -0,264 |
| 23 | POC7M2 RA1L3_HUMAN  | E.HHLRDYFE.Q            |            | 2 | 2,0689 | 0,135 | -0,218 |
| 23 | Q12849 GRSF1_HUMAN  | E.NGIHLLNR.D            |            | 2 | 2,0625 | 0,232 | -0,338 |
| 23 | P20700 LMNB1_HUMAN  | R.LKLS#PS#PSSR.V        | S391:S393: | 2 | 2,0561 | 0,146 | -0,495 |
| 23 | Q5UIP0 RIF1_HUMAN   | E.DSQVQITPNQK.T         |            | 2 | 2,0469 | 0,238 | -0,388 |
| 23 | Q9Y2X7 GIT1_HUMAN   | K.LSRHGS#GADS#DYE.N     | S592:S596: | 2 | 2,0441 | 0,12  | 0,157  |
| 23 | Q9Y4L1 HYOU1_HUMAN  | K.TPVIVTLKE.N           |            | 2 | 2,0292 | 0,168 | -0,061 |
| 23 | Q04637 IF4G1_HUMAN  | R.FSALQQAVPTSTDNR.R     |            | 2 | 2,0269 | 0,264 | 0      |
| 23 | P35527 K1C9_HUMAN   | R.MTLDDFR.I             |            | 2 | 2,0216 | 0,377 | 0      |
| 23 | P20042 IF2B_HUMAN   | K.NVKFPDEDE.I           |            | 2 | 2,0199 | 0,175 | -0,223 |
| 23 | Q6P2G2 Q6P2G2_HUMAN | K.SLGLPGPPTPR.S         |            | 2 | 2,0137 | 0,104 | -0,559 |
| 23 | Q99613 EIF3C_HUMAN  | K.QGTYGGYFR.D           |            | 2 | 2,0104 | 0,467 | -0,465 |
| 23 | O14974 MYPT1_HUMAN  | R.LAYVAPTIPR.R          |            | 2 | 2,0073 | 0,193 | -0,554 |
| 23 | Q14978 NOLC1_HUMAN  | K.GSPRPQAPK.A           |            | 2 | 2,0053 | 0,147 | -0,065 |
| 23 | Q8NEY8 PPHLN_HUMAN  | R.DNTFFRES#PVGR.K       | S133:      | 2 | 2,0051 | 0,081 | -0,568 |
| 23 | Q96MU7 YTDC1_HUMAN  | R.IGLEVDR.R             |            | 2 | 2,0023 | 0,1   | 0,152  |
| 23 | P04264 K2C1_HUMAN   | K.SISISVAR.G            |            | 2 | 1,9992 | 0,156 | 1,245  |

|    |                    |                          |            |   |        |       |        |
|----|--------------------|--------------------------|------------|---|--------|-------|--------|
| 23 | P38571 LICH_HUMAN  | E.DGYILCLNR.I            |            | 2 | 1,9959 | 0,284 | -0,434 |
| 23 | P04792 HSPB1_HUMAN | R.VSLDVNHFAPDE.L         |            | 2 | 1,9927 | 0,159 | -0,545 |
| 23 | Q8IVF2 AHNK2_HUMAN | K.AGTGLKGEEVE.G          |            | 2 | 1,9885 | 0,155 | -0,336 |
| 23 | Q96EQ0 SGTB_HUMAN  | R.SFS#SSAEEHS.-          | S297:      | 2 | 1,988  | 0,13  | -0,425 |
| 23 | Q92733 PRCC_HUMAN  | K.TILQGSSE.G             |            | 2 | 1,9841 | 0,174 | 0,146  |
| 23 | O95793 STAU1_HUMAN | K.VTFFEPGSGDENGTSNKEDE.F |            | 2 | 1,9809 | 0,35  | -0,565 |
| 23 | Q8NEY8 PPHLN_HUMAN | K.VLDKPSRLTEKE.L         |            | 2 | 1,9759 | 0,23  | 0      |
| 23 | Q96ST2 IWS1_HUMAN  | R.GKHMDFLSDFE.M          |            | 2 | 1,9719 | 0,236 | -0,46  |
| 23 | P05556 ITB1_HUMAN  | K.IRPLGFTEE.V            |            | 2 | 1,9707 | 0,185 | -0,345 |
| 23 | Q6ZU35 K1211_HUMAN | K.RHFS#SAGTIE.S          | S132:      | 2 | 1,9698 | 0,306 | -0,309 |
| 23 | P13639 EF2_HUMAN   | R.YLAEKYE.W              |            | 2 | 1,9683 | 0,138 | -0,067 |
| 23 | Q9P0K7 RAI14_HUMAN | E.KVASLLGK.K             |            | 2 | 1,9647 | 0,081 | 0,149  |
| 23 | Q14152 EIF3A_HUMAN | R.LGDSS#LSR.K            | S882:      | 2 | 1,9525 | 0,105 | 0,133  |
| 23 | P38159 HNRPG_HUMAN | R.DGYGGSRD#YSSSR.S       | S326:      | 2 | 1,936  | 0,22  | -0,698 |
| 23 | Q16543 CDC37_HUMAN | K.RLGPGLDPVEVYE.S        |            | 2 | 1,9343 | 0,112 | -0,569 |
| 23 | Q9BVP2 GNL3_HUMAN  | K.DIHEELPK.R             |            | 2 | 1,9313 | 0,132 | -0,187 |
| 23 | P21333 FLNA_HUMAN  | R.RRAPS#VANVGSHCD.L      | S2152:     | 2 | 1,9272 | 0,578 | -0,684 |
| 23 | Q8NAP3 ZBT38_HUMAN | K.YPAELDCAVGK.A          |            | 2 | 1,9192 | 0,312 | -0,599 |
| 23 | P00558 PGK1_HUMAN  | K.AGGFLM*KKE.L           |            | 2 | 1,8996 | 0,093 | 0      |
| 23 | P62753 RS6_HUMAN   | R.RLSS#LRAS#TSK.S        | S236:S240: | 2 | 1,8981 | 0,235 | -0,625 |
| 23 | Q9UHI6 DDX20_HUMAN | R.NNSVSGLSVK.S           |            | 2 | 1,8962 | 0,173 | -0,546 |
| 23 | P52292 IMA2_HUMAN  | R.RNVSSFPDDATSPLQE.N     |            | 2 | 1,8774 | 0,141 | -0,415 |
| 23 | O15347 HMGB3_HUMAN | K.NPEVPVNFAE.F           |            | 2 | 1,8712 | 0,313 | -0,437 |
| 23 | Q8WXH0 SYNE2_HUMAN | R.RGS#M*SYLAAVEEE.V      | S4108:     | 2 | 1,8698 | 0,249 | -0,555 |
| 23 | Q9H0B6 KLC2_HUMAN  | R.SGS#FGKLR.D            | S545:      | 2 | 1,8514 | 0,242 | -0,131 |
| 23 | P40123 CAP2_HUMAN  | K.TYKNPSLR.A             |            | 2 | 1,8502 | 0,267 | 0,062  |
| 23 | Q12931 TRAP1_HUMAN | R.HKLVSDGQALPE.M         |            | 2 | 1,8501 | 0,306 | -0,471 |
| 23 | Q9H6S1 AZI2_HUMAN  | R.DTVTPVSIYSGDE.S        |            | 2 | 1,8453 | 0,155 | -0,265 |
| 23 | O75643 U520_HUMAN  | R.CQLPDGSR.R             |            | 2 | 1,833  | 0,136 | 0,113  |
| 23 | P06493 CDC2_HUMAN  | E.GT#YGVVYK.G            | T14:       | 2 | 1,8317 | 0,124 | 0,063  |
| 23 | P35221 CTNA1_HUMAN | K.HVNPVQALSE.F           |            | 2 | 1,8303 | 0,115 | -0,223 |
| 23 | P55010 IF5_HUMAN   | K.LCTFILK.N              |            | 2 | 1,8224 | 0,14  | -0,068 |
| 23 | Q9NYJ8 TAB2_HUMAN  | R.SNS#ISQIPSL.EE.M       | S582:      | 2 | 1,8144 | 0,113 | -0,529 |



|    |                     |                              |                 |   |        |       |        |
|----|---------------------|------------------------------|-----------------|---|--------|-------|--------|
| 23 | Q6NXE6 ARMC6_HUMAN  | E.ADLTCSGIR.C                |                 | 2 | 1,8097 | 0,188 | 0      |
| 23 | O15446 RPA34_HUMAN  | E.DTVLSPTK.K                 |                 | 2 | 1,8069 | 0,185 | 0,142  |
| 23 | O95376 ARI2_HUMAN   | R.TLLKDFHDT.-                |                 | 2 | 1,8052 | 0,204 | -0,112 |
| 24 | Q8N488 RYBP_HUMAN   | K.SDILKDPPEANSIQSANATTK.T    |                 | 3 | 6,0767 | 0,382 | -0,32  |
| 24 | P23193 TCEA1_HUMAN  | K.KKEPAITSQNS#PEAREE.S       | S100:           | 3 | 5,9009 | 0,384 | -0,55  |
| 24 | Q9BVG4 CX026_HUMAN  | E.GYNKAVYISVQDKEGEK.G        |                 | 3 | 5,7373 | 0,47  | -0,379 |
| 24 | Q8IWS0 PHF6_HUMAN   | K.CGFCHVGEENEAR.G            |                 | 3 | 5,5809 | 0,433 | -0,216 |
| 24 | Q9NSM8 Q9NSM8_HUMAN | R.AGPIKAQKLPDLS#PVENKE.H     | S652:           | 3 | 5,4284 | 0,411 | -0,433 |
| 24 | P46013 KI67_HUMAN   | K.M*KTPVQYSQQNS#PQK.H        | S357:           | 3 | 5,1537 | 0,199 | -0,368 |
| 24 | O14545 TRAD1_HUMAN  | R.VRHQGDLSGGYLDLTKQE.T       |                 | 3 | 5,1389 | 0,467 | -0,447 |
| 24 | P46100 ATRX_HUMAN   | K.TTPLRRPTETNPVTS#NSDEECNE.T | S675:           | 3 | 5,127  | 0,477 | -0,537 |
| 24 | Q9HC35 EMAL4_HUMAN  | R.KPSHTSAVSIAGKE.T           |                 | 3 | 5,1188 | 0,37  | 0,13   |
| 24 | Q01804 OTUD4_HUMAN  | K.VKDPKTAADVSPGANSVDSR.V     |                 | 3 | 5,0031 | 0,329 | -0,693 |
| 24 | Q92934 BAD_HUMAN    | R.HSS#YPAGTEDDEGM*GEEPPFR.G  | S75:            | 3 | 4,9238 | 0,461 | -0,367 |
| 24 | Q9BVC5 ASHWN_HUMAN  | R.KSPSPGVKS#PPLSPVGT#TPVK.L  | S189:T197:      | 3 | 4,9185 | 1     | -0,247 |
| 24 | Q9NYB0 TE2IP_HUMAN  | E.HKYLLGDAPVS#PSSQK.L        | S203:           | 3 | 4,8862 | 0,288 | -0,202 |
| 24 | O60264 SMCA5_HUMAN  | E.LFAHFIQPAAQKT#PTS#PLK.M    | T113:S116:      | 3 | 4,8279 | 0,295 | -0,406 |
| 24 | Q29RF7 PDS5A_HUMAN  | E.SQGNATKNDDLKPK.P           |                 | 3 | 4,8064 | 0,48  | -0,591 |
| 24 | P46013 KI67_HUMAN   | K.IACRS#PQPDPVGT#PTIFKPQSK.R | S2223:T2231:    | 3 | 4,68   | 0,361 | -0,354 |
| 24 | Q9NYF8 BCLF1_HUMAN  | K.KAEGEPQEE#PLKSK.S          | S177:           | 3 | 4,6778 | 0,307 | -0,211 |
| 24 | Q9UFC0 LRWD1_HUMAN  | K.RPDDVPLSL#PSKR.A           | S243:           | 3 | 4,6713 | 0,322 | -0,666 |
| 24 | A4D186 A4D186_HUMAN | K.IQVLQQQADDAEERAE.R         |                 | 2 | 4,6431 | 0,349 | 0,066  |
| 24 | Q6WKZ4 RFIP1_HUMAN  | E.AKGEIKDS#SPSS#PS#PKGFR.K   | S338:S343:S345: | 3 | 4,6155 | 1     | -0,477 |
| 24 | POC7M2 RA1L3_HUMAN  | K.RGFAFVTFDDHDSVDK.I         |                 | 3 | 4,5836 | 0,284 | -1,281 |
| 24 | P23284 PPIB_HUMAN   | R.DKPLKDVIIADCGKIE.V         |                 | 3 | 4,5787 | 0,255 | -0,504 |
| 24 | A8MW92 P20LX_HUMAN  | E.ADISSANTQKALLSSTLSSGK.A    |                 | 3 | 4,5497 | 0,436 | -0,404 |
| 24 | O95793 STAU1_HUMAN  | R.KVTFEPGS#GDENGTSNKE.D      | S390:           | 3 | 4,5126 | 0,263 | -0,345 |
| 24 | Q8IWS0 PHF6_HUMAN   | K.CMLFSSALVSSHSDNE.S         |                 | 2 | 4,4694 | 0,538 | -0,684 |
| 24 | Q6KC79 NIPBL_HUMAN  | R.NKAITSLLGGGS#PK.N          | S2658:          | 2 | 4,439  | 0,238 | -0,171 |
| 24 | Q13442 HAP28_HUMAN  | R.KGVEGLIDIENPNR.V           |                 | 2 | 4,3944 | 0,456 | -0,471 |
| 24 | P51991 ROA3_HUMAN   | K.RGFAFVTFDDHDTVDK.I         |                 | 3 | 4,3694 | 0,29  | -0,489 |
| 24 | Q96SB4 SRPK1_HUMAN  | R.HKEDLHNANDCDVQNLNQE.S      |                 | 3 | 4,3683 | 0,315 | -0,08  |
| 24 | Q09161 NCBP1_HUMAN  | R.KTS#DANETEDHLE.S           | S22:            | 2 | 4,3666 | 0,385 | -0,233 |

|    |                     |                              |              |   |        |       |        |
|----|---------------------|------------------------------|--------------|---|--------|-------|--------|
| 24 | P45974 UBP5_HUMAN   | E.HLSHFGIDMLK.M              |              | 3 | 4,3574 | 0,37  | 0,282  |
| 24 | Q6NZI2 PTRF_HUMAN   | E.AGDLRRGS#S#PDVHALLE.I      | S365:S366:   | 3 | 4,3565 | 0,312 | -0,562 |
| 24 | P13645 K1C10_HUMAN  | K.GSLGGGFSSGGFSGGSFSR.G      |              | 2 | 4,3563 | 0,529 | -0,5   |
| 24 | P55196 AFAD_HUMAN   | R.ADRSS#PNVANQPPS#PGGK.S     | S1156:S1165: | 3 | 4,3509 | 0,357 | -0,617 |
| 24 | Q9NSM8 Q9NSM8_HUMAN | K.LPDLS#PVENKE.H             | S652:        | 2 | 4,3323 | 0,369 | -0,369 |
| 24 | Q9UHR5 S30BP_HUMAN  | E.KGGLVSDAYGEDDFSR.L         |              | 3 | 4,3089 | 0,309 | -0,213 |
| 24 | Q16181 SEPT7_HUMAN  | K.GQLTKS#PLAQM*EEE.R         | S334:        | 2 | 4,3038 | 0,525 | -0,515 |
| 24 | Q14684 RRP1B_HUMAN  | E.DIS#ADEDDQILSQGK.H         | S350:        | 2 | 4,2817 | 0,475 | -0,57  |
| 24 | Q01804 OTUD4_HUMAN  | K.TAADVVS#PGANSVDSR.V        | S1006:       | 2 | 4,2004 | 0,321 | 0,3    |
| 24 | Q8IY57 YAF2_HUMAN   | K.SPPASSAASADQHSQSGSSDNTER.G |              | 3 | 4,1929 | 0,461 | 0,223  |
| 24 | Q8NI27 THOC2_HUMAN  | R.KIDTHPS#PSHSSTVKDSLIE.L    | S1302:       | 3 | 4,1733 | 0,279 | -0,648 |
| 24 | Q14676 MDC1_HUMAN   | E.KEVPPGSAIIHIK.K            |              | 3 | 4,1576 | 0,368 | -0,066 |
| 24 | O14545 TRAD1_HUMAN  | E.GIPRLDSQPQETS#PELPR.R      | S415:        | 3 | 4,1479 | 0,192 | -0,436 |
| 24 | P49591 SYSC_HUMAN   | R.FKDPGLVDQLVKADSE.W         |              | 3 | 4,1179 | 0,279 | -0,519 |
| 24 | P35527 K1C9_HUMAN   | R.GGSGGSYGGGGSGGGYGGGSGSR.G  |              | 2 | 4,1164 | 0,464 | -0,409 |
| 24 | P11274 BCR_HUMAN    | R.HQDGLPYIDDS#PS#SSPHLSSK.G  | S459:S461:   | 3 | 4,1074 | 0,275 | -0,452 |
| 24 | Q96B23 CR025_HUMAN  | E.TAVEGDPSGVSGATVGR.K        |              | 2 | 4,1044 | 0,537 | 0,235  |
| 24 | Q7L2J0 MEPCE_HUMAN  | K.GFQRPVYLFHK.A              |              | 3 | 4,104  | 0,367 | -0,46  |
| 24 | P35580 MYH10_HUMAN  | R.KLDGETTDLQDQIAE.L          |              | 2 | 4,1002 | 0,48  | -0,437 |
| 24 | A8K333 A8K333_HUMAN | K.DQQLEPKKS#TS#PKKAVEPTVD.L  | S205:S207:   | 3 | 4,0981 | 0,35  | -0,221 |
| 24 | Q15185 TEBP_HUMAN   | D.S#DEDM*SNFDRFSE.M          | S113:        | 2 | 4,0962 | 0,393 | -0,583 |
| 24 | Q16181 SEPT7_HUMAN  | R.KLAAVTYNGVDNNK.N           |              | 2 | 4,0852 | 0,453 | 0,162  |
| 24 | Q9UK76 HN1_HUMAN    | R.RNS#SEASSGDFLDLKG.E        | S87:         | 2 | 4,0482 | 0,445 | -0,193 |
| 24 | Q9UHR5 S30BP_HUMAN  | E.KGGLVSDAYGEDDFSR.L         |              | 2 | 4,0241 | 0,426 | -0,284 |
| 24 | P35527 K1C9_HUMAN   | R.SGGGGGGGLSGGSIR.S          |              | 2 | 4,0235 | 0,539 | -0,495 |
| 24 | A8K630 A8K630_HUMAN | R.LQQQHSEQPPLQPS#PVTTRR.G    | S22:         | 3 | 4,0091 | 0,385 | 0,152  |
| 24 | Q96T58 MINT_HUMAN   | E.VGKPPQDVTDDS#PPSKK.K       | S1222:       | 3 | 4,0022 | 0,159 | -0,585 |
| 24 | Q96JN8 K1787_HUMAN  | R.FHQLHGNSAVITNGGR.T         |              | 3 | 4,0008 | 0,311 | -0,214 |
| 24 | Q01804 OTUD4_HUMAN  | K.TAADVSPGANSVDSR.V          |              | 2 | 3,9747 | 0,38  | -0,631 |
| 24 | P51114 FXR1_HUMAN   | R.RGPNYTSYGT#NSE.L           | T401:        | 2 | 3,9557 | 0,419 | -0,54  |
| 24 | Q14527 HLTF_HUMAN   | R.KTAVQYIESS#DSEEIE.T        | S398:        | 2 | 3,9509 | 0,348 | -0,64  |
| 24 | Q13442 HAP28_HUMAN  | R.KGVEGLIDIENPNR.V           |              | 3 | 3,9355 | 0,138 | -0,235 |
| 24 | Q0VF46 Q0VF46_HUMAN | K.TKTPKHS#PIKEPCGSLSE.T      | S99:         | 3 | 3,9246 | 0,302 | -0,498 |

|    |                     |                             |            |   |        |       |        |
|----|---------------------|-----------------------------|------------|---|--------|-------|--------|
| 24 | P62736 ACTA_HUMAN   | R.HQGVM*VGMGQKDSYVGDE.A     |            | 2 | 3,9224 | 0,461 | -0,312 |
| 24 | O95793 STAU1_HUMAN  | K.VTFFEPGS#GDENGTSNKE.D     | S390:      | 2 | 3,922  | 0,397 | -0,489 |
| 24 | Q6UN15 FIP1_HUMAN   | R.DHS#PTPSVFNSDEE.R         | S492:      | 2 | 3,9218 | 0,426 | -0,372 |
| 24 | P62917 RL8_HUMAN    | R.ASGNYATVISHNPE.T          |            | 2 | 3,8955 | 0,436 | -0,334 |
| 24 | Q8NC51 PAIRB_HUMAN  | R.KNPLPPSVGVVDKKEE.T        |            | 3 | 3,8768 | 0,315 | -0,316 |
| 24 | P35908 K22E_HUMAN   | R.FLEQQNQVLQTK.W            |            | 2 | 3,8675 | 0,381 | -0,579 |
| 24 | Q8IYB3 SRRM1_HUMAN  | E.ATSTSDILKVPKPEPIPEPK.E    |            | 3 | 3,8444 | 0,368 | -0,511 |
| 24 | O60264 SMCA5_HUMAN  | E.LFAHFIQPAAQK.T            |            | 2 | 3,831  | 0,417 | -0,979 |
| 24 | Q9NSM8 Q9NSM8_HUMAN | K.AQKLPDLS#PVENKE.H         | S652:      | 2 | 3,8303 | 0,414 | -0,518 |
| 24 | Q9H1A4 APC1_HUMAN   | E.KHKS#PSYQIKE.G            | S1347:     | 3 | 3,8194 | 0,292 | 0,064  |
| 24 | Q9NRL2 BAZ1A_HUMAN  | R.NSTADIS#IGEEERE.D         | S702:      | 2 | 3,7973 | 0,341 | -0,15  |
| 24 | P45974 UBP5_HUMAN   | E.HLSHFGIDM*LK.M            |            | 3 | 3,7946 | 0,337 | 0,07   |
| 24 | O60271 JIP4_HUMAN   | R.SAS#QSS#LDKLDQE.L         | S730:S733: | 2 | 3,7906 | 0,294 | -0,389 |
| 24 | P49591 SYSC_HUMAN   | R.FKDPGLVDQLVKADSE.W        |            | 2 | 3,7855 | 0,459 | -0,693 |
| 24 | P21333 FLNA_HUMAN   | R.RAPS#VANVGSHCDLSLK.I      | S2152:     | 3 | 3,7809 | 0,268 | -0,097 |
| 24 | P98171 RHG04_HUMAN  | R.GPGAPAS#PSASHPQGLDTPKPH.- | S930:      | 3 | 3,7801 | 0,375 | -0,64  |
| 24 | Q9NSM8 Q9NSM8_HUMAN | K.AQKLPDLS#PVENKE.H         | S652:      | 3 | 3,7702 | 0,289 | -0,111 |
| 24 | Q5T4S7 UBR4_HUMAN   | K.VTISDGKVADEEKPK.K         |            | 2 | 3,769  | 0,355 | -0,528 |
| 24 | Q9BZ23 PANK2_HUMAN  | R.LGS#YSQPTSVSR.Q           | S189:      | 2 | 3,7568 | 0,535 | -0,189 |
| 24 | Q99708 RBBP8_HUMAN  | R.SKS#EDSALFTHHSLGSE.V      | S379:      | 3 | 3,7518 | 0,38  | -0,383 |
| 24 | Q13523 PRP4B_HUMAN  | K.ARS#PTDDKVKIE.D           | S257:      | 3 | 3,7454 | 0,204 | -1,207 |
| 24 | Q8IWS0 PHF6_HUMAN   | K.CM*LFSSALVSSHSDNE.S       |            | 2 | 3,7437 | 0,402 | -0,475 |
| 24 | O14617 AP3D1_HUMAN  | R.NTETSKS#PEKDVPM*VE.K      | S829:      | 2 | 3,7242 | 0,388 | -0,582 |
| 24 | P04264 K2C1_HUMAN   | K.LNDLEDALQQAK.E            |            | 2 | 3,6942 | 0,367 | -0,719 |
| 24 | Q9NRA8 4ET_HUMAN    | R.RRNS#YTEEPE.W             | S213:      | 2 | 3,6933 | 0,277 | -0,608 |
| 24 | Q96MU7 YTDC1_HUMAN  | R.AKS#PT#PDGSERIGLE.V       | S146:T148: | 2 | 3,6919 | 0,352 | -0,497 |
| 24 | A8K630 A8K630_HUMAN | R.LQQQHSEQPPLQSPVTRR.G      |            | 3 | 3,6914 | 0,244 | -0,393 |
| 24 | Q9NPI6 DCP1A_HUMAN  | R.DKQS#PSQANGCSDHRPIDILE.M  | S142:      | 3 | 3,6885 | 0,16  | -0,374 |
| 24 | Q07866 KLC1_HUMAN   | R.SRES#LNVDVVKYE.S          | S520:      | 2 | 3,684  | 0,307 | -0,377 |
| 24 | P20042 IF2B_HUMAN   | K.KPFM*LDEEGDTQTEE.T        |            | 2 | 3,6824 | 0,422 | -0,41  |
| 24 | P46013 KI67_HUMAN   | K.IACKS#PPPESM*DTPSTR.R     | S2105:     | 3 | 3,68   | 0,285 | -0,265 |
| 24 | P06748 NPM_HUMAN    | K.TPKGPSSVEDIKAK.M          |            | 3 | 3,678  | 0,277 | -0,063 |
| 24 | P63279 UBC9_HUMAN   | R.KDHFPGFVAVPTK.N           |            | 3 | 3,6728 | 0,361 | -0,127 |

|    |                     |                               |                 |   |        |       |        |
|----|---------------------|-------------------------------|-----------------|---|--------|-------|--------|
| 24 | P04264 K2C1_HUMAN   | K.SLNNQFASFIDK.V              |                 | 2 | 3,6617 | 0,378 | -0,617 |
| 24 | Q8IYB3 SRRM1_HUMAN  | E.KKEKT#PELPEPSVK.V           | T220:           | 3 | 3,657  | 0,28  | -0,108 |
| 24 | P62753 RS6_HUMAN    | R.LSS#LRAS#TSKS#E.S           | S236:S240:S244: | 2 | 3,6566 | 1     | -0,324 |
| 24 | P13639 EF2_HUMAN    | K.ARPFPDGLAEDIDKGE.V          |                 | 3 | 3,6541 | 0,268 | -0,211 |
| 24 | O15027 SC16A_HUMAN  | E.HRPASALVNPLAR.G             |                 | 3 | 3,654  | 0,148 | -0,261 |
| 24 | P06748 NPM_HUMAN    | K.GPSSVEDIKAK.M               |                 | 2 | 3,6404 | 0,377 | -0,216 |
| 24 | Q9Y5B6 GCFC_HUMAN   | E.LGDFTPHDNEPGKGR.L           |                 | 3 | 3,618  | 0,402 | -0,335 |
| 24 | P46013 KI67_HUMAN   | K.TPVQYSQQQNS#PQKHK.N         | S357:           | 3 | 3,6131 | 0,248 | -0,832 |
| 24 | Q12756 KIF1A_HUMAN  | R.CNAVINEDPNNKLIRE.L          |                 | 2 | 3,6086 | 0,389 | 0      |
| 24 | Q16181 SEPT7_HUMAN  | R.KLAAVTYNGVDNNK.N            |                 | 3 | 3,604  | 0,213 | 0,121  |
| 24 | P04264 K2C1_HUMAN   | R.SGGGFSSGSAGIINYQR.R         |                 | 2 | 3,6038 | 0,411 | -0,074 |
| 24 | Q96EP5 DAZP1_HUMAN  | K.IFVGGIPHNCGETE.L            |                 | 2 | 3,6036 | 0,326 | -0,478 |
| 24 | O76003 GLRX3_HUMAN  | R.HASSGSFLPS#ANEHLKE.D        | S124:           | 3 | 3,5971 | 0,143 | -1,258 |
| 24 | Q9BVC5 ASHWN_HUMAN  | K.SPSGPVKS#PPLS#PVGTPVK.L     | S189:S193:      | 3 | 3,5937 | 0,243 | -0,437 |
| 24 | Q6NZI2 PTRF_HUMAN   | R.RGS#S#PDVHALLE.I            | S365:S366:      | 2 | 3,5902 | 0,492 | -0,085 |
| 24 | P62753 RS6_HUMAN    | R.RLS#S#LRASTS#KSE.S          | S235:S236:S242: | 2 | 3,5892 | 0,342 | -0,587 |
| 24 | Q9H1E3 NUCKS_HUMAN  | R.LKATVT#PS#PVKKG.G           | T179:S181:      | 2 | 3,5888 | 0,458 | -0,411 |
| 24 | Q9BVG4 CX026_HUMAN  | E.GYNKAVYISVQDK.E             |                 | 2 | 3,5761 | 0,318 | 0      |
| 24 | A8K630 A8K630_HUMAN | R.LQQQHSEQPPLQPS#PVTTTR.R     | S22:            | 3 | 3,5747 | 0,304 | -0,65  |
| 24 | Q92597 NDRG1_HUMAN  | R.TAS#GSSVTSLDGTR.S           | S330:           | 2 | 3,5544 | 0,538 | -0,43  |
| 24 | Q96B36 AKTS1_HUMAN  | R.LNT#SDFQKLK.R               | T246:           | 3 | 3,5471 | 0,233 | 0,144  |
| 24 | O14545 TRAD1_HUMAN  | R.HQGDLSGGYLDDTKQE.T          |                 | 3 | 3,5364 | 0,114 | -1,122 |
| 24 | Q0VF46 Q0VF46_HUMAN | K.T#PKHSPIKEEPCGSLSE.T        | T95:            | 3 | 3,5299 | 0,217 | -0,278 |
| 24 | Q9NYF8 BCLF1_HUMAN  | K.KAEGEPQEES#PLKSK.S          | S177:           | 2 | 3,5239 | 0,343 | -0,492 |
| 24 | Q13347 EIF3I_HUMAN  | R.TERPVNSAALSPNYDHSVVLGGGQE.A |                 | 3 | 3,5232 | 0,303 | -0,51  |
| 24 | O15427 MOT4_HUMAN   | E.KLHKPPADSGVDLRE.V           |                 | 3 | 3,5162 | 0,382 | -0,22  |
| 24 | P78347 GTF2I_HUMAN  | K.ANELPQPPVPEPANAGK.R         |                 | 2 | 3,5098 | 0,293 | -0,494 |
| 24 | Q13308 PTK7_HUMAN   | R.SSLQPITTLGKSE.F             |                 | 2 | 3,5053 | 0,453 | -0,448 |
| 24 | P49674 KC1E_HUMAN   | R.GAPANVS#SSDLTGRQE.V         | S389:           | 2 | 3,5016 | 0,321 | -0,439 |
| 24 | Q96SB3 NEB2_HUMAN   | K.IKPVEVEES#GES#EAE.S         | S304:S307:      | 2 | 3,4976 | 0,478 | -0,477 |
| 24 | Q9UFC0 LRWD1_HUMAN  | R.LAALKRPDDVPLSLS#PSKR.A      | S243:           | 3 | 3,4947 | 0,26  | -0,256 |
| 24 | O43719 HTSF1_HUMAN  | R.HFSEHPST#SKM*NAQE.T         | T408:           | 2 | 3,4908 | 0,31  | 0,2    |
| 24 | Q13501 SQSTM_HUMAN  | R.SRLTPVS#PESSSTEE.K          | S272:           | 2 | 3,4868 | 0,334 | -0,434 |

|    |                    |                          |        |   |        |       |        |
|----|--------------------|--------------------------|--------|---|--------|-------|--------|
| 24 | P35579 MYH9_HUMAN  | R.RGDLPFVVPR.R           |        | 2 | 3,4862 | 0,331 | -0,317 |
| 24 | O95400 CD2B2_HUMAN | R.LSGLADQM*VAR.G         |        | 2 | 3,4862 | 0,409 | -0,415 |
| 24 | P18615 NELFE_HUMAN | R.TQIVYS#DDVYKE.N        | S368:  | 2 | 3,484  | 0,351 | -0,396 |
| 24 | Q9NYB0 TE2IP_HUMAN | E.HKYLLGDAPVS#PSSQK.L    | S203:  | 2 | 3,4817 | 0,456 | -0,135 |
| 24 | P17844 DDX5_HUMAN  | E.KNFYQEHPDLAR.R         |        | 3 | 3,4709 | 0,142 | 0,06   |
| 24 | P23193 TCEA1_HUMAN | K.KKEPAITS#QNSPEAREE.S   | S97:   | 2 | 3,4705 | 0,369 | -0,367 |
| 24 | Q8NE71 ABCF1_HUMAN | K.LSVPTS#DEEDEVPAKPR.G   | S109:  | 3 | 3,4699 | 0,22  | 0,089  |
| 24 | Q9ULH0 ARMS_HUMAN  | E.RVPKS#PEHSAEPIR.T      | S1555: | 3 | 3,4665 | 0,252 | 0,109  |
| 24 | P09429 HMGB1_HUMAN | K.M*SSYAFFVQTCRE.E       |        | 2 | 3,466  | 0,494 | -0,372 |
| 24 | Q96T23 RSF1_HUMAN  | K.KTFLDKDAQRLS#PIPE.E    | S594:  | 2 | 3,4636 | 0,253 | -0,441 |
| 24 | Q96T58 MINT_HUMAN  | R.LLSVKGS#PKVDE.K        | S1287: | 2 | 3,4524 | 0,415 | -0,271 |
| 24 | Q96J02 ITCH_HUMAN  | R.RPAS#VNGSPSATSE.S      | S269:  | 2 | 3,4502 | 0,518 | -0,932 |
| 24 | P41227 ARD1A_HUMAN | R.HVVLGAIENKVE.S         |        | 2 | 3,4446 | 0,412 | -0,28  |
| 24 | Q9H6A9 PCX3_HUMAN  | K.AGSSDSCFSGTDRE.T       |        | 2 | 3,4428 | 0,368 | -0,744 |
| 24 | Q15424 SAFB1_HUMAN | R.KFDFDACNEVPPAPK.E      |        | 3 | 3,4427 | 0,101 | -0,211 |
| 24 | P21980 TGM2_HUMAN  | R.ANHNLKLAKEE.T          |        | 3 | 3,442  | 0,295 | 0,197  |
| 24 | Q53F19 CQ085_HUMAN | E.YHEELPALKQPR.E         |        | 3 | 3,4399 | 0,246 | 0      |
| 24 | P34897 GLYM_HUMAN  | K.LQDFKSFLKDSE.T         |        | 2 | 3,4364 | 0,394 | -0,466 |
| 24 | P62736 ACTA_HUMAN  | R.HQGVM*VGM*GQK.D        |        | 3 | 3,4308 | 0,228 | 0,38   |
| 24 | Q29RF7 PDS5A_HUMAN | K.RAAVGQES#PGGLE.A       | S1305: | 2 | 3,4299 | 0,426 | 0,271  |
| 24 | Q9NYF8 BCLF1_HUMAN | K.SFATASHRNTEEE.G        |        | 2 | 3,4274 | 0,389 | -0,99  |
| 24 | P48730 KC1D_HUMAN  | R.GAPVNISSDLTGR.Q        |        | 2 | 3,4252 | 0,248 | -0,533 |
| 24 | P23284 PPIB_HUMAN  | R.DKPLKDVIIADCGK.I       |        | 3 | 3,4198 | 0,163 | -0,233 |
| 24 | Q6P4Q7 CNNM4_HUMAN | R.DFS#AFKDADNE.L         | S533:  | 2 | 3,4134 | 0,333 | -0,456 |
| 24 | O95292 VAPB_HUMAN  | K.HKFM*VQSM*FAPDTSDM*E.A |        | 3 | 3,4119 | 0,202 | -0,34  |
| 24 | P06748 NPM_HUMAN   | K.M*QAS#IEKGGSLPKVE.A    | S254:  | 2 | 3,4051 | 0,367 | -0,365 |
| 24 | Q9NYB0 TE2IP_HUMAN | K.YLLGDAPVS#PSSQK.L      | S203:  | 2 | 3,4014 | 0,377 | -0,554 |
| 24 | POC7M2 RA1L3_HUMAN | K.IFVGGIKEDTEE.H         |        | 2 | 3,4007 | 0,243 | -0,456 |
| 24 | Q8IWS0 PHF6_HUMAN  | K.CGFCHVGEEENE.A         |        | 2 | 3,4001 | 0,385 | 0,333  |
| 24 | Q15181 IPYR_HUMAN  | E.FKDKDFAIDIIK.S         |        | 3 | 3,3879 | 0,287 | -0,378 |
| 24 | O94885 SASH1_HUMAN | R.TCS#FGGFDLTNR.S        | S407:  | 2 | 3,3878 | 0,423 | -0,503 |
| 24 | Q02952 AKA12_HUMAN | K.SAVVHDITDDGQEETPE.I    |        | 2 | 3,3831 | 0,503 | -0,132 |
| 24 | Q12906 ILF3_HUMAN  | K.VLQDM*GLPTGAEGR.D      |        | 2 | 3,3827 | 0,505 | -0,334 |

|    |                     |                             |                 |   |        |       |        |
|----|---------------------|-----------------------------|-----------------|---|--------|-------|--------|
| 24 | P08670 VIME_HUMAN   | R.RQVDQLTNDKARVE.V          |                 | 3 | 3,3779 | 0,332 | -0,219 |
| 24 | Q6UX04 SDC10_HUMAN  | K.DTSANVKS#AGEGEVE.K        | S299:           | 2 | 3,3752 | 0,407 | -0,543 |
| 24 | P15170 ERF3A_HUMAN  | E.KKHFTILDAPGHK.S           |                 | 3 | 3,3704 | 0,364 | -0,061 |
| 24 | A8K630 A8K630_HUMAN | R.LQQQHSEQPPLQPSPVTTR.R     |                 | 3 | 3,3702 | 0,322 | -0,421 |
| 24 | Q12756 KIF1A_HUMAN  | R.VLDTSVAYVRGEE.N           |                 | 2 | 3,3643 | 0,454 | -0,424 |
| 24 | P09874 PARP1_HUMAN  | E.VKAEPVEVVAPR.G            |                 | 3 | 3,3489 | 0,193 | -0,071 |
| 24 | Q9H1B7 EAP1_HUMAN   | R.AHGCFQDGRS#PGPPPPVGVK.T   | S69:            | 3 | 3,3403 | 0,302 | -0,256 |
| 24 | P49591 SYSC_HUMAN   | K.DPGLVDQLVKADSE.W          |                 | 2 | 3,331  | 0,486 | -0,246 |
| 24 | Q14C86 GAPD1_HUMAN  | R.SRS#SDIVSSVR.R            | S902:           | 2 | 3,3273 | 0,259 | 0,096  |
| 24 | Q8IYB3 SRRM1_HUMAN  | K.VPKPEPIPEPKEPS#PEKNSK.K   | S260:           | 3 | 3,3223 | 0,149 | -0,396 |
| 24 | Q00341 VIGLN_HUMAN  | R.RCDIIISGR.K               |                 | 2 | 3,3187 | 0,235 | -0,507 |
| 24 | A8K040 A8K040_HUMAN | K.NQVVSST#NGELNTDDPTAGR.S   | T368:           | 2 | 3,3178 | 0,446 | -1,019 |
| 24 | P62753 RS6_HUMAN    | R.RLS#S#LRAS#TSKSE.S        | S235:S236:S240: | 2 | 3,316  | 0,265 | -0,587 |
| 24 | P62753 RS6_HUMAN    | R.RLSS#LRAS#T#SKSE.S        | S236:S240:T241: | 2 | 3,3073 | 0,185 | -0,661 |
| 24 | P62736 ACTA_HUMAN   | R.HQGVMVGM*GQKDSYVGDE.A     |                 | 2 | 3,305  | 0,346 | -0,375 |
| 24 | P51858 HDGF_HUMAN   | R.RAGDLLEDS#PKRPK.E         | S165:           | 3 | 3,3013 | 0,174 | -0,11  |
| 24 | P09429 HMGB1_HUMAN  | K.M*SSYAFFVQTCREE.H         |                 | 2 | 3,2978 | 0,508 | -0,276 |
| 24 | Q71U36 TBA1A_HUMAN  | E.ITNACFEPANQM*VK.C         |                 | 2 | 3,2861 | 0,409 | 0      |
| 24 | P21359 NF1_HUMAN    | R.RM*SHVS#GGGSIDLSDTDSLQE.W | S821:           | 3 | 3,2854 | 0,265 | -0,48  |
| 24 | Q9BT25 NYS48_HUMAN  | R.SFAQVLELSAEASK.E          |                 | 2 | 3,2756 | 0,341 | -0,33  |
| 24 | Q96PN7 TREF1_HUMAN  | E.FKNLPALNGHM*R.S           |                 | 3 | 3,2727 | 0,258 | -0,129 |
| 24 | P21333 FLNA_HUMAN   | K.NGQHVASSPIPVVISQSE.I      |                 | 2 | 3,2716 | 0,351 | -0,528 |
| 24 | Q02790 FKBP4_HUMAN  | K.DKFSFDLGKGE.V             |                 | 2 | 3,271  | 0,25  | -0,196 |
| 24 | P46013 KI67_HUMAN   | R.NRT#PAKVEDAADSATKPE.N     | T401:           | 3 | 3,2665 | 0,342 | -0,092 |
| 24 | Q14677 EPN4_HUMAN   | E.LSDKIGSTIDDTISK.F         |                 | 3 | 3,2631 | 0,336 | 0      |
| 24 | P07814 SYEP_HUMAN   | E.DFKQYVNKNSKHEE.L          |                 | 3 | 3,2562 | 0,251 | -0,311 |
| 24 | P21333 FLNA_HUMAN   | R.AGGPGLERAE.A              |                 | 2 | 3,2552 | 0,353 | -0,319 |
| 24 | Q92598 HS105_HUMAN  | K.IKVNVNELPIE.A             |                 | 2 | 3,2496 | 0,297 | -0,682 |
| 24 | P46087 NOL1_HUMAN   | K.GISAGAVQTAGK.K            |                 | 2 | 3,2477 | 0,422 | -0,115 |
| 24 | Q7Z4V5 HDGR2_HUMAN  | K.LAGEELAGEEAPQEK.A         |                 | 2 | 3,2465 | 0,346 | -0,621 |
| 24 | P04264 K2C1_HUMAN   | K.WELLQQVDTSTR.T            |                 | 2 | 3,2457 | 0,447 | -0,413 |
| 24 | Q9UFC0 LRWD1_HUMAN  | R.LAALKRPDDVPLSLS#PSK.R     | S243:           | 3 | 3,2385 | 0,128 | -0,46  |
| 24 | Q9NZT2 OGFR_HUMAN   | R.SQGDEAGHGEDRPEPLS#PKE.S   | S378:           | 3 | 3,237  | 0,209 | -0,242 |

|    |                     |                           |            |   |        |       |        |
|----|---------------------|---------------------------|------------|---|--------|-------|--------|
| 24 | Q14C86 GAPD1_HUMAN  | K.TLRFS#LCSDNLE.G         | S566:      | 2 | 3,2348 | 0,508 | -0,556 |
| 24 | P40818 UBP8_HUMAN   | R.SYS#SPDITQAIQE.E        | S718:      | 2 | 3,2312 | 0,301 | -0,241 |
| 24 | Q14978 NOLC1_HUMAN  | K.ANGTSALTAQNGK.A         |            | 2 | 3,2269 | 0,471 | -0,495 |
| 24 | P00558 PGK1_HUMAN   | R.AHSSMVGVNLPQK.A         |            | 3 | 3,2203 | 0,093 | 0,134  |
| 24 | Q5T5C0 STXB5_HUMAN  | R.KLS#LPTDLKPD.L          | S759:      | 2 | 3,2202 | 0,345 | -0,747 |
| 24 | Q13442 HAP28_HUMAN  | K.KVTQLDLDPKE.L           |            | 2 | 3,2143 | 0,358 | 0      |
| 24 | Q9Y266 NUDC_HUMAN   | K.LKPNLNGADLPNYR.W        |            | 3 | 3,2099 | 0,248 | -0,334 |
| 24 | Q14684 RRP1B_HUMAN  | K.TPTSS#PASS#PLVAK.K      | S732:S736: | 2 | 3,2093 | 1     | -0,568 |
| 24 | P06748 NPM_HUMAN    | K.M*QAS#IEKGGSLPKVE.A     | S254:      | 3 | 3,2043 | 0,236 | -0,11  |
| 24 | Q9BVG4 CX026_HUMAN  | K.AVYISVQDKEGK.G          |            | 2 | 3,2005 | 0,277 | -0,333 |
| 24 | P00568 KAD1_HUMAN   | K.IIFVVGPGSGK.G           |            | 2 | 3,1961 | 0,281 | -0,216 |
| 24 | P21333 FLNA_HUMAN   | E.KTGVAVNKPAEFTVDAK.H     |            | 3 | 3,1918 | 0,171 | -0,618 |
| 24 | Q8NCM9 Q8NCM9_HUMAN | R.SSDITSDLGNVLTSTPNAK.T   |            | 2 | 3,1914 | 0,428 | -0,318 |
| 24 | Q09161 NCBP1_HUMAN  | K.TSDANETEDHLE.S          |            | 2 | 3,1896 | 0,3   | -0,359 |
| 24 | Q96ST2 IWS1_HUMAN   | R.KAAVLSDS#EDEE.K         | S400:      | 2 | 3,1874 | 0,361 | -0,533 |
| 24 | Q9Y6J0 CABIN_HUMAN  | K.FCQVHLGAAAQR.Q          |            | 3 | 3,1855 | 0,3   | -0,067 |
| 24 | Q9NZL4 HPBP1_HUMAN  | R.CQLLQQHEEYQEE.L         |            | 2 | 3,1849 | 0,328 | -0,563 |
| 24 | Q9NZN8 CNOT2_HUMAN  | K.FVEGVDSYHDE.N           |            | 2 | 3,1838 | 0,407 | -1,123 |
| 24 | Q9UJM3 ERRFI_HUMAN  | R.KHLSYVVS#P.-            | S461:      | 2 | 3,1824 | 0,253 | -0,44  |
| 24 | P22626 ROA2_HUMAN   | K.LFVGGIKEDTEE.H          |            | 2 | 3,1717 | 0,198 | -0,456 |
| 24 | P48634 BAT2_HUMAN   | E.FRGDDGRGGGTGGPNHPPAPR.G |            | 3 | 3,1695 | 0,324 | -0,441 |
| 24 | Q5UIP0 RIF1_HUMAN   | E.DSQVQITPNQK.T           |            | 2 | 3,1686 | 0,473 | -0,485 |
| 24 | Q13177 PAK2_HUMAN   | K.ERPEIS#PPSDFE.H         | S75:       | 2 | 3,1601 | 0,279 | -0,411 |
| 24 | P04264 K2C1_HUMAN   | K.YEELQITAGR.H            |            | 2 | 3,1576 | 0,267 | -0,31  |
| 24 | Q86TC9 MYPN_HUMAN   | K.HSPNLSFEPNFCQDNPR.S     |            | 3 | 3,1484 | 0,198 | -0,178 |
| 24 | Q6AI39 K0240_HUMAN  | R.REPLKASQCS#PGPE.G       | S934:      | 2 | 3,1438 | 0,251 | -0,522 |
| 24 | Q15185 TEBP_HUMAN   | E.IDLFHCIDPNDSK.H         |            | 3 | 3,1431 | 0,166 | -0,349 |
| 24 | P04264 K2C1_HUMAN   | R.TNAENEFVTIKK.D          |            | 3 | 3,1347 | 0,325 | 0      |
| 24 | Q9UKV3 ACINU_HUMAN  | E.KSKS#PS#PPRLTE.D        | S386:S388: | 3 | 3,1311 | 0,104 | 0      |
| 24 | Q9BTE7 DCNL5_HUMAN  | K.RKS#PGVAAVAE.D          | S9:        | 2 | 3,1272 | 0,331 | -0,494 |
| 24 | Q5SW79 CE170_HUMAN  | R.TPLTS#ADEHVHSKLE.G      | S1059:     | 3 | 3,1263 | 0,228 | -0,315 |
| 24 | Q9NZJ9 NUDT4_HUMAN  | R.AACLFRSEQEDE.V          |            | 2 | 3,1251 | 0,269 | -0,453 |
| 24 | P23284 PIIB_HUMAN   | R.DKPLKDVIIADCGKIE.V      |            | 2 | 3,1161 | 0,362 | -0,605 |

|    |                     |                                    |                 |   |        |       |        |
|----|---------------------|------------------------------------|-----------------|---|--------|-------|--------|
| 24 | Q8IWS0 PHF6_HUMAN   | K.CGFCVGEEN.N                      |                 | 2 | 3,1135 | 0,309 | -0,299 |
| 24 | Q6UN15 FIP1_HUMAN   | R.ERDHS#PTPSVFNSEDEE.R             | S492:           | 2 | 3,1124 | 0,409 | -0,19  |
| 24 | O60293 CC131_HUMAN  | R.LDSS#PVSSPR.K                    | S949:           | 2 | 3,1039 | 0,358 | -0,217 |
| 24 | O60264 SMCA5_HUMAN  | E.LFAHFIQPAAQK.T                   |                 | 3 | 3,1004 | 0,141 | -0,534 |
| 24 | P06748 NPM_HUMAN    | K.DYHFVKVDNDENE.H                  |                 | 2 | 3,0981 | 0,331 | -0,32  |
| 24 | Q99543 DNJC2_HUMAN  | R.NRNASAS#FQE.L                    | S49:            | 2 | 3,0978 | 0,291 | -0,203 |
| 24 | Q5T4S7 UBR4_HUMAN   | K.VTISDGKVADEEKPK.K                |                 | 3 | 3,0959 | 0,351 | -0,226 |
| 24 | Q9UQ35 SRRM2_HUMAN  | K.SATRPS#PSPERSST#GPEPPAPTPLLA.E.R | S351:T359:      | 3 | 3,0946 | 1     | -0,317 |
| 24 | Q96PK6 RBM14_HUMAN  | R.RLPDAHSDYAR.Y                    |                 | 2 | 3,0945 | 0,396 | -0,188 |
| 24 | Q8IVF2 AHNK2_HUMAN  | R.DAHDVS#PTSTDTE.A                 | S294:           | 2 | 3,0942 | 0,345 | -0,252 |
| 24 | P51991 ROA3_HUMAN   | E.DSVKPGAHLTVK.K                   |                 | 3 | 3,093  | 0,309 | 0,365  |
| 24 | Q00341 VIGLN_HUMAN  | R.RCDIIISGRK.E                     |                 | 3 | 3,0888 | 0,177 | -0,137 |
| 24 | P42704 LPPRC_HUMAN  | K.LQDAINILKE.M                     |                 | 2 | 3,0863 | 0,228 | -0,211 |
| 24 | Q9BZ23 PANK2_HUMAN  | R.RAS#SASVPAVGASAE.G               | S168:           | 2 | 3,0827 | 0,557 | -0,169 |
| 24 | Q14152 EIF3A_HUMAN  | R.LES#LNIQRE.K                     | S584:           | 2 | 3,0819 | 0,168 | -0,413 |
| 24 | Q9UQE7 SMC3_HUMAN   | R.SEDLDNSIDKTE.A                   |                 | 2 | 3,0773 | 0,298 | 0,089  |
| 24 | P31948 STIP1_HUMAN  | E.KYKDAIHFYNK.S                    |                 | 3 | 3,0749 | 0,254 | 0,192  |
| 24 | Q52LJ0 FA98B_HUMAN  | E.LQASQILQNK.K                     |                 | 2 | 3,0746 | 0,165 | -0,32  |
| 24 | P09429 HMGB1_HUMAN  | R.GKM*SSYAFFVQTCR.E                |                 | 3 | 3,0723 | 0,209 | -0,323 |
| 24 | Q8IYB3 SRRM1_HUMAN  | E.ATSTSDILKVPKPEPIPEPEPS#PEKNSK.K  | S260:           | 3 | 3,0696 | 0,408 | -0,341 |
| 24 | P55201 BRPF1_HUMAN  | R.GSLTPHPAACDKDGQTDS#AAEE.S        | S860:           | 3 | 3,0686 | 0,181 | -0,391 |
| 24 | Q13822 ENPP2_HUMAN  | E.ILT#LKTY#LHTYES#EI.-             | T851:Y855:S861: | 3 | 3,0617 | 0,239 | 1,595  |
| 24 | Q02952 AKA12_HUMAN  | K.LTASEQAHPQEPAESHEPRLS#AEYE.K     | S371:           | 3 | 3,0574 | 0,364 | -0,495 |
| 24 | P09960 LKHA4_HUMAN  | K.ASM*HPVTAM*LVGK.D                |                 | 3 | 3,0574 | 0,128 | 0      |
| 24 | Q14697 GANAB_HUMAN  | R.KLVAIVDPHIK.V                    |                 | 3 | 3,0542 | 0,128 | 0,148  |
| 24 | O14617 AP3D1_HUMAN  | R.NTETSKS#PEKDVPMVE.K              | S829:           | 2 | 3,0524 | 0,249 | -0,326 |
| 24 | A9CQZ4 A9CQZ4_HUMAN | K.AAEDEEVPAFFK.N                   |                 | 2 | 3,0517 | 0,437 | -0,361 |
| 24 | Q9Y4L1 HYOU1_HUMAN  | K.TPVIVTLKE.N                      |                 | 2 | 3,0517 | 0,291 | -0,122 |
| 24 | Q96J02 ITCH_HUMAN   | R.RPASVNGSPSATSE.S                 |                 | 2 | 3,0515 | 0,372 | -0,718 |
| 24 | Q8N2Y8 RUSC2_HUMAN  | R.KKT#GGSGSPPLRVSVGDSSQE.F         | T554:           | 3 | 3,0503 | 0,09  | -0,425 |
| 24 | P62736 ACTA_HUMAN   | R.HQGVM*VGM*GQKDSYVGDE.A           |                 | 2 | 3,0494 | 0,395 | -0,62  |
| 24 | Q9UHB6 LIMA1_HUMAN  | R.KIS#ENSYSLDDLE.I                 | S225:           | 2 | 3,0489 | 0,358 | -0,383 |
| 24 | P40818 UBP8_HUMAN   | K.RSYS#SPDITQAIQE.E                | S718:           | 2 | 3,0483 | 0,135 | -0,364 |



|    |                     |                          |            |   |        |       |        |
|----|---------------------|--------------------------|------------|---|--------|-------|--------|
| 24 | P20020 AT2B1_HUMAN  | K.SLDKDPLLLSGTHVM*E.G    |            | 3 | 3,046  | 0,167 | -0,31  |
| 24 | Q86SQ0 PHLB2_HUMAN  | R.KSS#ISSIS#GRDDLMDYHR.R | S415:S420: | 3 | 3,042  | 0,169 | -0,329 |
| 24 | P62917 RL8_HUMAN    | R.ASGNYATVISHNPE.T       |            | 3 | 3,0391 | 0,256 | -0,063 |
| 24 | P50914 RL14_HUMAN   | K.AALLKAS#PK.K           | S139:      | 2 | 3,0389 | 0,419 | 0      |
| 24 | Q96D71 REPS1_HUMAN  | R.RLKS#EDEL RPE.V        | S657:      | 3 | 3,0325 | 0,381 | -0,126 |
| 24 | Q8TCG1 K1524_HUMAN  | K.DLQITCDSL NK.Q         |            | 2 | 3,0279 | 0,372 | -0,56  |
| 24 | P04264 K2C1_HUMAN   | R.TNAENEFVTIK.K          |            | 2 | 3,0269 | 0,355 | -0,578 |
| 24 | Q4VXC3 Q4VXC3_HUMAN | K.QHINNQQPPQLR.W         |            | 3 | 3,0224 | 0,084 | -0,114 |
| 24 | A6NHR9 SMHD1_HUMAN  | K.CNDSLRHS#PKVE.T        | S1974:     | 3 | 3,0185 | 0,114 | -0,06  |
| 24 | P35658 NU214_HUMAN  | R.NRDSGYLHLLYK.R         |            | 3 | 3,0168 | 0,187 | -0,124 |
| 24 | Q99661 KIF2C_HUMAN  | K.RRS#VNSKIPAPKE.S       | S95:       | 3 | 3,0121 | 0,334 | -0,468 |
| 24 | O95218 ZRAB2_HUMAN  | K.AVG PASILKE.V          |            | 2 | 3,0099 | 0,393 | -0,186 |
| 24 | P35527 K1C9_HUMAN   | K.TLNDMRQEYEQLIAK.N      |            | 3 | 3,0098 | 0,266 | -0,593 |
| 24 | P62736 ACTA_HUMAN   | R.HQGVM*VGM*GQKDSYVGDE.A |            | 3 | 3,0077 | 0,29  | -0,279 |
| 24 | Q05D32 CTSL2_HUMAN  | R.DIDNLLITSTPR.A         |            | 2 | 3,0073 | 0,427 | -0,628 |
| 24 | Q6KC79 NIPBL_HUMAN  | K.AITSLGGGS#PK.N         | S2658:     | 2 | 3,0062 | 0,288 | -0,413 |
| 24 | Q9Y2W1 TR150_HUMAN  | K.SPLQSVVVR.R            |            | 2 | 3,0037 | 0,342 | -0,062 |
| 24 | Q9UNS1 TIM_HUMAN    | E.DAVGKEPLKAAPK.K        |            | 3 | 3,0011 | 0,206 | -0,138 |
| 24 | P29350 PTN6_HUMAN   | E.YGNITYPPAM*K.N         |            | 2 | 2,9927 | 0,388 | -0,192 |
| 24 | P62736 ACTA_HUMAN   | R.HQGVM*VGMGQK.D         |            | 2 | 2,9925 | 0,422 | -0,205 |
| 24 | P0C0S8 H2A1_HUMAN   | R.HLQLAIRNDEE.L          |            | 2 | 2,9922 | 0,277 | -0,274 |
| 24 | Q16537 2A5E_HUMAN   | R.SQSS#S#QFRSQGKPIE.L    | S33:S34:   | 2 | 2,9887 | 0,248 | -0,468 |
| 24 | P10809 CH60_HUMAN   | R.VTDALNATR.A            |            | 2 | 2,9841 | 0,417 | -1,016 |
| 24 | Q12834 CDC20_HUMAN  | K.VQT#TPSKPGDRYIPHR.S    | T69:       | 3 | 2,9814 | 0,147 | -0,552 |
| 24 | Q14671 PUM1_HUMAN   | E.YVLSS#SPGDSCLR.K       | S228:      | 2 | 2,9809 | 0,198 | 0,241  |
| 24 | Q641Q2 FA21A_HUMAN  | R.SRPTS#FADE.L           | S288:      | 2 | 2,9756 | 0,185 | 0      |
| 24 | Q07666 KHDR1_HUMAN  | R.SGS#M*DPSGAHPSVR.Q     | S20:       | 2 | 2,9654 | 0,329 | -0,412 |
| 24 | Q00341 VIGLN_HUMAN  | R.CDIIISGR.K             |            | 2 | 2,9628 | 0,252 | -0,35  |
| 24 | Q13442 HAP28_HUMAN  | K.GVEGLIDIENPNR.V        |            | 2 | 2,9625 | 0,367 | -0,513 |
| 24 | Q96T58 MINT_HUMAN   | K.IKLDRLNTVAS#PKDCQE.L   | S1062:     | 3 | 2,9625 | 0,116 | -0,088 |
| 24 | Q7Z4S6 KI21A_HUMAN  | E.KKIPEPS#PVTR.R         | S1239:     | 3 | 2,962  | 0,147 | 0,206  |
| 24 | Q92922 SMRC1_HUMAN  | R.KHS#PS#PPPPTPTESR.K    | S328:S330: | 3 | 2,9616 | 0,107 | -0,309 |
| 24 | Q6IBW4 CNDH2_HUMAN  | E.S#RSPQQSAALPR.R        | S282:      | 3 | 2,9527 | 0,31  | 0      |

|    |                    |                            |        |   |        |       |        |
|----|--------------------|----------------------------|--------|---|--------|-------|--------|
| 24 | P27824 CALX_HUMAN  | K.AEEDEILNR.S              |        | 2 | 2,9524 | 0,275 | 0,112  |
| 24 | Q96B23 CRO25_HUMAN | E.GDPSGVSGATVGR.K          |        | 2 | 2,9485 | 0,22  | -0,105 |
| 24 | Q16181 SEPT7_HUMAN | K.NKGQLTKS#PLAQM*E.E       | S334:  | 2 | 2,9454 | 0,351 | 1,784  |
| 24 | Q13428 TCOF_HUMAN  | K.TVANLLSGKS#PR.K          | S156:  | 2 | 2,9392 | 0,328 | -0,277 |
| 24 | Q9NQW6 ANLN_HUMAN  | K.TQS#LPVTEKVTE.N          | S485:  | 2 | 2,9363 | 0,34  | -0,346 |
| 24 | P00558 PGK1_HUMAN  | R.AHSSM*VGVNLPQK.A         |        | 2 | 2,9362 | 0,379 | -0,264 |
| 24 | O43719 HTSF1_HUMAN | R.HFSEHPSTS#KM*NAQE.T      | S409:  | 3 | 2,9341 | 0,271 | -0,2   |
| 24 | Q9GZV5 WWTR1_HUMAN | E.SFFKEPDSGSHSR.Q          |        | 3 | 2,9324 | 0,195 | 0,247  |
| 24 | P49591 SYSC_HUMAN  | K.DPGLVDQLVK.A             |        | 2 | 2,9324 | 0,227 | -0,338 |
| 24 | O75643 U520_HUMAN  | R.CTDKGVESVFDIM*E.M        |        | 2 | 2,9303 | 0,356 | -0,371 |
| 24 | Q96PE2 ARHGH_HUMAN | R.KSL#NPDIASE.T            | S463:  | 2 | 2,93   | 0,269 | -0,295 |
| 24 | Q6PD62 CTR9_HUMAN  | E.FVNDDT#DDDLPISE.K        | T925:  | 2 | 2,9225 | 0,231 | -0,292 |
| 24 | Q96T23 RSF1_HUMAN  | K.TFLDKDAQRLS#PIPE.E       | S594:  | 2 | 2,9214 | 0,239 | -0,674 |
| 24 | Q9NYF8 BCLF1_HUMAN | K.AEGEPQEE#PLKSK.S         | S177:  | 2 | 2,921  | 0,278 | -0,227 |
| 24 | Q02790 FKBP4_HUMAN | D.GTKFDSSSLDRK.D           |        | 2 | 2,9122 | 0,3   | -0,389 |
| 24 | Q9UBF8 PI4KB_HUMAN | R.ELPSLSPAPDTGLSPSK.R      |        | 2 | 2,9117 | 0,407 | -0,504 |
| 24 | P02545 LMNA_HUMAN  | R.LRLSPSPTSQR.S            |        | 2 | 2,9103 | 0,248 | -0,884 |
| 24 | Q9NP61 ARFG3_HUMAN | R.RKPDYEPVENTDE.A          |        | 2 | 2,9099 | 0,333 | -0,537 |
| 24 | Q9NRF9 DPOE3_HUMAN | R.KTLNASDVLSAM*EE.M        |        | 2 | 2,9096 | 0,272 | -0,56  |
| 24 | P35573 GDE_HUMAN   | K.SDPNQHLTIQDPE.Y          |        | 2 | 2,9087 | 0,228 | -0,456 |
| 24 | Q8WWK9 CKAP2_HUMAN | R.NLLFQDCEKE.Q             |        | 2 | 2,9066 | 0,367 | -0,753 |
| 24 | P18858 DNL1_HUMAN  | E.NNASLSDTSPM*DSS#PSGIPK.R | S114:  | 2 | 2,9017 | 0,52  | -0,465 |
| 24 | P14324 FPPS_HUMAN  | E.KQDFVQHFSQIVR.V          |        | 3 | 2,9004 | 0,171 | -0,112 |
| 24 | P62937 PIIA_HUMAN  | K.KITIADCGQLE.-            |        | 2 | 2,9002 | 0,376 | -0,391 |
| 24 | P09874 PARP1_HUMAN | E.VKAEPVEVVAPR.G           |        | 2 | 2,9001 | 0,234 | -0,094 |
| 24 | Q99460 PSMD1_HUMAN | E.KVSTAVLSITAK.A           |        | 2 | 2,8965 | 0,189 | 0,1    |
| 24 | O15226 NKRF_HUMAN  | K.KKDIKDLVVYE.N            |        | 2 | 2,8951 | 0,285 | -0,542 |
| 24 | Q16181 SEPT7_HUMAN | K.GQLTKS#PLAQME.E          | S334:  | 2 | 2,8907 | 0,084 | -0,529 |
| 24 | P00338 LDHA_HUMAN  | K.SADTLWGIQKE.L            |        | 2 | 2,8862 | 0,316 | -0,684 |
| 24 | O75167 PHAR2_HUMAN | R.KLS#LRPTVAE.L            | S560:  | 2 | 2,8854 | 0,246 | -0,204 |
| 24 | Q69YN4 VIR_HUMAN   | R.SFLSEPSS#PGRTK.T         | S1579: | 2 | 2,8849 | 0,232 | -0,497 |
| 24 | P29350 PTN6_HUMAN  | E.YGNITYPPAMK.N            |        | 2 | 2,8822 | 0,428 | -0,486 |
| 24 | Q15942 ZYX_HUMAN   | E.ADDNGCFPLDGHVLCR.K       |        | 3 | 2,8717 | 0,325 | -0,297 |

|    |                     |                            |              |   |        |       |        |
|----|---------------------|----------------------------|--------------|---|--------|-------|--------|
| 24 | Q8IUD2 RB6I2_HUMAN  | R.SVGKVEPSSQS#PGRS#PR.L    | S17:S21:     | 3 | 2,8697 | 0,284 | -0,573 |
| 24 | Q12923 PTN13_HUMAN  | K.SVAS#LNRS#PERR.K         | S1029:S1033: | 3 | 2,8697 | 0,173 | -0,06  |
| 24 | Q0VF46 Q0VF46_HUMAN | K.TPKHS#PIKEEPCGSLSE.T     | S99:         | 2 | 2,864  | 0,442 | -0,556 |
| 24 | O95544 NADK_HUMAN   | R.SLS#ASPALGSTKE.F         | S48:         | 2 | 2,862  | 0,37  | -0,276 |
| 24 | Q9NYL9 TMOD3_HUMAN  | E.HKDREDYVYPYGE.K          |              | 2 | 2,8554 | 0,351 | -0,455 |
| 24 | O43432 IF4G3_HUMAN  | R.RS#PVPAQIAITVPK.T        | S495:        | 2 | 2,8546 | 0,314 | -0,627 |
| 24 | Q13045 FLII_HUMAN   | E.AVLQS#PGLSGK.V           | S856:        | 2 | 2,8535 | 0,485 | -0,215 |
| 24 | P06748 NPM_HUMAN    | K.SIRDT#PAKNAQK.S          | T199:        | 3 | 2,8524 | 0,247 | -0,26  |
| 24 | Q96MU7 YTDC1_HUMAN  | R.LSSS#ASREPYKNQPE.K       | S120:        | 2 | 2,8441 | 0,244 | -0,551 |
| 24 | Q6NUN7 CK063_HUMAN  | R.SKPFSELSDS#DLEE.K        | S216:        | 2 | 2,8386 | 0,376 | -0,587 |
| 24 | Q13308 PTK7_HUMAN   | R.SSLQPITTLGK.S            |              | 2 | 2,8368 | 0,301 | -0,426 |
| 24 | Q15643 TRIPB_HUMAN  | D.MKPLDS#PGRR.K            | S1891:       | 3 | 2,8287 | 0,126 | 0,222  |
| 24 | P46013 KI67_HUMAN   | K.TTKIPCDS#PQS#DPVDTPSTK.Q | S1253:S1256: | 3 | 2,8283 | 0,259 | -0,676 |
| 24 | Q9BVJ6 UT14A_HUMAN  | R.KRSELS#QDAEPAGSQE.T      | S437:        | 2 | 2,8247 | 0,287 | -0,471 |
| 24 | P62937 PPIA_HUMAN   | K.ITIADCGQLE.-             |              | 2 | 2,8246 | 0,491 | -0,218 |
| 24 | O75182 SIN3B_HUMAN  | E.TVHVHGLPVTR.Y            |              | 3 | 2,8206 | 0,226 | 0,376  |
| 24 | P63241 IF5A1_HUMAN  | K.VHLVGIDIFTGK.K           |              | 2 | 2,8148 | 0,258 | -0,47  |
| 24 | Q96MU7 YTDC1_HUMAN  | R.AKS#PT#PDGSERIGLE.V      | S146:T148:   | 3 | 2,8136 | 0,211 | 0      |
| 24 | P22626 ROA2_HUMAN   | E.VDAAMAARPHSIDGR.V        |              | 3 | 2,8131 | 0,329 | -0,467 |
| 24 | P22626 ROA2_HUMAN   | K.KLFVGGIKE.D              |              | 2 | 2,8076 | 0,132 | -0,369 |
| 24 | Q9NZZ2 OGFR_HUMAN   | R.SVEPQDAGPLER.S           |              | 2 | 2,8042 | 0,382 | -0,188 |
| 24 | P35908 K22E_HUMAN   | K.YEELQVTVGR.H             |              | 2 | 2,8041 | 0,353 | 0,102  |
| 24 | P02545 LMNA_HUMAN   | R.LRLSPS#PTSQR.S           | S392:        | 2 | 2,802  | 0,371 | 0,185  |
| 24 | Q16181 SEPT7_HUMAN  | K.LAAVTYNGVDNNK.N          |              | 2 | 2,7969 | 0,518 | 0,088  |
| 24 | Q09666 AHNK_HUMAN   | K.M*EGDLKAPEVDIK.G         |              | 3 | 2,7967 | 0,18  | -0,063 |
| 24 | Q9H7N4 SFR19_HUMAN  | E.VLYDS#EGLS#GEERGGK.S     | S734:S738:   | 2 | 2,795  | 0,278 | -0,592 |
| 24 | Q08211 DHX9_HUMAN   | K.LAAQSCALSLVR.Q           |              | 2 | 2,791  | 0,287 | -0,379 |
| 24 | P16401 H15_HUMAN    | E.TATPAPVEKS#PAK.K         | S18:         | 2 | 2,79   | 0,286 | -0,709 |
| 24 | P35527 K1C9_HUMAN   | K.VQALEEANNDLENK.I         |              | 2 | 2,7893 | 0,256 | -0,231 |
| 24 | Q9UQ35 SRRM2_HUMAN  | E.SYFGVSSLQLK.G            |              | 2 | 2,7864 | 0,387 | -0,695 |
| 24 | Q8N2Y8 RUSC2_HUMAN  | K.TGGSGS#PPLRVSVGDSSQE.F   | S559:        | 2 | 2,7864 | 0,243 | -0,386 |
| 24 | Q13523 PRP4B_HUMAN  | K.ARS#PTDDKVKIE.D          | S257:        | 2 | 2,7806 | 0,316 | -0,509 |
| 24 | P09429 HMGB1_HUMAN  | K.KHPDASVNFSE.F            |              | 2 | 2,7786 | 0,301 | -0,496 |

|    |                    |                             |                 |   |        |       |        |
|----|--------------------|-----------------------------|-----------------|---|--------|-------|--------|
| 24 | P81605 DCD_HUMAN   | K.DAVEDLESVGK.G             |                 | 2 | 2,7731 | 0,402 | -0,42  |
| 24 | Q16181 SEPT7_HUMAN | K.GQLTKS#PLAQMEEE.R         | S334:           | 2 | 2,7714 | 0,287 | -0,074 |
| 24 | P62753 RS6_HUMAN   | R.RLS#S#LRAS#TSK.S          | S235:S236:S240: | 2 | 2,7696 | 0,489 | -0,338 |
| 24 | O14910 LIN7A_HUMAN | K.RGDQLLSVNGVSVE.G          |                 | 2 | 2,7678 | 0,344 | -0,414 |
| 24 | Q8IYB3 SRRM1_HUMAN | K.RES#PSPAPKPR.K            | S450:           | 3 | 2,7642 | 0,208 | 0,14   |
| 24 | P78527 PRKDC_HUMAN | E.SYSFKDTSTGHKNKE.F         |                 | 3 | 2,7631 | 0,216 | -0,423 |
| 24 | Q86UU0 BCL9L_HUMAN | K.NPQAGVPPFSSLK.G           |                 | 2 | 2,762  | 0,285 | -0,455 |
| 24 | Q14151 SAFB2_HUMAN | R.NLDTGGNKSVLM*E.R          |                 | 2 | 2,76   | 0,4   | -0,438 |
| 24 | Q8TB45 DEPD6_HUMAN | E.THDS#PFCLRK.Q             | S244:           | 3 | 2,7538 | 0,239 | 0      |
| 24 | P49915 GUAA_HUMAN  | K.IIGDTFVKIANE.V            |                 | 2 | 2,75   | 0,272 | -0,37  |
| 24 | P23193 TCEA1_HUMAN | K.NAAGALDLLKE.L             |                 | 2 | 2,7431 | 0,254 | -0,547 |
| 24 | P40227 TCPZ_HUMAN  | K.GIDPFSLDALSKE.G           |                 | 2 | 2,7421 | 0,358 | -0,526 |
| 24 | Q14978 NOLC1_HUMAN | K.IKLQT#PNT#FPK.R           | T607:T610:      | 3 | 2,7416 | 0,23  | -0,063 |
| 24 | Q96II8 LRCH3_HUMAN | R.ISHEGS#PVKPVAIRE.F        | S419:           | 3 | 2,7407 | 0,173 | 0      |
| 24 | P51858 HDGF_HUMAN  | R.AGDLLDS#PKRPK.E           | S165:           | 3 | 2,7369 | 0,118 | 0,182  |
| 24 | O43290 SNUT1_HUMAN | E.DKM*AIDDKYSR.R            |                 | 3 | 2,7313 | 0,351 | 0,135  |
| 24 | O95793 STAU1_HUMAN | R.KVTFEPGSGDE.N             |                 | 2 | 2,7305 | 0,27  | -0,558 |
| 24 | P13984 T2FB_HUMAN  | E.KHQYYNLKD.L               |                 | 3 | 2,7259 | 0,229 | 0,681  |
| 24 | Q9NR30 DDX21_HUMAN | R.IKDHIQNGKLD.L             |                 | 3 | 2,7238 | 0,111 | 0,143  |
| 24 | Q13442 HAP28_HUMAN | K.GVEGLIDIENPNRVAQTTK.K     |                 | 3 | 2,7219 | 0,087 | -0,534 |
| 24 | Q96MU7 YTDC1_HUMAN | R.RAKS#PT#PDGSERIGLE.V      | S146:T148:      | 2 | 2,7189 | 0,391 | -0,717 |
| 24 | Q5T200 ZC3HD_HUMAN | R.AQDIIGHHQS#EDRE.T         | S943:           | 3 | 2,7166 | 0,151 | -0,32  |
| 24 | Q9NWW8 CS062_HUMAN | R.TRS#NPEGAEDRAVGAQASVGSR.S | S29:            | 3 | 2,7162 | 0,354 | -0,319 |
| 24 | P11310 ACADM_HUMAN | R.QREPGLGFSFE.F             |                 | 2 | 2,695  | 0,324 | -0,481 |
| 24 | P30084 ECHM_HUMAN  | E.KKLFYSTFATDDR.K           |                 | 3 | 2,6949 | 0,112 | -0,804 |
| 24 | Q8NEY1 NAV1_HUMAN  | K.AVALSDSNISLK.S            |                 | 2 | 2,6942 | 0,38  | -0,196 |
| 24 | P23588 IF4B_HUMAN  | K.VAPAQPSEEGPGRKDE.N        |                 | 2 | 2,6937 | 0,424 | -0,805 |
| 24 | Q9NYF8 BCLF1_HUMAN | K.LKDLFDYS#PPLHK.N          | S512:           | 3 | 2,6929 | 0,162 | -0,553 |
| 24 | O95218 ZRAB2_HUMAN | R.GKAVGPASILKE.V            |                 | 2 | 2,6921 | 0,253 | -0,417 |
| 24 | O95239 KIF4A_HUMAN | K.HLPKDTLLSPDSSFY.Y         |                 | 2 | 2,691  | 0,372 | -0,362 |
| 24 | P29692 EF1D_HUMAN  | R.ATAPQQTQHVSPM*R.Q         |                 | 2 | 2,6891 | 0,331 | -0,254 |
| 24 | Q13442 HAP28_HUMAN | K.KVTQLDLDPKE.L             |                 | 3 | 2,6879 | 0,178 | 0      |
| 24 | Q9UBR2 CATZ_HUMAN  | R.VGDYGSLSGRE.K             |                 | 2 | 2,6872 | 0,379 | 0,107  |

|    |                    |                               |                 |   |        |       |        |
|----|--------------------|-------------------------------|-----------------|---|--------|-------|--------|
| 24 | P13639 EF2_HUMAN   | E.SNVLCLSK.S                  |                 | 2 | 2,6868 | 0,361 | 0,066  |
| 24 | Q8N2Y8 RUSC2_HUMAN | R.SPPVRLGS#LE.R               | S513:           | 2 | 2,6848 | 0,221 | -0,215 |
| 24 | P49591 SYSC_HUMAN  | R.FKDPGLVDQLVK.A              |                 | 2 | 2,6793 | 0,163 | -0,539 |
| 24 | P38159 HNRPG_HUMAN | R.DVYLS#PRDDGYSTKD.S          | S208:           | 2 | 2,6781 | 0,352 | -0,943 |
| 24 | P49023 PAXI_HUMAN  | R.GLEDVRPSVE.S                |                 | 2 | 2,6776 | 0,386 | -0,222 |
| 24 | Q9Y2W1 TR150_HUMAN | E.KGSFS#DTGLGDGK.M            | S379:           | 2 | 2,6743 | 0,274 | -0,633 |
| 24 | P62753 RS6_HUMAN   | R.RLS#S#LRASTKS#E.S           | S235:S236:S244: | 3 | 2,6696 | 0,241 | 0      |
| 24 | P20042 IF2B_HUMAN  | K.NVKFPDEDEILE.K              |                 | 2 | 2,6668 | 0,315 | -0,337 |
| 24 | Q9H2U1 DHX36_HUMAN | R.NRS#YIDRDSE.Y               | S161:           | 2 | 2,6632 | 0,341 | -0,731 |
| 24 | P02545 LMNA_HUMAN  | R.NSNLVGAAHEE.L               |                 | 2 | 2,661  | 0,32  | -0,428 |
| 24 | P10109 ADX_HUMAN   | R.SSEDKITVHFINR.D             |                 | 3 | 2,6596 | 0,13  | 0,112  |
| 24 | P43268 ETV4_HUMAN  | E.NLAFHS#PTTR.I               | S90:            | 2 | 2,6587 | 0,094 | -0,199 |
| 24 | Q5SW79 CE170_HUMAN | K.SIKS#DVPVYLK.R              | S359:           | 2 | 2,6554 | 0,291 | -0,275 |
| 24 | Q9NRY5 F1142_HUMAN | R.NATLSQVLRE.A                |                 | 2 | 2,6546 | 0,193 | -0,431 |
| 24 | Q9UNS1 TIM_HUMAN   | E.DAVGKEPLKAAPK.K             |                 | 2 | 2,6509 | 0,368 | -0,276 |
| 24 | P27635 RL10_HUMAN  | K.VDEFPLCGHM*VSDE.Y           |                 | 2 | 2,649  | 0,202 | -0,296 |
| 24 | Q15942 ZYX_HUMAN   | E.ADDNGCFPLDGHVLCR.K          |                 | 2 | 2,6471 | 0,465 | -0,33  |
| 24 | P51991 ROA3_HUMAN  | D.DHDTVDKIVVQK.Y              |                 | 3 | 2,6464 | 0,292 | 0,327  |
| 24 | P02545 LMNA_HUMAN  | R.LRLS#PS#PTSQR.S             | S390:S392:      | 2 | 2,6458 | 0,257 | -0,348 |
| 24 | P13647 K2C5_HUMAN  | R.ISISTSGGSF.R.N              |                 | 2 | 2,6451 | 0,258 | -0,329 |
| 24 | Q8IYB3 SRRM1_HUMAN | E.ATSTSDILKVPKPEPIPEKPS#PEK.N | S260:           | 3 | 2,6431 | 0,277 | -0,443 |
| 24 | P22626 ROA2_HUMAN  | E.VDAAM*AARPHSIDGR.V          |                 | 3 | 2,6395 | 0,278 | 0      |
| 24 | Q14247 SRC8_HUMAN  | R.MDKNASTFE.D                 |                 | 2 | 2,6368 | 0,308 | -0,117 |
| 24 | Q92890 UFD1_HUMAN  | K.GVEPSPS#PIKPGDIK.R          | S247:           | 2 | 2,6362 | 0,103 | 0      |
| 24 | P62805 H4_HUMAN    | R.DNIQGITKPAIR.R              |                 | 3 | 2,6358 | 0,216 | 0,276  |
| 24 | P23528 COF1_HUMAN  | K.KAVLFCLSE.D                 |                 | 2 | 2,6344 | 0,297 | -0,343 |
| 24 | Q9UK61 CC063_HUMAN | E.LINLIQCR.K                  |                 | 2 | 2,6218 | 0,265 | -0,118 |
| 24 | Q9NR30 DDX21_HUMAN | R.APQVLVLAPTRE.L              |                 | 2 | 2,6214 | 0,349 | -0,283 |
| 24 | P06748 NPM_HUMAN   | K.GPSSVEDIK.A                 |                 | 2 | 2,6204 | 0,353 | -0,131 |
| 24 | P26641 EF1G_HUMAN  | K.KAAAPAPEEEM*DE.C            |                 | 2 | 2,6175 | 0,325 | -0,695 |
| 24 | Q9ULV4 COR1C_HUMAN | E.GKNADPILISLK.H              |                 | 3 | 2,6146 | 0,082 | 0,144  |
| 24 | Q13561 DCTN2_HUMAN | E.HIIVNPNAAYDK.F              |                 | 2 | 2,6135 | 0,199 | -0,54  |
| 24 | Q15773 MLF2_HUMAN  | R.LAIQGPEDS#PSR.Q             | S238:           | 2 | 2,6133 | 0,36  | -0,362 |

|    |                     |                               |            |   |        |       |        |
|----|---------------------|-------------------------------|------------|---|--------|-------|--------|
| 24 | Q96ST2 IWS1_HUMAN   | R.M*NS#TGGQTPRRDLE.K          | S720:      | 3 | 2,6122 | 0,21  | -0,883 |
| 24 | A8K818 A8K818_HUMAN | E.GAEPQAQAALAAPK.K            |            | 2 | 2,6111 | 0,326 | -0,646 |
| 24 | P04264 K2C1_HUMAN   | R.SLDLDSIAAEVK.A              |            | 2 | 2,6106 | 0,348 | -0,562 |
| 24 | Q9UHD8 SEPT9_HUMAN  | K.VPEVPTAPATDAAPK.R           |            | 2 | 2,6066 | 0,258 | 0,083  |
| 24 | P62736 ACTA_HUMAN   | R.HQGVMVGMGQK.D               |            | 2 | 2,6055 | 0,248 | -0,208 |
| 24 | O14545 TRAD1_HUMAN  | R.LDSQPQETS#PELPR.R           | S415:      | 2 | 2,604  | 0,172 | -0,291 |
| 24 | P06748 NPM_HUMAN    | E.LKADKDYHFK.V                |            | 3 | 2,6033 | 0,09  | 0,289  |
| 24 | P62081 RS7_HUMAN    | K.VHLDKAQQNNVE.H              |            | 2 | 2,6031 | 0,333 | -0,7   |
| 24 | Q9H845 ACAD9_HUMAN  | R.AYICAHPLDR.T                |            | 2 | 2,6002 | 0,383 | -0,401 |
| 24 | Q03164 HRX_HUMAN    | E.ALSFPHLHLR.G                |            | 2 | 2,5926 | 0,191 | -0,41  |
| 24 | P63241 IF5A1_HUMAN  | K.VHLVGIDIFTGK.K              |            | 3 | 2,5907 | 0,11  | 0,352  |
| 24 | Q14152 EIF3A_HUMAN  | R.LGDSSLSR.K                  |            | 2 | 2,5865 | 0,261 | 0,365  |
| 24 | Q02790 FKBP4_HUMAN  | K.FSFDLGKGE.V                 |            | 2 | 2,5862 | 0,274 | 0      |
| 24 | Q9Y2W1 TR150_HUMAN  | R.IDIS#PSTFR.K                | S682:      | 2 | 2,5858 | 0,147 | -0,547 |
| 24 | Q9UKV3 ACINU_HUMAN  | K.AQEPPAKLLDD.L               |            | 2 | 2,5851 | 0,199 | -1,012 |
| 24 | Q9Y2X7 GIT1_HUMAN   | R.HTS#KLSRHGS#GADSDYE.N       | S585:S592: | 3 | 2,5846 | 0,182 | -0,273 |
| 24 | Q7Z4Q2 HEAT3_HUMAN  | R.NSIENIANE.T                 |            | 2 | 2,5825 | 0,099 | -0,061 |
| 24 | Q9BQ52 RNZ2_HUMAN   | K.IQTQLNLIHPD.I               |            | 2 | 2,5804 | 0,425 | -0,378 |
| 24 | Q9UJM3 ERRFI_HUMAN  | E.TNGGAQIQPLPADCGISSATEKPSK.T |            | 3 | 2,5782 | 0,085 | -0,623 |
| 24 | P22626 ROA2_HUMAN   | R.GGGNGFPGPGSNFR.G            |            | 2 | 2,577  | 0,358 | -0,354 |
| 24 | Q86SQ0 PHLB2_HUMAN  | R.HKS#HDNVVSLGGLE.G           | S157:      | 2 | 2,5751 | 0,276 | -0,82  |
| 24 | Q9UPN9 TRI33_HUMAN  | R.LKS#DERPVHIK.-              | S1119:     | 2 | 2,5746 | 0,387 | -0,522 |
| 24 | Q15149 PLEC1_HUMAN  | R.KYS#CDRSATVTRLE.D           | S887:      | 3 | 2,5712 | 0,191 | -0,207 |
| 24 | O14974 MYPT1_HUMAN  | R.LAYVAPTIPR.R                |            | 2 | 2,5686 | 0,187 | -0,443 |
| 24 | P48643 TCPE_HUMAN   | K.IAILTCPFPPKPK.T             |            | 3 | 2,5674 | 0,313 | -0,227 |
| 24 | Q16658 FSCN1_HUMAN  | R.YLKGDHAGVLK.A               |            | 3 | 2,5667 | 0,184 | 0,304  |
| 24 | O75531 BAF_HUMAN    | R.DFVAEPM*GEKPVGSLAGIGE.V     |            | 2 | 2,5655 | 0,39  | -0,544 |
| 24 | Q9Y2W1 TR150_HUMAN  | E.KGSFSDTGLGDGK.M             |            | 3 | 2,561  | 0,141 | 0,432  |
| 24 | P49591 SYSC_HUMAN   | E.LIPFVKPAPIEQEPSKK.Q         |            | 2 | 2,5589 | 0,158 | -0,445 |
| 24 | P31629 ZEP2_HUMAN   | R.RPVS#PGKDITAR.R             | S2118:     | 3 | 2,5548 | 0,189 | 0,199  |
| 24 | Q9H0G5 CCD55_HUMAN  | R.EKVIET#PE.N                 | T275:      | 2 | 2,5532 | 0,191 | 0      |
| 24 | Q5W0Q7 USPL1_HUMAN  | K.LAALM*SS#PQSR.T             | S909:      | 2 | 2,5505 | 0,285 | -0,291 |
| 24 | Q86V48 LUZP1_HUMAN  | K.SKNNDLQDNYLSE.Q             |            | 2 | 2,5499 | 0,112 | -0,238 |

|    |                    |                          |                 |   |        |       |        |
|----|--------------------|--------------------------|-----------------|---|--------|-------|--------|
| 24 | P0C0S8 H2A1_HUMAN  | R.AGLQFPVGR.V            |                 | 2 | 2,5489 | 0,245 | -0,194 |
| 24 | Q9Y6M4 KC1G3_HUMAN | R.SNAPITAPTEVEVM*DE.T    |                 | 2 | 2,543  | 0,29  | -0,497 |
| 24 | Q29RF7 PDS5A_HUMAN | R.KRAAVGQES#PGGLE.A      | S1305:          | 2 | 2,5406 | 0,433 | 0,083  |
| 24 | P46734 MP2K3_HUMAN | E.LM*EHPFFTLHK.T         |                 | 3 | 2,5376 | 0,129 | -0,129 |
| 24 | Q6WKZ4 RFIP1_HUMAN | K.GSEGENPLTVPGR.E        |                 | 2 | 2,5352 | 0,161 | -0,279 |
| 24 | P13639 EF2_HUMAN   | K.STLTDSLVC.A            |                 | 2 | 2,534  | 0,368 | 0,217  |
| 24 | Q5TZA2 CROCC_HUMAN | E.SGVQLSGSER.T           |                 | 2 | 2,5322 | 0,126 | 0,06   |
| 24 | Q01082 SPTB2_HUMAN | K.TALPAQSAATLPAR.T       |                 | 2 | 2,5313 | 0,303 | -0,357 |
| 24 | P12955 PEPD_HUMAN  | R.HSSYTCICGSGE.N         |                 | 2 | 2,5299 | 0,382 | -0,27  |
| 24 | P06748 NPM_HUMAN   | K.TPKGPSSVEDIK.A         |                 | 3 | 2,5288 | 0,22  | 0,291  |
| 24 | Q5JWF2 GNAS1_HUMAN | K.VQDIKNNLKE.A           |                 | 3 | 2,5273 | 0,157 | 0,533  |
| 24 | Q07666 KHDR1_HUMAN | R.SSGRS#GSM*DPSGAHPSVR.Q | S18:            | 3 | 2,5273 | 0,251 | 0      |
| 24 | Q15154 PCM1_HUMAN  | R.INFSDLDQR.S            |                 | 2 | 2,5269 | 0,275 | -0,11  |
| 24 | P11388 TOP2A_HUMAN | K.TQM*AEVLPS#PR.G        | S1213:          | 2 | 2,5246 | 0,203 | -0,645 |
| 24 | Q8N1G2 K0082_HUMAN | K.ISAIHILD.V             |                 | 2 | 2,5224 | 0,278 | 0      |
| 24 | Q9Y5K6 CD2AP_HUMAN | K.YFSLKPEEKDE.K          |                 | 2 | 2,5157 | 0,315 | -0,617 |
| 24 | Q9Y2X7 GIT1_HUMAN  | K.SLSS#PTDNLE.L          | S362:           | 2 | 2,5125 | 0,195 | -0,854 |
| 24 | Q9UPN9 TRI33_HUMAN | R.LKS#DERPVHIK.-         | S1119:          | 3 | 2,5071 | 0,183 | -0,13  |
| 24 | P55072 TERA_HUMAN  | R.KGDIFLVR.G             |                 | 2 | 2,5063 | 0,181 | 0,064  |
| 24 | Q9Y2W1 TR150_HUMAN | K.YYLHDDREGE.G           |                 | 2 | 2,5044 | 0,404 | -0,659 |
| 24 | P62753 RS6_HUMAN   | R.RLSS#LRAS#TSKS#E.S     | S236:S240:S244: | 3 | 2,504  | 0,137 | 0      |
| 24 | P12277 KCRB_HUMAN  | E.DRHGGYKPSDE.H          |                 | 3 | 2,5023 | 0,137 | 0,218  |
| 24 | P14625 ENPL_HUMAN  | K.IYFM*AGSSR.K           |                 | 2 | 2,5005 | 0,265 | -1,397 |
| 24 | Q9NWH9 SLTM_HUMAN  | R.IS#SKS#PGHM*VILD.Q     | S550:S553:      | 2 | 2,4996 | 0,12  | -0,469 |
| 24 | Q96T23 RSF1_HUMAN  | K.KTFLDKDAQRLS#PIPE.E    | S594:           | 3 | 2,4991 | 0,16  | -0,283 |
| 24 | P43243 MATR3_HUMAN | R.RDS#FDDRGPVSLNPVLD.Y   | S188:           | 2 | 2,494  | 0,329 | -1,166 |
| 24 | P49591 SYSC_HUMAN  | E.LIPFVKPAPIEQEPSK.K     |                 | 2 | 2,4939 | 0,129 | -0,544 |
| 24 | P46087 NOL1_HUMAN  | K.GPQSLFNAPR.G           |                 | 2 | 2,4938 | 0,185 | -0,337 |
| 24 | Q8NEJ9 NGDN_HUMAN  | R.ALSS#SVIRE.L           | S203:           | 2 | 2,4923 | 0,192 | 0,351  |
| 24 | P30305 MPIP2_HUMAN | R.NITNSQAPDGR.R          |                 | 2 | 2,4858 | 0,265 | -0,832 |
| 24 | P49915 GUAA_HUMAN  | R.KIIGDTFVK.I            |                 | 2 | 2,4847 | 0,082 | -0,06  |
| 24 | P48643 TCPE_HUMAN  | K.IAILTCPFEPKPK.T        |                 | 2 | 2,4753 | 0,257 | -0,606 |
| 24 | Q14686 NCOA6_HUMAN | R.RNS#RTEEPTVASESVE.N    | S2018:          | 2 | 2,4728 | 0,494 | -0,457 |

|    |                     |                           |            |   |        |       |        |
|----|---------------------|---------------------------|------------|---|--------|-------|--------|
| 24 | Q8IWE2 NXP20_HUMAN  | E.LHVAAT#PDKLNK.A         | T381:      | 3 | 2,4707 | 0,332 | 0,066  |
| 24 | Q5SW79 CE170_HUMAN  | R.IDLLAQPR.R              |            | 2 | 2,4683 | 0,28  | -0,066 |
| 24 | Q13427 PPIG_HUMAN   | R.DQS#PFSKIK.Q            | S687:      | 2 | 2,4682 | 0,105 | 0      |
| 24 | Q13442 HAP28_HUMAN  | R.M*QS#LSLNK.-            | S176:      | 2 | 2,4677 | 0,169 | -0,3   |
| 24 | P51858 HDGF_HUMAN   | R.AGDLLDES#PKRPK.E        | S165:      | 2 | 2,4615 | 0,127 | -0,567 |
| 24 | P18858 DNL1_HUMAN   | E.QATTSAQVACLYR.K         |            | 2 | 2,458  | 0,381 | -0,166 |
| 24 | Q96ST2 IWS1_HUMAN   | R.GKHMDFLSDFE.M           |            | 2 | 2,4561 | 0,253 | -0,368 |
| 24 | Q8IZ21 PHAR4_HUMAN  | R.KLS#QRPRTVAE.L          | S628:      | 2 | 2,456  | 0,16  | -0,202 |
| 24 | P22626 ROA2_HUMAN   | K.LFVGGIKE.D              |            | 2 | 2,4511 | 0,168 | 0,071  |
| 24 | O94915 FRYL_HUMAN   | E.LVDLKPLPTAR.R           |            | 2 | 2,4484 | 0,102 | -0,399 |
| 24 | POC7M2 RA1L3_HUMAN  | R.GFAFVTFDDHD.S           |            | 2 | 2,4436 | 0,343 | -0,576 |
| 24 | Q7L2J0 MEPCE_HUMAN  | K.GFQRPVYLFHK.A           |            | 2 | 2,44   | 0,135 | -0,701 |
| 24 | Q6XQN6 PNCB_HUMAN   | R.LRS#PAQYQVVLSE.R        | S513:      | 2 | 2,4377 | 0,3   | -0,311 |
| 24 | Q9Y613 FHOD1_HUMAN  | E.DGDIEEAPGAGGR.R         |            | 2 | 2,4375 | 0,251 | -0,196 |
| 24 | Q96RK0 CIC_HUMAN    | R.TQS#LSALPK.E            | S173:      | 2 | 2,4371 | 0,198 | 0,238  |
| 24 | Q15418 KS6A1_HUMAN  | R.KLPS#TTL.-              | S732:      | 2 | 2,4328 | 0,399 | 0,073  |
| 24 | Q9Y2W1 TR150_HUMAN  | K.SSFSITRE.A              |            | 2 | 2,4288 | 0,144 | 0,132  |
| 24 | P35579 MYH9_HUMAN   | R.GDLPFVVPR.R             |            | 2 | 2,4267 | 0,324 | -0,488 |
| 24 | O96028 NSD2_HUMAN   | R.ASTAASSALGFSK.S         |            | 2 | 2,4266 | 0,272 | -0,306 |
| 24 | Q96EP5 DAZP1_HUMAN  | K.IFVGGIPHNCGE.T          |            | 2 | 2,4266 | 0,243 | -0,094 |
| 24 | Q15942 ZYX_HUMAN    | E.ADDNGCFPLDGHVLCRK.C     |            | 3 | 2,4264 | 0,135 | -0,371 |
| 24 | Q92890 UFD1_HUMAN   | K.GVEPS#PS#PIKPGDIKR.G    | S245:S247: | 3 | 2,4219 | 0,088 | 0      |
| 24 | Q8TB45 DEPD6_HUMAN  | E.THDS#PFCLR.K            | S244:      | 2 | 2,4176 | 0,134 | -0,402 |
| 24 | Q9NYF8 BCLF1_HUMAN  | R.IDIS#PSTLR.K            | S658:      | 2 | 2,4171 | 0,185 | -0,338 |
| 24 | Q05D32 CTSL2_HUMAN  | D.IDNNLITSTPR.A           |            | 2 | 2,4171 | 0,292 | -0,196 |
| 24 | P05455 LA_HUMAN     | K.TKFAS#DDEHDE.H          | S366:      | 2 | 2,4145 | 0,19  | -0,533 |
| 24 | A8K333 A8K333_HUMAN | K.KS#TSPKKA VEPTVDLLGLD.G | S205:      | 3 | 2,4138 | 0,214 | -0,44  |
| 24 | P26373 RL13_HUMAN   | R.SKLLIFPR.K              |            | 2 | 2,4131 | 0,179 | -0,125 |
| 24 | Q29RF7 PDS5A_HUMAN  | R.AAVGQES#PGGLE.A         | S1305:     | 2 | 2,4114 | 0,199 | -0,408 |
| 24 | Q96L14 C170L_HUMAN  | R.SGDPRPQAAEPPDHLTITR.R   |            | 3 | 2,4106 | 0,155 | -0,178 |
| 24 | Q96RK0 CIC_HUMAN    | E.IQLPLPPGK.R             |            | 2 | 2,4091 | 0,28  | -0,127 |
| 24 | Q14444 CAPR1_HUMAN  | R.LNQDQLDAVSKYQE.V        |            | 2 | 2,4076 | 0,134 | -0,222 |
| 24 | Q8N5Y2 MS3L1_HUMAN  | R.SSS#PIPLTPSKE.G         | S400:      | 2 | 2,4071 | 0,191 | -0,461 |



|    |                     |                         |       |   |        |       |        |
|----|---------------------|-------------------------|-------|---|--------|-------|--------|
| 24 | P35221 CTNA1_HUMAN  | K.KHVNPVQALSE.F         |       | 2 | 2,4064 | 0,202 | -0,998 |
| 24 | Q9Y2W1 TR150_HUMAN  | R.ERS#PALKSPLQSVVVR.R   | S248: | 3 | 2,4062 | 0,162 | -0,396 |
| 24 | P48506 GSH1_HUMAN   | R.LVLSGKVLLE.T          |       | 2 | 2,4062 | 0,177 | -0,449 |
| 24 | Q86SQ0 PHLB2_HUMAN  | K.SHDNVYSLGGLE.G        |       | 2 | 2,4045 | 0,153 | -0,378 |
| 24 | P35269 T2FA_HUMAN   | E.ASSALFM*AK.K          |       | 2 | 2,4038 | 0,214 | -0,065 |
| 24 | P49902 5NTC_HUMAN   | E.M*ESPLATR.N           |       | 2 | 2,3909 | 0,141 | -0,066 |
| 24 | Q9NX55 HYPK_HUMAN   | R.VTDYAEKE.I            |       | 2 | 2,3866 | 0,254 | -0,338 |
| 24 | Q58FF8 H90B2_HUMAN  | K.YIDQEELNK.T           |       | 2 | 2,3815 | 0,187 | -0,318 |
| 24 | P51114 FXR1_HUMAN   | K.CTVDPEDLRE.A          |       | 2 | 2,3782 | 0,186 | -0,641 |
| 24 | ##Q14831 GRM7_HUMAN | D.FDIT#RDK.R            | T652: | 2 | 2,3777 | 0,088 | 0      |
| 24 | Q14914 LTB4D_HUMAN  | K.HFVGYPTNSDFE.L        |       | 2 | 2,3768 | 0,275 | -0,432 |
| 24 | O60524 SDCG1_HUMAN  | K.KLPS#DSGDLE.A         | S831: | 2 | 2,3737 | 0,343 | -0,214 |
| 24 | Q13442 HAP28_HUMAN  | R.M*QSL#LNK.-           | S178: | 2 | 2,3733 | 0,146 | -0,18  |
| 24 | P29374 ARI4A_HUMAN  | E.HFGTPVIAK.K           |       | 2 | 2,3722 | 0,16  | -1,509 |
| 24 | Q14671 PUM1_HUMAN   | E.YVLSS#SPGDSCLRK.G     | S228: | 2 | 2,3696 | 0,197 | -0,148 |
| 24 | P08670 VIME_HUMAN   | R.QVDQLTNDKARVE.V       |       | 2 | 2,3692 | 0,379 | -0,644 |
| 24 | Q96ST2 IWS1_HUMAN   | R.GKHM*DFLSDFE.M        |       | 2 | 2,3672 | 0,291 | -0,636 |
| 24 | P46013 KI67_HUMAN   | E.KLDLLGNLPGSK.R        |       | 2 | 2,3649 | 0,203 | -0,292 |
| 24 | Q14151 SAFB2_HUMAN  | K.SKGEPVISVK.T          |       | 2 | 2,3618 | 0,124 | -0,234 |
| 24 | Q8IWC1 MA7D3_HUMAN  | K.TYFNGDLKNFR.Q         |       | 2 | 2,3613 | 0,169 | -0,532 |
| 24 | Q9NZT2 OGFR_HUMAN   | R.S#VEPQDAGPLER.S       | S349: | 2 | 2,3565 | 0,093 | -0,62  |
| 24 | P09429 HMGB1_HUMAN  | K.MSSYAFFVQTCRE.E       |       | 2 | 2,3559 | 0,288 | -0,375 |
| 24 | P13645 K1C10_HUMAN  | K.VTMQNLNDR.L           |       | 2 | 2,35   | 0,182 | -0,336 |
| 24 | Q14103 HNRPD_HUMAN  | K.DLKDYFSKFE.V          |       | 3 | 2,3495 | 0,129 | 0      |
| 24 | O43237 DC1L2_HUMAN  | E.DFIVKPPVR.K           |       | 2 | 2,3488 | 0,194 | -0,342 |
| 24 | Q15185 TEBP_HUMAN   | E.IDLFHCIDPNSK.H        |       | 2 | 2,3475 | 0,193 | -0,388 |
| 24 | O43491 E41L2_HUMAN  | R.GLSPAQADSQFLE.N       |       | 2 | 2,345  | 0,29  | -0,269 |
| 24 | Q86YZ3 HORN_HUMAN   | R.GPYESGSGHSSGLGHR.E    |       | 3 | 2,3396 | 0,113 | -0,923 |
| 24 | O60927 PP1RB_HUMAN  | R.RSS#KCCCIYE.K         | S58:  | 2 | 2,3368 | 0,178 | -0,423 |
| 24 | Q9Y613 FHOD1_HUMAN  | E.DGDIEEAPGAGRR.E       |       | 3 | 2,3353 | 0,227 | -0,457 |
| 24 | P43307 SSRA_HUMAN   | E.TLNQINKAS#PR.R        | S268: | 2 | 2,3344 | 0,347 | -0,369 |
| 24 | Q7Z7K0 CC068_HUMAN  | K.NSGVLM*VVK.C          |       | 2 | 2,3333 | 0,146 | 0      |
| 24 | Q00341 VIGLN_HUMAN  | E.AKDCDPGS#PRRCIIISGR.K | S944: | 3 | 2,3311 | 0,389 | -0,619 |

|    |                    |                          |              |   |        |       |        |
|----|--------------------|--------------------------|--------------|---|--------|-------|--------|
| 24 | Q99807 COQ7_HUMAN  | E.HHDIGLDHDAE.L          |              | 3 | 2,3293 | 0,141 | 0,073  |
| 24 | Q15424 SAFB1_HUMAN | R.KFDFDACNEVPPAPK.E      |              | 2 | 2,3287 | 0,093 | -0,563 |
| 24 | Q15424 SAFB1_HUMAN | K.SKGVVPVISVK.T          |              | 2 | 2,3242 | 0,227 | -0,06  |
| 24 | Q8IUD2 RB6I2_HUMAN | R.SVGKVEPSSQSPGR.S       |              | 3 | 2,3228 | 0,183 | -0,065 |
| 24 | P14625 ENPL_HUMAN  | K.IYFMAGSSR.K            |              | 2 | 2,3219 | 0,365 | -0,236 |
| 24 | Q7RTX8 HIN1L_HUMAN | R.TPS#QIIR.K             | S415:        | 2 | 2,3165 | 0,083 | -0,136 |
| 24 | P38571 LICH_HUMAN  | E.DGYILCLNR.I            |              | 2 | 2,3106 | 0,264 | -0,326 |
| 24 | Q15032 R3HD1_HUMAN | R.DSS#QEYTDSTGIDLHE.F    | S142:        | 2 | 2,3096 | 0,238 | -0,065 |
| 24 | P53992 SC24C_HUMAN | E.FKHDDRLNEE.S           |              | 3 | 2,3091 | 0,128 | 0,07   |
| 24 | P35221 CTNA1_HUMAN | K.RAS#QKKHVNPVQALSE.F    | S886:        | 3 | 2,3071 | 0,163 | -0,391 |
| 24 | O75937 DNJC8_HUMAN | R.ALDVIQAGKEYVE.H        |              | 2 | 2,3062 | 0,317 | -0,425 |
| 24 | Q02790 FKBP4_HUMAN | K.DKFSFDLKG.G            |              | 2 | 2,3057 | 0,287 | -0,462 |
| 24 | P09960 LKHA4_HUMAN | K.ASM*HPVTAMLVGK.D       |              | 3 | 2,305  | 0,218 | 0,135  |
| 24 | Q66GS9 CP135_HUMAN | R.HGLATPPLSSTLR.S        |              | 2 | 2,3035 | 0,226 | -0,271 |
| 24 | Q9H1B7 EAP1_HUMAN  | K.TVALSAKE.A             |              | 2 | 2,3034 | 0,129 | 0,223  |
| 24 | P38398 BRCA1_HUMAN | E.LSRS#PS#PFTHTHLAQGYR.R | S1189:S1191: | 3 | 2,303  | 0,224 | -0,496 |
| 24 | O15446 RPA34_HUMAN | E.QINTEPLEDTVLS#PTKK.R   | S285:        | 3 | 2,3024 | 0,209 | -0,826 |
| 24 | P35269 T2FA_HUMAN  | K.YGIVLKE.F              |              | 2 | 2,3011 | 0,099 | 0,148  |
| 24 | P37108 SRP14_HUMAN | E.GFEPADNKCLR.A          |              | 2 | 2,2993 | 0,216 | -0,516 |
| 24 | Q5TON5 FBP1L_HUMAN | R.RHS#SDINHVLVTQGR.E     | S488:        | 3 | 2,2928 | 0,223 | -0,538 |
| 24 | Q92896 GSLG1_HUMAN | K.CLFNHKFEE.S            |              | 3 | 2,2896 | 0,155 | 0,149  |
| 24 | P29374 ARI4A_HUMAN | R.KILGQSS#PE.K           | S864:        | 2 | 2,2885 | 0,21  | -0,235 |
| 24 | P22626 ROA2_HUMAN  | K.KLFVGGIKEDTEE.H        |              | 2 | 2,2879 | 0,117 | -0,083 |
| 24 | P51946 CCNH_HUMAN  | E.LALNVITK.K             |              | 2 | 2,2872 | 0,16  | 0,07   |
| 24 | P46013 KI67_HUMAN  | E.GFKAGDKTLT#PR.K        | T391:        | 3 | 2,2843 | 0,086 | 0,2    |
| 24 | O00299 CLIC1_HUMAN | R.YLSNAYAREE.F           |              | 2 | 2,2837 | 0,355 | -0,201 |
| 24 | Q04637 IF4G1_HUMAN | R.IRDPNQGGKDITEE.I       |              | 3 | 2,2807 | 0,187 | 0      |
| 24 | P46087 NOL1_HUMAN  | E.GEALLPIER.A            |              | 2 | 2,2757 | 0,118 | -0,244 |
| 24 | Q86V48 LUZP1_HUMAN | K.NNDLQDNYLSE.Q          |              | 2 | 2,2749 | 0,137 | -0,276 |
| 24 | P10809 CH60_HUMAN  | R.VTDALNATRAAVEE.G       |              | 2 | 2,2672 | 0,396 | -0,334 |
| 24 | P81605 DCD_HUMAN   | K.ENAGEDPGLAR.Q          |              | 2 | 2,2653 | 0,333 | -0,324 |
| 24 | Q15165 PON2_HUMAN  | E.NSLLHLK.T              |              | 2 | 2,2606 | 0,096 | 0,296  |
| 24 | P13645 K1C10_HUMAN | K.DAEAWFNEK.S            |              | 2 | 2,2573 | 0,278 | -0,33  |

|    |                    |                     |            |   |        |       |        |
|----|--------------------|---------------------|------------|---|--------|-------|--------|
| 24 | Q8TBA6 GOGA5_HUMAN | R.KKS#EPDDELLFD.F   | S116:      | 2 | 2,2571 | 0,123 | -0,563 |
| 24 | O43395 PRPF3_HUMAN | R.IPRFEEVEEEPE.V    |            | 2 | 2,2569 | 0,139 | -0,568 |
| 24 | P06748 NPM_HUMAN   | E.LKADKDYHFK.V      |            | 2 | 2,2554 | 0,109 | -0,482 |
| 24 | Q8IUD2 RB6I2_HUMAN | R.SVGKVEPSSQSPGR.S  |            | 2 | 2,2479 | 0,2   | -0,517 |
| 24 | P19525 E2AK2_HUMAN | K.TKCLFIQM*E.F      |            | 2 | 2,2413 | 0,17  | -0,412 |
| 24 | P49815 TSC2_HUMAN  | R.IQTSLSASLGSADEN   |            | 2 | 2,2386 | 0,2   | -0,412 |
| 24 | Q13794 APR_HUMAN   | K.NAQPS#PARAPAELE.V | S13:       | 2 | 2,2379 | 0,193 | -0,398 |
| 24 | P02545 LMNA_HUMAN  | R.LRLS#PSPTSQR.S    | S390:      | 2 | 2,2377 | 0,264 | 0,092  |
| 24 | P49902 5NTC_HUMAN  | R.TSVDFKDTDYKR.H    |            | 3 | 2,2314 | 0,288 | 0,31   |
| 24 | Q14978 NOLC1_HUMAN | K.LQT#PNT#FPK.R     | T607:T610: | 2 | 2,2311 | 0,093 | -0,708 |
| 24 | P29966 MARCS_HUMAN | K.RFS#FKKS#FK.L     | S159:S163: | 2 | 2,2267 | 0,094 | -0,091 |
| 24 | Q14241 ELOA1_HUMAN | K.SLGSLPKVEE.T      |            | 2 | 2,2229 | 0,174 | -0,23  |
| 24 | Q641Q2 FA21A_HUMAN | K.AKS#PM*FPALGE.A   | S1169:     | 2 | 2,222  | 0,121 | -0,098 |
| 24 | Q99417 MYCBP_HUMAN | K.AKLAQYEPPEE.K     |            | 2 | 2,2204 | 0,219 | -0,348 |
| 24 | O94909 K0819_HUMAN | R.RPDS#PTRPTLR.G    | S789:      | 3 | 2,2185 | 0,21  | 0,133  |
| 24 | Q86V81 THOC4_HUMAN | R.SLGTADVHFE.R      |            | 2 | 2,2169 | 0,189 | -0,227 |
| 24 | P33176 KINH_HUMAN  | R.SHSIFLINVK.Q      |            | 2 | 2,2143 | 0,161 | -0,632 |
| 24 | Q8NEJ9 NGDN_HUMAN  | R.LVPVHYDETEAERE.K  |            | 3 | 2,2124 | 0,387 | -0,542 |
| 24 | P08670 VIME_HUMAN  | R.QVDQLTNDKAR.V     |            | 2 | 2,2122 | 0,305 | -0,284 |
| 24 | P31939 PUR9_HUMAN  | K.TLHPAVHAGILAR.N   |            | 3 | 2,2097 | 0,237 | -0,067 |
| 24 | Q7Z4V5 HDGR2_HUMAN | R.CGSSDLHDSVRE.G    |            | 3 | 2,2088 | 0,194 | 0,123  |
| 24 | Q53F19 CQ085_HUMAN | K.SRLDNLPSLQIE.V    |            | 2 | 2,2077 | 0,083 | -0,44  |
| 24 | Q13242 SFRS9_HUMAN | R.GSPHYFSPFRPY.-    |            | 2 | 2,2076 | 0,312 | -0,252 |
| 24 | Q00796 DHSO_HUMAN  | R.VAIEPGAPRENDE.F   |            | 2 | 2,2067 | 0,26  | -0,349 |
| 24 | Q96SB4 SRPK1_HUMAN | K.MTQEKLEE.S        |            | 2 | 2,2062 | 0,24  | -0,182 |
| 24 | Q9UHB7 AFF4_HUMAN  | R.TIS#QSSSLK.S      | S836:      | 2 | 2,2056 | 0,128 | -0,118 |
| 24 | Q92609 TBCD5_HUMAN | K.DSFFSNISR.S       |            | 2 | 2,2032 | 0,26  | -0,341 |
| 24 | Q9H6Z4 RANB3_HUMAN | E.EKPAIAPPVVFQK.D   |            | 2 | 2,2004 | 0,109 | -0,466 |
| 24 | P40938 RFC3_HUMAN  | R.IMCILRE.L         |            | 2 | 2,1991 | 0,182 | 0,065  |
| 24 | Q9H0G5 CCD55_HUMAN | R.AKDKFLDQE.R       |            | 2 | 2,1944 | 0,249 | -0,335 |
| 24 | Q13501 SQSTM_HUMAN | R.LTPVS#PESSSTEE.K  | S272:      | 2 | 2,1911 | 0,196 | -0,507 |
| 24 | P22626 ROA2_HUMAN  | E.EHHLRDYFEE.Y      |            | 2 | 2,1856 | 0,309 | -0,621 |
| 24 | Q14493 SLBP_HUMAN  | K.LLINDFGR.E        |            | 2 | 2,1849 | 0,085 | -0,129 |

|    |                     |                           |                    |   |        |       |        |
|----|---------------------|---------------------------|--------------------|---|--------|-------|--------|
| 24 | P50552 VASP_HUMAN   | E.MNAMLAR.R               |                    | 2 | 2,1801 | 0,261 | -0,076 |
| 24 | Q7Z3C6 ATG9A_HUMAN  | R.SASYPCAAPRPGAPE.T       |                    | 2 | 2,1696 | 0,134 | -0,239 |
| 24 | Q15942 ZYX_HUMAN    | R.VVALDKNFHMK.C           |                    | 3 | 2,1693 | 0,293 | -0,14  |
| 24 | P62753 RS6_HUMAN    | R.RRLSS#LRAST#SKS#E.S     | S236:T241:S244:    | 2 | 2,1682 | 0,33  | -0,537 |
| 24 | Q04637 IF4G1_HUMAN  | R.SFS#KEVEER.S            | S1188:             | 2 | 2,1639 | 0,092 | -0,615 |
| 24 | P08670 VIME_HUMAN   | R.QVDQLTNDKAR.V           |                    | 3 | 2,1637 | 0,162 | -0,213 |
| 24 | P05067 A4_HUMAN     | K.AVIQHFQE.K              |                    | 2 | 2,163  | 0,153 | -0,188 |
| 24 | Q9UHI6 DDX20_HUMAN  | R.RSS#FRLQTE.A            | S743:              | 2 | 2,1617 | 0,38  | -0,405 |
| 24 | Q53F19 CQ085_HUMAN  | R.LDNLPSLQIE.V            |                    | 2 | 2,1611 | 0,231 | -0,321 |
| 24 | Q9Y5W9 SNX11_HUMAN  | K.SCCFLPR.S               |                    | 2 | 2,1474 | 0,205 | -0,065 |
| 24 | O15013 ARHGA_HUMAN  | R.GRS#FIR.T               | S373:              | 2 | 2,144  | 0,181 | 0,15   |
| 24 | Q8NEY8 PPHLN_HUMAN  | R.DNTFFRES#PVGR.K         | S133:              | 3 | 2,1405 | 0,089 | 0,122  |
| 24 | Q9Y3T9 NOC2L_HUMAN  | R.GILRPLSTR.H             |                    | 2 | 2,1395 | 0,227 | -0,12  |
| 24 | P23528 COF1_HUMAN   | K.AVLFLCLSE.D             |                    | 2 | 2,1389 | 0,343 | -0,13  |
| 24 | Q9BST9 RTKN_HUMAN   | R.TFS#LDAVPPDHSPR.A       | S520:              | 2 | 2,1364 | 0,211 | -0,603 |
| 24 | P13639 EF2_HUMAN    | K.ARPFPDLAE.D             |                    | 2 | 2,1362 | 0,184 | -0,114 |
| 24 | P30153 2AAA_HUMAN   | R.YM*VADKFTE.L            |                    | 2 | 2,1354 | 0,223 | -0,218 |
| 24 | Q71RC2 LARP4_HUMAN  | R.CIVILRE.I               |                    | 2 | 2,134  | 0,156 | 0      |
| 24 | Q04637 IF4G1_HUMAN  | R.FSALQQAVPTESDNR.R.V     |                    | 3 | 2,1307 | 0,127 | -0,286 |
| 24 | Q9H089 LSG1_HUMAN   | K.FGHSSFDQAE.I            |                    | 2 | 2,1253 | 0,25  | -0,108 |
| 24 | P35030 TRY3_HUMAN   | D.TLDNDIM*LIK.L           |                    | 2 | 2,125  | 0,156 | -0,102 |
| 24 | P34932 HSP74_HUMAN  | K.VKTSTVDLPIE.N           |                    | 2 | 2,1226 | 0,106 | -0,304 |
| 24 | P56277 MTCPA_HUMAN  | R.SVVCSGFEKEEEE.N         |                    | 2 | 2,1223 | 0,228 | -0,16  |
| 24 | P19105 MLRM_HUMAN   | R.ATS#NVFAM*FD.Q          | S19:               | 2 | 2,1184 | 0,337 | -0,407 |
| 24 | Q9Y2W2 WBP11_HUMAN  | E.LTPLQAM*M*LR.M          |                    | 2 | 2,1159 | 0,188 | -0,304 |
| 24 | Q9UPN3 MACF1_HUMAN  | R.RRM*LS#SSDAITQE.F       | S1376:             | 2 | 2,115  | 0,208 | -0,46  |
| 24 | Q6VN20 RBP10_HUMAN  | K.SQDSYPGSPSL#PR.H        | S369:              | 2 | 2,1123 | 0,268 | -0,235 |
| 24 | P35611 ADDA_HUMAN   | K.SRSPGS#PVGE.G           | S358:              | 2 | 2,1074 | 0,137 | 0,348  |
| 24 | Q7RTQ0 Q7RTQ0_HUMAN | E.SGPDGGEEDGTGSLKR.S      |                    | 3 | 2,1056 | 0,305 | -0,117 |
| 24 | Q9UQ35 SRRM2_HUMAN  | R.S#S#SPVTELASRS#PIRQDR.G | S1101:S1102:S1112: | 3 | 2,1046 | 0,288 | -0,575 |
| 24 | Q9UKM9 RALY_HUMAN   | E.AGLPQGEAR.T             |                    | 2 | 2,1034 | 0,155 | 0,068  |
| 24 | Q02952 AKA12_HUMAN  | E.ALICVGSS#K.K            | S688:              | 2 | 2,1003 | 0,172 | -0,18  |
| 24 | O15446 RPA34_HUMAN  | K.QEQINTEPLEDTVLSPT#KKR.K | T287:              | 3 | 2,0983 | 0,091 | -0,456 |

|    |                    |                         |                 |   |        |       |        |
|----|--------------------|-------------------------|-----------------|---|--------|-------|--------|
| 24 | Q5SW79 CE170_HUMAN | R.TLPQLPNEEKSLE.S       |                 | 2 | 2,0948 | 0,276 | -0,326 |
| 24 | Q01518 CAP1_HUMAN  | R.ATKKEPAVLE.L          |                 | 2 | 2,0938 | 0,232 | -0,112 |
| 24 | Q09666 AHNK_HUMAN  | K.LQGGVSLASK.K          |                 | 2 | 2,0905 | 0,312 | -0,117 |
| 24 | Q02952 AKA12_HUMAN | E.GVTPWASFKK.M          |                 | 2 | 2,0883 | 0,176 | -0,327 |
| 24 | P15170 ERF3A_HUMAN | K.SFVPMN*IGGASQAD.L     |                 | 2 | 2,0863 | 0,102 | -0,346 |
| 24 | Q14686 NCOA6_HUMAN | R.RNS#RTEEPTVASE.S      | S2018:          | 2 | 2,0855 | 0,387 | -0,549 |
| 24 | P51003 PAPOA_HUMAN | K.IPTPIVGVK.R           |                 | 2 | 2,0837 | 0,093 | -0,528 |
| 24 | A1L390 PKHG3_HUMAN | E.NM*VEPPLSGR.V         |                 | 2 | 2,0807 | 0,148 | 0,109  |
| 24 | O60841 IF2P_HUMAN  | K.KIPQQLS.S             |                 | 2 | 2,078  | 0,083 | -0,071 |
| 24 | P27824 CALX_HUMAN  | K.AEEDILNRSR.N          |                 | 3 | 2,0778 | 0,131 | 0,064  |
| 24 | Q9Y2I7 FYV1_HUMAN  | K.TYSLAFKQE.L           |                 | 2 | 2,0776 | 0,29  | -0,337 |
| 24 | Q6P0N0 CN106_HUMAN | E.NQVAM*SFYK.H          |                 | 2 | 2,0753 | 0,122 | -0,553 |
| 24 | P62753 RS6_HUMAN   | R.RLS#S#LRSTS#KSE.S     | S235:S236:S242: | 3 | 2,0753 | 0,17  | -0,11  |
| 24 | Q8NCF5 NF2IP_HUMAN | D.NSPLSPPS#PR.T         | S204:           | 2 | 2,0741 | 0,083 | 0      |
| 24 | Q7Z4V5 HDGR2_HUMAN | R.ARGDS#EALDEES.-       | S664:           | 2 | 2,0709 | 0,134 | -0,629 |
| 24 | Q08170 SFRS4_HUMAN | K.SKPNLPSE.S            |                 | 2 | 2,0706 | 0,089 | -0,07  |
| 24 | Q9BQI3 E2AK1_HUMAN | K.YTTNLVIRE.S           |                 | 2 | 2,0637 | 0,213 | -0,33  |
| 24 | Q9NRA8 4ET_HUMAN   | R.RNDS#YTEEEPE.W        | S213:           | 2 | 2,0623 | 0,111 | -0,253 |
| 24 | Q9UPN3 MACF1_HUMAN | R.RMLSSSDAITQE.F        |                 | 2 | 2,0619 | 0,084 | -0,365 |
| 24 | Q14677 EPN4_HUMAN  | K.SAFPFSDKLG.E.L        |                 | 2 | 2,0589 | 0,233 | -0,611 |
| 24 | Q8N1G4 LRC47_HUMAN | K.KTSDLFLE.V            |                 | 2 | 2,058  | 0,086 | -0,232 |
| 24 | P62753 RS6_HUMAN   | R.RLS#S#LRAS#SKSE.S     | S235:S236:T241: | 3 | 2,0562 | 0,282 | 0      |
| 24 | Q92733 PRCC_HUMAN  | K.TILQGSSE.G            |                 | 2 | 2,0559 | 0,16  | 0,292  |
| 24 | Q9P2I0 CPSF2_HUMAN | D.SFNATYVQPR.R          |                 | 2 | 2,0541 | 0,3   | -0,413 |
| 24 | P20042 IF2B_HUMAN  | K.NVKFPDEDE.I           |                 | 2 | 2,0541 | 0,163 | -0,112 |
| 24 | O43164 PJA2_HUMAN  | R.KLISSSQVDQE.T         |                 | 2 | 2,051  | 0,142 | -0,692 |
| 24 | P20020 AT2B1_HUMAN | K.SLDKDLLLSGTHVM*E.G    |                 | 2 | 2,0508 | 0,183 | -0,413 |
| 24 | O95347 SMC2_HUMAN  | K.SQSAFDLK.K            |                 | 2 | 2,0479 | 0,14  | 0,204  |
| 24 | Q96ST2 IWS1_HUMAN  | K.HMDFLSDFE.M           |                 | 2 | 2,0436 | 0,2   | -0,428 |
| 24 | Q9NZJ5 E2AK3_HUMAN | E.DLDFPGKTVLR.Q         |                 | 2 | 2,0373 | 0,159 | -0,58  |
| 24 | O95292 VAPB_HUMAN  | K.FM*VQSM*FAPDTSDEM*E.A |                 | 2 | 2,0372 | 0,457 | -0,194 |
| 24 | P49736 MCM2_HUMAN  | R.GNDPLTSS#PGR.S        | S27:            | 2 | 2,0344 | 0,196 | -0,207 |
| 24 | Q9Y2W1 TR150_HUMAN | K.YYLHDDRE.G            |                 | 2 | 2,0342 | 0,264 | -0,549 |

|    |                     |                       |       |   |        |       |        |
|----|---------------------|-----------------------|-------|---|--------|-------|--------|
| 24 | Q96MU7 YTDC1_HUMAN  | R.GIS#PIVFDR.S        | S308: | 2 | 2,0336 | 0,1   | -0,338 |
| 24 | Q641Q2 FA21A_HUMAN  | K.RSRPTS#FADE.L       | S288: | 2 | 2,0302 | 0,336 | -0,196 |
| 24 | Q96FF9 CDCA5_HUMAN  | R.KS#GSELPSILPE.I     | S33:  | 2 | 2,0298 | 0,108 | -0,456 |
| 24 | B2RD09 B2RD09_HUMAN | R.VEVPSSASQAK.A       |       | 2 | 2,0288 | 0,235 | -0,111 |
| 24 | P07602 SAP_HUMAN    | K.LVGYLDR.N           |       | 2 | 2,0282 | 0,344 | 0,292  |
| 24 | Q96T37 RBM15_HUMAN  | R.SLS#PGGAALGYR.D     | S294: | 2 | 2,0281 | 0,171 | 0,993  |
| 24 | Q86YS7 K0528_HUMAN  | E.IIGSPIPEPR.Q        |       | 2 | 2,0277 | 0,167 | -0,226 |
| 24 | Q6P6C2 ALKB5_HUMAN  | R.SVLLPTHR.R          |       | 2 | 2,025  | 0,214 | -0,066 |
| 24 | P13645 K1C10_HUMAN  | R.LAADDFR.L           |       | 2 | 2,0242 | 0,253 | 0,604  |
| 24 | Q8IYB5 SMAP1_HUMAN  | K.KAAEPTVDLLGLD.G     |       | 2 | 2,0238 | 0,278 | -0,545 |
| 24 | P09661 RU2A_HUMAN   | K.GLLQSQIPGR.E        |       | 2 | 2,0142 | 0,144 | -0,542 |
| 24 | Q15773 MLF2_HUMAN   | R.LAIQGPEDS#PSRQSR.R  | S238: | 2 | 2,0089 | 0,405 | 0,496  |
| 24 | Q9Y478 AAKB1_HUMAN  | K.ILM*DSPEDADLFHSEE.I |       | 2 | 2,006  | 0,165 | -0,393 |
| 24 | Q15424 SAFB1_HUMAN  | R.SVVSFDKVKKEPR.K     |       | 3 | 2,0046 | 0,33  | 0,131  |
| 24 | Q14257 RCN2_HUMAN   | E.LHYPLGER.R          |       | 2 | 2,0018 | 0,289 | 0,062  |
| 24 | Q6LC90 Q6LC90_HUMAN | K.EKPGPEDKLEHQ.-      |       | 2 | 2      | 0,112 | -0,347 |
| 24 | Q9UNH7 SNX6_HUMAN   | K.SSLPNFKQNE.F        |       | 2 | 1,9923 | 0,223 | -0,21  |
| 24 | Q9Y2W1 TR150_HUMAN  | K.GSFS#DTGLGDGK.M     | S379: | 2 | 1,9921 | 0,262 | 0      |
| 24 | B2RD09 B2RD09_HUMAN | R.AAAGACTPPCT.-       |       | 2 | 1,988  | 0,285 | -0,113 |
| 24 | A9CQZ4 A9CQZ4_HUMAN | R.QKFCGM*FCPVEGSSE.N  |       | 2 | 1,9863 | 0,13  | -0,48  |
| 24 | P09874 PARP1_HUMAN  | R.KGDEVDGVDE.V        |       | 2 | 1,9811 | 0,226 | -0,23  |
| 24 | Q9Y2W1 TR150_HUMAN  | R.RIDIS#PSTFR.K       | S682: | 2 | 1,9777 | 0,094 | -0,671 |
| 24 | P22234 PUR6_HUMAN   | K.ACGNFGIPCELR.V      |       | 2 | 1,9747 | 0,102 | -0,525 |
| 24 | P35580 MYH10_HUMAN  | K.LDPLHLVD.Q          |       | 2 | 1,9666 | 0,099 | 0      |
| 24 | P45974 UBP5_HUMAN   | E.HLSHFGIDM*LK.M      |       | 2 | 1,9645 | 0,214 | -0,093 |
| 24 | Q8TCG1 K1524_HUMAN  | K.DLQITCDSLKQIE.T     |       | 2 | 1,9638 | 0,138 | -1,819 |
| 24 | P55010 IF5_HUMAN    | K.LCTFILK.N           |       | 2 | 1,9579 | 0,134 | -0,068 |
| 24 | Q15185 TEBP_HUMAN   | K.LTFSCLGGSDFNK.H     |       | 2 | 1,9545 | 0,297 | -0,338 |
| 24 | Q9Y3D7 TIM16_HUMAN  | R.SAAASNLSGLSLQE.A    |       | 2 | 1,9544 | 0,215 | -0,181 |
| 24 | P06493 CDC2_HUMAN   | K.TTGQVVAMK.K         |       | 2 | 1,9538 | 0,315 | 0,13   |
| 24 | Q9NYF8 BCLF1_HUMAN  | K.SQEEPKDTFE.H        |       | 2 | 1,9514 | 0,112 | -0,504 |
| 24 | A6NHR9 SMHD1_HUMAN  | E.KLGM*TPIR.K         |       | 2 | 1,9499 | 0,156 | -0,196 |
| 24 | Q8IWC1 MA7D3_HUMAN  | K.TYFNGDLK.N          |       | 2 | 1,9493 | 0,138 | 0,127  |

|    |                     |                     |        |   |        |       |        |
|----|---------------------|---------------------|--------|---|--------|-------|--------|
| 24 | Q8N6T3 ARFG1_HUMAN  | E.TFGSAEPTK.T       |        | 2 | 1,945  | 0,181 | 0      |
| 24 | Q8NEY8 PPHLN_HUMAN  | R.DNTFFRES#PVGR.K   | S133:  | 2 | 1,9441 | 0,105 | -0,486 |
| 24 | Q14103 HNRPD_HUMAN  | K.DYFSKFGV.V        |        | 2 | 1,9411 | 0,154 | -0,184 |
| 24 | Q92994 TF3B_HUMAN   | K.INYSVLR.G         |        | 2 | 1,9383 | 0,126 | 0,282  |
| 24 | Q7Z4S6 KI21A_HUMAN  | E.KKIEPS#PVTR.R     | S1239: | 2 | 1,9351 | 0,168 | 0,092  |
| 24 | P27695 APEX1_HUMAN  | K.NAGFTPQER.Q       |        | 2 | 1,9344 | 0,209 | 0      |
| 24 | Q9Y2S6 CCD72_HUMAN  | E.MDEEDKAFK.Q       |        | 2 | 1,9273 | 0,249 | 0      |
| 24 | P26373 RL13_HUMAN   | R.TIGISVDPR.R       |        | 2 | 1,9267 | 0,162 | 0,064  |
| 24 | Q7L014 DDX46_HUMAN  | K.GFKFDETE.Q        |        | 2 | 1,9266 | 0,165 | 0,063  |
| 24 | P31948 STIP1_HUMAN  | K.DAIHFYNK.S        |        | 2 | 1,9259 | 0,152 | -0,605 |
| 24 | Q6NUN7 CK063_HUMAN  | R.SKPFSELS#DSDLEE.K | S214:  | 2 | 1,9237 | 0,203 | -0,367 |
| 24 | P08670 VIME_HUMAN   | R.QVDQLTNDK.A       |        | 2 | 1,9202 | 0,191 | -0,69  |
| 24 | Q6ZNB6 NFXL1_HUMAN  | R.KAS#EIKE.A        | S835:  | 2 | 1,9151 | 0,099 | 0      |
| 24 | Q96HY7 DHTK1_HUMAN  | K.INPLFTGQALLE.N    |        | 2 | 1,908  | 0,329 | -0,371 |
| 24 | P57740 NU107_HUMAN  | R.VLLQAS#QDE.N      | S37:   | 2 | 1,9031 | 0,264 | 0      |
| 24 | P43243 MATR3_HUMAN  | R.CRDSFFGE.T        |        | 2 | 1,8963 | 0,234 | -0,862 |
| 24 | Q96D71 REPS1_HUMAN  | K.GTTPLAPPPKVR.R    |        | 2 | 1,8955 | 0,274 | -0,458 |
| 24 | Q9Y2W1 TR150_HUMAN  | R.IDIS#PSTFRK.H     | S682:  | 2 | 1,8955 | 0,097 | -0,294 |
| 24 | P35221 CTNA1_HUMAN  | K.HVNPVQALSE.F      |        | 2 | 1,8946 | 0,17  | -0,223 |
| 24 | P53367 ARFP1_HUMAN  | K.HSLPSGLLSE.T      |        | 2 | 1,8929 | 0,119 | 0      |
| 24 | B2RD09 B2RD09_HUMAN | R.AAAGACT#PPCT.-    | T462:  | 2 | 1,8919 | 0,174 | -0,316 |
| 24 | P22102 PUR2_HUMAN   | K.QVLVAPGNAGTACSE.K |        | 2 | 1,8896 | 0,082 | -0,166 |
| 24 | P35527 K1C9_HUMAN   | R.MTLDDFR.I         |        | 2 | 1,8874 | 0,351 | 0,068  |
| 24 | P35527 K1C9_HUMAN   | K.TLLDIDNTR.M       |        | 2 | 1,8861 | 0,269 | -0,23  |
| 24 | P27824 CALX_HUMAN   | K.AEEDILNRS#PR.N    | S583:  | 2 | 1,8838 | 0,101 | -0,728 |
| 24 | Q14103 HNRPD_HUMAN  | K.DLKDYFSK.F        |        | 2 | 1,8766 | 0,094 | -0,18  |
| 24 | P45974 UBP5_HUMAN   | E.HLSHFGIDMLK.M     |        | 2 | 1,8734 | 0,2   | -0,846 |
| 24 | Q99661 KIF2C_HUMAN  | R.S#VNSKIPAPKE.S    | S95:   | 2 | 1,8723 | 0,271 | -0,39  |
| 24 | O75643 U520_HUMAN   | R.LYDLNHNE.I        |        | 2 | 1,8676 | 0,105 | 0      |
| 24 | P31939 PUR9_HUMAN   | K.SLFSNVVTK.N       |        | 2 | 1,8613 | 0,122 | 0      |
| 24 | Q9Y4F1 FARP1_HUMAN  | R.SLASQPTELNSEVLE.Q |        | 2 | 1,853  | 0,17  | -0,453 |
| 24 | Q8IVF2 AHNK2_HUMAN  | K.AGTGLKGEEVE.G     |        | 2 | 1,8446 | 0,091 | -0,224 |
| 24 | Q14671 PUM1_HUMAN   | E.YVLSSSPGDSCLR.K   |        | 2 | 1,8388 | 0,174 | -0,254 |

|    |                     |                         |                    |   |        |       |        |
|----|---------------------|-------------------------|--------------------|---|--------|-------|--------|
| 24 | Q96ST2 IWS1_HUMAN   | K.HM*DFLSDFE.M          |                    | 2 | 1,8287 | 0,082 | -0,422 |
| 24 | P62241 RS8_HUMAN    | E.SHYALPLGR.K           |                    | 2 | 1,8223 | 0,096 | -0,361 |
| 24 | Q13247 SFRS6_HUMAN  | R.ALDKLDGTE.I           |                    | 2 | 1,8133 | 0,113 | 0      |
| 24 | Q3KQU3 MA7D1_HUMAN  | R.GPTPPAMGPR.D          |                    | 2 | 1,8077 | 0,195 | 0,124  |
| 24 | Q12834 CDC20_HUMAN  | E.AAGPAPSPMR.A          |                    | 2 | 1,8044 | 0,191 | -0,319 |
| 24 | O00193 SMAP_HUMAN   | R.SAS#PDDDLGSSNWE.A     | S17:               | 2 | 1,7984 | 0,245 | -0,626 |
| 24 | Q86X29 LSR_HUMAN    | R.SVDALDDLTPPSTAE.S     |                    | 2 | 1,7669 | 0,126 | -0,478 |
| 24 | P06493 CDC2_HUMAN   | E.GT#Y#GVVYKGR.H        | T14:Y15:           | 2 | 1,7471 | 0,081 | -0,291 |
| 24 | Q9NYF8 BCLF1_HUMAN  | K.TIAPQNAPRDE.S         |                    | 2 | 1,7216 | 0,275 | -0,101 |
| 24 | Q15126 PMVK_HUMAN   | R.QADPGFFCR.K           |                    | 2 | 1,7194 | 0,175 | -0,333 |
| 24 | P04637 P53_HUMAN    | R.ALPNNTS#SSPQPK.K      | S313:              | 2 | 1,7079 | 0,153 | -0,343 |
| 24 | Q9UHB7 AFF4_HUMAN   | R.T#ISQSSSLKSSNSNKE.T   | T834:              | 2 | 1,6919 | 0,308 | -0,327 |
| 24 | Q15910 EZH2_HUMAN   | E.FAAALTAER.I           |                    | 2 | 1,6779 | 0,095 | 0,128  |
| 24 | Q5VYV7 CT094_HUMAN  | R.LSTIQNS#PTK.K         | S396:              | 2 | 1,671  | 0,099 | -0,313 |
| 24 | Q8N3J6 CADM2_HUMAN  | D.LMQLT#CKTS#GS#KPAAD.I | T145:S149:S151:    | 2 | 1,6684 | 0,095 | -1,19  |
| 24 | Q6PH81 U547_HUMAN   | K.SCPCGYIFISR.K         |                    | 2 | 1,657  | 0,12  | -0,09  |
| 24 | Q08211 DHX9_HUMAN   | R.QKFMCE.V              |                    | 2 | 1,6542 | 0,088 | 0      |
| 24 | O43148 MCES_HUMAN   | R.LPLGTLISK.S           |                    | 2 | 1,6421 | 0,112 | 0,074  |
| 24 | Q99623 PHB2_HUMAN   | E.SFT#RGSDSLK.G         | T288:              | 2 | 1,6251 | 0,092 | -0,378 |
| 24 | Q07955 SFRS1_HUMAN  | K.VDGPRES#PS#YGRS#R.S   | S199:S201:S205:    | 2 | 1,6166 | 0,141 | -0,073 |
| 24 | Q9NWB6 ARGL1_HUMAN  | R.AS#SPPDRIDIFGR.T      | S76:               | 2 | 1,6125 | 0,108 | -0,646 |
| 24 | Q92598 HS105_HUMAN  | K.VVNVELPIE.A           |                    | 2 | 1,5892 | 0,133 | -0,482 |
| 24 | Q53GS9 SNUT2_HUMAN  | R.EAPASVVPFVR.V         |                    | 2 | 1,5722 | 0,16  | -0,625 |
| 24 | P08237 K6PF_HUMAN   | R.KRS#GEEAV.-           | S775:              | 2 | 1,5266 | 0,192 | -0,476 |
| 24 | Q9NYF8 BCLF1_HUMAN  | K.TIAPQNAPR.D           |                    | 2 | 1,5201 | 0,236 | -0,441 |
| 24 | Q6UN15 FIP1_HUMAN   | R.ERDHSPT#PS#VFNSDEE.R  | T494:S496:         | 2 | 1,5165 | 0,115 | -0,182 |
| 24 | Q9Y536 PAL4B_HUMAN  | R.IIPGFM*CQGGDFTR.H     |                    | 2 | 1,4904 | 0,305 | -0,604 |
| 24 | Q9BZ23 PANK2_HUMAN  | R.DRLGS#YSGPVSRS.Q      | S189:              | 2 | 1,4705 | 0,24  | -0,312 |
| 24 | Q9Y2W1 TR150_HUMAN  | R.RIDIS#PSTFRK.H        | S682:              | 2 | 1,4685 | 0,134 | -0,784 |
| 24 | P83881 RL36A_HUMAN  | R.KGQVIQF.-             |                    | 2 | 1,379  | 0,125 | -1,116 |
| 24 | P68104 EF1A1_HUMAN  | R.QTVAVGVK.A            |                    | 2 | 1,2901 | 0,102 | 0      |
| 24 | P05455 LA_HUMAN     | K.IRRS#PSKPLPE.V        | S92:               | 2 | 1,2119 | 0,252 | -0,807 |
| 24 | A1L3V1 A1L3V1_HUMAN | D.GY#HLDT#AKMT#CVDVNE.C | Y1325:T1329:T1333: | 2 | 1,1679 | 0,097 | 0,583  |



24

Q14679|TTLL4\_HUMAN

K.S#LPVSLT#ANK.A

S152:T158:

2

1,1491

0,143

1,948

**Table S3:** Peptide identification information for GPST workflow. SCX fraction number, protein reference, peptide sequence, phosphorylation localization, charge state, and SEQUEST scoring metrics (cross correlation, delta correlation, and ppm) are provided. Reverse hits that pass filters are included and used to maintain <1% false positive rate.

| Fraction | Ref                | Sequence                                | ModSite            | Charge | XCorr  | dCn   | PPM    |
|----------|--------------------|-----------------------------------------|--------------------|--------|--------|-------|--------|
| 1        | Q9UQ35 SRRM2_HUMAN | E.LSNS#PLRENS#FGS#PLEFR.N               | S1320:S1326:S1329: | 3      | 6,1106 | 0,522 | 0,24   |
| 1        | Q9UQ35 SRRM2_HUMAN | E.M*STSNFES#S#PEVEERPAVSLTLDQSQSQASLE.A | S1270:S1271:       | 3      | 6,0724 | 1     | 0,2    |
| 1        | Q9UER7 DAXX_HUMAN  | E.ASLDSGEGPSGMASQGCPASR.A               |                    | 2      | 5,7903 | 0,599 | 0      |
| 1        | Q92598 HS105_HUMAN | E.AGTQPQVQTDAQQTQSPPS#PE.L              | S557:              | 3      | 5,6446 | 0,418 | 0,542  |
| 1        | Q99700 ATX2_HUMAN  | E.AVAMPIPAAS#PTPAS#PASNR.A              | S727:S732:         | 2      | 5,6016 | 0,483 | 0,236  |
| 1        | Q9Y6A5 TACC3_HUMAN | E.NQM*VS#PGKVS#PEQAVEE.N                | S170:S177:         | 2      | 5,5376 | 0,498 | 0,568  |
| 1        | P43358 MAGA4_HUMAN | E.S#AGPPQSPQGASALPTTISFTCWR.Q           | S59:               | 2      | 5,5366 | 0,509 | 0,564  |
| 1        | Q8WXI9 P66B_HUMAN  | R.GRLT#PS#PDIIVLSDNE.A                  | T120:S122:         | 2      | 5,4693 | 0,474 | -0,065 |
| 1        | Q12888 TP53B_HUMAN | E.TSVIS#IDS#PQKLAILDQE.L                | S724:S727:         | 2      | 5,4265 | 0,392 | 0,576  |
| 1        | Q96JS3 PGBD1_HUMAN | E.LLQGLSFS#GDS#DVEKDNEPE.I              | S360:S363:         | 2      | 5,4214 | 0,521 | 0,522  |
| 1        | P08779 K1C16_HUMAN | K.IIAATIENAQPILQIDNAR.L                 |                    | 3      | 5,4028 | 0,47  | 0,443  |
| 1        | Q7Z3K3 POGZ_HUMAN  | E.GAECLNVDDQDEGS#PVTQEPE.L              | S949:              | 2      | 5,3184 | 0,605 | 0,515  |
| 1        | Q9UER7 DAXX_HUMAN  | E.ASLDSGEGPSGM*ASQGCPSASR.A             |                    | 2      | 5,2701 | 0,563 | 0,459  |
| 1        | P21127 CD2L1_HUMAN | E.GDYVPDS#PALS#PIELKQE.L                | S410:S414:         | 2      | 5,2284 | 0,52  | 0,576  |
| 1        | Q9Y6G9 DC1L1_HUMAN | R.VGSFGSS#PPGLSSTYTGGLGNE.I             | S13:               | 2      | 5,1986 | 0,536 | 0,543  |
| 1        | Q96RT1 LAP2_HUMAN  | E.NFNLLQNGDILNNS#TEE.K                  | S715:              | 2      | 5,1899 | 0,531 | 0,235  |
| 1        | Q9UIF9 BAZ2A_HUMAN | E.SVLQDNSFDLNNGS#DAEQEE.M               | S363:              | 2      | 5,1493 | 0,55  | 0,639  |
| 1        | Q02952 AKA12_HUMAN | E.M*VSAVSQLTDSPTTTEAT#PVQE.V            | T1020:             | 3      | 5,1443 | 0,384 | 0,217  |
| 1        | Q9UIF9 BAZ2A_HUMAN | E.SVLQDNS#FDLNNGS#DAEQEE.M              | S356:S363:         | 2      | 5,1393 | 0,454 | 0,618  |
| 1        | P49281 NRAM2_HUMAN | E.LYLLNTM*DADS#LVS#R.-                  | S564:S567:         | 2      | 5,114  | 0,504 | 0,517  |
| 1        | Q9UQ35 SRRM2_HUMAN | E.LSNS#PLRENS#FGS#PLEFR.N               | S1320:S1326:S1329: | 2      | 5,0664 | 0,619 | 0,213  |
| 1        | Q9Y2D5 AKAP2_HUMAN | E.TLSNDFSM*DNIS#DSGASNE.T               | S501:              | 2      | 5,0622 | 0,574 | 0,581  |
| 1        | P30622 CLIP1_HUMAN | E.AALNGNGDDLNNYDS#DDQE.K                | S1353:             | 2      | 5,0343 | 0,584 | 0,115  |
| 1        | Q99700 ATX2_HUMAN  | E.NSSNCTSGSSKPN#PS#IS#PSILSNTE.H        | S860:S862:S864:    | 3      | 4,9959 | 1     | 0,86   |
| 1        | Q99700 ATX2_HUMAN  | E.AVAM*PIPAASPT#PASPASNR.A              | T729:              | 2      | 4,9289 | 0,481 | 0,183  |
| 1        | Q15424 SAFB1_HUMAN | E.TLSGLGDSGAAGAAALSSASS#E.T             | S24:               | 2      | 4,927  | 0,559 | 0,436  |
| 1        | Q9Y3F4 STRAP_HUMAN | E.LEEIAS#ENS#DCIFSPADVK.A               | S335:S338:         | 3      | 4,9116 | 0,443 | 0,461  |
| 1        | Q99700 ATX2_HUMAN  | E.AVAM*PIPAAS#PTPASASNR.A               | S727:              | 2      | 4,9099 | 0,468 | 0,122  |
| 1        | Q92598 HS105_HUMAN | E.AGTQPQVQTDAQQTQS#PPSPE.L              | S554:              | 3      | 4,8731 | 0,4   | 0,31   |
| 1        | O00233 PSMD9_HUMAN | R.HNIIQLQNDHK.A                         |                    | 3      | 4,8713 | 0,387 | 0,197  |
| 1        | Q14C86 GAPD1_HUMAN | E.VSS#RPST#PGLSVVSGISATSE.D             | S758:T762:         | 2      | 4,8711 | 1     | 0,448  |
| 1        | Q9H0H5 RGAP1_HUMAN | E.SGSILS#DIS#FDKTDE.S                   | S154:S157:         | 2      | 4,8389 | 0,526 | 0,206  |
| 1        | P52597 HNRPF_HUMAN | E.SQSVSGCYGAGYSGQNS#M*GGYD.-            | S410:              | 2      | 4,8043 | 0,538 | 0,734  |

|   |                     |                                  |                    |   |        |       |        |
|---|---------------------|----------------------------------|--------------------|---|--------|-------|--------|
| 1 | Q13765 NACA_HUMAN   | E.LEEQDS#TQATTQQAQLAAAAE.I       | S43:               | 2 | 4,8016 | 0,538 | 0,427  |
| 1 | P12270 TPR_HUMAN    | E.SGGRS#VPTT#PLQVAAPVTVFTE.S     | S2196:T2200:       | 2 | 4,7952 | 0,509 | 0,411  |
| 1 | Q9NZN5 ARHGC_HUMAN  | E.IQS#PSSCADSQSQIM*E.Y           | S1492:             | 2 | 4,7611 | 0,412 | 0      |
| 1 | Q9BUR4 WDR79_HUMAN  | E.NTSLPAEEANGSL#EEE.A            | S114:              | 2 | 4,7475 | 0,548 | 0,46   |
| 1 | P27816 MAP4_HUMAN   | E.SLQDVGQSAAPTFM*IS#PE.T         | S624:              | 2 | 4,7196 | 0,546 | 0,865  |
| 1 | Q12888 TP53B_HUMAN  | D.SLSTNSSDLVAPS#PDAFR.S          | S366:              | 2 | 4,6745 | 0,42  | 0,314  |
| 1 | P13693 TCTP_HUMAN   | E.GNIDDS#LIGGNASAEGPEGEGTE.S     | S46:               | 2 | 4,6708 | 0,618 | 0,323  |
| 1 | Q12800 TFCP2_HUMAN  | E.SGLVQDFDAS#LSGIGQE.L           | S25:               | 2 | 4,664  | 0,485 | 0,609  |
| 1 | Q14C86 GAPD1_HUMAN  | E.LESCS#GLGS#TSDDDTVRE.V         | S742:S746:         | 2 | 4,6595 | 1     | 0,468  |
| 1 | Q9C0C9 UBE2O_HUMAN  | E.SASPEETPDGSAS#PVEM*QDE.G       | S441:              | 2 | 4,6359 | 0,503 | 0,113  |
| 1 | Q8N680 ZBTB2_HUMAN  | E.ASQLSQLTSNLAQVNR.T             |                    | 3 | 4,6329 | 0,335 | -0,106 |
| 1 | P98171 RHG04_HUMAN  | E.VVASDDGDVLDVSFQTS#PSTE.S       | S408:              | 2 | 4,6324 | 0,418 | 0,681  |
| 1 | P12270 TPR_HUMAN    | R.S#VPTT#PLQVAAPVTVFTE.S         | S2196:T2200:       | 2 | 4,6126 | 0,522 | 0,423  |
| 1 | Q02952 AKA12_HUMAN  | E.MVSAVSQLTDS#PDT#TEEAT#PVQE.V   | S1012:T1015:T1020: | 2 | 4,5922 | 1     | 0,821  |
| 1 | Q9NQG5 CT077_HUMAN  | E.DDDYPGSYS#PQDPSAGPLLTEE.L      | S166:              | 3 | 4,5837 | 0,354 | 0,526  |
| 1 | Q99700 ATX2_HUMAN   | E.AVAM*PIPAAS#PTPAS#PASNR.A      | S727:S732:         | 2 | 4,5773 | 0,445 | 0,234  |
| 1 | Q9NTJ3 SMC4_HUMAN   | E.EGPPPPS#PDGASS#DAEPEPPSGR.T    | S22:S28:           | 2 | 4,5705 | 0,398 | 0,204  |
| 1 | Q14444 CAPR1_HUMAN  | E.AAS#APAVEDQVPEAEPEPAEE.Y       | S264:              | 2 | 4,5669 | 0,48  | 0,661  |
| 1 | Q8WXI9 P66B_HUMAN   | R.GRLT#PS#PDIIVLS#DNE.A          | T120:S122:S129:    | 2 | 4,5548 | 0,456 | 0,683  |
| 1 | Q9NTJ3 SMC4_HUMAN   | E.GPPPPS#PDGASS#DAEPEPPSGR.T     | S22:S28:           | 2 | 4,5537 | 0,399 | 0,324  |
| 1 | Q6T4R5 NHS_HUMAN    | E.IDS#DES#PVARE.R                | S394:S397:         | 2 | 4,5512 | 0,386 | -0,443 |
| 1 | Q13263 TIF1B_HUMAN  | R.STAPSAASASASAAASS#PAGGGAEALE.L | S50:               | 2 | 4,5256 | 0,616 | 0,712  |
| 1 | A8K8B2 A8K8B2_HUMAN | E.SS#FLSSQNGDSSTSQE.T            | S396:              | 2 | 4,5116 | 0,453 | 0,21   |
| 1 | Q9UER7 DAXX_HUMAN   | E.ASLDSGEGPSGM*ASQGCPSASR.A      |                    | 3 | 4,505  | 0,464 | 0,603  |
| 1 | Q96JM3 ZN828_HUMAN  | K.LAPVPS#PEPQKPAPVS#PE.S         | S204:S214:         | 2 | 4,5028 | 0,442 | 0,488  |
| 1 | P05556 ITB1_HUMAN   | E.CSTDEVNSEDM*DAYCR.K            |                    | 2 | 4,5018 | 0,576 | 0,31   |
| 1 | Q92598 HS105_HUMAN  | E.AGTQPQVQTDAQQTQSPPS#PELTSEE.N  | S557:              | 3 | 4,4939 | 0,386 | 1,19   |
| 1 | Q02952 AKA12_HUMAN  | E.M*VSAVSQLTDS#PDTTEEAT#PVQE.V   | S1012:T1020:       | 2 | 4,4922 | 1     | -0,187 |
| 1 | O43166 SI1L1_HUMAN  | E.YGS#TSS#IDKQGTSGE.S            | S208:S211:         | 2 | 4,49   | 1     | 0,073  |
| 1 | Q13263 TIF1B_HUMAN  | R.STAPSAASASASAAASS#PAGGGAEALE.L | S50:               | 3 | 4,4838 | 0,47  | 0,839  |
| 1 | Q6P0N0 CN106_HUMAN  | E.SVDS#ADEQFQNTNAE.T             | S275:              | 2 | 4,4817 | 0,552 | 0,141  |
| 1 | Q9Y4E8 UBP15_HUMAN  | E.NSQSEDSVGGDNDS#ENGLCTE.D       | S690:              | 2 | 4,4784 | 0,492 | 0,106  |
| 1 | Q9UQ35 SRRM2_HUMAN  | E.NSFGS#PLEFRNS#GPLGTE.M         | S1329:S1336:       | 2 | 4,4533 | 0,42  | 0,354  |
| 1 | Q7Z3K3 POGZ_HUMAN   | E.CLNVDQDEGS#PVTQEPE.L           | S949:              | 3 | 4,4409 | 0,316 | 0,606  |
| 1 | Q8N163 K1967_HUMAN  | E.DSEVRS#VAS#NQSEM*E.F           | S675:S678:         | 2 | 4,4406 | 0,488 | 0      |
| 1 | Q12802 AKP13_HUMAN  | E.LVPDQAVISDSTFSLANS#PGSE.S      | S790:              | 3 | 4,4403 | 0,296 | 0,474  |
| 1 | Q99700 ATX2_HUMAN   | E.AVAM*PIPAAS#PTPASPASNR.A       | S727:              | 3 | 4,4355 | 0,48  | 0,365  |
| 1 | Q6NZI2 PTRF_HUMAN   | E.ITEESDAVLVDKS#DS#D.-           | S387:S389:         | 2 | 4,4283 | 0,549 | 0,389  |
| 1 | Q9NTJ3 SMC4_HUMAN   | E.EGPPPPSPDGASS#DAEPEPPSGR.T     | S28:               | 2 | 4,424  | 0,427 | 0,211  |

|   |                    |                                  |                    |       |        |       |        |
|---|--------------------|----------------------------------|--------------------|-------|--------|-------|--------|
| 1 | P08779 K1C16_HUMAN | K.IIAATIENAQPIQIDNAR.L           | 2                  | 4,414 | 0,382  | 0,355 |        |
| 1 | Q9Y6G9 DC1L1_HUMAN | R.VGS#FGSS#PPGLSSTYTGGLGNE.I     | S9:S13:            | 2     | 4,4058 | 1     | 0,419  |
| 1 | Q02952 AKA12_HUMAN | E.M*VSAVSQLTDS#PDT#TEEATPVQE.V   | S1012:T1015:       | 2     | 4,3963 | 1     | 0,654  |
| 1 | Q01433 AMPD2_HUMAN | E.M*LETIPPEEAGITMS#PGPQ.-        | S875:              | 3     | 4,3913 | 0,341 | 0,458  |
| 1 | Q9BUR4 WDR79_HUMAN | E.NTSLPAEEANGS#LS#EEEANGPE.L     | S112:S114:         | 2     | 4,3656 | 0,457 | 0,812  |
| 1 | Q15424 SAFB1_HUMAN | E.TINNLDS#SSDFTLQE.I             | S195:              | 3     | 4,3603 | 0,298 | 0,555  |
| 1 | Q9BUR4 WDR79_HUMAN | E.NTSLPAEEANGSLS#EEEANGPE.L      | S114:              | 2     | 4,3571 | 0,386 | 0,84   |
| 1 | Q9H4L7 SMRCD_HUMAN | E.ATPQPSQPGPSS#PISLS#AEEE.N      | S34:S39:           | 2     | 4,3545 | 0,552 | 0,43   |
| 1 | Q13426 XRCC4_HUMAN | E.TLRNS#S#PEDLFDEI.-             | S327:S328:         | 2     | 4,3467 | 0,41  | 0,272  |
| 1 | Q99700 ATX2_HUMAN  | E.AVAM*PIPAAS#PTPAS#PASNR.A      | S727:S732:         | 3     | 4,3422 | 0,495 | 0,527  |
| 1 | P40425 PBX2_HUMAN  | E.AVTPSSVTSPTGPGSVHS#DT#SN.-     | S426:T428:         | 2     | 4,3133 | 1     | 0,514  |
| 1 | Q8N163 K1967_HUMAN | E.DSEVRS#VAS#NQS#EME.F           | S675:S678:S681:    | 2     | 4,3092 | 0,499 | 0,064  |
| 1 | P43358 MAGA4_HUMAN | R.QPNEGSSSQEEEGPST#SPDAE.S       | T98:               | 3     | 4,2875 | 0,346 | 0,408  |
| 1 | P49281 NRAM2_HUMAN | E.LYLLNTMDADS#LVS#R.-            | S564:S567:         | 2     | 4,2855 | 0,362 | 0,522  |
| 1 | Q9Y3F4 STRAP_HUMAN | E.IAS#ENS#DCIFPSAPDVKA.-         | S335:S338:         | 2     | 4,2838 | 0,442 | 0,704  |
| 1 | Q9NRM2 ZN277_HUMAN | E.NDTLLCTLS#DSEDLTAQEQNE.N       | S399:              | 2     | 4,2725 | 0,469 | 0,762  |
| 1 | Q9NTJ3 SMC4_HUMAN  | E.GPPPPSPDGASS#DAEPEPPSGR.T      | S28:               | 2     | 4,2645 | 0,403 | 0,448  |
| 1 | P35527 K1C9_HUMAN  | R.GGSGGSYGGGGSGGGYGGGSGSR.G      |                    | 2     | 4,2465 | 0,525 | 0,068  |
| 1 | A1L390 PKHG3_HUMAN | E.SSGQGPSS#PVALLGQVQDFQQA.E.C    | S1169:             | 2     | 4,2445 | 0,573 | 0,586  |
| 1 | P98175 RBM10_HUMAN | E.LQS#PTHPSALPPATS#PTAQE.S       | S540:S553:         | 2     | 4,2428 | 0,275 | 0,322  |
| 1 | Q8N720 ZN655_HUMAN | E.TQSECLS#PEPQFVQDQDM*E.Q        | S28:               | 2     | 4,2253 | 0,509 | 0,313  |
| 1 | Q92598 HS105_HUMAN | E.AGTQPQVQTDAAQTSQS#PPSPELTSEE.N | S554:              | 3     | 4,2227 | 0,427 | 0,564  |
| 1 | Q71RC2 LARP4_HUMAN | E.CTSAQQLNM*STSS#PCAAE.L         | S546:              | 2     | 4,2174 | 0,511 | 0,239  |
| 1 | P46821 MAP1B_HUMAN | R.ESS#PLYS#PTFSDSTSAVKE.K        | S1793:S1797:       | 2     | 4,2139 | 1     | 1,113  |
| 1 | P49711 CTCF_HUMAN  | E.AQPAATDAPNGDLT#PE.M            | T717:              | 2     | 4,2071 | 0,395 | 0,222  |
| 1 | Q12888 TP53B_HUMAN | E.TSVIS#IDS#PQKLAILDQELE.H       | S724:S727:         | 2     | 4,2047 | 0,295 | 0,414  |
| 1 | Q92619 HMHA1_HUMAN | E.SRVVS#NDS#DS#DLEE.A            | S1027:S1030:S1032: | 2     | 4,1993 | 0,335 | -0,136 |
| 1 | Q9UER7 DAXX_HUMAN  | E.ASLDSGEGPSGMASQGCPSASR.A       |                    | 3     | 4,1869 | 0,464 | 0,26   |
| 1 | P19532 TFE3_HUMAN  | E.GVVGGLSGGALS#PLR.A             | S542:              | 2     | 4,1825 | 0,454 | 0,687  |
| 1 | P43358 MAGA4_HUMAN | R.QPNEGSSSQEEEGPSTSPDAE.S        | S90:               | 3     | 4,1808 | 0,343 | 0,082  |
| 1 | Q723K3 POGZ_HUMAN  | E.CLNVDQDEGS#PVTQEPE.L           | S949:              | 2     | 4,178  | 0,43  | 0,578  |
| 1 | Q92598 HS105_HUMAN | E.AGTQPQVQTDAAQTSQS#PPSPE.L      | S554:              | 2     | 4,1769 | 0,404 | 0,413  |
| 1 | Q92598 HS105_HUMAN | E.AGTQPQVQTDAAQTSQSPPS#PE.L      | S557:              | 2     | 4,1752 | 0,465 | 0,413  |
| 1 | Q7Z6Z7 HUWE1_HUMAN | E.VQAM*QS#FNSTQQNE.T             | S740:              | 2     | 4,1729 | 0,445 | 0,071  |
| 1 | Q02952 AKA12_HUMAN | E.MVSAVSQLTDS#PDTTEEAT#PVQE.V    | S1012:T1020:       | 2     | 4,171  | 0,455 | 1,034  |
| 1 | Q86WR0 CCD25_HUMAN | E.NM*SSNQDGNDS#DEFM*.-           | S204:              | 2     | 4,17   | 0,542 | 0,541  |
| 1 | Q8N2Y8 RUSC2_HUMAN | E.TSRPS#PLGSYS#PIR.S             | S775:S781:         | 3     | 4,169  | 1     | 0,218  |
| 1 | Q08J23 NSUN2_HUMAN | E.SAAS#TGQPDNDVTE.G              | S724:              | 2     | 4,1686 | 0,33  | 0,083  |
| 1 | P43358 MAGA4_HUMAN | R.QPNEGSSSQEEEGPSTSPDAE.S        | S99:               | 2     | 4,1662 | 0,478 | 0,435  |

|   |                    |                                 |                 |   |        |       |        |
|---|--------------------|---------------------------------|-----------------|---|--------|-------|--------|
| 1 | Q01433 AMPD2_HUMAN | E.MLEIPEEAGIT#M*SPGPQ.-         | T873:           | 3 | 4,1662 | 0,326 | 0,641  |
| 1 | O95835 LATS1_HUMAN | E.YINSEQSEQS#DEDDQNTGSE.I       | S1111:          | 2 | 4,1595 | 0,342 | 0,405  |
| 1 | O75400 PR40A_HUMAN | E.QAQLTSTPAIQDQSVSVSSNT#GEE.T   | T359:           | 2 | 4,1548 | 0,579 | 0,563  |
| 1 | P13693 TCTP_HUMAN  | E.GNIDDS#LIGGNASAEGPEGEGTE.S    | S46:            | 3 | 4,1445 | 0,36  | 0,564  |
| 1 | Q14C86 GAPD1_HUMAN | E.GISEGPSNRS#NS#VSS#LDLE.G      | S583:S585:S588: | 2 | 4,1379 | 0,375 | 0,446  |
| 1 | Q02952 AKA12_HUMAN | E.MVSAVSQLTDSPTDTEEAT#PVQE.V    | T1020:          | 3 | 4,1361 | 0,357 | 0,582  |
| 1 | P48960 CD97_HUMAN  | E.GSYDCVCSPGYEPVSGAK.T          |                 | 2 | 4,1313 | 0,578 | 0,505  |
| 1 | Q96TA1 NIBL1_HUMAN | E.VGLPFEASPESPPPAS#PDGVTE.I     | S633:           | 2 | 4,1128 | 0,515 | 0,756  |
| 1 | Q02952 AKA12_HUMAN | E.GS#PPPCLGQEE.A                | S1395:          | 2 | 4,1028 | 0,349 | 0,39   |
| 1 | Q9NTJ3 SMC4_HUMAN  | E.EGPPPPS#PDGASS#DAEPEPPSGR.T   | S22:S28:        | 3 | 4,0971 | 0,313 | 0,23   |
| 1 | P19105 MLRM_HUMAN  | R.ATS#NVFAM*FDQSQIQE.F          | S19:            | 3 | 4,07   | 0,355 | 0,191  |
| 1 | Q8TD19 NEK9_HUMAN  | E.FIPM*PDSPS#PLSAAFSESE.K       | S829:           | 2 | 4,0674 | 0,436 | 0,348  |
| 1 | P13693 TCTP_HUMAN  | E.GNIDDSLIGGNAS#AEGPEGEGTE.S    | S53:            | 2 | 4,0596 | 0,52  | 0,645  |
| 1 | O75531 BAF_HUMAN   | R.DFVAEPM*GEKPVGSLAGIGE.V       |                 | 2 | 4,0505 | 0,501 | 0,786  |
| 1 | Q96PM9 Z385A_HUMAN | E.NGLGPAPGS#PEKQPGS#PSPPSIPE.T  | S133:S140:      | 2 | 4,0484 | 0,347 | 0,695  |
| 1 | P55265 DSRAD_HUMAN | E.SQT#PTPSATSFSSGKS#PVTTLLC     | T601:S614:      | 2 | 4,0351 | 1     | 0,768  |
| 1 | Q8N108 MIER1_HUMAN | E.GETNFS#S#EIEDLARE.G           | S76:S77:        | 2 | 4,0317 | 0,33  | 0,329  |
| 1 | Q6PJG2 CN043_HUMAN | E.LPPYT#PPPILS#PVRE.G           | T655:S661:      | 3 | 4,0287 | 0,242 | 0,199  |
| 1 | P40425 PBX2_HUMAN  | E.AVTPSSVSTPEGPGS#VHSDT#S#N.-   | S423:T428:S429: | 2 | 4,0259 | 1     | 0,298  |
| 1 | Q8N163 K1967_HUMAN | E.DSEVRS#VAS#NQSEME.F           | S675:S678:      | 2 | 4,0244 | 0,537 | -0,134 |
| 1 | Q13263 TIF1B_HUMAN | E.TKPVLM*ALAEPGAEGPR.L          |                 | 3 | 4,0163 | 0,225 | 0,707  |
| 1 | P49006 MRP_HUMAN   | E.AGPQATEPST#PSGPESGTPASAEQNE.- | T178:           | 3 | 4,0158 | 0,437 | 0,479  |
| 1 | Q9Y3T9 NOC2L_HUMAN | E.FLASGFDS#ESES#ESENSPQAE.T     | S26:S30:        | 2 | 4,0082 | 1     | 0,913  |
| 1 | Q9H3S7 PTN23_HUMAN | E.STPIPS#SSPPLSS#PLPEAPQPK.E    | S1542:S1550:    | 3 | 3,9866 | 0,291 | 0,888  |
| 1 | Q7Z3K3 POGZ_HUMAN  | E.GAECLNVDDQDEGS#PVTQEPE.L      | S949:           | 3 | 3,9818 | 0,303 | 0,618  |
| 1 | P43358 MAGA4_HUMAN | R.QPNEGSSSQEEEGPSTSPDAE.S       |                 | 3 | 3,9809 | 0,371 | 0,338  |
| 1 | P12270 TPR_HUMAN   | R.SVPT#T#PLQVAAPVTVFTE.S        | T2199:T2200:    | 3 | 3,969  | 0,29  | 0,363  |
| 1 | Q9HC35 EMAL4_HUMAN | E.SVIQSNT#PT#PPPSQPLNE.T        | T897:T899:      | 2 | 3,9682 | 0,513 | 0,709  |
| 1 | Q12888 TP53B_HUMAN | E.DVCIDLTCDSGS#QAVPS#PATR.S     | S625:S630:      | 2 | 3,9675 | 0,45  | 0,912  |
| 1 | P54577 SYYC_HUMAN  | E.KHPDADSLYVEK.I                |                 | 3 | 3,9665 | 0,266 | 0,065  |
| 1 | Q6UXD5 SE6L2_HUMAN | E.LLVLAGGGSPGLAPR.L             |                 | 2 | 3,9543 | 0,479 | 0,531  |
| 1 | P61978 HNRPK_HUMAN | E.GLQLPS#PTATSQLPLESDAVE.C      | S116:           | 2 | 3,9483 | 0,509 | 1,311  |
| 1 | Q13263 TIF1B_HUMAN | E.TKPVLMALAEPGAEGPR.L           |                 | 3 | 3,9378 | 0,247 | 0,204  |
| 1 | Q15185 TEBP_HUMAN  | D.S#QDS#DDEKM*PDLE.-            | S148:S151:      | 2 | 3,9216 | 0,378 | -0,579 |
| 1 | Q5T8D3 ACBD5_HUMAN | E.DLGNVLTSTPNAK.T               |                 | 2 | 3,9188 | 0,532 | 0,183  |
| 1 | Q7Z3C6 ATG9A_HUMAN | E.ASYS#DS#PPGEEDLLVHVAE.G       | S16:S18:        | 2 | 3,9171 | 0,452 | 0,224  |
| 1 | P12270 TPR_HUMAN   | E.AGLEIDS#QEEEEPVQASDE.S        | S2271:          | 2 | 3,9149 | 0,495 | 0,227  |
| 1 | Q96TA1 NIBL1_HUMAN | E.VGLPFEASPES#PPPASPDGVTE.I     | S628:           | 2 | 3,9079 | 0,315 | 1,08   |
| 1 | Q14671 PUM1_HUMAN  | E.VNSVLS#PRS#ESGGLGVSM*VE.Y     | S209:S212:      | 2 | 3,9067 | 0,435 | 0      |

|   |                     |                                  |                 |   |        |       |        |
|---|---------------------|----------------------------------|-----------------|---|--------|-------|--------|
| 1 | Q6NZI2 PTRF_HUMAN   | E.IITEES#DAVLVDKS#DS#D.-         | S379:S387:S389: | 2 | 3,9053 | 0,39  | -0,311 |
| 1 | Q14160 LAP4_HUMAN   | E.ACPCQPDSGS#PLPAEEEK.R          | S504:           | 2 | 3,8931 | 0,43  | 0,119  |
| 1 | O15084 ANR28_HUMAN  | E.YLYTDVDELNDS#DSETY.-           | S1081:          | 2 | 3,8924 | 0,516 | 0,805  |
| 1 | Q7Z6Z7 HUWE1_HUMAN  | E.EAVGDTSAAGSSEQPR.A             |                 | 2 | 3,8866 | 0,56  | -0,156 |
| 1 | Q8IY92 BTBDC_HUMAN  | E.LFSIIDVDADQEPS#QS#PPRSE.A      | S521:S523:      | 3 | 3,8774 | 0,289 | 0      |
| 1 | Q3KQU3 MA7D1_HUMAN  | E.S#AAPASPAPS#PAPS#PTPAPPQK.E    | S539:S548:S552: | 2 | 3,8759 | 0,42  | 0,108  |
| 1 | Q86VM9 ZCH18_HUMAN  | R.AS#DLEDEESAAR.G                | S46:            | 2 | 3,8719 | 0,517 | 0,267  |
| 1 | Q6XQN6 PNCB_HUMAN   | R.LQALVNSLCAGQS#P.-              | S537:           | 2 | 3,8656 | 0,18  | 0,793  |
| 1 | Q9Y3F4 STRAP_HUMAN  | E.LEEIAS#ENS#DCIFPSAPDVKA.-      | S335:S338:      | 2 | 3,8639 | 0,47  | 0,299  |
| 1 | Q9UIF9 BAZ2A_HUMAN  | E.SVLQDNS#FDLNNGS#DAEQEE.M       | S356:S363:      | 3 | 3,8455 | 0,325 | 0,849  |
| 1 | Q9Y3F4 STRAP_HUMAN  | E.LEEIAS#ENS#DCIFPSAPDVK.A       | S335:S338:      | 2 | 3,8331 | 0,465 | 0,512  |
| 1 | Q02952 AKA12_HUMAN  | E.MVSAVSQLTDS#PDTTEE.A           | S1012:          | 2 | 3,8323 | 0,544 | 0,775  |
| 1 | Q9NQ92 CQ079_HUMAN  | E.GFAM*DEEDS#DGE.L               | S87:            | 2 | 3,8287 | 0,393 | 0,349  |
| 1 | Q9H5H4 ZN768_HUMAN  | E.S#QSPRYEQS#PGYEPR.S            | S116:S125:      | 3 | 3,8278 | 0,352 | 0,18   |
| 1 | Q9UQ35 SRRM2_HUMAN  | E.LSNS#PLRENS#FGSPLE.F           | S1320:S1326:    | 2 | 3,8249 | 0,374 | -0,384 |
| 1 | Q96TA1 NIBL1_HUMAN  | E.VGLPFEASPESPAS#PDGVTE.I        | S633:           | 3 | 3,8211 | 0,367 | 0,89   |
| 1 | P12270 TPR_HUMAN    | E.SGGRS#VPTT#PLQVAAPVTVFTE.S     | S2196:T2200:    | 3 | 3,8109 | 0,289 | 0,694  |
| 1 | Q09028 RBBP4_HUMAN  | E.NIYNDEDPEGS#VDPEGQGS.-         | S417:           | 2 | 3,8106 | 0,51  | 0,348  |
| 1 | Q5JSH3 WDR44_HUMAN  | E.YVSNDAAQSDDEE.K                | S403:           | 2 | 3,8001 | 0,39  | 0      |
| 1 | Q7Z406 MYH14_HUMAN  | E.AQPGSGPS#PEPEGS#PPAHPQ.-       | S1983:S1989:    | 3 | 3,7991 | 0,453 | 0,176  |
| 1 | Q56D06 Q56D06_HUMAN | E.AEATVNNSS#DTES#IPS#PHTE.A      | S728:S732:S735: | 2 | 3,7962 | 1     | 0,525  |
| 1 | O43379 WDR62_HUMAN  | E.LSLPEGPSVPSS#LPQT#PEQE.K       | S1049:T1053:    | 2 | 3,7893 | 0,493 | 0,626  |
| 1 | Q6NV74 CB055_HUMAN  | E.GGVPGEDPSS#RPAT#PELAEPE.S      | S334:T338:      | 2 | 3,786  | 0,33  | 0,542  |
| 1 | P04264 K2C1_HUMAN   | R.SLDLDSIIAEVK.A                 |                 | 2 | 3,782  | 0,411 | 0      |
| 1 | Q9Y6G9 DC1L1_HUMAN  | R.VGSFGSS#PPGLSSTYTGGLGNE.I      | S13:            | 3 | 3,7785 | 0,298 | 0,488  |
| 1 | P43358 MAGA4_HUMAN  | E.SAGPPQS#PQGASALPTTISFTCWR.Q    | S65:            | 3 | 3,7783 | 0,349 | 0,775  |
| 1 | O14641 DVL2_HUMAN   | E.ST#SLGDS#DEEDTM*SR.F           | T206:S211:      | 2 | 3,7768 | 0,47  | 0,203  |
| 1 | O43379 WDR62_HUMAN  | E.LSLPEGPSVPSS#SLPQT#PEQE.K      | S1048:T1053:    | 3 | 3,7735 | 0,282 | 0,626  |
| 1 | Q02952 AKA12_HUMAN  | E.MVSAVSQLTDSPT#T#EEATPVQE.V     | T1015:T1016:    | 2 | 3,7683 | 0,525 | 0,846  |
| 1 | Q9NQG5 CT077_HUMAN  | E.DDDYPGSYS#PQDPSAGPLLTEE.L      | S166:           | 2 | 3,7656 | 0,542 | 0,502  |
| 1 | Q96TA1 NIBL1_HUMAN  | E.VGLPFEASPES#PPPAS#PDGVTE.I     | S628:S633:      | 2 | 3,7623 | 0,505 | 0,73   |
| 1 | Q9NRM2 ZN277_HUMAN  | E.NDTLLCTL#DSEDLTAQEQNE.N        | S399:           | 3 | 3,7574 | 0,299 | 0,714  |
| 1 | P61978 HNRPK_HUMAN  | E.EGLQLPS#PTATSQLPLESDAVE.C      | S116:           | 3 | 3,7531 | 0,354 | 1,394  |
| 1 | Q9Y2U8 MAN1_HUMAN   | E.SLLGGPGGASAAPAAGSK.V           |                 | 2 | 3,7485 | 0,543 | 0,498  |
| 1 | P04264 K2C1_HUMAN   | K.NKLNLDLEDALQQAK.E              |                 | 2 | 3,7444 | 0,445 | 0,61   |
| 1 | P46100 ATRX_HUMAN   | E.TNPVTSNS#DEECNE.T              | S677:           | 2 | 3,7427 | 0,41  | 0,073  |
| 1 | P49006 MRP_HUMAN    | E.AGPQATEPST#PSGPESGPTPASAEQNE.- | T178:           | 2 | 3,7416 | 0,507 | 0,73   |
| 1 | Q16204 CCDC6_HUMAN  | K.SGGIVIS#PFRLEE.L               | S52:            | 2 | 3,7391 | 0,365 | 0,247  |
| 1 | P61978 HNRPK_HUMAN  | E.GLQLPSPT#ATSQLPLESDAVE.C       | T118:           | 2 | 3,7337 | 0,395 | 0,546  |

|   |                     |                                 |                 |   |        |       |        |
|---|---------------------|---------------------------------|-----------------|---|--------|-------|--------|
| 1 | Q96TA1 NIBL1_HUMAN  | E.VGLPFEASPES#PPPAS#PDGVTE.I    | S628:S633:      | 3 | 3,7335 | 0,256 | -0,078 |
| 1 | Q9NQX3 GEPH_HUMAN   | E.LEDLPS#PPPPLS#PPPT#TSPHKQTE.D | S188:S194:T198: | 3 | 3,7274 | 0,406 | 0,784  |
| 1 | Q9NVE7 PANK4_HUMAN  | E.NYAGSSGLM*SAS#PE.L            | S393:           | 2 | 3,7162 | 0,34  | 0,166  |
| 1 | Q8IYB3 SRRM1_HUMAN  | E.KKEKT#PELPEPSVK.V             | T220:           | 3 | 3,7077 | 0,35  | -0,216 |
| 1 | Q12888 TP53B_HUMAN  | E.VLSTQEDLFDQSNK.T              |                 | 2 | 3,7043 | 0,46  | 0,075  |
| 1 | P35908 K22E_HUMAN   | R.NLDLDSIAEVK.A                 |                 | 2 | 3,6953 | 0,449 | 0      |
| 1 | Q9HC35 EMAL4_HUMAN  | E.SVIQS#NT#PT#PPPSQPLNE.T       | S895:T897:T899: | 2 | 3,6938 | 0,515 | 0      |
| 1 | Q8WZ73 RFFL_HUMAN   | R.RAS#LSDLTDLEDIE.G             | S240:           | 2 | 3,6855 | 0,339 | 0,221  |
| 1 | O75376 NCOR1_HUMAN  | E.VIS#PASS#PAPPQEK.L            | S1977:S1981:    | 2 | 3,6826 | 0,376 | 0,156  |
| 1 | P11388 TOP2A_HUMAN  | E.NTEGS#PQEDGVELE.G             | S1247:          | 2 | 3,6802 | 0,458 | 0,154  |
| 1 | Q9P2R6 RERE_HUMAN   | E.IS#RPNS#PSEGESE.S             | S675:S679:      | 2 | 3,6766 | 0,458 | -0,161 |
| 1 | Q14160 LAP4_HUMAN   | E.LRS#LEPS#PSPGPQEEDGE.V        | S1575:S1579:    | 2 | 3,674  | 0,419 | 0,351  |
| 1 | Q6NV74 CB055_HUMAN  | E.GGVPGEDPSS#RPAT#PE.L          | S334:T338:      | 2 | 3,6674 | 0,361 | -0,142 |
| 1 | P27816 MAP4_HUMAN   | E.SLQDVGQSAAPT*IS#PE.T          | S624:           | 3 | 3,6588 | 0,215 | 0,556  |
| 1 | P05386 RLA1_HUMAN   | E.SEES#DDDM*GFGLFD.-            | S104:           | 2 | 3,6583 | 0,49  | 0,368  |
| 1 | O60292 SI1L3_HUMAN  | E.YGST#SSIDVQGM*PE.Q            | T205:           | 2 | 3,6544 | 0,311 | 0,311  |
| 1 | P46777 RL5_HUMAN    | R.KHIM*GQNVADYM*R.Y             |                 | 3 | 3,651  | 0,312 | 0      |
| 1 | Q9BUR4 WDR79_HUMAN  | E.FGS#PSELS#PRIEEQE.L           | S85:S90:        | 2 | 3,643  | 0,471 | 0,458  |
| 1 | Q9HC35 EMAL4_HUMAN  | E.SVIQSNT#PT#PPPSQPLNE.T        | T897:T899:      | 3 | 3,6409 | 0,336 | 0,531  |
| 1 | Q02952 AKA12_HUMAN  | E.M*VSAVSQLTDSPTTEAT#PVQE.V     | T1020:          | 2 | 3,6373 | 0,441 | 0,579  |
| 1 | Q96TA1 NIBL1_HUMAN  | E.YSNSGGGGSPSPST#PE.S           | T593:           | 2 | 3,6327 | 0,513 | 0      |
| 1 | Q02952 AKA12_HUMAN  | E.VSSLEGS#PPPCLGQEE.A           | S1395:          | 2 | 3,6304 | 0,532 | -0,76  |
| 1 | O43598 RCL_HUMAN    | E.ADPPGQVAAS#PDPTT.-            | S169:           | 2 | 3,6252 | 0,389 | 0,243  |
| 1 | Q9Y4E8 UBP15_HUMAN  | E.NSQSEDSVGGDNDS#ENGLCTE.D      | S690:           | 3 | 3,6192 | 0,401 | 0,319  |
| 1 | P08047 SP1_HUMAN    | E.SQPS#PLALLAATCSR.I            | S59:            | 2 | 3,6139 | 0,423 | 0,295  |
| 1 | Q12888 TP53B_HUMAN  | E.TSVIS#IDS#PQK.L               | S724:S727:      | 2 | 3,6083 | 0,353 | 0,64   |
| 1 | Q9NTJ3 SMC4_HUMAN   | E.EGPPPPSPDGASS#DAEPEPPSGR.T    | S28:            | 3 | 3,5913 | 0,377 | 0,158  |
| 1 | P35908 K22E_HUMAN   | R.FLEQQNQVLQTK.W                |                 | 2 | 3,5888 | 0,406 | 0,331  |
| 1 | Q5VY92 Q5VY92_HUMAN | R.LQDSS#DPDTGSEEE.G             | S941:           | 2 | 3,5844 | 0,423 | 0,154  |
| 1 | Q9Y5K6 CD2AP_HUMAN  | E.AQDDSETVLAGPTS#PIPSLGNVSE.T   | S189:           | 3 | 3,5842 | 0,225 | 0,742  |
| 1 | Q7Z406 MYH14_HUMAN  | E.AQPGSGPS#PEPEGS#PPAHPQ.-      | S1983:S1989:    | 2 | 3,5822 | 0,392 | 0,468  |
| 1 | Q96JG6 CC132_HUMAN  | E.DVLASNGYES#DEQE.K             | S546:           | 2 | 3,5772 | 0,322 | 0,298  |
| 1 | Q9HC35 EMAL4_HUMAN  | E.SVIQSNTPT#PPPSQPLNE.T         | T899:           | 2 | 3,5761 | 0,455 | 0,614  |
| 1 | Q9H5N1 RABE2_HUMAN  | E.LLPLS#RDPS#PPLEPLEE.L         | S200:S204:      | 2 | 3,5712 | 0,455 | 0,118  |
| 1 | Q8N720 ZN655_HUMAN  | E.TQSECLS#PEPQFVQD*E.Q          | S28:            | 3 | 3,5559 | 0,322 | 0,391  |
| 1 | Q66K74 MAP1S_HUMAN  | E.SLPTLSDSDPVPLAPGAADS#DEDTE.G  | S809:           | 2 | 3,5522 | 0,37  | 1,135  |
| 1 | Q9BQ61 CS043_HUMAN  | E.VSGAGSS#PVSGGVNLFANDGSFLE.L   | S50:            | 2 | 3,5495 | 0,483 | 0,312  |
| 1 | P49792 RBP2_HUMAN   | K.AVVS#PPKFVFGSE.S              | S2510:          | 2 | 3,5487 | 0,321 | 0,253  |
| 1 | Q04637 IF4G1_HUMAN  | E.LAPPPACPSES#PVPIAPTAQPE.E     | S390:           | 3 | 3,5428 | 0,317 | 0,317  |

|   |                    |                                   |                    |   |        |       |        |
|---|--------------------|-----------------------------------|--------------------|---|--------|-------|--------|
| 1 | P61978 HNRPK_HUMAN | E.GLQLPS#PTATSQLPLESDAVE.C        | S116:              | 3 | 3,5311 | 0,223 | -0,737 |
| 1 | O43290 SNUT1_HUMAN | E.GGAPPPGS#PQVLEEDEAELE.L         | S486:              | 2 | 3,5295 | 0,386 | 0,697  |
| 1 | Q9UQ35 SRRM2_HUMAN | E.MSTSNFES#S#PE.V                 | S1270:S1271:       | 2 | 3,5259 | 0,368 | 0,177  |
| 1 | Q14247 SRC8_HUMAN  | R.AKTQT#PPVS#PAPQPTTEE.R          | T401:S405:         | 2 | 3,5218 | 0,525 | 0      |
| 1 | P10636 TAU_HUMAN   | E.IVYKS#PVVSGDT#SPR.H             | S713:T720:         | 3 | 3,5194 | 0,342 | -0,104 |
| 1 | P62701 RS4X_HUMAN  | R.HPGSFDVVHVK.D                   |                    | 3 | 3,5145 | 0,279 | 0,823  |
| 1 | O75179 ANR17_HUMAN | E.HYPVSSPS#S#PS#PPAQPGGVS.R.N     | S2044:S2045:S2047: | 3 | 3,5139 | 1     | 0,314  |
| 1 | Q8IY81 RRMJ3_HUMAN | E.IM*SPLYQDEAPK.G                 |                    | 2 | 3,5125 | 0,251 | 0      |
| 1 | Q08170 SFRS4_HUMAN | E.KIQNNDNVGKPK.S                  |                    | 3 | 3,5095 | 0,168 | 0,27   |
| 1 | Q86WJ1 CHD1L_HUMAN | E.SNNYQSFCLPSEES#EPEDLE.N         | S692:              | 3 | 3,5081 | 0,271 | 0      |
| 1 | P49454 CENPF_HUMAN | E.GAVSANQCS#VDE.V                 | S1522:             | 2 | 3,5064 | 0,429 | 0      |
| 1 | P10636 TAU_HUMAN   | E.IVYKS#PVVS#GDT#SPR.H            | S713:S717:T720:    | 2 | 3,4929 | 0,359 | -0,727 |
| 1 | Q9UQ35 SRRM2_HUMAN | E.M*STSNFES#S#PE.V                | S1270:S1271:       | 2 | 3,492  | 0,255 | 0      |
| 1 | Q9Y5K6 CD2AP_HUMAN | E.AQDDSETVLAGPTS#PIPSLGNVSE.T     | S189:              | 2 | 3,4681 | 0,414 | 0,792  |
| 1 | Q8TEQ6 GEMI5_HUMAN | E.NSGPVENGVS#DQE.G                | S778:              | 2 | 3,468  | 0,4   | 0      |
| 1 | Q9NQW6 ANLN_HUMAN  | E.M*DQALAES#SEEQE.D               | S594:              | 2 | 3,4644 | 0,229 | -0,234 |
| 1 | Q9NRM2 ZN277_HUMAN | E.NDTLLCTL#S#ESDLTAQEQNE.N        | S399:S401:         | 2 | 3,4567 | 0,267 | 0,369  |
| 1 | Q9NQW6 ANLN_HUMAN  | E.MDQALAEES#EEQE.D                | S595:              | 2 | 3,4564 | 0,275 | 0,079  |
| 1 | Q2TAL8 QRIC1_HUMAN | E.VEPQSQPQPS#PE.L                 | S464:              | 2 | 3,4495 | 0,362 | -0,087 |
| 1 | Q9H4L7 SMRCD_HUMAN | E.ATPQSQPGPSS#PISLS#AEEL.N        | S34:S39:           | 3 | 3,4486 | 0,107 | 0,726  |
| 1 | O15085 ARHGB_HUMAN | E.LGPCPEDGSDAPLEDSTADAAAS#PGP.-   | S1519:             | 2 | 3,4482 | 0,512 | 0,095  |
| 1 | Q15942 ZYG_HUMAN   | E.IFPS#PPPPPEE.G                  | S116:              | 2 | 3,4359 | 0,324 | 0,431  |
| 1 | P04264 K2C1_HUMAN  | K.YEELQITAGR.H                    |                    | 2 | 3,4345 | 0,227 | 0,103  |
| 1 | O15027 SC16A_HUMAN | E.HRPASALVNPLAR.G                 |                    | 3 | 3,4335 | 0,358 | 0,326  |
| 1 | P12270 TPR_HUMAN   | E.TQVYNQDS#QDS#IGE.G              | S1890:S1893:       | 2 | 3,4288 | 0,475 | -0,21  |
| 1 | Q9Y3F4 STRAP_HUMAN | E.LEEIAS#ENS#DCIFPSAPDVKA.-       | S335:S338:         | 3 | 3,4286 | 0,237 | 0,522  |
| 1 | Q14160 LAP4_HUMAN  | E.ACPCQPDSGSPLPAEEK.R             |                    | 2 | 3,4269 | 0,507 | 0,062  |
| 1 | A1L390 PKHG3_HUMAN | E.SSGQGSS#PVALLGQVQD.F            | S1169:             | 2 | 3,4232 | 0,226 | 0      |
| 1 | Q99700 ATX2_HUMAN  | E.NSSNCTSGSS#KPNS#PSISPSILSNT.E.H | S856:S860:         | 3 | 3,4198 | 1     | 0,82   |
| 1 | Q86VR2 F134C_HUMAN | E.LAAFCPQLDDS#TVAR.E              | S274:              | 2 | 3,4045 | 0,396 | 0,63   |
| 1 | P02538 K2C6A_HUMAN | R.AIGGGLSSVGGGSSTIK.Y             |                    | 2 | 3,4032 | 0,523 | 0,169  |
| 1 | P13645 K1C10_HUMAN | R.ALEESNYELEGK.I                  |                    | 2 | 3,4031 | 0,516 | 0,088  |
| 1 | Q9NTJ3 SMC4_HUMAN  | E.EGPPPPS#PDGAS#SDAEPEPPSGR.T     | S22:S27:           | 2 | 3,402  | 0,43  | 0,408  |
| 1 | P09496 CLCA_HUMAN  | E.AFVNDIDESS#PGTEWE.R             | S206:              | 2 | 3,4    | 0,412 | 0,26   |
| 1 | Q15418 KS6A1_HUMAN | E.NGLLM*T#PCYTANFVAPE.V           | T573:              | 2 | 3,3923 | 0,373 | 0,184  |
| 1 | Q8IW35 CEP97_HUMAN | E.STFM*PVASGLS#PLS#PTVE.L         | S413:S416:         | 2 | 3,3921 | 0,445 | 0,428  |
| 1 | O14641 DVL2_HUMAN  | E.STS#LGDS#DEEDTMSR.F             | S207:S211:         | 2 | 3,383  | 0,372 | 0,409  |
| 1 | Q92598 HS105_HUMAN | E.AGTQPQVQTAQQTSS#PPS#PELTSEE.N   | S554:S557:         | 3 | 3,3829 | 0,257 | 0,366  |
| 1 | Q9UIF9 BAZ2A_HUMAN | E.SVLQDNSFDLNNGS#DAEQEE.M         | S363:              | 3 | 3,3754 | 0,151 | 0,639  |



|   |                    |                                              |                 |   |        |       |        |
|---|--------------------|----------------------------------------------|-----------------|---|--------|-------|--------|
| 1 | P38398 BRCA1_HUMAN | E.LLGS#DDS#HDGESE.S                          | S395:S398:      | 2 | 3,3639 | 0,358 | 0,16   |
| 1 | Q15185 TEBP_HUMAN  | D.S#DDEKM*PDLE.-                             | S151:           | 2 | 3,3636 | 0,196 | 0,096  |
| 1 | Q68CZ2 TENS3_HUMAN | E.LSTGSPSGS#PTLDIDQSIE.Q                     | S690:           | 2 | 3,3614 | 0,44  | 0,612  |
| 1 | Q96PE2 ARHG_HUMAN  | R.STISSFGNEETPSSK.E                          |                 | 2 | 3,3603 | 0,511 | 0,294  |
| 1 | Q9HCD6 TANC2_HUMAN | E.VQDENQTSAITQR.I                            |                 | 2 | 3,3545 | 0,44  | -0,328 |
| 1 | P04264 K2C1_HUMAN  | R.LRSEIDNVKK.Q                               |                 | 3 | 3,3484 | 0,17  | -0,076 |
| 1 | Q8N163 K1967_HUMAN | E.VRS#VAS#NQS#EME.F                          | S675:S678:S681: | 2 | 3,3469 | 0,421 | -0,155 |
| 1 | Q8WVB6 CTF18_HUMAN | E.NSPQVDGS#PPGLE.G                           | S871:           | 2 | 3,341  | 0,325 | 0,532  |
| 1 | Q9UQ35 SRRM2_HUMAN | E.NS#FGS#PLEFR.N                             | S1326:S1329:    | 2 | 3,3372 | 0,46  | 0,093  |
| 1 | Q9BQ61 CS043_HUMAN | E.VSGAGSS#PVS GG V N L F A N D G S F L E . L | S50:            | 3 | 3,3369 | 0,178 | 0,623  |
| 1 | Q8WUM0 NU133_HUMAN | E.NVS#ILAEDLE.G                              | S480:           | 2 | 3,3365 | 0,245 | 0,309  |
| 1 | Q9H3S7 PTN23_HUMAN | E.STPIPISSS#PPPLS#SPLPEAPQPK.E               | S1544:S1549:    | 2 | 3,3276 | 1     | 0,593  |
| 1 | Q86UA1 PRP39_HUMAN | -.M*EQSPDDS#PNVNASTEETE.M                    | S8:             | 2 | 3,3257 | 0,519 | 0,224  |
| 1 | Q13523 PRP4B_HUMAN | E.DSNM*SVPSESS#PQSSTR.T                      | S569:           | 2 | 3,325  | 0,416 | -0,061 |
| 1 | Q14202 ZMYM3_HUMAN | E.GLLEPLAPDS#PITLQS#PHIEEEE.T                | S148:S154:      | 2 | 3,3239 | 0,58  | 0,821  |
| 1 | Q9NTJ3 SMC4_HUMAN  | R.TES#PATAAETASEE.L                          | S41:            | 2 | 3,3201 | 0,374 | 0,248  |
| 1 | Q96S66 CLCC1_HUMAN | E.AAGS#PDQGSTYS#PAR.G                        | S524:S532:      | 2 | 3,3118 | 0,467 | -0,3   |
| 1 | P04792 HSPB1_HUMAN | R.ALS#RQLS#SGVSE.I                           | S78:S82:        | 2 | 3,309  | 0,384 | 0,35   |
| 1 | Q9Y5Q8 TF3C5_HUMAN | R.SKRPALFSSSAK.A                             |                 | 3 | 3,3083 | 0,269 | 0,429  |
| 1 | P61978 HNRPK_HUMAN | E.GLQLPSPT#ATSQPLE.S                         | T118:           | 3 | 3,3017 | 0,225 | 0,211  |
| 1 | Q8N108 MIER1_HUMAN | E.LLSLYGYGSTVR.L                             |                 | 2 | 3,3005 | 0,509 | 0,367  |
| 1 | P40425 PBX2_HUMAN  | E.AVTPSSVTSPTEGPGSVHS#DTS#N.-                | S426:S429:      | 3 | 3,2994 | 0,223 | 0,385  |
| 1 | Q96JM3 ZN828_HUMAN | E.TRKPGSPGSESPK.A                            |                 | 3 | 3,2928 | 0,309 | 0,77   |
| 1 | Q9BUQ8 DDX23_HUMAN | E.LANHPDAQHKPGTILTK.K                        |                 | 3 | 3,289  | 0,167 | 0,298  |
| 1 | Q8TC07 TBC15_HUMAN | E.ILGLQGSEVTPDS#DVGEDE.N                     | S640:           | 2 | 3,2856 | 0,411 | 0,912  |
| 1 | Q9BUR4 WDR79_HUMAN | E.FGS#PSELS#PR.I                             | S85:S90:        | 2 | 3,283  | 0,227 | 0,197  |
| 1 | P02538 K2C6A_HUMAN | K.NKLEGLDALQK.A                              |                 | 2 | 3,2817 | 0,236 | -0,18  |
| 1 | P35908 K22E_HUMAN  | K.VDLLNQEIEFLK.V                             |                 | 2 | 3,2809 | 0,31  | 0      |
| 1 | P32519 ELF1_HUMAN  | E.ALLNMDS#PGPM*LDE.K                         | S110:           | 2 | 3,2804 | 0,502 | -0,076 |
| 1 | O43379 WDR62_HUMAN | E.VEAGPGDQQGDSYLR.V                          |                 | 2 | 3,2796 | 0,456 | 0,077  |
| 1 | Q9Y3F4 STRAP_HUMAN | E.IAS#ENS#DCIFPSAPDVK.A                      | S335:S338:      | 2 | 3,2784 | 0,4   | 0,728  |
| 1 | P02533 K1C14_HUMAN | R.EVATNSELVQSGK.S                            |                 | 2 | 3,2736 | 0,406 | -0,179 |
| 1 | Q5SW79 CE170_HUMAN | R.LGS#LSARS#DSE.A                            | S1160:S1165:    | 2 | 3,2571 | 0,444 | -0,381 |
| 1 | Q9NQ55 SSF1_HUMAN  | E.LLATGAGLS#ES#EAEPDGDHNITE.L                | S238:S240:      | 3 | 3,252  | 0,215 | 0,883  |
| 1 | P61978 HNRPK_HUMAN | E.EGLQLPS#PTATSQPLESDAVE.C                   | S116:           | 2 | 3,2449 | 0,434 | 0,413  |
| 1 | Q14191 WRN_HUMAN   | K.HDGEDVLGNKVER.K                            |                 | 3 | 3,2425 | 0,305 | 0,249  |
| 1 | Q96EV2 RBM33_HUMAN | E.DDLLGEDLLSGKK.N                            |                 | 2 | 3,2373 | 0,287 | 0,522  |
| 1 | Q9BTT0 AN32E_HUMAN | E.LLQQITYLDGFDQEDNEAPD.S                     |                 | 3 | 3,2351 | 0,247 | 0,787  |
| 1 | Q66K74 MAP1S_HUMAN | R.AGGLGAEET#PPTSVSE.S                        | T782:           | 2 | 3,2323 | 0,356 | 0,309  |

|   |                    |                                  |                    |   |        |       |        |
|---|--------------------|----------------------------------|--------------------|---|--------|-------|--------|
| 1 | Q02952 AKA12_HUMAN | E.TV5#ILS#KTEGTQE.A              | S1256:S1259:       | 2 | 3,2276 | 0,365 | 0,393  |
| 1 | P10276 RARA_HUMAN  | E.GLDTLSGQPGGGGR.D               |                    | 2 | 3,2219 | 0,451 | 0,096  |
| 1 | O75952 CABYR_HUMAN | E.AVGGLSS#KPAT#PK.T              | S142:T146:         | 2 | 3,2179 | 0,329 | -0,355 |
| 1 | P43358 MAGA4_HUMAN | E.AAVSSSS#PLVPGTLEEVPAAE.S       | S44:               | 3 | 3,2121 | 0,448 | 0,787  |
| 1 | P04264 K2C1_HUMAN  | K.SKAEAESLYQSK.Y                 |                    | 2 | 3,2084 | 0,43  | -0,273 |
| 1 | Q7Z6Z7 HUWE1_HUMAN | E.VLSS#QEM*QVENE.L               | S2339:             | 2 | 3,206  | 0,227 | 0,328  |
| 1 | Q8N543 OGFD1_HUMAN | E.NNQM*AINNSQQS#NEQTDPEPEENE.T   | S413:              | 3 | 3,202  | 0,261 | 0,373  |
| 1 | P29590 PML_HUMAN   | E.VFLPNSNHVASGAGEAEER.V          |                    | 3 | 3,1993 | 0,223 | 0,277  |
| 1 | P04264 K2C1_HUMAN  | K.SLNNQFASFIDK.V                 |                    | 2 | 3,1987 | 0,445 | 0,617  |
| 1 | P07814 SYEP_HUMAN  | E.YIPGQPPLSQS#SDSS#PTR.N         | S882:S886:         | 2 | 3,1842 | 1     | 0      |
| 1 | Q8IX21 CJ006_HUMAN | E.YGT#PTKS#PPAALE.V              | T551:S555:         | 2 | 3,1826 | 0,271 | -0,082 |
| 1 | Q5VWN6 CJ018_HUMAN | E.VS#PAS#S#PEPPVPVKE.T           | S1400:S1403:S1404: | 2 | 3,179  | 0,435 | 0,693  |
| 1 | Q9HAW4 CLSPN_HUMAN | E.TIGPLS#EGDS#DEE.I              | S42:S46:           | 2 | 3,172  | 0,433 | 0,323  |
| 1 | Q15018 K0157_HUMAN | K.YPGSGADLPPPQR.A                |                    | 2 | 3,169  | 0,256 | 0      |
| 1 | P49006 MRP_HUMAN   | E.QGEIGACS#DEGTAQE.G             | S135:              | 2 | 3,1638 | 0,404 | 0,299  |
| 1 | Q8N1G2 K0082_HUMAN | E.LALSLSSTSDDEPPSSVSHGAK.A       |                    | 3 | 3,1621 | 0,454 | 0,251  |
| 1 | P49848 TAF6_HUMAN  | E.AGDS#PPPAPGT#PK.A              | S653:T660:         | 2 | 3,1577 | 0,253 | 0      |
| 1 | Q9HA65 TBC17_HUMAN | E.ILGLAPPAEPHS#PS#PTASPLPLSPTR.A | S602:S604:         | 3 | 3,1567 | 0,314 | 0,596  |
| 1 | Q96JP5 ZFP91_HUMAN | E.VLIEDSDS#AGP.-                 | S567:              | 2 | 3,1552 | 0,511 | 0,206  |
| 1 | Q6VY07 PACS1_HUMAN | E.MYNPSDS#GPEM*EETE.S            | S381:              | 2 | 3,1551 | 0,353 | 0,067  |
| 1 | Q96CW6 S7A60_HUMAN | E.FGYDS#PHDLDS#D.-               | S302:S308:         | 2 | 3,1498 | 0,369 | 0,559  |
| 1 | Q9UKV3 ACINU_HUMAN | E.LEEASAES#EDE.M                 | S169:              | 2 | 3,1489 | 0,218 | -0,095 |
| 1 | Q6PJG2 CN043_HUMAN | E.LPPYT#PPPILS#PVRE.G            | T655:S661:         | 2 | 3,1415 | 0,4   | 0,465  |
| 1 | Q15424 SAFB1_HUMAN | E.TINNLDTS#SSDFTILQE.I           | S195:              | 2 | 3,1396 | 0,102 | 0,432  |
| 1 | P35527 K1C9_HUMAN  | R.GGSGGSYGGGGSGGGYGGGSGSR.G      |                    | 3 | 3,1382 | 0,278 | 0,408  |
| 1 | P05556 ITB1_HUMAN  | E.CECQSEGIPESPK.C                |                    | 2 | 3,1371 | 0,464 | 0,642  |
| 1 | Q9H3R5 CENPH_HUMAN | R.AGGPPQVAGAQAACSE.D             |                    | 2 | 3,1338 | 0,44  | 0,166  |
| 1 | O94915 FRYL_HUMAN  | E.AALTAS#QILSR.T                 | S2499:             | 2 | 3,1323 | 0,23  | 0      |
| 1 | O95155 UBE4B_HUMAN | E.TQSQSLS#RSQS#M*DIRGVSC.E.K     | S101:S105:         | 3 | 3,1272 | 1     | 0,459  |
| 1 | Q02952 AKA12_HUMAN | E.MVSAVSQLTDS#PDTT#EEAT#PVQE.V   | S1012:T1016:T1020: | 3 | 3,1265 | 0,276 | 0,821  |
| 1 | O75362 ZN217_HUMAN | R.TYHQLVLHSR.V                   |                    | 3 | 3,1257 | 0,087 | 0,583  |
| 1 | O94915 FRYL_HUMAN  | E.AALTASQILSR.T                  |                    | 2 | 3,1232 | 0,257 | -0,108 |
| 1 | Q9BUR4 WDR79_HUMAN | E.FGS#PELS#PRIEE.Q               | S85:S90:           | 2 | 3,1169 | 0,333 | 0,683  |
| 1 | P46821 MAP1B_HUMAN | E.GEKL#PKS#DISPLT#PR.E           | S1779:S1782:T1788: | 3 | 3,1154 | 0,169 | 0,559  |
| 1 | Q8IY92 BTBDC_HUMAN | E.VVEVGDS#DDEQE.V                | S715:              | 2 | 3,1154 | 0,337 | 0,261  |
| 1 | Q86VR2 F134C_HUMAN | E.LAIT#DS#EHS#DAE.V              | T283:S285:S288:    | 2 | 3,113  | 0,315 | 0,319  |
| 1 | Q5F1R6 DJC21_HUMAN | E.FGDGS#DENEM*EE.H               | S283:              | 2 | 3,1118 | 0,097 | -0,252 |
| 1 | Q15398 DLG7_HUMAN  | E.MGIPQQTTS#PE.N                 | S662:              | 2 | 3,1099 | 0,183 | 0,288  |
| 1 | P21127 CD2L1_HUMAN | E.VGEGT#PQSSALTE.G               | T395:              | 2 | 3,1015 | 0,459 | 0,27   |

|   |                     |                                      |              |   |        |       |        |
|---|---------------------|--------------------------------------|--------------|---|--------|-------|--------|
| 1 | Q6PD74 P34_HUMAN    | E.IEGLS#\$#DEEH.-                    | S310:S311:   | 2 | 3,0998 | 0,358 | -0,096 |
| 1 | O15085 ARHGB_HUMAN  | E.LGPCPEDGSDAPLEDSTADAAAS#PGP.-      | S1519:       | 3 | 3,0978 | 0,247 | 0,426  |
| 1 | Q6P1R3 CK061_HUMAN  | E.VLSPAS#PGGLS#DGNPNSLSDPSTPR.G      | S27:S32:     | 3 | 3,0971 | 0,147 | -0,371 |
| 1 | P13645 K1C10_HUMAN  | R.SLLEGE GSSGGGGR.G                  |              | 2 | 3,0957 | 0,49  | -0,193 |
| 1 | Q15361 TTF1_HUMAN   | E.GSQVGS#EVGADM*QE.S                 | S301:        | 2 | 3,0926 | 0,297 | -0,164 |
| 1 | Q9UKV3 ACINU_HUMAN  | E.IEPM*EGPAPPVLIQLS#PPNTDADT#RE.L    | S453:T461:   | 3 | 3,0866 | 0,177 | 0,803  |
| 1 | Q8TEP8 CE192_HUMAN  | E.LS#PLVCS#PAGVSR.L                  | S432:S437:   | 2 | 3,0837 | 0,248 | 0,487  |
| 1 | Q07666 KHDR1_HUMAN  | E.GYYSQS#QGDSE.Y                     | S390:        | 2 | 3,0805 | 0,356 | -0,094 |
| 1 | P35527 K1C9_HUMAN   | R.FSSSSGYGGGSSR.V                    |              | 2 | 3,0748 | 0,434 | 0,099  |
| 1 | Q92900 RENT1_HUMAN  | E.AELLGADTQGS#EFE.F                  | S31:         | 2 | 3,0689 | 0,454 | 0,394  |
| 1 | Q8IY81 RRMJ3_HUMAN  | E.IMSPLYQDEAPK.G                     |              | 2 | 3,0669 | 0,135 | 0,175  |
| 1 | Q53F64 Q53F64_HUMAN | E.GES#PAGAGTGAAAGAGGATAAPPSGNQNGAE.G | S28:         | 2 | 3,0614 | 0,388 | 0,469  |
| 1 | Q02952 AKA12_HUMAN  | E.MVSAVSQLTDS#PDTTEAT#PVQE.V         | S1012:T1020: | 3 | 3,0564 | 0,272 | 0,494  |
| 1 | Q12888 TP53B_HUMAN  | E.TSVIS#IDS#PQKLAILDQE.L             | S724:S727:   | 3 | 3,0472 | 0,083 | 0,432  |
| 1 | P02538 K2C6A_HUMAN  | K.YEELQVTAGR.H                       |              | 2 | 3,0429 | 0,395 | 0,209  |
| 1 | Q5TAQ9 WD42A_HUMAN  | E.ASDLSLSLTGDDGGPNR.T                |              | 2 | 3,0389 | 0,402 | 0,583  |
| 1 | Q15424 SAFB1_HUMAN  | E.LAEAPTEAPS#PE.A                    | S344:        | 2 | 3,0259 | 0,341 | 0      |
| 1 | O15127 SCAM2_HUMAN  | R.AASS#AAQGAFAQGN.-                  | S320:        | 2 | 3,0233 | 0,318 | 0,194  |
| 1 | Q5T4S7 UBR4_HUMAN   | E.TAENVNNGNPS#PLE.A                  | S2788:       | 2 | 3,0182 | 0,333 | 0,159  |
| 1 | P10253 LYAG_HUMAN   | R.GAYTQVIFLAR.N                      |              | 2 | 3,0179 | 0,256 | 0,098  |
| 1 | Q9Y6X4 K0888_HUMAN  | E.LEDVPFSQNAQK.N                     |              | 2 | 3,0169 | 0,208 | 0,596  |
| 1 | Q9Y4W2 LAS1L_HUMAN  | E.VGPFSTGQES#PTAE.N                  | S617:        | 2 | 3,0158 | 0,399 | -0,328 |
| 1 | Q16643 DREB_HUMAN   | E.TQEPS#PILDSEE.T                    | S381:        | 2 | 3,0143 | 0,414 | 0,343  |
| 1 | Q96EV2 RBM33_HUMAN  | E.DDLLGEDLLSGK.K                     |              | 2 | 3,009  | 0,419 | 0,191  |
| 1 | O43379 WDR62_HUMAN  | E.LSLPEGSPVSSSLPQT#PEQE.K            | T1053:       | 3 | 3,008  | 0,274 | 0,486  |
| 1 | Q9NTJ3 SMC4_HUMAN   | E.EGPPPPS#PDGASSDAEPEPPSGR.T         | S22:         | 3 | 3,0018 | 0,176 | 0,079  |
| 1 | Q6UN15 FIP1_HUMAN   | E.NASANPPS#GIEDE.T                   | S62:         | 2 | 2,9975 | 0,19  | 0      |
| 1 | Q9Y3T9 NOC2L_HUMAN  | E.FLASGFDS#ES#ES#ESENSPOAE.T         | S26:S28:S30: | 2 | 2,9925 | 0,199 | 0,687  |
| 1 | P08047 SP1_HUMAN    | E.SQPSPLALLAATCSR.I                  |              | 2 | 2,9856 | 0,43  | 0      |
| 1 | P61978 HNRPK_HUMAN  | E.EGLQLPSPT#ATSQLPLESDAVE.C          | T118:        | 3 | 2,9838 | 0,25  | 0,775  |
| 1 | Q16204 CCDC6_HUMAN  | K.SGGIVISPFRLLEE.L                   |              | 2 | 2,9809 | 0,309 | 0,608  |
| 1 | Q8IWC1 MA7D3_HUMAN  | E.VFCNTS#MEAS#PK.A                   | S318:S322:   | 2 | 2,9774 | 0,4   | 0      |
| 1 | Q99700 ATX2_HUMAN   | E.AVAMPIPAAS#PTPAS#PASNR.A           | S727:S732:   | 3 | 2,9768 | 0,318 | 0,266  |
| 1 | Q13501 SQSTM_HUMAN  | R.DHRPPCAQEAPR.N                     |              | 3 | 2,9739 | 0,354 | 0      |
| 1 | Q9UKY1 ZHX1_HUMAN   | E.LISDLDEGPPVLTVENTR.A               |              | 3 | 2,9732 | 0,195 | 0,266  |
| 1 | Q8TDY2 RBCC1_HUMAN  | E.M*SQTITDLLSEQK.A                   |              | 2 | 2,9708 | 0,38  | 0,566  |
| 1 | Q9UHR4 BI2L1_HUMAN  | E.TEAVTVPTPS#PTPVR.S                 | S414:        | 2 | 2,9684 | 0,428 | 0,299  |
| 1 | Q09666 AHNK_HUMAN   | E.FS#GPST#PTGTLE.F                   | S5790:T5794: | 2 | 2,9676 | 0,237 | 0,09   |
| 1 | O95361 TRI16_HUMAN  | E.LDLM*APGPLPR.A                     |              | 2 | 2,9631 | 0,375 | 0,102  |

|   |                     |                                |                 |   |        |       |        |
|---|---------------------|--------------------------------|-----------------|---|--------|-------|--------|
| 1 | P04264 K2C1_HUMAN   | R.TNAENEFVTIKK.D               |                 | 2 | 2,963  | 0,458 | 0      |
| 1 | P21127 CD2L1_HUMAN  | E.GT#PQSSALTE.G                | T395:           | 2 | 2,9589 | 0,266 | 0      |
| 1 | Q5T8D3 ACBD5_HUMAN  | D.LGNVLTSTPNAK.T               |                 | 2 | 2,9587 | 0,341 | 0,301  |
| 1 | O95817 BAG3_HUMAN   | K.VPPAPVPCPPPS#PGPSAVPS#SPK.S  | S377:S385:      | 3 | 2,9572 | 0,091 | 0,769  |
| 1 | P29966 MARCS_HUMAN  | E.AAEPGS#PTAAEGE.A             | S118:           | 2 | 2,9562 | 0,517 | 0,096  |
| 1 | P02538 K2C6A_HUMAN  | K.ADTLTDEINFLR.A               |                 | 2 | 2,9549 | 0,373 | -0,607 |
| 1 | Q13263 TIF1B_HUMAN  | R.STAPSAASASASAAASS#PAGGGAE.A  | S50:            | 2 | 2,951  | 0,33  | 0,585  |
| 1 | Q9NPI6 DCP1A_HUMAN  | R.KASS#PS#PLTIGT#PE.S          | S523:S525:T531: | 2 | 2,946  | 0,34  | 0,15   |
| 1 | P04264 K2C1_HUMAN   | R.TNAENEFVTIK.K                |                 | 2 | 2,9382 | 0,368 | -0,096 |
| 1 | P07355 ANXA2_HUMAN  | E.KDIISDTSGDFRK.L              |                 | 3 | 2,9312 | 0,345 | 0,247  |
| 1 | Q6PKG0 LARP1_HUMAN  | R.AVT#PVPTKTEE.V               | T526:           | 2 | 2,9306 | 0,433 | 0      |
| 1 | P49792 RBP2_HUMAN   | E.TVFT#PKT#SPENVQD.R           | T1396:T1399:    | 2 | 2,9278 | 0,206 | 0,637  |
| 1 | Q9H4A3 WNK1_HUMAN   | R.DVDDGS#GSPHS#PHQLSSK.S       | S2027:S2032:    | 3 | 2,9271 | 0,385 | 0,455  |
| 1 | P51858 HDGF_HUMAN   | R.RAGDLLEDS#PKRPK.E            | S165:           | 3 | 2,9241 | 0,174 | -0,11  |
| 1 | Q6NZI2 PTRF_HUMAN   | E.SDAVLVDKS#DS#D.-             | S387:S389:      | 2 | 2,9231 | 0,31  | 0,259  |
| 1 | Q9Y289 SC5A6_HUMAN  | E.AM*ALDGTAYQSSS#TCILQE.T      | S626:           | 2 | 2,9162 | 0,274 | 0,333  |
| 1 | P05556 ITB1_HUMAN   | E.VNSEDMDAYCR.K                |                 | 2 | 2,9135 | 0,439 | 0      |
| 1 | P10636 TAU_HUMAN    | E.IVY#KSPVVS#GDTS#PR.H         | Y711:S717:S721: | 3 | 2,9127 | 0,288 | 0,099  |
| 1 | P05556 ITB1_HUMAN   | E.VNSEDMD*DAYCR.K              |                 | 2 | 2,9121 | 0,434 | 0,355  |
| 1 | Q8N1G2 K0082_HUMAN  | E.LALSLSST#SDDEPPSSVSHGAK.A    | T30:            | 3 | 2,9096 | 0,301 | 0,485  |
| 1 | P04264 K2C1_HUMAN   | K.QISNLQQSISDAEQR.G            |                 | 3 | 2,9083 | 0,314 | 0,213  |
| 1 | P25490 TYY1_HUMAN   | E.EQIIGENS#PPDYSE.Y            | S247:           | 2 | 2,9083 | 0,301 | 0,662  |
| 1 | Q12888 TP53B_HUMAN  | R.VDVSCEPLEGVEK.C              |                 | 2 | 2,908  | 0,35  | 0,585  |
| 1 | Q15185 TEBP_HUMAN   | D.S#DDEKMPDLE.-                | S151:           | 2 | 2,9038 | 0,25  | 0,097  |
| 1 | Q15154 PCM1_HUMAN   | E.TAGS#LSGVSITSE.L             | S328:           | 2 | 2,9013 | 0,296 | 0,189  |
| 1 | P35527 K1C9_HUMAN   | K.TLNDRMQEYQLIAK.N             |                 | 3 | 2,9007 | 0,152 | -0,593 |
| 1 | Q8IX21 CJ006_HUMAN  | E.Y#GTPTKS#PPAALE.V            | Y549:S555:      | 2 | 2,9006 | 0,098 | 0,082  |
| 1 | Q8N3U4 STAG2_HUMAN  | E.SETHFS#S#DTDFEDIE.G          | S22:S23:        | 2 | 2,9005 | 1     | 0,699  |
| 1 | P12270 TPR_HUMAN    | E.GVQGPLNVS#LSEE.G             | S1185:          | 2 | 2,9    | 0,299 | 0,433  |
| 1 | Q15424 SAFB1_HUMAN  | E.LAEAPTEAPS#PEAR.D            | S344:           | 2 | 2,9    | 0,283 | -0,241 |
| 1 | O43379 WDR62_HUMAN  | E.AGPGDQQGDSYLR.V              |                 | 2 | 2,8954 | 0,327 | -0,268 |
| 1 | B2RP63 B2RP63_HUMAN | R.TSS#IS#GPLSPAYTGQVPYNYNQLE.G | S8:S10:         | 2 | 2,8939 | 1     | 1,066  |
| 1 | Q08J23 NSUN2_HUMAN  | E.STQLS#PADLTE.G               | S456:           | 2 | 2,8937 | 0,464 | 0,295  |
| 1 | Q9BTX1 NDC1_HUMAN   | E.FSNPSPSTS#ISAE.G             | S504:           | 2 | 2,8903 | 0,256 | -0,087 |
| 1 | Q9BVJ6 UT14A_HUMAN  | E.LSQDAEPAGS#QE.T              | S445:           | 2 | 2,8878 | 0,264 | 0,186  |
| 1 | Q66K74 MAP1S_HUMAN  | E.S#LPTLSDDPVPLAPGAADS#DEDTE.G | S790:S809:      | 2 | 2,8873 | 0,44  | 0,459  |
| 1 | P43243 MATR3_HUMAN  | K.NTHCSSLPHYQK.L               |                 | 2 | 2,8857 | 0,444 | -0,083 |
| 1 | Q86VR2 F134C_HUMAN  | E.LAAFQPLDDSTVAR.E             |                 | 2 | 2,8841 | 0,43  | 0,147  |
| 1 | Q9NQW6 ANLN_HUMAN   | E.ASNQQPLS#GGEE.K              | S54:            | 2 | 2,8835 | 0,256 | -0,188 |

|   |                     |                                |            |   |        |       |        |
|---|---------------------|--------------------------------|------------|---|--------|-------|--------|
| 1 | Q96QR8 PURB_HUMAN   | R.GGGGGPCGFQPASR.G             |            | 2 | 2,8829 | 0,352 | -0,187 |
| 1 | Q6FIF0 ZFAN6_HUMAN  | E.AQSALDSTSSSM*QPS#PVSNQSLLE.S | S88:       | 2 | 2,8812 | 0,388 | 0,83   |
| 1 | Q8NB90 SPAT5_HUMAN  | E.LS#LQLSQLDLE.D               | S232:      | 2 | 2,8805 | 0,209 | 0,091  |
| 1 | Q01433 AMPD2_HUMAN  | E.EAGITM*S#PGPQ.-              | S875:      | 2 | 2,88   | 0,366 | 0,103  |
| 1 | Q96EV8 DTBP1_HUMAN  | E.GGESPVVQS#DEEE.V             | S321:      | 2 | 2,8742 | 0,166 | 0      |
| 1 | P35527 K1C9_HUMAN   | R.SGGGGGGGLGSGGSIR.S           |            | 2 | 2,8735 | 0,275 | 0      |
| 1 | Q9NUA8 ZBT40_HUMAN  | E.ACS#PSPAVQTSE.A              | S214:      | 2 | 2,8684 | 0,284 | 0,251  |
| 1 | P10636 TAU_HUMAN    | E.DHAGTYGLGDRK.D               |            | 3 | 2,8616 | 0,253 | 0,354  |
| 1 | Q02790 FKBP4_HUMAN  | K.SNTAGS#QSQVETEA.-            | S451:      | 2 | 2,8569 | 0,257 | 0,164  |
| 1 | P43243 MATR3_HUMAN  | K.NTHCSSLPHYQK.L               |            | 3 | 2,8524 | 0,326 | 0,186  |
| 1 | Q9Y3T9 NOC2L_HUMAN  | E.LEDLQLS#EDD.-                | S746:      | 2 | 2,8508 | 0,312 | 0,777  |
| 1 | O94842 TOX4_HUMAN   | E.VES#PSQM*DVE.L               | S550:      | 2 | 2,8505 | 0,274 | 0,201  |
| 1 | Q9ULI8 NEB1_HUMAN   | E.AVS#PTVSQLSAVFE.N            | S199:      | 2 | 2,8488 | 0,296 | 0,483  |
| 1 | A4LAA3 A4LAA3_HUMAN | E.T#VDQNSDS#DEMLAILKE.V        | T724:S731: | 2 | 2,8475 | 0,093 | 0,708  |
| 1 | Q9Y5B0 CTDP1_HUMAN  | E.LAGAPEPQGSQAQGG.R.V          |            | 2 | 2,8472 | 0,489 | -0,078 |
| 1 | Q99661 KIF2C_HUMAN  | E.LSS#QM*SS#FNE.A              | S629:S633: | 2 | 2,8438 | 0,104 | 0,187  |
| 1 | Q9Y3T9 NOC2L_HUMAN  | E.LEDLQLS#ED.D                 | S746:      | 2 | 2,8422 | 0,122 | 0,427  |
| 1 | P11388 TOP2A_HUMAN  | E.GS#PQEDGVELE.G               | S1247:     | 2 | 2,8419 | 0,205 | 0,098  |
| 1 | Q86WJ1 CHD1L_HUMAN  | E.SNNYQSFLPS#EES#EPEDLE.N      | S689:S692: | 2 | 2,8396 | 0,372 | 0,482  |
| 1 | Q00613 HSF1_HUMAN   | R.VKEEPPS#PPQS#PRVEE.A         | S303:S307: | 3 | 2,8356 | 0,28  | 0      |
| 1 | Q5UIP0 RIF1_HUMAN   | E.ICDM*DS#SEAM*SLE.S           | S1843:     | 2 | 2,8335 | 0,283 | 0,229  |
| 1 | Q9BPX3 CND3_HUMAN   | E.ADS#ES#DHEVPEPESE.M          | S973:S975: | 2 | 2,8329 | 0,32  | 0,067  |
| 1 | Q86W50 MET10_HUMAN  | E.ASEQFGS#PVAE.R               | S498:      | 2 | 2,8296 | 0,096 | 0,305  |
| 1 | Q16563 SYPL1_HUMAN  | K.TVTATFGYPFR.L                |            | 2 | 2,8289 | 0,454 | 0,29   |
| 1 | Q14157 UBP2L_HUMAN  | E.KSPAATSTAAPPPPS#SPLPSK.S     | S453:      | 3 | 2,8274 | 0,169 | 0,084  |
| 1 | Q05BQ5 MBTD1_HUMAN  | E.LLDGEDYNFLQGAS#DQE.S         | S612:      | 2 | 2,8259 | 0,288 | 0,673  |
| 1 | Q13428 TCOF_HUMAN   | K.TGPTVTQVK.A                  |            | 2 | 2,8249 | 0,341 | 0,131  |
| 1 | Q96CX2 KCD12_HUMAN  | E.GASAGAPS#PTLE.L              | S176:      | 2 | 2,8236 | 0,308 | 0,214  |
| 1 | Q9NYF8 BCLF1_HUMAN  | K.NTPSQSHSIQHS#PER.S           | S268:      | 3 | 2,8228 | 0,372 | -0,095 |
| 1 | Q9H501 ESF1_HUMAN   | E.M*QSVVQLIM*TR.D              |            | 2 | 2,8216 | 0,331 | 0,182  |
| 1 | Q15742 NAB2_HUMAN   | E.AGS#PPFSPAGGGVPE.G           | S205:      | 2 | 2,8213 | 0,296 | 0,649  |
| 1 | Q8WUM0 NU133_HUMAN  | E.GSLASSVAGPNS#E.S             | S499:      | 2 | 2,8176 | 0,244 | 0,097  |
| 1 | P04792 HSPB1_HUMAN  | E.SPAVAAPAYS.R.A               |            | 2 | 2,8172 | 0,413 | 0      |
| 1 | Q86VR2 F134C_HUMAN  | E.LAIT#DSEHS#DAE.V             | T283:S288: | 2 | 2,8111 | 0,309 | 0,506  |
| 1 | P40222 TXLNA_HUMAN  | K.HKDLQQLVDAK.L                |            | 3 | 2,8099 | 0,299 | 0,321  |
| 1 | O15060 ZBT39_HUMAN  | E.VIELS#DDS#EDE.L              | S323:S326: | 2 | 2,8094 | 0,155 | 0,086  |
| 1 | Q9HC35 EMAL4_HUMAN  | K.ATLLEDQDPS#PSS.-             | S978:      | 2 | 2,8094 | 0,425 | 0,389  |
| 1 | Q9C0C2 TB182_HUMAN  | E.GVLQS#PSQDQE.K               | S435:      | 2 | 2,8076 | 0,281 | 0,289  |
| 1 | Q01433 AMPD2_HUMAN  | E.TIPEEAGITM*S#PGPQ.-          | S875:      | 2 | 2,8053 | 0,211 | 0,376  |

|   |                     |                                 |                    |   |        |       |        |
|---|---------------------|---------------------------------|--------------------|---|--------|-------|--------|
| 1 | Q14676 MDC1_HUMAN   | R.AQPFGFIDS#DT#DAEEE.R          | S329:T331:         | 2 | 2,8033 | 0,376 | 0,316  |
| 1 | Q14676 MDC1_HUMAN   | R.AQPFGFIDS#DTDAEEE.R           | S329:              | 2 | 2,7946 | 0,481 | 0,527  |
| 1 | Q9BPX3 CND3_HUMAN   | E.GTEINS#DDEQE.S                | S674:              | 2 | 2,7933 | 0,285 | 0,463  |
| 1 | B2RXH1 B2RXH1_HUMAN | E.SVANVNANT#PSSE.L              | T693:              | 2 | 2,7894 | 0,302 | 0      |
| 1 | P04150 GCR_HUMAN    | E.NCLLS#PLAGEDD.S               | S226:              | 2 | 2,7893 | 0,464 | 0,265  |
| 1 | Q9Y6I9 TX264_HUMAN  | E.TSAATLSPGASSR.G               |                    | 2 | 2,785  | 0,442 | -0,101 |
| 1 | P46937 YAP1_HUMAN   | E.ALSS#DILNDM*E.S               | S430:              | 2 | 2,7791 | 0,188 | 0,655  |
| 1 | Q32MZ4 LRRF1_HUMAN  | E.VPGS#PAGTEGNCQE.A             | S521:              | 2 | 2,7679 | 0,434 | 0,082  |
| 1 | Q9Y5Q8 TF3C5_HUMAN  | E.DFKPS#DGS#ENEM*E.T            | S504:S507:         | 2 | 2,7675 | 0,234 | -0,073 |
| 1 | Q02952 AKA12_HUMAN  | E.LS#LQEGDLNGQK.G               | S75:               | 2 | 2,7642 | 0,477 | 0,177  |
| 1 | Q9BUR4 WDR79_HUMAN  | K.AMEDTSGEPAAEDE.G              |                    | 2 | 2,7626 | 0,388 | 0,168  |
| 1 | P05388 RLAO_HUMAN   | E.S#DEDM*GFGLFD.-               | S307:              | 2 | 2,7609 | 0,264 | 0,184  |
| 1 | Q7Z401 MYCPP_HUMAN  | E.LLLISS#LEDTNE.T               | S994:              | 2 | 2,759  | 0,391 | 0,086  |
| 1 | Q15424 SAFB1_HUMAN  | E.T#INNLDTSSSDFTILQE.I          | T188:              | 3 | 2,7558 | 0,101 | 0,647  |
| 1 | Q96TA1 NIBL1_HUMAN  | E.YSNSGGGGS#PSPSTPE.S           | S588:              | 2 | 2,7544 | 0,371 | 0,235  |
| 1 | Q9NQX3 GEPH_HUMAN   | E.LEDLPS#PPPPLS#PPPTTS#PHKQTE.D | S188:S194:S200:    | 3 | 2,7544 | 0,085 | 0,653  |
| 1 | Q12756 KIF1A_HUMAN  | E.ALS#PAFSEDSE.S                | S1413:             | 2 | 2,7541 | 0,31  | 0,297  |
| 1 | Q5VUA4 ZN318_HUMAN  | R.HTDFLLPHER.A                  |                    | 3 | 2,7535 | 0,196 | 0,217  |
| 1 | Q9Y2D5 AKAP2_HUMAN  | E.LSNSS#PDPM*AE.A               | S121:              | 2 | 2,752  | 0,404 | 0,196  |
| 1 | Q9P1Q0 VPS54_HUMAN  | E.LTPIAVDTTSQR.N                |                    | 2 | 2,7487 | 0,484 | 0,187  |
| 1 | Q9UQ35 SRRM2_HUMAN  | E.SYFGVSSLQLK.G                 |                    | 2 | 2,7479 | 0,352 | 0,397  |
| 1 | P19532 TFE3_HUMAN   | E.GVVGGLSGGALSPLR.A             |                    | 2 | 2,7476 | 0,237 | 0,091  |
| 1 | P52948 NUP98_HUMAN  | E.LSDSDM*VDIT#QEPVLDTM*LEE.S    | T954:              | 2 | 2,7459 | 0,45  | 1,116  |
| 1 | P35527 K1C9_HUMAN   | R.QGVDADINGLR.Q                 |                    | 2 | 2,7456 | 0,38  | -0,105 |
| 1 | Q9NQ88 CL005_HUMAN  | E.QFSQGS#NACLE.T                | S159:              | 2 | 2,7404 | 0,15  | 0,34   |
| 1 | B1Q2X3 B1Q2X3_HUMAN | E.GIILPSIAPSSLASEK.V            |                    | 2 | 2,7401 | 0,311 | 0,288  |
| 1 | Q9Y2F5 K0947_HUMAN  | E.TQDTSQSSLPGTLHCYTGIR.E        |                    | 3 | 2,7301 | 0,152 | 0,329  |
| 1 | P29374 ARI4A_HUMAN  | E.KNGTGQS#S#DS#EDLPVLD.N        | S1108:S1109:S1111: | 2 | 2,7286 | 0,104 | 1,219  |
| 1 | Q6GMV2 SMYD5_HUMAN  | E.NYLFVCSCKP.C                  |                    | 2 | 2,7197 | 0,309 | 0,663  |
| 1 | Q9BUW7 CI016_HUMAN  | E.FQQQLGEAPSDAS#P.-             | S82:               | 2 | 2,7189 | 0,291 | 0,628  |
| 1 | Q9UQ35 SRRM2_HUMAN  | E.M*STSNFESS#PE.V               | S1271:             | 2 | 2,7185 | 0,138 | 0,186  |
| 1 | P17029 ZKSC1_HUMAN  | E.ATGLS#PQAAQE.K                | S13:               | 2 | 2,7167 | 0,199 | -0,212 |
| 1 | Q9H8W4 PKHF2_HUMAN  | D.LLSAGDM*ATCQPAR.S             |                    | 2 | 2,7142 | 0,286 | -0,162 |
| 1 | Q99618 CDCA3_HUMAN  | E.LDLPLGTQLS#VEE.Q              | S131:              | 2 | 2,7141 | 0,294 | 0,408  |
| 1 | P28347 TEAD1_HUMAN  | R.MSDSADKPIDNDAE.G              |                    | 2 | 2,7139 | 0,231 | -0,324 |
| 1 | Q96AE4 FUBP1_HUMAN  | K.RPLEDGDQPDAAK.V               |                    | 3 | 2,712  | 0,194 | 0,125  |
| 1 | Q92598 HS105_HUMAN  | D.AQQTSQSPPS#PELTSE.E           | S557:              | 2 | 2,7115 | 0,371 | 0,276  |
| 1 | Q8N3F8 MILK1_HUMAN  | E.VAQPS#PTAS#LE.S               | S414:S418:         | 2 | 2,71   | 0,255 | 0,484  |
| 1 | P49848 TAF6_HUMAN   | E.AGDS#PPPAPGTPK.A              | S653:              | 2 | 2,7054 | 0,173 | -0,384 |

|   |                     |                                 |              |   |        |       |        |
|---|---------------------|---------------------------------|--------------|---|--------|-------|--------|
| 1 | Q6P2E9 EDC4_HUMAN   | R.T#RSPDVISSASTALSQDIPE.I       | T727:        | 3 | 2,6989 | 0,163 | 0,595  |
| 1 | P52701 MSH6_HUMAN   | E.LAVCDEPS#EPEEEEE.M            | S200:        | 2 | 2,6946 | 0,216 | 0,729  |
| 1 | Q8WYP5 AHTF1_HUMAN  | E.YQDAPS#PEDLEE.T               | S1335:       | 2 | 2,6935 | 0,165 | 0,331  |
| 1 | Q68E09 Q68E09_HUMAN | E.VVFASASVT#PPRT#PDSAPPSPAE.A   | T510:T514:   | 3 | 2,6932 | 0,245 | 0,9    |
| 1 | Q02952 AKA12_HUMAN  | E.VEETAGS#VPAEE.L               | S441:        | 2 | 2,6915 | 0,155 | 0,094  |
| 1 | B2RP63 B2RP63_HUMAN | R.TS#S#ISGPLSPAYTGQVPYNYNQL.E.G | S7:S8:       | 3 | 2,6913 | 1     | 0,8    |
| 1 | Q5QJE6 TDIF2_HUMAN  | K.LYTSAPNTSQGK.D                |              | 2 | 2,6902 | 0,419 | -0,096 |
| 1 | Q9UHY1 NRBP_HUMAN   | E.SQTVLSSGSDPK.V                |              | 2 | 2,6895 | 0,441 | -0,304 |
| 1 | Q02952 AKA12_HUMAN  | E.VEM*LSS#QE.R                  | S505:        | 2 | 2,6884 | 0,175 | 0      |
| 1 | Q9P1Y6 K1542_HUMAN  | E.AAGSFNS#DDDAE.S               | S101:        | 2 | 2,6869 | 0,217 | 0      |
| 1 | Q8TD19 NEK9_HUMAN   | E.FIPM*PDS#PSPLSAAFSE.S         | S827:        | 2 | 2,6864 | 0,358 | 0,646  |
| 1 | Q7Z5K2 WAPL_HUMAN   | E.STGDPFGFDS#DDE.S              | S77:         | 2 | 2,6864 | 0,402 | 0,498  |
| 1 | Q96QE3 ATAD5_HUMAN  | E.M*ENSL#DPENE.Q                | S356:        | 2 | 2,686  | 0,088 | 0,09   |
| 1 | Q96D71 REPS1_HUMAN  | K.KGSVSHDTVQPR.T                |              | 3 | 2,6842 | 0,137 | 0,349  |
| 1 | O43379 WDR62_HUMAN  | E.LSLPEGPSVPSLQQT#PEQE.K        | T1053:       | 2 | 2,6808 | 0,316 | 0,324  |
| 1 | Q9H5H4 ZN768_HUMAN  | R.YEPQS#PGYEPR.S                | S125:        | 2 | 2,6773 | 0,413 | 0,087  |
| 1 | P98175 RBM10_HUMAN  | E.LQSPTHSS#ALPPATS#PTAQE.S      | S546:S553:   | 3 | 2,677  | 0,129 | 0,562  |
| 1 | Q96S44 PRPK_HUMAN   | R.ATT#PADGEEPAPAE.A             | T8:          | 2 | 2,6744 | 0,191 | 0      |
| 1 | P11388 TOP2A_HUMAN  | E.NT#EGSPQEDGVELE.G             | T1244:       | 2 | 2,6739 | 0,211 | 0,154  |
| 1 | P04264 K2C1_HUMAN   | K.SKAEAESLYQSK.Y                |              | 3 | 2,6739 | 0,146 | 0,341  |
| 1 | P49023 PAXI_HUMAN   | E.ANSS#PPLPGALSPLYGVPE.T        | S170:        | 2 | 2,6733 | 0,273 | 0,376  |
| 1 | Q9ULJ3 ZN295_HUMAN  | K.IQPLEPDSPTGLS#ENPTPATE.K      | S1008:       | 2 | 2,6727 | 0,197 | 0,859  |
| 1 | P49023 PAXI_HUMAN   | E.ANSSPPLGALS#PLYGVPE.T         | S178:        | 2 | 2,671  | 0,252 | -0,376 |
| 1 | A1L390 PKHG3_HUMAN  | E.VFSAVEGPSAEETPS#DTESPE.V      | S533:        | 2 | 2,6679 | 0,332 | 0,326  |
| 1 | P30530 UFO_HUMAN    | R.APLQGTLLGYR.L                 |              | 2 | 2,6659 | 0,357 | 0,205  |
| 1 | Q92619 HMHA1_HUMAN  | E.VASGS#HSGS#EEQLE.A            | S1070:S1074: | 2 | 2,6635 | 0,143 | -1,006 |
| 1 | P06241 FYN_HUMAN    | E.DYFTATEPQY#QPGENL.-           | Y531:        | 2 | 2,6601 | 0,215 | 1,062  |
| 1 | Q5T457 UBR4_HUMAN   | E.TAENVNNGNPS#PLEALLAGAE.G      | S2788:       | 3 | 2,6541 | 0,083 | 0,169  |
| 1 | Q96PK6 RBM14_HUMAN  | R.AQPSVSLGAPYR.G                |              | 2 | 2,6527 | 0,34  | 0,392  |
| 1 | Q14568 HS902_HUMAN  | E.IEDVGS#DEEE.E                 | S263:        | 2 | 2,6523 | 0,266 | 0,102  |
| 1 | Q03468 ERCC6_HUMAN  | E.LSVISGNGECSNSSGTGK.T          |              | 2 | 2,6505 | 0,394 | -0,07  |
| 1 | Q9UPN9 TRI33_HUMAN  | R.LKS#DERPVHIK.-                | S1119:       | 3 | 2,6472 | 0,117 | 0,326  |
| 1 | Q7Z3T8 ZFY16_HUMAN  | E.IIQSPIS#QVPSVE.K              | S942:        | 2 | 2,6447 | 0,275 | 0,826  |
| 1 | P12270 TPR_HUMAN    | E.VM*AEEST#DGEVE.T              | T1877:       | 2 | 2,6401 | 0,237 | 0,263  |
| 1 | P13646 K1C13_HUMAN  | R.LEQEIATYR.S                   |              | 2 | 2,6386 | 0,41  | -0,217 |
| 1 | Q96RY5 CRML_HUMAN   | E.ALFDGGGGGPAVSDLS#Q.-          | S1265:       | 2 | 2,6365 | 0,256 | 0,525  |
| 1 | O00233 PSMD9_HUMAN  | R.HNIICLQNDHK.A                 |              | 2 | 2,6306 | 0,184 | 0,088  |
| 1 | Q9Y4F3 LKAP_HUMAN   | R.LVCLLPSSQAR.Q                 |              | 2 | 2,6305 | 0,314 | 0,392  |
| 1 | Q14160 LAP4_HUMAN   | E.ACPCQPDSGS#PLPAEEE.K          | S504:        | 2 | 2,6292 | 0,295 | 0,571  |

|   |                     |                                   |                    |   |        |       |        |
|---|---------------------|-----------------------------------|--------------------|---|--------|-------|--------|
| 1 | P23396 RS3_HUMAN    | E.ILPPT#PISE.Q                    | T221:              | 2 | 2,6266 | 0,222 | 0      |
| 1 | P05386 RLA1_HUMAN   | E.S#DDDM*GFGLFD.-                 | S104:              | 2 | 2,6237 | 0,257 | 0,371  |
| 1 | Q8NC44 F134A_HUMAN  | E.SGGFSVS#R.A                     | S326:              | 2 | 2,6225 | 0,355 | -0,209 |
| 1 | P49454 CENPF_HUMAN  | E.TS#NLQDMQSQE.I                  | S1248:             | 2 | 2,6209 | 0,218 | 0,179  |
| 1 | P25490 TYY1_HUMAN   | E.QIIGENS#PPDYSE.Y                | S247:              | 2 | 2,6198 | 0,205 | 0,319  |
| 1 | Q13895 BYST_HUMAN   | E.AEHGTGDKPAAPR.E                 |                    | 3 | 2,6194 | 0,198 | 0,28   |
| 1 | P35527 K1C9_HUMAN   | K.TLNDM*RQEYEQLIAK.N              |                    | 3 | 2,6176 | 0,397 | 0      |
| 1 | P28290 SSFA2_HUMAN  | E.SLQAM*GS#SADSCDSE.T             | S535:              | 2 | 2,617  | 0,295 | 1,636  |
| 1 | Q12888 TP53B_HUMAN  | E.T#SVIS#IDSPQKLAILDQELE.H        | T720:S724:         | 3 | 2,6151 | 0,099 | 0,31   |
| 1 | P98175 RBM10_HUMAN  | E.LQS#PTHPSALPPATS#PTAQE.S        | S540:S553:         | 3 | 2,6131 | 0,153 | 0,241  |
| 1 | Q8WUQ7 CS029_HUMAN  | E.QGVESEPLFPILK.Q                 |                    | 2 | 2,6111 | 0,209 | 0,335  |
| 1 | Q8TC07 TBC15_HUMAN  | E.ILGLQGSEVTT#PDS#DVGEDE.N        | T637:S640:         | 2 | 2,6096 | 0,371 | 0,549  |
| 1 | P78559 MAP1A_HUMAN  | R.CLS#PDDSTVK.M                   | S986:              | 2 | 2,6084 | 0,321 | 0,102  |
| 1 | P04637 P53_HUMAN    | E.NNVLS#PLPSQAM*DD.L              | S33:               | 2 | 2,608  | 0,294 | 0,611  |
| 1 | Q6UN15 FIP1_HUMAN   | E.NAS#ANPPSGIEDE.T                | S57:               | 2 | 2,6043 | 0,309 | 0,088  |
| 1 | A8K7V5 A8K7V5_HUMAN | E.VSTAPAGTDM*PAAK.K               |                    | 2 | 2,6038 | 0,372 | 0      |
| 1 | Q9Y5K6 CD2AP_HUMAN  | E.TVLAGPTSPIPS#LGNVSE.T           | S193:              | 2 | 2,6003 | 0,275 | 0,402  |
| 1 | P48960 CD97_HUMAN   | R.CNPGFSSFSE.I                    |                    | 2 | 2,5978 | 0,281 | 0,216  |
| 1 | Q8IW35 CEP97_HUMAN  | E.SSNNEQDNS#LLE.Q                 | S770:              | 2 | 2,5919 | 0,247 | -0,085 |
| 1 | P50548 ERF_HUMAN    | E.GAGALAPPPPPQIK.V                |                    | 2 | 2,5916 | 0,384 | 0,432  |
| 1 | Q92994 TF3B_HUMAN   | E.LLGGAPGSSEAAGS#PE.W             | S398:              | 2 | 2,59   | 0,164 | 0,082  |
| 1 | P42166 LAP2A_HUMAN  | R.SS#TLPPTISSSAE.N                | S159:              | 2 | 2,5857 | 0,361 | 0,09   |
| 1 | Q9NTJ3 SMC4_HUMAN   | E.IS#VLSPEDE.A                    | S1056:             | 2 | 2,5855 | 0,131 | 0,413  |
| 1 | P19532 TFE3_HUMAN   | E.IIS#LESS#YNDE.M                 | S270:S274:         | 2 | 2,5832 | 0,301 | 0,341  |
| 1 | O75175 CNOT3_HUMAN  | E.IFNQSSSTPTSTTSSS#PIPPSPANCTTE.N | S268:              | 3 | 2,5803 | 0,13  | 0,553  |
| 1 | P13647 K2C5_HUMAN   | R.GRLDSELR.N                      |                    | 2 | 2,5796 | 0,136 | 0,064  |
| 1 | Q9UQ35 SRRM2_HUMAN  | K.AGM*SSNQSISS#PVLDA              | S1404:             | 2 | 2,5789 | 0,102 | 0,998  |
| 1 | Q9NY61 AATF_HUMAN   | E.LLFQYPDTR.Y                     |                    | 2 | 2,5722 | 0,282 | 0,212  |
| 1 | Q9H4A3 WNK1_HUMAN   | R.DVDDGS#GS#PHS#PHQLSSK.S         | S2027:S2029:S2032: | 2 | 2,5713 | 0,282 | 0,234  |
| 1 | P61978 HNRPK_HUMAN  | E.GLQLPS#PTATSQLPLE.S             | S116:              | 2 | 2,5702 | 0,263 | 0,634  |
| 1 | Q02952 AKA12_HUMAN  | E.M*VSAVSQLTDS#PDTTEE.A           | S1012:             | 2 | 2,5672 | 0,133 | 0,64   |
| 1 | Q14160 LAP4_HUMAN   | E.ACPCQPDSGS#PLPAEE.E             | S504:              | 2 | 2,5646 | 0,286 | 0,136  |
| 1 | Q9NPF0 CD320_HUMAN  | R.TSGLCVPLTWR.C                   |                    | 2 | 2,5638 | 0,187 | 0,473  |
| 1 | Q02952 AKA12_HUMAN  | E.M*VSAVSQLTDS#PD.T               | S1012:             | 2 | 2,5629 | 0,336 | -0,169 |
| 1 | Q9H4L4 SEN3_HUMAN   | E.LFQGS#DLGM*AEE.A                | S288:              | 2 | 2,5575 | 0,133 | 0,175  |
| 1 | Q9UBB5 MBD2_HUMAN   | E.MDIEM*DS#GDEA.-                 | S407:              | 2 | 2,5436 | 0,323 | 0,186  |
| 1 | Q9NRS6 SNX15_HUMAN  | E.LEVPVDPSS#PAQE.A                | S180:              | 2 | 2,5411 | 0,286 | 0,149  |
| 1 | Q9UPN9 TRI33_HUMAN  | R.LKS#DERPVHIK.-                  | S1119:             | 2 | 2,5405 | 0,373 | -0,087 |
| 1 | Q02952 AKA12_HUMAN  | E.M*VSAVSQLTDSPTT#EE.A            | T1016:             | 2 | 2,5396 | 0,331 | -0,32  |



|   |                     |                              |              |   |        |       |        |
|---|---------------------|------------------------------|--------------|---|--------|-------|--------|
| 1 | Q9NWF9 RN216_HUMAN  | E.SDPLETQSQSSEDS#ETE.L       | S147:        | 2 | 2,5385 | 0,357 | 0      |
| 1 | Q14247 SRC8_HUMAN   | K.YGIDKDKVDK.S               |              | 2 | 2,5369 | 0,319 | 0,103  |
| 1 | Q99755 PI51A_HUMAN  | E.GSPIPDPSPFS#PLVGE.T        | S534:        | 2 | 2,5359 | 0,406 | 0,386  |
| 1 | Q12888 TP53B_HUMAN  | R.SEALS#SVLVDQEE.A           | S639:        | 2 | 2,5343 | 0,272 | 0,44   |
| 1 | Q5T4S7 UBR4_HUMAN   | K.LCTFTITQKE.F               |              | 2 | 2,5249 | 0,325 | -0,295 |
| 1 | A0MZ66 SHOT1_HUMAN  | E.ADSSS#PTGILATSE.S          | S494:        | 2 | 2,5211 | 0,337 | 0,431  |
| 1 | Q13123 RED_HUMAN    | E.CYPATM*DDM*AVDS#DEE.V      | S460:        | 2 | 2,5183 | 0,332 | 0      |
| 1 | P13693 TCTP_HUMAN   | E.GNIDDS#LIGGNASAEPEGE.G     | S46:         | 2 | 2,5164 | 0,251 | 0,246  |
| 1 | Q9UJM3 ERRFI_HUMAN  | E.ALSLDDT#DCE.V              | T167:        | 2 | 2,5155 | 0,282 | 0,2    |
| 1 | Q8TB99 Q8TB99_HUMAN | E.SLDSSS#QPGPVE.S            | S263:        | 2 | 2,5155 | 0,328 | -0,095 |
| 1 | P05362 ICAM1_HUMAN  | E.LAPLPSWQPVGK.N             |              | 2 | 2,5149 | 0,397 | 0,283  |
| 1 | P54725 RD23A_HUMAN  | E.QFIQM*LNEPPGELADIS#DVEGE.V | S295:        | 2 | 2,5077 | 0,399 | 0,773  |
| 1 | Q9BUR4 WDR79_HUMAN  | E.FGS#PSELS#PRIE.E           | S85:S90:     | 2 | 2,5036 | 0,245 | 0,495  |
| 1 | Q14686 MLL2_HUMAN   | E.LPTEPLAEPVPS#PLPLASS#PE.S  | S4673:S4680: | 3 | 2,5028 | 0,094 | 0,534  |
| 1 | Q13428 TCOF_HUMAN   | R.GPASVPSVGK.A               |              | 2 | 2,5027 | 0,37  | 0,136  |
| 1 | Q6NZI2 PTRF_HUMAN   | E.LS#S#DEAVEVEE.V            | S202:S203:   | 2 | 2,5011 | 0,116 | 0,357  |
| 1 | Q8WUA4 TF3C2_HUMAN  | E.AGPVGNM*TVVDS#PGQE.V       | S25:         | 2 | 2,499  | 0,245 | 0,221  |
| 1 | Q86WB0 NIPA_HUMAN   | E.GIAPEEGVDK.D               |              | 2 | 2,4949 | 0,306 | 0,213  |
| 1 | Q9Y2D5 AKAP2_HUMAN  | E.LSNSS#PDPM*AEAE.R          | S121:        | 2 | 2,4915 | 0,205 | 0,338  |
| 1 | Q02952 AKA12_HUMAN  | E.IIEQIPSSSES#NLEE.L         | S154:        | 2 | 2,4856 | 0,128 | 0,585  |
| 1 | Q9BTT0 AN32E_HUMAN  | E.LLQQITYLDGFDQEDNEAPD.S     |              | 2 | 2,4797 | 0,307 | 0,525  |
| 1 | Q9H7N4 SFR19_HUMAN  | R.FDIYDPFHPTDE.A             |              | 2 | 2,4789 | 0,316 | 0,489  |
| 1 | Q86WJ1 CHD1L_HUMAN  | E.SNNYQSFLPSEES#EPEDLE.N     | S692:        | 2 | 2,4777 | 0,174 | 0,199  |
| 1 | P32519 ELF1_HUMAN   | E.ALLNM*DS#PGPM*LDE.K        | S110:        | 2 | 2,4775 | 0,281 | 0,907  |
| 1 | P11362 FGFR1_HUMAN  | K.IGPDNLPYVQILK.T            |              | 2 | 2,4773 | 0,425 | 0,996  |
| 1 | Q86XP3 DDX42_HUMAN  | D.SDS#DDDPLEAFM*AE.V         | S111:        | 2 | 2,4745 | 0,249 | 0,149  |
| 1 | P32004 L1CAM_HUMAN  | E.AAGGNDSS#GATSPINPAVALE.-   | S1243:S1244: | 2 | 2,471  | 0,162 | 0,711  |
| 1 | Q7Z6Z7 HUWE1_HUMAN  | E.SAQPPEDSS#PPASSE.S         | S2918:       | 2 | 2,4628 | 0,335 | 0,156  |
| 1 | Q8N3P4 VPS8_HUMAN   | E.SILNET#DDEDE.S             | T75:         | 2 | 2,459  | 0,263 | 0,718  |
| 1 | P04264 K2C1_HUMAN   | R.DYQELM*NTK.L               |              | 2 | 2,4585 | 0,337 | -0,316 |
| 1 | P28715 ERCC5_HUMAN  | E.SAGQDLISIPK.A              |              | 2 | 2,458  | 0,181 | 0,216  |
| 1 | Q9HCF4 ALO17_HUMAN  | E.AAELLS#EPEESE.R            | S1258:       | 2 | 2,4528 | 0,193 | 0,726  |
| 1 | Q9UQ35 SRRM2_HUMAN  | E.QNSALPT#SSQDEE.L           | T1231:       | 2 | 2,4513 | 0,203 | 0,164  |
| 1 | P38398 BRCA1_HUMAN  | E.LQIDSCSS#SEE.I             | S646:        | 2 | 2,4444 | 0,367 | 0,274  |
| 1 | Q9ULW0 TPX2_HUMAN   | E.GLSGS#LVQEPFQLATE.K        | S654:        | 2 | 2,4443 | 0,303 | 0,486  |
| 1 | P04264 K2C1_HUMAN   | R.LLRDYQELM*NTK.L            |              | 2 | 2,4424 | 0,112 | 0,079  |
| 1 | Q9H4A3 WNK1_HUMAN   | R.DVDDGSGS#PHSPHQLSSK.S      | S2029:       | 3 | 2,4416 | 0,107 | 0,19   |
| 1 | Q9NZ53 PDXL2_HUMAN  | E.LLPVNGS#QEE.A              | S195:        | 2 | 2,4415 | 0,272 | 0,209  |
| 1 | P46821 MAP1B_HUMAN  | E.VAPVS#PEVTQE.V             | S1298:       | 2 | 2,4408 | 0,29  | 0,395  |

|   |                     |                            |            |   |        |       |        |
|---|---------------------|----------------------------|------------|---|--------|-------|--------|
| 1 | P35908 K22E_HUMAN   | K.IEISELNR.V               |            | 2 | 2,4408 | 0,219 | 0,188  |
| 1 | P49411 EFTU_HUMAN   | R.GLVM*VKPGSIKPHQK.V       |            | 3 | 2,4357 | 0,322 | 0,224  |
| 1 | P31946 1433B_HUMAN  | D.STLIM*QLLR.D             |            | 2 | 2,4355 | 0,3   | -0,224 |
| 1 | P35908 K22E_HUMAN   | K.DVDNAYM*IK.V             |            | 2 | 2,4337 | 0,161 | 0,225  |
| 1 | P49589 SYCC_HUMAN   | E.YLQM*AQNGS#FQ.-          | S746:      | 2 | 2,4324 | 0,131 | -0,618 |
| 1 | Q6PKG0 LARP1_HUMAN  | R.AVTPVPTKTEE.V            |            | 2 | 2,4282 | 0,378 | -0,104 |
| 1 | O60927 PP1RB_HUMAN  | K.CCCYIEKPR.A              |            | 3 | 2,4245 | 0,271 | 0,071  |
| 1 | Q9NWZ3 IRAQ4_HUMAN  | E.QSYM*PPDSSS#PE.N         | S152:      | 2 | 2,4229 | 0,169 | 0,086  |
| 1 | Q7Z3C6 ATG9A_HUMAN  | E.NALFTSIQS#LQSE.S         | S610:      | 2 | 2,4208 | 0,247 | 0,241  |
| 1 | Q9P031 TAP26_HUMAN  | E.QCSIDEPLFEDQCS#FDQPQPE.E | S140:      | 3 | 2,4197 | 0,128 | 0,483  |
| 1 | Q14692 BMS1_HUMAN   | K.AGLS#PANCQSDR.V          | S552:      | 2 | 2,4197 | 0,187 | -0,09  |
| 1 | P04259 K2C6B_HUMAN  | R.ATGGGLSSVGGGSSTIK.Y      |            | 2 | 2,4154 | 0,35  | 0,17   |
| 1 | O15446 RPA34_HUMAN  | E.VDM*ALGS#PE.M            | S205:      | 2 | 2,4142 | 0,164 | 0,12   |
| 1 | Q12802 AKP13_HUMAN  | E.STQCCPGS#PVAQTE.S        | S345:      | 2 | 2,4139 | 0,271 | -0,076 |
| 1 | Q13523 PRP4B_HUMAN  | R.TRS#PS#PDDILE.R          | S578:S580: | 2 | 2,4035 | 0,138 | 0,176  |
| 1 | Q00653 NFKB2_HUMAN  | E.DSAYGS#QSVEQE.A          | S870:      | 2 | 2,3965 | 0,129 | 0,354  |
| 1 | Q99708 RBBP8_HUMAN  | E.SETQGPM*S#PLGDE.L        | S276:      | 2 | 2,3957 | 0,398 | 0,761  |
| 1 | Q32MZ4 LRRF1_HUMAN  | E.SS#SLPENTVQVE.S          | S379:      | 2 | 2,3954 | 0,095 | 0,534  |
| 1 | Q9UHY1 NRBP_HUMAN   | E.VTS#PVVPPSVK.T           | S422:      | 2 | 2,3952 | 0,189 | -0,103 |
| 1 | P05556 ITB1_HUMAN   | E.CQSEGIPESPK.C            |            | 2 | 2,3872 | 0,37  | 0      |
| 1 | Q6P0N0 CN106_HUMAN  | E.NQVAM*S#FYK.H            | S761:      | 2 | 2,3872 | 0,19  | 0,206  |
| 1 | P55201 BRPF1_HUMAN  | E.GVS#PIPQEIFE.Y           | S238:      | 2 | 2,3864 | 0,226 | 0,471  |
| 1 | Q9Y6X4 K0888_HUMAN  | E.ASSEQLDQFTQSAEK.A        |            | 2 | 2,3858 | 0,29  | 0,512  |
| 1 | Q9Y4L1 HYOU1_HUMAN  | E.TLVEDS#AEEE.S            | S567:      | 2 | 2,3838 | 0,221 | 0,102  |
| 1 | Q4ZG04 Q4ZG04_HUMAN | E.LLLSTLVR.E               |            | 2 | 2,3805 | 0,24  | -0,333 |
| 1 | Q12800 TFCP2_HUMAN  | E.SGLVQDFDASLS#GIGQE.L     | S27:       | 2 | 2,378  | 0,249 | 0,474  |
| 1 | P08779 K1C16_HUMAN  | R.EVFTSSSSSSSR.Q           |            | 2 | 2,3769 | 0,318 | 0,194  |
| 1 | Q96B23 CR025_HUMAN  | E.INIASS#DSEVE.I           | S328:      | 2 | 2,3755 | 0,162 | 0,294  |
| 1 | Q9NTJ3 SMC4_HUMAN   | R.TESPAT#AAETAEE.L         | T44:       | 2 | 2,3727 | 0,172 | 0,579  |
| 1 | O60869 EDF1_HUMAN   | R.GKDIGKPIEK.G             |            | 2 | 2,3678 | 0,322 | -0,225 |
| 1 | Q9BQG0 MBB1A_HUMAN  | K.ALGGEDS#ENEEE.L          | S775:      | 2 | 2,3674 | 0,269 | -0,09  |
| 1 | Q9HC35 EMAL4_HUMAN  | E.SVIQSNTP#PPPSQPLNE.T     | T899:      | 3 | 2,3632 | 0,104 | 0,829  |
| 1 | P04264 K2C1_HUMAN   | K.NM*QDM*VEDYR.N           |            | 2 | 2,363  | 0,304 | 0      |
| 1 | Q9BVP2 GNL3_HUMAN   | E.NSS#GM#FAAEE.T           | S504:      | 2 | 2,3624 | 0,149 | -0,214 |
| 1 | Q9NXG2 THUM1_HUMAN  | E.YGDDM*YGPEK.F            |            | 2 | 2,3619 | 0,384 | 0      |
| 1 | P43358 MAGA4_HUMAN  | R.QPNEGSSSQEEEGPSTSPDAE.S  |            | 2 | 2,3605 | 0,446 | 0,113  |
| 1 | Q96JP5 ZFP91_HUMAN  | E.VLIEDS#DS#AGP.-          | S565:S567: | 2 | 2,3572 | 0,193 | 0,097  |
| 1 | Q14444 CAPR1_HUMAN  | E.YTEQSEVES#TE.Y           | S291:      | 2 | 2,3564 | 0,134 | -0,177 |
| 1 | P43358 MAGA4_HUMAN  | R.QPNEGSSSQEEEGPSTSPDAE.S  | S88:S90:   | 2 | 2,3539 | 0,244 | 0,526  |

|   |                     |                            |              |   |        |       |        |
|---|---------------------|----------------------------|--------------|---|--------|-------|--------|
| 1 | Q16204 CCDC6_HUMAN  | K.SGGIVISPFR.L             |              | 2 | 2,353  | 0,273 | 0,118  |
| 1 | P28290 SSFA2_HUMAN  | E.QS#YLKS#ELGLGLGE.M       | S1079:S1083: | 2 | 2,3529 | 0,121 | 0,295  |
| 1 | Q9UJM3 ERRFI_HUMAN  | E.ALS#LDDTDCE.V            | S163:        | 2 | 2,3504 | 0,308 | 0,4    |
| 1 | Q659A1 NARG2_HUMAN  | E.DTVLCSS#DTDEE.C          | S571:        | 2 | 2,3485 | 0,271 | 0,084  |
| 1 | Q9Y4C8 RBM19_HUMAN  | E.LSDMDYLK.S               |              | 2 | 2,3451 | 0,355 | 0,248  |
| 1 | P05783 K1C18_HUMAN  | R.STFS#TNYR.S              | S10:         | 2 | 2,3431 | 0,399 | 0      |
| 1 | Q9BUR4 WDR79_HUMAN  | K.AM*EDTSGEPAAEDE.G        |              | 2 | 2,3419 | 0,171 | 0,249  |
| 1 | P55884 EIF3B_HUMAN  | E.AASGPSES#PSPAAEE.L       | S83:         | 2 | 2,3377 | 0,176 | 0,234  |
| 1 | O15047 SET1A_HUMAN  | R.VAGS#PVT#PLPEQE.A        | S1103:T1106: | 2 | 2,3374 | 0,16  | 0,247  |
| 1 | P16435 NCPR_HUMAN   | E.HAQAVDYIK.K              |              | 2 | 2,3366 | 0,328 | -0,117 |
| 1 | Q9UQ35 SRRM2_HUMAN  | E.M*STSNFES#SPE.V          | S1270:       | 2 | 2,3345 | 0,144 | 0      |
| 1 | Q6NYC1 JMJD6_HUMAN  | E.SFS#LSPAADVADNVE.R       | S36:         | 2 | 2,3335 | 0,165 | 0,492  |
| 1 | Q9H0H5 RGAP1_HUMAN  | E.NSNAFST#PQT#PDIK.V       | T564:T567:   | 2 | 2,3279 | 0,405 | 0,291  |
| 1 | Q9UHR4 BI2L1_HUMAN  | E.AVT#VPTPS#PTPVR.S        | T409:S414:   | 2 | 2,3271 | 0,158 | 0,329  |
| 1 | Q9UIS9 MBD1_HUMAN   | E.GASS#PVQVGPVAASTE.A      | S465:        | 2 | 2,3229 | 0,25  | 0      |
| 1 | Q12792 TWF1_HUMAN   | E.DVSLHGYK.K               |              | 2 | 2,3211 | 0,202 | -0,133 |
| 1 | A2RTZ0 A2RTZ0_HUMAN | E.ALNQYSVIEETSS#DT#D.-     | S517:T519:   | 2 | 2,3158 | 0,32  | 0,632  |
| 1 | P08473 NEP_HUMAN    | R.NDPM*LLYNK.M             |              | 2 | 2,3153 | 0,201 | 0,326  |
| 1 | Q9Y4E5 ZN451_HUMAN  | E.YIDLVS#S#DDEEPSTSYTDE.N  | S50:S51:     | 2 | 2,3094 | 0,325 | 0,735  |
| 1 | Q9H009 NACA2_HUMAN  | E.NTQTPTVQES#EEEE.V        | S166:        | 2 | 2,309  | 0,298 | 0,333  |
| 1 | Q9H2G2 SLK_HUMAN    | E.TENSLPIPASK.R            |              | 2 | 2,3079 | 0,141 | 0,211  |
| 1 | Q01433 AMPD2_HUMAN  | E.AGITM*S#PGPQ.-           | S875:        | 2 | 2,3044 | 0,227 | 0,116  |
| 1 | P60709 ACTB_HUMAN   | E.ALFQPS#FLGM*E.S          | S265:        | 2 | 2,3038 | 0,222 | 0,274  |
| 1 | Q9UQ35 SRRM2_HUMAN  | E.FSAS#PM*LK.S             | S1124:       | 2 | 2,2995 | 0,155 | 0      |
| 1 | Q6PJT7 ZC3HE_HUMAN  | D.LVQPKPAS#PK.F            | S515:        | 2 | 2,2994 | 0,282 | 0      |
| 1 | Q9H2P0 ADNP_HUMAN   | E.TIHLTEPTK.L              |              | 2 | 2,2975 | 0,26  | -0,104 |
| 1 | P61978 HNRPK_HUMAN  | E.GLQLPS#PTATSQLPLESD.A    | S116:        | 2 | 2,285  | 0,284 | 0,505  |
| 1 | P49643 PRI2_HUMAN   | E.M*DM*EGLEDYFS#EDS.-      | S506:        | 2 | 2,2824 | 0,143 | 0,686  |
| 1 | Q9NTJ3 SMC4_HUMAN   | R.TESPATAAETASEE.L         |              | 2 | 2,2822 | 0,376 | -0,438 |
| 1 | Q9Y5Q8 TF3C5_HUMAN  | K.RPALFSSAK.A              |              | 2 | 2,2783 | 0,311 | -0,344 |
| 1 | O14686 MLL2_HUMAN   | E.LPTEPLAEPVPSPLPLASS#PE.S | S4680:       | 3 | 2,275  | 0,09  | 0,395  |
| 1 | P98171 RHG04_HUMAN  | E.VVASDDGDVLDLDFQTSPT#E.S  | T411:        | 2 | 2,2721 | 0,112 | 0,114  |
| 1 | P53618 COPB_HUMAN   | D.VLVVNQTSDT#LQNCTLE.L     | T752:        | 2 | 2,27   | 0,187 | 0,727  |
| 1 | Q9HCD6 TANC2_HUMAN  | E.NQTSAITQR.I              |              | 2 | 2,2698 | 0,292 | -0,479 |
| 1 | Q9BTX1 NDC1_HUMAN   | E.FSNPSPST#SISAE.G         | T503:        | 2 | 2,264  | 0,302 | 0,174  |
| 1 | P24534 EF1B_HUMAN   | E.KASLPGVKK.A              |              | 2 | 2,2615 | 0,213 | -0,131 |
| 1 | O15061 DMN_HUMAN    | E.VSS#PTGFAQSQVLE.D        | S1107:       | 2 | 2,2591 | 0,286 | 0,478  |
| 1 | O14514 BAI1_HUMAN   | E.NVATLSVSS#LE.R           | S1469:       | 2 | 2,2586 | 0,175 | 0,102  |
| 1 | P12270 TPR_HUMAN    | E.TQVYNQDSQDS#IGE.G        | S1893:       | 2 | 2,2584 | 0,136 | 0,073  |

|   |                    |                         |            |   |        |       |        |
|---|--------------------|-------------------------|------------|---|--------|-------|--------|
| 1 | Q9Y3Y2 CA077_HUMAN | E.LDAYM*AQT#DPETND.-    | T242:      | 2 | 2,2567 | 0,283 | -0,218 |
| 1 | P38159 HNRPG_HUMAN | R.GLPPS#M*E.R           | S352:      | 2 | 2,2536 | 0,17  | 0,369  |
| 1 | Q8TB72 PUM2_HUMAN  | E.VNAILS#PR.S           | S82:       | 2 | 2,2529 | 0,203 | 0,321  |
| 1 | Q9UFW8 CGBP1_HUMAN | E.NQLLNS#QDC.-          | S164:      | 2 | 2,2517 | 0,29  | -0,104 |
| 1 | P46937 YAP1_HUMAN  | E.QDGGTQNPVSS#PGM*SQE.L | S317:      | 2 | 2,2498 | 0,234 | 0,202  |
| 1 | Q06481 APLP2_HUMAN | E.DYCMVCK.A             |            | 2 | 2,2493 | 0,39  | -0,117 |
| 1 | Q8NC51 PAIRB_HUMAN | R.SSFHSHYGLK.H          |            | 2 | 2,2476 | 0,158 | -0,438 |
| 1 | P35527 K1C9_HUMAN  | R.QVLDNLTM*EK.S         |            | 2 | 2,2415 | 0,229 | 0,202  |
| 1 | Q16514 TAF12_HUMAN | K.IPGT#PGAGGRSL#PE.N    | T43:S51:   | 2 | 2,2398 | 0,178 | 0,166  |
| 1 | Q96T21 SEBP2_HUMAN | E.QAELS#GPEGM*DE.L      | S579:      | 2 | 2,2393 | 0,297 | 0,269  |
| 1 | P18583 SON_HUMAN   | E.S#VSQPEPPVQSE.I       | S1207:     | 2 | 2,2386 | 0,252 | 0      |
| 1 | Q86WR0 CCD25_HUMAN | E.NMSSNQDGNDS#DEFM*.-   | S204:      | 2 | 2,2366 | 0,135 | 0,137  |
| 1 | P13639 EF2_HUMAN   | E.DHACIPIKK.S           |            | 2 | 2,2353 | 0,23  | -0,113 |
| 1 | P04264 K2C1_HUMAN  | R.TLEGEESR.M            |            | 2 | 2,2304 | 0,239 | -0,118 |
| 1 | Q5TCZ1 SPD2A_HUMAN | E.YDIPAFGFDS#EPE.L      | S567:      | 2 | 2,2292 | 0,14  | 0,467  |
| 1 | Q9Y6N7 ROBO1_HUMAN | E.EAPSAPPQGVTVSK.N      |            | 2 | 2,2255 | 0,292 | 0      |
| 1 | Q8IUC6 TCAM1_HUMAN | E.IASPPPELSS#PPPGLPE.V  | S270:      | 2 | 2,2232 | 0,191 | 0,622  |
| 1 | Q99618 CDCA3_HUMAN | E.SS#PQPGLPAGEQLE.G     | S44:       | 2 | 2,2228 | 0,212 | 0,082  |
| 1 | Q03468 ERCC6_HUMAN | E.LFTLTS#PDASQSTE.T     | S1009:     | 2 | 2,2194 | 0,265 | 0,774  |
| 1 | P49006 MRP_HUMAN   | E.IGACS#DEGTAQE.G       | S135:      | 2 | 2,2186 | 0,166 | -0,278 |
| 1 | Q96S44 PRPK_HUMAN  | R.ATT#PADGEEPAP.E.A     | T8:        | 2 | 2,2183 | 0,153 | 0,179  |
| 1 | O14745 NHERF_HUMAN | E.AALES#PRPALVR.S       | S280:      | 3 | 2,2074 | 0,232 | 0,067  |
| 1 | Q92598 HS105_HUMAN | D.AQQTQSPPS#PELTSEE.N   | S557:      | 2 | 2,2061 | 0,316 | 0,322  |
| 1 | Q8IYA6 CKP2L_HUMAN | E.ALPVTLGFQT#PES#.-     | T742:S745: | 2 | 2,2038 | 0,229 | 0,241  |
| 1 | Q9C0C2 TB182_HUMAN | D.AHLRPTSLVQR.R         |            | 3 | 2,1955 | 0,313 | 0,286  |
| 1 | Q9H813 TM206_HUMAN | K.SALIVQGP.V            |            | 2 | 2,1953 | 0,247 | 0,114  |
| 1 | O95295 S25BP_HUMAN | R.DLFAEGLLE.F           |            | 2 | 2,1864 | 0,208 | -0,121 |
| 1 | Q9UHR4 BI2L1_HUMAN | E.AVTVPTSPPT#PVR.S      | T416:      | 2 | 2,1847 | 0,267 | 0,174  |
| 1 | Q9UHD8 SEPT9_HUMAN | R.LGDSSGPALK.R          |            | 2 | 2,1826 | 0,149 | -0,065 |
| 1 | Q12792 TWF1_HUMAN  | E.DVSLHGYKK.Y           |            | 2 | 2,1807 | 0,123 | 0      |
| 1 | O15056 SYNJ2_HUMAN | E.NFDFTSLDYES#E.G       | S1010:     | 2 | 2,1802 | 0,248 | 0      |
| 1 | Q8NI35 INADL_HUMAN | E.LYQDPS#PSM*E.L        | S883:      | 2 | 2,1754 | 0,151 | 0,29   |
| 1 | Q8IX90 CM003_HUMAN | E.QEAINS#DPELSNCE.N     | S119:      | 2 | 2,1747 | 0,132 | -0,072 |
| 1 | Q96GE4 CCD45_HUMAN | E.TLS#QHS#DGIVE.Y       | S419:S422: | 2 | 2,1678 | 0,298 | 0,181  |
| 1 | Q9HC35 EMAL4_HUMAN | E.TVADTTLTK.A           |            | 2 | 2,1665 | 0,32  | 0      |
| 1 | Q9NQT8 KI13B_HUMAN | E.AQDGPPS#PLSE.A        | S1559:     | 2 | 2,165  | 0,235 | 0,207  |
| 1 | Q70CQ2 UBP34_HUMAN | E.VLTPSTSDNETR.D        | S3235:     | 2 | 2,1647 | 0,183 | 0      |
| 1 | Q9Y4C8 RBM19_HUMAN | E.LSDM*DYLK.S           |            | 2 | 2,1647 | 0,136 | 0,061  |
| 1 | Q9P031 TAP26_HUMAN | E.DQCS#FDQPQPE.E        | S140:      | 2 | 2,1608 | 0,09  | 1,791  |

|   |                      |                                |              |   |        |       |        |
|---|----------------------|--------------------------------|--------------|---|--------|-------|--------|
| 1 | O43290 SNUT1_HUMAN   | E.NM*DIS#DEEE.G                | S474:        | 2 | 2,1596 | 0,081 | 0,207  |
| 1 | Q9NWS6 F118A_HUMAN   | E.SLDLKD.K                     |              | 2 | 2,1594 | 0,119 | 0,223  |
| 1 | Q96CX2 KCD12_HUMAN   | E.GAS#AGAPS#PTLE.L             | S171:S176:   | 2 | 2,1565 | 0,121 | -0,2   |
| 1 | Q06481 APLP2_HUMAN   | E.DYCM*AVCK.A                  |              | 2 | 2,1541 | 0,396 | -0,115 |
| 1 | ##P49790 NU153_HUMAN | E.TNS#VAPEPTIRGDT#INSSEED.A    | S1368:T1379: | 2 | 2,1456 | 0,126 | 1,53   |
| 1 | P49454 CENPF_HUMAN   | E.VFCSS#LQEE.N                 | S1626:       | 2 | 2,1409 | 0,15  | 0,207  |
| 1 | P35222 CTNB1_HUMAN   | E.QGFSQS#FTQE.Q                | S73:         | 2 | 2,1399 | 0,102 | 0,788  |
| 1 | Q8WVT3 TTC15_HUMAN   | E.TIDLGGDEFGS#EENE.T           | S45:         | 2 | 2,1381 | 0,276 | 0,433  |
| 1 | Q9BVG6 SCNM1_HUMAN   | R.RALDHYLTLR.S                 |              | 3 | 2,136  | 0,336 | 0,509  |
| 1 | Q2NXX8 ERC6L_HUMAN   | E.LCTNSS#LGM*E.K               | S829:        | 2 | 2,135  | 0,126 | -0,202 |
| 1 | P54577 SYYC_HUMAN    | E.KHPDADSLYVEK.I               |              | 2 | 2,1283 | 0,18  | 0,174  |
| 1 | P08069 IGF1R_HUMAN   | R.ALPLPQST#C.-                 | T1366:       | 2 | 2,1199 | 0,361 | 0,211  |
| 1 | P19338 NUCL_HUMAN    | E.DEDEIEPAAM*K.A               |              | 2 | 2,1196 | 0,203 | 0      |
| 1 | Q15424 SAFB1_HUMAN   | E.IEEPS#LEPE.N                 | S209:        | 2 | 2,1165 | 0,186 | 0,109  |
| 1 | Q29RF7 PDS5A_HUMAN   | R.AAVGQES#PGGLE.A              | S1305:       | 2 | 2,1137 | 0,206 | -0,102 |
| 1 | Q6VY07 PACS1_HUMAN   | E.M*YNPDS#GPEN*EETE.S          | S381:        | 2 | 2,1101 | 0,168 | 0,2    |
| 1 | Q8N3F8 MILK1_HUMAN   | E.VAQPSPT#ASLE.S               | T416:        | 2 | 2,1055 | 0,095 | 0,31   |
| 1 | Q02790 FKBP4_HUMAN   | K.FDSSLDRK.D                   |              | 2 | 2,1018 | 0,234 | 0,063  |
| 1 | Q5T1V6 DDX59_HUMAN   | E.SCPFPS#PGGQLAE.V             | S64:         | 2 | 2,1011 | 0,224 | 0,513  |
| 1 | Q8IW35 CEP97_HUMAN   | E.STFMPVASGLS#PLS#PTVE.L       | S413:S416:   | 2 | 2,1004 | 0,267 | 0,37   |
| 1 | Q66K74 MAP1S_HUMAN   | R.LLSL#PLR.G                   | S657:        | 2 | 2,1    | 0,112 | 0,352  |
| 1 | A6ND36 FA83G_HUMAN   | E.VYDPGSEDPR.G                 |              | 2 | 2,098  | 0,242 | -0,107 |
| 1 | Q3SY69 AL1L2_HUMAN   | E.VELVVDYIS#KE.V               | S431:        | 2 | 2,0975 | 0,09  | -0,71  |
| 1 | Q12888 TP53B_HUMAN   | K.M*VIQGPSS#PQGE.A             | S1114:       | 2 | 2,0973 | 0,3   | 0,368  |
| 1 | Q12888 TP53B_HUMAN   | E.LSQS#QDVEE.N                 | S178:        | 2 | 2,0954 | 0,139 | 0,109  |
| 1 | P55209 NP1L1_HUMAN   | R.LDGLVET#PTGYIE.S             | T62:         | 2 | 2,088  | 0,149 | 0,574  |
| 1 | Q5UIPO RIF1_HUMAN    | K.TVGPCLGDSK.N                 |              | 2 | 2,0803 | 0,293 | 0      |
| 1 | P49321 NASP_HUMAN    | E.QLVGQEVPPAEES#PEVTTE.A       | S344:        | 2 | 2,0799 | 0,249 | 0,345  |
| 1 | Q9BQ61 CS043_HUMAN   | E.VS#GAGSS#PVSGGVNLFANDGSFLE.L | S45:S50:     | 2 | 2,0781 | 0,153 | 0,603  |
| 1 | Q8IY92 BTBDC_HUMAN   | E.VILLLDS#DEELE.L              | S474:        | 2 | 2,0775 | 0,167 | 0,416  |
| 1 | Q7L4I2 RSRC2_HUMAN   | E.KLNFGNK.D                    |              | 2 | 2,0761 | 0,1   | 0,371  |
| 1 | P21127 CD2L1_HUMAN   | E.GDYVPDS#PALS#PIELKQE.L       | S410:S414:   | 3 | 2,0724 | 0,181 | 0,432  |
| 1 | P30622 CLIP1_HUMAN   | E.ANGLQTPASR.A                 |              | 2 | 2,0713 | 0,252 | 0,547  |
| 1 | Q96JM3 ZN828_HUMAN   | D.LDAM*DIK.G                   |              | 2 | 2,0693 | 0,168 | 0,371  |
| 1 | P49848 TAF6_HUMAN    | K.QEAGDS#PPPAPGT#PK.A          | S653:T660:   | 2 | 2,0686 | 0,105 | 0      |
| 1 | P18850 ATF6A_HUMAN   | E.LGYFTDT#DELQLE.A             | T41:         | 2 | 2,0668 | 0,087 | 0,451  |
| 1 | Q969V6 MKL1_HUMAN    | E.AIIVGQVNYPK.V                |              | 2 | 2,0616 | 0,161 | 0,507  |
| 1 | P49023 PAXI_HUMAN    | E.SSVPS#PVPAITVNPQGE.M         | S230:        | 2 | 2,0612 | 0,165 | 0,587  |
| 1 | P78364 PHC1_HUMAN    | E.NQSGGLGVDS#PSAE.L            | S786:        | 2 | 2,0566 | 0,092 | 0,245  |

|   |                      |                           |              |   |        |       |        |
|---|----------------------|---------------------------|--------------|---|--------|-------|--------|
| 1 | Q99728 BARD1_HUMAN   | E.FVS#PSPPADVSE.R         | S184:        | 2 | 2,0503 | 0,097 | 0,558  |
| 1 | Q9BYG5 PAR6B_HUMAN   | E.DNGVPPQQIPK.A           |              | 2 | 2,0476 | 0,251 | -0,334 |
| 1 | O15084 ANR28_HUMAN   | E.YLYTDVDELNDS#DS#ETY.-   | S1081:S1083: | 2 | 2,047  | 0,148 | 0,665  |
| 1 | Q9H3S7 PTN23_HUMAN   | K.EEPPVPEAPSSGPPSSSLE.L   |              | 3 | 2,0459 | 0,09  | 0,097  |
| 1 | Q6P0N0 CN106_HUMAN   | E.NQVAM*SFYK.H            |              | 2 | 2,0408 | 0,358 | -0,111 |
| 1 | Q92547 TOPB1_HUMAN   | E.NLDVS#AFQAPEDLLD.G      | S350:        | 2 | 2,0394 | 0,287 | 0,141  |
| 1 | Q07157 ZO1_HUMAN     | E.YSM*YSTDSR.H            |              | 2 | 2,0375 | 0,196 | 0      |
| 1 | Q8NC51 PAIRB_HUMAN   | R.SFSHYSGLKHE.D           |              | 3 | 2,0343 | 0,203 | 0,199  |
| 1 | Q9NRZ9 HELLS_HUMAN   | E.NSEDS#SPECLF.-          | S832:        | 2 | 2,033  | 0,146 | 0,536  |
| 1 | Q15185 TEBP_HUMAN    | E.M*M*NNMGGDEDVD.L        |              | 2 | 2,0225 | 0,082 | -0,09  |
| 1 | Q9UKM9 RALY_HUMAN    | E.LEHS#QDT#DADDGALQ.-     | S295:T298:   | 2 | 2,0212 | 0,161 | 0,275  |
| 1 | Q07021 C1QBP_HUMAN   | E.VSFQS#TGSE.W            | S213:        | 2 | 2,0205 | 0,153 | -0,106 |
| 1 | O60343 TBCD4_HUMAN   | R.AHTFSHPPSSTK.R          |              | 3 | 2,0187 | 0,204 | 0,775  |
| 1 | Q7Z7E8 UB2Q1_HUMAN   | D.TEDLDHYE.M              |              | 2 | 2,0171 | 0,192 | 0,597  |
| 1 | Q8NEZ4 MLL3_HUMAN    | E.KAS#PPAS#PPIAFPPAFE.A   | S4300:S4304: | 2 | 2,0057 | 0,124 | 0,648  |
| 1 | Q9H5H4 ZN768_HUMAN   | E.ISQQEGS#GDYE.V          | S46:         | 2 | 2,0036 | 0,132 | 0,094  |
| 1 | Q9NXH9 TRM1_HUMAN    | E.TSNQT#PPGPGAAAGPGID.-   | T646:        | 2 | 2,0019 | 0,271 | 0,289  |
| 1 | ##Q0VGL1 U539_HUMAN  | E.LDGSS#ALVAGE.S          | S71:         | 2 | 2,0019 | 0,105 | 0,333  |
| 1 | Q9H5Y7 SLIK6_HUMAN   | K.VLSPSGLLIHCQE.R         |              | 2 | 1,99   | 0,113 | 0,588  |
| 1 | Q9H4A3 WNK1_HUMAN    | R.KGTFTDDLHK.L            |              | 2 | 1,9891 | 0,324 | -0,525 |
| 1 | Q01201 RELB_HUMAN    | E.AAFGGGLLS#PGPEAT.-      | S573:        | 2 | 1,9881 | 0,26  | 0,171  |
| 1 | P40123 CAP2_HUMAN    | R.SALFAQLNQGE.A           |              | 2 | 1,9874 | 0,248 | 0      |
| 1 | Q9H3S7 PTN23_HUMAN   | K.EEPPVPEAPSSGPPSSSLE.L   |              | 2 | 1,9873 | 0,17  | 0,193  |
| 1 | Q8TD19 NEK9_HUMAN    | E.FIPM*PDS#PSPLSAFSESE.K  | S827:        | 2 | 1,9803 | 0,176 | 0,464  |
| 1 | Q92900 RENT1_HUMAN   | E.AELLGADT#QGS#EFE.F      | T28:S31:     | 2 | 1,9766 | 0,122 | 0,45   |
| 1 | Q9Y6X4 K0888_HUMAN   | E.DVPFSQNAGQK.N           |              | 2 | 1,9707 | 0,269 | 0,102  |
| 1 | P04406 G3P_HUMAN     | K.LVINGNPITIFQE.R         |              | 2 | 1,9609 | 0,166 | 0      |
| 1 | ##P53355 DAPK1_HUMAN | D.AHGyraAVHLAM*EGSK.D     |              | 2 | 1,951  | 0,104 | -1,78  |
| 1 | Q9UBL3 ASH2L_HUMAN   | E.GAGDTSEVM*DTQAGS#VDEE.N | S101:        | 2 | 1,9398 | 0,258 | 0,061  |
| 1 | P46777 RL5_HUMAN     | R.KHIM*GQNVADYM*R.Y       |              | 2 | 1,9359 | 0,249 | -0,077 |
| 1 | Q03164 HRX_HUMAN     | E.QFLGFGS#DEE.V           | S153:        | 2 | 1,9344 | 0,121 | 0,202  |
| 1 | Q14671 PUM1_HUMAN    | E.VNSVLS#PR.S             | S209:        | 2 | 1,9319 | 0,124 | -0,064 |
| 1 | O75821 EIF3G_HUMAN   | K.GIPLATGDTS#PEPE.L       | S42:         | 2 | 1,9271 | 0,174 | 0,083  |
| 1 | O15118 NPC1_HUMAN    | K.ALGLLCGK.D              |              | 2 | 1,9243 | 0,3   | -0,293 |
| 1 | Q96PZ2 F111A_HUMAN   | E.VFVNQQDDEM*M*S#DEDL.-   | S607:        | 2 | 1,9233 | 0,105 | 0,789  |
| 1 | O60239 3BP5_HUMAN    | E.FGM*M*FPVLGPR.S         |              | 2 | 1,9222 | 0,195 | 0,285  |
| 1 | Q6AI39 K0240_HUMAN   | E.LDFPNFS#PM*ASQE.N       | S1042:       | 2 | 1,9212 | 0,144 | 0,386  |
| 1 | P24534 EF1B_HUMAN    | E.KASLPGVK.K              |              | 2 | 1,9192 | 0,179 | -0,61  |
| 1 | Q5VU20 Q5VU20_HUMAN  | E.LTDLDQS#NVTEETPE.G      | S237:        | 2 | 1,9186 | 0,178 | 0,827  |

|   |                     |                             |                 |   |        |       |        |
|---|---------------------|-----------------------------|-----------------|---|--------|-------|--------|
| 1 | Q9Y3B9 RRP15_HUMAN  | D.DFM*MGASM*K.D             |                 | 2 | 1,9143 | 0,111 | -0,116 |
| 1 | Q8N1G1 REXO1_HUMAN  | E.VDFDS#DPM*EE.C            | S610:           | 2 | 1,9031 | 0,136 | 0,572  |
| 1 | Q5VU20 Q5VU20_HUMAN | E.LT#DLDQSNVTEETPE.G        | T232:           | 2 | 1,8966 | 0,224 | 0,896  |
| 1 | Q5SZR3 Q5SZR3_HUMAN | E.AASM*#SGDDNLEDDYLL.-      | S550:           | 2 | 1,8845 | 0,091 | 0,401  |
| 1 | Q16643 DREB_HUMAN   | E.GASTLQGEPR.A              |                 | 2 | 1,8808 | 0,209 | 0,24   |
| 1 | Q13283 G3BP1_HUMAN  | E.VFGGFVTEPQEES#EEE.V       | S149:           | 2 | 1,8774 | 0,253 | 0,58   |
| 1 | P54725 RD23A_HUMAN  | E.YLLTGIPGS#PEPE.H          | S205:           | 2 | 1,8714 | 0,14  | 0,672  |
| 1 | P35030 TRY3_HUMAN   | D.TLDNDIMLIK.L              |                 | 2 | 1,8695 | 0,277 | 0      |
| 1 | Q02952 AKA12_HUMAN  | E.M*VSAVSQLTDSPTD#TEE.A     | T1015:          | 2 | 1,8663 | 0,15  | 0,768  |
| 1 | P42166 LAP2A_HUMAN  | R.SSTPLPTISSAE.N            |                 | 2 | 1,8657 | 0,203 | -0,096 |
| 1 | Q8NCE2 MTMRE_HUMAN  | E.SS#PGATGSFTYE.A           | S453:           | 2 | 1,8626 | 0,353 | 0,57   |
| 1 | Q6NV74 CB055_HUMAN  | E.SGPVGYDS#EDE.L            | S75:            | 2 | 1,8618 | 0,205 | 0,099  |
| 1 | Q8WWI1 LMO7_HUMAN   | E.IQLPSQS#PVVE.Q            | S867:           | 2 | 1,8568 | 0,163 | 0,28   |
| 1 | P53621 COPA_HUMAN   | E.DLELPPELDIS#PGAAGGAE.D    | S895:           | 2 | 1,8561 | 0,201 | 0,632  |
| 1 | P13645 K1C10_HUMAN  | R.LAADDFR.L                 |                 | 2 | 1,8444 | 0,337 | 0,453  |
| 1 | Q53QZ3 RHG15_HUMAN  | E.LMLSEY#S#KIFGS#EE.D       | Y466:S467:S472: | 2 | 1,8337 | 0,107 | 1,173  |
| 1 | Q5JTD0 TJAP1_HUMAN  | E.LNLPIS#PEEE.R             | S491:           | 2 | 1,8336 | 0,228 | 0,2    |
| 1 | Q96M96 FGD4_HUMAN   | R.TPGIGPVLPLEE.R            |                 | 2 | 1,8297 | 0,101 | -0,1   |
| 1 | Q12802 AKP13_HUMAN  | E.LVPDQAVISDSTFSLANS#PGSE.S | S790:           | 2 | 1,801  | 0,135 | 0,844  |
| 1 | Q9BQY9 DBND2_HUMAN  | E.ELSLPVPTSDR.T             |                 | 2 | 1,7979 | 0,213 | 0,402  |
| 1 | Q14247 SRC8_HUMAN   | R.LPSS#PVYE.D               | S418:           | 2 | 1,7975 | 0,098 | -0,063 |
| 1 | Q92619 HMHA1_HUMAN  | E.AAGS#PPEEGGCTE.G          | S592:           | 2 | 1,7974 | 0,109 | 0,091  |
| 1 | Q9P1Y6 K1542_HUMAN  | R.SGPGLLPSEITR.T            |                 | 2 | 1,7852 | 0,087 | 0,298  |
| 1 | P31943 HNRH1_HUMAN  | E.NSSDFQS#NIA.-             | S446:           | 2 | 1,7755 | 0,177 | 0,315  |
| 1 | Q92900 RENT1_HUMAN  | E.LLGADTQGS#EFE.F           | S31:            | 2 | 1,759  | 0,139 | 0,362  |
| 1 | Q9UBB5 MBD2_HUMAN   | E.M*DIEM*DS#GDEA.-          | S407:           | 2 | 1,7365 | 0,189 | 0,092  |
| 1 | Q9BRT9 SLD5_HUMAN   | E.VDFLGQDS#DGGS#EEVVLTPAE.L | S12:S16:        | 2 | 1,7348 | 0,105 | 0,42   |
| 1 | Q9BYX4 IFIH1_HUMAN  | E.LTDLPS#PSFE.N             | S104:           | 2 | 1,7286 | 0,22  | 0,309  |
| 1 | Q9H1H9 KI13A_HUMAN  | R.VTGAVPER.V                |                 | 2 | 1,7218 | 0,135 | 0,368  |
| 1 | Q14676 MDC1_HUMAN   | R.LLLAEDS#EEE.V             | S168:           | 2 | 1,7215 | 0,11  | 0,397  |
| 1 | Q9NYF8 BCLF1_HUMAN  | K.NTPSQHSHSIQHS#PER.S       | S268:           | 2 | 1,708  | 0,117 | -0,381 |
| 1 | Q92900 RENT1_HUMAN  | E.LSQDSYLGDEFK.S            |                 | 2 | 1,7001 | 0,093 | 1,131  |
| 1 | Q9H0H5 RGAP1_HUMAN  | K.VSLLGPVT#TPE.H            | T579:           | 2 | 1,6943 | 0,1   | 0      |
| 1 | Q6P2E9 EDC4_HUMAN   | E.VEPLGLPQAS#PSR.T          | S723:           | 2 | 1,6865 | 0,192 | -0,171 |
| 1 | P46821 MAP1B_HUMAN  | E.QYGFLLT#PTK.Q             | T1067:          | 2 | 1,6747 | 0,313 | 0,592  |
| 1 | Q96SB3 NEB2_HUMAN   | E.DEELS#PTFPGGE.M           | S633:           | 2 | 1,6574 | 0,081 | 0      |
| 1 | Q96F45 ZN503_HUMAN  | E.YLQPLPSTPVS#PIELD.A       | S102:           | 2 | 1,6384 | 0,228 | 0,264  |
| 1 | P08651 NFIC_HUMAN   | R.SFVGLGPR.D                |                 | 2 | 1,6149 | 0,211 | 0,22   |
| 1 | Q8NET4 RGAG1_HUMAN  | R.VT#S#TSQMMPTASGD.M        | T871:S872:      | 2 | 1,5782 | 0,163 | 1,396  |

|   |                      |                                    |                 |   |        |       |        |
|---|----------------------|------------------------------------|-----------------|---|--------|-------|--------|
| 1 | P02538 K2C6A_HUMAN   | K.EYQELM*NVK.L                     |                 | 2 | 1,4852 | 0,167 | -0,313 |
| 1 | O43399 TPD54_HUMAN   | R.TPAVEGLTEAEIEEE.L                |                 | 2 | 1,4847 | 0,109 | 0,649  |
| 1 | Q5VWN6 CJ018_HUMAN   | E.VS#PASS#PEPPVPVKE.T              | S1400:S1404:    | 2 | 1,4776 | 0,129 | 0,291  |
| 1 | Q9H089 LSG1_HUMAN    | E.SEHLPAR.D                        |                 | 2 | 1,4163 | 0,191 | 0,377  |
| 1 | Q9H2G4 TSYL2_HUMAN   | E.NTYGNNFFK.G                      |                 | 2 | 1,3993 | 0,157 | 0      |
| 1 | ##Q5VZP5 DUS27_HUMAN | R.S#SYRFS#GIASDT#DED.G             | S259:S264:T270: | 2 | 1,3496 | 0,091 | -0,517 |
| 1 | P13645 K1C10_HUMAN   | R.VLDELTLTK.A                      |                 | 2 | 1,3311 | 0,21  | 0      |
| 1 | Q01433 AMPD2_HUMAN   | E.EAGITMS#PGPQ.-                   | S875:           | 2 | 1,3212 | 0,098 | 0,313  |
| 1 | P46821 MAP1B_HUMAN   | E.QYGFLTTPTK.Q                     |                 | 2 | 1,2828 | 0,153 | 0,106  |
| 1 | Q9Y2M0 MTMRF_HUMAN   | E.IALDLT#PVIE.E                    | T444:           | 2 | 1,2763 | 0,103 | 0,419  |
| 1 | P05783 K1C18_HUMAN   | R.STFSTNYR.S                       |                 | 2 | 1,2379 | 0,139 | 0      |
| 1 | P35527 K1C9_HUMAN    | R.M*TLDDFR.I                       |                 | 2 | 1,204  | 0,093 | 0,067  |
| 2 | O95232 CROP_HUMAN    | E.VNGTSEDIKS#EGDTQS#N.-            | S425:S431:      | 2 | 5,4334 | 0,562 | 0,44   |
| 2 | Q14247 SRC8_HUMAN    | R.AKTQT#PPVS#PAPQPTTEERLPSS#PVYE.D | T401:S405:S418: | 3 | 5,2325 | 1     | 0,36   |
| 2 | Q9Y6D5 BIG2_HUMAN    | E.NSQTNGIADDRQS#LSS#ADNLE.S        | S346:S349:      | 2 | 5,1187 | 0,476 | 0,509  |
| 2 | P48960 CD97_HUMAN    | E.GSYDCVCSPGYEPVSGAK.T             |                 | 2 | 5,02   | 0,518 | -0,252 |
| 2 | Q9H6Z4 RANB3_HUMAN   | E.NAAAES#GS#ESSSQEATPEKE.S         | S353:S355:      | 2 | 4,712  | 1     | 0,338  |
| 2 | P13645 K1C10_HUMAN   | K.GSLGGGFSSGGFSGGSFSR.G            |                 | 2 | 4,7046 | 0,526 | 0,071  |
| 2 | Q01831 XPC_HUMAN     | E.AAAPHTDAGGGLS#\$#DEEEGTSSQAE.A   | S883:S884:      | 2 | 4,6983 | 0,502 | 0,482  |
| 2 | Q7Z417 NUFP2_HUMAN   | E.SQNPLAS#PTNT#LLGSAKE.Q           | S629:T633:      | 2 | 4,6533 | 0,531 | 0,123  |
| 2 | Q96T60 PNKP_HUMAN    | E.TRTPES#QPDT#PPGTPLVSQDE.K        | S114:T118:      | 3 | 4,6211 | 1     | 0,379  |
| 2 | Q6NZI2 PTRF_HUMAN    | E.ITEESDAVLVDKS#DS#D.-             | S387:S389:      | 2 | 4,6137 | 0,476 | 0,389  |
| 2 | P40425 PBX2_HUMAN    | E.AVTPSSVTSPTGPGSVHS#DT#SN.-       | S426:T428:      | 2 | 4,559  | 1     | 0,72   |
| 2 | P21127 CD2L1_HUMAN   | E.GDYVPDS#PALS#PIELKQE.L           | S410:S414:      | 2 | 4,515  | 0,443 | 0,23   |
| 2 | Q9BQY9 DBND2_HUMAN   | E.SQRPPIGSIS#\$#M*EVNVDTL.E.Q      | S153:S154:      | 2 | 4,4836 | 0,478 | 0,209  |
| 2 | Q6T4R5 NHS_HUMAN     | E.IDS#DES#PVARE.R                  | S394:S397:      | 2 | 4,4132 | 0,354 | 0,266  |
| 2 | Q02952 AKA12_HUMAN   | E.HDPGQGSSS#PEQAGS#PTEGE.G         | S743:S749:      | 2 | 4,3861 | 0,483 | 0,346  |
| 2 | Q02952 AKA12_HUMAN   | E.ARGDTVVS#EAELT#PEAVTAAE.T        | S967:T972:      | 2 | 4,3681 | 0,484 | 0,322  |
| 2 | Q8WXI9 P66B_HUMAN    | R.GRLT#PS#PDIIVLSDNE.A             | T120:S122:      | 2 | 4,362  | 0,434 | 0,194  |
| 2 | Q8WXI9 P66B_HUMAN    | R.GRLT#PS#PDIIVLS#DNEASSPR.S       | T120:S122:S129: | 3 | 4,3272 | 0,225 | 0,074  |
| 2 | Q9HC35 EMAL4_HUMAN   | E.TAEESRISS#\$#PTLLE.N             | S918:S919:      | 2 | 4,3064 | 0,49  | 0,192  |
| 2 | Q86VR2 F134C_HUMAN   | E.LAAFCPQLDDSTVAR.E                |                 | 2 | 4,2993 | 0,412 | 0      |
| 2 | Q01831 XPC_HUMAN     | E.AAAPHTDAGGGLS#\$#DEEE.G          | S883:S884:      | 2 | 4,2624 | 0,557 | 0,326  |
| 2 | P35908 K22E_HUMAN    | R.FLEQQNQVLQTK.W                   |                 | 2 | 4,2365 | 0,316 | 0,331  |
| 2 | P27816 MAP4_HUMAN    | E.VGLLKDM*\$#PLS#ETE.M             | S507:S510:      | 2 | 4,2216 | 0,488 | 0,144  |
| 2 | Q9UMN6 MLL4_HUMAN    | E.IVAAGAM*GSSHGGPGDS#\$#EEE.S      | S2023:S2024:    | 2 | 4,2147 | 0,49  | 0,23   |
| 2 | Q6PKG0 LARP1_HUMAN   | E.TES#APGS#PRAVT#PVPTKTEE.V        | S517:S521:T526: | 3 | 4,1957 | 0,408 | 0,798  |
| 2 | Q9H4A3 WNK1_HUMAN    | E.LSEPSHLNGPS#\$#DPE.A             | S2011:S2012:    | 2 | 4,1854 | 0,416 | 0      |
| 2 | Q9ULD4 BRPF3_HUMAN   | E.NGEDHGVAGSPAS#PAS#IEEE.R         | S962:S965:      | 2 | 4,087  | 0,428 | 0,231  |



|   |                     |                                |                    |   |        |       |        |
|---|---------------------|--------------------------------|--------------------|---|--------|-------|--------|
| 2 | Q9P206 K1522_HUMAN  | E.SSTAEDALS#IRS#E.M            | S127:S130:         | 2 | 4,0484 | 0,444 | 0,4    |
| 2 | Q13426 XRCC4_HUMAN  | E.TLRNS#S#PEDLFDEI.-           | S327:S328:         | 2 | 4,0466 | 0,459 | -0,136 |
| 2 | O00233 PSMD9_HUMAN  | R.HNIICLQNDHK.A                |                    | 3 | 4,0359 | 0,304 | 0,394  |
| 2 | Q641Q2 FA21A_HUMAN  | E.KAVAS#PEATVS#QTDE.N          | S498:S504:         | 2 | 4,0328 | 0,571 | 0,072  |
| 2 | Q12888 TP53B_HUMAN  | D.SLSTNSSDLVAPS#PDAFR.S        | S366:              | 2 | 4,0309 | 0,481 | 0,251  |
| 2 | Q9ULU4 PKCB1_HUMAN  | E.TDSPTVHLGLDS#DS#ESE.L        | S707:S709:         | 2 | 4,0189 | 0,393 | 0      |
| 2 | Q9NQS7 INCE_HUMAN   | E.IANSTPNPKPAASS#PET#PSAGQQE.A | S421:T424:         | 3 | 4,0104 | 0,36  | 0,216  |
| 2 | A5YM69 A5YM69_HUMAN | E.HLDM*APFS#SDLGS#EEEE.V       | S140:S145:         | 2 | 3,9954 | 0,487 | 0      |
| 2 | Q9Y6A5 TACC3_HUMAN  | E.NQM*VS#PGKVS#PEQAVEE.N       | S170:S177:         | 2 | 3,9906 | 0,38  | 0,454  |
| 2 | Q9Y6X4 K0888_HUMAN  | E.STARPSSES#S#EEFLEEEPE.Q      | S378:S379:         | 2 | 3,9883 | 1     | 0,441  |
| 2 | Q15648 MED1_HUMAN   | R.GS#PSHSKS#PAYTPQNLD#ESE.S    | S1447:S1453:S1463: | 3 | 3,9672 | 1     | 0,298  |
| 2 | P35527 K1C9_HUMAN   | R.SGGGGGGGLGSGGSIR.S           |                    | 2 | 3,9645 | 0,54  | 0,495  |
| 2 | P12270 TPR_HUMAN    | E.SGGRS#VPTT#PLQVAAPVTVFTE.S   | S2196:T2200:       | 2 | 3,9585 | 0,427 | 0,411  |
| 2 | O14936 CSKP_HUMAN   | E.ALVRT#PPPTS#PYLNGDSPE.S      | T460:S465:         | 2 | 3,9397 | 0,373 | 0,562  |
| 2 | Q14C86 GAPD1_HUMAN  | E.GISEGPSNRSNS#VSS#LDLE.G      | S585:S588:         | 2 | 3,9253 | 0,207 | 0,463  |
| 2 | Q8WXI9 P66B_HUMAN   | R.GRLTPS#PDIIVLS#DNE.A         | S122:S129:         | 2 | 3,9159 | 0,418 | -0,194 |
| 2 | Q9UHY1 NRBP_HUMAN   | E.SQTVLS#S#GSDPKVE.S           | S11:S12:           | 2 | 3,895  | 0,443 | 0,077  |
| 2 | P52746 ZN142_HUMAN  | E.GSEAPHGGDLGGS#PS#PAEVEE.G    | S682:S684:         | 2 | 3,892  | 0,305 | 0,342  |
| 2 | P04264 K2C1_HUMAN   | K.QISNLQQSISDAEQR.G            |                    | 2 | 3,8882 | 0,41  | 0,355  |
| 2 | Q6NZI2 PTRF_HUMAN   | E.ESDAVLVDKS#DS#D.-            | S387:S389:         | 2 | 3,8703 | 0,337 | -0,079 |
| 2 | Q02952 AKA12_HUMAN  | E.HDPGQGS#S#PEQAGSPTEGE.G      | S742:S743:         | 2 | 3,8395 | 0,262 | 0,231  |
| 2 | P35908 K22E_HUMAN   | R.HGGGGGGFGGGGFGSR.S           |                    | 3 | 3,839  | 0,302 | 0,554  |
| 2 | Q9H8Y5 ANKZ1_HUMAN  | E.ESPKQGS#GS#EGEDGFQVE.L       | S403:S405:         | 2 | 3,8267 | 0,226 | 0,542  |
| 2 | Q9BUR4 WDR79_HUMAN  | E.FGS#PSELS#PRIEEQE.L          | S85:S90:           | 2 | 3,8182 | 0,416 | 0,523  |
| 2 | Q86W92 LIPB1_HUMAN  | D.FAARS#PSAS#ITDEDSNV.-        | S999:S1003:        | 2 | 3,8127 | 0,527 | 0      |
| 2 | Q7Z406 MYH14_HUMAN  | E.AQPGSGPS#PEPEGS#PPAHPO.-     | S1983:S1989:       | 2 | 3,7977 | 0,351 | 0,351  |
| 2 | O15234 CASC3_HUMAN  | E.QTSVRDPS#PEADAPVLGS#PE.K     | S363:S373:         | 2 | 3,7934 | 0,41  | 0,221  |
| 2 | P13645 K1C10_HUMAN  | K.IRLENIQTYR.S                 |                    | 2 | 3,789  | 0,432 | 0      |
| 2 | Q14160 LAP4_HUMAN   | E.LRS#LEPS#PSPGPQEEDGE.V       | S1575:S1579:       | 2 | 3,7755 | 0,429 | 0,351  |
| 2 | Q9Y6X4 K0888_HUMAN  | E.ASSEQLDQFTQSAEK.A            |                    | 2 | 3,7549 | 0,398 | 0,073  |
| 2 | Q9H5H4 ZN768_HUMAN  | E.SQS#PRYEQS#PGYEPR.S          | S118:S125:         | 3 | 3,7545 | 0,274 | 0,269  |
| 2 | P35908 K22E_HUMAN   | R.NKLNDEEALQQAQ.E              |                    | 3 | 3,7318 | 0,214 | 0,227  |
| 2 | Q9C0B0 UNK_HUMAN    | E.HFASGSFS#PGT#SPAFLSGPGAEE.L  | S631:T634:         | 2 | 3,729  | 1     | 0,417  |
| 2 | Q6PKG0 LARP1_HUMAN  | E.T#ESAPGS#PRAVT#PVPTKTEE.V    | T515:S521:T526:    | 2 | 3,7275 | 0,469 | 0,213  |
| 2 | Q8IY81 RRMJ3_HUMAN  | K.GTEASSGTEAATGLEGEEK.D        |                    | 2 | 3,7245 | 0,492 | 0,669  |
| 2 | Q6PD74 P34_HUMAN    | E.IEGLS#S#DEEH.-               | S310:S311:         | 2 | 3,7211 | 0,378 | -0,096 |
| 2 | P27816 MAP4_HUMAN   | E.VGLLKDM*S#PLS#E.T            | S507:S510:         | 2 | 3,7146 | 0,442 | 0,167  |
| 2 | Q8N1G0 ZN687_HUMAN  | E.ASLKLS#PAT#PTSE.G            | S374:T377:         | 2 | 3,7085 | 0,553 | 0,077  |
| 2 | Q5TAQ9 WD42A_HUMAN  | E.ASDLSLSLTGDDGGPNR.T          |                    | 2 | 3,696  | 0,463 | 0,146  |

|   |                    |                                   |                 |   |        |       |        |
|---|--------------------|-----------------------------------|-----------------|---|--------|-------|--------|
| 2 | Q12888 TP53B_HUMAN | E.VLSTQEDLFDQSNK.T                |                 | 2 | 3,6906 | 0,462 | 0,075  |
| 2 | Q2KHR3 QSER1_HUMAN | E.HLSSF#S#DEDDPGYSQD.A            | S1230:S1231:    | 2 | 3,6638 | 0,276 | 0,179  |
| 2 | Q5SVQ8 ZBT41_HUMAN | E.LT#EKSS#PEETLNE.L               | T187:S191:      | 2 | 3,655  | 0,219 | 0      |
| 2 | P04264 K2C1_HUMAN  | R.SLDLDSIAEVK.A                   |                 | 2 | 3,6373 | 0,401 | -0,375 |
| 2 | Q9NPI6 DCP1A_HUMAN | R.KAS#SPSPLTIGT#PE.S              | S522:T531:      | 2 | 3,6363 | 0,449 | 0      |
| 2 | Q9HC35 EMAL4_HUMAN | E.SRIS#SS#PTLLENSLE.Q             | S917:S919:      | 2 | 3,6182 | 0,336 | 0,136  |
| 2 | Q14247 SRC8_HUMAN  | R.AKTQT#PPVS#PAPQPTTEE.R          | T401:S405:      | 2 | 3,6175 | 0,365 | 0,504  |
| 2 | Q99700 ATX2_HUMAN  | E.AVAM*PIPAAS#PTPAS#PASNR.A       | S727:S732:      | 3 | 3,6073 | 0,351 | 0,439  |
| 2 | Q6NV74 CB055_HUMAN | E.GGVPGEDPSS#RPAT#PE.L            | S334:T338:      | 2 | 3,6066 | 0,381 | 0,285  |
| 2 | Q01831 XPC_HUMAN   | E.AAAPHTDAGGGLS#S#DEEETSSQAE.A    | S883:S884:      | 3 | 3,6024 | 0,363 | 0,144  |
| 2 | Q9UQ35 SRRM2_HUMAN | E.VEERPAVSLTLDQS#QSQAS#LE.A       | S1287:S1292:    | 3 | 3,5934 | 0,151 | 0,15   |
| 2 | Q9UK76 HN1_HUMAN   | R.RNS#SEASSGDFLDLKG.E             | S87:            | 2 | 3,5905 | 0,488 | 0,258  |
| 2 | P40425 PBX2_HUMAN  | E.AVTPSSVTSPTEGPGSVHS#DTS#N.-     | S426:S429:      | 3 | 3,5844 | 0,179 | 0,617  |
| 2 | Q7Z6Z7 HUWE1_HUMAN | E.EAVGDTSAAGSSEQPR.A              |                 | 2 | 3,5786 | 0,508 | 0,234  |
| 2 | Q6UXD5 SE6L2_HUMAN | E.LLVLAGGGSPGLAPR.L               |                 | 2 | 3,5761 | 0,388 | -0,089 |
| 2 | Q9BXJ9 NARG1_HUMAN | E.DM*KITVNGDS#S#AEAE.L            | S855:S856:      | 2 | 3,5716 | 0,348 | 0,652  |
| 2 | Q92734 TFG_HUMAN   | E.INKNVM*SAFGLTDDQVSGPPSAPAEDR.S  |                 | 3 | 3,5582 | 0,331 | -0,129 |
| 2 | Q9Y3F4 STRAP_HUMAN | E.IAS#ENS#DCIFPSAPDVKA.-          | S335:S338:      | 2 | 3,5521 | 0,441 | 0,117  |
| 2 | Q6NZI2 PTRF_HUMAN  | R.RGS#S#PDVHALLE.I                | S365:S366:      | 2 | 3,5514 | 0,5   | 0,169  |
| 2 | P04264 K2C1_HUMAN  | K.WELLQQVDTSTR.T                  |                 | 2 | 3,5437 | 0,402 | -0,579 |
| 2 | Q9UQ35 SRRM2_HUMAN | R.SSGHS#SSELS#PDAVE.K             | S1382:S1387:    | 2 | 3,5352 | 0,277 | -0,074 |
| 2 | Q86WR0 CCD25_HUMAN | E.NM*SSNQDGNDS#DEFM*.-            | S204:           | 2 | 3,5074 | 0,409 | 0,338  |
| 2 | Q6NZI2 PTRF_HUMAN  | E.SDAVLVDKS#DS#D.-                | S387:S389:      | 2 | 3,5008 | 0,383 | 0,086  |
| 2 | Q96T60 PNKP_HUMAN  | E.TRTPES#QPDT#PPGTPLVSQDE.K       | S114:T118:      | 2 | 3,4928 | 0,463 | 0,405  |
| 2 | Q02952 AKA12_HUMAN | E.TVS#ILS#KTEGTQE.A               | S1256:S1259:    | 2 | 3,4916 | 0,426 | -0,236 |
| 2 | Q8N163 K1967_HUMAN | E.DSEVRS#VAS#NQSEM*E.F            | S675:S678:      | 2 | 3,4883 | 0,32  | 0,463  |
| 2 | P42166 LAP2A_HUMAN | E.SRSS#T#PLPTISSAE.N              | S159:T160:      | 2 | 3,4748 | 0,501 | 0,654  |
| 2 | Q8N680 ZBTB2_HUMAN | E.ASQLSQLTSNLAQVNR.T              |                 | 2 | 3,4593 | 0,332 | 0,282  |
| 2 | Q92794 MYST3_HUMAN | E.TVQAVQSLTQEES#S#EHE.G           | S1436:S1437:    | 2 | 3,4552 | 0,384 | 0,473  |
| 2 | Q7Z406 MYH14_HUMAN | E.AQPGSGPS#PEPEGS#PPAHPQ.-        | S1983:S1989:    | 3 | 3,4464 | 0,342 | 0,351  |
| 2 | P35908 K22E_HUMAN  | K.NVQDAIADAEQR.G                  |                 | 2 | 3,4443 | 0,471 | 0,183  |
| 2 | Q86WC4 OSTM1_HUMAN | R.LKS#STS#FANIQE.N                | S322:S325:      | 2 | 3,428  | 0,266 | 0,329  |
| 2 | Q14160 LAP4_HUMAN  | E.LRS#LEPS#PSPGPQEE.D             | S1575:S1579:    | 2 | 3,4259 | 0,439 | 0,205  |
| 2 | P42566 EP15_HUMAN  | E.SEPIHQES#PARS#S#PELLPSGVTDENE.V | S558:S562:S563: | 3 | 3,4181 | 0,451 | 0,24   |
| 2 | Q9BVS4 RIOK2_HUMAN | E.TKEGS#EFS#FSDGEVAE.K            | S332:S335:      | 2 | 3,4173 | 0,345 | 0,39   |
| 2 | O95208 EPN2_HUMAN  | R.M*AQVATGM*GSNQITFGR.G           |                 | 2 | 3,4108 | 0,534 | 0,677  |
| 2 | P05362 ICAM1_HUMAN | E.AQVHLALGDQR.L                   |                 | 3 | 3,389  | 0,294 | 0,757  |
| 2 | P13645 K1C10_HUMAN | R.SQYEQLAEQNRK.D                  |                 | 2 | 3,375  | 0,314 | 0,163  |
| 2 | P49792 RBP2_HUMAN  | E.TVFT#PKT#SPENVQD.R              | T1396:T1399:    | 2 | 3,3632 | 0,32  | 0,071  |

|   |                    |                                   |                 |   |        |       |        |
|---|--------------------|-----------------------------------|-----------------|---|--------|-------|--------|
| 2 | P48960 CD97_HUMAN  | E.GSYDCVCSPGYEPVSGAK.T            |                 | 3 | 3,3619 | 0,348 | 0      |
| 2 | P04264 K2C1_HUMAN  | K.YEELQITAGR.H                    |                 | 2 | 3,3527 | 0,297 | 0,103  |
| 2 | Q32MZ4 LRRF1_HUMAN | R.NM*PGLSAATLASLGGTSSR.R          |                 | 2 | 3,3508 | 0,496 | -0,068 |
| 2 | Q13263 TIF1B_HUMAN | R.STAPSAAASASASAAASS#PAGGGAEALE.L | S50:            | 3 | 3,3468 | 0,201 | 0,229  |
| 2 | P39687 AN32A_HUMAN | E.LVLDNS#RS#NE.G                  | S27:S29:        | 2 | 3,3315 | 0,329 | 0      |
| 2 | O43379 WDR62_HUMAN | E.VEAGPGDQQGDSYL.R.V              |                 | 2 | 3,3244 | 0,449 | 0,23   |
| 2 | Q9HC35 EMAL4_HUMAN | E.SRIS#SS#PTLLE.N                 | S917:S919:      | 2 | 3,3195 | 0,285 | -0,181 |
| 2 | Q6PKG0 LARP1_HUMAN | R.AVT#PVPTKTEE.V                  | T526:           | 2 | 3,3063 | 0,397 | 0,097  |
| 2 | P13645 K1C10_HUMAN | K.QSLEASLAETEGR.Y                 |                 | 2 | 3,2961 | 0,433 | 0      |
| 2 | Q5H9R7 SAPS3_HUMAN | K.QDLFEPSSANTEDKM*E.V             |                 | 2 | 3,2944 | 0,477 | 0,197  |
| 2 | Q96ST2 IWS1_HUMAN  | K.TIAS#DS#EEEAGKE.L               | S438:S440:      | 2 | 3,293  | 0,29  | 0,08   |
| 2 | P04264 K2C1_HUMAN  | K.SKAEAESLYQSK.Y                  |                 | 2 | 3,288  | 0,417 | -0,273 |
| 2 | Q9H7Z6 MYST1_HUMAN | E.GTAPS#PGRVS#PPT#PARGEPE.V       | S37:S42:T45:    | 3 | 3,2845 | 0,24  | 0,166  |
| 2 | Q13263 TIF1B_HUMAN | E.TKPVLM*ALAEPGAEGPR.L            |                 | 3 | 3,258  | 0,175 | 0,202  |
| 2 | P35908 K22E_HUMAN  | K.VDLLNQEIEFLK.V                  |                 | 2 | 3,2575 | 0,394 | -0,084 |
| 2 | Q9NR48 ASH1L_HUMAN | E.LTSLKEAT#PS#PISE.S              | T1184:S1186:    | 2 | 3,2558 | 0,272 | 0,374  |
| 2 | Q16254 E2F4_HUMAN  | E.ASRPNS#PQLT#PTAVPGSAE.V         | S244:T248:      | 2 | 3,2482 | 0,325 | 0,419  |
| 2 | Q8TDD1 DDX54_HUMAN | R.GAASQARGS#DS#EDGEFE.I           | S39:S41:        | 2 | 3,2465 | 0,303 | -0,195 |
| 2 | Q9Y2E8 SL9A8_HUMAN | E.VRQGPS#GS#EDDEQELL.-            | S567:S569:      | 2 | 3,2435 | 0,293 | 0,191  |
| 2 | P18858 DNL1_HUMAN  | R.KQSQIQNQGEDS#GS#DPEDTY.-        | S911:S913:      | 2 | 3,2365 | 0,508 | 0,485  |
| 2 | Q92598 HS105_HUMAN | E.AGTQPQVQTDAQQTQSPPS#PE.L        | S557:           | 3 | 3,2236 | 0,344 | 0,387  |
| 2 | Q96JM3 ZN828_HUMAN | R.KPGPPLS#PEIRS#PAGS#PELR.K       | S427:S432:S436: | 3 | 3,2214 | 0,166 | 0,315  |
| 2 | P13645 K1C10_HUMAN | R.SLLEGEGSSGGGGR.G                |                 | 2 | 3,2189 | 0,424 | 0,29   |
| 2 | P02533 K1C14_HUMAN | R.EVATNSELVQSGK.S                 |                 | 2 | 3,2186 | 0,435 | 0,09   |
| 2 | Q8WVM7 STAG1_HUMAN | E.TTAHS#DAGS#ELEETE.V             | S20:S24:        | 2 | 3,2142 | 0,268 | 0      |
| 2 | O15047 SET1A_HUMAN | E.RVAGS#PVT#PLPEQE.A              | S1103:T1106:    | 2 | 3,2041 | 0,269 | -0,074 |
| 2 | Q6NZI2 PTRF_HUMAN  | E.SDAVLVDKS#D.S                   | S387:           | 2 | 3,1976 | 0,312 | 0,108  |
| 2 | P35908 K22E_HUMAN  | R.NLDLDSIIAEVK.A                  |                 | 2 | 3,1964 | 0,447 | -0,275 |
| 2 | Q92734 TFG_HUMAN   | K.NVM*SAFGLTDDQVSGPPSAPAEDR.S     |                 | 3 | 3,1947 | 0,238 | 0,517  |
| 2 | A1L390 PKHG3_HUMAN | D.LKALS#S#EEEE.M                  | S576:S577:      | 2 | 3,1939 | 0,255 | 0,257  |
| 2 | Q9HC35 EMAL4_HUMAN | E.SRISS#S#PTLLE.N                 | S918:S919:      | 2 | 3,1783 | 0,356 | 0,09   |
| 2 | Q14C86 GAPD1_HUMAN | R.SNS#VSS#LDLE.G                  | S585:S588:      | 2 | 3,1782 | 0,321 | 0,101  |
| 2 | P39880 CUX1_HUMAN  | E.IQAGSQGQAGASDS#PSAR.S           | S1321:          | 2 | 3,1675 | 0,479 | -0,138 |
| 2 | P35908 K22E_HUMAN  | R.GFSSGSAAVVS GGS.R               |                 | 2 | 3,1674 | 0,378 | 0,097  |
| 2 | Q14694 UBP10_HUMAN | E.TKYS#PPAIS#PLVSE.K              | S365:S370:      | 2 | 3,162  | 0,323 | 0,148  |
| 2 | Q96S66 CLCC1_HUMAN | E.AAGS#PDQGSTYS#PAR.G             | S524:S532:      | 2 | 3,1595 | 0,348 | 0,3    |
| 2 | Q8N163 K1967_HUMAN | E.DSEVRS#VAS#NQSE.M               | S675:S678:      | 2 | 3,1499 | 0,421 | 0,934  |
| 2 | P35908 K22E_HUMAN  | R.SKEEAELYHSK.Y                   |                 | 3 | 3,1464 | 0,163 | 0,131  |
| 2 | P21127 CD2L1_HUMAN | E.GDYVPDS#PALS#PIELKQE.L          | S410:S414:      | 3 | 3,146  | 0,3   | 0,086  |

|   |                    |                                 |                    |   |        |       |        |
|---|--------------------|---------------------------------|--------------------|---|--------|-------|--------|
| 2 | Q9NPI6 DCP1A_HUMAN | R.KAS#SPS#PLTIGTPE.S            | S522:S525:         | 2 | 3,1418 | 0,432 | 0,158  |
| 2 | Q01433 AMPD2_HUMAN | E.TIPEEAGITM*S#PGPQ.-           | S875:              | 2 | 3,1418 | 0,206 | 0,451  |
| 2 | Q9Y606 TRUA_HUMAN  | K.VSPLEGS#EGDGDGT#D.-           | S420:T426:         | 2 | 3,1405 | 0,482 | 0,299  |
| 2 | Q5VT06 CE350_HUMAN | E.TRS#PS#PISISSSE.T             | S1828:S1830:       | 2 | 3,1383 | 1     | 0      |
| 2 | Q96CW6 S7A6O_HUMAN | E.FGYDS#PHDLDS#D.-              | S302:S308:         | 2 | 3,1344 | 0,391 | 0      |
| 2 | Q9H813 TM206_HUMAN | E.RSTS#YQELS#EE.L               | S9:S14:            | 2 | 3,1339 | 0,346 | -0,246 |
| 2 | P13645 K1C10_HUMAN | R.LENEIQTYR.S                   |                    | 2 | 3,1273 | 0,183 | 0,105  |
| 2 | Q15018 K0157_HUMAN | K.YPGSGADLPPPQR.A               |                    | 2 | 3,1203 | 0,407 | 0,09   |
| 2 | Q15149 PLEC1_HUMAN | E.FADM*LSGNAGGFR.S              |                    | 2 | 3,1199 | 0,386 | -1,347 |
| 2 | Q9UHR4 BI2L1_HUMAN | E.IKTPAST#PVSGTPQAS#PM*IE.R     | T252:S261:         | 3 | 3,1181 | 0,201 | 0,418  |
| 2 | O94915 FRYL_HUMAN  | E.SRYS#SSS#GGSYEEE.K            | S1533:S1536:       | 2 | 3,1152 | 1     | 0,072  |
| 2 | P04264 K2C1_HUMAN  | K.NKLNDLEDALQQAK.E              |                    | 3 | 3,1028 | 0,287 | 0      |
| 2 | O94842 TOX4_HUMAN  | E.LVSGS#PVALS#PQPR.C            | S562:S567:         | 2 | 3,1024 | 0,255 | 1,089  |
| 2 | P35908 K22E_HUMAN  | R.GSSSGGGYSSGSSSYGSGGR.Q        |                    | 2 | 3,099  | 0,417 | -0,07  |
| 2 | Q6ZRS2 SRCAP_HUMAN | E.LTEAKT#PTS#S#PEKPQELVTAE.V    | T2682:S2685:S2686: | 2 | 3,091  | 0,327 | 0,782  |
| 2 | O60271 JIP4_HUMAN  | R.NVS#T#GSAENEKSE.V             | S329:T330:         | 2 | 3,0894 | 0,339 | 0,223  |
| 2 | O15027 SC16A_HUMAN | E.HRPASALVNPLAR.G               |                    | 3 | 3,0882 | 0,185 | 0,261  |
| 2 | Q14C86 GAPD1_HUMAN | E.GISEGPSNRS#NSVS#SLDLE.G       | S583:S587:         | 2 | 3,086  | 0,182 | 0,579  |
| 2 | Q9HAU5 RENT2_HUMAN | E.NKEVS#S#PDDLELE.L             | S513:S514:         | 2 | 3,0805 | 0,252 | 0,149  |
| 2 | Q9UQ35 SRRM2_HUMAN | E.VEERPAVSLTLDQSQS#QAS#LE.A     | S1289:S1292:       | 2 | 3,0779 | 0,515 | 0,598  |
| 2 | Q9UHR4 BI2L1_HUMAN | E.IKTPASTPVS#GTPQAS#PM*IE.R     | S255:S261:         | 2 | 3,0773 | 0,392 | 0,335  |
| 2 | Q92667 AKAP1_HUMAN | E.TSS#S#PRDKAIT#PPLPE.S         | S525:S526:T533:    | 2 | 3,0764 | 0,292 | 0      |
| 2 | Q9BQY9 DBND2_HUMAN | E.S#QRPPIGSIS#M*EVNVDTLQ        | S144:S154:         | 3 | 3,0684 | 0,088 | 0,157  |
| 2 | Q16204 CCDC6_HUMAN | K.SGGIVIS#PFRLEE.L              | S52:               | 2 | 3,0634 | 0,292 | -0,082 |
| 2 | Q9H5H4 ZN768_HUMAN | R.S#PGYEPRS#PGYESE.S            | S132:S139:         | 2 | 3,059  | 0,354 | 0,213  |
| 2 | P13645 K1C10_HUMAN | R.LKYENEVALR.Q                  |                    | 3 | 3,0589 | 0,172 | 0,592  |
| 2 | Q8N2Y8 RUSC2_HUMAN | E.TSRPS#PLGSYS#PIR.S            | S775:S781:         | 3 | 3,0509 | 0,18  | 0      |
| 2 | P85037 FOXK1_HUMAN | R.SGGLQT#PECLS#REGS#PIPHDPE.F   | T436:S441:S445:    | 3 | 3,0489 | 0,282 | 0,281  |
| 2 | Q9UQ35 SRRM2_HUMAN | E.M*STSNFESS#PE.V               | S1271:             | 2 | 3,0488 | 0,178 | 0,186  |
| 2 | P46777 RL5_HUMAN   | R.KHIM*GQNVADYM*R.Y             |                    | 3 | 3,0395 | 0,233 | 0,344  |
| 2 | Q9Y3T9 NOC2L_HUMAN | E.LEDLQLS#EDD.-                 | S746:              | 2 | 3,0393 | 0,401 | 0      |
| 2 | P35908 K22E_HUMAN  | R.YLDGLTAER.T                   |                    | 2 | 3,029  | 0,353 | -0,118 |
| 2 | Q8N1G2 K0082_HUMAN | E.LALSLSSTSDDEPPSSVSHGAK.A      |                    | 3 | 3,029  | 0,286 | -0,084 |
| 2 | Q9BVS4 RIOK2_HUMAN | E.TKEGS#EFSFS#DGEVAE.K          | S332:S337:         | 2 | 3,0239 | 0,448 | 0,26   |
| 2 | P04264 K2C1_HUMAN  | K.AEAESLYQSK.Y                  |                    | 2 | 3,0166 | 0,407 | 0,108  |
| 2 | Q96SB4 SRPK1_HUMAN | E.VINYTQNS#NNE.T                | S540:              | 2 | 3,0123 | 0,302 | 0,355  |
| 2 | Q86SQ0 PHLB2_HUMAN | E.KLQLS#DEES#VFEE.A             | S489:S493:         | 2 | 3,0049 | 0,154 | 0,214  |
| 2 | Q9NQX3 GEPH_HUMAN  | E.LEDLPS#PPPPLS#PPPTTSPHKQT#E.D | S188:S194:T205:    | 3 | 3,0044 | 0,208 | 0,457  |
| 2 | P17275 JUNB_HUMAN  | R.SRDAT#PPVS#PINM*EDQE.R        | T255:S259:         | 3 | 2,9892 | 0,282 | 0,621  |

|   |                     |                             |              |   |        |       |        |
|---|---------------------|-----------------------------|--------------|---|--------|-------|--------|
| 2 | P29590 PML_HUMAN    | E.VFLPNSNHVASGAGEAER.V      |              | 3 | 2,9826 | 0,228 | 0,277  |
| 2 | Q9H4L5 OSBL3_HUMAN  | E.SRLS#ITDS#LSE.F           | S443:S447:   | 2 | 2,9826 | 0,277 | -0,535 |
| 2 | Q96GX5 MASTL_HUMAN  | E.NIVNS#FTDKQQT#PE.K        | S512:T519:   | 2 | 2,9781 | 0,296 | 0      |
| 2 | P19338 NUCL_HUMAN   | K.GLSEDTTEETLKE.S           |              | 2 | 2,9619 | 0,394 | 0      |
| 2 | Q01082 SPTB2_HUMAN  | K.TALPAQSAATLPAR.T          |              | 2 | 2,9546 | 0,407 | 0,089  |
| 2 | O15061 DMN_HUMAN    | E.VSS#PTGFAQSQVLE.D         | S1107:       | 2 | 2,9534 | 0,28  | 0,08   |
| 2 | Q8N1G2 K0082_HUMAN  | E.LALSLSST#SDDEPPSSVSHGAK.A | T30:         | 3 | 2,9505 | 0,263 | 0,081  |
| 2 | P13645 K1C10_HUMAN  | K.IRLENEIQTYR.S             |              | 3 | 2,9498 | 0,158 | 0,255  |
| 2 | P35030 TRY3_HUMAN   | D.TLDNDIMLIK.L              |              | 2 | 2,9411 | 0,338 | -0,104 |
| 2 | Q16204 CCDC6_HUMAN  | K.SGGIVISPFRLLE.L           |              | 2 | 2,9398 | 0,35  | 0,174  |
| 2 | P04264 K2C1_HUMAN   | K.NKLNDLEDALQQAK.E          |              | 2 | 2,9339 | 0,324 | 0,153  |
| 2 | P04264 K2C1_HUMAN   | R.TNAENEFVTIKK.D            |              | 2 | 2,9283 | 0,382 | 0,175  |
| 2 | Q12756 KIF1A_HUMAN  | E.SHGS#SSASS#PLSAE.G        | S1425:S1430: | 2 | 2,9134 | 1     | -0,25  |
| 2 | Q8TDY2 RBCC1_HUMAN  | E.M*SQTITDLLSEQK.A          |              | 2 | 2,904  | 0,425 | -0,081 |
| 2 | P42166 LAP2A_HUMAN  | E.SRS#ST#PLPTISSAE.N        | S158:T160:   | 2 | 2,896  | 1     | -0,218 |
| 2 | Q9P1Q0 VPS54_HUMAN  | E.LTPIAVDTTSQR.N            |              | 2 | 2,8937 | 0,408 | 0,187  |
| 2 | Q9H5H4 ZN768_HUMAN  | E.FAPRS#PES#DSQSPEFE.S      | S104:S107:   | 2 | 2,8935 | 0,225 | -0,805 |
| 2 | Q14160 LAP4_HUMAN   | E.LRS#LESPS#PGPQEEDGE.V     | S1575:S1581: | 3 | 2,8913 | 0,191 | 0,527  |
| 2 | Q9H6Z4 RANB3_HUMAN  | E.NAAAESGS#ESSS#QEATPEKE.S  | S355:S359:   | 3 | 2,8722 | 1     | 0,084  |
| 2 | Q8WVM7 STAG1_HUMAN  | E.TTAHS#DAGS#ELEE.T         | S20:S24:     | 2 | 2,8701 | 0,203 | -0,162 |
| 2 | Q86W92 LIPB1_HUMAN  | E.DDM*FKDFAAR.S             |              | 3 | 2,8689 | 0,285 | 1,113  |
| 2 | Q969V6 MKL1_HUMAN   | E.AIIVGQVNYPK.V             |              | 2 | 2,8567 | 0,487 | 0,203  |
| 2 | P53396 ACLY_HUMAN   | R.TAS#FSEGRADE.V            | S455:        | 2 | 2,8553 | 0,474 | -0,286 |
| 2 | O43379 WDR62_HUMAN  | E.AGPGDQQGDSYL.R.V          |              | 2 | 2,8519 | 0,338 | 0,089  |
| 2 | Q9NWH9 SLTM_HUMAN   | E.VSKPLPS#EGS#LAE.A         | S214:S217:   | 2 | 2,851  | 0,225 | 0,331  |
| 2 | Q92619 HMHA1_HUMAN  | E.VASGS#HSGS#EEQLE.A        | S1070:S1074: | 2 | 2,8433 | 0,261 | 0,155  |
| 2 | P60709 ACTB_HUMAN   | R.GYSFTTTAERE.I             |              | 2 | 2,8312 | 0,513 | 0,193  |
| 2 | Q8IY92 BTBDC_HUMAN  | E.IFYTHQTLDS#DS#EDE.S       | S925:S927:   | 2 | 2,827  | 0,353 | 0      |
| 2 | P05556 ITB1_HUMAN   | K.NVLSLTNKGEVFNE.L          |              | 2 | 2,8259 | 0,226 | -0,234 |
| 2 | Q9UPQ6 Q9UPQ6_HUMAN | E.SETRSES#S#DFE.V           | S318:S319:   | 2 | 2,8175 | 0,253 | 0,17   |
| 2 | Q9UQ35 SRRM2_HUMAN  | E.SYFGVSSLQLK.G             |              | 2 | 2,8171 | 0,334 | -0,099 |
| 2 | O94909 K0819_HUMAN  | R.GPSQATS#PIRS#PQE.S        | S296:S300:   | 2 | 2,8147 | 0,266 | 0,076  |
| 2 | P04264 K2C1_HUMAN   | K.SLNNQFASFIDK.V            |              | 2 | 2,8087 | 0,364 | 0      |
| 2 | Q5T8D3 ACBD5_HUMAN  | E.DLGNVLTSTPNAK.T           |              | 2 | 2,8081 | 0,415 | 0,275  |
| 2 | P35908 K22E_HUMAN   | K.DVDNAYM*IK.V              |              | 2 | 2,8075 | 0,26  | -0,112 |
| 2 | Q8N1G2 K0082_HUMAN  | E.LALSLSSTS#DDEPPSSVSHGAK.A | S31:         | 2 | 2,8054 | 0,413 | 0,431  |
| 2 | O94915 FRYL_HUMAN   | E.AALTASQILSR.T             |              | 2 | 2,8031 | 0,317 | 0      |
| 2 | Q15154 PCM1_HUMAN   | E.GCPVS#INLS#KAE.T          | S1781:S1785: | 2 | 2,8027 | 0,19  | 0,17   |
| 2 | Q03252 LMNB2_HUMAN  | R.AGGPAT#PLS#PTRLSR.L       | T14:S17:     | 3 | 2,8006 | 0,254 | -1,115 |

|   |                     |                                 |                 |   |        |       |        |
|---|---------------------|---------------------------------|-----------------|---|--------|-------|--------|
| 2 | P14136 GFAP_HUMAN   | K.LALDIEIATYR.K                 |                 | 2 | 2,798  | 0,425 | -0,095 |
| 2 | Q16563 SYPL1_HUMAN  | K.TVTATFGYPFR.L                 |                 | 2 | 2,7964 | 0,462 | -0,29  |
| 2 | Q96A49 SYAP1_HUMAN  | E.AVRPKT#PPVVIK.S               | T248:           | 3 | 2,7963 | 0,164 | 0,132  |
| 2 | P35908 K22E_HUMAN   | K.LALDVEIATYR.K                 |                 | 2 | 2,7953 | 0,438 | -0,29  |
| 2 | Q9H5H4 ZN768_HUMAN  | R.S#PGYES#ESSRYE.S              | S139:S144:      | 2 | 2,7921 | 0,521 | 0,315  |
| 2 | P05556 ITB1_HUMAN   | R.SNGLICGGNGVCK.C               |                 | 2 | 2,7911 | 0,387 | 0      |
| 2 | P04264 K2C1_HUMAN   | R.LLRDYQELM*NTK.L               |                 | 3 | 2,7899 | 0,111 | 0,119  |
| 2 | P04264 K2C1_HUMAN   | R.TNAENEFVTIK.K                 |                 | 2 | 2,7874 | 0,342 | 0,096  |
| 2 | Q6XQN6 PNCB_HUMAN   | R.LQALVNSLCAGQS#P.-             | S537:           | 2 | 2,7788 | 0,4   | 0      |
| 2 | Q5SW79 CE170_HUMAN  | E.SGM*TVRS#T#GSATSLASQGE.R      | S627:T628:      | 2 | 2,7539 | 1     | 0      |
| 2 | Q9Y4B4 ARIP4_HUMAN  | E.GLARPV#PDS#PEIISE.L           | S1169:S1172:    | 2 | 2,7508 | 0,513 | 0,267  |
| 2 | P35612 ADDB_HUMAN   | E.TAPEEPGS#PAKS#APAS#PVQSPAKE.A | S592:S596:S600: | 3 | 2,7495 | 0,322 | 0,213  |
| 2 | P04264 K2C1_HUMAN   | K.QISNLQQSISDAEQR.G             |                 | 3 | 2,7362 | 0,173 | 0,32   |
| 2 | P62753 RS6_HUMAN    | R.LSS#LRAS#TSKS#E.S             | S236:S240:S244: | 3 | 2,7355 | 0,088 | 0,304  |
| 2 | A4QPA1 A4QPA1_HUMAN | E.VATVVIQPTVLR.A                |                 | 2 | 2,7328 | 0,398 | 0      |
| 2 | Q4G0J3 LARP7_HUMAN  | R.SRPTS#EGS#DIE.S               | S258:S261:      | 2 | 2,7297 | 0,161 | 0      |
| 2 | O60447 EVI5_HUMAN   | E.TGVGFPLHGK.S                  |                 | 2 | 2,7183 | 0,334 | 0,361  |
| 2 | P10619 PPGB_HUMAN   | E.SPAGVGFYSDDK.F                |                 | 2 | 2,7165 | 0,371 | 0,183  |
| 2 | P08047 SP1_HUMAN    | E.KGVGGNNGGNGGGGAFSQR.S         |                 | 3 | 2,7161 | 0,202 | 0,39   |
| 2 | P13645 K1C10_HUMAN  | R.LKYENEVALR.Q                  |                 | 2 | 2,7155 | 0,323 | 0,198  |
| 2 | P50851 LRBA_HUMAN   | E.NSSIEKTSS#LES#ASNIE.L         | S1000:S1003:    | 2 | 2,7144 | 0,386 | 0,749  |
| 2 | O43583 DENR_HUMAN   | K.LTVENS#PKQE.A                 | S73:            | 2 | 2,707  | 0,133 | -0,199 |
| 2 | P18858 DNL1_HUMAN   | E.QATTSAQVACLXR.K               |                 | 2 | 2,7049 | 0,46  | -0,748 |
| 2 | Q8N108 MIER1_HUMAN  | E.LLSLYGYGSTVR.L                |                 | 2 | 2,7001 | 0,422 | 0      |
| 2 | Q9P2R6 RERE_HUMAN   | E.IS#RPNS#PSEGEGE.S             | S675:S679:      | 2 | 2,6824 | 0,399 | 0,08   |
| 2 | Q9NY61 AATF_HUMAN   | E.LLFQYPDTR.Y                   |                 | 2 | 2,6786 | 0,221 | -0,529 |
| 2 | Q9Y6I9 TX264_HUMAN  | E.TSAATLSPGASSR.G               |                 | 2 | 2,6753 | 0,342 | -0,101 |
| 2 | Q14692 BMS1_HUMAN   | K.AGLS#PANCQSDRVNLE.K           | S552:           | 2 | 2,6737 | 0,269 | 0,135  |
| 2 | Q8WZ73 RFFL_HUMAN   | R.RAS#LSDLTDLEDIE.G             | S240:           | 2 | 2,6697 | 0,378 | -0,074 |
| 2 | P61978 HNRPK_HUMAN  | E.GLQLPS#PTATSQLPLESDAVE.C      | S116:           | 2 | 2,6623 | 0,202 | 0,109  |
| 2 | Q9UKM9 RALY_HUMAN   | E.LEHS#QDT#DADDGALQ.-           | S295:T298:      | 2 | 2,6612 | 0,201 | 0,138  |
| 2 | P04792 HSPB1_HUMAN  | E.SPAVAAPAYS.R.A                |                 | 2 | 2,6601 | 0,399 | 0      |
| 2 | P06241 FYN_HUMAN    | E.DYFTATEPQY#QPGENL.-           | Y531:           | 2 | 2,6527 | 0,396 | 0,312  |
| 2 | Q9NYY8 FAKD2_HUMAN  | E.ALPAVAAVNVQS#TQ.-             | S708:           | 2 | 2,6495 | 0,254 | 0,177  |
| 2 | Q8TB72 PUM2_HUMAN   | E.VNAILS#PRS#E.S                | S82:S85:        | 2 | 2,6485 | 0,168 | 0,294  |
| 2 | Q9NXG2 THUM1_HUMAN  | E.YGDDM*YGPEK.F                 |                 | 2 | 2,6478 | 0,359 | -0,102 |
| 2 | P05556 ITB1_HUMAN   | E.CECQSEGIPESPK.C               |                 | 2 | 2,645  | 0,375 | 0,241  |
| 2 | Q9UQ35 SRRM2_HUMAN  | K.DKFSFPVQDRPE.S                |                 | 3 | 2,6392 | 0,168 | 0,117  |
| 2 | P13645 K1C10_HUMAN  | R.LASYLDKVR.A                   |                 | 2 | 2,6261 | 0,082 | 0      |

|   |                    |                               |              |   |        |       |        |
|---|--------------------|-------------------------------|--------------|---|--------|-------|--------|
| 2 | Q15942 ZYG_HUMAN   | E.IFPS#PPPPPEEE.G             | S116:        | 2 | 2,6185 | 0,312 | 0,086  |
| 2 | Q14247 SRC8_HUMAN  | R.AKTQT#PPVS#PAPQPTEER.L      | T401:S405:   | 3 | 2,6184 | 0,231 | 0,087  |
| 2 | Q9UNE7 STUB1_HUMAN | R.LGAGGGS#PEKSPSAQE.L         | S19:         | 2 | 2,6082 | 0,269 | 0,236  |
| 2 | Q9Y2F5 K0947_HUMAN | E.VAAVKS#IS#PE.V              | S923:S925:   | 2 | 2,6012 | 0,161 | 0,21   |
| 2 | Q9BZF3 OSBL6_HUMAN | E.SRLS#M*SES#VSE.F            | S487:S491:   | 2 | 2,5987 | 0,276 | 0,264  |
| 2 | P78559 MAP1A_HUMAN | R.CLS#PDDSTVK.M               | S986:        | 2 | 2,5937 | 0,195 | 0,102  |
| 2 | Q9UQ35 SRRM2_HUMAN | E.KAGM*S#SNQSISS#PVL.D.A      | S1397:S1404: | 2 | 2,5931 | 0,117 | 0,136  |
| 2 | P04264 K2C1_HUMAN  | R.NKYEDEINKR.T                |              | 3 | 2,5912 | 0,131 | 0,559  |
| 2 | P13645 K1C10_HUMAN | R.QSVEADINGLR.R               |              | 2 | 2,5782 | 0,395 | -0,203 |
| 2 | Q9NQ55 SSF1_HUMAN  | E.LLATGAGLS#ES#EAEPDGDHNITE.L | S238:S240:   | 2 | 2,5772 | 0,194 | 0,589  |
| 2 | Q8IWW6 RHG12_HUMAN | E.LSSSSTEQIR.A                |              | 2 | 2,5691 | 0,12  | -0,11  |
| 2 | Q8TEQ6 GEMI5_HUMAN | E.NSGPVENGVS#DQE.G            | S778:        | 2 | 2,5658 | 0,258 | 0,173  |
| 2 | P08047 SP1_HUMAN   | E.SQPSPLALLAATCSR.I           |              | 2 | 2,5658 | 0,355 | 0      |
| 2 | Q9Y4C8 RBM19_HUMAN | E.LSDM*DYLK.S                 |              | 2 | 2,5613 | 0,176 | 0,183  |
| 2 | Q15648 MED1_HUMAN  | K.SYQNS#PSS#DDGIRPLPE.Y       | S1479:S1482: | 2 | 2,5597 | 0,277 | -0,362 |
| 2 | P02533 K1C14_HUMAN | R.VLDELTLAR.A                 |              | 2 | 2,5558 | 0,302 | 0      |
| 2 | Q96CX2 KCD12_HUMAN | E.GASAGAPS#PTLE.L             | S176:        | 2 | 2,553  | 0,368 | 0,107  |
| 2 | Q9UQ35 SRRM2_HUMAN | E.NS#FGS#PLEFR.N              | S1326:S1329: | 2 | 2,5526 | 0,4   | -0,093 |
| 2 | Q5SW79 CE170_HUMAN | R.ST#GSATS#LASQGE.R           | T628:S633:   | 2 | 2,5495 | 1     | 0,09   |
| 2 | Q32MZ4 LRRF1_HUMAN | R.RGS#GDTISISIDTE.A           | S120:        | 2 | 2,5436 | 0,268 | 0,172  |
| 2 | Q15742 NAB2_HUMAN  | E.LGEKLS#PLPGGPGAGDPR.I       | S171:        | 2 | 2,5428 | 0,201 | 0,068  |
| 2 | Q6NZI2 PTRF_HUMAN  | E.LGEGERPEED.A                |              | 2 | 2,5427 | 0,288 | 0      |
| 2 | P10276 RARA_HUMAN  | E.GLDTLSGQPGGGGR.D            |              | 2 | 2,5392 | 0,21  | 0,192  |
| 2 | Q03252 LMNB2_HUMAN | R.AGGPAT#PLS#PTR.L            | T14:S17:     | 2 | 2,5309 | 0,328 | 0,285  |
| 2 | O43379 WDR62_HUMAN | E.VEAGPGDQQGDSYLR.V           |              | 3 | 2,5297 | 0,174 | 0,115  |
| 2 | P05556 ITB1_HUMAN  | K.NVLSLTNKGE.V                |              | 2 | 2,528  | 0,228 | 0,454  |
| 2 | P04264 K2C1_HUMAN  | K.SKAEAESLYQSK.Y              |              | 3 | 2,5278 | 0,24  | 0,273  |
| 2 | P07195 LDHB_HUMAN  | E.KLIAPVAEEEE.A               |              | 2 | 2,5267 | 0,288 | 0,111  |
| 2 | Q14671 PUM1_HUMAN  | E.VNSVLS#PRS#E.S              | S209:S212:   | 2 | 2,5267 | 0,234 | 0      |
| 2 | P49792 RBP2_HUMAN  | E.T#VFTPKTS#PENVQD.R          | T1393:S1400: | 2 | 2,5261 | 0,207 | 0,283  |
| 2 | P48960 CD97_HUMAN  | R.CNPGFSSFSE.I                |              | 2 | 2,518  | 0,149 | 0,216  |
| 2 | P13645 K1C10_HUMAN | R.VLDELTLTK.A                 |              | 2 | 2,513  | 0,253 | -0,118 |
| 2 | Q96TA1 NIBL1_HUMAN | E.YSNSGGGSPSPST#PE.S          | T593:        | 2 | 2,5121 | 0,375 | 0,235  |
| 2 | Q9Y4W2 LAS1L_HUMAN | E.VGPFSTGQES#PTAE.N           | S617:        | 2 | 2,5097 | 0,322 | -1,395 |
| 2 | P04264 K2C1_HUMAN  | R.TNAENEFVTIKK.D              |              | 3 | 2,508  | 0,164 | 0,131  |
| 2 | P49792 RBP2_HUMAN  | E.TVFT#PKTS#PE.N              | T1396:S1400: | 2 | 2,5064 | 0,229 | 0      |
| 2 | Q9UIS9 MBD1_HUMAN  | E.GAS#SPVQVPGPVAASTE.A        | S464:        | 2 | 2,502  | 0,39  | -0,373 |
| 2 | P05556 ITB1_HUMAN  | E.VNSEDMD*DAYCR.K             |              | 2 | 2,4967 | 0,416 | 0,177  |
| 2 | Q00613 HSF1_HUMAN  | R.VKEEPPS#PPQS#PRVEE.A        | S303:S307:   | 3 | 2,4952 | 0,12  | 0,279  |

|   |                      |                                 |                 |   |        |       |        |
|---|----------------------|---------------------------------|-----------------|---|--------|-------|--------|
| 2 | Q8WXW3 PIBF1_HUMAN   | E.TTVPTDDIS#S#SEERE.G           | S35:S36:        | 2 | 2,4941 | 0,31  | 0,067  |
| 2 | P35908 K22E_HUMAN    | K.IEISELNR.V                    |                 | 2 | 2,494  | 0,234 | 0      |
| 2 | Q8IW35 CEP97_HUMAN   | E.SSNNEQDNS#LLE.Q               | S770:           | 2 | 2,4894 | 0,193 | -0,085 |
| 2 | Q9BUR4 WDR79_HUMAN   | E.FGS#PSELS#PR.I                | S85:S90:        | 2 | 2,488  | 0,243 | 0      |
| 2 | Q9NQX3 GEPH_HUMAN    | E.LEDLPS#PPPPLS#PPPTTS#PHKQTE.D | S188:S194:S200: | 3 | 2,4831 | 0,092 | 0,392  |
| 2 | P43243 MATR3_HUMAN   | K.NTHCSSLPHYQK.L                |                 | 3 | 2,4817 | 0,247 | 0,062  |
| 2 | Q9H2G2 SLK_HUMAN     | E.TENSLPIPASK.R                 |                 | 2 | 2,4778 | 0,392 | 0,316  |
| 2 | P12270 TPR_HUMAN     | E.S#GGRSVPT#TPLQVAAPVTVFTE.S    | S2192:T2199:    | 3 | 2,4756 | 0,103 | -0,077 |
| 2 | Q99661 KIF2C_HUMAN   | E.LSSQM*SS#FNE.A                | S633:           | 2 | 2,4655 | 0,256 | 0      |
| 2 | Q9UBU9 NXF1_HUMAN    | R.AFAM*PAPT#PSSS#PVPTLSPEQQE.M  | T554:S558:      | 2 | 2,4636 | 0,211 | 0,575  |
| 2 | P49848 TAF6_HUMAN    | E.AGDSPPPAPGT#PK.A              | T660:           | 2 | 2,4536 | 0,206 | 0,192  |
| 2 | P22694 KAPCB_HUMAN   | E.DIRVS#ITE.K                   | S339:           | 2 | 2,4498 | 0,105 | 0      |
| 2 | P62937 PPIA_HUMAN    | K.KITIADCGQLE.-                 |                 | 2 | 2,4489 | 0,258 | -0,587 |
| 2 | Q08J23 NSUN2_HUMAN   | E.STQLS#PADLTE.G                | S456:           | 2 | 2,4406 | 0,287 | 0      |
| 2 | ##O94830 DDHD2_HUMAN | E.Y#LS#GADM*DILE.F              | Y675:S677:      | 2 | 2,4388 | 0,153 | -1,305 |
| 2 | Q02952 AKA12_HUMAN   | E.TVS#ILS#KTE.G                 | S1256:S1259:    | 2 | 2,4386 | 0,128 | -0,107 |
| 2 | P55072 TERA_HUMAN    | E.DNSVVLSLQPK.M                 |                 | 2 | 2,4302 | 0,274 | 0,416  |
| 2 | Q6PKG0 LARP1_HUMAN   | E.TES#APGS#PRAVT#PVPTK.T        | S517:S521:T526: | 3 | 2,4281 | 0,128 | 0,189  |
| 2 | P35612 ADDB_HUMAN    | E.TAPEEPGS#PAKS#APAS#PVQSPAK.E  | S592:S596:S600: | 3 | 2,4274 | 0,271 | 0,299  |
| 2 | P23396 RS3_HUMAN     | E.ILPTT#PISE.Q                  | T221:           | 2 | 2,4273 | 0,206 | 0,116  |
| 2 | Q9BUR4 WDR79_HUMAN   | E.FGS#PSELS#PRIEE.Q             | S85:S90:        | 2 | 2,4251 | 0,272 | 0,152  |
| 2 | Q9C0B0 UNK_HUMAN     | E.HFASGSFSPGT#S#PAFLSGPGAEE.L   | T634:S635:      | 3 | 2,4203 | 0,13  | 0      |
| 2 | Q99733 NP1L4_HUMAN   | R.LDNVPHT#PSS#YIE.T             | T51:S54:        | 2 | 2,4147 | 0,17  | 0,299  |
| 2 | Q12923 PTN13_HUMAN   | E.ARY#SDGS#IALD.I               | Y344:S348:      | 2 | 2,4101 | 0,173 | 0,092  |
| 2 | Q96EZ8 MCRS1_HUMAN   | D.SSLM*ASGTAS#RS#EDEE.S         | S20:S22:        | 2 | 2,4051 | 0,448 | 0,466  |
| 2 | O75952 CABYR_HUMAN   | E.AVGGLSSKPAT#PK.T              | T146:           | 2 | 2,399  | 0,277 | 0      |
| 2 | P13647 K2C5_HUMAN    | R.ISISTSGGSFR.N                 |                 | 2 | 2,3927 | 0,271 | -0,11  |
| 2 | Q8N137 CNTRB_HUMAN   | E.LS#RSL#VGLK.K                 | S76:S80:        | 2 | 2,3847 | 0,106 | -0,1   |
| 2 | Q9NYF8 BCLF1_HUMAN   | E.ALDYFS#DKES#GKQK.F            | S385:S389:      | 3 | 2,383  | 0,09  | 0,206  |
| 2 | P13645 K1C10_HUMAN   | K.YENEVALR.Q                    |                 | 2 | 2,3817 | 0,279 | 0      |
| 2 | Q9UPN9 TRI33_HUMAN   | R.LKS#DERPVHIK.-                | S1119:          | 3 | 2,3802 | 0,174 | 0,13   |
| 2 | Q9UBR2 CATZ_HUMAN    | R.VGDYGSLSGRE.K                 |                 | 2 | 2,38   | 0,311 | 0,214  |
| 2 | Q9Y5B0 CTDP1_HUMAN   | E.LAGAPEPQGSQAQGG.R.V           |                 | 2 | 2,3673 | 0,36  | 0      |
| 2 | Q14247 SRC8_HUMAN    | K.TQT#PPVS#PAPQPTTE.R           | T401:S405:      | 2 | 2,3666 | 0,333 | 0,14   |
| 2 | Q15424 SAFB1_HUMAN   | E.LAEAPTEAPS#PE.A               | S344:           | 2 | 2,3489 | 0,215 | 0,189  |
| 2 | O75534 CSDE1_HUMAN   | E.S#KSPAAPGQS#PTGSVCYE.R        | S114:S123:      | 2 | 2,3454 | 0,31  | 0      |
| 2 | Q15742 NAB2_HUMAN    | E.LGEKLS#PLPGGPGAGDPR.I         | S171:           | 3 | 2,3436 | 0,115 | 0,203  |
| 2 | Q9H501 ESF1_HUMAN    | E.M*QSVVQLIM*TR.D               |                 | 2 | 2,3384 | 0,284 | -0,182 |
| 2 | O95155 UBE4B_HUMAN   | E.GVSSLSSSPS#NSLE.T             | S90:            | 2 | 2,3371 | 0,269 | 0,426  |



|   |                     |                             |              |   |        |       |        |
|---|---------------------|-----------------------------|--------------|---|--------|-------|--------|
| 2 | Q9H7Z6 MYST1_HUMAN  | E.GT#APSPGRVS#PPT#PARGEPE.V | T34:S42:T45: | 2 | 2,3299 | 0,339 | 0,222  |
| 2 | P14384 CBPM_HUMAN   | R.IHIM*PSM*NPDGFE.A         |              | 2 | 2,3254 | 0,387 | 0,241  |
| 2 | P18858 DNL1_HUMAN   | R.KQSQIQNQGGEDS#GS#DPEDTY.- | S911:S913:   | 3 | 2,3247 | 0,239 | 0,291  |
| 2 | P13645 K1C10_HUMAN  | K.DAEAWFNEK.S               |              | 2 | 2,3245 | 0,316 | -0,11  |
| 2 | Q99547 MPH6_HUMAN   | E.TVELDVVS#DEE.M            | S110:        | 2 | 2,3239 | 0,296 | 0,1    |
| 2 | P13645 K1C10_HUMAN  | K.ELTTEIDNNIEQISSYK.S       |              | 2 | 2,3216 | 0,455 | 0,244  |
| 2 | B2RA01 B2RA01_HUMAN | K.AQYEDIAQK.S               |              | 2 | 2,3205 | 0,168 | 0      |
| 2 | Q86WR7 CJ047_HUMAN  | R.M*AGNEALS#PTS#PFRE.G      | S212:S215:   | 2 | 2,3192 | 0,254 | -0,068 |
| 2 | Q9NQW6 ANLN_HUMAN   | E.ASNQQPLS#GGEE.K           | S54:         | 2 | 2,3186 | 0,267 | 0,094  |
| 2 | P85037 FOXK1_HUMAN  | R.S#APASPTHPGLM*S#PR.S      | S416:S428:   | 2 | 2,3152 | 0,112 | 0,29   |
| 2 | Q7Z2W4 ZCCHV_HUMAN  | E.FLASASASAER.S             |              | 2 | 2,3082 | 0,339 | -1,319 |
| 2 | P35030 TRY3_HUMAN   | D.TLDNDIM*LIK.L             |              | 2 | 2,3045 | 0,373 | -0,102 |
| 2 | P12270 TPR_HUMAN    | E.TQVYNQDSQDS#IGE.G         | S1893:       | 2 | 2,2977 | 0,343 | 0,147  |
| 2 | Q86WR7 CJ047_HUMAN  | E.ALS#PTS#PFRE.G            | S212:S215:   | 2 | 2,2956 | 0,203 | -0,289 |
| 2 | Q16643 DREB_HUMAN   | E.TQEPS#PILDSEE.T           | S381:        | 2 | 2,2936 | 0,147 | 0,599  |
| 2 | Q9UNE7 STUB1_HUMAN  | R.LGAGGGS#PEKS#PSAQE.L      | S19:S23:     | 2 | 2,2916 | 0,258 | 0,299  |
| 2 | Q00613 HSF1_HUMAN   | E.GRPPS#PPPTST#PE.K         | S363:T369:   | 2 | 2,2895 | 0,151 | 0,165  |
| 2 | Q96T60 PNKP_HUMAN   | E.T#RTPESQPD#PPGTPLVSQDE.K  | T109:T118:   | 3 | 2,2872 | 0,091 | 0,607  |
| 2 | Q9UQ35 SRRM2_HUMAN  | E.LS#NS#PLRE.N              | S1318:S1320: | 2 | 2,2865 | 0,135 | -0,113 |
| 2 | Q96JP5 ZFP91_HUMAN  | E.VLIEDSDS#AGP.-            | S567:        | 2 | 2,2828 | 0,308 | 0,103  |
| 2 | Q9H009 NACA2_HUMAN  | E.NTQTPTVQEE#EEEE.V         | S166:        | 2 | 2,2729 | 0,219 | 0,6    |
| 2 | Q96N67 DOCK7_HUMAN  | E.RSPS#GSAFGS#QE.N          | S1432:S1438: | 2 | 2,272  | 0,166 | 0,178  |
| 2 | P13647 K2C5_HUMAN   | K.AQYEEIANR.S               |              | 2 | 2,2634 | 0,409 | 0      |
| 2 | P51858 HDGF_HUMAN   | R.RAGDLLED#PKRPK.E          | S165:        | 3 | 2,2631 | 0,292 | -0,11  |
| 2 | P28290 SSFA2_HUMAN  | R.ASVALTPTAPSR.T            |              | 2 | 2,2624 | 0,228 | -0,104 |
| 2 | Q6GMV2 SMYD5_HUMAN  | E.NYLFVCSPK.C               |              | 2 | 2,2591 | 0,209 | 0,095  |
| 2 | Q8WUA4 TF3C2_HUMAN  | E.AGPVGNM*TVVDS#PGQE.V      | S25:         | 2 | 2,2571 | 0,144 | 0,295  |
| 2 | Q6NSJ2 PHLB3_HUMAN  | E.ASEVLAEPSSR.G             |              | 2 | 2,2562 | 0,204 | 0,213  |
| 2 | P31949 S10AB_HUMAN  | K.KLDTNSDGLDFSE.F           |              | 2 | 2,2489 | 0,168 | -0,156 |
| 2 | P05362 ICAM1_HUMAN  | E.AQVHLALGDQR.L             |              | 2 | 2,2484 | 0,295 | -0,202 |
| 2 | P00558 PGK1_HUMAN   | E.DKVSHVSTGGGASLE.L         |              | 2 | 2,2464 | 0,198 | -0,084 |
| 2 | Q9Y519 T184B_HUMAN  | E.KTLLLS#S#DDEF.-           | S402:S403:   | 2 | 2,2432 | 0,239 | 0      |
| 2 | Q9Y2W6 TDRKH_HUMAN  | E.ITHTLS#CLS#LSE.A          | S539:S542:   | 2 | 2,2422 | 0,147 | -0,08  |
| 2 | Q96PE2 ARHG_HUMAN   | R.STISSFGNEETPSSKE.A        |              | 2 | 2,2418 | 0,116 | 0      |
| 2 | P35367 HRH1_HUMAN   | E.LINRS#LPS#FSE.I           | S230:S233:   | 2 | 2,2354 | 0,099 | -0,086 |
| 2 | Q8N1G2 K0082_HUMAN  | E.LALSLSSTS#DDEPPSSVSHGAK.A | S31:         | 3 | 2,2313 | 0,205 | 0      |
| 2 | P35908 K22E_HUMAN   | R.HGGGGGGFGGGGFGSR.S        |              | 2 | 2,2186 | 0,276 | 0,092  |
| 2 | Q9Y4E8 UBP15_HUMAN  | E.TKGASAATGIPLES#DED.S      | S961:        | 2 | 2,1993 | 0,326 | -0,28  |
| 2 | Q8N9T8 KRI1_HUMAN   | D.SSS#DSSSES#DSS#D.E        | S49:S55:S58: | 3 | 2,1963 | 0,102 | 1,568  |

|   |                     |                            |   |        |       |        |
|---|---------------------|----------------------------|---|--------|-------|--------|
| 2 | Q9BUA3 YK007_HUMAN  | E.GVALLQDVR.A              | 2 | 2,1951 | 0,163 | -0,063 |
| 2 | P25398 RS12_HUMAN   | E.HQINLIKVDD.N             | 2 | 2,1945 | 0,304 | 0,204  |
| 2 | Q5T8D3 ACBD5_HUMAN  | D.LGNVLTSTPNAK.T           | 2 | 2,1924 | 0,226 | 0,1    |
| 2 | Q00839 HNRPU_HUMAN  | R.AKS#PQPPVEEED.E.H        | 2 | 2,1883 | 0,208 | -0,159 |
| 2 | Q9NZW4 DSPP_HUMAN   | D.SSDSSDS#SDS#TS#D.S       | 3 | 2,1858 | 0,082 | 1,146  |
| 2 | Q6NZI2 PTRF_HUMAN   | E.SDAVLVDK.S               | 2 | 2,1853 | 0,199 | 0,432  |
| 2 | Q96GY3 LIN37_HUMAN  | E.RECS#PSS#PLPLPEDEE.G     | 2 | 2,1848 | 0,325 | 0,233  |
| 2 | Q9UQ35 SRRM2_HUMAN  | K.AGM*SSNQSISS#PVLD.A      | 2 | 2,1788 | 0,254 | 0,23   |
| 2 | O15061 DMN_HUMAN    | E.SLS#RQRS#PAPGS#PDEE.G    | 2 | 2,1768 | 0,258 | 0,125  |
| 2 | P35908 K22E_HUMAN   | R.TAAENDFVTLK.K            | 2 | 2,173  | 0,278 | 0      |
| 2 | Q9H4A3 WNK1_HUMAN   | E.SSVLSSSS#PE.S            | 2 | 2,1691 | 0,207 | -0,115 |
| 2 | Q96AQ6 PBIP1_HUMAN  | E.GQS#PPQS#LPST#PK.A       | 2 | 2,1688 | 0,252 | 0,312  |
| 2 | Q9Y2W2 WBP11_HUMAN  | E.LTPLQAM*M*LR.M           | 2 | 2,1646 | 0,213 | 0,101  |
| 2 | Q00613 HSF1_HUMAN   | R.VKEEPPS#PPQS#PRVEE.A     | 2 | 2,1557 | 0,263 | 0,31   |
| 2 | Q14247 SRC8_HUMAN   | R.AKTQT#PPVS#PAPQPTTEER.L  | 2 | 2,1488 | 0,333 | 0,466  |
| 2 | Q6ZTN6 AN13D_HUMAN  | E.SLQLSTEPR.G              | 2 | 2,1457 | 0,196 | 0      |
| 2 | Q4ZG04 Q4ZG04_HUMAN | E.LLLSTLVR.E               | 2 | 2,1389 | 0,095 | 0      |
| 2 | Q9C0C2 TB182_HUMAN  | R.LDS#PPPS#PITE.A          | 2 | 2,1346 | 0,135 | 0      |
| 2 | Q14493 SLBP_HUMAN   | R.HM*DSQVEDEFDLE.A         | 2 | 2,134  | 0,36  | -0,152 |
| 2 | Q14247 SRC8_HUMAN   | K.T#QTPPVV#PAPQPTTEE.R     | 2 | 2,1306 | 0,149 | 0,281  |
| 2 | Q14247 SRC8_HUMAN   | R.AKTQT#PPVSPAPQPTTEE.R    | 2 | 2,1259 | 0,259 | -0,066 |
| 2 | Q15185 TEBP_HUMAN   | D.S#DDEKM*PDLE.-           | 2 | 2,1233 | 0,145 | 0,479  |
| 2 | Q00613 HSF1_HUMAN   | E.SEPAPASVTALTDAR.G        | 2 | 2,1137 | 0,171 | -0,246 |
| 2 | P35908 K22E_HUMAN   | R.DYQELM*NVK.L             | 2 | 2,1134 | 0,256 | -0,106 |
| 2 | Q14676 MDC1_HUMAN   | K.APQAVPLEK.S              | 2 | 2,1087 | 0,314 | 0,192  |
| 2 | P04264 K2C1_HUMAN   | R.DYQELM*NTK.L             | 2 | 2,1038 | 0,18  | 0,105  |
| 2 | Q13283 G3BP1_HUMAN  | K.SSS#PAPADIAQTVQE.D       | 2 | 2,1037 | 0,169 | 0,232  |
| 2 | Q5T457 UBR4_HUMAN   | E.TAENVNNGNPS#PLE.A        | 2 | 2,0982 | 0,178 | -0,159 |
| 2 | Q3KQU3 MA7D1_HUMAN  | E.LGAGAPPAVVAR.T           | 2 | 2,0954 | 0,235 | -0,113 |
| 2 | Q43598 RCL_HUMAN    | E.ADPPGQVAAS#PDPTT.-       | 2 | 2,094  | 0,176 | 0,081  |
| 2 | Q92538 GBF1_HUMAN   | E.KSQSAS#VES#IPEVLEE.C     | 2 | 2,0904 | 0,159 | 0,064  |
| 2 | ##Q03164 HRX_HUMAN  | E.GKLSSS#KS#VLDSAS#SQK.M   | 2 | 2,0845 | 0,216 | -0,438 |
| 2 | Q6S8J3 A26CA_HUMAN  | E.LPDGQVITIGNE.R           | 2 | 2,0825 | 0,145 | 0      |
| 2 | P49848 TAF6_HUMAN   | E.AGDS#PPPAPGTPK.A         | 2 | 2,0794 | 0,128 | -0,192 |
| 2 | P04264 K2C1_HUMAN   | R.TLLEGEESR.M              | 2 | 2,0745 | 0,27  | 0      |
| 2 | P46100 ATRX_HUMAN   | E.VQSSVDHQGDGS#S#GTEQEVE.S | 2 | 2,0744 | 0,174 | 0,109  |
| 2 | Q02952 AKA12_HUMAN  | K.SPSS#PVERE.M             | 2 | 2,0656 | 0,117 | 0,226  |
| 2 | P35908 K22E_HUMAN   | R.LQGEIAHVK.K              | 2 | 2,0554 | 0,119 | 0,061  |
| 2 | Q9BXJ9 NARG1_HUMAN  | K.IT#VNGDS#SAEAE.L         | 2 | 2,0526 | 0,082 | 0,247  |

|   |                    |                               |                    |   |        |       |        |
|---|--------------------|-------------------------------|--------------------|---|--------|-------|--------|
| 2 | Q6P0N0 CN106_HUMAN | E.NQVAM*SFYK.H                |                    | 2 | 2,052  | 0,263 | 0      |
| 2 | P68104 EF1A1_HUMAN | E.SFS#DYPPLGR.F               | S416:              | 2 | 2,0514 | 0,29  | 0,1    |
| 2 | Q8WXI7 MUC16_HUMAN | R.TGPPLGS#TS#QGT#FTLD.T       | S6747:S6749:T6752: | 2 | 2,0463 | 0,207 | -0,872 |
| 2 | O95361 TRI16_HUMAN | E.LDLM*APGPLPR.A              |                    | 2 | 2,044  | 0,198 | 0      |
| 2 | Q86W92 LIPB1_HUMAN | E.DDM*FKDFAAR.S               |                    | 2 | 2,0358 | 0,172 | 0,396  |
| 2 | P68104 EF1A1_HUMAN | E.S#FSDYPPLGR.F               | S414:              | 2 | 2,0315 | 0,265 | 0,1    |
| 2 | Q8TB72 PUM2_HUMAN  | E.VNAILS#PR.S                 | S82:               | 2 | 2,0302 | 0,167 | 0      |
| 2 | P25686 DNJB2_HUMAN | R.SGGTQVQQTPASCPLDS#DLS#EDE.D | S247:S250:         | 2 | 2,0226 | 0,227 | 0,473  |
| 2 | Q9UQ35 SRRM2_HUMAN | E.FSAS#PM*LK.S                | S1124:             | 2 | 2,0147 | 0,129 | -0,062 |
| 2 | Q03188 CENPC_HUMAN | E.ISRCS#LS#EPLESDE.A          | S613:S615:         | 2 | 2,0146 | 0,302 | 0      |
| 2 | Q9H7N4 SFR19_HUMAN | E.GLSQS#ISRIS#E.T             | S293:S298:         | 2 | 2,0095 | 0,122 | 0,091  |
| 2 | Q99733 NP1L4_HUMAN | R.LDNVPHTPS#S#YIE.T           | S53:S54:           | 2 | 2,009  | 0,169 | 0,224  |
| 2 | Q6NZI2 PTRF_HUMAN  | E.ESDAVLVDKS#D.S              | S387:              | 2 | 2,0081 | 0,187 | -0,194 |
| 2 | Q9UKM9 RALY_HUMAN  | E.GLLT#HS#EEEE.H              | T286:S288:         | 2 | 2,004  | 0,162 | 0,086  |
| 2 | P85037 FOXK1_HUMAN | R.TPFGPLSSR.S                 |                    | 2 | 1,9933 | 0,254 | 0,127  |
| 2 | P13645 K1C10_HUMAN | R.LAADDFR.L                   |                    | 2 | 1,9903 | 0,298 | 0,453  |
| 2 | Q6PJF5 RHDF2_HUMAN | E.SPPLSAS#YFR.G               | S315:              | 2 | 1,9879 | 0,239 | 0      |
| 2 | Q86SQ0 PHLB2_HUMAN | E.LEKLQLS#DEES#VFE.E          | S489:S493:         | 2 | 1,9846 | 0,189 | -0,134 |
| 2 | Q8N3U4 STAG2_HUMAN | E.T#HFSSDT#DFEDIE.G           | T19:T25:           | 2 | 1,9761 | 0,196 | 0,072  |
| 2 | Q12888 TP53B_HUMAN | R.ADDPLRLDQE.L                |                    | 2 | 1,9729 | 0,163 | -0,208 |
| 2 | Q12923 PTN13_HUMAN | E.NSFGPSGGLR.E                |                    | 2 | 1,9715 | 0,215 | 0,062  |
| 2 | P05556 ITB1_HUMAN  | E.CQSEGIPESPK.C               |                    | 2 | 1,9511 | 0,238 | -0,099 |
| 2 | P52701 MSH6_HUMAN  | E.VGTTYVT#DKS#EE.D            | T216:S219:         | 2 | 1,9499 | 0,234 | 0,164  |
| 2 | P35908 K22E_HUMAN  | K.FASFIDK.V                   |                    | 2 | 1,9479 | 0,158 | 0,221  |
| 2 | Q14683 SMC1A_HUMAN | R.ISS#IYARE.A                 | S971:              | 2 | 1,9423 | 0,177 | 0,419  |
| 2 | Q9H6F5 CCD86_HUMAN | R.LGGLRPES#PE.S               | S18:               | 2 | 1,9409 | 0,267 | 0,323  |
| 2 | P00533 EGFR_HUMAN  | E.DHFLSLQR.M                  |                    | 2 | 1,9404 | 0,148 | -0,18  |
| 2 | Q01433 AMPD2_HUMAN | E.EAGITM*S#PGPQ.-             | S875:              | 2 | 1,9404 | 0,145 | 0,412  |
| 2 | O75554 WBP4_HUMAN  | E.NSLGTLDESK.S                |                    | 2 | 1,9375 | 0,319 | -0,115 |
| 2 | Q14671 PUM1_HUMAN  | E.VNSVLS#PR.S                 | S209:              | 2 | 1,9342 | 0,213 | 0,192  |
| 2 | Q6ZSR9 YJ005_HUMAN | R.DGPSSNSS#FHS#S#EEEGTDLE.G   | S39:S42:S43:       | 2 | 1,9341 | 0,111 | 0,519  |
| 2 | Q58FF7 H90B3_HUMAN | E.DLPLNISRE.M                 |                    | 2 | 1,9326 | 0,287 | 0      |
| 2 | Q9UQ35 SRRM2_HUMAN | K.AGM*SSNQSISSPVL.D.A         |                    | 2 | 1,9316 | 0,15  | -0,162 |
| 2 | Q9H2P0 ADNP_HUMAN  | E.TIHLTEPTK.L                 |                    | 2 | 1,9258 | 0,252 | -0,104 |
| 2 | Q9BQY9 DBND2_HUMAN | E.LSLPVPTSDR.T                |                    | 2 | 1,9116 | 0,249 | 0      |
| 2 | Q8TDJ6 DMXL2_HUMAN | E.SLLSVPGQK.N                 |                    | 2 | 1,9098 | 0,25  | 0,197  |
| 2 | P68104 EF1A1_HUMAN | K.IGGIGTVPVGR.V               |                    | 2 | 1,8946 | 0,378 | 0,238  |
| 2 | Q9UKM9 RALY_HUMAN  | E.GLLT#HS#EEE.L               | T286:S288:         | 2 | 1,8934 | 0,082 | 0,104  |
| 2 | O60911 CATL2_HUMAN | D.TGFTVVAPGKE.K               |                    | 2 | 1,8891 | 0,139 | -0,11  |

|   |                     |                                  |                 |   |        |       |        |
|---|---------------------|----------------------------------|-----------------|---|--------|-------|--------|
| 2 | Q8NAV1 PR38A_HUMAN  | R.VSALEEDM*DD.V                  |                 | 2 | 1,8868 | 0,169 | 0      |
| 2 | P35527 K1C9_HUMAN   | R.QGVDADINGLR.Q                  |                 | 2 | 1,883  | 0,085 | -0,105 |
| 2 | P13645 K1C10_HUMAN  | K.SEITELRR.N                     |                 | 2 | 1,8774 | 0,121 | -0,061 |
| 2 | Q14C86 GAPD1_HUMAN  | R.SNS#VSS#LDLEGE.S               | S585:S588:      | 2 | 1,8755 | 0,13  | 0,087  |
| 2 | O95232 CROP_HUMAN   | E.VNGTSEDIKS#EGD.T               | S425:           | 2 | 1,8594 | 0,21  | 0,085  |
| 2 | P42166 LAP2A_HUMAN  | R.S#ST#PLPTISSAE.N               | S158:T160:      | 2 | 1,8591 | 0,092 | 0,085  |
| 2 | Q16204 CCDC6_HUMAN  | K.SGGIVISPFR.L                   |                 | 2 | 1,8499 | 0,115 | 0      |
| 2 | Q15424 SAFB1_HUMAN  | E.QSSAASELAEASS#EE.L             | S332:           | 2 | 1,8494 | 0,155 | 0      |
| 2 | Q9UQ35 SRRM2_HUMAN  | K.FSPFPVQDRPE.S                  |                 | 2 | 1,8332 | 0,081 | 0      |
| 2 | Q06481 APLP2_HUMAN  | E.DYCM*AVCK.A                    |                 | 2 | 1,83   | 0,326 | -0,115 |
| 2 | P54289 CA2D1_HUMAN  | E.SGYTFIAPR.D                    |                 | 2 | 1,8253 | 0,218 | 0,06   |
| 2 | O14641 DVL2_HUMAN   | R.HLAGYES#SST#LM*TSE.L           | S194:T197:      | 2 | 1,8219 | 0,222 | 0,955  |
| 2 | Q6P2E9 EDC4_HUMAN   | E.VEPLGLPQAS#PSR.T               | S723:           | 2 | 1,8147 | 0,297 | 0      |
| 3 | P46939 UTRO_HUMAN   | E.RTNGSFLTDSSS#TTGS#VEDE.H       | S3217:S3221:    | 2 | 6,2097 | 1     | 0,542  |
| 3 | Q8N9T8 KRI1_HUMAN   | E.GVHGPPVQLAVDDS#S#DEGE.L        | S286:S287:      | 2 | 6,1413 | 0,479 | 0,118  |
| 3 | Q9UHR4 BI2L1_HUMAN  | E.IKTPASTPVS#GTPQAS#PM*IE.R      | S255:S261:      | 2 | 5,3719 | 1     | 0,112  |
| 3 | Q9UHR4 BI2L1_HUMAN  | E.IKTPASTPVS#GT#PQAS#PM*IE.R     | T257:S261:      | 2 | 5,2827 | 1     | 0,446  |
| 3 | A8MVB1 A8MVB1_HUMAN | E.KLVSPPASAAASS#PSSS#PSPQPVSE.L  | S37:S41:        | 2 | 5,1737 | 1     | 0,677  |
| 3 | P05556 ITB1_HUMAN   | E.CSTDEVNSEDM*DAYCR.K            |                 | 2 | 4,8353 | 0,55  | 0,124  |
| 3 | Q13263 TIF1B_HUMAN  | E.TKPVLM*ALAEGPGAEGPR.L          |                 | 3 | 4,7365 | 0,319 | 0,505  |
| 3 | Q8N1G4 LRC47_HUMAN  | E.GSL#DTEADAVSGQLPDPTTNPSAGK.D   | S520:           | 2 | 4,7196 | 0,469 | 0,564  |
| 3 | O75179 ANR17_HUMAN  | R.NSPLDCGSAS#PNKVASSSEQE.A       | S2067:          | 2 | 4,7183 | 0,461 | 0,544  |
| 3 | Q92734 TFG_HUMAN    | K.NVM*SAFGLTDDQVSGPPSAPAEDR.S    |                 | 2 | 4,6888 | 0,555 | 0,591  |
| 3 | A8MVB1 A8MVB1_HUMAN | E.KLVSPPASAAASS#PSSS#PQPVSE.L    | S37:S43:        | 2 | 4,5117 | 1     | 0,677  |
| 3 | P48960 CD97_HUMAN   | E.GSYDCVCSPGYEPVSGAK.T           |                 | 2 | 4,4082 | 0,465 | -0,379 |
| 3 | Q13523 PRP4B_HUMAN  | E.GKVQSGM*GLILQGYES#GS#EEE.G     | S142:S144:      | 2 | 4,4032 | 0,55  | 0,514  |
| 3 | Q8IY81 RRMJ3_HUMAN  | K.GTEASSGTEAATGLEGEEK.D          |                 | 2 | 4,3542 | 0,436 | 0,334  |
| 3 | Q13263 TIF1B_HUMAN  | E.TKPVLM*ALAEGPGAEGPR.L          |                 | 2 | 4,2684 | 0,465 | -0,202 |
| 3 | O60306 AQR_HUMAN    | E.AM*TVQADIIPS#PTDTSCR.Q         | S1420:          | 2 | 4,1889 | 0,456 | 0      |
| 3 | Q9H3S7 PTN23_HUMAN  | E.STPIPSSS#PPPLSSPLPEAPQPK.E     | S1544:          | 3 | 4,169  | 0,376 | 0,153  |
| 3 | Q8N1G4 LRC47_HUMAN  | E.GSLSDT#EADAVSGQLPDPTTNPSAGK.D  | T522:           | 3 | 4,0771 | 0,269 | 0,212  |
| 3 | Q92734 TFG_HUMAN    | E.INKNVM*SAFGLTDDQVSGPPSAPAEDR.S |                 | 3 | 3,9707 | 0,411 | 0,323  |
| 3 | Q13523 PRP4B_HUMAN  | E.GKVQSGM*GLILQGYES#GS#EEEGE.I   | S142:S144:      | 3 | 3,8911 | 0,315 | 0,214  |
| 3 | Q8N1G2 K0082_HUMAN  | E.LALSLSSTSDDEPPSSVSHGAK.A       |                 | 2 | 3,8148 | 0,467 | -0,112 |
| 3 | Q12888 TP53B_HUMAN  | E.VLSTQEDLFDQSNK.T               |                 | 2 | 3,6671 | 0,473 | 0,225  |
| 3 | Q9P2M7 CING_HUMAN   | E.SALKNEGLS#S#DEE.F              | S1169:S1170:    | 2 | 3,6077 | 0,452 | 0,476  |
| 3 | Q92615 LARP5_HUMAN  | E.KFTSS#QT#QSPTPKPPS#PSFE.L      | S512:T514:S524: | 3 | 3,5939 | 1     | -1,309 |
| 3 | O75061 AUXI_HUMAN   | E.DHAALVNQES#EQS#DDE.L           | S453:S456:      | 2 | 3,546  | 0,417 | -0,063 |
| 3 | Q14247 SRC8_HUMAN   | R.AKT#QTPPV#PAPQPTEERLPSS#PVYE.D | T399:S405:S418: | 3 | 3,5432 | 1     | 0,24   |

|   |                     |                                |                 |   |        |       |        |
|---|---------------------|--------------------------------|-----------------|---|--------|-------|--------|
| 3 | Q32LY9 Q32LY9_HUMAN | E.ALLQSM*GLTPESIVPPPM*SPSS#K.S | S84:            | 3 | 3,4629 | 0,326 | 0,071  |
| 3 | P35527 K1C9_HUMAN   | R.SGGGGGGGLGSGGSIR.S           |                 | 2 | 3,4224 | 0,52  | 0,099  |
| 3 | P35908 K22E_HUMAN   | R.GFSSGSAAVVSOGSR.R            |                 | 2 | 3,3572 | 0,393 | -0,292 |
| 3 | Q9H3S7 PTN23_HUMAN  | E.STPIPSS#SPPLSSPLPEAPQPK.E    | S1543:          | 2 | 3,3328 | 0,141 | 0,51   |
| 3 | Q86VM9 ZCH18_HUMAN  | R.DSGSDQDLGAGVVR.A             |                 | 2 | 3,3212 | 0,388 | 0,351  |
| 3 | Q00613 HSF1_HUMAN   | E.GRPPS#PPPTST#PE.K            | S363:T369:      | 2 | 3,2987 | 0,299 | 0,247  |
| 3 | Q13523 PRP4B_HUMAN  | E.GKVQSGM*GLILQGYES#GS#EEEE.G  | S142:S144:      | 2 | 3,2982 | 0,391 | 0,286  |
| 3 | Q9NPI6 DCP1A_HUMAN  | R.KASSPS#PLTIGT#PE.S           | S525:T531:      | 2 | 3,2679 | 0,326 | -0,237 |
| 3 | Q9H4A3 WINK1_HUMAN  | E.LSEPSHLNGPS#S#DPE.A          | S2011:S2012:    | 2 | 3,1987 | 0,272 | 0,141  |
| 3 | P46939 UTRO_HUMAN   | E.RTNGSFLTDSS#TTGS#VEDE.H      | S3217:S3221:    | 3 | 3,198  | 1     | 0,163  |
| 3 | O75179 ANR17_HUMAN  | E.HYPVSSPSS#PS#PPAQPGGVSR.N    | S2045:S2047:    | 3 | 3,1805 | 0,224 | 0,163  |
| 3 | Q15018 K0157_HUMAN  | K.YPGSGADLPPPQR.A              |                 | 2 | 3,1716 | 0,413 | 0      |
| 3 | Q8N9T8 KRI1_HUMAN   | E.GVHGPPVQLAVDDS#S#DEGE.L      | S286:S287:      | 3 | 3,1631 | 0,107 | 0,265  |
| 3 | Q8N1G2 K0082_HUMAN  | E.LALSLSSTSDDEPPSSVSHGAK.A     |                 | 3 | 3,1535 | 0,41  | 0,251  |
| 3 | Q6NZI2 PTRF_HUMAN   | E.SDAVLVDKS#DS#D.-             | S387:S389:      | 2 | 3,1405 | 0,242 | 0      |
| 3 | Q8TDY2 RBCC1_HUMAN  | E.M*SQITDLLSEQK.A              |                 | 2 | 3,1382 | 0,427 | 0      |
| 3 | O75821 EIF3G_HUMAN  | K.GIPLATGDT#S#PEPE.L           | T41:S42:        | 2 | 3,1364 | 0,424 | 0,237  |
| 3 | P27816 MAP4_HUMAN   | E.VGLLKDM*S#PLS#ETE.M          | S507:S510:      | 2 | 3,1363 | 0,409 | 0,216  |
| 3 | Q9H9R9 DBND1_HUMAN  | R.RQPLSS#VSS#LE.V              | S64:S67:        | 2 | 3,1008 | 0,311 | -0,716 |
| 3 | Q5H9R7 SAPS3_HUMAN  | K.QDLFEPSSANTEDK.M             |                 | 2 | 3,0951 | 0,133 | 0      |
| 3 | Q9H8W4 PKHF2_HUMAN  | D.LLSAGDM*ATCQPAR.S            |                 | 2 | 3,0945 | 0,359 | 0,324  |
| 3 | O94915 FRYL_HUMAN   | E.SRYSSSS#GGS#YEEE.K           | S1536:S1539:    | 2 | 3,061  | 0,237 | 0      |
| 3 | P05556 ITB1_HUMAN   | E.CECQSEGIPESPK.C              |                 | 2 | 3,051  | 0,443 | 0,321  |
| 3 | Q9Y519 T184B_HUMAN  | E.KTLLLS#S#DDEF.-              | S402:S403:      | 2 | 3,0367 | 0,362 | 0      |
| 3 | Q7Z2T5 TRM1L_HUMAN  | E.VAQVQVPTPAR.D                |                 | 2 | 3,0247 | 0,396 | 0,209  |
| 3 | Q96BK5 PINX1_HUMAN  | K.KTPEGDAS#PST#PEENE.T         | S161:T164:      | 2 | 3,0041 | 0,332 | 0,132  |
| 3 | Q13523 PRP4B_HUMAN  | E.GKVQSGM*GLILQGY#ES#GSEEE.G   | Y140:S142:      | 3 | 2,9953 | 0,144 | 0,385  |
| 3 | P02768 ALBU_HUMAN   | K.KVPQVSTPTLVEVSR.N            |                 | 3 | 2,9745 | 0,287 | 0      |
| 3 | Q8N3Z6 ZCHC7_HUMAN  | E.NAHGLSS#LQS#NE.L             | S121:S124:      | 2 | 2,9671 | 0,279 | 0,325  |
| 3 | P06733 ENOA_HUMAN   | K.VVIGM*DVAASEFFR.S            |                 | 2 | 2,9489 | 0,528 | -0,157 |
| 3 | Q13523 PRP4B_HUMAN  | E.GKVQSGM*GLILQGYES#GS#EEE.G   | S142:S144:      | 3 | 2,9432 | 0,129 | 0,308  |
| 3 | Q9H8G2 CI082_HUMAN  | E.ILGLAESS#PNEPK.A             | S312:           | 2 | 2,9154 | 0,459 | 0,255  |
| 3 | A2RRP1 NAG_HUMAN    | R.T#IT#KNYRLVSLRST#TPEE.L      | T511:T513:T524: | 3 | 2,8983 | 0,104 | 0      |
| 3 | Q8WZ73 RFFL_HUMAN   | R.RAS#LSDLTDLEDIE.G            | S240:           | 2 | 2,8952 | 0,399 | 0      |
| 3 | Q6UXD5 SE6L2_HUMAN  | E.LLVLAGGGSPGLAPR.L            |                 | 2 | 2,8793 | 0,332 | -0,354 |
| 3 | Q16563 SYPL1_HUMAN  | K.TVTATFGYPFR.L                |                 | 2 | 2,8772 | 0,45  | -0,194 |
| 3 | Q70E73 RAPH1_HUMAN  | E.ISEQPTM*ATVVPQVPTS#PK.S      | S1206:          | 2 | 2,8582 | 0,427 | 0,348  |
| 3 | P18858 DNL1_HUMAN   | E.QATTAQVACLVR.K               |                 | 2 | 2,8487 | 0,427 | -0,748 |
| 3 | Q02952 AKA12_HUMAN  | E.SGEHTQVPADSPDSQEEQK.G        |                 | 3 | 2,8389 | 0,118 | 0,088  |

|   |                     |                               |                 |   |        |       |        |
|---|---------------------|-------------------------------|-----------------|---|--------|-------|--------|
| 3 | Q16204 CCDC6_HUMAN  | K.SGGIVIS#PFRLEE.L            | S52:            | 2 | 2,8376 | 0,303 | -0,082 |
| 3 | Q16643 DREB_HUMAN   | R.GPGS#PAEDLM*FM*E.S          | S416:           | 2 | 2,8216 | 0,23  | 0,163  |
| 3 | P05362 ICAM1_HUMAN  | E.AQVHLALGDQR.L               |                 | 3 | 2,8148 | 0,264 | 0,605  |
| 3 | O94909 K0819_HUMAN  | E.RGPS#QATS#PIRS#PQE.S        | S292:S296:S300: | 2 | 2,7974 | 0,179 | 0      |
| 3 | P05556 ITB1_HUMAN   | E.VNSED*DAYCR.K               |                 | 2 | 2,7943 | 0,428 | 0      |
| 3 | Q86V81 THOC4_HUMAN  | E.LDAQLDAYNAR.M               |                 | 2 | 2,7904 | 0,429 | 0,195  |
| 3 | Q92615 LARP5_HUMAN  | E.EKFTSSQTQS#PT#PPKPPSPS#FE.L | S516:T518:S526: | 3 | 2,771  | 1     | -0,069 |
| 3 | Q14247 SRC8_HUMAN   | R.AKTQT#PPVS#PAPQTEE.R        | T401:S405:      | 2 | 2,7596 | 0,431 | 0,252  |
| 3 | Q92734 TFG_HUMAN    | K.NVM*SAFGLTDDQVSGPPSAPAEDR.S |                 | 3 | 2,7404 | 0,233 | 0,517  |
| 3 | Q8IY81 RRMJ3_HUMAN  | E.IM*SPLYQDEAPK.G             |                 | 2 | 2,7354 | 0,219 | 0,607  |
| 3 | Q92889 XPF_HUMAN    | E.ISS#S#PES#CPEEIKHEE.F       | S509:S510:S513: | 3 | 2,7306 | 0,112 | 0,087  |
| 3 | Q14676 MDC1_HUMAN   | E.RAQPFQFIDS#D.T              | S329:           | 2 | 2,7003 | 0,334 | -0,183 |
| 3 | P29692 EF1D_HUMAN   | K.SLAGSSGPGASGTSGDHGE.L       |                 | 2 | 2,7002 | 0,457 | -0,071 |
| 3 | P05362 ICAM1_HUMAN  | E.AQVHLALGDQR.L               |                 | 2 | 2,6721 | 0,392 | -0,202 |
| 3 | Q15424 SAFB1_HUMAN  | E.LAEAPTEAPS#PEAR.D           | S344:           | 2 | 2,6632 | 0,321 | 0,08   |
| 3 | P05556 ITB1_HUMAN   | K.NVLSLTNKGE.V                |                 | 2 | 2,6612 | 0,203 | 0,681  |
| 3 | P78347 GTF2I_HUMAN  | R.KINSSPNVNTTASGVED.L         |                 | 2 | 2,6462 | 0,485 | 0,211  |
| 3 | Q9UQ35 SRRM2_HUMAN  | E.SYFGVSSLQLK.G               |                 | 2 | 2,6438 | 0,377 | -0,099 |
| 3 | P04264 K2C1_HUMAN   | R.SLDLDSIIAEVK.A              |                 | 2 | 2,6433 | 0,377 | -0,562 |
| 3 | Q9P1Q0 VPS54_HUMAN  | E.LTPIAVDTTSQR.N              |                 | 2 | 2,6429 | 0,382 | 0,187  |
| 3 | P04264 K2C1_HUMAN   | K.YEELQITAGR.H                |                 | 2 | 2,6387 | 0,224 | 0,103  |
| 3 | P26045 PTN3_HUMAN   | E.TEDVFYTYK.G                 |                 | 2 | 2,6106 | 0,367 | 0,105  |
| 3 | P42166 LAP2A_HUMAN  | E.QGTERSS#T#PLPTISSAENTR.Q    | S159:T160:      | 3 | 2,5801 | 0,111 | -0,074 |
| 3 | O15047 SET1A_HUMAN  | E.RVAGS#PVT#PLPEQE.A          | S1103:T1106:    | 2 | 2,5721 | 0,154 | 0,074  |
| 3 | P39880 CUX1_HUMAN   | E.IQAGSQGQAGASDPSAR.S         |                 | 2 | 2,5584 | 0,279 | 0,072  |
| 3 | Q14247 SRC8_HUMAN   | R.AKT#QTPPV#PAPQTEE.R         | T399:S405:      | 2 | 2,5148 | 0,341 | 0      |
| 3 | Q9NUL3 STAU2_HUMAN  | K.GSS#PT#PPCS#PVQPSK.Q        | S486:T488:S492: | 2 | 2,5105 | 0,339 | -0,138 |
| 3 | P04792 HSPB1_HUMAN  | E.SPAVAAPAYSRA.A              |                 | 2 | 2,4938 | 0,374 | -0,112 |
| 3 | P29590 PML_HUMAN    | E.VFLPNSNHVASGAGEAEER.V       |                 | 3 | 2,49   | 0,102 | 0,184  |
| 3 | Q16643 DREB_HUMAN   | E.TQEPS#PILDSEETR.A           | S381:           | 2 | 2,4714 | 0,187 | 0,725  |
| 3 | Q15185 TEBP_HUMAN   | D.S#DDEKM*PDLE.-              | S151:           | 2 | 2,4691 | 0,151 | -0,096 |
| 3 | Q9H4A3 WNK1_HUMAN   | R.DVDDGSGSPHS#PHQLSSK.S       | S2032:          | 3 | 2,4611 | 0,269 | 0      |
| 3 | O43379 WDR62_HUMAN  | E.AGPGDQQGDYSYLR.V            |                 | 2 | 2,4488 | 0,427 | 0,268  |
| 3 | P48960 CD97_HUMAN   | R.CNPGFSSFSE.I                |                 | 2 | 2,4462 | 0,155 | -0,108 |
| 3 | Q8TD55 PKHO2_HUMAN  | E.RAPTPVSAS#S#EVSPE.S         | S237:S238:      | 2 | 2,4414 | 0,256 | 0,292  |
| 3 | Q32LY9 Q32LY9_HUMAN | E.ALLQSM*GLTPESIVPPM*S#PSSK.S | S81:            | 2 | 2,439  | 0,394 | 0,568  |
| 3 | P05556 ITB1_HUMAN   | E.CSTDEVNSED*DAYCR.K          |                 | 3 | 2,4048 | 0,116 | 0,372  |
| 3 | Q14692 BMS1_HUMAN   | K.AGLS#PANCSQSDRVNLE.K        | S552:           | 2 | 2,3971 | 0,199 | -0,27  |
| 3 | Q4ZG04 Q4ZG04_HUMAN | E.LLLSTLVR.E                  |                 | 2 | 2,3839 | 0,339 | -0,533 |

|   |                     |                             |                 |   |        |       |        |
|---|---------------------|-----------------------------|-----------------|---|--------|-------|--------|
| 3 | Q9HC35 EMAL4_HUMAN  | E.SRISS#S#PTLLE.N           | S918:S919:      | 2 | 2,3809 | 0,213 | 0,09   |
| 3 | Q15293 RCN1_HUMAN   | K.TFDQLTPDESKE.R            |                 | 2 | 2,3482 | 0,151 | 0,26   |
| 3 | P48960 CD97_HUMAN   | E.GCQVLGSK.N                |                 | 2 | 2,3396 | 0,293 | 0,359  |
| 3 | P61604 CH10_HUMAN   | K.VLQATVVAVGSGSK.G          |                 | 2 | 2,3296 | 0,433 | 0,927  |
| 3 | Q8WWM7 ATX2L_HUMAN  | K.ISLAPTDVKE.L              |                 | 2 | 2,327  | 0,219 | -0,114 |
| 3 | Q86W92 LIPB1_HUMAN  | E.DDM*FKDFAAR.S             |                 | 3 | 2,327  | 0,102 | 0,891  |
| 3 | P35030 TRY3_HUMAN   | D.TLDNDIMLIK.L              |                 | 2 | 2,3154 | 0,268 | -0,104 |
| 3 | P05186 PPBT_HUMAN   | D.IDVIM*GGGR.K              |                 | 2 | 2,3015 | 0,227 | 0      |
| 3 | Q00613 HSF1_HUMAN   | R.VKEEPPS#PPQS#PRVEE.A      | S303:S307:      | 3 | 2,3002 | 0,281 | 0,093  |
| 3 | Q02952 AKA12_HUMAN  | K.VLSKPPEGVVSE.V            |                 | 2 | 2,2991 | 0,286 | 0      |
| 3 | Q13428 TCOF_HUMAN   | K.SAHTLGPTPSRTETLVEE.T      |                 | 3 | 2,2625 | 0,087 | 0,475  |
| 3 | Q9NWH9 SLTM_HUMAN   | E.VSKPLPS#EGS#LAE.A         | S214:S217:      | 2 | 2,2606 | 0,137 | 0      |
| 3 | Q9H4A3 WNK1_HUMAN   | K.QSSTPGSLFLSPPAPAPK.N      |                 | 2 | 2,2516 | 0,475 | -0,068 |
| 3 | Q9H8W4 PKHF2_HUMAN  | D.LLSAGDM*ATCQPAR.S         |                 | 3 | 2,2493 | 0,206 | 0,121  |
| 3 | Q8IWU2 LMTK2_HUMAN  | E.LSQLTALR.S                |                 | 2 | 2,2447 | 0,162 | 0      |
| 3 | Q13561 DCTN2_HUMAN  | K.YADLPGIAR.N               |                 | 2 | 2,2342 | 0,204 | -1,688 |
| 3 | P35030 TRY3_HUMAN   | D.TLDNDIM*LIK.L             |                 | 2 | 2,2295 | 0,354 | -0,102 |
| 3 | Q5T8D3 ACBD5_HUMAN  | D.LGNVLTSTPNAK.T            |                 | 2 | 2,2244 | 0,272 | 0,1    |
| 3 | Q9NY61 AATF_HUMAN   | E.LLFQYPDTR.Y               |                 | 2 | 2,2079 | 0,24  | -0,317 |
| 3 | Q6S8J3 A26CA_HUMAN  | K.AGFAGDDAPR.A              |                 | 2 | 2,2003 | 0,352 | -0,125 |
| 3 | O75179 ANR17_HUMAN  | R.NSPLDCGS#ASPKNVASSSEQE.A  | S2065:          | 3 | 2,1998 | 0,135 | 0,326  |
| 3 | Q9H9R9 DBND1_HUMAN  | R.RQPLS#SVSS#LE.V           | S63:S67:        | 2 | 2,1969 | 0,337 | -0,358 |
| 3 | Q9BQY9 DBND2_HUMAN  | E.SQRPPIGS#ISS#M*E.V        | S151:S154:      | 2 | 2,1774 | 0,175 | 0,39   |
| 3 | Q14202 ZMYM3_HUMAN  | E.LLGLGGLLYK.A              |                 | 2 | 2,1707 | 0,114 | -0,35  |
| 3 | Q96JY6 PDLI2_HUMAN  | R.SSYSSPTSL#PR.A            | S129:           | 2 | 2,1474 | 0,365 | -0,09  |
| 3 | Q92889 XPF_HUMAN    | E.IS#S#SPES#CPEEIKHEE.F     | S508:S509:S513: | 2 | 2,1319 | 0,258 | 0,582  |
| 3 | Q9H813 TM206_HUMAN  | E.RSTS#YQELS#EE.L           | S9:S14:         | 2 | 2,1064 | 0,197 | -0,164 |
| 3 | Q7LBR1 CHM1B_HUMAN  | E.DTM*SSTTLTTPQNQVDM*LLQE.M |                 | 2 | 2,1009 | 0,081 | 0,687  |
| 3 | P17275 JUNB_HUMAN   | R.DAT#PPVS#PINM*EDQE.R      | T255:S259:      | 2 | 2,0881 | 0,201 | 0,268  |
| 3 | O60447 EVI5_HUMAN   | E.TGVGFPLHGK.S              |                 | 2 | 2,087  | 0,22  | 0,301  |
| 3 | P02545 LMNA_HUMAN   | E.GDLIAAQAR.L               |                 | 2 | 2,0717 | 0,218 | 0,2    |
| 3 | Q8NCN4 RN169_HUMAN  | E.RSVS#PESNDS#ISEE.L        | S368:S374:      | 2 | 2,0129 | 0,134 | -0,072 |
| 3 | Q9Y4C8 RBM19_HUMAN  | E.LSDM*DYLK.S               |                 | 2 | 2,012  | 0,113 | -0,061 |
| 3 | Q63ZY3 KANK2_HUMAN  | E.IASM*LYSR.M               |                 | 2 | 2,01   | 0,209 | 0,191  |
| 3 | P10253 LYAG_HUMAN   | R.GAYTQVIFLAR.N             |                 | 2 | 1,9942 | 0,129 | -0,098 |
| 3 | Q6GMV2 SMYD5_HUMAN  | E.NYLFVCSCPK.C              |                 | 2 | 1,9922 | 0,192 | 0,095  |
| 3 | Q9Y3T9 NOC2L_HUMAN  | E.LEDLQLS#EDD.-             | S746:           | 2 | 1,9877 | 0,282 | 0,097  |
| 3 | P02538 K2C6A_HUMAN  | R.SGFSSVSVSR.S              |                 | 2 | 1,9778 | 0,337 | 0,06   |
| 3 | B2RA01 B2RA01_HUMAN | K.AQYEDIAQK.S               |                 | 2 | 1,9761 | 0,209 | 0,229  |

|   |                    |                             |                 |   |        |       |        |
|---|--------------------|-----------------------------|-----------------|---|--------|-------|--------|
| 3 | P05556 ITB1_HUMAN  | E.CQSEGIPESPK.C             |                 | 2 | 1,9621 | 0,34  | 0      |
| 3 | P68104 EF1A1_HUMAN | K.IGGIGTVPVGR.V             |                 | 2 | 1,9552 | 0,223 | -0,119 |
| 3 | P78310 CXAR_HUMAN  | E.M*TSSVISVK.N              |                 | 2 | 1,9455 | 0,279 | 0,252  |
| 3 | Q01831 XPC_HUMAN   | E.AAAPHTDAGGGLS#S#DEEE.G    | S883:S884:      | 2 | 1,9402 | 0,155 | -0,065 |
| 3 | P22626 ROA2_HUMAN  | R.GGGGNFGPGGSNFR.G          |                 | 2 | 1,9284 | 0,209 | 0,266  |
| 3 | Q9Y6D6 BIG1_HUMAN  | E.GDLDLHTNDVDK.S            |                 | 2 | 1,9258 | 0,208 | -0,091 |
| 3 | P54289 CA2D1_HUMAN | E.SGYTFIAPR.D               |                 | 2 | 1,9149 | 0,395 | 0,121  |
| 3 | Q86W92 LIPB1_HUMAN | E.DDM*FKDFAAR.S             |                 | 2 | 1,8917 | 0,242 | 0,099  |
| 3 | Q14202 ZMYM3_HUMAN | E.TTSIATAR.R                |                 | 2 | 1,874  | 0,264 | 0,594  |
| 3 | Q14692 BMS1_HUMAN  | K.AGLSPANQCQSDR.V           |                 | 2 | 1,8606 | 0,205 | -0,096 |
| 3 | P80723 BASP_HUMAN  | K.ETPAATEAPSSTPK.A          |                 | 2 | 1,856  | 0,208 | -0,088 |
| 3 | P81605 DCD_HUMAN   | K.ENAGEDPGLAR.Q             |                 | 2 | 1,822  | 0,332 | -0,108 |
| 3 | Q6NSJ2 PHLB3_HUMAN | E.ASEVLAEPSSR.G             |                 | 2 | 1,7644 | 0,334 | 0      |
| 3 | Q66K74 MAP1S_HUMAN | R.LSLS#PLR.G                | S657:           | 2 | 1,7324 | 0,112 | 0,423  |
| 3 | P42166 LAP2A_HUMAN | R.SST#PLPTISSAE.N           | T160:           | 2 | 1,7006 | 0,183 | -0,09  |
| 3 | Q14692 BMS1_HUMAN  | K.AGLSPANQCSDRVNLE.K        |                 | 2 | 1,681  | 0,11  | 0,282  |
| 3 | Q14676 MDC1_HUMAN  | E.RAQPFQFID.S               |                 | 2 | 1,6807 | 0,272 | 0      |
| 3 | P52209 6PGD_HUMAN  | K.VVGAQSLKE.M               |                 | 2 | 1,6574 | 0,114 | 0,131  |
| 3 | P39880 CUX1_HUMAN  | E.LSLTGASR.S                |                 | 2 | 1,6271 | 0,17  | 0,303  |
| 3 | Q8IZL8 PELP1_HUMAN | E.ALPSQGEVER.E              |                 | 2 | 1,6195 | 0,167 | 0      |
| 3 | Q9BQG0 MBB1A_HUMAN | E.QLM*TVLQAGK.A             |                 | 2 | 1,6103 | 0,21  | 0      |
| 3 | Q12923 PTN13_HUMAN | E.NSFGPSGGLR.E              |                 | 2 | 1,5991 | 0,158 | -0,062 |
| 3 | Q95361 TRI16_HUMAN | E.LDLM*APGPLPR.A            |                 | 2 | 1,5962 | 0,15  | -0,102 |
| 3 | P13647 K2C5_HUMAN  | R.TSFTSVSR.S                |                 | 2 | 1,5793 | 0,261 | 0,483  |
| 3 | Q5H9R7 SAPS3_HUMAN | K.QDLFEPSSANTEDKM*E.V       |                 | 2 | 1,5745 | 0,166 | 0,131  |
| 3 | Q9H8W4 PKHF2_HUMAN | R.SDSYSQSLK.S               |                 | 2 | 1,5192 | 0,304 | 0,12   |
| 3 | Q9BQY9 DBND2_HUMAN | E.LSLPVPTSDR.T              |                 | 2 | 1,4685 | 0,096 | 0      |
| 3 | O75643 U520_HUMAN  | R.CTLSANLVASGE.L            |                 | 2 | 1,4201 | 0,204 | -0,3   |
| 3 | P46821 MAP1B_HUMAN | E.QYGFLTPTK.Q               |                 | 2 | 1,4135 | 0,298 | 0,106  |
| 3 | Q9BZF1 OSBL8_HUMAN | K.DVLGPSTVVANSDE.S          |                 | 2 | 1,279  | 0,097 | 0,348  |
| 3 | P49792 RBP2_HUMAN  | E.STTGFNFSFK.S              |                 | 2 | 1,2675 | 0,191 | 0      |
| 4 | Q13263 TIF1B_HUMAN | E.TKPVLM*ALAEPGAEGPR.L      |                 | 3 | 5,4613 | 0,296 | 0,101  |
| 4 | Q9P1Y6 K1542_HUMAN | E.VYDPSDPTGSDSSAPGSS#PER.S  | S846:           | 2 | 5,0204 | 0,474 | 0,335  |
| 4 | O60306 AQR_HUMAN   | E.AM*TVQADIIPS#PTDTSCR.Q    | S1420:          | 2 | 4,7474 | 0,542 | 0,119  |
| 4 | Q8N9T8 KRI1_HUMAN  | E.GVHGPPVQLAVDDS#S#DEGE.L   | S286:S287:      | 2 | 4,474  | 0,439 | 0,118  |
| 4 | Q96T60 PNKP_HUMAN  | E.TRTPESQPDT#PPGT#PLVSQDE.K | T118:T122:      | 3 | 4,415  | 0,493 | 0,607  |
| 4 | Q02952 AKA12_HUMAN | E.TCVSGEDPTQGADLS#PDEK.V    | S483:           | 2 | 4,4021 | 0,419 | 0,351  |
| 4 | Q92615 LARP5_HUMAN | E.KFTSSQTS#PT#PPKPPS#PSFE.L | S516:T518:S524: | 3 | 4,3478 | 1     | 0,291  |
| 4 | P43358 MAGA4_HUMAN | R.QPNEGSSSQEEEGPSTSPDAE.S   |                 | 3 | 4,3349 | 0,459 | 1,269  |



|   |                     |                               |                 |   |        |       |        |
|---|---------------------|-------------------------------|-----------------|---|--------|-------|--------|
| 4 | Q96T60 PNKP_HUMAN   | E.TRTPESQPDT#PPGT#PLVSQDE.K   | T118:T122:      | 2 | 4,3199 | 0,458 | 0,304  |
| 4 | P51610 HCFC1_HUMAN  | E.SLAPSNTFVAPQPVVAS#PAK.L     | S1771:          | 2 | 4,2145 | 0,427 | 0,113  |
| 4 | Q13263 TIF1B_HUMAN  | E.TKPVLM*ALAEPGAEGPR.L        |                 | 2 | 4,2075 | 0,419 | 0,067  |
| 4 | Q9H4A3 WNK1_HUMAN   | K.QSSTPGSLFLSPPAPAPK.N        |                 | 2 | 4,1262 | 0,498 | -0,274 |
| 4 | P42166 LAP2A_HUMAN  | E.SRSST#PLPTISSSAENTR.Q       | T160:           | 3 | 4,0306 | 0,423 | -0,093 |
| 4 | P08651 NFIC_HUMAN   | E.DVDTSPPGGDYTSPSS#PTSSSR.N   | S305:           | 2 | 3,9871 | 1     | 0,417  |
| 4 | P43358 MAGA4_HUMAN  | R.QPNEGSSSQEEEGPSTSPDAE.S     |                 | 2 | 3,9834 | 0,581 | 1,693  |
| 4 | Q92734 TFG_HUMAN    | K.NVM*SAFGLTDDQVSGPPSAPAEDR.S |                 | 3 | 3,9688 | 0,446 | 0,148  |
| 4 | Q92619 HMHA1_HUMAN  | E.SRVVSNDS#DS#DLEE.A          | S1030:S1032:    | 2 | 3,9615 | 0,351 | 0,214  |
| 4 | Q92615 LARP5_HUMAN  | E.KFTSS#QT#QSPTPKPPS#PSFE.L   | S512:T514:S524: | 3 | 3,9389 | 1     | -0,873 |
| 4 | P78347 GTF2I_HUMAN  | R.KINSSPNVNTTASGVE.D          |                 | 2 | 3,8995 | 0,475 | 0      |
| 4 | Q92615 LARP5_HUMAN  | E.KFTSSQTQS#PT#PPKPPS#PSFE.L  | S516:T518:S524: | 2 | 3,854  | 1     | -1,261 |
| 4 | Q9NTJ3 SMC4_HUMAN   | E.EGPPPPSPDGASSDAEPEPPSGR.T   |                 | 2 | 3,8338 | 0,488 | 0,219  |
| 4 | Q12888 TP53B_HUMAN  | D.SLSTNSSDLVAPS#PDAFR.S       | S366:           | 2 | 3,783  | 0,414 | 0,063  |
| 4 | Q8N108 MIER1_HUMAN  | E.LLSLYGYGSTVR.L              |                 | 2 | 3,7765 | 0,474 | -0,092 |
| 4 | Q16204 CCDC6_HUMAN  | K.SGGIVIS#PFRLEE.L            | S52:            | 2 | 3,5688 | 0,384 | -0,329 |
| 4 | A7XP29 A7XP29_HUMAN | R.GCADGRDADPTEEQM*AE.T        |                 | 2 | 3,5071 | 0,44  | 0,196  |
| 4 | P46821 MAP1B_HUMAN  | R.ESS#PLYS#PTFSDSTSAVKE.K     | S1793:S1797:    | 2 | 3,4677 | 0,379 | 0,223  |
| 4 | Q2NKX8 ERC6L_HUMAN  | E.T#SLGAPEPLSGEQLVGSPODK.A    | T1172:          | 2 | 3,4627 | 0,45  | 0,111  |
| 4 | Q04917 1433F_HUMAN  | E.DSYKDSTLIM*QLLR.D           |                 | 3 | 3,4413 | 0,229 | -0,538 |
| 4 | Q14247 SRC8_HUMAN   | R.AKTQT#PPVS#PAPQPTEE.R       | T401:S405:      | 2 | 3,4192 | 0,389 | 0,315  |
| 4 | Q14807 KIF22_HUMAN  | E.IGS#PEPM*AAPASASQKLS#PLQK.L | S412:S427:      | 3 | 3,4053 | 0,334 | -0,998 |
| 4 | Q9UHR4 BI2L1_HUMAN  | E.IKTPASTPVSGT#PQAS#PM*IE.R   | T257:S261:      | 2 | 3,3845 | 0,483 | 0,112  |
| 4 | Q9H8G2 CI082_HUMAN  | E.ILGLAESS#PNEPK.A            | S312:           | 2 | 3,3483 | 0,306 | 0,085  |
| 4 | Q9H8W4 PKHF2_HUMAN  | D.LLSAGDM*ATCQPAR.S           |                 | 2 | 3,2834 | 0,446 | 0,243  |
| 4 | P35527 K1C9_HUMAN   | R.SGGGGGGGLSGGSIR.S           |                 | 2 | 3,2831 | 0,45  | 0      |
| 4 | O94916 NFAT5_HUMAN  | K.QPPPNM*IFNPNQNPM*ANQE.Q     |                 | 3 | 3,2602 | 0,321 | -0,909 |
| 4 | Q3L8U1 CHD9_HUMAN   | E.NLKEEPQS#S#EEE.S            | S2058:S2059:    | 2 | 3,2602 | 0,226 | 0,077  |
| 4 | P08651 NFIC_HUMAN   | R.TGM*GSDQEDSKPITLDTDFQE.S    |                 | 3 | 3,2566 | 0,206 | 0,226  |
| 4 | P24666 PPAC_HUMAN   | E.DFATFDYILCM*DE.S            |                 | 2 | 3,1942 | 0,412 | -0,295 |
| 4 | P05362 ICAM1_HUMAN  | E.AQVHLALGDQR.L               |                 | 3 | 3,1826 | 0,322 | 0,908  |
| 4 | P04264 K2C1_HUMAN   | R.SLDLDSIIAEVK.A              |                 | 2 | 3,1789 | 0,378 | -0,468 |
| 4 | P51610 HCFC1_HUMAN  | E.SLAPSNTFVAPQPVVAS#PAK.L     | S1771:          | 3 | 3,1699 | 0,344 | 0,085  |
| 4 | Q5TAQ9 WD42A_HUMAN  | E.ASDLSLSLTGDDGGPNR.T         |                 | 2 | 3,1486 | 0,467 | 0,146  |
| 4 | P05556 ITB1_HUMAN   | E.CECQSEGIPESPK.C             |                 | 2 | 3,1282 | 0,477 | 0,16   |
| 4 | P13645 K1C10_HUMAN  | K.GSLGGGFSSGGFSGGSFSR.G       |                 | 2 | 3,1141 | 0,407 | 0      |
| 4 | A8K4U7 A8K4U7_HUMAN | K.EPAGEAVAPALLES#PRPE.G       | S21:            | 2 | 3,1079 | 0,413 | 0,064  |
| 4 | O75179 ANR17_HUMAN  | R.NSPLDCGS#ASPKNVASSSEQE.A    | S2065:          | 2 | 3,0992 | 0,3   | 0,544  |
| 4 | P05362 ICAM1_HUMAN  | E.AQVHLALGDQR.L               |                 | 2 | 3,0554 | 0,432 | -0,101 |

|   |                    |                                   |                    |   |        |       |        |
|---|--------------------|-----------------------------------|--------------------|---|--------|-------|--------|
| 4 | P46821 MAP1B_HUMAN | E.GEKL#PKS#DISPLT#PR.E            | S1779:S1782:T1788: | 2 | 3,026  | 0,293 | 0      |
| 4 | P46821 MAP1B_HUMAN | E.GEKL#PKS#DISPLT#PR.E            | S1779:S1782:T1788: | 3 | 2,994  | 0,141 | 0      |
| 4 | Q6NXT1 ANR54_HUMAN | R.SGHSS#SEGECAVAPEPLTDAE.G        | S18:               | 2 | 2,9784 | 0,333 | 0,331  |
| 4 | Q15185 TEBP_HUMAN  | D.SQDS#DDEKM*PDLE.-               | S151:              | 2 | 2,9692 | 0,338 | 0,076  |
| 4 | Q13546 RIPK1_HUMAN | R.S#NSATEQPQGLSHSSQGLGM*GPVEE.S   | S333:              | 3 | 2,9424 | 0,303 | -0,073 |
| 4 | P04264 K2C1_HUMAN  | K.YEELQITAGR.H                    |                    | 2 | 2,92   | 0,21  | 0,103  |
| 4 | Q86VM9 ZCH18_HUMAN | R.ASDLEDEESAAR.G                  |                    | 2 | 2,9167 | 0,382 | -0,094 |
| 4 | P25789 PSA4_HUMAN  | E.DM*ACSVAGITSDANVLTNE.L          |                    | 3 | 2,9059 | 0,191 | 0,184  |
| 4 | Q16204 CCDC6_HUMAN | K.SGGIVISPFRL.EE.L                |                    | 2 | 2,8986 | 0,279 | -0,174 |
| 4 | Q92615 LARP5_HUMAN | E.KFTSSQT#QS#PTPPKPPS#PSFE.L      | T514:S516:S524:    | 3 | 2,8853 | 1     | -0,364 |
| 4 | Q92598 HS105_HUMAN | E.LNNTCEPVVVTQPKPK.I              |                    | 3 | 2,8797 | 0,331 | 0      |
| 4 | Q9UQ35 SRRM2_HUMAN | E.SYFGVSSLQLK.G                   |                    | 2 | 2,8596 | 0,423 | -0,199 |
| 4 | Q9H9R9 DBND1_HUMAN | R.RQPLSS#VSS#LE.V                 | S64:S67:           | 2 | 2,8585 | 0,28  | -0,358 |
| 4 | Q9H3P7 GCP60_HUMAN | E.GAPLLPPLPPPS#PPGSGR.G           | S43:               | 2 | 2,8558 | 0,271 | -0,324 |
| 4 | P14618 KPYM_HUMAN  | K.IYVDDGLISLQVK.Q                 |                    | 2 | 2,8488 | 0,407 | -0,417 |
| 4 | Q15185 TEBP_HUMAN  | D.S#DDEKM*PDLE.-                  | S151:              | 2 | 2,8398 | 0,187 | 0      |
| 4 | Q99567 NUP88_HUMAN | E.DVEVAES#PLR.V                   | S517:              | 2 | 2,8264 | 0,399 | 0,102  |
| 4 | P05556 ITB1_HUMAN  | E.VNSED#M*DAYCR.K                 |                    | 2 | 2,8248 | 0,482 | 0      |
| 4 | Q2NKX8 ERC6L_HUMAN | E.TS#LGAPEPLSGEQLVGSPPQDK.A       | S1173:             | 3 | 2,7933 | 0,22  | 0      |
| 4 | Q14818 PSA7_HUMAN  | R.AITVFSPDGHLEFQVE.Y              |                    | 2 | 2,7813 | 0,302 | -0,367 |
| 4 | Q12888 TP53B_HUMAN | E.DGENTQIEDTEPM*S#PVLNSK.F        | S552:              | 3 | 2,7783 | 0,155 | 0,159  |
| 4 | P46821 MAP1B_HUMAN | R.ESS#PLYSPTFSDSTSAVKE.K          | S1793:             | 2 | 2,7709 | 0,287 | 0,462  |
| 4 | P46937 YAP1_HUMAN  | K.QPPPLAPQS#PQGGVM*GGSNSNQQQM*R.L | S251:              | 3 | 2,7697 | 0,407 | 0,437  |
| 4 | Q09666 AHNK_HUMAN  | K.APKIS#M*PDFD.L                  | S2580:             | 2 | 2,7615 | 0,272 | 0,1    |
| 4 | Q8N1G2 K0082_HUMAN | E.LALSLSSTSDDEPPSSVSHGAK.A        |                    | 3 | 2,7585 | 0,416 | -0,586 |
| 4 | Q6P4F2 ADXL_HUMAN  | E.DDM*LDM*APLLQE.N                |                    | 2 | 2,7567 | 0,172 | -0,171 |
| 4 | Q8WXD9 CSKI1_HUMAN | E.VM*AIESPPPEPTPADCQS#PK.M        | S646:              | 3 | 2,7554 | 0,173 | 0,546  |
| 4 | Q9UQ35 SRRM2_HUMAN | E.NSFGS#PLEFR.N                   | S1329:             | 2 | 2,7042 | 0,457 | 0      |
| 4 | Q8WTS6 SETD7_HUMAN | E.DGGVLQGTYYDVGELNGPAQE.Y         |                    | 2 | 2,7041 | 0,333 | -0,06  |
| 4 | O95104 SFR15_HUMAN | E.NVTNNEGS#PPPPVK.V               | S154:              | 2 | 2,7017 | 0,355 | 0,159  |
| 4 | Q9Y2D9 ZN652_HUMAN | E.VNLNNQTLNVSK.G                  |                    | 2 | 2,6924 | 0,387 | -0,272 |
| 4 | P26447 S10A4_HUMAN | K.LM*SNLDSNRDNE.V                 |                    | 2 | 2,6923 | 0,286 | 0,257  |
| 4 | Q2NKX8 ERC6L_HUMAN | E.TSLGAPEPLSGEQLVGS#PQDK.A        | S1188:             | 3 | 2,6876 | 0,184 | 0,084  |
| 4 | P39880 CUX1_HUMAN  | E.IQAGSQGQAGASDPSAR.S             |                    | 2 | 2,6815 | 0,463 | -0,072 |
| 4 | P08651 NFIC_HUMAN  | E.DVDTSPGGDYTSPSS#PTSSSR.N        | S305:              | 3 | 2,6182 | 0,164 | -0,156 |
| 4 | Q9H3P7 GCP60_HUMAN | E.GAPLLPPLPPPS#PPGSGR.G           | S43:               | 3 | 2,6041 | 0,273 | 0,097  |
| 4 | Q6ZRV2 FA83H_HUMAN | R.RLS#LGQGDSTEAATEE.R             | S1003:             | 2 | 2,576  | 0,34  | 0,28   |
| 4 | Q13263 TIF1B_HUMAN | R.STAPSAASASASAAAASSPAGGGAEALE.L  |                    | 3 | 2,5582 | 0,256 | 0,237  |
| 4 | P28347 TEAD1_HUMAN | R.M*SDSADKPIDNDAE.G               |                    | 2 | 2,5496 | 0,404 | 0      |

|   |                     |                             |                 |   |        |       |        |
|---|---------------------|-----------------------------|-----------------|---|--------|-------|--------|
| 4 | Q6S8J3 A26CA_HUMAN  | K.AGFAGDDAPR.A              |                 | 2 | 2,5234 | 0,308 | -0,062 |
| 4 | P49792 RBP2_HUMAN   | E.SPATGILS#PR.G             | S955:           | 2 | 2,479  | 0,185 | 0,792  |
| 4 | P54105 ICLN_HUMAN   | D.GEEYDVEAHE.Q              |                 | 2 | 2,4758 | 0,331 | -0,518 |
| 4 | Q8NHY2 RFWD2_HUMAN  | E.DSTVPQFEAPS#PSHSSIIDSTE.Y | S319:           | 2 | 2,4714 | 0,251 | 0,304  |
| 4 | Q5H9R7 SAPS3_HUMAN  | K.QDLFEPSSANTEDKM*E.V       |                 | 2 | 2,4693 | 0,404 | 0,131  |
| 4 | Q9H3P7 GCP60_HUMAN  | R.GPGASGEQPEPGEAAAGGAAEE.A  |                 | 2 | 2,458  | 0,459 | 0,503  |
| 4 | P05556 ITB1_HUMAN   | E.CQSEGIPESPK.C             |                 | 2 | 2,4537 | 0,256 | 0      |
| 4 | Q02952 AKA12_HUMAN  | E.LS#LQEGDLNGQK.G           | S75:            | 2 | 2,4028 | 0,54  | -0,088 |
| 4 | Q96CB8 INT12_HUMAN  | E.TQSS#PITVQSSK.D           | S128:           | 2 | 2,3952 | 0,386 | -0,091 |
| 4 | Q12769 NU160_HUMAN  | E.DM*ITIDVENVM*E.D          |                 | 2 | 2,3904 | 0,343 | -0,169 |
| 4 | Q63ZY3 KANK2_HUMAN  | E.IASM*LYSR.M               |                 | 2 | 2,3849 | 0,227 | 0      |
| 4 | P35030 TRY3_HUMAN   | D.TLDNDIM*LIK.L             |                 | 2 | 2,3641 | 0,302 | 0      |
| 4 | P46777 RL5_HUMAN    | R.KHIM*GQNVADYM*R.Y         |                 | 3 | 2,3485 | 0,235 | 0,115  |
| 4 | O96028 NSD2_HUMAN   | K.GIGT#PPNTT#PIKNGS#PE.I    | T110:T115:S121: | 2 | 2,3216 | 0,323 | 0,191  |
| 4 | Q8IY81 RRMJ3_HUMAN  | E.IM*SPLYQDEAPK.G           |                 | 2 | 2,3199 | 0,221 | 0,607  |
| 4 | P81605 DCD_HUMAN    | K.ENAGEDPGLAR.Q             |                 | 2 | 2,3186 | 0,436 | -0,108 |
| 4 | Q9Y5B0 CTDP1_HUMAN  | E.LAGAPEPQGSCAQGGR.V        |                 | 2 | 2,3117 | 0,448 | 0      |
| 4 | P00533 EGFR_HUMAN   | E.DHFLSLQR.M                |                 | 2 | 2,309  | 0,095 | -0,18  |
| 4 | P48960 CD97_HUMAN   | E.GCQVLGSK.N                |                 | 2 | 2,3013 | 0,317 | 0,431  |
| 4 | O15027 SC16A_HUMAN  | E.HRPASALVNPLAR.G           |                 | 3 | 2,2747 | 0,127 | 0,326  |
| 4 | P02545 LMNA_HUMAN   | E.GDLIAAQAR.L               |                 | 2 | 2,2746 | 0,169 | 0,133  |
| 4 | P43358 MAGA4_HUMAN  | R.QPNEGSSS#QEEEGPSTSPDAE.S  | S90:            | 3 | 2,2745 | 0,093 | 0,163  |
| 4 | Q4ZG04 Q4ZG04_HUMAN | E.LLLSTLVR.E                |                 | 2 | 2,2687 | 0,209 | 0      |
| 4 | Q71U36 TBA1A_HUMAN  | E.HSDCAFM*VDNE.A            |                 | 2 | 2,2516 | 0,258 | -0,091 |
| 4 | P04792 HSPB1_HUMAN  | E.SPAVAAPAYS.R.A            |                 | 2 | 2,2108 | 0,261 | 0      |
| 4 | Q9H5J0 ZBTB3_HUMAN  | R.AFPSGGAVYGAQPSQPE.A       |                 | 2 | 2,2086 | 0,116 | -0,807 |
| 4 | O95671 ASML_HUMAN   | E.DLFQDAYYSPE.T             |                 | 2 | 2,1808 | 0,392 | 0      |
| 4 | Q7Z6Z7 HUWE1_HUMAN  | E.LS#PAPTITSLSPER.A         | S2826:          | 2 | 2,1771 | 0,411 | 0,079  |
| 4 | O60306 AQR_HUMAN    | E.AM*TVQADIIPSPT#DTSCR.Q    | T1422:          | 3 | 2,1698 | 0,121 | 0,444  |
| 4 | Q96DT7 ZBT10_HUMAN  | E.DCSVM*QPPVAYPEE.N         |                 | 2 | 2,1431 | 0,21  | -0,149 |
| 4 | Q02952 AKA12_HUMAN  | K.VLSKPPPEGVVSE.V           |                 | 2 | 2,1347 | 0,223 | -0,197 |
| 4 | Q15185 TEBP_HUMAN   | D.SDDEKM*PDLE.-             |                 | 2 | 2,1337 | 0,195 | 0,204  |
| 4 | Q5JSH3 WDR44_HUMAN  | K.VGLSTFKETE.N              |                 | 2 | 2,1234 | 0,328 | -0,11  |
| 4 | Q6GMV2 SMYD5_HUMAN  | E.NYLFVCSCPK.C              |                 | 2 | 2,121  | 0,258 | -0,284 |
| 4 | P48960 CD97_HUMAN   | R.CNPGFSSFS.E.I             |                 | 2 | 2,1092 | 0,195 | 0      |
| 4 | P35030 TRY3_HUMAN   | D.TLDNDIMLIK.L              |                 | 2 | 2,1032 | 0,33  | -0,207 |
| 4 | Q6P0N0 CN106_HUMAN  | E.NQVAM*SFYK.H              |                 | 2 | 2,0757 | 0,089 | -0,111 |
| 4 | Q9Y4C8 RBM19_HUMAN  | E.LSDM*DYLK.S               |                 | 2 | 2,0752 | 0,166 | 0,061  |
| 4 | Q15942 ZYX_HUMAN    | E.GGPEAPIPPPPQPR.E          |                 | 2 | 2,0742 | 0,271 | 0,173  |

|   |                     |                                |            |   |        |       |        |
|---|---------------------|--------------------------------|------------|---|--------|-------|--------|
| 4 | Q6NZI2 PTRF_HUMAN   | E.SDAVLVDKS#DS#D.-             | S387:S389: | 2 | 2,0696 | 0,177 | -0,346 |
| 4 | P63027 VAMP2_HUMAN  | R.LQQTQAQVDE.V                 |            | 2 | 2,0613 | 0,11  | -0,21  |
| 4 | Q14807 KIF22_HUMAN  | K.LSSM*DPAM*LE.R               |            | 2 | 2,0545 | 0,166 | 0      |
| 4 | Q32LY9 Q32LY9_HUMAN | E.ALLQSM*GLTPESIVPPPM*SPSS#K.S | S84:       | 3 | 2,0499 | 0,113 | -0,071 |
| 4 | P05387 RLA2_HUMAN   | E.DVIAQGIGK.L                  |            | 2 | 2,0387 | 0,194 | 0      |
| 4 | Q9NQ55 SSF1_HUMAN   | R.VGGS#DEEASGIPSR.T            | S359:      | 2 | 2,0374 | 0,304 | 0,169  |
| 4 | Q6P0N0 CN106_HUMAN  | E.NQVAM*S#FYK.H                | S761:      | 2 | 2,0308 | 0,103 | -0,206 |
| 4 | Q03164 HRX_HUMAN    | R.NLM*LPDGPKPQED.G             |            | 2 | 2,0271 | 0,145 | -0,083 |
| 4 | Q9H773 XTP3A_HUMAN  | R.FSFSPEPTLE.D                 |            | 2 | 2,0255 | 0,316 | -0,211 |
| 4 | P78347 GTF2I_HUMAN  | R.KINSSPNVNTTASGVED.L          |            | 2 | 2,0185 | 0,222 | 0,211  |
| 4 | P68104 EF1A1_HUMAN  | K.IGGIGTVPVGR.V                |            | 2 | 2,0139 | 0,231 | 0      |
| 4 | Q8WWM7 ATX2L_HUMAN  | K.ISLAPTDVKE.L                 |            | 2 | 1,9869 | 0,202 | 0      |
| 4 | Q8NC44 F134A_HUMAN  | E.SGGFS#VSR.A                  | S324:      | 2 | 1,9732 | 0,169 | 0,417  |
| 4 | O60502 NCOAT_HUMAN  | E.DEDGICGYALGTVD.V             |            | 2 | 1,9443 | 0,137 | -0,575 |
| 4 | Q7Z7G8 VP13B_HUMAN  | E.TM*AGPVPTS#PVR.S             | S1263:     | 2 | 1,9367 | 0,31  | 0,093  |
| 4 | P07195 LDHB_HUMAN   | R.GLTSVINQK.L                  |            | 2 | 1,9323 | 0,182 | 0      |
| 4 | Q16204 CCDC6_HUMAN  | K.SGGIVISPFR.L                 |            | 2 | 1,9307 | 0,197 | 0      |
| 4 | Q16643 DREB_HUMAN   | E.TQEPS#PILDSEETR.A            | S381:      | 2 | 1,9171 | 0,26  | 0,435  |
| 4 | P09493 TPM1_HUMAN   | E.NALDRAEQAE.A                 |            | 2 | 1,915  | 0,131 | -0,218 |
| 4 | Q70CQ2 UBP34_HUMAN  | E.VLTPSTSDNETR.D               | S3235:     | 2 | 1,8949 | 0,307 | 0,081  |
| 4 | Q16643 DREB_HUMAN   | R.GPGS#PAEDLM*FM*E.S           | S416:      | 2 | 1,8735 | 0,27  | 0,245  |
| 4 | P05783 K1C18_HUMAN  | E.DGEDFNLGDALD.S               |            | 2 | 1,8585 | 0,303 | -0,191 |
| 4 | P62280 RS11_HUMAN   | R.DVQIGDIVTVGE.C               |            | 2 | 1,8573 | 0,271 | -0,294 |
| 4 | Q14974 IMB1_HUMAN   | E.AADVADDQEEPATYCLSSSFE.L      |            | 2 | 1,8501 | 0,322 | 0,106  |
| 4 | P68104 EF1A1_HUMAN  | K.IGGIGTVPVGRVE.T              |            | 2 | 1,8236 | 0,14  | -0,292 |
| 4 | Q9UIW2 PLXA1_HUMAN  | E.DADM*FGFVYQDE.F              |            | 2 | 1,8197 | 0,193 | -0,336 |
| 4 | Q32LY9 Q32LY9_HUMAN | E.ALLQSM*GLTPESIVPPPM*S#PSSK.S | S81:       | 2 | 1,8177 | 0,142 | 0,853  |
| 4 | O75122 CLAP2_HUMAN  | R.NGSIPTYM*R.Q                 |            | 2 | 1,7992 | 0,156 | 0      |
| 4 | Q96SB3 NEB2_HUMAN   | E.DALSPVDM*EPE.K               |            | 2 | 1,7967 | 0,211 | 0,3    |
| 4 | Q9Y3B9 RRP15_HUMAN  | D.DFM*M*GASM*K.D               |            | 2 | 1,769  | 0,307 | -0,229 |
| 4 | Q13283 G3BP1_HUMAN  | K.SSS#PAPADIAQTVQE.D           | S232:      | 2 | 1,768  | 0,325 | 0,309  |
| 4 | Q13445 TMED1_HUMAN  | E.FTFLLPAGR.K                  |            | 2 | 1,7647 | 0,242 | -0,119 |
| 4 | Q14692 BMS1_HUMAN   | K.AGLSPANQSDR.V                |            | 2 | 1,7639 | 0,195 | -0,096 |
| 4 | P22626 ROA2_HUMAN   | R.GGGGNFGPGPSNFR.G             |            | 2 | 1,7525 | 0,307 | 0,177  |
| 4 | Q01082 SPTB2_HUMAN  | K.TALPAQSAATLPAR.T             |            | 2 | 1,7244 | 0,259 | -0,357 |
| 4 | Q8N954 CCD75_HUMAN  | E.DYM*SDSFINVQE.D              |            | 2 | 1,7239 | 0,208 | -0,083 |
| 4 | A6ND36 FA83G_HUMAN  | E.VYDPGSEDPR.G                 |            | 2 | 1,6733 | 0,217 | 0,215  |
| 4 | Q8WY54 PPM1E_HUMAN  | E.LFLGEFR.G                    |            | 2 | 1,6487 | 0,198 | 0,277  |
| 4 | Q7Z6Z7 HUWE1_HUMAN  | E.DSVLAVM*PPDIAAE.A            |            | 2 | 1,6046 | 0,099 | 0      |

|   |                    |                                   |       |   |        |       |        |
|---|--------------------|-----------------------------------|-------|---|--------|-------|--------|
| 4 | Q14676 MDC1_HUMAN  | E.RAQPFQFID.S                     |       | 2 | 1,5965 | 0,082 | 0,116  |
| 4 | Q14697 GANAB_HUMAN | R.LS#VSGRDE.N                     | S129: | 2 | 1,4225 | 0,137 | 0,323  |
| 4 | Q4LDG9 DNAL1_HUMAN | E.DLVFVGNPLEE.K                   |       | 2 | 1,3926 | 0,214 | -0,495 |
| 4 | Q14676 MDC1_HUMAN  | E.DEPTQAFM*LTTPQE.L               |       | 2 | 1,3421 | 0,174 | 0,452  |
| 4 | P52888 THOP1_HUMAN | E.DTTFLPFTLQE.L                   |       | 2 | 1,182  | 0,131 | -0,279 |
| 5 | P04264 K2C1_HUMAN  | R.GGGGGGYSGGSSYSGGGSYSGGGGGGGGR.G |       | 3 | 7,1735 | 0,483 | 0,537  |
| 5 | P02533 K1C14_HUMAN | R.TKVM*DVHDGKVVSTHEQVLR.T         |       | 3 | 6,8377 | 0,476 | -0,718 |
| 5 | P04264 K2C1_HUMAN  | R.GGGGGGYSGGSSYSGGGSYSGGGGGGGGR.G |       | 2 | 6,3367 | 0,55  | -0,717 |
| 5 | Q02413 DSG1_HUMAN  | R.SSSDHHFNQTIGSASPSTAR.S          |       | 2 | 4,8968 | 0,557 | 0      |
| 5 | P35527 K1C9_HUMAN  | R.GGSGGSYGGGGSGGGYGGGSGSR.G       |       | 2 | 4,8622 | 0,459 | -0,068 |
| 5 | P35527 K1C9_HUMAN  | R.GGSGGSYGGGGSGGGYGGGSGSR.G       |       | 3 | 4,794  | 0,519 | 0,408  |
| 5 | P15924 DESP_HUMAN  | R.AEMDMVAWGVDLASVEQHINSHR.G       |       | 3 | 4,6455 | 0,39  | 0,564  |
| 5 | P35908 K22E_HUMAN  | R.GGSGGGGSISGGGYSGGGSGGR.Y        |       | 2 | 4,5074 | 0,378 | -1,051 |
| 5 | P08779 K1C16_HUMAN | R.KNHEEEM*LALR.G                  |       | 3 | 4,4438 | 0,218 | -0,264 |
| 5 | P20930 FILA_HUMAN  | R.GYSGSQASDSEGHSESDTQSVSAQGK.A    |       | 3 | 4,4077 | 0,486 | -0,542 |
| 5 | P35908 K22E_HUMAN  | R.SKEEAEALYHSK.Y                  |       | 2 | 4,3188 | 0,459 | 0,438  |
| 5 | P14923 PLAK_HUMAN  | R.HVAAGTQQPYTDGVR.M               |       | 2 | 4,0839 | 0,569 | -0,381 |
| 5 | P35527 K1C9_HUMAN  | R.SGGGGGGGLGSGGSIR.S              |       | 2 | 4,0677 | 0,557 | 1,089  |
| 5 | P08047 SP1_HUMAN   | R.IES#PNENSNNSQGPSQSGGTGE.L       | S73:  | 3 | 4,0259 | 0,461 | 0,161  |
| 5 | P06733 ENOA_HUMAN  | K.KLNVTEQEIKIDK.L                 |       | 3 | 3,9594 | 0,285 | -0,127 |
| 5 | P35527 K1C9_HUMAN  | R.SGGGGGGGLGSGGS#IR.S             | S27:  | 2 | 3,9561 | 0,409 | -0,558 |
| 5 | Q02413 DSG1_HUMAN  | R.SSSDHHFNQTIGSASPSTAR.S          |       | 3 | 3,8756 | 0,289 | -0,789 |
| 5 | P43358 MAGA4_HUMAN | R.QPNEGSSSQEEGPSTS#PDAE.S         | S99:  | 2 | 3,8681 | 0,551 | -0,109 |
| 5 | P38398 BRCA1_HUMAN | E.LGS#DSEEDTVNK.A                 | S184: | 2 | 3,8632 | 0,367 | -0,55  |
| 5 | Q02413 DSG1_HUMAN  | R.NKAEFHHSIM*SQYK.L               |       | 2 | 3,8364 | 0,342 | 0,351  |
| 5 | P35908 K22E_HUMAN  | R.GSSSGGGYSSGSSYSGGGR.Q           |       | 2 | 3,8215 | 0,541 | -0,28  |
| 5 | P04264 K2C1_HUMAN  | K.SKAEAESLYQSK.Y                  |       | 2 | 3,8206 | 0,487 | -0,091 |
| 5 | Q7Z6Z7 HUWE1_HUMAN | E.EAVGDTSAAGSSEQPR.A              |       | 2 | 3,8172 | 0,603 | -0,234 |
| 5 | P35908 K22E_HUMAN  | R.SKEEAEALYHSK.Y                  |       | 3 | 3,8017 | 0,27  | 0,263  |
| 5 | P35579 MYH9_HUMAN  | R.NAEQYKQADKASTR.L                |       | 3 | 3,7669 | 0,377 | -0,318 |
| 5 | P04264 K2C1_HUMAN  | R.RVDQLKSDQSR.L                   |       | 3 | 3,7405 | 0,276 | 0,343  |
| 5 | Q08554 DSC1_HUMAN  | K.VQDQDLPNTPHSA.A                 |       | 3 | 3,6354 | 0,219 | 0,556  |
| 5 | P15924 DESP_HUMAN  | R.KIQSQFTDAQK.H                   |       | 2 | 3,6184 | 0,409 | -0,66  |
| 5 | P31947 1433S_HUMAN | R.YLAEVATGDDKKR.I                 |       | 2 | 3,6071 | 0,529 | 0,083  |
| 5 | P14923 PLAK_HUMAN  | R.HPEAEM*AQNSVR.L                 |       | 3 | 3,5297 | 0,415 | 0,198  |
| 5 | Q08554 DSC1_HUMAN  | R.M*KVQDQDLPNTPHSA.A              |       | 2 | 3,5209 | 0,365 | -0,278 |
| 5 | P04264 K2C1_HUMAN  | R.LRSEIDNVKK.Q                    |       | 3 | 3,5144 | 0,122 | 0,456  |
| 5 | P12814 ACTN1_HUMAN | K.HTNYTMEHIR.V                    |       | 3 | 3,4914 | 0,371 | 0,07   |
| 5 | P35579 MYH9_HUMAN  | R.ELEDATETADAM*NR.E               |       | 2 | 3,48   | 0,498 | -0,463 |

|   |                     |                             |   |        |       |        |
|---|---------------------|-----------------------------|---|--------|-------|--------|
| 5 | Q86YZ3 HORN_HUMAN   | R.GPYESGSGHSSGLGHR.E        | 3 | 3,4691 | 0,51  | 0,346  |
| 5 | P04075 ALDOA_HUMAN  | K.RLQSIGTENTEENRR.F         | 3 | 3,4675 | 0,281 | -0,406 |
| 5 | P02533 K1C14_HUMAN  | K.KNHEEEM*NALR.G            | 3 | 3,4637 | 0,246 | 0,396  |
| 5 | P08779 K1C16_HUMAN  | R.ILNEM*RDQYEQM*AEK.N       | 3 | 3,439  | 0,331 | 0,095  |
| 5 | P08779 K1C16_HUMAN  | K.EVASNSELVQSSR.S           | 2 | 3,4057 | 0,531 | -0,347 |
| 5 | P13645 K1C10_HUMAN  | R.SQYEQLAEQNRK.D            | 2 | 3,3929 | 0,377 | -1,062 |
| 5 | Q5VY92 Q5VY92_HUMAN | R.LQDSSDPDTGSEEE.G          | 2 | 3,3867 | 0,399 | -0,081 |
| 5 | P22735 TGM1_HUMAN   | R.KAVETAAAHGSKPNVYANR.G     | 3 | 3,3865 | 0,316 | -0,184 |
| 5 | Q08554 DSC1_HUMAN   | K.VQDQDLPNTPHSK.A           | 2 | 3,3813 | 0,283 | 0,082  |
| 5 | P02538 K2C6A_HUMAN  | R.RGFSANSAR.L               | 2 | 3,3482 | 0,291 | -0,821 |
| 5 | P04406 G3P_HUMAN    | R.LEKPAKYDDIKK.V            | 2 | 3,3231 | 0,196 | -0,506 |
| 5 | P02545 LMNA_HUMAN   | R.SGAQASSTPLSPTR.I          | 2 | 3,3128 | 0,475 | 0,179  |
| 5 | P63104 1433Z_HUMAN  | R.YLAEVAAGDDKK.G            | 3 | 3,2626 | 0,327 | 0,857  |
| 5 | Q9Y446 PKP3_HUMAN   | K.LFNHANQEVQR.H             | 3 | 3,2462 | 0,187 | -0,607 |
| 5 | P02533 K1C14_HUMAN  | R.TKVM*DVHDGKVVSTHE.Q       | 3 | 3,2396 | 0,293 | -0,509 |
| 5 | P04264 K2C1_HUMAN   | K.SKAEAESLYQSK.Y            | 3 | 3,2245 | 0,265 | 0,409  |
| 5 | P35527 K1C9_HUMAN   | R.FSSSS#GYGGSSR.V           | 2 | 3,2113 | 0,433 | -0,464 |
| 5 | P43358 MAGA4_HUMAN  | R.QPNEGSSSQEEGPS#TSPDAE.S   | 3 | 3,1921 | 0,292 | -0,082 |
| 5 | Q6KB66 K2C80_HUMAN  | R.IRYEDEISKR.T              | 3 | 3,1906 | 0,22  | 1,327  |
| 5 | P22735 TGM1_HUMAN   | R.GSGVNAAGDGTIR.E           | 2 | 3,1663 | 0,363 | -0,831 |
| 5 | P35908 K22E_HUMAN   | R.GSGGGGSGISGGGYGSGGGSGGR.Y | 3 | 3,159  | 0,27  | -0,63  |
| 5 | Q02413 DSG1_HUMAN   | K.TYVVTGNM*GSNDK.V          | 2 | 3,1415 | 0,411 | -0,783 |
| 5 | P04264 K2C1_HUMAN   | K.AEAESLYQSK.Y              | 2 | 3,1378 | 0,4   | -0,108 |
| 5 | O00512 BCL9_HUMAN   | R.AVT#PVSQGSNSSSADPK.A      | 2 | 3,1366 | 0,455 | -0,143 |
| 5 | P14923 PLAK_HUMAN   | R.HPEAEMAQNSVR.L            | 3 | 3,1291 | 0,203 | -0,735 |
| 5 | P13647 K2C5_HUMAN   | K.YEELQQTAGR.H              | 2 | 3,0851 | 0,419 | -0,204 |
| 5 | P14923 PLAK_HUMAN   | R.TMQNTSDLDTAR.C            | 2 | 3,0667 | 0,424 | -0,09  |
| 5 | P04792 HSPB1_HUMAN  | K.DGVVEITGKHEER.Q           | 2 | 3,0138 | 0,27  | -0,831 |
| 5 | P04406 G3P_HUMAN    | R.VVDLM*AHM*ASKE.-          | 2 | 3,0128 | 0,361 | -0,627 |
| 5 | P04259 K2C6B_HUMAN  | R.NM*QDLVEDLKNK.Y           | 2 | 2,9921 | 0,146 | -0,167 |
| 5 | P08779 K1C16_HUMAN  | R.EVFTSSSSSSR.Q             | 2 | 2,9614 | 0,416 | 0,194  |
| 5 | P04264 K2C1_HUMAN   | K.NM*QDM*VEDYR.N            | 2 | 2,9433 | 0,384 | -0,549 |
| 5 | P20930 FILA_HUMAN   | R.HSGIGHGQASSAVR.D          | 3 | 2,9127 | 0,229 | 0,201  |
| 5 | P02538 K2C6A_HUMAN  | R.NTKQEIAEINR.M             | 3 | 2,911  | 0,138 | 0,973  |
| 5 | P04264 K2C1_HUMAN   | R.GSGGGSSGGSIGGR.G          | 2 | 2,8984 | 0,36  | -0,893 |
| 5 | P08779 K1C16_HUMAN  | R.KNHEEEM*LALR.G            | 2 | 2,8951 | 0,39  | -0,792 |
| 5 | Q5VVQ6 OTU1_HUMAN   | R.FGEDAGYTKR.V              | 2 | 2,8846 | 0,357 | -0,107 |
| 5 | Q02413 DSG1_HUMAN   | R.NKAEFHHSIM*SQYK.L         | 3 | 2,8706 | 0,19  | 0,211  |
| 5 | P35908 K22E_HUMAN   | R.FLEQQNQVLQTK.W            | 3 | 2,7977 | 0,114 | 0,558  |

|   |                     |                           |        |   |        |       |        |
|---|---------------------|---------------------------|--------|---|--------|-------|--------|
| 5 | P04264 K2C1_HUMAN   | R.NKYEDEINKR.T            |        | 2 | 2,7949 | 0,339 | 0,746  |
| 5 | P09525 ANXA4_HUMAN  | R.ISQTYQQQYGR.S           |        | 2 | 2,7946 | 0,421 | -0,267 |
| 5 | P06702 S10A9_HUMAN  | K.MHEGDEGPGHHHKPGLGEGTP.- |        | 3 | 2,7503 | 0,324 | -0,168 |
| 5 | P43358 MAGA4_HUMAN  | R.QPNEGSSSQEEEGPSTSPDAE.S |        | 3 | 2,7465 | 0,109 | -0,169 |
| 5 | P15924 DESP_HUMAN   | R.LKAEFQEEAK.R            |        | 2 | 2,7455 | 0,228 | -0,511 |
| 5 | P05109 S10A8_HUMAN  | K.GNFHAVYRDDLKK.L         |        | 2 | 2,7257 | 0,189 | 0,859  |
| 5 | P04264 K2C1_HUMAN   | K.NM*QDM*VEDYRNK.Y        |        | 3 | 2,7242 | 0,428 | -0,465 |
| 5 | P02533 K1C14_HUMAN  | K.NHEEEM*NALR.G           |        | 3 | 2,7151 | 0,095 | 0,363  |
| 5 | Q86YZ3 HORN_HUMAN   | R.QSLGHGQHGSQSPSPSR.G     |        | 3 | 2,7065 | 0,301 | -0,282 |
| 5 | P13645 K1C10_HUMAN  | K.VTM*QNLNDR.L            |        | 2 | 2,7049 | 0,295 | -0,11  |
| 5 | Q13033 STRN3_HUMAN  | E.LAGGGGGGPGM*AAPPR.Q     |        | 2 | 2,6727 | 0,402 | -0,182 |
| 5 | P35908 K22E_HUMAN   | R.GSSSGGGYSSGSSYSGGR.Q    |        | 3 | 2,663  | 0,174 | -0,21  |
| 5 | P04264 K2C1_HUMAN   | R.GSSGGSSGGS#IGGR.G       | S612:  | 2 | 2,6579 | 0,379 | -0,104 |
| 5 | P11021 GRP78_HUMAN  | K.VYGERPLTK.D             |        | 2 | 2,6356 | 0,334 | -0,512 |
| 5 | P15924 DESP_HUMAN   | K.IQSQFTDAQK.H            |        | 2 | 2,6299 | 0,332 | -0,314 |
| 5 | P68104 EF1A1_HUMAN  | K.MDSTEPYSQK.R            |        | 2 | 2,6271 | 0,325 | -0,761 |
| 5 | Q01082 SPTB2_HUMAN  | E.VSASTQST#PASSR.A        | T2320: | 2 | 2,6151 | 0,444 | 0,09   |
| 5 | P35527 K1C9_HUMAN   | K.STM*QELNSR.L            |        | 2 | 2,6032 | 0,226 | -0,902 |
| 5 | Q3SYB4 Q3SYB4_HUMAN | K.VLADSSLEGQKK.T          |        | 2 | 2,6029 | 0,377 | 0,574  |
| 5 | P04264 K2C1_HUMAN   | K.KDVDGAYMTK.V            |        | 2 | 2,6012 | 0,262 | 0,757  |
| 5 | P15924 DESP_HUMAN   | R.YEVTSGGGGTSR.M          |        | 2 | 2,5729 | 0,452 | -0,521 |
| 5 | Q6S8J3 A26CA_HUMAN  | K.AGFAGDDAPR.A            |        | 2 | 2,5681 | 0,237 | -0,187 |
| 5 | Q02413 DSG1_HUMAN   | R.NKAEFHHSIMSQYK.L        |        | 3 | 2,5581 | 0,13  | -0,106 |
| 5 | Q5D862 FILA2_HUMAN  | R.FSNSSSNEFSK.C           |        | 2 | 2,5574 | 0,113 | -1,201 |
| 5 | P68104 EF1A1_HUMAN  | K.STTTGHLIYK.C            |        | 2 | 2,5363 | 0,397 | -0,98  |
| 5 | P35527 K1C9_HUMAN   | K.STMQELNSR.L             |        | 2 | 2,5335 | 0,225 | 0,229  |
| 5 | P04264 K2C1_HUMAN   | R.GENALKDAK.N             |        | 2 | 2,53   | 0,268 | -0,58  |
| 5 | P04264 K2C1_HUMAN   | K.KDVDGAYM*TK.V           |        | 2 | 2,5261 | 0,223 | 0      |
| 5 | P62736 ACTA_HUMAN   | R.HQGVVMVGMGQK.D          |        | 2 | 2,5254 | 0,181 | -1,353 |
| 5 | B2RA01 B2RA01_HUMAN | K.AQYEDIAQK.S             |        | 2 | 2,5231 | 0,165 | -0,114 |
| 5 | A6ND36 FA83G_HUMAN  | E.VYDPGSEDPR.G            |        | 2 | 2,5209 | 0,203 | -0,538 |
| 5 | Q7Z406 MYH14_HUMAN  | R.VAEQAANDLR.A            |        | 2 | 2,5143 | 0,344 | -0,224 |
| 5 | P15924 DESP_HUMAN   | R.ETQSQLETER.S            |        | 2 | 2,5101 | 0,331 | -0,999 |
| 5 | P04264 K2C1_HUMAN   | R.DYQELM*NTK.L            |        | 2 | 2,4947 | 0,317 | -1,475 |
| 5 | P13647 K2C5_HUMAN   | R.LRAEIDNVK.K             |        | 2 | 2,4872 | 0,206 | -0,807 |
| 5 | P02533 K1C14_HUMAN  | K.VVSTHEQVLR.T            |        | 2 | 2,4737 | 0,379 | 0,104  |
| 5 | Q02413 DSG1_HUMAN   | K.AEFHHSIM*SQYK.L         |        | 3 | 2,4514 | 0,276 | -0,306 |
| 5 | P02533 K1C14_HUMAN  | K.NHEEEMNALR.G            |        | 2 | 2,4303 | 0,427 | -0,982 |
| 5 | P31947 1433S_HUMAN  | R.YLAEVATGDDKKR.I         |        | 3 | 2,4293 | 0,355 | 0,374  |

|   |                     |                     |   |        |       |        |
|---|---------------------|---------------------|---|--------|-------|--------|
| 5 | P13647 K2C5_HUMAN   | R.EYQELM*NTK.L      | 2 | 2,4274 | 0,293 | -0,729 |
| 5 | P15924 DESP_HUMAN   | K.TTIHQQLTM*QK.E    | 2 | 2,4071 | 0,352 | -1,203 |
| 5 | P08779 K1C16_HUMAN  | K.EQSSSSFSQGQSS.-   | 2 | 2,3852 | 0,178 | 0,091  |
| 5 | P35527 K1C9_HUMAN   | R.FSSSSGYGGSSR.V    | 2 | 2,3845 | 0,429 | -0,296 |
| 5 | P35527 K1C9_HUMAN   | K.KGPAAIQK.N        | 2 | 2,3821 | 0,107 | -0,675 |
| 5 | P02538 K2C6A_HUMAN  | R.NTKQEIAEINR.M     | 2 | 2,3751 | 0,232 | -1,391 |
| 5 | P02533 K1C14_HUMAN  | K.VMDVHDGK.V        | 2 | 2,3671 | 0,286 | 0      |
| 5 | P15924 DESP_HUMAN   | R.GAGSIAGASAPK.E    | 2 | 2,3578 | 0,32  | -0,795 |
| 5 | P02533 K1C14_HUMAN  | R.ILNEM*RDQYEK.M    | 2 | 2,3542 | 0,098 | -0,839 |
| 5 | P15924 DESP_HUMAN   | R.RAEENALQQK.A      | 2 | 2,3305 | 0,082 | 0      |
| 5 | Q04695 K1C17_HUMAN  | K.ATM*QNLNDR.L      | 2 | 2,3129 | 0,39  | -0,452 |
| 5 | P04264 K2C1_HUMAN   | R.LRSEIDNVK.K       | 2 | 2,3072 | 0,271 | -0,341 |
| 5 | Q9BUR4 WDR79_HUMAN  | K.AM*EDTSGEPAAEDE.G | 2 | 2,3048 | 0,295 | 0,166  |
| 5 | P14923 PLAK_HUMAN   | R.ISEDKNPDYR.K      | 2 | 2,2967 | 0,224 | -0,099 |
| 5 | P04792 HSPB1_HUMAN  | K.DGVVEITGKHEER.Q   | 3 | 2,2844 | 0,252 | 0,125  |
| 5 | P04083 ANXA1_HUMAN  | R.SEIDM*NDIK.A      | 2 | 2,2816 | 0,248 | -1,242 |
| 5 | P13647 K2C5_HUMAN   | R.GRLDSELR.N        | 2 | 2,2606 | 0,118 | -0,709 |
| 5 | P13647 K2C5_HUMAN   | K.FVSTTSSSR.K       | 2 | 2,2383 | 0,207 | -0,188 |
| 5 | P04264 K2C1_HUMAN   | K.DVDGAYM*TK.V      | 2 | 2,2282 | 0,179 | -0,841 |
| 5 | A6NN35 A6NN35_HUMAN | R.LGEESIR.G         | 2 | 2,2238 | 0,104 | 0,531  |
| 5 | P35527 K1C9_HUMAN   | K.FEM*EQNLR.Q       | 2 | 2,1832 | 0,162 | -1,352 |
| 5 | A8MSI8 A8MSI8_HUMAN | R.ASSITSMLSGR.V     | 2 | 2,1745 | 0,207 | 0,51   |
| 5 | Q04695 K1C17_HUMAN  | K.ATMQNLNDR.L       | 2 | 2,1618 | 0,309 | -0,23  |
| 5 | P15924 DESP_HUMAN   | R.KIQSQFTDAQK.H     | 3 | 2,1567 | 0,306 | 0,212  |
| 5 | Q02413 DSG1_HUMAN   | R.EM*QDLGGGER.M     | 2 | 2,1419 | 0,308 | -0,11  |
| 5 | Q02413 DSG1_HUMAN   | R.EMQDLGGGER.M      | 2 | 2,1154 | 0,344 | -0,335 |
| 5 | Q13835 PKP1_HUMAN   | R.STTNKLETR.R       | 2 | 2,1    | 0,084 | 0      |
| 5 | P15924 DESP_HUMAN   | R.RQDSLESM*K.F      | 2 | 2,0788 | 0,288 | -0,33  |
| 5 | P35908 K22E_HUMAN   | K.YEDEINKR.T        | 2 | 2,0713 | 0,183 | 0,915  |
| 5 | P15924 DESP_HUMAN   | K.NDYDQLQK.A        | 2 | 2,0663 | 0,118 | -0,834 |
| 5 | P35527 K1C9_HUMAN   | K.IGLGGRGGSGGSYGR.G | 3 | 2,062  | 0,177 | 0,541  |
| 5 | P13647 K2C5_HUMAN   | K.HEISEMNR.M        | 2 | 2,0598 | 0,237 | -0,18  |
| 5 | P02533 K1C14_HUMAN  | K.NHEEEM*NALR.G     | 2 | 2,0429 | 0,265 | 0      |
| 5 | P02538 K2C6A_HUMAN  | R.GEM*ALKDAK.N      | 2 | 2,0377 | 0,192 | 0,187  |
| 5 | P13645 K1C10_HUMAN  | K.SEITELRR.N        | 2 | 2,0112 | 0,127 | -0,304 |
| 5 | P19013 K2C4_HUMAN   | R.TEEREQIK.L        | 2 | 2,0098 | 0,116 | 0,236  |
| 5 | P13645 K1C10_HUMAN  | K.NHEEEMKDLR.N      | 3 | 2,0084 | 0,264 | -0,211 |
| 5 | P02533 K1C14_HUMAN  | K.SEISELRR.T        | 2 | 1,9896 | 0,103 | -0,185 |
| 5 | P31946 1433B_HUMAN  | K.LAEQAER.Y         | 2 | 1,9171 | 0,128 | 0,373  |



|   |                     |                                   |        |   |        |       |        |
|---|---------------------|-----------------------------------|--------|---|--------|-------|--------|
| 5 | P13647 K2C5_HUMAN   | R.TSFTSVSR.S                      |        | 2 | 1,9056 | 0,228 | -0,689 |
| 5 | P04792 HSPB1_HUMAN  | R.AQLGGPEAAK.S                    |        | 2 | 1,9013 | 0,105 | 0,259  |
| 5 | P15924 DESP_HUMAN   | K.VLEQDKAR.L                      |        | 2 | 1,8892 | 0,149 | 0,127  |
| 5 | P14923 PLAK_HUMAN   | R.HPEAEMAQNSVR.L                  |        | 2 | 1,8618 | 0,135 | -1,248 |
| 5 | Q14BN3 Q14BN3_HUMAN | R.NLSSADAGR.Q                     |        | 2 | 1,8498 | 0,128 | 0,411  |
| 5 | P15924 DESP_HUMAN   | K.VTQLTDR.W                       |        | 2 | 1,8488 | 0,181 | 0,073  |
| 5 | Q08188 TGM3_HUMAN   | R.DAATDVASR.N                     |        | 2 | 1,8262 | 0,154 | -0,471 |
| 5 | P15924 DESP_HUMAN   | R.ISTEEAIR.K                      |        | 2 | 1,8017 | 0,133 | -0,797 |
| 5 | P02538 K2C6A_HUMAN  | R.SEIDHVK.K                       |        | 2 | 1,7874 | 0,119 | 0,368  |
| 5 | P08779 K1C16_HUMAN  | R.ILNEM*RDQYEQM*AEK.N             |        | 2 | 1,7854 | 0,311 | -0,379 |
| 5 | P04075 ALDOA_HUMAN  | K.YTPSGQAGAAASE.S                 |        | 2 | 1,7569 | 0,132 | 0,605  |
| 5 | P15924 DESP_HUMAN   | R.TVKDQDITR.F                     |        | 2 | 1,6889 | 0,108 | -0,113 |
| 5 | P02533 K1C14_HUMAN  | R.QFTSSSSM*K.G                    |        | 2 | 1,6682 | 0,286 | -0,599 |
| 5 | P02538 K2C6A_HUMAN  | K.YTTTSSSSR.K                     |        | 2 | 1,5577 | 0,268 | 0      |
| 5 | Q9NZT1 CALL5_HUMAN  | R.EADVVDQDGR.V                    |        | 2 | 1,5487 | 0,196 | 0,182  |
| 5 | P13647 K2C5_HUMAN   | K.FVSTTSSSRK.S                    |        | 2 | 1,5444 | 0,105 | -0,222 |
| 5 | Q02487 DSC2_HUMAN   | K.GNENGNFK.I                      |        | 2 | 1,5418 | 0,097 | 0,277  |
| 5 | P15924 DESP_HUMAN   | K.QSLDDAAK.T                      |        | 2 | 1,477  | 0,118 | 1,007  |
| 5 | P27482 CALL3_HUMAN  | R.ELGTVM*R.S                      |        | 2 | 1,4475 | 0,237 | 0,223  |
| 5 | Q04695 K1C17_HUMAN  | R.QFTSSSSIK.G                     |        | 2 | 1,406  | 0,083 | 0,619  |
| 5 | P15924 DESP_HUMAN   | R.SQLQISNNR.T                     |        | 2 | 1,1714 | 0,09  | 0,23   |
| 6 | Q13283 G3BP1_HUMAN  | E.TAPEDAQSSS#PAPADIAQTVQE.D       | S232:  | 2 | 6,5962 | 0,575 | 0,403  |
| 6 | Q16186 ADRM1_HUMAN  | E.YLNNPPM*PGALGASGS#GHE.L         | S143:  | 3 | 6,1841 | 0,446 | 0,178  |
| 6 | Q12888 TP53B_HUMAN  | E.NTQIEDTEPM*S#PVLNSK.F           | S552:  | 2 | 5,9966 | 0,536 | 0,183  |
| 6 | Q99661 KIF2C_HUMAN  | E.M*EACSNALIPGNLS#KEEEE.L         | S621:  | 2 | 5,9877 | 0,604 | 0,429  |
| 6 | P38398 BRCA1_HUMAN  | E.SAQS#PAAAHTTDTAGYNAM*EE.S       | S1613: | 2 | 5,9161 | 0,541 | 0,44   |
| 6 | Q9H814 RNUXA_HUMAN  | E.TFASDTNEALASLDES#QEGHAE.A       | S368:  | 2 | 5,8943 | 0,609 | 0,203  |
| 6 | Q7Z417 NUFP2_HUMAN  | E.IESQNPLAS#PTNTLLGSAKE.Q         | S629:  | 2 | 5,8887 | 0,535 | 0,227  |
| 6 | Q9H814 RNUXA_HUMAN  | E.TFASDTNEALASLDES#QEGHAE.A       | S368:  | 3 | 5,8571 | 0,444 | 0,152  |
| 6 | Q9UBL3 ASH2L_HUMAN  | E.ANLVDVSGGLETES#SNGKDTLE.G       | S78:   | 2 | 5,8323 | 0,554 | 0,105  |
| 6 | Q9UK61 CC063_HUMAN  | E.S#SPQNGGGGGLNIAEPSGGAGREE.N     | S36:   | 2 | 5,6458 | 0,523 | 0,214  |
| 6 | Q9Y2L9 LRCH1_HUMAN  | E.VQSDLTLQSNQS#PNEIRE.N           | S524:  | 3 | 5,645  | 0,408 | 0,224  |
| 6 | Q13283 G3BP1_HUMAN  | E.ETAPEDAQSSS#PAPADIAQTVQE.D      | S232:  | 2 | 5,5987 | 0,581 | 0,574  |
| 6 | Q9Y6A5 TACC3_HUMAN  | E.NQM*VS#PGKVSQSPEQAVEE.N         | S170:  | 2 | 5,576  | 0,511 | 0,236  |
| 6 | Q5UIPO RIF1_HUMAN   | E.FNSDISLSDNTT#PVKLNAQTE.I        | T1980: | 2 | 5,5699 | 0,406 | 0,308  |
| 6 | Q15083 ERC2_HUMAN   | E.NIQSLNAAAYATSGPM*YLS#DHE.G      | S65:   | 3 | 5,4867 | 0,388 | 0,308  |
| 6 | Q16186 ADRM1_HUMAN  | E.YLNNPPM*PGALGASGS#SGHE.L        | S142:  | 3 | 5,4775 | 0,505 | 0,267  |
| 6 | Q13283 G3BP1_HUMAN  | E.DAQSSS#PAPADIAQTVQE.D           | S232:  | 2 | 5,4587 | 0,498 | 0,302  |
| 6 | Q14566 MCM6_HUMAN   | E.GAGGINGHADS#PAPVNGINGYNEDINQE.S | S689:  | 3 | 5,4168 | 0,433 | 0,768  |

|   |                     |                                     |            |   |        |       |        |
|---|---------------------|-------------------------------------|------------|---|--------|-------|--------|
| 6 | Q7KZ85 SPT6H_HUMAN  | E.STPM*SIAGDAT#PLLDDEM*DR.-         | T1718:     | 2 | 5,3375 | 0,564 | 0,229  |
| 6 | Q9BZV1 UBXD1_HUMAN  | E.ATVSGS#PEAPGTNVVSEPRE.E.G         | S96:       | 2 | 5,2658 | 0,424 | 0,334  |
| 6 | Q5T5Y3 CAMP1_HUMAN  | E.VVDVNECDLS#IEKLN.E.T              | S1023:     | 2 | 5,2488 | 0,435 | 0,062  |
| 6 | Q13111 CAF1A_HUMAN  | E.VQAPCGAASGAGGGVGVDTGK.A           |            | 3 | 5,233  | 0,532 | 0,302  |
| 6 | Q8ND24 RN214_HUMAN  | E.VAGVVANAPS#PPESSSLCASKSDE.G       | S15:       | 3 | 5,1999 | 0,457 | 0,3    |
| 6 | Q02952 AKA12_HUMAN  | D.GST#PVADFDAPGTTQKDE.I             | T1175:     | 2 | 5,1928 | 0,5   | 0,255  |
| 6 | Q99996 AKAP9_HUMAN  | E.FGVDDSYSEQGAQDS#PTHLE.M           | S165:      | 2 | 5,17   | 0,528 | 0,324  |
| 6 | Q14839 CHD4_HUMAN   | E.VTAVDGYET#DHQDYCE.V               | T367:      | 2 | 5,1629 | 0,537 | 0,369  |
| 6 | Q8ND24 RN214_HUMAN  | E.VAGVVANAPS#PPESSSLCASK.S          | S15:       | 2 | 5,1541 | 0,43  | 0,232  |
| 6 | Q7Z417 NUFP2_HUMAN  | E.IESQNPLAS#PTNTLLGSAKE.Q           | S629:      | 3 | 5,1293 | 0,373 | 0,17   |
| 6 | P55327 TPD52_HUMAN  | E.VLNSAANASATTTEPLPEKTQES#L.-       | S183:      | 3 | 5,1173 | 0,468 | 0,43   |
| 6 | Q04637 IF4G1_HUMAN  | E.SEFSSS#PLQAPTPLASHTVE.I           | S343:      | 2 | 5,082  | 0,56  | 0,113  |
| 6 | Q8N1G0 ZN687_HUMAN  | E.NGPGM*QPPVSS#PPLGALKQE.S          | S215:      | 3 | 5,075  | 0,38  | 0,348  |
| 6 | Q14966 ZN638_HUMAN  | E.SEVQTATDS#PSVKPNELEEE.S           | S1119:     | 2 | 5,0746 | 0,536 | 0,215  |
| 6 | Q10570 CPSF1_HUMAN  | E.M*LYGDSGSLFS#PSKE.E               | S756:      | 2 | 5,0585 | 0,453 | -0,142 |
| 6 | Q8IVF2 AHNK2_HUMAN  | E.GDLHAAVGAPVM*SPLS#PGER.V          | S4897:     | 3 | 5,044  | 0,405 | 0,267  |
| 6 | P38398 BRCA1_HUMAN  | E.SGISLFSDDPES#DPSEDRAPE.S          | S1577:     | 2 | 5,0421 | 0,514 | 0      |
| 6 | Q92797 SYMPK_HUMAN  | E.AALLDSS#LEGPLKE.T                 | S1222:     | 2 | 5,0395 | 0,361 | -0,301 |
| 6 | Q16186 ADRM1_HUMAN  | E.YLNNPPM*PGALGASGSS#GHE.L          | S143:      | 2 | 4,9779 | 0,534 | -0,238 |
| 6 | Q02790 FKBP4_HUMAN  | E.SGAQS#APLPM*EGVDISPKQDE.G         | S15:       | 2 | 4,9574 | 0,397 | 0      |
| 6 | Q86VR2 F134C_HUMAN  | E.LAAFCPQLDDS#TVARE.L               | S274:      | 2 | 4,953  | 0,425 | 0,195  |
| 6 | P48960 CD97_HUMAN   | E.GSYDCVCSPGYEPVSGAK.T              |            | 2 | 4,9467 | 0,502 | 0,063  |
| 6 | Q9NTJ3 SMC4_HUMAN   | E.GPPPPSPDGAS#SDAEPEPPSGR.T         | S27:       | 2 | 4,9414 | 0,452 | 0,224  |
| 6 | P56537 IF6_HUMAN    | E.AQPSTIATSM*RDS#LIDSLT.-           | S239:      | 2 | 4,8452 | 0,532 | 0,116  |
| 6 | Q14444 CAPR1_HUMAN  | E.YTEQSEVES#TEYVNR.Q                | S291:      | 2 | 4,8392 | 0,538 | 0,127  |
| 6 | O14578 CTRO_HUMAN   | E.SVVSGLDLS#PAKTSSM*E.K             | S440:      | 2 | 4,7789 | 0,442 | -0,072 |
| 6 | Q7Z417 NUFP2_HUMAN  | E.IESQNPLAS#PTNTLLGSAK.E            | S629:      | 2 | 4,7219 | 0,496 | -0,181 |
| 6 | Q561V9 Q561V9_HUMAN | E.VEM*LVAGHEDS#NGCINYE.E.L          | S135:      | 2 | 4,72   | 0,488 | 0,324  |
| 6 | Q86TC9 MYPN_HUMAN   | E.IYIEGVSSSDS#EGDPNKEE.M            | S366:      | 2 | 4,7149 | 0,43  | -1,143 |
| 6 | Q9H0H5 RGAP1_HUMAN  | E.SGSILS#DISFDKTDE.S                | S154:      | 2 | 4,709  | 0,425 | -0,144 |
| 6 | Q8WWM7 ATX2L_HUMAN  | E.VDGLLTSEPM*GS#PVSSK.T             | S594:      | 2 | 4,7038 | 0,432 | 0,136  |
| 6 | Q9UK61 CC063_HUMAN  | E.S#SPQNGGGGLNIAEPSGGAGREE.N        | S36:       | 3 | 4,7004 | 0,276 | 0,161  |
| 6 | Q96JM3 ZN828_HUMAN  | E.LQTPLPS#PEPSKPASVS#SPEPPKSVPVCE.S | S173:S183: | 3 | 4,6913 | 1     | 0,229  |
| 6 | Q7L8J4 3BP5L_HUMAN  | E.VVEDEVPRS#PVAEEPGGGSSSE.A         | S30:       | 2 | 4,6858 | 0,477 | 0,401  |
| 6 | Q8IYB7 DI3L2_HUMAN  | E.AQFDGS#DSEDGHGITQNVLVD.G          | S173:      | 2 | 4,6656 | 0,368 | 0,214  |
| 6 | Q9BVJ6 UT14A_HUMAN  | E.LSQDAEPAGS#QETKDSGSQEVLS.E.L      | S445:      | 2 | 4,6653 | 0,587 | 0,759  |
| 6 | P78559 MAP1A_HUMAN  | E.VSPEDTQSLSLSEES#PSKE.T            | S1203:     | 2 | 4,6652 | 0,46  | 0,573  |
| 6 | Q9ULI2 RIMKB_HUMAN  | E.LGPPASTAVDNM*SASSSSVDS#DPESTERE.L | S353:      | 3 | 4,653  | 0,417 | 0,727  |
| 6 | Q13283 G3BP1_HUMAN  | E.TAPEDAQKSSS#PAPADIAQTVQE.D        | S232:      | 3 | 4,6447 | 0,429 | 1,285  |

|   |                    |                               |        |   |        |       |        |
|---|--------------------|-------------------------------|--------|---|--------|-------|--------|
| 6 | Q9UQ35 SRRM2_HUMAN | E.GDAPFSEPGTTSTQRPS#PE.T      | S323:  | 2 | 4,6242 | 0,426 | 0,344  |
| 6 | Q96RL1 UIMC1_HUMAN | E.TQLS#SSETFDLERE.V           | S451:  | 2 | 4,6198 | 0,529 | 0      |
| 6 | O43166 SI1L1_HUMAN | E.Y#GSTSSIDKQGTSGE.S          | Y206:  | 2 | 4,6162 | 0,592 | 0,306  |
| 6 | O14641 DVL2_HUMAN  | E.STSLGDS#DEEDTM*SR.F         | S211:  | 2 | 4,5911 | 0,54  | 0,495  |
| 6 | Q12888 TP53B_HUMAN | E.SVAS#PQKTM*SVLSCICE.A       | S1028: | 2 | 4,5879 | 0,419 | 0,184  |
| 6 | Q12873 CHD3_HUMAN  | E.LQGDGPPSS#PTNDPTVKYE.T      | S713:  | 2 | 4,5833 | 0,557 | -0,234 |
| 6 | Q9H0H5 RGAP1_HUMAN | E.SGSILSDIS#FDKTDE.S          | S157:  | 2 | 4,5565 | 0,427 | -0,072 |
| 6 | Q03468 ERCC6_HUMAN | E.LSVISGNCECSNSSGTGK.T        |        | 2 | 4,5557 | 0,582 | 0      |
| 6 | P52565 GDIR1_HUMAN | E.QLAQIAAENEDE.H              |        | 2 | 4,5334 | 0,554 | 0,251  |
| 6 | Q14966 ZN638_HUMAN | E.VQTATDS#PSVKPNELEEE.S       | S1119: | 2 | 4,5274 | 0,478 | 0,119  |
| 6 | Q8WWM7 ATX2L_HUMAN | E.VDGLLTSEPM*GS#PVSSKTE.S     | S594:  | 2 | 4,5252 | 0,514 | -0,481 |
| 6 | Q9UQ88 CD2L2_HUMAN | E.GDYVPDS#PALLPIELKQE.L       | S395:  | 2 | 4,5235 | 0,477 | 0      |
| 6 | Q9Y2X9 ZN281_HUMAN | E.NLS#PGTQTPSNDKASM*LQE.Y     | S651:  | 2 | 4,5077 | 0,504 | 0,115  |
| 6 | Q13111 CAF1A_HUMAN | E.VQAPCGAASGAGGGVGVDTGK.A     |        | 2 | 4,4948 | 0,607 | -0,067 |
| 6 | Q68E01 INT3_HUMAN  | E.FCSSPS#PPVEVKIEPVSM*E.M     | S502:  | 2 | 4,4916 | 0,426 | 0,312  |
| 6 | Q2NX8 ERC6L_HUMAN  | E.IADDLSAS#HSALQDAQASE.A      | S924:  | 2 | 4,4883 | 0,454 | -1,093 |
| 6 | Q7Z417 NUFP2_HUMAN | E.SQNPLAS#PTNTLLGSAKE.Q       | S629:  | 2 | 4,4843 | 0,524 | -0,064 |
| 6 | Q9HC35 EMAL4_HUMAN | E.NSLEQTVPESEDHS#EEE.S        | S938:  | 2 | 4,4797 | 0,166 | 0,539  |
| 6 | P35527 K1C9_HUMAN  | R.GSGSGSYGGGSGGGYGGGSGSR.G    |        | 2 | 4,4645 | 0,237 | 0,545  |
| 6 | Q66K89 E4F1_HUMAN  | E.M*AEAPGS#PHQQGLGLAGEGE.Q    | S165:  | 2 | 4,455  | 0,522 | 0,18   |
| 6 | P13645 K1C10_HUMAN | K.GSLGGGFSSGGFSGGSFSR.G       |        | 2 | 4,4454 | 0,532 | 0,143  |
| 6 | Q9NYF8 BCLF1_HUMAN | E.DQEALDYFS#DKE.S             | S385:  | 2 | 4,4418 | 0,25  | 0,079  |
| 6 | P10636 TAU_HUMAN   | R.HLSNVSTGSIDM*VDSPQLATLADE.V |        | 2 | 4,4411 | 0,607 | 0,281  |
| 6 | Q9Y3F4 STRAP_HUMAN | E.IAS#ENSDCIFPSAPDVKA.-       | S335:  | 2 | 4,4405 | 0,507 | 0      |
| 6 | Q14790 CASP8_HUMAN | E.LCGVM*TISDS#PREQDSE.S       | S211:  | 2 | 4,4404 | 0,416 | 0,604  |
| 6 | O15083 ERC2_HUMAN  | E.NIQSLNAAAYATSGPM*YLS#DHE.G  | S65:   | 2 | 4,4401 | 0,532 | 0,41   |
| 6 | Q15042 RB3GP_HUMAN | E.FFECLS#DTEELKNGQE.S         | S590:  | 3 | 4,435  | 0,298 | 0,263  |
| 6 | Q15042 RB3GP_HUMAN | E.FFECLS#DTEELKNGQE.S         | S590:  | 2 | 4,4303 | 0,44  | 0,117  |
| 6 | P48681 NEST_HUMAN  | E.VGQGM*PLVSEGRGS#PFQEEE.G    | S1577: | 2 | 4,4302 | 0,438 | -0,312 |
| 6 | O43399 TPD54_HUMAN | E.NGSDNLPSS#AGSGDKPLSDPAPF.-  | S192:  | 2 | 4,428  | 0,365 | 0,106  |
| 6 | Q10570 CPSF1_HUMAN | E.M*LYGDSGSLFS#PSKEE.A        | S756:  | 2 | 4,4214 | 0,493 | 0      |
| 6 | Q9UBL3 ASH2L_HUMAN | E.VM*DTQAGS#VDEENGR.Q         | S101:  | 2 | 4,4193 | 0,45  | 0,286  |
| 6 | Q8ND24 RN214_HUMAN | E.VAGVVANAPS#PPESSSLCASK.S    | S15:   | 3 | 4,4106 | 0,395 | 0,26   |
| 6 | Q96EB6 SIRT1_HUMAN | E.AALALQPGGS#PSAAGADRE.A      | S14:   | 2 | 4,404  | 0,528 | 0,134  |
| 6 | Q14C86 GAPD1_HUMAN | E.VSS#RPSTPGLSVVSGISATSE.D    | S758:  | 2 | 4,4023 | 0,551 | -0,116 |
| 6 | Q8IWB7 WDFY1_HUMAN | D.M*TPVVGCSLATGFS#PH.-        | S408:  | 2 | 4,3989 | 0,595 | 0,347  |
| 6 | Q8ND24 RN214_HUMAN | E.VAGVVANAPS#PPESSSLCASKSDE.G | S15:   | 2 | 4,3927 | 0,511 | 0,9    |
| 6 | Q99700 ATX2_HUMAN  | E.AVAM*PIPAAS#PTPASPASNR.A    | S727:  | 2 | 4,3922 | 0,467 | 0,061  |
| 6 | P46100 ATRX_HUMAN  | E.TFSS#AEGTVDKDTTIM*E.L       | S890:  | 2 | 4,3595 | 0,576 | -0,696 |

|   |                     |                                      |            |   |        |       |        |
|---|---------------------|--------------------------------------|------------|---|--------|-------|--------|
| 6 | P07437 TBB5_HUMAN   | E.YQQYQDATAEEEE.D                    |            | 2 | 4,3526 | 0,452 | -0,304 |
| 6 | O60271 JIP4_HUMAN   | E.GVTGAATSPSTNGAS#PVM*DKPPEM*E.A     | S865:      | 2 | 4,3501 | 0,507 | 0,48   |
| 6 | Q96B01 R51A1_HUMAN  | E.LPTVTTNVQNS#QDKSIE.K               | S120:      | 2 | 4,3456 | 0,448 | 0,125  |
| 6 | Q6NZY4 ZCHC8_HUMAN  | E.SNSAGS#PADM*ELSDSM*EVPHGSQSSE.S    | S440:      | 3 | 4,3348 | 0,267 | 0,33   |
| 6 | O15027 SC16A_HUMAN  | E.LVPPQQQAS#PPQLPK.A                 | S891:      | 3 | 4,3236 | 0,273 | 0,321  |
| 6 | Q8NFC6 FA44A_HUMAN  | E.VESDGAVTSAGTEIR.A                  |            | 2 | 4,2919 | 0,467 | 0,327  |
| 6 | Q8IZM8 ZN654_HUMAN  | E.NGS#PNNSLNNVFKPLTE.C               | S134:      | 2 | 4,2858 | 0,39  | -0,507 |
| 6 | Q96JM3 ZN828_HUMAN  | E.LQT#PLPS#PEPSKPASVSSPEPPK.S        | T169:S173: | 3 | 4,2735 | 0,397 | 0,145  |
| 6 | Q01831 XPC_HUMAN    | E.VEELS#EPVLGDVRE.S                  | S140:      | 2 | 4,2611 | 0,459 | -0,148 |
| 6 | Q6ZR2V2 FA83H_HUMAN | R.RLS#LGQGDSTEAATEE.R                | S1003:     | 2 | 4,2431 | 0,497 | 0,14   |
| 6 | Q2NXX8 ERC6L_HUMAN  | E.IADDLS#ASHSALQDAQASE.A             | S922:      | 2 | 4,2408 | 0,478 | -0,243 |
| 6 | P98175 RBM10_HUMAN  | E.ASSSQGTAANSQSYTIM*S#PAVLK.S        | S530:      | 3 | 4,2264 | 0,321 | 0,306  |
| 6 | Q14517 FAT1_HUMAN   | E.VM*M*SDYES#GDDGHFEE.V              | S4568:     | 2 | 4,2057 | 0,485 | 0,249  |
| 6 | Q7Z5K2 WAPL_HUMAN   | E.STGDPFGFDS#DDESLPVSSK.N            | S77:       | 2 | 4,2038 | 0,443 | 0      |
| 6 | Q8TAQ2 SMRC2_HUMAN  | E.DLTKDM*DEPS#PVPNVEE.V              | S347:      | 2 | 4,2036 | 0,419 | 0,364  |
| 6 | Q9Y3F4 STRAP_HUMAN  | E.IAS#ENSDCIFPSAPDVK.A               | S335:      | 2 | 4,1942 | 0,376 | 0,379  |
| 6 | A5YKK6 CNOT1_HUMAN  | E.M*M*DQAAAQLAQDNCE.L                |            | 2 | 4,1913 | 0,517 | -0,212 |
| 6 | Q99700 ATX2_HUMAN   | E.AVAM*PIPAAS#PTPASPASNR.A           | S727:      | 3 | 4,19   | 0,474 | 0,365  |
| 6 | Q8IVD9 NUDC3_HUMAN  | E.IEIDS#TTELDGHQE.V                  | S120:      | 2 | 4,1894 | 0,318 | 0,146  |
| 6 | P35580 MYH10_HUMAN  | E.GASLELS#DDDTESK.T                  | S1956:     | 2 | 4,1846 | 0,525 | 0,079  |
| 6 | P60660 MYL6_HUMAN   | E.VEM*LVAGHEDS#NGCINYE.A             | S135:      | 2 | 4,1798 | 0,438 | 0,343  |
| 6 | P49790 NU153_HUMAN  | E.IT#TSSPSPINSSQALTNK.V              | T495:      | 2 | 4,1792 | 0,487 | 0,127  |
| 6 | Q9C0G0 ZN407_HUMAN  | E.SLS#PGGAVIQQVTKQE.I                | S1958:     | 2 | 4,1697 | 0,352 | 0      |
| 6 | O00505 IMA3_HUMAN   | E.SLEDS#DVDADFK.A                    | S60:       | 2 | 4,1668 | 0,413 | -0,429 |
| 6 | Q9Y3F4 STRAP_HUMAN  | E.IASENS#DCIFPSAPDVKA.-              | S338:      | 2 | 4,1648 | 0,406 | -0,061 |
| 6 | P09496 CLCA_HUMAN   | E.SNGPTDS#YAAISQVDR.L                | S93:       | 2 | 4,156  | 0,506 | -0,208 |
| 6 | Q13283 G3BP1_HUMAN  | E.ETAPEDAQKSSS#PAPADIAQTVQE.D        | S232:      | 3 | 4,1499 | 0,409 | 0,717  |
| 6 | P46821 MAP1B_HUMAN  | E.VVSPSQSVTGSAGHTPPYQS#PTDE.K        | S1339:     | 2 | 4,1449 | 0,369 | 0,758  |
| 6 | Q8N1G0 ZN687_HUMAN  | E.NGPGM*QPPVSS#PPLGALKQE.S           | S215:      | 2 | 4,1435 | 0,39  | 0,232  |
| 6 | Q2TAL8 QRIC1_HUMAN  | D.LLTVDSAHLYSATGTITS#PTGE.T          | S303:      | 2 | 4,1418 | 0,461 | 0,633  |
| 6 | Q16659 MK06_HUMAN   | E.GFLNNS#GEFLFNK.Q                   | S665:      | 2 | 4,1266 | 0,38  | -0,389 |
| 6 | Q13685 AAMP_HUMAN   | E.SGAAADTPPLETLS#FHGDEE.I            | S20:       | 2 | 4,1192 | 0,449 | -0,115 |
| 6 | Q92997 DVL3_HUMAN   | E.TTSFFDS#DEDDSTSR.F                 | S192:      | 2 | 4,1143 | 0,531 | 0      |
| 6 | Q96D46 NMD3_HUMAN   | E.M*LEDLHIS#QDATGEE.G                | S490:      | 2 | 4,1118 | 0,579 | 0,205  |
| 6 | Q12800 TFCP2_HUMAN  | E.ITYVNNSPS#PGFNSSHSSFSLGE.G         | S291:      | 2 | 4,1085 | 0,482 | 0,195  |
| 6 | P35579 MYH9_HUMAN   | E.LADEIANSS#GKGALALEE.K              | S1714:     | 2 | 4,0958 | 0,301 | -0,261 |
| 6 | Q02952 AKA12_HUMAN  | E.TGTDGILAGSQEHDPGQSSS#PEQAGSPTEGE.G | S743:      | 3 | 4,0937 | 0,413 | 0,694  |
| 6 | Q12888 TP53B_HUMAN  | E.NTQIEDTEPM*S#PVLNSK.F              | S552:      | 3 | 4,0906 | 0,314 | 0,183  |
| 6 | Q08379 GOGA2_HUMAN  | E.VS#LAGSVEPAQGEARE.G                | S925:      | 2 | 4,0724 | 0,569 | 0,291  |

|   |                     |                                     |            |   |        |       |        |
|---|---------------------|-------------------------------------|------------|---|--------|-------|--------|
| 6 | P52272 HNRPM_HUMAN  | R.M*GLAM*GGGGAS#FDRAIE.M            | S618:      | 2 | 4,0673 | 0,355 | 0,135  |
| 6 | Q12756 KIF1A_HUMAN  | E.ALSPAFSESESHGSSASSPLS#AE.G        | S1433:     | 2 | 4,0655 | 0,48  | 0,873  |
| 6 | Q14160 LAP4_HUMAN   | E.VALVLLGRPS#PGAVGPE.D              | S1600:     | 2 | 4,0626 | 0,507 | -0,143 |
| 6 | Q8TF74 WIPF2_HUMAN  | R.TGPSGQSLAPPPPYR.Q                 |            | 2 | 4,0605 | 0,323 | -0,15  |
| 6 | Q9GZR1 SENP6_HUMAN  | E.SIS#PQPADSACSSPAPSTGKVE.A         | S352:      | 2 | 4,0596 | 0,615 | 0,108  |
| 6 | Q86WB0 NIPA_HUMAN   | K.DTSATSQSVNGS#PQAEQPSLE.S          | S62:       | 3 | 4,0575 | 0,183 | 0,331  |
| 6 | Q8IY81 RRMJ3_HUMAN  | E.IM*S#PLYQDEAPK.G                  | S584:      | 2 | 4,0557 | 0,362 | 0      |
| 6 | P55072 TERA_HUMAN   | E.DNS#VVVSLSQPKM*DE.L               | S37:       | 2 | 4,0527 | 0,464 | 0,371  |
| 6 | Q3V6T2 GRDN_HUMAN   | E.GFLQLPHQDS#QDSSSVGSNSLE.D         | S1439:     | 2 | 4,0323 | 0,379 | 0,304  |
| 6 | Q14247 SRC8_HUMAN   | R.AKTQT#PPVS#PAPQPTTEE.R            | T401:S405: | 2 | 4,0223 | 0,442 | 0,252  |
| 6 | Q9Y6Y8 S23IP_HUMAN  | R.KPNGGS#GGASTSSSGTNTLLFSSSATE.F    | S10:       | 2 | 4,018  | 0,349 | 0      |
| 6 | Q14157 UBP2L_HUMAN  | E.GATGSAVKSDS#PSTSSIPPLNE.T         | S647:      | 2 | 4,0178 | 0,481 | -0,224 |
| 6 | Q7Z309 F122B_HUMAN  | E.SLS#LSDSDFDKPE.K                  | S91:       | 2 | 4,017  | 0,415 | -0,321 |
| 6 | Q6PGN9 PSRC1_HUMAN  | E.TLDFGGLS#PSDSREEE.D               | S22:       | 2 | 4,0158 | 0,383 | 0      |
| 6 | P46013 KI67_HUMAN   | E.AQS#LEDLAGFKE.L                   | S1098:     | 2 | 4,0124 | 0,394 | -0,088 |
| 6 | P41212 ETV6_HUMAN   | E.SYPLSVS#PM*ENNHCPASSE.S           | S238:      | 2 | 4,0097 | 0,34  | 0,332  |
| 6 | Q9NWW8 CS062_HUMAN  | E.AASADDGSLNTS#GAGPK.S              | S66:       | 2 | 4,0084 | 0,47  | 0,458  |
| 6 | Q15233 NONO_HUMAN   | E.GIGAIGGT#PPAFNR.A                 | T450:      | 2 | 4,0035 | 0,514 | 0,173  |
| 6 | Q43399 TPD54_HUMAN  | E.NGSDNLPSSAGS#GDKPLSDPAPF.-        | S195:      | 2 | 3,9937 | 0,418 | 0,423  |
| 6 | Q969F1 TF3C6_HUMAN  | E.LS#GIIDSDFLSKCE.N                 | S28:       | 2 | 3,9935 | 0,466 | -0,293 |
| 6 | Q04637 IF4G1_HUMAN  | E.AALPPVS#PLKAALSEEE.L              | S1232:     | 2 | 3,9749 | 0,446 | -0,135 |
| 6 | O75528 TAD3L_HUMAN  | E.NIISPM*EDS#PIPDM*SGKE.S           | S280:      | 2 | 3,9658 | 0,305 | 0,353  |
| 6 | Q08945 SSRP1_HUMAN  | E.YADS#DEDQHDAYLE.R                 | S444:      | 2 | 3,9657 | 0,439 | 0,558  |
| 6 | Q4KMP7 TB10B_HUMAN  | R.RAS#AGPAPGPVVTAE.G                | S412:      | 2 | 3,9606 | 0,558 | -0,084 |
| 6 | Q9NR30 DDX21_HUMAN  | E.SNS#EIEQEIPVEQKE.G                | S173:      | 2 | 3,9562 | 0,515 | -0,133 |
| 6 | Q14247 SRC8_HUMAN   | R.LPS#SPVYEDAASFKAEL                | S417:      | 2 | 3,9304 | 0,487 | 0,136  |
| 6 | P51608 MECP2_HUMAN  | E.SSEDPTS#PPEPQDLSSSVCKEE.K         | S401:      | 2 | 3,9161 | 0,524 | 0,295  |
| 6 | Q9Y3C0 CCD53_HUMAN  | E.VS#PLNVTSVTNGAHPE.A               | S87:       | 2 | 3,9144 | 0,466 | 0,072  |
| 6 | P81605 DCD_HUMAN    | K.LGKDAVEDLESVGK.G                  |            | 3 | 3,9122 | 0,237 | 0,376  |
| 6 | O75376 NCOR1_HUMAN  | E.TAPSTS#PSLAVPSTKPAEDE.S           | S764:      | 2 | 3,9112 | 0,444 | 0,118  |
| 6 | Q8WWM7 ATX2L_HUMAN  | E.VDGLLTSEPM*GS#PVSSKTE.S           | S594:      | 3 | 3,9088 | 0,277 | 0,27   |
| 6 | P08047 SP1_HUMAN    | R.IES#PNENSNNSQGPSQSGGTGE.L         | S73:       | 3 | 3,9087 | 0,392 | 0,645  |
| 6 | Q8WVT3 TTC15_HUMAN  | E.TAS#EGSSPLADKLE.H                 | S52:       | 2 | 3,9022 | 0,386 | 0,229  |
| 6 | Q969W3 F104A_HUMAN  | E.SSGSDSGGSSSSSSSINSPPDR.A          |            | 2 | 3,8962 | 0,618 | 0,06   |
| 6 | Q5VY92 Q5VY92_HUMAN | R.LQDSSDPDTGSEEE.G                  |            | 2 | 3,8952 | 0,444 | 0,728  |
| 6 | Q9UBN6 TR10D_HUMAN  | E.LTGVTVES#PEEPQRLLLE.Q             | S310:      | 2 | 3,8783 | 0,341 | 0      |
| 6 | P21580 TNAP3_HUMAN  | E.STGGPHS#APTAPSPFLFSE.T            | S459:      | 2 | 3,8686 | 0,485 | 0,118  |
| 6 | Q99590 SFRIP_HUMAN  | E.TASQSQRS#PISDNSGCDAPGNSNPVSSSAE.S | S23:       | 3 | 3,8651 | 0,21  | 0,649  |
| 6 | Q86WB0 NIPA_HUMAN   | K.DTSATSQSVNGS#PQAEQPSLE.S          | S62:       | 2 | 3,8621 | 0,39  | 0,331  |

|   |                     |                                  |            |   |        |       |        |
|---|---------------------|----------------------------------|------------|---|--------|-------|--------|
| 6 | Q7KZ85 SPT6H_HUMAN  | E.STPM*SIAGDAT#PLLDDEM*DR.-      | T1718:     | 3 | 3,8615 | 0,206 | 0,172  |
| 6 | Q9Y580 RBM7_HUMAN   | R.TM*DNM*TSSAQIIQR.S             |            | 2 | 3,855  | 0,44  | -0,075 |
| 6 | O14686 MLL2_HUMAN   | E.GPVS#PDVEPGKEETEE.S            | S1396:     | 2 | 3,8478 | 0,451 | 0      |
| 6 | Q8WWM7 ATX2L_HUMAN  | E.VDGLLTSEPMGS#PVSSKTE.S         | S594:      | 2 | 3,8456 | 0,469 | 0,363  |
| 6 | P08069 IGF1R_HUMAN  | E.NGPGPGVLVLRAS#FDE.R            | S1339:     | 2 | 3,8354 | 0,531 | -0,143 |
| 6 | Q04637 IF4G1_HUMAN  | E.FSSS#PLQAPTPLASHTVE.I          | S343:      | 2 | 3,8316 | 0,451 | 0,25   |
| 6 | Q6UB98 ANR12_HUMAN  | E.SNQGSLTVPGDTPS#PKPE.V          | S1345:     | 2 | 3,8297 | 0,437 | 0,467  |
| 6 | Q9C0G0 ZN407_HUMAN  | E.S#LSPGGAVIQQVTK.Q              | S1956:     | 2 | 3,8253 | 0,339 | -0,333 |
| 6 | Q8WWH5 TRUB1_HUMAN  | E.AAVVSSPSLKTDT#PVLE.T           | S19:       | 2 | 3,8181 | 0,368 | 0,13   |
| 6 | Q12800 TFCP2_HUMAN  | E.ITYVNNSPS#PGFNSSHSSFLGE.G      | S291:      | 3 | 3,8115 | 0,261 | -0,146 |
| 6 | Q9UPU7 TBD2B_HUMAN  | E.GEGNGPPPTVAPSS#PSVVPVAR.D      | S473:      | 2 | 3,8089 | 0,297 | 0,567  |
| 6 | Q6NZI2 PTRF_HUMAN   | R.RGS#S#PDVHALLE.I               | S365:S366: | 2 | 3,7986 | 0,379 | -0,085 |
| 6 | A8KAP4 A8KAP4_HUMAN | E.VCTTSFSTS#PPSQLM*VPGKE.G       | S259:      | 2 | 3,792  | 0,409 | 0,434  |
| 6 | P81605 DCD_HUMAN    | K.LGKDAVEDLESVVGK.G              |            | 2 | 3,7826 | 0,371 | 0,418  |
| 6 | Q9UKV3 ACINU_HUMAN  | E.VAT#PPVPQLQVCEPKE.R            | T682:      | 3 | 3,7776 | 0,242 | 0,489  |
| 6 | Q02297 NRG1_HUMAN   | E.GAYVSSSE#PIRISVSTE.G           | S152:      | 2 | 3,7769 | 0,418 | 0,066  |
| 6 | P06748 NPM_HUMAN    | D.M*S#PLRPQNYLFGCE.L             | S10:       | 2 | 3,7719 | 0,467 | -0,27  |
| 6 | Q9BVJ6 UT14A_HUMAN  | E.LSQDAEPAGS#QETK.D              | S445:      | 2 | 3,7716 | 0,317 | 0,554  |
| 6 | Q14247 SRC8_HUMAN   | R.LPSSPVYEDAAS#FKAE.L            | S426:      | 2 | 3,7691 | 0,589 | 0,068  |
| 6 | Q86V48 LUZP1_HUMAN  | E.LLDLQDKVIAEGS#NSSM*LAE.I       | S57:       | 2 | 3,7507 | 0,317 | -0,207 |
| 6 | Q15424 SAFB1_HUMAN  | E.LAEAPTEAPS#PEAR.D              | S344:      | 2 | 3,749  | 0,414 | 0      |
| 6 | Q13283 G3BP1_HUMAN  | K.SSS#PAPADIAQTVQE.D             | S232:      | 2 | 3,7451 | 0,369 | 1,544  |
| 6 | P41250 SYG_HUMAN    | E.SVLAQLDNYGQQE.L                |            | 2 | 3,7412 | 0,41  | -0,167 |
| 6 | Q7Z6Z7 HUWE1_HUMAN  | E.AVGDTSAAGSSEQPR.A              |            | 2 | 3,7411 | 0,521 | 0,255  |
| 6 | Q7Z309 F122B_HUMAN  | E.SLSLS#DSDFDKPE.K               | S93:       | 2 | 3,7362 | 0,375 | -0,08  |
| 6 | Q04637 IF4G1_HUMAN  | E.SEFSSS#PLQAPTPLASHTVE.I        | S343:      | 3 | 3,7242 | 0,331 | 0,338  |
| 6 | Q14966 ZN638_HUMAN  | E.DS#LADFNNLKEE.L                | S1761:     | 2 | 3,718  | 0,399 | -0,248 |
| 6 | Q9UKY1 ZHX1_HUMAN   | E.QTINDLTFDGS#FVKEE.N            | S156:      | 2 | 3,7151 | 0,409 | -0,063 |
| 6 | Q14247 SRC8_HUMAN   | R.AKTQT#PPVSPAPQPTTE.R           | T401:      | 2 | 3,7147 | 0,358 | -0,066 |
| 6 | Q92797 SYMPK_HUMAN  | E.AALLDSS#LEGPLPK.E              | S1222:     | 2 | 3,7059 | 0,402 | 0      |
| 6 | Q7Z6Z7 HUWE1_HUMAN  | E.EAVGDTSAAGSSEQPR.A             |            | 2 | 3,6914 | 0,58  | 0,625  |
| 6 | Q9H307 PININ_HUMAN  | K.S#LSPGKENVSAALDM*E.K           | S441:      | 2 | 3,6903 | 0,409 | 0,219  |
| 6 | Q9Y2X9 ZN281_HUMAN  | E.NLS#PGTQTPSNDKASM*LQE.Y        | S651:      | 3 | 3,6901 | 0,317 | 0      |
| 6 | Q8WWM7 ATX2L_HUMAN  | D.GLLTSEPM*GS#PVSSKTE.S          | S594:      | 2 | 3,6875 | 0,439 | -0,134 |
| 6 | Q8NCN1 Q8NCN1_HUMAN | E.STS#GSSVSSSVSTLSHYTE.S         | S510:      | 2 | 3,6854 | 0,515 | -0,554 |
| 6 | Q9NR45 SIAS_HUMAN   | R.ALGSPT#KQLLPCEM*ACNE.K         | T277:      | 3 | 3,6833 | 0,265 | 0,259  |
| 6 | O60271 JIP4_HUMAN   | E.GVTGAATSPSTNGAS#PVM*DKPPEM*E.A | S865:      | 3 | 3,6627 | 0,376 | 0,288  |
| 6 | P60842 IF4A1_HUMAN  | R.SRDNGPDGM*EPEGVIE.S            |            | 2 | 3,6598 | 0,299 | 0,213  |
| 6 | Q69YH5 CDCA2_HUMAN  | R.VASDS#PKPALTLQGGQE.F           | S727:      | 2 | 3,6516 | 0,416 | 0,264  |

|   |                    |                               |        |   |        |       |        |
|---|--------------------|-------------------------------|--------|---|--------|-------|--------|
| 6 | P25311 ZA2G_HUMAN  | R.YSLTYIYTGLSK.H              |        | 2 | 3,6388 | 0,531 | 0,433  |
| 6 | Q13501 SQSTM_HUMAN | E.SASGPSEDPS#VNFLK.N          | S233:  | 2 | 3,6368 | 0,382 | -0,076 |
| 6 | P17301 ITA2_HUMAN  | E.M*SQVGFSAADYSSQND.I         |        | 2 | 3,6328 | 0,372 | -0,074 |
| 6 | Q9NQ57 INCE_HUMAN  | E.IANST#PNPKPAASSPETPSAGQQE.A | T412:  | 3 | 3,6325 | 0,237 | 0,149  |
| 6 | P49792 RBP2_HUMAN  | K.AVVS#PPKFVFGSE.S            | S2510: | 2 | 3,6301 | 0,386 | -0,338 |
| 6 | P04264 K2C1_HUMAN  | R.SLVNLGGSKSISISVAR.G         |        | 3 | 3,6205 | 0,433 | 0      |
| 6 | Q15233 NONO_HUMAN  | E.GIGAIGGT#PPAFNR.A           | T450:  | 3 | 3,6086 | 0,462 | 0,325  |
| 6 | P04264 K2C1_HUMAN  | K.WELLQQVDTSTR.T              |        | 2 | 3,6035 | 0,494 | 0,083  |
| 6 | Q6GYQ0 GRIPE_HUMAN | E.VAS#LTTLHIDSE.T             | S958:  | 2 | 3,5981 | 0,442 | -0,089 |
| 6 | P35527 K1C9_HUMAN  | R.SGGGGGGGLGSGGSIR.S          |        | 2 | 3,5939 | 0,478 | -0,099 |
| 6 | Q14160 LAP4_HUMAN  | D.LGPQTSTSPGRLS#PDFAAE.L      | S1566: | 2 | 3,5929 | 0,445 | 0,236  |
| 6 | Q8N680 ZBTB2_HUMAN | E.ASQLSQLTSNLAQVNR.T          |        | 2 | 3,5928 | 0,413 | 0      |
| 6 | P45974 UBP5_HUMAN  | E.DSFCSPHFSSPTS#PM*LDE.S      | S652:  | 2 | 3,5895 | 0,471 | 0,228  |
| 6 | P56537 IF6_HUMAN   | E.AQPSTIATS#M*RDSLIDSLT.-     | S235:  | 2 | 3,5888 | 0,452 | 0,116  |
| 6 | Q9H5N1 RABE2_HUMAN | E.LLPLSRDPS#PPLELEE.L         | S204:  | 2 | 3,5793 | 0,378 | -0,246 |
| 6 | Q4VCS5 AMOT_HUMAN  | D.TTVISHS#PNTSYDTALE.A        | S714:  | 2 | 3,5791 | 0,423 | 0      |
| 6 | Q92794 MYST3_HUMAN | E.TVQAVQSLTQEES#EHE.G         | S1437: | 2 | 3,5784 | 0,496 | 0,308  |
| 6 | Q9UQ88 CD2L2_HUMAN | E.GDYVPDS#PALLPIELKQE.L       | S395:  | 3 | 3,5725 | 0,35  | -0,355 |
| 6 | Q86V48 LUZP1_HUMAN | E.GVNQPAAVVM*EDSS#PHE.A       | S639:  | 2 | 3,5715 | 0,411 | 0,655  |
| 6 | Q99661 KIF2C_HUMAN | E.ACSNGALIPGNLS#KEEEE.L       | S621:  | 2 | 3,5712 | 0,364 | 1,771  |
| 6 | Q9Y2L9 LRCH1_HUMAN | E.VQSDLTLQSNQSQYS#PNEIRE.N    | S524:  | 2 | 3,5693 | 0,356 | 0,699  |
| 6 | Q8IY81 RRMJ3_HUMAN | E.IM*SPLY#QDEAPKGEASSGTE.A    | Y587:  | 3 | 3,5672 | 0,272 | 0,872  |
| 6 | Q8N543 OGFD1_HUMAN | E.NNQM*AINNSQQSNEQTDPEPEENE.T |        | 3 | 3,5635 | 0,326 | 0,575  |
| 6 | Q8IUD2 RB6I2_HUMAN | D.LNQLFQQDSSS#RTGEPICVAE.L    | S252:  | 2 | 3,5613 | 0,371 | 0,416  |
| 6 | O75376 NCOR1_HUMAN | E.TAPSTS#PSLAVPSTKPAEDESVE.T  | S764:  | 2 | 3,5581 | 0,421 | 0,513  |
| 6 | Q8N857 ENAH_HUMAN  | R.QNS#QLPAQVQNGPSQEELE.I      | S125:  | 2 | 3,5546 | 0,386 | 0,112  |
| 6 | P38398 BRCA1_HUMAN | E.SGISLFSDDPES#DPSEDRAPE.S    | S1577: | 3 | 3,5517 | 0,336 | -0,157 |
| 6 | Q8TB52 FBX30_HUMAN | D.IGM*LNT#SVPNDM*DEQQNARE.S   | T212:  | 3 | 3,551  | 0,35  | 0,231  |
| 6 | Q01433 AMPD2_HUMAN | E.QGPDT#PVSADAPVHPPALE.Q      | T289:  | 2 | 3,5432 | 0,45  | 0,308  |
| 6 | Q92547 TOPB1_HUMAN | E.YIADYLM*QES#PPHVE.N         | S1477: | 2 | 3,5413 | 0,338 | 0,517  |
| 6 | P16333 NCK1_HUMAN  | E.GDS#PLGDHVGSLSE.K           | S166:  | 2 | 3,5376 | 0,407 | -0,337 |
| 6 | P52948 NUP98_HUMAN | R.FS#FLSKPVDE.N               | S635:  | 2 | 3,5359 | 0,455 | -0,293 |
| 6 | Q14980 NUMA1_HUMAN | E.LTTLNATIQQDQE.L             |        | 2 | 3,5339 | 0,378 | 0,228  |
| 6 | Q9NQC3 RTN4_HUMAN  | E.TAASLPSLS#PLSAASFKE.H       | S239:  | 2 | 3,5314 | 0,456 | -0,066 |
| 6 | Q99661 KIF2C_HUMAN | E.LSPHS#GPSGEQLIQM*E.T        | S592:  | 2 | 3,5266 | 0,359 | -1,284 |
| 6 | P08047 SP1_HUMAN   | R.IES#PNENSNNSQGPSQSGGTGE.L   | S73:   | 2 | 3,5257 | 0,534 | 0,538  |
| 6 | Q9C0H5 K1688_HUMAN | E.DSGSSS#PPGVFLEKDYE.I        | S173:  | 2 | 3,5179 | 0,381 | 0      |
| 6 | O75533 SF3B1_HUMAN | E.AQGVGLDSTGYDQE.I            |        | 2 | 3,5156 | 0,5   | 0,304  |
| 6 | Q8ND30 LIPB2_HUMAN | E.IVM*VTQGPSE.T               |        | 2 | 3,5152 | 0,398 | -0,198 |

|   |                     |                               |            |   |        |       |        |
|---|---------------------|-------------------------------|------------|---|--------|-------|--------|
| 6 | Q9P2R6 RERE_HUMAN   | D.LQPFPS#PDGDTVQHEE.L         | S304:      | 2 | 3,5148 | 0,325 | 0,37   |
| 6 | O95208 EPN2_HUMAN   | R.M*AQVATGM*GSNQITFGR.G       |            | 2 | 3,5144 | 0,545 | 0,203  |
| 6 | P38398 BRCA1_HUMAN  | E.LGSDS#SEDTVNK.A             | S186:      | 2 | 3,5138 | 0,363 | 0,183  |
| 6 | P61626 LYSC_HUMAN   | R.STDYGIFQINSR.Y              |            | 2 | 3,5106 | 0,417 | 0,087  |
| 6 | Q561V9 Q561V9_HUMAN | E.M*LVAGHEDS#NGCINYYE.L       | S135:      | 2 | 3,5095 | 0,38  | -0,24  |
| 6 | Q14839 CHD4_HUMAN   | E.KS#AIDLTPIVVE.D             | S1648:     | 2 | 3,508  | 0,484 | -0,268 |
| 6 | P62158 CALM_HUMAN   | E.ADIDGDGQVNYEE.F             |            | 2 | 3,5004 | 0,393 | 0,086  |
| 6 | Q8N4C6 NIN_HUMAN    | E.ITTLNEEDSISNLK.L            |            | 2 | 3,4996 | 0,381 | 0      |
| 6 | Q12888 TP53B_HUMAN  | E.TSVISIDS#PQKLAILDQE.L       | S727:      | 2 | 3,4957 | 0,301 | -0,24  |
| 6 | O15354 GPR37_HUMAN  | E.M*S#TFASVGTHC.-             | S604:      | 2 | 3,4932 | 0,477 | 0      |
| 6 | O15504 NUPL2_HUMAN  | E.GFGLSENPFASLS#PDEQKDE.K     | S106:      | 2 | 3,493  | 0,408 | 0      |
| 6 | O75531 BAF_HUMAN    | R.DFVAEPM*GEKPVGSLAGIGE.V     |            | 2 | 3,4929 | 0,518 | 0,302  |
| 6 | Q02952 AKA12_HUMAN  | K.SAVVHDIT#DDGQEETPE.I        | T135:      | 2 | 3,4917 | 0,34  | -0,063 |
| 6 | P04150 GCR_HUMAN    | E.SLT#PGREENPSSVLAQE.R        | T8:        | 2 | 3,4886 | 0,303 | 0,193  |
| 6 | P40425 PBX2_HUMAN   | E.AVTPSSVTS#PTEGPGSVHSDTSN.-  | S416:      | 2 | 3,4858 | 0,354 | 0,638  |
| 6 | Q6ZRV2 FA83H_HUMAN  | E.GGFPVPQENGQPES#PR.R         | S998:      | 2 | 3,4852 | 0,385 | 0,137  |
| 6 | Q9NR45 SIAS_HUMAN   | R.ALGS#PTKQLLPCEM*ACNE.K      | S275:      | 2 | 3,4832 | 0,343 | 0,231  |
| 6 | Q08379 GOGA2_HUMAN  | E.GLAGQLQAQVQDNE.G            |            | 2 | 3,4817 | 0,362 | 0,332  |
| 6 | Q5H9F3 BCRL1_HUMAN  | E.GTSVTF#PLKSPQLE.R           | S599:      | 2 | 3,4777 | 0,312 | -0,69  |
| 6 | Q9H0H5 RGAP1_HUMAN  | E.SGS#ILSDISFDKTDE.S          | S151:      | 2 | 3,4763 | 0,313 | -0,216 |
| 6 | Q9BTE6 AASD1_HUMAN  | E.AQALLQDYISTQS#AKE.-         | S409:      | 2 | 3,474  | 0,435 | 0,33   |
| 6 | Q96JM3 ZN828_HUMAN  | E.LQTPLPS#PEPSKPASVS#SPEPPK.S | S173:S183: | 3 | 3,4678 | 0,346 | 0,145  |
| 6 | Q14692 BMS1_HUMAN   | E.TS#DIENLLKEE.D              | S639:      | 2 | 3,4647 | 0,34  | -0,244 |
| 6 | Q9Y580 RBM7_HUMAN   | R.TM*DNM*TSSAQIIQR.S          |            | 3 | 3,4637 | 0,187 | -0,112 |
| 6 | P49790 NU153_HUMAN  | E.ITTSSPINSSQALTNK.V          |            | 2 | 3,4633 | 0,444 | -0,066 |
| 6 | Q9UQ35 SRRM2_HUMAN  | E.NSFGS#PLEFRNSGPLGTE.M       | S1329:     | 2 | 3,4616 | 0,384 | 0,061  |
| 6 | Q02790 FKBP4_HUMAN  | E.SGAQS#APLPM*EGVDISPK.Q      | S15:       | 2 | 3,4608 | 0,433 | -0,779 |
| 6 | Q8N3U4 STAG2_HUMAN  | E.DVM*M*S#SEGRIEDLNE.G        | S1177:     | 2 | 3,4592 | 0,225 | 0      |
| 6 | Q8IUD2 RB6I2_HUMAN  | E.DNLNDSSQQLQD.S              |            | 2 | 3,457  | 0,255 | -0,177 |
| 6 | P16070 CD44_HUMAN   | E.SSETPDQFM*TADE.T            |            | 2 | 3,4531 | 0,468 | 0,166  |
| 6 | P35908 K22E_HUMAN   | R.FLEQQNQVLQTK.W              |            | 2 | 3,4521 | 0,43  | 0      |
| 6 | Q14966 ZN638_HUMAN  | E.SEVQTATDS#PSVKPNELEEE.S     | S1119:     | 3 | 3,4427 | 0,266 | 0,645  |
| 6 | Q9Y2U8 MAN1_HUMAN   | E.SLLGGPGGASAAPAAGSK.V        |            | 2 | 3,4372 | 0,438 | -0,166 |
| 6 | Q9Y618 NCOR2_HUMAN  | R.GQAGPPESLGVPTAQE.A          |            | 2 | 3,425  | 0,398 | -0,555 |
| 6 | O43432 IF4G3_HUMAN  | E.LSS#PREDTIPIPLTSCTE.T       | S305:      | 2 | 3,4245 | 0,403 | 0,335  |
| 6 | Q6ZTN6 AN13D_HUMAN  | R.GPGS#PPRT#PPAPGPPSFEE.Q     | S465:T469: | 2 | 3,4245 | 0,264 | 0,42   |
| 6 | P00558 PGK1_HUMAN   | E.DKVSHVSTGGGASLE.L           |            | 2 | 3,4201 | 0,432 | 0,338  |
| 6 | P25787 PSA2_HUMAN   | E.SFEGQM*TEDNIE.V             |            | 2 | 3,4197 | 0,374 | 0,172  |
| 6 | P46013 KI67_HUMAN   | E.LFQT#PGTDKPTTDE.K           | T2325:     | 2 | 3,4139 | 0,478 | 0      |



|   |                     |                               |        |   |        |       |        |
|---|---------------------|-------------------------------|--------|---|--------|-------|--------|
| 6 | Q9Y3C5 RNF11_HUMAN  | E.SQSDRAS#FGEGTEPDQEPPPPYQE.Q | S25:   | 3 | 3,4133 | 0,275 | 0,469  |
| 6 | P35612 ADDB_HUMAN   | E.AAS#PPPPQGQPYDFRSEDDPE.Y    | S11:   | 3 | 3,4132 | 0,242 | 0,217  |
| 6 | O43379 WDR62_HUMAN  | E.VEAGPGDQQGDSYLR.V           |        | 2 | 3,4059 | 0,46  | 0,077  |
| 6 | Q15393 SF3B3_HUMAN  | E.M*DYEEADNDPTGE.A            |        | 2 | 3,4046 | 0,458 | 0,406  |
| 6 | Q9H814 RNUXA_HUMAN  | E.ALASLDES#QEGHAE.A           | S368:  | 2 | 3,4005 | 0,343 | 0,079  |
| 6 | Q15942 ZYG_HUMAN    | E.KQHPVPPPAQNNQVR.S           |        | 3 | 3,3989 | 0,317 | 0,1    |
| 6 | Q14566 MCM6_HUMAN   | E.QFNQQLSTTIQEE.F             |        | 2 | 3,396  | 0,307 | 0      |
| 6 | Q14568 HS902_HUMAN  | E.TQTQDQPM*EEEEVE.T           |        | 2 | 3,3853 | 0,328 | 0,143  |
| 6 | Q9NQ55 SSF1_HUMAN   | R.VGGS#DEEASGIPSR.T           | S359:  | 2 | 3,3826 | 0,407 | 0,169  |
| 6 | P78527 PRKDC_HUMAN  | E.LAS#LDCYNHLAE.W             | S2998: | 2 | 3,3821 | 0,42  | 0      |
| 6 | Q96QC0 PP1RA_HUMAN  | E.ILTSIM*GS#PNSHPSEE.L        | S591:  | 2 | 3,3812 | 0,453 | 0,612  |
| 6 | Q9BTK6 PA1_HUMAN    | D.LFSLDSEDPSPAS#PPLR.S        | S237:  | 2 | 3,3766 | 0,425 | -0,192 |
| 6 | Q8IYL2 U383_HUMAN   | R.GPGPGQGS#PGGGPGPR.S         | S78:   | 2 | 3,3724 | 0,606 | 0,259  |
| 6 | Q16643 DREB_HUMAN   | E.TQEPSILDSEE.T               |        | 2 | 3,3665 | 0,314 | 0,091  |
| 6 | P12270 TPR_HUMAN    | E.SGGRS#VPTTPLQVAAPVTVFTE.S   | S2196: | 2 | 3,3656 | 0,391 | 0      |
| 6 | Q14690 RRP5_HUMAN   | E.DDS#LVDVYYRE.G              | S1498: | 2 | 3,3561 | 0,381 | 0,42   |
| 6 | P56537 IF6_HUMAN    | R.LSALGNVTCND.Y               |        | 2 | 3,3495 | 0,444 | 0,096  |
| 6 | Q969V6 MKL1_HUMAN   | E.AIIVGVNYPK.V                |        | 2 | 3,3492 | 0,399 | 0      |
| 6 | Q9Y3F4 STRAP_HUMAN  | E.LEEIAS#ENSDCIFSPAPDVKA.-    | S335:  | 2 | 3,3473 | 0,317 | 0,206  |
| 6 | P46937 YAP1_HUMAN   | E.ALSSDILNDM*E.S              |        | 2 | 3,3449 | 0,342 | 0,399  |
| 6 | Q8N1F7 NUP93_HUMAN  | E.SEPSYIS#DVGPPGR.S           | S168:  | 2 | 3,3422 | 0,456 | 0,396  |
| 6 | Q96D71 REPS1_HUMAN  | E.VFAASNVNDEQDDE.A            |        | 2 | 3,3418 | 0,383 | 0      |
| 6 | Q9UQ80 PA2G4_HUMAN  | E.NATSGETLEENEAGD.-           |        | 2 | 3,3401 | 0,439 | 0,556  |
| 6 | Q13283 G3BP1_HUMAN  | K.S#SSPAPADIAQTQVED.L         | S230:  | 2 | 3,3359 | 0,398 | -0,072 |
| 6 | P35579 MYH9_HUMAN   | E.DTLNSTAAQQE.L               |        | 2 | 3,3352 | 0,398 | 0,414  |
| 6 | Q7Z401 MYCPP_HUMAN  | E.STS#LTDEDVCHE.L             | S1370: | 2 | 3,3343 | 0,409 | 0      |
| 6 | Q8N201 INT1_HUMAN   | E.LLIAEEKLS#PEQE.G            | S307:  | 2 | 3,33   | 0,302 | 0      |
| 6 | Q96T58 MINT_HUMAN   | E.LKT#PPSVGPPSVTVVTL.E.S      | T1633: | 2 | 3,3294 | 0,348 | 0,193  |
| 6 | P30101 PDIA3_HUMAN  | E.SLVNEYDDNGE.G               |        | 2 | 3,3227 | 0,433 | 0,097  |
| 6 | Q71F23 CENPU_HUMAN  | E.TFDPPLHS#TAIYADEEE.F        | S77:   | 2 | 3,3138 | 0,449 | 0,303  |
| 6 | P19013 K2C4_HUMAN   | R.NLDLDSIIAEVR.A              |        | 2 | 3,3068 | 0,409 | -0,359 |
| 6 | P46821 MAP1B_HUMAN  | E.VVSPSQSVT#GSAGHTPYYSPTDE.K  | T1328: | 3 | 3,3053 | 0,356 | -0,071 |
| 6 | Q561V9 Q561V9_HUMAN | E.M*LVAGHEDS#NGCINYE.L        | S135:  | 3 | 3,2985 | 0,126 | 0,18   |
| 6 | P04264 K2C1_HUMAN   | R.SGGGFSSGSAGIINYQR.R         |        | 2 | 3,2887 | 0,41  | 0,736  |
| 6 | Q9NP55 PLUNC_HUMAN  | K.VTDPQLLELGLVQSPDGHR.L       |        | 3 | 3,2859 | 0,356 | -0,088 |
| 6 | Q9GZR1 SENP6_HUMAN  | E.S#ISQPADSACSSPAPSTGKVE.A    | S350:  | 3 | 3,2857 | 0,281 | 0,406  |
| 6 | Q13501 SQSTM_HUMAN  | E.S#ASGPSSEDPVSNFLK.N         | S224:  | 2 | 3,2804 | 0,354 | 0,076  |
| 6 | P08047 SP1_HUMAN    | E.SQPSPLALLAATCSR.I           |        | 2 | 3,2793 | 0,451 | -0,31  |
| 6 | Q6NZI2 PTRF_HUMAN   | E.ITEE#DAVLVDKSDSD.-          | S379:  | 2 | 3,279  | 0,347 | 0,541  |

|   |                     |                                |        |   |        |       |        |
|---|---------------------|--------------------------------|--------|---|--------|-------|--------|
| 6 | P38398 BRCA1_HUMAN  | E.SAQs#PAAAHTTDTAGYNAM*EE.S    | S1613: | 3 | 3,2776 | 0,174 | 0,495  |
| 6 | Q86XZ4 SPAS2_HUMAN  | E.TLS#IDARELEDPE.S             | S155:  | 2 | 3,2756 | 0,437 | -0,156 |
| 6 | Q14980 NUMA1_HUMAN  | E.ILQQLQVANE.A                 |        | 2 | 3,2741 | 0,341 | 0,095  |
| 6 | Q9UQ35 SRRM2_HUMAN  | E.NSFGS#PLEFR.N                | S1329: | 2 | 3,2735 | 0,381 | 0,297  |
| 6 | P68104 EF1A1_HUMAN  | E.S#FSDYPPPLGR.F               | S414:  | 2 | 3,2725 | 0,441 | 0,1    |
| 6 | Q9UNX4 WDR3_HUMAN   | E.VM*FFADATS#HLEE.K            | S923:  | 2 | 3,2626 | 0,456 | 0      |
| 6 | Q9UPN9 TRI33_HUMAN  | E.SSLT#PPLSTNLHLE.S            | T815:  | 2 | 3,262  | 0,413 | -0,23  |
| 6 | Q7Z417 NUFP2_HUMAN  | E.IESQNPLAS#PTNTLLGSAK.E       | S629:  | 3 | 3,257  | 0,374 | -0,181 |
| 6 | Q9UQ35 SRRM2_HUMAN  | D.SLVQSCPGSLSLCAGVK.S          |        | 2 | 3,2537 | 0,44  | 0,138  |
| 6 | Q0VGL1 U539_HUMAN   | E.GAVLASSGDLENDE.Q             |        | 2 | 3,253  | 0,317 | 0,089  |
| 6 | Q16658 FSCN1_HUMAN  | E.QSCAQVVLQAANE.R              |        | 2 | 3,2528 | 0,281 | 0,344  |
| 6 | P08238 HS90B_HUMAN  | E.LFS#ELAEDKE.N                | S417:  | 2 | 3,2521 | 0,229 | -0,097 |
| 6 | P13646 K1C13_HUMAN  | R.ALEEANADLEVK.I               |        | 2 | 3,2515 | 0,366 | -0,094 |
| 6 | Q8N108 MIER1_HUMAN  | E.LLSLYGYGSTVR.L               |        | 2 | 3,2507 | 0,507 | 0      |
| 6 | Q9BUA3 YK007_HUMAN  | E.QEFLVGSS#PGGSGR.A            | S82:   | 2 | 3,2495 | 0,42  | 0,251  |
| 6 | A4D210 A4D210_HUMAN | E.VGIAEAGPES#EGEAPGEQAR.D      | S64:   | 2 | 3,2486 | 0,367 | -0,3   |
| 6 | Q9Y4W2 LAS1L_HUMAN  | E.GSEAS#PIGKSPYTL.D.S          | S523:  | 2 | 3,2462 | 0,285 | -0,228 |
| 6 | O00303 EIF3F_HUMAN  | E.VTNCFSVPHNES#EDEVAVDM*E.F    | S142:  | 2 | 3,2407 | 0,313 | 0,39   |
| 6 | Q15365 PCBP1_HUMAN  | R.VM*TIPYQPM*PASS#PVICAGGQDR.C | S190:  | 3 | 3,2405 | 0,268 | 0,283  |
| 6 | Q01433 AMPD2_HUMAN  | E.QGPD#PVSADAPVHPPALE.Q        | T289:  | 3 | 3,2322 | 0,175 | 0,277  |
| 6 | Q6S8J3 A26CA_HUMAN  | E.KLCYVALDFEQE.M               |        | 2 | 3,232  | 0,335 | -0,403 |
| 6 | O43379 WDR62_HUMAN  | E.VEAGPGDQQGDSYLR.V            |        | 3 | 3,2294 | 0,237 | 0      |
| 6 | Q8ND24 RN214_HUMAN  | E.VAGVVANAPSPPE#SSLCASKSDE.G   | S19:   | 3 | 3,2255 | 0,107 | -0,225 |
| 6 | P40425 PBX2_HUMAN   | E.AVTPSSVTSPTEGPGSVHS#DTSN.-   | S426:  | 3 | 3,2236 | 0,161 | 0,159  |
| 6 | P21127 CD2L1_HUMAN  | E.GDYVPDS#PALSPIELKQE.L        | S410:  | 2 | 3,222  | 0,339 | 0,778  |
| 6 | O75140 DEPD5_HUMAN  | E.VSSS#LGYTSTR.D               | S548:  | 2 | 3,2167 | 0,295 | -0,197 |
| 6 | O15085 ARHGB_HUMAN  | E.NNQYDAPEPGTQR.L              |        | 2 | 3,2154 | 0,472 | 0,528  |
| 6 | Q9H3P7 GCP60_HUMAN  | E.VSVDGLTSL#PDPEERPGAE.G       | S20:   | 2 | 3,2151 | 0,422 | 0,238  |
| 6 | A1L020 MEX3A_HUMAN  | E.NDFLAGS#PDAAIDSR.Y           | S308:  | 2 | 3,2134 | 0,323 | -0,075 |
| 6 | Q12888 TP53B_HUMAN  | E.DTEPM*S#PVLNSK.F             | S552:  | 2 | 3,2042 | 0,308 | 0,173  |
| 6 | Q9NP55 PLUNC_HUMAN  | K.LDITAEILAVR.D                |        | 2 | 3,2033 | 0,223 | -0,301 |
| 6 | Q99590 SFRIP_HUMAN  | E.TASQSQRS#PISDNSGCD.A         | S23:   | 2 | 3,203  | 0,559 | 0,452  |
| 6 | P35527 K1C9_HUMAN   | R.FSSSSGYGGGSSR.V              |        | 2 | 3,1989 | 0,42  | 0,099  |
| 6 | O75376 NCOR1_HUMAN  | E.VIS#PASSAPPQEK.L             | S1977: | 2 | 3,1929 | 0,428 | 0,164  |
| 6 | O15027 SC16A_HUMAN  | E.ARS#PDPGIVPQEAPVGNLSE.L      | S1844: | 2 | 3,1923 | 0,435 | 0,333  |
| 6 | P12694 ODBA_HUMAN   | R.QQQQFSS#LDDKQPFGASAE.F       | S47:   | 3 | 3,1923 | 0,225 | 0,32   |
| 6 | Q8N1Q3 Q8N1Q3_HUMAN | E.ASS#M*VNFPAYSVR.S            | S104:  | 2 | 3,191  | 0,42  | 0,24   |
| 6 | Q9NQW6 ANLN_HUMAN   | K.SCSPS#PVSPQVQQAADTIS.D.S     | S99:   | 3 | 3,1875 | 0,262 | 0,163  |
| 6 | P19013 K2C4_HUMAN   | R.GAFSSVSM*SGGAGR.C            |        | 2 | 3,1851 | 0,376 | 0,284  |

|   |                     |                               |                 |   |        |       |        |
|---|---------------------|-------------------------------|-----------------|---|--------|-------|--------|
| 6 | Q9H467 CUED2_HUMAN  | E.NLQPQSSGVQGQVPIS#PEPLQRPE.M | S110:           | 3 | 3,1769 | 0,3   | 0,275  |
| 6 | Q8WWM7 ATX2L_HUMAN  | E.VDGLLTSEPM*GS#PVSSK.T       | S594:           | 3 | 3,1747 | 0,242 | 0,203  |
| 6 | Q92974 ARHG2_HUMAN  | R.EPALPLEPDSGGNTS#PGVTANGE.A  | S695:           | 2 | 3,174  | 0,42  | 0,533  |
| 6 | Q9BVJ6 UT14A_HUMAN  | E.LSQDAEPAGS#QETKDSGSQEVLS.E  | S445:           | 3 | 3,1738 | 0,263 | 0,356  |
| 6 | P04083 ANXA1_HUMAN  | K.GTDVNVFNTILTTR.S            |                 | 2 | 3,1699 | 0,338 | -0,236 |
| 6 | Q9H410 DSN1_HUMAN   | E.SSL#PVEVFAK.T               | S30:            | 2 | 3,1684 | 0,277 | -0,098 |
| 6 | Q8IUI8 CRLF3_HUMAN  | E.IAM*LGGVGEENE.K             |                 | 2 | 3,164  | 0,363 | -0,099 |
| 6 | Q08378 GOGA3_HUMAN  | E.ISL#PDTDDRLE.N              | S290:           | 2 | 3,1632 | 0,412 | 0,339  |
| 6 | P55036 PSMD4_HUMAN  | E.NNVGLITLANDCE.V             |                 | 2 | 3,1591 | 0,436 | 0,085  |
| 6 | Q16378 PROL4_HUMAN  | R.FPSVSLQEASSFFR.R            |                 | 2 | 3,1587 | 0,356 | -0,228 |
| 6 | Q9HCM4 E41L5_HUMAN  | E.M*ENS#PLLSPR.S              | S517:           | 2 | 3,1586 | 0,337 | 0,197  |
| 6 | Q02952 AKA12_HUMAN  | E.QS#HAEISPPAESGQAVEE.C       | S248:           | 2 | 3,1577 | 0,203 | 0,376  |
| 6 | Q9HC35 EMAL4_HUMAN  | E.TVADT#TLTKAPVSSTE.S         | T879:           | 2 | 3,1558 | 0,371 | 0      |
| 6 | Q8NFW8 NEUA_HUMAN   | E.VAYLGNVSDDEE.C              |                 | 2 | 3,1471 | 0,393 | -0,553 |
| 6 | Q9H019 FA54B_HUMAN  | E.LPSVPLLCAS#PECCKPE.H        | S210:           | 2 | 3,1429 | 0,468 | 0,23   |
| 6 | Q6ZU80 CN145_HUMAN  | E.T#STQVALDHLE.S              | T960:           | 2 | 3,1408 | 0,475 | 0,283  |
| 6 | Q15185 TEBP_HUMAN   | D.S#DDEKM*PDLE.-              | S151:           | 2 | 3,1385 | 0,144 | 0      |
| 6 | Q52LZ5 Q52LZ5_HUMAN | E.AIQAQYSES#LM*TSAPK.G        | S493:           | 2 | 3,137  | 0,361 | -0,216 |
| 6 | P55327 TPD52_HUMAN  | E.VLNSAANASATTTEPLPEK.T       |                 | 2 | 3,1366 | 0,457 | 0,446  |
| 6 | B011T5 B011T5_HUMAN | E.M*LVLEPRAS#DDETL.E.S        | S2337:          | 2 | 3,1335 | 0,351 | 0,067  |
| 6 | Q14721 KCNB1_HUMAN  | E.M*ESIPS#PVAPLPTRTE.G        | S567:           | 2 | 3,1293 | 0,4   | 0,268  |
| 6 | Q6S8J3 A26CA_HUMAN  | E.KSYELPDGQVITIGNE.R          |                 | 2 | 3,1209 | 0,355 | -0,138 |
| 6 | P23434 GCSH_HUMAN   | E.NGIGTVGISNFAQE.A            |                 | 2 | 3,1208 | 0,446 | 0,087  |
| 6 | Q43432 IF4G3_HUMAN  | E.LS#SPREDTIPIPLTSCTE.T       | S304:           | 2 | 3,1191 | 0,366 | -0,447 |
| 6 | Q15154 PCM1_HUMAN   | K.SVFEPEDSSIVDNE.L            |                 | 2 | 3,119  | 0,323 | 0      |
| 6 | P35908 K22E_HUMAN   | R.NLDLDSIIAEVK.A              |                 | 2 | 3,1178 | 0,358 | -0,367 |
| 6 | Q5BKZ1 ZN326_HUMAN  | E.GGIEGEGNIQGVGE.G            |                 | 2 | 3,1169 | 0,37  | 0,185  |
| 6 | Q49AR2 CE022_HUMAN  | E.ATFADLDCGDDEE.T             |                 | 2 | 3,107  | 0,345 | 0,084  |
| 6 | Q9Y3F4 STRAP_HUMAN  | E.IASENS#DCIFPSAPDVK.A        | S338:           | 2 | 3,1067 | 0,333 | 0,379  |
| 6 | Q16513 PKN2_HUMAN   | E.LSLVAAS#PTLSPR.Q            | S302:           | 2 | 3,1055 | 0,453 | -0,088 |
| 6 | Q13685 AAMP_HUMAN   | E.SGAAADTPPLETLS#FHGDEE.I     | S20:            | 3 | 3,1037 | 0,162 | -0,172 |
| 6 | P04264 K2C1_HUMAN   | K.YEELQITAGR.H                |                 | 2 | 3,1015 | 0,203 | 0,103  |
| 6 | Q9BVW5 TIPIN_HUMAN  | E.ETLLDQS#FKNVQQQLD.A         | S282:           | 2 | 3,1004 | 0,251 | -0,369 |
| 6 | Q86SQ0 PHLB2_HUMAN  | E.SSYLSILPKT#PEGISEE.Q        | T574:           | 2 | 3,0985 | 0,397 | 0,063  |
| 6 | Q8IZT6 ASPM_HUMAN   | E.SESVNPILS#PNQFLKD.N         | S392:           | 2 | 3,0933 | 0,477 | 0,065  |
| 6 | Q9UNP9 PIIE_HUMAN   | E.DAAAAIDNM*NESE.L            |                 | 2 | 3,0905 | 0,343 | -0,089 |
| 6 | P10636 TAU_HUMAN    | E.IVYKS#PVVS#GDTS#PR.H        | S713:S717:S721: | 2 | 3,0871 | 0,256 | 0,132  |
| 6 | O95208 EPN2_HUMAN   | R.M*AQVATGM*GSNQITFGR.G       |                 | 3 | 3,0869 | 0,262 | 0      |
| 6 | P04264 K2C1_HUMAN   | R.SLDLDSIIAEVK.A              |                 | 2 | 3,0866 | 0,361 | -0,375 |

|   |                    |                                  |            |   |        |       |        |
|---|--------------------|----------------------------------|------------|---|--------|-------|--------|
| 6 | Q6S8J3 A26CA_HUMAN | E.M*ATAASSSSLE.K                 |            | 2 | 3,0837 | 0,319 | 0,228  |
| 6 | Q9Y478 AAKB1_HUMAN | E.VFDALM*VDS#QKCSDVSE.L          | S170:      | 2 | 3,0816 | 0,426 | -0,602 |
| 6 | Q14444 CAPR1_HUMAN | E.VES#TEYVNR.Q                   | S291:      | 2 | 3,0815 | 0,469 | 0,207  |
| 6 | Q9ULF5 S39AA_HUMAN | E.GQQES#PPKNYLCIEEE.K            | S591:      | 2 | 3,0813 | 0,152 | 0,305  |
| 6 | Q12888 TP53B_HUMAN | E.SVAS#PQKTM*SVLSCICE.A          | S1028:     | 3 | 3,0807 | 0,244 | 0,643  |
| 6 | P49790 NU153_HUMAN | K.VQM*TS#PSSTGSPM*FK.F           | S516:      | 2 | 3,0796 | 0,295 | 0,216  |
| 6 | P30260 CDC27_HUMAN | E.SQESS#M*TDADDTQLHAAE.S         | S807:      | 2 | 3,077  | 0,273 | -1,742 |
| 6 | Q6ZTN6 AN13D_HUMAN | R.GPGS#PPRT#PPAPGPPSFEE.Q        | S465:T469: | 3 | 3,0763 | 0,31  | 0,45   |
| 6 | Q02952 AKA12_HUMAN | E.LS#LQEGDLNGQK.G                | S75:       | 2 | 3,0756 | 0,518 | 0,265  |
| 6 | P04264 K2C1_HUMAN  | K.SLNNQFASFIDK.V                 |            | 2 | 3,074  | 0,389 | -0,176 |
| 6 | Q96IZ0 PAWR_HUMAN  | E.DAITQQNTIQNE.A                 |            | 2 | 3,0717 | 0,263 | -0,177 |
| 6 | Q9UQR1 ZN148_HUMAN | E.FSEFPLVNVNDNR.A                |            | 2 | 3,071  | 0,488 | -0,315 |
| 6 | P62263 RS14_HUMAN  | E.SSPYAAM*LAAQD.V                |            | 2 | 3,07   | 0,459 | 0      |
| 6 | Q99961 SH3G1_HUMAN | E.GDVITLTNQIDE.N                 |            | 2 | 3,0632 | 0,378 | 0,278  |
| 6 | P35579 MYH9_HUMAN  | K.IAQLEEQLDNE.T                  |            | 2 | 3,0619 | 0,314 | 0      |
| 6 | P52948 NUP98_HUMAN | K.NLNNSNLFSPVNR.D                |            | 2 | 3,0614 | 0,279 | 0,164  |
| 6 | Q13153 PAK1_HUMAN  | E.DYNSSNALNVK.A                  |            | 2 | 3,0566 | 0,382 | -0,498 |
| 6 | P26639 SYTC_HUMAN  | E.GGVSSNDFSSLE.A                 |            | 2 | 3,0508 | 0,369 | 0,102  |
| 6 | O94915 FRYL_HUMAN  | E.AALTAS#QILSR.T                 | S2499:     | 2 | 3,0471 | 0,228 | 0      |
| 6 | O00566 MPP10_HUMAN | D.S#DLDFDISKLE.Q                 | S171:      | 2 | 3,0447 | 0,297 | -0,179 |
| 6 | Q2M2I8 AAK1_HUMAN  | E.QGGSGGLGSGS#SGGGGSTSGLGSYIGR.V | S20:       | 3 | 3,0391 | 0,171 | -0,861 |
| 6 | P46100 ATRX_HUMAN  | R.ET#FSSAEGTVDKDTTIM*E.L         | T887:      | 2 | 3,0346 | 0,315 | 0,475  |
| 6 | P46821 MAP1B_HUMAN | R.SLM*SS#PEDLTKDFEE.L            | S832:      | 2 | 3,0325 | 0,362 | -0,201 |
| 6 | O43815 STRN_HUMAN  | E.FDFLVTSEEGDNE.S                |            | 2 | 3,032  | 0,382 | 0      |
| 6 | P07814 SYEP_HUMAN  | E.YIPGQPPLSQSSDSS#PTR.N          | S886:      | 2 | 3,0311 | 0,429 | 0,122  |
| 6 | Q13151 ROA0_HUMAN  | E.ADAAM*AAS#PHAVDGNTVE.L         | S68:       | 2 | 3,0262 | 0,45  | -0,067 |
| 6 | Q96NA2 RILP_HUMAN  | E.AQPQS#PAPDPPCSALHE.H           | S377:      | 2 | 3,026  | 0,319 | 0,13   |
| 6 | Q15029 U5S1_HUMAN  | E.M*DFLADLM*DNSE.L               |            | 2 | 3,0259 | 0,384 | 0      |
| 6 | Q9H4L5 OSBL3_HUMAN | E.SLLDS#PAVAK.S                  | S410:      | 2 | 3,0253 | 0,323 | 0,511  |
| 6 | Q9BVJ6 UT14A_HUMAN | E.LSQDAEPAGSQETK.D               |            | 2 | 3,019  | 0,302 | 0,084  |
| 6 | Q9UNP9 PIIE_HUMAN  | E.DAAAAIDNM*NE.S                 |            | 2 | 3,018  | 0,455 | 0,318  |
| 6 | Q8WUA4 TF3C2_HUMAN | E.SLS#RLEQPDLSSE.M               | S77:       | 2 | 3,0168 | 0,233 | -0,396 |
| 6 | Q00653 NFKB2_HUMAN | E.DSAYGSQSVEQE.A                 |            | 2 | 3,0163 | 0,301 | 0,188  |
| 6 | Q8WWH5 TRUB1_HUMAN | E.AAVVSS#PSLKTDTSPVLE.T          | S11:       | 2 | 3,0149 | 0,452 | 0,13   |
| 6 | Q15154 PCM1_HUMAN  | E.TSTS#KSVFEPEDSSIVDNE.L         | S806:      | 2 | 3,0141 | 0,327 | 0      |
| 6 | P51587 BRCA2_HUMAN | E.QGLTLPYQS#PVKE.L               | S93:       | 2 | 3,0127 | 0,255 | -0,148 |
| 6 | Q96JM3 ZN828_HUMAN | E.LQTPLPS#PEPSKPASVSS#PEPPK.S    | S173:S184: | 2 | 3,0125 | 1     | 0,675  |
| 6 | Q6NVY1 HIBCH_HUMAN | E.NLQQDGGSSFALE.Q                |            | 2 | 3,0072 | 0,367 | 0,093  |
| 6 | Q99661 KIF2C_HUMAN | E.LSPHS#GPSGEQLIQM*ETEE.M        | S592:      | 2 | 3,0061 | 0,271 | 0,338  |

|   |                     |                                   |            |   |        |       |        |
|---|---------------------|-----------------------------------|------------|---|--------|-------|--------|
| 6 | P20810 ICAL_HUMAN   | E.DFSGPQNASS#LKFE.D               | S527:      | 2 | 3,0054 | 0,41  | 0      |
| 6 | Q66K89 E4F1_HUMAN   | E.M*AEAPGS#PHQQGLGLAGEGE.Q        | S165:      | 3 | 3,0047 | 0,332 | 0,54   |
| 6 | P02788 TRFL_HUMAN   | K.LRPVAAEVYGTER.Q                 |            | 2 | 2,9965 | 0,345 | -0,251 |
| 6 | Q13153 PAK1_HUMAN   | D.VATSPISPTENNTT#PPDALTR.N        | T230:      | 3 | 2,9958 | 0,127 | 0,485  |
| 6 | Q8WZ73 RFFL_HUMAN   | E.TQSIDS#EDSFVPGR.R               | S229:      | 2 | 2,9957 | 0,319 | 0,226  |
| 6 | Q14C86 GAPD1_HUMAN  | E.VLPSDS#EAPDLKQEE.R              | S724:      | 2 | 2,9948 | 0,354 | 0,211  |
| 6 | Q02952 AKA12_HUMAN  | E.ISPPAESGQAVEE.C                 |            | 2 | 2,9904 | 0,371 | -0,093 |
| 6 | P13010 KU86_HUMAN   | E.TVYCLNDDDE.T                    |            | 2 | 2,99   | 0,246 | 0,098  |
| 6 | P02788 TRFL_HUMAN   | R.SVNGKEDAIWNLLR.Q                |            | 3 | 2,9889 | 0,202 | -0,226 |
| 6 | Q9UBN6 TR10D_HUMAN  | E.T#LSNRYLQPTQVSEQE.I             | T279:      | 2 | 2,9871 | 0,298 | 0,247  |
| 6 | O00629 IMA4_HUMAN   | E.AETIGNLIEE.C                    |            | 2 | 2,9847 | 0,213 | 0,336  |
| 6 | P04075 ALDOA_HUMAN  | E.TTTQGLDGLSE.R                   |            | 2 | 2,983  | 0,271 | 0,217  |
| 6 | Q9H9A6 LRC40_HUMAN  | E.NLTTLDLQNNND.L                  |            | 2 | 2,9803 | 0,172 | 0,387  |
| 6 | P78536 ADA17_HUMAN  | E.SLS#LFHPSNVE.M                  | S706:      | 2 | 2,9802 | 0,253 | -0,279 |
| 6 | P05787 K2C8_HUMAN   | E.AES#M*YQIKYEE.L                 | S280:      | 2 | 2,9796 | 0,319 | 0,246  |
| 6 | P19419 ELK1_HUMAN   | R.S#TSPSPLEACLE.A                 | S198:      | 2 | 2,9792 | 0,173 | -0,267 |
| 6 | Q2TAL8 QRIC1_HUMAN  | E.FLDSLAS#KGPEALQE.F              | S36:       | 2 | 2,9768 | 0,323 | -0,652 |
| 6 | Q53T59 H1BP3_HUMAN  | E.QDQVAEEGPPVQSLK.G               |            | 2 | 2,9755 | 0,394 | 0,3    |
| 6 | Q8N3U4 STAG2_HUMAN  | E.DVM*M*SS#EGRIEDLNE.G            | S1178:     | 2 | 2,9738 | 0,296 | 0,266  |
| 6 | P17301 ITA2_HUMAN   | E.GTVQGGDNFQM*E.M                 |            | 2 | 2,9717 | 0,282 | 0,094  |
| 6 | Q14444 CAPR1_HUMAN  | E.YTEQSEVES#TEYVNR.Q              | S291:      | 3 | 2,9694 | 0,208 | 0      |
| 6 | O15027 SC16A_HUMAN  | E.ARS#PDPGIVPQEAPVGNLSE.L         | S1844:     | 3 | 2,9644 | 0,138 | 0,249  |
| 6 | P46937 YAP1_HUMAN   | E.STDSGLSM*SSYSVPR.T              |            | 2 | 2,9639 | 0,411 | 0,077  |
| 6 | P50542 PEX5_HUMAN   | E.VTDPLSVS#PAR.W                  | S155:      | 2 | 2,9625 | 0,378 | 0,1    |
| 6 | Q2NKX8 ERC6L_HUMAN  | E.VM*LLTLS#LYK.Q                  | S1242:     | 2 | 2,9621 | 0,292 | -0,573 |
| 6 | Q08211 DHX9_HUMAN   | E.LDALDANDE.L                     |            | 2 | 2,9608 | 0,333 | -0,063 |
| 6 | Q9H4I2 ZHX3_HUMAN   | E.ASSEPFDTSS#PQAGR.Q              | S946:      | 2 | 2,9557 | 0,326 | -0,302 |
| 6 | P28290 SSFA2_HUMAN  | R.ASVALTPTAPSR.T                  |            | 2 | 2,9532 | 0,252 | 0      |
| 6 | Q561V9 Q561V9_HUMAN | E.VEM*LVAGHEDS#NGCINYE.L          | S135:      | 3 | 2,9513 | 0,106 | 0,404  |
| 6 | Q8N8S7 ENAH_HUMAN   | R.QNS#QLPAQVQNGPSQEE.L            | S125:      | 3 | 2,9508 | 0,31  | 0      |
| 6 | P01876 IGHA1_HUMAN  | R.QEPSQGTTFVAVTSILR.V             |            | 3 | 2,9503 | 0,372 | -0,199 |
| 6 | Q8IZT6 ASPM_HUMAN   | E.SVNPILS#PNQFLKD.N               | S392:      | 2 | 2,9459 | 0,297 | -0,222 |
| 6 | Q05682 CALD1_HUMAN  | E.KQSVDKVTS#PTKV.-                | S789:      | 3 | 2,9375 | 0,217 | 0,367  |
| 6 | Q9NYL2 MLTK_HUMAN   | E.M*S#VYASLFKE.N                  | S362:      | 2 | 2,9323 | 0,368 | -0,672 |
| 6 | Q8IY92 BTBDC_HUMAN  | E.S#ITPPSR#PTKEAPPGLNDDAQIPASQE.S | S991:S998: | 3 | 2,9292 | 0,133 | 0,358  |
| 6 | Q12888 TP53B_HUMAN  | E.VLS#TQEDLFDQSNK.T               | S301:      | 2 | 2,927  | 0,316 | 0,716  |
| 6 | Q9BQG0 MBB1A_HUMAN  | K.ALGGEDS#ENEEE.L                 | S775:      | 2 | 2,9203 | 0,306 | 0,539  |
| 6 | P63096 GNAI1_HUMAN  | E.AAAYIQCQFE.D                    |            | 2 | 2,9202 | 0,352 | 0,203  |
| 6 | P41212 ETV6_HUMAN   | E.SYPLSVS#PM*ENNHCPASSE.S         | S238:      | 3 | 2,9191 | 0,146 | 0,665  |

|   |                    |                               |                 |   |        |       |        |
|---|--------------------|-------------------------------|-----------------|---|--------|-------|--------|
| 6 | Q8NCW5 AIBP_HUMAN  | E.YQFSVDQLM*E.L               |                 | 2 | 2,9179 | 0,33  | -0,191 |
| 6 | P10636 TAU_HUMAN   | E.IVY#KSPVVS#GDTS#PR.H        | Y711:S717:S721: | 3 | 2,9167 | 0,135 | 0,198  |
| 6 | P13010 KU86_HUMAN  | E.TVYCLNDDDETE.V              |                 | 2 | 2,9141 | 0,354 | 0,248  |
| 6 | Q9UGP5 DPOLL_HUMAN | E.ALLQTALSPPPPTRPV#PPQK.A     | S177:           | 3 | 2,9122 | 0,105 | 0,077  |
| 6 | Q6P2E9 EDC4_HUMAN  | E.VEPLGLPQAS#PSR.T            | S723:           | 2 | 2,9027 | 0,487 | 0,171  |
| 6 | P13646 K1C13_HUMAN | K.MIGFPSSAGSVS#PR.S           | S427:           | 2 | 2,9018 | 0,505 | -0,331 |
| 6 | P46087 NOL1_HUMAN  | E.VT#PESGPPKVEE.A             | T195:           | 2 | 2,9017 | 0,38  | 0,09   |
| 6 | Q96FZ7 CHMP6_HUMAN | E.LLAGSFTQEDE.D               |                 | 2 | 2,8991 | 0,254 | -0,202 |
| 6 | P61247 RS3A_HUMAN  | E.VSLADLQNDV.V                |                 | 2 | 2,8957 | 0,276 | 0,111  |
| 6 | Q9Y6M7 S4A7_HUMAN  | R.M*LQDDDDT#VHLPFE.G          | T1167:          | 2 | 2,8949 | 0,207 | 0,069  |
| 6 | Q9NP55 PLUNC_HUMAN | K.LQVNTPLVGASLLR.L            |                 | 2 | 2,8906 | 0,309 | -0,577 |
| 6 | P22670 RFX1_HUMAN  | E.LQS#PQQAQPPGGQK.Q           | S60:            | 3 | 2,8881 | 0,176 | 0      |
| 6 | Q9BZV1 UBXD1_HUMAN | E.ATVSGS#PEAPGTNVVSEPREE.G    | S96:            | 3 | 2,8873 | 0,213 | 0,417  |
| 6 | Q12888 TP53B_HUMAN | E.IEPKNS#PEDLGLSLTGD.S        | S500:           | 2 | 2,8866 | 0,42  | -0,065 |
| 6 | Q15836 VAMP3_HUMAN | R.LQQTQNOQVDE.V               |                 | 2 | 2,8858 | 0,324 | 0,406  |
| 6 | Q9UQ80 PA2G4_HUMAN | E.NATSGETLEENE.A              |                 | 2 | 2,8831 | 0,275 | -0,094 |
| 6 | Q14692 BMS1_HUMAN  | E.T#SDIENLLKEE.E              | T638:           | 2 | 2,8827 | 0,269 | -0,267 |
| 6 | Q2KHM9 K0753_HUMAN | E.EGPFILDQS#ASFKDE.V          | S476:           | 2 | 2,8786 | 0,427 | 0,069  |
| 6 | P35908 K22E_HUMAN  | K.AQYEEIAQR.S                 |                 | 2 | 2,8751 | 0,114 | 0      |
| 6 | Q9BUR4 WDR79_HUMAN | E.FGS#PSELSPR.I               | S85:            | 2 | 2,8745 | 0,14  | 0      |
| 6 | Q12888 TP53B_HUMAN | D.S#PQKLAILDQE.L              | S727:           | 2 | 2,8738 | 0,223 | 0      |
| 6 | Q8WZ73 RFFL_HUMAN  | R.RAS#LSDLTDLEDIE.G           | S240:           | 2 | 2,8733 | 0,403 | -0,074 |
| 6 | Q8TEH3 DEN1A_HUMAN | E.NGCAPTPEEQLPK.T             |                 | 2 | 2,8722 | 0,254 | 0      |
| 6 | Q9HCD6 TANC2_HUMAN | E.NM*T#ASTYSLNKIPE.R          | T233:           | 2 | 2,8691 | 0,265 | 0,22   |
| 6 | P02788 TRFL_HUMAN  | R.DGAGDVAFIR.E                |                 | 2 | 2,8655 | 0,301 | 0,179  |
| 6 | P07602 SAP_HUMAN   | D.NGDVCQDCIQM*VTD.I           |                 | 2 | 2,8651 | 0,394 | 0,365  |
| 6 | P13667 PDIA4_HUMAN | E.SGEDVNAAILDE.S              |                 | 2 | 2,865  | 0,245 | 0,099  |
| 6 | P52294 IMA1_HUMAN  | E.TEEVMS#DGGGFHE.A            | S63:            | 2 | 2,8639 | 0,403 | 0,234  |
| 6 | Q3KQU3 MA7D1_HUMAN | E.SAAPAS#PAPS#PAPSPT#PAPPQK.E | S544:S548:T554: | 3 | 2,8562 | 0,248 | 0,404  |
| 6 | O00401 WASL_HUMAN  | R.RVTNVGSLLLTPQENE.S          |                 | 2 | 2,8555 | 0,229 | -0,207 |
| 6 | Q02952 AKA12_HUMAN | E.GSPPPCLGQEE.A               |                 | 2 | 2,854  | 0,304 | 0,104  |
| 6 | Q93009 UBP7_HUMAN  | K.AGEQQLS#EPEDM*E.M           | S18:            | 2 | 2,8532 | 0,484 | 0      |
| 6 | Q9Y3F4 STRAP_HUMAN | E.IASENS#DCIFPSAPDVKA.-       | S338:           | 3 | 2,8529 | 0,126 | 0,274  |
| 6 | P20061 TCO1_HUMAN  | K.LVGIIQITLMQK.M              |                 | 2 | 2,8474 | 0,357 | 0,356  |
| 6 | P46777 RL5_HUMAN   | E.GQVEVTGDEYNVE.S             |                 | 2 | 2,8461 | 0,353 | 0,085  |
| 6 | P48643 TCPE_HUMAN  | E.NSGM*NPIQTM*TE.V            |                 | 2 | 2,8452 | 0,465 | 0,36   |
| 6 | P38117 ETFB_HUMAN  | E.VIAVSCGPAQCQE.T             |                 | 2 | 2,844  | 0,438 | 0,258  |
| 6 | Q13283 G3BP1_HUMAN | E.DAQKS#SSPAPADIAQTVQE.D      | S230:           | 3 | 2,8436 | 0,148 | 0,362  |
| 6 | Q9Y6A5 TACC3_HUMAN | E.NQM*VS#PGKVSQSPEQAVEE.N     | S170:           | 3 | 2,8433 | 0,237 | 0,354  |

|   |                     |                                 |        |   |        |       |        |
|---|---------------------|---------------------------------|--------|---|--------|-------|--------|
| 6 | Q14C86 GAPD1_HUMAN  | E.VLPS#DSEAPDLKQEE.R            | S722:  | 2 | 2,842  | 0,257 | -0,07  |
| 6 | P21333 FLNA_HUMAN   | E.VGQFQVDCSSAGSAE.L             |        | 2 | 2,8386 | 0,419 | 0,317  |
| 6 | Q8IWI9 MGAP_HUMAN   | E.SDSIS#PLLLHLE.D               | S2859: | 2 | 2,8384 | 0,532 | -0,435 |
| 6 | P98172 EFNB1_HUMAN  | E.M*PPQS#PANIYKV.-              | S338:  | 2 | 2,8361 | 0,179 | -0,152 |
| 6 | Q9UQ35 SRRM2_HUMAN  | E.NS#FGSPLEFR.N                 | S1326: | 2 | 2,8355 | 0,288 | -0,198 |
| 6 | Q15427 SF3B4_HUMAN  | R.NQDATVYVGGGLDE.K              |        | 2 | 2,8351 | 0,46  | 0,353  |
| 6 | P68371 TBB2C_HUMAN  | E.YQQYQDATAEEEE.G               |        | 2 | 2,8326 | 0,376 | 0      |
| 6 | Q92974 ARHG2_HUMAN  | R.EPALPLEPDSGGNTS#PGVTANGE.A    | S695:  | 3 | 2,8326 | 0,266 | 0,4    |
| 6 | Q01814 AT2B2_HUMAN  | K.SATSSSPGS#PIHSLE.T            | S1234: | 2 | 2,8325 | 0,25  | -1,032 |
| 6 | P53396 ACLY_HUMAN   | R.TAS#FSEGRADE.V                | S455:  | 2 | 2,8297 | 0,427 | 0,286  |
| 6 | Q9BUR4 WDR79_HUMAN  | E.FGSPSELS#PRIEEQE.L            | S90:   | 2 | 2,8243 | 0,396 | 0,342  |
| 6 | Q9Y5B6 GCFE_HUMAN   | E.DGVIIS#EHGEDE.M               | S180:  | 2 | 2,824  | 0,192 | 0,442  |
| 6 | O15078 CE290_HUMAN  | E.NSLTDNLNDLNNE.L               |        | 2 | 2,824  | 0,355 | -0,909 |
| 6 | Q08945 SSRP1_HUMAN  | D.S#DEDQHDAYLE.R                | S444:  | 2 | 2,8208 | 0,205 | 0,087  |
| 6 | Q14568 HS902_HUMAN  | E.TQTQDQPM*EEEE.V               |        | 2 | 2,8195 | 0,28  | 0,165  |
| 6 | O15513 O15513_HUMAN | E.NLS#M*HQM*LDQTLLE.L           | S33:   | 2 | 2,8151 | 0,342 | 0,068  |
| 6 | Q99081 HTF4_HUMAN   | E.GLS#PTPFM*NSNLM*GK.T          | S98:   | 2 | 2,8148 | 0,474 | 0,215  |
| 6 | P98175 RBM10_HUMAN  | E.ASSSQGTAANSQSYTIM*S#PAVLKSE.L | S530:  | 3 | 2,8145 | 0,148 | 0,28   |
| 6 | Q9UKV3 ACINU_HUMAN  | E.M*S#QNSFIK.Q                  | S132:  | 2 | 2,8145 | 0,284 | 0      |
| 6 | P13646 K1C13_HUMAN  | K.MIGFPSSAGSVSPR.S              |        | 2 | 2,8145 | 0,291 | -0,088 |
| 6 | P49790 NU153_HUMAN  | E.ITTSSPS#PINSSQALTNK.V         | S500:  | 2 | 2,8122 | 0,297 | -0,19  |
| 6 | Q7Z3C6 ATG9A_HUMAN  | E.ASYSDS#PPGEEDLLVHVAE.G        | S18:   | 2 | 2,8121 | 0,285 | 0      |
| 6 | P02538 K2C6A_HUMAN  | K.YEELQVTAGR.H                  |        | 2 | 2,8111 | 0,316 | 0      |
| 6 | P02538 K2C6A_HUMAN  | R.SGFSSVSVSR.S                  |        | 2 | 2,811  | 0,415 | 0,12   |
| 6 | O43399 TPD54_HUMAN  | E.NGSDNLPSSAGS#GDKPLSDPAPF.-    | S195:  | 3 | 2,8077 | 0,105 | 0,079  |
| 6 | P07737 PROF1_HUMAN  | D.SLLQDGEFSM*D.L                |        | 2 | 2,8064 | 0,328 | 0      |
| 6 | Q99733 NP1L4_HUMAN  | K.ASGDGES#LDEDSE.F              | S304:  | 2 | 2,8061 | 0,294 | 0,263  |
| 6 | Q9Y4W2 LAS1L_HUMAN  | E.AS#PIGKSPYTL.D.S              | S523:  | 2 | 2,8012 | 0,309 | -0,367 |
| 6 | Q15149 PLEC1_HUMAN  | E.DLLQDAQDE.K                   |        | 2 | 2,7994 | 0,339 | -0,117 |
| 6 | Q16543 CDC37_HUMAN  | E.GEEAGPGDPLLE.A                |        | 2 | 2,7994 | 0,25  | 0,515  |
| 6 | P50991 TCPD_HUMAN   | E.NAGLNPISTVTE.L                |        | 2 | 2,7949 | 0,263 | -0,1   |
| 6 | O95373 IPO7_HUMAN   | E.GYSTIIDDEDNPVDE.Y             |        | 2 | 2,7875 | 0,142 | 0,218  |
| 6 | Q92609 TBCD5_HUMAN  | E.AQISFLQGQLND.L                |        | 2 | 2,7854 | 0,322 | -0,183 |
| 6 | P35908 K22E_HUMAN   | R.HGGGGGGGFGGGGFGSR.S           |        | 3 | 2,7851 | 0,175 | 0,277  |
| 6 | Q96M96 FGD4_HUMAN   | R.TPGIGPVLPLEER.G               |        | 2 | 2,7843 | 0,459 | -0,089 |
| 6 | P11172 PYR5_HUMAN   | E.AGGDNLGQQYNSPQE.V             |        | 2 | 2,7826 | 0,397 | 0      |
| 6 | Q16186 ADRM1_HUMAN  | R.SQSAAVTPSSTTSSTR.A            |        | 2 | 2,7803 | 0,429 | 0,389  |
| 6 | Q86TI0 TBCD1_HUMAN  | E.LGELPPRS#PLEPVCE.D            | S695:  | 2 | 2,7792 | 0,3   | 0,069  |
| 6 | P49591 SYSC_HUMAN   | E.VAQLSQFDEE.L                  |        | 2 | 2,7791 | 0,339 | 0,419  |

|   |                     |                          |        |   |        |       |        |
|---|---------------------|--------------------------|--------|---|--------|-------|--------|
| 6 | P07954 FUMH_HUMAN   | E.NCVVGIQANTE.R          |        | 2 | 2,7782 | 0,302 | 0,405  |
| 6 | P53621 COPA_HUMAN   | E.NSTYDLYTIPK.D          |        | 2 | 2,772  | 0,441 | 0,093  |
| 6 | Q96AP0 ACD_HUMAN    | E.LILGSETPSS#PR.A        | S111:  | 2 | 2,7719 | 0,472 | 0,274  |
| 6 | P04792 HSPB1_HUMAN  | E.ITIPVTFES#RAQLGGPE.A   | S187:  | 2 | 2,7675 | 0,133 | 0,322  |
| 6 | Q16718 NDUA5_HUMAN  | E.DQLQGGQLEE.V           |        | 2 | 2,7642 | 0,177 | 0,109  |
| 6 | P02788 TRFL_HUMAN   | K.GGSFQLNELQGLK.S        |        | 2 | 2,762  | 0,267 | -0,088 |
| 6 | P61626 LYSC_HUMAN   | R.STDYGIFQINSR.Y         |        | 3 | 2,7601 | 0,182 | 0,196  |
| 6 | P07437 TBB5_HUMAN   | E.YQQYQDATAEEEEED.F      |        | 2 | 2,7586 | 0,407 | 0,213  |
| 6 | Q13033 STRN3_HUMAN  | E.LAGGGGGGPGM*AAPPR.Q    |        | 2 | 2,758  | 0,474 | 0,273  |
| 6 | P20700 LMNB1_HUMAN  | E.NSALQLQVTE.R           |        | 2 | 2,758  | 0,242 | 0,221  |
| 6 | Q96DA0 YPO03_HUMAN  | K.LGDSWDVK.L             |        | 2 | 2,7552 | 0,296 | 0,199  |
| 6 | P62136 PP1A_HUMAN   | E.FDNAGAM*M*SVDE.T       |        | 2 | 2,7546 | 0,265 | 0      |
| 6 | Q96EB6 SIRT1_HUMAN  | E.AALALQPGGS#PSAAGADRE.A | S14:   | 3 | 2,751  | 0,206 | 0,101  |
| 6 | P01876 IGHA1_HUMAN  | R.QEPSQGTTFVAVTSILR.V    |        | 2 | 2,7506 | 0,468 | -0,066 |
| 6 | Q9GZY8 CB033_HUMAN  | E.DVS#FSRPADLD.L         | S93:   | 2 | 2,7505 | 0,258 | -0,094 |
| 6 | Q01538 MYT1_HUMAN   | K.AFQCFDYSQDAE.A         |        | 2 | 2,7505 | 0,383 | 0,33   |
| 6 | Q9BVW5 TIPIN_HUMAN  | E.TLLDQS#FKNVQQQLD.A     | S282:  | 2 | 2,7471 | 0,32  | -0,263 |
| 6 | P04792 HSPB1_HUMAN  | E.GT#LTVEAPM*PK.L        | T162:  | 2 | 2,7436 | 0,124 | -0,098 |
| 6 | P57740 NU107_HUMAN  | E.QGM*ES#PLPAEDDNAIRE.H  | S734:  | 2 | 2,7417 | 0,333 | -0,062 |
| 6 | Q14966 ZN638_HUMAN  | E.IQDDSS#DLHLVTLDE.V     | S1744: | 2 | 2,7386 | 0,321 | -0,069 |
| 6 | Q99459 CDC5L_HUMAN  | E.SGITNSASSTLLSE.Y       |        | 2 | 2,7381 | 0,286 | 0,357  |
| 6 | P01876 IGHA1_HUMAN  | R.WLQGSQELPR.E           |        | 2 | 2,7364 | 0,345 | -0,402 |
| 6 | P55072 TERA_HUMAN   | E.AVCIVLSDDTCSDE.K       |        | 2 | 2,7354 | 0,129 | 0      |
| 6 | Q71RC2 LARP4_HUMAN  | E.LTALSTTQQE.K           |        | 2 | 2,7345 | 0,334 | 0,447  |
| 6 | P62158 CALM_HUMAN   | E.ADIDGDGQVNYE.E         |        | 2 | 2,7316 | 0,164 | 0      |
| 6 | Q02952 AKA12_HUMAN  | E.QVS#GSQGPSEEKPAPLATE.V | S386:  | 2 | 2,7314 | 0,139 | 0      |
| 6 | P02788 TRFL_HUMAN   | R.LKQVLLHQQAK.F          |        | 3 | 2,7305 | 0,282 | 0,42   |
| 6 | Q92543 SNX19_HUMAN  | E.GRAS#PVAAPVFLSYSEPE.G  | S306:  | 2 | 2,7302 | 0,469 | 0,187  |
| 6 | Q01831 XPC_HUMAN    | E.LS#EPVLGDVRE.S         | S140:  | 2 | 2,7292 | 0,418 | 0,094  |
| 6 | P04792 HSPB1_HUMAN  | E.SPAVAAPAYS.R.A         |        | 2 | 2,7285 | 0,377 | -0,112 |
| 6 | Q00839 HNRPU_HUMAN  | E.GISALDGDQM*E.L         |        | 2 | 2,7279 | 0,288 | -0,106 |
| 6 | O14744 ANM5_HUMAN   | E.LLGSFADNE.L            |        | 2 | 2,7248 | 0,327 | 0,189  |
| 6 | P30622 CLIP1_HUMAN  | E.ANGLQTTASR.A           |        | 2 | 2,7244 | 0,316 | 0,109  |
| 6 | Q02952 AKA12_HUMAN  | E.VEGGVPDIEEQE.R         |        | 2 | 2,7239 | 0,307 | -0,094 |
| 6 | Q9BUA3 YK007_HUMAN  | E.FLVGSS#PGGSGR.A        | S82:   | 2 | 2,7211 | 0,319 | -0,102 |
| 6 | P13645 K1C10_HUMAN  | R.SLLEGEGSSGGGGR.G       |        | 2 | 2,7204 | 0,34  | -0,483 |
| 6 | Q92797 SYMPK_HUMAN  | E.AALLDSS#LEGPLKE.T      | S1222: | 3 | 2,7163 | 0,207 | 0,113  |
| 6 | Q9H8T5 Q9H8T5_HUMAN | E.LGPAPSLGQASHSDS#E.M    | S273:  | 2 | 2,7124 | 0,429 | 0,523  |
| 6 | P37802 TAGL2_HUMAN  | K.NVIGLQM*GTNR.G         |        | 2 | 2,7115 | 0,398 | -0,2   |



|   |                     |                                 |        |   |        |       |        |
|---|---------------------|---------------------------------|--------|---|--------|-------|--------|
| 6 | Q9NP77 SSU72_HUMAN  | R.VAVVCCSSNQNR.S                |        | 2 | 2,7105 | 0,398 | 0,099  |
| 6 | Q7Z6Z7 HUWE1_HUMAN  | R.AGSST#PGDAPPAVAE.V            | T2889: | 2 | 2,7077 | 0,223 | 0,173  |
| 6 | Q8NE71 ABCF1_HUMAN  | E.EQSVSQIDGDFE.D                |        | 2 | 2,7064 | 0,434 | 0,27   |
| 6 | P46821 MAP1B_HUMAN  | E.SSPLYS#PTFSDSTSAVKE.K         | S1797: | 2 | 2,7022 | 0,404 | 0,123  |
| 6 | Q13045 FLII_HUMAN   | E.GLSNLADVDLSCND.L              |        | 2 | 2,698  | 0,33  | 0,082  |
| 6 | P39023 RL3_HUMAN    | E.IQVNGGTVAE.K                  |        | 2 | 2,6976 | 0,275 | 0,37   |
| 6 | P81605 DCD_HUMAN    | K.ENAGEDPGLAR.Q                 |        | 2 | 2,6974 | 0,419 | 0,108  |
| 6 | P43358 MAGA4_HUMAN  | E.AALLEEEEGV.-                  |        | 2 | 2,6916 | 0,155 | 0,345  |
| 6 | P18583 SON_HUMAN    | E.GPLLASDVGR.D                  |        | 2 | 2,6902 | 0,377 | 0,248  |
| 6 | Q9NR30 DDX21_HUMAN  | E.GAFSNFPISEE.T                 |        | 2 | 2,6849 | 0,105 | -0,306 |
| 6 | Q15942 ZYX_HUMAN    | E.GGPEAPIPPPPQPR.E              |        | 2 | 2,6842 | 0,343 | 0,26   |
| 6 | P49848 TAF6_HUMAN   | E.AGDS#PPPAPGTPK.A              | S653:  | 2 | 2,6818 | 0,226 | -0,096 |
| 6 | Q9NP55 PLUNC_HUMAN  | K.VTSVIPGLNNIIDIK.V             |        | 2 | 2,6814 | 0,208 | -0,306 |
| 6 | Q68E01 INT3_HUMAN   | E.FCSSPS#PPVEVK.I               | S502:  | 2 | 2,681  | 0,181 | 1,036  |
| 6 | Q96RY5 CRML_HUMAN   | E.NS#IDYISR.F                   | S1226: | 2 | 2,6805 | 0,398 | -0,233 |
| 6 | Q9BUL5 PHF23_HUMAN  | E.AM*AEPS#PEDPPPTLKPE.T         | S9:    | 2 | 2,6787 | 0,235 | 0,706  |
| 6 | Q08J23 NSUN2_HUMAN  | E.SAASGTQPDNDVTE.G              |        | 2 | 2,6779 | 0,43  | 0,438  |
| 6 | Q16514 TAF12_HUMAN  | K.IPGTPGAGGRLS#PE.N             | S51:   | 2 | 2,6774 | 0,356 | 0,088  |
| 6 | Q9UQ35 SRRM2_HUMAN  | E.SYFGVSSLQLK.G                 |        | 2 | 2,6764 | 0,461 | 0      |
| 6 | Q15907 RB11B_HUMAN  | E.TSALDSTNVEE.A                 |        | 2 | 2,6763 | 0,291 | 0,105  |
| 6 | Q7L7X3 TAOK1_HUMAN  | R.AGS#LKDPEIAE.L                | S9:    | 2 | 2,6761 | 0,131 | 0      |
| 6 | Q00613 HSF1_HUMAN   | E.LLS#PQEPPRPPEAE.N             | S444:  | 2 | 2,6755 | 0,216 | -0,223 |
| 6 | P12273 PIP_HUMAN    | R.FYTIEILKVE.-                  |        | 2 | 2,6754 | 0,191 | -0,486 |
| 6 | P16333 NCK1_HUMAN   | E.EGDS#PLGDHVGSLSE.K            | S166:  | 2 | 2,6751 | 0,302 | -0,386 |
| 6 | Q9H307 PININ_HUMAN  | R.DLIQDQNM*DE.K                 |        | 2 | 2,6743 | 0,192 | -0,197 |
| 6 | P52948 NUP98_HUMAN  | E.GDVNLTLNLDD.I                 |        | 2 | 2,6735 | 0,337 | -0,468 |
| 6 | B2RMZ9 B2RMZ9_HUMAN | R.APVS#PLKFSPFE.G               | S423:  | 2 | 2,6716 | 0,289 | -0,349 |
| 6 | O75534 CSDE1_HUMAN  | E.VLSNTFQFTNE.A                 |        | 2 | 2,6709 | 0,273 | -0,094 |
| 6 | Q13523 PRP4B_HUMAN  | R.TRSPS#PDDILE.R                | S580:  | 2 | 2,6706 | 0,166 | 0,186  |
| 6 | Q96QR8 PURB_HUMAN   | R.GGGGGPCGFQPASR.G              |        | 2 | 2,6686 | 0,379 | 0,187  |
| 6 | P35580 MYH10_HUMAN  | E.SQLQDTQELLQEE.T               |        | 2 | 2,6683 | 0,335 | -0,313 |
| 6 | Q13257 MD2L1_HUMAN  | E.SGPQFITNSEE.V                 |        | 2 | 2,6661 | 0,347 | 0      |
| 6 | Q9Y6Y8 S23IP_HUMAN  | R.KPNGGS#GGASTSSSGTNLLFSSSATE.F | S10:   | 3 | 2,6656 | 0,098 | 0,074  |
| 6 | Q9Y490 TLN1_HUMAN   | E.AVDNLSAFASNPE.F               |        | 2 | 2,6625 | 0,221 | 0,183  |
| 6 | Q7Z406 MYH14_HUMAN  | E.DTL DSTNAQQE.L                |        | 2 | 2,6625 | 0,282 | 0,2    |
| 6 | Q96DA0 YP003_HUMAN  | K.VFVAFQAFRLR.G                 |        | 2 | 2,6599 | 0,306 | -0,102 |
| 6 | Q9BVBW5 TIPIN_HUMAN | E.DFVSNNDVEVAE.N                |        | 2 | 2,658  | 0,344 | 0,295  |
| 6 | Q9Y3T9 NOC2L_HUMAN  | E.LQQLAQGPED.E.L                |        | 2 | 2,6573 | 0,256 | -0,497 |
| 6 | P02788 TRFL_HUMAN   | K.YLGPQYVAGITNLK.K              |        | 2 | 2,6562 | 0,234 | -0,238 |

|   |                    |                              |       |   |        |       |        |
|---|--------------------|------------------------------|-------|---|--------|-------|--------|
| 6 | Q9UHR4 BI2L1_HUMAN | R.SISTVNLSE.N                |       | 2 | 2,6561 | 0,274 | 0,064  |
| 6 | P51610 HCFC1_HUMAN | E.LAALVQQQLQE.A              |       | 2 | 2,6549 | 0,162 | 0      |
| 6 | P35579 MYH9_HUMAN  | E.FTTNLTEEEE.K               |       | 2 | 2,6545 | 0,146 | -0,101 |
| 6 | P10599 THIO_HUMAN  | E.VDVDDCQDVASE.C             |       | 2 | 2,6516 | 0,328 | 0,451  |
| 6 | P35030 TRY3_HUMAN  | D.TLDNDIMLIK.L               |       | 2 | 2,6507 | 0,338 | -0,207 |
| 6 | Q02297 NRG1_HUMAN  | E.GAYVSSES#PIR.I             | S152: | 2 | 2,649  | 0,412 | 0      |
| 6 | P11388 TOP2A_HUMAN | E.NTEGSPQEDGVELE.G           |       | 2 | 2,6485 | 0,214 | -0,325 |
| 6 | Q9Y4K4 M4K5_HUMAN  | E.TSS#IGNGDGISK.L            | S445: | 2 | 2,6485 | 0,508 | -0,301 |
| 6 | O15084 ANR28_HUMAN | E.DVNFQDNE.K                 |       | 2 | 2,6472 | 0,226 | 0      |
| 6 | Q86UP2 KTN1_HUMAN  | E.ASSASQFELE.I               |       | 2 | 2,6465 | 0,278 | 0,204  |
| 6 | Q8ND30 LIPB2_HUMAN | R.TLS#INEEPE.G               | S329: | 2 | 2,6406 | 0,254 | -0,098 |
| 6 | O94909 K0819_HUMAN | E.SALLFIPVHS#PSTE.G          | S313: | 2 | 2,6403 | 0,201 | -0,155 |
| 6 | P27635 RL10_HUMAN  | E.YEQLSSEALE.A               |       | 2 | 2,6396 | 0,267 | -1,461 |
| 6 | Q9H6T3 RPAP3_HUMAN | E.VSDTSSLQPQAS#LKQDVCQSYSE.K | S513: | 2 | 2,6374 | 0,255 | 0,74   |
| 6 | Q14693 LPIN1_HUMAN | E.VIPM*HLATS#PILSE.G         | S106: | 2 | 2,6317 | 0,223 | -0,152 |
| 6 | Q02952 AKA12_HUMAN | K.GALNGQGALNSQEEEE.V         |       | 2 | 2,6298 | 0,228 | 0,297  |
| 6 | P10599 THIO_HUMAN  | E.VDVDDCQDVASECE.V           |       | 2 | 2,6285 | 0,284 | 0,595  |
| 6 | Q96PE2 ARHGH_HUMAN | R.STISSSFNGEETPSSK.E         |       | 2 | 2,6248 | 0,367 | 0      |
| 6 | Q15149 PLEC1_HUMAN | E.TQALQQSFLSE.K              |       | 2 | 2,624  | 0,326 | -0,097 |
| 6 | P11388 TOP2A_HUMAN | E.LILFSNSDNE.R               |       | 2 | 2,6238 | 0,309 | -0,106 |
| 6 | Q8TEY7 UBP33_HUMAN | E.TTM*LIQDDENNSE.M           |       | 2 | 2,6234 | 0,158 | 0      |
| 6 | Q96PK6 RBM14_HUMAN | R.AQPSVSLGAPYR.G             |       | 2 | 2,6217 | 0,366 | 0,098  |
| 6 | P04792 HSPB1_HUMAN | E.GTLTVEAPM*PK.L             |       | 2 | 2,6196 | 0,243 | -0,21  |
| 6 | P22314 UBA1_HUMAN  | E.SGDFVSFSE.V                |       | 2 | 2,6173 | 0,224 | 0,063  |
| 6 | P19623 SPEE_HUMAN  | E.DGVLLCCQGE.C               |       | 2 | 2,6171 | 0,351 | 0      |
| 6 | Q9BR76 COR1B_HUMAN | E.NLEEPM*ALQE.L              |       | 2 | 2,6158 | 0,187 | -0,103 |
| 6 | P14625 ENPL_HUMAN  | E.TVEEPM*EEEE.A              |       | 2 | 2,6148 | 0,325 | 0,099  |
| 6 | P06702 S10A9_HUMAN | K.LGHPDTLNQGEFK.E            |       | 3 | 2,61   | 0,097 | 0,314  |
| 6 | Q9UQ35 SRRM2_HUMAN | E.GDAPFSEP GTTSTQRPS#PE.T    | S323: | 3 | 2,6094 | 0,187 | 0,516  |
| 6 | Q1KMD3 HNRL2_HUMAN | E.NDVIGCFANFE.T              |       | 2 | 2,6087 | 0,265 | 0,19   |
| 6 | Q16563 SYPL1_HUMAN | K.TVTATFGYPFR.L              |       | 2 | 2,6078 | 0,539 | -0,29  |
| 6 | Q96FV9 THOC1_HUMAN | E.NVTVFNTNEQE.S              |       | 2 | 2,6057 | 0,413 | 0,094  |
| 6 | Q9UJM3 ERRFI_HUMAN | E.ALSLDDTDCE.V               |       | 2 | 2,605  | 0,402 | -0,107 |
| 6 | Q9NTJ3 SMC4_HUMAN  | D.GASSDAEPEPPSGR.T           |       | 2 | 2,6043 | 0,36  | 0,36   |
| 6 | Q86TB9 PATL1_HUMAN | R.STS#PIIGSPPVR.A            | S179: | 2 | 2,6033 | 0,218 | 0      |
| 6 | P13489 RINI_HUMAN  | E.LTVSNNDINE.A               |       | 2 | 2,6022 | 0,225 | -0,218 |
| 6 | Q01082 SPTB2_HUMAN | E.LQSQAQALSQE.G              |       | 2 | 2,6012 | 0,132 | 0      |
| 6 | Q96MU7 YTDC1_HUMAN | R.GIS#PIVFDR.S               | S308: | 2 | 2,5977 | 0,305 | 0      |
| 6 | Q71U36 TBA1A_HUMAN | E.VGVDSVEGEGEEE.G            |       | 2 | 2,5959 | 0,227 | 0      |

|   |                     |                          |        |   |        |       |        |
|---|---------------------|--------------------------|--------|---|--------|-------|--------|
| 6 | Q6P158 DHX57_HUMAN  | D.LQEQDADAGSER.G         |        | 2 | 2,5949 | 0,279 | 0,37   |
| 6 | Q9H8M2 BRD9_HUMAN   | E.LDPDDS#HLNLDE.T        | S424:  | 2 | 2,5945 | 0,177 | 0,334  |
| 6 | P29401 TKT_HUMAN    | E.NAIYYNNE.D             |        | 2 | 2,5945 | 0,11  | 0,344  |
| 6 | Q9HCM4 E41L5_HUMAN  | R.SNIDVNINSQEE.V         |        | 2 | 2,5944 | 0,284 | -0,358 |
| 6 | Q9BTK6 PA1_HUMAN    | R.GHGDAASTAAPLSEE.G      |        | 2 | 2,5942 | 0,401 | -0,081 |
| 6 | Q9C0B0 UNK_HUMAN    | E.SALDDLNE.F             |        | 2 | 2,5927 | 0,179 | 0,11   |
| 6 | P55036 PSMD4_HUMAN  | E.GGAM*LGLGASDFE.F       |        | 2 | 2,5924 | 0,359 | -0,098 |
| 6 | Q8N392 RHG18_HUMAN  | R.S#ISQDSLDE.L           | S64:   | 2 | 2,5916 | 0,205 | 0      |
| 6 | Q9BUR4 WDR79_HUMAN  | E.FGSPSELS#PR.I          | S90:   | 2 | 2,5868 | 0,243 | -0,105 |
| 6 | Q8N5D0 WDTC1_HUMAN  | R.ITGLSSGGAGAS#DDEDSSE.G | S662:  | 2 | 2,5858 | 0,457 | 0,266  |
| 6 | Q96D46 NMD3_HUMAN   | E.DLHIS#QDATGEE.G        | S490:  | 2 | 2,5853 | 0,181 | 0,087  |
| 6 | P35579 MYH9_HUMAN   | E.GDSTDLSDQIAE.L         |        | 2 | 2,5832 | 0,207 | 0,585  |
| 6 | B2RA01 B2RA01_HUMAN | K.AQYEDIAQK.S            |        | 2 | 2,5821 | 0,169 | 0      |
| 6 | O60271 JIP4_HUMAN   | E.LSSAGSGLIGDVDE.G       |        | 2 | 2,5789 | 0,206 | 0,092  |
| 6 | Q96DA0 YP003_HUMAN  | R.VSVGLLVK.S             |        | 2 | 2,5737 | 0,242 | 0      |
| 6 | Q12931 TRAP1_HUMAN  | E.GIVTATEQE.V            |        | 2 | 2,5728 | 0,293 | 0,193  |
| 6 | P13645 K1C10_HUMAN  | K.DAEAWFNEK.S            |        | 2 | 2,5727 | 0,344 | 0,22   |
| 6 | Q9Y2L8 ZKSC5_HUMAN  | E.SCS#PHPLTVDTQPE.Q      | S161:  | 2 | 2,5724 | 0,228 | -0,148 |
| 6 | Q9BXI6 TB10A_HUMAN  | E.SLAQGPDAATTDE.L        |        | 2 | 2,5717 | 0,146 | -0,669 |
| 6 | Q5T4S7 UBR4_HUMAN   | K.LCTFTITQKE.F           |        | 2 | 2,5692 | 0,264 | -0,59  |
| 6 | P42166 LAP2A_HUMAN  | R.SSTPLPTISSAE.N         |        | 2 | 2,5689 | 0,362 | 0,096  |
| 6 | P19338 NUCL_HUMAN   | E.IDGRS#ISLYYTGE.K       | S458:  | 2 | 2,5679 | 0,351 | 0,314  |
| 6 | P62158 CALM_HUMAN   | E.VDADGNGTIDFPE.F        |        | 2 | 2,567  | 0,375 | 0,09   |
| 6 | Q6S8J3 A26CA_HUMAN  | E.LPDGQVITIGNE.R         |        | 2 | 2,5669 | 0,311 | 0,291  |
| 6 | P18583 SON_HUMAN    | E.SSITLT#PVESAVVAEEHE.V  | T1262: | 2 | 2,5532 | 0,241 | -0,185 |
| 6 | Q8TEU7 RPGF6_HUMAN  | E.VGDVDLTR.L             |        | 2 | 2,5531 | 0,282 | 0,209  |
| 6 | Q70CQ2 UBP34_HUMAN  | E.VLTPSTSDNETR.D         |        | 2 | 2,5508 | 0,39  | 0,343  |
| 6 | Q9NRS6 SNX15_HUMAN  | E.STEEASGS#PARGPLTEAE.L  | S201:  | 2 | 2,5501 | 0,404 | 0,131  |
| 6 | Q86WB0 NIPA_HUMAN   | E.GIAPEEGVDK.D           |        | 2 | 2,5477 | 0,535 | 0,213  |
| 6 | P62140 PP1B_HUMAN   | E.FDNAGGM*M*SVDE.T       |        | 2 | 2,5476 | 0,189 | 0,187  |
| 6 | Q9H6T3 RPAP3_HUMAN  | E.LEPNNFEATNE.L          |        | 2 | 2,5464 | 0,264 | 0,382  |
| 6 | Q86U44 MTA70_HUMAN  | E.AALS#PTFR.S            | S43:   | 2 | 2,5427 | 0,199 | 0,194  |
| 6 | P13489 RINI_HUMAN   | E.LSLAGNELGDG.E          |        | 2 | 2,5427 | 0,215 | 0      |
| 6 | P23528 COF1_HUMAN   | E.LQANCYEE.V             |        | 2 | 2,5426 | 0,303 | 0,238  |
| 6 | P14314 GLU2B_HUMAN  | E.LDTDGDGALSEAE.A        |        | 2 | 2,537  | 0,28  | 0,189  |
| 6 | Q9Y490 TLN1_HUMAN   | E.LAVFCS#PEPPAK.T        | S2162: | 2 | 2,5367 | 0,188 | 0,087  |
| 6 | P31689 DNJA1_HUMAN  | E.NGFLS#PDKLSLLE.K       | S335:  | 2 | 2,5305 | 0,327 | -0,323 |
| 6 | Q9NS87 KIF15_HUMAN  | E.DTQGNVSQLQAE.V         |        | 2 | 2,5284 | 0,161 | 0      |
| 6 | Q8TDY2 RBCC1_HUMAN  | K.SVEHVS#PDTADAE.S       | S266:  | 2 | 2,5281 | 0,282 | 0,17   |

|   |                     |                         |        |   |        |       |        |
|---|---------------------|-------------------------|--------|---|--------|-------|--------|
| 6 | O15067 PUR4_HUMAN   | E.AFDLAQSNSE.H          |        | 2 | 2,5242 | 0,111 | 0,113  |
| 6 | P49023 PAXI_HUMAN   | K.TSSVSNPQDSVGS#PCSR.V  | S106:  | 2 | 2,5242 | 0,203 | 0,265  |
| 6 | P42704 LPPRC_HUMAN  | E.DYFTQAM*E.V           |        | 2 | 2,5237 | 0,178 | 0,06   |
| 6 | Q12798 CETN1_HUMAN  | E.LGENLTDEELQE.M        |        | 2 | 2,5199 | 0,191 | -1,317 |
| 6 | Q8WWM7 ATX2L_HUMAN  | K.ISLAPTDVKE.L          |        | 2 | 2,5187 | 0,17  | -0,114 |
| 6 | P17844 DDX5_HUMAN   | E.LAQVQVQVAAE.Y         |        | 2 | 2,5145 | 0,122 | -0,103 |
| 6 | Q04637 IF4G1_HUMAN  | E.AALPPVS#PLKAALSEEE.L  | S1232: | 3 | 2,5143 | 0,153 | 0,102  |
| 6 | P22234 PUR6_HUMAN   | E.IVLADVIDND.S          |        | 2 | 2,5139 | 0,341 | -0,786 |
| 6 | O00358 FOXO1_HUMAN  | R.VFGLVPERPLS#PE.L      | S231:  | 2 | 2,5125 | 0,288 | -0,161 |
| 6 | P10809 CH60_HUMAN   | D.AAGVASLLTTAE.V        |        | 2 | 2,5113 | 0,362 | -0,111 |
| 6 | Q9Y3F4 STRAP_HUMAN  | E.IAS#ENSDCIFPSAPDVKA.- | S335:  | 3 | 2,5098 | 0,245 | 0      |
| 6 | Q9UMS4 PRP19_HUMAN  | E.NGTDPINNOPLSE.E       |        | 2 | 2,5029 | 0,384 | 0,087  |
| 6 | Q9NS86 LANC2_HUMAN  | E.AAAGALLASGAAEE.T      |        | 2 | 2,5007 | 0,223 | -1,218 |
| 6 | Q9BZD4 NUF2_HUMAN   | E.SLNLEDQIESDE.S        |        | 2 | 2,5007 | 0,245 | 0      |
| 6 | P35579 MYH9_HUMAN   | E.TLQSQLM*AE.K          |        | 2 | 2,5003 | 0,15  | 0,118  |
| 6 | Q03001 BPA1_HUMAN   | E.DFLEDSQE.S            |        | 2 | 2,4975 | 0,236 | 0,248  |
| 6 | P51157 RAB28_HUMAN  | K.IVVLDGASGK.T          |        | 2 | 2,4972 | 0,246 | -0,12  |
| 6 | Q5JVS0 HABP4_HUMAN  | E.SQGTPEEES#PAKVPELE.V  | S273:  | 2 | 2,4904 | 0,151 | -1,152 |
| 6 | P07954 FUMH_HUMAN   | E.LGYLTAEQFDE.W         |        | 2 | 2,4896 | 0,295 | -0,285 |
| 6 | Q9NR48 ASH1L_HUMAN  | E.GAALHLS#PDTVTDVIE.A   | S1889: | 2 | 2,4873 | 0,414 | -0,355 |
| 6 | P46821 MAP1B_HUMAN  | E.EGGYSYDISEK.T         |        | 2 | 2,4867 | 0,286 | -0,098 |
| 6 | Q9P270 SLAI2_HUMAN  | R.AGASIPSSGAAS#PR.G     | S63:   | 2 | 2,4866 | 0,384 | -0,093 |
| 6 | Q969U6 FBXW5_HUMAN  | R.IFDLGSNDNEE.V         |        | 2 | 2,4838 | 0,214 | 0,107  |
| 6 | P02538 K2C6A_HUMAN  | K.ADTLTDEINFLR.A        |        | 2 | 2,4837 | 0,342 | -0,433 |
| 6 | P42677 RS27_HUMAN   | K.DLLHPS#PEEE.K         | S11:   | 2 | 2,4806 | 0,272 | 0,098  |
| 6 | P39656 OST48_HUMAN  | E.DFGGNINVE.T           |        | 2 | 2,4801 | 0,287 | 0,19   |
| 6 | A6NJL0 A6NJL0_HUMAN | D.QLIDLNEM*.-           |        | 2 | 2,4782 | 0,401 | 0      |
| 6 | P13645 K1C10_HUMAN  | R.SQYEQLAEQNRK.D        |        | 2 | 2,4732 | 0,259 | 0,163  |
| 6 | Q15424 SAFB1_HUMAN  | E.SLS#DSRELVEGE.M       | S161:  | 2 | 2,4718 | 0,391 | 0,261  |
| 6 | P27816 MAP4_HUMAN   | K.KCS#LPAEE.D           | S636:  | 2 | 2,4705 | 0,209 | 0,06   |
| 6 | P43246 MSH2_HUMAN   | E.DILFGNND.M            |        | 2 | 2,4702 | 0,231 | 0      |
| 6 | Q7Z4H7 FA29A_HUMAN  | R.IDVM*GGSEEE.F         |        | 2 | 2,4651 | 0,206 | -0,451 |
| 6 | P01833 PIGR_HUMAN   | K.DGSFSVVITGLR.K        |        | 2 | 2,4649 | 0,346 | 0,195  |
| 6 | Q12931 TRAP1_HUMAN  | E.SSALPSGQLTSLSE.Y      |        | 2 | 2,4646 | 0,284 | -0,089 |
| 6 | Q9UG63 ABCF2_HUMAN  | E.NGDVVTEPQVAE.K        |        | 2 | 2,4621 | 0,287 | 0,097  |
| 6 | P61019 RAB2A_HUMAN  | E.GVFDINNE.A            |        | 2 | 2,4604 | 0,199 | 0,067  |
| 6 | P38606 VATA_HUMAN   | E.GDM*ATIQQVYEE.T       |        | 2 | 2,4529 | 0,16  | 0,192  |
| 6 | Q8TCS8 PNPT1_HUMAN  | E.TGVTISQVDEE.T         |        | 2 | 2,4521 | 0,211 | 0,207  |
| 6 | P02538 K2C6A_HUMAN  | R.AIGGGLSSVGGGSSTIK.Y   |        | 2 | 2,4457 | 0,307 | 0      |

|   |                    |                             |           |   |        |       |        |
|---|--------------------|-----------------------------|-----------|---|--------|-------|--------|
| 6 | Q5VWN6 CJ018_HUMAN | E.VS#PASSPEPPVPVKE.T        | S1400:    | 2 | 2,4398 | 0,149 | 0      |
| 6 | Q7Z406 MYH14_HUMAN | E.AAQPFLLTPR.G              |           | 2 | 2,4379 | 0,231 | 0,106  |
| 6 | P62937 PPIA_HUMAN  | K.ITIADCGQLE.-              |           | 2 | 2,4378 | 0,311 | 0,218  |
| 6 | Q8TE77 SSH3_HUMAN  | K.VGGVS#PEEHPAPE.V          | S484:     | 2 | 2,4363 | 0,298 | -0,088 |
| 6 | Q12888 TP53B_HUMAN | E.TSVISIDS#PQK.L            | S727:     | 2 | 2,4351 | 0,333 | 0,097  |
| 6 | P62826 RAN_HUMAN   | E.VAQTTALPDEDDDL.-          |           | 2 | 2,4321 | 0,179 | 0,325  |
| 6 | Q16718 NDUA5_HUMAN | E.DQLQGGQLE.E               |           | 2 | 2,4295 | 0,134 | 0,123  |
| 6 | Q9BQG0 MBB1A_HUMAN | E.QLMTVLQAGK.A              |           | 2 | 2,4291 | 0,331 | 0,224  |
| 6 | O43583 DENR_HUMAN  | K.LTVENS#PKQE.A             | S73:      | 2 | 2,4288 | 0,187 | 0      |
| 6 | P13647 K2C5_HUMAN  | K.AQYEEIANR.S               |           | 2 | 2,4265 | 0,371 | 0,112  |
| 6 | Q5T5U3 RHG21_HUMAN | K.SNTAVCVCNE.S              |           | 2 | 2,4248 | 0,222 | 0,211  |
| 6 | Q58FF7 H90B3_HUMAN | E.GLELPEDEEE.K              |           | 2 | 2,424  | 0,373 | 0,631  |
| 6 | P16435 NCPH_HUMAN  | E.LAQYASEPSEQE.L            |           | 2 | 2,4235 | 0,193 | 0      |
| 6 | P31949 S10AB_HUMAN | D.TNSDGLDFSE.F              |           | 2 | 2,4202 | 0,291 | 0,101  |
| 6 | Q03188 CENPC_HUMAN | E.AS#LQFVVEPSEATNRS#VQAHE.V | S96:S110: | 3 | 2,42   | 0,283 | 0,223  |
| 6 | Q13951 PEBB_HUMAN  | E.DALAQQAEE.A               |           | 2 | 2,4175 | 0,265 | -0,217 |
| 6 | Q15046 SYK_HUMAN   | E.NVATDTLE.S                |           | 2 | 2,4152 | 0,247 | 0      |
| 6 | Q15788 NCOA1_HUMAN | E.DQCISSQLDE.L              |           | 2 | 2,4135 | 0,242 | 0,204  |
| 6 | P35579 MYH9_HUMAN  | E.M*ETLQSQLM*AE.K           |           | 2 | 2,4135 | 0,241 | 0,279  |
| 6 | O75223 CG024_HUMAN | E.NGLPLEYQE.K               |           | 2 | 2,4135 | 0,187 | 0,115  |
| 6 | O75400 PR40A_HUMAN | E.VTSIVATVVDNE.N            |           | 2 | 2,4123 | 0,295 | 0      |
| 6 | P19013 K2C4_HUMAN  | K.LLEGEYR.M                 |           | 2 | 2,4072 | 0,116 | 0      |
| 6 | Q04637 IF4G1_HUMAN | E.NQPPAGSNPGPESE.G          |           | 2 | 2,4059 | 0,31  | 0,265  |
| 6 | Q16236 NF2L2_HUMAN | E.VGNCS#PHFLNAFE.D          | S243:     | 2 | 2,4023 | 0,238 | -0,543 |
| 6 | P31946 1433B_HUMAN | D.STLIM*QLLR.D              |           | 2 | 2,4017 | 0,239 | -0,447 |
| 6 | Q9H8S9 MOL1B_HUMAN | E.AT#LGSGLNRQAVM*LPE.G      | T35:      | 2 | 2,4017 | 0,273 | 0      |
| 6 | P13798 ACPH_HUMAN  | E.NVQYAGLDFE.A              |           | 2 | 2,4012 | 0,244 | -0,106 |
| 6 | Q96L73 NSD1_HUMAN  | E.NS#LISTKEEPPVLE.R         | S1334:    | 2 | 2,4007 | 0,259 | -0,149 |
| 6 | P27816 MAP4_HUMAN  | E.AQTLDSQIQE.T              |           | 2 | 2,3932 | 0,148 | 0,215  |
| 6 | Q04637 IF4G1_HUMAN | E.AALPPVS#PLK.A             | S1232:    | 2 | 2,391  | 0,275 | 0,114  |
| 6 | P62258 1433E_HUMAN | E.ALQDVEDENQ.-              |           | 2 | 2,3907 | 0,288 | 0,105  |
| 6 | Q9UBB5 MBD2_HUMAN  | E.EALM*ADILSR.A             |           | 2 | 2,3897 | 0,306 | 0,107  |
| 6 | O75643 U520_HUMAN  | E.IQNM*DDNIDE.T             |           | 2 | 2,3881 | 0,155 | 0,299  |
| 6 | Q8NE71 ABCF1_HUMAN | E.SIDALGEAINE.Y             |           | 2 | 2,3873 | 0,21  | -0,108 |
| 6 | Q6S8J3 A26CA_HUMAN | K.AGFAGDDAPR.A              |           | 2 | 2,386  | 0,3   | 0,125  |
| 6 | P61626 LYSC_HUMAN  | K.RLGMDGYR.G                |           | 2 | 2,3852 | 0,191 | -0,189 |
| 6 | Q9UKM9 RALY_HUMAN  | E.EGLLTHS#EEEELE.H          | S288:     | 2 | 2,3794 | 0,208 | 0,499  |
| 6 | Q15435 PP1R7_HUMAN | E.NIDTLTNLE.S               |           | 2 | 2,3785 | 0,097 | 0,118  |
| 6 | P34932 HSP74_HUMAN | E.M*LNLYEIENE.G             |           | 2 | 2,3775 | 0,117 | 0      |

|   |                     |                            |       |   |        |       |        |
|---|---------------------|----------------------------|-------|---|--------|-------|--------|
| 6 | Q10570 CPSF1_HUMAN  | E.FSM*YCNFFNNS.E.R         |       | 2 | 2,376  | 0,269 | -0,31  |
| 6 | P35659 DEK_HUMAN    | E.NYPTYDLTE.R              |       | 2 | 2,3743 | 0,177 | 0,437  |
| 6 | Q02952 AKA12_HUMAN  | E.LVTTCQAE.T               |       | 2 | 2,3707 | 0,298 | 0,265  |
| 6 | Q02952 AKA12_HUMAN  | E.GSTVNDQQL.E.V            |       | 2 | 2,3688 | 0,202 | 0,1    |
| 6 | Q8N5D0 WDTC1_HUMAN  | E.VM*LLNM*GYR.I            |       | 2 | 2,3661 | 0,312 | 0,108  |
| 6 | P50502 F10A1_HUMAN  | E.VLAAM*QDPE.V             |       | 2 | 2,3659 | 0,246 | 0,185  |
| 6 | P27797 CALR_HUMAN   | D.NFLITNDE.A               |       | 2 | 2,3633 | 0,099 | 0,189  |
| 6 | A8KAP4 A8KAP4_HUMAN | E.VCTTSFSTS#PPSQLM*VPGKE.G | S259: | 3 | 2,3571 | 0,116 | 0,732  |
| 6 | P19013 K2C4_HUMAN   | K.SISMSVAGSR.Q             |       | 2 | 2,3561 | 0,385 | -0,061 |
| 6 | P49023 PAXI_HUMAN   | K.TGSSS#PPGGPPKPGSQLD.S    | S322: | 2 | 2,353  | 0,26  | 0,14   |
| 6 | P39023 RL3_HUMAN    | E.QQVPVNVFGQDE.M           |       | 2 | 2,3468 | 0,274 | 0,41   |
| 6 | P11388 TOP2A_HUMAN  | E.GSPQEDGVELE.G            |       | 2 | 2,3467 | 0,223 | 0,316  |
| 6 | Q8TA97 Q8TA97_HUMAN | E.GGAAS#PTSPILVPGIK.V      | S469: | 2 | 2,3426 | 0,256 | 0,079  |
| 6 | P31949 S10AB_HUMAN  | K.ISS#PTETERCIE.S          | S6:   | 2 | 2,3424 | 0,318 | -0,081 |
| 6 | Q9BYG5 PAR6B_HUMAN  | E.DNGVPPQIPK.A             |       | 2 | 2,3419 | 0,306 | -0,334 |
| 6 | O43491 E41L2_HUMAN  | E.LGDYDPEEHGS#IDLSE.F      | S355: | 2 | 2,3401 | 0,205 | 0,263  |
| 6 | Q02952 AKA12_HUMAN  | E.LTQPTESQAND.I            |       | 2 | 2,3396 | 0,34  | 0,101  |
| 6 | Q9H0H5 RGAP1_HUMAN  | K.VSLLGPVTT#PE.H           | T580: | 2 | 2,3396 | 0,173 | -0,205 |
| 6 | Q4KMP7 TB10B_HUMAN  | R.AAGGAPS#PPPPVR.R         | S403: | 2 | 2,3392 | 0,236 | 0,195  |
| 6 | Q9H7N4 SFR19_HUMAN  | E.GLS#QSISR.I              | S291: | 2 | 2,3379 | 0,168 | -0,066 |
| 6 | Q14676 MDC1_HUMAN   | E.GKAPQAVPLEK.S            |       | 2 | 2,337  | 0,333 | 0      |
| 6 | P20061 TCO1_HUMAN   | R.GTSAVNVVLSLK.L           |       | 2 | 2,337  | 0,244 | -0,205 |
| 6 | Q9H307 PININ_HUMAN  | E.SVEPSENEAS#KELEPEM*E.F   | S422: | 2 | 2,3321 | 0,21  | 0,115  |
| 6 | Q00839 HNRPU_HUMAN  | E.NDVITCFANFE.S            |       | 2 | 2,3311 | 0,215 | -0,367 |
| 6 | Q9H299 SH3L3_HUMAN  | E.AVEQNTLQE.F              |       | 2 | 2,3297 | 0,174 | 0,236  |
| 6 | P17987 TCPA_HUMAN   | E.AAM*LGQAEE.V             |       | 2 | 2,3293 | 0,152 | 0,326  |
| 6 | Q7Z4H7 FA29A_HUMAN  | E.TFS#PAVGNR.I             | S715: | 2 | 2,3269 | 0,244 | 0      |
| 6 | Q13427 PPIG_HUMAN   | E.SIYGGFFEDE.S             |       | 2 | 2,3264 | 0,183 | -0,21  |
| 6 | Q14204 DYHC1_HUMAN  | E.GEIAENLPEQE.I            |       | 2 | 2,325  | 0,165 | 0,099  |
| 6 | Q6IA86 ELP2_HUMAN   | E.GATVPALGLSNK.A           |       | 2 | 2,3235 | 0,223 | -1,298 |
| 6 | P09211 GSTP1_HUMAN  | E.AALVDM*VNDGVED.L         |       | 2 | 2,3216 | 0,176 | 0,447  |
| 6 | P22234 PUR6_HUMAN   | E.TAFIAPQCE.M              |       | 2 | 2,3209 | 0,326 | 0,353  |
| 6 | P22314 UBA1_HUMAN   | E.VQGLQPNGEE.M             |       | 2 | 2,3195 | 0,296 | -0,228 |
| 6 | Q13564 ULA1_HUMAN   | E.IISSM*DNPNE.I            |       | 2 | 2,3188 | 0,197 | -0,098 |
| 6 | P78417 GSTO1_HUMAN  | E.LYLQNSPE.A               |       | 2 | 2,315  | 0,215 | 0,253  |
| 6 | Q9UPN3 MACF1_HUMAN  | E.DLLQDSM*DE.K             |       | 2 | 2,3132 | 0,172 | 0,113  |
| 6 | P10809 CH60_HUMAN   | D.M*AIATGGAVFGEE.G         |       | 2 | 2,3082 | 0,285 | 0,288  |
| 6 | P81605 DCD_HUMAN    | K.DAVEDLESVGK.G            |       | 2 | 2,3078 | 0,207 | 0      |
| 6 | P00558 PGK1_HUMAN   | K.VLPGVDALSNI.-            |       | 2 | 2,3059 | 0,324 | -0,444 |

|   |                    |                               |        |   |        |       |        |
|---|--------------------|-------------------------------|--------|---|--------|-------|--------|
| 6 | P11532 DMD_HUMAN   | E.M*M*PT#SPQSPRDAELIAE.A      | T3548: | 2 | 2,3051 | 0,094 | 0,246  |
| 6 | Q99460 PSMD1_HUMAN | E.ALQLM*ATYLPK.D              |        | 2 | 2,3036 | 0,134 | 0,096  |
| 6 | Q8NFC6 FA44A_HUMAN | E.SAEGDS#QIGTVVEHVE.A         | S1906: | 2 | 2,3011 | 0,318 | -1,124 |
| 6 | Q9NR45 SIAS_HUMAN  | K.QLLPCEM*ACNE.K              |        | 2 | 2,3005 | 0,202 | 0,088  |
| 6 | P31946 1433B_HUMAN | R.NLLS#VAYK.N                 | S47:   | 2 | 2,3003 | 0,194 | 0      |
| 6 | Q4KMQ1 CI075_HUMAN | R.QCVSAATSTNDSFE.I            |        | 2 | 2,3001 | 0,326 | 0,161  |
| 6 | Q99661 KIF2C_HUMAN | E.M*EACS#NGALIPGNLSKEEEE.L    | S611:  | 2 | 2,2954 | 0,283 | 0,537  |
| 6 | Q07021 C1QBP_HUMAN | E.VSFQSTGESE.W                |        | 2 | 2,2939 | 0,19  | -0,114 |
| 6 | P13646 K1C13_HUMAN | R.LKYENELALR.Q                |        | 3 | 2,2926 | 0,159 | 0,439  |
| 6 | Q13546 RIPK1_HUMAN | D.CVAVPSS#R.S                 | S331:  | 2 | 2,2916 | 0,145 | 0,191  |
| 6 | P54578 UBP14_HUMAN | E.NQLQLSCFINQE.V              |        | 2 | 2,2893 | 0,337 | -0,082 |
| 6 | P10243 MYBA_HUMAN  | E.NQPVSAQQNSPT#KFLAVE.A       | T338:  | 2 | 2,289  | 0,261 | 0,299  |
| 6 | P30279 CCND2_HUMAN | E.LDQAST#PTDVRDIDL.-          | T280:  | 2 | 2,2871 | 0,347 | 0,351  |
| 6 | Q15424 SAFB1_HUMAN | E.NSGDGDQEDVETSLE.N           |        | 2 | 2,2866 | 0,165 | 0,165  |
| 6 | Q9UHR4 BI2L1_HUMAN | E.AVTVPTSPST#PVR.S            | T416:  | 2 | 2,2859 | 0,187 | -0,087 |
| 6 | P30101 PDIA3_HUMAN | E.NFDEIVNNE.N                 |        | 2 | 2,2848 | 0,104 | 0,112  |
| 6 | P49736 MCM2_HUMAN  | E.GLALDDEDVEE.L               |        | 2 | 2,2833 | 0,215 | 0,203  |
| 6 | O75717 WDHD1_HUMAN | E.AILLACESTDE.L               |        | 2 | 2,2795 | 0,296 | 0,1    |
| 6 | P13639 EF2_HUMAN   | E.LLYEGPPDDE.A                |        | 2 | 2,2775 | 0,259 | 0,213  |
| 6 | Q9UBB5 MBD2_HUMAN  | E.ALM*ADILSR.A                |        | 2 | 2,2764 | 0,295 | 0,121  |
| 6 | Q14839 CHD4_HUMAN  | E.VTAVDGYET#DHQDYCE.V         | T367:  | 3 | 2,2749 | 0,188 | 0,462  |
| 6 | O00487 PSDE_HUMAN  | E.GLTLDQDYSE.H                |        | 2 | 2,2711 | 0,253 | 0      |
| 6 | Q9UBQ5 EIF3K_HUMAN | E.SGQIFICSQEE.S               |        | 2 | 2,27   | 0,215 | 0,282  |
| 6 | Q96F24 NRBF2_HUMAN | E.LS#EDILKGF*NN.-             | S277:  | 2 | 2,269  | 0,172 | -1,404 |
| 6 | P50851 LRBA_HUMAN  | E.NQELPDEGTLEE.T              |        | 2 | 2,2664 | 0,223 | 0      |
| 6 | P02768 ALBU_HUMAN  | K.KVPQVSTPTLVEVSR.N           |        | 3 | 2,2653 | 0,141 | 0,335  |
| 6 | Q9H0H5 RGAP1_HUMAN | K.VSLLGPVTTPE.H               |        | 2 | 2,2639 | 0,329 | -0,438 |
| 6 | P29317 EPHA2_HUMAN | E.ASESPCLECPE.H               |        | 2 | 2,2629 | 0,207 | 0      |
| 6 | Q58FF7 H90B3_HUMAN | E.DQTEYLEE.R                  |        | 2 | 2,2573 | 0,096 | 0,356  |
| 6 | P13647 K2C5_HUMAN  | R.ISISTSGGSFR.N               |        | 2 | 2,2557 | 0,414 | 0,219  |
| 6 | P05783 K1C18_HUMAN | E.STTVVTTQSAE.V               |        | 2 | 2,2556 | 0,285 | 0,217  |
| 6 | Q6ZTN6 AN13D_HUMAN | E.SLQLSTEPR.G                 |        | 2 | 2,2547 | 0,364 | -0,237 |
| 6 | P06748 NPM_HUMAN   | K.DYHFKVDNDENE.H              |        | 2 | 2,254  | 0,098 | 0,08   |
| 6 | Q7Z3U7 MON2_HUMAN  | E.GSS#PTQSTEQDQLQSTSDQM*DKE.I | S523:  | 3 | 2,2519 | 0,212 | 0,419  |
| 6 | P60709 ACTB_HUMAN  | R.GYSFTTTAE.R                 |        | 2 | 2,2499 | 0,186 | 0,125  |
| 6 | P36915 GNL1_HUMAN  | R.NPYALLGEDEC.-               |        | 2 | 2,2483 | 0,16  | 0      |
| 6 | Q02952 AKA12_HUMAN | E.EVVLPSSEE.G                 |        | 2 | 2,248  | 0,247 | -0,237 |
| 6 | Q08945 SSRP1_HUMAN | E.GM*NPSYDEYAD.S              |        | 2 | 2,2449 | 0,166 | 0,095  |
| 6 | Q96KP4 CNDP2_HUMAN | E.GM*EESGSEGLDE.L             |        | 2 | 2,2447 | 0,14  | 0,194  |

|   |                    |                                        |          |   |        |       |        |
|---|--------------------|----------------------------------------|----------|---|--------|-------|--------|
| 6 | Q9UJM3 ERRFI_HUMAN | R.GS#RPLPLPISE.A                       | S150:    | 2 | 2,2443 | 0,236 | -0,182 |
| 6 | O00410 IMB3_HUMAN  | E.CIAQLSPEQQAIIQE.L                    |          | 2 | 2,2434 | 0,177 | 0,362  |
| 6 | Q15404 RSU1_HUMAN  | E.VLNFFNNQIEE.L                        |          | 2 | 2,2434 | 0,148 | -0,357 |
| 6 | Q14160 LAP4_HUMAN  | R.ALS#PAELR.A                          | S1486:   | 2 | 2,2421 | 0,221 | 0,195  |
| 6 | Q9UHB6 LIMA1_HUMAN | E.NSYSLDDLE.I                          |          | 2 | 2,2417 | 0,205 | 0      |
| 6 | Q9UJX5 APC4_HUMAN  | E.SSVLTSFYNAEDE.S                      |          | 2 | 2,2412 | 0,128 | -0,25  |
| 6 | Q9Y490 TLN1_HUMAN  | E.M*DSALSVVQNLE.K                      |          | 2 | 2,2398 | 0,14  | -0,185 |
| 6 | Q92598 HS105_HUMAN | D.ISTTLNADE.A                          |          | 2 | 2,2397 | 0,162 | 0,063  |
| 6 | P60842 IF4A1_HUMAN | E.TFYNTSIEE.M                          |          | 2 | 2,2373 | 0,124 | 0,221  |
| 6 | Q14247 SRC8_HUMAN  | E.ASSQQGLAYATE.A                       |          | 2 | 2,2361 | 0,368 | 0,498  |
| 6 | Q9ULF5 S39AA_HUMAN | E.GQQES#PPKNYLCIEE.E                   | S591:    | 2 | 2,2331 | 0,277 | -0,196 |
| 6 | Q4KMP7 TB10B_HUMAN | R.AS#AGPAPGPVVTAE.G                    | S412:    | 2 | 2,2321 | 0,138 | 0,187  |
| 6 | Q99961 SH3G1_HUMAN | K.IAASSS#FR.S                          | S288:    | 2 | 2,2318 | 0,297 | 0,199  |
| 6 | O75367 H2AY_HUMAN  | E.ISNLAGFEVE.A                         |          | 2 | 2,2311 | 0,117 | 0      |
| 6 | Q9NQP4 PFD4_HUMAN  | E.DVNVTFE.D                            |          | 2 | 2,2302 | 0,11  | 0,222  |
| 6 | O75534 CSDE1_HUMAN | E.TLQPGDDVE.F                          |          | 2 | 2,2297 | 0,4   | 0,251  |
| 6 | Q86U44 MTA70_HUMAN | E.AALS#PTFRS#DSPVPTAPTSGGPKPSTASAVPE.L | S43:S48: | 3 | 2,2289 | 0,143 | 0,339  |
| 6 | P49327 FAS_HUMAN   | E.AIAPLLQE.L                           |          | 2 | 2,226  | 0,289 | 0,192  |
| 6 | Q02952 AKA12_HUMAN | E.VVLPS#EEEEGGAGTK.S                   | S1663:   | 2 | 2,2258 | 0,192 | -0,081 |
| 6 | Q86YC2 PALB2_HUMAN | E.SEILS#QPK.S                          | S376:    | 2 | 2,2254 | 0,172 | -0,062 |
| 6 | Q9Y5K6 CD2AP_HUMAN | E.TDVVNFDDIASSE.N                      |          | 2 | 2,2242 | 0,238 | 0      |
| 6 | Q09666 AHNK_HUMAN  | E.LS#LPAIHVE.G                         | S5125:   | 2 | 2,2216 | 0,104 | -0,23  |
| 6 | Q8WWH5 TRUB1_HUMAN | E.AAVVSSPSLK.T                         |          | 2 | 2,2212 | 0,306 | 0,064  |
| 6 | Q9Y2W1 TR150_HUMAN | E.M*KS#PREPGYKAE.G                     | S698:    | 3 | 2,2208 | 0,248 | -0,246 |
| 6 | Q9Y6A5 TACC3_HUMAN | K.VSGSPEQAVEE.N                        |          | 2 | 2,2153 | 0,285 | 0      |
| 6 | P12270 TPR_HUMAN   | E.GVQGPLNVLSLEE.G                      |          | 2 | 2,2138 | 0,199 | 0,275  |
| 6 | Q9BVW5 TIPIN_HUMAN | E.DFVSNNDE.V                           |          | 2 | 2,2137 | 0,084 | -0,065 |
| 6 | Q9Y490 TLN1_HUMAN  | E.LGPLANQLTSD.Y                        |          | 2 | 2,2109 | 0,281 | -0,108 |
| 6 | Q3KQU3 MA7D1_HUMAN | E.LGAGAPPVVAR.T                        |          | 2 | 2,207  | 0,348 | 0,113  |
| 6 | P01591 IGJ_HUMAN   | R.SSEDPNEDIVER.N                       |          | 2 | 2,2064 | 0,166 | -0,088 |
| 6 | P36542 ATPG_HUMAN  | E.LLNSGYEFDE.G                         |          | 2 | 2,2049 | 0,275 | 0,514  |
| 6 | Q14257 RCN2_HUMAN  | E.ALLGVQEDVDE.Y                        |          | 2 | 2,2024 | 0,32  | 0,205  |
| 6 | Q86VR2 F134C_HUMAN | E.LAITDS#EHSDAEVSCTD.N                 | S285:    | 2 | 2,2009 | 0,224 | 0,316  |
| 6 | P39656 OST48_HUMAN | E.LGSECGIEFDEE.K                       |          | 2 | 2,198  | 0,254 | 0,176  |
| 6 | Q9UKS6 PACN3_HUMAN | E.VTLTSIVPTR.D                         |          | 2 | 2,1967 | 0,126 | 0      |
| 6 | P13645 K1C10_HUMAN | K.VTMQNLNDR.L                          |          | 2 | 2,1967 | 0,247 | -0,112 |
| 6 | P14618 KPYM_HUMAN  | E.GSDVANAVLD.G                         |          | 2 | 2,1959 | 0,305 | 0,254  |
| 6 | P26641 EF1G_HUMAN  | E.SNAIAYYSNEE.L                        |          | 2 | 2,193  | 0,302 | 0,09   |
| 6 | P42695 CNDD3_HUMAN | R.ASAGHVAVSSPTPE.T                     |          | 2 | 2,1927 | 0,345 | -0,186 |



|   |                     |                       |              |   |        |       |        |
|---|---------------------|-----------------------|--------------|---|--------|-------|--------|
| 6 | P13646 K1C13_HUMAN  | R.SLLEGQDAK.M         |              | 2 | 2,1924 | 0,115 | 0,19   |
| 6 | Q9UJN8 MCD2L_HUMAN  | K.GSEQAPLM*SEDE.L     |              | 2 | 2,1896 | 0,195 | 0,093  |
| 6 | Q6P0N0 CN106_HUMAN  | E.NQVAM*SFYK.H        |              | 2 | 2,1893 | 0,236 | 0,111  |
| 6 | P61626 LYSC_HUMAN   | R.ATNYNAGDR.S         |              | 2 | 2,1886 | 0,427 | 0      |
| 6 | Q9Y2J2 E41L3_HUMAN  | E.TISFGSVS#PGGVKLE.I  | S962:        | 2 | 2,1856 | 0,121 | -0,157 |
| 6 | Q92576 PHF3_HUMAN   | E.NSLVGLPSCVDE.V      |              | 2 | 2,1809 | 0,13  | 0,189  |
| 6 | Q13765 NACA_HUMAN   | D.ETGVEVKDIE.L        |              | 2 | 2,1759 | 0,324 | -0,218 |
| 6 | Q03468 ERCC6_HUMAN  | E.QDCLQSQPVSNNEE.M    |              | 2 | 2,1734 | 0,206 | 0,296  |
| 6 | O43294 TGF1_HUMAN   | K.GSLDTM*LGLLQSD.L    |              | 2 | 2,1728 | 0,21  | -0,804 |
| 6 | Q9BUA3 YK007_HUMAN  | R.ALCM*VCGAE.I        |              | 2 | 2,1715 | 0,195 | 0      |
| 6 | Q7L014 DDX46_HUMAN  | D.AAVDIDEQIE.S        |              | 2 | 2,1697 | 0,106 | 0,111  |
| 6 | P00533 EGFR_HUMAN   | E.DHFLSLQR.M          |              | 2 | 2,1694 | 0,217 | 0,06   |
| 6 | Q96DY7 MTBP_HUMAN   | E.LS#PGKLQVLPFE.K     | S639:        | 2 | 2,1684 | 0,225 | -0,26  |
| 6 | Q9BXX5 B2L13_HUMAN  | E.VVPALEPTETLLS#EKE.I | S410:        | 2 | 2,1678 | 0,182 | 0      |
| 6 | Q9H0E9 BRD8_HUMAN   | E.AAS#LEEPKEEDQGE.G   | S641:        | 2 | 2,1673 | 0,195 | 0,53   |
| 6 | Q8IYL2 U383_HUMAN   | R.SLSGPEQGTACCE.L     |              | 2 | 2,1667 | 0,233 | -0,175 |
| 6 | Q9BQG0 MBB1A_HUMAN  | E.QLM*TVLQAGK.A       |              | 2 | 2,1654 | 0,341 | 0      |
| 6 | Q13564 ULA1_HUMAN   | E.NGAPEDENFEE.A       |              | 2 | 2,1648 | 0,138 | 0      |
| 6 | Q9H7N4 SFR19_HUMAN  | R.AAKVPS#TPPPK.A      | S975:        | 2 | 2,1632 | 0,191 | 0      |
| 6 | Q14160 LAP4_HUMAN   | E.QLDLGGNDLE.V        |              | 2 | 2,1609 | 0,164 | 0,114  |
| 6 | Q9Y490 TLN1_HUMAN   | K.VLVQNAAGSQE.K       |              | 2 | 2,1558 | 0,138 | 0,547  |
| 6 | P35579 MYH9_HUMAN   | E.LEDTLDSTAAQQE.L     |              | 2 | 2,1515 | 0,21  | 0,086  |
| 6 | Q9NQ88 CL005_HUMAN  | E.QFSQGSNSNLE.T       |              | 2 | 2,1492 | 0,109 | 0,36   |
| 6 | Q08378 GOGA3_HUMAN  | E.DTICLLQNE.K         |              | 2 | 2,1451 | 0,114 | -0,331 |
| 6 | Q58FF8 H90B2_HUMAN  | E.TFAFQAE.I           |              | 2 | 2,1432 | 0,086 | 0,749  |
| 6 | P50548 ERF_HUMAN    | E.GAGALAPPPPPQIK.V    |              | 2 | 2,1393 | 0,312 | 0      |
| 6 | Q9BPX3 CND3_HUMAN   | E.ADSESE#DHEVPEPESE.M | S975:        | 2 | 2,1389 | 0,279 | 0,07   |
| 6 | P35580 MYH10_HUMAN  | E.DQSILCTGE.S         |              | 2 | 2,1377 | 0,152 | 0,119  |
| 6 | Q92563 TICN2_HUMAN  | E.GETPGNFM*EDE.Q      |              | 2 | 2,1347 | 0,232 | -0,295 |
| 6 | Q6GYQ0 GRIPE_HUMAN  | R.SSST#SDILEPFTVE.R   | T798:        | 2 | 2,1342 | 0,126 | -0,307 |
| 6 | P41250 SYG_HUMAN    | E.ISELPVIVQD.L        |              | 2 | 2,1338 | 0,137 | 0      |
| 6 | P11182 ODB2_HUMAN   | E.GDTVSVQFDSICE.V     |              | 2 | 2,133  | 0,095 | 0      |
| 6 | Q15388 TOM20_HUMAN  | R.IVSAQSLAEDDVE.-     |              | 2 | 2,1315 | 0,122 | 0,177  |
| 6 | Q03519 TAP2_HUMAN   | E.ATSALDVQCE.Q        |              | 2 | 2,1306 | 0,246 | 0,446  |
| 6 | Q9UK45 LSM7_HUMAN   | E.AIPNPFIQQDA.-       |              | 2 | 2,1294 | 0,333 | -0,273 |
| 6 | O60343 TBCD4_HUMAN  | E.DSGFDEQQE.F         |              | 2 | 2,1293 | 0,157 | 0,231  |
| 6 | A8K710 A8K710_HUMAN | E.QSNTPLLLPLAAR.M     |              | 2 | 2,128  | 0,201 | 0,263  |
| 6 | P25054 APC_HUMAN    | E.SLSPSS#RPAS#PTR.S   | S2469:S2473: | 2 | 2,1217 | 0,169 | 0,487  |
| 6 | Q15020 SART3_HUMAN  | E.NSIPAAGETQNVE.V     |              | 2 | 2,1214 | 0,272 | 0,183  |

|   |                     |                                    |        |   |        |       |        |
|---|---------------------|------------------------------------|--------|---|--------|-------|--------|
| 6 | O00299 CLIC1_HUMAN  | D.NYLTSPLPEEVDE.T                  |        | 2 | 2,1195 | 0,086 | -0,081 |
| 6 | P05787 K2C8_HUMAN   | E.LGNM*QGLVE.D                     |        | 2 | 2,1192 | 0,126 | 0,187  |
| 6 | Q8NEZ4 MLL3_HUMAN   | E.SVTLPLETLVSV#PHEE.S              | S701:  | 2 | 2,1144 | 0,117 | -0,352 |
| 6 | Q13111 CAF1A_HUMAN  | K.ATLTAS#PLGAS.-                   | S933:  | 2 | 2,1137 | 0,236 | 0,114  |
| 6 | Q86SQ0 PHLB2_HUMAN  | E.SSYLSILPKT#PEGISE.E              | T574:  | 2 | 2,1136 | 0,166 | -0,271 |
| 6 | Q8WWH5 TRUB1_HUMAN  | E.AAVVSS#PSLK.T                    | S11:   | 2 | 2,1122 | 0,292 | 0      |
| 6 | P23634 AT2B4_HUMAN  | R.VLPANS#M*AESRE.G                 | S13:   | 2 | 2,1118 | 0,217 | 0,261  |
| 6 | P02788 TRFL_HUMAN   | K.DSAIGFSR.V                       |        | 2 | 2,1117 | 0,342 | 0,215  |
| 6 | P18669 PGAM1_HUMAN  | E.DQLPSCS.S                        |        | 2 | 2,1081 | 0,193 | 0,216  |
| 6 | Q02790 FKBP4_HUMAN  | K.SNTAGSQSQVETEA.-                 |        | 2 | 2,107  | 0,221 | 0,433  |
| 6 | P55036 PSMD4_HUMAN  | E.STM*VCVDNSE.Y                    |        | 2 | 2,1068 | 0,212 | 0,316  |
| 6 | Q7Z4Q2 HEAT3_HUMAN  | E.NTNGDDLIEDDE.M                   |        | 2 | 2,1057 | 0,139 | 0,181  |
| 6 | Q9UJN8 MCD2L_HUMAN  | E.QAPLM*SEDE.L                     |        | 2 | 2,1052 | 0,117 | 0,118  |
| 6 | Q5VY92 Q5VY92_HUMAN | R.M*QDIPEETESR.D                   |        | 2 | 2,1026 | 0,198 | 0,181  |
| 6 | Q58FF7 H90B3_HUMAN  | R.VFIM*DSCDE.L                     |        | 2 | 2,1011 | 0,227 | 0,108  |
| 6 | P40123 CAP2_HUMAN   | R.SALFAQLNQGE.A                    |        | 2 | 2,0961 | 0,277 | 0      |
| 6 | Q09666 AHNK_HUMAN   | E.VVLSGDDEE.Y                      |        | 2 | 2,0951 | 0,255 | 0,19   |
| 6 | O95613 PCNT_HUMAN   | E.LS#LM*GPVVHE.V                   | S1754: | 2 | 2,0947 | 0,194 | -0,104 |
| 6 | P06748 NPM_HUMAN    | D.M*DM*S#PLRPQNYLFGCE.L            | S10:   | 2 | 2,0945 | 0,306 | 0      |
| 6 | Q8TD19 NEK9_HUMAN   | R.LNPAVTCAGK.G                     |        | 2 | 2,0898 | 0,438 | 0,237  |
| 6 | P29966 MARCS_HUMAN  | E.AGEGGAEAPAAE.G                   |        | 2 | 2,0876 | 0,148 | 0,105  |
| 6 | P02788 TRFL_HUMAN   | R.THYYAVAVVK.K                     |        | 2 | 2,0865 | 0,179 | -0,212 |
| 6 | P49848 TAF6_HUMAN   | E.AGDSPPPAPGTPK.A                  |        | 2 | 2,0859 | 0,243 | 0,307  |
| 6 | O95433 AHSA1_HUMAN  | E.IPNLSDENSVDV.V                   |        | 2 | 2,0846 | 0,106 | 0,092  |
| 6 | P39687 AN32A_HUMAN  | E.GLTDEFEE.L                       |        | 2 | 2,0797 | 0,095 | 0,195  |
| 6 | A6NHR9 SMHD1_HUMAN  | E.NGTAFPFQVE.V                     |        | 2 | 2,0753 | 0,102 | -0,22  |
| 6 | A4UCT1 A4UCT1_HUMAN | -.DAGAEYVVE.S                      |        | 2 | 2,0745 | 0,081 | 0,32   |
| 6 | P01037 CYTN_HUMAN   | R.ALHFAISEYNK.A                    |        | 3 | 2,0735 | 0,092 | 0,354  |
| 6 | Q92974 ARHG2_HUMAN  | E.LLLTPREPALPLEPDS#GGNTSPGVTANGE.A | S690:  | 3 | 2,0715 | 0,389 | 0,184  |
| 6 | P23246 SFPQ_HUMAN   | E.AFSQFGPIE.R                      |        | 2 | 2,0623 | 0,298 | 0,306  |
| 6 | Q9HCM4 E41L5_HUMAN  | E.NS#PLLSR.S                       | S517:  | 2 | 2,0608 | 0,085 | 0,063  |
| 6 | Q14966 ZN638_HUMAN  | D.S#PSVKPNELEEE.S                  | S1119: | 2 | 2,06   | 0,259 | 0,085  |
| 6 | P45985 MP2K4_HUMAN  | E.VACYVCK.I                        |        | 2 | 2,0593 | 0,329 | 0,136  |
| 6 | P52747 ZN143_HUMAN  | E.AVTVADGDNLN.N                    |        | 2 | 2,0587 | 0,127 | -0,111 |
| 6 | P27816 MAP4_HUMAN   | E.AEAFDDVVE.T                      |        | 2 | 2,0575 | 0,334 | 0,116  |
| 6 | O43592 XPOT_HUMAN   | E.FCQALQQPD.A                      |        | 2 | 2,0556 | 0,192 | -1,653 |
| 6 | A5D8W1 YG011_HUMAN  | K.ILNLCSGK.I                       |        | 2 | 2,0556 | 0,132 | 0      |
| 6 | Q8WU90 ZC3HF_HUMAN  | E.IS#LEDLIERE.R                    | S231:  | 2 | 2,0519 | 0,288 | -0,376 |
| 6 | P35908 K22E_HUMAN   | K.FASFIDK.V                        |        | 2 | 2,0505 | 0,171 | 0      |

|   |                     |                           |        |   |        |       |        |
|---|---------------------|---------------------------|--------|---|--------|-------|--------|
| 6 | P13639 EF2_HUMAN    | E.NVNVIIISTYGEGE.S        |        | 2 | 2,0483 | 0,166 | 0,175  |
| 6 | P31943 HNRH1_HUMAN  | E.AFVELESEDE.V            |        | 2 | 2,0472 | 0,147 | 0,209  |
| 6 | Q92917 GPKOW_HUMAN  | E.LYIQQDNSE.R             |        | 2 | 2,0423 | 0,185 | 0      |
| 6 | P05556 ITB1_HUMAN   | E.CECQSEGIPESPK.C         |        | 2 | 2,0407 | 0,174 | 0,16   |
| 6 | Q14839 CHD4_HUMAN   | E.CTQAPAPASEDE.K          |        | 2 | 2,0361 | 0,222 | 0,096  |
| 6 | Q9H0E9 BRD8_HUMAN   | E.SM*LS#PSHGSNPIEDPLEAE.T | S585:  | 2 | 2,0361 | 0,098 | -0,695 |
| 6 | O60271 JIP4_HUMAN   | E.NLDSVFAQDQE.H           |        | 2 | 2,0339 | 0,195 | -0,482 |
| 6 | P17987 TCPA_HUMAN   | E.NLIVNTDE.L              |        | 2 | 2,0315 | 0,161 | 0,133  |
| 6 | Q9BTT0 AN32E_HUMAN  | E.VGLS#YLM*KEE.I          | S219:  | 2 | 2,0253 | 0,089 | 0,193  |
| 6 | Q9H4B7 TBB1_HUMAN   | R.ISVYYNE.A               |        | 2 | 2,0178 | 0,151 | 0,344  |
| 6 | P19013 K2C4_HUMAN   | K.IISTTTLNK.R             |        | 2 | 2,0144 | 0,18  | 0      |
| 6 | O94992 HEX11_HUMAN  | E.NLQLLTENE.L             |        | 2 | 2,011  | 0,178 | 0,341  |
| 6 | Q504Q3 PAN2_HUMAN   | K.NAAVFSSVLAL.-           |        | 2 | 2,0076 | 0,41  | 0      |
| 6 | O15355 PPM1G_HUMAN  | E.AGQVGEPGIPTGE.A         |        | 2 | 2,007  | 0,245 | 0,403  |
| 6 | O75376 NCOR1_HUMAN  | E.VISPASS#PAPPQEK.L       | S1981: | 2 | 1,9965 | 0,273 | 0,082  |
| 6 | Q02952 AKA12_HUMAN  | E.ASFTLTAAAEKE.K          |        | 2 | 1,9866 | 0,251 | 0,295  |
| 6 | P15374 UCLH3_HUMAN  | E.GQTEAPSIDE.K            |        | 2 | 1,9831 | 0,168 | 0,117  |
| 6 | P45974 UBP5_HUMAN   | E.CAFSFDTPESE.G           |        | 2 | 1,9828 | 0,198 | 0,095  |
| 6 | Q9UQN3 CHM2B_HUMAN  | E.SQDIVNQVLDE.I           |        | 2 | 1,98   | 0,191 | -0,194 |
| 6 | P08729 K2C7_HUMAN   | D.TSVVLSM*DNSR.S          |        | 2 | 1,9772 | 0,225 | 0,498  |
| 6 | Q9NP55 PLUNC_HUMAN  | R.LYVTIPLGIK.L            |        | 2 | 1,9752 | 0,154 | -0,218 |
| 6 | P04406 G3P_HUMAN    | E.STGVFTTM*E.K            |        | 2 | 1,9738 | 0,133 | -0,062 |
| 6 | O15027 SC16A_HUMAN  | E.LVPPQQQAS#PPQLPK.A      | S891:  | 2 | 1,9592 | 0,086 | -0,214 |
| 6 | P25205 MCM3_HUMAN   | E.DQQDTQIYE.K             |        | 2 | 1,9564 | 0,12  | 0      |
| 6 | Q03468 ERCC6_HUMAN  | K.TS#M*PSGDESIDE.K        | S1139: | 2 | 1,9463 | 0,107 | 0,089  |
| 6 | P04920 B3A2_HUMAN   | R.TS#PSSPAPLPHQE.A        | S170:  | 2 | 1,9447 | 0,322 | 0,085  |
| 6 | Q02952 AKA12_HUMAN  | K.SPSS#PVERE.M            | S1331: | 2 | 1,9438 | 0,128 | 0,226  |
| 6 | Q9BPX3 CND3_HUMAN   | E.ADSES#DHEVPEPE.S        | S975:  | 2 | 1,9395 | 0,12  | 0,802  |
| 6 | P13645 K1C10_HUMAN  | K.YENEVALR.Q              |        | 2 | 1,9372 | 0,207 | 0,061  |
| 6 | Q53H12 AGK_HUMAN    | E.GAGGSFSIDSEEYE.A        |        | 2 | 1,9366 | 0,299 | 0      |
| 6 | Q13586 STIM1_HUMAN  | E.LSPSAPPGGS#PHLD.S       | S608:  | 2 | 1,9329 | 0,19  | 0,173  |
| 6 | Q14980 NUMA1_HUMAN  | E.SLYFT#PIPAR.S           | T1776: | 2 | 1,9295 | 0,193 | -0,196 |
| 6 | P13645 K1C10_HUMAN  | R.LAADDFR.L               |        | 2 | 1,9268 | 0,329 | 0,227  |
| 6 | Q96RS6 NUDC1_HUMAN  | E.TNDPILGFQATNE.R         |        | 2 | 1,9266 | 0,176 | -0,086 |
| 6 | Q99961 SH3G1_HUMAN  | E.SNFGDALLDAGE.S          |        | 2 | 1,9261 | 0,14  | -0,303 |
| 6 | ##P56645 PER3_HUMAN | R.MSELKELDE.K             |        | 2 | 1,9237 | 0,105 | -0,112 |
| 6 | P31949 S10AB_HUMAN  | K.ISS#PTETER.C            | S6:    | 2 | 1,9233 | 0,244 | -0,111 |
| 6 | O95817 BAG3_HUMAN   | R.SQS#PLRGM*PE.T          | S136:  | 2 | 1,9214 | 0,22  | -0,102 |
| 6 | Q8NDI1 EHBP1_HUMAN  | E.VQPQVANSPS#SAAQK.A      | S966:  | 2 | 1,9173 | 0,266 | 0,46   |

|   |                      |                         |        |   |        |       |        |
|---|----------------------|-------------------------|--------|---|--------|-------|--------|
| 6 | P19013 K2C4_HUMAN    | K.SISM*SVAGSR.Q         |        | 2 | 1,916  | 0,233 | 0,543  |
| 6 | Q8WUM0 NU133_HUMAN   | E.NVSILAEDLE.G          |        | 2 | 1,9157 | 0,136 | 0      |
| 6 | P55036 PSMD4_HUMAN   | E.FGVDPSADPE.L          |        | 2 | 1,9156 | 0,082 | -0,236 |
| 6 | Q6PJG2 CN043_HUMAN   | E.AT#PVSIEPR.I          | T715:  | 2 | 1,9134 | 0,281 | 0,116  |
| 6 | P30101 PDIA3_HUMAN   | E.LTDDNFE.S             |        | 2 | 1,9124 | 0,184 | 0,357  |
| 6 | Q14676 MDC1_HUMAN    | K.APQAVPLEK.S           |        | 2 | 1,9078 | 0,163 | 0      |
| 6 | P51114 FXR1_HUMAN    | E.TTQLM*ILSASE.A        |        | 2 | 1,9054 | 0,106 | 0,302  |
| 6 | P61626 LYSC_HUMAN    | K.WESGYNTR.A            |        | 2 | 1,9031 | 0,366 | 0,06   |
| 6 | O75643 U520_HUMAN    | R.NALLQLTDSQIAD.V       |        | 2 | 1,9012 | 0,191 | 0      |
| 6 | Q9NZT2 OGFR_HUMAN    | E.AAELQDAEVE.S          |        | 2 | 1,8994 | 0,198 | -0,114 |
| 6 | Q9UGM3 DMBT1_HUMAN   | R.FGQGS GPIV LDDVR.C    |        | 2 | 1,8799 | 0,136 | -0,251 |
| 6 | Q9BV73 CP250_HUMAN   | E.VAM*FLQAS#VLERDSE.Q   | S2200: | 2 | 1,8775 | 0,139 | 0,681  |
| 6 | ##Q9UHC6 CNTP2_HUMAN | E.Y#DLLDLYDFE.G         | Y1020: | 2 | 1,8745 | 0,102 | -1,917 |
| 6 | P48681 NEST_HUMAN    | E.DAPGPQPAE.G           |        | 2 | 1,8732 | 0,153 | 0      |
| 6 | Q9BPX3 CND3_HUMAN    | E.ADS#ESDHEVPEPESE.M    | S973:  | 2 | 1,8726 | 0,115 | 0,351  |
| 6 | Q14151 SAFB2_HUMAN   | E.TSS#LNFK.V            | S195:  | 2 | 1,872  | 0,199 | 0      |
| 6 | ##P59796 GPX6_HUMAN  | K.LGLLIESNTGPE.Q        |        | 2 | 1,8711 | 0,199 | -0,294 |
| 6 | P62263 RS14_HUMAN    | E.QVISLGPQVAE.G         |        | 2 | 1,8688 | 0,101 | -0,107 |
| 6 | Q86Y82 STX12_HUMAN   | R.NPGPSGPQLRD.F         |        | 2 | 1,8675 | 0,147 | 0,429  |
| 6 | O75369 FLNB_HUMAN    | E.GLLAVQITDQE.G         |        | 2 | 1,8652 | 0,268 | -0,206 |
| 6 | P08574 CY1_HUMAN     | E.VEVQDGPNEDEGE.M       |        | 2 | 1,8625 | 0,083 | 0,284  |
| 6 | Q9Y6M7 S4A7_HUMAN    | D.NM*IASGQLDE.S         |        | 2 | 1,8623 | 0,094 | 0,112  |
| 6 | Q15942 ZYG_HUMAN     | E.SFPPAPLEEE.I          |        | 2 | 1,8524 | 0,121 | -0,437 |
| 6 | Q9H2P0 ADNP_HUMAN    | E.TIHLTEEPTK.L          |        | 2 | 1,8507 | 0,195 | -0,417 |
| 6 | Q8TDY2 RBCC1_HUMAN   | E.SLLTS#FPK.S           | S257:  | 2 | 1,8479 | 0,232 | 0,125  |
| 6 | Q96AP0 ACD_HUMAN     | E.LILGSETPS#SPRAGQLLE.V | S110:  | 2 | 1,8464 | 0,28  | 0      |
| 6 | P02788 TRFL_HUMAN    | K.EDAIWNLLR.Q           |        | 2 | 1,8411 | 0,243 | -0,432 |
| 6 | O75436 VP26A_HUMAN   | E.IDIVLNDGE.T           |        | 2 | 1,8395 | 0,082 | 0,123  |
| 6 | P13646 K1C13_HUMAN   | R.VILEIDNAR.L           |        | 2 | 1,8312 | 0,168 | 0      |
| 6 | Q9HBI1 PARVB_HUMAN   | E.DTQLEENEE.R           |        | 2 | 1,8282 | 0,096 | -0,331 |
| 6 | P43897 EFTS_HUMAN    | E.GLIGLLQE.G            |        | 2 | 1,8254 | 0,215 | 0,434  |
| 6 | P13010 KU86_HUMAN    | E.GSVTSVGSVNPAAE.N      |        | 2 | 1,8242 | 0,109 | 0      |
| 6 | Q12931 TRAP1_HUMAN   | E.DIPLNLSRE.L           |        | 2 | 1,8236 | 0,272 | 0,115  |
| 6 | Q96DA0 YP003_HUMAN   | R.GMVMYTSK.D            |        | 2 | 1,823  | 0,29  | 0,266  |
| 6 | Q9UQ80 PA2G4_HUMAN   | E.ASSGSVSVLSLCE.K       |        | 2 | 1,8206 | 0,146 | -0,094 |
| 6 | Q9BQY9 DBND2_HUMAN   | E.LSLPVPTSDR.T          |        | 2 | 1,8205 | 0,197 | 0,112  |
| 6 | P01876 IGHA1_HUMAN   | K.TPLTATLSK.S           |        | 2 | 1,8144 | 0,16  | 0,065  |
| 6 | Q13885 TBB2A_HUMAN   | E.FTEAESNM*NDLVSE.Y     |        | 2 | 1,8137 | 0,151 | 0,229  |
| 6 | Q6UN15 FIP1_HUMAN    | E.NASANPPSGIEDETAE.N    |        | 2 | 1,8127 | 0,089 | 0,229  |

|   |                     |                         |          |   |        |       |        |
|---|---------------------|-------------------------|----------|---|--------|-------|--------|
| 6 | O43660 PLRG1_HUMAN  | E.SGIFACAFDQSE.S        |          | 2 | 1,8118 | 0,164 | -0,366 |
| 6 | Q14118 DAG1_HUMAN   | E.TTPLNQDTM*GE.Y        |          | 2 | 1,8085 | 0,081 | 0,1    |
| 6 | Q8NDI1 EHBP1_HUMAN  | E.SNPFYEPK.S            |          | 2 | 1,802  | 0,293 | 0,373  |
| 6 | Q9BUJ2 HNRL1_HUMAN  | E.NDVIGCFADFE.C         |          | 2 | 1,8017 | 0,23  | -0,284 |
| 6 | P02788 TRFL_HUMAN   | R.YGYTGAFR.C            |          | 2 | 1,7947 | 0,285 | -0,111 |
| 6 | Q8WXX5 DNJC9_HUMAN  | E.M*DNFLAQM*E.A         |          | 2 | 1,785  | 0,082 | 0      |
| 6 | P46379 BAT3_HUMAN   | E.NASPAPGTTAEE.A        |          | 2 | 1,779  | 0,152 | 0,533  |
| 6 | Q6PKG0 LARP1_HUMAN  | R.AVTPVPTKTEE.V         |          | 2 | 1,7788 | 0,344 | -0,104 |
| 6 | O14524 TM194_HUMAN  | E.YGLGSIIAQDE.I         |          | 2 | 1,7635 | 0,083 | -0,209 |
| 6 | P05783 K1C18_HUMAN  | R.S#TFSTNYR.S           | S7:      | 2 | 1,7585 | 0,27  | -0,116 |
| 6 | Q14764 MVP_HUMAN    | R.QAIPLDENE.G           |          | 2 | 1,7549 | 0,134 | 0,119  |
| 6 | Q9H4L4 SENP3_HUMAN  | E.DGVRGS#PPVPSGPPM*EE.D | S212:    | 2 | 1,7547 | 0,084 | -0,068 |
| 6 | P04075 ALDOA_HUMAN  | R.LQSIGTENTEE.N         |          | 2 | 1,7501 | 0,085 | 0,1    |
| 6 | Q9NTJ3 SMC4_HUMAN   | D.GASS#DAEPEPPSGR.T     | S28:     | 2 | 1,7391 | 0,089 | 0,509  |
| 6 | Q96DR8 MUC11_HUMAN  | K.WVGDLPNGR.V           |          | 2 | 1,7379 | 0,181 | 0,301  |
| 6 | O75122 CLAP2_HUMAN  | R.NGSIPTYM*R.Q          |          | 2 | 1,7377 | 0,209 | -0,347 |
| 6 | Q7Z6Z7 HUWE1_HUMAN  | K.FVESILSNNTD.D         |          | 2 | 1,7368 | 0,189 | -0,182 |
| 6 | P42695 CNDD3_HUMAN  | R.ASAGHVAVSS#PTPE.T     | S1329:   | 2 | 1,7221 | 0,199 | 0,176  |
| 6 | O60303 K0556_HUMAN  | E.T#EGRSSPGPTLVVLE.F    | T248:    | 2 | 1,7179 | 0,143 | -0,07  |
| 6 | P61626 LYSC_HUMAN   | R.LGMDGYR.G             |          | 2 | 1,7152 | 0,236 | 0,601  |
| 6 | Q15365 PCBP1_HUMAN  | E.TLSQS#PQGR.V          | S173:    | 2 | 1,7129 | 0,12  | 0      |
| 6 | Q01082 SPTB2_HUMAN  | E.VSASTQSTPASSR.A       |          | 2 | 1,7084 | 0,324 | -0,382 |
| 6 | Q32LY9 Q32LY9_HUMAN | E.SPIVPPPM*S#PSSK.S     | S81:     | 2 | 1,7074 | 0,172 | 0      |
| 6 | Q5T3F8 TM63B_HUMAN  | E.DSLIENE.I             |          | 2 | 1,7066 | 0,09  | 0,372  |
| 6 | P01876 IGHA1_HUMAN  | K.YLTWASR.Q             |          | 2 | 1,705  | 0,115 | 0,068  |
| 6 | Q5JTD0 TJAP1_HUMAN  | R.GS#PEEELPLPAFE.K      | S300:    | 2 | 1,6985 | 0,212 | -0,245 |
| 6 | P13646 K1C13_HUMAN  | R.EQYEAMAER.N           |          | 2 | 1,6743 | 0,285 | 0      |
| 6 | P31942 HNRH3_HUMAN  | E.IVQFFQGLE.I           |          | 2 | 1,6706 | 0,196 | -0,339 |
| 6 | Q9UQ35 SRRM2_HUMAN  | K.RVPS#PTPAPK.E         | S2581:   | 2 | 1,6632 | 0,202 | -0,324 |
| 6 | Q16378 PROL4_HUMAN  | R.HPQEQLW.-             |          | 2 | 1,6554 | 0,123 | 0,118  |
| 6 | Q7L9L4 MOL1A_HUMAN  | E.AT#LGSGNLR.M          | T35:     | 2 | 1,6505 | 0,116 | -0,63  |
| 6 | P85037 FOXK1_HUMAN  | R.EGS#PIPHDPE.F         | S445:    | 2 | 1,65   | 0,141 | -0,105 |
| 6 | Q8TDY2 RBCC1_HUMAN  | E.SLLTS#FPKSVE.H        | S257:    | 2 | 1,6484 | 0,156 | -0,189 |
| 6 | P49848 TAF6_HUMAN   | R.AAAPPQPS#PPPTK.F      | S532:    | 2 | 1,6202 | 0,083 | 0      |
| 6 | Q8IX29 FBX16_HUMAN  | K.MS#T#WTPLNHQLLNDR.V   | S20:T21: | 2 | 1,618  | 0,137 | 0,922  |
| 6 | ##O76041 NEBL_HUMAN | K.YDKESAIE.A            |          | 2 | 1,6169 | 0,133 | -0,128 |
| 6 | Q96GQ7 DDX27_HUMAN  | E.AGGFFEDASQYDE.N       |          | 2 | 1,6123 | 0,089 | -0,085 |
| 6 | Q14566 MCM6_HUMAN   | E.GAGGINGHAD.S          |          | 2 | 1,5957 | 0,085 | 0,351  |
| 6 | Q00341 VIGLN_HUMAN  | E.ALIQNLNDNVVE.D        |          | 2 | 1,5952 | 0,113 | -0,199 |

|   |                     |                                              |            |   |        |       |        |
|---|---------------------|----------------------------------------------|------------|---|--------|-------|--------|
| 6 | Q9P260 K1468_HUMAN  | R.EPSTASGGGQLNR.A                            |            | 2 | 1,5821 | 0,345 | 0,192  |
| 6 | Q13445 TMED1_HUMAN  | E.FTFLLPAGR.K                                |            | 2 | 1,5818 | 0,165 | -0,239 |
| 6 | Q13885 TBB2A_HUMAN  | E.AESNM*NDLVSE.Y                             |            | 2 | 1,5754 | 0,142 | -0,398 |
| 6 | Q9NZI6 TF2L1_HUMAN  | D.VLALPIFK.Q                                 |            | 2 | 1,5589 | 0,116 | 0,203  |
| 6 | Q6S8J3 A26CA_HUMAN  | E.M*ATAASSSSLEK.S                            |            | 2 | 1,546  | 0,178 | -0,407 |
| 6 | Q96RV3 PCX1_HUMAN   | E.AT#PPVGCSSR.N                              | T137:      | 2 | 1,4423 | 0,221 | 0,219  |
| 6 | Q9Y490 TLN1_HUMAN   | E.FSSIPAQISPE.G                              |            | 2 | 1,3779 | 0,106 | 1,141  |
| 6 | Q8NAV1 PR38A_HUMAN  | E.EAEQLEPR.V                                 |            | 2 | 1,3583 | 0,129 | 0,314  |
| 6 | Q13283 G3BP1_HUMAN  | E.ETAPEDAQK.S                                |            | 2 | 1,3556 | 0,268 | -0,062 |
| 6 | P00488 F13A_HUMAN   | R.LS#IQSSPK.C                                | S146:      | 2 | 1,0692 | 0,152 | -0,065 |
| 7 | P35527 K1C9_HUMAN   | R.GGSGGSHGGGSGFGGESGGSYGGGEEASGSGGGYGGGSGK.S |            | 3 | 7,5034 | 0,593 | 0,454  |
| 7 | Q07866 KLC1_HUMAN   | E.SLNVDVVKYES#GPDGGEE.V                      | S530:      | 2 | 6,3679 | 0,547 | 0,247  |
| 7 | Q9BVJ6 UT14A_HUMAN  | E.LSQDAEPAGS#QETKDSGSQE.V                    | S445:      | 2 | 6,1423 | 0,551 | -0,114 |
| 7 | B2CI53 B2CI53_HUMAN | R.NGILAS PQS#APGNLDNSKSGE.I                  | S263:      | 2 | 6,0758 | 0,501 | 0      |
| 7 | P30260 CDC27_HUMAN  | E.SSM*TDADDTQLHAAES#DEF.-                    | S821:      | 2 | 5,9893 | 0,523 | -1,127 |
| 7 | Q92734 TFG_HUMAN    | E.INKNVM*SAFGLTDDQVSGPPSAPAEDR.S             |            | 3 | 5,9809 | 0,417 | 0,258  |
| 7 | Q14201 BTG3_HUMAN   | E.M*EVKPVSSVTAAS#PVYQISE.L                   | S169:      | 2 | 5,9061 | 0,562 | -0,111 |
| 7 | Q9Y6D5 BIG2_HUMAN   | E.NSQTNGIADDRQS#LSSADNLE.S                   | S346:      | 2 | 5,8472 | 0,615 | 0      |
| 7 | P35527 K1C9_HUMAN   | R.GGGGSGFGSYGGGSGGGFSASSLGGGFGGGSR.G         |            | 2 | 5,7614 | 0,635 | 0,541  |
| 7 | P46100 ATRX_HUMAN   | E.VQSSVDHQGDGSS#GTEQEVE.S                    | S550:      | 2 | 5,7119 | 0,554 | -0,906 |
| 7 | Q14247 SRC8_HUMAN   | R.AKT#QTPPVSPAPQPTEERLPSS#PVYE.D             | T399:S418: | 3 | 5,6989 | 1     | 0,123  |
| 7 | O94804 STK10_HUMAN  | E.SM*DYGTNLS#TDLSLNKE.M                      | S503:      | 2 | 5,6076 | 0,548 | -0,123 |
| 7 | Q8N1G0 ZN687_HUMAN  | E.NGPGM*QPPVSS#PPLGALKQE.S                   | S215:      | 3 | 5,6011 | 0,334 | 0,261  |
| 7 | Q9ULH0 ARMS_HUMAN   | E.TSQVILRPSS#PNPTTIQNE.N                     | S1718:     | 2 | 5,5004 | 0,523 | -0,434 |
| 7 | Q96PY6 NEK1_HUMAN   | E.INPSAIVDS#PVETKSPE.F                       | S868:      | 2 | 5,4316 | 0,481 | 0,327  |
| 7 | Q13283 G3BP1_HUMAN  | E.TAPEDAQKSSS#PAPADIAQTVQE.D                 | S232:      | 2 | 5,412  | 0,567 | -0,101 |
| 7 | P18031 PTN1_HUMAN   | E.KGS#PLNAAPYGIISM*SQDTE.V                   | S352:      | 2 | 5,4119 | 0,471 | 0,111  |
| 7 | Q7L590 MCM10_HUMAN  | E.SALDCNS#EENNFLTRE.N                        | S26:       | 2 | 5,398  | 0,469 | 0,062  |
| 7 | Q9HCF4 ALO17_HUMAN  | E.AGVATGSEAQSS#PQFQDHTTE.G                   | S193:      | 2 | 5,3979 | 0,577 | -0,229 |
| 7 | Q8WUD4 CCD12_HUMAN  | E.DSLASAVDAATEQKTCDS#D.-                     | S165:      | 2 | 5,379  | 0,405 | 0,473  |
| 7 | Q9Y3D3 RT16_HUMAN   | E.VLLASQKTDAEAT#DTEATET.-                    | T130:      | 2 | 5,367  | 0,607 | -0,225 |
| 7 | P04264 K2C1_HUMAN   | R.GSYGSGSSYSGGGSYGSGGGGGHGSYSGSSSGGYR.G      |            | 3 | 5,3624 | 0,626 | 0,331  |
| 7 | Q7Z417 NUFP2_HUMAN  | E.IESQNPLAS#PTNTLLGSAKE.Q                    | S629:      | 2 | 5,3597 | 0,476 | -0,227 |
| 7 | Q15398 DLG7_HUMAN   | E.M*GIPQQTTS#PENAGPQNTK.S                    | S662:      | 2 | 5,3575 | 0,44  | 0,233  |
| 7 | B2CI53 B2CI53_HUMAN | R.NGILAS PQS#APGNLDNSK.S                     | S263:      | 2 | 5,3468 | 0,509 | -1,31  |
| 7 | Q13283 G3BP1_HUMAN  | E.DAQKSSS#PAPADIAQTVQE.D                     | S232:      | 2 | 5,3201 | 0,529 | -0,241 |
| 7 | Q7Z4S6 KI21A_HUMAN  | R.KLS#SSDAPAQDTGSSAAAVE.T                    | S853:      | 2 | 5,2938 | 0,489 | -0,248 |
| 7 | Q8IZH2 XRN1_HUMAN   | E.SSSASLKSS#PIAQPASSFQVE.T                   | S1657:     | 2 | 5,2669 | 0,532 | -0,112 |
| 7 | Q15398 DLG7_HUMAN   | E.M*GIPQQTTS#PENAGPQNTKSE.H                  | S662:      | 2 | 5,2357 | 0,557 | 0,211  |

|   |                     |                                   |            |   |        |       |        |
|---|---------------------|-----------------------------------|------------|---|--------|-------|--------|
| 7 | Q15398 DLG7_HUMAN   | E.M*GIPQQTTS#PENAGPQNTKSE.H       | S662:      | 3 | 5,2353 | 0,432 | 0,396  |
| 7 | Q7Z417 NUFP2_HUMAN  | E.SQNPLAS#PTNTLLGSAKE.Q           | S629:      | 2 | 5,2073 | 0,554 | 0      |
| 7 | O14936 CSKP_HUMAN   | E.ALRV#PPPTSPYLNQDSPE.S           | T460:      | 2 | 5,1766 | 0,472 | 0,467  |
| 7 | Q9C0C2 TB182_HUMAN  | E.SQEPLAQES#PLPLATRE.A            | S601:      | 3 | 5,1429 | 0,271 | 0,365  |
| 7 | Q99459 CDC5L_HUMAN  | E.AQNLM*ALTNVDT#PLKGGINT#PLHE.S   | T377:T385: | 3 | 5,1353 | 0,467 | 0      |
| 7 | O95155 UBE4B_HUMAN  | E.TQSQSL#RSQSM*DIRGVSCE.K         | S101:      | 2 | 5,1011 | 0,529 | 0,106  |
| 7 | B2CI53 B2CI53_HUMAN | R.NGILASQ#APGNLDNSKSGE.I          | S263:      | 3 | 5,0983 | 0,479 | -0,257 |
| 7 | Q9C0C2 TB182_HUMAN  | E.SQEPLAQES#PLPLATRE.A            | S601:      | 2 | 5,097  | 0,492 | 0,365  |
| 7 | Q92734 TFG_HUMAN    | K.NVM*SAFGLTDDQVSGPPSAPAEDR.S     |            | 2 | 5,0712 | 0,61  | 0,591  |
| 7 | P35527 K1C9_HUMAN   | R.HGVQEIEIQLSQSLK.A               |            | 3 | 5,061  | 0,452 | -0,186 |
| 7 | Q9NXG2 THUM1_HUMAN  | E.AYLLNEYGDDM*YGPEK.F             |            | 2 | 5,0368 | 0,57  | -0,123 |
| 7 | P98175 RBM10_HUMAN  | E.LQSPHPSSALPPATS#PTAQE.S         | S553:      | 2 | 5,0282 | 0,532 | 0      |
| 7 | P09496 CLCA_HUMAN   | E.SNGPTDSYAAISQVDRQLQ#EPE.S       | S105:      | 2 | 5,0253 | 0,55  | 0,699  |
| 7 | Q9NXG2 THUM1_HUMAN  | E.AYLLNEYGDDM*YGPEK.F             |            | 3 | 5,0142 | 0,454 | 0,185  |
| 7 | Q14966 ZN638_HUMAN  | E.SEVQTATDS#PSVKPNELEEE.S         | S1119:     | 2 | 4,9841 | 0,558 | 0      |
| 7 | Q13283 G3BP1_HUMAN  | E.TAPEDAQKSS#PAPADIAQTVQE.D       | S232:      | 3 | 4,9795 | 0,457 | 0      |
| 7 | O43815 STRN_HUMAN   | E.LNQGDM*KPPSYDS#DEGNETE.V        | S137:      | 2 | 4,9702 | 0,568 | 0,42   |
| 7 | Q10570 CPSF1_HUMAN  | E.M*LYGDSGLS#PSKE.E               | S756:      | 2 | 4,9624 | 0,471 | 0,071  |
| 7 | Q9Y512 SAM50_HUMAN  | E.LAGYTGDDVS#FIKE.D               | S294:      | 2 | 4,9289 | 0,344 | 0,318  |
| 7 | Q6PKG0 LARP1_HUMAN  | E.TES#APGS#PRAVTPVPTKTEE.V        | S517:S521: | 3 | 4,9003 | 0,386 | 0,165  |
| 7 | Q9NUJ3 T11L1_HUMAN  | E.VSSCLSLCGSS#PFTTDKE.T           | S414:      | 3 | 4,8845 | 0,363 | 0,356  |
| 7 | Q9Y2L9 LRCH1_HUMAN  | E.VQSDLTLQSNQYS#PNEIRE.N          | S524:      | 3 | 4,8619 | 0,41  | 0,075  |
| 7 | Q15398 DLG7_HUMAN   | E.M*GIPQQTTS#PENAGPQNTK.S         | S662:      | 3 | 4,8371 | 0,434 | 0,349  |
| 7 | Q7Z4H7 FA29A_HUMAN  | E.FEVENS#PLSDVAKNTE.S             | S507:      | 2 | 4,8362 | 0,427 | -0,131 |
| 7 | P08779 K1C16_HUMAN  | R.GQTGGDVNVEMDAAPGVDLSR.I         |            | 2 | 4,8104 | 0,519 | 0,117  |
| 7 | Q96GA3 LTV1_HUMAN   | E.DDFILQANKAT#GEEE.G              | T171:      | 2 | 4,8073 | 0,454 | -0,069 |
| 7 | P02533 K1C14_HUMAN  | K.ILTATVDNANVLLQIDNAR.L           |            | 3 | 4,7913 | 0,247 | -0,089 |
| 7 | Q14C86 GAPD1_HUMAN  | E.LESCS#GLGSTSDDTDVRE.V           | S742:      | 2 | 4,7876 | 0,535 | 0,304  |
| 7 | Q15398 DLG7_HUMAN   | E.SRSS#IEDAQCPGLDLIEE.N           | S690:      | 2 | 4,7781 | 0,493 | 0      |
| 7 | Q14566 MCM6_HUMAN   | E.GAGGINGHADS#PAPVNGINGYNEDINQE.S | S689:      | 3 | 4,7717 | 0,251 | 0,128  |
| 7 | Q9Y6A5 TACC3_HUMAN  | E.NQM*VS#PGKVSQSPEQAVEE.N         | S170:      | 2 | 4,7601 | 0,45  | -0,118 |
| 7 | Q99504 EYA3_HUMAN   | E.SGEQTISQVS#NPDVSDQKPE.T         | S29:       | 2 | 4,7561 | 0,442 | 0,439  |
| 7 | Q9UQ35 SRRM2_HUMAN  | E.VEERPAVSLTLDQS#QSASLE.A         | S1287:     | 3 | 4,7558 | 0,433 | 0,309  |
| 7 | Q9H0H5 RGAP1_HUMAN  | E.SGSILSDIS#FDKTDE.S              | S157:      | 2 | 4,7494 | 0,492 | -0,216 |
| 7 | Q04695 K1C17_HUMAN  | R.GQVGGEINVEMDAAPGVDLSR.I         |            | 2 | 4,7484 | 0,514 | 0,231  |
| 7 | Q9H9F9 ARP5_HUMAN   | E.VDVVDSKPE#PDLE.Q                | T393:      | 2 | 4,7389 | 0,409 | -0,376 |
| 7 | Q15007 FL2D_HUMAN   | E.GNTTEDDFPSS#PGNGNK.S            | S306:      | 2 | 4,6789 | 0,447 | -0,067 |
| 7 | Q9UQ35 SRRM2_HUMAN  | E.GDAPFSEPGTTSTQRPS#PE.T          | S323:      | 2 | 4,6763 | 0,574 | 0,459  |
| 7 | P02533 K1C14_HUMAN  | K.ILTATVDNANVLLQIDNAR.L           |            | 2 | 4,6437 | 0,409 | 0,119  |

|   |                     |                                |            |   |        |       |        |
|---|---------------------|--------------------------------|------------|---|--------|-------|--------|
| 7 | O00512 BCL9_HUMAN   | E.VM*VRPPTVM*S#PSGNPQLD.S      | S35:       | 2 | 4,5981 | 0,332 | 0,958  |
| 7 | P15924 DESP_HUMAN   | K.ENAAYFQFFEEAQSTEAYLK.G       |            | 2 | 4,5948 | 0,492 | 0,409  |
| 7 | Q14966 ZN638_HUMAN  | E.VQTATDS#PSVKPNELEEE.S        | S1119:     | 2 | 4,5787 | 0,383 | -0,713 |
| 7 | Q7Z406 MYH14_HUMAN  | E.AQPGSGSPSEPEGS#PPAHPQ.-      | S1989:     | 3 | 4,5668 | 0,421 | 0,365  |
| 7 | P29966 MARCS_HUMAN  | E.AGASPVEKEAPEGEEAEPGS#PTAAE.G | S118:      | 2 | 4,5631 | 0,514 | 0,585  |
| 7 | P42566 EP15_HUMAN   | E.SPARRS#PELLPSGVTDENE.V       | S563:      | 2 | 4,5587 | 0,457 | 0      |
| 7 | Q8IW35 CEP97_HUMAN  | E.DIQTDEDKLNCS#LLSSE.S         | S397:      | 2 | 4,5299 | 0,484 | 0,179  |
| 7 | Q8TAQ2 SMRC2_HUMAN  | E.DLTKDM*DEPS#PVPNVVE.V        | S347:      | 2 | 4,5257 | 0,396 | -0,182 |
| 7 | Q99750 MDFI_HUMAN   | E.VVTGSTHPAAEAPPEEGS#LEE.A     | S53:       | 2 | 4,5245 | 0,483 | 0,234  |
| 7 | P78310 CXAR_HUMAN   | R.SYIGSNHS#SLGSM*SPSNM*E.G     | S300:      | 2 | 4,5239 | 0,468 | 0,116  |
| 7 | Q92734 TFG_HUMAN    | K.NVM*SAFGLTDDQVSGPPSAPAEDR.S  |            | 3 | 4,5238 | 0,341 | 0,148  |
| 7 | O60447 EVI5_HUMAN   | E.S#FHSSDEDFIDNSLQE.T          | S737:      | 2 | 4,5236 | 0,415 | 0,25   |
| 7 | Q9HC35 EMAL4_HUMAN  | E.TVADTTLTAKPVSS#TE.S          | S888:      | 2 | 4,5189 | 0,555 | -0,215 |
| 7 | Q6PIRO Q6PIRO_HUMAN | E.TSQPSDKTVLDT#YALIGE.T        | S384:      | 2 | 4,5125 | 0,464 | 0      |
| 7 | Q9BXI6 TB10A_HUMAN  | E.SLSGTRES#LAQGPDAATTDE.L      | S25:       | 2 | 4,5043 | 0,596 | 0,351  |
| 7 | Q04695 K1C17_HUMAN  | K.ILTATVDNANILLQIDNAR.L        |            | 3 | 4,4916 | 0,324 | -0,177 |
| 7 | Q9UHB6 LIMA1_HUMAN  | E.IGPGQLSSS#TFDSEKNE.S         | S244:      | 2 | 4,4845 | 0,432 | 0,78   |
| 7 | P82094 TMF1_HUMAN   | R.S#ATPVNCEQPDLVSSTPINE.G      | S399:      | 2 | 4,473  | 0,543 | 0,311  |
| 7 | Q9HC35 EMAL4_HUMAN  | E.TVADTTLTAKPV#STE.S           | S887:      | 2 | 4,4703 | 0,519 | 0,215  |
| 7 | Q15642 CIP4_HUMAN   | R.APSDS#S#LGTPSDGRPE.L         | S298:S299: | 2 | 4,4612 | 1     | 0,07   |
| 7 | Q9Y3F4 STRAP_HUMAN  | E.IASENS#DCIFPSAPDVK.A         | S338:      | 2 | 4,4565 | 0,449 | 0,316  |
| 7 | Q6NZY4 ZCHC8_HUMAN  | E.NSGLALYDGKDGT#DGETE.V        | T342:      | 2 | 4,4555 | 0,376 | 0      |
| 7 | Q9H4I2 ZH3_HUMAN    | E.ASEPFDTSS#PQAGRQLE.T         | S946:      | 2 | 4,4509 | 0,36  | 0,123  |
| 7 | O43353 RIPK2_HUMAN  | E.ILVVSR#PS#LNLLQNK.S          | S529:S531: | 3 | 4,4492 | 0,442 | -0,283 |
| 7 | Q92794 MYST3_HUMAN  | E.TVQAVQSLTQEES#EHE.G          | S1437:     | 2 | 4,4484 | 0,513 | -0,062 |
| 7 | Q15154 PCM1_HUMAN   | E.TSTSKS#VFEPEDSSIVDNE.L       | S808:      | 2 | 4,4462 | 0,439 | 0,113  |
| 7 | Q5W0B1 RN219_HUMAN  | E.LNLS#KGLTNDQLE.N             | S592:      | 2 | 4,4366 | 0,506 | 0,151  |
| 7 | Q6T4R5 NHS_HUMAN    | E.IDS#DESPVARE.R               | S394:      | 2 | 4,4362 | 0,468 | 0,188  |
| 7 | Q14247 SRC8_HUMAN   | R.AKTQT#PPVSPAPQPTTE.R         | T401:      | 2 | 4,4361 | 0,467 | -0,066 |
| 7 | Q7KZ85 SPT6H_HUMAN  | E.STPM*SIAGDAT#PLLDEM*DR.-     | T1718:     | 2 | 4,4085 | 0,467 | 0,229  |
| 7 | Q9NYF8 BCLF1_HUMAN  | E.DQEALDYFS#DKE.S              | S385:      | 2 | 4,3979 | 0,256 | 0,158  |
| 7 | Q14247 SRC8_HUMAN   | E.LSYRGPVS#GTEPEPVYSM*E.A      | S438:      | 2 | 4,3946 | 0,337 | 0,445  |
| 7 | P56537 IF6_HUMAN    | E.AQPSTIATSM*RDSDLIDS#LT.-     | S243:      | 2 | 4,3799 | 0,486 | 0,232  |
| 7 | P04264 K2C1_HUMAN   | R.THNLEPYFESFINNLR.R           |            | 3 | 4,3799 | 0,397 | 0      |
| 7 | Q6DN90 IQEC1_HUMAN  | E.GKQVS#VTNDGSQLGALVSP.E.C     | S198:      | 2 | 4,3687 | 0,486 | 0,236  |
| 7 | Q14839 CHD4_HUMAN   | E.VTAVDGYET#DHQDYCE.V          | T367:      | 2 | 4,359  | 0,238 | -0,185 |
| 7 | Q14207 NPAT_HUMAN   | E.NLPTIILSS#PTKS#PTKNAE.L      | S775:S779: | 2 | 4,3524 | 1     | 0,112  |
| 7 | Q9C0C2 TB182_HUMAN  | E.SQEPLAQGES#PLPLATR.E         | S601:      | 2 | 4,3487 | 0,494 | 0,065  |
| 7 | Q14202 ZMYM3_HUMAN  | E.LDKAS#SDLCDLVSNQSAE.G        | S949:      | 2 | 4,347  | 0,49  | 0,12   |



|   |                    |                                   |            |   |        |       |        |
|---|--------------------|-----------------------------------|------------|---|--------|-------|--------|
| 7 | Q15042 RB3GP_HUMAN | E.FFECLS#DTEELKGNQGE.S            | S590:      | 2 | 4,3425 | 0,467 | 0,234  |
| 7 | P04406 G3P_HUMAN   | K.RVIISAPSADAPM*FVM*GVNHE.K       |            | 3 | 4,3422 | 0,262 | 0,644  |
| 7 | Q9UBU9 NXF1_HUMAN  | R.AFAM*PAPTPS#SSPVPTLSPEQQE.M     | S556:      | 3 | 4,3397 | 0,373 | 0,297  |
| 7 | O95817 BAG3_HUMAN  | E.VKVPPAPVPCPPPS#PGPSAVPSS#PK.S   | S377:S386: | 3 | 4,3373 | 0,374 | -0,14  |
| 7 | Q6PGN9 PSRC1_HUMAN | E.TLDFGGLS#PSDSREEE.D             | S22:       | 2 | 4,3365 | 0,481 | 0      |
| 7 | P54105 ICLN_HUMAN  | E.CQALHPDPEDEDS#DD.Y              | S144:      | 2 | 4,3285 | 0,572 | -0,134 |
| 7 | P38432 P80C_HUMAN  | E.LTSSYS#PDVSDYKE.G               | S489:      | 2 | 4,321  | 0,472 | -0,511 |
| 7 | Q8IWW6 RHG12_HUMAN | R.AT#TPPNQGRPDS#PVYANLQE.L        | T230:S240: | 2 | 4,3209 | 0,472 | 0,316  |
| 7 | Q12873 CHD3_HUMAN  | E.LQGDGPPSS#PTNDPTVKYE.T          | S713:      | 2 | 4,297  | 0,493 | 0,234  |
| 7 | P49790 NU153_HUMAN | E.SSNITDGRIT#PEPAVSNT.E           | T102:      | 2 | 4,2943 | 0,349 | -0,118 |
| 7 | P35580 MYH10_HUMAN | E.GASLELS#DDDTESK.T               | S1956:     | 2 | 4,2909 | 0,566 | 0,158  |
| 7 | Q8IWJ2 GCC2_HUMAN  | E.LNETFLS#DSEKE.K                 | S345:      | 2 | 4,2724 | 0,217 | 0,654  |
| 7 | Q9Y6A5 TACC3_HUMAN | E.NQM*VSPGKVS#PEQAVEE.N           | S177:      | 2 | 4,258  | 0,28  | -0,118 |
| 7 | Q92997 DVL3_HUMAN  | E.TTSFFDS#DEDDSTSR.F              | S192:      | 2 | 4,2562 | 0,562 | 0,068  |
| 7 | P35908 K22E_HUMAN  | K.VLYDAEISQIHQSVTDNTNVILSM*DNSR.N |            | 3 | 4,2551 | 0,438 | 0      |
| 7 | Q9UQ35 SRRM2_HUMAN | E.VEERPAVSLTLDQSQS#QASLE.A        | S1289:     | 2 | 4,2547 | 0,452 | 0,103  |
| 7 | Q7Z417 NUFP2_HUMAN | E.SQNPLAS#PTNTLLGSAK.E            | S629:      | 2 | 4,2456 | 0,51  | -0,069 |
| 7 | P02538 K2C6A_HUMAN | R.ALYDAELSQM*QTHISDTSVVLMDNNR.N   |            | 3 | 4,2446 | 0,29  | 0,539  |
| 7 | O75113 N4BP1_HUMAN | E.FTQNAATGLNIS#RDE.T              | S226:      | 2 | 4,2373 | 0,508 | -0,497 |
| 7 | Q5JVS0 HABP4_HUMAN | E.SQGT#PEEESPAKVPE.L              | T268:      | 2 | 4,2335 | 0,418 | -0,293 |
| 7 | Q15642 CIP4_HUMAN  | R.APS#DSS#LGTPSDGRPE.L            | S296:S299: | 2 | 4,2288 | 0,418 | 0      |
| 7 | Q14157 UBP2L_HUMAN | E.GATGSAVKSDS#PTSSIPPLNE.T        | S647:      | 2 | 4,2266 | 0,438 | -0,671 |
| 7 | O95613 PCNT_HUMAN  | E.LAITDLES#GREDE.A                | S228:      | 2 | 4,2264 | 0,47  | -0,319 |
| 7 | Q01831 XPC_HUMAN   | E.VEELS#EPVLGDVRE.S               | S140:      | 2 | 4,2249 | 0,447 | 0,074  |
| 7 | Q13685 AAMP_HUMAN  | E.SGAAADT#PPLETLFHFHGDDEE.I       | T13:       | 2 | 4,222  | 0,381 | 0      |
| 7 | P63241 IF5A1_HUMAN | D.GYLSLLQDS#GEVRE.D               | S105:      | 2 | 4,2215 | 0,308 | 0,074  |
| 7 | P13645 K1C10_HUMAN | K.GSLGGGFSSGGFSGGSFSR.G           |            | 2 | 4,2181 | 0,443 | -0,143 |
| 7 | Q92576 PHF3_HUMAN  | E.TANLQDDRNS#QSSSVSYLE.S          | S473:      | 2 | 4,2112 | 0,461 | 0      |
| 7 | P08069 IGF1R_HUMAN | E.NGPGPGVLLVRAS#FDE.R             | S1339:     | 2 | 4,2005 | 0,407 | -0,071 |
| 7 | P27816 MAP4_HUMAN  | E.VGLLKDM*SPLS#ETE.M              | S510:      | 2 | 4,1984 | 0,435 | 0,076  |
| 7 | Q99575 POP1_HUMAN  | R.VQAYEEPSVASS#PNGKE.S            | S730:      | 2 | 4,1976 | 0,425 | 0,587  |
| 7 | O14640 DVL1_HUMAN  | E.SSSFVDS#DEDGSTR.L               | S194:      | 2 | 4,1895 | 0,46  | -0,221 |
| 7 | P27816 MAP4_HUMAN  | E.VGLLKDMS#PLSETE.M               | S507:      | 2 | 4,1871 | 0,566 | -0,305 |
| 7 | Q9Y2D5 AKAP2_HUMAN | E.NSLADFLPQT#PQTDNPSEGRGE.G       | T526:      | 2 | 4,1853 | 0,471 | 0,288  |
| 7 | P57764 GSDC1_HUMAN | E.GS#GRFSLPGATCLQGE.G             | S181:      | 2 | 4,1805 | 0,435 | 0      |
| 7 | P22314 UBA1_HUMAN  | E.LQS#ANASVDDSRLEE.L              | S816:      | 2 | 4,171  | 0,376 | 0,285  |
| 7 | Q8WUD4 CCD12_HUMAN | E.DSLASAVDAATEQKTCDS#D.-          | S165:      | 3 | 4,1703 | 0,345 | 0,355  |
| 7 | Q96RL1 UIMC1_HUMAN | E.TQLS#SSETFDLERE.V               | S451:      | 2 | 4,1659 | 0,527 | -0,213 |
| 7 | Q9NQ57 INCE_HUMAN  | E.IANSTPNPKPAASSPET#PSAGQQE.A     | T424:      | 3 | 4,1622 | 0,433 | -0,446 |

|   |                    |                                   |            |   |        |       |        |
|---|--------------------|-----------------------------------|------------|---|--------|-------|--------|
| 7 | Q13263 TIF1B_HUMAN | R.STAPSAASASASAAASS#PAGGGAEALE.L  | S50:       | 3 | 4,1608 | 0,381 | -0,153 |
| 7 | P50851 LRBA_HUMAN  | E.LQTTNTS#YEEM*KAEQE.N            | S1015:     | 2 | 4,1486 | 0,544 | 0,305  |
| 7 | Q9NQ57 INCE_HUMAN  | E.IANSTPNPKPAASS#PETPSAGQQE.A     | S421:      | 2 | 4,1474 | 0,491 | 0,099  |
| 7 | Q9BVJ6 UT14A_HUMAN | E.LSQDAEPAGS#QETK.D               | S445:      | 2 | 4,1332 | 0,349 | 0,238  |
| 7 | Q8WXI9 P66B_HUMAN  | R.GRLTPS#PDIIVLSDNE.A             | S122:      | 2 | 4,1279 | 0,334 | -0,338 |
| 7 | Q6NZI2 PTRF_HUMAN  | E.ITEESDAVLVDKSDS#D.-             | S389:      | 2 | 4,1271 | 0,467 | -0,135 |
| 7 | P11387 TOP1_HUMAN  | E.NGFSS#PPQIKDEPEDD.G             | S112:      | 2 | 4,1255 | 0,386 | -0,132 |
| 7 | Q6S8J3 A26CA_HUMAN | E.KSYELPDGQVIT#IGNE.R             | T949:      | 2 | 4,1217 | 0,459 | -0,199 |
| 7 | Q7Z4H7 FA29A_HUMAN | E.FEVENS#PLSDVAK.N                | S507:      | 2 | 4,1167 | 0,46  | -0,081 |
| 7 | Q6P2E9 EDC4_HUMAN  | E.NDS#LGADGTHGAGAM*E.S            | S486:      | 2 | 4,112  | 0,511 | -0,153 |
| 7 | Q15398 DLG7_HUMAN  | E.SRS#SIEDAQCPGLPDLIEE.N          | S689:      | 3 | 4,1118 | 0,331 | 0      |
| 7 | Q92543 SNX19_HUMAN | E.GRAS#PVAAPVFLSYSEPE.G           | S306:      | 2 | 4,1063 | 0,492 | -0,062 |
| 7 | Q8WXI9 P66B_HUMAN  | R.GRLT#PSPDIIVLSDNE.A             | T120:      | 2 | 4,1045 | 0,271 | -0,27  |
| 7 | Q9BXX5 B2L13_HUMAN | E.KS#SPATSLFVELDEEE.V             | S370:      | 2 | 4,1016 | 0,475 | -0,066 |
| 7 | Q6R327 RICTR_HUMAN | E.LSSIPSTLSLNSESTSS#R.H           | S1031:     | 2 | 4,0982 | 0,553 | 0,125  |
| 7 | Q9H814 RNUXA_HUMAN | E.ALASLDES#QEGHAE.A               | S368:      | 2 | 4,0935 | 0,397 | -0,397 |
| 7 | P41743 KPCI_HUMAN  | E.GLRPGDTTST#FCGTPNYIAPE.I        | T403:      | 2 | 4,0901 | 0,487 | 0,314  |
| 7 | O75781 PALM_HUMAN  | E.NAAAPS#PVRAPAPS#PAKE.E          | S116:S124: | 2 | 4,0881 | 0,508 | 0      |
| 7 | Q9NSI6 BRWD1_HUMAN | E.QIISLQTNNDNDERS#PE.S            | S649:      | 2 | 4,0865 | 0,427 | 0,126  |
| 7 | P10114 RAP2A_HUMAN | E.ILDTAGTEQFAS#M*RD.L             | S66:       | 2 | 4,0761 | 0,57  | -0,139 |
| 7 | P40818 UBP8_HUMAN  | E.SIPSKPAAQT#PPASIEVDE.N          | T351:      | 2 | 4,0744 | 0,528 | 0,242  |
| 7 | O75534 CSDE1_HUMAN | E.S#KSPAAPGQSPTGSVCYE.R           | S114:      | 2 | 4,0743 | 0,543 | -0,256 |
| 7 | Q12888 TP53B_HUMAN | E.VLSTQEDLFDQSNK.T                |            | 2 | 4,0543 | 0,456 | 0,15   |
| 7 | P27816 MAP4_HUMAN  | E.VGLLKDM*S#PLSETE.M              | S507:      | 2 | 4,043  | 0,408 | 0,378  |
| 7 | O75528 TAD3L_HUMAN | E.NIISPM*EDS#PIPDM*SGKE.S         | S280:      | 2 | 4,0319 | 0,369 | 0      |
| 7 | Q12756 KIF1A_HUMAN | E.ALSPAFSEDSHSSASS#PLSAE.G        | S1430:     | 2 | 4,0283 | 0,381 | 0,582  |
| 7 | P09496 CLCA_HUMAN  | E.SNGPTDSYAAISQVDR.L              |            | 2 | 4,0251 | 0,489 | -0,29  |
| 7 | Q9C0D2 K1731_HUMAN | E.M*DFANLT#LEEKSENE.A             | T2420:     | 2 | 4,0124 | 0,34  | 0,196  |
| 7 | P40123 CAP2_HUMAN  | E.SSPS#RSALFAQLNQGE.A             | S259:      | 2 | 4,0036 | 0,487 | -0,069 |
| 7 | P62191 PRS4_HUMAN  | E.IIDDNHAIVSTS#VGSE.H             | S126:      | 2 | 3,9968 | 0,532 | -0,14  |
| 7 | Q8N3D4 EH1L1_HUMAN | E.AGGQVGPAPRPPET#SPE.M            | T284:      | 2 | 3,9967 | 0,397 | -0,329 |
| 7 | O95402 MED26_HUMAN | E.SFASSLDGS#GHAGPE.G              | S199:      | 2 | 3,9936 | 0,526 | -0,244 |
| 7 | P23443 KS6B1_HUMAN | E.GGQLNES#M*DHGGVGPYE.L           | S53:       | 2 | 3,9847 | 0,545 | 0,199  |
| 7 | P08779 K1C16_HUMAN | K.IIAATIENAQPILQIDNAR.L           |            | 2 | 3,9767 | 0,397 | 0,118  |
| 7 | Q08378 GOGA3_HUMAN | E.TQLCSTD#PLPLEKEE.Q              | S140:      | 2 | 3,9726 | 0,372 | 0,57   |
| 7 | P13647 K2C5_HUMAN  | K.M*FFDAELSQMQTHVSDTSVVLSM*DNNR.N |            | 3 | 3,9666 | 0,161 | 0,117  |
| 7 | O00629 IMA4_HUMAN  | E.DSDIDGDYRVQNTS#LE.A             | S72:       | 2 | 3,9643 | 0,435 | 0      |
| 7 | Q9P287 BCCIP_HUMAN | E.LTDLLIQNHIGSVIK.Q               |            | 2 | 3,9635 | 0,474 | -0,068 |
| 7 | Q5T8D3 ACBD5_HUMAN | E.DLGNVLTSTPNAK.T                 |            | 2 | 3,9613 | 0,505 | -0,275 |

|   |                     |                                    |            |   |        |       |        |
|---|---------------------|------------------------------------|------------|---|--------|-------|--------|
| 7 | Q9H8W3 CJ084_HUMAN  | E.NS#GLNLQEDKEDE.S                 | S28:       | 2 | 3,9612 | 0,438 | -0,466 |
| 7 | Q4KMP7 TB10B_HUMAN  | R.RAS#AGPAPGPVVTA.E.G              | S412:      | 2 | 3,9544 | 0,471 | -0,251 |
| 7 | P35527 K1C9_HUMAN   | R.GSGSGSYGGGGSGGGYGGGGSGSR.G       |            | 2 | 3,9526 | 0,36  | 0      |
| 7 | Q13263 TIF1B_HUMAN  | E.TKPVLM*ALAEPGAEGPR.L             |            | 3 | 3,9515 | 0,174 | 0,303  |
| 7 | Q9ULU4 PKCB1_HUMAN  | E.TDSPVHLGLDS#DSESE.L              | S707:      | 2 | 3,9465 | 0,383 | 0,196  |
| 7 | Q8IWB9 TEX2_HUMAN   | E.LSNLS#SLNGHLE.S                  | S332:      | 2 | 3,9409 | 0,295 | 0,358  |
| 7 | Q9UKM9 RALY_HUMAN   | E.LEHS#QDTDADDGALQ.-               | S295:      | 2 | 3,9374 | 0,291 | -0,072 |
| 7 | Q99661 KIF2C_HUMAN  | E.ACSNGALIPGNLS#KEEEE.L            | S621:      | 2 | 3,9372 | 0,4   | 0      |
| 7 | Q8IYD8 FANCM_HUMAN  | E.FDDVS#LSPLNSKSE.S                | S1148:     | 2 | 3,9367 | 0,434 | 0,226  |
| 7 | Q9UHD8 SEPT9_HUMAN  | E.IQM*PKPAEAPTAPS#PAQTLE.N         | S203:      | 2 | 3,9294 | 0,402 | 0,112  |
| 7 | Q99700 ATX2_HUMAN   | E.VTSQGVQTS#SPACKQE.K              | S887:      | 2 | 3,9264 | 0,447 | 0,068  |
| 7 | Q9BVS4 RIOK2_HUMAN  | E.GSEFSFS#DGEVAEKAE.V              | S337:      | 2 | 3,9199 | 0,496 | 0,069  |
| 7 | P52701 MSH6_HUMAN   | E.VGTTYVTDKS#EEDNE.I               | S219:      | 2 | 3,9107 | 0,445 | 0,207  |
| 7 | Q9BTE6 AASD1_HUMAN  | E.AQALLQDYISTQS#AKE.-              | S409:      | 2 | 3,9064 | 0,406 | 0,198  |
| 7 | O43166 SI1L1_HUMAN  | E.YGS#TSSIDKQGTSGE.S               | S208:      | 2 | 3,902  | 0,596 | -0,306 |
| 7 | Q6GYQ0 GRIPE_HUMAN  | E.VASLTTLHIDS#E.T                  | S966:      | 2 | 3,9009 | 0,447 | 0,089  |
| 7 | Q9C0C2 TB182_HUMAN  | E.AQDLCRAS#PEPPGPE.S               | S672:      | 2 | 3,9008 | 0,535 | -0,143 |
| 7 | Q969K3 RNF34_HUMAN  | R.VRAS#LSDLSSLDDVE.G               | S254:      | 2 | 3,9006 | 0,501 | 0,145  |
| 7 | Q6P2E9 EDC4_HUMAN   | E.TCSTLAES#PRNGLQE.K               | S844:      | 2 | 3,8962 | 0,427 | -0,28  |
| 7 | P28715 ERCC5_HUMAN  | E.LTPAS#PTCTNSVSKNE.T              | S526:      | 3 | 3,8916 | 0,345 | 0,512  |
| 7 | Q9BTT0 AN32E_HUMAN  | E.IEGLNDT#FKELE.F                  | T40:       | 2 | 3,8909 | 0,393 | -0,492 |
| 7 | Q9UKN8 TF3C4_HUMAN  | K.ILLVDS#PGM*GNADDEQQEE.G          | S611:      | 3 | 3,8876 | 0,21  | 0,764  |
| 7 | Q15233 NONO_HUMAN   | E.GIGAIGGT#PPAFNR.A                | T450:      | 2 | 3,8817 | 0,514 | 0,173  |
| 7 | Q13029 PRDM2_HUMAN  | E.YNGIDLIVENPADGTRS#PS#PCKSLE.A    | S912:S914: | 3 | 3,8798 | 0,361 | 0,318  |
| 7 | Q9UQ35 SRRM2_HUMAN  | E.NSFGSPLEFRNS#GPLGTE.M            | S1336:     | 2 | 3,874  | 0,406 | 0,245  |
| 7 | Q5JRC6 Q5JRC6_HUMAN | E.AADLEES#FNEHE.L                  | S146:      | 2 | 3,87   | 0,481 | 0,415  |
| 7 | Q8N1G0 ZN687_HUMAN  | E.NGPGM*QPPVSS#PPLGALKQE.S         | S215:      | 2 | 3,8655 | 0,22  | 0      |
| 7 | Q9NZI7 UBIP1_HUMAN  | E.SGLVHDFDAS#LSGIGQE.L             | S22:       | 2 | 3,8653 | 0,479 | -0,135 |
| 7 | Q86SQ0 PHLB2_HUMAN  | E.LEKLQLS#DEESVFE.E                | S489:      | 2 | 3,8577 | 0,395 | -0,28  |
| 7 | Q6NYC8 PHTNS_HUMAN  | R.AKLGLS#PGEPSPVLGTVE.A            | S54:       | 2 | 3,8576 | 0,505 | -0,333 |
| 7 | Q13131 AAPK1_HUMAN  | E.VSLTSS#VTS#LDSSPVDLTPRPGSHTIE.F  | S515:S518: | 3 | 3,849  | 1     | 0,124  |
| 7 | Q9C0C2 TB182_HUMAN  | E.SQEPLAQES#PLPLATR.E              | S601:      | 3 | 3,8487 | 0,279 | 0,488  |
| 7 | Q9NRJ4 TULP4_HUMAN  | E.VLSLTES#PVPQRTE.K                | S1325:     | 2 | 3,8483 | 0,367 | 0,149  |
| 7 | O75665 OFD1_HUMAN   | E.GSLVDTLQSS#DKVE.S                | S994:      | 2 | 3,8462 | 0,441 | -0,47  |
| 7 | P02538 K2C6A_HUMAN  | R.ALYDAELSQM*QTHISDTSVVLISM*DNNR.N |            | 3 | 3,8422 | 0,34  | 0,119  |
| 7 | Q14247 SRC8_HUMAN   | R.AKTQT#PPVS#PAPQPTEE.R            | T401:S405: | 2 | 3,8391 | 0,466 | 0,252  |
| 7 | Q8NG31 CASC5_HUMAN  | E.IDNES#ALEDK.E.D                  | S1126:     | 2 | 3,8349 | 0,321 | -0,545 |
| 7 | Q02880 TOP2B_HUMAN  | K.VKAS#PITNDGEDE.F                 | S1400:     | 2 | 3,8346 | 0,403 | 0      |
| 7 | Q9HC35 EMAL4_HUMAN  | E.NSLEQTVPESEDHS#EEE.S             | S938:      | 2 | 3,8278 | 0,419 | 0,06   |

|   |                     |                                      |        |   |        |       |        |
|---|---------------------|--------------------------------------|--------|---|--------|-------|--------|
| 7 | Q6NZI2 PTRF_HUMAN   | E.SDAVLVDKS#DSD.-                    | S387:  | 2 | 3,8256 | 0,456 | 0,183  |
| 7 | Q8N201 INT1_HUMAN   | E.LLIAEEKLS#PEQE.G                   | S307:  | 2 | 3,8252 | 0,296 | 0,232  |
| 7 | Q5VY92 Q5VY92_HUMAN | R.LQDSS#DPDTGSEEE.G                  | S941:  | 2 | 3,8194 | 0,378 | -0,077 |
| 7 | Q16643 DREB_HUMAN   | E.GASTLQGEPRAPT#PPSGTE.V             | T497:  | 2 | 3,8143 | 0,38  | 0,379  |
| 7 | P51610 HCFC1_HUMAN  | E.AQPVHDLVPSILAS#PTTE.Q              | S984:  | 2 | 3,8119 | 0,37  | -0,187 |
| 7 | Q14839 CHD4_HUMAN   | E.VM*LQNGET#PKDLNDE.K                | T1679: | 2 | 3,8115 | 0,427 | -0,068 |
| 7 | P25490 TYY1_HUMAN   | E.VVGGDDS#DGLRAE.D                   | S118:  | 2 | 3,8075 | 0,528 | 0      |
| 7 | Q9NRS6 SNX15_HUMAN  | E.STEEASGS#PARGPLTE.A                | S201:  | 2 | 3,8039 | 0,513 | -0,512 |
| 7 | Q14202 ZMYM3_HUMAN  | E.LDKASS#DLCDLVSNSQSAE.G             | S950:  | 2 | 3,8033 | 0,523 | 0,3    |
| 7 | O15234 CASC3_HUMAN  | E.QTSVRDPS#PEADAPVLGSPE.K            | S363:  | 2 | 3,8023 | 0,298 | 0,343  |
| 7 | Q14320 FA50A_HUMAN  | E.LKSS#TVGLVTLND.M                   | S63:   | 2 | 3,7958 | 0,484 | -0,086 |
| 7 | Q562F6 SGOL2_HUMAN  | E.CSPAQVQS#DDEHE.K                   | S1187: | 2 | 3,7882 | 0,306 | 0,305  |
| 7 | P46821 MAP1B_HUMAN  | D.ISEKTT#PPEVSGYSYE.K                | S1965: | 2 | 3,7879 | 0,446 | 0,25   |
| 7 | Q9UHB6 LIMA1_HUMAN  | E.IGPGQLS#SSTFDSEKNE.S               | S242:  | 2 | 3,7878 | 0,531 | 0      |
| 7 | Q6S8J3 A26CA_HUMAN  | E.M*ATAASS#SSLEKSYE.L                | S933:  | 2 | 3,7864 | 0,469 | -0,074 |
| 7 | A6NKF1 SAC31_HUMAN  | E.VVM*AEEDEGTDRPGS#PA.-              | S401:  | 2 | 3,7752 | 0,539 | -0,061 |
| 7 | Q07021 C1QBP_HUMAN  | E.AES#DIFSIRE.V                      | S201:  | 2 | 3,7718 | 0,382 | -1,174 |
| 7 | Q9Y2F5 K0947_HUMAN  | E.AGCIPVTSAEKS#PE.A                  | S1470: | 2 | 3,7694 | 0,429 | -0,96  |
| 7 | Q92613 JADE3_HUMAN  | E.LS#DSEAESDGNKE.K                   | S774:  | 2 | 3,7672 | 0,523 | -0,251 |
| 7 | Q8N5S9 KKCC1_HUMAN  | E.GFGEGGKS#PELPGVQEDE.A              | S492:  | 2 | 3,7625 | 0,098 | 0,064  |
| 7 | Q8WUD4 CCD12_HUMAN  | E.DSLASAVDAATEQK.T                   |        | 2 | 3,7603 | 0,504 | 0,087  |
| 7 | Q05DR4 Q05DR4_HUMAN | R.S#LAALSQIAYQR.N                    | S12:   | 2 | 3,7559 | 0,217 | -0,435 |
| 7 | Q86SQ0 PHLB2_HUMAN  | E.LLSDLTRT#PPPPSSTFPK.A              | T550:  | 3 | 3,7486 | 0,323 | 0,18   |
| 7 | O75376 NCOR1_HUMAN  | E.TAEQM*DVDQEQHS#AEE.G               | S804:  | 2 | 3,7409 | 0,528 | 0,188  |
| 7 | O60841 IF2P_HUMAN   | E.AM*AS#DEETEKVE.G                   | S511:  | 2 | 3,7385 | 0,411 | -0,255 |
| 7 | Q99767 APBA2_HUMAN  | E.LAALRPES#PAPEEQE.C                 | S55:   | 2 | 3,7372 | 0,407 | 0,284  |
| 7 | Q9ULH0 ARMS_HUMAN   | E.TSQVILRPSSS#PNPTTIQNE.N            | S1718: | 3 | 3,736  | 0,245 | -0,569 |
| 7 | A1L020 MEX3A_HUMAN  | E.NDFLAGS#PDAAIDSR.Y                 | S308:  | 2 | 3,7324 | 0,36  | 0      |
| 7 | Q8NBU5 ATAD1_HUMAN  | E.YVNSTS#EESHDEDE.I                  | S319:  | 2 | 3,7231 | 0,435 | 0,142  |
| 7 | P35527 K1C9_HUMAN   | R.GGGGSFGYSYGGGSGGGFSASSLGGGFGGGSR.G |        | 3 | 3,721  | 0,433 | 0,203  |
| 7 | Q12888 TP53B_HUMAN  | E.VLSTQEDLFDQSNK.T                   |        | 3 | 3,7194 | 0,269 | 0,338  |
| 7 | O95551 TTRAP_HUMAN  | E.TTDSTTSKIS#PSEDTOQE.N              | S101:  | 2 | 3,7192 | 0,451 | -0,06  |
| 7 | P60660 MYL6_HUMAN   | E.M*LVAGHEDS#NGCINYE.A               | S135:  | 2 | 3,714  | 0,383 | 0,064  |
| 7 | P35908 K22E_HUMAN   | R.FLEQQNQVLQTK.W                     |        | 2 | 3,7091 | 0,349 | -0,083 |
| 7 | P49589 SYCC_HUMAN   | E.GEGDLISIS#ADRLSE.K                 | S307:  | 2 | 3,7066 | 0,394 | -0,638 |
| 7 | O00562 PITM1_HUMAN  | E.FFDAHEGFS#DSEE.V                   | S358:  | 2 | 3,7037 | 0,401 | 0,153  |
| 7 | Q9UHY1 NRBP_HUMAN   | E.SQTVLSSGS#DPKVE.S                  | S14:   | 2 | 3,7019 | 0,513 | -0,242 |
| 7 | P19174 PLCG1_HUMAN  | E.NGDLSPFSGT#SLRE.R                  | T1226: | 2 | 3,701  | 0,462 | -0,078 |
| 7 | Q8WVT3 TTC15_HUMAN  | E.TAS#EGSSPLADKLINE.H                | S52:   | 2 | 3,698  | 0,345 | 0,076  |

|   |                     |                                |            |   |        |       |        |
|---|---------------------|--------------------------------|------------|---|--------|-------|--------|
| 7 | Q15459 SF3A1_HUMAN  | E.KQS#DDEVYAPGLDIE.S           | S451:      | 2 | 3,6965 | 0,418 | -0,277 |
| 7 | Q13283 G3BP1_HUMAN  | K.SSS#PAPADIAQTVQE.D           | S232:      | 2 | 3,6915 | 0,318 | 1,003  |
| 7 | P38432 P80C_HUMAN   | E.LTSS#YSPDVSDYKE.G            | S487:      | 2 | 3,6843 | 0,528 | -0,146 |
| 7 | Q6WCQ1 MRIP_HUMAN   | E.ALGEKS#PDSATVSGYD.I          | S976:      | 2 | 3,6771 | 0,496 | -0,146 |
| 7 | Q15678 PTN14_HUMAN  | E.M*FSLEDS#IIERE.M             | S839:      | 2 | 3,6735 | 0,409 | -0,234 |
| 7 | Q13501 SQSTM_HUMAN  | E.SEGPSS#LDPSQEGPTGLKE.A       | S366:      | 2 | 3,6722 | 0,427 | 0,245  |
| 7 | Q9Y580 RBM7_HUMAN   | R.TM*DNM*TSSAQIIQR.S           |            | 3 | 3,6658 | 0,297 | 0      |
| 7 | Q7Z309 F122B_HUMAN  | E.SLSLS#DSDFDKPE.K             | S93:       | 2 | 3,6626 | 0,32  | 0,08   |
| 7 | P49792 RBP2_HUMAN   | K.AVVS#PPKFVFGSE.S             | S2510:     | 2 | 3,6618 | 0,409 | -0,338 |
| 7 | Q8WXW3 PIBF1_HUMAN  | E.TTVPTDDISS#SEERE.G           | S36:       | 2 | 3,661  | 0,429 | -0,559 |
| 7 | Q9H582 ZN644_HUMAN  | E.LLDDNNFIS#DKE.S              | S50:       | 2 | 3,6542 | 0,262 | 0,162  |
| 7 | Q2M3G4 SHRM1_HUMAN  | E.ALGGGDRAS#PASSTSSLD.L        | S12:       | 2 | 3,6493 | 0,38  | -0,267 |
| 7 | P02538 K2C6A_HUMAN  | R.ALYDAELSQMQTHISDTSVVLMDNNR.N |            | 3 | 3,6484 | 0,257 | -0,12  |
| 7 | Q9NZT2 OGFR_HUMAN   | E.GCAL#QGSLR.T                 | S420:      | 2 | 3,648  | 0,334 | -0,432 |
| 7 | P46013 KI67_HUMAN   | E.LFQT#PGTDKPTTDE.K            | T2325:     | 2 | 3,647  | 0,407 | -0,225 |
| 7 | Q8NFP9 NBEA_HUMAN   | E.GDDDAVS#LLQEKE.I             | S2138:     | 2 | 3,6467 | 0,307 | -0,163 |
| 7 | O14578 CTRO_HUMAN   | E.SVVSGLDSPAKTSS#M*E.K         | S446:      | 2 | 3,6458 | 0,52  | -0,144 |
| 7 | Q9HCS7 SYF1_HUMAN   | E.QQSVAAVFGS#LKED.-            | S851:      | 2 | 3,6436 | 0,439 | -0,147 |
| 7 | Q8NDI1 EHBP1_HUMAN  | E.VQPQVANS#PSSAAQK.A           | S964:      | 2 | 3,6418 | 0,438 | -0,077 |
| 7 | P04264 K2C1_HUMAN   | R.SLDLDSIIAEVK.A               |            | 2 | 3,6417 | 0,429 | -0,281 |
| 7 | O15027 SC16A_HUMAN  | E.ARS#PDPGIVPQEAPVGNLSE.L      | S1844:     | 2 | 3,6405 | 0,384 | 0,111  |
| 7 | P48960 CD97_HUMAN   | E.GSYDCVCSPGYEPVSGAK.T         |            | 2 | 3,633  | 0,576 | 0,189  |
| 7 | O14617 AP3D1_HUMAN  | R.ALDIDLKPLADSE.K              |            | 2 | 3,6281 | 0,329 | 0      |
| 7 | P38398 BRCA1_HUMAN  | E.LLGSDDS#HDGESE.S             | S398:      | 2 | 3,6276 | 0,49  | -0,169 |
| 7 | P00558 PGK1_HUMAN   | E.DKVSHVSTGGGASLE.L            |            | 2 | 3,627  | 0,431 | 0,169  |
| 7 | Q5JSH3 WDR44_HUMAN  | E.LSDQATAS#PIVAR.T             | S96:       | 2 | 3,625  | 0,406 | 0,087  |
| 7 | Q14694 UBP10_HUMAN  | E.TKYS#PPAISPLVSE.K            | S365:      | 2 | 3,6195 | 0,305 | 0      |
| 7 | P35908 K22E_HUMAN   | R.NLDLDSIIAEVK.A               |            | 2 | 3,6104 | 0,466 | -0,275 |
| 7 | Q9H307 PININ_HUMAN  | E.NVS#ALDM*EKE.S               | S450:      | 2 | 3,608  | 0,349 | -0,099 |
| 7 | Q15042 RB3GP_HUMAN  | E.CLS#DTEELKGNQGE.S            | S590:      | 2 | 3,6003 | 0,495 | 0,074  |
| 7 | P49757 NUMB_HUMAN   | E.GS#FRVTTATEQAE.R             | S194:      | 2 | 3,5988 | 0,403 | -0,165 |
| 7 | Q9Y2N3 PO121_HUMAN  | E.QIISSTLSS#PSSNAPDPCAKE.T     | S275:      | 3 | 3,597  | 0,28  | 0      |
| 7 | Q9Y3Q8 T22D4_HUMAN  | E.M*GQVPLDS#RPSS#PALYFTHD.A    | S260:S264: | 3 | 3,5946 | 0,234 | 0      |
| 7 | Q7Z401 MYCPP_HUMAN  | E.STS#LTDEDVCHE.L              | S1370:     | 2 | 3,5894 | 0,538 | -0,083 |
| 7 | B2RDY9 B2RDY9_HUMAN | E.SAS#RSALFAQINQGE.S           | S253:      | 2 | 3,5871 | 0,504 | 0,074  |
| 7 | P46013 KI67_HUMAN   | E.AQS#LEDLAGFKE.L              | S1098:     | 2 | 3,5857 | 0,392 | 0,088  |
| 7 | P06703 S10A6_HUMAN  | E.LTIGS#KLQDAE.I               | S46:       | 2 | 3,5842 | 0,399 | 0,194  |
| 7 | Q9NUJ3 T11L1_HUMAN  | E.VSSCLSLCGSS#PFTTDKE.T        | S414:      | 2 | 3,584  | 0,496 | 0,238  |
| 7 | O94842 TOX4_HUMAN   | E.LVSGS#PVALS#PQPR.C           | S562:S567: | 2 | 3,5836 | 0,183 | 0,545  |

|   |                     |                                   |            |   |        |       |        |
|---|---------------------|-----------------------------------|------------|---|--------|-------|--------|
| 7 | Q99661 KIF2C_HUMAN  | E.LSPHSGPS#GEQLIQM*E.T            | S595:      | 2 | 3,5822 | 0,383 | -0,068 |
| 7 | Q9NVU7 SDA1_HUMAN   | E.IDS#DEEPRGE.L                   | S585:      | 2 | 3,5798 | 0,424 | -0,298 |
| 7 | O43242 PSMD3_HUMAN  | E.AATGGGS#TGEADGKTA AAAAE.H       | S47:       | 2 | 3,5789 | 0,503 | -0,132 |
| 7 | Q9Y6A5 TACC3_HUMAN  | E.NQM*VS#PGKVGSGSPE.Q             | S170:      | 2 | 3,5699 | 0,42  | 0      |
| 7 | Q12904 MCA1_HUMAN   | E.NVIQSTAVTTVSS#GTKE.Q            | S107:      | 2 | 3,5669 | 0,484 | -0,474 |
| 7 | P35579 MYH9_HUMAN   | E.IANSS#GKGALALEE.K               | S1714:     | 2 | 3,5663 | 0,296 | 0,508  |
| 7 | Q9UHY1 NRBP_HUMAN   | E.SQTVLS#SGSDPKVE.S               | S11:       | 2 | 3,5604 | 0,494 | 0      |
| 7 | P42566 EP15_HUMAN   | E.SEPIHQES#PARS#SPELLPSGVT DENE.V | S558:S562: | 3 | 3,559  | 0,24  | 0,309  |
| 7 | Q92794 MYST3_HUMAN  | E.TVQAVQSLTQEES#EHE.G             | S1437:     | 3 | 3,5575 | 0,268 | 0      |
| 7 | Q9NUA8 ZBT40_HUMAN  | E.ILSSEGAGEPHSS#PE.L              | S160:      | 2 | 3,5572 | 0,266 | 0,077  |
| 7 | Q9UQ35 SRRM2_HUMAN  | D.APFSEPGTTSTQRPSS#PE.T           | S323:      | 2 | 3,555  | 0,39  | 0,624  |
| 7 | Q15424 SAFB1_HUMAN  | E.LAEAPTEAPS#PEAR.D               | S344:      | 2 | 3,5538 | 0,45  | -0,075 |
| 7 | Q15424 SAFB1_HUMAN  | E.LAEAPTEAPS#PEAR.D               | S344:      | 2 | 3,5534 | 0,381 | 0,08   |
| 7 | Q93009 UBP7_HUMAN   | K.AGEQQLS#EPEDM*E.M               | S18:       | 2 | 3,5519 | 0,443 | 0,078  |
| 7 | Q9UQ35 SRRM2_HUMAN  | E.GDAPFSEPGTTSTQRPSS#PE.T         | S323:      | 3 | 3,5458 | 0,179 | 0,688  |
| 7 | Q8TDY2 RBCC1_HUMAN  | E.M*SQITDLLSEQK.A                 |            | 2 | 3,545  | 0,397 | -0,242 |
| 7 | Q99661 KIF2C_HUMAN  | E.LSPHS#GPSGEQLIQM*E.T            | S592:      | 2 | 3,5444 | 0,411 | -1,351 |
| 7 | Q14254 FLOT2_HUMAN  | E.IVVL#GDNSKVTSSE.V               | S336:      | 2 | 3,544  | 0,466 | -0,16  |
| 7 | Q5UIP0 RIF1_HUMAN   | E.LDGGNDV#DLHSSEE.T               | S2006:     | 2 | 3,5437 | 0,448 | -0,812 |
| 7 | Q96MU7 YTDC1_HUMAN  | E.LYNPES#EQDKNE.K                 | S35:       | 2 | 3,541  | 0,166 | -0,158 |
| 7 | Q6VMQ6 MCAF1_HUMAN  | E.NVIEDNKS#ENILE.N                | S420:      | 2 | 3,5407 | 0,281 | -0,076 |
| 7 | Q8IXL7 MSRB3_HUMAN  | E.GSGVAS#PAQADKAEL.-              | S176:      | 2 | 3,5318 | 0,319 | -0,079 |
| 7 | P52294 IMA1_HUMAN   | E.TEEVMS*#DGGFHE.A                | S63:       | 2 | 3,5318 | 0,324 | -1,64  |
| 7 | Q9BXW6 OSBL1_HUMAN  | E.QSLVKGS#PPASILSEDE.F            | S465:      | 2 | 3,5293 | 0,288 | 0,133  |
| 7 | Q9BQY9 DBND2_HUMAN  | E.SQRPPIGS#ISSM*EVNVDTLE.Q        | S151:      | 2 | 3,5278 | 0,436 | 0,108  |
| 7 | Q9BUR4 WDR79_HUMAN  | E.FGSPSELS#PRIEEQE.L              | S90:       | 2 | 3,5267 | 0,397 | 0      |
| 7 | Q561V9 Q561V9_HUMAN | E.M*LVAGHEDS#NGCINYE.L            | S135:      | 2 | 3,5262 | 0,336 | -0,54  |
| 7 | Q9NZ63 CI078_HUMAN  | E.DLHLGT#SFSAE.T                  | T100:      | 2 | 3,5235 | 0,345 | 0,194  |
| 7 | Q01082 SPTB2_HUMAN  | E.QVSQLPQAEQGS#PR.M               | S2138:     | 2 | 3,5221 | 0,458 | -0,518 |
| 7 | A2RRP1 NAG_HUMAN    | E.GGENISAS#PLTSK.A                | S1384:     | 2 | 3,5161 | 0,379 | 0,091  |
| 7 | P30622 CLIP1_HUMAN  | E.IENLQNNQDSE.R                   |            | 2 | 3,5154 | 0,346 | -0,185 |
| 7 | O14686 MLL2_HUMAN   | E.GPVS#PDVEPGKEETEE.S             | S1396:     | 2 | 3,5084 | 0,471 | -0,274 |
| 7 | Q9Y365 PCTL_HUMAN   | E.LSVQHADS#LENIDE.S               | S259:      | 2 | 3,5047 | 0,251 | -0,148 |
| 7 | P38398 BRCA1_HUMAN  | E.DTS#FAENDIKE.S                  | S1164:     | 2 | 3,4993 | 0,337 | 0,181  |
| 7 | Q9UGU5 HM2L1_HUMAN  | E.AGELVIDDS#YRE.I                 | S312:      | 2 | 3,4953 | 0,427 | 0,169  |
| 7 | Q12888 TP53B_HUMAN  | K.TVSS#DGCST#PSREE.G              | S316:T321: | 2 | 3,4947 | 1     | 0      |
| 7 | Q6PGN9 PSRC1_HUMAN  | E.TLDFGGLS#PSDSREE.E              | S22:       | 2 | 3,492  | 0,429 | -0,289 |
| 7 | P23246 SFPQ_HUMAN   | R.FGQGGAGPVGQGGPR.G               |            | 2 | 3,4911 | 0,451 | -0,182 |
| 7 | Q92539 LPIN2_HUMAN  | E.TTYPQTACPKS#DSELE.V             | S243:      | 2 | 3,4872 | 0,382 | -0,128 |

|   |                     |                                        |            |   |        |       |        |
|---|---------------------|----------------------------------------|------------|---|--------|-------|--------|
| 7 | P08779 K1C16_HUMAN  | K.IIAATIENAPILQIDNAR.L                 |            | 3 | 3,4862 | 0,399 | 0,089  |
| 7 | Q04695 K1C17_HUMAN  | K.ILTATVDNANILLQIDNAR.L                |            | 2 | 3,4837 | 0,379 | 0      |
| 7 | Q02952 AKA12_HUMAN  | E.TLAGVKS#QEM*VM*E.Q                   | S1149:     | 2 | 3,4825 | 0,329 | -0,079 |
| 7 | P35527 K1C9_HUMAN   | R.HGVQEIELELQSQLSK.K                   |            | 2 | 3,478  | 0,453 | 0,266  |
| 7 | P27816 MAP4_HUMAN   | E.DTPSSKPTLLANGGHGVEGS#DTTGS#PTEFLEE.K | S94:S99:   | 3 | 3,4776 | 1     | 0,432  |
| 7 | Q9NZB2 F120A_HUMAN  | R.SSPINPAQSGS#PNHVD.S                  | S444:      | 2 | 3,476  | 0,37  | -0,072 |
| 7 | Q08211 DHX9_HUMAN   | E.IKSEEVPAFGVAS#PPPLTD.T               | S87:       | 2 | 3,4747 | 0,467 | -0,06  |
| 7 | Q12802 AKP13_HUMAN  | E.GLTGGAGVGNKPSS#SLE.V                 | S1618:     | 2 | 3,4701 | 0,361 | -0,227 |
| 7 | P27816 MAP4_HUMAN   | E.VGLLKDM*GS#PLSE.T                    | S507:      | 2 | 3,4605 | 0,447 | 0,264  |
| 7 | Q9H426 RIMS4_HUMAN  | R.SQS#RLS#LSASFE.A                     | S6:S9:     | 2 | 3,4593 | 0,316 | -0,083 |
| 7 | Q96EB6 SIRT1_HUMAN  | E.AALALQPGGS#PSAAGADRE.A               | S14:       | 2 | 3,4588 | 0,522 | 0,134  |
| 7 | Q16254 E2F4_HUMAN   | E.ASRPNS#PQLTPTAVPGSAE.V               | S244:      | 2 | 3,4579 | 0,522 | -0,062 |
| 7 | Q9Y2X9 ZN281_HUMAN  | E.NLSPGTQT#PSNDKASM*LQE.Y              | T656:      | 2 | 3,4564 | 0,447 | 0      |
| 7 | Q96E22 NGBR_HUMAN   | E.LLGLDCSKYS#PE.F                      | S168:      | 2 | 3,4532 | 0,363 | 0,083  |
| 7 | Q8WWM7 ATX2L_HUMAN  | E.VDGLLTSEPM*GS#PVSSKTE.S              | S594:      | 2 | 3,4526 | 0,448 | -0,902 |
| 7 | Q9H4A3 WINK1_HUMAN  | E.LSEPSHLNGPSS#DPE.A                   | S2012:     | 2 | 3,4517 | 0,357 | 0,148  |
| 7 | Q05BP1 Q05BP1_HUMAN | E.VGPLAHLAPS#PQSE.A                    | S22:       | 2 | 3,4473 | 0,493 | 0,329  |
| 7 | Q6ZTN6 AN13D_HUMAN  | R.GPGS#PPRT#PPAPGPPSFEE.Q              | S465:T469: | 2 | 3,4393 | 0,395 | 0,3    |
| 7 | Q96PE2 ARHG_HUMAN   | R.STISSFGNEETPSSKE.A                   |            | 2 | 3,4386 | 0,546 | 0,068  |
| 7 | P62258 1433E_HUMAN  | E.LDTLSEES#YKD.S                       | S213:      | 2 | 3,4363 | 0,4   | 0      |
| 7 | Q8TD19 NEK9_HUMAN   | E.SGGCGDSS#PGPSASQGPR.A                | S29:       | 2 | 3,4362 | 0,472 | 0,21   |
| 7 | Q14674 ESPL1_HUMAN  | R.GS#DGEDSASGGKTPAGPE.A                | S1508:     | 2 | 3,4339 | 0,537 | -0,068 |
| 7 | Q94916 NFAT5_HUMAN  | E.ISS#PARPCSFEE.A                      | S561:      | 2 | 3,4266 | 0,422 | -0,251 |
| 7 | Q9Y6D5 BIG2_HUMAN   | E.NSQTNGIADDRQS#LSSADNLE.S             | S346:      | 3 | 3,4266 | 0,187 | 0,079  |
| 7 | Q6P2E9 EDC4_HUMAN   | E.LGSEGLGSAAHGS#QPD.L                  | S565:      | 2 | 3,4262 | 0,383 | 0,078  |
| 7 | Q9P287 BCCIP_HUMAN  | E.LTDLLIQNHIGSVIK.Q                    |            | 3 | 3,4238 | 0,344 | 0      |
| 7 | Q9H2Y7 ZF106_HUMAN  | E.NS#PSSQSAGLSSINKE.G                  | S1279:     | 2 | 3,4221 | 0,408 | -0,362 |
| 7 | P42166 LAP2A_HUMAN  | E.RDS#GSFVAFQNIPIGSE.L                 | S442:      | 2 | 3,4218 | 0,367 | 0,409  |
| 7 | Q14201 BTG3_HUMAN   | E.M*EVKPSSVTAAAS#PVYQISE.L             | S169:      | 3 | 3,4203 | 0,322 | -0,585 |
| 7 | Q9Y606 TRUA_HUMAN   | K.VPSPLEGSEGDGDT#D.-                   | T426:      | 2 | 3,4203 | 0,498 | 0,157  |
| 7 | Q8N3D4 EH1L1_HUMAN  | E.AGGQVGPAPRPPETS#PE.M                 | S285:      | 2 | 3,4198 | 0,407 | 0      |
| 7 | Q6GYQ0 GRIPE_HUMAN  | R.SQT#PSPSTLNIDHM*E.Q                  | T1002:     | 2 | 3,4193 | 0,496 | -0,07  |
| 7 | Q14686 MLL2_HUMAN   | E.VSVLSSGS#PR.L                        | S48:       | 2 | 3,4177 | 0,324 | -0,114 |
| 7 | Q9Y580 RBM7_HUMAN   | R.TM*DNM*TSSAQIIQR.S                   |            | 2 | 3,4138 | 0,382 | 0      |
| 7 | Q56D06 Q56D06_HUMAN | E.AEATVNNSS#DTESIPSPHTE.A              | S728:      | 2 | 3,4133 | 0,363 | 0      |
| 7 | Q14151 SAFB2_HUMAN  | E.TSSLNFKVT#PDIEE.S                    | T201:      | 2 | 3,4066 | 0,321 | 0,073  |
| 7 | P05787 K2C8_HUMAN   | E.AES#M*YQIKYEE.L                      | S280:      | 2 | 3,4033 | 0,351 | -0,41  |
| 7 | Q14745 NHERF_HUMAN  | E.ALAEAALES#PRPALVR.S                  | S280:      | 3 | 3,4026 | 0,402 | 0,105  |
| 7 | Q15007 FL2D_HUMAN   | E.GNTTEDDFPSS#PGNGNK.S                 | S306:      | 3 | 3,4005 | 0,338 | 0,201  |

|   |                     |                              |            |   |        |       |        |
|---|---------------------|------------------------------|------------|---|--------|-------|--------|
| 7 | Q02413 DSG1_HUMAN   | K.VVKPLDYEAMQSLQLSIGVR.N     |            | 3 | 3,3993 | 0,155 | -0,326 |
| 7 | P04264 K2C1_HUMAN   | K.SLNNQFASFIDK.V             |            | 2 | 3,3978 | 0,407 | -0,617 |
| 7 | O95208 EPN2_HUMAN   | R.M*AQVATGM*GSNQITFGR.G      |            | 3 | 3,3963 | 0,373 | 0,508  |
| 7 | P19174 PLCG1_HUMAN  | E.NGDLS#PFSGTSLRE.R          | S1221:     | 2 | 3,3848 | 0,558 | 0,156  |
| 7 | O95196 CSPG5_HUMAN  | E.SFNIQNS#M*SPKLE.G          | S541:      | 2 | 3,3798 | 0,331 | -0,077 |
| 7 | Q7Z5L2 GIDRP_HUMAN  | E.NM*IVPIKLS#SDSE.I          | S240:      | 2 | 3,3779 | 0,349 | 0,319  |
| 7 | Q8IYA6 CKP2L_HUMAN  | E.NES#LDNFLKE.T              | S175:      | 2 | 3,3763 | 0,245 | -0,284 |
| 7 | P98172 EFNB1_HUMAN  | E.M*PPQS#PANIYK.V.-          | S338:      | 2 | 3,3726 | 0,268 | 0,304  |
| 7 | Q9NVU7 SDA1_HUMAN   | K.YIEIDS#DEEPRGE.L           | S585:      | 2 | 3,371  | 0,403 | -0,15  |
| 7 | Q9Y2D5 AKAP2_HUMAN  | E.NSLADFSLPQT#PQTDNPSEGRGE.G | T526:      | 3 | 3,3708 | 0,202 | 0,216  |
| 7 | Q9NRS6 SNX15_HUMAN  | E.STEEASGS#PARGPLTEAE.L      | S201:      | 2 | 3,3661 | 0,547 | 0,065  |
| 7 | P27816 MAP4_HUMAN   | E.ISS#AEKVALSSETE.V          | S432:      | 2 | 3,3637 | 0,518 | -0,239 |
| 7 | Q9Y4W2 LAS1L_HUMAN  | E.GSEAS#PIGKSPYTL.D.S        | S523:      | 2 | 3,359  | 0,319 | -0,076 |
| 7 | Q9BTX7 CT121_HUMAN  | E.SDSLRTS#PSVASLSE.N         | S11:       | 2 | 3,3589 | 0,416 | -0,302 |
| 7 | Q15544 TAF11_HUMAN  | E.SQDVS#DLTTVERE.D           | S64:       | 2 | 3,3563 | 0,337 | -0,157 |
| 7 | Q6NZI2 PTRF_HUMAN   | R.RGS#S#PDVHALLE.I           | S365:S366: | 2 | 3,3536 | 0,471 | 0,339  |
| 7 | Q7Z4Q2 HEAT3_HUMAN  | E.CGGQLFS#PLCLSHE.V          | S410:      | 2 | 3,3533 | 0,31  | -0,362 |
| 7 | P82094 TMF1_HUMAN   | R.S#ATPVNCEQPDLVSSTPINE.G    | S399:      | 3 | 3,3529 | 0,217 | 0,078  |
| 7 | P08779 K1C16_HUMAN  | R.VLQGLEIELQSQLSM*K.A        |            | 3 | 3,3473 | 0,202 | -0,499 |
| 7 | Q8TEH3 DEN1A_HUMAN  | E.AALQPLGQAKS#LE.D           | S592:      | 2 | 3,3417 | 0,308 | 0,087  |
| 7 | P29966 MARCS_HUMAN  | E.AGAS#PVEKEAPEAGE.A         | S101:      | 2 | 3,3397 | 0,49  | -0,241 |
| 7 | P06730 IF4E_HUMAN   | E.TTPTPNPPTTEEEKTES#NQE.V    | S24:       | 3 | 3,3364 | 0,148 | -0,079 |
| 7 | Q8N2Y8 RUSC2_HUMAN  | E.TSRPSPLGSYS#PIR.S          | S781:      | 3 | 3,3332 | 0,302 | 0,229  |
| 7 | P80723 BASP_HUMAN   | E.AAAAPAES#AAPAAGEEPSKEE.G   | S132:      | 3 | 3,3315 | 0,163 | 0,45   |
| 7 | Q6S8J3 A26CA_HUMAN  | E.KLCYVALDFEQE.M             |            | 2 | 3,328  | 0,338 | -0,242 |
| 7 | Q5CZB5 Q5CZB5_HUMAN | E.GEGAAGAGDHQDPS#LGAGE.A     | S114:      | 2 | 3,3265 | 0,449 | -0,137 |
| 7 | Q8WVT3 TTC15_HUMAN  | E.TASEGSS#PLADKLE.H          | S56:       | 2 | 3,3241 | 0,312 | 0,382  |
| 7 | Q96JN8 K1787_HUMAN  | E.AFM*VS#PAQARPE.T           | S247:      | 2 | 3,3236 | 0,279 | 0,087  |
| 7 | O95251 MYST2_HUMAN  | E.TEQVVDVS#DRE.T             | S111:      | 2 | 3,3227 | 0,422 | -0,347 |
| 7 | P53396 ACLY_HUMAN   | R.TAS#FSEGRADE.V             | S455:      | 2 | 3,3222 | 0,495 | 0,095  |
| 7 | O75116 ROCK2_HUMAN  | E.NLLLSDS#PSCRE.N            | S425:      | 2 | 3,3199 | 0,356 | 0,249  |
| 7 | O60303 K0556_HUMAN  | E.GRSS#PGPDTLVVLE.F          | S253:      | 2 | 3,3184 | 0,476 | -0,081 |
| 7 | Q5VYS8 ZCHC6_HUMAN  | E.TAESFGS#PPKEE.M            | S706:      | 2 | 3,3163 | 0,378 | -0,629 |
| 7 | Q86UU0 BCL9L_HUMAN  | E.AGT#PSLDSEAKE.V            | T129:      | 2 | 3,3057 | 0,176 | -0,19  |
| 7 | Q14683 SMC1A_HUMAN  | E.SQS#QGRDLTLE.E             | S360:      | 2 | 3,3035 | 0,363 | 0      |
| 7 | Q8TEA8 DTD1_HUMAN   | R.SASS#GAEGDVSSEREP.-        | S197:      | 2 | 3,3009 | 0,476 | -0,519 |
| 7 | P82094 TMF1_HUMAN   | E.TLAAGTSS#PKTE.G            | S170:      | 2 | 3,298  | 0,473 | -0,294 |
| 7 | Q9H0E9 BRD8_HUMAN   | E.ADVAIGKGDDETPLTNVK.T       |            | 3 | 3,2959 | 0,213 | 0,212  |
| 7 | Q13115 DUS4_HUMAN   | E.SQVLATSCAAEAAS#PSGPLRE.R   | S345:      | 3 | 3,2951 | 0,265 | 0,922  |



|   |                     |                                |                 |   |        |       |        |
|---|---------------------|--------------------------------|-----------------|---|--------|-------|--------|
| 7 | Q9H307 PININ_HUMAN  | K.S#LSPGKENVS#ALDM*EKE.S       | S441:S450:      | 2 | 3,2927 | 0,223 | 0,121  |
| 7 | P14921 ETS1_HUMAN   | E.CADVPLLT#PSSKE.M             | T38:            | 2 | 3,292  | 0,433 | 0,326  |
| 7 | Q9NP61 ARFG3_HUMAN  | E.DFFASHVS#PE.V                | S157:           | 2 | 3,2915 | 0,313 | 0      |
| 7 | Q6S8J3 A26CA_HUMAN  | E.M*ATAASSS#SLEK.S             | S934:           | 2 | 3,2866 | 0,37  | -0,191 |
| 7 | P18583 SON_HUMAN    | E.SDQTLAALLS#PKE.S             | S1697:          | 2 | 3,2827 | 0,331 | -0,084 |
| 7 | Q15185 TEBP_HUMAN   | D.SQDS#DDEKM*PDLE.-            | S151:           | 2 | 3,2822 | 0,403 | 0      |
| 7 | Q96RT1 LAP2_HUMAN   | E.TVTTLDYSHCS#LE.Q             | S33:            | 2 | 3,2805 | 0,407 | 0,076  |
| 7 | P35658 NU214_HUMAN  | E.SSQPDAFSS#GGGSKPSYE.A        | S1257:          | 2 | 3,2691 | 0,332 | -0,131 |
| 7 | P19532 TFE3_HUMAN   | E.GVVGGLSGGALS#PLR.A           | S542:           | 2 | 3,2664 | 0,42  | 0      |
| 7 | P04035 HMDH_HUMAN   | K.Y#IFFEQT#ET#ESTLSLK.N        | Y336:T342:T344: | 3 | 3,2661 | 0,137 | -0,42  |
| 7 | Q8TAQ2 SMRC2_HUMAN  | E.SSGIAGTT#SDEPERIEE.S         | T744:           | 2 | 3,2655 | 0,468 | 0,066  |
| 7 | O15234 CASC3_HUMAN  | E.ADAPVLGS#PEKEE.A             | S373:           | 2 | 3,265  | 0,36  | 0,172  |
| 7 | Q13129 RLF_HUMAN    | E.SFLS#DYDEGKE.D               | S512:           | 2 | 3,2621 | 0,246 | 0,089  |
| 7 | Q9HCF4 ALO17_HUMAN  | E.AGVATGSEAQSS#PQFQDHTE.G      | S193:           | 3 | 3,2608 | 0,103 | -0,172 |
| 7 | Q9H7M9 GI24_HUMAN   | E.LVRM*DS#NIQGIENPGFE.A        | S235:           | 2 | 3,259  | 0,405 | 0      |
| 7 | Q92797 SYMPK_HUMAN  | E.AALLDSS#LEGPLPK.E            | S1222:          | 2 | 3,2571 | 0,416 | -0,245 |
| 7 | Q9BQK8 LPIN3_HUMAN  | E.LTSPKS#DSELE.V               | S224:           | 2 | 3,2512 | 0,395 | -0,19  |
| 7 | Q6PD74 P34_HUMAN    | E.IEGLS#SDEEH.-                | S310:           | 2 | 3,2505 | 0,379 | 0,306  |
| 7 | P49137 MAPK2_HUMAN  | E.TTSHNSLTT#PCYTPYYVAPE.V      | T222:           | 2 | 3,2494 | 0,366 | 0,102  |
| 7 | O43815 STRN_HUMAN   | E.LNQGDM*KPPSYDS#DEGNETE.V     | S137:           | 3 | 3,2446 | 0,178 | 0,236  |
| 7 | P28715 ERCC5_HUMAN  | E.LTPAS#PTCTNSVSKNE.T          | S526:           | 2 | 3,2435 | 0,566 | 0,068  |
| 7 | P31629 ZEP2_HUMAN   | E.LVACTQDKAPS#PSETCDSE.I       | S832:           | 2 | 3,242  | 0,496 | 0,112  |
| 7 | P46821 MAP1B_HUMAN  | E.SSPLYS#PTFSDSTSAVKE.K        | S1797:          | 2 | 3,2409 | 0,295 | 0,246  |
| 7 | P27816 MAP4_HUMAN   | E.M*ALGKDVT#PPPETE.V           | T521:           | 2 | 3,2376 | 0,373 | -0,695 |
| 7 | P08779 K1C16_HUMAN  | R.GQTGGDVNVEM*DAAPGVDLSR.I     |                 | 2 | 3,2344 | 0,42  | 0,348  |
| 7 | Q6GYQ0 GRIPE_HUMAN  | E.VATITGSESAS#PVHS#PLGSR.S     | S990:S994:      | 3 | 3,2323 | 1     | -0,26  |
| 7 | B2CI53 B2CI53_HUMAN | R.NGILASPQS#APGNLDNSK.S        | S263:           | 3 | 3,2317 | 0,247 | -1,571 |
| 7 | P51991 ROA3_HUMAN   | E.GGNFGGGNYGGGNYND.F           |                 | 2 | 3,2272 | 0,4   | 0      |
| 7 | Q49A88 CCD14_HUMAN  | E.ASAPGIISALSQDS#DEGSE.T       | S710:           | 2 | 3,2239 | 0,448 | -1,554 |
| 7 | Q16643 DREB_HUMAN   | R.GPGS#PAEDLM*FM*E.S           | S416:           | 2 | 3,222  | 0,356 | 0      |
| 7 | Q12830 BPTF_HUMAN   | E.TSPSEGRS#PVGCLSETPDSSNM*AE.K | S517:           | 3 | 3,2184 | 0,264 | 0,071  |
| 7 | Q27J81 INF2_HUMAN   | E.SALDTS#LDKSFSE.D             | S1188:          | 2 | 3,2179 | 0,384 | 0      |
| 7 | Q13283 G3BP1_HUMAN  | K.S#SSPAPADIAQTVQE.D           | S230:           | 2 | 3,2136 | 0,275 | -0,077 |
| 7 | O60307 MAST3_HUMAN  | E.M*VPLSHLEEEQPAPES#PE.S       | S348:           | 2 | 3,2121 | 0,282 | 0,11   |
| 7 | P08621 RU17_HUMAN   | E.GLGND#RDM*YM*ESE.G           | S410:           | 2 | 3,212  | 0,398 | 0,071  |
| 7 | P52948 NUP98_HUMAN  | K.NLNNSNLFSVNR.D               |                 | 2 | 3,2082 | 0,277 | 0,164  |
| 7 | Q9NQC3 RTN4_HUMAN   | E.M*GSSFVS#PKAE.S              | S307:           | 2 | 3,2078 | 0,333 | 0,184  |
| 7 | Q9NXG2 THUM1_HUMAN  | E.LGQTKPTS#NPQVVNE.G           | S323:           | 2 | 3,2071 | 0,309 | 0,072  |
| 7 | P04264 K2C1_HUMAN   | K.WELLQQVDTSTR.T               |                 | 2 | 3,2026 | 0,421 | -0,331 |

|   |                     |                                   |            |   |        |       |        |
|---|---------------------|-----------------------------------|------------|---|--------|-------|--------|
| 7 | Q9UGU0 TCF20_HUMAN  | E.NDTVVIS#PKQE.G                  | S1522:     | 2 | 3,2016 | 0,399 | -0,093 |
| 7 | P60709 ACTB_HUMAN   | R.GYSFTTTAERE.I                   |            | 2 | 3,2013 | 0,518 | 0,193  |
| 7 | P18206 VINC_HUMAN   | E.AIDTKS#LLDASEE.A                | S721:      | 2 | 3,1995 | 0,189 | 0,083  |
| 7 | P42345 FRAP_HUMAN   | E.SLIS#INNKLQQPE.A                | S1418:     | 2 | 3,1983 | 0,373 | 1,95   |
| 7 | Q07021 C1QBP_HUMAN  | E.AESDIFS#IRE.V                   | S205:      | 2 | 3,1967 | 0,297 | -0,196 |
| 7 | O94916 NFAT5_HUMAN  | E.SSQTPLFHSSPQIQLVQGS#PSSQE.Q     | S1364:     | 2 | 3,1952 | 0,341 | 0,461  |
| 7 | Q9UPS6 SET1B_HUMAN  | E.GAM*LLS#PEPPAKE.V               | S1240:     | 2 | 3,1915 | 0,321 | 0      |
| 7 | Q5T4S7 UBR4_HUMAN   | E.SQEQS#EVDHGDFE.M                | S2760:     | 2 | 3,1884 | 0,411 | -0,154 |
| 7 | Q9Y6M7 S4A7_HUMAN   | E.NS#TVDFSKVD.M                   | S407:      | 2 | 3,1854 | 0,257 | 0      |
| 7 | P14136 GFAP_HUMAN   | K.LALDIEIATYR.K                   |            | 2 | 3,1815 | 0,477 | -0,095 |
| 7 | Q9H4I2 ZHX3_HUMAN   | E.ASSEPFDTSS#PQAGR.Q              | S946:      | 2 | 3,1804 | 0,49  | 0      |
| 7 | O94915 FRYL_HUMAN   | E.AALTASQILSR.T                   |            | 2 | 3,178  | 0,282 | -0,324 |
| 7 | Q5JVS0 HABP4_HUMAN  | E.SQGTPEEES#PAKVE.L               | S273:      | 2 | 3,1739 | 0,32  | -0,073 |
| 7 | Q9P1Y6 K1542_HUMAN  | E.GAS#DTEREPT.E.S                 | S915:      | 2 | 3,1722 | 0,21  | 0,435  |
| 7 | Q684P5 RPGP2_HUMAN  | E.GDSGGSQPSTTS#PFKQE.V            | S668:      | 2 | 3,1695 | 0,294 | -0,068 |
| 7 | P49023 PAXI_HUMAN   | K.QKS#AEPS#PTVM*STSLGSLSE.L       | S126:S130: | 3 | 3,1643 | 0,134 | -0,236 |
| 7 | Q14BN4 SLMAP_HUMAN  | E.SDFSDTLS#PSKE.K                 | S452:      | 2 | 3,1629 | 0,366 | -0,088 |
| 7 | Q13823 NOG2_HUMAN   | E.TAGEGSES#IIKEE.T                | S504:      | 2 | 3,1597 | 0,281 | -0,171 |
| 7 | Q15154 PCM1_HUMAN   | E.TASPVAVSLRS#DGSE.N              | S869:      | 2 | 3,154  | 0,357 | -0,078 |
| 7 | Q8NHW5 Q8NHW5_HUMAN | D.TTAAPAAAAAPAK.V                 |            | 2 | 3,1538 | 0,474 | 0,11   |
| 7 | Q14789 GGOB1_HUMAN  | E.SCSST#PGLEELFK.A                | T1260:     | 2 | 3,153  | 0,334 | -0,075 |
| 7 | Q13501 SQSTM_HUMAN  | E.SEGPSS#LDPSQEGPTGLKE.A          | S366:      | 3 | 3,1482 | 0,274 | 0,275  |
| 7 | P49023 PAXI_HUMAN   | K.QKS#AEPSPT#VM*STSLGSLSE.L       | S126:T132: | 2 | 3,1462 | 0,381 | 0,21   |
| 7 | Q99590 SFRIP_HUMAN  | E.SS#EGEIIQTVDR.Q                 | S299:      | 2 | 3,1438 | 0,356 | 0      |
| 7 | Q00613 HSF1_HUMAN   | R.VKEEPPS#PPQS#PRVEE.A            | S303:S307: | 2 | 3,1427 | 0,258 | -0,373 |
| 7 | Q9Y4B4 ARIP4_HUMAN  | E.GLARPVS#PDSPEIISE.L             | S1169:     | 2 | 3,1332 | 0,444 | -0,07  |
| 7 | Q9H7Z6 MYST1_HUMAN  | E.GTAPS#PGRVS#PPTPARGEPEVTVE.I    | S37:S42:   | 3 | 3,1321 | 0,136 | 0,215  |
| 7 | Q00613 HSF1_HUMAN   | E.LAPAS#PM*ASPGGSIDERPLSSS#PLVR.V | S275:S292: | 3 | 3,1316 | 0,176 | 0,33   |
| 7 | P56537 IF6_HUMAN    | E.AQPSTIATSM*RDS#LIDSLT.-         | S239:      | 2 | 3,1295 | 0,477 | 0      |
| 7 | O15027 SC16A_HUMAN  | E.ARS#PDPGIVPQEAPVGNLSE.L         | S1844:     | 3 | 3,1286 | 0,274 | 0,416  |
| 7 | Q08378 GOGA3_HUMAN  | E.ISLS#PDTDDRLE.N                 | S290:      | 2 | 3,1264 | 0,386 | 0,169  |
| 7 | P04264 K2C1_HUMAN   | K.YEELQITAGR.H                    |            | 2 | 3,125  | 0,258 | -0,31  |
| 7 | Q15398 DLG7_HUMAN   | E.LFDNKS#LTTE.C                   | S796:      | 2 | 3,1249 | 0,229 | -0,391 |
| 7 | Q9UQ35 SRRM2_HUMAN  | E.NSFGS#PLEFR.N                   | S1329:     | 2 | 3,1243 | 0,5   | 0,494  |
| 7 | Q15185 TEBP_HUMAN   | D.S#DDEKM*PDLE.-                  | S151:      | 2 | 3,1132 | 0,159 | 0      |
| 7 | Q9UPN6 RBM16_HUMAN  | E.TVQTTQS#PTPVEKE.T               | S617:      | 2 | 3,1123 | 0,352 | -0,526 |
| 7 | Q8IZ07 AN13A_HUMAN  | E.LQQVLQLS#LTDK.-                 | S586:      | 2 | 3,1117 | 0,348 | -0,083 |
| 7 | Q9UJX4 APC5_HUMAN   | E.FFLSQQAS#LLKNDE.T               | S221:      | 2 | 3,1106 | 0,138 | -0,284 |
| 7 | Q9Y3F4 STRAP_HUMAN  | E.IASENS#DCIFPSAPDVKA.-           | S338:      | 2 | 3,1078 | 0,297 | -0,122 |

|   |                     |                                 |            |   |        |       |        |
|---|---------------------|---------------------------------|------------|---|--------|-------|--------|
| 7 | Q9Y2D5 AKAP2_HUMAN  | E.AAAGFSEKPKQSM*FEPPQVSS#PVQE.K | S631:      | 3 | 3,1065 | 0,265 | 0,415  |
| 7 | Q13151 ROA0_HUMAN   | E.ADAAM*AAS#PHAVD.G             | S68:       | 2 | 3,1037 | 0,444 | 0      |
| 7 | P27816 MAP4_HUMAN   | E.TEM*ALGKDVT#PPPETE.V          | T521:      | 2 | 3,0999 | 0,367 | -0,067 |
| 7 | Q08945 SSRP1_HUMAN  | E.Y#ADSDEDQHDAYLE.R             | Y441:      | 2 | 3,0998 | 0,249 | 0,418  |
| 7 | Q99767 APBA2_HUMAN  | E.LAALRPES#PAPEEQE.C            | S55:       | 3 | 3,0961 | 0,272 | 0,426  |
| 7 | Q86WR7 CJ047_HUMAN  | R.M*AGNEALS#PTSPFRE.G           | S212:      | 2 | 3,0928 | 0,235 | 0,143  |
| 7 | Q15154 PCM1_HUMAN   | E.GCPVSINLS#KAE.T               | S1785:     | 2 | 3,092  | 0,372 | 0,45   |
| 7 | Q08211 DHX9_HUMAN   | E.GETVEPYKVNLS#QDLE.H           | S279:      | 2 | 3,0885 | 0,439 | 0,064  |
| 7 | Q9H4L4 SENP3_HUMAN  | E.DGVRGS#PPVPSGPPM*EE.D         | S212:      | 2 | 3,088  | 0,477 | 0,135  |
| 7 | Q16630 CPSF6_HUMAN  | E.M*DTART#PLSEAEFEE.I           | T407:      | 2 | 3,0853 | 0,352 | 0,469  |
| 7 | Q9NSK0 KLC4_HUMAN   | R.GLSAS#TM*DLSSSS.-             | S611:      | 2 | 3,0836 | 0,493 | -1,367 |
| 7 | P28749 RBL1_HUMAN   | D.M*QPLS#PISVHE.R               | S640:      | 2 | 3,0808 | 0,331 | 0,091  |
| 7 | P13056 NR2C1_HUMAN  | D.LRS#PLTATPTFTDSE.S            | S215:      | 2 | 3,0807 | 0,457 | 0,471  |
| 7 | Q9Y6X4 K0888_HUMAN  | E.STARPSSES#SEEFLEEEPE.Q        | S378:      | 2 | 3,0765 | 0,215 | 0,114  |
| 7 | P78527 PRKDC_HUMAN  | E.TQAS#QGTLQTR.T                | S2612:     | 2 | 3,0749 | 0,416 | 0,096  |
| 7 | P08047 SP1_HUMAN    | E.KGVGGNNGGNGNGGGAFSQAR.S       |            | 3 | 3,0748 | 0,221 | 0      |
| 7 | P02538 K2C6A_HUMAN  | K.YEELQVTAGR.H                  |            | 2 | 3,074  | 0,286 | 0,105  |
| 7 | O60264 SMCA5_HUMAN  | E.S#SLRNFTM*DTE.S               | S698:      | 2 | 3,0695 | 0,297 | 0,262  |
| 7 | Q15149 PLEC1_HUMAN  | E.FADM*LSGNAGGFR.S              |            | 2 | 3,0672 | 0,503 | -0,539 |
| 7 | Q9NRS6 SNX15_HUMAN  | E.ASGS#PARGPLTEAE.L             | S201:      | 2 | 3,0666 | 0,38  | -0,086 |
| 7 | Q9H0H5 RGAP1_HUMAN  | E.SGSILSDIS#FDKTD.E             | S157:      | 2 | 3,0665 | 0,35  | -0,078 |
| 7 | Q99640 PMYT1_HUMAN  | E.ASETLQS#PGYDPSRPE.S           | S94:       | 2 | 3,0648 | 0,356 | -0,202 |
| 7 | Q9H6Z4 RANB3_HUMAN  | E.NAAAES#GSESSSQEATPEKE.S       | S353:      | 2 | 3,062  | 0,349 | 0,467  |
| 7 | Q00613 HSF1_HUMAN   | R.VKEEPPS#PPQS#PRVEE.A          | S303:S307: | 3 | 3,0618 | 0,117 | -1,396 |
| 7 | O94916 NFAT5_HUMAN  | E.ISS#PARPCSEFE.E               | S561:      | 2 | 3,0615 | 0,373 | -0,092 |
| 7 | Q8N1G0 ZN687_HUMAN  | E.ASLLKLS#PATPTSE.G             | S374:      | 2 | 3,0595 | 0,458 | 0      |
| 7 | Q9NX40 OCAD1_HUMAN  | E.M*LPHYEPIPFSS#M*NE.S          | S167:      | 2 | 3,0567 | 0,257 | 0,123  |
| 7 | P10114 RAP2A_HUMAN  | E.ILDTAGTEQFAS#M*RD.L           | S66:       | 3 | 3,0545 | 0,11  | 0      |
| 7 | Q9UPN9 TRI33_HUMAN  | E.SSLT#PPLSTNLHLE.S             | T815:      | 2 | 3,0542 | 0,309 | -0,384 |
| 7 | P68104 EF1A1_HUMAN  | E.S#FSDYPPPLGR.F                | S414:      | 2 | 3,0538 | 0,38  | 0      |
| 7 | Q9H0H5 RGAP1_HUMAN  | E.SGSILSDISFDKT#DE.S            | T161:      | 2 | 3,0503 | 0,271 | -0,576 |
| 7 | Q13823 NOG2_HUMAN   | E.TAGEGS#ESIIEE.T               | S502:      | 2 | 3,0478 | 0,293 | 0,256  |
| 7 | Q6P9B6 K1609_HUMAN  | K.GNKS#ILDADPE.A                | S425:      | 2 | 3,0458 | 0,365 | -0,492 |
| 7 | Q9UIF8 BAZ2B_HUMAN  | E.GNGNSFLTNSVASSK.S             |            | 2 | 3,0451 | 0,368 | -0,247 |
| 7 | P30101 PDIA3_HUMAN  | E.SLVNEYDDNGE.G                 |            | 2 | 3,0434 | 0,419 | -0,486 |
| 7 | O15062 ZBTB5_HUMAN  | E.GVVVSAEKIDLS#PE.S             | S371:      | 2 | 3,0422 | 0,274 | 0,16   |
| 7 | Q9H8T5 Q9H8T5_HUMAN | E.LGPAPSLGQASHS#DSE.M           | S271:      | 2 | 3,0417 | 0,525 | 0,374  |
| 7 | P49792 RBP2_HUMAN   | E.TVFTPKTS#PENVDQD.R            | S1400:     | 2 | 3,0396 | 0,42  | 0,297  |
| 7 | Q9H9A7 RMI1_HUMAN   | R.CFTGSSSNTIPIR.Q               |            | 2 | 3,039  | 0,517 | -0,16  |

|   |                     |                                              |            |   |        |       |        |
|---|---------------------|----------------------------------------------|------------|---|--------|-------|--------|
| 7 | Q15424 SAFB1_HUMAN  | E.SLS#DSRELVEGE.M                            | S161:      | 2 | 3,0363 | 0,395 | 0,261  |
| 7 | Q8IZD4 DCP1B_HUMAN  | R.QTLPISGSQTGSSGVIS#PQE.L                    | S449:      | 3 | 3,0363 | 0,197 | 0,356  |
| 7 | Q9BX63 FANCJ_HUMAN  | E.AASHLS#PENFVEDE.A                          | S930:      | 2 | 3,0352 | 0,381 | 0,225  |
| 7 | P14868 SYDC_HUMAN   | D.LT#IQKADE.V                                | T52:       | 2 | 3,0351 | 0,342 | 0,367  |
| 7 | P40123 CAP2_HUMAN   | E.S#SPRSRSLFAQLNQGE.A                        | S256:      | 3 | 3,035  | 0,205 | -0,103 |
| 7 | P19338 NUCL_HUMAN   | E.LT#GLKVFNGE.I                              | T367:      | 2 | 3,0345 | 0,286 | 0,105  |
| 7 | Q9ULX9 MAFF_HUMAN   | E.LS#ENTPHLSDE.A                             | S18:       | 2 | 3,034  | 0,439 | 0,185  |
| 7 | Q5F1R6 DJC21_HUMAN  | E.DTNLNQDS#AKELE.D                           | S423:      | 2 | 3,0328 | 0,204 | -1,097 |
| 7 | P50542 PEX5_HUMAN   | E.AASKPLGVAS#EDELVAE.F                       | S58:       | 2 | 3,0293 | 0,399 | 0      |
| 7 | Q53F64 Q53F64_HUMAN | E.NGHEAVPEGES#PAGAGTGAAAGAGGATAAPPSGNQNGAE.G | S28:       | 3 | 3,0226 | 0,27  | 0,532  |
| 7 | Q9BUA3 YK007_HUMAN  | E.GVALLQDVR.A                                |            | 2 | 3,0221 | 0,256 | -0,126 |
| 7 | Q9ULA0 DNPEP_HUMAN  | E.LEKGT#PEPGPLNAVDE.R                        | T203:      | 2 | 3,0211 | 0,433 | 0,14   |
| 7 | Q96L73 NSD1_HUMAN   | R.AAS#PHQVTPQADE.K                           | S2471:     | 2 | 3,021  | 0,321 | 0      |
| 7 | Q14247 SRC8_HUMAN   | R.AKTQT#PPVSPAPQPTTE.R                       | T401:      | 3 | 3,0195 | 0,149 | 0,394  |
| 7 | Q8NCF5 NF2IP_HUMAN  | E.LADSS#GLYHE.G                              | S161:      | 2 | 3,018  | 0,319 | -0,416 |
| 7 | Q14247 SRC8_HUMAN   | E.LSYRGPVSGT#EPEPVYSM*E.A                    | T440:      | 3 | 3,0153 | 0,111 | 0,667  |
| 7 | Q7RTP8 Q7RTP8_HUMAN | R.ASS#LNLVNVGGK.A                            | S596:      | 2 | 3,0116 | 0,396 | -0,098 |
| 7 | Q9HC44 GPBL1_HUMAN  | E.GEVLSHS#LEAE.H                             | S384:      | 2 | 3,009  | 0,309 | 0,098  |
| 7 | Q9NP61 ARFG3_HUMAN  | D.SCVVPPLS#PPPKEE.D                          | S143:      | 2 | 3,0089 | 0,366 | 0,227  |
| 7 | O75821 EIF3G_HUMAN  | E.LLKGIPLATGDT#SPEPE.L                       | T41:       | 2 | 3,0086 | 0,351 | 0,067  |
| 7 | Q9Y508 ZN313_HUMAN  | E.DM*M*NQVLQRS#IIDQ.-                        | S224:      | 2 | 3,0072 | 0,321 | -0,135 |
| 7 | O75952 CABYR_HUMAN  | E.AVGGLSSKPAT#PK.T                           | T146:      | 2 | 3,0066 | 0,417 | -0,189 |
| 7 | O43379 WDR62_HUMAN  | E.VEAGPGDQQGDSYL.R.V                         |            | 2 | 3,0055 | 0,469 | 0,307  |
| 7 | Q09666 AHNK_HUMAN   | K.AEAPLPS#PKLE.G                             | S5110:     | 2 | 3,0048 | 0,401 | -0,594 |
| 7 | O15234 CASC3_HUMAN  | E.ADAPVLGS#PEKE.E                            | S373:      | 2 | 3,0044 | 0,184 | 0      |
| 7 | P35908 K22E_HUMAN   | K.VLYDAEISQIHQSVDTNVILSMDNSR.N               |            | 3 | 3,0043 | 0,292 | 0,12   |
| 7 | A8K4U7 A8K4U7_HUMAN | E.AVAPALLES#PRPE.G                           | S21:       | 2 | 3,004  | 0,327 | -1,28  |
| 7 | Q8NE71 ABCF1_HUMAN  | E.NDFSVSQAE.M                                |            | 2 | 3,0032 | 0,153 | -0,061 |
| 7 | Q15154 PCM1_HUMAN   | E.TAS#PVAVSLR.S                              | S861:      | 2 | 3,0029 | 0,362 | -0,226 |
| 7 | Q96D46 NMD3_HUMAN   | E.DLHIS#QDATGEE.G                            | S490:      | 2 | 3,0012 | 0,352 | -0,437 |
| 7 | Q8NFC6 FA44A_HUMAN  | E.SDGAVTSAGTEIR.A                            |            | 2 | 3,0007 | 0,359 | 0,193  |
| 7 | Q8WUD4 CCD12_HUMAN  | E.DSLASAVDAATEQK.T                           |            | 3 | 2,9985 | 0,278 | 0,52   |
| 7 | Q13283 G3BP1_HUMAN  | E.DAQKSS#SPAPADIAQTVQE.D                     | S231:      | 3 | 2,997  | 0,164 | 0,181  |
| 7 | O00303 EIF3F_HUMAN  | E.VTNCFVSPHNES#EDE.V                         | S142:      | 2 | 2,9912 | 0,276 | 1,985  |
| 7 | Q14693 LPIN1_HUMAN  | E.VIPM*HLATS#PILSE.G                         | S106:      | 2 | 2,989  | 0,28  | -0,076 |
| 7 | P18031 PTN1_HUMAN   | E.KGS#PLNAAPYGIE.S                           | S352:      | 2 | 2,9887 | 0,368 | -0,786 |
| 7 | Q8NCF4 RN169_HUMAN  | E.GLGST#PDAKLD.K                             | T554:      | 2 | 2,9866 | 0,324 | -0,317 |
| 7 | Q9UHY1 NRBP_HUMAN   | E.SQTVLS#SGSDPK.V                            | S11:       | 2 | 2,9803 | 0,353 | -0,38  |
| 7 | Q9H307 PININ_HUMAN  | K.SLS#PGKENVS#ALDM*EKE.S                     | S443:S450: | 3 | 2,9797 | 0,293 | 0,091  |

|   |                     |                                  |          |   |        |       |        |
|---|---------------------|----------------------------------|----------|---|--------|-------|--------|
| 7 | Q6P2E9 EDC4_HUMAN   | E.TCSTLAES#PR.N                  | S844:    | 2 | 2,9759 | 0,351 | -0,102 |
| 7 | Q5BJF6 ODFP2_HUMAN  | E.LLLQKLST#FEE.T                 | T262:    | 2 | 2,9725 | 0,336 | -0,174 |
| 7 | Q8TCU4 ALMS1_HUMAN  | E.FISSTTVRS#PLQE.A               | S2360:   | 2 | 2,9713 | 0,374 | 0,079  |
| 7 | P19338 NUCL_HUMAN   | E.FAS#FEDAKE.A                   | S532:    | 2 | 2,9672 | 0,194 | -0,109 |
| 7 | P04264 K2C1_HUMAN   | R.THNLEPYFESFINNLR.R             |          | 2 | 2,9651 | 0,293 | 0,122  |
| 7 | P02538 K2C6A_HUMAN  | K.ADTLTDEINFLR.A                 |          | 2 | 2,9615 | 0,236 | -0,52  |
| 7 | Q8WXI9 P66B_HUMAN   | R.GRLTPS#PDIIVLSDNE.A            | S122:    | 3 | 2,9598 | 0,084 | 0      |
| 7 | Q9H0E9 BRD8_HUMAN   | E.AAS#LEEPKEEDQGE.G              | S641:    | 2 | 2,9588 | 0,515 | 0,151  |
| 7 | Q92619 HMHA1_HUMAN  | E.ASALGHLS#FLEQQQSE.A            | S1053:   | 2 | 2,9588 | 0,288 | -0,267 |
| 7 | Q14683 SMC1A_HUMAN  | E.SQS#QGRDLTLEE.N                | S360:    | 2 | 2,9583 | 0,242 | 0,338  |
| 7 | Q86TI2 DPP9_HUMAN   | E.VEVIHVPS#PALE.E                | S292:    | 2 | 2,9583 | 0,164 | -0,445 |
| 7 | Q8IXT5 RB12B_HUMAN  | R.GRPGS#GTSGVDSLNFIE.S           | S98:     | 2 | 2,9564 | 0,425 | -0,197 |
| 7 | Q6S8J3 A26CA_HUMAN  | E.M*ATAASSSLE.K                  |          | 2 | 2,9554 | 0,329 | -0,114 |
| 7 | Q5R372 Q5R372_HUMAN | E.ISTPRPSS#PGGLPEED.S            | S119:    | 2 | 2,9495 | 0,302 | -0,284 |
| 7 | Q92804 RBP56_HUMAN  | E.SSGS#QGGRAPSYDQPD.Y            | S97:     | 2 | 2,948  | 0,319 | 0,072  |
| 7 | Q9NPR2 SEM4B_HUMAN  | R.LGS#EIRD.S                     | S825:    | 2 | 2,9442 | 0,173 | 0      |
| 7 | Q14686 MLL2_HUMAN   | E.LGVSTDVS#PARDE.G               | S974:    | 2 | 2,943  | 0,404 | -0,257 |
| 7 | Q8IZH2 XRN1_HUMAN   | E.SSSAS#LKSSPIAQPASSFQVE.T       | S1653:   | 3 | 2,9422 | 0,261 | 0,251  |
| 7 | P12035 K2C3_HUMAN   | R.TLYDAELSQMQSHISDTSVVLMSMDNNR.S |          | 3 | 2,9418 | 0,237 | 0,18   |
| 7 | Q14692 BMS1_HUMAN   | E.TS#DIENLLKEE.D                 | S639:    | 2 | 2,9403 | 0,396 | -0,488 |
| 7 | P18433 PTPRA_HUMAN  | E.YIDAFSDY#ANFK.-                | Y798:    | 2 | 2,9372 | 0,387 | -0,557 |
| 7 | Q5JRX3 PREP_HUMAN   | E.ALS#PGDRQQIYE.K                | S530:    | 2 | 2,937  | 0,35  | 0      |
| 7 | Q13573 SNW1_HUMAN   | E.VIALGVPNPRTS#NE.V              | S402:    | 2 | 2,9367 | 0,435 | 0,079  |
| 7 | Q13439 GOGA4_HUMAN  | E.VFTKEENPES#DGEPVVE.D           | S266:    | 2 | 2,934  | 0,41  | 0,246  |
| 7 | Q9NY61 AATF_HUMAN   | E.LLFQYPDTR.Y                    |          | 2 | 2,9328 | 0,299 | -0,212 |
| 7 | Q9NW68 BSDC1_HUMAN  | E.LM*GIS#PISPKE.A                | S232:    | 2 | 2,9304 | 0,414 | 0      |
| 7 | Q02447 SP3_HUMAN    | E.VLSAT#PTTIKDE.A                | T115:    | 2 | 2,9259 | 0,38  | 0      |
| 7 | Q08379 GOGA2_HUMAN  | E.VSLAGS#VEPAQGEARE.G            | S929:    | 2 | 2,9235 | 0,155 | -0,436 |
| 7 | Q86V81 THOC4_HUMAN  | E.LDAQLDAYNAR.M                  |          | 2 | 2,9231 | 0,472 | -0,488 |
| 7 | Q8WUA4 TF3C2_HUMAN  | E.SLS#RLEQPDLSE.M                | S77:     | 2 | 2,9227 | 0,384 | 0,158  |
| 7 | Q9C0B5 ZDHC5_HUMAN  | E.VALQPLLT#PKDE.V                | T659:    | 2 | 2,9181 | 0,497 | -0,087 |
| 7 | Q14978 NOLC1_HUMAN  | R.GGSISVQVNSIKFDS#E.-            | S698:    | 2 | 2,9178 | 0,299 | -0,14  |
| 7 | Q9UKX7 NUP50_HUMAN  | E.TQS#PSLFGSTK.L                 | S221:    | 2 | 2,9162 | 0,271 | -0,594 |
| 7 | Q03252 LMNB2_HUMAN  | R.AGGPAT#PLSPTRLR#R.L            | T14:S22: | 3 | 2,9159 | 0,218 | -0,334 |
| 7 | P61247 RS3A_HUMAN   | E.VSLADLQNDE.V                   |          | 2 | 2,9141 | 0,306 | -0,111 |
| 7 | P98170 BIRC4_HUMAN  | E.VLVADLVNAQK.D                  |          | 2 | 2,9139 | 0,302 | 0,104  |
| 7 | P10619 PPGB_HUMAN   | E.SPAGVGFYSDDK.F                 |          | 2 | 2,9123 | 0,426 | -1,927 |
| 7 | P35579 MYH9_HUMAN   | K.LKDVLLQVDDE.R                  |          | 2 | 2,9107 | 0,209 | -0,19  |
| 7 | Q9NWT1 PK1IP_HUMAN  | E.SLPPAAEPS#PVSKE.Q              | S320:    | 2 | 2,9096 | 0,512 | -0,328 |

|   |                    |                                |              |   |        |       |        |
|---|--------------------|--------------------------------|--------------|---|--------|-------|--------|
| 7 | P78310 CXAR_HUMAN  | R.TPQS#PTLPPAK.V               | S332:        | 2 | 2,9087 | 0,334 | 0      |
| 7 | Q02952 AKA12_HUMAN | E.TVSILS#KTEGTQE.A             | S1259:       | 2 | 2,9083 | 0,342 | 0      |
| 7 | Q9UKS6 PACN3_HUMAN | E.LS#FRAGEE.L                  | S383:        | 2 | 2,9066 | 0,328 | 0,247  |
| 7 | Q9UBF2 COPG2_HUMAN | E.SGSGS#NPFQHLE.K              | S16:         | 2 | 2,9022 | 0,104 | -0,273 |
| 7 | Q12834 CDC20_HUMAN | E.VAS#FLLSKE.N                 | S92:         | 2 | 2,8989 | 0,291 | -0,227 |
| 7 | P27816 MAP4_HUMAN  | E.VGLLKDMS#PLSE.T              | S507:        | 2 | 2,8977 | 0,374 | -0,178 |
| 7 | Q71F56 MD13L_HUMAN | E.VEDGLGS#PKPEE.I              | S923:        | 2 | 2,8927 | 0,33  | 0      |
| 7 | Q13625 ASPP2_HUMAN | E.NGVNS#PRM*DLTLAE.L           | S121:        | 2 | 2,891  | 0,209 | -0,227 |
| 7 | Q9UN79 SOX13_HUMAN | D.LISLDS#SPAKE.R               | S367:        | 2 | 2,8902 | 0,276 | 0,197  |
| 7 | Q96T23 RSF1_HUMAN  | E.AAETS#PPSNIIDHCE.K           | S619:        | 2 | 2,8867 | 0,343 | -0,355 |
| 7 | P19338 NUCL_HUMAN  | E.SKT#LVLSNLSYSATEE.T          | T487:        | 2 | 2,8835 | 0,23  | -0,335 |
| 7 | P35908 K22E_HUMAN  | K.LALDVEIATYR.K                |              | 2 | 2,8797 | 0,51  | -0,579 |
| 7 | Q96L14 C170L_HUMAN | E.ALNNM*GFPSAM*LPS#PPKQK.S     | S224:        | 3 | 2,8773 | 0,088 | 0,256  |
| 7 | Q9NYF8 BCLF1_HUMAN | E.ALDYFS#DKE.S                 | S385:        | 2 | 2,8756 | 0,332 | -0,104 |
| 7 | Q9NXG2 THUM1_HUMAN | E.YGDDM*YGPEK.F                |              | 2 | 2,8753 | 0,495 | -0,102 |
| 7 | Q8TDY2 RBCC1_HUMAN | E.SLLTS#FPKSVE.H               | S257:        | 2 | 2,8729 | 0,37  | -0,189 |
| 7 | Q9Y508 ZN313_HUMAN | E.DM*M*NQVLQR.S                |              | 2 | 2,8709 | 0,173 | 0      |
| 7 | Q14671 PUM1_HUMAN  | E.VNSVLS#PRSE.S                | S209:        | 2 | 2,8706 | 0,324 | -0,209 |
| 7 | O60336 MABP1_HUMAN | E.ASLQAPS#PGALLSRE.I           | S1216:       | 2 | 2,8704 | 0,284 | -0,155 |
| 7 | P27816 MAP4_HUMAN  | E.ALNSPHSES#FVSPE.A            | S202:        | 2 | 2,87   | 0,37  | 0,077  |
| 7 | Q14676 MDC1_HUMAN  | R.SSVKT#PEPVVPTAPE.L           | T1157:       | 2 | 2,8687 | 0,25  | -0,377 |
| 7 | P04264 K2C1_HUMAN  | R.SGGGFSSGSAGIINYQR.R          |              | 2 | 2,8684 | 0,415 | -0,221 |
| 7 | P13647 K2C5_HUMAN  | K.WTLLQEQT.K                   |              | 2 | 2,8672 | 0,297 | 0,101  |
| 7 | Q9P2B7 K1430_HUMAN | E.GEVDHSFFDS#DFEE.G            | S19:         | 2 | 2,8654 | 0,394 | -0,351 |
| 7 | Q96NA2 RILP_HUMAN  | E.AQPQS#PAPDPPCSALHE.H         | S377:        | 3 | 2,8647 | 0,204 | 0,194  |
| 7 | P02533 K1C14_HUMAN | R.TMQNLEIELQSQLSM*K.A          |              | 3 | 2,8639 | 0,342 | -0,192 |
| 7 | P57764 GSDC1_HUMAN | E.GS#GRFSLPGATCLQGE.G          | S181:        | 3 | 2,863  | 0,24  | 0,426  |
| 7 | O94782 UBP1_HUMAN  | E.SSEIS#PEPKTE.M               | S475:        | 2 | 2,8625 | 0,315 | -0,38  |
| 7 | O94909 K0819_HUMAN | R.GPSQATS#PIRSPQE.S            | S296:        | 2 | 2,8619 | 0,372 | -0,318 |
| 7 | P05787 K2C8_HUMAN  | E.LES#RLEGLTDE.I               | S212:        | 2 | 2,8594 | 0,341 | 0,273  |
| 7 | Q9P206 K1522_HUMAN | E.SSTAEDALS#IRSE.M             | S127:        | 2 | 2,8578 | 0,343 | 0,253  |
| 7 | Q9UKX7 NUP50_HUMAN | E.TQS#PSLFGSTKLQQE.S           | S221:        | 2 | 2,857  | 0,395 | -0,211 |
| 7 | P49006 MRP_HUMAN   | E.GGGDSSASSPTEEEQE.Q           |              | 2 | 2,8565 | 0,327 | 0,623  |
| 7 | P46013 KI67_HUMAN  | E.LFQT#PGHTEE.L                | T1233:       | 2 | 2,8555 | 0,285 | -0,197 |
| 7 | Q12756 KIF1A_HUMAN | E.ALSPAFSEDSHSGSSASS#PLSAE.G   | S1430:       | 3 | 2,854  | 0,183 | 0,145  |
| 7 | P13489 RINI_HUMAN  | E.LTVSNNDINE.A                 |              | 2 | 2,853  | 0,265 | -0,109 |
| 7 | Q99536 VAT1_HUMAN  | E.VAEAATGEDASS#PPPKTE.A        | S18:         | 2 | 2,8505 | 0,331 | 0,399  |
| 7 | P20020 AT2B1_HUMAN | R.NSS#PPPS#PNKNNNAVDSGIHLTIE.M | S1216:S1220: | 3 | 2,8496 | 0,119 | 0,069  |
| 7 | Q12888 TP53B_HUMAN | R.GNLLHFPSS#QGEEL.K            | S1068:       | 2 | 2,8467 | 0,277 | 0,15   |

|   |                    |                                  |        |   |        |       |        |
|---|--------------------|----------------------------------|--------|---|--------|-------|--------|
| 7 | Q13263 TIF1B_HUMAN | R.STAPSAASASASAAASS#PAGGGAEALE.L | S50:   | 2 | 2,845  | 0,382 | 0,102  |
| 7 | P07814 SYEP_HUMAN  | E.LAEPIAIRPTS#E.T                | S1122: | 2 | 2,8447 | 0,263 | 0,089  |
| 7 | P53539 FOSB_HUMAN  | -.M*FQAFPGDYDSGSR.C              |        | 2 | 2,8445 | 0,392 | 0,153  |
| 7 | Q15003 CND2_HUMAN  | E.GTEDLS#DVLVR.Q                 | S733:  | 2 | 2,8437 | 0,156 | -0,285 |
| 7 | Q12888 TP53B_HUMAN | E.SGLQIQKS#PEPE.V                | S294:  | 2 | 2,8429 | 0,398 | 0,088  |
| 7 | Q93009 UBP7_HUMAN  | K.AGEQQLS#EPEDM*EM*E.A           | S18:   | 2 | 2,8424 | 0,341 | -0,067 |
| 7 | P20810 ICAL_HUMAN  | E.DFSGPQNAS#SLKFE.D              | S526:  | 2 | 2,8421 | 0,189 | 0,152  |
| 7 | Q9UQ35 SRRM2_HUMAN | E.RSS#TGPEPPAPTLLAE.R            | S358:  | 2 | 2,8376 | 0,422 | 0,136  |
| 7 | Q9UQ80 PA2G4_HUMAN | E.NATSGETLEENE.A                 |        | 2 | 2,831  | 0,295 | 0,094  |
| 7 | P18858 DNL1_HUMAN  | D.CSQVS#PPRPATSPE.N              | S91:   | 2 | 2,8233 | 0,212 | 0,306  |
| 7 | Q9Y2D5 AKAP2_HUMAN | E.AAAFQSEKPOQSM*FEPQVS#SPVQE.K   | S630:  | 2 | 2,8225 | 0,276 | 0,923  |
| 7 | Q92508 FA38A_HUMAN | E.AGASLYQGLM*R.T                 |        | 2 | 2,8214 | 0,327 | 0,103  |
| 7 | O60716 CTND1_HUMAN | E.STAS#ILASVKE.Q                 | S11:   | 2 | 2,8213 | 0,213 | 0,206  |
| 7 | P78310 CXAR_HUMAN  | R.SYIGSNHSS#LGSM*SPSNM*E.G       | S301:  | 3 | 2,8181 | 0,093 | 0      |
| 7 | Q9H8G2 CI082_HUMAN | E.LFLAHS#DLEE.G                  | S120:  | 2 | 2,8144 | 0,28  | 0      |
| 7 | Q66K74 MAP1S_HUMAN | R.LSLS#PLRGGE.A                  | S657:  | 2 | 2,8133 | 0,243 | 0      |
| 7 | Q15836 VAMP3_HUMAN | R.RLQQTQNQVDE.V                  |        | 2 | 2,8088 | 0,32  | 0,18   |
| 7 | Q16204 CCDC6_HUMAN | K.SGGIVISPRLEE.L                 |        | 2 | 2,8087 | 0,248 | -0,261 |
| 7 | Q13613 MTMR1_HUMAN | E.TLDS#PTGSHVE.W                 | S49:   | 2 | 2,8076 | 0,405 | 0,1    |
| 7 | O14686 MLL2_HUMAN  | E.GPVS#PDVEPGKEE.T               | S1396: | 2 | 2,8074 | 0,359 | -0,687 |
| 7 | Q7Z406 MYH14_HUMAN | E.AQPGSGPSPEPEGS#PPAHPQ.-        | S1989: | 2 | 2,8067 | 0,228 | 0,061  |
| 7 | O43379 WDR62_HUMAN | E.AGPGDQQGDSYL.R.V               |        | 2 | 2,8056 | 0,388 | 0      |
| 7 | P30279 CCND2_HUMAN | E.LDQAST#PTDVRDIDL.-             | T280:  | 2 | 2,804  | 0,312 | -0,21  |
| 7 | Q15642 CIP4_HUMAN  | E.FEDFSQPM*NR.A                  |        | 2 | 2,8037 | 0,4   | 0,095  |
| 7 | Q13459 MYO9B_HUMAN | E.LDPRGS#DEENLDSE.T              | S1993: | 2 | 2,8021 | 0,249 | -0,589 |
| 7 | Q6GYQ0 GRIPE_HUMAN | R.SQTPSPSTLNIDHM*E.Q             |        | 2 | 2,8005 | 0,374 | 0,292  |
| 7 | Q09666 AHNK_HUMAN  | E.APLPS#PKLE.G                   | S5110: | 2 | 2,7984 | 0,221 | 0,355  |
| 7 | Q9P227 RHG23_HUMAN | E.ALPGALVS#PRFE.R                | S372:  | 2 | 2,7973 | 0,536 | -0,263 |
| 7 | Q9BSJ8 ESYT1_HUMAN | R.TLS#PEFNERFE.W                 | S1034: | 2 | 2,796  | 0,417 | -0,084 |
| 7 | Q8N3U4 STAG2_HUMAN | E.SETHFSSDT#DFEDIE.G             | T25:   | 2 | 2,7956 | 0,229 | 0      |
| 7 | Q12873 CHD3_HUMAN  | E.LQGDGPPSS#PTNDPTVKYE.T         | S713:  | 3 | 2,792  | 0,172 | 0,088  |
| 7 | P42166 LAP2A_HUMAN | R.S#STPLPTISSAE.N                | S158:  | 2 | 2,7893 | 0,344 | 0,18   |
| 7 | Q7Z417 NUFP2_HUMAN | E.SQNPLAS#PTNTLLGSAKE.Q          | S629:  | 3 | 2,7853 | 0,098 | 0,288  |
| 7 | P04259 K2C6B_HUMAN | R.SGFSISVSR.S                    |        | 2 | 2,784  | 0,318 | -0,238 |
| 7 | P52294 IMA1_HUMAN  | E.VM*S#DGGFHE.A                  | S63:   | 2 | 2,7821 | 0,237 | 0,227  |
| 7 | P52294 IMA1_HUMAN  | E.EEVM*S#DGGFHE.A                | S63:   | 2 | 2,7815 | 0,449 | 0,092  |
| 7 | Q02750 MP2K1_HUMAN | D.SM*ANS#FVGTR.S                 | S222:  | 2 | 2,7814 | 0,333 | -0,105 |
| 7 | Q9UPZ3 HPS5_HUMAN  | E.VTS#PPPPEEDRFQE.L              | S602:  | 2 | 2,7805 | 0,496 | 0,076  |
| 7 | Q9P2G1 AKIB1_HUMAN | E.ASLGAIGTS#LPSRLD.S             | S891:  | 2 | 2,7801 | 0,327 | -0,397 |

|   |                      |                                  |            |   |        |       |        |
|---|----------------------|----------------------------------|------------|---|--------|-------|--------|
| 7 | P56537 IF6_HUMAN     | E.AQPSTIATSM*R.D                 |            | 2 | 2,7789 | 0,514 | 0,207  |
| 7 | Q6P996 PDXD1_HUMAN   | E.TSS#VSHIEDLE.K                 | S722:      | 2 | 2,7778 | 0,326 | 0,188  |
| 7 | Q96EI5 TCAL4_HUMAN   | E.IEGKPES#EGEPGSE.T              | S102:      | 2 | 2,7759 | 0,237 | -0,24  |
| 7 | Q15424 SAFB1_HUMAN   | E.SLS#DSRELVE.G                  | S161:      | 2 | 2,7754 | 0,407 | -0,1   |
| 7 | P08621 RU17_HUMAN    | E.GLGND#RDM*YM*E.S               | S410:      | 2 | 2,7739 | 0,347 | 0,488  |
| 7 | P55072 TERA_HUMAN    | E.M*FAQTLQQR.G                   |            | 2 | 2,7706 | 0,22  | 0,498  |
| 7 | P54578 UBP14_HUMAN   | E.QGQYLQQDANE.C                  |            | 2 | 2,7666 | 0,289 | 0,189  |
| 7 | Q96EB6 SIRT1_HUMAN   | E.AALALQPGGS#PSAAGADRE.A         | S14:       | 3 | 2,7647 | 0,26  | 0,503  |
| 7 | P35579 MYH9_HUMAN    | E.IANSS#GKGALALE.E               | S1714:     | 2 | 2,764  | 0,127 | -0,372 |
| 7 | Q9H7N4 SFR19_HUMAN   | E.GLSQS#ISR.I                    | S293:      | 2 | 2,7603 | 0,184 | 0,131  |
| 7 | Q5VT52 K0460_HUMAN   | K.SFNYS#PNSSTSE.V                | S593:      | 2 | 2,7578 | 0,332 | -0,261 |
| 7 | P29966 MARCS_HUMAN   | K.EAPAEGEAAEPGS#PTAAEGE.A        | S118:      | 3 | 2,7546 | 0,178 | 0,188  |
| 7 | Q8IWS0 PHF6_HUMAN    | E.ADLEES#FNEHE.L                 | S145:      | 2 | 2,7544 | 0,272 | -0,61  |
| 7 | Q01831 XPC_HUMAN     | E.LS#EPVLGDVRE.S                 | S140:      | 2 | 2,7535 | 0,5   | 0,094  |
| 7 | P15622 ZN250_HUMAN   | E.SQNTDLS#PKPLISE.Q              | S134:      | 2 | 2,7525 | 0,177 | 0,152  |
| 7 | O43379 WDR62_HUMAN   | E.TLTES#PCRALGDVE.A              | S1070:     | 2 | 2,748  | 0,172 | 0,375  |
| 7 | O95155 UBE4B_HUMAN   | E.TQSQSLS#RSQSM*DIGVSCE.K        | S101:      | 3 | 2,7453 | 0,22  | 0      |
| 7 | Q6UUV9 CRT1_HUMAN    | E.NTTALIPATHNTGGS#LPD.L          | S245:      | 2 | 2,7438 | 0,282 | 0,131  |
| 7 | Q9UMY1 NOL7_HUMAN    | E.GQLASEEEEEAE.H                 |            | 2 | 2,7414 | 0,427 | 0,102  |
| 7 | Q16637 SMN_HUMAN     | E.VANNIEQNAQENENE.S              |            | 2 | 2,7409 | 0,306 | -0,213 |
| 7 | Q13523 PRP4B_HUMAN   | E.DSNM*SVPSEPSSPQSSTR.T          |            | 2 | 2,7386 | 0,393 | 0      |
| 7 | Q9NW68 BSDC1_HUMAN   | E.LM*GISPIS#PKE.A                | S235:      | 2 | 2,736  | 0,285 | 0,192  |
| 7 | Q9H7U1 GCA14_HUMAN   | E.GLEPIGNVHPVGS#YE.S             | S529:      | 2 | 2,7355 | 0,406 | 0,222  |
| 7 | Q9Y2L5 TRS85_HUMAN   | E.NITVS#SRPSVE.Q                 | S1298:     | 2 | 2,7352 | 0,263 | 0,096  |
| 7 | Q9H582 ZN644_HUMAN   | E.YYEDTGS#NNFLHE.I               | S926:      | 2 | 2,7326 | 0,292 | 0,439  |
| 7 | P45974 UBP5_HUMAN    | E.GGFDL#EEKFE.L                  | S110:      | 2 | 2,7321 | 0,189 | -0,091 |
| 7 | Q13496 MTM1_HUMAN    | K.YNSHS#LENE.S                   | S13:       | 2 | 2,7316 | 0,142 | -0,104 |
| 7 | Q16643 DREB_HUMAN    | E.GASTLQGEPR.A                   |            | 2 | 2,7291 | 0,217 | -0,42  |
| 7 | P27707 DCK_HUMAN     | R.SCPFSASSE.G                    |            | 2 | 2,7291 | 0,273 | 0,23   |
| 7 | Q92667 AKAP1_HUMAN   | E.LENS#KGPSLASLE.G               | S231:      | 2 | 2,7286 | 0,387 | -0,086 |
| 7 | P11169 GTR3_HUMAN    | E.M*NS#IEPAKE.T                  | S485:      | 2 | 2,7286 | 0,233 | 0      |
| 7 | Q86WR7 CJ047_HUMAN   | E.ALS#PTSPFRE.G                  | S212:      | 2 | 2,7278 | 0,324 | 0,206  |
| 7 | Q9UBB5 MBD2_HUMAN    | E.ALM*ADILSR.A                   |            | 2 | 2,7267 | 0,411 | -0,182 |
| 7 | ##A6NEL2 ANR56_HUMAN | E.DSSSLKARGALS#S#R.R             | S294:S295: | 2 | 2,7252 | 0,232 | 1,453  |
| 7 | Q9BVJ6 UT14A_HUMAN   | E.LSQDAEPAGS#QETKDSGSQE.V        | S445:      | 3 | 2,7241 | 0,315 | 0,427  |
| 7 | Q9Y613 EPN1_HUMAN    | E.LLAGEVPARS#PGAFDM*SGVGRS#LAE.A | S410:S422: | 3 | 2,7237 | 0,181 | 0,55   |
| 7 | Q99549 MPP8_HUMAN    | E.GVGVGEDNDAAAR.G                |            | 2 | 2,7223 | 0,422 | 0,642  |
| 7 | Q99590 SFRIP_HUMAN   | E.LIES#PKLE.S                    | S293:      | 2 | 2,7216 | 0,119 | -0,423 |
| 7 | Q86V48 LUZP1_HUMAN   | E.LTSVSNHVSS#PFE.L               | S840:      | 2 | 2,7206 | 0,37  | -0,247 |



|   |                    |                            |              |   |        |       |        |
|---|--------------------|----------------------------|--------------|---|--------|-------|--------|
| 7 | Q14207 NPAT_HUMAN  | E.NLPITLSSPT#KS#PTK.N      | T777:S779:   | 2 | 2,7195 | 0,178 | 0,066  |
| 7 | P04792 HSPB1_HUMAN | E.SPAVAAPAYS.R             |              | 2 | 2,7194 | 0,422 | -0,112 |
| 7 | Q12904 MCA1_HUMAN  | E.NVIQSTAVTTVS#SGTKE.Q     | S106:        | 3 | 2,7175 | 0,105 | -0,102 |
| 7 | Q8IWW6 RHG12_HUMAN | R.AT#TPPNQGRPDS#PVYANLQE.L | T230:S240:   | 3 | 2,7146 | 0,148 | 0      |
| 7 | Q96AQ6 PBIP1_HUMAN | E.GQSPQSLPSTPK.A           |              | 2 | 2,714  | 0,21  | 0,184  |
| 7 | Q14444 CAPR1_HUMAN | E.VES#TEYVNR.Q             | S291:        | 2 | 2,7132 | 0,332 | -0,415 |
| 7 | Q9P1Y6 K1542_HUMAN | E.AS#PAPLAQGEQGRE.D        | S1202:       | 2 | 2,7131 | 0,326 | -0,334 |
| 7 | Q14839 CHD4_HUMAN  | E.KS#AIDLTPIVVE.D          | S1648:       | 2 | 2,7128 | 0,198 | -0,268 |
| 7 | Q92526 TCPW_HUMAN  | E.VNS#GFFYK.T              | S246:        | 2 | 2,7102 | 0,244 | 0      |
| 7 | Q6ZN18 AEBP2_HUMAN | E.LS#RLS#PLPPGS#PGSAAR.G   | S15:S18:S24: | 3 | 2,7083 | 0,124 | 0,481  |
| 7 | Q8IVF2 AHNK2_HUMAN | E.ASVDVS#PPKVE.A           | S2179:       | 2 | 2,7066 | 0,247 | 0,202  |
| 7 | Q5VUA4 ZN318_HUMAN | E.LLLHS#PAR.S              | S1896:       | 2 | 2,7058 | 0,333 | -0,556 |
| 7 | Q9BV73 CP250_HUMAN | E.LGS#RGEQGVQLGE.V         | S2240:       | 2 | 2,7026 | 0,11  | -0,26  |
| 7 | Q86WR7 CJ047_HUMAN | E.ALSPTS#PFRE.G            | S215:        | 2 | 2,7021 | 0,351 | -0,103 |
| 7 | Q9ULF5 S39AA_HUMAN | E.GQQES#PPKNYLCIEEE.K      | S591:        | 2 | 2,7017 | 0,291 | -0,061 |
| 7 | O94909 K0819_HUMAN | E.LELRVS#EDEE.K            | S274:        | 2 | 2,6996 | 0,242 | -0,939 |
| 7 | Q8WWM7 ATX2L_HUMAN | E.GGDSNSDDYDLE.S           |              | 2 | 2,6877 | 0,341 | 0      |
| 7 | P27816 MAP4_HUMAN  | E.ALNSPHS#ESFVSPE.A        | S200:        | 2 | 2,685  | 0,418 | -0,232 |
| 7 | Q9UPN6 RBM16_HUMAN | E.TVQTTQS#PTPVEKE.T        | S617:        | 3 | 2,6845 | 0,109 | -0,113 |
| 7 | Q86XZ4 SPAS2_HUMAN | E.TLS#IDARELEDPE.S         | S155:        | 2 | 2,6823 | 0,384 | -0,078 |
| 7 | Q9H299 SH3L3_HUMAN | R.VYSTSVTGSRE.I            |              | 2 | 2,6812 | 0,395 | -0,309 |
| 7 | O15027 SC16A_HUMAN | K.QIDSS#PVGGETDE.T         | S391:        | 2 | 2,6805 | 0,229 | 0,259  |
| 7 | P02533 K1C14_HUMAN | R.VLDELTLAR.A              |              | 2 | 2,6805 | 0,175 | -0,237 |
| 7 | P04792 HSPB1_HUMAN | E.GTLTVEAPM*PK.L           |              | 2 | 2,6801 | 0,332 | 0      |
| 7 | Q6S8J3 A26CA_HUMAN | E.M*ATAASS#SSLEK.S         | S933:        | 2 | 2,6775 | 0,328 | 0,095  |
| 7 | Q92547 TOPB1_HUMAN | E.SICNS#LNSKLEPTLE.N       | S332:        | 2 | 2,6742 | 0,29  | -0,068 |
| 7 | Q8IWJ2 GCC2_HUMAN  | E.TFLS#DSEKE.K             | S345:        | 2 | 2,674  | 0,233 | -0,107 |
| 7 | Q86VR2 F134C_HUMAN | E.LAITDSEHS#DAE.V          | S288:        | 2 | 2,6735 | 0,289 | -0,178 |
| 7 | P30307 MPIP3_HUMAN | E.QIALLVKDM*S#P.-          | S472:        | 2 | 2,6723 | 0,153 | 0,093  |
| 7 | Q16563 SYPL1_HUMAN | K.TVTATFGYPFR.L            |              | 2 | 2,6723 | 0,46  | -0,29  |
| 7 | Q8TB72 PUM2_HUMAN  | E.YVLS#PADKLD.S            | S102:        | 2 | 2,6713 | 0,237 | 0,177  |
| 7 | P04920 B3A2_HUMAN  | E.QALLPRVPT#DEIE.A         | T257:        | 2 | 2,6704 | 0,193 | -0,156 |
| 7 | Q5T4S7 UBR4_HUMAN  | K.LCTFTITQKE.F             |              | 2 | 2,6699 | 0,278 | 0      |
| 7 | Q9Y490 TLN1_HUMAN  | E.NIFSSM*GDAGE.M           |              | 2 | 2,6695 | 0,444 | -0,213 |
| 7 | P51149 RAB7A_HUMAN | E.FLIQAS#PRDPE.N           | S111:        | 2 | 2,6671 | 0,339 | 0,271  |
| 7 | Q9BY11 PACN1_HUMAN | E.LS#FKAGDE.L              | S405:        | 2 | 2,6648 | 0,35  | -0,129 |
| 7 | O75113 N4BP1_HUMAN | E.TDGLSPSVASPS#PKE.V       | S500:        | 2 | 2,6608 | 0,35  | -0,079 |
| 7 | Q8WVM7 STAG1_HUMAN | E.NS#RPM*GDQIQEPESE.H      | S1126:       | 2 | 2,6607 | 0,306 | 0      |
| 7 | Q92625 ANS1A_HUMAN | E.QFSGLLHGSS#PVCE.V        | S507:        | 2 | 2,6602 | 0,37  | 0,153  |

|   |                     |                               |            |   |        |       |        |
|---|---------------------|-------------------------------|------------|---|--------|-------|--------|
| 7 | Q9NRS6 SNX15_HUMAN  | E.AS#GSPARGPLTE.A             | S199:      | 2 | 2,6592 | 0,514 | 0      |
| 7 | P51826 AFF3_HUMAN   | E.LLS#PLKDSDE.I               | S755:      | 2 | 2,6577 | 0,214 | 0,102  |
| 7 | Q9NSV4 DIAP3_HUMAN  | E.TELLGS#FSKNE.S              | S1173:     | 2 | 2,6576 | 0,256 | -0,094 |
| 7 | A6NDB9 PALM3_HUMAN  | E.VVQTSS#PRLQE.R              | S303:      | 2 | 2,6575 | 0,377 | 0,092  |
| 7 | Q8N163 K1967_HUMAN  | E.FSS#LQDM*PKE.L              | S687:      | 2 | 2,6564 | 0,142 | 0,095  |
| 7 | Q9P1Q0 VPS54_HUMAN  | E.LTPIAVDTTSQR.N              |            | 2 | 2,654  | 0,491 | -0,281 |
| 7 | Q86Y04 Q86Y04_HUMAN | D.LTLLS#PKSE.N                | S239:      | 2 | 2,6539 | 0,269 | 0      |
| 7 | Q9HBM1 SPC25_HUMAN  | E.LALFDKS#INE.F               | S12:       | 2 | 2,6517 | 0,165 | -0,397 |
| 7 | Q9NPI6 DCP1A_HUMAN  | R.KAS#SPSPLTIGTPE.S           | S522:      | 2 | 2,6492 | 0,386 | 0,083  |
| 7 | Q9Y448 T4AF1_HUMAN  | E.QQTLCNNQVND.L               |            | 2 | 2,6421 | 0,314 | 0      |
| 7 | P10253 LYAG_HUMAN   | R.GAYTQVIFLAR.N               |            | 2 | 2,6412 | 0,185 | -0,295 |
| 7 | P48637 GSHB_HUMAN   | E.GGGNNLYGEE.M                |            | 2 | 2,6408 | 0,202 | 0,121  |
| 7 | Q8IWW6 RHG12_HUMAN  | E.LSSSSTEQIR.A                |            | 2 | 2,6364 | 0,165 | -0,11  |
| 7 | P54105 ICLN_HUMAN   | E.CQALHPDPEDED.S              |            | 2 | 2,6351 | 0,232 | 0      |
| 7 | Q16643 DREB_HUMAN   | E.TQEPS#PILDSEETR.A           | S381:      | 2 | 2,6338 | 0,28  | 0,29   |
| 7 | Q92797 SYMPK_HUMAN  | K.ETAAGGLTLKEE.R              |            | 2 | 2,6335 | 0,295 | -0,4   |
| 7 | ##P04114 APOB_HUMAN | E.YYKVT#WGVIS#PDFYEE.R        | T167:S172: | 3 | 2,6321 | 0,093 | 1,273  |
| 7 | Q9UBU9 NXF1_HUMAN   | R.AFAM*PAPTPSSS#PVPTLSPEQQE.M | S558:      | 2 | 2,6307 | 0,398 | 0,495  |
| 7 | Q9HC44 GPBL1_HUMAN  | E.EGEVLSHS#LEAE.H             | S384:      | 2 | 2,63   | 0,155 | -0,619 |
| 7 | O94842 TOX4_HUMAN   | R.SGCENPPIVSK.D               |            | 2 | 2,6295 | 0,282 | -0,103 |
| 7 | Q9H0E9 BRD8_HUMAN   | E.SGTIFGSQIKD.A               |            | 2 | 2,6266 | 0,158 | 0,741  |
| 7 | Q13283 G3BP1_HUMAN  | K.SS#SPAPADIAQTVQE.D          | S231:      | 2 | 2,625  | 0,241 | 0,232  |
| 7 | Q6ZS30 NBEL1_HUMAN  | E.LS#FKSENQEE.F               | S64:       | 2 | 2,6225 | 0,164 | 0      |
| 7 | Q9H7P9 PKHG2_HUMAN  | E.GSRLPS#LSDISDVFE.M          | S658:      | 2 | 2,6204 | 0,236 | 0      |
| 7 | Q9Y4W2 LAS1L_HUMAN  | E.QGS#VNDVKEEE.K              | S560:      | 2 | 2,6192 | 0,369 | 0,093  |
| 7 | P02545 LMNA_HUMAN   | E.FES#RLADALQE.L              | S239:      | 2 | 2,6178 | 0,191 | -0,09  |
| 7 | P02533 K1C14_HUMAN  | K.DAEWFFTK.T                  |            | 2 | 2,6162 | 0,391 | -0,312 |
| 7 | P04920 B3A2_HUMAN   | R.TSPSS#PAPLPHQE.A            | S173:      | 2 | 2,6147 | 0,169 | -0,427 |
| 7 | O14641 DVL2_HUMAN   | R.HLAGYES#SSTLM*TSELE.S       | S194:      | 2 | 2,612  | 0,249 | -0,063 |
| 7 | Q8IU8 MINA_HUMAN    | E.SLIS#PIKTE.T                | S47:       | 2 | 2,6063 | 0,2   | 0,343  |
| 7 | P48960 CD97_HUMAN   | R.CNPGFSSFSE.I                |            | 2 | 2,606  | 0,326 | 0,431  |
| 7 | Q14C86 GAPD1_HUMAN  | E.VLPSDS#EAPDLKQEE.R          | S724:      | 2 | 2,602  | 0,136 | -0,702 |
| 7 | Q6S8J3 A26CA_HUMAN  | K.AGFAGDDAPR.A                |            | 2 | 2,6014 | 0,305 | 0,062  |
| 7 | P30622 CLIP1_HUMAN  | E.ANGLQTPASR.A                |            | 2 | 2,5984 | 0,24  | -0,437 |
| 7 | P42166 LAP2A_HUMAN  | R.SSTPLPTISSAE.N              |            | 2 | 2,5971 | 0,393 | 0      |
| 7 | P61019 RAB2A_HUMAN  | E.GVFDINNE.A                  |            | 2 | 2,5958 | 0,188 | -0,269 |
| 7 | P50443 S26A2_HUMAN  | E.SS#TDFKQFE.T                | S36:       | 2 | 2,5951 | 0,308 | -1,044 |
| 7 | P29692 EF1D_HUMAN   | E.NGAS#VILRD.I                | S44:       | 2 | 2,5949 | 0,136 | 0,238  |
| 7 | Q92797 SYMPK_HUMAN  | E.AALLDSS#LEGPLKE.T           | S1222:     | 2 | 2,5895 | 0,306 | -0,151 |

|   |                      |                              |                    |   |        |       |        |
|---|----------------------|------------------------------|--------------------|---|--------|-------|--------|
| 7 | Q9BUR4 WDR79_HUMAN   | E.FGSPSELS#PR.I              | S90:               | 2 | 2,5891 | 0,25  | -0,105 |
| 7 | Q8WWM7 ATX2L_HUMAN   | K.ISLAPTDVKE.L               |                    | 2 | 2,5883 | 0,217 | -0,227 |
| 7 | Q969S2 NEIL2_HUMAN   | E.M*GPPGSS#PTPEPPQKE.V       | S68:               | 2 | 2,5798 | 0,358 | 0,141  |
| 7 | Q14247 SRC8_HUMAN    | E.DAAS#FKAEL.L               | S426:              | 2 | 2,5793 | 0,297 | -0,133 |
| 7 | P55209 NP1L1_HUMAN   | E.IS#EELKE.K                 | S143:              | 2 | 2,5748 | 0,089 | -0,131 |
| 7 | Q5SWX8 ODR4_HUMAN    | E.M*LDHT#IQIEDLE.I           | T381:              | 2 | 2,5732 | 0,168 | 0,157  |
| 7 | P49815 TSC2_HUMAN    | D.LSFQPSQPLSK.S              |                    | 2 | 2,5721 | 0,361 | -0,099 |
| 7 | O15446 RPA34_HUMAN   | E.M*KPLES#PGGTM*APQQPE.G     | S359:              | 2 | 2,5692 | 0,279 | 0      |
| 7 | P27816 MAP4_HUMAN    | E.AT#PVPIKDM*E.I             | T585:              | 2 | 2,5686 | 0,382 | 0,102  |
| 7 | Q15911 ZFH3_HUMAN    | R.TLLS#PSSIKVE.G             | S2801:             | 2 | 2,5682 | 0,136 | 0,097  |
| 7 | P42566 EP15_HUMAN    | E.SPARRS#PELLPSGVTDE.N       | S563:              | 2 | 2,5663 | 0,461 | 0,469  |
| 7 | Q9UKM9 RALY_HUMAN    | E.EGLLTHS#EEEELE.H           | S288:              | 2 | 2,566  | 0,3   | 0,166  |
| 7 | Q8TEW0 PARD3_HUMAN   | E.LKSPGS#PPGPELPIE.T         | S695:              | 2 | 2,5639 | 0,316 | 0,229  |
| 7 | P49757 NUMB_HUMAN    | E.GS#FRVTTATE.Q              | S194:              | 2 | 2,5632 | 0,372 | -0,212 |
| 7 | P17535 JUND_HUMAN    | D.LGLLKLAS#PELE.R            | S100:              | 2 | 2,5583 | 0,344 | -0,537 |
| 7 | Q14692 BMS1_HUMAN    | E.TS#DIENLLKEE.E             | S639:              | 2 | 2,5561 | 0,243 | -0,267 |
| 7 | Q8N1F8 S11IP_HUMAN   | E.LELM*SS#FRE.R              | S432:              | 2 | 2,5528 | 0,338 | 0      |
| 7 | O14641 DVL2_HUMAN    | E.LSSYTYGGGSAS#SQHSE.G       | S582:              | 2 | 2,5517 | 0,446 | 0,339  |
| 7 | P45974 UBP5_HUMAN    | E.DSFCSPHFSSPTS#PM*LDE.S     | S652:              | 2 | 2,5513 | 0,323 | 0,685  |
| 7 | P37802 TAGL2_HUMAN   | K.NVIGLQM*GTNR.G             |                    | 2 | 2,5487 | 0,422 | -0,4   |
| 7 | Q8N7H5 PAF1_HUMAN    | E.GDGVVYNE.L                 |                    | 2 | 2,5483 | 0,257 | 0,266  |
| 7 | Q86V48 LUZP1_HUMAN   | R.HTS#TSNIQVGLAE.L           | S820:              | 2 | 2,5479 | 0,373 | 0,17   |
| 7 | P35030 TRY3_HUMAN    | D.TLDNDIMLIK.L               |                    | 2 | 2,5461 | 0,343 | -0,207 |
| 7 | Q9BVV6 K0586_HUMAN   | E.DSCASHGPM*#LGELE.L         | S1389:             | 2 | 2,5422 | 0,344 | -1,303 |
| 7 | Q9Y4K4 M4K5_HUMAN    | E.TSS#IGNGDGISK.L            | S445:              | 2 | 2,5413 | 0,35  | 0      |
| 7 | P19174 PLCG1_HUMAN   | E.NGDLS#PFGTSLR.E            | S1221:             | 2 | 2,5383 | 0,371 | -0,085 |
| 7 | Q03164 HRX_HUMAN     | E.SIPSRSS#PEGDPPVLTE.V       | S1685:             | 2 | 2,5376 | 0,321 | 0,125  |
| 7 | P31689 DNJA1_HUMAN   | E.NGFLSPDKLS#LLE.K           | S340:              | 2 | 2,5356 | 0,262 | -0,242 |
| 7 | Q9NRS6 SNX15_HUMAN   | E.GAAPS#PTHVAE.L             | S227:              | 2 | 2,5328 | 0,26  | -0,218 |
| 7 | O14578 CTRO_HUMAN    | E.SVVSGLDSPA.K.T             |                    | 2 | 2,5325 | 0,406 | -0,115 |
| 7 | Q15424 SAFB1_HUMAN   | E.SLSDS#RELVE.G              | S163:              | 2 | 2,528  | 0,273 | -0,201 |
| 7 | Q5TB80 QN1_HUMAN     | E.LNHS#SLGVGLDTLEE.Q         | S116:              | 2 | 2,5268 | 0,313 | -0,367 |
| 7 | Q9GZR2 REXO4_HUMAN   | E.GS#VLSLVKE.Q               | S226:              | 2 | 2,5264 | 0,257 | 0,222  |
| 7 | Q6ZU80 CN145_HUMAN   | E.TEQES#ILGVIGKE.I           | S826:              | 2 | 2,5235 | 0,237 | -0,165 |
| 7 | Q9Y3A2 UTP11_HUMAN   | E.TVNS#PAIYK.F               | S241:              | 2 | 2,5227 | 0,338 | 0,114  |
| 7 | Q8N3U4 STAG2_HUMAN   | E.SETHFS#SDTFEDIE.G          | S22:               | 2 | 2,5222 | 0,215 | -0,133 |
| 7 | P04264 K2C1_HUMAN    | K.SLNNQFASFIDKVR.F           |                    | 2 | 2,5212 | 0,352 | -0,372 |
| 7 | ##O60318 MCM3A_HUMAN | E.VNQNS#LAPT#FASLSNNS#SVPK.S | S1754:T1758:S1766: | 2 | 2,5211 | 0,117 | -1,011 |
| 7 | P52701 MSH6_HUMAN    | E.M*EVGTTYVTDK.S             |                    | 2 | 2,5159 | 0,218 | -0,097 |

|   |                     |                          |        |   |        |       |        |
|---|---------------------|--------------------------|--------|---|--------|-------|--------|
| 7 | Q17R89 RICH2_HUMAN  | E.LGSTLRSL#PLE.H         | S793:  | 2 | 2,5143 | 0,215 | -0,289 |
| 7 | P49711 CTCF_HUMAN   | E.LQGAYENEVS#KEGLAE.S    | S143:  | 2 | 2,5091 | 0,341 | -0,269 |
| 7 | Q96JM3 ZN828_HUMAN  | E.TDPVKS#PPLPE.H         | S108:  | 2 | 2,509  | 0,376 | -0,291 |
| 7 | Q8WWQ0 PHIP_HUMAN   | R.LSRGS#ISSTSE.V         | S674:  | 2 | 2,5084 | 0,276 | 0      |
| 7 | Q9NYZ3 GTSE1_HUMAN  | E.NVDS#PLLKF.-           | S715:  | 2 | 2,5062 | 0,385 | -0,438 |
| 7 | Q96RK0 CIC_HUMAN    | E.GAPQPS#PPPPGPSTAATGR.- | S1595: | 2 | 2,5047 | 0,349 | -0,268 |
| 7 | P19419 ELK1_HUMAN   | R.ST#SPSPLEACLE.A        | T199:  | 2 | 2,5029 | 0,193 | 0,178  |
| 7 | Q8N2Y8 RUSC2_HUMAN  | R.M*LS#CPVR.L            | S519:  | 2 | 2,4968 | 0,114 | -0,191 |
| 7 | O43524 FOXO3_HUMAN  | E.LQAS#PAKPSGE.T         | S43:   | 2 | 2,4961 | 0,254 | 0      |
| 7 | Q9Y678 COPG_HUMAN   | E.ST#PITAVKQPE.K         | T594:  | 2 | 2,4939 | 0,318 | 0,195  |
| 7 | Q96FW1 OTUB1_HUMAN  | E.LS#VLYKE.Y             | S55:   | 2 | 2,4914 | 0,235 | 0      |
| 7 | Q13426 XRCC4_HUMAN  | E.TLRNS#SPEDLFDEI.-      | S327:  | 2 | 2,4911 | 0,276 | -0,071 |
| 7 | Q8TF74 WIPF2_HUMAN  | R.QPPGVPNGPSS#PTNE.S     | S267:  | 2 | 2,4893 | 0,168 | 0,47   |
| 7 | P18583 SON_HUMAN    | E.SDS#FLKFD.S            | S154:  | 2 | 2,4885 | 0,242 | -0,117 |
| 7 | Q99733 NP1L4_HUMAN  | R.LDNVPHTPSS#YIE.T       | S54:   | 2 | 2,4879 | 0,132 | 0,236  |
| 7 | O95239 KIF4A_HUMAN  | E.SEDS#ITKQIE.S          | S815:  | 2 | 2,4833 | 0,228 | -0,298 |
| 7 | Q96PK6 RBM14_HUMAN  | R.AQPSVSLGAPYR.G         |        | 2 | 2,4824 | 0,255 | -0,294 |
| 7 | Q6UN15 FIP1_HUMAN   | R.DHS#PTPSVFNSDEE.R      | S492:  | 2 | 2,4822 | 0,262 | -0,223 |
| 7 | Q8TB72 PUM2_HUMAN   | E.VNAILS#PR.S            | S82:   | 2 | 2,481  | 0,22  | -0,321 |
| 7 | P49770 EI2BB_HUMAN  | E.VIM*TIGFSRT#VE.A       | T173:  | 2 | 2,4807 | 0,191 | -0,253 |
| 7 | Q14257 RCN2_HUMAN   | E.NTALDDAEEE.S           |        | 2 | 2,478  | 0,176 | -0,11  |
| 7 | P49023 PAXI_HUMAN   | K.TGSSS#PPGGPPKPGSQLD.S  | S322:  | 2 | 2,4748 | 0,231 | -0,419 |
| 7 | Q02952 AKA12_HUMAN  | K.SPSS#PVERE.M           | S1331: | 2 | 2,4731 | 0,177 | -0,113 |
| 7 | Q9UQ80 PA2G4_HUMAN  | E.NATSGETLEE.N           |        | 2 | 2,4723 | 0,168 | 0,232  |
| 7 | Q7Z3T8 ZFY16_HUMAN  | R.NEIIQS#PISQVPSVE.K     | S939:  | 2 | 2,4693 | 0,2   | -0,497 |
| 7 | P49321 NASP_HUMAN   | E.NM*EEEEENQAE.S         |        | 2 | 2,4665 | 0,278 | 0,186  |
| 7 | Q8TAQ2 SMRC2_HUMAN  | K.DM*DEPS#PVPNVEE.V      | S347:  | 2 | 2,4659 | 0,18  | -0,236 |
| 7 | Q2TA77 Q2TA77_HUMAN | E.TQSS#PTKGFVNL.-        | S499:  | 2 | 2,4645 | 0,262 | 0,09   |
| 7 | Q16186 ADRM1_HUMAN  | R.SQSAAVTPSSTTSSTR.A     |        | 2 | 2,458  | 0,332 | 0,233  |
| 7 | O43290 SNUT1_HUMAN  | E.KEPVPQPLPSDDTR.V       |        | 2 | 2,4551 | 0,246 | -1,7   |
| 7 | Q9Y4W2 LAS1L_HUMAN  | E.GSEAS#PIGK.S           | S523:  | 2 | 2,4541 | 0,301 | 0,132  |
| 7 | P19338 NUCL_HUMAN   | E.IDGRS#ISLYTGE.K        | S458:  | 2 | 2,4526 | 0,371 | 0,079  |
| 7 | O43166 SI1L1_HUMAN  | E.YGSTSS#IDKQGTSGE.S     | S211:  | 2 | 2,4509 | 0,337 | -0,306 |
| 7 | Q9UQ35 SRRM2_HUMAN  | E.FSAS#PM*LK.S           | S1124: | 2 | 2,4502 | 0,195 | 0,125  |
| 7 | P08069 IGF1R_HUMAN  | E.NGPGPGVLVLR.A          |        | 2 | 2,4465 | 0,464 | 0      |
| 7 | Q2M3G4 SHRM1_HUMAN  | E.AAAQAAEPPS#PPASR.A     | S133:  | 2 | 2,4442 | 0,204 | 0,406  |
| 7 | Q13435 SF3B2_HUMAN  | E.QQAQVEKEDFS#DM*VAE.H   | S838:  | 2 | 2,4421 | 0,118 | -1,439 |
| 7 | Q8NEY8 PPHLN_HUMAN  | E.SNT#THGIELFE.D         | T275:  | 2 | 2,4419 | 0,275 | -0,368 |
| 7 | Q9Y217 MTMR6_HUMAN  | E.GSS#PADNRYSEYAE.F      | S589:  | 2 | 2,4414 | 0,165 | -0,348 |

|   |                     |                            |            |   |        |       |        |
|---|---------------------|----------------------------|------------|---|--------|-------|--------|
| 7 | P04075 ALDOA_HUMAN  | E.S#LFVSNHAY.-             | S356:      | 2 | 2,4379 | 0,267 | 0,218  |
| 7 | Q9UJK0 CP042_HUMAN  | E.IDPFDVDS#GRE.F           | S241:      | 2 | 2,4377 | 0,235 | 0,183  |
| 7 | O95819 M4K4_HUMAN   | R.AASSLNLSNGETE.S          |            | 2 | 2,4335 | 0,209 | -0,094 |
| 7 | Q6ULP2 AFTIN_HUMAN  | E.ISTSS#LKVTD.A            | S866:      | 2 | 2,433  | 0,121 | 0,432  |
| 7 | O15212 PFD6_HUMAN   | E.TLAQLQQE.F               |            | 2 | 2,4313 | 0,136 | 0,131  |
| 7 | Q6PKG0 LARP1_HUMAN  | E.TES#APGS#PRAVTPVPTKTEE.V | S517:S521: | 2 | 2,43   | 0,431 | 0,331  |
| 7 | Q14126 DSG2_HUMAN   | E.NTYS#SGSSFPVK.S          | S883:      | 2 | 2,4297 | 0,197 | 0,42   |
| 7 | Q96KP4 CNDP2_HUMAN  | E.GM*EESGSEGLDE.L          |            | 2 | 2,4293 | 0,289 | 0,194  |
| 7 | Q13685 AAMP_HUMAN   | E.TLS#FHGDEE.I             | S20:       | 2 | 2,4289 | 0,321 | -0,219 |
| 7 | Q9UBF8 PI4KB_HUMAN  | E.NFDTTS#VPARIPE.N         | S413:      | 2 | 2,4257 | 0,142 | 0,24   |
| 7 | Q9Y618 NCOR2_HUMAN  | E.GT#PPPPPPSRDLTE.A        | T1383:     | 2 | 2,4256 | 0,253 | -1,188 |
| 7 | P55072 TERA_HUMAN   | E.DNSVVLSQPK.M             |            | 2 | 2,4222 | 0,183 | 0,624  |
| 7 | Q6PKG0 LARP1_HUMAN  | R.AVTPVPTKTEE.V            |            | 2 | 2,4214 | 0,439 | 0,208  |
| 7 | P40222 TXLNA_HUMAN  | E.GPGAQAPSS#PRVTE.A        | S515:      | 2 | 2,4161 | 0,267 | 0      |
| 7 | Q6ZNP1 Q6ZNP1_HUMAN | E.LSLTNIS#PK.F             | S39:       | 2 | 2,4148 | 0,359 | 0,232  |
| 7 | Q01968 OCRL_HUMAN   | E.KS#LLQM*VPLDE.G          | S716:      | 2 | 2,4143 | 0,255 | -0,178 |
| 7 | O14639 ABLM1_HUMAN  | R.TLS#PTPSAE.G             | S431:      | 2 | 2,4113 | 0,194 | 0,124  |
| 7 | Q9Y6A5 TACC3_HUMAN  | K.VSGS#PEQAVEE.N           | S177:      | 2 | 2,4054 | 0,163 | 0,201  |
| 7 | O43166 SI1L1_HUMAN  | E.YGS#TSSIDK.Q             | S208:      | 2 | 2,4049 | 0,318 | -0,118 |
| 7 | O60303 K0556_HUMAN  | E.TEGRSS#PGPDTLVVLE.F      | S253:      | 2 | 2,4035 | 0,224 | 0      |
| 7 | Q9BPZ3 PAIP2_HUMAN  | R.SST#SPSIINE.D            | T9:        | 2 | 2,4023 | 0,107 | -0,328 |
| 7 | O00629 IMA4_HUMAN   | E.DSDIDGDYR.V              |            | 2 | 2,4012 | 0,332 | 0,116  |
| 7 | Q9UKV3 ACINU_HUMAN  | K.TTS#PLEEEERE.I           | S365:      | 2 | 2,4001 | 0,302 | -0,959 |
| 7 | Q8IWC1 MA7D3_HUMAN  | E.AS#PKAGVGM*APE.V         | S322:      | 2 | 2,3998 | 0,476 | 0      |
| 7 | Q9H4L5 OSBL3_HUMAN  | E.SLLDS#PAVAK.S            | S410:      | 2 | 2,3951 | 0,211 | 0      |
| 7 | Q8IZL8 PELP1_HUMAN  | E.VEEPGEETER.G             |            | 2 | 2,3946 | 0,346 | 0,104  |
| 7 | Q32MZ4 LRRF1_HUMAN  | R.RGSGDT#SISIDTE.A         | T123:      | 2 | 2,394  | 0,132 | -0,43  |
| 7 | Q02952 AKA12_HUMAN  | E.GSTVNDQQLE.E             |            | 2 | 2,393  | 0,121 | 0      |
| 7 | P08134 RHOC_HUMAN   | D.M*ANRIS#AFGYLE.C         | S152:      | 2 | 2,3928 | 0,208 | -0,249 |
| 7 | Q9Y4B4 ARIP4_HUMAN  | E.GLARPVSPDS#PEIISE.L      | S1172:     | 2 | 2,391  | 0,156 | -0,14  |
| 7 | Q16643 DREB_HUMAN   | R.APT#PPSGTE.V             | T497:      | 2 | 2,3845 | 0,198 | -0,13  |
| 7 | P18583 SON_HUMAN    | E.SDQTLAALLS#PKESSGGE.K    | S1697:     | 2 | 2,384  | 0,378 | 0      |
| 7 | Q8IWZ3 ANKH1_HUMAN  | R.GANLEEVNDE.G             |            | 2 | 2,3792 | 0,271 | -0,784 |
| 7 | P30260 CDC27_HUMAN  | E.SQESSM*T#DADDTQLHAAE.S   | T809:      | 2 | 2,3791 | 0,082 | -0,06  |
| 7 | Q9Y570 PPME1_HUMAN  | E.GITS#PEGKSIVE.G          | S243:      | 2 | 2,3788 | 0,209 | 0,088  |
| 7 | Q8IZ21 PHAR4_HUMAN  | R.T#RSLPITIE.M             | T462:      | 2 | 2,3771 | 0,208 | 0,33   |
| 7 | P85037 FOXK1_HUMAN  | R.S#APASPTHPLM*#PR.S       | S416:S428: | 2 | 2,3762 | 0,13  | -0,29  |
| 7 | O43237 DC1L2_HUMAN  | R.RGPLTSGSDEE.N            |            | 2 | 2,3756 | 0,364 | 0,213  |
| 7 | P04075 ALDOA_HUMAN  | E.SLFVSNHAY.-              | S360:      | 2 | 2,3751 | 0,26  | 0,218  |

|   |                     |                     |        |   |        |       |        |
|---|---------------------|---------------------|--------|---|--------|-------|--------|
| 7 | P78559 MAP1A_HUMAN  | E.SS#PQKGLEVE.R     | S1762: | 2 | 2,3718 | 0,105 | -0,74  |
| 7 | P54278 PMS2_HUMAN   | E.GFSIPDT#GSHCSSE.Y | T511:  | 2 | 2,3691 | 0,358 | 0,078  |
| 7 | P06744 G6PI_HUMAN   | E.LQAAGKS#PEDLE.R   | S455:  | 2 | 2,3685 | 0,225 | 0,182  |
| 7 | Q49A88 CCD14_HUMAN  | E.ASAPGIISLSK.Q     |        | 2 | 2,3683 | 0,233 | -0,438 |
| 7 | Q9UFW8 CGBP1_HUMAN  | E.NQLLSQDC.-        |        | 2 | 2,3683 | 0,283 | 0,112  |
| 7 | Q66K74 MAP1S_HUMAN  | E.VGS#PHSTEVDE.S    | S688:  | 2 | 2,3625 | 0,119 | 0,197  |
| 7 | Q9UKM9 RALY_HUMAN   | E.GLLTHS#EEE.L      | S288:  | 2 | 2,3618 | 0,228 | 0,334  |
| 7 | P46060 RAGP1_HUMAN  | E.NDGATALAE.A       |        | 2 | 2,3607 | 0,238 | 0,354  |
| 7 | Q99460 PSMD1_HUMAN  | E.NADLPEGE.K        |        | 2 | 2,359  | 0,177 | 0,505  |
| 7 | Q9HCK8 CHD8_HUMAN   | E.VM*PAQS#PREDEE.S  | S283:  | 2 | 2,3546 | 0,29  | 0,082  |
| 7 | P12268 IMDH2_HUMAN  | K.NLIDAGVDALR.V     |        | 2 | 2,3535 | 0,156 | -0,211 |
| 7 | Q9Y2W6 TDRKH_HUMAN  | E.ITHTLS#CLSLSA.A   | S539:  | 2 | 2,3532 | 0,194 | -0,169 |
| 7 | Q12888 TP53B_HUMAN  | R.TSS#VLGM*SVE.S    | S119:  | 2 | 2,3494 | 0,174 | -0,441 |
| 7 | O75909 CCNK_HUMAN   | R.AVVVS#PKEE.N      | S340:  | 2 | 2,349  | 0,207 | 0      |
| 7 | Q01433 AMPD2_HUMAN  | R.QIS#QDVKLEPD.I    | S168:  | 2 | 2,3463 | 0,089 | 0,271  |
| 7 | Q6ZNP1 Q6ZNP1_HUMAN | E.LSLTNIS#PKFQE.T   | S39:   | 2 | 2,3368 | 0,269 | -0,084 |
| 7 | P60709 ACTB_HUMAN   | R.GYS#FTTTAERE.I    | S199:  | 2 | 2,3334 | 0,377 | -0,182 |
| 7 | Q96RL1 UIMC1_HUMAN  | E.TGAFRVPS#PGM*EE.A | S653:  | 2 | 2,3305 | 0,225 | 0,166  |
| 7 | P52948 NUP98_HUMAN  | E.RFS#FLSKPVDE.N    | S635:  | 2 | 2,3293 | 0,376 | 0,087  |
| 7 | Q8NBS9 TXND5_HUMAN  | E.NNFDDTIAE.G       |        | 2 | 2,3286 | 0,238 | 0,117  |
| 7 | Q14C86 GAPD1_HUMAN  | R.SNS#VSSLDLE.G     | S585:  | 2 | 2,3283 | 0,198 | 0,432  |
| 7 | Q9Y3D3 RT16_HUMAN   | K.TDAEAT#DTEATET.-  | T130:  | 2 | 2,3238 | 0,299 | 0,51   |
| 7 | Q99549 MPP8_HUMAN   | D.IQRSL#LNNDIFE.A   | S126:  | 2 | 2,3189 | 0,374 | -0,237 |
| 7 | Q9C0B5 ZDHC5_HUMAN  | E.LGQLQS#IRSE.G     | S445:  | 2 | 2,3177 | 0,368 | -0,202 |
| 7 | Q8TAP6 CEP76_HUMAN  | E.LPSS#PKQPICFD.R   | S83:   | 2 | 2,3163 | 0,286 | 0,083  |
| 7 | Q96L73 NSD1_HUMAN   | E.VS#PRPALE.S       | S1382: | 2 | 2,3143 | 0,301 | -0,129 |
| 7 | Q3SXY8 AR13B_HUMAN  | E.CLS#LEKLVNE.H     | S148:  | 2 | 2,3124 | 0,224 | -0,38  |
| 7 | Q8TDY2 RBCC1_HUMAN  | E.LVLS#PDM*PR.T     | S243:  | 2 | 2,3101 | 0,287 | -0,543 |
| 7 | P20810 ICAL_HUMAN   | E.ALSAS#LGTR.Q      | S297:  | 2 | 2,3098 | 0,276 | -0,383 |
| 7 | Q15942 ZYX_HUMAN    | R.EKVSS#IDLE.I      | S143:  | 2 | 2,3098 | 0,158 | -0,222 |
| 7 | Q7Z4H7 FA29A_HUMAN  | E.NS#PLSDVAKNTE.S   | S507:  | 2 | 2,308  | 0,163 | -0,18  |
| 7 | Q969F1 TF3C6_HUMAN  | E.VVASAPDKS#LE.L    | S160:  | 2 | 2,3027 | 0,274 | -0,204 |
| 7 | P19838 NFKB1_HUMAN  | E.VIQAASS#PVK.T     | S893:  | 2 | 2,3003 | 0,279 | -0,113 |
| 7 | Q00613 HSF1_HUMAN   | E.SEPAPASVTALTDAR.G |        | 2 | 2,2985 | 0,272 | 0,164  |
| 7 | Q0VDD7 CS057_HUMAN  | E.GFRVS#PQASVVLE.H  | S476:  | 2 | 2,2974 | 0,104 | -0,166 |
| 7 | P52701 MSH6_HUMAN   | E.VGTTYVTDKS#EE.D   | S219:  | 2 | 2,2949 | 0,083 | -0,173 |
| 7 | Q9H7P9 PKHG2_HUMAN  | R.GPS#PLHVLE.G      | S610:  | 2 | 2,2944 | 0,276 | -0,119 |
| 7 | Q6XZF7 DNMBP_HUMAN  | E.APTS#PLGHLTSE.Y   | S359:  | 2 | 2,2937 | 0,088 | 0      |
| 7 | Q9H0E9 BRD8_HUMAN   | E.SGTIFGSQIK.D      |        | 2 | 2,2884 | 0,397 | -0,235 |

|   |                    |                           |            |   |        |       |        |
|---|--------------------|---------------------------|------------|---|--------|-------|--------|
| 7 | Q00978 IRF9_HUMAN  | E.AQVQSLDCR.L             |            | 2 | 2,2881 | 0,321 | -0,113 |
| 7 | P22694 KAPCB_HUMAN | E.DIRVS#ITE.K             | S339:      | 2 | 2,2874 | 0,138 | -0,903 |
| 7 | P27348 1433T_HUMAN | E.QGAELSNEE.R             |            | 2 | 2,2823 | 0,111 | 0      |
| 7 | Q3KQU3 MA7D1_HUMAN | E.LGAGAPPAVVAR.T          |            | 2 | 2,2818 | 0,378 | -0,113 |
| 7 | Q13045 FLII_HUMAN  | E.FM*AANNLE.L             |            | 2 | 2,2797 | 0,196 | -0,235 |
| 7 | Q13523 PRP4B_HUMAN | R.TRS#PS#PDDILE.R         | S578:S580: | 2 | 2,2794 | 0,128 | -0,176 |
| 7 | Q7Z3C6 ATG9A_HUMAN | E.ASVY#QQAEDGKTE.L        | Y545:      | 2 | 2,279  | 0,236 | 0,405  |
| 7 | Q96QT4 TRPM7_HUMAN | E.SESTNS#VRLM*L.-         | S1860:     | 2 | 2,2739 | 0,387 | 0,549  |
| 7 | P28715 ERCC5_HUMAN | E.LTPAS#PTCTNSVSK.N       | S526:      | 2 | 2,2733 | 0,35  | -0,395 |
| 7 | Q14451 GRB7_HUMAN  | R.RAT#SLPSIPNPFPE.L       | T62:       | 2 | 2,2715 | 0,408 | -0,304 |
| 7 | Q6P2E9 EDC4_HUMAN  | E.VEPLGLPQAS#PSR.T        | S723:      | 2 | 2,27   | 0,364 | 0,085  |
| 7 | P26045 PTN3_HUMAN  | R.SLS#VEHLE.T             | S359:      | 2 | 2,2693 | 0,247 | 0,184  |
| 7 | Q6P0N0 CN106_HUMAN | E.NQVAM*SFYK.H            |            | 2 | 2,2687 | 0,238 | 0,111  |
| 7 | Q08499 PDE4D_HUMAN | E.VEIPSPT#QKE.K           | T350:      | 2 | 2,2677 | 0,153 | 0,101  |
| 7 | Q9Y490 TLN1_HUMAN  | E.GCVSASQAATE.D           |            | 2 | 2,2661 | 0,367 | 0,226  |
| 7 | Q8TD19 NEK9_HUMAN  | R.LNPAVTCAGK.G            |            | 2 | 2,2636 | 0,369 | -0,237 |
| 7 | Q16659 MK06_HUMAN  | R.ALS#DVTDEEE.V           | S386:      | 2 | 2,2568 | 0,127 | -0,308 |
| 7 | O94915 FRYL_HUMAN  | E.SGLPKNPS#VVFSSNEDLE.V   | S2380:     | 2 | 2,2564 | 0,332 | 0,366  |
| 7 | P35527 K1C9_HUMAN  | K.TLNDMRQEYEQLIAK.N       |            | 2 | 2,2536 | 0,131 | 0,198  |
| 7 | Q9UNE7 STUB1_HUMAN | R.LGAGGGS#PEKSPSAQE.L     | S19:       | 2 | 2,2533 | 0,33  | 0,236  |
| 7 | Q9H0W8 CS061_HUMAN | E.S#GHSQPGLYGIE.R         | S4:        | 2 | 2,2528 | 0,194 | 0,276  |
| 7 | Q9NS56 TOPRS_HUMAN | R.RTT#TPPDGVLFE.G         | T204:      | 2 | 2,2521 | 0,295 | -0,081 |
| 7 | Q14596 NBR1_HUMAN  | E.ET#FLLAKEE.R            | T510:      | 2 | 2,2508 | 0,147 | -0,21  |
| 7 | Q9BXS9 S26A6_HUMAN | E.VYM*AACHS#PVVSQLE.A     | S710:      | 2 | 2,2473 | 0,241 | 0,341  |
| 7 | Q69YN4 VIR_HUMAN   | E.TSPHT#FQLD.L            | T66:       | 2 | 2,2387 | 0,092 | 0,325  |
| 7 | Q969F1 TF3C6_HUMAN | E.VVASAPDKS#LELE.E        | S160:      | 2 | 2,238  | 0,091 | -0,085 |
| 7 | O15085 ARHGB_HUMAN | E.GDSGLDSGTERFPS#LSE.S    | S232:      | 2 | 2,2365 | 0,395 | 0,266  |
| 7 | Q92619 HMHA1_HUMAN | E.ASALGHLS#FLE.Q          | S1053:     | 2 | 2,236  | 0,166 | -0,299 |
| 7 | Q86VI3 IQGA3_HUMAN | E.ILSLS#ASREQE.A          | S1392:     | 2 | 2,2308 | 0,166 | -0,558 |
| 7 | Q14683 SMC1A_HUMAN | R.ISSIYARE.A              |            | 2 | 2,2291 | 0,128 | 0,065  |
| 7 | Q9UK59 DBR1_HUMAN  | E.FSASFSDVR.I             |            | 2 | 2,2289 | 0,201 | -1,261 |
| 7 | O75531 BAF_HUMAN   | R.DFVAEPM*GEKPVGSLAGIGE.V |            | 2 | 2,2267 | 0,284 | 0,181  |
| 7 | P60842 IF4A1_HUMAN | R.SRDNGPDGM*EPE.G         |            | 2 | 2,223  | 0,222 | -0,092 |
| 7 | O00139 KIF2A_HUMAN | E.VSPQLFT#FHE.A           | T609:      | 2 | 2,2226 | 0,291 | -0,19  |
| 7 | P08779 K1C16_HUMAN | R.DAETWFLSK.T             |            | 2 | 2,218  | 0,267 | -0,111 |
| 7 | Q12888 TP53B_HUMAN | E.SVPLHLS#LTE.T           | S692:      | 2 | 2,215  | 0,365 | -0,207 |
| 7 | O15047 SET1A_HUMAN | E.AS#PARPAGPTEE.S         | S1114:     | 2 | 2,2128 | 0,374 | 0      |
| 7 | Q7Z4Q2 HEAT3_HUMAN | E.NTNGDDLIEDDE.M          |            | 2 | 2,2128 | 0,14  | 0,271  |
| 7 | Q5SSJ5 HP1B3_HUMAN | E.NETPPATSS#EAEQPKGEPE.N  | S91:       | 2 | 2,2097 | 0,166 | 0      |

|   |                     |                            |        |   |        |       |        |
|---|---------------------|----------------------------|--------|---|--------|-------|--------|
| 7 | Q9Y490 TLN1_HUMAN   | D.TASDVLDKASS#LIEE.A       | S1164: | 2 | 2,2028 | 0,084 | 0      |
| 7 | P17987 TCPA_HUMAN   | E.NLIVNTDE.L               |        | 2 | 2,2003 | 0,156 | 0,266  |
| 7 | Q9H4G0 E41L1_HUMAN  | R.LPSSPASPS#PK.G           | S546:  | 2 | 2,1998 | 0,162 | -0,106 |
| 7 | P55265 DSRAD_HUMAN  | E.SQT#PTPSATSFSGK.S        | T601:  | 2 | 2,1967 | 0,424 | 0,451  |
| 7 | P60866 RS20_HUMAN   | K.DTGKT#PVEPE.V            | T9:    | 2 | 2,1966 | 0,219 | 0      |
| 7 | Q9P0W5 SCHI1_HUMAN  | E.TSLDTPLS#PM*SK.Q         | S330:  | 2 | 2,1898 | 0,272 | -0,622 |
| 7 | Q9UQ35 SRRM2_HUMAN  | E.VEERPAVSLTLDQS#QSQASLE.A | S1287: | 2 | 2,1838 | 0,274 | 0,309  |
| 7 | Q86VY9 T200A_HUMAN  | E.SFQPVSTVLPR.N            |        | 2 | 2,1812 | 0,2   | 0,198  |
| 7 | P25787 PSA2_HUMAN   | E.GQM*TEDNIE.V             |        | 2 | 2,1809 | 0,222 | 0,116  |
| 7 | Q6S8J3 A26CA_HUMAN  | E.KSYELPDGQVITIGNE.R       |        | 2 | 2,1771 | 0,339 | -0,277 |
| 7 | Q96EV2 RBM33_HUMAN  | E.DDLLGEDLLSGK.K           |        | 2 | 2,174  | 0,274 | -0,191 |
| 7 | Q12980 CP035_HUMAN  | E.LLPSGDS#PLNQR.M          | S476:  | 2 | 2,1733 | 0,372 | 0      |
| 7 | O75582 KS6A5_HUMAN  | E.FVAETER.A                |        | 2 | 2,1717 | 0,277 | 0,063  |
| 7 | P98169 ZXDB_HUMAN   | E.LLT#PTKAE.W              | T753:  | 2 | 2,1679 | 0,132 | 0,192  |
| 7 | Q5R372 Q5R372_HUMAN | E.ISTPRPS#SPGGLPE.E        | S118:  | 2 | 2,1674 | 0,108 | -0,414 |
| 7 | P12955 PEPD_HUMAN   | E.ASFDGIS#KFE.V            | S167:  | 2 | 2,1635 | 0,102 | -0,413 |
| 7 | Q14444 CAPR1_HUMAN  | K.GKLDDYQE.R               |        | 2 | 2,1634 | 0,196 | 0,126  |
| 7 | Q9BQG0 MBB1A_HUMAN  | E.QLM*TVLQAGK.A            |        | 2 | 2,1623 | 0,201 | -0,11  |
| 7 | Q8N5F7 NKAP_HUMAN   | E.NQIYSADE.K               |        | 2 | 2,1617 | 0,249 | 0,195  |
| 7 | Q9Y243 AKT3_HUMAN   | E.FTAQTITIT#PPEKYDE.D      | T447:  | 2 | 2,159  | 0,174 | 0,252  |
| 7 | P45985 MP2K4_HUMAN  | E.VACYVCK.I                |        | 2 | 2,1588 | 0,282 | 0      |
| 7 | P78536 ADA17_HUMAN  | E.SLSLFHPS#NVE.M           | S711:  | 2 | 2,1558 | 0,177 | -0,186 |
| 7 | P31946 1433B_HUMAN  | R.NLLS#VAYK.N              | S47:   | 2 | 2,1528 | 0,192 | 0,062  |
| 7 | Q76FK4 NOL8_HUMAN   | D.SITPSKS#SPVPVSD.T        | S267:  | 2 | 2,1446 | 0,278 | -0,33  |
| 7 | P39687 AN32A_HUMAN  | E.LSDNRVS#GGLEVLAE.K       | S77:   | 2 | 2,1362 | 0,197 | 0,074  |
| 7 | A8MXV4 NUD19_HUMAN  | E.TAT#PPSRPPPAE.G          | T31:   | 2 | 2,1319 | 0,294 | 0,094  |
| 7 | Q9NQW6 ANLN_HUMAN   | K.SCSPSPVS#PQVQPQAADTISD.S | S102:  | 2 | 2,1312 | 0,149 | 0,542  |
| 7 | O95155 UBE4B_HUMAN  | R.SQS#M*DIDGVSCE.K         | S105:  | 2 | 2,1299 | 0,266 | -0,6   |
| 7 | B2RMZ9 B2RMZ9_HUMAN | R.APVS#PLKFSPFE.G          | S423:  | 2 | 2,1246 | 0,252 | -0,436 |
| 7 | P20810 ICAL_HUMAN   | E.LS#EDFDRSE.C             | S373:  | 2 | 2,1225 | 0,282 | 0,207  |
| 7 | P04264 K2C1_HUMAN   | R.SLVNLGGSK.S              |        | 2 | 2,1208 | 0,138 | 0,139  |
| 7 | Q13111 CAF1A_HUMAN  | K.ATLTAS#PLGAS.-           | S933:  | 2 | 2,1203 | 0,369 | 0,114  |
| 7 | Q9NPL8 CC001_HUMAN  | E.SSLQEDEPEND.A            |        | 2 | 2,1131 | 0,14  | 0,097  |
| 7 | Q04695 K1C17_HUMAN  | K.DAEDWFFSK.T              |        | 2 | 2,1113 | 0,281 | -0,32  |
| 7 | Q5VYS8 ZCHC6_HUMAN  | E.SFGS#PPKEE.M             | S706:  | 2 | 2,1112 | 0,15  | 0,231  |
| 7 | Q5TC79 ZBT37_HUMAN  | E.VDRFSPS#GSVVPLTE.R       | S312:  | 2 | 2,1062 | 0,102 | -0,146 |
| 7 | Q13885 TBB2A_HUMAN  | R.INVYYNE.A                |        | 2 | 2,1062 | 0,144 | 0      |
| 7 | P48634 BAT2_HUMAN   | E.ALTTVTVAPAPR.R           |        | 2 | 2,1025 | 0,178 | -0,713 |
| 7 | Q5JSH3 WDR44_HUMAN  | K.LTQTSST#EQLNVLE.T        | T163:  | 2 | 2,1022 | 0,134 | 0      |



|   |                     |                          |       |   |        |       |        |
|---|---------------------|--------------------------|-------|---|--------|-------|--------|
| 7 | P52948 NUP98_HUMAN  | R.FSFLS#KPVDE.N          | S638: | 2 | 2,098  | 0,225 | -0,391 |
| 7 | O43741 AAKB2_HUMAN  | E.VFDALKLDS#M*ESSE.T     | S170: | 2 | 2,0979 | 0,154 | 0,366  |
| 7 | O43237 DC1L2_HUMAN  | R.GPLTSGSDEE.N           |       | 2 | 2,0974 | 0,096 | 0,308  |
| 7 | Q01081 U2AF1_HUMAN  | E.LS#PVTDFRE.A           | S145: | 2 | 2,0942 | 0,341 | 0      |
| 7 | Q8TER5 SOLO_HUMAN   | E.VTLPVRGS#PTDAE.G       | S255: | 2 | 2,0935 | 0,279 | -0,172 |
| 7 | Q9BV73 CP250_HUMAN  | D.LALSLAQTK.A            |       | 2 | 2,0892 | 0,195 | -0,065 |
| 7 | Q9Y508 ZN313_HUMAN  | E.EDM*M*NQVLQRS#IIDQ.-   | S224: | 2 | 2,0892 | 0,173 | -0,253 |
| 7 | Q96NA2 RILP_HUMAN   | E.AQPQS#PAPDPPCSALHE.H   | S377: | 2 | 2,0848 | 0,262 | 0,195  |
| 7 | Q6ZP91 Q6ZP91_HUMAN | E.DCYVPQRS#IYD.T         | S38:  | 2 | 2,0761 | 0,226 | -0,245 |
| 7 | Q13233 M3K1_HUMAN   | R.ASSSGFPGAR.A           |       | 2 | 2,0752 | 0,312 | 0,065  |
| 7 | Q8TDJ6 DMXL2_HUMAN  | E.SLLSVPGQK.N            |       | 2 | 2,0738 | 0,209 | 0,066  |
| 7 | O14964 HGS_HUMAN    | E.TALQEEEE.L             |       | 2 | 2,0691 | 0,101 | 0,193  |
| 7 | Q92598 HS105_HUMAN  | D.ISTTLNADE.A            |       | 2 | 2,061  | 0,106 | 0,063  |
| 7 | Q9BTT0 AN32E_HUMAN  | D.NCLCVNGE.I             |       | 2 | 2,0581 | 0,126 | -0,063 |
| 7 | P42166 LAP2A_HUMAN  | E.QGTESRSS#TPLPTISSAE.N  | S159: | 2 | 2,0571 | 0,144 | 0,061  |
| 7 | Q15642 CIP4_HUMAN   | E.DFSQPM*NR.A            |       | 2 | 2,0562 | 0,173 | 0,543  |
| 7 | Q8TD26 CHD6_HUMAN   | E.SLTYSQM*SR.T           |       | 2 | 2,053  | 0,218 | -0,112 |
| 7 | Q04917 1433F_HUMAN  | E.LNEPLSNE.D             |       | 2 | 2,0526 | 0,135 | 0,2    |
| 7 | Q9UKM9 RALY_HUMAN   | E.GLLTHS#EEEE.H          | S288: | 2 | 2,0502 | 0,132 | 0,183  |
| 7 | Q13501 SQSTM_HUMAN  | E.SEGPS#SLDPSQEGPTGLKE.A | S365: | 2 | 2,048  | 0,164 | 0,183  |
| 7 | Q07021 C1QBP_HUMAN  | E.SDIFS#IRE.V            | S205: | 2 | 2,0466 | 0,326 | 0      |
| 7 | Q12888 TP53B_HUMAN  | E.IEPKNS#PEDLGLSLTGD.S   | S500: | 2 | 2,0464 | 0,201 | 0      |
| 7 | Q0VGL1 U539_HUMAN   | E.NDEQAASAISE.L          |       | 2 | 2,0462 | 0,131 | 0,43   |
| 7 | Q86SQ0 PHLB2_HUMAN  | E.SSYLSILPKT#PEGISE.E    | T574: | 2 | 2,041  | 0,194 | -0,068 |
| 7 | P49848 TAF6_HUMAN   | E.AGDSPPPAPGTPK.A        |       | 2 | 2,0409 | 0,197 | 0,102  |
| 7 | Q00610 CLH1_HUMAN   | E.LINVCNE.N              |       | 2 | 2,0406 | 0,147 | 0,495  |
| 7 | Q8IZY2 ABCA7_HUMAN  | K.ADTDMEGSVDTRQE.K       |       | 2 | 2,0381 | 0,132 | -0,942 |
| 7 | Q9HC35 EMAL4_HUMAN  | E.QTVEPSEDHS#EEE.S       | S938: | 2 | 2,0356 | 0,199 | 0,306  |
| 7 | Q8NCD3 HJURP_HUMAN  | R.GGPAS#PGGLQGLE.T       | S473: | 2 | 2,0282 | 0,3   | 0,2    |
| 7 | P35527 K1C9_HUMAN   | K.TLLDIDNTR.M            |       | 2 | 2,0251 | 0,245 | 0,345  |
| 7 | O75962 TRIO_HUMAN   | E.GLSSGTLSK.S            |       | 2 | 2,0239 | 0,133 | 0,431  |
| 7 | Q03135 CAV1_HUMAN   | E.LS#EKQVYD.A            | S37:  | 2 | 2,0237 | 0,172 | -0,574 |
| 7 | Q96CS3 UBXD8_HUMAN  | D.FLFLSKES#PE.K          | S397: | 2 | 2,0196 | 0,151 | -0,382 |
| 7 | Q9BQA1 MEP50_HUMAN  | E.GFCSAGVQTE.A           |       | 2 | 2,0171 | 0,115 | -0,231 |
| 7 | Q6ZTN6 AN13D_HUMAN  | E.SLQLSTEP.R.G           |       | 2 | 2,0148 | 0,146 | -0,355 |
| 7 | Q9H2G2 SLK_HUMAN    | E.NLPDTEDEQE.T           |       | 2 | 2,0087 | 0,225 | 0,115  |
| 7 | Q8N556 AFAP1_HUMAN  | E.AVPLS#PGKAPE.Y         | S101: | 2 | 2,0047 | 0,16  | 0,319  |
| 7 | P13645 K1C10_HUMAN  | K.VTMQNLNDR.L            |       | 2 | 2,0031 | 0,195 | -0,671 |
| 7 | Q75N03 HAKAI_HUMAN  | E.LSM*APPPPR.S           |       | 2 | 2,001  | 0,231 | -0,062 |

|   |                      |                           |                |   |        |       |        |
|---|----------------------|---------------------------|----------------|---|--------|-------|--------|
| 7 | Q8TEH3 DEN1A_HUMAN   | E.AALQPLGQAK.S            |                | 2 | 1,9976 | 0,176 | -0,245 |
| 7 | P50895 LU_HUMAN      | E.QTGLLM*GGASGGAR.G       |                | 2 | 1,9911 | 0,374 | -0,094 |
| 7 | Q8WYP5 AHTF1_HUMAN   | E.SVDLPEEKLPISD.S         |                | 2 | 1,99   | 0,175 | 0      |
| 7 | Q8IZQ1 WDFY3_HUMAN   | E.GLGTDNVFS#LHE.D         | S995:          | 2 | 1,9885 | 0,343 | -0,535 |
| 7 | P31946 1433B_HUMAN   | D.STLIM*QLLR.D            |                | 2 | 1,9882 | 0,129 | -0,447 |
| 7 | Q07021 C1QBP_HUMAN   | E.VSFQSTGE.S              |                | 2 | 1,9873 | 0,131 | 0,143  |
| 7 | A1L390 PKHG3_HUMAN   | R.FFFNPSAVSQR.T           |                | 2 | 1,9852 | 0,143 | 0,188  |
| 7 | Q9P2D1 CHD7_HUMAN    | E.FANS#PSEDKEESM*E.I      | S1874:         | 2 | 1,9799 | 0,115 | -0,576 |
| 7 | Q6S8J3 A26CA_HUMAN   | E.LPDGQVITIGNE.R          |                | 2 | 1,9786 | 0,219 | 0,291  |
| 7 | P27815 PDE4A_HUMAN   | E.VEIPSPT#M*KE.R          | T304:          | 2 | 1,9752 | 0,185 | 0      |
| 7 | Q70CQ2 UBP34_HUMAN   | E.VLTPSTSDNETR.D          |                | 2 | 1,9748 | 0,323 | -0,086 |
| 7 | P35527 K1C9_HUMAN    | K.STMQELNSR.L             |                | 2 | 1,9694 | 0,108 | 0,343  |
| 7 | Q6IMN6 CAPR2_HUMAN   | R.ALS#PLQSTLSSAASPSQAYE.T | S102:          | 2 | 1,9641 | 0,311 | 0,351  |
| 7 | Q9UKN8 TF3C4_HUMAN   | K.ILLVDS#PGM*GNADDEQQEE.G | S611:          | 2 | 1,958  | 0,348 | 0,453  |
| 7 | P13010 KU86_HUMAN    | E.QGGAHFS#VSSLAE.G        | S577:          | 2 | 1,9578 | 0,116 | 0,445  |
| 7 | Q8TD26 CHD6_HUMAN    | E.LDQGLTNPSLRS#PEESTE.S   | S223:          | 2 | 1,954  | 0,295 | 0      |
| 7 | P41229 JAD1C_HUMAN   | E.STS#PKTFLE.S            | S287:          | 2 | 1,9469 | 0,266 | 0,224  |
| 7 | P18583 SON_HUMAN     | E.GPLLASDVGR.D            |                | 2 | 1,9407 | 0,325 | -0,248 |
| 7 | P22102 PUR2_HUMAN    | R.VLIIGS#GGRE.H           | S10:           | 2 | 1,9398 | 0,098 | 0,113  |
| 7 | P21675 TAF1_HUMAN    | E.NNGTDLLADE.N            |                | 2 | 1,9376 | 0,147 | 0      |
| 7 | P04264 K2C1_HUMAN    | R.TLLEGEESR.M             |                | 2 | 1,9285 | 0,162 | 0,354  |
| 7 | ##Q96RV3 PCX1_HUMAN  | D.RISS#IR.F               | S509:          | 2 | 1,9179 | 0,129 | 0,301  |
| 7 | P57740 NU107_HUMAN   | E.ISS#PVIR.E              | S11:           | 2 | 1,917  | 0,118 | 0,501  |
| 7 | P57740 NU107_HUMAN   | E.IS#SPVIRE.A             | S10:           | 2 | 1,9154 | 0,152 | -0,311 |
| 7 | ##Q8WZ42 TITIN_HUMAN | D.FQYKAT#IPS#AQVPE.G      | T19549:S19552: | 2 | 1,9035 | 0,09  | -1,754 |
| 7 | Q92619 HMHA1_HUMAN   | E.VASGSHSGS#EEQLE.A       | S1074:         | 2 | 1,9018 | 0,096 | 0,326  |
| 7 | Q8N2Y8 RUSC2_HUMAN   | E.TSRPSPLGSYS#PIR.S       | S781:          | 2 | 1,8942 | 0,341 | -0,076 |
| 7 | Q6ZSY5 PPR3F_HUMAN   | E.GDVPRSS#PPVAFTE.V       | S337:          | 2 | 1,8921 | 0,127 | 0,634  |
| 7 | P16989 DBPA_HUMAN    | E.AAAAAPQDPAPK.S          |                | 2 | 1,8916 | 0,341 | 0,11   |
| 7 | Q5JTC6 F123B_HUMAN   | K.VSPTPEPS#PPATE.K        | S246:          | 2 | 1,8875 | 0,145 | 0,088  |
| 7 | P09496 CLCA_HUMAN    | E.AFVNDIDE.S              |                | 2 | 1,8808 | 0,128 | 0      |
| 7 | P07602 SAP_HUMAN     | D.VVTAAGDM*LK.D           |                | 2 | 1,8755 | 0,231 | 0,239  |
| 7 | P85037 FOXK1_HUMAN   | R.TPFGPLSSR.S             |                | 2 | 1,8709 | 0,188 | 0,317  |
| 7 | P54105 ICLN_HUMAN    | D.GEEYDVE.A               |                | 2 | 1,8641 | 0,216 | 0,435  |
| 7 | Q13561 DCTN2_HUMAN   | E.GNFASIDE.R              |                | 2 | 1,8606 | 0,179 | 0,143  |
| 7 | P22626 ROA2_HUMAN    | R.GGGGNFGPGPSNFR.G        |                | 2 | 1,8595 | 0,285 | -0,266 |
| 7 | P08779 K1C16_HUMAN   | R.VLQGLEIELQSQLSMK.A      |                | 2 | 1,8556 | 0,251 | -0,067 |
| 7 | Q9UKM9 RALY_HUMAN    | E.EGLLTHS#EEE.L           | S288:          | 2 | 1,8535 | 0,267 | -0,1   |
| 7 | Q03164 HRX_HUMAN     | E.IQVLPEER.S              |                | 2 | 1,8468 | 0,16  | 0      |

|   |                     |                                      |              |   |        |       |        |
|---|---------------------|--------------------------------------|--------------|---|--------|-------|--------|
| 7 | P02538 K2C6A_HUMAN  | R.SGFSSVSVSR.S                       |              | 2 | 1,835  | 0,105 | -0,12  |
| 8 | Q9H8Y8 GORS2_HUMAN  | D.STPVSEKPVSAAVDANASES#P.-           | S451:        | 2 | 6,5705 | 0,5   | 0,69   |
| 8 | O43829 ZF161_HUMAN  | E.SKDLGSQT#PQALTFNDGM*SE.V           | T235:        | 2 | 6,4133 | 0,514 | -0,439 |
| 8 | A8MVB1 A8MVB1_HUMAN | E.KLVSPPASAAASS#PSSSPSPQPVE.L        | S37:         | 2 | 6,3197 | 0,605 | 0,798  |
| 8 | Q9H6Z4 RANB3_HUMAN  | E.NAAAESGSESSSQEAT#PEKE.S            | T363:        | 2 | 5,8635 | 0,536 | 0      |
| 8 | Q00537 PCTK2_HUMAN  | E.NLKM*GS#DGESDQASGTSSDE.V           | S105:        | 2 | 5,6625 | 0,614 | 0,116  |
| 8 | Q5UIP0 RIF1_HUMAN   | E.SKENT#PPVVISADQM*VNE.D             | T1388:       | 2 | 5,6381 | 0,476 | -0,119 |
| 8 | P55884 EIF3B_HUMAN  | E.GLLRPAGPGAPEAAGTEAS#SEE.V          | S51:         | 2 | 5,5668 | 0,549 | 0,455  |
| 8 | P35527 K1C9_HUMAN   | R.GGGGSGFGYSYGGGSGGGFSASSLGGGFGGGS.R |              | 2 | 5,5361 | 0,644 | 0,541  |
| 8 | Q9UQ35 SRRM2_HUMAN  | E.VEERPAVSLTLDQSQSQAS#LE.A           | S1292:       | 2 | 5,523  | 0,508 | 0      |
| 8 | Q5JVS0 HABP4_HUMAN  | -.M*KGALGS#PVAAAGAAM*QE.S            | S7:          | 2 | 5,4316 | 0,576 | 0,069  |
| 8 | P46100 ATRX_HUMAN   | E.VQSSVDHQDGGSS#GTEQEVE.S            | S550:        | 2 | 5,3825 | 0,572 | 0      |
| 8 | Q9ULD4 BRPF3_HUMAN  | E.NGEDHGVAGSPAS#PASIEEE.R            | S962:        | 2 | 5,2269 | 0,582 | 0,48   |
| 8 | Q9UQ35 SRRM2_HUMAN  | R.SSGHSSSELS#PDAVEK.A                | S1387:       | 2 | 5,1318 | 0,408 | -0,216 |
| 8 | O43815 STRN_HUMAN   | E.LNQGDM*KPPSYDS#DEGNETE.V           | S137:        | 2 | 5,1173 | 0,514 | -0,21  |
| 8 | O95232 CROP_HUMAN   | E.VNGTSEDIKS#EGDTQSN.-               | S425:        | 2 | 5,1151 | 0,561 | 0      |
| 8 | Q8N201 INT1_HUMAN   | R.VAGDLGAGSS#PHPS#LTEEEDSQTE.L       | S284:S288:   | 2 | 5,0658 | 1     | 0,569  |
| 8 | Q9P266 K1462_HUMAN  | E.HSDVDGVVTTDTPVPEPEPS#PLE.S         | S1194:       | 2 | 5,0162 | 0,543 | 0,295  |
| 8 | Q9C0B0 UNK_HUMAN    | E.HFASGSFS#PGTSPAFLSGPAAE.L          | S631:        | 2 | 5,0139 | 0,564 | 0,216  |
| 8 | Q14C86 GAPD1_HUMAN  | E.SCSGLGS#TSDDTDVRE.V                | S746:        | 2 | 4,9942 | 0,602 | 0,069  |
| 8 | Q9Y6D5 BIG2_HUMAN   | E.NSQTNGIADDRQSLSS#ADNLE.S           | S349:        | 2 | 4,9434 | 0,533 | 0,632  |
| 8 | A8MVB1 A8MVB1_HUMAN | E.KLVSPPASAAASSPS#SSPSPQPVE.L        | S39:         | 3 | 4,9411 | 0,453 | 0,524  |
| 8 | Q92797 SYMPK_HUMAN  | E.DAM*KT#PS#PAAEDAREPE.A             | T1257:S1259: | 2 | 4,9264 | 0,476 | 0,061  |
| 8 | Q9UQ35 SRRM2_HUMAN  | E.VEERPAVSLTLDQSQSQAS#LE.A           | S1292:       | 3 | 4,8446 | 0,483 | 0,232  |
| 8 | O43815 STRN_HUMAN   | E.LNQGDM*KPPSYDS#DEGNE.T             | S137:        | 2 | 4,8402 | 0,549 | 0      |
| 8 | P78310 CXAR_HUMAN   | R.SYIGSNHSSLGSM*S#PSNM*E.G           | S306:        | 2 | 4,83   | 0,444 | 0,116  |
| 8 | P40855 PEX19_HUMAN  | E.TLSGLAKNATDLQNSS#M*SEEE.L          | S147:        | 2 | 4,8292 | 0,53  | 0,21   |
| 8 | O95817 BAG3_HUMAN   | E.VKVPPAPVPCPPPS#PGPSAVPSS#PK.S      | S377:S386:   | 3 | 4,7979 | 0,36  | -0,351 |
| 8 | O95817 BAG3_HUMAN   | E.VKVPPAPVPCPPPS#PGPSAVPS#SPK.S      | S377:S385:   | 3 | 4,7942 | 0,467 | 0,07   |
| 8 | Q9UHR4 BI2L1_HUMAN  | E.IKTPASTPVSGT#PQASPM*IE.R           | T257:        | 2 | 4,7846 | 0,526 | 0,116  |
| 8 | Q9UHR4 BI2L1_HUMAN  | E.IKTPASTPVSGTPQAS#PM*IE.R           | S261:        | 2 | 4,7673 | 0,507 | 0,116  |
| 8 | Q9NV56 MRGBP_HUMAN  | E.VGGGGAAGDKGPGEAATS#PAEE.T          | S23:         | 2 | 4,7344 | 0,444 | 0,248  |
| 8 | Q9H1I8 ASCC2_HUMAN  | E.AVSQASSHPENS#EEEE.C                | S447:        | 2 | 4,7319 | 0,339 | -0,135 |
| 8 | Q8TD26 CHD6_HUMAN   | E.SKSST#SGITGDIGDELQE.A              | T2057:       | 2 | 4,7301 | 0,533 | 0,064  |
| 8 | Q14978 NOLC1_HUMAN  | R.GGSISVQVNSIKFDS#E.-                | S698:        | 2 | 4,6847 | 0,41  | -0,14  |
| 8 | P29374 ARI4A_HUMAN  | E.LSSLDNKNFSS#ATEDE.I                | S840:        | 2 | 4,6623 | 0,564 | -0,199 |
| 8 | Q92797 SYMPK_HUMAN  | E.DAM*KT#PS#PAAEDAREPE.A             | T1257:S1259: | 3 | 4,6544 | 0,414 | 0,368  |
| 8 | Q13263 TIF1B_HUMAN  | E.TKPVLM*ALAEPGAEGPR.L               |              | 3 | 4,6293 | 0,351 | -0,101 |
| 8 | Q15007 FL2D_HUMAN   | E.GNTTEDDFPSS#PGNGNK.S               | S306:        | 2 | 4,6118 | 0,506 | -0,201 |

|   |                    |                                     |              |   |        |       |        |
|---|--------------------|-------------------------------------|--------------|---|--------|-------|--------|
| 8 | P42566 EP15_HUMAN  | E.SEPIHQES#PARS#SPELLPSGVTDENE.V    | S558:S562:   | 3 | 4,611  | 0,287 | 0,247  |
| 8 | Q15648 MED1_HUMAN  | R.GSPSHS#KS#PAYTPQNLDESE.S          | S1451:S1453: | 3 | 4,6095 | 1     | 0,154  |
| 8 | P29374 ARI4A_HUMAN | E.SNQCIQQLTSERFDS#PAEE.T            | S932:        | 2 | 4,5985 | 0,378 | 0,421  |
| 8 | P46100 ATRX_HUMAN  | E.VQSSVDHQGDGSS#GTEQE.V             | S550:        | 2 | 4,5952 | 0,414 | -0,507 |
| 8 | Q96T58 MINT_HUMAN  | E.SGVVAVS#PEKSES#PQKE.D             | S2120:S2126: | 2 | 4,5726 | 0,403 | -0,445 |
| 8 | Q8TCN5 ZN507_HUMAN | E.NEKL#PTSNTSYSLE.K                 | S780:        | 2 | 4,5325 | 0,407 | 0,209  |
| 8 | Q92797 SYMPK_HUMAN | K.LKPGGVGAPS#SSSPSPS#PSARPGPPPSEE.A | S1168:S1175: | 3 | 4,4974 | 1     | -0,255 |
| 8 | Q14974 MYPT1_HUMAN | R.RST#QGVTLTDLQEA.E.K               | T696:        | 2 | 4,4936 | 0,564 | -0,141 |
| 8 | Q96T23 RSF1_HUMAN  | E.SEKPGS#PEAAETS#PPSNIIDHCE.K       | S612:S619:   | 3 | 4,4769 | 0,327 | 0,14   |
| 8 | Q96FF9 CDCA5_HUMAN | K.THS#VPAT#PTSTVPNPEAE.S            | S107:T111:   | 2 | 4,4697 | 1     | 0,117  |
| 8 | Q8TEW0 PARD3_HUMAN | E.SVSTASDQPSHS#LE.R                 | S973:        | 2 | 4,4011 | 0,481 | -0,16  |
| 8 | Q9NXG2 THUM1_HUMAN | E.AYLLNEYGDDM*YGPEK.F               |              | 2 | 4,3582 | 0,5   | -0,123 |
| 8 | Q5W0B1 RN219_HUMAN | E.LNLSKGS#LTNDQLE.N                 | S595:        | 2 | 4,3381 | 0,34  | 0,378  |
| 8 | Q96GX5 MASTL_HUMAN | E.NIVNSFTDKQQT#PE.K                 | T519:        | 2 | 4,3364 | 0,466 | -0,287 |
| 8 | Q15234 CASC3_HUMAN | E.QTSVRDPS#PEADAPVLGS#PEKE.E        | S363:S373:   | 3 | 4,3324 | 0,329 | 0,445  |
| 8 | Q9UK76 HN1_HUMAN   | E.GDIHENVDTDLPGS#LGQSE.E            | S115:        | 2 | 4,3323 | 0,522 | 0,118  |
| 8 | O00291 HIP1_HUMAN  | E.HISPVVIVIAEASS#PDSEPVLE.K         | S313:        | 2 | 4,3147 | 0,473 | 0,207  |
| 8 | Q9P266 K1462_HUMAN | E.HSDVDGVVSTDPVPEPEPS#PLE.S         | S1194:       | 3 | 4,2817 | 0,23  | 0,147  |
| 8 | Q5UIP0 RIF1_HUMAN  | E.SKENT#PPVVISADQM*VNE.D            | T1388:       | 3 | 4,2788 | 0,234 | 0,356  |
| 8 | Q9Y3S1 WNK2_HUMAN  | E.SYGGSDVTSKGKELS#DSCE.G            | S1150:       | 2 | 4,2665 | 0,49  | -0,187 |
| 8 | Q5SVQ8 ZBT41_HUMAN | E.IKS#PDDPLSTSEE.K                  | S751:        | 2 | 4,2659 | 0,427 | 0,244  |
| 8 | Q8IVF2 AHNK2_HUMAN | E.GDLHAAVGAPVM*SPLS#PGE.R           | S4897:       | 2 | 4,2534 | 0,478 | 0      |
| 8 | O00562 PITM1_HUMAN | E.FFDAHEGFS#DSEE.V                  | S358:        | 2 | 4,2379 | 0,369 | 0,306  |
| 8 | Q6NZY4 ZCHC8_HUMAN | E.NSGLALYDGKDGT#DGETE.V             | T342:        | 2 | 4,1954 | 0,563 | -0,127 |
| 8 | Q02952 AKA12_HUMAN | K.GALNGQGALNS#QEEEE.V               | S96:         | 2 | 4,1952 | 0,439 | 0,212  |
| 8 | Q15154 PCM1_HUMAN  | E.TASPVAVSLRS#DGS#ENLCTPQQSR.T      | S869:S872:   | 3 | 4,1835 | 1     | 0      |
| 8 | Q9UNZ2 NSF1C_HUMAN | K.LGSTAPQVLSTSS#PAQQAENE.A          | S272:        | 3 | 4,1788 | 0,411 | 0      |
| 8 | O75122 CLAP2_HUMAN | E.SYGM*HS#DDDANS DASSACSE.R         | S621:        | 2 | 4,1634 | 0,363 | 0,333  |
| 8 | P04792 HSPB1_HUMAN | E.SPAVAAPAYSRLS#RQLS#SGVSE.I        | S78:S82:     | 3 | 4,1589 | 1     | 0,074  |
| 8 | Q92917 GPKOW_HUMAN | E.LHYDAICQYM*GPS#DTDDD.-            | S471:        | 2 | 4,1572 | 0,488 | 0,552  |
| 8 | Q15424 SAFB1_HUMAN | E.DKETINNLDT#SSSDFTILQE.I           | T194:        | 2 | 4,1548 | 0,357 | 0,104  |
| 8 | Q8WXI9 P66B_HUMAN  | R.GRLT#PSPDIIVLSDNE.A               | T120:        | 2 | 4,1548 | 0,347 | -0,405 |
| 8 | P45880 VDAC2_HUMAN | E.FSTSGSSNTDTGKVTGT#LE.T            | T68:         | 2 | 4,1519 | 0,471 | -0,31  |
| 8 | Q8N1G2 K0082_HUMAN | E.LALSLSSTSDDEPPSSVSHGAK.A          |              | 2 | 4,1451 | 0,54  | 0,447  |
| 8 | Q6PJG2 CN043_HUMAN | E.LASLQNAKDGS#GSEE.K                | S486:        | 2 | 4,126  | 0,615 | -0,385 |
| 8 | P39880 CUX1_HUMAN  | E.IQAGSQGQAGASDS#PSAR.S             | S1321:       | 2 | 4,1244 | 0,555 | -0,207 |
| 8 | Q9H6Z4 RANB3_HUMAN | E.NAAAESGSESS#SQEATPEKE.S           | S358:        | 2 | 4,1236 | 0,342 | 0,234  |
| 8 | Q15477 SKIV2_HUMAN | R.GDTVSAAS#PCSAPLAR.A               | S245:        | 2 | 4,1141 | 0,496 | 0,311  |
| 8 | Q5JSH3 WDR44_HUMAN | E.TTKLTQTSS#TEQLNVLE.T              | S162:        | 2 | 4,111  | 0,414 | 0,062  |

|   |                    |                                  |              |   |        |       |        |
|---|--------------------|----------------------------------|--------------|---|--------|-------|--------|
| 8 | Q02241 KIF23_HUMAN | E.VINNTTVQLHT#PE.G               | T56:         | 2 | 4,0901 | 0,369 | -0,316 |
| 8 | P04264 K2C1_HUMAN  | R.THNLEPYFESFINNLR.R             |              | 3 | 4,0892 | 0,333 | -0,275 |
| 8 | P02538 K2C6A_HUMAN | R.ALYDAELSQMQTHISDTSVVLMS*DNNR.N |              | 3 | 4,0873 | 0,446 | 0,18   |
| 8 | Q96T23 RSF1_HUMAN  | E.S#EKPGEAAETS#PPSNIIDHCE.K      | S607:S619:   | 3 | 4,0868 | 0,423 | -0,14  |
| 8 | Q86W92 LIPB1_HUMAN | K.DFAARS#PSAS#ITDEDSNV.-         | S999:S1003:  | 2 | 4,0831 | 0,386 | 0      |
| 8 | Q07866 KLC1_HUMAN  | E.SLNVDVVKYES#GPDGGEE.V          | S530:        | 2 | 4,082  | 0,395 | 0,309  |
| 8 | Q8WUD4 CCD12_HUMAN | D.SLASAVDAATEQK.T                |              | 2 | 4,0808 | 0,51  | 0,095  |
| 8 | O00512 BCL9_HUMAN  | R.AVT#PVSQGSNSSFADPK.A           | T315:        | 2 | 4,0698 | 0,56  | -0,071 |
| 8 | Q2TAL8 QRIC1_HUMAN | D.SAHLYSATGTITS#PTGE.T           | S303:        | 2 | 4,0671 | 0,369 | 0      |
| 8 | Q07866 KLC1_HUMAN  | E.SLNVDVVKYES#GPD.G              | S530:        | 2 | 4,0607 | 0,483 | -0,228 |
| 8 | Q9H0H5 RGAP1_HUMAN | E.SGSILSDIS#FDKTDE.S             | S157:        | 2 | 4,035  | 0,379 | -0,216 |
| 8 | Q9Y3Q8 T22D4_HUMAN | E.T#GESAGTSRAAT#PLPSLR.V         | T200:T211:   | 3 | 4,028  | 0,241 | -0,189 |
| 8 | O60271 JIP4_HUMAN  | E.SGQVDKAS#LCGSM*TSNSSAE.T       | S822:        | 2 | 4,0246 | 0,368 | 0      |
| 8 | Q93008 USP9X_HUMAN | E.NYEGSEEVS#PPQTKDQ.-            | S2540:       | 2 | 4,0151 | 0,419 | -0,582 |
| 8 | P42166 LAP2A_HUMAN | E.SRSS#TPLPTISSAE.N              | S159:        | 2 | 4,0145 | 0,411 | 0,076  |
| 8 | Q03164 HRX_HUMAN   | E.IQVLPEERSDT#PE.V               | T506:        | 2 | 4,0122 | 0,318 | 0,23   |
| 8 | Q2NKX8 ERC6L_HUMAN | E.LCTNSS#LGM*EKS#FATKNE.A        | S829:S835:   | 2 | 4,0117 | 0,292 | 0,445  |
| 8 | Q86W56 PARG_HUMAN  | E.NVSQSLDKS#PTE.K                | S137:        | 2 | 4,0098 | 0,296 | -0,081 |
| 8 | Q0JRZ9 FCHO2_HUMAN | E.IPRPFS#PPVTSNTS#PPPAAPLAR.A    | S488:S496:   | 3 | 4,0042 | 0,265 | 0,145  |
| 8 | P27816 MAP4_HUMAN  | E.M*ALGKDVT#PPPETE.V             | T521:        | 2 | 3,9985 | 0,429 | 0,232  |
| 8 | O14641 DVL2_HUMAN  | R.HLAGYESS#STLM*TSELE.S          | S195:        | 2 | 3,9905 | 0,435 | 0      |
| 8 | Q13263 TIF1B_HUMAN | E.TKPVLM*ALAEGPGAEGPR.L          |              | 2 | 3,9868 | 0,471 | 0,135  |
| 8 | Q04726 TLE3_HUMAN  | E.SSANNVS#PSESLR.A               | S203:        | 2 | 3,9806 | 0,422 | -0,483 |
| 8 | Q15648 MED1_HUMAN  | R.GSPS#HSKS#PAYTPQNLDESE.S       | S1449:S1453: | 2 | 3,976  | 1     | 0,308  |
| 8 | O60307 MAST3_HUMAN | E.M*VPLSHLEEEQPPAPES#PE.S        | S348:        | 3 | 3,9754 | 0,294 | -0,496 |
| 8 | Q86V81 THOC4_HUMAN | E.LDAQLDAYNARM*DT#S.-            | T256:        | 2 | 3,9747 | 0,381 | 0,411  |
| 8 | Q8NBU5 ATAD1_HUMAN | E.YVNSTSEES#HDEDE.I              | S322:        | 2 | 3,9745 | 0,481 | -0,142 |
| 8 | Q92878 RAD50_HUMAN | E.DKLFVDCGS#QDFE.S               | S635:        | 2 | 3,9618 | 0,414 | -0,521 |
| 8 | Q86UP2 KTN1_HUMAN  | E.IQNGNLHES#DSE.S                | S75:         | 2 | 3,956  | 0,477 | 0,172  |
| 8 | Q9P287 BCCIP_HUMAN | E.LTDLLIQQNHIGSVIK.Q             |              | 2 | 3,9506 | 0,437 | -0,408 |
| 8 | Q9H7Z6 MYST1_HUMAN | E.GTAPS#PGRVS#PPTPARGEPE.V       | S37:S42:     | 3 | 3,9419 | 0,326 | 0,173  |
| 8 | P22314 UBA1_HUMAN  | E.M*ILTDSNGEQPLSAM*VSM*VTK.D     |              | 3 | 3,939  | 0,405 | 0,159  |
| 8 | Q6NZI2 PTRF_HUMAN  | R.RGS#S#PDVHALLE.I               | S365:S366:   | 2 | 3,939  | 0,549 | 0,169  |
| 8 | Q6NZI2 PTRF_HUMAN  | E.SDAVLVDKSDS#D.-                | S389:        | 2 | 3,9373 | 0,438 | -0,092 |
| 8 | Q5H9R7 SAPS3_HUMAN | E.FTSSLSTKDS#LRSNS#PVEM*E.T      | S735:S740:   | 3 | 3,931  | 1     | -0,23  |
| 8 | Q96D46 NMD3_HUMAN  | E.DLHISQDATGEEGAS#M*LT.-         | S500:        | 2 | 3,9237 | 0,437 | 0,062  |
| 8 | P48681 NEST_HUMAN  | E.NQECPRS#LEEDLE.T               | S578:        | 2 | 3,9222 | 0,336 | 0,287  |
| 8 | Q562F6 SGOL2_HUMAN | E.CSPAQVVS#DDEHE.K               | S1187:       | 2 | 3,9151 | 0,472 | 0,381  |
| 8 | Q14676 MDC1_HUMAN  | E.RS#QASTTVDINTQVE.K             | S513:        | 2 | 3,915  | 0,461 | -0,141 |

|   |                     |                                   |              |   |        |       |        |
|---|---------------------|-----------------------------------|--------------|---|--------|-------|--------|
| 8 | O75531 BAF_HUMAN    | R.DFVAEPM*GEKPVGSLAGIGE.V         |              | 2 | 3,911  | 0,44  | 0,181  |
| 8 | O00303 EIF3F_HUMAN  | E.VTNCFSVPHNES#EDE.V              | S142:        | 2 | 3,907  | 0,451 | 0,199  |
| 8 | P46013 KI67_HUMAN   | E.LFQT#PICTDKPT#THE.K             | T2203:T2211: | 2 | 3,9048 | 0,553 | -0,376 |
| 8 | Q8TDY2 RBCC1_HUMAN  | E.M*SQTITDLLSEQK.A                |              | 2 | 3,8992 | 0,366 | -0,162 |
| 8 | Q8N1G2 K0082_HUMAN  | E.LALSLSSTSDEPPSSVSHGAK.A         |              | 3 | 3,8967 | 0,468 | 0,335  |
| 8 | Q9BV73 CP250_HUMAN  | E.GDNIAQGS#GHENSLE.L              | S363:        | 2 | 3,892  | 0,454 | -0,076 |
| 8 | Q14966 ZN638_HUMAN  | E.AEKATCDS#DFAVETLE.L             | S1158:       | 2 | 3,888  | 0,366 | 0      |
| 8 | Q5JSZ5 K0515_HUMAN  | E.SSATSS#QRSS#PYGTLKPEE.M         | S993:S997:   | 3 | 3,8876 | 1     | 0      |
| 8 | Q5JSH3 WDR44_HUMAN  | E.TENTAYKVGNES#PVQE.L             | S50:         | 2 | 3,8861 | 0,368 | -1,388 |
| 8 | Q9C0C2 TB182_HUMAN  | E.AQDLCRAS#PEPPGPE.S              | S672:        | 2 | 3,8813 | 0,527 | -0,286 |
| 8 | Q13263 TIF1B_HUMAN  | R.STAPSAASASASAAASS#PAGGGAEALE.L  | S50:         | 3 | 3,8745 | 0,314 | 0,381  |
| 8 | P41227 ARD1A_HUMAN  | E.TTESTDVKDSSEAS#DSAS.-           | S231:        | 2 | 3,8729 | 0,428 | -0,322 |
| 8 | Q15642 CIP4_HUMAN   | R.APS#DSS#LGTPSDGRPE.L            | S296:S299:   | 2 | 3,8687 | 0,498 | -0,704 |
| 8 | Q12888 TP53B_HUMAN  | E.VLSTQEDLFDQSNK.T                |              | 2 | 3,8672 | 0,482 | 0      |
| 8 | O94842 TOX4_HUMAN   | E.SSPERPM*NNS#PEAHTVEAPS#PETICE.M | S523:S533:   | 3 | 3,8663 | 0,22  | 0,18   |
| 8 | Q7Z2Z1 CO042_HUMAN  | E.AEPLSKEESS#LGEE.S               | S1595:       | 2 | 3,8614 | 0,509 | -0,077 |
| 8 | P49815 TSC2_HUMAN   | E.GGRPS#VDLSFQPSQPLSK.S           | S1371:       | 2 | 3,86   | 0,521 | 0,37   |
| 8 | Q9H4A3 WINK1_HUMAN  | E.LSEPSHLNGPSS#DPE.A              | S2012:       | 2 | 3,8539 | 0,366 | 0,222  |
| 8 | O14974 MYPT1_HUMAN  | R.RST#QGVTLTDLQE.A                | T696:        | 2 | 3,8521 | 0,379 | -0,16  |
| 8 | Q86UE8 TLK2_HUMAN   | E.SSNQSLCSVGLSDKEVET#PE.K         | T52:         | 2 | 3,8485 | 0,516 | 0,209  |
| 8 | Q6UN15 FIP1_HUMAN   | E.NSNIQVLSERS#ATE.V               | S345:        | 2 | 3,8304 | 0,421 | 0,225  |
| 8 | Q9H6Z4 RANB3_HUMAN  | E.RTSS#LTQFPSSQSEE.R              | S126:        | 2 | 3,8263 | 0,476 | -0,206 |
| 8 | Q9BQY9 DBND2_HUMAN  | E.SQRPPIGSIS#SM*EVNVDTLE.Q        | S153:        | 2 | 3,8243 | 0,41  | 0,325  |
| 8 | Q9BYP7 WINK3_HUMAN  | E.ILTAGKQPSS#DSE.F                | S1424:       | 2 | 3,8197 | 0,473 | -0,173 |
| 8 | Q96EZ8 MCRS1_HUMAN  | D.SSLM*ASGTASRS#EDEE.S            | S22:         | 2 | 3,8189 | 0,472 | -0,209 |
| 8 | A4D1Y8 A4D1Y8_HUMAN | E.ALASSNSSSDHSGSTT#PSSGQE.T       | T122:        | 2 | 3,8169 | 0,311 | 0      |
| 8 | P14635 CCNB1_HUMAN  | E.EKLSPEPILVDTAS#PSPM*E.T         | S126:        | 2 | 3,8128 | 0,384 | 0,343  |
| 8 | O15027 SC16A_HUMAN  | E.ASGSFFKQIDSS#PVGGETDE.T         | S391:        | 2 | 3,8094 | 0,514 | 0,114  |
| 8 | P41743 KPCI_HUMAN   | E.GLRPGDTTST#FCGTPNYIAPE.I        | T403:        | 2 | 3,8072 | 0,475 | 0,418  |
| 8 | Q9UHY1 NRBP_HUMAN   | E.SQTVLSS#GSDPKVE.S               | S12:         | 2 | 3,8071 | 0,456 | -0,161 |
| 8 | Q9Y2F5 K0947_HUMAN  | E.AGCIPVTSAEKS#PE.A               | S1470:       | 2 | 3,8008 | 0,429 | -1,039 |
| 8 | Q9NSI6 BRWD1_HUMAN  | E.QIISLQTNNDNDERS#PE.S            | S649:        | 2 | 3,7986 | 0,394 | 0,566  |
| 8 | P04264 K2C1_HUMAN   | R.SLDLDSIIAEVK.A                  |              | 2 | 3,7938 | 0,415 | -0,375 |
| 8 | Q9BU19 ZN692_HUMAN  | E.GSRPSAS#PQAPTLQPQQ.-            | S509:        | 2 | 3,7925 | 0,372 | 0      |
| 8 | Q01804 OTUD4_HUMAN  | K.TAAAAADVNGFKPLSGNE.Q            |              | 2 | 3,7919 | 0,465 | -0,07  |
| 8 | P35908 K22E_HUMAN   | R.NLDLDSIIAEVK.A                  |              | 2 | 3,7876 | 0,395 | -0,367 |
| 8 | O14641 DVL2_HUMAN   | R.HLAGYES#SSTLM*TSE.L             | S194:        | 2 | 3,7829 | 0,373 | -0,071 |
| 8 | Q7LG56 RIR2B_HUMAN  | E.AAGLDQDERSSS#DTNE.S             | S20:         | 2 | 3,7796 | 0,455 | 0      |
| 8 | P14921 ETS1_HUMAN   | E.CADVPLLT#PSSKE.M                | T38:         | 2 | 3,7721 | 0,405 | -0,326 |

|   |                     |                                |            |   |        |       |        |
|---|---------------------|--------------------------------|------------|---|--------|-------|--------|
| 8 | P48681 NEST_HUMAN   | E.NQEPLRS#PEVGDEE.A            | S680:      | 2 | 3,7674 | 0,563 | -0,145 |
| 8 | P35527 K1C9_HUMAN   | R.SGGGGGGGLGSGGSIR.S           |            | 2 | 3,7664 | 0,536 | 0,396  |
| 8 | Q96RV3 PCX1_HUMAN   | E.LESSKPLS#GS#KESLVENSGLSGE.F  | S323:S325: | 3 | 3,764  | 0,153 | 0,22   |
| 8 | Q01850 CDR2_HUMAN   | E.LASVNPEPVSS#PTT#PPEYK.A      | S415:T418: | 2 | 3,7589 | 1     | 0,225  |
| 8 | Q96HN2 SAHH3_HUMAN  | E.VELKDL#PSEAE.S               | S23:       | 2 | 3,7588 | 0,369 | 0,087  |
| 8 | P98171 RHG04_HUMAN  | E.KQVVGAGLQTAGESGS#SPEGLLASE.L | S823:      | 3 | 3,7506 | 0,424 | 0,149  |
| 8 | Q5VT52 K0460_HUMAN  | E.TRVS#SSCLDLPDSTEE.K          | S1068:     | 2 | 3,7465 | 0,45  | -0,325 |
| 8 | P35612 ADDB_HUMAN   | E.AET#KSPLVS#PSKSLEE.G         | T611:S617: | 2 | 3,7455 | 0,407 | 0,197  |
| 8 | Q7Z3T8 ZFY16_HUMAN  | E.DLCLNDS#NSRDE.N              | S317:      | 2 | 3,7445 | 0,33  | 0,08   |
| 8 | P39880 CUX1_HUMAN   | E.IQAGSQQGAGASDPS#AR.S         | S1323:     | 3 | 3,7411 | 0,273 | 0      |
| 8 | O43815 STRN_HUMAN   | E.LNQGDM*KPPSYDS#DEGNETE.V     | S137:      | 3 | 3,7403 | 0,347 | -0,315 |
| 8 | Q96T23 RSF1_HUMAN   | E.SEKPGS#PEAAET#SPPSNIIDHCE.K  | S612:T618: | 2 | 3,7376 | 0,385 | 0,654  |
| 8 | O75781 PALM_HUMAN   | E.NAAAPS#PVRAPAPS#PAKE.E       | S116:S124: | 2 | 3,7303 | 0,445 | 0,194  |
| 8 | Q6NZI2 PTRF_HUMAN   | E.SDAVLVDKS#DSD.-              | S387:      | 2 | 3,7264 | 0,423 | -0,367 |
| 8 | Q8IVF2 AHNK2_HUMAN  | E.GDLHAAVGAPVM*S#PLSPGE.R      | S4894:     | 2 | 3,7132 | 0,345 | 0,064  |
| 8 | Q8ND04 CQ071_HUMAN  | E.VAIDGKEEDLGS#PTGE.L          | S469:      | 2 | 3,712  | 0,495 | 0,431  |
| 8 | P04264 K2C1_HUMAN   | K.SLNNQFASFIDK.V               |            | 2 | 3,712  | 0,38  | -0,617 |
| 8 | P02538 K2C6A_HUMAN  | R.ALYDAELSQMQTHISDTSVVLMDNNR.N |            | 3 | 3,7102 | 0,249 | 0,12   |
| 8 | Q9H6Z4 RANB3_HUMAN  | E.NAAAESGSESSQEAT#PEKE.S       | T363:      | 3 | 3,7026 | 0,34  | 0      |
| 8 | Q8N3D4 EH1L1_HUMAN  | E.AGGQVGPEAPRPETS#PE.M         | S285:      | 2 | 3,6979 | 0,396 | 0,263  |
| 8 | Q96ST3 SIN3A_HUMAN  | R.YM*NSDTTS#PELRE.H            | S1112:     | 2 | 3,6967 | 0,462 | 0,223  |
| 8 | Q86V81 THOC4_HUMAN  | E.LDAQLDAYNAR.M                |            | 2 | 3,6962 | 0,48  | -0,195 |
| 8 | Q14566 MCM6_HUMAN   | E.TNSRV#GVDGYETE.G             | S271:      | 2 | 3,696  | 0,446 | -0,765 |
| 8 | Q9NXG2 THUM1_HUMAN  | E.AYLLNEYGDDM*YGPEK.F          |            | 3 | 3,6939 | 0,286 | 0      |
| 8 | Q5CZB5 Q5CZB5_HUMAN | E.GEGAAGAGDHQDPS#LGAGE.A       | S114:      | 2 | 3,6833 | 0,281 | 0,069  |
| 8 | P27816 MAP4_HUMAN   | E.VGLLKDM*SPLS#ETE.M           | S510:      | 2 | 3,6771 | 0,426 | 0,076  |
| 8 | Q12872 SFRS8_HUMAN  | E.AGKIEES#PFSVEE.S             | S709:      | 2 | 3,6713 | 0,377 | 0,081  |
| 8 | Q9ULA0 DNPEP_HUMAN  | E.LEKGT#PEPGPLNAVDE.R          | T203:      | 2 | 3,6674 | 0,547 | -0,419 |
| 8 | P42566 EP15_HUMAN   | E.TANLNEHVEGQS#NLE.S           | S547:      | 2 | 3,6601 | 0,195 | -0,211 |
| 8 | O94915 FRYL_HUMAN   | E.SGLPKNPS#VVFSSNE.D           | S2380:     | 2 | 3,6561 | 0,429 | -0,52  |
| 8 | O75534 CSDE1_HUMAN  | E.SKS#PAAPGQSPTGSVCYE.R        | S116:      | 2 | 3,6556 | 0,521 | -0,128 |
| 8 | Q9H426 RIMS4_HUMAN  | R.SQSRLS#LSASFE.A              | S9:        | 2 | 3,6506 | 0,314 | -0,088 |
| 8 | Q9P2B7 K1430_HUMAN  | E.GEVDHSFFDS#DFEE.G            | S19:       | 2 | 3,6493 | 0,389 | -0,281 |
| 8 | P51991 ROA3_HUMAN   | D.FGNYSQQQSNYGPM*K.G           |            | 2 | 3,6447 | 0,538 | 0,201  |
| 8 | O43379 WDR62_HUMAN  | E.VEAGPGDQQGDSYLR.V            |            | 3 | 3,6433 | 0,252 | 0,345  |
| 8 | Q86V48 LUZP1_HUMAN  | E.STNSNAYTQRS#STDFSE.L         | S956:      | 2 | 3,6415 | 0,451 | -1,421 |
| 8 | O94909 K0819_HUMAN  | R.GPSQATS#PIRSPQE.S            | S296:      | 2 | 3,6383 | 0,483 | -0,238 |
| 8 | O60664 M6PBP_HUMAN  | E.LVSSKVS#GAQE.M               | S130:      | 2 | 3,6361 | 0,312 | -0,206 |
| 8 | Q8NHV4 NEDD1_HUMAN  | E.SGNLNTS#PSSNQTR.N            | S516:      | 2 | 3,6348 | 0,439 | -0,079 |

|   |                     |                                 |            |   |        |       |        |
|---|---------------------|---------------------------------|------------|---|--------|-------|--------|
| 8 | B2RDY9 B2RDY9_HUMAN | E.SASRS#ALFAQINQGE.S            | S255:      | 2 | 3,6315 | 0,417 | -0,147 |
| 8 | Q03468 ERCC6_HUMAN  | E.M*AIKQES#GGDGEVEE.Y           | S35:       | 2 | 3,6304 | 0,447 | -0,51  |
| 8 | Q13813 SPTA2_HUMAN  | E.AFLNTEDKGDS#LD.S              | S1476:     | 2 | 3,6299 | 0,371 | -0,162 |
| 8 | P68104 EF1A1_HUMAN  | K.SGDAAIVDM*VPGKPM*CVE.S        |            | 2 | 3,6287 | 0,359 | -0,639 |
| 8 | Q08050 FOXM1_HUMAN  | E.TLPISST#PSKSVLPRT#PE.S        | T611:T620: | 2 | 3,6265 | 1     | 0,354  |
| 8 | O95251 MYST2_HUMAN  | E.TEQVVDFS#DRE.T                | S111:      | 2 | 3,6254 | 0,423 | 0,087  |
| 8 | Q9UKM9 RALY_HUMAN   | E.LEHSQDT#DADDGALQ.-            | T298:      | 2 | 3,6218 | 0,362 | -0,144 |
| 8 | O95817 BAG3_HUMAN   | E.VKVPPAPVPCPPPS#PGPSAVPS#SPK.S | S377:S385: | 2 | 3,6212 | 0,377 | 0,936  |
| 8 | Q92734 TFG_HUMAN    | K.NVM*SAFGLTDDQVSGPPSAPAEDR.S   |            | 3 | 3,6047 | 0,33  | -0,222 |
| 8 | P16615 AT2A2_HUMAN  | E.FDELNPS#AQRD.A                | S663:      | 2 | 3,5996 | 0,407 | 0,623  |
| 8 | Q8N3D4 EH1L1_HUMAN  | E.AGGQVGPPEARPPET#SPE.M         | T284:      | 2 | 3,5982 | 0,409 | 0,066  |
| 8 | Q16512 PKN1_HUMAN   | E.GM*GYGDRTST#FCGTPE.F          | T774:      | 2 | 3,5979 | 0,395 | 0,067  |
| 8 | Q86W92 LIPB1_HUMAN  | D.FAARS#PSASITDEDSNV.-          | S999:      | 2 | 3,5932 | 0,454 | -0,396 |
| 8 | O15446 RPA34_HUMAN  | E.M*KPLES#PGGTM*APQQPE.G        | S359:      | 2 | 3,5928 | 0,297 | 0,064  |
| 8 | Q9ULH7 MKL2_HUMAN   | E.SQGSAA#PSEPKVSE.S             | S200:      | 2 | 3,5925 | 0,413 | 0,713  |
| 8 | Q9C0B0 UNK_HUMAN    | E.HFASGSFS#PGTSPAFLSGPGAAE.L    | S631:      | 3 | 3,5916 | 0,222 | -0,081 |
| 8 | Q13625 ASPP2_HUMAN  | E.NIYSNSQKPGS#PEPE.T            | S673:      | 2 | 3,5907 | 0,473 | -0,342 |
| 8 | Q9H6F5 CCD86_HUMAN  | R.LGGLRPES#PE.S                 | S18:       | 2 | 3,5889 | 0,324 | 0,107  |
| 8 | Q9Y3X0 CCDC9_HUMAN  | E.TKEGAAS#PAPETPQPTSPE.T        | S376:      | 2 | 3,5884 | 0,457 | 0,062  |
| 8 | O43432 IF4G3_HUMAN  | E.NGEEAEPVRNGAESVS#E.G          | S585:      | 2 | 3,5865 | 0,38  | -0,263 |
| 8 | P98171 RHG04_HUMAN  | E.KQVVGAGLQTAGESGSS#PEGLLASE.L  | S824:      | 2 | 3,5856 | 0,362 | 0,498  |
| 8 | P78310 CXAR_HUMAN   | R.SYIGSNHSSLGSM*S#PSNM*E.G      | S306:      | 3 | 3,5843 | 0,406 | 0,087  |
| 8 | Q32MZ4 LRRF1_HUMAN  | R.NM*PGLSAATLASLGGTSSR.R        |            | 2 | 3,5834 | 0,495 | 0,068  |
| 8 | P31943 HNRH1_HUMAN  | E.GRPS#GEAFVELESEDE.V           | S54:       | 2 | 3,5774 | 0,401 | 0,067  |
| 8 | O94915 FRYL_HUMAN   | E.SGLPKNPSVVFSS#NEDLE.V         | S2385:     | 2 | 3,5755 | 0,463 | 0,122  |
| 8 | Q8N5C1 FA26E_HUMAN  | E.NTFLDYANKLS#E.R               | S238:      | 2 | 3,5652 | 0,422 | -0,408 |
| 8 | Q2KHR3 QSER1_HUMAN  | E.SSTQRLS#DGEINAQE.S            | S586:      | 2 | 3,5632 | 0,396 | -1,636 |
| 8 | Q96E22 NGBR_HUMAN   | E.LLGLDCSKYS#PE.F               | S168:      | 2 | 3,5629 | 0,389 | 0,083  |
| 8 | P61129 ZC3H6_HUMAN  | E.TSNIALGSS#FSKE.S              | S188:      | 2 | 3,5544 | 0,424 | -1,46  |
| 8 | Q09666 AHNK_HUMAN   | R.LKS#EDGVEGDLGE.T              | S135:      | 2 | 3,5519 | 0,488 | 0,684  |
| 8 | Q8IW35 CEP97_HUMAN  | E.HSS#PVQDCQISQE.S              | S331:      | 2 | 3,5481 | 0,397 | 0      |
| 8 | P78312 CD008_HUMAN  | E.SKADS#PPPSYPTQQAQ.E           | S393:      | 2 | 3,548  | 0,407 | -0,137 |
| 8 | Q9H6Z4 RANB3_HUMAN  | E.NAAAESGSESS#SQEATPEKE.S       | S358:      | 3 | 3,5443 | 0,345 | 0,175  |
| 8 | P46100 ATRX_HUMAN   | E.NLVLSSTGFCQSS#GDE.A           | S1245:     | 2 | 3,5321 | 0,473 | -0,191 |
| 8 | P35527 K1C9_HUMAN   | R.GSGSGSYGGGGSGGGYGGGSGSR.G     |            | 2 | 3,5262 | 0,458 | 0,068  |
| 8 | Q32MZ4 LRRF1_HUMAN  | E.HES#PSQDISDACEAE.S            | S733:      | 2 | 3,5259 | 0,426 | -0,973 |
| 8 | Q9BXJ9 NARG1_HUMAN  | E.DM*KITVNGDS#SAEAE.L           | S855:      | 2 | 3,5241 | 0,351 | 0      |
| 8 | P27816 MAP4_HUMAN   | E.MALGKDV#PPPETE.V              | T521:      | 2 | 3,5237 | 0,396 | 0,234  |
| 8 | Q14151 SAFB2_HUMAN  | E.TSSLNFKVT#PDIEE.S             | T201:      | 2 | 3,516  | 0,244 | 0,147  |



|   |                    |                              |            |   |        |       |        |
|---|--------------------|------------------------------|------------|---|--------|-------|--------|
| 8 | O75821 EIF3G_HUMAN | E.LLKGIPLATGDTS#PEPE.L       | S42:       | 2 | 3,5154 | 0,409 | -0,268 |
| 8 | Q92615 LARP5_HUMAN | E.NSETGGNES#QPDSQEDPRE.V     | S148:      | 2 | 3,5145 | 0,416 | 0,34   |
| 8 | Q9P206 K1522_HUMAN | E.SSTAEDALS#IRSE.M           | S127:      | 2 | 3,5103 | 0,394 | -0,169 |
| 8 | P05362 ICAM1_HUMAN | E.AQVHLALGDQR.L              |            | 3 | 3,5086 | 0,426 | 1,06   |
| 8 | P55209 NP1L1_HUMAN | E.RLDGLVET#PTGYIE.S          | T62:       | 2 | 3,5063 | 0,409 | -0,074 |
| 8 | P40855 PEX19_HUMAN | E.TLSGLAKNATDLQNSS#M*SEEE.L  | S147:      | 3 | 3,5005 | 0,301 | -0,158 |
| 8 | Q9NZT2 OGFR_HUMAN  | E.GCALSQGS#LR.T              | S423:      | 2 | 3,4985 | 0,343 | -0,108 |
| 8 | Q15054 DPOD3_HUMAN | R.VALS#DDEKTE.T              | S307:      | 2 | 3,4948 | 0,322 | -0,206 |
| 8 | P24278 ZBT25_HUMAN | E.SVISQSHPS#PSSE.V           | S220:      | 2 | 3,4857 | 0,422 | 0,086  |
| 8 | P35612 ADDB_HUMAN  | E.AETKS#PLVS#PSKSLEE.G       | S613:S617: | 3 | 3,4855 | 0,335 | 0,098  |
| 8 | Q9UNZ2 NSF1C_HUMAN | K.LGSTAPQVLSTSS#PAQQAENE.A   | S272:      | 2 | 3,4852 | 0,451 | 0,111  |
| 8 | O95684 FR1OP_HUMAN | E.KSEIS#IGEEIEE.D            | S354:      | 2 | 3,4834 | 0,362 | -0,254 |
| 8 | P04150 GCR_HUMAN   | E.FSSGS#PGKETNE.S            | S203:      | 2 | 3,4806 | 0,458 | -0,185 |
| 8 | O14974 MYPT1_HUMAN | E.TQTDS#ISRVE.T              | S886:      | 2 | 3,4802 | 0,344 | 0,095  |
| 8 | Q15007 FL2D_HUMAN  | E.GNTTEDDFPSS#PGNGNK.S       | S306:      | 3 | 3,4773 | 0,406 | 0,302  |
| 8 | Q9BX63 FANCJ_HUMAN | E.AASHLS#PENFVEDE.A          | S930:      | 2 | 3,4756 | 0,345 | -0,225 |
| 8 | Q8IY92 BTBDC_HUMAN | E.IFYTHQTLDS#DSEDE.S         | S925:      | 2 | 3,4753 | 0,357 | -0,122 |
| 8 | Q99700 ATX2_HUMAN  | E.VTSQGVQTS#SPACKQE.K        | S887:      | 2 | 3,4746 | 0,385 | -0,137 |
| 8 | Q02952 AKA12_HUMAN | E.VAS#EKLTAQE.Q              | S347:      | 2 | 3,4722 | 0,393 | 0,328  |
| 8 | Q04726 TLE3_HUMAN  | E.SSANNVS#PSESLRASE.K        | S203:      | 2 | 3,4716 | 0,415 | 0,474  |
| 8 | Q96MU7 YTDC1_HUMAN | E.LYNPES#EQDKNE.K            | S35:       | 2 | 3,4679 | 0,276 | 0      |
| 8 | Q14493 SLBP_HUMAN  | E.ACLTEPLRDFSAM*S#.-         | S270:      | 2 | 3,4664 | 0,51  | -0,072 |
| 8 | O15027 SC16A_HUMAN | K.QIDSS#PVGGETDE.T           | S391:      | 2 | 3,4645 | 0,399 | -0,431 |
| 8 | Q00613 HSF1_HUMAN  | R.VKEEPPS#PPQS#PRVEE.A       | S303:S307: | 3 | 3,464  | 0,333 | 0      |
| 8 | Q14694 UBP10_HUMAN | E.TKYS#PPAISPLVSE.K          | S365:      | 2 | 3,4619 | 0,422 | 0      |
| 8 | Q15154 PCM1_HUMAN  | E.GCPVS#INLSKAE.T            | S1781:     | 2 | 3,4618 | 0,336 | 0      |
| 8 | P30260 CDC27_HUMAN | E.ITKLDSS#IISE.G             | S435:      | 2 | 3,4609 | 0,418 | -0,19  |
| 8 | Q5H9R7 SAPS3_HUMAN | K.QDLFEPSSANTEDKM*E.V        |            | 2 | 3,4609 | 0,396 | 0,788  |
| 8 | Q96CW6 S7A6O_HUMAN | E.FGYDSPHDLDS#D.-            | S308:      | 2 | 3,4584 | 0,403 | 0,084  |
| 8 | Q6PKG0 LARP1_HUMAN | R.ESPRPLQLPGAEGPAIS#DGEE.G   | S90:       | 2 | 3,4497 | 0,317 | 0,438  |
| 8 | Q00839 HNRPU_HUMAN | R.AKS#PQPPVEEED.H            | S270:      | 2 | 3,4432 | 0,414 | -0,238 |
| 8 | Q9NZJ4 SACS_HUMAN  | E.RYAS#NVCFITLGT.E.F         | S2511:     | 2 | 3,4408 | 0,354 | -0,215 |
| 8 | Q9BRK4 LZTS2_HUMAN | E.LQQLRDS#LDENE.A            | S346:      | 2 | 3,4397 | 0,343 | 0,317  |
| 8 | Q96S66 CLCC1_HUMAN | E.AAGSPDQGSTYS#PAR.G         | S532:      | 2 | 3,4332 | 0,489 | 0,316  |
| 8 | P18031 PTN1_HUMAN  | E.KGS#PLNAAPYGIE.S           | S352:      | 2 | 3,4308 | 0,418 | 0,349  |
| 8 | P85037 FOXK1_HUMAN | R.SGGLQTPECLS#REGS#PIPHDPE.F | S441:S445: | 3 | 3,4298 | 0,353 | -0,145 |
| 8 | Q6NZI2 PTRF_HUMAN  | E.ESDAVLVDKSDS#D.-           | S389:      | 2 | 3,4293 | 0,4   | -0,167 |
| 8 | Q9BTX7 CT121_HUMAN | E.SDSLRTS#PSVASLSE.N         | S11:       | 2 | 3,4186 | 0,443 | 0,151  |
| 8 | Q9UQ35 SRRM2_HUMAN | E.NSFGS#PLEFR.N              | S1329:     | 2 | 3,4179 | 0,457 | -0,099 |

|   |                    |                                   |              |   |        |       |        |
|---|--------------------|-----------------------------------|--------------|---|--------|-------|--------|
| 8 | P14314 GLU2B_HUMAN | E.LQTHPELDTDGDGALS#EAE.A          | S249:        | 2 | 3,4164 | 0,228 | 0,117  |
| 8 | P20700 LMNB1_HUMAN | E.M*NTS#TVNSAREE.L                | S284:        | 2 | 3,4139 | 0,357 | 0      |
| 8 | Q9P0U4 CXXC1_HUMAN | E.SYKYFPSSLS#PVTPSE.S             | S224:        | 2 | 3,4138 | 0,495 | -0,457 |
| 8 | Q12888 TP53B_HUMAN | E.IEPKNS#PEDLGLSLTGDSCK.L         | S500:        | 3 | 3,4137 | 0,096 | 0,245  |
| 8 | O60307 MAST3_HUMAN | E.M*VPLSHLEEEQPPAPES#PE.S         | S348:        | 2 | 3,411  | 0,431 | -0,11  |
| 8 | Q6ZRS2 SRCAP_HUMAN | E.AKT#PTSS#PEKPQELVTAE.V          | T2682:S2686: | 2 | 3,4088 | 0,45  | 0,353  |
| 8 | P48960 CD97_HUMAN  | E.GSYDCVCSPGYEPVSGAK.T            |              | 2 | 3,4067 | 0,517 | 0,316  |
| 8 | Q02952 AKA12_HUMAN | E.QSHAEIS#PPAESGQAVEE.C           | S253:        | 3 | 3,3969 | 0,19  | -0,094 |
| 8 | P39687 AN32A_HUMAN | E.LSDNRVS#GGLE.V                  | S77:         | 2 | 3,3965 | 0,245 | -0,199 |
| 8 | Q9Y5U2 TSSC4_HUMAN | E.LAHLAGPGS#PEAEE.W               | S265:        | 2 | 3,3937 | 0,445 | -0,167 |
| 8 | Q8NI35 INADL_HUMAN | E.NM*STGYHLGS#PTAE.H              | S1782:       | 2 | 3,3935 | 0,445 | 0,078  |
| 8 | O94909 K0819_HUMAN | E.LELRVS#EDEE.K                   | S274:        | 2 | 3,3909 | 0,373 | -0,188 |
| 8 | Q02952 AKA12_HUMAN | E.ARGDTVVS#EAELTPEAVTAAE.T        | S967:        | 2 | 3,3814 | 0,452 | 0,333  |
| 8 | Q6PKG0 LARP1_HUMAN | E.TESAPGS#PRAVT#PVPTKTEE.V        | S521:T526:   | 3 | 3,3783 | 0,282 | 0      |
| 8 | Q9NYF8 BCLF1_HUMAN | E.ALDYFS#DKES#GK.Q                | S385:S389:   | 2 | 3,3759 | 0,398 | -0,401 |
| 8 | Q9UJK0 CP042_HUMAN | E.FLANAKES#PQEEE.I                | S228:        | 2 | 3,366  | 0,361 | 0,078  |
| 8 | O60502 NCOAT_HUMAN | E.SKS#PEM*SM*QEDCISD.I            | S511:        | 2 | 3,3631 | 0,503 | 0,066  |
| 8 | Q02952 AKA12_HUMAN | E.QSHAEIS#PPAESGQAVEE.C           | S253:        | 2 | 3,3606 | 0,386 | 0,063  |
| 8 | Q13131 AAPK1_HUMAN | E.VSLTS#SVTS#LDSSPVDLTPRPGSHTIE.F | S514:S518:   | 3 | 3,3573 | 1     | 0,062  |
| 8 | Q7Z3J2 CP062_HUMAN | E.LDDFEEGS#QKE.L                  | S172:        | 2 | 3,3555 | 0,35  | -1,595 |
| 8 | Q8NFP9 NBEA_HUMAN  | E.GDDDAVS#LLQEKE.I                | S2138:       | 2 | 3,3543 | 0,207 | -0,081 |
| 8 | P62191 PRS4_HUMAN  | E.IIDDNHAIIVSTS#VGSE.H            | S126:        | 2 | 3,3543 | 0,524 | -0,351 |
| 8 | Q03188 CENPC_HUMAN | E.ISRCS#LSEPLESDE.A               | S613:        | 2 | 3,3516 | 0,348 | -0,717 |
| 8 | Q9H8W4 PKHF2_HUMAN | D.LLSAGDM*ATCQPAR.S               |              | 2 | 3,3473 | 0,476 | -0,324 |
| 8 | Q13459 MYO9B_HUMAN | E.LDPRGS#DEENLDSE.T               | S1993:       | 2 | 3,3462 | 0,34  | -0,147 |
| 8 | Q969K3 RNF34_HUMAN | R.VRAS#LSDLSSLDDVE.G              | S254:        | 2 | 3,3431 | 0,362 | -0,217 |
| 8 | P46100 ATRX_HUMAN  | E.SSNYDS#ELEKE.I                  | S819:        | 2 | 3,3408 | 0,295 | -0,088 |
| 8 | Q92878 RAD50_HUMAN | R.VFQT#EAELQE.V                   | T690:        | 2 | 3,3394 | 0,186 | 0,192  |
| 8 | Q00839 HNRPU_HUMAN | R.AKS#PQPPVEEE.D                  | S270:        | 2 | 3,3342 | 0,359 | 0,095  |
| 8 | Q9BQK8 LPIN3_HUMAN | E.LTSPKS#DSELE.V                  | S224:        | 2 | 3,3313 | 0,416 | -0,19  |
| 8 | Q9H6Z4 RANB3_HUMAN | E.SAGEHALEPPAPAGASAST#PPPPAPE.A   | T75:         | 2 | 3,3303 | 0,358 | 0,589  |
| 8 | Q68D10 SPT2_HUMAN  | E.FLEYNHAES#EQE.Y                 | S139:        | 2 | 3,3299 | 0,349 | 0      |
| 8 | P29966 MARCS_HUMAN | E.KGEPAAAAAPEAGAS#PVEK.E          | S101:        | 3 | 3,3262 | 0,247 | 0,2    |
| 8 | Q9UKM9 RALY_HUMAN  | E.LEHS#QDTDADDGALQ.-              | S295:        | 2 | 3,3241 | 0,249 | 0      |
| 8 | Q13523 PRP4B_HUMAN | E.M*EDANS#EKSINEE.N               | S20:         | 2 | 3,3238 | 0,398 | 0,307  |
| 8 | Q9Y365 PCTL_HUMAN  | E.LSVQHADS#LENIDE.S               | S259:        | 2 | 3,3236 | 0,207 | -0,296 |
| 8 | Q15154 PCM1_HUMAN  | E.LVHYEQTS#DM*M*TDAVNE.N          | S514:        | 2 | 3,3224 | 0,439 | -0,108 |
| 8 | Q8N1I0 DOCK4_HUMAN | E.SKT#PPPYSVYE.R                  | T1899:       | 2 | 3,3111 | 0,409 | 0,634  |
| 8 | Q9NSC5 HOME3_HUMAN | E.AQAASEVT#PTGEKE.G               | T243:        | 2 | 3,3105 | 0,356 | 0,163  |

|   |                     |                                              |              |   |        |       |        |
|---|---------------------|----------------------------------------------|--------------|---|--------|-------|--------|
| 8 | Q05BP1 Q05BP1_HUMAN | E.VGPLAHLAPS#PQSE.A                          | S22:         | 2 | 3,3082 | 0,385 | -0,082 |
| 8 | Q96F24 NRBF2_HUMAN  | E.GQSPLSQKYS#PSTE.K                          | S120:        | 2 | 3,3071 | 0,35  | -0,23  |
| 8 | Q9UGU0 TCF20_HUMAN  | E.NDTVITIS#PKQE.G                            | S1522:       | 2 | 3,3034 | 0,425 | -0,093 |
| 8 | Q8TDD1 DDX54_HUMAN  | E.CTS#DVEPDTR.E.M                            | S75:         | 2 | 3,3021 | 0,388 | 0,088  |
| 8 | Q9UBC2 EP15R_HUMAN  | D.GAHGAS#LTDLANLSE.G                         | S575:        | 2 | 3,2904 | 0,321 | -0,079 |
| 8 | Q9P2D1 CHD7_HUMAN   | E.FANS#PSEDKEE.S                             | S1874:       | 2 | 3,2903 | 0,27  | 0      |
| 8 | A8MVB1 A8MVB1_HUMAN | E.KLVSPASAAAASSPSS#SPSPQPVSE.L               | S40:         | 3 | 3,2869 | 0,218 | -0,075 |
| 8 | Q12888 TP53B_HUMAN  | E.VLSTQEDLFDQSNK.T                           |              | 3 | 3,2861 | 0,232 | 0,338  |
| 8 | O94992 HEXI1_HUMAN  | E.LLAQPCHDS#E.A                              | S125:        | 2 | 3,2836 | 0,373 | 0,098  |
| 8 | Q5VY92 Q5VY92_HUMAN | R.LQDSS#DPDTGSEEE.G                          | S941:        | 2 | 3,2836 | 0,349 | 0      |
| 8 | Q96RL1 UIMC1_HUMAN  | E.TGAFRVPS#PGM*EE.A                          | S653:        | 2 | 3,2814 | 0,483 | -0,083 |
| 8 | P33240 CSTF2_HUMAN  | R.QVPVM*QGTGM*QGASIQGGSQPGGFS#PGQNQVTPQDHE.K | S524:        | 3 | 3,28   | 0,31  | 0,666  |
| 8 | Q86SQ0 PHLB2_HUMAN  | E.LEKLQLS#DEESVFE.E                          | S489:        | 2 | 3,2761 | 0,333 | -0,419 |
| 8 | Q13127 REST_HUMAN   | K.TALAS#PPATM*AAANE.S                        | S992:        | 2 | 3,2735 | 0,348 | 0,339  |
| 8 | Q9ULI4 KI26A_HUMAN  | E.CDTQAASAGRAPS#PT#LGSPLPE.A                 | S1262:T1264: | 3 | 3,2634 | 0,193 | -0,439 |
| 8 | P85037 FOXK1_HUMAN  | R.SGGLQT#PECLSR.E                            | T436:        | 2 | 3,2594 | 0,335 | -0,088 |
| 8 | O60271 JIP4_HUMAN   | R.NVSTGS#AENEEKSE.V                          | S332:        | 2 | 3,2584 | 0,283 | 0,078  |
| 8 | Q71U36 TBA1A_HUMAN  | E.GM*EEGEFS#EARE.D                           | S419:        | 2 | 3,2551 | 0,466 | -0,166 |
| 8 | P78527 PRKDC_HUMAN  | E.TQAS#QGTLQTR.T                             | S2612:       | 2 | 3,2536 | 0,434 | 0,192  |
| 8 | Q13283 G3BP1_HUMAN  | K.SSS#PAPADIAQTVQE.D                         | S232:        | 2 | 3,2513 | 0,358 | -0,154 |
| 8 | O60220 TIM8A_HUMAN  | K.SKPVFSELS#D.-                              | S96:         | 2 | 3,249  | 0,383 | 0      |
| 8 | Q8N163 K1967_HUMAN  | E.DSEVRS#VASNQSE.M                           | S675:        | 2 | 3,2476 | 0,429 | 0,082  |
| 8 | Q13263 TIF1B_HUMAN  | E.KLS#PPYSSPQE.F                             | S752:        | 2 | 3,2447 | 0,347 | 0,093  |
| 8 | Q9H3N1 TXND1_HUMAN  | R.SLGPSLATDKS#.-                             | S280:        | 2 | 3,2415 | 0,462 | 0,317  |
| 8 | P10398 ARAF_HUMAN   | E.LLT#PQGPS#PR.T                             | T181:S186:   | 2 | 3,2404 | 0,255 | -0,1   |
| 8 | Q9BV73 CP250_HUMAN  | E.GDNIAQGGSGHENS#LE.L                        | S368:        | 2 | 3,2393 | 0,295 | -0,607 |
| 8 | P40855 PEX19_HUMAN  | K.NATDLQNSS#M*SEEE.L                         | S147:        | 2 | 3,2385 | 0,391 | -0,222 |
| 8 | P35908 K22E_HUMAN   | R.FLEQQNQVLQTK.W                             |              | 2 | 3,2378 | 0,312 | 0,165  |
| 8 | P13647 K2C5_HUMAN   | K.M*FFDAELSQMQTHVSDTSVVLSMDNNR.N             |              | 3 | 3,2367 | 0,232 | 0,235  |
| 8 | P49915 GUAA_HUMAN   | E.SASLVAS#GKAE.L                             | S382:        | 2 | 3,2349 | 0,345 | -0,111 |
| 8 | Q12888 TP53B_HUMAN  | E.SGLQIQKS#PEPE.V                            | S294:        | 2 | 3,2331 | 0,445 | 0,701  |
| 8 | Q14C86 GAPD1_HUMAN  | E.SCSGLGSTS#DDTDVRE.V                        | S748:        | 2 | 3,2312 | 0,499 | 0,138  |
| 8 | O43379 WDR62_HUMAN  | E.VEAGPGDQQGDSYLR.V                          |              | 2 | 3,231  | 0,479 | -0,077 |
| 8 | O75116 ROCK2_HUMAN  | E.NLLLSDS#PSCRE.N                            | S425:        | 2 | 3,2264 | 0,448 | 0      |
| 8 | Q14966 ZN638_HUMAN  | E.M*VKNS#NSLFTLDE.L                          | S1639:       | 2 | 3,2244 | 0,251 | -0,153 |
| 8 | Q14683 SMC1A_HUMAN  | E.SQS#QGRDLTLEE.N                            | S360:        | 2 | 3,2235 | 0,304 | 0,169  |
| 8 | Q9NZ63 CI078_HUMAN  | E.DLHLGT#SFSAE.T                             | T100:        | 2 | 3,2209 | 0,33  | 0      |
| 8 | Q5SYE7 NHSL1_HUMAN  | R.GGPVSRSS#PGAPSAGE.A                        | S1167:       | 2 | 3,2153 | 0,381 | 0,434  |
| 8 | Q96QR8 PURB_HUMAN   | E.HYAQLGPSS#PEQLAAGAE.G                      | S101:        | 2 | 3,2102 | 0,541 | 0,36   |

|   |                     |                                       |              |   |        |       |        |
|---|---------------------|---------------------------------------|--------------|---|--------|-------|--------|
| 8 | Q8WVM7 STAG1_HUMAN  | E.TTAHS#DAGSELEETE.V                  | S20:         | 2 | 3,2069 | 0,347 | -0,147 |
| 8 | P42224 STAT1_HUMAN  | E.IKS#LEDLQDE.Y                       | S162:        | 2 | 3,2062 | 0,245 | -0,288 |
| 8 | P02538 K2C6A_HUMAN  | R.ALYDAELSQM*QTHISDTSVVLISM*DNNR.N    |              | 3 | 3,2028 | 0,111 | 0      |
| 8 | O95684 FR1OP_HUMAN  | E.GALDLSDVHS#PPKS#PE.G                | S156:S160:   | 3 | 3,2025 | 0,225 | 0,303  |
| 8 | Q9H4N4 Q9H4N4_HUMAN | E.TRLS#FSDTYQDYE.E                    | S47:         | 2 | 3,202  | 0,391 | -0,286 |
| 8 | O14686 MLL2_HUMAN   | E.LKGS#PVLLDPEE.L                     | S876:        | 2 | 3,2008 | 0,402 | 0,177  |
| 8 | P46821 MAP1B_HUMAN  | E.KTTS#PPEVSGYSYE.K                   | S1965:       | 2 | 3,1957 | 0,301 | 0,3    |
| 8 | P60709 ACTB_HUMAN   | R.GYSFTTT#AERE.I                      | T203:        | 2 | 3,1943 | 0,46  | 0,273  |
| 8 | Q96HN2 SAHH3_HUMAN  | E.VELKDLSPTS#EAE.S                    | S25:         | 2 | 3,1822 | 0,215 | -0,349 |
| 8 | P42166 LAP2A_HUMAN  | E.SRS#STPLPTISSAE.N                   | S158:        | 2 | 3,1793 | 0,429 | -0,229 |
| 8 | P42166 LAP2A_HUMAN  | R.SST#PLPTISSAE.N                     | T160:        | 2 | 3,1786 | 0,388 | 0,27   |
| 8 | P30414 NKTR_HUMAN   | E.ICT#PDRSS#PAKVEE.T                  | T1133:S1138: | 3 | 3,1762 | 0,243 | 0,314  |
| 8 | Q96EI5 TCAL4_HUMAN  | E.IEGKPES#EGEPGSE.T                   | S102:        | 2 | 3,1761 | 0,42  | 0      |
| 8 | Q86W92 LIPB1_HUMAN  | E.DDM*FKDFAAR.S                       |              | 3 | 3,1711 | 0,22  | 1,113  |
| 8 | P35527 K1C9_HUMAN   | R.GGGGSGFGYSYGGGSGGGFSASSLGGGFGGGSR.G |              | 3 | 3,1649 | 0,254 | 0,135  |
| 8 | Q14C86 GAPD1_HUMAN  | E.CSSDFGGKDSVTS#PDM*DE.I              | S801:        | 2 | 3,1641 | 0,415 | 0,18   |
| 8 | Q9UJX4 APC5_HUMAN   | E.LDVS#VREEE.V                        | S195:        | 2 | 3,1576 | 0,338 | -0,211 |
| 8 | Q5T4S7 UBR4_HUMAN   | E.SAFQSEPRIS#E.S                      | S1752:       | 2 | 3,1576 | 0,359 | -0,367 |
| 8 | Q9UQ35 SRRM2_HUMAN  | R.VSGRTS#PPLLD.R                      | S2398:       | 2 | 3,1515 | 0,442 | 0,1    |
| 8 | Q6S8J3 A26CA_HUMAN  | E.KLCYVALDFEQE.M                      |              | 2 | 3,1498 | 0,4   | -0,081 |
| 8 | P19338 NUCL_HUMAN   | E.FAS#FEDAKE.A                        | S532:        | 2 | 3,1484 | 0,213 | 0,326  |
| 8 | P53396 ACLY_HUMAN   | R.TAS#FSEGRADE.V                      | S455:        | 2 | 3,148  | 0,396 | 0      |
| 8 | Q9UQ35 SRRM2_HUMAN  | R.SSGHSSSELS#PDAVE.K                  | S1387:       | 2 | 3,1439 | 0,419 | 0,389  |
| 8 | Q15398 DLG7_HUMAN   | E.LFDNKS#LTTE.C                       | S796:        | 2 | 3,1416 | 0,261 | -0,391 |
| 8 | O95232 CROP_HUMAN   | E.VNGTSEDIKS#E.G                      | S425:        | 2 | 3,1407 | 0,238 | -0,097 |
| 8 | O75821 EIF3G_HUMAN  | K.GIPLATGDTS#PEPE.L                   | S42:         | 2 | 3,1386 | 0,515 | 1,25   |
| 8 | Q9BQI3 E2AK1_HUMAN  | E.VLS#DQEEDRE.Q                       | S258:        | 2 | 3,1355 | 0,304 | 0      |
| 8 | Q9UHB6 LIMA1_HUMAN  | R.KIS#ENSYSLDDLE.I                    | S225:        | 2 | 3,1329 | 0,365 | -0,153 |
| 8 | Q8N680 ZBTB2_HUMAN  | E.GRS#ILLGSGDSE.V                     | S483:        | 2 | 3,1326 | 0,374 | -0,096 |
| 8 | Q9Y5U2 TSSC4_HUMAN  | E.LAHLAGPGS#PEAE.E                    | S265:        | 2 | 3,1283 | 0,327 | 0,275  |
| 8 | Q7Z5L2 GIDRP_HUMAN  | E.STNDTVS#PVM*IRE.C                   | S326:        | 2 | 3,1277 | 0,261 | -0,079 |
| 8 | Q9H814 RNUXA_HUMAN  | K.SLNFQEDDDTS#RE.T                    | S350:        | 2 | 3,1258 | 0,378 | -0,373 |
| 8 | P62699 YPEL5_HUMAN  | E.SEGFEEHVPS#DNS.-                    | S118:        | 2 | 3,1229 | 0,517 | 0,242  |
| 8 | Q9H6Z4 RANB3_HUMAN  | E.RTS#SLTQFPPSQSEE.R                  | S125:        | 2 | 3,1192 | 0,414 | -0,413 |
| 8 | Q7Z2W4 ZCCHV_HUMAN  | E.FLASASASAER.S                       |              | 2 | 3,119  | 0,475 | -0,22  |
| 8 | P23246 SFPQ_HUMAN   | R.FGQGGAGPVGQGGPR.G                   |              | 2 | 3,119  | 0,5   | -1,091 |
| 8 | P40855 PEX19_HUMAN  | E.GCS#VGAEADRE.L                      | S9:          | 2 | 3,1182 | 0,429 | 0,099  |
| 8 | P06744 G6PI_HUMAN   | E.LQAAGKS#PEDLE.R                     | S455:        | 2 | 3,1177 | 0,43  | -0,091 |
| 8 | Q8IWW6 RHG12_HUMAN  | R.ATT#PPNQGRPDS#PVYANLQE.L            | T231:S240:   | 3 | 3,1171 | 0,14  | -0,158 |

|   |                     |                              |              |   |        |       |        |
|---|---------------------|------------------------------|--------------|---|--------|-------|--------|
| 8 | Q14247 SRC8_HUMAN   | R.GPVSGETEPEPVYS#M*E.A       | S447:        | 2 | 3,1159 | 0,309 | 0      |
| 8 | Q7LBC6 JHD2B_HUMAN  | E.SLADDS#SRDS#FKQSLE.S       | S552:S556:   | 3 | 3,114  | 0,155 | 0,54   |
| 8 | Q8WVB6 CTF18_HUMAN  | E.LEGAS#TPSPS#GVPLFTAGRPPR.T | S33:S38:     | 3 | 3,1139 | 0,216 | 0,078  |
| 8 | Q86T12 DPP9_HUMAN   | E.VIHVPS#PALE.E              | S292:        | 2 | 3,1135 | 0,417 | -0,107 |
| 8 | Q8WXI9 P66B_HUMAN   | R.LTPS#PDIIVLSDNE.A          | S122:        | 2 | 3,1108 | 0,211 | -0,23  |
| 8 | Q01850 CDR2_HUMAN   | E.LASVNPEPVS#SPTT#PPEYK.A    | S414:T418:   | 3 | 3,1083 | 0,218 | 0,505  |
| 8 | Q6PD74 P34_HUMAN    | E.IEGLSS#DEEH.-              | S311:        | 2 | 3,1054 | 0,22  | 0,102  |
| 8 | P19174 PLCG1_HUMAN  | E.NGDLS#PFSGTSLRE.R          | S1221:       | 2 | 3,1018 | 0,483 | 0,156  |
| 8 | Q9Y6G9 DC1L1_HUMAN  | R.KPVTVSPTTPTS#PTEGEAS.-     | S516:        | 2 | 3,0952 | 0,39  | -0,124 |
| 8 | P82094 TMF1_HUMAN   | E.TLAAGTSS#PKTE.G            | S170:        | 2 | 3,0934 | 0,451 | 0      |
| 8 | P48960 CD97_HUMAN   | E.GSYDCVCSPGYEPVSGAK.T       |              | 3 | 3,0927 | 0,317 | 0,662  |
| 8 | Q9UHB6 LIMA1_HUMAN  | R.SRPFTVAASFQSTSVK.S         |              | 3 | 3,0925 | 0,115 | 0,107  |
| 8 | P28290 SSFA2_HUMAN  | E.ASAES#DVGKSSSESE.F         | S644:        | 2 | 3,0904 | 0,259 | -0,25  |
| 8 | Q6P2E9 EDC4_HUMAN   | R.S#AAGT#PVPSAHL.D.C         | S1248:T1252: | 2 | 3,0871 | 0,45  | 0,088  |
| 8 | Q09666 AHNK_HUMAN   | R.SNS#FSDERE.F               | S5782:       | 2 | 3,0862 | 0,414 | 0,212  |
| 8 | Q92614 MY18A_HUMAN  | E.TSTPSEHSAAPS#PQVE.V        | S164:        | 2 | 3,0839 | 0,317 | 0,501  |
| 8 | Q6N043 Z280D_HUMAN  | E.SITVS#DKENE.T              | S806:        | 2 | 3,0823 | 0,278 | -0,102 |
| 8 | Q86VI3 IQGA3_HUMAN  | E.VVDDALERQS#PE.A            | S308:        | 2 | 3,0799 | 0,263 | -0,424 |
| 8 | Q9ULD4 BRPF3_HUMAN  | E.LTAQDITECN#NKE.N           | S76:         | 2 | 3,0795 | 0,381 | -0,215 |
| 8 | P08621 RU17_HUMAN   | E.GLGND#RDM*YM*E.S           | S410:        | 2 | 3,0763 | 0,369 | -0,732 |
| 8 | P04264 K2C1_HUMAN   | K.WELLQQVDTSTR.T             |              | 2 | 3,0727 | 0,391 | -0,165 |
| 8 | Q14451 GRB7_HUMAN   | R.RATS#LPSINPFPE.L           | S63:         | 2 | 3,0637 | 0,317 | -0,228 |
| 8 | Q14839 CHD4_HUMAN   | E.VKS#TAPETAIE.C             | S1585:       | 2 | 3,063  | 0,206 | 0,199  |
| 8 | Q5VYS8 ZCHC6_HUMAN  | E.KNS#PVDQSDFFYE.F           | S939:        | 2 | 3,0584 | 0,26  | -0,368 |
| 8 | P48960 CD97_HUMAN   | R.CNPGFSSFSE.I               |              | 2 | 3,0581 | 0,411 | 0,216  |
| 8 | Q9H118 ASCC2_HUMAN  | E.FDVFSRDS#VD.L              | S552:        | 2 | 3,0561 | 0,367 | -0,193 |
| 8 | Q9Y4M2 Q9Y4M2_HUMAN | R.APDKGTDS#PS#PPPLEE.T       | S20:S22:     | 2 | 3,0549 | 0,326 | 0,136  |
| 8 | Q8NI08 NCOA7_HUMAN  | E.STLDNS#CQGAQM*DNKSE.V      | S617:        | 2 | 3,0534 | 0,404 | 0,246  |
| 8 | P56537 IF6_HUMAN    | E.AQPSTIATSM*RDSLIDSLT#.-    | T245:        | 2 | 3,0533 | 0,303 | 0      |
| 8 | Q96JK2 WDR22_HUMAN  | E.SSASLPRS#PPPTVDE.S         | S468:        | 2 | 3,0528 | 0,401 | -0,075 |
| 8 | Q15149 PLEC1_HUMAN  | E.FADM*LSGNAGGFR.S           |              | 2 | 3,0507 | 0,491 | -0,449 |
| 8 | Q6UN15 FIP1_HUMAN   | R.LVSELS#GGTGGDEEEE.W        | S14:         | 2 | 3,0506 | 0,266 | 0,145  |
| 8 | Q9BUA3 YK007_HUMAN  | E.GVALLQDVR.A                |              | 2 | 3,0448 | 0,281 | 0,063  |
| 8 | P18031 PTN1_HUMAN   | E.EKGS#PLNAAPYGIE.S          | S352:        | 2 | 3,0428 | 0,322 | 0,08   |
| 8 | Q5TGY3 AHDC1_HUMAN  | K.AY#SPTCSPT#LGFKEE.L        | S1398:T1405: | 2 | 3,0426 | 0,326 | -0,132 |
| 8 | P49792 RBP2_HUMAN   | E.SSINYTFKT#PE.K             | T2613:       | 2 | 3,0401 | 0,324 | -1,517 |
| 8 | Q8N3U4 STAG2_HUMAN  | E.SETHFSS#DTDFEDIE.G         | S23:         | 2 | 3,0393 | 0,21  | 0      |
| 8 | P30307 MPIP3_HUMAN  | E.QIALLVKDM*S#P.-            | S472:        | 2 | 3,0373 | 0,477 | 0,279  |
| 8 | Q8N4S0 CCD82_HUMAN  | E.LNLS#KIQSE.G               | S88:         | 2 | 3,0363 | 0,134 | 0      |

|   |                     |                                 |              |   |        |       |        |
|---|---------------------|---------------------------------|--------------|---|--------|-------|--------|
| 8 | O15085 ARHGB_HUMAN  | E.SSGGTT#PVGSFHTE.A             | T1462:       | 2 | 3,0338 | 0,37  | 0,254  |
| 8 | Q9HC44 GPBL1_HUMAN  | E.GEVLSHS#LEAE.H                | S384:        | 2 | 3,0333 | 0,093 | 0,195  |
| 8 | Q92619 HMHA1_HUMAN  | E.VASGSHSGS#EEQLE.A             | S1074:       | 2 | 3,0311 | 0,253 | 0,326  |
| 8 | Q9NXL9 MCM9_HUMAN   | E.INYSTHIFSPGGG#PE.G            | S707:        | 2 | 3,0307 | 0,259 | -0,289 |
| 8 | Q9P2F8 SI1L2_HUMAN  | E.FM*DTTGERS#PS#PLTGK.V         | S1650:S1652: | 3 | 3,0276 | 0,223 | 0,096  |
| 8 | Q6ZNJ1 NBEL2_HUMAN  | E.ASALRDNLGEVPLT#PTEE.A         | T1867:       | 2 | 3,0252 | 0,252 | 0,245  |
| 8 | Q7LBC6 JHD2B_HUMAN  | E.SLADSSS#RDS#FKQSLE.S          | S553:S556:   | 2 | 3,0211 | 0,271 | 0,48   |
| 8 | Q0VGA0 Q0VGA0_HUMAN | E.GLRPAS#PLALTQE.Q              | S388:        | 2 | 3,021  | 0,434 | 0      |
| 8 | Q9UJQ4 SALL4_HUMAN  | E.LGAPVNHHPGNDEVAS#EDE.A        | S57:         | 2 | 3,019  | 0,398 | -1,391 |
| 8 | Q92615 LARP5_HUMAN  | E.NSET#GGNESQPDSQEDPRE.V        | T143:        | 3 | 3,0185 | 0,295 | 0,085  |
| 8 | P02538 K2C6A_HUMAN  | R.ALYDAELSQM*QTHISDTSVVLSDNNR.N |              | 3 | 3,0178 | 0,18  | -0,12  |
| 8 | O75569 PRKRA_HUMAN  | E.YTTICRLES#FM*E.T              | S167:        | 2 | 3,0165 | 0,452 | -0,148 |
| 8 | Q8NCN4 RN169_HUMAN  | E.GLGST#PDAKLD.K                | T554:        | 2 | 3,0159 | 0,384 | 0,106  |
| 8 | O43815 STRN_HUMAN   | E.LNQGDM*KPPSY#DSDEGNETE.V      | Y135:        | 3 | 3,0121 | 0,134 | -0,315 |
| 8 | O75534 CSDE1_HUMAN  | E.S#KSPAAPGQSPTGSVCYE.R         | S114:        | 3 | 3,0121 | 0,247 | 0      |
| 8 | Q9BVI0 PHF20_HUMAN  | E.NTM*KTEPTS#PLVE.L             | S415:        | 2 | 3,0089 | 0,337 | 0,158  |
| 8 | P04792 HSPB1_HUMAN  | E.SPAVAAPAYS.R                  |              | 2 | 3,0076 | 0,385 | -0,224 |
| 8 | Q5C9Z4 NOM1_HUMAN   | E.FVHATS#EGEAPGGCE.G            | S57:         | 2 | 3,0066 | 0,509 | -0,75  |
| 8 | O94915 FRYL_HUMAN   | E.VLQIRDET#PTLE.A               | T2547:       | 2 | 3,0006 | 0,278 | 0      |
| 8 | Q9UQ35 SRRM2_HUMAN  | E.LSNS#PLRE.N                   | S1320:       | 2 | 3,0003 | 0,223 | -0,061 |
| 8 | P14868 SYDC_HUMAN   | D.LT#IQKADE.V                   | T52:         | 2 | 2,9962 | 0,325 | 0,489  |
| 8 | Q9NYV4 CD2L7_HUMAN  | E.NSS#VEAKDSGLE.S               | S434:        | 2 | 2,9955 | 0,37  | 0      |
| 8 | Q9UKS6 PACN3_HUMAN  | E.LS#FRAGEE.L                   | S383:        | 2 | 2,9953 | 0,32  | 0      |
| 8 | Q9NQS7 INCE_HUMAN   | E.QHVTQLM*STEPLPR.T             |              | 3 | 2,9936 | 0,337 | 0,443  |
| 8 | Q96T58 MINT_HUMAN   | E.SGVVAVS#PEKSES#PQKE.D         | S2120:S2126: | 3 | 2,9912 | 0,239 | -0,191 |
| 8 | Q92890 UFD1_HUMAN   | E.STEGEADHS#GYAGE.L             | S217:        | 2 | 2,9884 | 0,411 | 0,328  |
| 8 | Q9GZZ9 UBA5_HUMAN   | E.LKNFS#GPVPDLPE.G              | S358:        | 2 | 2,9874 | 0,264 | -0,327 |
| 8 | P48960 CD97_HUMAN   | R.ALTRAS#ESGI.-                 | S831:        | 2 | 2,981  | 0,342 | -0,124 |
| 8 | Q9NQW6 ANLN_HUMAN   | E.GELDM*EKS#QEE.M               | S583:        | 2 | 2,976  | 0,301 | 0,175  |
| 8 | Q6VMQ6 MCAF1_HUMAN  | E.SSFGS#PSKQESSE.S              | S477:        | 2 | 2,9735 | 0,305 | 0,17   |
| 8 | P13647 K2C5_HUMAN   | K.MFFDAELSQMQTHVSDTSVVLSDNNR.N  |              | 3 | 2,9676 | 0,149 | 0,469  |
| 8 | Q14671 PUM1_HUMAN   | E.VNSVLS#PRSE.S                 | S209:        | 2 | 2,9675 | 0,387 | 0      |
| 8 | Q9Y2W6 TDRKH_HUMAN  | E.ITHTLS#CLSLSE.A               | S539:        | 2 | 2,9637 | 0,125 | 0      |
| 8 | P50747 BPL1_HUMAN   | E.SVADETS#PERE.G                | S147:        | 2 | 2,9618 | 0,454 | 0      |
| 8 | Q5UIP0 RIF1_HUMAN   | E.CGSLDKTS#PEM*SNSNDE.R         | S1162:       | 2 | 2,9603 | 0,335 | 0,352  |
| 8 | Q15121 PEA15_HUMAN  | K.DIIHQPS#EEE.I                 | S116:        | 2 | 2,9598 | 0,298 | -1,036 |
| 8 | A5YM69 A5YM69_HUMAN | E.LQVPEENRADS#QDE.K             | S340:        | 2 | 2,9569 | 0,336 | -0,428 |
| 8 | Q16643 DREB_HUMAN   | R.GPGS#PAEDLM*FM*E.S            | S416:        | 2 | 2,9499 | 0,352 | -0,163 |
| 8 | O60832 DKC1_HUMAN   | R.KS#LPEEDVAE.I                 | S21:         | 2 | 2,9498 | 0,201 | -0,408 |

|   |                    |                                   |                 |   |        |       |        |
|---|--------------------|-----------------------------------|-----------------|---|--------|-------|--------|
| 8 | Q3B820 YB032_HUMAN | E.DSLSDSSRS#VSE.K                 | S142:           | 2 | 2,949  | 0,185 | 0,271  |
| 8 | Q9NQX3 GEPH_HUMAN  | E.LEDLPS#PPPPLS#PPPTTS#PHKQTEDK.G | S188:S194:S200: | 3 | 2,9444 | 1     | 0,421  |
| 8 | P55265 DSRAD_HUMAN | R.TM*LLLSRS#PE.A                  | S825:           | 2 | 2,9428 | 0,37  | 0,098  |
| 8 | P55036 PSMD4_HUMAN | R.TGLPDLSS#M*TEEE.Q               | S280:           | 2 | 2,9412 | 0,296 | 0,162  |
| 8 | Q6VMQ6 MCAF1_HUMAN | E.SSFGS#PSKQE.S                   | S477:           | 2 | 2,9387 | 0,316 | 0,108  |
| 8 | Q8IY92 BTBDC_HUMAN | E.GSLPHS#DDAGDYE.Q                | S294:           | 2 | 2,9271 | 0,433 | -0,254 |
| 8 | Q9Y266 NUDC_HUMAN  | E.TSGPQIKELT#DEEAE.R              | T108:           | 2 | 2,9231 | 0,396 | 0,565  |
| 8 | Q8N5A5 ZGPAT_HUMAN | E.AVEAPAAARGS#GSE.T               | S99:            | 2 | 2,9226 | 0,359 | 0,271  |
| 8 | O94909 K0819_HUMAN | R.GPSQATSPIRS#PQE.S               | S300:           | 2 | 2,9224 | 0,278 | -0,636 |
| 8 | P05787 K2C8_HUMAN  | E.VDPNIQAVRT#QE.K                 | T89:            | 2 | 2,9212 | 0,41  | -0,084 |
| 8 | Q9HBD1 RC3H2_HUMAN | K.IGS#PPKT#PVSNVAATSAGPSNVGTE.L   | S549:T553:      | 3 | 2,9208 | 0,115 | -0,806 |
| 8 | P46939 UTRO_HUMAN  | K.YGEHEAS#PDNGQNE.F               | S10:            | 2 | 2,9203 | 0,339 | 0,075  |
| 8 | Q00613 HSF1_HUMAN  | E.LAPASPM*ASPGGS#IDERPLSSS#PLVR.V | S283:S292:      | 3 | 2,9171 | 0,215 | 0,198  |
| 8 | O95208 EPN2_HUMAN  | E.LEQARPQT#SGEEE.L                | T273:           | 2 | 2,9167 | 0,322 | 0,157  |
| 8 | Q99590 SFRIP_HUMAN | E.GEIIQTVDRQS#VKS#PE.V            | S311:S314:      | 3 | 2,915  | 0,14  | 0,47   |
| 8 | Q14247 SRC8_HUMAN  | R.AKTQT#PPVS#PAPQPTTE.R           | T401:S405:      | 2 | 2,91   | 0,46  | -0,063 |
| 8 | Q9H6Z4 RANB3_HUMAN | E.SAGEHALEPPAPAGASAST#PPPPAPE.A   | T75:            | 3 | 2,9038 | 0,294 | 0,515  |
| 8 | Q9UQ35 SRRM2_HUMAN | E.M*NTGFSS#EVKE.D                 | S1349:          | 2 | 2,9003 | 0,369 | 0      |
| 8 | P04264 K2C1_HUMAN  | K.YEELQITAGR.H                    |                 | 2 | 2,9002 | 0,279 | -0,103 |
| 8 | Q16186 ADRM1_HUMAN | R.SQSAAVTPSSTTSSTR.A              |                 | 2 | 2,8942 | 0,37  | 0,156  |
| 8 | Q8IWJ2 GCC2_HUMAN  | E.TFLS#DSEKE.K                    | S345:           | 2 | 2,8932 | 0,32  | -0,107 |
| 8 | Q70Z53 F10C1_HUMAN | E.DSLLRNS#DEEE.S                  | S278:           | 2 | 2,8911 | 0,293 | -0,176 |
| 8 | Q9P2G4 K1383_HUMAN | E.RLT#PTNILGGNVE.M                | T631:           | 2 | 2,8876 | 0,356 | -0,25  |
| 8 | P04406 G3P_HUMAN   | K.RVIISAPSADAPM*FVM*GVNHE.K       |                 | 3 | 2,8866 | 0,105 | 0,241  |
| 8 | Q9Y2F5 K0947_HUMAN | R.LSAS#PAQEKE.A                   | S516:           | 2 | 2,8864 | 0,346 | -0,107 |
| 8 | Q9BYW2 SETD2_HUMAN | E.ASKLPTS#EPEADAE.I               | S1952:          | 2 | 2,8854 | 0,442 | -0,08  |
| 8 | O95684 FR1OP_HUMAN | E.GALDLSDVHS#PPKS#PE.G            | S156:S160:      | 2 | 2,8846 | 0,456 | -0,135 |
| 8 | Q04637 IF4G1_HUMAN | E.IHEPNGM*VPSELEPEVES#SPE.L       | S376:           | 2 | 2,8798 | 0,227 | 0      |
| 8 | Q16630 CPSF6_HUMAN | E.M*DTART#PLSEAE.F                | T407:           | 2 | 2,8797 | 0,394 | -0,344 |
| 8 | P32004 L1CAM_HUMAN | E.KEAAGGNDS#SGATSPINPAVALE.-      | S1243:          | 2 | 2,8787 | 0,214 | 0,109  |
| 8 | O95232 CROP_HUMAN  | E.VNGTSEDIKS#EGDTQSN.-            | S425:           | 3 | 2,8742 | 0,301 | 0,393  |
| 8 | Q96L91 EP400_HUMAN | E.GVLGPHTDALSS#DSE.N              | S2135:          | 2 | 2,874  | 0,279 | 0      |
| 8 | P35908 K22E_HUMAN  | K.VLYDAEISQIHQSVDTDNVILSMDNSR.N   |                 | 3 | 2,8714 | 0,255 | 0,18   |
| 8 | Q66K74 MAP1S_HUMAN | E.LPLAASSIPRPT#PS#PE.S            | T638:S640:      | 3 | 2,8686 | 0,222 | 0      |
| 8 | P27816 MAP4_HUMAN  | E.VGLLKDM*S#PLSE.T                | S507:           | 2 | 2,8683 | 0,409 | 0,176  |
| 8 | Q15742 NAB2_HUMAN  | E.LGEKLS#PLPGGPGAGDPR.I           | S171:           | 2 | 2,8673 | 0,371 | 0,136  |
| 8 | Q15067 ACOX1_HUMAN | E.LLTHILDGS#PE.K                  | S26:            | 2 | 2,866  | 0,354 | -0,191 |
| 8 | P29692 EF1D_HUMAN  | E.NGAS#VILRD.I                    | S44:            | 2 | 2,8613 | 0,102 | 0,119  |
| 8 | Q619Y2 THOC7_HUMAN | E.NDEKLS#VEVE.A                   | S188:           | 2 | 2,8604 | 0,146 | 0      |

|   |                     |                                    |                 |   |        |       |        |
|---|---------------------|------------------------------------|-----------------|---|--------|-------|--------|
| 8 | Q5H9F3 BCRL1_HUMAN  | E.GTSVTF#PLKS#PPQLERE.M            | S599:S603:      | 3 | 2,8602 | 0,161 | -0,343 |
| 8 | Q6S8J3 A26CA_HUMAN  | E.KLCY#VALDFEQE.M                  | Y918:           | 2 | 2,856  | 0,177 | -0,459 |
| 8 | Q96RK0 CIC_HUMAN    | E.RSM*SETGT#AAAPGVSS.E.L           | T305:           | 2 | 2,8556 | 0,234 | 0,211  |
| 8 | Q9C0B5 ZDHC5_HUMAN  | E.LGQLQS#IRSE.G                    | S445:           | 2 | 2,8511 | 0,238 | 0      |
| 8 | Q15154 PCM1_HUMAN   | E.GCPVSINLS#KAE.T                  | S1785:          | 2 | 2,8471 | 0,268 | 0,18   |
| 8 | Q14126 DSG2_HUMAN   | E.TSM*NTASHS#LCE.Q                 | S869:           | 2 | 2,8462 | 0,403 | -0,085 |
| 8 | Q14686 MLL2_HUMAN   | D.GFLKPPAGSVPGPDS#PGE.L            | S1880:          | 2 | 2,8454 | 0,383 | 0,205  |
| 8 | Q9UQ35 SRRM2_HUMAN  | K.AGM*SSNQSISS#PVL.D.A             | S1404:          | 2 | 2,8444 | 0,317 | -0,23  |
| 8 | Q9UPG8 PLAL2_HUMAN  | E.ALLAKS#PANLSE.A                  | S399:           | 2 | 2,8432 | 0,25  | 0,189  |
| 8 | P34932 HSP74_HUMAN  | E.QQQQTPAENKAES#EEM*E.T            | S546:           | 2 | 2,8394 | 0,334 | 0,235  |
| 8 | P49790 NU153_HUMAN  | E.NKS#SFNLGTIE.T                   | S1046:          | 2 | 2,8383 | 0,364 | -0,095 |
| 8 | P00441 SODC_HUMAN   | E.DSVISLSGDHCCIGR.T                |                 | 2 | 2,8364 | 0,389 | 0,3    |
| 8 | Q5SVQ8 ZBT41_HUMAN  | E.LTEKSS#PEETLNE.L                 | S191:           | 2 | 2,8349 | 0,273 | -0,078 |
| 8 | Q15154 PCM1_HUMAN   | E.SGNIS#QKS#DEEDFVK.V              | S1954:S1957:    | 2 | 2,8332 | 0,31  | -0,066 |
| 8 | Q9C0C2 TB182_HUMAN  | E.AQDLCRAS#PEPPGPE.S               | S672:           | 3 | 2,8301 | 0,146 | 0,429  |
| 8 | Q99618 CDCA3_HUMAN  | R.S#PSAGILRT#PIQVE.S               | S29:T37:        | 2 | 2,8297 | 0,505 | -0,075 |
| 8 | Q9ULI4 KI26A_HUMAN  | R.APS#PTLGS#PRLPE.A                | S1262:S1267:    | 2 | 2,8291 | 0,461 | -0,412 |
| 8 | P18206 VINC_HUMAN   | E.AIDTKS#LLDASEE.A                 | S721:           | 2 | 2,8278 | 0,33  | -0,249 |
| 8 | P35527 K1C9_HUMAN   | K.TLNDMRQEYEQLIAK.N                |                 | 3 | 2,8274 | 0,212 | -0,099 |
| 8 | Q15642 CIP4_HUMAN   | E.FEDFSQPM*NR.A                    |                 | 2 | 2,8265 | 0,421 | -0,379 |
| 8 | Q9NR30 DDX21_HUMAN  | R.SFS#KAFGQ.-                      | S778:           | 2 | 2,8262 | 0,348 | 0,577  |
| 8 | B1ALK7 B1ALK7_HUMAN | E.TKS#NGQTVIEE.K                   | S638:           | 2 | 2,8253 | 0,16  | 0,095  |
| 8 | Q9UHB6 LIMA1_HUMAN  | E.FTTQNQKS#QDVE.L                  | S726:           | 2 | 2,8215 | 0,329 | 0,324  |
| 8 | Q60869 EDF1_HUMAN   | -.MAESDWDVT#VLRKK.G                | T10:            | 3 | 2,8199 | 0,123 | 0,295  |
| 8 | P50443 S26A2_HUMAN  | E.SS#TDFKQFE.T                     | S36:            | 2 | 2,819  | 0,376 | -1,566 |
| 8 | Q8N4C6 NIN_HUMAN    | E.TFLSLEKS#YDE.V                   | S1310:          | 2 | 2,8176 | 0,235 | -0,173 |
| 8 | Q3B726 RPA43_HUMAN  | K.LADDADDT#PM*EE.S                 | T254:           | 2 | 2,817  | 0,4   | 0,258  |
| 8 | Q16563 SYPL1_HUMAN  | K.TVTATFGYPFR.L                    |                 | 2 | 2,8164 | 0,39  | -0,581 |
| 8 | Q92797 SYMPK_HUMAN  | E.ERS#PQTLAPVGE.D                  | S1243:          | 2 | 2,8161 | 0,371 | -0,089 |
| 8 | Q13263 TIF1B_HUMAN  | R.STAPSAASASASAAAS#SPAGGGAEALE.L   | S49:            | 2 | 2,8121 | 0,444 | 0,712  |
| 8 | Q75362 ZN217_HUMAN  | D.GRQPGTCS#PDLAAPLDE.N             | S421:           | 2 | 2,8115 | 0,42  | 0,655  |
| 8 | P30414 NKTR_HUMAN   | E.ICT#PDRSS#PAKVEE.T               | T1133:S1138:    | 2 | 2,8107 | 0,404 | -0,07  |
| 8 | Q9NYF8 BCLF1_HUMAN  | E.ALDYFS#DKE.S                     | S385:           | 2 | 2,8098 | 0,387 | 0,209  |
| 8 | P25490 TYY1_HUMAN   | E.VVGGDDSD#DGLRAE.D                | S118:           | 2 | 2,8072 | 0,297 | 0,089  |
| 8 | Q9UHR4 BI2L1_HUMAN  | E.IKTPASTPVSQTPQAS#PM*IE.R         | S261:           | 3 | 2,8052 | 0,123 | 0,521  |
| 8 | Q93008 USP9X_HUMAN  | E.GSEEV#PPQTKDQ.-                  | S2540:          | 2 | 2,8049 | 0,284 | -0,082 |
| 8 | Q04637 IF4G1_HUMAN  | E.IHEPNGM*VPSEDLPEVES#SPE.L        | S376:           | 3 | 2,8041 | 0,194 | 0,073  |
| 8 | Q75381 PEX14_HUMAN  | E.STSS#S#PGKEGHS#PEGSTVYHLLGPQEE.G | S274:S275:S282: | 3 | 2,8041 | 1     | 0,466  |
| 8 | Q14671 PUM1_HUMAN   | E.VNSVLSPRS#E.S                    | S212:           | 2 | 2,8039 | 0,381 | -1,462 |



|   |                    |                                   |              |   |        |       |        |
|---|--------------------|-----------------------------------|--------------|---|--------|-------|--------|
| 8 | P14136 GFAP_HUMAN  | K.LALDIEIATYR.K                   |              | 2 | 2,8035 | 0,417 | -0,286 |
| 8 | Q8IZT6 ASPM_HUMAN  | E.ENKIPISPIS#PAFNE.C              | S225:        | 2 | 2,7991 | 0,262 | -0,281 |
| 8 | Q9BZL6 KPCD2_HUMAN | E.NALHAS#EEEEGE.G                 | S362:        | 2 | 2,799  | 0,207 | 0,175  |
| 8 | Q86VR2 F134C_HUMAN | E.LAITDSEHS#DAE.V                 | S288:        | 2 | 2,7987 | 0,384 | -0,089 |
| 8 | P23763 VAMP1_HUMAN | E.LDDRADALQAGAS#QFE.S             | S77:         | 2 | 2,797  | 0,375 | 0      |
| 8 | Q9C0B5 ZDHC5_HUMAN | E.LGQLQSIRS#E.G                   | S448:        | 2 | 2,7944 | 0,328 | 0,101  |
| 8 | Q9Y266 NUDC_HUMAN  | E.TSGPQIKELT#DEE.A                | T108:        | 2 | 2,7933 | 0,182 | -0,16  |
| 8 | Q00613 HSF1_HUMAN  | E.LAPAS#PM*AS#PGGSIDERPLSSSPLVR.V | S275:S279:   | 3 | 2,7926 | 0,283 | 0,33   |
| 8 | P35658 NU214_HUMAN | K.SPGS#TPTT#PTSSQAPQK.L           | S433:T437:   | 2 | 2,7921 | 1     | 0,133  |
| 8 | Q9H6Z4 RANB3_HUMAN | E.RTS#SLTQFPPSQSEE.R              | S125:        | 3 | 2,7901 | 0,172 | -1,34  |
| 8 | Q8N3U4 STAG2_HUMAN | E.THFSS#DTDFEDIE.G                | S23:         | 2 | 2,79   | 0,275 | -0,15  |
| 8 | Q96PZ0 PUS7_HUMAN  | E.GKT#PPVFASE.G                   | T610:        | 2 | 2,7894 | 0,325 | 0,219  |
| 8 | Q86V48 LUZP1_HUMAN | R.HTS#TSNIQVGLAE.L                | S820:        | 2 | 2,7891 | 0,337 | -0,085 |
| 8 | Q8NBT0 WD51A_HUMAN | E.NQQLIM*QRAT#P.-                 | T406:        | 2 | 2,7879 | 0,276 | -0,175 |
| 8 | O94909 K0819_HUMAN | E.LELRVS#E.D                      | S274:        | 2 | 2,7876 | 0,249 | 0,264  |
| 8 | Q8TE77 SSH3_HUMAN  | D.FGQGSQS#PQKQEE.Q                | S87:         | 2 | 2,7837 | 0,135 | -0,08  |
| 8 | Q99618 CDCA3_HUMAN | R.VADPRS#PSAGILRT#PIQVE.S         | S29:T37:     | 2 | 2,7816 | 0,379 | 0,225  |
| 8 | Q14202 ZMYM3_HUMAN | R.RGS#PGQEEELPQGQPQS#PNAPPSPVGE.T | S172:S186:   | 3 | 2,7793 | 0,142 | 0,121  |
| 8 | Q9Y5B0 CTDP1_HUMAN | E.NS#PAAFPDR.E.G                  | S740:        | 2 | 2,7757 | 0,521 | -0,412 |
| 8 | Q9UKV3 ACINU_HUMAN | E.AS#SPPHPQLHS#EEE.I              | S424:S434:   | 2 | 2,775  | 0,378 | -0,135 |
| 8 | Q86SQ0 PHLB2_HUMAN | E.LLSDLTRT#PPPPSSTFPK.A           | T550:        | 3 | 2,7745 | 0,38  | 0,09   |
| 8 | P48681 NEST_HUMAN  | E.SLKS#AGQENLE.T                  | S831:        | 2 | 2,7741 | 0,178 | 0,486  |
| 8 | Q8NBT0 WD51A_HUMAN | E.NQQLIM*QR.A                     |              | 2 | 2,7737 | 0,141 | -0,233 |
| 8 | P08779 K1C16_HUMAN | K.IIAATIENAQPILQIDNAR.L           |              | 3 | 2,7731 | 0,172 | -0,177 |
| 8 | Q9NPR2 SEM4B_HUMAN | R.LGS#EIRD.S                      | S825:        | 2 | 2,7714 | 0,131 | 0,21   |
| 8 | P35527 K1C9_HUMAN  | R.HGVQELEIELQSQLSKK.A             |              | 3 | 2,7688 | 0,357 | -0,093 |
| 8 | P52294 IMA1_HUMAN  | E.VM*S#DGGFHE.A                   | S63:         | 2 | 2,7686 | 0,261 | 0      |
| 8 | Q6PKG0 LARP1_HUMAN | R.AVT#PVPTKTEE.V                  | T526:        | 2 | 2,7684 | 0,335 | -0,097 |
| 8 | Q3KQU3 MA7D1_HUMAN | E.ANANGSS#PEPVKAVE.A              | S742:        | 2 | 2,7648 | 0,354 | -0,079 |
| 8 | O60271 JIP4_HUMAN  | R.SASQSS#LDKLDQE.L                | S733:        | 2 | 2,7645 | 0,231 | -0,328 |
| 8 | P18583 SON_HUMAN   | R.AGIEGPLLASDVGR.D                |              | 2 | 2,7638 | 0,426 | -0,09  |
| 8 | Q8WYP5 AHTF1_HUMAN | E.LNHLS#PVQGTE.A                  | S1411:       | 2 | 2,7637 | 0,306 | -0,096 |
| 8 | P61006 RAB8A_HUMAN | E.NAFFT#LARD.I                    | T164:        | 2 | 2,7631 | 0,224 | -0,215 |
| 8 | Q9H0W8 CS061_HUMAN | E.SGHS#QPGLYGIE.R                 | S7:          | 2 | 2,7624 | 0,407 | -0,184 |
| 8 | Q12756 KIF1A_HUMAN | R.TPQPCS#RPAS#PEPE.L              | S1528:S1532: | 2 | 2,7623 | 0,323 | -0,285 |
| 8 | O94762 RECQ5_HUMAN | R.RVES#PALLASAPEAE.G              | S774:        | 2 | 2,7617 | 0,45  | -0,979 |
| 8 | Q9H7N4 SFR19_HUMAN | E.GLSQS#ISR.I                     | S293:        | 2 | 2,7612 | 0,218 | -0,131 |
| 8 | O43247 EAN57_HUMAN | -.M*ELGHGAGTTT#FT#R.A             | T11:T13:     | 2 | 2,76   | 0,105 | 0,664  |
| 8 | P55201 BRPF1_HUMAN | R.KTEGVS#PIPQEIFE.Y               | S238:        | 2 | 2,7581 | 0,303 | -0,369 |

|   |                     |                        |          |   |        |       |        |
|---|---------------------|------------------------|----------|---|--------|-------|--------|
| 8 | P07355 ANXA2_HUMAN  | E.ILCKLS#LE.G          | S12:     | 2 | 2,757  | 0,288 | -0,116 |
| 8 | Q9Y2W6 TDRKH_HUMAN  | E.ITHTLSCLS#LSE.A      | S542:    | 2 | 2,7539 | 0,258 | -0,085 |
| 8 | Q8WWI1 LMO7_HUMAN   | E.SGEGEIS#PQRE.V       | S1026:   | 2 | 2,7524 | 0,356 | 0      |
| 8 | O94854 K0754_HUMAN  | E.KNS#LADIFEE.R        | S220:    | 2 | 2,7508 | 0,239 | -0,098 |
| 8 | Q9Y2W1 TR150_HUMAN  | E.QTFSGGTS#QDTK.A      | S211:    | 2 | 2,7488 | 0,243 | -0,183 |
| 8 | Q9H7Z6 MYST1_HUMAN  | E.GTAPS#PGRVS#PPTPAR.G | S37:S42: | 3 | 2,7477 | 0,266 | 0,214  |
| 8 | Q8WVM7 STAG1_HUMAN  | E.TTAHS#DAGSELEE.T     | S20:     | 2 | 2,7456 | 0,122 | 0,086  |
| 8 | Q9NQC3 RTN4_HUMAN   | E.M*GSSFSVS#PKAE.S     | S307:    | 2 | 2,7438 | 0,333 | -0,092 |
| 8 | Q8IY67 RAVR1_HUMAN  | E.LVRPFGS#LE.R         | S157:    | 2 | 2,7427 | 0,352 | 0      |
| 8 | P25445 TNR6_HUMAN   | E.NQGSHE#PTLNPE.T      | S212:    | 2 | 2,7414 | 0,221 | 0      |
| 8 | Q9Y3X0 CCDC9_HUMAN  | R.TTHLAGALS#PGE.A      | S521:    | 2 | 2,7402 | 0,223 | 0,099  |
| 8 | Q9BVJ6 UT14A_HUMAN  | E.LEAHGVS#ESE.G        | S405:    | 2 | 2,7397 | 0,236 | 0      |
| 8 | A7E2V4 K0913_HUMAN  | E.SSPHS#PCEGLPSE.A     | S1092:   | 2 | 2,7348 | 0,309 | -1,5   |
| 8 | Q8TB72 PUM2_HUMAN   | E.VNAILS#PRSE.S        | S82:     | 2 | 2,7317 | 0,299 | -0,314 |
| 8 | Q5T5U3 RHG21_HUMAN  | D.SSRLS#PEVQSVAE.S     | S1604:   | 2 | 2,7311 | 0,358 | -0,166 |
| 8 | Q8TDR0 MIPT3_HUMAN  | E.SHNS#DNEEDDQFVVE.A   | S501:    | 2 | 2,7288 | 0,256 | -0,199 |
| 8 | Q5T200 ZC3HD_HUMAN  | E.DNKLS#QSSIQQE.L      | S1657:   | 2 | 2,7264 | 0,351 | -0,419 |
| 8 | P46821 MAP1B_HUMAN  | E.SFLS#ADDKASGR.G      | S1415:   | 2 | 2,7263 | 0,277 | 0,183  |
| 8 | Q5R372 Q5R372_HUMAN | E.ISTPRPSS#PGGLPEED.S  | S119:    | 2 | 2,7256 | 0,387 | -0,284 |
| 8 | O15015 ZN646_HUMAN  | E.AAPARS#PPLQLSE.A     | S930:    | 2 | 2,7217 | 0,326 | 0,172  |
| 8 | Q6NZI2 PTRF_HUMAN   | E.SDAVLVDK.S           |          | 2 | 2,7203 | 0,297 | 0,432  |
| 8 | Q86V48 LUZP1_HUMAN  | E.LTSVSNHVSS#PFE.L     | S840:    | 2 | 2,72   | 0,378 | 0      |
| 8 | Q3KR37 GRM1B_HUMAN  | E.ALEGDGS#LEKE.L       | S314:    | 2 | 2,7166 | 0,228 | 0,298  |
| 8 | Q16513 PKN2_HUMAN   | E.LSLVAASPTLS#PR.Q     | S306:    | 2 | 2,7163 | 0,355 | 0,088  |
| 8 | Q13017 RHG05_HUMAN  | E.NSYLS#DNTR.E.S       | S951:    | 2 | 2,7157 | 0,3   | 0,382  |
| 8 | Q9Y6M7 S4A7_HUMAN   | E.NST#VDFSKVD.M        | T408:    | 2 | 2,715  | 0,311 | 0,102  |
| 8 | Q9UGU0 TCF20_HUMAN  | E.GSSQPEEQKLS#PM*AE.S  | S513:    | 2 | 2,714  | 0,351 | -0,142 |
| 8 | Q13115 DUS4_HUMAN   | E.AAS#PSGPLRE.R        | S345:    | 2 | 2,7132 | 0,326 | -0,344 |
| 8 | Q86XZ4 SPAS2_HUMAN  | E.TLS#IDARE.L          | S155:    | 2 | 2,7112 | 0,326 | 0,186  |
| 8 | Q8IY81 RRMJ3_HUMAN  | E.IM*SPLYQDEAPK.G      |          | 2 | 2,709  | 0,23  | 0      |
| 8 | P27816 MAP4_HUMAN   | E.VGLLKDM*SPLS#E.T     | S510:    | 2 | 2,7085 | 0,282 | -0,176 |
| 8 | P46087 NOL1_HUMAN   | R.LGS#VEAPK.T          | S58:     | 2 | 2,7083 | 0,311 | -0,069 |
| 8 | Q969F1 TF3C6_HUMAN  | E.VVASAPDKS#LE.L       | S160:    | 2 | 2,7073 | 0,307 | -0,102 |
| 8 | P37802 TAGL2_HUMAN  | R.GPAY#GLSRE.V         | Y8:      | 2 | 2,7064 | 0,453 | -0,118 |
| 8 | Q9ULD5 ZN777_HUMAN  | E.NQRSS#PLSFPSVPQEE.T  | S7:      | 2 | 2,7048 | 0,523 | 0,13   |
| 8 | Q6IN85 SMEK1_HUMAN  | E.RFDDM*SS#PGLELPSCE.L | S127:    | 2 | 2,7037 | 0,164 | -0,882 |
| 8 | P27816 MAP4_HUMAN   | E.VGLLKDM*S#PLSETE.M   | S507:    | 2 | 2,7037 | 0,281 | 0,076  |
| 8 | Q6NSJ2 PHLB3_HUMAN  | E.ASEVLAEPSSR.G        |          | 2 | 2,7036 | 0,352 | -0,958 |
| 8 | Q9H8G2 CI082_HUMAN  | E.LFLAEHS#DLEE.G       | S120:    | 2 | 2,7012 | 0,217 | -0,088 |

|   |                      |                              |            |   |        |       |        |
|---|----------------------|------------------------------|------------|---|--------|-------|--------|
| 8 | Q9NQS7 INCE_HUMAN    | E.QHVTQLM*STEPLPR.T          |            | 2 | 2,7012 | 0,403 | -0,148 |
| 8 | P11766 ADHX_HUMAN    | E.FVTHNLS#FDE.I              | S351:      | 2 | 2,6997 | 0,166 | 0,189  |
| 8 | Q8WXH0 SYNE2_HUMAN   | E.VVLKAPDSS#PE.S             | S3076:     | 2 | 2,6997 | 0,334 | 0,1    |
| 8 | Q9BXW6 OSBL1_HUMAN   | E.AVTARS#FEEE.G              | S499:      | 2 | 2,6992 | 0,298 | -0,1   |
| 8 | P57740 NU107_HUMAN   | E.ISS#PVIREAE.V              | S11:       | 2 | 2,6989 | 0,363 | 0,103  |
| 8 | Q16513 PKN2_HUMAN    | E.LNAHIVVS#DPEDITD.C         | S110:      | 2 | 2,6958 | 0,379 | 0,071  |
| 8 | Q66K74 MAP1S_HUMAN   | E.LPLAASSIPRPR.T             |            | 2 | 2,6952 | 0,388 | -0,573 |
| 8 | Q9BZL4 PP12C_HUMAN   | E.NSS#PPSRIPEPE.S            | S499:      | 2 | 2,6933 | 0,415 | 0,176  |
| 8 | Q12888 TP53B_HUMAN   | K.M*VIQGPSS#PQGE.A           | S1114:     | 2 | 2,692  | 0,338 | 0      |
| 8 | O75821 EIF3G_HUMAN   | E.LLKGIPLATGD.T              |            | 2 | 2,6873 | 0,427 | -0,333 |
| 8 | P05556 ITB1_HUMAN    | E.CECQSEGIPESPK.C            |            | 2 | 2,6868 | 0,395 | -0,321 |
| 8 | Q9NRS6 SNX15_HUMAN   | E.ASGS#PARGPLTE.A            | S201:      | 2 | 2,6861 | 0,478 | -0,2   |
| 8 | P85037 FOXK1_HUMAN   | R.SGGLQTPECLS#REGS#PIPHDPE.F | S441:S445: | 2 | 2,6856 | 0,307 | -0,097 |
| 8 | P05556 ITB1_HUMAN    | K.NVLSLTNKGE.V               |            | 2 | 2,6844 | 0,17  | 0,34   |
| 8 | Q8NEZ4 MLL3_HUMAN    | E.VLS#PNSKVE.S               | S2828:     | 2 | 2,6828 | 0,231 | 0,232  |
| 8 | Q8TCN5 ZN507_HUMAN   | E.KLS#PTSNTSYSLE.K           | S780:      | 2 | 2,6819 | 0,126 | -0,81  |
| 8 | ##Q6PCE3 PGM2L_HUMAN | E.ALRLS#LE.L                 | S307:      | 2 | 2,6803 | 0,104 | 0,207  |
| 8 | Q6ZS30 NBEL1_HUMAN   | E.LSFKS#ENQEE.F              | S67:       | 2 | 2,6802 | 0,131 | -0,095 |
| 8 | Q02952 AKA12_HUMAN   | E.QKGESS#ASSPEEPEITCLE.K     | S566:      | 2 | 2,6795 | 0,248 | 0,854  |
| 8 | Q8IYX8 CF182_HUMAN   | E.SHS#VCDDIECE.L             | S355:      | 2 | 2,6755 | 0,288 | -1,535 |
| 8 | P04920 B3A2_HUMAN    | E.QALLPRVPT#DE.I             | T257:      | 2 | 2,6715 | 0,253 | -0,093 |
| 8 | Q9UKN5 PRDM4_HUMAN   | R.VT#SPISTDGM*AEE.L          | T201:      | 2 | 2,6698 | 0,4   | -0,255 |
| 8 | Q9BXJ9 NARG1_HUMAN   | K.ITVNGDS#SAEAEE.L           | S855:      | 2 | 2,6686 | 0,2   | 0,087  |
| 8 | Q684P5 RPGP2_HUMAN   | E.GDSGGSQPST#TSPFKQE.V       | T666:      | 2 | 2,6681 | 0,129 | 0,068  |
| 8 | Q14980 NUMA1_HUMAN   | E.SRPS#LSLGTITDEE.M          | S1945:     | 2 | 2,6672 | 0,088 | -0,231 |
| 8 | Q8TD26 CHD6_HUMAN    | E.SKSSTS#GITGDIGDELQE.A      | S2058:     | 2 | 2,6664 | 0,311 | 0,449  |
| 8 | Q15154 PCM1_HUMAN    | E.TAS#PVAVSLR.S              | S861:      | 2 | 2,6656 | 0,244 | 0,113  |
| 8 | Q8IVF2 AHNK2_HUMAN   | E.SFS#PEEKEE.G               | S5741:     | 2 | 2,6644 | 0,181 | 0,21   |
| 8 | Q6PKG0 LARP1_HUMAN   | R.ESPRPLQLPGAEGPAIS#DGEE.G   | S90:       | 3 | 2,6642 | 0,104 | -0,164 |
| 8 | Q9NQX3 GEPH_HUMAN    | E.LEDLPS#PPPPLS#PPPTTSPHK.Q  | S188:S194: | 3 | 2,6637 | 0,269 | 0,232  |
| 8 | Q92628 K0232_HUMAN   | E.KALYS#PLFPASECEE.C         | S1294:     | 2 | 2,6601 | 0,402 | -0,335 |
| 8 | Q9UN86 G3BP2_HUMAN   | E.EQEERQPS#PEPVQE.N          | S163:      | 2 | 2,6571 | 0,407 | 0,208  |
| 8 | O15234 CASC3_HUMAN   | E.QTSVRDPS#PEADAPVLGS#PEKE.E | S363:S373: | 2 | 2,6564 | 0,338 | 0,198  |
| 8 | Q9UQ35 SRRM2_HUMAN   | E.SYFGVSSLQLK.G              |            | 2 | 2,6556 | 0,349 | -0,099 |
| 8 | Q76FK4 NOL8_HUMAN    | D.SITPSKSS#PVPVSD.T          | S268:      | 2 | 2,6486 | 0,276 | 0,165  |
| 8 | Q9UJK0 CP042_HUMAN   | E.IDPFDVDS#GRE.F             | S241:      | 2 | 2,6435 | 0,352 | 0,092  |
| 8 | Q86SQ0 PHLB2_HUMAN   | E.KLQLS#DEESVFEE.A           | S489:      | 2 | 2,6415 | 0,191 | -0,523 |
| 8 | Q9UBS0 KS6B2_HUMAN   | E.GAVTHT#FCGTIE.Y            | T228:      | 2 | 2,6393 | 0,355 | 0      |
| 8 | Q14160 LAP4_HUMAN    | R.LRVQS#PEPPAPE.R            | S1475:     | 2 | 2,6362 | 0,415 | -0,261 |

|   |                    |                            |            |   |        |       |        |
|---|--------------------|----------------------------|------------|---|--------|-------|--------|
| 8 | P52948 NUP98_HUMAN | E.GSSEETS#FHDE.S           | S709:      | 2 | 2,6341 | 0,342 | -0,094 |
| 8 | P08670 VIME_HUMAN  | E.AANYQDT#IGR.L            | T361:      | 2 | 2,6339 | 0,175 | 0      |
| 8 | Q6ZS17 FA65A_HUMAN | E.GAVAPVLANGHAPYSR.T       |            | 2 | 2,6332 | 0,349 | -0,386 |
| 8 | Q8TB45 DEPD6_HUMAN | E.LLNEKS#PSSQE.T           | S235:      | 2 | 2,6318 | 0,238 | -0,279 |
| 8 | Q9C0C2 TB182_HUMAN | E.FSLS#VGPQRE.A            | S1093:     | 2 | 2,6269 | 0,252 | 0,203  |
| 8 | Q15836 VAMP3_HUMAN | R.RLQQTQNNQVDE.V           |            | 2 | 2,6261 | 0,352 | -0,09  |
| 8 | O95425 SVIL_HUMAN  | R.SLT#QPITTEE.V            | T736:      | 2 | 2,6235 | 0,28  | 0      |
| 8 | Q5VZK9 LR16A_HUMAN | E.IKT#PDSFEE.S             | T1128:     | 2 | 2,6211 | 0,149 | 0,106  |
| 8 | Q3KQU3 MA7D1_HUMAN | E.S#AAPASPAPSPAPSPTAPPQK.E | S539:      | 2 | 2,621  | 0,389 | 0,232  |
| 8 | Q9HC35 EMAL4_HUMAN | E.SRIS#SSPTLLE.N           | S917:      | 2 | 2,6176 | 0,183 | 0,384  |
| 8 | P51608 MECP2_HUMAN | E.TVS#IEVKE.V              | S313:      | 2 | 2,6125 | 0,154 | 0,062  |
| 8 | P35908 K22E_HUMAN  | K.LALDVEIATYR.K            |            | 2 | 2,609  | 0,386 | -0,579 |
| 8 | Q12923 PTN13_HUMAN | E.NS#FGPSSGGLRE.G          | S1232:     | 2 | 2,606  | 0,357 | 0,102  |
| 8 | P22694 KAPCB_HUMAN | E.DIRVS#ITE.K              | S339:      | 2 | 2,6024 | 0,176 | -1,265 |
| 8 | Q8WWM7 ATX2L_HUMAN | K.ISLAPTDVKE.L             |            | 2 | 2,6024 | 0,269 | 0,227  |
| 8 | Q9Y2D8 ADIP_HUMAN  | E.HS#SINVLNITAE.I          | S557:      | 2 | 2,6014 | 0,332 | -1,134 |
| 8 | P19338 NUCL_HUMAN  | D.GRS#ISLYTGE.K            | S458:      | 2 | 2,5984 | 0,428 | 0,46   |
| 8 | Q14C86 GAPD1_HUMAN | R.SNSVSS#LDLE.G            | S588:      | 2 | 2,5969 | 0,222 | 0,216  |
| 8 | Q15648 MED1_HUMAN  | D.FSTLYGSSPLER.Q           |            | 2 | 2,5951 | 0,336 | 0,27   |
| 8 | P56537 IF6_HUMAN   | E.AQPSTIATSM*R.D           |            | 2 | 2,5934 | 0,496 | 0,207  |
| 8 | Q9H019 FA54B_HUMAN | R.NAS#VPNLR.G              | S103:      | 2 | 2,5931 | 0,252 | -0,77  |
| 8 | Q9UHR4 BI2L1_HUMAN | E.IKTPASTPVSGT#PQASPM*IE.R | T257:      | 3 | 2,5927 | 0,149 | 0,521  |
| 8 | O43663 PRC1_HUMAN  | E.LDHT#PDTSFE.R            | T191:      | 2 | 2,5926 | 0,261 | 0,098  |
| 8 | O94782 UBP1_HUMAN  | E.SSEIS#PEPKTE.M           | S475:      | 2 | 2,5919 | 0,309 | -0,57  |
| 8 | Q5T8D3 ACBD5_HUMAN | D.LGNVLTSTPNAK.T           |            | 2 | 2,5884 | 0,389 | 0      |
| 8 | P56537 IF6_HUMAN   | E.RLS#ALGNVTTTEND.Y        | S102:      | 2 | 2,5878 | 0,408 | 0      |
| 8 | P55072 TERA_HUMAN  | E.DNSVVLSQPK.M             |            | 2 | 2,5871 | 0,347 | 0,104  |
| 8 | Q14694 UBP10_HUMAN | E.T#KYSPPAISPLVSE.K        | T362:      | 3 | 2,5867 | 0,13  | 0,117  |
| 8 | Q93073 K0256_HUMAN | E.TSDGLEAS#ENEKE.V         | S891:      | 2 | 2,5856 | 0,33  | 0,574  |
| 8 | Q96KR1 ZFR_HUMAN   | R.RDS#DGVDFEAE.G           | S1054:     | 2 | 2,5847 | 0,302 | 0,709  |
| 8 | Q9UK76 HN1_HUMAN   | R.RNSSEASS#GDFLDLKG.E      | S92:       | 3 | 2,5847 | 0,154 | 0      |
| 8 | Q9H019 FA54B_HUMAN | R.NAS#VPNLRGSEE.R          | S103:      | 2 | 2,5827 | 0,373 | 0,18   |
| 8 | O15061 DMN_HUMAN   | E.RM*S#YEGPTAEVVE.V        | S1141:     | 2 | 2,5808 | 0,142 | -0,156 |
| 8 | O96007 MOS2L_HUMAN | E.TKLPLS#PPLVE.D           | S20:       | 2 | 2,5803 | 0,298 | -0,383 |
| 8 | P52701 MSH6_HUMAN  | E.VGTTYVTDKSEED.N          |            | 2 | 2,5799 | 0,304 | -0,085 |
| 8 | Q14151 SAFB2_HUMAN | E.TSSLNFKVT#PDIE.E         | T201:      | 2 | 2,5745 | 0,34  | -0,398 |
| 8 | O94842 TOX4_HUMAN  | R.SGCENPIIVSK.D            |            | 2 | 2,5712 | 0,26  | -0,205 |
| 8 | Q9NYF8 BCLF1_HUMAN | E.TQS#PEQVKSE.K            | S496:      | 2 | 2,5705 | 0,294 | -0,201 |
| 8 | Q96FF9 CDCA5_HUMAN | E.TLGS#AS#TSTPGRR.S        | S154:S156: | 2 | 2,5682 | 1     | 0,168  |

|   |                     |                            |            |   |        |       |        |
|---|---------------------|----------------------------|------------|---|--------|-------|--------|
| 8 | Q14690 RRP5_HUMAN   | E.YVEAKSS#VLED.-           | S1867:     | 2 | 2,5623 | 0,23  | 0,092  |
| 8 | Q86UW6 N4BP2_HUMAN  | E.KSS#PGEIVVEE.R           | S751:      | 2 | 2,5612 | 0,189 | 0,106  |
| 8 | A1L390 PKHG3_HUMAN  | E.KGPLPS#PTAGLEE.S         | S1154:     | 2 | 2,5609 | 0,391 | -0,089 |
| 8 | Q13439 GOGA4_HUMAN  | E.VFTKEENPES#DGPEVVE.D     | S266:      | 2 | 2,5599 | 0,275 | 0,123  |
| 8 | P61254 RL26_HUMAN   | K.IM*SS#PLSKE.L            | S32:       | 2 | 2,5599 | 0,342 | 0,112  |
| 8 | Q92797 SYMPK_HUMAN  | E.RS#PQTLAPVGE.D           | S1243:     | 2 | 2,5591 | 0,305 | -0,296 |
| 8 | Q01082 SPTB2_HUMAN  | K.TALPAQSAATLPAR.T         |            | 2 | 2,5573 | 0,247 | -0,624 |
| 8 | Q15642 CIP4_HUMAN   | R.APSDS#S#LGTPSDGRPE.L     | S298:S299: | 2 | 2,5552 | 0,346 | 0,07   |
| 8 | P40222 TXLNA_HUMAN  | E.GPGAQAPSS#PRVTE.A        | S515:      | 2 | 2,5539 | 0,39  | -0,511 |
| 8 | Q99590 SFRIP_HUMAN  | E.LIES#PKLE.S              | S293:      | 2 | 2,55   | 0,142 | 0      |
| 8 | O94992 HEXI1_HUMAN  | R.APLS#KFGD.-              | S355:      | 2 | 2,5491 | 0,193 | 0,2    |
| 8 | Q9UKL3 C8AP2_HUMAN  | E.ADTCKNS#PLDELEE.G        | S928:      | 2 | 2,5484 | 0,277 | -0,287 |
| 8 | Q14498 RBM39_HUMAN  | E.RTDASS#ASSFLDSDELE.R     | S334:      | 2 | 2,5481 | 0,381 | -0,128 |
| 8 | Q9H7Z6 MYST1_HUMAN  | E.GTAPS#PGRVS#PPTPARGEPE.V | S37:S42:   | 2 | 2,5478 | 0,132 | 0,23   |
| 8 | Q9Y580 RBM7_HUMAN   | D.NM*TSSAQIIQR.S           |            | 2 | 2,546  | 0,248 | -0,096 |
| 8 | Q16204 CCDC6_HUMAN  | R.QLS#ESESLE.M             | S323:      | 2 | 2,5441 | 0,121 | 0,308  |
| 8 | Q9UPX8 SHAN2_HUMAN  | E.VEM*KPDSS#PSEVPE.G       | S748:      | 2 | 2,544  | 0,173 | -0,15  |
| 8 | O15381 NVL_HUMAN    | E.IQDSKDSS#LLE.S           | S211:      | 2 | 2,5414 | 0,238 | 0,186  |
| 8 | Q9H813 TM206_HUMAN  | E.NS#ELADEQDKE.T           | S24:       | 2 | 2,5414 | 0,204 | -0,27  |
| 8 | Q9UKX7 NUP50_HUMAN  | E.TQS#PSLFGSTK.L           | S221:      | 2 | 2,5396 | 0,256 | -0,198 |
| 8 | Q9UHX1 PUF60_HUMAN  | E.VYDQERFDNS#DLSA.-        | S555:      | 2 | 2,5351 | 0,279 | 0,281  |
| 8 | Q9HBM1 SPC25_HUMAN  | E.LALFDKS#INE.F            | S12:       | 2 | 2,5344 | 0,177 | -0,595 |
| 8 | Q8TB72 PUM2_HUMAN   | E.VNAILS#PR.S              | S82:       | 2 | 2,5287 | 0,25  | -0,064 |
| 8 | Q5TF39 NAGT1_HUMAN  | E.TSRS#SLTEPTAE.V          | S473:      | 2 | 2,5273 | 0,312 | 0      |
| 8 | P35527 K1C9_HUMAN   | R.QGVDADINGLR.Q            |            | 2 | 2,5273 | 0,303 | -0,527 |
| 8 | P02538 K2C6A_HUMAN  | K.ADTLTDEINFLR.A           |            | 2 | 2,5262 | 0,406 | -0,26  |
| 8 | Q92625 ANS1A_HUMAN  | E.QFSGLLHGSS#PVCE.V        | S507:      | 2 | 2,5226 | 0,395 | 0,076  |
| 8 | Q5R372 Q5R372_HUMAN | E.ISTPRPSS#PGGLPE.E        | S119:      | 2 | 2,5224 | 0,414 | 0,579  |
| 8 | O15534 PER1_HUMAN   | K.ASSS#QDLAM*EEEE.E.G      | S1263:     | 2 | 2,5208 | 0,262 | -0,148 |
| 8 | Q8WUX9 CHMP7_HUMAN  | E.LEKLS#LSE.G              | S429:      | 2 | 2,5177 | 0,249 | -0,061 |
| 8 | Q8N806 CN130_HUMAN  | E.SDLQTVFKNES#LNAE.S       | S277:      | 2 | 2,5152 | 0,222 | -0,069 |
| 8 | O43524 FOXO3_HUMAN  | E.LQAS#PAKPSGE.T           | S43:       | 2 | 2,5127 | 0,368 | 0,105  |
| 8 | P18583 SON_HUMAN    | E.SDQTLAALLS#PKE.S         | S1697:     | 2 | 2,512  | 0,46  | -0,252 |
| 8 | ##P04440 HB2P_HUMAN | R.ILNTS#VVGATEE.Q          | S88:       | 2 | 2,5119 | 0,085 | -0,093 |
| 8 | Q13428 TCOF_HUMAN   | K.TGPTVTQVK.A              |            | 2 | 2,5111 | 0,402 | 0,131  |
| 8 | Q8IY81 RRMJ3_HUMAN  | E.LKM*DLPGVVS#IADEGE.T     | S411:      | 2 | 2,5101 | 0,418 | -0,365 |
| 8 | Q96AQ6 PBIP1_HUMAN  | E.GQSPQSLPSTPK.A           |            | 2 | 2,5089 | 0,394 | -0,276 |
| 8 | Q9UKM9 RALY_HUMAN   | E.GLLTHS#EEE.L             | S288:      | 2 | 2,5081 | 0,138 | 0,111  |
| 8 | P31749 AKT1_HUMAN   | R.SGSPS#DNSGAEM*E.V        | S126:      | 2 | 2,5078 | 0,228 | -0,409 |

|   |                    |                           |            |   |        |       |        |
|---|--------------------|---------------------------|------------|---|--------|-------|--------|
| 8 | Q9UBW7 ZMYM2_HUMAN | K.M*TGSAPPPS#PTPNKE.M     | S838:      | 2 | 2,5076 | 0,434 | 0      |
| 8 | Q8N163 K1967_HUMAN | R.NAET#PEATTQQE.T         | T484:      | 2 | 2,5047 | 0,279 | 0,087  |
| 8 | Q6P996 PDXD1_HUMAN | E.RLS#SGPEQITLE.A         | S736:      | 2 | 2,5046 | 0,258 | 0      |
| 8 | P49757 NUMB_HUMAN  | E.GS#FRVTTATE.Q           | S194:      | 2 | 2,5033 | 0,382 | -0,106 |
| 8 | P29966 MARCS_HUMAN | E.AAVASS#PSKANGQE.N       | S27:       | 2 | 2,5026 | 0,46  | -0,262 |
| 8 | O95295 S25BP_HUMAN | D.SGIYPPGS#PGK.-          | S133:      | 2 | 2,4998 | 0,329 | -0,107 |
| 8 | P08107 HSP71_HUMAN | K.GSGS#GPTIEVD.-          | S633:      | 2 | 2,4981 | 0,15  | 0,19   |
| 8 | Q9HC44 GPBL1_HUMAN | E.GEVLSHS#LE.A            | S384:      | 2 | 2,4946 | 0,255 | -0,232 |
| 8 | P81605 DCD_HUMAN   | K.ENAGEDPGLAR.Q           |            | 2 | 2,4942 | 0,245 | -0,108 |
| 8 | O60763 USO1_HUMAN  | E.NSTRQS#EDLGSQFTE.I      | S106:      | 2 | 2,4915 | 0,34  | 0,069  |
| 8 | Q08050 FOXM1_HUMAN | E.TLPISSTPS#KSVLPRT#PE.S  | S613:T620: | 3 | 2,4899 | 0,086 | 0,265  |
| 8 | Q96JY6 PDLI2_HUMAN | R.SSYSSPTSL#PR.A          | S129:      | 2 | 2,4892 | 0,333 | -0,271 |
| 8 | Q99549 MPP8_HUMAN  | D.IQRLS#LNNDIFE.A         | S126:      | 2 | 2,4885 | 0,201 | -0,237 |
| 8 | Q6PJP8 DCR1A_HUMAN | E.CLDS#PPRSE.T            | S147:      | 2 | 2,4873 | 0,239 | 0,107  |
| 8 | Q86U44 MTA70_HUMAN | E.LLNTTT#AKE.Q            | T254:      | 2 | 2,4827 | 0,236 | 0      |
| 8 | Q86V81 THOC4_HUMAN | E.LDAQLDAYNAR.M           |            | 3 | 2,4796 | 0,136 | 1,097  |
| 8 | O60684 IMA7_HUMAN  | E.HYFGVEDD#SLAPQVDE.T     | S509:      | 2 | 2,4699 | 0,382 | 0      |
| 8 | Q15233 NONO_HUMAN  | E.GIGAIGGT#PPAFNR.A       | T450:      | 2 | 2,4696 | 0,152 | -0,433 |
| 8 | Q16799 RTN1_HUMAN  | E.AGSGPARQS#PVAM*E.T      | S71:       | 2 | 2,469  | 0,158 | -0,084 |
| 8 | Q14721 KCNB1_HUMAN | E.CATLLDKAVLS#PE.S        | S720:      | 2 | 2,4686 | 0,221 | 0,245  |
| 8 | Q9UBF8 PI4KB_HUMAN | E.QRAGS#FSTVPNYDNDDE.A    | S445:      | 2 | 2,4667 | 0,256 | 0,55   |
| 8 | P05783 K1C18_HUMAN | E.NS#LREVE.A              | S323:      | 2 | 2,4649 | 0,161 | 0,197  |
| 8 | Q9NWH9 SLTM_HUMAN  | E.VSKPLPS#EGSLAE.A        | S214:      | 2 | 2,4628 | 0,155 | 0,35   |
| 8 | O75531 BAF_HUMAN   | R.DFVAEPM*GEKPVGSLAGIGE.V |            | 3 | 2,4621 | 0,191 | 0,634  |
| 8 | Q9UGU0 TCF20_HUMAN | E.NDTVITIS#PK.Q           | S1522:     | 2 | 2,4593 | 0,226 | -0,81  |
| 8 | P13861 KAP2_HUMAN  | R.APASVLPAAATPR.Q         |            | 2 | 2,4567 | 0,415 | -0,318 |
| 8 | O75821 EIF3G_HUMAN | E.LLKGIPLATGDT#SPEPE.L    | T41:       | 2 | 2,4486 | 0,263 | -0,134 |
| 8 | P23528 COF1_HUMAN  | E.KLGG#AVISLE.G           | S156:      | 2 | 2,4464 | 0,22  | -0,317 |
| 8 | Q14247 SRC8_HUMAN  | E.DAAS#FKAE.L             | S426:      | 2 | 2,4461 | 0,283 | -0,133 |
| 8 | Q99590 SFRIP_HUMAN | E.GEIIQTVDR.Q             |            | 2 | 2,4444 | 0,225 | 0      |
| 8 | Q09472 EP300_HUMAN | E.VNSQAIAEKQPS#QE.V       | S973:      | 2 | 2,4425 | 0,375 | -0,152 |
| 8 | Q07021 C1QBP_HUMAN | E.SDIFS#IRE.V             | S205:      | 2 | 2,4399 | 0,3   | -0,816 |
| 8 | Q55YE7 NHSL1_HUMAN | R.S#PGAPSAGEAE.A          | S1167:     | 2 | 2,4369 | 0,241 | 0,232  |
| 8 | Q00613 HSF1_HUMAN  | E.GRPPS#PPPTSTPE.K        | S363:      | 2 | 2,4352 | 0,317 | 0,174  |
| 8 | P63218 GBG5_HUMAN  | K.VVQQLRLE.A              |            | 2 | 2,4295 | 0,138 | -0,124 |
| 8 | P19838 NFKB1_HUMAN | E.VIQAASS#PVK.T           | S893:      | 2 | 2,4273 | 0,242 | 0,113  |
| 8 | O60841 IF2P_HUMAN  | E.GNTVHIEVK.E             |            | 2 | 2,427  | 0,212 | 0,184  |
| 8 | P42166 LAP2A_HUMAN | E.RDSGS#FVAFQNPGESE.L     | S444:      | 2 | 2,4267 | 0,236 | -0,136 |
| 8 | Q9H7Z6 MYST1_HUMAN | E.GT#APSPGRVS#PPTARGEPE.V | T34:S42:   | 2 | 2,4262 | 0,201 | 0      |

|   |                     |                              |              |   |        |       |        |
|---|---------------------|------------------------------|--------------|---|--------|-------|--------|
| 8 | Q9C0C2 TB182_HUMAN  | E.SQEPLAGQES#PLPLATRE.A      | S601:        | 2 | 2,4252 | 0,345 | 0,061  |
| 8 | Q5T7W0 ZN618_HUMAN  | E.NNIASNQSR#PPAVVEE.K        | S429:        | 2 | 2,4196 | 0,174 | 0      |
| 8 | Q03468 ERCC6_HUMAN  | E.QLS#PQAATSRD.I             | S158:        | 2 | 2,4185 | 0,215 | -0,195 |
| 8 | Q77932 DOM3Z_HUMAN  | E.AM*TQDLSPPKT#PS#PK.-       | T392:S394:   | 3 | 2,418  | 0,088 | 0,098  |
| 8 | Q8TB72 PUM2_HUMAN   | E.VNAILSPRS#E.S              | S85:         | 2 | 2,417  | 0,205 | 0,209  |
| 8 | Q9UKV3 ACINU_HUMAN  | E.QTASEEET#PPPLLTKE.A        | T414:        | 2 | 2,415  | 0,206 | 0,066  |
| 8 | Q9Y4W2 LAS1L_HUMAN  | E.QGS#VNDVKEEE.K             | S560:        | 2 | 2,4133 | 0,319 | 0,093  |
| 8 | Q9BQQ3 GR65_HUMAN   | E.LTTTAVSTSGPEDICSSSSSHER.G  |              | 3 | 2,4116 | 0,215 | 0,076  |
| 8 | P42224 STAT1_HUMAN  | E.IKS#LEDLQDEYD.F            | S162:        | 2 | 2,4104 | 0,196 | -0,079 |
| 8 | P00558 PGK1_HUMAN   | E.DKVSHVSTGGGASLE.L          |              | 2 | 2,4102 | 0,34  | 0,084  |
| 8 | P13010 KU86_HUMAN   | E.QGGAHFS#VSSLAE.G           | S577:        | 2 | 2,4095 | 0,257 | -0,178 |
| 8 | Q9H3H3 CK068_HUMAN  | E.GS#PGGREDGFTA.E.H          | S12:         | 2 | 2,4093 | 0,252 | -0,359 |
| 8 | Q02952 AKA12_HUMAN  | K.SPSP#PVERE.M               | S1331:       | 2 | 2,4075 | 0,09  | 0,113  |
| 8 | Q9H6A9 PCX3_HUMAN   | E.RES#PAAQPLLE.H             | S2023:       | 2 | 2,4048 | 0,15  | 0,284  |
| 8 | O95817 BAG3_HUMAN   | K.VPPAPVPCPPS#PGPSAVPS#SPK.S | S377:S385:   | 3 | 2,4044 | 0,265 | 0,308  |
| 8 | P05387 RLA2_HUMAN   | E.DVIAQGIGK.L                |              | 2 | 2,4034 | 0,225 | 0,068  |
| 8 | Q9B XK5 B2L13_HUMAN | E.KSS#PATSLFVE.L             | S371:        | 2 | 2,4005 | 0,42  | 0      |
| 8 | P28838 AMPL_HUMAN   | E.FLLRFS#QDNA.-              | S515:        | 2 | 2,3962 | 0,314 | -0,378 |
| 8 | Q86U86 PB1_HUMAN    | E.GSS#PAYLKE.I               | S178:        | 2 | 2,3962 | 0,14  | -0,118 |
| 8 | P48681 NEST_HUMAN   | E.ALGKVES#EQEE.L             | S1261:       | 2 | 2,3929 | 0,094 | 0      |
| 8 | Q12888 TP53B_HUMAN  | R.GNLLHFPSS#QGEEE.K          | S1068:       | 2 | 2,3925 | 0,406 | 0,225  |
| 8 | Q02156 KPCE_HUMAN   | E.FKGFS#YFGE.D               | S729:        | 2 | 2,389  | 0,147 | -0,525 |
| 8 | P16615 AT2A2_HUMAN  | E.KVGEAT#ETALTCLVE.K         | T441:        | 2 | 2,3838 | 0,183 | -0,072 |
| 8 | Q15599 NHRF2_HUMAN  | E.SGLHLS#PTAAE.A             | S303:        | 2 | 2,3835 | 0,23  | 0,105  |
| 8 | Q9NPC7 MYNN_HUMAN   | E.QDSIQKS#PLSE.T             | S547:        | 2 | 2,3813 | 0,196 | -0,093 |
| 8 | Q02952 AKA12_HUMAN  | E.TVSILS#KTE.G               | S1259:       | 2 | 2,3809 | 0,111 | 0      |
| 8 | P46013 KI67_HUMAN   | E.LFQT#PICTDKPTT#HE.K        | T2203:T2212: | 3 | 2,3807 | 0,182 | -0,188 |
| 8 | Q92841 DDX17_HUMAN  | E.VARLT#PYEVDE.L             | T66:         | 2 | 2,3807 | 0,184 | -0,445 |
| 8 | Q70L73 Q70L73_HUMAN | R.RVS#RSS#FSSDPDESE.G        | S60:S63:     | 2 | 2,3804 | 0,248 | 0,066  |
| 8 | P09874 PARP1_HUMAN  | E.KT#LGDFAAE.Y               | T109:        | 2 | 2,3791 | 0,209 | -0,118 |
| 8 | P29083 T2EA_HUMAN   | E.LVAQM*T#PEEKE.A            | T419:        | 2 | 2,3754 | 0,229 | -0,089 |
| 8 | Q8IWU2 LMTK2_HUMAN  | E.LSQLTALR.S                 |              | 2 | 2,3736 | 0,09  | 0      |
| 8 | Q70CQ2 UBP34_HUMAN  | R.TGDFLGETIGNE.L             |              | 2 | 2,367  | 0,136 | -0,195 |
| 8 | Q96EY5 F125A_HUMAN  | E.GKSCS#PLAFSAFGD.L          | S232:        | 2 | 2,3667 | 0,361 | -0,48  |
| 8 | Q9UQ35 SRRM2_HUMAN  | E.FSAS#PM*LK.S               | S1124:       | 2 | 2,3662 | 0,175 | 0,312  |
| 8 | Q9NUL3 STAU2_HUMAN  | K.GSS#PT#PPCSPVQPSK.Q        | S486:T488:   | 2 | 2,3651 | 0,219 | -0,289 |
| 8 | Q14137 BOP1_HUMAN   | E.EQVQAST#PCPR.T             | T106:        | 2 | 2,3642 | 0,318 | -0,09  |
| 8 | Q3B820 YB032_HUMAN  | E.VQPVVIREDSL#DSSRS#VSE.K    | S137:S142:   | 3 | 2,3639 | 1     | -0,156 |
| 8 | P27816 MAP4_HUMAN   | K.DVT#PPPETE.V               | T521:        | 2 | 2,3626 | 0,262 | 0,115  |

|   |                     |                            |            |   |        |       |        |
|---|---------------------|----------------------------|------------|---|--------|-------|--------|
| 8 | Q93008 USP9X_HUMAN  | E.GSEEV#PPQTK.D            | S2540:     | 2 | 2,3617 | 0,162 | 0      |
| 8 | Q92628 K0232_HUMAN  | E.KALYS#PLFPASE.C          | S1294:     | 2 | 2,3613 | 0,351 | -0,348 |
| 8 | Q68E09 Q68E09_HUMAN | R.GAS#PPISAIEE.F           | S11:       | 2 | 2,3558 | 0,081 | 0      |
| 8 | Q96LZ7 FA82A_HUMAN  | K.AFNTRVEE.L               |            | 2 | 2,3541 | 0,235 | 0,126  |
| 8 | Q6ZN16 M3K15_HUMAN  | E.HGS#VSPSDAQPDALFE.R      | S950:      | 2 | 2,3518 | 0,222 | -0,264 |
| 8 | Q9Y5K6 CD2AP_HUMAN  | E.VSS#ISSKFE.T             | S432:      | 2 | 2,3518 | 0,214 | 0      |
| 8 | Q13523 PRP4B_HUMAN  | E.TQS#LREQPE.M             | S8:        | 2 | 2,3499 | 0,2   | 0,209  |
| 8 | Q9Y3Q8 T22D4_HUMAN  | R.AAT#PLPSLRVE.A           | T211:      | 2 | 2,3499 | 0,25  | 0      |
| 8 | Q16630 CPSF6_HUMAN  | E.M*DTART#PLSE.A           | T407:      | 2 | 2,3471 | 0,16  | 0,1    |
| 8 | Q9NYL9 TMOD3_HUMAN  | E.KVS#LDPELE.E             | S114:      | 2 | 2,3438 | 0,182 | -0,11  |
| 8 | Q14721 KCNB1_HUMAN  | E.CATLLDK.A                |            | 2 | 2,3427 | 0,259 | 0,297  |
| 8 | Q07157 ZO1_HUMAN    | E.YSM*YSTDSR.H             |            | 2 | 2,3416 | 0,322 | 0,217  |
| 8 | P07900 HS90A_HUMAN  | E.INPDHS#IIE.T             | S641:      | 2 | 2,3403 | 0,181 | 0      |
| 8 | Q9H307 PININ_HUMAN  | E.GAVS#RLGGE.R             | S84:       | 2 | 2,3395 | 0,144 | 0,264  |
| 8 | O15047 SET1A_HUMAN  | E.RVAGS#PVTPLPEQE.A        | S1103:     | 2 | 2,3382 | 0,097 | 0,078  |
| 8 | Q13614 MTMR2_HUMAN  | E.RAS#SPAQCVPVQTVV.-       | S630:      | 2 | 2,3359 | 0,379 | -0,274 |
| 8 | Q5VT52 K0460_HUMAN  | R.S#NSFNSTFE.H             | S1183:     | 2 | 2,3305 | 0,09  | -0,11  |
| 8 | Q9NYD6 HXC10_HUMAN  | E.QSLAGPKGS#PSESE.K        | S226:      | 2 | 2,3288 | 0,218 | 0,168  |
| 8 | O94804 STK10_HUMAN  | R.ILRLS#TFE.K              | S13:       | 2 | 2,3262 | 0,134 | -0,346 |
| 8 | Q5R372 Q5R372_HUMAN | E.ISTPRPSS#PGGLPEE.D       | S119:      | 2 | 2,3253 | 0,278 | -0,076 |
| 8 | Q6ZP91 Q6ZP91_HUMAN | E.DCYVPQRS#IYD.T           | S38:       | 2 | 2,3226 | 0,214 | 0,082  |
| 8 | P05556 ITB1_HUMAN   | E.VNSED#M*DAYCR.K          |            | 2 | 2,3211 | 0,417 | 0      |
| 8 | P15880 RS2_HUMAN    | E.TVFTKS#PYQE.F            | S264:      | 2 | 2,3163 | 0,222 | 0,191  |
| 8 | Q9BSJ8 ESYT1_HUMAN  | E.LSGGPPHITSS#APE.L        | S950:      | 2 | 2,3156 | 0,185 | -0,171 |
| 8 | Q96S38 KS6C1_HUMAN  | E.TKGE#GLVLE.G             | S872:      | 2 | 2,3148 | 0,175 | 0,11   |
| 8 | Q8WVB6 CTF18_HUMAN  | E.GAS#TPS#PSGVPLFTAGRPPR.T | S33:S36:   | 3 | 2,3134 | 0,223 | 0,087  |
| 8 | P00533 EGFR_HUMAN   | R.NGLQSCPIKE.D             |            | 2 | 2,308  | 0,127 | -0,426 |
| 8 | P51610 HCFC1_HUMAN  | E.LGHLS#AEGQE.G            | S1671:     | 2 | 2,3065 | 0,152 | -0,327 |
| 8 | Q96R06 SPAG5_HUMAN  | E.VAPCM#GDRFS#E.V          | S183:      | 2 | 2,3059 | 0,209 | -0,447 |
| 8 | Q52LW3 RHG29_HUMAN  | E.T#KSFENVSV.S             | T169:      | 2 | 2,3049 | 0,219 | 0      |
| 8 | P26038 MOES_HUMAN   | E.LTARIS#QLE.M             | S429:      | 2 | 2,3033 | 0,154 | 0      |
| 8 | Q9UKV3 ACINU_HUMAN  | E.ASS#PPHPQLHS#EEE.I       | S425:S434: | 2 | 2,3022 | 0,328 | -0,068 |
| 8 | Q5UIP0 RIF1_HUMAN   | E.DVSIKS#PICE.K            | S1616:     | 2 | 2,2972 | 0,224 | 0      |
| 8 | Q96EV2 RBM33_HUMAN  | E.DDLLGEDLLSGK.K           |            | 2 | 2,2971 | 0,305 | -0,191 |
| 8 | Q58FF8 H90B2_HUMAN  | K.SLVSVTKE.G               |            | 2 | 2,2964 | 0,18  | 0,353  |
| 8 | Q9Y2U5 M3K2_HUMAN   | R.DRSS#PPPGYIPDE.L         | S164:      | 2 | 2,2954 | 0,221 | 0,404  |
| 8 | Q6PKG0 LARP1_HUMAN  | R.AVTVPVPTKTEE.V           |            | 2 | 2,2921 | 0,451 | -0,416 |
| 8 | P25445 TNR6_HUMAN   | E.AYDT#LIKD.L              | T293:      | 2 | 2,2915 | 0,146 | -1,018 |
| 8 | O94782 UBP1_HUMAN   | E.SSEIS#PEPK.T             | S475:      | 2 | 2,2913 | 0,086 | -0,116 |



|   |                     |                         |            |   |        |       |        |
|---|---------------------|-------------------------|------------|---|--------|-------|--------|
| 8 | Q15742 NAB2_HUMAN   | E.LGEKLS#PLPGGPGAGDPR.I | S171:      | 3 | 2,29   | 0,105 | 1,119  |
| 8 | Q5F1R6 DJC21_HUMAN  | E.NFSRPQIDENPLD.D       |            | 2 | 2,2889 | 0,23  | 0      |
| 8 | P0C7M2 RA1L3_HUMAN  | K.SES#PKEPE.Q           | S6:        | 2 | 2,2883 | 0,119 | -0,372 |
| 8 | Q9NSI2 CU070_HUMAN  | E.LLAS#PAYR.A           | S203:      | 2 | 2,2841 | 0,106 | 0,126  |
| 8 | Q6ZRS2 SRCAP_HUMAN  | E.KNLSLT#PSAPSLTLE.A    | T2603:     | 2 | 2,2833 | 0,239 | -0,148 |
| 8 | O43290 SNUT1_HUMAN  | E.KEPVQPQLPSDDTR.V      |            | 3 | 2,2826 | 0,167 | -1,39  |
| 8 | Q5VYS8 ZCHC6_HUMAN  | E.SFGS#PPKEE.M          | S706:      | 2 | 2,2803 | 0,172 | 0,346  |
| 8 | Q02224 CENPE_HUMAN  | E.NIKM*DLS#YSLE.S       | S611:      | 2 | 2,2794 | 0,252 | 0,346  |
| 8 | Q9Y2N3 PO121_HUMAN  | E.TATKPQATSAPS#PAPK.Q   | S674:      | 3 | 2,2767 | 0,215 | 0,112  |
| 8 | Q12851 M4K2_HUMAN   | R.SLTIRS#ASE.F          | S384:      | 2 | 2,2752 | 0,188 | 0,117  |
| 8 | Q5VWN6 CJ018_HUMAN  | R.SRS#PLLVTVVE.S        | S2037:     | 2 | 2,2738 | 0,194 | -0,095 |
| 8 | Q5H9R7 SAPS3_HUMAN  | E.FTSSLS#TKDSL.R.S      | S731:      | 2 | 2,2696 | 0,242 | -0,172 |
| 8 | Q32MZ4 LRRF1_HUMAN  | R.RGS#GDTSIDTE.A        | S120:      | 2 | 2,2676 | 0,17  | 0      |
| 8 | Q2TB10 ZN800_HUMAN  | E.SPSPSIT#HSPQNE.L      | T424:      | 2 | 2,2646 | 0,183 | -0,668 |
| 8 | P04264 K2C1_HUMAN   | R.TNAENEFVTIK.K         |            | 2 | 2,2579 | 0,305 | 0,193  |
| 8 | Q08499 PDE4D_HUMAN  | E.VEIPSPT#QKE.K         | T350:      | 2 | 2,2578 | 0,092 | 0,404  |
| 8 | Q13371 PHLP_HUMAN   | E.VLVLTsvr.N            |            | 2 | 2,2573 | 0,24  | 0,275  |
| 8 | Q96JM3 ZN828_HUMAN  | E.TDPVKS#PPLPE.H        | S108:      | 2 | 2,2537 | 0,27  | 0      |
| 8 | O15014 ZN609_HUMAN  | E.LES#PLT#PGKVCR.A      | S743:T746: | 2 | 2,2523 | 0,335 | -0,322 |
| 8 | P98179 RBM3_HUMAN   | E.DHFS#FGPISE.V         | S28:       | 2 | 2,2505 | 0,372 | -0,375 |
| 8 | Q9Y624 JAM1_HUMAN   | E.GEFKQTSS#FLV.-        | S296:      | 2 | 2,2485 | 0,179 | -0,092 |
| 8 | O75781 PALM_HUMAN   | E.NGIHPLS#SSEVDE.L      | S228:      | 2 | 2,2478 | 0,179 | 0,083  |
| 8 | O15014 ZN609_HUMAN  | E.LES#PLT#PGKVCR.A      | S743:T746: | 3 | 2,2447 | 0,099 | 0,181  |
| 8 | Q9UMZ2 SYNG_HUMAN   | R.SLS#LGDKE.I           | S1075:     | 2 | 2,244  | 0,127 | 0,131  |
| 8 | P13798 ACPH_HUMAN   | K.ALDVSAS#DDE.I         | S187:      | 2 | 2,243  | 0,269 | 0,332  |
| 8 | P52701 MSH6_HUMAN   | E.VGTTYVTDK.S           |            | 2 | 2,239  | 0,387 | -0,496 |
| 8 | Q96JK2 WDR22_HUMAN  | E.IQPSRAS#PTSDIE.S      | S648:      | 2 | 2,2385 | 0,255 | -0,082 |
| 8 | Q15418 KS6A1_HUMAN  | R.KLPS#TTL.-            | S732:      | 2 | 2,2378 | 0,379 | 0      |
| 8 | Q9BTK6 PA1_HUMAN    | R.GHGDTAASTAAPLS#EEGE.V | S19:       | 2 | 2,2354 | 0,132 | -0,274 |
| 8 | Q2TB10 ZN800_HUMAN  | E.SPSPSITHS#PQNE.L      | S426:      | 2 | 2,2352 | 0,345 | 0,167  |
| 8 | Q9Y4M2 Q9Y4M2_HUMAN | R.CTM*PDEPLVR.A         |            | 2 | 2,235  | 0,124 | 0      |
| 8 | O14745 NHERF_HUMAN  | E.AALES#PRPALVR.S       | S280:      | 3 | 2,2321 | 0,179 | -1,21  |
| 8 | Q9UGU0 TCF20_HUMAN  | R.LNAS#PAAREE.A         | S574:      | 2 | 2,2302 | 0,173 | 0,322  |
| 8 | O94915 FRYL_HUMAN   | E.AALTASQILSR.T         |            | 2 | 2,2277 | 0,117 | 0      |
| 8 | Q9NS56 TOPRS_HUMAN  | R.RTTT#PPDSGVLFE.G      | T205:      | 2 | 2,2218 | 0,279 | 0      |
| 8 | Q96TA1 NIBL1_HUMAN  | E.AS#SPPAS#PLQHLLPGK.A  | S678:S683: | 3 | 2,221  | 0,281 | -0,52  |
| 8 | Q86VQ0 LCA5_HUMAN   | E.DFKPEEYPLT#PE.T       | T347:      | 2 | 2,2119 | 0,254 | 0      |
| 8 | P16949 STMN1_HUMAN  | E.NNNFS#KM*AEE.K        | S94:       | 2 | 2,2118 | 0,126 | -0,381 |
| 8 | Q96RT1 LAP2_HUMAN   | E.GDY#LSYRE.F           | Y1104:     | 2 | 2,2116 | 0,171 | 0,338  |

|   |                     |                             |            |   |        |       |        |
|---|---------------------|-----------------------------|------------|---|--------|-------|--------|
| 8 | O15015 ZN646_HUMAN  | E.LLHPS#PNQDSEE.A           | S33:       | 2 | 2,2079 | 0,22  | -0,169 |
| 8 | Q9Y4C8 RBM19_HUMAN  | E.LSDM*DYLK.S               |            | 2 | 2,2041 | 0,175 | 0,122  |
| 8 | Q52LD0 Q52LD0_HUMAN | K.AGGS#PAS#YHGSTSPR.V       | S192:S195: | 3 | 2,2028 | 0,139 | 0,115  |
| 8 | Q6PJT7 ZC3HE_HUMAN  | E.TYS#PFFR.N                | S274:      | 2 | 2,2004 | 0,093 | -0,245 |
| 8 | Q8TER5 SOLO_HUMAN   | E.VTLPVRGS#PTDAE.G          | S255:      | 2 | 2,1999 | 0,282 | 0,172  |
| 8 | Q14671 PUM1_HUMAN   | E.VNSVLS#PR.S               | S209:      | 2 | 2,1998 | 0,278 | -0,961 |
| 8 | Q9C0C2 TB182_HUMAN  | R.AS#PEPPGPE.S              | S672:      | 2 | 2,1962 | 0,288 | 0,19   |
| 8 | Q9Y5U2 TSSC4_HUMAN  | E.LAHLAGPGS#PE.A            | S265:      | 2 | 2,1881 | 0,279 | 0      |
| 8 | Q96T23 RSF1_HUMAN   | D.AQRLS#PIPE.E              | S594:      | 2 | 2,1875 | 0,138 | 0      |
| 8 | Q86XJ1 GA2L3_HUMAN  | R.HGPGLANVCQYDE.W           |            | 2 | 2,1844 | 0,311 | -0,585 |
| 8 | Q12888 TP53B_HUMAN  | K.TVSS#DGCST#PSREE.G        | S316:T321: | 2 | 2,1841 | 0,291 | 0,584  |
| 8 | Q9H0F6 SHRPN_HUMAN  | K.SNS#PPALGPE.A             | S131:      | 2 | 2,1837 | 0,251 | 0,233  |
| 8 | Q14157 UBP2L_HUMAN  | R.YPSSISS#PQKD.L            | S609:      | 2 | 2,1793 | 0,125 | 0,089  |
| 8 | Q9NW75 GPTC2_HUMAN  | E.LVHDLVS#ALEE.S            | S34:       | 2 | 2,1789 | 0,256 | -0,28  |
| 8 | Q16204 CCDC6_HUMAN  | K.SGGIVISPFRL.E.L           |            | 2 | 2,1695 | 0,204 | -0,261 |
| 8 | Q6Y7W6 PERQ2_HUMAN  | E.CGFYQR.S                  |            | 2 | 2,1691 | 0,274 | 0,294  |
| 8 | Q12769 NU160_HUMAN  | E.SNLQHLS#VLE.L             | S766:      | 2 | 2,1688 | 0,161 | 0      |
| 8 | Q12888 TP53B_HUMAN  | E.DLFDQSNK.T                |            | 2 | 2,1655 | 0,305 | 0      |
| 8 | Q9P035 PTAD1_HUMAN  | E.KRPLFLAPDFDR.W            |            | 3 | 2,1625 | 0,102 | 0,186  |
| 8 | Q7Z2Z1 CO042_HUMAN  | E.AEPLSKEESS#LGE.E          | S1595:     | 2 | 2,1623 | 0,171 | 0      |
| 8 | O43491 E41L2_HUMAN  | E.REEAVPEAS#PVTQAGASVITVE.T | S798:      | 2 | 2,1513 | 0,297 | 0,21   |
| 8 | Q9P031 TAP26_HUMAN  | E.QVHQPLLEEQCS#IDEPLFE.D    | S129:      | 3 | 2,1512 | 0,253 | -0,153 |
| 8 | O15446 RPA34_HUMAN  | E.M*KPLES#PGGTM*APQQPE.G    | S359:      | 3 | 2,1473 | 0,164 | 0,575  |
| 8 | O94916 NFAT5_HUMAN  | E.ISSPARPCS#FEE.A           | S567:      | 2 | 2,1452 | 0,216 | 0,167  |
| 8 | Q66K74 MAP1S_HUMAN  | E.LPLAASSIPRPT#PS#PE.S      | T638:S640: | 2 | 2,1447 | 0,292 | -0,063 |
| 8 | Q9H307 PININ_HUMAN  | E.IAIVHS#DAE.K              | S347:      | 2 | 2,1419 | 0,096 | 0,354  |
| 8 | P13647 K2C5_HUMAN   | K.WTLLQEQT.K.T              |            | 2 | 2,1405 | 0,171 | 0      |
| 8 | Q9H1I8 ASCC2_HUMAN  | R.GRLT#PSDM*PLLE.L          | T233:      | 2 | 2,1393 | 0,18  | 0,171  |
| 8 | O14686 MLL2_HUMAN   | E.LVNRPPS#STE.L             | S2694:     | 2 | 2,135  | 0,315 | 0      |
| 8 | Q9UQ35 SRRM2_HUMAN  | R.GEFSAS#PM*LK.S            | S1124:     | 2 | 2,1349 | 0,281 | 0,105  |
| 8 | O43432 IF4G3_HUMAN  | E.HS#PVVYGTVE.S             | S192:      | 2 | 2,13   | 0,205 | 0,209  |
| 8 | Q6WCQ1 MRIP_HUMAN   | E.VDRS#PGLPM*SD.L           | S618:      | 2 | 2,1288 | 0,26  | 0,192  |
| 8 | P27816 MAP4_HUMAN   | E.ALNSPHSES#FVSPE.A         | S202:      | 2 | 2,1281 | 0,138 | 0,309  |
| 8 | Q9H8W4 PKHF2_HUMAN  | R.SDSYSQSLK.S               |            | 2 | 2,1275 | 0,332 | 0,06   |
| 8 | Q6S8J3 A26CA_HUMAN  | K.AGFAGDDAPR.A              |            | 2 | 2,1258 | 0,149 | 0,062  |
| 8 | Q86SQ0 PHLB2_HUMAN  | E.KLQLS#DEESVFE.E           | S489:      | 2 | 2,1247 | 0,145 | -0,081 |
| 8 | Q9NYF8 BCLF1_HUMAN  | E.ALDYFS#DKES#GKQK.F        | S385:S389: | 3 | 2,1244 | 0,199 | 0,103  |
| 8 | Q9H4A3 WNK1_HUMAN   | E.LSEPSHLNGPSS#DPE.A        | S2012:     | 3 | 2,1237 | 0,107 | 0,445  |
| 8 | Q9NRY5 F1142_HUMAN  | E.KAETSLGIPS#PSEISTE.V      | S129:      | 2 | 2,1219 | 0,284 | 0,2    |

|   |                      |                           |                 |   |        |       |        |
|---|----------------------|---------------------------|-----------------|---|--------|-------|--------|
| 8 | P04075 ALDOA_HUMAN   | E.SLFVSNHAY#.-            | Y364:           | 2 | 2,1193 | 0,175 | 0,109  |
| 8 | O60303 K0556_HUMAN   | E.GRSS#PGPDTLVVLE.F       | S253:           | 2 | 2,1162 | 0,117 | -0,567 |
| 8 | Q9UHV7 MED13_HUMAN   | E.GFCS#PKPSE.I            | S890:           | 2 | 2,1124 | 0,206 | 0      |
| 8 | Q8WY91 THAP4_HUMAN   | E.AVQSEHS#PM*SINE.V       | S324:           | 2 | 2,1096 | 0,132 | -0,271 |
| 8 | Q4ZG04 Q4ZG04_HUMAN  | E.LLLSTLVR.E              |                 | 2 | 2,1022 | 0,288 | -0,133 |
| 8 | Q7L4E1 FA73B_HUMAN   | E.RT#LM*LPLTE.G           | T267:           | 2 | 2,1008 | 0,342 | -0,313 |
| 8 | P06753 TPM3_HUMAN    | R.KLVIIEGDLE.R            |                 | 2 | 2,0975 | 0,237 | -0,216 |
| 8 | ##Q96EK7 F120B_HUMAN | D.T#Y#MPVEQRPESDT#YMPVE.Q | T458:Y459:T470: | 2 | 2,0971 | 0,097 | 1,113  |
| 8 | B2RDY9 B2RDY9_HUMAN  | R.SALFAQINQGE.S           |                 | 2 | 2,0896 | 0,212 | -0,207 |
| 8 | O60307 MAST3_HUMAN   | E.RGPS#PSSLNTISLD.T       | S774:           | 2 | 2,0883 | 0,345 | -0,394 |
| 8 | P11166 GTR1_HUMAN    | E.ELFHPLGADS#QV.-         | S490:           | 2 | 2,084  | 0,191 | -0,438 |
| 8 | Q9HC35 EMAL4_HUMAN   | E.QTVEPESDHS#EEE.S        | S938:           | 2 | 2,0833 | 0,133 | -0,076 |
| 8 | Q7Z2K8 GRIN1_HUMAN   | E.ASS#LGQKDLE.A           | S762:           | 2 | 2,0812 | 0,11  | -0,108 |
| 8 | O95218 ZRAB2_HUMAN   | E.NVEYIER.E               |                 | 2 | 2,077  | 0,26  | 0,198  |
| 8 | Q14247 SRC8_HUMAN    | E.RLPSS#PVYE.D            | S418:           | 2 | 2,0753 | 0,193 | -0,108 |
| 8 | P05787 K2C8_HUMAN    | E.SS#DVLPK.-              | S478:           | 2 | 2,0703 | 0,134 | 0,369  |
| 8 | P57740 NU107_HUMAN   | E.ISS#PVIR.E              | S11:            | 2 | 2,0689 | 0,16  | 0,215  |
| 8 | O94915 FRYL_HUMAN    | K.NPSVVFS#SNEDLE.V        | S2384:          | 2 | 2,0687 | 0,193 | 0,08   |
| 8 | ##P31512 FMO4_HUMAN  | K.ILQEKET#AE.M            | T150:           | 2 | 2,0653 | 0,155 | -0,214 |
| 8 | P16989 DBPA_HUMAN    | E.AAAAAPQDPAPK.S          |                 | 2 | 2,0651 | 0,271 | 0,11   |
| 8 | Q9NYL9 TMOD3_HUMAN   | E.KVS#LDPELEE.A           | S114:           | 2 | 2,0648 | 0,11  | -0,098 |
| 8 | Q13042 CDC16_HUMAN   | E.TGLTPLET#SR.K           | T585:           | 2 | 2,0643 | 0,159 | -0,317 |
| 8 | O43572 AKA10_HUMAN   | E.SSSTLTVASR.N            |                 | 2 | 2,0572 | 0,169 | 0      |
| 8 | P85037 FOXK1_HUMAN   | E.GS#PIPHDPE.F            | S445:           | 2 | 2,0563 | 0,251 | 0,119  |
| 8 | Q5SYE7 NHSL1_HUMAN   | R.AVPSPT#TGEE.G           | T1235:          | 2 | 2,0545 | 0,292 | 0,114  |
| 8 | P48634 BAT2_HUMAN    | E.ALTTVTVAPAPR.R          |                 | 2 | 2,0535 | 0,346 | -0,713 |
| 8 | Q02952 AKA12_HUMAN   | E.TLAGVKS#QE.M            | S1149:          | 2 | 2,044  | 0,131 | 0,12   |
| 8 | P15559 NQO1_HUMAN    | E.GHLS#PDIVAE.Q           | S82:            | 2 | 2,0306 | 0,184 | 0      |
| 8 | P31943 HNRH1_HUMAN   | E.GRPS#GEAFVELE.S         | S54:            | 2 | 2,03   | 0,172 | -0,178 |
| 8 | Q9UPN3 MACF1_HUMAN   | R.RGS#DASDFDLE.T          | S5372:          | 2 | 2,0299 | 0,119 | -0,347 |
| 8 | Q9BQG0 MBB1A_HUMAN   | E.QLM*TVLQAGK.A           |                 | 2 | 2,0275 | 0,13  | -0,11  |
| 8 | Q6UN15 FIP1_HUMAN    | E.FTS#PPSLFK.T            | S259:           | 2 | 2,0244 | 0,096 | -0,442 |
| 8 | Q5VY92 Q5VY92_HUMAN  | R.M*QDIPEETESR.D          |                 | 2 | 2,0212 | 0,096 | -1,084 |
| 8 | P06493 CDC2_HUMAN    | E.GT#YGVVYK.G             | T14:            | 2 | 2,0109 | 0,4   | -0,189 |
| 8 | Q99536 VAT1_HUMAN    | E.AATGEDASS#PPPKTE.A      | S18:            | 2 | 2,01   | 0,34  | -0,397 |
| 8 | P11169 GTR3_HUMAN    | E.M*NS#IEPAKE.T           | S485:           | 2 | 2,0093 | 0,102 | -0,109 |
| 8 | Q9UHX1 PUF60_HUMAN   | K.LGLPPLT#PEQQE.A         | T60:            | 2 | 2,0042 | 0,091 | -0,087 |
| 8 | Q08050 FOXM1_HUMAN   | E.TLPISST#PSK.S           | T611:           | 2 | 2,0004 | 0,276 | -1,428 |
| 8 | Q99728 BARD1_HUMAN   | K.SRNEVVT#PE.K            | T299:           | 2 | 1,9922 | 0,095 | -0,11  |

|   |                    |                           |          |   |        |       |        |
|---|--------------------|---------------------------|----------|---|--------|-------|--------|
| 8 | Q8NI35 INADL_HUMAN | E.FSGTIHDINS#SLILE.A      | S805:    | 2 | 1,9897 | 0,168 | 0,071  |
| 8 | Q6NZI2 PTRF_HUMAN  | D.AVLVDKSDS#D.-           | S389:    | 2 | 1,9828 | 0,186 | 0,324  |
| 8 | Q71F56 MD13L_HUMAN | R.M*FPT#PPSLE.Q           | T867:    | 2 | 1,9808 | 0,202 | 0,109  |
| 8 | Q16512 PKN1_HUMAN  | R.TST#FCGTPE.F            | T774:    | 2 | 1,9798 | 0,162 | 0      |
| 8 | P05787 K2C8_HUMAN  | R.ISS#SSFSR.V             | S35:     | 2 | 1,9783 | 0,085 | 0,257  |
| 8 | Q14789 G0GB1_HUMAN | E.ISIVDIANK.R             |          | 2 | 1,9762 | 0,161 | 0,188  |
| 8 | P0C0S8 H2A1_HUMAN  | R.AGLQFPVGR.V             |          | 2 | 1,9723 | 0,309 | 0,065  |
| 8 | O95425 SVIL_HUMAN  | E.SSSTFSFSGR.D            |          | 2 | 1,9645 | 0,257 | 0      |
| 8 | Q9H2G2 SLK_HUMAN   | E.NSLPIPASK.R             |          | 2 | 1,9613 | 0,204 | 0,263  |
| 8 | P07195 LDHB_HUMAN  | E.KLIAPVAEEE.A            |          | 2 | 1,9586 | 0,172 | 0,222  |
| 8 | P27816 MAP4_HUMAN  | E.MALGKDVTPPET#E.V        | T526:    | 2 | 1,9581 | 0,102 | 0,78   |
| 8 | O00401 WASL_HUMAN  | E.TSKVIY#DFIE.K           | Y256:    | 2 | 1,9576 | 0,18  | -0,283 |
| 8 | Q5H9R7 SAPS3_HUMAN | E.FTSS#LSTK.D             | S729:    | 2 | 1,9481 | 0,1   | 0,192  |
| 8 | Q9UGU0 TCF20_HUMAN | D.TVTIS#PKQE.G            | S1522:   | 2 | 1,9374 | 0,189 | -0,113 |
| 8 | Q14451 GRB7_HUMAN  | R.RAT#SLPSIPNPFPE.L       | T62:     | 2 | 1,9348 | 0,32  | -0,38  |
| 8 | Q96PK6 RBM14_HUMAN | R.AQPSVSLGAPYR.G          |          | 2 | 1,9335 | 0,128 | 0      |
| 8 | P43487 RANG_HUMAN  | E.ALS#VKEE.T              | S188:    | 2 | 1,9314 | 0,101 | 0,285  |
| 8 | Q9UKV3 ACINU_HUMAN | K.AES#PAEKVPE.E           | S490:    | 2 | 1,9295 | 0,103 | -0,322 |
| 8 | O95208 EPN2_HUMAN  | E.LEQARPQTS#GEEE.L        | S274:    | 2 | 1,927  | 0,222 | -0,236 |
| 8 | Q9NY61 AATF_HUMAN  | E.LLFQYPDTR.Y             |          | 2 | 1,9262 | 0,156 | -0,423 |
| 8 | P40818 UBP8_HUMAN  | E.SIPSKPAAQT#PPASIE.V     | T351:    | 2 | 1,9259 | 0,224 | -0,292 |
| 8 | Q8WVB6 CTF18_HUMAN | E.GAST#PS#PSGVLFTAGRPPR.T | T34:S36: | 2 | 1,9235 | 0,188 | 0,578  |
| 8 | Q92785 REQU_HUMAN  | E.DSQPPT#PVSQR.S          | T248:    | 2 | 1,9172 | 0,119 | 0,094  |
| 8 | O95482 UB6L1_HUMAN | E.LVT#PQDHE.V             | T210:    | 2 | 1,9099 | 0,144 | 0,06   |
| 8 | Q8N1G0 ZN687_HUMAN | K.LSPAT#PTSE.G            | T377:    | 2 | 1,9085 | 0,125 | 0,248  |
| 8 | Q9H8V3 ECT2_HUMAN  | E.TM*YLYEK.A              |          | 2 | 1,9079 | 0,116 | -0,57  |
| 8 | P06493 CDC2_HUMAN  | E.GTY#GVVYK.G             | Y15:     | 2 | 1,9036 | 0,364 | -0,315 |
| 8 | P22626 ROA2_HUMAN  | R.GGGGNFGPGPGSNFR.G       |          | 2 | 1,9028 | 0,229 | -0,089 |
| 8 | Q02952 AKA12_HUMAN | K.SAESPTS#PVTSE.T         | S286:    | 2 | 1,8986 | 0,134 | 0,096  |
| 8 | Q86W92 LIPB1_HUMAN | E.DDM*FKDFAAR.S           |          | 2 | 1,8956 | 0,18  | 0      |
| 8 | Q5T8D3 ACBD5_HUMAN | E.DLGNVLTSTPNAK.T         |          | 2 | 1,8955 | 0,195 | 0,092  |
| 8 | Q9BQS8 FYCO1_HUMAN | E.ICLLKS#GE.L             | S1343:   | 2 | 1,8918 | 0,097 | 0      |
| 8 | Q5F1R6 DJC21_HUMAN | E.NFSRPQIDENPLDD.N        |          | 2 | 1,8849 | 0,099 | -0,147 |
| 8 | Q92597 NDRG1_HUMAN | D.ITPNSGAAGNSAGPK.S       |          | 2 | 1,8839 | 0,349 | 0      |
| 8 | P00533 EGFR_HUMAN  | E.DHFLSLQR.M              |          | 2 | 1,8838 | 0,282 | 0      |
| 8 | Q9NR30 DDX21_HUMAN | K.LRS#DAGLE.S             | S7:      | 2 | 1,8814 | 0,123 | 0,195  |
| 8 | Q6PJF5 RHDF2_HUMAN | E.SPPLSAS#YFR.G           | S315:    | 2 | 1,8805 | 0,133 | -0,405 |
| 8 | Q12756 KIF1A_HUMAN | E.SCPVVGVM*SR.S           |          | 2 | 1,8799 | 0,269 | -0,181 |
| 8 | Q15154 PCM1_HUMAN  | E.TASPVAVSLR.S            |          | 2 | 1,867  | 0,302 | 0,488  |

|   |                      |                                           |                 |   |        |       |        |
|---|----------------------|-------------------------------------------|-----------------|---|--------|-------|--------|
| 8 | Q15642 CIP4_HUMAN    | E.DFSQPM*NR.A                             |                 | 2 | 1,8662 | 0,184 | -0,06  |
| 8 | Q13445 TMED1_HUMAN   | E.FTFLLPAGR.K                             |                 | 2 | 1,8644 | 0,302 | -0,298 |
| 8 | Q9BQY9 DBND2_HUMAN   | E.LSLPVPSTDR.T                            |                 | 2 | 1,8626 | 0,222 | 0,112  |
| 8 | Q14203 DCTN1_HUMAN   | E.ANVRLS#LLE.K                            | S974:           | 2 | 1,8611 | 0,117 | -0,446 |
| 8 | Q9Y2W2 WBP11_HUMAN   | E.LTPLQAM*M*LR.M                          |                 | 2 | 1,8579 | 0,137 | 0      |
| 8 | Q12906 ILF3_HUMAN    | D.M*GLPTGAEGR.D                           |                 | 2 | 1,8456 | 0,178 | -0,243 |
| 8 | Q16204 CCDC6_HUMAN   | K.SGGIVISPFR.L                            |                 | 2 | 1,8441 | 0,16  | -0,236 |
| 8 | Q9UPS8 ANR26_HUMAN   | E.VAS#EEEQERE.G                           | S530:           | 2 | 1,8432 | 0,252 | 0      |
| 8 | Q08050 FOXMI1_HUMAN  | K.SVLPRT#PE.S                             | T620:           | 2 | 1,8432 | 0,169 | -0,872 |
| 8 | Q5T4S7 UBR4_HUMAN    | E.RLCS#IYPEENE.V                          | S4337:          | 2 | 1,8401 | 0,189 | -0,152 |
| 8 | Q16643 DREB_HUMAN    | E.GASTLQGEPR.A                            |                 | 2 | 1,8068 | 0,167 | 0,06   |
| 8 | Q9H0E9 BRD8_HUMAN    | E.SGTIFGSQIK.D                            |                 | 2 | 1,806  | 0,201 | -0,118 |
| 8 | P49411 EFTU_HUMAN    | E.HVVVVVVK.A                              |                 | 2 | 1,7893 | 0,118 | 0,318  |
| 8 | P05114 HMGNI1_HUMAN  | E.DLPAENGETK.T                            |                 | 2 | 1,7439 | 0,216 | 0,114  |
| 8 | P48436 SOX9_HUMAN    | E.QLS#PSHYSE.Q                            | S403:           | 2 | 1,7356 | 0,136 | -0,649 |
| 8 | P10809 CH60_HUMAN    | K.LVQDVANNTNEE.A                          |                 | 2 | 1,7053 | 0,114 | -0,181 |
| 8 | A8K7V5 A8K7V5_HUMAN  | E.VSTAPAGTDM*PAAK.K                       |                 | 2 | 1,7044 | 0,166 | 0      |
| 8 | Q2TAA2 IAH1_HUMAN    | E.LSLLGDGDH.-                             |                 | 2 | 1,6957 | 0,162 | 0,329  |
| 8 | P04264 K2C1_HUMAN    | R.TLLEGEESR.M                             |                 | 2 | 1,6723 | 0,164 | 0,708  |
| 8 | Q6ZRV2 FA83H_HUMAN   | R.RGS#PVPPVPE.R                           | S914:           | 2 | 1,6515 | 0,122 | 0      |
| 8 | P85037 FOXK1_HUMAN   | R.EGS#PIPHDPE.F                           | S445:           | 2 | 1,645  | 0,177 | 0      |
| 8 | O75952 CABYR_HUMAN   | E.AVGGLSSKATPK.T                          |                 | 2 | 1,6442 | 0,241 | 0,101  |
| 8 | P78347 GTF2I_HUMAN   | K.VKTEPT#EDSGISLE.M                       | T225:           | 2 | 1,6317 | 0,11  | -0,231 |
| 8 | Q8IZT6 ASPM_HUMAN    | E.ENKIPIS#PISPAFNE.C                      | S222:           | 2 | 1,6252 | 0,128 | -0,281 |
| 8 | ##Q92502 STAR8_HUMAN | E.IS#LS#RPFT#GPKHD.G                      | S789:S791:T795: | 2 | 1,6239 | 0,089 | -0,504 |
| 8 | O15047 SET1A_HUMAN   | K.FSFLAS#DTEEEEE.N                        | S508:           | 2 | 1,6072 | 0,209 | -0,076 |
| 9 | Q8IX01 SFR14_HUMAN   | E.ASGPS#PKPAGVDISEAPQTSSPCPSADIDM*KTM*E.T | S757:           | 3 | 8,9796 | 0,609 | 0,615  |
| 9 | Q8WXI9 P66B_HUMAN    | R.GRLTPS#PDIIVLS#DNEASS#PR.S              | S122:S129:S135: | 3 | 6,7211 | 0,338 | 0,074  |
| 9 | O75179 ANR17_HUMAN   | R.NSPLDCGSAS#PNKVASSSEQE.A                | S2067:          | 2 | 6,2748 | 0,531 | 0,544  |
| 9 | Q96LZ7 FA82A_HUMAN   | E.GGYIT#ANT#DTEEQSFVVPK.A                 | T154:T157:      | 2 | 6,0345 | 0,45  | 0,661  |
| 9 | Q8WU17 RN139_HUMAN   | R.NGVQHTGAAAEFNDT#D.-                     | T663:           | 2 | 6,029  | 0,497 | 0,586  |
| 9 | Q3B820 YB032_HUMAN   | E.KVAQPAGASADLNTS#FSGVDE.H                | S67:            | 2 | 5,9406 | 0,585 | 0      |
| 9 | Q92734 TFG_HUMAN     | E.INKNVM*SAFGLTDDQVSGPPSAPAEDR.S          |                 | 3 | 5,8572 | 0,578 | 0,323  |
| 9 | P16989 DBPA_HUMAN    | E.AKAGEAPTENPAPPTQQSS#AE.-                | S370:           | 2 | 5,8427 | 0,541 | 0      |
| 9 | P35579 MYH9_HUMAN    | E.ALKTELEDT#LDSTAAQQE.L                   | T1151:          | 2 | 5,7851 | 0,605 | -1,493 |
| 9 | Q76L83 ASXL2_HUMAN   | E.TNM*KEPLATLVDQS#PE.S                    | S562:           | 2 | 5,6806 | 0,441 | -0,131 |
| 9 | Q00537 PCTK2_HUMAN   | E.NLKM*GS#DGESDQASGTSSDE.V                | S105:           | 2 | 5,6804 | 0,554 | 0      |
| 9 | P19338 NUCL_HUMAN    | E.SKTLVLSNLS#YSATEE.T                     | S494:           | 2 | 5,6407 | 0,529 | 0      |
| 9 | Q96T60 PNKP_HUMAN    | E.TRTPESQPDT#PPGTPLVSQDE.K                | T118:           | 2 | 5,4907 | 0,584 | 0,209  |

|   |                     |                                           |              |   |        |       |        |
|---|---------------------|-------------------------------------------|--------------|---|--------|-------|--------|
| 9 | Q03164 HRX_HUMAN    | E.KSVASSESDPALLS#PGVDPTPE.G               | S2978:       | 2 | 5,4246 | 0,474 | 0,431  |
| 9 | Q92734 TFG_HUMAN    | K.NVM*SAFGLTDDQVSGPPSAPAEDR.S             |              | 2 | 5,4121 | 0,558 | 0,591  |
| 9 | Q96RG2 PASK_HUMAN   | E.LRETPSSLAVGS#DPDVGSLQE.Q                | S777:        | 2 | 5,3702 | 0,534 | 0,327  |
| 9 | Q8N9T8 KRI1_HUMAN   | E.GVHGGPPVQLAVDDDS#SDEGE.L                | S286:        | 2 | 5,3286 | 0,599 | 0,246  |
| 9 | O75376 NCOR1_HUMAN  | E.REPAPLLSAQYETLSDS#DD.-                  | S2438:       | 2 | 5,2558 | 0,579 | 0,112  |
| 9 | Q5T8I3 F102B_HUMAN  | E.KILQSQDFSLDSS#AEEE.G                    | S290:        | 2 | 5,2263 | 0,497 | 0,669  |
| 9 | Q14201 BTG3_HUMAN   | E.VKPSSVTAASAS#PVYQISE.L                  | S169:        | 2 | 5,2158 | 0,344 | -0,191 |
| 9 | P29966 MARCS_HUMAN  | E.LQANGSAPAADKEEPAAGSAAAGSAAEK.G          |              | 3 | 5,1991 | 0,455 | 0,403  |
| 9 | Q13263 TIF1B_HUMAN  | E.TKPVLM*ALAECPGAEGPR.L                   |              | 3 | 5,1617 | 0,3   | 0,404  |
| 9 | Q9UHR4 BI2L1_HUMAN  | E.IKTPASTPVSGTPQAS#PM*IE.R                | S261:        | 2 | 5,1557 | 0,492 | 0,116  |
| 9 | Q9NYL9 TMOD3_HUMAN  | E.KVSLDPELEELTASADT#E.L                   | T129:        | 2 | 5,1117 | 0,497 | -0,115 |
| 9 | Q9UQ35 SRRM2_HUMAN  | E.TKEQNSALPTSS#QDEELM*E.V                 | S1233:       | 2 | 5,065  | 0,527 | 0,219  |
| 9 | A8MVB1 A8MVB1_HUMAN | E.KLVSPASAAAASSPSSPS#PQPVSSE.L            | S43:         | 2 | 5,0275 | 0,476 | 0,399  |
| 9 | Q92917 GPKOW_HUMAN  | E.LHYDAICQYM*GPS#DTDDD.-                  | S471:        | 2 | 5,0252 | 0,601 | 0,552  |
| 9 | P02538 K2C6A_HUMAN  | R.AIGGGLSSVGGGSSTIK.Y                     |              | 2 | 4,9945 | 0,53  | 0,084  |
| 9 | Q96QR8 PURB_HUMAN   | E.HYAQLGPSS#PEQLAAGAE.G                   | S101:        | 2 | 4,9909 | 0,53  | 0,3    |
| 9 | Q02952 AKA12_HUMAN  | E.ARGDTTVSEALT#PEAVTAAE.T                 | T972:        | 2 | 4,966  | 0,442 | 0,333  |
| 9 | Q9UK76 HN1_HUMAN    | R.RNS#SEASSGDFLDLKG.E.G                   | S87:         | 2 | 4,9167 | 0,551 | 0,064  |
| 9 | Q14694 UBP10_HUMAN  | E.TKYS#PPAIS#PLVSEK.Q                     | S365:S370:   | 3 | 4,8833 | 0,312 | 0      |
| 9 | Q15464 SHB_HUMAN    | E.GQSVDS#DSESTVS#PR.L                     | S310:S317:   | 2 | 4,8803 | 1     | -0,143 |
| 9 | P26358 DNMT1_HUMAN  | E.KLSIFDANES#GFESYE.A                     | S394:        | 2 | 4,8697 | 0,389 | 0      |
| 9 | P05362 ICAM1_HUMAN  | E.LKREPAVGEPAEVTTTVLVR.R                  |              | 3 | 4,8216 | 0,466 | 0,084  |
| 9 | Q96B54 ZN428_HUMAN  | E.GTYHCTECEDS#FDNLGE.L                    | S169:        | 2 | 4,8046 | 0,544 | 0,346  |
| 9 | Q96S82 UBL7_HUMAN   | E.SSSHPTPTPGTQGHSS#GTS#PM*SSGVQSGTPITND.L | S298:S301:   | 3 | 4,7997 | 1     | 0,327  |
| 9 | P49916 DNL3_HUMAN   | E.KADFTVVAGDEGSS#TTGGSSEE.N               | S761:        | 2 | 4,7928 | 0,565 | 0,11   |
| 9 | Q81WW6 RHG12_HUMAN  | R.AT#TPPNQGRPDS#PVYANLQE.L                | T230:S240:   | 2 | 4,775  | 0,415 | 0,316  |
| 9 | Q86W92 LIPB1_HUMAN  | K.DFAARS#PSAS#ITDEDSNV.-                  | S999:S1003:  | 2 | 4,7659 | 0,444 | 0,12   |
| 9 | Q92797 SYMPK_HUMAN  | E.DAM*KT#PS#PAAEDAREPE.A                  | T1257:S1259: | 3 | 4,7606 | 0,411 | 0,459  |
| 9 | O95232 CROP_HUMAN   | E.VNGTSEDIKSEGDTQS#N.-                    | S431:        | 2 | 4,76   | 0,579 | -0,131 |
| 9 | Q8IX01 SFR14_HUMAN  | E.AS#GPSKPKAGVDISEAPQTSSPCPSADIDM*K.T     | S754:        | 3 | 4,7423 | 0,372 | 0,229  |
| 9 | P48960 CD97_HUMAN   | E.GSYDCVCSPGYEPVSGAK.T                    |              | 2 | 4,7348 | 0,552 | 0,252  |
| 9 | Q99550 MPP9_HUMAN   | E.KTFISLSTDV#PNQSNSTNE.M                  | S39:         | 2 | 4,722  | 0,529 | 0,522  |
| 9 | P67809 YBOX1_HUMAN  | R.NYQQNYQNS#ESGEKNE.G                     | S165:        | 2 | 4,7153 | 0,355 | 0,303  |
| 9 | Q6ZSR9 YJ005_HUMAN  | R.DGPSSNSSFHS#SEEEGTDL.E.G                | S42:S43:     | 2 | 4,7037 | 1     | 0,215  |
| 9 | Q8NHV4 NEDD1_HUMAN  | E.SGNLNTSPSSNQTRNS#E.K                    | S525:        | 2 | 4,6994 | 0,368 | -0,065 |
| 9 | Q9HD15 SRA1_HUMAN   | K.APRS#PPVGGSPASGVEPTSPVSE.A              | S87:         | 2 | 4,664  | 0,562 | 0,969  |
| 9 | Q92734 TFG_HUMAN    | K.NVM*SAFGLTDDQVSGPPSAPAEDR.S             |              | 3 | 4,6356 | 0,341 | 0,369  |
| 9 | Q96JM3 ZN828_HUMAN  | K.LAPVPS#PEPQKAPVS#PE.S                   | S204:S214:   | 2 | 4,6083 | 0,405 | 0,183  |
| 9 | O75531 BAF_HUMAN    | R.DFVAEPM*GEKPVGSLAGIGE.V                 |              | 2 | 4,6047 | 0,504 | 0,423  |

|   |                     |                                |              |   |        |       |        |
|---|---------------------|--------------------------------|--------------|---|--------|-------|--------|
| 9 | Q01804 OTUD4_HUMAN  | K.TAAAAADVNGFKPLSGNE.Q         |              | 2 | 4,5875 | 0,588 | -0,282 |
| 9 | A5YM69 A5YM69_HUMAN | E.HLDM*APFSSDLGS#EEEE.V        | S145:        | 2 | 4,5621 | 0,491 | 0      |
| 9 | Q02952 AKA12_HUMAN  | E.HDPGQGSSS#PEQAGSPTEGE.G      | S743:        | 2 | 4,5565 | 0,373 | 0      |
| 9 | P98171 RHG04_HUMAN  | E.KQVVGAGLQTAGESGSS#PEGLLASE.L | S824:        | 2 | 4,5467 | 0,46  | 0,398  |
| 9 | Q96S66 CLCC1_HUMAN  | E.SSQSAKPVSGQDTSNGTEGS#PAAE.K  | S509:        | 3 | 4,5413 | 0,454 | 0,231  |
| 9 | Q9UKI8 TLK1_HUMAN   | R.FTGVASGSTGSGSCSVGAK.A        |              | 2 | 4,5355 | 0,527 | -0,47  |
| 9 | P67809 YBOX1_HUMAN  | E.TKAADPPAENS#SAPEAEQGGAE.-    | S313:        | 2 | 4,502  | 0,454 | 0,442  |
| 9 | Q9UBQ5 EIF3K_HUMAN  | E.KIDFDSVSSIM*ASS#Q.-          | S217:        | 2 | 4,4906 | 0,439 | 0,071  |
| 9 | B2CI53 B2CI53_HUMAN | R.NGILASPQS#APGNLDNSK.S        | S263:        | 2 | 4,4716 | 0,517 | -0,393 |
| 9 | P54105 ICLN_HUMAN   | E.CQALHPDPEDEDS#DD.Y           | S144:        | 2 | 4,4604 | 0,521 | -0,335 |
| 9 | Q96T23 RSF1_HUMAN   | E.SEKPGS#PEAAETS#PPSNIIDHCE.K  | S612:S619:   | 3 | 4,4485 | 0,452 | 0,14   |
| 9 | P46821 MAP1B_HUMAN  | R.SLM*S#S#PEDLTKDFEE.L         | S831:S832:   | 2 | 4,4265 | 0,476 | -0,256 |
| 9 | Q14247 SRC8_HUMAN   | E.RLPSS#PVYEDAAS#FKAE.L        | S418:S426:   | 2 | 4,4226 | 0,533 | 0,602  |
| 9 | O43633 CHM2A_HUMAN  | E.LSNLPSTGGG#LS#VAAGGK.K       | S188:S190:   | 2 | 4,3847 | 0,53  | 0,275  |
| 9 | Q02952 AKA12_HUMAN  | E.AAPDTTADPAIAASDPATK.L        |              | 2 | 4,3741 | 0,381 | 0,205  |
| 9 | P05556 ITB1_HUMAN   | E.CSTDEVNSEDM*DAYCR.K          |              | 2 | 4,3735 | 0,558 | 0,124  |
| 9 | Q2TAL8 QRIC1_HUMAN  | D.SAHLYSATGTITS#PTGE.T         | S303:        | 2 | 4,3381 | 0,441 | -0,206 |
| 9 | Q5JSH3 WDR44_HUMAN  | E.NTAYKVGNES#PVQE.L            | S50:         | 2 | 4,3298 | 0,518 | -0,302 |
| 9 | Q8IWZ3 ANKH1_HUMAN  | E.THPSSS#PTPTSNTQEE.A          | S2069:       | 2 | 4,2935 | 0,457 | -0,065 |
| 9 | Q9NZL4 HPBP1_HUMAN  | E.KLLQTCFSS#PADDSM*D.R         | S354:        | 2 | 4,2927 | 0,418 | 0,128  |
| 9 | Q96GX5 MASTL_HUMAN  | E.NIVNSFTDKQQT#PE.K            | T519:        | 2 | 4,2474 | 0,443 | 0,287  |
| 9 | Q16204 CCDC6_HUMAN  | E.KLDQPV#APPS#PRDISM*E.I       | S240:S244:   | 3 | 4,2246 | 0,354 | -0,085 |
| 9 | P20020 AT2B1_HUMAN  | K.SATSSSPGS#PLHSLETS#L.-       | S1249:S1257: | 2 | 4,2179 | 1     | 0,191  |
| 9 | Q4KMP7 TB10B_HUMAN  | K.TDKYGFLLGGSQYSGSLE.S         |              | 2 | 4,1919 | 0,525 | 0,135  |
| 9 | P19338 NUCL_HUMAN   | E.SKTLVLSNLSYS#ATEE.T          | S496:        | 2 | 4,1906 | 0,593 | 0      |
| 9 | Q96A49 SYAP1_HUMAN  | E.AVRPKT#PPVVIK.S              | T248:        | 3 | 4,1877 | 0,331 | -0,066 |
| 9 | Q13263 TIF1B_HUMAN  | E.KLSPPYSS#PQEFAQD.V           | S757:        | 2 | 4,1814 | 0,374 | -0,275 |
| 9 | P13645 K1C10_HUMAN  | K.GSLGGGFSSGGFSGGSFSR.G        |              | 2 | 4,1787 | 0,568 | 0,143  |
| 9 | P29966 MARCS_HUMAN  | E.KGEPAAAAAPEAGAS#PVEK.E       | S101:        | 2 | 4,1612 | 0,418 | -0,2   |
| 9 | P22681 CBL_HUMAN    | E.GNLAHAHANTGPEES#ENE.D        | S767:        | 2 | 4,1588 | 0,526 | 0,839  |
| 9 | P18583 SON_HUMAN    | E.M*EHNTVCAAGTS#PVGE.I         | S1556:       | 2 | 4,1476 | 0,479 | -0,069 |
| 9 | Q14676 MDC1_HUMAN   | E.TQPQRLLLAEDS#EEE.V           | S168:        | 2 | 4,1438 | 0,55  | 0      |
| 9 | P39880 CUX1_HUMAN   | E.IQAGSQGQAGASDPSAR.S          |              | 2 | 4,1402 | 0,588 | -0,072 |
| 9 | P08729 K2C7_HUMAN   | E.LQSQISDTSVVLMS*DNSR.S        |              | 3 | 4,1352 | 0,379 | 0,458  |
| 9 | Q92797 SYMPK_HUMAN  | E.DAM*KT#PS#PAAEDAREPE.A       | T1257:S1259: | 2 | 4,135  | 0,481 | 0,061  |
| 9 | Q6NZI2 PTRF_HUMAN   | R.RGS#S#PDVHALLE.I             | S365:S366:   | 2 | 4,1347 | 0,465 | 0,169  |
| 9 | Q8WXV6 Q8WXV6_HUMAN | R.KRTSS#EDNLYLAVLR.A           | S21:         | 3 | 4,1306 | 0,307 | -0,198 |
| 9 | Q8NHV4 NEDD1_HUMAN  | E.SGNLNTS#PSSNQTR.N            | S516:        | 2 | 4,113  | 0,47  | -0,079 |
| 9 | Q8N9T8 KRI1_HUMAN   | E.GVHGPPVQLAVDDS#SDE.G         | S286:        | 2 | 4,1033 | 0,453 | 0,135  |

|   |                     |                                |              |   |        |       |        |
|---|---------------------|--------------------------------|--------------|---|--------|-------|--------|
| 9 | Q9UET6 RRMJ1_HUMAN  | E.YKYTPPTQPPI#PPYQE.A          | S271:        | 2 | 4,0994 | 0,457 | 0,117  |
| 9 | Q96JM3 ZN828_HUMAN  | E.SQKLAPVPS#PEPQKPAPVS#PE.S    | S204:S214:   | 3 | 4,0955 | 0,41  | 0,156  |
| 9 | P23443 KS6B1_HUMAN  | R.KVEPPFKPLLQSEEDVSQFDSK.F     |              | 3 | 4,087  | 0,261 | 0      |
| 9 | Q96T23 RSF1_HUMAN   | E.S#EKPGSPEAAETS#PPSNIIDHCE.K  | S607:S619:   | 2 | 4,0732 | 0,501 | 0,747  |
| 9 | Q13263 TIF1B_HUMAN  | E.TKPVLM*ALAEGPGAEGPR.L        |              | 2 | 4,072  | 0,494 | -0,067 |
| 9 | Q15942 ZYX_HUMAN    | E.KQHPVPPAQNQNQVR.S            |              | 3 | 4,0655 | 0,226 | -0,398 |
| 9 | O15061 DMN_HUMAN    | E.KSTFQSVVSES#PQEDSAGDTSGAE.M  | S1379:       | 2 | 4,0654 | 0,401 | 0,677  |
| 9 | Q92615 LARP5_HUMAN  | E.KFTSSQTQSPT#PPKPPS#PSFE.L    | T518:S524:   | 3 | 4,0619 | 1     | 0      |
| 9 | Q7Z6E9 RBBP6_HUMAN  | E.GSSSTLVDTSTSS#TGGG#PVR.K     | S1273:S1277: | 2 | 4,0503 | 1     | -0,111 |
| 9 | A8MVB1 A8MVB1_HUMAN | E.KLVSPASAAAASSPSS#PSPQPVSE.L  | S41:         | 3 | 4,049  | 0,322 | 0,299  |
| 9 | P98171 RHG04_HUMAN  | E.KQVVGAGLQTAGESGSS#PEGLLASE.L | S824:        | 3 | 4,049  | 0,393 | 0,224  |
| 9 | Q8TEA8 DTD1_HUMAN   | E.DRSASS#GAEGDVSSE.R           | S197:        | 2 | 4,048  | 0,513 | 0,398  |
| 9 | Q641Q2 FA21A_HUMAN  | E.KAVAS#PEATVSQTDE.N           | S498:        | 2 | 4,0473 | 0,555 | -0,227 |
| 9 | P08670 VIME_HUMAN   | E.VDALKGTNES#LE.R              | S339:        | 2 | 4,0432 | 0,418 | -0,18  |
| 9 | Q5VT06 CE350_HUMAN  | E.TRSPS#PISISSE.T              | S1830:       | 2 | 4,0414 | 0,346 | -0,171 |
| 9 | Q16204 CCDC6_HUMAN  | E.KLDQPV#APPS#PR.D             | S240:S244:   | 2 | 4,0405 | 0,399 | -0,157 |
| 9 | Q8WXI9 P66B_HUMAN   | R.GRLTPSPDIIVLS#DNE.A          | S129:        | 2 | 4,0329 | 0,439 | -0,405 |
| 9 | Q13523 PRP4B_HUMAN  | E.GKVQSGM*GLILQGYES#GSEEE.G    | S142:        | 2 | 4,0276 | 0,522 | 0,638  |
| 9 | Q9UNZ2 NSF1C_HUMAN  | R.KKS#PNELVDDLK.G              | S114:        | 3 | 4,0223 | 0,233 | -0,113 |
| 9 | Q13523 PRP4B_HUMAN  | E.GKVQSGM*GLILQGYES#GSEEE.G    | S142:        | 3 | 4,0031 | 0,263 | 0,159  |
| 9 | Q969S3 ZN622_HUMAN  | E.KGLGVDSVDKAM*NAAIQAIK.A      |              | 3 | 4      | 0,271 | 0      |
| 9 | Q9NQX3 GEPH_HUMAN   | E.LEDLPS#PPPPLS#PPPTTSPHK.Q    | S188:S194:   | 3 | 3,9936 | 0,33  | 0,077  |
| 9 | Q8N2M8 SFR16_HUMAN  | E.KITFITSFSGGS#DEE.A           | S320:        | 2 | 3,9891 | 0,429 | -0,227 |
| 9 | Q9H2J4 PDCL3_HUMAN  | D.LEENPKKPIEDVLLSSVR.R         |              | 3 | 3,9804 | 0,285 | 0,266  |
| 9 | Q92917 GPKOW_HUMAN  | E.NAGVDPTLAIPM*IQK.G           |              | 2 | 3,975  | 0,441 | 0      |
| 9 | Q15365 PCBP1_HUMAN  | R.VM*TIPYQPM*PASSPVICAGGQDR.C  |              | 2 | 3,9461 | 0,48  | 0,292  |
| 9 | Q15047 SETB1_HUMAN  | E.GGFADSDS#HS#SFKTNE.G         | S1000:S1002: | 2 | 3,9392 | 0,484 | 0      |
| 9 | P35527 K1C9_HUMAN   | R.SGGGGGGGLGSGGSIR.S           |              | 2 | 3,9252 | 0,533 | -0,792 |
| 9 | P35222 CTNB1_HUMAN  | E.TADLGLDIGAQGEPLGYR.Q         |              | 2 | 3,9206 | 0,54  | -0,198 |
| 9 | O94915 FRYL_HUMAN   | E.SRYS#SSSGGSYEEE.K            | S1533:       | 2 | 3,9133 | 0,529 | -0,152 |
| 9 | Q9H0F6 SHRPN_HUMAN  | K.GPPPEADLPRS#PGNLTE.R         | S165:        | 2 | 3,9025 | 0,27  | -1,002 |
| 9 | O75179 ANR17_HUMAN  | E.HYPVSSPSS#PS#PPAQPGGVSR.N    | S2045:S2047: | 3 | 3,8999 | 1     | 0,244  |
| 9 | P12270 TPR_HUMAN    | E.AM*QSEGPVEHVVPFGSTSGSVR.S    |              | 3 | 3,8996 | 0,312 | 0,241  |
| 9 | P35527 K1C9_HUMAN   | R.GGSGGSYGGGGSGGGYGGGSGSR.G    |              | 2 | 3,8987 | 0,39  | -0,068 |
| 9 | Q8N108 MIER1_HUMAN  | E.SAASS#RAPS#PPPTASNSNSQSEKE.D | S397:S401:   | 3 | 3,8865 | 1     | 0,139  |
| 9 | P55209 NP1L1_HUMAN  | E.RLDGLVET#PTGYIE.S            | T62:         | 2 | 3,8846 | 0,477 | -0,149 |
| 9 | Q96S66 CLCC1_HUMAN  | E.SSQSAKPVSGQDTSNGTEGS#PAAE.K  | S509:        | 2 | 3,877  | 0,519 | 0,206  |
| 9 | O15234 CASC3_HUMAN  | E.QTSVRDPS#PEADAPVLGS#PEKE.E   | S363:S373:   | 3 | 3,8739 | 0,285 | -0,074 |
| 9 | O95714 HERC2_HUMAN  | E.STHPSS#PGFEDCSSE.A           | S2423:       | 2 | 3,8699 | 0,526 | 0,068  |



|   |                     |                                 |              |   |        |       |        |
|---|---------------------|---------------------------------|--------------|---|--------|-------|--------|
| 9 | Q5THK1 CV030_HUMAN  | R.KSIVSLM*PEDQIS#PVSE.V         | S582:        | 2 | 3,8648 | 0,326 | 0,187  |
| 9 | P11388 TOP2A_HUMAN  | K.GSVPLSS#S#PPATHFPDETE.I       | S1392:S1393: | 2 | 3,8588 | 1     | 0,115  |
| 9 | Q16204 CCDC6_HUMAN  | E.KLDQPV#S#APPS#PRDISM*E.I      | S240:S244:   | 2 | 3,8561 | 0,542 | 0,114  |
| 9 | Q5VZK9 LR16A_HUMAN  | E.IKTPDS#FEESQGEE.I             | S1131:       | 2 | 3,854  | 0,473 | 0,073  |
| 9 | P32004 L1CAM_HUMAN  | E.KEAAGGNDSSGATS#PINPAVALE.-    | S1248:       | 2 | 3,851  | 0,376 | 0,109  |
| 9 | Q8IWIY9 CDAN1_HUMAN | R.SKQLQQS#PTPTCPTPE.L           | S265:        | 2 | 3,8479 | 0,482 | -0,13  |
| 9 | Q02952 AKA12_HUMAN  | E.QSHAEIS#PPAESGQAVEE.C         | S253:        | 2 | 3,8476 | 0,487 | 0,063  |
| 9 | O75420 PERQ1_HUMAN  | K.LVASLQDSS#LEEE.Q              | S443:        | 2 | 3,8429 | 0,336 | 0,163  |
| 9 | Q7Z3K3 POGZ_HUMAN   | E.SLHQLFEGES#ETE.S              | S1392:       | 2 | 3,8381 | 0,434 | 0      |
| 9 | P05556 ITB1_HUMAN   | E.CSTDEVNSEDM*DAYCR.K           |              | 3 | 3,8351 | 0,317 | 0,186  |
| 9 | Q66K89 E4F1_HUMAN   | E.HAGELVIAS#PEGQLE.V            | S772:        | 2 | 3,8248 | 0,41  | -0,075 |
| 9 | O75179 ANR17_HUMAN  | E.HYPVSSPSS#PS#PPAQGGVSR.N      | S2045:S2047: | 2 | 3,8233 | 1     | 0,65   |
| 9 | Q3KQU3 MA7D1_HUMAN  | E.S#AAPASPAPS#PAPSPTPAPPQK.E    | S539:S548:   | 2 | 3,8231 | 0,283 | 0,223  |
| 9 | Q9BVI0 PHF20_HUMAN  | E.NTM*KTEPTS#PLVE.L             | S415:        | 2 | 3,8211 | 0,435 | -0,316 |
| 9 | Q9BXJ9 NARG1_HUMAN  | E.DM*KITVNGDS#SAE.A             | S855:        | 2 | 3,8131 | 0,4   | -0,083 |
| 9 | A8MVB1 A8MVB1_HUMAN | E.KLVSPPASAAAASS#PSSSPSPQPVSE.L | S37:         | 3 | 3,8107 | 0,308 | 0,15   |
| 9 | Q9Y2F5 K0947_HUMAN  | E.RSCS#SPAVSQVLS#PKETVE.S       | S1890:S1903: | 3 | 3,8041 | 0,324 | 0,141  |
| 9 | Q9NZD8 SPG21_HUMAN  | E.VQKGS#LGISQEEQ.-              | S300:        | 2 | 3,7994 | 0,375 | -0,165 |
| 9 | Q14694 UBP10_HUMAN  | E.TKY#SPPAIS#PLVSEK.Q           | Y364:S370:   | 3 | 3,7882 | 0,305 | 0,103  |
| 9 | Q2NXX8 ERC6L_HUMAN  | E.TSLGAPEPLSGEQLVGSPQDK.A       |              | 2 | 3,7834 | 0,479 | -0,116 |
| 9 | P49321 NASP_HUMAN   | E.NKS#LQENEEEE.I                | S503:        | 2 | 3,7733 | 0,434 | 0,256  |
| 9 | Q9H307 PININ_HUMAN  | E.TNRVES#VEPSENE.A              | S413:        | 2 | 3,7661 | 0,392 | -0,078 |
| 9 | Q9UJX5 APC4_HUMAN   | K.IKEEVLS#ESEAE.N               | S777:        | 2 | 3,7643 | 0,42  | -0,085 |
| 9 | Q5VT52 K0460_HUMAN  | E.AASQS#TSAS#PANTTVSTIK.G       | S560:S564:   | 2 | 3,7581 | 1     | 0,431  |
| 9 | Q96T23 RSF1_HUMAN   | E.FKIS#DGSQDE.F                 | S1102:       | 2 | 3,7568 | 0,357 | -0,202 |
| 9 | Q7LBC6 JHD2B_HUMAN  | E.SLADSSS#RDS#FKQSLE.S          | S553:S556:   | 3 | 3,7548 | 0,393 | 0,45   |
| 9 | Q92917 GPKOW_HUMAN  | E.LHYDAICQYM*GPS#DTDDD.-        | S471:        | 3 | 3,7542 | 0,359 | 0,744  |
| 9 | Q13263 TIF1B_HUMAN  | E.VVAPEGTSAPGGGPGTLDDS#ATICR.V  | S624:        | 3 | 3,7519 | 0,302 | -0,445 |
| 9 | Q92615 LARP5_HUMAN  | E.EKFTSSQTQS#PTPPKPPS#PSFE.L    | S516:S524:   | 3 | 3,7492 | 0,381 | 0,285  |
| 9 | Q15424 SAFB1_HUMAN  | E.LAEAPT#EAPS#PEAR.D            | T340:S344:   | 2 | 3,7479 | 0,357 | -0,458 |
| 9 | Q96CW6 S7A6O_HUMAN  | E.FGYDSPHDLDS#D.-               | S308:        | 2 | 3,7351 | 0,391 | 0,084  |
| 9 | O00512 BCL9_HUMAN   | R.AVT#PVSQGSNSSADPK.A           | T315:        | 2 | 3,7212 | 0,56  | 0,071  |
| 9 | Q6NZI2 PTRF_HUMAN   | E.SDAVLVDKSDS#D.-               | S389:        | 2 | 3,7202 | 0,374 | -1,65  |
| 9 | Q13118 KLF10_HUMAN  | E.NRPVT#PVSDLSEEE.N             | T66:         | 2 | 3,7168 | 0,378 | 1,034  |
| 9 | Q6UWZ7 CCD98_HUMAN  | E.AKNSITDS#QM*DDVE.V            | S48:         | 2 | 3,7125 | 0,397 | -0,148 |
| 9 | P35612 ADDB_HUMAN   | E.AETKS#PLVS#PSKSLEE.G          | S613:S617:   | 3 | 3,7048 | 0,272 | 0,098  |
| 9 | Q14160 LAP4_HUMAN   | R.LRVQS#PEPPAPERALS#PAE.L       | S1475:S1486: | 3 | 3,6988 | 0,343 | -0,083 |
| 9 | P02538 K2C6A_HUMAN  | R.ALYDAELSQMTHISDTSVVLMS*DNNR.N |              | 3 | 3,6988 | 0,401 | 0,3    |
| 9 | Q96QC0 PP1RA_HUMAN  | K.LPPVLANLM*GSM*GAGK.G          |              | 3 | 3,6976 | 0,339 | 0      |

|   |                     |                                 |              |   |        |       |        |
|---|---------------------|---------------------------------|--------------|---|--------|-------|--------|
| 9 | P42166 LAP2A_HUMAN  | E.SRSST#PLPTISSAE.N             | T160:        | 2 | 3,6955 | 0,409 | 0,229  |
| 9 | Q86UP2 KTN1_HUMAN   | E.IQNGNLHES#DSE.S               | S75:         | 2 | 3,6861 | 0,505 | -0,172 |
| 9 | Q9HD15 SRA1_HUMAN   | K.APRS#PPVGS GPASGVEPTSFPVESE.A | S87:         | 3 | 3,6829 | 0,361 | 0,436  |
| 9 | Q7Z3T8 ZFY16_HUMAN  | E.KNVTGLDLLSS#VDGGTSDE.I        | S105:        | 2 | 3,6681 | 0,311 | -0,43  |
| 9 | Q8IZT6 ASPM_HUMAN   | E.NKIPISIPIS#PAFNE.C            | S225:        | 2 | 3,6671 | 0,419 | -0,911 |
| 9 | Q8WUF5 IASPP_HUMAN  | E.AGDVDEGPVARPLS#PTR.L          | S489:        | 3 | 3,6597 | 0,307 | 0,604  |
| 9 | Q99590 SFRIP_HUMAN  | E.IIQTVDRQS#VKS#PE.V            | S311:S314:   | 2 | 3,6522 | 0,333 | -0,416 |
| 9 | Q53HC9 TSSC1_HUMAN  | E.SGSHESPDDS#SSTAQTLE.L         | S116:        | 2 | 3,6417 | 0,365 | 0,064  |
| 9 | Q14980 NUMA1_HUMAN  | E.SRPSLS#LGTITDEE.M             | S1947:       | 2 | 3,6406 | 0,359 | -0,154 |
| 9 | Q6IBW4 CNDH2_HUMAN  | E.GM*SPM*EPAGVSPM*PGTQK.D       |              | 2 | 3,6385 | 0,354 | -0,264 |
| 9 | P35908 K22E_HUMAN   | R.NLDLDSIIAEVK.A                |              | 2 | 3,6364 | 0,405 | -0,459 |
| 9 | Q15424 SAFB1_HUMAN  | E.LAEAPTEAPS#PEAR.D             | S344:        | 2 | 3,6277 | 0,37  | -0,08  |
| 9 | P49790 NU153_HUMAN  | K.VQM*TS#PSSTGSPM*FK.F          | S516:        | 2 | 3,6255 | 0,352 | 0,072  |
| 9 | O43572 AKA10_HUMAN  | E.SSSTLTVASRNS#PAS#PLKE.L       | S278:S281:   | 2 | 3,6209 | 0,375 | 0,233  |
| 9 | Q9HCD5 NCOA5_HUMAN  | R.LM*RSS#TDS#LPGPISR.Q          | S378:S381:   | 2 | 3,6202 | 0,551 | 0,068  |
| 9 | O15085 ARHGB_HUMAN  | K.SLGGESS#GGTT#PVGSFHTE.A       | S1458:T1462: | 2 | 3,6197 | 1     | 0,248  |
| 9 | Q01804 OTUD4_HUMAN  | E.HVSLSNPAPLLVS#PE.V            | S578:        | 2 | 3,6156 | 0,403 | -0,223 |
| 9 | Q5T200 ZC3HD_HUMAN  | E.STS#RDS#LALDKE.R              | S1406:S1409: | 3 | 3,615  | 0,297 | 0,37   |
| 9 | Q9H832 UBE2Z_HUMAN  | E.NAEM*DS#DSSSS#GTETDLHGSLRV.-  | S337:S342:   | 3 | 3,5989 | 1     | 0,356  |
| 9 | P04264 K2C1_HUMAN   | R.SLDLDSIIAEVK.A                |              | 2 | 3,5839 | 0,409 | -0,468 |
| 9 | P11388 TOP2A_HUMAN  | E.ADDVKGSVPLS#SS#PPATHFPDETE.I  | S1391:S1393: | 3 | 3,5772 | 0,306 | 0,346  |
| 9 | Q8TDY2 RBCC1_HUMAN  | E.QTIHQVSLDLDSLAES#PE.S         | S727:        | 2 | 3,5708 | 0,454 | 0,118  |
| 9 | Q7Z2T5 TRM1L_HUMAN  | E.SHVQS#ASEDTVTE.R              | S707:        | 2 | 3,57   | 0,496 | -0,332 |
| 9 | Q8IWW6 RHG12_HUMAN  | R.ATT#PPNQGRPDS#PVYANLQE.L      | T231:S240:   | 3 | 3,5659 | 0,241 | 0,316  |
| 9 | Q9H5H4 ZN768_HUMAN  | E.GYLRGNM*#SENEEEE.I            | S33:         | 2 | 3,559  | 0,375 | -0,209 |
| 9 | Q03164 HRX_HUMAN    | E.VHPPLPISQS#PENE.S             | S518:        | 2 | 3,5497 | 0,466 | 0,301  |
| 9 | O60271 JIP4_HUMAN   | R.SAS#QSS#LDKLDQE.L             | S730:S733:   | 2 | 3,5428 | 0,315 | -0,233 |
| 9 | Q6IN85 SMEK1_HUMAN  | E.RFDDM*SS#PGLELPSCE.L          | S127:        | 2 | 3,5425 | 0,437 | -0,063 |
| 9 | Q14498 RBM39_HUMAN  | E.RTDASSASS#FLDSDELE.R          | S337:        | 2 | 3,5403 | 0,51  | 0,192  |
| 9 | Q9BQF6 SENP7_HUMAN  | E.GNQSLISAEPVVVS#S#DEEGPVEHK.S  | S377:S378:   | 3 | 3,5388 | 0,329 | 0,205  |
| 9 | O75400 PR40A_HUMAN  | R.FVKEPAFEDITLES#E.R            | S787:        | 2 | 3,5364 | 0,334 | -0,2   |
| 9 | Q9UK76 HN1_HUMAN    | R.NS#SEASSGDFLDLKG.E.G          | S87:         | 2 | 3,5281 | 0,445 | 0,07   |
| 9 | Q8IZT6 ASPM_HUMAN   | E.NKIPIS#PISPAFNE.C             | S222:        | 2 | 3,5258 | 0,409 | -0,304 |
| 9 | O60664 M6PBP_HUMAN  | E.LVSSKVS#GAQE.M                | S130:        | 2 | 3,5224 | 0,303 | -0,206 |
| 9 | P29374 ARI4A_HUMAN  | E.SRS#VKSES#DITIE.V             | S1018:S1023: | 2 | 3,5223 | 0,406 | 0,303  |
| 9 | Q08999 RBL2_HUMAN   | E.ICIAGS#PLT#PR.R               | S639:T642:   | 2 | 3,5218 | 0,441 | 0,272  |
| 9 | Q8IW35 CEP97_HUMAN  | E.HSS#PVQDCQISQE.S              | S331:        | 2 | 3,517  | 0,4   | 0,077  |
| 9 | Q92878 RAD50_HUMAN  | E.DKLFVDCGS#QDFE.S              | S635:        | 2 | 3,5113 | 0,38  | -0,298 |
| 9 | Q6DEN2 Q6DEN2_HUMAN | E.SREPAPAS#PAPAGVE.I            | S102:        | 2 | 3,5024 | 0,451 | -0,161 |

|   |                    |                                  |              |   |        |       |        |
|---|--------------------|----------------------------------|--------------|---|--------|-------|--------|
| 9 | P46821 MAP1B_HUMAN | E.GTVSDKSAT#PVDE.G               | T1532:       | 2 | 3,4901 | 0,436 | 0,088  |
| 9 | Q8N3P4 VPS8_HUMAN  | E.LNKS#FNLE.A                    | S26:         | 2 | 3,4899 | 0,092 | 0,117  |
| 9 | P27816 MAP4_HUMAN  | E.M*ALGKDVT#PPPETE.V             | T521:        | 2 | 3,4893 | 0,463 | -0,077 |
| 9 | Q7Z6E9 RBBP6_HUMAN | E.GSSSTLVDY#TSTSSTGG#PVRKSEE.K   | Y1268:S1277: | 3 | 3,4883 | 1     | 0,273  |
| 9 | Q9H0E9 BRD8_HUMAN  | E.ADVAIGKGET#PLTNVK.T            | T569:        | 3 | 3,4881 | 0,21  | -0,202 |
| 9 | P18583 SON_HUMAN   | R.AGIEGPLLASDVGR.D               |              | 2 | 3,4849 | 0,326 | -0,18  |
| 9 | Q8IZD2 MLL5_HUMAN  | E.CKDTQIVS#DAEVIQE.Q             | S623:        | 2 | 3,4821 | 0,352 | 0,067  |
| 9 | Q14157 UBP2L_HUMAN | E.KSPA VATSTAAPPPSS#PLPSK.S      | S454:        | 2 | 3,4718 | 0,404 | 0,45   |
| 9 | O95674 CDS2_HUMAN  | E.SEAKVDGETAS#DSE.S              | S33:         | 2 | 3,4712 | 0,382 | 0,081  |
| 9 | Q9NQS7 INCE_HUMAN  | E.QHVTQLM*STEPLPR.T              |              | 3 | 3,4697 | 0,31  | 0,332  |
| 9 | Q15022 SUZ12_HUMAN | E.KGESAS#PANEEITE.E              | S695:        | 2 | 3,4671 | 0,383 | -0,237 |
| 9 | Q9HAU5 RENT2_HUMAN | E.NKEVSS#PDDLELE.L               | S514:        | 2 | 3,4638 | 0,347 | -0,549 |
| 9 | Q9NQX3 GEPH_HUMAN  | E.LEDLPS#PPPPLS#PPPTTSPHKQTE.D   | S188:S194:   | 3 | 3,455  | 0,213 | -0,067 |
| 9 | Q96GY3 LIN37_HUMAN | E.RECSPSS#PLPLPEDEE.G            | S138:        | 2 | 3,4489 | 0,406 | 0,242  |
| 9 | O00567 NOL5A_HUMAN | K.SFSKEELM*SS#DLEE.T             | S520:        | 2 | 3,4427 | 0,48  | -0,071 |
| 9 | P42566 EP15_HUMAN  | E.SEPIHQESPARS#S#PELLPSGVTDENE.V | S562:S563:   | 3 | 3,4371 | 0,296 | 0      |
| 9 | O14617 AP3D1_HUMAN | R.ALDIDLKPLADSE.K                |              | 2 | 3,4369 | 0,421 | -0,242 |
| 9 | P02538 K2C6A_HUMAN | R.ALYDAELSQMQTHISDTSVVLSDMNNR.N  |              | 3 | 3,4365 | 0,302 | -0,06  |
| 9 | P42166 LAP2A_HUMAN | R.SS#TPLPTISSSAE.N               | S159:        | 2 | 3,4352 | 0,372 | 0      |
| 9 | O60271 JIP4_HUMAN  | E.KFIEFEDS#QEQE.K                | S109:        | 2 | 3,4317 | 0,091 | -0,076 |
| 9 | O95232 CROP_HUMAN  | E.VNGTSEDIKSEGDTQS#N.-           | S431:        | 3 | 3,4315 | 0,233 | 0,295  |
| 9 | Q6UB99 ANR11_HUMAN | E.GVFSSLQAKPS#PS#PRAE.L          | S1892:S1894: | 2 | 3,4313 | 0,379 | 0,064  |
| 9 | Q13428 TCOF_HUMAN  | K.LDSSPSVSTLAAKDDPD.G            |              | 2 | 3,4286 | 0,48  | -0,27  |
| 9 | Q8WYB5 MYST4_HUMAN | E.TSEGKTS#PS#PIRIEE.V            | S1301:S1303: | 3 | 3,4217 | 0,317 | 0,095  |
| 9 | Q15022 SUZ12_HUMAN | E.KGESAS#PANEEITEE.Q             | S695:        | 2 | 3,421  | 0,322 | 0,438  |
| 9 | Q5UIP0 RIF1_HUMAN  | E.CGSLDKT#SPEM*SNSNDE.R          | T1161:       | 2 | 3,4175 | 0,478 | 0      |
| 9 | O43293 DAPK3_HUMAN | K.SHS#S#LPPNNSYADFE.R            | S311:S312:   | 2 | 3,4174 | 0,272 | 0,134  |
| 9 | O95684 FR1OP_HUMAN | E.KSEIS#IGEEIEE.D                | S354:        | 2 | 3,414  | 0,362 | -0,085 |
| 9 | Q3KQU3 MA7D1_HUMAN | K.SLSRT#PETLLPFAEAE.A            | T813:        | 2 | 3,4116 | 0,277 | -0,265 |
| 9 | Q12872 SFRS8_HUMAN | E.AGKIEES#PFSVEE.S               | S709:        | 2 | 3,41   | 0,27  | 0,081  |
| 9 | Q9C0C9 UBE2O_HUMAN | E.QLLTGS#PTS#PTVEPEKPTRE.K       | S836:S839:   | 3 | 3,3949 | 0,361 | 0,472  |
| 9 | Q14247 SRC8_HUMAN  | E.RLPS#SPVYEDAAS#FKAE.L          | S417:S426:   | 3 | 3,3937 | 0,24  | 0      |
| 9 | Q99590 SFRIP_HUMAN | E.GEIIQTVDRQS#VKS#PE.V           | S311:S314:   | 3 | 3,3925 | 0,251 | 0      |
| 9 | O14974 MYPT1_HUMAN | R.RST#QGVTLTDLQAE.E.K            | T696:        | 2 | 3,3908 | 0,466 | -0,071 |
| 9 | Q92854 SEM4D_HUMAN | E.LKFADS#DADGD.-                 | S857:        | 2 | 3,3864 | 0,412 | 0,198  |
| 9 | Q8WY36 BBX_HUMAN   | E.VSSGTCRPDVSES#PE.L             | S236:        | 2 | 3,3852 | 0,169 | -0,072 |
| 9 | Q9Y3X0 CCDC9_HUMAN | E.GAASPAPETPQPTS#PETS PK.E       | S386:        | 2 | 3,3761 | 0,441 | 0,18   |
| 9 | Q66K74 MAP15_HUMAN | E.LPLAASSIPRPT#PS#PE.S           | T638:S640:   | 3 | 3,3733 | 0,404 | 0,563  |
| 9 | Q9Y5U2 TSSC4_HUMAN | E.LAHLAGPGS#PEAEE.W              | S265:        | 2 | 3,3718 | 0,424 | 0      |

|   |                    |                                |              |   |        |       |        |
|---|--------------------|--------------------------------|--------------|---|--------|-------|--------|
| 9 | Q02952 AKA12_HUMAN | E.SFEKAPQVTES#IE.S             | S1129:       | 2 | 3,3684 | 0,478 | -0,395 |
| 9 | Q16513 PKN2_HUMAN  | E.LSLVAAS#PTLSPR.Q             | S302:        | 2 | 3,3634 | 0,459 | 0      |
| 9 | Q96N67 DOCK7_HUMAN | E.RSPS#GSAFGSQE.N              | S1432:       | 2 | 3,3614 | 0,344 | 0      |
| 9 | O75534 CSDE1_HUMAN | E.SKSPAAPGQS#PTGVCYE.R         | S123:        | 2 | 3,3573 | 0,43  | -0,064 |
| 9 | P17544 ATF7_HUMAN  | D.SVIIADQT#PT#PTR.F            | T51:T53:     | 2 | 3,3564 | 0,322 | 0,313  |
| 9 | Q8IX90 CM003_HUMAN | E.NLLRT#PT#PPEVTKIPE.D         | T358:T360:   | 3 | 3,3561 | 0,299 | 0      |
| 9 | P35908 K22E_HUMAN  | R.GFSSGSAVVSGGSR.R             |              | 2 | 3,3555 | 0,325 | -0,292 |
| 9 | Q2KHR3 QSER1_HUMAN | E.HLSSFSS#DEDDPGYSQD.A         | S1231:       | 2 | 3,3541 | 0,447 | -0,372 |
| 9 | P67809 YBOX1_HUMAN | E.TKAADPPAENSS#APEAEQGGAE.-    | S314:        | 3 | 3,3513 | 0,288 | 0,249  |
| 9 | P35612 ADDB_HUMAN  | E.AETKS#PLVS#PSKSLE.E          | S613:S617:   | 3 | 3,3509 | 0,248 | 0,422  |
| 9 | P05556 ITB1_HUMAN  | E.CECQSEGIPEPK.C               |              | 2 | 3,3464 | 0,512 | -0,16  |
| 9 | Q96JM3 ZN828_HUMAN | E.YIKTDLDAM*DIK.G              |              | 3 | 3,3425 | 0,222 | 0,38   |
| 9 | Q7Z3K3 POGZ_HUMAN  | E.SLHQLFEGES#E.T               | S1392:       | 2 | 3,3422 | 0,274 | -0,18  |
| 9 | Q9H307 PININ_HUMAN | K.SLS#PGKENVSALDM*EKE.S        | S443:        | 3 | 3,3393 | 0,264 | 0,095  |
| 9 | Q7Z6Z7 HUWE1_HUMAN | E.LLERDGGG#GNS#TIIVSR.S        | S2362:S2365: | 3 | 3,3274 | 0,243 | 0,378  |
| 9 | P82094 TMF1_HUMAN  | E.SQVKDSS#LCVSGE.T             | S156:        | 2 | 3,3264 | 0,292 | -0,331 |
| 9 | P35612 ADDB_HUMAN  | E.TKS#PLVS#PSKSLE.E            | S613:S617:   | 2 | 3,3176 | 0,382 | -0,159 |
| 9 | P15822 ZEP1_HUMAN  | E.SHVLGTGQS#LDE.S              | S917:        | 2 | 3,3176 | 0,511 | -0,092 |
| 9 | Q9Y5U2 TSSC4_HUMAN | E.LAHLGPGS#PEAE.E              | S265:        | 2 | 3,3149 | 0,372 | 0,184  |
| 9 | Q9H4A3 WNK1_HUMAN  | E.LSEPSHLNGPSS#DPE.A           | S2012:       | 2 | 3,3129 | 0,287 | -0,297 |
| 9 | Q9Y2W6 TDRKH_HUMAN | E.ITHTLSCLSL#E.A               | S544:        | 2 | 3,3127 | 0,354 | 0,254  |
| 9 | P39880 CUX1_HUMAN  | E.IQAGSQGQAGASDPSAR.S          |              | 3 | 3,3103 | 0,212 | -0,108 |
| 9 | P05362 ICAM1_HUMAN | E.AQVHLALGDQR.L                |              | 2 | 3,3089 | 0,456 | -0,101 |
| 9 | Q4LE39 ARI4B_HUMAN | R.LSKPPFQTNPS#PE.M             | S675:        | 2 | 3,3087 | 0,26  | 0,321  |
| 9 | Q14694 UBP10_HUMAN | E.TKYS#PPAIS#PLVSEK.Q          | S365:S370:   | 2 | 3,305  | 0,36  | 0      |
| 9 | Q14684 RRP1B_HUMAN | E.AIVDQSPFVPEETM*EEQK.T        |              | 2 | 3,3027 | 0,361 | 0,117  |
| 9 | O94842 TOX4_HUMAN  | E.AHTVEAPS#PETICE.M            | S533:        | 2 | 3,3025 | 0,352 | -0,226 |
| 9 | Q8NCN4 RN169_HUMAN | E.RSVS#PESNDSISEE.L            | S368:        | 2 | 3,2939 | 0,377 | -0,076 |
| 9 | Q9HCD5 NCOA5_HUMAN | R.LM*RSS#TDS#LPGPISR.Q         | S378:S381:   | 3 | 3,2928 | 0,252 | 0,408  |
| 9 | O43896 KIF1C_HUMAN | R.GALPAVSSPPAPVS#PS#SPTTHNGE.L | S412:S414:   | 2 | 3,29   | 1     | 0,101  |
| 9 | Q9HCD5 NCOA5_HUMAN | R.SS#TDS#LPGPISR.Q             | S378:S381:   | 2 | 3,2831 | 0,412 | -0,177 |
| 9 | O60716 CTND1_HUMAN | E.GAM*SVVS#VETS#DDGTTR.R       | S125:S129:   | 2 | 3,2801 | 1     | 0,065  |
| 9 | Q96T23 RSF1_HUMAN  | E.SYLSKNS#EDDE.L               | S1248:       | 2 | 3,2773 | 0,374 | -0,536 |
| 9 | P15336 ATF2_HUMAN  | D.SVIVADQT#PT#PTR.F            | T51:T53:     | 2 | 3,2752 | 0,31  | 0,158  |
| 9 | Q96B23 CR025_HUMAN | E.TAKEEDGS#VELE.S              | S34:         | 2 | 3,275  | 0,288 | -0,088 |
| 9 | Q96AQ6 PBIP1_HUMAN | E.GQSPPQS#LPST#PK.A            | S129:T133:   | 2 | 3,2723 | 0,351 | -0,74  |
| 9 | Q01814 AT2B2_HUMAN | K.SATSS#SPGS#PIHSLE.T          | S1230:S1234: | 2 | 3,2721 | 1     | 0,528  |
| 9 | Q8WYP5 AHTF1_HUMAN | E.DELKDDAQS#VE.T               | S2190:       | 2 | 3,2717 | 0,319 | 0      |
| 9 | P04264 K2C1_HUMAN  | R.THNLPEPYFESFINLR.R           |              | 3 | 3,2717 | 0,272 | -0,275 |

|   |                     |                                   |              |   |        |       |        |
|---|---------------------|-----------------------------------|--------------|---|--------|-------|--------|
| 9 | O95232 CROP_HUMAN   | E.VNGTSEDIKS#E.G                  | S425:        | 2 | 3,2709 | 0,319 | -0,097 |
| 9 | Q562F6 SGOL2_HUMAN  | E.IHS#PNIQDSS#FDSVRE.G            | S1144:S1151: | 3 | 3,2685 | 0,274 | 0      |
| 9 | Q8WVM7 STAG1_HUMAN  | E.TTAHSDAGS#ELEETE.V              | S24:         | 2 | 3,2646 | 0,329 | -0,442 |
| 9 | Q02952 AKA12_HUMAN  | E.ARGDTVVS#EAELTPE.A              | S967:        | 2 | 3,2553 | 0,459 | 0      |
| 9 | P04264 K2C1_HUMAN   | K.YEELQITAGR.H                    |              | 2 | 3,2447 | 0,268 | -0,103 |
| 9 | P27816 MAP4_HUMAN   | E.EGRPVVSGTGN DITT#PPNK.E         | T687:        | 3 | 3,243  | 0,084 | 0      |
| 9 | Q12802 AKP13_HUMAN  | R.SLS#RPSS#LIEQE.K                | S2563:S2567: | 2 | 3,2371 | 0,383 | -0,243 |
| 9 | Q9UK76 HN1_HUMAN    | R.RNS#SEASSGDFLDLK.G              | S87:         | 2 | 3,2359 | 0,418 | -0,429 |
| 9 | O00273 DFFA_HUMAN   | E.KQAPELS#LSSQDLE.L               | S254:        | 2 | 3,2328 | 0,409 | 0,751  |
| 9 | Q92576 PHF3_HUMAN   | E.NNLQDNQTSNSS#PCR.S              | S1614:       | 2 | 3,2319 | 0,447 | -0,067 |
| 9 | Q14676 MDC1_HUMAN   | R.LLLAEDS#EEE.V                   | S168:        | 2 | 3,2246 | 0,324 | 0,795  |
| 9 | Q5W0B1 RN219_HUMAN  | K.SSQGSEFLEEPDKLEE.K              |              | 2 | 3,2243 | 0,271 | -0,067 |
| 9 | Q9Y266 NUDC_HUMAN   | E.NSKLS#DLDSE.T                   | S277:        | 2 | 3,2207 | 0,348 | 0,103  |
| 9 | P49790 NU153_HUMAN  | E.ITTSSPSPINSSQALTNK.V            |              | 3 | 3,2135 | 0,294 | -0,297 |
| 9 | Q9ULH7 MKL2_HUMAN   | E.NVHSPLPIS#PSPSE.Q               | S495:        | 2 | 3,2084 | 0,417 | 0,079  |
| 9 | O95872 BAT4_HUMAN   | E.NRS#PTPSLQYCE.N                 | S210:        | 2 | 3,2079 | 0,489 | -0,08  |
| 9 | P49790 NU153_HUMAN  | E.ITTSS#PSPINSSQALTNK.V           | S498:        | 2 | 3,1955 | 0,507 | 0,317  |
| 9 | Q6PID6 TTC33_HUMAN  | E.VTHFS#PKS#IPDYDFE.S             | S197:S200:   | 2 | 3,1945 | 0,345 | 0,126  |
| 9 | P35527 K1C9_HUMAN   | R.FSSSSGYGGSSR.V                  |              | 2 | 3,192  | 0,437 | -0,099 |
| 9 | Q12872 SFRS8_HUMAN  | E.AGKIEESPF#VEE.S                 | S712:        | 2 | 3,1856 | 0,36  | -0,081 |
| 9 | Q14674 ESPL1_HUMAN  | E.ILRGS#DGEDS#ASGGKTPAPGPE.A      | S1508:S1513: | 3 | 3,1848 | 0,235 | 0,405  |
| 9 | Q96QR8 PURB_HUMAN   | E.HYAQLGPSS#PEQLAAGAE.G           | S101:        | 3 | 3,1813 | 0,19  | 0,539  |
| 9 | Q92734 TFG_HUMAN    | K.NVM*SAFGLTDDQVSGPPS#APAEDR.S    | S197:        | 3 | 3,1731 | 0,197 | -0,072 |
| 9 | Q9H8Y5 ANKZ1_HUMAN  | R.RLAAQLGAPTS#PIPD.S              | S675:        | 2 | 3,1728 | 0,423 | 0,077  |
| 9 | Q8IVF2 AHNK2_HUMAN  | E.GDLHAAVGAPVM*SPLS#PGER.V        | S4897:       | 3 | 3,1683 | 0,131 | 0,8    |
| 9 | Q13435 SF3B2_HUMAN  | E.KEDFS#DM*VAE.H                  | S838:        | 2 | 3,1677 | 0,38  | 0      |
| 9 | Q16626 MEA1_HUMAN   | E.LAPVGDGDVVADIQDR.I              |              | 2 | 3,1672 | 0,46  | -0,223 |
| 9 | Q5T200 ZC3HD_HUMAN  | E.SRS#LS#PSHLTE.D                 | S875:S877:   | 2 | 3,1622 | 0,386 | -0,178 |
| 9 | Q96QC0 PP1RA_HUMAN  | K.LPPVLANLM*GSM*GAGK.G            |              | 2 | 3,1614 | 0,404 | -0,23  |
| 9 | Q9UQ35 SRRM2_HUMAN  | E.TKEQNSALPTSS#QDEELM*E.V         | S1233:       | 3 | 3,1579 | 0,151 | 0,246  |
| 9 | Q8WYQ5 DGCR8_HUMAN  | E.VCKDES#VDLEE.F                  | S434:        | 2 | 3,1564 | 0,259 | 0,087  |
| 9 | O43741 AAKB2_HUMAN  | R.DLSSS#PPGPYQGE.M                | S184:        | 2 | 3,1553 | 0,356 | 0,345  |
| 9 | Q96ER3 SAAL1_HUMAN  | K.SSS#DDEEQLTE.L                  | S57:         | 2 | 3,1452 | 0,326 | 0,277  |
| 9 | Q96AY2 EME1_HUMAN   | E.EKIVVVDIS#DCE.A                 | S50:         | 2 | 3,1427 | 0,456 | 0,328  |
| 9 | Q86W92 LIPB1_HUMAN  | R.S#SPAS#ITDEDSNV.-               | S999:S1003:  | 2 | 3,1404 | 0,385 | 0,082  |
| 9 | Q14694 UBP10_HUMAN  | E.TKYSPPAIS#PLVSE.K               | S370:        | 2 | 3,1394 | 0,428 | 0      |
| 9 | Q00613 HSF1_HUMAN   | E.LAPAS#PM*AS#PGGSIDERPLSSSPLVR.V | S275:S279:   | 3 | 3,1337 | 0,415 | 0,198  |
| 9 | Q9P147 Q9P147_HUMAN | D.NVVFVS#VET#GFHCVS#QD.G          | S84:T87:S93: | 3 | 3,1307 | 0,091 | -0,083 |
| 9 | Q16204 CCDC6_HUMAN  | E.KLDQPV#APPS#PR.D                | S240:S244:   | 3 | 3,1273 | 0,25  | 0,471  |

|   |                     |                                  |            |   |        |       |        |
|---|---------------------|----------------------------------|------------|---|--------|-------|--------|
| 9 | Q13435 SF3B2_HUMAN  | R.SRGSDS#PAADVEIE.Y              | S339:      | 2 | 3,1224 | 0,37  | 0      |
| 9 | O14545 TRAD1_HUMAN  | R.LDSQPQETS#PE.L                 | S415:      | 2 | 3,1209 | 0,319 | -0,093 |
| 9 | P46939 UTRO_HUMAN   | E.RTNGSFLTDSSS#TTGSVEDE.H        | S3217:     | 2 | 3,1181 | 0,409 | 1,012  |
| 9 | Q9UQ35 SRRM2_HUMAN  | E.NSFGS#PLEFR.N                  | S1329:     | 2 | 3,1108 | 0,453 | 0,198  |
| 9 | Q9UQ35 SRRM2_HUMAN  | R.SSGHSSSELS#PDAVE.K             | S1387:     | 2 | 3,1104 | 0,35  | -0,233 |
| 9 | Q9UPN4 AZI1_HUMAN   | E.AKLQSIM*#SFLDE.M               | S534:      | 2 | 3,1103 | 0,323 | -0,743 |
| 9 | Q27J81 INF2_HUMAN   | E.KLGPQDS#DPTEANLE.S             | S23:       | 2 | 3,1074 | 0,366 | -0,216 |
| 9 | P35612 ADDB_HUMAN   | E.TKS#PLVS#PSKSLEE.G             | S613:S617: | 2 | 3,1051 | 0,399 | -0,073 |
| 9 | O95232 CROP_HUMAN   | E.VNGTSEDIKSEGD.T                |            | 2 | 3,1014 | 0,352 | 0,452  |
| 9 | Q86SQ0 PHLB2_HUMAN  | E.LEKLQLS#DEE.S                  | S489:      | 2 | 3,1006 | 0,239 | 0,285  |
| 9 | Q86WC4 OSTM1_HUMAN  | R.LKSSTS#FANIQE.N                | S325:      | 2 | 3,0961 | 0,245 | 0,261  |
| 9 | Q15573 TAF1A_HUMAN  | E.LKGPVT#DDEEVE.T                | T13:       | 2 | 3,0959 | 0,374 | 0,259  |
| 9 | P54105 ICLN_HUMAN   | E.SKEPVADEEEE.D                  |            | 2 | 3,0924 | 0,36  | -0,097 |
| 9 | P04264 K2C1_HUMAN   | K.WELLQQVDTSTR.T                 |            | 2 | 3,0914 | 0,391 | 0,165  |
| 9 | Q9UPQ6 Q9UPQ6_HUMAN | E.SETRS#ESSDFE.V                 | S316:      | 2 | 3,0893 | 0,332 | -0,27  |
| 9 | O95239 KIF4A_HUMAN  | E.KFLEQS#M*DIE.D                 | S1038:     | 2 | 3,0883 | 0,294 | 0      |
| 9 | Q99590 SFRIP_HUMAN  | E.GEIIQTVDRQS#VKS#PE.V           | S311:S314: | 2 | 3,0867 | 0,285 | -0,063 |
| 9 | Q9UQ35 SRRM2_HUMAN  | E.LSNS#PLRE.N                    | S1320:     | 2 | 3,0861 | 0,197 | 0,061  |
| 9 | P27816 MAP4_HUMAN   | E.EGRPVVSGTGNDITT#PPNKELPPS#PE.K | T687:S696: | 3 | 3,086  | 0,124 | 0,128  |
| 9 | Q5VWN6 CJ018_HUMAN  | D.LIQHGS#PINNE.C                 | S1025:     | 2 | 3,0845 | 0,141 | 0,375  |
| 9 | Q5VZL5 ZMYM4_HUMAN  | E.KDQGS#TYSGDLE.S                | S1088:     | 2 | 3,0838 | 0,317 | 0      |
| 9 | O15534 PER1_HUMAN   | E.GRSSSS#PALPTAGNCTS.-           | S1279:     | 2 | 3,0809 | 0,328 | -0,071 |
| 9 | O15381 NVL_HUMAN    | E.IQDSKDSS#LLE.S                 | S211:      | 2 | 3,0766 | 0,302 | 0,093  |
| 9 | Q9Y2W6 TDRKH_HUMAN  | E.ITHTLSCLS#LSE.A                | S542:      | 2 | 3,0743 | 0,302 | 0,339  |
| 9 | P78371 TCPB_HUMAN   | E.DKLIHFGVALGE.A                 |            | 2 | 3,0673 | 0,386 | -0,352 |
| 9 | Q86W92 LIPB1_HUMAN  | E.DDM*FKDFAAR.S                  |            | 3 | 3,0647 | 0,135 | 0,742  |
| 9 | Q13596 SNX1_HUMAN   | K.ITTSLLPINNGSKE.N               |            | 2 | 3,062  | 0,369 | 0,164  |
| 9 | Q9Y266 NUDC_HUMAN   | E.TSGPQIKELT#DEE.A               | T108:      | 2 | 3,0552 | 0,31  | -0,16  |
| 9 | O95817 BAG3_HUMAN   | E.VKVPPAPVPCPPPS#PGPSAVPS#SPK.S  | S377:S385: | 3 | 3,0524 | 0,101 | 0,07   |
| 9 | A0MZ66 SHOT1_HUMAN  | E.AEFNS#PSPPT#PEPEGPR.K          | S532:T537: | 2 | 3,0499 | 0,401 | 0,301  |
| 9 | Q9H7Z6 MYST1_HUMAN  | E.GTAPSPGRVS#PPT#PARGEPE.V       | S42:T45:   | 3 | 3,0401 | 0,22  | -0,086 |
| 9 | Q9C0G0 ZN407_HUMAN  | E.SNFDHDS#FCE.T                  | S1163:     | 2 | 3,04   | 0,362 | 0,749  |
| 9 | P53396 ACLY_HUMAN   | R.TAS#FSERADE.V                  | S455:      | 2 | 3,0388 | 0,412 | -0,095 |
| 9 | Q8WVB6 CTF18_HUMAN  | E.LEGAST#PSPS#GVPLFTAGRPPR.T     | T34:S38:   | 3 | 3,038  | 0,145 | 0      |
| 9 | Q96PK6 RBM14_HUMAN  | R.ASYVAPLTAQPATYR.A              |            | 2 | 3,036  | 0,5   | 0      |
| 9 | Q8IZL8 PELP1_HUMAN  | R.GADTAPTLAPEALPSQGEVER.E        |            | 2 | 3,0283 | 0,248 | 0,694  |
| 9 | P42166 LAP2A_HUMAN  | E.QGTESRSS#T#PLPTISSAENTR.Q      | S159:T160: | 3 | 3,0279 | 0,17  | -0,148 |
| 9 | Q96T60 PNKP_HUMAN   | E.TRTPESQPDTPPGTPLVSQDE.K        | T118:      | 3 | 3,0225 | 0,247 | 0,235  |
| 9 | O77932 DOM3Z_HUMAN  | E.AM*QDQLSPPKT#PS#PK.-           | T392:S394: | 3 | 3,0218 | 0,245 | 0      |

|   |                    |                                     |              |   |        |       |        |
|---|--------------------|-------------------------------------|--------------|---|--------|-------|--------|
| 9 | Q16186 ADRM1_HUMAN | R.SQSAAVTPSSTTSSTR.A                |              | 2 | 3,0197 | 0,407 | 0,078  |
| 9 | P35527 K1C9_HUMAN  | R.GGGGSFGYSYGGGSGGGSASSLGGGFGGGSR.G |              | 3 | 3,0184 | 0,3   | 0,068  |
| 9 | Q6PJF5 RHDF2_HUMAN | R.GIPHS#ASPVS#PDGVQIPLKE.Y          | S323:S328:   | 3 | 3,01   | 0,122 | 0,251  |
| 9 | Q12888 TP53B_HUMAN | R.VDVSCEPLEGVEK.C                   |              | 2 | 3,0092 | 0,273 | -0,084 |
| 9 | O15085 ARHGB_HUMAN | K.SLGGES#S#GGTTPVGSFHTE.A           | S1457:S1458: | 2 | 3,0082 | 0,337 | 0,31   |
| 9 | O00273 DFFA_HUMAN  | E.KQAPELSLS#SQDLE.L                 | S256:        | 2 | 3,004  | 0,322 | 1,276  |
| 9 | Q14498 RBM39_HUMAN | E.RTDASS#ASSFLDSDELE.R              | S334:        | 2 | 3,0038 | 0,507 | 0,192  |
| 9 | Q9UNZ2 NSF1C_HUMAN | K.LGSTAPQVLSTS#SPAQQAENE.A          | S271:        | 2 | 3,003  | 0,361 | 0,222  |
| 9 | Q92576 PHF3_HUMAN  | E.STEFNKS#NLE.V                     | S419:        | 2 | 3,0023 | 0,268 | 0      |
| 9 | O43765 SGTA_HUMAN  | R.SQIRSRT#PS#ASNDQDQE.-             | T303:S305:   | 3 | 3,0013 | 0,172 | 0,616  |
| 9 | O60447 EVI5_HUMAN  | E.TGVGFPLHGK.S                      |              | 2 | 2,9994 | 0,372 | 0,181  |
| 9 | Q96HN2 SAHH3_HUMAN | E.LKDLS#PSEAE.S                     | S23:         | 2 | 2,9989 | 0,328 | 0      |
| 9 | Q7Z6Z7 HUWE1_HUMAN | R.DGGS#GNS#TIIVSR.S                 | S2362:S2365: | 2 | 2,9969 | 0,29  | 0,429  |
| 9 | Q7Z3K3 POGZ_HUMAN  | E.AKESGYS#DDEIM*E.L                 | S1200:       | 2 | 2,9947 | 0,32  | -0,078 |
| 9 | Q14966 ZN638_HUMAN | E.AEKATCDS#DFAVE.T                  | S1158:       | 2 | 2,9921 | 0,301 | 0,24   |
| 9 | Q00537 PCK2_HUMAN  | E.NLKM*GS#DGESDQASGTSSDE.V          | S105:        | 3 | 2,9919 | 0,269 | -0,26  |
| 9 | P04637 P53_HUMAN   | K.LM*FKTEGPDS#D.-                   | S392:        | 2 | 2,9914 | 0,38  | 0,274  |
| 9 | Q03164 HRX_HUMAN   | E.KSVASSESDPALLS#PGVDPTPE.G         | S2978:       | 3 | 2,9889 | 0,255 | 0,485  |
| 9 | Q5HYI7 MTX3_HUMAN  | E.NNSFQRLS#P.-                      | S311:        | 2 | 2,9885 | 0,226 | -0,32  |
| 9 | Q8WU17 RN139_HUMAN | R.NGVIQHTGAAAEFNDT#D.-              | T663:        | 3 | 2,9875 | 0,328 | 0,615  |
| 9 | Q9UKV3 ACINU_HUMAN | E.ASS#PPHPQLHS#EEE.I                | S425:S434:   | 2 | 2,986  | 0,44  | -0,135 |
| 9 | Q9UPN4 AZI1_HUMAN  | R.TQDVLAQDAAGDNLE.M                 |              | 2 | 2,9815 | 0,322 | 0,156  |
| 9 | P68104 EF1A1_HUMAN | K.SGDAAIVDM*VPGKPM*CVE.S            |              | 2 | 2,981  | 0,345 | -0,831 |
| 9 | Q01804 OTUD4_HUMAN | K.TAAAAADVNGFKPLSGNE.Q              |              | 3 | 2,9772 | 0,239 | 0,106  |
| 9 | P48681 NEST_HUMAN  | E.ALGKVES#EQEE.L                    | S1261:       | 2 | 2,9742 | 0,266 | 0      |
| 9 | P29966 MARCS_HUMAN | E.KGEPAAAAAPEAGAS#PVEK.E            | S101:        | 3 | 2,9738 | 0,172 | 0,2    |
| 9 | Q7Z6E9 RBBP6_HUMAN | E.GSSSTLVDYTST#SS#TGGSPVRK.S        | T1271:S1273: | 3 | 2,9703 | 1     | 0,157  |
| 9 | Q8IWW6 RHG12_HUMAN | R.AT#TPPNQGRPDS#PVYANLQE.L          | T230:S240:   | 3 | 2,9687 | 0,175 | 0,316  |
| 9 | Q02952 AKA12_HUMAN | E.QKGESS#ASSPEEPEE.I                | S566:        | 2 | 2,9678 | 0,217 | 0,219  |
| 9 | Q14160 LAP4_HUMAN  | R.LRVQS#PEPPAPE.R                   | S1475:       | 2 | 2,9668 | 0,41  | -0,087 |
| 9 | O14686 MLL2_HUMAN  | E.LVNRPPS#STE.L                     | S2694:       | 2 | 2,9663 | 0,409 | 0      |
| 9 | P04264 K2C1_HUMAN  | K.SLNNQFASFIDK.V                    |              | 2 | 2,9625 | 0,353 | -0,264 |
| 9 | P48960 CD97_HUMAN  | R.ALRAS#ESGI.-                      | S831:        | 2 | 2,9602 | 0,353 | 0      |
| 9 | Q8IWZ8 SF04_HUMAN  | E.IKVS#PPEGAE.T                     | S181:        | 2 | 2,9595 | 0,286 | 0      |
| 9 | Q8N108 MIER1_HUMAN | E.LLSLYGYGSTVR.L                    |              | 2 | 2,9551 | 0,44  | 0      |
| 9 | Q02224 CENPE_HUMAN | E.NIKM*DLS#YSLE.S                   | S611:        | 2 | 2,9543 | 0,083 | -0,173 |
| 9 | Q9UJA5 TRM6_HUMAN  | E.SNGTLEEKQAS#EQENE.D               | S298:        | 2 | 2,9512 | 0,28  | -0,065 |
| 9 | P46821 MAP1B_HUMAN | E.SFLSADDKAS#GR.G                   | S1421:       | 2 | 2,948  | 0,602 | -0,274 |
| 9 | Q9BUA3 YK007_HUMAN | E.GVALLQDVR.A                       |              | 2 | 2,9474 | 0,266 | -0,063 |

|   |                     |                                   |                 |   |        |       |        |
|---|---------------------|-----------------------------------|-----------------|---|--------|-------|--------|
| 9 | Q9UKV3 ACINU_HUMAN  | E.AS#SPPHPQLHS#EEE.I              | S424:S434:      | 2 | 2,9446 | 0,424 | -0,203 |
| 9 | Q9HC35 EMAL4_HUMAN  | R.ISS#PTLLENSLE.Q                 | S919:           | 2 | 2,9423 | 0,369 | -0,166 |
| 9 | Q5VZK9 LR16A_HUMAN  | E.IKT#PDSFEE.S                    | T1128:          | 2 | 2,9373 | 0,182 | 0,106  |
| 9 | Q8IW35 CEP97_HUMAN  | E.SHGIS#PPLQGE.I                  | S825:           | 2 | 2,9326 | 0,356 | -0,203 |
| 9 | Q9H5H4 ZN768_HUMAN  | E.LKTQS#PEFE.A                    | S160:           | 2 | 2,9321 | 0,265 | -0,737 |
| 9 | Q14493 SLBP_HUMAN   | R.HM*DSQVEDEFDLE.A                |                 | 2 | 2,9318 | 0,436 | -0,076 |
| 9 | P55082 MFAP3_HUMAN  | K.SIDTES#QGS#SHFSPDDIGSAE.S       | S331:S334:      | 2 | 2,9304 | 1     | 0,403  |
| 9 | Q14247 SRC8_HUMAN   | R.AKTQT#PPVS#PAPQPTEE.R           | T401:S405:      | 2 | 2,9253 | 0,419 | 0,315  |
| 9 | Q15121 PEA15_HUMAN  | D.IIRQPS#EEE.I                    | S116:           | 2 | 2,9217 | 0,308 | -0,207 |
| 9 | Q9H7N4 SFR19_HUMAN  | R.APEGDDFLSLHAES#DGE.G            | S453:           | 2 | 2,9181 | 0,387 | 0,065  |
| 9 | Q9P2B7 K1430_HUMAN  | E.VDHSFFDS#DFEE.G                 | S19:            | 2 | 2,9173 | 0,308 | -0,314 |
| 9 | Q14566 MCM6_HUMAN   | E.TNSRV#GVDGYE.T                  | S271:           | 2 | 2,913  | 0,262 | -0,805 |
| 9 | P42166 LAP2A_HUMAN  | E.ISTRPPLGS#TE.L                  | S235:           | 2 | 2,9121 | 0,454 | 0,197  |
| 9 | Q15047 SETB1_HUMAN  | E.GGFADSDS#HSS#FKTNE.G            | S1000:S1003:    | 3 | 2,9105 | 0,15  | 0      |
| 9 | Q9Y3X0 CCDC9_HUMAN  | R.TTHLAGALS#PGE.A                 | S521:           | 2 | 2,9104 | 0,312 | 0,593  |
| 9 | Q52LD0 Q52LD0_HUMAN | K.AGGS#PAS#YHGSTS#PR.V            | S192:S195:S201: | 2 | 2,9093 | 0,496 | -0,073 |
| 9 | Q5T200 ZC3HD_HUMAN  | E.STS#RDS#LALDKE.R                | S1406:S1409:    | 2 | 2,9091 | 0,277 | 0,165  |
| 9 | Q12888 TP53B_HUMAN  | E.AKEQLS#AQELM*E.S                | S280:           | 2 | 2,9068 | 0,398 | 0,331  |
| 9 | Q7Z6Z7 HUWE1_HUMAN  | E.LLERDGG#GNS#TIIVSR.S            | S2362:S2365:    | 2 | 2,9043 | 0,269 | 0,252  |
| 9 | Q9BVJ6 UT14A_HUMAN  | E.TKDSGS#QEVLSL.L                 | S453:           | 2 | 2,9006 | 0,255 | -0,09  |
| 9 | Q9H6S3 ES8L2_HUMAN  | R.SDGVAKM*#*PKDLFE.Q              | S28:            | 2 | 2,8976 | 0,321 | 0,226  |
| 9 | P31629 ZEP2_HUMAN   | E.STGTGLSR#PSQE.S                 | S966:           | 2 | 2,8969 | 0,186 | 0,528  |
| 9 | Q9Y2F5 K0947_HUMAN  | E.LDRLS#TSE.V                     | S1171:          | 2 | 2,8962 | 0,147 | 0,061  |
| 9 | P04792 HSPB1_HUMAN  | R.ALSRQLS#SGVSE.I                 | S82:            | 2 | 2,8955 | 0,368 | -0,093 |
| 9 | Q9Y6I3 EPN1_HUMAN   | E.LLAGEVPARS#PGAQFDM*SGVR.G       | S410:           | 3 | 2,8942 | 0,142 | -0,172 |
| 9 | O43379 WDR62_HUMAN  | E.AGPGDQQGDSYLR.V                 |                 | 2 | 2,8938 | 0,489 | -0,268 |
| 9 | Q9NPI6 DCP1A_HUMAN  | E.RNQM*GDSNISS#PGLQPSTQLSNLGSTE.T | S180:           | 3 | 2,893  | 0,244 | 0,251  |
| 9 | Q8IX90 CM003_HUMAN  | E.KS#PRS#PQLSDFGLE.R              | S152:S155:      | 2 | 2,8927 | 0,446 | -0,142 |
| 9 | P51955 NEK2_HUMAN   | R.KFLS#LASNPE.L                   | S365:           | 2 | 2,8907 | 0,212 | 0      |
| 9 | Q5TF39 NAGT1_HUMAN  | E.TSRSS#LTEPTAE.V                 | S474:           | 2 | 2,889  | 0,418 | -0,09  |
| 9 | P49792 RBP2_HUMAN   | E.KDSLITPHVSR.S                   |                 | 3 | 2,8888 | 0,363 | 0,219  |
| 9 | Q15283 RASA2_HUMAN  | E.KSL#PFFSEE.F                    | S84:            | 2 | 2,8879 | 0,305 | 0,098  |
| 9 | Q9NWH9 SLTM_HUMAN   | E.VSKPLPSEGS#LAE.A                | S217:           | 2 | 2,8865 | 0,241 | 0      |
| 9 | Q96ER3 SAAL1_HUMAN  | E.NTKSS#DDEEQLTE.L                | S57:            | 2 | 2,8832 | 0,184 | -0,073 |
| 9 | Q86VP6 CAND1_HUMAN  | E.SIQDSS#STNLE.S                  | S1220:          | 2 | 2,8801 | 0,327 | 0      |
| 9 | Q14966 ZN638_HUMAN  | E.SPGLKNS#PIDE.S                  | S1106:          | 2 | 2,8799 | 0,344 | -0,296 |
| 9 | P04264 K2C1_HUMAN   | R.TNAENEFVTIK.K                   |                 | 2 | 2,8796 | 0,374 | 0      |
| 9 | O94854 K0754_HUMAN  | E.VSEAGAS#NPS#LQEKKE.S            | S25:S28:        | 3 | 2,879  | 0,334 | 0,1    |
| 9 | O43432 IF4G3_HUMAN  | E.QKLDIESDS#PCSSE.A               | S1409:          | 2 | 2,8753 | 0,407 | 0      |



|   |                    |                               |              |   |        |       |        |
|---|--------------------|-------------------------------|--------------|---|--------|-------|--------|
| 9 | O95425 SVIL_HUMAN  | R.YQT#QPVTLGE.V               | T852:        | 2 | 2,8727 | 0,106 | 0      |
| 9 | P22626 ROA2_HUMAN  | R.GGGGNFGPGGSNFR.G            |              | 2 | 2,8714 | 0,43  | -0,266 |
| 9 | Q9Y4C1 JHD2A_HUMAN | E.HAPS#PSDVSNAPE.V            | S445:        | 2 | 2,8697 | 0,292 | 0,088  |
| 9 | P67936 TPM4_HUMAN  | E.NVGLHQTLDQ#LNE.L            | T241:        | 2 | 2,8694 | 0,204 | 0,294  |
| 9 | Q96QC0 PP1RA_HUMAN | E.TLEPGSGGS#PDGAGGSK.L        | S545:        | 2 | 2,8649 | 0,418 | -0,303 |
| 9 | O14929 HAT1_HUMAN  | E.ISM*QHEQLEES#FQE.L          | S401:        | 2 | 2,8635 | 0,23  | -0,333 |
| 9 | Q9HC35 EMAL4_HUMAN | E.SRISS#PTLLENSLE.Q           | S919:        | 2 | 2,8631 | 0,309 | 0      |
| 9 | Q9UK76 HN1_HUMAN   | R.RNSSEAS#SGDFDLKGE.G         | S91:         | 3 | 2,8622 | 0,291 | 0,483  |
| 9 | Q15154 PCM1_HUMAN  | E.TLKEPETVGAQS#I.-            | S2022:       | 2 | 2,8598 | 0,466 | -0,084 |
| 9 | P11940 PABP1_HUMAN | E.LLHM*LES#PE.S               | S599:        | 2 | 2,8564 | 0,17  | 0      |
| 9 | Q92538 GBF1_HUMAN  | E.KSQSASVES#IPEVLEE.C         | S352:        | 2 | 2,854  | 0,306 | -0,202 |
| 9 | Q99569 PKP4_HUMAN  | R.CRLGAES#PSIASTSTE.K         | S75:         | 2 | 2,8537 | 0,332 | 0,133  |
| 9 | P35030 TRY3_HUMAN  | D.TLDNDIMLIK.L                |              | 2 | 2,8527 | 0,32  | -0,207 |
| 9 | O60684 IMA7_HUMAN  | E.HYFGVEDDDSS#LAPQVDE.T       | S510:        | 2 | 2,8511 | 0,344 | 0,464  |
| 9 | Q13283 G3BP1_HUMAN | K.SSS#PAPADIAQTVQE.D          | S232:        | 2 | 2,8472 | 0,335 | -0,077 |
| 9 | P55072 TERA_HUMAN  | E.M*FAQTLQQR.G                |              | 2 | 2,8449 | 0,175 | -0,299 |
| 9 | Q02952 AKA12_HUMAN | E.SDKAIT#PQAQEE.L             | T1760:       | 2 | 2,8446 | 0,305 | 0,262  |
| 9 | O43572 AKA10_HUMAN | E.SSSTLTVASRNS#PAS#PLKE.L     | S278:S281:   | 3 | 2,8442 | 0,372 | -0,175 |
| 9 | Q5TBA9 FRY_HUMAN   | E.HSDLIM*TLS#PSEE.T           | S2544:       | 2 | 2,8431 | 0,301 | -0,157 |
| 9 | P11388 TOP2A_HUMAN | K.GSVPLS#S#SPPATHFPDETE.I     | S1391:S1392: | 3 | 2,8398 | 0,171 | -0,087 |
| 9 | Q9NXG2 THUM1_HUMAN | E.YGDDM*YGPEK.F               |              | 2 | 2,8397 | 0,453 | 0,102  |
| 9 | Q7Z417 NUFP2_HUMAN | E.ISLKNLS#SDE.A               | S112:        | 2 | 2,8379 | 0,105 | 0,72   |
| 9 | Q68D10 SPT2_HUMAN  | E.YNHAES#EQEYEE.Q             | S139:        | 2 | 2,8377 | 0,292 | -0,211 |
| 9 | Q9UBC2 EP15R_HUMAN | E.VTLSNLSM*PPP.K.F            |              | 2 | 2,8345 | 0,261 | 0      |
| 9 | Q2NKX8 ERC6L_HUMAN | E.DSADNRQNFSSQS#LE.H          | S971:        | 2 | 2,8344 | 0,156 | 0,275  |
| 9 | Q9Y613 EPN1_HUMAN  | E.AVG#PPPAATPTPT#PPTR.K       | S429:T439:   | 2 | 2,8303 | 1     | -0,26  |
| 9 | Q6PKG0 LARP1_HUMAN | R.AVT#PVPTKTEE.V              | T526:        | 2 | 2,8297 | 0,369 | -0,39  |
| 9 | O75179 ANR17_HUMAN | E.HYPVSS#PSS#PSPPAQPGVSR.N    | S2042:S2045: | 3 | 2,829  | 1     | 0      |
| 9 | Q9H6Z4 RANB3_HUMAN | E.RTS#SLTQFPPSQSEE.R          | S125:        | 2 | 2,8287 | 0,086 | 0      |
| 9 | P50851 LRBA_HUMAN  | E.TRNADDLEVSS#DIIE.A          | S1052:       | 2 | 2,8261 | 0,341 | -0,069 |
| 9 | Q02952 AKA12_HUMAN | E.ARGDTVSEAELT#PEAVTAAE.T     | T972:        | 3 | 2,8239 | 0,246 | 0,666  |
| 9 | Q16512 PKN1_HUMAN  | E.GM*GYGDRST#FCGTPE.F         | T774:        | 2 | 2,8195 | 0,16  | 0,133  |
| 9 | Q00613 HSF1_HUMAN  | E.GRPPS#PPPTSTPE.K            | S363:        | 2 | 2,8163 | 0,326 | -0,087 |
| 9 | P04264 K2C1_HUMAN  | R.NKYEDEINKR.T                |              | 3 | 2,8142 | 0,285 | 0,419  |
| 9 | Q13263 TIF1B_HUMAN | R.LAS#PSGS#TSSGLE.V           | S594:S598:   | 2 | 2,8093 | 0,203 | -0,18  |
| 9 | O75531 BAF_HUMAN   | D.FVAEPM*GEKPVGSLAGIGE.V      |              | 2 | 2,8071 | 0,305 | 0,064  |
| 9 | Q9H832 UBE2Z_HUMAN | E.NAEM*DS#DSS#SSGTETDLHGSLR.V | S337:S340:   | 3 | 2,8057 | 0,29  | 0,074  |
| 9 | P48960 CD97_HUMAN  | R.CNPGFSSSE.I                 |              | 2 | 2,8042 | 0,328 | 0,216  |
| 9 | Q92945 FUBP2_HUMAN | K.VQJS#PDSGGLPE.R             | S181:        | 2 | 2,8041 | 0,408 | 0,191  |

|   |                    |                                 |              |   |        |       |        |
|---|--------------------|---------------------------------|--------------|---|--------|-------|--------|
| 9 | O43379 WDR62_HUMAN | E.TVQNRVS#LE.K                  | S61:         | 2 | 2,8013 | 0,268 | -0,108 |
| 9 | Q8WYB5 MYST4_HUMAN | E.TSEGKT#SPS#PIRIEE.V           | T1300:S1303: | 2 | 2,8009 | 1     | -0,064 |
| 9 | Q5H9R7 SAPS3_HUMAN | K.DSLRS#NS#PVEM*E.T             | S738:S740:   | 2 | 2,7985 | 0,29  | -0,079 |
| 9 | P46821 MAP1B_HUMAN | E.NGPTEVDYSPS#DM*QDSSLCHK.I     | S1692:       | 3 | 2,7981 | 0,229 | 0      |
| 9 | Q8N2Y8 RUSC2_HUMAN | E.GGYGCPHASS#PE.L               | S356:        | 2 | 2,7968 | 0,356 | -0,188 |
| 9 | Q8IU85 KCC1D_HUMAN | E.GKGDVM*#TACGTPGYVAPE.V        | S179:        | 2 | 2,7959 | 0,329 | -0,122 |
| 9 | Q12888 TP53B_HUMAN | R.QDKPM*DTSVLSEE.G              |              | 2 | 2,7956 | 0,324 | 1,306  |
| 9 | Q9BXS6 NUSAP_HUMAN | E.ATQT#PVS#NKKPVFD.L            | T349:S352:   | 2 | 2,7927 | 0,494 | -0,505 |
| 9 | Q66K74 MAP1S_HUMAN | E.LPLAASSIPRPR.T                |              | 2 | 2,7903 | 0,292 | -0,095 |
| 9 | P04264 K2C1_HUMAN  | K.LALDLEIATYR.T                 |              | 2 | 2,788  | 0,319 | -0,286 |
| 9 | Q8NFC6 FA44A_HUMAN | E.IRAGS#ISSEE.V                 | S1701:       | 2 | 2,7868 | 0,213 | 0      |
| 9 | Q14694 UBP10_HUMAN | E.TKYS#PPAIS#PLVSEKQVE.V        | S365:S370:   | 3 | 2,7853 | 0,124 | 0,257  |
| 9 | P30622 CLIP1_HUMAN | E.SISNLS#EAGS#IKKGE.R           | S200:S204:   | 2 | 2,7838 | 0,372 | 0,145  |
| 9 | Q7Z7E8 UB2Q1_HUMAN | R.FRIAS#ACLDE.L                 | S63:         | 2 | 2,7825 | 0,247 | 0,193  |
| 9 | Q9Y217 MTMR6_HUMAN | E.FSKSEPAVVS#LE.Y               | S611:        | 2 | 2,7815 | 0,35  | -0,267 |
| 9 | Q99661 KIF2C_HUMAN | E.LRIT#AQENDM*E.V               | T123:        | 2 | 2,7778 | 0,294 | 0      |
| 9 | Q92797 SYMPK_HUMAN | E.ERS#PQTLAPVGE.D               | S1243:       | 2 | 2,7708 | 0,363 | 0,179  |
| 9 | Q06265 EXOS9_HUMAN | E.KAPIDTS#DVEE.K                | S306:        | 2 | 2,7704 | 0,424 | 0,19   |
| 9 | Q5H9R7 SAPS3_HUMAN | E.RIQFDDGGS#D.E                 | S617:        | 2 | 2,7702 | 0,281 | -0,278 |
| 9 | Q9UKV3 ACINU_HUMAN | E.ASS#PPHPQLHS#EEE.I            | S425:S434:   | 3 | 2,7685 | 0,121 | 0      |
| 9 | Q9Y5U2 TSSC4_HUMAN | E.LAHLAGPGS#PE.A                | S265:        | 2 | 2,764  | 0,389 | 0      |
| 9 | O95684 FR1OP_HUMAN | E.NKT#PLVNE.S                   | T55:         | 2 | 2,7631 | 0,269 | 0,123  |
| 9 | Q9P0K7 RAI14_HUMAN | E.ISENS#S#DLSQKLKE.T            | S478:S479:   | 2 | 2,7617 | 0,264 | 0,14   |
| 9 | O96007 MOS2L_HUMAN | E.TKLPLS#PPLVE.D                | S20:         | 2 | 2,7602 | 0,29  | -0,287 |
| 9 | Q9UPN4 AZI1_HUMAN  | K.ANNAGGGLPAAGPGDR.C            |              | 2 | 2,7569 | 0,477 | -0,175 |
| 9 | Q86W92 LIPB1_HUMAN | K.DFAARSPS#AS#ITDEDSNV.-        | S1001:S1003: | 3 | 2,7566 | 0,346 | 0,269  |
| 9 | Q6NZI2 PTRF_HUMAN  | R.RGS#SPDVHALLE.I               | S365:        | 2 | 2,7541 | 0,256 | -0,359 |
| 9 | Q6KC79 NIPBL_HUMAN | E.NDIPFNVQYPGQTSK.T             |              | 2 | 2,7533 | 0,444 | -0,143 |
| 9 | O75821 EIF3G_HUMAN | E.LLKGIPLATGDTS#PEPE.L          | S42:         | 2 | 2,7526 | 0,31  | -0,067 |
| 9 | Q99729 ROAA_HUMAN  | R.GFVFITFKEEEPVKK.V             |              | 3 | 2,7523 | 0,145 | -0,305 |
| 9 | P05556 ITB1_HUMAN  | E.VNSEDM*DAYCR.K                |              | 2 | 2,7463 | 0,419 | 0      |
| 9 | Q02952 AKA12_HUMAN | E.HDPGQGSSS#PEQAGSPTEGE.G       | S743:        | 3 | 2,7458 | 0,303 | 0,27   |
| 9 | P05556 ITB1_HUMAN  | E.CQSEGIPESPK.C                 |              | 2 | 2,7447 | 0,292 | -0,099 |
| 9 | Q8IWY8 ZSC29_HUMAN | R.ARS#PDLGPQE.Q                 | S152:        | 2 | 2,7444 | 0,358 | 0,212  |
| 9 | P35658 NU214_HUMAN | K.S#PGSTPTT#PTSSQAPQK.L         | S430:T437:   | 2 | 2,7409 | 1     | 0,266  |
| 9 | Q9P0V3 SH3B4_HUMAN | E.M*GYIPSSYVQPLNYR.N            |              | 3 | 2,7386 | 0,165 | 0,304  |
| 9 | Q99856 ARI3A_HUMAN | R.AQM*AALAAM*R.A                |              | 2 | 2,7385 | 0,49  | 0,114  |
| 9 | Q8TER5 SOLO_HUMAN  | E.HAGPSLPLGLS#PGACLS#LPARVEEE.A | S1438:S1443: | 3 | 2,7354 | 0,121 | -0,367 |
| 9 | Q9BQY9 DBND2_HUMAN | E.SQRPIGS#ISSM*E.V              | S151:        | 2 | 2,731  | 0,381 | 0      |

|   |                    |                               |              |   |        |       |        |
|---|--------------------|-------------------------------|--------------|---|--------|-------|--------|
| 9 | Q9UHX1 PUF60_HUMAN | K.LGLPPLTPEQQE.A              |              | 2 | 2,7309 | 0,358 | -0,461 |
| 9 | P08648 ITA5_HUMAN  | E.GQQLLYVTR.V                 |              | 2 | 2,7302 | 0,361 | -0,226 |
| 9 | Q14684 RRP1B_HUMAN | E.AIVDQSPFVPEETM*EEQK.T       |              | 3 | 2,7147 | 0,103 | 0,262  |
| 9 | Q6NZI2 PTRF_HUMAN  | D.AVLVDKSDS#D.-               | S389:        | 2 | 2,7135 | 0,335 | -0,432 |
| 9 | Q92900 RENT1_HUMAN | R.AYQHGGVTGLS#QY.-            | S1127:       | 2 | 2,7112 | 0,365 | 0,334  |
| 9 | Q01082 SPTB2_HUMAN | K.TALPAQSAATLPAR.T            |              | 2 | 2,7108 | 0,454 | -0,268 |
| 9 | P25705 ATPA_HUMAN  | E.ERILGADT#SVDLEE.T           | T64:         | 2 | 2,7088 | 0,336 | 0,075  |
| 9 | Q15276 RABE1_HUMAN | R.AIKAM*T#PEQEE.T             | T480:        | 2 | 2,7048 | 0,362 | 0,182  |
| 9 | Q6NYC8 PHTNS_HUMAN | E.VESRLS#PGE.S                | S224:        | 2 | 2,7029 | 0,171 | -0,81  |
| 9 | Q5T200 ZC3HD_HUMAN | E.SRS#LS#PSHLTE.D             | S875:S877:   | 3 | 2,6995 | 0,095 | 0,399  |
| 9 | O75952 CABYR_HUMAN | E.AVGGLSSKATPK.T              |              | 2 | 2,6983 | 0,419 | -0,101 |
| 9 | Q9BQ39 DDX50_HUMAN | E.GFNRLS#DE.F                 | S82:         | 2 | 2,697  | 0,235 | 0,06   |
| 9 | Q9C0D2 K1731_HUMAN | E.RTLS#SGQEQQVE.S             | S440:        | 2 | 2,697  | 0,359 | -0,432 |
| 9 | Q8N2M8 SFR16_HUMAN | E.KITFITS#FGGSDEE.A           | S316:        | 2 | 2,6943 | 0,319 | 0      |
| 9 | Q6PJF5 RHDF2_HUMAN | E.SPPLSASYFR.G                |              | 2 | 2,6938 | 0,305 | 0      |
| 9 | Q9Y624 JAM1_HUMAN  | E.FKQTSS#FLV.-                | S296:        | 2 | 2,692  | 0,443 | 0      |
| 9 | Q9H1I8 ASCC2_HUMAN | E.AVSQASSHPENS#EEEE.C         | S447:        | 2 | 2,6917 | 0,35  | 0,27   |
| 9 | Q13428 TCOF_HUMAN  | K.LDSSPSVSSTLAAK.D            |              | 2 | 2,6891 | 0,317 | 0,09   |
| 9 | Q15942 ZYG_HUMAN   | R.EKVSS#IDLE.I                | S143:        | 2 | 2,6891 | 0,133 | -0,111 |
| 9 | O43847 NRDC_HUMAN  | R.RGS#LSNAGDPE.I              | S94:         | 2 | 2,6887 | 0,341 | 0      |
| 9 | Q15365 PCBP1_HUMAN | R.VM*TIPYQPM*PASSPVICAGGQDR.C |              | 3 | 2,6878 | 0,167 | 0,511  |
| 9 | Q01814 AT2B2_HUMAN | K.SATS#SSPGS#PIHSLE.T         | S1229:S1234: | 2 | 2,6877 | 1     | 0,302  |
| 9 | Q2NKX8 ERC6L_HUMAN | E.TSLGAPEPLSGEQLVGSPQDK.A     |              | 3 | 2,6871 | 0,13  | 0,173  |
| 9 | Q12851 M4K2_HUMAN  | R.SLTIRS#ASE.F                | S384:        | 2 | 2,6856 | 0,306 | -0,234 |
| 9 | Q96R06 SPAG5_HUMAN | E.KGVNTS#VM*LE.N              | S353:        | 2 | 2,6847 | 0,222 | -0,312 |
| 9 | Q8NB78 AOF1_HUMAN  | R.AAATGNAS#PGKLE.H            | S247:        | 2 | 2,6846 | 0,223 | 0,096  |
| 9 | O60925 PFD1_HUMAN  | K.HAHLT#DTEIM*T#LVDETMYE.G    | T47:T53:     | 2 | 2,683  | 0,111 | -1,153 |
| 9 | Q6P2E9 EDC4_HUMAN  | E.VEPLGLPQASPSR.T             |              | 2 | 2,6806 | 0,39  | 0,271  |
| 9 | Q53GS7 GLE1_HUMAN  | E.TSPSSTSASALDQPSFVVK.S       |              | 2 | 2,6792 | 0,423 | 0,256  |
| 9 | P28347 TEAD1_HUMAN | R.M*SDSADKPIDNDAE.G           |              | 2 | 2,6783 | 0,489 | -0,08  |
| 9 | Q8IXT5 RB12B_HUMAN | R.GRPGSGTSGVDS#LSNFIE.S       | S105:        | 2 | 2,6776 | 0,289 | -0,066 |
| 9 | O43829 ZF161_HUMAN | R.KQVT#PSAIQSE.T              | T419:        | 2 | 2,6767 | 0,212 | -0,096 |
| 9 | Q86Y91 KI18B_HUMAN | E.SLGM*EAQVER.A               |              | 2 | 2,6749 | 0,334 | 0      |
| 9 | Q02952 AKA12_HUMAN | E.SGEHTQVPADS#PDSQEE.Q        | S554:        | 2 | 2,6742 | 0,458 | -0,064 |
| 9 | Q96MU7 YTDC1_HUMAN | R.AKS#PT#PDGSERIGLE.V         | S146:T148:   | 3 | 2,6736 | 0,25  | -0,533 |
| 9 | O75179 ANR17_HUMAN | R.NSPLDCGS#ASPKNVASSSEQE.A    | S2065:       | 3 | 2,6733 | 0,204 | 0,163  |
| 9 | Q9UKM9 RALY_HUMAN  | E.HSQDT#DADDGALQ.-            | T298:        | 2 | 2,6619 | 0,176 | 0      |
| 9 | Q969R5 LMBL2_HUMAN | E.HLDVAS#PDKASS#PELPVSVE.N    | S683:S689:   | 3 | 2,6609 | 0,245 | 0      |
| 9 | Q15477 SKIV2_HUMAN | R.ASS#LEDLVLKE.A              | S256:        | 2 | 2,6603 | 0,223 | -0,285 |

|   |                    |                            |              |   |        |       |        |
|---|--------------------|----------------------------|--------------|---|--------|-------|--------|
| 9 | P05556 ITB1_HUMAN  | K.NVLSLTNKGEVFNE.L         |              | 2 | 2,66   | 0,302 | -0,702 |
| 9 | O75970 MPDZ_HUMAN  | E.RTAPTALGITLSSS#PTSTPE.L  | S354:        | 2 | 2,6589 | 0,409 | 0,118  |
| 9 | O00358 FOXEL_HUMAN | R.VFGLVPERPLS#PE.L         | S231:        | 2 | 2,6588 | 0,359 | -0,161 |
| 9 | Q96JM3 ZN828_HUMAN | E.YIKTDLDAM*DIK.G          |              | 2 | 2,6575 | 0,295 | 0,254  |
| 9 | Q9UQ35 SRRM2_HUMAN | E.SYFGVSSLQLK.G            |              | 2 | 2,6528 | 0,459 | -0,298 |
| 9 | Q6NZI2 PTRF_HUMAN  | E.SDAVLVDK.S               |              | 2 | 2,6506 | 0,3   | 0,576  |
| 9 | Q8WXI9 P66B_HUMAN  | R.LTPSPDIIVLS#DNE.A        | S129:        | 2 | 2,6493 | 0,119 | -0,23  |
| 9 | Q8WZ73 RFFL_HUMAN  | R.RAS#LSDLTDLEDIE.G        | S240:        | 2 | 2,6468 | 0,324 | 0      |
| 9 | Q8NBT0 WD51A_HUMAN | E.NQQLIM*QR.A              |              | 2 | 2,646  | 0,11  | -0,233 |
| 9 | P05387 RLA2_HUMAN  | K.NIEDVIAQGIGK.L           |              | 2 | 2,6448 | 0,401 | -0,291 |
| 9 | Q9HC35 EMAL4_HUMAN | E.SRISSS#PTLLE.N           | S919:        | 2 | 2,6429 | 0,288 | -1,729 |
| 9 | P08670 VIME_HUMAN  | D.ALKGTNES#LE.R            | S339:        | 2 | 2,6421 | 0,18  | 0,107  |
| 9 | Q9NQW6 ANLN_HUMAN  | E.SSLFSPM*PSEEK.A          |              | 2 | 2,6411 | 0,307 | 0,09   |
| 9 | Q96JM3 ZN828_HUMAN | K.LAPVPS#PEPQKAPVVS#PE.S   | S204:S214:   | 3 | 2,6404 | 0,332 | 0,274  |
| 9 | Q16563 SYPL1_HUMAN | K.TVTATFGYPFR.L            |              | 2 | 2,6383 | 0,47  | -0,387 |
| 9 | Q02952 AKA12_HUMAN | E.TLAGVKS#QE.M             | S1149:       | 2 | 2,6324 | 0,183 | -0,06  |
| 9 | P07900 HS90A_HUMAN | E.SEDKPEIED.V              |              | 2 | 2,6311 | 0,23  | -0,574 |
| 9 | Q6ZRS2 SRCAP_HUMAN | E.KNLSLT#PSAPSLTLE.A       | T2603:       | 2 | 2,6295 | 0,388 | -0,074 |
| 9 | Q02952 AKA12_HUMAN | E.RPPAPSS#FVFQEE.T         | S1226:       | 2 | 2,6283 | 0,206 | -0,155 |
| 9 | P20700 LMNB1_HUMAN | R.AGGPTT#PLS#PTR.L         | T20:S23:     | 2 | 2,6279 | 0,411 | -0,093 |
| 9 | Q70SY1 CR3L2_HUMAN | R.KLS#ELS#EPGDGE.A         | S19:S22:     | 2 | 2,6262 | 0,322 | 0,086  |
| 9 | Q03468 ERCC6_HUMAN | E.GIPHSS#QTQE.Q            | S10:         | 2 | 2,6245 | 0,265 | 0      |
| 9 | Q86SQ0 PHLB2_HUMAN | E.KLQLS#DEESVFEE.A         | S489:        | 2 | 2,6222 | 0,309 | -0,149 |
| 9 | Q96RV3 PCX1_HUMAN  | E.LESSKPLSGS#KES#LVE.N     | S325:S328:   | 2 | 2,6144 | 0,159 | -0,066 |
| 9 | Q7L7X3 TAOK1_HUMAN | R.LGFSNM*VLSNLS#PE.A       | S896:        | 2 | 2,6142 | 0,12  | -0,152 |
| 9 | Q9UM47 NOTC3_HUMAN | E.DAICDTNPVNGR.A           |              | 2 | 2,6139 | 0,316 | -0,366 |
| 9 | P04792 HSPB1_HUMAN | E.SPAVAAPAYSRA.A           |              | 2 | 2,6134 | 0,343 | 0      |
| 9 | Q9UN86 G3BP2_HUMAN | E.RQPS#PEPVQE.N            | S163:        | 2 | 2,6125 | 0,246 | -0,098 |
| 9 | Q9UQ35 SRRM2_HUMAN | R.GEFSAS#PM*LK.S           | S1124:       | 2 | 2,61   | 0,345 | -0,629 |
| 9 | Q99700 ATX2_HUMAN  | E.NKGIS#PVVSE.H            | S783:        | 2 | 2,6074 | 0,214 | -0,44  |
| 9 | Q9P287 BCCIP_HUMAN | D.LLIQQNHIGSVIK.Q          |              | 2 | 2,6068 | 0,228 | 0,083  |
| 9 | Q96GI7 FA89A_HUMAN | E.YKGACQAASS#PDCTYALE.N    | S130:        | 2 | 2,6054 | 0,265 | -0,118 |
| 9 | P02533 K1C14_HUMAN | R.VLDELTLAR.A              |              | 2 | 2,6012 | 0,267 | -0,118 |
| 9 | O14686 MLL2_HUMAN  | R.LKST#ASSIE.T             | T1057:       | 2 | 2,6009 | 0,222 | 0,06   |
| 9 | Q12756 KIF1A_HUMAN | R.TPQPCS#RPAS#PEPE.L       | S1528:S1532: | 2 | 2,5996 | 0,32  | -0,214 |
| 9 | Q9C0C9 UBE2O_HUMAN | E.QLLTGS#PTS#PTVEPEKPTRE.K | S836:S839:   | 2 | 2,598  | 0,134 | 0,419  |
| 9 | P81605 DCD_HUMAN   | K.DAVEDLESVGK.G            |              | 2 | 2,5917 | 0,44  | 0,42   |
| 9 | P52948 NUP98_HUMAN | E.RFS#FLS#KPVDE.N          | S635:S638:   | 2 | 2,5901 | 0,303 | 0,329  |
| 9 | P35222 CTNB1_HUMAN | E.TADLGLDIGAQGEPLGYR.Q     |              | 3 | 2,5894 | 0,211 | -0,297 |

|   |                     |                              |                 |   |        |       |        |
|---|---------------------|------------------------------|-----------------|---|--------|-------|--------|
| 9 | Q9Y2K1 ZBTB1_HUMAN  | E.NM*RPPNNS#SPVQEDAE.N       | S411:           | 2 | 2,5894 | 0,406 | 0,195  |
| 9 | Q8WYP5 AHTF1_HUMAN  | E.TRIS#FVEE.D                | S1241:          | 2 | 2,5882 | 0,215 | 0,115  |
| 9 | Q12888 TP53B_HUMAN  | E.SGLQIQKS#PEPE.V            | S294:           | 2 | 2,5844 | 0,353 | 0,088  |
| 9 | Q8IXT5 RB12B_HUMAN  | R.GRPGSGTSGVDSL#NFIE.S       | S107:           | 2 | 2,5825 | 0,364 | -0,197 |
| 9 | Q8NEB9 PK3C3_HUMAN  | E.KDGDES#SPILTSFE.L          | S243:           | 2 | 2,5809 | 0,193 | -0,152 |
| 9 | P35221 CTNA1_HUMAN  | E.DFDVRS#RTS#VQTE.D          | S652:S655:      | 2 | 2,5801 | 0,324 | -0,215 |
| 9 | Q04637 IF4G1_HUMAN  | E.IHEPNGM*VPSEDELEPEVSS#PE.L | S377:           | 3 | 2,5779 | 0,156 | 0      |
| 9 | Q8WVC0 LEO1_HUMAN   | D.KPPT#PGQPVDE.N             | T333:           | 2 | 2,5766 | 0,162 | -0,098 |
| 9 | Q5JSJ4 DX26B_HUMAN  | E.LHLPLNS#PLPGSE.L           | S150:           | 2 | 2,5763 | 0,417 | -0,168 |
| 9 | P62753 RS6_HUMAN    | R.LSS#LRAS#TSKSE.S           | S236:S240:      | 2 | 2,5758 | 0,364 | -0,428 |
| 9 | P25445 TNR6_HUMAN   | E.NQGSHE#PTLNPE.T            | S212:           | 2 | 2,5741 | 0,134 | -0,082 |
| 9 | Q2NKX8 ERC6L_HUMAN  | E.LCTNS#SLGM*EKS#FATKNE.A    | S828:S835:      | 3 | 2,574  | 0,181 | 0,083  |
| 9 | Q9BVJ6 UT14A_HUMAN  | K.LQVASES#EEEE.G             | S343:           | 2 | 2,5721 | 0,199 | 0,367  |
| 9 | Q12873 CHD3_HUMAN   | E.KM*ETEADAPS#PAPSLGE.R      | S1601:          | 2 | 2,5659 | 0,435 | 0      |
| 9 | Q8IX90 CM003_HUMAN  | E.NLLRT#PT#PPEVTKIPE.D       | T358:T360:      | 2 | 2,5637 | 0,191 | 0,186  |
| 9 | O95714 HERC2_HUMAN  | E.GDM*HLLSGPLS#PNE.S         | S368:           | 2 | 2,5606 | 0,333 | 0,39   |
| 9 | Q96M96 FGD4_HUMAN   | R.TPGIGPVLPLEER.G            |                 | 2 | 2,5571 | 0,379 | -0,531 |
| 9 | Q9UPN3 MACF1_HUMAN  | R.RGS#DASDFDLE.T             | S5372:          | 2 | 2,5566 | 0,22  | -0,087 |
| 9 | Q02952 AKA12_HUMAN  | E.KSEDS#IAGSGVE.H            | S783:           | 2 | 2,5514 | 0,212 | -0,097 |
| 9 | Q9UKM9 RALY_HUMAN   | E.GLLTHS#EEE.L               | S288:           | 2 | 2,5502 | 0,192 | 0,223  |
| 9 | Q6Y7W6 PERQ2_HUMAN  | E.CGFYQRS#FDE.V              | S139:           | 2 | 2,5487 | 0,322 | 0,176  |
| 9 | O95201 ZN205_HUMAN  | E.KGAPES#GEEGLAPDSE.V        | S292:           | 2 | 2,5468 | 0,274 | 0,812  |
| 9 | Q16513 PKN2_HUMAN   | E.YKPDT#PQSGLE.Y             | T628:           | 2 | 2,5453 | 0,092 | -0,093 |
| 9 | Q9H813 TM206_HUMAN  | E.RSTS#YQELSEE.L             | S9:             | 2 | 2,5445 | 0,285 | -0,087 |
| 9 | Q9BVS4 RIOK2_HUMAN  | E.TKEGSEFS#DGEVAE.K          | S337:           | 2 | 2,5435 | 0,31  | -0,068 |
| 9 | Q8N9T8 KRI1_HUMAN   | E.GVHGPPVQLAVDDSS#DEGE.L     | S287:           | 3 | 2,5419 | 0,135 | 0,276  |
| 9 | Q15021 CND1_HUMAN   | E.FHLPLS#PEE.L               | S13:            | 2 | 2,5398 | 0,307 | -0,212 |
| 9 | Q9Y6N7 ROBO1_HUMAN  | E.TYTDLPPPPVPPPAIKS#PTAQSK.T | S1492:          | 3 | 2,5352 | 0,235 | 0,141  |
| 9 | P78412 IRX6_HUMAN   | R.T#LGQYQY#ERY#GAVELSGAGR.R  | T130:Y136:Y139: | 3 | 2,5351 | 0,081 | 1,861  |
| 9 | Q15417 CNN3_HUMAN   | R.DYQYSDQGIDY.-              |                 | 2 | 2,5348 | 0,434 | 0,089  |
| 9 | Q9NWB7 IFT57_HUMAN  | R.TRLS#EVM*EE.L              | S347:           | 2 | 2,5341 | 0,157 | 0,187  |
| 9 | Q8WWM7 ATX2L_HUMAN  | K.ISLAPTDVKE.L               |                 | 2 | 2,534  | 0,263 | -0,227 |
| 9 | Q9HC35 EMAL4_HUMAN  | E.KLS#LPQNE.T                | S869:           | 2 | 2,5326 | 0,24  | 0,302  |
| 9 | P20700 LMNB1_HUMAN  | R.LKLS#PS#PSSR.V             | S391:S393:      | 2 | 2,5326 | 0,259 | -0,198 |
| 9 | Q14247 SRC8_HUMAN   | E.RLPSS#PVYEDAAS#FKAE.L      | S418:S426:      | 3 | 2,5308 | 0,163 | 0,09   |
| 9 | P49790 NU153_HUMAN  | E.NKSS#FNLGTIE.T             | S1047:          | 2 | 2,53   | 0,253 | -0,095 |
| 9 | Q52LD0 Q52LD0_HUMAN | K.AGGS#PASYHGST#S#PR.V       | S192:T200:S201: | 3 | 2,5299 | 0,317 | 0,109  |
| 9 | P62753 RS6_HUMAN    | R.LSS#LRSTS#KSE.S            | S236:S242:      | 2 | 2,5292 | 0,367 | -0,257 |
| 9 | O60841 IF2P_HUMAN   | E.GNTVHIEVK.E                |                 | 2 | 2,5284 | 0,336 | 0,184  |

|   |                     |                              |            |   |        |       |        |
|---|---------------------|------------------------------|------------|---|--------|-------|--------|
| 9 | Q5VUA4 ZN318_HUMAN  | E.VILKGS#PEE.K               | S1420:     | 2 | 2,5265 | 0,372 | -0,116 |
| 9 | Q8NG27 PJA1_HUMAN   | E.VREPS#LQEE.Q               | S448:      | 2 | 2,5265 | 0,272 | -0,209 |
| 9 | Q9Y519 T184B_HUMAN  | E.KTLLSS#DDEF.-              | S403:      | 2 | 2,5222 | 0,404 | -0,181 |
| 9 | Q9HAN9 NMNA1_HUMAN  | E.ASDCDHQQNS#PTLE.R          | S117:      | 2 | 2,5181 | 0,342 | -0,073 |
| 9 | Q8IZT6 ASPM_HUMAN   | E.ENKIPISPIS#PAFNE.C         | S225:      | 2 | 2,5165 | 0,168 | -0,141 |
| 9 | Q13428 TCOF_HUMAN   | K.TGPTVTQVK.A                |            | 2 | 2,5154 | 0,349 | 0,131  |
| 9 | Q96C57 CL043_HUMAN  | E.SAIHS#PGTVE.K              | S179:      | 2 | 2,5116 | 0,291 | 0,113  |
| 9 | Q5SYE7 NHSL1_HUMAN  | R.AVPS#PTTGEE.G              | S1233:     | 2 | 2,5111 | 0,302 | 0      |
| 9 | Q8IWJ2 GCC2_HUMAN   | E.GKINS#LTEE.K               | S490:      | 2 | 2,5098 | 0,178 | -0,342 |
| 9 | Q8N1G2 K0082_HUMAN  | E.LALSLSSTSDDEPPSSVSHGAK.A   |            | 3 | 2,5062 | 0,351 | 0,251  |
| 9 | Q92667 AKAP1_HUMAN  | E.TSSS#PRDKAIT#PPPLPE.S      | S526:T533: | 2 | 2,5056 | 0,233 | 0,197  |
| 9 | Q01844 EWS_HUMAN    | R.QDHPSSM*GVYQGE.S           |            | 2 | 2,5036 | 0,18  | -0,168 |
| 9 | P19838 NFKB1_HUMAN  | E.LRDS#DSVCDSGVE.T           | S921:      | 2 | 2,5028 | 0,293 | 0,482  |
| 9 | O95684 FR1OP_HUMAN  | E.GALDLSDVHS#PPKS#PE.G       | S156:S160: | 3 | 2,5009 | 0,107 | -0,202 |
| 9 | Q5F1R6 DJC21_HUMAN  | E.NFSRPQIDENPLD.D            |            | 2 | 2,4972 | 0,099 | 0,079  |
| 9 | Q12996 CSTF3_HUMAN  | E.GNGPVESNAVLTK.A            |            | 2 | 2,4968 | 0,382 | -0,095 |
| 9 | Q9UN86 G3BP2_HUMAN  | E.QEERQPS#PEPVQE.N           | S163:      | 2 | 2,4943 | 0,245 | -0,299 |
| 9 | Q7Z6Z7 HUWE1_HUMAN  | E.NKGNDDT#PLALE.S            | T1722:     | 2 | 2,4941 | 0,191 | -0,487 |
| 9 | A6NKS9 A6NKS9_HUMAN | E.KLASM*ES#PEEPGASM*DE.N     | S19:       | 2 | 2,4934 | 0,335 | -0,064 |
| 9 | Q8N565 MREG_HUMAN   | E.LHYLPFPS#P.-               | S213:      | 2 | 2,4934 | 0,391 | -0,318 |
| 9 | A8K7V5 A8K7V5_HUMAN | E.VSTAPAGTDM*PAAK.K          |            | 2 | 2,4893 | 0,439 | 0      |
| 9 | P49023 PAXI_HUMAN   | E.HVYSFPNK.Q                 |            | 2 | 2,4892 | 0,326 | 0,123  |
| 9 | Q9Y6M5 ZNT1_HUMAN   | E.KTPAVS#ISCLE.L             | S466:      | 2 | 2,4891 | 0,199 | -0,095 |
| 9 | Q9BVS4 RIOK2_HUMAN  | E.SADARS#FE.M                | S390:      | 2 | 2,4877 | 0,119 | 0,19   |
| 9 | P13645 K1C10_HUMAN  | K.DAEAWFNEK.S                |            | 2 | 2,4853 | 0,301 | -0,11  |
| 9 | Q15418 KS6A1_HUMAN  | R.KLPS#TTL.-                 | S732:      | 2 | 2,4852 | 0,429 | 0,29   |
| 9 | P62753 RS6_HUMAN    | R.LSS#LRASTSKS#E.S           | S236:S244: | 2 | 2,482  | 0,392 | -0,086 |
| 9 | Q8NC44 F134A_HUMAN  | E.LAGFSPVVDVK.K              |            | 2 | 2,4818 | 0,29  | -0,216 |
| 9 | O60238 BNI3L_HUMAN  | K.NGGLEHVPS#S#SSIHNGDM*E.K   | S62:S63:   | 2 | 2,4806 | 0,291 | 0,342  |
| 9 | Q14807 KIF22_HUMAN  | E.IGSPEPM*AAPASASQKLS#PLQK.L | S427:      | 3 | 2,4796 | 0,157 | 0,794  |
| 9 | O60684 IMA7_HUMAN   | E.HYFGVEDDDS#SLAPQVDE.T      | S509:      | 2 | 2,4789 | 0,297 | 0,232  |
| 9 | Q15149 PLEC1_HUMAN  | R.SSS#VGSSSSYPIPAVSR.T       | S4386:     | 2 | 2,4785 | 0,304 | -0,864 |
| 9 | Q9NPI6 DCP1A_HUMAN  | R.KASSPS#PLTIGTPE.S          | S525:      | 2 | 2,4674 | 0,33  | 0,333  |
| 9 | B2RA01 B2RA01_HUMAN | K.AQYEDIAQK.S                |            | 2 | 2,4663 | 0,151 | -0,114 |
| 9 | Q99549 MPP8_HUMAN   | R.LSLNNDIFEANSDDSDQQS#E.T    | S142:      | 2 | 2,4642 | 0,255 | 0      |
| 9 | O15427 MOT4_HUMAN   | E.VVHTPETS#V.-               | S464:      | 2 | 2,4632 | 0,451 | -0,233 |
| 9 | Q96T23 RSF1_HUMAN   | E.SEKPGS#PEAAE.T             | S612:      | 2 | 2,4567 | 0,411 | -0,103 |
| 9 | Q9UHB6 LIMA1_HUMAN  | E.ILERPAQLANAR.E             |            | 3 | 2,4541 | 0,364 | 0,338  |
| 9 | P05556 ITB1_HUMAN   | K.NVLSLTNKGE.V               |            | 2 | 2,4517 | 0,238 | -0,113 |

|   |                    |                           |              |   |        |       |        |
|---|--------------------|---------------------------|--------------|---|--------|-------|--------|
| 9 | O15417 TNC18_HUMAN | E.RLS#PFLAE.S             | S263:        | 2 | 2,4516 | 0,111 | -0,12  |
| 9 | P40855 PEX19_HUMAN | K.NATDLQNSS#M*SEEE.L      | S147:        | 2 | 2,4474 | 0,153 | -0,37  |
| 9 | Q9UPX8 SHAN2_HUMAN | E.LDRYS#LDSE.D            | S364:        | 2 | 2,4462 | 0,095 | 0,518  |
| 9 | Q8IY67 RAVR1_HUMAN | E.LVRPFGS#LE.R            | S157:        | 2 | 2,4447 | 0,371 | -0,111 |
| 9 | Q9BZL6 KPCD2_HUMAN | E.NALHAS#EEEE.G           | S362:        | 2 | 2,4391 | 0,225 | 0,101  |
| 9 | P81605 DCD_HUMAN   | K.ENAGEDPGLAR.Q           |              | 2 | 2,436  | 0,36  | 0      |
| 9 | Q9H4B7 TBB1_HUMAN  | E.RIS#VYYNE.A             | S48:         | 2 | 2,4347 | 0,178 | -0,109 |
| 9 | Q7LBC6 JHD2B_HUMAN | E.NKPLGFSFGCS#SAQE.A      | S510:        | 2 | 2,4335 | 0,153 | -0,286 |
| 9 | P50443 S26A2_HUMAN | E.LQRES#S#TDFKQFE.T       | S35:S36:     | 3 | 2,432  | 0,095 | 0,721  |
| 9 | P55072 TERA_HUMAN  | E.DNSVVLSQPK.M            |              | 2 | 2,4289 | 0,237 | 0,104  |
| 9 | Q96QE3 ATAD5_HUMAN | K.SGYIS#ESENSE.I          | S306:        | 2 | 2,424  | 0,139 | 0,095  |
| 9 | Q5JSH3 WDR44_HUMAN | K.VGLSTFKE.T              |              | 2 | 2,4226 | 0,245 | 0,208  |
| 9 | P46063 RECQ1_HUMAN | E.LKLIYVT#PE.K            | T190:        | 2 | 2,4222 | 0,087 | -0,211 |
| 9 | P13645 K1C10_HUMAN | R.SLLEGEGSSGGGGR.G        |              | 2 | 2,421  | 0,319 | -0,29  |
| 9 | P41250 SYG_HUMAN   | E.DKAPQVDVDKAVAE.L        |              | 3 | 2,4183 | 0,178 | 0,185  |
| 9 | O43852 CALU_HUMAN  | K.M*ADKGDGLIATK.E         |              | 3 | 2,4168 | 0,128 | 0,353  |
| 9 | Q8WYP5 AHTF1_HUMAN | E.TRIS#FVEED.V            | S1241:       | 2 | 2,4161 | 0,22  | -1,038 |
| 9 | Q6PL24 TMED8_HUMAN | E.HTGAIDVLS#ADLE.S        | S137:        | 2 | 2,4137 | 0,269 | -0,343 |
| 9 | Q8TER5 SOLO_HUMAN  | R.TRAS#VAVSSFE.H          | S1421:       | 2 | 2,4106 | 0,204 | 0,692  |
| 9 | Q86UW6 N4BP2_HUMAN | E.TPHM*YFS#DSE.S          | S686:        | 2 | 2,4102 | 0,109 | 0,186  |
| 9 | Q00613 HSF1_HUMAN  | E.SEPAPASVT#ALTDAR.G      | T346:        | 2 | 2,4081 | 0,299 | 0,156  |
| 9 | P06576 ATPB_HUMAN  | E.LGIYPAVDPLDSTSR.I       |              | 2 | 2,4064 | 0,394 | -0,152 |
| 9 | P50991 TCPD_HUMAN  | R.FSNISAAK.A              |              | 2 | 2,4061 | 0,298 | 0,728  |
| 9 | Q9NUL3 STAU2_HUMAN | K.GSSPT#PPCS#PVQPSK.Q     | T488:S492:   | 2 | 2,4054 | 0,214 | -0,289 |
| 9 | Q09666 AHNK_HUMAN  | R.SNS#FSDERE.F            | S5782:       | 2 | 2,4048 | 0,217 | 0,106  |
| 9 | Q8N3U4 STAG2_HUMAN | E.THFSSDT#DFE.D           | T25:         | 2 | 2,4037 | 0,145 | 0      |
| 9 | Q00839 HNRPU_HUMAN | R.AKS#PQPPVEEE.D          | S270:        | 2 | 2,4016 | 0,307 | -0,378 |
| 9 | Q9HD15 SRA1_HUMAN  | E.TSPGPPPM*GPPPPSSK.A     |              | 2 | 2,3997 | 0,409 | -0,237 |
| 9 | O15085 ARHGB_HUMAN | K.SLGGES#SGGTT#PVGSFHTE.A | S1457:T1462: | 3 | 2,3991 | 0,161 | 0,372  |
| 9 | P35030 TRY3_HUMAN  | D.TLDNDIM*LIK.L           |              | 2 | 2,3925 | 0,327 | -0,102 |
| 9 | Q5H9R7 SAPS3_HUMAN | D.SLRSNS#PVEM*E.T         | S740:        | 2 | 2,3914 | 0,123 | -0,181 |
| 9 | O95208 EPN2_HUMAN  | E.LEQARPQT#SGEEE.L        | T273:        | 2 | 2,3905 | 0,278 | 0,079  |
| 9 | Q02952 AKA12_HUMAN | K.GALNGQGALNS#QEEEE.V     | S96:         | 2 | 2,3875 | 0,285 | -0,071 |
| 9 | P04264 K2C1_HUMAN  | K.SKAEAESLYQSK.Y          |              | 3 | 2,3855 | 0,153 | 0,477  |
| 9 | P51610 HCFC1_HUMAN | D.SYLLQLQK.Y              |              | 2 | 2,3842 | 0,227 | -0,123 |
| 9 | Q9UMZ2 SYNG_HUMAN  | E.NKPLGES#FAE.F           | S557:        | 2 | 2,3834 | 0,252 | 0,104  |
| 9 | Q96SB3 NEB2_HUMAN  | E.LEGNLQTLR.N             |              | 2 | 2,383  | 0,307 | 0,584  |
| 9 | Q13371 PHLP_HUMAN  | E.VLVLTsvr.N              |              | 2 | 2,3796 | 0,254 | 0,275  |
| 9 | P48960 CD97_HUMAN  | E.GCQVLGSK.N              |              | 2 | 2,3773 | 0,281 | 0,216  |

|   |                    |                            |            |   |        |       |        |
|---|--------------------|----------------------------|------------|---|--------|-------|--------|
| 9 | P27824 CALX_HUMAN  | R.GTLSGWILSK.A             |            | 2 | 2,3761 | 0,404 | 0      |
| 9 | Q7Z4V5 HDGR2_HUMAN | R.ARGDS#EALDEES.-          | S664:      | 2 | 2,3757 | 0,312 | -0,09  |
| 9 | Q14247 SRC8_HUMAN  | E.RLPSS#PVYE.D             | S418:      | 2 | 2,3741 | 0,282 | -0,216 |
| 9 | P35612 ADDB_HUMAN  | E.TKS#PLVS#PSKSL.EE.G      | S613:S617: | 3 | 2,365  | 0,096 | 0      |
| 9 | Q86SQ0 PHLB2_HUMAN | E.GNPNVVSSTLSVPAS#PR.V     | S334:      | 2 | 2,3632 | 0,253 | -0,285 |
| 9 | Q2KHR2 RFXD2_HUMAN | E.QKLQS#PLPGE.S            | S225:      | 2 | 2,3627 | 0,305 | -0,104 |
| 9 | Q969R5 LMBL2_HUMAN | E.HLDVAS#PDKASS#PELPSVSE.N | S683:S689: | 2 | 2,3588 | 0,253 | 0,218  |
| 9 | Q9HCU9 BRMS1_HUMAN | E.EDRQS#LDLSSE.W           | S173:      | 2 | 2,3557 | 0,198 | -0,18  |
| 9 | P02538 K2C6A_HUMAN | K.ADTLTDEINFLR.A           |            | 2 | 2,3544 | 0,188 | -0,26  |
| 9 | P30622 CLIP1_HUMAN | E.ANGLQTPASR.A             |            | 2 | 2,3535 | 0,262 | -0,219 |
| 9 | Q9UIF9 BAZ2A_HUMAN | E.VPLTASVTSPK.A            |            | 2 | 2,3516 | 0,325 | 0,111  |
| 9 | P04183 KITH_HUMAN  | R.GQIQVILGPM*FSGK.S        |            | 2 | 2,3506 | 0,088 | -0,409 |
| 9 | Q02952 AKA12_HUMAN | K.AIT#PQAQEE.L             | T1760:     | 2 | 2,3498 | 0,153 | -0,114 |
| 9 | Q9C0B1 FATSO_HUMAN | E.DAVPLCM*SADFP.R.V        |            | 2 | 2,348  | 0,387 | 0,326  |
| 9 | Q5QJE6 TDIF2_HUMAN | K.FGDCGGS#DDEEE.S          | S397:      | 2 | 2,348  | 0,24  | -0,175 |
| 9 | Q9H6F5 CCD86_HUMAN | R.LGGLRPES#PE.S            | S18:       | 2 | 2,3426 | 0,283 | 0      |
| 9 | Q8TDJ6 DMXL2_HUMAN | E.M*VDKPDIGS#YE.R          | S2123:     | 2 | 2,3398 | 0,335 | -0,362 |
| 9 | Q6UXD5 SE6L2_HUMAN | E.AGDTREYEV#I.-            | S909:      | 2 | 2,3378 | 0,373 | 0,185  |
| 9 | O95361 TRI16_HUMAN | E.LDLM*APGPLR.A            |            | 2 | 2,333  | 0,362 | 0      |
| 9 | Q14692 BMS1_HUMAN  | K.AGLSPANQSDR.V            |            | 2 | 2,3305 | 0,354 | -0,096 |
| 9 | Q9NRY5 F1142_HUMAN | E.KAETSLGIPSPS#EISTE.V     | S131:      | 2 | 2,3278 | 0,244 | -0,267 |
| 9 | Q7Z417 NUFP2_HUMAN | K.RTS#PQVLGSILK.S          | S572:      | 2 | 2,3235 | 0,31  | -0,354 |
| 9 | Q14966 ZN638_HUMAN | E.KATCDS#DFAVETLE.L        | S1158:     | 2 | 2,3188 | 0,169 | 0,146  |
| 9 | O94909 K0819_HUMAN | E.LRV#ELEE.K               | S274:      | 2 | 2,3181 | 0,265 | -0,346 |
| 9 | P49023 PAXI_HUMAN  | R.IS#ASS#ATRE.L            | S258:S261: | 2 | 2,3161 | 0,324 | -0,226 |
| 9 | Q86W92 LIPB1_HUMAN | E.DDM*FKDFAAR.S            |            | 2 | 2,3158 | 0,372 | 0,099  |
| 9 | O43765 SGTA_HUMAN  | R.SQIRS#RTPS#ASNDDQQE.-    | S301:S305: | 2 | 2,3096 | 0,234 | 0      |
| 9 | O95208 EPN2_HUMAN  | E.LEQARPQTS#GEEE.L         | S274:      | 2 | 2,3061 | 0,273 | -0,079 |
| 9 | Q9BZF3 OSBL6_HUMAN | E.SRLS#M*SESVSE.F          | S487:      | 2 | 2,306  | 0,26  | -0,373 |
| 9 | P30307 MPIP3_HUMAN | E.TGHLDSS#GLQE.V           | S102:      | 2 | 2,3055 | 0,117 | 0,199  |
| 9 | Q96LZ7 FA82A_HUMAN | K.AFNTRVEE.L               |            | 2 | 2,3024 | 0,222 | 0      |
| 9 | P18031 PTN1_HUMAN  | E.KGS#PLNAAPYIE.S          | S352:      | 2 | 2,3015 | 0,213 | -0,262 |
| 9 | O95359 TACC2_HUMAN | E.TKFSS#PTEE.L             | S2512:     | 2 | 2,3011 | 0,184 | -0,11  |
| 9 | Q8WWI1 LMO7_HUMAN  | E.SGEGEIS#PQRE.V           | S1026:     | 2 | 2,3002 | 0,277 | -0,673 |
| 9 | P46821 MAP1B_HUMAN | R.KLGDVS#PTQID.V           | S1501:     | 2 | 2,3002 | 0,158 | 0      |
| 9 | P35998 PRS7_HUMAN  | E.DDIQQLK.K                |            | 2 | 2,2956 | 0,212 | 0,125  |
| 9 | O43572 AKA10_HUMAN | E.SSSTLTVASR.N             |            | 2 | 2,2921 | 0,173 | 0,121  |
| 9 | Q9HC35 EMAL4_HUMAN | R.ISS#SPTLLE.N             | S918:      | 2 | 2,2874 | 0,093 | -0,238 |
| 9 | Q8N4C6 NIN_HUMAN   | E.NS#ILRNE.I               | S1524:     | 2 | 2,2865 | 0,235 | 0,329  |



|   |                    |                                  |            |   |        |       |        |
|---|--------------------|----------------------------------|------------|---|--------|-------|--------|
| 9 | Q86V48 LUZP1_HUMAN | R.HT#STSNIQVGLAE.L               | T819:      | 2 | 2,2852 | 0,208 | 0      |
| 9 | Q86TC9 MYPN_HUMAN  | E.YKISS#FE.Q                     | S907:      | 2 | 2,2846 | 0,182 | 0,128  |
| 9 | P21281 VATB2_HUMAN | E.DFLDIM*GQPINPQCR.I             |            | 2 | 2,2814 | 0,359 | -0,201 |
| 9 | Q96PK6 RBM14_HUMAN | R.AQPSVSLGAPYR.G                 |            | 2 | 2,2795 | 0,295 | 0      |
| 9 | Q9P266 K1462_HUMAN | E.DVGFGRNS#PE.M                  | S885:      | 2 | 2,2751 | 0,329 | 0      |
| 9 | Q2KHR3 QSER1_HUMAN | K.QEPLHSTSYAVNILE.N              |            | 2 | 2,2743 | 0,118 | 0      |
| 9 | Q86SQ0 PHLB2_HUMAN | E.KLQLS#DEESVFE.E                | S489:      | 2 | 2,2716 | 0,291 | 0      |
| 9 | P29374 ARI4A_HUMAN | E.KNGT#GQSSDSEDLPVLD.N           | T1105:     | 2 | 2,2708 | 0,103 | 0      |
| 9 | Q9BY89 K1671_HUMAN | E.NS#RGFDNPE.T                   | S673:      | 2 | 2,2684 | 0,089 | -0,109 |
| 9 | O43847 NRDC_HUMAN  | E.GRRGS#LSNAGDPE.I               | S94:       | 2 | 2,2639 | 0,328 | 0,35   |
| 9 | P46821 MAP1B_HUMAN | K.DFEELKAAE.V                    |            | 2 | 2,262  | 0,185 | 0,22   |
| 9 | O14974 MYPT1_HUMAN | R.KTGS#YGALAE.I                  | S445:      | 2 | 2,2614 | 0,083 | 0,113  |
| 9 | Q86UW6 N4BP2_HUMAN | E.KSS#PGEIVVEE.R                 | S751:      | 2 | 2,2612 | 0,187 | -0,317 |
| 9 | Q9Y4C8 RBM19_HUMAN | E.LSDM*DYLK.S                    |            | 2 | 2,2607 | 0,111 | 0,061  |
| 9 | P17612 KAPCA_HUMAN | E.EIRVS#INE.K                    | S339:      | 2 | 2,2597 | 0,099 | 0,352  |
| 9 | Q02880 TOP2B_HUMAN | E.YTFS#PGK.S                     | S1424:     | 2 | 2,2591 | 0,275 | 0,208  |
| 9 | Q96M11 HYLS1_HUMAN | R.KLPFPLS#PS.-                   | S297:      | 2 | 2,2461 | 0,258 | -0,572 |
| 9 | A1L390 PKHG3_HUMAN | R.FFFNPSAVSQR.T                  |            | 2 | 2,2427 | 0,189 | 0,188  |
| 9 | Q5SW79 CE170_HUMAN | R.STGSATSLAS#QGE.R               | S636:      | 2 | 2,242  | 0,113 | -0,287 |
| 9 | Q14157 UBP2L_HUMAN | E.AKGG#TTGSQFLE.Q                | S356:      | 2 | 2,2405 | 0,308 | -0,537 |
| 9 | Q9Y6N7 ROBO1_HUMAN | E.TYTDDLPPPPVPPAIKSPTAQS#K.T     | S1497:     | 3 | 2,2391 | 0,092 | 0,07   |
| 9 | Q04637 IF4G1_HUMAN | R.IRDPNQGGKDITEE.I               |            | 3 | 2,2381 | 0,209 | 0,233  |
| 9 | O00443 P3C2A_HUMAN | E.KLLDDDS#FE.T                   | S108:      | 2 | 2,2376 | 0,166 | -0,21  |
| 9 | Q9NUL3 STAU2_HUMAN | K.GSSPT#PPCS#PVQPSKQLE.Y         | T488:S492: | 2 | 2,2342 | 0,155 | 0,593  |
| 9 | Q66K74 MAP1S_HUMAN | E.LPLAASSIPRPT#PS#PE.S           | T638:S640: | 2 | 2,2329 | 0,148 | 0,188  |
| 9 | P05387 RLA2_HUMAN  | E.DVIAQGIGK.L                    |            | 2 | 2,2322 | 0,125 | 0,068  |
| 9 | Q15942 ZYX_HUMAN   | R.EKVSSIDLE.I                    |            | 2 | 2,23   | 0,138 | 0,12   |
| 9 | Q92625 ANS1A_HUMAN | E.KSPS#FASE.W                    | S663:      | 2 | 2,226  | 0,115 | 0,262  |
| 9 | Q9Y5B0 CTDP1_HUMAN | E.LAGAPEPQGSQAQGGR.V             |            | 2 | 2,2248 | 0,229 | -0,314 |
| 9 | O15062 ZBTB5_HUMAN | R.VGDIHILE.V                     |            | 2 | 2,2234 | 0,093 | 0,136  |
| 9 | Q02952 AKA12_HUMAN | K.SPSP#PVERE.M                   | S1331:     | 2 | 2,2187 | 0,227 | -0,226 |
| 9 | P35612 ADDB_HUMAN  | E.AETKS#PLVS#PSKSLE.E            | S613:S617: | 2 | 2,2143 | 0,175 | 0,07   |
| 9 | Q96PE2 ARHGH_HUMAN | R.KSL#NPDIASE.T                  | S463:      | 2 | 2,2132 | 0,121 | -0,098 |
| 9 | Q02952 AKA12_HUMAN | E.QRSPEQPPEGSST#PAEPEPSGGGPSAE.A | T21:       | 3 | 2,2123 | 0,249 | 0      |
| 9 | Q02952 AKA12_HUMAN | K.SAESPTS#PVTSE.T                | S286:      | 2 | 2,2122 | 0,186 | 0      |
| 9 | P55209 NP1L1_HUMAN | E.RLDGLVETPTGY#IE.S              | Y66:       | 2 | 2,2116 | 0,186 | -0,074 |
| 9 | P11766 ADHX_HUMAN  | E.FVTHNLS#FDE.I                  | S351:      | 2 | 2,203  | 0,09  | 0,095  |
| 9 | Q92538 GBF1_HUMAN  | E.KSQSASVES#IPEVLE.E             | S352:      | 2 | 2,2015 | 0,177 | -0,145 |
| 9 | Q92667 AKAP1_HUMAN | R.DKAIT#PPLPE.S                  | T533:      | 2 | 2,2013 | 0,171 | 0,105  |

|   |                     |                        |              |   |        |       |        |
|---|---------------------|------------------------|--------------|---|--------|-------|--------|
| 9 | Q9H0F6 SHRPN_HUMAN  | E.ACPVSLPSPPEASTLK.G   |              | 2 | 2,1991 | 0,269 | -0,221 |
| 9 | Q7Z591 AKNA_HUMAN   | E.RLFPNATS#PELLE.D     | S52:         | 2 | 2,199  | 0,252 | -0,311 |
| 9 | O15061 DMN_HUMAN    | K.GLQT#PVKD.A          | T598:        | 2 | 2,1987 | 0,215 | 0,585  |
| 9 | ##Q32P28 P3H1_HUMAN | E.KVGSM*T#QY#YD.L      | T549:Y551:   | 3 | 2,1985 | 0,158 | -1,27  |
| 9 | Q9UPN3 MACF1_HUMAN  | R.ASS#RRGS#DASDFDLE.T  | S5368:S5372: | 2 | 2,196  | 0,198 | -0,065 |
| 9 | P05186 PPBT_HUMAN   | D.IDVIM*GGGR.K         |              | 2 | 2,1882 | 0,316 | 0      |
| 9 | P17612 KAPCA_HUMAN  | E.IRV#INE.K            | S339:        | 2 | 2,185  | 0,084 | 0      |
| 9 | Q9P287 BCCIP_HUMAN  | E.LTDLLIQNHIGSVIK.Q    |              | 3 | 2,1832 | 0,134 | -0,204 |
| 9 | Q9H0F6 SHRPN_HUMAN  | K.SNS#PPALGPE.A        | S131:        | 2 | 2,1783 | 0,273 | 0      |
| 9 | Q4ZG04 Q4ZG04_HUMAN | E.LLLSTLVR.E           |              | 2 | 2,1709 | 0,299 | -0,867 |
| 9 | Q9HC35 EMAL4_HUMAN  | K.ATLLEDQDPS#PSS.-     | S978:        | 2 | 2,1687 | 0,369 | -0,156 |
| 9 | P49795 RG519_HUMAN  | R.ALLLQGPSQSS#EA.-     | S215:        | 2 | 2,1649 | 0,355 | 0,083  |
| 9 | Q6PGN9 PSRC1_HUMAN  | E.QCALQDRES#AGE.G      | S98:         | 2 | 2,1647 | 0,315 | -0,169 |
| 9 | Q03252 LMNB2_HUMAN  | R.AGGPAT#PLS#PTR.L     | T14:S17:     | 2 | 2,161  | 0,179 | 0,19   |
| 9 | P13010 KU86_HUMAN   | E.QGGAHFSVSS#LAE.G     | S580:        | 2 | 2,1582 | 0,188 | 0      |
| 9 | P08107 HSP71_HUMAN  | K.GSGS#GPTIEE.V        | S633:        | 2 | 2,1544 | 0,204 | 0,114  |
| 9 | Q15942 ZYG_HUMAN    | R.S#PGAPGLTLKEVEE.L    | S344:        | 2 | 2,154  | 0,111 | -0,532 |
| 9 | O14745 NHERF_HUMAN  | E.AALES#PRPALVR.S      | S280:        | 3 | 2,15   | 0,153 | 0,202  |
| 9 | Q9Y4F3 LKAP_HUMAN   | R.LVCLLPSSQAR.Q        |              | 2 | 2,1496 | 0,101 | 0,392  |
| 9 | P35527 K1C9_HUMAN   | K.TLLDIDNTR.M          |              | 2 | 2,1447 | 0,27  | 0,23   |
| 9 | Q9NQY0 BIN3_HUMAN   | E.LRLS#IVADD.-         | S248:        | 2 | 2,1404 | 0,189 | 0      |
| 9 | Q58FF8 H90B2_HUMAN  | K.SLVSVTKE.G           |              | 2 | 2,1373 | 0,093 | 0,424  |
| 9 | Q02952 AKA12_HUMAN  | K.VLSKPPGEGVSE.V       |              | 2 | 2,1311 | 0,265 | 0,098  |
| 9 | P49711 CTCF_HUMAN   | E.GKDVDVS#VYDFE.E      | S224:        | 2 | 2,129  | 0,288 | 0      |
| 9 | P23025 XPA_HUMAN    | E.FM*DSY#LMNHFD.L      | Y116:        | 2 | 2,1266 | 0,101 | -0,644 |
| 9 | P13647 K2C5_HUMAN   | K.WTLLQEQT.K           |              | 2 | 2,1254 | 0,231 | -0,101 |
| 9 | Q8N1Q3 Q8N1Q3_HUMAN | E.LPGSARS#S#PDRYSM*E.A | S10:S11:     | 3 | 2,1218 | 0,179 | -0,1   |
| 9 | Q9H4L5 OSBL3_HUMAN  | E.SRLS#ITDSLSE.F       | S443:        | 2 | 2,1214 | 0,125 | 0      |
| 9 | Q9NXG2 THUM1_HUMAN  | E.YGDDMYGPEK.F         |              | 2 | 2,1202 | 0,311 | -0,104 |
| 9 | P06748 NPM_HUMAN    | E.KTPKT#PKGPPSSVED.I   | T237:        | 3 | 2,1166 | 0,086 | 0,118  |
| 9 | Q14839 CHD4_HUMAN   | E.KSAIDLT#PIVVE.D      | T1653:       | 2 | 2,1148 | 0,297 | -0,089 |
| 9 | Q63ZY3 KANK2_HUMAN  | E.IASM*LYSR.M          |              | 2 | 2,1122 | 0,181 | -0,574 |
| 9 | P05362 ICAM1_HUMAN  | K.GTPM*KPNTQAT#PP.-    | T530:        | 2 | 2,1099 | 0,157 | 0      |
| 9 | Q3KQU3 MA7D1_HUMAN  | E.LGAGAPPVVAR.T        |              | 2 | 2,1087 | 0,389 | 0      |
| 9 | Q9Y3B9 RRP15_HUMAN  | E.SDGPDDSRPESASDS#DT.- | S280:        | 2 | 2,1028 | 0,267 | -0,067 |
| 9 | O15027 SC16A_HUMAN  | E.QVSSRPTS#PE.K        | S1263:       | 2 | 2,0984 | 0,208 | -0,313 |
| 9 | Q9UIG0 BAZ1B_HUMAN  | E.IVKFEPQVDT#EAE.D     | T833:        | 2 | 2,0924 | 0,137 | -0,077 |
| 9 | Q9H211 CDT1_HUMAN   | R.LRLS#VDE.V           | S73:         | 2 | 2,083  | 0,225 | 0,201  |
| 9 | P36915 GNL1_HUMAN   | R.NPYALLGEDEC.-        |              | 2 | 2,0802 | 0,328 | -0,095 |

|   |                    |                          |                    |   |        |       |        |
|---|--------------------|--------------------------|--------------------|---|--------|-------|--------|
| 9 | Q9UKV3 ACINU_HUMAN | K.SKS#PS#PPRLTE.D        | S386:S388:         | 2 | 2,0799 | 0,1   | 0      |
| 9 | Q10469 MGAT2_HUMAN | E.ALAPPLLDAEPAR.G        |                    | 2 | 2,0792 | 0,313 | -0,183 |
| 9 | Q6P499 NPAL3_HUMAN | E.LKASFS#YGALE.N         | S361:              | 2 | 2,0748 | 0,171 | -0,096 |
| 9 | P15586 GNS_HUMAN   | D.GM*SLLPILR.G           |                    | 2 | 2,0728 | 0,091 | 0,18   |
| 9 | Q14160 LAP4_HUMAN  | R.SLEPSPS#PGPQEE.D       | S1581:             | 2 | 2,0693 | 0,176 | 0,596  |
| 9 | Q15365 PCBP1_HUMAN | E.TLSQS#PQGR.V           | S173:              | 2 | 2,0683 | 0,281 | -0,232 |
| 9 | Q14683 SMC1A_HUMAN | R.ISSIYARE.A             |                    | 2 | 2,0655 | 0,15  | 0,13   |
| 9 | Q8N655 CJ012_HUMAN | E.AAQVNPIM*PK.E          |                    | 2 | 2,0649 | 0,345 | 0      |
| 9 | Q9BVJ6 UT14A_HUMAN | E.LEAHGVS#ESE.G          | S405:              | 2 | 2,0641 | 0,123 | 0,322  |
| 9 | Q12888 TP53B_HUMAN | K.M*VIQGPSS#PQGE.A       | S1114:             | 2 | 2,0641 | 0,124 | 0,092  |
| 9 | Q13523 PRP4B_HUMAN | R.TKLLDDLALLE.D          |                    | 2 | 2,0444 | 0,215 | -0,324 |
| 9 | Q13435 SF3B2_HUMAN | E.QQAQVEKEDFS#D.M        | S838:              | 2 | 2,0433 | 0,292 | -0,325 |
| 9 | P09884 DPOLA_HUMAN | K.Y#AALVVEPT#SDGNVVT#K.Q | Y1055:T1063:T1070: | 2 | 2,0415 | 0,252 | 1,299  |
| 9 | Q8IVF2 AHNK2_HUMAN | E.VTIHSIVT#PE.F          | T5484:             | 2 | 2,0339 | 0,12  | 0,311  |
| 9 | Q9BXX5 B2L13_HUMAN | E.QHLSS#PQGVQLD.I        | S38:               | 2 | 2,0321 | 0,344 | 0      |
| 9 | Q63HQ0 CD016_HUMAN | R.S#SRLS#SDATVLPNTE.S    | S170:S174:         | 2 | 2,0282 | 0,148 | 0,531  |
| 9 | Q9BXJ9 NARG1_HUMAN | K.ITVNGDS#SAE.A          | S855:              | 2 | 2,027  | 0,245 | 0,227  |
| 9 | O95425 SVIL_HUMAN  | E.KYGS#FEEAE.A           | S968:              | 2 | 2,0262 | 0,137 | -0,321 |
| 9 | Q7Z309 F122B_HUMAN | R.SSS#APLIHGLSD.L        | S25:               | 2 | 2,0248 | 0,337 | 0,193  |
| 9 | Q6ZRV2 FA83H_HUMAN | E.SKGS#PTSAYPE.R         | S870:              | 2 | 2,0206 | 0,224 | -0,203 |
| 9 | P05362 ICAM1_HUMAN | R.EPAVGEPAEVTTTTLVLR.R   |                    | 2 | 2,0202 | 0,331 | 0      |
| 9 | O43149 ZZEF1_HUMAN | E.VERPVVS#SPGDPE.Q       | S2443:             | 2 | 2,0169 | 0,225 | -0,09  |
| 9 | Q02447 SP3_HUMAN   | K.IGPPS#PGDDEEE.A        | S73:               | 2 | 2,0115 | 0,147 | 0,092  |
| 9 | Q969R5 LMBL2_HUMAN | E.AGELPT#SPLHLLSPGTPR.S  | T66:               | 2 | 2,0094 | 0,212 | -0,254 |
| 9 | Q14247 SRC8_HUMAN  | E.ERLPSS#PVYE.D          | S418:              | 2 | 2,0094 | 0,229 | -0,388 |
| 9 | P35527 K1C9_HUMAN  | K.TLNDM*RQEYEQLIAK.N     |                    | 3 | 2,0069 | 0,147 | -0,098 |
| 9 | Q92878 RAD50_HUMAN | E.DKLFDVCGS#QDFESD.L     | S635:              | 2 | 2,0036 | 0,107 | -0,132 |
| 9 | Q5T1M5 FKB15_HUMAN | E.LSCIPSHR.V             |                    | 2 | 2,0023 | 0,159 | 0,063  |
| 9 | Q14444 CAPR1_HUMAN | K.GKLDDYQE.R             |                    | 2 | 2,002  | 0,223 | 0,315  |
| 9 | P85037 FOXK1_HUMAN | R.TPFGPLSSR.S            |                    | 2 | 2,0008 | 0,266 | 0,063  |
| 9 | Q96PK6 RBM14_HUMAN | R.TQPM*TAQAASYR.A        |                    | 2 | 1,9999 | 0,359 | -0,091 |
| 9 | Q14839 CHD4_HUMAN  | E.VKST#APETAIE.C         | T1586:             | 2 | 1,9997 | 0,146 | -0,498 |
| 9 | Q14160 LAP4_HUMAN  | E.GAVVSAPS#VK.G          | S703:              | 2 | 1,9974 | 0,152 | -0,123 |
| 9 | Q96L92 SNX27_HUMAN | E.SGYGFNVR.G             |                    | 2 | 1,9966 | 0,242 | 0,203  |
| 9 | Q8WUF5 IASPP_HUMAN | E.AGDVDEGPVARPLS#PTR.L   | S489:              | 2 | 1,9939 | 0,393 | 0      |
| 9 | Q9UN86 G3BP2_HUMAN | E.ERQPS#PEPVQE.N         | S163:              | 2 | 1,9934 | 0,128 | -0,089 |
| 9 | Q12888 TP53B_HUMAN | R.STPFIVPSSPT#EQEGR.Q    | T382:              | 2 | 1,9835 | 0,184 | 1,751  |
| 9 | Q9H307 PININ_HUMAN | E.IAIVHS#D.A             | S347:              | 2 | 1,9707 | 0,085 | 0,219  |
| 9 | Q09666 AHNK_HUMAN  | K.LQSGSVSLASK.K          |                    | 2 | 1,9698 | 0,108 | -0,35  |

|   |                     |                             |                 |   |        |       |        |
|---|---------------------|-----------------------------|-----------------|---|--------|-------|--------|
| 9 | Q5VY92 Q5VY92_HUMAN | R.M*QDIPEETESR.D            |                 | 2 | 1,9633 | 0,166 | -0,361 |
| 9 | Q07157 ZO1_HUMAN    | E.YSM*YSTDSR.H              |                 | 2 | 1,9584 | 0,203 | 0,108  |
| 9 | P62937 PIIA_HUMAN   | K.ITIADCGQLE.-              |                 | 2 | 1,9574 | 0,119 | 0,109  |
| 9 | Q14789 G0GB1_HUMAN  | E.EKT#SHILS#LQK.T           | T378:S383:      | 2 | 1,9495 | 0,15  | -1,267 |
| 9 | Q96T23 RSF1_HUMAN   | K.AQIDPVLLK.N               |                 | 2 | 1,9456 | 0,228 | 0,061  |
| 9 | Q9Y608 LRRF2_HUMAN  | R.RGSGDT#SSLIDPDTSLSE.L     | T331:           | 2 | 1,9441 | 0,346 | -0,382 |
| 9 | P48681 NEST_HUMAN   | E.LQFPRT#PE.G               | T338:           | 2 | 1,9407 | 0,194 | 0,571  |
| 9 | Q5TAX3 ZCH11_HUMAN  | E.KVPSS#PAEAE.K             | S156:           | 2 | 1,9407 | 0,168 | 1,449  |
| 9 | Q9Y467 SALL2_HUMAN  | E.RSSS#PASALTPEGE.A         | S874:           | 2 | 1,936  | 0,246 | 0,249  |
| 9 | ##Q8IZC6 COR1_HUMAN | D.VSIPLQPD.Q                |                 | 2 | 1,9335 | 0,149 | 0,989  |
| 9 | A9CQZ4 A9CQZ4_HUMAN | E.DEEVPAFFK.N               |                 | 2 | 1,9313 | 0,15  | 0      |
| 9 | Q9C0C2 TB182_HUMAN  | R.LDS#PPPS#PITE.A           | S494:S498:      | 2 | 1,9261 | 0,194 | -0,929 |
| 9 | Q99567 NUP88_HUMAN  | R.VLAET#PDSFE.K             | T525:           | 2 | 1,923  | 0,134 | 0,411  |
| 9 | Q8WWM7 ATX2L_HUMAN  | K.ISLAPTDVK.E               |                 | 2 | 1,9177 | 0,146 | 0,323  |
| 9 | Q9H2P0 ADNP_HUMAN   | E.TIHLTEPTK.L               |                 | 2 | 1,911  | 0,206 | -0,522 |
| 9 | O75688 PPM1B_HUMAN  | E.SHTES#ESGLAE.L            | S456:           | 2 | 1,907  | 0,093 | -0,199 |
| 9 | Q99549 MPP8_HUMAN   | R.VTAVPVSAADS#TEE.L         | S20:            | 2 | 1,9064 | 0,157 | -0,084 |
| 9 | P19338 NUCL_HUMAN   | K.TLVLSNLS#YSATEE.T         | S494:           | 2 | 1,8954 | 0,234 | -0,38  |
| 9 | P00533 EGFR_HUMAN   | E.DHFLSLQR.M                |                 | 2 | 1,8952 | 0,129 | -0,12  |
| 9 | Q9Y2W2 WBP11_HUMAN  | E.LTPLQAM*M*LR.M            |                 | 2 | 1,8824 | 0,131 | 0,101  |
| 9 | Q15007 FL2D_HUMAN   | R.GSGYVQNLSAGYESVDS#PTGSE.N | S341:           | 2 | 1,8798 | 0,251 | 0,625  |
| 9 | P05362 ICAM1_HUMAN  | K.LLGIETPLPK.K              |                 | 2 | 1,877  | 0,285 | 0,564  |
| 9 | Q15742 NAB2_HUMAN   | K.LSPLPGGPGAGDPR.I          |                 | 2 | 1,8751 | 0,324 | 0,095  |
| 9 | P05787 K2C8_HUMAN   | R.VGS#SNFR.G                | S43:            | 2 | 1,871  | 0,094 | 0,144  |
| 9 | P40763 STAT3_HUMAN  | E.ADPGSAAPYLK.T             |                 | 2 | 1,8613 | 0,422 | 0,224  |
| 9 | P49792 RBP2_HUMAN   | E.SSINYTFKT#PE.K            | T2613:          | 2 | 1,8607 | 0,111 | -1,071 |
| 9 | Q9UGV2 NDRG3_HUMAN  | R.SVTSNQS#DGTQE.S           | S352:           | 2 | 1,8543 | 0,255 | -0,549 |
| 9 | Q9UHB6 LIMA1_HUMAN  | E.FTTQNQKS#QDVE.L           | S726:           | 2 | 1,8445 | 0,087 | 0      |
| 9 | Q9UBW7 ZMYM2_HUMAN  | E.LAS#QKGSVSE.T             | S108:           | 2 | 1,8431 | 0,095 | -0,674 |
| 9 | Q13426 XRCC4_HUMAN  | E.NSRPDSS#LPE.T             | S304:           | 2 | 1,842  | 0,096 | -0,103 |
| 9 | Q9C0B7 TMCO7_HUMAN  | R.VATT#T#FITLS#R.E          | T399:T400:S405: | 2 | 1,84   | 0,155 | -1,262 |
| 9 | O60678 ANM3_HUMAN   | K.QQTPCLFCNR.L              |                 | 2 | 1,8287 | 0,152 | 0      |
| 9 | Q53EZ4 CEP55_HUMAN  | K.CNIQYPATE.H               |                 | 2 | 1,8251 | 0,118 | 0,223  |
| 9 | P31327 CPSM_HUMAN   | K.GYSFGHPSSVAGE.V           |                 | 2 | 1,8116 | 0,179 | -0,188 |
| 9 | Q06830 PRDX1_HUMAN  | R.QITVNDLPVGR.S             |                 | 2 | 1,8102 | 0,278 | 1,208  |
| 9 | Q15651 HMG3_HUMAN   | E.AQKTES#VDNEGE.-           | S93:            | 2 | 1,8    | 0,271 | -0,264 |
| 9 | P46821 MAP1B_HUMAN  | E.QYGFLTPTK.Q               |                 | 2 | 1,7989 | 0,417 | 0,317  |
| 9 | P85037 FOXK1_HUMAN  | R.SAPAS#PTHPLM*SPR.S        | S420:           | 2 | 1,7923 | 0,308 | -0,076 |
| 9 | Q13243 SFRS5_HUMAN  | R.SVRS#PVPE.K               | S233:           | 2 | 1,7846 | 0,228 | -0,118 |

|    |                     |                                   |                 |   |        |       |        |
|----|---------------------|-----------------------------------|-----------------|---|--------|-------|--------|
| 9  | Q9P260 K1468_HUMAN  | R.EPSTASGGGQLNR.A                 |                 | 2 | 1,7845 | 0,371 | 0      |
| 9  | Q5SYE7 NHSL1_HUMAN  | K.QEIPAENSADTGGDGE.S              |                 | 2 | 1,7832 | 0,153 | -0,076 |
| 9  | A1L390 PKHG3_HUMAN  | R.FVSSFS#R.R                      | S614:           | 2 | 1,778  | 0,091 | 0,335  |
| 9  | P22102 PUR2_HUMAN   | E.KAFGAAGET#IVIEE.L               | T186:           | 2 | 1,7672 | 0,091 | 0,322  |
| 9  | Q14807 KIF22_HUMAN  | K.LSSM*DPAM*LE.R                  |                 | 2 | 1,7654 | 0,111 | 0,108  |
| 9  | Q86YR5 GPSM1_HUMAN  | R.IAQPSM*TAS#PQTEE.F              | S522:           | 2 | 1,761  | 0,235 | -0,077 |
| 9  | P23677 IP3KA_HUMAN  | R.LS#TSS#VSSTGSSS#LLEDSED.D       | S121:S124:S132: | 2 | 1,7222 | 0,112 | 0,986  |
| 9  | Q9UKM9 RALY_HUMAN   | E.AGLPQGEAR.T                     |                 | 2 | 1,7155 | 0,143 | 0,136  |
| 9  | P05783 K1C18_HUMAN  | R.STFSTNYR.S                      |                 | 2 | 1,7048 | 0,105 | 0,375  |
| 9  | Q13445 TMED1_HUMAN  | E.FTFLLPAGR.K                     |                 | 2 | 1,6968 | 0,25  | -0,239 |
| 9  | P31150 GDIA_HUMAN   | E.LLEPIDQK.F                      |                 | 2 | 1,6898 | 0,121 | 0,319  |
| 9  | Q9P265 DIP2B_HUMAN  | K.M*ALPM*PTK.R                    |                 | 2 | 1,6751 | 0,094 | 0,795  |
| 9  | Q15154 PCM1_HUMAN   | E.TASPVAVSLR.S                    |                 | 2 | 1,6734 | 0,109 | 0,183  |
| 9  | P04075 ALDOA_HUMAN  | R.ALQASALK.A                      |                 | 2 | 1,6707 | 0,082 | 0,38   |
| 9  | P08473 NEP_HUMAN    | R.NDPM*LLYNK.M                    |                 | 2 | 1,6324 | 0,122 | 0,977  |
| 9  | Q659C4 LARP2_HUMAN  | R.IGS#PLS#PKKNSE.T                | S340:S343:      | 2 | 1,5943 | 0,151 | 0,086  |
| 9  | Q9UQ35 SRRM2_HUMAN  | R.TAVAPSAVNLDPR.T                 |                 | 2 | 1,5716 | 0,11  | 0,088  |
| 9  | Q15021 CND1_HUMAN   | E.FHLPLS#PE.E                     | S13:            | 2 | 1,5615 | 0,151 | 0,179  |
| 9  | P06454 PTMA_HUMAN   | E.VVEEAENGR.D                     |                 | 2 | 1,5602 | 0,214 | -0,182 |
| 9  | Q9H2G2 SLK_HUMAN    | E.NSLPIPASK.R                     |                 | 2 | 1,5303 | 0,129 | 0,197  |
| 9  | Q8N5A5 ZGPAT_HUMAN  | E.GDGILPLR.T                      |                 | 2 | 1,4981 | 0,084 | 0,13   |
| 9  | P07195 LDHB_HUMAN   | R.GLTSVINQK.L                     |                 | 2 | 1,497  | 0,27  | -0,127 |
| 9  | Q92917 GPKOW_HUMAN  | E.LHYDAICQYM*GPSDT#DD.D           | T473:           | 2 | 1,4898 | 0,164 | 0,582  |
| 9  | Q12888 TP53B_HUMAN  | D.SLSTNSSDLVAPS#PDAFR.S           | S366:           | 2 | 1,4656 | 0,189 | 0,377  |
| 9  | Q9UHV7 MED13_HUMAN  | D.KAS#CKESK.T                     | S810:           | 2 | 1,4553 | 0,13  | 0,719  |
| 9  | P08670 VIME_HUMAN   | R.SYVTTSTR.T                      |                 | 2 | 1,4521 | 0,166 | 0,2    |
| 9  | Q99592 ZN238_HUMAN  | E.ALSLPTVR.D                      |                 | 2 | 1,3958 | 0,081 | -0,427 |
| 9  | A0N4V7 A0N4V7_HUMAN | K.GITLSVRP.-                      |                 | 2 | 1,3882 | 0,092 | 0,145  |
| 9  | Q8NAV1 PR38A_HUMAN  | E.EAEQLEPR.V                      |                 | 2 | 1,384  | 0,194 | 1,695  |
| 9  | P39880 CUX1_HUMAN   | E.LSLTGASR.S                      |                 | 2 | 1,3663 | 0,085 | 1,061  |
| 9  | Q9UKY7 CDV3_HUMAN   | E.VDYSGLR.V                       |                 | 2 | 1,3631 | 0,116 | 0,377  |
| 9  | P05783 K1C18_HUMAN  | E.IDLDSM*R.N                      |                 | 2 | 1,3125 | 0,097 | 0,704  |
| 9  | O14745 NHERF_HUMAN  | E.AALES#PRPALVR.S                 | S280:           | 2 | 1,3104 | 0,096 | 0,09   |
| 9  | P38159 HNRPG_HUMAN  | E.QATKPS#FE.S                     | S88:            | 2 | 1,174  | 0,092 | -0,247 |
| 10 | Q92734 TFG_HUMAN    | E.INKNVM*SAFGLTDDQVSGPPSAPAEDR.S  |                 | 3 | 7,2645 | 0,525 | 0,258  |
| 10 | Q02952 AKA12_HUMAN  | E.TCVSGEDPTQGADLS#PDEK.V          | S483:           | 2 | 6,4101 | 0,519 | 0,117  |
| 10 | O75179 ANR17_HUMAN  | R.NSPLDCGSAS#PNKVASSSEQE.A        | S2067:          | 2 | 6,3552 | 0,562 | 0,435  |
| 10 | P04264 K2C1_HUMAN   | R.GGGGGGYSGGGSSYSGGGSYSGGGGGGGR.G |                 | 3 | 6,3148 | 0,488 | 0,23   |
| 10 | Q9UD71 PPR1B_HUMAN  | E.SHLQISISNLNENQAS#EEEDE.L        | S102:           | 2 | 6,1078 | 0,525 | -0,104 |

|    |                    |                                           |                    |   |        |       |        |
|----|--------------------|-------------------------------------------|--------------------|---|--------|-------|--------|
| 10 | Q684P5 RPGP2_HUMAN | E.LANSSDATLPDRPLS#PPLTAPPTM*K.S           | S45:               | 3 | 5,976  | 0,49  | 0,341  |
| 10 | P46939 UTRO_HUMAN  | E.RTNGSFLTDSSS#TTGSVEDE.H                 | S3217:             | 2 | 5,9285 | 0,469 | 0,562  |
| 10 | P49840 GSK3A_HUMAN | R.ARTSS#FAEPGGGGGGGGGGPGGSASGPGGTGGGK.A   | S21:               | 3 | 5,815  | 0,464 | 0,467  |
| 10 | Q5T4S7 UBR4_HUMAN  | R.TSPADHGGSVGSESGGSAVDSVAGEHSVSGR.S       |                    | 3 | 5,7771 | 0,401 | 0,129  |
| 10 | Q8WU17 RN139_HUMAN | R.NGVIQHTGAAAEFNDDT#D.-                   | T663:              | 2 | 5,695  | 0,574 | -0,351 |
| 10 | P43308 SSRB_HUMAN  | E.DGPVVIGSTSAPGQGGILAQRE.F                |                    | 3 | 5,6828 | 0,468 | 0,434  |
| 10 | Q9UKV3 ACINU_HUMAN | E.LLVSQHTVQLVGGLS#PLSSPSDTK.A             | S478:              | 3 | 5,6783 | 0,333 | -0,144 |
| 10 | Q02952 AKA12_HUMAN | E.HDPGQGSSEPEQAGS#PTEGE.G                 | S749:              | 2 | 5,6338 | 0,523 | 0,06   |
| 10 | Q9UQ35 SRRM2_HUMAN | R.FQSDSSSYPTVDSNSLLGQSR.L                 |                    | 2 | 5,6005 | 0,629 | 0,536  |
| 10 | Q02952 AKA12_HUMAN | E.TCVS#GEDPTQGADLSPDEK.V                  | S472:              | 2 | 5,5773 | 0,439 | 0,117  |
| 10 | Q9P287 BCCIP_HUMAN | E.LTDLLIQNHIGSVIK.Q                       |                    | 2 | 5,5101 | 0,475 | 0      |
| 10 | P60174 TPIS_HUMAN  | E.LASQPDVDGFLVGGASLKPE.F                  |                    | 2 | 5,4969 | 0,525 | 0,061  |
| 10 | P43308 SSRB_HUMAN  | E.DGPVVIGSTSAPGQGGILAQRE.F                |                    | 2 | 5,4903 | 0,571 | 0,231  |
| 10 | Q96T60 PNKP_HUMAN  | E.TRTPESQPDTPPGTPLVSQDE.K                 | T118:              | 2 | 5,4304 | 0,526 | 0,523  |
| 10 | P55884 EIF3B_HUMAN | E.AASGPSES#PSPAAEELPGSHAEPVPAQGEAPGEQAR.D | S83:               | 3 | 5,3716 | 0,484 | 0,294  |
| 10 | P51610 HCFC1_HUMAN | E.AAASLVTSTVGQQNGSVVR.V                   |                    | 3 | 5,3374 | 0,567 | 0,892  |
| 10 | Q09666 AHNK_HUMAN  | K.TVIRLPS#GSGAAS#PT#GSAVDIR.A             | S210:S216:T218:    | 3 | 5,314  | 1     | 0,622  |
| 10 | P35611 ADDA_HUMAN  | E.AHRPPS#PTEAPTEAS#PEPAPDPAPVAEE.A        | S669:S678:         | 3 | 5,2616 | 0,49  | 0,608  |
| 10 | P60709 ACTB_HUMAN  | D.LYANTVLSGGTTM*YPGIADR.M                 |                    | 2 | 5,2554 | 0,579 | 0      |
| 10 | P49327 FAS_HUMAN   | E.LACPT#PKEDGLAQQQTQLNLR.S                | T2204:             | 3 | 5,2502 | 0,402 | 0,149  |
| 10 | O95470 SGPL1_HUMAN | E.LSSVFLDSLSTDTVTQGSQM*NGS#PKPH.-         | S564:              | 3 | 5,247  | 0,439 | 0,237  |
| 10 | P08651 NFIC_HUMAN  | R.TGM*GSDQEDSKIPLDTTDFQE.S                |                    | 2 | 5,2398 | 0,54  | 0,502  |
| 10 | P14625 ENPL_HUMAN  | R.FQSSHPTDITSLDQYVER.M                    |                    | 3 | 5,2271 | 0,386 | 0,486  |
| 10 | Q15648 MED1_HUMAN  | E.KSYQNS#PSS#DDGIRPLPE.Y                  | S1479:S1482:       | 2 | 5,2082 | 1     | 0,341  |
| 10 | Q92917 GPKOW_HUMAN | E.LHYDAICQYM*GPSDT#DDD.-                  | T473:              | 2 | 5,2039 | 0,506 | 0,441  |
| 10 | P08069 IGF1R_HUMAN | E.GFVIHDGECM*QECPSGFIR.N                  |                    | 3 | 5,1888 | 0,414 | 0,568  |
| 10 | P46821 MAP1B_HUMAN | E.KVSPSKS#PSLS#PSPPS#PLEKTPLGE.R          | S1256:S1260:S1265: | 3 | 5,1785 | 1     | 0,197  |
| 10 | Q92734 TFG_HUMAN   | K.NVM*SAFGLTDDQVSGPPSAPAEDR.S             |                    | 2 | 5,1628 | 0,541 | 0,591  |
| 10 | Q13263 TIF1B_HUMAN | E.GTSAPGGGGPGLTDDS#ATICR.V                | S624:              | 2 | 5,1338 | 0,625 | 0,186  |
| 10 | Q5T8I3 F102B_HUMAN | E.KILQSQDFSLDS#SAEEE.G                    | S289:              | 2 | 5,1319 | 0,536 | 0,122  |
| 10 | Q02952 AKA12_HUMAN | E.TCVSGEDPTQGADLS#PDEK.V                  | S483:              | 3 | 5,1171 | 0,44  | 0,351  |
| 10 | Q02952 AKA12_HUMAN | E.ARGDTVSEAEELT#PEAVTAAE.T                | T972:              | 2 | 5,1039 | 0,494 | 0,556  |
| 10 | Q8IYL3 CA174_HUMAN | E.DVQKPPLQM*DNSVFLDDDS#NQPM*PVSR.F        | S189:              | 3 | 5,1024 | 0,413 | 0,345  |
| 10 | P13645 K1C10_HUMAN | K.ELTTEIDNNEIQISSYK.S                     |                    | 2 | 5,0969 | 0,524 | -0,244 |
| 10 | O94864 ST65G_HUMAN | E.RFPSNLEVEAS#PQASSAE.V                   | S323:              | 2 | 5,0612 | 0,498 | 0,61   |
| 10 | Q14974 IMB1_HUMAN  | E.AIGYICQDIDPEQLQDKSNE.I                  |                    | 2 | 5,0515 | 0,405 | 0,836  |
| 10 | P42166 LAP2A_HUMAN | E.SRSS#TPLTISSAENR.Q                      | S159:              | 3 | 5,0336 | 0,433 | 0,186  |
| 10 | Q9ULT8 HECD1_HUMAN | E.GHDSLS#VGS#FEEDSKSE.F                   | S2317:S2320:       | 2 | 4,9957 | 0,44  | 0,434  |
| 10 | Q92734 TFG_HUMAN   | K.NVM*SAFGLTDDQVSGPPSAPAEDR.S             |                    | 3 | 4,9843 | 0,425 | 0,739  |

|    |                     |                                     |                 |   |        |       |        |
|----|---------------------|-------------------------------------|-----------------|---|--------|-------|--------|
| 10 | P48960 CD97_HUMAN   | E.GSYDCVCSPGYEPVSGAK.T              |                 | 2 | 4,978  | 0,487 | 0,442  |
| 10 | Q9UD71 PPR1B_HUMAN  | E.SHLQISISNLNENQAS#EEEDE.L          | S102:           | 3 | 4,9623 | 0,292 | -0,078 |
| 10 | P31943 HNRH1_HUMAN  | E.GRPSGEAFVELES#EDE.V               | S63:            | 2 | 4,9439 | 0,452 | 0,267  |
| 10 | Q8NDX5 PHC3_HUMAN   | R.M*DRT#PPPTLS#PAAITVGR.G           | T609:S616:      | 3 | 4,8595 | 0,329 | 0,085  |
| 10 | Q8IY17 PLPL6_HUMAN  | R.CVS#M*PGDISGLQGGPR.S              | S411:           | 2 | 4,8543 | 0,557 | 0,212  |
| 10 | Q9UNN5 FAF1_HUMAN   | E.FGVDDGEVFGM*ASSALR.K              |                 | 2 | 4,8286 | 0,332 | 0,413  |
| 10 | Q99747 SNAG_HUMAN   | E.GYDQQDQDQVSDVCNSPLFK.Y            |                 | 3 | 4,8283 | 0,169 | 0,703  |
| 10 | Q659C4 LARP2_HUMAN  | E.TKLNGPGENVS#EDE.A                 | S60:            | 2 | 4,8126 | 0,476 | -0,156 |
| 10 | Q02952 AKA12_HUMAN  | E.AAPDTTADPAIAASDPATK.L             |                 | 2 | 4,7948 | 0,421 | -0,342 |
| 10 | Q8IWT3 PARC_HUMAN   | E.RAALETPIIQGDGS#PE.L               | S947:           | 2 | 4,7669 | 0,377 | 0,131  |
| 10 | Q7Z5K2 WAPL_HUMAN   | E.STGDPPFGFDS#DDESLPVSSK.N          | S77:            | 2 | 4,7558 | 0,433 | 0,338  |
| 10 | O14562 UBFD1_HUMAN  | E.AEAAAAGAAAEDSGAAR.G               |                 | 2 | 4,7197 | 0,514 | 0,264  |
| 10 | Q92615 LARP5_HUMAN  | E.KFTSSQTQSPT#PPKPPS#PSFE.L         | T518:S524:      | 3 | 4,7163 | 0,371 | -1,202 |
| 10 | Q5JPI9 METLA_HUMAN  | R.SDKGS#PGEDGFVPSALGTRE.H           | S21:            | 2 | 4,7141 | 0,521 | 0,117  |
| 10 | Q16204 CCDC6_HUMAN  | E.KLDQPV#APPS#PRDISM*E.I            | S240:S244:      | 2 | 4,7084 | 0,482 | 0,569  |
| 10 | P54105 ICLN_HUMAN   | E.VDTPPTVAGQFEDADVDH.-              |                 | 2 | 4,7048 | 0,525 | 0,127  |
| 10 | O75179 ANR17_HUMAN  | E.HYPVSSPSS#PS#PPAQPGGVS.R.N        | S2045:S2047:    | 3 | 4,6949 | 1     | -0,081 |
| 10 | Q9H9E3 COG4_HUMAN   | -.M*ADLDS#PPKLSGVQQPSEGVGGGR.C      | S6:             | 3 | 4,6752 | 0,272 | 1,846  |
| 10 | Q16204 CCDC6_HUMAN  | E.KLDQPV#APPS#PRDISM*E.I            | S240:S244:      | 3 | 4,6715 | 0,347 | 0,341  |
| 10 | P08708 RS17_HUMAN   | D.FGS#LSNLQVQTQPTVGM*NFK.T          | S113:           | 2 | 4,6591 | 0,423 | 0,451  |
| 10 | Q53EZ4 CEP55_HUMAN  | E.KVAAS#PKS#PTAALNE.S               | S425:S428:      | 2 | 4,6358 | 0,43  | -0,297 |
| 10 | Q52LD0 Q52LD0_HUMAN | K.AGGS#PAS#YHGSTS#PR.V              | S192:S195:S201: | 2 | 4,6247 | 1     | 0,292  |
| 10 | Q9UQ35 SRRM2_HUMAN  | E.TKEQNSALPTSS#QDEE.L               | S1233:          | 2 | 4,6239 | 0,469 | 0      |
| 10 | Q9NQX3 GEPH_HUMAN   | E.VHDELEDLPS#PPPPLS#PPPTTS#PHKQTE.D | S188:S194:S200: | 3 | 4,6095 | 1     | 0,335  |
| 10 | Q96JM3 ZN828_HUMAN  | K.LAPVPS#PEPQKPAPVS#PE.S            | S204:S214:      | 2 | 4,5945 | 0,465 | 0,305  |
| 10 | P98171 RHG04_HUMAN  | E.KQVVGAGLQTAGESGSS#PE.G            | S824:           | 2 | 4,5931 | 0,564 | -0,065 |
| 10 | Q9UQ35 SRRM2_HUMAN  | R.FQSDSSSYPTVDSNSLLGQSRLE.T         |                 | 2 | 4,5886 | 0,482 | 0,582  |
| 10 | P55072 TERA_HUMAN   | E.TDPSPYCIVAPDTVHCE.G               |                 | 3 | 4,5665 | 0,395 | 0      |
| 10 | Q9H000 MKRN2_HUMAN  | R.KTQPSM*VSNPGSCSDPQPS#PE.M         | S139:           | 2 | 4,5613 | 0,392 | 0,21   |
| 10 | P60709 ACTB_HUMAN   | K.DLYANTVLSGGTTM*YPGIADR.M          |                 | 2 | 4,559  | 0,568 | 0,109  |
| 10 | P12270 TPR_HUMAN    | E.AM*QSEGPVEHVVPFGSTSGSVR.S         |                 | 3 | 4,5587 | 0,309 | -0,08  |
| 10 | P18858 DNL1_HUMAN   | K.QSQIQNQQGEDS#GS#DPEDTY.-          | S911:S913:      | 2 | 4,5498 | 0,46  | 0,205  |
| 10 | Q9C0C2 TB182_HUMAN  | E.ASQASPCPAVTPSAPSAAALPDEGSR.H      |                 | 2 | 4,5436 | 0,445 | 1,007  |
| 10 | P43308 SSRB_HUMAN   | E.DGPVVIGSTSAPGQGGILAQR.E           |                 | 3 | 4,5365 | 0,505 | 0,185  |
| 10 | Q14974 IMB1_HUMAN   | E.AIGYICQDIDPEQLQDK.S               |                 | 2 | 4,5261 | 0,343 | 0,243  |
| 10 | P35908 K22E_HUMAN   | R.HGGGGGGFGGGGFGSR.S                |                 | 2 | 4,5207 | 0,579 | -0,185 |
| 10 | P55795 HNRH2_HUMAN  | E.GRPSGEAFVELES#EEE.V               | S63:            | 2 | 4,5154 | 0,399 | 0,331  |
| 10 | Q8TEA8 DTD1_HUMAN   | E.DRSASS#GAEGDVS#SEREP.-            | S197:S204:      | 2 | 4,494  | 0,458 | 0,122  |
| 10 | P13645 K1C10_HUMAN  | K.GSLGGGFSSGGFSGGSFSR.G             |                 | 2 | 4,4862 | 0,578 | 0,143  |

|    |                     |                                         |                 |   |        |       |        |
|----|---------------------|-----------------------------------------|-----------------|---|--------|-------|--------|
| 10 | Q08J23 NSUN2_HUMAN  | E.STQLSPADLTEGKPTDPSKLES#PSFTGTGDTE.I   | S473:           | 3 | 4,4861 | 0,318 | 0,542  |
| 10 | Q13263 TIF1B_HUMAN  | E.TKPVLM*ALAEPGAEGPR.L                  |                 | 3 | 4,484  | 0,319 | 0,303  |
| 10 | Q96EB6 SIRT1_HUMAN  | E.RAGGAGFGT#DGDDQEAINE.A                | T719:           | 2 | 4,4759 | 0,473 | 0,062  |
| 10 | Q4KMP7 TB10B_HUMAN  | E.GLHPSLPS#PTGNS#TPLGSSKE.T             | S432:S437:      | 3 | 4,4668 | 1     | 0,247  |
| 10 | Q9UBQ5 EIF3K_HUMAN  | E.KIDFDSVSSIM*ASS#Q.-                   | S217:           | 2 | 4,4648 | 0,387 | 0,285  |
| 10 | P05783 K1C18_HUMAN  | R.STS#FRGGM*GSGGLATGIAGGLAGM*GGIQNEKE.T | S53:            | 3 | 4,4455 | 0,494 | 0,238  |
| 10 | P06576 ATPB_HUMAN   | R.IPSAVGYQPTLATDM*GTM*QER.I             |                 | 3 | 4,4418 | 0,25  | 0,557  |
| 10 | Q6WKZ4 RFIP1_HUMAN  | E.KDAAVVS#RQGS#SLNLFE.D                 | S496:S500:      | 2 | 4,4401 | 0,505 | 0      |
| 10 | P49790 NU153_HUMAN  | E.ITTSSPINSSQALTNK.V                    |                 | 2 | 4,4246 | 0,447 | -0,33  |
| 10 | Q15942 ZYG_HUMAN    | E.KQHPVPPAQNQNQVR.S                     |                 | 3 | 4,4028 | 0,37  | 0      |
| 10 | P46821 MAP1B_HUMAN  | E.NGPTEVDYS#PSDM*QDSSLHK.I              | S1690:          | 2 | 4,3856 | 0,526 | 0,511  |
| 10 | P08195 4F2_HUMAN    | E.KQPM*NAASGAAM*S#LAGAE.K               | S33:            | 2 | 4,3724 | 0,359 | 0      |
| 10 | Q4V328 GRAP1_HUMAN  | R.TQTGDSSS#ISS#FSYRE.I                  | S666:S669:      | 2 | 4,3712 | 1     | 0,191  |
| 10 | Q8IWIY8 ZSC29_HUMAN | E.AAASHSGLVGS#DAETEEPGQR.G              | S354:           | 3 | 4,3698 | 0,263 | 0,085  |
| 10 | Q5W0B1 RN219_HUMAN  | E.KTELNLS#KGS#LTNDQLE.N                 | S592:S595:      | 2 | 4,3669 | 0,339 | 0,119  |
| 10 | Q9UQ35 SRRM2_HUMAN  | R.SSGHS#SSELS#PDAVEK.A                  | S1382:S1387:    | 2 | 4,3663 | 1     | -0,275 |
| 10 | Q14694 UBP10_HUMAN  | E.SAS#PPADGTGSASGTLPVSQPK.S             | S321:           | 2 | 4,3633 | 0,383 | 0,233  |
| 10 | P49321 NASP_HUMAN   | E.NKS#LQENEEEE.I                        | S503:           | 2 | 4,3608 | 0,443 | 0,342  |
| 10 | O60271 JIP4_HUMAN   | K.ATTPASTANSDVATIPTDTPLKEENE.G          |                 | 2 | 4,3455 | 0,428 | 1,004  |
| 10 | Q13033 STRN3_HUMAN  | E.FDFLVTAEDGEGEGEAR.S                   |                 | 2 | 4,3419 | 0,573 | 0      |
| 10 | Q92615 LARP5_HUMAN  | E.KFTSSQTQS#PTPPKPPS#PSFE.L             | S516:S524:      | 3 | 4,3396 | 1     | 0,451  |
| 10 | Q8TEA8 DTD1_HUMAN   | E.DRSASS#GAEGDVSS#EREP.-                | S197:S205:      | 3 | 4,3391 | 0,352 | 0,275  |
| 10 | Q96JM3 ZN828_HUMAN  | E.SQKLAPVPS#PEPQKPAPVS#PE.S             | S204:S214:      | 3 | 4,3367 | 0,327 | 0,156  |
| 10 | P05556 ITB1_HUMAN   | E.CSTDEVNSEDN*DAYCR.K                   |                 | 2 | 4,3329 | 0,577 | 0,372  |
| 10 | Q14814 MEF2D_HUMAN  | E.RS#PAPPPPAVFPAARPEPGDGLSSPAGGSYE.T    | S450:           | 3 | 4,3142 | 0,39  | 0,235  |
| 10 | Q92797 SYMPK_HUMAN  | E.RSQTLAPVGEDAM*KT#PS#PAAE.D            | T1257:S1259:    | 3 | 4,3141 | 0,415 | 0      |
| 10 | Q14247 SRC8_HUMAN   | R.AKTQT#PPVS#PAPQTEERLPSS#PVYE.D        | T401:S405:S418: | 3 | 4,3132 | 1     | 1,081  |
| 10 | O75061 AUXI_HUMAN   | E.DHAALVNQESEQS#DDE.L                   | S456:           | 2 | 4,3079 | 0,588 | 0,196  |
| 10 | Q63ZY3 KANK2_HUMAN  | E.RSCDGAAGLPEVPAESSSS#PPGSE.V           | S428:           | 2 | 4,28   | 0,488 | 0,403  |
| 10 | Q9H7N4 SFR19_HUMAN  | R.APEGDDFLSLHAES#DGE.G                  | S453:           | 2 | 4,2746 | 0,52  | 0,261  |
| 10 | Q9Y365 PCTL_HUMAN   | E.RM*GGAGGEGS#DDDTSLT.-                 | S284:           | 2 | 4,269  | 0,532 | 0,071  |
| 10 | Q8WXI9 P66B_HUMAN   | E.RGRLT#PS#PDIIVLSDNE.A                 | T120:S122:      | 2 | 4,2685 | 0,424 | 0,119  |
| 10 | P68104 EF1A1_HUMAN  | E.TGVLPKPGM*VVTFAPVNVVTE.V              |                 | 2 | 4,2599 | 0,474 | 0,353  |
| 10 | P02686 MBP_HUMAN    | E.LNAEKAS#TNS#ETNRGESE.K                | S16:S19:        | 3 | 4,2552 | 0,309 | 0,611  |
| 10 | Q6GYQ0 GRIPE_HUMAN  | E.VATITGESAS#PVHS#PLGSR.S               | S990:S994:      | 2 | 4,2404 | 0,528 | 0,231  |
| 10 | P55036 PSMD4_HUMAN  | E.AGIATTGTEDSDDALLK.M                   |                 | 2 | 4,2293 | 0,432 | 0,218  |
| 10 | Q15424 SAFB1_HUMAN  | E.LAEAPT#EAPS#PEAR.D                    | T340:S344:      | 2 | 4,2236 | 0,443 | -0,305 |
| 10 | Q13428 TCOF_HUMAN   | K.LDSS#PSVSSTLAAKDDPDGKQE.A             | S1228:          | 2 | 4,2181 | 0,491 | 0,419  |
| 10 | P50851 LRBA_HUMAN   | E.TRNADDEVS#SDIIE.A                     | S1051:          | 2 | 4,2159 | 0,248 | 0,069  |



|    |                     |                                      |                    |   |        |       |        |
|----|---------------------|--------------------------------------|--------------------|---|--------|-------|--------|
| 10 | Q02952 AKA12_HUMAN  | E.LSES#QVHM*M*AAAVADGTR.A            | S887:              | 3 | 4,2047 | 0,381 | 0,092  |
| 10 | Q13506 NAB1_HUMAN   | E.SEHSLSPADLGS#PAS#PKESSE.A          | S180:S183:         | 3 | 4,1938 | 0,326 | -0,322 |
| 10 | Q01804 OTUD4_HUMAN  | E.HVSLSNPAPLLVS#PE.V                 | S578:              | 2 | 4,1919 | 0,494 | -0,223 |
| 10 | P10636 TAU_HUMAN    | R.HLSNVSTGSIDM*VDSPLATLADE.V         |                    | 2 | 4,1904 | 0,615 | 0,281  |
| 10 | Q9UPU9 SAM4A_HUMAN  | E.LHQM*ILTPIKAYSS#PSTT#PE.A          | S231:T235:         | 3 | 4,181  | 1     | 0,153  |
| 10 | Q92615 LARP5_HUMAN  | E.KFTSSQTQSPT#PPKPPS#PSFE.L          | T518:S524:         | 2 | 4,175  | 0,456 | -0,301 |
| 10 | Q3T8J9 GON4L_HUMAN  | K.VEHS#PGPPLADAECQE.G                | S1268:             | 2 | 4,1663 | 0,393 | 0,538  |
| 10 | Q04721 NOTC2_HUMAN  | R.RTPS#LALT#PPQAEQE.V                | S1804:T1808:       | 2 | 4,155  | 0,439 | 0,407  |
| 10 | P46821 MAP1B_HUMAN  | E.GEKL#PKS#DISPLT#PRE.S              | S1779:S1782:T1788: | 3 | 4,1443 | 0,317 | 0,524  |
| 10 | P10636 TAU_HUMAN    | E.IVYKS#PVVSGDTS#PR.H                | S713:S721:         | 3 | 4,1426 | 0,375 | 0,622  |
| 10 | Q641Q2 FA21A_HUMAN  | E.KAVASPEATVS#QTDE.N                 | S504:              | 2 | 4,0956 | 0,526 | -0,076 |
| 10 | P28290 SSFA2_HUMAN  | E.LLREAS#AES#DVGKSSE.S               | S641:S644:         | 2 | 4,0948 | 0,351 | 0,332  |
| 10 | Q8WUA4 TF3C2_HUMAN  | E.M*SLPTPLPGFEDS#PDQR.R              | S63:               | 3 | 4,0898 | 0,358 | 0,277  |
| 10 | Q6DEN2 Q6DEN2_HUMAN | E.SREPAPAS#PAPAGVE.I                 | S102:              | 2 | 4,088  | 0,473 | -0,161 |
| 10 | Q14980 NUMA1_HUMAN  | E.SRPSLSLGTIT#DEE.M                  | T1952:             | 2 | 4,0824 | 0,369 | 0,231  |
| 10 | Q9P1Z2 CACO1_HUMAN  | E.KSVLM*AAVQS#GGEE.A                 | S612:              | 2 | 4,0781 | 0,388 | 0,325  |
| 10 | Q6S8J3 A26CA_HUMAN  | E.KSYELPDGQVITIGNE.R                 |                    | 2 | 4,073  | 0,446 | -0,069 |
| 10 | Q16643 DREB_HUMAN   | R.GPGS#PAEDLM*FM*E.S                 | S416:              | 2 | 4,0591 | 0,344 | 0,49   |
| 10 | Q4KMQ1 CI075_HUMAN  | E.SGDPSSLHPPSPGTPSATPAS#PPASATPSQR.Q | S274:              | 3 | 4,059  | 0,345 | 0,423  |
| 10 | P54105 ICLN_HUMAN   | D.GM*EVDTTPTVAGQFEDADVDH.-           |                    | 3 | 4,0498 | 0,336 | 0,407  |
| 10 | Q8TEA8 DTD1_HUMAN   | E.DRSAS#S#GAEGDVSSEREP.-             | S196:S197:         | 2 | 4,046  | 0,46  | 0,122  |
| 10 | Q7Z5L2 GIDRP_HUMAN  | E.FKTEEQDDSGS#IE.F                   | S538:              | 2 | 4,0381 | 0,294 | 0,078  |
| 10 | Q05682 CALD1_HUMAN  | E.KGNVFSS#PTAAGT#PNKE.T              | S724:T730:         | 2 | 4,0342 | 0,485 | 0,065  |
| 10 | Q8N2M8 SFR16_HUMAN  | E.KITFITSGGGS#DEE.A                  | S320:              | 2 | 4,0296 | 0,352 | 0,076  |
| 10 | Q8N1G4 LRC47_HUMAN  | E.NKEEGSL#DTEAD.A                    | S520:              | 2 | 4,0258 | 0,529 | 0,165  |
| 10 | P10636 TAU_HUMAN    | E.IVYKS#PVVSGDTS#PR.H                | S713:S721:         | 2 | 4,0227 | 0,465 | -0,207 |
| 10 | P18858 DNL1_HUMAN   | R.KQSQIQNQGEDS#GS#DPEDTY.-           | S911:S913:         | 2 | 4,0184 | 0,413 | 0,388  |
| 10 | P49815 TSC2_HUMAN   | E.GGRPSVDLSFQPSQPLSK.S               |                    | 3 | 4,0128 | 0,195 | 0,289  |
| 10 | Q9H4A3 WNK1_HUMAN   | E.KQSSTPGSLFLSPPAPAPK.N              |                    | 3 | 4,0073 | 0,263 | 0,479  |
| 10 | P46821 MAP1B_HUMAN  | E.NGPTEVDYS#PSDM*QDSSLHK.I           | S1690:             | 3 | 3,9987 | 0,441 | 0,23   |
| 10 | Q8IVF2 AHNK2_HUMAN  | R.DAHDVS#PTST#DTEAQLTVE.R            | S294:T298:         | 2 | 3,9987 | 0,402 | 0,336  |
| 10 | Q6ZSR9 YJ005_HUMAN  | R.DGPSSNSSFHS#S#EEE.G                | S42:S43:           | 2 | 3,9946 | 0,402 | -0,278 |
| 10 | O95155 UBE4B_HUMAN  | E.KSM*SQVDVDS#GIENM*E.V              | S124:              | 2 | 3,975  | 0,471 | 0      |
| 10 | P08729 K2C7_HUMAN   | E.LQSQISDTSVVLMS#DNSR.S              |                    | 3 | 3,9707 | 0,371 | 0,55   |
| 10 | Q8WUA4 TF3C2_HUMAN  | E.M*SLPTPLPGFEDS#PDQR.R              | S63:               | 2 | 3,9688 | 0,334 | 0,123  |
| 10 | P67809 YBOX1_HUMAN  | E.TKAADPPAENS#SAPEAEQGGAE.-          | S313:              | 2 | 3,9619 | 0,486 | 0,442  |
| 10 | Q6UWZ7 CCD98_HUMAN  | E.AKNSITDS#QM*DDVE.V                 | S48:               | 2 | 3,9559 | 0,351 | 0,222  |
| 10 | Q92804 RBP56_HUMAN  | K.QSSYSQQPYNNQGGQQQNM*E.S            |                    | 3 | 3,9491 | 0,378 | 0      |
| 10 | P27816 MAP4_HUMAN   | E.EGRPVVSGTGNDITT#PPNK.E             | T687:              | 3 | 3,9443 | 0,357 | 0,091  |

|    |                    |                                         |              |   |        |       |        |
|----|--------------------|-----------------------------------------|--------------|---|--------|-------|--------|
| 10 | Q9H000 MKRN2_HUMAN | R.KTQPSM*VSNPGSCSDPQPS#PE.M             | S139:        | 3 | 3,9279 | 0,36  | 0,079  |
| 10 | Q7Z5L2 GIDRP_HUMAN | E.FKTEEQDDS#GSIE.F                      | S536:        | 2 | 3,9237 | 0,388 | 0,234  |
| 10 | Q9H4L7 SMRCD_HUMAN | R.ANT#PDS#DITEKTE.D                     | T54:S57:     | 2 | 3,9055 | 0,39  | -0,154 |
| 10 | Q14974 IMB1_HUMAN  | E.AIGYICQDIDPEQLQDKSNE.I                |              | 3 | 3,9045 | 0,348 | 0,313  |
| 10 | Q9UKI8 TLK1_HUMAN  | R.FTGVASGSTGSGSCSVGAK.A                 |              | 2 | 3,9026 | 0,433 | -0,403 |
| 10 | Q13435 SF3B2_HUMAN | R.SRGSDS#PAADVEIE.Y                     | S339:        | 2 | 3,8988 | 0,346 | 0,242  |
| 10 | Q92619 HMHA1_HUMAN | E.SRVVSNDS#DSDLEE.A                     | S1030:       | 2 | 3,8916 | 0,438 | 0      |
| 10 | Q12888 TP53B_HUMAN | E.IEPKNS#PEDLGLSLTGDSC.L                | S500:        | 3 | 3,8897 | 0,23  | 0,327  |
| 10 | P29966 MARCS_HUMAN | E.LQANGSAPAADKEEPAAGSGAAS#PSAAEK.G      | S81:         | 3 | 3,8821 | 0,362 | 0,913  |
| 10 | Q9P1Y6 K1542_HUMAN | R.LPALGEAHVS#PE.V                       | S1229:       | 2 | 3,8812 | 0,442 | 0,188  |
| 10 | Q13263 TIF1B_HUMAN | R.VCQKPGDLVM*CNQCE.F                    |              | 2 | 3,8771 | 0,44  | 0      |
| 10 | Q92785 REQU_HUMAN  | E.GEDKEDS#QPPT#PVSQR.S                  | S244:T248:   | 2 | 3,8751 | 0,316 | 0,316  |
| 10 | Q6NZI2 PTRF_HUMAN  | R.RGS#S#PDVHALLE.I                      | S365:S366:   | 2 | 3,8741 | 0,424 | 0,423  |
| 10 | Q14498 RBM39_HUMAN | E.RTDASSASSFLDS#DELE.R                  | S341:        | 2 | 3,8697 | 0,337 | 0,192  |
| 10 | P35527 K1C9_HUMAN  | R.SGGGGGGGLGSGGSIR.S                    |              | 2 | 3,8626 | 0,532 | -0,297 |
| 10 | Q9C0C2 TB182_HUMAN | E.ASQASPCPAVTPSAPSALPDEGSR.H            |              | 3 | 3,8574 | 0,282 | 0,906  |
| 10 | Q92889 XPF_HUMAN   | E.ISS#S#PESCPPEIKHEE.F                  | S509:S510:   | 3 | 3,8484 | 0,366 | 0      |
| 10 | Q15149 PLEC1_HUMAN | R.SSS#VGS#SSSYPIPAVSR.T                 | S4386:S4389: | 2 | 3,8483 | 1     | 0,319  |
| 10 | Q9NQW6 ANLN_HUMAN  | K.SCS#PSPVS#PQVQPQAADTISD.S             | S97:S102:    | 3 | 3,8438 | 0,175 | 0,392  |
| 10 | Q92615 LARP5_HUMAN | E.EKFTSSQTQSPT#PPKPPS#PSFE.L            | T518:S524:   | 3 | 3,8437 | 0,272 | 0,642  |
| 10 | Q02952 AKA12_HUMAN | E.TCVSGEDPTQGADLSPDEK.V                 |              | 2 | 3,8422 | 0,508 | 0,061  |
| 10 | P04183 KITH_HUMAN  | R.KLFAPQQILQCS#PAN.-                    | S231:        | 2 | 3,8388 | 0,427 | 0      |
| 10 | Q15365 PCBP1_HUMAN | R.VM*TIPYQPM*PASS#PVICAGGQDR.C          | S190:        | 3 | 3,8387 | 0,493 | 0,354  |
| 10 | Q6XQN6 PNCB_HUMAN  | E.RLQALVNSLCAGQS#P.-                    | S537:        | 2 | 3,8359 | 0,557 | 0,216  |
| 10 | P38398 BRCA1_HUMAN | E.KAVLTS#QKS#SEYPISQNPE.G               | S1457:S1460: | 3 | 3,833  | 1     | 0,081  |
| 10 | Q96JM3 ZN828_HUMAN | E.LQTPLPSPEPSKASVS#SPEPPKSVPVCE.S       | S183:        | 3 | 3,8324 | 0,347 | 0,469  |
| 10 | P18583 SON_HUMAN   | R.AGIEGPLLASDVGR.D                      |              | 2 | 3,8264 | 0,329 | 0      |
| 10 | Q9UQ35 SRRM2_HUMAN | R.NSGPLGTEM*NTGFSSEVKE.D                |              | 2 | 3,8193 | 0,501 | -0,061 |
| 10 | Q86UU1 PHLB1_HUMAN | E.IM*DSLVLLEPGAAGK.K                    |              | 2 | 3,8091 | 0,469 | 0,316  |
| 10 | O60271 JIP4_HUMAN  | R.SAS#QSS#LDKLDQE.L                     | S730:S733:   | 2 | 3,8085 | 0,419 | 0,156  |
| 10 | P11586 C1TC_HUMAN  | E.DSTVHGFLVQLPLDSSENSINTEE.V            |              | 2 | 3,8031 | 0,425 | 0,576  |
| 10 | P53621 COPA_HUMAN  | E.DGFVEATEGLGDDALGK.G                   |              | 2 | 3,8004 | 0,52  | -0,288 |
| 10 | P04264 K2C1_HUMAN  | R.SLDLDSIIAEVK.A                        |              | 2 | 3,7985 | 0,415 | -0,281 |
| 10 | P08651 NFIC_HUMAN  | R.TGM*GSDQEDSKPITLDTDFQE.S              |              | 3 | 3,7959 | 0,258 | 0,677  |
| 10 | P46821 MAP1B_HUMAN | E.FGQES#PEQSLAM*DFSR.Q                  | S1653:       | 2 | 3,7958 | 0,473 | -0,19  |
| 10 | Q969R5 LMBL2_HUMAN | E.HLDVASPDKAS#S#PELPVSVE.N              | S688:S689:   | 2 | 3,7947 | 0,443 | 0,218  |
| 10 | Q92797 SYMPK_HUMAN | E.AALLDSS#LEGPLPK.E                     | S1222:       | 2 | 3,7883 | 0,444 | -0,164 |
| 10 | Q9C0D5 TANC1_HUMAN | E.SSAGDGPVPYSQSSSLIM*PRPNS#VAATSSTKLE.D | S313:        | 3 | 3,7871 | 0,142 | 0,737  |
| 10 | Q9Y6G9 DC1L1_HUMAN | R.KPVTVS#PTTPTS#PTEGEAS.-               | S510:S516:   | 2 | 3,7806 | 1     | 0,298  |

|    |                     |                                    |              |   |        |       |        |
|----|---------------------|------------------------------------|--------------|---|--------|-------|--------|
| 10 | P18858 DNL1_HUMAN   | K.QSQIQNQGEDS#GS#DPEDTY.-          | S911:S913:   | 3 | 3,7791 | 0,352 | 0      |
| 10 | Q92615 LARP5_HUMAN  | E.KFTSSQTQS#PT#PPKPPSPSFE.L        | S516:T518:   | 3 | 3,7757 | 0,201 | 0,225  |
| 10 | P18583 SON_HUMAN    | E.HNTVCAAGTS#PVGE.I                | S1556:       | 2 | 3,7625 | 0,551 | -0,165 |
| 10 | Q8TEA8 DTD1_HUMAN   | R.SAS#SGAEGDVS#SEREP.-             | S196:S204:   | 2 | 3,7495 | 0,452 | 0,071  |
| 10 | Q8TER5 SOLO_HUMAN   | E.HAGPSLPLGS#PGACs#LPARVEEE.A      | S1438:S1443: | 3 | 3,7435 | 0,312 | 0,073  |
| 10 | Q7Z6B7 SRGP1_HUMAN  | E.KCM*AGDDYCDs#PYSE.H              | S717:        | 2 | 3,7394 | 0,38  | 0,193  |
| 10 | O60271 JIP4_HUMAN   | E.KFIEFEDs#QEQE.K                  | S109:        | 2 | 3,7357 | 0,274 | 0      |
| 10 | Q6S8J3 A26CA_HUMAN  | R.TTGIVM*DSGDGVTHTVPIYE.G          |              | 2 | 3,7348 | 0,402 | 0,463  |
| 10 | P35908 K22E_HUMAN   | K.NVQDAIADAEQR.G                   |              | 2 | 3,7343 | 0,484 | 0,275  |
| 10 | Q9C0B5 ZDHC5_HUMAN  | E.SVQAGPEPDPPLGYTs#PFLSAR.L        | S499:        | 3 | 3,7341 | 0,374 | 0,155  |
| 10 | A0JP21 A0JP21_HUMAN | E.ARPLLSQEDs#EEEE.N                | S1494:       | 2 | 3,7319 | 0,441 | 0,214  |
| 10 | Q9Y5B0 CTDP1_HUMAN  | E.LAGAPEPQGSQAQGG.R.V              |              | 3 | 3,7314 | 0,284 | 0,353  |
| 10 | Q5D862 FILA2_HUMAN  | R.SGQSSYGQHSSGSSQSSGYGQHGS.R.Q     |              | 3 | 3,7288 | 0,442 | 0,366  |
| 10 | Q9NP11 BRD7_HUMAN   | E.LAQVTPGDIVSTYGV.R.K              |              | 2 | 3,7286 | 0,485 | -0,676 |
| 10 | P42166 LAP2A_HUMAN  | R.SSTPLPT#HSSSAENTR.Q              | T164:        | 3 | 3,7235 | 0,149 | 0,318  |
| 10 | Q70CQ2 UBP34_HUMAN  | E.TRDSSIIDPGTEQDLPS#PE.N           | S3255:       | 2 | 3,7233 | 0,422 | 0,571  |
| 10 | P05783 K1C18_HUMAN  | R.GGM*GSGGLATGIAGGLAGM*GGIQNE.K    |              | 3 | 3,7205 | 0,214 | 0,253  |
| 10 | Q13428 TCOF_HUMAN   | K.LDSS#PSVSSTLAAKDDPDGKQE.A        | S1228:       | 3 | 3,7085 | 0,386 | 0,393  |
| 10 | Q14202 ZMYM3_HUMAN  | R.RGSPGQEEELPQGQPQS#PNAPPS#PSVGE.T | S186:S192:   | 3 | 3,7005 | 0,34  | 0,485  |
| 10 | Q9UPU9 SAM4A_HUMAN  | E.LHQM*ILTPIKAYSS#PSTT#PE.A        | S231:T235:   | 2 | 3,6896 | 1     | 0,613  |
| 10 | O75643 U520_HUMAN   | E.TM*DLDQGGREALAPR.Q               |              | 2 | 3,6892 | 0,509 | 0,164  |
| 10 | P42166 LAP2A_HUMAN  | E.SRSST#PLTISSSAE.N                | T160:        | 2 | 3,6883 | 0,406 | -0,458 |
| 10 | Q13428 TCOF_HUMAN   | K.LDSS#PSVSSTLAAK.D                | S1228:       | 2 | 3,6811 | 0,427 | 0,254  |
| 10 | P29374 ARI4A_HUMAN  | E.SRS#VKS#ESDITIE.V                | S1018:S1021: | 2 | 3,6733 | 0,52  | 0,227  |
| 10 | Q96L14 C170L_HUMAN  | E.ALNNM*GFPSAM*LPS#PPKQK.S         | S224:        | 3 | 3,6692 | 0,302 | 0,171  |
| 10 | Q5VZL5 ZMYM4_HUMAN  | E.KDQGSTYS#GDLE.S                  | S1091:       | 2 | 3,6691 | 0,376 | -0,088 |
| 10 | Q96FF9 CDCA5_HUMAN  | K.THSVPAT#PTST#PVPNPEAE.S          | T111:T115:   | 2 | 3,6666 | 1     | -0,117 |
| 10 | Q96J02 ITCH_HUMAN   | E.TRVSTNGS#DDPEDAGAGE.N            | S221:        | 2 | 3,6638 | 0,502 | 0,066  |
| 10 | P04264 K2C1_HUMAN   | K.QISNLQQSISDAEQR.G                |              | 2 | 3,6593 | 0,499 | 0      |
| 10 | Q04721 NOTC2_HUMAN  | E.AADIRRT#PSLALT#PPQAEQE.V         | T1802:T1808: | 3 | 3,6561 | 0,221 | 0,157  |
| 10 | Q7Z3K3 POGZ_HUMAN   | E.SLHQLFEGES#E.T                   | S1392:       | 2 | 3,6525 | 0,277 | 0,27   |
| 10 | Q9H307 PININ_HUMAN  | E.TNRVES#VEPS#ENEASKE.L            | S413:S417:   | 2 | 3,6466 | 0,463 | 0,236  |
| 10 | Q92539 LPIN2_HUMAN  | E.GKSEAPPASDLPSSSK.E               |              | 3 | 3,6452 | 0,308 | 0,117  |
| 10 | O94910 LPHN1_HUMAN  | R.GTM*GNHLLTNPVLQPR.G              |              | 3 | 3,6446 | 0,127 | 0,207  |
| 10 | P02686 MBP_HUMAN    | E.LNAEKAST#NS#ETNRGE.S             | T17:S19:     | 3 | 3,6442 | 0,314 | 0,097  |
| 10 | P17029 ZKSC1_HUMAN  | E.SREATGLS#PQAAQE.K                | S13:         | 2 | 3,6387 | 0,402 | -0,72  |
| 10 | P04264 K2C1_HUMAN   | K.WELLQQVDTSTR.T                   |              | 2 | 3,6362 | 0,494 | -0,165 |
| 10 | P35908 K22E_HUMAN   | R.NLDLDSIIAEVK.A                   |              | 2 | 3,6362 | 0,366 | -0,367 |
| 10 | O75691 UTP20_HUMAN  | K.S#LSDNGQPGT#PDPADSGGTS.AKE.S     | S1732:T1741: | 2 | 3,627  | 0,406 | 0,312  |

|    |                    |                                              |            |   |        |       |        |
|----|--------------------|----------------------------------------------|------------|---|--------|-------|--------|
| 10 | Q6ZRV2 FA83H_HUMAN | R.RLS#LGQGDSTEAATEE.R                        | S1003:     | 2 | 3,6224 | 0,473 | 0,21   |
| 10 | Q9UIF9 BAZ2A_HUMAN | K.M*CGYNGSVPS#VES#LHQE.V                     | S231:S234: | 2 | 3,621  | 0,361 | 0      |
| 10 | O60271 JIP4_HUMAN  | E.TRNVS#TGSAENEE.K                           | S329:      | 2 | 3,6126 | 0,374 | 0,248  |
| 10 | Q9NYL9 TMOD3_HUMAN | E.KVSLDPELEEALTSAS#DTE.L                     | S127:      | 2 | 3,607  | 0,382 | 0,231  |
| 10 | O60890 OPHN1_HUMAN | E.RTVFYTSSLDES#EDE.I                         | S610:      | 2 | 3,6053 | 0,498 | 0,197  |
| 10 | Q4LE39 ARI4B_HUMAN | R.RLS#KPPFQTNPS#PE.M                         | S666:S675: | 2 | 3,6034 | 0,23  | -0,139 |
| 10 | Q15149 PLEC1_HUMAN | R.SSS#VGSSSSYPISPAVSR.T                      | S4386:     | 2 | 3,5988 | 0,499 | 0,332  |
| 10 | Q9NQW6 ANLN_HUMAN  | K.SCS#PSPVS#PQVQPQAADTISD.S                  | S97:S102:  | 2 | 3,5984 | 0,513 | 0,209  |
| 10 | P05783 K1C18_HUMAN | R.STSFRGGM*GS#GGLATGIAGGLAGM*GGIQNE.K        | S60:       | 3 | 3,5969 | 0,354 | 0,259  |
| 10 | O60238 BNI3L_HUMAN | K.NGGLEHVPSS#SS#IHNGDM*E.K                   | S63:S65:   | 2 | 3,5946 | 0,453 | 0,797  |
| 10 | Q9UBC2 EP15R_HUMAN | E.VTLSNLSM*PPPK.F                            |            | 2 | 3,5918 | 0,479 | 0,32   |
| 10 | Q86YP4 P66A_HUMAN  | R.GLLASDLNTDGDGM*RVT#PEPGAGPTQGLLR.A         | T49:       | 3 | 3,5901 | 0,235 | -0,42  |
| 10 | Q6IQ55 TTBK2_HUMAN | E.KSILLES#DNEDE.K                            | S786:      | 2 | 3,5888 | 0,294 | 0,332  |
| 10 | Q02952 AKA12_HUMAN | E.ARGDTVVSEAELT#PE.A                         | T972:      | 2 | 3,5814 | 0,33  | 0,369  |
| 10 | Q9H307 PININ_HUMAN | E.TNRVES#VEPSENE.A                           | S413:      | 2 | 3,5794 | 0,412 | 0,233  |
| 10 | P49810 PSN2_HUMAN  | E.RTS#LM*#AESPTPR.S                          | S19:S22:   | 2 | 3,5789 | 0,194 | -0,152 |
| 10 | Q5VUA4 ZN318_HUMAN | E.VAILQVDDDS#GDPLNLVK.A                      | S2229:     | 2 | 3,5734 | 0,359 | 0,184  |
| 10 | P18858 DNL1_HUMAN  | E.QATTSQAQVACLVR.K                           |            | 3 | 3,5725 | 0,374 | 0,311  |
| 10 | O96028 NSD2_HUMAN  | E.M*KGIGTPPNTT#PIKNGS#PE.I                   | T115:S121: | 2 | 3,5715 | 0,383 | 0,462  |
| 10 | Q6ZRV2 FA83H_HUMAN | R.RS#QS#S#SQGDNPLAPGYLPPHYKE.Y               | S5:S7:S8:  | 3 | 3,5614 | 0,128 | 0,264  |
| 10 | Q13283 G3BP1_HUMAN | K.SSS#PAPADIAQTVQE.D                         | S232:      | 2 | 3,5606 | 0,253 | 0,386  |
| 10 | Q03164 HRX_HUMAN   | E.VHPPLPISQS#PENE.S                          | S518:      | 2 | 3,5571 | 0,213 | 0,301  |
| 10 | P40937 RFC5_HUMAN  | E.DRLPHLLLYGPPGTGK.T                         |            | 3 | 3,5531 | 0,307 | 0,105  |
| 10 | Q8NEF9 SRFB1_HUMAN | E.KEYFDDS#TEE.R                              | S264:      | 2 | 3,5518 | 0,456 | 0      |
| 10 | Q53GS7 GLE1_HUMAN  | E.TSPSSTSASALDQPSFVKSPDAS#SAFSPASPAT#PNGTK.G | S92:T102:  | 3 | 3,5498 | 1     | 0,744  |
| 10 | P04920 B3A2_HUMAN  | E.RTS#PS#SPAPLPHQE.A                         | S170:S172: | 2 | 3,5465 | 0,463 | -0,367 |
| 10 | Q01105 SET_HUMAN   | E.IDRLNEQAS#EE.I                             | S63:       | 2 | 3,5377 | 0,373 | 0,264  |
| 10 | P67809 YBOX1_HUMAN | E.TKAADPPAENS#SAPEAEQGGAE.-                  | S313:      | 3 | 3,533  | 0,415 | 0,166  |
| 10 | Q6P2E9 EDC4_HUMAN  | R.TRS#PDVISSASTALSQDIPE.I                    | S729:      | 2 | 3,5281 | 0,435 | 0,227  |
| 10 | Q14721 KCNB1_HUMAN | E.AGVHQYIDADT#DDE.G                          | T760:      | 2 | 3,5233 | 0,415 | 0,075  |
| 10 | Q14247 SRC8_HUMAN  | R.AKTQT#PPVS#PAPQPTTE.R                      | T401:S405: | 2 | 3,5221 | 0,312 | 0,126  |
| 10 | O43379 WDR62_HUMAN | E.VEAGPGDQQGDSYLR.V                          |            | 2 | 3,5209 | 0,496 | 0,46   |
| 10 | Q15149 PLEC1_HUMAN | E.FADM*LSGNAGGFR.S                           |            | 2 | 3,5188 | 0,448 | -0,449 |
| 10 | P35908 K22E_HUMAN  | R.HGGGGGGGFGGGGFGSR.S                        |            | 3 | 3,5185 | 0,311 | 0,485  |
| 10 | O94915 FRYL_HUMAN  | E.SRY#SSSSGGSYEEE.K                          | Y1532:     | 2 | 3,5159 | 0,454 | -0,152 |
| 10 | Q14247 SRC8_HUMAN  | R.AKTQT#PPVS#PAPQPTTEER.L                    | T401:S405: | 3 | 3,5133 | 0,349 | 0,175  |
| 10 | Q9H307 PININ_HUMAN | E.TNRVES#VEPS#ENEASKE.L                      | S413:S417: | 3 | 3,5104 | 0,2   | 0,443  |
| 10 | P28290 SSFA2_HUMAN | E.SKLDSDFNIS#HS#ELE.N                        | S425:S427: | 2 | 3,5101 | 0,477 | 0,31   |
| 10 | O95817 BAG3_HUMAN  | E.VKVPPAPVPCPPSPGSAVPSS#PK.S                 | S386:      | 3 | 3,5029 | 0,131 | 0,145  |

|    |                    |                                               |              |   |        |       |        |
|----|--------------------|-----------------------------------------------|--------------|---|--------|-------|--------|
| 10 | Q14247 SRC8_HUMAN  | K.T#QTPPVS#PAPQPTTEER.L                       | T399:S405:   | 2 | 3,5024 | 0,542 | 0,193  |
| 10 | O60271 JIP4_HUMAN  | K.AT#TPASTANSVDVATIPTDTPLKEENE.G              | T275:        | 2 | 3,5005 | 0,429 | 0,709  |
| 10 | Q6ZRV2 FA83H_HUMAN | E.GGFPVPQENGQPESPR.R                          |              | 2 | 3,4973 | 0,276 | 0,288  |
| 10 | Q16204 CCDC6_HUMAN | E.KLDQPVS#APPS#PR.D                           | S240:S244:   | 2 | 3,4942 | 0,369 | 0      |
| 10 | Q13029 PRDM2_HUMAN | E.KASQDTINSS#VVEE.N                           | S471:        | 2 | 3,4922 | 0,353 | -0,077 |
| 10 | P13645 K1C10_HUMAN | R.SQYQLAEQNR.K                                |              | 2 | 3,4907 | 0,341 | 0      |
| 10 | P15822 ZEP1_HUMAN  | E.SHVLGTGQS#LDE.S                             | S917:        | 2 | 3,4885 | 0,473 | 0      |
| 10 | Q15648 MED1_HUMAN  | E.KSYQNSPS#S#DDGIRPLPE.Y                      | S1481:S1482: | 3 | 3,4867 | 0,279 | 0,34   |
| 10 | P35908 K22E_HUMAN  | R.LLRDYQELMNVK.L                              |              | 3 | 3,4864 | 0,311 | 0,3    |
| 10 | P08559 ODPA_HUMAN  | E.NNRYGM*GTS#VE.R                             | S232:        | 2 | 3,4855 | 0,355 | -0,092 |
| 10 | Q8IW19 APLF_HUMAN  | E.DNILNETPKS#PVINLPHETT GASQLE.G              | S131:        | 3 | 3,4839 | 0,294 | -0,189 |
| 10 | Q14247 SRC8_HUMAN  | R.AKTQT#PPVS#PAPQPTTEER.L                     | T401:S405:   | 2 | 3,4827 | 0,436 | 0,35   |
| 10 | Q09666 AHNK_HUMAN  | E.GAKDIDISS#PE.F                              | S177:        | 2 | 3,4825 | 0,145 | 0      |
| 10 | Q16204 CCDC6_HUMAN | E.KLDQPVS#APPS#PR.D                           | S240:S244:   | 3 | 3,4808 | 0,26  | 0,825  |
| 10 | P29966 MARCS_HUMAN | E.LQANGSAPAADKEEPAAAGSGAAS#PSAAEKGEPAAAAAPE.A | S81:         | 3 | 3,4668 | 0,203 | 0,599  |
| 10 | Q92615 LARP5_HUMAN | E.KFTSSQTQS#PTPPKPPS#PSFE.L                   | S516:S524:   | 2 | 3,4652 | 1     | 0,802  |
| 10 | Q92614 MY18A_HUMAN | D.SGHLSTAS#S#SDDLKGE.E.G                      | S101:S102:   | 2 | 3,4647 | 1     | -0,065 |
| 10 | Q9P287 BCCIP_HUMAN | E.LTDLLIQNHIGSVIK.Q                           |              | 3 | 3,4644 | 0,255 | 0,204  |
| 10 | P39880 CUX1_HUMAN  | E.IQAGSQGQAGASDPSAR.S                         |              | 2 | 3,4603 | 0,562 | 0,145  |
| 10 | Q9UBC2 EP15R_HUMAN | E.VTLSNLNLSM*PPP.K.F                          |              | 3 | 3,4595 | 0,256 | 0,359  |
| 10 | Q3KQU3 MA7D1_HUMAN | E.S#AAPASPAPSPAPSPPTAPPQK.E                   | S539:        | 2 | 3,4583 | 0,477 | 0      |
| 10 | O75179 ANR17_HUMAN | R.NSPLDCGS#ASPKNVASSSEQE.A                    | S2065:       | 3 | 3,4583 | 0,148 | 0,245  |
| 10 | P13639 EF2_HUMAN   | E.ESQVAGTPM*FVVK.A                            |              | 2 | 3,4563 | 0,311 | -1,385 |
| 10 | Q13546 RIPK1_HUMAN | R.SNSAT#EQPGLSHSSQGLGM*GPVEE.S                | T337:        | 3 | 3,4553 | 0,219 | 0,22   |
| 10 | P52292 IMA2_HUMAN  | R.RNVSSFPDDATS#PLQE.N                         | S62:         | 2 | 3,4534 | 0,488 | 0,463  |
| 10 | Q05682 CALD1_HUMAN | E.KGNVFSS#PTAAGT#PNKE.T                       | S724:T730:   | 3 | 3,4525 | 0,243 | 0,294  |
| 10 | Q9HCG8 NCM_HUMAN   | R.NS#S#PEDRYEEQE.R                            | S27:S28:     | 2 | 3,451  | 0,294 | -0,223 |
| 10 | Q16204 CCDC6_HUMAN | K.SGGIVIS#PFRLEE.L                            | S52:         | 2 | 3,4485 | 0,343 | -0,082 |
| 10 | P02545 LMNA_HUMAN  | R.SGAQASSTPLSPTR.I                            |              | 2 | 3,4447 | 0,422 | 0,359  |
| 10 | P49790 NU153_HUMAN | E.ITTSSPSPINSSQALTNK.V                        |              | 3 | 3,4439 | 0,214 | -0,198 |
| 10 | P13645 K1C10_HUMAN | K.SKELTTEIDNIEQISSYK.S                        |              | 3 | 3,4417 | 0,089 | -0,827 |
| 10 | Q02952 AKA12_HUMAN | E.KAPQVTE#IE.S                                | S1129:       | 2 | 3,4411 | 0,274 | 0      |
| 10 | Q8IWC1 MA7D3_HUMAN | E.AM*VKAS#PKTS#LE.A                           | S449:S453:   | 2 | 3,439  | 0,444 | 0,085  |
| 10 | Q9ULT8 HECD1_HUMAN | E.GHDSLS#VGS#FEEDSKSE.F                       | S2317:S2320: | 3 | 3,4351 | 0,24  | 0,65   |
| 10 | P27707 DCK_HUMAN   | K.NGGNVLQM*M*YEKPE.R                          |              | 2 | 3,434  | 0,337 | 0,149  |
| 10 | P39880 CUX1_HUMAN  | K.DSKPPEPSDPPASDS#QPT#TPLPLSGHSALSIQE.L       | S1100:T1103: | 3 | 3,4309 | 1     | 0,413  |
| 10 | P35908 K22E_HUMAN  | R.FLEQQNQVLQTK.W                              |              | 2 | 3,4306 | 0,41  | 0,165  |
| 10 | P17275 JUNB_HUMAN  | E.ARS#RDAT#PPVSPINM*EDQE.R                    | S251:T255:   | 3 | 3,4296 | 0,162 | 0,16   |
| 10 | Q9UQ35 SRRM2_HUMAN | K.SKDSLVLQSCPGSLSLCAGVK.S                     |              | 3 | 3,4255 | 0,203 | 0,437  |

|    |                     |                                      |                 |   |        |       |        |
|----|---------------------|--------------------------------------|-----------------|---|--------|-------|--------|
| 10 | P04264 K2C1_HUMAN   | R.THNLEPYFESFINNLR.R                 |                 | 3 | 3,4255 | 0,289 | -0,092 |
| 10 | Q9NPI6 DCP1A_HUMAN  | R.KASSPSPLTIGT#PE.S                  | T531:           | 2 | 3,425  | 0,417 | 0,333  |
| 10 | Q71U36 TBA1A_HUMAN  | R.AVFVDLEPTVIDEVR.T                  |                 | 2 | 3,4239 | 0,435 | -0,143 |
| 10 | P05362 ICAM1_HUMAN  | E.AQVHLALGDQR.L                      |                 | 2 | 3,4218 | 0,488 | 0,303  |
| 10 | A8MVB1 A8MVB1_HUMAN | E.LDLSSEPQQLTAK.G                    |                 | 2 | 3,4123 | 0,43  | -0,341 |
| 10 | Q9HAU5 RENT2_HUMAN  | E.NKEVSS#PDDLE.L                     | S514:           | 2 | 3,4067 | 0,248 | 0      |
| 10 | Q92615 LARP5_HUMAN  | E.EKFTSSQT#QSPTPKPPS#PSFE.L          | T514:S524:      | 3 | 3,4059 | 1     | 0,357  |
| 10 | P05362 ICAM1_HUMAN  | E.AQVHLALGDQR.L                      |                 | 3 | 3,4008 | 0,35  | 0,757  |
| 10 | P42695 CNDD3_HUMAN  | R.ASAGHVAVSSPTPE.T                   |                 | 2 | 3,4005 | 0,517 | -0,466 |
| 10 | Q969R5 LMBL2_HUMAN  | E.LPTS#PLHLLSPGTPR.S                 | S67:            | 3 | 3,3969 | 0,138 | -0,11  |
| 10 | Q92854 SEM4D_HUMAN  | E.LKFADS#DADGD.-                     | S857:           | 2 | 3,3964 | 0,386 | 0,198  |
| 10 | P04264 K2C1_HUMAN   | K.YEELQITAGR.H                       |                 | 2 | 3,3882 | 0,206 | 0,103  |
| 10 | Q9NQX3 GEPH_HUMAN   | E.LEDLSPPPPPLSPPT#TSPHKQTE.D         | T198:           | 3 | 3,3875 | 0,28  | 0,346  |
| 10 | Q15424 SAFB1_HUMAN  | E.LAEAPTEAPS#PEAR.D                  | S344:           | 2 | 3,3841 | 0,406 | -0,161 |
| 10 | O95208 EPN2_HUMAN   | K.AGGS#PAS#YHGSP.E.A                 | S192:S195:      | 2 | 3,384  | 0,387 | -0,354 |
| 10 | Q66K74 MAP1S_HUMAN  | E.LPLAASSIPRPT#PS#PE.S               | T638:S640:      | 3 | 3,3761 | 0,374 | 0,282  |
| 10 | Q8TDM6 DLG5_HUMAN   | K.CVPASGELS#PELQE.W                  | S1146:          | 2 | 3,3751 | 0,303 | 0,382  |
| 10 | P49810 PSN2_HUMAN   | E.RTS#LM*S#AESPTPR.S                 | S19:S22:        | 3 | 3,3747 | 0,119 | 0,341  |
| 10 | Q02790 FKBP4_HUMAN  | E.SGAQSAPLPM*EGVDISPKQDE.G           |                 | 3 | 3,3722 | 0,276 | 0,337  |
| 10 | Q9NZB2 F120A_HUMAN  | E.RS#SPINPAQSGS#PNHVD.S              | S434:S444:      | 3 | 3,3632 | 0,23  | 0,095  |
| 10 | P19634 SL9A1_HUMAN  | R.CLS#DPGPHPEPEGEPFFPK.G             | S796:           | 3 | 3,3554 | 0,208 | 0,161  |
| 10 | P13645 K1C10_HUMAN  | K.QSLEASLAETEGR.Y                    |                 | 2 | 3,3542 | 0,481 | 0,263  |
| 10 | Q9NZB2 F120A_HUMAN  | E.RSS#PINPAQSGS#PNHVD.S              | S435:S444:      | 2 | 3,3534 | 0,402 | 0,254  |
| 10 | O75153 EIF3X_HUMAN  | E.SKSEDPGQEQEAGS#EEE.G               | S664:           | 2 | 3,3534 | 0,369 | 0,695  |
| 10 | P04264 K2C1_HUMAN   | R.LRSEIDNVKK.Q                       |                 | 3 | 3,3524 | 0,175 | 0,456  |
| 10 | P02538 K2C6A_HUMAN  | R.ALYDAELSQMQTHISDTSVVLMDNNR.N       |                 | 3 | 3,3509 | 0,408 | 0,06   |
| 10 | P84090 ERH_HUMAN    | E.GRTYADYES#VNE.C                    | S24:            | 2 | 3,3502 | 0,409 | 0,247  |
| 10 | O75909 CCNK_HUMAN   | E.NKENSS#PSVTSANLD.H                 | S9:             | 2 | 3,3483 | 0,469 | -0,297 |
| 10 | Q15003 CND2_HUMAN   | E.M*IS#LGDGDIR.T                     | S408:           | 2 | 3,3422 | 0,178 | 0,104  |
| 10 | P27816 MAP4_HUMAN   | D.TPSSKPTLLANGGHGVEGSDTTGS#PTEFLEE.K | S99:            | 3 | 3,3414 | 0,145 | 0,115  |
| 10 | Q9BRK4 LZTS2_HUMAN  | R.TESPPS#PSS#DVEDARE.Q               | S102:S105:      | 2 | 3,3409 | 1     | -0,197 |
| 10 | Q9H0W8 CS061_HUMAN  | E.GKGPVAVTGAST#PE.G                  | T118:           | 2 | 3,3383 | 0,44  | -0,181 |
| 10 | O95684 FR1OP_HUMAN  | E.KGPTTGEGALDLS#DVHS#PPKS#PE.G       | S152:S156:S160: | 3 | 3,3381 | 0,163 | 0,286  |
| 10 | Q96T60 PNKP_HUMAN   | E.TRPESQPDTPPGTPLVSQDE.K             | T118:           | 3 | 3,3345 | 0,159 | 0,392  |
| 10 | P05556 ITB1_HUMAN   | K.NVLSLTNKGEVFNE.L                   |                 | 2 | 3,3325 | 0,279 | 0,234  |
| 10 | Q13428 TCOF_HUMAN   | K.KLGAGEGGEASVS#PE.K                 | S1378:          | 2 | 3,3242 | 0,283 | -0,499 |
| 10 | Q14684 RRP1B_HUMAN  | E.AIVDQSPFVPEETM*EEQK.T              |                 | 2 | 3,3226 | 0,397 | 0,466  |
| 10 | P28290 SSFA2_HUMAN  | E.SKLDSDFNIS#SHS#ELENSSE.L           | S424:S427:      | 3 | 3,3226 | 0,114 | 0,23   |
| 10 | P18583 SON_HUMAN    | E.M*EHNTVCAAGTS#PVGE.I               | S1556:          | 2 | 3,3222 | 0,515 | 0,347  |

|    |                    |                                    |                 |   |        |       |        |
|----|--------------------|------------------------------------|-----------------|---|--------|-------|--------|
| 10 | Q13596 SNX1_HUMAN  | K.ITTSLLPINNGSKE.N                 |                 | 2 | 3,319  | 0,444 | 0,082  |
| 10 | Q6PL18 ATAD2_HUMAN | E.LRNNS#NTCNIENE.L                 | S1243:          | 2 | 3,3189 | 0,171 | 0      |
| 10 | P68104 EF1A1_HUMAN | E.TGVLPKPGM*VVTFAPVNVVTE.V         |                 | 3 | 3,3189 | 0,433 | 0,529  |
| 10 | O43379 WDR62_HUMAN | E.VEAGPGDQQGDSYLR.V                |                 | 3 | 3,3167 | 0,367 | 0,46   |
| 10 | O43432 IF4G3_HUMAN | E.QKLDFIEDS#PCSSE.A                | S1409:          | 2 | 3,3098 | 0,47  | 0,134  |
| 10 | Q7Z2W4 ZCCHV_HUMAN | E.FLASASAS#AERSC#PS#PDQISHR.A      | S267:T273:S275: | 3 | 3,3096 | 1     | 0,27   |
| 10 | P13645 K1C10_HUMAN | R.LENEIQTYR.S                      |                 | 2 | 3,3075 | 0,13  | 0,105  |
| 10 | P04264 K2C1_HUMAN  | K.NKLNLDLEDALQQAK.E                |                 | 3 | 3,3074 | 0,213 | 0,114  |
| 10 | Q14684 RRP1B_HUMAN | E.AIVDQSPFVPEETM*EEQK.T            |                 | 3 | 3,3047 | 0,24  | 0,612  |
| 10 | Q9UNE7 STUB1_HUMAN | R.LGAGGGS#PEKS#PSAQE.L             | S19:S23:        | 2 | 3,3045 | 0,384 | -0,598 |
| 10 | P35908 K22E_HUMAN  | R.GFSSGSAVVS GGSR.R                |                 | 2 | 3,3032 | 0,428 | -0,194 |
| 10 | P10636 TAU_HUMAN   | K.SPVVSGDTS#PR.H                   | S721:           | 2 | 3,2969 | 0,432 | -0,206 |
| 10 | Q9UHB6 LIMA1_HUMAN | E.NGADS#DEDDNSFLK.Q                | S686:           | 2 | 3,2951 | 0,255 | 0,152  |
| 10 | P08708 RS17_HUMAN  | D.FGSL5#NLQVTQPTVGM*NFK.T          | S115:           | 3 | 3,2925 | 0,223 | 0,169  |
| 10 | Q9P1Y6 K1542_HUMAN | E.AS#PAPLAQGE PGREDLPTRLPALGE.A    | S1202:          | 3 | 3,2874 | 0,381 | 0,14   |
| 10 | Q5H9R7 SAPS3_HUMAN | K.DSLRS#NS#PVEM*E.T                | S738:S740:      | 2 | 3,2863 | 0,312 | 0,238  |
| 10 | Q96L14 C170L_HUMAN | K.S#SPVNNHHS#PGQPTLGQPE.A          | S230:S238:      | 2 | 3,2821 | 0,291 | 0,218  |
| 10 | Q14247 SRC8_HUMAN  | R.AKTQT#PPVS#PAPQPT#EERLPSSPVYE.D  | T401:S405:T411: | 3 | 3,28   | 0,292 | 0,781  |
| 10 | Q63ZY3 KANK2_HUMAN | E.RSCDGAAGLPEVPAESSS#SPPGSE.V      | S427:           | 3 | 3,2796 | 0,245 | -1,434 |
| 10 | P55082 MFAP3_HUMAN | R.SNSPGGSDDDGS#LNEQGQE.I           | S304:           | 2 | 3,2758 | 0,468 | 0,309  |
| 10 | P27816 MAP4_HUMAN  | E.EGRPVS SGTGNDITT#PPNKELPPS#PE.K  | T687:S696:      | 3 | 3,2748 | 0,261 | 0,385  |
| 10 | Q8NEB9 PK3C3_HUMAN | E.IDSSQIITSPLSVS#SPPPASK.T         | S454:           | 2 | 3,2746 | 0,354 | 0,32   |
| 10 | P42167 LAP2B_HUMAN | E.HNQS#YSQAGITE.T                  | S222:           | 2 | 3,2726 | 0,301 | 0,086  |
| 10 | Q6ZRV2 FA83H_HUMAN | R.RLSLQGQDSTEAAATEE.R              |                 | 2 | 3,2655 | 0,478 | -0,147 |
| 10 | P46937 YAP1_HUMAN  | K.QPPPLAPQS#PQGGVM*GGSNSNQQQQM*R.L | S251:           | 3 | 3,2654 | 0,341 | 0,624  |
| 10 | P49790 NU153_HUMAN | K.VQM*TS#PSSTGSPM*FK.F             | S516:           | 2 | 3,263  | 0,451 | 0,072  |
| 10 | Q9C0C9 UBE2O_HUMAN | E.QLLTGS#PTS#PTVEPEKPTRE.K         | S836:S839:      | 3 | 3,2626 | 0,271 | 0,708  |
| 10 | Q9BQE3 TBA1C_HUMAN | E.KDYEEVGADS#AD.G                  | S439:           | 2 | 3,2621 | 0,118 | -0,088 |
| 10 | P35908 K22E_HUMAN  | K.VDLLNQEIEFLK.V                   |                 | 2 | 3,2562 | 0,363 | -0,167 |
| 10 | P27987 IP3KB_HUMAN | E.RQGQFLGSETS#PAPE.R               | S355:           | 2 | 3,2513 | 0,413 | -0,362 |
| 10 | P04264 K2C1_HUMAN  | K.SLNNQFASFIDK.V                   |                 | 2 | 3,2505 | 0,385 | 0,176  |
| 10 | Q8N108 MIER1_HUMAN | E.LLSLYGYGSTVR.L                   |                 | 2 | 3,2491 | 0,499 | 0,092  |
| 10 | Q16643 DREB_HUMAN  | E.TQEPSILDSEETR.A                  |                 | 2 | 3,2486 | 0,367 | 0,228  |
| 10 | P02686 MBP_HUMAN   | E.LNAEKAS#TNS#ETNRGESE.K           | S16:S19:        | 2 | 3,2479 | 0,418 | 0,349  |
| 10 | P13645 K1C10_HUMAN | R.SQYEQLAEQNRK.D                   |                 | 2 | 3,2476 | 0,353 | -0,245 |
| 10 | Q14966 ZN638_HUMAN | E.KES#PGLKNS#PIDE.S                | S1100:S1106:    | 2 | 3,2473 | 0,287 | 0      |
| 10 | Q7Z3B3 K1267_HUMAN | E.YSHGQS#PRS#PISPE.L               | S988:S991:      | 2 | 3,2432 | 0,343 | 0,072  |
| 10 | Q8WXI9 P66B_HUMAN  | R.GRLTPSPDIIVLS#DNE.A              | S129:           | 2 | 3,2419 | 0,307 | -0,203 |
| 10 | Q02952 AKA12_HUMAN | E.SGEHTQVPADSPDS#QEE.Q             | S557:           | 2 | 3,2406 | 0,285 | 0,322  |

|    |                    |                              |                 |   |        |       |        |
|----|--------------------|------------------------------|-----------------|---|--------|-------|--------|
| 10 | P02686 MBP_HUMAN   | E.LNAEKAS#TNS#ETNRGE.S       | S16:S19:        | 2 | 3,2385 | 0,414 | -0,065 |
| 10 | Q9GZM8 NDEL1_HUMAN | E.VTRKS#APS#SPTLDC.E.K       | S194:S197:      | 2 | 3,2375 | 1     | -0,202 |
| 10 | Q92888 ARHG1_HUMAN | E.GAETES#PEPGDEGEPGR.S       | S374:           | 2 | 3,2362 | 0,388 | 0      |
| 10 | P28715 ERCC5_HUMAN | E.SKFDSSLSS#DDE.T            | S563:           | 2 | 3,2349 | 0,418 | 0,323  |
| 10 | Q96Q42 ALS2_HUMAN  | E.NHASTALS#PSTE.T            | S277:           | 2 | 3,2322 | 0,369 | -0,188 |
| 10 | O00425 IF2B3_HUMAN | E.KSITILST#PE.G              | T249:           | 2 | 3,2225 | 0,143 | 0,209  |
| 10 | Q969V6 MKL1_HUMAN  | E.AIIVGQVNYPK.V              |                 | 2 | 3,2201 | 0,405 | 0,304  |
| 10 | O75674 TM1L1_HUMAN | E.ATNTTSEPSAPSQDLLDLSPS#PR.M | S323:           | 3 | 3,2197 | 0,275 | 0,074  |
| 10 | O75694 NU155_HUMAN | E.DQACATCLILACSTAACDRE.V     |                 | 3 | 3,2156 | 0,224 | -0,16  |
| 10 | P51858 HDGF_HUMAN  | E.VERPLPM*EVEK.N             |                 | 3 | 3,2155 | 0,331 | 0,34   |
| 10 | P62753 RS6_HUMAN   | R.RLS#S#LRAS#SKSE.S          | S235:S236:T241: | 3 | 3,2155 | 0,252 | -0,11  |
| 10 | Q14694 UBP10_HUMAN | E.SAS#PPADGTGSASGTLVPSQPK.S  | S321:           | 3 | 3,2119 | 0,223 | 0,087  |
| 10 | Q00688 FKBP3_HUMAN | K.TANKDHLVTAYNHLFE.T         |                 | 3 | 3,2114 | 0,278 | 0,098  |
| 10 | Q92917 GPKOW_HUMAN | E.LHYDAICQYM*GPS#DTDDD.-     | S471:           | 2 | 3,2094 | 0,424 | 0,552  |
| 10 | Q12756 KIF1A_HUMAN | E.SHGSSSASS#PLSAE.G          | S1430:          | 2 | 3,2058 | 0,39  | 0      |
| 10 | Q92917 GPKOW_HUMAN | E.NAGVDPTLAIPM*IQK.G         |                 | 2 | 3,2023 | 0,288 | 0,154  |
| 10 | Q86WC4 OSTM1_HUMAN | R.LCQTCYPLFQQVVSK.M          |                 | 2 | 3,1997 | 0,41  | 0,587  |
| 10 | O14617 AP3D1_HUMAN | R.ALDIDLKPLADSE.K            |                 | 2 | 3,1986 | 0,484 | 0      |
| 10 | Q4G0J3 LARP7_HUMAN | E.NRDIEIS#TEEE.K             | S337:           | 2 | 3,1978 | 0,278 | -0,69  |
| 10 | Q8WUF5 IASPP_HUMAN | E.AGDVDEGPVARPLS#PTR.L       | S489:           | 3 | 3,1976 | 0,299 | 0,403  |
| 10 | Q8N3Z6 ZCHC7_HUMAN | E.NAHGLSSS#LQSNE.L           | S121:           | 2 | 3,1971 | 0,333 | -0,171 |
| 10 | Q96AY2 EME1_HUMAN  | E.KIVVVDIS#DCE.A             | S50:            | 2 | 3,1921 | 0,419 | 0,27   |
| 10 | Q9Y6I3 EPN1_HUMAN  | E.LLAGEVPARS#PGAADM*SGVR.G   | S410:           | 3 | 3,1912 | 0,159 | 0,086  |
| 10 | Q96N67 DOCK7_HUMAN | E.RSPS#GSFAGSQE.N            | S1432:          | 2 | 3,1899 | 0,369 | 0,189  |
| 10 | P04264 K2C1_HUMAN  | R.NKYEDEINKR.T               |                 | 3 | 3,1862 | 0,218 | 0,419  |
| 10 | P15408 FOSL2_HUMAN | R.RSS#SSGDQSSDSLNS#PTLLAL.-  | S308:S320:      | 2 | 3,1858 | 1     | 0,214  |
| 10 | Q02952 AKA12_HUMAN | E.HTQVPADS#PDSQEE.Q          | S554:           | 2 | 3,185  | 0,47  | 0      |
| 10 | Q16186 ADRM1_HUMAN | R.SQSAAVTPSSTTSSTR.A         |                 | 2 | 3,1844 | 0,321 | 0,389  |
| 10 | P27816 MAP4_HUMAN  | K.DM*ES#PTKLDVTLAK.D         | S280:           | 3 | 3,1824 | 0,207 | 0,334  |
| 10 | P35908 K22E_HUMAN  | K.YEELQVTVGR.H               |                 | 2 | 3,1792 | 0,374 | 0      |
| 10 | Q96RS0 TGS1_HUMAN  | E.KCQSVS#SAGELE.T            | S577:           | 2 | 3,1781 | 0,306 | -0,089 |
| 10 | P31942 HNRH3_HUMAN | R.DGM*DNQGGYGSVGR.M          |                 | 2 | 3,1738 | 0,386 | 0,171  |
| 10 | P04264 K2C1_HUMAN  | K.SKAEAESLYQSK.Y             |                 | 2 | 3,173  | 0,416 | -0,273 |
| 10 | P04264 K2C1_HUMAN  | R.SLVNLGGSKSISISVAR.G        |                 | 3 | 3,1701 | 0,363 | 0,325  |
| 10 | Q8WU79 SMAP2_HUMAN | D.LDLLASVPS#PSSSGSR.K        | S219:           | 2 | 3,1693 | 0,419 | -0,074 |
| 10 | Q96A49 SYAP1_HUMAN | E.AVRPKT#PPVVIK.S            | T248:           | 3 | 3,167  | 0,178 | 0      |
| 10 | P18583 SON_HUMAN   | E.STS#PEPSKIM*LVEPPVAK.V     | S283:           | 3 | 3,1654 | 0,344 | 0,365  |
| 10 | P04264 K2C1_HUMAN  | K.QISNLQQSISDAEQR.G          |                 | 3 | 3,1632 | 0,227 | 0,32   |
| 10 | P42566 EP15_HUMAN  | E.SEPIHQES#PARSS#PE.L        | S558:S563:      | 2 | 3,162  | 0,39  | -0,067 |



|    |                    |                                     |              |   |        |       |        |
|----|--------------------|-------------------------------------|--------------|---|--------|-------|--------|
| 10 | Q8NA72 CE037_HUMAN | E.KYSLPVVQNDSSR.G                   |              | 3 | 3,1601 | 0,174 | 0,306  |
| 10 | P05556 ITB1_HUMAN  | R.SNGLICGGNGVCK.C                   |              | 2 | 3,1589 | 0,42  | -0,091 |
| 10 | Q5F1R6 DJC21_HUMAN | E.KEFGDGS#DENE.M                    | S283:        | 2 | 3,1561 | 0,293 | -0,187 |
| 10 | P04406 G3P_HUMAN   | K.LVINGNPITIFQE.R                   |              | 2 | 3,1471 | 0,327 | 0      |
| 10 | P02545 LMNA_HUMAN  | R.LRLS#PS#PTSQR.S                   | S390:S392:   | 2 | 3,1468 | 0,374 | -0,087 |
| 10 | Q9Y5B0 CTDP1_HUMAN | E.LAGAPEPQGSCAQGGR.V                |              | 2 | 3,1462 | 0,507 | -0,157 |
| 10 | Q9BVS4 RIOK2_HUMAN | E.KAEVYGS#ENESE.R                   | S350:        | 2 | 3,1453 | 0,396 | 0,172  |
| 10 | O75420 PERQ1_HUMAN | E.KLVASLQDSS#LEEE.Q                 | S443:        | 2 | 3,1441 | 0,274 | 0,3    |
| 10 | Q8NC51 PAIRB_HUMAN | K.QISYNYSDDLQSNVTEETPE.G            |              | 3 | 3,144  | 0,24  | 0,392  |
| 10 | Q86U44 MTA70_HUMAN | R.SDS#PVPTAPTSGGPKPSTASAVPE.L       | S50:         | 2 | 3,1409 | 0,343 | 0,105  |
| 10 | Q8N2Y8 RUSC2_HUMAN | E.REGPAAS#PAENEE.G                  | S1368:       | 2 | 3,1357 | 0,399 | 0,085  |
| 10 | Q9BQ39 DDX50_HUMAN | E.GFNRLS#DE.F                       | S82:         | 2 | 3,1341 | 0,226 | -0,3   |
| 10 | P42166 LAP2A_HUMAN | R.SST#PLPTISS#SAENTR.Q              | T160:S167:   | 2 | 3,1339 | 1     | 0,067  |
| 10 | P22314 UBA1_HUMAN  | E.LVALAQAVNAR.A                     |              | 2 | 3,1309 | 0,425 | 0,108  |
| 10 | P78364 PHC1_HUMAN  | E.ALS#PTS#PGPLSVR.A                 | S895:S898:   | 2 | 3,1298 | 0,429 | 0,169  |
| 10 | P02538 K2C6A_HUMAN | R.ALYDAELSQMQTHISDTSVVLMS*DNNR.N    |              | 3 | 3,1249 | 0,416 | 0,539  |
| 10 | Q17RY0 CPEB4_HUMAN | E.KQQLSPS#PGQE.A                    | S99:         | 2 | 3,1246 | 0,349 | 0,095  |
| 10 | Q9UNE7 STUB1_HUMAN | E.GGARLGAGGGS#PEKS#PSAQE.L          | S19:S23:     | 3 | 3,1164 | 0,193 | 0,185  |
| 10 | P78332 RBM6_HUMAN  | E.KLQSFDS#PE.R                      | S1025:       | 2 | 3,1155 | 0,37  | -0,216 |
| 10 | P08047 SP1_HUMAN   | R.SSSTGSSSTGGGGQESQPSPLALLAAT#CSR.I | T67:         | 3 | 3,1132 | 0,345 | 1,644  |
| 10 | Q96JM3 ZN828_HUMAN | E.YIKTDLDAM*DIK.G                   |              | 2 | 3,1131 | 0,424 | -0,085 |
| 10 | P26639 SYTC_HUMAN  | K.M*GGEEKPIGAGEE.K                  |              | 2 | 3,1122 | 0,395 | 0      |
| 10 | Q8TEA8 DTD1_HUMAN  | E.DRSAS#SGAEGDVSE.R                 | S196:        | 2 | 3,1114 | 0,391 | 0,159  |
| 10 | Q9UBC2 EP15R_HUMAN | K.FHDTSS#PLM*VTPPSAE.A              | S108:        | 2 | 3,1095 | 0,345 | 0,202  |
| 10 | Q99459 CDC5L_HUMAN | E.SDFSGVTPQR.Q                      |              | 2 | 3,1089 | 0,389 | -0,223 |
| 10 | Q9NZ53 PDXL2_HUMAN | E.NGCHDNPTLDVAS#DSQSE.M             | S558:        | 2 | 3,1057 | 0,391 | 0,181  |
| 10 | O94909 K0819_HUMAN | E.RGPS#QATS#PIRSPQE.S               | S292:S296:   | 2 | 3,1044 | 0,374 | -0,069 |
| 10 | Q70CQ2 UBP34_HUMAN | E.TREVL#PTSTSDNE.T                  | T3230:       | 2 | 3,1029 | 0,407 | -0,299 |
| 10 | Q92794 MYST3_HUMAN | E.NKEQDS#YSVE.S                     | S826:        | 2 | 3,1024 | 0,281 | 0,095  |
| 10 | P04792 HSPB1_HUMAN | R.ALS#RQLS#SGVSE.I                  | S78:S82:     | 2 | 3,1015 | 0,31  | -0,088 |
| 10 | P18858 DNL1_HUMAN  | E.QATTAQVACLVR.K                    |              | 2 | 3,1001 | 0,574 | 0,332  |
| 10 | Q9NP11 BRD7_HUMAN  | R.KAM*GISIPS#PVM*E.N                | S621:        | 2 | 3,1001 | 0,296 | 0,249  |
| 10 | P27816 MAP4_HUMAN  | E.EGRPVVSGTGNDIT#TPPNKELPPS#PE.K    | T686:S696:   | 3 | 3,1    | 0,17  | 0,578  |
| 10 | Q96L14 C170L_HUMAN | E.ALNNM*GFPSAM*LPS#PPK.Q            | S224:        | 2 | 3,0981 | 0,328 | 0,13   |
| 10 | Q66K74 MAP1S_HUMAN | E.RAGGLGAET#PPTSVSE.S               | T782:        | 2 | 3,0979 | 0,345 | 0,14   |
| 10 | Q01082 SPTB2_HUMAN | K.TALPAQSAATLPAR.T                  |              | 2 | 3,0976 | 0,463 | -0,357 |
| 10 | Q5HY17 MTX3_HUMAN  | E.NNSFQRLS#P.-                      | S311:        | 2 | 3,0969 | 0,257 | -0,213 |
| 10 | Q9UQ35 SRRM2_HUMAN | R.SSGHS#SSELS#PDAVE.K               | S1382:S1387: | 2 | 3,0939 | 1     | 0      |
| 10 | Q92922 SMRC1_HUMAN | R.KHS#PS#PPPPTPE.S                  | S328:S330:   | 2 | 3,0934 | 0,437 | -0,398 |

|    |                      |                                        |              |   |        |       |        |
|----|----------------------|----------------------------------------|--------------|---|--------|-------|--------|
| 10 | Q9UNN5 FAF1_HUMAN    | E.FGVDDGEVFGM*ASSALRK.S                |              | 3 | 3,0933 | 0,304 | 0,192  |
| 10 | P43358 MAGA4_HUMAN   | R.QPNEGSSSQEEEGPSTSPDAE.S              |              | 2 | 3,0923 | 0,383 | 0,226  |
| 10 | P13645 K1C10_HUMAN   | R.SLLEGEGSSGGGGR.G                     |              | 2 | 3,0843 | 0,482 | -0,193 |
| 10 | P13645 K1C10_HUMAN   | R.ISSSKGSLGGGFSSGGFSGGSFSR.G           |              | 3 | 3,0818 | 0,242 | 0,497  |
| 10 | Q99459 CDC5L_HUMAN   | R.QVVQTPNTVLSTPFR.T                    |              | 2 | 3,0811 | 0,384 | 0,072  |
| 10 | Q9P1Y6 K1542_HUMAN   | E.AS#PAPLAQGEPRGREDLPTRLPALGEAHVS#PE.V | S1202:S1229: | 3 | 3,0778 | 0,164 | 0,551  |
| 10 | Q8NEJ9 NGDN_HUMAN    | E.LKEQYS#DAPEE.I                       | S214:        | 2 | 3,0762 | 0,35  | 0      |
| 10 | Q14692 BMS1_HUMAN    | K.AGLSPANQSDRVNLE.K                    |              | 2 | 3,075  | 0,298 | 0,141  |
| 10 | P60174 TPIS_HUMAN    | K.VPADTEVVCAPPTAYIDFAR.Q               |              | 3 | 3,0741 | 0,305 | -0,167 |
| 10 | O00273 DFFA_HUMAN    | E.KQAPELSLS#SQDLE.L                    | S256:        | 2 | 3,0726 | 0,436 | 0,225  |
| 10 | Q02790 FKBP4_HUMAN   | E.QKSNTAGS#QSQVETEA.-                  | S451:        | 2 | 3,0705 | 0,47  | 0,28   |
| 10 | P55072 TERA_HUMAN    | E.TDPSPYCIVAPDVIHCE.G                  |              | 2 | 3,0624 | 0,484 | 0,118  |
| 10 | Q96JM3 ZN828_HUMAN   | E.LQTPLPS#PEPSKPASVSSPEPPK.S           | S173:        | 3 | 3,06   | 0,227 | 0,299  |
| 10 | Q96JM3 ZN828_HUMAN   | E.YIKTDLDAM*DIK.G                      |              | 3 | 3,0593 | 0,119 | 0,317  |
| 10 | Q6GYQ0 GRIPE_HUMAN   | E.VATITGESAS#PVHS#PLGSR.S              | S990:S994:   | 3 | 3,0561 | 0,281 | 0      |
| 10 | Q9Y6A5 TACC3_HUMAN   | E.STAPT NHLVAGR.A                      |              | 2 | 3,0537 | 0,443 | 0      |
| 10 | Q9GZN2 TGIF2_HUMAN   | E.LES#PKPLVTPGSTLLTR.A                 | S153:        | 3 | 3,0513 | 0,204 | -0,087 |
| 10 | Q9BUA3 YK007_HUMAN   | E.GVALLQDVR.A                          |              | 2 | 3,0482 | 0,295 | -0,126 |
| 10 | Q9NYF8 BCLF1_HUMAN   | E.ALDYFS#DKESGK.Q                      | S385:        | 2 | 3,048  | 0,499 | 0,424  |
| 10 | P43351 RAD52_HUMAN   | E.KDFLAGVT#QE.L                        | T318:        | 2 | 3,0441 | 0,278 | 0,205  |
| 10 | O94909 K0819_HUMAN   | E.RGPS#QATS#PIRSPQE.S                  | S292:S296:   | 3 | 3,0433 | 0,181 | 0      |
| 10 | Q92785 REQU_HUMAN    | E.GEDKEDS#QPPT#PVSQR.S                 | S244:T248:   | 3 | 3,0391 | 0,338 | 0,474  |
| 10 | P04264 K2C1_HUMAN    | K.SKAEAESLYQSK.Y                       |              | 3 | 3,0323 | 0,139 | 0,341  |
| 10 | P31939 PUR9_HUMAN    | K.HVSPAGAAVGIPLSEDE.A                  |              | 2 | 3,0318 | 0,353 | 0,148  |
| 10 | Q9UQ35 SRRM2_HUMAN   | E.NSFGS#PLEFR.N                        | S1329:       | 2 | 3,026  | 0,397 | 0,198  |
| 10 | O75531 BAF_HUMAN     | R.DFVAEPM*GEKPVGSLAGIGE.V              |              | 2 | 3,0245 | 0,459 | 0,483  |
| 10 | O95235 KI20A_HUMAN   | E.HSLQVS#PSLE.K                        | S532:        | 2 | 3,0228 | 0,352 | 0      |
| 10 | P50851 LRBA_HUMAN    | E.LKVEGS#PTEE.A                        | S1118:       | 2 | 3,0206 | 0,307 | 0      |
| 10 | Q9UPN4 AZI1_HUMAN    | K.ANNAGGGLPAAGPGDR.C                   |              | 2 | 3,0136 | 0,424 | -0,35  |
| 10 | P55072 TERA_HUMAN    | E.M*FAQTLQQR.G                         |              | 2 | 3,0124 | 0,29  | 0      |
| 10 | Q9Y6J0 CABIN_HUMAN   | R.GKNEES#LESTE.G                       | S1439:       | 2 | 3,0105 | 0,193 | 0,094  |
| 10 | Q15149 PLEC1_HUMAN   | R.SSS#VGSSSYPIPAVSR.T                  | S4386:       | 3 | 3,0056 | 0,246 | 0,199  |
| 10 | Q8N4L2 TM55A_HUMAN   | E.RSPLLSAS#HSGNVT#PTAPPYLQE.S          | S16:T22:     | 3 | 3,0041 | 0,207 | 0,283  |
| 10 | Q53EZ4 CEP55_HUMAN   | E.KVAASPKS#PT#AALNE.S                  | S428:T430:   | 3 | 2,9968 | 0,238 | 0,111  |
| 10 | P13645 K1C10_HUMAN   | R.NVSTGDVNVEM*NAAPGVDLTQLLNNM*R.S      |              | 3 | 2,9931 | 0,378 | 0,252  |
| 10 | Q9H8Y5 ANKZ1_HUMAN   | R.RLAAQLGAPTS#PIPD.S                   | S675:        | 2 | 2,9892 | 0,342 | 0,384  |
| 10 | ##P05023 AT1A1_HUMAN | E.LY#ANQFADKLE.E                       | Y482:        | 2 | 2,9872 | 0,122 | 0,351  |
| 10 | Q8NI08 NCOA7_HUMAN   | E.VDKQS#GS#PESRVE.N                    | S500:S502:   | 2 | 2,984  | 0,29  | 0,309  |
| 10 | Q9HC35 EMAL4_HUMAN   | E.SRISSS#PTLLE.N                       | S919:        | 2 | 2,9839 | 0,34  | 0,769  |

|    |                     |                                   |              |   |        |       |        |
|----|---------------------|-----------------------------------|--------------|---|--------|-------|--------|
| 10 | P04264 K2C1_HUMAN   | R.LLRDYQELMNTK.L                  |              | 3 | 2,9835 | 0,148 | 0,06   |
| 10 | Q02952 AKA12_HUMAN  | E.ESQLPGTGGPEDVLPVQR.A            |              | 3 | 2,9834 | 0,256 | 0,182  |
| 10 | Q15477 SKIV2_HUMAN  | R.ASS#LEDLVLKE.A                  | S256:        | 2 | 2,9811 | 0,328 | -0,095 |
| 10 | Q9NUQ3 TXLNG_HUMAN  | R.NLVS#PAYCTQE.S                  | S97:         | 2 | 2,9722 | 0,355 | 0,538  |
| 10 | P30414 NKTR_HUMAN   | R.LDT#PDINIVLK.Q                  | T1155:       | 2 | 2,9709 | 0,394 | 0      |
| 10 | Q9BXI6 TB10A_HUMAN  | R.APAAGESLSGTRES#LAQGPDAATTDE.L   | S25:         | 3 | 2,9707 | 0,149 | 0,283  |
| 10 | P35221 CTNA1_HUMAN  | E.DDQLIAGQSAR.A                   |              | 2 | 2,9693 | 0,295 | 0      |
| 10 | Q96G46 DUS3L_HUMAN  | R.TCGPLTDEDVVR.L                  |              | 2 | 2,9693 | 0,357 | 0,09   |
| 10 | P27816 MAP4_HUMAN   | E.AVAEPPQPTAVPLELAKE.I            |              | 2 | 2,9692 | 0,47  | 0,066  |
| 10 | Q15022 SUZ12_HUMAN  | E.KGESAS#PANEEITE.E               | S695:        | 2 | 2,9644 | 0,375 | -0,237 |
| 10 | P13645 K1C10_HUMAN  | R.LKYENEVALR.Q                    |              | 3 | 2,9642 | 0,172 | 1,481  |
| 10 | P46821 MAP1B_HUMAN  | E.KVS#PSKSPSLSPSPPS#PLE.K         | S1252:S1265: | 3 | 2,9625 | 0,294 | -0,264 |
| 10 | P18615 NELFE_HUMAN  | K.LKDPEKGPVPTFQPFQR.S             |              | 3 | 2,9605 | 0,18  | 0,184  |
| 10 | Q9UQ35 SRRM2_HUMAN  | E.KAGM*SSNQSISS#PVL.D.A           | S1404:       | 2 | 2,9593 | 0,377 | 0,284  |
| 10 | P42166 LAP2A_HUMAN  | R.SST#PLPTISSAENTR.Q              | T160:        | 2 | 2,9587 | 0,419 | 0,282  |
| 10 | Q9C0B1 FATSO_HUMAN  | E.DAVPLCM*SADFP.R.V               |              | 2 | 2,9576 | 0,588 | 0,653  |
| 10 | Q9NQW6 ANLN_HUMAN   | K.SCSPS#PVS#PQVQPQAADTISD.S       | S99:S102:    | 3 | 2,9569 | 0,28  | 0,392  |
| 10 | Q7Z333 SETX_HUMAN   | E.ARAFS#EGEQE.K                   | S2639:       | 2 | 2,9558 | 0,274 | -0,507 |
| 10 | Q9Y6N7 ROBO1_HUMAN  | E.TYTDDLPPPPVPPPAIKS#PTAQSK.T     | S1492:       | 3 | 2,9543 | 0,187 | 0,141  |
| 10 | Q7Z3K3 POGZ_HUMAN   | E.SLHQLFEGES#ETE.S                | S1392:       | 2 | 2,9529 | 0,404 | 0,692  |
| 10 | Q13509 TBB3_HUMAN   | E.VISDEHGI DPSGNYVGDSLQLE.R       |              | 2 | 2,9478 | 0,252 | 0,794  |
| 10 | Q6BDS2 URFB1_HUMAN  | E.LKS#DASSDQGPAS#PEKVL.E          | S918:S928:   | 3 | 2,9469 | 0,288 | 0,518  |
| 10 | P42694 HELZ_HUMAN   | E.LQDHSNQSSFNFS#PE.S              | S1800:       | 2 | 2,9465 | 0,356 | -0,256 |
| 10 | Q13077 TRAF1_HUMAN  | R.ALCCAGCLSENPR.N                 |              | 2 | 2,9458 | 0,414 | -0,728 |
| 10 | Q9BVJ6 UT14A_HUMAN  | E.AHGVS#ES#EGEERPVAE.E            | S405:S407:   | 3 | 2,9457 | 0,214 | 0,099  |
| 10 | Q70CQ2 UBP34_HUMAN  | E.TRDSSIIDPGTEQDLPS#PE.N          | S3255:       | 3 | 2,9456 | 0,205 | 0,599  |
| 10 | Q2TAZ0 ATG2A_HUMAN  | E.TRAQPSS#PLEGQAE.G               | S1630:       | 2 | 2,9453 | 0,355 | 0,157  |
| 10 | Q92558 WASF1_HUMAN  | E.NDVATILSR.R                     |              | 2 | 2,9381 | 0,317 | 0,185  |
| 10 | Q9BUR4 WDR79_HUMAN  | E.LM*PPPPERGDPPRLS#PDPVAGSAVSQE.L | S54:         | 3 | 2,9377 | 0,11  | 0,316  |
| 10 | Q9POV3 SH3B4_HUMAN  | K.SDAPTSSTFFGLK.S                 |              | 2 | 2,937  | 0,332 | 0,169  |
| 10 | Q02952 AKA12_HUMAN  | E.SDKAIT#PQAQEE.L                 | T1760:       | 2 | 2,9366 | 0,403 | -0,437 |
| 10 | P49023 PAXI_HUMAN   | K.TGSSS#PPGGPPKPGSQLD.S           | S322:        | 2 | 2,9354 | 0,395 | 0,07   |
| 10 | P13639 EF2_HUMAN    | E.SQVAGTPM*FVVK.A                 |              | 2 | 2,9324 | 0,152 | 0,286  |
| 10 | Q6KC79 NIPBL_HUMAN  | K.TPIT#PQDINRPLNAAQCLSQQE.Q       | T406:        | 3 | 2,9253 | 0,239 | 0,213  |
| 10 | A5YM69 A5YM69_HUMAN | E.HLDM*APFSSDLGS#EEEE.V           | S145:        | 2 | 2,9151 | 0,28  | 0      |
| 10 | Q14247 SRC8_HUMAN   | R.AKTQT#PPVS#PAPQPTEE.R           | T401:S405:   | 3 | 2,9136 | 0,159 | 0,189  |
| 10 | Q15003 CND2_HUMAN   | R.TM*CPLLSM*KPGE.Y                |              | 2 | 2,9113 | 0,322 | -0,35  |
| 10 | Q13740 CD166_HUMAN  | R.QIGDALPVSCTISASR.N              |              | 2 | 2,9093 | 0,447 | 0,219  |
| 10 | P51610 HCFC1_HUMAN  | E.AAASLVTSTVGQQNGSVVR.V           |              | 2 | 2,9092 | 0,302 | 0,463  |

|    |                     |                             |            |   |        |       |        |
|----|---------------------|-----------------------------|------------|---|--------|-------|--------|
| 10 | Q5VZL5 ZMYM4_HUMAN  | R.SDPLGSTQDHALSQE.S         |            | 2 | 2,9077 | 0,155 | 0,077  |
| 10 | P35908 K22E_HUMAN   | R.TAAENDFVTLKK.D            |            | 2 | 2,9047 | 0,212 | 0,091  |
| 10 | P46937 YAP1_HUMAN   | E.STDSGLSM*SSYSVPR.T        |            | 2 | 2,9032 | 0,394 | 0,077  |
| 10 | P50443 S26A2_HUMAN  | E.LQRES#S#TDFKQFE.T         | S35:S36:   | 3 | 2,8912 | 0,205 | 0      |
| 10 | Q9Y2H2 SAC2_HUMAN   | E.DRQLANS#LE.S              | S878:      | 2 | 2,8889 | 0,243 | -0,108 |
| 10 | Q06265 EXOS9_HUMAN  | E.KAPIDTS#DVEE.K            | S306:      | 2 | 2,8878 | 0,425 | -0,095 |
| 10 | Q5VY92 Q5VY92_HUMAN | R.M*QDIPEETESR.D            |            | 2 | 2,8876 | 0,293 | 0,09   |
| 10 | Q92841 DDX17_HUMAN  | R.SSQSSSQQFSGIGR.S          |            | 2 | 2,8809 | 0,429 | -0,251 |
| 10 | Q14498 RBM39_HUMAN  | E.RTDASSAS#SFLDSDELE.R      | S336:      | 2 | 2,8807 | 0,338 | 0,128  |
| 10 | Q9H5H4 ZN768_HUMAN  | E.M*RS#PEGYLR.G             | S23:       | 3 | 2,8785 | 0,202 | 0,607  |
| 10 | Q15223 PVRL1_HUMAN  | E.NM*VSQNDGS#FIS#KKE.W      | S508:S511: | 3 | 2,8767 | 0,271 | -0,197 |
| 10 | Q8IVT2 CS021_HUMAN  | E.SRIYAS#EEDD.-             | S675:      | 2 | 2,8762 | 0,309 | -0,193 |
| 10 | Q6PGQ7 BORA_HUMAN   | E.NSHM*CM*S#PLAE.S          | S478:      | 2 | 2,8759 | 0,337 | 0,176  |
| 10 | P04264 K2C1_HUMAN   | R.TNAENEFVTIK.K             |            | 2 | 2,8759 | 0,495 | 0      |
| 10 | Q9UKM9 RALY_HUMAN   | E.HSQDT#DADDGALQ.-          | T298:      | 2 | 2,8713 | 0,255 | -0,084 |
| 10 | P14618 KPYM_HUMAN   | E.AGTAFIQTQQLHAAM*ADTFLE.H  |            | 2 | 2,8597 | 0,423 | 0,749  |
| 10 | P14136 GFAP_HUMAN   | K.LALDIEIATYR.K             |            | 2 | 2,8594 | 0,419 | 0,095  |
| 10 | P05362 ICAM1_HUMAN  | R.EPAVGEPAEVTTTTLVLR.R      |            | 2 | 2,8589 | 0,237 | 0,552  |
| 10 | Q13029 PRDM2_HUMAN  | E.RETVS#PPCFDE.Y            | S796:      | 2 | 2,8581 | 0,22  | 0,086  |
| 10 | Q9HC35 EMAL4_HUMAN  | E.QAKATLLEDQDPS#PSS.-       | S978:      | 2 | 2,8577 | 0,297 | 0      |
| 10 | Q9H8W4 PKHF2_HUMAN  | D.LLSAGDM*ATCQPAR.S         |            | 2 | 2,8558 | 0,41  | 0,081  |
| 10 | Q9UQ35 SRRM2_HUMAN  | E.SYFGVSSLQLK.G             |            | 2 | 2,8543 | 0,471 | 0,099  |
| 10 | Q8IWZ3 ANKH1_HUMAN  | E.THPSSS#PTPTSNTQEE.A       | S2069:     | 2 | 2,8542 | 0,363 | 0,196  |
| 10 | P13647 K2C5_HUMAN   | R.ISISTSGGSFR.N             |            | 2 | 2,8541 | 0,398 | 0,11   |
| 10 | Q9UQ35 SRRM2_HUMAN  | R.FQSDSSSYPTVDSNSLLGQSRLE.T |            | 3 | 2,8512 | 0,232 | 0      |
| 10 | P61247 RS3A_HUMAN   | E.RADGYEPPVQES#V.-          | S263:      | 2 | 2,8511 | 0,374 | -0,32  |
| 10 | Q9H0G5 CCD55_HUMAN  | E.KVIET#PE.N                | T275:      | 2 | 2,8497 | 0,104 | 0,34   |
| 10 | Q15149 PLEC1_HUMAN  | R.RYASGS#SASLGGPE.S         | S4672:     | 2 | 2,8489 | 0,24  | -0,172 |
| 10 | Q96RV3 PCX1_HUMAN   | E.SSKPLSGS#KES#LVE.N        | S325:S328: | 2 | 2,8483 | 0,394 | -0,076 |
| 10 | Q68EM7 RHG17_HUMAN  | K.DPVSAAVPAPGR.N            |            | 2 | 2,8462 | 0,374 | 0,322  |
| 10 | Q09666 AHNK_HUMAN   | R.AGAISASGPE.L              |            | 2 | 2,8458 | 0,316 | 0,426  |
| 10 | Q7Z4H7 FA29A_HUMAN  | E.LIDSLGSNPFLTR.N           |            | 2 | 2,8444 | 0,467 | 0      |
| 10 | Q15742 NAB2_HUMAN   | E.KLSPLPGGPGAGDPR.I         |            | 3 | 2,8417 | 0,303 | 0,322  |
| 10 | Q5T4S7 UBR4_HUMAN   | E.VDHGDFEM*VS#E.S           | S2771:     | 2 | 2,8412 | 0,268 | -0,986 |
| 10 | P18583 SON_HUMAN    | E.GPLLASDVGR.D              |            | 2 | 2,8399 | 0,463 | -0,062 |
| 10 | Q9P1Q0 VPS54_HUMAN  | E.LTPIAVDTTSQR.N            |            | 2 | 2,8378 | 0,488 | 0,094  |
| 10 | Q9HCE0 K1632_HUMAN  | E.SHSGTPGYLTS#PE.L          | S1393:     | 2 | 2,837  | 0,095 | 0,173  |
| 10 | Q14493 SLBP_HUMAN   | R.HM*DSQVEDEFDLE.A          |            | 2 | 2,836  | 0,339 | -0,531 |
| 10 | O15427 MOT4_HUMAN   | E.VVHTPETS#V.-              | S464:      | 2 | 2,8335 | 0,34  | 0      |

|    |                     |                                      |                 |   |        |       |        |
|----|---------------------|--------------------------------------|-----------------|---|--------|-------|--------|
| 10 | Q12792 TWF1_HUMAN   | R.LIRGPAETEATT#D.-                   | T367:           | 2 | 2,8331 | 0,363 | -0,168 |
| 10 | O43379 WDR62_HUMAN  | E.AGPGDQQGDSYL.R.V                   |                 | 2 | 2,8325 | 0,264 | 0      |
| 10 | Q02952 AKA12_HUMAN  | E.EVVLPS#EEEEGGGAGTK.S               | S1663:          | 2 | 2,8325 | 0,248 | 0,074  |
| 10 | Q9Y2J4 AMOL2_HUMAN  | D.TT#LIRHSPQSPS#SSFNE.G              | T597:S608:      | 3 | 2,8323 | 0,305 | 0      |
| 10 | Q8IY81 RRMJ3_HUMAN  | E.IM*SPLYQDEAPK.G                    |                 | 2 | 2,8313 | 0,257 | -0,347 |
| 10 | Q5T200 ZC3HD_HUMAN  | E.SRS#LS#PSHLTE.D                    | S875:S877:      | 2 | 2,8287 | 0,428 | 0      |
| 10 | P05556 ITB1_HUMAN   | E.VNSEDM*DAYCR.K                     |                 | 2 | 2,8274 | 0,482 | 0,089  |
| 10 | O95777 LSM8_HUMAN   | E.RVFSSS#QGVE.Q                      | S49:            | 2 | 2,8268 | 0,323 | -0,208 |
| 10 | P60709 ACTB_HUMAN   | R.GYSFTTTAERE.I                      |                 | 2 | 2,8262 | 0,508 | 0,29   |
| 10 | Q92797 SYMPK_HUMAN  | E.AALLDSSLEGPLK.E                    |                 | 2 | 2,8211 | 0,372 | 0,432  |
| 10 | P13645 K1C10_HUMAN  | K.IRLENIQTYR.S                       |                 | 3 | 2,8207 | 0,139 | 0,51   |
| 10 | P42167 LAP2B_HUMAN  | E.HNQSYS#QAGITE.T                    | S224:           | 2 | 2,8206 | 0,373 | 0,086  |
| 10 | Q9UKJ3 GPTC8_HUMAN  | E.SGLERGEEQEQS#E.T                   | S762:           | 2 | 2,8201 | 0,308 | 0,313  |
| 10 | P10636 TAU_HUMAN    | K.SPVVS#GDTS#PR.H                    | S717:S721:      | 2 | 2,8199 | 0,362 | 1,16   |
| 10 | Q9Y2X9 ZN281_HUMAN  | E.KQIYTT#PLE.C                       | S714:           | 2 | 2,8181 | 0,265 | 0,097  |
| 10 | Q9Y2K1 ZBTB1_HUMAN  | E.NM*RPPNNS#PVQE.D                   | S412:           | 2 | 2,8154 | 0,309 | 0,39   |
| 10 | P13645 K1C10_HUMAN  | R.VLDELTLTK.A                        |                 | 2 | 2,8148 | 0,352 | 0,118  |
| 10 | Q01814 AT2B2_HUMAN  | K.SATSS#SPGS#PIHSLE.T                | S1230:S1234:    | 2 | 2,8147 | 1     | 0,151  |
| 10 | P04920 B3A2_HUMAN   | E.RTS#PS#SPAPLPHQE.A                 | S170:S172:      | 3 | 2,8122 | 0,277 | 0      |
| 10 | P50990 TCPQ_HUMAN   | E.DGAISTIVLR.G                       |                 | 2 | 2,8121 | 0,194 | 0,117  |
| 10 | P27987 IP3KB_HUMAN  | E.SQRQSDALPS#PE.L                    | S544:           | 2 | 2,8115 | 0,251 | -0,081 |
| 10 | Q02952 AKA12_HUMAN  | K.VLSKPPEGVVSEVE.M                   |                 | 2 | 2,8068 | 0,414 | -1,329 |
| 10 | Q9UJX2 CDC23_HUMAN  | R.RVS#PLNLSSVT#P.-                   | S582:T590:      | 2 | 2,8035 | 0,331 | 0,171  |
| 10 | Q71U36 TBA1A_HUMAN  | K.VGINYQPPTVVPGGDLAK.V               |                 | 2 | 2,8025 | 0,289 | 0,401  |
| 10 | Q9Y4B5 K0802_HUMAN  | R.GRS#PS#PIGVGSE.M                   | S1803:S1805:    | 2 | 2,8023 | 0,311 | -0,375 |
| 10 | Q96JM3 ZN828_HUMAN  | K.LAPVPS#PEPQKPAPVS#PE.S             | S204:S214:      | 3 | 2,7994 | 0,357 | 0,549  |
| 10 | O75179 ANR17_HUMAN  | R.NSPLDCGSASP.NK.V                   |                 | 2 | 2,798  | 0,321 | -0,181 |
| 10 | P35030 TRY3_HUMAN   | D.TLDNDIMLIK.L                       |                 | 2 | 2,7973 | 0,291 | -0,104 |
| 10 | Q7Z4V5 HDGR2_HUMAN  | E.SEKTSDDQDFT#PE.K                   | T205:           | 2 | 2,7951 | 0,252 | -0,083 |
| 10 | P48960 CD97_HUMAN   | R.CNPGFSSFSE.I                       |                 | 2 | 2,7921 | 0,274 | 0,216  |
| 10 | Q13404 UB2V1_HUMAN  | E.NM*KLPQPPEGQCY#SN.-                | Y219:           | 2 | 2,7904 | 0,3   | -0,131 |
| 10 | Q5VZK9 LR16A_HUMAN  | E.NRFGLGT#PE.K                       | T1228:          | 2 | 2,7893 | 0,315 | 0,342  |
| 10 | Q8IVF2 AHNK2_HUMAN  | E.SSILS#PCEDVTLTK.Y                  | S4785:          | 2 | 2,7878 | 0,383 | 0      |
| 10 | Q9BVS4 RIOK2_HUMAN  | E.KAEVYGS#ENE.S                      | S350:           | 2 | 2,7852 | 0,242 | -0,202 |
| 10 | Q99733 NP1L4_HUMAN  | K.LTDQVM*QNPR.V                      |                 | 2 | 2,782  | 0,337 | -1,002 |
| 10 | Q9Y262 IF3EI_HUMAN  | E.AAYDPYAY#PSDYDM*HTGDPK.Q           | Y19:            | 3 | 2,7778 | 0,245 | 0,308  |
| 10 | P46821 MAP1B_HUMAN  | R.ES#SPLYSPT#FSDSTS.VK.E             | S1792:T1799:    | 2 | 2,7752 | 0,204 | 0,223  |
| 10 | P10809 CH60_HUMAN   | K.LSDGVAVLK.V                        |                 | 2 | 2,7717 | 0,25  | 0,068  |
| 10 | A7MD40 A7MD40_HUMAN | K.MSSAISPTPEISSETPGY#IY#S#SNFHAVKR.E | Y399:Y401:S402: | 3 | 2,7692 | 0,093 | -0,97  |

|    |                     |                               |              |   |        |       |        |
|----|---------------------|-------------------------------|--------------|---|--------|-------|--------|
| 10 | P26006 ITA3_HUMAN   | R.TGAVYLCPLTAHK.D             |              | 3 | 2,768  | 0,323 | 0,128  |
| 10 | Q86UP2 KTN1_HUMAN   | R.DAVSNTTNQLE.S               |              | 2 | 2,7624 | 0,179 | -0,614 |
| 10 | P35908 K22E_HUMAN   | R.YLDGLTAER.T                 |              | 2 | 2,7612 | 0,282 | -0,353 |
| 10 | Q7Z6Z7 HUWE1_HUMAN  | R.DGGS#GNST#IIVSR.S           | S2362:T2366: | 2 | 2,7606 | 0,248 | -0,257 |
| 10 | Q9NPI1 BRD7_HUMAN   | E.LAQQVTPGDIVSTYGVRK.A        |              | 3 | 2,7605 | 0,257 | 0,473  |
| 10 | Q16563 SYPL1_HUMAN  | K.TVTATFGYPFR.L               |              | 2 | 2,7588 | 0,498 | 0      |
| 10 | P04264 K2C1_HUMAN   | R.TNAENEFVTIKK.D              |              | 3 | 2,7527 | 0,314 | 0,262  |
| 10 | O75691 UTP20_HUMAN  | K.S#LSDNGQPQT#PDPADSGGTSAKE.S | S1732:T1741: | 3 | 2,7524 | 0,115 | 0,312  |
| 10 | Q9H9R9 DBND1_HUMAN  | R.RQPLS#SVSS#LEVHFD.L         | S63:S67:     | 2 | 2,7484 | 0,275 | 0,197  |
| 10 | Q9Y2D8 ADIP_HUMAN   | E.HSSINVLNIT#AEE.I            | T565:        | 2 | 2,7465 | 0,411 | -0,081 |
| 10 | Q9H5H4 ZN768_HUMAN  | E.LKTS#PEFE.A                 | S160:        | 2 | 2,7464 | 0,123 | -1,053 |
| 10 | Q8NEM2 SHCBP_HUMAN  | R.DKPGSSLQSF#PE.G             |              | 2 | 2,7457 | 0,346 | 0,17   |
| 10 | Q5W0B1 RN219_HUMAN  | K.SSQGSEFLEEDKLEE.K           |              | 2 | 2,7437 | 0,388 | 0,268  |
| 10 | P49368 TCPG_HUMAN   | R.NLQDAM*QVCR.N               |              | 2 | 2,7411 | 0,486 | -0,195 |
| 10 | Q00613 HSF1_HUMAN   | E.SEPAPASVTALTDAR.G           |              | 2 | 2,7407 | 0,473 | 0,246  |
| 10 | P68104 EF1A1_HUMAN  | K.IGGIGTVPVGR.V               |              | 2 | 2,7383 | 0,414 | -0,119 |
| 10 | Q13263 TIF1B_HUMAN  | E.KLSPPYSS#PQE.F              | S757:        | 2 | 2,7372 | 0,326 | 0,186  |
| 10 | P05556 ITB1_HUMAN   | E.CECQSEGIPESPK.C             |              | 2 | 2,7371 | 0,319 | 0,08   |
| 10 | Q12767 K0195_HUMAN  | E.TKLG#NS#PF.-                | S1354:       | 2 | 2,7352 | 0,328 | 0,224  |
| 10 | P49321 NASP_HUMAN   | E.NDKTEEM*PNDS#VLE.N          | S497:        | 2 | 2,7347 | 0,183 | -0,071 |
| 10 | Q96RS0 TGS1_HUMAN   | K.KGDDLLETNNPEPE.K            |              | 2 | 2,7345 | 0,33  | 0,311  |
| 10 | Q96JM3 ZN828_HUMAN  | E.LQTPLPSPEPSKAS#VSSPEPPK.S   | S181:        | 3 | 2,7311 | 0,232 | 0,299  |
| 10 | Q9BS91 S35A5_HUMAN  | R.LTKPKS#DES#DEDTF.-          | S416:S419:   | 2 | 2,729  | 0,279 | 0,069  |
| 10 | Q8WUA4 TF3C2_HUMAN  | E.M*SLPTPLPGFEDS#PDQRR.L      | S63:         | 2 | 2,728  | 0,147 | 0,456  |
| 10 | Q96JM3 ZN828_HUMAN  | E.LQTPLPS#PEPSKASVSSPEPPK.S   | S173:        | 2 | 2,7277 | 0,239 | 0,598  |
| 10 | Q5JPI9 METLA_HUMAN  | R.S#DKGSPGEDGFVPSALGTR.E      | S17:         | 2 | 2,7267 | 0,264 | 0,748  |
| 10 | O75531 BAF_HUMAN    | D.FVAEPM*GEKPVGSLAGIGE.V      |              | 2 | 2,7248 | 0,307 | 0,192  |
| 10 | P40227 TCPZ_HUMAN   | K.VLAQNSGFDLQE.T              |              | 2 | 2,7245 | 0,274 | 0      |
| 10 | Q01167 FOXK2_HUMAN  | R.EGS#PAPLEPEPGAAQPK.L        | S398:        | 2 | 2,723  | 0,358 | 0,07   |
| 10 | Q9H307 PININ_HUMAN  | E.TNRVESVEPS#ENE.A            | S417:        | 2 | 2,722  | 0,345 | -0,078 |
| 10 | Q13045 FLII_HUMAN   | E.DILNTM*FDTSYSK.Q            |              | 2 | 2,7216 | 0,392 | -0,079 |
| 10 | Q00613 HSF1_HUMAN   | R.VKEEPS#PPQS#PRVEE.A         | S303:S307:   | 3 | 2,7206 | 0,243 | -0,186 |
| 10 | Q02952 AKA12_HUMAN  | E.ARGDTVVS#EAELTPE.A          | S967:        | 2 | 2,7185 | 0,131 | 0,443  |
| 10 | Q96JQ2 CLMN_HUMAN   | E.SHSLS#PPGE.N                | S526:        | 2 | 2,7161 | 0,285 | 0,123  |
| 10 | Q5M775 SPEC1_HUMAN  | E.TPSRPLSSTSNPFK.S            |              | 3 | 2,7147 | 0,279 | 0,421  |
| 10 | A7MD40 A7MD40_HUMAN | E.KM*SSAIS#PTPE.I             | S387:        | 2 | 2,7141 | 0,385 | -0,098 |
| 10 | Q9UJU6 DBNL_HUMAN   | K.LRS#PFLQK.Q                 | S283:        | 2 | 2,7114 | 0,155 | 0      |
| 10 | Q8WU79 SMAP2_HUMAN  | R.KVVGSM*PTAGSAGSVPE.N        |              | 2 | 2,7095 | 0,287 | 0      |
| 10 | O95155 UBE4B_HUMAN  | E.KSM*SQVDVDS#GIE.N           | S124:        | 2 | 2,7086 | 0,253 | -0,246 |

|    |                     |                                  |                 |   |        |       |        |
|----|---------------------|----------------------------------|-----------------|---|--------|-------|--------|
| 10 | P13647 K2C5_HUMAN   | K.WTLLQEQGTK.T                   |                 | 2 | 2,7085 | 0,289 | -0,203 |
| 10 | Q9Y2K1 ZBTB1_HUMAN  | E.NM*RPPNNS#SPVQEDAE.N           | S411:           | 2 | 2,7058 | 0,407 | -0,908 |
| 10 | Q9UKV3 ACINU_HUMAN  | K.AES#PAEKVPE.E                  | S490:           | 2 | 2,7054 | 0,334 | -0,215 |
| 10 | P16989 DBPA_HUMAN   | E.AKAGEAPTENPAPTQQSS#AE.-        | S370:           | 3 | 2,7044 | 0,26  | -0,085 |
| 10 | Q9BZF3 OSBL6_HUMAN  | R.QLLEPEPVLSKE.A                 |                 | 2 | 2,7009 | 0,31  | 0,412  |
| 10 | Q6GYQ0 GRIPE_HUMAN  | R.SQTPSPSTLNIDHM*E.Q             |                 | 2 | 2,6918 | 0,5   | 0,438  |
| 10 | Q00613 HSF1_HUMAN   | E.LAPASPM*ASPGGSIDERPLSSS#PLVR.V | S292:           | 3 | 2,69   | 0,214 | 0,408  |
| 10 | Q8NG27 PJA1_HUMAN   | E.VREPS#LQEE.Q                   | S448:           | 2 | 2,6883 | 0,318 | -0,314 |
| 10 | Q9NQW6 ANLN_HUMAN   | E.SSLFSPM*PSEEK.A                |                 | 2 | 2,6881 | 0,307 | -0,18  |
| 10 | Q01538 MYT1_HUMAN   | E.LRGPES#PS#PKPE.Y               | S333:S335:      | 2 | 2,6849 | 0,235 | 0,336  |
| 10 | Q92797 SYMPK_HUMAN  | K.ETAAGGLTLKEE.R                 |                 | 2 | 2,6831 | 0,331 | 0,1    |
| 10 | O94842 TOX4_HUMAN   | E.AHTVEAPS#PETICE.M              | S533:           | 2 | 2,683  | 0,363 | 0,828  |
| 10 | P51610 HCFC1_HUMAN  | R.VCS#NPPCETHE.T                 | S1014:          | 2 | 2,6827 | 0,088 | 0,173  |
| 10 | Q99460 PSMD1_HUMAN  | E.ALQLM*ATYLPK.D                 |                 | 2 | 2,6806 | 0,352 | 0,096  |
| 10 | Q7Z456 KI21A_HUMAN  | E.AS#LSPPSS#PPSRPR.N             | S1269:S1275:    | 2 | 2,6795 | 0,207 | 0,076  |
| 10 | P35527 K1C9_HUMAN   | R.GGSGGSYGGGGSGGGYGGGSGSR.G      |                 | 2 | 2,6787 | 0,388 | -0,068 |
| 10 | P04264 K2C1_HUMAN   | K.NMQDM*VEDYR.N                  |                 | 2 | 2,6786 | 0,341 | -0,278 |
| 10 | Q12888 TP53B_HUMAN  | R.ADDPLRLDQE.L                   |                 | 2 | 2,6766 | 0,282 | 0,104  |
| 10 | Q52LD0 Q52LD0_HUMAN | K.AGGS#PASY#HGSTS#PR.V           | S192:Y196:S201: | 2 | 2,6734 | 0,133 | 0,146  |
| 10 | P05556 ITB1_HUMAN   | K.NVLSLTNKGE.V                   |                 | 2 | 2,6731 | 0,191 | 0      |
| 10 | Q13263 TIF1B_HUMAN  | E.GTSAPGGGGPTLDDS#ATICR.V        | S624:           | 3 | 2,6724 | 0,229 | 0,279  |
| 10 | Q15149 PLEC1_HUMAN  | E.VQYLTGGLIEPDTGRVPLDE.A         |                 | 3 | 2,6714 | 0,2   | 0,645  |
| 10 | Q13263 TIF1B_HUMAN  | R.VCQKPGDLVM*CNQCE.F             |                 | 3 | 2,6711 | 0,323 | 0,099  |
| 10 | P46937 YAP1_HUMAN   | R.LQQLQM*EKE.R                   |                 | 2 | 2,6704 | 0,175 | 0,105  |
| 10 | Q2M2Z5 CT019_HUMAN  | K.RAS#PPVS#PIPVSE.Y              | S317:S321:      | 2 | 2,6682 | 0,368 | 0,163  |
| 10 | Q96EV8 DTBP1_HUMAN  | R.REPIGS#M*SSM*E.V               | S227:           | 2 | 2,6681 | 0,333 | -0,183 |
| 10 | Q8IW35 CEP97_HUMAN  | E.SHGIS#PPLQGE.I                 | S825:           | 2 | 2,667  | 0,256 | -0,508 |
| 10 | Q15149 PLEC1_HUMAN  | R.TLARPGPEPATDE.R                |                 | 2 | 2,6661 | 0,367 | 0      |
| 10 | P35908 K22E_HUMAN   | K.IEISELNR.V                     |                 | 2 | 2,6634 | 0,194 | 0      |
| 10 | Q63ZY3 KANK2_HUMAN  | E.RSCDGAAGLPEVPAESSSS#PPGSE.V    | S428:           | 3 | 2,6609 | 0,103 | 0,151  |
| 10 | P08648 ITA5_HUMAN   | E.GQQLLYVTR.V                    |                 | 2 | 2,6594 | 0,357 | -0,113 |
| 10 | B2RA01 B2RA01_HUMAN | K.AQYEDIAQK.S                    |                 | 2 | 2,6562 | 0,173 | 0,229  |
| 10 | P11717 MPRI_HUMAN   | K.TAGNDGKGTVPVFTGE.V             |                 | 2 | 2,6551 | 0,278 | 0,42   |
| 10 | Q04637 IF4G1_HUMAN  | R.IRDPNQGGKDITEE.I               |                 | 3 | 2,6534 | 0,206 | 0,116  |
| 10 | Q9H4A3 WNK1_HUMAN   | E.KQSSTPGSLFLS#PPAPAPK.N         | S19:            | 3 | 2,653  | 0,221 | 0,46   |
| 10 | Q8WWQ0 PHIP_HUMAN   | R.LSRGS#ISS#TSE.V                | S674:S677:      | 2 | 2,6522 | 0,23  | 0,19   |
| 10 | Q6P2E9 EDC4_HUMAN   | E.VEPLGLPQASPSR.T                |                 | 2 | 2,6508 | 0,351 | 0,271  |
| 10 | Q9BQG0 MBB1A_HUMAN  | E.SRDPAQPM*S#PGE.A               | S11:            | 2 | 2,65   | 0,248 | 0,178  |
| 10 | O95359 TACC2_HUMAN  | E.TKFSS#PTEE.L                   | S2512:          | 2 | 2,6483 | 0,24  | -0,11  |

|    |                     |                                     |            |   |        |       |        |
|----|---------------------|-------------------------------------|------------|---|--------|-------|--------|
| 10 | P46821 MAP1B_HUMAN  | R.ESS#PLYSPTFSDSTSAVKE.K            | S1793:     | 2 | 2,6481 | 0,198 | 0,231  |
| 10 | Q96Q15 SMG1_HUMAN   | E.LRVNNVTS#PE.F                     | S111:      | 2 | 2,648  | 0,24  | -0,303 |
| 10 | Q7Z6Z7 HUWE1_HUMAN  | E.NKGNDT#PLALE.S                    | T1722:     | 2 | 2,6434 | 0,369 | 0,195  |
| 10 | P55072 TERA_HUMAN   | K.GDDLSTAILK.Q                      |            | 2 | 2,6427 | 0,268 | 0,354  |
| 10 | P08758 ANXA5_HUMAN  | R.GTVTDFPGFDERADAE.T                |            | 2 | 2,6407 | 0,444 | -0,424 |
| 10 | Q9BRK5 CAB45_HUMAN  | E.ELKVDEET#QE.V                     | T193:      | 2 | 2,6402 | 0,285 | 0      |
| 10 | O96028 NSD2_HUMAN   | K.GIGT#PPNTTPIKNGS#PE.I             | T110:S121: | 2 | 2,64   | 0,301 | 0,796  |
| 10 | P27707 DCK_HUMAN    | E.FEELTM*S#QK.N                     | S74:       | 2 | 2,6397 | 0,216 | -0,101 |
| 10 | P04792 HSPB1_HUMAN  | E.SPVAAPAYSRA.A                     |            | 2 | 2,639  | 0,394 | -0,112 |
| 10 | Q8N1Q3 Q8N1Q3_HUMAN | E.NSSLNMM*PLR.G                     |            | 2 | 2,638  | 0,34  | 0      |
| 10 | P00558 PGK1_HUMAN   | E.M*IIGGGM*AFTFLK.V                 |            | 2 | 2,6348 | 0,358 | 0      |
| 10 | Q9UPN4 AZI1_HUMAN   | R.TQDVLAQDAAGDNLE.M                 |            | 2 | 2,6345 | 0,3   | 0      |
| 10 | A8K7V5 A8K7V5_HUMAN | E.VSTAPAGTDM*PAAK.K                 |            | 2 | 2,6341 | 0,326 | 0,183  |
| 10 | Q32MZ4 LRRF1_HUMAN  | E.HESPSQDIS#DACEAE.S                | S739:      | 2 | 2,6315 | 0,393 | 0,139  |
| 10 | Q9UPQ6 Q9UPQ6_HUMAN | E.SETRSESS#DFE.V                    | S319:      | 2 | 2,6315 | 0,467 | -0,09  |
| 10 | Q15742 NAB2_HUMAN   | E.LGEKLS#PLPGGPGAGDPR.I             | S171:      | 3 | 2,631  | 0,166 | 0,102  |
| 10 | P05387 RLA2_HUMAN   | K.NIEDVIAQGIGK.L                    |            | 2 | 2,6307 | 0,311 | 0,291  |
| 10 | Q9NWH9 SLTM_HUMAN   | R.DRFVQGS#E.G                       | S800:      | 2 | 2,6283 | 0,279 | -0,24  |
| 10 | Q92615 LARP5_HUMAN  | E.KFTSS#QTQSPTPPKPPS#PSFE.L         | S512:S524: | 2 | 2,6274 | 1     | -1,002 |
| 10 | Q6ZRV2 FA83H_HUMAN  | R.LSLGQGDSTEATEE.R                  |            | 2 | 2,6258 | 0,247 | 0,081  |
| 10 | Q6NYC8 PHTNS_HUMAN  | E.VESRLS#PGE.S                      | S224:      | 2 | 2,6245 | 0,177 | 0      |
| 10 | P35908 K22E_HUMAN   | R.DYQELMNVK.L                       |            | 2 | 2,6224 | 0,245 | 0      |
| 10 | Q13435 SF3B2_HUMAN  | R.SRGSDS#PAADVE.I                   | S339:      | 2 | 2,6206 | 0,338 | 0,096  |
| 10 | P51956 NEK3_HUMAN   | E.TEASDSVDGGHDSVILDPER.L            |            | 3 | 2,6192 | 0,208 | 0,61   |
| 10 | Q6IMN6 CAPR2_HUMAN  | E.SVLDFDKPSSAIPTSQPPSATPGS#PVASKE.Q | S660:      | 3 | 2,6174 | 0,215 | 0,119  |
| 10 | Q9NXG2 THUM1_HUMAN  | E.YGDDM*YGPEK.F                     |            | 2 | 2,6136 | 0,494 | -0,512 |
| 10 | Q15942 ZYG_HUMAN    | R.S#PGAPGPLTLK.E                    | S344:      | 2 | 2,6135 | 0,252 | 0,218  |
| 10 | Q8NDX5 PHC3_HUMAN   | R.GEDLTSEHPLLE.Q                    |            | 2 | 2,6127 | 0,39  | 0      |
| 10 | Q70CQ2 UBP34_HUMAN  | E.VLTPSTSDNETR.D                    |            | 2 | 2,6121 | 0,449 | -0,086 |
| 10 | P28066 PSA5_HUMAN   | E.YDRGVNTFS#PE.G                    | S16:       | 2 | 2,6088 | 0,307 | 0,089  |
| 10 | P27816 MAP4_HUMAN   | E.VALTEDQVPALKTEAPLAK.D             |            | 3 | 2,6072 | 0,123 | 0,275  |
| 10 | Q5THJ4 VP13D_HUMAN  | R.Y#IDTCM*VIFAPR.Y                  | Y3390:     | 2 | 2,6061 | 0,117 | 1,465  |
| 10 | Q3T8J9 GON4L_HUMAN  | K.LEPQELS#PLSATVFPK.V               | S1255:     | 2 | 2,6033 | 0,367 | -0,133 |
| 10 | Q9ULT8 HECD1_HUMAN  | E.GHDSL SVGS#FEE.D                  | S2320:     | 2 | 2,6032 | 0,334 | 0,363  |
| 10 | Q15435 PP1R7_HUMAN  | K.HSSGIVADLSEQSLK.D                 |            | 3 | 2,602  | 0,266 | 0,233  |
| 10 | Q9UK59 DBR1_HUMAN   | E.FSASFSDVR.I                       |            | 2 | 2,6009 | 0,302 | 0      |
| 10 | Q02952 AKA12_HUMAN  | E.SGEHTQVPADS#PDSQEE.Q              | S554:      | 2 | 2,5998 | 0,42  | 0      |
| 10 | Q4G0J3 LARP7_HUMAN  | R.SRPTSEGS#DIE.S                    | S261:      | 2 | 2,5984 | 0,262 | -0,485 |
| 10 | Q8N5A5 ZGPAT_HUMAN  | E.AVEAPAAARGSGSET#VPK.A             | T103:      | 3 | 2,5976 | 0,202 | 0      |



|    |                     |                                   |                 |   |        |       |        |
|----|---------------------|-----------------------------------|-----------------|---|--------|-------|--------|
| 10 | Q15223 PVRL1_HUMAN  | E.NM*VSQNDGS#FIS#KKE.W            | S508:S511:      | 2 | 2,5959 | 0,425 | -0,131 |
| 10 | O94804 STK10_HUMAN  | K.ASQS#RPNS#SALE.T                | S450:S454:      | 2 | 2,5956 | 0,194 | 0,26   |
| 10 | P13645 K1C10_HUMAN  | R.LKYENEVALR.Q                    |                 | 2 | 2,595  | 0,209 | 0      |
| 10 | P31946 1433B_HUMAN  | D.STLIM*QLLR.D                    |                 | 2 | 2,5944 | 0,184 | 0      |
| 10 | Q5QJE6 TDIF2_HUMAN  | E.SHTEAIS#DAE.T                   | S184:           | 2 | 2,5941 | 0,215 | -0,107 |
| 10 | Q5T4S7 UBR4_HUMAN   | K.LCTFTITQKE.F                    |                 | 2 | 2,593  | 0,259 | 0,197  |
| 10 | Q86UU1 PHLB1_HUMAN  | K.KPAATSPLSPM*ANGGR.Y             |                 | 3 | 2,5909 | 0,1   | 0      |
| 10 | P13645 K1C10_HUMAN  | K.DAEAWFNEK.S                     |                 | 2 | 2,589  | 0,301 | 0,22   |
| 10 | P10809 CH60_HUMAN   | R.KPLVIAEDVDGE.A                  |                 | 2 | 2,585  | 0,37  | 0,087  |
| 10 | Q14247 SRC8_HUMAN   | R.AKT#QTPPV#PAPQPTTEE.R           | T399:S405:      | 2 | 2,5799 | 0,13  | -0,189 |
| 10 | P12268 IMDH2_HUMAN  | E.DLVVAPAGITLKE.A                 |                 | 2 | 2,5771 | 0,214 | -0,184 |
| 10 | Q9Y262 IF3EI_HUMAN  | E.AAYDPYAYPSDY#DM*HTGDPK.Q        | Y23:            | 2 | 2,5754 | 0,16  | 0,411  |
| 10 | Q16204 CCDC6_HUMAN  | K.SGGIVISPFLEE.L                  |                 | 2 | 2,574  | 0,314 | 0      |
| 10 | Q14676 MDC1_HUMAN   | R.LLLAEDS#EEE.V                   | S168:           | 2 | 2,5721 | 0,224 | 0,298  |
| 10 | O43741 AAKB2_HUMAN  | R.DLSSS#PPGPYGQE.M                | S184:           | 2 | 2,5711 | 0,22  | 0,259  |
| 10 | P62753 RS6_HUMAN    | R.RLS#S#LRAS#TSKSE.S              | S235:S236:S240: | 2 | 2,5705 | 0,209 | -0,22  |
| 10 | P05556 ITB1_HUMAN   | E.CQSEGIPESPK.C                   |                 | 2 | 2,5702 | 0,375 | -0,099 |
| 10 | Q9H0J9 PAR12_HUMAN  | R.KDSSGSVS#PNTLSQEE.G             | S263:           | 2 | 2,5696 | 0,32  | -0,909 |
| 10 | Q8WXI9 P66B_HUMAN   | E.RGRLT#PS#PDIIVLSDNE.A           | T120:S122:      | 3 | 2,5676 | 0,251 | 0,358  |
| 10 | P54132 BLM_HUMAN    | E.LNPETST#DCDAR.Q                 | T359:           | 2 | 2,5654 | 0,291 | 0      |
| 10 | Q9Y6M5 ZNT1_HUMAN   | E.KTPAVSIS#CLE.L                  | S468:           | 2 | 2,5646 | 0,291 | 0,095  |
| 10 | O94804 STK10_HUMAN  | E.QGGDLS#PAANR.S                  | S438:           | 2 | 2,5569 | 0,34  | -0,105 |
| 10 | P17275 JUNB_HUMAN   | R.GASTFKEEPQTVPEAR.S              |                 | 3 | 2,5553 | 0,243 | 0,105  |
| 10 | P13645 K1C10_HUMAN  | K.YENEVALR.Q                      |                 | 2 | 2,5545 | 0,316 | -0,061 |
| 10 | Q9UJK0 CP042_HUMAN  | E.FGNPNRPVASTR.L                  |                 | 2 | 2,5538 | 0,198 | -0,185 |
| 10 | Q02952 AKA12_HUMAN  | E.VVLPS#EEEGGAGTK.S               | S1663:          | 2 | 2,5507 | 0,358 | -0,323 |
| 10 | O75531 BAF_HUMAN    | R.DFVAEPM*GEKPVGSLAGIGE.V         |                 | 3 | 2,5493 | 0,199 | 0,906  |
| 10 | P05556 ITB1_HUMAN   | E.VNSEDMDAYCR.K                   |                 | 2 | 2,5466 | 0,394 | -0,449 |
| 10 | O95361 TRI16_HUMAN  | E.LDLM*APGPLPR.A                  |                 | 2 | 2,5447 | 0,325 | 0      |
| 10 | Q9Y3X0 CCDC9_HUMAN  | E.GAASPAPETPQPT#SPETSPK.E         | T385:           | 2 | 2,5413 | 0,419 | 0,24   |
| 10 | A8MVB1 A8MVB1_HUMAN | R.GAGFPSIPVGKS#PM*VE.Q            | S110:           | 2 | 2,5412 | 0,224 | 0,073  |
| 10 | O00418 EF2K_HUMAN   | R.Y#SSSGS#PANSFHFKE.A             | Y69:S74:        | 2 | 2,5411 | 0,221 | 0,068  |
| 10 | Q9UBC2 EP15R_HUMAN  | K.FHDT#SSPLM*VTPPSAE.A            | T106:           | 2 | 2,5407 | 0,257 | -0,539 |
| 10 | Q99638 RAD9A_HUMAN  | R.VLPSISLS#PGPQPPKS#PGPHS#EEEDE.A | S328:S336:S341: | 3 | 2,5394 | 0,229 | 0,248  |
| 10 | Q9BZ95 NSD3_HUMAN   | E.HDPM*APVS#PE.Y                  | S1415:          | 2 | 2,5356 | 0,144 | 0,208  |
| 10 | Q02952 AKA12_HUMAN  | K.VLSKPPEGVVSE.V                  |                 | 2 | 2,5308 | 0,312 | -0,295 |
| 10 | Q9UKS6 PACN3_HUMAN  | E.VTLTTSIVPTR.D                   |                 | 2 | 2,5306 | 0,331 | -0,112 |
| 10 | P20700 LMNB1_HUMAN  | E.NRCQS#LTEDLE.F                  | S200:           | 2 | 2,5301 | 0,158 | 0,084  |
| 10 | O75122 CLAP2_HUMAN  | E.SYGM*HSDDDANSDASSACS#E.R        | S634:           | 2 | 2,5234 | 0,377 | 0,776  |

|    |                     |                             |              |   |        |       |        |
|----|---------------------|-----------------------------|--------------|---|--------|-------|--------|
| 10 | Q7Z5K2 WAPL_HUMAN   | E.STGDPFGFDS#DDESLPVSSK.N   | S77:         | 3 | 2,5157 | 0,25  | 0,169  |
| 10 | Q9BY89 K1671_HUMAN  | R.VHSEAIS#PAPE.E            | S749:        | 2 | 2,5121 | 0,289 | 0      |
| 10 | Q96GX5 MASTL_HUMAN  | E.KNQDPANILSACLS#E.T        | S240:        | 2 | 2,5119 | 0,391 | -0,14  |
| 10 | P55072 TERA_HUMAN   | E.DNSVVLSQPK.M              |              | 2 | 2,506  | 0,448 | 0      |
| 10 | Q02790 FKBP4_HUMAN  | E.QKSNTAGSQS#QVETEA.-       | S453:        | 2 | 2,5022 | 0,265 | 0      |
| 10 | Q14157 UBP2L_HUMAN  | E.AKGGSTTGS#QFLE.Q          | S360:        | 2 | 2,5012 | 0,29  | 0      |
| 10 | Q14247 SRC8_HUMAN   | E.RLPSS#PVYE.D              | S418:        | 2 | 2,5008 | 0,331 | 0,325  |
| 10 | Q6NZI2 PTRF_HUMAN   | E.SDAVLVDKSDS#D.-           | S389:        | 2 | 2,5003 | 0,231 | 0,092  |
| 10 | Q8NEY8 PPHLN_HUMAN  | E.KSDESNLPEIS#EYE.A         | S253:        | 2 | 2,4997 | 0,308 | 0      |
| 10 | Q9NVR5 CN104_HUMAN  | E.KDNLNES#VITE.E            | S264:        | 2 | 2,4955 | 0,171 | 0,364  |
| 10 | Q99426 TBCB_HUMAN   | E.KYTIS#QE.A                | S110:        | 2 | 2,4948 | 0,175 | 0,193  |
| 10 | P13693 TCTP_HUMAN   | E.DGVTPYM*IFFKDGLE.M        |              | 2 | 2,4905 | 0,276 | -0,209 |
| 10 | O00443 P3C2A_HUMAN  | E.KLLLDDS#FE.T              | S108:        | 2 | 2,4902 | 0,164 | -0,105 |
| 10 | Q12802 AKP13_HUMAN  | E.ACHM*SLSS#PE.L            | S1282:       | 2 | 2,4833 | 0,091 | 0,1    |
| 10 | Q7L3B6 CD37L_HUMAN  | E.SDFDVFSS#PR.C             | S32:         | 2 | 2,4816 | 0,346 | 0,366  |
| 10 | P13645 K1C10_HUMAN  | R.RVLDELTLTK.A              |              | 2 | 2,4723 | 0,241 | -0,103 |
| 10 | Q9UBG0 MRC2_HUMAN   | R.YS#RSS#SSPTEATE.K         | S1453:S1456: | 2 | 2,4709 | 1     | 0,234  |
| 10 | Q9Y4E6 WDR7_HUMAN   | E.ASRPNTALIS#PE.N           | S716:        | 2 | 2,465  | 0,121 | 0,274  |
| 10 | Q15459 SF3A1_HUMAN  | E.DSAPSKPVVGIYPPPE.V        |              | 2 | 2,4649 | 0,282 | 0,069  |
| 10 | Q14202 ZMYM3_HUMAN  | E.LLGLGGLLYK.A              |              | 2 | 2,4649 | 0,337 | 0      |
| 10 | P04264 K2C1_HUMAN   | K.NKLNDLEDALQQAQ.E          |              | 2 | 2,4649 | 0,349 | 0      |
| 10 | P35908 K22E_HUMAN   | K.KYEDEINKR.T               |              | 2 | 2,4632 | 0,234 | 0,102  |
| 10 | Q92576 PHF3_HUMAN   | E.NNLQDNQTSNSS#PCR.S        | S1614:       | 2 | 2,4582 | 0,431 | 0,269  |
| 10 | Q01082 SPTB2_HUMAN  | K.TALPAQSAAT#LPAR.T         | T2187:       | 2 | 2,4564 | 0,256 | 0,084  |
| 10 | O43493 TGON2_HUMAN  | K.SSAEAQTPEDTPNKSGAE.A      |              | 2 | 2,4529 | 0,318 | 0,134  |
| 10 | Q8IWJ2 GCC2_HUMAN   | E.GKINS#LTEE.K              | S490:        | 2 | 2,4481 | 0,131 | -0,342 |
| 10 | Q5TAX3 ZCH11_HUMAN  | E.KVPSS#PAEAE.K             | S156:        | 2 | 2,4433 | 0,196 | -0,223 |
| 10 | Q9UPU5 UBP24_HUMAN  | E.SNSLCPAGIR.N              |              | 2 | 2,4412 | 0,209 | 0      |
| 10 | Q659C4 LARP2_HUMAN  | R.IGS#PLS#PKKNSE.T          | S340:S343:   | 2 | 2,4388 | 0,193 | 0      |
| 10 | Q3T8J9 GON4L_HUMAN  | E.LSPLSATVFPK.V             |              | 2 | 2,4354 | 0,469 | 0      |
| 10 | O60447 EVI5_HUMAN   | E.TGVGFPLHGK.S              |              | 2 | 2,4347 | 0,287 | 0,06   |
| 10 | Q99650 OSMR_HUMAN   | E.NLTYNQAASDSGSCGHVPVS#PK.A | S877:        | 3 | 2,4329 | 0,12  | 0      |
| 10 | Q86W92 LIPB1_HUMAN  | E.DDM*FKDFAAR.S             |              | 3 | 2,4325 | 0,245 | 0,965  |
| 10 | Q8N0S5 Q8N0S5_HUMAN | R.DGAAA EVGR.A              |              | 2 | 2,4324 | 0,132 | 0,288  |
| 10 | Q9C0B1 FATSO_HUMAN  | R.VGM*GSSYNGQDE.V           |              | 2 | 2,4271 | 0,249 | 0,194  |
| 10 | A1L170 YA022_HUMAN  | R.TSSLDNEGPHPDLLSFE.-       |              | 2 | 2,4252 | 0,306 | 0,066  |
| 10 | Q3KQU3 MA7D1_HUMAN  | E.LGAGAPPAVVAR.T            |              | 2 | 2,4225 | 0,401 | 0,226  |
| 10 | Q10469 MGAT2_HUMAN  | E.ALAPPLLDAEPAR.G           |              | 2 | 2,4214 | 0,255 | 0,183  |
| 10 | P08621 RU17_HUMAN   | E.LRGGGGDM*AEPS#EAGD.A      | S320:        | 2 | 2,4212 | 0,318 | 0,227  |

|    |                    |                                      |            |   |        |       |        |
|----|--------------------|--------------------------------------|------------|---|--------|-------|--------|
| 10 | P19532 TFE3_HUMAN  | E.GVVGGLSGGALSPLR.A                  |            | 2 | 2,4209 | 0,198 | -0,182 |
| 10 | P08758 ANXA5_HUMAN | R.GTVTDFPGFDER.A                     |            | 2 | 2,4206 | 0,254 | 0,091  |
| 10 | P17301 ITA2_HUMAN  | E.IKAIASIPTE.Y                       |            | 2 | 2,4185 | 0,153 | 0,102  |
| 10 | Q9HBW0 LPAR2_HUMAN | E.NGHPLM*DST#.L.-                    | T350:      | 2 | 2,4184 | 0,226 | 0,207  |
| 10 | Q9UJ41 RABX5_HUMAN | E.AKAPS#PSINR.Q                      | S302:      | 2 | 2,4156 | 0,315 | 0      |
| 10 | Q9Y3T9 NOC2L_HUMAN | R.GILRPLSTR.H                        |            | 2 | 2,4125 | 0,281 | 0,181  |
| 10 | P23396 RS3_HUMAN   | K.GGKPEPPAM*PQPVPTA.-                |            | 2 | 2,4072 | 0,241 | -0,077 |
| 10 | Q2M2I8 AAK1_HUMAN  | R.TSQQNQVYNPSE.G                     |            | 2 | 2,4051 | 0,158 | 0,193  |
| 10 | Q5VV52 ZN691_HUMAN | E.HGQESLS#DELQE.T                    | S77:       | 2 | 2,403  | 0,12  | 0,084  |
| 10 | Q9Y6R0 NUMBL_HUMAN | E.AAAAPTAVAGPAQPGHVS#PTPATTSPGEKGE.A | S263:      | 3 | 2,4015 | 0,214 | 0,312  |
| 10 | Q7L7V1 DHX32_HUMAN | E.GLECPNSSSEKR.Y                     |            | 2 | 2,3979 | 0,281 | 0      |
| 10 | Q00613 HSF1_HUMAN  | R.VKEEPPS#PPQS#PRVEE.A               | S303:S307: | 2 | 2,3906 | 0,319 | -0,31  |
| 10 | Q3T8J9 GON4L_HUMAN | E.NAFQGLEPK.L                        |            | 2 | 2,3884 | 0,331 | 0,243  |
| 10 | Q9UGU0 TCF20_HUMAN | E.SLDGGCSSSEDQGER.V                  |            | 2 | 2,3869 | 0,349 | 0,438  |
| 10 | P62753 RS6_HUMAN   | R.LSS#LRASTKS#E.S                    | S236:S244: | 2 | 2,3861 | 0,386 | -0,171 |
| 10 | Q6UWZ7 CCD98_HUMAN | E.YSRS#PTF.-                         | S406:      | 2 | 2,3841 | 0,379 | -0,455 |
| 10 | Q9UQ35 SRRM2_HUMAN | E.FSAS#PM*LK.S                       | S1124:     | 2 | 2,3824 | 0,181 | 0,25   |
| 10 | Q8N7A1 KLDC1_HUMAN | E.EQIFWGWVHNDVHIFDT#K.T              | T178:      | 3 | 2,3791 | 0,103 | -0,487 |
| 10 | P68104 EF1A1_HUMAN | K.IGGIGTVPVGRVE.T                    |            | 2 | 2,3785 | 0,243 | -0,097 |
| 10 | Q9BWN1 PRR14_HUMAN | E.SFADIFLTPNK.T                      |            | 2 | 2,3765 | 0,323 | -0,097 |
| 10 | Q8WYP5 AHTF1_HUMAN | E.HQEM*DEGS#QSLE.K                   | S1304:     | 2 | 2,375  | 0,121 | 0,246  |
| 10 | Q15942 ZYG_HUMAN   | R.EKVSS#IDLE.I                       | S143:      | 2 | 2,3748 | 0,244 | 0,222  |
| 10 | P26045 PTN3_HUMAN  | E.TEDVFYTYK.G                        |            | 2 | 2,3708 | 0,315 | 0,314  |
| 10 | Q9Y519 T184B_HUMAN | E.KTLLSS#DDEF.-                      | S403:      | 2 | 2,3699 | 0,322 | 0      |
| 10 | P49368 TCPG_HUMAN  | E.DIIQLKPDVVITE.K                    |            | 2 | 2,3692 | 0,311 | 0,165  |
| 10 | Q96M96 FGD4_HUMAN  | R.TPGIGPVLPLEER.G                    |            | 2 | 2,3669 | 0,41  | -0,177 |
| 10 | Q02790 FKBP4_HUMAN | E.SGAQSAPLPM*EGVDISP.K               |            | 2 | 2,3661 | 0,274 | 0,339  |
| 10 | O43237 DC1L2_HUMAN | R.RGPLTSGS#DEE.N                     | S205:      | 2 | 2,3645 | 0,168 | -0,199 |
| 10 | Q9UK76 HN1_HUMAN   | R.RNSSEAS#SGDFLDLKG.E                | S91:       | 3 | 2,3645 | 0,157 | 0,29   |
| 10 | P05362 ICAM1_HUMAN | K.LLGIETPLPK.K                       |            | 2 | 2,3642 | 0,231 | 0,226  |
| 10 | P27816 MAP4_HUMAN  | K.KCSLPAEEDSVLE.K                    |            | 2 | 2,3636 | 0,163 | -0,661 |
| 10 | Q5W0B1 RN219_HUMAN | K.SLDLDGLSK.S                        |            | 2 | 2,3592 | 0,242 | 0,257  |
| 10 | Q96JM3 ZN828_HUMAN | K.TLDAM*DIK.G                        |            | 2 | 2,3542 | 0,347 | 0      |
| 10 | Q6P2E9 EDC4_HUMAN  | E.VEPLGLPQAS#PSR.T                   | S723:      | 2 | 2,3539 | 0,18  | 0,171  |
| 10 | Q14247 SRC8_HUMAN  | E.DVTQVSSAYQK.T                      |            | 2 | 2,3522 | 0,354 | 0,1    |
| 10 | Q02447 SP3_HUMAN   | R.TGERVS#PDINE.T                     | S317:      | 2 | 2,3508 | 0,117 | 0      |
| 10 | Q5TBA9 FRY_HUMAN   | E.HSDLIM*TLS#PSEE.T                  | S2544:     | 2 | 2,3457 | 0,131 | 0,235  |
| 10 | P49711 CTCF_HUMAN  | E.DACHLPQNQTDGGEVVQDVNSSVQM*VM*M*E.Q |            | 3 | 2,3449 | 0,17  | 0,784  |
| 10 | Q15942 ZYG_HUMAN   | E.GGPEAPIPPPPQPR.E                   |            | 2 | 2,3435 | 0,281 | 0,173  |

|    |                    |                                |                 |   |        |       |        |
|----|--------------------|--------------------------------|-----------------|---|--------|-------|--------|
| 10 | Q2TAZ0 ATG2A_HUMAN | R.AQPSS#PLEGQAE.G              | S1630:          | 2 | 2,3428 | 0,151 | 0,094  |
| 10 | Q6NSJ2 PHLB3_HUMAN | E.ASEVLAEPSSR.G                |                 | 2 | 2,3378 | 0,191 | 0,319  |
| 10 | P35908 K22E_HUMAN  | R.TAAENDFVTLK.K                |                 | 2 | 2,3357 | 0,339 | -0,101 |
| 10 | Q13404 UB2V1_HUMAN | E.NM*KLPQPPEGQCYS#N.-          | S220:           | 3 | 2,3355 | 0,266 | 0,295  |
| 10 | O43852 CALU_HUMAN  | K.M*ADKDGDLIATK.E              |                 | 3 | 2,3355 | 0,104 | 0,283  |
| 10 | Q15772 SPEG_HUMAN  | E.LRAPGS#VAE.R                 | S462:           | 2 | 2,3325 | 0,125 | 0,311  |
| 10 | Q6WKZ4 RFIP1_HUMAN | E.KDTAAVVS#RQGS#SLNLFE.D       | S496:S500:      | 3 | 2,3324 | 0,181 | 0,176  |
| 10 | Q9UPU9 SAM4A_HUMAN | E.LHQM*ILTPIK.A                |                 | 2 | 2,3301 | 0,44  | 0,403  |
| 10 | Q03181 PPARD_HUMAN | E.LNGGPQHALPSSSYDLSR.S         |                 | 3 | 2,3288 | 0,085 | -0,183 |
| 10 | Q02790 FKBP4_HUMAN | E.FKGEDLT#EEE.D                | T143:           | 2 | 2,3284 | 0,201 | 0,287  |
| 10 | Q9H7F4 T185B_HUMAN | R.VVITQS#PGKYVPPPK.L           | S333:           | 3 | 2,3279 | 0,134 | 0,102  |
| 10 | P11586 C1TC_HUMAN  | E.DSTVHGFLVQLPLDSE.N           |                 | 2 | 2,3265 | 0,254 | -0,139 |
| 10 | O94909 K0819_HUMAN | K.TSTPLAPLPVQSQSDTK.D          |                 | 2 | 2,3257 | 0,366 | 0,345  |
| 10 | P18858 DNL1_HUMAN  | E.QATTSAQVACLYRK.Q             |                 | 2 | 2,3251 | 0,405 | 0,076  |
| 10 | P49023 PAXI_HUMAN  | K.TGS#SSPPGGPPKPGSQLD.S        | S320:           | 2 | 2,3223 | 0,306 | 0      |
| 10 | Q14966 ZN638_HUMAN | E.KATCDS#DFAVE.T               | S1158:          | 2 | 2,32   | 0,237 | 0,277  |
| 10 | Q16891 IMMT_HUMAN  | E.GKPTPALS#EE.A                | S186:           | 2 | 2,3145 | 0,261 | 0,44   |
| 10 | Q13561 DCTN2_HUMAN | K.YADLPGIAR.N                  |                 | 2 | 2,3071 | 0,265 | 0,125  |
| 10 | Q9H9R9 DBND1_HUMAN | R.RQPLSS#VSSLE.V               | S64:            | 2 | 2,3069 | 0,211 | 0,095  |
| 10 | Q96PK6 RBM14_HUMAN | R.AQPSVSLGAPYR.G               |                 | 2 | 2,3057 | 0,186 | 0,098  |
| 10 | Q5VUA4 ZN318_HUMAN | E.LLLHS#PAR.S                  | S1896:          | 2 | 2,3031 | 0,265 | -0,062 |
| 10 | Q13428 TCOF_HUMAN  | K.VGPATPSAQVGK.W               |                 | 2 | 2,3029 | 0,309 | -0,11  |
| 10 | P78559 MAP1A_HUMAN | E.RFS#PSLE.A                   | S2276:          | 2 | 2,2979 | 0,171 | 0,466  |
| 10 | Q9C0C9 UBE2O_HUMAN | E.QLLTGS#PTS#PTVEPEKPTRE.K     | S836:S839:      | 2 | 2,2951 | 0,331 | 0,839  |
| 10 | Q6VMQ6 MCAF1_HUMAN | E.KLAPS#EDE.L                  | S445:           | 2 | 2,2946 | 0,149 | -0,189 |
| 10 | Q14692 BMS1_HUMAN  | K.AGLSPANQCQSDR.V              |                 | 2 | 2,2849 | 0,302 | -0,096 |
| 10 | Q7Z2W4 ZCCHV_HUMAN | E.FLASASASAERS#CT#PS#PDQISHR.A | S271:T273:S275: | 3 | 2,2844 | 0,152 | 1,82   |
| 10 | Q99700 ATX2_HUMAN  | E.NKGIS#PVVSE.H                | S783:           | 2 | 2,2761 | 0,13  | -1,099 |
| 10 | Q9NQS7 INCE_HUMAN  | K.KPEDNHTQCQLVPVVE.I           |                 | 2 | 2,2759 | 0,109 | -0,387 |
| 10 | P46821 MAP1B_HUMAN | K.SDIS#PLTPR.E                 | S1785:          | 2 | 2,2733 | 0,342 | 0,229  |
| 10 | Q06830 PRDX1_HUMAN | R.QITVNDLPVGR.S                |                 | 2 | 2,2722 | 0,244 | 0,302  |
| 10 | P00533 EGFR_HUMAN  | E.DHFLSLQR.M                   |                 | 2 | 2,2694 | 0,236 | -0,24  |
| 10 | P26639 SYTC_HUMAN  | K.M*GGEEKPIGAGE.E              |                 | 2 | 2,2657 | 0,325 | 0,307  |
| 10 | P46063 RECQ1_HUMAN | E.LKLIYVT#PE.K                 | T190:           | 2 | 2,26   | 0,374 | -0,106 |
| 10 | P42696 RBM34_HUMAN | R.LGQVASSLFR.G                 |                 | 2 | 2,2586 | 0,364 | 0,226  |
| 10 | P62753 RS6_HUMAN   | R.LSS#LRASTS#KSE.S             | S236:S242:      | 2 | 2,2572 | 0,29  | -0,086 |
| 10 | Q9UGP4 LIMD1_HUMAN | E.NGAPAVGPPVQPR.T              |                 | 2 | 2,2562 | 0,267 | -0,42  |
| 10 | Q92622 K0226_HUMAN | E.YLAIGNLDPR.G                 |                 | 2 | 2,2541 | 0,324 | 0,108  |
| 10 | Q13112 CAF1B_HUMAN | E.NKGGTES#LDP.-                | S556:           | 2 | 2,2421 | 0,249 | -0,222 |

|    |                    |                             |                 |   |        |       |        |
|----|--------------------|-----------------------------|-----------------|---|--------|-------|--------|
| 10 | Q58FF7 H90B3_HUMAN | K.HSQFIGYPITLYLEK.E         |                 | 3 | 2,2412 | 0,088 | 0      |
| 10 | P46821 MAP1B_HUMAN | E.SEKPLTQSGGAPPPGGK.Q       |                 | 3 | 2,2379 | 0,261 | 0,107  |
| 10 | P52948 NUP98_HUMAN | E.NGERFS#FLS#KPVDE.N        | S635:S638:      | 2 | 2,2376 | 0,212 | 0,205  |
| 10 | P26006 ITA3_HUMAN  | R.TGAVYLCPLTAHKDDCE.R       |                 | 3 | 2,2349 | 0,197 | 0,281  |
| 10 | P05787 K2C8_HUMAN  | E.VDPNIQAVR.T               |                 | 2 | 2,2296 | 0,231 | -0,241 |
| 10 | P62753 RS6_HUMAN   | R.LSS#LRASTSKSES#S#QK.-     | S236:S246:S247: | 3 | 2,2248 | 0,102 | 0,189  |
| 10 | Q14493 SLBP_HUMAN  | R.HM*DS#QVEDEFDLE.A         | S247:           | 2 | 2,2231 | 0,226 | 0,144  |
| 10 | O75140 DEPD5_HUMAN | R.KVS#VDQTATPM*LD.G         | S1081:          | 2 | 2,2223 | 0,272 | 0,163  |
| 10 | O94909 K0819_HUMAN | K.DRLGS#PLAVDE.A            | S450:           | 2 | 2,2221 | 0,183 | 0,097  |
| 10 | P22314 UBA1_HUMAN  | R.ALPAVQQNNLDE.D            |                 | 2 | 2,2219 | 0,223 | -0,093 |
| 10 | Q02952 AKA12_HUMAN | K.SPSS#PVERE.M              | S1331:          | 2 | 2,2204 | 0,174 | -0,453 |
| 10 | Q92889 XPF_HUMAN   | E.ISS#S#PESCPPEIKHEE.F      | S509:S510:      | 2 | 2,2155 | 0,374 | 0      |
| 10 | Q8TD19 NEK9_HUMAN  | R.LNPAVTCAGK.G              |                 | 2 | 2,21   | 0,352 | -0,118 |
| 10 | P05387 RLA2_HUMAN  | E.DVIAQGIGK.L               |                 | 2 | 2,2072 | 0,26  | 0,677  |
| 10 | Q9NQS7 INCE_HUMAN  | E.QHVTQLM*STEPLPR.T         |                 | 3 | 2,2031 | 0,255 | 0,111  |
| 10 | Q96AQ6 PBIP1_HUMAN | E.GQSPQSLPSTPK.A            |                 | 2 | 2,2028 | 0,294 | -0,092 |
| 10 | Q9H4G0 E41L1_HUMAN | E.FSRPAS#VSE.N              | S441:           | 2 | 2,1994 | 0,083 | 0      |
| 10 | Q9BTT0 AN32E_HUMAN | E.VGLSYLM*K.E               |                 | 2 | 2,1971 | 0,123 | 0,066  |
| 10 | P15408 FOSL2_HUMAN | R.RS#SSSGDQSSDSLNS#PTLLAL.- | S307:S320:      | 3 | 2,1937 | 0,155 | 0,08   |
| 10 | Q9Y4C8 RBM19_HUMAN | E.LSDM*DYLK.S               |                 | 2 | 2,1914 | 0,17  | 0,122  |
| 10 | P35221 CTNA1_HUMAN | E.FKAM*DS#I.-               | S905:           | 2 | 2,1899 | 0,278 | -0,202 |
| 10 | P49023 PAXI_HUMAN  | E.HVYSFPNK.Q                |                 | 2 | 2,187  | 0,253 | 0,369  |
| 10 | P27816 MAP4_HUMAN  | E.VALTEDQVPALK.T            |                 | 2 | 2,1863 | 0,256 | 0,19   |
| 10 | Q9P260 K1468_HUMAN | R.EPSTAS#GGGQLNR.A          | S170:           | 2 | 2,1846 | 0,315 | 0,27   |
| 10 | Q92538 GBF1_HUMAN  | E.KSQSASVES#IPE.V           | S352:           | 2 | 2,1825 | 0,191 | -0,727 |
| 10 | Q5TAQ9 WD42A_HUMAN | E.GRETSS#GIEVE.A            | S37:            | 2 | 2,1814 | 0,18  | -0,098 |
| 10 | Q9BRS8 LARP6_HUMAN | E.EGRLNCSTS#PE.I            | S409:           | 2 | 2,1811 | 0,104 | 0      |
| 10 | Q03252 LMNB2_HUMAN | R.AGGPATPLS#PTR.L           | S17:            | 2 | 2,1783 | 0,171 | -0,101 |
| 10 | P12004 PCNA_HUMAN  | E.DNADTLALVFEAPNQEK.V       |                 | 2 | 2,1775 | 0,198 | 0,195  |
| 10 | Q9Y624 JAM1_HUMAN  | E.FKQTSS#FLV.-              | S296:           | 2 | 2,1764 | 0,425 | 0,215  |
| 10 | P35908 K22E_HUMAN  | K.DVDNAYMIK.V               |                 | 2 | 2,172  | 0,311 | 0,228  |
| 10 | Q9UNX4 WDR3_HUMAN  | E.KLILTLT#.-                | T943:           | 2 | 2,1679 | 0,349 | 0,277  |
| 10 | P35908 K22E_HUMAN  | K.FASFIDKVR.F               |                 | 2 | 2,1676 | 0,23  | 0,113  |
| 10 | O95232 CROP_HUMAN  | E.VNGTSEDIKSEGD#QSN.-       | T429:           | 2 | 2,1652 | 0,185 | -0,197 |
| 10 | P17301 ITA2_HUMAN  | K.AIASIPTE.Y                |                 | 2 | 2,1642 | 0,094 | 0,064  |
| 10 | P35030 TRY3_HUMAN  | D.TLDNDIM*LIK.L             |                 | 2 | 2,1622 | 0,28  | 0      |
| 10 | P17612 KAPCA_HUMAN | E.IRV#INE.K                 | S339:           | 2 | 2,1568 | 0,204 | -0,201 |
| 10 | P13645 K1C10_HUMAN | K.NHEEEMKDLR.N              |                 | 3 | 2,1564 | 0,159 | 0,351  |
| 10 | Q8NG31 CASC5_HUMAN | R.LVANDSQLT#PLEE.W          | T1042:          | 2 | 2,1536 | 0,288 | 0,323  |

|    |                       |                         |        |   |        |       |        |
|----|-----------------------|-------------------------|--------|---|--------|-------|--------|
| 10 | Q96R06 SPAG5_HUMAN    | E.KGVNTS#VM*LE.N        | S353:  | 2 | 2,1531 | 0,12  | 0,312  |
| 10 | Q07157 ZO1_HUMAN      | E.YSM*YSTDSR.H          |        | 2 | 2,1526 | 0,215 | 0,108  |
| 10 | Q14247 SRC8_HUMAN     | E.RLPSSPVY#E.D          | Y421:  | 2 | 2,1502 | 0,26  | 0,216  |
| 10 | P01100 FOS_HUMAN      | E.ADSFPSCAAHR.K         |        | 3 | 2,1498 | 0,115 | 0,354  |
| 10 | P78364 PHC1_HUMAN     | E.ALSPTS#PGPLSVR.A      | S898:  | 2 | 2,1472 | 0,18  | 0,09   |
| 10 | Q66K74 MAP1S_HUMAN    | R.LLSL#PLR.G            | S657:  | 2 | 2,1388 | 0,127 | 0,423  |
| 10 | P05186 PPBT_HUMAN     | D.IDVIM*GGGR.K          |        | 2 | 2,1378 | 0,182 | -0,131 |
| 10 | Q6P4F7 RHGBA_HUMAN    | E.LT#PSNLNNK.H          | T567:  | 2 | 2,1365 | 0,221 | 0,113  |
| 10 | O75509 TNR21_HUMAN    | R.NGSFITKE.K            |        | 2 | 2,1342 | 0,261 | 0,204  |
| 10 | P49321 NASP_HUMAN     | D.KTEEM*PNDSVLE.N       |        | 2 | 2,1338 | 0,181 | -0,173 |
| 10 | Q9H5H4 ZN768_HUMAN    | E.SRSPGLVPPS#PE.F       | S97:   | 2 | 2,1335 | 0,187 | 0,562  |
| 10 | Q9BYK8 PR285_HUMAN    | K.AEPGDEALS#PASR.D      | S1006: | 2 | 2,132  | 0,318 | -0,973 |
| 10 | Q9UKM9 RALY_HUMAN     | E.AGLPQGEAR.T           |        | 2 | 2,1315 | 0,206 | -1,493 |
| 10 | Q9NTJ3 SMC4_HUMAN     | K.NTNAEES#LPE.I         | S982:  | 2 | 2,131  | 0,097 | 0      |
| 10 | Q8IWE5 PKHM2_HUMAN    | E.VLCQLKR.D             |        | 2 | 2,1289 | 0,157 | 0,399  |
| 10 | O75943 RAD17_HUMAN    | E.HGM*IDPDS#GDE.A       | S613:  | 2 | 2,1254 | 0,157 | 0      |
| 10 | P31483 TIA1_HUMAN     | K.TLYVGNLSR.D           |        | 2 | 2,122  | 0,386 | 0,119  |
| 10 | Q3KQU3 MA7D1_HUMAN    | K.SLSRT#PETLLPFAEAE.A   | T813:  | 2 | 2,119  | 0,223 | 0,066  |
| 10 | P23396 RS3_HUMAN      | E.ILPTT#PISEQK.G        | T221:  | 2 | 2,1151 | 0,126 | -0,093 |
| 10 | P52948 NUP98_HUMAN    | R.FSFLSKPVDE.N          |        | 2 | 2,1113 | 0,198 | 0      |
| 10 | Q6ZRV2 FA83H_HUMAN    | E.SKGS#PTSAYPE.R        | S870:  | 2 | 2,1109 | 0,287 | -0,101 |
| 10 | ##A6NND7 A6NND7_HUMAN | D.TQPGST#TPPDKE.H       | T657:  | 2 | 2,1026 | 0,121 | -0,091 |
| 10 | Q9Y608 LRRF2_HUMAN    | R.RGS#GDTSSLIDPDTSLSE.L | S328:  | 2 | 2,1003 | 0,164 | 0,509  |
| 10 | P48681 NEST_HUMAN     | E.GDRGS#PFQEEE.G        | S1577: | 2 | 2,0975 | 0,123 | 0,092  |
| 10 | Q9Y613 EPN1_HUMAN     | E.LLAGEVPAR.S           |        | 2 | 2,0972 | 0,236 | 0,263  |
| 10 | Q7Z2Z1 CO042_HUMAN    | E.NKSPLLS#VPFLSSAR.R    | S824:  | 3 | 2,095  | 0,085 | -0,216 |
| 10 | Q8IYB7 DI3L2_HUMAN    | E.DCNFALGQLAK.S         |        | 2 | 2,0938 | 0,203 | 0      |
| 10 | P05386 RLA1_HUMAN     | E.S#DDDDM*GFGLFD.-      | S104:  | 2 | 2,0934 | 0,29  | -0,186 |
| 10 | Q9H6X2 ANTR1_HUMAN    | R.DLGAIYVCVGVK.D        |        | 2 | 2,0924 | 0,201 | 0,189  |
| 10 | Q8IZD2 MLL5_HUMAN     | E.CKDTQIVS#DAEVIQE.Q    | S623:  | 2 | 2,0914 | 0,192 | 0,538  |
| 10 | Q14203 DCTN1_HUMAN    | E.TM*DALQADIDQLE.A      |        | 2 | 2,0896 | 0,105 | -0,083 |
| 10 | Q9H8W4 PKHF2_HUMAN    | R.SDSYSQSLK.S           |        | 2 | 2,0893 | 0,359 | 0,18   |
| 10 | Q13367 AP3B2_HUMAN    | E.KAFYGS#EEDE.A         | S272:  | 2 | 2,0876 | 0,098 | -0,292 |
| 10 | O75821 EIF3G_HUMAN    | K.GIPLATGDTS#PEPE.L     | S42:   | 2 | 2,0859 | 0,109 | 0,333  |
| 10 | P04264 K2C1_HUMAN     | R.SLVNLGGSK.S           |        | 2 | 2,0784 | 0,211 | -0,349 |
| 10 | Q14849 STAR3_HUMAN    | K.SFSAQERE.Y            |        | 2 | 2,0774 | 0,1   | 0,064  |
| 10 | Q92667 AKAP1_HUMAN    | R.DKAIT#PPLPE.S         | T533:  | 2 | 2,0764 | 0,118 | 0,42   |
| 10 | Q6ZS30 NBEL1_HUMAN    | K.SFSVHSDRE.S           |        | 2 | 2,0732 | 0,196 | 0,917  |
| 10 | P08473 NEP_HUMAN      | R.NDPM*LLYNK.M          |        | 2 | 2,0693 | 0,165 | 0,326  |

|    |                      |                         |                 |   |        |       |        |
|----|----------------------|-------------------------|-----------------|---|--------|-------|--------|
| 10 | P28347 TEAD1_HUMAN   | R.M*SDSADKPIDNDAE.G     |                 | 2 | 2,0665 | 0,116 | 0      |
| 10 | P62753 RS6_HUMAN     | R.LSS#LRAS#TSKSESS#QK.- | S236:S240:S247: | 2 | 2,0656 | 0,181 | 0,063  |
| 10 | P50991 TCPD_HUMAN    | R.FSNISAAK.A            |                 | 2 | 2,0568 | 0,201 | 0,437  |
| 10 | P04264 K2C1_HUMAN    | K.DVDGAYMTK.V           |                 | 2 | 2,0564 | 0,237 | 0,488  |
| 10 | P35908 K22E_HUMAN    | R.TAAENDFVTLKK.D        |                 | 3 | 2,0564 | 0,136 | 0      |
| 10 | Q9BQY9 DBND2_HUMAN   | E.SQRPPIGSIS#SM*E.V     | S153:           | 2 | 2,05   | 0,131 | 0,493  |
| 10 | Q63ZY3 KANK2_HUMAN   | E.IASM*LYSR.M           |                 | 2 | 2,0489 | 0,259 | 0,064  |
| 10 | P62256 UBE2H_HUMAN   | R.M*DTDVVKLIE.S         |                 | 2 | 2,0489 | 0,177 | 0,621  |
| 10 | P39880 CUX1_HUMAN    | E.LSLTGASR.S            |                 | 2 | 2,0434 | 0,276 | 0,303  |
| 10 | Q14739 LBR_HUMAN     | E.KFS#LSQE.S            | S154:           | 2 | 2,0422 | 0,129 | 0      |
| 10 | P13645 K1C10_HUMAN   | R.QSVEADINGLR.R         |                 | 2 | 2,0414 | 0,337 | 0,203  |
| 10 | Q9BVJ6 UT14A_HUMAN   | E.TKDS#GSQEVLSE.L       | S451:           | 2 | 2,0363 | 0,09  | 0,179  |
| 10 | P02545 LMNA_HUMAN    | R.LRLS#PS#PTSQR.S       | S390:S392:      | 3 | 2,0342 | 0,203 | 0,13   |
| 10 | Q9UIF9 BAZ2A_HUMAN   | E.KALLST#PNGAPE.G       | T1594:          | 2 | 2,0277 | 0,219 | 0,191  |
| 10 | P54289 CA2D1_HUMAN   | E.SGYTFIAPR.D           |                 | 2 | 2,0275 | 0,252 | -0,06  |
| 10 | ##Q9Y6A2 CP46A_HUMAN | D.QMS#VPT#QGDAK.A       | S322:T325:      | 3 | 2,0258 | 0,089 | -1,314 |
| 10 | Q9P266 K1462_HUMAN   | K.AGASGQPPSGPPGTGNE.Y   |                 | 2 | 2,0252 | 0,22  | 0      |
| 10 | P67809 YBOX1_HUMAN   | K.AADPPAENSS#APEAE.Q    | S314:           | 2 | 2,0242 | 0,23  | 0      |
| 10 | Q99549 MPP8_HUMAN    | R.VTAVPVSAADST#EE.L     | T21:            | 2 | 2,0155 | 0,149 | -0,168 |
| 10 | Q9Y3P9 RBGP1_HUMAN   | K.IVGNQSEQLQKE.L        |                 | 2 | 2,0142 | 0,109 | -0,171 |
| 10 | Q8NI35 INADL_HUMAN   | E.KVPDS#PENE.L          | S522:           | 2 | 2,0133 | 0,115 | 0,223  |
| 10 | Q66K74 MAP1S_HUMAN   | E.RLSLS#PLR.G           | S657:           | 2 | 2,0131 | 0,149 | 0,06   |
| 10 | Q86U44 MTA70_HUMAN   | E.AALSPTFR.S            |                 | 2 | 2,0111 | 0,219 | -0,778 |
| 10 | P46821 MAP1B_HUMAN   | K.IPPM*EEPSYTDNDLSE.L   |                 | 2 | 2,011  | 0,329 | -0,062 |
| 10 | Q8IW41 MAPK5_HUMAN   | K.QVIEEQTT#SHES#Q.-     | T468:S472:      | 2 | 2,001  | 0,291 | -0,146 |
| 10 | Q15018 K0157_HUMAN   | R.LQQAVLSR.Q            |                 | 2 | 2      | 0,21  | -0,133 |
| 10 | P13647 K2C5_HUMAN    | K.AQYEEIANR.S           |                 | 2 | 1,9962 | 0,232 | 0      |
| 10 | P35527 K1C9_HUMAN    | R.QGVDADINGLR.Q         |                 | 2 | 1,9902 | 0,267 | -0,211 |
| 10 | Q58FF7 H90B3_HUMAN   | E.DLPLNISRE.M           |                 | 2 | 1,9853 | 0,186 | 0,231  |
| 10 | Q8WYQ9 ZCH14_HUMAN   | E.YSSSSSPM*GVQAR.E      |                 | 2 | 1,9832 | 0,269 | 0      |
| 10 | Q9BYK8 PR285_HUMAN   | E.QAAVVAM*VK.A          |                 | 2 | 1,9776 | 0,322 | 0      |
| 10 | Q9Y5U2 TSSC4_HUMAN   | E.LAHLAGPGS#PE.A        | S265:           | 2 | 1,9775 | 0,096 | 0,108  |
| 10 | P41743 KPCI_HUMAN    | R.KIDQSEFE.G            |                 | 2 | 1,9714 | 0,134 | 0,184  |
| 10 | Q5T4S7 UBR4_HUMAN    | K.LCTFTITQK.E           |                 | 2 | 1,9683 | 0,204 | 0,11   |
| 10 | Q9ULR0 ISY1_HUMAN    | K.FIAHVPVPSQQEIEE.A     |                 | 2 | 1,9627 | 0,205 | 0,212  |
| 10 | Q8IYA6 CKP2L_HUMAN   | E.HDLVVAS#LDE.L         | S713:           | 2 | 1,9597 | 0,188 | -0,311 |
| 10 | O14974 MYPT1_HUMAN   | R.KTGS#YGALAE.I         | S445:           | 2 | 1,9554 | 0,089 | 0,34   |
| 10 | Q9HA05 Q9HA05_HUMAN  | K.M*NSIVYQK.Q           |                 | 2 | 1,9486 | 0,225 | -0,122 |
| 10 | P06733 ENOA_HUMAN    | E.VDLFTS#KGLFR.A        | S27:            | 2 | 1,9406 | 0,189 | 0      |

|    |                    |                        |        |   |        |       |        |
|----|--------------------|------------------------|--------|---|--------|-------|--------|
| 10 | Q96L91 EP400_HUMAN | K.ALS#PVTSR.T          | S736:  | 2 | 1,9402 | 0,156 | 0,134  |
| 10 | P67809 YBOX1_HUMAN | E.TKAADPPAENSS#APEAE.Q | S314:  | 2 | 1,9391 | 0,31  | 0,069  |
| 10 | Q6PL18 ATAD2_HUMAN | E.LRNNSNT#CNIE.N       | T1245: | 2 | 1,9357 | 0,206 | 0,259  |
| 10 | P06748 NPM_HUMAN   | K.M*SVQPTVSLGGFE.I     |        | 2 | 1,9337 | 0,175 | 0,089  |
| 10 | P13645 K1C10_HUMAN | R.LAADDFR.L            |        | 2 | 1,9337 | 0,242 | 0,302  |
| 10 | Q86U44 MTA70_HUMAN | E.AALS#PTFR.S          | S43:   | 2 | 1,9303 | 0,241 | 0,388  |
| 10 | P27824 CALX_HUMAN  | R.GTLSGWILSK.A         |        | 2 | 1,9208 | 0,235 | 0,23   |
| 10 | P46821 MAP1B_HUMAN | E.QYGFLTPTK.Q          |        | 2 | 1,9205 | 0,195 | 0      |
| 10 | P68104 EF1A1_HUMAN | E.SFS#DYPPPLGR.F       | S416:  | 2 | 1,9107 | 0,152 | 0,3    |
| 10 | Q9H501 ESF1_HUMAN  | E.M*QSVVQLIM*TR.D      |        | 2 | 1,9073 | 0,198 | 1,003  |
| 10 | Q13200 PSMD2_HUMAN | E.DVLTL LLPVM*GDSK.S   |        | 2 | 1,9052 | 0,198 | -0,241 |
| 10 | P54289 CA2D1_HUMAN | K.IIM*LFTDGGEEER.A     |        | 2 | 1,9014 | 0,113 | 0,087  |
| 10 | Q6S8J3 A26CA_HUMAN | R.AVFP SIVGRPR.Q       |        | 2 | 1,8918 | 0,13  | 0,102  |
| 10 | Q9Y2S7 PDIP2_HUMAN | E.DILPYTSTDQVPIQHE.L   |        | 2 | 1,8893 | 0,177 | 0,592  |
| 10 | Q9H0E9 BRD8_HUMAN  | K.GDETPLTNVK.T         |        | 2 | 1,8777 | 0,238 | -0,114 |
| 10 | O43396 TXNL1_HUMAN | K.GYM*DLM*PFINK.A      |        | 2 | 1,876  | 0,13  | -0,179 |
| 10 | Q13435 SF3B2_HUMAN | R.SRGS#DSPAADVE.I      | S337:  | 2 | 1,8647 | 0,158 | 0      |
| 10 | Q8IX12 CCAR1_HUMAN | R.LLLPTPTVKQE.S        |        | 2 | 1,8567 | 0,168 | 0      |
| 10 | P35527 K1C9_HUMAN  | K.TLLDIDNTR.M          |        | 2 | 1,8562 | 0,178 | 0,46   |
| 10 | P05783 K1C18_HUMAN | R.STFSTNYR.S           |        | 2 | 1,8548 | 0,334 | 0,25   |
| 10 | P48960 CD97_HUMAN  | E.GCQVLGSK.N           |        | 2 | 1,8546 | 0,205 | 0,719  |
| 10 | P13693 TCTP_HUMAN  | E.DGVTPYM*IFFK.D       |        | 2 | 1,8543 | 0,173 | -0,091 |
| 10 | Q9Y2W2 WBP11_HUMAN | E.LTPLQAM*M*LR.M       |        | 2 | 1,8498 | 0,294 | 0,101  |
| 10 | O60678 ANM3_HUMAN  | K.QQTPCLFCNR.L         |        | 2 | 1,8467 | 0,294 | 0,276  |
| 10 | Q9Y6E0 STK24_HUMAN | K.ADPEELFTKLE.K        |        | 2 | 1,8452 | 0,121 | -0,094 |
| 10 | O14641 DVL2_HUMAN  | E.RTSS#FSSVTD.S        | S252:  | 2 | 1,8416 | 0,175 | -0,209 |
| 10 | P50402 EMD_HUMAN   | E.DALLYQSK.G           |        | 2 | 1,8307 | 0,267 | 0,13   |
| 10 | P21333 FLNA_HUMAN  | E.VVIQDPM*GQK.G        |        | 2 | 1,8272 | 0,223 | -0,431 |
| 10 | O94762 RECQ5_HUMAN | E.GVQGPPM*APEK.Y       |        | 2 | 1,826  | 0,169 | 0,217  |
| 10 | P28066 PSA5_HUMAN  | R.GVNTFS#PE.G          | S16:   | 2 | 1,8217 | 0,128 | -0,131 |
| 10 | Q9UN86 G3BP2_HUMAN | E.ERQPS#PEPVQE.N       | S163:  | 2 | 1,8161 | 0,155 | 0,089  |
| 10 | Q96G28 CC104_HUMAN | K.THTSQAILQPVLAAE.D    |        | 2 | 1,8141 | 0,176 | 0,386  |
| 10 | Q8IY17 PLPL6_HUMAN | E.TPSAPLLSR.C          |        | 2 | 1,8091 | 0,387 | -0,13  |
| 10 | Q9H6Y2 WDR55_HUMAN | R.IRDT#PEDIVLE.A       | T31:   | 2 | 1,7844 | 0,109 | 0,442  |
| 10 | P04264 K2C1_HUMAN  | R.DYQELMNTK.L          |        | 2 | 1,7758 | 0,108 | 0,107  |
| 10 | P08651 NFIC_HUMAN  | R.SFVGLGPR.D           |        | 2 | 1,7705 | 0,188 | 0,22   |
| 10 | P46821 MAP1B_HUMAN | K.SDISPLT#PR.E         | T1788: | 2 | 1,7677 | 0,2   | 0,343  |
| 10 | P21333 FLNA_HUMAN  | R.RLTVS#SLQE.S         | S2338: | 2 | 1,7517 | 0,088 | 0,11   |
| 10 | Q96R06 SPAG5_HUMAN | E.STPVPLLGSDK.S        |        | 2 | 1,7509 | 0,13  | 0      |



|    |                      |                            |          |   |        |       |        |
|----|----------------------|----------------------------|----------|---|--------|-------|--------|
| 10 | P35908 K22E_HUMAN    | R.LQGEIAHVK.K              |          | 2 | 1,7505 | 0,249 | 0      |
| 10 | Q96PK6 RBM14_HUMAN   | R.TQPM*TAQAASYR.A          |          | 2 | 1,7461 | 0,211 | -0,546 |
| 10 | Q9UJM3 ERRFI_HUMAN   | E.DQVVCQFK.K               |          | 2 | 1,745  | 0,086 | -0,064 |
| 10 | Q12830 BPTF_HUMAN    | E.DAM*TVLTPLEKDYE.G        |          | 2 | 1,7441 | 0,149 | 1,751  |
| 10 | Q9UBG0 MRC2_HUMAN    | E.KNILVS#DM*E.M            | S1470:   | 2 | 1,7437 | 0,181 | 0,213  |
| 10 | P48634 BAT2_HUMAN    | E.KELTAS#VTE.A             | S1788:   | 2 | 1,7364 | 0,113 | 0,115  |
| 10 | Q3ZCQ8 TIM50_HUMAN   | E.DDPLAAFQ.Q               |          | 2 | 1,7238 | 0,12  | 0,348  |
| 10 | Q9P260 K1468_HUMAN   | R.EPSTASGGGQLNR.A          |          | 2 | 1,7195 | 0,361 | 0,287  |
| 10 | P18615 NELFE_HUMAN   | K.GPVPTFQPFQR.S            |          | 2 | 1,7132 | 0,18  | -0,096 |
| 10 | Q13445 TMED1_HUMAN   | E.FTFLLPAGR.K              |          | 2 | 1,694  | 0,198 | 0,06   |
| 10 | P13473 LAMP2_HUMAN   | E.NATCLYAK.W               |          | 2 | 1,6895 | 0,273 | 0,259  |
| 10 | P20645 MPRD_HUMAN    | K.SNGKETVVGR.L             |          | 2 | 1,6732 | 0,165 | -0,35  |
| 10 | Q9HCF4 ALO17_HUMAN   | K.FCSQCGER.L               |          | 2 | 1,6683 | 0,196 | -0,117 |
| 10 | Q9Y6D5 BIG2_HUMAN    | E.IGDGKGLDM*AR.R           |          | 2 | 1,6635 | 0,102 | -0,425 |
| 10 | Q9BQY9 DBND2_HUMAN   | E.LSLPVPTSDR.T             |          | 2 | 1,6612 | 0,232 | 0,225  |
| 10 | P13010 KU86_HUMAN    | E.DIIQGFR.Y                |          | 2 | 1,6534 | 0,098 | 0,287  |
| 10 | P35613 BASI_HUMAN    | R.FFVSSQGR.S               |          | 2 | 1,6509 | 0,116 | 0,18   |
| 10 | P30533 AMRP_HUMAN    | E.AEFEPR.V                 |          | 2 | 1,648  | 0,112 | 0,347  |
| 10 | O00541 PESC_HUMAN    | E.GDYVPPEK.L               |          | 2 | 1,6446 | 0,198 | 0,135  |
| 10 | P35908 K22E_HUMAN    | K.FASFIDK.V                |          | 2 | 1,6443 | 0,111 | 0,221  |
| 10 | Q13405 RM49_HUMAN    | E.DFLSPLLQK.T              |          | 2 | 1,6417 | 0,141 | 0      |
| 10 | Q99650 OSMR_HUMAN    | K.APSM*LGLM*TSPE.N         |          | 2 | 1,6312 | 0,106 | 0,289  |
| 10 | P13645 K1C10_HUMAN   | K.SEITELRR.N               |          | 2 | 1,6309 | 0,138 | 0,182  |
| 10 | O15085 ARHGB_HUMAN   | E.LDRNLAEDAS#STE.A         | S1312:   | 2 | 1,5762 | 0,123 | -0,081 |
| 10 | Q12888 TP53B_HUMAN   | D.SLSTNSSDLVAPS#PDAFR.S    | S366:    | 2 | 1,5628 | 0,293 | 0,251  |
| 10 | Q14202 ZMYM3_HUMAN   | E.TTSIATAR.R               |          | 2 | 1,5605 | 0,247 | 0,371  |
| 10 | Q15149 PLEC1_HUMAN   | E.FADM*LSGNAGGFRS#R.S      | S4382:   | 2 | 1,5545 | 0,382 | 0      |
| 10 | P13645 K1C10_HUMAN   | K.SEITELR.R                |          | 2 | 1,5543 | 0,106 | -0,072 |
| 10 | Q9Y4P8 WIPI2_HUMAN   | K.GTYVPSS#PTR.L            | S413:    | 2 | 1,552  | 0,09  | -0,32  |
| 10 | P08670 VIME_HUMAN    | R.SYVTTSTR.T               |          | 2 | 1,5288 | 0,257 | 0,2    |
| 10 | ##A6NL99 AQP73_HUMAN | E.HSGM*KPLVTIGHD.E         |          | 2 | 1,5158 | 0,115 | -1,473 |
| 10 | P14174 MIF_HUMAN     | R.ASVPDGFLSE.L             |          | 2 | 1,4694 | 0,102 | -0,06  |
| 10 | P11717 MPRI_HUMAN    | R.VQSSIAFLCGK.T            |          | 2 | 1,4624 | 0,083 | 0,202  |
| 10 | Q8WW12 PCNP_HUMAN    | K.ETVPTLAPK.T              |          | 2 | 1,4435 | 0,142 | -0,255 |
| 10 | O95155 UBE4B_HUMAN   | R.SQSS#EGVSSLSLSSPS#NSLE.T | S79:S90: | 2 | 1,4133 | 0,251 | 0,241  |
| 10 | Q9BQY9 DBND2_HUMAN   | E.ELSLPVPTSDR.T            |          | 2 | 1,4034 | 0,128 | 0      |
| 10 | Q9P258 RCC2_HUMAN    | E.YNPR#L.-                 | T521:    | 2 | 1,3551 | 0,227 | 0,145  |
| 10 | Q9UKY7 CDV3_HUMAN    | E.VDYSGLR.V                |          | 2 | 1,2992 | 0,168 | 0,301  |
| 10 | Q8WUF5 IASPP_HUMAN   | E.GPVARPLS#PTR.L           | S489:    | 2 | 1,2701 | 0,316 | -0,099 |

|    |                     |                                         |            |   |        |       |        |
|----|---------------------|-----------------------------------------|------------|---|--------|-------|--------|
| 10 | P06748 NPM_HUMAN    | E.GS#PIKVTLATLK.M                       | S70:       | 2 | 1,1967 | 0,148 | 0,187  |
| 10 | Q9H6Z4 RANB3_HUMAN  | E.AQLPPFPR.E                            |            | 2 | 1,1623 | 0,124 | 0,132  |
| 11 | Q9H9E3 COG4_HUMAN   | -.M*ADLDS#PPKLSGVQQPSEGVGGGR.C          | S6:        | 3 | 6,8763 | 0,368 | 0,443  |
| 11 | P49840 GSK3A_HUMAN  | R.ARTSS#FAEPGGGGGGGGGGPGGSASGPGGTGGGK.A | S21:       | 3 | 6,2452 | 0,543 | 0,2    |
| 11 | Q92734 TFG_HUMAN    | E.INKNVM*SAFGLTDDQVSGPPSAPAEDR.S        |            | 3 | 6,079  | 0,458 | 0,194  |
| 11 | Q02952 AKA12_HUMAN  | E.TCVSGEDPTQGADLS#PDEK.V                | S483:      | 2 | 6,0366 | 0,574 | 0,234  |
| 11 | Q92734 TFG_HUMAN    | K.NVM*SAFGLTDDQVSGPPSAPAEDR.S           |            | 3 | 5,8813 | 0,503 | 0,591  |
| 11 | Q8IY92 BTBDC_HUMAN  | E.GGS#PVSGQLLAGVQVQK.Q                  | S201:      | 2 | 5,8456 | 0,524 | -0,072 |
| 11 | P40425 PBX2_HUMAN   | E.KGGGSAAAAAAAAAASGGGVS#PDNSIE.H        | S151:      | 2 | 5,7823 | 0,51  | 0,11   |
| 11 | P08651 NFIC_HUMAN   | R.TGM*GSDQEDSKPITLDTDFQE.S              |            | 2 | 5,7668 | 0,487 | 0,703  |
| 11 | P13667 PDIA4_HUMAN  | E.NGVLVLDANFDNFVADKD.T                  |            | 2 | 5,7302 | 0,464 | 0,117  |
| 11 | Q06190 P2R3A_HUMAN  | E.GFEDYETDEPAS#PSEFGNK.S                | S1121:     | 2 | 5,6967 | 0,537 | 0      |
| 11 | P49815 TSC2_HUMAN   | E.LQTLQDILGDPGDKADVGRSL#PE.V            | S1411:     | 3 | 5,6859 | 0,439 | 0,145  |
| 11 | Q9P287 BCCIP_HUMAN  | E.LTDLLIQNHIGSVIK.Q                     |            | 2 | 5,6824 | 0,482 | -0,068 |
| 11 | Q7Z417 NUFP2_HUMAN  | E.NQSVDKSDTIPIPNGVVTNNSGYITNGYM*GK.G    |            | 3 | 5,678  | 0,549 | 0,666  |
| 11 | Q9NYV4 CD2L7_HUMAN  | E.TTSGTSTPEVKNSS#PAPPQPAPGKVE.S         | S1083:     | 3 | 5,6319 | 0,533 | 0,069  |
| 11 | P05783 K1C18_HUMAN  | R.STS#FRGGM*GSGGLATGIAGGLAGM*GGIQNEKE.T | S53:       | 3 | 5,5821 | 0,338 | 0,713  |
| 11 | Q92734 TFG_HUMAN    | K.NVM*SAFGLTDDQVSGPPSAPAEDR.S           |            | 2 | 5,5244 | 0,581 | 0,394  |
| 11 | O94826 TOM70_HUMAN  | E.GYALYAQALTDQQQFGK.A                   |            | 2 | 5,4712 | 0,552 | -0,192 |
| 11 | O60271 JIP4_HUMAN   | R.NVS#TGS#AENEEKSE.V                    | S329:S332: | 2 | 5,4224 | 0,518 | -0,149 |
| 11 | O95817 BAG3_HUMAN   | E.VKVPPAPVPCPPSPGSAVPSS#PK.S            | S386:      | 3 | 5,3872 | 0,438 | 0,217  |
| 11 | Q02952 AKA12_HUMAN  | E.TCVSGEDPTQGADLSPDEK.V                 |            | 2 | 5,3629 | 0,503 | -0,365 |
| 11 | Q9UKV3 ACINU_HUMAN  | E.LLVSQHTVQLVGGSL#PLSSPSDTK.A           | S478:      | 3 | 5,3339 | 0,415 | -0,216 |
| 11 | Q01970 PLCB3_HUMAN  | E.GLGDGPLVACASNGHAPGS#SGHLSGADSESQEE.N  | S1216:     | 3 | 5,2915 | 0,598 | 0,34   |
| 11 | Q92625 ANS1A_HUMAN  | E.VDKT#PPPQPPLISSM*DSISQK.S             | T318:      | 3 | 5,2841 | 0,405 | -0,62  |
| 11 | Q96T23 RSF1_HUMAN   | K.VGS#PLDYSVLDPSTNGQSPGK.A              | S1349:     | 2 | 5,2603 | 0,447 | 0,739  |
| 11 | Q9GZR7 DDX24_HUMAN  | E.LTDYQLVS#PAKNPSSLFSKE.A               | S60:       | 3 | 5,2543 | 0,414 | 1,35   |
| 11 | O75694 NU155_HUMAN  | E.DQACATCLILACSTAACDRE.V                |            | 2 | 5,2103 | 0,629 | 0,534  |
| 11 | P54105 ICLN_HUMAN   | E.VDTTPTVAGQFEDADVDH.-                  |            | 2 | 5,2006 | 0,544 | 0,127  |
| 11 | Q9UQ35 SRRM2_HUMAN  | K.SKDSLQVQSCPGSLSLCAGVK.S               |            | 3 | 5,1074 | 0,307 | 0,524  |
| 11 | P46100 ATRX_HUMAN   | R.LAM*NQNTDKISGSGSNSDM*M*E.N            |            | 2 | 5,0938 | 0,549 | 0,107  |
| 11 | O95817 BAG3_HUMAN   | E.VKVPPAPVPCPPSPGSAVPSS#PK.S            | S381:      | 3 | 5,0851 | 0,384 | 0,217  |
| 11 | Q9C005 DPY30_HUMAN  | E.GQTQVAENPHS#EYGLTDNVER.I              | S19:       | 3 | 5,067  | 0,503 | 0,453  |
| 11 | P51610 HCFC1_HUMAN  | E.AAASLVTSTVGGQNGSVVR.V                 |            | 2 | 5,0551 | 0,552 | 0,066  |
| 11 | Q14974 IMB1_HUMAN   | E.AIGYICQDIDPEQLQDK.S                   |            | 2 | 5,04   | 0,418 | -0,122 |
| 11 | Q12888 TP53B_HUMAN  | E.IEPKNS#PEDLGLSLTGDSC.L                | S500:      | 2 | 5,0389 | 0,439 | 0,327  |
| 11 | Q71U36 TBA1A_HUMAN  | K.TIGGGDDSFNTFFSETGAGK.H                |            | 2 | 5,0374 | 0,533 | 0,365  |
| 11 | Q13263 TIF1B_HUMAN  | E.TKPVLM*ALAEPGAEGPR.L                  |            | 3 | 4,9996 | 0,345 | 0,404  |
| 11 | Q9NZ23 Q9NZ23_HUMAN | E.DQVVSSDIVNNTHGSIFD.A                  |            | 2 | 4,9757 | 0,51  | 0,376  |

|    |                     |                                      |                 |   |        |       |        |
|----|---------------------|--------------------------------------|-----------------|---|--------|-------|--------|
| 11 | Q7Z5K2 WAPL_HUMAN   | E.STGDPFGFDS#DDESLPVSSK.N            | S77:            | 2 | 4,9492 | 0,405 | 0,788  |
| 11 | Q9BUR4 WDR79_HUMAN  | R.GDPPRLS#PDPVAGSAVSQE.L             | S54:            | 2 | 4,9307 | 0,551 | 0      |
| 11 | Q9BRJ6 CG050_HUMAN  | E.AVLRPGLDAEPELS#PEEQRVLE.R          | S59:            | 3 | 4,9117 | 0,328 | 0,362  |
| 11 | Q96JM3 ZN828_HUMAN  | K.LGSVLSPES#PKPTPLT#PLEPQKPGSVVSPE.L | S145:T152:      | 3 | 4,9111 | 0,436 | 0,227  |
| 11 | P51991 ROA3_HUMAN   | K.RGFVFTFDDHDTVDK.I                  |                 | 3 | 4,9091 | 0,306 | 0,293  |
| 11 | P08069 IGF1R_HUMAN  | E.GFVIHDGECM*QECPSGFIR.N             |                 | 3 | 4,905  | 0,298 | 0,162  |
| 11 | P55265 DSRAD_HUMAN  | K.TAESQT#PTPSATSFSGK.S               | T601:           | 2 | 4,8923 | 0,459 | -0,063 |
| 11 | P80723 BASP_HUMAN   | E.AAAAPAESAAPAAGEEPSKEE.G            |                 | 3 | 4,8904 | 0,419 | 0,094  |
| 11 | Q9H444 CHM4B_HUMAN  | E.ISTAISKPVGFGEFDEDE.L               |                 | 2 | 4,8569 | 0,435 | 0,354  |
| 11 | Q9UKN8 TF3C4_HUMAN  | K.ILLVDSPGM*GNADDEQEE.E              |                 | 2 | 4,8554 | 0,555 | 0,47   |
| 11 | Q13263 TIF1B_HUMAN  | E.TKPVLM*ALAEPGAEGPR.L               |                 | 2 | 4,8354 | 0,373 | 0,067  |
| 11 | P11388 TOP2A_HUMAN  | E.ADDVKGSVPLSS#PPATHFPDETE.I         | S1393:          | 3 | 4,8243 | 0,504 | 0,5    |
| 11 | Q92754 AP2C_HUMAN   | K.SYM*NPGDQS#PADSNK.T                | S434:           | 2 | 4,8186 | 0,528 | 0,286  |
| 11 | Q8ND56 LS14A_HUMAN  | E.TNSGTLPQSSAVGSAFTQDTR.S            |                 | 2 | 4,8128 | 0,566 | 0,11   |
| 11 | Q86YP4 P66A_HUMAN   | E.ATAQKPTGSVGVSTVTT#PPPLVR.G         | T189:           | 3 | 4,8035 | 0,289 | 0,081  |
| 11 | Q9BY44 EIF2A_HUMAN  | R.SDKS#PDLAPTAPQSTPR.N               | S506:           | 2 | 4,7684 | 0,512 | 0,188  |
| 11 | O43166 SI1L1_HUMAN  | E.DQALAQM*KPYSSS#KDS#PTLASK.V        | S1730:S1734:    | 3 | 4,7677 | 1     | 0,14   |
| 11 | Q96DF8 DGC14_HUMAN  | E.NT#PLRVEGSET#PYVDR.T               | T324:T333:      | 3 | 4,7641 | 0,391 | 0,459  |
| 11 | O15534 PER1_HUMAN   | E.LLLQEDSR#GTGSAASGLGSLGSGSGSHE.G    | S1053:          | 3 | 4,7606 | 0,519 | 0,593  |
| 11 | O60232 SSA27_HUMAN  | E.LDS#DVKDNPALNAQAALSQAR.E           | S78:            | 3 | 4,7421 | 0,402 | 0,076  |
| 11 | P23443 KS6B1_HUMAN  | E.GGQLNES#M*DHGGVGPYELGM*EHCE.K      | S53:            | 3 | 4,7311 | 0,459 | 0      |
| 11 | O95208 EPN2_HUMAN   | R.M*AQVATGM*GSNQITFGR.G              |                 | 2 | 4,722  | 0,584 | 0,339  |
| 11 | B0QY74 B0QY74_HUMAN | E.LVSQGIM*PPLKS#PAAFHE.Q             | S33:            | 2 | 4,6898 | 0,502 | 0,363  |
| 11 | Q14247 SRC8_HUMAN   | R.AKTQTPPVSPAPQTEERLPSS#PVYE.D       | S418:           | 3 | 4,6754 | 0,269 | 0,444  |
| 11 | Q63HJ5 Q63HJ5_HUMAN | K.SAPS#PTSNSTYLTM*NAASRE.I           | S295:           | 2 | 4,6696 | 0,545 | 0,112  |
| 11 | Q9NWS9 ZN446_HUMAN  | K.TEEPLGS#PHPSGTVES#PGEGPQDTRIE.G    | S137:S146:      | 3 | 4,6619 | 0,465 | 0,309  |
| 11 | Q2QGD7 ZXDC_HUMAN   | E.LLAPIKVEPDS#PSRPGAVGQQE.G          | S665:           | 3 | 4,6488 | 0,424 | 0,695  |
| 11 | Q15149 PLEC1_HUMAN  | R.SSS#VGS#SSYPISPAVSR.T              | S4386:S4389:    | 2 | 4,6429 | 1     | 0      |
| 11 | Q16881 TRXR1_HUMAN  | D.LIIIGGGSGGLAAAKE.A                 |                 | 2 | 4,6408 | 0,439 | 0,171  |
| 11 | O75955 FLOT1_HUMAN  | K.ITLVSSGS#GTM*GAAK.V                | S385:           | 2 | 4,6224 | 0,485 | -0,165 |
| 11 | P27816 MAP4_HUMAN   | E.DTPSSKPTLLANGGHGVEGSDTTGS#PTFLEE.K | S99:            | 3 | 4,5988 | 0,361 | 0,663  |
| 11 | Q53GS7 GLE1_HUMAN   | E.TSPSSSASALDQPSFVPK.S               |                 | 2 | 4,5701 | 0,463 | 0,32   |
| 11 | Q76FK4 NOL8_HUMAN   | E.DKPTHIFGS#DS#ECETEE.T              | S801:S803:      | 2 | 4,5697 | 0,469 | 0,325  |
| 11 | Q5JPI9 METLA_HUMAN  | R.SDKGS#PGEDGFVPSALGTRE.H            | S21:            | 2 | 4,5536 | 0,518 | 0,117  |
| 11 | Q8WXI9 P66B_HUMAN   | E.RGRLT#PS#PDIIVLS#DNEASSPR.S        | T120:S122:S129: | 3 | 4,5535 | 0,097 | 0      |
| 11 | Q05682 CALD1_HUMAN  | E.KGNVFSS#PTAAGT#PNKE.T              | S724:T730:      | 2 | 4,5449 | 0,473 | 0,131  |
| 11 | Q14247 SRC8_HUMAN   | R.AKTQT#PPVS#PAPQTEERLPSS#PVYE.D     | T401:S405:S418: | 3 | 4,5419 | 1     | 1,382  |
| 11 | Q96SB3 NEB2_HUMAN   | E.NGS#TVATAASPAPEEPKAQAPEKE.A        | S331:           | 3 | 4,5402 | 0,421 | -0,217 |
| 11 | Q99459 CDC5L_HUMAN  | E.AQNLM*ALTNVDT#PLKGGLNTPHE.S        | T377:           | 3 | 4,537  | 0,537 | 0,415  |

|    |                    |                                  |              |   |        |       |        |
|----|--------------------|----------------------------------|--------------|---|--------|-------|--------|
| 11 | Q15181 IPYR_HUMAN  | E.FKDKDFAIDIHK.S                 |              | 3 | 4,508  | 0,371 | 0,252  |
| 11 | O75531 BAF_HUMAN   | R.DFVAEPM*GEKPVGSLAGIGE.V        |              | 2 | 4,5066 | 0,503 | 1,753  |
| 11 | Q05524 ENO1B_HUMAN | K.DATNVGDEGGFAPNILENK.E          |              | 2 | 4,5043 | 0,501 | 0,187  |
| 11 | O94826 TOM70_HUMAN | E.GYALYAQALTDQQQFGKADE.M         |              | 2 | 4,4901 | 0,458 | 0,44   |
| 11 | Q8WWM7 ATX2L_HUMAN | E.VDGLLTSEPM*GS#PVSSK.T          | S594:        | 2 | 4,4722 | 0,358 | 0,136  |
| 11 | P18858 DNL1_HUMAN  | K.GQKPALDCSQVS#PPRPATSPE.N       | S91:         | 3 | 4,4715 | 0,262 | 0,556  |
| 11 | Q13283 G3BP1_HUMAN | K.SSS#PAPADIAQTVQEDLR.T          | S232:        | 2 | 4,463  | 0,479 | 0,373  |
| 11 | Q07955 SFRS1_HUMAN | E.AGDVCIADVYRDGTGVVE.F           |              | 2 | 4,4445 | 0,375 | 0,125  |
| 11 | P35527 K1C9_HUMAN  | R.GSGSGSYGGGGSGGGYGGGSGSR.G      |              | 2 | 4,4077 | 0,511 | 0,477  |
| 11 | Q9UNI6 DUS12_HUMAN | E.LFAVDPTTVSQGLKDE.V             |              | 2 | 4,3966 | 0,417 | 0,142  |
| 11 | O00505 IMA3_HUMAN  | E.DSDVDADFKAQNVTL.E.A            |              | 2 | 4,3916 | 0,441 | 0,207  |
| 11 | Q99459 CDC5L_HUMAN | E.DGM*ADYSDPSYVKQM*E.R           |              | 2 | 4,3741 | 0,542 | -0,327 |
| 11 | Q8IZH2 XRN1_HUMAN  | E.AQSSQATPVQTSQPDSSNIVKVS#PRE.S  | S1645:       | 3 | 4,3729 | 0,407 | 0      |
| 11 | Q8NG31 CASC5_HUMAN | R.KSLGT#PTVICT#PTEE.S            | T1011:T1017: | 2 | 4,37   | 0,497 | 0,408  |
| 11 | Q5EBL2 ZN628_HUMAN | E.HQPCPGPDAAPQPQEAPEAPK.A        |              | 3 | 4,3624 | 0,355 | 0,319  |
| 11 | O94826 TOM70_HUMAN | E.GYALYAQALTDQQQFGKADE.M         |              | 3 | 4,3584 | 0,444 | 0,743  |
| 11 | Q13263 TIF1B_HUMAN | R.STAPSAASASASAAASS#PAGGGAEALE.L | S50:         | 3 | 4,3522 | 0,491 | 0,076  |
| 11 | Q15149 PLEC1_HUMAN | E.ILTDPSDDTKGFFDPNTEE.N          |              | 2 | 4,3506 | 0,437 | 0,456  |
| 11 | Q8NC51 PAIRB_HUMAN | K.QISY#NYSDDLQSNVTEETPE.G        | Y244:        | 2 | 4,3405 | 0,572 | 0,304  |
| 11 | Q96T23 RSF1_HUMAN  | K.VGSPLDYSLVDLPSTNGQS#PGK.A      | S1365:       | 2 | 4,3378 | 0,537 | 0,739  |
| 11 | P63279 UBC9_HUMAN  | R.KDHPFGFVAVPTK.N                |              | 3 | 4,3359 | 0,344 | 0,444  |
| 11 | Q8IY92 BTBDC_HUMAN | E.GGS#PVSGQLLAGVQVQK.Q           | S201:        | 3 | 4,3358 | 0,284 | 0,107  |
| 11 | P08107 HSP71_HUMAN | R.IINEPTAAAIAYGLDR.T             |              | 2 | 4,33   | 0,5   | -0,217 |
| 11 | Q15642 CIP4_HUMAN  | R.APS#DSSLGTPSDGRPE.L            | S296:        | 2 | 4,321  | 0,568 | -0,148 |
| 11 | P22626 ROA2_HUMAN  | K.RGFGFVTFDDHDPVDK.I             |              | 3 | 4,3171 | 0,264 | 0,593  |
| 11 | P61160 ARP2_HUMAN  | E.LLFNTIQAADIDTR.S               |              | 3 | 4,3163 | 0,333 | 0,345  |
| 11 | P04083 ANXA1_HUMAN | E.VVLALLKTPAQFDADE.L             |              | 2 | 4,3133 | 0,45  | 0,071  |
| 11 | Q8IW19 APLF_HUMAN  | E.DNILNETPKS#PVINLPHE.T          | S131:        | 3 | 4,3025 | 0,278 | 0,347  |
| 11 | Q5T200 ZC3HD_HUMAN | E.SKLLDAHS#LGS#GAGE.G            | S1452:S1455: | 2 | 4,3016 | 0,536 | 0,304  |
| 11 | O95817 BAG3_HUMAN  | E.VKVPPAPVPCPPPS#PGPSAVPSSPK.S   | S377:        | 3 | 4,2939 | 0,416 | -1,448 |
| 11 | P18858 DNL1_HUMAN  | E.ALS#PAKQKPALDCSQVS#PPRPATSPE.N | S76:S91:     | 3 | 4,2764 | 0,466 | -0,186 |
| 11 | Q13546 RIPK1_HUMAN | R.SNSAT#EQPGSLHSSQGLGM*GPVEE.S   | T337:        | 2 | 4,2764 | 0,492 | 0,391  |
| 11 | P22314 UBA1_HUMAN  | R.LAGTQPLEVLEAVQR.S              |              | 3 | 4,274  | 0,349 | 0,113  |
| 11 | Q5VT52 K0460_HUMAN | E.AASQSTSAS#PANTTVSTIK.G         | S564:        | 2 | 4,2693 | 0,434 | -0,321 |
| 11 | O14795 UN13B_HUMAN | R.DGQAGFGQEKEPLEVTGQAE.K         |              | 2 | 4,2665 | 0,453 | 0,35   |
| 11 | Q12888 TP53B_HUMAN | E.IEPKNS#PEDLGLSLTGDSCK.L        | S500:        | 3 | 4,2626 | 0,461 | 0,245  |
| 11 | O75694 NU155_HUMAN | E.DQACATCLILACSTAACDRE.V         |              | 3 | 4,2618 | 0,441 | 0,64   |
| 11 | P46821 MAP1B_HUMAN | R.ASVSPM*DEPVPDSESPIEK.V         |              | 2 | 4,2552 | 0,444 | 0,421  |
| 11 | Q9BV73 CP250_HUMAN | E.KAQDLALSQAQTKAS#VSS#LQE.V      | S2186:S2189: | 3 | 4,252  | 0,227 | 0,078  |

|    |                     |                                       |                 |   |        |       |        |
|----|---------------------|---------------------------------------|-----------------|---|--------|-------|--------|
| 11 | P49840 GSK3A_HUMAN  | R.T#SSFAEPGGGGGGGGGGPGGSASGPGGTGGGK.A | T19:            | 2 | 4,2503 | 0,483 | 0,971  |
| 11 | O43399 TPD54_HUMAN  | E.NGSDNLPSSAGSGDKPLSDPAPF.-           |                 | 2 | 4,249  | 0,482 | 0,109  |
| 11 | Q12802 AKP13_HUMAN  | E.NALSSGTLQEEQRT#PPPGQDTQQFHE.K       | T953:           | 3 | 4,2372 | 0,308 | 0,554  |
| 11 | Q3KQU3 MA7D1_HUMAN  | E.KESAAPAS#PAPS#PAPSPT#PAPPQK.E       | S544:S548:T554: | 3 | 4,2267 | 0,41  | 0      |
| 11 | Q9Y4G8 RPGF2_HUMAN  | R.KGYTLAPSGTVDNFSDSGHSE.I             |                 | 3 | 4,2256 | 0,299 | 0      |
| 11 | P51610 HCFC1_HUMAN  | E.AAASLVTSTVGGQNGSVVR.V               |                 | 3 | 4,2029 | 0,437 | 0,198  |
| 11 | P18583 SON_HUMAN    | E.HNTVCAAGTS#PVGE.I                   | S1556:          | 2 | 4,1982 | 0,545 | -0,082 |
| 11 | Q9BVGW5 TIPIN_HUMAN | E.TLLDQS#FKNVQQQLDATSR.N              | S282:           | 3 | 4,1971 | 0,268 | 0,322  |
| 11 | O94842 TOX4_HUMAN   | E.LVSGS#PVALS#PQPR.C                  | S562:S567:      | 2 | 4,1915 | 0,326 | 1,012  |
| 11 | O43379 WDR62_HUMAN  | E.LQAITTATTPS#LDSEGQEPALR.S           | S1270:          | 3 | 4,178  | 0,425 | 0,308  |
| 11 | P09496 CLCA_HUMAN   | E.SNGPTDSYAAISQVDR.L                  |                 | 2 | 4,1721 | 0,454 | -0,145 |
| 11 | Q9UNS2 CSN3_HUMAN   | K.SM*GS#QEDDSGNKPSSYS.-               | S410:           | 2 | 4,17   | 0,546 | 0,978  |
| 11 | P04406 G3P_HUMAN    | K.LVINGNPITIFQER.D                    |                 | 2 | 4,1638 | 0,318 | 0,302  |
| 11 | P18858 DNL1_HUMAN   | E.DEALS#PAKGQKPALDCSQVS#PPRPATSPE.N   | S76:S91:        | 3 | 4,1634 | 0,408 | -0,458 |
| 11 | O94826 TOM70_HUMAN  | E.GYALYAQALTDQQQFGK.A                 |                 | 3 | 4,1575 | 0,432 | 0,385  |
| 11 | Q9UKI8 TLK1_HUMAN   | R.FTGVASGSTGSGSCSVGAK.A               |                 | 2 | 4,1553 | 0,537 | -0,268 |
| 11 | Q14247 SRC8_HUMAN   | R.AKTQT#PPVS#PAPQPTEER.L              | T401:S405:      | 2 | 4,1522 | 0,414 | 0      |
| 11 | P04083 ANXA1_HUMAN  | E.DFGVNEDLADSDAR.A                    |                 | 2 | 4,1445 | 0,507 | 1,041  |
| 11 | P09874 PARP1_HUMAN  | R.GGS#DDSSKDPIDVNYE.K                 | S782:           | 2 | 4,1397 | 0,441 | 0,206  |
| 11 | P13645 K1C10_HUMAN  | K.GSLGGGFSSGGFSGGSFSR.G               |                 | 2 | 4,1383 | 0,609 | -0,071 |
| 11 | Q8N556 AFAP1_HUMAN  | E.AYSGCSGPVDSECPSS#PVHKAEL            | S265:           | 3 | 4,1269 | 0,404 | 0      |
| 11 | Q12888 TP53B_HUMAN  | K.NS#PEDLGLSLTGDSC.L                  | S500:           | 2 | 4,1197 | 0,503 | -0,069 |
| 11 | P31949 S10AB_HUMAN  | E.FLNLIGGLAM*ACHD.S                   |                 | 2 | 4,1071 | 0,501 | 0,315  |
| 11 | Q6ZRV2 FA83H_HUMAN  | R.RLS#LGQGDSTEAATEE.R                 | S1003:          | 2 | 4,0971 | 0,459 | -0,28  |
| 11 | Q9NYV4 CD2L7_HUMAN  | E.TTSGTSTEPVKNS#SPAPPQPAPGKVE.S       | S1082:          | 2 | 4,094  | 0,456 | 0,554  |
| 11 | P35527 K1C9_HUMAN   | K.VQALEEANNDLENK.I                    |                 | 2 | 4,0902 | 0,418 | -0,461 |
| 11 | Q96T23 RSF1_HUMAN   | K.VGS#PLDYSVLDPSTNGQSPGK.A            | S1349:          | 3 | 4,0853 | 0,292 | 0,554  |
| 11 | Q99567 NUP88_HUMAN  | K.NQS#PTEAEKPASSSLPSS#PPPQLLTR.N      | S35:S50:        | 3 | 4,0705 | 1     | 0,254  |
| 11 | Q02790 FKBP4_HUMAN  | E.SGAQSAPLPM*EGVDISPKQDE.G            |                 | 3 | 4,0616 | 0,336 | 0,59   |
| 11 | Q96FF9 CDA5_HUMAN   | K.THS#VPATPTSTPVPNPEAE.S              | S107:           | 2 | 4,0589 | 0,462 | 0,121  |
| 11 | Q8ND56 LS14A_HUMAN  | E.TSNSGTLQSSAVGSAFTQDTR.S             |                 | 3 | 4,0538 | 0,394 | 0,248  |
| 11 | Q92888 ARHG1_HUMAN  | E.GAETES#PEPGDEGEPGR.S                | S374:           | 2 | 4,0478 | 0,521 | 0,068  |
| 11 | Q5VT52 K0460_HUMAN  | E.AASQSTSAS#PANTTVSTIK.G              | S564:           | 3 | 4,0342 | 0,304 | -0,481 |
| 11 | Q15149 PLEC1_HUMAN  | R.SSS#VGSSSYPIS#PAVSR.T               | S4386:S4396:    | 2 | 4,0338 | 1     | 0,382  |
| 11 | Q96RT7 GCP6_HUMAN   | E.AEPNTPRPQQS#PPGHTSQSALSGLAQSTVLD.C  | S1296:          | 3 | 4,0295 | 0,431 | 0,45   |
| 11 | Q14974 IMB1_HUMAN   | E.AIGYICQDIDPEQLQDKSNE.I              |                 | 2 | 4,0184 | 0,513 | 0,313  |
| 11 | Q06787 FMR1_HUMAN   | R.RGPGYTSGTNSEASNAS#ETE.S             | S500:           | 2 | 4,0164 | 0,406 | 0,116  |
| 11 | O15371 EIF3D_HUMAN  | R.YNFPNPNPFVEDDM*DKNE.I               |                 | 2 | 4,0095 | 0,275 | 0,444  |
| 11 | P35527 K1C9_HUMAN   | R.SGGGGGGGLGSGGSIR.S                  |                 | 2 | 3,9957 | 0,532 | -0,198 |

|    |                    |                                      |              |   |        |       |        |
|----|--------------------|--------------------------------------|--------------|---|--------|-------|--------|
| 11 | P39880 CUX1_HUMAN  | E.IQAGSQGQAGASDS#PSAR.S              | S1321:       | 2 | 3,9941 | 0,508 | -0,276 |
| 11 | P07737 PROF1_HUMAN | R.DSLLQDGEFSM*DLR.T                  |              | 2 | 3,993  | 0,416 | 0      |
| 11 | Q9Y478 AAKB1_HUMAN | E.LSSS#PPGPYHQEPYVCKPEE.R            | S182:        | 3 | 3,9847 | 0,189 | 0,461  |
| 11 | Q8N1G2 K0082_HUMAN | E.LALSLSSTSDDEPPSSVSHGAK.A           |              | 2 | 3,98   | 0,497 | 0,223  |
| 11 | P46821 MAP1B_HUMAN | K.VLS#PLRS#PPLIGSESAYE.S             | S1396:S1400: | 2 | 3,9709 | 0,301 | 1,058  |
| 11 | P14324 FPPS_HUMAN  | E.KQDFVQHFSQIVR.V                    |              | 3 | 3,9705 | 0,383 | 0      |
| 11 | Q12888 TP53B_HUMAN | E.VLSTQEDLFDQSNK.T                   |              | 2 | 3,9688 | 0,463 | 0,075  |
| 11 | P50454 SERPH_HUMAN | R.SAGLAFSLYQAM*AK.D                  |              | 2 | 3,9683 | 0,526 | 0,248  |
| 11 | Q86VP6 CAND1_HUMAN | E.TIVDTLCTNM*LSDK.E.Q                |              | 2 | 3,9672 | 0,46  | -0,069 |
| 11 | O75531 BAF_HUMAN   | R.DFVAEPMGEKPVGSLAGIGE.V             |              | 2 | 3,9662 | 0,575 | 0,244  |
| 11 | Q16643 DREB_HUMAN  | E.DGSDDLKLAASGEGGLQE.L               |              | 2 | 3,9622 | 0,489 | 0,138  |
| 11 | Q02790 FKBP4_HUMAN | E.SGAQSAPLPM*EGVDISPKQDE.G           |              | 2 | 3,9619 | 0,429 | 0,225  |
| 11 | P49321 NASP_HUMAN  | E.AESLDPTVKPVDVGGDEPEEK.V            |              | 3 | 3,9593 | 0,414 | -1,572 |
| 11 | Q00613 HSF1_HUMAN  | E.SEPAPAS#VTALTDAR.G                 | S344:        | 2 | 3,9585 | 0,406 | 0,312  |
| 11 | Q6P2E9 EDC4_HUMAN  | E.LGPQLGLDGGPGDGRHNT#PSLLE.A         | T807:        | 3 | 3,9493 | 0,342 | 0,22   |
| 11 | P55072 TERA_HUMAN  | E.DNSVVSLSQPKM*DE.L                  |              | 2 | 3,9431 | 0,43  | 0,156  |
| 11 | Q9UHY7 ENOPH_HUMAN | E.DAHLDGAVPIPAASNGVDD.L              |              | 2 | 3,9385 | 0,592 | 0,323  |
| 11 | P24534 EF1B_HUMAN  | E.DYVQSM*DVAAFNKI.-                  |              | 2 | 3,9346 | 0,416 | 0,151  |
| 11 | O60271 JIP4_HUMAN  | E.TRNVTSGS#AENEE.K                   | S332:        | 2 | 3,9281 | 0,305 | 0,497  |
| 11 | P60709 ACTB_HUMAN  | D.LYANTVLSGGTTM*YPGIADR.M            |              | 3 | 3,9261 | 0,279 | 0,778  |
| 11 | O60271 JIP4_HUMAN  | E.TRNVS#TGS#AENEKSE.V                | S329:S332:   | 2 | 3,9157 | 0,584 | 0,386  |
| 11 | Q96C36 P5CR2_HUMAN | E.SPTVSTLTSS#PGK.L                   | S304:        | 2 | 3,9151 | 0,493 | -0,339 |
| 11 | P39880 CUX1_HUMAN  | E.IQAGSQGQAGASDPSAR.S                |              | 2 | 3,9019 | 0,575 | 0,072  |
| 11 | Q8TBC4 UBA3_HUMAN  | E.NCPACSQLPQNIQFSPSAK.L              |              | 3 | 3,8927 | 0,418 | 0,256  |
| 11 | Q13546 RIPK1_HUMAN | R.S#NSATEQPGSLHSSQGLGM*GPVEE.S       | S333:        | 3 | 3,892  | 0,354 | 0,147  |
| 11 | Q92598 HS105_HUMAN | E.LNNTCEPVVTQPKPK.I                  |              | 2 | 3,8811 | 0,38  | 0      |
| 11 | P17706 PTN2_HUMAN  | E.DLSPAFDHS#PNKIM*TE.K               | S304:        | 2 | 3,8722 | 0,462 | 0,064  |
| 11 | Q5TAQ9 WD42A_HUMAN | E.ASDLSLSLTGDDGGPNR.T                |              | 2 | 3,8706 | 0,449 | -0,073 |
| 11 | O15534 PER1_HUMAN  | R.LRGLDSSS#TAPS#ALGE.R               | S811:S815:   | 2 | 3,8678 | 1     | 0      |
| 11 | P07602 SAP_HUMAN   | K.SLPCDICKDVVTAAGDM*LK.D             |              | 3 | 3,8636 | 0,381 | 0,694  |
| 11 | Q01804 OTUD4_HUMAN | K.TAAAAADVNGFKPLSGNE.Q               |              | 2 | 3,8634 | 0,522 | 0,352  |
| 11 | Q02952 AKA12_HUMAN | E.TDGSTPVADFDAPGTTQKDE.I             |              | 2 | 3,8616 | 0,45  | 0,714  |
| 11 | Q15477 SKIV2_HUMAN | R.GDTVSAAS#PCSAPLAR.A                | S245:        | 2 | 3,8564 | 0,413 | -0,156 |
| 11 | Q92922 SMRC1_HUMAN | R.KHS#PS#PPPPTPE.S                   | S328:S330:   | 2 | 3,8551 | 0,417 | 0,08   |
| 11 | P11388 TOP2A_HUMAN | E.ADDVKGSVPLSSS#PPATHFPDETE.I        | S1393:       | 2 | 3,8533 | 0,496 | 0,381  |
| 11 | P27816 MAP4_HUMAN  | E.DTPSSKPTLLANGGHGVEGSDTTGS#PTEFLE.E | S99:         | 3 | 3,843  | 0,337 | 0,23   |
| 11 | Q9Y613 EPN1_HUMAN  | R.SPGAFDM*SGVRGS#LAE.A               | S422:        | 2 | 3,8427 | 0,543 | 0,073  |
| 11 | Q9HCD6 TANC2_HUMAN | E.S#FSPSSISNIAFYNK.T                 | S1890:       | 2 | 3,8382 | 0,348 | 0,199  |
| 11 | Q9Y5S9 RBM8A_HUMAN | E.DYDSVEQDGEDPGPQR.S                 |              | 2 | 3,8359 | 0,486 | 0      |

|    |                     |                                        |            |   |        |       |        |
|----|---------------------|----------------------------------------|------------|---|--------|-------|--------|
| 11 | Q6ZN18 AEBP2_HUMAN  | E.LSRLS#PLPPGS#PGSAAR.G                | S18:S24:   | 2 | 3,8333 | 0,46  | 0,134  |
| 11 | Q7Z417 NUFP2_HUMAN  | K.NLS#SDEATNPISR.V                     | S112:      | 2 | 3,8292 | 0,377 | 0,329  |
| 11 | Q5JPI9 METLA_HUMAN  | R.SDKGS#PGEDGFVPSALGTR.E               | S21:       | 3 | 3,828  | 0,203 | 0,093  |
| 11 | O15372 EIF3H_HUMAN  | E.ITNCFPPQHTEDDADFDE.V                 |            | 2 | 3,826  | 0,461 | 0,531  |
| 11 | O95208 EPN2_HUMAN   | R.M*AQVATGM*GSNQITFGR.G                |            | 3 | 3,8233 | 0,456 | 0,609  |
| 11 | Q96SB3 NEB2_HUMAN   | E.NGS#TVATAASPAPEPK.A                  | S331:      | 2 | 3,8187 | 0,444 | 0,286  |
| 11 | O14757 CHK1_HUMAN   | K.HIQSNLDFSPVNSASSE.N                  |            | 2 | 3,8167 | 0,485 | 0      |
| 11 | Q13263 TIF1B_HUMAN  | E.GTSAPGGGGPGLTDDS#ATICR.V             | S624:      | 2 | 3,8114 | 0,468 | -0,991 |
| 11 | Q9ULR0 ISY1_HUMAN   | K.FIAHVPVPSQQEIEE.A                    |            | 2 | 3,8081 | 0,298 | 0,212  |
| 11 | P18583 SON_HUMAN    | R.AGIEGPLLASDVGR.D                     |            | 2 | 3,8053 | 0,344 | 0,18   |
| 11 | Q8IVF2 AHNK2_HUMAN  | R.KPDAEVLTVES#PEEE.A                   | S5175:     | 2 | 3,7883 | 0,459 | 0,07   |
| 11 | Q13428 TCOF_HUMAN   | K.LDSSPSVSTLAAKDDPDGKQE.A              |            | 2 | 3,7802 | 0,4   | 0,326  |
| 11 | Q5VUA4 ZN318_HUMAN  | E.VAILQVDDDSGDPLNLVK.A                 |            | 3 | 3,7764 | 0,275 | 0,096  |
| 11 | Q00688 FKBP3_HUMAN  | K.TANKDHLVTAYNHLFE.T                   |            | 2 | 3,7761 | 0,525 | -0,065 |
| 11 | Q9UFM0 Q9UFM0_HUMAN | R.DPPSLSSAS#PPGSRE.S                   | S10:       | 2 | 3,776  | 0,512 | -0,078 |
| 11 | Q16643 DREB_HUMAN   | R.GPGS#PAEDLM*FM*E.S                   | S416:      | 2 | 3,7734 | 0,306 | 0,327  |
| 11 | Q8N1G2 K0082_HUMAN  | E.LALSLSSTS#DDEPPSSVSHGAK.A            | S31:       | 3 | 3,772  | 0,303 | 0,404  |
| 11 | Q92754 AP2C_HUMAN   | K.SYM*NPGDQS#PADSNKTLK.K               | S434:      | 2 | 3,7701 | 0,499 | -0,357 |
| 11 | Q03188 CENPC_HUMAN  | E.ASLQFVVEPSEAT#NRSVQAHE.V             | T107:      | 3 | 3,7646 | 0,415 | 0,308  |
| 11 | P17987 TCPA_HUMAN   | E.AAM*LGQAEVQER.I                      |            | 2 | 3,7642 | 0,403 | 0,158  |
| 11 | Q8N163 K1967_HUMAN  | E.AQGETEPTQAPDALEQAADTSR.R             |            | 3 | 3,7557 | 0,398 | 0,303  |
| 11 | Q8WXI9 P66B_HUMAN   | E.RGRLT#PS#PDIIVLSDNE.A                | T120:S122: | 2 | 3,7519 | 0,511 | 0,239  |
| 11 | Q13885 TBB2A_HUMAN  | R.AILVDLEPGTM*DSVR.S                   |            | 2 | 3,7343 | 0,456 | 0,374  |
| 11 | Q6KB66 K2C80_HUMAN  | E.KYFSQESEVS#E.-                       | S451:      | 2 | 3,7335 | 0,351 | -0,173 |
| 11 | Q15424 SAFB1_HUMAN  | E.LAEAPTEAPS#PEAR.D                    | S344:      | 2 | 3,7333 | 0,419 | -0,161 |
| 11 | Q13263 TIF1B_HUMAN  | R.VCQKPGDLVM*CNQCE.F                   |            | 2 | 3,7325 | 0,55  | 0      |
| 11 | Q5T1M5 FKB15_HUMAN  | E.QSASASSGQPQAPLNR.E                   |            | 2 | 3,731  | 0,478 | -0,153 |
| 11 | Q9H444 CHM4B_HUMAN  | E.ISTAISKVGFGEFDE.D                    |            | 2 | 3,7299 | 0,479 | -0,067 |
| 11 | Q92598 HS105_HUMAN  | E.LNNTCEPVVTQPKPK.I                    |            | 3 | 3,7279 | 0,393 | 0,106  |
| 11 | Q13263 TIF1B_HUMAN  | E.GTSAPGGGGPGLTDDS#ATICR.V             | T620:      | 2 | 3,7273 | 0,586 | 0,372  |
| 11 | Q96TA1 NIBL1_HUMAN  | K.AVDLGPVKPSDQETGE.Q                   |            | 2 | 3,7224 | 0,452 | 0      |
| 11 | Q96T23 RSF1_HUMAN   | K.VGSPLDYSLVLDLPSTNGQS#PGKAIE.N        | S1365:     | 2 | 3,7217 | 0,364 | -0,093 |
| 11 | P42166 LAP2A_HUMAN  | E.SRSST#PLPTISSAENTR.Q                 | T160:      | 3 | 3,7198 | 0,298 | -0,186 |
| 11 | Q8IZL8 PELP1_HUMAN  | E.RGADTAPTLAPEALPSQGEVER.E             |            | 3 | 3,7131 | 0,302 | 0,404  |
| 11 | P10636 TAU_HUMAN    | K.SPVVSGDTS#PR.H                       | S721:      | 2 | 3,7093 | 0,438 | -0,31  |
| 11 | Q9BY44 EIF2A_HUMAN  | R.SDKS#PDLAPTPAPQSTPR.N                | S506:      | 3 | 3,7014 | 0,25  | 0,376  |
| 11 | P30622 CLIP1_HUMAN  | R.AT#SPLCTSTASM*VSSSPSTPSNIPQKPSQPAK.E | T146:      | 3 | 3,6981 | 0,273 | 0,751  |
| 11 | P54105 ICLN_HUMAN   | E.VDTTPTVAGQFEDADV.DH.-                |            | 3 | 3,6862 | 0,443 | 0,286  |
| 11 | P33991 MCM4_HUMAN   | E.NVGIDITEPLYM*QR.L                    |            | 2 | 3,6673 | 0,364 | 0      |

|    |                    |                                     |                 |   |        |       |        |
|----|--------------------|-------------------------------------|-----------------|---|--------|-------|--------|
| 11 | Q99700 ATX2_HUMAN  | E.FVSHNPPSEATPPVAR.T                |                 | 3 | 3,6448 | 0,099 | -0,515 |
| 11 | Q03188 CENPC_HUMAN | E.AS#LQFVVEPSEATNR.S                | S96:            | 2 | 3,6414 | 0,409 | 0,353  |
| 11 | Q8IXM2 CQ049_HUMAN | E.LTM*QLHPVADS#SPAGAK.W             | S35:            | 3 | 3,64   | 0,332 | -0,503 |
| 11 | Q8NC51 PAIRB_HUMAN | K.QIS#YNYSDLDQSNVTEETPE.G           | S243:           | 3 | 3,6368 | 0,293 | 0,076  |
| 11 | Q8WUA4 TF3C2_HUMAN | E.M*SLPTPLPGFEDS#PDQR.R             | S63:            | 2 | 3,6313 | 0,344 | 0,123  |
| 11 | P11388 TOP2A_HUMAN | K.GSVPLSS#PPATHFPDETE.I             | S1393:          | 2 | 3,6233 | 0,431 | 0,42   |
| 11 | Q8TDY2 RBCC1_HUMAN | E.M*SQTITDLLSEQK.A                  |                 | 2 | 3,6153 | 0,375 | 0      |
| 11 | P35568 IRS1_HUMAN  | E.QQQQQQLLHPPEPKS#PGEYVNIE.F        | S892:           | 3 | 3,6146 | 0,209 | 0,256  |
| 11 | Q14247 SRC8_HUMAN  | K.TQT#PPVS#PAPQTEERLPS#SPVYE.D      | T401:S405:S417: | 3 | 3,6145 | 1     | 0,707  |
| 11 | Q8IZ69 HTF9C_HUMAN | R.VEHPNGT#GVLGPHSPPAQPTPGPPDNTLQE.T | T595:           | 3 | 3,6141 | 0,288 | 0,352  |
| 11 | Q9BVS4 RIOK2_HUMAN | E.LLHPLGPDDKNIETK.E                 |                 | 3 | 3,6123 | 0,377 | 0,541  |
| 11 | P35527 K1C9_HUMAN  | K.VQALEEANNDLENK.I                  |                 | 3 | 3,6108 | 0,369 | -0,346 |
| 11 | Q2QGD7 ZXDC_HUMAN  | E.LLAPIKVEPDS#PSRPGAVGQQE.G         | S665:           | 2 | 3,6058 | 0,39  | 0,412  |
| 11 | Q7Z460 CLAP1_HUMAN | R.SSS#PGKLLSGYGGLTGGSSR.G           | S688:           | 3 | 3,5988 | 0,272 | 0,091  |
| 11 | Q9Y4L1 HYOU1_HUMAN | E.DEGVGATTVM*LKE.K                  |                 | 2 | 3,595  | 0,455 | 0,268  |
| 11 | O75531 BAF_HUMAN   | K.HRDFVAEPM*GEKPVGSLAGIGE.V         |                 | 3 | 3,5942 | 0,249 | 0,396  |
| 11 | Q14721 KCNB1_HUMAN | E.GQLLYSVDSS#PPKSLPGSTS#PK.F        | S773:S783:      | 3 | 3,5915 | 1     | -0,076 |
| 11 | Q9UHI6 DDX20_HUMAN | K.ATS#PKELGCDR.Q                    | S532:           | 3 | 3,5914 | 0,313 | 0,278  |
| 11 | Q14692 BMS1_HUMAN  | K.AGLSPANCSQSDRVNLE.K               |                 | 2 | 3,5877 | 0,399 | -0,352 |
| 11 | P35908 K22E_HUMAN  | R.NLDLDSIIAEVK.A                    |                 | 2 | 3,5877 | 0,364 | -0,183 |
| 11 | Q86VM9 ZCH18_HUMAN | R.DSGSDQDLGAGVR.A                   |                 | 2 | 3,5815 | 0,402 | -0,964 |
| 11 | Q9UJU6 DBNL_HUMAN  | R.AM*S#TTSISSPQPGK.L                | S269:           | 2 | 3,5795 | 0,535 | 0,164  |
| 11 | P22234 PUR6_HUMAN  | E.LLDS#PGKVLLQSK.D                  | S27:            | 2 | 3,5751 | 0,369 | 0,495  |
| 11 | Q8WXD5 GEMI6_HUMAN | E.DGSM*SVTGIM*GHAVQTVE.T            |                 | 2 | 3,5733 | 0,469 | -0,132 |
| 11 | P27816 MAP4_HUMAN  | D.M*ES#PTKLDVTLAK.D                 | S280:           | 3 | 3,5723 | 0,214 | 0      |
| 11 | O75509 TNR21_HUMAN | E.NSALLTVEPS#PQDKNK.G               | S541:           | 2 | 3,5645 | 0,387 | 0      |
| 11 | P33778 H2B1B_HUMAN | K.AM*GIM*NSFVNDIFER.I               |                 | 2 | 3,5626 | 0,524 | -0,137 |
| 11 | Q15181 IPYR_HUMAN  | E.FKDKDFAIDIK.S                     |                 | 2 | 3,5611 | 0,341 | -0,168 |
| 11 | P19838 NFKB1_HUMAN | E.VIQAAS#SPVKTTSQLHSLPLS#PASTR.Q    | S892:S907:      | 3 | 3,5551 | 1     | 0,131  |
| 11 | Q9NY61 AATF_HUMAN  | R.NSEDDGVVM*TFSSVK.V                |                 | 2 | 3,5432 | 0,434 | 0,823  |
| 11 | Q9Y6A5 TACC3_HUMAN | R.HGGVCAPAAVATS#PPGAIPK.E           | S250:           | 3 | 3,5409 | 0,199 | 0      |
| 11 | Q05524 ENO1B_HUMAN | K.DATNVGDEGGFAPNILENK.E             |                 | 3 | 3,5396 | 0,316 | 0,093  |
| 11 | Q8WZ73 RFFL_HUMAN  | R.RAS#LSDLTDLEDIE.G                 | S240:           | 2 | 3,5396 | 0,208 | 0,295  |
| 11 | Q9P1Y6 K1542_HUMAN | E.SIFGTEPEPPLGPSSAM*SK.L            |                 | 2 | 3,5326 | 0,456 | 0,752  |
| 11 | Q86WC4 OSTM1_HUMAN | K.RLKSST#S#FANIQE.N                 | T324:S325:      | 2 | 3,5323 | 0,35  | -0,074 |
| 11 | Q14247 SRC8_HUMAN  | R.AKTQT#PPVS#PAPQPTTEE.R            | T401:S405:      | 2 | 3,5285 | 0,34  | 0,881  |
| 11 | P21127 CD2L1_HUMAN | E.GDYVPDS#PALS#PIELKQELPK.Y         | S410:S414:      | 2 | 3,5244 | 0,359 | 0,298  |
| 11 | Q8WWM7 ATX2L_HUMAN | E.VDGLLTSEPM*GSPVSSK.T              |                 | 2 | 3,5232 | 0,276 | -0,638 |
| 11 | Q12888 TP53B_HUMAN | E.TEPVEQDSS#QPSLPLVR.A              | S831:           | 2 | 3,5209 | 0,262 | 0,56   |



|    |                    |                                      |                    |   |        |       |        |
|----|--------------------|--------------------------------------|--------------------|---|--------|-------|--------|
| 11 | Q14247 SRC8_HUMAN  | R.AKTQT#PPVS#PAPQPTEERLPS#SPVYE.D    | T401:S405:S417:    | 3 | 3,5207 | 0,103 | 0,36   |
| 11 | Q99459 CDC5L_HUMAN | E.DGM*ADYSDPSYVK.Q                   |                    | 2 | 3,5094 | 0,418 | -0,083 |
| 11 | Q92754 AP2C_HUMAN  | K.SYM*NGDQS#PADSNK.T                 | S434:              | 3 | 3,5092 | 0,335 | 0,536  |
| 11 | Q14247 SRC8_HUMAN  | R.AKTQT#PPVSPAPQPTEE.R               | T401:              | 2 | 3,5069 | 0,399 | 0      |
| 11 | Q12888 TP53B_HUMAN | K.TVSS#DGCSTPSREE.G                  | S316:              | 2 | 3,501  | 0,347 | 0      |
| 11 | Q86SQ0 PHLB2_HUMAN | E.LLSDLTRT#PPPPSSTFPK.A              | T550:              | 3 | 3,4936 | 0,321 | 0,36   |
| 11 | Q9UQ35 SRRM2_HUMAN | E.KSATRPS#PS#PERSSTGPEPPAPT#PLLA.E.R | S351:S353:T367:    | 3 | 3,493  | 1     | 0,473  |
| 11 | Q9Y490 TLN1_HUMAN  | E.GSFVDYQTT#M*VR.T                   | T1856:             | 2 | 3,4873 | 0,45  | -0,081 |
| 11 | O95373 IPO7_HUMAN  | E.TENDDLTNVIQK.M                     |                    | 2 | 3,486  | 0,419 | 0      |
| 11 | P39880 CUX1_HUMAN  | E.IQAGSQQGAGAS#DSPSAR.S              | S1319:             | 3 | 3,4857 | 0,344 | 0,103  |
| 11 | P35579 MYH9_HUMAN  | K.LKQVEDEKNSFR.E                     |                    | 3 | 3,4835 | 0,283 | 0,245  |
| 11 | P98170 BIRC4_HUMAN | E.VLVADLVNAQK.D                      |                    | 2 | 3,4827 | 0,481 | 0,209  |
| 11 | Q14C86 GAPD1_HUMAN | E.LPPAAAGATSLVAAPHSSS#SSPS#K.D       | S948:S952:         | 3 | 3,4811 | 0,095 | 0,445  |
| 11 | Q7Z3K3 POGZ_HUMAN  | R.SFLVASVLPGPDGNINS#PTR.N            | S1338:             | 2 | 3,4629 | 0,444 | 0,46   |
| 11 | Q53GS7 GLE1_HUMAN  | E.TSPSSTSASALDQPSFVPK.S              |                    | 3 | 3,462  | 0,259 | 0,288  |
| 11 | O15357 SHIP2_HUMAN | K.VFDQSS#PM*VTR.L                    | S241:              | 2 | 3,4613 | 0,412 | -0,082 |
| 11 | P54105 ICLN_HUMAN  | D.TTPTVAGQFEDADVDH.-                 |                    | 2 | 3,4608 | 0,536 | 0,143  |
| 11 | P46100 ATRX_HUMAN  | R.LAM*NQNTDKISGSGSNSDM*M*E.N         |                    | 3 | 3,4581 | 0,26  | 0      |
| 11 | Q92538 GBF1_HUMAN  | E.GTHVEKSQSAS#VES#IPEVLEE.C          | S349:S352:         | 3 | 3,4566 | 0,084 | 0,152  |
| 11 | O95208 EPN2_HUMAN  | R.MAQVATGM*GSNQITFGR.G               |                    | 2 | 3,4548 | 0,507 | 0,342  |
| 11 | P46821 MAP1B_HUMAN | E.RASVSPM*DEPVPDESPIEK.V             |                    | 3 | 3,4516 | 0,282 | 0,418  |
| 11 | Q96A49 SYAP1_HUMAN | E.AVRPKT#PPVVIK.S                    | T248:              | 3 | 3,4485 | 0,229 | 0,132  |
| 11 | Q7Z6Z7 HUWE1_HUMAN | R.DSAVAISGADSR.G                     |                    | 2 | 3,4455 | 0,424 | 0      |
| 11 | Q12888 TP53B_HUMAN | K.TVSSDGCSTPSREE.G                   |                    | 2 | 3,4404 | 0,46  | 0,484  |
| 11 | Q8WUA4 TF3C2_HUMAN | E.MSLPTPLPGFEDS#PDQR.R               | S63:               | 2 | 3,4367 | 0,344 | 0,31   |
| 11 | Q6P0N0 CN106_HUMAN | E.KDYFNSDS#A.-                       | S1131:             | 2 | 3,4286 | 0,413 | 0,443  |
| 11 | P31949 S10AB_HUMAN | E.FLNLIIGLAM*ACHD.S                  |                    | 3 | 3,4274 | 0,381 | 0,236  |
| 11 | Q8N1G4 LRC47_HUMAN | E.NKEEGSL#DTE.A                      | S520:              | 2 | 3,4256 | 0,376 | -0,852 |
| 11 | Q03164 HRX_HUMAN   | K.NALKESS#PAS#PLQIE.S                | S2543:S2546:       | 2 | 3,4201 | 0,286 | 0      |
| 11 | P21333 FLNA_HUMAN  | E.VLVYVEDPAGHQEE.A                   |                    | 2 | 3,4181 | 0,49  | 0      |
| 11 | P31946 1433B_HUMAN | E.ILNS#PEKACSLAK.T                   | S186:              | 2 | 3,4175 | 0,235 | -0,323 |
| 11 | P46821 MAP1B_HUMAN | E.KVSPSKS#PSLSPSPS#PLE.K             | S1256:S1265:       | 3 | 3,4165 | 1     | 0,264  |
| 11 | Q9NPI6 DCP1A_HUMAN | E.RKASS#PS#PLTIGTPE.S                | S523:S525:         | 2 | 3,416  | 0,443 | 0,072  |
| 11 | P35908 K22E_HUMAN  | R.HGGGGGGFGGGGFGSR.S                 |                    | 3 | 3,4126 | 0,357 | 0,485  |
| 11 | O60271 JIP4_HUMAN  | E.TRNVS#TGS#AENEK.S                  | S329:S332:         | 2 | 3,4062 | 0,432 | -0,58  |
| 11 | Q12756 KIF1A_HUMAN | E.GRYGATDLRT#PQPCS#RPAS#PEPE.L       | T1523:S1528:S1532: | 3 | 3,4052 | 0,165 | -0,197 |
| 11 | Q07955 SFRS1_HUMAN | E.AGDVCYADVYR.D                      |                    | 2 | 3,4001 | 0,457 | -0,379 |
| 11 | Q9NWS6 F118A_HUMAN | K.QQS#PDADRVDSTLLGNACQD.C            | S311:              | 3 | 3,3919 | 0,317 | 0,694  |
| 11 | O94762 RECQ5_HUMAN | K.YTGEEDGAGGHS#PAPPQTE.E             | S815:              | 2 | 3,3895 | 0,539 | 0,247  |

|    |                    |                                      |                    |   |        |       |        |
|----|--------------------|--------------------------------------|--------------------|---|--------|-------|--------|
| 11 | P46821 MAP1B_HUMAN | E.GEKLS#PKS#DIS#PLTPRE.S             | S1779:S1782:S1785: | 3 | 3,3894 | 0,316 | 0,524  |
| 11 | O43379 WDR62_HUMAN | E.VEAGPGDQQGDSYL.R.V                 |                    | 3 | 3,3866 | 0,296 | -0,115 |
| 11 | Q76FK4 NOL8_HUMAN  | E.DKPTHIIIFGS#DS#ECETEE.T            | S801:S803:         | 3 | 3,3859 | 0,366 | 0,568  |
| 11 | P38398 BRCA1_HUMAN | E.VDEYSGS#SEKIDLLASDPHE.A            | S425:              | 3 | 3,3836 | 0,21  | 0,242  |
| 11 | Q9NQS7 INCE_HUMAN  | R.TLSPTPAS#ATAPTSQGIPTSDEE.S         | S202:              | 2 | 3,3812 | 0,367 | 0,522  |
| 11 | Q5SW79 CE170_HUMAN | R.QGS#FTIEKPSNPIE.L                  | S838:              | 2 | 3,381  | 0,252 | 0      |
| 11 | Q00688 FKBP3_HUMAN | K.TANKDHLVTAYNHLFE.T                 |                    | 3 | 3,3784 | 0,294 | 0,391  |
| 11 | P18858 DNL1_HUMAN  | E.QATTSAQVACL.YR.K                   |                    | 3 | 3,3759 | 0,291 | 0,311  |
| 11 | Q14160 LAP4_HUMAN  | E.VSPGVIANPFAAGIGHRNS#LE.S           | S1220:             | 2 | 3,3745 | 0,402 | 0,558  |
| 11 | Q9Y6M4 KC1G3_HUMAN | K.QLPTPVGAVQQDPALSS#NRE.A            | S345:              | 2 | 3,3666 | 0,438 | 0,335  |
| 11 | Q14247 SRC8_HUMAN  | E.DVTQVSSAYQK.T                      |                    | 2 | 3,3644 | 0,357 | -0,1   |
| 11 | P31040 DHSA_HUMAN  | K.VSDSISAQYPVVDHE.F                  |                    | 2 | 3,3593 | 0,474 | 0,222  |
| 11 | Q15149 PLEC1_HUMAN | E.FADM*LSGNAGGF.R.S                  |                    | 2 | 3,3571 | 0,493 | -0,18  |
| 11 | O94762 RECQ5_HUMAN | E.GVQGPPM*APEKYTGEEDGAGGHS#PAPPQTE.E | S815:              | 3 | 3,3566 | 0,307 | 0,119  |
| 11 | P68371 TBB2C_HUMAN | R.AVLVDLEPGTM*DSVR.S                 |                    | 2 | 3,3558 | 0,48  | -0,151 |
| 11 | Q5VWN6 CJ018_HUMAN | E.LSGDS#DLDLLGDCRNPR.L               | S1830:             | 3 | 3,3556 | 0,335 | 0      |
| 11 | O75955 FLOT1_HUMAN | E.ISGPLTSANKITLVSSGS#GTM*GAAK.V      | S385:              | 3 | 3,3529 | 0,159 | 0,075  |
| 11 | P35908 K22E_HUMAN  | R.GFSSGSAVVSGGSR.R                   |                    | 2 | 3,3489 | 0,416 | -0,097 |
| 11 | Q9Y5S9 RBM8A_HUMAN | E.DYDSVEQDGDPEPGPQR.S                |                    | 3 | 3,343  | 0,237 | 0,101  |
| 11 | P10244 MYBB_HUMAN  | E.DNSLLNQGF.LQAKPE.K                 |                    | 2 | 3,3398 | 0,361 | 0,073  |
| 11 | Q5VUA4 ZN318_HUMAN | E.VAILQVDDDSGDPLNLVK.A               |                    | 2 | 3,3364 | 0,432 | 0,064  |
| 11 | Q9UBQ5 EIF3K_HUMAN | E.KIDFDSVSSIM*ASS#Q.-                | S217:              | 2 | 3,3313 | 0,404 | 0,357  |
| 11 | Q6IMN6 CAPR2_HUMAN | E.SVLDFDKPSSAIPTSQPPSATPGS#PVASKE.Q  | S660:              | 3 | 3,3313 | 0,334 | -0,119 |
| 11 | Q8TDY2 RBCC1_HUMAN | K.ASVSQTS#PQSAS#SPRM*E.S             | S647:S652:         | 2 | 3,329  | 1     | 0,57   |
| 11 | P09874 PARP1_HUMAN | K.GFSLLATEDKE.A                      |                    | 2 | 3,3248 | 0,345 | 0      |
| 11 | O00712 NFIB_HUMAN  | E.NM*EPSPTGDFYPSPPSPAAGS#R.T         | S300:              | 3 | 3,3195 | 0,146 | -0,623 |
| 11 | P35908 K22E_HUMAN  | R.GSSSGGGYSSGSSYSGGGR.Q              |                    | 2 | 3,3183 | 0,538 | 0,21   |
| 11 | Q9P0V3 SH3B4_HUMAN | K.SDAPTSSTFFTG.LKS#PAPE.Q            | S271:              | 2 | 3,318  | 0,447 | -0,182 |
| 11 | Q14493 SLBP_HUMAN  | R.HM*DS#QVEDEFDLE.A                  | S247:              | 2 | 3,3177 | 0,447 | 0,072  |
| 11 | Q6PJF5 RHDF2_HUMAN | R.GIPHSASPV\$#PDGVQIPLKE.Y           | S328:              | 3 | 3,3169 | 0,351 | 0,26   |
| 11 | Q96L14 C170L_HUMAN | E.ALNNM*GFPSAM*LPS#PPKQK.S           | S224:              | 3 | 3,3156 | 0,322 | 0,256  |
| 11 | Q9HCM1 CLO35_HUMAN | K.NM*ETPSTSNVSGR.V                   |                    | 2 | 3,3151 | 0,387 | 0,262  |
| 11 | A0JNW5 UH1BL_HUMAN | E.LALLLHPVDQANTLKS#PVSE.S            | S884:              | 3 | 3,3124 | 0,173 | 0,74   |
| 11 | Q96P16 P15RS_HUMAN | E.DACM*LLADYNGR.L                    |                    | 2 | 3,3103 | 0,408 | 0,345  |
| 11 | Q5JPI9 METLA_HUMAN | R.SDKGS#PGEDGFVPSALGTRE.H            | S21:               | 3 | 3,3097 | 0,261 | 0,614  |
| 11 | Q12888 TP53B_HUMAN | K.TVSSDGCST#PSREE.G                  | T321:              | 2 | 3,3072 | 0,446 | -0,307 |
| 11 | P00558 PGK1_HUMAN  | K.ACANPAAGSVILLENLR.F                |                    | 3 | 3,3059 | 0,118 | 0,103  |
| 11 | O14976 GAK_HUMAN   | E.AEPTDSDS#PPSSSADASR.F              | S780:              | 2 | 3,3041 | 0,538 | 0,066  |
| 11 | Q9Y2W1 TR150_HUMAN | R.M*DS#FDEDLARPSGLLAQE.R             | S575:              | 3 | 3,3035 | 0,213 | 0,613  |

|    |                     |                                       |                 |   |        |       |        |
|----|---------------------|---------------------------------------|-----------------|---|--------|-------|--------|
| 11 | P04792 HSPB1_HUMAN  | R.ALS#RQLS#SGVSE.I                    | S78:S82:        | 2 | 3,3024 | 0,285 | -0,175 |
| 11 | P41227 ARD1A_HUMAN  | E.SKGN#PPS#SGEACREE.K                 | S186:S189:      | 3 | 3,3001 | 0,328 | 0,395  |
| 11 | Q9UJU6 DBNL_HUMAN   | R.AM*STTSIS#SPQPGK.L                  | S274:           | 2 | 3,2979 | 0,492 | -0,656 |
| 11 | Q9C0C2 TB182_HUMAN  | R.NM*APGAVCS#PGESKE.L                 | S1297:          | 2 | 3,2957 | 0,166 | 0,15   |
| 11 | Q8TAQ2 SMRC2_HUMAN  | E.DLTKDM*DEPSPVNVVE.V                 |                 | 2 | 3,2936 | 0,294 | 0,126  |
| 11 | B2CI53 B2CI53_HUMAN | R.NGILASPQS#APGNLDNSK.S               | S263:           | 2 | 3,2932 | 0,168 | 1,899  |
| 11 | Q96PK6 RBM14_HUMAN  | R.TQSSASLAASYAAQQHPQAAASYR.G          |                 | 3 | 3,2914 | 0,399 | -0,371 |
| 11 | P04264 K2C1_HUMAN   | R.SLDLDSIIAEVK.A                      |                 | 2 | 3,2893 | 0,398 | -0,187 |
| 11 | Q02952 AKA12_HUMAN  | E.LVEM*DAEPQEAEPAGE.L                 |                 | 2 | 3,2865 | 0,386 | -0,135 |
| 11 | P62888 RL30_HUMAN   | R.VCTLAIIDPGDSDIIR.S                  |                 | 2 | 3,2861 | 0,277 | -0,416 |
| 11 | Q9NS68 TNR19_HUMAN  | E.ACS#PNPATLGCQVHSAASLQAR.N           | S261:           | 3 | 3,2849 | 0,357 | -0,397 |
| 11 | P04075 ALDOA_HUMAN  | R.TVPPAVTGITFLS#GGQSEEE.A             | S272:           | 3 | 3,2849 | 0,208 | 0,436  |
| 11 | Q96DF8 DGC14_HUMAN  | E.NT#PLRVEGSET#PYVDRTPGPAFK.I         | T324:T333:      | 3 | 3,2695 | 0,273 | 0,408  |
| 11 | P05362 ICAM1_HUMAN  | E.AQVHLALGDQR.L                       |                 | 3 | 3,2669 | 0,321 | 0,757  |
| 11 | P51991 ROA3_HUMAN   | E.GGNFGGGNYGGGGNYNDFGNYSQQQSNYGPM*K.G |                 | 3 | 3,2667 | 0,245 | 0,866  |
| 11 | P36578 RL4_HUMAN    | E.VPELPLVVEDKVE.G                     |                 | 2 | 3,2666 | 0,408 | 0,832  |
| 11 | P13645 K1C10_HUMAN  | R.LENEIQTYR.S                         |                 | 2 | 3,2622 | 0,154 | -0,628 |
| 11 | Q15149 PLEC1_HUMAN  | R.SSS#VGSSSSYPIPAVSR.T                | S4386:          | 2 | 3,2593 | 0,375 | 0,133  |
| 11 | Q8N556 AFAP1_HUMAN  | K.KLS#SERPS#S#DGEGVVE.N               | S277:S282:S283: | 2 | 3,2563 | 0,45  | 0,255  |
| 11 | P33778 H2B1B_HUMAN  | K.AM*GIM*NSFVNDIFER.I                 |                 | 3 | 3,2557 | 0,382 | 0,103  |
| 11 | Q99459 CDC5L_HUMAN  | E.AQNLM*ALTNVDTPLK.G                  |                 | 2 | 3,254  | 0,412 | -0,074 |
| 11 | P35908 K22E_HUMAN   | R.SKEEAEALYHSK.Y                      |                 | 3 | 3,2531 | 0,325 | 0,263  |
| 11 | O00410 IMB3_HUMAN   | E.FVNLGDQQSFGIK.T                     |                 | 2 | 3,2482 | 0,432 | 0,336  |
| 11 | Q15468 STIL_HUMAN   | K.TTAVEDTVQAGR.Q                      |                 | 2 | 3,248  | 0,433 | 0,489  |
| 11 | O75531 BAF_HUMAN    | R.DFVAEPM*GEKPVGSLAGIGE.V             |                 | 3 | 3,2474 | 0,365 | 0,544  |
| 11 | Q12857 NFIA_HUMAN   | E.M*DSPGEEPFTGQGR.S                   |                 | 2 | 3,246  | 0,449 | 0,217  |
| 11 | O00629 IMA4_HUMAN   | E.DSDIDGDYRVQNTSLE.A                  |                 | 2 | 3,2425 | 0,494 | 0,134  |
| 11 | Q99439 CNN2_HUMAN   | K.AGQCVIGLQM*GTNK.C                   |                 | 2 | 3,2391 | 0,482 | 0      |
| 11 | Q13439 GOGA4_HUMAN  | E.QQQLQQALAPAQASSNSSTPTR.M            |                 | 3 | 3,2375 | 0,409 | 0,237  |
| 11 | Q01167 FOXK2_HUMAN  | R.EGS#PAPLEPEPGAAQPK.L                | S398:           | 2 | 3,2311 | 0,359 | -0,278 |
| 11 | Q14980 NUMA1_HUMAN  | R.TQPDGTSVPGEAS#PISQR.L               | S1757:          | 2 | 3,2306 | 0,417 | 0,548  |
| 11 | Q92922 SMRC1_HUMAN  | E.DLTKDM*EDPTVPNIEE.V                 |                 | 2 | 3,2285 | 0,294 | 0,374  |
| 11 | Q12830 BPTF_HUMAN   | E.DAM*TVLTPLTEKDYE.G                  |                 | 2 | 3,2227 | 0,412 | 0,28   |
| 11 | Q49AR2 CE022_HUMAN  | E.NTASTNCDS#SSEGLEKDTATQR.S           | S197:           | 3 | 3,2184 | 0,403 | -0,298 |
| 11 | P18031 PTN1_HUMAN   | E.DNDYINASLIK.M                       |                 | 2 | 3,2168 | 0,505 | 0,289  |
| 11 | P31943 HNRH1_HUMAN  | E.GRPSGEAFVELES#EDE.V                 | S63:            | 2 | 3,2163 | 0,349 | 0,4    |
| 11 | Q5JPI9 METLA_HUMAN  | R.SDKGS#PGEDGFVPSALGTR.E              | S21:            | 2 | 3,2135 | 0,238 | 0,062  |
| 11 | Q00613 HSF1_HUMAN   | E.LAPASPM*AS#PGGSIDERPLSSSPLVR.V      | S279:           | 3 | 3,2129 | 0,35  | 0,681  |
| 11 | Q9Y4F5 K0284_HUMAN  | R.SLASSAQPLGK.G                       |                 | 2 | 3,2126 | 0,39  | -0,328 |

|    |                    |                                 |              |   |        |       |        |
|----|--------------------|---------------------------------|--------------|---|--------|-------|--------|
| 11 | P68104 EF1A1_HUMAN | E.TGVLKPGM*VVTFAPVNVVTE.V       |              | 2 | 3,2125 | 0,26  | 0,118  |
| 11 | Q96ST3 SIN3A_HUMAN | R.YM*NSDTT#SPELRE.H             | T1111:       | 2 | 3,212  | 0,395 | 0,074  |
| 11 | Q14247 SRC8_HUMAN  | E.EQARAKTQT#PPVS#PAPQPTEE.R     | T401:S405:   | 3 | 3,2115 | 0,245 | 0      |
| 11 | Q15365 PCBP1_HUMAN | R.IITLTGPTNAIFK.A               |              | 2 | 3,2075 | 0,371 | 0,351  |
| 11 | P18858 DNL1_HUMAN  | E.QATTSAQVACLVR.K               |              | 2 | 3,2013 | 0,584 | -0,083 |
| 11 | Q9Y3Q8 T22D4_HUMAN | E.M*GQVPLDSRPS#PALYFTHD.A       | S264:        | 3 | 3,197  | 0,166 | -0,076 |
| 11 | Q92990 GLMN_HUMAN  | E.DFGLFQLAGQR.C                 |              | 2 | 3,1953 | 0,442 | 0,097  |
| 11 | P24534 EF1B_HUMAN  | E.DYVQSM*DVAAFNKI.-             |              | 3 | 3,1953 | 0,219 | 0,452  |
| 11 | Q8IVF2 AHNK2_HUMAN | E.GIAPTPEPLQPSCR.K              |              | 2 | 3,1938 | 0,488 | 0      |
| 11 | Q9BUA3 YK007_HUMAN | E.GVALLQDVR.A                   |              | 2 | 3,1917 | 0,289 | -0,691 |
| 11 | Q96G46 DUS3L_HUMAN | E.NCGAQVVPAGPGTST#PPSS#PVR.T    | T273:S277:   | 3 | 3,1887 | 0,368 | 0,157  |
| 11 | P05556 ITB1_HUMAN  | R.SNGLICGGNGVCK.C               |              | 2 | 3,1883 | 0,399 | -0,274 |
| 11 | P08865 RSSA_HUMAN  | R.AIVAIENPADVSVISSR.N           |              | 2 | 3,1878 | 0,428 | 0,42   |
| 11 | P14625 ENPL_HUMAN  | E.SDDPM*AYIHFTAEGE.V            |              | 2 | 3,187  | 0,385 | -0,072 |
| 11 | P30086 PEBP1_HUMAN | K.LYTLVLTDPDAPSR.K              |              | 2 | 3,185  | 0,165 | 0,078  |
| 11 | P82675 RT05_HUMAN  | K.DPEPEDEVDPVKLD.W              |              | 2 | 3,1797 | 0,328 | -0,076 |
| 11 | Q5JPH6 SYEM_HUMAN  | R.VVPGAAENIEDM*LE.W             |              | 2 | 3,1767 | 0,306 | 0,162  |
| 11 | Q14004 CD2L5_HUMAN | E.ASLQLRPPPEPST#PVSGQDDLIQHQD.M | T1226:       | 3 | 3,1757 | 0,202 | 0,189  |
| 11 | Q00613 HSF1_HUMAN  | R.VKEEPPS#PPQS#PRVEE.A          | S303:S307:   | 3 | 3,1719 | 0,294 | 0,093  |
| 11 | Q9P287 BCCIP_HUMAN | E.LTDLLIQNHIGSVIK.Q             |              | 3 | 3,1718 | 0,328 | 1,021  |
| 11 | Q9NYV4 CD2L7_HUMAN | K.NSS#PAPPQPAPGKVE.S            | S1083:       | 2 | 3,1716 | 0,467 | -0,863 |
| 11 | Q5VWN6 CJ018_HUMAN | E.VDSSASTTLGR.Q                 |              | 2 | 3,1704 | 0,476 | -0,103 |
| 11 | P46821 MAP1B_HUMAN | E.KVSPSKSPS#LSPSPPS#PLE.K       | S1258:S1265: | 3 | 3,1666 | 0,251 | 0,352  |
| 11 | P41227 ARD1A_HUMAN | E.SKGN#PPS#SGEACRE.E            | S186:S189:   | 3 | 3,1664 | 0,36  | -0,212 |
| 11 | Q6ZRV2 FA83H_HUMAN | R.RGS#LTLTISGESPK.A             | S936:        | 2 | 3,1648 | 0,354 | 0,4    |
| 11 | P48681 NEST_HUMAN  | E.ASTGQSPEDHASLAPPLS#PDHSSLE.A  | S471:        | 3 | 3,1645 | 0,174 | 0,491  |
| 11 | Q14247 SRC8_HUMAN  | R.AKTQTTPVPSPAPQPTEER.L         |              | 3 | 3,1638 | 0,288 | 0,095  |
| 11 | Q99733 NP1L4_HUMAN | E.RLDNVPH#PSS#YIE.T             | T51:S54:     | 2 | 3,1634 | 0,411 | 0,136  |
| 11 | P62834 RAP1A_HUMAN | E.DVPM*ILVGNKCDLE.D             |              | 2 | 3,1632 | 0,269 | 0,151  |
| 11 | O75643 U520_HUMAN  | E.TM*DLDQGGEALAPR.Q             |              | 2 | 3,1616 | 0,337 | 0,409  |
| 11 | O94909 K0819_HUMAN | E.RGPSQATS#PIRS#PQE.S           | S296:S300:   | 2 | 3,1578 | 0,326 | 0,069  |
| 11 | Q8WWQ0 PHIP_HUMAN  | R.LSRGS#ISS#TSE.V               | S674:S677:   | 2 | 3,1577 | 0,299 | -0,285 |
| 11 | Q5F1R6 DJC21_HUMAN | E.KEFGDGS#DENE.M                | S283:        | 2 | 3,1576 | 0,268 | -0,373 |
| 11 | P46821 MAP1B_HUMAN | E.KVSPSKS#PSLSPSPPS#PLE.K       | S1256:S1265: | 2 | 3,1566 | 1     | -0,117 |
| 11 | Q4GOJ3 LARP7_HUMAN | E.NRDIEIS#TEEE.K                | S337:        | 2 | 3,1565 | 0,327 | -0,172 |
| 11 | Q12904 MCA1_HUMAN  | K.QIPFPGT#PLHANSM*VSE.N         | T84:         | 2 | 3,155  | 0,371 | 1,094  |
| 11 | P19634 SL9A1_HUMAN | R.CLS#DPGPHPEPEGEPFFPK.G        | S796:        | 3 | 3,1492 | 0,206 | 0,241  |
| 11 | Q92598 HS105_HUMAN | E.CLNQRPPENPDTDK.N              |              | 3 | 3,148  | 0,314 | 0,109  |
| 11 | Q13263 TIF1B_HUMAN | E.DGSLSLDGADSTGVVAK.L           |              | 2 | 3,1478 | 0,233 | 0,307  |

|    |                     |                                       |            |   |        |       |        |
|----|---------------------|---------------------------------------|------------|---|--------|-------|--------|
| 11 | O75509 TNR21_HUMAN  | E.NSALLTVEPS#PQDKNK.G                 | S541:      | 3 | 3,1471 | 0,222 | 0,301  |
| 11 | Q5T1M5 FKB15_HUMAN  | R.ERPES#PM*VPSEQVVEE.A                | S979:      | 2 | 3,1471 | 0,475 | 0,252  |
| 11 | Q07020 RL18_HUMAN   | K.ILTFDQLALDSPK.G                     |            | 2 | 3,1448 | 0,437 | 0,418  |
| 11 | Q96TA1 NIBL1_HUMAN  | E.ASS#PPAS#PLQHLLPGK.A                | S679:S683: | 2 | 3,1353 | 0,235 | 0,208  |
| 11 | P57076 CU059_HUMAN  | E.DLSGTQAGLNVIKE.A                    |            | 2 | 3,1341 | 0,193 | 0,253  |
| 11 | Q6S8J3 A26CA_HUMAN  | E.KSYELPDGQVITIGNE.R                  |            | 2 | 3,1317 | 0,439 | 0,069  |
| 11 | Q96S66 CLCC1_HUMAN  | E.AAGSPDQGSTYS#PAR.G                  | S532:      | 2 | 3,1309 | 0,464 | 0,079  |
| 11 | P55072 TERA_HUMAN   | E.M*FAQTLQQSR.G                       |            | 2 | 3,1302 | 0,226 | -0,1   |
| 11 | O75153 EIF3X_HUMAN  | E.SKSEDPGQEQEAGS#EEE.G                | S664:      | 2 | 3,1279 | 0,409 | 0,139  |
| 11 | P07355 ANXA2_HUMAN  | E.TVILGLLKTPAQYDASE.L                 |            | 2 | 3,1278 | 0,458 | -0,067 |
| 11 | Q9UER7 DAXX_HUMAN   | K.DGDKS#PM*SSLQISNE.K                 | S495:      | 2 | 3,1274 | 0,192 | -0,501 |
| 11 | P27816 MAP4_HUMAN   | D.M*ES#PTKLDVTLAK.D                   | S280:      | 2 | 3,1272 | 0,381 | 0,08   |
| 11 | Q13242 SFRS9_HUMAN  | E.AGDVCYADVQKDGVM*VE.Y                |            | 2 | 3,124  | 0,381 | -0,19  |
| 11 | O60506 HNRPQ_HUMAN  | E.DGALAVLQQFK.D                       |            | 2 | 3,1193 | 0,389 | 0,205  |
| 11 | Q9BRJ6 CG050_HUMAN  | E.AVLRPGLDAEPELS#PEEQR.V              | S59:       | 3 | 3,115  | 0,235 | -0,167 |
| 11 | O00505 IMA3_HUMAN   | E.SLESDVDADFK.A                       |            | 2 | 3,1145 | 0,424 | -0,091 |
| 11 | Q9UKN8 TF3C4_HUMAN  | K.ILLVDSPGM*GNADDEQQEE.G              |            | 3 | 3,1112 | 0,172 | 0,441  |
| 11 | P05362 ICAM1_HUMAN  | E.AQVHLALGDQR.L                       |            | 2 | 3,1097 | 0,345 | -0,808 |
| 11 | P29353 SHC1_HUMAN   | K.YNPLRNES#LSSLEE.G                   | S17:       | 2 | 3,1095 | 0,192 | 0,07   |
| 11 | Q02790 FKBP4_HUMAN  | E.SGAQSAPLPM*EGVDISPK.Q               |            | 3 | 3,1009 | 0,297 | 1,524  |
| 11 | Q14247 SRC8_HUMAN   | K.T#QTPPV#PAPQPTEE.R                  | T399:S405: | 3 | 3,1003 | 0,09  | 0,526  |
| 11 | P09496 CLCA_HUMAN   | E.SNGPTDSYAAISQVDR.L                  |            | 3 | 3,1002 | 0,167 | 0,109  |
| 11 | A6H8Y3 A6H8Y3_HUMAN | E.SSSSLSSVGTGKAPS#PPPLLTDR.Q          | S132:      | 3 | 3,0973 | 0,172 | 0,227  |
| 11 | Q08211 DHX9_HUMAN   | E.GETVEPYKVNLSQDLE.H                  |            | 2 | 3,0962 | 0,242 | 0,67   |
| 11 | Q16643 DREB_HUMAN   | K.LAASGEGGLQE.L                       |            | 2 | 3,0961 | 0,36  | -0,118 |
| 11 | P07737 PROF1_HUMAN  | R.DSLLQDGEFSM*DLR.T                   |            | 3 | 3,096  | 0,27  | -0,223 |
| 11 | P04626 ERBB2_HUMAN  | R.EGPLPAARPAGAT#LE.R                  | T1166:     | 2 | 3,096  | 0,505 | 0,399  |
| 11 | P49840 GSK3A_HUMAN  | R.TSSFAEPGGGGGGGGGGGPGGSASGPGGTGGGK.A |            | 3 | 3,0949 | 0,215 | 0,451  |
| 11 | P61978 HNRPK_HUMAN  | K.IILDLISEPIK.G                       |            | 2 | 3,0923 | 0,372 | 0,091  |
| 11 | Q15477 SKIV2_HUMAN  | R.ASS#LEDLVLKE.A                      | S256:      | 2 | 3,0913 | 0,274 | 0,095  |
| 11 | P29401 TKT_HUMAN    | R.SVPTSTVFYPSDGVATEK.A                |            | 2 | 3,0905 | 0,469 | 0,129  |
| 11 | Q01850 CDR2_HUMAN   | E.LASVNPEPVSS#PTTPPEYK.A              | S415:      | 2 | 3,0894 | 0,333 | -0,233 |
| 11 | Q96N67 DOCK7_HUMAN  | R.SAVRPASLNLNR.S                      |            | 3 | 3,0854 | 0,333 | 0,282  |
| 11 | Q8IVT2 CS021_HUMAN  | E.SRIYAS#EEDD.-                       | S675:      | 2 | 3,0853 | 0,304 | 0,482  |
| 11 | Q4KMP7 TB10B_HUMAN  | R.RAS#AGPAPGPVVTAE.G                  | S412:      | 2 | 3,0847 | 0,436 | -0,418 |
| 11 | P60842 IF4A1_HUMAN  | R.SRDNGPDGM*EPEGVIE.S                 |            | 2 | 3,0845 | 0,448 | -0,071 |
| 11 | Q16204 CCDC6_HUMAN  | K.SGGIVIS#PFRLEE.L                    | S52:       | 2 | 3,0844 | 0,35  | 0,164  |
| 11 | P12268 IMDH2_HUMAN  | E.DLVVAPAGITLKE.A                     |            | 2 | 3,0811 | 0,285 | 0,092  |
| 11 | Q9BVS4 RIOK2_HUMAN  | E.LLHPLGPDDKNIETK.E                   |            | 2 | 3,0776 | 0,464 | -0,289 |

|    |                    |                                   |            |   |        |       |        |
|----|--------------------|-----------------------------------|------------|---|--------|-------|--------|
| 11 | P38919 IF4A3_HUMAN | E.VDVTPTFDTM*GLRE.D               |            | 2 | 3,0772 | 0,372 | 0      |
| 11 | P36776 LONM_HUMAN  | E.NLQDFVGGKPVFTVE.R               |            | 2 | 3,0767 | 0,311 | 0,153  |
| 11 | Q9H4A3 WNK1_HUMAN  | R.DVDDGSGSPHS#PHQLSSK.S           | S2032:     | 3 | 3,0762 | 0,3   | 0,19   |
| 11 | Q8NEZ4 MLL3_HUMAN  | E.GNAVACPVSSAQ#PPHSAGAPAAK.G      | S3758:     | 3 | 3,0749 | 0,297 | 0      |
| 11 | Q86WR7 CJ047_HUMAN | E.RM*AGNEALS#PTS#PFRE.G           | S212:S215: | 3 | 3,0743 | 0,206 | -0,566 |
| 11 | Q01082 SPTB2_HUMAN | K.TALPAQSAATLPAR.T                |            | 2 | 3,0739 | 0,396 | 0,089  |
| 11 | P31948 STIP1_HUMAN | E.VQQIM*SDPAM*R.L                 |            | 2 | 3,0723 | 0,508 | -0,187 |
| 11 | P78332 RBM6_HUMAN  | E.KLQSFDS#PE.R                    | S1025:     | 2 | 3,0717 | 0,314 | 0      |
| 11 | Q16643 DREB_HUMAN  | E.TQEPSILDSEETR.A                 |            | 2 | 3,0717 | 0,412 | 0,228  |
| 11 | P13645 K1C10_HUMAN | R.SLLEGEGSSGGGGR.G                |            | 2 | 3,0706 | 0,444 | -0,29  |
| 11 | Q96GA3 LTV1_HUMAN  | E.DDFILQANK.A                     |            | 2 | 3,0686 | 0,249 | 0,344  |
| 11 | Q9UQ35 SRRM2_HUMAN | R.SSGHSSSELS#PDAVEK.A             | S1387:     | 3 | 3,0674 | 0,152 | -0,431 |
| 11 | P19838 NFKB1_HUMAN | K.TTSQAHSPLS#PASTR.Q              | S907:      | 3 | 3,0631 | 0,297 | 0,422  |
| 11 | P11142 HSP7C_HUMAN | K.TVTNAVVTVPAYFNDSQR.Q            |            | 3 | 3,0602 | 0,292 | 0,646  |
| 11 | Q14247 SRC8_HUMAN  | R.AKT#QTPPV#PAPQPTEE.R            | T399:S405: | 3 | 3,0599 | 0,292 | 1,605  |
| 11 | P09874 PARP1_HUMAN | E.DFLQDVSASTK.S                   |            | 2 | 3,0581 | 0,393 | 0,202  |
| 11 | Q9NQS7 INCE_HUMAN  | R.T#LSPTPASATAPTSQGIPTSDEE.S      | T195:      | 3 | 3,0564 | 0,212 | 0,156  |
| 11 | Q9GZR7 DDX24_HUMAN | E.LTDYQLVS#PAKNPSSLFSK.E          | S60:       | 3 | 3,055  | 0,351 | 0,084  |
| 11 | Q96QE3 ATAD5_HUMAN | E.DSVIIIDSS#PTALKHPE.K            | S756:      | 3 | 3,0514 | 0,372 | 0,192  |
| 11 | Q9UMZ2 SYNG_HUMAN  | E.AS#PVPLTSNVGSTVK.G              | S720:      | 2 | 3,0419 | 0,386 | -1,191 |
| 11 | Q15477 SKIV2_HUMAN | R.GDTVASAPCSAPLAR.A               |            | 2 | 3,0385 | 0,422 | 0,164  |
| 11 | Q8TB72 PUM2_HUMAN  | R.AGAGQRPLT#PNQGGQQGQAE.S         | T396:      | 2 | 3,0341 | 0,377 | 0,115  |
| 11 | P48634 BAT2_HUMAN  | E.ALTTVTVAPAPR.R                  |            | 2 | 3,0337 | 0,37  | -0,204 |
| 11 | P04264 K2C1_HUMAN  | K.YEELQITAGR.H                    |            | 2 | 3,0336 | 0,249 | -1,137 |
| 11 | Q8TEQ0 SNX29_HUMAN | E.TRNVEPQS#GDL.-                  | S425:      | 2 | 3,0314 | 0,342 | -0,377 |
| 11 | Q9UQ35 SRRM2_HUMAN | E.NSFGS#PLEFR.N                   | S1329:     | 2 | 3,0311 | 0,405 | 0,198  |
| 11 | P52597 HNRPF_HUMAN | E.DVQNFLSDCTIHD.G                 |            | 2 | 3,0284 | 0,279 | -0,078 |
| 11 | Q96TA1 NIBL1_HUMAN | E.TGEQVSS#PSSHPALHTTTEDSAGVQTEF.- | S712:      | 3 | 3,0273 | 0,32  | 0,368  |
| 11 | P68104 EF1A1_HUMAN | K.IGGIGTVPVGRVE.T                 |            | 2 | 3,0267 | 0,477 | 0,195  |
| 11 | Q9Y639 NPTN_HUMAN  | E.YHCVYHFVSAPK.A                  |            | 2 | 3,0261 | 0,495 | 0,405  |
| 11 | P61758 PFD3_HUMAN  | E.DLDFLRDQFTTTE.V                 |            | 2 | 3,025  | 0,172 | -0,152 |
| 11 | Q13523 PRP4B_HUMAN | R.TRSPS#PDDILE.R                  | S580:      | 2 | 3,023  | 0,253 | 0      |
| 11 | O00512 BCL9_HUMAN  | R.AVTPVSQGSNSSSADPK.A             |            | 2 | 3,0217 | 0,357 | -0,598 |
| 11 | Q9UBU7 DBF4A_HUMAN | K.FAQLGRIS#PVPS#PE.S              | S103:S107: | 2 | 3,0184 | 0,256 | 0,347  |
| 11 | Q969V6 MKL1_HUMAN  | E.SQGSVPS#PLEAR.V                 | S139:      | 2 | 3,0175 | 0,367 | -0,28  |
| 11 | Q9Y490 TLN1_HUMAN  | R.GVGAAATAVTQALNE.L               |            | 2 | 3,0171 | 0,264 | 0      |
| 11 | P07195 LDHB_HUMAN  | K.LIAPVAEEEEATVPNNK.I             |            | 2 | 3,0169 | 0,337 | 0      |
| 11 | P27707 DCK_HUMAN   | K.NGGNVLQM*M*YEKPE.R              |            | 2 | 3,0105 | 0,175 | 0      |
| 11 | P62805 H4_HUMAN    | K.TVTAM*DVVYALK.R                 |            | 2 | 3,006  | 0,562 | 0,184  |

|    |                     |                                    |              |   |        |       |        |
|----|---------------------|------------------------------------|--------------|---|--------|-------|--------|
| 11 | Q9BVW5 TIPIN_HUMAN  | E.NGVIDLPDYEHVEDE.T                |              | 2 | 3,0038 | 0,216 | -0,07  |
| 11 | Q8WYQ9 ZCH14_HUMAN  | E.YSSSSSPM*GVQAR.E                 |              | 2 | 3,0037 | 0,406 | 0,251  |
| 11 | Q96JY6 PDLI2_HUMAN  | R.ALAT#PPKLHTCE.K                  | T279:        | 2 | 3,002  | 0,371 | 0,086  |
| 11 | P53396 ACLY_HUMAN   | R.TAS#FSEGRADE.V                   | S455:        | 2 | 2,9993 | 0,37  | -0,095 |
| 11 | Q92797 SYMPK_HUMAN  | E.AALLDSS#LEGPLPK.E                | S1222:       | 2 | 2,999  | 0,379 | 0,245  |
| 11 | Q9NZM1 MYOF_HUMAN   | E.DRDHYIPNTLNPVFGFR.M              |              | 3 | 2,9942 | 0,132 | 0,096  |
| 11 | Q4V328 GRAP1_HUMAN  | R.SLS#SSPQAQPPRAELSDDEEVAE.L       | S690:        | 2 | 2,9909 | 0,477 | 0,585  |
| 11 | Q86YP4 P66A_HUMAN   | R.RPPS#PDVIVLSDNEQPSS#PR.V         | S100:S114:   | 3 | 2,9882 | 0,193 | 0,545  |
| 11 | Q12756 KIF1A_HUMAN  | E.SHGSSSASS#PLSAE.G                | S1430:       | 2 | 2,9878 | 0,456 | -0,088 |
| 11 | Q9BV44 THUM3_HUMAN  | E.DVSTLIGDDLASCKDE.T               |              | 2 | 2,9843 | 0,452 | 0,491  |
| 11 | O60307 MAST3_HUMAN  | E.FLAVQPTPTFAER.S                  |              | 2 | 2,9822 | 0,266 | -0,083 |
| 11 | Q14493 SLBP_HUMAN   | R.HM*DSQVEDEFDLE.A                 |              | 2 | 2,9819 | 0,314 | 0,152  |
| 11 | Q14690 RRP5_HUMAN   | E.DDSLVDVYYRE.G                    |              | 2 | 2,9813 | 0,288 | 0,089  |
| 11 | P11388 TOP2A_HUMAN  | E.LKPQKS#VVS#DLE.A                 | S1374:S1377: | 2 | 2,9792 | 0,38  | -0,244 |
| 11 | Q9NR31 SAR1A_HUMAN  | E.TISNVPILILGNK.I                  |              | 2 | 2,9789 | 0,383 | 0,441  |
| 11 | Q15149 PLEC1_HUMAN  | R.SRSS#VGSS#SYPISPAVSR.T           | S4386:S4391: | 3 | 2,9729 | 1     | -0,254 |
| 11 | Q03252 LMNB2_HUMAN  | R.AGGPAT#PLSPTR.L                  | T14:         | 2 | 2,9717 | 0,359 | -0,101 |
| 11 | Q00613 HSF1_HUMAN   | R.VKEEPPS#PPQS#PRVEE.A             | S303:S307:   | 2 | 2,9708 | 0,376 | -0,062 |
| 11 | Q9Y2L5 TRS85_HUMAN  | E.SYEDGPCTITSNK.N                  |              | 2 | 2,9706 | 0,479 | -0,414 |
| 11 | P55072 TERA_HUMAN   | E.DNSVVLSQPK.M                     |              | 2 | 2,9683 | 0,426 | -0,104 |
| 11 | P35221 CTNA1_HUMAN  | E.DDQLIAGQSAR.A                    |              | 2 | 2,968  | 0,283 | -0,208 |
| 11 | Q8TB72 PUM2_HUMAN   | R.AGAGQRPLT#PNQGGQQGQAE.S          | T396:        | 3 | 2,9671 | 0,152 | 0      |
| 11 | B1ALX9 B1ALX9_HUMAN | E.GDNYSATLLEPAASS#LSPDHKNM*E.I     | S224:        | 3 | 2,967  | 0,166 | 0,208  |
| 11 | Q14721 KCNB1_HUMAN  | E.GQLLYSVDSS#PPK.S                 | S773:        | 2 | 2,9668 | 0,372 | 0,332  |
| 11 | Q8N1G2 K0082_HUMAN  | E.LALSLSSTSDDPEPSSVSHGAK.A         |              | 3 | 2,9648 | 0,299 | 0,335  |
| 11 | P00558 PGK1_HUMAN   | K.ACANPAAGSVILLENLR.F              |              | 2 | 2,9614 | 0,444 | 0      |
| 11 | P56537 IF6_HUMAN    | E.AQPSTIATSM*RDSLIDSLT.-           |              | 2 | 2,9595 | 0,359 | 0      |
| 11 | Q14974 IMB1_HUMAN   | E.AIGYICQDIDPEQLQDK.S              |              | 3 | 2,9584 | 0,168 | -0,365 |
| 11 | P35908 K22E_HUMAN   | K.YEELQVTVGR.H                     |              | 2 | 2,958  | 0,277 | 0,307  |
| 11 | P31943 HNRH1_HUMAN  | E.IVPNGITLPVDFQGR.S                |              | 2 | 2,9569 | 0,331 | -0,075 |
| 11 | Q8NEY8 PPHLN_HUMAN  | E.KLEKS#DES#NLPE.I                 | S244:S247:   | 2 | 2,9539 | 0,195 | -0,079 |
| 11 | P54727 RD23B_HUMAN  | K.QEKPAEKPAETPVAT#SPTATDSTSGDSSR.S | T159:        | 3 | 2,9518 | 0,293 | 0,302  |
| 11 | P49321 NASP_HUMAN   | E.SSTS#GFTPGGGGSSVSM*IASR.K        | S680:        | 2 | 2,9507 | 0,347 | 0      |
| 11 | Q86XJ1 GA2L3_HUMAN  | R.HGPGLANVCQYDE.W                  |              | 2 | 2,9475 | 0,352 | -0,334 |
| 11 | P02538 K2C6A_HUMAN  | R.ALYDAELSQMQTHISDTSVVLMSMDNNR.N   |              | 3 | 2,9423 | 0,15  | 0,241  |
| 11 | Q9H0E9 BRD8_HUMAN   | E.ADVAIGKGDDETPLTNVK.T             |              | 3 | 2,9403 | 0,155 | 0,318  |
| 11 | Q96QR8 PURB_HUMAN   | E.HYAQLGPSS#PE.Q                   | S101:        | 2 | 2,9387 | 0,299 | -0,289 |
| 11 | P11021 GRP78_HUMAN  | R.IINEPTAAAAYGLDK.R                |              | 2 | 2,9352 | 0,388 | 0,294  |
| 11 | Q8N1G2 K0082_HUMAN  | K.ASTTSLSGDSETE.G                  |              | 2 | 2,9342 | 0,481 | 0,089  |

|    |                    |                                |            |   |        |       |        |
|----|--------------------|--------------------------------|------------|---|--------|-------|--------|
| 11 | Q96B23 CR025_HUMAN | E.LRRDS#SES#QLASTE.S           | S66:S69:   | 2 | 2,9336 | 0,484 | -0,14  |
| 11 | O75369 FLNB_HUMAN  | E.DAGEGGLDLAIEGPSKAE.I         |            | 2 | 2,9319 | 0,229 | -1,694 |
| 11 | O43829 ZF161_HUMAN | R.KQVTPSAIQS#E.T               | S425:      | 2 | 2,9318 | 0,164 | 0,192  |
| 11 | Q13188 STK3_HUMAN  | E.DSLTKQPEEVFDVLE.K            |            | 2 | 2,9293 | 0,355 | 0      |
| 11 | Q7Z460 CLAP1_HUMAN | K.LLGSYGGTLTGGSSR.G            |            | 2 | 2,9292 | 0,409 | -1,413 |
| 11 | Q99549 MPP8_HUMAN  | E.GVGVVGEDNDAAAR.G             |            | 2 | 2,9263 | 0,453 | 0      |
| 11 | P05556 ITB1_HUMAN  | E.VNSEDM*DAYCR.K               |            | 2 | 2,9262 | 0,507 | 0      |
| 11 | Q9UJZ1 STML2_HUMAN | K.APVPGT#PDSLSSGSSR.D          | T327:      | 2 | 2,9237 | 0,471 | -0,077 |
| 11 | Q08AD1 CA1L1_HUMAN | K.LNQSSPDNVTDTK.G              |            | 2 | 2,9204 | 0,455 | -0,086 |
| 11 | P04792 HSPB1_HUMAN | E.SPAVAAPAYS.R                 |            | 2 | 2,9189 | 0,395 | 0      |
| 11 | Q96C36 P5CR2_HUMAN | E.SPTVSTLTPSS#PGKLLTR.S        | S304:      | 3 | 2,9167 | 0,198 | 0,19   |
| 11 | Q9ULR0 ISY1_HUMAN  | K.FIAHVPVPSQQE.I               |            | 2 | 2,9154 | 0,339 | 0,18   |
| 11 | Q96C57 CL043_HUMAN | E.HEQDGNELQTT#PE.F             | T79:       | 2 | 2,9129 | 0,181 | 0      |
| 11 | P49736 MCM2_HUMAN  | R.GNDPLTSS#PGR.S               | S27:       | 2 | 2,9048 | 0,316 | 0      |
| 11 | Q9UQ35 SRRM2_HUMAN | R.NSGPLGTEM*NTGFSSEVKE.D       |            | 2 | 2,9036 | 0,464 | -0,183 |
| 11 | P05556 ITB1_HUMAN  | E.CECQSEGIPESPK.C              |            | 2 | 2,9019 | 0,338 | -0,16  |
| 11 | P26639 SYTC_HUMAN  | K.M*GGEEKPIGAGEE.K             |            | 2 | 2,9018 | 0,429 | -0,092 |
| 11 | P20618 PSB1_HUMAN  | E.DFAIVASDTR.L                 |            | 2 | 2,9015 | 0,314 | 0,111  |
| 11 | Q09666 AHNK_HUMAN  | K.VKGDLDIAGPNLE.G              |            | 2 | 2,8995 | 0,281 | 0,091  |
| 11 | Q9Y478 AAKB1_HUMAN | E.VFDALM*VDSQK.C               |            | 2 | 2,8969 | 0,415 | -0,096 |
| 11 | Q9NQ55 SSF1_HUMAN  | R.VGGS#DEEASGIPSR.T            | S359:      | 2 | 2,8935 | 0,512 | 0,085  |
| 11 | Q9UQ35 SRRM2_HUMAN | K.DKFS#PFPVQDRPE.S             | S1188:     | 3 | 2,8914 | 0,095 | 0,111  |
| 11 | Q9UQ35 SRRM2_HUMAN | E.SYFGVSSLQLK.G                |            | 2 | 2,889  | 0,465 | 0,099  |
| 11 | Q12888 TP53B_HUMAN | K.TVSSDGCST#PSREE.G            | T321:      | 3 | 2,8883 | 0,21  | 0,115  |
| 11 | Q6ZRV2 FA83H_HUMAN | R.RLSLQGDSTE.A                 |            | 2 | 2,8867 | 0,442 | -0,525 |
| 11 | P02545 LMNA_HUMAN  | R.LRLS#PS#PTSQR.S              | S390:S392: | 2 | 2,8844 | 0,233 | -0,087 |
| 11 | Q9NWZ5 UCKL1_HUMAN | R.ADADPSPTS#PPTAR.D            | S16:       | 2 | 2,8829 | 0,256 | -0,25  |
| 11 | Q9H813 TM206_HUMAN | E.RSTSYQELS#EE.L               | S14:       | 2 | 2,8811 | 0,293 | -0,26  |
| 11 | O60271 JIP4_HUMAN  | E.DLPLEPSVTKAE.R               |            | 2 | 2,8781 | 0,365 | 0,282  |
| 11 | Q7L590 MCM10_HUMAN | E.GDDVLFYDES#PPRPK.L           | S644:      | 3 | 2,8743 | 0,158 | -0,383 |
| 11 | Q9NR30 DDX21_HUMAN | E.VDLVIQSSPPKDVE.S             |            | 2 | 2,8742 | 0,361 | 0,32   |
| 11 | P60174 TPIS_HUMAN  | K.SNVSDAVAQSTR.I               |            | 2 | 2,874  | 0,371 | 0,593  |
| 11 | Q8N1G2 K0082_HUMAN | E.LALSLSSTS#DDEPPSSVSHGAK.A    | S31:       | 2 | 2,8738 | 0,363 | 0,323  |
| 11 | P11388 TOP2A_HUMAN | K.GSVPLSSPPAT#HFPDETE.I        | T1397:     | 3 | 2,8669 | 0,264 | 0,449  |
| 11 | P08651 NFIC_HUMAN  | R.TGM*GSDQEDSKPITLDTDFQE.S     |            | 3 | 2,8629 | 0,087 | 0,301  |
| 11 | Q9BVG4 CX026_HUMAN | E.DFNYGTLR.L                   |            | 2 | 2,8615 | 0,344 | 0,111  |
| 11 | O00178 GTPB1_HUMAN | R.SAM*DSPVPASM*FAPEPS#SPGAAR.A | S24:       | 3 | 2,8614 | 0,306 | 0,386  |
| 11 | Q13242 SFRS9_HUMAN | R.IYVGNLPTDVRE.K               |            | 2 | 2,86   | 0,434 | -0,355 |
| 11 | P07602 SAP_HUMAN   | K.DVVTAAGDM*LK.D               |            | 2 | 2,8592 | 0,424 | 0,322  |



|    |                     |                                   |            |   |        |       |        |
|----|---------------------|-----------------------------------|------------|---|--------|-------|--------|
| 11 | Q14247 SRC8_HUMAN   | K.TQT#PPVS#PAPQPTEE.R             | T401:S405: | 3 | 2,8574 | 0,085 | 0,421  |
| 11 | Q9BVS4 RIOK2_HUMAN  | E.KAEVYGS#ENE.S                   | S350:      | 2 | 2,8567 | 0,259 | -0,304 |
| 11 | P55072 TERA_HUMAN   | E.DNSVVSLSQPKM*DE.L               |            | 3 | 2,8554 | 0,214 | 0,584  |
| 11 | Q5UIP0 RIF1_HUMAN   | E.SQES#PNENFK.T                   | S1854:     | 2 | 2,8545 | 0,297 | -0,291 |
| 11 | P14618 KPYM_HUMAN   | E.ASDGIM*VAR.G                    |            | 2 | 2,8536 | 0,387 | -0,456 |
| 11 | Q9Y6I3 EPN1_HUMAN   | E.LLAGEVPARS#PGAFFDM*SGVR.G       | S410:      | 3 | 2,8533 | 0,323 | 0,516  |
| 11 | Q9H0G5 CCD55_HUMAN  | E.KVIET#PE.N                      | T275:      | 2 | 2,8508 | 0,089 | 0,34   |
| 11 | Q16563 SYPL1_HUMAN  | K.TVTATFGYPFR.L                   |            | 2 | 2,8469 | 0,503 | 0,097  |
| 11 | Q02790 FKBP4_HUMAN  | E.SGAQSAPLPM*EGVDISPK.Q           |            | 2 | 2,8431 | 0,362 | 0,542  |
| 11 | O00311 CDC7_HUMAN   | E.ASLGIQM*DEPM*AFS#PQRDR.F        | S16:       | 3 | 2,8427 | 0,368 | 0,243  |
| 11 | Q13740 CD166_HUMAN  | R.QIGDALPVSTISASR.N               |            | 2 | 2,8353 | 0,406 | 0,073  |
| 11 | P04075 ALDOA_HUMAN  | E.IAM*ATVTALR.R                   |            | 2 | 2,8314 | 0,272 | 0,115  |
| 11 | P19838 NFKB1_HUMAN  | E.VIQAASS#PVK.T                   | S893:      | 2 | 2,827  | 0,402 | -0,339 |
| 11 | O94915 FRYL_HUMAN   | E.SRYSSSSGGS#YEEE.K               | S1539:     | 2 | 2,8257 | 0,338 | 0      |
| 11 | Q8WU79 SMAP2_HUMAN  | R.KVVGSM*PTAGSAGS#VPE.N           | S240:      | 2 | 2,8237 | 0,257 | 0,731  |
| 11 | P21333 FLNA_HUMAN   | R.AGQSAAGAAPGGGVDTR.D             |            | 3 | 2,823  | 0,218 | 1,458  |
| 11 | A1L162 A1L162_HUMAN | K.KNTQAPLELM*AE.F                 |            | 2 | 2,8197 | 0,429 | -0,269 |
| 11 | P31946 1433B_HUMAN  | D.STLIM*QLLR.D                    |            | 2 | 2,8194 | 0,251 | -0,224 |
| 11 | Q9H0E9 BRD8_HUMAN   | R.SGVAEAPVGSK.A                   |            | 2 | 2,814  | 0,265 | -0,244 |
| 11 | Q8WXI9 P66B_HUMAN   | E.RGRLT#PS#PDIIVLSDNE.A           | T120:S122: | 3 | 2,812  | 0,121 | 0,358  |
| 11 | Q9P2D1 CHD7_HUMAN   | E.LKGVEVGADTGSK.S                 |            | 3 | 2,8104 | 0,147 | 0,508  |
| 11 | Q9Y6I9 TX264_HUMAN  | E.TSAATLSPGASSR.G                 |            | 2 | 2,8097 | 0,425 | -0,304 |
| 11 | Q15942 ZYG_HUMAN    | E.GGPEAPIPPPPQPR.E                |            | 3 | 2,8077 | 0,129 | 0,454  |
| 11 | Q9NQS7 INCE_HUMAN   | E.QHVTQLM*STEPLPR.T               |            | 3 | 2,8073 | 0,335 | 0,332  |
| 11 | Q01484 ANK2_HUMAN   | K.SDS#NAS#FLR.A                   | S31:S34:   | 2 | 2,8073 | 0,221 | 0,316  |
| 11 | P05783 K1C18_HUMAN  | R.GGM*GSGGLATGIAGGLAGM*GGIQNE.K   |            | 3 | 2,8069 | 0,133 | 0,085  |
| 11 | Q68EM7 RHG17_HUMAN  | K.DPVSAAVPAPGR.N                  |            | 2 | 2,8068 | 0,366 | -0,322 |
| 11 | Q3KQU3 MA7D1_HUMAN  | E.SAAPAS#PAPSPAPSPTAPPQK.E        | S544:      | 3 | 2,8056 | 0,216 | 0      |
| 11 | Q92619 HMHA1_HUMAN  | E.SRVVSNDSDS#DLEE.A               | S1032:     | 2 | 2,8038 | 0,203 | 0,374  |
| 11 | Q13283 G3BP1_HUMAN  | K.SSSPAPADIAQTVQE.D               |            | 2 | 2,8035 | 0,126 | -1,463 |
| 11 | Q9H444 CHM4B_HUMAN  | E.ISTAIKPVGFGEFDEDE.L             |            | 3 | 2,8033 | 0,272 | 0,442  |
| 11 | Q9NTZ6 RBM12_HUMAN  | E.DSIYIAYGPNK.A                   |            | 2 | 2,8012 | 0,387 | 0,282  |
| 11 | Q02952 AKA12_HUMAN  | K.VLSKPPEGVVS#E.V                 | S498:      | 2 | 2,7962 | 0,336 | 0,277  |
| 11 | Q5T1M5 FKB15_HUMAN  | E.QSASASSGQPAPLNR.E               |            | 3 | 2,7955 | 0,151 | 0,114  |
| 11 | P49023 PAXI_HUMAN   | K.TGSSS#PPGGPPKPGSQLDSM*LGSLQSD.L | S322:      | 2 | 2,786  | 0,387 | 0,82   |
| 11 | P11233 RALA_HUMAN   | E.DENVPFLLVGNK.S                  |            | 2 | 2,784  | 0,237 | 0,363  |
| 11 | P35612 ADDB_HUMAN   | K.SAPASPVQSPAKE.A                 |            | 2 | 2,7839 | 0,479 | -0,385 |
| 11 | Q9HB07 MYG1_HUMAN   | E.DSM*VGTLYDKM*YE.N               |            | 2 | 2,7837 | 0,389 | 0      |
| 11 | Q02952 AKA12_HUMAN  | E.HTQVPADS#PDS#QEEQKGE.S          | S554:S557: | 3 | 2,7813 | 0,248 | -0,342 |

|    |                    |                                  |              |   |        |       |        |
|----|--------------------|----------------------------------|--------------|---|--------|-------|--------|
| 11 | Q8NFJ5 RAI3_HUMAN  | E.TGDTLY#APYSTHFQLQNQPPQKE.F     | Y317:        | 3 | 2,7809 | 0,236 | 1,134  |
| 11 | Q9P260 K1468_HUMAN | E.RQSGTTPPGM*GAPGVPGAAGVGGAGGR.E |              | 3 | 2,7795 | 0,163 | -0,082 |
| 11 | P26639 SYTC_HUMAN  | K.M*GGEEKPIGAGE.E                |              | 2 | 2,7766 | 0,362 | 0,205  |
| 11 | Q969T4 UB2E3_HUMAN | R.DPAAPEPEEQEE.R                 |              | 2 | 2,775  | 0,252 | -0,091 |
| 11 | Q9UGP4 LIMD1_HUMAN | R.TPSVSAPLALSCPR.Q               |              | 2 | 2,7741 | 0,534 | 0,168  |
| 11 | Q9H6F5 CCD86_HUMAN | E.FESNPEETREPGS#PPSVQR.A         | S47:         | 3 | 2,7735 | 0,301 | 0,082  |
| 11 | Q00613 HSF1_HUMAN  | E.SEPAPASVTALTDAR.G              |              | 2 | 2,7734 | 0,401 | -0,328 |
| 11 | Q66K74 MAP1S_HUMAN | E.TLVLLNPSDK.S                   |              | 2 | 2,7721 | 0,274 | 0,111  |
| 11 | P04406 G3P_HUMAN   | K.LVINGNPITIFQER.D               |              | 3 | 2,7716 | 0,249 | 0,793  |
| 11 | P04406 G3P_HUMAN   | K.IISNASCTTNCLAPLAK.V            |              | 2 | 2,7703 | 0,257 | 0      |
| 11 | Q86YS7 K0528_HUMAN | K.LSSPAAFLPACNS#PSKE.M           | S260:        | 2 | 2,7703 | 0,344 | -0,394 |
| 11 | Q16891 IMMT_HUMAN  | E.GKLHNM*IVDLDNVVK.K             |              | 3 | 2,7657 | 0,216 | 0,321  |
| 11 | O94842 TOX4_HUMAN  | R.SGCENPPIVSK.D                  |              | 2 | 2,7646 | 0,242 | -0,411 |
| 11 | O43379 WDR62_HUMAN | E.AGPGDQQGDSYLR.V                |              | 2 | 2,7643 | 0,415 | 0      |
| 11 | O95359 TACC2_HUMAN | E.AGEVTPSDSGGQEDS#PAK.G          | S2256:       | 2 | 2,7631 | 0,369 | 0,202  |
| 11 | Q9UNS2 CSN3_HUMAN  | E.ITVNPQFVQK.S                   |              | 2 | 2,7621 | 0,412 | -1,143 |
| 11 | Q6NSJ2 PHLB3_HUMAN | E.ASEVLAEPSSR.G                  |              | 2 | 2,7577 | 0,359 | 0,213  |
| 11 | P35568 IRS1_HUMAN  | E.QQQQQQLLHPPEPK.S               |              | 3 | 2,7504 | 0,169 | 0,407  |
| 11 | Q12888 TP53B_HUMAN | R.ADDPLRLDQE.L                   |              | 2 | 2,7503 | 0,256 | 0,104  |
| 11 | Q9Y262 IF3EI_HUMAN | E.AAYDPY#AYPSDYDM*HTGDPK.Q       | Y17:         | 3 | 2,7502 | 0,338 | 0,077  |
| 11 | Q8NG31 CASC5_HUMAN | K.SLGT#PTVICT#PTEE.S             | T1011:T1017: | 2 | 2,7489 | 0,342 | 0,22   |
| 11 | P30414 NKTR_HUMAN  | R.LDT#PDINIVLK.Q                 | T1155:       | 2 | 2,7482 | 0,222 | 0,277  |
| 11 | Q96TA1 NIBL1_HUMAN | K.AVDLGPCKPSDQE.T                |              | 2 | 2,7479 | 0,42  | -0,18  |
| 11 | O75955 FLOT1_HUMAN | K.ITLVS#SGSGTM*GAAK.V            | S382:        | 2 | 2,7474 | 0,148 | 0,083  |
| 11 | P19838 NFKB1_HUMAN | E.VIQAASSPVK.T                   |              | 2 | 2,7468 | 0,446 | -0,061 |
| 11 | Q9UKV3 ACINU_HUMAN | K.AES#PAEKVPE.E                  | S490:        | 2 | 2,7459 | 0,257 | -0,107 |
| 11 | Q96LR5 UB2E2_HUMAN | R.VDDS#PSTSGGSS#DGDQRE.S         | S11:S19:     | 2 | 2,7456 | 0,421 | -0,374 |
| 11 | P61247 RS3A_HUMAN  | E.RADGYEPPVQES#V.-               | S263:        | 2 | 2,7454 | 0,346 | -0,479 |
| 11 | Q8IXK0 PHC2_HUMAN  | E.KLPQQDHTTTT#DS#EM*EEPYLQE.S    | T619:S621:   | 3 | 2,7423 | 0,155 | 0,065  |
| 11 | P02533 K1C14_HUMAN | R.APSTYGGGLSVSSSR.F              |              | 2 | 2,7408 | 0,439 | -0,428 |
| 11 | P02545 LMNA_HUMAN  | R.SGAQASSTPLSPTR.I               |              | 2 | 2,74   | 0,385 | 0      |
| 11 | Q9HB40 RISC_HUMAN  | E.DFM*KPVISIVDE.L                |              | 2 | 2,7342 | 0,352 | 0,087  |
| 11 | P53396 ACLY_HUMAN  | R.TIAIIAEGIPEALTR.K              |              | 2 | 2,7327 | 0,385 | 0,467  |
| 11 | Q6R327 RICTR_HUMAN | E.ALASPAKDVLFDTITM*K.A           |              | 3 | 2,7288 | 0,212 | 0,283  |
| 11 | Q92754 AP2C_HUMAN  | K.SYM*NPGDQS#PADSNKTLE.K         | S434:        | 3 | 2,7285 | 0,141 | -0,357 |
| 11 | Q6R327 RICTR_HUMAN | K.HIEDTGS#TPS#IGE.N              | S1174:S1177: | 2 | 2,7252 | 0,403 | 0,081  |
| 11 | Q86WC4 OSTM1_HUMAN | R.LCQTCYPLFQQVVSK.M              |              | 3 | 2,7117 | 0,155 | -0,196 |
| 11 | Q96T23 RSF1_HUMAN  | K.LSDDFDS#PVKGPLCK.S             | S387:        | 3 | 2,7114 | 0,221 | 0,416  |
| 11 | P04264 K2C1_HUMAN  | R.TNAENEFVTIK.K                  |              | 2 | 2,7112 | 0,498 | 0,193  |

|    |                     |                             |                 |   |        |       |        |
|----|---------------------|-----------------------------|-----------------|---|--------|-------|--------|
| 11 | Q6ZP91 Q6ZP91_HUMAN | E.SSFVEPADM*SDAVTK.A        |                 | 2 | 2,7082 | 0,29  | 0      |
| 11 | P26640 SYVC_HUMAN   | R.AASGYPVKVPLEVQE.A         |                 | 2 | 2,7068 | 0,271 | 0,154  |
| 11 | Q15003 CND2_HUMAN   | E.M*IS#LGDGDIR.T            | S408:           | 2 | 2,7066 | 0,289 | -0,104 |
| 11 | O75940 SPF30_HUMAN  | E.VTPLLNLPVVEE.G            |                 | 2 | 2,705  | 0,385 | -0,18  |
| 11 | P50990 TCPQ_HUMAN   | E.DGAISTIVLR.G              |                 | 2 | 2,7044 | 0,258 | 0,233  |
| 11 | Q01082 SPTB2_HUMAN  | K.GEQVSNGLPAEQGS#PR.M       | S2138:          | 2 | 2,7036 | 0,354 | -0,067 |
| 11 | O43399 TPD54_HUMAN  | E.NGSDNLPSSAGSGDKPLSDPAPF.- |                 | 3 | 2,7033 | 0,305 | 0,82   |
| 11 | P62753 RS6_HUMAN    | R.RLS#S#LRAS#TSKSE.S        | S235:S236:S240: | 2 | 2,7023 | 0,154 | -0,661 |
| 11 | Q9HCD6 TANC2_HUMAN  | K.TNNAQNGHLLD.D             |                 | 2 | 2,7011 | 0,259 | -0,202 |
| 11 | Q724K8 TRI46_HUMAN  | R.YDPDSGHDS#GAEDATVE.A      | S638:           | 2 | 2,7005 | 0,43  | -0,132 |
| 11 | Q13283 G3BP1_HUMAN  | E.EKPEPVLEETAPEDAQK.S       |                 | 3 | 2,6978 | 0,209 | -0,383 |
| 11 | Q9P258 RCC2_HUMAN   | E.RCSSSSGGGS#SGDEDGLE.L     | S50:            | 2 | 2,6972 | 0,191 | 0      |
| 11 | Q86TC9 MYPN_HUMAN   | E.RTPVDES#DDE.I             | S928:           | 2 | 2,6971 | 0,357 | -0,098 |
| 11 | Q6ZN18 AEBP2_HUMAN  | E.LSRLS#PLPPGS#PGSAAR.G     | S18:S24:        | 3 | 2,6953 | 0,326 | 0      |
| 11 | Q14676 MDC1_HUMAN   | E.GKAPQAVPLEK.S             |                 | 2 | 2,6932 | 0,347 | -0,858 |
| 11 | P62841 RS15_HUMAN   | E.M*VGSM*VG VYNGK.T         |                 | 2 | 2,6923 | 0,438 | 0,096  |
| 11 | P46459 NSF_HUMAN    | K.ICSS#PDKM*IGFSE.T         | S569:           | 2 | 2,6914 | 0,317 | 0,082  |
| 11 | Q9H019 FA54B_HUMAN  | K.ASS#FADM*M*GILKD.F        | S238:           | 2 | 2,6905 | 0,246 | -0,081 |
| 11 | P04264 K2C1_HUMAN   | K.NM*QDM*VEDYR.N            |                 | 2 | 2,689  | 0,382 | -0,275 |
| 11 | O95208 EPN2_HUMAN   | R.GSS#QPNLSTSHSEQE.Y        | S173:           | 2 | 2,6869 | 0,321 | -0,073 |
| 11 | P35527 K1C9_HUMAN   | K.TLNDM*RQEYEQLIAK.N        |                 | 3 | 2,6861 | 0,376 | -0,098 |
| 11 | P04792 HSPB1_HUMAN  | E.GTLTVEAPM*PK.L            |                 | 2 | 2,6857 | 0,398 | 0,21   |
| 11 | Q9H7N4 SFR19_HUMAN  | K.AAPPPPALTPDSQTVDSCKT#PE.V | T1001:          | 3 | 2,6839 | 0,168 | 0      |
| 11 | Q9UQ35 SRRM2_HUMAN  | K.TVART#PLGQR.S             | T1531:          | 2 | 2,6836 | 0,343 | -0,207 |
| 11 | P62753 RS6_HUMAN    | R.RLS#S#LRAS#TSKSE.S        | S235:S236:S240: | 3 | 2,6814 | 0,139 | -0,44  |
| 11 | P49796 RGS3_HUMAN   | E.VRLDSTYSQK.A              |                 | 2 | 2,6785 | 0,219 | -0,102 |
| 11 | P11586 C1TC_HUMAN   | E.DSTVHGFLVQLPLDSE.N        |                 | 2 | 2,6761 | 0,283 | 0,069  |
| 11 | P54577 SYYC_HUMAN   | E.KHPDADSLYVEK.I            |                 | 3 | 2,6756 | 0,137 | 0,13   |
| 11 | Q86UE4 LYRIC_HUMAN  | E.AAAVPAAPDDLALLK.N         |                 | 2 | 2,6754 | 0,344 | 0,081  |
| 11 | Q8IWW6 RHG12_HUMAN  | E.LSSSSTEQIR.A              |                 | 2 | 2,6743 | 0,151 | -0,22  |
| 11 | Q92508 FA38A_HUMAN  | R.SGS#EEAVTDPGERE.A         | S1190:          | 2 | 2,6738 | 0,349 | -0,237 |
| 11 | Q14247 SRC8_HUMAN   | K.TQT#PPVS#PAPQPTEE.R       | T401:S405:      | 2 | 2,6737 | 0,332 | 0,421  |
| 11 | P42166 LAP2A_HUMAN  | R.SSTPLPTISS#AENTR.Q        | S168:           | 2 | 2,6652 | 0,238 | 0      |
| 11 | Q8IUW5 RELL1_HUMAN  | E.KIELNDS#VNE.N             | S109:           | 2 | 2,6647 | 0,264 | 0      |
| 11 | Q02952 AKA12_HUMAN  | K.SATLSS#TES#TASE.M         | S645:S648:      | 2 | 2,6618 | 1     | 0      |
| 11 | P51114 FXR1_HUMAN   | E.DGM*VPFVFGTKE.S           |                 | 2 | 2,6612 | 0,306 | 0,254  |
| 11 | P52701 MSH6_HUMAN   | E.DLM*VVPDKISE.V            |                 | 2 | 2,6608 | 0,265 | 0      |
| 11 | Q9Y606 TRUA_HUMAN   | E.DDLVSALVR.S               |                 | 2 | 2,6598 | 0,293 | 0,062  |
| 11 | Q9Y217 MTMR6_HUMAN  | R.TIEGSS#PADNRYSE.Y         | S589:           | 2 | 2,6592 | 0,125 | -0,38  |

|    |                     |                                   |                 |   |        |       |        |
|----|---------------------|-----------------------------------|-----------------|---|--------|-------|--------|
| 11 | P68104 EF1A1_HUMAN  | E.S#FSDYPPPLGR.F                  | S414:           | 2 | 2,6555 | 0,232 | 0,2    |
| 11 | Q9H6Z4 RANB3_HUMAN  | R.VLS#PPKLN.E.V                   | S333:           | 2 | 2,6515 | 0,256 | 0,227  |
| 11 | Q9UBC2 EP15R_HUMAN  | K.ALLFSNNTQE.L                    |                 | 2 | 2,6474 | 0,301 | 0,322  |
| 11 | Q32MZ4 LRRF1_HUMAN  | R.RGS#GDTISISIDTE.A               | S120:           | 2 | 2,6471 | 0,347 | 0,172  |
| 11 | Q15942 ZYX_HUMAN    | R.EKVSS#IDLE.I                    | S143:           | 2 | 2,647  | 0,136 | 0      |
| 11 | P51692 STA5B_HUMAN  | E.ANNGSS#PAGSLADAM*SQK.H          | S128:           | 2 | 2,6467 | 0,338 | -0,271 |
| 11 | Q9UPN4 AZI1_HUMAN   | R.TQDVLAQDAAGDNLE.M               |                 | 2 | 2,6464 | 0,196 | 0,078  |
| 11 | Q9UQ35 SRRM2_HUMAN  | R.SSGHSS#SELS#PDAVE.K             | S1383:S1387:    | 2 | 2,6428 | 1     | 0      |
| 11 | P11717 MPRI_HUMAN   | R.VQSSIAFLCGK.T                   |                 | 2 | 2,641  | 0,364 | 0,101  |
| 11 | Q96JM3 ZN828_HUMAN  | E.IRSPAGS#PE.L                    | S436:           | 2 | 2,6403 | 0,287 | 0,184  |
| 11 | P12004 PCNA_HUMAN   | K.LSQTSNVDKKEE.A                  |                 | 2 | 2,6312 | 0,157 | 0      |
| 11 | P49792 RBP2_HUMAN   | K.SISS#PSVSSE.T                   | S2805:          | 2 | 2,6299 | 0,135 | -0,23  |
| 11 | Q9HA05 Q9HA05_HUMAN | R.STT#PTSS#PFR.A                  | T519:S523:      | 2 | 2,6281 | 0,308 | -0,197 |
| 11 | Q8TDY2 RBCC1_HUMAN  | K.SVEHVSPDTADAE.S                 |                 | 2 | 2,6272 | 0,285 | 0      |
| 11 | Q9C0C9 UBE2O_HUMAN  | E.KAQALPNGVPK.A                   |                 | 2 | 2,6263 | 0,289 | -0,109 |
| 11 | P26006 ITA3_HUMAN   | R.TGAVYLCPLTAHKDDCE.R             |                 | 3 | 2,6235 | 0,197 | 0,094  |
| 11 | P30622 CLIP1_HUMAN  | E.ANGLQTPASR.A                    |                 | 2 | 2,6207 | 0,423 | -0,219 |
| 11 | Q96RK0 CIC_HUMAN    | E.TRERS#M*S#ETGTAAAPGVSE.L        | S299:S301:      | 2 | 2,6145 | 0,344 | 0,333  |
| 11 | Q9H7P9 PKHG2_HUMAN  | E.LFS#GSNPGK.L                    | S714:           | 2 | 2,6133 | 0,253 | 0,062  |
| 11 | P60709 ACTB_HUMAN   | E.EHPVLLTEAPLNPK.A                |                 | 3 | 2,6131 | 0,084 | 0,235  |
| 11 | Q13490 BIRC2_HUMAN  | E.DAVM*M*NTPVVK.S                 |                 | 2 | 2,6116 | 0,38  | 0,099  |
| 11 | Q00613 HSF1_HUMAN   | E.LAPAS#PM*AS#PGGSIDERPLSSSPLVR.V | S275:S279:      | 3 | 2,61   | 0,253 | 0,661  |
| 11 | Q10587 TEF_HUMAN    | E.NGIPAS#PTHLAHNLLPVAE.L          | S113:           | 2 | 2,6098 | 0,163 | 0,455  |
| 11 | O00505 IMA3_HUMAN   | E.DSDVDADFK.A                     |                 | 2 | 2,6093 | 0,249 | -0,241 |
| 11 | P50748 KNTC1_HUMAN  | E.DSVSVLVL.R.C                    |                 | 2 | 2,6092 | 0,171 | 0,123  |
| 11 | P00338 LDHA_HUMAN   | K.DQLIYNLLKEE.Q                   |                 | 2 | 2,6087 | 0,193 | 0,354  |
| 11 | Q6GYQ0 GRIPE_HUMAN  | R.SQTPSPSTLNIDHM*E.Q              |                 | 2 | 2,6084 | 0,345 | 0,292  |
| 11 | P63261 ACTG_HUMAN   | E.IAALVIDNGSGM*CK.A               |                 | 2 | 2,608  | 0,31  | 0,083  |
| 11 | Q5VZK9 LR16A_HUMAN  | E.NRFGLGT#PE.K                    | T1228:          | 2 | 2,6077 | 0,313 | 0,228  |
| 11 | P05556 ITB1_HUMAN   | K.NVLSLTKGE.V                     |                 | 2 | 2,6061 | 0,222 | -0,113 |
| 11 | P49321 NASP_HUMAN   | E.SLDPTVKPVDVGGDEPEEK.V           |                 | 3 | 2,606  | 0,168 | -0,455 |
| 11 | Q8TAT6 NPL4_HUMAN   | K.VFGAPNVVEDE.I                   |                 | 2 | 2,604  | 0,265 | 0,207  |
| 11 | P30989 NTR1_HUMAN   | R.KADS#VS#S#NHTLSSNATRE.T         | S401:S403:S404: | 3 | 2,5997 | 0,247 | -0,256 |
| 11 | Q8IWE2 NXP20_HUMAN  | E.DQTVVSVDAK.V                    |                 | 2 | 2,5996 | 0,344 | 0,105  |
| 11 | Q92622 K0226_HUMAN  | E.YLAIGNLDP.R.G                   |                 | 2 | 2,5966 | 0,419 | 0,216  |
| 11 | P14618 KPYM_HUMAN   | K.KGVNLPGAAVDLPVAVSE.K            |                 | 2 | 2,5953 | 0,322 | 0,298  |
| 11 | Q9NR30 DDX21_HUMAN  | E.VDLVIQSSPPKDVE.S                |                 | 3 | 2,5945 | 0,199 | 0,36   |
| 11 | Q15149 PLEC1_HUMAN  | R.S#S#SVGSSSSYPISPAVSR.T          | S4384:S4385:    | 3 | 2,5945 | 0,091 | 0,191  |
| 11 | P07737 PROF1_HUMAN  | K.TFVNITPAEVLVVGK.D               |                 | 2 | 2,5886 | 0,269 | 0      |

|    |                     |                                  |       |   |        |       |        |
|----|---------------------|----------------------------------|-------|---|--------|-------|--------|
| 11 | B0QY74 B0QY74_HUMAN | E.LVSQGIM*PPLKS#PAAFHE.Q         | S33:  | 3 | 2,5849 | 0,173 | 1,178  |
| 11 | Q07065 CKAP4_HUMAN  | E.DGVLSM*QVASAR.Q                |       | 2 | 2,5805 | 0,44  | -0,098 |
| 11 | Q9Y3A5 SBDS_HUMAN   | E.IVCLIDPGCFR.E                  |       | 2 | 2,5772 | 0,272 | 0,181  |
| 11 | Q8TDY2 RBCC1_HUMAN  | K.ASVSQT#PQSASSPR.M              | S647: | 2 | 2,5762 | 0,257 | 0,389  |
| 11 | Q6P4Q7 CNNM4_HUMAN  | E.DEQSNIVDILYVKD.L               |       | 2 | 2,5747 | 0,155 | 0,443  |
| 11 | Q09028 RBBP4_HUMAN  | E.FILATGSADK.T                   |       | 2 | 2,5745 | 0,258 | 0,119  |
| 11 | Q14789 G0GB1_HUMAN  | R.APLDPELHQE.S                   |       | 2 | 2,5737 | 0,325 | 0,106  |
| 11 | Q9COF1 K1712_HUMAN  | R.ASTVNYCGLNE.I                  |       | 2 | 2,5734 | 0,166 | -0,099 |
| 11 | P07602 SAP_HUMAN    | R.LGPGM*ADICK.N                  |       | 2 | 2,5733 | 0,337 | -0,34  |
| 11 | Q6P0N0 CN106_HUMAN  | E.TLSTNCIPIK.N                   |       | 2 | 2,5732 | 0,367 | 0,213  |
| 11 | O00165 HAX1_HUMAN   | R.GDPES#PRPPALDDAFSILD.L         | S255: | 2 | 2,5702 | 0,375 | 0,233  |
| 11 | P49792 RBP2_HUMAN   | E.VM*VPSFCKSEEPDSITK.S           |       | 3 | 2,5698 | 0,201 | 0,279  |
| 11 | P53582 AMPM1_HUMAN  | E.VLDVAAGM*IKPGVTTEE.I           |       | 2 | 2,5695 | 0,215 | 0,14   |
| 11 | P14136 GFAP_HUMAN   | K.LALDIEIATYR.K                  |       | 2 | 2,5695 | 0,36  | 0,191  |
| 11 | Q96PE2 ARHGH_HUMAN  | R.SVS#FKLLE.R                    | S15:  | 2 | 2,5675 | 0,104 | 0,122  |
| 11 | Q9H8S9 MOL1B_HUMAN  | R.QAVM*LPEGEDLNE.W               |       | 2 | 2,567  | 0,16  | 0      |
| 11 | O14744 ANM5_HUMAN   | E.YTSFLAPISSSK.L                 |       | 2 | 2,5666 | 0,343 | 0,188  |
| 11 | P49736 MCM2_HUMAN   | E.AGALVLADR.G                    |       | 2 | 2,563  | 0,291 | 0,207  |
| 11 | O00178 GTPB1_HUMAN  | R.SAM*DSPVPASM*FAPEPSS#PGAAR.A   | S25:  | 3 | 2,5624 | 0,265 | 0,463  |
| 11 | Q96Q15 SMG1_HUMAN   | E.LRVNNVTS#PE.F                  | S111: | 2 | 2,5621 | 0,18  | -0,202 |
| 11 | Q15642 CIP4_HUMAN   | E.FEDFSQPM*NR.A                  |       | 2 | 2,56   | 0,323 | -0,095 |
| 11 | Q9Y613 EPN1_HUMAN   | E.LLAGEVPAR.S                    |       | 2 | 2,5593 | 0,245 | -0,132 |
| 11 | P49368 TCPG_HUMAN   | E.DIIQLKPDVVITE.K                |       | 2 | 2,558  | 0,263 | 1,645  |
| 11 | P29353 SHC1_HUMAN   | R.NES#LSSLEE.G                   | S17:  | 2 | 2,5559 | 0,156 | 0,224  |
| 11 | Q9NXG2 THUM1_HUMAN  | E.YGDDM*YGPEK.F                  |       | 2 | 2,5544 | 0,4   | -0,307 |
| 11 | Q9Y490 TLN1_HUMAN   | E.LAVFCSPEPPAK.T                 |       | 2 | 2,5502 | 0,36  | 0,278  |
| 11 | Q3KQU3 MA7D1_HUMAN  | K.SLSRT#PETLLPFAEAE.A            | T813: | 2 | 2,5501 | 0,301 | 0,133  |
| 11 | Q8N157 AHI1_HUMAN   | E.TLYQELPPEIK.E                  |       | 2 | 2,5466 | 0,29  | 0,092  |
| 11 | O15355 PPM1G_HUMAN  | E.DAFLAIDAK.L                    |       | 2 | 2,5453 | 0,198 | 0      |
| 11 | Q00613 HSF1_HUMAN   | E.LAPAS#PM*ASPGGSIDERPLSSSPLVR.V | S275: | 2 | 2,5453 | 0,311 | 0,726  |
| 11 | P48960 CD97_HUMAN   | R.CNPGFSSSE.I                    |       | 2 | 2,5443 | 0,254 | 0,216  |
| 11 | P05556 ITB1_HUMAN   | E.CSTDEVNSED#DAYCR.K             |       | 3 | 2,5383 | 0,099 | -0,093 |
| 11 | P08648 ITA5_HUMAN   | E.GQQLLYVTR.V                    |       | 2 | 2,5344 | 0,386 | 0      |
| 11 | Q9H307 PININ_HUMAN  | K.SLS#PGKENVSALDM*EKE.S          | S443: | 2 | 2,5338 | 0,16  | -0,379 |
| 11 | Q15942 ZYX_HUMAN    | E.GGPEAPIPPPPQPREK.V             |       | 2 | 2,5335 | 0,127 | -0,366 |
| 11 | Q07157 ZO1_HUMAN    | E.TNPASSTS#AVNHVNLTVNR.L         |       | 3 | 2,5315 | 0,345 | 0      |
| 11 | P26006 ITA3_HUMAN   | R.TGAVLYCPLTAHK.D                |       | 3 | 2,5294 | 0,295 | 0,32   |
| 11 | P35568 IRS1_HUMAN   | K.S#PGEYVNIIE.F                  | S892: | 2 | 2,5285 | 0,145 | 0,224  |
| 11 | O00512 BCL9_HUMAN   | R.AVT#PVSQGSNSSSADPK.A           | T315: | 2 | 2,5272 | 0,362 | 0,071  |

|    |                     |                               |              |   |        |       |        |
|----|---------------------|-------------------------------|--------------|---|--------|-------|--------|
| 11 | Q02952 AKA12_HUMAN  | K.SAVVHDITDDGQEETPE.I         |              | 2 | 2,5259 | 0,324 | 0,199  |
| 11 | P56182 RRP1_HUMAN   | R.SEKPPAGSICR.A               |              | 3 | 2,5256 | 0,271 | 1,369  |
| 11 | Q6PGQ7 BORA_HUMAN   | E.LALLQDVER.E                 |              | 2 | 2,5241 | 0,328 | 0,115  |
| 11 | Q14676 MDC1_HUMAN   | R.KSQLPAEGDAGAE.W             |              | 2 | 2,524  | 0,328 | 0      |
| 11 | B2RA01 B2RA01_HUMAN | K.AQYEDIAQK.S                 |              | 2 | 2,5207 | 0,133 | -0,343 |
| 11 | Q9H7P9 PKHG2_HUMAN  | E.SSDLT#PPHS#PPSSR.Q          | T1257:S1261: | 3 | 2,5172 | 0,113 | -0,106 |
| 11 | P46100 ATRX_HUMAN   | E.IEDAS#PTKCPITTK.L           | S1527:       | 3 | 2,5171 | 0,262 | 0,111  |
| 11 | P08670 VIME_HUMAN   | R.QDVDNASLAR.L                |              | 2 | 2,5143 | 0,266 | 0      |
| 11 | A8K7V5 A8K7V5_HUMAN | E.VSTAPAGTDM*PAAK.K           |              | 2 | 2,5095 | 0,388 | 0,275  |
| 11 | P29966 MARCS_HUMAN  | E.KGEPAAAAAPEAGAS#PVEK.E      | S101:        | 3 | 2,5087 | 0,102 | -0,2   |
| 11 | Q9UHB6 LIMA1_HUMAN  | R.ETPHS#PGVEDAPIAK.V          | S490:        | 3 | 2,5059 | 0,22  | 0,225  |
| 11 | A1L390 PKHG3_HUMAN  | R.FFFNPSAVSQR.T               |              | 2 | 2,5039 | 0,338 | 0,094  |
| 11 | Q9NQS7 INCE_HUMAN   | E.QHVTQLM*STEPLPR.T           |              | 2 | 2,5035 | 0,444 | 0      |
| 11 | O15027 SC16A_HUMAN  | K.FANLT#PSR.T                 | T1876:       | 2 | 2,4966 | 0,253 | 0,247  |
| 11 | P09211 GSTP1_HUMAN  | D.AFPLLSAYVGR.L               |              | 2 | 2,496  | 0,412 | -0,102 |
| 11 | Q7Z4K8 TRI46_HUMAN  | E.SFQGAPDVISPR.Y              |              | 2 | 2,4944 | 0,412 | 0,096  |
| 11 | P42166 LAP2A_HUMAN  | R.SST#PLPTISSAENTR.Q          | T160:        | 2 | 2,4921 | 0,325 | 0,282  |
| 11 | Q9UBB5 MBD2_HUMAN   | E.ALM*ADILSR.A                |              | 2 | 2,4918 | 0,406 | -0,061 |
| 11 | P27707 DCK_HUMAN    | E.FEELTM*S#QK.N               | S74:         | 2 | 2,4884 | 0,187 | -0,404 |
| 11 | Q9P1Y6 K1542_HUMAN  | E.AS#PAPLAQGEPRDLPTLRLPALGE.A | S1202:       | 3 | 2,4868 | 0,247 | 0,07   |
| 11 | Q06830 PRDX1_HUMAN  | R.QITVNDLPVGR.S               |              | 2 | 2,4857 | 0,184 | 0      |
| 11 | P13645 K1C10_HUMAN  | R.SQYQLAEQNR.K                |              | 2 | 2,4852 | 0,188 | -0,357 |
| 11 | Q96TA1 NIBL1_HUMAN  | E.ASS#PPAS#PLQHLLPGK.A        | S679:S683:   | 3 | 2,4848 | 0,474 | 0,52   |
| 11 | Q96L14 C170L_HUMAN  | E.NAES#EADFSIHFN.R.V          | S269:        | 2 | 2,4824 | 0,204 | -0,071 |
| 11 | Q13371 PHLP_HUMAN   | E.VLVLTSVR.N                  |              | 2 | 2,4815 | 0,201 | 0,138  |
| 11 | P10809 CH60_HUMAN   | K.LSDGVAVLK.V                 |              | 2 | 2,4796 | 0,262 | 0,203  |
| 11 | Q9Y478 AAKB1_HUMAN  | E.LSSS#PPGPYHQEPYVCKPE.E      | S182:        | 3 | 2,4788 | 0,213 | 0,081  |
| 11 | Q03405 UPAR_HUMAN   | E.LENLPQNGR.Q                 |              | 2 | 2,4787 | 0,317 | -0,117 |
| 11 | P35612 ADDB_HUMAN   | K.SAPASPVQSPAKEAE.T           |              | 2 | 2,4784 | 0,202 | -0,332 |
| 11 | Q96G28 CC104_HUMAN  | K.THTSQAILQPVLAAE.D           |              | 2 | 2,4765 | 0,391 | 0,695  |
| 11 | P35527 K1C9_HUMAN   | R.GGSGGSYGGGGSGGGYGGGSGSR.G   |              | 3 | 2,4751 | 0,153 | 0,612  |
| 11 | P35527 K1C9_HUMAN   | K.TLLDIDNTR.M                 |              | 2 | 2,4723 | 0,3   | 0,115  |
| 11 | Q9H019 FA54B_HUMAN  | E.DDCVLSLK.A                  |              | 2 | 2,4701 | 0,301 | 0,198  |
| 11 | Q8IWY8 ZSC29_HUMAN  | R.APVLFQSPR.G                 |              | 2 | 2,4692 | 0,321 | 0,18   |
| 11 | Q63HJ5 Q63HJ5_HUMAN | E.GTNLDPDVPNK.S               |              | 2 | 2,4676 | 0,439 | 0      |
| 11 | P11142 HSP7C_HUMAN  | K.TVTNAVVTVPAYFNDSQR.Q        |              | 2 | 2,4653 | 0,236 | 0,308  |
| 11 | P28347 TEAD1_HUMAN  | R.M*SDSADKPIDNDAE.G           |              | 2 | 2,4643 | 0,42  | -0,16  |
| 11 | Q9UQ35 SRRM2_HUMAN  | R.GEFSAS#PM*LK.S              | S1124:       | 2 | 2,4618 | 0,299 | 0,315  |
| 11 | P46100 ATRX_HUMAN   | E.IEDAS#PTKCPITTK.L           | S1527:       | 2 | 2,4599 | 0,304 | 0,223  |

|    |                      |                                 |                 |   |        |       |        |
|----|----------------------|---------------------------------|-----------------|---|--------|-------|--------|
| 11 | Q9UJZ1 STML2_HUMAN   | R.DVQGTDASLDEE.L                |                 | 2 | 2,4583 | 0,37  | -0,095 |
| 11 | Q9Y6M7 S4A7_HUMAN    | E.GGSLLQIPVK.A                  |                 | 2 | 2,4575 | 0,213 | 0,241  |
| 11 | P05556 ITB1_HUMAN    | K.NVLSLTKGEVFNE.L               |                 | 2 | 2,4565 | 0,13  | 0,936  |
| 11 | O96019 ACL6A_HUMAN   | E.DCPKVDFTP AIGM*VVE.R          |                 | 2 | 2,4556 | 0,376 | 0,34   |
| 11 | Q92558 WASF1_HUMAN   | E.NDVATILSR.R                   |                 | 2 | 2,4527 | 0,319 | 0,247  |
| 11 | Q13263 TIF1B_HUMAN   | E.GTSAPGGGGPTLDDS#ATICR.V       | S624:           | 3 | 2,4469 | 0,27  | -0,279 |
| 11 | Q9UQ35 SRRM2_HUMAN   | R.SSGHSSS#ELSPDAVE.K            | S1384:S1387:    | 2 | 2,4443 | 0,231 | -0,592 |
| 11 | Q86YS7 K0528_HUMAN   | E.IIGS#PIPEPR.Q                 | S643:           | 2 | 2,4441 | 0,253 | 0,211  |
| 11 | Q562F6 SGOL2_HUMAN   | K.HITS#EADS#DPGNPVE.L           | S1028:S1032:    | 2 | 2,4411 | 0,275 | -0,282 |
| 11 | Q9H7P9 PKHG2_HUMAN   | R.QLLGPNAALSR.Y                 |                 | 2 | 2,4391 | 0,239 | 0,302  |
| 11 | P54278 PMS2_HUMAN    | E.DIFIVDQHATDE.K                |                 | 2 | 2,4375 | 0,213 | 0,174  |
| 11 | ##Q8WXG9 GPR98_HUMAN | K.NKLTPLNNGS#IFWQSS#Y#ETFQVLK.C | S499:S506:Y507: | 3 | 2,4348 | 0,193 | 0,805  |
| 11 | P05387 RLA2_HUMAN    | E.DVIAQGIGK.L                   |                 | 2 | 2,4312 | 0,24  | -0,203 |
| 11 | P46821 MAP1B_HUMAN   | E.ATEPEPSGSIANPAAST#SPSLSHR.F   | T24:            | 3 | 2,4306 | 0,218 | 0,075  |
| 11 | P60174 TPIS_HUMAN    | E.LIGTLNAAK.V                   |                 | 2 | 2,4305 | 0,272 | -0,068 |
| 11 | Q9H446 RWDD1_HUMAN   | E.DNDVSDILK.L                   |                 | 2 | 2,4304 | 0,211 | 0,18   |
| 11 | Q8NFZ5 TNIP2_HUMAN   | R.AAAAALCTLYHE.A                |                 | 2 | 2,4301 | 0,289 | -0,3   |
| 11 | P61758 PFD3_HUMAN    | E.AVFVEDVDSFM*KQPGNE.T          |                 | 3 | 2,4299 | 0,204 | 0,38   |
| 11 | Q04637 IF4G1_HUMAN   | R.IRDPNQGGKDITEE.I              |                 | 3 | 2,4288 | 0,214 | 0      |
| 11 | Q5VY92 Q5VY92_HUMAN  | R.M*QDIPEETESR.D                |                 | 2 | 2,4285 | 0,256 | -0,181 |
| 11 | O43852 CALU_HUMAN    | K.M*ADKDGDLIATK.E               |                 | 3 | 2,4214 | 0,189 | 0,283  |
| 11 | Q14185 DOCK1_HUMAN   | E.DAATYLSLPSTK.A                |                 | 2 | 2,4183 | 0,232 | 0,096  |
| 11 | P36507 MP2K2_HUMAN   | R.LNQPGT#PTR.T                  | T394:           | 2 | 2,4175 | 0,266 | 0,115  |
| 11 | O94854 K0754_HUMAN   | E.DLDSL VFGIKE.V                |                 | 2 | 2,4173 | 0,154 | 0      |
| 11 | Q9NW68 BSDC1_HUMAN   | E.LM*GISPIS#PK.E                | S235:           | 2 | 2,4165 | 0,291 | 0      |
| 11 | Q8N2Y8 RUSC2_HUMAN   | R.M*LS#CPVR.L                   | S519:           | 2 | 2,4162 | 0,173 | -0,763 |
| 11 | Q9Y6I3 EPN1_HUMAN    | E.LLAGEVPARS#PGA FDM*SGVR.G     | S410:           | 2 | 2,4139 | 0,339 | 0,23   |
| 11 | P51610 HCFC1_HUMAN   | R.VCS#NPPCETHE.T                | S1014:          | 2 | 2,4132 | 0,153 | 0,433  |
| 11 | Q86YP4 P66A_HUMAN    | R.VNGLTTVALKE.T                 |                 | 2 | 2,4111 | 0,23  | 0,213  |
| 11 | Q13263 TIF1B_HUMAN   | R.STAPSA AASASASAAA SPPAGGGAE.A |                 | 2 | 2,4106 | 0,194 | 0,304  |
| 11 | Q7Z5J4 RAI1_HUMAN    | K.APLICTKEE.V                   |                 | 2 | 2,4073 | 0,188 | -0,23  |
| 11 | Q14353 GAMT_HUMAN    | E.VGFGM*AIAASK.V                |                 | 2 | 2,4057 | 0,279 | 0      |
| 11 | Q2KHR3 QSER1_HUMAN   | E.LDGLPSDQFAK.G                 |                 | 2 | 2,4024 | 0,426 | 0,102  |
| 11 | Q9Y4F5 K0284_HUMAN   | K.SGPSPTTPQPLR.A                |                 | 2 | 2,4009 | 0,269 | -0,69  |
| 11 | Q6VMQ6 MCAF1_HUMAN   | K.DKEEVNGIEE.I                  |                 | 2 | 2,3997 | 0,126 | -0,21  |
| 11 | P11137 MAP2_HUMAN    | R.LSNVSSSGSINLLE.S              |                 | 2 | 2,3984 | 0,346 | 0,516  |
| 11 | Q96S82 UBL7_HUMAN    | E.GLS#DDED DFHPNTR.S            | S230:           | 2 | 2,3961 | 0,473 | -1,15  |
| 11 | Q14676 MDC1_HUMAN    | K.APQAVPLEK.S                   |                 | 2 | 2,3954 | 0,29  | -0,512 |
| 11 | P81605 DCD_HUMAN     | K.ENAGEDPGLAR.Q                 |                 | 2 | 2,3942 | 0,157 | -0,324 |

|    |                       |                          |            |   |        |       |        |
|----|-----------------------|--------------------------|------------|---|--------|-------|--------|
| 11 | O95361 TRI16_HUMAN    | E.LDLM*APGPLPR.A         |            | 2 | 2,3939 | 0,359 | 0,204  |
| 11 | P62258 1433E_HUMAN    | K.LICCDILDVLDK.H         |            | 2 | 2,3931 | 0,321 | -0,083 |
| 11 | Q96GE4 CCD45_HUMAN    | K.SRTS#FVEDTE.T          | S234:      | 2 | 2,3926 | 0,244 | -0,195 |
| 11 | Q92619 HMHA1_HUMAN    | E.ATVS#LSSLVDYPHQAR.V    | S949:      | 2 | 2,3891 | 0,215 | 0,736  |
| 11 | Q5VT52 K0460_HUMAN    | R.NLPSSAQPFIPK.S         |            | 2 | 2,3834 | 0,28  | 0,564  |
| 11 | Q02952 AKA12_HUMAN    | K.SATLS#ST#ESTASE.M      | S644:T646: | 2 | 2,3824 | 0,264 | 0      |
| 11 | Q6ZRV2 FA83H_HUMAN    | R.RLS#LGQGDSTE.A         | S1003:     | 2 | 2,3822 | 0,342 | -0,294 |
| 11 | Q8N1F7 NUP93_HUMAN    | E.SEPSYISDVGPPGR.S       |            | 2 | 2,3739 | 0,234 | -0,501 |
| 11 | P17066 HSP76_HUMAN    | E.ILANDQGNR.T            |            | 2 | 2,3679 | 0,203 | -0,244 |
| 11 | P49023 PAXI_HUMAN     | E.HVYSFPNK.Q             |            | 2 | 2,3671 | 0,419 | 0,062  |
| 11 | Q9Y3L3 3BP1_HUMAN     | K.VTRS#PPETAAPVED.M      | S550:      | 2 | 2,3664 | 0,21  | 0,236  |
| 11 | P52788 SPSY_HUMAN     | E.DYTGKDVLLGGGDDGGILCE.I |            | 2 | 2,3658 | 0,297 | 0,357  |
| 11 | P41227 ARD1A_HUMAN    | E.SKGNS#PPS#SGEACRE.E    | S186:S189: | 2 | 2,361  | 0,329 | -0,071 |
| 11 | Q14004 CD2L5_HUMAN    | K.INLPAGILATGEK.Q        |            | 2 | 2,3609 | 0,36  | 0,376  |
| 11 | P05386 RLA1_HUMAN     | E.S#DDDM*GFGLFD.-        | S104:      | 2 | 2,3598 | 0,146 | 0      |
| 11 | Q9NZJ0 DTL_HUMAN      | E.DLSKDSLGP TK.S         |            | 2 | 2,3561 | 0,285 | -0,21  |
| 11 | Q8IWZ3 ANKH1_HUMAN    | D.FKLA AAVLR.T           |            | 2 | 2,3524 | 0,191 | -0,123 |
| 11 | Q00688 FKBP3_HUMAN    | K.DHLVTAYNHLFE.T         |            | 2 | 2,351  | 0,215 | 0,251  |
| 11 | P11137 MAP2_HUMAN     | R.RLSNVSSSGSINLLE.S      |            | 2 | 2,348  | 0,13  | -0,387 |
| 11 | P42229 STA5A_HUMAN    | K.HLQINQTFEE.L           |            | 2 | 2,3445 | 0,23  | -1,551 |
| 11 | P35612 ADDB_HUMAN     | K.SAPASPVQSPAK.E         |            | 2 | 2,3416 | 0,481 | -0,428 |
| 11 | Q13439 GOGA4_HUMAN    | R.TSS#FTEQLDE.G          | S41:       | 2 | 2,3411 | 0,129 | 0,296  |
| 11 | Q14697 GANAB_HUMAN    | E.SRLS#FQHDP E.T         | S916:      | 2 | 2,3342 | 0,134 | -0,094 |
| 11 | O43264 ZW10_HUMAN     | R.DSVVLSLLK.Q            |            | 2 | 2,3342 | 0,183 | 0,25   |
| 11 | Q9BQA1 MEP50_HUMAN    | R.KET#PPPLVPPAARE.W      | T5:        | 2 | 2,333  | 0,168 | -0,154 |
| 11 | Q99714 HCD2_HUMAN     | R.GVIINTASVA AFE.G       |            | 2 | 2,3327 | 0,21  | 0,283  |
| 11 | Q68CZ2 TENS3_HUMAN    | E.AASPLPDS#PGDKLVIVK.F   | S1154:     | 2 | 2,332  | 0,145 | 0,068  |
| 11 | P61158 ARP3_HUMAN     | E.DHYFLLTEPPLNTPE.N      |            | 2 | 2,3249 | 0,271 | 0,137  |
| 11 | Q96LZ7 FA82A_HUMAN    | K.AFNTRVEE.L             |            | 2 | 2,322  | 0,269 | 0,253  |
| 11 | P12268 IMDH2_HUMAN    | E.DLVVAPAGITLK.E         |            | 2 | 2,3216 | 0,109 | 0      |
| 11 | Q6S8J3 A26CA_HUMAN    | E.LPDGQVITIGNE.R         |            | 2 | 2,3181 | 0,191 | 0,194  |
| 11 | ##A6NND7 A6NND7_HUMAN | D.TQPGS#TTPPDKE.H        | S656:      | 2 | 2,316  | 0,214 | -0,182 |
| 11 | Q96B23 CR025_HUMAN    | E.LRRDS#S#ESQLASTE.S     | S66:S67:   | 2 | 2,3159 | 0,189 | 0      |
| 11 | O95644 NFAC1_HUMAN    | E.VEDVLPSSK.R            |            | 2 | 2,3129 | 0,251 | 0,188  |
| 11 | A4D0Z9 A4D0Z9_HUMAN   | E.DALPGLGLYR.T           |            | 2 | 2,3125 | 0,355 | 0,227  |
| 11 | Q8NBJ4 GOLM1_HUMAN    | R.QQLQALSEPQPR.L         |            | 2 | 2,3108 | 0,35  | -0,35  |
| 11 | P35908 K22E_HUMAN     | K.IEISELNR.V             |            | 2 | 2,3083 | 0,145 | 0      |
| 11 | Q04637 IF4G1_HUMAN    | E.YTLGEESEAPGQR.A        |            | 2 | 2,3078 | 0,23  | -0,17  |
| 11 | Q9Y2L5 TRS85_HUMAN    | E.DGPCTITSNK.N           |            | 2 | 2,3076 | 0,251 | 0,112  |



|    |                    |                         |            |   |        |       |        |
|----|--------------------|-------------------------|------------|---|--------|-------|--------|
| 11 | P38159 HNRPG_HUMAN | E.RGLPPS#M*E.R          | S352:      | 2 | 2,3052 | 0,273 | 0      |
| 11 | P49815 TSC2_HUMAN  | K.ADVGRLS#PE.V          | S1411:     | 2 | 2,2986 | 0,281 | 0,357  |
| 11 | P30048 PRDX3_HUMAN | R.GLFIIDPNGVIK.H        |            | 2 | 2,2934 | 0,158 | 0,19   |
| 11 | Q9UPU5 UBP24_HUMAN | E.SNSLCPAGIR.N          |            | 2 | 2,2865 | 0,169 | -0,227 |
| 11 | P57737 CORO7_HUMAN | E.LLNAM*VAK.L           |            | 2 | 2,2843 | 0,224 | 0,348  |
| 11 | P55072 TERA_HUMAN  | R.IVSQLLTLM*DGLK.Q      |            | 2 | 2,2824 | 0,316 | 0,675  |
| 11 | P19838 NFKB1_HUMAN | K.TTSQAHSPLS#PASTR.Q    | S907:      | 2 | 2,2799 | 0,326 | 0,07   |
| 11 | Q96PK6 RBM14_HUMAN | R.AQPSVSLGAPYR.G        |            | 2 | 2,2794 | 0,271 | -0,098 |
| 11 | P31942 HNRH3_HUMAN | E.IVPNGITLTM*DYQGR.S    |            | 2 | 2,279  | 0,261 | 0,648  |
| 11 | Q5VT52 K0460_HUMAN | K.ASIGQS#GGLPSTTFK.L    | S614:      | 2 | 2,2786 | 0,155 | 0,621  |
| 11 | O60841 IF2P_HUMAN  | E.GNTVHIEVK.E           |            | 2 | 2,2779 | 0,201 | 0      |
| 11 | P09497 CLCB_HUMAN  | E.ANGPADGYAAIAQADR.L    |            | 2 | 2,2755 | 0,257 | -0,391 |
| 11 | P50991 TCPD_HUMAN  | R.FSNISAAK.A            |            | 2 | 2,2743 | 0,285 | 0,437  |
| 11 | Q9NR00 CH004_HUMAN | R.VSPS#IHGYHFD.T        | S21:       | 2 | 2,2741 | 0,276 | 0,182  |
| 11 | P49810 PSN2_HUMAN  | E.RTSLM*S#AES#PTPR.S    | S22:S25:   | 2 | 2,2713 | 0,138 | -0,152 |
| 11 | Q9H6Z4 RANB3_HUMAN | K.FVFGQNM*SER.V         |            | 2 | 2,2702 | 0,355 | 0,396  |
| 11 | Q9H0G5 CCD55_HUMAN | E.KCILQTDVK.V           |            | 2 | 2,2693 | 0,302 | -0,442 |
| 11 | Q04323 SAKS1_HUMAN | E.LGLVPSAVLIVAK.K       |            | 2 | 2,2682 | 0,356 | 0      |
| 11 | O75643 U520_HUMAN  | E.YKFSVDVK.E            |            | 2 | 2,2675 | 0,202 | -0,124 |
| 11 | Q14692 BMS1_HUMAN  | K.AGLSPANQCQSDR.V       |            | 2 | 2,2617 | 0,348 | 0      |
| 11 | P62834 RAP1A_HUMAN | E.DVPM*ILVGNKCDLEDE.R   |            | 2 | 2,2611 | 0,307 | 0,327  |
| 11 | Q86SQ0 PHLB2_HUMAN | E.YTKPDSRSL#TGT#TVE.D   | S468:T471: | 2 | 2,2611 | 0,302 | -0,403 |
| 11 | P54132 BLM_HUMAN   | E.LNPETS#TDCDAR.Q       | S358:      | 2 | 2,2609 | 0,196 | 0      |
| 11 | Q9BY44 EIF2A_HUMAN | R.NTVSQSISGDPE.I        |            | 2 | 2,2609 | 0,362 | 0,198  |
| 11 | Q02952 AKA12_HUMAN | K.VLSKPPEGVSE.V         |            | 2 | 2,2606 | 0,246 | -0,295 |
| 11 | O94762 RECQ5_HUMAN | E.GVQGPPM*APEK.Y        |            | 2 | 2,2605 | 0,309 | -0,217 |
| 11 | Q9Y3L3 3BP1_HUMAN  | R.TESEVPPRPAS#PK.V      | S544:      | 2 | 2,2567 | 0,242 | -0,331 |
| 11 | Q86WR7 CJ047_HUMAN | E.RM*AGNEALSPT*S#PFRE.G | T214:S215: | 2 | 2,2531 | 0,141 | -0,126 |
| 11 | Q6S8J3 A26CA_HUMAN | K.AGFAGDDAPR.A          |            | 2 | 2,2504 | 0,131 | 0,062  |
| 11 | Q14C86 GAPD1_HUMAN | E.DTQFVDGYK.Q           |            | 2 | 2,2467 | 0,378 | -0,114 |
| 11 | Q969J3 L12R1_HUMAN | K.GLLSGQTS#PTNAKLE.K    | S75:       | 2 | 2,2405 | 0,122 | 0,535  |
| 11 | O75955 FLOT1_HUMAN | E.ISGPLTSANK.I          |            | 2 | 2,2365 | 0,319 | 0,062  |
| 11 | Q66K74 MAP1S_HUMAN | R.LSLS#PLR.G            | S657:      | 2 | 2,2324 | 0,137 | 0,352  |
| 11 | Q9UJZ1 STML2_HUMAN | K.APVPGTTPDS#LSSGSSR.D  | S330:      | 2 | 2,2307 | 0,281 | -0,229 |
| 11 | P78364 PHC1_HUMAN  | E.ALSPT#SPGPLSVR.A      | T897:      | 2 | 2,2282 | 0,341 | 0,179  |
| 11 | Q5T4S7 UBR4_HUMAN  | K.LCTFTITQKE.F          |            | 2 | 2,2253 | 0,218 | 0,197  |
| 11 | Q15642 CIP4_HUMAN  | E.DFSQPMNR.A            |            | 2 | 2,2234 | 0,133 | 0,368  |
| 11 | Q9H0G5 CCD55_HUMAN | K.CILQTDVK.V            |            | 2 | 2,2231 | 0,234 | 0,312  |
| 11 | Q9H0H0 INT2_HUMAN  | E.LM*GILPTVR.S          |            | 2 | 2,2225 | 0,178 | 0      |

|    |                      |                             |            |   |        |       |        |
|----|----------------------|-----------------------------|------------|---|--------|-------|--------|
| 11 | Q58FF7 H90B3_HUMAN   | E.DLPLNISRE.M               |            | 2 | 2,2207 | 0,163 | 0,115  |
| 11 | P31930 QCR1_HUMAN    | E.DAVPTLTPCR.F              |            | 2 | 2,2178 | 0,249 | -0,216 |
| 11 | P00533 EGFR_HUMAN    | E.DHFLSLQR.M                |            | 2 | 2,2169 | 0,249 | 0      |
| 11 | O00178 GTPB1_HUMAN   | R.LHGGFDS#DCS#EDGEALNGEPE.L | S44:S47:   | 2 | 2,2166 | 0,178 | -1,019 |
| 11 | P40763 STAT3_HUMAN   | E.ADPGSAAPYLK.T             |            | 2 | 2,2154 | 0,478 | 0,448  |
| 11 | Q13428 TCOF_HUMAN    | K.LDSSPSVSSTLAAK.D          |            | 2 | 2,2122 | 0,097 | 0      |
| 11 | Q15468 STIL_HUMAN    | E.AQSLM*PCS#PK.T            | S753:      | 2 | 2,212  | 0,243 | -0,301 |
| 11 | P85037 FOXK1_HUMAN   | R.TPFGPLSSR.S               |            | 2 | 2,2111 | 0,392 | 0,127  |
| 11 | Q9Y6A5 TACC3_HUMAN   | K.EACGGAPLQGLPGE.A          |            | 2 | 2,2105 | 0,358 | 0,36   |
| 11 | P13645 K1C10_HUMAN   | R.VLDELTLTK.A               |            | 2 | 2,2027 | 0,179 | 0,118  |
| 11 | Q9Y3T9 NOC2L_HUMAN   | R.GILRPLSTR.H               |            | 2 | 2,2017 | 0,165 | -0,843 |
| 11 | P35568 IRS1_HUMAN    | E.QQQQQQPLLHPPPEPK.S        |            | 2 | 2,1995 | 0,091 | -0,068 |
| 11 | Q8IYB7 DI3L2_HUMAN   | K.KLSVCVSE.K                |            | 2 | 2,1989 | 0,083 | 0,331  |
| 11 | Q12873 CHD3_HUMAN    | R.KIPLEDEVPGVPGE.M          |            | 2 | 2,1983 | 0,296 | 0,165  |
| 11 | P38398 BRCA1_HUMAN   | K.VADVLDVNE.V               |            | 2 | 2,1981 | 0,153 | 0      |
| 11 | ##A2RUS2 DEND3_HUMAN | R.YY#QAVVGYTRNGCVD.T        | Y1117:     | 2 | 2,1967 | 0,083 | -1,786 |
| 11 | P21127 CD2L1_HUMAN   | E.GDYVPDS#PALS#PIELK.Q      | S410:S414: | 2 | 2,1954 | 0,137 | 0,328  |
| 11 | Q00526 CDK3_HUMAN    | E.TGQLVALK.K                |            | 2 | 2,1952 | 0,193 | 0      |
| 11 | P04264 K2C1_HUMAN    | R.TLEGEESR.M                |            | 2 | 2,1948 | 0,23  | -0,236 |
| 11 | Q6P2E9 EDC4_HUMAN    | R.SAAGT#PVPSAHL.D.C         | T1252:     | 2 | 2,1922 | 0,352 | -0,094 |
| 11 | Q2NKX8 ERC6L_HUMAN   | E.VM*LLTSLYK.Q              |            | 2 | 2,1904 | 0,274 | 0,102  |
| 11 | Q6ZS30 NBEL1_HUMAN   | K.SFSVHSDRE.S               |            | 2 | 2,187  | 0,289 | -0,115 |
| 11 | A6NNP5 U594_HUMAN    | D.RLS#S#IR.V                | S95:S96:   | 2 | 2,1841 | 0,117 | -0,137 |
| 11 | P21127 CD2L1_HUMAN   | K.YLPALQGCR.S               |            | 2 | 2,1824 | 0,301 | -0,566 |
| 11 | A8K710 A8K710_HUMAN  | E.QSNTPLLLPLAAR.M           |            | 2 | 2,1803 | 0,342 | 0,613  |
| 11 | Q6P2E9 EDC4_HUMAN    | E.VEPLGLPQAS#PSR.T          | S723:      | 2 | 2,1774 | 0,394 | 0,256  |
| 11 | Q6PKG0 LARP1_HUMAN   | R.AVTPVPTKTEE.V             |            | 2 | 2,1713 | 0,321 | -0,416 |
| 11 | P21333 FLNA_HUMAN    | E.VVIQDPM*GQK.G             |            | 2 | 2,1666 | 0,327 | 0,108  |
| 11 | Q15181 IPYR_HUMAN    | K.VIAINVDDPDAANYNDIND.V     |            | 2 | 2,1658 | 0,228 | -0,237 |
| 11 | Q8IVF2 AHNK2_HUMAN   | E.VQAGQVDVK.L               |            | 2 | 2,1657 | 0,183 | 0,323  |
| 11 | P14406 CX7A2_HUMAN   | E.DDEIPLYLK.G               |            | 2 | 2,1583 | 0,227 | -0,11  |
| 11 | Q5W0B1 RN219_HUMAN   | K.SLDLDGLSK.S               |            | 2 | 2,1581 | 0,202 | 0,386  |
| 11 | O94763 RMP_HUMAN     | R.NTNVNAM*HQVTD.S           |            | 2 | 2,1559 | 0,173 | 0      |
| 11 | P61978 HNRPK_HUMAN   | R.AQPYDPNFYDE.T             |            | 2 | 2,1556 | 0,161 | 0,09   |
| 11 | P11142 HSP7C_HUMAN   | K.NQVAM*NPTNTVFD.A          |            | 2 | 2,1547 | 0,323 | -1,248 |
| 11 | Q01484 ANK2_HUMAN    | R.AGNLDKVVE.Y               |            | 2 | 2,1535 | 0,291 | -0,516 |
| 11 | Q15366 PCBP2_HUMAN   | R.IITLAGPTNAIFK.A           |            | 2 | 2,1506 | 0,205 | 0,18   |
| 11 | P50402 EMD_HUMAN     | E.DALLYQSK.G                |            | 2 | 2,1487 | 0,253 | -0,715 |
| 11 | Q2QGD7 ZXDC_HUMAN    | K.VEPDS#PSRPGAVGQQE.G       | S665:      | 2 | 2,146  | 0,319 | -0,282 |

|    |                     |                       |            |   |        |       |        |
|----|---------------------|-----------------------|------------|---|--------|-------|--------|
| 11 | Q10469 MGAT2_HUMAN  | E.ALAPPLLDAEPAR.G     |            | 2 | 2,136  | 0,442 | 0,274  |
| 11 | P55196 AFAD_HUMAN   | E.YFT#FPASK.S         | T1215:     | 2 | 2,136  | 0,097 | 0,117  |
| 11 | P78559 MAP1A_HUMAN  | R.CLS#PDDSTVK.M       | S986:      | 2 | 2,1352 | 0,233 | -0,406 |
| 11 | Q6R327 RICTR_HUMAN  | K.DVLFTDTITM*K.A      |            | 2 | 2,135  | 0,19  | -0,188 |
| 11 | Q7KZF4 SND1_HUMAN   | E.YGM*IYLGK.D         |            | 2 | 2,1322 | 0,204 | -0,19  |
| 11 | P62736 ACTA_HUMAN   | R.DLTDYLM*K.I         |            | 2 | 2,1289 | 0,243 | -0,06  |
| 11 | Q13523 PRP4B_HUMAN  | R.TRSPSPDDILE.R       |            | 2 | 2,1271 | 0,162 | -0,595 |
| 11 | P20020 AT2B1_HUMAN  | K.LKTSPNEGLSGNPADLE.R |            | 2 | 2,1268 | 0,258 | 0,14   |
| 11 | P41227 ARD1A_HUMAN  | E.SKGN#PPS#SGEACREE.K | S186:S189: | 2 | 2,1262 | 0,395 | 0,329  |
| 11 | Q9P260 K1468_HUMAN  | R.EPSTASGGGQLNR.A     |            | 2 | 2,1233 | 0,44  | 0,096  |
| 11 | P68371 TBB2C_HUMAN  | R.ALTVPELTQQM*FDAK.N  |            | 2 | 2,1225 | 0,312 | 0,571  |
| 11 | P30153 2AAA_HUMAN   | E.NVIM*SQILPCIKE.L    |            | 2 | 2,1198 | 0,232 | 0,078  |
| 11 | P08648 ITA5_HUMAN   | R.LLVCDLGNPM*K.A      |            | 2 | 2,1179 | 0,093 | 0      |
| 11 | P56537 IF6_HUMAN    | E.AQPSTIATSM*R.D      |            | 2 | 2,1166 | 0,383 | 0      |
| 11 | Q96AE4 FUBP1_HUMAN  | E.RSCM*LTGT#PE.S      | T153:      | 2 | 2,1113 | 0,198 | -0,293 |
| 11 | Q9P275 UBP36_HUMAN  | E.DLVSLPHQLPE.A       |            | 2 | 2,1095 | 0,19  | -0,196 |
| 11 | Q9BQG0 MBB1A_HUMAN  | E.SRDPAQPM*S#PGE.A    | S11:       | 2 | 2,1057 | 0,123 | -0,357 |
| 11 | Q3KQU3 MA7D1_HUMAN  | E.NGFSTNGPSGDK.S      |            | 2 | 2,1051 | 0,197 | -0,31  |
| 11 | Q13546 RIPK1_HUMAN  | D.CVAVPSSR.S          |            | 2 | 2,1043 | 0,187 | -0,418 |
| 11 | Q16352 AINX_HUMAN   | E.YQDLLNVK.M          |            | 2 | 2,1019 | 0,218 | -0,061 |
| 11 | Q15154 PCM1_HUMAN   | E.TAS#PVAVSLR.S       | S861:      | 2 | 2,1018 | 0,333 | -0,451 |
| 11 | P23434 GCSH_HUMAN   | K.M*TLNPNSELDE.L      |            | 2 | 2,1003 | 0,141 | 0,292  |
| 11 | P35527 K1C9_HUMAN   | R.M*TLDDFR.I          |            | 2 | 2,0961 | 0,109 | 0,2    |
| 11 | P02533 K1C14_HUMAN  | R.EVATNSELVQSGK.S     |            | 2 | 2,0952 | 0,385 | -0,358 |
| 11 | P35908 K22E_HUMAN   | K.DVDNAYM*IK.V        |            | 2 | 2,0943 | 0,253 | 0,225  |
| 11 | P52948 NUP98_HUMAN  | E.VVVYLDDNQKPPVGE.G   |            | 2 | 2,0913 | 0,203 | 0,219  |
| 11 | P15822 ZEP1_HUMAN   | R.VGVTGHVPLLE.R       |            | 2 | 2,0898 | 0,121 | 0,109  |
| 11 | P09429 HMGB1_HUMAN  | K.KHPDASVNFSE.F       |            | 2 | 2,0894 | 0,168 | -0,396 |
| 11 | Q16512 PKN1_HUMAN   | R.DARPLTAAE.Q         |            | 2 | 2,0846 | 0,084 | 0,388  |
| 11 | Q9UPT8 ZC3H4_HUMAN  | R.QQTSSRPPASVGE.L     |            | 2 | 2,0838 | 0,411 | 0      |
| 11 | Q66K74 MAP1S_HUMAN  | E.LGPIPAGEEK.A        |            | 2 | 2,0817 | 0,283 | -0,362 |
| 11 | P04150 GCR_HUMAN    | K.LCLVCSDE.A          |            | 2 | 2,0814 | 0,198 | 0,123  |
| 11 | Q92797 SYMPK_HUMAN  | K.ETAAGGLTLKE.E       |            | 2 | 2,0769 | 0,26  | -0,224 |
| 11 | Q8NHW5 Q8NHW5_HUMAN | D.TTAAPAAAAAPAK.V     |            | 2 | 2,0746 | 0,138 | 0,439  |
| 11 | Q3KQU3 MA7D1_HUMAN  | E.LGAGAPPVAVAR.T      |            | 2 | 2,0668 | 0,338 | -0,113 |
| 11 | Q9Y4C8 RBM19_HUMAN  | E.LSDM*DYLK.S         |            | 2 | 2,0536 | 0,109 | 0      |
| 11 | P51610 HCFC1_HUMAN  | E.LQVS#PGPR.Q         | S1507:     | 2 | 2,0519 | 0,096 | 0,065  |
| 11 | P22307 NLTP_HUMAN   | K.ANLVFK.E.I          |            | 2 | 2,0495 | 0,118 | 0,594  |
| 11 | Q9BZF3 OSBL6_HUMAN  | E.SRLSM*SES#VSE.F     | S491:      | 2 | 2,0454 | 0,099 | -0,373 |

|    |                     |                          |                 |   |        |       |        |
|----|---------------------|--------------------------|-----------------|---|--------|-------|--------|
| 11 | Q15642 CIP4_HUMAN   | E.DFSQPM*NR.A            |                 | 2 | 2,0442 | 0,119 | 0,121  |
| 11 | O43237 DC1L2_HUMAN  | R.RGPLTSGSDEE.N          |                 | 2 | 2,044  | 0,317 | 0,213  |
| 11 | Q9BTT0 AN32E_HUMAN  | E.VGLSYLM*K.E            |                 | 2 | 2,0408 | 0,174 | -0,066 |
| 11 | P35527 K1C9_HUMAN   | R.QVLDNLTM*EK.S          |                 | 2 | 2,0315 | 0,233 | -0,101 |
| 11 | Q9BYG5 PAR6B_HUMAN  | E.DNGVPQQIPK.A           |                 | 2 | 2,0306 | 0,302 | 0      |
| 11 | Q02790 FKBP4_HUMAN  | E.SGAQSAPLMMEGVDISPK.Q   |                 | 2 | 2,0241 | 0,313 | -0,068 |
| 11 | P55209 NP1L1_HUMAN  | R.QLTVQM*M*QNPQILAALQE.R |                 | 2 | 2,0235 | 0,217 | 0,467  |
| 11 | P55072 TERA_HUMAN   | D.NSVVLSLQPK.M           |                 | 2 | 2,0234 | 0,088 | 0      |
| 11 | P13645 K1C10_HUMAN  | R.LAADDFR.L              |                 | 2 | 2,0222 | 0,353 | 0,302  |
| 11 | P36915 GNL1_HUMAN   | R.NPYALLGEDEC.-          |                 | 2 | 2,0204 | 0,313 | 0,286  |
| 11 | P49792 RBP2_HUMAN   | E.STTGFNFSFK.S           |                 | 2 | 2,0203 | 0,133 | 0,322  |
| 11 | Q8N157 AHI1_HUMAN   | K.ERS#PPLSPEE.K          | S1123:          | 2 | 2,0201 | 0,311 | -0,1   |
| 11 | Q14191 WRN_HUMAN    | E.YLSDIAYK.S             |                 | 2 | 2,0154 | 0,13  | 0,376  |
| 11 | Q9Y4M2 Q9Y4M2_HUMAN | E.VISPQPDEVQR.E          |                 | 2 | 2,0148 | 0,242 | -0,481 |
| 11 | P49792 RBP2_HUMAN   | K.SEEPDSITK.S            |                 | 2 | 2,0123 | 0,303 | -1,516 |
| 11 | P17301 ITA2_HUMAN   | K.AIASIPTE.Y             |                 | 2 | 2,0113 | 0,1   | -0,191 |
| 11 | Q9P1Q0 VPS54_HUMAN  | E.LTPIAVDTTSQR.N         |                 | 2 | 2,011  | 0,304 | -0,187 |
| 11 | Q9HD15 SRA1_HUMAN   | E.TSPGPPPM*GPPPPSSK.A    |                 | 2 | 2,0063 | 0,362 | 0      |
| 11 | Q03164 HRX_HUMAN    | E.IQVLPEER.S             |                 | 2 | 1,995  | 0,198 | 0,496  |
| 11 | O60271 JIP4_HUMAN   | E.LSDVSQGGSK.A           |                 | 2 | 1,9929 | 0,228 | -0,187 |
| 11 | O75717 WDHD1_HUMAN  | E.DLDDDDPKFINVGE.K       |                 | 2 | 1,9913 | 0,121 | 0,077  |
| 11 | Q6P0N0 CN106_HUMAN  | E.NQVAM*SFYK.H           |                 | 2 | 1,9894 | 0,163 | 0      |
| 11 | O75643 U520_HUMAN   | R.CTLSANLVASGE.L         |                 | 2 | 1,989  | 0,239 | 0,2    |
| 11 | Q8NBJ4 GOLM1_HUMAN  | R.DLSENNDQR.Q            |                 | 2 | 1,986  | 0,223 | -0,447 |
| 11 | Q16204 CCDC6_HUMAN  | K.SGGIVISPF.R.L          |                 | 2 | 1,9835 | 0,159 | 0,236  |
| 11 | P10276 RARA_HUMAN   | E.GLDTLSGQPGGGGR.D       |                 | 2 | 1,9833 | 0,104 | 0      |
| 11 | Q07157 ZO1_HUMAN    | E.YSM*YSTDSR.H           |                 | 2 | 1,9736 | 0,215 | 0,325  |
| 11 | Q9ULX6 AKP8L_HUMAN  | E.TDM*M*QGGVYGSNGER.Y    |                 | 2 | 1,969  | 0,35  | -0,077 |
| 11 | Q9H8W4 PKHF2_HUMAN  | R.SDSYSQSLK.S            |                 | 2 | 1,968  | 0,373 | 0      |
| 11 | Q7Z434 MAVS_HUMAN   | E.QALQTL#PR.A            | S165:           | 2 | 1,9655 | 0,124 | 0,223  |
| 11 | Q9HA65 TBC17_HUMAN  | E.AGDSTQILFSK.K          |                 | 2 | 1,9633 | 0,095 | 0,105  |
| 11 | P13645 K1C10_HUMAN  | R.LASYLDK.V              |                 | 2 | 1,9613 | 0,142 | 0,151  |
| 11 | O14497 ARI1A_HUMAN  | E.YEVGDPGQR.T            |                 | 2 | 1,9596 | 0,206 | 0,06   |
| 11 | P62753 RS6_HUMAN    | R.RLS#S#LRSTS#K.S        | S235:S236:S242: | 2 | 1,9588 | 0,359 | 0      |
| 11 | O75410 TACC1_HUMAN  | E.NTS#PLLGDAR.F          | S276:           | 2 | 1,9541 | 0,19  | -0,109 |
| 11 | P14618 KPYM_HUMAN   | R.GDLGIEIPAE.K           |                 | 2 | 1,9521 | 0,14  | 0,361  |
| 11 | Q12905 ILF2_HUMAN   | K.ILPTLEAVALGNK.V        |                 | 2 | 1,9477 | 0,18  | -0,087 |
| 11 | Q14C86 GAPD1_HUMAN  | K.IEDLRSE.C              |                 | 2 | 1,9428 | 0,086 | 0,495  |
| 11 | O75531 BAF_HUMAN    | E.KPVGSLAGIGE.V          |                 | 2 | 1,9372 | 0,165 | 0,119  |

|    |                    |                          |            |   |        |       |        |
|----|--------------------|--------------------------|------------|---|--------|-------|--------|
| 11 | Q9HBH9 MKNK2_HUMAN | E.NTLPTPM*VLQR.N         |            | 2 | 1,9323 | 0,142 | 0      |
| 11 | P62081 RS7_HUMAN   | E.DLVFPSEIVGK.R          |            | 2 | 1,93   | 0,164 | 0      |
| 11 | Q96T23 RSF1_HUMAN  | K.AQIDPVLLK.N            |            | 2 | 1,9285 | 0,176 | 0,245  |
| 11 | P22102 PUR2_HUMAN  | E.CQVILPLLK.S            |            | 2 | 1,9233 | 0,188 | 0      |
| 11 | Q96AG4 LRC59_HUMAN | K.LVTLPVSFAQLK.N         |            | 2 | 1,9194 | 0,349 | 0,278  |
| 11 | Q6UN15 FIP1_HUMAN  | E.FTS#PPSLFK.T           | S259:      | 2 | 1,914  | 0,113 | 0      |
| 11 | Q96MT8 CEP63_HUMAN | E.IIQAQLVNR.K            |            | 2 | 1,9081 | 0,226 | 0,347  |
| 11 | Q13428 TCOF_HUMAN  | K.AGPVAVQVK.A            |            | 2 | 1,9069 | 0,178 | 0,562  |
| 11 | P49792 RBP2_HUMAN  | E.VM*VPSFCK.S            |            | 2 | 1,9064 | 0,107 | 0,124  |
| 11 | Q8NDD1 CA131_HUMAN | R.HCAPS#GTPTGPE.I        | S103:      | 2 | 1,9009 | 0,273 | 0,284  |
| 11 | Q15477 SKIV2_HUMAN | E.NEAVGQPGGPR.G          |            | 2 | 1,8914 | 0,161 | 0,113  |
| 11 | P33176 KINH_HUMAN  | D.KDITLTND.K             |            | 2 | 1,8791 | 0,114 | 0,332  |
| 11 | P63104 1433Z_HUMAN | K.GIVDQSQQAYQE.A         |            | 2 | 1,8699 | 0,1   | -0,357 |
| 11 | P39880 CUX1_HUMAN  | E.LSLTGASR.S             |            | 2 | 1,8685 | 0,094 | -0,076 |
| 11 | P62081 RS7_HUMAN   | K.IVKPNGEKPDEFE.S        |            | 2 | 1,8675 | 0,217 | -0,244 |
| 11 | Q9P260 K1468_HUMAN | R.EPSTAS#GGGQLNR.A       | S170:      | 2 | 1,8607 | 0,246 | 0,18   |
| 11 | Q9BV86 CI032_HUMAN | E.DFLVQAK.T              |            | 2 | 1,8483 | 0,174 | 0,297  |
| 11 | Q9Y6Q9 NCOA3_HUMAN | D.NSPNM*NITQPSK.V        |            | 2 | 1,8475 | 0,215 | 0,272  |
| 11 | Q9Y446 PKP3_HUMAN  | E.QLEPAATSTYR.A          |            | 2 | 1,8469 | 0,238 | -0,296 |
| 11 | O60673 DPOLZ_HUMAN | K.LGFLSER.S              |            | 2 | 1,842  | 0,18  | 0,148  |
| 11 | Q9NYP9 CU045_HUMAN | E.S#KLSFATCKS#.-         | S224:S233: | 2 | 1,8411 | 0,208 | -0,379 |
| 11 | Q9BVS4 RIOK2_HUMAN | R.SSGDPEQIKEDS#LS#EE.S   | S380:S382: | 2 | 1,8341 | 0,135 | 0,064  |
| 11 | P45974 UBP5_HUMAN  | K.IVILPDYLE.I            |            | 2 | 1,8336 | 0,104 | -0,113 |
| 11 | P41227 ARD1A_HUMAN | E.DLM*NM*QHCHLLCLPE.N    |            | 2 | 1,8318 | 0,194 | 0,064  |
| 11 | Q9Y217 MTMR6_HUMAN | E.QTLPLVNDALR.T          |            | 2 | 1,8239 | 0,18  | -0,492 |
| 11 | Q15029 U5S1_HUMAN  | K.FFDDPM*LLE.L           |            | 2 | 1,8138 | 0,084 | 0,107  |
| 11 | P31946 1433B_HUMAN | K.DSTLIM*QLLR.D          |            | 2 | 1,8102 | 0,097 | -0,202 |
| 11 | Q9UHB6 LIMA1_HUMAN | K.VGVLAASM*E.A           |            | 2 | 1,8102 | 0,151 | 0      |
| 11 | P04264 K2C1_HUMAN  | R.SLVNLGGSK.S            |            | 2 | 1,807  | 0,197 | -0,349 |
| 11 | P16949 STMN1_HUMAN | E.SVPEFPLS#PPK.K         | S38:       | 2 | 1,8019 | 0,24  | 0,191  |
| 11 | Q8IWJ2 GCC2_HUMAN  | E.QLLNS#PETK.L           | S1441:     | 2 | 1,8012 | 0,188 | -0,22  |
| 11 | Q71U36 TBA1A_HUMAN | R.AVFVDLEPTVIDE.V        |            | 2 | 1,7999 | 0,2   | 0,169  |
| 11 | Q9UHA4 MK111_HUMAN | E.LRQVVEVS#.-            | S124:      | 2 | 1,7918 | 0,168 | 0,06   |
| 11 | P35908 K22E_HUMAN  | K.FASFIDK.V              |            | 2 | 1,79   | 0,154 | 0,295  |
| 11 | Q5VWN6 CJ018_HUMAN | R.QCS#LNCISSGCHTSGDSLE.L | S1220:     | 2 | 1,7865 | 0,116 | 0,445  |
| 11 | P19105 MLRM_HUMAN  | E.LLTTM*GDR.F            |            | 2 | 1,7789 | 0,215 | 0,33   |
| 11 | Q66K74 MAP1S_HUMAN | E.RLSLS#PLR.G            | S657:      | 2 | 1,7787 | 0,139 | 0      |
| 11 | Q71U36 TBA1A_HUMAN | K.VGINYQPPTVVPGGDLAK.V   |            | 2 | 1,7732 | 0,125 | 0,334  |
| 11 | P08729 K2C7_HUMAN  | E.LQSQISDTSVVLSM*DNSR.S  |            | 2 | 1,7716 | 0,086 | 0,367  |

|    |                     |                        |                |   |        |       |        |
|----|---------------------|------------------------|----------------|---|--------|-------|--------|
| 11 | P34897 GLYM_HUMAN   | R.AFPM*PGFDEH.-        |                | 2 | 1,7675 | 0,476 | 0,105  |
| 11 | P62249 RS16_HUMAN   | K.LLEPVLLL GK.E        |                | 2 | 1,7652 | 0,258 | -0,111 |
| 11 | P46821 MAP1B_HUMAN  | E.QYGFLTTP#K.Q         | T1069:         | 2 | 1,7643 | 0,165 | 0,494  |
| 11 | P23258 TBG1_HUMAN   | E.DIFDIIDR.E           |                | 2 | 1,7615 | 0,086 | 0,121  |
| 11 | P05114 HMG1_HUMAN   | E.DLPAENGETK.T         |                | 2 | 1,7558 | 0,363 | -0,114 |
| 11 | P15924 DESP_HUMAN   | K.ISTISSVR.N           |                | 2 | 1,7537 | 0,191 | 0,283  |
| 11 | Q9HC35 EMAL4_HUMAN  | E.IEVPDQYGTIR.A        |                | 2 | 1,7485 | 0,156 | 0      |
| 11 | P13010 KU86_HUMAN   | E.DIIQGFR.Y            |                | 2 | 1,7393 | 0,203 | 0,287  |
| 11 | Q14191 WRN_HUMAN    | E.EYLSDIAYK.S          |                | 2 | 1,7388 | 0,218 | -0,111 |
| 11 | Q01664 TFAP4_HUMAN  | R.AVIVKPV.R.S          |                | 2 | 1,7315 | 0,088 | 0,138  |
| 11 | Q8WTW3 COG1_HUMAN   | R.LDLRDPALFE.T         |                | 2 | 1,7293 | 0,244 | -0,29  |
| 11 | Q8WUD4 CCD12_HUMAN  | E.DSLASAVDAATEQK.T     |                | 2 | 1,7285 | 0,166 | -0,347 |
| 11 | Q15149 PLEC1_HUMAN  | E.LTTLTSQYIK.F         |                | 2 | 1,7251 | 0,112 | 0,104  |
| 11 | ##Q9UIU6 SIX4_HUMAN | R.KEAPS#PY#RNQK.Y      | S533:Y535:     | 2 | 1,7154 | 0,088 | -0,165 |
| 11 | Q9UKM9 RALY_HUMAN   | E.AGLPQGEAR.T          |                | 2 | 1,7054 | 0,162 | -1,221 |
| 11 | Q9UJA5 TRM6_HUMAN   | E.SNGTLEEK.Q           |                | 2 | 1,689  | 0,221 | 0,347  |
| 11 | P52565 GDIR1_HUMAN  | R.AEEYFLTPVEEAPK.G     |                | 2 | 1,6865 | 0,145 | 0,07   |
| 11 | P46821 MAP1B_HUMAN  | E.QYGFLTTPK.Q          |                | 2 | 1,6863 | 0,24  | 0,106  |
| 11 | Q5UIP0 RIF1_HUMAN   | R.RQTFITL.E.K          |                | 2 | 1,6824 | 0,11  | 0,242  |
| 11 | P06744 G6PI_HUMAN   | E.SSLFIIASK.T          |                | 2 | 1,6765 | 0,174 | 0,126  |
| 11 | P48637 GSHB_HUMAN   | E.IAVVYFR.D            |                | 2 | 1,6723 | 0,212 | 0,351  |
| 11 | P30260 CDC27_HUMAN  | R.LFTSDSSTTKE.N        |                | 2 | 1,6639 | 0,099 | -0,301 |
| 11 | P30533 AMRP_HUMAN   | E.AEFEEPR.V            |                | 2 | 1,6613 | 0,141 | 0,139  |
| 11 | Q6S8J3 A26CA_HUMAN  | E.TTFNSIM*K.S          |                | 2 | 1,659  | 0,272 | 0,255  |
| 11 | ##Q969E3 UCN3_HUMAN | R.S#RLY#HFS#RKSLLSAD.E | S98:Y101:S104: | 2 | 1,6388 | 0,118 | 0,906  |
| 11 | P31327 CPSM_HUMAN   | K.IALGIPLPEIK.N        |                | 2 | 1,6274 | 0,213 | -0,105 |
| 11 | Q02952 AKA12_HUMAN  | E.TGETLEPAGAHVLEE.K    |                | 2 | 1,6249 | 0,195 | 0,366  |
| 11 | Q14247 SRC8_HUMAN   | K.T#QTPPV#PAPQPTEE.R   | T399:S405:     | 2 | 1,6209 | 0,089 | 0,21   |
| 11 | P52655 TF2AA_HUMAN  | E.DVINDVR.D            |                | 2 | 1,6137 | 0,138 | 0,22   |
| 11 | Q8NHM5 JHD1B_HUMAN  | E.SM*LIDAPR.K          |                | 2 | 1,6112 | 0,14  | 0,066  |
| 11 | Q9BQY9 DBND2_HUMAN  | E.LSLPVPTSDR.T         |                | 2 | 1,6106 | 0,097 | 0,225  |
| 11 | Q9NVM9 CLO11_HUMAN  | E.EDVLNCQK.T           |                | 2 | 1,6066 | 0,093 | -0,061 |
| 11 | O75122 CLAP2_HUMAN  | R.NGSIPTYM*R.Q         |                | 2 | 1,6047 | 0,12  | -0,347 |
| 11 | O43493 TGON2_HUMAN  | K.SSAEAQTPEDTPNKSGAE.A |                | 2 | 1,6036 | 0,136 | 0      |
| 11 | P11142 HSP7C_HUMAN  | K.VCNPIITK.L           |                | 2 | 1,6015 | 0,219 | 0,065  |
| 11 | Q5UIP0 RIF1_HUMAN   | K.TVGPCLGDSK.N         |                | 2 | 1,5973 | 0,09  | 0,236  |
| 11 | P46087 NOL1_HUMAN   | E.LSTVPS#VTK.T         | S666:          | 2 | 1,5405 | 0,16  | -0,181 |
| 11 | Q15742 NAB2_HUMAN   | K.LSPLPGGPGAGDPR.I     |                | 2 | 1,5383 | 0,249 | 0,095  |
| 11 | P11940 PABP1_HUMAN  | E.FSPFGTITSAK.V        |                | 2 | 1,5267 | 0,091 | 0,106  |

|    |                     |                                           |            |   |        |       |        |
|----|---------------------|-------------------------------------------|------------|---|--------|-------|--------|
| 11 | Q8WW12 PCNP_HUMAN   | K.ETVPTLAPK.T                             |            | 2 | 1,5163 | 0,182 | -0,191 |
| 11 | O96018 APBA3_HUMAN  | E.DGIICLLR.G                              |            | 2 | 1,5089 | 0,119 | -0,35  |
| 11 | P06748 NPM_HUMAN    | K.M*SVQPTVSLGGFE.I                        |            | 2 | 1,507  | 0,171 | 0,178  |
| 12 | Q01082 SPTB2_HUMAN  | K.GEQVSNGLPAEQGS#PR.M                     | S2138:     | 2 | 6,0024 | 0,505 | -0,266 |
| 12 | B2CI53 B2CI53_HUMAN | R.NGILASPQS#APGNLDNSK.S                   | S263:      | 2 | 5,6694 | 0,512 | -1,703 |
| 12 | Q5JRA6 MIA3_HUMAN   | D.LLPSGSRDEPPPASQSTSQDCSQALKQS#P.-        | S1906:     | 3 | 5,6681 | 0,604 | 0,232  |
| 12 | Q8NHZ8 CDC26_HUMAN  | E.DVEVVGGS#DGEGAIGLSSDPK.S                | S42:       | 2 | 5,5403 | 0,567 | 0,118  |
| 12 | Q2TAL8 QRIC1_HUMAN  | E.AYNAVHVSGS#PTALAAVKLE.D                 | S345:      | 2 | 5,5221 | 0,49  | 0      |
| 12 | Q96T23 RSF1_HUMAN   | E.SEKPGS#PEAAETSPPSNIIDHCE.K              | S612:      | 3 | 5,477  | 0,578 | 0      |
| 12 | Q9NZL9 MAT2B_HUMAN  | E.NQPDAASQLNVDASGNLAKE.A                  |            | 2 | 5,4099 | 0,648 | 0,777  |
| 12 | Q9NYV4 CD2L7_HUMAN  | E.TTSGTSTEPVKNSS#PAPPQPAPGKVE.S           | S1083:     | 3 | 5,3357 | 0,55  | 0,069  |
| 12 | Q92734 TFG_HUMAN    | K.NVM*SAFGLTDDQVSGPPSAPAEDR.S             |            | 2 | 5,3155 | 0,593 | 0,493  |
| 12 | A8K6V7 A8K6V7_HUMAN | E.LEEKS#TT#PPPAEPVSLPQEPKPR.V             | S225:T227: | 3 | 5,2915 | 0,457 | -0,46  |
| 12 | Q8NHZ8 CDC26_HUMAN  | E.DVEVVGGS#DGEGAIGLSSDPK.S                | S42:       | 3 | 5,2499 | 0,416 | 0,177  |
| 12 | P13667 PDIA4_HUMAN  | E.SDPAYQQYQDAANNLRE.D                     |            | 2 | 5,2487 | 0,489 | 0,123  |
| 12 | Q9H307 PININ_HUMAN  | K.SLS#PGKENVSALDM*EKE.S                   | S443:      | 3 | 5,2155 | 0,413 | 0,19   |
| 12 | Q9UHR5 S30BP_HUMAN  | E.KGGLVS#DAYGEDDFSR.L                     | S43:       | 3 | 5,1981 | 0,346 | 0,407  |
| 12 | Q92734 TFG_HUMAN    | K.NVM*SAFGLTDDQVSGPPSAPAEDR.S             |            | 3 | 5,1671 | 0,458 | 0,148  |
| 12 | Q09666 AHNK_HUMAN   | K.TVIRLPS#GSGAAS#PTGSAVDIR.A              | S210:S216: | 3 | 5,1569 | 0,332 | 0      |
| 12 | Q6NV74 CB055_HUMAN  | R.GIS#LSHQNLAQSAVM*M*E.K                  | S910:      | 2 | 5,119  | 0,526 | 0,19   |
| 12 | Q13263 TIF1B_HUMAN  | E.RGAAAAATGQPGTAPAGT#PGAPPLAGM*AIVKEETE.A | T541:      | 3 | 5,0752 | 0,4   | 0,319  |
| 12 | P11388 TOP2A_HUMAN  | E.ADDVKGSVPLSSS#PPATHFPEDE.I              | S1393:     | 2 | 4,993  | 0,501 | 0,381  |
| 12 | Q86W92 LIPB1_HUMAN  | K.DFAARS#PSASITDEDSNV.-                   | S999:      | 2 | 4,9203 | 0,47  | -0,995 |
| 12 | Q13263 TIF1B_HUMAN  | E.TKPVLM*ALAEGPGAEGPR.L                   |            | 3 | 4,9135 | 0,322 | 0,303  |
| 12 | P42566 EP15_HUMAN   | E.SEPIHQESPARSS#PELLPSGVTDENE.V           | S563:      | 3 | 4,884  | 0,42  | 0,381  |
| 12 | Q12802 AKP13_HUMAN  | E.NALSSGTLQEEQRT#PPPGQDTQQFHE.K           | T953:      | 3 | 4,8725 | 0,444 | 0,369  |
| 12 | Q15477 SKIV2_HUMAN  | E.AVGQPGGPRGDTVSASPCSAPLAR.A              |            | 3 | 4,834  | 0,384 | 0,317  |
| 12 | P55884 EIF3B_HUMAN  | E.GLLRPAGPGAPEAAGTEASSEE.V                |            | 2 | 4,8295 | 0,531 | 0,236  |
| 12 | Q8N4Q1 MIA40_HUMAN  | E.DHETPSSAELVADDPNDPYEE.H                 |            | 2 | 4,8257 | 0,416 | 0,105  |
| 12 | P18858 DNL1_HUMAN   | K.GQKPALDCSQVS#PPRPATSPE.N                | S91:       | 3 | 4,8173 | 0,287 | 1,351  |
| 12 | Q00839 HNRPU_HUMAN  | E.AGGRPAM*EPGNGLDLGGDS#AGR.S              | S66:       | 3 | 4,7695 | 0,467 | 0      |
| 12 | P17275 JUNB_HUMAN   | R.SRDAT#PPVS#PINM*EDQE.R                  | T255:S259: | 2 | 4,7542 | 0,551 | 0      |
| 12 | Q96SB3 NEB2_HUMAN   | E.NGSTVAT#AASPAPEEPKAQAAPEKE.A            | T335:      | 3 | 4,7238 | 0,518 | 0      |
| 12 | Q32MZ4 LRRF1_HUMAN  | R.CTLPEHES#PSQDISDACEAE.S                 | S733:      | 2 | 4,7147 | 0,575 | 0,415  |
| 12 | P56192 SYMC_HUMAN   | E.TVTTAKPQQIQALM*DE.V                     |            | 2 | 4,7007 | 0,512 | 0      |
| 12 | Q15181 IPYR_HUMAN   | E.FKDKDFAIIDK.S                           |            | 3 | 4,6606 | 0,353 | 0      |
| 12 | Q9UK76 HN1_HUMAN    | R.RNS#SEASSGDFLDLKGGE.G                   | S87:       | 2 | 4,659  | 0,595 | 0,064  |
| 12 | Q13263 TIF1B_HUMAN  | E.TKPVLM*ALAEGPGAEGPR.L                   |            | 2 | 4,6528 | 0,444 | -0,135 |
| 12 | O00629 IMA4_HUMAN   | E.DSDIDGDYRVQNTSLE.A                      |            | 2 | 4,6502 | 0,482 | 0      |

|    |                     |                                  |                 |   |        |       |        |
|----|---------------------|----------------------------------|-----------------|---|--------|-------|--------|
| 12 | Q9UGU0 TCF20_HUMAN  | E.ATS#PGAKDM*PLSSDGNPKVNE.K      | S583:           | 3 | 4,6391 | 0,404 | -0,414 |
| 12 | P14314 GLU2B_HUMAN  | E.LQTHPELDTDGDGALSEAE.A          |                 | 2 | 4,6257 | 0,525 | -0,305 |
| 12 | Q8IYB3 SRRM1_HUMAN  | E.KKEKT#PELPEPSVK.V              | T220:           | 3 | 4,6214 | 0,285 | -0,108 |
| 12 | Q8WXI9 P66B_HUMAN   | E.RGRLT#PSPDIIVLS#DNEAS#SPR.S    | T120:S129:S134: | 3 | 4,6006 | 0,519 | 0,07   |
| 12 | O95865 DDAH2_HUMAN  | E.NATLDGTDVLTGRE.F               |                 | 2 | 4,589  | 0,478 | -0,227 |
| 12 | Q9HBD1 RC3H2_HUMAN  | K.IGS#PPKTPVSNVAATSAGPSNVGTE.L   | S549:           | 3 | 4,5854 | 0,358 | -0,076 |
| 12 | Q9BPX7 CG025_HUMAN  | E.ALATPLPKDYTT#DSEH.-            | T417:           | 2 | 4,5484 | 0,353 | 0      |
| 12 | A8K933 A8K933_HUMAN | E.LCHHSS#SS#T#PLAADRE.S          | S200:S202:T203: | 3 | 4,5413 | 1     | -0,456 |
| 12 | P51784 UBP11_HUMAN  | R.RLLSPAGSSGAPAS#PACSS#PPSSE.F   | S905:S910:      | 2 | 4,5269 | 1     | 0,402  |
| 12 | Q15149 PLEC1_HUMAN  | R.SSS#VGSSSSYPIPAVSR.T           | S4386:          | 2 | 4,5208 | 0,506 | 0,199  |
| 12 | O95684 FR1OP_HUMAN  | E.GALDLSDVHS#PPKSPE.G            | S156:           | 2 | 4,4657 | 0,288 | 0,141  |
| 12 | Q01484 ANK2_HUMAN   | K.AM*IVPSS#PSKTPEEVSTPAEEE.K     | S3760:          | 2 | 4,4657 | 0,504 | 0,304  |
| 12 | Q13263 TIF1B_HUMAN  | R.STAPSAASASASAAASS#PAGGGAEALE.L | S50:            | 3 | 4,4506 | 0,415 | 0,229  |
| 12 | Q32MZ4 LRRF1_HUMAN  | R.NM*PGLSAATLASLGGTSSR.R         |                 | 2 | 4,4346 | 0,521 | -0,135 |
| 12 | Q13813 SPTA2_HUMAN  | E.NAEEDLTDPVRCNSLEE.I            |                 | 2 | 4,4194 | 0,554 | 0,245  |
| 12 | O95817 BAG3_HUMAN   | E.VKVPPAPVPCPPPS#PGPSAVPSSPK.S   | S377:           | 3 | 4,4104 | 0,496 | -1,811 |
| 12 | Q92797 SYMPK_HUMAN  | E.DAM*KTPS#PAAEDAREPE.A          | S1259:          | 3 | 4,3971 | 0,435 | -0,287 |
| 12 | Q5JRA6 MIA3_HUMAN   | E.ASGKPSPS#DPGSGTATM*M*NSSSR.G   | S1727:          | 3 | 4,3955 | 0,338 | -0,236 |
| 12 | Q96SB3 NEB2_HUMAN   | E.NGSTVATAAS#PAPEPK.A            | S338:           | 2 | 4,3675 | 0,484 | -0,071 |
| 12 | Q8WXI9 P66B_HUMAN   | R.LQQAALS#PTTAPAVSSVSKQE.T       | S486:           | 3 | 4,356  | 0,464 | -0,079 |
| 12 | Q92615 LARP5_HUMAN  | R.SPS#PAHLRDDPKVAE.K             | S601:           | 3 | 4,3539 | 0,301 | 0,223  |
| 12 | Q92734 TFG_HUMAN    | E.INKNVM*SAFGLTDDQVSGPPSAPAEDR.S |                 | 3 | 4,3412 | 0,366 | 0,323  |
| 12 | Q03518 TAP1_HUMAN   | E.NIAYGLTQKPTM*EE.I              |                 | 2 | 4,3358 | 0,472 | 0,227  |
| 12 | Q562F6 SGOL2_HUMAN  | E.SNNLSADTPCATVLDK.Q             |                 | 2 | 4,3355 | 0,475 | -1,716 |
| 12 | O95359 TACC2_HUMAN  | K.TPSSPS#KS#PASFEIPASAM*E.A      | S2392:S2394:    | 2 | 4,3353 | 1     | 0,333  |
| 12 | Q9UHB6 LIMA1_HUMAN  | E.IGPQLSSSTFDSEKNE.S             |                 | 2 | 4,3038 | 0,427 | -1,495 |
| 12 | O75554 WBP4_HUMAN   | E.NEYVS#TSEADGGGEPK.V            | S323:           | 2 | 4,2586 | 0,367 | -0,071 |
| 12 | Q15942 ZYG_HUMAN    | E.KQHPVPPPAQNQNQVR.S             |                 | 3 | 4,247  | 0,338 | -0,398 |
| 12 | Q9Y6W5 WASF2_HUMAN  | E.KRDVVGNDVATILSR.R              |                 | 3 | 4,231  | 0,367 | 0,223  |
| 12 | O60341 LSD1_HUMAN   | R.IADQFLGAM*YTLPR.Q              |                 | 3 | 4,2274 | 0,362 | 0      |
| 12 | P51784 UBP11_HUMAN  | R.RLLSPAGSSGAPASPACS#S#PPSSE.F   | S909:S910:      | 3 | 4,2206 | 1     | 0,376  |
| 12 | Q12904 MCA1_HUMAN   | E.NVIQSTAVTTVSSGTKE.Q            |                 | 2 | 4,2135 | 0,534 | -0,071 |
| 12 | Q9UK76 HN1_HUMAN    | R.RNSS#EASSGDFLDLKG.E            | S88:            | 3 | 4,2035 | 0,417 | 0,387  |
| 12 | Q01804 OTUD4_HUMAN  | K.TAAAAADVNGFKPLSGNE.Q           |                 | 2 | 4,199  | 0,603 | 0,563  |
| 12 | O94842 TOX4_HUMAN   | E.LVSGS#PVALS#PQPR.C             | S562:S567:      | 2 | 4,1631 | 0,311 | 0,311  |
| 12 | Q9ULI4 KI26A_HUMAN  | E.CDTQAASAGRAPS#PTLGSPR.L        | S1262:          | 3 | 4,1613 | 0,308 | 0,088  |
| 12 | Q9H0E9 BRD8_HUMAN   | E.ADVAIGKGDDETPLTNVK.T           |                 | 2 | 4,1599 | 0,52  | 0      |
| 12 | Q15642 CIP4_HUMAN   | R.APS#DSSLGTPSDGRPE.L            | S296:           | 2 | 4,1479 | 0,439 | -0,369 |
| 12 | O00148 DDX39_HUMAN  | K.GLAITFVSDENDAK.I               |                 | 2 | 4,1407 | 0,527 | -0,33  |



|    |                    |                                 |                 |   |        |       |        |
|----|--------------------|---------------------------------|-----------------|---|--------|-------|--------|
| 12 | Q16643 DREB_HUMAN  | E.DGSDDLKLAASGEGGLQE.L          |                 | 2 | 4,1347 | 0,525 | -0,069 |
| 12 | Q9Y2N3 PO121_HUMAN | E.LCHHS#SSS#T#PLAADKE.S         | S441:S444:T445: | 3 | 4,1327 | 0,188 | -0,277 |
| 12 | Q02952 AKA12_HUMAN | E.DSIAGSGVEHS#TPDTEPGKEE.S      | S792:           | 2 | 4,1274 | 0,394 | 0,11   |
| 12 | O75179 ANR17_HUMAN | R.NSPLDCGSAS#PNKVASSSEQE.A      | S2067:          | 2 | 4,127  | 0,401 | -0,653 |
| 12 | O75531 BAF_HUMAN   | R.DFVAEPM*GEKPVGSLAGIGE.V       |                 | 2 | 4,1182 | 0,486 | 0,121  |
| 12 | Q13136 LIPA1_HUMAN | E.AEGPPGGGGHGS#PSQPDADSHFE.Q    | S26:            | 3 | 4,0799 | 0,306 | -0,148 |
| 12 | Q9UQ35 SRRM2_HUMAN | R.SSGHSSSELS#PDAVEK.A           | S1387:          | 2 | 4,0747 | 0,366 | -0,503 |
| 12 | O94842 TOX4_HUMAN  | E.LVS#GSPVALS#PQPR.C            | S560:S567:      | 3 | 4,0744 | 0,339 | 0,467  |
| 12 | O75179 ANR17_HUMAN | E.HYPVSSPSS#PSPPAQGGVSR.N       | S2045:          | 3 | 4,0602 | 0,328 | 0,084  |
| 12 | Q14247 SRC8_HUMAN  | R.AKTQT#PPVS#PAPQPTTEE.R        | T401:S405:      | 2 | 4,0547 | 0,447 | 0,189  |
| 12 | Q9H0E9 BRD8_HUMAN  | K.GDETPLTNVTEAS#PE.S            | S579:           | 2 | 4,042  | 0,41  | 0      |
| 12 | P35580 MYH10_HUMAN | E.DQSILCTGESGAGKTE.N            |                 | 2 | 4,0406 | 0,491 | -0,074 |
| 12 | A7E2V4 K0913_HUMAN | E.SSPHS#PCEGLPSEALTPRPE.G       | S1092:          | 3 | 4,0318 | 0,357 | 0      |
| 12 | Q9UK76 HN1_HUMAN   | R.NS#SEASSGDFLDLKG.G            | S87:            | 2 | 4,0225 | 0,498 | -0,07  |
| 12 | Q16533 SNPC1_HUMAN | E.DKPLSLSM*PVITEEEENE.S         |                 | 2 | 4,0196 | 0,527 | 0,235  |
| 12 | Q5TAQ9 WD42A_HUMAN | E.ASDLSLSLTGDDGGPNR.T           |                 | 2 | 3,9939 | 0,51  | 0,437  |
| 12 | Q00610 CLH1_HUMAN  | E.KHDVVFLITK.Y                  |                 | 3 | 3,9832 | 0,104 | -0,762 |
| 12 | Q92797 SYMPK_HUMAN | E.TAAGGLTLKEERS#PQTLAPVGE.D     | S1243:          | 2 | 3,9769 | 0,353 | 0,423  |
| 12 | Q9NYV4 CD2L7_HUMAN | E.TTSGTSTEPVKNSS#PAPPQPAPGKVE.S | S1083:          | 2 | 3,9757 | 0,428 | 0,277  |
| 12 | O15234 CASC3_HUMAN | E.QTSVRDPS#PEADAPVLGSPEKE.E     | S363:           | 3 | 3,9685 | 0,334 | 0,153  |
| 12 | O60341 LSD1_HUMAN  | R.IADQFLGAM*YTLPR.Q             |                 | 2 | 3,9657 | 0,282 | -0,303 |
| 12 | Q9UK76 HN1_HUMAN   | R.RNS#SEASSGDFLDLKG.G           | S87:            | 2 | 3,9423 | 0,497 | 0,143  |
| 12 | Q9BRJ6 CG050_HUMAN | E.AVLRPGLDAEPELS#PEEQRVLE.R     | S59:            | 3 | 3,9359 | 0,282 | -0,145 |
| 12 | P21333 FLNA_HUMAN  | E.AGAGGLAIAVEGPSKAE.I           |                 | 2 | 3,9307 | 0,486 | -0,244 |
| 12 | Q00839 HNRPU_HUMAN | D.ENGHGEQQPQPATQQQQPQQQR.G      |                 | 3 | 3,9203 | 0,41  | -0,139 |
| 12 | Q9NWX4 CA123_HUMAN | E.ILSSTIKPYNAEDNE.N             |                 | 2 | 3,906  | 0,271 | 0      |
| 12 | P10809 CH60_HUMAN  | E.IAQVATISANGDKE.I              |                 | 2 | 3,9049 | 0,446 | 0      |
| 12 | P36507 MP2K2_HUMAN | R.RKPVLPAITINPTIAEGPS#PTSE.G    | S23:            | 3 | 3,9032 | 0,412 | 0,222  |
| 12 | P21333 FLNA_HUMAN  | E.ISIQDM*TAQVTS#PSGK.T          | S2180:          | 2 | 3,9026 | 0,417 | -0,347 |
| 12 | Q92576 PHF3_HUMAN  | E.DAGSSDISSDAACTNPNKTE.N        |                 | 2 | 3,8861 | 0,536 | 0,359  |
| 12 | P08238 HS90B_HUMAN | R.NPDDITQEEYGEFYK.S             |                 | 2 | 3,8821 | 0,46  | -0,198 |
| 12 | P55072 TERA_HUMAN  | E.DNSVVSLSQPKM*DE.L             |                 | 2 | 3,8792 | 0,468 | 1,325  |
| 12 | Q05524 ENO1B_HUMAN | K.VNQIGSVTESLQACK.L             |                 | 2 | 3,878  | 0,443 | -0,299 |
| 12 | P18031 PTN1_HUMAN  | E.DNDYINASLIK*EE.A              |                 | 2 | 3,8666 | 0,399 | -0,073 |
| 12 | P42704 LPPRC_HUMAN | E.NGCLSDSDM*FSQAGLR.S           |                 | 2 | 3,8655 | 0,438 | -0,55  |
| 12 | Q02952 AKA12_HUMAN | E.VAS#EKLTASEQAHPQEPAE.S        | S347:           | 2 | 3,856  | 0,426 | 0      |
| 12 | P51991 ROA3_HUMAN  | D.FGNYSQQQSNYGPM*K.G            |                 | 2 | 3,8412 | 0,513 | -0,268 |
| 12 | O43823 AKAP8_HUMAN | E.GDFS#ENDDAAGDFR.S             | S328:           | 2 | 3,8407 | 0,506 | -0,076 |
| 12 | Q00610 CLH1_HUMAN  | E.AIDSYIKADDPSSYM*E.V           |                 | 2 | 3,8362 | 0,548 | -0,201 |

|    |                     |                               |              |   |        |       |        |
|----|---------------------|-------------------------------|--------------|---|--------|-------|--------|
| 12 | Q59GW8 Q59GW8_HUMAN | R.KHTLSFVDVGTGK.V             |              | 3 | 3,8333 | 0,406 | -0,461 |
| 12 | Q6NYC8 PHTNS_HUMAN  | K.LLES#PGVEAGEGAE.K           | S368:        | 2 | 3,8275 | 0,468 | 0,078  |
| 12 | O60716 CTND1_HUMAN  | E.DGYPGGSDNYGS#LSR.V          | S230:        | 2 | 3,8228 | 0,533 | -0,075 |
| 12 | Q13813 SPTA2_HUMAN  | R.DLAALGDKVNSLGE.T            |              | 2 | 3,8096 | 0,389 | -0,087 |
| 12 | Q06323 PSME1_HUMAN  | E.LDAFLKEPALNE.A              |              | 2 | 3,8025 | 0,354 | -0,269 |
| 12 | Q6S8J3 A26CA_HUMAN  | K.SYELPDGQVITIGNER.F          |              | 2 | 3,8014 | 0,377 | -0,204 |
| 12 | O76021 RL1D1_HUMAN  | K.ATNES#EDEIQLVPIGKK.T        | S361:        | 3 | 3,7915 | 0,35  | -0,089 |
| 12 | Q8N4Q1 MIA40_HUMAN  | E.DHETPSSAELVADDPNDPYEE.H     |              | 3 | 3,7845 | 0,37  | 0,157  |
| 12 | Q5T1M5 FKB15_HUMAN  | R.ERPES#PM*VPSEQVVEE.A        | S979:        | 2 | 3,7841 | 0,435 | 0,189  |
| 12 | Q9UNS2 CSN3_HUMAN   | K.SM*GSQEDDSGNKPSSY#S.-       | Y422:        | 2 | 3,778  | 0,472 | -0,456 |
| 12 | Q02880 TOP2B_HUMAN  | K.VKAS#PIT#NDGEDE.F           | S1400:T1403: | 2 | 3,776  | 0,468 | -0,159 |
| 12 | Q5TZA2 CROCC_HUMAN  | R.APSPAPRPVPGS#PARDAPAEGSGE.G | S1460:       | 3 | 3,776  | 0,339 | 0      |
| 12 | P09874 PARP1_HUMAN  | R.GGS#DDSSKDPIDVNYE.K         | S782:        | 2 | 3,7702 | 0,415 | 0      |
| 12 | Q15642 CIP4_HUMAN   | R.APSDSSLGT#PSDGRPE.L         | T302:        | 2 | 3,7694 | 0,423 | 0      |
| 12 | Q8N7R7 CCYL1_HUMAN  | R.SFS#ADNFIGIQR.S             | S344:        | 2 | 3,7682 | 0,339 | 0      |
| 12 | P13693 TCTP_HUMAN   | E.NM*NPDGM*VALLDYRE.D         |              | 2 | 3,7654 | 0,493 | -0,138 |
| 12 | P18583 SON_HUMAN    | R.AGIEGPLLASDVGR.D            |              | 2 | 3,7636 | 0,363 | 0      |
| 12 | Q02952 AKA12_HUMAN  | K.S#AVVHDITDDGQEETPE.I        | S128:        | 2 | 3,7597 | 0,454 | 0,063  |
| 12 | Q92598 HS105_HUMAN  | E.LNNTCEPVVTQPKPK.I           |              | 2 | 3,7555 | 0,393 | 0,141  |
| 12 | Q561V9 Q561V9_HUMAN | E.M*LVAGHEDSNGCINYE.L         |              | 2 | 3,7553 | 0,389 | -0,25  |
| 12 | P11388 TOP2A_HUMAN  | E.ADDVKGSVPLSSS#PPATHFPDE.T   | S1393:       | 3 | 3,7548 | 0,273 | 0,078  |
| 12 | Q2QGD7 ZXDC_HUMAN   | E.LLAPIKVEPDS#PSRPGAVGQQE.G   | S665:        | 3 | 3,7511 | 0,338 | 0,232  |
| 12 | Q9Y2K5 R3HD2_HUMAN  | E.TQDIIQLHISCP#DKEEE.K        | S109:        | 2 | 3,7443 | 0,533 | 0,11   |
| 12 | Q9UHR6 ZNHI2_HUMAN  | E.LAPART#PPDSVKDASAAEPAAAE.R  | T161:        | 2 | 3,7431 | 0,431 | 0,211  |
| 12 | P07900 HS90A_HUMAN  | R.NPDDITNEEYGEFYK.S           |              | 2 | 3,7423 | 0,392 | -0,599 |
| 12 | Q96G46 DUS3L_HUMAN  | E.NCGAQQVPAGPGTST#PPS#SPVR.T  | T273:S276:   | 2 | 3,7401 | 1     | 0,42   |
| 12 | Q9Y2K5 R3HD2_HUMAN  | E.TQDIIQLHISCP#DKEEE.K        | S109:        | 3 | 3,7398 | 0,225 | 0      |
| 12 | Q14694 UBP10_HUMAN  | E.FILGCTASKIT#PDGITKE.A       | T100:        | 2 | 3,736  | 0,406 | 0,12   |
| 12 | P52272 HNRPM_HUMAN  | R.M*GS#VERM*GSGIE.R           | S446:        | 2 | 3,7342 | 0,467 | -0,268 |
| 12 | Q04917 1433F_HUMAN  | E.DSYKDSTLIM*QLLR.D           |              | 3 | 3,7313 | 0,205 | -0,323 |
| 12 | P17275 JUNB_HUMAN   | R.SRDAT#PPVS#PINM*EDQE.R      | T255:S259:   | 3 | 3,7303 | 0,294 | 0,355  |
| 12 | P07355 ANXA2_HUMAN  | E.KDIISDTSGDFRK.L             |              | 3 | 3,7201 | 0,505 | 0      |
| 12 | Q71F56 MD13L_HUMAN  | E.VEDGLGS#PKPEEIKD.F          | S923:        | 2 | 3,7177 | 0,298 | -0,144 |
| 12 | P11388 TOP2A_HUMAN  | E.ADDVKGSVPLSSS#PPATHFPDETE.I | S1393:       | 3 | 3,7155 | 0,46  | 0,999  |
| 12 | P63279 UBC9_HUMAN   | R.KDHPFGFVAVPTK.N             |              | 3 | 3,7144 | 0,347 | 0,063  |
| 12 | Q8IZ21 PHAR4_HUMAN  | E.NSDSFSSEDSSLGR.T            |              | 2 | 3,7128 | 0,548 | -0,812 |
| 12 | P14625 ENPL_HUMAN   | E.AIQLDGLNASQIRE.L            |              | 3 | 3,7075 | 0,469 | 0,12   |
| 12 | P39880 CUX1_HUMAN   | E.IQAGSQGQAGASDPSAR.S         |              | 3 | 3,7062 | 0,351 | -0,108 |
| 12 | Q07020 RL18_HUMAN   | K.TAVVVGTITDDVR.V             |              | 2 | 3,7046 | 0,42  | 0,363  |

|    |                     |                                       |              |   |        |       |        |
|----|---------------------|---------------------------------------|--------------|---|--------|-------|--------|
| 12 | P40926 MDHM_HUMAN   | R.FVFSLV DAM*NGK.E                    |              | 2 | 3,6979 | 0,47  | -0,182 |
| 12 | Q5TGY3 AHDC1_HUMAN  | E.AACLSAPHLAS#PPAT#PKADKEPLE.M        | S1507:T1511: | 3 | 3,6925 | 0,387 | 0,139  |
| 12 | P55072 TERA_HUMAN   | E.DNSVVLSLQPKM*DE.L                   |              | 3 | 3,6861 | 0,287 | 0,935  |
| 12 | P41236 IPP2_HUMAN   | E.M*NILATYHPADKDYGLM*K.I              |              | 3 | 3,6811 | 0,289 | 0,087  |
| 12 | Q58FF8 H90B2_HUMAN  | K.ADLINNLGTIAK.F                      |              | 2 | 3,6739 | 0,471 | -0,294 |
| 12 | Q01970 PLCB3_HUMAN  | E.GLGDGPLVACASNGHAPGSSGHLGADSES#QEE.N | S1227:       | 3 | 3,6698 | 0,439 | 0,793  |
| 12 | Q96JM3 ZN828_HUMAN  | K.LAPVPS#PEPQKPAPVSPE.S               | S204:        | 2 | 3,6568 | 0,378 | -0,064 |
| 12 | O75781 PALM_HUMAN   | E.NAAAPS#PVRAPAPSPAKEE.R              | S116:        | 2 | 3,6478 | 0,353 | -0,377 |
| 12 | O75970 MPDZ_HUMAN   | E.DVTKDADLS#PVNASIIKE.N               | S483:        | 2 | 3,6392 | 0,368 | 0,612  |
| 12 | Q02952 AKA12_HUMAN  | E.DSIAGSGVEHST#PDTEPGKEE.S            | T793:        | 3 | 3,6369 | 0,28  | 0,165  |
| 12 | Q6Y7W6 PERQ2_HUMAN  | E.ASEETPQTSSSSARPGT#PSDHQSQE.A        | T382:        | 3 | 3,6367 | 0,327 | 0      |
| 12 | Q00613 HSF1_HUMAN   | R.GHTDTEGRPPS#PPPTST#PE.K             | S363:T369:   | 2 | 3,6348 | 1     | 0,115  |
| 12 | Q9UHR5 S30BP_HUMAN  | E.KGGLVS#DAYGEDDFSR.L                 | S43:         | 2 | 3,6303 | 0,397 | -0,204 |
| 12 | O15541 R113A_HUMAN  | E.NYEVGS#DDEEIPFK.C                   | S253:        | 2 | 3,6273 | 0,269 | -0,213 |
| 12 | Q12888 TP53B_HUMAN  | E.VLSTQEDLFDQSNK.T                    |              | 2 | 3,6252 | 0,464 | -0,075 |
| 12 | P21333 FLNA_HUMAN   | E.ISIQDM*TAQVT#SPSGKTHE.A             | T2179:       | 3 | 3,6184 | 0,389 | 0,086  |
| 12 | O43166 SI1L1_HUMAN  | E.NHRPLS#AAS#NSDQLE.D                 | S1708:S1711: | 2 | 3,6176 | 0,492 | -0,136 |
| 12 | Q9H4A3 WNK1_HUMAN   | E.KQSSTPGSLFLSPAPAPK.N                |              | 3 | 3,6161 | 0,221 | 0,192  |
| 12 | P08107 HSP71_HUMAN  | K.NQVALNPQNTVFDK.R                    |              | 2 | 3,6152 | 0,454 | -0,368 |
| 12 | P35222 CTNB1_HUMAN  | E.TADLGLDIGAQGEPLGYR.Q                |              | 2 | 3,6064 | 0,528 | -0,132 |
| 12 | P15170 ERF3A_HUMAN  | E.ISEAEPGGGS#LGDGRPPEESAHE.M          | S36:         | 3 | 3,6058 | 0,28  | -0,233 |
| 12 | Q6S8J3 A26CA_HUMAN  | E.KSYELPDGQVITIGNE.R                  |              | 2 | 3,6056 | 0,458 | -0,484 |
| 12 | P11142 HSP7C_HUMAN  | K.NQVAM*NPTNTVFDK.R                   |              | 2 | 3,6044 | 0,44  | -0,073 |
| 12 | P48960 CD97_HUMAN   | E.GSYDCVCSPGYEPVSGAK.T                |              | 2 | 3,5986 | 0,415 | -0,126 |
| 12 | Q2TAL8 QRIC1_HUMAN  | E.AYNAVHVSGS#PTALAAVKLE.D             | S345:        | 3 | 3,5943 | 0,239 | 0,088  |
| 12 | Q03111 ENL_HUMAN    | E.STS#PKGGPPPPPPPPR.A                 | S267:        | 3 | 3,5897 | 0,172 | 0      |
| 12 | Q14676 MDC1_HUMAN   | E.LQPSTSTDQPV T#PEPTSQATR.G           | T1466:       | 3 | 3,5878 | 0,317 | -0,158 |
| 12 | O43572 AKA10_HUMAN  | E.DSGSAQLFM*THSE.G                    |              | 2 | 3,5786 | 0,492 | -0,086 |
| 12 | Q92797 SYMPK_HUMAN  | K.LKPGGVGAPSSS#SPSPSPARPGPPPSEE.A     | S1170:       | 3 | 3,5778 | 0,101 | 0,066  |
| 12 | Q96SB3 NEB2_HUMAN   | E.NGSTVATAAS#PAPEEPKAAPEKE.A          | S338:        | 2 | 3,5743 | 0,469 | 0,193  |
| 12 | Q9BY44 EIF2A_HUMAN  | E.ARS#DKS#PDLAPTAPQSTPR.N             | S503:S506:   | 3 | 3,5723 | 0,123 | -0,812 |
| 12 | A8K6V7 A8K6V7_HUMAN | E.LEEKST#T#PPPAEPVSLPQEPKPR.V         | T226:T227:   | 3 | 3,5514 | 0,301 | 0      |
| 12 | P46379 BAT3_HUMAN   | E.VLGAAATTDYNNNHE.G                   |              | 2 | 3,5375 | 0,388 | 0,307  |
| 12 | Q9BQ67 GRWD1_HUMAN  | E.SGDTS#SEGPAQVYLPGRGPPLRE.G          | S25:         | 3 | 3,5317 | 0,246 | -0,149 |
| 12 | P34932 HSP74_HUMAN  | D.ATQIAGLNCLR.L                       |              | 2 | 3,5307 | 0,35  | -0,1   |
| 12 | P39880 CUX1_HUMAN   | E.IQAGSQGQAGASDPSAR.S                 |              | 2 | 3,5282 | 0,543 | -0,217 |
| 12 | P46821 MAP1B_HUMAN  | E.KSGKQGS#PDQVS#PVSE.M                | S1438:S1443: | 2 | 3,5281 | 0,339 | -0,068 |
| 12 | P62834 RAP1A_HUMAN  | E.ILD TAGTEQFTAM*RD.L                 |              | 2 | 3,5275 | 0,522 | -0,145 |
| 12 | P14625 ENPL_HUMAN   | E.AIQLDGLNASQIRE.L                    |              | 2 | 3,526  | 0,39  | -0,16  |

|    |                    |                                    |                 |   |        |       |        |
|----|--------------------|------------------------------------|-----------------|---|--------|-------|--------|
| 12 | P31946 1433B_HUMAN | E.ILNS#PEKACSLAK.T                 | S186:           | 2 | 3,5252 | 0,379 | -0,404 |
| 12 | P60842 IF4A1_HUMAN | K.M*FVLDEADEM*LSR.G                |                 | 2 | 3,5232 | 0,387 | 0,307  |
| 12 | Q92841 DDX17_HUMAN | K.APILIATDVASR.G                   |                 | 2 | 3,5228 | 0,146 | 0,099  |
| 12 | Q9UHI6 DDX20_HUMAN | K.ATS#PKELGCDR.Q                   | S532:           | 3 | 3,5203 | 0,358 | 0,348  |
| 12 | Q8IVF2 AHNK2_HUMAN | K.SIEASVDVS#PPKVE.A                | S2179:          | 2 | 3,5203 | 0,354 | 0      |
| 12 | Q9BRJ6 CG050_HUMAN | E.AVLRPGLDAEPELS#PEEQR.V           | S59:            | 3 | 3,5187 | 0,213 | 0,167  |
| 12 | Q7Z417 NUFP2_HUMAN | K.NLS#SDEATNPISR.V                 | S112:           | 2 | 3,5166 | 0,345 | 0,493  |
| 12 | Q6NYC8 PHTNS_HUMAN | E.VESRLS#PGESAYQK.L                | S224:           | 2 | 3,5106 | 0,308 | -0,374 |
| 12 | Q969F1 TF3C6_HUMAN | E.IQM*NDSSNLS#CEQEKPM*HLE.I        | S177:           | 3 | 3,5063 | 0,275 | -0,073 |
| 12 | Q4V328 GRAP1_HUMAN | R.SLSSS#PQAQPPRPAELSDDEE.V         | S692:           | 2 | 3,5047 | 0,417 | 0,111  |
| 12 | Q9UN86 G3BP2_HUMAN | E.AHPVTNGIEEPELES#SHEPEPEPE.S      | S192:           | 2 | 3,5026 | 0,437 | 0,268  |
| 12 | P14324 FPPS_HUMAN  | E.KQDFVQHFSQIVR.V                  |                 | 3 | 3,4986 | 0,208 | 0,112  |
| 12 | Q92797 SYMPK_HUMAN | E.DAM*KTPS#PAAEDAREPE.A            | S1259:          | 2 | 3,4964 | 0,45  | -0,255 |
| 12 | P61158 ARP3_HUMAN  | E.DHYFLLTEPPLNTPE.N                |                 | 2 | 3,4934 | 0,333 | -0,342 |
| 12 | Q15424 SAFB1_HUMAN | E.LAEAPTEAPS#PEAR.D                | S344:           | 2 | 3,4924 | 0,349 | -0,08  |
| 12 | Q86V81 THOC4_HUMAN | E.LDAQLDAYNAR.M                    |                 | 2 | 3,4912 | 0,419 | 0,098  |
| 12 | Q14247 SRC8_HUMAN  | R.AKTQT#PPVS#PAPQPTTEERLPSS#PVYE.D | T401:S405:S418: | 3 | 3,4898 | 1     | 0,36   |
| 12 | P20810 ICAL_HUMAN  | E.DFSGPQNASSLKFE.D                 |                 | 2 | 3,4897 | 0,273 | 0      |
| 12 | Q8N556 AFAP1_HUMAN | E.AYSGCSGPDVSECPPPPS#SPVHKAE.L     | S264:           | 3 | 3,4878 | 0,343 | -0,34  |
| 12 | Q15390 MTFR1_HUMAN | E.KAPS#RQIS#LPDLSQEELQK.T          | S115:S119:      | 3 | 3,4822 | 0,204 | -0,075 |
| 12 | Q86YP4 P66A_HUMAN  | E.ATAQKPTGSVGTSTTT#PPPLVR.G        | T189:           | 3 | 3,4817 | 0,251 | 0      |
| 12 | Q14674 ESPL1_HUMAN | E.ILRGS#DGEDSASGGK.T               | S1508:          | 3 | 3,4734 | 0,313 | 0,06   |
| 12 | Q14156 EFR3A_HUMAN | R.IGPPSS#PSATDKEENPAVLAE.N         | S220:           | 2 | 3,4708 | 0,464 | 0      |
| 12 | P50548 ERF_HUMAN   | R.RVS#SDLQHATAQLSLE.H              | S531:           | 2 | 3,4698 | 0,468 | -0,199 |
| 12 | O14497 ARI1A_HUMAN | K.VSS#PAPM*EGGEEEE.L               | S1755:          | 2 | 3,4693 | 0,416 | -0,146 |
| 12 | Q9UJZ1 STML2_HUMAN | E.YAVTQLAQTTM*R.S                  |                 | 2 | 3,4624 | 0,439 | 0      |
| 12 | P22626 ROA2_HUMAN  | D.FGNYNQQPSNYGPM*K.S               |                 | 2 | 3,4597 | 0,392 | -0,416 |
| 12 | P50748 KNTC1_HUMAN | E.DYSNSSLVADLRE.Q                  |                 | 2 | 3,4596 | 0,428 | -0,415 |
| 12 | Q6ZN18 AEBP2_HUMAN | E.LSRLS#PLPPGS#PGSAAR.G            | S18:S24:        | 2 | 3,4587 | 0,468 | 0,134  |
| 12 | Q58FG1 HS904_HUMAN | R.TLTIVDTGIGM*TK.A                 |                 | 2 | 3,4563 | 0,442 | 0      |
| 12 | Q9BUA3 YK007_HUMAN | R.AES#PSPAPPPGLR.G                 | S308:           | 2 | 3,455  | 0,311 | -0,36  |
| 12 | P55263 ADK_HUMAN   | E.VTAFAVLDQDQKE.I                  |                 | 2 | 3,4535 | 0,3   | -0,25  |
| 12 | P52209 6PGD_HUMAN  | K.GILFVGSVSGGEEGAR.Y               |                 | 2 | 3,4528 | 0,388 | -0,23  |
| 12 | Q8WVM8 SCFD1_HUMAN | E.DDM*FVLCNQNKE.L                  |                 | 2 | 3,4525 | 0,468 | -0,08  |
| 12 | O75554 WBP4_HUMAN  | E.NEYVSTS#EADGGGEPK.V              | S325:           | 2 | 3,4506 | 0,323 | 0,071  |
| 12 | Q96A49 SYAP1_HUMAN | E.AVRPKT#PPVVIK.S                  | T248:           | 3 | 3,4499 | 0,172 | 0,132  |
| 12 | P42166 LAP2A_HUMAN | E.QGTERSS#T#PLPTISSAENTR.Q         | S159:T160:      | 3 | 3,4432 | 0,23  | -0,074 |
| 12 | Q96QE3 ATAD5_HUMAN | E.DSVIIDSS#PTALKHPE.K              | S756:           | 2 | 3,4334 | 0,361 | 0,064  |
| 12 | P61604 CH10_HUMAN  | K.VLQATVVAVGSGSK.G                 |                 | 2 | 3,4327 | 0,589 | 0      |

|    |                    |                                            |            |   |        |       |        |
|----|--------------------|--------------------------------------------|------------|---|--------|-------|--------|
| 12 | P27816 MAP4_HUMAN  | K.DM*ES#PTKLDVTLAK.D                       | S280:      | 2 | 3,4312 | 0,288 | 0,148  |
| 12 | P42704 LPPRC_HUMAN | E.NGCLSDSDM*FSQAGLRSE.A                    |            | 2 | 3,4276 | 0,412 | 0,245  |
| 12 | Q4V328 GRAP1_HUMAN | R.SLSSS#PQAQPPRPAELSDDEE.V                 | S692:      | 3 | 3,4273 | 0,141 | 0,166  |
| 12 | Q92538 GBF1_HUMAN  | E.VLEECT#SPADHSDSASVHD.M                   | T361:      | 3 | 3,4264 | 0,259 | 0,343  |
| 12 | Q9UNS2 CSN3_HUMAN  | K.SM*GS#QEDDSGNKPSSYS.-                    | S410:      | 2 | 3,4238 | 0,391 | -0,196 |
| 12 | P51991 ROA3_HUMAN  | D.FGNYSGQQQSNYGPM*KGGSFGR.S                |            | 3 | 3,423  | 0,365 | 0      |
| 12 | Q8TAQ2 SMRC2_HUMAN | E.SSGIAGTTSDEPERIEE.S                      |            | 2 | 3,4217 | 0,424 | 0      |
| 12 | Q8TBN0 R3GEF_HUMAN | K.TLVITSTPAS#PNRE.L                        | S168:      | 2 | 3,4143 | 0,493 | 0,078  |
| 12 | Q13765 NACA_HUMAN  | K.SPASDTYIVFGEAK.I                         |            | 2 | 3,4124 | 0,535 | -0,329 |
| 12 | P05387 RLA2_HUMAN  | K.NIEDVIAQGIGK.L                           |            | 2 | 3,4122 | 0,476 | 0      |
| 12 | P23229 ITA6_HUMAN  | E.DGPYEVGGETEHEDE.S                        |            | 2 | 3,4034 | 0,524 | -0,239 |
| 12 | Q14444 CAPR1_HUMAN | E.LQYVLDKLGDDE.V                           |            | 2 | 3,4006 | 0,444 | -0,26  |
| 12 | Q02952 AKA12_HUMAN | E.M*DAEPQEAEPKE.L                          |            | 2 | 3,3993 | 0,363 | -0,334 |
| 12 | Q9Y478 AAKB1_HUMAN | E.LSSS#PPGPYHQEPYVCKPEE.R                  | S182:      | 3 | 3,3988 | 0,3   | 0,077  |
| 12 | P18031 PTN1_HUMAN  | E.DNDYINASLIK.M                            |            | 2 | 3,3966 | 0,429 | -0,096 |
| 12 | P63241 IF5A1_HUMAN | D.GYLSLLQDSGEVRE.D                         |            | 2 | 3,3961 | 0,373 | -0,234 |
| 12 | P11388 TOP2A_HUMAN | K.GSVPLSSS#PPATHFPDETE.I                   | S1393:     | 2 | 3,3945 | 0,325 | 0,12   |
| 12 | P13645 K1C10_HUMAN | K.GSLGGGFSSGGFSGGSFSR.G                    |            | 2 | 3,3936 | 0,409 | 0,071  |
| 12 | Q9BZE4 NOG1_HUMAN  | E.LSEDDQKIFTDLQSE.G                        |            | 2 | 3,3923 | 0,331 | -0,138 |
| 12 | Q14160 LAP4_HUMAN  | E.NAVTITPLRPEDDYS#PRE.R                    | S835:      | 2 | 3,383  | 0,377 | 0,113  |
| 12 | Q14004 CD2L5_HUMAN | E.TQQQLNKINLPAGILATGEK.Q                   |            | 3 | 3,3823 | 0,171 | -0,342 |
| 12 | P34897 GLYM_HUMAN  | R.VLELVSITANK.N                            |            | 2 | 3,3802 | 0,387 | -0,308 |
| 12 | O14641 DVL2_HUMAN  | E.STSLGDS#DEEDTM*SR.F                      | S211:      | 2 | 3,3774 | 0,407 | -0,566 |
| 12 | Q96T23 RSF1_HUMAN  | D.AQRLS#PIPEEVPKSTLE.S                     | S594:      | 2 | 3,3738 | 0,42  | 0,433  |
| 12 | P21333 FLNA_HUMAN  | R.GAGTGGLGLAVEGPSEAK.M                     |            | 2 | 3,3723 | 0,454 | -0,233 |
| 12 | Q9UHR5 S30BP_HUMAN | E.KGGLVSDAYGEDDFSR.L                       |            | 3 | 3,3718 | 0,378 | 0,213  |
| 12 | Q9Y4L1 HYOU1_HUMAN | E.DEGVGATTVM*LKE.K                         |            | 2 | 3,3671 | 0,444 | -0,089 |
| 12 | P13639 EF2_HUMAN   | R.ETVSEESNVLCLSK.S                         |            | 2 | 3,3615 | 0,49  | 0,153  |
| 12 | O75381 PEX14_HUMAN | E.STSSS#PGKEGHS#PEGSTVYHLLGPQEE.G          | S275:S282: | 3 | 3,3604 | 1     | 0,239  |
| 12 | Q9UN86 G3BP2_HUMAN | E.AHPVTNGIEEPELES#SHEPEPEPESE.T            | S192:      | 3 | 3,3557 | 0,368 | -1,551 |
| 12 | O43707 ACTN4_HUMAN | K.LVSIGAEIIVDGNAM                          |            | 2 | 3,3556 | 0,523 | -0,161 |
| 12 | P14625 ENPL_HUMAN  | K.GVVDSDDLPLNVSRE                          |            | 2 | 3,3527 | 0,388 | -0,164 |
| 12 | Q14966 ZN638_HUMAN | E.S#ADITFATLNTK.G                          | S1697:     | 2 | 3,3526 | 0,56  | -0,09  |
| 12 | Q9NRL2 BAZ1A_HUMAN | K.KKDAIDPLLFK.Y                            |            | 3 | 3,3504 | 0,24  | 0,284  |
| 12 | P27816 MAP4_HUMAN  | E.VALTEDQVPALKTEAPLAK.D                    |            | 3 | 3,3496 | 0,312 | 0,183  |
| 12 | Q6ZRV2 FA83H_HUMAN | R.RGS#LTLTISGESPK.A                        | S936:      | 2 | 3,3483 | 0,376 | -0,08  |
| 12 | P46013 KI67_HUMAN  | E.LFQTPGHTEES#M*TDDKITE.V                  | S1970:     | 3 | 3,3453 | 0,321 | 0,08   |
| 12 | P18858 DNL1_HUMAN  | E.ALS#PAKGQKALDCSQVS#PPRPATSPE.N           | S76:S91:   | 3 | 3,3441 | 0,118 | 0,434  |
| 12 | Q96PK6 RBM14_HUMAN | R.GQPGNAYDGAGQPSAAYLSM*SQGAVANANST#PPPYE.R | T572:      | 3 | 3,3439 | 0,319 | 0,906  |

|    |                     |                               |            |   |        |       |        |
|----|---------------------|-------------------------------|------------|---|--------|-------|--------|
| 12 | P0C7M2 RA1L3_HUMAN  | E.DSQRPGAHLTVK.K              |            | 3 | 3,3432 | 0,367 | 0,419  |
| 12 | Q16643 DREB_HUMAN   | E.DGSDDLKLAASGE.G             |            | 2 | 3,3369 | 0,512 | 0,286  |
| 12 | P49321 NASP_HUMAN   | E.SSTSGFTPGGGGSSVSM*IASR.K    |            | 2 | 3,3316 | 0,448 | 0,564  |
| 12 | Q08211 DHX9_HUMAN   | E.GETVEPYKVNLSQDLE.H          |            | 2 | 3,3288 | 0,334 | -0,134 |
| 12 | Q9H0H5 RGAP1_HUMAN  | E.SGSILSDISFDKTDE.S           |            | 2 | 3,3283 | 0,369 | -0,454 |
| 12 | P07737 PROF1_HUMAN  | R.DSLLQDGEFSM*DLR.T           |            | 2 | 3,3273 | 0,423 | 0      |
| 12 | Q96AD5 PLPL2_HUMAN  | R.NNLS#LGDALAK.W              | S428:      | 2 | 3,326  | 0,295 | 0      |
| 12 | P18031 PTN1_HUMAN   | E.DNDYINASLIK*M*E.E           |            | 2 | 3,3258 | 0,417 | 0      |
| 12 | Q02952 AKA12_HUMAN  | E.REVIAEEEEPTVTEPLPE.N        |            | 2 | 3,3244 | 0,322 | 0,06   |
| 12 | P68104 EF1A1_HUMAN  | E.S#FSDYPLGR.F                | S414:      | 2 | 3,3218 | 0,412 | 0      |
| 12 | Q7Z2W4 ZCHV_HUMAN   | E.FLASASAS#AER.S              | S267:      | 2 | 3,3213 | 0,42  | -0,308 |
| 12 | Q9Y6S1 Q9Y6S1_HUMAN | E.VSPAEPAS#PGTPQQVK.D         | S71:       | 2 | 3,319  | 0,432 | -0,365 |
| 12 | Q9Y6I3 EPN1_HUMAN   | E.AVGS#PPPAATPTPTPTR.K        | S429:      | 2 | 3,3127 | 0,478 | -0,204 |
| 12 | P49792 RBP2_HUMAN   | K.AVVS#PPKFVFGSE.S            | S2510:     | 2 | 3,3084 | 0,391 | -0,422 |
| 12 | Q9UGU0 TCF20_HUMAN  | E.ATS#PGAKDM*PLSSDGNPK.V      | S583:      | 3 | 3,3075 | 0,283 | -0,196 |
| 12 | Q14674 ESPL1_HUMAN  | E.ILRGS#DGEDSASGGK.T          | S1508:     | 2 | 3,3069 | 0,448 | -0,16  |
| 12 | Q9Y5S2 MRCKB_HUMAN  | E.YFNAPLAHDLTFR.T             |            | 2 | 3,3056 | 0,544 | -0,439 |
| 12 | P13667 PDIA4_HUMAN  | E.DYAGEVKDLGLSE.S             |            | 2 | 3,3043 | 0,313 | -0,087 |
| 12 | Q02952 AKA12_HUMAN  | E.KEPSKSAES#PTS#PVTSE.T       | S283:S286: | 2 | 3,3042 | 1     | -0,127 |
| 12 | P21333 FLNA_HUMAN   | E.ISIQDM*TAQVTS#PSGKTHE.A     | S2180:     | 2 | 3,3035 | 0,423 | 0,459  |
| 12 | Q00653 NFKB2_HUMAN  | E.YDDFKLNS#SIVEPKEPAPE.T      | S22:       | 3 | 3,3028 | 0,158 | 0,081  |
| 12 | O15541 R113A_HUMAN  | E.VGS#DDEEIPFK.C              | S253:      | 2 | 3,2986 | 0,352 | 0,093  |
| 12 | P46087 NOL1_HUMAN   | K.TQASS#SFQDSSQPAGKAE.G       | S674:      | 2 | 3,2956 | 0,456 | 0,128  |
| 12 | P51784 UBP11_HUMAN  | R.LLSPAGSSGAPAS#PACSS#PPSSE.F | S905:S910: | 3 | 3,2927 | 0,211 | 0,241  |
| 12 | P67870 CSK2B_HUMAN  | E.DYIQDKFNLTGLNE.Q            |            | 2 | 3,2899 | 0,433 | -0,146 |
| 12 | Q9P246 STIM2_HUMAN  | E.TKS#M*IFSPASK.V             | S661:      | 2 | 3,2883 | 0,366 | -0,472 |
| 12 | Q92615 LARP5_HUMAN  | R.TLSADASVNTLPVVVSR.E         |            | 2 | 3,2862 | 0,42  | -0,212 |
| 12 | Q9UKF6 CPSF3_HUMAN  | E.SDQLLIRPLGAGQE.V            |            | 2 | 3,2844 | 0,352 | -0,082 |
| 12 | P07954 FUMH_HUMAN   | E.NEPGSSIM*PGKVNPTQCE.A       |            | 2 | 3,2837 | 0,461 | -0,809 |
| 12 | P12956 KU70_HUMAN   | K.NIYVLQELDNPGAK.R            |            | 2 | 3,2829 | 0,377 | -0,155 |
| 12 | Q14694 UBP10_HUMAN  | E.FILGCTASKIT#PDGITKE.A       | T100:      | 3 | 3,2826 | 0,321 | 0,09   |
| 12 | Q96QE3 ATAD5_HUMAN  | E.DSVIIIDSS#PTALKHPE.K        | S756:      | 3 | 3,2773 | 0,39  | 0,096  |
| 12 | Q10567 AP1B1_HUMAN  | E.VVLAEKPLISEE.T              |            | 2 | 3,2684 | 0,315 | 0      |
| 12 | P34932 HSP74_HUMAN  | K.VLATAFDTTLGGR.K             |            | 2 | 3,2654 | 0,46  | -0,277 |
| 12 | P78527 PRKDC_HUMAN  | E.DNSM*NVDQDGDPSDRM*E.V       |            | 2 | 3,2641 | 0,407 | 0,125  |
| 12 | P24534 EF1B_HUMAN   | K.YGPADVEDTTGSGATDSK.D        |            | 2 | 3,2624 | 0,551 | -0,276 |
| 12 | P38646 GRP75_HUMAN  | E.DKVIAYVDLGGGTFD.I           |            | 2 | 3,2565 | 0,45  | -0,389 |
| 12 | P35611 ADDA_HUMAN   | R.AAVVTS#PPPTTAPHKE.R         | S12:       | 2 | 3,2536 | 0,411 | 0,073  |
| 12 | Q15742 NAB2_HUMAN   | E.KLS#PLPGGPGAGDPR.I          | S171:      | 3 | 3,253  | 0,291 | 0,183  |

|    |                      |                              |        |   |        |       |        |
|----|----------------------|------------------------------|--------|---|--------|-------|--------|
| 12 | Q12888 TP53B_HUMAN   | R.VDVSCEPLEGVEK.C            |        | 2 | 3,2515 | 0,391 | -0,084 |
| 12 | Q9H0E9 BRD8_HUMAN    | E.ADVAIGKGDETPLTNVK.T        |        | 3 | 3,2462 | 0,318 | 0,318  |
| 12 | O15085 ARHGB_HUMAN   | E.DLLVLLKQKDE.K              |        | 2 | 3,2456 | 0,173 | -0,279 |
| 12 | P51858 HDGF_HUMAN    | R.RAGDLLEDS#PKRPK.E          | S165:  | 3 | 3,2427 | 0,301 | 0,33   |
| 12 | Q12888 TP53B_HUMAN   | K.TVSSDGCST#PSREE.G          | T321:  | 2 | 3,2357 | 0,421 | -0,383 |
| 12 | P30101 PDIA3_HUMAN   | K.VVVAENFDEIVNNE.N           |        | 2 | 3,2343 | 0,246 | -0,23  |
| 12 | O14795 UN13B_HUMAN   | R.DGQAGFGQEKPLE.V            |        | 2 | 3,234  | 0,32  | 0,405  |
| 12 | Q9Y6I9 TX264_HUMAN   | E.TSAATLSPGASSR.G            |        | 2 | 3,2326 | 0,482 | -0,202 |
| 12 | Q8N0S6 CENPL_HUMAN   | E.DYFIGAT#PLQK.R             | T25:   | 2 | 3,2236 | 0,468 | -0,183 |
| 12 | Q06190 P2R3A_HUMAN   | E.TDEPAS#PSEFGNK.S           | S1121: | 2 | 3,2236 | 0,415 | -0,335 |
| 12 | O15027 SC16A_HUMAN   | E.HRPASALVNPLAR.G            |        | 3 | 3,2224 | 0,102 | 0,196  |
| 12 | P34931 HS71L_HUMAN   | K.DAGVIAGLNVL.R              |        | 2 | 3,2215 | 0,372 | -0,306 |
| 12 | B2CI53 B2CI53_HUMAN  | R.SNM*S#PDKPVSVK.I           | S1105: | 2 | 3,2197 | 0,334 | -0,529 |
| 12 | P45974 UBP5_HUMAN    | E.HLSHFGIDM*LK.M             |        | 3 | 3,2162 | 0,238 | 0,418  |
| 12 | Q01082 SPTB2_HUMAN   | E.IQQQYSDVNNR.W              |        | 2 | 3,2157 | 0,408 | -0,179 |
| 12 | P15170 ERF3A_HUMAN   | E.ISEAEPGGGS#LGDGRPPEESAHE.M | S36:   | 2 | 3,2152 | 0,495 | 0,207  |
| 12 | P30101 PDIA3_HUMAN   | E.SNDGPVKVVVAENFDE.I         |        | 2 | 3,2151 | 0,249 | -0,284 |
| 12 | O60318 MCM3A_HUMAN   | E.NAVFKPILGAESEPE.K          |        | 2 | 3,2114 | 0,317 | 0      |
| 12 | O94760 DDAH1_HUMAN   | E.NATLDGGDVLFTGRE.F          |        | 2 | 3,2112 | 0,375 | -0,234 |
| 12 | Q96FF9 CDCA5_HUMAN   | K.THSVPAT#PTSTPVPNPEAE.S     | T111:  | 2 | 3,2096 | 0,522 | 0,243  |
| 12 | O95470 SGPL1_HUMAN   | D.SLYSTDTVTQGSQM*NGS#PKPH.-  | S564:  | 2 | 3,2085 | 0,284 | 0,314  |
| 12 | P19338 NUCL_HUMAN    | K.GLSEDTTEETLKE.S            |        | 2 | 3,2065 | 0,332 | 0,168  |
| 12 | Q14103 HNRPD_HUMAN   | K.IFVGGLSPDTPEEK.I           |        | 2 | 3,2049 | 0,446 | 0      |
| 12 | Q9H6F5 CCD86_HUMAN   | R.CQPKPSEEAPKCS#QDQGVLAASE.L | S128:  | 3 | 3,2002 | 0,348 | -0,217 |
| 12 | Q8N954 CCD75_HUMAN   | E.DLSSNCPGPTSADHD.-          |        | 2 | 3,2001 | 0,413 | -0,078 |
| 12 | P36507 MP2K2_HUMAN   | E.GAS#EANLVDLQK.K            | S30:   | 2 | 3,199  | 0,193 | -0,276 |
| 12 | P10809 CH60_HUMAN    | K.TLNDELEIIEGM*K.F           |        | 2 | 3,1988 | 0,417 | 0,241  |
| 12 | P27816 MAP4_HUMAN    | K.DM*ES#PTKLDVTLAK.D         | S280:  | 3 | 3,1983 | 0,28  | 0,111  |
| 12 | P27816 MAP4_HUMAN    | E.EGRPVSSTGTNDITT#PPNK.E     | T687:  | 3 | 3,1981 | 0,163 | 0,091  |
| 12 | P05787 K2C8_HUMAN    | R.SLDM*DSIIAEVK.A            |        | 2 | 3,1979 | 0,451 | 0,091  |
| 12 | Q9Y6W5 WASF2_HUMAN   | R.DVVGNDVATILSR.R            |        | 2 | 3,1917 | 0,374 | -0,449 |
| 12 | Q6ZRV2 FA83H_HUMAN   | R.RGS#LTLTISGESPK.A          | S936:  | 3 | 3,1911 | 0,327 | 0,24   |
| 12 | P22466 GALA_HUMAN    | R.LLDLPAAAS#SEDIERS.-        | S116:  | 2 | 3,1904 | 0,345 | -0,069 |
| 12 | Q5VZ89 DEN4C_HUMAN   | E.DKLF#PVIAR.N               | S989:  | 2 | 3,189  | 0,198 | -0,498 |
| 12 | Q53F64 Q53F64_HUMAN  | K.IFVGGLNPEATEEK.I           |        | 2 | 3,1881 | 0,358 | 0,162  |
| 12 | Q14157 UBP2L_HUMAN   | E.KSPAVATSTAAPPPSS#PLPSK.S   | S454:  | 3 | 3,1875 | 0,152 | 0      |
| 12 | ##Q96M60 CO033_HUMAN | R.YTPAPLPEQFIKT#LK.I         | T91:   | 3 | 3,1873 | 0,082 | -1,302 |
| 12 | Q9BUA3 YK007_HUMAN   | E.GGLPRAES#PSPAPPPGLR.G      | S308:  | 3 | 3,1857 | 0,353 | -0,199 |
| 12 | P49454 CENPF_HUMAN   | K.NSAILQNRVDSLE.F            |        | 2 | 3,1856 | 0,368 | 0,251  |

|    |                    |                                       |              |   |        |       |        |
|----|--------------------|---------------------------------------|--------------|---|--------|-------|--------|
| 12 | P27816 MAP4_HUMAN  | E.DTPSSKPTLLANGGHGVEGSDTTGS#PTEFLEE.K | S99:         | 3 | 3,1789 | 0,293 | 0,663  |
| 12 | Q86W92 LIPB1_HUMAN | E.DDM*FKDFAAR.S                       |              | 3 | 3,1784 | 0,233 | 1,039  |
| 12 | Q12888 TP53B_HUMAN | R.GNLLHFSSQGE.EE.K                    |              | 2 | 3,1776 | 0,39  | -0,158 |
| 12 | P18583 SON_HUMAN   | E.SDQTLAALLS#PK.E                     | S1697:       | 2 | 3,1775 | 0,347 | -0,184 |
| 12 | Q9NYV4 CD2L7_HUMAN | K.NSS#PAPPQPAPGKVE.S                  | S1083:       | 2 | 3,1751 | 0,49  | -0,235 |
| 12 | Q9NPI6 DCP1A_HUMAN | E.RKASS#PSPLT#IGTPE.S                 | S523:T528:   | 2 | 3,1744 | 1     | 0,143  |
| 12 | Q92598 HS105_HUMAN | E.LNNTCEPVVTQPKPK.I                   |              | 3 | 3,1734 | 0,339 | -0,212 |
| 12 | P62266 RS23_HUMAN  | K.VANVSLALYK.G                        |              | 2 | 3,1722 | 0,379 | -0,205 |
| 12 | P40189 IL6RB_HUMAN | E.GHSSGIGGSSCM*SSSRPS#ISSS#DENE.S     | S740:S744:   | 3 | 3,1693 | 0,191 | 0,33   |
| 12 | P04406 G3P_HUMAN   | E.GLM*TTVHAIAT#QKTVD.G                | T184:        | 3 | 3,1685 | 0,089 | 0,194  |
| 12 | Q09666 AHNK_HUMAN  | K.VKGDLDIAGPNLE.G                     |              | 2 | 3,1682 | 0,287 | 0      |
| 12 | P11142 HSP7C_HUMAN | K.NQVAM*NPTNTVFD.A                    |              | 2 | 3,1668 | 0,392 | -1,83  |
| 12 | P11142 HSP7C_HUMAN | K.DAGTIAGLNVL.R.I                     |              | 2 | 3,1665 | 0,303 | -0,102 |
| 12 | Q96566 CLCC1_HUMAN | E.AAGSPDQGSTYS#PAR.G                  | S532:        | 2 | 3,1641 | 0,363 | -0,237 |
| 12 | O15085 ARHGB_HUMAN | E.NDLLDLGDPLRE.R                      |              | 2 | 3,1635 | 0,43  | -0,329 |
| 12 | P49792 RBP2_HUMAN  | E.LEDYSEGGPLYK.N                      |              | 2 | 3,1626 | 0,378 | -0,089 |
| 12 | Q00613 HSF1_HUMAN  | E.SEPAPASVTALTDAR.G                   |              | 2 | 3,1626 | 0,496 | -0,246 |
| 12 | P42704 LPPRC_HUMAN | K.NTKLDDDLFLKR.Y                      |              | 3 | 3,1607 | 0,301 | 0,201  |
| 12 | Q12888 TP53B_HUMAN | K.NSPEDLGLSLTGDSCK.L                  |              | 2 | 3,1604 | 0,428 | -0,288 |
| 12 | Q8NBF6 K0241_HUMAN | E.DAAM*KTEEPLFQVE.D                   |              | 2 | 3,1591 | 0,278 | -0,075 |
| 12 | Q02952 AKA12_HUMAN | E.DSIAGSGVEHS#TPDTEPGKEE.S            | S792:        | 3 | 3,1576 | 0,242 | -0,082 |
| 12 | Q96N67 DOCK7_HUMAN | R.SAVRPASLNLNR.S                      |              | 3 | 3,155  | 0,149 | 0,282  |
| 12 | Q8ND30 LIPB2_HUMAN | R.CSS#PTVGGPPLPQK.S                   | S363:        | 2 | 3,153  | 0,34  | 0,474  |
| 12 | Q53H82 LACB2_HUMAN | E.DLYDYM*NSLKE.L                      |              | 2 | 3,1478 | 0,208 | 0,087  |
| 12 | Q9H9B1 EHMT1_HUMAN | E.DSYLFDLDNKDGE.V                     |              | 2 | 3,1454 | 0,298 | -0,398 |
| 12 | P35030 TRY3_HUMAN  | D.TLDNDIMLIK.L                        |              | 2 | 3,145  | 0,321 | -0,415 |
| 12 | Q04446 GLGB_HUMAN  | R.RQFHLTDDDLLR.Y                      |              | 3 | 3,1449 | 0,201 | 0,239  |
| 12 | Q9Y490 TLN1_HUMAN  | E.STM*LEDSVS#PK.K                     | S425:        | 2 | 3,144  | 0,451 | -0,284 |
| 12 | Q92547 TOPB1_HUMAN | E.LQVDIQNLEDS#PFQKPLHDSE.I            | S1183:       | 3 | 3,142  | 0,189 | 0      |
| 12 | Q9P1Y6 K1542_HUMAN | R.LPALGEAHVS#PE.V                     | S1229:       | 2 | 3,1418 | 0,299 | -0,188 |
| 12 | Q9C0C2 TB182_HUMAN | R.VSGAGFS#PSSKM*E.G                   | S1138:       | 2 | 3,1363 | 0,315 | 0      |
| 12 | Q9BQ67 GRWD1_HUMAN | E.S#GDTSSGEPAAQVYLPGR.G               | S21:         | 2 | 3,136  | 0,235 | 0,406  |
| 12 | P35527 K1C9_HUMAN  | R.SGGGGGGGLGSGGSIR.S                  |              | 2 | 3,1335 | 0,446 | 0      |
| 12 | Q9Y3F4 STRAP_HUMAN | E.NSDCIFPSAPDVKA.-                    |              | 2 | 3,1312 | 0,482 | -0,08  |
| 12 | Q9UL46 PSME2_HUMAN | E.DSLNVADLTSR.A                       |              | 2 | 3,1291 | 0,463 | -0,374 |
| 12 | Q95433 AHSA1_HUMAN | E.SVDPVQGPAKTEE.R                     |              | 2 | 3,1286 | 0,377 | 0,249  |
| 12 | Q02880 TOP2B_HUMAN | E.LKVKAS#PIT#NDGEDE.F                 | S1400:T1403: | 2 | 3,1285 | 0,483 | -0,137 |
| 12 | Q9HCM4 E41L5_HUMAN | K.NANVQDAATNSAVLNE.N                  |              | 2 | 3,124  | 0,348 | -0,673 |
| 12 | Q8N3V7 SYNPO_HUMAN | E.ASNFQQEPAPR.D                       |              | 3 | 3,1224 | 0,234 | 1,395  |



|    |                    |                                    |                 |   |        |       |        |
|----|--------------------|------------------------------------|-----------------|---|--------|-------|--------|
| 12 | O14617 AP3D1_HUMAN | R.ALDIDLDKPLADSE.K                 |                 | 2 | 3,1178 | 0,327 | -0,161 |
| 12 | Q02952 AKA12_HUMAN | D.GSTPVADFDAPGTTQKDE.I             |                 | 2 | 3,1165 | 0,342 | 0,399  |
| 12 | P60709 ACTB_HUMAN  | E.EHPVLLTEAPLNPK.A                 |                 | 3 | 3,1163 | 0,293 | 0,47   |
| 12 | Q01484 ANK2_HUMAN  | K.SDS#NAS#FLR.A                    | S31:S34:        | 2 | 3,1128 | 0,372 | 0      |
| 12 | P23528 COF1_HUMAN  | R.YALYDATYETK.E                    |                 | 2 | 3,1123 | 0,415 | -0,274 |
| 12 | Q9Y478 AAKB1_HUMAN | E.LSSS#PPGPYHQEPYVCKPE.E           | S182:           | 2 | 3,1119 | 0,295 | 0,325  |
| 12 | P04406 G3P_HUMAN   | R.VPTANVSVVDLTCR.L                 |                 | 2 | 3,1096 | 0,518 | -0,159 |
| 12 | Q05524 ENO1B_HUMAN | D.LVVGLCTGQIK.T                    |                 | 2 | 3,109  | 0,41  | 0      |
| 12 | Q9UPT8 ZC3H4_HUMAN | E.GSLHSS#PVGPSSSK.G                | S908:           | 3 | 3,1088 | 0,101 | 0,065  |
| 12 | Q9Y639 NPTN_HUMAN  | E.YHCVYHFVSAPK.A                   |                 | 3 | 3,108  | 0,344 | 0,424  |
| 12 | Q16533 SNPC1_HUMAN | E.DKPLSLSM*PVITEEEE.N              |                 | 2 | 3,1078 | 0,334 | 0,067  |
| 12 | Q7L1V2 MON1B_HUMAN | E.TGSKDKDQPPS#PS#PPPQSE.A          | S59:S61:        | 3 | 3,1042 | 0,359 | -0,086 |
| 12 | Q9BSC4 NOL10_HUMAN | E.DQQTVLKQPQFYE.I                  |                 | 2 | 3,1005 | 0,285 | -0,163 |
| 12 | Q9UPT8 ZC3H4_HUMAN | K.TGSGS#PFAGNS#PARE.G              | S1269:S1275:    | 2 | 3,0989 | 0,391 | 0      |
| 12 | P29966 MARCS_HUMAN | E.KGEPAAAAPEAGASPVEK.E             |                 | 3 | 3,098  | 0,356 | -0,313 |
| 12 | P21333 FLNA_HUMAN  | R.EAGAGGLAIAVEGPSK.A               |                 | 2 | 3,097  | 0,445 | 0      |
| 12 | Q15370 ELOB_HUMAN  | D.DQLLDDGKTLGE.C                   |                 | 2 | 3,0962 | 0,391 | -0,468 |
| 12 | Q5VWN6 CJ018_HUMAN | E.VDSSSASTTLGR.Q                   |                 | 2 | 3,0957 | 0,483 | -0,207 |
| 12 | Q86UP2 KTN1_HUMAN  | E.VIDLLKPDQVE.G                    |                 | 2 | 3,0944 | 0,343 | -0,096 |
| 12 | O95373 IPO7_HUMAN  | E.NDDLTVNIQK.M                     |                 | 2 | 3,0936 | 0,282 | -0,316 |
| 12 | O60271 JIP4_HUMAN  | R.TKLHQLS#GS#DQLE.S                | S183:S185:      | 2 | 3,0935 | 0,513 | -0,453 |
| 12 | P27816 MAP4_HUMAN  | E.EGRPVSSTGNDITT#PPNKELPPSPE.K     | T687:           | 3 | 3,0929 | 0,231 | 0      |
| 12 | Q9Y2N3 PO121_HUMAN | E.LCHHS#SS#ST#PLAADKE.S            | S441:S443:T445: | 2 | 3,0916 | 1     | 0,062  |
| 12 | Q8NEZ4 MLL3_HUMAN  | E.GNAVACPSSAQ#PPHSAGAPAAKGDGSGNE.L | S3758:          | 3 | 3,089  | 0,142 | 0,064  |
| 12 | P00558 PGK1_HUMAN  | R.GCITIIGGGDTATCCAK.W              |                 | 2 | 3,0868 | 0,494 | -0,209 |
| 12 | Q01082 SPTB2_HUMAN | K.TALPAQSAAT#LPAR.T                | T2187:          | 2 | 3,0831 | 0,382 | -0,084 |
| 12 | P62258 1433E_HUMAN | K.VAGM*DVELTVEER.N                 |                 | 2 | 3,0827 | 0,43  | 0,25   |
| 12 | Q15149 PLEC1_HUMAN | K.GYSPYSVSGSGS#TAGSR.T             | S4622:          | 2 | 3,0819 | 0,406 | -0,327 |
| 12 | Q8WYA6 CTBL1_HUMAN | E.LTDIDTLHESEE.G                   |                 | 2 | 3,0783 | 0,352 | 0,435  |
| 12 | Q9BZE9 ASPC1_HUMAN | R.AAGS#PSPLPAPDPAPK.S              | S500:           | 2 | 3,0779 | 0,355 | 0,079  |
| 12 | P23284 PPIB_HUMAN  | K.TVDNFVALATGEK.G                  |                 | 2 | 3,0732 | 0,461 | -0,447 |
| 12 | Q9UK76 HN1_HUMAN   | E.GDIHENVDTLPGSLGQSE.E             |                 | 2 | 3,0669 | 0,42  | 0,062  |
| 12 | Q8WWQ0 PHIP_HUMAN  | E.DGPCQQAQVLIRE.V                  |                 | 2 | 3,0656 | 0,366 | 0,231  |
| 12 | P63104 1433Z_HUMAN | K.GIVDQSQQAYQE.A                   |                 | 2 | 3,0648 | 0,421 | 0,089  |
| 12 | P0C7M2 RA1L3_HUMAN | K.IEVIEIM*TDR.G                    |                 | 2 | 3,0643 | 0,164 | -0,099 |
| 12 | P63244 GBLP_HUMAN  | K.DVLSVAFSSDNR.Q                   |                 | 2 | 3,0633 | 0,445 | -0,186 |
| 12 | P62306 RUXF_HUMAN  | E.EYIDGALSGLGE.V                   |                 | 2 | 3,0632 | 0,509 | -0,359 |
| 12 | O00159 MYO1C_HUMAN | E.VTYSVTGFLDKNND.L                 |                 | 2 | 3,0614 | 0,401 | -0,078 |
| 12 | Q13283 G3BP1_HUMAN | K.SSSPAPADIAQTVQE.D                |                 | 2 | 3,0612 | 0,331 | -1,87  |

|    |                     |                                   |        |   |        |       |        |
|----|---------------------|-----------------------------------|--------|---|--------|-------|--------|
| 12 | P55072 TERA_HUMAN   | E.DNSVVVLSQPKM*D.E                |        | 2 | 3,059  | 0,442 | -0,34  |
| 12 | Q15149 PLEC1_HUMAN  | E.GTSCIAGVFDATKE.R                |        | 2 | 3,0535 | 0,337 | -0,471 |
| 12 | Q8WXV6 Q8WXV6_HUMAN | E.DNLYLAVLR.A                     |        | 2 | 3,052  | 0,289 | -0,34  |
| 12 | Q96FF9 CDCA5_HUMAN  | K.THSVPATPTS#TPVNPPEAE.S          | S114:  | 3 | 3,0507 | 0,112 | 0,091  |
| 12 | P31040 DHSA_HUMAN   | K.VSDSISAQYPVVDHE.F               |        | 2 | 3,0458 | 0,485 | 0,297  |
| 12 | Q9NTZ6 RBM12_HUMAN  | E.DSIYIAYGPNKG.A                  |        | 2 | 3,0453 | 0,322 | 0,094  |
| 12 | P54132 BLM_HUMAN    | E.DVLST#SKDLLSKPE.K               | T337:  | 2 | 3,0437 | 0,175 | 0,378  |
| 12 | Q92917 GPKOW_HUMAN  | E.DVLSPTDTCVCRTE.G                |        | 2 | 3,0435 | 0,541 | -0,073 |
| 12 | P54278 PMS2_HUMAN   | E.DIFIVDQHATDE.K                  |        | 2 | 3,043  | 0,241 | 0,087  |
| 12 | Q9C0H9 SNIP_HUMAN   | K.SVDFEM*PPPS#PPLNLHE.L           | S738:  | 2 | 3,0429 | 0,252 | 0      |
| 12 | Q9Y478 AAKB1_HUMAN  | E.LSSS#PPGYPHQEPYVCKPE.E          | S182:  | 3 | 3,0424 | 0,26  | 0,325  |
| 12 | Q12857 NFIA_HUMAN   | E.M*DSPGEEPFTGQGR.S               |        | 2 | 3,041  | 0,446 | 0,217  |
| 12 | P08651 NFIC_HUMAN   | E.DSKPITLDTDFQE.S                 |        | 2 | 3,0406 | 0,355 | -0,227 |
| 12 | O60610 DIAP1_HUMAN  | E.NDYPDVLFKFPDE.L                 |        | 2 | 3,0404 | 0,328 | -0,252 |
| 12 | O95470 SGPL1_HUMAN  | D.SLYSTDTVTQGSQM*NGS#PKPH.-       | S564:  | 3 | 3,0378 | 0,332 | 0,314  |
| 12 | P05783 K1C18_HUMAN  | R.TVQSLEIDLDSM*R.N                |        | 2 | 3,0371 | 0,467 | -0,32  |
| 12 | P24534 EF1B_HUMAN   | E.DDKVGTDM*LEE.Q                  |        | 2 | 3,0329 | 0,376 | -0,192 |
| 12 | P41219 PERI_HUMAN   | K.M*ALDIEIATYR.K                  |        | 2 | 3,0316 | 0,492 | -0,279 |
| 12 | Q13283 G3BP1_HUMAN  | E.IQEEKPEPVLEE.T                  |        | 2 | 3,029  | 0,163 | -0,169 |
| 12 | P49023 PAXI_HUMAN   | K.TGSSS#PPGGPPKPGSQLDSM*LGLSQSD.L | S322:  | 2 | 3,0226 | 0,307 | 0,728  |
| 12 | Q8N3V7 SYNPO_HUMAN  | E.ASNFQQEPAPR.D                   |        | 2 | 3,0221 | 0,24  | 0      |
| 12 | P42166 LAP2A_HUMAN  | E.ATQILSVPKVDDE.I                 |        | 2 | 3,0203 | 0,311 | -0,259 |
| 12 | P51858 HDGF_HUMAN   | E.VERPLPM*EVEK.N                  |        | 3 | 3,0201 | 0,271 | 0,136  |
| 12 | Q00839 HNRPU_HUMAN  | R.AKS#PQPPVEEED.H                 | S270:  | 2 | 3,0195 | 0,353 | 0,079  |
| 12 | P18858 DNL1_HUMAN   | E.DEALS#PAKGQKPALD.C              | S76:   | 2 | 3,0176 | 0,274 | -0,301 |
| 12 | P27708 PYR1_HUMAN   | E.SIVVAPSQTLNDRE.Y                |        | 2 | 3,0176 | 0,458 | 0      |
| 12 | P63000 RAC1_HUMAN   | R.HHCPNTPHILVGTK.L                |        | 3 | 3,0156 | 0,206 | 0      |
| 12 | P49023 PAXI_HUMAN   | K.TGSSS#PPGGPPKPGSQLD.S           | S322:  | 2 | 2,9997 | 0,362 | -0,21  |
| 12 | Q96D71 REPS1_HUMAN  | E.LSDFDKDGALTLDE.F                |        | 2 | 2,9971 | 0,348 | -1,189 |
| 12 | O15027 SC16A_HUMAN  | K.QIDSSPVGGETDE.T                 |        | 2 | 2,9943 | 0,405 | 0      |
| 12 | Q99856 ARI3A_HUMAN  | R.AQM*AALAAM*R.A                  |        | 2 | 2,9909 | 0,407 | -0,114 |
| 12 | O15231 ZN185_HUMAN  | R.RES#CGSSVLTFE.G                 | S233:  | 2 | 2,9896 | 0,377 | -0,156 |
| 12 | Q16531 DDB1_HUMAN   | E.NAFNLFVCQK.D                    |        | 2 | 2,9885 | 0,401 | -0,098 |
| 12 | Q96GA3 LTV1_HUMAN   | E.DDFILQANK.A                     |        | 2 | 2,9878 | 0,292 | 0      |
| 12 | Q641Q2 FA21A_HUMAN  | E.DQNIIQAPQKE.V                   |        | 2 | 2,9876 | 0,258 | 0,19   |
| 12 | P25705 ATPA_HUMAN   | R.ILGADTSVDLEETGR.V               |        | 2 | 2,9876 | 0,374 | -0,31  |
| 12 | Q02952 AKA12_HUMAN  | K.ERPPAPS#SFVFEQE.T               | S1225: | 2 | 2,9866 | 0,198 | 0,072  |
| 12 | O60506 HNRPQ_HUMAN  | E.DGALAVLQQFK.D                   |        | 2 | 2,9855 | 0,405 | -0,205 |
| 12 | Q9H307 PININ_HUMAN  | K.SLS#PGKENVSALDM*EKE.S           | S443:  | 2 | 2,9853 | 0,408 | -0,253 |

|    |                    |                                       |              |   |        |       |        |
|----|--------------------|---------------------------------------|--------------|---|--------|-------|--------|
| 12 | Q96DG6 CMBL_HUMAN  | E.DCSPADKPYIDE.A                      |              | 2 | 2,9848 | 0,369 | -0,519 |
| 12 | Q05524 ENO1B_HUMAN | R.YISPDQLADLYK.G                      |              | 2 | 2,9823 | 0,408 | -0,257 |
| 12 | Q9Y3L3 3BP1_HUMAN  | K.VTRS#PPETAAPVED.M                   | S550:        | 2 | 2,9821 | 0,452 | 0      |
| 12 | Q96NC0 ZMAT2_HUMAN | E.M*AAVM*GFSGFGST#K.K                 | T195:        | 2 | 2,9809 | 0,363 | 0,081  |
| 12 | Q12888 TP53B_HUMAN | R.QSQQPM*KPIS#PVKDPVS#PASQK.M         | S1094:S1101: | 3 | 2,9781 | 0,188 | -0,287 |
| 12 | Q15154 PCM1_HUMAN  | R.SDGS#ENLCTPQQSR.T                   | S872:        | 2 | 2,976  | 0,407 | -0,368 |
| 12 | Q13813 SPTA2_HUMAN | E.NAEEDLTDPVR.C                       |              | 2 | 2,9741 | 0,431 | 0,291  |
| 12 | Q5VZL5 ZMYM4_HUMAN | K.AKSEDS#DVELS#D.-                    | S1542:S1547: | 2 | 2,9731 | 0,246 | -0,084 |
| 12 | Q96G46 DUS3L_HUMAN | E.NCGAQQVPAGPGTST#PPSS#PVR.T          | T273:S277:   | 3 | 2,9728 | 0,25  | 0,157  |
| 12 | Q13283 G3BP1_HUMAN | K.SSS#PAPADIAQTVQE.D                  | S232:        | 2 | 2,9699 | 0,145 | -0,077 |
| 12 | P13667 PDIA4_HUMAN | E.SDPAYQQYQDAANLRE.D                  |              | 3 | 2,9698 | 0,181 | 0      |
| 12 | P22314 UBA1_HUMAN  | E.LQSANASVDDSRLEE.L                   |              | 2 | 2,9696 | 0,496 | -0,224 |
| 12 | Q13442 HAP28_HUMAN | K.GVEGLIDIENPNR.V                     |              | 2 | 2,9681 | 0,394 | -0,342 |
| 12 | Q9C0C2 TB182_HUMAN | R.SYQFGIIGNDR.V                       |              | 2 | 2,9675 | 0,431 | -0,096 |
| 12 | Q16531 DDB1_HUMAN  | E.ATADDLIKVVVE.L                      |              | 2 | 2,9674 | 0,316 | -0,375 |
| 12 | P05783 K1C18_HUMAN | R.STS#FRGGM*GSGGLATGIAGGLAGM*GGIQNE.K | S53:         | 3 | 2,9672 | 0,156 | 0,324  |
| 12 | Q9Y490 TLN1_HUMAN  | E.TQVVLINAVKD.V                       |              | 2 | 2,9667 | 0,39  | 0,203  |
| 12 | Q71U36 TBA1A_HUMAN | E.DM*AALEKDYEE.V                      |              | 2 | 2,9632 | 0,26  | 0,092  |
| 12 | Q14690 RRP5_HUMAN  | E.DDSLVDVYRE.G                        |              | 2 | 2,9619 | 0,416 | -0,178 |
| 12 | Q15477 SKIV2_HUMAN | R.GDTVSAASPCAPLAR.A                   |              | 2 | 2,9598 | 0,515 | 0,164  |
| 12 | Q9H4L5 OSBL3_HUMAN | E.SLLLDS#PAVAK.S                      | S410:        | 2 | 2,959  | 0,346 | 0,204  |
| 12 | Q15149 PLEC1_HUMAN | E.FADM*LSGNAGGFR.S                    |              | 2 | 2,9587 | 0,422 | -1,437 |
| 12 | Q9UNZ2 NSF1C_HUMAN | R.KKSPNELVDDLK.G                      |              | 3 | 2,9569 | 0,209 | 0,239  |
| 12 | P52948 NUP98_HUMAN | K.NLNNSNLFSPVNR.D                     |              | 2 | 2,9552 | 0,242 | -0,328 |
| 12 | Q71U36 TBA1A_HUMAN | K.DVNAAIATIK.T                        |              | 2 | 2,9536 | 0,347 | -0,06  |
| 12 | Q9HCP0 KC1G1_HUMAN | E.LNVDDPTGAHS#NAPITAHAE.V             | S388:        | 3 | 2,9526 | 0,089 | -0,087 |
| 12 | O94979 SC31A_HUMAN | R.AQGEPVAGHES#PKIPIYE.K               | S799:        | 2 | 2,9481 | 0,456 | -0,129 |
| 12 | Q8WWM7 ATX2L_HUMAN | K.ISLAPTDVKE.L                        |              | 2 | 2,9477 | 0,358 | -0,227 |
| 12 | P40926 MDHM_HUMAN  | K.GYLGPEQLPDCLK.G                     |              | 2 | 2,9463 | 0,267 | -0,246 |
| 12 | Q5SW79 CE170_HUMAN | E.RSES#LDPDSSM*DTTLILK.D              | S881:        | 3 | 2,9458 | 0,169 | -0,348 |
| 12 | Q92547 TOPB1_HUMAN | E.DVTHVIVGDYDDE.L                     |              | 2 | 2,9453 | 0,457 | 0,33   |
| 12 | Q9UNS2 CSN3_HUMAN  | E.ITVNPQFVQK.S                        |              | 2 | 2,9389 | 0,409 | -0,104 |
| 12 | P08670 VIME_HUMAN  | R.QDVDNAS#LARLDLE.R                   | S214:        | 2 | 2,9383 | 0,354 | -0,149 |
| 12 | P09874 PARP1_HUMAN | E.DFLQDVSASTK.S                       |              | 2 | 2,938  | 0,442 | 0      |
| 12 | P23434 GCSH_HUMAN  | E.ALAENPGLVKNK.S                      |              | 2 | 2,9375 | 0,411 | 0,108  |
| 12 | Q9UPN4 AZI1_HUMAN  | R.TQDVLAQDAAGDNLE.M                   |              | 2 | 2,9365 | 0,124 | 0,391  |
| 12 | O95433 AHSA1_HUMAN | E.LVQAFTHAPATLE.A                     |              | 2 | 2,9311 | 0,331 | -0,262 |
| 12 | P05388 RLAO_HUMAN  | K.IIQLDDYPK.C                         |              | 2 | 2,9308 | 0,314 | -0,401 |
| 12 | O00232 PSD12_HUMAN | E.VDYSATVDQR.L                        |              | 2 | 2,9244 | 0,391 | 0,106  |

|    |                     |                                          |              |   |        |       |        |
|----|---------------------|------------------------------------------|--------------|---|--------|-------|--------|
| 12 | Q9UBR2 CATZ_HUMAN   | R.VGDYGSLSGRE.K                          |              | 2 | 2,9208 | 0,451 | 0,107  |
| 12 | A6NNK3 A6NNK3_HUMAN | E.SGDIVSLIHD.-                           |              | 2 | 2,9204 | 0,388 | -0,116 |
| 12 | Q9UPT8 ZC3H4_HUMAN  | E.GSLHSS#PVGPSSSK.G                      | S908:        | 2 | 2,9201 | 0,401 | -0,434 |
| 12 | P61158 ARP3_HUMAN   | R.YSYVCPDLVKE.F                          |              | 2 | 2,92   | 0,287 | -0,089 |
| 12 | Q5UIP0 RIF1_HUMAN   | E.SQES#PNENFK.T                          | S1854:       | 2 | 2,9183 | 0,346 | -0,194 |
| 12 | Q13111 CAF1A_HUMAN  | D.ILAVRPPQIKS#LPAT#PQGK.N                | S237:T241:   | 3 | 2,9155 | 0,341 | -0,337 |
| 12 | Q9UQ35 SRRM2_HUMAN  | E.NSFGS#PLEFR.N                          | S1329:       | 2 | 2,9139 | 0,495 | -0,198 |
| 12 | O43815 STRN_HUMAN   | E.VAPALSVFNDTKE.L                        |              | 2 | 2,9138 | 0,415 | 0      |
| 12 | P31949 S10AB_HUMAN  | K.KLDTNSDGLDFSE.F                        |              | 2 | 2,9044 | 0,213 | -0,233 |
| 12 | P06744 G6PI_HUMAN   | E.SSLFIIASK.T                            |              | 2 | 2,9042 | 0,354 | 0      |
| 12 | P50748 KNTC1_HUMAN  | K.VAQAFM*LSDDE.I                         |              | 2 | 2,9024 | 0,442 | 0      |
| 12 | Q9NP77 SSU72_HUMAN  | R.VAVVCSNQR.S                            |              | 2 | 2,8994 | 0,37  | -0,099 |
| 12 | Q03252 LMNB2_HUMAN  | R.AGGPAT#PLS#PTR.L                       | T14:S17:     | 2 | 2,8928 | 0,475 | -0,19  |
| 12 | Q9UQ35 SRRM2_HUMAN  | K.DKFSFPVQDRPE.S                         |              | 3 | 2,8919 | 0,119 | 0,234  |
| 12 | Q9UHN6 TMEM2_HUMAN  | K.SLLQGTIQM*IQE.R                        |              | 2 | 2,8917 | 0,138 | -0,443 |
| 12 | Q00653 NFKB2_HUMAN  | K.LNS#SIVEPKEPAPE.T                      | S22:         | 2 | 2,8899 | 0,262 | -0,23  |
| 12 | Q9UK76 HN1_HUMAN    | R.RNSS#EASSGDFLDLK.G                     | S88:         | 3 | 2,8883 | 0,125 | 0,107  |
| 12 | Q14004 CD2L5_HUMAN  | E.QGLLLGGASAATAATAAGGTGGS#GGSPASSSGTQR.R | S177:        | 3 | 2,8876 | 0,25  | 0,243  |
| 12 | P29317 EPHA2_HUMAN  | E.DACQACSPGFFKFE.A                       |              | 2 | 2,8865 | 0,249 | -0,367 |
| 12 | Q8IY17 PLPL6_HUMAN  | E.ASGGSLAAPART#PTQEPR.E                  | T455:        | 2 | 2,8863 | 0,359 | 0      |
| 12 | Q92841 DDX17_HUMAN  | R.GDGPICLVLAPTR.E                        |              | 2 | 2,8857 | 0,286 | -0,089 |
| 12 | O95373 IPO7_HUMAN   | E.TENDDLTNVIQK.M                         |              | 2 | 2,885  | 0,198 | -0,176 |
| 12 | Q01484 ANK2_HUMAN   | K.AM*IVPSS#PSKTPEEVSTPAEEE.K             | S3760:       | 3 | 2,8838 | 0,252 | 0,228  |
| 12 | Q9UBB4 ATX10_HUMAN  | E.DNSQNQDLIAKM*EE.Q                      |              | 2 | 2,8829 | 0,148 | -0,222 |
| 12 | Q9Y6W5 WASF2_HUMAN  | E.KRDVVGNDVATILSR.R                      |              | 2 | 2,8826 | 0,203 | 0,074  |
| 12 | Q9NXG2 THUM1_HUMAN  | E.YGDDM*YGPEK.F                          |              | 2 | 2,8803 | 0,467 | 0      |
| 12 | O76021 RL1D1_HUMAN  | K.ATNES#EDEIPQLVPIGKK.T                  | S361:        | 2 | 2,8794 | 0,319 | -0,238 |
| 12 | Q13153 PAK1_HUMAN   | E.DYNSSNALNVK.A                          |              | 2 | 2,8766 | 0,42  | -0,299 |
| 12 | P46776 RL27A_HUMAN  | K.TGAAPIIDVVR.S                          |              | 2 | 2,8737 | 0,49  | 0,329  |
| 12 | P57076 CU059_HUMAN  | E.DLSGTQAGLNVIKE.A                       |              | 2 | 2,8734 | 0,26  | 0,253  |
| 12 | Q9BV29 CCD32_HUMAN  | E.DEPAAGDKPAAAEQ.-                       |              | 2 | 2,8715 | 0,473 | -0,267 |
| 12 | Q14160 LAP4_HUMAN   | R.NSLES#IS#SIDRE.L                       | S1223:S1225: | 2 | 2,8705 | 0,346 | 0      |
| 12 | Q9UKN8 TF3C4_HUMAN  | K.ILLVDSPGM*GNADDEQEE.G                  |              | 2 | 2,8701 | 0,43  | 0,235  |
| 12 | P25205 MCM3_HUMAN   | E.AGAM*VLADR.G                           |              | 2 | 2,8697 | 0,343 | 0,265  |
| 12 | O43504 HBXIP_HUMAN  | E.DTM*KNPSIVGVLCTD.S                     |              | 2 | 2,8681 | 0,273 | -0,293 |
| 12 | P06733 ENOA_HUMAN   | R.GNPTVEVDLFTSK.G                        |              | 2 | 2,8668 | 0,497 | 0,26   |
| 12 | P11021 GRP78_HUMAN  | R.ITPSYVAFTPEGER.L                       |              | 2 | 2,8632 | 0,49  | 0      |
| 12 | P05556 ITB1_HUMAN   | R.SNGLICGGNGVCK.C                        |              | 2 | 2,8616 | 0,303 | -0,457 |
| 12 | Q02952 AKA12_HUMAN  | K.SAES#PTS#PVTSE.T                       | S283:S286:   | 2 | 2,8615 | 0,311 | 0      |

|    |                    |                               |          |   |        |       |        |
|----|--------------------|-------------------------------|----------|---|--------|-------|--------|
| 12 | Q9Y508 ZN313_HUMAN | E.DM*M*NQVLQR.S               |          | 2 | 2,86   | 0,22  | -0,209 |
| 12 | P56537 IF6_HUMAN   | E.ILADVLKVE.V                 |          | 2 | 2,8558 | 0,325 | 0,061  |
| 12 | Q14160 LAP4_HUMAN  | E.VSPGVIANPFAAGIGHR.N         |          | 2 | 2,8476 | 0,435 | -0,293 |
| 12 | Q9Y2W1 TR150_HUMAN | E.DLARPSGLLAQE.R              |          | 2 | 2,8467 | 0,312 | 0,192  |
| 12 | P07355 ANXA2_HUMAN | E.GDHST#PPSAYGSVK.A           | T19:     | 2 | 2,8386 | 0,146 | -0,247 |
| 12 | Q99436 PSB7_HUMAN  | K.DGIVLGADTR.A                |          | 2 | 2,8355 | 0,223 | 0,06   |
| 12 | Q12873 CHD3_HUMAN  | E.LDDILKFGTEE.L               |          | 2 | 2,8352 | 0,232 | -0,095 |
| 12 | P38646 GRP75_HUMAN | E.QQIVIQSSGGLSKDDIE.N         |          | 2 | 2,8336 | 0,418 | 0      |
| 12 | O95831 AIFM1_HUMAN | E.TDHIVAAVGLEPNVE.L           |          | 2 | 2,8334 | 0,365 | -0,156 |
| 12 | Q96G46 DUS3L_HUMAN | R.TCGPLTDEDVVR.L              |          | 2 | 2,8334 | 0,452 | -0,179 |
| 12 | Q86UP2 KTN1_HUMAN  | R.DAVSNTTNQLE.S               |          | 2 | 2,8321 | 0,339 | 0      |
| 12 | O60271 JIP4_HUMAN  | E.NLDSVFAQDQEHQVE.L           |          | 2 | 2,831  | 0,46  | 0      |
| 12 | Q8WZ73 RFFL_HUMAN  | R.RAS#LSDLTDLEDIE.G           | S240:    | 2 | 2,8305 | 0,317 | -0,295 |
| 12 | Q9H6U6 BCAS3_HUMAN | R.NFDGYRS#PLPTNE.S            | S910:    | 2 | 2,8258 | 0,283 | -0,691 |
| 12 | Q96T23 RSF1_HUMAN  | D.AQRLS#PIPEEVPKSTLE.S        | S594:    | 3 | 2,8253 | 0,235 | 0,093  |
| 12 | P60174 TPIS_HUMAN  | E.GLGVIAICIGKLDE.R            |          | 2 | 2,8252 | 0,41  | -0,331 |
| 12 | Q14974 IMB1_HUMAN  | E.AYTGIVQGLKGDQE.N            |          | 2 | 2,825  | 0,321 | 0,33   |
| 12 | P14625 ENPL_HUMAN  | K.SILFVPTSAPR.G               |          | 2 | 2,8246 | 0,379 | -0,103 |
| 12 | Q07065 CKAP4_HUMAN | E.DGVLSM*QVASAR.Q             |          | 2 | 2,8241 | 0,429 | -1,171 |
| 12 | Q9H299 SH3L3_HUMAN | R.VYSTSVTGSRE.I               |          | 2 | 2,8237 | 0,389 | 0      |
| 12 | Q13263 TIF1B_HUMAN | R.LAS#PSGSTSSGLE.V            | S594:    | 2 | 2,8225 | 0,423 | -0,288 |
| 12 | Q14204 DYHC1_HUMAN | E.DLDKVEPAVIE.A               |          | 2 | 2,8183 | 0,369 | -0,397 |
| 12 | P42166 LAP2A_HUMAN | R.SST#PLPTISSSAENTR.Q         | T160:    | 2 | 2,8175 | 0,355 | 0,212  |
| 12 | Q8IUW5 RELL1_HUMAN | R.SLM*SVSGAETVNGEVPAT#PVKRE.R | T261:    | 3 | 2,8158 | 0,126 | -0,447 |
| 12 | Q6DD88 ATLA3_HUMAN | E.ANNLAAAASAK.D               |          | 2 | 2,8111 | 0,35  | -0,183 |
| 12 | Q96B23 CR025_HUMAN | E.LRRDSS#ES#QLASTE.S          | S67:S69: | 2 | 2,8108 | 0,319 | -0,14  |
| 12 | Q6DD88 ATLA3_HUMAN | E.VCGGEKPYLSPDILEE.K          |          | 2 | 2,8101 | 0,224 | -0,135 |
| 12 | Q12888 TP53B_HUMAN | K.TVSS#DGCSTPSREE.G           | S316:    | 2 | 2,8096 | 0,326 | -0,153 |
| 12 | P60842 IF4A1_HUMAN | R.SRDNGPDGM*EPGEVIE.S         |          | 2 | 2,8095 | 0,361 | -0,994 |
| 12 | O15042 SR140_HUMAN | E.SLCDS#PHQNLRSRPLE.N         | S67:     | 2 | 2,809  | 0,345 | 0,188  |
| 12 | Q9H8H0 NOL11_HUMAN | E.ILQNGFNPEEDKCNNCDQE.L       |          | 3 | 2,8088 | 0,232 | 0,079  |
| 12 | P05783 K1C18_HUMAN | R.TVQSLEIDLDSM*R.N            |          | 3 | 2,8079 | 0,184 | 0,18   |
| 12 | P22314 UBA1_HUMAN  | R.YDGQVAVFGSDLQEK.L           |          | 2 | 2,8072 | 0,307 | 0,368  |
| 12 | P54105 ICLN_HUMAN  | E.CQALHPDPEDED.S              |          | 2 | 2,8071 | 0,421 | 0,171  |
| 12 | Q9UBB9 TFP11_HUMAN | R.DM*VVNLFHE.L                |          | 2 | 2,8061 | 0,271 | -0,218 |
| 12 | P10599 THIO_HUMAN  | E.ALDAAGDKLVVVD.F             |          | 2 | 2,8057 | 0,462 | -0,095 |
| 12 | Q14789 GOGB1_HUMAN | E.DVSYLSGQLSEKE.A             |          | 2 | 2,8046 | 0,299 | -0,084 |
| 12 | Q96EV2 RBM33_HUMAN | K.VKPAS#PVAQPKEE.A            | S775:    | 3 | 2,8041 | 0,161 | 0,063  |
| 12 | P07195 LDHB_HUMAN  | K.M*VVESAYEVIK.L              |          | 2 | 2,8023 | 0,252 | -0,19  |

|    |                    |                                    |              |   |        |       |        |
|----|--------------------|------------------------------------|--------------|---|--------|-------|--------|
| 12 | P35908 K22E_HUMAN  | R.NLDLDSIIAEVK.A                   |              | 2 | 2,802  | 0,364 | -0,367 |
| 12 | Q12888 TP53B_HUMAN | R.ADDPLRLDQE.L                     |              | 2 | 2,7983 | 0,24  | 0      |
| 12 | P30281 CCND3_HUMAN | R.GSSSQGPSQTST#PTDVTAIHL.-         | T283:        | 2 | 2,7964 | 0,168 | 0,34   |
| 12 | P43246 MSH2_HUMAN  | E.FLVKPSFDPNLSE.L                  |              | 2 | 2,7942 | 0,263 | -0,654 |
| 12 | O14773 TPP1_HUMAN  | E.DSLSSAYIQR.V                     |              | 2 | 2,7931 | 0,222 | 0,107  |
| 12 | Q9Y266 NUDC_HUMAN  | R.FDGM*LLAM*AQQHE.G                |              | 2 | 2,7923 | 0,366 | -0,08  |
| 12 | Q07157 ZO1_HUMAN   | E.TLNDEVGT#PPESAIR.S               | T868:        | 2 | 2,7918 | 0,326 | 0,206  |
| 12 | P18858 DNL1_HUMAN  | K.TSKAET#PTESVSEPE.V               | T195:        | 2 | 2,7908 | 0,383 | -0,292 |
| 12 | P62269 RS18_HUMAN  | K.IAFAITAIK.G                      |              | 2 | 2,7902 | 0,248 | -0,064 |
| 12 | P42166 LAP2A_HUMAN | E.ATQILSVPK.V                      |              | 2 | 2,7849 | 0,287 | 0,191  |
| 12 | O60506 HNRPQ_HUMAN | E.DGALAVLQQFKD.S                   |              | 2 | 2,7828 | 0,275 | -0,467 |
| 12 | O14939 PLD2_HUMAN  | E.DESLLPLGSKE.G                    |              | 2 | 2,782  | 0,36  | -0,38  |
| 12 | Q14247 SRC8_HUMAN  | R.AKTQT#PPVS#PAPQPTEE.R            | T401:S405:   | 3 | 2,7781 | 0,178 | 0,85   |
| 12 | O95163 ELP1_HUMAN  | E.DVFLAVSHSE.F                     |              | 2 | 2,7772 | 0,337 | 0      |
| 12 | P27816 MAP4_HUMAN  | E.TVGKTDYIPLLDVDE.K                |              | 2 | 2,7766 | 0,249 | -0,509 |
| 12 | P04083 ANXA1_HUMAN | E.DLADSDARALYE.A                   |              | 2 | 2,7745 | 0,356 | 0,091  |
| 12 | Q9H7N4 SFR19_HUMAN | K.AAPPPPALTPDSQTVDSCKT#PE.V        | T1001:       | 3 | 2,7744 | 0,104 | -0,224 |
| 12 | Q08211 DHX9_HUMAN  | E.TVEPYKVNLSQDLE.H                 |              | 2 | 2,7737 | 0,314 | -0,224 |
| 12 | Q14160 LAP4_HUMAN  | E.NAVTITPLRPEDDYS#PRE.R            | S835:        | 3 | 2,7731 | 0,346 | -0,085 |
| 12 | Q8TDY2 RBCC1_HUMAN | K.SVEHVS#PDTADAE.S                 | S266:        | 2 | 2,7714 | 0,353 | 0      |
| 12 | P04406 G3P_HUMAN   | R.GALQNIIPASTGAAK.A                |              | 2 | 2,7697 | 0,176 | -0,346 |
| 12 | P49458 SRP09_HUMAN | K.VTDDLVLCLVYK.T                   |              | 2 | 2,7687 | 0,359 | -0,184 |
| 12 | P33176 KINH_HUMAN  | E.IGIAVGNNVDKQPE.G                 |              | 2 | 2,767  | 0,248 | -0,336 |
| 12 | P62736 ACTA_HUMAN  | K.EITALAPSTM*K.I                   |              | 2 | 2,7601 | 0,303 | -0,104 |
| 12 | P46821 MAP1B_HUMAN | K.QGS#PDQVS#PVSE.M                 | S1438:S1443: | 2 | 2,7579 | 0,244 | 0,088  |
| 12 | Q16643 DREB_HUMAN  | K.LAASGEGGLQE.L                    |              | 2 | 2,7566 | 0,314 | 0,118  |
| 12 | Q8IZ21 PHAR4_HUMAN | R.TRS#LPITIE.M                     | S464:        | 2 | 2,7557 | 0,346 | 0      |
| 12 | Q8NEY8 PPHLN_HUMAN | E.KLEKS#DES#NLPE.I                 | S244:S247:   | 2 | 2,7552 | 0,24  | 0      |
| 12 | P53396 ACLY_HUMAN  | R.TAS#FSESRADE.V                   | S455:        | 2 | 2,7542 | 0,407 | -0,286 |
| 12 | O95433 AHS1_HUMAN  | E.AM*GIYISTLKTE.F                  |              | 2 | 2,753  | 0,364 | 0,363  |
| 12 | P62857 RS28_HUMAN  | R.EGDVLTLLLESER.E                  |              | 2 | 2,7528 | 0,4   | -0,628 |
| 12 | Q8N3U4 STAG2_HUMAN | E.DVM*M*SSEGRIEDLNE.G              |              | 2 | 2,7512 | 0,277 | 0,278  |
| 12 | P18846 ATF1_HUMAN  | E.TAPQPGSAVQGAHISHIAQQVSSLS#ESEE.S | S36:         | 3 | 2,7512 | 0,358 | 0,181  |
| 12 | O60506 HNRPQ_HUMAN | E.GLTDVILYHQPD DK.K                |              | 2 | 2,7507 | 0,251 | -0,302 |
| 12 | P55072 TERA_HUMAN  | E.M*FAQTLQQSR.G                    |              | 2 | 2,7493 | 0,179 | -0,299 |
| 12 | P04264 K2C1_HUMAN  | R.SLDLDSIIAEVK.A                   |              | 2 | 2,7493 | 0,477 | -0,281 |
| 12 | P30040 ERP29_HUMAN | E.VGISDYGDKLN M*E.L                |              | 2 | 2,7474 | 0,287 | 0,084  |
| 12 | Q8TAT6 NPL4_HUMAN  | E.LLEDPKAEVVDE.I                   |              | 2 | 2,7435 | 0,284 | 0,18   |
| 12 | P62805 H4_HUMAN    | K.TVTAM*DVVYALK.R                  |              | 2 | 2,742  | 0,498 | -0,092 |

|    |                     |                           |            |   |        |       |        |
|----|---------------------|---------------------------|------------|---|--------|-------|--------|
| 12 | O43379 WDR62_HUMAN  | E.GPIVATLAQPLR.R          |            | 2 | 2,7408 | 0,4   | 0,395  |
| 12 | P36578 RL4_HUMAN    | E.LPLVVEDKVE.G            |            | 2 | 2,7407 | 0,376 | -0,321 |
| 12 | Q15003 CND2_HUMAN   | E.GTEDLSVDLVR.Q           |            | 2 | 2,7395 | 0,198 | -0,203 |
| 12 | P12814 ACTN1_HUMAN  | R.FAIQDISVEETSAK.E        |            | 2 | 2,7373 | 0,387 | -0,476 |
| 12 | Q9BQA1 MEP50_HUMAN  | R.KET#PPPLVPPAAR.E        | T5:        | 2 | 2,7364 | 0,317 | -0,084 |
| 12 | P55072 TERA_HUMAN   | E.DNSVVLSLQPK.M           |            | 2 | 2,7335 | 0,391 | 0      |
| 12 | Q9P1Y6 K1542_HUMAN  | E.DLPTRLPALGEAHVS#PE.V    | S1229:     | 2 | 2,7327 | 0,399 | 0,065  |
| 12 | Q9HA05 Q9HA05_HUMAN | K.M*NSIVYQK.Q             |            | 2 | 2,73   | 0,316 | -0,305 |
| 12 | Q2NL82 TSR1_HUMAN   | E.TM*T#IGES#VHDDLYDKK.V   | T449:S453: | 3 | 2,7283 | 0,189 | 0,271  |
| 12 | P07954 FUMH_HUMAN   | E.LSGAM*NTTACSLM*K.I      |            | 2 | 2,7252 | 0,404 | -0,483 |
| 12 | A6NHG4 DDTL_HUMAN   | E.LDTNLPANRVPAGLE.K       |            | 2 | 2,7239 | 0,377 | -0,154 |
| 12 | O43242 PSMD3_HUMAN  | E.LDVTLEDIKE.H            |            | 2 | 2,7215 | 0,314 | -0,191 |
| 12 | Q00613 HSF1_HUMAN   | R.GHTDTEGRPPS#PPPTST#PE.K | S363:T369: | 3 | 2,7209 | 0,24  | -0,259 |
| 12 | Q9H7N4 SFR19_HUMAN  | K.AAPPPPALT#PDSQTVDSCK.T  | T989:      | 3 | 2,7208 | 0,316 | 0,173  |
| 12 | Q08J23 NSUN2_HUMAN  | E.SAASTGQPDNDVTEGQR.A     |            | 2 | 2,7185 | 0,447 | -0,211 |
| 12 | P14625 ENPL_HUMAN   | E.SDDPM*AYIHFTAEGE.V      |            | 2 | 2,7165 | 0,369 | -0,215 |
| 12 | P11388 TOP2A_HUMAN  | K.GSVPLSSS#PPATHFPDE.T    | S1393:     | 2 | 2,7147 | 0,248 | 0,203  |
| 12 | P04792 HSPB1_HUMAN  | E.SPAVAAPAYS.R            |            | 2 | 2,7112 | 0,392 | -0,224 |
| 12 | Q68D38 Q68D38_HUMAN | E.DISTTVVYRM*E.S          |            | 2 | 2,7109 | 0,402 | -0,183 |
| 12 | Q6NYC8 PHTNS_HUMAN  | E.AQTQKPEPPESA.EK.L       |            | 2 | 2,7108 | 0,346 | 1,822  |
| 12 | Q15084 PDIA6_HUMAN  | E.LTDDSFDKNVLDSE.D        |            | 2 | 2,7089 | 0,358 | -0,534 |
| 12 | Q9UJA5 TRM6_HUMAN   | E.DSM*AEAPESNHPEDQE.T     |            | 2 | 2,7064 | 0,431 | -0,339 |
| 12 | Q14204 DYHC1_HUMAN  | E.SYDPVLPVLPVLR.V         |            | 2 | 2,7058 | 0,453 | -0,161 |
| 12 | P14618 KPYM_HUMAN   | R.GDLGIEIPA.EK.V          |            | 2 | 2,7045 | 0,351 | 0      |
| 12 | Q01105 SET_HUMAN    | R.VEVTEFEDIK.S            |            | 2 | 2,7043 | 0,263 | 0,404  |
| 12 | Q9UJU6 DBNL_HUMAN   | R.AM*STTSIS#SPQPGK.L      | S274:      | 2 | 2,7038 | 0,466 | -0,082 |
| 12 | P27816 MAP4_HUMAN   | E.TEATPVPIKDM*E.I         |            | 2 | 2,7023 | 0,36  | -0,272 |
| 12 | Q53F19 CQ085_HUMAN  | K.AEAPAGPALGLPS#PEAE.S    | S25:       | 2 | 2,6983 | 0,387 | -0,221 |
| 12 | O75787 RENR_HUMAN   | E.NSVLSSLPLNSLSR.N        |            | 2 | 2,6959 | 0,276 | -0,246 |
| 12 | Q8IXM2 CQ049_HUMAN  | E.LTM*QLHPVADSS#PAGAK.W   | S36:       | 3 | 2,6936 | 0,193 | 0      |
| 12 | P29401 TKT_HUMAN    | E.AM*AFASIYKLD.N          |            | 2 | 2,6905 | 0,361 | -0,098 |
| 12 | Q14789 G0GB1_HUMAN  | E.DLNQVITIKD.S            |            | 2 | 2,6898 | 0,179 | 0,105  |
| 12 | Q15942 ZYX_HUMAN    | R.S#PGAPGPLTLKE.V         | S344:      | 2 | 2,6887 | 0,337 | -0,489 |
| 12 | O60506 HNRPQ_HUMAN  | E.DGALAVLQQFKDSD.L        |            | 2 | 2,6855 | 0,495 | -0,162 |
| 12 | Q86XJ1 GA2L3_HUMAN  | R.HGPGLANVCQYDE.W         |            | 2 | 2,6849 | 0,287 | -0,084 |
| 12 | P42166 LAP2A_HUMAN  | R.SSTPLPTISSAENTR.Q       |            | 2 | 2,683  | 0,377 | -0,148 |
| 12 | P35030 TRY3_HUMAN   | D.TLDNDIM*LIK.L           |            | 2 | 2,6808 | 0,355 | 0      |
| 12 | Q03252 LMNB2_HUMAN  | E.SLSYQLSGLQK.Q           |            | 2 | 2,6785 | 0,354 | -0,199 |
| 12 | P38646 GRP75_HUMAN  | R.TTPSVVAFTADGER.L        |            | 2 | 2,6785 | 0,516 | 0,168  |

|    |                     |                            |          |   |        |       |        |
|----|---------------------|----------------------------|----------|---|--------|-------|--------|
| 12 | Q00613 HSF1_HUMAN   | E.SEPAPASVTALTDAR.G        |          | 3 | 2,6782 | 0,427 | 0,246  |
| 12 | Q15311 RBP1_HUMAN   | E.HGSGLTRT#PS#SEE.I        | T27:S29: | 2 | 2,6781 | 0,321 | -0,482 |
| 12 | O00170 AIP_HUMAN    | E.LDPALAPVVSRE.L           |          | 2 | 2,6775 | 0,409 | -0,193 |
| 12 | P42285 SK2L2_HUMAN  | E.DNFNTAM*QVLRD.A          |          | 2 | 2,6751 | 0,374 | 0,593  |
| 12 | Q5T0R9 Q5T0R9_HUMAN | K.GAAPYVQAFD.S             |          | 2 | 2,6746 | 0,327 | 0,117  |
| 12 | P27816 MAP4_HUMAN   | E.VALTEDQVPALK.T           |          | 2 | 2,6736 | 0,24  | 0      |
| 12 | P52272 HNRPM_HUMAN  | R.M*GLAM*GGGGGASFDR.A      |          | 2 | 2,6728 | 0,315 | -0,345 |
| 12 | Q9UQ35 SRRM2_HUMAN  | E.SYFGVSSLQLK.G            |          | 2 | 2,6719 | 0,392 | -0,099 |
| 12 | P26640 SYVC_HUMAN   | R.AASGYPVKVPLEVQE.A        |          | 2 | 2,6715 | 0,337 | -0,308 |
| 12 | P62241 RS8_HUMAN    | K.NCIVLIDSTPYR.Q           |          | 2 | 2,67   | 0,331 | -0,168 |
| 12 | Q92917 GPKOW_HUMAN  | E.DVLSPTDCVCR.T            |          | 2 | 2,6663 | 0,399 | 0,092  |
| 12 | Q00653 NFKB2_HUMAN  | E.YDDFKLNS#SIVEPKEPAPE.T   | S22:     | 2 | 2,6654 | 0,101 | 0,432  |
| 12 | P29692 EF1D_HUMAN   | K.SLAGSSGPGASSGTSGDHGE.L   |          | 2 | 2,6622 | 0,43  | -0,426 |
| 12 | Q9Y2U8 MAN1_HUMAN   | E.TS#VQGGGGLAM*NDR.A       | S309:    | 2 | 2,6607 | 0,424 | -0,502 |
| 12 | P30837 AL1B1_HUMAN  | R.VLGYIQLGQKE.G            |          | 2 | 2,6524 | 0,112 | 0,196  |
| 12 | P14927 QCR7_HUMAN   | E.NFYLEPYLKE.V             |          | 2 | 2,6522 | 0,192 | 0,093  |
| 12 | P35813 PPM1A_HUMAN  | E.DAHTAVIGLPSGLE.S         |          | 2 | 2,6514 | 0,375 | -0,354 |
| 12 | Q7Z6Z7 HUWE1_HUMAN  | R.DGGSGNSTIIVSR.S          |          | 2 | 2,6505 | 0,343 | -0,193 |
| 12 | Q9Y4L1 HYOU1_HUMAN  | E.DAEPISPEKVE.T            |          | 2 | 2,65   | 0,314 | -0,091 |
| 12 | P55072 TERA_HUMAN   | E.EAEKNAPAIIFIDE.L         |          | 2 | 2,6498 | 0,244 | -0,235 |
| 12 | Q13151 ROA0_HUMAN   | K.LFIGGLNVQTSE.S           |          | 2 | 2,6475 | 0,304 | -0,286 |
| 12 | P06753 TPM3_HUMAN   | K.LVIIEDLER.T              |          | 2 | 2,647  | 0,249 | 0      |
| 12 | P28066 PSA5_HUMAN   | E.IDAHIGCAM*SGLIAD.A       |          | 2 | 2,6461 | 0,329 | 0,156  |
| 12 | P23258 TBG1_HUMAN   | E.DIFDIIDRE.A              |          | 2 | 2,6459 | 0,305 | -0,537 |
| 12 | P33991 MCM4_HUMAN   | R.ALADDDFLTGTGK.T          |          | 2 | 2,6447 | 0,312 | -0,268 |
| 12 | Q9UNN5 FAF1_HUMAN   | E.VFGM*ASSALR.K            |          | 2 | 2,6442 | 0,421 | 0,463  |
| 12 | P34931 HS71L_HUMAN  | R.TTPSYVAFTDTER.L          |          | 2 | 2,6424 | 0,484 | 0      |
| 12 | P63218 GBG5_HUMAN   | K.VVQQLRLE.A               |          | 2 | 2,6413 | 0,21  | -0,124 |
| 12 | P31327 CPSM_HUMAN   | K.AVNTLNEALEFAK.S          |          | 2 | 2,6361 | 0,206 | -0,172 |
| 12 | Q53F19 CQ085_HUMAN  | R.VSVKAEAPAGPALGLPS#PEAE.S | S25:     | 2 | 2,6335 | 0,41  | 0,236  |
| 12 | Q96C19 EFHD2_HUMAN  | E.DSGLCVLAR.L              |          | 2 | 2,6326 | 0,315 | -0,185 |
| 12 | Q13011 ECH1_HUMAN   | E.ASGVALGEAPDHSYE.S        |          | 2 | 2,6321 | 0,296 | 0,081  |
| 12 | P10809 CH60_HUMAN   | K.TLNDELEIIEGM*K.F         |          | 3 | 2,6307 | 0,094 | 0,24   |
| 12 | Q9GZY8 CB033_HUMAN  | E.DVSFSRPADLD.L            |          | 2 | 2,6302 | 0,348 | -0,2   |
| 12 | P49023 PAXI_HUMAN   | E.HVYSFPNK.Q               |          | 2 | 2,6299 | 0,481 | -0,43  |
| 12 | Q2TAA2 IAH1_HUMAN   | E.LSLLGDGDH.-              |          | 2 | 2,6296 | 0,286 | -0,132 |
| 12 | P52434 RPAB3_HUMAN  | E.DIFDVKDIDPE.G            |          | 2 | 2,6295 | 0,378 | -0,187 |
| 12 | P58546 MTPN_HUMAN   | K.GPDGLTAFEATDNQAIK.A      |          | 2 | 2,6293 | 0,503 | -0,907 |
| 12 | P60174 TPIS_HUMAN   | D.GFLVGGASLKPE.F           |          | 2 | 2,6285 | 0,209 | -0,104 |



|    |                      |                                   |            |   |        |       |        |
|----|----------------------|-----------------------------------|------------|---|--------|-------|--------|
| 12 | Q9UQ35 SRRM2_HUMAN   | K.SGM*S#PEQSRFQSD.S               | S1132:     | 2 | 2,6259 | 0,266 | -0,236 |
| 12 | Q9UHD8 SEPT9_HUMAN   | E.M*IPFAVVGSDHE.Y                 |            | 2 | 2,6238 | 0,387 | -0,185 |
| 12 | P14625 ENPL_HUMAN    | E.SDDPM*AYIHFTAE.G                |            | 2 | 2,6186 | 0,228 | -0,242 |
| 12 | O60271 JIP4_HUMAN    | E.NLDSVFAQDQEHQVE.L               |            | 3 | 2,6169 | 0,261 | 0,312  |
| 12 | Q9BQA1 MEP50_HUMAN   | R.KET#PPPLVPPAARE.W               | T5:        | 2 | 2,6168 | 0,317 | -0,231 |
| 12 | P49023 PAXI_HUMAN    | K.TGSSSPPGGPPKPGSQLDS#M*LGSLQSD.L | S336:      | 3 | 2,6139 | 1     | 0,205  |
| 12 | P23284 PIIB_HUMAN    | K.DTNGSQFFITTVK.T                 |            | 2 | 2,6135 | 0,265 | -0,084 |
| 12 | P13807 GYS1_HUMAN    | E.SLLVGS#LPDM*NK.M                | S412:      | 2 | 2,6133 | 0,298 | 0      |
| 12 | P06748 NPM_HUMAN     | D.M*SPLRPQNYLFGCE.L               |            | 2 | 2,6132 | 0,182 | -0,353 |
| 12 | P07237 PDIA1_HUMAN   | E.VAVIGFFKDVE.S                   |            | 2 | 2,6115 | 0,235 | -0,698 |
| 12 | P19338 NUCL_HUMAN    | K.GFGFVDFNSEEDAK.A                |            | 2 | 2,6104 | 0,258 | -0,312 |
| 12 | P62258 1433E_HUMAN   | E.DLVYQAKLAE.Q                    |            | 2 | 2,6092 | 0,398 | 0,106  |
| 12 | Q9H4A4 AMPB_HUMAN    | R.RPLHSAQAVDVASASNFR.A            |            | 3 | 2,609  | 0,278 | -0,095 |
| 12 | P81605 DCD_HUMAN     | K.ENAGEDPGLAR.Q                   |            | 2 | 2,6086 | 0,32  | -0,648 |
| 12 | O75534 CSDE1_HUMAN   | E.ILDGNQLHIADEVE.F                |            | 2 | 2,6083 | 0,317 | -0,234 |
| 12 | Q9BYW2 SETD2_HUMAN   | E.IGDTLSTAEESS#PPKSR.V            | S131:      | 3 | 2,6062 | 0,128 | -0,099 |
| 12 | Q9H7N4 SFR19_HUMAN   | K.AAPPPPALT#PDSQTVDSCKTPE.V       | T989:      | 3 | 2,605  | 0,233 | 0,075  |
| 12 | Q9UJU6 DBNL_HUMAN    | K.LRS#PFLQK.Q                     | S283:      | 2 | 2,6037 | 0,116 | -0,228 |
| 12 | Q13439 GOGA4_HUMAN   | E.QQQLQQALAPAQASSNSSTPTR.M        |            | 3 | 2,6021 | 0,293 | 0,237  |
| 12 | O43396 TXNL1_HUMAN   | E.NDPGSNEDTDIPK.G                 |            | 2 | 2,5978 | 0,161 | -0,261 |
| 12 | Q8N3X1 FNBP4_HUMAN   | K.VQTT#PKVEEE.Q                   | T517:      | 2 | 2,5978 | 0,297 | 0,295  |
| 12 | Q14980 NUMA1_HUMAN   | E.AATLAANNTQLQAR.V                |            | 2 | 2,5973 | 0,309 | -0,423 |
| 12 | P14618 KPYM_HUMAN    | R.AGKPVICATQM*LE.S                |            | 2 | 2,597  | 0,335 | -0,17  |
| 12 | Q92841 DDX17_HUMAN   | R.GDGPICLVLAPTRE.L                |            | 2 | 2,5966 | 0,21  | -0,326 |
| 12 | P84077 ARF1_HUMAN    | R.DAVLLVFANK.Q                    |            | 2 | 2,5962 | 0,381 | -0,448 |
| 12 | P12004 PCNA_HUMAN    | K.LSQTSNVDEKEE.A                  |            | 2 | 2,5961 | 0,217 | 0      |
| 12 | O00232 PSD12_HUMAN   | E.VDYSATVDQRLPE.C                 |            | 2 | 2,5955 | 0,135 | -0,163 |
| 12 | Q96AX1 VP33A_HUMAN   | E.DFFDKLTVEQE.F                   |            | 2 | 2,5954 | 0,323 | 0,089  |
| 12 | Q92628 K0232_HUMAN   | E.TTQVCNES#PHGDGYSSGVIKD.I        | S814:      | 3 | 2,5927 | 0,191 | -0,235 |
| 12 | P18124 RL7_HUMAN     | R.IALTDNALIAR.S                   |            | 2 | 2,5826 | 0,403 | 0,104  |
| 12 | Q9HCS7 SYF1_HUMAN    | E.QQSVPAAVFGSLKED.-               |            | 2 | 2,5823 | 0,306 | -0,542 |
| 12 | O95208 EPN2_HUMAN    | R.GSS#QPNLSTSHSEQE.Y              | S173:      | 2 | 2,5819 | 0,414 | -0,073 |
| 12 | O43719 HTSF1_HUMAN   | E.DRNTNVVYVSGLPDITVDE.F           |            | 2 | 2,5801 | 0,385 | 0,348  |
| 12 | Q9UQ35 SRRM2_HUMAN   | R.M*SCFSRPSM*S#PTPLDR.C           | S2123:     | 3 | 2,5795 | 0,157 | -0,185 |
| 12 | P08670 VIME_HUMAN    | E.NTLQS#FRQVDNASLAR.L             | S205:      | 2 | 2,5781 | 0,278 | 0,424  |
| 12 | O14964 HGS_HUMAN     | E.SDAM*FAAER.A                    |            | 2 | 2,5764 | 0,332 | -0,18  |
| 12 | ##Q9BPZ3 PAIP2_HUMAN | D.ENIISPS#TSS#RSPDKM*.-           | S118:S121: | 3 | 2,5722 | 0,188 | 1,711  |
| 12 | Q9H307 PININ_HUMAN   | K.ENVSALDM*EKE.S                  |            | 2 | 2,5706 | 0,211 | -0,095 |
| 12 | A6H8Y1 BDP1_HUMAN    | E.M*ETDLNATGR.E                   |            | 2 | 2,5696 | 0,369 | -0,217 |

|    |                     |                                   |                    |   |        |       |        |
|----|---------------------|-----------------------------------|--------------------|---|--------|-------|--------|
| 12 | Q8N4C8 MINK1_HUMAN  | E.RTLDEAPRPPK.K                   |                    | 3 | 2,5693 | 0,126 | 0,357  |
| 12 | P07355 ANXA2_HUMAN  | E.GDHS#TPPSAYGSVK.A               | S18:               | 3 | 2,5674 | 0,104 | 0      |
| 12 | Q6S8J3 A26CA_HUMAN  | E.M*ATAASSSSLEK.S                 |                    | 2 | 2,5669 | 0,353 | -0,611 |
| 12 | Q14165 K0152_HUMAN  | E.DQILYQTER.Y                     |                    | 2 | 2,5668 | 0,301 | -0,419 |
| 12 | P21980 TGM2_HUMAN   | E.GDLSTKYDAPFVFAE.V               |                    | 2 | 2,5661 | 0,265 | -0,368 |
| 12 | Q05524 ENO1B_HUMAN  | K.VNQIGSVTE.S                     |                    | 2 | 2,5651 | 0,227 | 0,129  |
| 12 | P08107 HSP71_HUMAN  | K.NQVALNPQNTVFD.A                 |                    | 2 | 2,5638 | 0,325 | -0,084 |
| 12 | Q9NWS8 RMND1_HUMAN  | E.DLM*HCTAFATADE.Y                |                    | 2 | 2,5628 | 0,351 | 0,081  |
| 12 | P61758 PFD3_HUMAN   | E.DLDFLRDQFTTTE.V                 |                    | 2 | 2,5616 | 0,239 | -0,686 |
| 12 | P07814 SYEP_HUMAN   | E.DIQVTLFTR.A                     |                    | 2 | 2,5595 | 0,225 | -0,112 |
| 12 | O43252 PAPS1_HUMAN  | E.VFVDAPLHVCE.Q                   |                    | 2 | 2,5592 | 0,314 | 0      |
| 12 | P14618 KPYM_HUMAN   | R.LDIDSPITAR.N                    |                    | 2 | 2,5582 | 0,316 | 0,306  |
| 12 | Q9NZN5 ARHGC_HUMAN  | E.S#THQQQHSPQNTHS#DGAIS#PFTPE.F   | S1450:S1463:S1468: | 3 | 2,5529 | 0,172 | -0,255 |
| 12 | Q12888 TP53B_HUMAN  | K.TVSSDGCST#PSREE.G               | T321:              | 3 | 2,5501 | 0,191 | 0      |
| 12 | Q04637 IF4G1_HUMAN  | E.AVGDLLDAFKE.A                   |                    | 2 | 2,5492 | 0,31  | -0,518 |
| 12 | P31948 STIP1_HUMAN  | K.LM*DVGLIAIR.-                   |                    | 2 | 2,5471 | 0,383 | 0      |
| 12 | Q86YS7 K0528_HUMAN  | K.LSSPA AFLPACNS#PSKE.M           | S260:              | 2 | 2,5433 | 0,268 | -0,066 |
| 12 | Q86W92 LIPB1_HUMAN  | R.SPS#ASITDEDSNV.-                | S1001:             | 2 | 2,5423 | 0,138 | 0,174  |
| 12 | Q5T5Y3 CAMP1_HUMAN  | K.CSSTPDNLSR.T                    |                    | 2 | 2,5409 | 0,428 | -0,107 |
| 12 | Q14676 MDC1_HUMAN   | E.GKAPQAVPLEK.S                   |                    | 2 | 2,5395 | 0,289 | -0,107 |
| 12 | Q16881 TRXR1_HUMAN  | D.LIIIGGGSGGLAAAKE.A              |                    | 2 | 2,5391 | 0,181 | -0,256 |
| 12 | Q9UBC2 EP15R_HUMAN  | K.ALLFSNNTQE.L                    |                    | 2 | 2,5389 | 0,213 | 0,215  |
| 12 | P51114 FXR1_HUMAN   | E.LDEDTGTFR.I                     |                    | 2 | 2,5382 | 0,41  | -0,232 |
| 12 | O75526 HNRGT_HUMAN  | R.IVEVLLM*K.D                     |                    | 2 | 2,5375 | 0,124 | -0,063 |
| 12 | Q8NG31 CASC5_HUMAN  | K.DSGIGSVAGK.L                    |                    | 2 | 2,5338 | 0,247 | -0,685 |
| 12 | P55265 DSRAD_HUMAN  | K.TAESQT#PTPSATSFSGK.S            | T601:              | 2 | 2,5327 | 0,332 | 0,444  |
| 12 | P08648 ITA5_HUMAN   | E.GQQLLYVTR.V                     |                    | 2 | 2,5322 | 0,322 | -0,113 |
| 12 | P12956 KU70_HUMAN   | R.DSLIFLVDASK.A                   |                    | 2 | 2,5258 | 0,426 | -0,303 |
| 12 | P49116 NR2C2_HUMAN  | E.DGTVLLATDSKAE.T                 |                    | 2 | 2,5214 | 0,346 | 0,185  |
| 12 | Q9UGU0 TCF20_HUMAN  | K.DM*PLSSDGNPKVNE.K               |                    | 2 | 2,5184 | 0,134 | -0,321 |
| 12 | Q7Z4M8 Q7Z4M8_HUMAN | E.ISGALPVAS#PASSR.T               | S171:              | 2 | 2,5168 | 0,194 | 0      |
| 12 | O95817 BAG3_HUMAN   | R.SQS#PLRGM*PE.T                  | S136:              | 2 | 2,5166 | 0,243 | -0,204 |
| 12 | O95985 TOP3B_HUMAN  | E.AALLDVFNK.A                     |                    | 2 | 2,5165 | 0,375 | -0,11  |
| 12 | P49023 PAXI_HUMAN   | K.TGSS#SPPGGPPKPGSQLD.S           | S321:              | 2 | 2,5139 | 0,317 | -0,14  |
| 12 | Q6ZUM4 RHG27_HUMAN  | E.DARPNAAAPALGPVGLE.S             |                    | 2 | 2,5089 | 0,308 | -0,151 |
| 12 | Q00341 VIGLN_HUMAN  | E.VIINFDPDAQK.S                   |                    | 2 | 2,5049 | 0,225 | -0,295 |
| 12 | O15530 PDPK1_HUMAN  | E.DM*HIQITDFGTAK.V                |                    | 3 | 2,5044 | 0,111 | -0,061 |
| 12 | Q15942 ZYX_HUMAN    | R.EKVSS#IDLE.I                    | S143:              | 2 | 2,5032 | 0,095 | -0,111 |
| 12 | Q13263 TIF1B_HUMAN  | R.STAPSAAASASASAAAS#SPAGGGAEALE.L | S49:               | 2 | 2,5002 | 0,319 | 0,407  |

|    |                    |                                   |          |   |        |       |        |
|----|--------------------|-----------------------------------|----------|---|--------|-------|--------|
| 12 | Q9BVG4 CX026_HUMAN | E.DFNYGTLR.L                      |          | 2 | 2,4999 | 0,365 | -0,222 |
| 12 | Q9C0C2 TB182_HUMAN | R.CPARPPPSGSQLLEE.M               |          | 2 | 2,498  | 0,406 | -0,144 |
| 12 | Q96B23 CR025_HUMAN | E.LRRDS#SES#QLASTE.S              | S66:S69: | 2 | 2,4976 | 0,347 | -0,351 |
| 12 | Q9NUL3 STAU2_HUMAN | K.GSSPTPPCS#PVQPSK.Q              | S492:    | 2 | 2,4969 | 0,222 | 0,076  |
| 12 | Q15836 VAMP3_HUMAN | R.RLQQTQNQVDE.V                   |          | 2 | 2,4926 | 0,288 | -0,539 |
| 12 | P29966 MARCS_HUMAN | E.KGEPAAAAAPEAGAS#PVEK.E          | S101:    | 3 | 2,4911 | 0,088 | -0,1   |
| 12 | Q8WYQ5 DGCR8_HUMAN | E.QSSDLTPSGDVS#PVKPLSR.S          | S377:    | 3 | 2,4905 | 0,116 | 0,268  |
| 12 | P48960 CD97_HUMAN  | R.CNPGFSSFSE.I                    |          | 2 | 2,49   | 0,135 | 0      |
| 12 | P49327 FAS_HUMAN   | R.VLEALLPLK.G                     |          | 2 | 2,4898 | 0,32  | -0,061 |
| 12 | P35611 ADDA_HUMAN  | R.AAVVTS#PPPTTAPHKE.R             | S12:     | 3 | 2,4889 | 0,193 | 0,326  |
| 12 | P46100 ATR_X_HUMAN | R.LAM*NQNTDKISGSGSNSDM*M*E.N      |          | 3 | 2,4888 | 0,181 | -0,08  |
| 12 | Q9NZT2 OGFR_HUMAN  | R.SVEPQDAGPLER.S                  |          | 2 | 2,4837 | 0,201 | -0,282 |
| 12 | Q01082 SPTB2_HUMAN | K.TALPAQSAATLPAR.T                |          | 2 | 2,4824 | 0,365 | -0,446 |
| 12 | Q9BYT8 NEUL_HUMAN  | E.DDTFLVFSKAE.L                   |          | 2 | 2,482  | 0,347 | -0,192 |
| 12 | P19338 NUCL_HUMAN  | E.DGEIDGNKVTLD.W                  |          | 2 | 2,4816 | 0,209 | 0,096  |
| 12 | P51858 HDGF_HUMAN  | R.RAGDLEDS#PK.R                   | S165:    | 2 | 2,4806 | 0,13  | 0,286  |
| 12 | P49792 RBP2_HUMAN  | R.FALVT#PKKE.G                    | T1412:   | 2 | 2,4787 | 0,156 | 0      |
| 12 | Q7Z6Z7 HUWE1_HUMAN | E.VANCCIRIALPAPR.G                |          | 3 | 2,4785 | 0,295 | 0,341  |
| 12 | Q9UBV8 PEF1_HUMAN  | E.DFVTM*TASR.M                    |          | 2 | 2,4769 | 0,16  | -0,584 |
| 12 | Q15477 SKIV2_HUMAN | R.ASS#LEDLVLKE.A                  | S256:    | 2 | 2,4743 | 0,287 | -0,285 |
| 12 | P11142 HSP7C_HUMAN | E.KVCNPIITK.L                     |          | 2 | 2,4726 | 0,192 | 0      |
| 12 | P55265 DSRAD_HUMAN | E.SEKTAES#QTPTPSATSFSGK.S         | S599:    | 3 | 2,4722 | 0,114 | 0      |
| 12 | P40926 MDHM_HUMAN  | K.IFGVTTLDIVR.A                   |          | 2 | 2,4715 | 0,315 | -0,494 |
| 12 | Q14789 G0GB1_HUMAN | E.ISIVDIANK.R                     |          | 2 | 2,4713 | 0,265 | 0,063  |
| 12 | Q9H426 RIMS4_HUMAN | E.TGLAVEM*PSR.T                   |          | 2 | 2,471  | 0,231 | -0,227 |
| 12 | P40926 MDHM_HUMAN  | K.TIIPLIQCTPK.V                   |          | 2 | 2,4697 | 0,214 | -0,178 |
| 12 | Q86UW6 N4BP2_HUMAN | E.LCAYSCEDR.S                     |          | 2 | 2,4669 | 0,29  | -0,104 |
| 12 | P30041 PRDX6_HUMAN | R.DFTPVCTTELGR.A                  |          | 2 | 2,4667 | 0,286 | 0,437  |
| 12 | P19838 NFKB1_HUMAN | E.VIQAASSPVK.T                    |          | 2 | 2,465  | 0,443 | -0,122 |
| 12 | P14618 KPYM_HUMAN  | K.GADFLVTEVENGGSLGSK.K            |          | 2 | 2,463  | 0,393 | -0,137 |
| 12 | P20700 LMNB1_HUMAN | E.GDLEDLKDQIAQLE.A                |          | 2 | 2,4623 | 0,253 | -0,308 |
| 12 | Q8WVM7 STAG1_HUMAN | R.SQLEDM*NEEFE.D                  |          | 2 | 2,462  | 0,218 | -0,176 |
| 12 | Q99543 DNJC2_HUMAN | E.GDNDYFTCITK.A                   |          | 2 | 2,4619 | 0,289 | -0,091 |
| 12 | P49023 PAXI_HUMAN  | K.T#GSSSPPGGPPKPGSQLDSM*LGSLQSD.L | T318:    | 3 | 2,4617 | 0,196 | 0,137  |
| 12 | P08134 RHOC_HUMAN  | E.NYIADIEVDGKQVE.L                |          | 2 | 2,4613 | 0,182 | 0,077  |
| 12 | Q13428 TCOF_HUMAN  | E.AQVQASVVK.V                     |          | 2 | 2,4605 | 0,344 | 0      |
| 12 | P28065 PSB9_HUMAN  | E.FDGGVVM*GSDSR.V                 |          | 2 | 2,4586 | 0,316 | -0,196 |
| 12 | Q9P0K7 RAI14_HUMAN | E.NAGIQSLLSK.I                    |          | 2 | 2,4575 | 0,215 | 0,107  |
| 12 | P04406 G3P_HUMAN   | D.APM*FVM*GVNHE.K                 |          | 2 | 2,4571 | 0,262 | -0,386 |

|    |                    |                              |            |   |        |       |        |
|----|--------------------|------------------------------|------------|---|--------|-------|--------|
| 12 | Q14BN4 SLMAP_HUMAN | E.SDFSDTLS#PSKEK.S           | S452:      | 2 | 2,4558 | 0,268 | -0,241 |
| 12 | P00338 LDHA_HUMAN  | K.QVVESAYEVIK.L              |            | 2 | 2,4528 | 0,32  | -0,193 |
| 12 | Q32MZ4 LRRF1_HUMAN | R.CTLPEHESPS#QDISDACEAE.S    | S735:      | 3 | 2,4528 | 0,257 | 0,388  |
| 12 | P50990 TCPQ_HUMAN  | R.DIDEVSSLLR.T               |            | 2 | 2,4491 | 0,244 | -0,106 |
| 12 | Q01518 CAP1_HUMAN  | K.AGAAPYVQAFD.S              |            | 2 | 2,445  | 0,429 | 0      |
| 12 | O00257 CBX4_HUMAN  | E.VSGVSDPQPQDAGSR.K          |            | 2 | 2,4443 | 0,196 | -0,407 |
| 12 | P00505 AATM_HUMAN  | R.IAAAALNTPDLR.K             |            | 2 | 2,4436 | 0,409 | -0,096 |
| 12 | P02545 LMNA_HUMAN  | R.IDSLSAQLSQLQK.Q            |            | 2 | 2,4419 | 0,158 | -0,085 |
| 12 | Q6P3X3 TTC27_HUMAN | E.LNDDTILNDIK.L              |            | 2 | 2,4378 | 0,172 | -0,862 |
| 12 | Q7KZF4 SND1_HUMAN  | E.YGM*IYLGK.D                |            | 2 | 2,4374 | 0,279 | 0,317  |
| 12 | A6NDU8 U600_HUMAN  | E.LGDLAQAHIQQLSE.A           |            | 2 | 2,4373 | 0,251 | -0,32  |
| 12 | Q5T230 UTF1_HUMAN  | E.LGLPVS#PGSAQR.T            | S54:       | 2 | 2,4316 | 0,289 | 0      |
| 12 | P01112 RASH_HUMAN  | E.DAFYTLVRE.I                |            | 2 | 2,4264 | 0,333 | -0,11  |
| 12 | Q13371 PHLP_HUMAN  | E.VLVLTsvr.N                 |            | 2 | 2,4264 | 0,197 | -0,069 |
| 12 | P49790 NU153_HUMAN | E.GSVLDILKS#PGFASPK.I        | S614:      | 3 | 2,4263 | 0,186 | -0,431 |
| 12 | Q96DT7 ZBT10_HUMAN | E.GASLGDGSGAEGGSCSSSR.R      |            | 2 | 2,4237 | 0,271 | -0,144 |
| 12 | O15226 NKRF_HUMAN  | E.DLLDQLKQE.G                |            | 2 | 2,4226 | 0,113 | -0,111 |
| 12 | Q16643 DREB_HUMAN  | E.NAEPVGTTYQK.T              |            | 2 | 2,4214 | 0,291 | -0,505 |
| 12 | P26045 PTN3_HUMAN  | E.TEDVFYTYK.G                |            | 2 | 2,4213 | 0,309 | 0,419  |
| 12 | O94842 TOX4_HUMAN  | R.SGCENPPIVSK.D              |            | 2 | 2,4198 | 0,18  | -0,205 |
| 12 | P06400 RB_HUMAN    | E.GLPT#PTKM*T#PR.S           | T821:T826: | 2 | 2,4197 | 0,356 | -0,266 |
| 12 | P25054 APC_HUMAN   | R.SGRS#PTGNTPPVIDSVSE.K      | S2674:     | 2 | 2,4192 | 0,344 | -0,065 |
| 12 | P43686 PRS6B_HUMAN | E.AVELPLTHFE.L               |            | 2 | 2,4177 | 0,134 | 0      |
| 12 | Q12888 TP53B_HUMAN | R.SEDM*PFS#PK.A              | S265:      | 2 | 2,4173 | 0,272 | 0,323  |
| 12 | P36776 LONM_HUMAN  | D.IIALNPLYRE.S               |            | 2 | 2,4169 | 0,36  | -0,304 |
| 12 | Q15942 ZYX_HUMAN   | E.GGPEAPIPPPQPR.E            |            | 3 | 2,4166 | 0,13  | 0,389  |
| 12 | P31946 1433B_HUMAN | K.DSTLIM*QLLR.D              |            | 2 | 2,4147 | 0,26  | -0,506 |
| 12 | Q9C0D5 TANC1_HUMAN | R.SQPSSSVPSYIR.N             |            | 2 | 2,4124 | 0,365 | 0,175  |
| 12 | P07437 TBB5_HUMAN  | E.LTQQVFDK.N                 |            | 2 | 2,4098 | 0,291 | 0,232  |
| 12 | P60174 TPIS_HUMAN  | K.VTNGAFTGEISPGM*IK.D        |            | 2 | 2,4097 | 0,392 | -0,149 |
| 12 | Q15029 U5S1_HUMAN  | E.LYLDcvm*HD.L               |            | 2 | 2,4088 | 0,287 | 0      |
| 12 | O14617 AP3D1_HUMAN | E.NALPS#DEDDKDPNDPYR.A       | S788:      | 3 | 2,4081 | 0,196 | -0,269 |
| 12 | Q9Y608 LRRF2_HUMAN | R.RGS#GDTSSLIDPDTSLSE.L      | S328:      | 2 | 2,4069 | 0,321 | -0,127 |
| 12 | Q09666 AHNK_HUMAN  | K.FKAEAPLPS#PKLE.G           | S5110:     | 2 | 2,4059 | 0,227 | -0,162 |
| 12 | Q8IY17 PLPL6_HUMAN | E.ASGGSLAAPART#PTQEPR.E      | T455:      | 3 | 2,403  | 0,18  | -0,099 |
| 12 | Q9NTK5 OLA1_HUMAN  | K.IGIVGLPNVGK.S              |            | 2 | 2,403  | 0,327 | -0,114 |
| 12 | Q6ZN18 AEBP2_HUMAN | E.LSRLS#PLPPGS#PGSAAR.G      | S18:S24:   | 3 | 2,4017 | 0,121 | 0,1    |
| 12 | P22314 UBA1_HUMAN  | K.DNPGVVTCLEAR.H             |            | 2 | 2,4015 | 0,242 | 0,084  |
| 12 | Q9UN86 G3BP2_HUMAN | E.AHPVTNGIEEPEES#SHEPEPEPE.S | S192:      | 3 | 2,3989 | 0,185 | 0      |

|    |                    |                           |        |   |        |       |        |
|----|--------------------|---------------------------|--------|---|--------|-------|--------|
| 12 | O15231 ZN185_HUMAN | R.QSSPSGSEQLVR.R          |        | 2 | 2,3988 | 0,196 | 0      |
| 12 | P61586 RHOA_HUMAN  | E.NYVADIEVDGK.Q           |        | 2 | 2,3985 | 0,302 | -1,995 |
| 12 | P14868 SYDC_HUMAN  | K.IYVISLAEPR.L            |        | 2 | 2,3977 | 0,283 | -0,42  |
| 12 | Q9P0W5 SCHI1_HUMAN | K.QSSSYSDRDTTEEE.S        |        | 2 | 2,3973 | 0,31  | -0,448 |
| 12 | P36507 MP2K2_HUMAN | R.LNQPGT#PTR.T            | T394:  | 2 | 2,397  | 0,183 | 0      |
| 12 | O94876 TMCC1_HUMAN | R.SSST#TDAPTGSAM*M*E.I    | T159:  | 2 | 2,3949 | 0,208 | 0,077  |
| 12 | P11532 DMD_HUMAN   | R.SDS#SQPM*LLR.V          | S3623: | 2 | 2,3936 | 0,215 | -0,099 |
| 12 | Q00839 HNRPU_HUMAN | E.DEHFDDTVVCLD.T          |        | 2 | 2,3912 | 0,263 | 0      |
| 12 | Q9H583 HEAT1_HUMAN | E.VASLLFDPKE.A            |        | 2 | 2,3911 | 0,275 | -0,109 |
| 12 | Q9UMS0 NFU1_HUMAN  | E.DGGDVIYK.G              |        | 2 | 2,3866 | 0,279 | 0      |
| 12 | Q9NQ55 SSF1_HUMAN  | R.VGGS#DEEASGIPSR.T       | S359:  | 2 | 2,385  | 0,178 | 0,085  |
| 12 | P17812 PYRG1_HUMAN | E.NFCNIHVSLVPQPSSTGE.Q    |        | 2 | 2,3842 | 0,281 | -0,246 |
| 12 | O94979 SC31A_HUMAN | R.AQGEPVAGHES#PKIPIYE.K   | S799:  | 3 | 2,3838 | 0,265 | 0      |
| 12 | P12956 KU70_HUMAN  | E.QAVDLTLPKVE.A           |        | 2 | 2,3833 | 0,346 | -0,302 |
| 12 | P60174 TPIS_HUMAN  | E.GLGVIACIGEK.L           |        | 2 | 2,3832 | 0,202 | -0,109 |
| 12 | O43390 HNRPR_HUMAN | K.LKDYAFVHFEDR.G          |        | 3 | 2,3824 | 0,341 | -0,119 |
| 12 | P52888 THOP1_HUMAN | E.DFLNSLEKM*E.D           |        | 2 | 2,3817 | 0,179 | -0,196 |
| 12 | O60610 DIAP1_HUMAN | R.VQLNVFDEQGEED.S         |        | 2 | 2,3803 | 0,254 | -0,16  |
| 12 | Q9UQ35 SRRM2_HUMAN | R.GEFSAS#PM*LK.S          | S1124: | 2 | 2,3789 | 0,34  | 0,21   |
| 12 | P46013 KI67_HUMAN  | E.AQALDLTGFKE.L           |        | 2 | 2,3776 | 0,378 | 0,092  |
| 12 | Q9UQ35 SRRM2_HUMAN | K.DKFS#PFVQDRPE.S         | S1188: | 2 | 2,3774 | 0,251 | 0,074  |
| 12 | Q13127 REST_HUMAN  | E.SVSTEDLSPPS#PLPK.E      | S864:  | 2 | 2,3769 | 0,19  | 0,07   |
| 12 | P30837 AL1B1_HUMAN | E.LDTQQGPQVDKEQFE.R       |        | 2 | 2,3738 | 0,283 | -0,069 |
| 12 | Q8N1G2 K0082_HUMAN | E.LALSLSSTSDEPPSSVSHGAK.A |        | 3 | 2,3724 | 0,138 | -0,084 |
| 12 | P62191 PRS4_HUMAN  | E.SVELPLTHPE.Y            |        | 2 | 2,3672 | 0,261 | -0,109 |
| 12 | Q969Z0 TBRG4_HUMAN | E.DQFFSLVHE.K             |        | 2 | 2,3665 | 0,336 | -0,217 |
| 12 | P55769 NH2L1_HUMAN | E.DKNVPYVFR.S             |        | 3 | 2,3652 | 0,172 | 0,591  |
| 12 | Q86YC2 PALB2_HUMAN | E.GSCIFPEELS#PKRM*DTE.M   | S660:  | 2 | 2,3638 | 0,215 | -0,117 |
| 12 | Q8TF05 PP4R1_HUMAN | E.LDINELPNCK.I            |        | 2 | 2,3625 | 0,277 | -0,502 |
| 12 | O75781 PALM_HUMAN  | E.NAAAPS#PVRAPAPSPAKEE.R  | S116:  | 3 | 2,3617 | 0,332 | -0,189 |
| 12 | Q92870 APBB2_HUMAN | R.NSPAT#PPNTLNLR.S        | T34:   | 2 | 2,3611 | 0,264 | 0      |
| 12 | Q16186 ADRM1_HUMAN | R.SQSAAVTPSSSTTSSTR.A     |        | 2 | 2,3586 | 0,208 | -0,156 |
| 12 | P20700 LMNB1_HUMAN | R.AGGPTT#PLSPTR.L         | T20:   | 2 | 2,3539 | 0,298 | 0      |
| 12 | P61160 ARP2_HUMAN  | E.ALFPHLINVE.G            |        | 2 | 2,3537 | 0,322 | -0,286 |
| 12 | Q9Y3X0 CCDC9_HUMAN | R.TTHLAGALSPGE.A          |        | 2 | 2,3478 | 0,236 | 0,317  |
| 12 | Q5QJE6 TDIF2_HUMAN | E.AES#HVSISR.I            | S145:  | 2 | 2,3477 | 0,169 | -0,652 |
| 12 | P51991 ROA3_HUMAN  | E.DTEEYNLRDYFE.K          |        | 2 | 2,3474 | 0,19  | -0,689 |
| 12 | Q9C073 F117A_HUMAN | K.ASS#PGHPAFLE.D          | S306:  | 2 | 2,3449 | 0,275 | 0,307  |
| 12 | Q15836 VAMP3_HUMAN | R.LQQTQNVDE.V             |        | 2 | 2,3416 | 0,235 | 0,304  |

|    |                    |                       |            |   |        |       |        |
|----|--------------------|-----------------------|------------|---|--------|-------|--------|
| 12 | Q9UGC6 RGS17_HUMAN | E.DYISILSPKE.V        |            | 2 | 2,3411 | 0,297 | -0,105 |
| 12 | Q8N6H7 ARFG2_HUMAN | R.LGM*GLVSR.S         |            | 2 | 2,3403 | 0,311 | 0,144  |
| 12 | Q96R06 SPAG5_HUMAN | R.TDDLREE.V           |            | 2 | 2,3383 | 0,243 | 0,062  |
| 12 | P21359 NF1_HUMAN   | E.GYLAATYPTVGQTS#PR.A | S2515:     | 2 | 2,3381 | 0,336 | -1,316 |
| 12 | P10809 CH60_HUMAN  | R.GYISPYFINTSK.G      |            | 2 | 2,3381 | 0,181 | -0,176 |
| 12 | O95239 KIF4A_HUMAN | K.KT#PPAPSPFDLPE.L    | T1181:     | 2 | 2,3345 | 0,148 | -0,248 |
| 12 | Q9UBQ7 GRHPR_HUMAN | E.TAVFINISR.G         |            | 2 | 2,3319 | 0,238 | 0,119  |
| 12 | P23396 RS3_HUMAN   | R.TEIIILATR.T         |            | 2 | 2,3308 | 0,201 | -0,237 |
| 12 | Q8NFH5 NUP53_HUMAN | K.TLGTPTQPGSTPR.I     |            | 2 | 2,328  | 0,222 | -0,558 |
| 12 | Q00653 NFKB2_HUMAN | K.LNSS#IVEPK.E        | S23:       | 2 | 2,3279 | 0,216 | -0,343 |
| 12 | Q9Y613 FHOD1_HUMAN | E.IM*DLLVQSVTKS#SPR.A | S1118:     | 3 | 2,3274 | 0,172 | 0,62   |
| 12 | O76003 GLRX3_HUMAN | E.LVGGLDIVKE.L        |            | 2 | 2,3269 | 0,16  | 0,117  |
| 12 | P52272 HNRPM_HUMAN | R.AFITNIPFDVK.W       |            | 2 | 2,3241 | 0,317 | -0,482 |
| 12 | O76003 GLRX3_HUMAN | E.LPQVSFVKLE.A        |            | 2 | 2,3216 | 0,318 | -0,316 |
| 12 | Q6PJF5 RHDF2_HUMAN | E.SPPLSASYFR.G        |            | 2 | 2,3206 | 0,285 | -0,108 |
| 12 | Q02952 AKA12_HUMAN | K.SATLSS#TES#TASE.M   | S645:S648: | 2 | 2,3196 | 0,195 | -0,341 |
| 12 | Q86W92 LIPB1_HUMAN | E.DDM*FKDFAAR.S       |            | 2 | 2,3144 | 0,253 | 0,198  |
| 12 | Q6S8J3 A26CA_HUMAN | K.AGFAGDDAPR.A        |            | 2 | 2,3123 | 0,27  | -0,25  |
| 12 | P49407 ARRB1_HUMAN | E.DTNLASSTLLRE.G      |            | 2 | 2,3112 | 0,299 | -0,185 |
| 12 | Q13371 PHLP_HUMAN  | R.NSATCHESEDS#DLEID.- | S296:      | 2 | 2,3108 | 0,144 | 0      |
| 12 | Q96I24 FUBP3_HUMAN | E.SSGIPERPCVLGTPE.S   |            | 2 | 2,309  | 0,337 | -0,072 |
| 12 | Q86YC2 PALB2_HUMAN | E.GSCIFPEELS#PK.R     | S660:      | 2 | 2,3081 | 0,39  | 0,085  |
| 12 | P60174 TPIS_HUMAN  | E.LIGTLNAAK.V         |            | 2 | 2,3068 | 0,243 | -1,489 |
| 12 | P05387 RLA2_HUMAN  | E.DVIAQGIGK.L         |            | 2 | 2,3066 | 0,132 | -0,271 |
| 12 | Q04695 K1C17_HUMAN | R.ALEEANTELEVK.I      |            | 2 | 2,3061 | 0,286 | 0,363  |
| 12 | Q9Y230 RUVB2_HUMAN | E.DAYTVLTR.I          |            | 2 | 2,3054 | 0,18  | -0,39  |
| 12 | P22234 PUR6_HUMAN  | E.LLDS#PGKVLLQSKD.Q   | S27:       | 2 | 2,3031 | 0,232 | -0,153 |
| 12 | A6NHQ2 FBRLL_HUMAN | R.TNIIPVLEDAR.H       |            | 2 | 2,301  | 0,224 | -0,295 |
| 12 | Q12931 TRAP1_HUMAN | E.DIPLNLSRE.L         |            | 2 | 2,2986 | 0,295 | 0,231  |
| 12 | Q9H0H0 INT2_HUMAN  | E.LM*GILPTVR.S        |            | 2 | 2,2974 | 0,152 | 0      |
| 12 | Q9BTE0 NAT9_HUMAN  | E.DADKCTFIVLDAE.K     |            | 2 | 2,2938 | 0,146 | -0,245 |
| 12 | Q13439 GOGA4_HUMAN | R.T#SSFTEQLDE.G       | T39:       | 2 | 2,2935 | 0,166 | 0,296  |
| 12 | Q12888 TP53B_HUMAN | E.DLFDQSNK.T          |            | 2 | 2,293  | 0,306 | -0,442 |
| 12 | Q8TBX8 PI42C_HUMAN | E.SFIDVYAIR.S         |            | 2 | 2,2927 | 0,259 | -0,113 |
| 12 | Q9UQQ2 SH2B3_HUMAN | E.ASPEPGPGPAAPGLPK.A  |            | 2 | 2,2924 | 0,287 | 0,085  |
| 12 | P30520 PURA2_HUMAN | E.LPVNAQNYVR.F        |            | 2 | 2,2901 | 0,23  | -0,312 |
| 12 | P62273 RS29_HUMAN  | K.DIGFIKLD.-          |            | 2 | 2,2886 | 0,102 | -0,066 |
| 12 | P08670 VIME_HUMAN  | R.QDVDNASLAR.L        |            | 2 | 2,2884 | 0,19  | -0,112 |
| 12 | P25789 PSA4_HUMAN  | K.LLDEVFFSEK.I        |            | 2 | 2,2841 | 0,347 | -0,398 |

|    |                    |                         |            |   |        |       |        |
|----|--------------------|-------------------------|------------|---|--------|-------|--------|
| 12 | Q99728 BARD1_HUMAN | E.VSLPLAEQIES#PDTK.S    | S288:      | 2 | 2,2827 | 0,186 | -0,429 |
| 12 | Q6NZI2 PTRF_HUMAN  | R.RGS#SPDVHALLE.I       | S365:      | 2 | 2,2827 | 0,115 | 0,179  |
| 12 | O75381 PEX14_HUMAN | E.GSTVTYHLLGPQEE.G      |            | 2 | 2,2748 | 0,237 | -0,159 |
| 12 | P06576 ATPB_HUMAN  | E.ILVTGIKVVD.L          |            | 2 | 2,2735 | 0,358 | -0,115 |
| 12 | P40925 MDHC_HUMAN  | K.FVEGLPINDFSR.E        |            | 2 | 2,2718 | 0,238 | -0,088 |
| 12 | Q6PKG0 LARP1_HUMAN | R.AVTPVPTKTEE.V         |            | 2 | 2,2705 | 0,439 | -0,833 |
| 12 | O60812 HNRCL_HUMAN | R.VFIGNLNTLVVK.K        |            | 2 | 2,268  | 0,248 | -0,371 |
| 12 | O43264 ZW10_HUMAN  | R.DSVVLSLLK.Q           |            | 2 | 2,267  | 0,223 | -0,063 |
| 12 | P08069 IGF1R_HUMAN | E.NGPGPGVLR.A           |            | 2 | 2,2659 | 0,291 | 0,113  |
| 12 | P19105 MLRM_HUMAN  | E.LLTTM*GDR.F           |            | 2 | 2,2657 | 0,341 | -0,529 |
| 12 | P35244 RFA3_HUMAN  | E.DSHPFDLGLYNE.A        |            | 2 | 2,2655 | 0,288 | 0,087  |
| 12 | Q14240 IF4A2_HUMAN | E.IVDNFDDM*NLKE.S       |            | 2 | 2,2633 | 0,253 | -0,748 |
| 12 | P35268 RL22_HUMAN  | K.ITVTSEVPFSK.R         |            | 2 | 2,2624 | 0,327 | 0,101  |
| 12 | Q02952 AKA12_HUMAN | K.SAESPT#S#PVTSE.T      | T285:S286: | 2 | 2,2515 | 0,221 | -0,361 |
| 12 | P35579 MYH9_HUMAN  | R.IAEFTTNLTETEEK.S      |            | 2 | 2,251  | 0,158 | -0,148 |
| 12 | Q8N3X1 FNBP4_HUMAN | K.VQTT#PKVEE.E          | T517:      | 2 | 2,2494 | 0,248 | 0      |
| 12 | P12004 PCNA_HUMAN  | E.M*KLM*DLDVEQLGIPEQE.Y |            | 2 | 2,2485 | 0,299 | 0      |
| 12 | Q01844 EWS_HUMAN   | R.QDHPSSM*GVYGE.S       |            | 2 | 2,2467 | 0,111 | -0,084 |
| 12 | Q92841 DDX17_HUMAN | K.FVINYDYPNSSE.D        |            | 2 | 2,2454 | 0,295 | -0,169 |
| 12 | Q15650 TRIP4_HUMAN | E.SDSPFVFICK.N          |            | 2 | 2,2447 | 0,361 | -0,305 |
| 12 | P31689 DNJA1_HUMAN | E.NGFLSPDKLSLLE.K       |            | 2 | 2,2443 | 0,244 | -0,511 |
| 12 | P06576 ATPB_HUMAN  | K.VVDLLAPYAK.G          |            | 2 | 2,2432 | 0,323 | -0,224 |
| 12 | Q9UHY7 ENOPH_HUMAN | E.DAHLDGAVPIAASNGVDD.L  |            | 2 | 2,2422 | 0,339 | 0,129  |
| 12 | P60983 GMFB_HUMAN  | E.GISPDELKDELPE.R       |            | 2 | 2,2404 | 0,292 | -0,338 |
| 12 | O94804 STK10_HUMAN | E.AECPNPST#PSK.A        | T952:      | 2 | 2,2385 | 0,263 | -0,289 |
| 12 | Q9HD15 SRA1_HUMAN  | E.DVLRPLEQALE.D         |            | 2 | 2,238  | 0,256 | -0,38  |
| 12 | Q8IW35 CEP97_HUMAN | R.YGKESDLGDVSEE.H       |            | 2 | 2,2368 | 0,083 | -0,171 |
| 12 | P30622 CLIP1_HUMAN | E.ANGLQTPASR.A          |            | 2 | 2,2365 | 0,303 | -0,437 |
| 12 | Q9Y217 MTMR6_HUMAN | E.DLYAFSYNPK.Q          |            | 2 | 2,2354 | 0,321 | 0      |
| 12 | Q8IYS1 P20D2_HUMAN | E.NAAYLPDM*AEHD.V       |            | 2 | 2,2343 | 0,389 | -0,985 |
| 12 | Q9NWX8 PAG1_HUMAN  | K.SREEDPTLTEEE.I        |            | 2 | 2,2332 | 0,158 | -0,51  |
| 12 | P06400 RB_HUMAN    | R.SRILVSIGE.S           |            | 2 | 2,2329 | 0,215 | 0,125  |
| 12 | Q96I99 SUCB2_HUMAN | E.QQVCFDAK.I            |            | 2 | 2,2322 | 0,272 | -0,119 |
| 12 | Q03405 UPAR_HUMAN  | E.LENLPQNGR.Q           |            | 2 | 2,2302 | 0,252 | 0,117  |
| 12 | P09874 PARP1_HUMAN | E.VAYSLLR.G             |            | 2 | 2,2302 | 0,136 | 0,297  |
| 12 | Q9NZN5 ARHGC_HUMAN | E.DILVLLQK.Q            |            | 2 | 2,2301 | 0,2   | -0,129 |
| 12 | O43609 SPY1_HUMAN  | E.IQPTAILSQIK.A         |            | 2 | 2,2261 | 0,456 | -0,339 |
| 12 | P08240 SRPR_HUMAN  | K.GTLGGM*FGM*LK.G       |            | 2 | 2,2258 | 0,25  | 0,107  |
| 12 | P08670 VIME_HUMAN  | K.ILLAELEQLK.G          |            | 2 | 2,2255 | 0,177 | -0,209 |

|    |                     |                          |            |   |        |       |        |
|----|---------------------|--------------------------|------------|---|--------|-------|--------|
| 12 | Q92615 LARP5_HUMAN  | R.S#PSPAHLRDDPKVAE.K     | S599:      | 2 | 2,2248 | 0,363 | 0,298  |
| 12 | P55072 TERA_HUMAN   | E.VDIGIPDATGRLE.I        |            | 2 | 2,2235 | 0,2   | -0,27  |
| 12 | Q9Y2U5 M3K2_HUMAN   | R.LSIIGPTRS.D            |            | 2 | 2,2214 | 0,186 | 0,258  |
| 12 | A1L020 MEX3A_HUMAN  | E.NDFLAGSPDAAIDSR.Y      |            | 2 | 2,2151 | 0,116 | 1,497  |
| 12 | Q9UNN5 FAF1_HUMAN   | E.VFGM*ASSALRK.S         |            | 2 | 2,2148 | 0,261 | -0,206 |
| 12 | Q15742 NAB2_HUMAN   | K.LSPLPGGPGAGDPR.I       |            | 2 | 2,212  | 0,266 | 0,095  |
| 12 | P00533 EGFR_HUMAN   | E.DHFLSLQR.M             |            | 2 | 2,2111 | 0,241 | -0,24  |
| 12 | Q00839 HNRPU_HUMAN  | R.AKS#PQPPVEEE.D         | S270:      | 2 | 2,2107 | 0,208 | 0      |
| 12 | P31946 1433B_HUMAN  | D.STLIM*QLLR.D           |            | 2 | 2,2082 | 0,218 | -0,447 |
| 12 | P02647 APOA1_HUMAN  | E.DLRQGLLPVLE.S          |            | 2 | 2,2079 | 0,108 | -0,584 |
| 12 | Q9H7N4 SFR19_HUMAN  | K.AAPPPPALT#PDSQTVDSCK.T | T989:      | 2 | 2,2071 | 0,148 | -0,115 |
| 12 | Q15154 PCM1_HUMAN   | E.TASPVAVSLR.S           |            | 2 | 2,2066 | 0,282 | 0,244  |
| 12 | P43307 SSRA_HUMAN   | E.ASPSADTTILFVKGE.D      |            | 2 | 2,2044 | 0,138 | -0,397 |
| 12 | Q9Y6D5 BIG2_HUMAN   | E.IGDGKGLDM*AR.R         |            | 2 | 2,2003 | 0,164 | 0,212  |
| 12 | ##Q96RV3 PCX1_HUMAN | D.RIS#S#IR.F             | S508:S509: | 2 | 2,1973 | 0,122 | -0,137 |
| 12 | P07919 QCR6_HUMAN   | E.LVDPLTTVRE.Q           |            | 2 | 2,1971 | 0,181 | 0,107  |
| 12 | P48960 CD97_HUMAN   | E.VTIQNVIK.L             |            | 2 | 2,1963 | 0,147 | 0      |
| 12 | P54727 RD23B_HUMAN  | E.YLLM*GIPGDRE.S         |            | 2 | 2,1962 | 0,285 | -0,095 |
| 12 | P60842 IF4A1_HUMAN  | R.VLITDLLAR.G            |            | 2 | 2,1956 | 0,193 | -0,328 |
| 12 | Q6PJG2 CN043_HUMAN  | E.AT#PVSIEPR.I           | T715:      | 2 | 2,1932 | 0,416 | 0      |
| 12 | Q8IZ21 PHAR4_HUMAN  | E.NSDS#FSEDSSTLGR.T      | S451:      | 2 | 2,1909 | 0,118 | 0,309  |
| 12 | P35998 PRS7_HUMAN   | R.ALDEGDIALLK.T          |            | 2 | 2,1894 | 0,201 | -0,316 |
| 12 | Q9BYK8 PR285_HUMAN  | E.DGLLDTVARPE.S          |            | 2 | 2,1882 | 0,229 | 0,617  |
| 12 | P55072 TERA_HUMAN   | E.LVQYPVEHPD.K           |            | 2 | 2,1858 | 0,225 | -0,102 |
| 12 | P07737 PROF1_HUMAN  | K.STGGAPTFFNVTVTK.T      |            | 2 | 2,1856 | 0,114 | -0,354 |
| 12 | O95433 AHSA1_HUMAN  | E.AM*GIYISTLK.T          |            | 2 | 2,1855 | 0,221 | 0      |
| 12 | P49321 NASP_HUMAN   | E.DVPAPSTSADKVE.S        |            | 2 | 2,1797 | 0,31  | -0,093 |
| 12 | Q99666 RGPD5_HUMAN  | K.AVVS#PPKFVSE.S         | S1534:     | 2 | 2,1773 | 0,23  | -0,821 |
| 12 | P20618 PSB1_HUMAN   | E.DFAIVASDTR.L           |            | 2 | 2,1761 | 0,349 | -0,111 |
| 12 | Q12968 NFAC3_HUMAN  | E.DQAAILPGKLE.L          |            | 2 | 2,1753 | 0,111 | -0,106 |
| 12 | Q9NZW5 MPP6_HUMAN   | E.AHDIVASK.C             |            | 2 | 2,1747 | 0,302 | 0,145  |
| 12 | O76021 RL1D1_HUMAN  | K.ATNES#EDEIPLVPIGK.K    | S361:      | 2 | 2,1725 | 0,283 | -0,191 |
| 12 | Q8WYA1 BMAL2_HUMAN  | E.NQCIAPVVSSR.V          |            | 2 | 2,1719 | 0,268 | -0,198 |
| 12 | P05198 IF2A_HUMAN   | E.DVVM*VNV.R.S           |            | 2 | 2,1704 | 0,153 | 0      |
| 12 | P62937 PPIA_HUMAN   | K.KITIADCGLE.-           |            | 2 | 2,1676 | 0,141 | 0,391  |
| 12 | ##Q04759 KPCT_HUMAN | K.DLLINDLK.L             |            | 2 | 2,1666 | 0,083 | -0,258 |
| 12 | Q15942 ZYX_HUMAN    | E.GGPEAPIPPPQPR.E        |            | 2 | 2,1656 | 0,255 | -0,087 |
| 12 | P62937 PPIA_HUMAN   | D.IAVDGEPLGR.V           |            | 2 | 2,1636 | 0,263 | 0      |
| 12 | Q9HB40 RISC_HUMAN   | E.DFM*KPVISIVDE.L        |            | 2 | 2,163  | 0,183 | -0,087 |



|    |                    |                          |            |   |        |       |        |
|----|--------------------|--------------------------|------------|---|--------|-------|--------|
| 12 | P49023 PAXI_HUMAN  | E.LNAVQHNPFGPADE.A       |            | 2 | 2,1614 | 0,355 | -0,228 |
| 12 | P17706 PTN2_HUMAN  | E.DLSPAFDHS#PNK.I        | S304:      | 2 | 2,1603 | 0,135 | 0,26   |
| 12 | P78364 PHC1_HUMAN  | E.IDGQALLLKE.E           |            | 2 | 2,156  | 0,209 | -1,207 |
| 12 | O75179 ANR17_HUMAN | R.NSPLDCGSASPKN.V        |            | 2 | 2,1554 | 0,264 | -0,543 |
| 12 | Q9NR00 CH004_HUMAN | R.VSPS#IHGYHFD.T         | S21:       | 2 | 2,155  | 0,271 | -0,182 |
| 12 | Q9UNS2 CSN3_HUMAN  | K.SM*GSQEDDSGNKPS#YS.-   | S421:      | 2 | 2,1538 | 0,288 | -0,196 |
| 12 | Q9Y490 TLN1_HUMAN  | E.SALQLLYTAKE.A          |            | 2 | 2,1527 | 0,148 | -0,099 |
| 12 | Q16352 AINX_HUMAN  | E.YQDLLNVK.M             |            | 2 | 2,1524 | 0,149 | 0      |
| 12 | Q96R06 SPAG5_HUMAN | E.TNS#ISLNGPLR.T         | S157:      | 2 | 2,1453 | 0,219 | 0,097  |
| 12 | Q92616 GCN1L_HUMAN | E.DALCTVLHLTE.R          |            | 2 | 2,1426 | 0,215 | -0,288 |
| 12 | Q92628 K0232_HUMAN | E.GIASFS#PSFKPK.S        | S1067:     | 2 | 2,1419 | 0,205 | -0,363 |
| 12 | Q9H2G2 SLK_HUMAN   | E.TENSLPIPASK.R          |            | 2 | 2,1367 | 0,225 | 0,105  |
| 12 | Q6P0N0 CN106_HUMAN | E.NQVAM*SFYK.H           |            | 2 | 2,1329 | 0,275 | 0,111  |
| 12 | O75952 CABYR_HUMAN | E.AVGGLSSKATPK.T         |            | 2 | 2,1311 | 0,378 | -0,402 |
| 12 | P80723 BASP_HUMAN  | E.QAAPGPAAGGEAPK.A       |            | 2 | 2,1308 | 0,404 | -0,3   |
| 12 | Q8WW01 SEN15_HUMAN | E.SDSTIVYYK.L            |            | 2 | 2,1308 | 0,315 | 0,227  |
| 12 | P22626 ROA2_HUMAN  | R.GGGGNFGPGPSNFR.G       |            | 2 | 2,1285 | 0,316 | 0,177  |
| 12 | Q9UGU0 TCF20_HUMAN | R.LNAS#PAAREE.A          | S574:      | 2 | 2,1235 | 0,165 | -0,107 |
| 12 | Q9Y3L3 3BP1_HUMAN  | R.TESEVPPRPAS#PK.V       | S544:      | 2 | 2,1212 | 0,204 | -0,248 |
| 12 | P08670 VIME_HUMAN  | R.QDVDNAS#LAR.L          | S214:      | 2 | 2,1163 | 0,135 | -0,313 |
| 12 | Q96EV2 RBM33_HUMAN | K.VKPAS#PVAQPKEE.A       | S775:      | 2 | 2,116  | 0,354 | -0,334 |
| 12 | P16949 STMN1_HUMAN | K.DLSLEEIQK.K            |            | 2 | 2,1149 | 0,119 | -0,34  |
| 12 | P50402 EMD_HUMAN   | E.DALLYQSK.G             |            | 2 | 2,1084 | 0,276 | 0,13   |
| 12 | Q86V48 LUZP1_HUMAN | R.S#STDFSELEQPR.S        | S956:      | 2 | 2,1068 | 0,158 | -1,323 |
| 12 | Q92797 SYMPK_HUMAN | E.TAAGGLTLK.E            |            | 2 | 2,1055 | 0,285 | 0,44   |
| 12 | Q71U36 TBA1A_HUMAN | K.EIIDLVLDLDR.I          |            | 2 | 2,1055 | 0,352 | -0,225 |
| 12 | Q9Y3T9 NOC2L_HUMAN | R.GILRPLSTR.H            |            | 2 | 2,1053 | 0,211 | -0,12  |
| 12 | Q9NUL3 STAU2_HUMAN | K.GSS#PTPPCSPVQPSK.Q     | S486:      | 2 | 2,0967 | 0,17  | 0      |
| 12 | P52789 HXK2_HUMAN  | E.DIM*RG#GTQLFDHIAE.C    | S122:      | 2 | 2,0957 | 0,291 | -0,194 |
| 12 | Q96TC7 FA82C_HUMAN | E.DLAIQKDLLEE.V          |            | 2 | 2,0956 | 0,234 | -0,603 |
| 12 | Q96PZ0 PUS7_HUMAN  | E.DVPRPPDTVSTGK.G        |            | 2 | 2,0918 | 0,444 | -0,535 |
| 12 | P20042 IF2B_HUMAN  | E.VEPEPTEDKDLE.A         |            | 2 | 2,0913 | 0,167 | -0,174 |
| 12 | Q9BX84 TRPM6_HUMAN | D.LSALTVDTLK.V           |            | 2 | 2,0874 | 0,101 | 0,115  |
| 12 | Q6P158 DHX57_HUMAN | R.DLQEQDADAGSER.G        |            | 2 | 2,0793 | 0,359 | 0      |
| 12 | Q7Z406 MYH14_HUMAN | K.EQADFALEALAK.A         |            | 2 | 2,0743 | 0,465 | -0,187 |
| 12 | P09936 UCHL1_HUMAN | E.DGSVLKQFLSE.T          |            | 2 | 2,0713 | 0,181 | -0,2   |
| 12 | P46013 KI67_HUMAN  | E.ALEDLVGFKE.L           |            | 2 | 2,0711 | 0,269 | -0,327 |
| 12 | O94804 STK10_HUMAN | K.FFPYSSADAS.-           |            | 2 | 2,0683 | 0,257 | 0,223  |
| 12 | Q09666 AHNK_HUMAN  | R.LPS#GSGAAS#PTGSAVDIR.A | S210:S216: | 2 | 2,0674 | 0,228 | -0,271 |

|    |                      |                         |       |   |        |       |        |
|----|----------------------|-------------------------|-------|---|--------|-------|--------|
| 12 | Q9UQ35 SRRM2_HUMAN   | R.TAAALAPASLTSAR.M      |       | 2 | 2,0674 | 0,114 | -0,094 |
| 12 | P68104 EF1A1_HUMAN   | K.IGGIGTVPVGR.V         |       | 2 | 2,0671 | 0,152 | 0      |
| 12 | ##O60524 SDCG1_HUMAN | K.QLS#VLVKEIDKTE.L      | S849: | 2 | 2,0668 | 0,101 | -0,308 |
| 12 | Q9NQS7 INCE_HUMAN    | R.IAQVS#PGPR.D          | S263: | 2 | 2,0659 | 0,139 | -0,121 |
| 12 | O75674 TM1L1_HUMAN   | D.LLDLSPS#PR.M          | S323: | 2 | 2,0633 | 0,222 | 0,113  |
| 12 | Q12767 K0195_HUMAN   | E.DFVCDYHLE.M           |       | 2 | 2,0606 | 0,12  | 0      |
| 12 | P36578 RL4_HUMAN     | R.GPCIYINEDNGIIK.A      |       | 2 | 2,06   | 0,13  | -0,76  |
| 12 | P50502 F10A1_HUMAN   | K.AIDLFTDAIK.L          |       | 2 | 2,0544 | 0,113 | -0,22  |
| 12 | Q9NS56 TOPRS_HUMAN   | R.RT#TTPPDSGVLFE.G      | T203: | 2 | 2,0507 | 0,204 | -0,081 |
| 12 | Q9NR31 SAR1A_HUMAN   | K.LVFLGLDNAGK.T         |       | 2 | 2,0488 | 0,282 | -0,106 |
| 12 | P62736 ACTA_HUMAN    | D.LTDYLM*K.I            |       | 2 | 2,0424 | 0,213 | 0,271  |
| 12 | Q09666 AHNK_HUMAN    | K.AEGPEVDVNLPK.A        |       | 2 | 2,0422 | 0,222 | -0,77  |
| 12 | Q9Y5Q8 TF3C5_HUMAN   | E.DEEVPKQPLE.A          |       | 2 | 2,0385 | 0,135 | -0,103 |
| 12 | P00441 SODC_HUMAN    | K.GDGPVQGIINFQK.E       |       | 2 | 2,0378 | 0,225 | -0,162 |
| 12 | P49454 CENPF_HUMAN   | K.NSAILQNR.V            |       | 2 | 2,0352 | 0,194 | 0,133  |
| 12 | Q8WTU2 SRB4D_HUMAN   | R.GPILLDNVK.C           |       | 2 | 2,03   | 0,147 | 0,063  |
| 12 | P09874 PARP1_HUMAN   | K.GFSLLATEDKE.A         |       | 2 | 2,0278 | 0,117 | -0,101 |
| 12 | P49792 RBP2_HUMAN    | K.AVVSPPKFVFGSE.S       |       | 2 | 2,0253 | 0,146 | 0,447  |
| 12 | Q92616 GCN1L_HUMAN   | E.VM*AGLVEKLE.K         |       | 2 | 2,0243 | 0,15  | -1,26  |
| 12 | P31930 QCR1_HUMAN    | E.DAVPTLTPCR.F          |       | 2 | 2,0241 | 0,206 | 0,216  |
| 12 | P26006 ITA3_HUMAN    | K.NDPGHHIE.D            |       | 2 | 2,0223 | 0,136 | 0,236  |
| 12 | Q8TEV9 SMCR8_HUMAN   | K.VLISVGSY#K.S          | Y418: | 2 | 2,0219 | 0,085 | 0,233  |
| 12 | O75369 FLNB_HUMAN    | E.AGAGGLSIAVEGPSKAE.I   |       | 2 | 2,0172 | 0,267 | 0      |
| 12 | O95163 ELP1_HUMAN    | R.IVGVQDLLDQE.S         |       | 2 | 2,0143 | 0,255 | -0,496 |
| 12 | Q96TA1 NIBL1_HUMAN   | D.SM*VM*HNS#DPNLHLLAE.G | S561: | 2 | 2,0124 | 0,359 | 0,064  |
| 12 | O75821 EIF3G_HUMAN   | K.GIPLATGDT SPEPE.L     |       | 2 | 2,0094 | 0,106 | -0,088 |
| 12 | Q14C86 GAPD1_HUMAN   | E.DTQFVDGYK.Q           |       | 2 | 2,0084 | 0,295 | 0      |
| 12 | Q9NWH9 SLTM_HUMAN    | R.IVQISGNSM*PR.G        |       | 2 | 2,0068 | 0,082 | -0,902 |
| 12 | Q6IPM2 IQCE_HUMAN    | R.VLSTS#PTISK.T         | S322: | 2 | 2,0029 | 0,182 | -0,11  |
| 12 | P30622 CLIP1_HUMAN   | E.ANGLQTPAS#R.A         | S143: | 2 | 2,0027 | 0,411 | -0,306 |
| 12 | P60866 RS20_HUMAN    | K.DTGKTPVEPE.V          |       | 2 | 1,999  | 0,228 | 0      |
| 12 | P36957 ODO2_HUMAN    | E.ALLVPDGGKVE.G         |       | 2 | 1,9981 | 0,301 | 0,111  |
| 12 | Q32MZ4 LRRF1_HUMAN   | R.RGSGDT#SISIDTE.A      | T123: | 2 | 1,9972 | 0,091 | 0,258  |
| 12 | Q8WXF7 ATLA1_HUMAN   | E.DDLQHLQLFTE.Y         |       | 2 | 1,9881 | 0,154 | -0,269 |
| 12 | P39687 AN32A_HUMAN   | K.DLSTIEPLK.K           |       | 2 | 1,9869 | 0,243 | -0,06  |
| 12 | O00267 SPT5H_HUMAN   | E.DLKDM*LEFPAQE.L       |       | 2 | 1,9859 | 0,121 | -0,252 |
| 12 | Q13813 SPTA2_HUMAN   | E.AFLNTEDKGDSDLDSVE.A   |       | 2 | 1,9846 | 0,112 | -0,07  |
| 12 | Q96T23 RSF1_HUMAN    | K.AQIDPVLLK.N           |       | 2 | 1,9779 | 0,286 | 0,184  |
| 12 | Q8WXX5 DNJC9_HUMAN   | E.DSPVLTQDR.D           |       | 2 | 1,9777 | 0,288 | -0,118 |

|    |                    |                          |            |   |        |       |        |
|----|--------------------|--------------------------|------------|---|--------|-------|--------|
| 12 | Q9UPN3 MACF1_HUMAN | E.TADSTTAAVLQGK.L        |            | 2 | 1,9773 | 0,15  | -0,097 |
| 12 | Q09666 AHNK_HUMAN  | E.LNLKS#PK.V             | S3426:     | 2 | 1,9771 | 0,087 | -0,208 |
| 12 | Q8TD19 NEK9_HUMAN  | R.LNPAVTCAGK.G           |            | 2 | 1,977  | 0,328 | -0,118 |
| 12 | Q9BYT8 NEUL_HUMAN  | E.DDTFLVFSK.A            |            | 2 | 1,9714 | 0,394 | -0,228 |
| 12 | Q96QF0 RAB3I_HUMAN | E.LPTQPVYSS#PR.R         | S87:       | 2 | 1,9712 | 0,131 | 0,184  |
| 12 | Q96EQ0 SGTB_HUMAN  | E.DTHLAVSQPLTE.M         |            | 2 | 1,9674 | 0,226 | -0,279 |
| 12 | Q7Z3K3 POGZ_HUMAN  | R.SSPEETIEPE.S           |            | 2 | 1,9659 | 0,121 | -0,109 |
| 12 | Q9H2Y7 ZF106_HUMAN | E.TQTVISSIK.G            |            | 2 | 1,9558 | 0,215 | -0,062 |
| 12 | P07954 FUMH_HUMAN  | E.NEPGSSIM*PGK.V         |            | 2 | 1,9535 | 0,104 | -0,215 |
| 12 | Q86V48 LUZP1_HUMAN | E.LLDLQDKVIAE.G          |            | 2 | 1,9464 | 0,148 | 0      |
| 12 | Q9ULL5 PRR12_HUMAN | E.TLPSFSS#DEEDSVAK.N     | S561:      | 2 | 1,944  | 0,107 | -0,144 |
| 12 | P27816 MAP4_HUMAN  | K.NVVLPTETE.V            |            | 2 | 1,939  | 0,266 | 0,061  |
| 12 | Q13445 TMED1_HUMAN | E.FTLLPAGR.K             |            | 2 | 1,9381 | 0,242 | -0,239 |
| 12 | Q29983 MICA_HUMAN  | R.SSQHFYYDGE.L           |            | 2 | 1,9379 | 0,307 | 0,198  |
| 12 | Q13464 ROCK1_HUMAN | E.SDIEQLR.A              |            | 2 | 1,9377 | 0,086 | 0,142  |
| 12 | P49795 RGS19_HUMAN | E.DYVSILSPKE.V           |            | 2 | 1,936  | 0,11  | 0      |
| 12 | P55072 TERA_HUMAN  | K.DVDLEFLAK.M            |            | 2 | 1,9343 | 0,112 | -0,116 |
| 12 | Q9C073 F117A_HUMAN | E.LASTPNDKASS#PGHPAFLE.D | S306:      | 2 | 1,9282 | 0,181 | 0,604  |
| 12 | Q8NB90 SPAT5_HUMAN | E.IIELPLKQPE.L           |            | 2 | 1,9202 | 0,196 | -0,31  |
| 12 | P54652 HSP72_HUMAN | E.LNADLFR.G              |            | 2 | 1,9076 | 0,17  | 0,216  |
| 12 | P31327 CPSM_HUMAN  | K.TLGVDFIDVATK.V         |            | 2 | 1,9058 | 0,233 | -0,191 |
| 12 | Q15642 CIP4_HUMAN  | E.DFSQPM*NR.A            |            | 2 | 1,9012 | 0,115 | 0,241  |
| 12 | P08134 RHOC_HUMAN  | E.NYIADIEVDGK.Q          |            | 2 | 1,9012 | 0,132 | 0      |
| 12 | Q14980 NUMA1_HUMAN | D.GTSVPGEPAS#PISQR.L     | S1757:     | 2 | 1,9011 | 0,297 | -0,39  |
| 12 | P45974 UBP5_HUMAN  | R.DGLGGLPDIVR.D          |            | 2 | 1,8963 | 0,208 | -0,439 |
| 12 | Q9NY27 PP4R2_HUMAN | E.VSSVS#PLK.N            | S226:      | 2 | 1,8958 | 0,244 | 0,272  |
| 12 | Q02952 AKA12_HUMAN | R.AATIIEER.S             |            | 2 | 1,8947 | 0,201 | 0,135  |
| 12 | Q86TC9 MYPN_HUMAN  | R.SSVPIPIPADTRDNE.V      |            | 2 | 1,8904 | 0,329 | 0,227  |
| 12 | Q9UQ35 SRRM2_HUMAN | K.RVPS#PTPAPK.E          | S2581:     | 2 | 1,8897 | 0,158 | -0,216 |
| 12 | Q15293 RCN1_HUMAN  | E.FTAFLHPEEFE.H          |            | 2 | 1,8884 | 0,283 | -0,357 |
| 12 | Q8WWM7 ATX2L_HUMAN | D.SSLSSYVPLEKDNSEE.F     |            | 2 | 1,8879 | 0,222 | 0,324  |
| 12 | Q86YP4 P66A_HUMAN  | R.VNGLTTVALKE.T          |            | 2 | 1,8868 | 0,083 | -0,107 |
| 12 | Q9UJU6 DBNL_HUMAN  | R.AM*S#TTSISS#PQPGK.L    | S269:S275: | 2 | 1,8854 | 1     | -0,156 |
| 12 | Q15003 CND2_HUMAN  | E.DLSDVLR.Q              |            | 2 | 1,8828 | 0,211 | 0,2    |
| 12 | P40763 STAT3_HUMAN | E.ADPGSAAPYLK.T          |            | 2 | 1,8822 | 0,094 | 0,336  |
| 12 | P30044 PRDX5_HUMAN | R.LLADPTGAFGK.E          |            | 2 | 1,8804 | 0,213 | 0      |
| 12 | P06737 PYGL_HUMAN  | E.NLFIFGM*R.I            |            | 2 | 1,8794 | 0,169 | -0,361 |
| 12 | Q96GY3 LIN37_HUMAN | R.SRIPS#PLQPE.M          | S182:      | 2 | 1,8772 | 0,197 | -0,304 |
| 12 | Q93008 USP9X_HUMAN | E.DEEPAPHTD.L            |            | 2 | 1,8756 | 0,195 | -0,105 |

|    |                     |                       |        |   |        |       |        |
|----|---------------------|-----------------------|--------|---|--------|-------|--------|
| 12 | Q8N3V7 SYNPO_HUMAN  | R.DRAS#PAAAEVVPE.W    | S685:  | 2 | 1,8755 | 0,185 | -0,241 |
| 12 | P25054 APC_HUMAN    | E.DCPINNR.S           |        | 2 | 1,873  | 0,2   | -0,062 |
| 12 | Q9UQ35 SRRM2_HUMAN  | K.TVART#PLGQR.S       | T1531: | 2 | 1,8724 | 0,289 | -0,207 |
| 12 | Q9H0E9 BRD8_HUMAN   | K.GDETPLTNVK.T        |        | 2 | 1,8709 | 0,29  | -0,227 |
| 12 | Q9UKM9 RALY_HUMAN   | E.AGLPQGGEAR.T        |        | 2 | 1,8708 | 0,11  | 0,136  |
| 12 | Q9BRX5 PSF3_HUMAN   | E.DTSALVAR.L          |        | 2 | 1,8678 | 0,154 | 0,22   |
| 12 | Q8TA86 RP9_HUMAN    | E.DETKPEDCIPDVPGNE.H  |        | 2 | 1,8663 | 0,206 | -0,067 |
| 12 | A9CQZ4 A9CQZ4_HUMAN | E.DEEVPAFFK.N         |        | 2 | 1,8649 | 0,13  | -0,226 |
| 12 | Q15154 PCM1_HUMAN   | E.DLPLKLIYSE.A        |        | 2 | 1,8641 | 0,129 | 0,755  |
| 12 | P05783 K1C18_HUMAN  | E.QLNGILLHLE.S        |        | 2 | 1,8619 | 0,163 | -0,318 |
| 12 | Q92688 AN32B_HUMAN  | R.IFGGLDM*LAEK.L      |        | 2 | 1,8601 | 0,167 | -0,302 |
| 12 | P06748 NPM_HUMAN    | K.GPSSVEDIK.A         |        | 2 | 1,8597 | 0,244 | -0,262 |
| 12 | P30041 PRDX6_HUMAN  | K.LSILYPATTGR.N       |        | 2 | 1,8581 | 0,104 | 0      |
| 12 | P04075 ALDOA_HUMAN  | R.ALQASALK.A          |        | 2 | 1,8558 | 0,104 | 0,532  |
| 12 | O75643 U520_HUMAN   | R.CTLSANLVASGE.L      |        | 2 | 1,854  | 0,234 | -0,2   |
| 12 | P24752 THIL_HUMAN   | E.DLIVKDGLTD.V        |        | 2 | 1,8513 | 0,152 | -0,112 |
| 12 | O15144 ARPC2_HUMAN  | R.IIEETLALK.F         |        | 2 | 1,8496 | 0,154 | 0      |
| 12 | Q5UIP0 RIF1_HUMAN   | K.TVGPCLGDSK.N        |        | 2 | 1,8491 | 0,306 | -0,354 |
| 12 | Q14254 FLOT2_HUMAN  | E.IVVLSGDNSK.V        |        | 2 | 1,8467 | 0,099 | -0,236 |
| 12 | P30041 PRDX6_HUMAN  | K.LPFPIDDR.N          |        | 2 | 1,8448 | 0,165 | 0,225  |
| 12 | Q4G1A8 Q4G1A8_HUMAN | K.INNKANVVT#PKK.K     | S338:  | 2 | 1,8411 | 0,114 | -0,409 |
| 12 | P08670 VIME_HUMAN   | E.NTLQSFR.Q           |        | 2 | 1,8353 | 0,11  | 0,352  |
| 12 | Q16563 SYPL1_HUMAN  | K.TVTATFGYPFR.L       |        | 2 | 1,8344 | 0,362 | -0,194 |
| 12 | Q5T4S7 UBR4_HUMAN   | E.DYLAVCGLKD.C        |        | 2 | 1,8317 | 0,229 | -0,211 |
| 12 | Q8TDY2 RBCC1_HUMAN  | E.SLLTSFPK.S          |        | 2 | 1,8195 | 0,082 | 0,068  |
| 12 | P38646 GRP75_HUMAN  | K.DAGQISGLNVLR.V      |        | 2 | 1,8192 | 0,129 | -0,196 |
| 12 | Q9Y6X4 K0888_HUMAN  | E.DYM*SDLR.C          |        | 2 | 1,8177 | 0,141 | 0,2    |
| 12 | P22061 PIMT_HUMAN   | E.LLFDQLHE.G          |        | 2 | 1,8138 | 0,194 | -0,18  |
| 12 | P51784 UBP11_HUMAN  | E.DIVVPVYLRE.R        |        | 2 | 1,8132 | 0,216 | -0,101 |
| 12 | Q4ZG04 Q4ZG04_HUMAN | E.LLLSTLVR.E          |        | 2 | 1,8074 | 0,148 | 0,133  |
| 12 | Q6S8J3 A26CA_HUMAN  | E.TTFNSIM*K.S         |        | 2 | 1,8067 | 0,207 | 0,064  |
| 12 | Q02952 AKA12_HUMAN  | K.SAESPT#SPVTSE.T     | T285:  | 2 | 1,8044 | 0,146 | 0,767  |
| 12 | P49023 PAXI_HUMAN   | E.GGFM*AQGK.T         |        | 2 | 1,8018 | 0,227 | 0,451  |
| 12 | Q86UP2 KTN1_HUMAN   | E.ALCVVDLLKE.K        |        | 2 | 1,7999 | 0,13  | -0,316 |
| 12 | P51858 HDGF_HUMAN   | R.RAGDLLEDS#PKRPK.E   | S165:  | 2 | 1,7896 | 0,139 | -0,294 |
| 12 | Q9Y6Y0 NS1BP_HUMAN  | K.SLS#FEM*QQDE.L      | S338:  | 2 | 1,7738 | 0,136 | 0      |
| 12 | O94762 RECQ5_HUMAN  | R.GEVPGGSAHYGGPS#PE.K | S727:  | 2 | 1,7619 | 0,19  | 0      |
| 12 | P28072 PSB6_HUMAN   | R.DGSSGGVIR.L         |        | 2 | 1,761  | 0,155 | 0,216  |
| 12 | P18615 NELFE_HUMAN  | K.GPVPTFQPFQR.S       |        | 2 | 1,7504 | 0,144 | -0,287 |

|    |                     |                           |          |   |        |       |        |
|----|---------------------|---------------------------|----------|---|--------|-------|--------|
| 12 | Q8WZ73 RFFL_HUMAN   | R.RAS#LSDLTDL.E.D         | S240:    | 2 | 1,7463 | 0,209 | -0,188 |
| 12 | Q9Y536 PAL4B_HUMAN  | R.IIPGFM*CQGGDFTR.H       |          | 2 | 1,7457 | 0,339 | 0      |
| 12 | P12814 ACTN1_HUMAN  | K.ATLPDADKE.R             |          | 2 | 1,7351 | 0,172 | -0,064 |
| 12 | Q9UBB5 MBD2_HUMAN   | E.ALM*ADILSR.A            |          | 2 | 1,7344 | 0,121 | -0,182 |
| 12 | Q9UQ35 SRRM2_HUMAN  | E.NSFGSPLEFR.N            |          | 2 | 1,7291 | 0,104 | -0,317 |
| 12 | Q9H7E9 CH033_HUMAN  | E.AAAAPGPGT#PCASR.G       | T19:     | 2 | 1,7243 | 0,238 | -0,268 |
| 12 | Q9HD15 SRA1_HUMAN   | E.TSPGPPPM*GPPPPSSK.A     |          | 2 | 1,7011 | 0,13  | -0,394 |
| 12 | O00487 PSDE_HUMAN   | E.AVDPVFQAK.M             |          | 2 | 1,6984 | 0,132 | 0,188  |
| 12 | P53618 COPB_HUMAN   | E.ITVGPVQK.L              |          | 2 | 1,6905 | 0,09  | 0,145  |
| 12 | Q09666 AHNK_HUMAN   | K.LSGPS#LKM*PSLE.I        | S4903:   | 2 | 1,6877 | 0,145 | -0,09  |
| 12 | O95155 UBE4B_HUMAN  | R.SQSSEGVSS#LSSS#PSNSLE.T | S84:S88: | 2 | 1,6771 | 0,173 | 0,06   |
| 12 | Q99618 CDCA3_HUMAN  | R.VADPRSPS#AGILR.T        | S31:     | 2 | 1,6764 | 0,083 | 0,172  |
| 12 | P46777 RL5_HUMAN    | K.NSVTPDM*M*EE.M          |          | 2 | 1,6731 | 0,081 | 0      |
| 12 | Q9UGU0 TCF20_HUMAN  | E.ATS#PGAKDM*PLSSDGNPK.V  | S583:    | 2 | 1,6697 | 0,248 | -0,457 |
| 12 | Q02297 NRG1_HUMAN   | R.YVSAM*TTPAR.M           |          | 2 | 1,6691 | 0,117 | -0,329 |
| 12 | Q02790 FKBP4_HUMAN  | K.FSFDLGKGE.V             |          | 2 | 1,6682 | 0,134 | -0,305 |
| 12 | P05787 K2C8_HUMAN   | R.VGS#SNFR.G              | S43:     | 2 | 1,6676 | 0,143 | 0,288  |
| 12 | Q9Y2H9 MAST1_HUMAN  | R.SPAVRPRS#R.S            | S159:    | 2 | 1,6642 | 0,142 | 0,331  |
| 12 | Q5T0J5 Q5T0J5_HUMAN | E.M*FVVCSK.E              |          | 2 | 1,6631 | 0,083 | -0,619 |
| 12 | P52272 HNRPM_HUMAN  | R.M*GLVM*DR.M             |          | 2 | 1,6558 | 0,19  | 0,143  |
| 12 | Q14693 LPIN1_HUMAN  | E.VAALYFPK.N              |          | 2 | 1,6498 | 0,2   | -0,47  |
| 12 | P09960 LKHA4_HUMAN  | E.DAIPLALK.M              |          | 2 | 1,6491 | 0,181 | 0,363  |
| 12 | Q9HC35 EMAL4_HUMAN  | E.TVADTTLTK.A             |          | 2 | 1,6444 | 0,281 | 0,128  |
| 12 | Q9UGU0 TCF20_HUMAN  | K.DM*PLSSDGNPK.V          |          | 2 | 1,6405 | 0,124 | 0,104  |
| 12 | Q9UPN3 MACF1_HUMAN  | E.DAPDGDASQLLHQAE.V       |          | 2 | 1,6388 | 0,147 | -0,221 |
| 12 | A8K7V5 A8K7V5_HUMAN | E.VSTAPAGTDM*PAAK.K       |          | 2 | 1,6388 | 0,156 | -0,183 |
| 12 | Q9UKY7 CDV3_HUMAN   | E.VDYSGLR.V               |          | 2 | 1,6377 | 0,165 | 0,452  |
| 12 | O14745 NHERF_HUMAN  | E.AALES#PRPALVR.S         | S280:    | 2 | 1,6355 | 0,256 | 0,09   |
| 12 | Q8WYP5 AHTF1_HUMAN  | K.KCAVPVETE.W             |          | 2 | 1,6327 | 0,199 | 1,063  |
| 12 | P09960 LKHA4_HUMAN  | E.ISLPIALSK.N             |          | 2 | 1,6134 | 0,141 | -0,129 |
| 12 | Q00653 NFKB2_HUMAN  | D.DFKLNSS#IVEPKEPAPE.T    | S23:     | 2 | 1,609  | 0,239 | -0,123 |
| 12 | O75044 FNBP2_HUMAN  | E.LEGPVYSR.G              |          | 2 | 1,6007 | 0,114 | 0,066  |
| 12 | P12956 KU70_HUMAN   | E.QAVDLTLPK.V             |          | 2 | 1,5822 | 0,209 | -0,062 |
| 12 | Q9UPT8 ZC3H4_HUMAN  | R.QQTSSRPPASVGE.L         |          | 2 | 1,5758 | 0,186 | -0,182 |
| 12 | Q9P260 K1468_HUMAN  | R.EPSTASGGGQLNR.A         |          | 2 | 1,5746 | 0,398 | -0,096 |
| 12 | Q14683 SMC1A_HUMAN  | R.ISSYARE.A               |          | 2 | 1,5528 | 0,107 | 0,195  |
| 12 | Q9UHX1 PUF60_HUMAN  | K.LGLPPLTPEQQE.A          |          | 2 | 1,5458 | 0,149 | -0,092 |
| 12 | Q00610 CLH1_HUMAN   | E.AIDSIK.A                |          | 2 | 1,5357 | 0,095 | 0,753  |
| 12 | P31949 S10AB_HUMAN  | K.ISSPTETER.C             |          | 2 | 1,526  | 0,125 | -1,196 |

|    |                     |                                   |            |   |        |       |        |
|----|---------------------|-----------------------------------|------------|---|--------|-------|--------|
| 12 | Q9NZ63 CI078_HUMAN  | E.DADM*M*KYIETE.L                 |            | 2 | 1,5203 | 0,119 | -0,443 |
| 12 | ##Q15075 EEA1_HUMAN | K.IDAIETALQAAK.Q                  |            | 2 | 1,5137 | 0,113 | -0,098 |
| 12 | Q6DKJ4 NXN_HUMAN    | E.VIAGPLLR.N                      |            | 2 | 1,4637 | 0,094 | 0,291  |
| 12 | P30153 2AAA_HUMAN   | E.ALVM*PTLR.Q                     |            | 2 | 1,4512 | 0,128 | 0,266  |
| 12 | Q13356 PPIL2_HUMAN  | D.LLTDEPFSRQD.I                   |            | 2 | 1,4066 | 0,122 | -1,201 |
| 13 | Q7Z6E9 RBBP6_HUMAN  | E.GSSSTLVDTSTSTGGS#PVR.K          | S1277:     | 2 | 6,0897 | 0,611 | 0,23   |
| 13 | Q8WXI9 P66B_HUMAN   | R.LQQQAALS#PTTAPAVSSVSKQE.T       | S486:      | 2 | 5,6837 | 0,489 | 0,526  |
| 13 | P62191 PRS4_HUMAN   | E.KAPQETYADIGGLDNQIQE.I           |            | 2 | 5,6707 | 0,54  | -0,117 |
| 13 | Q12893 TM115_HUMAN  | E.SGAKVDS#PLPSDKAPT#PPGKGAPE.S    | S320:T329: | 3 | 5,5514 | 0,392 | 0,144  |
| 13 | O75381 PEX14_HUMAN  | E.GHS#PEGSTVYHLLGPQEE.G           | S282:      | 2 | 5,4269 | 0,529 | 0,691  |
| 13 | O75688 PPM1B_HUMAN  | E.SGLAELDS#SNEDAGTK.M             | S465:      | 2 | 5,3964 | 0,492 | -0,51  |
| 13 | Q00839 HNRPU_HUMAN  | E.AGGRPAM*EPNGS#LDLGGDSAGR.S      | S59:       | 3 | 5,3293 | 0,509 | 0,245  |
| 13 | Q9UGU0 TCF20_HUMAN  | E.ATS#PGAKDM*PLSSDGNPKVNE.K       | S583:      | 3 | 5,2181 | 0,359 | -0,579 |
| 13 | Q5VT52 K0460_HUMAN  | E.AASQSTSAS#PANTTVSTIK.G          | S564:      | 2 | 5,1153 | 0,384 | -0,128 |
| 13 | Q53EZ4 CEP55_HUMAN  | E.KVAASPKS#PTAALNES#LVECPK.C      | S428:S436: | 3 | 5,0662 | 0,511 | -0,819 |
| 13 | Q8NHZ8 CDC26_HUMAN  | E.VVGG#DGEGAIGLSSDPK.S            | S42:       | 2 | 5,0613 | 0,467 | 0,071  |
| 13 | Q96DT7 ZBT10_HUMAN  | E.GASLGDGS#GAEGGSCSSR.R           | S197:      | 2 | 5,0187 | 0,562 | -0,274 |
| 13 | O14964 HGS_HUMAN    | R.KS#PTPSAPVPLTEPAAQPGE.G         | S345:      | 2 | 5,0063 | 0,512 | 0,119  |
| 13 | P35611 ADDA_HUMAN   | E.AHRPPS#PTEAPTEASPEPAPDPAPVAEE.A | S669:      | 3 | 4,9412 | 0,477 | 0,25   |
| 13 | Q9H832 UBE2Z_HUMAN  | E.NAEM*DSDSS#SGTETDLHGSLRV.-      | S341:      | 3 | 4,9226 | 0,43  | -0,147 |
| 13 | P12004 PCNA_HUMAN   | E.LGNNGNIKLS#QTSNVDKEEE.A         | S183:      | 3 | 4,8982 | 0,365 | -0,255 |
| 13 | O15085 ARHGB_HUMAN  | K.SLGGESSGTT#PVGSFHTE.A           | T1462:     | 2 | 4,8539 | 0,536 | 0,065  |
| 13 | Q13177 PAK2_HUMAN   | E.KIGQGASGTVFTATDVALGQE.V         |            | 2 | 4,8527 | 0,562 | 0,119  |
| 13 | Q09666 AHNK_HUMAN   | R.LPS#GSGAAS#PTGSAVDIR.A          | S210:S216: | 2 | 4,8159 | 0,514 | -0,338 |
| 13 | Q5JRA6 MIA3_HUMAN   | E.ASGKPSPSDPGSGTATM*M*NSSSR.G     |            | 3 | 4,7991 | 0,467 | -0,163 |
| 13 | Q9UK76 HN1_HUMAN    | R.RNS#SEASSGDFLDLK.G              | S87:       | 2 | 4,7872 | 0,448 | 0,143  |
| 13 | B2CI53 B2CI53_HUMAN | R.NGILAS PQS#APGNLDNSK.S          | S263:      | 2 | 4,7799 | 0,574 | -1,834 |
| 13 | P55884 EIF3B_HUMAN  | R.S#DSRAQAVSEDAGGNE.G             | S117:      | 2 | 4,7745 | 0,569 | 0,073  |
| 13 | Q7Z6E9 RBBP6_HUMAN  | E.GSSSTLVDTSTSTGGS#PVRK.S         | S1277:     | 2 | 4,7578 | 0,486 | 0,108  |
| 13 | Q09666 AHNK_HUMAN   | K.TVIRLPS#GSGAAS#PTGSAVDIR.A      | S210:S216: | 2 | 4,7572 | 1     | 0,215  |
| 13 | Q5UIP0 RIF1_HUMAN   | E.NRPFS#PSPLNNISSTVTVK.N          | S1236:     | 3 | 4,7502 | 0,342 | -0,513 |
| 13 | P22466 GALA_HUMAN   | R.LLDLPA AAS#SEDIERS.-            | S116:      | 2 | 4,674  | 0,411 | -0,276 |
| 13 | P08651 NFIC_HUMAN   | R.TGM*GS#DQEDSKPITLDTTDFQE.S      | S201:      | 2 | 4,665  | 0,539 | 0,583  |
| 13 | P07737 PROF1_HUMAN  | R.SSFYVNGLT LGGQK.C               |            | 2 | 4,6298 | 0,366 | -0,083 |
| 13 | Q09666 AHNK_HUMAN   | K.TVIRLPS#GSGAAS#PTGSAVDIR.A      | S210:S216: | 3 | 4,6222 | 0,359 | -0,161 |
| 13 | Q16531 DDB1_HUMAN   | E.VQDTSGGTTALRPSASTQALSSSVSSSK.L  |            | 3 | 4,6126 | 0,432 | -0,54  |
| 13 | Q02952 AKA12_HUMAN  | E.AAPD TTADPAIAASDPATK.L          |            | 2 | 4,6113 | 0,431 | 0      |
| 13 | P78310 CXAR_HUMAN   | R.SY#IGSNHSSLGSM*SPSNM*E.G        | Y294:      | 2 | 4,598  | 0,497 | 0,233  |
| 13 | Q13136 LIPA1_HUMAN  | E.AEGPPGGGGHGS#PSQPDADSHFE.Q      | S26:       | 3 | 4,5939 | 0,259 | -0,148 |

|    |                    |                                   |                 |   |        |       |        |
|----|--------------------|-----------------------------------|-----------------|---|--------|-------|--------|
| 13 | Q5VUA4 ZN318_HUMAN | E.VAILQVDDDSGDPLNLVK.A            |                 | 2 | 4,5395 | 0,371 | -0,255 |
| 13 | P46821 MAP1B_HUMAN | R.KLGDVS#PTQIDVSVQFGSFKE.D        | S1501:          | 2 | 4,5244 | 0,463 | 0,324  |
| 13 | Q92797 SYMPK_HUMAN | E.TAAGGLTLKEERS#PQTLAPVGE.D       | S1243:          | 2 | 4,4751 | 0,368 | 0,318  |
| 13 | O75427 LRCH4_HUMAN | R.GTVEEQRPPELS#PGAGDRE.R          | S380:           | 3 | 4,4731 | 0,387 | 0,609  |
| 13 | P04406 G3P_HUMAN   | E.NGKLVINGNPITIFQE.R              |                 | 2 | 4,4532 | 0,398 | -0,139 |
| 13 | Q9UK76 HN1_HUMAN   | R.RNS#SEASSGDFLDLKG.E             | S87:            | 2 | 4,444  | 0,518 | -0,064 |
| 13 | O15234 CASC3_HUMAN | E.QTSVRDPS#PEADAPVLGSPEKE.E       | S363:           | 3 | 4,4125 | 0,365 | 0,077  |
| 13 | P11388 TOP2A_HUMAN | E.LKPQKS#VVS#DLEADDVK.G           | S1374:S1377:    | 3 | 4,3434 | 0,274 | -0,27  |
| 13 | Q9UK76 HN1_HUMAN   | E.GDIHENVDTLPGSLGQSE.E            |                 | 2 | 4,3293 | 0,417 | 0      |
| 13 | Q92576 PHF3_HUMAN  | E.NNLQDNQTSNSS#PCR.S              | S1614:          | 2 | 4,3276 | 0,553 | -0,269 |
| 13 | Q92615 LARP5_HUMAN | E.EKFTSSQTQSPTPPKPPS#PSFE.L       | S524:           | 3 | 4,3262 | 0,397 | -0,147 |
| 13 | Q726E9 RBBP6_HUMAN | E.GSSSTLVDTSTSTGGS#PVR.K          | S1277:          | 3 | 4,3051 | 0,539 | 0,172  |
| 13 | Q14247 SRC8_HUMAN  | R.AKTQT#PPVPAPQPTEER.L            | T401:           | 3 | 4,2808 | 0,302 | -0,272 |
| 13 | O95684 FR1OP_HUMAN | E.GALDLSDVHSPPKS#PE.G             | S160:           | 2 | 4,2784 | 0,397 | 0,141  |
| 13 | Q15424 SAFB1_HUMAN | E.LAEAPTEAPS#PEAR.D               | S344:           | 2 | 4,2704 | 0,432 | 0,482  |
| 13 | Q5JRA6 MIA3_HUMAN  | E.ASGKPSPSDPGSGTATM*M*NSSS#R.G    | S1741:          | 3 | 4,2498 | 0,381 | -0,158 |
| 13 | Q8WYL5 SSH1_HUMAN  | E.STRPDS#PALFVDKPTGE.R            | S237:           | 3 | 4,239  | 0,211 | -0,09  |
| 13 | P17275 JUNB_HUMAN  | R.SRDAT#PPVS#PINM*E.D             | T255:S259:      | 2 | 4,2253 | 0,506 | -0,289 |
| 13 | P17706 PTN2_HUMAN  | E.LSKEDLS#PAFDHS#PNKIM*TE.K       | S298:S304:      | 3 | 4,1984 | 0,356 | -0,225 |
| 13 | Q96JM3 ZN828_HUMAN | E.LRKPGLPLS#PEIRS#PAGS#PE.L       | S427:S432:S436: | 2 | 4,1891 | 0,432 | 0,525  |
| 13 | Q9H0F6 SHRPN_HUMAN | K.GPPPEADLPRS#PGNLTE.R            | S165:           | 2 | 4,1845 | 0,451 | 0      |
| 13 | P27816 MAP4_HUMAN  | K.TDYIPLLDVDEKGTNS#E.S            | S60:            | 2 | 4,1836 | 0,391 | -0,061 |
| 13 | Q92797 SYMPK_HUMAN | E.DAM*KTPS#PAAEDAREPE.A           | S1259:          | 3 | 4,1796 | 0,351 | 0,479  |
| 13 | Q8IXS6 PALM2_HUMAN | E.LVSGRPVSDTTEPSS#PEGKEE.S        | S351:           | 3 | 4,179  | 0,417 | -0,08  |
| 13 | P29966 MARCS_HUMAN | E.KGEPAAAAAPEAGAS#PVEK.E          | S101:           | 2 | 4,1695 | 0,447 | -0,533 |
| 13 | Q9H4A3 WINK1_HUMAN | E.KQSSTPGSLFLSPPAPAPK.N           |                 | 2 | 4,1643 | 0,45  | 0,128  |
| 13 | Q13263 TIF1B_HUMAN | R.STAPSAASASASAAASS#PAGGGAEALE.L  | S50:            | 3 | 4,1629 | 0,288 | 0,305  |
| 13 | Q9UHR5 S30BP_HUMAN | E.KGGLVSDAYGEDDFS#R.L             | S52:            | 2 | 4,1486 | 0,496 | -0,815 |
| 13 | O43633 CHM2A_HUMAN | E.LSNLPSTGGS#LSVAAGGK.K           | S188:           | 2 | 4,1468 | 0,482 | -0,863 |
| 13 | Q6IQ49 CA055_HUMAN | K.LQES#QPGNAVIDKE.T               | S373:           | 2 | 4,1328 | 0,478 | -0,076 |
| 13 | Q14694 UBP10_HUMAN | E.TKYS#PPAISPLVSEK.Q              | S365:           | 3 | 4,1303 | 0,395 | 0,108  |
| 13 | Q9H4A3 WINK1_HUMAN | E.KQSSTPGSLFLS#PPAPAPK.N          | S19:            | 3 | 4,1238 | 0,321 | -0,092 |
| 13 | Q8WXI9 P66B_HUMAN  | R.LQQQAALS#PTTAPAVSSVSK.Q         | S486:           | 2 | 4,1084 | 0,478 | 0      |
| 13 | P51636 CAV2_HUMAN  | K.ADVQLFM*DDDSYS#HHS#GLE.Y        | S20:S23:        | 3 | 4,1033 | 0,346 | -0,078 |
| 13 | Q96FF9 CDA5_HUMAN  | K.THSVAT#PTSTVPVNPPEAE.S          | T111:           | 2 | 4,0987 | 0,511 | 0,243  |
| 13 | O43765 SGTA_HUMAN  | R.SQIRS#RT#PS#ASNDDQQE.-          | S301:T303:S305: | 2 | 4,0868 | 0,326 | 0      |
| 13 | Q13263 TIF1B_HUMAN | K.RSTAPSAASASASAAASS#PAGGGAEALE.L | S50:            | 3 | 4,0783 | 0,393 | 0,143  |
| 13 | P28370 SMCA1_HUMAN | E.LFAHFIQPSAQKS#PT#SPLNM*K.L      | S116:T118:      | 3 | 4,0655 | 0,325 | -0,073 |
| 13 | Q92615 LARP5_HUMAN | R.SPS#PAHLRDDPKVAE.K              | S601:           | 3 | 4,0652 | 0,324 | 0      |

|    |                    |                                         |                 |   |        |       |        |
|----|--------------------|-----------------------------------------|-----------------|---|--------|-------|--------|
| 13 | Q96RR4 KKCC2_HUMAN | R.SQGGLAAGGSLDM*NGR.C                   |                 | 2 | 4,0579 | 0,514 | -0,405 |
| 13 | Q8NHZ8 CDC26_HUMAN | E.VVGG#DGEAIGLSSDPK.S                   | S42:            | 3 | 4,0533 | 0,435 | 0,106  |
| 13 | O95425 SVIL_HUMAN  | E.TSGVHGDS#PYGSGTM*DTHSLE.S             | S86:            | 3 | 4,0511 | 0,28  | -0,574 |
| 13 | Q9H4A3 WNK1_HUMAN  | E.KQSSTPGSLFLSPAPAPK.N                  |                 | 3 | 4,0365 | 0,226 | 0,192  |
| 13 | Q96S82 UBL7_HUMAN  | E.SSSHTPTPGTQGHSSGTS#PM*SSGVQSGTPITND.L | S301:           | 3 | 4,0268 | 1     | 0,446  |
| 13 | O94782 UBP1_HUMAN  | E.IDQVPAQSS#PINCEK.R                    | S67:            | 2 | 4,0191 | 0,449 | 0,063  |
| 13 | Q5VT52 K0460_HUMAN | E.M*M*DKPTSSVDTM*SLLSK.I                |                 | 3 | 4,0172 | 0,294 | 0      |
| 13 | Q96JM3 ZN828_HUMAN | E.LRKPGPLS#PEIRS#PAGS#PE.L              | S427:S432:S436: | 3 | 4,0119 | 0,345 | 0,157  |
| 13 | P51991 ROA3_HUMAN  | D.FGNYSQQQSNYGPM*K.G                    |                 | 2 | 4,0098 | 0,48  | -0,201 |
| 13 | P36915 GNL1_HUMAN  | D.GPAVLVEQQTDSAM*EPTGPTQE.R             |                 | 3 | 4,0005 | 0,278 | -0,08  |
| 13 | Q9H832 UBE2Z_HUMAN | E.NAEM*DSDSSSS#GTETDLHGSLRV.-           | S342:           | 2 | 3,983  | 0,531 | 0,294  |
| 13 | Q96IZ7 RSRC1_HUMAN | E.IEAIES#DSFVQQTFR.S                    | S237:           | 2 | 3,9813 | 0,508 | -0,396 |
| 13 | Q15424 SAFB1_HUMAN | E.SSELEQPFAQDTSS#VGPDR.K                | S247:           | 2 | 3,979  | 0,412 | -0,115 |
| 13 | O60264 SMCA5_HUMAN | E.M*EEIFDDAS#PGK.Q                      | S66:            | 2 | 3,9727 | 0,464 | 0,085  |
| 13 | Q9H0E9 BRD8_HUMAN  | E.ADVAIGKGETPLTNVK.T                    |                 | 3 | 3,971  | 0,309 | 0,423  |
| 13 | Q13263 TIF1B_HUMAN | E.TKPVLM*ALAEGPGAEGPR.L                 |                 | 3 | 3,9703 | 0,272 | 0,101  |
| 13 | P62829 RL23_HUMAN  | E.DNAGVIVNNKGE.M                        |                 | 2 | 3,9684 | 0,434 | -0,298 |
| 13 | P27816 MAP4_HUMAN  | E.EGRPVVSGTGNDITPPNK.E                  |                 | 2 | 3,9429 | 0,426 | -0,566 |
| 13 | Q02952 AKA12_HUMAN | E.GLEGS#IDTGITVSR.E                     | S1287:          | 2 | 3,9179 | 0,475 | -0,493 |
| 13 | O75179 ANR17_HUMAN | E.HYPVSSPSS#PSPPAQGGVSR.N               | S2045:          | 3 | 3,9169 | 0,162 | 0,253  |
| 13 | Q6Y7W6 PERQ2_HUMAN | E.ASEETPQTSSSARPGT#PSDHQSQE.A           | T382:           | 3 | 3,8895 | 0,307 | -0,136 |
| 13 | Q12893 TM115_HUMAN | E.S#GAKVDSPLPSDKAPT#PPGK.G              | S314:T329:      | 3 | 3,8828 | 0,286 | -0,26  |
| 13 | Q9H3S7 PTN23_HUMAN | E.SQHGGTQS#PGGGQPLLQPTKVDAE.G           | S1133:          | 3 | 3,8796 | 0,13  | -0,288 |
| 13 | Q9UNZ2 NSF1C_HUMAN | K.LGSTAPQVLSTSSPAQAENE.A                |                 | 3 | 3,8786 | 0,258 | -1,643 |
| 13 | Q92878 RAD50_HUMAN | E.DKLFVCGSQDFESD.L                      |                 | 2 | 3,8711 | 0,463 | -0,346 |
| 13 | Q15942 ZYG_HUMAN   | R.S#PGAPGLTLKEVEE.L                     | S344:           | 2 | 3,8672 | 0,423 | -0,38  |
| 13 | P10809 CH60_HUMAN  | E.IAQVATISANGDKE.I                      |                 | 2 | 3,8666 | 0,444 | -0,172 |
| 13 | P31946 1433B_HUMAN | E.VASGDNKQTTVSNSQQAYQE.A                |                 | 2 | 3,866  | 0,398 | 0,453  |
| 13 | Q9UPT8 ZC3H4_HUMAN | E.GSLHSS#PVGPSSSK.G                     | S908:           | 2 | 3,8621 | 0,435 | -0,52  |
| 13 | Q9Y2K5 R3HD2_HUMAN | D.IIQLHISCPS#DKEEE.K                    | S109:           | 2 | 3,8579 | 0,376 | -0,13  |
| 13 | O43164 PJA2_HUMAN  | E.DHTAIGQECCPICCSE.Y                    |                 | 2 | 3,8494 | 0,415 | 0,591  |
| 13 | Q5SW79 CE170_HUMAN | E.RS#ESLDPDSSM*DTTLILK.D                | S879:           | 3 | 3,8463 | 0,186 | -0,087 |
| 13 | P22314 UBA1_HUMAN  | E.LQSANASVDDSRLEE.L                     |                 | 2 | 3,8285 | 0,447 | -0,224 |
| 13 | Q15149 PLEC1_HUMAN | K.GYSPYSVSGSGST#AGSR.T                  | T4623:          | 2 | 3,8237 | 0,494 | -0,066 |
| 13 | Q9UHR5 S30BP_HUMAN | E.KGGLVSDAYGEDDFS#R.L                   | S52:            | 3 | 3,8164 | 0,448 | -0,917 |
| 13 | Q4KMP7 TB10B_HUMAN | R.RAS#AGPAPGPVVTAE.G                    | S412:           | 2 | 3,8091 | 0,491 | -0,334 |
| 13 | Q9H0E9 BRD8_HUMAN  | E.ADVAIGKGETPLTNVK.T                    |                 | 2 | 3,8083 | 0,433 | -0,141 |
| 13 | P51991 ROA3_HUMAN  | D.FGNYSQQQSNYGPM*K.G                    |                 | 3 | 3,8079 | 0,213 | -0,1   |
| 13 | Q96T58 MINT_HUMAN  | E.SGVVAVSPEKSES#PQKE.D                  | S2126:          | 2 | 3,8018 | 0,354 | -0,531 |



|    |                     |                                   |                 |   |        |       |        |
|----|---------------------|-----------------------------------|-----------------|---|--------|-------|--------|
| 13 | P36507 MP2K2_HUMAN  | R.RKPVLPALTINPTIAEGPS#PTSE.G      | S23:            | 3 | 3,798  | 0,472 | -0,222 |
| 13 | Q5CZB5 Q5CZB5_HUMAN | E.GEGAAGAGDHQDPSLGAGEAAS#KE.S     | S122:           | 3 | 3,7965 | 0,167 | -0,162 |
| 13 | Q9H4A3 WNK1_HUMAN   | E.ATTAQVVSQPAPQVLPQVSAGK.Q        |                 | 3 | 3,7939 | 0,312 | 0,159  |
| 13 | Q8N201 INT1_HUMAN   | R.VAGDLGAGSS#PHPSLTHEEEDSQTE.L    | S284:           | 2 | 3,786  | 0,462 | 0,489  |
| 13 | Q9UBT2 SAE2_HUMAN   | E.DGKGTLISSEGETE.A                |                 | 2 | 3,7755 | 0,493 | -0,073 |
| 13 | Q02880 TOP2B_HUMAN  | E.FVPSDGLDKDEYTF#PGK.S            | S1424:          | 2 | 3,7746 | 0,387 | -0,117 |
| 13 | P27816 MAP4_HUMAN   | E.EGRPVVSGTGNDDITPPNKELPPS#PE.K   | S696:           | 3 | 3,7576 | 0,332 | -0,198 |
| 13 | O75179 ANR17_HUMAN  | E.HYPVSSPSS#PS#PPAQGGVSR.N        | S2045:S2047:    | 3 | 3,7447 | 0,262 | -0,325 |
| 13 | Q9UPN3 MACF1_HUMAN  | E.LATSGGQS#PTGEQIPQFQQR.Q         | S3634:          | 3 | 3,7433 | 0,293 | -1,242 |
| 13 | P55196 AFAD_HUMAN   | K.ITSVSTGNLCTEEQT#PPRPE.A         | T1194:          | 3 | 3,739  | 0,46  | 0,688  |
| 13 | Q13885 TBB2A_HUMAN  | E.GAELVDS#VLDVVKE.S               | S115:           | 2 | 3,7363 | 0,485 | -0,071 |
| 13 | Q96A33 CCD47_HUMAN  | E.SNFTLVGDDGTNKE.A                |                 | 2 | 3,7256 | 0,446 | -0,245 |
| 13 | P15822 ZEP1_HUMAN   | E.SVS#PKKPLFLQPPSE.L              | S130:           | 2 | 3,7224 | 0,375 | -0,277 |
| 13 | Q96T23 RSF1_HUMAN   | E.IKLS#DDFDS#PVKGPLCK.S           | S382:S387:      | 3 | 3,7141 | 0,246 | -0,352 |
| 13 | Q15424 SAFB1_HUMAN  | E.LAEAPTEAPS#PEAR.D.S             | S344:           | 2 | 3,7097 | 0,501 | -0,597 |
| 13 | Q01082 SPTB2_HUMAN  | E.TVDTSEM*VNGATEQR.T              |                 | 2 | 3,7096 | 0,48  | -0,295 |
| 13 | B2CI53 B2CI53_HUMAN | R.GPDEEAVVDLKG.T                  |                 | 2 | 3,7057 | 0,475 | -0,099 |
| 13 | Q9Y6M7 S4A7_HUMAN   | R.M*LQDDDDT#VHLPFE.G              | T1167:          | 2 | 3,6964 | 0,385 | -0,276 |
| 13 | Q92597 NDRG1_HUMAN  | E.GAHLDTPNNSGAAGNSAGPKS#M*EVSC.-  | S389:           | 3 | 3,6906 | 0,42  | -0,209 |
| 13 | Q9Y2K5 R3HD2_HUMAN  | D.IIQLHISCP#DKEEE.K               | S109:           | 3 | 3,6806 | 0,411 | 0      |
| 13 | O00303 EIF3F_HUMAN  | E.VTNCFSVPHNESEDE.V               |                 | 2 | 3,6745 | 0,498 | 0      |
| 13 | Q6ZU35 K1211_HUMAN  | R.KPAS#PPLPATQKEKPSQTPE.A         | S1042:          | 3 | 3,6689 | 0,223 | -0,248 |
| 13 | Q96JM3 ZN828_HUMAN  | K.LAPVPSPEPQKPAPVS#PE.S           | S214:           | 3 | 3,667  | 0,336 | 0,286  |
| 13 | P06213 INSR_HUMAN   | E.DNYIVLNKDDNEE.C                 |                 | 2 | 3,6627 | 0,121 | 0      |
| 13 | Q5UIP0 RIF1_HUMAN   | E.LIIEDNNAS#PQKLRE.L              | S2144:          | 2 | 3,6624 | 0,291 | -0,201 |
| 13 | Q92878 RAD50_HUMAN  | E.DKLFVCGSQDFE.S                  |                 | 2 | 3,6609 | 0,373 | -0,313 |
| 13 | P09429 HMGB1_HUMAN  | K.M*SSYAFFVQTCR.E                 |                 | 2 | 3,6602 | 0,406 | -0,161 |
| 13 | Q14839 CHD4_HUMAN   | E.VM*LQNGETPKDLNDE.K              |                 | 2 | 3,6576 | 0,465 | -0,142 |
| 13 | Q9H0E9 BRD8_HUMAN   | E.ADVAIGKGDET#PLTNVKTE.A          | T569:           | 3 | 3,6549 | 0,347 | -0,18  |
| 13 | P18583 SON_HUMAN    | R.AGIEGPLLASDVGR.D                |                 | 2 | 3,6514 | 0,333 | -0,27  |
| 13 | Q641Q2 FA21A_HUMAN  | E.DQNIIQAPQKE.V                   |                 | 2 | 3,6481 | 0,367 | 0,19   |
| 13 | Q66K74 MAP1S_HUMAN  | E.LPLAASSIPRPT#PS#PES#HRSPAEGSE.R | T638:S640:S643: | 3 | 3,6445 | 1     | 0,06   |
| 13 | P35222 CTNB1_HUMAN  | E.TADLGLDIGAQGEPLGYR.Q            |                 | 2 | 3,6423 | 0,542 | 0      |
| 13 | Q9NYF8 BCLF1_HUMAN  | E.ALDYFS#DKESGK.Q                 | S385:           | 2 | 3,6393 | 0,519 | -0,678 |
| 13 | P17275 JUNB_HUMAN   | R.SRDAT#PPVS#PINM*EDQE.R          | T255:S259:      | 2 | 3,6355 | 0,517 | 0,355  |
| 13 | Q5UIP0 RIF1_HUMAN   | E.LIIEDNNAS#PQK.L                 | S2144:          | 2 | 3,6339 | 0,324 | -0,257 |
| 13 | Q86V88 MGDP1_HUMAN  | K.AQTGPLRS#SLEESPFEA.-            | S167:           | 2 | 3,6327 | 0,329 | 0,064  |
| 13 | Q4KMP7 TB10B_HUMAN  | E.GLHPSLPSPT#GNSTPLGSSKE.T        | T434:           | 3 | 3,6225 | 0,207 | 0,085  |
| 13 | Q99728 BARD1_HUMAN  | E.VSLPLAEQIES#PDTK.S              | S288:           | 2 | 3,6155 | 0,463 | -0,286 |

|    |                     |                                  |            |   |        |       |        |
|----|---------------------|----------------------------------|------------|---|--------|-------|--------|
| 13 | P05787 K2C8_HUMAN   | R.ASLEAAIADAEQR.G                |            | 2 | 3,6117 | 0,409 | -0,272 |
| 13 | Q96T37 RBM15_HUMAN  | E.FSQQFLDS#PAK.A                 | S935:      | 2 | 3,6112 | 0,357 | -0,362 |
| 13 | Q02952 AKA12_HUMAN  | E.GSIDTGITVS#R.E                 | S1295:     | 2 | 3,6069 | 0,313 | 0,412  |
| 13 | O60684 IMA7_HUMAN   | E.HYFGVEDDDSSLAPQVDE.T           |            | 2 | 3,6042 | 0,549 | 0      |
| 13 | Q96JM3 ZN828_HUMAN  | E.YIKTDLDAM*DIK.G                |            | 3 | 3,601  | 0,32  | 0,444  |
| 13 | Q13263 TIF1B_HUMAN  | R.STAPSAASASASAAASS#PAGGGAEALE.L | S50:       | 2 | 3,6006 | 0,442 | 0,305  |
| 13 | P19338 NUCL_HUMAN   | E.SKTLVLSNLSYSATEE.T             |            | 2 | 3,5992 | 0,414 | -0,42  |
| 13 | Q04721 NOTC2_HUMAN  | R.RTPS#LALTPPQAEQE.V             | S1804:     | 2 | 3,5987 | 0,513 | -0,355 |
| 13 | P23763 VAMP1_HUMAN  | E.LDDRADALQAGASQFE.S             |            | 2 | 3,5961 | 0,316 | -0,572 |
| 13 | Q96SB4 SRPK1_HUMAN  | E.DLHNANDCDVQNLNQE.S             |            | 2 | 3,5899 | 0,251 | -0,193 |
| 13 | O43815 STRN_HUMAN   | E.ADSLTYDIANNKD.A                |            | 2 | 3,5871 | 0,367 | 0,254  |
| 13 | Q92797 SYMPK_HUMAN  | E.AALLDSSLEGPLK.E                |            | 2 | 3,5867 | 0,42  | -0,173 |
| 13 | Q86U44 MTA70_HUMAN  | E.IDACM*DSEAPGSKDHTPS#QE.L       | S350:      | 3 | 3,5758 | 0,315 | 0,081  |
| 13 | P07814 SYEP_HUMAN   | K.EYIPGQPPLSQSSDSS#PTR.N         | S886:      | 2 | 3,5721 | 0,375 | 0,23   |
| 13 | Q92797 SYMPK_HUMAN  | K.TPS#PAAEDAREPE.A               | S1259:     | 2 | 3,5695 | 0,499 | 0      |
| 13 | Q12873 CHD3_HUMAN   | E.ASATNS#PCTSKPATPAPSEKGE.G      | S1549:     | 3 | 3,569  | 0,203 | -0,081 |
| 13 | Q09472 EP300_HUMAN  | E.VNSQAIAEKQPS#QEVKM*E.A         | S973:      | 3 | 3,5687 | 0,303 | -0,26  |
| 13 | A8MRS9 A8MRS9_HUMAN | E.TGQM*ATLTSGGKPNK.D             |            | 3 | 3,5625 | 0,487 | -0,112 |
| 13 | Q6NYC8 PHTNS_HUMAN  | E.VESRLS#PGESAYQK.L              | S224:      | 2 | 3,557  | 0,383 | -0,598 |
| 13 | P04264 K2C1_HUMAN   | R.SLDLDSIIAEVK.A                 |            | 2 | 3,5561 | 0,413 | -0,562 |
| 13 | Q96EV8 DTBP1_HUMAN  | E.VQVDTALATSHTDR.E               |            | 2 | 3,5549 | 0,31  | -0,403 |
| 13 | P49815 TSC2_HUMAN   | E.GGRPSVDLSFQPSQPLSK.S           |            | 3 | 3,5487 | 0,192 | -0,096 |
| 13 | O15042 SR140_HUMAN  | E.SLCDS#PHQNLSRPLLE.N            | S67:       | 2 | 3,5483 | 0,434 | -0,251 |
| 13 | Q96JM3 ZN828_HUMAN  | K.LAPVPS#PEPQKPAPVSPE.S          | S204:      | 2 | 3,5426 | 0,399 | 0,064  |
| 13 | Q05524 ENO1B_HUMAN  | K.VNQIGSVTESLQACK.L              |            | 2 | 3,5401 | 0,483 | 0      |
| 13 | Q9UPN3 MACF1_HUMAN  | E.LATSGGQS#PTGEQIPQFQQR.Q        | S3634:     | 2 | 3,539  | 0,343 | -0,773 |
| 13 | P42166 LAP2A_HUMAN  | R.SST#PLPTISSSAENTR.Q            | T160:      | 2 | 3,5349 | 0,463 | 0,424  |
| 13 | O14617 AP3D1_HUMAN  | R.ALDIDLKPLADSE.K                |            | 2 | 3,5321 | 0,446 | -0,483 |
| 13 | Q15149 PLEC1_HUMAN  | E.FADM*LSGNAGGFR.S               |            | 2 | 3,5274 | 0,441 | -1,347 |
| 13 | P02545 LMNA_HUMAN   | R.SGAQASSTPLS#PTR.I              | S22:       | 2 | 3,5239 | 0,394 | 0,339  |
| 13 | Q96T23 RSF1_HUMAN   | E.SEKPGS#PEAAETS#PPSNIIDHCEK.L   | S612:S619: | 3 | 3,5221 | 0,358 | 0,467  |
| 13 | Q14694 UBP10_HUMAN  | E.TKYS#PPAISPLVSEK.Q             | S365:      | 2 | 3,5167 | 0,427 | -0,359 |
| 13 | P04792 HSPB1_HUMAN  | E.SPAAVAAPAYSRALSRQLS#SGVSE.I    | S82:       | 3 | 3,5148 | 0,438 | 0,23   |
| 13 | P78371 TCPB_HUMAN   | E.ALLSSAVDHGSDE.V                |            | 2 | 3,5118 | 0,491 | 0,094  |
| 13 | Q6IE81 JADE1_HUMAN  | E.KGVQVPVS#PGTIPQPVAR.V          | S89:       | 3 | 3,5098 | 0,143 | -0,575 |
| 13 | Q13136 LIPA1_HUMAN  | E.AEGPPGGGGHGSGPS#QPDADSHFE.Q    | S28:       | 2 | 3,5087 | 0,355 | -0,099 |
| 13 | P11172 PYR5_HUMAN   | E.NVFVAANHNGS#PLSIKE.A           | S214:      | 2 | 3,5049 | 0,307 | -0,195 |
| 13 | Q03001 BPA1_HUMAN   | E.DKLILAGNALQSD.S                |            | 2 | 3,5048 | 0,448 | -0,449 |
| 13 | O94842 TOX4_HUMAN   | E.LVSGS#PVALS#PQPR.C             | S562:S567: | 2 | 3,4991 | 0,148 | 0,7    |

|    |                     |                                   |              |   |        |       |        |
|----|---------------------|-----------------------------------|--------------|---|--------|-------|--------|
| 13 | P42345 FRAP_HUMAN   | E.SIHS#FIGDGLVKPE.A               | S2481:       | 2 | 3,497  | 0,356 | -0,618 |
| 13 | P27348 1433T_HUMAN  | E.LLDKYLIANATNPE.S                |              | 2 | 3,4968 | 0,386 | -0,31  |
| 13 | P51858 HDGF_HUMAN   | E.VERPLPM*EVEK.N                  |              | 3 | 3,4968 | 0,41  | -0,749 |
| 13 | O43166 SI1L1_HUMAN  | E.NHRPLS#AAS#NSDQLE.D             | S1708:S1711: | 2 | 3,4932 | 0,49  | -0,136 |
| 13 | Q9NY12 NOLA1_HUMAN  | E.NKVPLYFNAPVYLE.N                |              | 2 | 3,4899 | 0,295 | -0,236 |
| 13 | P62979 RS27A_HUMAN  | E.CGAGVFM*ASHFD.R                 |              | 2 | 3,4832 | 0,388 | -0,464 |
| 13 | O60716 CTND1_HUMAN  | E.GAM*SVVS#VETSDDGTR.R            | S125:        | 2 | 3,4828 | 0,421 | -0,202 |
| 13 | Q99590 SFRIP_HUMAN  | E.NNM*PSSDLADEKVE.T               |              | 2 | 3,4789 | 0,296 | -0,312 |
| 13 | Q9NQW6 ANLN_HUMAN   | K.SCSPS#PVSPQVQPQAADTISD.S        | S99:         | 3 | 3,4784 | 0,329 | 0,244  |
| 13 | Q9BZE4 NOG1_HUMAN   | E.DDQKIFTDLQSE.G                  |              | 2 | 3,4682 | 0,415 | -0,085 |
| 13 | O43303 CE110_HUMAN  | K.GKEQAM*DLIIQDTDE.N              |              | 2 | 3,4667 | 0,392 | -0,85  |
| 13 | P19338 NUCL_HUMAN   | K.TLVLSNLSYSATEE.T                |              | 2 | 3,4656 | 0,441 | -0,32  |
| 13 | Q92562 SAC3_HUMAN   | E.GS#VSQRS#TPVKM*TDAGDSAK.V       | S771:S776:   | 3 | 3,4638 | 0,444 | -0,166 |
| 13 | B2RMQ4 B2RMQ4_HUMAN | E.VVARPAS#LSNDKLM*E.K             | S327:        | 2 | 3,4635 | 0,477 | -0,212 |
| 13 | O75781 PALM_HUMAN   | E.NAAAPSPVRAPAPS#PAKE.E           | S124:        | 2 | 3,4626 | 0,369 | -0,337 |
| 13 | Q00839 HNRPU_HUMAN  | E.AGGRPAM*EPGNCS#LDLGGDSAGR.S     | S59:         | 2 | 3,4602 | 0,505 | 0,763  |
| 13 | Q15185 TEBP_HUMAN   | E.FCVEDSKDVNVNFE.K                |              | 2 | 3,4541 | 0,301 | 0      |
| 13 | Q9Y618 NCOR2_HUMAN  | E.AAKPPEPEKPVSP#PPPIE.S           | S215:        | 3 | 3,4532 | 0,43  | 0,098  |
| 13 | P43487 RANG_HUMAN   | E.SNHDPQFEPVSLPEQE.I              |              | 2 | 3,4531 | 0,409 | -0,062 |
| 13 | P0C7M2 RA1L3_HUMAN  | D.FGNYNQSSNFGPM*K.G               |              | 2 | 3,4524 | 0,334 | 0,213  |
| 13 | Q7Z7C8 TAF8_HUMAN   | E.NLALHIS#M*EDSGAEKE.N            | S259:        | 2 | 3,4523 | 0,271 | 0,332  |
| 13 | P31948 STIP1_HUMAN  | E.IAT#PPPPPPPKKE.T                | T198:        | 3 | 3,4511 | 0,213 | 0,189  |
| 13 | Q6S8J3 A26CA_HUMAN  | E.KSYELPDGQVITIGNE.R              |              | 2 | 3,4476 | 0,44  | -0,415 |
| 13 | P11586 C1TC_HUMAN   | E.VNKGDILVVATGQPE.M               |              | 2 | 3,4465 | 0,443 | -0,396 |
| 13 | O14745 NHERF_HUMAN  | E.AALESPPALVRSASS#DTSEE.L         | S291:        | 3 | 3,4434 | 0,282 | 0,325  |
| 13 | P25705 ATPA_HUMAN   | E.ERILGADTSVDLEE.T                |              | 2 | 3,4429 | 0,432 | -0,079 |
| 13 | P29966 MARCS_HUMAN  | E.AAAERPGEAAVASSPS#KANGQE.N       | S29:         | 3 | 3,4378 | 0,329 | 0,84   |
| 13 | Q59FE8 Q59FE8_HUMAN | R.STPAEDDS#PGDSQVKSE.V            | S352:        | 2 | 3,4368 | 0,458 | -0,334 |
| 13 | P27816 MAP4_HUMAN   | E.EGRPVSSTGNDITT#PPNK.E           | T687:        | 3 | 3,436  | 0,216 | 0      |
| 13 | Q93009 UBP7_HUMAN   | E.DQFCGHQGNM*YDEE.K               |              | 2 | 3,4286 | 0,36  | -0,525 |
| 13 | Q9UQ35 SRRM2_HUMAN  | E.KSATRPS#PS#PERSSTGPEPPAPTLLAE.R | S351:S353:   | 3 | 3,4266 | 1     | 0,061  |
| 13 | P29966 MARCS_HUMAN  | E.AAAERPGEAAVASS#PSK.A            | S27:         | 3 | 3,4197 | 0,262 | 0      |
| 13 | Q5VWN6 CJ018_HUMAN  | K.TGTLQDLIQHGS#PINNE.C            | S1025:       | 2 | 3,4193 | 0,4   | 0,127  |
| 13 | Q14974 IMB1_HUMAN   | E.AYTGIVQGLKGDQE.N                |              | 2 | 3,419  | 0,409 | -0,247 |
| 13 | Q13428 TCOF_HUMAN   | K.LDSSPSVSSTLAAKDDPDGKQE.A        |              | 2 | 3,4155 | 0,421 | 0      |
| 13 | Q9H5N1 RABE2_HUMAN  | K.QM*QVLLAQVQNSE.Q                |              | 2 | 3,4118 | 0,444 | 0      |
| 13 | P13645 K1C10_HUMAN  | K.GSLGGGFSSGGFSGGSFSR.G           |              | 2 | 3,4064 | 0,465 | -0,214 |
| 13 | Q7Z2W4 ZCCHV_HUMAN  | R.SCT#PS#PDQISHR.A                | T273:S275:   | 3 | 3,3857 | 0,269 | 0      |
| 13 | Q92576 PHF3_HUMAN   | E.NNLQDNQTSNSS#PCR.S              | S1614:       | 3 | 3,3853 | 0,151 | -0,202 |

|    |                     |                                |              |   |        |       |        |
|----|---------------------|--------------------------------|--------------|---|--------|-------|--------|
| 13 | Q6P1R4 DUS1L_HUMAN  | E.DRPLIVQFCANDPE.V             |              | 2 | 3,3817 | 0,562 | -0,292 |
| 13 | Q96AE4 FUBP1_HUMAN  | R.QQAAYYAQTS#PQGM*PQHPPAPQGQ.- | S630:        | 2 | 3,3806 | 0,483 | 0,638  |
| 13 | P68104 EF1A1_HUMAN  | E.S#FSDYPLGR.F                 | S414:        | 2 | 3,3799 | 0,417 | -0,1   |
| 13 | P04075 ALDOA_HUMAN  | K.GILAADESTGSIK.R              |              | 2 | 3,3767 | 0,542 | -0,183 |
| 13 | P18583 SON_HUMAN    | E.SDQTLAALLS#PK.E              | S1697:       | 2 | 3,368  | 0,479 | -0,276 |
| 13 | Q14444 CAPR1_HUMAN  | E.LQYVLDKLGDE.V                |              | 2 | 3,367  | 0,487 | -0,433 |
| 13 | Q12802 AKP13_HUMAN  | E.KNAVLGLPVALQDK.A             |              | 3 | 3,3658 | 0,323 | 0,062  |
| 13 | P35527 K1C9_HUMAN   | R.SGGGGGGGLGSGGSIR.S           |              | 2 | 3,3649 | 0,524 | 0,198  |
| 13 | Q92797 SYMPK_HUMAN  | K.T#PSPAEDAREPE.A              | T1257:       | 2 | 3,3615 | 0,366 | 0,168  |
| 13 | O75531 BAF_HUMAN    | R.DFVAEPM*GKPVGSLAGIGE.V       |              | 2 | 3,3605 | 0,518 | -0,06  |
| 13 | Q9C0C2 TB182_HUMAN  | E.ASQASPCPAVTPSAPSALPDEGSR.H   |              | 3 | 3,3543 | 0,314 | 0,151  |
| 13 | P11831 SRF_HUMAN    | E.LQVVNLDTAHSTKS#E.-           | S507:        | 2 | 3,3535 | 0,364 | -0,071 |
| 13 | Q13885 TBB2A_HUMAN  | E.GAELVDS#VLDVVR.K             | S115:        | 2 | 3,3531 | 0,179 | -0,504 |
| 13 | Q9UKV3 ACINU_HUMAN  | K.KCEAEEAEPAAATQPQTSE.T        |              | 3 | 3,3529 | 0,245 | 0,088  |
| 13 | Q6NZI2 PTRF_HUMAN   | R.RGS#S#PDVHALLE.I             | S365:S366:   | 2 | 3,3523 | 0,409 | -0,508 |
| 13 | Q96AE4 FUBP1_HUMAN  | R.QQAAYYAQTS#PQGM*PQHPPAPQGQ.- | S630:        | 3 | 3,3502 | 0,249 | 0,342  |
| 13 | Q96JM3 ZN828_HUMAN  | E.LRKPGPLS#PEIR.S              | S427:        | 3 | 3,3393 | 0,262 | 0      |
| 13 | P17275 JUNB_HUMAN   | R.SRDAT#PPVS#PINM*EDQE.R       | T255:S259:   | 3 | 3,3387 | 0,28  | 0,532  |
| 13 | Q13885 TBB2A_HUMAN  | K.EVDEQM*LNQVQNK.N             |              | 2 | 3,3335 | 0,266 | -0,334 |
| 13 | P18858 DNL1_HUMAN   | E.QATTSQAQVACLYR.K             |              | 2 | 3,3325 | 0,539 | -0,166 |
| 13 | Q9Y2X7 GIT1_HUMAN   | R.ARS#M*DSSDLSGAVTLQE.Y        | S410:        | 2 | 3,3319 | 0,338 | -0,247 |
| 13 | Q01082 SPTB2_HUMAN  | K.TALPAQSAAT#LPAR.T            | T2187:       | 2 | 3,33   | 0,368 | 0      |
| 13 | O15541 R113A_HUMAN  | E.NYEVGS#DDEEIPFK.C            | S253:        | 2 | 3,3293 | 0,242 | -0,213 |
| 13 | P49023 PAXI_HUMAN   | E.LNAVQHNPFGPADE.A             |              | 2 | 3,3222 | 0,519 | 0      |
| 13 | A8K9W7 A8K9W7_HUMAN | E.SEDPDYYQNIQGS#HSS#EGNE.G     | S260:        | 3 | 3,3119 | 0,366 | 0,208  |
| 13 | Q5SW79 CE170_HUMAN  | E.RSES#LDPDSSM*DTTLILK.D       | S881:        | 2 | 3,3069 | 0,392 | 0,348  |
| 13 | Q9UJV9 DDX41_HUMAN  | R.SGNTGIATTFINK.A              |              | 2 | 3,3036 | 0,384 | -0,184 |
| 13 | O95239 KIF4A_HUMAN  | K.KT#PPAPSPFDLPE.L             | T1181:       | 2 | 3,301  | 0,413 | -0,413 |
| 13 | P80723 BASP_HUMAN   | E.SAAPAAGEEPSKEE.G             |              | 2 | 3,2968 | 0,391 | -0,355 |
| 13 | Q6NYC8 PHTNS_HUMAN  | E.VESRLS#PGESAYQK.L            | S224:        | 3 | 3,294  | 0,267 | 0,785  |
| 13 | Q92734 TFG_HUMAN    | K.NVM*SAFGLTDDQVSGPPSAPAEDR.S  |              | 3 | 3,2914 | 0,195 | 0,295  |
| 13 | Q9H307 PININ_HUMAN  | K.SLS#PGKENVSALDM*EKE.S        | S443:        | 3 | 3,2852 | 0,151 | -0,095 |
| 13 | P53396 ACLY_HUMAN   | R.TAS#FSEGRADE.V               | S455:        | 2 | 3,2776 | 0,436 | -0,095 |
| 13 | Q8WX92 NELFB_HUMAN  | R.KPS#PAQAAETPALE.L            | S557:        | 2 | 3,2668 | 0,456 | 0,082  |
| 13 | Q9UGP4 LIMD1_HUMAN  | E.GSLGGQNSGIGGR.S              |              | 2 | 3,2667 | 0,366 | 0      |
| 13 | Q9Y6A5 TACC3_HUMAN  | E.LKEES#FRDPAEVLGTGAE.V        | S524:        | 2 | 3,2667 | 0,286 | -0,18  |
| 13 | Q6S8J3 A26CA_HUMAN  | E.LPDGQVITIGNER.F              |              | 2 | 3,2626 | 0,337 | -0,605 |
| 13 | Q02952 AKA12_HUMAN  | E.GGGAGTKS#VPEDDGHALAE.R       | S1674:       | 2 | 3,2623 | 0,457 | -0,187 |
| 13 | O95359 TACC2_HUMAN  | K.TPSSPS#KS#PASFEIPASAM*E.A    | S2392:S2394: | 2 | 3,2575 | 1     | -0,111 |

|    |                     |                                  |            |   |        |       |        |
|----|---------------------|----------------------------------|------------|---|--------|-------|--------|
| 13 | Q02952 AKA12_HUMAN  | E.TDVVLKVDAQE.A                  |            | 2 | 3,2552 | 0,318 | -0,1   |
| 13 | Q00613 HSF1_HUMAN   | K.CLSVACLDKNE.L                  |            | 2 | 3,2519 | 0,34  | -0,093 |
| 13 | Q9HAV7 GRPE1_HUMAN  | K.NSGQNLEEDM*GQSE.Q              |            | 2 | 3,2514 | 0,427 | 0,393  |
| 13 | Q96RQ3 MCCA_HUMAN   | E.DKTFQVLGNLYSE.G                |            | 2 | 3,2476 | 0,462 | -0,242 |
| 13 | B2RMQ4 B2RMQ4_HUMAN | E.VVARPAS#LSNDKLM*E.K            | S327:      | 3 | 3,2433 | 0,251 | 0,318  |
| 13 | Q14149 MORC3_HUMAN  | K.SES#PDHM*VSQYQQALEE.I          | S765:      | 2 | 3,2352 | 0,38  | 0,118  |
| 13 | Q7Z2W4 ZCCHV_HUMAN  | E.FLASASASAER.S                  |            | 2 | 3,2346 | 0,486 | -0,989 |
| 13 | Q8TBN0 R3GEF_HUMAN  | K.TLVITSTPAS#PNRE.L              | S168:      | 2 | 3,2329 | 0,438 | -0,156 |
| 13 | Q7Z698 SPRE2_HUMAN  | E.AELGDDDVFTTATDSSSNSSQK.R       |            | 2 | 3,2327 | 0,472 | -0,429 |
| 13 | P35611 ADDA_HUMAN   | E.AHRPPS#PTEAPTEASPEPAPDPAPVAE.E | S669:      | 3 | 3,2302 | 0,28  | 0,131  |
| 13 | P21333 FLNA_HUMAN   | E.ISIQDM*TAQVTS#PSGK.T           | S2180:     | 3 | 3,2299 | 0,12  | 0,416  |
| 13 | Q12888 TP53B_HUMAN  | R.GNLLHFPSS#QGEEE.K              | S1068:     | 2 | 3,2297 | 0,505 | -0,15  |
| 13 | Q09666 AHNK_HUMAN   | E.VGFHGAAPDISVK.G                |            | 2 | 3,2287 | 0,4   | 0,094  |
| 13 | P05362 ICAM1_HUMAN  | E.AQVHLALGDQR.L                  |            | 2 | 3,2275 | 0,414 | -0,202 |
| 13 | Q01082 SPTB2_HUMAN  | E.GM*QLISEKPETE.A                |            | 2 | 3,227  | 0,342 | -0,177 |
| 13 | Q8WXI9 P66B_HUMAN   | R.LQQQAALS#PTTAPAVSSVSK.Q        | S486:      | 3 | 3,2246 | 0,254 | -0,089 |
| 13 | Q00613 HSF1_HUMAN   | R.GHTDTEGRPPS#PPPTST#PE.K        | S363:T369: | 2 | 3,2242 | 0,271 | 0,46   |
| 13 | P07910 HNRPC_HUMAN  | K.GFAFVQYVNER.N                  |            | 2 | 3,2232 | 0,305 | -0,367 |
| 13 | Q6P996 PDXD1_HUMAN  | E.TS#SVSHIEDLEKVE.R              | S721:      | 2 | 3,2214 | 0,373 | -0,443 |
| 13 | P46013 KI67_HUMAN   | E.KDIIIFVGT#PVQK.L               | T1315:     | 2 | 3,2207 | 0,295 | -0,238 |
| 13 | P10599 THIO_HUMAN   | K.TAFQEALDAAGDK.L                |            | 2 | 3,2184 | 0,386 | -0,456 |
| 13 | Q9UKV3 ACINU_HUMAN  | K.KCEAEEAEPPAATQPQTSE.T          |            | 2 | 3,2179 | 0,479 | -0,118 |
| 13 | P27816 MAP4_HUMAN   | K.KCS#LPAEEDSVLE.K               | S636:      | 2 | 3,2158 | 0,292 | -0,235 |
| 13 | Q96JQ2 CLMN_HUMAN   | E.FM*HQIIDQVLQGGPGK.T            |            | 3 | 3,2038 | 0,318 | -0,718 |
| 13 | Q66K74 MAP1S_HUMAN  | E.LPLAASSIPRPR.T                 |            | 2 | 3,2006 | 0,291 | -0,095 |
| 13 | Q9NVM9 CLO11_HUMAN  | E.AEIIKDS#PDS#PEPPNKKPLVE.M      | S623:S626: | 3 | 3,1997 | 0,109 | -0,446 |
| 13 | Q8NFC6 FA44A_HUMAN  | E.DKSPET#GTAGGSSTASYSAGR.G       | T2478:     | 3 | 3,1987 | 0,268 | -0,266 |
| 13 | Q14160 LAP4_HUMAN   | E.NAVTITPLRPEDDYS#PRE.R          | S835:      | 2 | 3,1958 | 0,256 | 0      |
| 13 | Q14207 NPAT_HUMAN   | K.FLTSDNNIAQVPK.Q                |            | 2 | 3,1939 | 0,357 | -0,169 |
| 13 | Q9UGU0 TCF20_HUMAN  | E.ATS#PGAKDM*PLSSDGNPK.V         | S583:      | 3 | 3,1933 | 0,31  | -0,098 |
| 13 | P18615 NELFE_HUMAN  | R.SIS#ADDDLQE.S                  | S115:      | 2 | 3,1909 | 0,333 | 0,104  |
| 13 | P63241 IF5A1_HUMAN  | D.GYLSLLQDSGEVRE.D               |            | 2 | 3,188  | 0,412 | -0,234 |
| 13 | Q99459 CDC5L_HUMAN  | E.YNVNTNNSVALRT#PRT#PASQDR.I     | T352:T355: | 3 | 3,1869 | 0,355 | 0,073  |
| 13 | Q12906 ILF3_HUMAN   | E.AKPAVVAPAPVVE.A                |            | 2 | 3,1851 | 0,48  | 0,098  |
| 13 | Q96SB4 SRPK1_HUMAN  | E.DLHNANDCDVQNLNQE.S             |            | 3 | 3,1849 | 0,106 | -0,096 |
| 13 | Q9H9J4 UBP42_HUMAN  | D.M*APAGHPGEDAEPSPGERVE.D        | S919:      | 3 | 3,1812 | 0,222 | 0,344  |
| 13 | Q9BUH6 CI142_HUMAN  | E.DRASLTLSGGPSALAFD.L            |            | 2 | 3,1782 | 0,477 | -0,436 |
| 13 | P68104 EF1A1_HUMAN  | K.IGGIGTVPVGR.V                  |            | 2 | 3,1655 | 0,356 | 0,119  |
| 13 | O60264 SMCA5_HUMAN  | E.M*EEIFDDAS#PGKQK.E             | S66:       | 3 | 3,164  | 0,243 | 0,433  |

|    |                     |                                |        |   |        |       |        |
|----|---------------------|--------------------------------|--------|---|--------|-------|--------|
| 13 | Q8N108 MIER1_HUMAN  | E.LLSLYGYGSTVR.L               |        | 2 | 3,1638 | 0,433 | 0      |
| 13 | P08670 VIME_HUMAN   | E.AANYQDTIGRLQDE.I             |        | 2 | 3,1636 | 0,262 | -0,153 |
| 13 | Q4V328 GRAP1_HUMAN  | R.TQTGDSISSISSFSYRE.I          |        | 2 | 3,1588 | 0,469 | -0,07  |
| 13 | Q71U36 TBA1A_HUMAN  | K.DVNAAIATIK.T                 |        | 2 | 3,1579 | 0,432 | -0,3   |
| 13 | Q12888 TP53B_HUMAN  | E.DSSVVIVDVKEPSR.V             |        | 3 | 3,1494 | 0,269 | 0,225  |
| 13 | O00139 KIF2A_HUMAN  | E.DGKQQVQVVGLQE.R              |        | 2 | 3,1481 | 0,265 | -0,342 |
| 13 | Q5CZB5 Q5CZB5_HUMAN | E.GEGAAGAGDHQDPSLGAGE.A        |        | 2 | 3,1476 | 0,457 | -0,432 |
| 13 | Q9Y608 LRRF2_HUMAN  | R.NSASATTPLSGNSS#R.R           | S324:  | 2 | 3,1466 | 0,408 | -0,638 |
| 13 | O15014 ZN609_HUMAN  | E.ADKIYSFTDNAPS#PSIGGSSRLE.N   | S804:  | 3 | 3,1426 | 0,211 | 0,294  |
| 13 | Q02952 AKA12_HUMAN  | K.ERPPAPS#SFVFQEE.T            | S1225: | 2 | 3,1419 | 0,239 | -0,215 |
| 13 | O60264 SMCA5_HUMAN  | E.M*EEIFDDAS#PGKQK.E           | S66:   | 2 | 3,1385 | 0,447 | 0,794  |
| 13 | Q8N2Y8 RUSC2_HUMAN  | E.GPAAM*AGPGS#PPR.R            | S536:  | 2 | 3,1374 | 0,451 | -0,967 |
| 13 | Q6PKG0 LARP1_HUMAN  | R.AVT#PVPTKTEE.V               | T526:  | 2 | 3,1312 | 0,321 | 0      |
| 13 | Q13428 TCOF_HUMAN   | K.LDSSPSVSSTLAAK.D             |        | 2 | 3,1293 | 0,474 | 0      |
| 13 | Q9UL46 PSME2_HUMAN  | E.DSLNVADLTSR.A                |        | 2 | 3,1278 | 0,426 | -0,187 |
| 13 | Q02952 AKA12_HUMAN  | E.SQVHM*M*AAAVADGTR.A          |        | 3 | 3,126  | 0,206 | 0      |
| 13 | Q9H078 CLPB_HUMAN   | E.LLDGGANPLQR.N                |        | 2 | 3,1254 | 0,381 | 0      |
| 13 | Q4G0F5 VP26B_HUMAN  | R.TPSQLSDNCRQ.-                |        | 2 | 3,1244 | 0,453 | -0,344 |
| 13 | P22626 ROA2_HUMAN   | R.GGGGNFGPGPSNFR.G             |        | 2 | 3,1176 | 0,453 | -0,443 |
| 13 | Q16643 DREB_HUMAN   | E.DGSDDLKLAASGE.G              |        | 2 | 3,1175 | 0,491 | 0      |
| 13 | P05783 K1C18_HUMAN  | R.GGM*GSGGLATGIAGLAGM*GGIQNE.K |        | 3 | 3,1167 | 0,252 | 0,085  |
| 13 | P14314 GLU2B_HUMAN  | E.TM*VTSTTEPSRCE.Y             |        | 2 | 3,1162 | 0,456 | -0,483 |
| 13 | Q99459 CDC5L_HUMAN  | E.YNVTNNSVALR.T                |        | 2 | 3,113  | 0,323 | -0,39  |
| 13 | Q9H4A3 WNK1_HUMAN   | E.KQSSTPGSLFLS#PPAPAPK.N       | S19:   | 2 | 3,1119 | 0,362 | -0,123 |
| 13 | P30101 PDIA3_HUMAN  | E.LSDFISYLQRE.A                |        | 2 | 3,1079 | 0,404 | -0,356 |
| 13 | Q9BZE9 ASPC1_HUMAN  | R.AAGS#PSPLPAPDPAPK.S          | S500:  | 2 | 3,1021 | 0,285 | 0,079  |
| 13 | Q9UHB6 LIMA1_HUMAN  | E.ISKPEVPEDVDLD.L              |        | 2 | 3,1016 | 0,339 | -0,335 |
| 13 | P46821 MAP1B_HUMAN  | R.KLGDVS#PTQIDVQFGSFKE.D       | S1501: | 3 | 3,1014 | 0,24  | -0,324 |
| 13 | P55072 TERA_HUMAN   | E.DNSVVLSQPK.M                 |        | 2 | 3,0987 | 0,371 | -0,104 |
| 13 | P29966 MARCS_HUMAN  | E.KGEPAAAAAPEAGAS#PVEK.E       | S101:  | 3 | 3,0976 | 0,155 | 0      |
| 13 | A0MZ66 SHOT1_HUMAN  | E.AEFNSPS#PPTPEGEGPR.K         | S534:  | 2 | 3,0975 | 0,387 | 0,063  |
| 13 | P29692 EF1D_HUMAN   | R.GVVQELQQAIK.L                |        | 2 | 3,097  | 0,371 | -0,563 |
| 13 | Q08379 GOGA2_HUMAN  | E.GSPRDNPT#AAQQIM*QLLRE.M      | T947:  | 3 | 3,086  | 0,093 | -0,17  |
| 13 | Q58FF8 H90B2_HUMAN  | K.ADLINNLGTIAK.F               |        | 2 | 3,0856 | 0,418 | -0,196 |
| 13 | O14964 HGS_HUMAN    | R.KSPT#PSAPVPLTEPAAQPGE.G      | T347:  | 3 | 3,0822 | 0,23  | 0,178  |
| 13 | P10809 CH60_HUMAN   | K.NAGVEGSLIVEK.I               |        | 2 | 3,08   | 0,304 | 0      |
| 13 | Q9Y613 FHOD1_HUMAN  | E.TLAGAM*PNEAGGHPDAR.Q         |        | 2 | 3,0799 | 0,346 | -0,145 |
| 13 | Q8TAQ2 SMRC2_HUMAN  | K.GGTM*TDLDEQEDE.S             |        | 2 | 3,0763 | 0,412 | -0,084 |
| 13 | O15355 PPM1G_HUMAN  | E.LAQIAGRTEDEDE.K              |        | 2 | 3,0749 | 0,459 | -0,158 |

|    |                     |                               |            |   |        |       |        |
|----|---------------------|-------------------------------|------------|---|--------|-------|--------|
| 13 | Q86TI0 TBCD1_HUMAN  | E.LIDSS#PLSDNQR.M             | S1072:     | 2 | 3,0704 | 0,283 | -0,086 |
| 13 | Q9NW75 GPTC2_HUMAN  | E.LVHDLVSALEES#SEQAR.G        | S39:       | 3 | 3,0702 | 0,245 | 0      |
| 13 | Q9UCN2 Q9UCN2_HUMAN | -.PYQYPALT#PEQK.K             | T8:        | 2 | 3,0667 | 0,279 | -0,081 |
| 13 | Q13409 DC1I2_HUMAN  | D.VGEQIAVPR.N                 |            | 2 | 3,0661 | 0,242 | 0      |
| 13 | Q09666 AHNK_HUMAN   | E.SDLKGPVEVDIEGPE.G           |            | 2 | 3,066  | 0,404 | -0,164 |
| 13 | Q16254 E2F4_HUMAN   | E.AGPQAPPPPGT#PSRHE.K         | T14:       | 3 | 3,0651 | 0,245 | 0,109  |
| 13 | Q96K76 UBP47_HUMAN  | E.TSDFENIES#PLNER.D           | S910:      | 2 | 3,0643 | 0,399 | 0,141  |
| 13 | Q92797 SYMPK_HUMAN  | E.DAM*KTPS#PAAEDAREPE.A       | S1259:     | 2 | 3,064  | 0,381 | -0,255 |
| 13 | Q8TF15 Q8TF15_HUMAN | E.VELSST#PPLPASR.I            | T188:      | 2 | 3,0639 | 0,352 | -0,17  |
| 13 | Q9UHR5 S30BP_HUMAN  | E.KGGLVSDAYGEDDFSR.L          |            | 3 | 3,0628 | 0,306 | -0,107 |
| 13 | P62158 CALM_HUMAN   | R.EADIDGDGQVNYEE.F            |            | 2 | 3,0589 | 0,321 | -0,157 |
| 13 | Q9NXG2 THUM1_HUMAN  | E.LGQTKPTSNPQVVNE.G           |            | 2 | 3,056  | 0,335 | 0,076  |
| 13 | Q9NYH9 UTP6_HUMAN   | E.IES#QTEEQPTTK.Q             | S286:      | 2 | 3,0537 | 0,414 | -0,415 |
| 13 | P30837 AL1B1_HUMAN  | E.LDTQQGPQVDKE.Q              |            | 2 | 3,0531 | 0,383 | 0,09   |
| 13 | Q96G21 IMP4_HUMAN   | E.FDDAGGEGVTSHVDDE.Y          |            | 2 | 3,0506 | 0,277 | -0,222 |
| 13 | Q96T23 RSF1_HUMAN   | D.AQRLS#PIPEEVPKSTLE.S        | S594:      | 3 | 3,0491 | 0,288 | -0,278 |
| 13 | P62241 RS8_HUMAN    | K.ISSLLEEQFQGGK.L             |            | 2 | 3,0491 | 0,423 | -0,162 |
| 13 | Q5VUA4 ZN318_HUMAN  | E.VILKGS#PEEKVVLAE.K          | S1420:     | 3 | 3,0478 | 0,096 | -0,324 |
| 13 | Q12893 TM115_HUMAN  | K.VDS#PLPSDKAPT#PPGK.G        | S320:T329: | 3 | 3,0451 | 0,131 | -0,207 |
| 13 | Q12802 AKP13_HUMAN  | E.KNAVLGLPVALQDK.A            |            | 2 | 3,0424 | 0,323 | 0,25   |
| 13 | P08670 VIME_HUMAN   | E.NTLQSFQRQVDNAS#LAR.L        | S214:      | 3 | 3,0396 | 0,107 | -0,363 |
| 13 | P51858 HDGF_HUMAN   | E.VERPLPM*EVEKNST#PS#EPGSGR.G | T200:S202: | 3 | 3,0388 | 0,211 | 0,071  |
| 13 | Q9UQ35 SRRM2_HUMAN  | E.SYFGVSSLQLK.G               |            | 2 | 3,0357 | 0,466 | -0,596 |
| 13 | Q969R5 LMBL2_HUMAN  | E.EHLDVASPKAS#SPELPVSVE.N     | S688:      | 3 | 3,0352 | 0,193 | -0,24  |
| 13 | Q12873 CHD3_HUMAN   | E.LDDILKFGTEE.L               |            | 2 | 3,0345 | 0,361 | -0,381 |
| 13 | Q6ZRV2 FA83H_HUMAN  | R.RLS#LGQGDSTEAATEE.R         | S1003:     | 2 | 3,0319 | 0,422 | 0      |
| 13 | O94885 SASH1_HUMAN  | E.VEKPDAS#PTSLQLR.S           | S101:      | 2 | 3,0317 | 0,357 | 0,151  |
| 13 | P12814 ACTN1_HUMAN  | R.TINEVENQILTR.D              |            | 2 | 3,0296 | 0,27  | -0,171 |
| 13 | Q8N0S6 CENPL_HUMAN  | E.DYFIGAT#PLQK.R              | T25:       | 2 | 3,0286 | 0,387 | -0,366 |
| 13 | Q9BTT0 AN32E_HUMAN  | E.IEGLNDFKE.L                 |            | 2 | 3,0237 | 0,242 | 0      |
| 13 | P27816 MAP4_HUMAN   | E.AGAPTSASGLNGHPT#LSGGGDQRE.A | T1130:     | 3 | 3,0234 | 0,37  | 0      |
| 13 | Q9C0C9 UBE2O_HUMAN  | E.QLLTGSPT#SPTVEPEKPTRE.K     | T838:      | 3 | 3,023  | 0,306 | 0,407  |
| 13 | O95208 EPN2_HUMAN   | R.GSS#QPNLSTSHSEQE.Y          | S173:      | 2 | 3,0222 | 0,406 | -0,293 |
| 13 | P55072 TERA_HUMAN   | E.M*FAQTLQQSR.G               |            | 2 | 3,0212 | 0,288 | 0,1    |
| 13 | Q92692 PVRL2_HUMAN  | E.HS#PLKTPYFDAGASCTEQE.M      | S433:      | 3 | 3,0209 | 0,253 | -0,247 |
| 13 | O00712 NFIB_HUMAN   | E.QDSGQSGSPS#HNDPAKNPPGYLE.D  | S196:      | 3 | 3,0199 | 0,108 | 0,074  |
| 13 | P42025 ACTY_HUMAN   | R.ACYLSINPQKDE.A              |            | 2 | 3,0179 | 0,384 | -0,679 |
| 13 | Q01105 SET_HUMAN    | R.VEVTEFEDIK.S                |            | 2 | 3,0166 | 0,414 | -0,303 |
| 13 | Q6S8J3 A26CA_HUMAN  | E.KLCYVALDFEQE.M              |            | 2 | 3,0161 | 0,277 | -0,322 |

|    |                    |                                 |            |   |        |       |        |
|----|--------------------|---------------------------------|------------|---|--------|-------|--------|
| 13 | Q7Z2W4 ZCCHV_HUMAN | R.SCT#PS#PDQISHR.A              | T273:S275: | 2 | 3,0159 | 0,363 | -0,553 |
| 13 | P08670 VIME_HUMAN  | R.QDVDNAS#LAR.L                 | S214:      | 2 | 3,0156 | 0,317 | 0,209  |
| 13 | Q6NZI2 PTRF_HUMAN  | E.SDAVLVDKSDSD.-                |            | 2 | 3,0155 | 0,422 | -0,098 |
| 13 | Q9H7Z6 MYST1_HUMAN | E.GTAPSPGRVS#PPTPARGEPE.V       | S42:       | 3 | 3,0153 | 0,165 | -0,359 |
| 13 | Q71U36 TBA1A_HUMAN | E.DM*AALEKDYEE.V                |            | 2 | 3,0125 | 0,228 | -0,092 |
| 13 | P27816 MAP4_HUMAN  | R.AS#PIKM*DLAPSKD.M             | S358:      | 3 | 3,0099 | 0,162 | 0,249  |
| 13 | Q14247 SRC8_HUMAN  | R.AKTQT#PPVS#PAPQPTEE.R         | T401:S405: | 2 | 3,0041 | 0,451 | 0,189  |
| 13 | O60716 CTND1_HUMAN | E.GAM*SVVSVETS#DDGTTRRTE.T      | S129:      | 3 | 3,0033 | 0,241 | -0,25  |
| 13 | Q9ULA0 DNPEP_HUMAN | E.M*HLVPILATAIQEE.L             |            | 2 | 3,0004 | 0,454 | -0,232 |
| 13 | Q07866 KLC1_HUMAN  | E.SLNVDVVKYE.S                  |            | 2 | 2,9983 | 0,398 | -0,105 |
| 13 | P30622 CLIP1_HUMAN | E.ANGLQTPASR.A                  |            | 2 | 2,9863 | 0,386 | -0,437 |
| 13 | Q7Z6M1 RABEK_HUMAN | E.DSNSLTLNHE.A                  |            | 2 | 2,9849 | 0,377 | -0,216 |
| 13 | Q05519 SFR11_HUMAN | E.AQS#LISAAIEPDKKEE.K           | S231:      | 3 | 2,9831 | 0,228 | -0,708 |
| 13 | P55072 TERA_HUMAN  | E.CQANFISIKGPE.L                |            | 2 | 2,9825 | 0,2   | -0,626 |
| 13 | O60716 CTND1_HUMAN | E.DGYPGGSDNYGS#LSR.V            | S230:      | 2 | 2,9792 | 0,31  | 0,225  |
| 13 | Q9UHR5 S30BP_HUMAN | E.KGGLVSDAYGEDDFSR.L            |            | 2 | 2,979  | 0,404 | -0,711 |
| 13 | Q8IVF2 AHNK2_HUMAN | E.VDVEAPGAKLD.S                 |            | 2 | 2,9754 | 0,36  | 0,219  |
| 13 | Q7LBC6 JHD2B_HUMAN | E.SLADSSS#RDSFKQSLE.S           | S553:      | 3 | 2,975  | 0,325 | 0,281  |
| 13 | Q86W92 LIPB1_HUMAN | R.SPSAS#ITDEDSNV.-              | S1003:     | 2 | 2,9744 | 0,314 | -0,087 |
| 13 | Q99615 DNJC7_HUMAN | E.ALGDAQQSVR.L                  |            | 2 | 2,9717 | 0,379 | -0,35  |
| 13 | Q16204 CCDC6_HUMAN | E.KLDQPVSAPPS#PR.D              | S244:      | 3 | 2,9717 | 0,286 | -0,621 |
| 13 | Q9H4A3 WNK1_HUMAN  | R.DVDDGSGSPHS#PHQLSSK.S         | S2032:     | 3 | 2,9708 | 0,38  | 0,095  |
| 13 | Q9UPM8 AP4E1_HUMAN | E.AKS#GETTSTHNM*TCSSFSLSNVAYE.D | S804:      | 3 | 2,9695 | 0,242 | -0,127 |
| 13 | Q9UJW0 DCTN4_HUMAN | E.DYYTRPVNLTE.V                 |            | 2 | 2,9675 | 0,355 | -0,979 |
| 13 | P18615 NELFE_HUMAN | E.KGPVPTFQPFQR.S                |            | 3 | 2,9658 | 0,12  | 0,065  |
| 13 | P08670 VIME_HUMAN  | R.QDVDNAS#LARLDLE.R             | S214:      | 2 | 2,9636 | 0,335 | -0,596 |
| 13 | P08069 IGF1R_HUMAN | E.NKLPEPEELDLEPENM*E.S          |            | 2 | 2,9622 | 0,394 | 0      |
| 13 | Q00169 PIPNA_HUMAN | E.VLVNEPYEKDGE.K                |            | 2 | 2,9607 | 0,338 | -0,088 |
| 13 | Q13885 TBB2A_HUMAN | R.ISEQFTAM*FR.R                 |            | 2 | 2,9578 | 0,439 | 0      |
| 13 | P13797 PLST_HUMAN  | -.M*ATTQISKDELDE.L              |            | 2 | 2,9577 | 0,411 | -0,408 |
| 13 | P38646 GRP75_HUMAN | E.DKVIAYVDLGGGTFD.I             |            | 2 | 2,9577 | 0,315 | -1,865 |
| 13 | P30101 PDIA3_HUMAN | E.LSDFISYLQR.E                  |            | 2 | 2,9562 | 0,434 | -0,196 |
| 13 | Q02539 H11_HUMAN   | K.ALAAAGYDVEK.N                 |            | 2 | 2,9559 | 0,381 | 0      |
| 13 | P14625 ENPL_HUMAN  | R.ELISNASDALDK.I                |            | 2 | 2,9559 | 0,404 | -0,191 |
| 13 | P05787 K2C8_HUMAN  | K.SYKVSTS#GPR.A                 | S15:       | 2 | 2,954  | 0,315 | -0,105 |
| 13 | Q5VUA4 ZN318_HUMAN | E.VILKGS#PEEK.V                 | S1420:     | 2 | 2,9505 | 0,247 | 0      |
| 13 | O00629 IMA4_HUMAN  | K.IEQLQNHENE.D                  |            | 2 | 2,9501 | 0,135 | -0,195 |
| 13 | Q14674 ESPL1_HUMAN | E.ILRGS#DGEDSASGGK.T            | S1508:     | 3 | 2,9491 | 0,115 | -0,179 |
| 13 | Q969F1 TF3C6_HUMAN | E.IQM*NDSSNLS#CEQEKPM*HLE.I     | S177:      | 3 | 2,9443 | 0,422 | -0,073 |



|    |                    |                           |        |   |        |       |        |
|----|--------------------|---------------------------|--------|---|--------|-------|--------|
| 13 | P46821 MAP1B_HUMAN | E.VVEEHCAS#PEDKTLE.V      | S1312: | 2 | 2,9433 | 0,33  | 0      |
| 13 | P18583 SON_HUMAN   | E.SDQTLAALLS#PKESSGGEK.E  | S1697: | 3 | 2,9428 | 0,217 | -0,183 |
| 13 | Q9BUF5 TBB6_HUMAN  | E.HGIDPAGGYVGDSALQLE.R    |        | 2 | 2,9419 | 0,477 | -0,271 |
| 13 | Q6P4R8 NFRKB_HUMAN | K.AVSTVVVTTAPS#PK.Q       | S1291: | 2 | 2,9415 | 0,451 | 0,17   |
| 13 | P30622 CLIP1_HUMAN | E.SNKPAGDVDM*SLSLLQE.I    |        | 2 | 2,94   | 0,432 | -0,335 |
| 13 | P04406 G3P_HUMAN   | K.LVINGNPITIFQE.R         |        | 2 | 2,9348 | 0,343 | -0,251 |
| 13 | P60174 TPIS_HUMAN  | K.VTNGAFTGEIS#PGM*IKD.C   | S80:   | 2 | 2,9338 | 0,357 | -0,266 |
| 13 | P18583 SON_HUMAN   | E.SDQTLAALLS#PKESSGGEK.E  | S1697: | 2 | 2,9295 | 0,503 | 0,244  |
| 13 | Q9UP83 COG5_HUMAN  | E.GGGGSVAVAGLGAR.G        |        | 2 | 2,9251 | 0,371 | 0,108  |
| 13 | P35908 K22E_HUMAN  | R.NLDLDSIIAEVK.A          |        | 2 | 2,9214 | 0,365 | -0,275 |
| 13 | P21333 FLNA_HUMAN  | E.ISIQDM*TAQVTS#PSGKTHE.A | S2180: | 3 | 2,9212 | 0,151 | 0      |
| 13 | P10809 CH60_HUMAN  | E.VVVTEIPKEE.K            |        | 2 | 2,9197 | 0,431 | 0,427  |
| 13 | A0MZ66 SHOT1_HUMAN | E.AEFNSPSPPT#PEPGEPR.K    | T537:  | 2 | 2,9195 | 0,424 | 0,188  |
| 13 | O60271 JIP4_HUMAN  | E.LDM*DKDLSGYK.G          |        | 3 | 2,9189 | 0,297 | 0,351  |
| 13 | Q9Y490 TLN1_HUMAN  | K.VLVQNAAGSQE.K           |        | 2 | 2,9185 | 0,333 | -0,219 |
| 13 | Q7Z4H7 FA29A_HUMAN | R.NQIPRT#PENLITE.I        | T584:  | 2 | 2,912  | 0,434 | -0,228 |
| 13 | Q06830 PRDX1_HUMAN | R.LVQAFQFTDK.H            |        | 2 | 2,9096 | 0,367 | -0,102 |
| 13 | P30837 AL1B1_HUMAN | R.VLGYIQLGQKE.G           |        | 2 | 2,9083 | 0,173 | 0,098  |
| 13 | P02533 K1C14_HUMAN | R.VLDELTLAR.A             |        | 2 | 2,9032 | 0,163 | 0,237  |
| 13 | Q99590 SFRIP_HUMAN | E.GEIIQTVDR.Q             |        | 2 | 2,9025 | 0,194 | -0,355 |
| 13 | O75643 U520_HUMAN  | E.VLSLVGKLE.G             |        | 2 | 2,8993 | 0,247 | 0,191  |
| 13 | P15170 ERF3A_HUMAN | E.AEPGGGS#LGDGRPPEESAHE.M | S36:   | 2 | 2,8991 | 0,444 | -0,601 |
| 13 | P04264 K2C1_HUMAN  | K.SLNNQFASFDK.V           |        | 2 | 2,8991 | 0,326 | -0,264 |
| 13 | P24534 EF1B_HUMAN  | E.DDKVGTDM*LEE.Q          |        | 2 | 2,8981 | 0,332 | -0,096 |
| 13 | P60981 DEST_HUMAN  | E.CQANGPEDLNR.A           |        | 2 | 2,8971 | 0,326 | -0,383 |
| 13 | O95373 IPO7_HUMAN  | E.NDDLTNVIQK.M            |        | 2 | 2,8959 | 0,267 | 0      |
| 13 | Q9C0C2 TB182_HUMAN | R.CPARPPPSGSQGLLEE.M      |        | 2 | 2,8958 | 0,474 | 0,072  |
| 13 | Q92922 SMRC1_HUMAN | K.GGTVADLDEQDEE.T         |        | 2 | 2,8951 | 0,327 | 0,177  |
| 13 | Q15003 CND2_HUMAN  | E.GTEDLSDVLR.Q            |        | 2 | 2,8899 | 0,331 | -0,507 |
| 13 | P12814 ACTN1_HUMAN | R.LAILGIHNE.V             |        | 2 | 2,8899 | 0,334 | -0,062 |
| 13 | Q9BZE9 ASPC1_HUMAN | R.AAGSPS#PLPAPDPAPK.S     | S502:  | 2 | 2,8875 | 0,44  | -0,314 |
| 13 | P06576 ATPB_HUMAN  | D.SGAPIKIPVGPE.T          |        | 2 | 2,8872 | 0,324 | 0      |
| 13 | Q9GZZ9 UBA5_HUMAN  | E.GITVAYTIPK.K            |        | 2 | 2,8864 | 0,453 | -0,115 |
| 13 | P49792 RBP2_HUMAN  | K.AVVS#PPKFVFGSE.S        | S2510: | 2 | 2,8848 | 0,298 | -0,338 |
| 13 | Q12802 AKP13_HUMAN | R.SLS#RPSSLIEQE.K         | S2563: | 2 | 2,8829 | 0,197 | -1,112 |
| 13 | P41227 ARD1A_HUMAN | E.DSGGDSKDLSEVSE.T        |        | 2 | 2,8828 | 0,285 | -0,343 |
| 13 | P19338 NUCL_HUMAN  | K.EVFEDAAEIR.L            |        | 2 | 2,8825 | 0,223 | -0,414 |
| 13 | Q9Y608 LRRF2_HUMAN | R.NSASATTPLS#GNSSR.R      | S320:  | 2 | 2,882  | 0,303 | 0,479  |
| 13 | Q9NXG2 THUM1_HUMAN | E.YGDDM*YGPEK.F           |        | 2 | 2,8819 | 0,464 | -0,102 |

|    |                     |                        |        |   |        |       |        |
|----|---------------------|------------------------|--------|---|--------|-------|--------|
| 13 | Q06323 PSME1_HUMAN  | E.LDAFLKEPALNE.A       |        | 2 | 2,8794 | 0,294 | -0,449 |
| 13 | Q9H7P9 PKHG2_HUMAN  | E.M*DERGPS#PLHVLE.G    | S610:  | 2 | 2,8773 | 0,291 | -0,465 |
| 13 | P52701 MSH6_HUMAN   | E.SDSIGLTPGEKSE.L      |        | 2 | 2,8766 | 0,44  | -0,277 |
| 13 | Q14674 ESPL1_HUMAN  | E.ILRGS#DGEDSASGGK.T   | S1508: | 2 | 2,875  | 0,403 | -0,319 |
| 13 | O15355 PPM1G_HUMAN  | E.TAM*FSVYDGHGEE.V     |        | 2 | 2,8712 | 0,46  | -0,724 |
| 13 | P21333 FLNA_HUMAN   | E.ISIQDM*TAQVTS#PSGK.T | S2180: | 2 | 2,8689 | 0,344 | -0,277 |
| 13 | P04792 HSPB1_HUMAN  | R.LFDQAFGLPR.L         |        | 2 | 2,8687 | 0,314 | -0,419 |
| 13 | Q13596 SNX1_HUMAN   | K.ITTSLLPINNGSKE.N     |        | 2 | 2,8669 | 0,445 | -0,328 |
| 13 | Q86W92 LIPB1_HUMAN  | R.SPSASITDEDS#NV.-     | S1009: | 2 | 2,8652 | 0,293 | 0,174  |
| 13 | P26639 SYTC_HUMAN   | K.M*GGEEKPIGAGEE.K     |        | 2 | 2,864  | 0,409 | 0,185  |
| 13 | Q13283 G3BP1_HUMAN  | E.IQEEKPEPVLEE.T       |        | 2 | 2,8638 | 0,153 | -0,254 |
| 13 | P54920 SNAA_HUMAN   | E.QVGTNAM*DS#PLLK.Y    | S195:  | 2 | 2,8627 | 0,334 | -0,083 |
| 13 | Q14019 COTL1_HUMAN  | E.LEEDFIKSE.L          |        | 2 | 2,861  | 0,131 | -0,22  |
| 13 | Q00613 HSF1_HUMAN   | E.SEPAPASVTALTDAR.G    |        | 2 | 2,8595 | 0,497 | -0,328 |
| 13 | Q08945 SSRP1_HUMAN  | E.IPLSNVSQCTTGK.N      |        | 2 | 2,8578 | 0,14  | -0,087 |
| 13 | Q71U36 TBA1A_HUMAN  | E.HGIQPDGQM*PSDK.T     |        | 2 | 2,8566 | 0,475 | -0,257 |
| 13 | O00273 DFFA_HUMAN   | E.VDAVDTGISRE.T        |        | 2 | 2,8527 | 0,39  | -0,21  |
| 13 | Q09666 AHNK_HUMAN   | K.ASLGS#LEGEAEAE.A     | S5752: | 2 | 2,851  | 0,325 | -0,091 |
| 13 | Q13077 TRAF1_HUMAN  | E.DLQIS#PGSR.L         | S66:   | 2 | 2,8488 | 0,285 | -0,214 |
| 13 | Q6UB99 ANR11_HUMAN  | E.GVFSSLQAKPS#PR.A     | S1894: | 2 | 2,8474 | 0,192 | -1,341 |
| 13 | Q96JM3 ZN828_HUMAN  | E.LLAS#PKKLE.D         | S603:  | 2 | 2,845  | 0,22  | -0,409 |
| 13 | Q9Y618 NCOR2_HUMAN  | E.AAKPPEPEKPV#PPPPIE.S | S215:  | 2 | 2,8444 | 0,284 | 0      |
| 13 | Q9GZZ9 UBA5_HUMAN   | E.GKPVDLVLSCVDNFE.A    |        | 2 | 2,8402 | 0,303 | -0,361 |
| 13 | P24534 EF1B_HUMAN   | E.DDKVGTDM*LE.E        |        | 2 | 2,8388 | 0,358 | -0,75  |
| 13 | P23528 COF1_HUMAN   | R.YALYDATYETK.E        |        | 2 | 2,8372 | 0,457 | -0,638 |
| 13 | Q16881 TRXR1_HUMAN  | R.VVGFHVLGPNAGE.V      |        | 2 | 2,8357 | 0,422 | -0,188 |
| 13 | Q6NYC8 PHTNS_HUMAN  | E.AQTQKPEPPESA EK.L    |        | 2 | 2,8346 | 0,27  | -0,158 |
| 13 | P62829 RL23_HUMAN   | E.DNAGVIVN NK.G        |        | 2 | 2,8327 | 0,393 | 0      |
| 13 | P18615 NELFE_HUMAN  | E.KGPVPTFQPFQR.S       |        | 2 | 2,831  | 0,299 | -0,348 |
| 13 | Q49A39 Q49A39_HUMAN | E.QLNFS#DDDEQGSNSPK.E  | S92:   | 2 | 2,8301 | 0,303 | 0,328  |
| 13 | Q9UQ35 SRRM2_HUMAN  | R.SSTGPEPPAPTLLAE.R    |        | 2 | 2,8253 | 0,236 | 0      |
| 13 | P62701 RS4X_HUMAN   | R.LSNIFVIGK.G          |        | 2 | 2,8249 | 0,396 | -0,062 |
| 13 | Q16531 DDB1_HUMAN   | R.QGQQLVTCSGAFKE.G     |        | 2 | 2,8237 | 0,392 | -0,227 |
| 13 | Q5T3I0 GPTC4_HUMAN  | E.DLNLEDRGEE.T         |        | 2 | 2,8233 | 0,289 | 0      |
| 13 | Q13127 REST_HUMAN   | E.SVSTEDLSPPS#PPLPK.E  | S864:  | 2 | 2,8226 | 0,387 | -0,211 |
| 13 | Q9BWT3 PAPOG_HUMAN  | R.DTDNGTGFNSPASK.S     |        | 2 | 2,8219 | 0,365 | -0,252 |
| 13 | P15822 ZEP1_HUMAN   | K.ISVGRLS#PQQE.S       | S1734: | 2 | 2,8137 | 0,305 | 0      |
| 13 | P04792 HSPB1_HUMAN  | E.SPAAAPAYSRALSR.Q     |        | 2 | 2,8134 | 0,177 | -0,161 |
| 13 | P14618 KPYM_HUMAN   | R.AGKPVICATQM*LE.S     |        | 2 | 2,8105 | 0,314 | -0,085 |

|    |                     |                         |        |   |        |       |        |
|----|---------------------|-------------------------|--------|---|--------|-------|--------|
| 13 | Q13162 PRDX4_HUMAN  | E.GTAVIDGEFKE.L         |        | 2 | 2,805  | 0,281 | 0,105  |
| 13 | P67936 TPM4_HUMAN   | E.NVGLHQTLDQTLNE.L      |        | 2 | 2,8045 | 0,175 | -0,308 |
| 13 | P29966 MARCS_HUMAN  | E.AAAERPGEAAVAS#SPSK.A  | S26:   | 2 | 2,8043 | 0,284 | -0,218 |
| 13 | Q05639 EF1A2_HUMAN  | E.S#FSQYPLGR.F          | S414:  | 2 | 2,8041 | 0,401 | 0      |
| 13 | P29692 EF1D_HUMAN   | R.IASLEVENQSLR.G        |        | 2 | 2,8038 | 0,327 | -0,09  |
| 13 | P02545 LMNA_HUMAN   | K.NIYS#EELRE.T          | S212:  | 2 | 2,8006 | 0,292 | -0,099 |
| 13 | Q14160 LAP4_HUMAN   | R.LRVQS#PEPPAPER.A      | S1475: | 2 | 2,8004 | 0,216 | -0,314 |
| 13 | Q9HA05 Q9HA05_HUMAN | K.M*NSIVYQK.Q           |        | 2 | 2,799  | 0,264 | 0,366  |
| 13 | Q8NB78 AOF1_HUMAN   | R.AAATGNAS#PGKLE.H      | S247:  | 2 | 2,7945 | 0,246 | 0,289  |
| 13 | Q96DG6 CMBL_HUMAN   | E.DCSPADKPYIDE.A        |        | 2 | 2,7942 | 0,329 | -0,346 |
| 13 | Q9Y639 NPTN_HUMAN   | E.YHCVYHFVSAPK.A        |        | 2 | 2,7894 | 0,339 | -0,405 |
| 13 | Q15019 SEPT2_HUMAN  | E.NEDM*NKDQILLE.K       |        | 2 | 2,789  | 0,213 | 0,083  |
| 13 | Q07666 KHDR1_HUMAN  | E.YYDYGHGEVQDSYE.A      |        | 2 | 2,7866 | 0,323 | -0,141 |
| 13 | P30040 ERP29_HUMAN  | E.VGISDYGDKLNLM*E.L     |        | 2 | 2,7839 | 0,396 | -0,084 |
| 13 | Q92616 GCN1L_HUMAN  | E.GVLTGSPEQKEE.A        |        | 2 | 2,7835 | 0,391 | -0,575 |
| 13 | Q08379 GOGA2_HUMAN  | R.DNPTAQQIM*QLLRE.M     |        | 2 | 2,7821 | 0,29  | -0,438 |
| 13 | Q7Z417 NUFP2_HUMAN  | E.NLNIVQDK.I            |        | 2 | 2,7791 | 0,21  | 0,711  |
| 13 | Q9UER7 DAXX_HUMAN   | R.KQS#EEPFTTVLE.N       | S593:  | 2 | 2,779  | 0,16  | -0,41  |
| 13 | P05186 PPBT_HUMAN   | K.GFFLLVEGGR.I          |        | 2 | 2,7773 | 0,361 | -0,446 |
| 13 | P46013 KI67_HUMAN   | E.LFQT#PICTDKPTTHE.K    | T2203: | 2 | 2,7766 | 0,307 | 0      |
| 13 | Q96R06 SPAG5_HUMAN  | K.LASTIADNQEQLLE.K      |        | 2 | 2,7695 | 0,296 | -0,158 |
| 13 | Q16881 TRXR1_HUMAN  | D.STIGIHPVCAE.V         |        | 2 | 2,7692 | 0,494 | 0,103  |
| 13 | P11387 TOP1_HUMAN   | E.NGFSSPPQIKDEPEDD.G    |        | 2 | 2,7669 | 0,368 | -0,137 |
| 13 | P30154 2AAB_HUMAN   | E.DM*DVKYFAQE.A         |        | 2 | 2,7651 | 0,283 | -0,193 |
| 13 | P20700 LMNB1_HUMAN  | E.GDLEDLKDQIAQLE.A      |        | 2 | 2,7634 | 0,232 | -0,384 |
| 13 | Q96AQ6 PBIP1_HUMAN  | E.GQSPPQS#LPSTPK.A      | S129:  | 2 | 2,7633 | 0,296 | -0,521 |
| 13 | P49023 PAXI_HUMAN   | K.TGSSS#PPGGPPKPGSQLD.S | S322:  | 2 | 2,7632 | 0,287 | -0,349 |
| 13 | P37198 NUP62_HUMAN  | E.LDFILSQQKE.L          |        | 2 | 2,7615 | 0,268 | -0,5   |
| 13 | O95202 LETM1_HUMAN  | E.DVHISTSQVAE.I         |        | 2 | 2,7582 | 0,39  | -0,206 |
| 13 | P21333 FLNA_HUMAN   | K.YGGDEIPFSPYR.V        |        | 2 | 2,7564 | 0,174 | -0,348 |
| 13 | Q9Y4K0 LOXL2_HUMAN  | E.DRPM*FM*LQCAM*EE.N    |        | 2 | 2,7546 | 0,424 | -0,072 |
| 13 | Q9Y6D5 BIG2_HUMAN   | E.DVVTSAIKE.A           |        | 2 | 2,7533 | 0,203 | 0,127  |
| 13 | P39880 CUX1_HUMAN   | E.IQAGSQGQAGASDPSAR.S   |        | 2 | 2,7533 | 0,468 | -0,361 |
| 13 | O14974 MYPT1_HUMAN  | E.TSSTSAGDRYDSSLGR.S    |        | 2 | 2,7528 | 0,259 | 0      |
| 13 | O94909 K0819_HUMAN  | E.GEPLSLPTPRS#PSDRE.L   | S546:  | 2 | 2,752  | 0,327 | -0,403 |
| 13 | O43237 DC1L2_HUMAN  | E.NFTTVKPEDAYE.D        |        | 2 | 2,7485 | 0,296 | -0,086 |
| 13 | P55072 TERA_HUMAN   | E.CQANFISIK.G           |        | 2 | 2,7483 | 0,366 | 0,113  |
| 13 | P04844 RPN2_HUMAN   | E.IEDLVARLDE.L          |        | 2 | 2,7392 | 0,208 | -0,312 |
| 13 | Q6PKG0 LARP1_HUMAN  | E.DFRVDPPM*GEE.G        |        | 2 | 2,7359 | 0,247 | -0,28  |

|    |                    |                           |          |   |        |       |        |
|----|--------------------|---------------------------|----------|---|--------|-------|--------|
| 13 | P35030 TRY3_HUMAN  | D.TLDNDIMLIK.L            |          | 2 | 2,7343 | 0,331 | -0,519 |
| 13 | P46776 RL27A_HUMAN | K.TGAAPIIDVVR.S           |          | 2 | 2,7323 | 0,485 | 0,11   |
| 13 | O43633 CHM2A_HUMAN | E.LSNLPS#TGGSLVAAGGK.K    | S184:    | 2 | 2,7309 | 0,356 | -0,144 |
| 13 | P81605 DCD_HUMAN   | K.DAVEDLESVGK.G           |          | 2 | 2,7298 | 0,372 | -0,525 |
| 13 | P62333 PRS10_HUMAN | K.ALQSVGQIVGE.V           |          | 2 | 2,7289 | 0,332 | 0,111  |
| 13 | Q8WYP5 AHTF1_HUMAN | E.DELKDDAQSV.E            |          | 2 | 2,7278 | 0,369 | -0,684 |
| 13 | Q96TA1 NIBL1_HUMAN | E.DSKVEGPAFTD.A           |          | 2 | 2,7261 | 0,435 | 0,105  |
| 13 | Q09666 AHNK_HUMAN  | E.GDIKAPS#LDIKGPE.V       | S3326:   | 2 | 2,7259 | 0,342 | -0,321 |
| 13 | Q96D46 NMD3_HUMAN  | E.DLHISQDATGEE.G          |          | 2 | 2,7256 | 0,391 | -0,371 |
| 13 | P14618 KPYM_HUMAN  | R.GDLGIEIPA.EK.V          |          | 2 | 2,7215 | 0,334 | 0      |
| 13 | P14618 KPYM_HUMAN  | K.KGVNLPGAAVDLPVSE.K      |          | 2 | 2,7185 | 0,371 | -0,522 |
| 13 | P20839 IMDH1_HUMAN | K.NLIDAGVDGLR.V           |          | 2 | 2,7147 | 0,318 | -0,107 |
| 13 | Q96D71 REPS1_HUMAN | E.LSDFDKDGALTLDE.F        |          | 2 | 2,7145 | 0,325 | 0      |
| 13 | Q9Y608 LRRF2_HUMAN | R.RGS#GDTSSLIDPDTSLSE.L   | S328:    | 2 | 2,7129 | 0,374 | -0,255 |
| 13 | Q9UNZ2 NSF1C_HUMAN | K.LGSTAPQVLSTSSPAQQAENE.A |          | 2 | 2,7114 | 0,497 | -1,154 |
| 13 | P09493 TPM1_HUMAN  | E.ADVAS#LNR.R             | S87:     | 2 | 2,7099 | 0,122 | 0,264  |
| 13 | Q12846 STX4_HUMAN  | E.KQQVITLATPLPEE.S        |          | 2 | 2,709  | 0,299 | -0,389 |
| 13 | P20073 ANXA7_HUMAN | R.LLVSM*CQGNRDE.N         |          | 2 | 2,7075 | 0,27  | -0,509 |
| 13 | Q99733 NP1L4_HUMAN | K.LTDQVM*QNPR.V           |          | 2 | 2,707  | 0,365 | -1,202 |
| 13 | P20700 LMNB1_HUMAN | R.AGGPTT#PLS#PTR.L        | T20:S23: | 2 | 2,7044 | 0,23  | -0,093 |
| 13 | Q6VMQ6 MCAF1_HUMAN | E.NVIEDNKSENILE.N         |          | 2 | 2,7036 | 0,274 | -0,643 |
| 13 | P55072 TERA_HUMAN  | E.EAEKNAPAIIFIDE.L        |          | 2 | 2,7035 | 0,243 | -0,156 |
| 13 | P46013 KI67_HUMAN  | E.AQSLEDLAGFKE.L          |          | 2 | 2,7001 | 0,38  | -0,093 |
| 13 | Q9UQE7 SMC3_HUMAN  | E.DLDNSIDKTE.A            |          | 2 | 2,6998 | 0,338 | -0,106 |
| 13 | Q71U36 TBA1A_HUMAN | E.DM*AALEKDY.E            |          | 2 | 2,6976 | 0,335 | -0,203 |
| 13 | Q09666 AHNK_HUMAN  | K.LSGPS#LKM*PSLE.I        | S4903:   | 2 | 2,6935 | 0,262 | -0,45  |
| 13 | Q6NZI2 PTRF_HUMAN  | R.GSS#PDVHALLE.I          | S366:    | 2 | 2,6895 | 0,328 | 0,304  |
| 13 | Q96TC7 FA82C_HUMAN | E.DALQSFLKAE.L            |          | 2 | 2,6832 | 0,28  | -0,39  |
| 13 | Q9NWW4 CA123_HUMAN | E.ILSSTIKPYNAEDNE.N       |          | 2 | 2,682  | 0,351 | 0,072  |
| 13 | Q92563 TICN2_HUMAN | E.LAAINLDKYE.V            |          | 2 | 2,6799 | 0,243 | -0,106 |
| 13 | P07355 ANXA2_HUMAN | E.GDHST#PPSAYGSVK.A       | T19:     | 2 | 2,6762 | 0,298 | -0,411 |
| 13 | P51149 RAB7A_HUMAN | E.FLIQASPRDPE.N           |          | 2 | 2,6755 | 0,286 | -0,096 |
| 13 | P37802 TAGL2_HUMAN | R.TLM*NLGGLAVAR.D         |          | 2 | 2,6755 | 0,374 | -0,198 |
| 13 | Q58FG1 HS904_HUMAN | E.YLNFIRGVVDSE.D          |          | 2 | 2,6749 | 0,281 | -0,691 |
| 13 | O43707 ACTN4_HUMAN | D.AEDIVNTARPDE.K          |          | 2 | 2,6733 | 0,355 | -0,275 |
| 13 | O94909 K0819_HUMAN | K.TSTPLAPLPVQSQSDTK.D     |          | 2 | 2,6733 | 0,259 | -0,138 |
| 13 | Q13435 SF3B2_HUMAN | E.TGKPLYGDVFGTNAE.F       |          | 2 | 2,672  | 0,385 | -0,149 |
| 13 | P32119 PRDX2_HUMAN | E.DYGVLKTDE.G             |          | 2 | 2,6708 | 0,161 | 0,235  |
| 13 | O43572 AKA10_HUMAN | R.NSPAS#PLKE.L            | S281:    | 2 | 2,6706 | 0,257 | -0,119 |

|    |                     |                          |        |   |        |       |        |
|----|---------------------|--------------------------|--------|---|--------|-------|--------|
| 13 | O00139 KIF2A_HUMAN  | K.QQVQVVGLQE.R           |        | 2 | 2,6704 | 0,215 | 0,108  |
| 13 | O14617 AP3D1_HUMAN  | R.ALDIDLKPLAD.S          |        | 2 | 2,6696 | 0,373 | -0,376 |
| 13 | P30622 CLIP1_HUMAN  | E.DLQFRVEEE.S            |        | 2 | 2,6689 | 0,237 | 0      |
| 13 | Q8IWQ3 BRISK2_HUMAN | E.VLSVTDGGS#PVPAR.R      | S393:  | 2 | 2,6689 | 0,268 | 0,085  |
| 13 | P11021 GRP78_HUMAN  | R.NELESYAYSLK.N          |        | 2 | 2,6678 | 0,273 | -0,278 |
| 13 | P49757 NUMB_HUMAN   | R.VTTATEQAEREE.I         |        | 2 | 2,6676 | 0,425 | -0,089 |
| 13 | O95831 AIFM1_HUMAN  | E.TDHIVAAVGLEPNVE.L      |        | 2 | 2,6675 | 0,299 | -0,234 |
| 13 | Q9UGU0 TCF20_HUMAN  | E.ATS#PGAKDM*PLSSDGNPK.V | S583:  | 2 | 2,6651 | 0,327 | -0,131 |
| 13 | Q9UGU0 TCF20_HUMAN  | K.DM*PLSSDGNPKVNE.K      |        | 2 | 2,6639 | 0,233 | -0,482 |
| 13 | P38646 GRP75_HUMAN  | K.VQQTVDLDFGR.A          |        | 2 | 2,6639 | 0,319 | -0,095 |
| 13 | P18583 SON_HUMAN    | K.ESSGGEKEVPPPK.E        |        | 2 | 2,6634 | 0,176 | -0,255 |
| 13 | Q12888 TP53B_HUMAN  | R.VDVSCEPLEGVEK.C        |        | 2 | 2,6628 | 0,312 | -0,334 |
| 13 | Q9Y2S7 PDIP2_HUMAN  | E.NLSDVVLQRE.R           |        | 2 | 2,6622 | 0,116 | -0,095 |
| 13 | P34931 HS71L_HUMAN  | R.TTPSYVAFTDTER.L        |        | 2 | 2,6617 | 0,506 | -0,492 |
| 13 | P08670 VIME_HUMAN   | R.QDVDNAS#LARLD.L        | S214:  | 2 | 2,6605 | 0,425 | 0      |
| 13 | O00148 DDX39_HUMAN  | R.ILVATNLFGR.G           |        | 2 | 2,6602 | 0,435 | -0,332 |
| 13 | P63208 SKP1_HUMAN   | E.FLKVDQGTLE.L           |        | 2 | 2,6594 | 0,252 | -0,47  |
| 13 | P81605 DCD_HUMAN    | K.ENAGEDPGLAR.Q          |        | 2 | 2,6547 | 0,369 | -0,216 |
| 13 | Q16204 CCDC6_HUMAN  | E.KLDQPVSAAPP#PR.D       | S244:  | 2 | 2,6535 | 0,357 | -0,663 |
| 13 | P32119 PRDX2_HUMAN  | K.ATAVVDGAFK.E           |        | 2 | 2,6525 | 0,273 | 0,748  |
| 13 | Q9UMS0 NFU1_HUMAN   | E.DGGDVIYK.G             |        | 2 | 2,6518 | 0,342 | 0,211  |
| 13 | O14978 ZN263_HUMAN  | R.GPAPGEEKFE.N           |        | 2 | 2,6487 | 0,376 | 0      |
| 13 | Q96T58 MINT_HUMAN   | E.SGVVAVS#PEKSESPQKE.D   | S2120: | 2 | 2,6479 | 0,206 | -0,664 |
| 13 | Q13573 SNW1_HUMAN   | R.LFNQS#KGM*DSGFAGGEDE.I | S415:  | 2 | 2,6469 | 0,233 | 0,184  |
| 13 | Q9H7P9 PKHG2_HUMAN  | R.GPS#PLHVLE.G           | S610:  | 2 | 2,6448 | 0,264 | 0      |
| 13 | P09493 TPM1_HUMAN   | R.IQLVEEELDR.A           |        | 2 | 2,6427 | 0,236 | -1,373 |
| 13 | O95490 LPHN2_HUMAN  | R.GNS#DGYIIPINKE.G       | S1430: | 2 | 2,6426 | 0,242 | -0,163 |
| 13 | Q96PK2 MACF4_HUMAN  | E.DTQKLDNFLGE.V          |        | 2 | 2,6401 | 0,312 | -0,191 |
| 13 | Q14789 GOGB1_HUMAN  | R.DQLLSQVKE.L            |        | 2 | 2,6379 | 0,101 | 0,115  |
| 13 | P38159 HNRPG_HUMAN  | R.DVYLS#PRDDGYSTKD.S     | S208:  | 2 | 2,6366 | 0,404 | 0,27   |
| 13 | P04075 ALDOA_HUMAN  | K.YTPSGQAGAAASE.S        |        | 2 | 2,6364 | 0,368 | 0      |
| 13 | P01112 RASH_HUMAN   | E.DAFYTLVRE.I            |        | 2 | 2,6357 | 0,313 | -0,11  |
| 13 | Q00839 HNRPU_HUMAN  | K.YNILGTNTIM*DK.M        |        | 2 | 2,6344 | 0,181 | -0,523 |
| 13 | Q9UQ35 SRRM2_HUMAN  | E.NSFGS#PLEFR.N          | S1329: | 2 | 2,6318 | 0,42  | -0,099 |
| 13 | P25789 PSA4_HUMAN   | E.AIGHAGTCLGILAND.G      |        | 2 | 2,6316 | 0,27  | -0,247 |
| 13 | Q12931 TRAP1_HUMAN  | E.DYGLFM*RE.G            |        | 2 | 2,6315 | 0,186 | 0      |
| 13 | O95208 EPN2_HUMAN   | R.GS#SQPNLSTSHSEQE.Y     | S172:  | 2 | 2,6309 | 0,122 | -0,293 |
| 13 | Q5VUA4 ZN318_HUMAN  | E.VILKGS#PEEKVVLA.E.K    | S1420: | 2 | 2,63   | 0,311 | -0,577 |
| 13 | P61956 SUMO2_HUMAN  | K.VAGQDGSVVQFK.I         |        | 2 | 2,6295 | 0,3   | 0,395  |

|    |                    |                         |        |   |        |       |        |
|----|--------------------|-------------------------|--------|---|--------|-------|--------|
| 13 | P12268 IMDH2_HUMAN | K.NLIDAGVDALR.V         |        | 2 | 2,6271 | 0,206 | -0,422 |
| 13 | P17987 TCPA_HUMAN  | E.AAITILRIDDL.L         |        | 2 | 2,6263 | 0,282 | -0,554 |
| 13 | P08174 DAF_HUMAN   | E.DTVITYKCEE.S          |        | 2 | 2,6251 | 0,331 | -0,194 |
| 13 | P04792 HSPB1_HUMAN | R.ALSRQLS#SGVSE.I       | S82:   | 2 | 2,6232 | 0,123 | -0,279 |
| 13 | Q9UDT6 CLIP2_HUMAN | E.DALRDALDQAQQVE.K      |        | 2 | 2,6197 | 0,246 | -0,388 |
| 13 | Q8WU90 ZC3HF_HUMAN | E.ISLEDLIERE.R          |        | 2 | 2,6191 | 0,326 | -0,702 |
| 13 | Q96RL1 UIMC1_HUMAN | R.DLNES#PVKSFVSISE.A    | S677:  | 2 | 2,6181 | 0,351 | -0,423 |
| 13 | P29692 EF1D_HUMAN  | D.DKVGTDLLEEE.I         |        | 2 | 2,6174 | 0,258 | -0,391 |
| 13 | P10644 KAPO_HUMAN  | K.IVVQGEPEGDE.F         |        | 2 | 2,6144 | 0,284 | -0,468 |
| 13 | Q8N3X1 FNBP4_HUMAN | E.VEES#PEKIK.V          | S508:  | 2 | 2,6119 | 0,191 | -0,321 |
| 13 | Q9UBT2 SAE2_HUMAN  | E.FEVVGDAPEK.V          |        | 2 | 2,6072 | 0,349 | -0,224 |
| 13 | Q15477 SKIV2_HUMAN | R.GDTVSAAPCSAPLAR.A     |        | 2 | 2,6061 | 0,326 | -0,328 |
| 13 | Q9NZ63 CI078_HUMAN | E.DLHLGTSFSAE.T         |        | 2 | 2,6019 | 0,326 | -0,104 |
| 13 | P68104 EF1A1_HUMAN | E.SFS#DYPPLGR.F         | S416:  | 2 | 2,6011 | 0,233 | 0,1    |
| 13 | O95208 EPN2_HUMAN  | K.NIVNNYSEAE.I          |        | 2 | 2,5978 | 0,371 | -0,106 |
| 13 | Q8ND30 LIPB2_HUMAN | R.CSS#PTVGGPPPLPQK.S    | S363:  | 2 | 2,5903 | 0,199 | 0,158  |
| 13 | Q99618 CDCA3_HUMAN | R.SPSAGILRT#PIQVE.S     | T37:   | 2 | 2,5894 | 0,291 | -0,552 |
| 13 | Q5VTB9 CA164_HUMAN | R.GSGFIM*CSGK.E         |        | 2 | 2,5874 | 0,451 | 0,345  |
| 13 | Q5UIP0 RIF1_HUMAN  | E.LIIEDNNAS#PQKLR.E     | S2144: | 2 | 2,5873 | 0,166 | 0,144  |
| 13 | Q9NZM1 MYOF_HUMAN  | E.LFDNDQVGKDE.F         |        | 2 | 2,5817 | 0,158 | -0,191 |
| 13 | O14979 HNRDL_HUMAN | K.DAASVDKVL.L           |        | 2 | 2,5801 | 0,266 | -0,583 |
| 13 | Q9UK76 HN1_HUMAN   | E.ASSGDFLDLKG.E         |        | 2 | 2,5793 | 0,083 | 0,197  |
| 13 | Q07021 C1QBP_HUMAN | E.AESDIFSIRE.V          |        | 2 | 2,576  | 0,306 | -0,105 |
| 13 | P10809 CH60_HUMAN  | R.GYISPYFINTSK.G        |        | 2 | 2,5734 | 0,272 | -0,351 |
| 13 | P61081 UBC12_HUMAN | E.TM*VYHPNIDLE.G        |        | 2 | 2,5699 | 0,329 | 0,272  |
| 13 | Q16555 DPYL2_HUMAN | K.DRFQLTDCQIYE.V        |        | 2 | 2,5693 | 0,3   | -0,077 |
| 13 | P05787 K2C8_HUMAN  | E.VDPNIQAVR.T           |        | 2 | 2,5685 | 0,322 | -0,663 |
| 13 | Q12888 TP53B_HUMAN | R.GNLLHFPSSQGEEE.K      |        | 2 | 2,5683 | 0,405 | -0,237 |
| 13 | P14618 KPYM_HUMAN  | K.ITLDNAYM*EK.C         |        | 2 | 2,5674 | 0,193 | 0,101  |
| 13 | P00338 LDHA_HUMAN  | K.LVIITAGAR.Q           |        | 2 | 2,567  | 0,364 | 0      |
| 13 | O43395 PRPF3_HUMAN | E.VFGDDSEISKE.S         |        | 2 | 2,5668 | 0,257 | -0,1   |
| 13 | P10809 CH60_HUMAN  | K.LSDGVAVLK.V           |        | 2 | 2,5638 | 0,234 | 0,135  |
| 13 | Q9HOC8 ILKAP_HUMAN | E.M*QDAHVILNDITEE.C     |        | 2 | 2,5629 | 0,291 | 0      |
| 13 | P40189 IL6RB_HUMAN | K.SY#LPQTVR.Q           | Y905:  | 2 | 2,5626 | 0,176 | 0,117  |
| 13 | P55265 DSRAD_HUMAN | E.NGQEPVIKLE.N          |        | 2 | 2,5622 | 0,21  | -1,191 |
| 13 | Q9NWS0 PIHD1_HUMAN | E.GLEDKYNLQLNPE.W       |        | 2 | 2,5621 | 0,246 | 0,08   |
| 13 | Q5UIP0 RIF1_HUMAN  | E.NRPFS#PSPLNNSSTVTVK.N | S1236: | 2 | 2,5616 | 0,323 | 0,342  |
| 13 | Q9BRK3 MXRA8_HUMAN | E.LAHS#PLPAK.Y          | S423:  | 2 | 2,5613 | 0,116 | -0,421 |
| 13 | P07355 ANXA2_HUMAN | E.GDHSTPPS#AYGSVK.A     | S22:   | 2 | 2,561  | 0,164 | 0,165  |

|    |                    |                      |        |   |        |       |        |
|----|--------------------|----------------------|--------|---|--------|-------|--------|
| 13 | Q71UI9 H2AV_HUMAN  | R.GDEELDSLIIK.A      |        | 2 | 2,5604 | 0,258 | 0      |
| 13 | P49589 SYCC_HUMAN  | E.GEGDLSISADR.L      |        | 2 | 2,5595 | 0,226 | -0,109 |
| 13 | Q5H9R7 SAPS3_HUMAN | K.DSLRSNS#PVEM*E.T   | S740:  | 2 | 2,558  | 0,207 | -0,084 |
| 13 | Q9BTT0 AN32E_HUMAN | E.IEGLNDTFKELE.F     |        | 2 | 2,5546 | 0,246 | -0,433 |
| 13 | Q8TEX9 IPO4_HUMAN  | E.NAFFDEKEDTCAAVGE.I |        | 2 | 2,5539 | 0,424 | -0,203 |
| 13 | Q09666 AHNK_HUMAN  | K.AEGPEVDVNLPK.A     |        | 2 | 2,5524 | 0,296 | -0,77  |
| 13 | P16615 AT2A2_HUMAN | E.DSANFIKYE.T        |        | 2 | 2,5497 | 0,197 | -1,908 |
| 13 | P11172 PYR5_HUMAN  | D.AIVLLDRE.Q         |        | 2 | 2,5486 | 0,135 | 0,066  |
| 13 | Q9GZY8 CB033_HUMAN | E.DVSFSRPADLD.L      |        | 2 | 2,5484 | 0,35  | -0,3   |
| 13 | A8MT69 STR13_HUMAN | E.DALRVDVDQLE.K      |        | 2 | 2,5482 | 0,23  | -0,096 |
| 13 | P40763 STAT3_HUMAN | R.TLDSLM*QFGNNGE.G   |        | 2 | 2,5465 | 0,316 | -0,254 |
| 13 | Q9NWH9 SLTM_HUMAN  | R.IVQISGNS#M*PR.G    | S1014: | 2 | 2,5457 | 0,265 | -0,564 |
| 13 | Q9H2G2 SLK_HUMAN   | K.RAS#SDLSIASSE.E    | S340:  | 2 | 2,5455 | 0,287 | -0,468 |
| 13 | P07900 HS90A_HUMAN | K.DQVANSAFVER.L      |        | 2 | 2,543  | 0,226 | 0      |
| 13 | Q12905 ILF2_HUMAN  | R.AQDPSEVLTM*LTNE.T  |        | 2 | 2,5425 | 0,366 | -0,234 |
| 13 | P27816 MAP4_HUMAN  | K.DGVLTLANNVTPAK.D   |        | 2 | 2,5406 | 0,389 | 0      |
| 13 | P08648 ITA5_HUMAN  | E.GQQLLYVTR.V        |        | 2 | 2,54   | 0,343 | 0,113  |
| 13 | P38159 HNRPG_HUMAN | K.LFIGGLNTETNEK.A    |        | 2 | 2,5398 | 0,337 | 0,17   |
| 13 | Q16576 RBBP7_HUMAN | E.FGGFGSVTGK.I       |        | 2 | 2,5382 | 0,27  | -0,191 |
| 13 | P05387 RLA2_HUMAN  | E.DVIAQGIGK.L        |        | 2 | 2,5375 | 0,135 | -0,203 |
| 13 | Q8IZ21 PHAR4_HUMAN | R.TRS#LPITIE.M       | S464:  | 2 | 2,5373 | 0,343 | -0,22  |
| 13 | Q8WVC0 LEO1_HUMAN  | E.VEIPKVNTDLGND.L    |        | 2 | 2,5342 | 0,228 | -0,949 |
| 13 | Q14694 UBP10_HUMAN | E.SIDLPTKPE.S        |        | 2 | 2,5334 | 0,31  | -0,547 |
| 13 | Q9H7N4 SFR19_HUMAN | R.RVAVVGTAE.A        |        | 2 | 2,5324 | 0,297 | 0,22   |
| 13 | Q02952 AKA12_HUMAN | E.GSIDTGITVS#REK.V   | S1295: | 2 | 2,5302 | 0,443 | -0,423 |
| 13 | O95831 AIFM1_HUMAN | E.IDSDFGGFR.V        |        | 2 | 2,5288 | 0,352 | 0      |
| 13 | Q71F56 MD13L_HUMAN | E.DGLGS#PKPEEIKD.F   | S923:  | 2 | 2,5232 | 0,09  | -0,5   |
| 13 | P08708 RS17_HUMAN  | E.IIEVDPDTKE.M       |        | 2 | 2,5228 | 0,357 | -0,105 |
| 13 | Q96DG6 CMBL_HUMAN  | E.NDVVIPLKD.V        |        | 2 | 2,522  | 0,133 | 0,06   |
| 13 | Q99590 SFRIP_HUMAN | E.SSEGEIIQTVDR.Q     |        | 2 | 2,5205 | 0,245 | -0,274 |
| 13 | P13667 PDIA4_HUMAN | R.FDVSGYPTLK.I       |        | 2 | 2,5198 | 0,118 | 0,325  |
| 13 | Q8ND04 CQ071_HUMAN | E.S#SPAPPDSDADKLKE.K | S667:  | 2 | 2,5185 | 0,26  | -0,298 |
| 13 | Q6S8J3 A26CA_HUMAN | K.AGFAGDDAPR.A       |        | 2 | 2,5173 | 0,333 | 0,5    |
| 13 | P14174 MIF_HUMAN   | K.LLCGLLAER.L        |        | 2 | 2,5158 | 0,239 | -0,233 |
| 13 | O00410 IMB3_HUMAN  | E.VM*GDGCLNNEHFEE.L  |        | 2 | 2,5129 | 0,322 | 0      |
| 13 | P14618 KPYM_HUMAN  | R.LDIDSPITAR.N       |        | 2 | 2,5103 | 0,341 | -0,102 |
| 13 | O43175 SERA_HUMAN  | R.GGIVDEGALLR.A      |        | 2 | 2,5084 | 0,249 | 0,444  |
| 13 | P11177 ODPB_HUMAN  | E.DNSIPQVKD.I        |        | 2 | 2,5071 | 0,323 | 0      |
| 13 | P02545 LMNA_HUMAN  | E.GDLIAAQR.L         |        | 2 | 2,5071 | 0,139 | -0,067 |

|    |                    |                        |        |   |        |       |        |
|----|--------------------|------------------------|--------|---|--------|-------|--------|
| 13 | P46379 BAT3_HUMAN  | R.DLEAPEVQE.S          |        | 2 | 2,5048 | 0,116 | 0      |
| 13 | Q13642 FHL1_HUMAN  | E.DFYCVTCHE.T          |        | 2 | 2,5018 | 0,36  | 0,099  |
| 13 | Q9UNN5 FAF1_HUMAN  | E.VFGM*ASSALR.K        |        | 2 | 2,501  | 0,372 | -0,347 |
| 13 | Q8WVM8 SCFD1_HUMAN | E.DDM*FVLCNQNKE.L      |        | 2 | 2,5009 | 0,312 | -0,08  |
| 13 | Q8NI08 NCOA7_HUMAN | E.STLDNSCQGAQM*DNKSE.V |        | 2 | 2,5007 | 0,235 | -0,321 |
| 13 | P46013 KI67_HUMAN  | E.LFQT#PVCTDKPTTHE.K   | T1476: | 2 | 2,5005 | 0,271 | 0      |
| 13 | P08133 ANXA6_HUMAN | E.IADTPSGDKTSLE.T      |        | 2 | 2,4994 | 0,38  | -0,183 |
| 13 | Q02952 AKA12_HUMAN | E.GSIDTGITVS#REKVE.V   | S1295: | 2 | 2,4992 | 0,45  | 0      |
| 13 | P35268 RL22_HUMAN  | K.AGNLGGGVVTIER.S      |        | 2 | 2,4981 | 0,376 | -0,196 |
| 13 | Q58FF7 H90B3_HUMAN | E.LKIDIIPNPQE.R        |        | 2 | 2,4978 | 0,241 | -0,381 |
| 13 | P10809 CH60_HUMAN  | K.VGEVIVTK.D           |        | 2 | 2,4975 | 0,293 | 0      |
| 13 | P05783 K1C18_HUMAN | R.QAQEYEALLNIK.V       |        | 2 | 2,4975 | 0,29  | -0,687 |
| 13 | Q13283 G3BP1_HUMAN | K.SSS#PAPADIAQTVQE.D   | S232:  | 2 | 2,4947 | 0,262 | -0,309 |
| 13 | P30049 ATPD_HUMAN  | D.M*LDLGAAK.A          |        | 2 | 2,4907 | 0,162 | 0,146  |
| 13 | Q96JM3 ZN828_HUMAN | K.GQESS#SDQEQVDVE.S    | S652:  | 2 | 2,4904 | 0,127 | -0,453 |
| 13 | Q96PK6 RBM14_HUMAN | R.AQPSVSLGAPYR.G       |        | 2 | 2,4898 | 0,365 | -0,098 |
| 13 | O00358 FOXO1_HUMAN | R.VFGLVPERPLS#PE.L     | S231:  | 2 | 2,487  | 0,268 | -0,321 |
| 13 | P46821 MAP1B_HUMAN | K.DFEELKAAE.V          |        | 2 | 2,4807 | 0,209 | 0,66   |
| 13 | P61758 PFD3_HUMAN  | E.DVDSFM*KQPGNE.T      |        | 2 | 2,4805 | 0,192 | -0,618 |
| 13 | Q9NQW7 XPP1_HUMAN  | E.DGAFGIRIE.N          |        | 2 | 2,48   | 0,194 | -0,062 |
| 13 | Q58FF8 H90B2_HUMAN | K.SIYYITGESK.E         |        | 2 | 2,4794 | 0,361 | -0,105 |
| 13 | Q9BTT0 AN32E_HUMAN | E.VGLSYLM*KEE.I        |        | 2 | 2,478  | 0,101 | -0,206 |
| 13 | O14979 HNRDL_HUMAN | E.NIELPM*DTKTNE.R      |        | 2 | 2,4765 | 0,244 | -0,172 |
| 13 | P08670 VIME_HUMAN  | E.AANYQDTIGR.L         |        | 2 | 2,4762 | 0,211 | -0,44  |
| 13 | Q8TER5 SOLO_HUMAN  | E.ALGNLPS#PSEHKLPE.C   | S419:  | 2 | 2,4758 | 0,311 | -0,219 |
| 13 | P31948 STIP1_HUMAN | E.IAT#PPPPPPK.K        | T198:  | 2 | 2,4716 | 0,273 | -0,819 |
| 13 | Q16563 SYPL1_HUMAN | K.TVTATFGYPFR.L        |        | 2 | 2,4703 | 0,412 | -0,29  |
| 13 | Q14493 SLBP_HUMAN  | R.HM*DSQVEDEFDLE.A     |        | 2 | 2,4702 | 0,27  | -0,076 |
| 13 | O75643 U520_HUMAN  | E.YKFSVDVK.E           |        | 2 | 2,47   | 0,279 | 0      |
| 13 | P50990 TCPQ_HUMAN  | K.FAEAFEAIPIR.A        |        | 2 | 2,4668 | 0,276 | -0,424 |
| 13 | Q4KMP7 TB10B_HUMAN | R.AAGGAPS#PPPPVVR.R    | S403:  | 2 | 2,4661 | 0,23  | -0,389 |
| 13 | P38919 IF4A3_HUMAN | E.DM*TKVEFE.T          |        | 2 | 2,4658 | 0,126 | -0,06  |
| 13 | Q9NQX3 GEPH_HUMAN  | K.GVQCEEEEE.K          |        | 2 | 2,4657 | 0,106 | -0,099 |
| 13 | P12270 TPR_HUMAN   | E.QIINTM*TQDLR.G       |        | 2 | 2,465  | 0,354 | 0,09   |
| 13 | P39019 RS19_HUMAN  | R.VLQALEGLK.M          |        | 2 | 2,4639 | 0,292 | -0,44  |
| 13 | Q8TAT6 NPL4_HUMAN  | E.GYQVSNQCM*ALVRDE.C   |        | 2 | 2,4599 | 0,384 | -0,273 |
| 13 | O43290 SNUT1_HUMAN | E.KEPVPQPLPSDDTR.V     |        | 2 | 2,4582 | 0,369 | -0,309 |
| 13 | Q9UBC2 EP15R_HUMAN | K.FHDTSS#PLM*VTPPSAE.A | S108:  | 2 | 2,4574 | 0,388 | -0,471 |
| 13 | Q8TF05 PP4R1_HUMAN | E.LTAPDSNDDVKTE.A      |        | 2 | 2,4572 | 0,343 | -0,261 |



|    |                     |                           |            |   |        |       |        |
|----|---------------------|---------------------------|------------|---|--------|-------|--------|
| 13 | O43852 CALU_HUMAN   | E.YDYM*KDIVVQE.T          |            | 2 | 2,4551 | 0,139 | -0,086 |
| 13 | P11532 DMD_HUMAN    | K.VNGTTVSSPSTSLQR.S       |            | 2 | 2,4548 | 0,268 | -0,716 |
| 13 | Q13077 TRAF1_HUMAN  | R.ALCCAGCLSENPR.N         |            | 2 | 2,4548 | 0,399 | -0,243 |
| 13 | Q15631 TSN_HUMAN    | E.ILGIEPDRE.K             |            | 2 | 2,4546 | 0,241 | -0,703 |
| 13 | P49721 PSB2_HUMAN   | D.LDNISFPK.Q              |            | 2 | 2,4531 | 0,121 | 0,131  |
| 13 | Q96MW1 CCD43_HUMAN  | E.DSLLNICKE.I             |            | 2 | 2,4529 | 0,145 | 0,112  |
| 13 | O43572 AKA10_HUMAN  | E.SSSTLTVASR.N            |            | 2 | 2,4509 | 0,292 | 0,06   |
| 13 | P43897 EFTS_HUMAN   | E.LSGLPAGPDRE.G           |            | 2 | 2,4499 | 0,199 | 0,549  |
| 13 | Q14683 SMC1A_HUMAN  | R.ISSIYARE.A              |            | 2 | 2,4498 | 0,129 | 0      |
| 13 | P17987 TCPA_HUMAN   | R.EQLAIAEFAR.S            |            | 2 | 2,4492 | 0,291 | -0,213 |
| 13 | P50748 KNCTC1_HUMAN | E.IFFTAEKTDE.L            |            | 2 | 2,4485 | 0,324 | -0,102 |
| 13 | Q2TAA2 IAH1_HUMAN   | E.LSLLGDGDH.-             |            | 2 | 2,4484 | 0,256 | -0,79  |
| 13 | P20700 LMNB1_HUMAN  | E.DLKDQIAQLE.A            |            | 2 | 2,4468 | 0,16  | -0,208 |
| 13 | Q86XP3 DDX42_HUMAN  | K.IIDPLPIDHSE.I           |            | 2 | 2,4431 | 0,277 | -0,272 |
| 13 | O75449 KTNA1_HUMAN  | D.ST#PLKAAQHDLPASEGE.V    | T81:       | 2 | 2,4419 | 0,273 | -0,067 |
| 13 | Q92576 PHF3_HUMAN   | K.GNIDGNVSCSE.N           |            | 2 | 2,4419 | 0,221 | 0      |
| 13 | P18858 DNL1_HUMAN   | E.DEALS#PAKGQKPALD.C      | S76:       | 2 | 2,4402 | 0,313 | -0,151 |
| 13 | Q15678 PTN14_HUMAN  | E.DSSPVVHQSLQE.V          |            | 2 | 2,438  | 0,135 | -0,184 |
| 13 | O94909 K0819_HUMAN  | E.GEPLSLPTPR.S            |            | 2 | 2,4379 | 0,387 | -0,229 |
| 13 | Q9Y2W1 TR150_HUMAN  | E.DLARPSGLLAQE.R          |            | 2 | 2,4374 | 0,218 | -0,192 |
| 13 | P31937 3HIDH_HUMAN  | R.SGNLTFM*VGGVEDE.F       |            | 2 | 2,4367 | 0,241 | -0,498 |
| 13 | P78364 PHC1_HUMAN   | E.ALS#PTS#PGPLSVR.A       | S895:S898: | 2 | 2,4364 | 0,237 | -0,508 |
| 13 | P42704 LPPRC_HUMAN  | E.DALNLKEE.F              |            | 2 | 2,4329 | 0,127 | -0,131 |
| 13 | Q99613 EIF3C_HUMAN  | E.LVTKPVGGNYGK.Q          |            | 2 | 2,4316 | 0,279 | 0,297  |
| 13 | Q9NX24 NOLA2_HUMAN  | E.KGIM*VLAGDTLPIE.V       |            | 2 | 2,429  | 0,366 | -0,414 |
| 13 | Q4ZG04 Q4ZG04_HUMAN | E.LLLSTLVR.E              |            | 2 | 2,4287 | 0,31  | -0,267 |
| 13 | P19447 ERCC3_HUMAN  | E.DLAFSTKEE.Q             |            | 2 | 2,4276 | 0,297 | 0,117  |
| 13 | P48681 NEST_HUMAN   | E.DHASLAPPLS#PDHSSLE.A    | S471:      | 2 | 2,4265 | 0,31  | -0,132 |
| 13 | Q9BVV6 K0586_HUMAN  | E.DAGIEKDAVTQE.T          |            | 2 | 2,4263 | 0,179 | -0,956 |
| 13 | O00566 MPP10_HUMAN  | E.DTGVLVNK.K              |            | 2 | 2,4263 | 0,131 | 0,433  |
| 13 | P21333 FLNA_HUMAN   | E.ISIQDM*TAQVTS#PSGKTHE.A | S2180:     | 2 | 2,4262 | 0,377 | 0,344  |
| 13 | P07195 LDHB_HUMAN   | K.IVVVTAGVR.Q             |            | 2 | 2,4261 | 0,302 | 0,334  |
| 13 | Q8IX90 CM003_HUMAN  | K.NSIALVSTNYPLSK.T        |            | 2 | 2,425  | 0,348 | 0      |
| 13 | P27816 MAP4_HUMAN   | E.VALTEDQVPALK.T          |            | 2 | 2,4244 | 0,101 | -0,475 |
| 13 | P22626 ROA2_HUMAN   | K.IDTIEIITDR.Q            |            | 2 | 2,4219 | 0,181 | -0,308 |
| 13 | P23396 RS3_HUMAN    | R.TEIIILATR.T             |            | 2 | 2,4184 | 0,217 | -0,237 |
| 13 | Q9Y6A5 TACC3_HUMAN  | E.STAPTNLVAGR.A           |            | 2 | 2,4176 | 0,397 | -0,199 |
| 13 | Q9Y3X0 CCDC9_HUMAN  | R.TTHLAGALSPGE.A          |            | 2 | 2,4156 | 0,32  | -0,211 |
| 13 | Q8WYH8 ING5_HUMAN   | K.TLS#PDQRVE.R            | S57:       | 2 | 2,4117 | 0,257 | -0,217 |

|    |                      |                            |            |   |        |       |        |
|----|----------------------|----------------------------|------------|---|--------|-------|--------|
| 13 | P07900 HS90A_HUMAN   | E.LFTELAEDKE.N             |            | 2 | 2,41   | 0,233 | -0,51  |
| 13 | P40227 TCPZ_HUMAN    | K.ALQFLEEVK.V              |            | 2 | 2,409  | 0,139 | -0,227 |
| 13 | Q16555 DPYL2_HUMAN   | E.DGTLHVTE.G               |            | 2 | 2,4084 | 0,282 | 0,28   |
| 13 | P09622 DLDH_HUMAN    | E.KM*VVIGAGVIGVE.L         |            | 2 | 2,4071 | 0,275 | -0,189 |
| 13 | P31946 1433B_HUMAN   | D.STLIM*QLLR.D             |            | 2 | 2,4068 | 0,111 | -0,224 |
| 13 | P27816 MAP4_HUMAN    | K.DM*ES#PTKLD.V            | S280:      | 2 | 2,4048 | 0,141 | -0,108 |
| 13 | O60343 TBCD4_HUMAN   | E.DAFYNSQKFE.V             |            | 2 | 2,4005 | 0,238 | -0,293 |
| 13 | Q6R327 RICTR_HUMAN   | K.HIEDTGSTPSIGE.N          |            | 2 | 2,4002 | 0,283 | -1,454 |
| 13 | P14625 ENPL_HUMAN    | E.DEDDKTVLD.L              |            | 2 | 2,3986 | 0,186 | 0      |
| 13 | Q99543 DNJC2_HUMAN   | E.GDNDYFTCITK.A            |            | 2 | 2,3964 | 0,24  | 0,091  |
| 13 | P27816 MAP4_HUMAN    | E.DQVPALKTE.A              |            | 2 | 2,3956 | 0,172 | 0,244  |
| 13 | P07737 PROF1_HUMAN   | K.STGGAPTfnVTVTK.T         |            | 2 | 2,3952 | 0,322 | -0,088 |
| 13 | O43765 SGTA_HUMAN    | R.S#PART#PPSEEDSAEAE.R     | S77:T81:   | 2 | 2,3949 | 0,276 | 0,2    |
| 13 | Q14232 EI2BA_HUMAN   | E.KADLVIVGAEGVVE.N         |            | 2 | 2,3937 | 0,287 | -0,436 |
| 13 | Q9NTK5 OLA1_HUMAN    | E.DDDITHVE.G               |            | 2 | 2,3921 | 0,273 | -0,646 |
| 13 | Q9Y478 AAKB1_HUMAN   | E.DADLFHSEE.I              |            | 2 | 2,3906 | 0,194 | -0,115 |
| 13 | O75179 ANR17_HUMAN   | R.NSPLDCGSASPnk.V          |            | 2 | 2,3903 | 0,332 | -0,725 |
| 13 | P06748 NPM_HUMAN     | D.M*SPLRPQNYLFGCE.L        |            | 2 | 2,3895 | 0,201 | -0,071 |
| 13 | O15439 MRP4_HUMAN    | E.SEQPPVPGT#PTLR.N         | T646:      | 2 | 2,3889 | 0,141 | 0,084  |
| 13 | P78310 CXAR_HUMAN    | R.M*GAIPVM*IPAQSK.D        |            | 2 | 2,3876 | 0,29  | 0,089  |
| 13 | Q8IVF2 AHNK2_HUMAN   | K.SIEASVDVS#PPKVE.A        | S2179:     | 2 | 2,3866 | 0,272 | -0,476 |
| 13 | P68371 TBB2C_HUMAN   | R.YLTVAAVFR.G              |            | 2 | 2,3844 | 0,23  | -0,235 |
| 13 | Q12888 TP53B_HUMAN   | K.TVSS#DGCSTPSREE.G        | S316:      | 2 | 2,3826 | 0,245 | -0,23  |
| 13 | Q9UPT8 ZC3H4_HUMAN   | K.GSGPPTEEEEGE.R           |            | 2 | 2,3823 | 0,14  | -0,278 |
| 13 | Q9Y277 VDAC3_HUMAN   | K.LTLSALIDGK.N             |            | 2 | 2,3802 | 0,352 | -0,355 |
| 13 | Q92615 LARP5_HUMAN   | R.S#PSPAHLRDDPKVAE.K       | S599:      | 2 | 2,3747 | 0,434 | 0      |
| 13 | O76003 GLRX3_HUMAN   | E.LVGGDLIVKE.L             |            | 2 | 2,3736 | 0,141 | -0,351 |
| 13 | P51858 HDGF_HUMAN    | K.LVIDEPAKE.K              |            | 2 | 2,3734 | 0,247 | 0,18   |
| 13 | P05787 K2C8_HUMAN    | K.LVSESDVLPK.-             |            | 2 | 2,3716 | 0,331 | -0,208 |
| 13 | A8K7V5 A8K7V5_HUMAN  | E.VSTAPAGTDM*PAAK.K        |            | 2 | 2,3711 | 0,357 | -0,183 |
| 13 | P08243 ASNS_HUMAN    | E.DSNLIPKE.I               |            | 2 | 2,3693 | 0,2   | 0,266  |
| 13 | P16401 H15_HUMAN     | K.ALAAGGYDVEK.N            |            | 2 | 2,3673 | 0,226 | -0,223 |
| 13 | O43399 TPD54_HUMAN   | R.LGLSTLGEK.Q              |            | 2 | 2,3671 | 0,316 | -0,118 |
| 13 | P28066 PSA5_HUMAN    | K.LGSTAIGIQTSE.G           |            | 2 | 2,3644 | 0,338 | 0,104  |
| 13 | Q9Y490 TLN1_HUMAN    | E.SALQLLYTAKE.A            |            | 2 | 2,3634 | 0,409 | -0,099 |
| 13 | Q9UPX8 SHAN2_HUMAN   | E.IKS#PILSGPK.A            | S1017:     | 2 | 2,3632 | 0,231 | -0,218 |
| 13 | P62937 PPIA_HUMAN    | K.SIYGEKFEDE.N             |            | 2 | 2,3623 | 0,202 | -0,201 |
| 13 | Q99961 SH3G1_HUMAN   | E.QSNGGFPCTTAPK.I          |            | 2 | 2,3609 | 0,36  | -0,268 |
| 13 | ##O15062 ZBTB5_HUMAN | E.DQPEPS#SLPES#KVVVRM*HE.K | S342:S347: | 2 | 2,359  | 0,083 | -1,877 |

|    |                    |                                |            |   |        |       |        |
|----|--------------------|--------------------------------|------------|---|--------|-------|--------|
| 13 | P05362 ICAM1_HUMAN | R.SFSCSATLE.V                  |            | 2 | 2,3533 | 0,225 | 0,487  |
| 13 | Q9NQW6 ANLN_HUMAN  | K.TPIS#PLK.T                   | S323:      | 2 | 2,3529 | 0,178 | -0,073 |
| 13 | Q5JRA6 MIA3_HUMAN  | E.ASGKPSPSDPGSGTATM*M*NS#SSR.G | S1739:     | 2 | 2,3518 | 0,299 | 0      |
| 13 | P00558 PGK1_HUMAN  | K.VSHVSTGGGASLE.L              |            | 2 | 2,3518 | 0,082 | -0,102 |
| 13 | Q13371 PHLP_HUMAN  | E.VLVLTsvr.N                   |            | 2 | 2,3516 | 0,267 | 0,069  |
| 13 | P62851 RS25_HUMAN  | R.AALQELLSK.G                  |            | 2 | 2,3514 | 0,241 | -0,125 |
| 13 | P55209 NP1L1_HUMAN | E.RLDGLVETPTGYIE.S             |            | 2 | 2,3505 | 0,4   | -0,39  |
| 13 | P16220 CREB1_HUMAN | D.LSSDAPGVPR.I                 |            | 2 | 2,35   | 0,198 | 0,183  |
| 13 | P46020 KPB1_HUMAN  | R.S#VRPTDSNVs#PAISIHE.I        | S972:S981: | 2 | 2,3494 | 0,235 | 0,372  |
| 13 | Q15811 ITSN1_HUMAN | E.IDIFNNQLKE.L                 |            | 2 | 2,3492 | 0,169 | 0      |
| 13 | Q5JRA6 MIA3_HUMAN  | R.GSS#PTRVLDE.G                | S1745:     | 2 | 2,3484 | 0,245 | 0      |
| 13 | Q5T3I0 GPTC4_HUMAN | E.DILDVRDE.K                   |            | 2 | 2,3475 | 0,193 | 0,125  |
| 13 | P60174 TPIS_HUMAN  | E.FVDIINAK.Q                   |            | 2 | 2,3409 | 0,161 | -0,398 |
| 13 | P13639 EF2_HUMAN   | R.CLYASVLTaqPR.L               |            | 2 | 2,3408 | 0,308 | -0,531 |
| 13 | P38919 IF4A3_HUMAN | E.TQALILAPTRE.L                |            | 2 | 2,3395 | 0,314 | 0      |
| 13 | P62256 UBE2H_HUMAN | R.M*DTDVVKLIE.S                |            | 2 | 2,3369 | 0,212 | -0,103 |
| 13 | P17252 KPCA_HUMAN  | R.T#FCGTPDYIAPE.I              | T497:      | 2 | 2,3364 | 0,301 | -0,168 |
| 13 | Q9UPU9 SAM4A_HUMAN | E.LHQM*ILTPIK.A                |            | 2 | 2,3332 | 0,351 | -0,101 |
| 13 | Q13439 GOGA4_HUMAN | K.LQLRVPS#VE.S                 | S71:       | 2 | 2,3309 | 0,242 | -0,109 |
| 13 | P15311 EZRI_HUMAN  | K.APDFVfyAPR.L                 |            | 2 | 2,3298 | 0,32  | -0,206 |
| 13 | Q16531 DDB1_HUMAN  | K.LFSSSTAPHETS#FGEEVE.V        | S781:      | 2 | 2,326  | 0,414 | 0,24   |
| 13 | P26651 TTP_HUMAN   | E.LSPSPTSPT#ATSTTPSR.Y         | T95:       | 2 | 2,325  | 0,288 | -0,483 |
| 13 | P06576 ATPB_HUMAN  | K.IGLFGGAGVGK.T                |            | 2 | 2,3209 | 0,345 | 0,25   |
| 13 | O94973 AP2A2_HUMAN | E.NQLLQIGLK.S                  |            | 2 | 2,3189 | 0,244 | -0,119 |
| 13 | P35244 RFA3_HUMAN  | E.DSHPFDLGLYNE.A               |            | 2 | 2,3178 | 0,276 | -0,434 |
| 13 | P48634 BAT2_HUMAN  | E.SDLAPS#DKEAPTKE.G            | S1120:     | 2 | 2,3177 | 0,36  | -0,733 |
| 13 | P29966 MARCS_HUMAN | E.AVAPEKPPASDE.T               |            | 2 | 2,3168 | 0,255 | -0,286 |
| 13 | P48444 COPD_HUMAN  | E.NVNLAQIR.T                   |            | 2 | 2,3165 | 0,183 | -0,131 |
| 13 | P22695 QCR2_HUMAN  | E.QNGDSLvhAAfVAE.S             |            | 2 | 2,3154 | 0,277 | -0,084 |
| 13 | Q8WUM4 PDC6I_HUMAN | K.FLTALAQDGVINEE.A             |            | 2 | 2,3142 | 0,234 | -0,401 |
| 13 | P29218 IMPA1_HUMAN | E.IQVIPLQRDDED.-               |            | 2 | 2,3138 | 0,196 | -0,508 |
| 13 | P29692 EF1D_HUMAN  | E.DDKVGTDLLEE.E                |            | 2 | 2,3116 | 0,211 | -1,088 |
| 13 | Q15386 UBE3C_HUMAN | E.DAYDKLSPE.N                  |            | 2 | 2,3106 | 0,228 | 0,118  |
| 13 | Q06830 PRDX1_HUMAN | R.QITVNDLPVGR.S                |            | 2 | 2,3097 | 0,308 | 0      |
| 13 | P48634 BAT2_HUMAN  | E.ALTTVTVAPAPR.R               |            | 2 | 2,3094 | 0,331 | 0      |
| 13 | Q8NEM2 SHCBP_HUMAN | E.GILIKDFLDE.H                 |            | 2 | 2,3041 | 0,306 | -0,629 |
| 13 | Q01082 SPTB2_HUMAN | K.TALPAQSAATLpar.T             |            | 2 | 2,3037 | 0,277 | -0,268 |
| 13 | Q92615 LARP5_HUMAN | E.EKFTSSQTQSPTPKPPS#PSFE.L     | S524:      | 2 | 2,3028 | 0,144 | 0,393  |
| 13 | Q6PKG0 LARP1_HUMAN | R.AVTPVPTKTEE.V                |            | 2 | 2,3012 | 0,406 | -0,104 |

|    |                    |                        |       |   |        |       |        |
|----|--------------------|------------------------|-------|---|--------|-------|--------|
| 13 | P05783 K1C18_HUMAN | E.DLRAQIFANTVD.N       |       | 2 | 2,2966 | 0,248 | -0,179 |
| 13 | Q9BRS2 RIOK1_HUMAN | R.VVPGQFDDADSS#DSE.N   | S22:  | 2 | 2,2956 | 0,22  | 0      |
| 13 | P48960 CD97_HUMAN  | R.CNPGFSSFSE.I         |       | 2 | 2,2947 | 0,248 | -0,431 |
| 13 | O95817 BAG3_HUMAN  | R.SQS#PLRGM*PE.T       | S136: | 2 | 2,2936 | 0,401 | -0,815 |
| 13 | O60524 SDCG1_HUMAN | E.ADKPVEDILTYEE.F      |       | 2 | 2,2916 | 0,285 | -0,401 |
| 13 | Q5W0B1 RN219_HUMAN | E.DFSLHSSSCPVTNE.I     |       | 2 | 2,2914 | 0,244 | -0,232 |
| 13 | P13667 PDIA4_HUMAN | D.NFVADKDTVLLF.F       |       | 2 | 2,2909 | 0,128 | -0,626 |
| 13 | P29966 MARCS_HUMAN | E.AGASPVEKEAPEGE.A     |       | 2 | 2,2909 | 0,318 | -0,508 |
| 13 | O75534 CSDE1_HUMAN | E.DISIEHFE.G           |       | 2 | 2,2886 | 0,193 | -0,185 |
| 13 | Q8IXM2 CQ049_HUMAN | E.GLGET#PPAK.K         | T161: | 2 | 2,2863 | 0,324 | 0,064  |
| 13 | P55327 TPD52_HUMAN | K.NSPTFKS#FEKVE.N      | S136: | 2 | 2,286  | 0,18  | -0,15  |
| 13 | P19174 PLCG1_HUMAN | E.NGDLSPFSGTSLRE.R     |       | 2 | 2,284  | 0,216 | -0,412 |
| 13 | Q09666 AHNK_HUMAN  | E.VDQVDPKLE.G          |       | 2 | 2,2823 | 0,243 | -0,12  |
| 13 | Q99471 PFD5_HUMAN  | E.HVLIDVGTGYVE.K       |       | 2 | 2,2803 | 0,245 | -0,25  |
| 13 | Q16531 DDB1_HUMAN  | R.LGDSQLVK.L           |       | 2 | 2,28   | 0,119 | 0,142  |
| 13 | Q5VZK9 LR16A_HUMAN | R.YGVQVM*GSLLAE.M      |       | 2 | 2,2787 | 0,336 | -0,364 |
| 13 | P98175 RBM10_HUMAN | K.LASDDRPS#PPR.G       | S722: | 2 | 2,2768 | 0,161 | -0,378 |
| 13 | Q8IVF7 FMNL3_HUMAN | E.DLDLDFEE.L           |       | 2 | 2,2764 | 0,251 | -0,326 |
| 13 | P42285 SK2L2_HUMAN | E.DNFNTAM*QVLRD.A      |       | 2 | 2,2758 | 0,212 | -0,085 |
| 13 | Q9NV88 INT9_HUMAN  | E.DSTHIICDNDE.M        |       | 2 | 2,2756 | 0,199 | -0,648 |
| 13 | P29692 EF1D_HUMAN  | E.DDKVGTDLLE.E         |       | 2 | 2,2747 | 0,097 | -0,221 |
| 13 | P62913 RL11_HUMAN  | K.YDGILPGK.-           |       | 2 | 2,274  | 0,252 | -0,125 |
| 13 | Q9UQ35 SRRM2_HUMAN | R.TAAALAPASLTSAR.M     |       | 2 | 2,2721 | 0,286 | 0,188  |
| 13 | P18858 DNL1_HUMAN  | E.ALS#PAKGQKPALD.C     | S76:  | 2 | 2,2688 | 0,226 | -0,709 |
| 13 | Q8IXM2 CQ049_HUMAN | K.KLNFDQA.-            |       | 2 | 2,2684 | 0,319 | 0,292  |
| 13 | P01112 RASH_HUMAN  | E.DAFYTLVR.E           |       | 2 | 2,2679 | 0,262 | -0,062 |
| 13 | Q15021 CND1_HUMAN  | E.SEPFSHIDPEESE.T      |       | 2 | 2,2672 | 0,22  | -0,449 |
| 13 | Q9H4A3 WNK1_HUMAN  | K.QSSTPGSLFLSPPAPAPK.N |       | 2 | 2,2654 | 0,225 | -0,342 |
| 13 | Q86U44 MTA70_HUMAN | E.IDACM*DSEAPGSK.D     |       | 2 | 2,2649 | 0,221 | -0,262 |
| 13 | P39748 FEN1_HUMAN  | E.AHQLFLEPEVLDPE.S     |       | 2 | 2,2641 | 0,229 | 0,298  |
| 13 | Q58EX7 PKHG4_HUMAN | E.LQGS#PLSR.K          | S64:  | 2 | 2,2633 | 0,202 | -0,13  |
| 13 | Q96ER3 SAAL1_HUMAN | E.VVDKLFDLDE.K         |       | 2 | 2,2614 | 0,087 | -0,511 |
| 13 | Q5VWG9 TAF3_HUMAN  | K.QIQT#PPDAGKLNSE.N    | T364: | 2 | 2,2606 | 0,229 | -0,387 |
| 13 | Q03405 UPAR_HUMAN  | E.LENLPQNGR.Q          |       | 2 | 2,2602 | 0,105 | -0,117 |
| 13 | O95292 VAPB_HUMAN  | E.QVLSLEPQHE.L         |       | 2 | 2,2593 | 0,263 | 0,103  |
| 13 | Q9NNW7 TRXR2_HUMAN | E.DSTTGKEDTGTFD.T      |       | 2 | 2,2589 | 0,169 | -1,066 |
| 13 | Q07157 ZO1_HUMAN   | E.YSM*YSTDSR.H         |       | 2 | 2,2567 | 0,224 | -0,108 |
| 13 | Q9UBB4 ATX10_HUMAN | E.DNSQNQDLIAK.M        |       | 2 | 2,2522 | 0,221 | 0,098  |
| 13 | P52948 NUP98_HUMAN | R.FSFLSKPVDE.N         |       | 2 | 2,2493 | 0,157 | -0,417 |

|    |                     |                              |          |   |        |       |        |
|----|---------------------|------------------------------|----------|---|--------|-------|--------|
| 13 | Q15836 VAMP3_HUMAN  | R.RLQQTQNVQDE.V              |          | 2 | 2,2464 | 0,147 | -0,628 |
| 13 | P17987 TCPA_HUMAN   | E.DAVHSGALND.-               |          | 2 | 2,2449 | 0,359 | -0,061 |
| 13 | Q12888 TP53B_HUMAN  | E.DLFDQSNK.T                 |          | 2 | 2,2418 | 0,273 | 0,631  |
| 13 | P04075 ALDOA_HUMAN  | R.LQSIGTENTEE.N              |          | 2 | 2,2407 | 0,132 | 0,2    |
| 13 | P78310 CXAR_HUMAN   | R.TPQS#PTLPPAK.V             | S332:    | 2 | 2,2398 | 0,107 | -0,201 |
| 13 | Q8NBS9 TXND5_HUMAN  | E.QLALGLEHSE.T               |          | 2 | 2,2387 | 0,229 | -0,222 |
| 13 | P27816 MAP4_HUMAN   | K.TDYIPLLDVDEK.T             |          | 2 | 2,2376 | 0,281 | -0,515 |
| 13 | P49454 CENPF_HUMAN  | K.NSAILQNR.V                 |          | 2 | 2,2362 | 0,323 | 0,133  |
| 13 | O94804 STK10_HUMAN  | R.ILRLS#TFE.K                | S13:     | 2 | 2,2346 | 0,2   | -0,115 |
| 13 | Q8WYA6 CTBL1_HUMAN  | E.LTDIDTLHESEE.G             |          | 2 | 2,2333 | 0,168 | 0,174  |
| 13 | P39687 AN32A_HUMAN  | E.LSDNRVSGGLEVLAE.K          |          | 2 | 2,2327 | 0,283 | -0,313 |
| 13 | Q12857 NFIA_HUMAN   | E.VEPGM*PS#PTTLK.K           | S319:    | 2 | 2,232  | 0,247 | -0,271 |
| 13 | Q9H0E9 BRD8_HUMAN   | R.DKPVPLPAPE.M               |          | 2 | 2,2303 | 0,159 | -0,115 |
| 13 | Q16718 NDUA5_HUMAN  | E.VILQAEHE.L                 |          | 2 | 2,2277 | 0,223 | 0,13   |
| 13 | Q07157 ZO1_HUMAN    | D.NSILPPLDKE.K               |          | 2 | 2,227  | 0,143 | 0,108  |
| 13 | Q8N5F7 NKAP_HUMAN   | R.ALASFNQEE.R                |          | 2 | 2,227  | 0,112 | 0,423  |
| 13 | Q92797 SYMPK_HUMAN  | E.TAAGGLTLK.E                |          | 2 | 2,2209 | 0,242 | 0,513  |
| 13 | Q14974 IMB1_HUMAN   | E.AYTGIVQGLK.G               |          | 2 | 2,2199 | 0,207 | -0,232 |
| 13 | P27708 PYR1_HUMAN   | E.IGEHVAPSEAANSLE.Q          |          | 2 | 2,2188 | 0,218 | -0,24  |
| 13 | O43847 NRDC_HUMAN   | E.GRRGS#LS#NAGDPE.I          | S94:S96: | 2 | 2,215  | 0,261 | -0,248 |
| 13 | O14964 HGS_HUMAN    | E.EARKS#PTPSAPVPLTEPAAQPGE.G | S345:    | 2 | 2,2148 | 0,356 | 0,405  |
| 13 | P62805 H4_HUMAN     | K.VFLENVIR.D                 |          | 2 | 2,2126 | 0,146 | -0,863 |
| 13 | P49023 PAXI_HUMAN   | R.IS#ASSATRE.L               | S258:    | 2 | 2,2124 | 0,436 | -0,913 |
| 13 | O60934 NBN_HUMAN    | E.IGLAVIFM*TTK.N             |          | 2 | 2,2116 | 0,138 | -0,504 |
| 13 | P60174 TPIS_HUMAN   | K.VIADNVKD.W                 |          | 2 | 2,2104 | 0,175 | 0,07   |
| 13 | Q9Y3T9 NOC2L_HUMAN  | R.GILRPLSTR.H                |          | 2 | 2,2057 | 0,185 | 0,241  |
| 13 | Q9Y262 IF3EI_HUMAN  | E.VDFYIDKD.M                 |          | 2 | 2,2044 | 0,255 | 0,06   |
| 13 | P15559 NQO1_HUMAN   | R.ALIVLAHSE.R                |          | 2 | 2,2043 | 0,221 | 0      |
| 13 | P31930 QCR1_HUMAN   | E.TGLLGAHFVCD.R              |          | 2 | 2,2023 | 0,196 | -0,513 |
| 13 | Q01581 HMCS1_HUMAN  | E.DTYFDRDVE.K                |          | 2 | 2,2004 | 0,274 | 0,21   |
| 13 | Q59G85 Q59G85_HUMAN | K.GGGPVTLQDYR.L              |          | 2 | 2,1995 | 0,281 | 0,21   |
| 13 | Q969H8 CS010_HUMAN  | K.SYLYFTQFK.A                |          | 2 | 2,1986 | 0,265 | -0,204 |
| 13 | Q16625 OCLN_HUMAN   | E.LPLTSPVDDFR.Q              |          | 2 | 2,1985 | 0,348 | -0,484 |
| 13 | Q14160 LAP4_HUMAN   | R.ALS#PAELR.A                | S1486:   | 2 | 2,1971 | 0,205 | 0,26   |
| 13 | Q15836 VAMP3_HUMAN  | R.LQQTQNVQDE.V               |          | 2 | 2,1965 | 0,196 | 0,203  |
| 13 | Q9NP61 ARFG3_HUMAN  | E.DFFASHVSPE.V               |          | 2 | 2,1952 | 0,309 | 0      |
| 13 | P52788 SPSY_HUMAN   | D.LQSYDGDAQGKEE.I            |          | 2 | 2,194  | 0,245 | 0      |
| 13 | P61158 ARP3_HUMAN   | R.YSYVCPDLVKE.F              |          | 2 | 2,1924 | 0,196 | -0,178 |
| 13 | P48637 GSHB_HUMAN   | E.NCLLRPGS#PAR.V             | S415:    | 2 | 2,1907 | 0,179 | -0,554 |

|    |                    |                        |       |   |        |       |        |
|----|--------------------|------------------------|-------|---|--------|-------|--------|
| 13 | P49023 PAXI_HUMAN  | K.TSSVSNPQDSVGS#PCSR.V | S106: | 2 | 2,1876 | 0,231 | -0,529 |
| 13 | P07237 PDIA1_HUMAN | E.SEELTAER.I           |       | 2 | 2,1825 | 0,247 | 0,196  |
| 13 | Q15003 CND2_HUMAN  | E.DFPQNDDEKE.R         |       | 2 | 2,1822 | 0,225 | 0,395  |
| 13 | P11177 ODPB_HUMAN  | R.DEKVFLGEE.V          |       | 2 | 2,1815 | 0,149 | -0,621 |
| 13 | Q96TC7 FA82C_HUMAN | E.DALQSFLK.A           |       | 2 | 2,1813 | 0,163 | 0,132  |
| 13 | P09382 LEG1_HUMAN  | D.QANLTVKLPDGYE.F      |       | 2 | 2,1805 | 0,243 | -0,253 |
| 13 | Q9H2D6 TARA_HUMAN  | E.DGHIPPGYISQE.A       |       | 2 | 2,177  | 0,291 | -0,372 |
| 13 | P25398 RS12_HUMAN  | K.DVIEEYFK.C           |       | 2 | 2,1719 | 0,284 | 0,117  |
| 13 | P16403 H12_HUMAN   | K.ASGPPVSELITK.A       |       | 2 | 2,1716 | 0,256 | 0,204  |
| 13 | P60604 UB2G2_HUMAN | E.KILLSVSM*LAEPNDE.S   |       | 2 | 2,1714 | 0,231 | -0,413 |
| 13 | P09936 UCHL1_HUMAN | E.DGSVLKQFLSE.T        |       | 2 | 2,1706 | 0,301 | -0,2   |
| 13 | P19338 NUCL_HUMAN  | R.SISLYYTGEK.G         |       | 2 | 2,1692 | 0,262 | 0      |
| 13 | P62736 ACTA_HUMAN  | K.EITALAPSTM*K.I       |       | 2 | 2,1676 | 0,273 | 0,104  |
| 13 | Q9Y5Q8 TF3C5_HUMAN | E.DEEVPKQPLE.A         |       | 2 | 2,1672 | 0,161 | -0,103 |
| 13 | P35579 MYH9_HUMAN  | K.TDLLLEPYNK.Y         |       | 2 | 2,1665 | 0,195 | -0,303 |
| 13 | Q9H2P0 ADNP_HUMAN  | E.TIHLTEPTK.L          |       | 2 | 2,1631 | 0,185 | -0,731 |
| 13 | Q08211 DHX9_HUMAN  | E.TVEPYKVNLSQDLE.H     |       | 2 | 2,1626 | 0,215 | 0,075  |
| 13 | Q2TBE0 C19L2_HUMAN | E.DKGLDCIFLE.T         |       | 2 | 2,1614 | 0,293 | -0,303 |
| 13 | O15061 DMN_HUMAN   | K.GLQTPVKD.A           |       | 2 | 2,161  | 0,105 | 1,209  |
| 13 | Q9NQE9 HINT3_HUMAN | E.DLICFKD.I            |       | 2 | 2,1609 | 0,193 | 0,134  |
| 13 | Q58FF7 H90B3_HUMAN | R.APFDLFENK.K          |       | 2 | 2,1595 | 0,248 | -0,451 |
| 13 | P30041 PRDX6_HUMAN | K.LPFPIDDR.N           |       | 2 | 2,1584 | 0,306 | 0,112  |
| 13 | P08133 ANXA6_HUMAN | E.LDM*LDIRE.I          |       | 2 | 2,1552 | 0,124 | -0,179 |
| 13 | Q15942 ZYG_HUMAN   | E.DCGKPLSIE.A          |       | 2 | 2,1543 | 0,1   | 0,239  |
| 13 | Q9BSJ8 ESYT1_HUMAN | R.FFLQDPQSQE.L         |       | 2 | 2,1543 | 0,236 | -0,394 |
| 13 | P35579 MYH9_HUMAN  | K.ALELDSNLYR.I         |       | 2 | 2,1542 | 0,217 | 0,307  |
| 13 | P05783 K1C18_HUMAN | E.QLNGILLHLE.S         |       | 2 | 2,1539 | 0,25  | -0,53  |
| 13 | P52272 HNRPM_HUMAN | R.M*GPAM*GPALGAGIE.R   |       | 2 | 2,1538 | 0,279 | -0,842 |
| 13 | P28066 PSA5_HUMAN  | E.LEEVIKDI.-           |       | 2 | 2,1511 | 0,203 | 0,127  |
| 13 | P80723 BASP_HUMAN  | E.TPAATEAPSST#PK.A     | T196: | 2 | 2,149  | 0,35  | -0,182 |
| 13 | P27816 MAP4_HUMAN  | E.VALAKDM*ES#PTKLD.V   | S280: | 2 | 2,1438 | 0,236 | -0,151 |
| 13 | Q58FF7 H90B3_HUMAN | E.DLPLNISRE.M          |       | 2 | 2,1424 | 0,329 | 0,115  |
| 13 | Q86V48 LUZP1_HUMAN | E.DGISSTLPSKE.S        |       | 2 | 2,1397 | 0,25  | 0      |
| 13 | Q96C19 EFHD2_HUMAN | E.IDVSSEGVK.G          |       | 2 | 2,1378 | 0,296 | -0,261 |
| 13 | Q9BRJ6 CG050_HUMAN | E.AVLRPGLDAEPE.L       |       | 2 | 2,1334 | 0,301 | -0,193 |
| 13 | Q15084 PDIA6_HUMAN | R.NSYLEVLLK.L          |       | 2 | 2,1331 | 0,353 | -0,452 |
| 13 | Q15691 MARE1_HUMAN | E.SLQLNLTKIE.Q         |       | 2 | 2,1325 | 0,091 | -0,526 |
| 13 | Q15084 PDIA6_HUMAN | E.LDDLKDEL.-           |       | 2 | 2,1323 | 0,196 | -0,06  |
| 13 | P11766 ADHX_HUMAN  | E.GCFPVILGHE.G         |       | 2 | 2,1288 | 0,189 | 0,324  |

|    |                     |                           |        |   |        |       |        |
|----|---------------------|---------------------------|--------|---|--------|-------|--------|
| 13 | P54920 SNAA_HUMAN   | E.LFPAFSDSRE.C            |        | 2 | 2,1265 | 0,274 | -0,209 |
| 13 | P05783 K1C18_HUMAN  | R.AQIFANTVD.N             |        | 2 | 2,1261 | 0,19  | -0,187 |
| 13 | Q4G0F5 VP26B_HUMAN  | E.GTTS#LGEVR.T            | S319:  | 2 | 2,1186 | 0,179 | 0,366  |
| 13 | Q6ZSR9 YJ005_HUMAN  | R.DGPSSNSS#FHSSEEEGTDLE.G | S39:   | 2 | 2,1176 | 0,09  | 0,446  |
| 13 | P51149 RAB7A_HUMAN  | E.FLIQASPR.D              |        | 2 | 2,1156 | 0,233 | 0,458  |
| 13 | P48444 COPD_HUMAN   | E.TTFLVDKYE.I             |        | 2 | 2,1153 | 0,285 | -0,656 |
| 13 | O94804 STK10_HUMAN  | K.ASQSRPNS#SALE.T         | S454:  | 2 | 2,1143 | 0,205 | -0,184 |
| 13 | P54652 HSP72_HUMAN  | K.LLQDFFNKG.E             |        | 2 | 2,1141 | 0,329 | -0,677 |
| 13 | Q16186 ADRM1_HUMAN  | R.SQSAAVTPSSTTSSTR.A      |        | 2 | 2,1124 | 0,129 | -0,311 |
| 13 | P11172 PYR5_HUMAN   | E.FLHLTPGVQLE.A           |        | 2 | 2,1123 | 0,243 | -0,389 |
| 13 | Q3KQU3 MA7D1_HUMAN  | E.LGAGAPPVVAR.T           |        | 2 | 2,1112 | 0,365 | -0,339 |
| 13 | Q8WXX5 DNJC9_HUMAN  | E.DSPVLTQDR.D             |        | 2 | 2,11   | 0,196 | 0,473  |
| 13 | Q15942 ZYG_HUMAN    | R.S#PGAPGPLTLK.E          | S344:  | 2 | 2,11   | 0,333 | -0,218 |
| 13 | Q14839 CHD4_HUMAN   | E.VM*LQNGETPK.D           |        | 2 | 2,1061 | 0,116 | -0,108 |
| 13 | Q8TEQ6 GEMI5_HUMAN  | E.AEQPLCSSQSQCKEE.K       |        | 2 | 2,106  | 0,245 | 0      |
| 13 | Q13490 BIRC2_HUMAN  | R.NSFAHLS#PTLE.H          | S140:  | 2 | 2,1015 | 0,082 | -0,618 |
| 13 | P11388 TOP2A_HUMAN  | K.GSVPLSS#PPATHFPDETE.I   | S1393: | 2 | 2,1004 | 0,144 | 0      |
| 13 | Q96JM3 ZN828_HUMAN  | K.TDLDM*DIK.G             |        | 2 | 2,1002 | 0,194 | 0,588  |
| 13 | Q15691 MARE1_HUMAN  | E.SLQLNLTK.I              |        | 2 | 2,0993 | 0,115 | 0,2    |
| 13 | Q92547 TOPB1_HUMAN  | K.GVLTQTLE.M              |        | 2 | 2,097  | 0,132 | 0,496  |
| 13 | P27708 PYR1_HUMAN   | E.NLDPLGIHTGE.S           |        | 2 | 2,0968 | 0,294 | -0,314 |
| 13 | O43852 CALU_HUMAN   | E.FTAFLHPEE.Y             |        | 2 | 2,0961 | 0,32  | -0,112 |
| 13 | Q9GZR2 REXO4_HUMAN  | E.T#SPQVKGEEM*PAGKDQE.A   | T110:  | 2 | 2,0954 | 0,421 | -0,253 |
| 13 | Q9H0E9 BRD8_HUMAN   | K.GDETPLTNVK.T            |        | 2 | 2,0933 | 0,256 | -0,568 |
| 13 | P07919 QCR6_HUMAN   | E.LVDPLTTVRE.Q            |        | 2 | 2,0901 | 0,155 | -0,107 |
| 13 | Q09666 AHNK_HUMAN   | E.YDVTVPKLE.G             |        | 2 | 2,0866 | 0,183 | 0,115  |
| 13 | Q9UJM3 ERRFI_HUMAN  | E.DQVVCQFK.K              |        | 2 | 2,0825 | 0,095 | 0,064  |
| 13 | Q7Z736 PKHH3_HUMAN  | E.VTLTQPVR.S              |        | 2 | 2,0819 | 0,197 | 0,2    |
| 13 | Q07864 DPOE1_HUMAN  | E.DM*YQEHINE.I            |        | 2 | 2,0806 | 0,153 | -0,102 |
| 13 | Q86UP2 KTN1_HUMAN   | E.SDLSSKTQLLDVQDE.N       |        | 2 | 2,0806 | 0,107 | -0,338 |
| 13 | P08865 RSSA_HUMAN   | K.SDGIYIINLK.R            |        | 2 | 2,0786 | 0,163 | -0,215 |
| 13 | P47736 RPGP1_HUMAN  | E.TEPLQS#PTTK.V           | S74:   | 2 | 2,0768 | 0,304 | -0,206 |
| 13 | Q6NZI2 PTRF_HUMAN   | R.RGSS#PDVHALLE.I         | S366:  | 2 | 2,0749 | 0,21  | -0,09  |
| 13 | Q15185 TEBP_HUMAN   | E.IDLFHCIDPND.S           |        | 2 | 2,0723 | 0,161 | -0,18  |
| 13 | Q6ZWH8 Q6ZWH8_HUMAN | E.DHGLLAGAQAQVGD.S        |        | 2 | 2,0718 | 0,109 | -0,6   |
| 13 | P00558 PGK1_HUMAN   | K.ALM*DEVVK.A             |        | 2 | 2,0718 | 0,177 | 0,199  |
| 13 | Q9BRX5 PSF3_HUMAN   | E.DTSALVAR.L              |        | 2 | 2,0687 | 0,108 | 0,439  |
| 13 | P60174 TPIS_HUMAN   | D.GFLVGGASLKPE.F          |        | 2 | 2,0659 | 0,236 | -0,208 |
| 13 | P15822 ZEP1_HUMAN   | K.KPLFLQQPSE.L            |        | 2 | 2,0651 | 0,127 | -0,206 |

|    |                    |                       |            |   |        |       |        |
|----|--------------------|-----------------------|------------|---|--------|-------|--------|
| 13 | Q29983 MICA_HUMAN  | R.SSQHFYDGE.L         |            | 2 | 2,0648 | 0,316 | -0,693 |
| 13 | P23526 SAHH_HUMAN  | R.IILAEGR.L           |            | 2 | 2,064  | 0,262 | 0,276  |
| 13 | P54105 ICLN_HUMAN  | E.AHEQGGDIPTFYTYEE.G  |            | 2 | 2,0635 | 0,392 | 0,43   |
| 13 | Q5VWN6 CJ018_HUMAN | E.ILSPLFPR.N          |            | 2 | 2,0621 | 0,136 | -0,323 |
| 13 | P27695 APEX1_HUMAN | E.DGDELRTPE.A         |            | 2 | 2,0607 | 0,213 | -0,105 |
| 13 | P53621 COPA_HUMAN  | E.NAVLLCTR.A          |            | 2 | 2,0547 | 0,15  | 0,064  |
| 13 | P55809 SCOT_HUMAN  | E.ADADLINAGKE.T       |            | 2 | 2,0524 | 0,115 | -0,218 |
| 13 | Q13151 ROA0_HUMAN  | K.LFIGGLNVQTS.E       |            | 2 | 2,0493 | 0,186 | -0,382 |
| 13 | Q12756 KIF1A_HUMAN | E.CLLYIKD.G           |            | 2 | 2,0491 | 0,178 | -0,449 |
| 13 | P13798 ACPH_HUMAN  | K.ALDVSASDDE.I        |            | 2 | 2,0483 | 0,182 | 0,776  |
| 13 | P30101 PDIA3_HUMAN | K.VVVAENFDE.I         |            | 2 | 2,0479 | 0,217 | 0,119  |
| 13 | P32969 RL9_HUMAN   | K.FLDGIYVSEK.G        |            | 2 | 2,0478 | 0,238 | 0      |
| 13 | Q96RV3 PCX1_HUMAN  | E.LESSKPLS#GSKESLVE.N | S323:      | 2 | 2,0461 | 0,178 | -0,207 |
| 13 | Q9Y2Q5 MAPIP_HUMAN | K.FILM*DCM*E.G        |            | 2 | 2,0456 | 0,151 | -0,336 |
| 13 | Q96TC7 FA82C_HUMAN | E.DLAIQKDL.EE.L       |            | 2 | 2,045  | 0,189 | -0,208 |
| 13 | Q8IUI8 CRLF3_HUMAN | D.DSILNIVKD.H         |            | 2 | 2,0438 | 0,222 | -0,18  |
| 13 | P09525 ANXA4_HUMAN | E.GNYLDDALVRQD.A      |            | 2 | 2,0403 | 0,13  | 1,858  |
| 13 | Q9UKM9 RALY_HUMAN  | E.AGLPQGEAR.T         |            | 2 | 2,0402 | 0,274 | -1,9   |
| 13 | P11021 GRP78_HUMAN | E.ISAM*VLTK.M         |            | 2 | 2,037  | 0,186 | 0,208  |
| 13 | P19338 NUCL_HUMAN  | K.ALELTGLK.V          |            | 2 | 2,0368 | 0,197 | 0,072  |
| 13 | P05787 K2C8_HUMAN  | E.VDPNIQAVRTQE.K      |            | 2 | 2,0343 | 0,198 | -0,267 |
| 13 | Q96S44 PRPK_HUMAN  | E.DKGVLDLYVLE.K       |            | 2 | 2,0323 | 0,263 | -0,212 |
| 13 | P50990 TCPQ_HUMAN  | E.AEVPVKDM*LE.A       |            | 2 | 2,0299 | 0,25  | 0      |
| 13 | Q96JM3 ZN828_HUMAN | R.KT#SPASLDFPE.S      | T458:      | 2 | 2,0291 | 0,135 | -0,288 |
| 13 | Q06830 PRDX1_HUMAN | K.ATAVM*PDGQFK.D      |            | 2 | 2,0273 | 0,206 | -0,413 |
| 13 | Q00613 HSF1_HUMAN  | E.GRPPS#PPPT#STPEK.C  | S363:T367: | 2 | 2,0254 | 0,183 | -0,228 |
| 13 | P08174 DAF_HUMAN   | E.DTVITYK.C           |            | 2 | 2,024  | 0,28  | 0,218  |
| 13 | P45880 VDAC2_HUMAN | K.LTSLALVDGK.S        |            | 2 | 2,0231 | 0,373 | -0,24  |
| 13 | Q13162 PRDX4_HUMAN | E.IIAFGDRLEE.F        |            | 2 | 2,023  | 0,295 | -0,21  |
| 13 | Q15164 TIF1A_HUMAN | E.DYSM*YSKPE.D        |            | 2 | 2,0224 | 0,281 | 0,644  |
| 13 | Q9UQ35 SRRM2_HUMAN | K.TVART#PLGQR.S       | T1531:     | 2 | 2,0224 | 0,261 | -0,103 |
| 13 | Q9NRF9 DPOE3_HUMAN | E.ALPDGVNISKE.A       |            | 2 | 2,0153 | 0,244 | 0      |
| 13 | P17174 AATC_HUMAN  | K.IANDNSLNHE.Y        |            | 2 | 2,0134 | 0,295 | 0      |
| 13 | P51991 ROA3_HUMAN  | K.IETIEVM*EDR.Q       |            | 2 | 2,0081 | 0,301 | 0      |
| 13 | Q01813 K6PP_HUMAN  | E.CVQM*TQDVQKAM*DE.R  |            | 2 | 2,0054 | 0,24  | -0,071 |
| 13 | Q8NBJ4 GOLM1_HUMAN | R.QQLQALSEPQPR.L      |            | 2 | 2,0049 | 0,183 | 0,525  |
| 13 | P08473 NEP_HUMAN   | E.DLIAQIRE.V          |            | 2 | 2,0033 | 0,082 | 0,127  |
| 13 | P30050 RL12_HUMAN  | K.IGPLGLSPK.K         |            | 2 | 2,0014 | 0,275 | 0,346  |
| 13 | Q86UP2 KTN1_HUMAN  | E.LTTLIHQLQE.K        |            | 2 | 2,0009 | 0,17  | -0,306 |



|    |                     |                        |       |   |        |       |        |
|----|---------------------|------------------------|-------|---|--------|-------|--------|
| 13 | P98179 RBM3_HUMAN   | E.DHFSSFGPISE.V        |       | 2 | 1,9993 | 0,297 | -0,1   |
| 13 | P27816 MAP4_HUMAN   | E.ATPVPIKDM*E.I        |       | 2 | 1,9986 | 0,194 | -0,983 |
| 13 | P10398 ARAF_HUMAN   | E.LLT#PQGPSR.T         | T181: | 2 | 1,9969 | 0,116 | -0,213 |
| 13 | Q6NVY1 HIBCH_HUMAN  | E.EDLLALKS#PSKE.N      | S234: | 2 | 1,9959 | 0,291 | -0,173 |
| 13 | Q9C0C2 TB182_HUMAN  | K.SSPCHSQLLE.A         |       | 2 | 1,9959 | 0,152 | -0,316 |
| 13 | P52907 CAZA1_HUMAN  | E.ASDPQPEEADGGLK.S     |       | 2 | 1,995  | 0,109 | 0      |
| 13 | P31350 RIR2_HUMAN   | E.NT#PPALSGTR.V        | T33:  | 2 | 1,9883 | 0,317 | 0      |
| 13 | Q01433 AMPD2_HUMAN  | R.QIS#QDVKLEPD.I       | S168: | 2 | 1,9875 | 0,161 | 0      |
| 13 | P20700 LMNB1_HUMAN  | R.AGGPTTPLS#PTR.L      | S23:  | 2 | 1,9843 | 0,315 | -0,099 |
| 13 | Q8WWM7 ATX2L_HUMAN  | K.ISLAPTDVKE.L         |       | 2 | 1,9828 | 0,185 | -0,227 |
| 13 | P23526 SAHH_HUMAN   | K.VPAINVNDVTK.S        |       | 2 | 1,9806 | 0,38  | -0,388 |
| 13 | P38159 HNRPG_HUMAN  | R.DVYLS#PR.D           | S208: | 2 | 1,9799 | 0,237 | 0,066  |
| 13 | Q9UBT2 SAE2_HUMAN   | K.GTILISSEGETE.A       |       | 2 | 1,9776 | 0,133 | -0,715 |
| 13 | P12956 KU70_HUMAN   | R.LGSLVDEFK.E          |       | 2 | 1,9726 | 0,224 | -0,121 |
| 13 | P13645 K1C10_HUMAN  | R.LAADDFR.L            |       | 2 | 1,9715 | 0,285 | 0,302  |
| 13 | Q6IE81 JADE1_HUMAN  | E.KGVQVPVS#PGTIPQVAR.V | S89:  | 2 | 1,9698 | 0,125 | 0,192  |
| 13 | Q7Z434 MAVS_HUMAN   | E.QALQTLS#PR.A         | S165: | 2 | 1,9668 | 0,154 | 0,112  |
| 13 | P0C0S8 H2A1_HUMAN   | R.AGLQFPVGR.V          |       | 2 | 1,9664 | 0,314 | 0,065  |
| 13 | P54727 RD23B_HUMAN  | E.YLLM*GIPGDRE.S       |       | 2 | 1,9653 | 0,232 | -0,095 |
| 13 | P14625 ENPL_HUMAN   | R.LSLNIDPAK.V          |       | 2 | 1,9607 | 0,227 | -0,562 |
| 13 | Q93009 UBP7_HUMAN   | K.AGEQQLS#EPEDM*E.M    | S18:  | 2 | 1,9603 | 0,189 | -0,548 |
| 13 | Q16658 FSCN1_HUMAN  | E.DRLSCFAQTVSPA.E.K    |       | 2 | 1,9599 | 0,092 | -0,309 |
| 13 | Q9Y5M8 SRPRB_HUMAN  | E.FSQLPLKVE.F          |       | 2 | 1,9585 | 0,1   | 0      |
| 13 | P31948 STIP1_HUMAN  | E.IAT#PPPPPPPKKE.T     | T198: | 2 | 1,956  | 0,15  | -0,337 |
| 13 | Q96J01 THOC3_HUMAN  | E.DHFIDIAEVE.T         |       | 2 | 1,9539 | 0,228 | -0,205 |
| 13 | Q71U36 TBA1A_HUMAN  | K.EIIDLVLDL.R          |       | 2 | 1,9528 | 0,286 | -0,225 |
| 13 | Q13509 TBB3_HUMAN   | E.HGIDPSGNYVGSDQLLE.R  |       | 2 | 1,9504 | 0,305 | 0,064  |
| 13 | P21333 FLNA_HUMAN   | R.TPCEEILVK.H          |       | 2 | 1,9474 | 0,166 | -0,112 |
| 13 | P00533 EGFR_HUMAN   | E.DHFLSLQR.M           |       | 2 | 1,9473 | 0,232 | 0,12   |
| 13 | Q99798 ACON_HUMAN   | R.DGYAQILRD.L          |       | 2 | 1,9463 | 0,109 | 0      |
| 13 | Q13596 SNX1_HUMAN   | K.ITTSLLPINNGSK.E      |       | 2 | 1,9405 | 0,116 | -0,27  |
| 13 | P07355 ANXA2_HUMAN  | K.AYTNFDAE.R           |       | 2 | 1,9381 | 0,097 | 0,393  |
| 13 | Q7Z333 SETX_HUMAN   | E.ASS#PTFSKEPM*KVQD.S  | S642: | 2 | 1,9366 | 0,24  | -0,209 |
| 13 | P13645 K1C10_HUMAN  | R.VLDELTLTK.A          |       | 2 | 1,9363 | 0,193 | -0,355 |
| 13 | O15513 O15513_HUMAN | E.NLSM*HQM*LDQTLLE.L   |       | 2 | 1,9345 | 0,104 | -0,286 |
| 13 | P23588 IF4B_HUMAN   | K.VAPAQPSEEGPGRKDE.N   |       | 2 | 1,9328 | 0,118 | -0,293 |
| 13 | P40925 MDHC_HUMAN   | E.GLPINDFSRE.K         |       | 2 | 1,9308 | 0,114 | 0,106  |
| 13 | O15061 DMN_HUMAN    | K.GLQT#PVKDAGGGTGR.E   | T598: | 2 | 1,9299 | 0,289 | -0,245 |
| 13 | Q5BKX6 S45A4_HUMAN  | E.LALDYPDVDIM*R.S      |       | 2 | 1,9269 | 0,254 | -1,104 |

|    |                     |                           |       |   |        |       |        |
|----|---------------------|---------------------------|-------|---|--------|-------|--------|
| 13 | O95835 LATS1_HUMAN  | E.DQPSLPKEDE.S            |       | 2 | 1,9232 | 0,207 | -0,632 |
| 13 | O60271 JIP4_HUMAN   | E.GADLLGM*GR.E            |       | 2 | 1,9208 | 0,241 | 0,337  |
| 13 | P46821 MAP1B_HUMAN  | K.SDISPLTPR.E             |       | 2 | 1,9197 | 0,228 | 0,619  |
| 13 | O94903 PROSC_HUMAN  | R.IGS#TIFGERD.Y           | S244: | 2 | 1,9157 | 0,161 | -0,727 |
| 13 | P60903 S10AA_HUMAN  | E.DLRVLM*E.K              |       | 2 | 1,9154 | 0,103 | 1,094  |
| 13 | O14979 HNRDL_HUMAN  | E.NIELPM*DTK.T            |       | 2 | 1,914  | 0,186 | -0,113 |
| 13 | Q96EQ0 SGTB_HUMAN   | E.DTHLAVSQPLTE.M          |       | 2 | 1,9139 | 0,219 | 0      |
| 13 | Q9C0C9 UBE2O_HUMAN  | E.QLLTGSPTS#PTVEPEKPTRE.K | S839: | 2 | 1,9131 | 0,32  | 0,326  |
| 13 | P08195 4F2_HUMAN    | R.VILDLPNYR.G             |       | 2 | 1,9093 | 0,246 | -0,304 |
| 13 | P62937 PIIA_HUMAN   | R.VSFELFADK.V             |       | 2 | 1,9088 | 0,241 | -0,347 |
| 13 | Q9ULA0 DNPEP_HUMAN  | K.GTPEPGPLNAVDE.R         |       | 2 | 1,9059 | 0,12  | -0,094 |
| 13 | Q99436 PSB7_HUMAN   | D.GIVLGADTR.A             |       | 2 | 1,9057 | 0,143 | 0,203  |
| 13 | Q6ZP91 Q6ZP91_HUMAN | E.DCVVPQR.S               |       | 2 | 1,9012 | 0,212 | 0,39   |
| 13 | P85037 FOXK1_HUMAN  | R.QS#PGPALAR.L            | S101: | 2 | 1,899  | 0,215 | 0,125  |
| 13 | O60506 HNRPQ_HUMAN  | R.LFVGSIPK.S              |       | 2 | 1,8986 | 0,186 | 0,142  |
| 13 | P08865 RSSA_HUMAN   | R.LLVVTDPR.A              |       | 2 | 1,8944 | 0,168 | 0,2    |
| 13 | Q9Y2H9 MAST1_HUMAN  | R.SPAVRPRS#R.S            | S159: | 2 | 1,8939 | 0,082 | 0,662  |
| 13 | Q9H2Y7 ZF106_HUMAN  | E.TQTVISSIK.G             |       | 2 | 1,8877 | 0,167 | -0,25  |
| 13 | Q9H1Z4 WDR13_HUMAN  | R.GSYQLQAQM*NR.A          |       | 2 | 1,8871 | 0,123 | -0,186 |
| 13 | Q9BXW7 CECR5_HUMAN  | E.NAQGLGFR.N              |       | 2 | 1,8857 | 0,27  | 0,495  |
| 13 | Q86W92 LIPB1_HUMAN  | E.DDM*FKDFAAR.S           |       | 2 | 1,8845 | 0,177 | 0,396  |
| 13 | Q96FX7 TRM61_HUMAN  | E.VLPQVYNVR.T             |       | 2 | 1,8831 | 0,207 | -0,785 |
| 13 | P85299 PTOR1_HUMAN  | E.GIFIDFGR.G              |       | 2 | 1,8761 | 0,263 | 0      |
| 13 | P13639 EF2_HUMAN    | K.VFDAIM*NFK.K            |       | 2 | 1,8748 | 0,134 | 0,222  |
| 13 | Q6S8J3 A26CA_HUMAN  | D.SGDGVTHTVPIYE.G         |       | 2 | 1,8716 | 0,287 | -0,089 |
| 13 | Q92622 K0226_HUMAN  | E.DLHLYSLND.L             |       | 2 | 1,871  | 0,149 | -0,336 |
| 13 | Q8IXM2 CQ049_HUMAN  | E.DSGIPLPAES#PK.K         | S96:  | 2 | 1,8664 | 0,286 | 0,284  |
| 13 | Q9Y6D5 BIG2_HUMAN   | E.IGDGKGLDM*AR.R          |       | 2 | 1,866  | 0,185 | -0,637 |
| 13 | P20810 ICAL_HUMAN   | E.ALSASLGTR.Q             |       | 2 | 1,8607 | 0,199 | 0,279  |
| 13 | P08238 HS90B_HUMAN  | E.INPDHPIVE.T             |       | 2 | 1,8601 | 0,157 | 0,118  |
| 13 | Q02952 AKA12_HUMAN  | E.DVLQPVQR.A              |       | 2 | 1,8578 | 0,142 | -0,064 |
| 13 | Q03113 GNA12_HUMAN  | K.ILLLGAGESGK.S           |       | 2 | 1,8572 | 0,152 | 0      |
| 13 | Q9BUA3 YK007_HUMAN  | R.AES#PSPAPPPGLR.G        | S308: | 2 | 1,8558 | 0,164 | -0,27  |
| 13 | P19338 NUCL_HUMAN   | K.GIAYIEFK.T              |       | 2 | 1,8538 | 0,24  | 0,194  |
| 13 | Q6PID6 TTC33_HUMAN  | K.SIPDYDFE.S              |       | 2 | 1,8478 | 0,255 | -0,062 |
| 13 | P13639 EF2_HUMAN    | E.LYQTFQR.I               |       | 2 | 1,847  | 0,174 | 0,191  |
| 13 | P31946 1433B_HUMAN  | R.NLLSVAYK.N              |       | 2 | 1,8431 | 0,226 | -0,403 |
| 13 | P62258 1433E_HUMAN  | K.EAAENSLVAYK.A           |       | 2 | 1,8401 | 0,177 | 0,102  |
| 13 | O15014 ZN609_HUMAN  | E.LESPLT#PGK.V            | T746: | 2 | 1,8395 | 0,195 | 0      |

|    |                       |                        |       |   |        |       |        |
|----|-----------------------|------------------------|-------|---|--------|-------|--------|
| 13 | Q6PKG0 LARP1_HUMAN    | E.DFRVDPPM*GE.E        |       | 2 | 1,8332 | 0,117 | -0,31  |
| 13 | O14745 NHERF_HUMAN    | E.AALESPRPALVR.S       |       | 2 | 1,8318 | 0,168 | 0,381  |
| 13 | Q9UIG0 BAZ1B_HUMAN    | E.DDKLILCDE.C          |       | 2 | 1,8306 | 0,125 | 0,218  |
| 13 | P14324 FPPS_HUMAN     | E.DSYSHIM*ALIE.Q       |       | 2 | 1,8291 | 0,115 | -0,188 |
| 13 | ##O43245 O43245_HUMAN | E.DS#GGAEKASNHNKLDQR.L | S371: | 2 | 1,8233 | 0,146 | 1,6    |
| 13 | P15531 NDKA_HUMAN     | R.TFIAIKPD.G           |       | 2 | 1,8214 | 0,224 | 0,337  |
| 13 | Q3MHD2 LSM12_HUMAN    | E.YFSVGSQVSCR.T        |       | 2 | 1,8212 | 0,244 | 0,095  |
| 13 | ##Q7Z3Z3 PIWL3_HUMAN  | R.LCDPSTPTLEK.S        |       | 2 | 1,8201 | 0,176 | -1,838 |
| 13 | P31948 STIP1_HUMAN    | R.LAYINPDLALEE.K       |       | 2 | 1,8184 | 0,193 | -0,448 |
| 13 | P46934 NEDD4_HUMAN    | R.RGS#LQAYTFE.E        | S428: | 2 | 1,8149 | 0,13  | -0,78  |
| 13 | ##O75604 UBP2_HUMAN   | R.LGALGQASK.S          |       | 2 | 1,8121 | 0,121 | 0,578  |
| 13 | P40939 ECHA_HUMAN     | E.DLGKVFGE.R           |       | 2 | 1,81   | 0,23  | 0,282  |
| 13 | P09936 UCHL1_HUMAN    | E.AIQAAHDAVAQE.G       |       | 2 | 1,8082 | 0,173 | -0,1   |
| 13 | Q96HQ2 C2AIL_HUMAN    | E.DLPQFTTR.S           |       | 2 | 1,8075 | 0,101 | -0,062 |
| 13 | Q92841 DDX17_HUMAN    | R.LIDFLESGK.T          |       | 2 | 1,8063 | 0,172 | -0,298 |
| 13 | P52788 SPSY_HUMAN     | E.IDSILNKVEE.R         |       | 2 | 1,8058 | 0,154 | -0,21  |
| 13 | P78310 CXAR_HUMAN     | K.VAAPNLSR.M           |       | 2 | 1,8022 | 0,156 | 0,368  |
| 13 | Q15003 CND2_HUMAN     | E.M*TDLKAPLQQCAE.D     |       | 2 | 1,797  | 0,163 | 0,16   |
| 13 | P46379 BAT3_HUMAN     | E.DQRLINLVGE.S         |       | 2 | 1,7913 | 0,164 | -0,316 |
| 13 | Q96A08 H2B1A_HUMAN    | R.LLLPGELAK.H          |       | 2 | 1,7866 | 0,172 | -0,639 |
| 13 | O14979 HNRDL_HUMAN    | K.DLTEYLSR.F           |       | 2 | 1,7772 | 0,119 | -0,061 |
| 13 | P31946 1433B_HUMAN    | D.STLIM*QLLRD.N        |       | 2 | 1,7761 | 0,279 | -0,506 |
| 13 | ##Q9UPP5 K1107_HUMAN  | K.SINQCELALKE.K        |       | 2 | 1,7704 | 0,171 | 0      |
| 13 | P04844 RPN2_HUMAN     | E.IEDLVAR.L            |       | 2 | 1,7703 | 0,124 | 0,075  |
| 13 | P54652 HSP72_HUMAN    | E.LNADLFR.G            |       | 2 | 1,7643 | 0,247 | 0,072  |
| 13 | P18031 PTN1_HUMAN     | E.DTNLKLTLISE.D        |       | 2 | 1,7626 | 0,121 | -0,196 |
| 13 | Q6S8J3 A26CA_HUMAN    | E.M*ATAASSSSLEK.S      |       | 2 | 1,7608 | 0,237 | -0,305 |
| 13 | O14617 AP3D1_HUMAN    | E.QANNPFYIK.S          |       | 2 | 1,7592 | 0,143 | -0,223 |
| 13 | P55072 TERA_HUMAN     | E.VYLPYFLE.A           |       | 2 | 1,7591 | 0,137 | -0,416 |
| 13 | P36915 GNL1_HUMAN     | D.SAM*EPTGPTQE.R       |       | 2 | 1,7559 | 0,214 | -0,21  |
| 13 | Q15942 ZYX_HUMAN      | E.GGPEAPIPPPPQPR.E     |       | 2 | 1,7556 | 0,266 | 0,519  |
| 13 | Q12873 CHD3_HUMAN     | E.ELLSDM*KAD.V         |       | 2 | 1,7529 | 0,295 | 0,118  |
| 13 | P07355 ANXA2_HUMAN    | K.SALSGHLE.T           |       | 2 | 1,747  | 0,133 | 0,15   |
| 13 | P23588 IF4B_HUMAN     | K.VAPAQPSEEGPGR.K      |       | 2 | 1,7448 | 0,23  | -0,094 |
| 13 | P14324 FPPS_HUMAN     | E.EDSYSHIM*ALIE.Q      |       | 2 | 1,7417 | 0,153 | -0,171 |
| 13 | Q9BRA2 TXD17_HUMAN    | K.TIFAYFTGSK.D         |       | 2 | 1,7259 | 0,246 | -0,43  |
| 13 | O43390 HNRPR_HUMAN    | E.GALSVLQQFKE.S        |       | 2 | 1,7145 | 0,197 | -0,4   |
| 13 | P11142 HSP7C_HUMAN    | E.VSSM*VLTK.M          |       | 2 | 1,7137 | 0,096 | 0,138  |
| 13 | P34931 HS71L_HUMAN    | E.ISSM*VLTK.L          |       | 2 | 1,7046 | 0,182 | 0,136  |

|    |                     |                        |        |   |        |       |        |
|----|---------------------|------------------------|--------|---|--------|-------|--------|
| 13 | Q96RR4 KKCC2_HUMAN  | R.SLSAPGNLLTK.K        |        | 2 | 1,7009 | 0,178 | 0      |
| 13 | P46939 UTRO_HUMAN   | E.DINAYFK.Q            |        | 2 | 1,7001 | 0,131 | 0      |
| 13 | Q92615 LARP5_HUMAN  | R.SPS#PAHLRDDPK.V      | S601:  | 2 | 1,6981 | 0,127 | -0,546 |
| 13 | Q9H4D5 NXF3_HUMAN   | D.TKM*AS#NPR.K         | S241:  | 2 | 1,6978 | 0,086 | 0,853  |
| 13 | Q9UBG0 MRC2_HUMAN   | R.CLTALPYICK.R         |        | 2 | 1,6899 | 0,143 | -0,295 |
| 13 | P48637 GSHB_HUMAN   | E.IAVVYFRD.G           |        | 2 | 1,6877 | 0,119 | 0,062  |
| 13 | P10398 ARAF_HUMAN   | E.LLTPQGPS#PR.T        | S186:  | 2 | 1,6811 | 0,095 | -0,106 |
| 13 | P08670 VIME_HUMAN   | R.SYVTTSTR.T           |        | 2 | 1,6727 | 0,215 | -0,467 |
| 13 | Q04760 LGUL_HUMAN   | E.AALSCCSDADPSTKD.F    |        | 2 | 1,672  | 0,343 | -0,611 |
| 13 | P34931 HS71L_HUMAN  | E.SYAFNM*K.S           |        | 2 | 1,672  | 0,347 | 0,139  |
| 13 | ##O60885 BRD4_HUMAN | K.TT#KPEPPLSPPE.H      | T1048: | 2 | 1,6706 | 0,115 | 0,178  |
| 13 | O00154 BACH_HUMAN   | E.VPPVVYSR.Q           |        | 2 | 1,6697 | 0,203 | -0,067 |
| 13 | P58304 VSX2_HUMAN   | D.AQAAIS#QEELR.E       | S297:  | 2 | 1,6633 | 0,114 | 1,036  |
| 13 | P29373 RABP2_HUMAN  | K.VLGVNVM*LR.K         |        | 2 | 1,6591 | 0,122 | -0,06  |
| 13 | P49023 PAXI_HUMAN   | E.LM*ASLSDFK.I         |        | 2 | 1,6573 | 0,156 | 0,237  |
| 13 | Q92609 TBCD5_HUMAN  | E.SM*PVQLNK.G          |        | 2 | 1,6572 | 0,118 | 0,196  |
| 13 | Q63ZY3 KANK2_HUMAN  | E.IASM*LYSR.M          |        | 2 | 1,6491 | 0,227 | 0,064  |
| 13 | Q8N543 OGFD1_HUMAN  | E.YGGFTSYIAKGEDEE.L    |        | 2 | 1,6472 | 0,162 | 0,073  |
| 13 | Q9NR09 BIRC6_HUMAN  | E.DSSSCSDIPK.L         |        | 2 | 1,646  | 0,139 | 0,111  |
| 13 | P06733 ENOA_HUMAN   | E.VDLFTSK.G            |        | 2 | 1,6412 | 0,255 | 0,452  |
| 13 | P17844 DDX5_HUMAN   | R.LIDFLECGK.T          |        | 2 | 1,6403 | 0,096 | -0,334 |
| 13 | Q6GMW9 FTHL3_HUMAN  | K.APAAAPAPR.S          |        | 2 | 1,6393 | 0,212 | 0,445  |
| 13 | P30533 AMRP_HUMAN   | E.AEFEEPR.V            |        | 2 | 1,6303 | 0,086 | 0,208  |
| 13 | Q16658 FSCN1_HUMAN  | K.YLTAEAFGFK.V         |        | 2 | 1,6203 | 0,094 | -0,213 |
| 13 | P30041 PRDX6_HUMAN  | R.VVVFVGPDK.K          |        | 2 | 1,6195 | 0,133 | -0,363 |
| 13 | Q16352 AINX_HUMAN   | R.EYQDLLNVK.M          |        | 2 | 1,6191 | 0,148 | 0,109  |
| 13 | Q66K74 MAP1S_HUMAN  | R.LSLS#PLR.G           | S657:  | 2 | 1,6182 | 0,128 | 0,141  |
| 13 | P08238 HS90B_HUMAN  | R.ALLFIPR.R            |        | 2 | 1,6175 | 0,197 | 0,147  |
| 13 | Q86WB0 NIPA_HUMAN   | R.LPLVPES#PRR.M        | S321:  | 2 | 1,6171 | 0,18  | 0,098  |
| 13 | Q9H6R0 DHX33_HUMAN  | E.DSGICYR.L            |        | 2 | 1,6169 | 0,3   | 0,21   |
| 13 | P49207 RL34_HUMAN   | R.IVYLYTK.K            |        | 2 | 1,595  | 0,155 | 0,271  |
| 13 | Q12888 TP53B_HUMAN  | E.SVPLHLSLTE.T         |        | 2 | 1,5938 | 0,101 | 0,111  |
| 13 | Q9ULL5 PRR12_HUMAN  | E.GLGLGCP#PCKR.L       | S540:  | 2 | 1,5771 | 0,123 | -0,265 |
| 13 | P11021 GRP78_HUMAN  | E.IDVNGILR.V           |        | 2 | 1,5733 | 0,159 | 0,407  |
| 13 | Q7Z460 CLAP1_HUMAN  | R.IPGSVNAM*R.V         |        | 2 | 1,5613 | 0,347 | 0      |
| 13 | Q9P260 K1468_HUMAN  | R.EPSTASGGGQLNR.A      |        | 2 | 1,5538 | 0,284 | -0,192 |
| 13 | Q92667 AKAP1_HUMAN  | K.AITPPLPE.S           |        | 2 | 1,5476 | 0,159 | 0,146  |
| 13 | Q9UKX7 NUP50_HUMAN  | D.LTPIFKDYE.K          |        | 2 | 1,542  | 0,097 | -0,108 |
| 13 | P20700 LMNB1_HUMAN  | E.M*AEIRDQM*QQQLNDYE.Q |        | 2 | 1,536  | 0,142 | -0,716 |

|    |                     |                                    |              |   |        |       |        |
|----|---------------------|------------------------------------|--------------|---|--------|-------|--------|
| 13 | Q8N3C0 HELCL1_HUMAN | E.GDIFAIVSK.A                      |              | 2 | 1,5292 | 0,236 | 0,899  |
| 13 | P33778 H2B1B_HUMAN  | K.ESYSIYVYK.V                      |              | 2 | 1,5216 | 0,233 | -0,212 |
| 13 | P68104 EF1A1_HUMAN  | R.QTVAVGVIK.A                      |              | 2 | 1,5031 | 0,158 | -0,133 |
| 13 | Q01081 U2AF1_HUMAN  | E.LSPVTDFRE.A                      |              | 2 | 1,5027 | 0,099 | -0,688 |
| 13 | Q6NYC8 PHTNS_HUMAN  | R.LS#PGESAYQK.L                    | S224:        | 2 | 1,493  | 0,46  | -0,21  |
| 13 | P22626 ROA2_HUMAN   | R.DYFEEYGK.I                       |              | 2 | 1,4761 | 0,301 | -0,232 |
| 13 | P42167 LAP2B_HUMAN  | K.GGPLQALTRE.S                     |              | 2 | 1,4718 | 0,166 | 0      |
| 13 | O76021 RL1D1_HUMAN  | K.ALPASETPK.A                      |              | 2 | 1,4315 | 0,128 | 0      |
| 13 | P56385 ATP5I_HUMAN  | E.LAEDDSILK.-                      |              | 2 | 1,4137 | 0,098 | -0,365 |
| 13 | Q9BPX7 CG025_HUMAN  | E.ALATPLPK.D                       |              | 2 | 1,3992 | 0,184 | 0,602  |
| 13 | P62807 H2B1C_HUMAN  | K.ESYSVYVYK.V                      |              | 2 | 1,3884 | 0,192 | -0,107 |
| 13 | Q14683 SMC1A_HUMAN  | R.ISSIYAR.E                        |              | 2 | 1,3739 | 0,203 | 0,075  |
| 13 | Q09666 AHNK_HUMAN   | K.LQSGVSLASK.K                     |              | 2 | 1,3502 | 0,152 | 0,35   |
| 13 | P49792 RBP2_HUMAN   | E.STTGFNFSFK.S                     |              | 2 | 1,3003 | 0,088 | 0      |
| 13 | Q9UQ80 PA2G4_HUMAN  | D.AM*PFTLR.A                       |              | 2 | 1,2613 | 0,082 | 0,573  |
| 14 | Q8TD19 NEK9_HUMAN   | R.HCDSINSDFGSESGCGDSS#PGPSASQGPR.A | S29:         | 3 | 6,6948 | 0,526 | 0,355  |
| 14 | Q9P2Y5 UVRAG_HUMAN  | R.KITSLSS#LDTSLDFSKE.N             | S550:        | 2 | 6,3959 | 0,586 | 0,239  |
| 14 | O94887 FARP2_HUMAN  | E.FKDSSSLTDPQVSVYKS#PAAE.R         | S439:        | 2 | 6,3352 | 0,584 | 0,302  |
| 14 | Q5JT44 Q5JT44_HUMAN | E.GDNLET#PSQS#PQLFHDDTHSR.I        | T124:S128:   | 3 | 6,2693 | 0,49  | 0      |
| 14 | P46060 RAGP1_HUMAN  | E.KLDLNGNTLGEEGCEQLQE.V            |              | 2 | 6,2666 | 0,507 | 0,455  |
| 14 | Q8WXI9 P66B_HUMAN   | R.GRLT#PSPDIIVLS#DNEASSPR.S        | T120:S129:   | 3 | 5,8528 | 0,33  | 0      |
| 14 | Q9UQ35 SRRM2_HUMAN  | R.FQSDSSSYPTVDSNLLGQSR.L           |              | 2 | 5,7641 | 0,538 | 0,107  |
| 14 | Q8WXI9 P66B_HUMAN   | R.LTPSPDIIVLS#DNEASS#PR.S          | S129:S135:   | 2 | 5,5194 | 0,459 | 0,225  |
| 14 | O75691 UTP20_HUMAN  | K.SLSDNGQPGT#PDPADSGGTSAKE.S       | T1741:       | 2 | 5,5121 | 0,541 | 0,108  |
| 14 | Q14694 UBP10_HUMAN  | E.TKYSPPAIS#PLVSEK.Q               | S370:        | 3 | 5,4839 | 0,298 | -0,108 |
| 14 | P51636 CAV2_HUMAN   | E.KADVQLFM*DDDSYS#HHS#GLE.Y        | S20:S23:     | 3 | 5,3756 | 0,37  | -0,296 |
| 14 | P24928 RPB1_HUMAN   | E.KINAGFGDDLNCIFNDDNAE.K           |              | 2 | 5,3283 | 0,545 | 0,218  |
| 14 | Q13506 NAB1_HUMAN   | E.SEHSLPADLGSPAS#PKESSE.A          | S183:        | 2 | 5,3184 | 0,517 | 0,334  |
| 14 | P35527 K1C9_HUMAN   | R.HGVQELEIEIQSQLSKK.A              |              | 3 | 5,2959 | 0,39  | -0,651 |
| 14 | Q9Y4W6 AFG32_HUMAN  | E.KSTYEEFVEGTGSLDE.D               |              | 2 | 5,122  | 0,484 | -0,477 |
| 14 | Q14157 UBP2L_HUMAN  | E.KSPAVATSTAAPPPSS#PLPSK.S         | S454:        | 2 | 5,1157 | 0,554 | 0,338  |
| 14 | Q9P287 BCCIP_HUMAN  | E.LTDLLIQNHIGSVIK.Q                |              | 2 | 5,0934 | 0,504 | -0,34  |
| 14 | P46821 MAP1B_HUMAN  | E.KVSPSKSPS#LSPSPS#PLEK.T          | S1258:S1265: | 3 | 5,0758 | 1     | 0,083  |
| 14 | P55884 EIF3B_HUMAN  | R.SDS#RAQAVSEDAGGNE.G              | S119:        | 2 | 5,0224 | 0,578 | -0,292 |
| 14 | Q9UK76 HN1_HUMAN    | R.RNS#SEASSGDFLDLKG.E              | S87:         | 2 | 5,0214 | 0,602 | -0,129 |
| 14 | Q5JT44 Q5JT44_HUMAN | E.GDNLET#PSQS#PQLFHDDTHSR.IE.Q     | T124:S128:   | 3 | 5,012  | 0,498 | 0,329  |
| 14 | Q99598 TSNAX_HUMAN  | E.GKDVNSSS#PVM*LAFK.S              | S33:         | 2 | 4,9956 | 0,528 | 0      |
| 14 | Q53EZ4 CEP55_HUMAN  | E.KVAASPKS#PTAALNES#LVECPK.C       | S428:S436:   | 3 | 4,9938 | 0,479 | -0,074 |
| 14 | O60238 BNI3L_HUMAN  | R.GSSHCD#PSPQEDGQIM*FDVE.M         | S95:         | 2 | 4,9763 | 0,463 | 0,404  |

|    |                    |                                     |              |   |        |       |        |
|----|--------------------|-------------------------------------|--------------|---|--------|-------|--------|
| 14 | P08779 K1C16_HUMAN | K.IIAATIENAPILQIDNAR.L              |              | 3 | 4,9723 | 0,397 | -0,089 |
| 14 | Q9UL03 INT6_HUMAN  | E.NHVADQLSSDITPNAM*DTE.F            |              | 2 | 4,9683 | 0,464 | 0      |
| 14 | Q9H6F5 CCD86_HUMAN | R.LQQGAGLESPQQPEPGAAS#PQRQQDLHLE.S  | S91:         | 3 | 4,9453 | 0,453 | 0,338  |
| 14 | Q13506 NAB1_HUMAN  | E.SEHSLPADLGGSPAS#PKESSE.A          | S183:        | 3 | 4,9297 | 0,357 | 0,167  |
| 14 | O94887 FARP2_HUMAN | E.FKDSSSLTDPQVSVYKS#PAAE.R          | S439:        | 3 | 4,856  | 0,396 | 0,075  |
| 14 | P08621 RU17_HUMAN  | E.ARGGGGGQDNGLEGLGNDNR.D            |              | 3 | 4,8412 | 0,48  | 0,388  |
| 14 | Q8NEF9 SRFB1_HUMAN | E.NTLYSNDNGSNLQRE.A                 |              | 2 | 4,8314 | 0,479 | -0,071 |
| 14 | Q13509 TBB3_HUMAN  | E.HGIDPSGNYVGDSDLQLE.R              |              | 2 | 4,8306 | 0,395 | 0,382  |
| 14 | Q4KMP7 TB10B_HUMAN | E.GLHPSLPS#PTGNSTPLGSSKE.T          | S432:        | 2 | 4,8253 | 0,497 | 0,114  |
| 14 | Q99567 NUP88_HUMAN | K.NQS#PTEAEKPASSLPSSPPPQLLTR.N      | S35:         | 3 | 4,8191 | 0,386 | 0      |
| 14 | Q09666 AHNK_HUMAN  | E.VTGS#DDETGLKQSGVSLASK.K           | S5841:       | 3 | 4,8081 | 0,344 | 0,173  |
| 14 | Q9C0C2 TB182_HUMAN | R.RES#AAS#GLGGLLEEE.G               | S1473:S1476: | 2 | 4,8019 | 0,511 | -0,291 |
| 14 | Q6KC79 NIPBL_HUMAN | K.GSRPPLILQSQSLPCSS#PR.D            | S306:        | 3 | 4,8016 | 0,279 | 0,254  |
| 14 | P39880 CUX1_HUMAN  | E.IQAGSQGQAGASDS#PSAR.S             | S1321:       | 3 | 4,8009 | 0,352 | -1,448 |
| 14 | P54105 ICLN_HUMAN  | D.GM*EVDTTPTVAGQFEDADVDH.-          |              | 2 | 4,7575 | 0,555 | 0,325  |
| 14 | Q92597 NDRG1_HUMAN | E.GAHLDITPNSGAAGNSAGPK.S            |              | 2 | 4,7504 | 0,581 | 0,066  |
| 14 | Q9Y2X9 ZN281_HUMAN | E.HSELVQEENLS#PGTQTPSNDKASM*LQE.Y   | S651:        | 3 | 4,7489 | 0,344 | 0      |
| 14 | Q4KMP7 TB10B_HUMAN | E.GLHPSLPSPT#GNSTPLGSSKE.T          | T434:        | 3 | 4,7474 | 0,328 | 0,171  |
| 14 | O75943 RAD17_HUMAN | E.HGM*IDPDS#GDEAQLNGGHSAAE.S        | S613:        | 3 | 4,7387 | 0,275 | 0      |
| 14 | P49815 TSC2_HUMAN  | E.GGRPSVDLSFQPSQPLSK.S              |              | 2 | 4,7275 | 0,346 | 0,193  |
| 14 | Q92597 NDRG1_HUMAN | E.GAHLDITPNSGAAGNSAGPK.S            |              | 3 | 4,7228 | 0,458 | 0,1    |
| 14 | Q13263 TIF1B_HUMAN | R.STAPSAASASASAAASS#PAGGGAE.A       | S50:         | 3 | 4,709  | 0,352 | 0      |
| 14 | Q8ND56 LS14A_HUMAN | E.TSNSGTLPQSSAVGSAFTQDTR.S          |              | 3 | 4,684  | 0,48  | 0,331  |
| 14 | P19634 SL9A1_HUMAN | E.TSSPGTDDVFTAPSDS#PSSQR.I          | S785:        | 2 | 4,672  | 0,507 | 0,527  |
| 14 | Q92692 PVRL2_HUMAN | E.HS#PLKTPYFDAGASCTE.Q              | S433:        | 2 | 4,6673 | 0,517 | -0,311 |
| 14 | Q8IX90 CM003_HUMAN | K.TDVKDDLSDPPVASSCISE.K             | S139:        | 2 | 4,6602 | 0,537 | 0,577  |
| 14 | O14964 HGS_HUMAN   | E.ARKS#PTSPAPVPLTEPAAQPGE.G         | S345:        | 2 | 4,6542 | 0,529 | 0,535  |
| 14 | Q6IBW4 CNDH2_HUMAN | E.DRANGVASSGVPQEAENE.F              |              | 2 | 4,6526 | 0,564 | -0,667 |
| 14 | P35611 ADDA_HUMAN  | E.AHRPPS#PTEAPTEASPEPAPDPAPVAEE.A   | S669:        | 3 | 4,6517 | 0,418 | -0,5   |
| 14 | Q92597 NDRG1_HUMAN | E.GAHLDITPNSGAAGNSAGPKS#M*E.V       | S389:        | 3 | 4,6505 | 0,362 | -0,241 |
| 14 | Q9UBQ5 EIF3K_HUMAN | E.KIDFDSVSSIM*ASSQ.-                |              | 2 | 4,6352 | 0,522 | 0,075  |
| 14 | Q969R5 LMBL2_HUMAN | E.HLDVASPDKAS#SPELPSVVE.N           | S688:        | 2 | 4,6091 | 0,473 | 0,339  |
| 14 | Q14694 UBP10_HUMAN | E.S#ASPPADGTGSASGTLPSVQPK.S         | S319:        | 3 | 4,6065 | 0,399 | 0      |
| 14 | Q96JM3 ZN828_HUMAN | K.LGSVLSPES#PKPTPLTLEPQKPGSVVVSPE.L | S145:        | 3 | 4,606  | 0,354 | 0,233  |
| 14 | Q9NZL4 HPBP1_HUMAN | K.LLQTCFSS#PADDSM*DR.-              | S354:        | 2 | 4,5971 | 0,624 | -0,252 |
| 14 | Q9UQ35 SRRM2_HUMAN | R.FQSDSSSYPTVDSNLLGQSR.L            |              | 3 | 4,5794 | 0,537 | -0,08  |
| 14 | Q9H8Y8 GORS2_HUMAN | E.DRVGDSTPVSEKPVSAAVDANASES#P.-     | S451:        | 3 | 4,5674 | 0,479 | 0,412  |
| 14 | Q8WUD4 CCD12_HUMAN | R.LKGQEDSLASAVDAATEQK.T             |              | 2 | 4,5665 | 0,621 | 0,062  |
| 14 | Q14247 SRC8_HUMAN  | R.AKTQT#PPVSPAPQPTEER.L             | T401:        | 3 | 4,5494 | 0,33  | -0,182 |

|    |                     |                                  |            |   |        |       |        |
|----|---------------------|----------------------------------|------------|---|--------|-------|--------|
| 14 | O14686 MLL2_HUMAN   | E.IKLEGPVS#PDVEPGKEE.T           | S1396:     | 2 | 4,4974 | 0,398 | 0,256  |
| 14 | Q9UHR5 S30BP_HUMAN  | E.KGGLVSDAYGEDDFSR.L             |            | 2 | 4,4969 | 0,538 | -0,284 |
| 14 | Q53F19 CQ085_HUMAN  | E.NKAGS#FITGIDVTSKE.A            | S73:       | 2 | 4,4902 | 0,526 | 0,14   |
| 14 | Q96JM3 ZN828_HUMAN  | K.LAPVPSPEPQKPAPVS#PE.S          | S214:      | 2 | 4,4762 | 0,413 | 0,064  |
| 14 | Q96I24 FUBP3_HUMAN  | R.QQVAFYQGTLGQAQHS#QEQ.-         | S569:      | 2 | 4,472  | 0,538 | 0,212  |
| 14 | Q12931 TRAP1_HUMAN  | E.KGTITIQDTGIGM*TQEE.L           |            | 2 | 4,4703 | 0,558 | -0,066 |
| 14 | Q8WUD4 CCD12_HUMAN  | R.LKGQEDSLASAVDAATEQK.T          |            | 3 | 4,4673 | 0,285 | 0,187  |
| 14 | Q9Y6G5 COMDA_HUMAN  | K.LKS#PQAVLQLGVNNE.D             | S155:      | 2 | 4,46   | 0,484 | -0,072 |
| 14 | Q53F19 CQ085_HUMAN  | K.AGS#FITGIDVTSKE.A              | S73:       | 2 | 4,4502 | 0,516 | -0,243 |
| 14 | Q7L2J0 MEPCE_HUMAN  | E.SHPVPPTAPLT#PLLHGE.G           | T291:      | 3 | 4,4391 | 0,423 | 0,199  |
| 14 | Q32MZ4 LRRF1_HUMAN  | R.NM*PGLSAATLASLGGTSSR.R         |            | 2 | 4,4339 | 0,385 | -0,135 |
| 14 | P16070 CD44_HUMAN   | E.M*VHLVNKESS#ETPDQFM*TADE.T     | S718:      | 3 | 4,4287 | 0,405 | 0,073  |
| 14 | P46821 MAP1B_HUMAN  | R.T#PEEGGYSYDISEK.T              | T1949:     | 2 | 4,4251 | 0,6   | -0,369 |
| 14 | Q8NCM9 Q8NCM9_HUMAN | R.SSDITSDLGNVLTSTPNAK.T          |            | 2 | 4,424  | 0,527 | -0,318 |
| 14 | Q14694 UBP10_HUMAN  | E.SAS#PPADGTGSASGTLPVSQPK.S      | S321:      | 2 | 4,4222 | 0,435 | 0      |
| 14 | P29692 EF1D_HUMAN   | E.NIQKS#LAGSSGPGASSGTSGDHGE.L    | S60:       | 3 | 4,3993 | 0,477 | -0,321 |
| 14 | A8K1U6 A8K1U6_HUMAN | E.TGVFVINHTCRS#.-                | S523:      | 2 | 4,3955 | 0,418 | -0,226 |
| 14 | O14686 MLL2_HUMAN   | E.IKLEGPVS#PDVEPGKEE.T           | S1396:     | 3 | 4,3923 | 0,15  | 0,192  |
| 14 | Q02952 AKA12_HUMAN  | E.TCVSGEDPTQGADLSPDEK.V          |            | 2 | 4,3653 | 0,432 | -0,426 |
| 14 | Q92615 LARP5_HUMAN  | E.KFTSSQTQSPTPPKPPS#PSFE.L       | S524:      | 3 | 4,3556 | 0,341 | 0,699  |
| 14 | Q9H832 UBE2Z_HUMAN  | E.NAEM*DSDSSSS#GTETDLHGSLRV.-    | S342:      | 3 | 4,3459 | 0,301 | -0,147 |
| 14 | Q92615 LARP5_HUMAN  | E.KFTSSQTQSPTPPKPPS#PSFE.L       | S524:      | 2 | 4,3436 | 0,431 | 0,518  |
| 14 | P78310 CXAR_HUMAN   | R.SYIGSNHS#SLGSM*SPSNM*E.G       | S300:      | 2 | 4,3434 | 0,45  | -0,116 |
| 14 | O75691 UTP20_HUMAN  | K.SLSDNGQPGT#PDPADSGGTSAK.E      | T1741:     | 2 | 4,3406 | 0,434 | 0,913  |
| 14 | Q14980 NUMA1_HUMAN  | R.TQPDGTSVPGEPAS#PISQR.L         | S1757:     | 2 | 4,3131 | 0,437 | 0,122  |
| 14 | Q6BDS2 URFB1_HUMAN  | E.LKSDASS#DQGPASPEK.V            | S922:      | 2 | 4,2927 | 0,472 | -0,791 |
| 14 | Q69YH5 CDCA2_HUMAN  | R.VASDS#PKPALTLQQGQE.F           | S727:      | 2 | 4,2877 | 0,434 | 0      |
| 14 | Q14247 SRC8_HUMAN   | R.AKTQT#PPVSPAPQPTEERLPSS#PVYE.D | T401:S418: | 3 | 4,286  | 1     | 0,123  |
| 14 | Q9UKI8 TLK1_HUMAN   | R.FTGVASGSTGSGSCSVGAK.A          |            | 2 | 4,2803 | 0,564 | -0,336 |
| 14 | Q8IWW6 RHG12_HUMAN  | R.ATTPPNQGRPDS#PVYANLQE.L        | S240:      | 2 | 4,2794 | 0,292 | 0,328  |
| 14 | P55036 PSMD4_HUMAN  | E.KVNVDIINFGEDEVNTE.K            |            | 2 | 4,2694 | 0,402 | 0,063  |
| 14 | Q15599 NHRF2_HUMAN  | E.SGLHLS#PTAAEAKE.K              | S303:      | 3 | 4,2647 | 0,253 | 0,245  |
| 14 | Q2QGD7 ZXDC_HUMAN   | E.GSHGLPQSTLPS#PAEQHGAQDTE.L     | S688:      | 3 | 4,2527 | 0,356 | 0      |
| 14 | O75531 BAF_HUMAN    | R.DFVAEPM*GEKPVGSLAGIGE.V        |            | 2 | 4,2421 | 0,501 | -0,181 |
| 14 | Q8N3C0 HELC1_HUMAN  | E.NAKPNYGCQVTIQSEQE.K            |            | 2 | 4,2313 | 0,428 | 0,186  |
| 14 | Q9NQ92 CQ079_HUMAN  | E.LKADQGNPYDADDIQE.S             |            | 2 | 4,2291 | 0,433 | 0,272  |
| 14 | P02545 LMNA_HUMAN   | R.SGAQASST#PLS#PTR.I             | T19:S22:   | 2 | 4,2254 | 1     | -0,642 |
| 14 | Q8WUD4 CCD12_HUMAN  | K.GQEDSLASAVDAATEQK.T            |            | 2 | 4,2233 | 0,513 | -0,142 |
| 14 | Q9UKV3 ACINU_HUMAN  | E.LLVSQHTVQLVGGLS#PLSSPSDTK.A    | S478:      | 3 | 4,2144 | 0,302 | -0,072 |

|    |                     |                                          |                 |   |        |       |        |
|----|---------------------|------------------------------------------|-----------------|---|--------|-------|--------|
| 14 | O14964 HGS_HUMAN    | R.KSPT#PSAPVPLTEPAAQPGEGHAAPTNNVENPLPE.T | T347:           | 3 | 4,214  | 0,376 | 0,716  |
| 14 | Q6Y7W6 PERQ2_HUMAN  | E.KM*VAYLQDSALDDE.R                      |                 | 2 | 4,1987 | 0,528 | -0,302 |
| 14 | Q53GS7 GLE1_HUMAN   | E.TSPSSTSASALDQPSFVPK.S                  |                 | 2 | 4,1933 | 0,441 | 0      |
| 14 | P78364 PHC1_HUMAN   | E.RDDVSTLGSMT*LPKAS#PVAE.S               | S664:           | 2 | 4,1914 | 0,438 | 0,342  |
| 14 | Q9Y6M7 S4A7_HUMAN   | R.M*LQDDDDT#VHLPE.G                      | T1167:          | 2 | 4,1871 | 0,431 | -0,069 |
| 14 | P29966 MARCS_HUMAN  | E.AAAERPGEAAVASS#PSKANGQE.N              | S27:            | 2 | 4,1738 | 0,456 | 0,224  |
| 14 | B2CI53 B2CI53_HUMAN | R.NGILASPQS#APGNLDNSK.S                  | S263:           | 2 | 4,1716 | 0,525 | -1,179 |
| 14 | Q15916 ZBTB6_HUMAN  | E.M*KS#PELSTVDIGFKDNE.I                  | S202:           | 2 | 4,1653 | 0,415 | -0,487 |
| 14 | Q02952 AKA12_HUMAN  | E.STAVGQAHS#DISKDM*SE.A                  | S1628:          | 2 | 4,1652 | 0,497 | -0,394 |
| 14 | P49023 PAXI_HUMAN   | K.TSSVSNPQDSVGS#PCSR.V                   | S106:           | 3 | 4,165  | 0,177 | 0      |
| 14 | P02538 K2C6A_HUMAN  | R.AIGGGLSSVGGGSSTIK.Y                    |                 | 2 | 4,1566 | 0,528 | 0      |
| 14 | Q96JM3 ZN828_HUMAN  | E.LRKPGPPLS#PEIRS#PAGS#PE.L              | S427:S432:S436: | 3 | 4,1561 | 0,337 | 0,551  |
| 14 | Q9UPU5 UBP24_HUMAN  | R.IILNSHS#PAGSAAISQQD.F                  | S862:           | 2 | 4,1538 | 0,333 | 0,323  |
| 14 | Q92576 PHF3_HUMAN   | E.NNLQDNQTSNSS#PCR.S                     | S1614:          | 2 | 4,1534 | 0,544 | -0,74  |
| 14 | Q8WXI9 P66B_HUMAN   | R.GRLTPSPDIIVLS#DNEASS#PR.S              | S129:S135:      | 3 | 4,1504 | 0,354 | -0,077 |
| 14 | Q7L2J0 MEPCE_HUMAN  | E.SHPVPPTAPLT#PLLHGE.G                   | T291:           | 2 | 4,1402 | 0,498 | 0      |
| 14 | Q9UKI8 TLK1_HUMAN   | E.SSNHSFGSLGSL#DKESETPE.K                | S105:           | 2 | 4,1389 | 0,469 | 0,107  |
| 14 | O43379 WDR62_HUMAN  | R.FATSLPHFPGCAGPTEDE.L                   |                 | 2 | 4,1224 | 0,401 | 0      |
| 14 | P04406 G3P_HUMAN    | R.VIISAPSADAPM*FVM*GVNHE.K               |                 | 2 | 4,1142 | 0,519 | 0      |
| 14 | Q9HAV7 GRPE1_HUMAN  | K.NSGQNLEEDM*GQSE.Q                      |                 | 2 | 4,1086 | 0,468 | -0,157 |
| 14 | Q15149 PLEC1_HUMAN  | R.SSS#VGSSSSYPIPAVSR.T                   | S4386:          | 2 | 4,099  | 0,509 | 0,133  |
| 14 | P68104 EF1A1_HUMAN  | R.VETGVLKPGM*VVTFAPVNVTTVEK.S            |                 | 3 | 4,0983 | 0,304 | 0      |
| 14 | P40222 TXLNA_HUMAN  | R.RPEGPGAQAPS#SPR.V                      | S514:           | 2 | 4,09   | 0,334 | -0,246 |
| 14 | P10636 TAU_HUMAN    | R.HLSNVSTGSIDM*VDSPQLATLADE.V            |                 | 2 | 4,0879 | 0,517 | 0,188  |
| 14 | P12270 TPR_HUMAN    | E.ASDQVSDDTVEM*PLPK.K                    |                 | 2 | 4,0837 | 0,497 | -0,14  |
| 14 | Q86UP2 KTN1_HUMAN   | E.IQNGNLHES#DSESVPR.D                    | S75:            | 2 | 4,0806 | 0,485 | -0,328 |
| 14 | Q6PJT7 ZC3HE_HUMAN  | E.VVQQQS#RTPRIS#PPIKEE.T                 | S403:S409:      | 3 | 4,073  | 0,433 | 0,158  |
| 14 | Q15424 SAFB1_HUMAN  | E.LAEAPTEAPS#PEAR.D                      | S344:           | 2 | 4,0606 | 0,366 | -0,321 |
| 14 | O94885 SASH1_HUMAN  | E.KLLVDSQGLSGCS#PR.D                     | S721:           | 2 | 4,0581 | 0,444 | 0,072  |
| 14 | P08779 K1C16_HUMAN  | R.GQTGGDVNVEMDAAPGVDLRS.I                |                 | 2 | 4,0523 | 0,547 | 0,584  |
| 14 | P54105 ICLN_HUMAN   | D.TPTVAGQFEDADVDH.-                      |                 | 2 | 4,0497 | 0,594 | -0,143 |
| 14 | P49815 TSC2_HUMAN   | E.GGRPSVDLSFQPSQPLSK.S                   |                 | 3 | 4,0481 | 0,129 | 0,385  |
| 14 | Q5VUA4 ZN318_HUMAN  | E.LTALGNLGDGM*PVDFCTTR.V                 |                 | 2 | 4,0338 | 0,446 | -0,061 |
| 14 | Q5JRA6 MIA3_HUMAN   | E.ASGKPSDPGSGTATM*M*NSSSR.G              |                 | 3 | 4,0335 | 0,342 | -0,082 |
| 14 | Q8NFC6 FA44A_HUMAN  | E.HSTNLDSS#PSLSSVTVPLRE.S                | S1281:          | 2 | 4,0322 | 0,412 | 0,318  |
| 14 | Q9UER7 DAXX_HUMAN   | K.DGDKS#PM*SSLQJSNE.K                    | S495:           | 2 | 4,0181 | 0,332 | -0,143 |
| 14 | Q9Y4F1 FARP1_HUMAN  | E.IEQRPTPGS#RLGAPE.N                     | S12:            | 3 | 4,0142 | 0,384 | 0,108  |
| 14 | Q96RU3 FNBP1_HUMAN  | R.TVS#DNS#LSNSRGE.G                      | S296:S299:      | 2 | 4,0089 | 0,38  | -0,16  |
| 14 | Q13765 NACA_HUMAN   | E.AKIEDLSQQAQLAAAE.K                     |                 | 2 | 3,9984 | 0,493 | 0,145  |



|    |                    |                                  |                 |   |        |       |        |
|----|--------------------|----------------------------------|-----------------|---|--------|-------|--------|
| 14 | P13645 K1C10_HUMAN | K.GSLGGGFSSGGFSGGSFSR.G          |                 | 2 | 3,9814 | 0,407 | 0      |
| 14 | P11388 TOP2A_HUMAN | K.SVVS#DLEADDVK.G                | S1377:          | 2 | 3,9771 | 0,494 | -0,18  |
| 14 | Q92615 LARP5_HUMAN | K.FTSSQTQSPTPPKPPS#PSFE.L        | S524:           | 2 | 3,9743 | 0,339 | 0,548  |
| 14 | P05783 K1C18_HUMAN | E.VKGLQAQIASSGLTVE.V             |                 | 2 | 3,9719 | 0,544 | -0,076 |
| 14 | Q58FF8 H90B2_HUMAN | E.FDGKS#LVSVTKE.G                | S305:           | 3 | 3,9652 | 0,22  | -0,066 |
| 14 | Q9UQ35 SRRM2_HUMAN | R.RGEGDAPFSEPGTTSTQRPSS#PE.T     | S323:           | 3 | 3,9642 | 0,313 | -0,074 |
| 14 | Q9NVM9 CLO11_HUMAN | E.AEIKDS#PDS#PEPPNKKPLVE.M       | S623:S626:      | 3 | 3,9604 | 0,224 | 0,223  |
| 14 | Q92597 NDRG1_HUMAN | E.GAHLDT#PNSGAAGNSAGPK.S         | T375:           | 3 | 3,9533 | 0,28  | -0,669 |
| 14 | Q09666 AHNK_HUMAN  | R.LPSGSGAAS#PT#GSAVDIR.A         | S216:T218:      | 2 | 3,9532 | 1     | -0,135 |
| 14 | Q9UK76 HN1_HUMAN   | R.RNS#SEASSGDFLDLK.G             | S87:            | 2 | 3,9362 | 0,446 | -0,072 |
| 14 | P46734 MP2K3_HUMAN | D.FGISGYLVDS#VAK.T               | S218:           | 2 | 3,9335 | 0,482 | -0,34  |
| 14 | P08621 RU17_HUMAN  | R.GGGGGQDNGLEGLGNSR.D            |                 | 2 | 3,9302 | 0,585 | -0,221 |
| 14 | P31943 HNRH1_HUMAN | E.GRPSGEAFVELESEDE.V             |                 | 2 | 3,9288 | 0,37  | -0,139 |
| 14 | Q99747 SNAG_HUMAN  | E.KAVQLYQQTANVFE.N               |                 | 2 | 3,9156 | 0,428 | -0,298 |
| 14 | Q96JM3 ZN828_HUMAN | E.LRKP GPPLS#PEIRS#PAGS#PE.L     | S427:S432:S436: | 2 | 3,9124 | 0,518 | 0,525  |
| 14 | P04406 G3P_HUMAN   | K.RVIISAPSADAPM*FVM*GVNHE.K      |                 | 3 | 3,9112 | 0,312 | 0,402  |
| 14 | Q43663 PRC1_HUMAN  | E.FAKDPSLS#DSSTVGLQRE.L          | S589:           | 3 | 3,9067 | 0,264 | 0      |
| 14 | Q9H0E9 BRD8_HUMAN  | R.SGVAEAPVGS#KAPS#IDGKEE.L       | S383:S387:      | 2 | 3,8953 | 0,369 | 0,351  |
| 14 | Q01814 AT2B2_HUMAN | K.SATSSSPGS#PIHSLE.T             | S1234:          | 2 | 3,8935 | 1     | -0,794 |
| 14 | P68104 EF1A1_HUMAN | K.SGDAAIVDM*VPGKPM*CVE.S         |                 | 2 | 3,8916 | 0,344 | -0,831 |
| 14 | P19338 NUCL_HUMAN  | E.SKTLVLSNLSYSATEE.T             |                 | 2 | 3,8886 | 0,57  | 0      |
| 14 | Q7Z3T8 ZFY16_HUMAN | E.KNVTGLDLLSSVDGGTSDE.I          |                 | 2 | 3,8834 | 0,485 | -0,192 |
| 14 | P61769 B2MG_HUMAN  | K.SNFLNCYVSGFHPSDIE.V            |                 | 2 | 3,8759 | 0,383 | 0,123  |
| 14 | Q15397 IPO8_HUMAN  | E.NKGVLSAFNFGTVPSNN.-            |                 | 2 | 3,8755 | 0,481 | -0,345 |
| 14 | Q96SB4 SRPK1_HUMAN | E.DLHNANDCDVQNLNQE.S             |                 | 2 | 3,8726 | 0,288 | -0,321 |
| 14 | Q14694 UBP10_HUMAN | E.LHTTES#IDLDPTKPE.S             | S309:           | 2 | 3,8694 | 0,531 | -0,206 |
| 14 | P27816 MAP4_HUMAN  | E.VALAKDM*ES#PTKLD.V             | S280:           | 2 | 3,8691 | 0,493 | -0,454 |
| 14 | Q14126 DSG2_HUMAN  | R.NYFTDKAAS#YTEEDE.N             | S782:           | 2 | 3,8689 | 0,532 | 0      |
| 14 | P29966 MARCS_HUMAN | E.AAAERPGEAAVASS#PSK.A           | S27:            | 3 | 3,8682 | 0,317 | 0      |
| 14 | P35527 K1C9_HUMAN  | R.GGSGGSYGGGGSGGGYGGGSGSR.G      |                 | 2 | 3,8642 | 0,394 | -0,136 |
| 14 | Q43293 DAPK3_HUMAN | K.SHS#SLPPNNSYADFE.R             | S311:           | 2 | 3,8575 | 0,343 | -0,07  |
| 14 | Q562F6 SGOL2_HUMAN | E.IHS#PNIQDSSFDSVRE.G            | S1144:          | 3 | 3,8526 | 0,356 | -0,191 |
| 14 | P35527 K1C9_HUMAN  | R.SGGGGGGGLGSGGSIR.S             |                 | 2 | 3,8512 | 0,485 | -0,198 |
| 14 | P49815 TSC2_HUMAN  | E.GGRPSVDLSFQPSQPLSKSSS#SPE.L    | S1387:          | 3 | 3,8503 | 0,089 | 0,215  |
| 14 | Q8N108 MIER1_HUMAN | R.APS#PPPTASNSSNSQSEKE.D         | S401:           | 3 | 3,8472 | 0,195 | 0      |
| 14 | Q6ZSR9 YJ005_HUMAN | R.DGPSSNSS#FHSSEEE.G             | S39:            | 2 | 3,845  | 0,494 | -0,073 |
| 14 | Q9UQ35 SRRM2_HUMAN | K.SATRPS#PS#PERSSTGPEPPAPTLLAE.R | S351:S353:      | 3 | 3,8449 | 1     | -0,317 |
| 14 | P42166 LAP2A_HUMAN | E.HSAM*LVSTAAS#PSLIKE.T          | S310:           | 2 | 3,8443 | 0,415 | 0,332  |
| 14 | Q96I24 FUBP3_HUMAN | R.QQVAFYQTLGQAQHS#QEQ.-          | S569:           | 3 | 3,839  | 0,525 | 0      |

|    |                     |                             |            |   |        |       |        |
|----|---------------------|-----------------------------|------------|---|--------|-------|--------|
| 14 | Q16658 FSCN1_HUMAN  | R.QGM*DLSANQDEETDQE.T       |            | 3 | 3,8361 | 0,344 | 0      |
| 14 | Q9H4L7 SMRCD_HUMAN  | K.VFAEDQDM*QYAS#QSEVPNGKE.V | S302:      | 3 | 3,8328 | 0,356 | 0,074  |
| 14 | Q4V328 GRAP1_HUMAN  | R.TQTGDSSTSS#ISSFSYRE.I     | S666:      | 2 | 3,831  | 0,51  | 0,266  |
| 14 | P29966 MARCS_HUMAN  | E.KGEPAAAAAPEAGAS#PVEK.E    | S101:      | 2 | 3,8271 | 0,482 | -0,067 |
| 14 | P78364 PHC1_HUMAN   | E.RDDVSTLGSMT*LPKAS#PVAE.S  | S664:      | 3 | 3,8248 | 0,351 | 0,085  |
| 14 | Q71F56 MD13L_HUMAN  | E.QHPAFS#PVM*NYKDGISSE.T    | S878:      | 3 | 3,8174 | 0,319 | 0,261  |
| 14 | Q8WWM7 ATX2L_HUMAN  | E.VDGLLTSEPM*GS#PVSSK.T     | S594:      | 2 | 3,8151 | 0,543 | 0,203  |
| 14 | Q9H307 PININ_HUMAN  | E.IAIVHS#DAEKE.Q            | S347:      | 2 | 3,8126 | 0,425 | 0      |
| 14 | P17152 TMM11_HUMAN  | E.RVS#LSATDCYIVHE.I         | S23:       | 2 | 3,8031 | 0,516 | -0,141 |
| 14 | Q14247 SRC8_HUMAN   | K.TQT#PPVSPAPQPTEER.L       | T401:      | 2 | 3,7958 | 0,495 | -0,336 |
| 14 | Q07864 DPOE1_HUMAN  | E.KVPVEQVTNFEEVCDE.I        |            | 2 | 3,788  | 0,278 | 0,19   |
| 14 | P31948 STIP1_HUMAN  | E.IAT#PPPPPPPKKE.T          | T198:      | 3 | 3,7857 | 0,357 | 0,694  |
| 14 | Q9P1Y6 K1542_HUMAN  | E.SIFGTEPEPPLGPSSAM*SK.L    |            | 2 | 3,7832 | 0,528 | -0,125 |
| 14 | Q13435 SF3B2_HUMAN  | K.LAQQQAALLM*QQEE.R         |            | 2 | 3,7832 | 0,425 | -0,151 |
| 14 | Q13415 ORC1_HUMAN   | E.TGLSYTEDDKKAS#PE.H        | S311:      | 2 | 3,7789 | 0,376 | 0      |
| 14 | Q16531 DDB1_HUMAN   | K.LFSSSTAPHETS#FGEEVE.V     | S781:      | 2 | 3,7777 | 0,45  | 0      |
| 14 | P11172 PYR5_HUMAN   | E.NVFVAANHNGS#PLS#IKEAPKE.L | S214:S217: | 3 | 3,7771 | 0,225 | -0,077 |
| 14 | Q92878 RAD50_HUMAN  | E.DKLFVCGSQDFE.S            |            | 2 | 3,7742 | 0,406 | -0,078 |
| 14 | O60238 BNI3L_HUMAN  | R.GSSHCDSPS#PQEDGQIM*FDVE.M | S97:       | 3 | 3,7731 | 0,265 | -0,076 |
| 14 | O75534 CSDE1_HUMAN  | E.KLLTSYGFIQCSE.R           |            | 2 | 3,773  | 0,474 | -0,316 |
| 14 | O60716 CTND1_HUMAN  | E.GAM*SVVSVETS#DDGTTR.R     | S129:      | 2 | 3,756  | 0,494 | -0,472 |
| 14 | P27816 MAP4_HUMAN   | E.GRPVVSMTGNDITPPNK.E       |            | 3 | 3,7558 | 0,361 | -0,202 |
| 14 | Q9GZM8 NDEL1_HUMAN  | E.KM*DSAVQASLS#LPATPVGK.G   | S215:      | 2 | 3,7467 | 0,412 | 0,306  |
| 14 | Q9NYF8 BCLF1_HUMAN  | E.ALDYFS#DKESGK.Q           | S385:      | 2 | 3,7451 | 0,495 | -0,085 |
| 14 | Q14694 UBP10_HUMAN  | E.TKYSPPAIS#PLVSEK.Q        | S370:      | 2 | 3,7429 | 0,436 | 0      |
| 14 | Q9UKV3 ACINU_HUMAN  | E.LLVSQHTVQLVGGSLSPSSPDTK.A |            | 3 | 3,7421 | 0,302 | 0,074  |
| 14 | Q9BY44 EIF2A_HUMAN  | E.ARSDKS#PDLAPTPAPQSTPR.N   | S506:      | 3 | 3,7384 | 0,229 | -0,084 |
| 14 | Q9NQ55 SSF1_HUMAN   | R.VGGS#DEEASGIPSR.T         | S359:      | 2 | 3,7355 | 0,48  | -0,254 |
| 14 | P49023 PAXI_HUMAN   | K.TSSVSNPQDSVGS#PCSR.V      | S106:      | 2 | 3,7333 | 0,32  | -0,397 |
| 14 | Q59FE8 Q59FE8_HUMAN | R.STPAEDDS#PGDSQVKSE.V      | S352:      | 2 | 3,7331 | 0,504 | -0,267 |
| 14 | P36957 ODO2_HUMAN   | E.KAVGDTVAEDEVVCE.I         |            | 2 | 3,7299 | 0,404 | 0      |
| 14 | Q14155 ARHG7_HUMAN  | E.KLSSANISYLM*GNLEE.I       |            | 2 | 3,7262 | 0,433 | -0,068 |
| 14 | Q15149 PLEC1_HUMAN  | R.SRSSS#VGSSTYPISPAVSR.T    | S4386:     | 3 | 3,7252 | 0,364 | 0,088  |
| 14 | Q9UHR5 S30BP_HUMAN  | K.GGLVSDAYGEDDFSR.L         |            | 2 | 3,7211 | 0,466 | -0,154 |
| 14 | Q9P265 DIP2B_HUMAN  | R.QAALSAALQQSLQNAE.S        |            | 2 | 3,7203 | 0,467 | -0,149 |
| 14 | Q9NQW6 ANLN_HUMAN   | K.SCSPSPVS#PQVQPQAADTISD.S  | S102:      | 3 | 3,7194 | 0,383 | 0,894  |
| 14 | Q9C0C2 TB182_HUMAN  | R.NM*APGAVCS#PGESKE.L       | S1297:     | 2 | 3,7183 | 0,391 | -0,299 |
| 14 | P98196 AT11A_HUMAN  | E.SSGIDM*IDS#PSVNGR.E       | S459:      | 2 | 3,7144 | 0,31  | 0      |
| 14 | Q9UPS8 ANR26_HUMAN  | R.NVGM*PVAHM*ES#PE.R        | S489:      | 2 | 3,7141 | 0,523 | -0,566 |

|    |                    |                                 |            |   |        |       |        |
|----|--------------------|---------------------------------|------------|---|--------|-------|--------|
| 14 | P46060 RAGP1_HUMAN | E.KLDLNGNTLGEEGCEQLQE.V         |            | 3 | 3,7094 | 0,293 | 0,511  |
| 14 | Q9H4A3 WNK1_HUMAN  | E.QQSSTPGSLFLSPAPAPK.N          |            | 3 | 3,7059 | 0,35  | 0      |
| 14 | Q32MZ4 LRRF1_HUMAN | K.STGDGTLGRAS#EVE.V             | S300:      | 2 | 3,705  | 0,312 | -0,502 |
| 14 | Q92560 BAP1_HUMAN  | K.GSSPS#IRPIQGSQGS#SSPVEKEVVE.A | S585:S595: | 3 | 3,6992 | 1     | -0,135 |
| 14 | Q92576 PHF3_HUMAN  | E.NNLQDNQTSNSS#PCR.S            | S1614:     | 3 | 3,6966 | 0,366 | -0,907 |
| 14 | P25705 ATPA_HUMAN  | E.ERILGADTSVDLEE.T              |            | 2 | 3,6954 | 0,422 | -0,158 |
| 14 | P13646 K1C13_HUMAN | R.ALEEANADLEVK.I                |            | 2 | 3,6927 | 0,33  | -0,562 |
| 14 | Q6P2E9 EDC4_HUMAN  | R.TRS#PDVISSASTALSQDIPE.I       | S729:      | 2 | 3,6903 | 0,431 | 0,227  |
| 14 | Q99598 TSNAX_HUMAN | E.GKDVNSSS#PVM*LAFK.S           | S33:       | 3 | 3,6871 | 0,274 | 0,327  |
| 14 | P35908 K22E_HUMAN  | R.FLEQQNQVLQTK.W                |            | 2 | 3,6868 | 0,408 | -0,413 |
| 14 | Q9Y2X9 ZN281_HUMAN | E.HSELVQEENLS#PGTQTPSNDK.A      | S651:      | 3 | 3,6737 | 0,31  | 0      |
| 14 | Q9UQ35 SRRM2_HUMAN | R.FQSDSSSYPTVDSNSLLGQSRLE.T     |            | 3 | 3,6668 | 0,272 | 0      |
| 14 | Q9Y3A4 ZG14_HUMAN  | E.LQEKPDLAES#PKE.S              | S99:       | 2 | 3,6664 | 0,315 | -0,156 |
| 14 | P59074 CG301_HUMAN | E.KQLAQIDGTLSTIE.F              |            | 2 | 3,6662 | 0,476 | -0,161 |
| 14 | P49841 GSK3B_HUMAN | E.LSSNPPLATILIPPHAR.I           |            | 3 | 3,6656 | 0,35  | -0,102 |
| 14 | Q92797 SYMPK_HUMAN | E.AALLDSSLEGPLPK.E              |            | 2 | 3,6539 | 0,443 | 0      |
| 14 | Q14674 ESPL1_HUMAN | E.ILRGS#DGEDSASGGKTPAPGPE.A     | S1508:     | 3 | 3,6508 | 0,334 | -0,42  |
| 14 | Q14444 CAPR1_HUMAN | E.TQFTSGEKEQVDE.W               |            | 2 | 3,6448 | 0,43  | -0,081 |
| 14 | Q6NYC8 PHTNS_HUMAN | E.SRLS#PGESAYQK.L               | S224:      | 2 | 3,6406 | 0,21  | -0,348 |
| 14 | Q9H9J4 UBP42_HUMAN | R.GPPEDRDAEPQPGS#PAAE.S         | S754:      | 2 | 3,6376 | 0,448 | -0,642 |
| 14 | Q09666 AHNK_HUMAN  | R.LKS#EDGVEGDLGE.T              | S135:      | 2 | 3,6375 | 0,391 | 0,427  |
| 14 | Q09666 AHNK_HUMAN  | K.GPKVDIDT#PDINIE.G             | T3716:     | 2 | 3,6292 | 0,448 | -0,076 |
| 14 | Q6NZI2 PTRF_HUMAN  | R.RGS#\$#PDVHALLE.I             | S365:S366: | 2 | 3,6267 | 0,407 | 0,085  |
| 14 | P02533 K1C14_HUMAN | K.ILTATVDNANVLLQIDNAR.L         |            | 3 | 3,6261 | 0,199 | -0,178 |
| 14 | Q9BXJ9 NARG1_HUMAN | E.DM*KITVNGDSSAE.A              |            | 2 | 3,6222 | 0,368 | 0,265  |
| 14 | P29966 MARCS_HUMAN | E.AAAERPGEAAVASSPS#KANGQE.N     | S29:       | 3 | 3,6205 | 0,166 | 0,336  |
| 14 | Q6ZVM7 TM1L2_HUMAN | K.TVTYEDPQAVGGLASALDNR.K        |            | 3 | 3,6198 | 0,419 | -0,176 |
| 14 | Q96L14 C170L_HUMAN | E.ALNNM*GFPSAM*LPS#PPKQK.S      | S224:      | 3 | 3,6163 | 0,175 | 0,256  |
| 14 | Q99614 TTC1_HUMAN  | E.CFHDCSAS#FEEEPGADKVE.N        | S69:       | 3 | 3,6163 | 0,243 | -0,558 |
| 14 | O14617 AP3D1_HUMAN | R.ALDIDLKPLADSE.K               |            | 2 | 3,6107 | 0,442 | 0,322  |
| 14 | Q5UIPO RIF1_HUMAN  | E.LIIEDNNAS#PQKLRE.L            | S2144:     | 2 | 3,6071 | 0,445 | -0,335 |
| 14 | Q9HCJ3 RAVR2_HUMAN | E.KCIAYS#PPFGDYAQVSSLR.N        | S635:      | 3 | 3,6062 | 0,328 | 0      |
| 14 | P08779 K1C16_HUMAN | K.TEELNKEVASNSELVQSSR.S         |            | 3 | 3,606  | 0,246 | 0,173  |
| 14 | Q9Y490 TLN1_HUMAN  | E.HGS#VALPAIM*R.S               | S446:      | 2 | 3,6058 | 0,401 | -0,196 |
| 14 | P04264 K2C1_HUMAN  | R.SGGGFSSGSAGIINYQR.R           |            | 2 | 3,6023 | 0,487 | 0      |
| 14 | Q7LBC6 JHD2B_HUMAN | E.SLADSSS#RDSFKQSLE.S           | S553:      | 2 | 3,5962 | 0,547 | 0,063  |
| 14 | Q9H8Y8 GORS2_HUMAN | K.KIS#LPGQM*AGTPIT#PLKDGTFE.V   | S214:T225: | 3 | 3,5934 | 0,313 | 0,074  |
| 14 | Q4LE39 ARI4B_HUMAN | D.LVISKPVSKS#PE.R               | S778:      | 2 | 3,5924 | 0,303 | -0,537 |
| 14 | O00139 KIF2A_HUMAN | E.GAEINKS#LLALKE.C              | S484:      | 3 | 3,5821 | 0,131 | 0,125  |

|    |                    |                                |                 |   |        |       |        |
|----|--------------------|--------------------------------|-----------------|---|--------|-------|--------|
| 14 | P38646 GRP75_HUMAN | E.VKSTNGDITFLGGEDFD.Q          |                 | 2 | 3,5794 | 0,506 | -0,072 |
| 14 | Q494U1 PKHN1_HUMAN | D.LTQLHRLS#LES#SPDAPDHTSE.T    | S488:S491:      | 3 | 3,5777 | 0,355 | -0,66  |
| 14 | Q14203 DCTN1_HUMAN | E.LKEQVDAALGAE.E.M             |                 | 2 | 3,5766 | 0,32  | -0,178 |
| 14 | O43663 PRC1_HUMAN  | E.LDHTPDIT#SFERDVVCE.D         | T194:           | 2 | 3,5716 | 0,302 | -0,122 |
| 14 | Q13136 LIPA1_HUMAN | K.RSS#DGS#LS#HEEDLAK.V         | S239:S242:S244: | 2 | 3,5712 | 0,34  | 0      |
| 14 | O95429 BAG4_HUMAN  | K.DSSYPYSQSDQSM*NR.H           |                 | 2 | 3,5633 | 0,403 | 0,069  |
| 14 | O00139 KIF2A_HUMAN | E.QSSSAQQNGSVSDIS#PVQAAK.K     | S140:           | 3 | 3,563  | 0,174 | -0,169 |
| 14 | Q86VM9 ZCH18_HUMAN | R.ASDLEDEESAAR.G               |                 | 2 | 3,5615 | 0,367 | -1,227 |
| 14 | O95208 EPN2_HUMAN  | E.RM*AQVATGM*GSNQITFGR.G       |                 | 3 | 3,5609 | 0,303 | -0,093 |
| 14 | Q9UQ35 SRRM2_HUMAN | R.FQSDSSSYPTVDSNSLLGQSRLE.T    |                 | 2 | 3,5603 | 0,299 | 0,776  |
| 14 | P22059 OSBP1_HUMAN | K.RTGS#NIS#GASS#DISLDE.Q       | S379:S382:S386: | 2 | 3,5594 | 0,381 | 0,125  |
| 14 | Q69YH5 CDCA2_HUMAN | E.ERVASDS#PKPALTLQQGQE.F       | S727:           | 3 | 3,5592 | 0,213 | 0,171  |
| 14 | Q9Y6G9 DC1L1_HUMAN | E.NFQTLKAEDNFE.D               |                 | 2 | 3,5584 | 0,215 | -0,503 |
| 14 | P19634 SL9A1_HUMAN | E.TSSPGTDDVFTPAPSDS#PSSQR.I    | S785:           | 3 | 3,5541 | 0,414 | 0,316  |
| 14 | Q5T8P6 RBM26_HUMAN | K.VM*QPLVQQPILPVVK.Q           |                 | 2 | 3,5534 | 0,404 | -0,286 |
| 14 | Q96RL1 UIMC1_HUMAN | E.KLLLEEEPTTSHGQS#SQGIVEE.T    | S401:           | 2 | 3,5499 | 0,394 | 0,294  |
| 14 | P10636 TAU_HUMAN   | K.SPVVSGDTS#PR.H               | S721:           | 2 | 3,5494 | 0,387 | -0,206 |
| 14 | Q8WWM7 ATX2L_HUMAN | E.VDGLLTSEPM*GSPVSSK.T         |                 | 2 | 3,5481 | 0,574 | -0,142 |
| 14 | Q92785 REQU_HUMAN  | E.GEDKEDS#QPPTPVSR.S           | S244:           | 2 | 3,5388 | 0,361 | -0,198 |
| 14 | Q96L14 C170L_HUMAN | E.ALNNM*GFPS#AM*LSPPKQK.S      | S219:           | 3 | 3,5378 | 0,326 | -0,171 |
| 14 | P55769 NH2L1_HUMAN | E.GSQLKQQIQSIQQSIE.R           |                 | 2 | 3,5358 | 0,437 | -0,067 |
| 14 | P40222 TXLNA_HUMAN | D.LSAGGQGLTDSGPER.R            |                 | 2 | 3,5253 | 0,52  | 0,08   |
| 14 | Q8N2M8 SFR16_HUMAN | E.LYGGLQRSEDE.K                |                 | 2 | 3,5209 | 0,279 | -0,447 |
| 14 | O95490 LPHN2_HUMAN | R.GNS#DGYIIPINKE.G             | S1430:          | 2 | 3,5206 | 0,367 | -0,244 |
| 14 | Q15365 PCBP1_HUMAN | R.VM*TIPYQPM*PASS#PVICAGGQDR.C | S190:           | 3 | 3,5206 | 0,459 | 0,212  |
| 14 | P54105 ICLN_HUMAN  | D.GM*EVDTTPTVAGQFEDADV.DH.-    |                 | 3 | 3,518  | 0,304 | 0,081  |
| 14 | Q7L7X3 TAOK1_HUMAN | E.GDHTVM*S#NSS#VIHLKPEEE.N     | S392:S395:      | 3 | 3,5157 | 0,129 | 0,24   |
| 14 | Q6PJT7 ZC3HE_HUMAN | E.VVQQQSRT#PRIS#PPIKEE.T       | T405:S409:      | 3 | 3,5098 | 0,315 | -0,396 |
| 14 | Q9HB96 FANCE_HUMAN | K.TGEDGSNLDDAKGLAE.S           |                 | 2 | 3,5073 | 0,569 | -0,077 |
| 14 | Q02952 AKA12_HUMAN | K.ERPPAPSS#FVFQEE.T            | S1226:          | 2 | 3,5056 | 0,272 | -0,215 |
| 14 | P07355 ANXA2_HUMAN | E.GDHSTPPSAYGS#VK.A            | S26:            | 2 | 3,5053 | 0,538 | -0,165 |
| 14 | Q14980 NUMA1_HUMAN | E.SRPSLSLGTIT#DEEM*KTGDPQE.T   | T1952:          | 3 | 3,5053 | 0,209 | -0,074 |
| 14 | Q9UKI8 TLK1_HUMAN  | E.SSNHSFGS#LGLSLDK.E.S         | S100:           | 3 | 3,5046 | 0,315 | -0,106 |
| 14 | Q96SB4 SRPK1_HUMAN | E.DLHNANDCDVQNLNQE.S           |                 | 3 | 3,4947 | 0,165 | -0,193 |
| 14 | Q9H6F5 CCD86_HUMAN | R.LQQGAGLESPQGPPEGAAS#PQR.Q    | S91:            | 3 | 3,4943 | 0,15  | 0      |
| 14 | Q6B0I6 JHD3D_HUMAN | E.DGALM*DKPVLPS#PGLQHPVK.A     | S502:           | 3 | 3,4877 | 0,131 | -0,083 |
| 14 | Q9UBU7 DBF4A_HUMAN | K.FAQTTEGRIS#PVPSPE.S          | S103:           | 2 | 3,4867 | 0,453 | -0,363 |
| 14 | Q6PGN9 PSRC1_HUMAN | E.TFVLKDS#PVRD.L               | S122:           | 2 | 3,4815 | 0,42  | -0,27  |
| 14 | O75044 FNBP2_HUMAN | R.GGSM*EDYCDIS#PHGE.T          | S702:           | 2 | 3,4752 | 0,485 | -0,149 |

|    |                     |                                    |              |   |        |       |        |
|----|---------------------|------------------------------------|--------------|---|--------|-------|--------|
| 14 | Q15021 CND1_HUMAN   | D.NFDCFGDKLSDE.S                   |              | 2 | 3,474  | 0,326 | 0,253  |
| 14 | Q02952 AKA12_HUMAN  | E.STAVGQAHS#DISKDM*SE.A            | S1628:       | 3 | 3,4696 | 0,251 | -0,098 |
| 14 | Q08999 RBL2_HUMAN   | E.ICIAGS#PLTPR.R                   | S639:        | 2 | 3,4684 | 0,389 | -0,386 |
| 14 | Q9BVS4 RIOK2_HUMAN  | E.LLHPLGPDDKNIETK.E                |              | 3 | 3,4665 | 0,242 | 0,216  |
| 14 | Q9UHV9 PFD2_HUMAN   | E.HS#LVIDTLKE.V                    | S55:         | 2 | 3,466  | 0,318 | -0,494 |
| 14 | P18583 SON_HUMAN    | R.AGIEGPLLASDVGR.D                 |              | 2 | 3,4654 | 0,381 | 0      |
| 14 | Q04721 NOTC2_HUMAN  | R.RTPS#LALTPPQAEQE.V               | S1804:       | 2 | 3,4641 | 0,45  | 0      |
| 14 | Q9NWH9 SLTM_HUMAN   | K.DGQDAIAQS#PEKE.S                 | S289:        | 2 | 3,4564 | 0,357 | -0,416 |
| 14 | P02765 FETUA_HUMAN  | K.CDSSPDS#AEDVRK.V                 | S138:        | 3 | 3,4545 | 0,319 | 0,118  |
| 14 | P46821 MAP1B_HUMAN  | E.FGQES#PEQSLAM*DFSR.Q             | S1653:       | 2 | 3,4541 | 0,432 | -0,38  |
| 14 | Q92734 TFG_HUMAN    | K.NVM*SAFGLTDDQVSGPPSAPAEDR.S      |              | 3 | 3,4505 | 0,281 | 0,517  |
| 14 | Q0VG05 Q0VG05_HUMAN | E.VGLGTEEDPSLPALLTQPR.K            |              | 2 | 3,4492 | 0,509 | 0,061  |
| 14 | Q14674 ESPL1_HUMAN  | E.ILRGS#DGEDSASGGK.T               | S1508:       | 2 | 3,4485 | 0,625 | -0,319 |
| 14 | Q96T23 RSF1_HUMAN   | E.IKLSDDFDS#PVKGPLCK.S             | S387:        | 3 | 3,4461 | 0,394 | -0,183 |
| 14 | Q14247 SRC8_HUMAN   | R.AKTQT#PPVSPAPQPTTE.R             | T401:        | 2 | 3,4411 | 0,465 | -0,131 |
| 14 | Q9UHB6 LIMA1_HUMAN  | E.VQQPVHPKPLS#PDSRASS#LSE.S        | S362:S369:   | 3 | 3,4403 | 0,33  | 0      |
| 14 | Q71U36 TBA1A_HUMAN  | E.HSDCAFM*VDNEAIYD.I               |              | 2 | 3,4384 | 0,457 | -0,135 |
| 14 | Q9H3P2 NELFA_HUMAN  | E.ASRPPEEPSAPS#PTLPAQFK.Q          | S384:        | 3 | 3,4382 | 0,374 | -0,084 |
| 14 | P35908 K22E_HUMAN   | R.NLDLDSIIAEVK.A                   |              | 2 | 3,4319 | 0,444 | -0,367 |
| 14 | Q15019 SEPT2_HUMAN  | E.NEDM*NKDQILLE.K                  |              | 2 | 3,4315 | 0,225 | 0,165  |
| 14 | Q9UPN3 MACF1_HUMAN  | R.ALIAQLPS#PAIDHE.Q                | S3850:       | 2 | 3,4291 | 0,29  | -0,471 |
| 14 | Q9P2Y5 UVRAG_HUMAN  | R.KITS#LSSSLDTSLDFSKE.N            | S546:        | 3 | 3,4284 | 0,297 | 0,269  |
| 14 | O75381 PEX14_HUMAN  | K.SPSPSPAAVNHSSSDIS#PVSNE.S        | S265:        | 3 | 3,4238 | 0,315 | 0      |
| 14 | Q8WXI9 P66B_HUMAN   | R.LTPSPDIIVLS#DNEASS#PR.S          | S129:S135:   | 3 | 3,4215 | 0,339 | -0,169 |
| 14 | Q6IN85 SMEK1_HUMAN  | K.TKNDDDIM*DPISK.F                 |              | 3 | 3,417  | 0,207 | 0,243  |
| 14 | O43293 DAPK3_HUMAN  | K.SHSS#LPPNNSYADFE.R               | S312:        | 2 | 3,4153 | 0,482 | -0,21  |
| 14 | Q9H4A3 WNK1_HUMAN   | E.QQSSTPGSLFLS#PPAPAPK.N           | S19:         | 3 | 3,4115 | 0,096 | 0      |
| 14 | Q9UQ35 SRRM2_HUMAN  | E.KSATRPS#PS#PERSTGPEPPAPTPLLA.E.R | S351:S353:   | 3 | 3,4017 | 1     | 0,425  |
| 14 | Q6S8J3 A26CA_HUMAN  | E.KSYELPDGQVITIGNE.R               |              | 2 | 3,3983 | 0,383 | -0,554 |
| 14 | P04264 K2C1_HUMAN   | K.YEELQITAGR.H                     |              | 2 | 3,395  | 0,216 | -0,207 |
| 14 | Q8N655 CJ012_HUMAN  | E.NTLQCPKT#PLRQDLE.A               | T65:         | 3 | 3,3903 | 0,285 | -0,387 |
| 14 | Q9Y490 TLN1_HUMAN   | E.KM*VGGIAQIIAAQEE.M               |              | 2 | 3,3894 | 0,305 | -0,543 |
| 14 | P12270 TPR_HUMAN    | E.ASDQVSDDTVEM*PLPK.K              |              | 3 | 3,3877 | 0,255 | 0,105  |
| 14 | P42166 LAP2A_HUMAN  | R.SST#PLPTISSAENTR.Q               | T160:        | 2 | 3,3864 | 0,349 | 0,353  |
| 14 | P04264 K2C1_HUMAN   | R.SLDLDSIIAEVK.A                   |              | 2 | 3,3855 | 0,408 | -0,281 |
| 14 | P29966 MARCS_HUMAN  | E.KGEPAAAAAPEAGAS#PVEK.E           | S101:        | 3 | 3,3828 | 0,241 | 0,1    |
| 14 | Q12888 TP53B_HUMAN  | R.SEDPPTT#PIRGNLLHFPSS#QGEEE.K     | T1056:S1068: | 3 | 3,3825 | 0,44  | -0,065 |
| 14 | Q9NS56 TOPRS_HUMAN  | E.NQPSNIVSLQTEPSR.Q                |              | 2 | 3,3799 | 0,413 | -0,146 |
| 14 | Q6PKG0 LARP1_HUMAN  | K.GLSAS#LPDLDE.N                   | S548:        | 2 | 3,3797 | 0,41  | -0,095 |

|    |                    |                             |            |   |        |       |        |
|----|--------------------|-----------------------------|------------|---|--------|-------|--------|
| 14 | Q86W92 LIPB1_HUMAN | R.SPSASITDEDS#NV.-          | S1009:     | 2 | 3,3779 | 0,469 | -0,174 |
| 14 | Q9HB96 FANCE_HUMAN | E.SLADGGSAS#PIKDQPVM*AVK.T  | S249:      | 2 | 3,3757 | 0,223 | 0,354  |
| 14 | P19532 TFE3_HUMAN  | E.GVVGGSLGGALSPLR.A         |            | 2 | 3,3725 | 0,345 | -0,091 |
| 14 | Q9Y3E2 BOLA1_HUMAN | E.NSQLDTSPPCLGGNKK.T        |            | 2 | 3,371  | 0,257 | -0,213 |
| 14 | Q8TEA7 TBCK_HUMAN  | E.DDQSNLPHSNNSNNE.L         |            | 2 | 3,3706 | 0,296 | 0,078  |
| 14 | Q9UJU6 DBNL_HUMAN  | R.FQDVGPQAPVGS#VYQK.T       | S160:      | 2 | 3,3686 | 0,311 | -0,678 |
| 14 | Q5VUA4 ZN318_HUMAN | R.SLLNPQDT#PVKISAPE.L       | T1883:     | 2 | 3,3631 | 0,274 | -0,273 |
| 14 | Q04837 SSB_HUMAN   | E.GKNPVITIFSLATNE.M         |            | 2 | 3,3626 | 0,445 | -0,327 |
| 14 | Q9H307 PININ_HUMAN | K.SLS#PGKENVSALDM*E.K       | S443:      | 2 | 3,3606 | 0,46  | -0,511 |
| 14 | O15160 RPAC1_HUMAN | E.KVLVYNNTSIVQDE.I          |            | 2 | 3,3599 | 0,406 | -0,075 |
| 14 | P04264 K2C1_HUMAN  | K.SLNNQFASFIDK.V            |            | 2 | 3,352  | 0,37  | 0,088  |
| 14 | O14617 AP3D1_HUMAN | E.NALPS#DEDDKDPNDPYR.A      | S788:      | 2 | 3,3482 | 0,458 | -0,06  |
| 14 | Q3B820 YB032_HUMAN | E.NYFIDTNSQDSYK.E           |            | 2 | 3,3459 | 0,487 | 0      |
| 14 | P04264 K2C1_HUMAN  | K.SLNNQFASFIDKVR.F          |            | 2 | 3,3445 | 0,386 | -0,298 |
| 14 | P42166 LAP2A_HUMAN | R.SSTPLPTISSAENTR.Q         |            | 2 | 3,3437 | 0,385 | -0,148 |
| 14 | Q9Y217 FYV1_HUMAN  | R.SAS#ITNLSLDR.S            | S307:      | 2 | 3,3423 | 0,465 | -0,485 |
| 14 | P61163 ACTZ_HUMAN  | E.KAQYYLPDGGSTIE.I          |            | 2 | 3,339  | 0,306 | 0,082  |
| 14 | P43358 MAGA4_HUMAN | K.SQHCKPEEGVEAQEE.A         |            | 2 | 3,3346 | 0,361 | -0,139 |
| 14 | P17706 PTN2_HUMAN  | E.LSKEDLS#PAFDHS#PNKIM*TE.K | S298:S304: | 3 | 3,3344 | 0,237 | -0,075 |
| 14 | Q02952 AKA12_HUMAN | K.SAVVHDIT#DDGQEETPE.I      | T135:      | 2 | 3,3336 | 0,461 | -0,571 |
| 14 | Q12888 TP53B_HUMAN | R.GNLLHFPSS#QGEEE.K         | S1068:     | 2 | 3,3278 | 0,499 | -0,301 |
| 14 | P51636 CAV2_HUMAN  | K.ADVQLFM*DDDS#YSHHS#GLE.Y  | S18:S23:   | 3 | 3,3261 | 0,249 | -0,156 |
| 14 | P42166 LAP2A_HUMAN | E.SRSST#PLPTISSAENTR.Q      | T160:      | 3 | 3,3248 | 0,344 | 0      |
| 14 | Q16555 DPYL2_HUMAN | K.DRFQLTDCQIYE.V            |            | 2 | 3,324  | 0,547 | 0,231  |
| 14 | Q9Y6K9 NEMO_HUMAN  | E.DLKQQLQQAEE.A             |            | 2 | 3,3223 | 0,213 | 0,183  |
| 14 | Q14247 SRC8_HUMAN  | R.AKTQT#PPVSPAPQPTEER.L     | T401:      | 2 | 3,3169 | 0,43  | -0,182 |
| 14 | Q68DK2 ZFY26_HUMAN | E.IVHQAADPETLPRS#PSAE.F     | S1762:     | 3 | 3,3099 | 0,219 | 0      |
| 14 | Q15819 UB2V2_HUMAN | E.NM*KLPQPPEGQTYNN.-        |            | 2 | 3,3078 | 0,25  | -0,629 |
| 14 | P55060 XPO2_HUMAN  | D.NAALYAQKYDEE.F            |            | 2 | 3,3052 | 0,359 | -0,259 |
| 14 | Q09666 AHNK_HUMAN  | E.VGFHGAAPDISVK.G           |            | 3 | 3,3049 | 0,35  | 0,352  |
| 14 | P37802 TAGL2_HUMAN | K.NVIGLQM*GT#NR.G           | T180:      | 2 | 3,3018 | 0,417 | -0,376 |
| 14 | Q96A49 SYAP1_HUMAN | E.AVRPKT#PPVVIK.S           | T248:      | 3 | 3,3009 | 0,197 | -0,528 |
| 14 | Q86Y13 DZIP3_HUMAN | R.LIKDDAS#DVQE.D            | S707:      | 2 | 3,2992 | 0,296 | -0,093 |
| 14 | P05787 K2C8_HUMAN  | K.LSELEAALQR.A              |            | 2 | 3,2991 | 0,118 | 0,108  |
| 14 | Q14839 CHD4_HUMAN  | E.KSAIDLT#PIVVEDKE.E        | T1653:     | 2 | 3,2954 | 0,41  | 0,281  |
| 14 | P23443 KS6B1_HUMAN | E.SIHDGTVTHT#FCGTIE.Y       | T252:      | 2 | 3,2946 | 0,491 | -0,395 |
| 14 | Q9UPN4 AZI1_HUMAN  | K.ANNAGGGLPAAGPGDR.C        |            | 2 | 3,2944 | 0,436 | -0,35  |
| 14 | O95425 SVIL_HUMAN  | E.KYGLTLDPEADSE.Y           |            | 2 | 3,2916 | 0,345 | -0,424 |
| 14 | Q12931 TRAP1_HUMAN | E.KGTITIQDTGIGM*TQEE.L      |            | 3 | 3,2899 | 0,232 | 0      |

|    |                     |                                  |            |   |        |       |        |
|----|---------------------|----------------------------------|------------|---|--------|-------|--------|
| 14 | P52907 CAZA1_HUMAN  | E.GAAHAFQAQNM*DQFT#PVKIE.G       | T63:       | 3 | 3,2891 | 0,111 | 0,392  |
| 14 | P33316 DUT_HUMAN    | E.VQALDDTERGS#GGFGSTGKN.-        | S243:      | 2 | 3,2888 | 0,506 | 0      |
| 14 | O00139 KIF2A_HUMAN  | E.QSSSAQQNGSVSDIS#PVQAAK.K       | S140:      | 2 | 3,2856 | 0,409 | 0,45   |
| 14 | Q04695 K1C17_HUMAN  | R.ALEEANTELEVK.I                 |            | 2 | 3,2846 | 0,471 | 0,363  |
| 14 | Q9H0E9 BRD8_HUMAN   | R.SGVAEAPVGS#KAPS#IDGKEE.L       | S383:S387: | 3 | 3,2828 | 0,208 | 0,088  |
| 14 | Q92615 LARP5_HUMAN  | E.EKFTSSQTQSPTPKPPS#PSFE.L       | S524:      | 3 | 3,2794 | 0,208 | 0,295  |
| 14 | B0V0T1 B0V0T1_HUMAN | E.HIYCALSGSAADAQAVAD.M           |            | 2 | 3,2785 | 0,502 | 0,067  |
| 14 | Q99961 SH3G1_HUMAN  | E.VKQNFIDPLQNLCE.K               |            | 2 | 3,2752 | 0,427 | -0,426 |
| 14 | Q7Z2W4 ZCCHV_HUMAN  | E.FLASASASAER.S                  |            | 2 | 3,2745 | 0,416 | 0      |
| 14 | Q9UBQ0 VPS29_HUMAN  | E.NKFYINPGSATGAYNALE.T           |            | 2 | 3,2732 | 0,405 | 0,063  |
| 14 | Q9ULR0 ISY1_HUMAN   | K.FIAHVPVPSQQEIEE.A              |            | 2 | 3,2731 | 0,328 | 0,071  |
| 14 | P11388 TOP2A_HUMAN  | K.SVVSLEADDVK.G                  |            | 2 | 3,2715 | 0,516 | -0,191 |
| 14 | Q9UBB5 MBD2_HUMAN   | E.QGGQGSALAPS#PVSGVR.R           | S44:       | 2 | 3,2714 | 0,337 | -0,074 |
| 14 | Q15365 PCBP1_HUMAN  | R.CSDAAGYPHATHDLE.G              |            | 3 | 3,2709 | 0,317 | 0      |
| 14 | Q6NVY1 HIBCH_HUMAN  | E.EDLLALKS#PSKE.N                | S234:      | 2 | 3,2708 | 0,317 | 0,087  |
| 14 | O60566 BUB1B_HUMAN  | E.AELLTS#AEKR.A                  | S435:      | 2 | 3,2703 | 0,281 | 0,509  |
| 14 | Q0VG05 Q0VG05_HUMAN | E.VGLGTEEDPSLPALLTQPR.K          |            | 3 | 3,2676 | 0,218 | 0      |
| 14 | P08670 VIME_HUMAN   | K.FADLSEANR.N                    |            | 2 | 3,2674 | 0,343 | 0      |
| 14 | Q00613 HSF1_HUMAN   | R.VKEEPPS#PPQS#PRVEE.A           | S303:S307: | 3 | 3,2637 | 0,29  | 0      |
| 14 | Q16204 CCDC6_HUMAN  | E.KLDQPVSAAPS#PR.D               | S244:      | 2 | 3,2618 | 0,382 | -0,083 |
| 14 | O60934 NBN_HUMAN    | R.M*LS#QDAPTVKE.S                | S397:      | 2 | 3,2594 | 0,253 | -0,464 |
| 14 | P19634 SL9A1_HUMAN  | R.CLS#DPGPHPEPGEPEFFPK.G         | S796:      | 3 | 3,2591 | 0,368 | 0,08   |
| 14 | P30405 PPIF_HUMAN   | K.GSGDPSSSSSGNPLVYLDVDANGKPLGR.V |            | 3 | 3,2585 | 0,314 | -0,065 |
| 14 | P08670 VIME_HUMAN   | E.VDALKGTNESLE.R                 |            | 2 | 3,2564 | 0,458 | -0,478 |
| 14 | P29401 TKT_HUMAN    | R.SVPTSTVFYPSDGVATEK.A           |            | 2 | 3,2557 | 0,446 | 0,065  |
| 14 | P52788 SPSY_HUMAN   | D.LQSYDGAQGKEE.I                 |            | 2 | 3,2545 | 0,445 | -0,508 |
| 14 | P05556 ITB1_HUMAN   | R.SNGLICGGNGVCK.C                |            | 2 | 3,2535 | 0,334 | 0      |
| 14 | P82979 HCC1_HUMAN   | R.FGLNVSS#ISR.K                  | S163:      | 2 | 3,2523 | 0,386 | -0,316 |
| 14 | Q96GV9 CE030_HUMAN  | R.STLTLPFPGAEANS#PGKAE.A         | S25:       | 3 | 3,2509 | 0,314 | 0,088  |
| 14 | Q52LD0 Q52LD0_HUMAN | K.AGGS#PAS#YHGSTSPR.V            | S192:S195: | 2 | 3,2482 | 0,476 | -0,383 |
| 14 | Q00613 HSF1_HUMAN   | R.VKEEPPS#PPQS#PRVEE.A           | S303:S307: | 2 | 3,2479 | 0,297 | -0,124 |
| 14 | Q08050 FOXM1_HUMAN  | E.VGGPFKT#PIKE.T                 | T600:      | 3 | 3,2434 | 0,177 | 1,095  |
| 14 | P21980 TGM2_HUMAN   | E.QKTVEIPDPVEAGEE.V              |            | 2 | 3,2403 | 0,404 | -1,71  |
| 14 | P62805 H4_HUMAN     | R.ISGLIYEETR.G                   |            | 2 | 3,24   | 0,314 | -0,207 |
| 14 | Q8TF05 PP4R1_HUMAN  | E.SEGVPVSS#PNITM*ATR.K           | S496:      | 2 | 3,2375 | 0,37  | 0,14   |
| 14 | P11047 LAMC1_HUMAN  | E.GRPSAYNFDNSPVLQE.W             |            | 2 | 3,236  | 0,231 | -0,816 |
| 14 | P26006 ITA3_HUMAN   | R.TGAVYLCPLTAHK.D                |            | 3 | 3,2345 | 0,401 | 0,256  |
| 14 | Q96KB5 TOPK_HUMAN   | E.GISNFKT#PSKLSE.K               | T9:        | 2 | 3,2336 | 0,293 | -0,41  |
| 14 | Q08J23 NSUN2_HUMAN  | E.GKPTDPSKLES#PSFTGTGDTE.I       | S473:      | 2 | 3,2325 | 0,246 | 0,328  |

|    |                    |                                |              |   |        |       |        |
|----|--------------------|--------------------------------|--------------|---|--------|-------|--------|
| 14 | O60264 SMCA5_HUMAN | E.IFDDAS#PGKQKE.I              | S66:         | 2 | 3,2309 | 0,378 | -0,259 |
| 14 | Q9P2M7 CING_HUMAN  | E.DSKQALQLQAQLE.D              |              | 2 | 3,2298 | 0,262 | -0,229 |
| 14 | P05362 ICAM1_HUMAN | E.AQVHLALGDQR.L                |              | 3 | 3,2297 | 0,151 | 1,06   |
| 14 | Q8IWW6 RHG12_HUMAN | R.ATTPPNQGRPDS#PVYANLQE.L      | S240:        | 3 | 3,2286 | 0,276 | -0,164 |
| 14 | Q8WYB5 MYST4_HUMAN | E.TSEGKTS#PSPIRIEE.V           | S1301:       | 3 | 3,2278 | 0,235 | 0,298  |
| 14 | P19338 NUCL_HUMAN  | K.TLVLSNLSYSATEE.T             |              | 2 | 3,2235 | 0,469 | -0,32  |
| 14 | Q9UHN6 TMEM2_HUMAN | E.DRAT#FAFSPPEEQQAQRE.S        | T59:         | 3 | 3,2233 | 0,088 | -0,088 |
| 14 | P20700 LMNB1_HUMAN | E.SLSSQLSNLQKE.S               |              | 2 | 3,2231 | 0,251 | -0,457 |
| 14 | P35527 K1C9_HUMAN  | R.IKFEMEQLNR.Q                 |              | 3 | 3,2228 | 0,15  | 0,419  |
| 14 | P04264 K2C1_HUMAN  | K.SKAEAESLYQSK.Y               |              | 3 | 3,2201 | 0,28  | 0,205  |
| 14 | P15924 DESP_HUMAN  | R.NLTIRS#SS#FSDTLEE.S          | S2606:S2608: | 2 | 3,2184 | 0,382 | -0,066 |
| 14 | Q14974 IMB1_HUMAN  | E.VKNYVLQTLGTE.T               |              | 2 | 3,2173 | 0,395 | 0,089  |
| 14 | P30414 NKTR_HUMAN  | E.ICTPDRS#SPAKVEE.T            | S1137:       | 2 | 3,2128 | 0,257 | -0,366 |
| 14 | Q9H4A3 WNK1_HUMAN  | E.SLQKDDYGFSGS#QKLE.G          | S1220:       | 3 | 3,2046 | 0,302 | 0,283  |
| 14 | P08670 VIME_HUMAN  | E.AANYQDTIGRLQDE.I             |              | 2 | 3,2012 | 0,154 | -0,077 |
| 14 | Q8WUM0 NU133_HUMAN | E.LFSSSDLSDSE.L                |              | 2 | 3,1991 | 0,341 | -0,17  |
| 14 | Q9UER7 DAXX_HUMAN  | E.AAAGKGDGKS#PM*SSLQISNE.K     | S495:        | 3 | 3,1951 | 0,212 | -0,174 |
| 14 | Q9NVI7 ATD3A_HUMAN | E.DQLKQQQLLEE.N                |              | 2 | 3,1947 | 0,257 | -0,493 |
| 14 | P49916 DNL3_HUMAN  | K.LATKSS#PVKVGE.K              | S826:        | 2 | 3,1917 | 0,342 | -0,377 |
| 14 | O60264 SMCA5_HUMAN | E.M*EEIFDDAS#PGK.Q             | S66:         | 2 | 3,187  | 0,354 | 0      |
| 14 | Q09666 AHNK_HUMAN  | E.GDIKAPS#LDIKGPE.V            | S3326:       | 2 | 3,1868 | 0,35  | -0,241 |
| 14 | Q9NQ88 CL005_HUMAN | E.KIIQGQGVDEPLSE.T             |              | 2 | 3,1808 | 0,423 | -0,161 |
| 14 | Q969R5 LMBL2_HUMAN | E.EHLDVASPDKAS#SPELPVSVE.N     | S688:        | 2 | 3,1797 | 0,349 | 0,534  |
| 14 | Q01518 CAP1_HUMAN  | E.NKLSDLLAPISE.Q               |              | 2 | 3,1782 | 0,431 | -0,375 |
| 14 | P35658 NU214_HUMAN | R.SAQGSSSPVPSM*VQK.S           |              | 2 | 3,1776 | 0,383 | -0,162 |
| 14 | Q71U36 TBA1A_HUMAN | E.HGIQPDGQM*PSDK.T             |              | 2 | 3,177  | 0,458 | -0,513 |
| 14 | P27816 MAP4_HUMAN  | E.GRPVVSGTGNDITTPPNKELPPS#PE.K | S696:        | 3 | 3,1761 | 0,275 | -0,069 |
| 14 | P42166 LAP2A_HUMAN | R.NRPPLPAGTNSK.G               |              | 2 | 3,1747 | 0,471 | -0,292 |
| 14 | Q9HAV7 GRPE1_HUMAN | K.QKNSGQNLEEDM*GQSE.Q          |              | 2 | 3,1723 | 0,432 | 0      |
| 14 | Q8N108 MIER1_HUMAN | R.APS#PPPTASNSSNSQSEKE.D       | S401:        | 2 | 3,1723 | 0,457 | 0,122  |
| 14 | P08779 K1C16_HUMAN | K.IIAATIENAQPILQIDNAR.L        |              | 2 | 3,1699 | 0,479 | 0      |
| 14 | Q92562 SAC3_HUMAN  | E.GSVSQRS#T#PVKM*TDAGDSAK.V    | S776:T777:   | 3 | 3,168  | 0,214 | -0,083 |
| 14 | O15042 SR140_HUMAN | E.S#ARESLCDS#PHQNLSRPLLE.N     | S59:S67:     | 3 | 3,1666 | 0,27  | -0,148 |
| 14 | Q58FF8 H90B2_HUMAN | E.FDGKS#LVSVTKE.G              | S305:        | 2 | 3,1651 | 0,249 | -0,439 |
| 14 | P02545 LMNA_HUMAN  | R.NSNLVGAAHEE.L                |              | 2 | 3,164  | 0,375 | 1,283  |
| 14 | P11142 HSP7C_HUMAN | K.NSLESYAFNM*K.A               |              | 2 | 3,1636 | 0,431 | 0      |
| 14 | Q58FF7 H90B3_HUMAN | E.LKIDIIPNPQE.R                |              | 2 | 3,1611 | 0,323 | -0,095 |
| 14 | O95336 6PGL_HUMAN  | E.DQEENPLPAALVQPHTGK.L         |              | 3 | 3,1602 | 0,331 | -0,47  |
| 14 | Q8IXK0 PHC2_HUMAN  | E.KLPQQDHTTTTDS#EM*EEPYLQE.S   | S621:        | 3 | 3,1576 | 0,133 | 0,539  |



|    |                    |                                 |            |   |        |       |        |
|----|--------------------|---------------------------------|------------|---|--------|-------|--------|
| 14 | Q99436 PSB7_HUMAN  | E.KITPLEIEVLEE.T                |            | 2 | 3,1488 | 0,258 | -0,604 |
| 14 | O60216 RAD21_HUMAN | E.NDFGDFGM*DDRE.I               |            | 2 | 3,1483 | 0,46  | 0,17   |
| 14 | Q8WU90 ZC3HF_HUMAN | R.FSTYTS#DKDENKLSA              | S360:      | 2 | 3,148  | 0,439 | -0,265 |
| 14 | P14618 KPYM_HUMAN  | K.KGVNLPGAAVDLPAVSE.K           |            | 2 | 3,1431 | 0,436 | -0,596 |
| 14 | P49792 RBP2_HUMAN  | K.FGHVDQENSPS#FM*FQGSSNTE.F     | S1871:     | 3 | 3,1414 | 0,208 | -0,15  |
| 14 | Q8NHP8 PLBL2_HUMAN | D.VSAGQLLM*VDGR.H               |            | 2 | 3,14   | 0,388 | 0,29   |
| 14 | P53396 ACLY_HUMAN  | R.TAS#FSESRAD.V                 | S455:      | 2 | 3,1367 | 0,422 | -0,286 |
| 14 | Q92622 K0226_HUMAN | R.RPS#EGQSLISYLSE.Q             | S469:      | 2 | 3,1313 | 0,48  | -0,222 |
| 14 | Q8N3V7 SYNPO_HUMAN | E.ASNFQQEPAPR.D                 |            | 2 | 3,1295 | 0,387 | -0,294 |
| 14 | O60684 IMA7_HUMAN  | E.HYFGVEDDDSSLAPQVDE.T          |            | 2 | 3,1278 | 0,466 | -0,121 |
| 14 | P04075 ALDOA_HUMAN | K.RLQSIGTENTEE.N                |            | 2 | 3,1278 | 0,478 | -0,177 |
| 14 | Q7Z3T8 ZFY16_HUMAN | E.DLCLNDSNSRDE.N                |            | 2 | 3,1167 | 0,237 | -0,594 |
| 14 | O00562 PITM1_HUMAN | E.FGPVRDPLADGVEGLGR.G           |            | 3 | 3,116  | 0,283 | 0,208  |
| 14 | P52948 NUP98_HUMAN | E.NGERFS#FLSKPVDE.N             | S635:      | 3 | 3,1129 | 0,218 | 0      |
| 14 | Q96T23 RSF1_HUMAN  | E.IKLS#DDFDS#PVKGPLCK.S         | S382:S387: | 3 | 3,1113 | 0,286 | 0,352  |
| 14 | O60841 IF2P_HUMAN  | E.TVAVKPTENNEEE.F               |            | 2 | 3,1105 | 0,335 | -0,334 |
| 14 | P39687 AN32A_HUMAN | E.GKLEGLTDEFEE.L                |            | 2 | 3,1085 | 0,363 | -0,268 |
| 14 | P05787 K2C8_HUMAN  | E.AAIADAEQRGE.L                 |            | 2 | 3,1068 | 0,511 | -0,432 |
| 14 | Q96BW5 PTER_HUMAN  | R.AM*SVEQLTDVLM*NE.I            |            | 2 | 3,1015 | 0,297 | 0      |
| 14 | Q4KMP7 TB10B_HUMAN | E.GLHPSLPSPTGNSTPLGS#SKE.T      | S442:      | 3 | 3,0965 | 0,139 | -0,256 |
| 14 | Q08257 QOR_HUMAN   | E.M*LANVNLSKD.L                 |            | 2 | 3,0929 | 0,266 | -0,218 |
| 14 | P51003 PAPOA_HUMAN | K.HYGITS#PISLAAPKE.T            | S24:       | 2 | 3,0912 | 0,307 | 0      |
| 14 | P49588 SYAC_HUMAN  | E.KGLVVDM*DGFEER                |            | 2 | 3,0889 | 0,433 | -0,082 |
| 14 | Q13263 TIF1B_HUMAN | E.KLSPPYSSPQEFAQD.V             |            | 2 | 3,0866 | 0,424 | -0,216 |
| 14 | Q9P2M7 CING_HUMAN  | K.QALQQLQAQLE.D                 |            | 2 | 3,0866 | 0,331 | -0,096 |
| 14 | Q9UMZ2 SYNG_HUMAN  | K.FDFLVATSQSK.M                 |            | 2 | 3,0828 | 0,429 | 0,098  |
| 14 | O00443 P3C2A_HUMAN | K.VSNLQVS#PKSE.D                | S259:      | 2 | 3,0815 | 0,384 | -0,674 |
| 14 | Q12888 TP53B_HUMAN | R.GNLLHFPS#SQGEEE.K             | S1067:     | 2 | 3,081  | 0,354 | -0,225 |
| 14 | Q7LBC6 JHD2B_HUMAN | E.SLADSSS#RDSFK.Q               | S553:      | 2 | 3,0807 | 0,366 | -0,163 |
| 14 | Q7LBC6 JHD2B_HUMAN | E.SLADSSS#RDSFKQSLE.S           | S553:      | 3 | 3,0807 | 0,318 | 0,375  |
| 14 | P08758 ANXA5_HUMAN | D.KYM*TISGFQIEE.T               |            | 2 | 3,0806 | 0,397 | -0,167 |
| 14 | Q0JRZ9 FCHO2_HUMAN | K.VSIGNITLS#PAISRHS#PVQM*NR.N   | S387:S394: | 3 | 3,0769 | 0,197 | 0,072  |
| 14 | Q15942 ZYX_HUMAN   | R.S#PGAPGPLTLKE.V               | S344:      | 2 | 3,0726 | 0,443 | 0,098  |
| 14 | Q15742 NAB2_HUMAN  | E.KLSPLPGGPGAGDPR.I             |            | 3 | 3,0669 | 0,395 | 0,322  |
| 14 | Q15477 SKIV2_HUMAN | R.ASS#LEDLVLKE.A                | S256:      | 2 | 3,0656 | 0,259 | -0,285 |
| 14 | P49792 RBP2_HUMAN  | E.EENKSGGTGAAGASDT#TIKPNPE.N    | T2209:     | 3 | 3,0654 | 0,228 | 1,187  |
| 14 | P62988 UBIQ_HUMAN  | R.TLS#DYNIQKE.S                 | S57:       | 2 | 3,065  | 0,336 | 0,473  |
| 14 | O14617 AP3D1_HUMAN | R.ALDIDLKPLAD.S                 |            | 2 | 3,0645 | 0,421 | 0      |
| 14 | P05783 K1C18_HUMAN | R.GGM*GSGGLATGIAGGLAGM*GGIQNE.K |            | 3 | 3,0644 | 0,23  | 0      |

|    |                     |                               |        |   |        |       |        |
|----|---------------------|-------------------------------|--------|---|--------|-------|--------|
| 14 | Q01082 SPTB2_HUMAN  | K.TALPAQSAAT#LPAR.T           | T2187: | 2 | 3,0634 | 0,286 | 0      |
| 14 | P18615 NELFE_HUMAN  | E.KGPVPTFQPFQR.S              |        | 3 | 3,0628 | 0,275 | 0,457  |
| 14 | P02533 K1C14_HUMAN  | R.APSTYGGGLSVSSSR.F           |        | 2 | 3,0628 | 0,455 | 0      |
| 14 | Q9BRP8 WIBG_HUMAN   | E.ALSRT#LDKVSLEE.T            | T112:  | 2 | 3,0608 | 0,295 | -0,158 |
| 14 | P05783 K1C18_HUMAN  | K.GLQAQIASSGLTVE.V            |        | 2 | 3,0598 | 0,479 | 0,089  |
| 14 | Q9UQ35 SRRM2_HUMAN  | R.FQSDSSSYPTVDS#NSLLGQSR.L    | S1150: | 3 | 3,0594 | 0,128 | -0,311 |
| 14 | Q9ULW0 TPX2_HUMAN   | K.SSDQPLTVPV#PK.F             | S738:  | 2 | 3,0566 | 0,308 | -0,085 |
| 14 | Q6YHK3 CD109_HUMAN  | R.NNVVITVTQR.N                |        | 2 | 3,0561 | 0,432 | 0,427  |
| 14 | P18583 SON_HUMAN    | E.IALHS#GEEPHAAEE.H           | S1509: | 2 | 3,0549 | 0,406 | -0,814 |
| 14 | Q2M1Z3 CDGAP_HUMAN  | E.STPVLLSKGS#PERE.D           | S803:  | 2 | 3,0529 | 0,413 | 0,154  |
| 14 | P24928 RPB1_HUMAN   | E.KINAGFGDDLNCIFNDDNAE.K      |        | 3 | 3,0508 | 0,139 | -0,326 |
| 14 | Q99460 PSMD1_HUMAN  | E.SVDKIEVLYEDE.G              |        | 2 | 3,0494 | 0,195 | 0      |
| 14 | P20020 AT2B1_HUMAN  | E.M*NKS#ATSSSPGSPHLSLE.T      | S1241: | 3 | 3,0489 | 0,143 | 0,095  |
| 14 | P35908 K22E_HUMAN   | K.LALDVEIATYR.K               |        | 2 | 3,0488 | 0,496 | -0,29  |
| 14 | Q7Z6Z7 HUWE1_HUMAN  | E.SILSNNTTDDHCQE.F            |        | 2 | 3,0484 | 0,468 | 0,523  |
| 14 | Q9NZN5 ARHGC_HUMAN  | E.QHGISVTGLQS#PDRDLGLE.S      | S1176: | 3 | 3,0477 | 0,191 | -0,087 |
| 14 | P31949 S10AB_HUMAN  | K.KLDTNSDQGDLDFSE.F           |        | 2 | 3,0463 | 0,336 | 0      |
| 14 | Q59FE8 Q59FE8_HUMAN | R.STPAEDDS#PGDSQVK.S          | S352:  | 2 | 3,0463 | 0,515 | 0,227  |
| 14 | Q5VUA4 ZN318_HUMAN  | E.DQLSEGRNS#PEKAE.N           | S1243: | 2 | 3,0445 | 0,26  | -0,074 |
| 14 | P00338 LDHA_HUMAN   | K.VTLTSEEAR.L                 |        | 2 | 3,0429 | 0,291 | -0,537 |
| 14 | P49023 PAXI_HUMAN   | K.TGSSS#PPGGPPKPGSQLD.S       | S322:  | 2 | 3,0426 | 0,293 | -0,14  |
| 14 | P54105 ICLN_HUMAN   | E.AHEQGGDIPTFYTYEE.G          |        | 2 | 3,0411 | 0,363 | 0,43   |
| 14 | Q9P2E9 RRBP1_HUMAN  | R.NTDVAQS#PEAPKQE.A           | S615:  | 2 | 3,0351 | 0,348 | -0,077 |
| 14 | Q9NQ55 SSF1_HUMAN   | K.ARVGGS#DEEASGIPSR.T         | S359:  | 2 | 3,0344 | 0,348 | -0,366 |
| 14 | P32004 L1CAM_HUMAN  | E.DGS#FIGQYSGK.K              | S1224: | 2 | 3,0342 | 0,322 | 0      |
| 14 | Q9P287 BCCIP_HUMAN  | E.LTDLLIQNHIGSVIK.Q           |        | 3 | 3,0341 | 0,23  | -0,306 |
| 14 | Q9UPN4 AZI1_HUMAN   | E.ATGPGGSQAINNLR.R            |        | 2 | 3,0336 | 0,484 | -0,18  |
| 14 | Q9UGV2 NDRG3_HUMAN  | E.SCES#PDVLDLRHQTME.V         | S361:  | 2 | 3,0325 | 0,502 | 0,321  |
| 14 | Q9UQ35 SRRM2_HUMAN  | E.SYFGVSSLQLK.G               |        | 2 | 3,0311 | 0,422 | -0,099 |
| 14 | Q5T0F9 C2D1B_HUMAN  | K.RPLAPQEPANRS#PETDPPAPPALE.S | S241:  | 3 | 3,0306 | 0,081 | -1,043 |
| 14 | O00139 KIF2A_HUMAN  | E.GAEINKS#LLALKE.C            | S484:  | 2 | 3,0267 | 0,316 | -0,083 |
| 14 | P51784 UBP11_HUMAN  | K.AAYVLFYQR.Q                 |        | 2 | 3,0255 | 0,328 | 0,108  |
| 14 | Q9H4A3 WNK1_HUMAN   | K.DRPVSQPS#LVGSKEEPPPAR.S     | S170:  | 3 | 3,0234 | 0,298 | 0      |
| 14 | Q16543 CDC37_HUMAN  | E.AKEGEEAGPGDPLLE.A           |        | 2 | 3,0233 | 0,352 | -1,291 |
| 14 | Q9BTT0 AN32E_HUMAN  | E.IEGLNDFKE.L                 |        | 2 | 3,0205 | 0,292 | 0,105  |
| 14 | Q9P2E9 RRBP1_HUMAN  | E.NSILRDALNQATSQVE.S          |        | 2 | 3,0203 | 0,343 | -0,277 |
| 14 | P55769 NH2L1_HUMAN  | K.QQIQSIQQSIE.R               |        | 2 | 3,0198 | 0,215 | -1,031 |
| 14 | Q96RT1 LAP2_HUMAN   | R.SKTQDIVLGT#FLSINSKEE.T      | S794:  | 3 | 3,0188 | 0,237 | 0,161  |
| 14 | Q12802 AKP13_HUMAN  | R.SLS#RPSSLIEQE.K             | S2563: | 2 | 3,0183 | 0,249 | 0,171  |

|    |                     |                                 |            |   |        |       |        |
|----|---------------------|---------------------------------|------------|---|--------|-------|--------|
| 14 | P04264 K2C1_HUMAN   | R.NKYEDEINKR.T                  |            | 3 | 3,0175 | 0,234 | 0      |
| 14 | Q9UGV2 NDRG3_HUMAN  | E.SCES#PDVLDLDR.H               | S361:      | 2 | 3,0172 | 0,467 | -0,291 |
| 14 | Q09666 AHNK_HUMAN   | E.VGFHGAAPDISVK.G               |            | 2 | 3,0137 | 0,269 | 0,094  |
| 14 | P46926 GNPI1_HUMAN  | E.NTHILDGNAVDLQAE.C             |            | 2 | 3,0131 | 0,329 | 0,076  |
| 14 | Q9BUA3 YK007_HUMAN  | E.GVALLQDVR.A                   |            | 2 | 3,0112 | 0,3   | 0,063  |
| 14 | P41236 IPP2_HUMAN   | E.TADGESM*NTEES#NQGSTPSDQQQNK.L | S188:      | 3 | 3,0098 | 0,281 | -0,132 |
| 14 | Q6AI39 K0240_HUMAN  | E.KVVGSS#PGHPAVQVE.S            | S675:      | 2 | 3,0066 | 0,36  | -0,388 |
| 14 | O14617 AP3D1_HUMAN  | E.TSKS#PEKDVPM*VE.K             | S829:      | 2 | 3,0031 | 0,428 | -0,395 |
| 14 | Q99708 RBBP8_HUMAN  | R.FSDSTSKT#PPQEE.L              | T315:      | 2 | 3,0027 | 0,419 | -0,478 |
| 14 | P08621 RU17_HUMAN   | E.GLGNDSRDM*YM*E.S              |            | 2 | 3,0004 | 0,362 | 0,773  |
| 14 | P49023 PAXI_HUMAN   | K.TSS#VSNPQDSVGSPPCSR.V         | S96:       | 2 | 2,9966 | 0,417 | -0,132 |
| 14 | P37802 TAGL2_HUMAN  | E.GKNVIGLQM*GTNR.G              |            | 2 | 2,9933 | 0,425 | -0,869 |
| 14 | Q5JRX3 PREP_HUMAN   | E.DTNNLFSVQFR.T                 |            | 2 | 2,9928 | 0,348 | -0,273 |
| 14 | P55209 NP1L1_HUMAN  | E.RLDGLVETPTGYIE.S              |            | 2 | 2,992  | 0,452 | -0,078 |
| 14 | P02545 LMNA_HUMAN   | R.LADALQELR.A                   |            | 2 | 2,989  | 0,246 | -0,119 |
| 14 | Q9UHV7 MED13_HUMAN  | K.TGNLDP LSCISTADLHK.M          |            | 3 | 2,9887 | 0,207 | -0,199 |
| 14 | P35527 K1C9_HUMAN   | K.TLNDM*RQEYEQLIAK.N            |            | 3 | 2,9885 | 0,338 | -0,196 |
| 14 | P37802 TAGL2_HUMAN  | E.GKNVIGLQM*GT#NR.G             | T180:      | 3 | 2,9881 | 0,336 | 0,246  |
| 14 | P04264 K2C1_HUMAN   | K.LALDLEIATYR.T                 |            | 2 | 2,9867 | 0,367 | -0,382 |
| 14 | Q9NUG6 PDRG1_HUMAN  | E.LKGFNLNPLNQDE.L               |            | 2 | 2,9776 | 0,348 | -0,325 |
| 14 | P04264 K2C1_HUMAN   | R.TNAENEFVTIKK.D                |            | 3 | 2,9762 | 0,351 | 0,197  |
| 14 | P11021 GRP78_HUMAN  | R.VEIIANDQGNR.I                 |            | 2 | 2,975  | 0,321 | -0,397 |
| 14 | Q9H2G2 SLK_HUMAN    | E.VRS#VVADTDQK.A                | S655:      | 2 | 2,9739 | 0,289 | 0,376  |
| 14 | Q6ZP91 Q6ZP91_HUMAN | E.SSFVEPADM*SDAVTK.A            |            | 2 | 2,9711 | 0,348 | -0,381 |
| 14 | P07355 ANXA2_HUMAN  | E.LASALKS#ALSGHLE.T             | S89:       | 2 | 2,9685 | 0,21  | -0,33  |
| 14 | P51957 NEK4_HUMAN   | K.DQSLALS#PKLE.C                | S461:      | 2 | 2,9669 | 0,207 | 0,381  |
| 14 | P39023 RL3_HUMAN    | E.RLEQQVPVNQVFGQDE.M            |            | 2 | 2,9668 | 0,418 | -0,065 |
| 14 | Q96L14 C170L_HUMAN  | E.ALNNM*GFPSAM*LPSPPK.Q         |            | 2 | 2,9633 | 0,425 | 0,068  |
| 14 | P08779 K1C16_HUMAN  | R.APSTYGGGLSVSSR.F              |            | 2 | 2,9616 | 0,483 | -0,273 |
| 14 | P09211 GSTP1_HUMAN  | E.YVNLPIPINGKQ.-                |            | 2 | 2,9611 | 0,378 | -0,278 |
| 14 | P01100 FOS_HUMAN    | R.KGS#SSNEPSSDSLSS#PTLLAL.-     | S362:S374: | 2 | 2,9562 | 0,374 | 0,109  |
| 14 | Q99590 SFRIP_HUMAN  | E.GEIIQTVDR.Q                   |            | 2 | 2,9559 | 0,202 | -0,947 |
| 14 | Q9H116 GZF1_HUMAN   | R.CPQDQS#PDRVGTE.M              | S265:      | 2 | 2,9528 | 0,38  | 0      |
| 14 | P20700 LMNB1_HUMAN  | R.AGGPTT#PLSPTR.L               | T20:       | 2 | 2,9517 | 0,425 | -0,099 |
| 14 | Q8NBU5 ATAD1_HUMAN  | E.TDGFSGSDLKE.M                 |            | 2 | 2,951  | 0,418 | -0,106 |
| 14 | P52732 KIF11_HUMAN  | E.NIQKPLSSVQE.N                 |            | 2 | 2,9502 | 0,27  | -0,785 |
| 14 | P18583 SON_HUMAN    | E.IALHS#GEEPHAEE.H              | S1509:     | 3 | 2,9487 | 0,201 | -0,732 |
| 14 | O75431 MTX2_HUMAN   | E.NATLYQQLKGE.Q                 |            | 2 | 2,9482 | 0,37  | -1,35  |
| 14 | Q06210 GFPT1_HUMAN  | E.TDCGVHINAGPE.I                |            | 2 | 2,9469 | 0,417 | -0,288 |

|    |                    |                              |              |   |        |       |        |
|----|--------------------|------------------------------|--------------|---|--------|-------|--------|
| 14 | P37802 TAGL2_HUMAN | K.NVIGLQM*GTNR.G             |              | 2 | 2,946  | 0,494 | -0,5   |
| 14 | Q9H307 PININ_HUMAN | R.GFS#DSGGGPPAK.Q            | S66:         | 2 | 2,9422 | 0,425 | -0,211 |
| 14 | Q9UQ35 SRRM2_HUMAN | E.NSFGS#PLEFR.N              | S1329:       | 2 | 2,941  | 0,43  | 0      |
| 14 | Q15149 PLEC1_HUMAN | E.QSVLDQLRGEAE.A             |              | 2 | 2,938  | 0,32  | 0,363  |
| 14 | Q75LS8 FKB9L_HUMAN | E.IDKDGNGEVLEE.F             |              | 2 | 2,9374 | 0,202 | 1,62   |
| 14 | P78371 TCPB_HUMAN  | E.GNTTAGLDM*RE.G             |              | 2 | 2,9333 | 0,458 | -0,31  |
| 14 | Q8N108 MIER1_HUMAN | E.LLSLYGYGSTVR.L             |              | 2 | 2,9318 | 0,427 | -0,184 |
| 14 | O95817 BAG3_HUMAN  | E.KVQGLEQAVDNFE.G            |              | 2 | 2,9293 | 0,189 | -0,083 |
| 14 | P31937 3HIDH_HUMAN | R.SGNLTFM*VGGVEDE.F          |              | 2 | 2,9293 | 0,282 | 0,083  |
| 14 | P50542 PEX5_HUMAN  | E.AASKPLGVASEDE.L            |              | 2 | 2,9268 | 0,259 | -0,287 |
| 14 | P27816 MAP4_HUMAN  | K.DGVLTLANNVTPAK.D           |              | 2 | 2,9253 | 0,324 | -0,086 |
| 14 | P18615 NELFE_HUMAN | E.KGPVPTFQPFQR.S             |              | 2 | 2,9246 | 0,292 | -0,261 |
| 14 | Q9UPU9 SAM4A_HUMAN | E.LHQM*ILTPIK.A              |              | 3 | 2,9243 | 0,116 | 0,907  |
| 14 | Q08J23 NSUN2_HUMAN | E.ANS#PDVTAGCDPAGVHPPR.-     | S751:        | 3 | 2,9235 | 0,273 | 0      |
| 14 | Q9UKF7 PITC1_HUMAN | E.DNKGSNDTIFDNE.A            |              | 2 | 2,9233 | 0,247 | 0      |
| 14 | Q9NWH9 SLTM_HUMAN  | R.IVQISGNS#M*PR.G            | S1014:       | 2 | 2,9231 | 0,398 | -0,658 |
| 14 | P52948 NUP98_HUMAN | R.FS#FLSKPVDE.N              | S635:        | 2 | 2,9217 | 0,46  | -0,293 |
| 14 | O75691 UTP20_HUMAN | K.SLSDNGQPGT#PDPADSGGTSAKE.S | T1741:       | 3 | 2,9204 | 0,329 | -0,161 |
| 14 | P31942 HNRH3_HUMAN | E.AFVQFASKE.I                |              | 2 | 2,92   | 0,196 | 0      |
| 14 | Q12756 KIF1A_HUMAN | R.TPQPCS#RPAS#PEPELLPE.A     | S1528:S1532: | 2 | 2,9172 | 0,224 | 0,451  |
| 14 | Q9P2E9 RRBP1_HUMAN | R.DALNQATSQVE.S              |              | 2 | 2,9171 | 0,363 | -0,311 |
| 14 | Q02952 AKA12_HUMAN | E.SQVHM*M*AAAVADGTR.A        |              | 3 | 2,9165 | 0,156 | 0,348  |
| 14 | Q14980 NUMA1_HUMAN | E.FASHLQQLQDALNE.L           |              | 2 | 2,9162 | 0,181 | -0,151 |
| 14 | P78364 PHC1_HUMAN  | E.ALSPTS#PGPLSVR.A           | S898:        | 2 | 2,916  | 0,387 | -0,269 |
| 14 | Q16658 FSCN1_HUMAN | E.DRLSCFAQTVSPA.E.K          |              | 2 | 2,9153 | 0,324 | -0,232 |
| 14 | Q96GV9 CE030_HUMAN | R.STLTLPFGAEANS#PGKAE.A      | S25:         | 2 | 2,9125 | 0,42  | 0,118  |
| 14 | P60174 TPIS_HUMAN  | E.FVDIINAKQ.-                |              | 2 | 2,9084 | 0,212 | -0,466 |
| 14 | Q6ZRV2 FA83H_HUMAN | R.RGSPTT#GFIEQKGS#PTSAYPE.R  | T895:S903:   | 3 | 2,903  | 0,305 | -0,232 |
| 14 | Q8ND56 LS14A_HUMAN | E.TSNSGTLPQSSAVGSAFTQDTR.S   |              | 2 | 2,8996 | 0,318 | 0,331  |
| 14 | P23368 MAOM_HUMAN  | K.ALTSQLTDEE.L               |              | 2 | 2,8995 | 0,278 | -0,11  |
| 14 | Q99543 DNJC2_HUMAN | E.FSYLDEEEKE.K               |              | 2 | 2,8983 | 0,318 | -0,189 |
| 14 | Q8IYQ7 THNS1_HUMAN | E.KLQDVGNEQFLEEE.G           |              | 2 | 2,897  | 0,417 | 0,073  |
| 14 | Q96ST2 IWS1_HUMAN  | R.KLPGS#DS#ENEE.L            | S131:S133:   | 2 | 2,8944 | 0,172 | 0      |
| 14 | Q15365 PCBP1_HUMAN | R.CSDAAGYPHATHD.L            |              | 3 | 2,8914 | 0,251 | 0,065  |
| 14 | P13647 K2C5_HUMAN  | K.WTLLQEQGTK.T               |              | 2 | 2,8904 | 0,335 | -0,101 |
| 14 | Q9Y4E8 UBP15_HUMAN | E.YFLNDKYQEE.L               |              | 2 | 2,8887 | 0,194 | -0,181 |
| 14 | P04075 ALDOA_HUMAN | E.IAM*ATVTALR.R              |              | 2 | 2,8868 | 0,374 | -0,344 |
| 14 | Q96TA1 NIBL1_HUMAN | E.DSKVEGPAFTD.A              |              | 2 | 2,8824 | 0,424 | -0,314 |
| 14 | Q86UP2 KTN1_HUMAN  | R.DAVSNNTTNQLE.S             |              | 2 | 2,8801 | 0,332 | -0,307 |

|    |                    |                             |          |   |        |       |        |
|----|--------------------|-----------------------------|----------|---|--------|-------|--------|
| 14 | Q9UPU9 SAM4A_HUMAN | E.LHQM*ILTPIKAYSSPST#TPE.A  | T234:    | 3 | 2,8797 | 0,23  | 0      |
| 14 | Q71U36 TBA1A_HUMAN | E.HGIQPDGQM*PSDK.T          |          | 3 | 2,8781 | 0,154 | -0,064 |
| 14 | P46459 NSF_HUMAN   | E.NDIKPAFGTNQE.D            |          | 2 | 2,878  | 0,314 | -0,274 |
| 14 | Q00613 HSF1_HUMAN  | K.CLSVACLDKNE.L             |          | 2 | 2,8775 | 0,359 | 0,373  |
| 14 | O15061 DMN_HUMAN   | K.GLQT#PVKDAGGGTGRE.A       | T598:    | 3 | 2,8741 | 0,092 | 0,563  |
| 14 | P62736 ACTA_HUMAN  | K.DSYVVGDEAQS.K             |          | 2 | 2,8683 | 0,35  | -0,407 |
| 14 | Q02952 AKA12_HUMAN | K.VVGQTT#PESFE.K            | T1116:   | 2 | 2,8682 | 0,325 | 0,192  |
| 14 | P00338 LDHA_HUMAN  | D.LVKVTLTSEEE.A             |          | 2 | 2,8677 | 0,365 | -1,075 |
| 14 | P04264 K2C1_HUMAN  | R.TNAENEFVTIK.K             |          | 2 | 2,8655 | 0,39  | -0,385 |
| 14 | Q8N3P4 VPS8_HUMAN  | K.TSEEELNKS#FNLE.A          | S26:     | 2 | 2,865  | 0,224 | -0,151 |
| 14 | Q8N655 CJ012_HUMAN | E.DVISRPHS#PPEIVSR.E        | S381:    | 3 | 2,8644 | 0,123 | -0,414 |
| 14 | P07910 HNRPC_HUMAN | R.GDDQLELIK.D               |          | 2 | 2,8618 | 0,147 | -0,473 |
| 14 | Q92890 UFD1_HUMAN  | E.STEGEADHSGYAGE.L          |          | 2 | 2,8595 | 0,308 | -0,26  |
| 14 | O00443 P3C2A_HUMAN | K.VSNLQVS#PK.S              | S259:    | 2 | 2,8591 | 0,321 | -0,116 |
| 14 | Q86UP2 KTN1_HUMAN  | E.IQNGNLHES#DSESVPR.D       | S75:     | 3 | 2,8581 | 0,373 | -0,098 |
| 14 | Q7Z333 SETX_HUMAN  | E.ASS#PTFSKEPM*KVQD.S       | S642:    | 3 | 2,85   | 0,332 | -0,209 |
| 14 | P35612 ADDB_HUMAN  | E.AETKS#PLVSPSK.S           | S613:    | 2 | 2,8485 | 0,291 | -0,184 |
| 14 | P67936 TPM4_HUMAN  | E.NVGLHQTLTDLNE.L           |          | 2 | 2,848  | 0,184 | -0,308 |
| 14 | P19338 NUCL_HUMAN  | K.NDLAVVDVR.I               |          | 2 | 2,848  | 0,38  | 0,366  |
| 14 | Q5H9R7 SAPS3_HUMAN | E.FTSSLSTKDSL.R             |          | 2 | 2,8474 | 0,435 | -0,545 |
| 14 | Q1KMD3 HNRL2_HUMAN | E.VTYGELEKEE.A              |          | 2 | 2,8461 | 0,273 | 0,102  |
| 14 | P27816 MAP4_HUMAN  | E.VALAKDM*ES#PTKLD.V        | S280:    | 3 | 2,846  | 0,279 | -0,113 |
| 14 | P02538 K2C6A_HUMAN | K.ADTLTDEINFLR.A            |          | 2 | 2,8433 | 0,301 | -0,347 |
| 14 | P02533 K1C14_HUMAN | R.VLDELTLAR.A               |          | 2 | 2,8426 | 0,281 | -0,118 |
| 14 | Q14204 DYHC1_HUMAN | E.VDGLDVSKE.G               |          | 2 | 2,8375 | 0,26  | -0,063 |
| 14 | Q8N201 INT1_HUMAN  | R.VAGDLGAGSSPHSLTEEDS#QTE.L | S295:    | 3 | 2,8372 | 0,145 | 0,073  |
| 14 | Q8N4C8 MINK1_HUMAN | R.SDSVLPASHGHLPOAGS#LE.R    | S763:    | 2 | 2,8363 | 0,405 | -0,185 |
| 14 | P46821 MAP1B_HUMAN | R.QSPDHPTVGAGVLHITE.N       |          | 3 | 2,8336 | 0,272 | 0,208  |
| 14 | P46013 KI67_HUMAN  | K.TRGS#IPTDVEVLPTETE.I      | S425:    | 2 | 2,8334 | 0,35  | 0,19   |
| 14 | Q96JM3 ZN828_HUMAN | K.LAPVPSPEPQKPAPVS#PE.S     | S214:    | 3 | 2,8331 | 0,29  | 0,286  |
| 14 | P00558 PGK1_HUMAN  | K.VSHVSTGGGASLE.L           |          | 2 | 2,83   | 0,205 | 0      |
| 14 | P42345 FRAP_HUMAN  | E.S#IHSFIGDGLVKPE.A         | S2478:   | 2 | 2,8276 | 0,269 | -0,309 |
| 14 | P62333 PRS10_HUMAN | K.ALQSVGQIVGE.V             |          | 2 | 2,827  | 0,355 | -0,111 |
| 14 | Q14320 FA50A_HUMAN | E.LKSSTVGLVTLND.M           |          | 2 | 2,826  | 0,415 | -0,181 |
| 14 | O43765 SGTA_HUMAN  | R.S#PART#PPSEEDSAE.A        | S77:T81: | 2 | 2,8219 | 0,487 | 0,075  |
| 14 | P12955 PEPD_HUMAN  | E.KYAVDDVQYVDE.I            |          | 2 | 2,8209 | 0,364 | -0,253 |
| 14 | Q9H307 PININ_HUMAN | E.IAIVHS#DAEKEQE.E          | S347:    | 3 | 2,82   | 0,168 | -0,118 |
| 14 | Q8TDY2 RBCC1_HUMAN | R.LDS#LPEHEDSE.K            | S222:    | 2 | 2,8198 | 0,172 | -0,181 |
| 14 | Q86YS7 K0528_HUMAN | E.IIGS#PIPEPR.Q             | S643:    | 2 | 2,8194 | 0,319 | 0,211  |

|    |                     |                              |              |   |        |       |        |
|----|---------------------|------------------------------|--------------|---|--------|-------|--------|
| 14 | Q9Y6A5 TACC3_HUMAN  | E.STAPT NHLVAGR.A            |              | 2 | 2,8172 | 0,462 | -0,299 |
| 14 | P54578 UBP14_HUMAN  | E.AIEDDSVKE.T                |              | 2 | 2,8161 | 0,298 | -0,849 |
| 14 | Q6ZRV2 FA83H_HUMAN  | R.RLS#LGQGDSTEAATEE.R        | S1003:       | 2 | 2,813  | 0,326 | -0,07  |
| 14 | Q13765 NACA_HUMAN   | E.AKIEDLSQQAQAAAAE.K         |              | 3 | 2,8089 | 0,239 | 0,325  |
| 14 | Q8IVF2 AHNK2_HUMAN  | E.GDLSLADKD.V                |              | 2 | 2,808  | 0,269 | 0,261  |
| 14 | P05787 K2C8_HUMAN   | E.SM*YQIKYEE.L               |              | 2 | 2,8078 | 0,34  | -0,202 |
| 14 | P04259 K2C6B_HUMAN  | R.SGFSSISVSR.S               |              | 2 | 2,807  | 0,327 | 0,594  |
| 14 | P29966 MARCS_HUMAN  | E.AAAERPGEAAVASS#PSK.A       | S27:         | 2 | 2,8063 | 0,245 | 0      |
| 14 | Q86TG7 PEG10_HUMAN  | E.NNNLQSQVQK.L               |              | 2 | 2,8046 | 0,162 | -0,104 |
| 14 | P09211 GSTP1_HUMAN  | E.YVNLPIPINGNK.Q             |              | 2 | 2,8031 | 0,303 | 0,308  |
| 14 | Q12756 KIF1A_HUMAN  | R.TPQPCSRPAS#PEPE.L          | S1532:       | 2 | 2,8026 | 0,297 | -0,299 |
| 14 | P49792 RBP2_HUMAN   | E.KDSLIT#PHVS#R.S            | T2450:S2454: | 2 | 2,8025 | 0,336 | -0,173 |
| 14 | P49757 NUMB_HUMAN   | R.VTTATEQAEREE.I             |              | 2 | 2,802  | 0,39  | -0,358 |
| 14 | A6NN80 A6NN80_HUMAN | E.GGENLDQAREDAQE.I           |              | 2 | 2,8017 | 0,252 | -0,796 |
| 14 | P35658 NU214_HUMAN  | R.SAQGSSSPVPSM*VQKS#PR.I     | S666:        | 3 | 2,799  | 0,16  | 0      |
| 14 | Q9UKI8 TLK1_HUMAN   | E.SSNHSFGSLGSLGSL#DKESETPE.K | S105:        | 3 | 2,7936 | 0,161 | -0,161 |
| 14 | Q96T23 RSF1_HUMAN   | E.IKLS#DDFDS#PVKGPLCK.S      | S382:S387:   | 2 | 2,7896 | 0,287 | 0,235  |
| 14 | Q15648 MED1_HUMAN   | K.SPAYTPQNLDSESE.S           |              | 2 | 2,7891 | 0,308 | -0,079 |
| 14 | Q9Y4A5 TRRAP_HUMAN  | E.LAPGDQTS#TPKTK.E.L         | S2572:       | 2 | 2,7887 | 0,444 | -1,1   |
| 14 | P52294 IMA1_HUMAN   | D.SKIVQVALNGLE.N             |              | 2 | 2,7873 | 0,257 | -0,096 |
| 14 | Q15477 SKIV2_HUMAN  | R.GDTVASPCSAPLAR.A           |              | 2 | 2,7865 | 0,406 | -0,246 |
| 14 | Q9Y2D5 AKAP2_HUMAN  | D.SLQVPVS#PSSTSSR.C          | S152:        | 2 | 2,7861 | 0,412 | -0,378 |
| 14 | P55209 NP1L1_HUMAN  | E.FHFEPNEYFTNE.V             |              | 2 | 2,7835 | 0,286 | -0,62  |
| 14 | Q8IZ21 PHAR4_HUMAN  | R.TRS#LPITIE.M               | S464:        | 2 | 2,7823 | 0,364 | 0      |
| 14 | Q92844 TANK_HUMAN   | D.STFLHSTPERPGILS#PATSE.A    | S257:        | 3 | 2,7822 | 0,181 | 0      |
| 14 | O14974 MYPT1_HUMAN  | R.ILVDNLCDM*E.M              |              | 2 | 2,7815 | 0,246 | -0,099 |
| 14 | P35527 K1C9_HUMAN   | R.HGVQELEIELQSQLSK.K         |              | 3 | 2,7808 | 0,175 | -0,199 |
| 14 | Q9H307 PININ_HUMAN  | E.IAIVHS#DAEKEQEE.E          | S347:        | 3 | 2,7805 | 0,15  | -0,327 |
| 14 | Q969R5 LMBL2_HUMAN  | E.HLDVASPDK.A                |              | 2 | 2,7787 | 0,31  | -1,553 |
| 14 | A8K5L5 A8K5L5_HUMAN | E.SQLDGS#LISR.R              | S470:        | 2 | 2,778  | 0,253 | 0,422  |
| 14 | Q96ER3 SAAL1_HUMAN  | E.VVDKLFDLDE.K               |              | 2 | 2,7777 | 0,297 | 0      |
| 14 | Q92625 ANS1A_HUMAN  | E.TLHTAS#PHPGGAAE.G          | S589:        | 2 | 2,777  | 0,473 | 0,539  |
| 14 | P08670 VIME_HUMAN   | R.QDVDNAS#LARLD.L            | S214:        | 2 | 2,7749 | 0,411 | -0,087 |
| 14 | Q8IXH7 NELFD_HUMAN  | E.NDSIAGTIKTE.G              |              | 2 | 2,7747 | 0,268 | 0      |
| 14 | Q9C0C2 TB182_HUMAN  | R.RES#AAS#GLGGLL.EE          | S1473:S1476: | 2 | 2,7739 | 0,387 | -0,788 |
| 14 | O75427 LRCH4_HUMAN  | E.AAATTSVPGS#PGLPGRR.S       | S25:         | 3 | 2,7731 | 0,306 | 0,218  |
| 14 | Q9C0D2 K1731_HUMAN  | R.TLS#SGQEQQVE.S             | S440:        | 2 | 2,7728 | 0,15  | -0,388 |
| 14 | P12268 IMDH2_HUMAN  | K.NLIDAGVDALR.V              |              | 2 | 2,7727 | 0,262 | -0,105 |
| 14 | O60684 IMA7_HUMAN   | E.HYFGVEDDDSSLAPQVDE.T       |              | 3 | 2,7688 | 0,115 | 0,09   |

|    |                    |                              |        |   |        |       |        |
|----|--------------------|------------------------------|--------|---|--------|-------|--------|
| 14 | Q9UKM9 RALY_HUMAN  | E.LEHSQDTDADDGALQ.-          |        | 2 | 2,7676 | 0,374 | -0,151 |
| 14 | P60709 ACTB_HUMAN  | R.GYSFTTTAERE.I              |        | 2 | 2,7672 | 0,543 | -0,387 |
| 14 | P10599 THIO_HUMAN  | K.EKLEATINELV.-              |        | 2 | 2,7661 | 0,341 | -0,388 |
| 14 | P40222 TXLNA_HUMAN | R.RPEGPGAQAPSS#PR.V          | S515:  | 3 | 2,7658 | 0,236 | -0,369 |
| 14 | Q00610 CLH1_HUMAN  | E.KIVLDNSVFSE.H              |        | 2 | 2,7656 | 0,358 | 0,195  |
| 14 | P58546 MTPN_HUMAN  | E.ATDNQAIKALLQ.-             |        | 2 | 2,7654 | 0,27  | 0,095  |
| 14 | Q9BSJ8 ESYT1_HUMAN | R.FFLQDPQSQE.L               |        | 2 | 2,763  | 0,324 | 0      |
| 14 | Q92922 SMRC1_HUMAN | R.AS#GKVDPTYGLE.S            | S748:  | 2 | 2,7617 | 0,138 | 0      |
| 14 | Q5T3I0 GPTC4_HUMAN | E.DLNLEDRGEE.T               |        | 2 | 2,7602 | 0,274 | -0,308 |
| 14 | Q9BY84 DUS16_HUMAN | E.YYKPTTLDGTNK.L             |        | 3 | 2,759  | 0,363 | 0,061  |
| 14 | P60174 TPIS_HUMAN  | K.IAVAAQNCYK.V               |        | 2 | 2,7517 | 0,384 | 0,643  |
| 14 | P17252 KPCA_HUMAN  | E.HM*M*DGVTTRT#FCGTPDYIAPE.I | T497:  | 2 | 2,7514 | 0,319 | 0,486  |
| 14 | Q8N4C8 MINK1_HUMAN | R.SDSVLPASHGHL PQAGS#LE.R    | S763:  | 3 | 2,7514 | 0,111 | 0,185  |
| 14 | P18615 NELFE_HUMAN | R.SIS#ADDDLQE.S              | S115:  | 2 | 2,7506 | 0,31  | -0,208 |
| 14 | P35030 TRY3_HUMAN  | D.TLDNDIMLIK.L               |        | 2 | 2,7473 | 0,355 | 0      |
| 14 | Q9UPY3 DICER_HUMAN | K.KISLS#PFSTTDSAYE.W         | S1460: | 2 | 2,7473 | 0,344 | -0,353 |
| 14 | O94903 PROSC_HUMAN | R.IGS#TIFGERD.Y              | S244:  | 2 | 2,7468 | 0,426 | -0,519 |
| 14 | Q9NP64 NO40_HUMAN  | R.RS#FQDYTGQK.I              | S114:  | 2 | 2,7468 | 0,405 | 0,186  |
| 14 | Q8IYW5 RN168_HUMAN | E.GSISAS#PLNSR.K             | S197:  | 2 | 2,7462 | 0,204 | 0,417  |
| 14 | P55072 TERA_HUMAN  | E.DNSVVLSQPK.M               |        | 2 | 2,7443 | 0,238 | -0,312 |
| 14 | P05161 UCRP_HUMAN  | E.GKPLEDQLPLGE.Y             |        | 2 | 2,7439 | 0,329 | 0      |
| 14 | P62917 RL8_HUMAN   | R.AVVGVVAGGGR.I              |        | 2 | 2,7439 | 0,456 | -0,065 |
| 14 | P31948 STIP1_HUMAN | E.FQLALKDCEE.C               |        | 2 | 2,7437 | 0,248 | 0,097  |
| 14 | Q16204 CCDC6_HUMAN | E.KLDQPVSAPPS#PR.D           | S244:  | 3 | 2,7426 | 0,211 | -0,373 |
| 14 | Q9Y5L4 TIM13_HUMAN | K.VQIAVANAQE.L               |        | 2 | 2,742  | 0,231 | -0,117 |
| 14 | Q5JSZ5 K0515_HUMAN | R.SS#PYGTLKPEE.M             | S997:  | 2 | 2,7416 | 0,297 | -0,379 |
| 14 | P62495 ERF1_HUMAN  | E.KILYLTPQE.K                |        | 2 | 2,7409 | 0,285 | 0      |
| 14 | Q9Y2X7 GIT1_HUMAN  | R.LQPFHS#TELE.D              | S536:  | 2 | 2,7405 | 0,296 | 0      |
| 14 | Q58FF8 H90B2_HUMAN | K.SIYYITGESK.E               |        | 2 | 2,7386 | 0,293 | -0,105 |
| 14 | Q6P2E9 EDC4_HUMAN  | E.VEPLGLPQAS#PSR.T           | S723:  | 2 | 2,7381 | 0,437 | 0,085  |
| 14 | P49321 NASP_HUMAN  | E.AESLDPTVKPVDVGGDEPEEK.V    |        | 3 | 2,7378 | 0,24  | -0,745 |
| 14 | Q5JTD0 TJAP1_HUMAN | E.CHSLGTARGS#PEEELPLPAFE.K   | S300:  | 3 | 2,7363 | 0,24  | -0,231 |
| 14 | Q9BZ95 NSD3_HUMAN  | R.GLSDLQVGFQK.Q              |        | 2 | 2,7358 | 0,517 | 0,218  |
| 14 | Q15311 RBP1_HUMAN  | E.IASLS#KEDVSKEE.M           | S463:  | 3 | 2,7357 | 0,16  | 0      |
| 14 | P31949 S10AB_HUMAN | K.LDTNSDGQLDFSE.F            |        | 2 | 2,7346 | 0,102 | 0,339  |
| 14 | Q02952 AKA12_HUMAN | E.GSIDTGITVSR.E              |        | 2 | 2,7336 | 0,336 | 0,221  |
| 14 | Q9UBT2 SAE2_HUMAN  | E.KFAM*VAPDVQIE.D            |        | 2 | 2,7316 | 0,316 | -0,447 |
| 14 | O43396 TXNL1_HUMAN | K.GYM*DLM*PFINK.A            |        | 2 | 2,7303 | 0,363 | -0,269 |
| 14 | P10809 CH60_HUMAN  | K.LSDGVAVLK.V                |        | 2 | 2,7301 | 0,281 | -0,068 |

|    |                     |                                          |            |   |        |       |        |
|----|---------------------|------------------------------------------|------------|---|--------|-------|--------|
| 14 | Q9Y5L4 TIM13_HUMAN  | E.QVKVQIAVANAQE.L                        |            | 2 | 2,7288 | 0,316 | -0,262 |
| 14 | Q99638 RAD9A_HUMAN  | D.GHFVLATLSDTDSHSQDLGS#PE.R              | S277:      | 3 | 2,728  | 0,202 | 0,076  |
| 14 | O94986 CE152_HUMAN  | K.LGIHPSDS#EGELNIE.L                     | S404:      | 2 | 2,7279 | 0,29  | -0,144 |
| 14 | Q15311 RBP1_HUMAN   | E.IASLS#KEDVSKEE.M                       | S463:      | 2 | 2,7278 | 0,272 | -0,242 |
| 14 | P08779 K1C16_HUMAN  | R.DAETWFLSK.T                            |            | 2 | 2,7247 | 0,339 | 0      |
| 14 | P17252 KPCA_HUMAN   | E.HM*M*DGVTTRT#FCGTPDYIAPE.I             | T497:      | 3 | 2,724  | 0,149 | 0,291  |
| 14 | P05362 ICAM1_HUMAN  | E.LDLRPQGLE.L                            |            | 2 | 2,7208 | 0,277 | -0,117 |
| 14 | Q8NI08 NCOA7_HUMAN  | E.CLS#LDPEER.K                           | S441:      | 2 | 2,7198 | 0,184 | 0      |
| 14 | O00273 DFFA_HUMAN   | E.VDAVDTGISRE.T                          |            | 2 | 2,7185 | 0,321 | -0,21  |
| 14 | Q13416 ORC2_HUMAN   | K.SVS#FSLKNDPE.I                         | S122:      | 2 | 2,7139 | 0,306 | 0,094  |
| 14 | Q9Y4L1 HYOU1_HUMAN  | E.SGVLSLDRVE.S                           |            | 2 | 2,7136 | 0,243 | -0,113 |
| 14 | P31948 STIP1_HUMAN  | E.RLAYINPDLALEE.K                        |            | 2 | 2,713  | 0,327 | -0,643 |
| 14 | P98179 RBM3_HUMAN   | E.DHFSSFGPISE.V                          |            | 2 | 2,7123 | 0,437 | -0,1   |
| 14 | Q13185 CBX3_HUMAN   | E.ADLVLAKE.A                             |            | 2 | 2,712  | 0,104 | 0,213  |
| 14 | Q9NRL2 BAZ1A_HUMAN  | R.NSTADIS#IGEEERE.D                      | S702:      | 2 | 2,711  | 0,327 | 0,15   |
| 14 | P31946 1433B_HUMAN  | K.DSTLIM*QLLR.D                          |            | 2 | 2,7082 | 0,117 | -0,607 |
| 14 | P53621 COPA_HUMAN   | E.GLGDDALGKGQEE.G                        |            | 2 | 2,7067 | 0,341 | -0,379 |
| 14 | Q5T4S7 UBR4_HUMAN   | E.GHPAGPGSVSSSTGAISTTTGHQEGDGS#EGEGEGE.T | S2952:     | 3 | 2,7052 | 0,177 | 0,332  |
| 14 | Q9H0R6 QRSL1_HUMAN  | E.KQVQFPVIQLQE.L                         |            | 2 | 2,704  | 0,104 | -0,335 |
| 14 | P08670 VIME_HUMAN   | R.QDVDNAS#LAR.L                          | S214:      | 2 | 2,7038 | 0,149 | -0,209 |
| 14 | P04075 ALDOA_HUMAN  | R.ALANSLACQGK.Y                          |            | 2 | 2,7017 | 0,235 | -0,108 |
| 14 | Q14669 TRIPC_HUMAN  | K.AQQLLQGLQASDE.S                        |            | 2 | 2,7011 | 0,275 | 0,348  |
| 14 | Q9UQ35 SRRM2_HUMAN  | E.KSATRPS#PS#PER.S                       | S351:S353: | 3 | 2,7004 | 0,143 | -0,807 |
| 14 | Q13596 SNX1_HUMAN   | K.ITTSLLPINNGSKE.N                       |            | 2 | 2,6988 | 0,373 | -0,41  |
| 14 | Q06830 PRDX1_HUMAN  | E.IIAFSDRAEE.F                           |            | 2 | 2,6984 | 0,207 | -0,318 |
| 14 | Q7Z2W4 ZCCHV_HUMAN  | R.SCT#PS#PDQISHR.A                       | T273:S275: | 3 | 2,6963 | 0,232 | 0      |
| 14 | P09972 ALDOC_HUMAN  | K.RLS#QIGVENTEE.N                        | S45:       | 2 | 2,6959 | 0,269 | -0,168 |
| 14 | P13010 KU86_HUMAN   | E.ASNQLINHIE.Q                           |            | 2 | 2,6947 | 0,3   | -0,107 |
| 14 | Q99959 PKP2_HUMAN   | E.NDFVGGRS#PVPK.T                        | S102:      | 2 | 2,6942 | 0,32  | -0,271 |
| 14 | P16333 NCK1_HUMAN   | E.GDFLIRDSE.S                            |            | 2 | 2,6935 | 0,219 | 0,116  |
| 14 | Q8TDY2 RBCC1_HUMAN  | E.CLGRIDS#LPEHEDSE.K                     | S222:      | 2 | 2,6929 | 0,34  | -0,93  |
| 14 | Q8NBS9 TXND5_HUMAN  | E.ADKGTVALTE.N                           |            | 2 | 2,6904 | 0,432 | 0,109  |
| 14 | Q59G85 Q59G85_HUMAN | K.GGGPVTLQDYR.L                          |            | 2 | 2,6898 | 0,374 | 0,21   |
| 14 | P08670 VIME_HUMAN   | E.AANYQDTIGR.L                           |            | 2 | 2,689  | 0,161 | -0,33  |
| 14 | Q6NXE6 ARMC6_HUMAN  | E.SQGVDSLNIK.T                           |            | 2 | 2,6889 | 0,304 | 0      |
| 14 | Q8WUD4 CCD12_HUMAN  | R.LKGQEDSLASAVDAATE.Q                    |            | 2 | 2,686  | 0,337 | -0,501 |
| 14 | P14866 HNRPL_HUMAN  | E.DGSCSYKDFSE.S                          |            | 2 | 2,6842 | 0,251 | -0,188 |
| 14 | P09493 TPM1_HUMAN   | R.LATALQKLE.E                            |            | 2 | 2,6833 | 0,118 | -0,062 |
| 14 | P08107 HSP71_HUMAN  | D.ANTLAEKDEFE.H                          |            | 2 | 2,6812 | 0,307 | -0,289 |



|    |                    |                              |              |   |        |       |        |
|----|--------------------|------------------------------|--------------|---|--------|-------|--------|
| 14 | P08243 ASNS_HUMAN  | E.DSNLIPKE.I                 |              | 2 | 2,6805 | 0,272 | 0,4    |
| 14 | P62805 H4_HUMAN    | K.VFLENVIR.D                 |              | 2 | 2,6781 | 0,133 | -0,123 |
| 14 | O15061 DMN_HUMAN   | K.GLQT#PVKDAGGGTGR.E         | T598:        | 2 | 2,6776 | 0,408 | -0,245 |
| 14 | P04264 K2C1_HUMAN  | K.SKAEAESLYQSK.Y             |              | 2 | 2,6768 | 0,402 | -0,364 |
| 14 | Q15819 UB2V2_HUMAN | K.LPQPPEGQTYNN.-             |              | 2 | 2,6733 | 0,375 | -0,18  |
| 14 | Q9ULR0 ISY1_HUMAN  | K.FIAHVPVPSQQE.I             |              | 2 | 2,6716 | 0,359 | 0,09   |
| 14 | P21980 TGM2_HUMAN  | K.TVEIPDPVEAGEE.V            |              | 2 | 2,6714 | 0,259 | 0,176  |
| 14 | Q86UP2 KTN1_HUMAN  | E.LDSLKDAVE.H                |              | 2 | 2,6702 | 0,206 | -0,246 |
| 14 | P14314 GLU2B_HUMAN | E.LAADAFKE.L                 |              | 2 | 2,6655 | 0,125 | 0,282  |
| 14 | P61160 ARP2_HUMAN  | E.KLCYVGYNIEQE.Q             |              | 2 | 2,663  | 0,289 | -0,08  |
| 14 | Q92526 TCPW_HUMAN  | E.VNS#GFFYK.T                | S246:        | 2 | 2,6613 | 0,298 | -0,117 |
| 14 | Q8IZS6 TC1D3_HUMAN | R.KERRPS#MFEKE.A             | S34:         | 2 | 2,66   | 0,162 | 0,483  |
| 14 | O43396 TXNL1_HUMAN | E.NDPGSNEDTDIPK.G            |              | 2 | 2,6586 | 0,14  | 0,435  |
| 14 | P46821 MAP1B_HUMAN | E.VVEEHCAS#PEDKTLE.V         | S1312:       | 2 | 2,6583 | 0,407 | -0,201 |
| 14 | P49023 PAXI_HUMAN  | R.ISASS#ATRE.L               | S261:        | 2 | 2,6576 | 0,294 | 0,852  |
| 14 | P48637 GSHB_HUMAN  | E.QTLSSTIKQDD.F              |              | 2 | 2,6574 | 0,43  | -0,395 |
| 14 | P27708 PYR1_HUMAN  | E.ATAGNPGGQTVRE.R            |              | 2 | 2,6535 | 0,33  | 0      |
| 14 | P68104 EF1A1_HUMAN | E.S#FSDYPPPLGR.F             | S414:        | 2 | 2,6518 | 0,373 | 0,3    |
| 14 | Q9BPX3 CND3_HUMAN  | E.NCITLQDFNR.A               |              | 2 | 2,6487 | 0,329 | 0      |
| 14 | Q9UBT2 SAE2_HUMAN  | E.FEVVGDAPEK.V               |              | 2 | 2,6483 | 0,338 | -0,336 |
| 14 | Q9Y618 NCOR2_HUMAN | E.AAKPPEPEKPV#PPPIE.S        | S215:        | 2 | 2,6453 | 0,361 | 0,131  |
| 14 | Q9UKA4 AKA11_HUMAN | R.S#LSEEVESSE.S              | S1169:       | 2 | 2,6453 | 0,15  | 0,208  |
| 14 | Q9UNI6 DUS12_HUMAN | K.ILPVLGS#QTGKI.-            | S335:        | 2 | 2,6445 | 0,214 | -0,28  |
| 14 | Q6NZI2 PTRF_HUMAN  | E.SDAVLVDKSDSD.-             |              | 2 | 2,6404 | 0,386 | -0,293 |
| 14 | P04264 K2C1_HUMAN  | R.TNAENEFVTIKK.D             |              | 2 | 2,6401 | 0,263 | -0,35  |
| 14 | Q9Y618 NCOR2_HUMAN | E.AAKPPEPEKPV#PPPIE.S        | S215:        | 3 | 2,64   | 0,258 | 0,196  |
| 14 | Q9UGP4 LIMD1_HUMAN | R.TPSVSAPLALSCPR.Q           |              | 2 | 2,6391 | 0,476 | -0,168 |
| 14 | Q9GZM8 NDEL1_HUMAN | E.KM*DSAVQASLS#LPATPVGK.G    | S215:        | 3 | 2,6385 | 0,275 | 0,092  |
| 14 | O95359 TACC2_HUMAN | K.TPS#S#PSKSPASFE.I          | S2389:S2390: | 2 | 2,6362 | 1     | -0,741 |
| 14 | Q13813 SPTA2_HUMAN | E.SQTLQQFSR.D                |              | 2 | 2,6356 | 0,335 | -0,446 |
| 14 | Q2NL82 TSR1_HUMAN  | E.LS#EAKDFLKE.S              | S377:        | 3 | 2,6343 | 0,289 | 0,363  |
| 14 | Q01433 AMPD2_HUMAN | E.NHVFNLESPLPE.A             |              | 2 | 2,6335 | 0,335 | -0,087 |
| 14 | Q9H5V8 CDCP1_HUMAN | K.LATEEPPRS#PPPE.S           | S797:        | 2 | 2,6332 | 0,369 | -0,427 |
| 14 | P13639 EF2_HUMAN   | K.STLTDLSVCK.A               |              | 2 | 2,6288 | 0,335 | 0,109  |
| 14 | P68104 EF1A1_HUMAN | K.IGGIGTVPVGR.V              |              | 2 | 2,6255 | 0,202 | 0,119  |
| 14 | Q9UKV3 ACINU_HUMAN | E.ASS#PPHPQLHSEEE.I          | S425:        | 2 | 2,6239 | 0,421 | -0,354 |
| 14 | Q14764 MVP_HUMAN   | E.KSFFLQPGEQLE.Q             |              | 2 | 2,6236 | 0,247 | 0      |
| 14 | P27816 MAP4_HUMAN  | K.GISEDS#HLE.S               | S605:        | 2 | 2,6234 | 0,316 | -0,114 |
| 14 | O95425 SVIL_HUMAN  | E.TSGVHGDSPLYGSGTM*DTHS#LE.S | S97:         | 3 | 2,6231 | 0,204 | -0,164 |

|    |                    |                                        |       |   |        |       |        |
|----|--------------------|----------------------------------------|-------|---|--------|-------|--------|
| 14 | Q9BPX3 CND3_HUMAN  | E.LLVDLTRPSGLNPQAK.T                   |       | 3 | 2,6209 | 0,159 | -0,106 |
| 14 | P39687 AN32A_HUMAN | E.VTNLNDYRE.N                          |       | 2 | 2,6194 | 0,224 | 0,217  |
| 14 | A8MW92 P20LX_HUMAN | E.SGDSSGCICKPKS#PLSPE.L                | S372: | 3 | 2,6189 | 0,248 | -0,19  |
| 14 | P08648 ITA5_HUMAN  | E.GQQLLYVTR.V                          |       | 2 | 2,6164 | 0,338 | -0,34  |
| 14 | P15374 UCHL3_HUMAN | E.TSAHEGQTEAPSIDE.K                    |       | 2 | 2,6145 | 0,353 | -0,388 |
| 14 | Q13765 NACA_HUMAN  | E.TGVEVKDIE.L                          |       | 2 | 2,6144 | 0,206 | -0,678 |
| 14 | Q8NEM2 SHCBP_HUMAN | R.DKPGSSLQSFM*PE.G                     |       | 2 | 2,6123 | 0,277 | -0,085 |
| 14 | P04792 HSPB1_HUMAN | E.SPAVAAPAYS.R                         |       | 2 | 2,6118 | 0,394 | -0,784 |
| 14 | Q96D46 NMD3_HUMAN  | E.DLHISQDATGEE.G                       |       | 2 | 2,611  | 0,34  | -0,65  |
| 14 | Q9UQ35 SRRM2_HUMAN | R.SSTGPEPPAPTLLAE.R                    |       | 2 | 2,6106 | 0,178 | 0,468  |
| 14 | P13473 LAMP2_HUMAN | E.DKGILTVDE.L                          |       | 2 | 2,6098 | 0,158 | 0,123  |
| 14 | Q9Y5Y5 PEX16_HUMAN | E.TQAQPPDGDHS#PGNHE.Q                  | S158: | 3 | 2,6081 | 0,207 | -0,311 |
| 14 | Q9BX68 HINT2_HUMAN | E.DQQLVFRD.V                           |       | 2 | 2,6074 | 0,15  | 0      |
| 14 | Q9Y4I5 MTL5_HUMAN  | E.AQIM*CSSICK.C                        |       | 2 | 2,6071 | 0,393 | 0      |
| 14 | Q9UHY7 ENOPH_HUMAN | E.KTYYSLITSFSE.L                       |       | 2 | 2,607  | 0,236 | -0,339 |
| 14 | P48634 BAT2_HUMAN  | E.ALTTVTVAPAPR.R                       |       | 2 | 2,6062 | 0,411 | -0,204 |
| 14 | Q9GZZ9 UBA5_HUMAN  | E.LKNFSGPVPDLPE.G                      |       | 2 | 2,6033 | 0,306 | 0      |
| 14 | P42704 LPPRC_HUMAN | E.DALNLKEE.F                           |       | 2 | 2,603  | 0,153 | -0,327 |
| 14 | P62333 PRS10_HUMAN | E.IGGLSEQIRE.L                         |       | 2 | 2,5988 | 0,279 | 0,221  |
| 14 | Q8IYB3 SRRM1_HUMAN | E.KAVAAAAAAVTPAAIAAATTTLAQEEPVAAPEPK.K |       | 3 | 2,5985 | 0,161 | 0,451  |
| 14 | Q00169 PIPNA_HUMAN | R.VILPVSVDY                            |       | 2 | 2,5959 | 0,306 | 0      |
| 14 | P14923 PLAK_HUMAN  | R.VSVELTNSLFK.H                        |       | 2 | 2,5946 | 0,295 | -0,197 |
| 14 | Q12904 MCA1_HUMAN  | R.ITFDAFPGEPEL                         |       | 2 | 2,5916 | 0,451 | -0,499 |
| 14 | P63151 2ABA_HUMAN  | E.NDCIFDKFE.C                          |       | 2 | 2,591  | 0,298 | -0,205 |
| 14 | P02794 FRIH_HUMAN  | E.SGLAEYLFDK.H                         |       | 2 | 2,5898 | 0,338 | -0,213 |
| 14 | P49736 MCM2_HUMAN  | R.GNDPLTSS#PGR.S                       | S27:  | 2 | 2,5896 | 0,308 | 0      |
| 14 | P31939 PUR9_HUMAN  | K.HVSPAGAAVGIPLSEDE.A                  |       | 2 | 2,5873 | 0,432 | -0,074 |
| 14 | Q9NWS0 PIHD1_HUMAN | E.DKYNLQLNPE.W                         |       | 2 | 2,5871 | 0,214 | 0      |
| 14 | P15924 DESP_HUMAN  | E.SVSKISTISSVR.N                       |       | 3 | 2,5859 | 0,36  | 0,072  |
| 14 | O14964 HGS_HUMAN   | E.ARKSPT#PSAPVPLTEPAAQPGE.G            | T347: | 3 | 2,5853 | 0,216 | 0,722  |
| 14 | P00709 LALBA_HUMAN | D.KFLDDDITDD.I                         |       | 2 | 2,584  | 0,359 | -0,714 |
| 14 | Q15185 TEBP_HUMAN  | D.SKDVNVNFE.K                          |       | 2 | 2,5837 | 0,223 | -0,232 |
| 14 | P19338 NUCL_HUMAN  | E.FASFEDAKE.A                          |       | 2 | 2,5833 | 0,212 | 0      |
| 14 | Q96JM3 ZN828_HUMAN | R.NVLQFTEE.K                           |       | 2 | 2,5811 | 0,248 | -0,062 |
| 14 | P16403 H12_HUMAN   | R.SGVSLAALK.K                          |       | 2 | 2,58   | 0,272 | 0,288  |
| 14 | Q9NV88 INT9_HUMAN  | E.DSTHIICDNDE.M                        |       | 2 | 2,5782 | 0,291 | -0,278 |
| 14 | O60841 IF2P_HUMAN  | E.GNTVHIEVK.E                          |       | 2 | 2,5778 | 0,298 | 0,122  |
| 14 | Q00613 HSF1_HUMAN  | E.SEPAPASVTALTDAR.G                    |       | 2 | 2,5778 | 0,432 | -0,411 |
| 14 | Q15942 ZYX_HUMAN   | R.EKVSS#IDLE.I                         | S143: | 2 | 2,5758 | 0,181 | 0      |

|    |                    |                            |            |   |        |       |        |
|----|--------------------|----------------------------|------------|---|--------|-------|--------|
| 14 | P42345 FRAP_HUMAN  | E.STENS#PTPSPLQK.K         | S1859:     | 2 | 2,5705 | 0,214 | -0,666 |
| 14 | Q8N1G2 K0082_HUMAN | E.LALSLSSTSDDEPPSSVSHGAK.A |            | 3 | 2,5704 | 0,148 | -0,251 |
| 14 | O75376 NCOR1_HUMAN | K.ADSVDVEVRVPE.N           |            | 2 | 2,5666 | 0,354 | -0,186 |
| 14 | Q86TB9 PATL1_HUMAN | R.RSTS#PIIGS#PPVR.A        | S179:S184: | 2 | 2,5657 | 0,356 | 0,32   |
| 14 | Q9Y265 RUVB1_HUMAN | K.QAASGLVGQE.N             |            | 2 | 2,5656 | 0,202 | 0,064  |
| 14 | Q14247 SRC8_HUMAN  | K.T#QTPPVSPAPQPTEE.R       | T399:      | 2 | 2,5633 | 0,331 | 0      |
| 14 | P46821 MAP1B_HUMAN | E.SFLSADDKASGR.G           |            | 2 | 2,5601 | 0,373 | -0,486 |
| 14 | O94864 ST65G_HUMAN | K.NPNAPFQIR.H              |            | 2 | 2,5585 | 0,353 | 0,115  |
| 14 | P37802 TAGL2_HUMAN | E.GKNVIGLQM*GTNR.G         |            | 3 | 2,5581 | 0,176 | 0,195  |
| 14 | Q5T3I0 GPTC4_HUMAN | E.EDILDVRDE.K              |            | 2 | 2,5579 | 0,201 | -0,111 |
| 14 | P62699 YPEL5_HUMAN | E.SEGFEEHVPSDNS.-          |            | 2 | 2,5577 | 0,338 | -0,085 |
| 14 | Q96GQ7 DDX27_HUMAN | E.KDVYAVLQLE.A             |            | 2 | 2,5562 | 0,125 | -0,104 |
| 14 | Q9NQW6 ANLN_HUMAN  | K.SCSPSPVS#PQVQPQAADTISD.S | S102:      | 2 | 2,5555 | 0,251 | 0,542  |
| 14 | P61960 UFM1_HUMAN  | E.FKVPAATSAIITND.G         |            | 2 | 2,5537 | 0,233 | 0,169  |
| 14 | P11021 GRP78_HUMAN | E.KNILVFDLGGGTFD.V         |            | 2 | 2,5532 | 0,278 | -0,163 |
| 14 | P42166 LAP2A_HUMAN | R.NRPPLPAGTNSK.G           |            | 3 | 2,5531 | 0,382 | 0,365  |
| 14 | Q9Y608 LRRF2_HUMAN | R.NSASATTPLS#GNSSR.R       | S320:      | 2 | 2,553  | 0,252 | -0,319 |
| 14 | Q9UHV9 PFD2_HUMAN  | E.HS#LVIDTLKEVDE.T         | S55:       | 2 | 2,5518 | 0,393 | 0,077  |
| 14 | P19105 MLRM_HUMAN  | K.GNFNYIEFTR.I             |            | 2 | 2,5516 | 0,28  | -0,194 |
| 14 | Q04637 IF4G1_HUMAN | R.FSALQQAVPTTESTDNRR.V     |            | 3 | 2,5516 | 0,115 | -0,191 |
| 14 | P60709 ACTB_HUMAN  | R.GYSFTTTAER.E             |            | 2 | 2,5502 | 0,427 | -0,215 |
| 14 | P38646 GRP75_HUMAN | K.STNGDFTLGGEDFD.Q         |            | 2 | 2,5501 | 0,335 | 0,165  |
| 14 | P62826 RAN_HUMAN   | K.NLQYYDISAK.S             |            | 2 | 2,5482 | 0,382 | -0,603 |
| 14 | P13667 PDIA4_HUMAN | E.KYGIVDYM*IE.Q            |            | 2 | 2,5459 | 0,31  | 0,098  |
| 14 | P26639 SYTC_HUMAN  | E.M*YNILKAE.H              |            | 2 | 2,5442 | 0,138 | 0,122  |
| 14 | Q9BTT0 AN32E_HUMAN | E.ITNLEDYRE.S              |            | 2 | 2,5438 | 0,329 | 0,635  |
| 14 | P61978 HNRPK_HUMAN | E.NTQTTIKLFQE.C            |            | 2 | 2,5423 | 0,361 | -0,092 |
| 14 | Q4G148 GL8D3_HUMAN | R.SLLKPLELE.L              |            | 2 | 2,542  | 0,225 | 0      |
| 14 | O75145 LIPA3_HUMAN | R.GEGPAIPGDT#PPPT#PR.S     | T714:T718: | 2 | 2,5378 | 0,312 | -0,213 |
| 14 | P17987 TCPA_HUMAN  | E.DAVHSGALND.-             |            | 2 | 2,5365 | 0,411 | -0,55  |
| 14 | P49368 TCPG_HUMAN  | E.TGTLVDM*KE.L             |            | 2 | 2,5354 | 0,327 | 0,181  |
| 14 | Q9UN86 G3BP2_HUMAN | E.AHPVTNGIEEPLLEE.S        |            | 2 | 2,535  | 0,363 | -0,079 |
| 14 | P14618 KPYM_HUMAN  | R.VNFAM*NVGK.A             |            | 2 | 2,5347 | 0,376 | 0,184  |
| 14 | Q9UK76 HN1_HUMAN   | R.RNSS#EASSGDFLDLKG.E      | S88:       | 3 | 2,5341 | 0,118 | 0,193  |
| 14 | P00558 PGK1_HUMAN  | K.VLPGVDALSNI.-            |            | 2 | 2,5334 | 0,369 | -0,222 |
| 14 | Q99666 RGPD5_HUMAN | E.DRNSLLNM*ICQQVE.A        |            | 2 | 2,5332 | 0,325 | -0,211 |
| 14 | O95202 LETM1_HUMAN | E.DVHISTSQVAE.I            |            | 2 | 2,5313 | 0,373 | -0,206 |
| 14 | Q86UU0 BCL9L_HUMAN | R.GLLS#PPM*GQSGLRE.V       | S750:      | 2 | 2,5311 | 0,199 | -0,238 |
| 14 | Q86UP2 KTN1_HUMAN  | K.TQLLQDVQDE.N             |            | 2 | 2,5296 | 0,268 | 0,103  |

|    |                     |                             |            |   |        |       |        |
|----|---------------------|-----------------------------|------------|---|--------|-------|--------|
| 14 | Q9NWH9 SLTM_HUMAN   | E.VSKPLPS#EGS#LAEADHTAHEE.M | S214:S217: | 3 | 2,5287 | 0,23  | 0,077  |
| 14 | Q10713 MPPA_HUMAN   | E.RDM*SNVSLGPTPIPE.L        |            | 2 | 2,5257 | 0,205 | 0      |
| 14 | Q8WYB5 MYST4_HUMAN  | E.TSEGKT#SPSPIRIEEE.V       | T1300:     | 2 | 2,5253 | 0,262 | 0      |
| 14 | P46821 MAP1B_HUMAN  | K.TT#SPPEVSGYSYE.K          | T1964:     | 2 | 2,5249 | 0,302 | 0      |
| 14 | O75691 UTP20_HUMAN  | K.SLSDNGQPGT#PDPADSGGTSAK.E | T1741:     | 3 | 2,5241 | 0,198 | 0,086  |
| 14 | P62829 RL23_HUMAN   | E.DNAGVIVNNK.G              |            | 2 | 2,5237 | 0,29  | 0      |
| 14 | P35249 RFC4_HUMAN   | E.AVVKDLIDE.G               |            | 2 | 2,5229 | 0,147 | -0,67  |
| 14 | P20700 LMNB1_HUMAN  | R.LKLS#PS#PSSR.V            | S391:S393: | 2 | 2,5228 | 0,159 | -0,099 |
| 14 | P35658 NU214_HUMAN  | K.SPRIT#PPAAKPGS#PQAK.S     | T670:S678: | 3 | 2,5197 | 0,15  | -0,295 |
| 14 | P09493 TPM1_HUMAN   | R.LATALQKLEE.A              |            | 2 | 2,5187 | 0,247 | -0,328 |
| 14 | P06576 ATPB_HUMAN   | E.TIKGFQQILAGE.Y            |            | 2 | 2,5183 | 0,271 | -0,467 |
| 14 | Q9NQW6 ANLN_HUMAN   | E.DVTSKLDE.K                |            | 2 | 2,5181 | 0,167 | 0,135  |
| 14 | Q02952 AKA12_HUMAN  | K.SPSS#PVERE.M              | S1331:     | 2 | 2,5178 | 0,223 | -0,226 |
| 14 | Q8N3C0 HELC1_HUMAN  | E.EKPVYIQLDE.I              |            | 2 | 2,5126 | 0,265 | -0,09  |
| 14 | Q5VZ89 DEN4C_HUMAN  | R.STS#LSALVR.S              | S1089:     | 2 | 2,5126 | 0,283 | 0,18   |
| 14 | Q9NPI6 DCP1A_HUMAN  | R.KASSPS#PLTIGTPE.S         | S525:      | 2 | 2,5118 | 0,276 | -0,167 |
| 14 | P0C0S8 H2A1_HUMAN   | R.AGLQFPVGR.V               |            | 2 | 2,5117 | 0,301 | 0,065  |
| 14 | P30153 2AAA_HUMAN   | E.VRLNIISNLDCVNE.V          |            | 2 | 2,5096 | 0,312 | -0,441 |
| 14 | P26368 U2AF2_HUMAN  | E.IVEDVRDE.C                |            | 2 | 2,5068 | 0,271 | 0      |
| 14 | P06733 ENOA_HUMAN   | R.GNPTVEVDLFTSK.G           |            | 2 | 2,5062 | 0,273 | 0,087  |
| 14 | Q13242 SFRS9_HUMAN  | R.GS#PHYFS#PFRPY.-          | S211:S216: | 2 | 2,5016 | 0,328 | -0,151 |
| 14 | Q9UBF2 COPG2_HUMAN  | E.VGDTFEKEE.T               |            | 2 | 2,5014 | 0,254 | -0,232 |
| 14 | Q9Y3T9 NOC2L_HUMAN  | R.GILRPLSTR.H               |            | 2 | 2,4997 | 0,284 | -0,06  |
| 14 | Q16204 CCDC6_HUMAN  | E.KLDQPV#APPSPR.D           | S240:      | 3 | 2,4988 | 0,116 | 0,311  |
| 14 | Q5H9R7 SAPS3_HUMAN  | E.FTSSLSTKDSLRSNS#PVEM*E.T  | S740:      | 3 | 2,4982 | 0,139 | 0      |
| 14 | Q02952 AKA12_HUMAN  | E.IVEIHEENE.V               |            | 2 | 2,4957 | 0,179 | -0,439 |
| 14 | A0JLS5 A0JLS5_HUMAN | E.LDNLLHE.K                 |            | 2 | 2,4955 | 0,181 | 0,214  |
| 14 | P27816 MAP4_HUMAN   | E.EGRPVSSTGNDITPPNK.E       |            | 3 | 2,4947 | 0,116 | 0      |
| 14 | Q6NZI2 PTRF_HUMAN   | E.LGEGERPEED.A              |            | 2 | 2,4943 | 0,296 | 0      |
| 14 | O43396 TXNL1_HUMAN  | E.LTEDDIKE.D                |            | 2 | 2,4938 | 0,226 | 0,317  |
| 14 | P49419 AL7A1_HUMAN  | E.KIQVLGSLVLE.M             |            | 2 | 2,4931 | 0,17  | -0,285 |
| 14 | P39023 RL3_HUMAN    | E.RLEQQVPVNQVFGQDE.M        |            | 3 | 2,4928 | 0,092 | 0,194  |
| 14 | Q13613 MTMR1_HUMAN  | R.GSS#PSHSATSVHTSV.-        | S653:      | 3 | 2,4926 | 0,346 | -0,06  |
| 14 | P27816 MAP4_HUMAN   | E.GRPVVSSTGNDITPPNK.E       |            | 2 | 2,4922 | 0,25  | -0,472 |
| 14 | A6NK10 A6NK10_HUMAN | E.DQNLLLLNE.L               |            | 2 | 2,4918 | 0,114 | 0      |
| 14 | O94804 STK10_HUMAN  | K.ASQS#RPNSSALE.T           | S450:      | 2 | 2,4898 | 0,39  | -0,184 |
| 14 | Q9UGP4 LIMD1_HUMAN  | E.NGAPAVGPVQPR.T            |            | 2 | 2,4877 | 0,435 | -0,315 |
| 14 | Q53GS9 SNUT2_HUMAN  | R.EAPASVVPFVR.V             |            | 2 | 2,4856 | 0,339 | -0,104 |
| 14 | O95235 KI20A_HUMAN  | E.DKQQVPSSEDSM*E.K          |            | 2 | 2,4855 | 0,444 | -0,087 |

|    |                     |                             |            |   |        |       |        |
|----|---------------------|-----------------------------|------------|---|--------|-------|--------|
| 14 | O43290 SNUT1_HUMAN  | E.KEPVPQPLPSDDTR.V          |            | 3 | 2,4853 | 0,172 | -0,232 |
| 14 | P20248 CCNA2_HUMAN  | E.DEKPVSVNE.V               |            | 2 | 2,4841 | 0,21  | -0,42  |
| 14 | Q8NAP3 ZBT38_HUMAN  | R.SPQPAAVLTR.S              |            | 2 | 2,4839 | 0,365 | -0,469 |
| 14 | P63096 GNAI1_HUMAN  | E.VKLLLLGAGE.S              |            | 2 | 2,4836 | 0,207 | 0      |
| 14 | Q9UMZ2 SYNG_HUMAN   | K.ISKFDFLVATSQSK.M          |            | 2 | 2,4817 | 0,28  | 0,155  |
| 14 | Q8WYP5 AHTF1_HUMAN  | E.NLLDVIKD.T                |            | 2 | 2,4816 | 0,163 | 0,197  |
| 14 | P02533 K1C14_HUMAN  | K.DAEWFVFTK.T               |            | 2 | 2,481  | 0,282 | -0,312 |
| 14 | P32004 L1CAM_HUMAN  | E.DGS#FIGQYSGKKE.K          | S1224:     | 2 | 2,4786 | 0,307 | 0      |
| 14 | Q9H4H8 FA83D_HUMAN  | E.SSTVS#EEDYFSSHRDE.L       | S369:      | 2 | 2,4748 | 0,406 | -0,062 |
| 14 | Q96TA1 NIBL1_HUMAN  | K.AVDLGPCKPSDQE.T           |            | 2 | 2,4744 | 0,349 | -0,09  |
| 14 | A8MW92 P20LX_HUMAN  | E.SGDSSGCIPPKS#PLSPE.L      | S372:      | 2 | 2,4739 | 0,15  | 0      |
| 14 | Q9NWB6 ARGL1_HUMAN  | E.IEEKLIEEE.T               |            | 2 | 2,473  | 0,123 | -0,216 |
| 14 | Q8TDN6 BXDC2_HUMAN  | K.DKLFVINE.V                |            | 2 | 2,473  | 0,09  | -0,062 |
| 14 | O43166 SI1L1_HUMAN  | E.LDVDS#FDECIS#PTYK.T       | S187:S193: | 2 | 2,4728 | 0,189 | 0,438  |
| 14 | Q7Z2W4 ZCCHV_HUMAN  | R.SCTPS#PDQISHR.A           | S275:      | 2 | 2,4713 | 0,17  | 0,5    |
| 14 | Q02952 AKA12_HUMAN  | E.VALKGEGTEAE.C             |            | 2 | 2,4706 | 0,329 | -0,198 |
| 14 | O75351 VPS4B_HUMAN  | E.NKPSIIFIDE.I              |            | 2 | 2,469  | 0,122 | -0,104 |
| 14 | O43615 TIM44_HUMAN  | E.NNVVFNRRFE.M              |            | 2 | 2,469  | 0,276 | -0,379 |
| 14 | P19338 NUCL_HUMAN   | R.SISLYYTGEK.G              |            | 2 | 2,4675 | 0,24  | 0,105  |
| 14 | P49790 NU153_HUMAN  | E.DHLVYADEE.S               |            | 2 | 2,4669 | 0,362 | -0,224 |
| 14 | Q9H583 HEAT1_HUMAN  | E.KNVLGSALLCIAE.V           |            | 2 | 2,4668 | 0,285 | -0,527 |
| 14 | Q2TAA2 IAH1_HUMAN   | E.LSLLGDGDH.-               |            | 2 | 2,4645 | 0,285 | -0,066 |
| 14 | P10809 CH60_HUMAN   | R.GYISPYFINTSK.G            |            | 2 | 2,4606 | 0,169 | 0      |
| 14 | P35612 ADDB_HUMAN   | E.AETKS#PLVSPSK.S           | S613:      | 3 | 2,4602 | 0,249 | 0,345  |
| 14 | P09874 PARP1_HUMAN  | E.CSQQLVFK.S                |            | 2 | 2,458  | 0,29  | 0,325  |
| 14 | P60709 ACTB_HUMAN   | E.TTFNSIM*KCD.V             |            | 2 | 2,458  | 0,294 | -0,099 |
| 14 | Q9BTT0 AN32E_HUMAN  | E.GLNDTFKELE.F              |            | 2 | 2,4573 | 0,206 | 0      |
| 14 | P35548 MSX2_HUMAN   | E.AHS#PGPLVKPFE.T           | S91:       | 2 | 2,455  | 0,314 | -0,269 |
| 14 | Q15003 CND2_HUMAN   | E.DFPQNDDEKE.R              |            | 2 | 2,4549 | 0,178 | -0,099 |
| 14 | P32314 FOXN2_HUMAN  | E.SDSLATSIDPK.E             |            | 2 | 2,4546 | 0,261 | 0      |
| 14 | P09493 TPM1_HUMAN   | R.LATALQKLEAE.K             |            | 2 | 2,4539 | 0,193 | -0,185 |
| 14 | P13647 K2C5_HUMAN   | R.ISISTSGGSFR.N             |            | 2 | 2,4532 | 0,307 | 0,11   |
| 14 | B2RA01 B2RA01_HUMAN | K.AQYEDIAQK.S               |            | 2 | 2,4493 | 0,165 | 0,114  |
| 14 | P46821 MAP1B_HUMAN  | K.DFEELKAAE.V               |            | 2 | 2,4457 | 0,16  | 0,22   |
| 14 | Q9Y613 EPN1_HUMAN   | E.LLAGEVPARS#PGAFFDM*SGVR.G | S410:      | 3 | 2,4448 | 0,12  | 0,086  |
| 14 | Q969R5 LMBL2_HUMAN  | E.HLDVASPDKASS#PELPSVSE.N   | S689:      | 3 | 2,4444 | 0,123 | 0,424  |
| 14 | Q15819 UB2V2_HUMAN  | E.NM*KLPQPPEGQTYNN.-        |            | 3 | 2,4439 | 0,114 | 0,209  |
| 14 | P11216 PYGB_HUMAN   | E.KVIPAADLSQQISTAGTE.A      |            | 2 | 2,4437 | 0,337 | 0,267  |
| 14 | Q06830 PRDX1_HUMAN  | D.YGVLKADE.G                |            | 2 | 2,4428 | 0,174 | -0,136 |

|    |                     |                            |        |   |        |       |        |
|----|---------------------|----------------------------|--------|---|--------|-------|--------|
| 14 | P31948 STIP1_HUMAN  | E.TKPEPM*EEDLPE.N          |        | 2 | 2,4423 | 0,169 | -0,341 |
| 14 | P78310 CXAR_HUMAN   | R.SYIGSNHSS#LGSM*SPSNM*E.G | S301:  | 3 | 2,4419 | 0,183 | -0,087 |
| 14 | P05787 K2C8_HUMAN   | R.VGS#SNFR.G               | S43:   | 2 | 2,4405 | 0,225 | 0,144  |
| 14 | O95208 EPN2_HUMAN   | K.NIVNNYSEAE.I             |        | 2 | 2,44   | 0,387 | -0,317 |
| 14 | P52948 NUP98_HUMAN  | E.NGERFS#FLSKPVDE.N        | S635:  | 2 | 2,4393 | 0,25  | -0,286 |
| 14 | Q9UBG0 MRC2_HUMAN   | R.CLTALPYICK.R             |        | 2 | 2,4392 | 0,42  | 0      |
| 14 | Q16204 CCDC6_HUMAN  | K.SGGIVISPFRL EE.L         |        | 2 | 2,4389 | 0,197 | -0,261 |
| 14 | P56192 SYMC_HUMAN   | K.TS#PKPAVVE.T             | S825:  | 2 | 2,4363 | 0,173 | -0,726 |
| 14 | Q04695 K1C17_HUMAN  | K.DAEDWFFSK.T              |        | 2 | 2,4357 | 0,301 | -0,107 |
| 14 | Q86XP3 DDX42_HUMAN  | K.IIDPLPIDHSE.I            |        | 2 | 2,4356 | 0,21  | -0,181 |
| 14 | P30260 CDC27_HUMAN  | R.LFTSDSSTTKE.N            |        | 2 | 2,4355 | 0,409 | -0,401 |
| 14 | Q13404 UB2V1_HUMAN  | E.NM*KLPQPPEGQCYSN.-       |        | 2 | 2,4329 | 0,283 | -0,137 |
| 14 | Q6UB98 ANR12_HUMAN  | E.SLVLTHLSR.C              |        | 2 | 2,4328 | 0,157 | -0,476 |
| 14 | Q7Z7N9 T179B_HUMAN  | E.TDALVGSRLS#HS.-          | S217:  | 2 | 2,432  | 0,146 | -0,277 |
| 14 | Q14789 G0GB1_HUMAN  | E.ISIVDIANK.R              |        | 2 | 2,4318 | 0,164 | -0,188 |
| 14 | Q9NZN8 CNOT2_HUMAN  | R.SSPSICM*PK.Q             |        | 2 | 2,4313 | 0,315 | -0,215 |
| 14 | P11177 ODPB_HUMAN   | E.DNSIPQVKD.I              |        | 2 | 2,4298 | 0,269 | 0      |
| 14 | Q70UQ0 IKIP_HUMAN   | E.NQYQLLKLE.T              |        | 2 | 2,4294 | 0,154 | -0,212 |
| 14 | Q99798 ACON_HUMAN   | R.DGYAQILRD.L              |        | 2 | 2,4245 | 0,3   | 0,232  |
| 14 | P54819 KAD2_HUMAN   | E.NFCVCHLATGD.M            |        | 2 | 2,423  | 0,429 | 0,094  |
| 14 | P37275 ZEB1_HUMAN   | E.AGPEILSNEHVGAR.A         |        | 3 | 2,4221 | 0,161 | 0,315  |
| 14 | P35527 K1C9_HUMAN   | K.TLNDMRQEYEQLIAK.N        |        | 3 | 2,4221 | 0,191 | -0,198 |
| 14 | Q96TC7 FA82C_HUMAN  | R.KDS#LDLEEE.A             | S212:  | 2 | 2,4194 | 0,205 | -0,316 |
| 14 | Q96PZ0 PUS7_HUMAN   | R.YSDFVVHE.I               |        | 2 | 2,4192 | 0,139 | -0,245 |
| 14 | Q07021 C1QBP_HUMAN  | E.SDIFSIRE.V               |        | 2 | 2,4184 | 0,377 | -0,631 |
| 14 | P62249 RS16_HUMAN   | E.IKDILIQYD.R              |        | 2 | 2,4172 | 0,36  | -0,218 |
| 14 | Q16799 RTN1_HUMAN   | K.GSIS#EDELITAIKE.A        | S352:  | 2 | 2,416  | 0,213 | -0,847 |
| 14 | O43290 SNUT1_HUMAN  | E.KEPVPQPLPSDDTR.V         |        | 2 | 2,4152 | 0,281 | -0,695 |
| 14 | P14625 ENPL_HUMAN   | K.FAFQAEVNR.M              |        | 2 | 2,4134 | 0,322 | -0,226 |
| 14 | Q8TEM1 PO210_HUMAN  | E.KLQLLNPEIEAE.Q           |        | 2 | 2,4124 | 0,261 | 0,262  |
| 14 | Q58FG1 HS904_HUMAN  | E.YCVQQLKEFE.G             |        | 2 | 2,4123 | 0,167 | -0,091 |
| 14 | Q9UPX8 SHAN2_HUMAN  | E.IKS#PILSGPK.A            | S1017: | 2 | 2,4118 | 0,139 | -0,327 |
| 14 | P34932 HSP74_HUMAN  | E.VLVNHFC EE.F             |        | 2 | 2,4117 | 0,315 | 0,106  |
| 14 | Q13506 NAB1_HUMAN   | E.SEHSLSPADLGSPAS#PK.E     | S183:  | 3 | 2,4114 | 0,202 | -0,104 |
| 14 | P04075 ALDOA_HUMAN  | R.LQSIGTENTEE.N            |        | 2 | 2,4106 | 0,283 | 0,3    |
| 14 | Q00839 HNRPU_HUMAN  | K.NGQDLGVAFK.I             |        | 2 | 2,4085 | 0,178 | 0      |
| 14 | Q5TCU3 Q5TCU3_HUMAN | E.IHQTL DQTLLE.L           |        | 2 | 2,408  | 0,274 | 0      |
| 14 | P23229 ITA6_HUMAN   | E.GCGDDNVCNSNLKLE.Y        |        | 2 | 2,4061 | 0,141 | -0,36  |
| 14 | Q8IWR0 Z3H7A_HUMAN  | E.NFLGISSQPR.N             |        | 2 | 2,4057 | 0,102 | 0      |

|    |                     |                                 |              |   |        |       |        |
|----|---------------------|---------------------------------|--------------|---|--------|-------|--------|
| 14 | O15231 ZN185_HUMAN  | R.RES#CGSSVLTFE.G               | S233:        | 2 | 2,4042 | 0,218 | -0,234 |
| 14 | A0FGR8 ESYT2_HUMAN  | R.SSSLLASPGHISVK.E              |              | 3 | 2,4039 | 0,191 | 0,311  |
| 14 | Q03405 UPAR_HUMAN   | E.LENLPQNGR.Q                   |              | 2 | 2,4032 | 0,156 | -0,586 |
| 14 | O94804 STK10_HUMAN  | E.QGGDLS#PAANR.S                | S438:        | 2 | 2,4018 | 0,415 | -0,837 |
| 14 | Q5JSH3 WDR44_HUMAN  | E.FYDAPEDVHLGGGYPVGS#PGK.V      | S27:         | 3 | 2,4017 | 0,25  | -0,245 |
| 14 | Q15185 TEBP_HUMAN   | D.EDM*SNFDRFSE.M                |              | 2 | 2,4006 | 0,255 | -0,175 |
| 14 | Q725K2 WAPL_HUMAN   | E.NQSYLIAYKD.S                  |              | 2 | 2,4005 | 0,225 | -0,201 |
| 14 | P51858 HDGF_HUMAN   | E.DAEAPGIRDHES#L.-              | S239:        | 2 | 2,398  | 0,326 | -0,573 |
| 14 | Q9Y2V2 CHSP1_HUMAN  | R.ERS#PS#PLRGNVPS#PLPTR.R       | S30:S32:S41: | 3 | 2,398  | 0,222 | -0,159 |
| 14 | P07900 HS90A_HUMAN  | R.APFDLFENR.K                   |              | 2 | 2,3979 | 0,22  | -0,11  |
| 14 | P62158 CALM_HUMAN   | R.EADIDGDGQVNYEE.F              |              | 2 | 2,3964 | 0,224 | -0,236 |
| 14 | P63241 IF5A1_HUMAN  | E.DLRLPEGD.L                    |              | 2 | 2,3961 | 0,178 | 0,133  |
| 14 | Q15185 TEBP_HUMAN   | K.DVNVNFE.K                     |              | 2 | 2,3956 | 0,153 | 0,146  |
| 14 | Q01082 SPTB2_HUMAN  | K.TALPAQSAATLPAR.T              |              | 2 | 2,3945 | 0,249 | -0,981 |
| 14 | Q00613 HSF1_HUMAN   | E.LAPASPM*ASPGGSIDERPLSSSPLVR.V |              | 3 | 2,3932 | 0,348 | 0      |
| 14 | P30622 CLIP1_HUMAN  | E.ANGLQTTPASR.A                 |              | 2 | 2,3922 | 0,28  | -0,109 |
| 14 | P62256 UBE2H_HUMAN  | R.M*DTDVVK.L                    |              | 2 | 2,3916 | 0,081 | 0,37   |
| 14 | P60002 ELOF1_HUMAN  | E.TQFTCPFCNHE.K                 |              | 2 | 2,3915 | 0,376 | -0,339 |
| 14 | O75643 U520_HUMAN   | E.YKFSVDVK.E                    |              | 2 | 2,3913 | 0,27  | -0,124 |
| 14 | Q92576 PHF3_HUMAN   | K.GNIDGNVSCSE.N                 |              | 2 | 2,3907 | 0,3   | 0      |
| 14 | O94901 UN84A_HUMAN  | R.LATTACTLGDGE.A                |              | 2 | 2,3896 | 0,114 | -0,101 |
| 14 | O75431 MTX2_HUMAN   | E.NATLYQQLK.G                   |              | 2 | 2,3894 | 0,264 | 0,339  |
| 14 | Q12888 TP53B_HUMAN  | R.SEDPPTT#PIR.G                 | T1056:       | 2 | 2,3873 | 0,426 | 0,511  |
| 14 | Q15435 PP1R7_HUMAN  | E.GLQNLVNLRE.L                  |              | 2 | 2,3869 | 0,306 | 0      |
| 14 | Q9Y6D6 BIG1_HUMAN   | E.HEGDLDLHTNDVDK.S              |              | 3 | 2,3847 | 0,197 | -0,569 |
| 14 | Q9UKV3 ACINU_HUMAN  | R.KIS#VVSATK.G                  | S825:        | 2 | 2,3826 | 0,096 | 0,12   |
| 14 | Q00839 HNRPU_HUMAN  | E.TEDYGEKFDE.N                  |              | 2 | 2,3823 | 0,203 | -0,396 |
| 14 | Q8NB90 SPAT5_HUMAN  | E.M*DGIEQLKD.V                  |              | 2 | 2,3819 | 0,209 | -0,115 |
| 14 | Q5TCU3 Q5TCU3_HUMAN | E.TLASAKEENVE.I                 |              | 2 | 2,3818 | 0,253 | -0,41  |
| 14 | Q9NUP1 CNO_HUMAN    | E.DLLTRVDE.F                    |              | 2 | 2,3814 | 0,186 | -0,889 |
| 14 | Q16891 IMMT_HUMAN   | E.QAVQSHAVAEEE.A                |              | 2 | 2,381  | 0,273 | -0,188 |
| 14 | P80723 BASP_HUMAN   | K.ETPAATEAPSST#PK.A             | T196:        | 2 | 2,3806 | 0,376 | 0      |
| 14 | Q9HB96 FANCE_HUMAN  | E.SLADGGS#ASPIKDQPVV*AVK.T      | S247:        | 3 | 2,3796 | 0,15  | 0,266  |
| 14 | P54278 PMS2_HUMAN   | E.YAASS#PGDRGSQEHVDSQE.K        | S523:        | 3 | 2,3787 | 0,217 | -0,174 |
| 14 | Q00341 VIGLN_HUMAN  | E.NAVHSTEPVVQE.N                |              | 2 | 2,3775 | 0,348 | -0,186 |
| 14 | P35527 K1C9_HUMAN   | R.IKFEMEQLNR.Q                  |              | 2 | 2,3773 | 0,297 | 0,093  |
| 14 | P49721 PSB2_HUMAN   | E.KILLLCVGE.A                   |              | 2 | 2,3763 | 0,356 | -0,233 |
| 14 | P11137 MAP2_HUMAN   | E.M*LDLAGTR.S                   |              | 2 | 2,3761 | 0,145 | 0,068  |
| 14 | A8K1U6 A8K1U6_HUMAN | E.TGVFVINHFT#CRS.-              | T520:        | 3 | 2,3757 | 0,232 | 0,226  |

|    |                     |                             |                 |   |        |       |        |
|----|---------------------|-----------------------------|-----------------|---|--------|-------|--------|
| 14 | Q9UPU9 SAM4A_HUMAN  | E.LHQM*ILTPIK.A             |                 | 2 | 2,3752 | 0,379 | 0      |
| 14 | Q92558 WASF1_HUMAN  | E.NDVATILSR.R               |                 | 2 | 2,3733 | 0,302 | 0,123  |
| 14 | Q6ZRV2 FA83H_HUMAN  | E.VAAPGAVGGER.R             |                 | 2 | 2,3733 | 0,382 | -0,31  |
| 14 | P28290 SSFA2_HUMAN  | E.TRCSP#PSFTYK.Y            | S767:           | 2 | 2,3724 | 0,16  | -0,171 |
| 14 | O43237 DC1L2_HUMAN  | R.RGPLTSGSDEE.N             |                 | 2 | 2,3724 | 0,406 | -0,319 |
| 14 | P40925 MDHC_HUMAN   | E.GLPINDFSRE.K              |                 | 2 | 2,3717 | 0,448 | -0,106 |
| 14 | P18858 DNL1_HUMAN   | E.ALS#PAKGQKPALD.C          | S76:            | 3 | 2,3715 | 0,233 | 0,199  |
| 14 | P06756 ITAV_HUMAN   | E.LIAYLRDE.S                |                 | 2 | 2,3712 | 0,28  | -0,184 |
| 14 | Q08499 PDE4D_HUMAN  | E.VEIPS#PTQKEKE.K           | S348:           | 2 | 2,3709 | 0,156 | 0      |
| 14 | P35244 RFA3_HUMAN   | E.DSHPFDLGLYNE.A            |                 | 2 | 2,3702 | 0,349 | -0,26  |
| 14 | Q02878 RL6_HUMAN    | E.GEIFDTEKE.K               |                 | 2 | 2,3701 | 0,156 | 0,114  |
| 14 | Q9Y2F5 K0947_HUMAN  | E.LCSS#PLGK.R               | S533:           | 2 | 2,368  | 0,248 | 0      |
| 14 | Q13188 STK3_HUMAN   | E.DSLTKQPEE.V               |                 | 2 | 2,3678 | 0,159 | -0,699 |
| 14 | Q14676 MDC1_HUMAN   | K.APQAVPLEK.S               |                 | 2 | 2,3662 | 0,328 | -0,768 |
| 14 | Q69YU3 AN34A_HUMAN  | E.SLPGAVS#PLSGR.R           | S392:           | 2 | 2,3661 | 0,482 | 0,2    |
| 14 | Q8N806 CN130_HUMAN  | E.SDLQTVFKNE.S              |                 | 2 | 2,3641 | 0,218 | 0,103  |
| 14 | P62256 UBE2H_HUMAN  | R.RM*DTDVVKLIE.S            |                 | 3 | 2,3639 | 0,158 | 0,411  |
| 14 | P56537 IF6_HUMAN    | R.HGLLVPNNTTDQE.L           |                 | 2 | 2,3635 | 0,304 | 0,339  |
| 14 | A8K7V5 A8K7V5_HUMAN | E.VSTAPAGTDM*PAAK.K         |                 | 2 | 2,361  | 0,482 | -0,092 |
| 14 | O75642 IF1AH_HUMAN  | E.LVFKEDGQE.Y               |                 | 2 | 2,3606 | 0,255 | -1,833 |
| 14 | P62937 PPIA_HUMAN   | K.SIYGKFEDE.N               |                 | 2 | 2,3593 | 0,248 | -0,201 |
| 14 | Q9Y3E2 BOLA1_HUMAN  | E.NSQLDTSPPCLGGNKK.T        |                 | 3 | 2,3568 | 0,231 | -0,107 |
| 14 | Q9UQ35 SRRM2_HUMAN  | E.LDVKPSAS#PQER.S           | S1552:          | 3 | 2,3554 | 0,244 | 0,26   |
| 14 | P08107 HSP71_HUMAN  | K.GGSGSGPTIEEVD.-           |                 | 2 | 2,3551 | 0,258 | 0      |
| 14 | P68431 H31_HUMAN    | E.IAQDFKTD.L                |                 | 2 | 2,3533 | 0,252 | 0,976  |
| 14 | P24534 EF1B_HUMAN   | E.DDKVGTDM*LE.E             |                 | 2 | 2,3523 | 0,18  | -0,214 |
| 14 | Q8N8S7 ENAH_HUMAN   | R.GNGPLPLGGSGLM*EE.M        |                 | 2 | 2,35   | 0,222 | 0,085  |
| 14 | O43583 DENR_HUMAN   | K.LTVENS#PKQE.A             | S73:            | 2 | 2,3482 | 0,236 | -0,1   |
| 14 | Q8N8S7 ENAH_HUMAN   | E.DTSFPGGNAIGVNSASSK.T      |                 | 2 | 2,346  | 0,164 | -0,204 |
| 14 | Q9UQ35 SRRM2_HUMAN  | E.KSATRPS#PS#PER.S          | S351:S353:      | 2 | 2,346  | 0,261 | -0,497 |
| 14 | Q9UL46 PSME2_HUMAN  | E.LYHISSNLE.K               |                 | 2 | 2,346  | 0,263 | -0,103 |
| 14 | Q13136 LIPA1_HUMAN  | K.RSS#DGS#LS#HEEDLAK.V      | S239:S242:S244: | 3 | 2,345  | 0,227 | 0,196  |
| 14 | P10809 CH60_HUMAN   | R.VTDALNATR.A               |                 | 2 | 2,345  | 0,237 | 0,444  |
| 14 | Q01968 OCRL_HUMAN   | E.KSLLQM*VPLDE.G            |                 | 2 | 2,3448 | 0,133 | -0,189 |
| 14 | P30414 NKTR_HUMAN   | R.LDTPDINIVLKQDM*ATEHPQAE.V |                 | 3 | 2,3413 | 0,191 | 0      |
| 14 | P17980 PRS6A_HUMAN  | E.KAPSIIFIDE.L              |                 | 2 | 2,3406 | 0,137 | 0      |
| 14 | Q08211 DHX9_HUMAN   | E.QDHDLQAILQE.R             |                 | 2 | 2,3399 | 0,144 | -0,093 |
| 14 | Q15084 PDIA6_HUMAN  | E.LDDLKDEL.-                |                 | 2 | 2,3381 | 0,161 | -0,36  |
| 14 | P39023 RL3_HUMAN    | K.IGQGYLIK.D                |                 | 2 | 2,3374 | 0,283 | 0      |



|    |                    |                                  |          |   |        |       |        |
|----|--------------------|----------------------------------|----------|---|--------|-------|--------|
| 14 | Q00613 HSF1_HUMAN  | E.LAPAS#PM*ASPGGSIDERPLSSSPLVR.V | S275:    | 3 | 2,3368 | 0,342 | -0,136 |
| 14 | Q5JTH9 RRP12_HUMAN | K.SEAPET#PM*EEEEAE.L             | T77:     | 2 | 2,3363 | 0,329 | -0,632 |
| 14 | O00505 IMA3_HUMAN  | E.NEDIYKLAFE.I                   |          | 2 | 2,3344 | 0,262 | 0      |
| 14 | P60174 TPIS_HUMAN  | E.FVDIINAK.Q                     |          | 2 | 2,3342 | 0,202 | -0,663 |
| 14 | O43663 PRC1_HUMAN  | E.SLLQLHDAE.I                    |          | 2 | 2,3322 | 0,323 | 0,119  |
| 14 | Q92538 GBF1_HUMAN  | E.KGLLTIPM*DNTE.V                |          | 2 | 2,332  | 0,333 | -0,362 |
| 14 | Q8IX01 SFR14_HUMAN | E.DSTLFGRE.Y                     |          | 2 | 2,3314 | 0,181 | -0,066 |
| 14 | Q92615 LARP5_HUMAN | E.EKFTSSQTQSPTPKPPS#PSFE.L       | S524:    | 2 | 2,3309 | 0,113 | 0,786  |
| 14 | Q92692 PVRL2_HUMAN | E.HS#PLKTPYFDAGASCTE.Q           | S433:    | 3 | 2,3288 | 0,286 | -0,187 |
| 14 | Q01518 CAP1_HUMAN  | E.LQAYIKE.F                      |          | 2 | 2,3269 | 0,082 | 0,071  |
| 14 | P35527 K1C9_HUMAN  | K.STMQELNSR.L                    |          | 2 | 2,3258 | 0,297 | 0,114  |
| 14 | Q15631 TSN_HUMAN   | E.ILGIEPDRE.K                    |          | 2 | 2,3249 | 0,26  | -0,117 |
| 14 | P35908 K22E_HUMAN  | K.IEISELNR.V                     |          | 2 | 2,3249 | 0,238 | 0,125  |
| 14 | P22626 ROA2_HUMAN  | R.GGGGNFGPGPGS#NFR.G             | S225:    | 2 | 2,323  | 0,147 | -0,67  |
| 14 | Q5VUA4 ZN318_HUMAN | E.DQLSEGRNS#PEKAE.N              | S1243:   | 3 | 2,3224 | 0,102 | 0,112  |
| 14 | Q53F19 CQ085_HUMAN | E.NKAGS#FITGIDVTSKE.A            | S73:     | 3 | 2,3219 | 0,158 | 0,314  |
| 14 | P06744 G6PI_HUMAN  | K.NLVTEDVM*R.M                   |          | 2 | 2,3195 | 0,352 | -0,447 |
| 14 | P31948 STIP1_HUMAN | E.IAT#PPPPPPK.K                  | T198:    | 2 | 2,3175 | 0,301 | -0,614 |
| 14 | Q5JTD0 TJAP1_HUMAN | R.GS#PEEELPLPAFE.K               | S300:    | 2 | 2,3173 | 0,299 | -0,163 |
| 14 | O14974 MYPT1_HUMAN | R.LAYVAPTIPR.R                   |          | 2 | 2,3173 | 0,324 | 0      |
| 14 | O60841 IF2P_HUMAN  | E.KGVYVQASTLGSLE.A               |          | 2 | 2,3169 | 0,373 | -0,336 |
| 14 | Q14116 IL18_HUMAN  | R.SIM*FTVQNE.-                   |          | 2 | 2,3138 | 0,245 | 0,203  |
| 14 | P27824 CALX_HUMAN  | D.TKPLIVQYE.V                    |          | 2 | 2,3126 | 0,294 | -0,112 |
| 14 | Q9H7P9 PKHG2_HUMAN | E.M*DERGPS#PLHVLE.G              | S610:    | 2 | 2,312  | 0,295 | -0,077 |
| 14 | P55265 DSRAD_HUMAN | E.NGQEPVIKLE.N                   |          | 2 | 2,311  | 0,108 | -0,65  |
| 14 | O75427 LRCH4_HUMAN | E.AAATTSVPGS#PGLPGR.R            | S25:     | 2 | 2,3093 | 0,169 | -0,241 |
| 14 | Q9H6Z4 RANB3_HUMAN | R.VLS#PPKLINE.V                  | S333:    | 2 | 2,3089 | 0,189 | -0,113 |
| 14 | Q09666 AHNK_HUMAN  | R.AGAISASGPE.L                   |          | 2 | 2,3068 | 0,233 | 0,213  |
| 14 | Q14498 RBM39_HUMAN | E.RTDASSASSFLDSDELE.R            |          | 2 | 2,3033 | 0,323 | -0,133 |
| 14 | Q15418 KS6A1_HUMAN | D.LKPSNILYVDE.S                  |          | 2 | 2,3027 | 0,358 | 0      |
| 14 | Q9BWU0 NADAP_HUMAN | E.DGSLSRPQPE.I                   |          | 2 | 2,3024 | 0,3   | 0      |
| 14 | P18621 RL17_HUMAN  | E.LKGLDVDSLVIH.H                 |          | 2 | 2,3011 | 0,147 | -0,469 |
| 14 | P07195 LDHB_HUMAN  | E.KLIAPVAEEE.A                   |          | 2 | 2,2968 | 0,317 | 0      |
| 14 | Q9UJX2 CDC23_HUMAN | R.RVS#PLNLSSVTP.-                | S582:    | 2 | 2,2965 | 0,176 | -0,09  |
| 14 | Q15942 ZYX_HUMAN   | E.DCGKPLSIE.A                    |          | 2 | 2,2963 | 0,157 | -0,12  |
| 14 | P51636 CAV2_HUMAN  | E.KADVQLFM*DDDSYS#HHS#GLE.Y      | S20:S23: | 2 | 2,2962 | 0,351 | -0,099 |
| 14 | P00558 PGK1_HUMAN  | E.GKVLPGVDALSNI.-                |          | 2 | 2,2939 | 0,286 | -0,095 |
| 14 | Q99590 SFRIP_HUMAN | E.SSEGEIQTVD.R                   |          | 2 | 2,293  | 0,284 | 0,366  |
| 14 | Q9Y3A5 SBDS_HUMAN  | E.VLNLKDVVEE.G                   |          | 2 | 2,2929 | 0,132 | 0,115  |

|    |                      |                             |        |   |        |       |        |
|----|----------------------|-----------------------------|--------|---|--------|-------|--------|
| 14 | Q9UHV7 MED13_HUMAN   | E.GFCS#PKPSEIKD.F           | S890:  | 3 | 2,2927 | 0,295 | -0,38  |
| 14 | Q9C0C9 UBE2O_HUMAN   | K.AQALPNGVPK.A              |        | 2 | 2,2922 | 0,361 | -0,429 |
| 14 | P35527 K1C9_HUMAN    | K.TLLDIDNTR.M               |        | 2 | 2,292  | 0,326 | 0,115  |
| 14 | Q01433 AMPD2_HUMAN   | R.QIS#QDVKLEPD.I            | S168:  | 2 | 2,2863 | 0,289 | 0,09   |
| 14 | Q9H9J4 UBP42_HUMAN   | R.DAEPQGS#PAAE.S            | S754:  | 2 | 2,2856 | 0,328 | -0,195 |
| 14 | P31946 1433B_HUMAN   | D.STLIM*QLLR.D              |        | 2 | 2,2853 | 0,162 | -0,447 |
| 14 | Q9Y5Y5 PEX16_HUMAN   | E.TQAQPPDGDHS#PGNHE.Q       | S158:  | 2 | 2,2852 | 0,235 | 0      |
| 14 | Q9ULL5 PRR12_HUMAN   | E.GLGLGCPS#PCKR.L           | S540:  | 2 | 2,2829 | 0,315 | -0,53  |
| 14 | Q5W0B1 RN219_HUMAN   | K.SLDLDGLSK.S               |        | 2 | 2,2809 | 0,211 | -0,064 |
| 14 | P62805 H4_HUMAN      | E.NVIRDAVTYTE.H             |        | 2 | 2,2804 | 0,299 | -1,048 |
| 14 | P62244 RS15A_HUMAN   | R.M*NVLADALK.S              |        | 2 | 2,2788 | 0,128 | -0,123 |
| 14 | Q5H9R7 SAPS3_HUMAN   | R.SNS#PVEM*E.T              | S740:  | 2 | 2,277  | 0,088 | 0      |
| 14 | Q86UP2 KTN1_HUMAN    | K.AAGDTVIENS DV S#PETE.S    | S1313: | 2 | 2,2765 | 0,12  | -0,191 |
| 14 | Q9Y2K6 UBP20_HUMAN   | E.FLSCDS#SSDRGEGDQGR.G      | S288:  | 3 | 2,2743 | 0,128 | 0,182  |
| 14 | Q92540 SMG7_HUMAN    | K.AELS#PSM*APQE.T           | S967:  | 2 | 2,2706 | 0,289 | 0      |
| 14 | Q5JTD0 TJAP1_HUMAN   | E.CHSLGTARG S#PEEELPLPAFE.K | S300:  | 2 | 2,2693 | 0,235 | 0,205  |
| 14 | Q9UKV3 ACINU_HUMAN   | E.ASS#PPHPQLHSEEE.I         | S425:  | 3 | 2,2674 | 0,081 | 0,744  |
| 14 | Q9H4H8 FA83D_HUMAN   | E.SSTVS#EEDYFSSHRDE.L       | S369:  | 3 | 2,2673 | 0,348 | 0,187  |
| 14 | P35613 BASI_HUMAN    | K.GSDQAIITLR.V              |        | 2 | 2,2652 | 0,188 | 1,022  |
| 14 | Q07157 ZO1_HUMAN     | E.YSM*YSTDSR.H              |        | 2 | 2,2645 | 0,221 | -0,217 |
| 14 | ##Q0VDD8 DYH14_HUMAN | D.EVIRVEE.A                 |        | 2 | 2,2637 | 0,188 | 0,349  |
| 14 | P09211 GSTP1_HUMAN   | K.ASCLYGQLPK.F              |        | 2 | 2,2601 | 0,258 | 0,322  |
| 14 | P68104 EF1A1_HUMAN   | R.LPLQDVYK.I                |        | 2 | 2,2589 | 0,163 | -0,188 |
| 14 | O00233 PSMD9_HUMAN   | K.GIGM*NEPLVDCE.G           |        | 2 | 2,257  | 0,166 | -0,09  |
| 14 | Q7Z2W4 ZCCHV_HUMAN   | R.SCTPSPDQISHRAS#LE.D       | S284:  | 2 | 2,256  | 0,441 | 0,131  |
| 14 | P05023 AT1A1_HUMAN   | E.LKDAFQNAYLE.L             |        | 2 | 2,254  | 0,173 | -0,186 |
| 14 | P17661 DESM_HUMAN    | K.VELQELNDR.F               |        | 2 | 2,2535 | 0,312 | -0,109 |
| 14 | P49588 SYAC_HUMAN    | K.M*HSPQTSAM*LFTVDNE.A      |        | 2 | 2,2533 | 0,183 | -0,066 |
| 14 | Q12904 MCA1_HUMAN    | E.QIQPDLHTNDE.C             |        | 2 | 2,25   | 0,21  | -0,186 |
| 14 | Q13428 TCOF_HUMAN    | K.VGPATPSAQVGK.W            |        | 2 | 2,25   | 0,453 | -0,329 |
| 14 | B0AZS1 B0AZS1_HUMAN  | E.DDRNS#FTLKLE.D            | S20:   | 2 | 2,2498 | 0,155 | 0,086  |
| 14 | Q9H6F5 CCD86_HUMAN   | E.SNPEETREPGS#PPSVQR.A      | S47:   | 3 | 2,2476 | 0,187 | 0,188  |
| 14 | Q16740 CLPP_HUMAN    | R.DRYM*SPM*EAQE.F           |        | 2 | 2,2464 | 0,132 | -1,406 |
| 14 | Q8NFC6 FA44A_HUMAN   | E.HSTNLDS#SPSLSSVTVPLRE.S   | S1280: | 3 | 2,2462 | 0,135 | 0      |
| 14 | Q9NYF8 BCLF1_HUMAN   | E.ALDYFSDKE.S               |        | 2 | 2,246  | 0,104 | 0,224  |
| 14 | Q96FW1 OTUB1_HUMAN   | E.ALLDDSK.E.L               |        | 2 | 2,2436 | 0,195 | 0,137  |
| 14 | Q9H4B7 TBB1_HUMAN    | R.FPGQLNADLR.K              |        | 2 | 2,2433 | 0,143 | -0,216 |
| 14 | Q6T4R5 NHS_HUMAN     | E.GV FVS#PNKPR.T            | S1413: | 2 | 2,2417 | 0,23  | 0,103  |
| 14 | Q9P260 K1468_HUMAN   | E.DKISLLNSE.K               |        | 2 | 2,2413 | 0,259 | -0,898 |

|    |                    |                                    |        |   |        |       |        |
|----|--------------------|------------------------------------|--------|---|--------|-------|--------|
| 14 | Q8NHZ8 CDC26_HUMAN | E.LKDDIEEFE.N                      |        | 2 | 2,2404 | 0,236 | -0,293 |
| 14 | Q05524 ENO1B_HUMAN | K.VNQIGSVTE.S                      |        | 2 | 2,238  | 0,088 | -0,129 |
| 14 | P14618 KPYM_HUMAN  | K.KGVNLPGAAVDLPVSE.K               |        | 3 | 2,2378 | 0,094 | -0,335 |
| 14 | P13645 K1C10_HUMAN | K.VTMQNLNDR.L                      |        | 2 | 2,2375 | 0,24  | 0      |
| 14 | Q9GZR7 DDX24_HUMAN | E.FEVKDPELE.A                      |        | 2 | 2,237  | 0,189 | 0,11   |
| 14 | Q13613 MTMR1_HUMAN | R.GSS#PSHSATSVHTSV.-               | S653:  | 2 | 2,2365 | 0,325 | -0,241 |
| 14 | Q9Y2Z0 SUGT1_HUMAN | E.DYNLKE.L                         |        | 2 | 2,2357 | 0,118 | 0,273  |
| 14 | P27816 MAP4_HUMAN  | K.DM*ES#PTKLD.V                    | S280:  | 2 | 2,2335 | 0,117 | -0,216 |
| 14 | Q13283 G3BP1_HUMAN | E.LKDIFFQSYGNVVE.L                 |        | 2 | 2,2302 | 0,083 | -0,316 |
| 14 | P11021 GRP78_HUMAN | K.ITITNDQNR.L                      |        | 2 | 2,2301 | 0,199 | -0,454 |
| 14 | O75179 ANR17_HUMAN | R.NSPLDCGSASPKN.V                  |        | 2 | 2,2299 | 0,095 | -0,453 |
| 14 | P11021 GRP78_HUMAN | K.NQLTSNPE.N                       |        | 2 | 2,2275 | 0,099 | 0,068  |
| 14 | Q00169 PIPNA_HUMAN | E.YRVILPVSVD.E.Y                   |        | 2 | 2,2256 | 0,257 | -0,189 |
| 14 | Q9BV44 THUM3_HUMAN | E.VLLNIHDNE.V                      |        | 2 | 2,2252 | 0,153 | -0,114 |
| 14 | Q58FF7 H90B3_HUMAN | K.EQVANSFVER.V                     |        | 2 | 2,2207 | 0,464 | -0,878 |
| 14 | Q29983 MICA_HUMAN  | R.SSQHFYDGE.L                      |        | 2 | 2,2204 | 0,25  | -0,396 |
| 14 | P18583 SON_HUMAN   | K.RLS#ENAFDLE.A                    | S2238: | 2 | 2,2202 | 0,259 | 0,192  |
| 14 | P00558 PGK1_HUMAN  | E.KACANPAAGSVILLE.N                |        | 2 | 2,2172 | 0,098 | 0      |
| 14 | Q14103 HNRPD_HUMAN | K.IDASKNEEDE.G                     |        | 2 | 2,2171 | 0,252 | -0,637 |
| 14 | P04075 ALDOA_HUMAN | E.SLFVSNHAY.-                      |        | 2 | 2,217  | 0,256 | -0,47  |
| 14 | Q13200 PSMD2_HUMAN | E.LSEEDKQLQDE.L                    |        | 2 | 2,2152 | 0,174 | -0,274 |
| 14 | P13645 K1C10_HUMAN | K.DAEAWFNEK.S                      |        | 2 | 2,2151 | 0,226 | -0,769 |
| 14 | P27816 MAP4_HUMAN  | K.KCS#LPAEEDSVLE.K                 | S636:  | 2 | 2,2146 | 0,149 | -0,078 |
| 14 | P40763 STAT3_HUMAN | E.ADPGSAAPYLK.T                    |        | 2 | 2,2144 | 0,408 | -0,112 |
| 14 | P46821 MAP1B_HUMAN | K.SDIS#PLTPR.E                     | S1785: | 2 | 2,2141 | 0,19  | 0,229  |
| 14 | O94804 STK10_HUMAN | K.ASQSRPNSSALE.T                   |        | 2 | 2,2134 | 0,108 | -1,761 |
| 14 | P21127 CD2L1_HUMAN | E.GDYVPDS#PALSPIELK.Q              | S410:  | 2 | 2,2121 | 0,297 | 0      |
| 14 | P23396 RS3_HUMAN   | K.AELNEFLTR.E                      |        | 2 | 2,2116 | 0,143 | 0,112  |
| 14 | Q8TAQ2 SMRC2_HUMAN | E.LETIM*DRE.R                      |        | 2 | 2,2105 | 0,213 | -0,179 |
| 14 | Q2NKX8 ERC6L_HUMAN | R.QNFSSQSLE.H                      |        | 2 | 2,2097 | 0,228 | -0,352 |
| 14 | P82979 HCC1_HUMAN  | R.FGLNVSSISR.K                     |        | 2 | 2,2095 | 0,207 | -0,339 |
| 14 | P35527 K1C9_HUMAN  | K.TLNDMRQEYEQLIAK.N                |        | 2 | 2,2074 | 0,197 | -0,198 |
| 14 | P40222 TXLNA_HUMAN | D.LSAGGQGLTDSGPERRPEGPGAQAPSS#PR.V | S515:  | 3 | 2,2065 | 0,218 | -0,488 |
| 14 | P51570 GALK1_HUMAN | E.HTDYNQGLVLP*ALE.L                |        | 2 | 2,2031 | 0,108 | -0,142 |
| 14 | Q92622 K0226_HUMAN | E.YLAIGNLDPR.G                     |        | 2 | 2,2031 | 0,22  | -0,108 |
| 14 | P83731 RL24_HUMAN  | K.VFQFLNAK.C                       |        | 2 | 2,2029 | 0,248 | -0,315 |
| 14 | Q02952 AKA12_HUMAN | E.VFDEKIE.V                        |        | 2 | 2,2026 | 0,167 | 0,069  |
| 14 | P78417 GSTO1_HUMAN | E.DYAGLKEE.F                       |        | 2 | 2,1972 | 0,144 | 0,198  |
| 14 | Q8WU20 FRS2_HUMAN  | E.NVTVPAS#AHKIE.Y                  | S403:  | 2 | 2,1967 | 0,285 | -0,091 |

|    |                     |                             |        |   |        |       |        |
|----|---------------------|-----------------------------|--------|---|--------|-------|--------|
| 14 | P04844 RPN2_HUMAN   | E.TKDLLLLAAVSE.D            |        | 2 | 2,1954 | 0,216 | -0,21  |
| 14 | Q9H2U2 IPYR2_HUMAN  | K.LIAINANDPE.A              |        | 2 | 2,1948 | 0,087 | -0,798 |
| 14 | O15027 SC16A_HUMAN  | E.ALLQHTSEQEE.M             |        | 2 | 2,1933 | 0,282 | -0,285 |
| 14 | Q9H9A5 CNOTA_HUMAN  | E.GTGQSSGITDQEKE.L          |        | 2 | 2,1932 | 0,229 | -0,255 |
| 14 | Q2TU84 Q2TU84_HUMAN | E.DDSPALKE.K                |        | 2 | 2,1922 | 0,108 | 0,139  |
| 14 | Q9UQ80 PA2G4_HUMAN  | R.AFFSEVER.R                |        | 2 | 2,1921 | 0,141 | 0,248  |
| 14 | O60812 HNRCL_HUMAN  | K.SDVEAIFSK.Y               |        | 2 | 2,1919 | 0,241 | 0,306  |
| 14 | P42677 RS27_HUMAN   | K.DLLHPS#PEEE.K             | S11:   | 2 | 2,1879 | 0,15  | 0,294  |
| 14 | Q96TA2 YMEL1_HUMAN  | E.AKANAPCVIFIDE.L           |        | 2 | 2,1863 | 0,084 | 0      |
| 14 | Q9NR09 BIRC6_HUMAN  | E.DTVKDLEE.L                |        | 2 | 2,1845 | 0,145 | 0,129  |
| 14 | Q9HC35 EMAL4_HUMAN  | K.ATLLEDQQDPSPSS.-          |        | 2 | 2,1837 | 0,226 | -0,328 |
| 14 | Q02952 AKA12_HUMAN  | E.ALICVGSSK.K               |        | 2 | 2,1834 | 0,319 | 0,196  |
| 14 | Q9UKG1 DP13A_HUMAN  | E.AVTPS#PSFQQR.H            | S401:  | 2 | 2,1829 | 0,298 | -0,094 |
| 14 | Q92526 TCPW_HUMAN   | E.VNSGFFYK.T                |        | 2 | 2,1808 | 0,418 | 0,127  |
| 14 | Q09666 AHNK_HUMAN   | E.GDIKAPS#LDIKGPE.V         | S3326: | 3 | 2,1796 | 0,306 | 0,12   |
| 14 | Q9NQW6 ANLN_HUMAN   | K.TPIS#PLK.T                | S323:  | 2 | 2,1793 | 0,217 | 0,438  |
| 14 | Q9NQX3 GEPH_HUMAN   | E.DTELIRE.S                 |        | 2 | 2,179  | 0,135 | 0,975  |
| 14 | Q96T23 RSF1_HUMAN   | E.SYS#PSKDR.N               | S463:  | 2 | 2,1782 | 0,098 | -0,479 |
| 14 | P62258 1433E_HUMAN  | R.IISSIEQKEE.N              |        | 2 | 2,1779 | 0,175 | 0,104  |
| 14 | Q96RL1 UIMC1_HUMAN  | E.KLLLEEEPTTSHGQSS#QGIVEE.T | S402:  | 3 | 2,1759 | 0,19  | 0,294  |
| 14 | P04406 G3P_HUMAN    | E.GPLKILGYTE.H              |        | 2 | 2,1736 | 0,347 | 0,106  |
| 14 | P38646 GRP75_HUMAN  | E.DKVIAYVD.L                |        | 2 | 2,1733 | 0,287 | -0,991 |
| 14 | P15822 ZEP1_HUMAN   | K.IDFLNKA.E.F               |        | 2 | 2,173  | 0,138 | 0,064  |
| 14 | Q16658 FSCN1_HUMAN  | R.QGM*DLSANQDEETDQE.T       |        | 2 | 2,1719 | 0,252 | -0,267 |
| 14 | P08107 HSP71_HUMAN  | K.LLQDFFNDR.D               |        | 2 | 2,1717 | 0,16  | 0,22   |
| 14 | Q99460 PSMD1_HUMAN  | E.LVEPVAAHGPK.I             |        | 2 | 2,1685 | 0,263 | 0,764  |
| 14 | P39880 CUX1_HUMAN   | E.IQAGSQGQAGASDPSAR.S       |        | 2 | 2,1673 | 0,283 | 0      |
| 14 | P55327 TPD52_HUMAN  | E.DVKNS#PTFK.S              | S131:  | 2 | 2,1662 | 0,185 | 0      |
| 14 | O95817 BAG3_HUMAN   | R.SQS#PLRGM*PE.T            | S136:  | 2 | 2,1649 | 0,324 | -0,204 |
| 14 | Q15149 PLEC1_HUMAN  | E.FADM*LSGNAGGFRSR.S        |        | 3 | 2,1608 | 0,253 | 0,228  |
| 14 | Q14160 LAP4_HUMAN   | R.QSPAS#PPPLGGGAPVR.T       | S1448: | 2 | 2,1606 | 0,202 | -0,311 |
| 14 | P34932 HSP74_HUMAN  | E.QQQQTPAENKAEESE.M         |        | 2 | 2,1577 | 0,32  | -0,497 |
| 14 | Q93034 CUL5_HUMAN   | E.DLNQAFKE.M                |        | 2 | 2,1575 | 0,211 | -0,19  |
| 14 | Q16630 CPSF6_HUMAN  | E.AVHSLGVNDILE.I            |        | 2 | 2,156  | 0,109 | -0,096 |
| 14 | Q58FF7 H90B3_HUMAN  | E.DLPLNISRE.M               |        | 2 | 2,1547 | 0,265 | 0      |
| 14 | Q9UBT2 SAE2_HUMAN   | E.VVGDAPEKVGPK.Q            |        | 2 | 2,1499 | 0,312 | -0,306 |
| 14 | ##P25205 MCM3_HUMAN | R.LVHDS#IE.R                | S311:  | 2 | 2,1487 | 0,143 | -0,137 |
| 14 | Q9Y450 HBS1L_HUMAN  | R.DKPSVEPVEE.Y              |        | 2 | 2,1446 | 0,169 | 0,108  |
| 14 | O75410 TACC1_HUMAN  | E.AETPIRS#PFKE.S            | S72:   | 2 | 2,1436 | 0,284 | 0,18   |

|    |                     |                       |        |   |        |       |        |
|----|---------------------|-----------------------|--------|---|--------|-------|--------|
| 14 | P13010 KU86_HUMAN   | E.QGGAHFSVSSLAE.G     |        | 2 | 2,141  | 0,251 | -0,095 |
| 14 | P18615 NELFE_HUMAN  | K.GPVPTFQPFQR.S       |        | 2 | 2,1407 | 0,289 | 0      |
| 14 | O15417 TNC18_HUMAN  | R.KEEAPENVVE.K        |        | 2 | 2,1403 | 0,292 | -0,107 |
| 14 | P05186 PPBT_HUMAN   | K.YALELQK.L           |        | 2 | 2,1393 | 0,198 | -0,141 |
| 14 | Q09666 AHNK_HUMAN   | K.LQGSQVSLASK.K       |        | 2 | 2,137  | 0,379 | -1,049 |
| 14 | Q9NQS7 INCE_HUMAN   | R.VLAPILPDNFSTPTGSR.T |        | 2 | 2,1367 | 0,367 | -0,137 |
| 14 | ##Q9C0G6 DYH6_HUMAN | E.QDVALKE.M           |        | 2 | 2,1363 | 0,084 | 1,291  |
| 14 | P61081 UBC12_HUMAN  | E.GNVCLNILRE.D        |        | 2 | 2,1357 | 0,346 | -0,205 |
| 14 | Q02952 AKA12_HUMAN  | E.M*VVQVERE.K         |        | 2 | 2,1347 | 0,107 | -0,303 |
| 14 | P31350 RIR2_HUMAN   | E.NT#PPALSGTR.V       | T33:   | 2 | 2,1326 | 0,262 | 0,446  |
| 14 | Q9UQ35 SRRM2_HUMAN  | E.SSLVFKDT#LRTPPRER.S | T1205: | 3 | 2,1319 | 0,217 | 0,092  |
| 14 | Q8TDY2 RBCC1_HUMAN  | K.SPAIDSTRGDS#LVAE.L  | S1286: | 2 | 2,1308 | 0,32  | -0,275 |
| 14 | Q12849 GRSF1_HUMAN  | E.LAPSKLEEEVDD.V      |        | 2 | 2,1292 | 0,268 | 0,181  |
| 14 | P30085 KCY_HUMAN    | E.VVQIFDKEG.-         |        | 2 | 2,1287 | 0,244 | 0,118  |
| 14 | Q96FS4 SIPA1_HUMAN  | E.FLHSQNSLS#PR.S      | S839:  | 2 | 2,1281 | 0,252 | -0,447 |
| 14 | Q08J23 NSUN2_HUMAN  | R.M*VYSTCSLNPIEDE.A   |        | 2 | 2,1251 | 0,223 | 0,073  |
| 14 | Q969H8 CS010_HUMAN  | E.SDVPLKTEE.F         |        | 2 | 2,1246 | 0,165 | 0,12   |
| 14 | P18858 DNL1_HUMAN   | E.ALS#PAKGQKPALD.C    | S76:   | 2 | 2,1245 | 0,364 | -0,532 |
| 14 | Q93009 UBP7_HUMAN   | K.AGEQQLS#EPE.D       | S18:   | 2 | 2,1242 | 0,13  | -0,104 |
| 14 | P04264 K2C1_HUMAN   | K.SISISVAR.G          |        | 2 | 2,1221 | 0,101 | 1,904  |
| 14 | O43683 BUB1_HUMAN   | R.DGKFS#PIQE.K        | S655:  | 2 | 2,1217 | 0,157 | -0,443 |
| 14 | Q66K74 MAP1S_HUMAN  | R.LLSL#PLR.G          | S657:  | 2 | 2,1209 | 0,152 | 0,282  |
| 14 | P60174 TPIS_HUMAN   | K.VTNGAFTGE.I         |        | 2 | 2,1208 | 0,196 | 0,204  |
| 14 | P30044 PRDX5_HUMAN  | K.VNLAELFK.G          |        | 2 | 2,1198 | 0,289 | 0,196  |
| 14 | P17301 ITA2_HUMAN   | E.KAGTLGEQIFSIE.G     |        | 2 | 2,117  | 0,18  | -0,175 |
| 14 | O43504 HBXIP_HUMAN  | D.SQGLNLGCR.G         |        | 2 | 2,1163 | 0,242 | 0      |
| 14 | O43572 AKA10_HUMAN  | R.NSPAS#PLKE.L        | S281:  | 2 | 2,1159 | 0,122 | 0,119  |
| 14 | Q5H9R7 SAPS3_HUMAN  | E.FTSSLSTK.D          |        | 2 | 2,1148 | 0,111 | 0,21   |
| 14 | P27695 APEX1_HUMAN  | E.DGDELRTPEPE.A       |        | 2 | 2,114  | 0,254 | 0      |
| 14 | Q9H307 PININ_HUMAN  | E.IAIVHS#DAEKE.Q      | S347:  | 3 | 2,1134 | 0,108 | 0,708  |
| 14 | O15061 DMN_HUMAN    | K.GLQT#PVKDAGGGTGRE.A | T598:  | 2 | 2,113  | 0,272 | 0      |
| 14 | P20700 LMNB1_HUMAN  | E.TLLKVDLE.N          |        | 2 | 2,109  | 0,093 | -0,066 |
| 14 | Q14247 SRC8_HUMAN   | E.DAASFKAEL           |        | 2 | 2,1082 | 0,239 | 0      |
| 14 | P08670 VIME_HUMAN   | R.EEAENTLQSFR.Q       |        | 2 | 2,1082 | 0,097 | 0      |
| 14 | Q14694 UBP10_HUMAN  | K.YSPPAIS#PLVSEK.Q    | S370:  | 2 | 2,1073 | 0,277 | 0      |
| 14 | P46821 MAP1B_HUMAN  | E.SFLSADDK.A          |        | 2 | 2,1064 | 0,17  | -0,069 |
| 14 | P11940 PABP1_HUMAN  | K.GFGFVSFER.H         |        | 2 | 2,1063 | 0,308 | -0,35  |
| 14 | Q9NWW4 CA123_HUMAN  | E.NITNLRPVGE.D        |        | 2 | 2,106  | 0,119 | -0,219 |
| 14 | P62195 PRS8_HUMAN   | E.IDSIGSSRLE.G        |        | 2 | 2,1057 | 0,093 | -0,34  |

|    |                    |                         |       |   |        |       |        |
|----|--------------------|-------------------------|-------|---|--------|-------|--------|
| 14 | P31327 CPSM_HUMAN  | E.DRSIFSAVLDE.L         |       | 2 | 2,1052 | 0,179 | -0,585 |
| 14 | P07942 LAMB1_HUMAN | R.DIRDPNFCE.R           |       | 2 | 2,0979 | 0,279 | 0,209  |
| 14 | P31948 STIP1_HUMAN | E.IAT#PPPPPPPKKE.T      | T198: | 2 | 2,0978 | 0,196 | -0,253 |
| 14 | P78371 TCPB_HUMAN  | E.IASTFDHPE.L           |       | 2 | 2,0965 | 0,362 | -0,18  |
| 14 | Q8N350 DOS_HUMAN   | R.FLSTSSTGR.R           |       | 2 | 2,096  | 0,269 | 0,319  |
| 14 | Q9UKS6 PACN3_HUMAN | E.VTLTSIVPTR.D          |       | 2 | 2,0929 | 0,278 | -0,224 |
| 14 | Q8IXM2 CQ049_HUMAN | K.KLNFDQA.-             |       | 2 | 2,0928 | 0,278 | 0,511  |
| 14 | Q9BRL6 SFR2B_HUMAN | R.VGDVYIPR.E            |       | 2 | 2,0904 | 0,245 | -0,066 |
| 14 | Q6ZS30 NBEL1_HUMAN | K.SFSVHSDRE.S           |       | 2 | 2,0893 | 0,277 | 0,115  |
| 14 | P04075 ALDOA_HUMAN | R.ALQASALK.A            |       | 2 | 2,0845 | 0,15  | 0,152  |
| 14 | P35579 MYH9_HUMAN  | E.LEEICHDL.E.A          |       | 2 | 2,0836 | 0,129 | 0,105  |
| 14 | P49368 TCPG_HUMAN  | E.M*AVAHALTE.K          |       | 2 | 2,0833 | 0,149 | 0,954  |
| 14 | O00401 WASL_HUMAN  | K.VIY#DFIEK.T           | Y256: | 2 | 2,0831 | 0,256 | 0      |
| 14 | P35579 MYH9_HUMAN  | K.ASITALEAK.I           |       | 2 | 2,0816 | 0,15  | 0,202  |
| 14 | Q9NYL2 MLTK_HUMAN  | R.DLSFKEQE.L            |       | 2 | 2,0783 | 0,136 | 0,061  |
| 14 | P40926 MDHM_HUMAN  | R.ANTFVAELK.G           |       | 2 | 2,0767 | 0,264 | 0      |
| 14 | P07355 ANXA2_HUMAN | E.GDHSTPPSAY#GSVK.A     | Y24:  | 2 | 2,0756 | 0,296 | 0      |
| 14 | Q92688 AN32B_HUMAN | R.IFGGLDM*LAE.K         |       | 2 | 2,0755 | 0,217 | 0      |
| 14 | P07355 ANXA2_HUMAN | E.ILCKLSLE.G            |       | 2 | 2,0732 | 0,085 | -0,125 |
| 14 | O75410 TACC1_HUMAN | E.LGEESRS#SPLKLE.F      | S315: | 2 | 2,0706 | 0,159 | 0      |
| 14 | Q8IUC6 TCAM1_HUMAN | E.DFQVPGRGE.L           |       | 2 | 2,07   | 0,125 | -0,668 |
| 14 | Q15435 PP1R7_HUMAN | E.NLSNLHQLQM*LE.L       |       | 2 | 2,07   | 0,131 | 0      |
| 14 | P11388 TOP2A_HUMAN | E.DVGINYRE.V            |       | 2 | 2,059  | 0,356 | -0,126 |
| 14 | Q71U36 TBA1A_HUMAN | K.FDLM*YAK.R            |       | 2 | 2,0556 | 0,125 | 0,067  |
| 14 | Q13347 EIF3I_HUMAN | E.VLVNVKE.H             |       | 2 | 2,0554 | 0,107 | 0,381  |
| 14 | Q92597 NDRG1_HUMAN | E.KGETITGLLQE.F         |       | 2 | 2,0507 | 0,148 | 0      |
| 14 | Q15046 SYK_HUMAN   | E.GIDLTHNPE.F           |       | 2 | 2,0503 | 0,256 | 0,429  |
| 14 | P62244 RS15A_HUMAN | K.IVNVLTGR.L            |       | 2 | 2,0494 | 0,233 | -0,07  |
| 14 | P46781 RS9_HUMAN   | R.LFEGNALLR.R           |       | 2 | 2,0447 | 0,166 | 0,118  |
| 14 | Q13464 ROCK1_HUMAN | E.SDIEQLR.A             |       | 2 | 2,0435 | 0,081 | 0      |
| 14 | P13639 EF2_HUMAN   | K.SDPVVSURE.T           |       | 2 | 2,0424 | 0,251 | -0,232 |
| 14 | Q7Z7F0 K0907_HUMAN | E.NLLQTVHAE.Y           |       | 2 | 2,0408 | 0,143 | 0,238  |
| 14 | Q58FF7 H90B3_HUMAN | R.APFDLFENK.K           |       | 2 | 2,039  | 0,171 | -0,451 |
| 14 | P46934 NEDD4_HUMAN | R.RGS#LQAYTFE.E         | S428: | 2 | 2,0384 | 0,081 | -0,097 |
| 14 | P14618 KPYM_HUMAN  | K.GVNLPGAADVLPVSE.K     |       | 2 | 2,0383 | 0,203 | -0,081 |
| 14 | Q13547 HDAC1_HUMAN | R.ISICSSDKR.I           |       | 2 | 2,0358 | 0,173 | 0      |
| 14 | P05362 ICAM1_HUMAN | R.SFSCSATLE.V           |       | 2 | 2,034  | 0,171 | 0,061  |
| 14 | Q9GZR2 REXO4_HUMAN | E.T#SPQVKGEEM*PAGKDQE.A | T110: | 3 | 2,0333 | 0,122 | -0,095 |
| 14 | Q13017 RHG05_HUMAN | E.DVFLPSR.D             |       | 2 | 2,033  | 0,299 | 0,262  |

|    |                    |                           |              |   |        |       |        |
|----|--------------------|---------------------------|--------------|---|--------|-------|--------|
| 14 | Q14116 IL18_HUMAN  | E.SDYFGKLE.S              |              | 2 | 2,0327 | 0,264 | -0,254 |
| 14 | Q8N655 CJ012_HUMAN | E.NTLQCPKT#PLRQDLE.A      | T65:         | 2 | 2,0315 | 0,296 | -0,193 |
| 14 | Q71F56 MD13L_HUMAN | E.QHPAFS#PVM*NYK.D        | S878:        | 3 | 2,0313 | 0,147 | 0,121  |
| 14 | Q9UKV3 ACINU_HUMAN | E.AS#SPPHPQLHSEEE.I       | S424:        | 2 | 2,0297 | 0,252 | -0,283 |
| 14 | Q09666 AHNK_HUMAN  | K.VDIDT#PDINIEGSE.G       | T3716:       | 2 | 2,0291 | 0,297 | -0,535 |
| 14 | Q7Z460 CLAP1_HUMAN | R.IPGSVNAM*R.V            |              | 2 | 2,024  | 0,315 | 0,063  |
| 14 | Q9H0G5 CCD55_HUMAN | E.KCILQTDVK.V             |              | 2 | 2,0223 | 0,325 | 0,11   |
| 14 | P35908 K22E_HUMAN  | K.FASFIDK.V               |              | 2 | 2,0183 | 0,137 | 0,368  |
| 14 | Q9C0C2 TB182_HUMAN | R.RES#AAS#GLGGLLE.E       | S1473:S1476: | 2 | 2,0177 | 0,117 | -0,43  |
| 14 | P19338 NUCL_HUMAN  | K.TGISDVFAC.N             |              | 2 | 2,0172 | 0,276 | -0,325 |
| 14 | P46821 MAP1B_HUMAN | R.SLM*SS#PEDLTKDFEE.L     | S832:        | 2 | 2,0168 | 0,143 | -0,334 |
| 14 | Q92609 TBCD5_HUMAN | D.THLVNIQDVILQE.N         |              | 2 | 2,0161 | 0,123 | -0,08  |
| 14 | P07195 LDHB_HUMAN  | R.GLTSVINQK.L             |              | 2 | 2,016  | 0,268 | 0,064  |
| 14 | O15062 ZBTB5_HUMAN | R.VGDIHILE.V              |              | 2 | 2,0157 | 0,123 | 0,204  |
| 14 | P40939 ECHA_HUMAN  | E.DLGKVFGE.R              |              | 2 | 2,0131 | 0,148 | 0,141  |
| 14 | O60716 CTND1_HUMAN | E.KALSAIADLLTNE.H         |              | 2 | 2,0119 | 0,264 | -0,628 |
| 14 | O15061 DMN_HUMAN   | K.GLQTPVKD.A              |              | 2 | 2,0082 | 0,115 | 1,493  |
| 14 | A6NHR9 SMHD1_HUMAN | E.ASGLSLHYEE.I            |              | 2 | 2,0071 | 0,176 | 0,331  |
| 14 | P13645 K1C10_HUMAN | R.LAADDFR.L               |              | 2 | 2,007  | 0,189 | 0,453  |
| 14 | P40925 MDHC_HUMAN  | E.DVAFKDL.D.V             |              | 2 | 2,0035 | 0,176 | -1,52  |
| 14 | P04075 ALDOA_HUMAN | R.QLLLTADDR.V             |              | 2 | 2,0029 | 0,154 | 0,233  |
| 14 | Q01082 SPTB2_HUMAN | E.YLFQAKDDEE.M            |              | 2 | 2,0018 | 0,168 | -0,388 |
| 14 | Q71U36 TBA1A_HUMAN | E.GEFSEAREDM*AAL.E.K      |              | 2 | 2,001  | 0,218 | -0,155 |
| 14 | P35659 DEK_HUMAN   | E.GEGTPTQPASEKEPEM*PGPR.E |              | 3 | 2,001  | 0,165 | -0,347 |
| 14 | P12268 IMDH2_HUMAN | D.IDFLKEEE.H              |              | 2 | 1,9996 | 0,088 | -0,119 |
| 14 | O75534 CSDE1_HUMAN | E.IFFHYSE.F               |              | 2 | 1,9971 | 0,107 | 0,065  |
| 14 | Q6ZRV2 FA83H_HUMAN | E.VAAPGAVGGERRS#LE.S      | S785:        | 2 | 1,997  | 0,393 | 0,394  |
| 14 | P51858 HDGF_HUMAN  | E.VERPLPM*EVE.K           |              | 2 | 1,9966 | 0,187 | 0,301  |
| 14 | Q9Y6A5 TACC3_HUMAN | R.AM*TLS#PQEE.V           | S317:        | 2 | 1,9966 | 0,104 | 0,111  |
| 14 | P54725 RD23A_HUMAN | E.IM*SM*GYERE.R           |              | 2 | 1,9911 | 0,306 | -0,531 |
| 14 | Q07343 PDE4B_HUMAN | D.VEIPS#PTQK.D            | S290:        | 2 | 1,9875 | 0,125 | -0,226 |
| 14 | Q9Y6D5 BIG2_HUMAN  | R.GSS#LSGTDDGAQEVVKDILE.D | S277:        | 2 | 1,9869 | 0,205 | 0      |
| 14 | P85299 PTOR1_HUMAN | E.GIFIDFGR.G              |              | 2 | 1,9841 | 0,263 | 0,132  |
| 14 | P49792 RBP2_HUMAN  | E.STTGFNFSFK.S            |              | 2 | 1,977  | 0,536 | 0      |
| 14 | P62256 UBE2H_HUMAN | R.M*DTDVVKLIE.S           |              | 2 | 1,9747 | 0,18  | -0,103 |
| 14 | Q96RS6 NUDC1_HUMAN | E.LVIGDKQGE.L             |              | 2 | 1,9744 | 0,09  | 0,064  |
| 14 | P11766 ADHX_HUMAN  | E.FVTHNLSFDE.I            |              | 2 | 1,9742 | 0,138 | 0,101  |
| 14 | P17480 UBF1_HUMAN  | K.LPES#PKRAEE.I           | S484:        | 2 | 1,9731 | 0,425 | 0      |
| 14 | Q01469 FABP5_HUMAN | K.ELGVGIALR.K             |              | 2 | 1,9715 | 0,237 | 0,263  |

|    |                      |                         |              |   |        |       |        |
|----|----------------------|-------------------------|--------------|---|--------|-------|--------|
| 14 | O43719 HTSF1_HUMAN   | E.FEENGLK.D             |              | 2 | 1,9694 | 0,17  | 0      |
| 14 | Q16555 DPYL2_HUMAN   | E.DGTLHVTE.G            |              | 2 | 1,964  | 0,237 | -0,28  |
| 14 | P30043 BLVRB_HUMAN   | E.VTVLVRD.S             |              | 2 | 1,9579 | 0,115 | 0,456  |
| 14 | Q8NFA0 UBP32_HUMAN   | R.GHVLGGS#QPE.L         | S1454:       | 2 | 1,9552 | 0,108 | -0,345 |
| 14 | Q9BTT0 AN32E_HUMAN   | E.DYRESIFE.L            |              | 2 | 1,9522 | 0,185 | -0,23  |
| 14 | P06748 NPM_HUMAN     | K.GPSSVEDIK.A           |              | 2 | 1,9506 | 0,207 | 0,982  |
| 14 | Q86VX9 MON1A_HUMAN   | R.GPPPLPTDM*R.Q         |              | 2 | 1,9506 | 0,325 | -0,334 |
| 14 | Q09666 AHNK_HUMAN    | K.TGTCRIS#M*SE.V        | S570:        | 2 | 1,95   | 0,233 | -0,296 |
| 14 | Q76L83 ASXL2_HUMAN   | E.ALQM*SS#PGRKEECE.S    | S440:        | 2 | 1,9491 | 0,302 | -0,852 |
| 14 | P08107 HSP71_HUMAN   | K.GGSGSGPTIEE.V         |              | 2 | 1,9464 | 0,226 | 0,246  |
| 14 | P50416 CPT1A_HUMAN   | E.KAAFFVTLDETEE.G       |              | 2 | 1,9457 | 0,284 | -0,651 |
| 14 | P68431 H31_HUMAN     | K.STELLIR.K             |              | 2 | 1,9449 | 0,2   | -0,22  |
| 14 | Q92616 GCN1L_HUMAN   | E.M*LQAQLDRE.A          |              | 2 | 1,9399 | 0,144 | 0,109  |
| 14 | ##Q9Y4F3 LKAP_HUMAN  | K.QLASISSVDY#D.Q        | Y366:        | 2 | 1,9385 | 0,107 | -1,15  |
| 14 | Q5SYE7 NHSL1_HUMAN   | R.SLS#FSGPR.Y           | S1495:       | 2 | 1,938  | 0,096 | -0,197 |
| 14 | Q14683 SMC1A_HUMAN   | R.ISSIYARE.A            |              | 2 | 1,937  | 0,162 | 0,195  |
| 14 | Q8WWM7 ATX2L_HUMAN   | E.IESS#PQYR.L           | S306:        | 2 | 1,9355 | 0,301 | -1,496 |
| 14 | Q9P1Y6 K1542_HUMAN   | R.GAVAAEGAS#DTEREPT.E.S | S915:        | 2 | 1,9336 | 0,27  | 0,129  |
| 14 | O95453 PARN_HUMAN    | R.NNSFTAPSTVGK.R        |              | 2 | 1,9277 | 0,127 | -0,299 |
| 14 | P05787 K2C8_HUMAN    | E.AYM*NKVELE.S          |              | 2 | 1,9268 | 0,166 | 0      |
| 14 | Q9Y3B9 RRP15_HUMAN   | R.DDFM*M*GASM*K.D       |              | 2 | 1,9257 | 0,18  | 0,103  |
| 14 | P05787 K2C8_HUMAN    | R.ISS#SSFSR.V           | S35:         | 2 | 1,9249 | 0,097 | 0,385  |
| 14 | O75821 EIF3G_HUMAN   | K.GIPLATGDTS#PEPE.L     | S42:         | 2 | 1,9228 | 0,1   | 0,083  |
| 14 | Q99567 NUP88_HUMAN   | R.NVVFLGGE.L            |              | 2 | 1,9216 | 0,15  | 0,274  |
| 14 | P08238 HS90B_HUMAN   | E.INPDHPIVE.T           |              | 2 | 1,9201 | 0,129 | -0,59  |
| 14 | P13473 LAMP2_HUMAN   | R.IPLNDLFR.C            |              | 2 | 1,9149 | 0,239 | -0,185 |
| 14 | Q92783 STAM1_HUMAN   | E.AM*CHQM*GPLIDE.K      |              | 2 | 1,9145 | 0,185 | -0,34  |
| 14 | P62333 PRS10_HUMAN   | E.NDLKALQSVGQIVGE.V     |              | 2 | 1,9133 | 0,14  | -0,233 |
| 14 | Q12906 ILF3_HUMAN    | D.M*GLPTGAEGR.D         |              | 2 | 1,9115 | 0,299 | -0,061 |
| 14 | O43310 K0427_HUMAN   | R.LPPQQSGGPEVE.T        |              | 2 | 1,9111 | 0,15  | 0,099  |
| 14 | Q9Y2H0 DLGP4_HUMAN   | E.DISM*KFDE.L           |              | 2 | 1,91   | 0,087 | -0,244 |
| 14 | P81605 DCD_HUMAN     | K.ENAGEDPGLAR.Q         |              | 2 | 1,9098 | 0,124 | -0,648 |
| 14 | O76003 GLRX3_HUMAN   | E.LLPILRGEN.-           |              | 2 | 1,9078 | 0,177 | 0,476  |
| 14 | P08670 VIME_HUMAN    | R.SYVTTSTR.T            |              | 2 | 1,9053 | 0,25  | -0,267 |
| 14 | P33316 DUT_HUMAN     | E.VQALDDTER.G           |              | 2 | 1,9049 | 0,252 | -0,233 |
| 14 | ##Q8N7A1 KLDC1_HUMAN | R.LLS#Y#PQT#QFILLD.N    | S65:Y66:T69: | 2 | 1,903  | 0,233 | 1,567  |
| 14 | Q9Y262 IF3EI_HUMAN   | E.VDFYIDKD.M            |              | 2 | 1,9015 | 0,289 | 0,301  |
| 14 | A9CQZ4 A9CQZ4_HUMAN  | E.DEEVPAFFK.N           |              | 2 | 1,8998 | 0,15  | 0      |
| 14 | P60660 MYL6_HUMAN    | E.AFQLFDR.T             |              | 2 | 1,8971 | 0,131 | 0      |



|    |                    |                      |        |   |        |       |        |
|----|--------------------|----------------------|--------|---|--------|-------|--------|
| 14 | Q02880 TOP2B_HUMAN | E.YTFS#PGK.S         | S1424: | 2 | 1,8969 | 0,205 | 0,208  |
| 14 | Q08J23 NSUN2_HUMAN | E.FDCAFR.L           |        | 2 | 1,8968 | 0,201 | 0,449  |
| 14 | P34931 HS71L_HUMAN | E.SYAFNM*K.S         |        | 2 | 1,8942 | 0,155 | 0,348  |
| 14 | Q99567 NUP88_HUMAN | E.DLSYCREE.R         |        | 2 | 1,8938 | 0,24  | 0,341  |
| 14 | Q92616 GCN1L_HUMAN | K.SIIQSAQQD.S        |        | 2 | 1,8847 | 0,217 | 0,246  |
| 14 | Q9Y450 HBS1L_HUMAN | E.YDYEDLKE.S         |        | 2 | 1,884  | 0,214 | 0,341  |
| 14 | P26373 RL13_HUMAN  | R.GFSLEELR.V         |        | 2 | 1,8816 | 0,26  | 0,064  |
| 14 | Q9NSD9 SYFB_HUMAN  | E.NKPLYPVIYD.S       |        | 2 | 1,8788 | 0,202 | -0,2   |
| 14 | P61254 RL26_HUMAN  | K.YVIYIER.V          |        | 2 | 1,8786 | 0,276 | -0,128 |
| 14 | P09382 LEG1_HUMAN  | K.LPDGYEFK.F         |        | 2 | 1,8782 | 0,262 | 0,189  |
| 14 | Q8IXM2 CQ049_HUMAN | E.GLGET#PPAK.K       | T161:  | 2 | 1,8708 | 0,165 | 0      |
| 14 | P11940 PABP1_HUMAN | R.YQGVNLYVK.N        |        | 2 | 1,8679 | 0,177 | 0,225  |
| 14 | P40222 TXLNA_HUMAN | R.VTEAPCYPGAPSTE.A   |        | 2 | 1,8665 | 0,186 | 0      |
| 14 | Q9NUQ8 ABCF3_HUMAN | E.KFSPPIQLDE.V       |        | 2 | 1,861  | 0,218 | -0,379 |
| 14 | Q9NVP1 DDX18_HUMAN | R.ILDVGFEEE.L        |        | 2 | 1,859  | 0,15  | 0,464  |
| 14 | P05362 ICAM1_HUMAN | E.AQVHLALGD.Q        |        | 2 | 1,8581 | 0,202 | 0,462  |
| 14 | Q5H9R7 SAPS3_HUMAN | E.FTSSLSTKD.S        |        | 2 | 1,8504 | 0,222 | 0,062  |
| 14 | O15014 ZN609_HUMAN | E.LES#PLTPGK.V       | S743:  | 2 | 1,8471 | 0,11  | -0,06  |
| 14 | P30837 AL1B1_HUMAN | R.DRVYLASLE.T        |        | 2 | 1,8405 | 0,119 | -0,114 |
| 14 | P60981 DEST_HUMAN  | E.KLGGSLIVAFE.G      |        | 2 | 1,8366 | 0,111 | -0,43  |
| 14 | P33176 KINH_HUMAN  | E.RFVCSPDEVM*DTIDE.G |        | 2 | 1,8362 | 0,196 | -0,267 |
| 14 | P85037 FOXK1_HUMAN | R.EGS#PIPHDPE.F      | S445:  | 2 | 1,8353 | 0,144 | -0,105 |
| 14 | Q9UHB9 SRP68_HUMAN | E.QAVLYNQR.V         |        | 2 | 1,8341 | 0,297 | 0,184  |
| 14 | P80723 BASP_HUMAN  | K.KTEAAPAAAAQE.T     |        | 2 | 1,8304 | 0,192 | -0,103 |
| 14 | P52948 NUP98_HUMAN | R.FSFLSKPVDE.N       |        | 2 | 1,8281 | 0,139 | -0,104 |
| 14 | P08670 VIME_HUMAN  | R.SVS#SSSYR.R        | S7:    | 2 | 1,8249 | 0,176 | 0,192  |
| 14 | P00533 EGFR_HUMAN  | E.DHFLSLQR.M         |        | 2 | 1,8194 | 0,219 | -0,12  |
| 14 | Q9P260 K1468_HUMAN | R.EPSTASGGGQLNR.A    |        | 2 | 1,8192 | 0,4   | 0      |
| 14 | P06733 ENOA_HUMAN  | R.IEELGSK.A          |        | 2 | 1,8178 | 0,305 | 0,607  |
| 14 | P30622 CLIP1_HUMAN | E.QLLAERDLE.R        |        | 2 | 1,8167 | 0,138 | 0,337  |
| 14 | Q9NW13 RBM28_HUMAN | K.CLLAASPENE.A       |        | 2 | 1,8164 | 0,176 | -0,663 |
| 14 | Q9UKM9 RALY_HUMAN  | E.AGLPQGEAR.T        |        | 2 | 1,8057 | 0,288 | -1,629 |
| 14 | Q9NY33 DPP3_HUMAN  | R.LASVLGSEPSLDSE.V   |        | 2 | 1,8027 | 0,188 | 0      |
| 14 | Q9UPN4 AZI1_HUMAN  | E.LSPTPGGTAHQALK.A   |        | 2 | 1,8016 | 0,103 | -0,266 |
| 14 | Q9Y232 CDYL1_HUMAN | K.ILVPKS#PVK.S       | S201:  | 2 | 1,7963 | 0,119 | -0,115 |
| 14 | Q969H8 CS010_HUMAN | K.SYLYFTQFK.A        |        | 2 | 1,7935 | 0,242 | -0,815 |
| 14 | P46013 KI67_HUMAN  | E.DLVGFKE.L          |        | 2 | 1,7887 | 0,097 | -0,377 |
| 14 | P15924 DESP_HUMAN  | R.GLVGIEFK.E         |        | 2 | 1,7848 | 0,181 | 0,141  |
| 14 | P13639 EF2_HUMAN   | K.FSVSPVVR.V         |        | 2 | 1,7834 | 0,082 | 0,205  |

|    |                     |                        |       |   |        |       |        |
|----|---------------------|------------------------|-------|---|--------|-------|--------|
| 14 | P60660 MYL6_HUMAN   | K.EAFQLFDR.T           |       | 2 | 1,7818 | 0,198 | 0,238  |
| 14 | Q8WUD4 CCD12_HUMAN  | E.AAKPEPVIEE.V         |       | 2 | 1,7758 | 0,234 | 0,113  |
| 14 | Q96JM3 ZN828_HUMAN  | R.KTS#PASLDFPE.S       | S459: | 2 | 1,7705 | 0,092 | -0,671 |
| 14 | Q9P266 K1462_HUMAN  | E.SLLPGIRR.A           |       | 2 | 1,7683 | 0,105 | 0,134  |
| 14 | O43181 NDUS4_HUMAN  | E.KLDITTLTGVP.E        |       | 2 | 1,7677 | 0,12  | -0,284 |
| 14 | Q71U36 TBA1A_HUMAN  | K.EIIDLVLDLDR.I        |       | 2 | 1,7637 | 0,215 | 0,337  |
| 14 | P13647 K2C5_HUMAN   | K.AQYEEIANR.S          |       | 2 | 1,7581 | 0,086 | 1,561  |
| 14 | Q68DN6 RGPD1_HUMAN  | D.ESTTGFNFSFK.S        |       | 2 | 1,7574 | 0,131 | -0,096 |
| 14 | P05783 K1C18_HUMAN  | E.IDLDSM*R.N           |       | 2 | 1,7561 | 0,271 | 0,282  |
| 14 | P40189 IL6RB_HUMAN  | K.SYLPQTVR.Q           |       | 2 | 1,7499 | 0,147 | 0,19   |
| 14 | P01100 FOS_HUMAN    | E.ADSFPSCAAHR.K        |       | 2 | 1,7435 | 0,224 | -0,473 |
| 14 | P54105 ICLN_HUMAN   | E.DSIRDYED.G           |       | 2 | 1,7378 | 0,277 | 0,06   |
| 14 | Q6S8J3 A26CA_HUMAN  | E.KLCYVALD.F           |       | 2 | 1,7369 | 0,169 | -0,062 |
| 14 | Q96J01 THOC3_HUMAN  | E.DHFIDIAEVE.T         |       | 2 | 1,73   | 0,091 | -0,308 |
| 14 | Q8WZA9 IRGQ_HUMAN   | R.AAHGVLLQALDE.M       |       | 2 | 1,7287 | 0,121 | 0,197  |
| 14 | O75396 SC22B_HUMAN  | E.DLHSEFDE.Q           |       | 2 | 1,7277 | 0,177 | 0,185  |
| 14 | Q99653 CHP1_HUMAN   | E.DFQRIPE.L            |       | 2 | 1,7245 | 0,225 | 0,067  |
| 14 | Q15019 SEPT2_HUMAN  | E.VTQDLHYE.N           |       | 2 | 1,7229 | 0,236 | -0,668 |
| 14 | P05362 ICAM1_HUMAN  | R.EPAVGEPAEVTTTTVLVR.R |       | 2 | 1,721  | 0,193 | 0,414  |
| 14 | Q14789 G0GB1_HUMAN  | E.ISIVDIANKR.S         |       | 2 | 1,7167 | 0,119 | 0,216  |
| 14 | O15355 PPM1G_HUMAN  | E.LRLLSSIVIEE.L        |       | 2 | 1,7115 | 0,14  | -0,211 |
| 14 | Q5VWN6 CJ018_HUMAN  | E.ILSPLFPR.N           |       | 2 | 1,7102 | 0,198 | -0,259 |
| 14 | O43615 TIM44_HUMAN  | E.NNVVFN.R.F           |       | 2 | 1,709  | 0,222 | 0,283  |
| 14 | ##Q9NQW6 ANLN_HUMAN | K.DLGS#PDKK.Q          | S234: | 2 | 1,7051 | 0,111 | -0,454 |
| 14 | Q9ULW0 TPX2_HUMAN   | E.ICPFS#FDSR.D         | S539: | 2 | 1,7    | 0,164 | 0      |
| 14 | Q6PL24 TMED8_HUMAN  | E.HTGAIDVLSADLE.S      |       | 2 | 1,698  | 0,189 | 0,091  |
| 14 | P35579 MYH9_HUMAN   | R.VVFQEFR.Q            |       | 2 | 1,6975 | 0,278 | 0,066  |
| 14 | P26373 RL13_HUMAN   | R.TIGISVDPR.R          |       | 2 | 1,6965 | 0,184 | 0      |
| 14 | Q9H6F5 CCD86_HUMAN  | R.AGLGS#PERPPK.T       | S58:  | 2 | 1,6817 | 0,283 | -0,308 |
| 14 | P78364 PHC1_HUMAN   | E.ALS#PTSPGPLSVR.A     | S895: | 2 | 1,6755 | 0,159 | 0      |
| 14 | Q92609 TBCD5_HUMAN  | E.SM*PVQLNK.G          |       | 2 | 1,6752 | 0,087 | 0,065  |
| 14 | P05114 HMG1_HUMAN   | K.EDLPAENGETK.T        |       | 2 | 1,6751 | 0,253 | -0,406 |
| 14 | P51858 HDGF_HUMAN   | E.DAEAPGIR.D           |       | 2 | 1,6746 | 0,101 | 0,074  |
| 14 | P13639 EF2_HUMAN    | R.GGGQIIPAR.R          |       | 2 | 1,662  | 0,088 | 0,44   |
| 14 | P12004 PCNA_HUMAN   | R.YLNFFTK.A            |       | 2 | 1,6615 | 0,168 | 0,065  |
| 14 | P60228 EIF3E_HUMAN  | E.SYTYKDPITE.F         |       | 2 | 1,659  | 0,105 | 0,1    |
| 14 | P08779 K1C16_HUMAN  | R.EVFTSSSSSSSR.Q       |       | 2 | 1,645  | 0,219 | -0,097 |
| 14 | P40925 MDHC_HUMAN   | E.GLPINDFSR.E          |       | 2 | 1,6421 | 0,139 | 0,359  |
| 14 | P13639 EF2_HUMAN    | K.GVQYLNEIK.D          |       | 2 | 1,6311 | 0,104 | 0,344  |

|    |                      |                                            |            |   |        |       |        |
|----|----------------------|--------------------------------------------|------------|---|--------|-------|--------|
| 14 | P68104 EF1A1_HUMAN   | R.QTVAVGVK.A                               |            | 2 | 1,6299 | 0,091 | 0      |
| 14 | P07814 SYEP_HUMAN    | K.IVQIPFCGE.I                              |            | 2 | 1,6218 | 0,31  | -0,115 |
| 14 | Q7L4E1 FA73B_HUMAN   | E.QALSVGQR.G                               |            | 2 | 1,6155 | 0,294 | 0,071  |
| 14 | Q5T0F9 C2D1B_HUMAN   | E.DEIPPPVALGK.R                            |            | 2 | 1,6149 | 0,15  | -0,322 |
| 14 | P78559 MAP1A_HUMAN   | K.ESSEKPE.K                                |            | 2 | 1,6119 | 0,087 | 0,135  |
| 14 | P02538 K2C6A_HUMAN   | R.SLYGLGGSK.R                              |            | 2 | 1,6118 | 0,103 | 0      |
| 14 | P63104 1433Z_HUMAN   | E.KFLIPNASQAE.S                            |            | 2 | 1,6076 | 0,158 | -0,2   |
| 14 | ##Q05086 UBE3A_HUMAN | E.T#ELPDVRPGK.K                            | T446:      | 2 | 1,598  | 0,164 | -1,535 |
| 14 | P31948 STIP1_HUMAN   | E.QM*QKDPQALSE.H                           |            | 2 | 1,5961 | 0,13  | 0,756  |
| 14 | P12814 ACTN1_HUMAN   | K.ALDFIASK.G                               |            | 2 | 1,5922 | 0,111 | 0,071  |
| 14 | P06493 CDC2_HUMAN    | E.GT#YGVVYK.G                              | T14:       | 2 | 1,5884 | 0,119 | -0,063 |
| 14 | Q9NVX2 NLE1_HUMAN    | R.LLVQFQDE.G                               |            | 2 | 1,5766 | 0,176 | -0,123 |
| 14 | P05783 K1C18_HUMAN   | E.IEALKEE.L                                |            | 2 | 1,5717 | 0,159 | 0,587  |
| 14 | Q8TEW8 PAR3L_HUMAN   | D.FGPTLGLK.K                               |            | 2 | 1,5583 | 0,117 | 0,22   |
| 14 | P35527 K1C9_HUMAN    | R.MTLDDFR.I                                |            | 2 | 1,5433 | 0,144 | 0,068  |
| 14 | Q9Y230 RUVB2_HUMAN   | E.SFSFLNR.A                                |            | 2 | 1,5389 | 0,14  | 0,21   |
| 14 | P53621 COPA_HUMAN    | E.GLGDDALGK.G                              |            | 2 | 1,5381 | 0,142 | 0,865  |
| 14 | P19338 NUCL_HUMAN    | K.GIAYIEFK.T                               |            | 2 | 1,5328 | 0,212 | 0,13   |
| 14 | Q07021 C1QBP_HUMAN   | E.SDIFSIR.E                                |            | 2 | 1,5288 | 0,143 | 0,364  |
| 14 | Q9Y4M2 Q9Y4M2_HUMAN  | R.AVNPHLPR.Q                               |            | 2 | 1,5275 | 0,159 | 0      |
| 14 | P50995 ANX11_HUMAN   | E.TDLLDIR.S                                |            | 2 | 1,5206 | 0,134 | -0,072 |
| 14 | Q8NCE2 MTMRE_HUMAN   | E.DICM*LR.R                                |            | 2 | 1,4805 | 0,099 | 0,296  |
| 14 | Q14683 SMC1A_HUMAN   | R.ISSIYAR.E                                |            | 2 | 1,4715 | 0,155 | 0      |
| 14 | Q58FG1 HS904_HUMAN   | E.YLNFIR.G                                 |            | 2 | 1,4634 | 0,156 | 0,369  |
| 14 | Q9BQA1 MEP50_HUMAN   | E.NET#LIVSK.F                              | T113:      | 2 | 1,4488 | 0,096 | 0,186  |
| 14 | P46013 KI67_HUMAN    | E.DLTGFKE.L                                |            | 2 | 1,4265 | 0,194 | 1,054  |
| 14 | P15374 UCHL3_HUMAN   | E.SVSM*S#PEER.A                            | S130:      | 2 | 1,4037 | 0,134 | -0,327 |
| 14 | Q6UB99 ANR11_HUMAN   | E.VSFT#EPPGDDKPRE.S                        | T1327:     | 2 | 1,3166 | 0,341 | -0,369 |
| 14 | Q8NEZ2 VP37A_HUMAN   | K.S#ASS#SAAGSPGGLTSLQQK.Q                  | S10:S13:   | 2 | 1,2655 | 0,166 | -0,784 |
| 15 | Q8WUD4 CCD12_HUMAN   | R.LKGQEDSLASAVDAATEQK.T                    |            | 2 | 6,2293 | 0,608 | -0,373 |
| 15 | Q08J23 NSUN2_HUMAN   | R.AGEPNS#PDAEEANS#PDVTAGCDPAGVHPPR.-       | S743:S751: | 3 | 4,9923 | 0,473 | -0,922 |
| 15 | Q15149 PLEC1_HUMAN   | R.SSS#VGSSSYPISPAVSR.T                     | S4386:     | 2 | 4,7811 | 0,48  | 0,399  |
| 15 | Q9NW82 WDR70_HUMAN   | K.TM*FAQVES#DDEEAK.N                       | S638:      | 2 | 4,6545 | 0,469 | -0,288 |
| 15 | P31943 HNRH1_HUMAN   | E.GRPSGEAFVELESEDE.V                       |            | 2 | 4,6299 | 0,449 | -0,627 |
| 15 | Q9UK76 HN1_HUMAN     | R.RNS#S#EASSGDFDLKGE.G                     | S87:S88:   | 2 | 4,5536 | 0,434 | 0,248  |
| 15 | O14964 HGS_HUMAN     | R.KSPTPS#APVPLTEPAAQPGEGHAAPTNNVENPLPE.T   | S349:      | 3 | 4,5472 | 0,382 | 0,204  |
| 15 | Q8WUD4 CCD12_HUMAN   | K.GQEDSLASAVDAATEQK.T                      |            | 2 | 4,5448 | 0,554 | -0,567 |
| 15 | Q08J23 NSUN2_HUMAN   | E.GKPTDPSKLES#PSFTGTGDTE.I                 | S473:      | 3 | 4,4739 | 0,379 | -0,328 |
| 15 | O14964 HGS_HUMAN     | E.ARKSPT#PSAPVPLTEPAAQPGEGHAAPTNNVENPLPE.T | T347:      | 3 | 4,4227 | 0,274 | 1,346  |

|    |                    |                                     |            |   |        |       |        |
|----|--------------------|-------------------------------------|------------|---|--------|-------|--------|
| 15 | Q02952 AKA12_HUMAN | K.SAVVHDITDDGQEET#PE.I              | T142:      | 2 | 4,3731 | 0,37  | -0,317 |
| 15 | Q6NZI2 PTRF_HUMAN  | E.AGDLRRGS#S#PDVHALLE.I             | S365:S366: | 3 | 4,3709 | 0,414 | -0,375 |
| 15 | P60709 ACTB_HUMAN  | D.LYANTVLSGGTTM*YPGIADR.M           |            | 2 | 4,319  | 0,555 | 0      |
| 15 | O75694 NU155_HUMAN | K.KPGPPVLSSDPNM*LSNEE.A             |            | 2 | 4,2981 | 0,355 | -0,696 |
| 15 | Q71RC2 LARP4_HUMAN | R.SNVVS#PTKNEDNGAPE.N               | S647:      | 2 | 4,2723 | 0,372 | -0,14  |
| 15 | Q96JM3 ZN828_HUMAN | K.LGSVLSPE#PKPTPLTLEPQKPGSVVSPE.L   | S145:      | 3 | 4,2438 | 0,328 | -0,465 |
| 15 | Q92560 BAP1_HUMAN  | K.GSS#PSIRIQGSQGS#PVEKE.V           | S583:S597: | 3 | 4,233  | 1     | -0,231 |
| 15 | O75145 LIPA3_HUMAN | R.RGS#ALGPDEAGGELE.R                | S17:       | 2 | 4,2013 | 0,436 | -0,635 |
| 15 | Q9UKV3 ACINU_HUMAN | E.LLVSQHTVQLVGGLS#PLSSPSDTK.A       | S478:      | 3 | 4,1799 | 0,376 | -0,432 |
| 15 | Q6NZI2 PTRF_HUMAN  | R.RGS#S#PDVHALLE.I                  | S365:S366: | 2 | 4,1168 | 0,524 | -0,593 |
| 15 | O43251 RBM9_HUMAN  | E.HNLTLYGSTQAHGEQSSNS#PSTQNGSLTTE.G | S85:       | 3 | 4,0933 | 0,476 | 0,113  |
| 15 | Q13506 NAB1_HUMAN  | E.HSLSPADLGPAS#PK.E                 | S183:      | 2 | 4,0792 | 0,29  | -0,869 |
| 15 | Q01082 SPTB2_HUMAN | E.TVDTSEM*VNGATEQR.T                |            | 2 | 4,0554 | 0,472 | -0,148 |
| 15 | Q06265 EXOS9_HUMAN | E.KAPIDTS#DVEEK.A                   | S306:      | 2 | 4,0219 | 0,429 | -0,432 |
| 15 | Q14978 NOLC1_HUMAN | R.GGSISVQVNSIKFDS#E.-               | S698:      | 2 | 4,0189 | 0,431 | -0,14  |
| 15 | Q14247 SRC8_HUMAN  | R.AKTQT#PPVSPAPQPTTE.R              | T401:      | 2 | 4,0161 | 0,496 | -0,197 |
| 15 | Q9Y3A4 ZG14_HUMAN  | E.LQEKPDLAES#PKE.S                  | S99:       | 2 | 3,9612 | 0,416 | -0,312 |
| 15 | P78310 CXAR_HUMAN  | R.SYIGSNHSSLGSM*S#PSNM*E.G          | S306:      | 2 | 3,9595 | 0,448 | 0,233  |
| 15 | P63261 ACTG_HUMAN  | E.IAALVIDNGSGM*CK.A                 |            | 2 | 3,952  | 0,44  | -0,167 |
| 15 | Q8TE77 SSH3_HUMAN  | E.LHGDQTDGFGQS#PQKQEE.Q             | S87:       | 2 | 3,9183 | 0,309 | 0,425  |
| 15 | Q8IYB7 DI3L2_HUMAN | E.AQFDGS#DSEDGHGITQNVLVDGVK.K       | S173:      | 3 | 3,9168 | 0,41  | -0,071 |
| 15 | P42166 LAP2A_HUMAN | E.HSAM*LVSTAAS#PSLIKE.T             | S310:      | 2 | 3,9154 | 0,439 | -0,398 |
| 15 | Q8N6H7 ARFG2_HUMAN | E.HGPNTDLLGTS#PK.A                  | S201:      | 2 | 3,9042 | 0,487 | -0,603 |
| 15 | P39880 CUX1_HUMAN  | E.IQAGSQGQAGASDPSAR.S               |            | 2 | 3,8486 | 0,574 | 0      |
| 15 | Q9H307 PININ_HUMAN | K.S#LSPGKENVSALDM*E.K               | S441:      | 2 | 3,8464 | 0,401 | -0,438 |
| 15 | Q15464 SHB_HUMAN   | E.GQSVD#DSESTVSPR.L                 | S310:      | 2 | 3,8207 | 0,38  | -0,075 |
| 15 | Q9UER7 DAXX_HUMAN  | K.DGDKS#PM*SSLQISNE.K               | S495:      | 2 | 3,8174 | 0,341 | -0,644 |
| 15 | Q92804 RBP56_HUMAN | K.QSSYSQQPYNNQGGQQNM*E.S            |            | 3 | 3,8157 | 0,206 | 0,241  |
| 15 | P04264 K2C1_HUMAN  | R.THNLEPYFESFINNLR.R                |            | 3 | 3,8068 | 0,361 | -0,642 |
| 15 | Q32MZ4 LRRF1_HUMAN | R.NM*PGLSAATLASLGGTSSR.R            |            | 2 | 3,7956 | 0,51  | -0,27  |
| 15 | Q14562 DHX8_HUMAN  | K.NPDGSLQAAM*M*QSALAKE.R            |            | 2 | 3,7953 | 0,513 | -0,37  |
| 15 | Q9NX63 CHCH3_HUMAN | K.SQRYS#GAYGASVSDEE.L               | S50:       | 2 | 3,7573 | 0,543 | -0,068 |
| 15 | Q9P265 DIP2B_HUMAN | R.QAALSAALQQSLQNAE.S                |            | 2 | 3,7417 | 0,46  | -1,337 |
| 15 | O75531 BAF_HUMAN   | R.DFVAEPM*GEKPVGSLAGIGE.V           |            | 2 | 3,7321 | 0,481 | 0,181  |
| 15 | P55884 EIF3B_HUMAN | R.AQAVSEDAGNEGR.A                   |            | 2 | 3,7261 | 0,559 | -0,269 |
| 15 | P08621 RU17_HUMAN  | E.ARGGGGGQDNGLEGLGND#R.D            | S410:      | 2 | 3,6935 | 0,42  | 0      |
| 15 | Q9UQ35 SRRM2_HUMAN | R.SSGHSSSELS#PDAVEK.A               | S1387:     | 2 | 3,6537 | 0,406 | -0,216 |
| 15 | Q96SB3 NEB2_HUMAN  | K.IHFSTAPIQVFSTYSNE.D               |            | 2 | 3,6472 | 0,438 | -0,44  |
| 15 | Q02880 TOP2B_HUMAN | K.VKAS#PITNDGEDE.F                  | S1400:     | 2 | 3,6116 | 0,385 | 0      |

|    |                     |                            |            |   |        |       |        |
|----|---------------------|----------------------------|------------|---|--------|-------|--------|
| 15 | Q92615 LARP5_HUMAN  | E.KFTSSQTQSPTPPKPPS#PSFE.L | S524:      | 3 | 3,6071 | 0,278 | 0      |
| 15 | Q9C0C2 TB182_HUMAN  | E.AADSDAHLFQDSTEPR.A       |            | 2 | 3,6    | 0,542 | -0,555 |
| 15 | Q00613 HSF1_HUMAN   | R.GHTDTEGRPPS#PPPTSTPE.K   | S363:      | 2 | 3,5923 | 0,382 | 0,299  |
| 15 | A8K1U6 A8K1U6_HUMAN | E.TGVFVINHFTCRS#.-         | S523:      | 2 | 3,5648 | 0,44  | -0,302 |
| 15 | Q9UJ14 GGT7_HUMAN   | E.DAFLGDPDTPDSFLK.S        |            | 2 | 3,5579 | 0,423 | -0,418 |
| 15 | Q8TE77 SSH3_HUMAN   | E.LHGDQDTDFGQGSQS#PQKQEE.Q | S87:       | 3 | 3,5559 | 0,218 | 0,08   |
| 15 | Q7L7X3 TAOK1_HUMAN  | E.GDHTVM*S#NS#SVIHLKPEEE.N | S392:S394: | 3 | 3,532  | 0,269 | 0,16   |
| 15 | P60709 ACTB_HUMAN   | D.LYANTVLSGGTTM*YPGIADR.M  |            | 3 | 3,5118 | 0,249 | 0,086  |
| 15 | Q96SB3 NEB2_HUMAN   | R.KIHFSTAPIQVFSTYSNE.D     |            | 3 | 3,4884 | 0,307 | -0,354 |
| 15 | P82094 TMF1_HUMAN   | E.INS#DDELSGK.G            | S344:      | 2 | 3,48   | 0,489 | -0,105 |
| 15 | Q2PPJ7 AS250_HUMAN  | E.NAPAAGSGHLTVGQQQQVLR.S   |            | 3 | 3,4699 | 0,404 | -0,45  |
| 15 | P35579 MYH9_HUMAN   | K.IAQLEEQLDNE.T            |            | 2 | 3,4582 | 0,311 | -0,469 |
| 15 | P35749 MYH11_HUMAN  | E.M*KTQLEEELEDE.L          |            | 2 | 3,4142 | 0,126 | -1,06  |
| 15 | P78347 GTF2I_HUMAN  | R.KINS#SPNVNTTASGVED.L     | S830:      | 2 | 3,3802 | 0,432 | 0,135  |
| 15 | O00139 KIF2A_HUMAN  | E.INKS#LLALKE.C            | S484:      | 2 | 3,3767 | 0,324 | -0,101 |
| 15 | Q8TEA8 DTD1_HUMAN   | R.SAS#SGAEGDVSSEREP.-      | S196:      | 2 | 3,3764 | 0,397 | -0,223 |
| 15 | P04183 KITH_HUMAN   | R.KLFAPQQILQCS#PAN.-       | S231:      | 2 | 3,3623 | 0,365 | 0      |
| 15 | Q92804 RBP56_HUMAN  | K.QSSYSQQPYNNQGGQQQNM*E.S  |            | 2 | 3,3555 | 0,429 | 0,429  |
| 15 | O75506 HSBP1_HUMAN  | E.KNIADLM*TQAGVEE.L        |            | 2 | 3,3497 | 0,469 | -0,715 |
| 15 | P18583 SON_HUMAN    | R.AGIEGPLLASDVGR.D         |            | 2 | 3,3414 | 0,297 | -0,09  |
| 15 | O60264 SMCA5_HUMAN  | E.IFDDAS#PGKQKE.I          | S66:       | 2 | 3,3393 | 0,377 | -0,345 |
| 15 | Q16514 TAF12_HUMAN  | K.IPGTPGAGGRLS#PE.N        | S51:       | 2 | 3,3377 | 0,335 | -1,23  |
| 15 | O14893 GEMI2_HUMAN  | E.AAQCPDVVVAQIDPK.K        |            | 2 | 3,337  | 0,298 | -0,757 |
| 15 | P49023 PAXI_HUMAN   | K.TSSVSNPQDSVGS#PCSR.V     | S106:      | 2 | 3,2874 | 0,403 | -0,066 |
| 15 | Q9Y580 RBM7_HUMAN   | E.RTM*DNM*TSSAQIQR.S       |            | 3 | 3,2872 | 0,268 | 0      |
| 15 | Q00839 HNRPU_HUMAN  | R.AKS#PQPVEEED.E.H         | S270:      | 2 | 3,2818 | 0,473 | -0,397 |
| 15 | Q99439 CNN2_HUMAN   | K.AGQCVIGLQM*GTNK.C        |            | 2 | 3,2803 | 0,399 | -0,981 |
| 15 | Q9H307 PININ_HUMAN  | K.S#LSPGKENVS#ALDM*EKE.S   | S441:S450: | 2 | 3,2665 | 0,24  | -0,546 |
| 15 | B2CI53 B2CI53_HUMAN | E.RNGILASPQS#APGNLDNSK.S   | S263:      | 2 | 3,2648 | 0,231 | 0      |
| 15 | Q9H307 PININ_HUMAN  | E.IAIVHS#DAEKE.Q           | S347:      | 2 | 3,2486 | 0,408 | -0,283 |
| 15 | Q08J23 NSUN2_HUMAN  | E.GKPTDPSKLES#PSFTGTGDTE.I | S473:      | 2 | 3,2396 | 0,271 | -0,219 |
| 15 | Q71U36 TBA1A_HUMAN  | E.HSDCAFV*VDNEAIYD.I       |            | 2 | 3,2164 | 0,291 | -0,474 |
| 15 | P24534 EF1B_HUMAN   | K.YGPADVEDTTGSGATDSK.D     |            | 2 | 3,1973 | 0,59  | -0,551 |
| 15 | O00231 PSD11_HUMAN  | R.AQS#LLSTDRE.A            | S14:       | 2 | 3,1942 | 0,287 | 0,203  |
| 15 | Q99700 ATX2_HUMAN   | E.NIKPNETS#PSFSKAE.N       | S771:      | 2 | 3,1835 | 0,356 | -0,353 |
| 15 | Q9Y6M7 S4A7_HUMAN   | K.TSS#TVNTKFE.K            | S26:       | 2 | 3,1816 | 0,431 | 0      |
| 15 | P78347 GTF2I_HUMAN  | R.KINS#SPNVNTTASGVE.D      | S830:      | 2 | 3,1801 | 0,453 | -0,287 |
| 15 | Q14980 NUMA1_HUMAN  | E.SRPSLSLGTITDEE.M         |            | 2 | 3,179  | 0,353 | -0,486 |
| 15 | P04264 K2C1_HUMAN   | R.SLDLDSIIAEVK.A           |            | 2 | 3,1786 | 0,425 | -0,375 |

|    |                     |                           |            |   |        |       |        |
|----|---------------------|---------------------------|------------|---|--------|-------|--------|
| 15 | Q14493 SLBP_HUMAN   | R.HM*DSQVEDEFDLE.A        |            | 2 | 3,1713 | 0,371 | -0,834 |
| 15 | Q01082 SPTB2_HUMAN  | E.KM*LTAQDM*SYDE.A        |            | 2 | 3,1475 | 0,358 | -0,167 |
| 15 | Q9H3S7 PTN23_HUMAN  | R.RGAAAADLLSSS#PE.S       | S1123:     | 2 | 3,1394 | 0,306 | -1,027 |
| 15 | Q02952 AKA12_HUMAN  | E.SQVHM*M*AAVADGTR.A      |            | 3 | 3,1173 | 0,353 | 0,464  |
| 15 | Q92598 HS105_HUMAN  | E.LNNTCEPVVTQPKPK.I       |            | 3 | 3,1075 | 0,173 | -0,212 |
| 15 | Q9UQ35 SRRM2_HUMAN  | E.SYFGVSSLQLK.G           |            | 2 | 3,1068 | 0,457 | -0,496 |
| 15 | Q12905 ILF2_HUMAN   | R.VKPAPDETS#FSE.A         | S52:       | 2 | 3,1016 | 0,286 | -0,352 |
| 15 | Q04917 1433F_HUMAN  | E.DSYKDSTLIM*QLLR.D       |            | 2 | 3,0995 | 0,381 | -0,574 |
| 15 | P02545 LMNA_HUMAN   | R.NSNLVGAAHEE.L           |            | 2 | 3,0848 | 0,295 | -0,321 |
| 15 | Q58FF8 H90B2_HUMAN  | E.SKEQVANSAFVE.Q          |            | 2 | 3,0829 | 0,454 | -0,559 |
| 15 | Q9Y490 TLN1_HUMAN   | E.KM*VGGIAQIIAAQEE.M      |            | 2 | 3,0799 | 0,264 | -1,008 |
| 15 | O14530 TXND9_HUMAN  | E.IQKLDQM*DEDE.L          |            | 2 | 3,0721 | 0,399 | -0,177 |
| 15 | P40222 TXLNA_HUMAN  | D.LSAGGQGS LTDSGPER.R     |            | 2 | 3,068  | 0,469 | -0,159 |
| 15 | Q14974 IMB1_HUMAN   | E.VKNYVLQTLGTE.T          |            | 2 | 3,0667 | 0,45  | -0,179 |
| 15 | Q8TEA8 DTD1_HUMAN   | R.SASS#GAEGDVSSEREP.-     | S197:      | 2 | 3,0527 | 0,451 | -0,074 |
| 15 | Q9UK76 HN1_HUMAN    | R.RNS#SEASSGDFDLK.G       | S87:       | 2 | 3,0524 | 0,341 | -0,286 |
| 15 | Q9H307 PININ_HUMAN  | K.SLS#PGKENVS#ALDM*EKE.S  | S443:S450: | 3 | 3,045  | 0,11  | -1,183 |
| 15 | P61160 ARP2_HUMAN   | E.IKDLM*VGDEASE.L         |            | 2 | 3,0391 | 0,415 | -0,184 |
| 15 | Q15427 SF3B4_HUMAN  | E.RNQDATVYVGGGLDE.K       |            | 2 | 3,0362 | 0,284 | -0,714 |
| 15 | P35908 K22E_HUMAN   | R.NLDLDSIIAEVK.A          |            | 2 | 3,035  | 0,311 | -0,642 |
| 15 | Q8N6H7 ARFG2_HUMAN  | E.HGPNTDLLGTS#PKASLE.L    | S201:      | 2 | 3,0321 | 0,292 | -0,134 |
| 15 | Q9Y6Y8 S23IP_HUMAN  | K.VVES#PDFSKDE.D          | S926:      | 2 | 3,0299 | 0,29  | -0,641 |
| 15 | Q99700 ATX2_HUMAN   | E.NIKPNET#SPSFSK.A        | T770:      | 2 | 3,0299 | 0,353 | 0,399  |
| 15 | O43583 DENR_HUMAN   | E.FAKLTVENS#PKQE.A        | S73:       | 2 | 3,0254 | 0,329 | -0,621 |
| 15 | P35659 DEK_HUMAN    | E.GEGTPTQPASEKEPEM*PGPR.E |            | 2 | 3,0211 | 0,277 | 0      |
| 15 | Q9BZ95 NSD3_HUMAN   | E.ILEKPSPPQPPPSVPTVIK.K   |            | 3 | 3,02   | 0,251 | -0,599 |
| 15 | Q92785 REQU_HUMAN   | E.GEDKEDS#QPPTPVSR.S      | S244:      | 3 | 3,0142 | 0,146 | -0,494 |
| 15 | Q6NZI2 PTRF_HUMAN   | D.LRRGS#S#PDVHALLE.I      | S365:S366: | 3 | 3,0137 | 0,237 | 0,214  |
| 15 | Q14980 NUMA1_HUMAN  | E.KQAAS#PLEPK.E           | S271:      | 2 | 3,0114 | 0,337 | -0,106 |
| 15 | P41236 IPP2_HUMAN   | E.M*NILATYHPADK.D         |            | 3 | 3,0006 | 0,15  | 0,197  |
| 15 | P23443 KS6B1_HUMAN  | E.SIHDGTVTHT#FCGTIE.Y     | T252:      | 2 | 2,9996 | 0,272 | -0,263 |
| 15 | P08133 ANXA6_HUMAN  | E.IKDAISGIGTDE.K          |            | 2 | 2,9689 | 0,429 | -0,701 |
| 15 | O43166 SI1L1_HUMAN  | K.KLIDLES#PTPE.S          | S1549:     | 2 | 2,9634 | 0,317 | -0,277 |
| 15 | Q7Z6Z7 HUWE1_HUMAN  | E.KFQDADPLEQDE.L          |            | 2 | 2,9629 | 0,175 | -0,255 |
| 15 | Q9Y608 LRRF2_HUMAN  | R.NSASATPLSGNS#S#R.R      | S323:S324: | 2 | 2,9613 | 0,37  | 0,152  |
| 15 | Q9Y2J4 AMOL2_HUMAN  | R.TLLAIQQALR.G            |            | 2 | 2,958  | 0,363 | -0,389 |
| 15 | P49792 RBP2_HUMAN   | E.KVELVTGEEDE.K           |            | 2 | 2,9522 | 0,32  | -0,293 |
| 15 | Q15651 HMG3_HUMAN   | K.EGTAPS#ENGETKAE.A       | S78:       | 2 | 2,9509 | 0,53  | -0,075 |
| 15 | B2CI53 B2CI53_HUMAN | E.RNGILASPQS#APGNLDSK.S   | S263:      | 3 | 2,95   | 0,269 | -0,181 |

|    |                     |                                  |            |   |        |       |        |
|----|---------------------|----------------------------------|------------|---|--------|-------|--------|
| 15 | Q9UQ35 SRRM2_HUMAN  | R.SSGHSSSELS#PDAVEK.A            | S1387:     | 3 | 2,9238 | 0,099 | 0      |
| 15 | O60271 JIP4_HUMAN   | R.SASQSS#LDKLDQE.L               | S733:      | 2 | 2,9206 | 0,14  | 0      |
| 15 | Q13506 NAB1_HUMAN   | E.HSLSPADLGSPAS#PKESSE.A         | S183:      | 3 | 2,9113 | 0,303 | -0,833 |
| 15 | Q9UHB6 LIMA1_HUMAN  | R.KIS#ENSYSLDDLE.I               | S225:      | 2 | 2,9039 | 0,309 | -0,306 |
| 15 | Q04917 1433F_HUMAN  | E.DSYKDSLIM*QLLR.D               |            | 3 | 2,9021 | 0,129 | 0      |
| 15 | P39687 AN32A_HUMAN  | E.VTNLNDRYRE.N                   |            | 2 | 2,8995 | 0,233 | -0,217 |
| 15 | Q6P2E9 EDC4_HUMAN   | E.GLEPDSM*ASAASALHLLS#PRPRPGPE.L | S780:      | 3 | 2,8901 | 0,307 | 0,199  |
| 15 | O14617 AP3D1_HUMAN  | R.ALDIDLKPLADSE.K                |            | 2 | 2,8897 | 0,384 | 0,161  |
| 15 | Q6KC79 NIPBL_HUMAN  | E.KAAM*YDISS#PSKD.S              | S350:      | 2 | 2,8875 | 0,375 | -1,204 |
| 15 | Q9P260 K1468_HUMAN  | E.DKISLLNSE.K                    |            | 2 | 2,8853 | 0,307 | 0      |
| 15 | Q8TEW0 PARD3_HUMAN  | E.GSM*ALNARPQS#PRE.G             | S1116:     | 3 | 2,8831 | 0,304 | -0,114 |
| 15 | P05783 K1C18_HUMAN  | R.GGM*GSGGLATGIAGGLAGM*GGIQNE.K  |            | 3 | 2,8824 | 0,089 | -0,085 |
| 15 | Q9Y4B6 VPRBP_HUMAN  | E.NQDIAANYRDE.N                  |            | 2 | 2,8753 | 0,348 | -0,28  |
| 15 | O43583 DENR_HUMAN   | K.LTVENS#PKQE.A                  | S73:       | 2 | 2,8746 | 0,259 | -0,498 |
| 15 | Q58FG0 HS905_HUMAN  | E.TKDQVANSFAVE.C                 |            | 2 | 2,8687 | 0,32  | -1,025 |
| 15 | P07195 LDHB_HUMAN   | E.KLIAPVAEEE.A                   |            | 2 | 2,8632 | 0,287 | -0,999 |
| 15 | Q8NEL9 DDHD1_HUMAN  | E.NEGISTIPS#PVTS#PVLRS.R         | S723:S727: | 2 | 2,8579 | 0,326 | -0,363 |
| 15 | P37802 TAGL2_HUMAN  | K.NVIGLQM*GTNR.G                 |            | 2 | 2,8553 | 0,482 | -0,1   |
| 15 | P39687 AN32A_HUMAN  | E.GKLEGLTDFEE.L                  |            | 2 | 2,8529 | 0,226 | 0      |
| 15 | Q96RU3 FNBP1_HUMAN  | R.T#VSDNS#LSNSRGE.G              | T294:S299: | 2 | 2,8476 | 0,388 | 0,08   |
| 15 | Q14247 SRC8_HUMAN   | R.AKTQT#PPVSPAPQPTTEE.R          | T401:      | 3 | 2,844  | 0,196 | 0      |
| 15 | Q9NX63 CHCH3_HUMAN  | R.YS#GAYGASVSDEE.L               | S50:       | 2 | 2,842  | 0,365 | -0,086 |
| 15 | Q6S8J3 A26CA_HUMAN  | E.KLCYVALDFEQE.M                 |            | 2 | 2,8414 | 0,298 | -0,966 |
| 15 | P10515 ODP2_HUMAN   | E.DKLVPADNE.K                    |            | 2 | 2,8339 | 0,217 | -0,122 |
| 15 | Q92576 PHF3_HUMAN   | E.NNLQDNQTSNSSPCR.S              |            | 2 | 2,8334 | 0,466 | -0,07  |
| 15 | Q9UPN9 TRI33_HUMAN  | E.DAGSSSLDNLLSR.Y                |            | 2 | 2,8247 | 0,268 | -0,366 |
| 15 | O75691 UTP20_HUMAN  | E.KELQNDM*TDEK.S                 |            | 3 | 2,8243 | 0,21  | 0,268  |
| 15 | O43166 SI1L1_HUMAN  | E.DLKKLIDLES#PTPE.S              | S1549:     | 2 | 2,8224 | 0,371 | -0,364 |
| 15 | P40222 TXLNA_HUMAN  | R.RPEGPGAQAPSS#PR.V              | S515:      | 2 | 2,8182 | 0,361 | 0,082  |
| 15 | P08670 VIME_HUMAN   | E.VDALKGTNE.S                    |            | 2 | 2,8135 | 0,276 | 0,129  |
| 15 | Q15819 UB2V2_HUMAN  | E.NM*KLPQPPEGQTYNN.-             |            | 2 | 2,8125 | 0,153 | 0,07   |
| 15 | O60264 SMCA5_HUMAN  | E.IFDDAS#PGK.Q                   | S66:       | 2 | 2,8124 | 0,358 | 0      |
| 15 | O75937 DNJC8_HUMAN  | E.GKPTIVEEDDPE.L                 |            | 2 | 2,8084 | 0,469 | -0,367 |
| 15 | P05114 HMG1_HUMAN   | E.TKEDLPAENGETK.T                |            | 3 | 2,805  | 0,16  | 0,192  |
| 15 | O75947 ATP5H_HUMAN  | E.DKYTAQVDAEE.K                  |            | 2 | 2,8019 | 0,419 | -0,673 |
| 15 | Q9P287 BCCIP_HUMAN  | E.LTDLLIQNHIGSVIK.Q              |            | 3 | 2,8013 | 0,144 | 0      |
| 15 | P27816 MAP4_HUMAN   | K.DM*ES#PTKLDVTLAK.D             | S280:      | 2 | 2,7896 | 0,272 | -0,965 |
| 15 | Q13367 AP3B2_HUMAN  | K.AFYGS#EEDEAK.G                 | S272:      | 2 | 2,7861 | 0,469 | -0,552 |
| 15 | Q52LD0 Q52LD0_HUMAN | K.AGGS#PAS#YHGSTSPR.V            | S192:S195: | 2 | 2,7845 | 0,409 | -0,383 |

|    |                    |                                  |            |   |        |       |        |
|----|--------------------|----------------------------------|------------|---|--------|-------|--------|
| 15 | Q9NZL4 HPBP1_HUMAN | E.KLLQTCFSS#PADDSM*DR.-          | S354:      | 2 | 2,7722 | 0,467 | -0,236 |
| 15 | O60264 SMCA5_HUMAN | E.IFDDAS#PGKQK.E                 | S66:       | 2 | 2,7699 | 0,169 | -0,285 |
| 15 | Q7Z6M1 RABEK_HUMAN | R.TFHTSSAAIGNQLYVFGGGER.G        |            | 3 | 2,7688 | 0,182 | -0,744 |
| 15 | Q8TEA8 DTD1_HUMAN  | E.DRSAS#SGAEGDVSSEREP.-          | S196:      | 2 | 2,7641 | 0,238 | 0,064  |
| 15 | P82094 TMF1_HUMAN  | K.GYALVPIIVNSSTPK.S              |            | 2 | 2,7641 | 0,136 | -0,47  |
| 15 | P14136 GFAP_HUMAN  | K.LALDIEIATYR.K                  |            | 2 | 2,7625 | 0,334 | -0,382 |
| 15 | P41236 IPP2_HUMAN  | E.M*NILATYHPADK.D                |            | 2 | 2,7615 | 0,203 | -0,614 |
| 15 | Q6S8J3 A26CA_HUMAN | K.AGFAGDDAPR.A                   |            | 2 | 2,7558 | 0,385 | -0,125 |
| 15 | Q96SB3 NEB2_HUMAN  | E.SGCVEIPGLS#EEEDPAPSR.K         | S436:      | 2 | 2,7555 | 0,291 | 0,116  |
| 15 | Q8N556 AFAP1_HUMAN | K.KLS#SERPS#SDGEGVVE.N           | S277:S282: | 2 | 2,7503 | 0,368 | -0,465 |
| 15 | Q9P1Y6 K1542_HUMAN | E.KAEAPS#SPDVAPAGK.E             | S1359:     | 2 | 2,7497 | 0,377 | -0,081 |
| 15 | P04792 HSPB1_HUMAN | E.SPAVAAPAYS.R.A                 |            | 2 | 2,7436 | 0,322 | -0,336 |
| 15 | P63241 IF5A1_HUMAN | E.IEQKYDCGEE.I                   |            | 2 | 2,7321 | 0,271 | 0      |
| 15 | Q00839 HNRPU_HUMAN | E.TEDYGEKFDE.N                   |            | 2 | 2,7312 | 0,481 | -0,198 |
| 15 | Q15648 MED1_HUMAN  | E.KSYQNSPS#SDDGIRPLPE.Y          | S1481:     | 3 | 2,7232 | 0,098 | -0,619 |
| 15 | P19838 NFKB1_HUMAN | K.TTSQAHSPLSPASTR.Q              |            | 3 | 2,7217 | 0,14  | 0,221  |
| 15 | P49023 PAXI_HUMAN  | E.HVYSFPNK.Q                     |            | 2 | 2,7212 | 0,403 | -0,43  |
| 15 | Q13263 TIF1B_HUMAN | R.STAPSAASASASAAASS#PAGGGAEALE.L | S50:       | 3 | 2,7083 | 0,228 | -0,305 |
| 15 | Q9UQ35 SRRM2_HUMAN | R.GEFSAS#PM*LK.S                 | S1124:     | 2 | 2,7038 | 0,383 | -0,944 |
| 15 | P42224 STAT1_HUMAN | E.IKSLEDLQDE.Y                   |            | 2 | 2,696  | 0,251 | -0,513 |
| 15 | Q12888 TP53B_HUMAN | R.ADDPLRLDQE.L                   |            | 2 | 2,6946 | 0,296 | -1,041 |
| 15 | Q14980 NUMA1_HUMAN | E.KQAQLAQLTQQQE.Q                |            | 2 | 2,6814 | 0,227 | -0,806 |
| 15 | Q96S82 UBL7_HUMAN  | E.GLS#DDEDDFHPNTR.S              | S230:      | 2 | 2,6795 | 0,358 | -1,15  |
| 15 | Q01814 AT2B2_HUMAN | K.SATSSSPGS#PIHSLE.T             | S1234:     | 2 | 2,6751 | 0,151 | -0,794 |
| 15 | P63104 1433Z_HUMAN | E.KFLIPNASQAE.S                  |            | 2 | 2,6722 | 0,246 | -0,601 |
| 15 | Q9Y266 NUDC_HUMAN  | K.LSDLDS#ETR.S                   | S281:      | 2 | 2,6667 | 0,198 | -0,109 |
| 15 | O75943 RAD17_HUMAN | E.HGM*IDPDS#GDEAQLNGGHSAAEE.S    | S613:      | 3 | 2,6651 | 0,109 | -0,232 |
| 15 | Q9H8G2 CI082_HUMAN | E.KELFLAEHS#DLEE.G               | S120:      | 2 | 2,6626 | 0,217 | -0,595 |
| 15 | Q15149 PLEC1_HUMAN | E.FADM*LSGNAGGFR.S               |            | 2 | 2,6585 | 0,519 | -0,988 |
| 15 | P05114 HMG1_HUMAN  | E.TKEDLPAENGETK.T                |            | 2 | 2,6511 | 0,292 | -0,085 |
| 15 | Q02535 ID3_HUMAN   | -.M*KALS#PVR.G                   | S5:        | 2 | 2,6501 | 0,181 | -0,061 |
| 15 | Q06323 PSME1_HUMAN | E.DKGPPCGPVNCNE.K                |            | 2 | 2,6491 | 0,228 | 0,085  |
| 15 | P41236 IPP2_HUMAN  | E.M*NILATYHPADKDYGLM*K.I         |            | 3 | 2,6463 | 0,114 | -0,693 |
| 15 | P35612 ADDB_HUMAN  | E.TKS#PLVSPSK.S                  | S613:      | 2 | 2,64   | 0,218 | -0,109 |
| 15 | Q14694 UBP10_HUMAN | E.NDGVSSGGLGQRE.R                |            | 2 | 2,6394 | 0,336 | -0,308 |
| 15 | P13639 EF2_HUMAN   | E.ICLKDLEED.H                    |            | 2 | 2,6381 | 0,192 | -0,43  |
| 15 | Q96TA1 NIBL1_HUMAN | K.AVDLGPCKPSDQE.T                |            | 2 | 2,6374 | 0,346 | 0      |
| 15 | Q92574 TSC1_HUMAN  | R.NKS#ESQCDEDGM*TSSLSE.S         | S1100:     | 2 | 2,6351 | 0,308 | 0,232  |
| 15 | Q92785 REQU_HUMAN  | E.GEDKEDSQPPT#PVSQR.S            | T248:      | 2 | 2,6332 | 0,303 | 0,198  |



|    |                     |                              |            |   |        |       |        |
|----|---------------------|------------------------------|------------|---|--------|-------|--------|
| 15 | P20020 AT2B1_HUMAN  | K.SATSSSPGSPHLSLET#SL.-      | T1256:     | 2 | 2,6311 | 0,372 | -0,332 |
| 15 | P29558 RBMS1_HUMAN  | E.TSNDHS#PYTFQPNK.-          | S398:      | 3 | 2,6304 | 0,139 | -0,533 |
| 15 | Q07021 C1QBP_HUMAN  | E.SDIFSIRE.V                 |            | 2 | 2,6296 | 0,28  | -0,252 |
| 15 | Q96TA1 NIBL1_HUMAN  | E.ASS#PPASPLQHLLPGK.A        | S679:      | 2 | 2,6289 | 0,352 | -0,508 |
| 15 | Q9H6Z4 RANB3_HUMAN  | E.KVEVITGEEAE.S              |            | 2 | 2,6267 | 0,276 | 0      |
| 15 | Q9C0C2 TB182_HUMAN  | E.AADSDAHLFQDSTEPR.A         |            | 3 | 2,6214 | 0,309 | -0,52  |
| 15 | Q6S8J3 A26CA_HUMAN  | E.KLCYVALDFE.Q               |            | 2 | 2,6197 | 0,306 | -0,291 |
| 15 | Q6AI39 K0240_HUMAN  | E.KVVGSS#PGHPAVQVE.S         | S675:      | 2 | 2,617  | 0,31  | -0,466 |
| 15 | Q96GS4 CQ059_HUMAN  | R.RAT#ISSPLELE.G             | T62:       | 2 | 2,6155 | 0,145 | -0,282 |
| 15 | Q00839 HNRPU_HUMAN  | R.AKS#PQPPVEEE.D             | S270:      | 2 | 2,6126 | 0,379 | 0      |
| 15 | Q00613 HSF1_HUMAN   | E.SEPAPASVTALTDAR.G          |            | 2 | 2,6115 | 0,4   | -0,657 |
| 15 | Q9UBR2 CATZ_HUMAN   | R.VGDYGSLSGRE.K              |            | 2 | 2,6087 | 0,307 | -0,749 |
| 15 | Q9UN86 G3BP2_HUMAN  | E.SSHEPEPEPESE.T             |            | 2 | 2,6048 | 0,282 | -0,09  |
| 15 | Q86WB0 NIPA_HUMAN   | R.QLIDEGIAPEEGVDAK.D         |            | 2 | 2,6025 | 0,546 | -0,491 |
| 15 | Q8WWQ0 PHIP_HUMAN   | R.LSRGS#ISSTSE.V             | S674:      | 2 | 2,6024 | 0,211 | -0,203 |
| 15 | Q9UGU0 TCF20_HUMAN  | R.LNAS#PAAREE.A              | S574:      | 2 | 2,6023 | 0,189 | 0,107  |
| 15 | P46821 MAP1B_HUMAN  | K.SDISPLT#PRE.S              | T1788:     | 2 | 2,5992 | 0,373 | -1,021 |
| 15 | Q6GYQ0 GRIPE_HUMAN  | E.SLKEPEPLHS#PDSE.R          | S1478:     | 2 | 2,5967 | 0,315 | 0,148  |
| 15 | P07910 HNRPC_HUMAN  | R.GDDQLELIK.D                |            | 2 | 2,584  | 0,142 | -0,237 |
| 15 | P49023 PAXI_HUMAN   | K.QKS#AEPS#PTVM*STSLGSLNSE.L | S126:S130: | 2 | 2,5797 | 0,326 | 0,315  |
| 15 | B2RDY9 B2RDY9_HUMAN | R.SALFAQINQGE.S              |            | 2 | 2,5791 | 0,245 | 0,104  |
| 15 | Q6WCQ1 MRIP_HUMAN   | E.TNAVGPS#PSSDTR.Q           | S325:      | 2 | 2,5783 | 0,48  | -0,089 |
| 15 | Q9UHB6 LIMA1_HUMAN  | E.VQQPVHPKPLSPDS#R.A         | S365:      | 3 | 2,5765 | 0,226 | -0,104 |
| 15 | Q01082 SPTB2_HUMAN  | K.TALPAQSAATLPAR.T           |            | 2 | 2,5751 | 0,386 | -0,624 |
| 15 | Q99700 ATX2_HUMAN   | E.NIKPNETS#PSFSK.A           | S771:      | 3 | 2,5733 | 0,123 | 0,598  |
| 15 | Q15477 SKIV2_HUMAN  | R.GDTVSAASPCSAPLAR.A         |            | 2 | 2,5702 | 0,354 | -0,246 |
| 15 | Q9BVS4 RIOK2_HUMAN  | R.SSGDPEQIKEDS#LSEE.S        | S380:      | 2 | 2,5685 | 0,227 | -0,133 |
| 15 | Q8TBEO BAHD1_HUMAN  | E.GKLS#PVAAPHEE.G            | S405:      | 2 | 2,5443 | 0,35  | -0,649 |
| 15 | P04075 ALDOA_HUMAN  | K.RLQS#IGTENEE.N             | S46:       | 2 | 2,5416 | 0,312 | -0,167 |
| 15 | Q9BVS4 RIOK2_HUMAN  | R.S#SGDPEQIKE.D              | S369:      | 2 | 2,5416 | 0,221 | 0,104  |
| 15 | Q14980 NUMA1_HUMAN  | R.RAS#M*QPIQIAE.G            | S1969:     | 2 | 2,541  | 0,243 | -0,728 |
| 15 | P62937 PPIA_HUMAN   | K.KITIADCGQLE.-              |            | 2 | 2,5376 | 0,32  | -0,391 |
| 15 | Q8TE77 SSH3_HUMAN   | K.VGGVS#PEEHPAPE.V           | S484:      | 2 | 2,5342 | 0,399 | -0,441 |
| 15 | Q14257 RCN2_HUMAN   | E.KANQDSGPGLSLEE.F           |            | 2 | 2,5272 | 0,264 | -0,591 |
| 15 | Q01814 AT2B2_HUMAN  | K.SATSSS#PGSPIHSLE.T         | S1231:     | 2 | 2,5268 | 1     | -0,794 |
| 15 | Q9GZR7 DDX24_HUMAN  | E.AGAETRS#PGKAAE.S           | S287:      | 2 | 2,5262 | 0,34  | -0,168 |
| 15 | Q32MZ4 LRRF1_HUMAN  | K.IDGATQSS#PAEPK.S           | S714:      | 2 | 2,5201 | 0,246 | -0,088 |
| 15 | Q71U36 TBA1A_HUMAN  | E.HSDCAFMT*VDNE.A            |            | 2 | 2,5187 | 0,276 | -0,455 |
| 15 | P16435 NCPR_HUMAN   | K.IQTLTSS#VRE.S              | S63:       | 2 | 2,5185 | 0,256 | -0,302 |

|    |                    |                                  |            |   |        |       |        |
|----|--------------------|----------------------------------|------------|---|--------|-------|--------|
| 15 | Q01433 AMPD2_HUMAN | E.RQIS#QDVKLEPD.I                | S168:      | 2 | 2,5125 | 0,367 | -0,728 |
| 15 | P46937 YAP1_HUMAN  | R.LQQLQM*EKE.R                   |            | 2 | 2,5025 | 0,185 | 0,105  |
| 15 | P60174 TPIS_HUMAN  | R.IIYGG#VTGATCKE.L               | S212:      | 2 | 2,4941 | 0,101 | -0,635 |
| 15 | Q14692 BMS1_HUMAN  | K.AGLS#PANCQSDR.V                | S552:      | 2 | 2,4908 | 0,319 | 0      |
| 15 | Q13435 SF3B2_HUMAN | E.KEDFSDM*VAE.H                  |            | 2 | 2,4905 | 0,231 | -0,514 |
| 15 | P46459 NSF_HUMAN   | E.NDIKPAFGTNQE.D                 |            | 2 | 2,4904 | 0,296 | -0,457 |
| 15 | P49023 PAXI_HUMAN  | E.LM*ASLSDFK.I                   |            | 2 | 2,4889 | 0,35  | -0,119 |
| 15 | Q9UMZ2 SYNG_HUMAN  | E.ASPVPLTSNVGSTVK.G              |            | 2 | 2,4884 | 0,381 | -0,502 |
| 15 | Q92785 REQU_HUMAN  | E.GEDKEDSQPPT#PVSQR.S            | T248:      | 3 | 2,4852 | 0,099 | -0,198 |
| 15 | Q9ULA0 DNPEP_HUMAN | E.KGTPEPGPLNAVDE.R               |            | 2 | 2,4839 | 0,484 | -0,171 |
| 15 | Q6NZI2 PTRF_HUMAN  | R.GS#S#PDVHALLE.I                | S365:S366: | 2 | 2,4762 | 0,328 | 0,285  |
| 15 | P04920 B3A2_HUMAN  | E.RTS#PSSPAPLPHQE.A              | S170:      | 2 | 2,4748 | 0,383 | -0,616 |
| 15 | Q05682 CALD1_HUMAN | E.AKTTTTNTQVEGDDE.A              |            | 2 | 2,4721 | 0,345 | 0,303  |
| 15 | Q13596 SNX1_HUMAN  | K.ITTSLLPINNGSKE.N               |            | 2 | 2,4684 | 0,289 | -1,067 |
| 15 | P19484 TFEB_HUMAN  | R.VHGLPTTSPS#GM*NM*AE.L          | S334:      | 2 | 2,4645 | 0,368 | -0,421 |
| 15 | P61160 ARP2_HUMAN  | E.IKDLM*VGDE.A                   |            | 2 | 2,4641 | 0,203 | -0,236 |
| 15 | Q99700 ATX2_HUMAN  | E.NIKPNETS#PSFSKAE.N             | S771:      | 3 | 2,4577 | 0,176 | 0      |
| 15 | Q9UK76 HN1_HUMAN   | R.RNS#SEASSGDFLD.L               | S87:       | 2 | 2,4568 | 0,122 | -0,333 |
| 15 | Q6QNY1 BL1S2_HUMAN | E.AKEPAEADITE.L                  |            | 2 | 2,4566 | 0,209 | -0,104 |
| 15 | O75822 EIF3J_HUMAN | E.AEVKPEVKIS#E.K                 | S72:       | 2 | 2,4565 | 0,163 | -0,186 |
| 15 | Q9UGV2 NDRG3_HUMAN | E.SCESPDVLDR.H                   |            | 2 | 2,4531 | 0,254 | 0      |
| 15 | P49321 NASP_HUMAN  | E.DKVQIAANEE.T                   |            | 2 | 2,4388 | 0,183 | -0,655 |
| 15 | Q13263 TIF1B_HUMAN | E.KLSPPYSSPQE.F                  |            | 2 | 2,4338 | 0,254 | -0,396 |
| 15 | Q14247 SRC8_HUMAN  | K.TQT#PPVPAPQPTEE.R              | T401:      | 2 | 2,4321 | 0,336 | -0,515 |
| 15 | O43504 HBXIP_HUMAN | E.DTM*KNPSIVGVLCTDSQGLNLGCR.G    |            | 3 | 2,4309 | 0,128 | 0,483  |
| 15 | Q86Y13 DZIP3_HUMAN | E.DKFYSLDE.L                     |            | 2 | 2,4278 | 0,112 | 0,24   |
| 15 | Q9UJW0 DCTN4_HUMAN | E.IKIEPAQAVDE.V                  |            | 2 | 2,4249 | 0,347 | -0,503 |
| 15 | Q96PM5 ZN363_HUMAN | R.RIS#LDQQ.-                     | S257:      | 2 | 2,4237 | 0,178 | 0,065  |
| 15 | P00558 PGK1_HUMAN  | K.ITLPVDFVTADKFDE.N              |            | 2 | 2,4231 | 0,383 | -0,357 |
| 15 | P62195 PRS8_HUMAN  | E.HAPSIIFM*DE.I                  |            | 2 | 2,4223 | 0,315 | 0,208  |
| 15 | O00512 BCL9_HUMAN  | R.DPGT#PNDDSDIKE.C               | T115:      | 2 | 2,4199 | 0,222 | 0,082  |
| 15 | P27816 MAP4_HUMAN  | E.TERAS#PIKM*D.L                 | S358:      | 3 | 2,4188 | 0,14  | -0,073 |
| 15 | Q13263 TIF1B_HUMAN | R.STAPSAASASASAAASS#PAGGGAEALE.L | S50:       | 2 | 2,4141 | 0,322 | 0,204  |
| 15 | O94854 K0754_HUMAN | R.RDS#DSFLNIFPE.K                | S666:      | 2 | 2,4126 | 0,286 | -0,401 |
| 15 | Q96RU3 FNBP1_HUMAN | R.TVS#DNS#LSNSR.G                | S296:S299: | 2 | 2,4031 | 0,232 | -0,182 |
| 15 | Q02790 FKBP4_HUMAN | E.AHLAVNDFE.L                    |            | 2 | 2,4012 | 0,217 | 0      |
| 15 | Q9HC35 EMAL4_HUMAN | E.SHSNDQS#PQIR.A                 | S138:      | 2 | 2,4012 | 0,393 | -0,362 |
| 15 | Q13200 PSMD2_HUMAN | E.DKQLQDELE.M                    |            | 2 | 2,3994 | 0,162 | -1,2   |
| 15 | Q68EM7 RHG17_HUMAN | K.DPVSAAVPAPGR.N                 |            | 2 | 2,3971 | 0,199 | -0,322 |

|    |                    |                            |            |   |        |       |        |
|----|--------------------|----------------------------|------------|---|--------|-------|--------|
| 15 | Q6S8J3 A26CA_HUMAN | E.KSYELPDGQVITIGNE.R       |            | 2 | 2,393  | 0,258 | -0,069 |
| 15 | Q6P9B6 K1609_HUMAN | K.GNKSHILDADPE.A           | S425:      | 2 | 2,3828 | 0,237 | -0,394 |
| 15 | Q58FF7 H90B3_HUMAN | E.YCVQQLKE.F               |            | 2 | 2,3813 | 0,117 | -0,343 |
| 15 | P15336 ATF2_HUMAN  | E.TTHQDS#PLPHPE.S          | S118:      | 2 | 2,372  | 0,39  | -0,339 |
| 15 | Q71U36 TBA1A_HUMAN | E.GEFSEARED.M              |            | 2 | 2,3647 | 0,344 | -0,117 |
| 15 | Q16891 IMMT_HUMAN  | E.GKPTPALSEE.A             |            | 2 | 2,3618 | 0,231 | -0,356 |
| 15 | O75116 ROCK2_HUMAN | E.NDVNSLKDQLE.D            |            | 2 | 2,3524 | 0,226 | -0,383 |
| 15 | P43121 MUC18_HUMAN | E.DKDAQFYCE.L              |            | 2 | 2,3449 | 0,202 | -0,104 |
| 15 | O75351 VPS4B_HUMAN | E.NKPSIIFIDE.I             |            | 2 | 2,3432 | 0,179 | -1,037 |
| 15 | P40222 TXLNA_HUMAN | R.RPEGPGAQAPSS#PR.V        | S515:      | 3 | 2,3415 | 0,182 | 0,307  |
| 15 | O95235 KI20A_HUMAN | E.DKQQVPSEDSM*E.K          |            | 2 | 2,3391 | 0,327 | -0,173 |
| 15 | O43237 DC1L2_HUMAN | R.GPLTSGSDEE.N             |            | 2 | 2,3361 | 0,337 | -0,123 |
| 15 | Q6S8J3 A26CA_HUMAN | E.KM*TQIM*FE.T             |            | 2 | 2,334  | 0,11  | -0,345 |
| 15 | P04792 HSPB1_HUMAN | R.ALSRQLS#SGVSE.I          | S82:       | 2 | 2,3339 | 0,178 | -0,65  |
| 15 | Q8IUD2 RB6I2_HUMAN | E.NQHM*QM*TIQALQDE.L       |            | 2 | 2,3324 | 0,199 | -0,781 |
| 15 | Q02952 AKA12_HUMAN | E.VALKGEGTEE.A             |            | 2 | 2,3253 | 0,283 | 0,118  |
| 15 | Q14019 COTL1_HUMAN | E.VVQNFAKE.F               |            | 2 | 2,3228 | 0,249 | 0,065  |
| 15 | P38398 BRCA1_HUMAN | E.KAVLTSQKSS#EYPISQNPE.G   | S1461:     | 3 | 2,3207 | 0,178 | -0,502 |
| 15 | Q8WYP5 AHTF1_HUMAN | R.SLPSSSQLKGS#PQAISR.A     | S1169:     | 2 | 2,3207 | 0,301 | -0,201 |
| 15 | P20700 LMNB1_HUMAN | R.LKLS#PS#PSSR.V           | S391:S393: | 2 | 2,3198 | 0,117 | -0,495 |
| 15 | Q15149 PLEC1_HUMAN | E.DKEQM*AQQLAEE.T          |            | 2 | 2,3128 | 0,218 | -0,595 |
| 15 | P37802 TAGL2_HUMAN | E.GKNVIGLQM*GTNR.G         |            | 2 | 2,3101 | 0,123 | -0,261 |
| 15 | Q8IVF2 AHNK2_HUMAN | R.DAHDVS#PTSTDTE.A         | S294:      | 2 | 2,3057 | 0,249 | 0      |
| 15 | P17980 PRS6A_HUMAN | E.KAPSIIFIDE.L             |            | 2 | 2,3054 | 0,249 | -0,646 |
| 15 | O15027 SC16A_HUMAN | K.FANLTPSR.T               |            | 2 | 2,3046 | 0,2   | -0,135 |
| 15 | Q01804 OTUD4_HUMAN | E.SNYFGLS#PEER.R           | S443:      | 2 | 2,3025 | 0,48  | 0,177  |
| 15 | P16949 STMN1_HUMAN | E.LILS#PRSKE.S             | S25:       | 2 | 2,301  | 0,218 | -0,109 |
| 15 | Q6P996 PDXD1_HUMAN | E.GHPGAPSPQHT#DQTE.A       | T761:      | 2 | 2,2998 | 0,173 | -0,596 |
| 15 | P42166 LAP2A_HUMAN | R.SSTPLPTISSSAENTR.Q       |            | 2 | 2,2975 | 0,402 | -0,37  |
| 15 | Q9NWS0 PIHD1_HUMAN | E.DKYNLQLNPE.W             |            | 2 | 2,296  | 0,121 | -0,297 |
| 15 | Q96D46 NMD3_HUMAN  | E.STDRS#PGHILCCE.C         | S11:       | 2 | 2,2922 | 0,306 | -0,757 |
| 15 | P78332 RBM6_HUMAN  | R.EEQSSDAGLFKEE.G          |            | 2 | 2,29   | 0,224 | -0,581 |
| 15 | Q15185 TEBP_HUMAN  | E.DSKDVNVNFE.K             |            | 2 | 2,2831 | 0,237 | -0,314 |
| 15 | P27816 MAP4_HUMAN  | E.EGRPVVSGTGNDDITT#PPNKE.L | T687:      | 2 | 2,2781 | 0,293 | -0,227 |
| 15 | Q92733 PRCC_HUMAN  | K.SAALQVTK.Q               |            | 2 | 2,278  | 0,335 | 0,447  |
| 15 | Q12888 TP53B_HUMAN | R.GNLLHFPSS#QGEEE.K        | S1068:     | 2 | 2,2753 | 0,295 | -0,526 |
| 15 | Q13242 SFRS9_HUMAN | R.GS#PHYFS#PFRPY.-         | S211:S216: | 2 | 2,2711 | 0,236 | -0,302 |
| 15 | O00203 AP3B1_HUMAN | K.NFYES#DDDQKE.K           | S276:      | 2 | 2,2661 | 0,369 | -0,166 |
| 15 | Q66GS9 CP135_HUMAN | E.KDFLQETVDE.K             |            | 2 | 2,2635 | 0,254 | -0,399 |

|    |                     |                            |        |   |        |       |        |
|----|---------------------|----------------------------|--------|---|--------|-------|--------|
| 15 | P19838 NFKB1_HUMAN  | E.VIQAAS#SPVK.T            | S892:  | 2 | 2,2617 | 0,171 | 0,113  |
| 15 | P11177 ODPB_HUMAN   | E.KVFLLEE.V                |        | 2 | 2,254  | 0,152 | 0,13   |
| 15 | P11279 LAMP1_HUMAN  | K.TSASGSCGAHLVTLE.L        |        | 2 | 2,2483 | 0,268 | -0,491 |
| 15 | P52732 KIF11_HUMAN  | E.DKLIAQNLE.L              |        | 2 | 2,2472 | 0,082 | -0,117 |
| 15 | Q8IXM2 CQ049_HUMAN  | E.DSGIPLPAES#PKKGPK.K      | S96:   | 2 | 2,2453 | 0,228 | -0,502 |
| 15 | O15234 CASC3_HUMAN  | E.LKS#EANDAVNSSTKEE.K      | S117:  | 2 | 2,2386 | 0,357 | 0,068  |
| 15 | P55786 PSA_HUMAN    | E.IHATGFNYQNEDE.K          |        | 2 | 2,2371 | 0,244 | -0,159 |
| 15 | P35659 DEK_HUMAN    | E.GTPTQPASEKEPEM*PGPR.E    |        | 2 | 2,234  | 0,316 | 0,063  |
| 15 | P60709 ACTB_HUMAN   | R.GYSFTTTAER.E             |        | 2 | 2,2312 | 0,424 | -1,4   |
| 15 | P27816 MAP4_HUMAN   | E.TERAS#PIKM*D.L           | S358:  | 2 | 2,2185 | 0,26  | -0,294 |
| 15 | Q13428 TCOF_HUMAN   | K.LDSSPSVSSTLAAKDDPDGKQE.A |        | 3 | 2,216  | 0,196 | -0,244 |
| 15 | P68104 EF1A1_HUMAN  | K.SGDAAIVDM*VPGKPM*CVE.S   |        | 2 | 2,2147 | 0,331 | -0,639 |
| 15 | O75330 HMMR_HUMAN   | E.NFALKT#PLKE.G            | T703:  | 2 | 2,2097 | 0,283 | -0,492 |
| 15 | Q8TEX9 IPO4_HUMAN   | E.NAFFDEKE.D               |        | 2 | 2,2089 | 0,198 | 0,427  |
| 15 | P19838 NFKB1_HUMAN  | E.VIQAASSPVK.T             |        | 2 | 2,2077 | 0,393 | -0,061 |
| 15 | P21333 FLNA_HUMAN   | K.IQQNTFTR.W               |        | 2 | 2,2073 | 0,143 | -0,061 |
| 15 | Q09666 AHNK_HUMAN   | K.LQGGVSLASK.K             |        | 2 | 2,1998 | 0,305 | -0,932 |
| 15 | P21796 VDAC1_HUMAN  | E.FQLHTNVNDGTE.F           |        | 2 | 2,1983 | 0,374 | -1,154 |
| 15 | P22626 ROA2_HUMAN   | R.GGGGNFGPGPSNFR.G         |        | 2 | 2,1965 | 0,422 | -1,063 |
| 15 | P30622 CLIP1_HUMAN  | E.ANGLQTPASR.A             |        | 2 | 2,1951 | 0,316 | -0,219 |
| 15 | P35659 DEK_HUMAN    | E.GEGTPTQPASEK.E           |        | 2 | 2,1946 | 0,401 | 0      |
| 15 | O60271 JIP4_HUMAN   | R.S#ASQSSLDKLDQE.L         | S728:  | 2 | 2,1889 | 0,236 | -0,492 |
| 15 | Q92499 DDX1_HUMAN   | E.LKFNFGEEE.F              |        | 2 | 2,1829 | 0,202 | -0,11  |
| 15 | Q6IN85 SMEK1_HUMAN  | E.KICQVQGK.D               |        | 2 | 2,1826 | 0,207 | -0,063 |
| 15 | P42166 LAP2A_HUMAN  | E.DKDDLDVTE.L              |        | 2 | 2,1824 | 0,116 | 0,232  |
| 15 | P42566 EP15_HUMAN   | E.SEPIHQESPAR.S            |        | 2 | 2,1791 | 0,284 | -0,585 |
| 15 | P23528 COF1_HUMAN   | E.KLGGSAVISLE.G            |        | 2 | 2,1647 | 0,16  | 0      |
| 15 | P37802 TAGL2_HUMAN  | R.NFSDNQLQEGK.N            |        | 2 | 2,1638 | 0,245 | -0,477 |
| 15 | P14625 ENPL_HUMAN   | D.GLNASQIRE.L              |        | 2 | 2,1627 | 0,235 | 0,062  |
| 15 | Q58FF7 H90B3_HUMAN  | E.YCVQQLK.E                |        | 2 | 2,161  | 0,105 | -0,065 |
| 15 | Q9UQ35 SRRM2_HUMAN  | E.LASRS#PIRQDR.G           | S1112: | 3 | 2,1569 | 0,154 | -1,326 |
| 15 | A1L390 PKHG3_HUMAN  | E.M*DSYYPNR.Y              |        | 2 | 2,1545 | 0,213 | -0,345 |
| 15 | P17812 PYRG1_HUMAN  | E.LKFPS#INHD.-             | S587:  | 2 | 2,1531 | 0,218 | -0,212 |
| 15 | Q14978 NOLC1_HUMAN  | R.GGSISVQVNSIK.F           |        | 2 | 2,153  | 0,317 | -0,41  |
| 15 | Q02952 AKA12_HUMAN  | K.AITPQAQEE.L              |        | 2 | 2,1514 | 0,295 | -0,062 |
| 15 | Q9GZR7 DDX24_HUMAN  | E.AGAETRS#PGKAAE.S         | S287:  | 3 | 2,1449 | 0,122 | 0,063  |
| 15 | Q5TCU3 Q5TCU3_HUMAN | E.TLASAKEENVE.I            |        | 2 | 2,1435 | 0,165 | 0      |
| 15 | P49023 PAXI_HUMAN   | K.TGSS#SPPGGPPKPGSQLD.S    | S321:  | 2 | 2,1433 | 0,222 | -0,419 |
| 15 | P51114 FXR1_HUMAN   | E.LSNPS#ETESER.K           | S409:  | 2 | 2,1402 | 0,164 | 0,092  |

|    |                     |                               |            |   |        |       |        |
|----|---------------------|-------------------------------|------------|---|--------|-------|--------|
| 15 | Q15742 NAB2_HUMAN   | K.LSPLPGGPGAGDPR.I            |            | 2 | 2,1363 | 0,253 | -0,662 |
| 15 | P53396 ACLY_HUMAN   | R.TAS#FSEGRADE.V              | S455:      | 2 | 2,1331 | 0,368 | -0,381 |
| 15 | Q13439 GOGA4_HUMAN  | E.SLFRS#PIKE.S                | S78:       | 2 | 2,123  | 0,157 | -1,16  |
| 15 | Q8TEA8 DTD1_HUMAN   | R.SASSGAEGDVSS#EREP.-         | S205:      | 2 | 2,1175 | 0,212 | 0,148  |
| 15 | Q01082 SPTB2_HUMAN  | K.TALPAQSAATLPAR.T            |            | 3 | 2,1122 | 0,083 | 0,401  |
| 15 | Q9Y2H0 DLGP4_HUMAN  | E.TSSSS#PAEPAQPGACR.R         | S787:      | 2 | 2,1102 | 0,258 | 0      |
| 15 | P46100 ATRX_HUMAN   | E.KCGLGQENS#DNEHLVENE.V       | S634:      | 2 | 2,1055 | 0,213 | 0      |
| 15 | Q9UQ35 SRRM2_HUMAN  | E.LDVKPSAS#PQER.S             | S1552:     | 3 | 2,1053 | 0,102 | 0,065  |
| 15 | P11142 HSP7C_HUMAN  | D.NNLLGKFE.L                  |            | 2 | 2,1039 | 0,218 | -0,13  |
| 15 | P55265 DSRAD_HUMAN  | E.KICDYLFNVSD.S               |            | 2 | 2,1017 | 0,171 | -0,799 |
| 15 | P04075 ALDOA_HUMAN  | E.HTTPSALAIM*E.N              |            | 2 | 2,0996 | 0,205 | -0,449 |
| 15 | Q14247 SRC8_HUMAN   | K.T#QTPPVSPAPQPTEE.R          | T399:      | 2 | 2,0938 | 0,281 | -0,368 |
| 15 | Q14676 MDC1_HUMAN   | E.GKAPQAVPLEK.S               |            | 2 | 2,0877 | 0,234 | -0,214 |
| 15 | O43896 KIF1C_HUMAN  | E.DGGTVGVFS#PK.K              | S494:      | 2 | 2,0835 | 0,284 | 0      |
| 15 | Q12756 KIF1A_HUMAN  | K.TPHLVNLNEDPLM*SE.C          |            | 2 | 2,0828 | 0,13  | -0,212 |
| 15 | Q02952 AKA12_HUMAN  | E.AKTEPFTQGK.V                |            | 2 | 2,0824 | 0,145 | -0,11  |
| 15 | P35659 DEK_HUMAN    | E.GEGTPTQPASEKEPEM*PGPR.E     |            | 3 | 2,0816 | 0,123 | 0,867  |
| 15 | Q9Y4B5 K0802_HUMAN  | E.KGLPSTSSK.E                 |            | 2 | 2,0745 | 0,116 | 0,135  |
| 15 | P38646 GRP75_HUMAN  | E.FKDQLPADE.C                 |            | 2 | 2,0714 | 0,228 | -0,115 |
| 15 | Q6WKZ4 RFIP1_HUMAN  | E.KDTAAVVS.R                  |            | 2 | 2,0714 | 0,171 | 0      |
| 15 | Q14676 MDC1_HUMAN   | E.ADKSS#PGIHLE.R              | S505:      | 2 | 2,0707 | 0,209 | -0,494 |
| 15 | Q96S82 UBL7_HUMAN   | E.GLS#DDEDDFHPNTR.S           | S230:      | 3 | 2,0667 | 0,089 | -0,862 |
| 15 | Q9Y2W1 TR150_HUMAN  | K.SPLQSVVVR.R                 |            | 2 | 2,0666 | 0,244 | 0      |
| 15 | O43237 DC1L2_HUMAN  | R.RGPLTSGSDEE.N               |            | 2 | 2,061  | 0,281 | 0      |
| 15 | Q5VY92 Q5VY92_HUMAN | R.M*QDIPEETESR.D              |            | 2 | 2,0561 | 0,142 | 0,09   |
| 15 | P60842 IF4A1_HUMAN  | R.KGVAINM*VTEE.D              |            | 2 | 2,0493 | 0,086 | -0,404 |
| 15 | P35520 CBS_HUMAN    | E.KGFDQAPVVDE.A               |            | 2 | 2,0411 | 0,227 | -1,215 |
| 15 | O95684 FR1OP_HUMAN  | E.KGPTTGEGALDLSDVHS#PPKS#PE.G | S156:S160: | 3 | 2,0398 | 0,082 | -0,812 |
| 15 | P62249 RS16_HUMAN   | E.IKDILIQYD.R                 |            | 2 | 2,0355 | 0,195 | -0,218 |
| 15 | P06748 NPM_HUMAN    | K.GPSSVEDIK.A                 |            | 2 | 2,0334 | 0,153 | 0      |
| 15 | Q8TCG1 K1524_HUMAN  | E.VQNQLVDRE.H                 |            | 2 | 2,0306 | 0,229 | -0,222 |
| 15 | Q8WUY1 CH055_HUMAN  | E.SGLSDVTKDQ.-                |            | 2 | 2,0275 | 0,201 | -0,232 |
| 15 | P78310 CXAR_HUMAN   | E.RTPQS#PTLPPAK.V             | S332:      | 2 | 2,0252 | 0,167 | -0,178 |
| 15 | Q9UKV3 ACINU_HUMAN  | K.TTS#PLEEEERE.I              | S365:      | 2 | 2,0243 | 0,235 | -0,087 |
| 15 | P35658 NU214_HUMAN  | R.SAQGSSS#PVPSM*VQK.S         | S657:      | 2 | 2,0198 | 0,281 | -0,077 |
| 15 | Q05519 SFR11_HUMAN  | K.GTGDSLRE.S                  |            | 2 | 2,0168 | 0,334 | 0,365  |
| 15 | Q9Y490 TLN1_HUMAN   | E.AKPAVAVAENEE.I              |            | 2 | 2,0165 | 0,4   | 0,203  |
| 15 | Q15424 SAFB1_HUMAN  | E.LAEAPTEAPS#PEAR.D           | S344:      | 2 | 2,014  | 0,213 | -0,321 |
| 15 | Q9P265 DIP2B_HUMAN  | E.DKNSALTVQD.V                |            | 2 | 2,0133 | 0,163 | -0,112 |

|    |                     |                           |              |   |        |       |        |
|----|---------------------|---------------------------|--------------|---|--------|-------|--------|
| 15 | P46821 MAP1B_HUMAN  | K.SDISPLT#PR.E            | T1788:       | 2 | 2,01   | 0,24  | -1,488 |
| 15 | Q8IYQ7 THNS1_HUMAN  | K.AQIIGSQRE.N             |              | 2 | 2,0096 | 0,204 | 0,122  |
| 15 | O75694 NU155_HUMAN  | E.DRM*YDLSL.L             |              | 2 | 2,0044 | 0,235 | 0,107  |
| 15 | P13861 KAP2_HUMAN   | R.APASVLPAAATPR.Q         |              | 2 | 2,0043 | 0,315 | -0,954 |
| 15 | Q02952 AKA12_HUMAN  | E.KGLAEVQQDGEAEE.G        |              | 2 | 2,0024 | 0,087 | -0,162 |
| 15 | P08651 NFIC_HUMAN   | E.GGISS#PVKKE.M           | S323:        | 2 | 2,0019 | 0,22  | -0,103 |
| 15 | Q96T23 RSF1_HUMAN   | E.SYS#PSKDRNIITE.G        | S463:        | 2 | 1,9995 | 0,218 | -1,074 |
| 15 | P42166 LAP2A_HUMAN  | R.SSTPLPTISS#SAENTR.Q     | S167:        | 2 | 1,9958 | 0,223 | -0,141 |
| 15 | Q8N350 DOS_HUMAN    | R.FLSTSSSTGR.R            |              | 2 | 1,9903 | 0,333 | 0,064  |
| 15 | Q6ZR2V2 FA83H_HUMAN | R.KGS#PTPGFSTR.R          | S881:        | 2 | 1,9878 | 0,191 | -0,502 |
| 15 | P62316 SMD2_HUMAN   | E.M*T#PEELQKR.E           | T12:         | 2 | 1,9824 | 0,105 | 0,199  |
| 15 | Q86YS7 K0528_HUMAN  | E.IIGSPIPEPR.Q            |              | 2 | 1,9745 | 0,227 | 0,113  |
| 15 | O75676 KS6A4_HUMAN  | R.SS#PPLRT#PDVLE.S        | S682:T687:   | 2 | 1,9719 | 0,209 | -0,249 |
| 15 | Q13435 SF3B2_HUMAN  | R.SSLGQS#ASET#EEDTVSVSK.K | S284:T288:   | 2 | 1,9703 | 0,281 | -0,232 |
| 15 | P05787 K2C8_HUMAN   | E.AAIADAEQR.G             |              | 2 | 1,9673 | 0,341 | 0,129  |
| 15 | P24534 EF1B_HUMAN   | E.KASLPGVK.K              |              | 2 | 1,9651 | 0,127 | 0,305  |
| 15 | Q9HCG8 NCM_HUMAN    | R.NS#SPEDRYEEQE.R         | S27:         | 2 | 1,963  | 0,117 | -0,156 |
| 15 | Q9UQ35 SRRM2_HUMAN  | R.SSGHSSS#ELSPDAVE.K      | S1384:       | 2 | 1,9598 | 0,212 | 0      |
| 15 | Q16740 CLPP_HUMAN   | R.DRYM*SPM*EAQE.F         |              | 2 | 1,9479 | 0,231 | -0,088 |
| 15 | P46940 IQGA1_HUMAN  | E.LQDKFNVDE.Y             |              | 2 | 1,9476 | 0,105 | -0,771 |
| 15 | Q01082 SPTB2_HUMAN  | E.SS#PIPSPT#SDRK.A        | S2165:T2171: | 2 | 1,9412 | 0,153 | -0,085 |
| 15 | Q6NZI2 PTRF_HUMAN   | E.SEALPEKE.G              |              | 2 | 1,9399 | 0,175 | 0,676  |
| 15 | P56211 ARP19_HUMAN  | E.DKVTS#PEKAAE.A          | S23:         | 2 | 1,9219 | 0,198 | -0,093 |
| 15 | O76031 CLPX_HUMAN   | E.KAQQGIVFLDE.V           |              | 2 | 1,9126 | 0,222 | -0,88  |
| 15 | Q00610 CLH1_HUMAN   | E.KIVLDNSVFSE.H           |              | 2 | 1,9103 | 0,243 | 0      |
| 15 | P49321 NASP_HUMAN   | K.TEEM*PNDSVLE.N          |              | 2 | 1,907  | 0,177 | -0,286 |
| 15 | P68431 H31_HUMAN    | E.IAQDFKTD.L              |              | 2 | 1,906  | 0,227 | 0,065  |
| 15 | Q3T8J9 GON4L_HUMAN  | E.LSPLSATVFPK.V           |              | 2 | 1,9052 | 0,265 | -0,105 |
| 15 | P25054 APC_HUMAN    | K.RHSGS#YLVTSV.-          | S2837:       | 2 | 1,9047 | 0,136 | -0,854 |
| 15 | P81605 DCD_HUMAN    | K.ENAGEDPGLAR.Q           |              | 2 | 1,9034 | 0,282 | 0,216  |
| 15 | Q01105 SET_HUMAN    | E.AIEHIDE.V               |              | 2 | 1,8972 | 0,202 | 0,221  |
| 15 | Q8NBJ4 GOLM1_HUMAN  | R.QQLQALSEPQPR.L          |              | 2 | 1,8943 | 0,273 | -0,787 |
| 15 | Q15814 TBCC_HUMAN   | E.SIQDS#PLPK.K            | S168:        | 2 | 1,8915 | 0,186 | -0,115 |
| 15 | Q8NFB5 NUP53_HUMAN  | K.TLGTPTQPGSTPR.I         |              | 2 | 1,8895 | 0,228 | -0,093 |
| 15 | P35659 DEK_HUMAN    | E.GTPTQPASEKEPE.M         |              | 2 | 1,8852 | 0,254 | 0      |
| 15 | Q9UPU5 UBP24_HUMAN  | E.SNSLCPAGIR.N            |              | 2 | 1,8833 | 0,084 | -0,227 |
| 15 | P85037 FOXK1_HUMAN  | R.EGS#PIPHDPE.F           | S445:        | 2 | 1,8813 | 0,196 | -0,421 |
| 15 | Q9Y3T9 NOC2L_HUMAN  | R.GILRPLSTR.H             |              | 2 | 1,8628 | 0,119 | -0,421 |
| 15 | Q8N3V7 SYNPO_HUMAN  | R.AAATT#PTKVYSE.V         | T461:        | 2 | 1,8571 | 0,101 | 0      |

|    |                    |                      |              |   |        |       |        |
|----|--------------------|----------------------|--------------|---|--------|-------|--------|
| 15 | P19623 SPEE_HUMAN  | D.GVIQCTERDE.F       |              | 2 | 1,8555 | 0,277 | -0,303 |
| 15 | Q92932 PTPR2_HUMAN | E.IDIAATLE.H         |              | 2 | 1,8506 | 0,118 | 0,937  |
| 15 | Q01082 SPTB2_HUMAN | E.S#SPIPSPT#SDRK.A   | S2164:T2171: | 2 | 1,8463 | 0,145 | -0,682 |
| 15 | Q9Y6M7 S4A7_HUMAN  | R.KIPTGAEASNVLVGE.V  |              | 2 | 1,8429 | 0,081 | -0,493 |
| 15 | Q9UKM9 RALY_HUMAN  | E.AGLPQGGEAR.T       |              | 2 | 1,8403 | 0,169 | 0,068  |
| 15 | Q9UHB7 AFF4_HUMAN  | E.SNRT#PVKPSVVEEE.D  | T674:        | 2 | 1,8402 | 0,132 | 0,074  |
| 15 | P62256 UBE2H_HUMAN | R.RM*DTDVVK.L        |              | 2 | 1,8335 | 0,09  | -0,311 |
| 15 | Q92621 NU205_HUMAN | E.NRS#VSGFLHFD.T     | S1165:       | 2 | 1,831  | 0,303 | -0,449 |
| 15 | P10809 CH60_HUMAN  | K.LVQDVANNTNEE.A     |              | 2 | 1,8233 | 0,181 | -0,181 |
| 15 | P26641 EF1G_HUMAN  | E.TQTLVRE.Y          |              | 2 | 1,8168 | 0,202 | 0,288  |
| 15 | P13639 EF2_HUMAN   | E.ICLKDLEE.D         |              | 2 | 1,8164 | 0,085 | -0,239 |
| 15 | P21333 FLNA_HUMAN  | E.YAVHVLCNSE.D       |              | 2 | 1,8152 | 0,124 | -0,512 |
| 15 | O94864 ST65G_HUMAN | K.NPNAPFQIR.H        |              | 2 | 1,8098 | 0,185 | 0,115  |
| 15 | P35030 TRY3_HUMAN  | D.TLDNDIM*LIK.L      |              | 2 | 1,8004 | 0,312 | 0      |
| 15 | P63241 IF5A1_HUMAN | E.GDLGKEIE.Q         |              | 2 | 1,7999 | 0,172 | 0,354  |
| 15 | P49790 NU153_HUMAN | E.DHLVYADEE.S        |              | 2 | 1,7946 | 0,266 | -0,336 |
| 15 | Q92609 TBCD5_HUMAN | E.FTGS#PPSATKKD.S    | S554:        | 2 | 1,7824 | 0,164 | 0      |
| 15 | P78364 PHC1_HUMAN  | E.ALSPTSPGPLSVR.A    |              | 2 | 1,7791 | 0,225 | -0,476 |
| 15 | P55060 XPO2_HUMAN  | E.KVIVPNM*E.F        |              | 2 | 1,7665 | 0,105 | 0      |
| 15 | P46087 NOL1_HUMAN  | R.LGSVEAPK.T         |              | 2 | 1,7577 | 0,298 | 0,457  |
| 15 | P30101 PDIA3_HUMAN | E.DKTVAYTE.Q         |              | 2 | 1,7359 | 0,154 | 0,197  |
| 15 | P06576 ATPB_HUMAN  | E.GNDLYHE.M          |              | 2 | 1,7255 | 0,149 | 0,432  |
| 15 | Q8NC51 PAIRB_HUMAN | E.EGPKEM*TLDE.W      |              | 2 | 1,7249 | 0,099 | -0,105 |
| 15 | P30837 AL1B1_HUMAN | R.DRVYLASLE.T        |              | 2 | 1,7185 | 0,125 | -0,229 |
| 15 | Q14257 RCN2_HUMAN  | E.ALHLIDE.M          |              | 2 | 1,7151 | 0,157 | 0,301  |
| 15 | Q9H2P0 ADNP_HUMAN  | E.TIHLTEPTK.L        |              | 2 | 1,7105 | 0,215 | -0,209 |
| 15 | O14523 TMM24_HUMAN | R.SDISERPS#VDDIESE.T | S613:        | 2 | 1,7082 | 0,258 | -0,694 |
| 15 | Q99436 PSB7_HUMAN  | E.KITPLEIE.V         |              | 2 | 1,6961 | 0,087 | 0,712  |
| 15 | P20700 LMNB1_HUMAN | R.LKLS#PSPS#SR.V     | S391:S395:   | 2 | 1,6771 | 0,22  | -0,495 |
| 15 | O15355 PPM1G_HUMAN | K.AYTGFS#NSER.G      | S216:        | 2 | 1,6743 | 0,084 | -0,376 |
| 15 | Q9H307 PININ_HUMAN | E.TGNQHNDVEIEE.A     |              | 2 | 1,6665 | 0,132 | 0      |
| 15 | Q8IXM2 CQ049_HUMAN | E.DSGIPLPAES#PK.K    | S96:         | 2 | 1,6612 | 0,187 | -1,134 |
| 15 | P31939 PUR9_HUMAN  | E.ALGIPAAASF.K       |              | 2 | 1,6488 | 0,176 | -0,233 |
| 15 | Q96G46 DUS3L_HUMAN | R.TCGPLTDEDVVR.L     |              | 2 | 1,6441 | 0,145 | -0,448 |
| 15 | Q8N350 DOS_HUMAN   | R.RVS#FNE.A          | S127:        | 2 | 1,643  | 0,204 | 0,587  |
| 15 | P08670 VIME_HUMAN  | R.SVSSSYR.R          |              | 2 | 1,5998 | 0,108 | 0,349  |
| 15 | Q15819 UB2V2_HUMAN | K.LPQPPEGQTYNN.-     |              | 2 | 1,5867 | 0,215 | -0,27  |
| 15 | P68104 EF1A1_HUMAN | K.YAWVLDK.L          |              | 2 | 1,5706 | 0,196 | -0,613 |
| 15 | O00425 IF2B3_HUMAN | E.KSITILSTPE.G       |              | 2 | 1,5628 | 0,094 | -0,336 |

|    |                      |                                                 |            |   |        |       |        |
|----|----------------------|-------------------------------------------------|------------|---|--------|-------|--------|
| 15 | Q96TC7 FA82C_HUMAN   | R.KDS#LDLEEE.A                                  | S212:      | 2 | 1,5586 | 0,162 | -0,843 |
| 15 | Q96RK0 CIC_HUMAN     | R.VPGQGLENR.G                                   |            | 2 | 1,5271 | 0,227 | 0      |
| 15 | Q14019 COTL1_HUMAN   | E.EDFIKSE.L                                     |            | 2 | 1,5246 | 0,081 | 0,351  |
| 15 | P35221 CTNA1_HUMAN   | E.TEDFDVR.S                                     |            | 2 | 1,5029 | 0,171 | -0,069 |
| 15 | Q8WUM9 S20A1_HUMAN   | R.ERLPS#VDLKEE.T                                | S335:      | 2 | 1,4993 | 0,171 | -0,35  |
| 15 | P55209 NP1L1_HUMAN   | R.QLTVQM*M*QNPQILAALQE.R                        |            | 2 | 1,4936 | 0,083 | -0,117 |
| 15 | ##Q6AI08 HEAT6_HUMAN | K.KNLT#PR.S                                     | T870:      | 2 | 1,479  | 0,1   | 0,528  |
| 15 | P62753 RS6_HUMAN     | R.LS#SLRASTKSE.S                                | S235:      | 2 | 1,4627 | 0,388 | -0,091 |
| 15 | P04075 ALDOA_HUMAN   | R.LQSIGTENTEE.N                                 |            | 2 | 1,213  | 0,094 | -0,2   |
| 16 | P05387 RLA2_HUMAN    | E.DVIAQGIGKLASVPAGGAVAVSAAPGSAAPAAGSAPAAAAEEK.K |            | 3 | 6,3937 | 0,465 | 0,701  |
| 16 | P49419 AL7A1_HUMAN   | E.DNKLPGAICSLTCGGADIGTAM*AKDE.R                 |            | 3 | 6,1304 | 0,396 | -0,068 |
| 16 | P08779 K1C16_HUMAN   | K.IIAATIENAQPILQIDNAR.L                         |            | 3 | 5,6616 | 0,511 | 0      |
| 16 | P05783 K1C18_HUMAN   | R.STS#FRGGM*GSGGLATGIAGGLAGM*GGIQNEKE.T         | S53:       | 3 | 5,2449 | 0,394 | 0,238  |
| 16 | Q15398 DLG7_HUMAN    | E.RM*S#LPLLAGGVADDINTNKK.E                      | S725:      | 3 | 5,0909 | 0,519 | -0,083 |
| 16 | P04264 K2C1_HUMAN    | R.THNLEPYFESFINNLR.R                            |            | 3 | 4,98   | 0,45  | -0,092 |
| 16 | Q6P6C2 ALKB5_HUMAN   | E.AAAAAAAAAAAAAAAAAAAAAEPYPVSGAK.R              |            | 3 | 4,7429 | 0,53  | 0,079  |
| 16 | Q99575 POP1_HUMAN    | R.VQAYEEPSVASS#PNGKE.S                          | S730:      | 2 | 4,6992 | 0,407 | -0,652 |
| 16 | Q9ULT8 HECD1_HUMAN   | E.GHDSLSVGS#FEEDSKSE.F                          | S2320:     | 2 | 4,6079 | 0,463 | -0,646 |
| 16 | P13645 K1C10_HUMAN   | K.ELTTEIDNIEQISSYK.S                            |            | 2 | 4,5563 | 0,487 | 0,244  |
| 16 | Q09666 AHNK_HUMAN    | E.TQSGKTVIRLPS#GSGAASPTGSAVDIRAGAISASGPE.L      | S210:      | 3 | 4,5435 | 0,489 | 0,518  |
| 16 | P02533 K1C14_HUMAN   | K.ILTATVDNANVLLQIDNAR.L                         |            | 3 | 4,5352 | 0,251 | 0      |
| 16 | Q99575 POP1_HUMAN    | E.SRVQAYEEPSVASS#PNGKE.S                        | S730:      | 2 | 4,5346 | 0,441 | 0      |
| 16 | P13645 K1C10_HUMAN   | K.SKELTTEIDNIEQISSYK.S                          |            | 3 | 4,501  | 0,368 | -0,579 |
| 16 | Q9H8Y8 GORS2_HUMAN   | K.ISLPGQM*AGT#PIT#PLKDGFT.E.V                   | T222:T225: | 2 | 4,4947 | 0,533 | 0,312  |
| 16 | Q5JSH3 WDR44_HUMAN   | E.DVHLGGGYPVGS#PGKVGLSTFKE.T                    | S27:       | 3 | 4,4826 | 0,445 | -0,077 |
| 16 | P13645 K1C10_HUMAN   | K.GSLGGGFSSGGFSSGFSR.G                          |            | 2 | 4,4417 | 0,546 | -0,071 |
| 16 | Q96TA1 NIBL1_HUMAN   | R.GLLAQGLRPES#PPPAGPLLNGAPAGESPQPK.A            | S652:      | 3 | 4,438  | 0,45  | -0,118 |
| 16 | Q9C0C2 TB182_HUMAN   | K.RDS#LGAYASQDANE.Q                             | S893:      | 2 | 4,4366 | 0,557 | -0,464 |
| 16 | P60709 ACTB_HUMAN    | D.LYANTVLSGGTTM*YPGIADR.M                       |            | 2 | 4,4284 | 0,518 | 0,115  |
| 16 | P27816 MAP4_HUMAN    | E.VALAKDM*ES#PTKLDVTLAK.D                       | S280:      | 3 | 4,3816 | 0,527 | -0,086 |
| 16 | P35527 K1C9_HUMAN    | R.HGVQEIEIQLSQLSK.K                             |            | 3 | 4,3716 | 0,362 | 0,1    |
| 16 | A8K6V7 A8K6V7_HUMAN  | E.LEEKSTT#PPPAEPVSLPQEPKPR.V                    | T227:      | 3 | 4,3589 | 0,207 | -0,068 |
| 16 | P46100 ATRX_HUMAN    | E.KCGLGQENS#DNEHLVENE.V                         | S634:      | 2 | 4,2714 | 0,566 | 0,113  |
| 16 | Q92598 HS105_HUMAN   | E.LNNTCEPVVTQPKPK.I                             |            | 3 | 4,2569 | 0,431 | 1,484  |
| 16 | P08865 RSSA_HUMAN    | K.FLAAGTHLGGTNLDFQM*E.Q                         |            | 2 | 4,21   | 0,442 | -0,189 |
| 16 | P27816 MAP4_HUMAN    | K.DM*ES#PTKLDVTLAK.D                            | S280:      | 3 | 4,1966 | 0,239 | -0,668 |
| 16 | Q13885 TBB2A_HUMAN   | K.VSDTVVEPYNATLSVHQLVENTDE.T                    |            | 2 | 4,1872 | 0,553 | 0,459  |
| 16 | Q99575 POP1_HUMAN    | E.SRVQAYEEPSVASS#PNGKE.S                        | S730:      | 3 | 4,1611 | 0,325 | -0,086 |
| 16 | Q04917 1433F_HUMAN   | E.DSYKDSTLIM*QLLR.D                             |            | 2 | 4,0793 | 0,411 | -0,215 |



|    |                    |                                |              |   |        |       |        |
|----|--------------------|--------------------------------|--------------|---|--------|-------|--------|
| 16 | P49915 GUAA_HUMAN  | E.DGVFNISVDNTCSLFR.G           |              | 2 | 4,0706 | 0,472 | 0,132  |
| 16 | Q9UMZ2 SYNG_HUMAN  | K.ISKFDLVLVATSQSK.M            |              | 3 | 4,0655 | 0,225 | -0,116 |
| 16 | P21333 FLNA_HUMAN  | E.EHIPDSPFVVPVAS#PSGDAR.R      | S2327:       | 3 | 4,0642 | 0,213 | -0,254 |
| 16 | P60709 ACTB_HUMAN  | D.LYANTVLSGGTTM*YPGIADR.M      |              | 3 | 4,0459 | 0,294 | 0,173  |
| 16 | Q5VT52 K0460_HUMAN | E.M*M*DKPTSSSVDTM*SLLSK.I      |              | 3 | 4,0428 | 0,317 | 0,091  |
| 16 | P51858 HDGF_HUMAN  | E.VERPLPM*EVEK.N               |              | 3 | 4,036  | 0,424 | -1,294 |
| 16 | Q09666 AHNK_HUMAN  | R.LPS#GSGAASPTGSVDIR.A         | S210:        | 2 | 4,0105 | 0,578 | -0,779 |
| 16 | P27816 MAP4_HUMAN  | E.VALAKDM*ES#PTKLDVTLAK.D      | S280:        | 2 | 4,0038 | 0,347 | 0,115  |
| 16 | P35222 CTNB1_HUMAN | E.TADLGLDIGAQGEPLGYR.Q         |              | 2 | 3,9926 | 0,56  | 0,066  |
| 16 | P08047 SP1_HUMAN   | E.KGVGGNNGGNGNGGGAFSQAR.S      |              | 3 | 3,9506 | 0,391 | -0,293 |
| 16 | Q6NZI2 PTRF_HUMAN  | R.RGS#S#PDVHALLE.I             | S365:S366:   | 2 | 3,9431 | 0,549 | -0,677 |
| 16 | Q14247 SRC8_HUMAN  | R.AKTQTPPVSPAPQPTEE.R          | S405:        | 2 | 3,9386 | 0,395 | -0,066 |
| 16 | O60499 STX10_HUMAN | K.SPS#DLLDASAVSATS.R.Y         | S134:        | 2 | 3,9374 | 0,46  | -0,074 |
| 16 | P55884 EIF3B_HUMAN | R.S#DSRAQAVSEDAGGNE.G          | S117:        | 2 | 3,9069 | 0,483 | -0,219 |
| 16 | O75531 BAF_HUMAN   | R.DFVAEPM*GEKPVGSLAGIGE.V      |              | 2 | 3,9015 | 0,49  | 0,242  |
| 16 | Q05682 CALD1_HUMAN | E.KGNVFSSPTAAGT#PNKE.T         | T730:        | 2 | 3,8971 | 0,407 | -0,137 |
| 16 | Q02880 TOP2B_HUMAN | K.VKAS#PITNDGEDE.F             | S1400:       | 2 | 3,8792 | 0,398 | -0,252 |
| 16 | Q13263 TIF1B_HUMAN | E.DGSLSLDGADSTGVVAK.L          |              | 2 | 3,8779 | 0,5   | -0,23  |
| 16 | Q5JSH3 WDR44_HUMAN | E.DVHLGGGYPVGS#PGKVGLSTFKETE.N | S27:         | 3 | 3,874  | 0,447 | -0,21  |
| 16 | P13645 K1C10_HUMAN | K.IRLENIQTYR.S                 |              | 2 | 3,8572 | 0,379 | -0,255 |
| 16 | P49792 RBP2_HUMAN  | E.DALDDSVSSSVHAS#PLASS#PVRK.N  | S2246:S2251: | 3 | 3,8355 | 1     | -0,213 |
| 16 | P62158 CALM_HUMAN  | R.VFDKDGNGYIS#AAE.L            | S102:        | 2 | 3,803  | 0,344 | -0,545 |
| 16 | P35908 K22E_HUMAN  | K.VDLLNQEIEFLK.V               |              | 2 | 3,7896 | 0,385 | -0,167 |
| 16 | P49023 PAXI_HUMAN  | R.FIHQQPQSSS#PVYGSSAK.T        | S85:         | 3 | 3,7868 | 0,143 | -0,18  |
| 16 | Q9Y266 NUDC_HUMAN  | K.LSDLSETRS#M*VE.K             | S285:        | 2 | 3,7829 | 0,344 | -0,464 |
| 16 | P04406 G3P_HUMAN   | K.LVINGNPITIFQER.D             |              | 2 | 3,7756 | 0,376 | 0,151  |
| 16 | O00560 SDCB1_HUMAN | E.DLKVDKVIQAQTAFSANPANPAILSE.A |              | 3 | 3,7737 | 0,381 | 0,067  |
| 16 | P35658 NU214_HUMAN | K.SPGS#TPTT#PTSSQAPQKLD.A      | S433:T437:   | 2 | 3,7567 | 1     | 0      |
| 16 | Q99497 PARK7_HUMAN | K.KEGPYDVVVLPGGNLGAQNLSE.S     |              | 2 | 3,7532 | 0,327 | 0,433  |
| 16 | Q99497 PARK7_HUMAN | E.DAKKEGPYDVVVLPGGNLGAQNLSE.S  |              | 3 | 3,7462 | 0,333 | -0,071 |
| 16 | P04075 ALDOA_HUMAN | K.RLQS#IGTENTEE.N              | S46:         | 2 | 3,7309 | 0,424 | -0,419 |
| 16 | Q9UHB6 LIMA1_HUMAN | R.KIS#ENSYSLDDLE.I             | S225:        | 2 | 3,7299 | 0,384 | -0,077 |
| 16 | Q9Y6M7 S4A7_HUMAN  | E.IKGNCS#GGSRENST#VDFSKVD.M    | S400:T408:   | 3 | 3,7183 | 0,193 | -0,316 |
| 16 | Q9HCD6 TANC2_HUMAN | E.ARPSQGLPVIQS#PPS#SPPHRD.S    | S1442:S1445: | 3 | 3,6878 | 0,233 | -0,23  |
| 16 | Q9Y448 T4AF1_HUMAN | E.SKGLDPALGSETLASR.Q           |              | 3 | 3,6691 | 0,349 | 0      |
| 16 | P35908 K22E_HUMAN  | R.GFSSGSAAVVSOGSR.R            |              | 2 | 3,6599 | 0,422 | -0,292 |
| 16 | P13645 K1C10_HUMAN | K.NQILNLTDDNANILLQIDNAR.L      |              | 3 | 3,6429 | 0,28  | 0      |
| 16 | Q14676 MDC1_HUMAN  | E.LQPSTSTDQPVT#PEPTSQATR.G     | T1466:       | 3 | 3,6263 | 0,357 | -1,182 |
| 16 | P26006 ITA3_HUMAN  | R.TGAVYLCPLTAHK.D              |              | 3 | 3,6227 | 0,406 | -0,064 |

|    |                    |                                    |              |   |        |       |        |
|----|--------------------|------------------------------------|--------------|---|--------|-------|--------|
| 16 | Q02952 AKA12_HUMAN | E.HTQVPADSPDS#QEEQKGE.S            | S557:        | 3 | 3,6179 | 0,318 | 0,177  |
| 16 | Q53HL2 BOREA_HUMAN | R.IYNISGNGS#PLADSK.E               | S219:        | 2 | 3,6037 | 0,366 | -0,42  |
| 16 | P04264 K2C1_HUMAN  | R.LLRDYQELM*NTK.L                  |              | 3 | 3,601  | 0,177 | 0,119  |
| 16 | P04264 K2C1_HUMAN  | R.SLVNLGGSKSISISVAR.G              |              | 3 | 3,601  | 0,426 | -0,108 |
| 16 | P48681 NEST_HUMAN  | E.NLRS#PEEVDK.E                    | S905:        | 2 | 3,5979 | 0,352 | -0,437 |
| 16 | Q71RC2 LARP4_HUMAN | E.LRSNVVS#PTKNEDNGAPE.N            | S647:        | 2 | 3,5972 | 0,303 | 0,122  |
| 16 | Q17RY0 CPEB4_HUMAN | E.KIRIES#PVLTGFDYQE.A              | S137:        | 2 | 3,5819 | 0,449 | 0,062  |
| 16 | P0C7M2 RA1L3_HUMAN | R.KLFIGGLSFETTDE.S                 |              | 2 | 3,5797 | 0,574 | 0,078  |
| 16 | Q09666 AHNK_HUMAN  | K.TVIRLPSGS#GAASPTGSVAVDIR.A       | S212:        | 3 | 3,5729 | 0,323 | -0,334 |
| 16 | P04264 K2C1_HUMAN  | R.SLDLDSIIAEVK.A                   |              | 2 | 3,5661 | 0,369 | -0,468 |
| 16 | P35908 K22E_HUMAN  | R.SKEEAEALYHSK.Y                   |              | 3 | 3,5528 | 0,206 | -0,723 |
| 16 | P13645 K1C10_HUMAN | R.ALEESNYELEGK.I                   |              | 2 | 3,5309 | 0,45  | -0,353 |
| 16 | Q8TEA8 DTD1_HUMAN  | E.DRSASSGAEGDVSS#EREP.-            | S205:        | 3 | 3,5262 | 0,306 | -0,286 |
| 16 | Q92598 HS105_HUMAN | E.LNNTCEPVVTQPKPK.I                |              | 2 | 3,5147 | 0,348 | -0,637 |
| 16 | P35527 K1C9_HUMAN  | R.SGGGGGGGLGSGGSIR.S               |              | 2 | 3,509  | 0,433 | -0,495 |
| 16 | Q02952 AKA12_HUMAN | E.HTQVPADS#PDSQEEQKGE.S            | S554:        | 3 | 3,5088 | 0,364 | 0,089  |
| 16 | P12270 TPR_HUMAN   | E.LAAM*#PTAAAVAK.I                 | S379:        | 2 | 3,5069 | 0,3   | -1,128 |
| 16 | P00558 PGK1_HUMAN  | K.ITLPVDFVTADKFDE.N                |              | 2 | 3,5024 | 0,375 | -0,214 |
| 16 | Q14C86 GAPD1_HUMAN | E.LPPAAAIGATSLVAAPHSSS#SSPSK.D     | S948:        | 3 | 3,4961 | 0,397 | 0,077  |
| 16 | Q8TE77 SSH3_HUMAN  | E.LHGDQTDGQGSQS#PQKQEE.Q           | S87:         | 3 | 3,495  | 0,301 | -0,08  |
| 16 | P52565 GDIR1_HUMAN | E.QLAQIAAENEDEHS#VNYKPPAQK.S       | S24:         | 3 | 3,4895 | 0,341 | 0,066  |
| 16 | O94842 TOX4_HUMAN  | E.LVSGSPVALS#PQPR.C                | S567:        | 2 | 3,4747 | 0,456 | -0,41  |
| 16 | Q13263 TIF1B_HUMAN | E.DGSLSLDGADSTGVVAKLS#PANQR.K      | S697:        | 3 | 3,4739 | 0,31  | -0,075 |
| 16 | Q96T23 RSF1_HUMAN  | K.NSSQQDNSSRES#PSLE.D              | S217:        | 2 | 3,4716 | 0,414 | -0,529 |
| 16 | Q9UHR5 S30BP_HUMAN | E.KGGLVSDAYGEDDFSR.L               |              | 3 | 3,4633 | 0,366 | -0,32  |
| 16 | Q05682 CALD1_HUMAN | E.KGNVFSS#PTAAGTPNKE.T             | S724:        | 2 | 3,4625 | 0,43  | -1,846 |
| 16 | P35908 K22E_HUMAN  | K.SISISVAGGGGGFGAAGGFGGR.G         |              | 2 | 3,4559 | 0,554 | 0,199  |
| 16 | Q9UJU6 DBNL_HUMAN  | R.AM*ST#TSISSPQPGK.L               | T270:        | 2 | 3,4508 | 0,414 | -0,41  |
| 16 | P35908 K22E_HUMAN  | R.FLEQQNQVLQTK.W                   |              | 2 | 3,4505 | 0,398 | -0,331 |
| 16 | P04920 B3A2_HUMAN  | E.RTSPSS#PAPLPHQE.A                | S173:        | 2 | 3,435  | 0,415 | -0,847 |
| 16 | P02794 FRIH_HUMAN  | E.YLFDKHTLGDSD#DNES.-              | S179:        | 2 | 3,4325 | 0,514 | -0,469 |
| 16 | Q09666 AHNK_HUMAN  | K.SSKAS#LGS#LEGEAEAE.A             | S5749:S5752: | 2 | 3,432  | 0,455 | -0,566 |
| 16 | P02538 K2C6A_HUMAN | R.AIGGGLSSVGGGSSTIK.Y              |              | 2 | 3,4293 | 0,559 | -0,253 |
| 16 | P18583 SON_HUMAN   | R.AGIEGPLLASDVGR.D                 |              | 2 | 3,426  | 0,352 | 0      |
| 16 | Q92797 SYMPK_HUMAN | K.LKPGVGAPSSSS#PSPS#PSARPGPPPSEE.A | S1171:S1175: | 3 | 3,4205 | 1     | 0,064  |
| 16 | Q6Y7W6 PERQ2_HUMAN | E.M*GTFDSS#GAFLSLK.K               | S303:        | 2 | 3,4197 | 0,477 | 0      |
| 16 | P13010 KU86_HUMAN  | E.DIIQGFYRGSDIVPFSKVDE.E           |              | 3 | 3,4194 | 0,337 | 0,08   |
| 16 | Q99661 KIF2C_HUMAN | E.LRITAQENDM*E.V                   |              | 2 | 3,4183 | 0,398 | -0,548 |
| 16 | Q6S8J3 A26CA_HUMAN | E.KSYELPDGQVITIGNE.R               |              | 2 | 3,4024 | 0,319 | 0      |

|    |                     |                                       |              |   |        |       |        |
|----|---------------------|---------------------------------------|--------------|---|--------|-------|--------|
| 16 | P36507 MP2K2_HUMAN  | R.RKPVLPALTINPTIAEGPSPT#SE.G          | T25:         | 3 | 3,4015 | 0,291 | 0,222  |
| 16 | P54578 UBP14_HUMAN  | E.KGEQGQYLQQDANE.C                    |              | 2 | 3,3882 | 0,37  | -0,228 |
| 16 | Q99700 ATX2_HUMAN   | E.NIKPNETS#PSFSKAE.N                  | S771:        | 2 | 3,3851 | 0,338 | -0,282 |
| 16 | Q92993 TIP60_HUMAN  | E.AKT#PTKNGPLPGS#RPGS#PERE.V          | T77:S86:S90: | 3 | 3,3841 | 0,277 | 0,394  |
| 16 | P13645 K1C10_HUMAN  | R.LKYENEVALR.Q                        |              | 3 | 3,3731 | 0,154 | 0,37   |
| 16 | P60709 ACTB_HUMAN   | R.VAPEEHPVLLTEAPLNPK.A                |              | 3 | 3,3729 | 0,202 | 0,094  |
| 16 | P05783 K1C18_HUMAN  | R.S#TSFRGGM*GSGGLATGIAGGLAGM*GGIQNE.K | S51:         | 3 | 3,3714 | 0,261 | 0,648  |
| 16 | Q8TEA8 DTD1_HUMAN   | R.SASSGAEGDVSS#EREP.-                 | S205:        | 2 | 3,3644 | 0,432 | -0,519 |
| 16 | P04264 K2C1_HUMAN   | K.WELLQQVDTSTR.T                      |              | 2 | 3,3587 | 0,477 | -0,083 |
| 16 | Q9HA05 Q9HA05_HUMAN | E.DTLVNNVPLPNTLPLPKRE.T               |              | 3 | 3,3548 | 0,196 | -0,172 |
| 16 | P49419 AL7A1_HUMAN  | E.DNKLPGAICSLTCGGADIGTAM*AK.D         |              | 3 | 3,3521 | 0,176 | 0,225  |
| 16 | Q01082 SPTB2_HUMAN  | K.TALPAQSAAT#LPAR.T                   | T2187:       | 3 | 3,3489 | 0,246 | 0,316  |
| 16 | Q01082 SPTB2_HUMAN  | K.TALPAQSAAT#LPAR.T                   | T2187:       | 2 | 3,3317 | 0,423 | -0,337 |
| 16 | P02538 K2C6A_HUMAN  | K.YEELQVTAGR.H                        |              | 2 | 3,3317 | 0,373 | -0,105 |
| 16 | Q96A49 SYAP1_HUMAN  | E.AVRPKT#PPVVIK.S                     | T248:        | 3 | 3,3087 | 0,192 | 0,33   |
| 16 | P04264 K2C1_HUMAN   | K.QISNLQQSISDAEQR.G                   |              | 2 | 3,3016 | 0,531 | -0,426 |
| 16 | Q9UGP4 LIMD1_HUMAN  | E.GSLGGQNSGIGGR.S                     |              | 2 | 3,2853 | 0,372 | -0,105 |
| 16 | O00566 MPP10_HUMAN  | D.S#DLDFDISKLE.Q                      | S171:        | 2 | 3,2799 | 0,26  | 0      |
| 16 | P39880 CUX1_HUMAN   | E.IQAGSQGQAGASDPSAR.S                 |              | 2 | 3,2797 | 0,539 | 0,217  |
| 16 | B2CI53 B2CI53_HUMAN | E.RNGILASPQS#APGNLDNSK.S              | S263:        | 3 | 3,2698 | 0,369 | -0,181 |
| 16 | Q12849 GRSF1_HUMAN  | E.INNEDVDALM*K.S                      |              | 2 | 3,265  | 0,276 | 0      |
| 16 | P19525 E2AK2_HUMAN  | E.KKAVS#PLLLTTNSSE.G                  | S83:         | 2 | 3,2648 | 0,207 | -0,621 |
| 16 | P12270 TPR_HUMAN    | E.ASDQVSDDTVEM*PLPK.K                 |              | 2 | 3,2612 | 0,459 | -0,977 |
| 16 | P13646 K1C13_HUMAN  | R.ALEEANADLEVK.I                      |              | 2 | 3,2574 | 0,379 | -0,843 |
| 16 | P35908 K22E_HUMAN   | K.VLYDAEISQIHQSVTDNTNVILSM*DNSR.N     |              | 3 | 3,2502 | 0,325 | 0,418  |
| 16 | Q14980 NUMA1_HUMAN  | E.KQAQLAQTLLQQQE.Q                    |              | 2 | 3,2499 | 0,33  | -0,403 |
| 16 | Q9H307 PININ_HUMAN  | K.SLS#PGKENVS#ALDM*EKE.S              | S443:S450:   | 3 | 3,2486 | 0,247 | -0,637 |
| 16 | Q02952 AKA12_HUMAN  | E.LDKVKS#ATLSSTE.S                    | S640:        | 2 | 3,2483 | 0,311 | -1,087 |
| 16 | P02538 K2C6A_HUMAN  | R.ALYDAELSQM*QTHISDTSVVLSM*DNNR.N     |              | 3 | 3,2475 | 0,315 | 0,238  |
| 16 | O94804 STK10_HUMAN  | E.KQVAEQGGDLS#PAANR.S                 | S438:        | 3 | 3,2414 | 0,156 | -0,425 |
| 16 | P18858 DNL1_HUMAN   | K.TSKAET#PTESVSEPE.V                  | T195:        | 2 | 3,2386 | 0,422 | -0,292 |
| 16 | P13645 K1C10_HUMAN  | R.NVSTGDVNVEM*NAAPGVDLTQLLNNMR.S      |              | 3 | 3,2249 | 0,236 | 0,127  |
| 16 | Q13619 CUL4A_HUMAN  | R.KGS#FSALVGR.T                       | S10:         | 2 | 3,2157 | 0,345 | -0,221 |
| 16 | Q92878 RAD50_HUMAN  | E.KVFQGTDEQLND.L                      |              | 2 | 3,2149 | 0,328 | -0,7   |
| 16 | Q92547 TOPB1_HUMAN  | R.NAVALSAS#PQLKE.A                    | S888:        | 2 | 3,2037 | 0,344 | -0,607 |
| 16 | P35908 K22E_HUMAN   | R.GSSSGGGYSSGSSSYGSGGR.Q              |              | 2 | 3,1942 | 0,518 | 0,07   |
| 16 | P02533 K1C14_HUMAN  | R.EVATNSELVQSGK.S                     |              | 2 | 3,1936 | 0,51  | -0,537 |
| 16 | O95777 LSM8_HUMAN   | E.TDSALDLGNIR.A                       |              | 2 | 3,1864 | 0,335 | 0      |
| 16 | P12270 TPR_HUMAN    | E.ASDQVSDDTVEM*PLPK.K                 |              | 3 | 3,1854 | 0,318 | -0,733 |

|    |                    |                                             |              |   |        |       |        |
|----|--------------------|---------------------------------------------|--------------|---|--------|-------|--------|
| 16 | Q6ZN18 AEBP2_HUMAN | R.SLS#PGAASSSSGDGDGKE.G                     | S141:        | 2 | 3,1773 | 0,539 | -0,433 |
| 16 | Q15365 PCBP1_HUMAN | R.CSDAAGYPHATHDLE.G                         |              | 2 | 3,1664 | 0,466 | -0,148 |
| 16 | P42696 RBM34_HUMAN | R.LGQVASSLFR.G                              |              | 2 | 3,1582 | 0,389 | -0,453 |
| 16 | Q9H2W6 RM46_HUMAN  | E.RTLATLSENNM*E.A                           |              | 2 | 3,154  | 0,458 | -0,525 |
| 16 | O95777 LSM8_HUMAN  | E.TDSALDLGNIRAEPLNSVAH.-                    |              | 3 | 3,1515 | 0,287 | -0,087 |
| 16 | P08865 RSSA_HUMAN  | E.DVLKFLAAGTHLGGTNLDFQM*E.Q                 |              | 3 | 3,1436 | 0,311 | -0,153 |
| 16 | Q8IX90 CM003_HUMAN | E.KSPRS#PQLSDFGLE.R                         | S155:        | 2 | 3,1391 | 0,388 | 0      |
| 16 | Q14980 NUMA1_HUMAN | R.KNS#LISSLEEE.V                            | S1225:       | 2 | 3,137  | 0,357 | 0,643  |
| 16 | Q9Y490 TLN1_HUMAN  | K.KSTVLQQQYNR.V                             |              | 3 | 3,1302 | 0,138 | 0,134  |
| 16 | P09622 DLDH_HUMAN  | E.DTIVSSTGALSJK.K                           |              | 2 | 3,1283 | 0,465 | -0,283 |
| 16 | Q562F6 SGOL2_HUMAN | K.HITSEADS#DPGNPVE.L                        | S1032:       | 2 | 3,1258 | 0,449 | -0,222 |
| 16 | Q15427 SF3B4_HUMAN | E.RNQDATVYVGGGLDE.K                         |              | 2 | 3,1255 | 0,378 | -0,159 |
| 16 | Q5T200 ZC3HD_HUMAN | R.SLS#PSHLTE.D                              | S877:        | 2 | 3,1216 | 0,34  | -0,232 |
| 16 | P35908 K22E_HUMAN  | R.NLDLDSIIAEVK.A                            |              | 2 | 3,1207 | 0,473 | -0,183 |
| 16 | Q9H2Y7 ZF106_HUMAN | E.GVSISS#PGLAR.K                            | S851:        | 2 | 3,1132 | 0,273 | -0,403 |
| 16 | Q06210 GFPT1_HUMAN | E.SKGYDFESETDTE.T                           |              | 2 | 3,112  | 0,467 | -0,405 |
| 16 | O95239 KIF4A_HUMAN | E.VRGQVSESEDS#ITKQIE.S                      | S815:        | 2 | 3,1108 | 0,379 | -0,615 |
| 16 | Q9H8Y8 GORS2_HUMAN | K.ISLPGQM*AGT#PIT#PLKDGFE.V                 | T222:T225:   | 3 | 3,1089 | 0,108 | 0,156  |
| 16 | Q9C0C2 TB182_HUMAN | E.FGKRDS#LGAYASQDANE.Q                      | S893:        | 2 | 3,1073 | 0,361 | -0,128 |
| 16 | P60709 ACTB_HUMAN  | D.LYANTVLSSGTTM*YPGIADRM*QKE.I              |              | 3 | 3,1041 | 0,2   | 0,138  |
| 16 | Q9Y613 FHOD1_HUMAN | E.IM*DLLVQSVTK.S                            |              | 2 | 3,1025 | 0,188 | -0,386 |
| 16 | Q14BN4 SLMAP_HUMAN | K.VSLLKDDLQGAQSE.I                          |              | 2 | 3,0981 | 0,28  | -0,487 |
| 16 | Q9H3S7 PTN23_HUMAN | R.RGAAAADLLSSS#PE.S                         | S1123:       | 2 | 3,0961 | 0,254 | -0,343 |
| 16 | O14964 HGS_HUMAN   | E.ARKS#PTPSAPVPLTEPAAQPGEGHAAPTNNVVENPLPE.T | S345:        | 3 | 3,0936 | 0,144 | 0,673  |
| 16 | Q9UNE7 STUB1_HUMAN | R.LGAGGGS#PEKSPSAQE.L                       | S19:         | 2 | 3,0906 | 0,341 | -0,472 |
| 16 | Q14247 SRC8_HUMAN  | R.AKTQT#PPVSPAPQPTEE.R                      | T401:        | 2 | 3,0858 | 0,488 | -0,197 |
| 16 | P18583 SON_HUMAN   | R.SAAS#PVVSSM*PER.A                         | S1769:       | 2 | 3,0795 | 0,359 | 0,259  |
| 16 | Q15459 SF3A1_HUMAN | K.ASKPLPPAPAPDEYLVSPITGE.K                  |              | 2 | 3,0786 | 0,36  | 0,434  |
| 16 | Q9H8G2 CI082_HUMAN | E.KELFLAEHS#DLEE.G                          | S120:        | 2 | 3,0676 | 0,324 | -0,446 |
| 16 | P13645 K1C10_HUMAN | R.SLLEGEVSSGGGGR.G                          |              | 2 | 3,0615 | 0,452 | -0,29  |
| 16 | Q09666 AHNK_HUMAN  | K.SSKAS#LGS#LEGEAE.A                        | S5749:S5752: | 2 | 3,0614 | 0,404 | -0,32  |
| 16 | Q5T5U3 RHG21_HUMAN | R.LRTSTS#DLRGE.I                            | S1862:       | 3 | 3,0568 | 0,245 | 0,326  |
| 16 | Q15052 ARHG6_HUMAN | R.M*S#GFIYQGK.I                             | S488:        | 2 | 3,0547 | 0,269 | -0,217 |
| 16 | P35908 K22E_HUMAN  | K.LALDVEIATYR.K                             |              | 2 | 3,0541 | 0,486 | -0,097 |
| 16 | P23229 ITA6_HUMAN  | R.TGGLYSCDITAR.G                            |              | 2 | 3,0466 | 0,483 | -0,371 |
| 16 | Q05682 CALD1_HUMAN | E.KQS#VDKVTS#PTKV.-                         | S783:S789:   | 3 | 3,0432 | 0,281 | -0,116 |
| 16 | O95684 FR1OP_HUMAN | K.SGLSSLAGAPSLKDSE.S                        |              | 2 | 3,0373 | 0,293 | -0,643 |
| 16 | P04264 K2C1_HUMAN  | K.YEELQITAGR.H                              |              | 2 | 3,0352 | 0,28  | -0,31  |
| 16 | O94842 TOX4_HUMAN  | E.LVSGS#PVALSQPR.C                          | S562:        | 2 | 3,0337 | 0,287 | -0,246 |

|    |                    |                             |            |   |        |       |        |
|----|--------------------|-----------------------------|------------|---|--------|-------|--------|
| 16 | P04792 HSPB1_HUMAN | R.ALSRQLS#SGVSE.I           | S82:       | 2 | 3,0242 | 0,327 | -0,093 |
| 16 | P13645 K1C10_HUMAN | R.LENEIQTYR.S               |            | 2 | 3,0226 | 0,201 | -0,209 |
| 16 | O95359 TACC2_HUMAN | K.TPSSPS#KSPASFEIPASAM*E.A  | S2392:     | 2 | 3,0203 | 0,438 | 0,115  |
| 16 | O95429 BAG4_HUMAN  | K.DSSYPYSQSDQSM*NR.H        |            | 2 | 3,0152 | 0,387 | -0,48  |
| 16 | P40222 TXLNA_HUMAN | D.LSAGGQGS�TDSGPER.R        |            | 2 | 3,0147 | 0,409 | -0,239 |
| 16 | Q6KC79 NIPBL_HUMAN | E.KAAM*YDISS#PSKD.S         | S350:      | 2 | 3,0137 | 0,281 | -0,451 |
| 16 | P04264 K2C1_HUMAN  | R.TNAENEFVTIKK.D            |            | 2 | 3,004  | 0,363 | -1,138 |
| 16 | P49327 FAS_HUMAN   | E.DVVVLHQATILPK.T           |            | 2 | 2,9985 | 0,386 | -0,823 |
| 16 | Q09666 AHNK_HUMAN  | K.TVIRLPS#GSGAASPTGSAVDIR.A | S210:      | 2 | 2,9984 | 0,353 | 0,334  |
| 16 | Q14155 ARHG7_HUMAN | K.LPTTGM*TITKLEDSE.N        |            | 2 | 2,9843 | 0,363 | -0,222 |
| 16 | O95239 KIF4A_HUMAN | R.GQVSESEDS#ITKQIE.S        | S815:      | 2 | 2,9841 | 0,261 | -0,141 |
| 16 | P04264 K2C1_HUMAN  | R.TNAENEFVTIK.K             |            | 2 | 2,9808 | 0,423 | -0,578 |
| 16 | Q9UBR2 CATZ_HUMAN  | R.VGDYGSLSGRE.K             |            | 2 | 2,9763 | 0,432 | -0,428 |
| 16 | Q8NG31 CASC5_HUMAN | R.KSLGTPVICT#PTEE.S         | T1017:     | 2 | 2,9711 | 0,225 | -0,285 |
| 16 | O14974 MYPT1_HUMAN | R.RST#QGVTLDLQEA.E.K        | T696:      | 2 | 2,9699 | 0,415 | -0,282 |
| 16 | P35908 K22E_HUMAN  | K.YEELQVTVGR.H              |            | 2 | 2,9684 | 0,427 | -0,307 |
| 16 | P35579 MYH9_HUMAN  | E.AKIAQLEEQLDNE.T           |            | 2 | 2,967  | 0,381 | -0,569 |
| 16 | Q9BRZ2 TRI56_HUMAN | E.RQGGVQPQAGDGAQT#PKEE.K    | T418:      | 3 | 2,9629 | 0,31  | 0      |
| 16 | P04264 K2C1_HUMAN  | K.SKAEAESLYQSK.Y            |            | 3 | 2,9604 | 0,172 | 0,205  |
| 16 | Q9UJ14 GGT7_HUMAN  | E.DAFLGDPDTPDPSFLK.S        |            | 2 | 2,9596 | 0,388 | -0,07  |
| 16 | Q9ULH0 ARMS_HUMAN  | E.YLSDALLDKK.D              |            | 2 | 2,9431 | 0,377 | -0,419 |
| 16 | Q8WWQ0 PHIP_HUMAN  | R.LSRGS#ISSTSE.V            | S674:      | 2 | 2,9405 | 0,272 | -0,912 |
| 16 | Q8N6T3 ARFG1_HUMAN | R.VSGQPQSVTASSDKAFE.D       |            | 2 | 2,9401 | 0,489 | 0      |
| 16 | P35908 K22E_HUMAN  | K.NVQDAIADAEQR.G            |            | 2 | 2,9399 | 0,284 | -0,367 |
| 16 | Q14157 UBP2L_HUMAN | R.RYPSS#ISSS#PQKD.L         | S605:S609: | 2 | 2,9389 | 0,277 | -0,606 |
| 16 | Q5VUB5 CJ038_HUMAN | E.HLYPAPSS#PEKE.Q           | S525:      | 2 | 2,9375 | 0,434 | -1,36  |
| 16 | Q99700 ATX2_HUMAN  | E.NIKPNETS#PSFSKAE.N        | S771:      | 3 | 2,937  | 0,306 | -0,106 |
| 16 | P02538 K2C6A_HUMAN | K.ADTLTDEINFLR.A            |            | 2 | 2,9366 | 0,328 | 0      |
| 16 | Q15149 PLEC1_HUMAN | E.AQAATGFLLDPVKGER.L        |            | 3 | 2,9319 | 0,332 | 0      |
| 16 | Q15047 SETB1_HUMAN | R.NYGYNPS#PVKPE.G           | S1066:     | 2 | 2,9319 | 0,387 | -0,338 |
| 16 | P49810 PSN2_HUMAN  | E.RTSLM*SAES#PTPR.S         | S25:       | 3 | 2,9273 | 0,263 | 0      |
| 16 | Q9Y580 RBM7_HUMAN  | E.RTM*DNM*TSSAQIIQR.S       |            | 3 | 2,9257 | 0,249 | -0,41  |
| 16 | Q04917 1433F_HUMAN | E.DSYKDSTLIM*QLLR.D         |            | 3 | 2,9234 | 0,116 | 0,108  |
| 16 | Q8N568 DCLK2_HUMAN | R.CIS#PEGVNGNR.C            | S375:      | 2 | 2,917  | 0,366 | -0,571 |
| 16 | O00231 PSD11_HUMAN | R.AQS#LLSTDRE.A             | S14:       | 2 | 2,9111 | 0,399 | -0,305 |
| 16 | Q9UQ35 SRRM2_HUMAN | R.SSGHSS#SELSPDAVE.K        | S1383:     | 2 | 2,9071 | 0,265 | -0,544 |
| 16 | Q9UL46 PSME2_HUMAN | E.DSLNVADLTSLR.A            |            | 2 | 2,9063 | 0,421 | 0,187  |
| 16 | P42696 RBM34_HUMAN | R.LGQVASSLFRGE.H            |            | 2 | 2,9055 | 0,35  | -0,386 |
| 16 | Q9C0C2 TB182_HUMAN | E.AADSDAHLFQDSTEP.R.A       |            | 3 | 2,9023 | 0,339 | 0,104  |

|    |                    |                                |              |   |        |       |        |
|----|--------------------|--------------------------------|--------------|---|--------|-------|--------|
| 16 | P04264 K2C1_HUMAN  | R.NKYEDEINKR.T                 |              | 3 | 2,8984 | 0,322 | 0,419  |
| 16 | P04264 K2C1_HUMAN  | K.AEAESLYQSK.Y                 |              | 2 | 2,8978 | 0,432 | -0,217 |
| 16 | P35908 K22E_HUMAN  | R.YLDGLTAER.T                  |              | 2 | 2,8912 | 0,346 | -0,588 |
| 16 | P13861 KAP2_HUMAN  | R.APASVLPAAATPR.Q              |              | 2 | 2,8865 | 0,463 | -0,106 |
| 16 | Q6NZI2 PTRF_HUMAN  | E.AGDLRRGS#S#PDVHALLE.I        | S365:S366:   | 3 | 2,8759 | 0,178 | -0,656 |
| 16 | Q96C57 CL043_HUMAN | E.SAIHS#PGTVEKE.A              | S179:        | 2 | 2,8751 | 0,296 | -0,274 |
| 16 | Q96S82 UBL7_HUMAN  | E.GLS#DDEDDFHPNTR.S            | S230:        | 3 | 2,8677 | 0,254 | -0,108 |
| 16 | P0C7M2 RA1L3_HUMAN | K.SES#PKEPEQLRK.L              | S6:          | 3 | 2,8673 | 0,283 | 0,121  |
| 16 | Q02040 SF17A_HUMAN | R.CPGGVLSICIPDNNQQPK.G         |              | 2 | 2,865  | 0,339 | -0,13  |
| 16 | Q9Y618 NCOR2_HUMAN | E.LLPDPLLRPSPLLATGQPAGSEDLTK.D |              | 3 | 2,8591 | 0,2   | 0,068  |
| 16 | Q53EZ4 CEP55_HUMAN | E.KVAASPXS#PTAALNE.S           | S428:        | 3 | 2,8587 | 0,091 | -0,936 |
| 16 | Q96D46 NMD3_HUMAN  | E.STDRS#PGHILCCE.C             | S11:         | 2 | 2,8568 | 0,514 | -1,135 |
| 16 | Q8N3Z6 ZCHC7_HUMAN | E.NAHGLSSSLQSNE.L              |              | 2 | 2,8551 | 0,151 | -1,089 |
| 16 | Q9Y613 FHOD1_HUMAN | E.IM*DLLVQSVTKS#SPR.A          | S1118:       | 3 | 2,8501 | 0,227 | -0,103 |
| 16 | Q9C0C2 TB182_HUMAN | E.AADSDAHLFQDSTEPR.A           |              | 2 | 2,8485 | 0,428 | 0,069  |
| 16 | Q9NQW6 ANLN_HUMAN  | D.ASLVNASISSVK.A               |              | 2 | 2,8483 | 0,454 | -0,676 |
| 16 | P06748 NPM_HUMAN   | E.KGGS#LPKVE.A                 | S260:        | 2 | 2,8479 | 0,315 | -0,429 |
| 16 | Q6S8J3 A26CA_HUMAN | E.KLCYVALDFEQE.M               |              | 2 | 2,8446 | 0,278 | -0,081 |
| 16 | Q13439 GOGA4_HUMAN | R.TSSFT#EQLDEGTPNRE.S          | T43:         | 2 | 2,8408 | 0,377 | -0,194 |
| 16 | Q71RC2 LARP4_HUMAN | E.KDLIEDSSVQK.D                |              | 3 | 2,8404 | 0,186 | 0,435  |
| 16 | P41162 ETV3_HUMAN  | R.IKVEPASEKDPE.S               |              | 3 | 2,8398 | 0,177 | 0,273  |
| 16 | P04183 KITH_HUMAN  | R.KLFAPQQILQCS#PAN.-           | S231:        | 2 | 2,8395 | 0,397 | 0,136  |
| 16 | Q9NW97 TMM51_HUMAN | E.ARGEEQNPRLS#ISLPSYE.S        | S155:        | 3 | 2,8361 | 0,16  | 0      |
| 16 | Q8IYB3 SRRM1_HUMAN | E.ATSTSDILKVPKPEIPEKPEPS#PE.K  | S260:        | 3 | 2,8306 | 0,174 | -0,198 |
| 16 | P52948 NUP98_HUMAN | E.NNS#YHM*HPAGIILTK.V          | S726:        | 3 | 2,8304 | 0,195 | -0,408 |
| 16 | Q9UQ35 SRRM2_HUMAN | R.TAAALAPASLTSAR.M             |              | 2 | 2,8177 | 0,395 | -0,188 |
| 16 | Q9Y224 CN166_HUMAN | E.GLPVALDKHILGFDTGDAVLNE.A     |              | 3 | 2,8038 | 0,148 | 0,08   |
| 16 | P13645 K1C10_HUMAN | K.QSLEASLAETEGR.Y              |              | 2 | 2,8036 | 0,474 | -0,439 |
| 16 | Q15648 MED1_HUMAN  | E.RGSPSHS#KS#PAYTPQNLDESE.S    | S1451:S1453: | 3 | 2,8017 | 1     | -0,65  |
| 16 | Q8TEA8 DTD1_HUMAN  | E.DRSASSGAEGDVSS#HEREP.-       | S205:        | 2 | 2,8005 | 0,377 | -0,191 |
| 16 | P55786 PSA_HUMAN   | E.LDALDNSHPIEVSVGHPSEVDE.I     |              | 3 | 2,797  | 0,246 | -0,31  |
| 16 | P16949 STMN1_HUMAN | E.SKDPADETEAD.-                |              | 2 | 2,7966 | 0,357 | -0,104 |
| 16 | Q12756 KIF1A_HUMAN | R.TPQPCS#RPAS#PEPE.L           | S1528:S1532: | 2 | 2,7964 | 0,301 | -0,427 |
| 16 | Q9UMZ2 SYNG_HUMAN  | K.FDFLVATSQSK.M                |              | 2 | 2,7883 | 0,411 | 0,294  |
| 16 | Q9UJU6 DBNL_HUMAN  | R.AM*STTSSIS#PQPGK.L           | S275:        | 2 | 2,7869 | 0,384 | 0,164  |
| 16 | Q68EM7 RHG17_HUMAN | K.DPVSAAVPAPGR.N               |              | 2 | 2,7863 | 0,246 | -0,107 |
| 16 | Q8IZD4 DCP1B_HUMAN | E.FFTGPVQPGS#PHNIGTSR.G        | S337:        | 3 | 2,7764 | 0,277 | -0,462 |
| 16 | Q08J23 NSUN2_HUMAN | E.LRNVLNNSK                    |              | 2 | 2,7732 | 0,365 | -0,312 |
| 16 | Q8WXI9 P66B_HUMAN  | E.RGRLTPS#PDIIVLSDNE.A         | S122:        | 3 | 2,7726 | 0,208 | 0,28   |

|    |                     |                                  |        |   |        |       |        |
|----|---------------------|----------------------------------|--------|---|--------|-------|--------|
| 16 | Q5M775 SPEC1_HUMAN  | E.KLIYLEHS#PNSE.G                | S260:  | 2 | 2,7701 | 0,401 | -0,485 |
| 16 | O75531 BAF_HUMAN    | R.DFVAEPM*GEKPVGSLAGIGE.V        |        | 3 | 2,7624 | 0,27  | 0,725  |
| 16 | Q01082 SPTB2_HUMAN  | K.AKTALPAQSAATLPAR.T             |        | 3 | 2,76   | 0,124 | -0,233 |
| 16 | P05114 HMG1_HUMAN   | E.TKEDLPAENGETK.T                |        | 3 | 2,7557 | 0,161 | 0,192  |
| 16 | P13645 K1C10_HUMAN  | R.SQYEQLAEQNR.K                  |        | 2 | 2,7528 | 0,295 | -0,179 |
| 16 | P07951 TPM2_HUMAN   | K.IVTNNLKS#LE.A                  | S206:  | 2 | 2,7521 | 0,264 | -0,403 |
| 16 | P46100 ATRX_HUMAN   | E.KCGLGQENS#DNEHLVE.N            | S634:  | 2 | 2,7473 | 0,436 | -0,192 |
| 16 | P04264 K2C1_HUMAN   | K.NKLNDLEALQQAK.E                |        | 2 | 2,7433 | 0,42  | 0,076  |
| 16 | P02533 K1C14_HUMAN  | K.DAEWFFTK.T                     |        | 2 | 2,7423 | 0,431 | -0,104 |
| 16 | Q9UNX4 WDR3_HUMAN   | R.EAEYEES#VAKE.D                 | S726:  | 2 | 2,741  | 0,328 | -0,268 |
| 16 | P08779 K1C16_HUMAN  | K.TEELNKEVASNSLVQSSR.S           |        | 3 | 2,7371 | 0,145 | -0,086 |
| 16 | P19525 E2AK2_HUMAN  | K.AVS#PLLLTTTNSSE.G              | S83:   | 2 | 2,736  | 0,329 | 0,081  |
| 16 | Q86UU1 PHLB1_HUMAN  | E.DFSLTLGAR.G                    |        | 2 | 2,7358 | 0,215 | 0,124  |
| 16 | P13645 K1C10_HUMAN  | R.NVQALEIELQSQLALK.Q             |        | 3 | 2,7356 | 0,109 | -0,204 |
| 16 | P07814 SYEP_HUMAN   | E.DSLVLYNR.V                     |        | 2 | 2,7351 | 0,253 | 0,062  |
| 16 | P27797 CALR_HUMAN   | E.VKIDNSQVE.S                    |        | 2 | 2,7311 | 0,219 | -0,118 |
| 16 | P08779 K1C16_HUMAN  | R.APSTYGGGLSVSSR.F               |        | 2 | 2,7296 | 0,446 | -0,364 |
| 16 | Q71U36 TBA1A_HUMAN  | E.HSDCAFV*VDNE.A                 |        | 2 | 2,7283 | 0,297 | -0,273 |
| 16 | Q8WXI9 P66B_HUMAN   | E.RGRLT#PSPDIIVLSDNE.A           | T120:  | 2 | 2,7279 | 0,259 | -0,187 |
| 16 | P13645 K1C10_HUMAN  | K.YENEVALR.Q                     |        | 2 | 2,7212 | 0,378 | -0,061 |
| 16 | P38398 BRCA1_HUMAN  | E.NFEEHSM*S#PERE.M               | S1009: | 2 | 2,72   | 0,355 | -0,154 |
| 16 | P13645 K1C10_HUMAN  | R.VLDELTLTK.A                    |        | 2 | 2,7147 | 0,297 | -0,473 |
| 16 | P02533 K1C14_HUMAN  | R.APSTYGGGLSVSSR.F               |        | 2 | 2,7129 | 0,53  | -0,77  |
| 16 | P14136 GFAP_HUMAN   | K.LALDIEIATYR.K                  |        | 2 | 2,7117 | 0,525 | 0      |
| 16 | P49023 PAXI_HUMAN   | E.HVYSFPNK.Q                     |        | 2 | 2,7111 | 0,415 | -0,123 |
| 16 | Q12931 TRAP1_HUMAN  | E.NAM*IAAGLVDDPR.A               |        | 2 | 2,711  | 0,426 | -0,18  |
| 16 | Q9NPI6 DCP1A_HUMAN  | E.KHAPTYTIPLS#PVLSPPLPAE.A       | S315:  | 3 | 2,7092 | 0,41  | 0,158  |
| 16 | P53396 ACLY_HUMAN   | R.TAS#FSEGRADE.V                 | S455:  | 2 | 2,7086 | 0,331 | -0,381 |
| 16 | P82673 RT35_HUMAN   | E.NSISQYKE.S                     |        | 2 | 2,703  | 0,202 | -0,252 |
| 16 | Q9Y4M2 Q9Y4M2_HUMAN | E.RCTM*PDEPLVR.A                 |        | 3 | 2,6977 | 0,113 | 0,132  |
| 16 | P05114 HMG1_HUMAN   | E.TKEDLPAENGETK.T                |        | 2 | 2,6971 | 0,23  | -0,085 |
| 16 | Q6P6C2 ALKB5_HUMAN  | E.AAAAAAAAAAAAAAAAAAAEPYVSGAKR.K |        | 3 | 2,6951 | 0,338 | 0,221  |
| 16 | P13645 K1C10_HUMAN  | R.SQYEQLAEQNR.K                  |        | 2 | 2,6937 | 0,321 | -0,572 |
| 16 | P35749 MYH11_HUMAN  | E.M*KTQLELEDE.L                  |        | 2 | 2,6931 | 0,119 | -0,53  |
| 16 | Q99700 ATX2_HUMAN   | E.NKGISPVVSE.H                   |        | 2 | 2,6876 | 0,321 | -0,118 |
| 16 | Q9UQ35 SRRM2_HUMAN  | R.SSGHSSSELS#PDAVEK.A            | S1387: | 2 | 2,6875 | 0,321 | -0,36  |
| 16 | P19525 E2AK2_HUMAN  | E.KKAVS#PLLLTTTNSSE.G            | S83:   | 3 | 2,6866 | 0,186 | -0,31  |
| 16 | P35527 K1C9_HUMAN   | R.FSSSSGYGGSSR.V                 |        | 2 | 2,6862 | 0,401 | -0,395 |
| 16 | P35908 K22E_HUMAN   | R.NKLNDLEALQQAK.E                |        | 3 | 2,6845 | 0,101 | 0,113  |

|    |                     |                                |            |   |        |       |        |
|----|---------------------|--------------------------------|------------|---|--------|-------|--------|
| 16 | Q15785 TOM34_HUMAN  | K.NRVPS#AGDVE.K                | S186:      | 2 | 2,6789 | 0,442 | -0,434 |
| 16 | Q9Y490 TLN1_HUMAN   | K.KSTVLQQYNR.V                 |            | 2 | 2,6775 | 0,286 | -0,804 |
| 16 | Q14203 DCTN1_HUMAN  | E.DCTM*QLADHIK.F               |            | 2 | 2,6749 | 0,348 | -1,086 |
| 16 | Q8TDY2 RBCC1_HUMAN  | R.ST#ELVLS#PDM*PR.T            | T238:S243: | 2 | 2,6738 | 0,275 | -0,481 |
| 16 | P13647 K2C5_HUMAN   | K.WTLLQEQTGK.T                 |            | 2 | 2,6711 | 0,378 | -0,304 |
| 16 | P13647 K2C5_HUMAN   | K.LAELEEALQK.A                 |            | 2 | 2,666  | 0,121 | -0,427 |
| 16 | Q5T200 ZC3HD_HUMAN  | E.SRSL#PSHLTE.D                | S877:      | 2 | 2,662  | 0,286 | -0,377 |
| 16 | P09493 TPM1_HUMAN   | E.NALDRAEQAE.A                 |            | 2 | 2,6592 | 0,27  | -1,42  |
| 16 | Q9UQ35 SRRM2_HUMAN  | E.SYFGVSSLQLK.G                |            | 2 | 2,6506 | 0,384 | -0,298 |
| 16 | Q92610 ZN592_HUMAN  | E.SVSLSHSGSAPDPAVSVIVK.N       |            | 3 | 2,6489 | 0,21  | -0,09  |
| 16 | P08559 ODPA_HUMAN   | E.NNRYGM*GTS#VER.A             | S232:      | 3 | 2,6475 | 0,224 | 0,185  |
| 16 | P50990 TCPQ_HUMAN   | E.GNKNVGLDIE.A                 |            | 2 | 2,6401 | 0,252 | -0,23  |
| 16 | O15234 CASC3_HUMAN  | E.LKSEANDAVNS#STKEE.K          | S125:      | 2 | 2,6384 | 0,433 | 0      |
| 16 | Q9UHD8 SEPT9_HUMAN  | R.RVQT#PLLR.A                  | T49:       | 2 | 2,6379 | 0,132 | -0,23  |
| 16 | P19838 NFKB1_HUMAN  | E.VIQAASSPVK.T                 |            | 2 | 2,6354 | 0,401 | 0,061  |
| 16 | Q9Y490 TLN1_HUMAN   | E.STM*LEDVSV#PK.K              | S425:      | 2 | 2,6352 | 0,373 | -0,284 |
| 16 | Q86VP6 CAND1_HUMAN  | D.SIKLDDDSE.R                  |            | 2 | 2,6304 | 0,272 | 0      |
| 16 | O75531 BAF_HUMAN    | K.HRDFVAEPM*GEKPVGSLAGIGE.V    |            | 3 | 2,6274 | 0,3   | -0,554 |
| 16 | P49023 PAXI_HUMAN   | K.QKS#AEPSPT#VM*STSLGSNLSE.L   | S126:T132: | 3 | 2,6249 | 0,099 | -0,157 |
| 16 | Q70L73 Q70L73_HUMAN | R.RVS#RSS#FSSDPDESE.G          | S60:S63:   | 2 | 2,624  | 1     | -0,463 |
| 16 | Q9H165 BC11A_HUMAN  | E.KAVDKPPSPS#PIE.M             | S88:       | 2 | 2,6186 | 0,274 | -1,013 |
| 16 | P04264 K2C1_HUMAN   | K.NKLNDLEDALQQAK.E             |            | 3 | 2,6161 | 0,231 | 0,229  |
| 16 | Q9BTL3 F103A_HUMAN  | K.RPPES#PPIVEE.W               | S36:       | 2 | 2,6154 | 0,292 | -0,55  |
| 16 | Q5VT52 K0460_HUMAN  | E.M*M*DKPTSSVDTM*SLLSK.I       |            | 2 | 2,6153 | 0,386 | 0,304  |
| 16 | O75592 MYCB2_HUMAN  | E.NRAPS#PHVVQE.N               | S2882:     | 2 | 2,6132 | 0,442 | -0,464 |
| 16 | Q01105 SET_HUMAN    | E.IDRLNEQASEE.I                |            | 2 | 2,6129 | 0,33  | -0,655 |
| 16 | Q6Y7W6 PERQ2_HUMAN  | K.KVQKEPIPEEQE.M               |            | 2 | 2,6126 | 0,091 | 0,252  |
| 16 | Q15075 EEA1_HUMAN   | E.NKLQQQLTQAAQE.L              |            | 2 | 2,6085 | 0,331 | -0,895 |
| 16 | P08779 K1C16_HUMAN  | R.VLQGLEIELQSQLSM*K.A          |            | 3 | 2,6079 | 0,236 | -0,1   |
| 16 | O43583 DENR_HUMAN   | K.LTVENS#PKQE.A                | S73:       | 2 | 2,6064 | 0,2   | -0,896 |
| 16 | Q9UBR2 CATZ_HUMAN   | R.VGDYGSLSGR.E                 |            | 2 | 2,604  | 0,285 | 0      |
| 16 | P05556 ITB1_HUMAN   | K.NVLSLTNKGE.V                 |            | 2 | 2,6027 | 0,249 | -0,227 |
| 16 | P51858 HDGF_HUMAN   | E.VERPLPM*EVEK.N               |            | 2 | 2,5986 | 0,233 | -1,09  |
| 16 | P30279 CCND2_HUMAN  | E.AVLLNSLQQYR.Q                |            | 2 | 2,5979 | 0,38  | 0,093  |
| 16 | P27816 MAP4_HUMAN   | E.VALAKDM*ES#PTK.L             | S280:      | 2 | 2,5975 | 0,394 | -0,088 |
| 16 | O60828 PQBP1_HUMAN  | K.TGADTTAAGPLFQQRPYPS#PGAVLR.A | S247:      | 3 | 2,595  | 0,256 | 0,138  |
| 16 | P27816 MAP4_HUMAN   | K.DM*ES#PTKLDVTLAK.D           | S280:      | 2 | 2,5817 | 0,306 | -0,297 |
| 16 | Q9H3P7 GCP60_HUMAN  | E.VVVAGSSLPTSSK.V              |            | 2 | 2,5775 | 0,405 | -0,396 |
| 16 | Q8NEL9 DDHD1_HUMAN  | E.NEGISTIPS#PVTS#PVLSR.R       | S723:S727: | 2 | 2,5773 | 0,241 | 0,182  |



|    |                     |                            |        |   |        |       |        |
|----|---------------------|----------------------------|--------|---|--------|-------|--------|
| 16 | Q01484 ANK2_HUMAN   | K.SDS#NASFLR.A             | S31:   | 2 | 2,5766 | 0,354 | -0,113 |
| 16 | Q14676 MDC1_HUMAN   | E.LQPSTSTDQPVT#PEPTSQATR.G | T1466: | 2 | 2,5758 | 0,398 | -0,736 |
| 16 | P28066 PSA5_HUMAN   | R.ITS#PLM*EPSSIEK.I        | S56:   | 2 | 2,5736 | 0,315 | -0,719 |
| 16 | Q9UBF2 COPG2_HUMAN  | E.DVIIVTSSLTK.D            |        | 2 | 2,5736 | 0,344 | -0,415 |
| 16 | O60502 NCOAT_HUMAN  | E.LKPM*DTDKES#IAE.S        | S505:  | 2 | 2,5732 | 0,244 | -0,853 |
| 16 | Q5JSH3 WDR44_HUMAN  | E.DVHLGGGYPVGS#PGK.V       | S27:   | 2 | 2,5658 | 0,406 | -0,642 |
| 16 | Q14204 DYHC1_HUMAN  | E.KSLLQALNE.V              |        | 2 | 2,5649 | 0,244 | 0,06   |
| 16 | Q09666 AHNK_HUMAN   | E.TGKLQGGVSLASKK.S         |        | 3 | 2,5581 | 0,215 | 0,25   |
| 16 | P84103 SFRS3_HUMAN  | K.VYVGNLGNNGNKTELE.R       |        | 2 | 2,5573 | 0,416 | -0,354 |
| 16 | Q9UK76 HN1_HUMAN    | R.RNSS#EASSGDFLD.L         | S88:   | 2 | 2,5554 | 0,393 | -0,416 |
| 16 | Q00839 HNRPU_HUMAN  | E.RLQAALDDEE.A             |        | 2 | 2,5531 | 0,23  | -0,526 |
| 16 | P52701 MSH6_HUMAN   | E.DYSQNVAVR.L              |        | 2 | 2,5519 | 0,338 | -0,116 |
| 16 | O43683 BUB1_HUMAN   | E.TSHEDLPAS#QERSE.V        | S314:  | 3 | 2,5504 | 0,133 | 0      |
| 16 | P08107 HSP71_HUMAN  | D.NNLLGRFE.L               |        | 2 | 2,55   | 0,202 | -0,127 |
| 16 | Q9HA05 Q9HA05_HUMAN | E.DTLVNNVPLPNTLPLPK.R      |        | 2 | 2,5499 | 0,399 | -0,066 |
| 16 | Q5VZL5 ZMYM4_HUMAN  | K.AKSEDS#DVELSD.-          | S1542: | 2 | 2,5493 | 0,243 | -0,444 |
| 16 | P02533 K1C14_HUMAN  | R.VLDELTLAR.A              |        | 2 | 2,5475 | 0,266 | -0,355 |
| 16 | P36957 ODO2_HUMAN   | E.KAVGDTVAEDE.V            |        | 2 | 2,5472 | 0,233 | -0,968 |
| 16 | Q13439 GOGA4_HUMAN  | E.QQQLQQALAPAQASSNSSTPTR.M |        | 3 | 2,5468 | 0,197 | 0,079  |
| 16 | P13645 K1C10_HUMAN  | K.DAEAWFNEK.S              |        | 2 | 2,5462 | 0,311 | -0,33  |
| 16 | P37802 TAGL2_HUMAN  | E.GKNVIGLQM*GTNR.G         |        | 3 | 2,5425 | 0,283 | 0,13   |
| 16 | P20700 LMNB1_HUMAN  | E.IRDQM*QQQLNDYE.Q         |        | 2 | 2,541  | 0,332 | -0,288 |
| 16 | P39748 FEN1_HUMAN   | E.KQLQQAQAAGAEQE.V         |        | 2 | 2,539  | 0,332 | -0,163 |
| 16 | Q86YP4 P66A_HUMAN   | R.VNGLTTVALKE.T            |        | 2 | 2,5332 | 0,29  | -0,32  |
| 16 | P13646 K1C13_HUMAN  | R.LEQEIATYR.S              |        | 2 | 2,5315 | 0,357 | -0,435 |
| 16 | A8K6V7 A8K6V7_HUMAN | K.STT#PPPAEPVSLPQEPKPR.V   | T227:  | 3 | 2,5258 | 0,252 | -0,166 |
| 16 | P08779 K1C16_HUMAN  | K.IIAATIENAQPILQIDNAR.L    |        | 2 | 2,5256 | 0,314 | 0,236  |
| 16 | P19338 NUCL_HUMAN   | K.GLSEDTTEE.T              |        | 2 | 2,523  | 0,312 | -0,124 |
| 16 | P11142 HSP7C_HUMAN  | E.TKSFYPEE.V               |        | 2 | 2,5216 | 0,402 | -0,975 |
| 16 | Q14257 RCN2_HUMAN   | E.KANQDSGPGLSLEE.F         |        | 2 | 2,5161 | 0,283 | -0,507 |
| 16 | P07814 SYEP_HUMAN   | R.VAVQGDVVRE.L             |        | 2 | 2,5138 | 0,246 | -1,593 |
| 16 | Q03188 CENPC_HUMAN  | E.NIHTS#HITQDE.F           | S447:  | 2 | 2,5131 | 0,434 | -0,089 |
| 16 | Q00839 HNRPU_HUMAN  | R.AKS#PQPPVEE.D            | S270:  | 2 | 2,5125 | 0,201 | -0,378 |
| 16 | Q86XJ1 GA2L3_HUMAN  | R.HGPGLANVCQYDE.W          |        | 2 | 2,5118 | 0,398 | -0,919 |
| 16 | P56537 IF6_HUMAN    | E.RLSALGNVTTTCND.Y         |        | 2 | 2,5088 | 0,456 | -0,429 |
| 16 | P02538 K2C6A_HUMAN  | R.SGFSSVSVSR.S             |        | 2 | 2,5084 | 0,427 | -0,241 |
| 16 | Q9UPN4 AZI1_HUMAN   | K.ANNAGGGLPAAGPGDR.C       |        | 2 | 2,5081 | 0,324 | -0,175 |
| 16 | Q8NFH5 NUP53_HUMAN  | R.CALSS#PSLAFTPIK.T        | S259:  | 2 | 2,501  | 0,228 | -0,073 |
| 16 | Q9UQ35 SRRM2_HUMAN  | R.RSCFESS#PDPE.L           | S876:  | 2 | 2,4996 | 0,268 | -0,614 |

|    |                     |                              |            |   |        |       |        |
|----|---------------------|------------------------------|------------|---|--------|-------|--------|
| 16 | P39687 AN32A_HUMAN  | E.GKLEGLTDE.F                |            | 2 | 2,4974 | 0,238 | -0,063 |
| 16 | P13645 K1C10_HUMAN  | R.QSVEADINGLR.R              |            | 2 | 2,495  | 0,434 | -0,102 |
| 16 | Q96N67 DOCK7_HUMAN  | R.SAVRPASLNLNR.S             |            | 3 | 2,4947 | 0,28  | 0,282  |
| 16 | O60504 VINEX_HUMAN  | E.GDRVDVM*QQCDD.G            |            | 2 | 2,4933 | 0,333 | -0,168 |
| 16 | B2RA01 B2RA01_HUMAN | K.AQYEDIAQK.S                |            | 2 | 2,4931 | 0,14  | -0,114 |
| 16 | P20700 LMNB1_HUMAN  | R.AGGPTT#PLS#PTR.L           | T20:S23:   | 2 | 2,4916 | 0,27  | -1,021 |
| 16 | P04264 K2C1_HUMAN   | R.DYQELMNTK.L                |            | 2 | 2,4913 | 0,235 | -0,321 |
| 16 | P78527 PRKDC_HUMAN  | E.KITAQSIEE.L                |            | 2 | 2,4898 | 0,191 | -0,299 |
| 16 | Q02790 FKBP4_HUMAN  | E.QKSNTAGSQSQVETEA.-         |            | 2 | 2,4895 | 0,32  | 0      |
| 16 | Q9H2Y7 ZF106_HUMAN  | D.FSLITTGIQEPQTDETRNS#PTQK.T | S400:      | 3 | 2,4846 | 0,243 | 0,342  |
| 16 | Q8TDY2 RBCC1_HUMAN  | E.QKASVSQTSPOSASS#PRM*E.S    | S653:      | 3 | 2,4787 | 0,159 | 0,174  |
| 16 | O15234 CASC3_HUMAN  | E.LKSEANDAVNSST#KEE.K        | T127:      | 3 | 2,4773 | 0,153 | 0,203  |
| 16 | P19484 TFEB_HUMAN   | R.VHGLPTTS#PSGM*NM*AE.L      | S332:      | 2 | 2,4765 | 0,334 | -0,21  |
| 16 | Q6YHK3 CD109_HUMAN  | R.NNVVITVTQR.N               |            | 2 | 2,4764 | 0,349 | 0,213  |
| 16 | Q9H2Y7 ZF106_HUMAN  | E.GVSISSPGLAR.K              |            | 2 | 2,4761 | 0,144 | -0,216 |
| 16 | Q14493 SLBP_HUMAN   | R.HM*DSQVEDEFDLE.A           |            | 2 | 2,4741 | 0,235 | -0,227 |
| 16 | P62753 RS6_HUMAN    | R.LSS#LRASTSKSE.S            | S236:      | 2 | 2,4739 | 0,419 | -0,544 |
| 16 | Q96FV2 SCRN2_HUMAN  | E.DAAPFSYHSTFLLADRTE.A       |            | 3 | 2,4734 | 0,248 | -0,09  |
| 16 | P05387 RLA2_HUMAN   | E.DVIAQGIGK.L                |            | 2 | 2,4729 | 0,196 | -1,76  |
| 16 | P04264 K2C1_HUMAN   | K.NMQDM*VEDYR.N              |            | 2 | 2,4723 | 0,422 | -0,371 |
| 16 | Q9H307 PININ_HUMAN  | K.SLS#PGKENVS#ALDM*EKE.S     | S443:S450: | 2 | 2,4716 | 0,349 | -0,121 |
| 16 | O60271 JIP4_HUMAN   | E.KDVLQGELE.A                |            | 2 | 2,4711 | 0,158 | -0,473 |
| 16 | Q9BWU0 NADAP_HUMAN  | K.TTSLCAGPSASKNE.Y           |            | 2 | 2,4706 | 0,335 | -0,343 |
| 16 | Q9UHB9 SRP68_HUMAN  | E.KLASAFTEE.Q                |            | 2 | 2,4654 | 0,326 | -0,184 |
| 16 | P05556 ITB1_HUMAN   | K.NVLSLTKNGEVFNE.L           |            | 2 | 2,4649 | 0,257 | 0,156  |
| 16 | Q9HC35 EMAL4_HUMAN  | E.KLSLPQNE.T                 |            | 2 | 2,4649 | 0,2   | -0,131 |
| 16 | Q07157 ZO1_HUMAN    | E.DTAQAAFYPQK.S              |            | 2 | 2,4648 | 0,347 | -0,394 |
| 16 | P42566 EP15_HUMAN   | E.SEPIHQESPARS#SPE.L         | S562:      | 2 | 2,4633 | 0,135 | 0      |
| 16 | O43237 DC1L2_HUMAN  | R.RGPLTS#GSDEE.N             | S203:      | 2 | 2,4621 | 0,132 | -0,696 |
| 16 | Q09666 AHNK_HUMAN   | R.AGAISASGPE.L               |            | 2 | 2,4603 | 0,431 | 0,355  |
| 16 | P09874 PARP1_HUMAN  | E.KTLGDFAAE.Y                |            | 2 | 2,4582 | 0,248 | 0      |
| 16 | Q58FF8 H90B2_HUMAN  | E.SKEQVANSAFVE.Q             |            | 2 | 2,4573 | 0,404 | -0,559 |
| 16 | Q96TA1 NIBL1_HUMAN  | K.AVDLGPCKPSDQE.T            |            | 2 | 2,4568 | 0,252 | -0,812 |
| 16 | Q5JSH3 WDR44_HUMAN  | E.DVHLGGGYPVGS#PGKVGLSTFK.E  | S27:       | 3 | 2,4527 | 0,189 | -0,162 |
| 16 | Q9UKL0 RCOR1_HUMAN  | E.TNGPSNQKPVKS#PDNSIK.M      | S457:      | 3 | 2,4524 | 0,103 | 0,092  |
| 16 | Q02790 FKBP4_HUMAN  | E.FKGEDLTEEE.D               |            | 2 | 2,4517 | 0,256 | -0,714 |
| 16 | Q01082 SPTB2_HUMAN  | K.TALPAQSAATLPAR.T           |            | 2 | 2,4488 | 0,367 | -0,535 |
| 16 | Q86SQ0 PHLB2_HUMAN  | E.YTKPDSRSL#TGTTVE.D         | S468:      | 2 | 2,4456 | 0,296 | -0,563 |
| 16 | Q8N5P1 ZC3H8_HUMAN  | E.NLFSKPPNPALGK.T            |            | 2 | 2,4451 | 0,252 | -0,265 |

|    |                     |                        |            |   |        |       |        |
|----|---------------------|------------------------|------------|---|--------|-------|--------|
| 16 | Q92499 DDX1_HUMAN   | E.LKFNFGEEE.F          |            | 2 | 2,445  | 0,159 | -0,329 |
| 16 | P31946 1433B_HUMAN  | K.DSTLIM*QLLR.D        |            | 2 | 2,4433 | 0,15  | -0,303 |
| 16 | P22059 OSBP1_HUMAN  | R.GATVLPANTPGNVGSGK.D  |            | 2 | 2,443  | 0,319 | -0,158 |
| 16 | P60660 MYL6_HUMAN   | K.VLGNPKS#DE.M         | S57:       | 2 | 2,4413 | 0,149 | -0,235 |
| 16 | Q15029 U5S1_HUMAN   | E.KGLAEDIENE.V         |            | 2 | 2,441  | 0,22  | -0,437 |
| 16 | Q7Z309 F122B_HUMAN  | R.SSS#APLIHGLSD.L      | S25:       | 2 | 2,4386 | 0,461 | -0,483 |
| 16 | P42166 LAP2A_HUMAN  | R.SSTPLPTISSAENTR.Q    |            | 2 | 2,4349 | 0,384 | -0,444 |
| 16 | Q14155 ARHG7_HUMAN  | K.LPTTGM*TITKLE.D      |            | 2 | 2,434  | 0,353 | -0,646 |
| 16 | P49321 NASP_HUMAN   | E.SEAAGDGVDTK.V        |            | 2 | 2,4289 | 0,389 | -0,116 |
| 16 | Q15477 SKIV2_HUMAN  | R.ASS#LEDLVLKE.A       | S256:      | 2 | 2,428  | 0,25  | -0,19  |
| 16 | P08107 HSP71_HUMAN  | E.TKAFYPEE.I           |            | 2 | 2,4272 | 0,295 | -0,124 |
| 16 | Q9H307 PININ_HUMAN  | E.TNRVSVSEPS#ENEASKE.L | S417:      | 3 | 2,4271 | 0,171 | -0,276 |
| 16 | Q13439 GOGA4_HUMAN  | E.SLFRS#PIKE.S         | S78:       | 2 | 2,4242 | 0,166 | -0,633 |
| 16 | P08779 K1C16_HUMAN  | R.DAETWFLSK.T          |            | 2 | 2,422  | 0,437 | -0,111 |
| 16 | P38646 GRP75_HUMAN  | E.FKDQLPADE.C          |            | 2 | 2,4181 | 0,22  | -0,344 |
| 16 | O43399 TPD54_HUMAN  | R.NSATFKS#FE.D         | S166:      | 2 | 2,4176 | 0,344 | -0,22  |
| 16 | P35908 K22E_HUMAN   | K.DVDNAYM*IK.V         |            | 2 | 2,4162 | 0,197 | -0,45  |
| 16 | Q08AE8 SPIR1_HUMAN  | E.NGLSTSQQVPAQR.K      |            | 2 | 2,4157 | 0,342 | -0,352 |
| 16 | Q99700 ATX2_HUMAN   | E.NIKPNET#SPSFSK.A     | T770:      | 2 | 2,4147 | 0,233 | -0,319 |
| 16 | P54920 SNAA_HUMAN   | E.AHEEQNVDSYTE.S       |            | 2 | 2,4146 | 0,378 | 0,172  |
| 16 | Q9H792 SG269_HUMAN  | E.FNNCLNR.G            |            | 2 | 2,4136 | 0,194 | 0,78   |
| 16 | Q6P2E9 EDC4_HUMAN   | E.KSCQAM*FQQIND.S      |            | 2 | 2,4133 | 0,289 | -0,493 |
| 16 | P05362 ICAM1_HUMAN  | E.AQVHLALGDQR.L        |            | 3 | 2,4129 | 0,148 | 1,665  |
| 16 | Q9NPQ8 RIC8A_HUMAN  | E.HSQSFTFDDAQQE.D      |            | 2 | 2,4098 | 0,372 | -0,317 |
| 16 | P09132 SRP19_HUMAN  | E.DGSLCLVQFPSR.K       |            | 2 | 2,4058 | 0,246 | 0,442  |
| 16 | Q96S82 UBL7_HUMAN   | E.GLS#DDEDDFHPNTR.S    | S230:      | 2 | 2,4051 | 0,23  | -0,359 |
| 16 | O00566 MPP10_HUMAN  | D.LDFDISKLE.Q          |            | 2 | 2,4049 | 0,162 | 0      |
| 16 | P07951 TPM2_HUMAN   | E.KTIDDLE.D            |            | 2 | 2,4023 | 0,097 | -0,585 |
| 16 | P20700 LMNB1_HUMAN  | R.LKLS#PS#PSSR.V       | S391:S393: | 2 | 2,4021 | 0,23  | -0,099 |
| 16 | P40222 TXLNA_HUMAN  | R.RPEGPGAQAPSS#PR.V    | S515:      | 3 | 2,3962 | 0,236 | 0,184  |
| 16 | Q9H6Z4 RANB3_HUMAN  | R.VLS#PPKLINE.V        | S333:      | 2 | 2,3946 | 0,235 | -0,68  |
| 16 | P11388 TOP2A_HUMAN  | E.LKPQKS#VVSDLE.A      | S1374:     | 2 | 2,3938 | 0,372 | -0,857 |
| 16 | Q16543 CDC37_HUMAN  | K.TGDEKDVSV.-          | S377:      | 2 | 2,385  | 0,52  | -0,355 |
| 16 | O15320 CTGE5_HUMAN  | E.SSLKDas#FEKE.A       | S116:      | 2 | 2,385  | 0,474 | -0,462 |
| 16 | A1L390 PKHG3_HUMAN  | E.M*DSYYPNR.Y          |            | 2 | 2,3832 | 0,313 | -0,23  |
| 16 | A6NFI3 A6NFI3_HUMAN | R.GGDAKS#PVLQE.K       | S112:      | 2 | 2,3808 | 0,172 | -0,413 |
| 16 | P13645 K1C10_HUMAN  | K.VTMQNLNDR.L          |            | 2 | 2,379  | 0,24  | -0,112 |
| 16 | Q8N6H7 ARFG2_HUMAN  | E.HGPNTDLLGTS#PK.A     | S201:      | 2 | 2,3784 | 0,423 | -0,517 |
| 16 | P16949 STMN1_HUMAN  | E.LEKRAS#GQAFE.L       | S16:       | 2 | 2,3776 | 0,256 | -0,742 |

|    |                     |                            |            |   |        |       |        |
|----|---------------------|----------------------------|------------|---|--------|-------|--------|
| 16 | Q14126 DSG2_HUMAN   | K.GS#SS#ASIVKGQHE.M        | S699:S701: | 2 | 2,3762 | 0,305 | -0,422 |
| 16 | Q07157 ZO1_HUMAN    | R.IDS#PGFKPASQQK.A         | S912:      | 3 | 2,3752 | 0,183 | 0,062  |
| 16 | Q14694 UBP10_HUMAN  | K.KLLS#PSNE.K              | S547:      | 2 | 2,3741 | 0,11  | 0      |
| 16 | Q8N6T3 ARFG1_HUMAN  | R.YVGFNGT#PPPQKKE.D        | T189:      | 3 | 2,3732 | 0,269 | -0,111 |
| 16 | P28066 PSA5_HUMAN   | E.EKLNATNIE.L              |            | 2 | 2,3721 | 0,199 | 0,118  |
| 16 | Q9P287 BCCIP_HUMAN  | E.LTDLLIQNHIGSVIK.Q        |            | 3 | 2,3649 | 0,252 | 0,204  |
| 16 | Q9ULV3 CIZ1_HUMAN   | R.IPSTDTQVQPK.L            |            | 2 | 2,3593 | 0,357 | -0,502 |
| 16 | P42224 STAT1_HUMAN  | E.IKSLEDLQDE.Y             |            | 2 | 2,3579 | 0,126 | -0,615 |
| 16 | Q99590 SFRIP_HUMAN  | E.GEIIQTVDR.Q              |            | 2 | 2,3523 | 0,169 | 0      |
| 16 | P0C7M2 RA1L3_HUMAN  | R.KLFIGGLSFE.T             |            | 2 | 2,352  | 0,103 | -0,11  |
| 16 | Q9BUB5 MKNK1_HUMAN  | K.ICDFDLGSGM*K.L           |            | 2 | 2,3512 | 0,373 | -0,485 |
| 16 | Q9UQ35 SRRM2_HUMAN  | R.GEFSAS#PM*LK.S           | S1124:     | 2 | 2,3431 | 0,2   | -0,315 |
| 16 | Q8IY67 RAVR1_HUMAN  | E.ALGLGPPAAQLT#PPPAPVGLR.G | T463:      | 3 | 2,3427 | 0,177 | 0,176  |
| 16 | Q6XZF7 DNMBP_HUMAN  | E.NTLGVEEQR.H              |            | 2 | 2,3401 | 0,14  | -0,117 |
| 16 | O60524 SDCG1_HUMAN  | E.SFDKAVDE.F               |            | 2 | 2,3393 | 0,227 | 0,067  |
| 16 | Q71RC2 LARP4_HUMAN  | R.SNVVSPT#KNEDNGAPE.N      | T649:      | 2 | 2,3384 | 0,27  | -0,351 |
| 16 | Q15477 SKIV2_HUMAN  | R.GDTVSAASPCAPLAR.A        |            | 2 | 2,3373 | 0,455 | -0,41  |
| 16 | Q01433 AMPD2_HUMAN  | E.RQIS#QDVKLEPD.I          | S168:      | 2 | 2,3373 | 0,335 | -0,566 |
| 16 | Q06265 EXOS9_HUMAN  | -.M*KETPLSNCE.R            |            | 2 | 2,3271 | 0,399 | -0,299 |
| 16 | P13010 KU86_HUMAN   | R.YGSDIVPFSKVDE.E          |            | 2 | 2,3261 | 0,244 | 0      |
| 16 | P45973 CBX5_HUMAN   | E.KIIGATDSCGD.L            |            | 2 | 2,3235 | 0,361 | -0,537 |
| 16 | P14618 KPYM_HUMAN   | D.NAYM*EKCD.E.N            |            | 2 | 2,3208 | 0,287 | -0,208 |
| 16 | P26358 DNMT1_HUMAN  | E.IKNQLCDLE.T              |            | 2 | 2,3183 | 0,173 | -0,431 |
| 16 | Q9BX40 LS14B_HUMAN  | E.SANAQFNREE.L             |            | 2 | 2,318  | 0,206 | 0,105  |
| 16 | P26640 SYVC_HUMAN   | E.FVDM*DFGTGAVK.I          |            | 2 | 2,3176 | 0,096 | -0,468 |
| 16 | O15145 ARPC3_HUMAN  | E.TKDTDIVDE.A              |            | 2 | 2,3165 | 0,137 | 0      |
| 16 | O00541 PESC_HUMAN   | E.GDYVPPEKLLKLLALQR.G      |            | 3 | 2,3138 | 0,141 | -0,298 |
| 16 | O75400 PR40A_HUMAN  | K.NRES#FQIFLDE.L           | S613:      | 2 | 2,3129 | 0,097 | -0,083 |
| 16 | Q58FF7 H90B3_HUMAN  | R.RVFIM*DSCDE.L            |            | 2 | 2,3098 | 0,47  | 0      |
| 16 | Q03518 TAP1_HUMAN   | K.SGAHSFISGLPQGYDTEVDE.A   |            | 2 | 2,3078 | 0,318 | 0,116  |
| 16 | P21333 FLNA_HUMAN   | R.RLTVSSLQE.S              |            | 2 | 2,3036 | 0,139 | -0,118 |
| 16 | P50990 TCPQ_HUMAN   | E.KLFVTND.A                |            | 2 | 2,302  | 0,178 | 1,312  |
| 16 | P40222 TXLNA_HUMAN  | R.TAQSGALRDVS#EE.L         | S72:       | 2 | 2,3018 | 0,23  | -0,507 |
| 16 | Q5JSH3 WDR44_HUMAN  | K.VGLSTFKE.T               |            | 2 | 2,3002 | 0,173 | 0,346  |
| 16 | Q9Y3Q8 T22D4_HUMAN  | R.GAS#GGAGGRS#LDSRLE.L     | S116:S123: | 3 | 2,2978 | 0,149 | -0,333 |
| 16 | Q02952 AKA12_HUMAN  | E.SQVHM*M*AAAVADGTR.A      |            | 3 | 2,2937 | 0,139 | 0,232  |
| 16 | P12277 KCRB_HUMAN   | E.ALSSLDGDLAGR.Y           |            | 2 | 2,2909 | 0,287 | -1,038 |
| 16 | P29375 JAD1A_HUMAN  | K.AAANPDLQGHLPFQQSAFNR.V   |            | 3 | 2,2899 | 0,152 | 0,726  |
| 16 | Q49A39 Q49A39_HUMAN | E.KQPS#PEEIRE.R            | S257:      | 2 | 2,2845 | 0,222 | -0,377 |

|    |                     |                                  |        |   |        |       |        |
|----|---------------------|----------------------------------|--------|---|--------|-------|--------|
| 16 | P04264 K2C1_HUMAN   | R.TNAENEFVTIKK.D                 |        | 3 | 2,2843 | 0,295 | -0,59  |
| 16 | P67870 CSK2B_HUMAN  | D.KFNLTGLNE.Q                    |        | 2 | 2,284  | 0,178 | 1,06   |
| 16 | Q14247 SRC8_HUMAN   | K.TQTPVVS#PAPQPTEE.R             | S405:  | 2 | 2,2834 | 0,416 | -0,883 |
| 16 | P13667 PDIA4_HUMAN  | E.VKDLGLSE.S                     |        | 2 | 2,2829 | 0,15  | 0,142  |
| 16 | P55209 NP1L1_HUMAN  | R.QLTVQM*M*QNPQILAALQE.R         |        | 2 | 2,2826 | 0,37  | 0,351  |
| 16 | P27816 MAP4_HUMAN   | R.KPCNSQPSELSSE.T                |        | 2 | 2,2817 | 0,285 | -0,584 |
| 16 | Q86SQ0 PHLB2_HUMAN  | R.QASGT#PQPALRE.R                | T404:  | 2 | 2,2803 | 0,351 | -0,366 |
| 16 | Q8WY36 BBX_HUMAN    | E.LRQKS#PLFQFAE.I                | S243:  | 2 | 2,2776 | 0,344 | 0,158  |
| 16 | Q16204 CCDC6_HUMAN  | K.SGGIVISPFRL EE.L               |        | 2 | 2,2768 | 0,188 | 0,174  |
| 16 | Q9UKV3 ACINU_HUMAN  | K.TTS#PLEEEERE.I                 | S365:  | 2 | 2,2748 | 0,367 | -0,261 |
| 16 | Q9BZL6 KPCD2_HUMAN  | E.NALHASEEEEGE.G                 |        | 2 | 2,2701 | 0,364 | -0,186 |
| 16 | Q9UK61 CC063_HUMAN  | E.LINLIQCR.K                     |        | 2 | 2,2689 | 0,143 | -0,118 |
| 16 | P43307 SSRA_HUMAN   | E.TLNQINKAS#PR.R                 | S268:  | 2 | 2,2659 | 0,277 | -1,107 |
| 16 | O60841 IF2P_HUMAN   | E.GNTVHIEVK.E                    |        | 2 | 2,2658 | 0,279 | -0,122 |
| 16 | Q9BXP5 ARS2_HUMAN   | R.ILEQEEEE.Q                     |        | 2 | 2,2644 | 0,095 | -0,213 |
| 16 | P13645 K1C10_HUMAN  | R.NVSTGDVNVEMNAAPGVDLTQLLNNM*R.S |        | 3 | 2,2636 | 0,154 | 0      |
| 16 | Q6Y7W6 PERQ2_HUMAN  | K.VQKEPIEEQE.M                   |        | 2 | 2,262  | 0,205 | -1,012 |
| 16 | Q71U36 TBA1A_HUMAN  | E.GEFSEARE.D                     |        | 2 | 2,259  | 0,205 | -0,594 |
| 16 | Q9P2D6 F135A_HUMAN  | K.SKS#IEITFE.K                   | S707:  | 2 | 2,2575 | 0,202 | -0,323 |
| 16 | Q9HA05 Q9HA05_HUMAN | K.M*NSIVYQK.Q                    |        | 2 | 2,2565 | 0,31  | 0,183  |
| 16 | Q02952 AKA12_HUMAN  | E.VHVSTVEE.R                     |        | 2 | 2,2549 | 0,219 | 0,203  |
| 16 | P13010 KU86_HUMAN   | R.YGSDIVPFSKVDEE.Q               |        | 2 | 2,2515 | 0,218 | -0,077 |
| 16 | Q9P287 BCCIP_HUMAN  | E.SGVPQPPDPPVQR.D                |        | 2 | 2,249  | 0,19  | -0,266 |
| 16 | P02545 LMNA_HUMAN   | E.SRLADALQE.L                    |        | 2 | 2,2483 | 0,168 | -0,608 |
| 16 | Q86XP3 DDX42_HUMAN  | K.IIDPLPIDHSE.I                  |        | 2 | 2,2482 | 0,208 | -0,091 |
| 16 | P52272 HNRPM_HUMAN  | K.GCGVVKFESPE.V                  |        | 2 | 2,2445 | 0,234 | -0,404 |
| 16 | P13647 K2C5_HUMAN   | R.ISISTSGGSFR.N                  |        | 2 | 2,2435 | 0,249 | -0,439 |
| 16 | P35580 MYH10_HUMAN  | E.M*RTQLEEELEDE.L                |        | 2 | 2,2405 | 0,157 | -0,433 |
| 16 | Q02952 AKA12_HUMAN  | K.SATLS#STESTASE.M               | S644:  | 2 | 2,2394 | 0,248 | -0,181 |
| 16 | Q92618 ZN516_HUMAN  | R.LLNGASQADGAR.V                 |        | 2 | 2,238  | 0,224 | -0,208 |
| 16 | O43166 SI1L1_HUMAN  | K.DSS#PTLASKVDQLE.G              | S1734: | 2 | 2,2348 | 0,344 | -0,466 |
| 16 | Q7Z3E1 PARPT_HUMAN  | E.SGSLDGVFR.S                    |        | 2 | 2,234  | 0,246 | 0,325  |
| 16 | P68104 EF1A1_HUMAN  | K.IGGIGITVPVGR.V                 |        | 2 | 2,233  | 0,386 | -0,238 |
| 16 | Q4KMQ2 TM16F_HUMAN  | E.AVDNNLRPKS#E.-                 | S909:  | 2 | 2,2325 | 0,372 | -0,092 |
| 16 | Q13242 SFRS9_HUMAN  | R.IYVGNLPTDVR.E                  |        | 2 | 2,2304 | 0,375 | -0,489 |
| 16 | O15513 O15513_HUMAN | E.KSIDDLEE.K                     |        | 2 | 2,23   | 0,165 | -0,836 |
| 16 | Q86YS7 K0528_HUMAN  | E.IIGS#PIPEPR.Q                  | S643:  | 2 | 2,2257 | 0,349 | -0,211 |
| 16 | Q14978 NOLC1_HUMAN  | R.GGSISVQVNSIKFDS#E.-            | S698:  | 2 | 2,2231 | 0,204 | 0,698  |
| 16 | Q02790 FKBP4_HUMAN  | K.SNTAGSQSQVETEA.-               |        | 2 | 2,2221 | 0,312 | -0,346 |

|    |                    |                               |        |   |        |       |        |
|----|--------------------|-------------------------------|--------|---|--------|-------|--------|
| 16 | P04792 HSPB1_HUMAN | D.VNHFAPDE.L                  |        | 2 | 2,2188 | 0,197 | -0,197 |
| 16 | P07195 LDHB_HUMAN  | E.KLIAPVAEEE.A                |        | 2 | 2,2165 | 0,199 | -0,111 |
| 16 | Q9Y2X3 NOL5_HUMAN  | E.KLNLSCIHS#PVVNE.L           | S109:  | 2 | 2,2151 | 0,193 | -0,65  |
| 16 | Q6S8J3 A26CA_HUMAN | E.KM*TQIM*FE.T                |        | 2 | 2,2146 | 0,188 | -1,036 |
| 16 | Q6ULP2 AFTIN_HUMAN | E.KQGLPTLQQDE.F               |        | 2 | 2,2145 | 0,239 | 0,097  |
| 16 | O94826 TOM70_HUMAN | E.NYDKIIE.C                   |        | 2 | 2,2123 | 0,108 | -0,124 |
| 16 | Q9Y3L3 3BP1_HUMAN  | E.SEVPPRPAS#PK.V              | S544:  | 2 | 2,1991 | 0,131 | -0,098 |
| 16 | P50990 TCPQ_HUMAN  | K.IAVYSCPFDGM*ITE.T           |        | 2 | 2,1927 | 0,232 | 0      |
| 16 | Q8IWZ3 ANKH1_HUMAN | R.RLTS#SVSCALDE.A             | S177:  | 2 | 2,1927 | 0,35  | -0,43  |
| 16 | Q02952 AKA12_HUMAN | E.KSEDSIAGSGVE.H              |        | 2 | 2,1918 | 0,261 | -0,414 |
| 16 | O60313 OPA1_HUMAN  | E.EHPAYLASDE.I                |        | 2 | 2,1907 | 0,207 | -1,293 |
| 16 | Q6P996 PDXD1_HUMAN | E.KVERLS#SGPEQITL.E.A         | S736:  | 2 | 2,1872 | 0,423 | -0,553 |
| 16 | Q9NRL3 STRN4_HUMAN | E.FDFLGSGEDGEGAPDPR.R         |        | 2 | 2,1835 | 0,326 | 0,138  |
| 16 | P08670 VIME_HUMAN  | R.SYVTS#TR.T                  | S34:   | 2 | 2,1782 | 0,317 | -0,123 |
| 16 | Q08722 CD47_HUMAN  | E.VSQLLKGDSLKM*DK.S           |        | 3 | 2,1778 | 0,172 | 0,111  |
| 16 | Q8WWM7 ATX2L_HUMAN | E.FNPTKPLLSVKN.S              |        | 2 | 2,1736 | 0,182 | -0,719 |
| 16 | Q9Y3L3 3BP1_HUMAN  | R.TESEVPPRPAS#PK.V            | S544:  | 2 | 2,1726 | 0,283 | -0,662 |
| 16 | Q8TER5 SOLO_HUMAN  | R.T#RASVAVSSFE.H              | T1418: | 2 | 2,1714 | 0,195 | -0,396 |
| 16 | P27695 APEX1_HUMAN | E.NKLPAELQE.L                 |        | 2 | 2,1699 | 0,137 | -0,117 |
| 16 | P13647 K2C5_HUMAN  | R.GRLDSELR.N                  |        | 2 | 2,1675 | 0,116 | -0,129 |
| 16 | Q9NQ55 SSF1_HUMAN  | R.VGGS#DEEASGIPSR.T           | S359:  | 2 | 2,1649 | 0,236 | -0,254 |
| 16 | Q7Z6Z7 HUWE1_HUMAN | E.NKGNLTPALE.S                |        | 2 | 2,1637 | 0,202 | -0,521 |
| 16 | P52292 IMA2_HUMAN  | E.KYFSVEEEE.D                 |        | 2 | 2,1616 | 0,178 | 0      |
| 16 | P40925 MDHC_HUMAN  | E.LQDCALPLLKDIATDKE.D         |        | 3 | 2,1492 | 0,093 | -0,09  |
| 16 | Q5T5U3 RHG21_HUMAN | R.LRTS#TSDLSRGE.I             | S1860: | 2 | 2,1482 | 0,418 | -0,522 |
| 16 | P13645 K1C10_HUMAN | R.NVQALEIEIQLSQLALK.Q         |        | 2 | 2,1439 | 0,294 | -0,339 |
| 16 | P43358 MAGA4_HUMAN | E.AAVS#SSSPLVPGTLEEVPAAE.S    | S41:   | 3 | 2,1397 | 0,176 | -0,35  |
| 16 | P63313 TYB10_HUMAN | E.TIEQEKRSEIS.-               | S41:   | 2 | 2,1371 | 0,261 | -0,174 |
| 16 | Q14694 UBP10_HUMAN | E.SAS#PPADGTGSASGTLVPSQPK.S   | S321:  | 2 | 2,1349 | 0,305 | 0,117  |
| 16 | Q9NPR2 SEM4B_HUMAN | K.RPLS#IQDSFVE.V              | S804:  | 2 | 2,1324 | 0,355 | 0,089  |
| 16 | P22626 ROA2_HUMAN  | R.GGNFGFGDSR.G                |        | 2 | 2,1315 | 0,205 | -0,06  |
| 16 | P84090 ERH_HUMAN   | E.GRTYADYESVNE.C              |        | 2 | 2,1284 | 0,108 | -0,608 |
| 16 | P02533 K1C14_HUMAN | K.ASLENSLEETK.G               |        | 2 | 2,1241 | 0,309 | -0,3   |
| 16 | Q13428 TCOF_HUMAN  | K.LDSSPSVSTLAAKDDPDGKQE.A     |        | 3 | 2,1238 | 0,203 | -0,081 |
| 16 | Q8WY36 BBX_HUMAN   | R.QKS#PLFQFAE.I               | S243:  | 2 | 2,1227 | 0,143 | -0,478 |
| 16 | Q6ZN18 AEBP2_HUMAN | R.LSPLPPGS#PGSAAR.G           | S24:   | 2 | 2,1216 | 0,238 | -0,528 |
| 16 | P55196 AFAD_HUMAN  | E.DKAYQLE.R                   |        | 2 | 2,1194 | 0,136 | 0,493  |
| 16 | Q8IYB7 D13L2_HUMAN | E.AQFDGS#DSEDGHGITQNVLVDGVK.K | S173:  | 3 | 2,1191 | 0,161 | -0,071 |
| 16 | Q9BUJ2 HNRL1_HUMAN | E.NYGDKFAE.N                  |        | 2 | 2,1183 | 0,18  | 0,129  |

|    |                    |                             |            |   |        |       |        |
|----|--------------------|-----------------------------|------------|---|--------|-------|--------|
| 16 | P22102 PUR2_HUMAN  | E.KISNTAISISD.H             |            | 2 | 2,1179 | 0,322 | -0,425 |
| 16 | P13010 KU86_HUMAN  | R.YGSDIVPFSK.V              |            | 2 | 2,1178 | 0,299 | -0,548 |
| 16 | P35908 K22E_HUMAN  | K.IEISELNR.V                |            | 2 | 2,117  | 0,18  | -0,251 |
| 16 | Q9ULW0 TPX2_HUMAN  | K.SSDQPLTVPS#PK.F           | S738:      | 2 | 2,1168 | 0,105 | -0,255 |
| 16 | Q15942 ZYX_HUMAN   | R.EKVSS#IDLE.I              | S143:      | 2 | 2,115  | 0,143 | -0,333 |
| 16 | P20700 LMNB1_HUMAN | E.IRDQM*QQQLND.Y            |            | 2 | 2,1114 | 0,169 | 0,087  |
| 16 | Q00610 CLH1_HUMAN  | E.DKLECSEE.L                |            | 2 | 2,1102 | 0,221 | 0,242  |
| 16 | P30622 CLIP1_HUMAN | E.SISNLS#EAGS#IKKGERE.L     | S200:S204: | 2 | 2,1092 | 0,522 | -0,31  |
| 16 | Q9Y6M7 S4A7_HUMAN  | R.KIPTGAEASNVLVGE.V         |            | 2 | 2,1064 | 0,126 | -0,493 |
| 16 | O75880 SCO1_HUMAN  | E.KM*IQVVDE.I               |            | 2 | 2,1037 | 0,161 | 0,062  |
| 16 | Q6NZI2 PTRF_HUMAN  | R.GS#S#PDVHALLE.I           | S365:S366: | 2 | 2,1015 | 0,213 | -0,285 |
| 16 | Q9HCM7 AUT2L_HUMAN | R.TTPLGGLGPGEAR.D           |            | 2 | 2,1008 | 0,262 | -0,299 |
| 16 | P18858 DNL1_HUMAN  | E.GEDGDQPTT#PPKPLK.T        | T183:      | 3 | 2,0947 | 0,127 | -0,551 |
| 16 | P27816 MAP4_HUMAN  | K.LDVTLAKDM*QPSM*E.S        |            | 2 | 2,0939 | 0,095 | -0,152 |
| 16 | Q15149 PLEC1_HUMAN | E.LRLQAEAE.R                |            | 2 | 2,0903 | 0,199 | -0,23  |
| 16 | Q8N1F7 NUP93_HUMAN | E.KDNALLSAIEE.S             |            | 2 | 2,0774 | 0,149 | -0,203 |
| 16 | Q15773 MLF2_HUMAN  | E.RQDYINLDESE.A             |            | 2 | 2,0738 | 0,162 | -0,265 |
| 16 | P49454 CENPF_HUMAN | E.KAQLLQGLDE.A              |            | 2 | 2,0705 | 0,248 | -0,438 |
| 16 | P13804 ETFA_HUMAN  | E.KASSTSPVEISE.W            |            | 2 | 2,0699 | 0,272 | -0,494 |
| 16 | Q8NDX5 PHC3_HUMAN  | R.GEDLTSEHPLE.Q             |            | 2 | 2,0694 | 0,326 | -0,273 |
| 16 | Q05682 CALD1_HUMAN | E.KGNVFSPTAAGT#PNKE.T       | T730:      | 3 | 2,0637 | 0,174 | -0,102 |
| 16 | P55786 PSA_HUMAN   | E.IHATGFNYQNE.D             |            | 2 | 2,0627 | 0,311 | -0,471 |
| 16 | Q9UPN3 MACF1_HUMAN | R.RGS#DASDFLLE.T            | S5372:     | 2 | 2,0599 | 0,264 | 0,087  |
| 16 | P07814 SYEP_HUMAN  | E.GHSAFATM*EE.A             |            | 2 | 2,0577 | 0,114 | -0,334 |
| 16 | P08865 RSSA_HUMAN  | K.FLAAGTHLGGTNLDFQM*E.Q     |            | 3 | 2,0542 | 0,129 | 0,378  |
| 16 | Q5VT52 K0460_HUMAN | K.IIS#PGSSTPS#STRSPPPGRDE.S | S758:S765: | 3 | 2,0535 | 0,093 | -0,16  |
| 16 | P67936 TPM4_HUMAN  | E.KTIDDLEE.K                |            | 2 | 2,0508 | 0,169 | -0,57  |
| 16 | Q13596 SNX1_HUMAN  | K.ITTSLLPINNGSKE.N          |            | 2 | 2,0426 | 0,326 | -0,492 |
| 16 | Q9Y4B5 K0802_HUMAN | E.NDYLKDE.L                 |            | 2 | 2,0415 | 0,211 | 0,204  |
| 16 | Q8NOX4 CLYBL_HUMAN | E.DIDLGPTEK.C               |            | 2 | 2,0404 | 0,105 | 0,185  |
| 16 | Q9Y608 LRRF2_HUMAN | R.NSASATTPLSGNSS#R.R        | S324:      | 2 | 2,0379 | 0,317 | 0      |
| 16 | P42224 STAT1_HUMAN | E.VHPSRLQTTDNLPM*S#PEEFDE.V | S727:      | 3 | 2,0295 | 0,085 | 0,276  |
| 16 | P11021 GRP78_HUMAN | D.NHLLGTFD.L                |            | 2 | 2,026  | 0,233 | 0,067  |
| 16 | Q14155 ARHG7_HUMAN | K.LPTTGM*TITK.L             |            | 2 | 2,0248 | 0,185 | -0,226 |
| 16 | P33993 MCM7_HUMAN  | R.SVRFS#EAE.Q               | S678:      | 2 | 2,0241 | 0,129 | -0,121 |
| 16 | P14618 KPYM_HUMAN  | D.NAYMEKCDE.N               |            | 2 | 2,0224 | 0,265 | 0,105  |
| 16 | Q99733 NP1L4_HUMAN | E.RLDNVPHTPSS#YIE.T         | S54:       | 2 | 2,0171 | 0,193 | -0,571 |
| 16 | P21980 TGM2_HUMAN  | E.RDLYLENPE.I               |            | 2 | 2,0145 | 0,124 | -0,425 |
| 16 | Q969V6 MKL1_HUMAN  | R.AGSCCLS#PGGRAE.L          | S511:      | 2 | 2,014  | 0,255 | -0,609 |

|    |                    |                                          |             |   |        |       |        |
|----|--------------------|------------------------------------------|-------------|---|--------|-------|--------|
| 16 | P30260 CDC27_HUMAN | R.LFTSDSSTTKE.N                          |             | 2 | 2,0133 | 0,113 | -0,602 |
| 16 | Q15149 PLEC1_HUMAN | E.FADM*LSGNAGGFR.S                       |             | 2 | 2,0127 | 0,125 | -1,616 |
| 16 | Q9HCG8 NCM_HUMAN   | R.NSS#PEDRYEE.Q                          | S28:        | 2 | 2,0063 | 0,122 | -0,561 |
| 16 | O60832 DKC1_HUMAN  | R.KSLPEEDVAE.I                           |             | 2 | 2,0043 | 0,094 | -0,328 |
| 16 | P22314 UBA1_HUMAN  | R.RVS#GPDPKPGS#NCSPAQSVLSEVPSVPTNGM*AK.N | S13:S21:    | 3 | 2,0012 | 0,162 | 0,726  |
| 16 | Q9P2D6 F135A_HUMAN | E.GLDPTICGYNFDPK.T                       |             | 2 | 1,9974 | 0,278 | 0      |
| 16 | Q15942 ZYG_HUMAN   | E.GGPEAPIPPPQPR.E                        |             | 2 | 1,9974 | 0,224 | -0,606 |
| 16 | O75369 FLNB_HUMAN  | E.KSGCIVNNLAE.F                          |             | 2 | 1,9954 | 0,126 | -0,304 |
| 16 | Q6P996 PDXD1_HUMAN | R.LS#SGPEQITL.E.A                        | S736:       | 2 | 1,9924 | 0,13  | -0,389 |
| 16 | Q9Y4F5 K0284_HUMAN | R.TSFSGRS#VE.L                           | S1199:      | 2 | 1,9903 | 0,093 | -0,697 |
| 16 | P35527 K1C9_HUMAN  | R.QGVDADINGLR.Q                          |             | 2 | 1,9894 | 0,272 | -0,948 |
| 16 | P62753 RS6_HUMAN   | R.LSSLRAS#TSKSE.S                        | S240:       | 2 | 1,9893 | 0,246 | -0,363 |
| 16 | O75688 PPM1B_HUMAN | E.ILRAEED.E.F                            |             | 2 | 1,9893 | 0,144 | -0,876 |
| 16 | Q9Y608 LRRF2_HUMAN | R.NSASATPLSGNSSR.R                       |             | 2 | 1,989  | 0,294 | -0,505 |
| 16 | P13645 K1C10_HUMAN | R.LAADDFR.L                              |             | 2 | 1,9889 | 0,341 | 0,302  |
| 16 | O00116 ADAS_HUMAN  | E.NNLTAHVE.A                             |             | 2 | 1,9848 | 0,249 | 0,068  |
| 16 | Q7KZ85 SPT6H_HUMAN | E.SYDQAIRNDE.T                           |             | 2 | 1,9847 | 0,126 | -1,209 |
| 16 | P09493 TPM1_HUMAN  | E.KSIDDLEDE.L                            |             | 2 | 1,9824 | 0,125 | -0,229 |
| 16 | Q14160 LAP4_HUMAN  | R.QSPAS#PPPLGGGAPVR.T                    | S1448:      | 2 | 1,9788 | 0,175 | -0,623 |
| 16 | O75717 WDHD1_HUMAN | R.SNILSDNPDFSDE.A                        |             | 2 | 1,9777 | 0,183 | 0      |
| 16 | Q13242 SFRS9_HUMAN | R.GS#PHYFS#PFRPY.-                       | S211:S216:- | 2 | 1,9771 | 0,185 | -0,151 |
| 16 | P56192 SYMC_HUMAN  | K.T#SPKPAVVE.T                           | T824:       | 2 | 1,9719 | 0,087 | 0,545  |
| 16 | P04083 ANXA1_HUMAN | E.KILVALCGGN.-                           |             | 2 | 1,9709 | 0,296 | 0,584  |
| 16 | P49419 AL7A1_HUMAN | E.LGLREENE.G                             |             | 2 | 1,9669 | 0,12  | 0,127  |
| 16 | P11021 GRP78_HUMAN | E.KNILVFD.L                              |             | 2 | 1,9655 | 0,115 | 0,359  |
| 16 | Q9NSI2 CU070_HUMAN | E.LDVRS#VTS#VR.R                         | S73:S76:    | 2 | 1,9638 | 0,138 | -0,661 |
| 16 | P22626 ROA2_HUMAN  | R.GGGGNFGPGPSNFR.G                       |             | 2 | 1,9636 | 0,369 | -0,443 |
| 16 | P68104 EF1A1_HUMAN | K.DGNASGTTLE.A                           |             | 2 | 1,958  | 0,291 | -0,34  |
| 16 | O00541 PESC_HUMAN  | E.GDYVPPEK.L                             |             | 2 | 1,9569 | 0,26  | 0,135  |
| 16 | O60716 CTND1_HUMAN | R.GSLAS#LDSL.R.K                         | S349:       | 2 | 1,9545 | 0,29  | 0      |
| 16 | Q99873 ANM1_HUMAN  | E.LSCSTDYR.M                             |             | 2 | 1,9543 | 0,217 | 0      |
| 16 | Q15149 PLEC1_HUMAN | E.VTASQVAATK.T                           |             | 2 | 1,9539 | 0,247 | 0,125  |
| 16 | Q14676 MDC1_HUMAN  | R.S#SVKTPETVVPTAPE.L                     | S1317:      | 2 | 1,9533 | 0,177 | -0,301 |
| 16 | O43156 K0406_HUMAN | E.QFLLNYLK.E                             |             | 2 | 1,9531 | 0,136 | 0,117  |
| 16 | Q9NZT2 OGFR_HUMAN  | E.DRPEPLS#PKE.S                          | S378:       | 2 | 1,9479 | 0,213 | -0,587 |
| 16 | Q07157 ZO1_HUMAN   | R.IDS#PGFKPASQQK.A                       | S912:       | 2 | 1,9477 | 0,159 | -0,329 |
| 16 | Q99471 PFD5_HUMAN  | E.KIQPALQE.K                             |             | 2 | 1,9414 | 0,096 | 0,132  |
| 16 | Q9UMX3 BOK_HUMAN   | R.RSS#VFAAE.I                            | S8:         | 2 | 1,9345 | 0,154 | -1,095 |
| 16 | P11021 GRP78_HUMAN | K.NKITITND.Q                             |             | 2 | 1,9339 | 0,244 | 0      |



|    |                     |                      |            |   |        |       |        |
|----|---------------------|----------------------|------------|---|--------|-------|--------|
| 16 | Q96S66 CLCC1_HUMAN  | R.FQTGNKS#PEVLR.A    | S438:      | 2 | 1,9329 | 0,103 | -0,168 |
| 16 | P35527 K1C9_HUMAN   | K.TLLDIDNTR.M        |            | 2 | 1,9302 | 0,24  | 0      |
| 16 | Q14966 ZN638_HUMAN  | E.KES#PGLKNSPIDE.S   | S1100:     | 2 | 1,9292 | 0,204 | -1,552 |
| 16 | P06748 NPM_HUMAN    | E.KT#PKT#PKGPPSSVE.D | T234:T237: | 2 | 1,9214 | 0,164 | 0      |
| 16 | Q9Y4M2 Q9Y4M2_HUMAN | K.SSFLSS#PER.A       | S134:      | 2 | 1,9205 | 0,092 | -0,896 |
| 16 | P06753 TPM3_HUMAN   | E.GDLERTEE.R         |            | 2 | 1,9199 | 0,193 | 0,257  |
| 16 | P67936 TPM4_HUMAN   | E.LKCGDLEEE.L        |            | 2 | 1,913  | 0,169 | -0,67  |
| 16 | Q02790 FKBP4_HUMAN  | E.AHLAVNDFE.L        |            | 2 | 1,9125 | 0,085 | -1,501 |
| 16 | O95359 TACC2_HUMAN  | E.SAEGVVPPASGGGR.V   |            | 2 | 1,9105 | 0,251 | -0,492 |
| 16 | P00533 EGFR_HUMAN   | E.DHFLSLQR.M         |            | 2 | 1,9072 | 0,249 | -0,48  |
| 16 | P80723 BASP_HUMAN   | K.ETPAATEAPSS#TPK.A  | S195:      | 2 | 1,9045 | 0,362 | -0,083 |
| 16 | P48637 GSHB_HUMAN   | E.KIEPEPFE.N         |            | 2 | 1,8996 | 0,09  | -0,185 |
| 16 | Q92622 K0226_HUMAN  | E.SQLSSVLR.R         |            | 2 | 1,8986 | 0,082 | -0,617 |
| 16 | Q9H9R9 DBND1_HUMAN  | E.RRQPLS#SVSS#LE.V   | S63:S67:   | 2 | 1,8953 | 0,326 | -0,643 |
| 16 | P13645 K1C10_HUMAN  | K.SEITELRR.N         |            | 2 | 1,8934 | 0,133 | -0,122 |
| 16 | Q9H6Z4 RANB3_HUMAN  | K.FVFGQNM*SER.V      |            | 2 | 1,8932 | 0,28  | -0,198 |
| 16 | P10809 CH60_HUMAN   | K.LSDGVAVLK.V        |            | 2 | 1,8923 | 0,096 | 0      |
| 16 | O15231 ZN185_HUMAN  | R.RES#CGSSVLTDFE.G   | S233:      | 2 | 1,8764 | 0,286 | -0,234 |
| 16 | P14618 KPYM_HUMAN   | K.KGVNLPGAAVDLPVSE.K |            | 2 | 1,873  | 0,128 | -0,149 |
| 16 | O14745 NHERF_HUMAN  | E.SPRPALVR.S         |            | 2 | 1,8634 | 0,089 | -1,089 |
| 16 | Q8IY92 BTBDC_HUMAN  | R.DCRS#PGLLD.T       | S786:      | 2 | 1,8599 | 0,168 | -0,329 |
| 16 | P46821 MAP1B_HUMAN  | K.SDISPLTPR.E        |            | 2 | 1,859  | 0,198 | -1,361 |
| 16 | P16615 AT2A2_HUMAN  | E.KM*NVFDTE.L        |            | 2 | 1,8552 | 0,107 | -0,549 |
| 16 | P31946 1433B_HUMAN  | D.STLIM*QLLR.D       |            | 2 | 1,8549 | 0,212 | -0,224 |
| 16 | O95297 MPZL1_HUMAN  | E.SVVY#ADIR.K        | Y263:      | 2 | 1,8515 | 0,092 | -0,122 |
| 16 | Q13310 PABP4_HUMAN  | K.GYAFVHFE.T         |            | 2 | 1,8512 | 0,296 | 0,252  |
| 16 | Q8NI08 NCOA7_HUMAN  | E.VDKQSGS#PESRVE.N   | S502:      | 2 | 1,8509 | 0,268 | -0,081 |
| 16 | Q9H2G2 SLK_HUMAN    | E.NSLPIPASK.R        |            | 2 | 1,8492 | 0,103 | 0,066  |
| 16 | P04264 K2C1_HUMAN   | K.DVDGAYMTK.V        |            | 2 | 1,8491 | 0,27  | -0,488 |
| 16 | Q8TEQ6 GEMI5_HUMAN  | E.KNEPLSLPE.L        |            | 2 | 1,8478 | 0,101 | 0,119  |
| 16 | P34932 HSP74_HUMAN  | K.QVYVDKLA.E.L       |            | 2 | 1,837  | 0,259 | -0,229 |
| 16 | P21912 DHSB_HUMAN   | E.GKQQYLQSI.EE.R     |            | 2 | 1,8366 | 0,092 | -0,092 |
| 16 | Q9UKS6 PACN3_HUMAN  | E.VTLTSIVPTR.D       |            | 2 | 1,8311 | 0,176 | -0,224 |
| 16 | O14530 TXND9_HUMAN  | E.KAPFLCE.R          |            | 2 | 1,8278 | 0,109 | 0,353  |
| 16 | Q14974 IMB1_HUMAN   | E.DDIVPHVLPFIKE.H    |            | 2 | 1,8273 | 0,27  | -0,24  |
| 16 | Q86WB0 NIPA_HUMAN   | R.SQDATFSPGSEQAE.K   |            | 2 | 1,827  | 0,341 | -0,336 |
| 16 | Q03164 HRX_HUMAN    | E.KT#NLDLGPTAPSLEK.E | T972:      | 2 | 1,8247 | 0,115 | -1,613 |
| 16 | Q15942 ZYX_HUMAN    | R.S#PGAPGPLTK.E      | S344:      | 2 | 1,8239 | 0,236 | 0      |
| 16 | Q59HB8 Q59HB8_HUMAN | R.QKLTAQVEE.L        |            | 2 | 1,8115 | 0,126 | 0      |

|    |                     |                        |            |   |        |       |        |
|----|---------------------|------------------------|------------|---|--------|-------|--------|
| 16 | Q92598 HS105_HUMAN  | K.QAYVDKLEE.L          |            | 2 | 1,8105 | 0,309 | 0      |
| 16 | P0C7M2 RA1L3_HUMAN  | K.LFIGGLSFETTDE.S      |            | 2 | 1,8056 | 0,249 | -0,256 |
| 16 | P42224 STAT1_HUMAN  | R.LQTTDNLPM*S#PEEFDE.V | S727:      | 2 | 1,8002 | 0,263 | 0,353  |
| 16 | Q9GZT8 NIF3L_HUMAN  | E.NKINIILSE.T          |            | 2 | 1,7959 | 0,082 | -0,234 |
| 16 | Q14592 ZN460_HUMAN  | E.NSYKFEE.M            |            | 2 | 1,7884 | 0,232 | -0,998 |
| 16 | Q8IXH7 NELFD_HUMAN  | E.NKGASELVAE.L         |            | 2 | 1,7851 | 0,14  | -0,959 |
| 16 | Q8N2M8 SFR16_HUMAN  | E.TGAAKPKLT#PQE.K      | T558:      | 2 | 1,7747 | 0,326 | -0,369 |
| 16 | Q9UK45 LSM7_HUMAN   | R.QLGLVVCR.G           |            | 2 | 1,7688 | 0,103 | -0,129 |
| 16 | O95433 AHS1_HUMAN   | E.GRGIPAPEEE.R         |            | 2 | 1,7679 | 0,163 | -0,231 |
| 16 | P16070 CD44_HUMAN   | E.KALSIGFE.T           |            | 2 | 1,764  | 0,116 | 0,212  |
| 16 | Q308M2 Q308M2_HUMAN | R.GQPS#PLAQVQQ.-       | S301:      | 2 | 1,7629 | 0,147 | -0,297 |
| 16 | Q14247 SRC8_HUMAN   | K.TQT#PPVSPAPQPTEE.R   | T401:      | 2 | 1,7468 | 0,256 | -0,221 |
| 16 | Q9BYT8 NEUL_HUMAN   | E.LKYSIDQE.F           |            | 2 | 1,7425 | 0,087 | -0,184 |
| 16 | P62195 PRS8_HUMAN   | R.VHVTVQEDFE.M         |            | 2 | 1,7417 | 0,141 | 0      |
| 16 | P51991 ROA3_HUMAN   | E.YNLRDYFE.K           |            | 2 | 1,7391 | 0,179 | 0      |
| 16 | Q15459 SF3A1_HUMAN  | R.RTDIFGVEE.T          |            | 2 | 1,7387 | 0,153 | -0,343 |
| 16 | Q6R327 RICTR_HUMAN  | K.HIEDTGSTPS#IGE.N     | S1177:     | 2 | 1,7374 | 0,174 | -0,172 |
| 16 | P35908 K22E_HUMAN   | K.FASFIDK.V            |            | 2 | 1,7324 | 0,106 | 0,368  |
| 16 | Q96G46 DUS3L_HUMAN  | R.TCGPLTDEDVVR.L       |            | 2 | 1,7317 | 0,132 | -0,627 |
| 16 | P04264 K2C1_HUMAN   | R.SLVNLGGSK.S          |            | 2 | 1,7308 | 0,132 | -0,209 |
| 16 | P63098 CANB1_HUMAN  | E.M*CSHFDADE.I         |            | 2 | 1,7298 | 0,211 | -0,974 |
| 16 | Q13618 CUL3_HUMAN   | E.NGHIFTVND.Q          |            | 2 | 1,7214 | 0,084 | -0,96  |
| 16 | Q9P107 GMIP_HUMAN   | R.SLDS#PTSS#PGAGTR.Q   | S437:S441: | 2 | 1,7142 | 0,261 | -1,062 |
| 16 | O00541 PESC_HUMAN   | E.GDYVPPEK.L           |            | 2 | 1,7038 | 0,286 | -0,213 |
| 16 | Q15742 NAB2_HUMAN   | K.LSPLPGGPGAGDPR.I     |            | 2 | 1,7011 | 0,183 | -0,095 |
| 16 | Q9H6Z4 RANB3_HUMAN  | E.RVLS#PPKLINE.V       | S333:      | 2 | 1,6982 | 0,1   | -0,297 |
| 16 | Q8NBJ4 GOLM1_HUMAN  | R.QQLQALSEPQPR.L       |            | 2 | 1,6963 | 0,195 | -0,35  |
| 16 | Q03252 LMNB2_HUMAN  | R.AGGPATPLS#PTR.L      | S17:       | 2 | 1,6893 | 0,19  | -1,316 |
| 16 | P28066 PSA5_HUMAN   | E.GRLFQVE.Y            |            | 2 | 1,6815 | 0,087 | 0,144  |
| 16 | Q96PU5 NED4L_HUMAN  | R.LRS#CSVTDVAE.Q       | S340:      | 2 | 1,6792 | 0,087 | -0,44  |
| 16 | P13010 KU86_HUMAN   | E.DIIQGFY              |            | 2 | 1,6681 | 0,149 | 0,287  |
| 16 | Q3KQU3 MA7D1_HUMAN  | E.LGAGAPPVVAR.T        |            | 2 | 1,6673 | 0,232 | -0,339 |
| 16 | Q9NY33 DPP3_HUMAN   | E.KGAFNFDQE.T          |            | 2 | 1,6667 | 0,158 | -0,231 |
| 16 | P38398 BRCA1_HUMAN  | K.VNNIPSQSTR.H         |            | 2 | 1,6655 | 0,129 | 0      |
| 16 | P30084 ECHM_HUMAN   | E.KAQFAQPE.I           |            | 2 | 1,6611 | 0,117 | 0,398  |
| 16 | P31948 STIP1_HUMAN  | E.FLNRFEA              |            | 2 | 1,6597 | 0,109 | -0,064 |
| 16 | Q9UKV3 ACINU_HUMAN  | E.VAT#PPVPLQVCEPK.E    | T682:      | 2 | 1,6494 | 0,32  | -0,35  |
| 16 | Q13206 DDX10_HUMAN  | E.LVLHLLR.S            |            | 2 | 1,6493 | 0,124 | 0,141  |
| 16 | ##P29353 SHC1_HUMAN | R.GLISSLPR.S           |            | 2 | 1,6411 | 0,12  | 0      |

|    |                     |                                     |            |   |        |       |        |
|----|---------------------|-------------------------------------|------------|---|--------|-------|--------|
| 16 | Q13596 SNX1_HUMAN   | K.ITTSLLPINNGSK.E                   |            | 2 | 1,6369 | 0,21  | -0,539 |
| 16 | O00505 IMA3_HUMAN   | E.RDDNPSLQFE.A                      |            | 2 | 1,6301 | 0,09  | -0,899 |
| 16 | P22087 FBRL_HUMAN   | K.NLVPGESVYGEK.R                    |            | 2 | 1,6202 | 0,172 | -0,189 |
| 16 | Q9Y6M7 S4A7_HUMAN   | K.VDM*NFM*R.K                       |            | 2 | 1,6162 | 0,169 | -0,065 |
| 16 | P98175 RBM10_HUMAN  | K.LASDDRPS#PPR.G                    | S722:      | 2 | 1,6019 | 0,276 | -0,473 |
| 16 | Q9H6F5 CCD86_HUMAN  | R.AGLGS#PERPPK.T                    | S58:       | 2 | 1,6014 | 0,107 | -0,41  |
| 16 | Q9Y467 SALL2_HUMAN  | R.SSSPAS#ALTPE.G                    | S877:      | 2 | 1,5989 | 0,088 | -0,108 |
| 16 | P12268 IMDH2_HUMAN  | E.GGVHS#LHSYE.K                     | S505:      | 2 | 1,5982 | 0,112 | -1,36  |
| 16 | P08473 NEP_HUMAN    | E.LNYKEDE.Y                         |            | 2 | 1,5974 | 0,083 | -1,071 |
| 16 | Q5MNZ6 WIP13_HUMAN  | R.VYNTDPLKE.K                       |            | 2 | 1,5948 | 0,106 | -0,339 |
| 16 | O75955 FLOT1_HUMAN  | E.KVSAQYLSE.I                       |            | 2 | 1,593  | 0,097 | -0,119 |
| 16 | P62834 RAP1A_HUMAN  | E.KYDPTIED.S                        |            | 2 | 1,5754 | 0,142 | -0,124 |
| 16 | P43686 PRS6B_HUMAN  | E.FLHAQEE.V                         |            | 2 | 1,5715 | 0,089 | 0,209  |
| 16 | Q9BSQ5 CCM2_HUMAN   | E.STIDFLDR.A                        |            | 2 | 1,5459 | 0,206 | -0,126 |
| 16 | P13645 K1C10_HUMAN  | R.LASYLDK.V                         |            | 2 | 1,5287 | 0,186 | 0,301  |
| 16 | Q02952 AKA12_HUMAN  | E.HETA VTVSEE.V                     |            | 2 | 1,5138 | 0,14  | -0,332 |
| 16 | P61978 HNRPK_HUMAN  | E.GLQLPS#PTATSQPLESDAVE.C           | S116:      | 2 | 1,5041 | 0,108 | 0,219  |
| 16 | Q13136 LIPA1_HUMAN  | E.RLAS#LSSHVTE.L                    | S275:      | 2 | 1,474  | 0,275 | -0,381 |
| 16 | Q15942 ZYX_HUMAN    | E.KCNTCGEPITD.R                     |            | 2 | 1,4692 | 0,151 | -0,754 |
| 16 | Q71RC2 LARP4_HUMAN  | E.QYVPPRS#PK.-                      | S722:      | 2 | 1,4296 | 0,082 | 0,106  |
| 16 | P24928 RPB1_HUMAN   | E.TDGVSLM*R.V                       |            | 2 | 1,4171 | 0,128 | 0      |
| 16 | P06748 NPM_HUMAN    | E.GSPIKVTLATLK.M                    |            | 2 | 1,3631 | 0,111 | -0,497 |
| 16 | Q02880 TOP2B_HUMAN  | E.YTFSPGK.S                         |            | 2 | 1,3626 | 0,267 | 1,373  |
| 16 | Q9NUQ3 TXLNG_HUMAN  | R.NLVSPAYCTQE.S                     |            | 2 | 1,2626 | 0,09  | -0,19  |
| 16 | P02545 LMNA_HUMAN   | R.LRLS#PSPTSQR.S                    | S390:      | 2 | 1,2571 | 0,191 | -0,461 |
| 17 | O75717 WDHD1_HUMAN  | R.SHILEDDENS#VDISM*LK.T             | S383:      | 2 | 6,4282 | 0,589 | 0,299  |
| 17 | Q8NDX5 PHC3_HUMAN   | R.M*DRT#PPPPTLS#PAAITVGR.G          | T609:S616: | 3 | 6,2756 | 0,414 | 0,085  |
| 17 | Q2TAL8 QRIC1_HUMAN  | E.AYNAVHVS#GSPTALAAVKLEDDKE.K       | S343:      | 3 | 6,2733 | 0,501 | 0,357  |
| 17 | Q5JRA6 MIA3_HUMAN   | E.ASGKPSPSDPGSGTATM*M*NSSSR.G       |            | 3 | 6,0673 | 0,546 | 0,734  |
| 17 | Q6AWB1 Q6AWB1_HUMAN | K.TSKLPTRPAS#TGVAGASSSLGSPGSASAGE.L | S120:      | 3 | 6,032  | 0,507 | -0,397 |
| 17 | Q96L14 C170L_HUMAN  | R.ALHPAAVSAAAEFENAES#E.A            | S269:      | 2 | 5,9129 | 0,6   | 0,184  |
| 17 | Q9UQ35 SRRM2_HUMAN  | K.SKDSLQSCPGSLCAGVK.S               |            | 3 | 5,8355 | 0,455 | 0,175  |
| 17 | Q9NQW6 ANLN_HUMAN   | K.ALSSADDASLVNASISSVK.A             |            | 2 | 5,7957 | 0,596 | 0,243  |
| 17 | Q12765 SCRN1_HUMAN  | E.DANSCHSFQAYLIVDRDE.A              |            | 2 | 5,7125 | 0,545 | 0,219  |
| 17 | A8K6V7 A8K6V7_HUMAN | E.KST#TPPPAEPVSLPQEPKPR.V           | T226:      | 3 | 5,6994 | 0,465 | -0,47  |
| 17 | Q12888 TP53B_HUMAN  | E.ASEES#LQFNLEKPATGER.K             | S1002:     | 3 | 5,5622 | 0,372 | 0      |
| 17 | Q9UHK0 NUFP1_HUMAN  | E.NQVLDSSAPKS#PSQDVK.A              | S403:      | 2 | 5,5474 | 0,496 | -0,909 |
| 17 | P80723 BASP_HUMAN   | K.AQGPAASAEKPKVEAPAANSQDTVTVKE.-    |            | 3 | 5,5468 | 0,381 | 0      |
| 17 | O75376 NCOR1_HUMAN  | E.VSQASQLLQQQQQQQLR.R               |            | 3 | 5,4553 | 0,465 | 0      |

|    |                    |                                         |            |   |        |       |        |
|----|--------------------|-----------------------------------------|------------|---|--------|-------|--------|
| 17 | Q02078 MEF2A_HUMAN | E.HRGCDs#PDPDTSY#VLTPHTEE.K             | S98:Y105:  | 3 | 5,4415 | 1     | -0,213 |
| 17 | P38398 BRCA1_HUMAN | E.LEDLTANTNTQDPFLIGSSK.Q                |            | 2 | 5,4185 | 0,556 | 0      |
| 17 | P05783 K1C18_HUMAN | R.GGM*GSGGLATGIAGGLAGM*GGIQNE.K         |            | 2 | 5,3183 | 0,556 | 0,225  |
| 17 | P55884 EIF3B_HUMAN | R.SDS#RAQAVSEDAGGNEGR.A                 | S119:      | 3 | 5,2859 | 0,444 | -0,388 |
| 17 | P08651 NFIC_HUMAN  | R.TGM*GSDQEDSKIPITLDTTDFQE.S            |            | 2 | 5,2743 | 0,53  | 0,502  |
| 17 | Q9H6F5 CCD86_HUMAN | R.LQQGAGLESPQQPEPGAAS#PQRQDLHLE.S       | S91:       | 3 | 5,2486 | 0,557 | 0,676  |
| 17 | P05783 K1C18_HUMAN | R.STS#FRGGM*GSGGLATGIAGGLAGM*GGIQNEKE.T | S53:       | 3 | 5,2194 | 0,321 | 1,069  |
| 17 | O00499 BIN1_HUMAN  | E.IRVNHEPEPAGGATPGATLPK.S               |            | 3 | 5,2155 | 0,362 | 0,087  |
| 17 | Q92615 LARP5_HUMAN | E.RTLSADASVNTLPVVVSR.E                  |            | 2 | 5,1754 | 0,462 | -0,129 |
| 17 | Q5T457 UBR4_HUMAN  | E.KAAPPPPPPPPLESS#PR.V                  | S620:      | 3 | 5,1524 | 0,347 | 0,287  |
| 17 | Q9P1Y6 K1542_HUMAN | E.RTVTCVTVVEPEAPPs#PDVLAATHR.V          | S973:      | 3 | 5,1436 | 0,479 | 0,314  |
| 17 | Q5UIP0 RIF1_HUMAN  | K.KADVQAPVS#PSETSQANPYSE.G              | S1772:     | 2 | 5,1328 | 0,504 | 0,107  |
| 17 | Q09666 AHNK_HUMAN  | K.TVIRLPSGSGAAS#PTGSAVDIR.A             | S216:      | 3 | 5,109  | 0,377 | 0,083  |
| 17 | P52907 CAZA1_HUMAN | E.DGNVQLVSHKDVQDSLTVSNE.A               |            | 2 | 5,1016 | 0,466 | -1,282 |
| 17 | Q9Y6X9 MORC2_HUMAN | R.LM*KPPS#PEHQSLDTQQEGGEE.V             | S856:      | 3 | 5,0756 | 0,351 | 0,214  |
| 17 | Q13263 TIF1B_HUMAN | E.DGSLSLDGADSTGVVAKLS#PANQR.K           | S697:      | 3 | 5,0541 | 0,453 | 0,3    |
| 17 | Q15942 ZYX_HUMAN   | E.ALSAGTGS#PQPPSFTYAQQR.E               | S308:      | 2 | 5,0465 | 0,414 | 0      |
| 17 | P05783 K1C18_HUMAN | R.S#TSFRGGM*GSGGLATGIAGGLAGM*GGIQNE.K   | S51:       | 3 | 5,0236 | 0,517 | 0,065  |
| 17 | Q58WW2 IQWD1_HUMAN | E.KLS#PKPGTGEPVLSLHYSTE.G               | S467:      | 3 | 4,9916 | 0,328 | -0,082 |
| 17 | Q09666 AHNK_HUMAN  | R.LPSGSGAAS#PTGSAVDIR.A                 | S216:      | 2 | 4,9819 | 0,447 | -0,354 |
| 17 | Q71RC2 LARP4_HUMAN | R.AS#TASPCNNNINAATAVALQEPR.K            | S594:      | 3 | 4,9576 | 0,335 | 0,299  |
| 17 | O43524 FOXO3_HUMAN | R.TNSNASTVSGRLS#PIM*ASTE.L              | S325:      | 2 | 4,9378 | 0,474 | 0      |
| 17 | Q2TAL8 QRIC1_HUMAN | E.AYNAVHVSGS#PTALAAVKLEDDKE.K           | S345:      | 2 | 4,9219 | 0,494 | 0,666  |
| 17 | P27816 MAP4_HUMAN  | K.DM*ES#PTKLDVTLAKD.M                   | S280:      | 3 | 4,8926 | 0,402 | -1,144 |
| 17 | Q5VZL5 ZMYM4_HUMAN | K.CGGVEQASSS#PRSDPLGSTQDHALSQE.S        | S1241:     | 3 | 4,8923 | 0,416 | 0,064  |
| 17 | P38398 BRCA1_HUMAN | E.LEDLTANTNTQDPFLIGSSK.Q                |            | 3 | 4,8793 | 0,343 | 0,085  |
| 17 | Q96I18 LRCH3_HUMAN | E.LYSSRPYGALDSGFNSVDSGDK.R              |            | 3 | 4,8733 | 0,428 | -0,157 |
| 17 | Q03519 TAP2_HUMAN  | E.DDKVM*AAAQAAHADDIFIQE.M               |            | 2 | 4,8558 | 0,466 | 0,237  |
| 17 | Q32MZ4 LRRF1_HUMAN | R.NM*PGLSAATLASLGGTSSR.R                |            | 2 | 4,8457 | 0,504 | 0      |
| 17 | P35606 COPB2_HUMAN | E.LDGKPAS#PTPVIVASHTANK.E               | S859:      | 3 | 4,8244 | 0,334 | -0,439 |
| 17 | Q9H0D6 XRN2_HUMAN  | E.M*RM*QNNSS#PSISPNTSFTSDGSPSPLGGIK.R   | S471:      | 3 | 4,8157 | 0,47  | 0,457  |
| 17 | Q86WB0 NIPA_HUMAN  | R.QLIDEGIAPEEGVDAK.D                    |            | 2 | 4,7757 | 0,559 | -0,35  |
| 17 | Q9H0D6 XRN2_HUMAN  | E.M*RM*QNNSSPSISPNTSFTSDGSPS#PLGGIK.R   | S487:      | 3 | 4,7726 | 0,401 | 0,114  |
| 17 | Q9UK76 HN1_HUMAN   | R.RNS#SEASSGDFLDLKG                     | S87:       | 2 | 4,7646 | 0,441 | 0,143  |
| 17 | P17980 PRS6A_HUMAN | E.VDERPTEQYSDIGGLDK.Q                   |            | 3 | 4,757  | 0,386 | 0,19   |
| 17 | P02545 LMNA_HUMAN  | R.SYRS#VGGSGGGSFGDNLVTR.S               | S628:      | 3 | 4,756  | 0,372 | 0,089  |
| 17 | Q12888 TP53B_HUMAN | E.GRQDKPM*DTS#VLS#EEGGEPFQK.K           | S395:S398: | 3 | 4,7182 | 0,381 | -0,35  |
| 17 | Q9UHV7 MED13_HUMAN | E.GFCS#PKPSEIKDFSYYVYKPE.N              | S890:      | 3 | 4,7158 | 0,33  | -0,074 |
| 17 | Q71U36 TBA1A_HUMAN | E.HGIQPDGQM*PSDKTIGGGDSDFFSE.T          |            | 3 | 4,7131 | 0,499 | -0,122 |

|    |                    |                                    |                 |   |        |       |        |
|----|--------------------|------------------------------------|-----------------|---|--------|-------|--------|
| 17 | Q9UHB7 AFF4_HUMAN  | E.KELLS#PLSEPDDRYPLIVK.I           | S703:           | 3 | 4,7127 | 0,499 | -0,239 |
| 17 | P80723 BASP_HUMAN  | K.AQGAASAEEPKEPVEAPAANS#DQTVTVKE.- | S219:           | 3 | 4,7122 | 0,484 | 0,677  |
| 17 | Q8ND56 LS14A_HUMAN | E.TSNGTLPQSSAVGSAFTQDTR.S          |                 | 2 | 4,6749 | 0,56  | 0,331  |
| 17 | P05783 K1C18_HUMAN | R.GGM*GSGGLATGIAGGLAGM*GGIQNE.K    |                 | 3 | 4,649  | 0,328 | 0,085  |
| 17 | Q02880 TOP2B_HUMAN | E.FVPSDGLDKDEYTF#PGK.S             | S1424:          | 2 | 4,6436 | 0,463 | 0,117  |
| 17 | O95292 VAPB_HUMAN  | E.INKIISTTASKTETPIVSK.S            |                 | 2 | 4,6197 | 0,492 | 0,42   |
| 17 | P36507 MP2K2_HUMAN | R.RKPVLPALTINPTIAEGPS#PTSE.G       | S23:            | 3 | 4,6124 | 0,432 | 0,074  |
| 17 | O14641 DVL2_HUMAN  | E.RHLAGYESS#STLM*TSELE.S           | S195:           | 2 | 4,6006 | 0,5   | 0,232  |
| 17 | P60709 ACTB_HUMAN  | D.LYANTVLSGGTTM*YPGIADR.M          |                 | 2 | 4,5994 | 0,532 | 0,346  |
| 17 | P00558 PGK1_HUMAN  | K.ITLPVDFVTADKFDE.N                |                 | 2 | 4,5977 | 0,438 | -0,143 |
| 17 | O60271 JIP4_HUMAN  | E.TRNVSTGS#AENEKSE.V               | S332:           | 2 | 4,5964 | 0,566 | -0,067 |
| 17 | Q9H4A3 WNK1_HUMAN  | K.DRPVSQLVGSKEEPPPAR.S             |                 | 3 | 4,5844 | 0,408 | -1,364 |
| 17 | P20810 ICAL_HUMAN  | K.KPADDQDPIDALSGDLDCPSTTE.T        |                 | 2 | 4,5718 | 0,475 | 0,383  |
| 17 | Q5T4S7 UBR4_HUMAN  | E.KAAPPPPPPPPLES#SPR.V             | S619:           | 3 | 4,5705 | 0,327 | 0      |
| 17 | O95239 KIF4A_HUMAN | E.KVLYLLSQLQSQM*AEK.Q              |                 | 3 | 4,5687 | 0,391 | 0,181  |
| 17 | Q13263 TIF1B_HUMAN | R.STAPSAASASASAAASS#PAGGGAEALE.L   | S50:            | 3 | 4,5653 | 0,38  | -0,687 |
| 17 | Q5TAX3 ZCH11_HUMAN | E.LSQNCIDLKSKS#PDPDKSTGTDCR.S      | S841:           | 3 | 4,5592 | 0,389 | -0,194 |
| 17 | Q2TB10 ZN800_HUMAN | K.VKVEPADSVESS#PPSIT#HSPQNE.L      | S419:T424:      | 3 | 4,5543 | 1     | -0,494 |
| 17 | Q13263 TIF1B_HUMAN | E.DGSLS#LDGADSTGVVAK.L             | S683:           | 2 | 4,5489 | 0,529 | -1,97  |
| 17 | Q8WXI9 P66B_HUMAN  | E.RGRLT#PSPDIIVLS#DNEASS#PR.S      | T120:S129:S135: | 3 | 4,545  | 0,459 | 0,279  |
| 17 | O75381 PEX14_HUMAN | E.STSSSPGKEGHS#PEGSTVYHLLGPQEE.G   | S282:           | 3 | 4,5268 | 1     | 0,307  |
| 17 | Q9NRL3 STRN4_HUMAN | E.FDFLGS#GEDGEGAPDPR.R             | S324:           | 2 | 4,5174 | 0,396 | 0,397  |
| 17 | P19525 E2AK2_HUMAN | K.AVS#PLLLTTNSSE.G                 | S83:            | 2 | 4,5083 | 0,453 | -0,081 |
| 17 | P09211 GSTP1_HUMAN | E.AALVDM*VNDGVEDLR.C               |                 | 2 | 4,5042 | 0,43  | 0,224  |
| 17 | P61158 ARP3_HUMAN  | E.DHYFLLTEPPLNTPENRE.Y             |                 | 2 | 4,492  | 0,364 | 0,112  |
| 17 | P35606 COPB2_HUMAN | E.LDGKPAS#PTPVIVASHTANKE.E         | S859:           | 3 | 4,4841 | 0,308 | 0,496  |
| 17 | P04792 HSPB1_HUMAN | R.AQLGGPEAAKS#DE.T                 | S199:           | 2 | 4,4771 | 0,488 | -0,09  |
| 17 | Q9UHR5 S30BP_HUMAN | E.KGGLVSDAYGEDDFSR.L               |                 | 3 | 4,4668 | 0,337 | 1,705  |
| 17 | Q04656 ATP7A_HUMAN | E.GSQQRS#PSYTNSTATFIIDGM*HCK.S     | S270:           | 3 | 4,4511 | 0,342 | 0,126  |
| 17 | Q32MZ4 LRRF1_HUMAN | R.CTLPEHESPSQDISDACEAE.S           |                 | 2 | 4,4462 | 0,544 | 0,322  |
| 17 | P84103 SFRS3_HUMAN | K.VYVGNLGNNGNKTE.L                 |                 | 2 | 4,4448 | 0,397 | -0,082 |
| 17 | Q00839 HNRPU_HUMAN | E.AGGRPAM*EPGNGLDLGGDSAGR.S        |                 | 3 | 4,4439 | 0,403 | 0,17   |
| 17 | Q86W56 PARG_HUMAN  | E.IDVVPESPLS#DVGSEDEVGTGPK.N       | S264:           | 2 | 4,4427 | 0,511 | 0,107  |
| 17 | O60506 HNRPQ_HUMAN | E.IYVAGLVAHSDLDER.A                |                 | 2 | 4,4423 | 0,491 | -0,147 |
| 17 | Q13885 TBB2A_HUMAN | E.IVHIQAGQCGNQIGAK.F               |                 | 3 | 4,4397 | 0,35  | 0      |
| 17 | O75531 BAF_HUMAN   | R.DFVAEPM*GEKPVGSLAGIGE.V          |                 | 2 | 4,4182 | 0,514 | 0,242  |
| 17 | Q6PKG0 LARP1_HUMAN | E.S#RFSHLTSLPQQLPSQQLM*SK.D        | S577:           | 3 | 4,4171 | 0,285 | -0,146 |
| 17 | Q02952 AKA12_HUMAN | E.KEPSKSAESPTS#PVTSE.T             | S286:           | 2 | 4,4125 | 0,467 | -0,331 |
| 17 | P19525 E2AK2_HUMAN | K.KAVS#PLLLTTNSSE.G                | S83:            | 2 | 4,4076 | 0,64  | 0,223  |

|    |                     |                                   |                    |   |        |       |        |
|----|---------------------|-----------------------------------|--------------------|---|--------|-------|--------|
| 17 | O15061 DMN_HUMAN    | E.VSAGGDLSQAAS#PTGASR.S           | S1163:             | 2 | 4,3998 | 0,448 | -0,784 |
| 17 | P40222 TXLNA_HUMAN  | R.VQDLSAGGQGS LTDSGPER.R          |                    | 2 | 4,3969 | 0,553 | 0,065  |
| 17 | Q02952 AKA12_HUMAN  | E.DSIAGSGVEHSTPDTEPGKEE.S         |                    | 2 | 4,3872 | 0,521 | -0,797 |
| 17 | Q9Y394 DHRS7_HUMAN  | E.KDILVLPDLTDTGSHE.A              |                    | 2 | 4,3845 | 0,357 | -0,131 |
| 17 | Q92615 LARP5_HUMAN  | E.THS#VDRLPSALTATAACK.S           | S620:              | 3 | 4,3787 | 0,451 | -0,288 |
| 17 | P18858 DNL1_HUMAN   | K.GQKPALDCSQVS#PPRPATSPE.N        | S91:               | 3 | 4,368  | 0,239 | 0      |
| 17 | Q2TAL8 QRIC1_HUMAN  | E.AYNAVHVSGS#PTALAAVK.L           | S345:              | 2 | 4,3576 | 0,534 | -0,532 |
| 17 | O60271 JIP4_HUMAN   | R.NVSTGS#AENEKSE.V                | S332:              | 2 | 4,3563 | 0,384 | -0,313 |
| 17 | O95292 VAPB_HUMAN   | E.INKIISTTASKTETPIVSK.S           |                    | 3 | 4,3523 | 0,334 | 0,09   |
| 17 | Q9UHR5 S30BP_HUMAN  | E.KGGLVSDAYGEDDFSR.L              |                    | 2 | 4,3439 | 0,546 | -0,64  |
| 17 | Q6KC79 NIPBL_HUMAN  | K.GSRPPLILQSQSLPCSSPR.D           |                    | 3 | 4,3435 | 0,351 | 1,143  |
| 17 | P61158 ARP3_HUMAN   | E.DHYFLLTEPPLNTPENRE.Y            |                    | 3 | 4,3359 | 0,347 | 0      |
| 17 | Q9HAV7 GRPE1_HUMAN  | K.NSGQNLEEDM*GQSEQK.A             |                    | 2 | 4,3288 | 0,471 | 0,202  |
| 17 | A0FGR8 ESYT2_HUMAN  | E.KAQPEAGPQGLHDLGR.S              |                    | 3 | 4,328  | 0,417 | 0,103  |
| 17 | Q92613 JADE3_HUMAN  | E.TDQQPHS#PDSSSVHSIR.N            | S566:              | 3 | 4,3204 | 0,315 | -0,716 |
| 17 | O94888 UBXD7_HUMAN  | E.HGQLDGLSS#PPKK.C                | S270:              | 3 | 4,3098 | 0,377 | 0,06   |
| 17 | O00429 DNM1L_HUMAN  | K.HPDFADACGLM*NNNIEE.Q            |                    | 2 | 4,2965 | 0,443 | -0,373 |
| 17 | Q96JH7 VCIP1_HUMAN  | E.TTDGCVADALGAAFATR.S             |                    | 2 | 4,291  | 0,539 | -0,216 |
| 17 | Q8ND56 LS14A_HUMAN  | E.TSNSGTLPOSSAVGSAFTQDTR.S        |                    | 3 | 4,2868 | 0,425 | 0,165  |
| 17 | Q6S8J3 A26CA_HUMAN  | R.TTGIVM*DSGDGVTHTVPIYE.G         |                    | 2 | 4,2518 | 0,454 | 0,579  |
| 17 | P11388 TOP2A_HUMAN  | K.GSVPLSS#PPATHFPDETE.I           | S1393:             | 2 | 4,2482 | 0,547 | 0,18   |
| 17 | Q99497 PARK7_HUMAN  | K.KEGPYDVVVLPGGNLGAQNLSE.S        |                    | 2 | 4,2465 | 0,382 | 0,433  |
| 17 | A4D210 A4D210_HUMAN | E.VGIAEAGPES#EGEAPGEQAR.D         | S64:               | 2 | 4,2413 | 0,282 | 0      |
| 17 | P27816 MAP4_HUMAN   | K.DM*ES#PTKLDVTLAKD.M             | S280:              | 2 | 4,2356 | 0,473 | -1,318 |
| 17 | Q9NZT2 OGFR_HUMAN   | E.GAGDSAASVSGGAQTLALAGSPAPSGHPK.A |                    | 3 | 4,2284 | 0,456 | 0,073  |
| 17 | O94842 TOX4_HUMAN   | R.INLQQPPPLQIK.S                  |                    | 2 | 4,2124 | 0,346 | 0,161  |
| 17 | Q14686 NCOA6_HUMAN  | R.KM*VYQESQNPSSS#PLAE.M           | S1124:             | 2 | 4,2103 | 0,47  | 0      |
| 17 | O75152 ZC11A_HUMAN  | R.RLS#SAS#TGKPLSVEDDFE.K          | S758:S761:         | 2 | 4,2016 | 0,491 | 0,111  |
| 17 | O95292 VAPB_HUMAN   | K.TETPIVSKS#LSSSLDDTE.V           | S156:              | 2 | 4,2001 | 0,302 | 0,245  |
| 17 | P05198 IF2A_HUMAN   | K.HAVSDPSILDSLNEDE.R              |                    | 2 | 4,1938 | 0,465 | 0,372  |
| 17 | Q9C0C2 TB182_HUMAN  | R.RES#AASGLGGLLEEE.G              | S1473:             | 2 | 4,1913 | 0,513 | 0,076  |
| 17 | P11021 GRP78_HUMAN  | E.VVATNGDTHLGGEDFDQRVM*E.H        |                    | 3 | 4,1862 | 0,387 | 0,079  |
| 17 | O00499 BIN1_HUMAN   | R.VNHEPEPAGGATPGATLPK.S           |                    | 3 | 4,1829 | 0,263 | 0,099  |
| 17 | P51858 HDGF_HUMAN   | E.VERPLPM*EVEKNST#PSEPGSGR.G      | T200:              | 3 | 4,1819 | 0,308 | -0,587 |
| 17 | Q13263 TIF1B_HUMAN  | E.DGSLSLDGADS#TGVVAK.L            | S689:              | 2 | 4,1767 | 0,42  | 0,511  |
| 17 | P42566 EP15_HUMAN   | K.NIIGSS#PVADFSAIKE.L             | S324:              | 2 | 4,1669 | 0,435 | 0      |
| 17 | P50548 ERF_HUMAN    | R.RVS#SDLQHATAQLSLE.H             | S531:              | 2 | 4,1655 | 0,561 | -0,133 |
| 17 | Q7Z7F0 K0907_HUMAN  | E.VTSSGGSPGGTT#AAPSGALDAAA VAAK.I | T49:               | 3 | 4,1575 | 0,351 | 0      |
| 17 | Q01082 SPTB2_HUMAN  | R.TSS#KESS#PIPS#PTSDRK.A          | S2161:S2165:S2169: | 2 | 4,1565 | 1     | 0,179  |

|    |                     |                                           |            |   |        |       |        |
|----|---------------------|-------------------------------------------|------------|---|--------|-------|--------|
| 17 | P27816 MAP4_HUMAN   | E.VALAKDM*ES#PTKLDVTLAK.D                 | S280:      | 2 | 4,1549 | 0,486 | 0,459  |
| 17 | P80723 BASP_HUMAN   | K.AQGPAAS#AEPEKPVVEAPAANSQTVTVKE.-        | S205:      | 3 | 4,1535 | 0,248 | 1,108  |
| 17 | P02545 LMNA_HUMAN   | R.S#VGGSGGGSFGDNLVTR.S                    | S628:      | 2 | 4,1477 | 0,448 | -0,445 |
| 17 | O43149 ZZEF1_HUMAN  | E.KESPGDLTRS#PE.M                         | S240:      | 2 | 4,1474 | 0,399 | -0,087 |
| 17 | Q01082 SPTB2_HUMAN  | E.TVDTSEM*VNGATEQR.T                      |            | 2 | 4,1453 | 0,476 | -0,369 |
| 17 | Q9Y490 TLN1_HUMAN   | E.LLDHVLTLQKPSPE.L                        |            | 3 | 4,1419 | 0,288 | -0,107 |
| 17 | Q8WWM7 ATX2L_HUMAN  | R.GQSTGKGPPQS#PVFE.G                      | S111:      | 2 | 4,1416 | 0,385 | -0,306 |
| 17 | P42166 LAP2A_HUMAN  | R.S#STPLPTISSAENTR.Q                      | S158:      | 2 | 4,1364 | 0,391 | 0      |
| 17 | Q9Y2X7 GIT1_HUMAN   | R.ARS#M*DSSDLSDGAVTLQE.Y                  | S410:      | 2 | 4,1362 | 0,514 | 0,123  |
| 17 | Q02880 TOP2B_HUMAN  | E.LKVKAS#PITNDGEDE.F                      | S1400:     | 2 | 4,1268 | 0,545 | -0,791 |
| 17 | Q13200 PSMD2_HUMAN  | E.DYIKSGALLACGIVNSGVR.N                   |            | 3 | 4,1267 | 0,27  | -0,367 |
| 17 | Q14980 NUMA1_HUMAN  | R.TQPDGTSVPGEPAS#PISQR.L                  | S1757:     | 2 | 4,1245 | 0,473 | 0,183  |
| 17 | Q09666 AHNK_HUMAN   | E.TGKLQSGVSLAKK.S                         |            | 3 | 4,1232 | 0,382 | -0,188 |
| 17 | Q8IWW6 RHG12_HUMAN  | E.KTSFSQEQSCDSAGEGSR.I                    |            | 3 | 4,1229 | 0,385 | -0,175 |
| 17 | P28290 SSFA2_HUMAN  | R.NIM*TQQKDS#FEM*EE.V                     | S466:      | 2 | 4,1217 | 0,304 | -0,53  |
| 17 | Q13200 PSMD2_HUMAN  | K.SGALLACGIVNSGVR.N                       |            | 2 | 4,1019 | 0,541 | 0      |
| 17 | P55884 EIF3B_HUMAN  | E.AASGPSES#PSPAAEELPGSHAEPVPAQGEAPGEQAR.D | S83:       | 3 | 4,095  | 0,326 | 0,098  |
| 17 | Q13017 RHG05_HUMAN  | K.IRNS#FVNNTQGDEE.N                       | S1124:     | 2 | 4,0871 | 0,555 | 0,143  |
| 17 | Q6AWB1 Q6AWB1_HUMAN | K.LPTRPAS#TGAVAGASSSLGPGSGSASAGE.L        | S120:      | 3 | 4,0854 | 0,365 | 0,075  |
| 17 | P19634 SL9A1_HUMAN  | E.TSSPGTDDVFTAPSDSPSSQR.I                 |            | 2 | 4,0831 | 0,55  | 0,327  |
| 17 | A8MZ97 YB050_HUMAN  | E.NAGETGQEEDDGLQK.I                       |            | 2 | 4,0805 | 0,447 | -0,383 |
| 17 | Q9UHR5 S30BP_HUMAN  | K.GGLVSDAYGEDDFSR.L                       |            | 2 | 4,0781 | 0,595 | 0,154  |
| 17 | Q15149 PLEC1_HUMAN  | K.GYYSPYSVSGSGS#TAGSR.T                   | S4622:     | 2 | 4,0727 | 0,526 | 0      |
| 17 | P78364 PHC1_HUMAN   | E.RDDVSTLGSM*LPKAS#PVAESPK.V              | S664:      | 3 | 4,0702 | 0,239 | 0,298  |
| 17 | Q66K74 MAP1S_HUMAN  | E.LPLAASSIPRPT#PSPES#HRSPAEGSE.R          | T638:S643: | 3 | 4,0693 | 1     | 0,306  |
| 17 | B2CI53 B2CI53_HUMAN | R.NGILASPQS#APGNLDNSK.S                   | S263:      | 2 | 4,0691 | 0,535 | -1,375 |
| 17 | P48643 TCPE_HUMAN   | E.ANHLLQLQNNLPAVR.W                       |            | 3 | 4,0663 | 0,288 | 0,465  |
| 17 | P04075 ALDOA_HUMAN  | K.IGEHTPSALAIM*ENANVLAR.Y                 |            | 3 | 4,0642 | 0,362 | 0,258  |
| 17 | P47755 CAZA2_HUMAN  | E.DGNVQLVSHKDIQDSLTVSNE.V                 |            | 2 | 4,0631 | 0,408 | 0,531  |
| 17 | Q86UP2 KTN1_HUMAN   | K.KVEPVPVTKQPT#PPSE.A                     | T153:      | 3 | 4,0623 | 0,232 | -0,202 |
| 17 | Q9HAV7 GRPE1_HUMAN  | K.NSGQNLEEDM*GQSEQKADPPATE.K              |            | 2 | 4,0612 | 0,461 | -0,098 |
| 17 | Q9NVM9 CLO11_HUMAN  | E.AEIIKDSPDS#PEPPNKKPLVE.M                | S626:      | 2 | 4,0544 | 0,453 | 0,41   |
| 17 | Q14676 MDC1_HUMAN   | E.LQPSTSTDQPV#PEPTSQATR.G                 | T1466:     | 3 | 4,054  | 0,295 | -0,236 |
| 17 | Q6Y7W6 PERQ2_HUMAN  | E.M*GTFDSS#GAFLSLK.K                      | S303:      | 2 | 4,0532 | 0,475 | -0,313 |
| 17 | Q9H4A4 AMPB_HUMAN   | R.RPLHSAQAVDVASASNFR.A                    |            | 3 | 4,0463 | 0,315 | -0,095 |
| 17 | O15091 K0391_HUMAN  | E.DHALAPVRNTIQLPTQPLNSEE.W                |            | 3 | 4,0444 | 0,34  | 0,15   |
| 17 | Q15149 PLEC1_HUMAN  | R.SSS#VGSSSSYISPASVSR.T                   | S4386:     | 2 | 4,0441 | 0,436 | 0,332  |
| 17 | A6PWH8 A6PWH8_HUMAN | E.RRCS#ASLGLVM*AENDVDNE.L                 | S17:       | 3 | 4,0374 | 0,44  | -0,164 |
| 17 | Q96FJ2 DYL2_HUMAN   | K.NADM*SEDM*QQDAVDCATQAM*E.K              |            | 3 | 4,0374 | 0,342 | -0,076 |

|    |                     |                                       |            |   |        |       |        |
|----|---------------------|---------------------------------------|------------|---|--------|-------|--------|
| 17 | P28370 SMCA1_HUMAN  | E.LFAHFIQPSAQKS#PTSPLNM*K.L           | S116:      | 3 | 4,0327 | 0,403 | -0,225 |
| 17 | P04844 RPN2_HUMAN   | E.DQVIQLM*NAIFSK.K                    |            | 2 | 4,0302 | 0,519 | 0      |
| 17 | P30086 PEBP1_HUMAN  | E.VDEQPQHPLHVTYAGAAVDE.L              |            | 2 | 4,0301 | 0,456 | 0,112  |
| 17 | O95359 TACC2_HUMAN  | K.TPSSPS#KSPASFEIPASAM*E.A            | S2392:     | 2 | 4,0258 | 0,53  | 0,231  |
| 17 | Q86WB0 NIPA_HUMAN   | K.DTSATSQSVNGS#PQAEQPSLE.S            | S62:       | 3 | 4,0232 | 0,361 | 0      |
| 17 | Q6P2E9 EDC4_HUMAN   | D.SM*ASAASALHLLS#PRRPRGPE.L           | S780:      | 3 | 4,0197 | 0,347 | 0      |
| 17 | Q9UHB6 LIMA1_HUMAN  | R.SRPFTVAASFQSTSVKS#PK.T              | S604:      | 3 | 4,0132 | 0,365 | -0,174 |
| 17 | Q5VT52 K0460_HUMAN  | R.GPTSTSIDNIDGT#PVRDER.S              | T723:      | 2 | 4,0107 | 0,345 | 0,116  |
| 17 | P52701 MSH6_HUMAN   | R.LGHM*ACM*VENECEDPSQE.T              |            | 2 | 4,0083 | 0,414 | 0,338  |
| 17 | P40818 UBP8_HUMAN   | R.STKPVVFS#PTLM*LTDEE.K               | S452:      | 2 | 4,0073 | 0,49  | -0,674 |
| 17 | Q09666 AHNK_HUMAN   | R.LPS#GSGAASPTGSVDIR.A                | S210:      | 2 | 4,0057 | 0,579 | 0      |
| 17 | P05783 K1C18_HUMAN  | R.STSFRGGM*GS#GGLATGIAGGLAGM*GGIQNE.K | S60:       | 3 | 3,9816 | 0,372 | 0,454  |
| 17 | Q13263 TIF1B_HUMAN  | E.DGSLSLDGADSTGVVAK.L                 |            | 2 | 3,9784 | 0,53  | -0,153 |
| 17 | Q6UN15 FIP1_HUMAN   | E.RDHS#PTPSVFNSDEE.R                  | S492:      | 2 | 3,9766 | 0,423 | 0,272  |
| 17 | Q15365 PCBP1_HUMAN  | R.VM*TIPYQPM*PASSPVICAGGQDR.C         |            | 3 | 3,9593 | 0,412 | 0,219  |
| 17 | P49792 RBP2_HUMAN   | R.CVACQNPDKPS#PSTSVAPASF.K            | S1573:     | 3 | 3,9478 | 0,347 | 0,217  |
| 17 | Q9UKI8 TLK1_HUMAN   | R.FTGVASGSTGSGSCSVGAK.A               |            | 2 | 3,9466 | 0,547 | -1,208 |
| 17 | Q86SQ0 PHLB2_HUMAN  | R.RNFS#CGS#VEFDEADLE.S                | S384:S387: | 2 | 3,9426 | 0,537 | 0,12   |
| 17 | P61289 PSME3_HUMAN  | E.LDSFLKEPILNIHD.L                    |            | 3 | 3,9274 | 0,372 | 0,111  |
| 17 | Q5VT52 K0460_HUMAN  | R.GPTSTSIDNIDGT#PVRDER.S              | T723:      | 3 | 3,9236 | 0,445 | 0,347  |
| 17 | Q99497 PARK7_HUMAN  | K.KEGPYDVVVLPGGNLGAQNLSE.S            |            | 3 | 3,9223 | 0,336 | 0,73   |
| 17 | P08670 VIME_HUMAN   | E.NTLQSFQRQVDNASLAR.L                 |            | 3 | 3,9202 | 0,298 | -0,284 |
| 17 | P00338 LDHA_HUMAN   | K.DQLIYNLLKKEEQTPQNK.I                |            | 3 | 3,9202 | 0,289 | 0,265  |
| 17 | Q9H4A3 WNK1_HUMAN   | R.VSSQQTVSYGS#QHE.Q                   | S679:      | 2 | 3,9195 | 0,425 | 0,226  |
| 17 | Q92598 HS105_HUMAN  | E.LNNTCEPVVTQPKPK.I                   |            | 2 | 3,9128 | 0,35  | -0,566 |
| 17 | Q96BT3 CENPT_HUMAN  | K.NS#PGKPAQFLAGEAEE.V                 | S288:      | 2 | 3,9098 | 0,372 | -1,839 |
| 17 | Q9UBR2 CATZ_HUMAN   | E.CDKFNQCGTCNE.F                      |            | 2 | 3,9027 | 0,424 | -0,716 |
| 17 | O60271 JIP4_HUMAN   | R.SAS#QSS#LDKLDQE.L                   | S730:S733: | 2 | 3,9016 | 0,272 | 0,078  |
| 17 | Q99497 PARK7_HUMAN  | E.DAKKEGPYDVVVLPGGNLGAQNLSE.S         |            | 2 | 3,9002 | 0,39  | 0,475  |
| 17 | P29375 JAD1A_HUMAN  | K.AAANPDLQGHLPFQSAFNR.V               |            | 3 | 3,8986 | 0,437 | 0,242  |
| 17 | Q96FJ2 DYL2_HUMAN   | K.NADM*SEDM*QDAVDCATQAM*E.K           |            | 2 | 3,893  | 0,565 | 0,101  |
| 17 | Q02880 TOP2B_HUMAN  | K.VKAS#PITNDGEDE.F                    | S1400:     | 2 | 3,8877 | 0,445 | -0,084 |
| 17 | O14497 ARI1A_HUMAN  | K.VS#SPAPM*EGGEEEE.L                  | S1754:     | 2 | 3,8865 | 0,418 | -0,219 |
| 17 | Q02952 AKA12_HUMAN  | K.QLLQTVNVPIIDGAKE.V                  |            | 2 | 3,8846 | 0,403 | -0,07  |
| 17 | Q4KMP7 TB10B_HUMAN  | R.RAS#AGPAPGPVVTAE.G                  | S412:      | 2 | 3,8767 | 0,506 | -0,167 |
| 17 | Q13428 TCOF_HUMAN   | R.KSAEPSANTTLVS#ETEEE.G               | S171:      | 2 | 3,8742 | 0,557 | 0,305  |
| 17 | Q13085 ACACA_HUMAN  | R.FIIGSVSEDNS#EDE.I                   | S29:       | 2 | 3,8698 | 0,461 | 0,075  |
| 17 | P35611 ADDA_HUMAN   | E.DGHRSTST#AVPNLFVPLNTNPK.E           | S483:      | 3 | 3,8687 | 0,141 | 0      |
| 17 | B2CI53 B2CI53_HUMAN | R.NGILASPQSAPGNLDSK.S                 |            | 2 | 3,8631 | 0,548 | 0,137  |



|    |                     |                                   |            |   |        |       |        |
|----|---------------------|-----------------------------------|------------|---|--------|-------|--------|
| 17 | Q96JM3 ZN828_HUMAN  | K.SSFFIEPQKPVFPE.T                |            | 2 | 3,8595 | 0,461 | -0,222 |
| 17 | P35527 K1C9_HUMAN   | R.SGGGGGGGLGSGGSIR.S              |            | 2 | 3,859  | 0,515 | -0,99  |
| 17 | Q14966 ZN638_HUMAN  | E.VQIEHDPELEKES#PGLK.N            | S1100:     | 3 | 3,8579 | 0,232 | 0,18   |
| 17 | P17275 JUNB_HUMAN   | R.SRDAT#PPVSPINM*EDQE.R           | T255:      | 2 | 3,8529 | 0,524 | -0,308 |
| 17 | Q5VWN6 CJ018_HUMAN  | E.NKVDILDAAVQTK.T                 |            | 2 | 3,8474 | 0,499 | -0,172 |
| 17 | P48551 INAR2_HUMAN  | R.RKS#PLQDPFPEEDYSSTE.G           | S400:      | 3 | 3,8461 | 0,354 | 0,166  |
| 17 | O15234 CASC3_HUMAN  | E.LKSEANDAVNS#STKEE.K             | S125:      | 2 | 3,8459 | 0,496 | -0,271 |
| 17 | P35606 COPB2_HUMAN  | D.GKPAS#PTPVIVASHTANKEE.K         | S859:      | 3 | 3,8455 | 0,331 | -0,26  |
| 17 | A8K6V7 A8K6V7_HUMAN | E.EKSTT#PPPAEPVSLPQEPKPR.V        | T227:      | 3 | 3,8422 | 0,348 | 0      |
| 17 | Q9BY44 EIF2A_HUMAN  | R.SDKS#PDLAPTAPQSTPR.N            | S506:      | 3 | 3,8377 | 0,311 | -0,658 |
| 17 | Q13200 PSMD2_HUMAN  | E.DYIKSGALLACGIVNSGVRNE.C         |            | 3 | 3,837  | 0,293 | 0      |
| 17 | Q9Y2I7 FYV1_HUMAN   | R.SAS#ITNLSLDR.S                  | S307:      | 2 | 3,833  | 0,499 | -0,485 |
| 17 | O75717 WDHD1_HUMAN  | R.SHILEDDENS#VDISM*LK.T           | S383:      | 3 | 3,8324 | 0,217 | 0,09   |
| 17 | O14983 AT2A1_HUMAN  | E.ITAM*TG DG VNDAPALK.K           |            | 2 | 3,8275 | 0,402 | 0,077  |
| 17 | B2R8U0 B2R8U0_HUMAN | K.AAAGPLDM*SLPSTPDIK.I            |            | 2 | 3,8248 | 0,444 | 0      |
| 17 | Q2TAL8 QRIC1_HUMAN  | E.AYNAVHVSGS#PTALAAVK.L           | S345:      | 3 | 3,8219 | 0,436 | -0,399 |
| 17 | B2CI53 B2CI53_HUMAN | E.RNGILASPQS#APGNLDNSK.S          | S263:      | 3 | 3,8206 | 0,288 | 0,272  |
| 17 | P08670 VIME_HUMAN   | E.NTLQSFQRQVDNASLAR.L             |            | 2 | 3,8197 | 0,356 | -1,009 |
| 17 | Q6PIRO Q6PIRO_HUMAN | K.TSVSQNVIPSS#AQK.R               | S177:      | 2 | 3,8191 | 0,424 | -0,56  |
| 17 | Q15365 PCBP1_HUMAN  | R.VM*TIPYQPM*PASS#PVICAGGQDR.C    | S190:      | 3 | 3,8167 | 0,316 | 0,212  |
| 17 | Q8NF64 ZMIZ2_HUMAN  | E.VKS#PFLPDLKPNLNSLHSSPSGSGPCDE.L | S395:      | 3 | 3,8078 | 0,407 | 0,419  |
| 17 | Q8IXM2 CQ049_HUMAN  | K.KVASGVLSPPPAAPSSSSVPE.A         |            | 2 | 3,8003 | 0,37  | -0,678 |
| 17 | Q15365 PCBP1_HUMAN  | R.VM*TIPYQPM*PASSPVICAGGQDR.C     |            | 2 | 3,7998 | 0,485 | 0,584  |
| 17 | Q5VZ89 DEN4C_HUMAN  | K.TPDESKLFS#PVIAR.N               | S989:      | 3 | 3,7945 | 0,386 | 0,417  |
| 17 | P40222 TXLNA_HUMAN  | R.RPEGGAQAPSS#PR.V                | S515:      | 2 | 3,79   | 0,392 | 0,082  |
| 17 | O14639 ABLM1_HUMAN  | E.SIYSRPGSSIPGS#PGHTIYAK.V        | S367:      | 3 | 3,7887 | 0,366 | 0,081  |
| 17 | P35606 COPB2_HUMAN  | E.LDGKPAS#PTPVIVASHTANKEE.K       | S859:      | 2 | 3,7865 | 0,552 | 0,313  |
| 17 | Q6Y7W6 PERQ2_HUMAN  | E.M*GTFDSS#GAFLSLKK.V             | S303:      | 2 | 3,7861 | 0,352 | -0,217 |
| 17 | O95251 MYST2_HUMAN  | E.TKNTADHDES#PPRTPT#GNAPSSE.S     | S124:T130: | 3 | 3,7856 | 0,23  | 0,499  |
| 17 | P21359 NF1_HUMAN    | E.GYLAATYPTVGQTS#PR.A             | S2515:     | 2 | 3,781  | 0,523 | 0,069  |
| 17 | P17275 JUNB_HUMAN   | R.SRDAT#PPVSPINM*E.D              | T255:      | 2 | 3,7794 | 0,485 | -0,152 |
| 17 | Q14195 DPYL3_HUMAN  | R.NLHQSGFSLSGTQVDE.G              |            | 2 | 3,7736 | 0,497 | -0,142 |
| 17 | P49589 SYCC_HUMAN   | E.DVQAALKPFSVKLNE.T               |            | 2 | 3,7716 | 0,369 | -0,147 |
| 17 | P60709 ACTB_HUMAN   | R.KDLYANTVLSGGTTM*YPGIADR.M       |            | 3 | 3,7706 | 0,335 | -0,233 |
| 17 | Q96JM3 ZN828_HUMAN  | E.LRKPGPPLS#PEIRS#PAGSPE.L        | S427:S432: | 2 | 3,7701 | 0,416 | 0,543  |
| 17 | Q5QJE6 TDIF2_HUMAN  | E.LQDTS#LQQLVSQR.H                | S330:      | 2 | 3,7684 | 0,416 | -0,076 |
| 17 | P61163 ACTZ_HUMAN   | E.LLFRPDLIGEESSEGIHE.V            |            | 3 | 3,765  | 0,284 | 0,281  |
| 17 | Q92667 AKAP1_HUMAN  | E.AKSIPLECLSS#PKGVLFSSK.S         | S151:      | 3 | 3,7627 | 0,386 | 0,079  |
| 17 | Q5VWN6 CJ018_HUMAN  | E.NKVDILDAAVQTK.T                 |            | 3 | 3,7614 | 0,302 | 0,582  |

|    |                    |                              |            |   |        |       |        |
|----|--------------------|------------------------------|------------|---|--------|-------|--------|
| 17 | Q6ZNB6 NFXL1_HUMAN | E.KGSVGAVPSGTSPGGVATTAAGSR.H |            | 3 | 3,7604 | 0,305 | 0,341  |
| 17 | Q96T23 RSF1_HUMAN  | E.IKLS#DDFDSPVKGPLCK.S       | S382:      | 3 | 3,7584 | 0,317 | 0,275  |
| 17 | P02545 LMNA_HUMAN  | R.SGAQASSTPLS#PTR.I          | S22:       | 2 | 3,7539 | 0,494 | 0      |
| 17 | Q16352 AINX_HUMAN  | E.VDVTVAKPDLTSALRE.I         |            | 3 | 3,7526 | 0,395 | 0,213  |
| 17 | O60664 M6PBP_HUMAN | R.IATSLDGFVDVASVQQQR.Q       |            | 2 | 3,7435 | 0,468 | -0,066 |
| 17 | Q5JSH3 WDR44_HUMAN | E.DVHLGGGYPVGS#PGKVGLSTFKE.T | S27:       | 3 | 3,7373 | 0,386 | -0,845 |
| 17 | Q9P2D6 F135A_HUMAN | E.GLDPTICGYNFDPK.T           |            | 2 | 3,7357 | 0,461 | 0      |
| 17 | Q13428 TCOF_HUMAN  | R.LASTNSSVLGADLPSSM*KE.K     |            | 2 | 3,7324 | 0,3   | -0,888 |
| 17 | Q6NZI2 PTRF_HUMAN  | R.RGS#S#PDVHALLE.I           | S365:S366: | 2 | 3,7292 | 0,42  | 0,085  |
| 17 | Q8NB49 AT11C_HUMAN | E.VDGLS#QTDGTLTYFDK.V        | S445:      | 2 | 3,7274 | 0,255 | -0,265 |
| 17 | Q92625 ANS1A_HUMAN | E.ALYNAISCHSLDSM*ASGR.S      |            | 3 | 3,7268 | 0,389 | 0,557  |
| 17 | P10809 CH60_HUMAN  | R.LAKLSDGVAVLK.V             |            | 3 | 3,7165 | 0,331 | 0,527  |
| 17 | Q9H3P2 NELFA_HUMAN | E.ASRPPEEPSAPS#PTLPAQFK.Q    | S384:      | 3 | 3,716  | 0,348 | 0,167  |
| 17 | P54819 KAD2_HUMAN  | E.NFCVCHLATGDM*LR.A          |            | 2 | 3,7147 | 0,407 | -0,071 |
| 17 | Q9NRL2 BAZ1A_HUMAN | R.NSTADIS#IGEEERE.D          | S702:      | 2 | 3,7097 | 0,384 | -0,075 |
| 17 | P04792 HSPB1_HUMAN | E.SRAQLGGPEAAKS#DE.T         | S199:      | 3 | 3,707  | 0,372 | 0      |
| 17 | Q13459 MYO9B_HUMAN | R.RTS#FSTDVSKLLPSLAK.A       | S1354:     | 3 | 3,7047 | 0,376 | 0,272  |
| 17 | Q15717 ELAV1_HUMAN | E.DCRGDIGRTNLIVNYPQNM*TQDE.L |            | 3 | 3,7018 | 0,442 | 0,322  |
| 17 | P18615 NELFE_HUMAN | K.LKDPEKGPVPTFQPFQR.S        |            | 3 | 3,6994 | 0,455 | 0      |
| 17 | Q9C0C2 TB182_HUMAN | E.AQDLCRAS#PEPPGPSSSR.W      | S672:      | 3 | 3,6903 | 0,269 | -0,172 |
| 17 | Q96A49 SYAP1_HUMAN | E.AVRPKT#PPVVIK.S            | T248:      | 3 | 3,6893 | 0,192 | 0,132  |
| 17 | P18858 DNL1_HUMAN  | K.TSKAET#PTESVSEPE.V         | T195:      | 2 | 3,6825 | 0,49  | -0,146 |
| 17 | O76021 RL1D1_HUMAN | K.ATNES#EDEIPQLVPIGKK.T      | S361:      | 3 | 3,6734 | 0,284 | -0,268 |
| 17 | Q9Y490 TLN1_HUMAN  | K.KSTVLQQQYNR.V              |            | 3 | 3,669  | 0,193 | 0,067  |
| 17 | Q8N1G2 K0082_HUMAN | E.LALSLSSTSDDEPPSSVSHGAK.A   |            | 3 | 3,663  | 0,338 | 0,084  |
| 17 | Q5T5U3 RHG21_HUMAN | E.TGSDSGTLLTSSQASLAR.F       |            | 2 | 3,6607 | 0,484 | 0      |
| 17 | P00558 PGK1_HUMAN  | E.SPERPFLAILGGAK.V           |            | 3 | 3,6534 | 0,304 | 0,377  |
| 17 | O75132 ZBED4_HUMAN | E.LELM*NSTSEDVAASHR.C        |            | 3 | 3,6533 | 0,354 | -0,412 |
| 17 | O75132 ZBED4_HUMAN | E.LM*NSTSEDVAASHR.C          |            | 3 | 3,6505 | 0,22  | -1,133 |
| 17 | Q9NQG5 CT077_HUMAN | K.LSM*EDSKS#PPPKATEE.K       | S134:      | 3 | 3,6374 | 0,327 | 0,199  |
| 17 | Q14997 PSME4_HUMAN | K.NPSINQILLS#PEK.I           | S1121:     | 2 | 3,6281 | 0,102 | -0,08  |
| 17 | Q09666 AHNK_HUMAN  | K.TVIRLPS#GSGAASPTGSAVDIR.A  | S210:      | 2 | 3,6236 | 0,348 | 0,557  |
| 17 | Q9Y608 LRRF2_HUMAN | R.RGS#GDTSSLIDPDTSLSE.L      | S328:      | 2 | 3,6195 | 0,534 | 0,127  |
| 17 | Q9UPP1 PHF8_HUMAN  | E.GKLGNGSGAGGILLDLLK.A       |            | 2 | 3,6186 | 0,415 | -0,233 |
| 17 | P18887 XRCC1_HUMAN | E.SANSLRPGALFFSR.I           |            | 3 | 3,6147 | 0,381 | 0,12   |
| 17 | P09622 DLDH_HUMAN  | E.DTIVSSTGALSJK.K            |            | 2 | 3,6115 | 0,431 | 0      |
| 17 | Q8WWM7 ATX2L_HUMAN | K.TTYDSSLSSYTVPLEKDNSEE.F    |            | 2 | 3,6049 | 0,564 | 0,619  |
| 17 | Q5UIP0 RIF1_HUMAN  | K.KADVQAPVSPS#ETSQANPYSE.G   | S1774:     | 3 | 3,6044 | 0,39  | -0,08  |
| 17 | O95292 VAPB_HUMAN  | K.IISTTASKTET#PIVSK.S        | T150:      | 2 | 3,6031 | 0,45  | -0,486 |

|    |                     |                              |            |   |        |       |        |
|----|---------------------|------------------------------|------------|---|--------|-------|--------|
| 17 | P30307 MPIP3_HUMAN  | K.LDKNPNLGEDQAEI.I           |            | 2 | 3,6003 | 0,387 | 1,319  |
| 17 | Q09666 AHNK_HUMAN   | K.TVIRLPSGS#GAASPTGSAVDIR.A  | S212:      | 3 | 3,5997 | 0,196 | -0,25  |
| 17 | P31323 KAP3_HUMAN   | E.AAPADAGAFNAPVINR.F         |            | 2 | 3,5993 | 0,471 | -0,628 |
| 17 | O95482 UB6L1_HUMAN  | K.KM*ADTSS#M*DEDFE.S         | S338:      | 2 | 3,5991 | 0,391 | -0,151 |
| 17 | Q03252 LMNB2_HUMAN  | R.AGGPAT#PLSPTR.L            | T14:       | 2 | 3,5985 | 0,438 | 0,203  |
| 17 | Q8WU79 SMAP2_HUMAN  | E.KDLDLLASVPS#PSSSGSR.K      | S219:      | 2 | 3,5946 | 0,447 | 0,515  |
| 17 | Q99471 PFD5_HUMAN   | E.AKDCLNVLNKS#NE.G           | S56:       | 2 | 3,5943 | 0,395 | 0,308  |
| 17 | P04406 G3P_HUMAN    | E.LNGKLTGM*AFRVPTANVSVVD.L   |            | 2 | 3,5943 | 0,248 | 0,332  |
| 17 | P55196 AFAD_HUMAN   | K.QGAIYHGLATLLNQPS#PM*M*QR.I | S1090:     | 3 | 3,5926 | 0,098 | 0,15   |
| 17 | Q04917 1433F_HUMAN  | E.DSYKDSTLIM*QLLR.D          |            | 3 | 3,5858 | 0,282 | -0,108 |
| 17 | Q12893 TM115_HUMAN  | E.SGAKVDS#PLPSDKAPTPPGK.G    | S320:      | 3 | 3,5858 | 0,359 | -0,451 |
| 17 | Q9H6Z4 RANB3_HUMAN  | R.SVLRPAVLQAPQPK.A           |            | 3 | 3,5824 | 0,212 | 0,304  |
| 17 | P63313 TYB10_HUMAN  | E.KNTLPT#KETIEQE.K           | T31:       | 2 | 3,5811 | 0,379 | -0,303 |
| 17 | P26374 RAE2_HUMAN   | E.ESQLSYFNSDEM*PAK.H         |            | 2 | 3,5724 | 0,394 | -0,139 |
| 17 | Q15418 KS6A1_HUMAN  | E.KKAYS#FCGTVE.Y             | S221:      | 2 | 3,5723 | 0,37  | 0,445  |
| 17 | Q14789 G0GB1_HUMAN  | E.DASALQGGTSVAQIK.A          |            | 2 | 3,5677 | 0,373 | 0      |
| 17 | P25787 PSA2_HUMAN   | E.LEDAIHTAILTLKE.S           |            | 3 | 3,5658 | 0,296 | 0,117  |
| 17 | Q9UPU5 UBP24_HUMAN  | R.HLQQGSES#PM*M*IGE.L        | S1854:     | 2 | 3,5634 | 0,524 | -0,663 |
| 17 | Q96MU7 YTDC1_HUMAN  | R.RAKS#PT#PDGSERIGLE.V       | S146:T148: | 3 | 3,5618 | 0,197 | 0,195  |
| 17 | Q13885 TBB2A_HUMAN  | E.IVHIQAGQCGNQIGAK.F         |            | 2 | 3,5532 | 0,403 | 0      |
| 17 | Q92615 LARP5_HUMAN  | R.TLSADASVNTLPVVVSR.E        |            | 2 | 3,5508 | 0,441 | 0,071  |
| 17 | Q86WB0 NIPA_HUMAN   | K.DTSATSQSVNGS#PQAEQPSLE.S   | S62:       | 2 | 3,55   | 0,423 | 0,441  |
| 17 | P49589 SYCC_HUMAN   | E.DVQAALKPFSVK.L             |            | 2 | 3,5487 | 0,311 | 0,187  |
| 17 | Q96D71 REPS1_HUMAN  | R.TGSDHTNPTS#PLLVKPSDLLEE.N  | S430:      | 3 | 3,545  | 0,225 | 0,151  |
| 17 | Q92576 PHF3_HUMAN   | K.STFSPAPRPEM*PGTVEVE.S      |            | 2 | 3,5443 | 0,329 | 0,251  |
| 17 | Q9NVM9 CLO11_HUMAN  | E.AEIKDSPDS#PEPPNKKPLVE.M    | S626:      | 3 | 3,5353 | 0,187 | 0,307  |
| 17 | O60271 JIP4_HUMAN   | E.T#RNVSTGSAENEKSE.V         | T325:      | 3 | 3,5353 | 0,247 | 0,101  |
| 17 | Q9H1A4 APC1_HUMAN   | E.LRDS#SKLHDS#LYNE.D         | S563:S569: | 2 | 3,5352 | 0,422 | 0      |
| 17 | A8K933 A8K933_HUMAN | E.LCHHS#SSST#PLAADRE.S       | S199:T203: | 3 | 3,535  | 1     | -0,19  |
| 17 | O43290 SNUT1_HUMAN  | R.S#ILSKYDEELE.G             | S332:      | 2 | 3,5324 | 0,322 | 0,174  |
| 17 | Q9Y6G9 DC1L1_HUMAN  | R.KPVTVS#PTTPTS#PTEGEAS.-    | S510:S516: | 2 | 3,5302 | 1     | -1,908 |
| 17 | P40222 TXLNA_HUMAN  | D.LSAGGQGS�TDSGPER.R         |            | 2 | 3,5285 | 0,519 | -0,557 |
| 17 | Q96JM3 ZN828_HUMAN  | E.LRKPGPPLS#PEIRS#PAGSPE.L   | S427:S432: | 3 | 3,5282 | 0,272 | 0,489  |
| 17 | Q92547 TOPB1_HUMAN  | K.NLQLALANSSR.N              |            | 2 | 3,5207 | 0,392 | -0,103 |
| 17 | P46821 MAP1B_HUMAN  | K.KTDDVEAM*SSQPALALDE.R      |            | 2 | 3,5102 | 0,482 | -1,323 |
| 17 | Q9UKV0 HDAC9_HUMAN  | R.SDSSACVDDTLGQVAVK.V        |            | 2 | 3,5085 | 0,417 | 0,067  |
| 17 | Q8TAQ5 ZN420_HUMAN  | E.NYSNLVSLDLPSR.C            |            | 2 | 3,5081 | 0,47  | -0,248 |
| 17 | A8K933 A8K933_HUMAN | E.LCHHSSS#S#PLAADRE.S        | S201:S202: | 3 | 3,5062 | 1     | 0,19   |
| 17 | P60709 ACTB_HUMAN   | D.LYANTVLSGGTTM*YPGIADR.M    |            | 3 | 3,506  | 0,289 | 0,173  |

|    |                    |                              |                 |   |        |       |        |
|----|--------------------|------------------------------|-----------------|---|--------|-------|--------|
| 17 | Q09666 AHNK_HUMAN  | K.FKAEAPLPS#PKLE.G           | S5110:          | 2 | 3,5033 | 0,508 | -0,162 |
| 17 | Q9H6F5 CCD86_HUMAN | R.LQQGAGLESPQGPPEGAAS#PQR.Q  | S91:            | 3 | 3,5017 | 0,234 | -0,23  |
| 17 | P13929 ENOB_HUMAN  | E.NINNTLGPALLQK.K            |                 | 2 | 3,5016 | 0,372 | -0,262 |
| 17 | Q9Y613 FHOD1_HUMAN | E.IM*DLLVQSVTK.S             |                 | 2 | 3,4985 | 0,309 | 0,193  |
| 17 | Q99471 PFD5_HUMAN  | E.AKDCLNVLNKS#NE.G           | S56:            | 3 | 3,4972 | 0,163 | 0,346  |
| 17 | Q8NB49 AT11C_HUMAN | E.VDGLS#QTDGTLTYFDKVDK.N     | S445:           | 3 | 3,4916 | 0,271 | 0      |
| 17 | O60271 JIP4_HUMAN  | E.TRNVSTGS#AENEKSE.V         | S332:           | 3 | 3,4908 | 0,295 | 0      |
| 17 | P31947 1433S_HUMAN | K.GAVEKGEELSCEE.R            |                 | 2 | 3,4861 | 0,407 | -0,849 |
| 17 | P36507 MP2K2_HUMAN | K.TLRLNQPGT#PTRTAV.-         | T394:           | 3 | 3,4817 | 0,314 | -0,107 |
| 17 | P21333 FLNA_HUMAN  | E.HIPDSPFVVPVAS#PSGDAR.R     | S2327:          | 3 | 3,4776 | 0,269 | 0,451  |
| 17 | Q9P2D0 IBTK_HUMAN  | R.DLQS#PDFTTGFHSDKIE.A       | S1045:          | 2 | 3,4772 | 0,387 | 0,302  |
| 17 | P18583 SON_HUMAN   | R.AGIEGPLLASDVGR.D           |                 | 2 | 3,4746 | 0,349 | 0,09   |
| 17 | O95239 KIF4A_HUMAN | E.KQLEES#VSEKE.Q             | S951:           | 2 | 3,4721 | 0,42  | -0,264 |
| 17 | Q12888 TP53B_HUMAN | R.GNLLHFPSSQGEEL.K           |                 | 2 | 3,4717 | 0,366 | -0,316 |
| 17 | P13693 TCTP_HUMAN  | E.STVITGVDIVM*NHHLQE.T       |                 | 2 | 3,469  | 0,497 | 0,383  |
| 17 | Q9C0C2 TB182_HUMAN | R.RES#AAS#GLGGLLEE.G         | S1473:S1476:    | 2 | 3,465  | 0,217 | -0,218 |
| 17 | Q9UQ35 SRRM2_HUMAN | R.SSGHSSSELS#PDAVE.K         | S1387:          | 2 | 3,4647 | 0,421 | 0      |
| 17 | O95872 BAT4_HUMAN  | E.SHGETRS#PENRS#PTPSLQYCE.N  | S205:S210:      | 3 | 3,4619 | 0,199 | 0,494  |
| 17 | Q9Y4F5 K0284_HUMAN | R.KM*IDQVFGVLES#PE.L         | S597:           | 2 | 3,4617 | 0,28  | -0,289 |
| 17 | Q3KR37 GRM1B_HUMAN | K.SSIETKPDAS#PQLPK.K         | S274:           | 3 | 3,4557 | 0,251 | -0,109 |
| 17 | P27816 MAP4_HUMAN  | K.DM*ES#PTKLDVTLAK.D         | S280:           | 3 | 3,4543 | 0,286 | 0,445  |
| 17 | Q14247 SRC8_HUMAN  | R.AKTQTPPVS#PAPQPTTE.R       | S405:           | 2 | 3,4531 | 0,447 | -0,591 |
| 17 | Q16555 DPYL2_HUMAN | K.TVT#PAS#SAKT#SPAKQQAPPVR.N | T514:S517:T521: | 3 | 3,4516 | 1     | 0,155  |
| 17 | Q9NWH9 SLTM_HUMAN  | R.AGAGM*ITQHSSNAS#PINR.I     | S1002:          | 3 | 3,4498 | 0,242 | -0,383 |
| 17 | Q14997 PSME4_HUMAN | K.NPSINQILLS#PEKIKE.G        | S1121:          | 3 | 3,4492 | 0,262 | -0,288 |
| 17 | Q9UK76 HN1_HUMAN   | R.RNS#SEASSGDFLDLKE.G        | S87:            | 2 | 3,4462 | 0,501 | -0,451 |
| 17 | Q92734 TFG_HUMAN   | K.QSTQVM*AASM*SAFDPLKNQDE.I  |                 | 3 | 3,4377 | 0,323 | 0,157  |
| 17 | P41227 ARD1A_HUMAN | E.NKVES#KGNS#PPSSGEACRE.E    | S182:S186:      | 3 | 3,4361 | 0,324 | 0,167  |
| 17 | Q3B820 YB032_HUMAN | E.NYFIDTNSQDSYK.E            |                 | 2 | 3,4356 | 0,47  | -0,229 |
| 17 | Q9Y490 TLN1_HUMAN  | E.DEGGSGRPLLQAAK.G           |                 | 2 | 3,4329 | 0,367 | -0,436 |
| 17 | O60271 JIP4_HUMAN  | R.TKLHQLS#GSDQLE.S           | S183:           | 2 | 3,4317 | 0,55  | -0,318 |
| 17 | O43765 SGTA_HUMAN  | R.SQIRS#RTPS#ASNDQDQE.-      | S301:S305:      | 2 | 3,4312 | 0,445 | 0,235  |
| 17 | P18583 SON_HUMAN   | R.LTSLRAGIEGPLLASDVGRDR.S    |                 | 3 | 3,4311 | 0,14  | 0,25   |
| 17 | P62158 CALM_HUMAN  | E.AFSLFDKDGDTITTK.E.L        |                 | 2 | 3,4285 | 0,547 | 0,066  |
| 17 | Q02952 AKA12_HUMAN | E.LQSHAKS#PPS#PVERE.M        | S1328:S1331:    | 3 | 3,4278 | 0,151 | 0,1    |
| 17 | Q92574 TSC1_HUMAN  | E.ASASIPTTVGS#LPSSK.S        | S1080:          | 2 | 3,425  | 0,469 | 0,154  |
| 17 | Q13409 DC1I2_HUMAN | K.SVSTPSEAGSQDSGDGAVGSR.T    |                 | 2 | 3,423  | 0,475 | -0,188 |
| 17 | P53618 COPB_HUMAN  | E.DQFQLSLLAAM*GNTQR.K        |                 | 2 | 3,4226 | 0,458 | 0      |
| 17 | O14617 AP3D1_HUMAN | R.ALDIDLKPLADSE.K            |                 | 2 | 3,4185 | 0,457 | -0,242 |

|    |                     |                             |            |   |        |       |        |
|----|---------------------|-----------------------------|------------|---|--------|-------|--------|
| 17 | P09874 PARP1_HUMAN  | R.GGSDDSSKDPIDVNYE.K        |            | 2 | 3,4164 | 0,271 | -0,144 |
| 17 | P46020 KPB1_HUMAN   | R.S#VRPTDSNVSPAISHE.I       | S972:      | 2 | 3,4161 | 0,545 | 1,227  |
| 17 | P04406 G3P_HUMAN    | E.GLM*TTVHAITATQK.T         |            | 2 | 3,4138 | 0,387 | 0,246  |
| 17 | Q6S8J3 A26CA_HUMAN  | E.KSYELPDGQVITIGNE.R        |            | 2 | 3,4127 | 0,335 | 0      |
| 17 | Q5W0B1 RN219_HUMAN  | K.SSQGSEFLEEDPKLEE.K        |            | 2 | 3,4098 | 0,371 | 0      |
| 17 | O43663 PRC1_HUMAN   | K.SDATSGILNST#NIQS.-        | T616:      | 2 | 3,4085 | 0,413 | 0,077  |
| 17 | Q15424 SAFB1_HUMAN  | R.KFDFDACNEVPPAPK.E         |            | 3 | 3,4078 | 0,214 | -0,422 |
| 17 | P33316 DUT_HUMAN    | R.GNVGVVLFNFGKE.K           |            | 2 | 3,4076 | 0,44  | -0,619 |
| 17 | Q9UKV3 ACINU_HUMAN  | E.KSKS#PS#PPRLTE.D          | S386:S388: | 3 | 3,4054 | 0,148 | -0,369 |
| 17 | Q02880 TOP2B_HUMAN  | K.VKAS#PITNDGE.D            | S1400:     | 2 | 3,403  | 0,377 | 0      |
| 17 | Q09666 AHNK_HUMAN   | R.EGAKDIDISS#PE.F           | S177:      | 2 | 3,403  | 0,173 | -1,638 |
| 17 | P27816 MAP4_HUMAN   | E.VALAKDM*ES#PTKLDVTLAK.D   | S280:      | 3 | 3,4021 | 0,541 | 0,258  |
| 17 | Q71RC2 LARP4_HUMAN  | R.ASTASPCNNNINAATAVALQEPR.K |            | 3 | 3,4008 | 0,35  | 0,463  |
| 17 | O43513 MED7_HUMAN   | R.VKTEPM*DADDS#NNCTGQNE.H   | S194:      | 2 | 3,4006 | 0,274 | 0,11   |
| 17 | Q5UIP0 RIF1_HUMAN   | K.ADVQAPVS#PSETSQANPYSE.G   | S1772:     | 2 | 3,3975 | 0,314 | -0,113 |
| 17 | Q02952 AKA12_HUMAN  | E.DSIAGSGVEHSTPDTEPGKEE.S   |            | 3 | 3,3957 | 0,333 | -0,683 |
| 17 | P68371 TBB2C_HUMAN  | E.IVHLQAGQCGNQIGAK.F        |            | 3 | 3,3946 | 0,316 | -0,108 |
| 17 | P62158 CALM_HUMAN   | E.AFSLFDKDGDTITTKE.L        |            | 3 | 3,3935 | 0,228 | 0,397  |
| 17 | Q9C0B5 ZDHC5_HUMAN  | R.SSS#LKSAQGTGFE.L          | S429:      | 2 | 3,3914 | 0,46  | -0,088 |
| 17 | Q13439 GOGA4_HUMAN  | E.QQQLQQALAPAQASSNSSTPTR.M  |            | 2 | 3,3907 | 0,418 | 0,528  |
| 17 | Q9UNX4 WDR3_HUMAN   | K.GS#SPGIQDTLEAE.D          | S240:      | 2 | 3,3906 | 0,376 | -0,617 |
| 17 | P21333 FLNA_HUMAN   | K.DGSCGVAYVVQEPGDYE.V       |            | 2 | 3,3866 | 0,347 | -0,265 |
| 17 | Q96RT1 LAP2_HUMAN   | K.ISEPEAEIS#PGSLPVTANM*K.A  | S569:      | 3 | 3,3826 | 0,272 | -0,084 |
| 17 | Q9UPP1 PHF8_HUMAN   | E.GKLGNGSGAGGILDLLK.A       |            | 3 | 3,3824 | 0,268 | 0,116  |
| 17 | P33991 MCM4_HUMAN   | R.GQSDIAITKDM*FEE.A         |            | 2 | 3,3816 | 0,369 | 0,076  |
| 17 | P49591 SYSC_HUMAN   | K.YAGLSTCFRQE.V             |            | 2 | 3,381  | 0,414 | -0,275 |
| 17 | Q96JB2 COG3_HUMAN   | E.DHVQNNAEQLGAFAGVK.Q       |            | 3 | 3,3797 | 0,305 | 0,294  |
| 17 | P46821 MAP1B_HUMAN  | E.HCAS#PEDKTLE.V            | S1312:     | 2 | 3,3796 | 0,488 | -0,268 |
| 17 | Q12931 TRAP1_HUMAN  | E.NAM*IAAGLVDDPR.A          |            | 2 | 3,378  | 0,453 | -0,09  |
| 17 | O94967 WDR47_HUMAN  | E.KNELRDS#TEQFQE.Y          | S422:      | 2 | 3,3698 | 0,289 | -0,501 |
| 17 | Q8IYS0 GRM1C_HUMAN  | E.NLSLSIEDVQPR.S            |            | 2 | 3,3656 | 0,41  | 0,267  |
| 17 | Q08EQ4 TMSL1_HUMAN  | E.KNPLPSKET#IEQE.K          | T34:       | 2 | 3,365  | 0,339 | -0,153 |
| 17 | Q8WUM4 PDC6I_HUMAN  | K.FLTALAQDGVINEE.A          |            | 2 | 3,3635 | 0,285 | 0      |
| 17 | Q15942 ZYX_HUMAN    | R.S#PGAPGLTLKEVEE.L         | S344:      | 2 | 3,3568 | 0,394 | 0,076  |
| 17 | P23229 ITA6_HUMAN   | R.TGGLYSCDITAR.G            |            | 2 | 3,3559 | 0,535 | 0,093  |
| 17 | O60293 CC131_HUMAN  | R.RISTS#DILSEK.K            | S354:      | 3 | 3,3556 | 0,185 | 0,138  |
| 17 | Q92545 TM131_HUMAN  | E.RLS#PAPLAHPSHPER.A        | S1273:     | 3 | 3,3528 | 0,433 | -0,314 |
| 17 | A6NH35 A6NH35_HUMAN | R.KLFIGGLSFETTED.S          |            | 2 | 3,3517 | 0,506 | 0,078  |
| 17 | Q9Y6A5 TACC3_HUMAN  | E.NCDFLFSPEVTGR.S           |            | 2 | 3,3501 | 0,444 | -0,223 |

|    |                    |                               |            |   |        |       |        |
|----|--------------------|-------------------------------|------------|---|--------|-------|--------|
| 17 | P98171 RHG04_HUMAN | R.GPGAPAS#PSASHPQGLDTPKPH.-   | S930:      | 3 | 3,35   | 0,24  | -0,64  |
| 17 | Q8WTT2 NOC3L_HUMAN | E.VATES#PLDFTK.Y              | S787:      | 2 | 3,3482 | 0,561 | 0,189  |
| 17 | Q96ST3 SIN3A_HUMAN | E.RYM*NSDTTS#PELRE.H          | S1112:     | 2 | 3,3457 | 0,317 | -0,34  |
| 17 | P19105 MLRM_HUMAN  | E.DLHDM*LASLGKNPTDE.Y         |            | 2 | 3,3455 | 0,438 | -0,069 |
| 17 | Q6P158 DHX57_HUMAN | R.DLQEQQDADAGSER.G            |            | 2 | 3,3421 | 0,356 | -0,511 |
| 17 | Q9P265 DIP2B_HUMAN | R.QAALSAALQQSLQNAE.S          |            | 2 | 3,3415 | 0,457 | -0,149 |
| 17 | Q9UGU5 HM2L1_HUMAN | K.SPPTTM*LLPAS#PAKAPE.T       | S512:      | 2 | 3,3383 | 0,416 | -0,473 |
| 17 | O75152 ZC11A_HUMAN | R.RLSS#AS#TGKPPLSVEDDFE.K     | S759:S761: | 3 | 3,3376 | 0,167 | 0,417  |
| 17 | Q5VTL8 PR38B_HUMAN | E.GHGSSS#FDRELE.R             | S290:      | 2 | 3,3366 | 0,468 | -0,435 |
| 17 | Q9UPP1 PHF8_HUMAN  | E.GKLGNGSGAGGILDLLKASR.Q      |            | 3 | 3,3349 | 0,329 | -0,194 |
| 17 | Q9H3P2 NELFA_HUMAN | E.ASRPPEEPSAPSPTLPAQFK.Q      |            | 3 | 3,3339 | 0,213 | -0,087 |
| 17 | P05362 ICAM1_HUMAN | E.AQVHLALGDQR.L               |            | 3 | 3,3322 | 0,239 | 0,605  |
| 17 | P55884 EIF3B_HUMAN | E.RSDS#RAQAVSEDAGGNE.G        | S119:      | 3 | 3,3314 | 0,246 | -0,1   |
| 17 | Q05397 FAK1_HUMAN  | K.LQPQEIS#PPPTANLDR.S         | S910:      | 2 | 3,325  | 0,269 | 0,066  |
| 17 | Q9NQW6 ANLN_HUMAN  | K.DKSTT#PGGTGIKPFLE.R         | T364:      | 2 | 3,3138 | 0,446 | 0      |
| 17 | Q9Y613 FHOD1_HUMAN | E.IM*DLLVQSVTKSS#PRALAARE.R   | S1119:     | 3 | 3,3128 | 0,343 | 0,461  |
| 17 | Q99497 PARK7_HUMAN | E.DAKKEGPDYVVVLPGGNLGAQNLSE.S |            | 3 | 3,3115 | 0,297 | 0,214  |
| 17 | Q02790 FKBP4_HUMAN | K.SNTAGS#QSQVETEA.-           | S451:      | 2 | 3,3106 | 0,45  | -0,246 |
| 17 | Q5PRF9 SAM4B_HUMAN | E.HALGDGTDKTST#I.-            | T693:      | 2 | 3,3105 | 0,37  | 0      |
| 17 | A0MZ66 SHOT1_HUMAN | E.NKEDS#IENVRE.T              | S619:      | 2 | 3,3094 | 0,398 | -0,259 |
| 17 | Q02952 AKA12_HUMAN | E.SQVHM*M*AAAVADGTR.A         |            | 3 | 3,3042 | 0,265 | -0,232 |
| 17 | Q96JM2 ZN462_HUMAN | E.KDAVEKPILS#SEE.L            | S264:      | 2 | 3,2985 | 0,46  | 0      |
| 17 | Q96T58 MINT_HUMAN  | K.IKLSVLNS#EDE.L              | S1333:     | 2 | 3,2952 | 0,309 | -0,092 |
| 17 | P42696 RBM34_HUMAN | R.LGQVASSLFR.G                |            | 2 | 3,2944 | 0,408 | 0      |
| 17 | Q9NYP9 CU045_HUMAN | R.CVSCNVSDKE.Q                |            | 2 | 3,2916 | 0,422 | -0,47  |
| 17 | Q9UMZ2 SYNG_HUMAN  | K.ISKFDFLVATSQSK.M            |            | 3 | 3,2894 | 0,19  | 0,582  |
| 17 | P28290 SSFA2_HUMAN | E.KEPCAPLTIPSIR.N             |            | 3 | 3,2881 | 0,247 | 0,062  |
| 17 | Q2NXX8 ERC6L_HUMAN | K.M*ASVVIDDLPKEGE.K           |            | 2 | 3,2866 | 0,354 | 0,321  |
| 17 | Q9NWH9 SLTM_HUMAN  | K.DGQDAIAQS#PEKE.S            | S289:      | 2 | 3,2855 | 0,362 | -0,249 |
| 17 | Q66K74 MAP1S_HUMAN | E.LPLAASSIPRPR.T              |            | 2 | 3,2852 | 0,331 | 0      |
| 17 | P31629 ZEP2_HUMAN  | E.ASDKM*S#PGPPIPLDIASR.G      | S296:      | 3 | 3,2819 | 0,199 | 0,376  |
| 17 | O15534 PER1_HUMAN  | R.LRGLDSSSTAPS#ALGE.R         | S815:      | 2 | 3,2811 | 0,467 | 0,149  |
| 17 | Q6PKG0 LARP1_HUMAN | E.RESRPLQLPGAEGPAIS#DGEE.G    | S90:       | 3 | 3,2801 | 0,398 | -0,384 |
| 17 | Q9NQW6 ANLN_HUMAN  | K.ALSSSADDAASLVNASISSVK.A     |            | 3 | 3,279  | 0,266 | 0,273  |
| 17 | O00629 IMA4_HUMAN  | D.SGIVPHLVPLLSHQE.V           |            | 3 | 3,2781 | 0,214 | 0,225  |
| 17 | P49591 SYSC_HUMAN  | E.DLPIKYAGLSTCFRQE.V          |            | 2 | 3,2764 | 0,472 | 0      |
| 17 | O60506 HNRPQ_HUMAN | E.NFQTLLDAGLPQKVAEKLDE.I      |            | 3 | 3,2754 | 0,231 | 0      |
| 17 | Q9UKV3 ACINU_HUMAN | D.LHADDSTRIS#EDE.T            | S898:      | 2 | 3,274  | 0,466 | -0,25  |
| 17 | Q9UHB7 AFF4_HUMAN  | E.KELLSPLS#EPDDRYPLIVK.I      | S706:      | 3 | 3,2718 | 0,354 | 0      |

|    |                     |                                  |              |   |        |       |        |
|----|---------------------|----------------------------------|--------------|---|--------|-------|--------|
| 17 | Q9UQ35 SRRM2_HUMAN  | E.SYFGVSSLQLK.G                  |              | 2 | 3,2712 | 0,403 | -0,397 |
| 17 | Q09666 AHNK_HUMAN   | K.GAKPQGHIGVDASAPQIGGS#ITGPSVE.V | S407:        | 3 | 3,2705 | 0,282 | 0      |
| 17 | Q9BZ95 NSD3_HUMAN   | R.GLSDLQVGFQK.Q                  |              | 2 | 3,2698 | 0,406 | 0,109  |
| 17 | P11766 ADHX_HUMAN   | K.LKAGDTVIPLYIQCGE.C             |              | 2 | 3,2644 | 0,433 | 0,065  |
| 17 | P28370 SMCA1_HUMAN  | E.LFAHFQPSAQK.S                  |              | 2 | 3,2558 | 0,273 | -0,352 |
| 17 | Q9Y2N3 PO121_HUMAN  | E.LCHHSSS#ST#PLAADKE.S           | S443:T445:   | 3 | 3,2555 | 1     | -0,674 |
| 17 | P19525 E2AK2_HUMAN  | E.KKAVS#PLLLTTTNSSE.G            | S83:         | 2 | 3,2526 | 0,208 | -0,345 |
| 17 | Q9UHV7 MED13_HUMAN  | E.SKTGNLDP LSCISTADLHK.M         |              | 3 | 3,252  | 0,193 | -0,089 |
| 17 | P84103 SFRS3_HUMAN  | K.VYVGNLGNNGNKTELE.R             |              | 2 | 3,2489 | 0,422 | 0,284  |
| 17 | Q5VVJ2 MYSM1_HUMAN  | K.NSSDLLLLDFPNSK.M               |              | 2 | 3,2473 | 0,431 | 0      |
| 17 | Q8N2M8 SFR16_HUMAN  | E.KLTRPAAS#PAVGE.K               | S532:        | 2 | 3,2452 | 0,364 | -0,443 |
| 17 | P30153 2AAA_HUMAN   | K.TDLVPAFQNLN*KDCE.A             |              | 2 | 3,2433 | 0,438 | -0,136 |
| 17 | P35579 MYH9_HUMAN   | E.LDDLLVLDLHQR.Q                 |              | 3 | 3,2418 | 0,153 | -0,252 |
| 17 | Q17RV1 Q17RV1_HUMAN | K.SKQFSPSGYLS#DTEE.S             | S1562:       | 2 | 3,2414 | 0,219 | 0,07   |
| 17 | Q00613 HSF1_HUMAN   | R.GHTDTEGRPPS#PPPTST#PEK.C       | S363:T369:   | 3 | 3,2394 | 0,21  | -0,163 |
| 17 | Q8NEY8 PPHLN_HUMAN  | E.KLEKS#DESNLPE.I                | S244:        | 2 | 3,2375 | 0,38  | 0      |
| 17 | Q9NP73 ALG13_HUMAN  | K.ADLVISHAGAGSCLE.T              |              | 2 | 3,235  | 0,483 | 0,244  |
| 17 | A8K6V7 A8K6V7_HUMAN | E.KSTTPPPAEPVS#LPQEPKPR.V        | S235:        | 2 | 3,2347 | 0,382 | 0,209  |
| 17 | Q9Y613 FHOD1_HUMAN  | E.IM*DLLVQSVTKS#SPR.A            | S1118:       | 3 | 3,2293 | 0,372 | 0,103  |
| 17 | P19105 MLRM_HUMAN   | E.DLHDM*LASLGKNPTDE.Y            |              | 3 | 3,2292 | 0,28  | 0,31   |
| 17 | P78310 CXAR_HUMAN   | K.TQYNQVPSEDFER.T                |              | 2 | 3,2272 | 0,375 | 0      |
| 17 | P12004 PCNA_HUMAN   | R.DLSHIGDAVVISCAK.D              |              | 3 | 3,2262 | 0,245 | -0,115 |
| 17 | P19338 NUCL_HUMAN   | K.GFGFVDFNSEEDAK.A               |              | 2 | 3,226  | 0,403 | -0,156 |
| 17 | P04150 GCR_HUMAN    | K.SSASTAVSAAPEKE.F               |              | 2 | 3,2251 | 0,367 | 0      |
| 17 | Q5UIP0 RIF1_HUMAN   | K.KADVQAPVS#PSETS QANPYSE.G      | S1772:       | 3 | 3,2244 | 0,248 | 0,08   |
| 17 | Q12931 TRAP1_HUMAN  | R.GVVDESDIPLNLSRE.L              |              | 2 | 3,2205 | 0,308 | -0,594 |
| 17 | Q5VVJ2 MYSM1_HUMAN  | E.LSS#QTPQKNSSDLLLLDFPNSK.M      | S234:        | 3 | 3,2198 | 0,123 | 0,074  |
| 17 | Q9UQ35 SRRM2_HUMAN  | K.DKFSPPVQDRPE.S                 |              | 2 | 3,2186 | 0,21  | -0,078 |
| 17 | Q96PZ0 PUS7_HUMAN   | E.DVPRPPDTVSTGK.G                |              | 2 | 3,2126 | 0,098 | -1,337 |
| 17 | P27816 MAP4_HUMAN   | K.DGVLTLANNVTPAK.D               |              | 2 | 3,2126 | 0,396 | -0,259 |
| 17 | Q8IX90 CM003_HUMAN  | K.NSIALVSTNYPLSK.T               |              | 2 | 3,2122 | 0,375 | 0,243  |
| 17 | Q12756 KIF1A_HUMAN  | R.TPQPCS#RPAS#PEPE.L             | S1528:S1532: | 2 | 3,2122 | 0,386 | -0,427 |
| 17 | Q9NTZ6 RBM12_HUMAN  | E.NAVHVLVDNNGQGLGQALVQFKNE.D     |              | 3 | 3,2112 | 0,088 | 0,499  |
| 17 | Q86YS7 K0528_HUMAN  | E.IIGS#PIPEPR.Q                  | S643:        | 2 | 3,2066 | 0,401 | 0      |
| 17 | Q9UJC5 SH3L2_HUMAN  | E.SNTVFSFLGLKPR.L                |              | 2 | 3,2043 | 0,431 | -0,416 |
| 17 | P09525 ANXA4_HUMAN  | E.DAIISVLAYR.N                   |              | 2 | 3,2014 | 0,469 | -0,544 |
| 17 | P13645 K1C10_HUMAN  | K.GSLGGGFSSGGFSGGSFSR.G          |              | 2 | 3,2    | 0,508 | 0,643  |
| 17 | P42696 RBM34_HUMAN  | R.LGQVASSLFRGE.H                 |              | 2 | 3,1993 | 0,405 | -0,097 |
| 17 | Q12849 GRSF1_HUMAN  | E.DVLNFFSDCR.I                   |              | 2 | 3,1992 | 0,489 | -0,192 |

|    |                    |                                    |              |   |        |       |        |
|----|--------------------|------------------------------------|--------------|---|--------|-------|--------|
| 17 | P08651 NFIC_HUMAN  | R.TGM*GSDQEDSKPITLDTTDFQE.S        |              | 3 | 3,1942 | 0,182 | 0,602  |
| 17 | Q14966 ZN638_HUMAN | E.KESPLGKNS#PIDE.S                 | S1106:       | 2 | 3,1889 | 0,234 | -0,082 |
| 17 | Q7L1V2 MON1B_HUMAN | E.TGSKDKDQPPSPS#PPPQSE.A           | S61:         | 3 | 3,1881 | 0,303 | -0,267 |
| 17 | O95359 TACC2_HUMAN | K.IGSSLPQDDDAPK.K                  |              | 2 | 3,1879 | 0,315 | -0,727 |
| 17 | Q2NKX8 ERC6L_HUMAN | K.ADIGPNLDQLKDDE.I                 |              | 2 | 3,1845 | 0,398 | 0      |
| 17 | Q9H7N4 SFR19_HUMAN | R.VFVVGTEAEACRE.G                  |              | 2 | 3,1838 | 0,472 | -0,083 |
| 17 | P26006 ITA3_HUMAN  | R.TGAVYLCPLTAHK.D                  |              | 2 | 3,1835 | 0,486 | -0,256 |
| 17 | Q6Y7W6 PERQ2_HUMAN | K.KVQKEPIPEEQE.M                   |              | 2 | 3,1834 | 0,251 | -0,168 |
| 17 | Q92598 HS105_HUMAN | E.LNNTCEPVVTTQPKPKIES#PKLE.R       | S809:        | 3 | 3,1825 | 0,185 | 0,211  |
| 17 | O15143 ARC1B_HUMAN | R.FQNLDKKASS#E.G                   | S311:        | 2 | 3,1819 | 0,399 | -0,272 |
| 17 | Q96KP4 CNDP2_HUMAN | K.NVM*LLPVGSADDGAHSQNE.K           |              | 2 | 3,1796 | 0,48  | 0,495  |
| 17 | Q9UKV3 ACINU_HUMAN | K.S#PS#PPRLTE.D                    | S386:S388:   | 2 | 3,1796 | 0,247 | -0,107 |
| 17 | P05387 RLA2_HUMAN  | K.NIEDVIAQGIGK.L                   |              | 2 | 3,1793 | 0,474 | -0,097 |
| 17 | P31946 1433B_HUMAN | E.SYKDSTLIM*QLLR.D                 |              | 2 | 3,1775 | 0,327 | -0,154 |
| 17 | Q9HCN8 SDF2L_HUMAN | E.GIFIKPSVEPSAGHDEL.-              |              | 3 | 3,1774 | 0,171 | 0,102  |
| 17 | P55196 AFAD_HUMAN  | R.LSDRVSS#AS#STAE.R                | S546:S548:   | 2 | 3,1772 | 0,37  | -0,231 |
| 17 | P49840 GSK3A_HUMAN | R.DSGKVTTVVATLGQGPERS              |              | 3 | 3,1735 | 0,291 | 0,605  |
| 17 | P04792 HSPB1_HUMAN | E.SRAQLGGPEAAKS#DE.T               | S199:        | 2 | 3,1713 | 0,418 | -0,229 |
| 17 | P33316 DUT_HUMAN   | E.DYRGNVGVVLFNFGKE.K               |              | 2 | 3,1712 | 0,31  | -0,404 |
| 17 | P35580 MYH10_HUMAN | E.KNSLQEQEEEE.E                    |              | 2 | 3,1711 | 0,234 | 0,818  |
| 17 | Q9UHV7 MED13_HUMAN | K.TGNLDPLSCISTADLHK.M              |              | 3 | 3,1695 | 0,34  | 0,298  |
| 17 | P50548 ERF_HUMAN   | R.VSSDLQHATAQLSLE.H                |              | 2 | 3,1688 | 0,202 | 0,534  |
| 17 | O95785 WIZ_HUMAN   | K.NPEDKSPQLSLS#PRPAS#PK.A          | S1012:S1017: | 3 | 3,168  | 0,335 | 0,166  |
| 17 | Q9BWU0 NADAP_HUMAN | K.TTSLCAGPSASKNE.Y                 |              | 2 | 3,1671 | 0,289 | 0,171  |
| 17 | P42166 LAP2A_HUMAN | R.SSTPLPTISSAENTR.Q                |              | 2 | 3,1651 | 0,416 | -0,222 |
| 17 | Q9HCD5 NCOA5_HUMAN | E.RLM*RS#STDS#LPGPISR.Q            | S377:S381:   | 3 | 3,1629 | 0,347 | -0,188 |
| 17 | P39687 AN32A_HUMAN | K.LLPQLTYLDGYDR.D                  |              | 2 | 3,1535 | 0,273 | -0,389 |
| 17 | Q96MU7 YTDC1_HUMAN | R.RAKS#PT#PDGSERIGLE.V             | S146:T148:   | 2 | 3,1531 | 0,403 | 0,13   |
| 17 | Q01082 SPTB2_HUMAN | K.AKTALPAQSAATLPAR.T               |              | 3 | 3,1506 | 0,19  | 0      |
| 17 | O60293 CC131_HUMAN | R.RIS#TSDILSEK.K                   | S352:        | 2 | 3,1476 | 0,409 | -0,184 |
| 17 | Q76FK4 NOL8_HUMAN  | E.TDHRNSS#PGEASLLE.K               | S1099:       | 2 | 3,1471 | 0,449 | -0,216 |
| 17 | P02545 LMNA_HUMAN  | R.S#GAQASSTPLS#PTR.I               | S12:S22:     | 2 | 3,1437 | 0,422 | 0,241  |
| 17 | Q71RC2 LARP4_HUMAN | K.DGLNQTTIPVS#PPSTTKPSR.A          | S583:        | 3 | 3,1417 | 0,095 | 0      |
| 17 | P51858 HDGF_HUMAN  | E.VERPLPM*EVEK.N                   |              | 3 | 3,1385 | 0,345 | -0,477 |
| 17 | Q13428 TCOF_HUMAN  | R.TNVVTM*PTAHPR.I                  |              | 2 | 3,1364 | 0,436 | -0,546 |
| 17 | Q9P2E9 RRBP1_HUMAN | K.SHVEDGDIAGAPASS#PEAPPAEQDPVQLK.T | S1277:       | 3 | 3,1358 | 0,306 | 0,061  |
| 17 | O60504 VINEX_HUMAN | R.DFVYPSSTRDPASNGGGS#PARREE.K      | S373:        | 3 | 3,134  | 0,338 | 0,135  |
| 17 | P07814 SYEP_HUMAN  | K.EYIPGQPPLSQSS#DSS#PTR.N          | S883:S886:   | 2 | 3,1318 | 0,333 | 0,111  |
| 17 | Q8N5P1 ZC3H8_HUMAN | E.NLFSKPPNPALGK.T                  |              | 2 | 3,1298 | 0,254 | -0,706 |



|    |                    |                                |              |   |        |       |        |
|----|--------------------|--------------------------------|--------------|---|--------|-------|--------|
| 17 | P55884 EIF3B_HUMAN | E.RSDS#RAQAVSEDAAGNE.G         | S119:        | 2 | 3,1241 | 0,384 | -0,133 |
| 17 | P37275 ZEB1_HUMAN  | E.AGPEILSNEHVGAR.A             |              | 2 | 3,124  | 0,344 | 0      |
| 17 | Q86W92 LIPB1_HUMAN | R.SPASITDEDSNV.-               |              | 2 | 3,1238 | 0,442 | -0,092 |
| 17 | P04406 G3P_HUMAN   | K.LVINGNPITIFQER.D             |              | 2 | 3,1229 | 0,384 | -0,454 |
| 17 | Q86WB0 NIPA_HUMAN  | R.QLIDEGIAPEEGVDAK.D           |              | 3 | 3,119  | 0,34  | 0,105  |
| 17 | Q9Y608 LRRF2_HUMAN | R.NSASATPLSGNSSR.R             |              | 2 | 3,117  | 0,492 | -0,168 |
| 17 | Q15390 MTFR1_HUMAN | R.QIS#LPDLSQEELK.T             | S119:        | 3 | 3,1121 | 0,232 | -0,203 |
| 17 | Q99459 CDC5L_HUMAN | E.YNVTNNSVALR.T                |              | 2 | 3,111  | 0,349 | 0      |
| 17 | Q9Y490 TLN1_HUMAN  | E.LLDHVLLTLQKPSPE.L            |              | 2 | 3,1078 | 0,396 | -0,072 |
| 17 | O15061 DMN_HUMAN   | R.HVTLGPGQS#PLSRE.V            | S1181:       | 3 | 3,1064 | 0,186 | 0,47   |
| 17 | Q96T23 RSF1_HUMAN  | E.SEKPGS#PEAAETS#PPSNIIDHCEK.L | S612:S619:   | 3 | 3,1062 | 0,354 | 0,401  |
| 17 | Q05682 CALD1_HUMAN | E.FDPTITDASLSLPSR.R            |              | 2 | 3,1057 | 0,451 | 0,075  |
| 17 | Q02952 AKA12_HUMAN | E.LQSHAKS#PPS#PVERE.M          | S1328:S1331: | 2 | 3,1048 | 0,41  | -0,268 |
| 17 | P60900 PSA6_HUMAN  | E.VGVVTVENPK.F                 |              | 2 | 3,1024 | 0,393 | 0,117  |
| 17 | Q13439 GOGA4_HUMAN | E.QQQLQALAPAQASSNSSTPTR.M      |              | 3 | 3,1008 | 0,241 | 0,396  |
| 17 | Q8N3X1 FNBP4_HUMAN | E.M*EVEES#PEKIK.V              | S508:        | 2 | 3,1003 | 0,271 | -0,172 |
| 17 | Q14980 NUMA1_HUMAN | R.KNS#LISSLEE.V                | S1225:       | 2 | 3,1    | 0,355 | 0,275  |
| 17 | Q9Y2W1 TR150_HUMAN | R.ERS#PALKS#PLQSVVVR.R         | S248:S253:   | 3 | 3,0996 | 0,246 | 0,57   |
| 17 | P53396 ACLY_HUMAN  | E.GGVDVGDVDAK.A                |              | 2 | 3,0967 | 0,427 | -0,473 |
| 17 | P63244 GBLP_HUMAN  | K.IIVDELKQEVISTSSK.A           |              | 3 | 3,0942 | 0,144 | 0,204  |
| 17 | Q15365 PCBP1_HUMAN | R.VM*TIPYQPM*PASS#PVICAGGQDR.C | S190:        | 2 | 3,0937 | 0,315 | 0,849  |
| 17 | Q96D71 REPS1_HUMAN | K.RTGS#DHTNPTS#PLLVKPSDLLEE.N  | S423:S430:   | 3 | 3,0907 | 0,124 | 0,069  |
| 17 | O14641 DVL2_HUMAN  | E.RHLAGYES#SSTLM*TSELE.S       | S194:        | 3 | 3,0888 | 0,302 | 0,174  |
| 17 | P52907 CAZA1_HUMAN | E.GAAHAFAYNM*DQFTPVKIE.G       |              | 3 | 3,0872 | 0,159 | 0,081  |
| 17 | Q9H6F5 CCD86_HUMAN | R.AGLGSPERPPKT#S#PGSPR.L       | T65:S66:     | 3 | 3,087  | 0,232 | -0,469 |
| 17 | Q6ZU35 K1211_HUMAN | E.NVSVSQPGSSSVSR.A             |              | 2 | 3,0858 | 0,353 | -0,082 |
| 17 | Q86U90 YRDC_HUMAN  | R.LLRLPGSGAVQAASPE.R           |              | 2 | 3,0856 | 0,406 | 0,234  |
| 17 | Q14157 UBP2L_HUMAN | R.RYPSS#ISS#SPQKD.L            | S605:S608:   | 2 | 3,0843 | 1     | -0,53  |
| 17 | P29374 ARI4A_HUMAN | R.SVKS#ESDITIE.V               | S1021:       | 2 | 3,0823 | 0,332 | 0,095  |
| 17 | Q9Y2U8 MAN1_HUMAN  | E.TSVQGGGGLAM*NDR.A            |              | 2 | 3,08   | 0,386 | -0,177 |
| 17 | Q15742 NAB2_HUMAN  | E.KLSPLPGGPGAGDPR.I            |              | 3 | 3,0764 | 0,346 | 0,58   |
| 17 | P11172 PYR5_HUMAN  | E.NVFVAANHNGS#PLSIK.E          | S214:        | 2 | 3,0755 | 0,363 | 0,14   |
| 17 | Q9ULU4 PKCB1_HUMAN | K.TSTTGSILNLNLD.R.S            |              | 2 | 3,073  | 0,367 | -0,486 |
| 17 | O60271 JIP4_HUMAN  | K.LHQLSGS#DQLE.S               | S185:        | 2 | 3,0729 | 0,332 | -0,187 |
| 17 | Q9UGU0 TCF20_HUMAN | R.QLSGQSTSSDTTYKGGASE.K        |              | 2 | 3,0698 | 0,368 | 0,128  |
| 17 | P61289 PSME3_HUMAN | E.LDSFLKEPILNIHD.L             |              | 2 | 3,0677 | 0,375 | 0      |
| 17 | P10809 CH60_HUMAN  | K.VGEVIVTKDDAM*LLK.G           |              | 3 | 3,0675 | 0,357 | 0,444  |
| 17 | Q71U36 TBA1A_HUMAN | K.TIGGGDDSFNTFFSE.T            |              | 2 | 3,0638 | 0,355 | 0      |
| 17 | Q9UQ35 SRRM2_HUMAN | K.DKFS#PFVQDRPE.S              | S1188:       | 2 | 3,0634 | 0,339 | 0      |

|    |                     |                                    |                 |   |        |       |        |
|----|---------------------|------------------------------------|-----------------|---|--------|-------|--------|
| 17 | Q32MZ4 LRRF1_HUMAN  | R.NM*PGLSAATLASLGGTSSR.R           |                 | 3 | 3,0622 | 0,279 | 0,506  |
| 17 | Q15149 PLEC1_HUMAN  | E.FADM*LSGNAGGFR.S                 |                 | 2 | 3,0574 | 0,449 | -1,796 |
| 17 | Q15417 CNN3_HUMAN   | R.DYQYSDQGIDY.-                    |                 | 2 | 3,0568 | 0,39  | 0,089  |
| 17 | P49589 SYCC_HUMAN   | E.DVQAALKPFSVKLNE.T                |                 | 3 | 3,0548 | 0,258 | 0,11   |
| 17 | Q5T200 ZC3HD_HUMAN  | E.SRSL#PSHLTE.D                    | S877:           | 2 | 3,0523 | 0,227 | 0      |
| 17 | Q66K74 MAP1S_HUMAN  | E.LPLAASSIPRPR#PS#PESHR.S          | T638:S640:      | 3 | 3,0488 | 0,319 | -0,157 |
| 17 | Q9NPR2 SEM4B_HUMAN  | K.RPLSIQDS#FVE.V                   | S808:           | 2 | 3,0484 | 0,387 | -0,089 |
| 17 | P07355 ANXA2_HUMAN  | K.AYTNFDAERDALNIE.T                |                 | 2 | 3,0474 | 0,406 | -0,14  |
| 17 | P52756 RBM5_HUMAN   | R.NGDEENPLKR.G                     |                 | 2 | 3,0462 | 0,17  | -0,208 |
| 17 | Q9Y6M7 S4A7_HUMAN   | R.KIPTGAEASNVLVGE.V                |                 | 2 | 3,0447 | 0,349 | -0,411 |
| 17 | Q9UGP4 LIMD1_HUMAN  | E.GSLGGQNSGIGGR.S                  |                 | 2 | 3,0438 | 0,426 | 0,421  |
| 17 | P28074 PSB5_HUMAN   | R.VSSDNVADLHE.K                    |                 | 2 | 3,0432 | 0,416 | -0,103 |
| 17 | P60709 ACTB_HUMAN   | D.VDIRKDLYANTVLSGGTTM*YPGIAD.R     |                 | 3 | 3,0429 | 0,378 | 0,136  |
| 17 | Q9Y613 FHOD1_HUMAN  | E.IM*DLLVQSVTKSS#PR.A              | S1119:          | 2 | 3,0422 | 0,286 | 0      |
| 17 | P54725 RD23A_HUMAN  | E.SSTSFPPAPTSGM*SHPPAAREDKS#PSEE.S | S123:           | 3 | 3,0418 | 0,263 | 0,238  |
| 17 | O43513 MED7_HUMAN   | R.VKTEPM*DADDS#NNCTGQNE.H          | S194:           | 3 | 3,0411 | 0,291 | 0,412  |
| 17 | Q15365 PCBP1_HUMAN  | R.CSDAAGYPHATHDLE.G                |                 | 3 | 3,0345 | 0,247 | -1,001 |
| 17 | P10809 CH60_HUMAN   | R.LAKLSDGVAVLKVGGTSDVE.V           |                 | 3 | 3,0336 | 0,118 | 0,28   |
| 17 | O60825 F262_HUMAN   | R.NYS#VGSRLPKPLSPLR.A              | S483:           | 3 | 3,0331 | 0,152 | 0,294  |
| 17 | P07814 SYEP_HUMAN   | K.EYIPGQPPLSQS#SDSS#PTR.N          | S882:S886:      | 2 | 3,03   | 1     | -0,111 |
| 17 | P41162 ETV3_HUMAN   | R.IKVEPASEKDPE.S                   |                 | 3 | 3,029  | 0,164 | 0,409  |
| 17 | Q86W92 LIPB1_HUMAN  | E.DDM*FKDFAAR.S                    |                 | 3 | 3,0289 | 0,214 | 0,668  |
| 17 | Q9ULJ3 ZN295_HUMAN  | R.VTVGDAATTAASSSVTRD.L             |                 | 2 | 3,0228 | 0,391 | 0      |
| 17 | Q96B36 AKTS1_HUMAN  | E.NGPPS#SPDLDRIAASM*R.A            | S211:           | 3 | 3,0204 | 0,264 | 0,097  |
| 17 | Q9NPI6 DCP1A_HUMAN  | E.RKAS#SPSPLTIGTPE.S               | S522:           | 2 | 3,0203 | 0,434 | 0,151  |
| 17 | Q7Z5K2 WAPL_HUMAN   | K.RPES#PSEIS#PIKGSVR.T             | S221:S226:      | 3 | 3,0161 | 0,437 | 0,193  |
| 17 | Q9NR48 ASH1L_HUMAN  | E.KQPPVYCTS#PDFK.M                 | S529:           | 2 | 3,0155 | 0,455 | -0,445 |
| 17 | P07814 SYEP_HUMAN   | E.APCVLIYIPDGHTKE.M                |                 | 3 | 3,0146 | 0,174 | 0,214  |
| 17 | O95831 AIFM1_HUMAN  | E.AIGLVDSSLPTVGVFAK.A              |                 | 2 | 3,0123 | 0,378 | -0,364 |
| 17 | Q9NX24 NOLA2_HUMAN  | E.DRNLPYVYIPSK.T                   |                 | 3 | 3,01   | 0,302 | 0,437  |
| 17 | P00558 PGK1_HUMAN   | K.ALESPERPFILAILGGAK.V             |                 | 2 | 3,0089 | 0,309 | -0,207 |
| 17 | O00221 IKBE_HUMAN   | E.DGDTLVHLAVIHE.A                  |                 | 2 | 3,0044 | 0,206 | -0,172 |
| 17 | P09382 LEG1_HUMAN   | E.AINYM*AADGDFK.I                  |                 | 2 | 3,0032 | 0,51  | 0      |
| 17 | A8K2B4 A8K2B4_HUMAN | R.TNTM*NGSKS#PVISRPK.S             | S508:           | 3 | 2,9986 | 0,23  | 0,202  |
| 17 | Q8WWY3 PRP31_HUMAN  | E.TQLDLS#GDSVK.T                   | S44:            | 2 | 2,9977 | 0,124 | -0,393 |
| 17 | Q13043 STK4_HUMAN   | E.NQINSFGKS#VPGPLK.N               | S414:           | 2 | 2,9954 | 0,425 | -0,146 |
| 17 | Q6ZNP1 Q6ZNP1_HUMAN | E.VKEKPCVS#PTVGE.K                 | S325:           | 2 | 2,9928 | 0,275 | -0,242 |
| 17 | Q8WXI9 P66B_HUMAN   | E.RGRLT#PSPDIIVLS#DNEASS#PR.S      | T120:S129:S135: | 2 | 2,9923 | 0,382 | 0,559  |
| 17 | Q14997 PSME4_HUMAN  | K.NPSINQILLS#PEKIKE.G              | S1121:          | 2 | 2,9876 | 0,231 | 0,064  |

|    |                     |                               |              |   |        |       |        |
|----|---------------------|-------------------------------|--------------|---|--------|-------|--------|
| 17 | Q13242 SFRS9_HUMAN  | R.IYVGNLPTDVR.E               |              | 2 | 2,9876 | 0,444 | 0,196  |
| 17 | Q00613 HSF1_HUMAN   | K.CLSVACLDKNE.L               |              | 2 | 2,9866 | 0,303 | -0,373 |
| 17 | Q16643 DREB_HUMAN   | E.TQEPSILDSEETR.A             |              | 2 | 2,9849 | 0,366 | -0,457 |
| 17 | Q92734 TFG_HUMAN    | K.NVM*SAFGLTDDQVSGPPSAPAEDR.S |              | 3 | 2,9845 | 0,195 | 0,074  |
| 17 | P35908 K22E_HUMAN   | R.NLDLDSIIAEVK.A              |              | 2 | 2,9828 | 0,379 | -0,459 |
| 17 | Q8N3R9 MPP5_HUMAN   | E.M*AVDCPGDLGTR.M             |              | 2 | 2,9812 | 0,349 | -0,746 |
| 17 | P08195 4F2_HUMAN    | K.GQSEDPGSLLSLFR.R            |              | 2 | 2,9804 | 0,244 | -0,405 |
| 17 | O75152 ZC11A_HUMAN  | R.RLS#SASTGKPLSVEDDFE.K       | S758:        | 3 | 2,9801 | 0,193 | 0,173  |
| 17 | P14625 ENPL_HUMAN   | E.LISNASDALDKIR.L             |              | 2 | 2,9747 | 0,328 | -0,345 |
| 17 | O94804 STK10_HUMAN  | K.LANGSLEPPAQAAPGPSKR.D       |              | 3 | 2,9743 | 0,182 | 0,098  |
| 17 | O43290 SNUT1_HUMAN  | K.M*SSSDTPLGTVALLQE.K         |              | 2 | 2,9711 | 0,303 | 0,073  |
| 17 | Q13439 GOGA4_HUMAN  | R.SRTSS#FTEQLDE.G             | S41:         | 2 | 2,9707 | 0,228 | -0,165 |
| 17 | P49591 SYSC_HUMAN   | E.DLPIKYAGLSTCFRQE.V          |              | 3 | 2,9669 | 0,321 | 0,482  |
| 17 | Q9NQ84 GPC5C_HUMAN  | K.VPSEGAYDIILPR.A             |              | 2 | 2,9659 | 0,363 | -0,341 |
| 17 | P63244 GBLP_HUMAN   | K.IIVDELKQEVISTSSK.A          |              | 2 | 2,9651 | 0,343 | -0,273 |
| 17 | P49903 SPS1_HUMAN   | R.DKVM*PLIIQGFKDAAEE.A        |              | 2 | 2,9647 | 0,377 | -0,191 |
| 17 | Q9C0B5 ZDHC5_HUMAN  | K.LSRGDS#LKEPTSIAE.S          | S380:        | 2 | 2,9618 | 0,399 | -0,362 |
| 17 | Q9UBU7 DBF4A_HUMAN  | K.LLFI#EPIPHPS#NE.L           | S413:S420:   | 2 | 2,9616 | 0,418 | -0,139 |
| 17 | Q6S8J3 A26CA_HUMAN  | E.KLCYVALDFEQE.M              |              | 2 | 2,9582 | 0,129 | -0,161 |
| 17 | O75874 IDHC_HUMAN   | R.ATDFVVPGPVKVE.I             |              | 2 | 2,9555 | 0,467 | 0,278  |
| 17 | Q05655 KPCD_HUMAN   | R.RSDSASSEPVGIYQGF.E.K        |              | 2 | 2,9541 | 0,436 | 0,067  |
| 17 | P49792 RBP2_HUMAN   | E.TVFTPKT#S#PENVQDR.F         | T1399:S1400: | 3 | 2,951  | 0,231 | 0,097  |
| 17 | Q6P1L5 AL2SC_HUMAN  | E.GSEESPCSADDLLVDPR.D         |              | 2 | 2,9482 | 0,312 | 0      |
| 17 | Q5VWN6 CJ018_HUMAN  | K.VDILDAAVQTK.T               |              | 2 | 2,946  | 0,4   | 0,312  |
| 17 | O75874 IDHC_HUMAN   | R.ATDFVVPGPVK.V               |              | 2 | 2,9457 | 0,455 | 0,449  |
| 17 | O75494 FUSIP_HUMAN  | R.YLRPPNTSLFVR.N              |              | 3 | 2,9448 | 0,237 | 0,313  |
| 17 | O60664 M6PBP_HUMAN  | R.IATSLDGFVDVASVQQQR.Q        |              | 3 | 2,9446 | 0,249 | 0,797  |
| 17 | Q70L73 Q70L73_HUMAN | R.RVS#RSS#FSSDPDESE.G         | S60:S63:     | 2 | 2,9412 | 0,396 | 0,132  |
| 17 | Q07021 C1QBP_HUMAN  | K.AFVDFLSDEIKE.E              |              | 2 | 2,9387 | 0,393 | -0,259 |
| 17 | P41236 IPP2_HUMAN   | E.M*NILATYHPADKDYGLM*K.I      |              | 3 | 2,9381 | 0,212 | 0,346  |
| 17 | Q8IVF2 AHNK2_HUMAN  | K.ALVDVSAPKVE.A               |              | 2 | 2,9358 | 0,425 | -0,433 |
| 17 | P05556 ITB1_HUMAN   | K.NVLSLTKNKGEVFNE.L           |              | 2 | 2,9286 | 0,296 | -0,312 |
| 17 | Q9UNX4 WDR3_HUMAN   | E.IEDPEEPDPKK.I               |              | 3 | 2,9248 | 0,081 | 0,282  |
| 17 | Q14974 IMB1_HUMAN   | E.DDIVPHVLPFIKE.H             |              | 2 | 2,9246 | 0,335 | -0,321 |
| 17 | P13994 CC130_HUMAN  | R.QDKPLS#PAGSSQE.A            | S362:        | 2 | 2,9194 | 0,409 | -0,171 |
| 17 | Q7L1V2 MON1B_HUMAN  | K.DKDQPPSPS#PPPQSE.A          | S61:         | 2 | 2,9188 | 0,345 | 0,362  |
| 17 | P14618 KPYM_HUMAN   | K.KGVNLPGAAVDLPAVSE.K         |              | 2 | 2,9177 | 0,289 | 0,075  |
| 17 | Q9UMZ2 SYNG_HUMAN   | K.FDFLVATSQSK.M               |              | 2 | 2,9176 | 0,418 | 0,785  |
| 17 | P15170 ERF3A_HUMAN  | E.ISEAEPGGSLGDGRPPEESAHE.M    |              | 3 | 2,9168 | 0,284 | -0,402 |

|    |                     |                               |                    |   |        |       |        |
|----|---------------------|-------------------------------|--------------------|---|--------|-------|--------|
| 17 | Q14152 EIF3A_HUMAN  | R.NQLTAM*SSVLAK.A             |                    | 2 | 2,9164 | 0,379 | -0,095 |
| 17 | Q02952 AKA12_HUMAN  | K.SAESPTS#PVTSE.T             | S286:              | 2 | 2,9162 | 0,442 | 0,192  |
| 17 | Q9NY27 PP4R2_HUMAN  | E.KNVM*VVSCVYPSSEK.N          |                    | 3 | 2,9161 | 0,248 | 0,21   |
| 17 | Q13111 CAF1A_HUMAN  | D.ILAVRPPQIK.S                |                    | 2 | 2,9133 | 0,191 | 0,537  |
| 17 | P40855 PEX19_HUMAN  | R.S#PGDTAKDALFASQE.K          | S54:               | 2 | 2,9131 | 0,318 | -0,151 |
| 17 | Q9UK76 HN1_HUMAN    | R.RNSS#EASSGDFLDLK.G          | S88:               | 3 | 2,91   | 0,27  | 0,429  |
| 17 | Q00613 HSF1_HUMAN   | E.SEPAPASVTALTDAR.G           |                    | 2 | 2,9097 | 0,494 | 0      |
| 17 | P16949 STMN1_HUMAN  | E.SVPEFPLS#PPKKK.D            | S38:               | 2 | 2,9094 | 0,342 | -0,557 |
| 17 | P78364 PHC1_HUMAN   | K.ASPVAES#PKVM*DE.K           | S669:              | 2 | 2,9074 | 0,424 | -0,922 |
| 17 | A1L4Q4 A1L4Q4_HUMAN | E.KKDPANPS#PVM*PGIATSE.R      | S124:              | 3 | 2,9041 | 0,227 | 0,189  |
| 17 | Q02952 AKA12_HUMAN  | K.ERPPAPSSFVFQEE.T            |                    | 2 | 2,9023 | 0,311 | 0,075  |
| 17 | O60506 HNRPQ_HUMAN  | E.NFQTLLDAGLPQK.V             |                    | 2 | 2,9017 | 0,332 | -0,253 |
| 17 | Q9P2D0 IBTK_HUMAN   | E.GSYAGVGSPPR.D               |                    | 2 | 2,9006 | 0,414 | 0,128  |
| 17 | P84077 ARF1_HUMAN   | E.LRDAVLLVFANK.Q              |                    | 2 | 2,8999 | 0,339 | 0      |
| 17 | P07814 SYEP_HUMAN   | R.VAVQGDVVRE.L                |                    | 2 | 2,8969 | 0,326 | -1,366 |
| 17 | Q9UPN9 TRI33_HUMAN  | E.DAGSSSLDNLLSR.Y             |                    | 2 | 2,8934 | 0,322 | -0,183 |
| 17 | Q86UP2 KTN1_HUMAN   | K.KVEPVPVTKOPT#PPSE.A         | T153:              | 2 | 2,8926 | 0,406 | -0,202 |
| 17 | Q8WZ42 TITIN_HUMAN  | E.Y#VCEALNDSGKTAT#S#AKLTVVK.R | Y4358:T4371:S4372: | 3 | 2,8908 | 0,105 | -1,622 |
| 17 | Q5VZK9 LR16A_HUMAN  | E.KRSS#GFISELPSEE.G           | S968:              | 2 | 2,8896 | 0,397 | 0      |
| 17 | Q15390 MTFR1_HUMAN  | R.QJS#LPDLSQEEPQLK.T          | S119:              | 2 | 2,887  | 0,407 | -0,27  |
| 17 | P42704 LPPRC_HUMAN  | R.LIASYCNVGDIE.G              |                    | 2 | 2,8868 | 0,198 | -0,18  |
| 17 | Q6NSJ5 LRC8E_HUMAN  | E.DTLYQGLPAEVR.D              |                    | 2 | 2,8867 | 0,416 | -0,09  |
| 17 | P55196 AFAD_HUMAN   | E.TTFDLGGDIHSGTALPTSK.S       |                    | 3 | 2,8798 | 0,404 | 0,286  |
| 17 | Q03164 HRX_HUMAN    | R.NSSTPGLQVPVSPT#VPIQNQK.Y    | T3038:             | 3 | 2,8769 | 0,167 | -0,161 |
| 17 | P21359 NF1_HUMAN    | E.GYLAATYPTVGQTS#PR.A         | S2515:             | 3 | 2,8752 | 0,395 | 0,623  |
| 17 | A9CQZ4 A9CQZ4_HUMAN | K.AAEDEEVPAFFK.N              |                    | 2 | 2,8745 | 0,311 | -0,09  |
| 17 | Q32MZ4 LRRF1_HUMAN  | K.IDGATQSSPAEPK.S             |                    | 2 | 2,8692 | 0,393 | 0,656  |
| 17 | Q9ULW0 TPX2_HUMAN   | K.SSDQPLTVPV#PK.F             | S738:              | 2 | 2,8681 | 0,352 | 0,085  |
| 17 | Q9UPM8 AP4E1_HUMAN  | E.LKKFS#LTSE.L                | S847:              | 2 | 2,8653 | 0,292 | 0      |
| 17 | P46108 CRK_HUMAN    | E.KYRPAS#ASVSALIGGNQE.G       | S194:              | 3 | 2,864  | 0,085 | 0,095  |
| 17 | Q14676 MDC1_HUMAN   | R.SSVKT#PETVVPTAPE.L          | T1321:             | 2 | 2,8639 | 0,238 | 0,075  |
| 17 | Q9NQG5 CT077_HUMAN  | K.LSM*EDSKS#PPPKATEE.K        | S134:              | 2 | 2,8627 | 0,38  | 0      |
| 17 | P46020 KPB1_HUMAN   | E.FGVERS#VRPTDSNVSPAISHE.I    | S972:              | 3 | 2,8616 | 0,121 | 0,074  |
| 17 | Q8NDX5 PHC3_HUMAN   | R.GEDLTSEHPLE.Q               |                    | 2 | 2,8605 | 0,351 | 0,182  |
| 17 | P50990 TCPQ_HUMAN   | K.APGFAQM*LKE.G               |                    | 2 | 2,8597 | 0,279 | -0,661 |
| 17 | O75410 TACC1_HUMAN  | E.NTS#PLLGDAR.F               | S276:              | 2 | 2,8586 | 0,519 | 0      |
| 17 | Q9UNW9 NOVA2_HUMAN  | R.KRPLETPPEVVCTK.R            |                    | 3 | 2,8582 | 0,119 | 0,111  |
| 17 | Q6BDS2 URFB1_HUMAN  | R.LKPSAS#FGSPVQSE.A           | S755:              | 2 | 2,8571 | 0,482 | -0,081 |
| 17 | Q9BWU0 NADAP_HUMAN  | R.KINAGS#QDDE.M               | S329:              | 2 | 2,8559 | 0,353 | -0,422 |

|    |                     |                           |            |   |        |       |        |
|----|---------------------|---------------------------|------------|---|--------|-------|--------|
| 17 | P04075 ALDOA_HUMAN  | R.ALANSLACQGK.Y           |            | 2 | 2,854  | 0,367 | -0,861 |
| 17 | P17544 ATF7_HUMAN   | R.TDSVIADQT#PTPT#R.F      | T51:T55:   | 2 | 2,8527 | 0,295 | 0,206  |
| 17 | Q09666 AHNK_HUMAN   | K.AEAPLPS#PKLE.G          | S5110:     | 2 | 2,8517 | 0,434 | -0,198 |
| 17 | P05783 K1C18_HUMAN  | E.VDAPKS#QDLAK.I          | S242:      | 2 | 2,8495 | 0,215 | -0,292 |
| 17 | Q15691 MARE1_HUMAN  | E.TAVAPSLVAPALNPK.K       |            | 2 | 2,849  | 0,3   | -0,696 |
| 17 | Q9UPP1 PHF8_HUMAN   | K.LGNNGSGAGGILDLLK.A      |            | 2 | 2,8484 | 0,351 | -0,352 |
| 17 | Q9UBR2 CATZ_HUMAN   | R.VGDYGSLSGRE.K           |            | 2 | 2,8453 | 0,384 | -0,107 |
| 17 | P19338 NUCL_HUMAN   | E.T#GSSKGFVDFNSEEDAK.A    | T606:      | 2 | 2,8452 | 0,469 | 0,464  |
| 17 | Q6Y7W6 PERQ2_HUMAN  | K.VQKEPIPEEQE.M           |            | 2 | 2,8434 | 0,258 | -0,736 |
| 17 | P01100 FOS_HUMAN    | R.KGS#SSNEPSSDSLSPDLLAL.- | S362:      | 2 | 2,8414 | 0,323 | 0,113  |
| 17 | Q965T3 SIN3A_HUMAN  | E.RYM*NSDTS#PELRE.H       | S1112:     | 3 | 2,8404 | 0,192 | 0,102  |
| 17 | Q7Z6E9 RBBP6_HUMAN  | E.NKTDSLFLVPSR.D          |            | 2 | 2,837  | 0,271 | 0,089  |
| 17 | Q7KZ85 SPT6H_HUMAN  | R.LKDLDLDAFAEE.L          |            | 2 | 2,8365 | 0,407 | 0,088  |
| 17 | P13861 KAP2_HUMAN   | R.APASVLPAATPR.Q          |            | 2 | 2,8363 | 0,39  | 0,212  |
| 17 | Q9H4A3 WNK1_HUMAN   | E.QAVAGPAPSTVPSSTSK.D     |            | 2 | 2,8348 | 0,397 | -0,616 |
| 17 | P42167 LAP2B_HUMAN  | E.HNQSYSQAGITE.T          |            | 2 | 2,8339 | 0,211 | -0,914 |
| 17 | Q9UNK0 STX8_HUMAN   | E.QDAGLDLSSIISR.Q         |            | 2 | 2,8338 | 0,435 | -0,338 |
| 17 | Q04917 1433F_HUMAN  | E.DSYKDSTLIM*QLLR.D       |            | 2 | 2,8324 | 0,293 | -0,503 |
| 17 | Q9Y6I9 TX264_HUMAN  | E.TSAATLSPGASSR.G         |            | 2 | 2,8322 | 0,237 | -0,202 |
| 17 | P47756 CAPZB_HUMAN  | E.DLLSSVDQPLK.I           |            | 2 | 2,8318 | 0,313 | 0,1    |
| 17 | P07355 ANXA2_HUMAN  | E.GDHST#PPSAYGSVK.A       | T19:       | 2 | 2,8308 | 0,267 | -0,411 |
| 17 | P25787 PSA2_HUMAN   | E.DAIHTAILTKE.S           |            | 2 | 2,8303 | 0,373 | 0,276  |
| 17 | P78344 IF4G2_HUMAN  | E.ISLRPAQSFLM*NK.N        |            | 3 | 2,8296 | 0,237 | 0,361  |
| 17 | Q05DR4 Q05DR4_HUMAN | R.S#LAALSQIAYQR.N         | S12:       | 2 | 2,8296 | 0,228 | -0,174 |
| 17 | B0I1T5 B0I1T5_HUMAN | E.GDLQFPSPK.I             |            | 2 | 2,8295 | 0,363 | 0,062  |
| 17 | Q14493 SLBP_HUMAN   | R.HM*DSQVEDEFDLE.A        |            | 2 | 2,8286 | 0,277 | 0,152  |
| 17 | Q9NPR2 SEM4B_HUMAN  | E.KRPLS#IQDSFVE.V         | S804:      | 2 | 2,8235 | 0,322 | -0,081 |
| 17 | P56182 RRP1_HUMAN   | R.SEKPPAGSICR.A           |            | 3 | 2,8195 | 0,343 | 0,532  |
| 17 | Q9UGU0 TCF20_HUMAN  | R.SSLHTPFSS#PNSE.T        | S1053:     | 2 | 2,8188 | 0,292 | 0,353  |
| 17 | Q71U36 TBA1A_HUMAN  | E.HSDCAFV#VDNE.A          |            | 2 | 2,8162 | 0,35  | -0,273 |
| 17 | A0FGR8 ESYT2_HUMAN  | R.SSSLLAS#PGHISVK.E       | S743:      | 2 | 2,8143 | 0,345 | 0,079  |
| 17 | Q9UBU7 DBF4A_HUMAN  | E.KKLLFIS#EPIPHPS#NE.L    | S413:S420: | 3 | 2,8128 | 0,09  | 0,455  |
| 17 | O75061 AUXI_HUMAN   | E.DVFHPSGPASTQSTPR.R      |            | 3 | 2,8126 | 0,357 | 0,217  |
| 17 | Q13098 CSN1_HUMAN   | R.DSQTQAILTK.L            |            | 2 | 2,8086 | 0,311 | -0,442 |
| 17 | A8K7V5 A8K7V5_HUMAN | E.VSTAPAGTDM*PAAK.K       |            | 2 | 2,8084 | 0,466 | 0,092  |
| 17 | O00257 CBX4_HUMAN   | E.VILLDS#DLDEPIDLR.S      | S465:      | 2 | 2,8082 | 0,341 | -0,203 |
| 17 | P26006 ITA3_HUMAN   | R.TGAVYLCPLTAHK.D         |            | 3 | 2,8081 | 0,344 | 0,383  |
| 17 | P04632 CPNS1_HUMAN  | E.AAAQYNPEPPPR.T          |            | 2 | 2,807  | 0,343 | -0,693 |
| 17 | Q8NB49 AT11C_HUMAN  | E.VDGLS#QTDGTLTYFDKVDK.N  | S445:      | 2 | 2,8064 | 0,38  | 0,224  |

|    |                    |                               |                    |   |        |       |        |
|----|--------------------|-------------------------------|--------------------|---|--------|-------|--------|
| 17 | Q99996 AKAP9_HUMAN | R.TGKPTNLLREEE.F              |                    | 3 | 2,8054 | 0,193 | 0,198  |
| 17 | Q9C0B5 ZDHC5_HUMAN | R.GDS#LKEPTSIAE.S             | S380:              | 2 | 2,8029 | 0,277 | 0,368  |
| 17 | O75152 ZC11A_HUMAN | R.RLS#SAS#TGKPPLSVEDDFE.K     | S758:S761:         | 3 | 2,8025 | 0,26  | 0      |
| 17 | Q8NG31 CASC5_HUMAN | K.TILYSCGQDDM*E.I             |                    | 2 | 2,8017 | 0,256 | -0,084 |
| 17 | P22059 OSBP1_HUMAN | R.GATVLPANTPGNVGSGK.D         |                    | 2 | 2,8009 | 0,534 | 1,268  |
| 17 | P10809 CH60_HUMAN  | K.LSDGVAVLK.V                 |                    | 2 | 2,7991 | 0,294 | -1,15  |
| 17 | Q8TAT6 NPL4_HUMAN  | E.SSSEQYVPDVFYK.D             |                    | 2 | 2,7983 | 0,432 | -0,315 |
| 17 | Q9UQ35 SRRM2_HUMAN | E.NSFGS#PLEFR.N               | S1329:             | 2 | 2,7948 | 0,455 | 0,297  |
| 17 | Q71U36 TBA1A_HUMAN | E.HGIQPDGQM*PSDK.T            |                    | 2 | 2,794  | 0,444 | 0,086  |
| 17 | Q9UQ35 SRRM2_HUMAN | E.SYFGVSSLQLKGQSQTS#PDHR.S    | S1064:             | 3 | 2,7925 | 0,182 | 0,152  |
| 17 | O14686 MLL2_HUMAN  | R.ISTEELPKM*E.S               |                    | 2 | 2,7891 | 0,345 | -0,102 |
| 17 | Q5T457 UBR4_HUMAN  | E.DGSCALVK.R                  |                    | 2 | 2,7877 | 0,234 | 0,063  |
| 17 | Q15058 KIF14_HUMAN | K.TSNKFGS#LE.K                | S272:              | 2 | 2,7857 | 0,377 | -0,344 |
| 17 | Q9H2G2 SLK_HUMAN   | E.SECLNPSTQSR.I               |                    | 2 | 2,7855 | 0,323 | -0,382 |
| 17 | Q99959 PKP2_HUMAN  | E.NDFVGGRS#PVPK.T             | S102:              | 2 | 2,7831 | 0,375 | -0,271 |
| 17 | P51858 HDGF_HUMAN  | E.VERPLPM*EVEKNS#TPS#EPGSGR.G | S199:S202:         | 3 | 2,781  | 0,252 | -1,707 |
| 17 | P08651 NFIC_HUMAN  | D.SKPIITLDTTDFQE.S            |                    | 2 | 2,7805 | 0,289 | 0,163  |
| 17 | P05387 RLA2_HUMAN  | E.DVIAQGIGK.L                 |                    | 2 | 2,7797 | 0,192 | -0,609 |
| 17 | Q05397 FAK1_HUMAN  | E.DKPTLNFFYQQVK.S             |                    | 3 | 2,7791 | 0,176 | 0,112  |
| 17 | Q01082 SPTB2_HUMAN | R.TSS#KESS#PIPS#PTSDR.K       | S2161:S2165:S2169: | 2 | 2,7767 | 1     | -0,573 |
| 17 | P31689 DNJA1_HUMAN | R.GKNVVHQLS#VTLE.D            | S112:              | 2 | 2,774  | 0,395 | 0,162  |
| 17 | Q13200 PSMD2_HUMAN | K.SGALLACGIVNSGVR.N           |                    | 3 | 2,7708 | 0,168 | 0,496  |
| 17 | P55201 BRPF1_HUMAN | R.RKTEGVS#PIPQEIFE.Y          | S238:              | 2 | 2,7702 | 0,444 | 0,067  |
| 17 | Q66K74 MAP1S_HUMAN | E.LPLAASSIPRPR#PSPES#HR.S     | T638:S643:         | 3 | 2,7688 | 0,288 | -0,157 |
| 17 | P18615 NELFE_HUMAN | K.DPEKGPVPTFQPFQR.S           |                    | 3 | 2,7657 | 0,217 | 0,105  |
| 17 | P52907 CAZA1_HUMAN | E.DGNVQLVSHKDVQDSLTVSNE.A     |                    | 3 | 2,7638 | 0,15  | -0,641 |
| 17 | P10809 CH60_HUMAN  | K.VGEVIVTKDDAM*LLK.G          |                    | 2 | 2,7635 | 0,188 | -0,222 |
| 17 | P08107 HSP71_HUMAN | R.T#LSSSTQASLE.I              | T273:              | 2 | 2,7619 | 0,244 | -0,101 |
| 17 | P30044 PRDX5_HUMAN | K.THLPGFVEQAE.A               |                    | 2 | 2,7617 | 0,369 | 0      |
| 17 | Q68CQ4 DEF_HUMAN   | E.TNFLEEEES#GDNSSLK.A         | S177:              | 2 | 2,7604 | 0,287 | -0,558 |
| 17 | Q02952 AKA12_HUMAN | E.KEPSKSAESPTS#PVTSE.T        | S286:              | 3 | 2,7602 | 0,344 | 0,199  |
| 17 | Q9Y613 FHOD1_HUMAN | R.TPQS#PAPCVLLR.A             | S498:              | 2 | 2,7567 | 0,281 | -0,086 |
| 17 | Q8WWI1 LMO7_HUMAN  | R.SLTSCSSDITLR.G              |                    | 2 | 2,7566 | 0,291 | -0,182 |
| 17 | Q9Y490 TLN1_HUMAN  | K.KSTVLQQQYNR.V               |                    | 2 | 2,7563 | 0,156 | -0,268 |
| 17 | O76021 RL1D1_HUMAN | K.ATNES#EDEIPLVPIGK.K         | S361:              | 2 | 2,756  | 0,4   | -0,064 |
| 17 | P19525 E2AK2_HUMAN | E.KKAVS#PLLLTTTNSSE.G         | S83:               | 3 | 2,7524 | 0,299 | -0,207 |
| 17 | Q8IWA0 WDR75_HUMAN | K.VQDTS#NTGLGEDIIHQLSK.S      | S796:              | 3 | 2,7522 | 0,294 | 0,171  |
| 17 | Q14C86 GAPD1_HUMAN | E.ITHGAHQLTSPPS#QSE.S         | S819:              | 3 | 2,7478 | 0,144 | -1,55  |
| 17 | Q92692 PVRL2_HUMAN | K.TPYFDAGASCT#EQE.M           | T447:              | 2 | 2,7466 | 0,138 | 0,221  |

|    |                     |                          |       |   |        |       |        |
|----|---------------------|--------------------------|-------|---|--------|-------|--------|
| 17 | P68104 EF1A1_HUMAN  | K.IGGIGTVPVGRVE.T        |       | 2 | 2,7463 | 0,402 | 0,097  |
| 17 | Q9BZE9 ASPC1_HUMAN  | E.HAISPSAADVLVAR.Y       |       | 3 | 2,7458 | 0,167 | 0      |
| 17 | Q9UNX4 WDR3_HUMAN   | K.IKGSS#PGIQDTLEAE.D     | S241: | 2 | 2,7401 | 0,499 | -1,652 |
| 17 | O75643 U520_HUMAN   | E.VTGPVIAPLFPQK.R        |       | 2 | 2,7396 | 0,307 | -0,089 |
| 17 | Q96JM3 ZN828_HUMAN  | E.LRKPGPPLS#PEIR.S       | S427: | 3 | 2,7387 | 0,094 | 0,238  |
| 17 | P35232 PHB_HUMAN    | D.DVSLTHLTFGKEFTE.A      |       | 3 | 2,7368 | 0,17  | 0,106  |
| 17 | Q9Y6D6 BIG1_HUMAN   | E.HEGDLDLHTNDVDK.S       |       | 3 | 2,7367 | 0,168 | -1,592 |
| 17 | P39880 CUX1_HUMAN   | E.IQAGSQGQAGASDPSAR.S    |       | 2 | 2,7367 | 0,436 | 0,145  |
| 17 | Q00653 NFKB2_HUMAN  | K.LNSSIVEPKAPE.T         |       | 2 | 2,7366 | 0,292 | 0,081  |
| 17 | P19174 PLCG1_HUMAN  | K.NGILYLEDPVNHE.W        |       | 2 | 2,7365 | 0,233 | -0,161 |
| 17 | P35030 TRY3_HUMAN   | D.TLDNDIMLIK.L           |       | 2 | 2,7328 | 0,374 | -0,104 |
| 17 | P54652 HSP72_HUMAN  | R.TLS#SSTQASIE.I         | S278: | 2 | 2,7306 | 1     | -0,101 |
| 17 | Q5M775 SPEC1_HUMAN  | E.TPSRPLSSTSNPFK.S       |       | 3 | 2,7293 | 0,237 | 0,361  |
| 17 | Q9H4L7 SMRCD_HUMAN  | K.DTVIIVSEPS#EDEE.S      | S127: | 2 | 2,726  | 0,144 | 0,074  |
| 17 | Q9Y6M7 S4A7_HUMAN   | E.NS#TVDFSKVDM*NFM*R.K   | S407: | 3 | 2,7239 | 0,244 | -0,192 |
| 17 | O14980 XPO1_HUMAN   | K.NVDILKDPE.T            |       | 2 | 2,7233 | 0,248 | 0,234  |
| 17 | P07814 SYEP_HUMAN   | E.APCVLIYIPDGHTK.E       |       | 2 | 2,7231 | 0,283 | 0,231  |
| 17 | O43290 SNUT1_HUMAN  | E.HAIDS#FREGE.T          | S265: | 2 | 2,723  | 0,364 | -0,492 |
| 17 | P40222 TXLNA_HUMAN  | R.RPEGPGAQAPSS#PR.V      | S515: | 3 | 2,722  | 0,226 | 0,246  |
| 17 | Q13616 CUL1_HUMAN   | K.GPTLTVYKE.S            |       | 2 | 2,7218 | 0,302 | 0,061  |
| 17 | P09493 TPM1_HUMAN   | E.NALDRAEQAE.A           |       | 2 | 2,7213 | 0,159 | 0,109  |
| 17 | Q15717 ELAV1_HUMAN  | R.TNLIVNYLPQNM*TQDE.L    |       | 2 | 2,7195 | 0,366 | 0,32   |
| 17 | Q59EP6 Q59EP6_HUMAN | E.ALLQAVDPGLPSVK.Q       |       | 2 | 2,7182 | 0,414 | -0,173 |
| 17 | P46821 MAP1B_HUMAN  | K.ASTTLDIKDSISAVSSEK.V   |       | 3 | 2,7182 | 0,326 | 0      |
| 17 | Q6XZF7 DNMBP_HUMAN  | E.NTLGVVEEQR.H           |       | 2 | 2,7108 | 0,303 | -0,467 |
| 17 | Q76176 SSH2_HUMAN   | K.DITTS#ADQIAE.V         | S487: | 2 | 2,7085 | 0,227 | 0,196  |
| 17 | P15927 RFA2_HUMAN   | E.VINAHM*VLSK.A          |       | 2 | 2,7083 | 0,335 | -0,541 |
| 17 | Q8IXM2 CQ049_HUMAN  | E.DSGIPLPAES#PKKGPK.K    | S96:  | 2 | 2,7061 | 0,425 | -0,215 |
| 17 | Q00653 NFKB2_HUMAN  | E.YDDFKLNSSIVEPK.E       |       | 3 | 2,7059 | 0,215 | -0,221 |
| 17 | B2RBN7 B2RBN7_HUMAN | R.RPSRCT#GGVVVRPQAVTE.Q  | T17:  | 3 | 2,7041 | 0,226 | 0,089  |
| 17 | P40227 TCPZ_HUMAN   | K.KQDEPIDLFM*IE.I        |       | 2 | 2,703  | 0,359 | 0,327  |
| 17 | O75420 PERQ1_HUMAN  | E.M*GTFDAS#GAFLPLKK.G    | S309: | 2 | 2,701  | 0,426 | -0,436 |
| 17 | P07814 SYEP_HUMAN   | E.DSLVLYNR.V             |       | 2 | 2,7006 | 0,277 | 0,062  |
| 17 | Q02218 ODO1_HUMAN   | K.VFHLPSTTTFIGGQE.S      |       | 2 | 2,7006 | 0,297 | -0,079 |
| 17 | P27708 PYR1_HUMAN   | E.NM*AVIDCFASDHAPHTLEE.K |       | 3 | 2,6991 | 0,292 | 0,168  |
| 17 | P04406 G3P_HUMAN    | E.HQVVSSDFNSD.T          |       | 2 | 2,6989 | 0,44  | -0,494 |
| 17 | Q00839 HNRPU_HUMAN  | E.RLQAALDDEE.A           |       | 2 | 2,6975 | 0,206 | 0      |
| 17 | Q8N1F7 NUP93_HUMAN  | K.ASVLLGSR.G             |       | 2 | 2,6973 | 0,292 | 0,532  |
| 17 | P48634 BAT2_HUMAN   | E.ALTTVTVAPAPR.R         |       | 2 | 2,6965 | 0,439 | -0,306 |

|    |                    |                             |            |   |        |       |        |
|----|--------------------|-----------------------------|------------|---|--------|-------|--------|
| 17 | P37275 ZEB1_HUMAN  | E.AGPEILSNEHVGAR.A          |            | 3 | 2,6949 | 0,27  | 0,252  |
| 17 | Q9Y6D5 BIG2_HUMAN  | R.GSS#LSGTDDGAQEVVKDILE.D   | S277:      | 2 | 2,6948 | 0,349 | 0,232  |
| 17 | P33316 DUT_HUMAN   | R.GNVGVVLFNFGK.E            |            | 2 | 2,6941 | 0,391 | -0,39  |
| 17 | P18583 SON_HUMAN   | E.GPLLASDVGR.D              |            | 2 | 2,6904 | 0,343 | 0,31   |
| 17 | Q13523 PRP4B_HUMAN | R.TKLDDLALLELE.K            |            | 2 | 2,6898 | 0,263 | -0,41  |
| 17 | Q96S82 UBL7_HUMAN  | E.GLS#DDEDDFHPNTR.S         | S230:      | 3 | 2,6878 | 0,307 | 0,215  |
| 17 | P04406 G3P_HUMAN   | D.AGAGIALNDHFVK.L           |            | 3 | 2,6868 | 0,227 | 0,279  |
| 17 | P00558 PGK1_HUMAN  | K.ALESPERPFLAILGGAK.V       |            | 3 | 2,6867 | 0,106 | -0,31  |
| 17 | P27816 MAP4_HUMAN  | R.AS#PIKM*DLAPSKDM*GPPKE.N  | S358:      | 2 | 2,6863 | 0,389 | -1,838 |
| 17 | Q13428 TCOF_HUMAN  | K.SPQVKPASTM*GM*GPLGK.G     |            | 3 | 2,6861 | 0,255 | 1,171  |
| 17 | P40222 TXLNA_HUMAN | R.RPEGPGAQAPSS#PRVTE.A      | S515:      | 2 | 2,686  | 0,193 | -0,538 |
| 17 | Q92609 TBCD5_HUMAN | E.DQILVSLAGLK.Q             |            | 2 | 2,6857 | 0,266 | 0      |
| 17 | Q01082 SPTB2_HUMAN | K.TALPAQSAATLPAR.T          |            | 2 | 2,6855 | 0,381 | -0,357 |
| 17 | Q3V6T2 GRDN_HUMAN  | K.DSNPYATLPR.A              |            | 2 | 2,6837 | 0,23  | 0      |
| 17 | Q14457 BECN1_HUMAN | E.TNSGEEPFIETPR.Q           |            | 2 | 2,6823 | 0,351 | 0,33   |
| 17 | Q14C86 GAPD1_HUMAN | E.ITHGAHQLT#PPSQSE.S        | S816:      | 2 | 2,6773 | 0,263 | -0,896 |
| 17 | Q99497 PARK7_HUMAN | K.EGPHYDVVVLPGGNGLGAQNLSE.S |            | 3 | 2,6748 | 0,095 | -0,086 |
| 17 | Q96Q45 AL2S4_HUMAN | K.KSS#SSS#LLRNE.N           | S127:S130: | 2 | 2,6734 | 0,203 | -1,606 |
| 17 | P80723 BASP_HUMAN  | K.ETPAATEAPSSTPK.A          |            | 2 | 2,6726 | 0,374 | -0,264 |
| 17 | Q9P287 BCCIP_HUMAN | E.SGVPQPPDPPVQR.D           |            | 2 | 2,6712 | 0,291 | 0,266  |
| 17 | P19634 SL9A1_HUMAN | E.TSSPGTDDVFTPAPSDSPSSQR.I  |            | 3 | 2,6693 | 0,303 | 0,164  |
| 17 | Q02952 AKA12_HUMAN | K.VVGQTTTPES#FEKAPQVTE.S    | S1119:     | 2 | 2,6682 | 0,268 | 0,903  |
| 17 | P18858 DNL1_HUMAN  | E.GEDGDQPTT#PPKPLK.T        | T183:      | 3 | 2,6672 | 0,316 | -0,331 |
| 17 | Q12765 SCRN1_HUMAN | E.DANSCHSFQSAYLIVDRDE.A     |            | 3 | 2,6671 | 0,235 | 0,493  |
| 17 | Q96T23 RSF1_HUMAN  | K.LASEKEVVE.C               |            | 2 | 2,6663 | 0,351 | -0,79  |
| 17 | P54577 SYYC_HUMAN  | R.TVVSGLVQFVPKEE.L          |            | 2 | 2,666  | 0,378 | 0,08   |
| 17 | Q8WUF8 CE021_HUMAN | E.DLDSGTQIPFIK.R            |            | 2 | 2,663  | 0,388 | 0,091  |
| 17 | Q00613 HSF1_HUMAN  | R.VKEEPPS#PPQS#PRVEE.A      | S303:S307: | 3 | 2,6629 | 0,132 | 0      |
| 17 | P04264 K2C1_HUMAN  | R.SLDLDSIIAEVK.A            |            | 2 | 2,6603 | 0,399 | -0,375 |
| 17 | Q8IYB3 SRRM1_HUMAN | K.VPKPEPIPEPKEPS#PE.K       | S260:      | 3 | 2,6601 | 0,081 | -0,198 |
| 17 | Q32MZ4 LRRF1_HUMAN | R.RGS#GDTISISIDTE.A         | S120:      | 2 | 2,6576 | 0,179 | -0,172 |
| 17 | Q9BR76 COR1B_HUMAN | R.DADPILISLRE.A             |            | 2 | 2,6574 | 0,293 | -0,196 |
| 17 | Q16204 CCDC6_HUMAN | K.SGGIVISPFRLLE.L           |            | 2 | 2,6562 | 0,273 | 0,087  |
| 17 | P06493 CDC2_HUMAN  | K.IGEGT#Y#GVVYK.G           | T14:Y15:   | 2 | 2,6544 | 0,166 | -0,091 |
| 17 | P78364 PHC1_HUMAN  | E.ALSPTS#PGPLSVR.A          | S898:      | 2 | 2,6538 | 0,392 | -0,09  |
| 17 | Q5T200 ZC3HD_HUMAN | R.SLS#PSHLTE.D              | S877:      | 2 | 2,6513 | 0,135 | 0      |
| 17 | Q09666 AHNK_HUMAN  | E.VDLNVAAPK.V               |            | 2 | 2,6508 | 0,334 | 0,197  |
| 17 | P07814 SYEP_HUMAN  | K.EYIPGQPPLSQS#SDSS#PTR.N   | S882:S886: | 3 | 2,6494 | 1     | 0,166  |
| 17 | P19105 MLRM_HUMAN  | E.DLHDM*LASLGK.N            |            | 2 | 2,6492 | 0,31  | -0,1   |



|    |                    |                              |              |   |        |       |        |
|----|--------------------|------------------------------|--------------|---|--------|-------|--------|
| 17 | P14625 ENPL_HUMAN  | E.LISNASDALDK.I              |              | 2 | 2,6461 | 0,332 | -0,213 |
| 17 | Q9UNX4 WDR3_HUMAN  | K.IKGSS#PGIQDTLE.A           | S241:        | 2 | 2,6451 | 0,389 | -0,428 |
| 17 | Q9C0H5 K1688_HUMAN | R.SRRPS#GSQHS#PSLQTFAPE.A    | S246:S251:   | 3 | 2,6441 | 0,179 | 0,082  |
| 17 | P22626 ROA2_HUMAN  | R.GGGGNFGPGGSNFR.G           |              | 2 | 2,6431 | 0,329 | 0      |
| 17 | Q15003 CND2_HUMAN  | R.KAPLNIPGT#PVLE.D           | T49:         | 2 | 2,6421 | 0,294 | 0,171  |
| 17 | O00410 IMB3_HUMAN  | K.FKPDCVNVEE.V               |              | 2 | 2,6406 | 0,188 | -0,197 |
| 17 | Q8ND56 LS14A_HUMAN | E.QAVQTASAHLPAPAAVGR.R       |              | 3 | 2,6401 | 0,311 | 0,21   |
| 17 | Q6U841 S4A10_HUMAN | E.NS#TVDFSK.G                | S280:        | 2 | 2,6386 | 0,239 | 0,062  |
| 17 | Q8NEM2 SHCBP_HUMAN | R.DKPGSSLQSFM*PE.G           |              | 2 | 2,6377 | 0,2   | -0,339 |
| 17 | P27816 MAP4_HUMAN  | K.TDYIPLLDVDEK.T             |              | 2 | 2,6365 | 0,327 | -0,343 |
| 17 | Q9H1A4 APC1_HUMAN  | E.LRDS#SKLHDS#LYNE.D         | S563:S569:   | 3 | 2,6348 | 0,226 | 0,199  |
| 17 | P62318 SMD3_HUMAN  | E.DNM*NCQM*SNITVTYR.D        |              | 2 | 2,629  | 0,225 | -0,26  |
| 17 | Q16637 SMN_HUMAN   | E.DGCIYPATIASIDFK.R          |              | 2 | 2,6238 | 0,362 | -0,146 |
| 17 | P51784 UBP11_HUMAN | K.AAYVLFYQR.Q                |              | 2 | 2,6238 | 0,304 | 0,216  |
| 17 | Q8N655 CJ012_HUMAN | E.DVISRPHS#PPEIVSR.E         | S381:        | 3 | 2,6235 | 0,224 | -1,137 |
| 17 | Q8TEU7 RPGF6_HUMAN | E.VGDVDLTR.L                 |              | 2 | 2,6222 | 0,278 | 0,139  |
| 17 | Q8NI35 INADL_HUMAN | E.LVDEPFLDLGK.S              |              | 2 | 2,6202 | 0,245 | 0,196  |
| 17 | P31946 1433B_HUMAN | K.DSTLIM*QLLR.D              |              | 2 | 2,6193 | 0,084 | -0,202 |
| 17 | P04406 G3P_HUMAN   | K.LVINGNPITIFQER.D           |              | 3 | 2,6189 | 0,186 | 0,113  |
| 17 | P52701 MSH6_HUMAN  | E.DYSQNVAVR.L                |              | 2 | 2,6179 | 0,383 | 0      |
| 17 | Q96B36 AKTS1_HUMAN | E.NGPPSS#PDLDR.I             | S212:        | 2 | 2,6178 | 0,251 | -0,198 |
| 17 | P31689 DNJA1_HUMAN | K.NVVHQLS#VTLE.D             | S112:        | 2 | 2,6178 | 0,233 | 0,185  |
| 17 | Q02952 AKA12_HUMAN | E.SAHEPRLS#AEYE.K            | S371:        | 2 | 2,6167 | 0,319 | 0      |
| 17 | P52594 NUPL_HUMAN  | K.GTPSQS#PVVGR.S             | S181:        | 2 | 2,6159 | 0,495 | -0,105 |
| 17 | Q14974 IMB1_HUMAN  | E.DDIVPHVLPFIKE.H            |              | 3 | 2,6148 | 0,224 | -0,06  |
| 17 | P49591 SYSC_HUMAN  | K.YAGLSTCFR.Q                |              | 2 | 2,6146 | 0,446 | 0      |
| 17 | P08047 SP1_HUMAN   | E.KGVGGNNGGNGGGAFSQAR.S      |              | 3 | 2,6138 | 0,092 | -0,195 |
| 17 | Q92797 SYMPK_HUMAN | K.ETAAGGLTLKEERS#PQTLAPVGE.D | S1243:       | 2 | 2,611  | 0,313 | 0,702  |
| 17 | Q9NQB0 TF7L2_HUMAN | E.SETNQNSS#S#DSEAERRPPPR.S   | S59:S60:     | 3 | 2,6097 | 0,295 | 0      |
| 17 | Q9UQ35 SRRM2_HUMAN | R.GEFSAS#PM*LK.S             | S1124:       | 2 | 2,6069 | 0,39  | -0,105 |
| 17 | Q96P11 NSUN5_HUMAN | E.DFLAVSPSDPR.Y              |              | 2 | 2,6054 | 0,346 | 0,304  |
| 17 | O75475 PSIP1_HUMAN | K.QSNASS#DVEVEEKE.T          | S106:        | 2 | 2,6034 | 0,221 | -0,15  |
| 17 | Q969J2 ZKSC4_HUMAN | E.VRAPCS#PARGPE.R            | S44:         | 2 | 2,5986 | 0,456 | -0,266 |
| 17 | P30307 MPIP3_HUMAN | K.YLGS#PITTVPK.L             | S168:        | 2 | 2,5975 | 0,171 | 0,291  |
| 17 | Q13439 GOGA4_HUMAN | R.TS#\$FTEQLDE.G             | S40:         | 2 | 2,596  | 0,224 | -0,395 |
| 17 | P68104 EF1A1_HUMAN | K.IGGIGTVPVGR.V              |              | 2 | 2,5959 | 0,308 | 0,238  |
| 17 | P05556 ITB1_HUMAN  | K.NVLSTLNKGE.V               |              | 2 | 2,5944 | 0,213 | 0,34   |
| 17 | P62753 RS6_HUMAN   | K.LNISFPATGCQK.L             |              | 2 | 2,5935 | 0,128 | -0,183 |
| 17 | Q9UPT8 ZC3H4_HUMAN | K.T#GSGSPFAGNS#PARE.G        | T1265:S1275: | 2 | 2,5931 | 0,283 | -0,918 |

|    |                    |                            |       |   |        |       |        |
|----|--------------------|----------------------------|-------|---|--------|-------|--------|
| 17 | P10809 CH60_HUMAN  | R.LAKLSDGVAVLK.V           |       | 2 | 2,5844 | 0,226 | 0,201  |
| 17 | O15047 SET1A_HUMAN | K.FSFLAS#DTEEEEE.N         | S508: | 2 | 2,5842 | 0,269 | -0,076 |
| 17 | Q02952 AKA12_HUMAN | K.STPVIVSATTK.K            |       | 2 | 2,5841 | 0,43  | 0,111  |
| 17 | Q92667 AKAP1_HUMAN | R.ADPAIKEPLPVEDVCPK.V      |       | 3 | 2,5838 | 0,081 | -0,097 |
| 17 | Q99497 PARK7_HUMAN | D.VVVLPGGNLGAQNLSE.S       |       | 2 | 2,5801 | 0,285 | 0,311  |
| 17 | Q9C0C2 TB182_HUMAN | K.VSAPGVLTQAQDR.V          |       | 2 | 2,5797 | 0,478 | 1,608  |
| 17 | P33981 TTK_HUMAN   | E.CRDLVVPGSKPSGNDS#CE.L    | S321: | 3 | 2,5785 | 0,161 | -0,178 |
| 17 | Q92615 LARP5_HUMAN | R.EPSVPASCAVSATYER.S       |       | 2 | 2,5773 | 0,389 | -0,637 |
| 17 | Q9H6F5 CCD86_HUMAN | E.SNPEETREPGS#PPSVQR.A     | S47:  | 3 | 2,5771 | 0,291 | -0,658 |
| 17 | Q15424 SAFB1_HUMAN | R.KFDFDACNE.V              |       | 2 | 2,5766 | 0,261 | 0,106  |
| 17 | Q8IYB3 SRRM1_HUMAN | E.KT#PELPEPSVK.V           | T220: | 3 | 2,5761 | 0,192 | -0,07  |
| 17 | Q7LDG7 GRP2_HUMAN  | E.LYQLSLQR.E               |       | 2 | 2,5758 | 0,115 | 0      |
| 17 | Q9H6F5 CCD86_HUMAN | E.YSPES#PRCQPKPSEEAPK.C    | S113: | 3 | 2,5735 | 0,218 | 0,169  |
| 17 | Q05524 ENO1B_HUMAN | D.LVVGLCTGQIK.T            |       | 2 | 2,5725 | 0,383 | 0      |
| 17 | P15531 NDKA_HUMAN  | R.TFIAIKPDGVQR.G           |       | 2 | 2,5707 | 0,241 | -0,181 |
| 17 | P01112 RASH_HUMAN  | K.SALTIQLIQNHVDE.Y         |       | 2 | 2,5694 | 0,38  | -0,353 |
| 17 | O75390 CISY_HUMAN  | E.TSVLDPDEGIR.F            |       | 2 | 2,5688 | 0,26  | 0      |
| 17 | Q92616 GCN1L_HUMAN | K.KLDAGNQLALIEE.L          |       | 2 | 2,5687 | 0,18  | -0,173 |
| 17 | Q96JH7 VCIP1_HUMAN | E.TTDGCVADALGAAFATR.S      |       | 3 | 2,5649 | 0,117 | -0,323 |
| 17 | Q9BY44 EIF2A_HUMAN | R.NTVSQSISGDPE.I           |       | 2 | 2,5626 | 0,39  | 0,198  |
| 17 | Q9NQW6 ANLN_HUMAN  | K.DKSTTPGGT#GIKPFLE.R      | T368: | 3 | 2,5622 | 0,236 | 0,106  |
| 17 | Q9NRF9 DPOE3_HUMAN | E.DLNLNNAVITR.I            |       | 2 | 2,5587 | 0,269 | 0,199  |
| 17 | Q9Y3L3 3BP1_HUMAN  | E.SEVPPRPAS#PK.V           | S544: | 2 | 2,5584 | 0,098 | 0,098  |
| 17 | O14617 AP3D1_HUMAN | E.QANNPFYIKS#SPSPQKR.Y     | S685: | 3 | 2,5583 | 0,118 | 0,358  |
| 17 | P61289 PSME3_HUMAN | E.AEDLVANFFPK.K            |       | 2 | 2,5561 | 0,329 | -0,78  |
| 17 | Q71U36 TBA1A_HUMAN | D.KTIGGGDDSFNTFFSE.T       |       | 2 | 2,5472 | 0,218 | 0,213  |
| 17 | P25787 PSA2_HUMAN  | E.LEDAIHTAILTLKE.S         |       | 2 | 2,5443 | 0,287 | 0      |
| 17 | P19338 NUCL_HUMAN  | K.GLSEDTTEE.T              |       | 2 | 2,544  | 0,195 | 0,124  |
| 17 | Q92597 NDRG1_HUMAN | E.AFKYFVQGM*GYM*PSASM*TR.L |       | 3 | 2,5421 | 0,102 | -0,33  |
| 17 | O95394 AGM1_HUMAN  | E.HATCLANAEEQD.M           |       | 2 | 2,5377 | 0,233 | -0,449 |
| 17 | Q14676 MDC1_HUMAN  | E.GKAPQAVPLEK.S            |       | 2 | 2,5358 | 0,293 | -0,429 |
| 17 | Q96RS0 TGS1_HUMAN  | K.GIGLDESELDS#EAE.L        | S89:  | 2 | 2,5339 | 0,127 | 0,237  |
| 17 | Q99497 PARK7_HUMAN | K.EGPYDVVVLPGGNGLGAQNLSE.S |       | 2 | 2,5311 | 0,24  | 0,344  |
| 17 | Q6ZW31 SYDE1_HUMAN | R.GAYLQSLEPSSR.R           |       | 2 | 2,5304 | 0,373 | 0,093  |
| 17 | Q9UIW2 PLXA1_HUMAN | R.SRTPM*ITPDLE.S           |       | 2 | 2,5283 | 0,231 | 0      |
| 17 | P07954 FUMH_HUMAN  | E.VNQDYGLDPK.I             |       | 2 | 2,5266 | 0,249 | -0,106 |
| 17 | Q03518 TAP1_HUMAN  | R.CPPSGLLTPHLE.G           |       | 2 | 2,5215 | 0,309 | -0,255 |
| 17 | P13693 TCTP_HUMAN  | E.STVITGVDIVM*NHHLQE.T     |       | 3 | 2,5196 | 0,201 | 0,383  |
| 17 | Q9H5V8 CDCP1_HUMAN | K.LATEEPPRSPPESE.S         |       | 2 | 2,5182 | 0,411 | -0,671 |

|    |                     |                                  |            |   |        |       |        |
|----|---------------------|----------------------------------|------------|---|--------|-------|--------|
| 17 | Q03164 HRX_HUMAN    | R.TIAHS#PTSFTE.S                 | S2098:     | 2 | 2,518  | 0,343 | -0,192 |
| 17 | Q9Y6X4 K0888_HUMAN  | K.ILALSQNEPK.R                   |            | 2 | 2,5163 | 0,215 | -0,11  |
| 17 | P52907 CAZA1_HUMAN  | K.DVQDSLTVSNE.A                  |            | 2 | 2,5142 | 0,254 | -0,101 |
| 17 | Q9Y6X2 PIAS3_HUMAN  | E.VCPPPGYGLDGLQYS#PVQGGDPSENKK.K | S431:      | 3 | 2,5136 | 0,192 | 0,187  |
| 17 | Q15185 TEBP_HUMAN   | E.DM*SNFDRFSE.M                  |            | 2 | 2,5127 | 0,208 | 0,193  |
| 17 | Q9UPU9 SAM4A_HUMAN  | E.HALGDGVDRTS#TL.-               | S527:      | 2 | 2,5102 | 0,475 | -0,601 |
| 17 | Q12923 PTN13_HUMAN  | K.RFES#SSGLPGVDE.T               | S442:      | 2 | 2,5095 | 0,391 | -0,418 |
| 17 | O75643 U520_HUMAN   | E.YKFSVDVK.E                     |            | 2 | 2,5089 | 0,326 | -0,062 |
| 17 | Q3KR37 GRM1B_HUMAN  | K.SSIETKPDAS#PQLPKK.S            | S274:      | 3 | 2,5085 | 0,169 | -0,203 |
| 17 | Q8TAA5 GRPE2_HUMAN  | K.IFGIQSFCK.D                    |            | 2 | 2,5062 | 0,232 | -0,111 |
| 17 | Q12893 TM115_HUMAN  | K.VDSPLPS#DKAPTTPPGK.G           | S324:      | 3 | 2,5026 | 0,09  | 0,434  |
| 17 | Q6S8J3 A26CA_HUMAN  | K.AGFAGDDAPR.A                   |            | 2 | 2,5016 | 0,327 | 0,062  |
| 17 | Q96Q89 MPPH1_HUMAN  | R.NKIEDGS#VVLD.S                 | S1600:     | 2 | 2,5011 | 0,126 | -0,096 |
| 17 | P06748 NPM_HUMAN    | E.KT#PKT#PKGPPSVE.D              | T234:T237: | 2 | 2,5004 | 0,335 | 0,08   |
| 17 | P62753 RS6_HUMAN    | R.RLS#S#LRASTSK.S                | S235:S236: | 2 | 2,4982 | 0,403 | -0,893 |
| 17 | Q9C0B5 ZDHC5_HUMAN  | K.KVSGVGGTTYE.I                  |            | 2 | 2,4957 | 0,397 | -0,222 |
| 17 | Q9Y490 TLN1_HUMAN   | E.DEGGSGRPLLQAAK.G               |            | 3 | 2,4921 | 0,187 | -0,261 |
| 17 | Q9Y2X7 GIT1_HUMAN   | E.FKHDS#FVPCSE.K                 | S670:      | 2 | 2,4921 | 0,31  | -0,255 |
| 17 | O00512 BCL9_HUMAN   | R.STAPLNTQISALR.N                |            | 2 | 2,4902 | 0,289 | -0,089 |
| 17 | Q01082 SPTB2_HUMAN  | E.TVDTSEM*VNGATEQR.T             |            | 3 | 2,4898 | 0,352 | 0,111  |
| 17 | P18615 NELFE_HUMAN  | R.SIS#ADDDLQE.S                  | S115:      | 2 | 2,4858 | 0,208 | 0,208  |
| 17 | Q9HC35 EMAL4_HUMAN  | E.KLSLPQNE.T                     |            | 2 | 2,4844 | 0,236 | -0,066 |
| 17 | Q9C0H2 TTYH3_HUMAN  | E.NTPLIGRES#PPPSYTSSM*R.A        | S496:      | 3 | 2,4816 | 0,226 | 0,084  |
| 17 | Q05DR4 Q05DR4_HUMAN | R.SLAALSQIAYQR.N                 |            | 2 | 2,481  | 0,295 | 0,092  |
| 17 | Q9NX24 NOLA2_HUMAN  | E.DRNLPYVYIPSK.T                 |            | 2 | 2,4809 | 0,304 | -0,083 |
| 17 | Q86YS7 K0528_HUMAN  | E.IIGSPIPEPR.Q                   |            | 2 | 2,4785 | 0,384 | 0,113  |
| 17 | Q9C0C2 TB182_HUMAN  | R.RES#AASGLGGLLE.E               | S1473:     | 2 | 2,4784 | 0,331 | -0,091 |
| 17 | P37802 TAGL2_HUMAN  | K.NVIGLQM*GTNR.G                 |            | 2 | 2,4778 | 0,317 | 0,2    |
| 17 | P04075 ALDOA_HUMAN  | R.VNPCIGGVILFHE.T                |            | 2 | 2,4735 | 0,233 | -0,671 |
| 17 | O60664 M6PBP_HUMAN  | E.NLPILQQPTEK.V                  |            | 2 | 2,4719 | 0,272 | -0,095 |
| 17 | P29375 JAD1A_HUMAN  | E.DYICINCAK.K                    |            | 2 | 2,4705 | 0,393 | -0,738 |
| 17 | Q9Y490 TLN1_HUMAN   | E.VANSTANLVK.T                   |            | 2 | 2,4704 | 0,346 | 0,06   |
| 17 | P55884 EIF3B_HUMAN  | R.SDS#RAQAVSEDAGNEGR.A           | S119:      | 2 | 2,4699 | 0,4   | -0,259 |
| 17 | O14974 MYPT1_HUMAN  | R.KTGSY#GALAE.I                  | Y446:      | 2 | 2,4685 | 0,3   | 0,34   |
| 17 | Q13642 FHL1_HUMAN   | D.KFCANTCVE.C                    |            | 2 | 2,467  | 0,398 | 0      |
| 17 | Q92598 HS105_HUMAN  | E.CLNQRPPENPDTDK.N               |            | 3 | 2,467  | 0,148 | 0,543  |
| 17 | Q5UIP0 RIF1_HUMAN   | K.ADVQAPVS#PSETSQANPYSE.G        | S1772:     | 3 | 2,4667 | 0,18  | 0,254  |
| 17 | Q9UKL0 RCOR1_HUMAN  | E.TNGPSNQKPKVSPDNS#IK.M          | S461:      | 3 | 2,4637 | 0,122 | -0,092 |
| 17 | P63027 VAMP2_HUMAN  | E.GGPPAPPPNLTSNR.R               |            | 2 | 2,4635 | 0,294 | -0,355 |

|    |                     |                         |        |   |        |       |        |
|----|---------------------|-------------------------|--------|---|--------|-------|--------|
| 17 | Q86XP3 DDX42_HUMAN  | K.IIDPLPPIDHSE.I        |        | 2 | 2,4634 | 0,383 | 0      |
| 17 | P11586 C1TC_HUMAN   | R.M*FGIPVVAVNAFK.T      |        | 2 | 2,4625 | 0,364 | -0,405 |
| 17 | Q9NY33 DPP3_HUMAN   | E.KGAFNFDQE.T           |        | 2 | 2,4615 | 0,218 | 0,116  |
| 17 | Q15154 PCM1_HUMAN   | R.SSLVDEHPEDA EFE.Q     |        | 2 | 2,4615 | 0,19  | 0      |
| 17 | Q9UQ35 SRRM2_HUMAN  | K.FSPFPVQDRPE.S         |        | 2 | 2,4606 | 0,257 | 0,093  |
| 17 | P15559 NQO1_HUMAN   | R.ALIVLAHSE.R           |        | 2 | 2,459  | 0,406 | -0,064 |
| 17 | P29375 JAD1A_HUMAN  | K.LPM*EDLKE.T           |        | 2 | 2,4585 | 0,168 | 0,062  |
| 17 | P51858 HDGF_HUMAN   | E.VERPLPM*EVEK.N        |        | 2 | 2,4573 | 0,184 | -1,09  |
| 17 | Q86W92 LIPB1_HUMAN  | E.DDM*FKDFAAR.S         |        | 2 | 2,4568 | 0,34  | 0,099  |
| 17 | P31946 1433B_HUMAN  | D.STLIM*QLLR.D          |        | 2 | 2,4566 | 0,19  | -0,335 |
| 17 | P15586 GNS_HUMAN    | E.FDIKVPLLVR.G          |        | 3 | 2,4557 | 0,196 | 0,381  |
| 17 | P43686 PRS6B_HUMAN  | K.ISGADINSICQE.S        |        | 2 | 2,4555 | 0,198 | -0,093 |
| 17 | P05787 K2C8_HUMAN   | R.ASLEAAIADAEQRGELAIK.D |        | 3 | 2,4543 | 0,082 | 0,281  |
| 17 | O95433 AHSA1_HUMAN  | K.TLFLAVQVQNEE.G        |        | 2 | 2,454  | 0,307 | 0      |
| 17 | Q96AJ9 VTI1A_HUMAN  | R.AHLLDNTERLE.R         |        | 2 | 2,4521 | 0,346 | -0,186 |
| 17 | P11309 PIM1_HUMAN   | K.INS#LAHLR.A           | S99:   | 2 | 2,4495 | 0,146 | -0,243 |
| 17 | O95785 WIZ_HUMAN    | R.SPSDLHISPLAK.K        |        | 2 | 2,448  | 0,312 | 0,289  |
| 17 | Q9NR30 DDX21_HUMAN  | K.LRS#DAGLE.S           | S7:    | 2 | 2,4469 | 0,117 | 0,13   |
| 17 | Q9BTK6 PA1_HUMAN    | R.DLFLDSEDPSPAS#PPLR.S  | S237:  | 2 | 2,4467 | 0,441 | 0,362  |
| 17 | P46821 MAP1B_HUMAN  | K.DSISAVSSEK.V          |        | 2 | 2,4455 | 0,22  | 0,119  |
| 17 | P38432 P80C_HUMAN   | E.ARNS#SEKLPT.E.L       | S271:  | 2 | 2,445  | 0,287 | -0,186 |
| 17 | O95831 AIFM1_HUMAN  | K.TGGLEIDSDFGGFR.V      |        | 2 | 2,4436 | 0,279 | -0,498 |
| 17 | Q9UK76 HN1_HUMAN    | R.RNSS#EASSGDFLDLKG.E.G | S88:   | 3 | 2,4432 | 0,219 | -0,097 |
| 17 | O15320 CTGE5_HUMAN  | E.KDPYALDVPNTAFGR.E     |        | 3 | 2,443  | 0,215 | 0,22   |
| 17 | P46940 IQGA1_HUMAN  | K.TLQALQIPAAKLE.G       |        | 2 | 2,4428 | 0,268 | -0,175 |
| 17 | Q9UNX4 WDR3_HUMAN   | E.IEDPEEPDPK.K          |        | 2 | 2,4407 | 0,126 | -1,461 |
| 17 | O60841 IF2P_HUMAN   | E.DEIPVLKDELIHE.L       |        | 2 | 2,4365 | 0,274 | -0,079 |
| 17 | O00221 IKBE_HUMAN   | E.DGDTLVHLAVIHE.A       |        | 3 | 2,4337 | 0,302 | 0,193  |
| 17 | Q96CW5 GCP3_HUMAN   | D.ILYVFQGGIDGK.N        |        | 2 | 2,4324 | 0,415 | -0,097 |
| 17 | Q9NPI1 BRD7_HUMAN   | R.KAM*GISIPS#PVM*E.N    | S621:  | 2 | 2,4298 | 0,251 | 0,083  |
| 17 | Q9GZZ9 UBA5_HUMAN   | E.GITVAYTIPK.K          |        | 2 | 2,4289 | 0,339 | 0,23   |
| 17 | Q9Y4B6 VPRBP_HUMAN  | R.HLPS#PPTLDSIITE.Y     | S1000: | 2 | 2,4248 | 0,236 | -0,458 |
| 17 | Q6ZRV2 FA83H_HUMAN  | R.KGS#PTPGFSTR.R        | S881:  | 2 | 2,4244 | 0,083 | -0,502 |
| 17 | P14625 ENPL_HUMAN   | R.LSLNIDPDAK.V          |        | 2 | 2,4235 | 0,257 | -0,225 |
| 17 | Q12996 CSTF3_HUMAN  | E.GNGPVESNAVLTK.A       |        | 2 | 2,4206 | 0,31  | -0,285 |
| 17 | P25787 PSA2_HUMAN   | E.DAIHTAILTLKE.S        |        | 3 | 2,4205 | 0,169 | 0,552  |
| 17 | O60504 VINEX_HUMAN  | R.DFVYPSSTR.D           |        | 2 | 2,4205 | 0,317 | 0,228  |
| 17 | Q86UA6 RIP_HUMAN    | E.KSLQFDE.K             |        | 2 | 2,4192 | 0,161 | 0,422  |
| 17 | Q9HA05 Q9HA05_HUMAN | K.M*NSIVYQK.Q           |        | 2 | 2,4183 | 0,231 | -0,061 |

|    |                     |                               |        |   |        |       |        |
|----|---------------------|-------------------------------|--------|---|--------|-------|--------|
| 17 | Q9H4B7 TBB1_HUMAN   | E.RISVYYNE.A                  |        | 2 | 2,4156 | 0,241 | 0,234  |
| 17 | P07355 ANXA2_HUMAN  | K.AYTNFDAER.D                 |        | 2 | 2,4152 | 0,353 | 0,112  |
| 17 | O14974 MYPT1_HUMAN  | R.LAYVAPTIPR.R                |        | 2 | 2,414  | 0,302 | 0      |
| 17 | Q15149 PLEC1_HUMAN  | K.GYYSYVSVSGSGSTAGSR.T        |        | 2 | 2,4133 | 0,283 | -1,3   |
| 17 | Q2NKX8 ERC6L_HUMAN  | E.SFNYVLSK.S                  |        | 2 | 2,4129 | 0,223 | 0,127  |
| 17 | P14866 HNRPL_HUMAN  | E.M*ADGYAVDR.A                |        | 2 | 2,4123 | 0,216 | 0,18   |
| 17 | O60307 MAST3_HUMAN  | R.LHQLPFQPTPDE.L              |        | 2 | 2,4122 | 0,408 | 0      |
| 17 | Q96JG6 CC132_HUMAN  | E.QS#RSPSVSPSKQPVSTSSK.T      | S492:  | 3 | 2,4113 | 0,168 | 0,623  |
| 17 | P36507 MP2K2_HUMAN  | R.LNQPGT#PTRTAV.-             | T394:  | 2 | 2,4093 | 0,286 | -1,188 |
| 17 | Q3KQU3 MA7D1_HUMAN  | E.ARS#PGLQKE.A                | S753:  | 2 | 2,4071 | 0,224 | -0,343 |
| 17 | Q8IWZ3 ANKH1_HUMAN  | E.RGANLEEVNDE.G               |        | 2 | 2,4068 | 0,27  | -0,098 |
| 17 | P30520 PURA2_HUMAN  | R.VGIGAFPTEQDNE.I             |        | 2 | 2,4043 | 0,244 | 0,089  |
| 17 | Q96B23 CR025_HUMAN  | E.LRRDS#SESQLASTE.S           | S66:   | 2 | 2,404  | 0,519 | 0,515  |
| 17 | Q9UNX4 WDR3_HUMAN   | K.GS#SPGIQDTLE.A              | S240:  | 2 | 2,4033 | 0,327 | 0,206  |
| 17 | O60508 PRP17_HUMAN  | K.SPS#SKPSLAVAVDSAPE.V        | S45:   | 2 | 2,4033 | 0,118 | 0,071  |
| 17 | Q13017 RHG05_HUMAN  | E.IYVVPDDSQNR.I               |        | 2 | 2,4017 | 0,372 | -0,093 |
| 17 | P15927 RFA2_HUMAN   | R.APISNPGM*SE.A               |        | 2 | 2,4006 | 0,343 | 0,18   |
| 17 | Q13136 LIPA1_HUMAN  | R.VGSGSLDNLGR.F               |        | 2 | 2,3993 | 0,27  | 0      |
| 17 | Q9Y536 PAL4B_HUMAN  | E.NFRALSTGE.K                 |        | 2 | 2,3979 | 0,277 | 0,123  |
| 17 | Q9Y5B9 SP16H_HUMAN  | R.INFYCPGSALGR.N              |        | 2 | 2,3974 | 0,152 | 0      |
| 17 | Q9NPR2 SEM4B_HUMAN  | E.SEKRPLSIQDS#FVE.V           | S808:  | 2 | 2,3964 | 0,405 | -0,071 |
| 17 | Q969K3 RNF34_HUMAN  | R.AS#LSDLSSLDDEVE.G           | S254:  | 2 | 2,3935 | 0,169 | 0      |
| 17 | Q9BPZ3 PAIP2_HUMAN  | R.S#STSPSIINE.D               | S7:    | 2 | 2,3922 | 0,108 | 0      |
| 17 | Q9C0C2 TB182_HUMAN  | R.HNGSL#PGLE.A                | S1385: | 2 | 2,3836 | 0,156 | 0,112  |
| 17 | O43852 CALU_HUMAN   | K.IDGDKDGFVTVDE.L             |        | 2 | 2,3825 | 0,272 | 0,433  |
| 17 | Q15149 PLEC1_HUMAN  | E.TGLCLLPLTDK.A               |        | 2 | 2,3795 | 0,32  | 0      |
| 17 | P08240 SRPR_HUMAN   | K.GTLGGM*FGM*LK.G             |        | 2 | 2,3787 | 0,408 | -0,533 |
| 17 | P63027 VAMP2_HUMAN  | R.LQQTQAQVDE.V                |        | 2 | 2,3787 | 0,199 | 0,105  |
| 17 | Q09666 AHNK_HUMAN   | K.LQGGVSLASK.K                |        | 2 | 2,3786 | 0,354 | -1,282 |
| 17 | P09493 TPM1_HUMAN   | K.ATDAEADVAS#LNRR.I           | S87:   | 3 | 2,376  | 0,257 | 0,35   |
| 17 | P22626 ROA2_HUMAN   | R.GGGGNFGPGPGSNFRGGSDGYGSGR.G |        | 3 | 2,3756 | 0,151 | 0,403  |
| 17 | P61289 PSME3_HUMAN  | E.DLVANFFPK.K                 |        | 2 | 2,3753 | 0,269 | -0,116 |
| 17 | Q8IYB3 SRRM1_HUMAN  | E.KT#PELPEPSVK.V              | T220:  | 2 | 2,3752 | 0,148 | -0,467 |
| 17 | Q12765 SCRN1_HUMAN  | E.SITVQTM*M*NTLR.D            |        | 2 | 2,3726 | 0,432 | 0,171  |
| 17 | Q9Y6M7 S4A7_HUMAN   | E.NST#VDFSKVDM*NFM*R.K        | T408:  | 2 | 2,3717 | 0,218 | -0,128 |
| 17 | Q9Y2U5 M3K2_HUMAN   | R.NGS#FTSINSE.G               | S182:  | 2 | 2,3716 | 0,143 | -0,215 |
| 17 | Q96DR7 SGEF_HUMAN   | K.SSSEQKLPLQR.L               |        | 2 | 2,3683 | 0,189 | -0,383 |
| 17 | P46013 KI67_HUMAN   | K.AM*LT#PKPAGGDE.K            | T1176: | 2 | 2,3656 | 0,341 | -0,095 |
| 17 | B1PJR7 B1PJR7_HUMAN | E.VILLDS#DLDEPIDLRCVK.T       | S467:  | 3 | 2,3652 | 0,083 | -0,5   |

|    |                     |                                |            |   |        |       |        |
|----|---------------------|--------------------------------|------------|---|--------|-------|--------|
| 17 | P12270 TPR_HUMAN    | E.KFLADQQSE.I                  |            | 2 | 2,3651 | 0,13  | -1,488 |
| 17 | Q8NFA0 UBP32_HUMAN  | E.QQGIIDYAQFLPK.T              |            | 2 | 2,3649 | 0,361 | 0      |
| 17 | P06753 TPM3_HUMAN   | E.LKNVTNNLKS#LE.A              | S206:      | 2 | 2,3646 | 0,392 | 0,084  |
| 17 | Q5JRA6 MIA3_HUMAN   | E.ASGKPSPSDPGSGTATM*M*NSSSR.G  |            | 2 | 2,3641 | 0,19  | 0,218  |
| 17 | O14920 IKKB_HUMAN   | E.DESLQSLK.A                   |            | 2 | 2,3626 | 0,108 | 0,199  |
| 17 | P00519 ABL1_HUMAN   | K.GSALGTPAAAEPVT#PTSK.A        | T852:      | 2 | 2,3624 | 0,334 | -0,141 |
| 17 | Q13137 CACO2_HUMAN  | E.DHVFCHS#L.-                  | S445:      | 2 | 2,3618 | 0,289 | 0      |
| 17 | P02545 LMNA_HUMAN   | R.LRLSPS#PTSQR.S               | S392:      | 2 | 2,3584 | 0,335 | -1,292 |
| 17 | Q9UQ35 SRRM2_HUMAN  | E.FSAS#PM*LK.S                 | S1124:     | 2 | 2,3582 | 0,167 | 0,312  |
| 17 | Q15185 TEBP_HUMAN   | D.EDM*SNFDRFSE.M               |            | 2 | 2,3574 | 0,213 | 0,088  |
| 17 | O95630 STABP_HUMAN  | E.FTITHVLIPK.Q                 |            | 2 | 2,3564 | 0,229 | 0      |
| 17 | P50990 TCPQ_HUMAN   | E.KLFVTND.A                    |            | 2 | 2,3563 | 0,199 | 0,656  |
| 17 | P30622 CLIP1_HUMAN  | E.SISNLS#EAGS#IKKGERE.L        | S200:S204: | 3 | 2,3563 | 0,291 | 0,279  |
| 17 | O75581 LRP6_HUMAN   | R.SYSHHLYPPPS#PCTDSS.-         | S1607:     | 3 | 2,3559 | 0,109 | 0,434  |
| 17 | P04406 G3P_HUMAN    | E.LNGKLTGM*AFRVPTANVSVVD.L     |            | 3 | 2,3541 | 0,239 | 0,332  |
| 17 | Q9Y3L3 3BP1_HUMAN   | K.VTRS#PPETAAPVED.M            | S550:      | 2 | 2,3533 | 0,177 | -0,945 |
| 17 | Q96S82 UBL7_HUMAN   | E.GLS#DDEDDFHPNTR.S            | S230:      | 2 | 2,3497 | 0,49  | 0      |
| 17 | P11532 DMD_HUMAN    | E.HKGLS#PLPSPPE.M              | S3537:     | 2 | 2,3441 | 0,265 | -0,273 |
| 17 | P07951 TPM2_HUMAN   | E.KTIDDLE.D                    |            | 2 | 2,3435 | 0,103 | -0,073 |
| 17 | P18615 NELFE_HUMAN  | K.GPVPTFQPFQR.S                |            | 2 | 2,3427 | 0,327 | 0,192  |
| 17 | Q4KMP7 TB10B_HUMAN  | R.QQPPLGPSSLLSLPGLK.S          |            | 2 | 2,3378 | 0,384 | -0,067 |
| 17 | Q5JSH3 WDR44_HUMAN  | K.VGLSTFKE.T                   |            | 2 | 2,3362 | 0,19  | 0,277  |
| 17 | Q9UMZ2 SYNG_HUMAN   | K.LADVGGDLK.H                  |            | 2 | 2,3354 | 0,278 | 0,069  |
| 17 | Q8WXH0 SYNE2_HUMAN  | E.DKLLPTEDQSFNDLAHD.V          |            | 3 | 2,3352 | 0,125 | 1,028  |
| 17 | P10809 CH60_HUMAN   | K.VGGTSDVEVNE.K                |            | 2 | 2,3342 | 0,227 | -0,331 |
| 17 | O60684 IMA7_HUMAN   | K.SYKNNALNPEE.M                |            | 2 | 2,3323 | 0,266 | -0,668 |
| 17 | P28066 PSA5_HUMAN   | E.KLNATNIE.L                   |            | 2 | 2,3322 | 0,277 | 0,068  |
| 17 | O95425 SVIL_HUMAN   | E.SSSTFSFSGR.D                 |            | 2 | 2,3299 | 0,205 | -0,459 |
| 17 | Q92576 PHF3_HUMAN   | E.KQES#PKSTFSPAPRPEM*PGTVEVE.S | S1178:     | 3 | 2,3292 | 0,107 | 0,067  |
| 17 | P30622 CLIP1_HUMAN  | E.S#ISNLSEAGS#IKKGERE.L        | S195:S204: | 2 | 2,3283 | 0,395 | 0,869  |
| 17 | A4D0Z9 A4D0Z9_HUMAN | E.DALPGLGLYR.T                 |            | 2 | 2,3282 | 0,371 | 0,454  |
| 17 | Q8WTT2 NOC3L_HUMAN  | E.VATES#PLDFTKYLKTSLH.-        | S787:      | 3 | 2,3227 | 0,178 | -0,172 |
| 17 | Q8IZQ1 WDFY3_HUMAN  | R.VSS#GFGLSK.L                 | S2278:     | 2 | 2,3195 | 0,212 | 0,444  |
| 17 | Q96ST8 CC123_HUMAN  | R.RSS#LPSFE.T                  | S114:      | 2 | 2,3175 | 0,227 | -0,061 |
| 17 | Q13546 RIPK1_HUMAN  | R.M*QSLQLDCVAVPSS#R.S          | S331:      | 2 | 2,3163 | 0,307 | -0,956 |
| 17 | Q9P287 BCCIP_HUMAN  | E.LTDLLIQNHIGSVIK.Q            |            | 3 | 2,3093 | 0,084 | 0,51   |
| 17 | Q8NDI1 EHBP1_HUMAN  | K.LGYSYSRD.L                   |            | 2 | 2,3092 | 0,368 | -0,317 |
| 17 | Q9UIF9 BAZ2A_HUMAN  | E.M*EGPEECLGR.R                |            | 2 | 2,3051 | 0,377 | -0,613 |
| 17 | Q7Z3C6 ATG9A_HUMAN  | R.SFSPLQPGQAPTGR.A             |            | 2 | 2,3047 | 0,364 | -0,169 |

|    |                     |                                       |            |   |        |       |        |
|----|---------------------|---------------------------------------|------------|---|--------|-------|--------|
| 17 | Q9NZN8 CNOT2_HUMAN  | R.SSPSIICM*PK.Q                       |            | 2 | 2,3013 | 0,304 | -0,537 |
| 17 | Q4G148 GL8D3_HUMAN  | R.SLLKPLELE.L                         |            | 2 | 2,3001 | 0,222 | 0      |
| 17 | O75179 ANR17_HUMAN  | R.NSPLDCGSASPKN.V                     |            | 2 | 2,2974 | 0,221 | -0,453 |
| 17 | P05787 K2C8_HUMAN   | E.SRLEGLTDE.I                         |            | 2 | 2,2968 | 0,147 | -0,12  |
| 17 | Q8N8S7 ENAH_HUMAN   | K.STPLSQPSANGVQTE.G                   |            | 2 | 2,2968 | 0,444 | -0,241 |
| 17 | Q15652 JHD2C_HUMAN  | E.REQDNSESPNGRTS#PLVSQLNNE.Q          | S2053:     | 3 | 2,2966 | 0,114 | -0,072 |
| 17 | Q9BSQ5 CCM2_HUMAN   | E.STIDFLDR.A                          |            | 2 | 2,2923 | 0,287 | 0,126  |
| 17 | Q9UMX3 BOK_HUMAN    | R.RSS#VFAAE.I                         | S8:        | 2 | 2,2874 | 0,286 | -0,838 |
| 17 | P39687 AN32A_HUMAN  | K.LLPQLTYLDGYDRDDK.E                  |            | 2 | 2,2834 | 0,346 | -0,19  |
| 17 | P07814 SYEP_HUMAN   | E.APCVLIYIPDGHTK.E                    |            | 3 | 2,2814 | 0,142 | 0,115  |
| 17 | Q8N1F7 NUP93_HUMAN  | R.GLDIS#HIS#QRLE.S                    | S72:S75:   | 3 | 2,2807 | 0,179 | 0,239  |
| 17 | Q9NYP9 CU045_HUMAN  | E.DTNCILLR.C                          |            | 2 | 2,2804 | 0,167 | 0,061  |
| 17 | P18887 XRCC1_HUMAN  | E.SANSLRPGALFFSR.I                    |            | 2 | 2,2796 | 0,22  | -0,16  |
| 17 | Q5T8P6 RBM26_HUMAN  | E.KLFDVANTK.S                         |            | 2 | 2,2795 | 0,342 | -0,118 |
| 17 | P07814 SYEP_HUMAN   | K.EYIPGQPPLS#QSSDSPT#R.N              | S880:T888: | 3 | 2,2793 | 0,267 | -0,829 |
| 17 | O75170 SAPS2_HUMAN  | R.VGTEGLVDS#FSQGLE.R                  | S289:      | 2 | 2,2785 | 0,263 | 0      |
| 17 | Q9HAV7 GRPE1_HUMAN  | K.NSGQNLEEDM*GQSEQKADPPATE.K          |            | 3 | 2,2777 | 0,364 | 0,22   |
| 17 | P60842 IF4A1_HUMAN  | K.ATQALVLAPTRE.L                      |            | 2 | 2,2764 | 0,164 | -0,576 |
| 17 | P31040 DHSA_HUMAN   | E.AGFNTACVTK.L                        |            | 2 | 2,2747 | 0,405 | -0,114 |
| 17 | P41227 ARD1A_HUMAN  | E.SKGNSPPS#SGEACRE.E                  | S189:      | 3 | 2,2715 | 0,199 | -0,111 |
| 17 | Q5JU85 IQEC2_HUMAN  | E.DTYGAGDGLKR.G                       |            | 2 | 2,2711 | 0,414 | -0,212 |
| 17 | P78310 CXAR_HUMAN   | R.TPQS#PTLPPAK.V                      | S332:      | 2 | 2,2684 | 0,204 | 0      |
| 17 | P30153 2AAA_HUMAN   | K.TDLVPAFQNLNLM*K.D                   |            | 2 | 2,2676 | 0,164 | 0      |
| 17 | Q96JM3 ZN828_HUMAN  | E.LRKPGPLS#PEIR.S                     | S427:      | 2 | 2,2675 | 0,198 | -0,158 |
| 17 | P48960 CD97_HUMAN   | R.CNPGFSSFSE.I                        |            | 2 | 2,2618 | 0,092 | 0,108  |
| 17 | Q5UIP0 RIF1_HUMAN   | R.RAS#QGLSSIE.N                       | S1542:     | 2 | 2,2609 | 0,195 | -0,295 |
| 17 | P26045 PTN3_HUMAN   | E.TEDVFYTYK.G                         |            | 2 | 2,2598 | 0,252 | -0,523 |
| 17 | P22314 UBA1_HUMAN   | R.VSGPDPKPGSNCSQAQSVLSEVPSVPTNGM*AK.N |            | 3 | 2,2597 | 0,134 | 0,342  |
| 17 | Q9NWS0 PIHD1_HUMAN  | R.IPM*SLGEPHAE.L                      |            | 2 | 2,2592 | 0,275 | 0      |
| 17 | Q9NTJ3 SMC4_HUMAN   | E.KSNILSNE.M                          |            | 2 | 2,2567 | 0,109 | 0,27   |
| 17 | Q76M58 Q76M58_HUMAN | K.LVEALCAEHQINLIK.V                   |            | 3 | 2,2534 | 0,129 | 0,104  |
| 17 | Q6ZSZ5 ARHGI_HUMAN  | R.SLS#PILPGR.H                        | S1103:     | 2 | 2,2504 | 0,219 | 0,06   |
| 17 | Q5JTV8 TOIP1_HUMAN  | E.SFPAGSTLIFYK.Y                      |            | 2 | 2,2503 | 0,166 | 0      |
| 17 | O60716 CTND1_HUMAN  | E.DGYPGGSDNYGSLSR.V                   |            | 2 | 2,247  | 0,217 | 0,711  |
| 17 | Q8WYP5 AHTF1_HUMAN  | R.GREVS#PSDVRE.D                      | S1953:     | 2 | 2,2427 | 0,343 | -0,651 |
| 17 | P04406 G3P_HUMAN    | R.GALQNIIPASTGAAK.A                   |            | 2 | 2,2423 | 0,153 | 0      |
| 17 | Q9H0H5 RGAP1_HUMAN  | K.SALAFLNR.G                          |            | 2 | 2,2398 | 0,31  | 0      |
| 17 | P21333 FLNA_HUMAN   | R.RLTVSSLQE.S                         |            | 2 | 2,2377 | 0,152 | 0,236  |
| 17 | P08670 VIME_HUMAN   | R.QDVDNASLAR.L                        |            | 2 | 2,2376 | 0,252 | -0,448 |

|    |                    |                         |            |   |        |       |        |
|----|--------------------|-------------------------|------------|---|--------|-------|--------|
| 17 | P49591 SYSC_HUMAN  | E.DLPIKYAGLSTCFR.Q      |            | 2 | 2,237  | 0,405 | -0,074 |
| 17 | P04406 G3P_HUMAN   | K.LTGM*AFRVPTANVSVVD.L  |            | 2 | 2,2366 | 0,117 | -0,136 |
| 17 | P42167 LAP2B_HUMAN | K.YVPLADVKE.K           |            | 2 | 2,2362 | 0,281 | -0,327 |
| 17 | P06748 NPM_HUMAN   | E.KT#PKT#PKGPPSSVED.I   | T234:T237: | 2 | 2,2332 | 0,349 | -0,673 |
| 17 | P10809 CH60_HUMAN  | K.ISSIQSIVPALEIANHR.K   |            | 3 | 2,2323 | 0,116 | -0,286 |
| 17 | Q66K74 MAP1S_HUMAN | R.T#PS#PESHRSPEAGSE.R   | T638:S640: | 2 | 2,2277 | 0,25  | 0,212  |
| 17 | P20700 LMNB1_HUMAN | E.NRCQSLTEDLE.F         |            | 2 | 2,2267 | 0,318 | -0,626 |
| 17 | Q14974 IMB1_HUMAN  | K.YM*EAFKPFGLGK.N       |            | 3 | 2,2247 | 0,099 | 0      |
| 17 | P35030 TRY3_HUMAN  | D.TLDNDIM*LIK.L         |            | 2 | 2,2227 | 0,207 | 0      |
| 17 | Q9C0C2 TB182_HUMAN | R.SPSQDFSFIEDTE.I       |            | 2 | 2,2207 | 0,14  | -0,244 |
| 17 | Q12923 PTN13_HUMAN | K.TFSSS#PPKPGDIFE.V     | S1359:     | 2 | 2,2183 | 0,142 | 0      |
| 17 | Q96RS0 TGS1_HUMAN  | K.GIGLDES#ELDSEAE.L     | S85:       | 2 | 2,2179 | 0,259 | -0,395 |
| 17 | Q14152 EIF3A_HUMAN | E.DAPIGPHLQSM*PSEQIR.N  |            | 3 | 2,2158 | 0,238 | -0,193 |
| 17 | Q96RT1 LAP2_HUMAN  | E.KYM*IGNSVQK.I         |            | 2 | 2,2121 | 0,151 | -0,412 |
| 17 | P11940 PABP1_HUMAN | K.GYGFVHFE.T            |            | 2 | 2,2111 | 0,147 | 0,064  |
| 17 | Q99759 M3K3_HUMAN  | R.QGSY#TSINSE.G         | Y195:      | 2 | 2,2077 | 0,14  | -1,047 |
| 17 | Q68CZ2 TENS3_HUMAN | R.LPDTGEGPSR.A          |            | 2 | 2,2022 | 0,311 | 0      |
| 17 | Q96RK0 CIC_HUMAN   | R.S#M*SETGTAAAPGVSE.L   | S299:      | 2 | 2,1991 | 0,251 | 0      |
| 17 | Q9H6F5 CCD86_HUMAN | K.CSQDQGVLAEL           |            | 2 | 2,196  | 0,086 | -0,511 |
| 17 | O75420 PERQ1_HUMAN | E.M*GTFDAS#GAFLPLKK.G   | S309:      | 3 | 2,1927 | 0,187 | -0,327 |
| 17 | Q8NCD3 HJURP_HUMAN | K.LNPDPHFQGFQK.L        |            | 2 | 2,1895 | 0,275 | -0,171 |
| 17 | Q9Y6I3 EPN1_HUMAN  | E.LLAGEVPAR.S           |            | 2 | 2,1883 | 0,253 | 0,329  |
| 17 | Q9Y6A5 TACC3_HUMAN | R.SSVLRVS#QKE.N         | S39:       | 2 | 2,188  | 0,23  | 0,201  |
| 17 | P54819 KAD2_HUMAN  | E.NFCVCHLATGDM*LR.A     |            | 3 | 2,1865 | 0,191 | 0,107  |
| 17 | O75592 MYCB2_HUMAN | E.TSPITDTLAKR.T         |            | 2 | 2,1831 | 0,315 | -0,185 |
| 17 | Q5SRE5 NU188_HUMAN | E.VIALFDQTR.H           |            | 2 | 2,1828 | 0,29  | 0      |
| 17 | P37802 TAGL2_HUMAN | K.IQASTM*AFK.Q          |            | 2 | 2,1793 | 0,203 | -0,723 |
| 17 | P21333 FLNA_HUMAN  | E.ISFEDRK.D             |            | 2 | 2,1782 | 0,12  | 0      |
| 17 | P21964 COMT_HUMAN  | E.KAIYKGGPS#EAGP.-      | S267:      | 2 | 2,1778 | 0,396 | -1,171 |
| 17 | Q96GX5 MASTL_HUMAN | R.NTAQHLLTVS#GFSL.-     | S875:      | 2 | 2,1774 | 0,302 | -0,084 |
| 17 | Q96T23 RSF1_HUMAN  | K.AQIDPVLLK.N           |            | 2 | 2,1753 | 0,258 | 0,184  |
| 17 | Q99426 TBCB_HUMAN  | E.KYTISQE.A             |            | 2 | 2,1747 | 0,138 | 0,211  |
| 17 | P25963 IKBA_HUMAN  | E.DGDSFLHLAIHEE.K       |            | 3 | 2,1715 | 0,225 | 0,115  |
| 17 | O43765 SGTA_HUMAN  | E.AAATGKEM*PQDLRS#PAR.T | S77:       | 3 | 2,1671 | 0,215 | -0,29  |
| 17 | Q92539 LPIN2_HUMAN | E.DTVCTIVKPKPR.A        |            | 3 | 2,1668 | 0,187 | 0,323  |
| 17 | P49736 MCM2_HUMAN  | E.SFTM*ASS#PAQR.R       | S13:       | 2 | 2,1663 | 0,232 | -0,382 |
| 17 | P52597 HNRPF_HUMAN | K.FM*SVQRPGPYD.R        |            | 2 | 2,1648 | 0,31  | 0,186  |
| 17 | P46940 IQGA1_HUMAN | K.TLQALQIPAAK.L         |            | 2 | 2,1641 | 0,161 | 0,106  |
| 17 | Q15742 NAB2_HUMAN  | R.SFS#PKS#PLE.L         | S159:S162: | 2 | 2,1629 | 0,187 | -0,212 |



|    |                    |                             |              |   |        |       |        |
|----|--------------------|-----------------------------|--------------|---|--------|-------|--------|
| 17 | Q29983 MICA_HUMAN  | R.SSQHFYDGE.L               |              | 2 | 2,1626 | 0,337 | -0,297 |
| 17 | P22626 ROA2_HUMAN  | R.GGGGNFGPGGSNFR.G          |              | 3 | 2,1621 | 0,148 | 0,332  |
| 17 | Q6UB98 ANR12_HUMAN | R.RCS#M*PSVICE.H            | S1311:       | 2 | 2,1618 | 0,154 | 0,091  |
| 17 | P55265 DSRAD_HUMAN | K.ALHGATNSM*AS#DNQPE.G      | S690:        | 2 | 2,1572 | 0,323 | 0,327  |
| 17 | P24928 RPB1_HUMAN  | K.LLQFHVATM*VDNE.L          |              | 2 | 2,1555 | 0,179 | 0,08   |
| 17 | Q14974 IMB1_HUMAN  | E.KTVS#PDRLE.L              | S12:         | 2 | 2,1551 | 0,131 | 0,976  |
| 17 | Q9H6F5 CCD86_HUMAN | R.CQKPSEEAPK.C              |              | 2 | 2,1546 | 0,228 | -0,288 |
| 17 | Q8N999 CL029_HUMAN | R.KM*PCVFTVE.V              |              | 2 | 2,154  | 0,172 | 0,108  |
| 17 | O75410 TACC1_HUMAN | E.SRSS#PLKLE.F              | S316:        | 2 | 2,1512 | 0,217 | -0,334 |
| 17 | Q6ZRV2 FA83H_HUMAN | R.APAGDLLPSAFR.V            |              | 2 | 2,1499 | 0,365 | 0      |
| 17 | P42166 LAP2A_HUMAN | R.NRPPLPAGTNSK.G            |              | 3 | 2,1492 | 0,327 | 0,438  |
| 17 | P35232 PHB_HUMAN   | D.DVSLTHLTFGK.E             |              | 2 | 2,1487 | 0,304 | -0,1   |
| 17 | Q01082 SPTB2_HUMAN | E.S#SPIPSPT#SDRK.A          | S2164:T2171: | 2 | 2,1456 | 0,298 | -0,511 |
| 17 | Q9Y3D0 FA96B_HUMAN | E.NANPLIYQR.S               |              | 2 | 2,1433 | 0,202 | 0,224  |
| 17 | P31946 1433B_HUMAN | E.QGHELNEE.R                |              | 2 | 2,1423 | 0,115 | -0,117 |
| 17 | Q15424 SAFB1_HUMAN | K.ADLLAVVK.R                |              | 2 | 2,1383 | 0,191 | 0,466  |
| 17 | P42167 LAP2B_HUMAN | E.SLVVNRVTGNFKHAS#PILPITE.F | S306:        | 3 | 2,1377 | 0,189 | -0,074 |
| 17 | Q5VZK9 LR16A_HUMAN | R.SS#GFISELPSEE.G           | S968:        | 2 | 2,1377 | 0,105 | 0      |
| 17 | Q3KQU3 MA7D1_HUMAN | E.AKS#RGPT#PPAM*GPR.D       | S93:T97:     | 3 | 2,1345 | 0,096 | 0,114  |
| 17 | P62753 RS6_HUMAN   | R.RLS#S#LRASTKSE.S          | S235:S236:   | 3 | 2,1324 | 0,25  | -1,041 |
| 17 | Q00536 PCTK1_HUMAN | K.RLS#LPADIR.L              | S119:        | 2 | 2,1305 | 0,204 | 0,109  |
| 17 | Q96EZ8 MCRS1_HUMAN | E.DQTVQPLPK.G               |              | 2 | 2,1304 | 0,226 | -0,713 |
| 17 | P08670 VIME_HUMAN  | R.QVQS#LTCE.V               | S325:        | 2 | 2,1241 | 0,192 | -0,817 |
| 17 | Q5SW79 CE170_HUMAN | R.RTLPQLPNEE.K              |              | 2 | 2,1228 | 0,282 | 0,102  |
| 17 | Q15185 TEBP_HUMAN  | D.SKDVNVNFE.K               |              | 2 | 2,1191 | 0,271 | 0,464  |
| 17 | Q9UKS6 PACN3_HUMAN | E.VLTLSIVPTR.D              |              | 2 | 2,1187 | 0,177 | -0,112 |
| 17 | P62750 RL23A_HUMAN | K.VNTLIRPDGE.K              |              | 2 | 2,117  | 0,095 | 0,438  |
| 17 | Q9H6F5 CCD86_HUMAN | E.SNPEETREPGS#PPSVQR.A      | S47:         | 2 | 2,1163 | 0,218 | -0,188 |
| 17 | O00267 SPT5H_HUMAN | E.HNFQPGDNVE.V              |              | 2 | 2,1061 | 0,18  | -0,844 |
| 17 | O76031 CLPX_HUMAN  | R.LPVVVPLHSLDE.K            |              | 2 | 2,1041 | 0,279 | -0,185 |
| 17 | P27816 MAP4_HUMAN  | R.AS#PIKM*DLAPSK.D          | S358:        | 2 | 2,1027 | 0,309 | -0,36  |
| 17 | Q969K3 RNF34_HUMAN | E.RVRAS#LSDLSLDDVE.G        | S254:        | 2 | 2,1012 | 0,232 | 0,132  |
| 17 | Q9UKV0 HDAC9_HUMAN | E.LQGDQAM*QEDRAPSSGNSTR.S   |              | 3 | 2,1005 | 0,127 | -0,254 |
| 17 | P09211 GSTP1_HUMAN | K.ALPGQLKPF.T               |              | 2 | 2,1    | 0,184 | 0      |
| 17 | Q15942 ZYX_HUMAN   | R.EKVSS#IDLE.I              | S143:        | 2 | 2,0971 | 0,237 | 0,111  |
| 17 | Q9UKV3 ACINU_HUMAN | E.KSKS#PS#PPRLTE.D          | S386:S388:   | 2 | 2,0957 | 0,229 | -0,656 |
| 17 | Q9C0C2 TB182_HUMAN | R.VVGKPAQLGTQR.S            |              | 3 | 2,0939 | 0,154 | 0,292  |
| 17 | Q8NBJ5 GT251_HUMAN | E.YGFLPVPLR.A               |              | 2 | 2,0877 | 0,153 | -0,23  |
| 17 | Q9UEY8 ADDG_HUMAN  | E.DDTVPLS#PLKYM*AQR.Q       | S423:        | 2 | 2,0804 | 0,229 | -0,067 |

|    |                     |                            |            |   |        |       |        |
|----|---------------------|----------------------------|------------|---|--------|-------|--------|
| 17 | Q14980 NUMA1_HUMAN  | E.GTPLSITSKLPR.T           |            | 2 | 2,078  | 0,198 | -0,192 |
| 17 | Q71RC2 LARP4_HUMAN  | K.DGLNQTTIPVSP#PPSTTKPSR.A | S583:      | 2 | 2,0772 | 0,244 | 0,112  |
| 17 | P08670 VIME_HUMAN   | E.TRDGQVINE.T              |            | 2 | 2,0746 | 0,081 | -0,355 |
| 17 | Q96JM3 ZN828_HUMAN  | R.KTS#PASLDFPE.S           | S459:      | 2 | 2,0719 | 0,268 | 0,288  |
| 17 | Q9UEY8 ADDG_HUMAN   | E.DDTVPLS#PLK.Y            | S423:      | 2 | 2,0706 | 0,242 | -0,314 |
| 17 | P62136 PP1A_HUMAN   | E.SNYLFLGDYVDR.G           |            | 2 | 2,0684 | 0,345 | -0,167 |
| 17 | Q86WB0 NIPA_HUMAN   | R.SQDATFSPGSE.Q            |            | 2 | 2,0663 | 0,113 | 0      |
| 17 | P15531 NDKA_HUMAN   | R.TFIAIKPDGVQR.G           |            | 3 | 2,0624 | 0,135 | -0,136 |
| 17 | Q13523 PRP4B_HUMAN  | R.TKLDDLALLE.D             |            | 2 | 2,0612 | 0,172 | -0,216 |
| 17 | P21333 FLNA_HUMAN   | R.ANLQSFQVD.T              |            | 2 | 2,0604 | 0,148 | 0      |
| 17 | P05787 K2C8_HUMAN   | R.ISSSS#FSR.V              | S37:       | 2 | 2,0572 | 0,108 | -0,064 |
| 17 | Q13428 TCOF_HUMAN   | E.ALAAM*NAAQVKPLGK.S       |            | 3 | 2,0531 | 0,308 | -0,122 |
| 17 | Q08945 SSRP1_HUMAN  | E.ISFVNFAR.G               |            | 2 | 2,0518 | 0,153 | 0,192  |
| 17 | Q92539 LPIN2_HUMAN  | R.ALGTQM*S#DPTSVAE.L       | S337:      | 2 | 2,0484 | 0,115 | -0,568 |
| 17 | Q12888 TP53B_HUMAN  | R.SEDPPTT#PIR.G            | T1056:     | 2 | 2,0451 | 0,234 | -0,205 |
| 17 | P62753 RS6_HUMAN    | R.RLS#S#LRASTKSE.S         | S235:S236: | 2 | 2,0439 | 0,217 | -0,771 |
| 17 | Q9C0C2 TB182_HUMAN  | K.SSPCHSQLE.A              |            | 2 | 2,0437 | 0,105 | -0,105 |
| 17 | B2RAI3 B2RAI3_HUMAN | D.FKFM*AQGK.T              |            | 2 | 2,0433 | 0,174 | 0      |
| 17 | A8MVW0 U560A_HUMAN  | E.LRRDS#LTSPED.E.L         | S789:      | 2 | 2,0432 | 0,388 | -0,733 |
| 17 | Q09666 AHNK_HUMAN   | K.ADIKSPSLDVTPEAE.L        |            | 2 | 2,0426 | 0,287 | -0,146 |
| 17 | Q9UGV2 NDRG3_HUMAN  | K.YFLQGM*GYIPSASM*TR.L     |            | 2 | 2,0425 | 0,203 | 0,066  |
| 17 | O94913 PCF11_HUMAN  | E.LQEPDCS#PKVKEER.I        | S1520:     | 3 | 2,0406 | 0,176 | -0,306 |
| 17 | P38398 BRCA1_HUMAN  | K.VNNIPSQSTR.H             |            | 2 | 2,0351 | 0,227 | -0,328 |
| 17 | P02545 LMNA_HUMAN   | E.SRLADALQE.L              |            | 2 | 2,0293 | 0,144 | 0,061  |
| 17 | P08670 VIME_HUMAN   | R.TYS#LGSALRPSTSR.S        | S39:       | 3 | 2,0279 | 0,1   | 0,116  |
| 17 | Q9BS91 S35A5_HUMAN  | R.LTKPKS#DES#DEDTF.-       | S416:S419: | 2 | 2,0223 | 0,18  | 0,413  |
| 17 | P07602 SAP_HUMAN    | K.LVGYLDR.N                |            | 2 | 2,0212 | 0,193 | -0,146 |
| 17 | Q9UKV3 ACINU_HUMAN  | E.KSKS#PSPPRLT#E.D         | S386:T393: | 2 | 2,0202 | 0,295 | -0,656 |
| 17 | P04406 G3P_HUMAN    | E.GLM*TTVHAITATQK.T        |            | 3 | 2,0194 | 0,322 | 0,369  |
| 17 | Q9UQ35 SRRM2_HUMAN  | E.SSLVFKDT#LRTPPRER.S      | T1205:     | 3 | 2,0187 | 0,166 | 0,185  |
| 17 | Q9UQ35 SRRM2_HUMAN  | E.SYFGVSSLQLK.G            |            | 3 | 2,0175 | 0,244 | 0,595  |
| 17 | Q6PJT7 ZC3HE_HUMAN  | R.TGSISSSVSPAKPE.R         |            | 2 | 2,016  | 0,156 | -0,084 |
| 17 | Q99733 NP1L4_HUMAN  | E.RLDNVPHTPS#SYIE.T        | S53:       | 2 | 2,0158 | 0,147 | -0,571 |
| 17 | Q00839 HNRPU_HUMAN  | K.S#SGPTSLFAVTVAPPGAR.Q    | S187:      | 2 | 2,0107 | 0,101 | 0,068  |
| 17 | Q96SB4 SRPK1_HUMAN  | E.QHISQLQE.S               |            | 2 | 2,0059 | 0,143 | 0,31   |
| 17 | Q5SW79 CE170_HUMAN  | R.TLPQLPNEE.K              |            | 2 | 2,005  | 0,141 | 0      |
| 17 | O14497 ARI1A_HUMAN  | R.TLLDPGRFSK.V             |            | 2 | 2,0027 | 0,121 | 1,183  |
| 17 | Q14980 NUMA1_HUMAN  | R.LPPKVESLE.S              |            | 2 | 1,9984 | 0,285 | -0,362 |
| 17 | O75376 NCOR1_HUMAN  | R.RRPS#LLSE.F              | S70:       | 2 | 1,9974 | 0,163 | 0      |

|    |                    |                     |            |   |        |       |        |
|----|--------------------|---------------------|------------|---|--------|-------|--------|
| 17 | P05388 RLAO_HUMAN  | E.ILSDVQLIK.T       |            | 2 | 1,9907 | 0,202 | -0,237 |
| 17 | Q96PZ2 F111A_HUMAN | E.HYFS#PVSKE.Q      | S26:       | 2 | 1,9824 | 0,196 | 0,208  |
| 17 | P14618 KPYM_HUMAN  | E.VENGGSLGSK.K      |            | 2 | 1,9823 | 0,332 | -0,129 |
| 17 | P09874 PARP1_HUMAN | E.VAYSLLR.G         |            | 2 | 1,9795 | 0,193 | 0,223  |
| 17 | P20618 PSB1_HUMAN  | R.DVYTGDALR.I       |            | 2 | 1,9793 | 0,331 | 0,06   |
| 17 | O14980 XPO1_HUMAN  | D.AVLIDYQR.N        |            | 2 | 1,978  | 0,26  | -0,624 |
| 17 | O94833 BPAEA_HUMAN | E.HSTLSQQVDE.K      |            | 2 | 1,9765 | 0,204 | 0      |
| 17 | O75976 CBPD_HUMAN  | R.FVAGIHGNAPVGTE.L  |            | 2 | 1,9682 | 0,119 | 0,178  |
| 17 | Q9H3N1 TXND1_HUMAN | K.LLSESAQPLK.K      |            | 2 | 1,9669 | 0,119 | 0,112  |
| 17 | P16949 STMN1_HUMAN | E.SVPEFPLS#PPKK.K   | S38:       | 2 | 1,9658 | 0,253 | 0,087  |
| 17 | P41236 IPP2_HUMAN  | E.AM*APDILAR.K      |            | 2 | 1,9653 | 0,102 | -0,125 |
| 17 | O00299 CLIC1_HUMAN | R.KFLDGNE.L         |            | 2 | 1,9631 | 0,094 | -0,222 |
| 17 | Q14677 EPN4_HUMAN  | E.NYHFVDE.H         |            | 2 | 1,9593 | 0,154 | 0,264  |
| 17 | P30041 PRDX6_HUMAN | K.LPFPIDDR.N        |            | 2 | 1,9534 | 0,214 | 0,337  |
| 17 | Q9BTC0 DIDO1_HUMAN | K.VTVDDLPNR.M       |            | 2 | 1,9493 | 0,223 | -0,237 |
| 17 | Q9Y6D5 BIG2_HUMAN  | E.IGDGKGLDM*AR.R    |            | 2 | 1,9446 | 0,3   | -0,212 |
| 17 | O75581 LRP6_HUMAN  | R.TIIQGHLDYVM*D.I   |            | 2 | 1,939  | 0,19  | -0,343 |
| 17 | P0C7M2 RA1L3_HUMAN | R.KLFIGGLSFE.T      |            | 2 | 1,9386 | 0,096 | -0,329 |
| 17 | P31949 S10AB_HUMAN | E.SLIAVFQK.Y        |            | 2 | 1,9327 | 0,297 | 0,067  |
| 17 | Q9H2P0 ADNP_HUMAN  | E.TIHLTEPTK.L       |            | 2 | 1,9269 | 0,26  | -1,357 |
| 17 | Q92613 JADE3_HUMAN | R.NM*QVPQESLE.M     |            | 2 | 1,9227 | 0,158 | 0,307  |
| 17 | Q9Y6D5 BIG2_HUMAN  | R.RCS#VTS#M*E.S     | S614:S617: | 2 | 1,9221 | 0,108 | -0,213 |
| 17 | Q13137 CACO2_HUMAN | R.GASIPFQFRPENE.E   |            | 2 | 1,9208 | 0,298 | -0,245 |
| 17 | Q8NCD3 HJURP_HUMAN | R.GGPAS#PGGLQGLE.T  | S473:      | 2 | 1,9204 | 0,229 | 0,1    |
| 17 | P50990 TCPO_HUMAN  | E.ILPNLVCCSAK.N     |            | 2 | 1,9186 | 0,168 | -0,096 |
| 17 | P49023 PAXI_HUMAN  | E.HVYSFPNK.Q        |            | 2 | 1,9165 | 0,314 | -1,107 |
| 17 | Q96P47 CENG3_HUMAN | E.LHRS#PSLL.-       | S871:      | 2 | 1,9141 | 0,174 | 0,122  |
| 17 | A6NDB9 PALM3_HUMAN | E.GLEGPEVAGR.E      |            | 2 | 1,9126 | 0,313 | -0,372 |
| 17 | P39656 OST48_HUMAN | K.TADDPSSLIK.Y      |            | 2 | 1,911  | 0,226 | 0      |
| 17 | Q8IVF2 AHNK2_HUMAN | E.GIRPRPQGSS#PVYE.Y | S56:       | 2 | 1,9102 | 0,205 | -0,977 |
| 17 | P51858 HDGF_HUMAN  | K.SCVEEPEPEPE.A     |            | 2 | 1,9081 | 0,109 | -0,75  |
| 17 | Q9H3K6 BOLA2_HUMAN | R.VLVVSAKFE.G       |            | 2 | 1,9059 | 0,231 | 0,184  |
| 17 | Q9H2G2 SLK_HUMAN   | E.NSLPIPASK.R       |            | 2 | 1,8962 | 0,107 | 0,197  |
| 17 | Q86SQ0 PHLB2_HUMAN | R.KSS#ISSISGRDD.L   | S415:      | 2 | 1,8952 | 0,086 | -0,733 |
| 17 | Q8WWI1 LMO7_HUMAN  | E.SLDSLGSR.S        |            | 2 | 1,8938 | 0,171 | -0,073 |
| 17 | Q9Y6M7 S4A7_HUMAN  | K.VDM*NFM*R.K       |            | 2 | 1,8915 | 0,287 | -0,194 |
| 17 | P04075 ALDOA_HUMAN | R.ALQASALK.A        |            | 2 | 1,8886 | 0,087 | 0,304  |
| 17 | P60174 TPIS_HUMAN  | R.HVFGESDE.L        |            | 2 | 1,867  | 0,131 | -1,061 |
| 17 | Q9H5V8 CDCP1_HUMAN | K.LATEEPPPR.S       |            | 2 | 1,8668 | 0,313 | 0,06   |

|    |                     |                        |          |   |        |       |        |
|----|---------------------|------------------------|----------|---|--------|-------|--------|
| 17 | Q9H7N4 SFR19_HUMAN  | R.RVFFVVGTEAE.A        |          | 2 | 1,8638 | 0,226 | 0,331  |
| 17 | Q96JB5 CK5P3_HUMAN  | E.TRNQFLDE.L           |          | 2 | 1,8623 | 0,158 | 0,119  |
| 17 | P51858 HDGF_HUMAN   | K.DLFPYEEESKE.K        |          | 2 | 1,8617 | 0,156 | 0,194  |
| 17 | P55209 NP1L1_HUMAN  | E.FHFEPNE.Y            |          | 2 | 1,8603 | 0,138 | -0,066 |
| 17 | Q99848 EBP2_HUMAN   | R.GLLKPGLNVVLE.G       |          | 2 | 1,8574 | 0,129 | -0,097 |
| 17 | Q13907 IDI1_HUMAN   | E.IDYILLVR.K           |          | 2 | 1,8562 | 0,128 | 0,182  |
| 17 | P00533 EGFR_HUMAN   | E.DHFLSLQR.M           |          | 2 | 1,8502 | 0,083 | 0      |
| 17 | Q9UBC2 EP15R_HUMAN  | K.ALLFSNNTQE.L         |          | 2 | 1,8502 | 0,084 | 0,322  |
| 17 | Q86VQ1 GLC11_HUMAN  | R.ATVPYQLLR.G          |          | 2 | 1,8493 | 0,115 | 0,115  |
| 17 | Q8WXI9 P66B_HUMAN   | R.LT#PSPDIIVLSDNE.A    | T120:    | 2 | 1,8476 | 0,15  | -0,23  |
| 17 | Q9H4A3 WNK1_HUMAN   | E.QAVLPAVIPK.K         |          | 2 | 1,8463 | 0,09  | 0,353  |
| 17 | P16949 STMN1_HUMAN  | E.SVPEFPLS#PPK.K       | S38:     | 2 | 1,8448 | 0,322 | 0,764  |
| 17 | Q00653 NFKB2_HUMAN  | E.VRFYEDDE.N           |          | 2 | 1,8437 | 0,227 | -0,341 |
| 17 | Q8WW12 PCNP_HUMAN   | K.ETVPTLAPK.T          |          | 2 | 1,8423 | 0,235 | -0,766 |
| 17 | P14618 KPYM_HUMAN   | D.GLISLQVK.Q           |          | 2 | 1,8361 | 0,096 | 0,853  |
| 17 | Q96JM3 ZN828_HUMAN  | E.LRKP GPPLS#PE.I      | S427:    | 2 | 1,8329 | 0,121 | 0      |
| 17 | P43490 NAMPT_HUMAN  | E.HFQDDVFNE.K          |          | 2 | 1,8259 | 0,112 | -0,106 |
| 17 | B0I1T5 B0I1T5_HUMAN | K.ISS#SPKFDSR.D        | S1338:   | 2 | 1,8252 | 0,205 | -1,317 |
| 17 | P51571 SSRD_HUMAN   | E.VRFFDEE.S            |          | 2 | 1,8195 | 0,111 | 0,324  |
| 17 | O00541 PESC_HUMAN   | E.GDYVPPEK.L           |          | 2 | 1,8189 | 0,256 | 0,202  |
| 17 | Q96I25 SPF45_HUMAN  | R.RPDPDS#DEDE.D        | S155:    | 2 | 1,8181 | 0,225 | -0,194 |
| 17 | Q8N1F7 NUP93_HUMAN  | R.GLDIS#HIS#QRLE.S     | S72:S75: | 2 | 1,8135 | 0,159 | 0,08   |
| 17 | Q13085 ACACA_HUMAN  | R.FIIGSVS#EDNSEDE.I    | S25:     | 2 | 1,8061 | 0,153 | 0,226  |
| 17 | O00429 DNM1L_HUMAN  | E.LAYINTK.H            |          | 2 | 1,8021 | 0,168 | 0,667  |
| 17 | Q14152 EIF3A_HUMAN  | E.DAPIGPHLQSM*PSEQIR.N |          | 2 | 1,8018 | 0,102 | 0      |
| 17 | P49790 NU153_HUMAN  | R.SHLNFSM*LE.S         |          | 2 | 1,7982 | 0,167 | 0,112  |
| 17 | P34932 HSP74_HUMAN  | K.QVYVDKLAEL           |          | 2 | 1,798  | 0,215 | -0,344 |
| 17 | P38646 GRP75_HUMAN  | E.VILVGGM*TR.M         |          | 2 | 1,7972 | 0,235 | 0,063  |
| 17 | Q9H6Y2 WDR55_HUMAN  | R.IRDTPEDIVLE.A        |          | 2 | 1,7929 | 0,102 | 0,282  |
| 17 | P05783 K1C18_HUMAN  | R.IS#VSRSTS#FR.G       | S47:S53: | 2 | 1,7812 | 0,109 | -0,094 |
| 17 | Q15365 PCBP1_HUMAN  | E.TLSQSPQGR.V          |          | 2 | 1,7736 | 0,124 | 0      |
| 17 | Q9Y2W2 WBP11_HUMAN  | E.LTPLQAM*M*LR.M       |          | 2 | 1,765  | 0,367 | 0      |
| 17 | Q12840 KIF5A_HUMAN  | K.ISFLENNLE.Q          |          | 2 | 1,7634 | 0,152 | -0,339 |
| 17 | Q9H2G2 SLK_HUMAN    | K.FYIPSLHS#TGS.-       | S1232:   | 2 | 1,7612 | 0,197 | 0,44   |
| 17 | Q63ZY3 KANK2_HUMAN  | R.VVEGPREVE.V          |          | 2 | 1,7599 | 0,149 | -0,241 |
| 17 | Q14693 LPIN1_HUMAN  | E.VAALYFPK.N           |          | 2 | 1,7495 | 0,101 | 0,336  |
| 17 | P49736 MCM2_HUMAN   | R.GNDPLTS#SPGR.S       | S26:     | 2 | 1,749  | 0,164 | -0,62  |
| 17 | P31483 TIA1_HUMAN   | K.TLYVGNLSD            |          | 2 | 1,7474 | 0,204 | 0,06   |
| 17 | Q96RT1 LAP2_HUMAN   | K.SGPVGSVVK.S          |          | 2 | 1,7407 | 0,165 | 0,22   |

|    |                       |                                           |       |   |        |       |        |
|----|-----------------------|-------------------------------------------|-------|---|--------|-------|--------|
| 17 | P49327 FAS_HUMAN      | E.SIIIIHSSLAEP.R.V                        |       | 2 | 1,738  | 0,109 | -0,24  |
| 17 | Q9BQY9 DBND2_HUMAN    | E.LSLPVPTSDR.T                            |       | 2 | 1,7348 | 0,275 | 0,225  |
| 17 | Q8IYB3 SRRM1_HUMAN    | E.ATSTSDILK.V                             |       | 2 | 1,7264 | 0,086 | -1,825 |
| 17 | O95425 SVIL_HUMAN     | R.S#LTQPITTEE.V                           | S734: | 2 | 1,7214 | 0,096 | 0      |
| 17 | Q9BUF5 TBB6_HUMAN     | R.SGPFGLFRPD.N                            |       | 2 | 1,7088 | 0,125 | 0,899  |
| 17 | P00338 LDHA_HUMAN     | E.LALVDVIEDK.L                            |       | 2 | 1,7063 | 0,088 | -0,547 |
| 17 | O95757 HS74L_HUMAN    | K.QVYVDKLQE.L                             |       | 2 | 1,7036 | 0,145 | 0      |
| 17 | Q9NUU7 DD19A_HUMAN    | E.RLDTDDLDE.I                             |       | 2 | 1,6991 | 0,116 | 0,112  |
| 17 | Q1KMD3 HNRL2_HUMAN    | E.KCDYM*DE.V                              |       | 2 | 1,6943 | 0,164 | 0,062  |
| 17 | P56182 RRP1_HUMAN     | R.SEKPPAGSICR.A                           |       | 2 | 1,6828 | 0,143 | 0,203  |
| 17 | Q9P1Y5 K1543_HUMAN    | K.AVTFS#PDLGVPVHEGLGE.Y                   | S685: | 2 | 1,6792 | 0,104 | -0,128 |
| 17 | O75362 ZN217_HUMAN    | K.GTAVVPFR.A                              |       | 2 | 1,6781 | 0,23  | 0,36   |
| 17 | Q92667 AKAP1_HUMAN    | K.VVS#TPPSVTEPPEKE.L                      | S69:  | 2 | 1,6739 | 0,107 | -0,51  |
| 17 | P31939 PUR9_HUMAN     | K.ALFEVPE.L                               |       | 2 | 1,6666 | 0,129 | 0,261  |
| 17 | Q9Y5W9 SNX11_HUMAN    | R.AVGGDHAVPLDPGQLE.T                      |       | 2 | 1,6636 | 0,153 | 0,077  |
| 17 | Q13409 DC1I2_HUMAN    | E.QINIFFDYSGR.D                           |       | 2 | 1,6587 | 0,209 | -0,718 |
| 17 | O00471 EXOC5_HUMAN    | E.DAGILCQR.V                              |       | 2 | 1,6559 | 0,127 | 0      |
| 17 | Q14974 IMB1_HUMAN     | E.DDIVPHVLPFIK.E                          |       | 2 | 1,6376 | 0,143 | -0,35  |
| 17 | P35232 PHB_HUMAN      | E.DIAYQLSR.S                              |       | 2 | 1,6359 | 0,216 | -0,126 |
| 17 | P16949 STMN1_HUMAN    | E.SKDPADETEAD.-                           |       | 2 | 1,6266 | 0,204 | -0,311 |
| 17 | P49419 AL7A1_HUMAN    | E.TFAPILYVFK.F                            |       | 2 | 1,6242 | 0,242 | -0,305 |
| 17 | P54105 ICLN_HUMAN     | E.HLYVM*VNAK.F                            |       | 2 | 1,6192 | 0,249 | -0,559 |
| 17 | Q9H6F5 CCD86_HUMAN    | R.AGLGS#PERPPK.T                          | S58:  | 2 | 1,6002 | 0,191 | -0,205 |
| 17 | Q9NZT2 OGFR_HUMAN     | R.EQPPTPEPGQSAS#EVE.K                     | S405: | 2 | 1,5818 | 0,212 | 0      |
| 17 | Q13541 4EBP1_HUMAN    | K.RAGGEESQFE.M                            |       | 2 | 1,5801 | 0,176 | -0,11  |
| 17 | ##Q8N9G5 Q8N9G5_HUMAN | R.RSS#GLASRPR.V                           | S251: | 2 | 1,5786 | 0,085 | 0,732  |
| 17 | Q8NHQ8 RASF8_HUMAN    | K.GLM*DIFGK.G                             |       | 2 | 1,5559 | 0,196 | 0,136  |
| 17 | Q8TEU7 RPGF6_HUMAN    | E.SEVGDVDLTR.L                            |       | 2 | 1,5334 | 0,121 | 0,336  |
| 17 | P61201 CSN2_HUMAN     | K.AALSSFQK.V                              |       | 2 | 1,4473 | 0,198 | -1,575 |
| 17 | Q9H6F5 CCD86_HUMAN    | R.QQDLHLE.S                               |       | 2 | 1,4432 | 0,157 | 0,415  |
| 17 | Q92667 AKAP1_HUMAN    | K.SIPLECPLS#SPK.G                         | S150: | 2 | 1,4183 | 0,139 | -0,173 |
| 17 | Q96DR7 SGEF_HUMAN     | R.GLFPGPQK.S                              |       | 2 | 1,3707 | 0,096 | 0,217  |
| 18 | Q9H6F5 CCD86_HUMAN    | R.LQQGAGLESPQGQPEPGAAS#PQRQDLHLE.S        | S91:  | 3 | 6,8681 | 0,608 | 0,451  |
| 18 | P20810 ICAL_HUMAN     | E.GITGPPADSSKPIGPDDAIDALSSDFTCGS#PTAAGK.K | S243: | 3 | 6,86   | 0,522 | 0,721  |
| 18 | P05783 K1C18_HUMAN    | R.STS#FRGGM*GSGGLATGIAGGLAGM*GGIQNEKE.T   | S53:  | 3 | 6,3651 | 0,455 | 0,356  |
| 18 | P35527 K1C9_HUMAN     | R.HGVQELEIELQSLSKK.A                      |       | 3 | 6,3306 | 0,384 | 0,093  |
| 18 | Q9H0D6 XRN2_HUMAN     | E.M*RM*QNNSSPSISNTSFTSDGSPSPLGGIK.R       |       | 3 | 6,313  | 0,378 | 0,117  |
| 18 | Q15398 DLG7_HUMAN     | E.RM*S#LPLLAGGVADDINTNKKE.G               | S725: | 3 | 6,2766 | 0,49  | 0,235  |
| 18 | Q9Y6A5 TACC3_HUMAN    | K.TTHGILQKPVADTDLGDAS#PAFGSGSSSE.S        | S133: | 3 | 6,2122 | 0,542 | -0,924 |

|    |                     |                                       |           |   |        |       |        |
|----|---------------------|---------------------------------------|-----------|---|--------|-------|--------|
| 18 | Q09666 AHNK_HUMAN   | K.GAKPQGHIGVDASAPQIGGS#ITGPSVE.V      | S407:     | 3 | 6,2013 | 0,494 | 0,491  |
| 18 | Q70E73 RAPH1_HUMAN  | E.SQSNHSNQSDSGVSDTQPAGHVR.S           |           | 3 | 6,0863 | 0,457 | -0,229 |
| 18 | P11172 PYR5_HUMAN   | E.NVFVAANHNGS#PLSIKEAPKE.L            | S214:     | 2 | 6,0509 | 0,461 | 0,318  |
| 18 | Q13263 TIF1B_HUMAN  | E.KRSTAPSAASASASAAAAS#SPAGGGAEALE.L   | S49:      | 3 | 5,8512 | 0,413 | -0,273 |
| 18 | Q15942 ZYX_HUMAN    | E.ALSAGTGS#PQPPSFTYAQQR.E             | S308:     | 2 | 5,8491 | 0,451 | -0,228 |
| 18 | Q9UHB6 LIMA1_HUMAN  | R.SRPFTVAASFQSTSVKS#PK.T              | S604:     | 3 | 5,7947 | 0,487 | 0,348  |
| 18 | Q9UQ35 SRRM2_HUMAN  | K.S#GM*SPEQSRFQSDSSSYPTVDSNLLGQSR.L   | S1129:    | 3 | 5,7673 | 0,573 | 1,099  |
| 18 | P05783 K1C18_HUMAN  | E.DGEDFNLDALDSSNSM*QTIQK.T            |           | 2 | 5,7377 | 0,586 | 0,61   |
| 18 | Q7Z417 NUFP2_HUMAN  | E.LEKRT#SPQVLGSLKSGTTSE.S             | T571:     | 3 | 5,6991 | 0,446 | 0,237  |
| 18 | P05783 K1C18_HUMAN  | R.GGM*GSGGLATGIAGGLAGM*GGIQNE.K       |           | 3 | 5,5886 | 0,405 | 0,422  |
| 18 | Q8N0Z3 CCD52_HUMAN  | R.SPT#FSEELPVLGDGQQLR.T               | T642:     | 2 | 5,5557 | 0,548 | 0,238  |
| 18 | Q9UQ35 SRRM2_HUMAN  | K.SKDSLQVQSCPGSLSLCAGVK.S             |           | 3 | 5,5238 | 0,445 | 0,175  |
| 18 | Q32MZ4 LRRF1_HUMAN  | R.NM*PGLSAATLASLGGTSSR.R              |           | 2 | 5,5117 | 0,538 | 0      |
| 18 | Q02078 MEF2A_HUMAN  | E.HRGCD5#PDPDTSY#VLTPHTEE.K           | S98:Y105: | 3 | 5,4649 | 1     | 0,213  |
| 18 | Q9NQW6 ANLN_HUMAN   | K.ALSSADDASLVNASISSVK.A               |           | 2 | 5,4432 | 0,578 | -0,061 |
| 18 | P05783 K1C18_HUMAN  | R.ST#SFRGGM*GSGGLATGIAGGLAGM*GGIQNE.K | T52:      | 3 | 5,4155 | 0,425 | 0,907  |
| 18 | Q13464 ROCK1_HUMAN  | E.M*LVGDTPFYADS#LVGTYSK.I             | S282:     | 2 | 5,3442 | 0,586 | 0,113  |
| 18 | Q14247 SRC8_HUMAN   | R.AKTQTPPVSPAPQPTTEERLPS#PVYE.D       | S418:     | 3 | 5,3336 | 0,414 | -0,254 |
| 18 | Q9UQ35 SRRM2_HUMAN  | R.FQSDSSSYPTVDSNLLGQSR.L              |           | 2 | 5,2953 | 0,597 | 0,215  |
| 18 | Q92797 SYMPK_HUMAN  | K.LKPGVGAPSSSS#PSPSPSARPGPPPSEE.A     | S1171:    | 3 | 5,2874 | 0,418 | 0,131  |
| 18 | Q9H0D6 XRN2_HUMAN   | E.M*RM*QNNS#SPSISPNTSFTSDGSPSPLGGIK.R | S470:     | 3 | 5,2784 | 1     | 0,685  |
| 18 | Q8WYL5 SSH1_HUMAN   | E.STRPDS#PALFVDKPTEGERTE.R            | S237:     | 3 | 5,2693 | 0,278 | 0,228  |
| 18 | P00533 EGFR_HUMAN   | E.RELVEPLT#PSGEAPNQALLR.I             | T693:     | 3 | 5,2122 | 0,434 | 0,403  |
| 18 | P05783 K1C18_HUMAN  | E.DFNLDALDSSNSM*QTIQK.T               |           | 3 | 5,1844 | 0,557 | 0,523  |
| 18 | Q8NCM9 Q8NCM9_HUMAN | R.SSDITSDLGNVLTSTPNAK.T               |           | 2 | 5,1818 | 0,6   | 0,064  |
| 18 | Q92615 LARP5_HUMAN  | E.RTLSADASVNTLPVVVSR.E                |           | 2 | 5,1529 | 0,455 | 0      |
| 18 | Q12765 SCRN1_HUMAN  | E.DANSCHSFQ SAYLIVDRDE.A              |           | 2 | 5,1485 | 0,528 | 0,219  |
| 18 | O94876 TMCC1_HUMAN  | R.NKFGS#ADNIPNLKDSLEE.G               | S382:     | 2 | 5,1069 | 0,52  | 0      |
| 18 | Q5VUA4 ZN318_HUMAN  | R.SVRIPS#PNILKTGLTE.N                 | S2101:    | 3 | 5,1025 | 0,453 | 0,203  |
| 18 | P46821 MAP1B_HUMAN  | E.KTATCHSSSS#PPIDAASAEPYGFR.A         | S1819:    | 3 | 5,0737 | 0,465 | 0,14   |
| 18 | Q53HL2 BOREA_HUMAN  | R.IYNISGNGS#PLADSKE.I                 | S219:     | 2 | 5,0647 | 0,416 | 0,14   |
| 18 | P55196 AFAD_HUMAN   | E.VAKQGAIIYHGLATLLNQPS#PM*M*QR.I      | S1090:    | 3 | 5,0616 | 0,369 | -0,134 |
| 18 | P08651 NFIC_HUMAN   | R.TGM*GSDQEDSKPITLDTDFQE.S            |           | 2 | 5,0555 | 0,516 | 0,602  |
| 18 | Q09666 AHNK_HUMAN   | E.TGKLQGSQVSLASKK.S                   |           | 3 | 5,0354 | 0,428 | -0,751 |
| 18 | Q8ND56 LS14A_HUMAN  | E.TSNSGTLQSSAVGSAFTQDTR.S             |           | 2 | 5,0349 | 0,561 | 0,331  |
| 18 | Q13428 TCOF_HUMAN   | R.LAS#TNSSVLGADLPSSM*KE.K             | S107:     | 2 | 5,0264 | 0,432 | -0,122 |
| 18 | P55209 NP1L1_HUMAN  | R.M*RS#EPDSDPFSFDGPE.I                | S237:     | 2 | 5,0233 | 0,544 | 0,301  |
| 18 | Q15293 RCN1_HUMAN   | E.LGERPPEDNQSFQYDHE.A                 |           | 3 | 5,0144 | 0,351 | 0      |
| 18 | Q9P2E9 RRBP1_HUMAN  | K.SHVEDGDIAGAPASS#PEAPPAEQDPVQLK.T    | S1277:    | 3 | 5,0092 | 0,468 | 0,122  |

|    |                    |                                           |            |   |        |       |        |
|----|--------------------|-------------------------------------------|------------|---|--------|-------|--------|
| 18 | Q86WB0 NIPA_HUMAN  | R.QLIDEGIAPEEGVDAK.D                      |            | 2 | 4,9859 | 0,514 | 0      |
| 18 | Q96S94 CCNL2_HUMAN | R.GLLPGGTQVLDGTSGF5#PAPK.L                | S330:      | 2 | 4,9703 | 0,484 | 0,235  |
| 18 | Q08J23 NSUN2_HUMAN | R.AGEPNSPDAEEANS#PDVTAGCDPAGVHPPR.-       | S751:      | 3 | 4,9483 | 0,394 | 0,237  |
| 18 | Q96L14 C170L_HUMAN | R.ALHPAAVSAAEFENAES#E.A                   | S269:      | 2 | 4,9268 | 0,563 | 0,122  |
| 18 | Q9BTK6 PA1_HUMAN   | R.DLFSLDSEDPSPAS#PPLR.S                   | S237:      | 2 | 4,9258 | 0,522 | 0      |
| 18 | Q8WXI9 P66B_HUMAN  | R.LTPSPDIIVLS#DNEASSPR.S                  | S129:      | 2 | 4,9151 | 0,424 | 0      |
| 18 | P52948 NUP98_HUMAN | E.NHQQDGEDSLVSHFYTNPIAKPIPQT#PE.S         | T670:      | 3 | 4,8944 | 0,432 | 0,327  |
| 18 | P35606 COPB2_HUMAN | E.LDGKPAS#PTPVIVASHTANKEE.K               | S859:      | 3 | 4,8703 | 0,459 | 0,313  |
| 18 | Q9H6T3 RPAP3_HUMAN | E.NNPINLANVIAATGTTSK.K                    |            | 2 | 4,8584 | 0,498 | -0,068 |
| 18 | P61421 VA0D1_HUMAN | K.LHLQSTDYGNFLANE.A                       |            | 2 | 4,8518 | 0,511 | 0      |
| 18 | O95684 FR1OP_HUMAN | E.KGPTTGEALDLSDVHS#PPKSPE.G               | S156:      | 3 | 4,8455 | 0,435 | 0,381  |
| 18 | Q9HOD6 XRN2_HUMAN  | E.M*RM*QNNSSPSISPTS#DGSPLGGIK.R           | S482:      | 3 | 4,8385 | 0,345 | 0,342  |
| 18 | Q9UKL0 RCOR1_HUMAN | R.VGPQYQAVVPDFDPAK.L                      |            | 2 | 4,8321 | 0,451 | 0,07   |
| 18 | P55011 S12A2_HUMAN | R.AAAAAAAAAAAAAAAAAAGAGAGAK.Q             |            | 3 | 4,8042 | 0,438 | 0,115  |
| 18 | Q9UQ35 SRRM2_HUMAN | R.FQSDSSSYPTVDSNSLLGQSRLE.T               |            | 2 | 4,7956 | 0,495 | 0,679  |
| 18 | P11532 DMD_HUMAN   | E.HKGLSPLSPPEM*M*PTS#PQSPR.D              | S3549:     | 3 | 4,7908 | 0,405 | 0      |
| 18 | Q9UHK0 NUFP1_HUMAN | E.NQVLDSSAPKS#PSQDVK.A                    | S403:      | 2 | 4,7592 | 0,467 | -1,168 |
| 18 | Q71RC2 LARP4_HUMAN | R.ASTAS#PCNNNINAATAVALQEPR.K              | S597:      | 3 | 4,7554 | 0,359 | 0,821  |
| 18 | Q9BY44 EIF2A_HUMAN | E.ARSDKS#PDLAPTPAPQSTPR.N                 | S506:      | 3 | 4,7463 | 0,373 | 1,179  |
| 18 | Q9NZT2 OGFR_HUMAN  | E.GAGDSAASVSGGAQTLALAGS#PAPSGHPK.A        | S484:      | 3 | 4,7457 | 0,463 | 0,212  |
| 18 | P05787 K2C8_HUMAN  | E.TRDGKLV5#ESS#DVLPK.-                    | S475:S478: | 2 | 4,7347 | 0,485 | 0,065  |
| 18 | Q08J23 NSUN2_HUMAN | R.AGEPNS#PDAEEANS PDVTAGCDPAGVHPPR.-      | S743:      | 3 | 4,7257 | 0,513 | 1,183  |
| 18 | Q8WXI9 P66B_HUMAN  | R.GRLTPSPDIIVLS#DNEASSPR.S                | S129:      | 3 | 4,7073 | 0,319 | 0,159  |
| 18 | P55884 EIF3B_HUMAN | E.AASGPSES#PSPAAEELPGSHAEPVPAQGEAPGEQAR.D | S83:       | 3 | 4,6695 | 0,506 | 0,489  |
| 18 | P54277 PMS1_HUMAN  | K.NYSNVDTSVIPFQNDM*HNDE.S                 |            | 2 | 4,6683 | 0,546 | 0,829  |
| 18 | Q9UK76 HN1_HUMAN   | R.RNS#SEASSGDFLDLKE.G                     | S87:       | 2 | 4,6468 | 0,47  | -0,193 |
| 18 | Q92598 HS105_HUMAN | E.CLNQRPPENPDTDKNVQQDNSE.A                |            | 3 | 4,6424 | 0,258 | 0      |
| 18 | Q8NCF5 NF2IP_HUMAN | E.VLSRDS#PLKTLM*SHYEE.A                   | S369:      | 3 | 4,6422 | 0,302 | 0,251  |
| 18 | Q5UIP0 RIF1_HUMAN  | E.NRPFSPSPLNNISSTVTVK.N                   |            | 3 | 4,6286 | 0,399 | 0,267  |
| 18 | O15085 ARHGB_HUMAN | E.LDSDVVFHGEPEPEELPGGTGSQQR.V             |            | 3 | 4,6278 | 0,363 | 0,543  |
| 18 | P68400 CSK21_HUMAN | E.AM*EHYPFYTVVKD.Q                        |            | 3 | 4,6112 | 0,378 | 0,34   |
| 18 | Q9Y2W1 TR150_HUMAN | K.SPVGKSPPS#TGSTYGSSQKEE.S                | S323:      | 3 | 4,6042 | 0,388 | -0,501 |
| 18 | Q9C0C2 TB182_HUMAN | R.RES#AASGLGGLLEEE.G                      | S1473:     | 2 | 4,5995 | 0,501 | -0,076 |
| 18 | P13645 K1C10_HUMAN | K.GSLGGGFSSGGFSGGSFSR.G                   |            | 2 | 4,579  | 0,517 | 0,071  |
| 18 | Q92870 APBB2_HUMAN | R.TKS#FLNYYADLE.T                         | S160:      | 2 | 4,5759 | 0,405 | -0,237 |
| 18 | Q9ULU4 PKCB1_HUMAN | K.TGQAGSLSGS#PKPFSPQLSAPITTK.T            | S490:      | 3 | 4,5694 | 0,349 | -0,505 |
| 18 | Q6S8J3 A26CA_HUMAN | R.TTGIVM*DSGDGVTHTVPIYE.G                 |            | 2 | 4,568  | 0,417 | 0,463  |
| 18 | P18583 SON_HUMAN   | R.LTSLRAGIEGPLLASDVGR.D                   |            | 3 | 4,5651 | 0,424 | -0,665 |
| 18 | Q9BY44 EIF2A_HUMAN | R.SDKS#PDLAPTPAPQSTPR.N                   | S506:      | 2 | 4,5637 | 0,518 | -0,314 |

|    |                     |                                        |        |   |        |       |        |
|----|---------------------|----------------------------------------|--------|---|--------|-------|--------|
| 18 | Q58WW2 IQWD1_HUMAN  | E.KLS#PKPGTGEPVLSLHYSTE.G              | S467:  | 3 | 4,5555 | 0,321 | 0,082  |
| 18 | Q15029 U5S1_HUMAN   | E.TIVQEEDT#QPLTEPIIKPVK.T              | T86:   | 3 | 4,5507 | 0,441 | -0,233 |
| 18 | P05387 RLA2_HUMAN   | K.LASVPAGGAVAVSAAPGSAAPAAGSAPAAAAEEK.K |        | 2 | 4,5426 | 0,602 | 0,792  |
| 18 | Q05655 KPCD_HUMAN   | R.RSDS#ASSEPVGIYQGFE.K                 | S304:  | 2 | 4,5197 | 0,472 | 0      |
| 18 | Q5W0B1 RN219_HUMAN  | K.SSQGSEFLEEDPKLEE.K                   |        | 2 | 4,5176 | 0,376 | 0,334  |
| 18 | Q15942 ZYG_HUMAN    | K.FTPVASKFS#PGAPGGSGSQPNQK.L           | S281:  | 2 | 4,5136 | 0,405 | 0,525  |
| 18 | P52907 CAZA1_HUMAN  | E.DGNVQLVSHKDVQDSLTVSNE.A              |        | 2 | 4,5093 | 0,497 | -0,214 |
| 18 | A0FGR8 ESYT2_HUMAN  | E.KAQPPEAGPQGLHDLGR.S                  |        | 3 | 4,5029 | 0,531 | 0,413  |
| 18 | Q6UB35 C1TM_HUMAN   | E.KNPAFKPVLAIHQAGDDNLM*QE.I            |        | 3 | 4,5004 | 0,44  | 0,151  |
| 18 | Q02952 AKA12_HUMAN  | E.DFAAHPGEDAVPTGPDCAK.S                |        | 2 | 4,4942 | 0,58  | 0,469  |
| 18 | Q9H330 CI005_HUMAN  | E.SAPTLSTSPSPSSPTSPS#PTLGR.R           | S332:  | 2 | 4,4887 | 0,51  | 0,394  |
| 18 | P49023 PAXI_HUMAN   | E.M*SS#PQRVTSTQQTR.I                   | S244:  | 3 | 4,4835 | 0,368 | 0      |
| 18 | P22087 FBRL_HUMAN   | E.NM*KPQEQLTLEPYERD.H                  |        | 3 | 4,4738 | 0,381 | 0,638  |
| 18 | Q6UB35 C1TM_HUMAN   | E.KNPAFKPVLAIHQAGDDNLM*QE.I            |        | 2 | 4,4691 | 0,451 | 0,101  |
| 18 | Q9UQ35 SRRM2_HUMAN  | R.FQSDSSSYPTVDSNSLLGQSR.L              |        | 3 | 4,4651 | 0,357 | 0,322  |
| 18 | Q5UIP0 RIF1_HUMAN   | E.LDPSLVSANDS#PSGM*QTR.C               | S2161: | 2 | 4,4619 | 0,529 | -0,062 |
| 18 | P60709 ACTB_HUMAN   | R.KDLYANTVLSGGTTM*YPGIADR.M            |        | 3 | 4,4581 | 0,478 | 0      |
| 18 | P33991 MCM4_HUMAN   | R.GQSDIAITKDM*FEE.A                    |        | 2 | 4,4576 | 0,335 | 0      |
| 18 | P07437 TBB5_HUMAN   | E.VISDEHGIDPTGTYHGSDQLQDR.I            |        | 3 | 4,4564 | 0,44  | -0,139 |
| 18 | Q9NWH9 SLTM_HUMAN   | R.AGAGM*ITQHSSNAS#PINR.I               | S1002: | 3 | 4,4492 | 0,456 | 0,383  |
| 18 | Q59HD5 Q59HD5_HUMAN | E.ARS#PSVAAM*ASPQLCR.A                 | S15:   | 3 | 4,4473 | 0,187 | -0,203 |
| 18 | Q9Y3F4 STRAP_HUMAN  | K.LYKYDYNSGEELE.S                      |        | 2 | 4,4455 | 0,438 | 0      |
| 18 | P62158 CALM_HUMAN   | E.AFSLFDKDGDTITTK.E.L                  |        | 2 | 4,4439 | 0,519 | -0,066 |
| 18 | Q9H0E9 BRD8_HUMAN   | R.SGVAEAPVGSKAPS#IDGKEE.L              | S387:  | 3 | 4,4427 | 0,303 | -0,364 |
| 18 | Q9H6F5 CCD86_HUMAN  | E.FESNPEETREPGSPSVQR.A                 |        | 3 | 4,4419 | 0,321 | -0,341 |
| 18 | Q0JRZ9 FCHO2_HUMAN  | E.LKVSIGNITLS#PAISR.H                  | S387:  | 2 | 4,4323 | 0,459 | -0,349 |
| 18 | Q53EZ4 CEP55_HUMAN  | K.SPTAALNES#LVECPK.C                   | S436:  | 2 | 4,4289 | 0,394 | -0,719 |
| 18 | Q32MZ4 LRRF1_HUMAN  | R.NM*PGLSAATLASLGGTSS#R.R              | S116:  | 2 | 4,427  | 0,392 | -0,129 |
| 18 | Q96EV2 RBM33_HUMAN  | R.CSATPSAQVKPIVSAS#PPSR.A              | S751:  | 3 | 4,4221 | 0,387 | -0,345 |
| 18 | P08670 VIME_HUMAN   | E.NTLQSFROQVDNANSLAR.L                 |        | 3 | 4,4212 | 0,278 | 0,378  |
| 18 | Q9Y6A5 TACC3_HUMAN  | E.NCDFLFS#PPEVTGR.S                    | S25:   | 2 | 4,4162 | 0,424 | -0,142 |
| 18 | Q9UQ35 SRRM2_HUMAN  | E.KSATRPSPS#PERSSTGPEPPAPTLLAE.R       | S353:  | 3 | 4,4134 | 0,38  | 0,249  |
| 18 | O75152 ZC11A_HUMAN  | R.RLS#SASTGKPLSVEDDFE.K                | S758:  | 2 | 4,4043 | 0,518 | 0,346  |
| 18 | Q5VUA4 ZN318_HUMAN  | E.LTALGNLGDGM*PVDFCTTR.V               |        | 2 | 4,3973 | 0,483 | -0,428 |
| 18 | B2CI53 B2CI53_HUMAN | R.NGILASPQS#APGNLDNSK.S                | S263:  | 2 | 4,3918 | 0,575 | -0,589 |
| 18 | Q9UGV2 NDRG3_HUMAN  | K.YFLQGM*GYIPSASM*TR.L                 |        | 2 | 4,3906 | 0,394 | -0,197 |
| 18 | P17812 PYRG1_HUMAN  | E.DHPFFVGVQYHPE.F                      |        | 2 | 4,3785 | 0,478 | 0,078  |
| 18 | Q15149 PLEC1_HUMAN  | K.GYYSPYSVSGSGST#AGSR.T                | T4623: | 2 | 4,3753 | 0,531 | 0      |
| 18 | P55060 XPO2_HUMAN   | K.SQICDAAALYAQKYDEE.F                  |        | 2 | 4,3677 | 0,59  | 0,605  |



|    |                     |                                    |            |   |        |       |        |
|----|---------------------|------------------------------------|------------|---|--------|-------|--------|
| 18 | Q14157 UBP2L_HUMAN  | E.NDSSNLDPSQAPSLAQPLVFSNSK.Q       |            | 3 | 4,3626 | 0,342 | -0,145 |
| 18 | P35527 K1C9_HUMAN   | R.HGVQELEIELQSQLSK.K               |            | 2 | 4,3516 | 0,492 | 0,266  |
| 18 | Q9NTK5 OLA1_HUMAN   | E.GSVDPIRDIEIHEE.L                 |            | 3 | 4,3485 | 0,3   | 0,212  |
| 18 | P17706 PTN2_HUMAN   | E.LSKEDLSPAFDHS#PNKIM*TE.K         | S304:      | 2 | 4,3194 | 0,523 | 0,622  |
| 18 | Q9H0D6 XRN2_HUMAN   | R.M*QNNSSPSISPNTSFTSDGSPSPLGGIKR.K |            | 3 | 4,317  | 0,476 | 0,307  |
| 18 | Q13263 TIF1B_HUMAN  | R.STAPSAAASASASAAASS#PAGGGAEALE.L  | S50:       | 3 | 4,3124 | 0,34  | 0,458  |
| 18 | P33316 DUT_HUMAN    | E.DYRGNVGVVLFNFGKE.K               |            | 2 | 4,3119 | 0,319 | -0,471 |
| 18 | P05783 K1C18_HUMAN  | E.DFNLGDALDSSNSM*QTIQK.T           |            | 2 | 4,3098 | 0,515 | 0,349  |
| 18 | Q9NWH9 SLTM_HUMAN   | E.VSKPLPSEGS#LAEADHTAHEE.M         | S217:      | 3 | 4,3092 | 0,38  | 0,32   |
| 18 | O14497 ARI1A_HUMAN  | E.RGEDPPPDIFAAADSKK.S              |            | 3 | 4,3061 | 0,361 | 0,302  |
| 18 | Q9BTU6 P4K2A_HUMAN  | R.VAAAAGSGPS#PPGS#PGHDRE.R         | S47:S51:   | 2 | 4,2991 | 0,465 | -0,309 |
| 18 | P61769 B2MG_HUMAN   | K.SNFLNCYVSGFHPSDIE.V              |            | 2 | 4,299  | 0,459 | 0,43   |
| 18 | Q9UHB6 LIMA1_HUMAN  | R.ETPHS#PGVEDAPIAKVGVLAASM*E.A     | S490:      | 3 | 4,2872 | 0,294 | 0,219  |
| 18 | P22059 OSBP1_HUMAN  | K.RTGS#NIS#GASSDISLDE.Q            | S379:S382: | 2 | 4,2839 | 0,459 | 0,261  |
| 18 | Q15424 SAFB1_HUMAN  | K.ILDILGETCKS#EPVKEE.S             | S227:      | 3 | 4,2817 | 0,254 | 0,269  |
| 18 | O00571 DDX3X_HUMAN  | E.KYDDIPVEATGNNPCPHIE.S            |            | 3 | 4,2725 | 0,175 | -0,422 |
| 18 | P05787 K2C8_HUMAN   | E.TRDGKLV#ESS#DVLPK.-              | S475:S478: | 3 | 4,2694 | 0,327 | 0,484  |
| 18 | Q00536 PCTK1_HUMAN  | E.DINKRLS#LPADIRLPE.G              | S119:      | 3 | 4,268  | 0,181 | 0      |
| 18 | Q09666 AHNK_HUMAN   | K.GPHVDVSGPDIDIEGPE.G              |            | 2 | 4,2646 | 0,411 | 0,352  |
| 18 | Q09666 AHNK_HUMAN   | E.LNLKS#PKVKGDLDIAGPNLE.G          | S3426:     | 3 | 4,2581 | 0,412 | 0,582  |
| 18 | Q0JRZ9 FCHO2_HUMAN  | E.LKVSIGNITLS#PAISRHS#PVQM*NR.N    | S387:S394: | 3 | 4,2461 | 0,31  | -0,065 |
| 18 | Q14789 G0GB1_HUMAN  | E.LRSSSQTQPLKVQYQR.Q               |            | 3 | 4,241  | 0,34  | -1,094 |
| 18 | O94876 TMCC1_HUMAN  | R.NKFGS#ADNIPNLKDSLE.E             | S382:      | 2 | 4,2394 | 0,403 | 0,314  |
| 18 | Q8ND56 LS14A_HUMAN  | K.TQLSQGRSS#PQLDPLRKS#PTM*E.Q      | S183:S192: | 3 | 4,2302 | 0,296 | 0,07   |
| 18 | Q6P6C2 ALKB5_HUMAN  | E.AAAAAAAAAAAAAAAAAAAAAEPYPVSGAK.R |            | 3 | 4,2121 | 0,371 | 0      |
| 18 | Q0JRZ9 FCHO2_HUMAN  | E.LKVSIGNITLS#PAISR.H              | S387:      | 3 | 4,2095 | 0,2   | -0,418 |
| 18 | P02545 LMNA_HUMAN   | R.SVGGG#GGGSGFDNLVTR.S             | S632:      | 2 | 4,2061 | 0,554 | -0,445 |
| 18 | Q9UHR5 S30BP_HUMAN  | E.KGGLVSDAYGEDDFSR.L               |            | 2 | 4,1895 | 0,513 | 0      |
| 18 | Q5JSZ5 K0515_HUMAN  | R.HIISATSLSTS#PTE.L                | S226:      | 2 | 4,1835 | 0,583 | 0      |
| 18 | Q9C0C2 TB182_HUMAN  | R.SFGTRPLS#SGFSPEEAQQQDEE.F        | S983:      | 3 | 4,1685 | 0,34  | -0,146 |
| 18 | Q15149 PLEC1_HUMAN  | R.SSS#VGSSSYPISPAVSR.T             | S4386:     | 2 | 4,1566 | 0,476 | 0,066  |
| 18 | Q9NVM9 CLO11_HUMAN  | E.IIKDSPDS#PEPPNKKPLVE.M           | S626:      | 2 | 4,1467 | 0,33  | 0,224  |
| 18 | Q5JT44 Q5JT44_HUMAN | E.GDNLETPSQS#PQLFHDDTHSRIE.Q       | S128:      | 3 | 4,1443 | 0,225 | 0,338  |
| 18 | Q9H0E9 BRD8_HUMAN   | R.SGVAEAPVGSKAPS#IDGKEE.L          | S387:      | 2 | 4,1396 | 0,394 | -0,608 |
| 18 | Q9P260 K1468_HUMAN  | R.AGS#ISTLDSLDFAR.Y                | S180:      | 2 | 4,1371 | 0,388 | -0,08  |
| 18 | Q9Y2X7 GIT1_HUMAN   | R.ARS#M*DSSDLSDGAVTLQE.Y           | S410:      | 2 | 4,1352 | 0,452 | 0,308  |
| 18 | Q9UPN9 TRI33_HUMAN  | R.SACM*LSSPESSLT#PPLSTNLHLE.S      | T815:      | 2 | 4,135  | 0,481 | 1,141  |
| 18 | Q9Y2L9 LRCH1_HUMAN  | E.NS#PAVS#PTTNSTAPFLKPR.S          | S532:S536: | 2 | 4,1347 | 0,448 | -0,111 |
| 18 | Q9H6F5 CCD86_HUMAN  | E.FESNPEETREPGS#PPSVQR.A           | S47:       | 3 | 4,1179 | 0,376 | 0      |

|    |                    |                                  |                    |   |        |       |        |
|----|--------------------|----------------------------------|--------------------|---|--------|-------|--------|
| 18 | P17706 PTN2_HUMAN  | E.LSKEDLSPAFDHS#PNKIM*TE.K       | S304:              | 3 | 4,1152 | 0,417 | 0,544  |
| 18 | P09211 GSTP1_HUMAN | R.CKYISLIYNTYE.A                 |                    | 2 | 4,1131 | 0,474 | 0      |
| 18 | P00558 PGK1_HUMAN  | E.SPERPFLAILGGAK.V               |                    | 3 | 4,1062 | 0,323 | 0,126  |
| 18 | Q96JH7 VCIP1_HUMAN | E.TTDGCVADALGAAFATR.S            |                    | 2 | 4,1039 | 0,478 | -0,288 |
| 18 | Q13547 HDAC1_HUMAN | K.LHISPSNM*TNQNTNE.Y             |                    | 2 | 4,1035 | 0,444 | -0,213 |
| 18 | P05787 K2C8_HUMAN  | E.TRDGKLV#ES#SDVLPK.-            | S475:S477:         | 2 | 4,0865 | 0,372 | 0,194  |
| 18 | P15336 ATF2_HUMAN  | R.NDSVIVADQT#PT#PTRFLK.N         | T51:T53:           | 2 | 4,0844 | 0,513 | 0,903  |
| 18 | P08670 VIME_HUMAN  | E.SRISLPLPNFSSLNLRE.T            |                    | 3 | 4,0796 | 0,381 | 0      |
| 18 | Q01082 SPTB2_HUMAN | R.TSS#KESS#PIPS#PTSDR.K          | S2161:S2165:S2169: | 2 | 4,078  | 1     | -0,191 |
| 18 | Q09666 AHNK_HUMAN  | E.LNLKS#PKVKGDLDIAGPNLE.G        | S3426:             | 2 | 4,0698 | 0,412 | 0,443  |
| 18 | Q13263 TIF1B_HUMAN | E.DKADVQSIIGLQRFTE.T             |                    | 2 | 4,0692 | 0,443 | -0,065 |
| 18 | Q8NI35 INADL_HUMAN | E.NM*STGYHLGS#PTAEHHPEDTEE.Q     | S1782:             | 3 | 4,0673 | 0,392 | -0,505 |
| 18 | Q99497 PARK7_HUMAN | K.KEGPYDVVVLPGGNLGAQNLSE.S       |                    | 2 | 4,0651 | 0,411 | 0,324  |
| 18 | Q15424 SAFB1_HUMAN | R.KFDFDACNEVPPAPK.E              |                    | 2 | 4,0494 | 0,448 | 0,07   |
| 18 | Q12893 TM115_HUMAN | E.SGAKVDSPLPSDKAPT#PPGKGAPE.S    | T329:              | 3 | 4,0483 | 0,344 | -0,447 |
| 18 | O60271 JIP4_HUMAN  | R.NVSTGS#AENEKSE.V               | S332:              | 2 | 4,047  | 0,385 | -0,235 |
| 18 | Q8N0Z3 CCD52_HUMAN | R.SPT#FSEELPVLGDGQQLR.T          | T642:              | 3 | 4,0428 | 0,305 | 0      |
| 18 | Q9UBC2 EP15R_HUMAN | E.RGS#FGAM*DDPFKNK.A             | S593:              | 3 | 4,0426 | 0,367 | 0      |
| 18 | P17544 ATF7_HUMAN  | R.TDSVIIADQT#PT#PTR.F            | T51:T53:           | 2 | 4,042  | 0,462 | -0,275 |
| 18 | Q99497 PARK7_HUMAN | E.DAKKEGPYDVVVLPGGNLGAQNLSE.S    |                    | 3 | 4,0329 | 0,406 | -0,071 |
| 18 | Q9BTK6 PA1_HUMAN   | R.TGRDLFSLDSEDSPAS#PPLR.S        | S237:              | 3 | 4,0283 | 0,222 | 0,157  |
| 18 | P20020 AT2B1_HUMAN | R.NSS#PPPS#PNKNNNAVDSGIHLTIE.M   | S1216:S1220:       | 3 | 4,0235 | 0,336 | 0,206  |
| 18 | O14641 DVL2_HUMAN  | E.RHLAGYESS#STLM*TSE.L           | S195:              | 2 | 4,0233 | 0,527 | 0,262  |
| 18 | O75376 NCOR1_HUMAN | E.VSQASQLLQQQQQQLR.R             |                    | 3 | 4,0202 | 0,394 | 0,364  |
| 18 | Q9Y4X0 AMER1_HUMAN | K.LSSS#PPSGSGGGGASSSSHCSGE.S     | S16:               | 2 | 4,0163 | 0,511 | 0,337  |
| 18 | Q86WB0 NIPA_HUMAN  | R.SQDATFSPGSEQAEKS#PGPIVSR.T     | S344:              | 3 | 4,0139 | 0,386 | 0,075  |
| 18 | P52948 NUP98_HUMAN | E.SAGNKHSNS#NS#VDDTIVALNM*R.A    | S681:S683:         | 3 | 4,0088 | 1     | 0,219  |
| 18 | Q15149 PLEC1_HUMAN | E.LQLVTYKAQLEPVAS#PAKKPK.V       | S1435:             | 3 | 4,0076 | 0,415 | -0,23  |
| 18 | Q9HAF1 CA149_HUMAN | K.SSVTSAAAVSALAGVQDQLIEK.R       |                    | 3 | 4,0061 | 0,203 | 0,341  |
| 18 | Q9UQ35 SRRM2_HUMAN | R.SSGHSSSELS#PDAVEK.A            | S1387:             | 2 | 4,0059 | 0,365 | -1,15  |
| 18 | Q99536 VAT1_HUMAN  | E.NGVTHPIDYHTTDYVDE.I            |                    | 2 | 4,0049 | 0,562 | -0,185 |
| 18 | Q04917 1433F_HUMAN | E.DSYKDSTLIM*QLLR.D              |                    | 3 | 4,0036 | 0,235 | 0,108  |
| 18 | Q16891 IMMT_HUMAN  | R.QTASVTLQAIQAQNAAVQAVNAHSNILK.A |                    | 3 | 4,0031 | 0,363 | 0,323  |
| 18 | P35606 COPB2_HUMAN | E.LDGKPAS#PTPVIVASHTANKE.E       | S859:              | 3 | 3,9995 | 0,455 | 0,248  |
| 18 | P46100 ATRX_HUMAN  | E.NLVLSSTGFCQS#S#GDEALSK.S       | S1244:S1245:       | 3 | 3,9965 | 1     | 0,458  |
| 18 | Q96T23 RSF1_HUMAN  | E.IKLS#DDFDS#PVKGPLCK.S          | S382:S387:         | 3 | 3,9936 | 0,344 | 0,44   |
| 18 | Q9UK61 CC063_HUMAN | R.KLQQFSPLS#DYEGQEEE.M           | S636:              | 2 | 3,9925 | 0,355 | 0      |
| 18 | P54277 PMS1_HUMAN  | E.SSGKNYSNVDTSVIPFQNDM*HNDE.S    |                    | 3 | 3,9915 | 0,288 | 0,067  |
| 18 | O00505 IMA3_HUMAN  | E.VKVQTAALRAVGNIVTGTDE.Q         |                    | 2 | 3,9837 | 0,508 | 0      |

|    |                     |                                    |                    |   |        |       |        |
|----|---------------------|------------------------------------|--------------------|---|--------|-------|--------|
| 18 | O75531 BAF_HUMAN    | R.DFVAEPM*GEKPVGSLAGIGE.V          |                    | 2 | 3,978  | 0,48  | 0,483  |
| 18 | Q12756 KIF1A_HUMAN  | R.TPQPCSRPAS#PEPELLPE.A            | S1532:             | 2 | 3,976  | 0,288 | 0,351  |
| 18 | Q5TGY3 AHDC1_HUMAN  | E.YSDVLAKLAFILNR.Q                 |                    | 2 | 3,9641 | 0,443 | -0,162 |
| 18 | Q6P6C2 ALKB5_HUMAN  | E.AAAAAAAAAAAAAAAAAAAEPYPVSGAKRK.Y |                    | 3 | 3,9564 | 0,292 | -0,21  |
| 18 | P31939 PUR9_HUMAN   | K.HVSPAGAAVGIPLSEDE.A              |                    | 2 | 3,9449 | 0,425 | 0,074  |
| 18 | P55196 AFAD_HUMAN   | K.QGAIYHGLATLLNQPS#PM*M*QR.I       | S1090:             | 3 | 3,9422 | 0,132 | -0,225 |
| 18 | O43707 ACTN4_HUMAN  | K.ACLISLGYDVENDRQGEAE.F            |                    | 2 | 3,9386 | 0,443 | 0,228  |
| 18 | Q7Z460 CLAP1_HUMAN  | R.SRS#DIDVNAASAK.S                 | S600:              | 2 | 3,9349 | 0,385 | -0,246 |
| 18 | O15085 ARHGB_HUMAN  | E.LDDSDVFGHEPEPEELPGGTGSQQR.V      |                    | 2 | 3,9202 | 0,288 | 0,634  |
| 18 | Q8WU17 RN139_HUMAN  | E.RNGVIQHTGAAAEFNDT#D.-            | T663:              | 2 | 3,9188 | 0,433 | -0,109 |
| 18 | P41236 IPP2_HUMAN   | E.M*NILATYHPADKYGLM*K.I            |                    | 2 | 3,9057 | 0,515 | 0,462  |
| 18 | B2CI53 B2CI53_HUMAN | R.NGILASPQSAPGNLNSK.S              |                    | 2 | 3,9038 | 0,501 | 0      |
| 18 | Q6NZI2 PTRF_HUMAN   | R.RGS#S#PDVHALLE.I                 | S365:S366:         | 2 | 3,9032 | 0,452 | 0,339  |
| 18 | Q9NVM9 CLO11_HUMAN  | E.AEIIKDSPDS#PEPPNKKPLVE.M         | S626:              | 2 | 3,9031 | 0,364 | 0,512  |
| 18 | P02545 LMNA_HUMAN   | R.SGAQASSTPLS#PTR.I                | S22:               | 2 | 3,9002 | 0,523 | -0,424 |
| 18 | Q92499 DDX1_HUMAN   | E.HLNCTISQVEPDIKVPVDE.F            |                    | 2 | 3,8961 | 0,315 | 0,556  |
| 18 | O00178 GTPB1_HUMAN  | R.LHGGFSDSCSEGEALNGEPE.L           |                    | 2 | 3,8902 | 0,374 | 0,328  |
| 18 | Q13596 SNX1_HUMAN   | K.ITTSLLPINNGSKE.N                 |                    | 2 | 3,8797 | 0,481 | -0,41  |
| 18 | O95208 EPN2_HUMAN   | E.RM*AQVATGM*GSNQITFGR.G           |                    | 3 | 3,8737 | 0,457 | -0,28  |
| 18 | Q9HCM4 E41L5_HUMAN  | K.NANVQDAATNSAVLNE.N               |                    | 2 | 3,8734 | 0,437 | 0,15   |
| 18 | Q9P265 DIP2B_HUMAN  | R.QAALSAALQSLQNAE.S                |                    | 2 | 3,8734 | 0,569 | -0,074 |
| 18 | Q15942 ZYG_HUMAN    | E.ALSAGTGS#PQPPSFTYAQQR.E          | S308:              | 3 | 3,873  | 0,276 | 0      |
| 18 | Q9NQG5 CT077_HUMAN  | K.LSM*EDSKS#PPPKATEE.K             | S134:              | 3 | 3,8669 | 0,212 | -0,397 |
| 18 | P04792 HSPB1_HUMAN  | R.AQLGGPEAAKS#DE.T                 | S199:              | 2 | 3,8626 | 0,456 | 0,09   |
| 18 | Q00536 PCTK1_HUMAN  | K.RLS#LPADIRLPE.G                  | S119:              | 3 | 3,8622 | 0,357 | 0,313  |
| 18 | P09874 PARP1_HUMAN  | E.YSASQLKGFSLLATEDKE.A             |                    | 3 | 3,8615 | 0,317 | 0,092  |
| 18 | Q96D71 REPS1_HUMAN  | R.TGSDHTNPTS#PLLVKPSDLLEE.N        | S430:              | 3 | 3,8596 | 0,162 | 0,151  |
| 18 | Q01082 SPTB2_HUMAN  | R.TSS#KESS#PIPS#PTSDRK.A           | S2161:S2165:S2169: | 2 | 3,8578 | 1     | -0,179 |
| 18 | Q58FF8 H90B2_HUMAN  | E.LISNASDALDKIRYE.S                |                    | 2 | 3,855  | 0,502 | -0,071 |
| 18 | Q9UPV9 TRAK1_HUMAN  | R.NES#SSSVQNYFHLD.S                | S200:              | 2 | 3,8542 | 0,459 | -0,071 |
| 18 | P41208 CETN2_HUMAN  | K.M*NFGDFLTVM*TQK.M                |                    | 2 | 3,8512 | 0,494 | -1,872 |
| 18 | P15336 ATF2_HUMAN   | R.NDSVIVADQT#PT#PTR.F              | T51:T53:           | 2 | 3,8484 | 0,489 | -0,55  |
| 18 | O75132 ZBED4_HUMAN  | E.LM*NSTSEDVAASHR.C                |                    | 3 | 3,8438 | 0,429 | 0,238  |
| 18 | Q8TEW0 PARD3_HUMAN  | R.RSS#DPALIGLSTSVSD.S              | S144:              | 2 | 3,8398 | 0,432 | 0,072  |
| 18 | Q96T23 RSF1_HUMAN   | E.IKLSDDFDS#PVKGPLCK.S             | S387:              | 3 | 3,8341 | 0,39  | 0,549  |
| 18 | Q9H8H0 NOL11_HUMAN  | E.DVNLDKVFKATLSAE.V                |                    | 2 | 3,8326 | 0,423 | -0,444 |
| 18 | Q9NZN3 EHD3_HUMAN   | E.IFYTLS#PVDGK.I                   | S456:              | 2 | 3,8248 | 0,413 | 0,185  |
| 18 | P15408 FOSL2_HUMAN  | R.RSSSS#GDQSSDSLNSPTLLAL.-         | S310:              | 2 | 3,8217 | 0,378 | 0,222  |
| 18 | Q15418 KS6A1_HUMAN  | E.KKAYS#FCGTVE.Y                   | S221:              | 2 | 3,8196 | 0,548 | -0,089 |

|    |                    |                                  |              |   |        |       |        |
|----|--------------------|----------------------------------|--------------|---|--------|-------|--------|
| 18 | Q8WU17 RN139_HUMAN | E.RNGVIQHTGAAAEFNDT#D.-          | T663:        | 3 | 3,8191 | 0,442 | -0,163 |
| 18 | P46821 MAP1B_HUMAN | R.ESS#PLYS#PTFSDSTSAVKE.K        | S1793:S1797: | 2 | 3,8183 | 1     | 0,445  |
| 18 | Q9H4M9 EHD1_HUMAN  | E.IFYTLS#PVNGKITGANAKKE.M        | S456:        | 3 | 3,8171 | 0,338 | 0,246  |
| 18 | Q9UHI6 DDX20_HUMAN | K.ATS#PKELGCDR.Q                 | S532:        | 3 | 3,8168 | 0,349 | 0,278  |
| 18 | P02545 LMNA_HUMAN  | R.SGAQASST#PLS#PTR.I             | T19:S22:     | 2 | 3,8167 | 1     | -0,722 |
| 18 | Q12893 TM115_HUMAN | E.SGAKVDS#PLPSDKAPTTPGK.G        | S320:        | 3 | 3,8086 | 0,342 | -0,18  |
| 18 | Q13136 LIPA1_HUMAN | K.RSS#DGS#LSHEEDLAK.V            | S239:S242:   | 2 | 3,8056 | 0,461 | -1,294 |
| 18 | P35527 K1C9_HUMAN  | R.SGGGGGGGLSGGSIR.S              |              | 2 | 3,8056 | 0,485 | 0,198  |
| 18 | P11172 PYR5_HUMAN  | E.NVFVAANHNGS#PLSIK.E            | S214:        | 2 | 3,803  | 0,337 | -0,419 |
| 18 | P04183 KITH_HUMAN  | R.KLFAPQQILQCS#PAN.-             | S231:        | 2 | 3,7991 | 0,447 | 0,34   |
| 18 | P24928 RPB1_HUMAN  | E.DLVKDVLSNAHIQNE.L              |              | 2 | 3,7968 | 0,45  | 0,072  |
| 18 | Q6PIW4 FIGL1_HUMAN | R.ILVVGATNRPQEIDE.A              |              | 2 | 3,7948 | 0,462 | 0,148  |
| 18 | Q9H2U1 DHX36_HUMAN | E.EQIVQLLNSVQAK.N                |              | 2 | 3,7938 | 0,454 | 0,083  |
| 18 | O43166 SI1L1_HUMAN | E.NHRPLS#AASNSDQLE.D             | S1708:       | 2 | 3,7928 | 0,556 | -0,071 |
| 18 | Q9Y6D5 BIG2_HUMAN  | R.GSS#LSGTDDGAQEVVKDILE.D        | S277:        | 2 | 3,7914 | 0,396 | 0      |
| 18 | Q16555 DPYL2_HUMAN | R.NLHQSGFSLSGAQIDD.N             |              | 2 | 3,7866 | 0,487 | -0,072 |
| 18 | P68371 TBB2C_HUMAN | E.IVHLQAGQCGNQIGAK.F             |              | 3 | 3,7865 | 0,438 | -0,324 |
| 18 | Q9H4A3 WNK1_HUMAN  | K.LGAAAADAVTGRTEE.Y              |              | 2 | 3,7825 | 0,529 | 0,17   |
| 18 | P35908 K22E_HUMAN  | R.GSSSGGGYSSGSSYGSNGR.Q          |              | 2 | 3,7785 | 0,581 | 0      |
| 18 | P40189 IL6RB_HUMAN | E.DLQLVDHVDGGDGILPR.Q            |              | 3 | 3,778  | 0,322 | 0,402  |
| 18 | Q17RY0 CPEB4_HUMAN | K.IRIES#PVLTFDFYQE.A             | S137:        | 2 | 3,7694 | 0,34  | -0,528 |
| 18 | Q14596 NBR1_HUMAN  | E.TVIRSLT#LDAAPDHNPPCR.Q         | T658:        | 3 | 3,7635 | 0,291 | -0,744 |
| 18 | Q9Y6G9 DC1L1_HUMAN | R.KPVTVSPTT#PTS#PTEGEAS.-        | T513:S516:   | 3 | 3,7624 | 1     | 0,089  |
| 18 | Q14247 SRC8_HUMAN  | K.TQTPPVSPAPQPTTEERLPSS#PVYE.D   | S418:        | 2 | 3,7622 | 0,45  | 0,272  |
| 18 | O15371 EIF3D_HUMAN | E.GKYLILKDPNKQVIR.V              |              | 3 | 3,7604 | 0,29  | 0,307  |
| 18 | Q09666 AHNK_HUMAN  | E.TGKLQSGVSLASK.K                |              | 3 | 3,7584 | 0,359 | 0,549  |
| 18 | P24534 EF1B_HUMAN  | K.YGPADVEDTTGSGATDSK.D           |              | 2 | 3,7557 | 0,613 | -0,62  |
| 18 | Q965B4 SRPK1_HUMAN | E.SES#PVERPLKENPPNKM*TQE.K       | S482:        | 3 | 3,7526 | 0,278 | -0,228 |
| 18 | Q658Y4 F91A1_HUMAN | D.LQHLCGYVTM*LNASSQLADR.K        |              | 3 | 3,7472 | 0,309 | -0,798 |
| 18 | P48634 BAT2_HUMAN  | E.GKPSLTLPASAPGPEEALTTVTVAPAPR.R |              | 3 | 3,7435 | 0,205 | 0      |
| 18 | Q9BY44 EIF2A_HUMAN | E.ARSDKS#PDLAPTAPQSTPR.N         | S506:        | 2 | 3,7401 | 0,262 | 0,112  |
| 18 | Q9C0C2 TB182_HUMAN | E.AADSDAHLFQDSTEPR.A             |              | 2 | 3,7296 | 0,516 | 0,139  |
| 18 | Q7Z3K3 POGZ_HUMAN  | K.LSGEHS#ESST#PRPR.S             | S1364:T1368: | 3 | 3,7244 | 0,356 | -0,108 |
| 18 | P08670 VIME_HUMAN  | E.NTLQSFQRQVDNANSLAR.L           |              | 2 | 3,7223 | 0,337 | 0,063  |
| 18 | Q14789 G0GB1_HUMAN | R.SSSSQTQPLKVQYQR.Q              |              | 3 | 3,7211 | 0,32  | 0,105  |
| 18 | O60271 JIP4_HUMAN  | R.SAS#QSS#LDKLDQE.L              | S730:S733:   | 2 | 3,7147 | 0,364 | 0      |
| 18 | Q12888 TP53B_HUMAN | R.GNLLHFPSS#QGEEE.K              | S1068:       | 2 | 3,7122 | 0,474 | 0,225  |
| 18 | Q9Y6G9 DC1L1_HUMAN | R.KPVTVS#PTT#PTSPTTEGEAS.-       | S510:T513:   | 2 | 3,7063 | 1     | -0,239 |
| 18 | P68104 EF1A1_HUMAN | K.SGDAAIVDM*VPGKPM*CVE.S         |              | 2 | 3,6984 | 0,33  | 0,192  |

|    |                    |                               |                    |   |        |       |        |
|----|--------------------|-------------------------------|--------------------|---|--------|-------|--------|
| 18 | Q9BTU6 P4K2A_HUMAN | R.VAAAAGSGPS#PPGS#PGHDRE.R    | S47:S51:           | 3 | 3,6982 | 0,471 | -0,185 |
| 18 | O15047 SET1A_HUMAN | K.FSFLAS#DTEEEEE.N            | S508:              | 2 | 3,6954 | 0,318 | 0,151  |
| 18 | Q5VT52 K0460_HUMAN | E.M*M*DKPTSSSVDTM*SLLSK.I     |                    | 3 | 3,6929 | 0,209 | 0,091  |
| 18 | Q96JM3 ZN828_HUMAN | E.LRKPGPPLSPEIRS#PAGS#PE.L    | S432:S436:         | 3 | 3,6928 | 0,485 | 0,326  |
| 18 | Q8TEW8 PAR3L_HUMAN | K.KS#SSLES#LQTAVAE.V          | S744:S749:         | 2 | 3,6913 | 0,508 | 0      |
| 18 | Q6VY07 PACS1_HUMAN | E.ITDQDM*FGDASTSLVVPEK.V      |                    | 2 | 3,6897 | 0,403 | 0,118  |
| 18 | O60271 JIP4_HUMAN  | R.TKLHQLSGS#DQLE.S            | S185:              | 2 | 3,6897 | 0,54  | -0,874 |
| 18 | Q02952 AKA12_HUMAN | E.LQSHAKS#PPS#PVERE.M         | S1328:S1331:       | 3 | 3,6843 | 0,328 | 0,201  |
| 18 | Q5VUA4 ZN318_HUMAN | E.LTALGNLGDGM*PVDFCTTR.V      |                    | 3 | 3,6839 | 0,282 | -0,275 |
| 18 | Q9Y6W5 WASF2_HUMAN | R.DVVGNDVATILSR.R             |                    | 2 | 3,6839 | 0,492 | -0,18  |
| 18 | Q9NWH9 SLTM_HUMAN  | K.DGQDAIAQS#PEKE.S            | S289:              | 2 | 3,681  | 0,396 | 0,083  |
| 18 | P04264 K2C1_HUMAN  | R.SLDLDSIIAEVK.A              |                    | 2 | 3,6754 | 0,424 | -0,187 |
| 18 | Q13263 TIF1B_HUMAN | K.IVAERPGTNSTGPAPM*APPR.A     |                    | 3 | 3,6752 | 0,259 | 0,27   |
| 18 | Q9NVM9 CLO11_HUMAN | E.AEIIKDSPDS#PEPPNKKPLVE.M    | S626:              | 3 | 3,668  | 0,204 | 0,768  |
| 18 | O96019 ACL6A_HUMAN | R.STGLILDGATHHTAIPVHD.G       |                    | 3 | 3,6673 | 0,391 | 0,365  |
| 18 | P06576 ATPB_HUMAN  | K.GFQQILAGEYDHLPE.Q           |                    | 2 | 3,6623 | 0,337 | -0,355 |
| 18 | Q99497 PARK7_HUMAN | E.VAAQVKAPLVLKD.-             |                    | 3 | 3,6621 | 0,351 | 0,406  |
| 18 | P49792 RBP2_HUMAN  | E.KDSLITPHVS#RSST#PRES#PCGK.I | S2454:T2458:S2462: | 3 | 3,6617 | 1     | -0,546 |
| 18 | Q9H330 CI005_HUMAN | E.SAPTLSTSPSPSSPSTSPS#PTLGR.R | S332:              | 3 | 3,6615 | 0,492 | 0,222  |
| 18 | Q09666 AHNK_HUMAN  | K.VKGDLDIAGPNLE.G             |                    | 2 | 3,65   | 0,338 | 0,637  |
| 18 | Q96T23 RSF1_HUMAN  | E.IKLS#DDFDSPVKGPLCK.S        | S382:              | 3 | 3,6485 | 0,404 | 0,732  |
| 18 | Q15390 MTFR1_HUMAN | R.QIS#LPDLSQEELQK.T           | S119:              | 3 | 3,6458 | 0,16  | 0,304  |
| 18 | Q6P2E9 EDC4_HUMAN  | E.LGSEGLGSAAHGS#QPDLRR.I      | S565:              | 3 | 3,6338 | 0,41  | 0,368  |
| 18 | Q6S8J3 A26CA_HUMAN | E.KSYELPDGQVITIGNE.R          |                    | 2 | 3,6335 | 0,424 | 0,069  |
| 18 | P26440 IVD_HUMAN   | E.DCKIPAANILGHE.N             |                    | 3 | 3,6326 | 0,133 | 0,509  |
| 18 | Q96GQ7 DDX27_HUMAN | R.SADFNPDFVFTEKE.G            |                    | 2 | 3,6299 | 0,469 | 0,074  |
| 18 | Q14697 GANAB_HUMAN | R.LSFQHDPETSVLVLR.K           |                    | 3 | 3,6277 | 0,285 | 0,315  |
| 18 | Q92598 HS105_HUMAN | R.GCALQCAILS#PAFK.V           | S384:              | 2 | 3,6232 | 0,424 | -0,075 |
| 18 | P50851 LRBA_HUMAN  | E.IGLCSSTSVQAASGIR.R          |                    | 2 | 3,6161 | 0,484 | 0      |
| 18 | P55196 AFAD_HUMAN  | R.RQES#RTQDASGPELIPASIE.F     | S573:              | 2 | 3,6102 | 0,354 | 0,513  |
| 18 | Q9H307 PININ_HUMAN | E.IAIVHS#DAEK.E               | S347:              | 2 | 3,6077 | 0,408 | -0,315 |
| 18 | Q71RC2 LARP4_HUMAN | E.KDLIEDSSVQK.D               |                    | 3 | 3,6053 | 0,255 | 0,724  |
| 18 | O15061 DMN_HUMAN   | E.VSAGGDL#QAAS#PTGASR.S       | S1159:S1163:       | 2 | 3,603  | 0,414 | -0,885 |
| 18 | Q15366 PCBP2_HUMAN | K.GVTIPYRKPSSS#PVIFAGGQDR.Y   | S189:              | 3 | 3,5982 | 0,301 | 0,146  |
| 18 | Q02952 AKA12_HUMAN | E.KEPSKSAESPTS#PVTSE.T        | S286:              | 2 | 3,5938 | 0,533 | 0      |
| 18 | Q9Y2W1 TR150_HUMAN | K.SPPSTGSTYGSSQKEE.S          |                    | 2 | 3,5911 | 0,628 | -0,074 |
| 18 | P07900 HS90A_HUMAN | E.LISNSSDALDKIRYE.S           |                    | 2 | 3,5891 | 0,474 | 0,212  |
| 18 | P78371 TCPB_HUMAN  | D.NAGYDSADLVAQLR.A            |                    | 2 | 3,5883 | 0,461 | 0,245  |
| 18 | Q13564 ULA1_HUMAN  | E.DIGKLSCLTGFLQE.Y            |                    | 2 | 3,5841 | 0,395 | -0,071 |

|    |                    |                                                 |            |   |        |       |        |
|----|--------------------|-------------------------------------------------|------------|---|--------|-------|--------|
| 18 | Q96PZ0 PUS7_HUMAN  | K.GQDGLQNDFLSISEDVPRPPDTVSTGK.G                 |            | 3 | 3,5832 | 0,354 | 0,255  |
| 18 | Q9Y6G9 DC1L1_HUMAN | E.LDRITRKPVTVSPT#TPTS#PTEGEAS.-                 | T512:S516: | 3 | 3,5799 | 1     | 0,523  |
| 18 | P35908 K22E_HUMAN  | R.FLEQQNQVLQTK.W                                |            | 2 | 3,5736 | 0,387 | -0,165 |
| 18 | Q9UHB6 LIMA1_HUMAN | E.VQQPVHPKPLS#PDSR.A                            | S362:      | 2 | 3,564  | 0,315 | -0,277 |
| 18 | Q58WW2 IQWD1_HUMAN | E.KLS#PKPGTGEPVLSLHYSTE.G                       | S467:      | 2 | 3,5624 | 0,376 | 0,44   |
| 18 | Q9BQC3 DPH2_HUMAN  | R.RGIAIAYEDEGS#G.-                              | S488:      | 2 | 3,5623 | 0,491 | 0,258  |
| 18 | Q9P270 SLAI2_HUMAN | R.SGAVQGAGSLGPGS#PVR.A                          | S48:       | 2 | 3,5609 | 0,409 | -0,232 |
| 18 | P08670 VIME_HUMAN  | R.QDVDNASLARLDLE.R                              |            | 2 | 3,5605 | 0,416 | 0,313  |
| 18 | Q8IWW6 RHG12_HUMAN | R.IHQDSESGDELSSSSTEQIR.A                        |            | 3 | 3,5576 | 0,33  | -0,498 |
| 18 | Q9NQG5 CT077_HUMAN | K.LSM*EDSKS#PPPKATEE.K                          | S134:      | 2 | 3,5565 | 0,443 | -0,066 |
| 18 | Q9BY44 EIF2A_HUMAN | R.SDKS#PDLAPTAPQSTPR.N                          | S506:      | 3 | 3,5562 | 0,334 | -0,282 |
| 18 | O75947 ATP5H_HUMAN | K.M*KNLIPFDQM*TIEDLNE.A                         |            | 2 | 3,5518 | 0,172 | 0,351  |
| 18 | P60174 TPIS_HUMAN  | K.VAHALAEGLGVIACIGEK.L                          |            | 3 | 3,5506 | 0,169 | 0,101  |
| 18 | Q32MZ4 LRRF1_HUMAN | K.STGDGTLGRAS#EVEVKNE.I                         | S300:      | 3 | 3,5502 | 0,319 | -0,19  |
| 18 | Q8NEM2 SHCBP_HUMAN | E.KGLFQDEDS#CSDCSYR.D                           | S42:       | 2 | 3,548  | 0,554 | 0,537  |
| 18 | P04264 K2C1_HUMAN  | K.SLNNQFASFIDK.V                                |            | 2 | 3,5448 | 0,433 | -0,088 |
| 18 | P55884 EIF3B_HUMAN | R.SDS#RAQAVSEDAGGNEGR.A                         | S119:      | 3 | 3,5447 | 0,305 | 0,291  |
| 18 | Q96T23 RSF1_HUMAN  | E.IKLSDDFDS#PVKGPLCK.S                          | S387:      | 2 | 3,5431 | 0,385 | 0,305  |
| 18 | P84103 SFRS3_HUMAN | K.VYVGNLGNNGNKTE.L                              |            | 2 | 3,5427 | 0,364 | 0,165  |
| 18 | Q02952 AKA12_HUMAN | E.SQVHM*M*AAAVADGTR.A                           |            | 3 | 3,5423 | 0,329 | 0      |
| 18 | P00519 ABL1_HUMAN  | E.SDPLDHEPAVS#PLLPR.K                           | S569:      | 3 | 3,5375 | 0,373 | 0,301  |
| 18 | P05387 RLA2_HUMAN  | E.DVIAQGIGKLASVPAGGAVAVSAAPGSAAPAAGSAPAAAAEEK.K |            | 3 | 3,537  | 0,383 | 1,201  |
| 18 | Q9NVM9 CLO11_HUMAN | E.IIKDSPDS#PEPPNKPLVE.M                         | S626:      | 3 | 3,5348 | 0,219 | 0,251  |
| 18 | Q5VZ89 DEN4C_HUMAN | K.TPDESKLFS#PVIAR.N                             | S989:      | 3 | 3,5321 | 0,258 | 0,313  |
| 18 | Q09666 AHNK_HUMAN  | K.GPRIS#APNVDFNLE.G                             | S5448:     | 2 | 3,5303 | 0,42  | 0      |
| 18 | Q6S8J3 A26CA_HUMAN | E.KLCYVALDFEQE.M                                |            | 2 | 3,527  | 0,373 | -0,161 |
| 18 | O15027 SC16A_HUMAN | E.QHSPLVAPPAALPSDGRDE.V                         |            | 3 | 3,5266 | 0,304 | -0,748 |
| 18 | P55884 EIF3B_HUMAN | R.AQAVSEDAGGNEGR.A                              |            | 2 | 3,5258 | 0,494 | 0,09   |
| 18 | P09960 LKHA4_HUMAN | E.DNLRSLVLDTKDLTIE.K                            |            | 2 | 3,5232 | 0,381 | -0,066 |
| 18 | Q16643 DREB_HUMAN  | R.VASASAGSCDVPS#PFNHRPGSHLD.S                   | S312:      | 3 | 3,5204 | 0,291 | -1,725 |
| 18 | Q15390 MTFR1_HUMAN | R.QIS#LPDLSQEEPQLK.T                            | S119:      | 2 | 3,5154 | 0,449 | 0      |
| 18 | Q8NI35 INADL_HUMAN | E.KLEKVPDS#PENE.L                               | S522:      | 2 | 3,512  | 0,352 | -0,083 |
| 18 | Q71RC2 LARP4_HUMAN | E.KDLIEDSSVQK.D                                 |            | 2 | 3,5117 | 0,371 | 0,097  |
| 18 | Q9C0B5 ZDHC5_HUMAN | K.SFHFDPLSSGS#RSSS#LKSAQGTGFE.L                 | S425:S429: | 3 | 3,5102 | 1     | 0,066  |
| 18 | O60271 JIP4_HUMAN  | E.TRNVSTGS#AENEKSE.V                            | S332:      | 3 | 3,505  | 0,358 | -0,201 |
| 18 | Q53F19 CQ085_HUMAN | E.YHEELPALKQPR.E                                |            | 3 | 3,4996 | 0,269 | -0,247 |
| 18 | Q9C0B5 ZDHC5_HUMAN | R.SSS#LKS#AQGTGFE.L                             | S429:S432: | 2 | 3,4988 | 0,389 | -1,673 |
| 18 | O95239 KIF4A_HUMAN | E.AQVETS#PET#SRSSDAFTTQHALR.Q                   | S501:T504: | 3 | 3,4978 | 0,268 | -0,137 |
| 18 | P35606 COPB2_HUMAN | D.GKPAS#PTPVIVASHTANKEE.K                       | S859:      | 3 | 3,4964 | 0,307 | -0,087 |

|    |                    |                               |                    |   |        |       |        |
|----|--------------------|-------------------------------|--------------------|---|--------|-------|--------|
| 18 | P62158 CALM_HUMAN  | E.AFSLFDKDGDTITTKE.L          |                    | 3 | 3,4949 | 0,281 | 1,19   |
| 18 | P05387 RLA2_HUMAN  | K.LASVPAGGAVAVSAAAGSAPAAAEK.K |                    | 3 | 3,4935 | 0,33  | 0,528  |
| 18 | P60174 TPIS_HUMAN  | E.GLGVIACIGEKLDERE.A          |                    | 2 | 3,4934 | 0,365 | -0,139 |
| 18 | P14618 KPYM_HUMAN  | E.NGGSLGSKKGVNLPAAVDLPVSE.K   |                    | 3 | 3,4933 | 0,347 | 0,157  |
| 18 | Q05397 FAK1_HUMAN  | K.LQPQEIS#PPPTANLDR.S         | S910:              | 2 | 3,4932 | 0,448 | -0,066 |
| 18 | Q01518 CAP1_HUMAN  | E.M*NDAAM*FYTNR.V             |                    | 2 | 3,4928 | 0,44  | -0,536 |
| 18 | Q7L2J0 MEPCE_HUMAN | K.DITDPLSLNTCTDE.G            |                    | 2 | 3,4925 | 0,424 | -0,077 |
| 18 | P28290 SSFA2_HUMAN | R.NIM*TQQKDS#FE.M             | S466:              | 2 | 3,4867 | 0,305 | -1,104 |
| 18 | P26038 MOES_HUMAN  | K.TAM*STPHVAEPAENEQDEQDE.N    |                    | 3 | 3,4853 | 0,32  | -0,156 |
| 18 | Q53F19 CQ085_HUMAN | E.LKM*IST#PS#PKK.S            | T413:S415:         | 2 | 3,485  | 0,274 | -0,26  |
| 18 | Q92870 APBB2_HUMAN | R.RTKS#FLNYYADLE.T            | S160:              | 2 | 3,483  | 0,474 | -0,144 |
| 18 | Q9HCD6 TANC2_HUMAN | R.SSS#QLGSPDVSHLIR.R          | S1740:             | 2 | 3,4815 | 0,311 | -0,147 |
| 18 | P40189 IL6RB_HUMAN | E.DLQLVDHVDGGDGILPR.Q         |                    | 2 | 3,4806 | 0,363 | 0,335  |
| 18 | Q9Y6G9 DC1L1_HUMAN | R.KPVTVSPT#TPTSPT#EGEAS.-     | T512:T518:         | 3 | 3,4778 | 1     | -0,268 |
| 18 | P00558 PGK1_HUMAN  | E.SPERPFLAILGGAK.V            |                    | 2 | 3,474  | 0,234 | -0,168 |
| 18 | Q01518 CAP1_HUMAN  | E.NKLSDLLAPISEQIKE.V          |                    | 2 | 3,4733 | 0,415 | 0      |
| 18 | P42684 ABL2_HUMAN  | R.AGKPTASDDTSKPFPR.S          |                    | 3 | 3,4729 | 0,338 | -0,328 |
| 18 | Q9Y608 LRRF2_HUMAN | R.RGS#GDTSSLIDPDTSLSE.L       | S328:              | 2 | 3,4627 | 0,451 | -0,064 |
| 18 | Q12888 TP53B_HUMAN | R.GNLLHFPSSQGEEE.K            |                    | 2 | 3,4611 | 0,403 | -0,316 |
| 18 | Q8WWI1 LMO7_HUMAN  | R.GGREGFES#DTDSE.F            | S276:              | 2 | 3,4608 | 0,338 | -0,749 |
| 18 | Q8IXM2 CQ049_HUMAN | K.KVASGVLSPPPAAPPSSSSVPE.A    |                    | 2 | 3,4588 | 0,317 | 0,339  |
| 18 | Q09666 AHNK_HUMAN  | K.IKGGADVSGGVS#APDISLGE.G     | S5577:             | 2 | 3,458  | 0,378 | 0,32   |
| 18 | P41236 IPP2_HUMAN  | E.MNILATYHPADKDYGLM*K.I       |                    | 3 | 3,4543 | 0,356 | -0,174 |
| 18 | Q9BVG4 CX026_HUMAN | E.TLRIDVLDPEELKSE.S           |                    | 3 | 3,4526 | 0,242 | 0      |
| 18 | Q8NEM2 SHCBP_HUMAN | E.KGLFQDEDS#CSDCSYR.D         | S42:               | 3 | 3,4509 | 0,501 | 0,179  |
| 18 | Q01082 SPTB2_HUMAN | R.TSS#KES#SPIPS#PTSDRK.A      | S2161:S2164:S2169: | 3 | 3,4505 | 1     | -0,179 |
| 18 | P05387 RLA2_HUMAN  | K.NIEDVIAQGIGK.L              |                    | 2 | 3,4503 | 0,459 | -0,097 |
| 18 | Q13136 LIPA1_HUMAN | R.S#S#DGSLSHEEDLAKVIE.L       | S238:S239:         | 2 | 3,4459 | 0,432 | 0      |
| 18 | P68104 EF1A1_HUMAN | D.VYKIGGIGTVPVGR.V            |                    | 3 | 3,4394 | 0,372 | 0,323  |
| 18 | P15336 ATF2_HUMAN  | R.NDSVIVADQT#PT#PTRFLK.N      | T51:T53:           | 3 | 3,4356 | 0,303 | 0      |
| 18 | P43686 PRS6B_HUMAN | E.DYVARPDKISGADINSICQE.S      |                    | 3 | 3,4345 | 0,347 | -0,163 |
| 18 | Q9Y6G9 DC1L1_HUMAN | R.KPVTVSPTT#PTS#PTEGEAS.-     | T513:S516:         | 2 | 3,4339 | 1     | 0      |
| 18 | Q99661 KIF2C_HUMAN | K.GKEIDFDDVAAINPE.L           |                    | 2 | 3,4328 | 0,337 | 0,149  |
| 18 | P07814 SYEP_HUMAN  | E.APCVLIYIPDGHTKE.M           |                    | 3 | 3,4319 | 0,171 | 0,214  |
| 18 | P18583 SON_HUMAN   | E.HDM*VISTS#PSGG#EADIEGLPAK.D | S1646:S1651:       | 3 | 3,4316 | 0,187 | 0,356  |
| 18 | Q8IVF2 AHNK2_HUMAN | K.TTDLISIQSPS#ADLE.V          | S1712:             | 2 | 3,4311 | 0,339 | 0      |
| 18 | Q00613 HSF1_HUMAN  | R.GHTDTEGRPPS#PPPTS#TPEK.C    | S363:S368:         | 3 | 3,4289 | 0,265 | 0,081  |
| 18 | Q8N4C8 MINK1_HUMAN | R.SDGD TDS#VSTM*VVH DVEE.I    | S862:              | 2 | 3,4283 | 0,509 | -0,121 |
| 18 | P35908 K22E_HUMAN  | R.NLDLDSIIAEVK.A              |                    | 2 | 3,4244 | 0,461 | -0,55  |

|    |                    |                                  |            |   |        |       |        |
|----|--------------------|----------------------------------|------------|---|--------|-------|--------|
| 18 | Q5JRX3 PREP_HUMAN  | E.HENPSDPQTPLVFKGVVFNE.M         |            | 3 | 3,4227 | 0,288 | -0,162 |
| 18 | Q96RU3 FNBP1_HUMAN | R.TV5#DNLSNSRGE.G                | S296:      | 2 | 3,4226 | 0,42  | 0,422  |
| 18 | O00418 EF2K_HUMAN  | K.LLQSAKT#ILRGTEE.K              | T348:      | 2 | 3,4211 | 0,505 | 0      |
| 18 | Q6T4R5 NHS_HUMAN   | E.KSPSPDKADTSS#HFS#VDTE.G        | S754:S757: | 3 | 3,4193 | 0,143 | 0      |
| 18 | Q7L1W4 LRC8D_HUMAN | E.DHLFDLPLEVKE.A                 |            | 2 | 3,4172 | 0,518 | -0,157 |
| 18 | P55145 ARMET_HUMAN | R.LCYYIGATDDAATK.I               |            | 2 | 3,4168 | 0,441 | -0,391 |
| 18 | Q04917 1433F_HUMAN | E.DSYKDSTLIM*QLLR.D              |            | 2 | 3,4166 | 0,441 | -0,144 |
| 18 | O15061 DMN_HUMAN   | K.GLQTPVKDAGGGTGR.E              |            | 3 | 3,4159 | 0,201 | 0,323  |
| 18 | Q02040 SF17A_HUMAN | R.CPGGVLSCIPDNNQQPK.G            |            | 2 | 3,4142 | 0,317 | 0,389  |
| 18 | P15924 DESP_HUMAN  | R.NLTIRSS#SFSDTLEE.S             | S2607:     | 2 | 3,4132 | 0,254 | 0,137  |
| 18 | Q0JRZ9 FCHO2_HUMAN | K.VSIGNITLSPAISR.H               |            | 2 | 3,41   | 0,486 | 0      |
| 18 | Q6P6C2 ALKB5_HUMAN | E.AAAAAAAVAAAAAAAAAAEPYPVSGAKR.K |            | 3 | 3,4072 | 0,411 | 0,147  |
| 18 | Q03164 HRX_HUMAN   | R.NSSTPGLQVPVPS#PTVPIQNQK.Y      | S3036:     | 3 | 3,4065 | 0,292 | 0,242  |
| 18 | Q14247 SRC8_HUMAN  | R.AKTQTPPVSPAPQPTTEER.L          |            | 3 | 3,4052 | 0,27  | 0,189  |
| 18 | Q09666 AHNK_HUMAN  | K.FKAEAPLPS#PKLE.G               | S5110:     | 2 | 3,4051 | 0,479 | -0,486 |
| 18 | Q8TEX9 IPO4_HUMAN  | E.LCGVLKAVLQR.K                  |            | 2 | 3,4033 | 0,256 | -0,194 |
| 18 | P17812 PYRG1_HUMAN | E.DHPFFVGVQYHPE.F                |            | 3 | 3,4023 | 0,166 | 0,931  |
| 18 | O95359 TACC2_HUMAN | E.KIGSSLPQDDDAPKK.Q              |            | 3 | 3,4001 | 0,342 | -0,343 |
| 18 | Q92667 AKAP1_HUMAN | E.AKSIPLECPLS#SPKGVLFSSK.S       | S150:      | 3 | 3,3974 | 0,347 | 0      |
| 18 | P35908 K22E_HUMAN  | R.HGGGGGGGGGGGGFGSR.S            |            | 3 | 3,3966 | 0,194 | 0,277  |
| 18 | O15320 CTGE5_HUMAN | E.KLNRS#NSELEDE.I                | S137:      | 2 | 3,3943 | 0,382 | 0,161  |
| 18 | P49023 PAXI_HUMAN  | E.MSS#PQRVTSTQQQTR.I             | S244:      | 3 | 3,3927 | 0,293 | 0,403  |
| 18 | Q9H4M9 EHD1_HUMAN  | E.IFYTLS#PVNGK.I                 | S456:      | 2 | 3,3926 | 0,417 | -0,37  |
| 18 | Q96TA1 NIBL1_HUMAN | E.DQYGVALFNSM*RHE.I              |            | 2 | 3,3913 | 0,172 | 0,725  |
| 18 | P35606 COPB2_HUMAN | E.LDGKPPAS#PTPVIVASHTANKEE.K     | S859:      | 2 | 3,3911 | 0,443 | 0,208  |
| 18 | Q8WXI9 P66B_HUMAN  | R.LTPSPDIIVLS#DNEASSPR.S         | S129:      | 3 | 3,3904 | 0,262 | 0      |
| 18 | P34931 HS71L_HUMAN | E.GIDFYTSITR.A                   |            | 2 | 3,3871 | 0,408 | 0,312  |
| 18 | Q13263 TIF1B_HUMAN | E.DKADVQSIIGLQR.F                |            | 2 | 3,387  | 0,406 | 0      |
| 18 | Q9Y6G9 DC1L1_HUMAN | R.ITRKPVTVS#PTT#PTSPTGEAS.-      | S510:T513: | 3 | 3,3856 | 1     | 0      |
| 18 | P35908 K22E_HUMAN  | R.GGSGGGGSISGGGYGSGGGSGGR.Y      |            | 2 | 3,3847 | 0,57  | -0,56  |
| 18 | Q15424 SAFB1_HUMAN | R.KDFDFACNEVPPAPK.E              |            | 3 | 3,3847 | 0,259 | -0,316 |
| 18 | O43149 ZZEF1_HUMAN | E.KESPGDLTRS#PE.M                | S240:      | 2 | 3,381  | 0,373 | 0      |
| 18 | P49023 PAXI_HUMAN  | K.QKS#AEPSPTVM*STSLGSLNLSL.L     | S126:      | 3 | 3,3793 | 0,113 | 0,407  |
| 18 | Q12888 TP53B_HUMAN | R.SEDPPTT#PIRGNLLHFPSSQGEEL.K    | T1056:     | 3 | 3,3747 | 0,345 | 0,067  |
| 18 | Q9UK76 HN1_HUMAN   | R.RNS#SEASSGDFDLKGE.G            | S87:       | 3 | 3,3735 | 0,171 | -0,097 |
| 18 | Q96A49 SYAP1_HUMAN | E.AVRPKT#PPVVIK.S                | T248:      | 3 | 3,3731 | 0,239 | 0,132  |
| 18 | Q9H6Z4 RANB3_HUMAN | R.SVLRPAVLQAPQPK.A               |            | 3 | 3,3718 | 0,11  | 0,365  |
| 18 | Q99426 TBCB_HUMAN  | E.LYGVDDKFYSKLDQE.D              |            | 2 | 3,3713 | 0,454 | 0,268  |
| 18 | Q86UP2 KTN1_HUMAN  | K.AKQNDQVSFASLVEE.L              |            | 2 | 3,3709 | 0,299 | 0      |



|    |                    |                                        |                 |   |        |       |        |
|----|--------------------|----------------------------------------|-----------------|---|--------|-------|--------|
| 18 | O43765 SGTA_HUMAN  | R.SQIRS#RTPS#ASNDDQQE.-                | S301:S305:      | 2 | 3,3704 | 0,438 | 0      |
| 18 | O14818 PSA7_HUMAN  | R.DQS#LKILNPEEIE.K                     | S216:           | 2 | 3,3703 | 0,233 | 0,228  |
| 18 | P05783 K1C18_HUMAN | R.GGM*GSGGLATGIAGGLAGM*GGIQNEKE.T      |                 | 3 | 3,369  | 0,28  | 0,076  |
| 18 | P35527 K1C9_HUMAN  | R.HGVQELEIELQSQLSK.K                   |                 | 3 | 3,3679 | 0,276 | 0,1    |
| 18 | P19784 CSK22_HUMAN | E.AM*EHPYFYPVVK.E.Q                    |                 | 3 | 3,3671 | 0,194 | 0      |
| 18 | Q8WUA7 TB22A_HUMAN | E.SHTSCPAESASDAAPLQR.S                 |                 | 3 | 3,3645 | 0,187 | 0,194  |
| 18 | P49755 TMEDA_HUMAN | K.GKFAFTTEDYDM*FE.V                    |                 | 2 | 3,3634 | 0,521 | -0,071 |
| 18 | O14617 AP3D1_HUMAN | R.ALDIDLKPLADSE.K                      |                 | 2 | 3,3634 | 0,426 | 0,161  |
| 18 | Q9Y6G9 DC1L1_HUMAN | R.KPVTVS#PTTPTS#PTEGEAS.-              | S510:S516:      | 2 | 3,363  | 1     | -0,417 |
| 18 | Q14247 SRC8_HUMAN  | E.DVTQVSAYQK.T                         |                 | 2 | 3,3603 | 0,419 | 0      |
| 18 | O60271 JIP4_HUMAN  | R.S#ASQSS#LDKLDQE.L                    | S728:S733:      | 2 | 3,3589 | 0,272 | 0,389  |
| 18 | P13804 ETFA_HUMAN  | E.HANDSLAPITLNTITAATR.L                |                 | 3 | 3,3578 | 0,321 | 0,092  |
| 18 | P30101 PDIA3_HUMAN | E.STAGEIPVVAIR.T                       |                 | 2 | 3,3564 | 0,348 | 0      |
| 18 | Q9UKL3 C8AP2_HUMAN | E.GSSIEDAQTS#QHATLKPERS.S              | S1278:          | 3 | 3,3555 | 0,352 | 0,086  |
| 18 | Q96N67 DOCK7_HUMAN | R.SAVRPASLNLNR.S                       |                 | 3 | 3,3522 | 0,308 | -0,211 |
| 18 | O00257 CBX4_HUMAN  | E.VSGVSDPQPQDAGSR.K                    |                 | 2 | 3,3454 | 0,34  | -1,545 |
| 18 | Q5VT52 K0460_HUMAN | K.NTGVS#PASRSPGTPSPSNLT#S#GLK.T        | S473:T490:S491: | 3 | 3,3431 | 0,236 | 0,133  |
| 18 | P35606 COPB2_HUMAN | E.LDGKPAS#PTPVIVASHTANKE.E             | S859:           | 2 | 3,3427 | 0,439 | 0,552  |
| 18 | P08651 NFIC_HUMAN  | R.TGM*GSDQEDSKPITLDTDFQE.S             |                 | 3 | 3,3425 | 0,237 | 0,527  |
| 18 | Q5T280 CI114_HUMAN | E.DRGRPYTLSVALPGSILDNAQSPE.L           |                 | 3 | 3,3408 | 0,435 | 0,143  |
| 18 | Q8N122 RPTOR_HUMAN | D.TSSLTQSAPASPT#NK.G                   | T865:           | 2 | 3,3393 | 0,469 | -0,389 |
| 18 | Q13263 TIF1B_HUMAN | E.DKADVQSIIGLQR.F                      |                 | 3 | 3,3321 | 0,253 | 0,19   |
| 18 | P28074 PSB5_HUMAN  | R.VSSDNVADLHE.K                        |                 | 2 | 3,3316 | 0,449 | -0,206 |
| 18 | P49023 PAXI_HUMAN  | K.QKS#AEPSPTVM*STSLGSNLSE.L            | S126:           | 2 | 3,3298 | 0,385 | 0,761  |
| 18 | Q8IUW5 RELL1_HUMAN | R.RSLM*S#VSGAETVNGEVPATPVKRE.R         | S247:           | 3 | 3,3275 | 0,116 | -0,561 |
| 18 | P49736 MCM2_HUMAN  | K.M*ITLSKDKQIQE.K                      |                 | 2 | 3,3265 | 0,388 | 0,25   |
| 18 | P35527 K1C9_HUMAN  | R.GGSGGSYGGGGSGGGYGGGSGSR.G            |                 | 2 | 3,3246 | 0,448 | 0,136  |
| 18 | Q9UKL0 RCOR1_HUMAN | E.TNGPSNQKPVKS#PDNSIK.M                | S457:           | 3 | 3,3221 | 0,301 | -0,184 |
| 18 | O75362 ZN217_HUMAN | R.TKADVT#PPPDGSTTHNLE.V                | T648:           | 3 | 3,3211 | 0,383 | 0      |
| 18 | Q5TGY3 AHDC1_HUMAN | E.YSDVLAKLAFLNR.Q                      |                 | 3 | 3,3174 | 0,265 | 0,242  |
| 18 | Q9NZN3 EHD3_HUMAN  | E.IFYTLS#PVDGKITGANAK.K                | S456:           | 2 | 3,3171 | 0,313 | -1,05  |
| 18 | Q96T23 RSF1_HUMAN  | K.LSDDFDS#PVKGPLCK.S                   | S387:           | 2 | 3,3162 | 0,365 | 0      |
| 18 | Q8ND56 LS14A_HUMAN | R.S#SPQLDPLRKSPT#M*E.Q                 | S182:T194:      | 2 | 3,3157 | 0,436 | -0,459 |
| 18 | P42166 LAP2A_HUMAN | D.VYVQLYLQHLTAR.N                      |                 | 2 | 3,3135 | 0,267 | 0,076  |
| 18 | P21359 NF1_HUMAN   | E.GYLAATYPTVGQTS#PR.A                  | S2515:          | 2 | 3,3121 | 0,335 | 0,346  |
| 18 | Q7Z417 NUFP2_HUMAN | K.RTS#PQVLGSILK.S                      | S572:           | 2 | 3,3092 | 0,366 | -0,088 |
| 18 | Q01518 CAP1_HUMAN  | K.LSDLLAPISEQIKE.V                     |                 | 2 | 3,3087 | 0,464 | -0,078 |
| 18 | P22314 UBA1_HUMAN  | R.VS#GPDPKPGSNCSQAQSVLSEVPSVPTNGM*AK.N | S13:            | 3 | 3,3076 | 0,155 | 1,001  |
| 18 | Q9Y2K5 R3HD2_HUMAN | K.ASS#FSGISILTR.G                      | S349:           | 2 | 3,3055 | 0,293 | -0,093 |

|    |                     |                                  |            |   |        |       |        |
|----|---------------------|----------------------------------|------------|---|--------|-------|--------|
| 18 | P32969 RL9_HUMAN    | R.DFNHINVELSLLGK.K               |            | 3 | 3,3054 | 0,189 | 0      |
| 18 | P04792 HSPB1_HUMAN  | E.SRAQLGGPEAAKS#DE.T             | S199:      | 3 | 3,3031 | 0,319 | -0,344 |
| 18 | Q9Y5B6 GCFC_HUMAN   | K.TGGAFSNALSSNLVLRPGEIPD.A       |            | 2 | 3,303  | 0,198 | 0,22   |
| 18 | O75152 ZC11A_HUMAN  | R.RLS#SASTGKPPLSVEDDFE.K         | S758:      | 3 | 3,3021 | 0,123 | 0,432  |
| 18 | P22314 UBA1_HUMAN   | R.RVS#GPDPKPGSNCSQAQSVLSE.V      | S13:       | 3 | 3,295  | 0,143 | 0,156  |
| 18 | P35527 K1C9_HUMAN   | K.TLNDRMRQEYEQLIAK.N             |            | 3 | 3,2887 | 0,276 | -1,778 |
| 18 | P40763 STAT3_HUMAN  | E.NLQDDDFDFNYK.T                 |            | 2 | 3,2885 | 0,321 | 0,43   |
| 18 | Q96KP4 CNDP2_HUMAN  | K.NVM*LLPVGSAADDGAHSQNE.K        |            | 2 | 3,2885 | 0,265 | 0      |
| 18 | Q96L14 C170L_HUMAN  | E.ALNNM*GFPSAM*LPSPPK.Q          |            | 3 | 3,287  | 0,143 | 0,304  |
| 18 | Q68DX9 Q68DX9_HUMAN | R.IDS#PGFKPASQQVYR.K             | S491:      | 3 | 3,2839 | 0,392 | 0,413  |
| 18 | Q8TEX9 IPO4_HUMAN   | E.LCGVLKAVLQR.K                  |            | 3 | 3,2821 | 0,212 | 0,291  |
| 18 | Q724H7 FA29A_HUMAN  | E.EDILNKS#LDAKEPPSDLTR.-         | S943:      | 3 | 3,2803 | 0,306 | 0,329  |
| 18 | O43291 SPIT2_HUMAN  | R.NAADSSVPSAPR.R                 |            | 2 | 3,2796 | 0,394 | -0,104 |
| 18 | P25786 PSA1_HUMAN   | K.NVSIGIVGKDLE.F                 |            | 2 | 3,2719 | 0,484 | 0,098  |
| 18 | Q9NZT2 OGFR_HUMAN   | E.GAGDAAVASGGAQTLALAGSPAPSGHPK.A |            | 3 | 3,271  | 0,337 | 0,292  |
| 18 | O95490 LPHN2_HUMAN  | R.GNS#DGYIIPINKE.G               | S1430:     | 2 | 3,2693 | 0,364 | 0      |
| 18 | Q9NZN3 EHD3_HUMAN   | E.IFYTLS#PVDGKITGANAK.K          | S456:      | 3 | 3,269  | 0,319 | 1,019  |
| 18 | Q2NKX8 ERC6L_HUMAN  | E.AEALS#PEQAAHYLR.Y              | S14:       | 2 | 3,2674 | 0,375 | 0      |
| 18 | P46821 MAP1B_HUMAN  | E.SEKPLTQSGGAPPPGGK.Q            |            | 2 | 3,2653 | 0,471 | -0,501 |
| 18 | Q7L2J0 MEPCE_HUMAN  | R.TLNAET#PKS#SPLPAKGRDPVEILIPK.D | T213:S216: | 3 | 3,262  | 0,194 | 0,187  |
| 18 | P15927 RFA2_HUMAN   | E.ISQVTIVGIIR.H                  |            | 2 | 3,2609 | 0,297 | 0,102  |
| 18 | Q04917 1433F_HUMAN  | E.DSYKDSTLIM*QLLRD.N             |            | 2 | 3,2606 | 0,435 | -0,404 |
| 18 | Q13459 MYO9B_HUMAN  | R.SPLEHS#SPEKEAPSPE.K            | S1114:     | 2 | 3,2601 | 0,5   | -0,068 |
| 18 | P41236 IPP2_HUMAN   | E.M*NILATYHPADKDYGLM*K.I         |            | 3 | 3,2599 | 0,313 | 0,952  |
| 18 | P29966 MARCS_HUMAN  | E.NGHVKVNGDAS#PAAAE.S            | S46:       | 2 | 3,2589 | 0,442 | -0,151 |
| 18 | P48634 BAT2_HUMAN   | R.RGDKEAPPPVLLTPK.A              |            | 3 | 3,2574 | 0,301 | 0,226  |
| 18 | Q01082 SPTB2_HUMAN  | K.AKTALPAQSAATLTPAR.T            |            | 3 | 3,2541 | 0,323 | -0,117 |
| 18 | P08670 VIME_HUMAN   | E.NTLQSFQRQVDNASLARLD.L          |            | 3 | 3,2529 | 0,306 | 0,338  |
| 18 | O94876 TMCC1_HUMAN  | R.NKFGS#ADNIPNLKDSLEE.G          | S382:      | 3 | 3,2502 | 0,1   | 0,177  |
| 18 | O60271 JIP4_HUMAN   | E.LDM*DKDLSGYK.G                 |            | 3 | 3,2476 | 0,283 | 0,703  |
| 18 | O43597 SPY2_HUMAN   | R.LLGSS#FSSGPVADGIIR.V           | S139:      | 2 | 3,2456 | 0,407 | 0      |
| 18 | Q9UGV2 NDRG3_HUMAN  | E.AFKYFLQGM*GYIPSASM*TR.L        |            | 3 | 3,2429 | 0,117 | 0,915  |
| 18 | Q13428 TCOF_HUMAN   | K.SPQVKPASTM*GM*GPLGK.G          |            | 3 | 3,2411 | 0,389 | -0,106 |
| 18 | Q14671 PUM1_HUMAN   | E.YVLSSS#PGDSCLR.K               | S229:      | 2 | 3,2398 | 0,314 | 0,08   |
| 18 | Q9UNX4 WDR3_HUMAN   | E.IEDPEEPDPKK.I                  |            | 3 | 3,2392 | 0,15  | 1,128  |
| 18 | P13639 EF2_HUMAN    | E.SGEHIIAGAGELHLE.I              |            | 3 | 3,2364 | 0,16  | 0,298  |
| 18 | Q8WUA2 PPIL4_HUMAN  | E.DYM*PIKNTNQDIYRE.M             |            | 3 | 3,2317 | 0,299 | 0,573  |
| 18 | P04083 ANXA1_HUMAN  | E.VVLALLKTPAQFDADEL.R.A          |            | 3 | 3,2316 | 0,248 | 0,092  |
| 18 | Q9NQS7 INCE_HUMAN   | R.VLAPILPDNFSTPTGSR.T            |            | 2 | 3,2307 | 0,348 | -0,068 |

|    |                     |                                        |            |   |        |       |        |
|----|---------------------|----------------------------------------|------------|---|--------|-------|--------|
| 18 | Q9NQW6 ANLN_HUMAN   | K.ATS#PVKSTTSITDAK.S                   | S295:      | 3 | 3,2299 | 0,467 | 0,461  |
| 18 | P09525 ANXA4_HUMAN  | E.DAIISVLAYR.N                         |            | 2 | 3,2292 | 0,437 | 0,327  |
| 18 | P33316 DUT_HUMAN    | R.GNVGVVLFNFGKE.K                      |            | 2 | 3,2276 | 0,357 | -0,265 |
| 18 | Q13885 TBB2A_HUMAN  | E.IVHIQAGQCGNQIGAK.F                   |            | 3 | 3,2263 | 0,4   | -0,432 |
| 18 | Q5VUA4 ZN318_HUMAN  | R.SVRIPS#PNILKTGLTE.N                  | S2101:     | 2 | 3,2257 | 0,362 | 0,068  |
| 18 | P35908 K22E_HUMAN   | K.VDLLNQEIEFLK.V                       |            | 2 | 3,2246 | 0,302 | 0,167  |
| 18 | O95359 TACC2_HUMAN  | K.TSSKTPSS#PSKSPASFE.I                 | S2390:     | 2 | 3,223  | 0,207 | -1,149 |
| 18 | Q8NBF2 NHLC2_HUMAN  | K.VSTVAGIGIQGTDKE.G                    |            | 2 | 3,2212 | 0,399 | 0,083  |
| 18 | P13645 K1C10_HUMAN  | K.SKELTTEIDNIEQISSYK.S                 |            | 3 | 3,2199 | 0,273 | -1,406 |
| 18 | P35658 NU214_HUMAN  | R.SAQGSSSPVPSM*VQK.S                   |            | 2 | 3,2192 | 0,364 | 0      |
| 18 | P35232 PHB_HUMAN    | D.DVSLTHLTFGKE.F                       |            | 2 | 3,2176 | 0,492 | 0,091  |
| 18 | Q00613 HSF1_HUMAN   | K.CLSVACLDKNE.L                        |            | 2 | 3,2146 | 0,313 | 0,186  |
| 18 | P62158 CALM_HUMAN   | E.AFSLFDKDGDTITTK.E                    |            | 3 | 3,2108 | 0,298 | 0,32   |
| 18 | P0C7M2 RA1L3_HUMAN  | R.KLFIGGLSFETTDE.S                     |            | 2 | 3,2094 | 0,483 | 0,078  |
| 18 | P41252 SYIC_HUMAN   | E.SHQNYKDVQDPSVFTFPLEEDE.T             |            | 3 | 3,2088 | 0,16  | -0,134 |
| 18 | Q9NWW8 CS062_HUMAN  | R.TRS#NPEGAEDRAVGAQASVGSR.S            | S29:       | 3 | 3,2082 | 0,44  | 0,08   |
| 18 | P22314 UBA1_HUMAN   | R.RVS#GPDPKPGSNCSAQSVLSEVPSVPTNGM*AK.N | S13:       | 3 | 3,2079 | 0,405 | 0,85   |
| 18 | Q9Y6I9 TX264_HUMAN  | E.TSAATLSPGASSR.G                      |            | 2 | 3,2061 | 0,457 | -0,405 |
| 18 | P62937 PPIA_HUMAN   | R.VSFELFADKVPK.T                       |            | 2 | 3,2036 | 0,439 | -0,177 |
| 18 | P09874 PARP1_HUMAN  | K.GFSLLATEDKE.A                        |            | 2 | 3,2008 | 0,386 | 0,101  |
| 18 | Q9Y394 DHRS7_HUMAN  | E.KDILVLPDLTDTGSHE.A                   |            | 3 | 3,1989 | 0,24  | -0,392 |
| 18 | Q9NQW6 ANLN_HUMAN   | K.DKSTT#PGGTGIKPFLE.R                  | T364:      | 3 | 3,1983 | 0,349 | 0,423  |
| 18 | Q14980 NUMA1_HUMAN  | R.TQPDGTSVPGEPAS#PISQR.L               | S1757:     | 2 | 3,1975 | 0,509 | 0      |
| 18 | Q99426 TBCB_HUMAN   | E.LYGVDDKFYSKLDQE.D                    |            | 3 | 3,197  | 0,373 | 0,603  |
| 18 | P49755 TMEDA_HUMAN  | K.FAFTTEDYDM*FE.V                      |            | 2 | 3,1959 | 0,46  | -0,159 |
| 18 | P14618 KPYM_HUMAN   | K.KGVNLPGAAVDLPVSE.K                   |            | 2 | 3,1912 | 0,374 | -0,075 |
| 18 | O15427 MOT4_HUMAN   | E.KNGEVVHTPETS#V.-                     | S464:      | 2 | 3,1887 | 0,4   | -0,083 |
| 18 | Q9Y608 LRRF2_HUMAN  | R.NSASATTPLSGNSSR.R                    |            | 2 | 3,1885 | 0,47  | 0,084  |
| 18 | Q2NL66 Q2NL66_HUMAN | R.GPST#PKKPLEQSC.-                     | T226:      | 2 | 3,1858 | 0,391 | -0,647 |
| 18 | Q8N4C8 MINK1_HUMAN  | E.RTLDEAPRPPK.K                        |            | 3 | 3,182  | 0,156 | 0,357  |
| 18 | Q9P0K8 FOXJ2_HUMAN  | K.CSPGS#PTDPNATLSKDE.A                 | S46:       | 2 | 3,18   | 0,382 | 0,066  |
| 18 | Q9Y608 LRRF2_HUMAN  | R.NSASATTPLSGNSS#R.R                   | S324:      | 2 | 3,1798 | 0,533 | -0,08  |
| 18 | Q00536 PCTK1_HUMAN  | K.RLS#LPADIRLPE.G                      | S119:      | 2 | 3,1796 | 0,436 | 0,084  |
| 18 | Q9C0C2 TB182_HUMAN  | R.VSGAGFS#PSSKM*E.G                    | S1138:     | 2 | 3,1747 | 0,226 | 1,857  |
| 18 | P33316 DUT_HUMAN    | R.GNVGVVLFNFGK.E                       |            | 2 | 3,1746 | 0,446 | -0,39  |
| 18 | Q15149 PLEC1_HUMAN  | E.AQAASGFLLDPVR.N                      |            | 2 | 3,1722 | 0,408 | 0,091  |
| 18 | Q96T23 RSF1_HUMAN   | E.SEKPGS#PEAAET#SPPSNIIDHCEK.L         | S612:T618: | 3 | 3,1719 | 0,405 | 0,267  |
| 18 | O95757 HS74L_HUMAN  | E.DGEDQPKQVYVDK.L                      |            | 3 | 3,1717 | 0,23  | 0,18   |
| 18 | Q02952 AKA12_HUMAN  | K.SAVVHDITDDGQEETPE.I                  |            | 2 | 3,1682 | 0,493 | -0,199 |

|    |                    |                                    |                    |   |        |       |        |
|----|--------------------|------------------------------------|--------------------|---|--------|-------|--------|
| 18 | Q7Z6E9 RBBP6_HUMAN | E.NKTDSLFLVPSR.D                   |                    | 2 | 3,1676 | 0,266 | 0,089  |
| 18 | Q9HCN4 GPN1_HUMAN  | D.AGTAKDS#LSPVLHPSDLILTR.G         | S312:              | 3 | 3,1658 | 0,232 | 0      |
| 18 | Q9UNX4 WDR3_HUMAN  | K.IKGSS#PGIQDTLE.A                 | S241:              | 2 | 3,1657 | 0,365 | -0,685 |
| 18 | O95684 FR1OP_HUMAN | E.KGPTTGEGALDLSDVHS#PPKSPE.G       | S156:              | 2 | 3,1642 | 0,335 | 0,61   |
| 18 | P07355 ANXA2_HUMAN | E.VTIVNILTNR.S                     |                    | 2 | 3,1623 | 0,455 | -0,213 |
| 18 | Q6QNY0 BL1S3_HUMAN | R.VAGEAAET#DS#EPEPEPEPTAAPR.D      | T63:S65:           | 3 | 3,1597 | 0,275 | 0,073  |
| 18 | Q96JG6 CC132_HUMAN | R.DYVDEQTDGDPVK.S                  |                    | 2 | 3,1594 | 0,426 | 0,257  |
| 18 | Q14596 NBR1_HUMAN  | R.QKS#LQM*TFALPEGPLGNEKEE.I        | S673:              | 3 | 3,1576 | 0,214 | 0,075  |
| 18 | P09211 GSTP1_HUMAN | D.GVEDLRCKYISLIYTNYE.A             |                    | 3 | 3,1551 | 0,17  | -0,082 |
| 18 | P17706 PTN2_HUMAN  | E.LSKEDLS#PAFDHSPNKIM*TE.K         | S298:              | 3 | 3,1518 | 0,13  | 0,078  |
| 18 | Q01082 SPTB2_HUMAN | R.TSS#KES#SPIPSPT#SDRKAK.T         | S2161:S2164:T2171: | 3 | 3,151  | 1     | -0,734 |
| 18 | Q96PZ0 PUS7_HUMAN  | E.DVPRPPDTVSTGK.G                  |                    | 2 | 3,1508 | 0,143 | -1,248 |
| 18 | Q5VZL5 ZMYM4_HUMAN | E.TLHTHLPQT#PE.T                   | T217:              | 2 | 3,1491 | 0,369 | -0,631 |
| 18 | Q13242 SFRS9_HUMAN | R.IYVGNLPTDVRE.K                   |                    | 2 | 3,1491 | 0,383 | 0      |
| 18 | Q6P6C2 ALKB5_HUMAN | E.AAAAAAAAAAAAAAAAAAAAAEPYPVSGAK.R |                    | 2 | 3,1465 | 0,413 | 0,42   |
| 18 | Q9C0C2 TB182_HUMAN | E.AADSDAHLFQDSTEPR.A               |                    | 3 | 3,1443 | 0,396 | 0,831  |
| 18 | P04264 K2C1_HUMAN  | K.SKAEAESLYQSK.Y                   |                    | 3 | 3,1435 | 0,162 | 0,614  |
| 18 | P31947 1433S_HUMAN | K.GAVEKGEELSCEE.R                  |                    | 2 | 3,141  | 0,349 | 0,679  |
| 18 | Q56P03 EAPP_HUMAN  | E.VDVLLHGT#PDQKR.K                 | T37:               | 3 | 3,1384 | 0,4   | 0,352  |
| 18 | O00418 EF2K_HUMAN  | K.LLQSAKT#ILRGTEE.K                | T348:              | 3 | 3,1381 | 0,355 | 0,446  |
| 18 | O43765 SGTA_HUMAN  | R.SQIRSRT#PS#ASNDQQE.-             | T303:S305:         | 3 | 3,1361 | 0,158 | 0,44   |
| 18 | P04264 K2C1_HUMAN  | R.THNLEPYFESFINNLR.R               |                    | 3 | 3,1358 | 0,273 | -0,459 |
| 18 | O60832 DKC1_HUMAN  | E.RKS#LPEEDVAE.I                   | S21:               | 2 | 3,1354 | 0,347 | -1,263 |
| 18 | P08195 4F2_HUMAN   | K.GQSEDPGSLLSLFR.R                 |                    | 2 | 3,1353 | 0,255 | -0,405 |
| 18 | O60716 CTND1_HUMAN | E.DGYPGGSDNYGSLSR.V                |                    | 2 | 3,1315 | 0,489 | 0,158  |
| 18 | Q9UPN9 TRI33_HUMAN | R.SACM*LSSPESSLT#PPLSTNLHLE.S      | T815:              | 3 | 3,1295 | 0,275 | 0      |
| 18 | Q9H4A3 WNK1_HUMAN  | E.QAVAGPAPSTVPSSTSK.D              |                    | 2 | 3,1285 | 0,42  | 0      |
| 18 | P46013 KI67_HUMAN  | K.AM*LT#PKPAGGDE.K                 | T1176:             | 2 | 3,1251 | 0,36  | 0,476  |
| 18 | Q13885 TBB2A_HUMAN | E.LVDSVLDVVR.K                     |                    | 2 | 3,1229 | 0,26  | 0,109  |
| 18 | O95425 SVIL_HUMAN  | E.IKTPTGEGLLDS#PSKTM*SIKE.R        | S1120:             | 3 | 3,1216 | 0,293 | 0,471  |
| 18 | P49840 GSK3A_HUMAN | R.DSGKVTTVVATLGQGPERS              |                    | 3 | 3,1204 | 0,319 | 0,302  |
| 18 | Q96QD8 S38A2_HUMAN | K.SHYADVDPENQNFLE.S                |                    | 2 | 3,1185 | 0,191 | 0,71   |
| 18 | P52948 NUP98_HUMAN | E.NNS#YHM*HPAGIILTK.V              | S726:              | 3 | 3,1167 | 0,34  | 0,306  |
| 18 | Q16643 DREB_HUMAN  | E.TQEPSILDSEETR.A                  |                    | 2 | 3,1149 | 0,399 | 0,457  |
| 18 | P31946 1433B_HUMAN | E.SYKDSTLIM*QLLR.D                 |                    | 3 | 3,113  | 0,188 | 0,231  |
| 18 | Q7L2J0 MEPCE_HUMAN | E.KEPFLVPAPPPLKDE.S                |                    | 3 | 3,1117 | 0,214 | 0,206  |
| 18 | P06576 ATPB_HUMAN  | E.TIKGFQQILAGEYDHLPE.Q             |                    | 3 | 3,11   | 0,162 | -0,178 |
| 18 | Q00610 CLH1_HUMAN  | E.GCEEPATHNALAK.I                  |                    | 2 | 3,1098 | 0,392 | -0,175 |
| 18 | P09960 LKHA4_HUMAN | R.SLVLDTKDLTIE.K                   |                    | 2 | 3,1078 | 0,283 | 0,181  |

|    |                     |                                  |            |   |        |       |        |
|----|---------------------|----------------------------------|------------|---|--------|-------|--------|
| 18 | Q13885 TBB2A_HUMAN  | R.LHFFM*PGFAPLTSR.G              |            | 2 | 3,106  | 0,455 | -0,298 |
| 18 | P63104 1433Z_HUMAN  | K.GIVDQSQQAYQE.A                 |            | 2 | 3,1056 | 0,391 | -0,536 |
| 18 | O60524 SDCG1_HUMAN  | E.LKLQTNHVTM*LLR.N               |            | 3 | 3,1053 | 0,301 | -0,231 |
| 18 | Q6UB99 ANR11_HUMAN  | E.KKS#PFLSSAE.G                  | S610:      | 2 | 3,1024 | 0,282 | -0,208 |
| 18 | Q7Z5K2 WAPL_HUMAN   | K.RPES#PSEIS#PIKGSVR.T           | S221:S226: | 3 | 3,1005 | 0,376 | 0,193  |
| 18 | Q7Z417 NUFP2_HUMAN  | K.RTS#PQVLGSILK.S                | S572:      | 3 | 3,0984 | 0,165 | 0,265  |
| 18 | Q9UN86 G3BP2_HUMAN  | R.NSSYVHGGVDASGKPEAVYGQND.I      |            | 3 | 3,0978 | 0,341 | 0      |
| 18 | Q92499 DDX1_HUMAN   | E.HLNCTISQVEPDIK.V               |            | 3 | 3,0962 | 0,186 | 0      |
| 18 | P00519 ABL1_HUMAN   | E.SDPLDHEPAVS#PLLPRKE.R          | S569:      | 3 | 3,0951 | 0,173 | 0      |
| 18 | Q8ND56 LS14A_HUMAN  | R.SLKTQLSQGRSS#PQLDPLRKS#PTM*E.Q | S183:S192: | 3 | 3,0896 | 0,142 | 0,865  |
| 18 | P46934 NEDD4_HUMAN  | E.NGNIQLQAQR.A                   |            | 2 | 3,0878 | 0,35  | 0,107  |
| 18 | Q8WXV6 Q8WXV6_HUMAN | R.TSS#EDNLYLAVLR.A               | S21:       | 2 | 3,0877 | 0,22  | -0,313 |
| 18 | Q9Y411 MYO5A_HUMAN  | E.NIS#PGQIIDEPIRPVNIPR.K         | S1452:     | 3 | 3,0872 | 0,337 | -0,083 |
| 18 | Q07666 KHDR1_HUMAN  | E.KDSLDPSTHAM*QLLTAE.I           |            | 2 | 3,0857 | 0,294 | 0,423  |
| 18 | O75132 ZBED4_HUMAN  | E.LM*NSTSEDVAASHR.C              |            | 2 | 3,0856 | 0,376 | -0,636 |
| 18 | Q5JT44 Q5JT44_HUMAN | E.GDNLET#PSQSPQLFHDDTHSR.I       | T124:      | 3 | 3,0815 | 0,138 | 0,446  |
| 18 | P05362 ICAM1_HUMAN  | E.AQVHLALGDQR.L                  |            | 3 | 3,0799 | 0,277 | 0,605  |
| 18 | Q9UPZ3 HPS5_HUMAN   | E.LILKFEPLDSACSS#R.R             | S433:      | 3 | 3,0793 | 0,291 | 0,101  |
| 18 | P43686 PRS6B_HUMAN  | K.ISGADINSICQE.S                 |            | 2 | 3,0779 | 0,471 | 0,28   |
| 18 | O43290 SNUT1_HUMAN  | R.#ILSKYDEE.L                    | S332:      | 2 | 3,0769 | 0,298 | 0,105  |
| 18 | Q9UHB6 LIMA1_HUMAN  | E.VQQPVHPKPLS#PDSR.A             | S362:      | 3 | 3,0768 | 0,185 | 1,244  |
| 18 | P31946 1433B_HUMAN  | E.SYKDSTLIM*QLLR.D               |            | 2 | 3,073  | 0,462 | -0,385 |
| 18 | P25787 PSA2_HUMAN   | E.DAIHTAILTLKE.S                 |            | 3 | 3,0614 | 0,213 | 1,725  |
| 18 | Q01082 SPTB2_HUMAN  | K.AKTALPAQSAATLPAR.T             |            | 2 | 3,0612 | 0,239 | -0,779 |
| 18 | Q5VWN6 CJ018_HUMAN  | E.APFLHPAPRS#RSPLLVTVVE.S        | S2035:     | 3 | 3,0599 | 0,201 | 0,242  |
| 18 | Q9UBR2 CATZ_HUMAN   | R.VGDYGSLSGRE.K                  |            | 2 | 3,0578 | 0,515 | -0,428 |
| 18 | Q12893 TM115_HUMAN  | E.SGAKVDSPLPSDKAPT#PPGK.G        | T329:      | 3 | 3,0572 | 0,107 | -0,361 |
| 18 | P13645 K1C10_HUMAN  | R.SLLEGEGSSGGGGR.G               |            | 2 | 3,0572 | 0,466 | -1,063 |
| 18 | Q13885 TBB2A_HUMAN  | R.LHFFM*PGFAPLTSR.G              |            | 3 | 3,056  | 0,276 | 0      |
| 18 | Q5VZK9 LR16A_HUMAN  | R.YGVQVM*GSGLLAE.M               |            | 2 | 3,0542 | 0,32  | 0,364  |
| 18 | P04264 K2C1_HUMAN   | K.LALDLEIATYR.T                  |            | 2 | 3,0535 | 0,458 | -0,191 |
| 18 | Q96HC4 PDLI5_HUMAN  | K.KANNSQEPS#PQLASSVASTR.S        | S313:      | 3 | 3,0532 | 0,358 | -1,615 |
| 18 | Q59FE8 Q59FE8_HUMAN | R.STPAEDDSPGDSSQVKSE.V           |            | 2 | 3,0528 | 0,576 | 0,279  |
| 18 | Q02952 AKA12_HUMAN  | E.DFAAHPGEDAVPTGPDCQAK.S         |            | 3 | 3,0522 | 0,235 | 0,088  |
| 18 | Q71U36 TBA1A_HUMAN  | E.KAYHEQLS#VAE.I                 | S287:      | 2 | 3,0518 | 0,362 | -0,09  |
| 18 | Q9UHB6 LIMA1_HUMAN  | R.ETPHS#PGVEDAPIAK.V             | S490:      | 3 | 3,0494 | 0,299 | 0,786  |
| 18 | P39880 CUX1_HUMAN   | E.IQAGSQGQAGASDPSAR.S            |            | 2 | 3,0477 | 0,465 | -0,361 |
| 18 | Q9NR09 BIRC6_HUMAN  | E.TLM*HDQVKPS#SSKELPSDFQL.-      | S4818:     | 3 | 3,0407 | 0,278 | 0,81   |
| 18 | B2R8U0 B2R8U0_HUMAN | K.AAAGPLDM*SLPSTPDIK.I           |            | 2 | 3,0406 | 0,366 | -0,072 |

|    |                     |                                    |              |   |        |       |        |
|----|---------------------|------------------------------------|--------------|---|--------|-------|--------|
| 18 | Q8WXI9 P66B_HUMAN   | R.LTPSPDIIVLS#DNE.A                | S129:        | 2 | 3,039  | 0,312 | 0      |
| 18 | Q9UQ35 SRRM2_HUMAN  | E.SYFGVSSLQLK.G                    |              | 2 | 3,0382 | 0,405 | -0,099 |
| 18 | Q9P287 BCCIP_HUMAN  | E.LTDLLIQQNHIGSVIK.Q               |              | 3 | 3,0373 | 0,216 | 0,714  |
| 18 | Q9UBG0 MRC2_HUMAN   | R.YSRSS#SSPTEATE.K                 | S1456:       | 2 | 3,0372 | 0,346 | -0,329 |
| 18 | Q96S38 KS6C1_HUMAN  | E.LKFFPNDDPEAVSSPR.T               |              | 3 | 3,036  | 0,224 | 0,101  |
| 18 | P62736 ACTA_HUMAN   | D.LAGRDLTDYLM*K.I                  |              | 3 | 3,0343 | 0,274 | -0,13  |
| 18 | P78347 GTF2I_HUMAN  | E.DLQLDKPASGVKEE.W                 |              | 2 | 3,0339 | 0,304 | -0,08  |
| 18 | P04792 HSPB1_HUMAN  | E.SRAQLGGPEAAKS#DE.T               | S199:        | 2 | 3,0312 | 0,479 | -0,382 |
| 18 | Q8IXM2 CQ049_HUMAN  | E.DSGIPLPAES#PKKGPK.K              | S96:         | 2 | 3,0272 | 0,336 | -0,43  |
| 18 | Q7L2J0 MEPCE_HUMAN  | R.TLNAET#PKSS#PLPAK.G              | T213:S217:   | 2 | 3,0269 | 0,278 | -1,21  |
| 18 | Q0JRZ9 FCHO2_HUMAN  | E.LKVSIGNITLSPAISR.H               |              | 3 | 3,0242 | 0,3   | 0      |
| 18 | Q9UPN4 AZI1_HUMAN   | R.SPAGVDLSLTGLPPPVS.R              |              | 2 | 3,0204 | 0,341 | 0      |
| 18 | Q8N2M8 SFR16_HUMAN  | E.KKAS#IGYTYE.D                    | S147:        | 2 | 3,0119 | 0,369 | -0,394 |
| 18 | P60709 ACTB_HUMAN   | E.EHPVLLTEAPLNPK.A                 |              | 3 | 3,0104 | 0,284 | 0,235  |
| 18 | A9CQZ4 A9CQZ4_HUMAN | E.DEEVPAFFKNLGS#PKPR.Q             | S27:         | 3 | 3,0095 | 0,209 | -1,188 |
| 18 | Q96RS0 TGS1_HUMAN   | K.GIGLDESELDS#EAE.L                | S89:         | 2 | 3,009  | 0,347 | 0,474  |
| 18 | Q6MZL5 Q6MZL5_HUMAN | E.M*EQLFHDDQGGVTR.W                |              | 3 | 3,0083 | 0,189 | 0,666  |
| 18 | Q13330 MTA1_HUMAN   | E.ASQS#PLVLK.Q                     | S522:        | 2 | 3,0066 | 0,399 | 0,179  |
| 18 | P02545 LMNA_HUMAN   | R.LRLS#PS#PTSQR.S                  | S390:S392:   | 2 | 3,0054 | 0,284 | -1,044 |
| 18 | Q07157 ZO1_HUMAN    | E.NQTYPPY#SPQAQPPIHR.I             | Y898:        | 3 | 3,0041 | 0,284 | 0,582  |
| 18 | P18583 SON_HUMAN    | R.LTSLRAGIEGPLLASDVGRDR.S          |              | 3 | 3,0035 | 0,299 | 0,25   |
| 18 | P04406 G3P_HUMAN    | K.LVINGNPITIFQER.D                 |              | 2 | 3,0018 | 0,426 | 0      |
| 18 | P46821 MAP1B_HUMAN  | E.SEKPLTQSGGAPPPGGK.Q              |              | 3 | 3,001  | 0,26  | -0,322 |
| 18 | Q09666 AHNK_HUMAN   | E.TGKLQSGSVSLASK.K                 |              | 2 | 2,9994 | 0,219 | 0,092  |
| 18 | Q09666 AHNK_HUMAN   | K.AEAPLPS#PKLE.G                   | S5110:       | 2 | 2,9958 | 0,413 | -0,396 |
| 18 | Q12888 TP53B_HUMAN  | E.GRQDKPM*DTS#VLSEE.G              | S395:        | 2 | 2,9881 | 0,404 | -0,136 |
| 18 | P54727 RD23B_HUMAN  | K.QEKPAEKPAETPVAT#SPTATDSTSGDSSR.S | T159:        | 3 | 2,988  | 0,223 | 0,484  |
| 18 | Q6VY07 PACS1_HUMAN  | K.TDLQGSAS#PSKVE.G                 | S495:        | 2 | 2,9868 | 0,276 | -0,262 |
| 18 | Q7Z5J4 RAI1_HUMAN   | R.GLKGAGGS#PVGVEE.G                | S1374:       | 2 | 2,9862 | 0,326 | -0,091 |
| 18 | Q5SW79 CE170_HUMAN  | R.QGS#FTIEKPSNPIE.L                | S838:        | 2 | 2,9846 | 0,239 | 0,066  |
| 18 | P00338 LDHA_HUMAN   | E.LALVDVIEDKLGKE.M                 |              | 2 | 2,9831 | 0,324 | -0,316 |
| 18 | O15027 SC16A_HUMAN  | K.SHLVGVKPFADR.A                   |              | 3 | 2,9797 | 0,114 | 0      |
| 18 | O60271 JIP4_HUMAN   | E.LDM*DKDLSGYK.G                   |              | 2 | 2,9787 | 0,415 | -0,094 |
| 18 | P51858 HDGF_HUMAN   | E.VERPLPM*EVEK.N                   |              | 3 | 2,9786 | 0,185 | 0,408  |
| 18 | Q08945 SSRP1_HUMAN  | K.QGTQYTFSSIEREE.Y                 |              | 2 | 2,9766 | 0,308 | -0,437 |
| 18 | P60900 PSA6_HUMAN   | E.AEIDAHLVALAERD.-                 |              | 3 | 2,9718 | 0,222 | 0,42   |
| 18 | Q02952 AKA12_HUMAN  | R.EARGDVTVS#EAELTPE.A              | S967:        | 2 | 2,9716 | 0,225 | -0,137 |
| 18 | Q9UQ35 SRRM2_HUMAN  | R.SGAGS#S#PETKEQNSALPTSSQDEE.L     | S1218:S1219: | 3 | 2,9708 | 0,291 | 0,07   |
| 18 | P52948 NUP98_HUMAN  | E.NNS#YHM*HPAGIILTK.V              | S726:        | 2 | 2,9705 | 0,204 | 0,545  |

|    |                    |                               |        |   |        |       |        |
|----|--------------------|-------------------------------|--------|---|--------|-------|--------|
| 18 | Q86V48 LUZP1_HUMAN | E.RHTS#TSNIQVGLAE.L           | S820:  | 2 | 2,9673 | 0,357 | -0,153 |
| 18 | P24928 RPB1_HUMAN  | K.DVLSNAHIQNE.L               |        | 2 | 2,9652 | 0,345 | -0,098 |
| 18 | O75688 PPM1B_HUMAN | E.DAHTAVVGIPHGLE.D            |        | 3 | 2,9646 | 0,127 | 0,065  |
| 18 | P18583 SON_HUMAN   | E.RLTSLRAGIEGPLLASDVGR.D      |        | 3 | 2,9642 | 0,244 | 0      |
| 18 | O95429 BAG4_HUMAN  | K.DSSYPYSQSDQSM*NR.H          |        | 2 | 2,9642 | 0,485 | -0,206 |
| 18 | Q9NQS7 INCE_HUMAN  | E.QHVTQLM*STEPLPR.T           |        | 3 | 2,9617 | 0,364 | -0,221 |
| 18 | Q14697 GANAB_HUMAN | R.LSVSGRDENSVE.L              |        | 2 | 2,9611 | 0,36  | 0,094  |
| 18 | Q9P265 DIP2B_HUMAN | R.QAALSAALQQSLQNAE.S          |        | 3 | 2,9608 | 0,231 | 0,223  |
| 18 | P35030 TRY3_HUMAN  | D.TLDNDIMLIK.L                |        | 2 | 2,9598 | 0,328 | 0,207  |
| 18 | Q9UHB6 LIMA1_HUMAN | E.NEEILERPAQLANAR.E           |        | 3 | 2,9586 | 0,13  | -0,743 |
| 18 | Q8NEM2 SHCBP_HUMAN | R.DKPGSSLQSFM*PE.G            |        | 2 | 2,9575 | 0,389 | 0,085  |
| 18 | P78310 CXAR_HUMAN  | R.M*GAIPVM*IPAQSK.D           |        | 2 | 2,9541 | 0,444 | 0,266  |
| 18 | Q99569 PKP4_HUMAN  | R.SAVS#PDLHITPIYE.G           | S406:  | 2 | 2,9538 | 0,184 | 0      |
| 18 | O15014 ZN609_HUMAN | K.SKDAEQLVKE.G                |        | 2 | 2,9522 | 0,378 | -0,425 |
| 18 | Q15149 PLEC1_HUMAN | R.CRPDQLTGLSLLPLSE.K          |        | 2 | 2,9463 | 0,222 | -0,136 |
| 18 | Q99714 HCD2_HUMAN  | K.GGIVGM*TLPIARD.L            |        | 2 | 2,9458 | 0,431 | 0,371  |
| 18 | O15014 ZN609_HUMAN | E.NTTPTQPLTPLHVVTQNGAEASSVK.T |        | 3 | 2,9424 | 0,52  | 0,212  |
| 18 | Q09666 AHNK_HUMAN  | E.GAKDIDISS#PE.F              | S177:  | 2 | 2,9363 | 0,107 | 0,101  |
| 18 | Q8NCF5 NF2IP_HUMAN | E.VLSLRDS#PLKTLM*SHYEE.A      | S369:  | 2 | 2,9355 | 0,207 | 0,335  |
| 18 | P04843 RPN1_HUMAN  | K.VTAEVVLAHLGGGSTR.A          |        | 3 | 2,9327 | 0,267 | 0      |
| 18 | P10809 CH60_HUMAN  | R.KPLVIAEDVDGE.A              |        | 2 | 2,9295 | 0,481 | 0,087  |
| 18 | P05787 K2C8_HUMAN  | E.LGNM*QGLVEDFK.N             |        | 2 | 2,9279 | 0,361 | -0,179 |
| 18 | O94876 TMCC1_HUMAN | R.NKFGS#ADNIPNLKDSLE.E        | S382:  | 3 | 2,9279 | 0,109 | 0,283  |
| 18 | P80723 BASP_HUMAN  | K.ESEPQAAAEPAAEKE.G           |        | 2 | 2,9252 | 0,383 | 0,235  |
| 18 | P08670 VIME_HUMAN  | E.NTLQSFQRQVDNASLARLD.L       |        | 2 | 2,9248 | 0,312 | 0      |
| 18 | Q01469 FABP5_HUMAN | K.TTQFSCTLGEKFEE.T            |        | 2 | 2,9242 | 0,212 | 0,073  |
| 18 | Q09666 AHNK_HUMAN  | K.FKAEAPLPS#PKLE.G            | S5110: | 3 | 2,9227 | 0,289 | 0,182  |
| 18 | Q9UPN9 TRI33_HUMAN | E.DAGSSSLDNLLSR.Y             |        | 2 | 2,9222 | 0,334 | -0,091 |
| 18 | P19105 MLRM_HUMAN  | E.KLNGTDPEDVIR.N              |        | 3 | 2,9206 | 0,167 | 0,472  |
| 18 | Q722K8 GRIN1_HUMAN | R.DAGLQVSLGAAE.T              |        | 2 | 2,9177 | 0,282 | 0,324  |
| 18 | O75083 WDR1_HUMAN  | R.LYSILGTTLKDE.G              |        | 2 | 2,9163 | 0,311 | -0,18  |
| 18 | O00505 IMA3_HUMAN  | E.VKVQTAALRAVGNIVTGTDE.Q      |        | 3 | 2,9157 | 0,16  | 0      |
| 18 | Q9Y6E2 BZW2_HUMAN  | R.DTLVQGLNEAGDDLE.A           |        | 2 | 2,9142 | 0,21  | 0,384  |
| 18 | O75064 DEN4B_HUMAN | E.SLQEQP GALPVPGPSR.S         |        | 2 | 2,9134 | 0,316 | 0,075  |
| 18 | Q12849 GRSF1_HUMAN | E.DVLNFFSDCR.I                |        | 2 | 2,9126 | 0,456 | -0,288 |
| 18 | Q13263 TIF1B_HUMAN | K.ADVQSIHGLQR.F               |        | 2 | 2,9116 | 0,171 | 0,305  |
| 18 | Q70Z53 F10C1_HUMAN | E.DDLLLQKPFQKE.K              |        | 2 | 2,9115 | 0,187 | 0,166  |
| 18 | P23526 SAHH_HUMAN  | E.QM*KDDAIVCNIGHFDVE.I        |        | 3 | 2,9095 | 0,128 | 0,365  |
| 18 | P56182 RRP1_HUMAN  | R.SEKPPAGSICR.A               |        | 3 | 2,907  | 0,313 | 0,609  |

|    |                    |                              |                    |   |        |       |        |
|----|--------------------|------------------------------|--------------------|---|--------|-------|--------|
| 18 | Q15365 PCBP1_HUMAN | R.CSDAAGYPHATHDLE.G          |                    | 3 | 2,9064 | 0,202 | -0,89  |
| 18 | Q15056 IF4H_HUMAN  | R.GSNM*DFREPTEEE.R           |                    | 2 | 2,9055 | 0,391 | -0,157 |
| 18 | P61247 RS3A_HUMAN  | E.VVNKLIPDSIGKDIE.K          |                    | 3 | 2,9034 | 0,314 | 0,669  |
| 18 | P30260 CDC27_HUMAN | R.LFTSDSSTTKE.N              |                    | 2 | 2,9034 | 0,404 | 0      |
| 18 | O75449 KTNA1_HUMAN | E.SFKLDST#PLKAAQHDLPASEGE.V  | T81:               | 3 | 2,902  | 0,102 | 0,076  |
| 18 | Q6NWX9 PR40B_HUMAN | E.LQQAELPNRS#PGFGIKKE.K      | S832:              | 3 | 2,8993 | 0,379 | 0,437  |
| 18 | O15061 DMN_HUMAN   | K.GLQTPVKDAGGGTGR.E          |                    | 2 | 2,8955 | 0,315 | 0      |
| 18 | P55209 NP1L1_HUMAN | R.QLTVQM*M*QNPQILALQE.R      |                    | 2 | 2,8928 | 0,315 | 0,117  |
| 18 | O43166 SI1L1_HUMAN | R.HSAS#PVVFTS#ARS#SPKEE.L    | S1433:S1439:S1442: | 3 | 2,8907 | 0,092 | 0,255  |
| 18 | Q15942 ZYX_HUMAN   | K.FS#PGAPGGSGSQPNQK.L        | S281:              | 2 | 2,8899 | 0,327 | -0,382 |
| 18 | P55196 AFAD_HUMAN  | R.RQES#RTQDASGPELILPASIE.F   | S573:              | 3 | 2,8891 | 0,244 | 0,154  |
| 18 | P42166 LAP2A_HUMAN | R.SSTPLPTISSSAENTR.Q         |                    | 2 | 2,8883 | 0,467 | 0,074  |
| 18 | P41240 CSK_HUMAN   | K.VSDFGLTKE.A                |                    | 2 | 2,8878 | 0,305 | -0,245 |
| 18 | Q03701 CEBPZ_HUMAN | R.LGGTKQDYLM*LATLDE.N        |                    | 2 | 2,8873 | 0,246 | -0,137 |
| 18 | P31946 1433B_HUMAN | K.DSTLIM*QLLR.D              |                    | 2 | 2,8868 | 0,147 | -0,405 |
| 18 | Q9UPN4 AZI1_HUMAN  | E.ATGPGGSQAINNLR.R           |                    | 2 | 2,8863 | 0,39  | -0,09  |
| 18 | Q15393 SF3B3_HUMAN | E.LDLGLNHVVR.K               |                    | 2 | 2,8843 | 0,363 | -0,107 |
| 18 | Q8TAQ2 SMRC2_HUMAN | E.DKNNASHVVYPVPGNLEEEE.W     |                    | 3 | 2,8825 | 0,154 | 0,163  |
| 18 | Q12873 CHD3_HUMAN  | E.ADAPS#PAPS#LGERLEPR.K      | S1601:S1605:       | 2 | 2,8811 | 0,383 | -0,508 |
| 18 | Q12888 TP53B_HUMAN | K.M*VIQGPSS#PQGE.A           | S1114:             | 2 | 2,8807 | 0,298 | 0,092  |
| 18 | Q5VUA4 ZN318_HUMAN | R.IPS#PNILK.T                | S2101:             | 2 | 2,8806 | 0,24  | 0,254  |
| 18 | Q14676 MDC1_HUMAN  | R.SSVKT#PETVVPTAPE.L         | T1321:             | 2 | 2,8784 | 0,307 | 0,15   |
| 18 | O75781 PALM_HUMAN  | E.VVM*NSQQTPVGT#PKDKR.V      | T145:              | 3 | 2,8783 | 0,172 | -0,369 |
| 18 | Q9UBG0 MRC2_HUMAN  | R.TLGDQLSLLGAR.T             |                    | 2 | 2,8774 | 0,369 | -0,45  |
| 18 | Q14697 GANAB_HUMAN | E.DRSLLSVNAR.G               |                    | 2 | 2,8762 | 0,105 | -0,294 |
| 18 | P05556 ITB1_HUMAN  | K.NVLSLTNKGEVFNE.L           |                    | 2 | 2,8695 | 0,274 | 0,078  |
| 18 | P35908 K22E_HUMAN  | K.LALDVEIATYR.K              |                    | 2 | 2,8676 | 0,467 | 0,097  |
| 18 | P68104 EF1A1_HUMAN | D.VYKIGGIGTVPVGRVE.T         |                    | 2 | 2,8647 | 0,361 | -0,371 |
| 18 | Q9C0C2 TB182_HUMAN | R.SYQFGIIGNDR.V              |                    | 2 | 2,8625 | 0,409 | 0,576  |
| 18 | P40855 PEX19_HUMAN | R.S#PGDTAKDALFASQE.K         | S54:               | 2 | 2,8611 | 0,372 | 0,151  |
| 18 | Q13464 ROCK1_HUMAN | K.NSLTFPDDNDISKE.A           |                    | 2 | 2,8608 | 0,344 | 0,153  |
| 18 | Q8IWU2 LMTK2_HUMAN | E.DCLHQDISPDAVTVPVEILSTDAR.T |                    | 3 | 2,8607 | 0,088 | 0,345  |
| 18 | P08670 VIME_HUMAN  | R.ISLPLPNFSSLNLR.T           |                    | 2 | 2,8606 | 0,345 | -0,215 |
| 18 | Q6P2E9 EDC4_HUMAN  | E.LGSEGLGSAAHGS#QPDLR.R      | S565:              | 3 | 2,8603 | 0,139 | -0,2   |
| 18 | Q09666 AHNK_HUMAN  | K.GPKVDIDT#PDINIE.G          | T3716:             | 2 | 2,8588 | 0,261 | -0,076 |
| 18 | P15170 ERF3A_HUMAN | E.ITALICLVDDK.S              |                    | 3 | 2,8552 | 0,335 | 0,646  |
| 18 | Q13099 IFT88_HUMAN | R.GSAFDPLSQSR.G              |                    | 2 | 2,8551 | 0,4   | -0,105 |
| 18 | Q9C0C2 TB182_HUMAN | K.VSAPGVLTQAQDR.V            |                    | 2 | 2,8543 | 0,526 | 0,402  |
| 18 | O43765 SGTA_HUMAN  | R.SPART#PPSEEDSAE.A          | T81:               | 2 | 2,8543 | 0,371 | 0,079  |



|    |                    |                           |            |   |        |       |        |
|----|--------------------|---------------------------|------------|---|--------|-------|--------|
| 18 | P10809 CH60_HUMAN  | R.GYISPYFINTSK.G          |            | 2 | 2,8534 | 0,389 | 0,088  |
| 18 | P52272 HNRPM_HUMAN | K.GCGVVKFES#PEVAE.R       | S701:      | 2 | 2,8507 | 0,318 | -0,231 |
| 18 | Q9BSJ8 ESYT1_HUMAN | E.TDLSQGVAR.W             |            | 2 | 2,8502 | 0,15  | 0,709  |
| 18 | Q00613 HSF1_HUMAN  | E.SEPAPASVTALTDAR.G       |            | 2 | 2,8496 | 0,544 | 0      |
| 18 | P27816 MAP4_HUMAN  | E.VALAKDM*ES#PTKLDVTLAK.D | S280:      | 3 | 2,8492 | 0,295 | 0,086  |
| 18 | P46940 IQGA1_HUMAN | K.TLQALQIPAAK.L           |            | 2 | 2,8469 | 0,309 | 0      |
| 18 | P68104 EF1A1_HUMAN | K.IGGIGTVPVGR.V           |            | 2 | 2,8461 | 0,436 | -0,119 |
| 18 | Q6BDS2 URFB1_HUMAN | R.LKPSASFGS#PVQSE.A       | S758:      | 2 | 2,8437 | 0,425 | -0,081 |
| 18 | O75420 PERQ1_HUMAN | E.TAEKEPPAAEDDIR.G        |            | 3 | 2,8429 | 0,152 | 0,237  |
| 18 | P22314 UBA1_HUMAN  | R.YDGQVAVFGSDLQE.K        |            | 2 | 2,842  | 0,3   | 0      |
| 18 | Q9C0B5 ZDHC5_HUMAN | R.SSS#LKSAQGTGFE.L        | S429:      | 2 | 2,8412 | 0,415 | 0      |
| 18 | P35221 CTNA1_HUMAN | E.DDQLIAGQSAR.A           |            | 2 | 2,8401 | 0,301 | -0,935 |
| 18 | Q86YP4 P66A_HUMAN  | R.VNGLTTVALKE.T           |            | 2 | 2,8393 | 0,391 | -0,107 |
| 18 | Q14562 DHX8_HUMAN  | E.IELVEEPPFLR.G           |            | 2 | 2,8361 | 0,328 | -0,166 |
| 18 | Q9NRY4 GRLF1_HUMAN | E.DTSLPSLSKDHSKLS#M*ELE.G | S1013:     | 3 | 2,8338 | 0,275 | 0,331  |
| 18 | P08670 VIME_HUMAN  | E.NTLQSFQRQVDNASLARLDLE.R |            | 3 | 2,8337 | 0,149 | 0,076  |
| 18 | Q86YS7 K0528_HUMAN | E.INPPEISEEIIGS#PIPEPR.Q  | S643:      | 3 | 2,8319 | 0,323 | -0,084 |
| 18 | Q92615 LARP5_HUMAN | R.TLS#ADASVNTLPVVVSR.E    | S568:      | 2 | 2,8306 | 0,219 | 0,405  |
| 18 | Q9UQ35 SRRM2_HUMAN | R.VSGRTS#PPLDR.A          | S2398:     | 2 | 2,8305 | 0,284 | -0,266 |
| 18 | Q70Z53 F10C1_HUMAN | E.DDLLLQKPFQKE.K          |            | 3 | 2,8285 | 0,356 | 0,248  |
| 18 | Q9BRQ6 CHCH6_HUMAN | R.RVS#FGVDEEE.R           | S13:       | 2 | 2,8271 | 0,34  | 0,489  |
| 18 | Q5VUA4 ZN318_HUMAN | R.SVRIPS#PNILK.T          | S2101:     | 3 | 2,8254 | 0,262 | 0,561  |
| 18 | P04792 HSPB1_HUMAN | E.SPAVAAPAYS.R            |            | 2 | 2,8233 | 0,379 | -0,672 |
| 18 | P51784 UBP11_HUMAN | K.AAYVLFYQR.Q             |            | 2 | 2,8233 | 0,289 | 0,324  |
| 18 | Q02952 AKA12_HUMAN | K.ERPPAPSSFVFQEE.T        |            | 2 | 2,8213 | 0,228 | 0,226  |
| 18 | P20700 LMNB1_HUMAN | E.FRKS#M*YEEE.I           | S210:      | 2 | 2,8184 | 0,096 | 0      |
| 18 | Q13115 DUS4_HUMAN  | E.DSTVSLVVQALR.R          |            | 2 | 2,8173 | 0,209 | -0,095 |
| 18 | P40222 TXLNA_HUMAN | R.RPEGPGAQAPSS#PR.V       | S515:      | 2 | 2,8121 | 0,374 | -0,246 |
| 18 | Q86YS7 K0528_HUMAN | E.IIGSPIPEPR.Q            |            | 2 | 2,8114 | 0,333 | 0,113  |
| 18 | O75362 ZN217_HUMAN | E.TQANNLICR.T             |            | 2 | 2,8105 | 0,269 | -0,672 |
| 18 | Q9UBU7 DBF4A_HUMAN | K.LLFIS#EPIPHPS#NE.L      | S413:S420: | 2 | 2,8081 | 0,295 | 0      |
| 18 | P60900 PSA6_HUMAN  | E.AEIDAHLVALAERD.-        |            | 2 | 2,8079 | 0,394 | -0,08  |
| 18 | Q96T23 RSF1_HUMAN  | K.LSDDFDS#PVKGPLCK.S      | S387:      | 3 | 2,8059 | 0,25  | 0,208  |
| 18 | P42704 LPPRC_HUMAN | E.AVFSALVTGHAR.A          |            | 2 | 2,8024 | 0,407 | 0      |
| 18 | Q9NYF8 BCLF1_HUMAN | E.GEPQEE#PLKSK.S          | S177:      | 2 | 2,7999 | 0,095 | -0,52  |
| 18 | Q9H223 EHD4_HUMAN  | E.LFYTLS#PINGK.I          | S459:      | 2 | 2,7987 | 0,449 | 0,092  |
| 18 | Q5VZK9 LR16A_HUMAN | R.RYGVQVM*GSGLLAE.M       |            | 2 | 2,7952 | 0,341 | 0      |
| 18 | P49792 RBP2_HUMAN  | E.KDS#LITPHVSR.S          | S2447:     | 2 | 2,7946 | 0,311 | -0,366 |
| 18 | Q86TB9 PATL1_HUMAN | R.STS#PIIGSPPVR.A         | S179:      | 2 | 2,7946 | 0,223 | -0,189 |

|    |                    |                              |            |   |        |       |        |
|----|--------------------|------------------------------|------------|---|--------|-------|--------|
| 18 | Q9UQ35 SRRM2_HUMAN | R.FQSDSSSYPTVDSNSLLGQSRLE.T  |            | 3 | 2,7886 | 0,243 | 0,509  |
| 18 | Q13428 TCOF_HUMAN  | K.TVANLLSGKS#PR.K            | S156:      | 2 | 2,7881 | 0,27  | 0,277  |
| 18 | Q9P2K5 MYEF2_HUMAN | K.AEVPGATGGDS#PHLQPAEPPGEP.R | S17:       | 3 | 2,7878 | 0,315 | -0,224 |
| 18 | P21333 FLNA_HUMAN  | K.TGVAVNKP AEFTVDAK.H        |            | 3 | 2,7859 | 0,334 | 0,222  |
| 18 | Q96EP5 DAZP1_HUMAN | E.DEQSVDQAVNM*HFHD.I         |            | 3 | 2,7845 | 0,2   | -0,102 |
| 18 | P30279 CCND2_HUMAN | E.AVLLNSLQQYR.Q              |            | 2 | 2,783  | 0,35  | 0,093  |
| 18 | O60841 IF2P_HUMAN  | E.NVRIPGM*LIIDTPGHE.S        |            | 3 | 2,7798 | 0,098 | 0,617  |
| 18 | Q53F19 CQ085_HUMAN | E.LKM*IST#PS#PK.K            | T413:S415: | 2 | 2,7758 | 0,251 | 0,191  |
| 18 | Q5JTV8 TOIP1_HUMAN | E.ASS#QTDLSTISKK.T           | S164:      | 3 | 2,7756 | 0,293 | -0,232 |
| 18 | P62937 PPIA_HUMAN  | R.VSFELFADKVPK.T             |            | 3 | 2,7735 | 0,38  | 0,066  |
| 18 | Q15149 PLEC1_HUMAN | E.FADM*LSGNAGGF.R.S          |            | 2 | 2,7723 | 0,458 | -1,077 |
| 18 | P13861 KAP2_HUMAN  | R.APASVLPAAATPR.Q            |            | 2 | 2,7714 | 0,508 | 0,636  |
| 18 | P42166 LAP2A_HUMAN | D.VYVQLYLQHLTAR.N            |            | 3 | 2,7712 | 0,446 | 0      |
| 18 | Q9Y6M7 S4A7_HUMAN  | R.KIPTGAEASNVLVGE.V          |            | 2 | 2,7696 | 0,378 | -0,164 |
| 18 | Q5VUA4 ZN318_HUMAN | R.SVRIPS#PNILK.T             | S2101:     | 2 | 2,7684 | 0,272 | 0      |
| 18 | P13051 UNG_HUMAN   | K.TLYSFFSPSPAR.K             |            | 2 | 2,7677 | 0,388 | 0      |
| 18 | Q9UIF9 BAZ2A_HUMAN | R.VIM*SDLQIR.G               |            | 2 | 2,7651 | 0,313 | 0      |
| 18 | P00519 ABL1_HUMAN  | E.SDPLDHEPAVS#PLLPR.K        | S569:      | 2 | 2,7644 | 0,391 | 0,402  |
| 18 | P78347 GTF2I_HUMAN | E.DLQLDKPASGVKE.E            |            | 2 | 2,7619 | 0,198 | -0,436 |
| 18 | P49023 PAXI_HUMAN  | R.ISASSATRELDE.L             |            | 2 | 2,7609 | 0,372 | 0      |
| 18 | Q92609 TBCD5_HUMAN | E.VGIDPLSSYSNK.S             |            | 2 | 2,7604 | 0,404 | 0,286  |
| 18 | Q9BVL2 NUPL1_HUMAN | K.ALKDENLPPVICQDVE.N         |            | 2 | 2,7604 | 0,319 | 0,066  |
| 18 | Q5TDH0 DDI2_HUMAN  | D.FSSIAVPGTSSPR.Q            |            | 2 | 2,7582 | 0,228 | 0,374  |
| 18 | P31947 1433S_HUMAN | E.DM*AAFMM*KGAVEKGEE.L       |            | 3 | 2,7567 | 0,297 | 0,222  |
| 18 | Q8N122 RPTOR_HUMAN | R.SVSS#YGNIR.A               | S722:      | 2 | 2,7566 | 0,292 | 0,23   |
| 18 | Q9H2U1 DHX36_HUMAN | E.QIVQLLSVQAK.N              |            | 2 | 2,7563 | 0,13  | 1,456  |
| 18 | Q13263 TIF1B_HUMAN | E.DKADVQSIIGLQRFFE.T         |            | 3 | 2,7553 | 0,245 | -0,098 |
| 18 | P16949 STMN1_HUMAN | E.SVPEFPLS#PPKKK.D           | S38:       | 2 | 2,7549 | 0,281 | -0,318 |
| 18 | Q96JH7 VCIP1_HUMAN | E.TTDGCVADALGAAFATR.S        |            | 3 | 2,7539 | 0,301 | 0,216  |
| 18 | Q86YS7 K0528_HUMAN | E.IIGS#PIPEPR.Q              | S643:      | 2 | 2,7529 | 0,35  | 0      |
| 18 | P68104 EF1A1_HUMAN | K.IGGIGTVPVGRVE.T            |            | 2 | 2,7485 | 0,439 | 0      |
| 18 | P02545 LMNA_HUMAN  | R.SGAQASST#PLS#PTRITR.L      | T19:S22:   | 3 | 2,7484 | 0,143 | -0,194 |
| 18 | P22059 OSBP1_HUMAN | R.GATVLPANTPGNVGSGK.D        |            | 2 | 2,7474 | 0,501 | 0,713  |
| 18 | P50579 AMPM2_HUMAN | E.VAASGSHLNGDLDPDDREE.G      |            | 3 | 2,747  | 0,18  | -0,092 |
| 18 | Q96RL1 UIMC1_HUMAN | R.DLNES#PVKSFVSISE.A         | S677:      | 2 | 2,7467 | 0,355 | -0,141 |
| 18 | Q8TEW0 PARD3_HUMAN | K.AGS#PSRDVGP SLGLK.K        | S873:      | 2 | 2,7456 | 0,376 | 0      |
| 18 | P52907 CAZA1_HUMAN | E.ASDPQPEEADGGLK.S           |            | 2 | 2,7442 | 0,329 | 0,086  |
| 18 | P41227 ARD1A_HUMAN | E.NKVES#KGN#PPSSGEACRE.E     | S182:S186: | 3 | 2,7441 | 0,13  | 0,167  |
| 18 | Q9H8U3 ZFAN3_HUMAN | E.CGPCTDAHVSLIT#PTKR.S       | T112:      | 3 | 2,7437 | 0,374 | -0,961 |

|    |                    |                                 |              |   |        |       |        |
|----|--------------------|---------------------------------|--------------|---|--------|-------|--------|
| 18 | Q14247 SRC8_HUMAN  | K.TQTPPVSPAPQPTTEERLPSS#PVYE.D  | S418:        | 3 | 2,7406 | 0,212 | 0,204  |
| 18 | Q9UPZ3 HPS5_HUMAN  | E.LILKFEPLDSACSS#R.R            | S433:        | 2 | 2,7378 | 0,329 | 0,067  |
| 18 | Q9BQA1 MEP50_HUMAN | E.HDDIVSTVSVLSSGTQAVSGSK.D      |              | 3 | 2,7376 | 0,179 | -0,084 |
| 18 | P25787 PSA2_HUMAN  | E.DAIHTAILTLKE.S                |              | 2 | 2,7367 | 0,453 | 0,552  |
| 18 | P04406 G3P_HUMAN   | E.HQVVSSDFNSDTHSSTFDAGAGIALND.H |              | 3 | 2,7366 | 0,15  | 0,786  |
| 18 | P98164 LRP2_HUMAN  | E.SVAAT#PPPS#PSLPAKPKPPSR.R     | T4612:S4616: | 3 | 2,7352 | 0,299 | -0,163 |
| 18 | P07355 ANXA2_HUMAN | E.GDHST#PPSAYGSVK.A             | T19:         | 2 | 2,7341 | 0,162 | -0,165 |
| 18 | O60784 TOM1_HUMAN  | E.FDM*FALTR.G                   |              | 2 | 2,7309 | 0,29  | 0,24   |
| 18 | Q8TEW0 PARD3_HUMAN | K.AGS#PSRDVGPLGLKK.S            | S873:        | 3 | 2,7298 | 0,087 | 0      |
| 18 | Q08257 QOR_HUMAN   | E.YALAADHTVYKLPE.K              |              | 3 | 2,7275 | 0,227 | -0,23  |
| 18 | Q9NWW8 CS062_HUMAN | R.AVGAQASVGS.R                  |              | 2 | 2,7273 | 0,199 | 0      |
| 18 | O60271 JIP4_HUMAN  | E.NKAFDRNTES#LFEE.L             | S381:        | 2 | 2,7268 | 0,221 | -0,343 |
| 18 | Q9Y2W2 WBP11_HUMAN | K.SGSPVPVSVQTKDDVYE.A           |              | 2 | 2,7236 | 0,269 | -0,945 |
| 18 | Q5VT06 CE350_HUMAN | E.DLSGHSVSVSSDKGR.S             |              | 3 | 2,7228 | 0,342 | 0,119  |
| 18 | P35527 K1C9_HUMAN  | K.TLNDM*RQEYQLIAK.N             |              | 3 | 2,7212 | 0,231 | 0,294  |
| 18 | Q14258 TRI25_HUMAN | R.AS#APSPNAQVACDHCLKE.A         | S97:         | 2 | 2,7192 | 0,447 | -0,779 |
| 18 | O43765 SGTA_HUMAN  | R.SPART#PPSEEDSAEAE.R           | T81:         | 2 | 2,7189 | 0,454 | -0,418 |
| 18 | Q0JRZ9 FCHO2_HUMAN | K.VSIGNIT#LSPAISRHS#PVQM*NR.N   | T385:S394:   | 3 | 2,7175 | 0,168 | 0,215  |
| 18 | Q13043 STK4_HUMAN  | R.LLALDPM*M*EQE.I               |              | 2 | 2,7173 | 0,32  | 0,369  |
| 18 | P22626 ROA2_HUMAN  | R.GGGGNFGPGPSNFR.G              |              | 2 | 2,7171 | 0,431 | -0,089 |
| 18 | Q9UBC2 EP15R_HUMAN | K.ALLFSNNTQE.L                  |              | 2 | 2,7162 | 0,379 | 0,215  |
| 18 | Q5T1M5 FKB15_HUMAN | E.SLAAS#PM*AAKPDNPSGK.V         | S1065:       | 2 | 2,7156 | 0,345 | -0,351 |
| 18 | P62805 H4_HUMAN    | K.TVTAM*DVVYALK.R               |              | 2 | 2,7143 | 0,39  | -0,092 |
| 18 | Q8NDI1 EHBP1_HUMAN | E.LSDLYVSDK.K                   |              | 2 | 2,7133 | 0,195 | 0      |
| 18 | P49792 RBP2_HUMAN  | E.KDSLIT#PHVSR.S                | T2450:       | 3 | 2,7124 | 0,178 | 0,274  |
| 18 | P84103 SFRS3_HUMAN | K.VYVGNLGNNGNK.T                |              | 2 | 2,7106 | 0,355 | -0,391 |
| 18 | Q7LBC6 JHD2B_HUMAN | R.SEEPLKTSSASNSNSE.L            |              | 2 | 2,7091 | 0,306 | -0,205 |
| 18 | Q12765 SCRN1_HUMAN | E.DANSCHSFQSAYLIVDRDE.A         |              | 3 | 2,7079 | 0,305 | 0,246  |
| 18 | P52948 NUP98_HUMAN | K.VGYTIPSM*DDLAK.I              |              | 2 | 2,7079 | 0,376 | 0      |
| 18 | P05783 K1C18_HUMAN | E.VDAPKS#QDLAK.I                | S242:        | 2 | 2,7071 | 0,153 | -0,585 |
| 18 | P04264 K2C1_HUMAN  | R.TNAENEFVTIKK.D                |              | 3 | 2,707  | 0,391 | 0,262  |
| 18 | O43166 SI1L1_HUMAN | E.LDVDSFDECISPT#YK.T            | T195:        | 3 | 2,7047 | 0,192 | 0,783  |
| 18 | P04264 K2C1_HUMAN  | K.SLNQFASFIDKVR.F               |              | 2 | 2,7031 | 0,408 | 0      |
| 18 | Q9UPZ3 HPS5_HUMAN  | E.SFSILDSGIYR.I                 |              | 2 | 2,7028 | 0,333 | -0,776 |
| 18 | P24928 RPB1_HUMAN  | E.DLVKDVLSNAHIQNE.L             |              | 3 | 2,7008 | 0,215 | 0,216  |
| 18 | Q96PK6 RBM14_HUMAN | R.ASYVAPLTAQPATYR.A             |              | 2 | 2,6979 | 0,351 | -1,062 |
| 18 | Q9ULU4 PKCB1_HUMAN | K.ILM*SKPVLSGGTGR.R             |              | 3 | 2,6976 | 0,292 | -0,383 |
| 18 | Q96L14 C170L_HUMAN | K.SSPVNNHHS#PGQTPTLGQPE.A       | S238:        | 2 | 2,6971 | 0,289 | -0,338 |
| 18 | Q96PZ0 PUS7_HUMAN  | E.DVPRPPDTVSTGKGGK.N            |              | 3 | 2,6961 | 0,281 | -0,454 |

|    |                    |                              |        |   |        |       |        |
|----|--------------------|------------------------------|--------|---|--------|-------|--------|
| 18 | P19338 NUCL_HUMAN  | K.GFGFVDFNS#EEDAK.A          | S619:  | 2 | 2,6959 | 0,282 | -0,372 |
| 18 | Q8IWZ3 ANKH1_HUMAN | E.NGHTDVADVLLQAGADLEHE.S     |        | 3 | 2,6955 | 0,143 | -0,174 |
| 18 | Q6ZRV2 FA83H_HUMAN | E.RRSS#PVPPVPE.R             | S925:  | 2 | 2,695  | 0,296 | -0,094 |
| 18 | O00522 KRIT1_HUMAN | E.DAYVAVIRPK.N               |        | 2 | 2,6948 | 0,395 | 0      |
| 18 | P08240 SRPR_HUMAN  | K.GTLGGM*FGM*LK.G            |        | 2 | 2,6934 | 0,482 | -0,32  |
| 18 | P49915 GUAA_HUMAN  | E.VVLLTHGDSVDKVD.G           |        | 2 | 2,6923 | 0,367 | -0,778 |
| 18 | Q15788 NCOA1_HUMAN | R.KGS#PCDTLASSTE.K           | S22:   | 2 | 2,6902 | 0,264 | -0,511 |
| 18 | P35908 K22E_HUMAN  | R.YLDGLTAER.T                |        | 2 | 2,6896 | 0,27  | 0,118  |
| 18 | O15231 ZN185_HUMAN | R.RES#CGSSVLTDFE.G           | S233:  | 2 | 2,6885 | 0,308 | 0,156  |
| 18 | Q9C0C2 TB182_HUMAN | R.RES#AASGLGGLLE.E           | S1473: | 2 | 2,6874 | 0,264 | 0,182  |
| 18 | P18583 SON_HUMAN   | R.SAAS#PVVSSM*PER.A          | S1769: | 2 | 2,6862 | 0,427 | -0,259 |
| 18 | Q8IYB3 SRRM1_HUMAN | E.KT#PELPEPSVK.V             | T220:  | 3 | 2,685  | 0,163 | 0,28   |
| 18 | P08240 SRPR_HUMAN  | E.AALSEDINLIR.G              |        | 2 | 2,6842 | 0,257 | 0,1    |
| 18 | O75940 SPF30_HUMAN | E.DLAKQLASYKAQLQQVE.A        |        | 3 | 2,6834 | 0,201 | -0,284 |
| 18 | P61604 CH10_HUMAN  | K.VVLDDKDYFLFR.D             |        | 3 | 2,6818 | 0,376 | 0,239  |
| 18 | P61247 RS3A_HUMAN  | E.VVNKLIPDSIGKDIE.K          |        | 2 | 2,6804 | 0,143 | 0,298  |
| 18 | Q96T23 RSF1_HUMAN  | E.AAETS#PPSNIIDHCEK.L        | S619:  | 3 | 2,6785 | 0,128 | 0,297  |
| 18 | Q8NI27 THOC2_HUMAN | K.RVPSIDVLCNE.F              |        | 2 | 2,6749 | 0,375 | 0      |
| 18 | Q86TB9 PATL1_HUMAN | R.RST#SPIIGSPPVR.A           | T178:  | 2 | 2,6731 | 0,287 | 0,084  |
| 18 | P41236 IPP2_HUMAN  | E.M*NILATYHPADK.D            |        | 3 | 2,6715 | 0,162 | 0,46   |
| 18 | Q01082 SPTB2_HUMAN | K.TALPAQSAATLPAR.T           |        | 2 | 2,6705 | 0,401 | -0,268 |
| 18 | O60841 IF2P_HUMAN  | R.IPGM*LIIDTPGHE.S           |        | 2 | 2,6697 | 0,38  | 0,26   |
| 18 | Q9C0C2 TB182_HUMAN | R.SPS#QDFSFIEDTE.I           | S1554: | 2 | 2,6634 | 0,156 | -0,231 |
| 18 | Q9ULU4 PKCB1_HUMAN | K.TSTTGSI LNLDLDR.S          |        | 2 | 2,6632 | 0,28  | 0      |
| 18 | Q09666 AHNK_HUMAN  | K.LQSGSVLASK.K               |        | 2 | 2,662  | 0,33  | -0,816 |
| 18 | Q13177 PAK2_HUMAN  | E.KERPEIS#PPSDFE.H           | S75:   | 2 | 2,6617 | 0,434 | -1,136 |
| 18 | P12004 PCNA_HUMAN  | K.LSQTSNVDKEEE.A             |        | 2 | 2,6584 | 0,26  | -0,354 |
| 18 | Q9BPZ3 PAIP2_HUMAN | E.DVIINGHSHEDDNPFAE.Y        |        | 2 | 2,6535 | 0,37  | 0,447  |
| 18 | Q01518 CAP1_HUMAN  | E.NKLSDLLAPISEIQIKE.V        |        | 3 | 2,6535 | 0,119 | -0,509 |
| 18 | P68104 EF1A1_HUMAN | D.VYKIGGIGTVPVGRVE.T         |        | 3 | 2,6526 | 0,171 | 0,111  |
| 18 | Q9UNX4 WDR3_HUMAN  | K.GS#SPGIQDTLE.A             | S240:  | 2 | 2,6521 | 0,297 | 0,412  |
| 18 | P51114 FXR1_HUMAN  | E.NGLVTVADYISR.A             |        | 2 | 2,6491 | 0,326 | 0      |
| 18 | P60174 TPIS_HUMAN  | E.GLGVIACIGEK.L              |        | 2 | 2,647  | 0,199 | 0,218  |
| 18 | Q96BK5 PINX1_HUMAN | K.KTPEGDASPST#PEENE.T        | T164:  | 2 | 2,6463 | 0,316 | -0,207 |
| 18 | Q9UKS6 PACN3_HUMAN | E.VTLTSIVPTR.D               |        | 2 | 2,6449 | 0,369 | -0,112 |
| 18 | Q14247 SRC8_HUMAN  | K.TQTPPVSPAPQPTTEER.L        |        | 2 | 2,6443 | 0,232 | -0,914 |
| 18 | Q15942 ZYX_HUMAN   | K.FTPVASKFS#PGAPGGSGSQPNQK.L | S281:  | 3 | 2,6438 | 0,309 | 0,629  |
| 18 | Q92598 HS105_HUMAN | R.GCALQCAILS#PAFKVRE.F       | S384:  | 3 | 2,6432 | 0,143 | 0      |
| 18 | P13645 K1C10_HUMAN | R.LENEIQTYR.S                |        | 2 | 2,6432 | 0,198 | -0,105 |

|    |                     |                            |                    |   |        |       |        |
|----|---------------------|----------------------------|--------------------|---|--------|-------|--------|
| 18 | Q9NVA2 SEP11_HUMAN  | E.M*GFKDTPDSKPFSLQE.T      |                    | 3 | 2,6418 | 0,138 | 0,187  |
| 18 | Q16512 PKN1_HUMAN   | K.SSRDPPSSPSSLSSPIQE.S     |                    | 2 | 2,6417 | 0,395 | -1,773 |
| 18 | Q8N3D4 EH1L1_HUMAN  | E.DRRLPGSQAPPALVSSSQSLLE.W |                    | 3 | 2,64   | 0,234 | 0,872  |
| 18 | O14980 XPO1_HUMAN   | K.NVDILKDPE.T              |                    | 2 | 2,64   | 0,295 | 0,234  |
| 18 | P05787 K2C8_HUMAN   | K.SYKVS#TSGPR.A            | S13:               | 2 | 2,6395 | 0,335 | -0,42  |
| 18 | Q12905 ILF2_HUMAN   | R.VKPAPDETSFSE.A           |                    | 2 | 2,6379 | 0,313 | 0,093  |
| 18 | Q86TB9 PATL1_HUMAN  | R.RSTS#PIIGSPVVR.A         | S179:              | 3 | 2,6376 | 0,099 | 0,442  |
| 18 | Q6ZNP1 Q6ZNP1_HUMAN | E.VKEKPCVS#PTVGE.K         | S325:              | 2 | 2,6358 | 0,1   | -0,242 |
| 18 | P18583 SON_HUMAN    | R.AGIEGPLLASDVGRDR.S       |                    | 2 | 2,6357 | 0,163 | 0      |
| 18 | P10809 CH60_HUMAN   | K.NQLKDM*AIATGGAVFGEE.G    |                    | 2 | 2,6352 | 0,26  | 0,327  |
| 18 | O95359 TACC2_HUMAN  | K.TPSS#PSKSPASFE.I         | S2390:             | 2 | 2,6339 | 0,106 | 0      |
| 18 | P49023 PAXI_HUMAN   | K.TGSSS#PPGGPPKPGSQLD.S    | S322:              | 2 | 2,6338 | 0,374 | -0,559 |
| 18 | P54652 HSP72_HUMAN  | R.TLS#SSTQASIE.I           | S278:              | 2 | 2,6335 | 0,134 | -0,304 |
| 18 | Q9HA05 Q9HA05_HUMAN | R.STT#PTSSPFR.A            | T519:              | 2 | 2,6329 | 0,354 | -0,525 |
| 18 | P58546 MTPN_HUMAN   | K.NGDLDEVKD.Y              |                    | 2 | 2,6309 | 0,396 | 0,182  |
| 18 | Q8NDI1 EHBP1_HUMAN  | E.LSDLYSDKK.K              |                    | 2 | 2,6308 | 0,227 | -0,209 |
| 18 | P04264 K2C1_HUMAN   | K.AEAESLYQSK.Y             |                    | 2 | 2,6301 | 0,439 | -0,217 |
| 18 | Q15418 KS6A1_HUMAN  | K.KAYS#FCGTVE.Y            | S221:              | 2 | 2,6281 | 0,323 | 0      |
| 18 | Q13523 PRP4B_HUMAN  | R.TKLDDLALLEDE.K           |                    | 2 | 2,6279 | 0,346 | -0,41  |
| 18 | Q08J23 NSUN2_HUMAN  | E.GKPTDPSKLESPTSFTGTGDTE.I |                    | 3 | 2,6268 | 0,241 | 0,68   |
| 18 | Q96B23 CR025_HUMAN  | E.LRRDS#SESQLASTE.S        | S66:               | 2 | 2,6263 | 0,381 | 0,221  |
| 18 | Q6QNY0 BL1S3_HUMAN  | E.ELYLGPSGPTR.G            |                    | 2 | 2,6241 | 0,362 | 0,205  |
| 18 | Q96JM3 ZN828_HUMAN  | R.KTS#PASLDFPE.S           | S459:              | 2 | 2,6238 | 0,264 | 0,192  |
| 18 | P49736 MCM2_HUMAN   | R.GNDPLTSS#PGR.S           | S27:               | 2 | 2,6195 | 0,397 | 0,207  |
| 18 | Q8WYP5 AHTF1_HUMAN  | R.STPLAS#PS#PSPGRS#PQR.L   | S1223:S1225:S1231: | 2 | 2,6192 | 1     | -0,187 |
| 18 | Q7L2J0 MEPCE_HUMAN  | K.GRDPVEILIPK.D            |                    | 2 | 2,6124 | 0,23  | -0,099 |
| 18 | Q16204 CCDC6_HUMAN  | K.SGGIVISPFRLLE.L          |                    | 2 | 2,61   | 0,301 | -0,087 |
| 18 | O75607 NPM3_HUMAN   | D.DFQLQPPVTFR.L            |                    | 2 | 2,6099 | 0,328 | 0      |
| 18 | Q9P2R6 RERE_HUMAN   | D.FKLVHNSQACCR.S           |                    | 3 | 2,6081 | 0,243 | 0,241  |
| 18 | Q09666 AHNK_HUMAN   | K.GDLDIAGPNLE.G            |                    | 2 | 2,6074 | 0,243 | 0,329  |
| 18 | P62306 RUXF_HUMAN   | R.CNNVLYIR.G               |                    | 2 | 2,6066 | 0,272 | 0,116  |
| 18 | Q8TEX9 IPO4_HUMAN   | E.LCGVLKAVLQRK.T           |                    | 3 | 2,6058 | 0,269 | 0,33   |
| 18 | P52701 MSH6_HUMAN   | E.DYSQNVAVR.L              |                    | 2 | 2,5973 | 0,386 | 0      |
| 18 | Q96S82 UBL7_HUMAN   | E.GLS#DDEDDFHPNTR.S        | S230:              | 3 | 2,5957 | 0,26  | 0,108  |
| 18 | Q9NY27 PP4R2_HUMAN  | E.SEVSSVS#PLK.N            | S226:              | 2 | 2,5949 | 0,321 | 0,11   |
| 18 | Q99613 EIF3C_HUMAN  | E.LLGQGLLLR.S              |                    | 2 | 2,5945 | 0,262 | -0,124 |
| 18 | P10523 ARRS_HUMAN   | E.DIDVIGLTFR.R             |                    | 2 | 2,5941 | 0,399 | -0,212 |
| 18 | P78347 GTF2I_HUMAN  | E.DLQLDKPASGVKKEE.W        |                    | 3 | 2,5938 | 0,114 | -0,299 |
| 18 | Q13596 SNX1_HUMAN   | K.ITTSLLPINNGSK.E          |                    | 2 | 2,5931 | 0,424 | 0      |

|    |                    |                            |            |   |        |       |        |
|----|--------------------|----------------------------|------------|---|--------|-------|--------|
| 18 | Q9HCN4 GPN1_HUMAN  | K.DSLS#PVLHPSDLILTR.G      | S314:      | 2 | 2,5927 | 0,409 | 0,463  |
| 18 | Q58FF7 H90B3_HUMAN | K.HSQFIGYPITLYLEK.E        |            | 3 | 2,592  | 0,146 | 0      |
| 18 | A1L390 PKHG3_HUMAN | R.FFFNPSAVSQR.T            |            | 2 | 2,5887 | 0,242 | 0,094  |
| 18 | P21333 FLNA_HUMAN  | R.FLPREEGPYEVE.V           |            | 2 | 2,5883 | 0,266 | -0,333 |
| 18 | Q15424 SAFB1_HUMAN | R.CYGFVTM*STAAEE.A         |            | 2 | 2,5858 | 0,361 | -0,259 |
| 18 | Q13112 CAF1B_HUMAN | E.IQSETPGDAQGS#PPELKRPR.L  | S538:      | 3 | 2,5856 | 0,301 | -0,408 |
| 18 | P31946 1433B_HUMAN | E.ESYKDSTLIM*QLLR.D        |            | 3 | 2,5839 | 0,219 | -0,32  |
| 18 | Q8ND56 LS14A_HUMAN | R.SLKTQLS#QGR.S            | S178:      | 2 | 2,582  | 0,469 | -1,222 |
| 18 | P08107 HSP71_HUMAN | K.NQVALNPQNTVFD.A          |            | 2 | 2,5805 | 0,339 | 0,501  |
| 18 | Q12792 TWF1_HUMAN  | E.DKQPCYILFRLDSQNAQGYE.W   |            | 3 | 2,5797 | 0,152 | -0,224 |
| 18 | Q02952 AKA12_HUMAN | K.STPVIVSATTK.K            |            | 2 | 2,5793 | 0,585 | 0,332  |
| 18 | P11766 ADHX_HUMAN  | K.LKAGDVTIPLYIPQCGE.C      |            | 2 | 2,5791 | 0,295 | 0,13   |
| 18 | P49790 NU153_HUMAN | R.SHLNFS#M*LE.S            | S139:      | 2 | 2,5756 | 0,367 | 0,312  |
| 18 | Q7L2J0 MEPCE_HUMAN | R.DPVEILIPK.D              |            | 2 | 2,5749 | 0,217 | 0,477  |
| 18 | Q86VS8 HOOK3_HUMAN | R.FNNSSLKIEE.L             |            | 2 | 2,5733 | 0,307 | 0,103  |
| 18 | P62136 PP1A_HUMAN  | E.SNYLFLGDYVDR.G           |            | 2 | 2,5732 | 0,456 | -0,167 |
| 18 | Q5H9R7 SAPS3_HUMAN | R.TGQPSAPGDTSVNGPV.-       |            | 2 | 2,5704 | 0,38  | -0,082 |
| 18 | O60716 CTND1_HUMAN | E.RGS#LASLDS#LRK.G         | S346:S352: | 2 | 2,5641 | 0,241 | -0,083 |
| 18 | Q9NXH9 TRM1_HUMAN  | R.GDQCCYSHS#PPTPR.V        | S625:      | 3 | 2,5632 | 0,151 | 0,525  |
| 18 | Q8WWI1 LMO7_HUMAN  | R.SLTSCSSDITLR.G           |            | 2 | 2,559  | 0,382 | 0,273  |
| 18 | Q09666 AHNK_HUMAN  | K.ASLGSLEGEAEAE.A          |            | 2 | 2,5572 | 0,297 | 0,58   |
| 18 | O14686 MLL2_HUMAN  | R.ISTEELPKM*E.S            |            | 2 | 2,556  | 0,274 | 0,102  |
| 18 | Q02952 AKA12_HUMAN | E.KEPSKSAESPTS#PVTSE.T     | S286:      | 3 | 2,552  | 0,317 | 0,199  |
| 18 | Q15942 ZYG_HUMAN   | K.FSPGAPGGSGSQPNQK.L       |            | 2 | 2,5506 | 0,326 | -0,644 |
| 18 | P35527 K1C9_HUMAN  | R.IKFEM*EQNLR.Q            |            | 3 | 2,5483 | 0,084 | 0      |
| 18 | P55072 TERA_HUMAN  | E.IFDKARQAAPCVLFFDE.L      |            | 3 | 2,547  | 0,144 | 0,18   |
| 18 | Q7Z2W4 ZCCHV_HUMAN | K.TVFS#PTLPAAR.S           | S378:      | 2 | 2,5455 | 0,36  | -0,098 |
| 18 | Q6NYC8 PHTNS_HUMAN | E.ILVLGGLR.L               |            | 2 | 2,5417 | 0,228 | -0,425 |
| 18 | Q9H6Z4 RANB3_HUMAN | R.ERTSS#LTQFPQSSEE.R       | S126:      | 2 | 2,5416 | 0,352 | -0,192 |
| 18 | Q86VW2 GEFT_HUMAN  | R.LAKLDEDEL.-              |            | 2 | 2,5398 | 0,351 | -1,05  |
| 18 | Q93050 VPP1_HUMAN  | R.DLNPDVNVFQR.K            |            | 2 | 2,5396 | 0,346 | -0,278 |
| 18 | P13645 K1C10_HUMAN | R.LKYENEVALR.Q             |            | 3 | 2,5394 | 0,25  | -0,074 |
| 18 | Q9HC52 CBX8_HUMAN  | R.DM*GAQGGRPSLIAR.I        |            | 3 | 2,539  | 0,109 | -0,759 |
| 18 | Q8NEF9 SRFB1_HUMAN | K.AVTIANS#PSKPSEKDSVVSLE.S | S203:      | 3 | 2,5388 | 0,161 | 0,082  |
| 18 | Q9HCD6 TANC2_HUMAN | E.TSVSQLPGRPKS#PLSK.M      | S1579:     | 3 | 2,5378 | 0,209 | 0,104  |
| 18 | O75054 IGSF3_HUMAN | E.QVQPNSFSLGIFNSR.K        |            | 2 | 2,5372 | 0,256 | 1,224  |
| 18 | P28066 PSA5_HUMAN  | E.AIKSSLIILKQVM*EE.K       |            | 3 | 2,5348 | 0,1   | 0,213  |
| 18 | P13645 K1C10_HUMAN | K.YENEVALR.Q               |            | 2 | 2,5314 | 0,327 | -1,289 |
| 18 | P61604 CH10_HUMAN  | K.VVLDDKDYFLFR.D           |            | 2 | 2,5301 | 0,44  | 0      |

|    |                    |                                 |                    |   |        |       |        |
|----|--------------------|---------------------------------|--------------------|---|--------|-------|--------|
| 18 | Q12792 TWF1_HUMAN  | E.DKQPCYILFR.L                  |                    | 3 | 2,5269 | 0,236 | 0,341  |
| 18 | Q9NQG5 CT077_HUMAN | R.QKIASLPQEVQD.V                |                    | 2 | 2,5255 | 0,304 | 0,09   |
| 18 | P68104 EF1A1_HUMAN | E.SFSDYPPLGR.F                  |                    | 2 | 2,5254 | 0,47  | -0,643 |
| 18 | Q86UE4 LYRIC_HUMAN | K.LSSQIS#AGEE.K                 | S298:              | 2 | 2,5254 | 0,202 | -0,222 |
| 18 | O60271 JIP4_HUMAN  | K.AFDRNTES#LFEE.L               | S381:              | 2 | 2,5244 | 0,161 | -0,159 |
| 18 | Q9H078 CLPB_HUMAN  | E.DSDKQLLKSPQLPSPQAE.K          |                    | 3 | 2,522  | 0,242 | 0,185  |
| 18 | Q9UQ35 SRRM2_HUMAN | R.GEFSAS#PM*LK.S                | S1124:             | 2 | 2,5196 | 0,293 | -0,105 |
| 18 | P29317 EPHA2_HUMAN | R.NGVSVGLVTSR.S                 |                    | 2 | 2,5196 | 0,487 | -0,37  |
| 18 | P46940 IQGA1_HUMAN | K.TLQALQIPAAKLE.G               |                    | 2 | 2,5175 | 0,141 | -1,398 |
| 18 | Q6QNY0 BL1S3_HUMAN | R.DLPPLVVQRE.S                  |                    | 2 | 2,5159 | 0,448 | 0,105  |
| 18 | P62256 UBE2H_HUMAN | R.M*DTDVVKLI.E.S                |                    | 2 | 2,5143 | 0,315 | 0,207  |
| 18 | Q09666 AHNK_HUMAN  | E.GTLTGPRLGSPSGKTGTGR.I         | S559:              | 3 | 2,5132 | 0,207 | 0      |
| 18 | O43290 SNUT1_HUMAN | E.SVDDLAQQKPR.S                 |                    | 2 | 2,5128 | 0,331 | 0,097  |
| 18 | P00558 PGK1_HUMAN  | K.ITLPVDFVTADKFDE.N             |                    | 2 | 2,5121 | 0,438 | 0      |
| 18 | Q9UQ35 SRRM2_HUMAN | K.DKFS#PFVQDRPE.S               | S1188:             | 2 | 2,5118 | 0,3   | 0      |
| 18 | Q16181 SEPT7_HUMAN | E.KVNIPLIAK.A                   |                    | 2 | 2,5117 | 0,176 | 0,11   |
| 18 | Q53F19 CQ085_HUMAN | E.LKM*IST#PS#PK.K               | T413:S415:         | 3 | 2,5113 | 0,187 | 0,286  |
| 18 | Q15424 SAFB1_HUMAN | E.LAEAPTEAPS#PEAR.D             | S344:              | 2 | 2,5107 | 0,219 | -0,643 |
| 18 | Q7Z7E8 UB2Q1_HUMAN | K.KSEDDGIGKE.N                  |                    | 2 | 2,5106 | 0,223 | -0,34  |
| 18 | Q14980 NUMA1_HUMAN | R.TQPDGTSVPGEPAS#PISQRLPPKVE.S  | S1757:             | 3 | 2,5085 | 0,131 | -0,137 |
| 18 | O15417 TNC18_HUMAN | E.AGRPGVLQAPPGS#PRPLDRPE.G      | S416:              | 3 | 2,5079 | 0,207 | 0,244  |
| 18 | P50395 GDIB_HUMAN  | K.FVSISDLLVPK.D                 |                    | 2 | 2,5074 | 0,364 | -0,601 |
| 18 | P15586 GNS_HUMAN   | E.FDIKVLLVR.G                   |                    | 3 | 2,5071 | 0,086 | 0,838  |
| 18 | P12956 KU70_HUMAN  | R.DSLIFLVDASK.A                 |                    | 2 | 2,5055 | 0,325 | 0,101  |
| 18 | Q9Y5B6 GCFE_HUMAN  | K.TGGAFSNALSSLNVLVLRPGEIPD.A    |                    | 3 | 2,5031 | 0,223 | -0,083 |
| 18 | P07355 ANXA2_HUMAN | E.GDHSTPPSAYGSVK.A              |                    | 2 | 2,5028 | 0,381 | -0,261 |
| 18 | Q70SY1 CR3L2_HUMAN | E.HSYSLCEEPR.A                  |                    | 3 | 2,4991 | 0,12  | 0,572  |
| 18 | Q8NB49 AT11C_HUMAN | E.VDGLS#QTDGTLTYFDKVDK.N        | S445:              | 3 | 2,4975 | 0,176 | 0      |
| 18 | Q9NXG2 THUM1_HUMAN | E.YGDDM*YGPEK.F                 |                    | 2 | 2,4966 | 0,476 | -0,41  |
| 18 | Q8N2M8 SFR16_HUMAN | E.KLTRPAAS#PAVGE.K              | S532:              | 2 | 2,4944 | 0,386 | -0,709 |
| 18 | P48634 BAT2_HUMAN  | E.ALTTVTVAPAPR.R                |                    | 2 | 2,4935 | 0,278 | 0,102  |
| 18 | P51587 BRCA2_HUMAN | K.LSISNSNNFE.V                  |                    | 2 | 2,4935 | 0,276 | -0,542 |
| 18 | Q12888 TP53B_HUMAN | E.ARSEDPT#TPIRGNLLHFPSSQGE.EE.K | T1055:             | 3 | 2,4923 | 0,233 | 0,311  |
| 18 | P35527 K1C9_HUMAN  | R.QGVDADINGLR.Q                 |                    | 2 | 2,4899 | 0,322 | -0,211 |
| 18 | P05556 ITB1_HUMAN  | K.NVLSLTNKGE.V                  |                    | 2 | 2,4897 | 0,243 | 0,34   |
| 18 | P50990 TCPQ_HUMAN  | K.NLRDIDE.V                     |                    | 2 | 2,4873 | 0,121 | 0,139  |
| 18 | Q01082 SPTB2_HUMAN | R.TSS#KESS#PIPSPT#SDR.K         | S2161:S2165:T2171: | 3 | 2,4869 | 1     | 0,191  |
| 18 | Q12906 ILF3_HUMAN  | E.SKFNYSGS#GGR.S                | S812:              | 3 | 2,4855 | 0,226 | 0,147  |
| 18 | Q9C0B5 ZDHC5_HUMAN | K.LSRGDS#LKEPTSIAE.S            | S380:              | 2 | 2,4853 | 0,359 | -0,435 |

|    |                     |                             |            |   |        |       |        |
|----|---------------------|-----------------------------|------------|---|--------|-------|--------|
| 18 | Q63ZY3 KANK2_HUMAN  | R.AQSLEPYGTGLR.A            |            | 2 | 2,4846 | 0,137 | 0      |
| 18 | P42167 LAP2B_HUMAN  | E.SLVVNRVTGNFKHAS#PILPITE.F | S306:      | 3 | 2,4843 | 0,299 | 0,148  |
| 18 | Q5VZL5 ZMYM4_HUMAN  | K.AKSESDVVELS#D.-           | S1547:     | 2 | 2,4827 | 0,235 | -0,355 |
| 18 | Q96JM3 ZN828_HUMAN  | R.KTSPASLDFPE.S             |            | 2 | 2,482  | 0,378 | 0,205  |
| 18 | Q9H2P0 ADNP_HUMAN   | K.ISNDNPEEHVLK.V            |            | 3 | 2,4819 | 0,137 | -1,049 |
| 18 | Q96PY6 NEK1_HUMAN   | R.SVISVTSALKE.V             |            | 2 | 2,4818 | 0,273 | 0,323  |
| 18 | P35030 TRY3_HUMAN   | D.TLDNDIM*LIK.L             |            | 2 | 2,4811 | 0,311 | 0      |
| 18 | P68104 EF1A1_HUMAN  | E.S#FSDYPLGR.F              | S414:      | 2 | 2,48   | 0,34  | 0      |
| 18 | P13645 K1C10_HUMAN  | R.VLDELTLTK.A               |            | 2 | 2,4783 | 0,371 | 0      |
| 18 | P08670 VIME_HUMAN   | R.DNLAEDIM*R.L              |            | 2 | 2,4753 | 0,223 | -0,112 |
| 18 | Q9BQC3 DPH2_HUMAN   | R.GIAIAYEDEGS#G.-           | S488:      | 2 | 2,4743 | 0,404 | 0,097  |
| 18 | Q5T8P6 RBM26_HUMAN  | E.KLFDVANTK.S               |            | 2 | 2,4722 | 0,293 | -1,413 |
| 18 | O60884 DNJA2_HUMAN  | E.DM*M*HPLKVSLE.D           |            | 2 | 2,4718 | 0,15  | -0,092 |
| 18 | P60709 ACTB_HUMAN   | E.GYALPHAILR.L              |            | 2 | 2,4689 | 0,278 | 0,22   |
| 18 | P78316 NOP14_HUMAN  | E.LTHYGQSLADIEK.H           |            | 3 | 2,4688 | 0,116 | 0,062  |
| 18 | A9CQZ4 A9CQZ4_HUMAN | R.QKFCGM*FCPVEGSSE.N        |            | 2 | 2,4672 | 0,423 | 0,343  |
| 18 | Q96BK5 PINX1_HUMAN  | E.KKS#FSLEE.K               | S110:      | 2 | 2,466  | 0,267 | -1,863 |
| 18 | Q96A49 SYAP1_HUMAN  | E.AVRPKT#PPVVIK.S           | T248:      | 2 | 2,4656 | 0,293 | -0,705 |
| 18 | Q9P0K7 RAI14_HUMAN  | E.NAGIQSLLSK.I              |            | 2 | 2,4645 | 0,318 | 0      |
| 18 | P05387 RLA2_HUMAN   | E.DVIAQGIGK.L               |            | 2 | 2,4642 | 0,276 | -0,812 |
| 18 | Q9Y3L3 3BP1_HUMAN   | K.VTRS#PPETAAPVED.M         | S550:      | 2 | 2,463  | 0,363 | -0,788 |
| 18 | A9CQZ4 A9CQZ4_HUMAN | K.FCGM*FCPVEGSSE.N          |            | 2 | 2,4629 | 0,191 | 0,16   |
| 18 | O95429 BAG4_HUMAN   | R.HNFPCSVHQYE.S             |            | 2 | 2,4617 | 0,368 | -0,086 |
| 18 | Q15149 PLEC1_HUMAN  | K.AQLEPVAS#PAKKPK.V         | S1435:     | 2 | 2,4609 | 0,123 | -1,027 |
| 18 | P62750 RL23A_HUMAN  | K.VNTLIRPDGE.K              |            | 2 | 2,4606 | 0,321 | 0,657  |
| 18 | Q15942 ZYG_HUMAN    | R.GPPASS#PAPAPKFSVTPK.F     | S259:      | 3 | 2,4605 | 0,164 | 0      |
| 18 | P45974 UBP5_HUMAN   | R.KAVYYTGN SGAE.A           |            | 2 | 2,4605 | 0,245 | -0,484 |
| 18 | P48637 GSHB_HUMAN   | E.NCLLRPGSPAR.V             |            | 2 | 2,4576 | 0,262 | -0,393 |
| 18 | Q02952 AKA12_HUMAN  | K.KGLSSDLEGE.K              |            | 2 | 2,4563 | 0,203 | 0,118  |
| 18 | Q96P16 P15RS_HUMAN  | R.IASLPVEVQE.V              |            | 2 | 2,4541 | 0,318 | 0,225  |
| 18 | Q9UQ35 SRRM2_HUMAN  | E.LASRS#PIRQDR.G            | S1112:     | 3 | 2,4531 | 0,235 | 0,332  |
| 18 | Q7Z6E9 RBBP6_HUMAN  | K.TDSLFVLP SR.D             |            | 2 | 2,452  | 0,311 | 0,107  |
| 18 | Q14697 GANAB_HUMAN  | R.SLLSVNAR.G                |            | 2 | 2,4518 | 0,358 | 0,251  |
| 18 | P49023 PAXI_HUMAN   | K.TSSVSNPQDSVGS PCSR.V      |            | 2 | 2,45   | 0,206 | -0,346 |
| 18 | Q9Y2W1 TR150_HUMAN  | R.ERS#PALKS#PLQSVVVR.R      | S248:S253: | 3 | 2,4494 | 0,133 | 0,285  |
| 18 | P52907 CAZA1_HUMAN  | E.DGNVQLVSHKDVQDSLTVSNE.A   |            | 3 | 2,449  | 0,216 | -0,32  |
| 18 | P28066 PSA5_HUMAN   | E.AIKSSLILKQVM*E.E          |            | 3 | 2,4489 | 0,108 | 0,115  |
| 18 | Q9BSL1 UBAC1_HUMAN  | E.ENIQDQDVL LLIK.K          |            | 2 | 2,4487 | 0,211 | 0      |
| 18 | Q8WUA2 PPIL4_HUMAN  | E.DYM*PIKNTNQDIYRE.M        |            | 2 | 2,4482 | 0,434 | 0,255  |



|    |                     |                                   |        |   |        |       |        |
|----|---------------------|-----------------------------------|--------|---|--------|-------|--------|
| 18 | Q9NYF8 BCLF1_HUMAN  | K.SQEEPKDTFE.H                    |        | 2 | 2,4482 | 0,157 | 0,101  |
| 18 | P78559 MAP1A_HUMAN  | R.FHTSTYDLPGPE.G                  |        | 2 | 2,4471 | 0,234 | 0,447  |
| 18 | O15371 EIF3D_HUMAN  | K.YLILKDPNK.Q                     |        | 2 | 2,446  | 0,193 | 0,221  |
| 18 | P51114 FXR1_HUMAN   | R.KVPGVTAIELDE.D                  |        | 2 | 2,4444 | 0,23  | 0,288  |
| 18 | P23588 IF4B_HUMAN   | K.VAPAQPSEEGPGRKDE.N              |        | 2 | 2,4441 | 0,335 | -0,293 |
| 18 | P25705 ATPA_HUMAN   | R.TGAIVDVPVGE.E.L                 |        | 2 | 2,4413 | 0,368 | 0,206  |
| 18 | Q86UP2 KTN1_HUMAN   | K.QNDQVVSFASLVEE.L                |        | 2 | 2,4389 | 0,235 | -0,083 |
| 18 | Q9C0B5 ZDHC5_HUMAN  | K.SFHFDPLSSGSR.S                  |        | 3 | 2,4368 | 0,164 | 0,957  |
| 18 | Q2NL66 Q2NL66_HUMAN | R.GPST#PKKPLEQSC.-                | T226:  | 3 | 2,4351 | 0,207 | 0,182  |
| 18 | Q9Y3Q8 T22D4_HUMAN  | R.SFTGGLGQLVVPK.A                 |        | 2 | 2,4346 | 0,223 | -0,088 |
| 18 | Q13263 TIF1B_HUMAN  | R.KVPRVS#LE.R                     | S489:  | 2 | 2,4339 | 0,089 | -0,605 |
| 18 | P35998 PRS7_HUMAN   | E.DDIQQLK.K                       |        | 2 | 2,4337 | 0,179 | -0,063 |
| 18 | P04183 KITH_HUMAN   | K.LFAPQQILQCS#PAN.-               | S231:  | 2 | 2,4291 | 0,287 | -0,073 |
| 18 | Q16531 DDB1_HUMAN   | E.DLNLLIAKNTRLE.I                 |        | 3 | 2,4276 | 0,224 | 0,363  |
| 18 | Q9NQW6 ANLN_HUMAN   | K.ATS#PVKSTTSITDAK.S              | S295:  | 2 | 2,4257 | 0,343 | 0,154  |
| 18 | P18583 SON_HUMAN    | K.DTEEPLPVKE.S                    |        | 2 | 2,4253 | 0,333 | -0,211 |
| 18 | Q63ZY3 KANK2_HUMAN  | R.VVEGPREVE.V                     |        | 2 | 2,4227 | 0,315 | -0,241 |
| 18 | O60812 HNRCL_HUMAN  | R.VFIGNLNTLVVK.K                  |        | 2 | 2,4215 | 0,19  | 0,093  |
| 18 | Q6XZF7 DNMBP_HUMAN  | E.NTLGVVEQR.H                     |        | 2 | 2,4205 | 0,302 | 0      |
| 18 | P52907 CAZA1_HUMAN  | K.DVQDSLTVSNE.A                   |        | 2 | 2,4202 | 0,163 | 0,101  |
| 18 | P48507 GSH0_HUMAN   | D.IQLLTHNDPKELLSE.A               |        | 3 | 2,42   | 0,11  | -0,105 |
| 18 | Q13616 CUL1_HUMAN   | R.M*YNLVSRI                       |        | 2 | 2,4164 | 0,182 | -0,136 |
| 18 | P46821 MAP1B_HUMAN  | K.QGSPDQVS#PVSE.M                 | S1443: | 2 | 2,416  | 0,187 | 0,186  |
| 18 | O75822 EIF3J_HUMAN  | E.IDDLKKITNSLTVLCSE.K             |        | 2 | 2,4159 | 0,377 | -0,188 |
| 18 | Q14980 NUMA1_HUMAN  | E.GTPLSITSKLPR.T                  |        | 2 | 2,4148 | 0,267 | 0,096  |
| 18 | Q9BTX1 NDC1_HUMAN   | R.VSSYPVEPK.K                     |        | 2 | 2,4136 | 0,266 | 0,112  |
| 18 | Q9H6F5 CCD86_HUMAN  | R.AGLGSPERPPK.T                   |        | 2 | 2,4072 | 0,33  | -0,33  |
| 18 | P17301 ITA2_HUMAN   | E.NKADNLVNLKIPLLYDAE.I            |        | 3 | 2,4071 | 0,123 | -0,09  |
| 18 | Q8IY57 YAF2_HUMAN   | E.VTVGDLTVIITDFKEK.T              |        | 2 | 2,4051 | 0,366 | -0,137 |
| 18 | Q6Y7W6 PERQ2_HUMAN  | E.M*GTFDSS#GAFLSLK.K              | S303:  | 2 | 2,4049 | 0,165 | -0,235 |
| 18 | Q71U36 TBA1A_HUMAN  | E.HGIQPDGQM*PSDKTIGGGDDSFNTFFSE.T |        | 3 | 2,4043 | 0,125 | -0,244 |
| 18 | Q12888 TP53B_HUMAN  | E.GRQDKPM*DTSVLS#EE.G             | S398:  | 2 | 2,4038 | 0,158 | 1,228  |
| 18 | Q6QNY0 BL1S3_HUMAN  | E.LYLGPSGPTR.G                    |        | 2 | 2,3976 | 0,338 | -0,23  |
| 18 | P08758 ANXA5_HUMAN  | E.SILTLTSTR.S                     |        | 2 | 2,3966 | 0,315 | -0,182 |
| 18 | Q8WWM7 ATX2L_HUMAN  | E.GILAPQPPPPQHQERPGAAAIGSAR.G     |        | 3 | 2,3951 | 0,228 | 0,415  |
| 18 | Q09666 AHNK_HUMAN   | E.LNLKS#PK.V                      | S3426: | 2 | 2,3945 | 0,142 | 0      |
| 18 | Q9H6F5 CCD86_HUMAN  | E.SNPEETREPGSPPSVQR.A             |        | 3 | 2,3929 | 0,18  | 0,294  |
| 18 | Q00536 PCTK1_HUMAN  | E.DINKRLS#LPADIRLPE.G             | S119:  | 2 | 2,3873 | 0,173 | -0,126 |
| 18 | Q9Y3T9 NOC2L_HUMAN  | R.GILRPLSTR.H                     |        | 2 | 2,387  | 0,187 | -0,301 |

|    |                    |                              |            |   |        |       |        |
|----|--------------------|------------------------------|------------|---|--------|-------|--------|
| 18 | Q92615 LARP5_HUMAN | R.LSSLIIGPSK.E               |            | 2 | 2,3866 | 0,28  | 0,12   |
| 18 | P00441 SODC_HUMAN  | R.HVGD LGNV TADK DGVADVSIE.D |            | 3 | 2,3845 | 0,175 | -0,26  |
| 18 | P02545 LMNA_HUMAN  | R.SGAQASST#PLSPTR.I          | T19:       | 2 | 2,383  | 0,192 | 0,085  |
| 18 | Q13523 PRP4B_HUMAN | R.TKLDLALLE.D                |            | 2 | 2,3812 | 0,248 | -0,216 |
| 18 | Q4G148 GL8D3_HUMAN | R.SLLKPLELE.L                |            | 2 | 2,3811 | 0,202 | -1,756 |
| 18 | P07355 ANXA2_HUMAN | K.AYTNFDAERD.A               |            | 2 | 2,3799 | 0,295 | -0,406 |
| 18 | P60842 IF4A1_HUMAN | K.ATQALVLAPTRE.L             |            | 2 | 2,3795 | 0,203 | 0,288  |
| 18 | Q13242 SFRS9_HUMAN | R.GS#PHYFS#PFRPY.-           | S211:S216: | 2 | 2,3731 | 0,21  | 0,076  |
| 18 | Q00613 HSF1_HUMAN  | E.SEPAPASVTALTDAR.G          |            | 3 | 2,3724 | 0,165 | 0,8    |
| 18 | Q86XL3 ANKL2_HUMAN | R.AFAGPLS#PAKAE.D            | S528:      | 2 | 2,3719 | 0,26  | 0,098  |
| 18 | Q02952 AKA12_HUMAN | R.GDTVVS#EAELTPE.A           | S967:      | 2 | 2,3717 | 0,21  | 0,257  |
| 18 | Q8ND56 LS14A_HUMAN | E.QAVQTASAHLPAPAAVGR.R       |            | 3 | 2,3715 | 0,177 | 0      |
| 18 | Q14697 GANAB_HUMAN | E.DRSLLSVNAR.G               |            | 3 | 2,3713 | 0,114 | 0,661  |
| 18 | Q13642 FHL1_HUMAN  | K.AIVAGDQNVE.Y               |            | 2 | 2,3689 | 0,321 | -0,6   |
| 18 | P61421 VA0D1_HUMAN | E.DLKLHLQSTDYGNFLANE.A       |            | 2 | 2,3688 | 0,18  | 0,352  |
| 18 | Q13627 DYR1A_HUMAN | R.IYQY#IQSR.F                | Y321:      | 2 | 2,3677 | 0,311 | -0,212 |
| 18 | Q9BPY3 F118B_HUMAN | K.QLLQSVLHLM*E.N             |            | 2 | 2,3674 | 0,418 | -0,276 |
| 18 | Q9H8H0 NOL11_HUMAN | E.DVNLDKVKF.A                |            | 2 | 2,3644 | 0,297 | 0,113  |
| 18 | Q9BY89 K1671_HUMAN | R.ERPVLGGVE.Q                |            | 2 | 2,3633 | 0,252 | 0,563  |
| 18 | Q12888 TP53B_HUMAN | R.SEDPPT#PIR.G               | T1056:     | 2 | 2,3633 | 0,392 | -0,102 |
| 18 | P31946 1433B_HUMAN | D.STLIM*QLLR.D               |            | 2 | 2,3625 | 0,294 | 0      |
| 18 | Q9Y3F4 STRAP_HUMAN | K.YDYNSGEELE.S               |            | 2 | 2,3623 | 0,295 | 0,1    |
| 18 | Q03701 CEBPZ_HUMAN | K.KGAIDDLQGELE.A             |            | 2 | 2,3611 | 0,144 | -0,431 |
| 18 | Q09666 AHNK_HUMAN  | E.GDLKGPEVDIKGPK.V           |            | 3 | 2,3607 | 0,225 | -1,825 |
| 18 | Q9UQ35 SRRM2_HUMAN | K.AGM*SSNQSISSPVL.D.A        |            | 2 | 2,3602 | 0,281 | -1,698 |
| 18 | Q8IWI9 MGAP_HUMAN  | E.SKVM*PTLAPVVAK.L           |            | 2 | 2,3587 | 0,284 | -0,809 |
| 18 | Q9Y6M5 ZNT1_HUMAN  | E.IKNM*PNKQPES#SL.-          | S505:      | 2 | 2,3586 | 0,391 | -0,617 |
| 18 | Q9UQN3 CHM2B_HUMAN | K.TVDDVIKE.Q                 |            | 2 | 2,3571 | 0,117 | 0,066  |
| 18 | P48960 CD97_HUMAN  | R.CNPGFSSFSE.I               |            | 2 | 2,3571 | 0,231 | 0,431  |
| 18 | Q9BPY3 F118B_HUMAN | E.DSGKQLLQSVLHLM*E.N         |            | 3 | 2,3565 | 0,142 | 0      |
| 18 | Q9UGU0 TCF20_HUMAN | R.QLSGQSTSSDTTYKGGASEK.A     |            | 3 | 2,3545 | 0,288 | 0,09   |
| 18 | Q8NC51 PAIRB_HUMAN | E.LTES#PKYIQK.Q              | S234:      | 2 | 2,3544 | 0,189 | 0,284  |
| 18 | P42166 LAP2A_HUMAN | R.NRPPLPAGTNSK.G             |            | 2 | 2,3533 | 0,207 | 0      |
| 18 | O00418 EF2K_HUMAN  | K.LLQSAKT#ILR.G              | T348:      | 3 | 2,3529 | 0,173 | 0,523  |
| 18 | P04181 OAT_HUMAN   | K.TVQGPPSTDDIFE.R            |            | 2 | 2,3522 | 0,119 | -0,347 |
| 18 | Q8WUA2 PPIL4_HUMAN | K.NTNQDIYRE.M                |            | 2 | 2,3507 | 0,09  | -0,106 |
| 18 | Q15424 SAFB1_HUMAN | K.ADSLLAVVK.R                |            | 2 | 2,3502 | 0,197 | 0,333  |
| 18 | Q12830 BPTF_HUMAN  | K.VTS#SPITSEEE.S             | S1533:     | 2 | 2,3478 | 0,314 | -1,066 |
| 18 | P52272 HNRPM_HUMAN | R.M*GPLGLDHM*ASSIE.R         |            | 2 | 2,3474 | 0,277 | -0,819 |

|    |                    |                                    |              |   |        |       |        |
|----|--------------------|------------------------------------|--------------|---|--------|-------|--------|
| 18 | P48637 GSHB_HUMAN  | E.NCLLRPGSPAR.V                    |              | 3 | 2,3449 | 0,24  | 0,295  |
| 18 | P46937 YAP1_HUMAN  | R.TPDDFLNSVDE.M                    |              | 2 | 2,3449 | 0,219 | 0,292  |
| 18 | Q09666 AHNK_HUMAN  | K.VQANLGGAPDINIE.G                 |              | 2 | 2,3417 | 0,283 | 0,27   |
| 18 | P18754 RCC1_HUMAN  | K.SGVVYSGFCNDE.G                   |              | 2 | 2,3404 | 0,296 | 0,179  |
| 18 | O14733 MP2K7_HUMAN | D.ISPQRPRPTLQLPLANDGGG#RSPSSE.S    | S53:         | 3 | 2,34   | 0,201 | 0,451  |
| 18 | Q13416 ORC2_HUMAN  | K.SVSFSLKNDPE.I                    |              | 2 | 2,3379 | 0,398 | 0,2    |
| 18 | P00749 UROK_HUMAN  | E.DYIVYLGR.S                       |              | 2 | 2,3358 | 0,303 | 0,244  |
| 18 | Q13428 TCOF_HUMAN  | K.VGPATPSAQVGK.W                   |              | 2 | 2,3358 | 0,384 | 0      |
| 18 | A5A3E0 A26CB_HUMAN | E.LRVAPEEHPVLLTE.A                 |              | 2 | 2,3325 | 0,215 | -0,381 |
| 18 | Q8NEY8 PPHLN_HUMAN | K.LEKS#DES#NLPE.I                  | S244:S247:   | 2 | 2,3312 | 0,134 | 0,086  |
| 18 | Q96QZ7 MAGI1_HUMAN | E.GT#RSADNT#LERRE.K                | T1359:T1365: | 3 | 2,3311 | 0,102 | 0,22   |
| 18 | Q09666 AHNK_HUMAN  | K.LQSGSVSLASKK.S                   |              | 2 | 2,3309 | 0,311 | -0,208 |
| 18 | P49023 PAXI_HUMAN  | E.HVYSFPNK.Q                       |              | 2 | 2,3308 | 0,448 | -1,107 |
| 18 | Q32MZ4 LRRF1_HUMAN | R.RGS#GDTISISIDTE.A                | S120:        | 2 | 2,3288 | 0,144 | 0,172  |
| 18 | P55011 S12A2_HUMAN | R.DGGGVRDEGPAAAGDGLGRPLGPTPS#QSR.F | S77:         | 3 | 2,3286 | 0,167 | 0,129  |
| 18 | P50990 TCPQ_HUMAN  | E.VGDTQVVVFKHE.K                   |              | 3 | 2,3275 | 0,118 | 0,471  |
| 18 | Q66K14 TBC9B_HUMAN | E.DACHLIPLRE.V                     |              | 3 | 2,3271 | 0,115 | 0,274  |
| 18 | P52594 NUPL_HUMAN  | K.GTPSQS#PVVGR.S                   | S181:        | 2 | 2,327  | 0,458 | 0      |
| 18 | P49915 GUAA_HUMAN  | E.VVLLTHGDSVDKVAD.G                |              | 3 | 2,3264 | 0,296 | -0,35  |
| 18 | O60271 JIP4_HUMAN  | E.LDM*DKDLSGYKSS#TPTK.G            | S364:        | 3 | 2,3169 | 0,134 | 0,179  |
| 18 | Q96A08 H2B1A_HUMAN | R.LLLPGELAK.H                      |              | 2 | 2,3145 | 0,089 | 0      |
| 18 | Q9C0C2 TB182_HUMAN | R.VVGKPAQLGTQR.S                   |              | 3 | 2,3143 | 0,333 | 0,146  |
| 18 | P62937 PIIA_HUMAN  | R.VSFELFADK.V                      |              | 2 | 2,3126 | 0,184 | 0,231  |
| 18 | Q5VWN6 CJ018_HUMAN | E.APFLHPAPR.S                      |              | 2 | 2,3105 | 0,306 | -0,546 |
| 18 | P51858 HDGF_HUMAN  | K.ASGYQSS#QKKSCVVEPEPEPE.A         | S103:        | 3 | 2,31   | 0,167 | -0,374 |
| 18 | Q56P03 EAPP_HUMAN  | E.VDVLLHGT#PDQK.R                  | T37:         | 3 | 2,3098 | 0,277 | 0,717  |
| 18 | Q9UNX4 WDR3_HUMAN  | E.IEDPEEPDPK.K                     |              | 2 | 2,3079 | 0,092 | -0,104 |
| 18 | Q8IY57 YAF2_HUMAN  | E.VTVGDLTVIITDFKEK.T               |              | 3 | 2,3071 | 0,219 | -0,206 |
| 18 | Q04637 IF4G1_HUMAN | R.FSALQQAVPTTESTDNRR.V             |              | 3 | 2,3063 | 0,096 | 0,095  |
| 18 | Q86XP3 DDX42_HUMAN | K.IIDPLPPIDHSE.I                   |              | 2 | 2,3031 | 0,289 | 0,181  |
| 18 | Q9HCN4 GPN1_HUMAN  | D.SLSPVLHPSDLILTR.G                |              | 2 | 2,3008 | 0,122 | -0,444 |
| 18 | O43237 DC1L2_HUMAN | K.TVLSNVQEE.L                      |              | 2 | 2,3005 | 0,126 | 0,12   |
| 18 | P05787 K2C8_HUMAN  | R.NIS#RLQAE.I                      | S315:        | 2 | 2,3001 | 0,138 | -0,06  |
| 18 | P25787 PSA2_HUMAN  | E.DAIHTAILTK.E                     |              | 2 | 2,2981 | 0,32  | 0,102  |
| 18 | A0FGR8 ESYT2_HUMAN | R.SSSLLASPGHISVK.E                 |              | 2 | 2,2971 | 0,081 | 0,166  |
| 18 | Q2NKX8 ERC6L_HUMAN | E.AEALS#PEQAAHYLR.Y                | S14:         | 3 | 2,2964 | 0,137 | 0,447  |
| 18 | P08670 VIME_HUMAN  | R.QDVDNASLAR.L                     |              | 2 | 2,2953 | 0,225 | -0,224 |
| 18 | Q8N0Z3 CCD52_HUMAN | K.TQAPFVNLSQPLCNHSNTQQSR.S         |              | 3 | 2,2928 | 0,286 | -0,07  |
| 18 | P15924 DESP_HUMAN  | E.SVSKISTISSVR.N                   |              | 3 | 2,2926 | 0,247 | 0,362  |

|    |                     |                             |                 |   |        |       |        |
|----|---------------------|-----------------------------|-----------------|---|--------|-------|--------|
| 18 | Q5JRA6 MIA3_HUMAN   | R.GSS#PTRVLDE.G             | S1745:          | 2 | 2,2894 | 0,146 | -0,214 |
| 18 | Q9BPW8 NIPS1_HUMAN  | E.NVYTYVPLVR.H              |                 | 2 | 2,2886 | 0,382 | 0,1    |
| 18 | O15031 PLXB2_HUMAN  | E.KIIDQVYR.G                |                 | 2 | 2,2875 | 0,18  | -0,354 |
| 18 | Q9P246 STIM2_HUMAN  | R.ISS#IPHDLCHNGE.K          | S719:           | 3 | 2,2847 | 0,164 | 0,117  |
| 18 | Q8IWA0 WDR75_HUMAN  | K.VQDTSNTGLGE.D             |                 | 2 | 2,284  | 0,358 | 0      |
| 18 | P41236 IPP2_HUMAN   | E.M*NILATYHPAD.K            |                 | 2 | 2,2831 | 0,11  | -0,773 |
| 18 | Q9BQA1 MEP50_HUMAN  | E.HDDIVSTVSVLSSGTQAVSGSKD.I |                 | 3 | 2,2816 | 0,152 | 0,24   |
| 18 | Q7Z4V5 HDGR2_HUMAN  | R.ARGDS#EALDEES.-           | S664:           | 2 | 2,2812 | 0,256 | 0      |
| 18 | O00410 IMB3_HUMAN   | R.VQAHAAAALINFTE.D          |                 | 2 | 2,2805 | 0,255 | 0,084  |
| 18 | P52732 KIF11_HUMAN  | K.SYLYPSTLVR.T              |                 | 2 | 2,2804 | 0,284 | 0,204  |
| 18 | P09211 GSTP1_HUMAN  | K.ASCLYGQLPK.F              |                 | 2 | 2,2794 | 0,119 | 0,322  |
| 18 | Q9BTC0 DIDO1_HUMAN  | K.VTVDDLPCR.M               |                 | 2 | 2,2773 | 0,291 | -1,423 |
| 18 | Q6NWX9 PR40B_HUMAN  | E.LQQAELPNRS#PGFGIK.K       | S832:           | 2 | 2,2769 | 0,229 | 0,133  |
| 18 | Q9HCN4 GPN1_HUMAN   | K.DSLSPVLHPSDLILTR.G        |                 | 2 | 2,2762 | 0,266 | 0      |
| 18 | Q6PJT7 ZC3HE_HUMAN  | R.TPRIS#PPIKEEE.T           | S409:           | 2 | 2,2652 | 0,187 | -0,661 |
| 18 | P07602 SAP_HUMAN    | R.LGPGM*ADICK.N             |                 | 2 | 2,264  | 0,353 | -0,113 |
| 18 | P49023 PAXI_HUMAN   | K.SAEPS#PTVM*STSLGSLNSE.L   | S130:           | 2 | 2,2614 | 0,27  | -0,368 |
| 18 | P08133 ANXA6_HUMAN  | E.DTIIDIITHR.S              |                 | 2 | 2,2609 | 0,273 | 0,102  |
| 18 | P13861 KAP2_HUMAN   | R.RVS#VCAE.T                | S99:            | 2 | 2,2576 | 0,133 | 0,339  |
| 18 | Q5VY92 Q5VY92_HUMAN | E.GSSRSL#PPHS#PR.D          | S956:S960:      | 2 | 2,255  | 0,135 | 0,17   |
| 18 | Q92615 LARP5_HUMAN  | K.RLS#REQST#PPKS#PQ.-       | S727:T732:S736: | 2 | 2,2541 | 0,348 | -0,264 |
| 18 | Q3T8J9 GON4L_HUMAN  | E.DNLLALGLK.H               |                 | 2 | 2,2519 | 0,253 | -0,829 |
| 18 | Q00610 CLH1_HUMAN   | E.GCEEPATHNALAK.I           |                 | 3 | 2,2506 | 0,349 | -0,196 |
| 18 | P63104 1433Z_HUMAN  | K.KGIVDQSQAYQE.A            |                 | 2 | 2,2506 | 0,107 | -0,572 |
| 18 | Q9NTJ3 SMC4_HUMAN   | K.ISLHPIEDNPIEE.I           |                 | 2 | 2,246  | 0,095 | 0,081  |
| 18 | P07355 ANXA2_HUMAN  | E.GDHSTPPSAYGSVK.A          |                 | 3 | 2,2458 | 0,169 | 0,196  |
| 18 | O00401 WASL_HUMAN   | K.VIY#DFIEK.T               | Y256:           | 2 | 2,2454 | 0,264 | 0,441  |
| 18 | O95425 SVIL_HUMAN   | D.STQFTVAGR.M               |                 | 2 | 2,2444 | 0,351 | -0,063 |
| 18 | Q96T23 RSF1_HUMAN   | K.LASEKEVVE.C               |                 | 2 | 2,2426 | 0,295 | -0,486 |
| 18 | Q08209 PP2BA_HUMAN  | R.DAM*PSDANLNSINK.A         |                 | 2 | 2,2426 | 0,211 | -0,243 |
| 18 | Q9HC35 EMAL4_HUMAN  | E.SRISS#PTLLE.N             | S919:           | 2 | 2,2421 | 0,166 | 0,384  |
| 18 | P10809 CH60_HUMAN   | K.DM*AIATGGAVFGEE.G         |                 | 2 | 2,2421 | 0,264 | 0      |
| 18 | Q01082 SPTB2_HUMAN  | K.TALPAQSAATLPR.T           |                 | 3 | 2,2412 | 0,119 | -0,067 |
| 18 | P11142 HSP7C_HUMAN  | K.NQTAEKEEFE.H              |                 | 2 | 2,24   | 0,179 | -0,299 |
| 18 | Q9C0C2 TB182_HUMAN  | R.SPSQDFSFIEDTE.I           |                 | 2 | 2,2391 | 0,126 | 0,244  |
| 18 | P29401 TKT_HUMAN    | R.VLDPFTIKPLDR.K            |                 | 2 | 2,2382 | 0,142 | 0,086  |
| 18 | P46821 MAP1B_HUMAN  | K.SDISPLTPR.E               |                 | 2 | 2,2355 | 0,281 | 0      |
| 18 | P22314 UBA1_HUMAN   | R.RVS#GPDPKPGSNCSPAQSVLSE.V | S13:            | 2 | 2,2354 | 0,152 | 0,727  |
| 18 | Q7Z3K3 POGZ_HUMAN   | R.SSPEETIEPE.S              |                 | 2 | 2,2331 | 0,179 | -0,327 |

|    |                     |                                |                 |   |        |       |        |
|----|---------------------|--------------------------------|-----------------|---|--------|-------|--------|
| 18 | Q14676 MDC1_HUMAN   | E.SLTAIPEPASPQLLETPIHAS#QIQK.V | S1786:          | 3 | 2,2307 | 0,125 | 0,133  |
| 18 | Q9H6S3 ES8L2_HUMAN  | E.DAGAPFEQAGQK.Y               |                 | 2 | 2,2304 | 0,22  | 0      |
| 18 | P12081 SYHC_HUMAN   | E.TQVLVASAQK.K                 |                 | 2 | 2,2285 | 0,269 | 0      |
| 18 | P0C7M2 RA1L3_HUMAN  | R.KLFIGGLSFE.T                 |                 | 2 | 2,2285 | 0,125 | -0,11  |
| 18 | Q13136 LIPA1_HUMAN  | K.RSS#DGS#LSHEEDLAK.V          | S239:S242:      | 3 | 2,2248 | 0,135 | -1,021 |
| 18 | A8MVW0 U560A_HUMAN  | E.LRRDS#LTSPEDE.L              | S789:           | 2 | 2,2232 | 0,292 | 0,081  |
| 18 | P28749 RBL1_HUMAN   | R.KFTRDT#PLGK.L                | T340:           | 2 | 2,2231 | 0,15  | 0      |
| 18 | O60884 DNJA2_HUMAN  | E.ALCGFQFTFK.H                 |                 | 2 | 2,2227 | 0,422 | 0,1    |
| 18 | P07602 SAP_HUMAN    | E.KGCSFLPDYQK.Q                |                 | 2 | 2,2132 | 0,084 | 0,169  |
| 18 | O75145 LIPA3_HUMAN  | R.GEGPAIPGDT#PPPTPR.S          | T714:           | 2 | 2,2104 | 0,267 | -0,372 |
| 18 | Q9Y6X0 SETBP_HUMAN  | D.S#GIGT#DNNS#TSDQAEKSSE.S     | S815:T819:S823: | 3 | 2,2097 | 0,162 | -0,422 |
| 18 | Q9HA05 Q9HA05_HUMAN | R.STTPTSPFR.A                  |                 | 2 | 2,2092 | 0,352 | 1,242  |
| 18 | Q969H8 CS010_HUMAN  | K.SYLYFTQFK.A                  |                 | 2 | 2,2018 | 0,385 | -0,306 |
| 18 | Q14160 LAP4_HUMAN   | R.FQTEDDARTGE.K                |                 | 2 | 2,1988 | 0,305 | 0      |
| 18 | O15355 PPM1G_HUMAN  | E.VVDFIQSK.I                   |                 | 2 | 2,1969 | 0,214 | 0,13   |
| 18 | P11172 PYR5_HUMAN   | E.NVFVAANHNGS#PLSIK.E          | S214:           | 3 | 2,1965 | 0,293 | 0,209  |
| 18 | Q9UKV3 ACINU_HUMAN  | E.VATPPVPQLQVCEPK.E            |                 | 2 | 2,1946 | 0,447 | -0,22  |
| 18 | Q13573 SNW1_HUMAN   | K.GM*DSGFAGGEDE.I              |                 | 2 | 2,1944 | 0,198 | 0,308  |
| 18 | P43686 PRS6B_HUMAN  | E.DYVARPDK.I                   |                 | 2 | 2,1936 | 0,235 | -0,063 |
| 18 | Q9BUA3 YK007_HUMAN  | E.AM*VVAVIPRPEPM*LR.V          |                 | 3 | 2,1932 | 0,119 | 0,107  |
| 18 | Q63ZY3 KANK2_HUMAN  | R.ALAM*PGRPES#PPVFR.S          | S375:           | 2 | 2,1917 | 0,188 | 0,425  |
| 18 | Q86V48 LUZP1_HUMAN  | K.AIGALASSR.R                  |                 | 2 | 2,1903 | 0,197 | 0,144  |
| 18 | Q01970 PLCB3_HUMAN  | K.SLGDEGLNR.G                  |                 | 2 | 2,1894 | 0,167 | 0,571  |
| 18 | Q9H4A3 WNK1_HUMAN   | K.EGPVAS#PPFM*DLE.Q            | S1978:          | 2 | 2,189  | 0,163 | 0      |
| 18 | Q03164 HRX_HUMAN    | R.TIAHS#PTSFTE.S               | S2098:          | 2 | 2,1846 | 0,271 | 0,096  |
| 18 | Q14980 NUMA1_HUMAN  | R.LPPKVESLE.S                  |                 | 2 | 2,1812 | 0,318 | -0,121 |
| 18 | Q9NYV4 CD2L7_HUMAN  | E.SLVQTLVK.N                   |                 | 2 | 2,1798 | 0,081 | 0,481  |
| 18 | O94880 PHF14_HUMAN  | R.KRS#FVPEEE.K                 | S835:           | 2 | 2,1774 | 0,147 | -0,711 |
| 18 | Q9H6Z4 RANB3_HUMAN  | E.DGNYCPPVKR.E                 |                 | 2 | 2,1756 | 0,228 | -0,708 |
| 18 | Q12792 TWF1_HUMAN   | E.DKQPCYILFR.L                 |                 | 2 | 2,1756 | 0,186 | -0,091 |
| 18 | Q15311 RBP1_HUMAN   | E.HGSGLTRTPSS#EE.I             | S30:            | 2 | 2,1744 | 0,552 | -0,679 |
| 18 | O15371 EIF3D_HUMAN  | E.M*DFPQLM*K.M                 |                 | 2 | 2,1735 | 0,22  | 0      |
| 18 | Q6VY07 PACS1_HUMAN  | E.SILST#PKPK.L                 | T394:           | 2 | 2,171  | 0,235 | -1,393 |
| 18 | Q96SB4 SRPK1_HUMAN  | E.SES#PVERPLKENPPNK.M          | S482:           | 3 | 2,1706 | 0,132 | -0,192 |
| 18 | O76021 RL1D1_HUMAN  | K.ATNES#EDEIPLVPIGK.K          | S361:           | 2 | 2,1696 | 0,24  | -0,191 |
| 18 | Q12888 TP53B_HUMAN  | R.SEDPPTT#PIRGNLLHFPSSQGEED.K  | T1056:          | 2 | 2,1676 | 0,243 | 0,359  |
| 18 | Q8NCF5 NF2IP_HUMAN  | E.VSLSRDS#PLK.T                | S369:           | 2 | 2,1658 | 0,179 | -0,206 |
| 18 | Q96AT9 RPE_HUMAN    | K.VGLAIKPGTSVE.Y               |                 | 2 | 2,1638 | 0,112 | 0,208  |
| 18 | B2RAI3 B2RAI3_HUMAN | D.FKFM*AQGK.T                  |                 | 2 | 2,1637 | 0,173 | 0,188  |

|    |                     |                                   |            |   |        |       |        |
|----|---------------------|-----------------------------------|------------|---|--------|-------|--------|
| 18 | Q6ZTN6 AN13D_HUMAN  | R.ILQLSLTEH.-                     |            | 2 | 2,1588 | 0,148 | 0,116  |
| 18 | A5A3E0 A26CB_HUMAN  | R.VAPEEHPVLLTE.A                  |            | 2 | 2,1549 | 0,302 | 0,091  |
| 18 | Q13885 TBB2A_HUMAN  | K.GHYTEGAELVDSVLDVVR.K            |            | 3 | 2,1526 | 0,104 | -0,467 |
| 18 | P19105 MLRM_HUMAN   | R.NAFACFDEE.A                     |            | 2 | 2,1519 | 0,173 | 0,664  |
| 18 | Q9HCD6 TANC2_HUMAN  | R.RPISVNPNE.I                     |            | 2 | 2,1511 | 0,165 | -0,357 |
| 18 | Q6BDS2 URFB1_HUMAN  | E.GVAAPVSGGAAR.L                  |            | 2 | 2,1455 | 0,265 | -0,361 |
| 18 | O00541 PESC_HUMAN   | E.GDYVPPEKLLALQR.G                |            | 3 | 2,1453 | 0,165 | 0,199  |
| 18 | Q9HCN4 GPN1_HUMAN   | D.SLSPVLHPSDLILTR.G               |            | 3 | 2,1446 | 0,118 | 0,222  |
| 18 | O60841 IF2P_HUMAN   | E.GNTVHIEVK.E                     |            | 2 | 2,1396 | 0,237 | -0,245 |
| 18 | O15371 EIF3D_HUMAN  | E.GKYLKDPNK.Q                     |            | 3 | 2,1393 | 0,152 | -0,142 |
| 18 | Q14980 NUMA1_HUMAN  | R.TQPDGTSVGPGEAS#PISQRLPPKVESLE.S | S1757:     | 3 | 2,1373 | 0,126 | 0,305  |
| 18 | P35658 NU214_HUMAN  | R.ITPPAAKPGS#PQAK.S               | S678:      | 2 | 2,1348 | 0,277 | -0,254 |
| 18 | P28290 SSFA2_HUMAN  | E.KEPCAPLTIPSIR.N                 |            | 2 | 2,133  | 0,097 | -0,329 |
| 18 | Q9UQ35 SRRM2_HUMAN  | R.SSTGPEPPAPTLLAE.R               |            | 2 | 2,1328 | 0,157 | 0,078  |
| 18 | Q5VY92 Q5VY92_HUMAN | E.GSSRLS#PPHS#PR.D                | S956:S960: | 3 | 2,1308 | 0,188 | 0,445  |
| 18 | Q7Z3B3 K1267_HUMAN  | E.AAPTS#PPIVPLK.S                 | S1082:     | 2 | 2,1306 | 0,296 | -0,096 |
| 18 | Q13242 SFRS9_HUMAN  | R.IYVGNLPTDVR.E                   |            | 2 | 2,1306 | 0,406 | 0,196  |
| 18 | Q96JM3 ZN828_HUMAN  | E.LRKPGPPLS#PE.I                  | S427:      | 2 | 2,13   | 0,159 | 0,192  |
| 18 | Q08722 CD47_HUMAN   | E.VSQLLKGDASLK.M                  |            | 3 | 2,1293 | 0,102 | 0,581  |
| 18 | Q6NWX9 PR40B_HUMAN  | E.LQQAELPNRS#PGFGIK.K             | S832:      | 3 | 2,1275 | 0,115 | 0,399  |
| 18 | Q9UQ35 SRRM2_HUMAN  | E.SSLVFKDTRLRT#PPRER.S            | T1208:     | 3 | 2,1254 | 0,082 | -0,185 |
| 18 | Q9P287 BCCIP_HUMAN  | E.SGVPQPPDPPVQR.D                 |            | 2 | 2,1249 | 0,176 | -0,622 |
| 18 | Q5VT52 K0460_HUMAN  | R.LSSSPGLFGAFSVR.G                |            | 2 | 2,1244 | 0,266 | -0,428 |
| 18 | Q8NCF5 NF2IP_HUMAN  | K.TLM*SHYEE.A                     |            | 2 | 2,123  | 0,244 | -1,07  |
| 18 | P31483 TIA1_HUMAN   | K.TLYVGNLSR.D                     |            | 2 | 2,1214 | 0,411 | 0,179  |
| 18 | P05787 K2C8_HUMAN   | R.ISSSS#FSR.V                     | S37:       | 2 | 2,1208 | 0,096 | 0,257  |
| 18 | P08865 RSSA_HUMAN   | D.LYFYRDPEEIEKE.E                 |            | 3 | 2,1177 | 0,091 | 0,845  |
| 18 | P38646 GRP75_HUMAN  | R.TTPSVVAFTADGER.L                |            | 2 | 2,1174 | 0,389 | -0,168 |
| 18 | Q13017 RHG05_HUMAN  | E.IYVVPDDSQNR.I                   |            | 2 | 2,1162 | 0,329 | -0,093 |
| 18 | P52789 HXK2_HUMAN   | R.GSGTQLFDHIAE.C                  |            | 2 | 2,1148 | 0,166 | 0,287  |
| 18 | Q86X29 LSR_HUMAN    | K.NLALS#RES#LVV.-                 | S643:S646: | 2 | 2,1147 | 0,275 | 0      |
| 18 | Q9UHB9 SRP68_HUMAN  | K.NSLKDLPDVQE.L                   |            | 2 | 2,1145 | 0,203 | 0,291  |
| 18 | Q9P260 K1468_HUMAN  | R.AGSISTLDSLDFAR.Y                |            | 2 | 2,1135 | 0,287 | -0,252 |
| 18 | P78364 PHC1_HUMAN   | E.ALSPTSPGPLSVR.A                 |            | 2 | 2,1128 | 0,148 | 0,095  |
| 18 | Q8IVF2 AHNK2_HUMAN  | E.ADVSLPSM*QGDLK.T                |            | 2 | 2,1118 | 0,127 | -0,975 |
| 18 | O60271 JIP4_HUMAN   | K.QRSAS#QSS#LDKLDQE.L             | S730:S733: | 2 | 2,1061 | 0,088 | -0,198 |
| 18 | P18887 XRCC1_HUMAN  | E.SANSLRPGALFFSR.I                |            | 3 | 2,1057 | 0,095 | 0,18   |
| 18 | Q92615 LARP5_HUMAN  | R.EPSVPASCAVSATYER.S              |            | 2 | 2,1055 | 0,221 | 0,071  |
| 18 | Q9H4A3 WNK1_HUMAN   | R.DVDDGSGSPHSPHQLSSK.S            |            | 3 | 2,104  | 0,107 | -0,198 |

|    |                    |                           |       |   |        |       |        |
|----|--------------------|---------------------------|-------|---|--------|-------|--------|
| 18 | O60684 IMA7_HUMAN  | K.SYKNNALNPEE.M           |       | 2 | 2,0986 | 0,187 | -0,191 |
| 18 | Q9H7D0 DOCK5_HUMAN | K.FYLTLPGTKM*E.M          |       | 2 | 2,0984 | 0,207 | -0,278 |
| 18 | Q15942 ZYX_HUMAN   | R.EKVS#SIDLE.I            | S142: | 2 | 2,0984 | 0,084 | -0,111 |
| 18 | Q9Y365 PCTL_HUMAN  | R.M*GGAGGEGS#DDDSLTL.-    | S284: | 2 | 2,0961 | 0,267 | -0,234 |
| 18 | P09382 LEG1_HUMAN  | K.SFVLNLGKD.S             |       | 2 | 2,0911 | 0,177 | 0,123  |
| 18 | P35251 RFC1_HUMAN  | K.NKPLS#PIKLTPTSVDL.Y     | S156: | 2 | 2,0897 | 0,227 | 0      |
| 18 | P50990 TCPQ_HUMAN  | E.ILPNLVCCSAK.N           |       | 2 | 2,0876 | 0,438 | 0,383  |
| 18 | Q9H4A3 WNK1_HUMAN  | D.LGLAT#LKRASFAKSVIGTPE.F | T373: | 3 | 2,087  | 0,119 | 0,428  |
| 18 | Q9NPI6 DCP1A_HUMAN | R.QRS#PLLNQPVPE.L         | S353: | 2 | 2,0853 | 0,193 | -0,251 |
| 18 | Q6P0N0 CN106_HUMAN | E.NQVAM*SFYK.H            |       | 2 | 2,0817 | 0,218 | -1,879 |
| 18 | Q12888 TP53B_HUMAN | R.SEDPPTPIR.G             |       | 2 | 2,0808 | 0,368 | -0,11  |
| 18 | Q00839 HNRPU_HUMAN | K.EKPYFPIPEE.Y            |       | 2 | 2,0797 | 0,224 | 0,293  |
| 18 | Q9Y570 PPME1_HUMAN | K.QCEGITS#PEGSK.S         | S243: | 2 | 2,0791 | 0,172 | -0,533 |
| 18 | P42677 RS27_HUMAN  | K.DLLHPSPEEE.K            |       | 2 | 2,0749 | 0,239 | 0,209  |
| 18 | Q96JM3 ZN828_HUMAN | K.TSPASLDFPE.S            |       | 2 | 2,0722 | 0,316 | 0,459  |
| 18 | Q96JG6 CC132_HUMAN | R.S#PSVSPSKQPVSTSSK.T     | S494: | 3 | 2,0708 | 0,174 | -0,326 |
| 18 | Q96IV0 NGLY1_HUMAN | K.LLLTYADNLR.N            |       | 2 | 2,0693 | 0,372 | -0,374 |
| 18 | Q15418 KS6A1_HUMAN | R.KLPS#TTL.-              | S732: | 2 | 2,0692 | 0,406 | 0,145  |
| 18 | Q8ND56 LS14A_HUMAN | R.RS#PVSTRPLPSASQK.A      | S216: | 3 | 2,0668 | 0,084 | 0      |
| 18 | P62736 ACTA_HUMAN  | R.DLTDYLM*K.I             |       | 2 | 2,0657 | 0,265 | -0,962 |
| 18 | Q5H9R7 SAPS3_HUMAN | K.CAAPRPPSSS#PEQR.T       | S853: | 2 | 2,0653 | 0,134 | -0,075 |
| 18 | Q02952 AKA12_HUMAN | K.SAESPT#SPVTSE.T         | T285: | 2 | 2,0634 | 0,107 | -0,096 |
| 18 | Q9P246 STIM2_HUMAN | R.ISS#IPHDLCHNGE.K        | S719: | 2 | 2,0611 | 0,197 | 0      |
| 18 | Q8ND56 LS14A_HUMAN | R.SLKTQLSQGR.S            |       | 2 | 2,0581 | 0,223 | 0      |
| 18 | Q8WWI1 LMO7_HUMAN  | E.SLDSLGSR.S              |       | 2 | 2,0564 | 0,224 | 0,511  |
| 18 | Q09666 AHNK_HUMAN  | E.LKGGVVDVNLK.G           |       | 2 | 2,0536 | 0,199 | -0,107 |
| 18 | O75179 ANR17_HUMAN | R.KVPVPIGTE.R             |       | 2 | 2,053  | 0,28  | 0,519  |
| 18 | Q9Y2W2 WBP11_HUMAN | E.LTPLQAM*M*LR.M          |       | 2 | 2,0469 | 0,259 | -0,101 |
| 18 | Q14258 TRI25_HUMAN | E.QFLQADLAR.E             |       | 2 | 2,0456 | 0,277 | -1,149 |
| 18 | Q13011 ECH1_HUMAN  | E.ALGSGLVSR.V             |       | 2 | 2,0448 | 0,188 | 0,355  |
| 18 | Q8WXS3 BAALC_HUMAN | E.AEKS#KIKAPTDSVSD.E      | S60:  | 2 | 2,0425 | 0,1   | -0,074 |
| 18 | Q15149 PLEC1_HUMAN | E.LQLVTYK.A               |       | 2 | 2,0417 | 0,151 | 0,494  |
| 18 | P04075 ALDOA_HUMAN | R.ALQASALK.A              |       | 2 | 2,0409 | 0,201 | 0,608  |
| 18 | Q9H2P0 ADNP_HUMAN  | E.TIHLTEPTK.L             |       | 2 | 2,0401 | 0,197 | -1,044 |
| 18 | P52594 NUPL_HUMAN  | D.SAPTLHLNK.G             |       | 2 | 2,04   | 0,166 | -0,622 |
| 18 | O43765 SGTA_HUMAN  | E.AAATGKEM*PQDLR.S        |       | 2 | 2,0393 | 0,164 | 0      |
| 18 | Q5H9R7 SAPS3_HUMAN | K.CAAPRPPSSS#PEQR.T       | S853: | 3 | 2,0349 | 0,238 | 0,113  |
| 18 | Q9P246 STIM2_HUMAN | E.IYQTLSPR.K              |       | 2 | 2,0346 | 0,21  | -0,437 |
| 18 | Q8N3D4 EH1L1_HUMAN | R.LPGSQAPPALVSSSQSLE.W    |       | 2 | 2,0321 | 0,181 | 0,389  |

|    |                     |                            |            |   |        |       |        |
|----|---------------------|----------------------------|------------|---|--------|-------|--------|
| 18 | P62753 RS6_HUMAN    | R.RLSS#LRAS#TSKSE.S        | S236:S240: | 2 | 2,0273 | 0,299 | 0,54   |
| 18 | Q8WW12 PCNP_HUMAN   | K.ETVPTLAPK.T              |            | 2 | 2,0248 | 0,305 | -0,638 |
| 18 | Q9UPU5 UBP24_HUMAN  | K.QQHQSASSILE.S            |            | 2 | 2,024  | 0,201 | -0,092 |
| 18 | P85299 PTOR1_HUMAN  | E.GIFIDFGR.G               |            | 2 | 2,0227 | 0,236 | 0,198  |
| 18 | Q9UHB6 LIMA1_HUMAN  | E.ILERPAQLANARETPHS#PGVE.D | S490:      | 3 | 2,0224 | 0,176 | 0,077  |
| 18 | Q9UQ35 SRRM2_HUMAN  | K.DTLRT#PPRER.S            | T1208:     | 3 | 2,0213 | 0,149 | 0,208  |
| 18 | O95881 TXD12_HUMAN  | R.ILFLDPSGK.V              |            | 2 | 2,0204 | 0,359 | 0,123  |
| 18 | P42285 SK2L2_HUMAN  | R.NFQPVIIFFSK.K            |            | 2 | 2,0202 | 0,217 | -0,256 |
| 18 | Q9H2Y7 ZF106_HUMAN  | K.IGTLGSATTE.L             |            | 2 | 2,0165 | 0,201 | 0,385  |
| 18 | Q06323 PSME1_HUMAN  | E.NLLGSYFPK.K              |            | 2 | 2,0157 | 0,276 | 0,117  |
| 18 | Q96P47 CENG3_HUMAN  | E.LHRS#PSLL.-              | S871:      | 2 | 2,0156 | 0,294 | 0      |
| 18 | Q96GQ7 DDX27_HUMAN  | D.FNPDFVFTEKE.G            |            | 2 | 2,0128 | 0,109 | 0      |
| 18 | P09211 GSTP1_HUMAN  | E.DLRCKYISLIYTNYE.A        |            | 2 | 2,0077 | 0,218 | 0,063  |
| 18 | Q9UQ35 SRRM2_HUMAN  | E.KSATRPS#PSPE.R           | S351:      | 2 | 2,0077 | 0,104 | -0,296 |
| 18 | P49407 ARRB1_HUMAN  | E.DLDVLTGLTFRKD.L          |            | 2 | 2,0071 | 0,107 | 0,263  |
| 18 | P06756 ITAV_HUMAN   | E.REQLQPHENGEENSET#.-      | T1048:     | 2 | 2,0067 | 0,291 | 0      |
| 18 | A9CQZ4 A9CQZ4_HUMAN | K.NLGSQS#PKPR.Q            | S27:       | 2 | 2,005  | 0,147 | -0,223 |
| 18 | Q5H9R7 SAPS3_HUMAN  | K.CAAPRPSS#SPEQR.T         | S852:      | 3 | 2,0033 | 0,091 | 0      |
| 18 | Q9UKV3 ACINU_HUMAN  | E.KSKS#PS#PPRLTE.D         | S386:S388: | 2 | 1,9988 | 0,359 | -0,903 |
| 18 | Q93074 MED12_HUMAN  | K.GSPS#PEKPDVEKE.V         | S702:      | 2 | 1,997  | 0,261 | 0      |
| 18 | P53618 COPB_HUMAN   | K.LIVLDRLE.L               |            | 2 | 1,9947 | 0,119 | 1,238  |
| 18 | Q9NQG5 CT077_HUMAN  | E.NAASGDATVR.Q             |            | 2 | 1,9926 | 0,21  | -0,254 |
| 18 | P50395 GDIB_HUMAN   | R.TYDATTHFE.T              |            | 2 | 1,9892 | 0,336 | 0,225  |
| 18 | Q13347 EIF3I_HUMAN  | R.IHYFDPQYFE.F             |            | 2 | 1,9886 | 0,18  | -0,18  |
| 18 | Q6KC79 NIPBL_HUMAN  | K.AITSLGGGS#PK.N           | S2658:     | 2 | 1,9861 | 0,262 | 0      |
| 18 | Q14116 IL18_HUMAN   | R.GM*AVTISVK.C             |            | 2 | 1,983  | 0,143 | 0,265  |
| 18 | Q9H6F5 CCD86_HUMAN  | K.CSQDQGVASE.L             |            | 2 | 1,9791 | 0,161 | -0,409 |
| 18 | Q68EM7 RHG17_HUMAN  | R.ILLDIDNDTE.S             |            | 2 | 1,9776 | 0,208 | 0,105  |
| 18 | P62736 ACTA_HUMAN   | D.LAGRDLTDYLM*K.I          |            | 2 | 1,9771 | 0,094 | -0,346 |
| 18 | Q9UHB6 LIMA1_HUMAN  | K.VGVLAASM*E.A             |            | 2 | 1,9717 | 0,205 | -0,888 |
| 18 | P63241 IF5A1_HUMAN  | E.DLRLPEGDLGK.E            |            | 2 | 1,97   | 0,199 | 0,302  |
| 18 | O96000 NDUBA_HUMAN  | E.VEQFTQVAK.A              |            | 2 | 1,9655 | 0,211 | -0,697 |
| 18 | Q9Y217 FYV1_HUMAN   | R.SASITNLSLDR.S            |            | 2 | 1,9651 | 0,251 | -0,311 |
| 18 | P49792 RBP2_HUMAN   | E.STTGFNFSEK.S             |            | 2 | 1,9619 | 0,413 | 0,215  |
| 18 | Q9H1A4 APC1_HUMAN   | E.GSLS#PVIAPK.K            | S688:      | 2 | 1,96   | 0,195 | 0,698  |
| 18 | Q9UQ80 PA2G4_HUMAN  | K.IDLGVHVD.G               |            | 2 | 1,9474 | 0,21  | 0,141  |
| 18 | ##P18031 PTN1_HUMAN | D.ESILTLK.L                |            | 2 | 1,9467 | 0,12  | 0,607  |
| 18 | O00165 HAX1_HUMAN   | E.GLGPVLQPQPK.S            |            | 2 | 1,9419 | 0,12  | -0,108 |
| 18 | P31946 1433B_HUMAN  | K.DSTLIM*QLLRD.N           |            | 2 | 1,9369 | 0,311 | -0,462 |



|    |                     |                      |          |   |        |       |        |
|----|---------------------|----------------------|----------|---|--------|-------|--------|
| 18 | Q9H307 PININ_HUMAN  | E.IAIVHS#D.A         | S347:    | 2 | 1,9365 | 0,091 | -0,585 |
| 18 | P54819 KAD2_HUMAN   | R.AVLLGPPGAGK.G      |          | 2 | 1,9349 | 0,125 | 0,187  |
| 18 | Q02952 AKA12_HUMAN  | K.TKDVPFFE.G         |          | 2 | 1,932  | 0,151 | 0,31   |
| 18 | Q6NYC8 PHTNS_HUMAN  | E.ILVLGGYLRLSR.S     |          | 2 | 1,9293 | 0,133 | -0,269 |
| 18 | Q66K74 MAP1S_HUMAN  | E.LGPIPAGEEK.A       |          | 2 | 1,9174 | 0,251 | -0,121 |
| 18 | P04406 G3P_HUMAN    | E.GLM*TTVHAITATQK.T  |          | 2 | 1,9169 | 0,149 | 0,41   |
| 18 | Q02952 AKA12_HUMAN  | K.SVPEDDGHALLAE.R    |          | 2 | 1,9168 | 0,102 | 0,18   |
| 18 | Q6ZRV2 FA83H_HUMAN  | E.RRGS#PVPPVPE.R     | S914:    | 2 | 1,9144 | 0,29  | -0,192 |
| 18 | P20700 LMNB1_HUMAN  | R.AGGPTT#PLS#PTR.L   | T20:S23: | 2 | 1,913  | 0,124 | -0,371 |
| 18 | Q68DX9 Q68DX9_HUMAN | R.IDS#PGFKPASQQVYR.K | S491:    | 2 | 1,9102 | 0,299 | 0,275  |
| 18 | Q8IVF2 AHNK2_HUMAN  | K.LDLKS#PK.A         | S1112:   | 2 | 1,9042 | 0,119 | 0,069  |
| 18 | Q8NB37 PDCC1_HUMAN  | R.YHALLIPSCPGALTD.L  |          | 2 | 1,904  | 0,203 | -1,799 |
| 18 | O95757 HS74L_HUMAN  | K.QVYVDKLQE.L        |          | 2 | 1,9033 | 0,175 | -0,109 |
| 18 | P34897 GLYM_HUMAN   | R.AFPM*PGFDEH.-      |          | 2 | 1,9008 | 0,446 | -0,21  |
| 18 | O15061 DMN_HUMAN    | R.TFS#PTYGLLR.N      | S429:    | 2 | 1,8959 | 0,257 | -0,296 |
| 18 | O60684 IMA7_HUMAN   | K.SYKNNALNPE.E       |          | 2 | 1,8916 | 0,277 | 0      |
| 18 | Q14161 GIT2_HUMAN   | E.NKHDSY#IPCSE.R     | Y669:    | 2 | 1,8901 | 0,205 | -1,024 |
| 18 | Q9H6Z4 RANB3_HUMAN  | K.FVFGQNM*SER.V      |          | 2 | 1,8881 | 0,098 | 0,099  |
| 18 | P15924 DESP_HUMAN   | K.ISTISSVR.N         |          | 2 | 1,8872 | 0,23  | 0      |
| 18 | Q9H4L7 SMRCD_HUMAN  | R.KASISYFK.N         |          | 2 | 1,8854 | 0,104 | 0,129  |
| 18 | P13861 KAP2_HUMAN   | E.DLEVPVPSR.F        |          | 2 | 1,8828 | 0,106 | -0,06  |
| 18 | P42167 LAP2B_HUMAN  | K.HAS#PILPITE.F      | S306:    | 2 | 1,8804 | 0,23  | 0      |
| 18 | P61247 RS3A_HUMAN   | K.LIPDSIGKDIE.K      |          | 2 | 1,8792 | 0,173 | -0,102 |
| 18 | P16949 STMN1_HUMAN  | E.SVPEFPLS#PPK.K     | S38:     | 2 | 1,875  | 0,282 | 0,095  |
| 18 | P46013 KI67_HUMAN   | D.LAGTLPGS#KR.Q      | S1207:   | 2 | 1,8659 | 0,365 | -0,113 |
| 18 | Q9NTK5 OLA1_HUMAN   | E.GSVDPIRDIEIHEE.L   |          | 2 | 1,857  | 0,137 | -0,213 |
| 18 | Q13523 PRP4B_HUMAN  | K.LLAPDM*FTE.S       |          | 2 | 1,856  | 0,095 | -0,463 |
| 18 | Q5JTD0 TJAP1_HUMAN  | E.CHSLGTARGS#PEEE.L  | S300:    | 2 | 1,8518 | 0,144 | 0,152  |
| 18 | P38646 GRP75_HUMAN  | K.NAVITVPAYFND.S     |          | 2 | 1,8489 | 0,28  | 0      |
| 18 | P35908 K22E_HUMAN   | R.SLVGLGGTK.S        |          | 2 | 1,8432 | 0,151 | 0,147  |
| 18 | Q14004 CD2L5_HUMAN  | K.LADFLAR.L          |          | 2 | 1,8396 | 0,163 | 0,141  |
| 18 | P31939 PUR9_HUMAN   | K.ALFEVPE.L          |          | 2 | 1,8371 | 0,081 | 0,131  |
| 18 | P98175 RBM10_HUMAN  | K.LASDDRPS#PPR.G     | S722:    | 2 | 1,832  | 0,106 | 0,189  |
| 18 | Q6S8J3 A26CA_HUMAN  | E.TTFNSIM*K.S        |          | 2 | 1,8293 | 0,221 | -0,255 |
| 18 | Q96P47 CENG3_HUMAN  | E.LHRSPS#LL.-        | S873:    | 2 | 1,8214 | 0,466 | 0,182  |
| 18 | P40925 MDHC_HUMAN   | E.LQDCALPLLK.D       |          | 2 | 1,8141 | 0,106 | 0,208  |
| 18 | Q96T23 RSF1_HUMAN   | K.AQIDPVLLK.N        |          | 2 | 1,8124 | 0,193 | 0,367  |
| 18 | Q53F19 CQ085_HUMAN  | E.YHEELPALK.Q        |          | 2 | 1,8106 | 0,14  | -0,222 |
| 18 | P63096 GNAI1_HUMAN  | D.TSIILFLNK.K        |          | 2 | 1,8097 | 0,187 | -0,233 |

|    |                      |                              |              |   |        |       |        |
|----|----------------------|------------------------------|--------------|---|--------|-------|--------|
| 18 | Q5VT52 K0460_HUMAN   | K.IISPGSSTPSSTR.S            |              | 2 | 1,8091 | 0,119 | -0,567 |
| 18 | P08238 HS90B_HUMAN   | R.NPDDITQEE.Y                |              | 2 | 1,8087 | 0,085 | 0,345  |
| 18 | Q92581 SL9A6_HUMAN   | R.RFM*GNSEDALDRE.L           |              | 2 | 1,7957 | 0,154 | -0,297 |
| 18 | Q9P2I0 CPSF2_HUMAN   | K.SLFGDDEKE.T                |              | 2 | 1,7956 | 0,164 | 0,235  |
| 18 | Q7Z417 NUFP2_HUMAN   | R.TS#PQVLGSILK.S             | S572:        | 2 | 1,7947 | 0,185 | -0,399 |
| 18 | P13645 K1C10_HUMAN   | R.LAADDR.L                   |              | 2 | 1,7884 | 0,385 | 0,755  |
| 18 | P13645 K1C10_HUMAN   | R.LKYENEVALR.Q               |              | 2 | 1,7882 | 0,145 | -0,198 |
| 18 | Q9H0H5 RGAP1_HUMAN   | K.SALAF.LNR.G                |              | 2 | 1,7866 | 0,103 | 0,274  |
| 18 | Q9UHB6 LIMA1_HUMAN   | K.TVS#PPIR.K                 | S609:        | 2 | 1,7861 | 0,117 | 0,144  |
| 18 | P50395 GDIB_HUMAN    | E.SQIFISR.T                  |              | 2 | 1,7808 | 0,203 | 0,358  |
| 18 | Q9BTT0 AN32E_HUMAN   | E.LRNRS#PEEVTE.L             | S15:         | 2 | 1,7791 | 0,317 | -0,519 |
| 18 | Q9P2C4 TM181_HUMAN   | E.EM*PLQNGQAIR.A             |              | 2 | 1,7785 | 0,299 | 0,383  |
| 18 | Q9Y4C4 MFHA1_HUMAN   | D.HNQLT#AFPR.Q               | T194:        | 2 | 1,7778 | 0,133 | -0,734 |
| 18 | Q9NY27 PP4R2_HUMAN   | E.VSSVS#PLK.N                | S226:        | 2 | 1,7723 | 0,137 | 0,204  |
| 18 | Q9BTD8 RBM42_HUMAN   | E.LGLGLGLGLK.E               |              | 2 | 1,77   | 0,098 | 0,065  |
| 18 | Q9Y6M7 S4A7_HUMAN    | K.VDM*NFM*R.K                |              | 2 | 1,7557 | 0,274 | -0,387 |
| 18 | Q6QNY0 BL1S3_HUMAN   | R.DLPPLVVQR.E                |              | 2 | 1,7508 | 0,338 | 0,235  |
| 18 | P35579 MYH9_HUMAN    | R.IIGLDQVAGM*SE.T            |              | 2 | 1,7503 | 0,137 | 0      |
| 18 | Q96PK6 RBM14_HUMAN   | R.QPT#PPFFGR.D               | T206:        | 2 | 1,7494 | 0,351 | 0,325  |
| 18 | P21333 FLNA_HUMAN    | R.ANLPQSFQVD.T               |              | 2 | 1,7465 | 0,141 | 0,327  |
| 18 | O75400 PR40A_HUMAN   | E.DVLFFLSK.K                 |              | 2 | 1,7436 | 0,263 | 0      |
| 18 | P40855 PEX19_HUMAN   | E.SALDDFDK.A                 |              | 2 | 1,7422 | 0,135 | 0,268  |
| 18 | ##Q68DQ2 YC012_HUMAN | D.EDFNM*KLR.E                |              | 2 | 1,7405 | 0,1   | 0      |
| 18 | Q09666 AHNK_HUMAN    | K.SPSLDVTVPE.A               |              | 2 | 1,739  | 0,107 | 0,234  |
| 18 | O60610 DIAP1_HUMAN   | E.YFLDFPK.K                  |              | 2 | 1,735  | 0,152 | 0,262  |
| 18 | P23588 IF4B_HUMAN    | K.VAPAQPSEEGPGR.K            |              | 2 | 1,7114 | 0,264 | -0,283 |
| 18 | Q66K74 MAP1S_HUMAN   | R.LSLS#PLR.G                 | S657:        | 2 | 1,7107 | 0,101 | 0,423  |
| 18 | Q9P2T1 GMPR2_HUMAN   | K.TGVGYQLSAVM*E.C            |              | 2 | 1,7005 | 0,237 | 0,089  |
| 18 | Q68CZ2 TENS3_HUMAN   | R.LPDTGEGPSR.A               |              | 2 | 1,6952 | 0,129 | -0,119 |
| 18 | O00541 PESC_HUMAN    | E.GDYVPPEK.L                 |              | 2 | 1,6898 | 0,245 | 0,404  |
| 18 | Q9BR39 JPH2_HUMAN    | E.GGS#PSPAGT#PPQPK.R         | S484:T490:   | 2 | 1,6654 | 0,226 | -0,849 |
| 18 | P08670 VIME_HUMAN    | E.NTLQSFR.Q                  |              | 2 | 1,6643 | 0,09  | -0,07  |
| 18 | Q9C0C2 TB182_HUMAN   | R.VVGKPAQLGTQR.S             |              | 2 | 1,6566 | 0,265 | -0,486 |
| 18 | Q9UQ35 SRRM2_HUMAN   | E.LASRS#PIRQDRGEFS#ASPM*LK.S | S1112:S1122: | 2 | 1,64   | 0,217 | 1,355  |
| 18 | P54105 ICLN_HUMAN    | E.HLYVM*VNAK.F               |              | 2 | 1,6399 | 0,172 | 0      |
| 18 | P34932 HSP74_HUMAN   | E.M*RDKLS#GEYE.K             | S633:        | 2 | 1,6192 | 0,207 | -0,184 |
| 18 | P61201 CSN2_HUMAN    | K.AALSSFQK.V                 |              | 2 | 1,6154 | 0,258 | 0,143  |
| 18 | O14737 PDCD5_HUMAN   | E.NYLIQM*AR.Y                |              | 2 | 1,6033 | 0,125 | -0,238 |
| 18 | Q9UHB6 LIMA1_HUMAN   | R.ETPHS#PGVEDAPIAK.V         | S490:        | 2 | 1,5992 | 0,292 | -0,45  |

|    |                     |                                         |            |   |        |       |        |
|----|---------------------|-----------------------------------------|------------|---|--------|-------|--------|
| 18 | P31949 S10AB_HUMAN  | E.SLIAVFQK.Y                            |            | 2 | 1,594  | 0,163 | 0,202  |
| 18 | Q96RS0 TGS1_HUMAN   | K.LYNLGLK.G                             |            | 2 | 1,5853 | 0,12  | 0,594  |
| 18 | P31040 DHSA_HUMAN   | E.AGFNTACVTK.L                          |            | 2 | 1,5833 | 0,149 | 1,027  |
| 18 | Q09666 AHNK_HUMAN   | K.AEAPLPS#PK.L                          | S5110:     | 2 | 1,573  | 0,169 | 0,185  |
| 18 | P08727 K1C19_HUMAN  | R.FGPGVAFR.A                            |            | 2 | 1,5411 | 0,201 | -0,072 |
| 18 | P05783 K1C18_HUMAN  | E.IDLDSM*R.N                            |            | 2 | 1,5403 | 0,149 | 0,775  |
| 18 | Q17RV1 Q17RV1_HUMAN | E.FQFGDGSK.H                            |            | 2 | 1,5402 | 0,088 | 0,117  |
| 18 | Q9UBI6 GBG12_HUMAN  | R.RTVQQLRLE.A                           |            | 2 | 1,5193 | 0,096 | -0,427 |
| 18 | Q9UKY7 CDV3_HUMAN   | E.VDYSGLR.V                             |            | 2 | 1,5061 | 0,105 | 0,151  |
| 18 | O95402 MED26_HUMAN  | R.QQSLYAPK.G                            |            | 2 | 1,5036 | 0,116 | 0,065  |
| 18 | P49023 PAXI_HUMAN   | R.IS#ASSATRE.L                          | S258:      | 2 | 1,4823 | 0,094 | 0,061  |
| 18 | O76003 GLRX3_HUMAN  | E.LDTICPK.A                             |            | 2 | 1,4752 | 0,189 | 0,432  |
| 18 | P35527 K1C9_HUMAN   | R.M*TLDDFR.I                            |            | 2 | 1,346  | 0,107 | 0,534  |
| 19 | P05783 K1C18_HUMAN  | R.STS#FRGGM*GSGGLATGIAGGLAGM*GGIQNEKE.T | S53:       | 3 | 6,3093 | 0,473 | 0,594  |
| 19 | P62937 PIIA_HUMAN   | K.HTGPGILSM*ANAGPNTNGSQFFICTAK.T        |            | 3 | 6,1048 | 0,55  | 0,391  |
| 19 | Q13885 TBB2A_HUMAN  | E.SCDCLQGFQLTHSLGGGTGSGM*GTLISK.I       |            | 3 | 6,0474 | 0,458 | 0,671  |
| 19 | P05783 K1C18_HUMAN  | E.DFNLDALDSSNSM*QTIQK.T                 |            | 2 | 5,9427 | 0,491 | 0      |
| 19 | Q53EZ4 CEP55_HUMAN  | K.VAASPKS#PTAALNES#LVECPK.C             | S428:S436: | 3 | 5,9064 | 0,464 | -1,1   |
| 19 | Q9H6F5 CCD86_HUMAN  | R.LQQGAGLESPQQPEPGAAS#PQRQDLHLE.S       | S91:       | 3 | 5,8938 | 0,569 | 0,451  |
| 19 | P11532 DMD_HUMAN    | E.HKGLSPLSPPEM*M*PTS#PQSPR.D            | S3549:     | 3 | 5,8657 | 0,508 | -0,147 |
| 19 | Q9HAF1 CA149_HUMAN  | K.SSVTSAAAVSALAGVQDQLIEK.R              |            | 3 | 5,8632 | 0,445 | 0,085  |
| 19 | Q96SB3 NEB2_HUMAN   | K.IHFSTAPIQVFSTYSNEDYDR.R               |            | 3 | 5,8173 | 0,528 | 0      |
| 19 | P80723 BASP_HUMAN   | K.AQGPAASAEKPKVEAPAANSQTVTVKE.-         |            | 3 | 5,7328 | 0,461 | 0,19   |
| 19 | Q9H0D6 XRN2_HUMAN   | E.M*RM*QNNSSPSISPNTSFTSDGSPSPLGGIK.R    |            | 3 | 5,6526 | 0,428 | 0      |
| 19 | O94925 GLSK_HUMAN   | E.DDKPHNPM*VNAGAIVVTSLIK.Q              |            | 3 | 5,6224 | 0,357 | -0,164 |
| 19 | Q1KMD3 HNRL2_HUMAN  | E.AAAEPDASEKPAEATAGSGGVNGGEEQGLGK.R     |            | 3 | 5,6156 | 0,511 | 0,32   |
| 19 | P46734 MP2K3_HUMAN  | K.M*CDFGISGYLVDS#VAKTM*D.A              | S218:      | 2 | 5,5836 | 0,542 | 0,33   |
| 19 | P05783 K1C18_HUMAN  | E.DGEDFNLDALDSSNSM*QTIQK.T              |            | 2 | 5,5315 | 0,555 | -0,711 |
| 19 | Q9UK76 HN1_HUMAN    | R.RNS#SEASSGDFLDLKE.G                   | S87:       | 2 | 5,5099 | 0,501 | 0,903  |
| 19 | Q9H8Y8 GORS2_HUMAN  | K.ISLPGQM*AGTPIT#PLKDGFE.V              | T225:      | 3 | 5,4911 | 0,364 | 0,403  |
| 19 | Q08J23 NSUN2_HUMAN  | R.AGEPNSPDAEEANS#PDVTAGCDPAGVHPPR.-     | S751:      | 3 | 5,4673 | 0,547 | 0      |
| 19 | P68104 EF1A1_HUMAN  | E.DGPKFLKSGDAAIVDM*VPGKPM*CVE.S         |            | 3 | 5,4465 | 0,448 | 0,272  |
| 19 | Q12888 TP53B_HUMAN  | E.VSPSQTGGSSGDLGDISSFSSK.A              |            | 2 | 5,4259 | 0,658 | 0,116  |
| 19 | Q71RC2 LARP4_HUMAN  | R.ASTASPCNNNINAATAVALQEPR.K             |            | 2 | 5,3763 | 0,526 | 0,618  |
| 19 | P05783 K1C18_HUMAN  | E.DFNLDALDSSNSM*QTIQK.T                 |            | 3 | 5,3485 | 0,46  | 0,348  |
| 19 | Q9NQW6 ANLN_HUMAN   | K.ALSSADDAASLVNASISSVK.A                |            | 2 | 5,3161 | 0,615 | -0,121 |
| 19 | Q32MZ4 LRRF1_HUMAN  | R.NM*PGLSAATLASLGGTS#SR.R               | S115:      | 2 | 5,2916 | 0,451 | -0,065 |
| 19 | Q9NZN5 ARHGC_HUMAN  | R.YRTAS#QGPQTDSVIQNSE.N                 | S1288:     | 2 | 5,2702 | 0,393 | -0,355 |
| 19 | Q9H8Y8 GORS2_HUMAN  | K.KISLPGQM*AGTPIT#PLKDGFE.V             | T225:      | 3 | 5,2619 | 0,465 | 0,382  |

|    |                     |                                      |            |   |        |       |        |
|----|---------------------|--------------------------------------|------------|---|--------|-------|--------|
| 19 | P05783 K1C18_HUMAN  | E.DGEDFNLGDALDSSNSM*QTIQK.T          |            | 3 | 5,2478 | 0,532 | -1,067 |
| 19 | Q8IWW6 RHG12_HUMAN  | E.KTSFSQEQSCDSAGEGSEI.I              |            | 3 | 5,2379 | 0,425 | 0,175  |
| 19 | Q9UQ35 SRRM2_HUMAN  | K.SKDSLVLQSCPGSLSLCAGVK.S            |            | 3 | 5,2198 | 0,492 | 0,175  |
| 19 | Q8IZ69 HTF9C_HUMAN  | E.RVEHPNGTGVLGPHS#PPAQPPTGPPDNTLQE.T | S602:      | 3 | 5,1604 | 0,419 | 0,335  |
| 19 | Q7Z417 NUFP2_HUMAN  | E.LEKRTS#PQVLGSILKSGTTSE.S           | S572:      | 3 | 5,1358 | 0,405 | 0,079  |
| 19 | P55209 NP1L1_HUMAN  | R.M*RS#EPDSDPFSFDGPE.I               | S237:      | 2 | 5,1184 | 0,56  | 0,482  |
| 19 | Q9H0D6 XRN2_HUMAN   | R.M*QNNSSPISPNSTFTSDGSPSPLGGIKR.K    |            | 3 | 5,0755 | 0,523 | 0,184  |
| 19 | Q9UK76 HN1_HUMAN    | E.EKPVPAAPVPSVAPAPVPSR.R             |            | 3 | 5,0468 | 0,407 | 0,089  |
| 19 | Q5SYE7 NHSL1_HUMAN  | E.NLGHLLGGASGTGTLRPKS#QE.L           | S388:      | 3 | 5,0278 | 0,444 | 0,421  |
| 19 | Q92547 TOPB1_HUMAN  | E.ARPFNDSTHAEPNDST#HISLQEE.N         | T525:      | 3 | 5,0145 | 0,36  | -0,984 |
| 19 | Q9NV56 MRGBP_HUMAN  | E.M*KEDVDPHNGADDVFSS#GSLGK.A         | S147:      | 3 | 5,0109 | 0,333 | -0,294 |
| 19 | Q9UK76 HN1_HUMAN    | R.NS#SEASSGDFLDLKE.G                 | S87:       | 2 | 5,003  | 0,546 | 0,281  |
| 19 | Q12792 TWF1_HUMAN   | K.KYLLSQSS#PAPLTAEEEE.L              | S161:      | 2 | 4,9502 | 0,497 | 0,242  |
| 19 | P57078 RIPK4_HUMAN  | K.RAS#APTFDNDYSLSE.L                 | S370:      | 2 | 4,9302 | 0,51  | -0,278 |
| 19 | A5PKX8 A5PKX8_HUMAN | E.NGQELS#PIALEPGPEPHR.A              | S288:      | 3 | 4,9275 | 0,346 | 0,181  |
| 19 | P49023 PAXI_HUMAN   | R.FIHQQPQSSS#PVYGSSAK.T              | S85:       | 3 | 4,9131 | 0,253 | -0,541 |
| 19 | Q8WU17 RN139_HUMAN  | E.RNGVIQHTGAAAEFNDT#D.-              | T663:      | 3 | 4,909  | 0,451 | 0,817  |
| 19 | Q9H9R9 DBND1_HUMAN  | E.VFADS#DDENLNTESPAGLHPLPR.A         | S95:       | 3 | 4,9089 | 0,448 | -0,426 |
| 19 | Q92797 SYMPK_HUMAN  | K.LKPGVGAPSSSSPS#PSPSARPGPPPSEE.A    | S1173:     | 3 | 4,908  | 0,447 | 0,262  |
| 19 | Q92598 HS105_HUMAN  | K.FFGKDISTTLNADE.A                   |            | 2 | 4,9079 | 0,459 | -0,235 |
| 19 | Q71RC2 LARP4_HUMAN  | R.AS#TASPCNNNINAATAVALQEPR.K         | S594:      | 3 | 4,9077 | 0,418 | 0,747  |
| 19 | Q9HC35 EMAL4_HUMAN  | E.SHSNDQSPQIRAS#PS#PQPSSQLQIHR.Q     | S144:S146: | 3 | 4,8956 | 1     | 1,282  |
| 19 | O00178 GTPB1_HUMAN  | R.LHGGFDS#DCS#EDGEALNGEPE.L          | S44:S47:   | 2 | 4,8838 | 0,474 | -0,51  |
| 19 | Q71RC2 LARP4_HUMAN  | R.ASTAS#PCNNNINAATAVALQEPR.K         | S597:      | 2 | 4,8814 | 0,398 | 0,896  |
| 19 | Q14676 MDC1_HUMAN   | E.LQPSTSTDQPVTSPTSQVTR.G             |            | 2 | 4,8699 | 0,546 | 0      |
| 19 | O00178 GTPB1_HUMAN  | R.SAM*DSPVPASM*FAPEPSS#PGAAR.A       | S25:       | 2 | 4,8681 | 0,546 | -0,309 |
| 19 | Q92598 HS105_HUMAN  | E.CLNQRPPENPDTDKNVQQDNSE.A           |            | 3 | 4,8602 | 0,322 | 0      |
| 19 | Q9P107 GMIP_HUMAN   | R.SQGS#PEDSAPQASPGPSK.Q              | S234:      | 2 | 4,8467 | 0,508 | 0      |
| 19 | Q96RR4 KKCC2_HUMAN  | E.RSQGGLAAGSLDM*NGR.C                |            | 3 | 4,8453 | 0,468 | 0,33   |
| 19 | P16949 STMN1_HUMAN  | K.RAS#GQAFELILS#PR.S                 | S16:S25:   | 2 | 4,8412 | 0,349 | 0,072  |
| 19 | Q99832 TCPH_HUMAN   | R.TM*M*ACGGSIQTSVNALSADVLGR.C        |            | 2 | 4,8289 | 0,604 | 0,412  |
| 19 | Q6S8J3 A26CA_HUMAN  | E.KSYELPDGQVITIGNER.F                |            | 2 | 4,8146 | 0,542 | 0,064  |
| 19 | P49792 RBP2_HUMAN   | E.DALDDSVSSSVHASPLAS#SPVRK.N         | S2250:     | 3 | 4,8042 | 0,375 | 0,44   |
| 19 | P05783 K1C18_HUMAN  | E.DGEDFNLGDALDSS#NSM*QTIQK.T         | S399:      | 2 | 4,7948 | 0,379 | 1,18   |
| 19 | Q8WXI9 P66B_HUMAN   | R.LTPSPDIIVLS#DNEASSPR.S             | S129:      | 2 | 4,7939 | 0,446 | -0,233 |
| 19 | P05783 K1C18_HUMAN  | R.GGM*GSGGLATGIAGGLAGM*GGIQNEKE.T    |            | 3 | 4,7897 | 0,402 | 0,227  |
| 19 | Q9UK76 HN1_HUMAN    | E.EKPVPAAPVPS#PVAPAPVPSR.R           | S131:      | 3 | 4,7715 | 0,427 | 0,256  |
| 19 | Q7Z3T8 ZFY16_HUMAN  | K.IDPDQTVIRAES#LDGGDTSSTVVE.S        | S467:      | 2 | 4,751  | 0,498 | 0,661  |
| 19 | Q9UKV3 ACINU_HUMAN  | E.TKDPSSGQEVAT#PPVPLQVCEPK.E         | T682:      | 3 | 4,7375 | 0,379 | 0      |

|    |                     |                                       |            |   |        |       |        |
|----|---------------------|---------------------------------------|------------|---|--------|-------|--------|
| 19 | Q14444 CAPR1_HUMAN  | E.VVNSLQQPQAAS#PSVPEPHSLTPVAQADPLVR.R | S335:      | 3 | 4,7233 | 0,43  | 0,724  |
| 19 | Q9UPN9 TRI33_HUMAN  | R.SACM*LSSPESSLT#PPLSTNLHLE.S         | T815:      | 2 | 4,7214 | 0,434 | 0,856  |
| 19 | Q9H8Y8 GORS2_HUMAN  | K.ISLPGQM*AGTPIT#PLKDGFE.V            | T225:      | 2 | 4,706  | 0,572 | 0,43   |
| 19 | Q9BWU0 NADAP_HUMAN  | E.TLASQDLSGDFKPKALPVS#PAAR.S          | S82:       | 3 | 4,7026 | 0,406 | -0,075 |
| 19 | P05783 K1C18_HUMAN  | R.GGM*GSGGLATGIAGGLAGM*GGIQNE.K       |            | 3 | 4,6966 | 0,413 | 0,085  |
| 19 | A0FGR8 ESYT2_HUMAN  | E.KAQPEAGPQGLHDLGR.S                  |            | 2 | 4,6887 | 0,52  | 0,069  |
| 19 | Q9UKL0 RCOR1_HUMAN  | R.VGPQYQAVVPDFDPAK.L                  |            | 2 | 4,6869 | 0,357 | -0,07  |
| 19 | Q9H4A4 AMPB_HUMAN   | R.RPLHSAQAVDVASASNFR.A                |            | 3 | 4,6736 | 0,448 | 0,095  |
| 19 | P04406 G3P_HUMAN    | E.NGKLVINGNPITIFQER.D                 |            | 3 | 4,6694 | 0,314 | 0,287  |
| 19 | Q6P0Q8 MAST2_HUMAN  | R.NQSLGQS#APSLTAGLKE.L                | S148:      | 2 | 4,6484 | 0,498 | -0,069 |
| 19 | O95905 SGT1_HUMAN   | R.NQVEPVSQTTDNNS#DEEDSGTGE.S          | S579:      | 3 | 4,6433 | 0,424 | -1,084 |
| 19 | Q96KN1 FA84B_HUMAN  | E.LATHLHPAEPEEGDSNVAR.T               |            | 3 | 4,6372 | 0,412 | -0,179 |
| 19 | Q15029 U5S1_HUMAN   | E.TIVQEEDT#QPLTEPIIKPVK.T             | T86:       | 3 | 4,6281 | 0,306 | -0,155 |
| 19 | Q9UQ35 SRRM2_HUMAN  | K.SKDSLQVQSCPGSLCAGVK.S               |            | 2 | 4,6247 | 0,52  | -0,233 |
| 19 | Q3MHD2 LSM12_HUMAN  | E.VEIINDRTET#PPPLASLNVS.K             | T75:       | 3 | 4,6188 | 0,369 | 0      |
| 19 | Q6P9B6 K1609_HUMAN  | E.IDQLFDALSSDKNS#PNVSSK.S             | S37:       | 3 | 4,6185 | 0,365 | -0,815 |
| 19 | P55884 EIF3B_HUMAN  | R.SDS#RAQAVSEDAGGNEGR.A               | S119:      | 3 | 4,6137 | 0,291 | 0,097  |
| 19 | P30050 RL12_HUMAN   | R.HPHDIIDDINSGAVECPAS.-               |            | 2 | 4,6117 | 0,53  | 1,073  |
| 19 | Q9H0D6 XRN2_HUMAN   | E.M*RM*QNNSSPSISNTSFTSDGSPSPLGGIKR.K  |            | 3 | 4,6035 | 0,356 | 0,111  |
| 19 | P78318 IGBP1_HUMAN  | D.LKYLLVPAFQGALTM*K.Q                 |            | 3 | 4,6016 | 0,358 | 0      |
| 19 | Q59HC3 Q59HC3_HUMAN | E.GDNM*ETPAS#SPQLSHDDTHSRIE.H         | S1113:     | 3 | 4,6003 | 0,389 | -0,14  |
| 19 | Q9UK76 HN1_HUMAN    | K.GEGDIHENVDTDLPGSLGQSE.E             |            | 2 | 4,589  | 0,543 | 0,113  |
| 19 | Q96PK6 RBM14_HUMAN  | R.S#PPRASVAPLTAQPATYR.A               | S220:      | 3 | 4,586  | 0,355 | 0,172  |
| 19 | Q9UHR5 S30BP_HUMAN  | E.KGGLVSDAYGEDDFSR.L                  |            | 2 | 4,5833 | 0,518 | -0,356 |
| 19 | O95208 EPN2_HUMAN   | K.KTAESVTS#LPSQNNGTSPDPFE.S           | S477:      | 3 | 4,5832 | 0,371 | 0,294  |
| 19 | Q9Y2X7 GIT1_HUMAN   | R.ARS#M*DSSDLSGAVTLQEYLE.L            | S410:      | 2 | 4,5763 | 0,449 | 0,307  |
| 19 | Q12965 MYO1E_HUMAN  | R.NFIGDYIGM*EEHPE.L                   |            | 2 | 4,5701 | 0,472 | 0,366  |
| 19 | Q8NEL9 DDHD1_HUMAN  | E.KKPVASPSAT#TVGTQTLPHSSSGFLD.S       | T794:      | 3 | 4,5699 | 0,328 | 1,902  |
| 19 | P05783 K1C18_HUMAN  | R.GGM*GS#GGLATGIAGGLAGM*GGIQNE.K      | S60:       | 3 | 4,5448 | 0,353 | 0      |
| 19 | P22059 OSBP1_HUMAN  | K.RTGS#NIS#GASSDISLDE.Q               | S379:S382: | 2 | 4,543  | 0,475 | 0,979  |
| 19 | Q6P6C2 ALKB5_HUMAN  | E.AAAAAAAAAAAAAAAAAAAAAEPYPVSGAK.R    |            | 3 | 4,5306 | 0,441 | 0,393  |
| 19 | Q9Y6D5 BIG2_HUMAN   | R.GSS#LSGTDDGAQEVVKDILE.D             | S277:      | 2 | 4,527  | 0,501 | 0,232  |
| 19 | P18583 SON_HUMAN    | E.RLTSLRAGIEGPLLASDVGR.D              |            | 3 | 4,5178 | 0,421 | 0,088  |
| 19 | Q8NEL9 DDHD1_HUMAN  | E.NEGISTIPS#PVTSPVLSR.R               | S723:      | 2 | 4,5173 | 0,398 | 0,379  |
| 19 | Q92625 ANS1A_HUMAN  | R.SLS#KSDSLLTCS#PTEDATM*GSR.S         | S624:S634: | 3 | 4,5141 | 1     | 0,139  |
| 19 | P05783 K1C18_HUMAN  | E.DGEDFNLDALDSS#NSM*QTIQK.T           | S399:      | 3 | 4,4992 | 0,436 | 0,369  |
| 19 | A0FGR8 ESYT2_HUMAN  | E.KAQPEAGPQGLHDLGR.S                  |            | 3 | 4,4901 | 0,504 | 0,207  |
| 19 | Q9P265 DIP2B_HUMAN  | R.QAALSAALQQSLQNAE.S                  |            | 2 | 4,4714 | 0,543 | 0,223  |
| 19 | Q86T35 Q86T35_HUMAN | E.ANKTPLEKPHS#PADQPEQQAE.S            | S265:      | 3 | 4,4674 | 0,296 | 0,072  |

|    |                    |                                    |                 |   |        |       |        |
|----|--------------------|------------------------------------|-----------------|---|--------|-------|--------|
| 19 | Q8WUA2 PPIL4_HUMAN | E.TFVDKDFVPYQDIR.I                 |                 | 2 | 4,4583 | 0,425 | 0,14   |
| 19 | Q01518 CAP1_HUMAN  | E.NKLSDLLAPISEQIKE.V               |                 | 2 | 4,4435 | 0,393 | -0,068 |
| 19 | Q9UK76 HN1_HUMAN   | R.RNS#SEASSGDFLDLKG.E              | S87:            | 3 | 4,4417 | 0,381 | 1,644  |
| 19 | Q09666 AHNK_HUMAN  | E.TGKLQSGSVSLASKK.S                |                 | 3 | 4,4416 | 0,404 | 0      |
| 19 | Q9NQW6 ANLN_HUMAN  | K.TPIS#PLKTGVSKPIVK.S              | S323:           | 3 | 4,4398 | 0,459 | 0,105  |
| 19 | Q16555 DPYL2_HUMAN | K.TVT#PASSAKTS#PAKQQAPPVR.N        | T514:S522:      | 3 | 4,4355 | 1     | 0,08   |
| 19 | Q14676 MDC1_HUMAN  | E.LQPSTSTDQPVTPPTSQATR.G           |                 | 2 | 4,4352 | 0,486 | 0      |
| 19 | Q9NZQ3 SPN90_HUMAN | R.RGTHTTVSQVQPPPSK.A               |                 | 3 | 4,4103 | 0,337 | -0,532 |
| 19 | Q92797 SYMPK_HUMAN | K.LKPGGVGAPSSSS#PSPSPSARPGPPPSEE.A | S1171:          | 3 | 4,4094 | 0,346 | 0      |
| 19 | Q96D71 REPS1_HUMAN | R.T#GSDHTNPTS#PLLVKPSDLLEE.N       | T421:S430:      | 2 | 4,409  | 1     | 0,486  |
| 19 | O94888 UBXD7_HUMAN | E.HGQLDGLSS#PPKK.C                 | S270:           | 3 | 4,3945 | 0,354 | 0,358  |
| 19 | Q92794 MYST3_HUMAN | E.HNSPISSVQSHPSQSVR.S              |                 | 3 | 4,39   | 0,499 | 0,099  |
| 19 | P51858 HDGF_HUMAN  | E.VERPLPM*EVEKNST#PSEPGSGR.G       | T200:           | 3 | 4,3825 | 0,311 | -0,073 |
| 19 | P49585 PCY1A_HUMAN | R.HKAAAYDIS#EDEED.-                | S362:           | 2 | 4,3622 | 0,541 | -0,146 |
| 19 | Q86TC9 MYPN_HUMAN  | K.TPEPS#SPVKEPPVLAKPK.L            | S643:           | 3 | 4,3466 | 0,321 | 0,088  |
| 19 | Q7Z5L9 I2BP2_HUMAN | R.AAASLAAVSGTAAASLGSAQPTDLGAHK.R   |                 | 3 | 4,3446 | 0,451 | 0      |
| 19 | Q9H307 PININ_HUMAN | K.SLS#PGKENVSALDMEKE.S             | S443:           | 3 | 4,3381 | 0,351 | 0,191  |
| 19 | O60841 IF2P_HUMAN  | K.SKVTVDTGVPASEE.K                 |                 | 2 | 4,3319 | 0,323 | 0,159  |
| 19 | Q15149 PLEC1_HUMAN | K.GYYSYVSVSGSGTAGSR.T              |                 | 2 | 4,3266 | 0,633 | -0,274 |
| 19 | P49643 PRI2_HUMAN  | K.TKDASSALASLNSS#LE.M              | S493:           | 2 | 4,3095 | 0,395 | 0,219  |
| 19 | P0C0S8 H2A1_HUMAN  | K.VTIAQGGVLPNIQAVLLPKKT#E.S        | T121:           | 2 | 4,2992 | 0,335 | 0,103  |
| 19 | Q9UK76 HN1_HUMAN   | R.RNS#SEASSGDFLDLKG.E              | S87:            | 2 | 4,2954 | 0,47  | 0      |
| 19 | P46734 MP2K3_HUMAN | K.M*CDFGISGYLVDS#VAK.T             | S218:           | 2 | 4,2885 | 0,485 | 0,197  |
| 19 | Q13885 TBB2A_HUMAN | E.IVHIQAGQCGNQIGAK.F               |                 | 3 | 4,2849 | 0,315 | 0,216  |
| 19 | P46734 MP2K3_HUMAN | K.M*CDFGISGYLVDS#VAKTM*D.A         | S218:           | 3 | 4,2769 | 0,284 | 0,412  |
| 19 | Q0JRZ9 FCHO2_HUMAN | E.LKVSIGNITLS#PAISR.H              | S387:           | 3 | 4,2724 | 0,183 | -0,314 |
| 19 | Q9NX40 OCAD1_HUMAN | E.SAPTGITDHIVQGPDPNLEES#PKRK.N     | S191:           | 3 | 4,2515 | 0,357 | -0,132 |
| 19 | Q9H9R9 DBND1_HUMAN | E.RRQPLSS#VSS#LEVHFD.L             | S64:S67:        | 3 | 4,2324 | 0,33  | 0      |
| 19 | Q7L2Z9 CENPQ_HUMAN | K.KM*EDLTNVS#SLLNM*E.R             | S138:           | 2 | 4,2296 | 0,55  | 0      |
| 19 | Q92615 LARP5_HUMAN | R.TLS#ADASVNTLPVVVSR.E             | S568:           | 2 | 4,2253 | 0,404 | 0,202  |
| 19 | Q13459 MYO9B_HUMAN | R.VQEKPDS#PGGSTQIQR.Y              | S1290:          | 3 | 4,2119 | 0,381 | 0      |
| 19 | Q9UPX8 SHAN2_HUMAN | R.QGIAVM*TPTVPGS#PKAPFLGIPR.G      | S235:           | 3 | 4,196  | 0,428 | -0,151 |
| 19 | Q9H307 PININ_HUMAN | K.S#LSPGKENVSALDMEKE.S             | S441:           | 2 | 4,1949 | 0,479 | 0      |
| 19 | P18583 SON_HUMAN   | R.AGIEGPLLASDVGR.D                 |                 | 2 | 4,1884 | 0,321 | 0,18   |
| 19 | Q8WU17 RN139_HUMAN | E.RNGVIQHTGAAAEFNDT#D.-            | T663:           | 2 | 4,1862 | 0,415 | 1,089  |
| 19 | P00558 PGK1_HUMAN  | D.KIQLINM*LDKVNE.M                 |                 | 3 | 4,1839 | 0,38  | -0,108 |
| 19 | P15336 ATF2_HUMAN  | K.M*PLDLS#PLATPIIR.S               | S94:            | 2 | 4,1803 | 0,404 | 0      |
| 19 | Q0JRZ9 FCHO2_HUMAN | E.LKVSIGNITLS#PAISR.H              | S387:           | 2 | 4,1781 | 0,426 | -0,279 |
| 19 | P29590 PML_HUMAN   | K.AVS#PPHLDGPPS#PRS#PVGISE.V       | S518:S527:S530: | 3 | 4,1725 | 0,41  | 0,313  |

|    |                     |                                       |              |   |        |       |        |
|----|---------------------|---------------------------------------|--------------|---|--------|-------|--------|
| 19 | Q15459 SF3A1_HUMAN  | K.VM*QQQQTTQQQLPQK.V                  |              | 2 | 4,164  | 0,382 | 0      |
| 19 | Q9Y3F4 STRAP_HUMAN  | K.LYKYDYNSGEELE.S                     |              | 2 | 4,1613 | 0,417 | 0,226  |
| 19 | Q5VT52 K0460_HUMAN  | E.M*M*DKPTSSSVDTM*SLLSK.I             |              | 3 | 4,1553 | 0,272 | 0,365  |
| 19 | Q9NQ55 SSF1_HUMAN   | R.VGGS#DEEASGIPSR.T                   | S359:        | 2 | 4,1437 | 0,444 | -0,254 |
| 19 | Q9UQ35 SRRM2_HUMAN  | K.DSLVQSCPGSLSLCAGVK.S                |              | 2 | 4,1432 | 0,487 | -0,13  |
| 19 | Q9C0C2 TB182_HUMAN  | R.RES#AASGLGGLLEE.E.G                 | S1473:       | 2 | 4,1394 | 0,505 | 0,076  |
| 19 | Q96C34 RUND1_HUMAN  | E.ATAEPGAAPGS#PPDS#PGR.T              | S71:S75:     | 2 | 4,1359 | 0,448 | -0,127 |
| 19 | Q15424 SAFB1_HUMAN  | E.LAEAPTEAPS#PEAR.D                   | S344:        | 2 | 4,1342 | 0,426 | -0,482 |
| 19 | Q15424 SAFB1_HUMAN  | K.ILDILGETCKS#EPVKEE.S                | S227:        | 3 | 4,1316 | 0,351 | 0,179  |
| 19 | B2CI53 B2CI53_HUMAN | E.RNGILASPQS#APGNLDNSK.S              | S263:        | 3 | 4,1286 | 0,364 | 0,272  |
| 19 | P04406 G3P_HUMAN    | R.VIISAPSADAPM*FVM*GVNHE.K            |              | 2 | 4,1254 | 0,474 | 0      |
| 19 | O95359 TACC2_HUMAN  | K.QALYLM*FDTSQESPVK.S                 |              | 2 | 4,1247 | 0,478 | 0,391  |
| 19 | Q15648 MED1_HUMAN   | K.NYGS#PLISGS#TPKHE.R                 | S1433:S1439: | 2 | 4,1223 | 0,415 | -0,349 |
| 19 | Q9Y2X7 GIT1_HUMAN   | R.ARS#M*DSSDLSGAVTLQE.Y               | S410:        | 2 | 4,1163 | 0,51  | 0      |
| 19 | P68104 EF1A1_HUMAN  | E.ALDCILPPTRPDKPLRLPLQD.V             |              | 3 | 4,1162 | 0,283 | 0,362  |
| 19 | P05783 K1C18_HUMAN  | R.S#TSFRGGM*GSGGLATGIAGGLAGM*GGIQNE.K | S51:         | 3 | 4,1078 | 0,323 | 0,194  |
| 19 | P78347 GTF2I_HUMAN  | R.KINSSPNVNTTASGVED.L                 |              | 2 | 4,1002 | 0,56  | 0,493  |
| 19 | B2CI53 B2CI53_HUMAN | R.NGILASPQSAPGNLDNSK.S                |              | 2 | 4,0959 | 0,393 | 0      |
| 19 | Q5JRA6 MIA3_HUMAN   | K.QGKQSATDYSDPDNVDGLFIVDIPK.T         |              | 3 | 4,0943 | 0,341 | 0,437  |
| 19 | Q6S8J3 A26CA_HUMAN  | E.KSYELPDGQVITIGNER.F                 |              | 3 | 4,0927 | 0,205 | 0,286  |
| 19 | Q9Y608 LRRF2_HUMAN  | R.RGS#GDTSSLIDPDTSLSE.L               | S328:        | 2 | 4,0925 | 0,466 | 1,082  |
| 19 | P05387 RLA2_HUMAN   | E.LNGKNIEDVIAQGIGK.L                  |              | 2 | 4,0895 | 0,5   | 0,292  |
| 19 | P07437 TBB5_HUMAN   | E.VISDEHGIDPTGYHGDSDLQLDR.I           |              | 3 | 4,0882 | 0,36  | 0      |
| 19 | P10768 ESTD_HUMAN   | E.HGLVVIAPDTS#PR.G                    | S84:         | 2 | 4,0842 | 0,543 | 0,085  |
| 19 | Q92615 LARP5_HUMAN  | E.RSPS#PAHLPPDDPKVAE.K                | S601:        | 3 | 4,0797 | 0,338 | -1,731 |
| 19 | Q6P0N0 CN106_HUMAN  | R.ASVQGVPLESSNNDIFLPVK.Q              |              | 2 | 4,078  | 0,253 | 0,115  |
| 19 | Q9H6F5 CCD86_HUMAN  | R.LQQGAGLESPQGQPEPGAAS#PQR.Q          | S91:         | 3 | 4,0772 | 0,189 | 0,154  |
| 19 | P11388 TOP2A_HUMAN  | K.SVVS#DLEADDVK.G                     | S1377:       | 2 | 4,0736 | 0,471 | 0,18   |
| 19 | Q13136 LIPA1_HUMAN  | R.SSDGS#LS#HEEDLAKVIE.L               | S242:S244:   | 3 | 4,0736 | 0,446 | 0,37   |
| 19 | P57078 RIPK4_HUMAN  | R.LKRAS#APTFDNDYSLSE.L                | S370:        | 2 | 4,0724 | 0,474 | 0,122  |
| 19 | Q9ULU4 PKCB1_HUMAN  | K.TGQAGS#LSGS#PKPFSPQLSAPITTK.T       | S486:S490:   | 3 | 4,0706 | 0,289 | 0,419  |
| 19 | Q86SQ0 PHLB2_HUMAN  | K.AHLPLGQNSCGS#VLPPLAAM*AK.D          | S937:        | 3 | 4,0701 | 0,19  | -0,292 |
| 19 | P13645 K1C10_HUMAN  | K.GSLGGGFSSGGFSGGSFSR.G               |              | 2 | 4,0685 | 0,427 | 0,214  |
| 19 | Q02040 SF17A_HUMAN  | R.CPGGVLSICIPDNQPK.G                  |              | 2 | 4,0634 | 0,396 | 0,13   |
| 19 | Q99536 VAT1_HUMAN   | E.NGVTHPIDYHTTDYVDE.I                 |              | 2 | 4,0626 | 0,474 | -0,432 |
| 19 | Q13112 CAF1B_HUMAN  | E.IQSETPGDAQGS#PPELK.R                | S538:        | 2 | 4,0587 | 0,58  | -0,399 |
| 19 | P04406 G3P_HUMAN    | E.NGKLVINGNPITIFQER.D                 |              | 2 | 4,0542 | 0,553 | 0,255  |
| 19 | P27816 MAP4_HUMAN   | E.TERAS#PIKMDLAPSKD.M                 | S358:        | 3 | 4,053  | 0,394 | 0,099  |
| 19 | Q9UFC0 LRWD1_HUMAN  | E.GS#PVAGSDGSQPAVK.L                  | S259:        | 2 | 4,0489 | 0,533 | -0,425 |

|    |                    |                                |                    |   |        |       |        |
|----|--------------------|--------------------------------|--------------------|---|--------|-------|--------|
| 19 | P18206 VINC_HUMAN  | K.AQQVSQLDVLTAKE.N             |                    | 2 | 4,0387 | 0,538 | -0,651 |
| 19 | P19338 NUCL_HUMAN  | K.GFGFVDFNS#EEDAK.A            | S619:              | 2 | 4,0262 | 0,361 | -0,074 |
| 19 | P61769 B2MG_HUMAN  | K.SNFLNCYVSGFHPSDIE.V          |                    | 2 | 4,0262 | 0,404 | 0,43   |
| 19 | P05387 RLA2_HUMAN  | K.NIEDVIAQGIGK.L               |                    | 2 | 4,0219 | 0,479 | 0      |
| 19 | Q32MZ4 LRRF1_HUMAN | R.NM*PGLSAATLASLGGTSSR.R       |                    | 2 | 4,0173 | 0,432 | 0,135  |
| 19 | O95819 M4K4_HUMAN  | R.VLEPPVPSRSES#FSNGNSE.S       | S602:              | 2 | 4,0153 | 0,488 | 0,347  |
| 19 | P10809 CH60_HUMAN  | K.NQLKDM*AIATGGAVFGEE.G        |                    | 2 | 4,0132 | 0,509 | 0,392  |
| 19 | P04406 G3P_HUMAN   | K.LVINGNPITIFQER.D             |                    | 3 | 4,0129 | 0,307 | 0,34   |
| 19 | P49792 RBP2_HUMAN  | R.EDALDDSVSSSVHAS#PLASS#PVRK.N | S2246:S2251:       | 3 | 4,01   | 1     | 0,745  |
| 19 | O95684 FR1OP_HUMAN | E.KGPTTGEALDLSDVHSPPKS#PE.G    | S160:              | 3 | 4,0071 | 0,166 | 0,076  |
| 19 | Q13263 TIF1B_HUMAN | E.DGSLSLDGADSTGVVAK.L          |                    | 2 | 4,0062 | 0,452 | 0,766  |
| 19 | P35606 COPB2_HUMAN | D.GKPAS#PTPVIVASHTANKEE.K      | S859:              | 3 | 3,9977 | 0,357 | -0,346 |
| 19 | O14893 GEMI2_HUMAN | R.KQS#VNISLSGCQPAPE.G          | S81:               | 2 | 3,9946 | 0,392 | -0,204 |
| 19 | P63241 IF5A1_HUMAN | E.DLRLPEGDLGKE.I               |                    | 3 | 3,9877 | 0,408 | -0,068 |
| 19 | Q15149 PLEC1_HUMAN | E.LQLVTYKAQLEPVAS#PAKKPK.V     | S1435:             | 3 | 3,9794 | 0,244 | -1,378 |
| 19 | Q9NQW6 ANLN_HUMAN  | K.ALSSSADDASLVNASISSVK.A       |                    | 3 | 3,9773 | 0,203 | -0,091 |
| 19 | Q01082 SPTB2_HUMAN | E.SEHPDQAQAILSR.L              |                    | 3 | 3,9686 | 0,242 | 0,567  |
| 19 | Q9P260 K1468_HUMAN | R.AGS#ISTLDSLDFAR.Y            | S180:              | 2 | 3,967  | 0,472 | -0,159 |
| 19 | Q9UQ35 SRRM2_HUMAN | R.FQSDSSSYPTVDSNSLLGQSR.L      |                    | 3 | 3,9656 | 0,373 | 0,322  |
| 19 | Q9BWD1 THIC_HUMAN  | E.DQDKVAVLSQNRTE.N             |                    | 2 | 3,9592 | 0,474 | -0,304 |
| 19 | P23443 KS6B1_HUMAN | R.KVEPPFKPLLQSEEDVSQFDSK.F     |                    | 3 | 3,9494 | 0,159 | -0,575 |
| 19 | P49454 CENPF_HUMAN | E.LNDS#RSECITATRK.M            | S1324:             | 3 | 3,9417 | 0,334 | 0      |
| 19 | P16949 STMN1_HUMAN | R.SKESVPEFPLS#PPKKK.D          | S38:               | 3 | 3,9416 | 0,34  | 0,292  |
| 19 | P0C0S8 H2A1_HUMAN  | K.VTIAQGGVLPNIQAVLLPK.K        |                    | 2 | 3,9403 | 0,379 | -0,126 |
| 19 | Q9NQW6 ANLN_HUMAN  | K.ATS#PVKSTTSITDAK.S           | S295:              | 3 | 3,9387 | 0,406 | -0,231 |
| 19 | Q96A49 SYAP1_HUMAN | E.AVRPKT#PPVVIK.S              | T248:              | 3 | 3,9378 | 0,254 | -0,066 |
| 19 | P78347 GTF2I_HUMAN | R.KINSSPNVNTTASGVE.D           |                    | 2 | 3,9356 | 0,536 | -0,151 |
| 19 | Q9Y6G9 DC1L1_HUMAN | R.KPVTVS#PTTPTSPTEGEAS.-       | S510:              | 2 | 3,934  | 0,513 | 0,062  |
| 19 | Q9BSL1 UBAC1_HUMAN | E.ENIQDQDVLLLIK.K              |                    | 2 | 3,9285 | 0,32  | 0,158  |
| 19 | O95831 AIFM1_HUMAN | R.SLS#AIDRAGAE.V               | S268:              | 2 | 3,9223 | 0,468 | 0,521  |
| 19 | Q13112 CAF1B_HUMAN | E.IQSETPGDAQGS#PPELK.R         | S538:              | 3 | 3,9187 | 0,432 | -0,598 |
| 19 | P49792 RBP2_HUMAN  | E.KDSLITPHVSRSS#T#PRES#PCGK.I  | S2457:T2458:S2462: | 3 | 3,9067 | 1     | 0,068  |
| 19 | P30153 2AAA_HUMAN  | E.KLTQDQDQDVVK.Y               |                    | 3 | 3,9041 | 0,26  | -0,071 |
| 19 | Q9UHR5 S30BP_HUMAN | E.KGGLVSDAYGEDDFSR.L           |                    | 3 | 3,902  | 0,305 | 1,386  |
| 19 | Q86W56 PARG_HUMAN  | E.IDVVPESPLSDVGSSEVDVGTGPK.N   |                    | 2 | 3,9    | 0,334 | 0,222  |
| 19 | O95359 TACC2_HUMAN | E.KIGSSLPQDDDAPKK.Q            |                    | 3 | 3,8992 | 0,337 | 0,114  |
| 19 | Q9P0K8 FOXJ2_HUMAN | K.CSPGS#PTDPNATLSKDE.A         | S46:               | 2 | 3,8962 | 0,553 | 0,066  |
| 19 | Q13188 STK3_HUMAN  | K.LADFGVAGQLTDTM*AK.R          |                    | 2 | 3,8937 | 0,551 | 0,221  |
| 19 | Q9Y6W5 WASF2_HUMAN | R.DVVGNDVATILSR.R              |                    | 2 | 3,8912 | 0,459 | 0,18   |



|    |                    |                                 |            |   |        |       |        |
|----|--------------------|---------------------------------|------------|---|--------|-------|--------|
| 19 | Q86TC9 MYPN_HUMAN  | K.TPEPSS#PVKEPPPVLAKPKLD.S      | S644:      | 3 | 3,8901 | 0,331 | -0,079 |
| 19 | Q92598 HS105_HUMAN | R.GCALQCAILS#PAFK.V             | S384:      | 2 | 3,8895 | 0,313 | -0,151 |
| 19 | Q9BY89 K1671_HUMAN | K.ATFFAVTYQIPNTQK.A             |            | 2 | 3,8851 | 0,436 | 0      |
| 19 | P04406 G3P_HUMAN   | R.VIISAPSADAPM*FVM*GVNHE.K      |            | 3 | 3,8835 | 0,409 | 0,086  |
| 19 | Q9BX66 SRBS1_HUMAN | R.RVGEQDSAPTQEKP#SPGKAIE.K      | T349:      | 3 | 3,8822 | 0,215 | -1,293 |
| 19 | Q9H8Y8 GORS2_HUMAN | K.ISLPGQM*AGT#PITPLKDGFE.V      | T222:      | 2 | 3,8803 | 0,482 | 0,323  |
| 19 | P18583 SON_HUMAN   | R.LTSLRAGIEGPLLASDVGR.D         |            | 3 | 3,8786 | 0,348 | 0      |
| 19 | Q96A49 SYAP1_HUMAN | E.AVRPKT#PPVVIKSQLK.T           | T248:      | 3 | 3,8761 | 0,169 | -0,695 |
| 19 | Q8WWM7 ATX2L_HUMAN | E.FNPTKPLLSVNKSTSTPTS#PGPR.T    | S684:      | 3 | 3,8758 | 0,19  | -0,146 |
| 19 | Q8TDD1 DDX54_HUMAN | R.KLGPGRPLPTFTSECTS#DVEPDTR.E.M | S75:       | 3 | 3,8739 | 0,408 | 0,247  |
| 19 | P09211 GSTP1_HUMAN | E.AALVDM*VNDGVEDLR.C            |            | 2 | 3,8611 | 0,514 | 0,224  |
| 19 | P68104 EF1A1_HUMAN | K.SGDAAIVDM*VPGKPMCVE.S         |            | 2 | 3,8507 | 0,44  | 0,193  |
| 19 | P29692 EF1D_HUMAN  | K.SLAGSSGPGASGTSGDHGE.L         |            | 2 | 3,8394 | 0,607 | -0,71  |
| 19 | Q13459 MYO9B_HUMAN | R.VQEKPDS#PGGSTQIQR.Y           | S1290:     | 2 | 3,8393 | 0,415 | 0,068  |
| 19 | Q71RC2 LARP4_HUMAN | R.ASTASPCNNINAATAVALQEPR.K      |            | 3 | 3,8345 | 0,348 | 0      |
| 19 | Q14676 MDC1_HUMAN  | E.LQPSTSTDQPVTSQVTR.G           |            | 3 | 3,8335 | 0,381 | -0,324 |
| 19 | P13051 UNG_HUMAN   | K.TLYSFFSPSPAR.K                |            | 2 | 3,8304 | 0,457 | 0,178  |
| 19 | Q9H4A3 WNK1_HUMAN  | K.KEGPVAS#PPFM*DLE.Q            | S1978:     | 2 | 3,8291 | 0,52  | 0,378  |
| 19 | Q9NQS1 AVEN_HUMAN  | R.DSQKPTS#PLQSAGDHLEEE.L        | S273:      | 2 | 3,8286 | 0,498 | -0,114 |
| 19 | Q16851 UGPA_HUMAN  | E.HLNKTYNTDVPLVLM*NSFNTDE.D     |            | 3 | 3,8283 | 0,191 | -0,213 |
| 19 | Q9ULU4 PKCB1_HUMAN | K.TDKTSTTGSILNLNLDLDR.S         |            | 3 | 3,8272 | 0,328 | 0,495  |
| 19 | Q9H6F5 CCD86_HUMAN | E.FESNPEETREPGSPSVQR.A          |            | 3 | 3,8269 | 0,361 | 0,085  |
| 19 | P0C0S8 H2A1_HUMAN  | K.VTIAQGGVLPNIQAVLLPK.K         |            | 3 | 3,8243 | 0,372 | -0,095 |
| 19 | Q92597 NDRG1_HUMAN | K.YFVQGM*GYM*PSASM*TR.L         |            | 2 | 3,8215 | 0,456 | -0,13  |
| 19 | P29375 JAD1A_HUMAN | K.AAANPDLQGHLPFQQSAFNR.V        |            | 3 | 3,8142 | 0,416 | -0,161 |
| 19 | Q9UQ35 SRRM2_HUMAN | K.DKFSFPVQDRPE.S                |            | 2 | 3,8078 | 0,423 | -0,078 |
| 19 | Q9UKK3 PARP4_HUMAN | K.QLLGLQPSTVSPHLR.V             |            | 3 | 3,7947 | 0,386 | 0,104  |
| 19 | Q14195 DPYL3_HUMAN | R.NLHQSGFSLSGTQVDE.G            |            | 2 | 3,7937 | 0,486 | -0,071 |
| 19 | O95067 CCNB2_HUMAN | K.GPS#PTPEDVSM*KEE.N            | S92:       | 2 | 3,7918 | 0,449 | -0,992 |
| 19 | O14908 GIPC1_HUMAN | R.SRGPATVEDLPSAFEE.K            |            | 2 | 3,7794 | 0,416 | -0,143 |
| 19 | Q9UGV2 NDRG3_HUMAN | D.NLQLFLNSYNGR.R                |            | 2 | 3,7789 | 0,459 | -0,085 |
| 19 | Q7L2J0 MEPCE_HUMAN | R.TLNAET#PKSS#PLPAK.G           | T213:S217: | 2 | 3,777  | 0,353 | -0,427 |
| 19 | Q9NUQ3 TXLNG_HUMAN | R.SAVQKPPS#TGSAPAIESVD.-        | S517:      | 2 | 3,7752 | 0,434 | 0,254  |
| 19 | P51636 CAV2_HUMAN  | E.KADVQLFM*DDDS#YSHHSGLE.Y      | S18:       | 3 | 3,7746 | 0,364 | 0,306  |
| 19 | Q0VDD7 CS057_HUMAN | R.ASQDHLSEQGADDSKPE.T           |            | 3 | 3,7743 | 0,42  | 0,504  |
| 19 | O94925 GLSK_HUMAN  | E.KFDYVM*QFLNKM*AGNE.Y          |            | 3 | 3,773  | 0,083 | -0,279 |
| 19 | O95405 ZFYV9_HUMAN | E.ISTRPCLALAPDS#PDNDLR.A        | S668:      | 3 | 3,7712 | 0,177 | -1,169 |
| 19 | P15336 ATF2_HUMAN  | E.DDIKKM*PLDLS#PLATPIIR.S       | S94:       | 3 | 3,7688 | 0,241 | 0,164  |
| 19 | P40818 UBP8_HUMAN  | R.STKPVVFSPTLM*LTDEE.K          |            | 2 | 3,7623 | 0,48  | 0,192  |

|    |                     |                               |                 |   |        |       |        |
|----|---------------------|-------------------------------|-----------------|---|--------|-------|--------|
| 19 | Q9Y2W1 TR150_HUMAN  | R.SPALKS#PLQSVVVR.R           | S253:           | 3 | 3,7566 | 0,272 | 0,234  |
| 19 | P11388 TOP2A_HUMAN  | K.GSVPLSS#PPATHFPDETE.I       | S1393:          | 2 | 3,7509 | 0,405 | 0,42   |
| 19 | P52565 GDIR1_HUMAN  | E.NEEDHS#VNYKPPAQK.S          | S24:            | 3 | 3,7508 | 0,377 | -0,279 |
| 19 | Q13409 DC1I2_HUMAN  | K.SVSTPSEAGSQDSGDGAVGSR.T     |                 | 2 | 3,7452 | 0,573 | -0,375 |
| 19 | P11388 TOP2A_HUMAN  | K.SVVSLEADDVK.G               |                 | 2 | 3,7417 | 0,425 | 0,096  |
| 19 | Q96GQ7 DDX27_HUMAN  | R.SADFNPDFVFTEKE.G            |                 | 2 | 3,7373 | 0,456 | 0      |
| 19 | Q9UHB6 LIMA1_HUMAN  | E.VQQPVHPKPLS#PDSR.A          | S362:           | 2 | 3,7336 | 0,271 | 0,069  |
| 19 | P42166 LAP2A_HUMAN  | D.VYVQLYLQHLTAR.N             |                 | 2 | 3,7236 | 0,458 | 0,228  |
| 19 | Q14974 IMB1_HUMAN   | E.LM*KDPSVVVRD.T              |                 | 3 | 3,7191 | 0,266 | -0,43  |
| 19 | Q7Z434 MAVS_HUMAN   | R.GPVS#PSVSFQPLAR.S           | S222:           | 2 | 3,7174 | 0,423 | 0,481  |
| 19 | P22087 FBRL_HUMAN   | E.NM*KPQEQLTEPYERD.H          |                 | 3 | 3,7126 | 0,292 | 0,456  |
| 19 | Q9P246 STIM2_HUMAN  | E.KSCS#M*NQLSSGIPVVKPR.H      | S680:           | 3 | 3,7113 | 0,367 | 0      |
| 19 | Q9UGV2 NDRG3_HUMAN  | K.YFLQGM*GYIPSASM*TR.L        |                 | 2 | 3,7097 | 0,333 | -0,526 |
| 19 | Q9C0C2 TB182_HUMAN  | R.RGAGAELKDTQSPSTCSE.G        |                 | 3 | 3,7066 | 0,293 | 0,097  |
| 19 | Q9Y2W1 TR150_HUMAN  | R.SPALKSPLQSVVVR.R            |                 | 3 | 3,706  | 0,324 | 0,617  |
| 19 | Q13439 GOGA4_HUMAN  | R.TSS#FTEQLDEGTPNRE.S         | S41:            | 2 | 3,704  | 0,326 | 0,258  |
| 19 | Q4KMP7 TB10B_HUMAN  | R.RQQPLGPSLLS#LPGLK.S         | S386:           | 3 | 3,6917 | 0,269 | -0,089 |
| 19 | Q02952 AKA12_HUMAN  | E.KQEKEPSKAES#PTS#PVTSE.T     | S283:S286:      | 3 | 3,6843 | 0,377 | 0,079  |
| 19 | Q8WXV6 Q8WXV6_HUMAN | R.TSS#EDNLYLAVLR.A            | S21:            | 2 | 3,6827 | 0,235 | -0,234 |
| 19 | Q00341 VIGLN_HUMAN  | E.DKDQDLITIIGKE.D             |                 | 2 | 3,6805 | 0,36  | -0,082 |
| 19 | Q1L5Z9 LONF2_HUMAN  | K.KDLS#PQRS#PNS#ETEE.S        | S425:S429:S432: | 2 | 3,6785 | 0,375 | 0,125  |
| 19 | Q9HAF1 CA149_HUMAN  | K.SSVTSAAAVSALAGVQDQLIEKR.E   |                 | 3 | 3,6722 | 0,318 | -0,08  |
| 19 | P55884 EIF3B_HUMAN  | R.AQAVSEDAGGNEGR.A            |                 | 2 | 3,6689 | 0,527 | -0,448 |
| 19 | Q9NRY4 GRLF1_HUMAN  | E.EENIYVPHDSTQGK.I            |                 | 2 | 3,6663 | 0,577 | 0,215  |
| 19 | P78332 RBM6_HUMAN   | R.EEQSSDAGLFKEE.G             |                 | 2 | 3,6658 | 0,267 | 0,083  |
| 19 | Q9BWD1 THIC_HUMAN   | E.DQDKVAVLSQNR.T              |                 | 2 | 3,6509 | 0,412 | -0,444 |
| 19 | P49792 RBP2_HUMAN   | E.SSINYTFKT#PEKAKE.K          | T2613:          | 3 | 3,6497 | 0,27  | -0,502 |
| 19 | P16949 STMN1_HUMAN  | R.SKESVPEFPLS#PPK.K           | S38:            | 3 | 3,6486 | 0,252 | 0,564  |
| 19 | Q5H9R7 SAPS3_HUMAN  | K.LTSQDAACKDAEECEP.T          |                 | 2 | 3,6481 | 0,376 | -0,192 |
| 19 | Q03252 LMNB2_HUMAN  | E.ARM*RLS#LSYQLSGLQK.Q        | S296:           | 3 | 3,6475 | 0,16  | 0,617  |
| 19 | O95905 SGT1_HUMAN   | R.NQVEPVSQTTDNNS#DEEDSGTGE.S  | S579:           | 2 | 3,6468 | 0,606 | -1,06  |
| 19 | Q9BX66 SRBS1_HUMAN  | R.RVGEQDSAPTQEKPTS#PGK.A      | S350:           | 3 | 3,6465 | 0,323 | -0,087 |
| 19 | Q04917 1433F_HUMAN  | E.DSYKSTLIM*QLLR.D            |                 | 3 | 3,6423 | 0,252 | -0,108 |
| 19 | Q9BTC0 DIDO1_HUMAN  | K.HDSSAPDPAPDS#ADEVM*PEAVPE.V | S898:           | 2 | 3,6411 | 0,488 | 0,298  |
| 19 | P41250 SYG_HUMAN    | E.DKAPQVDVDKAVAE.L            |                 | 3 | 3,6362 | 0,292 | 0,616  |
| 19 | P78371 TCPB_HUMAN   | R.SLHDALCVLAQTVKD.S           |                 | 2 | 3,6351 | 0,522 | 0,073  |
| 19 | Q7Z333 SETX_HUMAN   | R.CFTANQNNVGDTSR.G            |                 | 2 | 3,6349 | 0,582 | -0,231 |
| 19 | Q09666 AHNK_HUMAN   | R.LKS#EDGVEGDIGE.T            | S135:           | 2 | 3,6342 | 0,451 | 0,256  |
| 19 | P28066 PSA5_HUMAN   | E.KRITS#PLM*EPSSIEK.I         | S56:            | 3 | 3,6328 | 0,388 | 0,101  |

|    |                     |                                    |              |   |        |       |        |
|----|---------------------|------------------------------------|--------------|---|--------|-------|--------|
| 19 | P62913 RL11_HUMAN   | R.KNNFSDTGNFGFGIQE.H               |              | 2 | 3,6321 | 0,439 | 0,206  |
| 19 | B2RDE1 B2RDE1_HUMAN | R.M*LDQTLDDLNM*.-                  |              | 2 | 3,6305 | 0,23  | 0,249  |
| 19 | Q9UPN9 TRI33_HUMAN  | E.DAGSSSLDNLLSR.Y                  |              | 2 | 3,63   | 0,284 | 0,274  |
| 19 | Q9H307 PININ_HUMAN  | K.SLS#PGKENVSALDM*EKE.S            | S443:        | 3 | 3,6234 | 0,262 | 0,474  |
| 19 | P00558 PGK1_HUMAN   | K.ITLPVDFVTADKFDE.N                |              | 2 | 3,6222 | 0,396 | -0,285 |
| 19 | P13639 EF2_HUMAN    | E.SGEHIIAGAGELHLE.I                |              | 3 | 3,6181 | 0,262 | 0,179  |
| 19 | P0C7M2 RA1L3_HUMAN  | R.KLFIGGLSFETTDE.S                 |              | 2 | 3,6166 | 0,499 | 0,078  |
| 19 | Q9NS91 RAD18_HUMAN  | K.LNES#VM*VFTK.D                   | S322:        | 2 | 3,6163 | 0,409 | 1,158  |
| 19 | P13861 KAP2_HUMAN   | E.ARAPASVLPAAATPR.Q                |              | 2 | 3,6083 | 0,286 | -0,177 |
| 19 | P46821 MAP1B_HUMAN  | R.TPEEGGYSYDISEK.T                 |              | 2 | 3,6078 | 0,489 | 0,232  |
| 19 | Q5VUA4 ZN318_HUMAN  | R.SVRIPS#PNILKTGLTE.N              | S2101:       | 3 | 3,6056 | 0,353 | 0,203  |
| 19 | Q02952 AKA12_HUMAN  | K.LTASEQAHPQEPAESAEHPRLS#AEYE.K    | S371:        | 3 | 3,6045 | 0,453 | 0,186  |
| 19 | Q9P270 SLAI2_HUMAN  | R.LS#LQGHPTDLQTSNVKNEE.K           | S391:        | 3 | 3,5895 | 0,138 | -0,084 |
| 19 | Q09666 AHNK_HUMAN   | E.LNLKS#PKVKGDLDIAGPNLE.G          | S3426:       | 3 | 3,5865 | 0,242 | 0,083  |
| 19 | O75152 ZC11A_HUMAN  | R.RLS#SASTGKPPLSVEDDFE.K           | S758:        | 2 | 3,5793 | 0,425 | 0,346  |
| 19 | P43897 EFTS_HUMAN   | E.GSLKDQLALAIGK.L                  |              | 3 | 3,5774 | 0,233 | 0,278  |
| 19 | Q9C073 F117A_HUMAN  | E.RGS#PLLGDHAVR.G                  | S178:        | 3 | 3,5761 | 0,376 | 0,269  |
| 19 | P68104 EF1A1_HUMAN  | K.SGDAAIVDM*VPGKPM*CVE.S           |              | 2 | 3,5707 | 0,379 | 0,256  |
| 19 | Q15424 SAFB1_HUMAN  | K.ILDILGETCKS#EPVKEE.S             | S227:        | 2 | 3,5686 | 0,497 | 0,06   |
| 19 | P22087 FBRL_HUMAN   | E.NM*KPQEQLTEPYERD.H               |              | 2 | 3,5628 | 0,395 | 0,243  |
| 19 | Q9BWD1 THIC_HUMAN   | E.DQDKVAVLSQNRTE.N                 |              | 3 | 3,5623 | 0,232 | -0,114 |
| 19 | Q53F19 CQ085_HUMAN  | E.LKM*IST#PS#PKK.S                 | T413:S415:   | 2 | 3,5609 | 0,434 | -0,174 |
| 19 | P54727 RD23B_HUMAN  | K.QEKPAEKPAETPVAT#SPTATDSTSGDSSR.S | T159:        | 3 | 3,5591 | 0,256 | 0,363  |
| 19 | P35579 MYH9_HUMAN   | K.IAQLEEQLDNETKE.R                 |              | 2 | 3,5585 | 0,436 | -0,147 |
| 19 | Q13136 LIPA1_HUMAN  | R.S#SDGSL#HEEDLAK.V                | S238:S244:   | 2 | 3,5554 | 0,285 | -0,149 |
| 19 | Q01518 CAP1_HUMAN   | E.M*NDAAM*FYTNR.V                  |              | 2 | 3,5548 | 0,318 | -0,089 |
| 19 | Q9NVM9 CLO11_HUMAN  | E.IIKDSPDS#PEPPNKKPLVE.M           | S626:        | 3 | 3,5484 | 0,229 | -0,084 |
| 19 | O43291 SPIT2_HUMAN  | R.NAADSSVPSAPR.R                   |              | 2 | 3,5483 | 0,371 | -0,208 |
| 19 | Q71RC2 LARP4_HUMAN  | E.KDLIEDSSVQK.D                    |              | 3 | 3,5472 | 0,27  | 0,435  |
| 19 | P24534 EF1B_HUMAN   | K.YGPADVEDTTGSGATDSK.D             |              | 2 | 3,5472 | 0,582 | 0      |
| 19 | Q9UQ35 SRRM2_HUMAN  | K.VKAQT#PPGPSLSGSKS#PCPQEK.S       | T1003:S1014: | 3 | 3,542  | 0,229 | -0,375 |
| 19 | Q9BPX3 CND3_HUMAN   | E.KSKLNLAQFLNEDLS#.-               | S1015:       | 2 | 3,5393 | 0,279 | -0,203 |
| 19 | Q5VSL9 FA40A_HUMAN  | R.AAS#PPASASDLIE.Q                 | S335:        | 2 | 3,539  | 0,234 | -0,093 |
| 19 | Q9UKL0 RCOR1_HUMAN  | E.TNGPSNQKPVKS#PDNSIK.M            | S457:        | 3 | 3,5377 | 0,198 | 0,184  |
| 19 | Q53F19 CQ085_HUMAN  | E.YHEELPALKQPR.E                   |              | 3 | 3,5257 | 0,241 | -0,247 |
| 19 | P51610 HCFC1_HUMAN  | R.SPAFVQLAPLSSK.V                  |              | 2 | 3,5218 | 0,477 | 0,091  |
| 19 | Q6WKZ4 RFIP1_HUMAN  | E.GM*LM*GVKPGEDASGPAEDLVR.R        |              | 3 | 3,5171 | 0,26  | 0,423  |
| 19 | Q16555 DPYL2_HUMAN  | R.NLHQSGFSLGAQIDDNIPR.R            |              | 3 | 3,5117 | 0,283 | 0,253  |
| 19 | P04406 G3P_HUMAN    | E.NGKLVINGNPITIFQERDPS#K.I         | S83:         | 3 | 3,5093 | 0,283 | 0,454  |

|    |                    |                                  |            |   |        |       |        |
|----|--------------------|----------------------------------|------------|---|--------|-------|--------|
| 19 | P52594 NUPL_HUMAN  | K.SLLGDSAPTLHLNK.G               |            | 2 | 3,5069 | 0,459 | 0,25   |
| 19 | O60658 PDE8A_HUMAN | K.DDDPHANDLVGGLM*SDGLR.R         |            | 3 | 3,5054 | 0,29  | 0,182  |
| 19 | Q96JG6 CC132_HUMAN | R.DYVDEQTDGDPVK.S                |            | 2 | 3,5053 | 0,495 | 0,171  |
| 19 | Q9HC38 GLOD4_HUMAN | K.LLDDAM*AADKSDE.W               |            | 2 | 3,5051 | 0,395 | -0,433 |
| 19 | Q8IXT5 RB12B_HUMAN | E.DFRFPEDFRHS#PE.D               | S575:      | 3 | 3,5039 | 0,254 | 0,197  |
| 19 | Q9UK76 HN1_HUMAN   | K.GEGDIHENVDLPGSLGQSE.E          |            | 3 | 3,503  | 0,359 | 0,253  |
| 19 | P09211 GSTP1_HUMAN | R.CKYISLIYTNYE.A                 |            | 2 | 3,4915 | 0,488 | -0,078 |
| 19 | Q96FW1 OTUB1_HUMAN | E.YAEDDNIYQQK.I                  |            | 2 | 3,4883 | 0,438 | -0,352 |
| 19 | Q6NZI2 PTRF_HUMAN  | R.RGS#S#PDVHALLE.I               | S365:S366: | 2 | 3,4876 | 0,456 | 0,169  |
| 19 | P14618 KPYM_HUMAN  | K.IYVDDGLISLQVK.Q                |            | 2 | 3,4869 | 0,424 | 0      |
| 19 | Q08379 GOGA2_HUMAN | R.DNPTAQQIM*QLLRE.M              |            | 3 | 3,4852 | 0,295 | 0,219  |
| 19 | Q9BXY0 RBM13_HUMAN | E.KALIAAQLDNAIEKE.L              |            | 3 | 3,4835 | 0,206 | 0,45   |
| 19 | Q12789 TF3C1_HUMAN | D.LQCVCLNTPLGVVR.C               |            | 2 | 3,4827 | 0,436 | 0,15   |
| 19 | Q92615 LARP5_HUMAN | R.TLSADASVNTLPVVVSR.E            |            | 2 | 3,4783 | 0,324 | 0,494  |
| 19 | Q01082 SPTB2_HUMAN | K.TALPAQSAAT#LPAR.T              | T2187:     | 2 | 3,4766 | 0,459 | -0,421 |
| 19 | Q96T23 RSF1_HUMAN  | E.SEKPGS#PEAAETS#PPSNIIDHCEK.L   | S612:S619: | 3 | 3,4762 | 0,34  | -0,067 |
| 19 | Q96RU3 FNBP1_HUMAN | R.TVS#DNSLSNSRGE.G               | S296:      | 2 | 3,4752 | 0,448 | 0      |
| 19 | P35527 K1C9_HUMAN  | R.HGVQELEIELQSQLSK.K             |            | 3 | 3,4743 | 0,116 | -0,199 |
| 19 | P31946 1433B_HUMAN | E.SYKDSTLIM*QLLR.D               |            | 3 | 3,4737 | 0,154 | 0,115  |
| 19 | Q9UPN9 TRI33_HUMAN | R.SACM*LSSPESSLT#PPLSTNLHLE.S    | T815:      | 3 | 3,4725 | 0,464 | 0,214  |
| 19 | Q14203 DCTN1_HUMAN | E.DGADTTS#PETPDSSASK.V           | S105:      | 2 | 3,4671 | 0,487 | -0,28  |
| 19 | O15127 SCAM2_HUMAN | R.AAS#SAAQGAFAQGN.-              | S319:      | 2 | 3,4664 | 0,45  | 0      |
| 19 | Q14839 CHD4_HUMAN  | K.TPTPSTPGDTQPNTAPVPPAEDGIKIEE.N |            | 3 | 3,466  | 0,22  | 0,681  |
| 19 | P22681 CBL_HUMAN   | E.IKGTEPIVVDPFDPR.G              |            | 3 | 3,4621 | 0,243 | 0,435  |
| 19 | Q9Y608 LRRF2_HUMAN | R.NSASATTPLS#GNSSR.R             | S320:      | 2 | 3,4614 | 0,455 | 0,08   |
| 19 | Q14562 DHX8_HUMAN  | E.IELVEEPPFLR.G                  |            | 2 | 3,46   | 0,399 | -0,249 |
| 19 | Q9H6Z4 RANB3_HUMAN | R.SVLRPAVLQAPQPK.A               |            | 3 | 3,4548 | 0,356 | 0,304  |
| 19 | Q7L014 DDX46_HUMAN | R.KLLEPVDHGKIE.Y                 |            | 2 | 3,4537 | 0,362 | -0,354 |
| 19 | Q09666 AHNK_HUMAN  | K.VKGDLDIAGPNLE.G                |            | 2 | 3,451  | 0,357 | 0,091  |
| 19 | Q02952 AKA12_HUMAN | E.SQVHM*M*AAAVADGTR.A            |            | 3 | 3,4467 | 0,309 | 0,232  |
| 19 | P43358 MAGA4_HUMAN | K.SQHCKPEEGVEAQEE.A              |            | 2 | 3,4445 | 0,398 | -0,347 |
| 19 | Q5W0B1 RN219_HUMAN | K.SSQGSEFLEEPDKLEE.K             |            | 2 | 3,4444 | 0,395 | 0,134  |
| 19 | Q9C0C2 TB182_HUMAN | E.HGVGGVSQCPEPGLR.H              |            | 2 | 3,4403 | 0,523 | -0,315 |
| 19 | Q03252 LMNB2_HUMAN | R.LES#LSYQLSGLQK.Q               | S296:      | 2 | 3,434  | 0,412 | 0,237  |
| 19 | Q99832 TCPH_HUMAN  | R.TM*M*ACGGSIQTSVNALSADVLGR.C    |            | 3 | 3,4324 | 0,316 | 0,154  |
| 19 | P80303 NUCB2_HUMAN | K.LHDVNSDGFLEDEQE.L              |            | 2 | 3,4281 | 0,252 | -0,603 |
| 19 | P68104 EF1A1_HUMAN | K.SGDAAIVDMVPGKPM*CVE.S          |            | 3 | 3,4215 | 0,166 | 0,097  |
| 19 | P27348 1433T_HUMAN | R.KQTIDNSQGAYQE.A                |            | 2 | 3,4211 | 0,39  | 0      |
| 19 | P78371 TCPB_HUMAN  | E.DKLIHFSGVALGE.A                |            | 2 | 3,4184 | 0,384 | -1,408 |

|    |                     |                               |            |   |        |       |        |
|----|---------------------|-------------------------------|------------|---|--------|-------|--------|
| 19 | Q5VT52 K0460_HUMAN  | E.M*M*DKPTSSSVDTM*SLLSK.I     |            | 2 | 3,4183 | 0,442 | 0,304  |
| 19 | Q13136 LIPA1_HUMAN  | R.SSDGS#LS#HEEDLAKVIE.L       | S242:S244: | 2 | 3,4172 | 0,223 | 0,309  |
| 19 | P55196 AFAD_HUMAN   | E.TTFDLGGDIHSGTALPTS#TTR.L    | S535:      | 3 | 3,4165 | 0,367 | 0,524  |
| 19 | P49023 PAXI_HUMAN   | K.QKS#AEPSPTVM*STSLGSLNSE.L   | S126:      | 2 | 3,4139 | 0,401 | 0,761  |
| 19 | P78316 NOP14_HUMAN  | E.LTHYGQSLADIEK.H             |            | 3 | 3,4135 | 0,359 | 0,62   |
| 19 | P15260 INGR1_HUMAN  | E.SSSPLSSNQSEPGSIALNSYHSR.N   |            | 3 | 3,4115 | 0,351 | -0,076 |
| 19 | Q96D71 REPS1_HUMAN  | R.TGSDHT#NPT#SPLLVKPSDLLEE.N  | T426:T429: | 3 | 3,4111 | 0,107 | 0,219  |
| 19 | Q9C037 TRIM4_HUMAN  | E.DDQRPVCLVCRE.S              |            | 3 | 3,4041 | 0,19  | -0,473 |
| 19 | P57078 RIPK4_HUMAN  | R.LKRAS#APTFDNDYSLSE.L        | S370:      | 3 | 3,4031 | 0,254 | -0,183 |
| 19 | O14617 AP3D1_HUMAN  | R.ALDIDLKPLADSE.K             |            | 2 | 3,4024 | 0,451 | -0,081 |
| 19 | Q6ZRV2 FA83H_HUMAN  | R.HLRPPQYVTR.E                |            | 3 | 3,4014 | 0,378 | 1,082  |
| 19 | Q99638 RAD9A_HUMAN  | D.GHFVLATLSDTDS#HSQDLGS#PER.H | S270:S277: | 3 | 3,3983 | 0,299 | 0,139  |
| 19 | Q9Y2X7 GIT1_HUMAN   | E.LEDDAIYSVHVPAGLYR.I         |            | 3 | 3,3982 | 0,303 | -1,144 |
| 19 | P49840 GSK3A_HUMAN  | R.DSGKVTTVVATLQGPER.S         |            | 3 | 3,394  | 0,425 | -1,411 |
| 19 | P18206 VINC_HUMAN   | K.AQQVSQGLDVLTA.V             |            | 2 | 3,3936 | 0,371 | -0,167 |
| 19 | Q9NQS7 INCE_HUMAN   | E.QHVTQLM*STEPLPR.T           |            | 3 | 3,3889 | 0,329 | 0,111  |
| 19 | P35908 K22E_HUMAN   | R.NLDLDSIIAEVK.A              |            | 2 | 3,3834 | 0,353 | -0,275 |
| 19 | Q8IWW6 RHG12_HUMAN  | R.IHQDSESGDELSSSTEQIR.A       |            | 3 | 3,3825 | 0,345 | -0,083 |
| 19 | Q96PU5 NED4L_HUMAN  | E.DGASGSATNSNNHLIEPQIR.R      |            | 2 | 3,3795 | 0,177 | -0,117 |
| 19 | P49792 RBP2_HUMAN   | E.KDSLITPHVSR.S               |            | 3 | 3,3785 | 0,292 | 0,073  |
| 19 | Q9ULU4 PKCB1_HUMAN  | E.LKST#\$#PASEKADPGAVKDK.A    | T651:S652: | 3 | 3,3707 | 0,306 | 0,263  |
| 19 | A9CQZ4 A9CQZ4_HUMAN | K.TIDFDSL#VGR.G               | S56:       | 2 | 3,3674 | 0,412 | 0      |
| 19 | O75151 PHF2_HUMAN   | K.ALRPPTS#PGVFGALQNFKE.D      | S655:      | 3 | 3,3666 | 0,275 | 0,173  |
| 19 | Q68DX9 Q68DX9_HUMAN | R.IDS#PGFKPASQQVYR.K          | S491:      | 3 | 3,3632 | 0,287 | 0,206  |
| 19 | P31946 1433B_HUMAN  | E.SYKDSTLIM*QLLRD.N           |            | 2 | 3,3601 | 0,442 | 0      |
| 19 | Q99714 HCD2_HUMAN   | K.KLGNNCVFAPADVTSE.K          |            | 2 | 3,3595 | 0,493 | -0,354 |
| 19 | Q05639 EF1A2_HUMAN  | E.ALDTILPPTRPDKPLRLPLQD.V     |            | 3 | 3,3588 | 0,212 | -0,518 |
| 19 | Q15643 TRIPB_HUMAN  | E.DKVENLVDQLNK.S              |            | 2 | 3,3569 | 0,307 | 0      |
| 19 | O95359 TACC2_HUMAN  | K.IGSSLPQDDDAPK.K             |            | 2 | 3,3487 | 0,432 | 0      |
| 19 | Q9NWH9 SLTM_HUMAN   | E.VSKPLPSEGS#LAEADHTAHEE.M    | S217:      | 3 | 3,3482 | 0,329 | 0      |
| 19 | Q9C0C2 TB182_HUMAN  | R.VSGAGFS#PSSKM*E.G           | S1138:     | 2 | 3,3458 | 0,397 | -0,354 |
| 19 | Q8N6T3 ARFG1_HUMAN  | R.VSQPQSVTASSDKAFE.D          |            | 2 | 3,3422 | 0,456 | -0,632 |
| 19 | O75151 PHF2_HUMAN   | K.ALRPPT#SPGVFGALQNFK.E       | T654:      | 3 | 3,3324 | 0,196 | 0      |
| 19 | P31939 PUR9_HUMAN   | K.HVSPAGAAVGIPLSEDE.A         |            | 2 | 3,3265 | 0,53  | 0,296  |
| 19 | Q9UKV8 I2C2_HUMAN   | R.SAS#FNTDPYVRE.F             | S379:      | 2 | 3,3226 | 0,284 | 0,083  |
| 19 | P00491 PNPH_HUMAN   | D.HINLPGFSGQNPLR.G            |            | 3 | 3,3218 | 0,154 | 0,236  |
| 19 | Q9BZE9 ASPC1_HUMAN  | R.AAGS#PSPLPAPDPAPK.S         | S500:      | 2 | 3,3214 | 0,419 | 0,471  |
| 19 | P30153 2AAA_HUMAN   | E.KLTQDQDQDVVK.Y              |            | 2 | 3,3196 | 0,453 | 0      |
| 19 | Q9Y2W2 WBP11_HUMAN  | R.M*AGQEIPEEGR.E              |            | 2 | 3,3186 | 0,4   | 0,099  |

|    |                     |                            |            |   |        |       |        |
|----|---------------------|----------------------------|------------|---|--------|-------|--------|
| 19 | Q13177 PAK2_HUMAN   | K.YLS#FTPPEKDGFPSTPALNAK.G | S141:      | 3 | 3,3182 | 0,141 | 0,303  |
| 19 | P78316 NOP14_HUMAN  | E.LTHYGQSLADIEK.H          |            | 2 | 3,3165 | 0,399 | -0,248 |
| 19 | Q2NKX8 ERC6L_HUMAN  | E.AEALS#PEQAAHYLR.Y        | S14:       | 2 | 3,3139 | 0,257 | 0,447  |
| 19 | B2R8U0 B2R8U0_HUMAN | K.AAAGPLDM*SLPSTPDIK.I     |            | 2 | 3,3139 | 0,485 | 0,072  |
| 19 | Q9Y2X7 GIT1_HUMAN   | E.DDAIYVHVPAAGLYR.I        |            | 3 | 3,3107 | 0,312 | -0,655 |
| 19 | Q9ULU4 PKCB1_HUMAN  | E.SM*DFLDKSTAS#PASTK.T     | S475:      | 2 | 3,3107 | 0,321 | -0,753 |
| 19 | Q9UQ35 SRRM2_HUMAN  | E.KSEEPAGQILSHLS#SELKE.M   | S1257:     | 3 | 3,3097 | 0,228 | 0,085  |
| 19 | Q92870 APBB2_HUMAN  | R.TKS#FLNYYADLE.T          | S160:      | 2 | 3,3062 | 0,36  | 0,158  |
| 19 | Q03164 HRX_HUMAN    | R.NSSTPGLQVPVSPVPIQNQK.Y   |            | 3 | 3,3029 | 0,208 | -0,083 |
| 19 | Q9ULU4 PKCB1_HUMAN  | E.SM*DFLDKSTAS#PASTK.T     | S475:      | 3 | 3,3017 | 0,307 | -0,308 |
| 19 | P16949 STMN1_HUMAN  | R.AS#GQAFELILS#PR.S        | S16:S25:   | 2 | 3,2997 | 0,335 | -0,158 |
| 19 | P13639 EF2_HUMAN    | E.SGEHIIAGAGELHLE.I        |            | 2 | 3,2989 | 0,4   | -0,08  |
| 19 | Q9H6F5 CCD86_HUMAN  | E.FESNPEETREPGS#PPSVQR.A   | S47:       | 3 | 3,298  | 0,329 | -0,082 |
| 19 | Q03164 HRX_HUMAN    | R.NSSTPGLQVPVSPVPIQNQK.Y   | S3036:     | 3 | 3,2976 | 0,325 | 0,161  |
| 19 | O15231 ZN185_HUMAN  | E.RQSSPSGSEQLVR.R          |            | 3 | 3,2945 | 0,197 | 0,447  |
| 19 | P55327 TPD52_HUMAN  | K.NSPTFKS#FEKVE.N          | S136:      | 2 | 3,2943 | 0,459 | -0,451 |
| 19 | Q14676 MDC1_HUMAN   | E.LQPSTSTDQPVTPPEPTSQATR.G |            | 3 | 3,2919 | 0,26  | -0,163 |
| 19 | Q8N655 CJ012_HUMAN  | E.DVISRPHS#PPEIVSRE.E      | S381:      | 3 | 3,2911 | 0,206 | 0,386  |
| 19 | Q6S8J3 A26CA_HUMAN  | E.KLCYVALDFEQE.M           |            | 2 | 3,2904 | 0,289 | -0,242 |
| 19 | P40763 STAT3_HUMAN  | E.NLQDDDFDNFK.T            |            | 2 | 3,2857 | 0,285 | 0,172  |
| 19 | P22059 OSBP1_HUMAN  | R.GATVLPANTPGNVGSGK.D      |            | 2 | 3,2855 | 0,38  | 0,792  |
| 19 | P51659 DHB4_HUMAN   | R.GALVVVNDLGGDFK.G         |            | 2 | 3,2845 | 0,373 | 0,087  |
| 19 | P08651 NFIC_HUMAN   | E.LQGHLAYDLNPASTGLR.R      |            | 3 | 3,2843 | 0,108 | 0,2    |
| 19 | Q5EBL4 RIPL1_HUMAN  | E.NRIPQPPPIAHPR.T          |            | 3 | 3,2837 | 0,218 | -0,674 |
| 19 | Q9Y426 CU025_HUMAN  | E.KDISVQAIACR.S            |            | 3 | 3,2828 | 0,203 | 1,74   |
| 19 | P19338 NUCL_HUMAN   | K.GLSEDTTEETLKE.S          |            | 2 | 3,2828 | 0,342 | 0,924  |
| 19 | P05387 RLA2_HUMAN   | K.NIEDVIAQGIGK.L           |            | 3 | 3,2817 | 0,195 | 0,509  |
| 19 | Q12888 TP53B_HUMAN  | R.GNLLHFPSS#QGEEE.K        | S1068:     | 2 | 3,2815 | 0,395 | 0,301  |
| 19 | P60900 PSA6_HUMAN   | E.IDAHLVALAERD.-           |            | 3 | 3,281  | 0,286 | 0,553  |
| 19 | Q9UNN5 FAF1_HUMAN   | E.NAEPVS#KLRIRTPSGEFLE.R   | S574:      | 3 | 3,2801 | 0,154 | -0,494 |
| 19 | P49454 CENPF_HUMAN  | E.LNDS#RSECITATR.K         | S1324:     | 3 | 3,2793 | 0,158 | 0,228  |
| 19 | Q86WK6 AMGO1_HUMAN  | R.RM*S#DPESVSSVFSDTPIVV.-  | S477:      | 2 | 3,2775 | 0,408 | 0,568  |
| 19 | O94979 SC31A_HUMAN  | K.IALALNKVDGANVALK.D       |            | 3 | 3,2742 | 0,346 | 0,341  |
| 19 | P35221 CTNA1_HUMAN  | E.DDQLIAGQSAR.A            |            | 2 | 3,2701 | 0,382 | -0,312 |
| 19 | P02545 LMNA_HUMAN   | R.IRIDSLSAQLSQLQK.Q        |            | 3 | 3,27   | 0,249 | 0,753  |
| 19 | P55209 NP1L1_HUMAN  | R.SVLYFTGEAIEDDD.D         |            | 2 | 3,2683 | 0,52  | -0,155 |
| 19 | Q8WXI9 P66B_HUMAN   | R.TTSSAIYM*NLASHIQPGTVNR.V |            | 3 | 3,2633 | 0,292 | 0,562  |
| 19 | Q9BZE9 ASPC1_HUMAN  | E.HAISPSAADVLVAR.Y         |            | 3 | 3,2625 | 0,346 | -1,235 |
| 19 | Q9UQ35 SRRM2_HUMAN  | R.DRS#PPKS#PEKLPQSSSSE.S   | S404:S408: | 3 | 3,2623 | 0,15  | -0,173 |

|    |                    |                                        |                 |   |        |       |        |
|----|--------------------|----------------------------------------|-----------------|---|--------|-------|--------|
| 19 | P31949 S10AB_HUMAN | K.KLDTNSDGLDFSE.F                      |                 | 2 | 3,2603 | 0,363 | -0,544 |
| 19 | Q9UK76 HN1_HUMAN   | R.RNSS#EASSGDFLDLK.G                   | S88:            | 3 | 3,2581 | 0,196 | 0,429  |
| 19 | P08670 VIME_HUMAN  | R.KVESLQEEIAFLK.K                      |                 | 3 | 3,2574 | 0,178 | 0,238  |
| 19 | Q9Y450 HBS1L_HUMAN | K.GPPIEDAIASSDVLE.T                    |                 | 2 | 3,2503 | 0,397 | 0,403  |
| 19 | Q92945 FUBP2_HUMAN | E.YRVPDGM*VGLIIGR.G                    |                 | 3 | 3,2502 | 0,21  | 0,234  |
| 19 | P05387 RLA2_HUMAN  | K.LASVPAGGAVAVSAAPGSAAPAAGSAPAAAAEEK.K |                 | 3 | 3,2494 | 0,275 | -0,528 |
| 19 | Q14247 SRC8_HUMAN  | E.DVTQVSSAYQK.T                        |                 | 2 | 3,2493 | 0,343 | -0,1   |
| 19 | O60506 HNRPQ_HUMAN | E.DGALAVLQQFK.D                        |                 | 2 | 3,2484 | 0,404 | 0,513  |
| 19 | Q9Y608 LRRF2_HUMAN | R.NSASATTPLSGNSS#R.R                   | S324:           | 2 | 3,2483 | 0,476 | -0,08  |
| 19 | P27824 CALX_HUMAN  | E.VEDSKPDTTAPPSSPK.V                   |                 | 3 | 3,2474 | 0,301 | -0,221 |
| 19 | Q15149 PLEC1_HUMAN | K.AQLEPVAS#PAKKPK.V                    | S1435:          | 2 | 3,2458 | 0,278 | 0      |
| 19 | Q9UBU7 DBF4A_HUMAN | K.LLFI#EPIPHPSNE.L                     | S413:           | 2 | 3,2456 | 0,372 | -0,365 |
| 19 | P26639 SYTC_HUMAN  | K.M*GGEEKPIGAGEE.K                     |                 | 2 | 3,2446 | 0,457 | -0,092 |
| 19 | Q03135 CAV1_HUMAN  | K.AM*ADELS#EKQVYD.A                    | S37:            | 2 | 3,2433 | 0,316 | 0,383  |
| 19 | Q13546 RIPK1_HUMAN | R.M*QSLQDLCVAVPSSR.S                   |                 | 2 | 3,2431 | 0,422 | 0      |
| 19 | Q6NYC8 PHTNS_HUMAN | R.DIEAQTQKPEPPESAEL.L                  |                 | 3 | 3,237  | 0,205 | 0,193  |
| 19 | Q72417 NUFP2_HUMAN | E.LEKRTS#PQVLGSILK.S                   | S572:           | 3 | 3,2332 | 0,256 | 0,627  |
| 19 | P05114 HMG1_HUMAN  | E.TKEDLPAENGETK.T                      |                 | 2 | 3,2328 | 0,388 | 1,022  |
| 19 | P63104 1433Z_HUMAN | K.KGIVDQSQAYQE.A                       |                 | 2 | 3,2323 | 0,348 | -0,408 |
| 19 | P30153 2AAA_HUMAN  | E.KLTQDQDQDVVYFAQE.A                   |                 | 3 | 3,2313 | 0,09  | -0,095 |
| 19 | Q04917 1433F_HUMAN | E.DSYKDSTLIM*QLLR.D                    |                 | 2 | 3,2312 | 0,441 | -0,215 |
| 19 | Q9UK76 HN1_HUMAN   | R.NSS#EASSGDFLDLKG.G                   | S88:            | 3 | 3,2304 | 0,264 | 0,738  |
| 19 | P02765 FETUA_HUMAN | K.CDSSPDSAEDVR.K                       |                 | 2 | 3,23   | 0,458 | 0,547  |
| 19 | Q8IWE2 NXP20_HUMAN | E.SKVQSFLASLDGKLE.L                    |                 | 3 | 3,2232 | 0,197 | 0,418  |
| 19 | P20073 ANXA7_HUMAN | E.DAQRLYQAGEGRLGTDE.S                  |                 | 3 | 3,2213 | 0,21  | 0,487  |
| 19 | P29590 PML_HUMAN   | K.AVS#PPHLDGPPS#PRS#PVIGSE.V           | S518:S527:S530: | 2 | 3,2209 | 0,339 | 0,418  |
| 19 | Q9UKV3 ACINU_HUMAN | K.SLIPDIKPLAGQEAVVDLHADDSR.I           |                 | 3 | 3,2192 | 0,196 | 0      |
| 19 | Q6NZ12 PTRF_HUMAN  | R.RGS#SPDVHALLE.I                      | S365:           | 2 | 3,2165 | 0,369 | -1,972 |
| 19 | P29966 MARCS_HUMAN | E.AAAERPGEAAVASS#PSK.A                 | S27:            | 3 | 3,2093 | 0,248 | 1,198  |
| 19 | Q92882 OSTF1_HUMAN | D.M*ATNAACASLLKK.K                     |                 | 2 | 3,2075 | 0,444 | -0,35  |
| 19 | Q2YD98 K1530_HUMAN | E.VSDPTSAAAQLR.Q                       |                 | 2 | 3,2066 | 0,401 | -0,301 |
| 19 | Q7Z3C6 ATG9A_HUMAN | R.SFS#PLQPGQAPTGR.A                    | S656:           | 2 | 3,2048 | 0,411 | 0      |
| 19 | Q7Z3B3 K1267_HUMAN | R.LS#PGTSSSNLGGVKLE.G                  | S249:           | 2 | 3,2043 | 0,414 | -0,35  |
| 19 | P15586 GNS_HUMAN   | E.FDIKVPLLVR.G                         |                 | 3 | 3,2034 | 0,337 | 0,686  |
| 19 | P15880 RS2_HUMAN   | K.SPYQEFTDHLVK.T                       |                 | 3 | 3,202  | 0,266 | 0,312  |
| 19 | P42166 LAP2A_HUMAN | D.VYVQLYLQHLTAR.N                      |                 | 3 | 3,2    | 0,419 | 0,114  |
| 19 | Q8IWW6 RHG12_HUMAN | R.IHQDSESGDELSSSSTE.Q                  |                 | 2 | 3,199  | 0,45  | -0,135 |
| 19 | Q9UHB6 LIMA1_HUMAN | E.VQQPVHPKPLS#PDSR.A                   | S362:           | 3 | 3,1945 | 0,166 | 0,518  |
| 19 | Q71RC2 LARP4_HUMAN | K.DGLNQTTIPVS#PPSTTKPSR.A              | S583:           | 3 | 3,1945 | 0,331 | 0      |

|    |                     |                                |          |   |        |       |        |
|----|---------------------|--------------------------------|----------|---|--------|-------|--------|
| 19 | P61026 RAB10_HUMAN  | E.DILRKT#PVKEPNSE.N            | T174:    | 3 | 3,192  | 0,251 | -0,107 |
| 19 | Q6Q0C0 TRAF7_HUMAN  | E.TTFGPAFSAVTTITK.A            |          | 2 | 3,1918 | 0,462 | -0,079 |
| 19 | P00558 PGK1_HUMAN   | D.KIQLINNM*LDKVNE.M            |          | 2 | 3,191  | 0,341 | -0,072 |
| 19 | P78318 IGBP1_HUMAN  | K.YLLVPAFQGALTM*K.Q            |          | 2 | 3,1907 | 0,343 | 0      |
| 19 | P05362 ICAM1_HUMAN  | E.AQVHLALGDQR.L                |          | 3 | 3,1904 | 0,247 | 0,227  |
| 19 | P51858 HDGF_HUMAN   | E.VERPLPM*EVEK.N               |          | 3 | 3,1897 | 0,285 | -1,226 |
| 19 | Q5JPI3 CC038_HUMAN  | E.DIHFLFQQQVKE.D               |          | 3 | 3,1876 | 0,087 | 0,264  |
| 19 | P55209 NP1L1_HUMAN  | R.QLTVQM*M*QNPQILAALQE.R       |          | 2 | 3,1875 | 0,43  | 0      |
| 19 | P46934 NEDD4_HUMAN  | E.NGNIQLQAQR.A                 |          | 2 | 3,1857 | 0,335 | 0      |
| 19 | P16949 STMN1_HUMAN  | R.SKESVPEFPLS#PPKKK.D          | S38:     | 2 | 3,1842 | 0,375 | 0,195  |
| 19 | P48643 TCPE_HUMAN   | E.M*NPALGIDCLHK.G              |          | 2 | 3,1839 | 0,38  | -0,44  |
| 19 | Q6NWX9 PR40B_HUMAN  | E.LQQAELPNRS#PGFGIKKE.K        | S832:    | 3 | 3,1836 | 0,241 | 0,087  |
| 19 | Q5T6F2 UBAP2_HUMAN  | R.LAQVIFDKNDSDFE.A             |          | 2 | 3,1816 | 0,392 | 0,52   |
| 19 | P52756 RBM5_HUMAN   | R.GLVAAAYSGDS#DNEEE.L          | S624:    | 2 | 3,1806 | 0,4   | 0,075  |
| 19 | P34931 HS71L_HUMAN  | E.GIDFYTSITR.A                 |          | 2 | 3,1735 | 0,398 | -1,248 |
| 19 | O94762 RECQ5_HUMAN  | R.GGEHEPPSRPCGLLDEGSEPLPGPR.G  |          | 3 | 3,1733 | 0,404 | -0,863 |
| 19 | P08670 VIME_HUMAN   | E.VDALKGTNES#LER.Q             | S339:    | 2 | 3,1717 | 0,165 | -0,242 |
| 19 | Q96T23 RSF1_HUMAN   | E.IKLSDDFDS#PVKGPLCK.S         | S387:    | 3 | 3,168  | 0,223 | -0,183 |
| 19 | P27816 MAP4_HUMAN   | R.LATNTS#APDLK.N               | S928:    | 2 | 3,1663 | 0,334 | -0,202 |
| 19 | P56537 IF6_HUMAN    | D.YVALVHPDLDR.E                |          | 2 | 3,1651 | 0,46  | -1,026 |
| 19 | P17812 PYRG1_HUMAN  | E.DHPFFVGVQYHPE.F              |          | 3 | 3,1642 | 0,157 | 0,698  |
| 19 | P63104 1433Z_HUMAN  | K.GIVDQSQQAYQE.A               |          | 2 | 3,1636 | 0,397 | -0,715 |
| 19 | Q15637 SF01_HUMAN   | R.TGDLGIPPNPEDRS#PS#PEPIYNSE.G | S80:S82: | 2 | 3,16   | 0,281 | 0,445  |
| 19 | Q14676 MDC1_HUMAN   | R.SSVKT#PETVVPTAPE.L           | T1321:   | 2 | 3,1586 | 0,31  | 0,903  |
| 19 | A9CQZ4 A9CQZ4_HUMAN | E.DEEVPAFFKNLGS#PKPR.Q         | S27:     | 3 | 3,1573 | 0,28  | -0,764 |
| 19 | O00592 PODXL_HUMAN  | E.KKVVS#LNGE.L                 | S499:    | 2 | 3,1553 | 0,396 | -0,463 |
| 19 | Q13045 FLII_HUMAN   | E.AVLQS#PGLSGK.V               | S856:    | 2 | 3,1522 | 0,462 | -1,073 |
| 19 | Q9NQS7 INCE_HUMAN   | E.RVLAPILPDNFSTPTGSR.T         |          | 3 | 3,1522 | 0,21  | 0,094  |
| 19 | P25205 MCM3_HUMAN   | E.M*PQVHT#PKTADSQETKE.S        | T722:    | 3 | 3,1471 | 0,261 | 0      |
| 19 | P78316 NOP14_HUMAN  | E.LTHYGQSLADIEKHNDIVD.S        |          | 3 | 3,1469 | 0,257 | -0,084 |
| 19 | P00558 PGK1_HUMAN   | E.SPERPFLAILGGAK.V             |          | 3 | 3,146  | 0,107 | 0,314  |
| 19 | P54252 ATX3_HUMAN   | R.AIQLSM*QGSSR.N               |          | 2 | 3,1459 | 0,441 | -0,102 |
| 19 | P31946 1433B_HUMAN  | E.SYKDSTLIM*QLLR.D             |          | 2 | 3,1397 | 0,505 | -0,154 |
| 19 | Q96PZ0 PUS7_HUMAN   | E.DVPRPPDTVSTGK.G              |          | 2 | 3,1396 | 0,195 | -0,267 |
| 19 | O76094 SRP72_HUMAN  | R.SLSEDTDGTEEDPQAE.L           |          | 2 | 3,1394 | 0,421 | -0,425 |
| 19 | P78347 GTF2I_HUMAN  | K.INSSPNVNTTASGVED.L           |          | 2 | 3,1384 | 0,356 | 0,304  |
| 19 | Q9UHI6 DDX20_HUMAN  | K.ATS#PKELGCDR.Q               | S532:    | 3 | 3,1376 | 0,277 | 0,278  |
| 19 | P10109 ADX_HUMAN    | R.SSS#EDKITVHFINR.D            | S63:     | 3 | 3,1349 | 0,253 | 0,214  |
| 19 | Q8IU81 I2BP1_HUMAN  | E.ALGHS#PKDPGGGGPVR.A          | S436:    | 3 | 3,1338 | 0,231 | 0,335  |



|    |                    |                                |       |   |        |       |        |
|----|--------------------|--------------------------------|-------|---|--------|-------|--------|
| 19 | Q5VT52 K0460_HUMAN | R.GPTSTSIDNIDGT#PVRDER.S       | T723: | 3 | 3,1336 | 0,358 | 0,26   |
| 19 | P11142 HSP7C_HUMAN | K.TVTNAVVTVPAYFNDSQR.Q         |       | 2 | 3,1322 | 0,389 | 0,369  |
| 19 | P18858 DNL1_HUMAN  | K.TSKAETPTESVSEPE.V            |       | 2 | 3,1319 | 0,464 | 0,23   |
| 19 | Q8ND24 RN214_HUMAN | K.QKNS#PLLSVSSQTITKE.N         | S47:  | 3 | 3,1308 | 0,316 | -1,414 |
| 19 | Q96AQ6 PBIP1_HUMAN | R.ALQAPHS#PSKTDGKE.L           | S43:  | 3 | 3,1298 | 0,268 | 0,444  |
| 19 | P46087 NOL1_HUMAN  | K.GISAGAVQTAGK.K               |       | 2 | 3,1249 | 0,472 | 0,575  |
| 19 | Q3T8J9 GON4L_HUMAN | E.KGVVIPTWNIS#PIKK.A           | S346: | 3 | 3,1218 | 0,128 | -0,727 |
| 19 | P68104 EF1A1_HUMAN | K.YYVTIIDAPGHR.D               |       | 3 | 3,1216 | 0,391 | 0,325  |
| 19 | P30050 RL12_HUMAN  | R.HPHDIIDDINSGAVECPAS.-        |       | 3 | 3,1209 | 0,451 | 0,626  |
| 19 | Q96HC4 PDLI5_HUMAN | E.VVKVPVITS#PAVSK.V            | S111: | 2 | 3,1193 | 0,437 | 0,244  |
| 19 | P08195 4F2_HUMAN   | K.GQSEDPGSLLSLFR.R             |       | 2 | 3,1188 | 0,394 | -0,324 |
| 19 | P12004 PCNA_HUMAN  | K.LSQTSNVDEKEE.A               |       | 2 | 3,1185 | 0,213 | -0,088 |
| 19 | Q9UMZ2 SYNG_HUMAN  | K.ISKFDLVATSQSK.M              |       | 3 | 3,1173 | 0,242 | 0,466  |
| 19 | Q9UQ35 SRRM2_HUMAN | K.DKFSFPVQDRPE.S               |       | 3 | 3,1165 | 0,347 | 0,468  |
| 19 | Q9P246 STIM2_HUMAN | R.ISS#IPHDLCHNGE.K             | S719: | 3 | 3,1161 | 0,355 | -0,117 |
| 19 | Q9NQW6 ANLN_HUMAN  | R.LFKQDTSSS#TTHLAQQLKQE.R      | S419: | 3 | 3,1121 | 0,227 | 0,386  |
| 19 | Q92560 BAP1_HUMAN  | K.GSSPSIRPIQGSQSSS#PVEKEVVE.A  | S597: | 3 | 3,1108 | 0,233 | -0,14  |
| 19 | P41252 SYIC_HUMAN  | E.SHQNYKDVQDPSVFTFPLEEDE.T     |       | 3 | 3,1098 | 0,334 | -0,134 |
| 19 | O00178 GTPB1_HUMAN | R.SAM*DSPVPASM*FAPEPSS#PGAAR.A | S25:  | 3 | 3,107  | 0,363 | 0,617  |
| 19 | P11940 PABP1_HUMAN | R.SKGFVCFSSPEE.A               |       | 2 | 3,1057 | 0,383 | 0,155  |
| 19 | P28066 PSA5_HUMAN  | R.ITS#PLM*EPSSIEK.I            | S56:  | 2 | 3,1016 | 0,195 | 0,319  |
| 19 | Q9UGV2 NDRG3_HUMAN | E.AFKYFLQGM*GYIPASM*TR.L       |       | 3 | 3,1012 | 0,17  | 1,663  |
| 19 | Q9UNN5 FAF1_HUMAN  | R.IRTPS#GEFLE.R                | S582: | 2 | 3,1006 | 0,307 | -0,993 |
| 19 | P62158 CALM_HUMAN  | R.VFDKDGNGYISAAE.L             |       | 2 | 3,1004 | 0,322 | -0,082 |
| 19 | P46087 NOL1_HUMAN  | K.KGPQSLFNAPR.G                |       | 3 | 3,1003 | 0,321 | 0,602  |
| 19 | Q01518 CAP1_HUMAN  | K.LSDLLAPISEIQIKE.V            |       | 2 | 3,0988 | 0,185 | 0,392  |
| 19 | O94964 CT117_HUMAN | R.TKS#VSSM*SEFE.S              | S55:  | 2 | 3,0968 | 0,235 | -0,551 |
| 19 | P39656 OST48_HUMAN | R.TLVLLDNLNVRE.T               |       | 2 | 3,0956 | 0,327 | -0,087 |
| 19 | P62913 RL11_HUMAN  | K.NNFSDTGNFGFIQE.H             |       | 2 | 3,0939 | 0,356 | 0,148  |
| 19 | Q13425 SNTB2_HUMAN | R.GPAGEAGAS#PPVR.R             | S110: | 2 | 3,0912 | 0,469 | 0      |
| 19 | Q9UMZ2 SYNG_HUMAN  | K.FDFLVATSQSK.M                |       | 2 | 3,091  | 0,413 | 0      |
| 19 | Q6ZRV2 FA83H_HUMAN | R.KGS#PTPGFSTR.R               | S881: | 2 | 3,0909 | 0,263 | 0,1    |
| 19 | Q6ZVM7 TM1L2_HUMAN | K.TVTYEDPQAVGGGLASALDNR.K      |       | 3 | 3,0897 | 0,163 | 0,264  |
| 19 | O95478 NSA2_HUMAN  | E.KTPQGAVPAYLLDRE.G            |       | 3 | 3,0885 | 0,286 | 0,221  |
| 19 | Q02040 SF17A_HUMAN | R.CPGGVLSICIPDNQPK.G           |       | 3 | 3,0838 | 0,183 | 0,485  |
| 19 | P50995 ANX11_HUMAN | R.GTITDAPGFDPRLRAE.V           |       | 2 | 3,0829 | 0,429 | 0,874  |
| 19 | O95865 DDAH2_HUMAN | E.KAGAGLSSLCLVLSTRPHS#.-       | S285: | 3 | 3,0824 | 0,12  | 0,36   |
| 19 | P28290 SSFA2_HUMAN | R.NIM*TQKQDS#FEM*EE.V          | S466: | 2 | 3,0819 | 0,118 | 0,132  |
| 19 | Q9BSL1 UBAC1_HUMAN | E.NIQDQDVLLLIK.K               |       | 2 | 3,0815 | 0,232 | 0      |

|    |                     |                                     |          |   |        |       |        |
|----|---------------------|-------------------------------------|----------|---|--------|-------|--------|
| 19 | Q9H307 PININ_HUMAN  | K.SLS#PGKENVSALDM*EKE.S             | S443:    | 2 | 3,0792 | 0,376 | -0,316 |
| 19 | O94925 GLSK_HUMAN   | E.DDKPHNPM*VNAGAIIVTSLIKQGVNNAE.K   |          | 3 | 3,0781 | 0,408 | 0,559  |
| 19 | Q5T5P2 SKT_HUMAN    | R.ISSLPVS RPIS#PSPSAILE.R           | S361:    | 2 | 3,0777 | 0,401 | 0,301  |
| 19 | Q9HCN4 GPN1_HUMAN   | K.DLSLPVLHPSDLILTR.G                |          | 2 | 3,0762 | 0,429 | 0      |
| 19 | P30050 RL12_HUMAN   | E.ILGTAQSVGCNV DGR.H                |          | 2 | 3,0757 | 0,422 | 1,262  |
| 19 | P49023 PAXI_HUMAN   | E.QNDKPYCQCNFLK.L                   |          | 3 | 3,0753 | 0,147 | 0      |
| 19 | P21333 FLNA_HUMAN   | K.DGSCGVAYVVQEPGDYE.V               |          | 2 | 3,071  | 0,302 | 0,661  |
| 19 | P62495 ERF1_HUMAN   | R.YVLHCQGTEEE.K                     |          | 2 | 3,0709 | 0,44  | 0      |
| 19 | A8MW92 P20LX_HUMAN  | E.DLTLVSQLSSSVINK.T                 |          | 2 | 3,0704 | 0,318 | -0,38  |
| 19 | P51784 UBP11_HUMAN  | E.SKAAYVLFYQR.Q                     |          | 3 | 3,0699 | 0,161 | 0,543  |
| 19 | Q02952 AKA12_HUMAN  | E.STAVGQAHS DISKDM*SE.A             |          | 3 | 3,0695 | 0,432 | 0,308  |
| 19 | Q6P1L5 AL2SC_HUMAN  | R.SIDTQTPGGADR.G                    |          | 2 | 3,0695 | 0,42  | -0,2   |
| 19 | O00139 KIF2A_HUMAN  | E.DGKQVQV VGLQERE.V                 |          | 3 | 3,069  | 0,099 | 0,214  |
| 19 | Q9NZN5 ARHGC_HUMAN  | R.TAS#QGPQTDSVIQNSE.N               | S1288:   | 2 | 3,0682 | 0,17  | -0,981 |
| 19 | O00754 MA2B1_HUMAN  | E.HQFVGEDSGR.N                      |          | 2 | 3,0674 | 0,417 | -0,203 |
| 19 | Q9UPW0 FOXJ3_HUMAN  | K.NALLDPNTTLDQEE.V                  |          | 2 | 3,067  | 0,376 | 0      |
| 19 | Q96SB4 SRPK1_HUMAN  | E.SES#PVERPLKENPPNKM*TQE.K          | S482:    | 3 | 3,0662 | 0,266 | 0      |
| 19 | P04406 G3P_HUMAN    | R.VVDLM*AHM*ASKE.-                  |          | 2 | 3,0657 | 0,349 | -0,179 |
| 19 | Q9H4A3 WVK1_HUMAN   | K.EGPVAS#PPFM*DLE.Q                 | S1978:   | 2 | 3,0641 | 0,427 | 0,329  |
| 19 | Q00341 VIGLN_HUMAN  | D.FSVQIKFPDREE.N                    |          | 3 | 3,0635 | 0,154 | 0,245  |
| 19 | Q92882 OSTF1_HUMAN  | D.M*ATNAACASLLK.K                   |          | 2 | 3,0579 | 0,498 | -0,096 |
| 19 | Q8IU81 I2BP1_HUMAN  | R.AGGAS#PAASSTAQPPTQHR.L            | S453:    | 3 | 3,0567 | 0,272 | -0,586 |
| 19 | O00148 DDX39_HUMAN  | K.ILNDVQDRFE.V                      |          | 2 | 3,0549 | 0,243 | -1,075 |
| 19 | Q9BZE9 ASPC1_HUMAN  | E.HAISPSAADVLVAR.Y                  |          | 2 | 3,0539 | 0,497 | -0,954 |
| 19 | P48634 BAT2_HUMAN   | E.ALTTVTVAPAPR.R                    |          | 2 | 3,0533 | 0,471 | 0,102  |
| 19 | Q9UPZ3 HPS5_HUMAN   | E.SFSILDSGIYR.I                     |          | 2 | 3,0513 | 0,366 | 0      |
| 19 | P27816 MAP4_HUMAN   | E.TERAS#PIKM*DLAPSKD.M              | S358:    | 3 | 3,0503 | 0,291 | 0      |
| 19 | O14908 GIPC1_HUMAN  | R.SRGPATVEDLPSAFE.E                 |          | 2 | 3,0501 | 0,368 | -0,465 |
| 19 | Q9UQ35 SRRM2_HUMAN  | R.VSGRT#SPLLDR.A                    | T2397:   | 2 | 3,0494 | 0,332 | -0,974 |
| 19 | Q71U36 TBA1A_HUMAN  | E.KAYHEQLS#VAE.I                    | S287:    | 2 | 3,0487 | 0,335 | -0,18  |
| 19 | Q9Y426 CU025_HUMAN  | E.KDISVQAIACR.S                     |          | 2 | 3,0482 | 0,347 | 0,871  |
| 19 | P40855 PEX19_HUMAN  | R.S#PGDTAKDALFASQE.K                | S54:     | 2 | 3,0465 | 0,351 | 0      |
| 19 | P12270 TPR_HUMAN    | E.VVQS#SPVERPSTSTAVFGTVSATPSSSLPK.R | S1803:   | 3 | 3,0433 | 0,367 | 0,593  |
| 19 | P06493 CDC2_HUMAN   | K.IGEGT#Y#GVVYK.G                   | T14:Y15: | 2 | 3,0408 | 0,139 | 0,816  |
| 19 | Q7Z417 NUFP2_HUMAN  | E.LEKRTS#PQVLGSILK.S                | S572:    | 2 | 3,0406 | 0,347 | 0,07   |
| 19 | A8K7W5 A8K7W5_HUMAN | E.KLNIGTDS DSSPQK.S                 |          | 2 | 3,038  | 0,285 | -0,082 |
| 19 | Q96PU5 NED4L_HUMAN  | E.DGASGSATNSNNHLEPQIR.R             |          | 3 | 3,0368 | 0,31  | -0,088 |
| 19 | P40189 IL6RB_HUMAN  | E.DLQLVDHVDGGDGILPR.Q               |          | 3 | 3,035  | 0,244 | 0,503  |
| 19 | P05556 ITB1_HUMAN   | K.NVLSLTNKGEVFNE.L                  |          | 2 | 3,0303 | 0,244 | 0,312  |

|    |                    |                          |        |   |        |       |        |
|----|--------------------|--------------------------|--------|---|--------|-------|--------|
| 19 | Q9Y5J1 UTP18_HUMAN | E.LVFGDVENDEDEALLR.R     |        | 2 | 3,0302 | 0,247 | -0,143 |
| 19 | P16401 H15_HUMAN   | R.NGLSLAALKK.A           |        | 2 | 3,0207 | 0,214 | 0,06   |
| 19 | Q9NQW6 ANLN_HUMAN  | K.STLS#QTVPSKGE.L        | S339:  | 2 | 3,0206 | 0,395 | -1,021 |
| 19 | Q969S3 ZN622_HUMAN | D.AM*NAAIQQAIA.A         |        | 2 | 3,0186 | 0,422 | 0      |
| 19 | Q9H6Z4 RANB3_HUMAN | K.NLSDSGEERPRGE.A        |        | 2 | 3,0147 | 0,503 | 0,189  |
| 19 | P51114 FXR1_HUMAN  | E.DLM*GLAIGHGSNIQQAR.K   |        | 3 | 3,0138 | 0,13  | 0,482  |
| 19 | Q9BZ95 NSD3_HUMAN  | R.GLSDLQVGFQK.Q          |        | 2 | 3,0121 | 0,533 | 0,327  |
| 19 | A0FGR8 ESYT2_HUMAN | R.SSSLLASPGHISVK.E       |        | 2 | 3,0114 | 0,226 | 0,083  |
| 19 | P68104 EF1A1_HUMAN | K.SGDAAIVDMVPGKPM*CVE.S  |        | 2 | 3,0097 | 0,469 | 0,129  |
| 19 | P12955 PEPD_HUMAN  | E.IASVLTSQKPSVLLTLR.G    |        | 3 | 3,0083 | 0,179 | 0,501  |
| 19 | Q08379 GOGA2_HUMAN | R.DNPTAQQIM*QLLRE.M      |        | 2 | 3,0047 | 0,295 | -0,219 |
| 19 | Q92785 REQU_HUMAN  | E.GEDKEDSQPPTPVSR.S      |        | 3 | 3,0026 | 0,246 | -0,103 |
| 19 | Q96SB3 NEB2_HUMAN  | E.SGCVEIPGLS#EEEDPAPSR.K | S436:  | 2 | 3,0016 | 0,364 | 0,231  |
| 19 | P04264 K2C1_HUMAN  | R.SLDLDSIIAEVK.A         |        | 2 | 2,9975 | 0,4   | -0,187 |
| 19 | Q9NR30 DDX21_HUMAN | R.SDAGLES#DTAM*KKGE.T    | S13:   | 2 | 2,9959 | 0,427 | 0,075  |
| 19 | P27348 1433T_HUMAN | K.QTIDNSQGAYQE.A         |        | 2 | 2,9956 | 0,219 | 0      |
| 19 | P35222 CTNB1_HUMAN | E.GVATYAAAVLFR.M         |        | 2 | 2,9953 | 0,273 | -0,985 |
| 19 | Q9Y2U8 MAN1_HUMAN  | E.SLLGGPGGASAAPAAGSK.V   |        | 2 | 2,9918 | 0,456 | 0,332  |
| 19 | O60256 KPRB_HUMAN  | E.SDLVDGRHS#PPM*VR.S     | S227:  | 3 | 2,9901 | 0,138 | -0,11  |
| 19 | P49023 PAXI_HUMAN  | E.HVYSFPNKQK.S           |        | 3 | 2,9885 | 0,27  | 0,586  |
| 19 | Q16512 PKN1_HUMAN  | E.KLNLGTDSDSSPQK.S       |        | 3 | 2,9881 | 0,088 | 0,307  |
| 19 | Q9ULU4 PKCB1_HUMAN | K.ILM*SKPVLSGGTGR.R      |        | 3 | 2,9862 | 0,395 | 0,383  |
| 19 | Q9H8Y8 GORS2_HUMAN | K.ISLPGQM*AGT#PITPLK.D   | T222:  | 2 | 2,9847 | 0,332 | 0,071  |
| 19 | Q86UE8 TLK2_HUMAN  | R.SSPQHS#LSNPLPR.R       | S115:  | 3 | 2,9822 | 0,191 | 0,488  |
| 19 | Q9NZM1 MYOF_HUMAN  | E.FEGLTDFSDTFK.L         |        | 2 | 2,9791 | 0,397 | 0,173  |
| 19 | P49792 RBP2_HUMAN  | E.KDSLITPHVSR.S          |        | 2 | 2,9778 | 0,297 | -0,292 |
| 19 | Q04637 IF4G1_HUMAN | R.FSALQQAVPTESTDNRR.V    |        | 3 | 2,9774 | 0,31  | 0,095  |
| 19 | Q5SRE5 NU188_HUMAN | E.LSTLLSSLSR.Y           |        | 2 | 2,9746 | 0,271 | -0,113 |
| 19 | P27824 CALX_HUMAN  | E.VEDSKPDTTAPPSSPK.V     |        | 2 | 2,9743 | 0,371 | -0,368 |
| 19 | Q12774 ARHG5_HUMAN | E.SLSETPGPSS#PRQPR.K     | S48:   | 2 | 2,9722 | 0,459 | -0,146 |
| 19 | Q9H6F5 CCD86_HUMAN | R.AGLGSPERPPK.T          |        | 2 | 2,972  | 0,343 | 0,11   |
| 19 | P08651 NFIC_HUMAN  | R.TGM*GSDQEDSKPITLD.T    |        | 2 | 2,9716 | 0,4   | 0,214  |
| 19 | Q9H4A3 WNK1_HUMAN  | R.DVDDGSGSPHS#PHQLSSK.S  | S2032: | 3 | 2,9706 | 0,388 | 1,422  |
| 19 | Q5VUA4 ZN318_HUMAN | R.IPS#PNILK.T            | S2101: | 2 | 2,9697 | 0,208 | 0,127  |
| 19 | O15231 ZN185_HUMAN | R.RES#CGSSVLTD FE.G      | S233:  | 2 | 2,9695 | 0,311 | 0,078  |
| 19 | P00441 SODC_HUMAN  | E.DSVISLSGDHICIIGR.T     |        | 2 | 2,9691 | 0,578 | 0,3    |
| 19 | Q13206 DDX10_HUMAN | R.SQADKVI EPR.A          |        | 2 | 2,9634 | 0,218 | 0      |
| 19 | Q86XJ1 GA2L3_HUMAN | E.TLLNTS#GPEDSISIPK.S    | S195:  | 2 | 2,9614 | 0,362 | 0,07   |
| 19 | P41250 SYG_HUMAN   | E.DKAPQVDVDKAVAE.L       |        | 2 | 2,9568 | 0,446 | -0,246 |

|    |                    |                                    |              |   |        |       |        |
|----|--------------------|------------------------------------|--------------|---|--------|-------|--------|
| 19 | P51784 UBP11_HUMAN | K.AAYVLFYQR.Q                      |              | 2 | 2,9562 | 0,311 | 0      |
| 19 | P37802 TAGL2_HUMAN | E.GKNVIGLQM*GTNR.G                 |              | 2 | 2,9541 | 0,434 | -0,261 |
| 19 | Q9Y6G9 DC1L1_HUMAN | R.KPVTVSPPTPTS#PTEGEAS.-           | S516:        | 2 | 2,9541 | 0,408 | 0,372  |
| 19 | Q9P2K5 MYEF2_HUMAN | K.AEVPGATGGDS#PHLQPAEPPGEP.R       | S17:         | 3 | 2,9514 | 0,301 | 0,15   |
| 19 | Q7Z6Z7 HUWE1_HUMAN | R.AIAM*SLGQDIPM*DQR.A              |              | 2 | 2,951  | 0,362 | -0,364 |
| 19 | P49736 MCM2_HUMAN  | E.SFTM*AS#SPAQR.R                  | S12:         | 2 | 2,946  | 0,47  | 0,095  |
| 19 | Q7Z5K2 WAPL_HUMAN  | K.RPES#PSEIS#PIKGSVR.T             | S221:S226:   | 3 | 2,9393 | 0,376 | -0,096 |
| 19 | Q53F19 CQ085_HUMAN | E.LKM*IST#PS#PK.K                  | T413:S415:   | 2 | 2,9386 | 0,247 | 0,191  |
| 19 | P04264 K2C1_HUMAN  | K.YEELQITAGR.H                     |              | 2 | 2,9382 | 0,35  | 0,207  |
| 19 | P15927 RFA2_HUMAN  | K.IDDM*TAAPM*DVR.Q                 |              | 2 | 2,9356 | 0,435 | 0,089  |
| 19 | Q13523 PRP4B_HUMAN | R.TKLDDLALLEDE.K                   |              | 2 | 2,9353 | 0,241 | -0,328 |
| 19 | Q9Y4B5 K0802_HUMAN | R.GRS#PPERPVPGT#PKEPSLGE.Q         | S297:T306:   | 3 | 2,9314 | 0,245 | 0      |
| 19 | Q99661 KIF2C_HUMAN | K.GKEIDFDDVAAINPE.L                |              | 2 | 2,9307 | 0,362 | 0,075  |
| 19 | Q08J23 NSUN2_HUMAN | E.GKPTDPSKLESPSFTGTGDTE.I          |              | 3 | 2,9287 | 0,197 | -0,34  |
| 19 | Q14116 IL18_HUMAN  | R.TIFIISM*YKD.S                    |              | 2 | 2,9275 | 0,325 | 0,294  |
| 19 | P22626 ROA2_HUMAN  | R.GGGGNFGPGPGSNFR.G                |              | 2 | 2,9273 | 0,462 | 0,354  |
| 19 | P21580 TNAP3_HUMAN | E.DLKVHFLDPENE.M                   |              | 2 | 2,9245 | 0,346 | 0,94   |
| 19 | Q9NQW6 ANLN_HUMAN  | E.LLPKT#PIS#PLKTGVSKPIVK.S         | T320:S323:   | 3 | 2,924  | 0,133 | 0,161  |
| 19 | Q6ZRV2 FA83H_HUMAN | R.RGS#PTTGFIQKGS#PTSAYPER.R        | S892:S903:   | 3 | 2,9236 | 0,331 | -0,145 |
| 19 | O95405 ZFYV9_HUMAN | R.AGQFGISAR.K                      |              | 2 | 2,9173 | 0,224 | 0,807  |
| 19 | Q8IY63 AMOL1_HUMAN | E.HASAPLLPPPPTSALSSIASTTAASSAHAK.T |              | 3 | 2,9162 | 0,255 | 0,322  |
| 19 | P04264 K2C1_HUMAN  | K.SLNNQFASFIDK.V                   |              | 2 | 2,9131 | 0,455 | 0,176  |
| 19 | O75531 BAF_HUMAN   | R.DFVAEPM*GEKPVGSLAGIGE.V          |              | 2 | 2,9108 | 0,342 | -0,302 |
| 19 | P55209 NP1L1_HUMAN | R.QLTVQM*M*QNPQILAALQE.R           |              | 3 | 2,9087 | 0,247 | 0,175  |
| 19 | O94762 RECQ5_HUMAN | R.GEVPGGSAAHYGGPS#PE.K             | S727:        | 2 | 2,9071 | 0,384 | -0,541 |
| 19 | P46013 KI67_HUMAN  | K.IPCKSS#PELE.D                    | S2828:       | 2 | 2,9067 | 0,322 | -0,197 |
| 19 | Q9UFC0 LRWD1_HUMAN | E.GS#PVAGSDGSQPAVKLEPLHLQCHSK.N    | S259:        | 3 | 2,906  | 0,186 | -0,25  |
| 19 | P42166 LAP2A_HUMAN | R.SSTPLPTISSSAENTR.Q               |              | 2 | 2,9026 | 0,475 | -0,592 |
| 19 | Q9P107 GMIP_HUMAN  | E.FLPSLNSSPLDIR.K                  |              | 2 | 2,9023 | 0,353 | -0,084 |
| 19 | Q8IVF2 AHNK2_HUMAN | K.LSLVLDKDE.V                      |              | 2 | 2,9014 | 0,215 | 0,118  |
| 19 | Q14697 GANAB_HUMAN | E.DRSLLSVNAR.G                     |              | 2 | 2,9    | 0,195 | -0,294 |
| 19 | Q03252 LMNB2_HUMAN | R.M*RLES#LSYQLSGLQK.Q              | S296:        | 3 | 2,8973 | 0,133 | 0,297  |
| 19 | Q9Y2X7 GIT1_HUMAN  | E.DDAIYSVHVPAGLYR.I                |              | 2 | 2,8955 | 0,389 | -0,218 |
| 19 | P0C0S8 H2A1_HUMAN  | K.VTIAQGGVLPNIQAVLLPKKT#E.S        | T121:        | 3 | 2,8953 | 0,176 | 0,232  |
| 19 | Q12888 TP53B_HUMAN | R.QSQQPM*KPIS#PVKDPVS#PASQK.M      | S1094:S1101: | 3 | 2,8953 | 0,232 | 0,287  |
| 19 | Q9NQS1 AVEN_HUMAN  | R.DSQKPTS#PLQSAGDHLEEE.L           | S273:        | 3 | 2,8947 | 0,231 | 0,17   |
| 19 | Q12888 TP53B_HUMAN | R.VDVSCEPLEGVEK.C                  |              | 2 | 2,8945 | 0,336 | -0,167 |
| 19 | P60660 MYL6_HUMAN  | K.ILYSQCGDVM*R.A                   |              | 2 | 2,8924 | 0,477 | 0,27   |
| 19 | Q13428 TCOF_HUMAN  | R.TNVVTM*PTAHP.R                   |              | 2 | 2,8916 | 0,358 | -0,182 |

|    |                     |                             |            |   |        |       |        |
|----|---------------------|-----------------------------|------------|---|--------|-------|--------|
| 19 | P30279 CCND2_HUMAN  | E.AVLLNSLQQYR.Q             |            | 2 | 2,8905 | 0,412 | 0,28   |
| 19 | Q9BZE9 ASPC1_HUMAN  | R.AAGSPS#PLPAPDPAPK.S       | S502:      | 2 | 2,8894 | 0,4   | 0,079  |
| 19 | Q9Y2W1 TR150_HUMAN  | R.ERS#PALKS#PLQSVVVR.R      | S248:S253: | 3 | 2,8885 | 0,313 | 0,475  |
| 19 | Q14493 SLBP_HUMAN   | R.HM*DSQVEDEFDLE.A          |            | 2 | 2,8883 | 0,124 | 0,076  |
| 19 | Q9BSJ8 ESYT1_HUMAN  | E.TDLSQGVAR.W               |            | 2 | 2,8868 | 0,179 | 0,129  |
| 19 | Q15293 RCN1_HUMAN   | K.TFDQLTPDESKE.R            |            | 2 | 2,8867 | 0,196 | -0,26  |
| 19 | Q9NWS0 PIHD1_HUMAN  | R.LVM*GGPQQLYHLD.A          |            | 2 | 2,8864 | 0,499 | 0      |
| 19 | Q6S8J3 A26CA_HUMAN  | K.AGFAGDDAPR.A              |            | 2 | 2,8862 | 0,303 | 0,187  |
| 19 | O60318 MCM3A_HUMAN  | E.DAPFQHS#PLGK.A            | S538:      | 2 | 2,8845 | 0,326 | -0,573 |
| 19 | O94763 RMP_HUMAN    | R.NTNVNAM*HQVTDSTPCCHK.D    |            | 3 | 2,8836 | 0,176 | -0,083 |
| 19 | P21333 FLNA_HUMAN   | K.AGNNM*LLVGVHGPR.T         |            | 3 | 2,8832 | 0,402 | 0,378  |
| 19 | Q14151 SAFB2_HUMAN  | R.CYGFVTM*STSDE.A           |            | 2 | 2,8792 | 0,3   | -1,209 |
| 19 | Q96RL1 UIMC1_HUMAN  | R.DLNES#PVKSFVSISE.A        | S677:      | 2 | 2,8772 | 0,436 | 0,07   |
| 19 | Q9COK3 ARP11_HUMAN  | D.ITYFIQQLR.E               |            | 2 | 2,8752 | 0,283 | -0,283 |
| 19 | P35998 PRS7_HUMAN   | E.DDIQQLL.K                 |            | 2 | 2,8752 | 0,168 | -0,251 |
| 19 | P35221 CTNA1_HUMAN  | R.AIM*AQLPQEQK.A            |            | 2 | 2,8752 | 0,266 | 0,192  |
| 19 | Q9H6H4 REEP4_HUMAN  | R.SISDAPAPAYHDPLYLE.D       |            | 2 | 2,8752 | 0,302 | 0,263  |
| 19 | P11532 DMD_HUMAN    | K.GLSPLSPPEM*M*PT#SPQSPR.D  | T3548:     | 3 | 2,8739 | 0,241 | -1,155 |
| 19 | P53985 MOT1_HUMAN   | E.TSIDVAGKPNVTK.A           |            | 2 | 2,8724 | 0,436 | -0,334 |
| 19 | Q9P0K7 RAI14_HUMAN  | E.NAGIQSLLSK.I              |            | 2 | 2,8686 | 0,362 | -0,107 |
| 19 | Q9H6F5 CCD86_HUMAN  | R.AGLGSPERPPKTS#PGSPR.L     | S66:       | 3 | 2,8666 | 0,273 | 0,196  |
| 19 | Q9Y2W1 TR150_HUMAN  | R.ERS#PALKSPLQSVVVR.R       | S248:      | 3 | 2,8658 | 0,264 | 0,495  |
| 19 | Q8NI27 THOC2_HUMAN  | E.KTPVSGSLKS#PVPR.S         | S1278:     | 3 | 2,8657 | 0,276 | 0,119  |
| 19 | P13639 EF2_HUMAN    | R.LAKS#DPM*VQCIIE.S         | S530:      | 2 | 2,8652 | 0,312 | 0,141  |
| 19 | Q12905 ILF2_HUMAN   | R.VKPAPDETSFSE.A            |            | 2 | 2,8631 | 0,369 | 0,28   |
| 19 | P08240 SRPR_HUMAN   | E.AALSEDINLIR.G             |            | 2 | 2,8612 | 0,313 | 0,301  |
| 19 | O95425 SVIL_HUMAN   | R.SVDYNM*PRS#PVEM*DE.D      | S1322:     | 2 | 2,8611 | 0,368 | -0,13  |
| 19 | Q9HA05 Q9HA05_HUMAN | K.M*NSIVYQK.Q               |            | 2 | 2,8607 | 0,309 | -0,55  |
| 19 | Q9HC35 EMAL4_HUMAN  | E.SHSNDQSPQIR.A             |            | 2 | 2,8576 | 0,362 | -0,096 |
| 19 | Q96C19 EFHD2_HUMAN  | R.VFNPYTEFKE.F              |            | 2 | 2,8568 | 0,301 | -0,096 |
| 19 | Q86XJ1 GA2L3_HUMAN  | E.ETLLNTS#GPEDSISIPK.S      | S195:      | 2 | 2,8565 | 0,249 | -0,714 |
| 19 | P07737 PROF1_HUMAN  | K.CSVIRDS#LLQDGE.F          | S77:       | 2 | 2,8564 | 0,4   | 0      |
| 19 | O00257 CBX4_HUMAN   | E.VILLDS#DLDEPIDLR.S        | S465:      | 2 | 2,8559 | 0,339 | 0,135  |
| 19 | O75607 NPM3_HUMAN   | D.DFQLQPPVTFRLK.S           |            | 3 | 2,8503 | 0,089 | 0,691  |
| 19 | P68104 EF1A1_HUMAN  | K.FLKSGDAAIVDM*VPGKPM*CVE.S |            | 3 | 2,8494 | 0,196 | 0,08   |
| 19 | Q9UBR2 CATZ_HUMAN   | R.VGDYGSLSGR.E              |            | 2 | 2,8488 | 0,357 | -0,121 |
| 19 | Q05209 PTN12_HUMAN  | R.SCLVEGDAKEE.I             |            | 2 | 2,8484 | 0,346 | -0,197 |
| 19 | Q2M1Z3 CDGAP_HUMAN  | K.NRPS#SLNLDPAIPIAD.L       | S1105:     | 2 | 2,8482 | 0,474 | 0,069  |
| 19 | Q9H6F5 CCD86_HUMAN  | R.AGLGSPERPPKT#SPGS#PR.L    | T65:S69:   | 3 | 2,8474 | 0,14  | 0,188  |

|    |                    |                              |        |   |        |       |        |
|----|--------------------|------------------------------|--------|---|--------|-------|--------|
| 19 | P52756 RBM5_HUMAN  | R.NGDEENPLKR.G               |        | 2 | 2,8461 | 0,234 | -0,312 |
| 19 | Q96JM3 ZN828_HUMAN | E.LRKPGPLS#PEIR.S            | S427:  | 3 | 2,8457 | 0,268 | 0,238  |
| 19 | Q01082 SPTB2_HUMAN | K.TALPAQSAATLPAR.T           |        | 2 | 2,8426 | 0,438 | -0,357 |
| 19 | P82650 RT22_HUMAN  | R.DRM*IQVYFPKE.G             |        | 3 | 2,8424 | 0,117 | 0,254  |
| 19 | P10809 CH60_HUMAN  | E.DVQPHDLGKVG.E.V            |        | 2 | 2,8388 | 0,346 | -0,471 |
| 19 | P23229 ITA6_HUMAN  | R.TGGLYSCDITAR.G             |        | 2 | 2,8347 | 0,39  | 0,186  |
| 19 | P09525 ANXA4_HUMAN | E.DAHSVLYR.N                 |        | 2 | 2,8341 | 0,407 | 0,218  |
| 19 | P52907 CAZA1_HUMAN | R.LLLNNDNLLRE.G              |        | 2 | 2,8336 | 0,323 | 0,368  |
| 19 | Q8NI08 NCOA7_HUMAN | K.LSKEPSDTSSAFE.S            |        | 2 | 2,8335 | 0,354 | -0,524 |
| 19 | Q15149 PLEC1_HUMAN | E.FADM*LSGNAGGFR.S           |        | 2 | 2,8328 | 0,419 | -0,898 |
| 19 | P19634 SL9A1_HUMAN | K.INNYLTVPAHKLDSPTM*S#R.A    | S697:  | 3 | 2,8324 | 0,103 | 0,406  |
| 19 | Q13416 ORC2_HUMAN  | K.SVS#FSLKNDPE.I             | S122:  | 2 | 2,8315 | 0,35  | 0,187  |
| 19 | O60508 PRP17_HUMAN | K.SPS#SKPSLAVAVDSAPE.V       | S45:   | 2 | 2,8314 | 0,178 | -1,417 |
| 19 | Q9NYL2 MLTK_HUMAN  | E.SM*SNDSLDPDKCNS#FLHNKAE.W  | S275:  | 3 | 2,8312 | 0,16  | -0,367 |
| 19 | O95602 RPA1_HUMAN  | R.TALSAVDM*TQRE.A            |        | 2 | 2,8237 | 0,335 | -0,547 |
| 19 | Q8NI27 THOC2_HUMAN | K.RVPSIDVLCNE.F              |        | 2 | 2,8219 | 0,352 | -0,094 |
| 19 | Q8IVF2 AHNK2_HUMAN | E.DVKLPEGPVHE.G              |        | 3 | 2,8194 | 0,162 | 0,674  |
| 19 | Q14697 GANAB_HUMAN | E.DRSLLSVNAR.G               |        | 3 | 2,8192 | 0,143 | 0,22   |
| 19 | Q9UNN8 EPCR_HUMAN  | E.DTCVQYVQK.H                |        | 2 | 2,818  | 0,335 | -0,107 |
| 19 | Q02952 AKA12_HUMAN | E.STAVGQAHSDISKDM*SE.A       |        | 2 | 2,8164 | 0,333 | 0,069  |
| 19 | Q9Y2W1 TR150_HUMAN | R.SPALKS#PLQSVVVR.R          | S253:  | 2 | 2,8152 | 0,317 | -0,703 |
| 19 | Q13043 STK4_HUMAN  | R.LLALDPM*M*EQE.I            |        | 2 | 2,8143 | 0,355 | 0,461  |
| 19 | Q12888 TP53B_HUMAN | E.GRQDKPM*DTSVLS#EEGGEPFQK.K | S398:  | 3 | 2,8092 | 0,112 | 1,518  |
| 19 | P49023 PAXI_HUMAN  | K.SAEPSPTVM*STS#LGSNLSE.L    | S137:  | 2 | 2,8079 | 0,261 | -1,288 |
| 19 | Q96AD5 PLPL2_HUMAN | R.VQS#LPSVPLSCAAYRE.A        | S404:  | 2 | 2,8056 | 0,285 | -0,066 |
| 19 | Q96PU5 NED4L_HUMAN | R.S#LSSPTVTL SAPLE.G         | S446:  | 2 | 2,8005 | 0,229 | 0,494  |
| 19 | P63241 IF5A1_HUMAN | R.LPEGDLGKE.I                |        | 2 | 2,8003 | 0,28  | -0,509 |
| 19 | Q96M11 HYLS1_HUMAN | R.KLPFPLS#PS.-               | S297:  | 2 | 2,8002 | 0,363 | -0,114 |
| 19 | A1L390 PKHG3_HUMAN | R.HGSATDSLSCQLSPE.V          |        | 2 | 2,7996 | 0,352 | 0,077  |
| 19 | P04406 G3P_HUMAN   | K.LVINGNPITIFQERDPS#K.I      | S83:   | 2 | 2,7972 | 0,347 | 0,115  |
| 19 | P42766 RL35_HUMAN  | E.LLKQLDDLKVE.L              |        | 2 | 2,7963 | 0,215 | 0,279  |
| 19 | Q9H5J0 ZBTB3_HUMAN | R.APHPPVADVSLAS#PSSSTE.T     | S271:  | 2 | 2,7955 | 0,38  | 0,253  |
| 19 | Q9UKS6 PACN3_HUMAN | E.VTLTSIVPTR.D               |        | 2 | 2,7954 | 0,362 | 0,449  |
| 19 | Q12849 GRSF1_HUMAN | E.DVLNFFSDCR.I               |        | 2 | 2,7949 | 0,46  | 0,096  |
| 19 | Q09666 AHNK_HUMAN  | K.ASLGS#LEGEAEAE.A           | S5752: | 2 | 2,7946 | 0,276 | -0,091 |
| 19 | Q15369 ELOC_HUMAN  | K.AM*LSGPGQFAENE.T           |        | 2 | 2,7945 | 0,134 | 0,268  |
| 19 | P63241 IF5A1_HUMAN | E.DICPSTHNM*DVPNIK.R         |        | 2 | 2,7933 | 0,295 | 0      |
| 19 | P31946 1433B_HUMAN | K.DSTLIM*QLLR.D              |        | 2 | 2,793  | 0,117 | -0,202 |
| 19 | Q8WWY3 PRP31_HUMAN | E.DLGFSLGHLGK.S              |        | 2 | 2,7927 | 0,438 | 0,107  |

|    |                     |                          |                    |   |        |       |        |
|----|---------------------|--------------------------|--------------------|---|--------|-------|--------|
| 19 | Q8NC51 PAIRB_HUMAN  | E.LTES#PKYIQK.Q          | S234:              | 2 | 2,7923 | 0,299 | -1,801 |
| 19 | Q9BZL6 KPCD2_HUMAN  | R.QASLSIS#VSNISQIQE.N    | S533:              | 2 | 2,7905 | 0,288 | 0,365  |
| 19 | P05114 HMG1_HUMAN   | E.TKEDLPAENGETK.T        |                    | 3 | 2,7896 | 0,088 | 1,405  |
| 19 | Q71RC2 LARP4_HUMAN  | K.DGLNQTTPVSPSTTKPSR.A   |                    | 3 | 2,7875 | 0,174 | 0,175  |
| 19 | Q9C0C2 TB182_HUMAN  | R.RGAGAELKDTQS#PSTCSE.G  | S712:              | 3 | 2,7843 | 0,239 | 0      |
| 19 | Q16204 CCDC6_HUMAN  | K.SGGIVISPFRL.EE.L       |                    | 2 | 2,7837 | 0,333 | 0,087  |
| 19 | Q5VT52 K0460_HUMAN  | R.LSSSPGLFGAFSVR.G       |                    | 2 | 2,7834 | 0,372 | -0,171 |
| 19 | O75962 TRIO_HUMAN   | R.NFLNALTSP#PIEYQR.N     | S2223:             | 2 | 2,7834 | 0,352 | -0,07  |
| 19 | Q01082 SPTB2_HUMAN  | R.TSS#KES#SPIPS#PTSDRK.A | S2161:S2164:S2169: | 2 | 2,7813 | 1     | 0,239  |
| 19 | B1AM35 B1AM35_HUMAN | K.RPAS#VSSAAVE.H         | S240:              | 2 | 2,779  | 0,435 | 0,098  |
| 19 | Q5SW79 CE170_HUMAN  | R.QGS#FTIEKPSNPIE.L      | S838:              | 2 | 2,7778 | 0,204 | 0,266  |
| 19 | Q15424 SAFB1_HUMAN  | K.ADSLLAVVK.R            |                    | 2 | 2,7735 | 0,241 | -0,2   |
| 19 | P07355 ANXA2_HUMAN  | E.VTIVNILTNR.S           |                    | 2 | 2,7732 | 0,386 | 0      |
| 19 | P02545 LMNA_HUMAN   | R.SGAQASSTPLS#PTR.I      | S22:               | 2 | 2,7724 | 0,435 | -0,339 |
| 19 | P60174 TPIS_HUMAN   | E.VVCAPPTAYIDFAR.Q       |                    | 2 | 2,7663 | 0,365 | -0,154 |
| 19 | Q9BVL2 NUPL1_HUMAN  | R.TQKT#PPGLQHE.Y         | T331:              | 3 | 2,7658 | 0,182 | 0,417  |
| 19 | Q9NTI5 PDS5B_HUMAN  | E.TVSNASSSNPSS#PGRIK.G   | S1166:             | 2 | 2,7646 | 0,387 | 0,131  |
| 19 | O43294 TGFI1_HUMAN  | K.KRPS#LPSS#PSPGLPK.A    | S137:S141:         | 3 | 2,7641 | 0,28  | 0,214  |
| 19 | P43897 EFTS_HUMAN   | E.GSLKDQLALAIKGLGE.N     |                    | 2 | 2,763  | 0,308 | -0,151 |
| 19 | P35579 MYH9_HUMAN   | K.VSHLLGINVDFTR.G        |                    | 3 | 2,7624 | 0,336 | 0,116  |
| 19 | Q14157 UBP2L_HUMAN  | R.LAQM*ISDHNDADFEE.K     |                    | 2 | 2,7621 | 0,29  | -0,139 |
| 19 | Q9NPR2 SEM4B_HUMAN  | E.KRPLSIQDS#FVE.V        | S808:              | 2 | 2,7589 | 0,429 | -0,081 |
| 19 | P68104 EF1A1_HUMAN  | K.IGGIGTVPVGRVE.T        |                    | 2 | 2,7506 | 0,319 | 0,097  |
| 19 | Q9P107 GMIP_HUMAN   | R.SLDS#PTSSPGAGTR.Q      | S437:              | 2 | 2,7501 | 0,396 | 0,259  |
| 19 | Q9HCM7 AUT2L_HUMAN  | R.TTPLGGLGPGEAR.D        |                    | 2 | 2,7484 | 0,343 | -0,498 |
| 19 | O95359 TACC2_HUMAN  | K.IGSSLPQDDDAPKK.Q       |                    | 3 | 2,7468 | 0,257 | 0,311  |
| 19 | Q9P287 BCCIP_HUMAN  | E.LTDLLIQNHIGSVIK.Q      |                    | 3 | 2,7439 | 0,221 | 0      |
| 19 | Q9Y6K9 NEMO_HUMAN   | K.AQVTSLLGELQE.S         |                    | 2 | 2,7439 | 0,258 | 0      |
| 19 | O00139 KIF2A_HUMAN  | K.QQVQVVGLQERE.V         |                    | 2 | 2,7434 | 0,329 | 0,259  |
| 19 | Q12905 ILF2_HUMAN   | E.ISTWDGVIVTPSEK.A       |                    | 2 | 2,7429 | 0,308 | 0,319  |
| 19 | Q9HCK8 CHD8_HUMAN   | E.HRVLDNFS#DIVE.G        | S1400:             | 2 | 2,7394 | 0,198 | -0,801 |
| 19 | Q07157 ZO1_HUMAN    | R.IDS#PGFKPASQQK.A       | S912:              | 3 | 2,7384 | 0,175 | 0,123  |
| 19 | Q99747 SNAG_HUMAN   | K.LGLSLVVPGGGIK.K        |                    | 2 | 2,7371 | 0,297 | 0      |
| 19 | Q9GZR7 DDX24_HUMAN  | E.LTDYQLVSPAK.N          |                    | 2 | 2,7357 | 0,32  | 0,099  |
| 19 | Q9Y2D5 AKAP2_HUMAN  | K.NLM*QTLM*EDYE.T        |                    | 2 | 2,7345 | 0,307 | -0,086 |
| 19 | Q9H4A3 WNK1_HUMAN   | R.DVDDGSGSPHSPHQLSSK.S   |                    | 3 | 2,7343 | 0,393 | 0      |
| 19 | Q9UHB7 AFF4_HUMAN   | R.M*FS#PM*EEKE.L         | S694:              | 2 | 2,7337 | 0,245 | -0,59  |
| 19 | Q9UQ35 SRRM2_HUMAN  | E.HKELS#NS#PLRE.N        | S1318:S1320:       | 2 | 2,7336 | 0,244 | 0      |
| 19 | P11388 TOP2A_HUMAN  | K.GSVPLSSSPATHFPDETE.I   |                    | 2 | 2,7306 | 0,449 | 0      |

|    |                      |                            |              |   |        |       |        |
|----|----------------------|----------------------------|--------------|---|--------|-------|--------|
| 19 | O14686 MLL2_HUMAN    | R.ISTEELPKM*E.S            |              | 2 | 2,7303 | 0,346 | 0      |
| 19 | O15014 ZN609_HUMAN   | K.SKDAEQLVKE.G             |              | 2 | 2,7302 | 0,341 | -0,106 |
| 19 | Q9UHB6 LIMA1_HUMAN   | R.ETPHS#PGVEDAPIAK.V       | S490:        | 3 | 2,7302 | 0,194 | 0,112  |
| 19 | P55072 TERA_HUMAN    | K.GVLFGPPGCGK.T            |              | 2 | 2,724  | 0,406 | 0,195  |
| 19 | Q15154 PCM1_HUMAN    | R.ALYALQDIVSR.H            |              | 2 | 2,7209 | 0,186 | 0,195  |
| 19 | Q9UBR2 CATZ_HUMAN    | R.VGDYGSLSGRE.K            |              | 2 | 2,7209 | 0,453 | -0,535 |
| 19 | P05455 LA_HUMAN      | E.DLHILFSNHGE.I            |              | 2 | 2,7204 | 0,406 | 0,286  |
| 19 | Q9NTI5 PDS5B_HUMAN   | E.TVSNASSSSNPSS#PGR.I      | S1166:       | 2 | 2,7191 | 0,351 | -0,151 |
| 19 | O60524 SDCG1_HUMAN   | E.LKLQTNHVTM*LLR.N         |              | 3 | 2,7186 | 0,28  | 0,462  |
| 19 | P31948 STIP1_HUMAN   | K.ALDLSSCKE.A              |              | 2 | 2,7182 | 0,237 | 1,716  |
| 19 | Q86YS7 K0528_HUMAN   | E.IIGS#PIPEPR.Q            | S643:        | 2 | 2,7181 | 0,354 | 0,211  |
| 19 | Q96B54 ZN428_HUMAN   | R.SPLGEAPPGTPPCR.L         |              | 2 | 2,7176 | 0,332 | -1,614 |
| 19 | Q9UHB6 LIMA1_HUMAN   | E.ILERPAQLANAR.E           |              | 3 | 2,7155 | 0,262 | -0,947 |
| 19 | P68104 EF1A1_HUMAN   | R.EHALLAYTLGVK.Q           |              | 2 | 2,7148 | 0,387 | 0,093  |
| 19 | Q6NWX9 PR40B_HUMAN   | E.LQQAELPNRS#PGFGIK.K      | S832:        | 3 | 2,713  | 0,081 | 0,1    |
| 19 | Q13136 LIPA1_HUMAN   | K.KM*QM*DGNVSGTQRLD.S      |              | 3 | 2,7124 | 0,15  | 0,107  |
| 19 | P28074 PSB5_HUMAN    | R.VSSDNVADLHEK.Y           |              | 3 | 2,7117 | 0,308 | 0,487  |
| 19 | Q9UPN3 MACF1_HUMAN   | K.LVSDTIGQRVDE.I           |              | 2 | 2,7087 | 0,364 | 0,641  |
| 19 | Q9UBG0 MRC2_HUMAN    | R.TLGDQLSLLGAR.T           |              | 2 | 2,7053 | 0,369 | -0,36  |
| 19 | Q9UHB6 LIMA1_HUMAN   | E.ILERPAQLANAR.E           |              | 2 | 2,7047 | 0,09  | -1,444 |
| 19 | Q13416 ORC2_HUMAN    | K.SVSFSLKNDPE.I            |              | 2 | 2,7044 | 0,378 | 0,698  |
| 19 | Q9H3M3 Q9H3M3_HUMAN  | E.KATDATTATFFK.M           |              | 2 | 2,7013 | 0,422 | -0,375 |
| 19 | Q99426 TBCB_HUMAN    | E.LYGVDDKFYSKLDQE.D        |              | 3 | 2,7008 | 0,28  | 0,302  |
| 19 | Q9C0B5 ZDHC5_HUMAN   | R.GDS#LKEPTSIAE.S          | S380:        | 2 | 2,7008 | 0,474 | 0,276  |
| 19 | Q13263 TIF1B_HUMAN   | D.GADSTGVVAKLS#PANQR.K     | S697:        | 3 | 2,7006 | 0,121 | -0,104 |
| 19 | P04264 K2C1_HUMAN    | K.LALDLEIATYR.T            |              | 2 | 2,7001 | 0,373 | -0,382 |
| 19 | Q5SYE7 NHSL1_HUMAN   | R.ATM*PQVPGGSVKPK.I        |              | 3 | 2,6992 | 0,17  | 0,324  |
| 19 | P27816 MAP4_HUMAN    | R.LATNTSAPDLK.N            |              | 2 | 2,699  | 0,341 | -0,108 |
| 19 | Q9UQ35 SRRM2_HUMAN   | K.AQT#PPGPSLSGSKS#PCPQEK.S | T1003:S1014: | 3 | 2,6986 | 0,357 | 0,331  |
| 19 | P12956 KU70_HUMAN    | R.DSLIFLVDASK.A            |              | 2 | 2,6985 | 0,356 | 0,202  |
| 19 | P06756 ITAV_HUMAN    | K.IYIGDDNPLTLIVK.A         |              | 2 | 2,6984 | 0,287 | -0,465 |
| 19 | ##Q8N5D0 WDTC1_HUMAN | D.AAGT#ILIR.D              | T569:        | 2 | 2,6956 | 0,125 | 0,682  |
| 19 | Q9NYF8 BCLF1_HUMAN   | K.LKDLFDY#SPPLHK.N         | Y511:        | 3 | 2,695  | 0,166 | 0,221  |
| 19 | Q96JM3 ZN828_HUMAN   | R.KTS#PASLDFPE.S           | S459:        | 2 | 2,6948 | 0,34  | 0,384  |
| 19 | Q8IUW5 RELL1_HUMAN   | E.NSDTVGQIVHYIM*KNE.A      |              | 3 | 2,6944 | 0,216 | 0,098  |
| 19 | Q9UKK3 PARP4_HUMAN   | E.SCKPTATEPLFK.K           |              | 3 | 2,6936 | 0,142 | 0,663  |
| 19 | Q12888 TP53B_HUMAN   | R.KGVSQTGTPVCEE.D          |              | 2 | 2,6933 | 0,489 | 0      |
| 19 | Q01844 EWS_HUMAN     | R.QDHPSSM*GVYGQE.S         |              | 2 | 2,6904 | 0,245 | 0,757  |
| 19 | O94826 TOM70_HUMAN   | E.GRAS#PAPGSGHPEGPAHLD.M   | S91:         | 3 | 2,6899 | 0,122 | 1,034  |



|    |                     |                             |              |   |        |       |        |
|----|---------------------|-----------------------------|--------------|---|--------|-------|--------|
| 19 | P08758 ANXA5_HUMAN  | E.SILTLLTSR.S               |              | 2 | 2,6899 | 0,314 | -0,182 |
| 19 | Q13428 TCOF_HUMAN   | K.TVANLLSGKS#PR.K           | S156:        | 2 | 2,6899 | 0,263 | 0,092  |
| 19 | Q9UQ35 SRRM2_HUMAN  | E.SYFGVSSLQLK.G             |              | 2 | 2,6898 | 0,357 | 0,199  |
| 19 | P51114 FXR1_HUMAN   | E.NGLVTVADYISR.A            |              | 2 | 2,6889 | 0,39  | 0,093  |
| 19 | P68104 EF1A1_HUMAN  | E.S#FSDYPPPLGR.F            | S414:        | 2 | 2,6887 | 0,289 | 0,4    |
| 19 | O75781 PALM_HUMAN   | E.NAAAPS#PVRAPAPS#PAKEER.K  | S116:S124:   | 3 | 2,6881 | 0,359 | 0,084  |
| 19 | Q9C0C2 TB182_HUMAN  | E.HGVGGVSCQPEPGLR.H         |              | 3 | 2,6861 | 0,214 | 0,236  |
| 19 | Q9NQS7 INCE_HUMAN   | E.QHVTQLM*STEPLPR.T         |              | 2 | 2,6846 | 0,353 | -0,443 |
| 19 | Q9Y3F4 STRAP_HUMAN  | K.YDYNSGEELE.S              |              | 2 | 2,6819 | 0,291 | 0,2    |
| 19 | P27816 MAP4_HUMAN   | E.VALAKDM*ES#PTKLDVTLAK.D   | S280:        | 3 | 2,6813 | 0,184 | 0,086  |
| 19 | Q9UGU0 TCF20_HUMAN  | R.LNAS#PAAREE.A             | S574:        | 2 | 2,6811 | 0,286 | -0,643 |
| 19 | Q9ULH0 ARMS_HUMAN   | E.YLSDALLDKK.D              |              | 2 | 2,676  | 0,325 | -0,105 |
| 19 | O94880 PHF14_HUMAN  | R.NRPLLDVFSM*EE.L           |              | 2 | 2,6744 | 0,368 | -0,166 |
| 19 | P02545 LMNA_HUMAN   | R.LRLS#PS#PTSQR.S           | S390:S392:   | 2 | 2,6743 | 0,237 | -0,609 |
| 19 | P54577 SYYC_HUMAN   | E.VALNKLLDPIRE.K            |              | 3 | 2,674  | 0,182 | 0,132  |
| 19 | O43776 SYNC_HUMAN   | K.SPAGSIVHE.L               |              | 2 | 2,672  | 0,229 | 0,136  |
| 19 | Q8NHQ8 RASF8_HUMAN  | R.ILQNPISSGFNPE.G           |              | 2 | 2,672  | 0,331 | 0,345  |
| 19 | Q13564 ULA1_HUMAN   | E.DLRLDKPFPE.L              |              | 3 | 2,6711 | 0,109 | 0,743  |
| 19 | P05556 ITB1_HUMAN   | E.VNSEDM*DAYCR.K            |              | 2 | 2,6707 | 0,365 | 0      |
| 19 | O75607 NPM3_HUMAN   | D.DFQLQPPVTFR.L             |              | 2 | 2,6699 | 0,414 | 0,181  |
| 19 | Q9UQ35 SRRM2_HUMAN  | K.SST#PPGESYFGVSSLQLK.G     | T1043:       | 2 | 2,6644 | 0,215 | 0,497  |
| 19 | O00562 PITM1_HUMAN  | R.SSYSSQHGGAVSPQLSE.W       |              | 2 | 2,6636 | 0,403 | 0,067  |
| 19 | O60812 HNRCL_HUMAN  | K.QKVDSLLENLE.K             |              | 2 | 2,6633 | 0,179 | -0,189 |
| 19 | Q9H4A3 WNK1_HUMAN   | K.EGPVAS#PPFMDLE.Q          | S1978:       | 2 | 2,6602 | 0,254 | -0,498 |
| 19 | Q9NQ84 GPC5C_HUMAN  | K.VPSEGAYDIILPR.A           |              | 2 | 2,6598 | 0,286 | 0,171  |
| 19 | Q99759 M3K3_HUMAN   | E.NM*GLAVQYLDPR.G           |              | 2 | 2,6587 | 0,333 | 0      |
| 19 | Q9NPI6 DCP1A_HUMAN  | R.QRS#PLLNQPVPE.L           | S353:        | 2 | 2,6585 | 0,368 | -0,335 |
| 19 | A9CQZ4 A9CQZ4_HUMAN | K.AAEDEEVPAFFK.N            |              | 2 | 2,6583 | 0,249 | 0      |
| 19 | Q9HC35 EMAL4_HUMAN  | R.AS#PS#PQPSSQPLQIHR.Q      | S144:S146:   | 2 | 2,6566 | 0,315 | -0,904 |
| 19 | Q9C0C2 TB182_HUMAN  | E.AADSDAHLFQDSTEPR.A        |              | 3 | 2,6559 | 0,237 | 0      |
| 19 | P60174 TPIS_HUMAN   | K.IAVAAQNCYK.V              |              | 2 | 2,655  | 0,313 | -1,394 |
| 19 | Q9Y618 NCOR2_HUMAN  | E.GVEPVS#PVSS#PSLTHDKGLPK.H | S2057:S2061: | 3 | 2,6543 | 0,278 | 0,719  |
| 19 | P18583 SON_HUMAN    | R.AGIEGPLLASDVGRDR.S        |              | 2 | 2,6507 | 0,19  | 0      |
| 19 | Q08AE8 SPIR1_HUMAN  | E.NGLSTSQQVPAQR.K           |              | 2 | 2,6502 | 0,354 | 0      |
| 19 | P26006 ITA3_HUMAN   | R.TGAVYLCPLTAHK.D           |              | 3 | 2,6499 | 0,26  | -0,128 |
| 19 | Q9UHV9 PFD2_HUMAN   | E.TLTQQLQAK.G               |              | 2 | 2,6489 | 0,204 | 0      |
| 19 | P60900 PSA6_HUMAN   | E.AEIDAHLVALAERD.-          |              | 3 | 2,6488 | 0,193 | 0,42   |
| 19 | Q86YP4 P66A_HUMAN   | R.VNGLTTVALKE.T             |              | 2 | 2,6486 | 0,301 | 0,213  |
| 19 | Q8IY57 YAF2_HUMAN   | D.LTVIITDFK.E               |              | 2 | 2,6482 | 0,227 | -0,465 |

|    |                     |                             |            |   |        |       |        |
|----|---------------------|-----------------------------|------------|---|--------|-------|--------|
| 19 | P60900 PSA6_HUMAN   | D.SSTVTHLFK.I               |            | 2 | 2,6466 | 0,196 | -0,12  |
| 19 | P63104 1433Z_HUMAN  | E.VAAGDDKKGIVDQSQQAYQE.A    |            | 3 | 2,6462 | 0,287 | -0,34  |
| 19 | P09211 GSTP1_HUMAN  | E.DLRCKYISLIYTNYE.A         |            | 3 | 2,6461 | 0,156 | 0,188  |
| 19 | Q8N5Y2 MS3L1_HUMAN  | R.SSS#PIPLT#PSKE.G          | S400:T405: | 2 | 2,6442 | 0,185 | 0,087  |
| 19 | Q09666 AHNK_HUMAN   | K.VQANLGAPDINIE.G           |            | 2 | 2,6441 | 0,281 | 0,27   |
| 19 | P43897 EFTS_HUMAN   | E.GSLKDQLALAIGK.L           |            | 2 | 2,6427 | 0,306 | -0,371 |
| 19 | Q02952 AKA12_HUMAN  | K.SAES#PTS#PVTSE.T          | S283:S286: | 2 | 2,6427 | 0,162 | -1,444 |
| 19 | Q14699 RFTN1_HUMAN  | E.NEKPGETDVCAPAGR.N         |            | 3 | 2,6421 | 0,106 | -0,792 |
| 19 | Q13439 GOGA4_HUMAN  | K.LQLRVPS#VE.S              | S71:       | 2 | 2,6414 | 0,207 | 0,218  |
| 19 | Q09666 AHNK_HUMAN   | K.ADIKS#PSLDVTVPEAE.L       | S4993:     | 2 | 2,6401 | 0,196 | 0,07   |
| 19 | Q58FF8 H90B2_HUMAN  | E.SLTDPSKLDGKE.L            |            | 2 | 2,64   | 0,316 | -0,266 |
| 19 | P49023 PAXI_HUMAN   | R.ISASSATRE.L               |            | 2 | 2,6398 | 0,301 | 0,066  |
| 19 | O60256 KPRB_HUMAN   | R.SVAAIHPSLE.I              |            | 2 | 2,6393 | 0,254 | -0,357 |
| 19 | Q8IWA0 WDR75_HUMAN  | K.VQDTS#NTGLGEDIIHQLSK.S    | S796:      | 3 | 2,6388 | 0,162 | -0,171 |
| 19 | P55072 TERA_HUMAN   | E.DIGGLEDVKRE.L             |            | 2 | 2,6382 | 0,407 | 0,595  |
| 19 | Q13428 TCOF_HUMAN   | K.GSLGQGTAPVLPKG.T          |            | 2 | 2,638  | 0,163 | 0,19   |
| 19 | Q9UMY4 SNX12_HUMAN  | K.IAGHPLAQNE.R              |            | 2 | 2,6365 | 0,362 | 0      |
| 19 | P38646 GRP75_HUMAN  | R.QAASSLQQASLK.L            |            | 2 | 2,6352 | 0,29  | 0,099  |
| 19 | Q12888 TP53B_HUMAN  | K.M*VIQGPSS#PQGE.A          | S1114:     | 2 | 2,6344 | 0,275 | -0,276 |
| 19 | P00441 SODC_HUMAN   | R.HVGD LGNVTADKDG VADVSIE.D |            | 3 | 2,6334 | 0,162 | 0,173  |
| 19 | Q92615 LARP5_HUMAN  | E.RSPS#PAHL PDDPKVAE.K      | S601:      | 2 | 2,6332 | 0,339 | -1,155 |
| 19 | Q8NHV4 NEDD1_HUMAN  | E.TDSGKNQDFSSFDDTGK.S       |            | 3 | 2,6288 | 0,161 | -1,979 |
| 19 | P82650 RT22_HUMAN   | R.M*IQVYFPKE.G              |            | 2 | 2,6271 | 0,232 | 0,521  |
| 19 | A8K6Q8 A8K6Q8_HUMAN | E.KLDSTDFSTIK.L             |            | 2 | 2,6226 | 0,293 | -0,45  |
| 19 | P84090 ERH_HUMAN    | D.LADLSCLVYR.A              |            | 2 | 2,6224 | 0,377 | 0,101  |
| 19 | P10109 ADX_HUMAN    | R.SSS#EDKITVHFINRDGE.T      | S63:       | 3 | 2,6223 | 0,336 | -0,091 |
| 19 | P11233 RALA_HUMAN   | E.DENVPFLLVGNK.S            |            | 2 | 2,6216 | 0,266 | 0      |
| 19 | Q12756 KIF1A_HUMAN  | K.KTPHLVNLNEDPLM*SE.C       |            | 2 | 2,6215 | 0,37  | 0,198  |
| 19 | Q09666 AHNK_HUMAN   | K.LSGPS#LKM*PSLE.I          | S4903:     | 2 | 2,621  | 0,263 | -0,18  |
| 19 | P08621 RU17_HUMAN   | E.FEDPRDAPPPTRAE.T          |            | 3 | 2,6173 | 0,197 | -0,343 |
| 19 | P30041 PRDX6_HUMAN  | K.LPFIIDDR.N                |            | 2 | 2,6171 | 0,256 | 0      |
| 19 | Q15424 SAFB1_HUMAN  | K.ADSLLAVVKR.E              |            | 2 | 2,6142 | 0,174 | 0,228  |
| 19 | Q9UQ35 SRRM2_HUMAN  | R.GEFSAS#PM*LK.S            | S1124:     | 2 | 2,6142 | 0,397 | 0,21   |
| 19 | O15371 EIF3D_HUMAN  | K.YLILKDPNK.Q               |            | 2 | 2,6135 | 0,229 | -0,111 |
| 19 | P05556 ITB1_HUMAN   | K.NVLSLTNKG.V               |            | 2 | 2,6134 | 0,266 | 0,227  |
| 19 | P05023 AT1A1_HUMAN  | R.DKYEPAAVS#E.Q             | S16:       | 2 | 2,6131 | 0,311 | 0,205  |
| 19 | Q13136 LIPA1_HUMAN  | K.M*QM*DG NVSGTQR LD.S      |            | 2 | 2,6111 | 0,342 | -0,077 |
| 19 | Q96SB4 SRPK1_HUMAN  | E.SES#PVERPLK.E             | S482:      | 2 | 2,6094 | 0,22  | -0,1   |
| 19 | Q08AE8 SPIR1_HUMAN  | R.KLRPVS#PEE.I              | S228:      | 2 | 2,6092 | 0,262 | 0      |

|    |                     |                              |        |   |        |       |        |
|----|---------------------|------------------------------|--------|---|--------|-------|--------|
| 19 | O00410 IMB3_HUMAN   | K.FKPDCVNVVEE.V              |        | 2 | 2,6028 | 0,194 | -0,099 |
| 19 | Q9NYF8 BCLF1_HUMAN  | D.LFDYS#PPLHK.N              | S512:  | 2 | 2,6027 | 0,132 | 0      |
| 19 | Q9C0C2 TB182_HUMAN  | R.SLPSDLAFNGDLAK.A           |        | 2 | 2,6016 | 0,28  | 0      |
| 19 | P07195 LDHB_HUMAN   | E.VFLSLPCILNAR.G             |        | 2 | 2,6011 | 0,174 | -0,174 |
| 19 | P35030 TRY3_HUMAN   | D.TLDNDIMLIK.L               |        | 2 | 2,6007 | 0,351 | 0      |
| 19 | P16949 STMN1_HUMAN  | R.SKESVPEFPLS#PPK.K          | S38:   | 2 | 2,6001 | 0,287 | 0,075  |
| 19 | Q9UQ35 SRRM2_HUMAN  | K.RVPS#PTPAPKE.A             | S2581: | 2 | 2,5984 | 0,275 | -0,097 |
| 19 | O15371 EIF3D_HUMAN  | E.GKYLILKDPNKQVIR.V          |        | 3 | 2,5951 | 0,21  | 0,41   |
| 19 | Q9NR30 DDX21_HUMAN  | R.SDAGLES#DTAM*KKGE.T        | S13:   | 3 | 2,5913 | 0,262 | 0,783  |
| 19 | Q9NQW6 ANLN_HUMAN   | K.STLSQTVPSKGE.L             |        | 2 | 2,5903 | 0,312 | 0,099  |
| 19 | Q9UQ35 SRRM2_HUMAN  | R.VSGRTS#PPLDR.A             | S2398: | 3 | 2,5881 | 0,127 | -0,597 |
| 19 | Q58FF8 H90B2_HUMAN  | K.SLVSVTKE.G                 |        | 2 | 2,588  | 0,199 | 0,424  |
| 19 | Q13123 RED_HUMAN    | K.QLGDFFGM*SNSYAE.C          |        | 2 | 2,5863 | 0,259 | 0,231  |
| 19 | Q15459 SF3A1_HUMAN  | K.VM*QQQQTTQQQLPQK.V         |        | 3 | 2,5853 | 0,087 | -0,093 |
| 19 | P55010 IF5_HUMAN    | K.VLTLS#DDLERTIEE.R          | S229:  | 2 | 2,5842 | 0,277 | 0      |
| 19 | Q9UK76 HN1_HUMAN    | R.RNS#SEASSGDFLD.L           | S87:   | 2 | 2,5797 | 0,152 | -0,333 |
| 19 | Q6PJT7 ZC3HE_HUMAN  | R.TPRIS#PPIKEEE.T            | S409:  | 2 | 2,5775 | 0,387 | -0,165 |
| 19 | Q13523 PRP4B_HUMAN  | R.TKLDDLALLE.D               |        | 2 | 2,5748 | 0,207 | -0,755 |
| 19 | P62937 PPIA_HUMAN   | K.KITIADCGQLE.-              |        | 2 | 2,5747 | 0,329 | -0,782 |
| 19 | Q92598 HS105_HUMAN  | R.IAKFFGKDISTTLNADE.A        |        | 3 | 2,5711 | 0,205 | 0,098  |
| 19 | O15127 SCAM2_HUMAN  | E.FSQGIFSSR.T                |        | 2 | 2,5706 | 0,19  | 0,356  |
| 19 | P37802 TAGL2_HUMAN  | E.GKNVIGLQM*GTNR.G           |        | 3 | 2,5688 | 0,159 | 0      |
| 19 | Q7L014 DDX46_HUMAN  | R.KLLEPVDHGKIE.Y             |        | 3 | 2,5675 | 0,204 | -0,597 |
| 19 | Q2NKX8 ERC6L_HUMAN  | E.ALS#PEQAAHYLR.Y            | S14:   | 2 | 2,5664 | 0,378 | 0      |
| 19 | O60684 IMA7_HUMAN   | K.SYKNNALNPEE.M              |        | 2 | 2,5663 | 0,34  | -0,572 |
| 19 | A9CQZ4 A9CQZ4_HUMAN | K.NLGSQS#PKPR.Q              | S27:   | 2 | 2,5662 | 0,212 | -0,335 |
| 19 | Q92945 FUBP2_HUMAN  | R.VPDGM*VGLIIGR.G            |        | 2 | 2,5656 | 0,245 | 0,196  |
| 19 | Q15149 PLEC1_HUMAN  | K.AQLEPVAS#PAK.K             | S1435: | 2 | 2,5655 | 0,298 | -0,512 |
| 19 | P51858 HDGF_HUMAN   | K.LVIDEPAKE.K                |        | 2 | 2,5653 | 0,395 | -0,782 |
| 19 | Q86YV5 SG223_HUMAN  | E.DAPVVYLGSFR.G              |        | 2 | 2,5613 | 0,421 | 0,199  |
| 19 | P63241 IF5A1_HUMAN  | E.DLRLPEGDLGKE.I             |        | 2 | 2,5605 | 0,22  | -0,909 |
| 19 | Q9UKA4 AKA11_HUMAN  | E.KLS#PLTGQACR.Y             | S1580: | 2 | 2,5603 | 0,181 | -0,279 |
| 19 | Q12774 ARHG5_HUMAN  | E.SLSETPGPSS#PRQPR.K         | S48:   | 3 | 2,5551 | 0,311 | 0      |
| 19 | P28074 PSB5_HUMAN   | R.VSSDNVADLHE.K              |        | 2 | 2,5546 | 0,302 | -0,103 |
| 19 | Q8ND56 LS14A_HUMAN  | E.QAVQTASAHLPAAVGR.R         |        | 3 | 2,549  | 0,351 | 0,21   |
| 19 | P63241 IF5A1_HUMAN  | K.VHLVGIDIFTGK.K             |        | 3 | 2,5482 | 0,19  | 0,422  |
| 19 | O75494 FUSIP_HUMAN  | R.DAEDALHNLD.R               |        | 2 | 2,5472 | 0,265 | 0,219  |
| 19 | Q86WB0 NIPA_HUMAN   | R.SQDATFSPGSEQAEKS#PGPIVSR.T | S344:  | 3 | 2,5471 | 0,159 | -0,298 |
| 19 | O60841 IF2P_HUMAN   | E.GNTVHIEVK.E                |        | 2 | 2,5461 | 0,271 | 0,367  |

|    |                     |                             |                    |   |        |       |        |
|----|---------------------|-----------------------------|--------------------|---|--------|-------|--------|
| 19 | Q9HCN4 GPN1_HUMAN   | K.DSLSPVLHPSDLILTR.G        |                    | 3 | 2,5459 | 0,229 | 0,207  |
| 19 | Q7Z3T8 ZFY16_HUMAN  | E.DRKIDPDQTVIR.A            |                    | 3 | 2,5446 | 0,189 | 0,251  |
| 19 | Q6IFS5 HSN2_HUMAN   | E.AQTHHFQPLLR.T             |                    | 3 | 2,5443 | 0,347 | 0,339  |
| 19 | P13804 ETFA_HUMAN   | E.VSCLVAGTK.C               |                    | 2 | 2,5437 | 0,246 | 0,652  |
| 19 | Q9UL46 PSME2_HUMAN  | E.KVLSLLALVKPE.V            |                    | 2 | 2,5423 | 0,226 | -0,186 |
| 19 | P68104 EF1A1_HUMAN  | E.ALDCILPPTPTDKPLR.L        |                    | 3 | 2,54   | 0,299 | -1,584 |
| 19 | Q9UKV3 ACINU_HUMAN  | E.VATPPVPQLQVCEPK.E         |                    | 3 | 2,5352 | 0,233 | 0,22   |
| 19 | Q9NQS7 INCE_HUMAN   | R.IAQVS#PGPR.D              | S263:              | 2 | 2,5343 | 0,104 | 0,425  |
| 19 | Q9NY93 DDX56_HUMAN  | R.GPILLPYQFR.M              |                    | 2 | 2,5342 | 0,371 | 0,101  |
| 19 | P46100 ATRX_HUMAN   | K.SCGLNPKLE.K               |                    | 2 | 2,5333 | 0,301 | -0,18  |
| 19 | P49790 NU153_HUMAN  | R.LM*T#PKPVSIATNR.S         | T369:              | 3 | 2,5332 | 0,184 | 0,3    |
| 19 | Q8TEX9 IPO4_HUMAN   | E.LCGVLKAVLQR.K             |                    | 3 | 2,5329 | 0,251 | 1,6    |
| 19 | Q147X3 MAK3_HUMAN   | R.LLSSSLTADCSLRS#PSGRE.V    | S199:              | 2 | 2,5325 | 0,272 | 0,461  |
| 19 | P42166 LAP2A_HUMAN  | R.NRPPLPAGTNSK.G            |                    | 2 | 2,5303 | 0,332 | -0,097 |
| 19 | Q9Y613 FHOD1_HUMAN  | R.TPQS#PAPCVLLR.A           | S498:              | 2 | 2,5297 | 0,245 | -0,172 |
| 19 | Q5SW79 CE170_HUMAN  | R.FGYDTNLFVVQGE.M           |                    | 2 | 2,5273 | 0,141 | -0,153 |
| 19 | P49023 PAXI_HUMAN   | K.TGSSS#PPGGPPKPGSQLD.S     | S322:              | 2 | 2,5268 | 0,367 | -0,21  |
| 19 | O15371 EIF3D_HUMAN  | E.GKYLILKDPNK.Q             |                    | 3 | 2,5254 | 0,146 | 0,496  |
| 19 | Q9ULR0 ISY1_HUMAN   | K.FIAHVPVPSQQE.I            |                    | 2 | 2,5235 | 0,211 | -0,632 |
| 19 | Q01082 SPTB2_HUMAN  | R.T#SSKES#SPIPS#PTSDRK.A    | T2159:S2164:S2169: | 3 | 2,5222 | 0,09  | 0,179  |
| 19 | P04406 G3P_HUMAN    | R.GALQNIIPASTGAAK.A         |                    | 2 | 2,5205 | 0,151 | 0,259  |
| 19 | Q9HB09 B2L12_HUMAN  | R.SPAQEEPTDFLSR.L           |                    | 2 | 2,5204 | 0,23  | 0,165  |
| 19 | Q8WWI1 LMO7_HUMAN   | E.DQGKKPQDQLVIE.R           |                    | 2 | 2,5202 | 0,102 | -0,081 |
| 19 | P05556 ITB1_HUMAN   | E.KTVM*PYISTTPAK.L          |                    | 2 | 2,5198 | 0,391 | -0,336 |
| 19 | Q9UQ80 PA2G4_HUMAN  | R.LVKPGNQNTQVTE.A           |                    | 2 | 2,5178 | 0,294 | 0      |
| 19 | A9CQZ4 A9CQZ4_HUMAN | R.QKFCGM*FCPVEGSSE.N        |                    | 2 | 2,5175 | 0,354 | 0,137  |
| 19 | P25705 ATPA_HUMAN   | K.GM*SLNLEPDNVGVVVFVFGNDK.L |                    | 2 | 2,5174 | 0,202 | 0,806  |
| 19 | P07355 ANXA2_HUMAN  | K.AYTNFDAERD.A              |                    | 2 | 2,5162 | 0,316 | -0,102 |
| 19 | Q8N122 RPTOR_HUMAN  | R.SVSS#YGNIR.A              | S722:              | 2 | 2,5154 | 0,295 | -0,115 |
| 19 | Q9Y3Q8 T22D4_HUMAN  | R.SFTGGLGQLVVPK.A           |                    | 2 | 2,5119 | 0,326 | 0,088  |
| 19 | P07737 PROF1_HUMAN  | K.TLVLLM*GKE.G              |                    | 2 | 2,5072 | 0,356 | 0,538  |
| 19 | P09211 GSTP1_HUMAN  | E.DLRCKYISLIYTNYE.A         |                    | 2 | 2,5065 | 0,246 | 0,188  |
| 19 | P08670 VIME_HUMAN   | R.DNLAEDIM*R.L              |                    | 2 | 2,5065 | 0,257 | 0      |
| 19 | B2R6R8 B2R6R8_HUMAN | R.LKDANDVPIQCE.I            |                    | 2 | 2,5064 | 0,385 | -0,609 |
| 19 | P28838 AMPL_HUMAN   | K.GLVGLIYSK.E               |                    | 2 | 2,5032 | 0,396 | 0,128  |
| 19 | P06733 ENOA_HUMAN   | K.SCNCLLLK.V                |                    | 2 | 2,5028 | 0,335 | -0,121 |
| 19 | Q86WB0 NIPA_HUMAN   | R.SM*GTGDTPGLE.V            |                    | 2 | 2,4998 | 0,521 | -0,339 |
| 19 | P55196 AFAD_HUMAN   | E.TTFDLGGDIHSGTALPTSK.S     |                    | 3 | 2,4992 | 0,358 | 0,286  |
| 19 | Q9NZZ3 CHMP5_HUMAN  | K.NKDGVLVDE.F               |                    | 2 | 2,4982 | 0,144 | -0,123 |

|    |                     |                              |            |   |        |       |        |
|----|---------------------|------------------------------|------------|---|--------|-------|--------|
| 19 | Q92560 BAP1_HUMAN   | K.VLFGEDDSLLRVD.C            |            | 2 | 2,4962 | 0,27  | -0,083 |
| 19 | Q9BPX3 CND3_HUMAN   | E.KSKLNLAQFLNEDLS#.-         | S1015:     | 3 | 2,4942 | 0,25  | 0,102  |
| 19 | Q96AQ6 PBIP1_HUMAN  | R.ALQAPHS#PSKTDGKE.L         | S43:       | 2 | 2,4912 | 0,205 | -0,222 |
| 19 | P80723 BASP_HUMAN   | K.ETPAATEAPSSTPK.A           |            | 2 | 2,4909 | 0,342 | 0,088  |
| 19 | O75152 ZC11A_HUMAN  | R.RLS#SASTGKPPLSVEDDFE.K     | S758:      | 3 | 2,4907 | 0,085 | 0,086  |
| 19 | P51858 HDGF_HUMAN   | E.VERPLPMEVEK.N              |            | 3 | 2,4873 | 0,227 | 0,276  |
| 19 | Q9Y2K5 R3HD2_HUMAN  | K.ASS#FSGISILTR.G            | S349:      | 2 | 2,4871 | 0,163 | 0,093  |
| 19 | O95453 PARN_HUMAN   | R.NNSFTAPSTVGK.R             |            | 2 | 2,4869 | 0,258 | 1,596  |
| 19 | Q12756 KIF1A_HUMAN  | K.KTPHLVNLNEDPLM*SE.C        |            | 3 | 2,4865 | 0,225 | 0,592  |
| 19 | O43719 HTSF1_HUMAN  | E.AFLNAPEANR.G               |            | 2 | 2,4821 | 0,218 | -0,111 |
| 19 | Q9NZM1 MYOF_HUMAN   | E.M*EDTKPLLASK.L             |            | 3 | 2,4814 | 0,209 | 0,732  |
| 19 | P06733 ENOA_HUMAN   | E.KSCNCLLLKVNQIGSVTE.S       |            | 3 | 2,4807 | 0,305 | 0      |
| 19 | Q13242 SFRS9_HUMAN  | R.GS#PHYFS#PFRPY.-           | S211:S216: | 2 | 2,48   | 0,289 | -0,151 |
| 19 | Q9NRY4 GRLF1_HUMAN  | E.NIYSVPHDSTQGK.I            |            | 2 | 2,4708 | 0,308 | -0,422 |
| 19 | Q05519 SFR11_HUMAN  | R.TLFGFLGKIDE.L              |            | 2 | 2,4687 | 0,342 | -0,197 |
| 19 | Q70E73 RAPH1_HUMAN  | R.SQS#IVSVVFSE.A             | S623:      | 2 | 2,4686 | 0,221 | 0,195  |
| 19 | P61106 RAB14_HUMAN  | K.KIYQNIQDGSGLDLNAAE.S       |            | 2 | 2,4684 | 0,212 | 0,58   |
| 19 | P80723 BASP_HUMAN   | K.KTEAPAAPAAQE.T             |            | 2 | 2,4682 | 0,308 | 0,103  |
| 19 | Q86YS7 K0528_HUMAN  | E.IIGSPIPEPR.Q               |            | 2 | 2,4672 | 0,3   | 0,339  |
| 19 | Q5TDH0 DDI2_HUMAN   | D.FSSIAPVPGTSSPR.Q           |            | 2 | 2,467  | 0,199 | 1,682  |
| 19 | Q96M11 HYLS1_HUMAN  | R.CDLANGVIPR.K               |            | 2 | 2,4669 | 0,322 | 0,547  |
| 19 | P16403 H12_HUMAN    | R.SGVSLAALKK.A               |            | 2 | 2,4665 | 0,135 | 0,626  |
| 19 | A1L390 PKHG3_HUMAN  | R.FFFNPSAVSQR.T              |            | 2 | 2,4654 | 0,306 | 0,282  |
| 19 | Q9UPT5 EXOC7_HUMAN  | E.DFADNIKNDPDKE.Y            |            | 2 | 2,4648 | 0,378 | -0,481 |
| 19 | Q15942 ZYX_HUMAN    | K.FTPVASKFS#PGAPGGSGSQPNQK.L | S281:      | 3 | 2,4645 | 0,106 | -0,157 |
| 19 | Q7RTP8 Q7RTP8_HUMAN | R.NNCLADSR.A                 |            | 2 | 2,4645 | 0,203 | -0,321 |
| 19 | Q9Y3Z3 SAMH1_HUMAN  | R.CDDS#PRT#PSNTPSAE.A        | S18:T21:   | 2 | 2,4643 | 0,211 | -0,748 |
| 19 | Q04917 1433F_HUMAN  | E.DRNLLSVAYK.N               |            | 2 | 2,4631 | 0,227 | -0,103 |
| 19 | P35269 T2FA_HUMAN   | K.KIYQEEEM*PE.S              |            | 2 | 2,4617 | 0,208 | -0,279 |
| 19 | P22314 UBA1_HUMAN   | R.KLAYVAAGD.L                |            | 2 | 2,4601 | 0,275 | -0,202 |
| 19 | P07814 SYEP_HUMAN   | E.DLKTHM*VVANTM*E.D          |            | 2 | 2,46   | 0,227 | 0,08   |
| 19 | Q6ZS17 FA65A_HUMAN  | R.RPETPSSGPLDEE.G            |            | 2 | 2,4598 | 0,403 | -0,69  |
| 19 | Q8NFM4 NUP37_HUMAN  | E.GHTDFINGLVFDPK.E           |            | 2 | 2,4597 | 0,238 | 0      |
| 19 | Q99569 PKP4_HUMAN   | E.GQTLVQPSVANR.A             |            | 2 | 2,4584 | 0,159 | -0,096 |
| 19 | Q147X3 MAK3_HUMAN   | R.LLSSSLTADCSLRS#PSGRE.V     | S199:      | 3 | 2,4575 | 0,091 | 0,346  |
| 19 | O43598 RCL_HUMAN    | R.GEPGRPALYFCGSIR.G          |            | 3 | 2,4571 | 0,14  | 0,653  |
| 19 | Q9NVD7 PARVA_HUMAN  | K.SPSVPKSPT#PKS#PPSR.K       | T16:S19:   | 3 | 2,4562 | 0,244 | 0,202  |
| 19 | Q6WKZ4 RFIP1_HUMAN  | E.GLSFLGGLR.S                |            | 2 | 2,4546 | 0,29  | 0      |
| 19 | P09936 UCHL1_HUMAN  | R.M*PFVNVHGASSE.D            |            | 2 | 2,4542 | 0,264 | -0,757 |

|    |                    |                           |            |   |        |       |        |
|----|--------------------|---------------------------|------------|---|--------|-------|--------|
| 19 | Q12774 ARHG5_HUMAN | E.SLSETPGPSS#PR.Q         | S48:       | 2 | 2,454  | 0,417 | -0,094 |
| 19 | Q9Y2W2 WBP11_HUMAN | E.LTPLQAMM*LR.M           |            | 2 | 2,4535 | 0,347 | -0,103 |
| 19 | Q92882 OSTF1_HUMAN | D.MATNAACASLLK.K          |            | 2 | 2,4521 | 0,229 | -0,585 |
| 19 | Q9UPX8 SHAN2_HUMAN | K.APFLGIPR.G              |            | 2 | 2,4519 | 0,344 | 0,28   |
| 19 | Q01082 SPTB2_HUMAN | R.LQAAYAGDKADD.I          |            | 2 | 2,4514 | 0,372 | 0      |
| 19 | Q9UJM3 ERRFI_HUMAN | E.DSTLSDFKYDVPGR.R.S      |            | 3 | 2,4496 | 0,261 | -0,208 |
| 19 | P15311 EZRI_HUMAN  | K.LFFLQVKE.G              |            | 2 | 2,4495 | 0,124 | -0,119 |
| 19 | P34932 HSP74_HUMAN | R.NSFTLKE.D               |            | 2 | 2,4488 | 0,152 | -0,064 |
| 19 | Q9UKV3 ACINU_HUMAN | R.RLS#QPESAE.K            | S710:      | 2 | 2,4472 | 0,286 | 0,111  |
| 19 | P11940 PABP1_HUMAN | R.SKGFVFCSSPE.E           |            | 2 | 2,446  | 0,237 | 0      |
| 19 | P46379 BAT3_HUMAN  | E.VLGAAATTDYNNNHGEE.D     |            | 3 | 2,4443 | 0,282 | 0,178  |
| 19 | P49959 MRE11_HUMAN | E.SDVEEDIFPTTSK.T         |            | 2 | 2,4441 | 0,238 | 1,413  |
| 19 | Q9H2G2 SLK_HUMAN   | K.LADFGVSAK.N             |            | 2 | 2,4438 | 0,37  | -0,202 |
| 19 | Q9H8Y8 GORS2_HUMAN | K.ISLPGQM*AGTPIT#PLK.D    | T225:      | 2 | 2,4391 | 0,355 | -0,142 |
| 19 | P11142 HSP7C_HUMAN | K.DNNLLGKFE.L             |            | 2 | 2,4382 | 0,327 | 0      |
| 19 | Q9UQ35 SRRM2_HUMAN | E.SSLVFKDT#LRTPPRE.R      | T1205:     | 3 | 2,4376 | 0,199 | 0,1    |
| 19 | Q06323 PSME1_HUMAN | E.NLLGSYFPK.K             |            | 2 | 2,4374 | 0,228 | 0,117  |
| 19 | Q8N108 MIER1_HUMAN | E.DKVIFLKD.A              |            | 2 | 2,4366 | 0,159 | 0,335  |
| 19 | Q9H6Y2 WDR55_HUMAN | K.AHGAPINLLVDE.N          |            | 2 | 2,4364 | 0,275 | 0,168  |
| 19 | P55884 EIF3B_HUMAN | R.SDS#RAQAVSEDAGGNEGR.A   | S119:      | 2 | 2,4358 | 0,169 | 0,065  |
| 19 | O60812 HNRCL_HUMAN | R.VFIGNLNTLVVK.K          |            | 2 | 2,4338 | 0,197 | 0      |
| 19 | P51858 HDGF_HUMAN  | R.AGDLLDS#PKRPK.E         | S165:      | 2 | 2,4334 | 0,345 | -0,486 |
| 19 | P49736 MCM2_HUMAN  | R.GNDPLTSS#PGR.S          | S27:       | 2 | 2,4319 | 0,38  | -1,24  |
| 19 | Q96GX5 MASTL_HUMAN | E.LALS#PIHNSALPTTGR.S     | S370:      | 2 | 2,4316 | 0,189 | -0,134 |
| 19 | Q13952 NFYC_HUMAN  | K.ATGNSTPCTSSLPTTHPPSHR.A |            | 3 | 2,4305 | 0,12  | 0,58   |
| 19 | Q13112 CAF1B_HUMAN | E.IQSETPGDAQGS#PPELKRPR.L | S538:      | 3 | 2,4289 | 0,183 | -0,245 |
| 19 | P45974 UBP5_HUMAN  | R.DGLGGLPDIVR.D           |            | 2 | 2,4269 | 0,27  | -0,11  |
| 19 | P50990 TCPQ_HUMAN  | E.VGDTQVVVFKHE.K          |            | 2 | 2,4264 | 0,257 | 0,809  |
| 19 | Q14676 MDC1_HUMAN  | R.DAEEDM*PQR.V            |            | 2 | 2,4248 | 0,371 | -0,22  |
| 19 | Q9H0E9 BRD8_HUMAN  | R.SGVAEAPVGSKAPS#IDGKEE.L | S387:      | 3 | 2,4237 | 0,198 | 0,091  |
| 19 | Q6P0N0 CN106_HUMAN | E.KENNS#FQSDSSLR.A        | S172:      | 3 | 2,4235 | 0,113 | 0,299  |
| 19 | Q562F6 SGOL2_HUMAN | E.KDNFFSLT#PK.D           | T845:      | 2 | 2,4227 | 0,115 | -0,096 |
| 19 | Q9Y3L3 3BP1_HUMAN  | K.VTRS#PPETAAPVED.M       | S550:      | 2 | 2,4226 | 0,319 | -0,158 |
| 19 | Q53F19 CQ085_HUMAN | E.LKM*IST#PS#PK.K         | T413:S415: | 3 | 2,4214 | 0,133 | 0,501  |
| 19 | Q13242 SFRS9_HUMAN | R.GSPHYFS#PFRPY.-         | S216:      | 2 | 2,4214 | 0,408 | 0      |
| 19 | P02649 APOE_HUMAN  | E.KVQAAVGTSAAPVPSDNH.-    |            | 3 | 2,4209 | 0,229 | -0,837 |
| 19 | P22234 PUR6_HUMAN  | K.ITSCIFQLLQE.A           |            | 2 | 2,4208 | 0,129 | 0      |
| 19 | Q9P246 STIM2_HUMAN | E.IYQTLSPR.K              |            | 2 | 2,4202 | 0,234 | -0,312 |
| 19 | P52594 NUPL_HUMAN  | K.GTPSQS#PVVGR.S          | S181:      | 2 | 2,418  | 0,396 | -0,105 |

|    |                    |                       |        |   |        |       |        |
|----|--------------------|-----------------------|--------|---|--------|-------|--------|
| 19 | Q9NQS7 INCE_HUMAN  | R.VLAPILPDNFSTPTGSR.T |        | 2 | 2,4165 | 0,357 | 0,137  |
| 19 | Q9Y6X9 MORC2_HUMAN | E.SPIKLSPATPSR.K      |        | 3 | 2,4159 | 0,174 | 0,073  |
| 19 | Q8TCN5 ZN507_HUMAN | E.NLIPDSLLTSAQK.I     |        | 2 | 2,4155 | 0,276 | 0,087  |
| 19 | P31949 S10AB_HUMAN | E.SLIAVFQK.Y          |        | 2 | 2,4153 | 0,264 | 0,135  |
| 19 | Q8IXT5 RB12B_HUMAN | R.FPPEDFRHS#PE.D      | S575:  | 2 | 2,4148 | 0,11  | -0,085 |
| 19 | Q8NEZ5 FBX22_HUMAN | R.ILPHTVLYM*ADSE.T    |        | 2 | 2,4147 | 0,256 | 0,162  |
| 19 | Q9BY44 EIF2A_HUMAN | K.SPDLAPTAPQSTPR.N    |        | 2 | 2,4131 | 0,302 | -0,238 |
| 19 | O75880 SCO1_HUMAN  | K.LVGLTGTRREE.V       |        | 2 | 2,4126 | 0,354 | 0,454  |
| 19 | P49790 NU153_HUMAN | R.SHLNFSM*LE.S        |        | 2 | 2,4109 | 0,308 | 0,223  |
| 19 | P21796 VDAC1_HUMAN | E.DQLARGLKLTFD.S      |        | 2 | 2,4079 | 0,318 | -0,532 |
| 19 | Q8N1I0 DOCK4_HUMAN | R.M*LFNHIGDGALPR.S    |        | 3 | 2,4075 | 0,313 | 0,502  |
| 19 | Q6XZF7 DNMBP_HUMAN | E.NTLGVVEEQR.H        |        | 2 | 2,4067 | 0,207 | 0,117  |
| 19 | P23588 IF4B_HUMAN  | K.VAPAQPSEEGPGRKDE.N  |        | 2 | 2,4064 | 0,408 | -0,512 |
| 19 | Q9H116 GZF1_HUMAN  | K.TAEGDVGDYR.C        |        | 2 | 2,4049 | 0,434 | 0,225  |
| 19 | P11021 GRP78_HUMAN | E.ISAM*VLTK.M         |        | 2 | 2,4046 | 0,166 | 0,833  |
| 19 | Q6ZUT9 RA61L_HUMAN | E.LM*TSASDEDLVK.Q     |        | 2 | 2,4038 | 0,116 | -0,184 |
| 19 | P49755 TMEDA_HUMAN | K.GKFAFTE.D           |        | 2 | 2,4027 | 0,307 | 0,677  |
| 19 | P42166 LAP2A_HUMAN | R.QNGSNDSDRYS#DNEE.G  | S184:  | 2 | 2,4013 | 0,383 | -0,27  |
| 19 | Q9UHB6 LIMA1_HUMAN | E.VQQPVHPKPLSPDSR.A   |        | 3 | 2,4    | 0,178 | 0,109  |
| 19 | P49411 EFTU_HUMAN  | E.HVVVVVVK.A          |        | 2 | 2,3997 | 0,475 | 0,446  |
| 19 | Q9BSQ5 CCM2_HUMAN  | E.STIDFLDR.A          |        | 2 | 2,3968 | 0,224 | 0,189  |
| 19 | P55072 TERA_HUMAN  | K.GDDLSTAILK.Q        |        | 2 | 2,3961 | 0,195 | 0,472  |
| 19 | P49840 GSK3A_HUMAN | K.VTTVVATLGQGPER.S    |        | 2 | 2,3957 | 0,305 | -0,513 |
| 19 | P22681 CBL_HUMAN   | K.GTEPIVDPFDPR.G      |        | 2 | 2,3955 | 0,334 | -0,423 |
| 19 | P49750 YLPM1_HUMAN | K.SQLLAPPPPSAPPGNK.T  |        | 2 | 2,3949 | 0,087 | -0,155 |
| 19 | P26640 SYVC_HUMAN  | K.ITPAHDQNDYE.V       |        | 2 | 2,3907 | 0,254 | 0      |
| 19 | Q9UKS6 PACN3_HUMAN | R.ALYDYAGQEADE.L      |        | 2 | 2,3907 | 0,249 | 0,181  |
| 19 | Q01970 PLCB3_HUMAN | R.KRPLEQSNS#ALSE.S    | S492:  | 2 | 2,3898 | 0,221 | -0,079 |
| 19 | Q9Y6A5 TACC3_HUMAN | K.EACGGAPLQGLPGE.A    |        | 2 | 2,3859 | 0,248 | 0,18   |
| 19 | Q09666 AHNK_HUMAN  | K.ADIKS#PSLDVTVPE.A   | S4993: | 2 | 2,3854 | 0,1   | 0,472  |
| 19 | P42166 LAP2A_HUMAN | R.SSTPLPTISS#AENTR.Q  | S168:  | 2 | 2,3845 | 0,248 | 0,141  |
| 19 | P06756 ITAV_HUMAN  | E.REQLQPHENGEGNS#ET.- | S1046: | 2 | 2,3818 | 0,378 | 0,128  |
| 19 | O60664 M6PBP_HUMAN | R.TLTAADVSGAQPIISK.L  |        | 2 | 2,3813 | 0,235 | 0      |
| 19 | Q6PJT7 ZC3HE_HUMAN | R.DLVQPDKPAS#PK.F     | S515:  | 2 | 2,3792 | 0,318 | 0,177  |
| 19 | Q9Y618 NCOR2_HUMAN | K.SRS#PAPPADKE.A      | S1025: | 2 | 2,3784 | 0,375 | -0,198 |
| 19 | P46821 MAP1B_HUMAN | K.SDISPLTPRE.S        |        | 2 | 2,378  | 0,267 | -0,328 |
| 19 | Q9ULU4 PKCB1_HUMAN | K.ADPGAVKDKAS#PEPE.K  | S668:  | 2 | 2,3728 | 0,233 | -0,077 |
| 19 | Q13428 TCOF_HUMAN  | R.KSAEPSANTTLVSE.T    |        | 2 | 2,3697 | 0,303 | 0,34   |
| 19 | Q02952 AKA12_HUMAN | K.VLSKPPEGVVSE.V      |        | 2 | 2,3679 | 0,183 | -0,786 |

|    |                      |                            |                 |   |        |       |        |
|----|----------------------|----------------------------|-----------------|---|--------|-------|--------|
| 19 | P11940 PABP1_HUMAN   | E.LLHM*LES#PESLR.S         | S599:           | 2 | 2,3664 | 0,14  | 0,16   |
| 19 | Q14562 DHX8_HUMAN    | E.LVEEPPFLR.G              |                 | 2 | 2,3658 | 0,27  | -0,893 |
| 19 | Q09666 AHNK_HUMAN    | K.LQGGVSLASKK.S            |                 | 2 | 2,3641 | 0,245 | -0,104 |
| 19 | Q16531 DDB1_HUMAN    | E.SFLDISRPK.M              |                 | 2 | 2,3621 | 0,17  | 0,344  |
| 19 | Q9H4A3 WNK1_HUMAN    | K.DRPVSQLVGSK.E            |                 | 2 | 2,3608 | 0,264 | -0,623 |
| 19 | P49023 PAXI_HUMAN    | E.HVYSFPNK.Q               |                 | 2 | 2,3606 | 0,403 | -0,184 |
| 19 | Q32MZ4 LRRF1_HUMAN   | R.RGS#GDTSIDTE.A           | S120:           | 2 | 2,3587 | 0,114 | 0      |
| 19 | O75351 VPS4B_HUMAN   | K.LQNQLQGAIIE.R            |                 | 2 | 2,3567 | 0,191 | 0,276  |
| 19 | Q9Y490 TLN1_HUMAN    | E.DVIATANLSR.R             |                 | 2 | 2,3555 | 0,22  | 0,575  |
| 19 | Q14676 MDC1_HUMAN    | R.SSVKT#PEPVPTAPE.L        | T1157:          | 2 | 2,355  | 0,325 | -0,377 |
| 19 | P16949 STMN1_HUMAN   | K.ESVPEFPLS#PPK.K          | S38:            | 2 | 2,3543 | 0,371 | 0,347  |
| 19 | P61978 HNRPK_HUMAN   | R.AQPYDPNFYDE.T            |                 | 2 | 2,3481 | 0,213 | 0,449  |
| 19 | Q9Y2W2 WBP11_HUMAN   | E.LTPLQAM*MLR.M            |                 | 2 | 2,3478 | 0,334 | 0,308  |
| 19 | Q9P2I0 CPSF2_HUMAN   | D.SLVSSLQFCK.A             |                 | 2 | 2,3472 | 0,325 | 0,209  |
| 19 | P31946 1433B_HUMAN   | K.DSTLIM*QLLRD.N           |                 | 2 | 2,3468 | 0,243 | -0,277 |
| 19 | Q68EM7 RHG17_HUMAN   | R.ILLDIDNDTE.S             |                 | 2 | 2,3455 | 0,181 | 0      |
| 19 | Q14315 FLNC_HUMAN    | K.DGSCGVSYVVQEPGDYE.V      |                 | 2 | 2,3454 | 0,145 | 0,197  |
| 19 | O95425 SVIL_HUMAN    | R.DSSFTEVPRS#PK.H          | S245:           | 2 | 2,3439 | 0,129 | 0,171  |
| 19 | Q15464 SHB_HUMAN     | K.GIQLYDTPYEPE.G           |                 | 2 | 2,3434 | 0,285 | -0,171 |
| 19 | Q9Y613 FHOD1_HUMAN   | R.TPQSPAPCVLLR.A           |                 | 2 | 2,3434 | 0,353 | -0,091 |
| 19 | Q3V6T2 GRDN_HUMAN    | K.DSNPYAT#LPR.A            | T1801:          | 2 | 2,3431 | 0,157 | 0,402  |
| 19 | Q8N3R9 MPP5_HUMAN    | E.LDLNSS#M*R.L             | S84:            | 2 | 2,3424 | 0,301 | -1,892 |
| 19 | P51858 HDGF_HUMAN    | E.DAEAPGIRDHESL.-          |                 | 2 | 2,3389 | 0,353 | -1,904 |
| 19 | Q86WB0 NIPA_HUMAN    | R.SQDATFS#PGSEQAE.K        | S335:           | 2 | 2,3385 | 0,306 | 0      |
| 19 | Q6S8J3 A26CA_HUMAN   | E.KSYELPDGQVITIGNE.R       |                 | 2 | 2,3376 | 0,263 | 0,138  |
| 19 | Q5VT52 K0460_HUMAN   | R.RM*#SGEPIQTVE.S          | S1099:          | 2 | 2,337  | 0,284 | -0,091 |
| 19 | Q9Y618 NCOR2_HUMAN   | E.SDAPQQPGSS#PR.G          | S1018:          | 2 | 2,3334 | 0,237 | -0,467 |
| 19 | P15336 ATF2_HUMAN    | K.KM*PLDLS#PLATPIIR.S      | S94:            | 2 | 2,3288 | 0,246 | 0      |
| 19 | Q9UIF9 BAZ2A_HUMAN   | R.VIM*SDLQIR.G             |                 | 2 | 2,3263 | 0,215 | 0,447  |
| 19 | P22307 NLTP_HUMAN    | K.ANLVFKI.I                |                 | 2 | 2,3252 | 0,227 | 0,446  |
| 19 | P14625 ENPL_HUMAN    | R.GTTITLVLKEE.A            |                 | 2 | 2,3234 | 0,129 | -0,203 |
| 19 | P68104 EF1A1_HUMAN   | K.YYVTIIDAPGHR.D           |                 | 2 | 2,323  | 0,253 | 0,087  |
| 19 | ##O75631 UPK3A_HUMAN | D.S#WLT#QDEVLGTSMNVLVY#K.F | S105:T108:Y122: | 2 | 2,3226 | 0,123 | -1,209 |
| 19 | P51957 NEK4_HUMAN    | R.KQIHCLS#EDE.L            | S677:           | 2 | 2,3224 | 0,329 | -0,091 |
| 19 | Q6QNY0 BL1S3_HUMAN   | E.LYLGPSGPTR.G             |                 | 2 | 2,3208 | 0,293 | -0,115 |
| 19 | P09211 GSTP1_HUMAN   | K.YISLIYTNYE.A             |                 | 2 | 2,3202 | 0,395 | 0,286  |
| 19 | Q8WYP5 AHTF1_HUMAN   | R.TTSFFLNS#PEKE.H          | S1292:          | 2 | 2,3178 | 0,161 | -0,247 |
| 19 | O00425 IF2B3_HUMAN   | K.IPVSGPFLVK.T             |                 | 2 | 2,3091 | 0,344 | 0,231  |
| 19 | O75116 ROCK2_HUMAN   | R.NLTLKIEQE.T              |                 | 2 | 2,3069 | 0,177 | -1,121 |



|    |                     |                       |        |   |        |       |        |
|----|---------------------|-----------------------|--------|---|--------|-------|--------|
| 19 | P60709 ACTB_HUMAN   | E.GYALPHAILR.L        |        | 2 | 2,3036 | 0,413 | 0,11   |
| 19 | P62736 ACTA_HUMAN   | R.DLTDYLM*K.I         |        | 2 | 2,3025 | 0,203 | 0,361  |
| 19 | P35030 TRY3_HUMAN   | D.TLDNDIM*LIK.L       |        | 2 | 2,3018 | 0,364 | 0      |
| 19 | O14561 ACPM_HUMAN   | E.KLSVNSHFH*K.D       |        | 2 | 2,3003 | 0,123 | 0      |
| 19 | P31946 1433B_HUMAN  | R.YDDM*AAAM*K.A       |        | 2 | 2,2964 | 0,416 | -0,233 |
| 19 | P07195 LDHB_HUMAN   | R.GLTSVINQK.L         |        | 2 | 2,2927 | 0,215 | 0      |
| 19 | P39687 AN32A_HUMAN  | K.SLDLFNCE.V          |        | 2 | 2,2924 | 0,222 | 1,1    |
| 19 | P21333 FLNA_HUMAN   | K.IQQNTFTR.W          |        | 2 | 2,2898 | 0,102 | 0      |
| 19 | P07602 SAP_HUMAN    | R.LGPGM*ADICK.N       |        | 2 | 2,2888 | 0,295 | -0,34  |
| 19 | Q9UPY6 WASF3_HUMAN  | R.EPVGNDVATILSR.R     |        | 2 | 2,2885 | 0,158 | 0,089  |
| 19 | Q5VUA4 ZN318_HUMAN  | R.SVRIPS#PNILK.T      | S2101: | 2 | 2,287  | 0,097 | -0,374 |
| 19 | P22681 CBL_HUMAN    | E.IKGTEPIVVDPFDP.R    |        | 2 | 2,2865 | 0,109 | 0,072  |
| 19 | Q6PJT7 ZC3HE_HUMAN  | R.VLSGHLM*QTR.D       |        | 2 | 2,2845 | 0,239 | 0      |
| 19 | O00505 IMA3_HUMAN   | E.VKVQTAALR.A         |        | 2 | 2,284  | 0,09  | -0,062 |
| 19 | Q9Y2W2 WBP11_HUMAN  | E.LTPLQAM*M*LR.M      |        | 2 | 2,2837 | 0,366 | -0,405 |
| 19 | Q9NPR2 SEM4B_HUMAN  | R.LGS#EIRDSVV.-       | S825:  | 2 | 2,2836 | 0,18  | -0,528 |
| 19 | P06744 G6PI_HUMAN   | D.ASTNGLINFIK.Q       |        | 2 | 2,283  | 0,205 | 1,45   |
| 19 | Q5VUA4 ZN318_HUMAN  | R.SVRIPS#PNILKTGLTE.N | S2101: | 2 | 2,2787 | 0,362 | 0,203  |
| 19 | O75475 PSIP1_HUMAN  | K.QSNASS#DVEVEE.K     | S106:  | 2 | 2,2776 | 0,146 | -1,599 |
| 19 | O95881 TXD12_HUMAN  | E.DFSPDGGYIPR.I       |        | 2 | 2,2746 | 0,281 | -1,396 |
| 19 | Q13242 SFRS9_HUMAN  | R.GS#PHYFSPFRPY.-     | S211:  | 2 | 2,2728 | 0,403 | 0      |
| 19 | Q00610 CLH1_HUMAN   | R.RPLIDQVVQTALSE.T    |        | 2 | 2,2682 | 0,421 | -0,156 |
| 19 | Q9NY27 PP4R2_HUMAN  | E.VSSVS#PLKNK.H       | S226:  | 2 | 2,2678 | 0,15  | -0,214 |
| 19 | Q7LDG7 GRP2_HUMAN   | E.LYQLSLQR.E          |        | 2 | 2,267  | 0,149 | 0,179  |
| 19 | O75663 TIPRL_HUMAN  | R.IQHSGSGFIE.F        |        | 2 | 2,2625 | 0,184 | -0,234 |
| 19 | Q09028 RBBP4_HUMAN  | E.TILASSGTDR.R        |        | 2 | 2,2621 | 0,302 | -0,06  |
| 19 | P49006 MRP_HUMAN    | K.GEGESPPVNGTDE.A     |        | 2 | 2,2607 | 0,217 | -0,189 |
| 19 | Q9UQ35 SRRM2_HUMAN  | K.FSPFPVQDRPE.S       |        | 2 | 2,2549 | 0,22  | 0,278  |
| 19 | Q68CZ2 TENS3_HUMAN  | R.LPDTGEGPSR.A        |        | 2 | 2,2539 | 0,389 | 0,119  |
| 19 | O75396 SC22B_HUMAN  | K.KLAFAYLE.D          |        | 2 | 2,2523 | 0,19  | -1,405 |
| 19 | Q6NYC8 PHTNS_HUMAN  | E.ILVLGGYLR.L         |        | 2 | 2,2506 | 0,182 | -0,425 |
| 19 | Q7Z3C6 ATG9A_HUMAN  | R.SFSPLOPGQAPTGR.A    |        | 2 | 2,2502 | 0,308 | 0,254  |
| 19 | Q05524 ENO1B_HUMAN  | K.VNQIGSVTE.S         |        | 2 | 2,2476 | 0,195 | -1,353 |
| 19 | Q15003 CND2_HUMAN   | R.KAPLNIPGTPVLE.D     |        | 2 | 2,2456 | 0,082 | 0,181  |
| 19 | Q9UKV3 ACINU_HUMAN  | R.SAQPLPKIEE.L        |        | 2 | 2,2452 | 0,226 | 0,199  |
| 19 | B2RMZ9 B2RMZ9_HUMAN | R.APVS#PLKFSPFE.G     | S423:  | 2 | 2,2433 | 0,119 | -0,523 |
| 19 | Q12756 KIF1A_HUMAN  | R.TPQPCSRPAS#PEPE.L   | S1532: | 2 | 2,2423 | 0,169 | 0,224  |
| 19 | P05787 K2C8_HUMAN   | K.SYKVSTSGPR.A        |        | 2 | 2,2412 | 0,343 | 0,677  |
| 19 | O95573 ACSL3_HUMAN  | E.KFEIPVK.I           |        | 2 | 2,2401 | 0,088 | 0,213  |

|    |                      |                                    |       |   |        |       |        |
|----|----------------------|------------------------------------|-------|---|--------|-------|--------|
| 19 | Q66K74 MAP1S_HUMAN   | E.AGLSLPLR.G                       |       | 2 | 2,2361 | 0,138 | 0,516  |
| 19 | P46821 MAP1B_HUMAN   | K.SDISPLTPR.E                      |       | 2 | 2,234  | 0,114 | 0,681  |
| 19 | Q96B54 ZN428_HUMAN   | R.AAQPPAQPCQLCGR.S                 |       | 2 | 2,2295 | 0,37  | -0,079 |
| 19 | Q86V48 LUZP1_HUMAN   | K.AIGALASSR.R                      |       | 2 | 2,2281 | 0,283 | 0,216  |
| 19 | Q9HCP0 KC1G1_HUMAN   | K.NLYTNEYVAIK.L                    |       | 2 | 2,2278 | 0,245 | 0,459  |
| 19 | P49755 TMEDA_HUMAN   | K.GKFAFTTEDYD.M                    |       | 2 | 2,223  | 0,191 | -0,189 |
| 19 | O94906 PRP6_HUMAN    | E.ADAIYAALDKR.M                    |       | 2 | 2,2229 | 0,247 | 0,505  |
| 19 | Q96SB3 NEB2_HUMAN    | R.NEDVDPM*AASAEYE.L                |       | 2 | 2,2228 | 0,161 | 0,157  |
| 19 | P99999 CYC_HUMAN     | R.ADLIAYLK.K                       |       | 2 | 2,2194 | 0,227 | 0,067  |
| 19 | Q86TC9 MYPN_HUMAN    | K.TPEPS#SPVKEPPPVLAKPK.L           | S643: | 2 | 2,2189 | 0,321 | 1,292  |
| 19 | Q8N584 CRO17_HUMAN   | E.DAVQYFQR.A                       |       | 2 | 2,2178 | 0,19  | 0      |
| 19 | P68104 EF1A1_HUMAN   | E.SFSDYPLGR.F                      |       | 2 | 2,2146 | 0,299 | -1,071 |
| 19 | Q6P6C2 ALKB5_HUMAN   | E.AAAAAAAAAAAAAAAAAAAAAEPYPVSGAK.R |       | 2 | 2,2142 | 0,248 | 0,315  |
| 19 | Q9UPU5 UBP24_HUMAN   | K.QQHQSASSILE.S                    |       | 2 | 2,2126 | 0,286 | 0,092  |
| 19 | Q7Z3T8 ZFY16_HUMAN   | K.SLDLKDNDVIQD.S                   |       | 2 | 2,2112 | 0,168 | -1,508 |
| 19 | P81605 DCD_HUMAN     | K.ENAGEDPGLAR.Q                    |       | 2 | 2,2108 | 0,199 | 0,216  |
| 19 | P61981 1433G_HUMAN   | R.YDDM*AAAM*KNVTE.L                |       | 2 | 2,2051 | 0,151 | 1,555  |
| 19 | O95905 SGT1_HUMAN    | E.LAHTCISK.S                       |       | 2 | 2,1994 | 0,351 | -0,066 |
| 19 | Q99569 PKP4_HUMAN    | E.LQGSQTALYR.T                     |       | 2 | 2,1982 | 0,336 | 0,107  |
| 19 | P05787 K2C8_HUMAN    | E.VDPNIQAVR.T                      |       | 2 | 2,1954 | 0,252 | -0,362 |
| 19 | Q9P246 STIM2_HUMAN   | R.IS#SIPHDLCHNGE.K                 | S718: | 2 | 2,1948 | 0,128 | 0      |
| 19 | P14373 TRI27_HUMAN   | E.DQM*PICVVCDR.S                   |       | 2 | 2,1928 | 0,155 | -0,433 |
| 19 | A6NIE6 RN3L1_HUMAN   | E.NDFFNS#PPRK.T                    | S44:  | 2 | 2,1904 | 0,265 | 0,094  |
| 19 | P52732 KIF11_HUMAN   | K.SYLYPSTLVR.T                     |       | 2 | 2,1865 | 0,181 | -0,102 |
| 19 | Q9Y4B6 VPRBP_HUMAN   | R.KLSSEPLLPLDEE.A                  |       | 2 | 2,1855 | 0,231 | -0,083 |
| 19 | P31943 HNRH1_HUMAN   | R.GLPFGCSKEE.I                     |       | 2 | 2,185  | 0,277 | 0      |
| 19 | Q9UPN9 TRI33_HUMAN   | R.GPTS#PSVTAIE.L                   | S659: | 2 | 2,1838 | 0,106 | 0      |
| 19 | Q12756 KIF1A_HUMAN   | E.DGGTGLGVFSPK.K                   |       | 2 | 2,1795 | 0,31  | 0,226  |
| 19 | Q6P4E1 CASC4_HUMAN   | K.VDDLPPALR.K                      |       | 2 | 2,1784 | 0,248 | 0,306  |
| 19 | P78371 TCPB_HUMAN    | K.LIHFSGVALGE.A                    |       | 2 | 2,1766 | 0,143 | 0,107  |
| 19 | P20700 LMNB1_HUMAN   | E.LFHQQGT#PR.A                     | T575: | 2 | 2,176  | 0,174 | -0,105 |
| 19 | Q5H9R7 SAPS3_HUMAN   | E.KHIAFT#PE.S                      | T631: | 2 | 2,1747 | 0,215 | -0,537 |
| 19 | Q9NX31 CT111_HUMAN   | E.DYSQSLHAR.T                      |       | 2 | 2,1727 | 0,133 | -0,113 |
| 19 | Q8IX12 CCAR1_HUMAN   | E.DVFFQLSAVK.G                     |       | 2 | 2,1694 | 0,355 | 0,529  |
| 19 | Q9UPS6 SET1B_HUMAN   | E.SS#PAGPEKPHDSLDSR.I              | S488: | 2 | 2,1691 | 0,115 | -1,387 |
| 19 | P25440 BRD2_HUMAN    | R.IRKPS#LLYE.G                     | S37:  | 2 | 2,162  | 0,154 | 0,509  |
| 19 | A5A3E0 A26CB_HUMAN   | E.LRVAPEEHPVLLTE.A                 |       | 2 | 2,1618 | 0,313 | -0,076 |
| 19 | ##Q96BJ8 ELMO3_HUMAN | R.LKT#EM*TLLQE.L                   | T38:  | 2 | 2,1604 | 0,192 | -1,312 |
| 19 | P08107 HSP71_HUMAN   | K.DNNLLGRFE.L                      |       | 2 | 2,1601 | 0,189 | -0,679 |

|    |                     |                            |       |   |        |       |        |
|----|---------------------|----------------------------|-------|---|--------|-------|--------|
| 19 | O43252 PAPS1_HUMAN  | R.LDGCTAFALM*YE.G          |       | 2 | 2,1597 | 0,225 | 0,347  |
| 19 | P08670 VIME_HUMAN   | E.RKVES#LQEE.I             | S226: | 2 | 2,1566 | 0,152 | 0,102  |
| 19 | Q8TDZ2 MICA1_HUMAN  | E.GAGPVPDPSQPTR.R          |       | 2 | 2,1544 | 0,105 | -1,622 |
| 19 | P04264 K2C1_HUMAN   | K.WELLQQVDTSTR.T           |       | 2 | 2,153  | 0,247 | 0,496  |
| 19 | P51858 HDGF_HUMAN   | E.DAEAPGIRDHE.S            |       | 2 | 2,1512 | 0,207 | 0      |
| 19 | P62736 ACTA_HUMAN   | E.ITALAPSTM*K.I            |       | 2 | 2,1482 | 0,13  | -0,349 |
| 19 | Q99961 SH3G1_HUMAN  | R.SM*PPLDQPSCK.A           |       | 2 | 2,1397 | 0,277 | -0,096 |
| 19 | Q9P265 DIP2B_HUMAN  | K.M*ALPM*PTK.R             |       | 2 | 2,1384 | 0,127 | 0,265  |
| 19 | Q5H9R7 SAPS3_HUMAN  | E.EKHIAFT#PE.S             | T631: | 2 | 2,1348 | 0,127 | -0,635 |
| 19 | O15355 PPM1G_HUMAN  | E.VVDFIQSK.I               |       | 2 | 2,1348 | 0,249 | 0,065  |
| 19 | O95163 ELP1_HUMAN   | K.YLLHLVDVNE.L             |       | 2 | 2,1315 | 0,201 | 0,201  |
| 19 | P35269 T2FA_HUMAN   | K.IYQEEEM*PE.S             |       | 2 | 2,1311 | 0,165 | 0,412  |
| 19 | Q14126 DSG2_HUMAN   | K.GQIIGNFQAFDE.D           |       | 2 | 2,1265 | 0,164 | -0,182 |
| 19 | Q8NI27 THOC2_HUMAN  | R.VPSIDVLCNE.F             |       | 2 | 2,1265 | 0,084 | -1,065 |
| 19 | P08240 SRPR_HUMAN   | K.SLSREDM*E.S              |       | 2 | 2,1257 | 0,155 | -0,248 |
| 19 | Q86UE8 TLK2_HUMAN   | R.SS#PQHSLSNPLPR.R         | S111: | 2 | 2,1256 | 0,18  | 0,732  |
| 19 | Q04837 SSB_HUMAN    | D.NIIFLSDQTK.E             |       | 2 | 2,1223 | 0,18  | 0,517  |
| 19 | P14174 MIF_HUMAN    | R.SYSKLLCGLLAE.R           |       | 2 | 2,1184 | 0,128 | -0,36  |
| 19 | Q6NZI2 PTRF_HUMAN   | R.GSS#PDVHALLE.I           | S366: | 2 | 2,1146 | 0,31  | 0,405  |
| 19 | P55265 DSRAD_HUMAN  | E.VTPVTGASLR.R             |       | 2 | 2,1145 | 0,16  | -0,183 |
| 19 | P62256 UBE2H_HUMAN  | R.M*DTDVVKLIE.S            |       | 2 | 2,1143 | 0,205 | -0,103 |
| 19 | P55072 TERA_HUMAN   | R.LIVDEAINE.D              |       | 2 | 2,1129 | 0,096 | 0,3    |
| 19 | O95881 TXD12_HUMAN  | R.ILFLDPSGK.V              |       | 2 | 2,1127 | 0,155 | 0,062  |
| 19 | P07814 SYEP_HUMAN   | K.THM*VVANTM*E.D           |       | 2 | 2,1126 | 0,202 | -0,419 |
| 19 | P49792 RBP2_HUMAN   | E.STTGFNFSFK.S             |       | 2 | 2,1109 | 0,188 | 0      |
| 19 | Q9H0H5 RGAP1_HUMAN  | R.CPLPCIPTLIGT#PVK.I       | T342: | 2 | 2,1104 | 0,225 | -0,28  |
| 19 | Q9UK58 CCNL1_HUMAN  | E.KS#PISINVK.T             | S352: | 2 | 2,1103 | 0,176 | -1,373 |
| 19 | Q13144 EI2BE_HUMAN  | K.GYNPAEVGAAGK.G           |       | 2 | 2,1101 | 0,192 | -0,323 |
| 19 | Q5SYE7 NHSL1_HUMAN  | R.ATM*PQVPGGSVKPK.I        |       | 2 | 2,1069 | 0,213 | -0,259 |
| 19 | Q9Y5B0 CTDP1_HUMAN  | E.LAGAPEPQGSCAQGGR.V       |       | 2 | 2,1065 | 0,247 | -0,314 |
| 19 | Q99996 AKAP9_HUMAN  | K.IHTPVSQEE.R              |       | 2 | 2,1053 | 0,098 | 0,469  |
| 19 | P68104 EF1A1_HUMAN  | K.FLKSGDAAIVD.M            |       | 2 | 2,1007 | 0,198 | -0,107 |
| 19 | Q8N3R9 MPP5_HUMAN   | K.TGIDNPM*FDTEE.G          |       | 2 | 2,0998 | 0,155 | 0,088  |
| 19 | P27348 1433T_HUMAN  | R.YDDM*ATCM*K.A            |       | 2 | 2,0941 | 0,306 | -0,418 |
| 19 | O00116 ADAS_HUMAN   | E.DFLHDLKE.T               |       | 2 | 2,0939 | 0,087 | 0,12   |
| 19 | Q9HAF1 CA149_HUMAN  | K.SSVTSAAAVSALAGVQDQLIEK.R |       | 2 | 2,0913 | 0,309 | -0,228 |
| 19 | P62256 UBE2H_HUMAN  | R.RM*DTDVVK.L              |       | 2 | 2,0913 | 0,195 | -0,187 |
| 19 | B0AZS1 B0AZS1_HUMAN | E.DDRNSFTLKE.D             |       | 2 | 2,0908 | 0,122 | -0,091 |
| 19 | O75427 LRCH4_HUMAN  | E.AAATTSVPGS#PGLPGRR.S     | S25:  | 2 | 2,0874 | 0,251 | -0,219 |

|    |                       |                        |       |   |        |       |        |
|----|-----------------------|------------------------|-------|---|--------|-------|--------|
| 19 | Q7L014 DDX46_HUMAN    | K.NFYVEVPE.L           |       | 2 | 2,0851 | 0,141 | 0,49   |
| 19 | O43847 NRDC_HUMAN     | R.RGS#LSNAGDPE.I       | S94:  | 2 | 2,085  | 0,32  | -0,309 |
| 19 | Q9UQ35 SRRM2_HUMAN    | R.GEFSASPM*LK.S        |       | 2 | 2,0841 | 0,204 | 0,789  |
| 19 | Q9UJM3 ERRFI_HUMAN    | R.QNS#EGSASKVPCILPIE.N | S369: | 2 | 2,0834 | 0,088 | 0,241  |
| 19 | Q76L83 ASXL2_HUMAN    | E.SLVTSPS#KPK.S        | S526: | 2 | 2,0797 | 0,157 | -0,217 |
| 19 | O00401 WASL_HUMAN     | K.VIY#DFIEK.T          | Y256: | 2 | 2,0741 | 0,232 | 0,22   |
| 19 | Q9BWD1 THIC_HUMAN     | K.VAVLSQNR.T           |       | 2 | 2,0739 | 0,261 | 0,275  |
| 19 | P43358 MAGA4_HUMAN    | K.M*IFGIDVKE.V         |       | 2 | 2,073  | 0,177 | 0,114  |
| 19 | Q9BUQ8 DDX23_HUMAN    | K.SGVAITFLTKE.D        |       | 2 | 2,0724 | 0,178 | -0,105 |
| 19 | Q05639 EF1A2_HUMAN    | K.SLKSGDAAIVE.M        |       | 2 | 2,0718 | 0,23  | 0,224  |
| 19 | P60953 CDC42_HUMAN    | R.LRPLSYPQTD.V         |       | 2 | 2,0705 | 0,343 | 0,103  |
| 19 | A9CQZ4 A9CQZ4_HUMAN   | E.DEEVPAFFK.N          |       | 2 | 2,0662 | 0,149 | 0,451  |
| 19 | P29590 PML_HUMAN      | D.LSSCITQGK.D          |       | 2 | 2,0616 | 0,183 | 0,245  |
| 19 | P42704 LPPRC_HUMAN    | K.TVQLTSSELE.S         |       | 2 | 2,0585 | 0,187 | -0,11  |
| 19 | P63104 1433Z_HUMAN    | R.YDDM*AACM*K.S        |       | 2 | 2,0561 | 0,307 | -0,429 |
| 19 | Q9Y3D0 FA96B_HUMAN    | E.NANPLIYQR.S          |       | 2 | 2,0553 | 0,252 | -0,112 |
| 19 | Q5VZK9 LR16A_HUMAN    | R.SS#GFISELPSEE.G      | S968: | 2 | 2,0546 | 0,096 | 0,179  |
| 19 | P15924 DESP_HUMAN     | K.ISTISSVR.N           |       | 2 | 2,0524 | 0,298 | -0,141 |
| 19 | Q14697 GANAB_HUMAN    | R.LSVSGRDENSVE.L       |       | 2 | 2,0504 | 0,108 | -1,511 |
| 19 | P25788 PSA3_HUMAN     | R.CKDGVVFGVE.K         |       | 2 | 2,0469 | 0,288 | -0,22  |
| 19 | P05387 RLA2_HUMAN     | E.DVIAQGIGK.L          |       | 2 | 2,0417 | 0,101 | -0,745 |
| 19 | P04083 ANXA1_HUMAN    | E.ATIIDLTK.R           |       | 2 | 2,0415 | 0,281 | 0,062  |
| 19 | P49736 MCM2_HUMAN     | R.RGNDPLTSS#PGR.S      | S27:  | 2 | 2,0345 | 0,295 | -0,091 |
| 19 | O14646 CHD1_HUMAN     | K.KFQACIDE.Y           |       | 2 | 2,0287 | 0,09  | -0,302 |
| 19 | Q5VZK9 LR16A_HUMAN    | E.KRSS#GFISE.L         | S968: | 2 | 2,0261 | 0,119 | -0,336 |
| 19 | O95405 ZFYV9_HUMAN    | R.KPFTTLGE.V           |       | 2 | 2,0231 | 0,112 | 0      |
| 19 | O95359 TACC2_HUMAN    | R.KTLPLTTAPE.A         |       | 2 | 2,0225 | 0,201 | 0,114  |
| 19 | Q92547 TOPB1_HUMAN    | E.DSPFQKPLHDSE.I       |       | 2 | 2,022  | 0,216 | 0      |
| 19 | P11279 LAMP1_HUMAN    | K.TSASGSCGAHLVTLE.L    |       | 2 | 2,022  | 0,15  | -0,082 |
| 19 | ##A8K8F3 A8K8F3_HUMAN | K.YGLLPIK.L            |       | 2 | 2,0211 | 0,115 | 0,379  |
| 19 | Q6UB35 C1TM_HUMAN     | R.VHGLALQISE.N         |       | 2 | 2,0194 | 0,1   | 0,114  |
| 19 | Q07666 KHDR1_HUMAN    | K.FLVPDM*M*DDICQE.Q    |       | 2 | 2,0122 | 0,122 | 0,148  |
| 19 | O00754 MA2B1_HUMAN    | R.DLFSTFTITR.L         |       | 2 | 2,011  | 0,243 | -0,305 |
| 19 | A8K1N6 A8K1N6_HUMAN   | K.GSLLPTS#PR.L         | S284: | 2 | 2,0089 | 0,209 | 0      |
| 19 | P63241 IF5A1_HUMAN    | K.VHLVGIDIFTGK.K       |       | 2 | 2,0084 | 0,197 | 0,094  |
| 19 | ##Q9P2D6 F135A_HUMAN  | E.VGSDS#FR.S           | S748: | 2 | 2,0053 | 0,249 | 0,432  |
| 19 | Q6PL18 ATAD2_HUMAN    | E.SNLNM*YTR.G          |       | 2 | 2,0035 | 0,207 | -0,421 |
| 19 | Q15003 CND2_HUMAN     | E.SVSALVDK.F           |       | 2 | 1,9979 | 0,164 | 0,074  |
| 19 | Q00839 HNRPU_HUMAN    | K.LKVSSELKEE.L         |       | 2 | 1,9975 | 0,234 | -0,454 |

|    |                     |                               |        |   |        |       |        |
|----|---------------------|-------------------------------|--------|---|--------|-------|--------|
| 19 | Q7Z417 NUFP2_HUMAN  | R.TS#PQVLGSILK.S              | S572:  | 2 | 1,9937 | 0,276 | -0,399 |
| 19 | P27824 CALX_HUMAN   | K.VTYKAPVPTGE.V               |        | 2 | 1,991  | 0,321 | -0,735 |
| 19 | Q9UKV3 ACINU_HUMAN  | E.VATPPVPQLQVCEPK.E           |        | 2 | 1,9904 | 0,42  | 0,293  |
| 19 | Q9H1A4 APC1_HUMAN   | E.GSL#PVIAPK.K                | S688:  | 2 | 1,986  | 0,091 | 0,349  |
| 19 | O43776 SYNC_HUMAN   | E.DLVCDVVDR.I                 |        | 2 | 1,9848 | 0,177 | -0,895 |
| 19 | Q8N3X1 FNBP4_HUMAN  | K.VQTTTPKVEEE.Q               |        | 2 | 1,9835 | 0,22  | 0,105  |
| 19 | Q9UQ35 SRRM2_HUMAN  | K.ALPQTPRPR.S                 |        | 2 | 1,9831 | 0,12  | -0,471 |
| 19 | P23193 TCEA1_HUMAN  | R.DTYVSSFPR.A                 |        | 2 | 1,9831 | 0,259 | 0,114  |
| 19 | Q12792 TWF1_HUMAN   | E.DVSLHGYK.K                  |        | 2 | 1,9821 | 0,177 | 0,266  |
| 19 | Q9ULU4 PKCB1_HUMAN  | E.SM*DFLDK.S                  |        | 2 | 1,979  | 0,139 | 0,35   |
| 19 | Q15276 RABE1_HUMAN  | D.AGLLPSGDPFSK.S              |        | 2 | 1,9709 | 0,15  | 0,281  |
| 19 | Q9NR31 SAR1A_HUMAN  | E.VFM*CSVLK.R                 |        | 2 | 1,9705 | 0,144 | -0,305 |
| 19 | O76031 CLPX_HUMAN   | E.DALKAIARLALE.R              |        | 2 | 1,9692 | 0,143 | -1,14  |
| 19 | P60709 ACTB_HUMAN   | K.DLYANTVLSGGTTM*YPGIADR.M    |        | 2 | 1,964  | 0,15  | 0,109  |
| 19 | O75369 FLNB_HUMAN   | K.QKDFLDGVYAFE.Y              |        | 2 | 1,9568 | 0,153 | -0,341 |
| 19 | P08240 SRPR_HUMAN   | K.GTLGGM*FGM*LKGLVGSK.S       |        | 2 | 1,9559 | 0,181 | -0,145 |
| 19 | P28070 PSB4_HUMAN   | R.SYNRFQIATVTE.K              |        | 2 | 1,9543 | 0,244 | 0,683  |
| 19 | Q9BW61 DDA1_HUMAN   | R.EYPSEQIIVTE.K               |        | 2 | 1,9528 | 0,185 | 0,28   |
| 19 | P51858 HDGF_HUMAN   | E.VERPLPM*EVEK.N              |        | 2 | 1,9508 | 0,274 | -1,726 |
| 19 | P14625 ENPL_HUMAN   | E.FSVIADPR.G                  |        | 2 | 1,9478 | 0,224 | 0      |
| 19 | Q9H6F5 CCD86_HUMAN  | E.SNPEETREPGS#PPSVQR.A        | S47:   | 2 | 1,9467 | 0,135 | 0,063  |
| 19 | Q6KC79 NIPBL_HUMAN  | K.AITSLGGGS#PK.N              | S2658: | 2 | 1,9459 | 0,092 | -0,103 |
| 19 | Q9C0C2 TB182_HUMAN  | K.SSPCHSQLLE.A                |        | 2 | 1,9456 | 0,192 | -0,527 |
| 19 | Q15149 PLEC1_HUMAN  | E.LQLVTYK.A                   |        | 2 | 1,943  | 0,198 | 0,141  |
| 19 | Q96A49 SYAP1_HUMAN  | E.AVRPKT#PPVVIK.S             | T248:  | 2 | 1,9406 | 0,164 | -0,969 |
| 19 | P61586 RHOA_HUMAN   | R.LRPLSYPTD.V                 |        | 2 | 1,9406 | 0,335 | 0,415  |
| 19 | P31946 1433B_HUMAN  | R.NLLSVAYK.N                  |        | 2 | 1,9365 | 0,148 | 0,202  |
| 19 | P16949 STMN1_HUMAN  | E.SVPEFPLS#PPK.K              | S38:   | 2 | 1,9364 | 0,256 | -0,095 |
| 19 | Q96T23 RSF1_HUMAN   | K.AQIDPVLLK.N                 |        | 2 | 1,9266 | 0,209 | -0,061 |
| 19 | P42677 RS27_HUMAN   | K.DLLHPSPEEE.K                |        | 2 | 1,9198 | 0,152 | 0,105  |
| 19 | Q13428 TCOF_HUMAN   | K.TVANLLSGK.S                 |        | 2 | 1,9181 | 0,26  | 0,203  |
| 19 | A6NH35 A6NH35_HUMAN | K.LFIGGLSFETTED.S             |        | 2 | 1,9165 | 0,334 | -0,085 |
| 19 | P14406 CX7A2_HUMAN  | E.LAVASFPK.K                  |        | 2 | 1,9156 | 0,211 | 0,293  |
| 19 | Q71U36 TBA1A_HUMAN  | K.TIGGGDDSFNTFFSE.T           |        | 2 | 1,9155 | 0,196 | -0,23  |
| 19 | Q15942 ZYX_HUMAN    | K.FSPGAPGGSGSQPNQK.L          |        | 2 | 1,906  | 0,206 | -0,08  |
| 19 | Q13263 TIF1B_HUMAN  | R.STAPSAASASASAAASS#PAGGGAE.A | S50:   | 2 | 1,9059 | 0,169 | 0,117  |
| 19 | Q5T5P2 SKT_HUMAN    | R.SM*VVPGNATIPR.D             |        | 2 | 1,9044 | 0,13  | 0      |
| 19 | O94804 STK10_HUMAN  | K.ASQSRPNSSALE.T              |        | 2 | 1,9015 | 0,105 | 0,098  |
| 19 | B2RAI3 B2RAI3_HUMAN | D.FKFM*AQGK.T                 |        | 2 | 1,8996 | 0,158 | -0,752 |

|    |                       |                         |        |   |        |       |        |
|----|-----------------------|-------------------------|--------|---|--------|-------|--------|
| 19 | P35998 PRS7_HUMAN     | E.DDIQQLKK.I            |        | 2 | 1,8991 | 0,116 | 0,111  |
| 19 | P04637 P53_HUMAN      | R.ALPNNTSSS#PQPK.K      | S315:  | 2 | 1,8975 | 0,307 | 0,258  |
| 19 | O75475 PSIP1_HUMAN    | K.FSSQQAATK.Q           |        | 2 | 1,896  | 0,199 | -0,063 |
| 19 | P52948 NUP98_HUMAN    | R.SLVGGLLQSK.F          |        | 2 | 1,8955 | 0,182 | 0      |
| 19 | Q9UPS6 SET1B_HUMAN    | E.SS#PAGPEKPHDSLDSRIE.M | S488:  | 2 | 1,8937 | 0,213 | 0,366  |
| 19 | ##A8MXP5 A8MXP5_HUMAN | K.KKWPS#VMEE.L          | S1372: | 2 | 1,889  | 0,1   | 1,91   |
| 19 | O95831 AIFM1_HUMAN    | K.KVVQLDVRD.N           |        | 2 | 1,8864 | 0,13  | -0,455 |
| 19 | Q92598 HS105_HUMAN    | K.LM*SSNSTDLPLNIE.C     |        | 2 | 1,8859 | 0,086 | 0,236  |
| 19 | P41250 SYG_HUMAN      | E.DKAPQVDVDK.A          |        | 2 | 1,8841 | 0,257 | -0,985 |
| 19 | Q8TEU7 RPGF6_HUMAN    | E.VEPTDSEPYSCSK.S       |        | 2 | 1,881  | 0,095 | -0,163 |
| 19 | O15511 ARPC5_HUMAN    | R.KVDVDEYDE.N           |        | 2 | 1,8798 | 0,174 | 0      |
| 19 | Q96N67 DOCK7_HUMAN    | R.S#M*SIDDTPR.G         | S180:  | 2 | 1,8773 | 0,112 | 0,327  |
| 19 | P10809 CH60_HUMAN     | E.DVQPHDLGK.V           |        | 2 | 1,8757 | 0,203 | 1,511  |
| 19 | P40261 NNMT_HUMAN     | E.GLFSVLAR.K            |        | 2 | 1,8745 | 0,217 | 0,495  |
| 19 | Q92733 PRCC_HUMAN     | K.TILQGSSE.G            |        | 2 | 1,8692 | 0,09  | 0,073  |
| 19 | O14974 MYPT1_HUMAN    | R.KTGS#YGALAE.I         | S445:  | 2 | 1,866  | 0,088 | 0,34   |
| 19 | Q00839 HNRPU_HUMAN    | K.SSGPTSLFAVTVAPPGAR.Q  |        | 2 | 1,8596 | 0,203 | 0      |
| 19 | Q13136 LIPA1_HUMAN    | K.KM*QM*DGNVSGTQRLD.S   |        | 2 | 1,8587 | 0,195 | 0      |
| 19 | Q6ZT12 UBR3_HUMAN     | K.SIQDLIKE.V            |        | 2 | 1,8574 | 0,088 | 0,387  |
| 19 | Q6S8J3 A26CA_HUMAN    | E.TTFNSIM*K.S           |        | 2 | 1,8571 | 0,355 | 0,318  |
| 19 | P55809 SCOT_HUMAN     | E.NGVLGLGPYPR.Q         |        | 2 | 1,8567 | 0,134 | -0,213 |
| 19 | Q96T88 UHRF1_HUMAN    | D.TIQLLVR.Q             |        | 2 | 1,8564 | 0,089 | 0,217  |
| 19 | A8K1N6 A8K1N6_HUMAN   | K.KGSLPTS#PR.L          | S284:  | 2 | 1,8557 | 0,104 | 0,322  |
| 19 | Q71U36 TBA1A_HUMAN    | E.DAANNYAR.G            |        | 2 | 1,8477 | 0,151 | 0,136  |
| 19 | Q08752 PPID_HUMAN     | K.NIGNTFFK.S            |        | 2 | 1,8368 | 0,247 | 0,389  |
| 19 | P05783 K1C18_HUMAN    | E.IDLDSM*R.N            |        | 2 | 1,8226 | 0,289 | 0,211  |
| 19 | Q96T23 RSF1_HUMAN     | E.TLALLKAQIDPVLLK.N     |        | 2 | 1,8214 | 0,114 | 0,224  |
| 19 | O15116 LSM1_HUMAN     | R.GIFVVRGE.N            |        | 2 | 1,8196 | 0,229 | 0,278  |
| 19 | Q9Y3M8 STA13_HUMAN    | D.LYTLPR.G              |        | 2 | 1,8155 | 0,259 | 0,418  |
| 19 | Q13123 RED_HUMAN      | K.LLM*T#PR.A            | T42:   | 2 | 1,8108 | 0,082 | 0,443  |
| 19 | P42695 CNDD3_HUMAN    | R.NSSAFSYQR.Q           |        | 2 | 1,8036 | 0,217 | -0,46  |
| 19 | P63241 IF5A1_HUMAN    | K.RNDFQLIGIQD.G         |        | 2 | 1,7848 | 0,16  | -0,278 |
| 19 | P07355 ANXA2_HUMAN    | K.SALSGHLE.T            |        | 2 | 1,7798 | 0,264 | 0,375  |
| 19 | Q8IYW5 RN168_HUMAN    | E.GSISAS#PLNSR.K        | S197:  | 2 | 1,7747 | 0,217 | 0,313  |
| 19 | O00512 BCL9_HUMAN     | R.STAPLNTQISALR.N       |        | 2 | 1,7701 | 0,105 | -0,267 |
| 19 | Q05519 SFR11_HUMAN    | R.TLFGFLGK.I            |        | 2 | 1,7651 | 0,106 | 0,138  |
| 19 | Q9Y6M7 S4A7_HUMAN     | K.VDM*NFM*R.K           |        | 2 | 1,7642 | 0,162 | 0,129  |
| 19 | Q9C0B5 ZDHC5_HUMAN    | K.LS#RGDSLKEPTSIAE.S    | S376:  | 2 | 1,7558 | 0,177 | -0,797 |
| 19 | Q96RS0 TGS1_HUMAN     | K.LYNLGLK.G             |        | 2 | 1,7525 | 0,167 | -1,114 |

|    |                      |                                         |              |   |        |       |        |
|----|----------------------|-----------------------------------------|--------------|---|--------|-------|--------|
| 19 | P68104 EF1A1_HUMAN   | E.HALLAYTLGVK.Q                         |              | 2 | 1,7476 | 0,358 | 0,411  |
| 19 | P31937 3HIDH_HUMAN   | R.IITM*LPTSINAIE.A                      |              | 2 | 1,7417 | 0,205 | 0,085  |
| 19 | Q13564 ULA1_HUMAN    | E.DLRLDKPFPE.L                          |              | 2 | 1,7402 | 0,177 | 0,099  |
| 19 | Q5JPB2 ZN831_HUMAN   | R.TLTSS#SPDS#KVTEE.G                    | S1527:S1531: | 2 | 1,7355 | 0,113 | -0,892 |
| 19 | Q9UQ35 SRRM2_HUMAN   | R.TS#PPLDR.A                            | S2398:       | 2 | 1,7328 | 0,124 | 0,125  |
| 19 | P08107 HSP71_HUMAN   | R.LVNHFVEE.F                            |              | 2 | 1,7315 | 0,156 | -0,062 |
| 19 | P49736 MCM2_HUMAN    | E.TIYQNYQR.I                            |              | 2 | 1,7236 | 0,139 | -0,112 |
| 19 | O00505 IMA3_HUMAN    | R.AVGNIVTGTDE.Q                         |              | 2 | 1,7225 | 0,21  | 0,227  |
| 19 | ##Q96BN6 F149B_HUMAN | E.SPTIQR.G                              |              | 2 | 1,712  | 0,096 | 0,823  |
| 19 | P08727 K1C19_HUMAN   | R.FGPGVAFR.A                            |              | 2 | 1,7107 | 0,183 | -1,864 |
| 19 | Q9NPR2 SEM4B_HUMAN   | R.VRLGS#EIRDSVV.-                       | S825:        | 2 | 1,7093 | 0,439 | -0,087 |
| 19 | Q13123 RED_HUMAN     | R.WDFDTQEE.Y                            |              | 2 | 1,7012 | 0,112 | 0,342  |
| 19 | P14625 ENPL_HUMAN    | K.LIINSLYK.N                            |              | 2 | 1,6987 | 0,102 | 0,316  |
| 19 | Q659C4 LARP2_HUMAN   | E.LQVPINSPR.R                           |              | 2 | 1,6966 | 0,178 | 0,238  |
| 19 | Q99426 TBCB_HUMAN    | R.RGTVM*YVGLTD.F                        |              | 2 | 1,6954 | 0,108 | -0,199 |
| 19 | Q9UHB6 LIMA1_HUMAN   | R.ET#PHSPGVEDAPIAK.V                    | T487:        | 2 | 1,6837 | 0,345 | -0,15  |
| 19 | Q9P107 GMIP_HUMAN    | E.TPITSVPR.G                            |              | 2 | 1,676  | 0,172 | 0,21   |
| 19 | Q96LD4 TRI47_HUMAN   | K.VLSAVEDRM*DE.L                        |              | 2 | 1,6731 | 0,226 | -0,095 |
| 19 | P34932 HSP74_HUMAN   | K.QVYVDKLAE.L                           |              | 2 | 1,67   | 0,313 | -0,229 |
| 19 | O75494 FUSIP_HUMAN   | E.DVRDAEDALHNLDR                        |              | 2 | 1,6598 | 0,173 | 0      |
| 19 | Q9C0C2 TB182_HUMAN   | R.RGAGAELKDTQS#PSTCSE.G                 | S712:        | 2 | 1,6501 | 0,169 | 0      |
| 19 | Q96PK6 RBM14_HUMAN   | R.QPT#PPFFGR.D                          | T206:        | 2 | 1,6475 | 0,305 | 0      |
| 19 | Q9UQ35 SRRM2_HUMAN   | R.ARS#RT#PPSAPSQSR.M                    | S2407:T2409: | 2 | 1,6361 | 0,248 | 0      |
| 19 | P62333 PRS10_HUMAN   | E.M*FNYAR.D                             |              | 2 | 1,6337 | 0,126 | 0,746  |
| 19 | O94913 PCF11_HUMAN   | E.LQEPCDSPK.V                           |              | 2 | 1,6211 | 0,084 | 0,568  |
| 19 | Q92598 HS105_HUMAN   | K.DISTTLNADE.A                          |              | 2 | 1,6207 | 0,164 | 0,226  |
| 19 | A6NHU9 A6NHU9_HUMAN  | K.TIGSYVPGPR.S                          |              | 2 | 1,5935 | 0,224 | 0,117  |
| 19 | P13693 TCTP_HUMAN    | R.DLISHDE.M                             |              | 2 | 1,5875 | 0,193 | -1,472 |
| 19 | O00273 DFFA_HUMAN    | K.SLTPVTLVLAE.D                         |              | 2 | 1,5505 | 0,141 | 0,213  |
| 19 | P05362 ICAM1_HUMAN   | K.DGTFPLPIGE.S                          |              | 2 | 1,542  | 0,132 | 0,233  |
| 19 | O60658 PDE8A_HUMAN   | E.LYSPQFGAK.D                           |              | 2 | 1,5408 | 0,19  | -0,121 |
| 19 | P49757 NUMB_HUMAN    | R.GFPALSQK.M                            |              | 2 | 1,5271 | 0,268 | 0,432  |
| 19 | Q07955 SFRS1_HUMAN   | E.DM*TYAVR.K                            |              | 2 | 1,5226 | 0,112 | 0,35   |
| 19 | Q9BS26 TXND4_HUMAN   | E.NQVVFAR.V                             |              | 2 | 1,5049 | 0,135 | 1,024  |
| 20 | P05783 K1C18_HUMAN   | R.ST#SFRGGM*GSGGLATGIAGGLAGM*GGIQNEKE.T | T52:         | 3 | 6,6193 | 0,476 | 0,713  |
| 20 | P46734 MP2K3_HUMAN   | K.M*CDFGISGYLVDS#VAK.T                  | S218:        | 2 | 6,2331 | 0,545 | 0,131  |
| 20 | O94925 GLSK_HUMAN    | E.DDKPHNPM*VNAGAIVVTSLIK.Q              |              | 3 | 6,2043 | 0,463 | 0,082  |
| 20 | Q15149 PLEC1_HUMAN   | E.LQLVITYKAQLEPVAS#PAKKPKVQSGSE.S       | S1435:       | 3 | 6,1548 | 0,507 | -0,061 |
| 20 | Q9NY33 DPP3_HUMAN    | K.LAQDFLDSQNL SAYNTR.L                  |              | 2 | 6,132  | 0,473 | 0,125  |

|    |                    |                                       |            |   |        |       |        |
|----|--------------------|---------------------------------------|------------|---|--------|-------|--------|
| 20 | Q71RC2 LARP4_HUMAN | R.ASTAS#PCNNNINAATAVALQEPR.K          | S597:      | 2 | 6,0378 | 0,457 | 0,697  |
| 20 | Q9P2Y5 UVRAG_HUMAN | R.KITSLSS#LDTSLDFSKE.N                | S550:      | 2 | 5,8986 | 0,47  | 0,659  |
| 20 | Q9NQW6 ANLN_HUMAN  | K.ALSSSADDASLVNASISSSVK.A             |            | 2 | 5,7253 | 0,607 | 0,182  |
| 20 | P05783 K1C18_HUMAN | E.DFNLGDALDSS#NSM*QTIQK.T             | S399:      | 2 | 5,7216 | 0,4   | 0,336  |
| 20 | P78332 RBM6_HUMAN  | E.HESPADFQNSQS#PVQDQDKSQLSQR.E        | S362:      | 3 | 5,5573 | 0,445 | 0      |
| 20 | Q9C0B5 ZDHC5_HUMAN | K.YRPGYSSSTSAAAM*PHSSSAK.L            |            | 3 | 5,534  | 0,422 | 0,252  |
| 20 | Q9H6F5 CCD86_HUMAN | R.LQQGAGLESPQQPEPGAAS#PQRQDDLHLE.S    | S91:       | 3 | 5,4993 | 0,6   | 0,113  |
| 20 | P46821 MAP1B_HUMAN | K.LGDVS#PTQIDVSQLGFSFKE.D             | S1501:     | 2 | 5,4842 | 0,505 | 0,229  |
| 20 | P46821 MAP1B_HUMAN | E.RKLGDVS#PTQIDVSQLGFSFKE.D           | S1501:     | 3 | 5,4837 | 0,451 | 0,454  |
| 20 | Q86WB0 NIPA_HUMAN  | R.SQDATFS#PGSEQAEKS#PGPIVSR.T         | S335:S344: | 3 | 5,481  | 0,471 | -0,289 |
| 20 | P40855 PEX19_HUMAN | E.SALDDFDKAKPSPAPPSTTTAPDASGPQK.R     |            | 3 | 5,4297 | 0,547 | -0,063 |
| 20 | Q9Y6G9 DC1L1_HUMAN | R.KPVTVSPTTPTS#PTEGEAS.-              | S516:      | 2 | 5,4142 | 0,544 | 0,372  |
| 20 | P13645 K1C10_HUMAN | K.GSLGGGFSSGGFSSGGSFSR.G              |            | 2 | 5,3275 | 0,569 | 0,071  |
| 20 | Q9H0D6 XRN2_HUMAN  | E.M*RM*QNNSSPSISPNTSFTSDGSPSPLGGIK.R  |            | 3 | 5,3236 | 0,386 | 0,585  |
| 20 | Q9H4A4 AMPB_HUMAN  | R.RPLHSAQAVDVASASNFR.A                |            | 3 | 5,299  | 0,499 | -0,095 |
| 20 | Q09666 AHNK_HUMAN  | E.TGKLQSGVSLASKK.S                    |            | 3 | 5,2904 | 0,453 | 0,313  |
| 20 | Q9UQ35 SRRM2_HUMAN | K.SKDSLQSCPGSLSLCAGVK.S               |            | 3 | 5,2163 | 0,386 | 0,262  |
| 20 | Q9P260 K1468_HUMAN | R.KNYKSS#PEIQEPIKPLE.K                | S244:      | 3 | 5,2042 | 0,391 | -0,088 |
| 20 | Q9H0D6 XRN2_HUMAN  | R.M*QNNSSPSISPNTSFTSDGSPSPLGGIKR.K    |            | 3 | 5,1867 | 0,486 | 0,368  |
| 20 | Q9ULU4 PKCB1_HUMAN | K.TGQAGSLSGS#PKPFSPQLSAPITTK.T        | S490:      | 3 | 5,1829 | 0,538 | 0,433  |
| 20 | Q9H4A4 AMPB_HUMAN  | R.RPLHSAQAVDVASASNFR.A                |            | 2 | 5,1803 | 0,496 | -0,443 |
| 20 | Q9BX68 HINT2_HUMAN | E.DQQLLGHLLLVAQTAKAE.G                |            | 3 | 5,118  | 0,397 | -0,176 |
| 20 | Q9H6T3 RPAP3_HUMAN | E.NNPINLANVIAATGTTSK.K                |            | 2 | 5,1146 | 0,49  | 0,136  |
| 20 | Q9UKV5 AMFR2_HUMAN | R.SDS#IRPALNSPVERPSSDQEEGE.T          | S509:      | 3 | 5,1052 | 0,479 | 0,071  |
| 20 | P05783 K1C18_HUMAN | E.DFNLGDALDSSNSM*QTIQK.T              |            | 2 | 5,0971 | 0,471 | 0,465  |
| 20 | O95453 PARN_HUMAN  | E.KRSQANGAGALSYVS#PNTSK.C             | S163:      | 3 | 5,0895 | 0,358 | 0,346  |
| 20 | Q9UK76 HN1_HUMAN   | R.RNS#SEASSGDFLDLKG.E.G               | S87:       | 3 | 5,0873 | 0,432 | 1,354  |
| 20 | Q9H4A3 WNK1_HUMAN  | K.DRPVSQLVGSKEPPPAR.S                 |            | 3 | 5,086  | 0,403 | 0      |
| 20 | Q9H0D6 XRN2_HUMAN  | E.M*RM*QNNSSPSISPNTSFTSDGSPSPLGGIKR.K |            | 3 | 5,0766 | 0,5   | 0,223  |
| 20 | Q9UK76 HN1_HUMAN   | R.RNS#SEASSGDFLDLKG.E.G               | S87:       | 2 | 5,0425 | 0,577 | 0,193  |
| 20 | Q15637 SF01_HUMAN  | E.RAYIVQLQIEDLTR.K                    |            | 3 | 5,0277 | 0,27  | 0,213  |
| 20 | Q8NCE2 MTMRE_HUMAN | K.DRGS#TTS#LGSDFSLVM*E.S              | S438:S441: | 2 | 5,0248 | 1     | 0,123  |
| 20 | O95453 PARN_HUMAN  | R.SQANGAGALSYVS#PNTSK.C               | S163:      | 2 | 4,9954 | 0,544 | 0,067  |
| 20 | Q9BQA1 MEP50_HUMAN | -.M*RKET#PPPLVPPAARE.W                | T5:        | 3 | 4,9547 | 0,295 | 0      |
| 20 | Q8IW35 CEP97_HUMAN | K.LHIACFPVQLDTLS#DGASVDE.S            | S813:      | 2 | 4,9511 | 0,478 | 0,515  |
| 20 | Q32MZ4 LRRF1_HUMAN | R.NM*PGLSAATLASLGGTSS#R.R             | S116:      | 2 | 4,9283 | 0,434 | 0,259  |
| 20 | Q02952 AKA12_HUMAN | E.DFAAHPGEDAVPTGPDCQAK.S              |            | 2 | 4,9073 | 0,527 | 0      |
| 20 | Q02952 AKA12_HUMAN | E.KQEKEPSKAES#PTS#PVTSE.T             | S283:S286: | 2 | 4,8982 | 1     | 0,423  |
| 20 | Q9Y5J1 UTP18_HUMAN | E.LVFGDVENDEDALLR.R                   |            | 2 | 4,8955 | 0,436 | -0,143 |



|    |                    |                                     |            |   |        |       |        |
|----|--------------------|-------------------------------------|------------|---|--------|-------|--------|
| 20 | Q9NWH9 SLTM_HUMAN  | R.AGAGM*ITQHSSNAS#PINR.I            | S1002:     | 3 | 4,8635 | 0,489 | 0,575  |
| 20 | P24752 THIL_HUMAN  | E.DLIVKDGTLTDVYNKIHM*GSCAE.N        |            | 3 | 4,8594 | 0,4   | 0,147  |
| 20 | Q3MHD2 LSM12_HUMAN | E.VEIINDRTET#PPPLASLNVS.K           | T75:       | 3 | 4,8396 | 0,378 | 0,54   |
| 20 | Q9UQ35 SRRM2_HUMAN | E.KM*ALPPQEDATAS#PPRQK.D            | S1179:     | 3 | 4,8204 | 0,421 | 0,089  |
| 20 | Q9UK76 HN1_HUMAN   | R.NS#SEASSGDFLDLKG.E                | S87:       | 2 | 4,8044 | 0,535 | 0,211  |
| 20 | Q96S94 CCNL2_HUMAN | R.GLLPGGTQVLDGTSFGSPAPK.L           |            | 2 | 4,7955 | 0,548 | -0,061 |
| 20 | Q6P6C2 ALKB5_HUMAN | E.AAAAAAAAAAAAAAAAAAAEPYPVSGAK.R    |            | 3 | 4,7889 | 0,446 | 0,315  |
| 20 | Q8NFC6 FA44A_HUMAN | E.GKDKDVTL#PVKAGPATTSSE.T           | S1531:     | 2 | 4,7813 | 0,367 | 0,323  |
| 20 | P49585 PCY1A_HUMAN | R.HKAAAYDIS#EDED.-                  | S362:      | 2 | 4,7744 | 0,52  | -0,146 |
| 20 | Q32M24 LRRF1_HUMAN | R.CTLPEHES#PSQDISDACEAE.S           | S733:      | 2 | 4,7717 | 0,47  | 0,207  |
| 20 | Q9H9C1 CN133_HUMAN | R.TRPGS#FQSLSDALS DTPAK.S           | S121:      | 3 | 4,7555 | 0,332 | 0,178  |
| 20 | Q5UIP0 RIF1_HUMAN  | E.LDPSLVSANDS#PSGM*QTR.C            | S2161:     | 2 | 4,7535 | 0,369 | 0      |
| 20 | Q92900 RENT1_HUMAN | E.DLEKPGVDEEPQHVLRLYE.D             |            | 3 | 4,7534 | 0,543 | 0,161  |
| 20 | P06744 G6PI_HUMAN  | E.LDGSAQVTSHDASTNGLINFIK.Q          |            | 3 | 4,7332 | 0,419 | 0,4    |
| 20 | Q96T88 UHRF1_HUMAN | D.TIQLLVRQSLVLP HSTK.E              |            | 3 | 4,7297 | 0,133 | 0,189  |
| 20 | P24534 EF1B_HUMAN  | K.YGPADVEDTTGSGATDSK.D              |            | 2 | 4,7222 | 0,432 | -0,413 |
| 20 | P22234 PUR6_HUMAN  | E.LLDS#PGKVLLQSKDQITAGNAAR.K        | S27:       | 3 | 4,7177 | 0,4   | 0,296  |
| 20 | Q5T4S7 UBR4_HUMAN  | E.KAAPPPPPPPPLESS#PR.V              | S620:      | 3 | 4,7063 | 0,308 | -0,765 |
| 20 | A0FGR8 ESYT2_HUMAN | E.KAQPPEAGPQGLHDLGR.S               |            | 3 | 4,7025 | 0,484 | 0,207  |
| 20 | Q9UK76 HN1_HUMAN   | E.EKPVPAAPVPS#PVAPAPVPSR.R          | S131:      | 3 | 4,6794 | 0,432 | 0,256  |
| 20 | Q9UHB6 LIMA1_HUMAN | R.SRPFTVAASFQSTSVKS#PK.T            | S604:      | 3 | 4,6712 | 0,413 | 0,435  |
| 20 | P41214 LIGA_HUMAN  | R.GLNQDSTDSKTLQE QM*DE.L            |            | 2 | 4,6631 | 0,473 | 0,238  |
| 20 | Q71RC2 LARP4_HUMAN | R.AST#ASPCNNNINAATAVALQEPR.K        | T595:      | 3 | 4,6604 | 0,38  | 0,373  |
| 20 | P21127 CD2L1_HUMAN | R.GTS#PRPPEGGLGYSQLGDDDLKE.T        | S752:      | 3 | 4,6369 | 0,409 | -0,371 |
| 20 | P68104 EF1A1_HUMAN | E.DGPKFLKSGDAAIVDM*VPGKPM*CVE.S     |            | 3 | 4,6244 | 0,448 | 0,34   |
| 20 | P49006 MRP_HUMAN   | K.SNGDLSPKGEGESPPVNGTDE.A           |            | 2 | 4,6161 | 0,487 | -0,234 |
| 20 | Q8NFC6 FA44A_HUMAN | E.GKDKDVTL#PVKAGPATTSSE.T           | S1531:     | 3 | 4,609  | 0,439 | 0,081  |
| 20 | Q9BWU0 NADAP_HUMAN | E.TLASQDLSGDFKKPALVPS#PAAR.S        | S82:       | 3 | 4,603  | 0,421 | 0,299  |
| 20 | Q9UGU5 HM2L1_HUMAN | K.ASSVGVLS#PQKKSPTTM*LLPAS#PAKAPE.T | S497:S512: | 3 | 4,5986 | 1     | 0,657  |
| 20 | Q9NX40 OCAD1_HUMAN | E.SAPTGITDHIVQGPDPNLEES#PKRK.N      | S191:      | 3 | 4,5912 | 0,393 | -0,397 |
| 20 | Q9Y6G9 DC1L1_HUMAN | R.ITRKPVTVSPPTPTS#PTEGEAS.-         | S516:      | 2 | 4,582  | 0,451 | 0,627  |
| 20 | Q71RC2 LARP4_HUMAN | R.ASTASPCNNNINAATAVALQEPR.K         |            | 3 | 4,5766 | 0,366 | -0,154 |
| 20 | Q9UQ35 SRRM2_HUMAN | K.DSLVQSCPGSLSLCAGVK.S              |            | 3 | 4,5611 | 0,366 | -0,097 |
| 20 | Q8IWA0 WDR75_HUMAN | K.VQDTS#NTGLGEDIIHQLSKSEE.K         | S796:      | 3 | 4,5581 | 0,29  | 0,221  |
| 20 | Q8IWA0 WDR75_HUMAN | K.VQDTS#NTGLGEDIIHQLSK.S            | S796:      | 3 | 4,5507 | 0,446 | 0,171  |
| 20 | Q9NQW6 ANLN_HUMAN  | K.ALSSSADDASLVNASISSSVK.A           |            | 3 | 4,5361 | 0,426 | 0,364  |
| 20 | Q15084 PDIA6_HUMAN | E.HQLCVVAVLPHILDTGAAGR.N            |            | 3 | 4,5352 | 0,305 | -0,172 |
| 20 | O95359 TACC2_HUMAN | E.KIGSSLPQDDDAPKK.Q                 |            | 3 | 4,5325 | 0,365 | -0,343 |
| 20 | P68104 EF1A1_HUMAN | K.FLKSGDAAIVDM*VPGKPM*CVE.S         |            | 2 | 4,5256 | 0,603 | 0,531  |

|    |                     |                                   |            |   |        |       |        |
|----|---------------------|-----------------------------------|------------|---|--------|-------|--------|
| 20 | Q13459 MYO9B_HUMAN  | R.VQEKPDS#PGGSTQIQR.Y             | S1290:     | 3 | 4,513  | 0,452 | 0,506  |
| 20 | Q02790 FKBP4_HUMAN  | E.HSIVYLKPSYAFGS#VGKE.K           | S229:      | 3 | 4,5039 | 0,509 | 0,266  |
| 20 | Q32MZ4 LRRF1_HUMAN  | R.DEKPIKTEVPGS#PAGTEGNCQE.A       | S521:      | 3 | 4,5012 | 0,499 | -0,151 |
| 20 | Q92560 BAP1_HUMAN   | K.GSSPSIRPIQGSQGSS#SPVEKE.V       | S596:      | 3 | 4,4999 | 0,429 | -0,558 |
| 20 | Q14980 NUMA1_HUMAN  | K.SREPQAKPQLDLSIDS#LDLSCEE.G      | S1724:     | 3 | 4,4816 | 0,292 | 0,203  |
| 20 | P07814 SYEP_HUMAN   | E.DVAM*LHIKPDQFTYTSDFHE.T         |            | 3 | 4,4778 | 0,418 | 0,076  |
| 20 | Q00610 CLH1_HUMAN   | R.KFNALFAQGNYSE.A                 |            | 2 | 4,4667 | 0,43  | 0,082  |
| 20 | Q7Z417 NUFP2_HUMAN  | E.KRT#SPQVLGSILK.S                | T571:      | 3 | 4,4505 | 0,348 | 0,303  |
| 20 | Q9Y608 LRRF2_HUMAN  | R.RGS#GDTSSLIDPDTSLSE.L           | S328:      | 2 | 4,4346 | 0,528 | 0,382  |
| 20 | P55072 TERA_HUMAN   | R.GGNIGDGGGAADRVINQILTE.M         |            | 2 | 4,4251 | 0,403 | 0,181  |
| 20 | Q5SW79 CE170_HUMAN  | K.SASAKS#IDSKVADAATE.V            | S138:      | 2 | 4,4237 | 0,576 | 0,211  |
| 20 | Q8NCM9 Q8NCM9_HUMAN | R.SSDITSDLGNVLTSTPNAK.T           |            | 2 | 4,4224 | 0,587 | 0,127  |
| 20 | P46821 MAP1B_HUMAN  | R.KLGDVSPT#QIDVSVQFGSFK.E         | T1503:     | 3 | 4,4217 | 0,495 | 0,404  |
| 20 | O43432 IF4G3_HUMAN  | R.GGS#SKDLLDNQSQE.E               | S1156:     | 2 | 4,4186 | 0,412 | -0,157 |
| 20 | Q8ND56 LS14A_HUMAN  | K.TQLSQGRS#SPQLDPLRKS#PTM*E.Q     | S182:S192: | 3 | 4,4118 | 0,275 | 0,348  |
| 20 | P35579 MYH9_HUMAN   | K.IAQLLEEQLDNETKE.R               |            | 2 | 4,4108 | 0,419 | -0,294 |
| 20 | O75152 ZC11A_HUMAN  | R.LSSASTGKPLSVEDDFE.K             |            | 2 | 4,4082 | 0,283 | 0,065  |
| 20 | P31948 STIP1_HUMAN  | E.KGNKALSVGNIDDALQCYSE.A          |            | 3 | 4,4053 | 0,479 | 1,425  |
| 20 | O15061 DMN_HUMAN    | E.VSAGGDLSQAAS#PTGASR.S           | S1163:     | 2 | 4,4045 | 0,459 | 0      |
| 20 | Q8WUX9 CHMP7_HUMAN  | E.LDILLQDTTKEPLDLPDNP.R           |            | 3 | 4,4038 | 0,287 | 0,079  |
| 20 | Q9BY44 EIF2A_HUMAN  | E.ARSDKS#PDLAPTAPQSTPR.N          | S506:      | 3 | 4,3995 | 0,23  | -0,253 |
| 20 | Q13428 TCOF_HUMAN   | R.KSAEPSANTTLVS#ETEEE.G           | S171:      | 2 | 4,3976 | 0,551 | -0,183 |
| 20 | Q9NT99 LRC4B_HUMAN  | K.GPPGLNSIHEPLLK.S                |            | 2 | 4,392  | 0,382 | -0,754 |
| 20 | O75475 PSIP1_HUMAN  | E.AGVVTTATASVNLKVS#PKRGRPAATE.V   | S177:      | 3 | 4,3916 | 0,372 | 0,275  |
| 20 | Q9C0B5 ZDHC5_HUMAN  | R.SPTFGKS#FHFDPDPLSSGR.S          | S415:      | 3 | 4,3854 | 0,358 | 0,18   |
| 20 | P12270 TPR_HUMAN    | R.FRFGPPEDM*PQTSSSHSD.L           |            | 3 | 4,3841 | 0,32  | 0,09   |
| 20 | P46821 MAP1B_HUMAN  | K.LGDVS#PTQIDVSVQFGSFK.E          | S1501:     | 2 | 4,3777 | 0,484 | 0,426  |
| 20 | Q9NY33 DPP3_HUMAN   | E.DAKLAQDFLDSQNL SAYNTR.L         |            | 3 | 4,3724 | 0,444 | 0,403  |
| 20 | Q9H307 PININ_HUMAN  | K.SLS#PGKENVSALDM*EKE.S           | S443:      | 3 | 4,3708 | 0,327 | 0,284  |
| 20 | Q7L2J0 MEPCE_HUMAN  | R.TLNAETPKSS#PLPAK.G              | S217:      | 2 | 4,3541 | 0,348 | -0,149 |
| 20 | P04406 G3P_HUMAN    | K.RVIISAPSADAPM*FVM*GVNHE.K       |            | 3 | 4,3529 | 0,377 | 0,483  |
| 20 | Q15149 PLEC1_HUMAN  | E.LQLVTYKAQLEPVAS#PAKKPK.V        | S1435:     | 3 | 4,322  | 0,432 | -0,077 |
| 20 | B2CI53 B2CI53_HUMAN | E.RNGILASPQS#APGNLDNSK.S          | S263:      | 3 | 4,3181 | 0,34  | 0,362  |
| 20 | Q9NYJ8 TAB2_HUMAN   | R.TLTHSIS#DGQLQGGQSNSE.L          | S108:      | 2 | 4,3159 | 0,459 | 0,299  |
| 20 | Q16555 DPYL2_HUMAN  | R.NLHQSGFSLSGAQIDDNIPR.R          |            | 3 | 4,3044 | 0,383 | 0,169  |
| 20 | P28066 PSA5_HUMAN   | E.KRITS#PLM*EPSSIEKIVE.I          | S56:       | 3 | 4,3011 | 0,274 | 0,17   |
| 20 | Q15029 U5S1_HUMAN   | E.VETIVQEEDT#QPLTEPIIKPVK.T       | T86:       | 3 | 4,3004 | 0,29  | -0,071 |
| 20 | Q9HC35 EMAL4_HUMAN  | E.SHSNDQSPQIRAS#PS#PQPSSQPLQIHR.Q | S144:S146: | 3 | 4,2951 | 1     | 0,466  |
| 20 | Q15029 U5S1_HUMAN   | E.TIVQEEDT#QPLTEPIIKPVK.T         | T86:       | 2 | 4,2897 | 0,327 | 0,517  |

|    |                     |                                         |              |   |        |       |        |
|----|---------------------|-----------------------------------------|--------------|---|--------|-------|--------|
| 20 | P07108 ACBP_HUMAN   | E.DAM*KAYINKVEE.L                       |              | 3 | 4,2844 | 0,329 | 0,256  |
| 20 | Q6ULP2 AFTIN_HUMAN  | E.TVNPQGTDDLDNVADSK.G                   |              | 2 | 4,284  | 0,525 | 0,341  |
| 20 | Q9GZU1 MCLN1_HUMAN  | E.LQAYIAQCQDSPTSGK.F                    |              | 2 | 4,2811 | 0,57  | -0,483 |
| 20 | P00558 PGK1_HUMAN   | E.DKVSHVSTGGGASLE.L                     |              | 2 | 4,2797 | 0,503 | -0,845 |
| 20 | P11532 DMD_HUMAN    | E.HKGLSPLSPPEM*M*PT#SPQSPR.D            | T3548:       | 3 | 4,2776 | 0,384 | 0,074  |
| 20 | A6NMQ1 A6NMQ1_HUMAN | E.IGASALS#DSGSFVSSR.A                   | S17:         | 2 | 4,2582 | 0,483 | 0,075  |
| 20 | P04406 G3P_HUMAN    | R.VIISAPSADAPM*FVM*GVNHE.K              |              | 2 | 4,2519 | 0,501 | 0,346  |
| 20 | P35579 MYH9_HUMAN   | E.LDNVTGLLSQSDSK.S                      |              | 2 | 4,2498 | 0,506 | 0,413  |
| 20 | Q9UK76 HN1_HUMAN    | R.RNS#SEASSGDFLDLK.G                    | S87:         | 2 | 4,2467 | 0,489 | 0,072  |
| 20 | Q6ZVM7 TM1L2_HUMAN  | R.KQS#SEGIPVAQPSVM*DDIE.V               | S423:        | 2 | 4,2431 | 0,449 | 0,23   |
| 20 | P49792 RBP2_HUMAN   | E.SSINYTFKT#PEKAKE.K                    | T2613:       | 3 | 4,2387 | 0,384 | -0,301 |
| 20 | P48634 BAT2_HUMAN   | R.GSEGKPSLTLPASAPGPEEALTTVTVAPAPR.R     |              | 3 | 4,2321 | 0,278 | 0,244  |
| 20 | O94864 ST65G_HUMAN  | K.IKEEPVSDITFPVSEEE.A                   |              | 2 | 4,2305 | 0,424 | 0,355  |
| 20 | Q8WYP5 AHTF1_HUMAN  | E.TRIS#FVEEDVHPK.W                      | S1241:       | 3 | 4,2252 | 0,284 | 0,335  |
| 20 | Q9NYJ8 TAB2_HUMAN   | R.TLTHSIS#DGQLQGGQSNSE.L                | S108:        | 3 | 4,2237 | 0,358 | 0,449  |
| 20 | Q9C0C2 TB182_HUMAN  | R.RES#AASGLGGLLEE.E                     | S1473:       | 2 | 4,223  | 0,449 | 0,153  |
| 20 | P20020 AT2B1_HUMAN  | R.NS#SPPPS#PNKNNNAVDSGIHLTIE.M          | S1215:S1220: | 3 | 4,2214 | 0,37  | 0,412  |
| 20 | Q04917 1433F_HUMAN  | E.DSYKDSTLIM*QLLR.D                     |              | 3 | 4,2203 | 0,3   | 0,323  |
| 20 | O15231 ZN185_HUMAN  | R.GGQGDPAVPAQPPADPST#PERQSSPS#GSEQLVR.R | T215:S223:   | 3 | 4,2165 | 1     | 0,629  |
| 20 | Q9Y2X7 GIT1_HUMAN   | R.ARS#M*DSSDLSGAVTLQE.Y                 | S410:        | 2 | 4,214  | 0,45  | -0,185 |
| 20 | P07814 SYEP_HUMAN   | E.KTGKEYIPGQPPLSQSSDSS#PTR.N            | S886:        | 3 | 4,2017 | 0,34  | -1,008 |
| 20 | Q9P2D1 CHD7_HUMAN   | R.DGFYM*EDGDPSVAQLLHE.R                 |              | 2 | 4,1924 | 0,478 | 0,658  |
| 20 | P80723 BASP_HUMAN   | K.AQGPAASAEKPKVEAPAANSQTVTVKE.-         |              | 3 | 4,1922 | 0,274 | 0,19   |
| 20 | Q13263 TIF1B_HUMAN  | E.DGSLSLDGADSTGVVAK.L                   |              | 2 | 4,1906 | 0,492 | 0,307  |
| 20 | P49411 EFTU_HUMAN   | E.HVVVVYNKADAVQDSE.M                    |              | 2 | 4,186  | 0,54  | -0,138 |
| 20 | P28066 PSA5_HUMAN   | E.KRITS#PLM*EPSSIEK.I                   | S56:         | 3 | 4,1749 | 0,441 | -0,101 |
| 20 | Q9UQ35 SRRM2_HUMAN  | R.SGAGSS#PETKEQNSALPTSSQDEE.L           | S1219:       | 2 | 4,1708 | 0,425 | 0,291  |
| 20 | P60709 ACTB_HUMAN   | K.DLYANTVLSGGTTM*YPGIADR.M              |              | 2 | 4,1659 | 0,438 | 0      |
| 20 | Q2NKX8 ERC6L_HUMAN  | E.KQDLSSIKVNVTTLQDGK.G                  |              | 3 | 4,1569 | 0,414 | -0,185 |
| 20 | Q02952 AKA12_HUMAN  | E.LQSHAKS#PPSPVERE.M                    | S1328:       | 3 | 4,1534 | 0,382 | -0,105 |
| 20 | Q3MHD2 LSM12_HUMAN  | E.VEIINDRTET#PPPLASLNVS KLASK.A         | T75:         | 3 | 4,1525 | 0,356 | 0,33   |
| 20 | B2RMZ9 B2RMZ9_HUMAN | R.RLNS#SPRAPVS#PLKFSPFE.G               | S416:S423:   | 3 | 4,1507 | 0,281 | 0,08   |
| 20 | Q9Y608 LRRF2_HUMAN  | R.RGS#GDTSSLIDPDT#LSE.L                 | S328:S340:   | 2 | 4,1462 | 1     | 0,183  |
| 20 | P46937 YAP1_HUMAN   | E.LRTM*TTNS#SDPFLNSGTYHSRDE.S           | S331:        | 3 | 4,1429 | 0,281 | 0,336  |
| 20 | P46100 ATRX_HUMAN   | E.NLVLSSTGFCQSS#GDEALSK.S               | S1245:       | 3 | 4,1387 | 0,461 | 0,237  |
| 20 | P40189 IL6RB_HUMAN  | E.DLQLVDHVDGGDGILPR.Q                   |              | 2 | 4,1352 | 0,515 | 0,201  |
| 20 | Q9UPS6 SET1B_HUMAN  | K.LLFLREPDS#DTELQM*E.G                  | S522:        | 2 | 4,1352 | 0,482 | 0      |
| 20 | Q3MHD2 LSM12_HUMAN  | E.VEIINDRTET#PPPLASLNVS K.L             | T75:         | 2 | 4,1285 | 0,408 | 0,514  |
| 20 | Q6ZVM7 TM1L2_HUMAN  | K.TVTYEDPQAVGGLASALDNR.K                |              | 3 | 4,1162 | 0,496 | 0,264  |

|    |                    |                                  |            |   |        |       |        |
|----|--------------------|----------------------------------|------------|---|--------|-------|--------|
| 20 | P42166 LAP2A_HUMAN | K.LREQGT#ESRSST#PLPTISSSAE.N     | T154:T160: | 3 | 4,1138 | 1     | -0,22  |
| 20 | Q9H3C7 GGNB2_HUMAN | E.NTSCTCPSSGNLLGS#PK.I           | S450:      | 2 | 4,1109 | 0,452 | 0,197  |
| 20 | Q8IWW6 RHG12_HUMAN | E.KTSFSQEQSCDS#AGEGSER.I         | S201:      | 3 | 4,1047 | 0,419 | 0,169  |
| 20 | Q9UQ35 SRRM2_HUMAN | K.DSLVQSCPGSLSLCAGVK.S           |            | 2 | 4,1044 | 0,55  | -0,13  |
| 20 | O95359 TACC2_HUMAN | K.QALYLM*FDTSQESPVK.S            |            | 2 | 4,097  | 0,545 | 0,261  |
| 20 | Q9Y6G9 DC1L1_HUMAN | R.KPVTVS#PTTPTSPTTEGEAS.-        | S510:      | 2 | 4,095  | 0,546 | -0,062 |
| 20 | Q9NQW6 ANLN_HUMAN  | K.TPIS#PLKTVGSKPIVK.S            | S323:      | 3 | 4,0853 | 0,388 | 0      |
| 20 | Q15637 SF01_HUMAN  | E.RAYIVQLQIEDLTK.L               |            | 3 | 4,0808 | 0,215 | 0,892  |
| 20 | Q9H5J8 JOSD3_HUMAN | R.YKFLDDDGSGIS#PIEE.S            | S206:      | 2 | 4,0769 | 0,477 | 0,405  |
| 20 | Q9P2Y5 UVRAG_HUMAN | R.KITSLSS#SLDTSLDFSKE.N          | S549:      | 3 | 4,0734 | 0,333 | 0,628  |
| 20 | P07437 TBB5_HUMAN  | E.HGIDPTGTYHGSDQLQLDR.I          |            | 3 | 4,0638 | 0,415 | -0,349 |
| 20 | P11717 MPRI_HUMAN  | K.ALSSLHGDDQDS#EDE.V             | S2409:     | 2 | 4,0622 | 0,541 | -0,216 |
| 20 | Q8NFC6 FA44A_HUMAN | E.GKDKDVTL#PVK.A                 | S1531:     | 3 | 4,0608 | 0,373 | 0,334  |
| 20 | Q92597 NDRG1_HUMAN | K.YFVQGM*GYM*PSASM*TR.L          |            | 2 | 4,0591 | 0,485 | 0,195  |
| 20 | P09622 DLDH_HUMAN  | K.IPNIYAIGDVVAGPM*LAHK.A         |            | 3 | 4,0511 | 0,206 | 0      |
| 20 | Q86TC9 MYPN_HUMAN  | K.TPEPSS#PVKEPPVLAKPK.L          | S644:      | 3 | 4,0511 | 0,286 | 0,352  |
| 20 | P43897 EFTS_HUMAN  | R.LGQHVVGM*APLSVGLDDEPGGAE.T     |            | 3 | 4,0508 | 0,285 | 0,738  |
| 20 | P16949 STMN1_HUMAN | R.SKESVPEFPLS#PPKKK.D            | S38:       | 3 | 4,0466 | 0,281 | 0,292  |
| 20 | Q08J23 NSUN2_HUMAN | E.DVKILLTQENPFFR.K               |            | 3 | 4,0444 | 0,185 | 0,106  |
| 20 | P05783 K1C18_HUMAN | E.DGEDFNLDALDSSNSM*QTIQK.T       |            | 3 | 4,0443 | 0,452 | 0,305  |
| 20 | Q9BX68 HINT2_HUMAN | E.DQQLLGHLLLVAKQTAK.A            |            | 3 | 4,0348 | 0,338 | 0,097  |
| 20 | Q09666 AHNK_HUMAN  | E.TGKLQSGSVSLASK.K               |            | 3 | 4,0311 | 0,447 | 0,206  |
| 20 | P0C7M2 RA1L3_HUMAN | R.KLFIGGLSFETTDE.S               |            | 2 | 4,0297 | 0,5   | 0,078  |
| 20 | Q8ND56 LS14A_HUMAN | R.SLKTQLSQGRSS#PQLDPLRKS#PTM*E.Q | S183:S192: | 3 | 4,0243 | 0,321 | 0,433  |
| 20 | P29692 EF1D_HUMAN  | K.SLAGSSGPGASSGTSGDHGE.L         |            | 2 | 4,0215 | 0,471 | -0,923 |
| 20 | Q15398 DLG7_HUMAN  | E.SPVKLFSGLSVSSEGPSQR.L          |            | 3 | 4,0192 | 0,232 | 0,559  |
| 20 | O75531 BAF_HUMAN   | R.DFVAEPM*GEKPVGSLAGIGE.V        |            | 2 | 4,019  | 0,47  | 0,483  |
| 20 | Q9UHB6 LIMA1_HUMAN | R.SRPFTVAASFQSTSVK.S             |            | 3 | 4,0155 | 0,447 | 0,534  |
| 20 | P68104 EF1A1_HUMAN | K.SGDAAIVDM*VPGKPMCVE.S          |            | 2 | 4,0141 | 0,411 | 0,193  |
| 20 | Q9UHR5 S30BP_HUMAN | E.KGGLVSDAYGEDDFSR.L             |            | 3 | 4,0103 | 0,38  | 0,426  |
| 20 | Q92560 BAP1_HUMAN  | E.GGKGSPPSIRPIQGSQGS#SSPVEKE.V   | S595:      | 3 | 4,0076 | 0,346 | 0,216  |
| 20 | Q86SQ0 PHLB2_HUMAN | K.AHLPLGQSNS#CGSVLPPSLAAM*AK.D   | S934:      | 3 | 4,0075 | 0,253 | 0,219  |
| 20 | Q6S8J3 A26CA_HUMAN | E.KSYELPDGQVITIGNER.F            |            | 3 | 4,0037 | 0,295 | 0      |
| 20 | P24752 THIL_HUMAN  | E.DLIVKDGGLTDVYNK.I              |            | 2 | 3,9923 | 0,408 | -0,077 |
| 20 | Q9UHB6 LIMA1_HUMAN | R.KIS#ENSYSLDDLE.I               | S225:      | 2 | 3,9894 | 0,314 | -0,153 |
| 20 | Q6ZSR9 YJ005_HUMAN | K.LGGAVPFAPPEVS#PEQAK.T          | S93:       | 2 | 3,9829 | 0,328 | -0,391 |
| 20 | Q9Y490 TLN1_HUMAN  | E.STM*LEDS#VSPKSTVLQQQYNR.V      | S423:      | 3 | 3,9798 | 0,455 | 0,694  |
| 20 | Q32MZ4 LRRF1_HUMAN | R.NM*PGLSAATLASLGGTSSR.R         |            | 2 | 3,9783 | 0,517 | 0,135  |
| 20 | P51991 ROA3_HUMAN  | R.GFAFVTDDHDTVDKIVVQK.Y          |            | 3 | 3,9776 | 0,364 | 0,401  |

|    |                     |                                  |              |   |        |       |        |
|----|---------------------|----------------------------------|--------------|---|--------|-------|--------|
| 20 | B2RDE1 B2RDE1_HUMAN | R.KIQVLQQQADDAEE.R               |              | 2 | 3,9703 | 0,447 | -0,151 |
| 20 | Q9H1B7 EAP1_HUMAN   | E.VGVGAGGKRPGRS#VSSTDQERE.L      | S334:        | 3 | 3,968  | 0,383 | 0,255  |
| 20 | Q96EV2 RBM33_HUMAN  | K.VKPAS#PVAQPKEE.A               | S775:        | 3 | 3,9674 | 0,175 | -0,251 |
| 20 | P60709 ACTB_HUMAN   | K.DLYANTVLSGGTTM*YPGIADR.M       |              | 3 | 3,9664 | 0,27  | 0,41   |
| 20 | Q96AD5 PLPL2_HUMAN  | R.VQS#LPSVPLSCAAYRE.A            | S404:        | 2 | 3,9607 | 0,344 | 0      |
| 20 | P05783 K1C18_HUMAN  | E.DFNLGDALDSS#NSM*QTIQK.T        | S399:        | 3 | 3,9533 | 0,434 | 0,671  |
| 20 | Q9BTA9 WAC_HUMAN    | R.STCSLTPALAAHFSE.N              |              | 2 | 3,9512 | 0,437 | 0,077  |
| 20 | Q6IEG0 CF151_HUMAN  | E.NSDSLFVDLAAK.I                 |              | 2 | 3,9511 | 0,446 | -0,093 |
| 20 | Q9C0C2 TB182_HUMAN  | E.HGVGGVSVQCPEPGLR.H             |              | 2 | 3,949  | 0,532 | 0      |
| 20 | Q9UK76 HN1_HUMAN    | R.NS#SEASSGDFLDLKG               | S87:         | 2 | 3,9377 | 0,447 | 1,653  |
| 20 | Q5VWN6 CJ018_HUMAN  | K.SLSDTLVSTTAPSGIVNVSVK.Q        |              | 3 | 3,931  | 0,439 | 0,088  |
| 20 | P12694 ODBA_HUMAN   | R.KPKPNPNLLFSDVYQE.M             |              | 2 | 3,9214 | 0,333 | 0,323  |
| 20 | P04049 RAF1_HUMAN   | R.STST#PNVHM*VSTTLPVDSR.M        | T260:        | 2 | 3,9187 | 0,338 | -0,115 |
| 20 | B2CI53 B2CI53_HUMAN | R.SNM*S#PDKPVS#VKISFE.D          | S1105:S1111: | 3 | 3,9137 | 0,378 | 0,377  |
| 20 | Q9UKV5 AMFR2_HUMAN  | R.SDSIRPALNSPVERPS#SDQEEGE.T     | S522:        | 3 | 3,9135 | 0,526 | -0,426 |
| 20 | B2CI53 B2CI53_HUMAN | R.SNM*S#PDKPVS#VKISFE.D          | S1105:S1111: | 2 | 3,9115 | 0,455 | 0,126  |
| 20 | P13861 KAP2_HUMAN   | E.ARAPASVLPAAATPR.Q              |              | 2 | 3,9109 | 0,416 | -0,885 |
| 20 | P42166 LAP2A_HUMAN  | D.VYVQLYLQHLTAR.N                |              | 2 | 3,9102 | 0,388 | -0,304 |
| 20 | P40818 UBP8_HUMAN   | R.STKPVVFS#PTLM*LTDEE.K          | S452:        | 2 | 3,8962 | 0,382 | -1,472 |
| 20 | Q8NFC6 FA44A_HUMAN  | E.GKDKDVTLS#PVK.A                | S1531:       | 2 | 3,896  | 0,38  | -0,178 |
| 20 | Q5QJE6 TDIF2_HUMAN  | E.LQDTSLQQLVSQR.H                |              | 3 | 3,8915 | 0,321 | 0,483  |
| 20 | O15400 STX7_HUMAN   | R.VRAS#SRVS#GSFPEDSSKE.R         | S125:S129:   | 3 | 3,8896 | 0,211 | 0,263  |
| 20 | P08133 ANXA6_HUMAN  | K.YRGSIHDFPGFDPNQDAE.A           |              | 3 | 3,8761 | 0,435 | -0,177 |
| 20 | Q96GQ7 DDX27_HUMAN  | R.SADFNPDFVFTEKE.G               |              | 2 | 3,8739 | 0,489 | 0      |
| 20 | Q9Y6G9 DC1L1_HUMAN  | E.LDRITRKPVTVSPTTPTS#PTEGEAS.-   | S516:        | 3 | 3,8683 | 0,396 | -0,067 |
| 20 | P00441 SODC_HUMAN   | E.DSVISLSGDHCIIGRTLTVVHE.K       |              | 3 | 3,8551 | 0,234 | 0,079  |
| 20 | Q66K74 MAP1S_HUMAN  | R.S#AS#PHDVDLCLVSPCEFE.H         | S729:S731:   | 2 | 3,8518 | 0,322 | 0,22   |
| 20 | P31943 HNRH1_HUMAN  | K.HTGPNS#PDTANDGFVR.L            | S104:        | 3 | 3,8505 | 0,282 | 0,518  |
| 20 | Q02952 AKA12_HUMAN  | E.KQEKEPSKSAESPT#S#PVTSE.T       | T285:S286:   | 3 | 3,8494 | 1     | -0,238 |
| 20 | Q9UNZ2 NSF1C_HUMAN  | R.KKS#PNELVDDLK.G                | S114:        | 3 | 3,8461 | 0,259 | 0,34   |
| 20 | Q9P265 DIP2B_HUMAN  | R.QAALSAALQQSLQNAE.S             |              | 2 | 3,8432 | 0,506 | 0,223  |
| 20 | Q7L014 DDX46_HUMAN  | R.KLLEPVDHGKIE.Y                 |              | 3 | 3,8337 | 0,331 | -0,133 |
| 20 | Q8ND56 LS14A_HUMAN  | E.TNSGTLPOSSAVGSAFTQDTR.S        |              | 3 | 3,8329 | 0,198 | 0,083  |
| 20 | O14545 TRAD1_HUMAN  | E.ADQSHGGPRS#LSDIKGADE.I         | S278:        | 3 | 3,8285 | 0,332 | 0,35   |
| 20 | Q9ULU4 PKCB1_HUMAN  | K.TDKTSTTGSI LNLDLDR.S           |              | 3 | 3,8258 | 0,388 | 0,495  |
| 20 | Q8WYQ5 DGCR8_HUMAN  | R.EQS#PPPPLQTSSGAE.V             | S35:         | 2 | 3,8246 | 0,44  | -0,228 |
| 20 | Q9UKL0 RCOR1_HUMAN  | R.VGPQYQAVVPDFDPAK.L             |              | 2 | 3,818  | 0,447 | 0,423  |
| 20 | Q7Z5L9 I2BP2_HUMAN  | R.AAASLAAVSGTAAASLGSAQPTDLGAHK.R |              | 3 | 3,8105 | 0,398 | 0,367  |
| 20 | Q92614 MY18A_HUMAN  | R.RVS#SS#SELDLPSGDHCE.A          | S1067:S1069: | 2 | 3,8098 | 0,562 | -0,36  |

|    |                     |                                       |        |   |        |       |        |
|----|---------------------|---------------------------------------|--------|---|--------|-------|--------|
| 20 | Q8IU81 I2BP1_HUMAN  | E.ALGHS#PKDPGGGGGPVR.A                | S436:  | 3 | 3,8079 | 0,368 | 0      |
| 20 | Q0JRZ9 FCHO2_HUMAN  | E.LKVSIGNITLS#PAISR.H                 | S387:  | 2 | 3,8073 | 0,173 | -0,14  |
| 20 | P14866 HNRPL_HUMAN  | R.IQHPSNVLHFFNAPLEVTEE.N              |        | 3 | 3,8055 | 0,288 | 0,158  |
| 20 | P27348 1433T_HUMAN  | R.KQTIDNSQGAYQE.A                     |        | 2 | 3,8034 | 0,44  | -0,329 |
| 20 | P04406 G3P_HUMAN    | K.LVINGNPITIFQER.D                    |        | 2 | 3,8026 | 0,369 | -0,076 |
| 20 | Q9P260 K1468_HUMAN  | R.AGS#ISTLDSLDFAR.Y                   | S180:  | 2 | 3,8004 | 0,465 | 0      |
| 20 | P05387 RLA2_HUMAN   | K.LASVPAGGAVAVSAAPGSAAPAAGSAPAAAEEK.K |        | 3 | 3,7948 | 0,315 | -0,132 |
| 20 | P27816 MAP4_HUMAN   | E.RAS#PIKM*DLAPSKD.M                  | S358:  | 3 | 3,7927 | 0,459 | 0,563  |
| 20 | Q9UQ35 SRRM2_HUMAN  | K.DKFS#PPFPVQDRPE.S                   | S1188: | 2 | 3,7907 | 0,434 | 0,297  |
| 20 | Q9UKV8 I2C2_HUMAN   | R.SAS#FNTDPYVRE.F                     | S379:  | 2 | 3,7847 | 0,432 | 0      |
| 20 | Q9HAV4 XPO5_HUMAN   | E.VM*DLITVCCVSK.K                     |        | 2 | 3,7842 | 0,429 | -0,169 |
| 20 | Q96AD5 PLPL2_HUMAN  | E.LRRVQS#LPSVPLSCAAYRE.A              | S404:  | 3 | 3,7812 | 0,356 | 0,08   |
| 20 | Q9H0H5 RGAP1_HUMAN  | R.CPLPCIPTLIGT#PVKIGE.G               | T342:  | 2 | 3,7803 | 0,33  | 0,358  |
| 20 | Q9UKV3 ACINU_HUMAN  | E.TKDPSSGQEVAT#PPVPQLQVCEPK.E         | T682:  | 3 | 3,7762 | 0,351 | 0,342  |
| 20 | Q13263 TIF1B_HUMAN  | E.DGSLSLDGADSTGVVAKLSPANQR.K          |        | 3 | 3,7659 | 0,345 | -0,543 |
| 20 | P31948 STIP1_HUMAN  | K.ALSVGNIDDALQCYSE.A                  |        | 3 | 3,759  | 0,23  | 0,313  |
| 20 | P19338 NUCL_HUMAN   | K.TLFVKGLSEDTTEE.T                    |        | 2 | 3,7542 | 0,361 | 0,467  |
| 20 | Q6UN15 FIP1_HUMAN   | R.LPGAIDVIGQTITISR.V                  |        | 2 | 3,7537 | 0,516 | -0,074 |
| 20 | Q9BQA1 MEP50_HUMAN  | -.MRKET#PPPLVPPAARE.W                 | T5:    | 3 | 3,7525 | 0,251 | -0,098 |
| 20 | Q15149 PLEC1_HUMAN  | K.GYYS#PYSVSGSGSTAGSR.T               | S4613: | 2 | 3,7444 | 0,463 | -0,196 |
| 20 | P04049 RAF1_HUMAN   | R.STS#TPNVHM*VSTTLPVDSR.M             | S259:  | 3 | 3,7436 | 0,331 | 0,172  |
| 20 | Q9NY33 DPP3_HUMAN   | K.LAQDFLDSQNLSAYNTR.L                 |        | 3 | 3,7362 | 0,26  | 0,468  |
| 20 | Q63HJ5 Q63HJ5_HUMAN | K.AHIQDVHTAFLQPTDVAEDNVNE.L           |        | 3 | 3,7331 | 0,238 | 0,642  |
| 20 | P62917 RL8_HUMAN    | K.KAQLNIGNVLPVGTM*PE.G                |        | 2 | 3,7327 | 0,407 | 0,204  |
| 20 | Q14161 GIT2_HUMAN   | R.QKS#LSDSLSDGPVTVQE.F                | S415:  | 2 | 3,7289 | 0,416 | -0,064 |
| 20 | P0C7M2 RA1L3_HUMAN  | R.GFAFVTFDDHDSVDKIVIQK.Y              |        | 3 | 3,7284 | 0,42  | -0,321 |
| 20 | Q96AD5 PLPL2_HUMAN  | R.VQS#LPSVPLSCAAYR.E                  | S404:  | 2 | 3,7275 | 0,24  | -0,212 |
| 20 | Q9HC38 GLOD4_HUMAN  | K.LLDDAM*AADKSDE.W                    |        | 2 | 3,7224 | 0,39  | -0,26  |
| 20 | P10398 ARAF_HUMAN   | R.TQADELPACLLSAAR.L                   |        | 2 | 3,7204 | 0,47  | 0,075  |
| 20 | Q9GZR7 DDX24_HUMAN  | E.LTDYQLVS#PAKNPSSLFSK.E              | S60:   | 2 | 3,7181 | 0,346 | 0,449  |
| 20 | Q71RC2 LARP4_HUMAN  | E.KDLIEDSSVQK.D                       |        | 2 | 3,7133 | 0,388 | -0,097 |
| 20 | Q96S38 KS6C1_HUMAN  | E.LKFFPNDDPEAVSSPR.T                  |        | 3 | 3,7109 | 0,187 | -0,201 |
| 20 | Q05209 PTN12_HUMAN  | E.NM*ISSIEPEKQDS#PPPKPPR.T            | S332:  | 3 | 3,7107 | 0,283 | 0,312  |
| 20 | P04406 G3P_HUMAN    | R.VIISAPSADAPM*FVM*GVNHE.K            |        | 3 | 3,6985 | 0,225 | 0,691  |
| 20 | P11388 TOP2A_HUMAN  | K.SVVSLEADDVK.G                       |        | 2 | 3,6983 | 0,4   | 0,096  |
| 20 | Q16555 DPYL2_HUMAN  | K.TVTPASSAKTS#PAKQQAPPVR.N            | S522:  | 3 | 3,6963 | 0,379 | -0,083 |
| 20 | P18583 SON_HUMAN    | R.LTSLRAGIEGPLLASDVGR.D               |        | 3 | 3,6952 | 0,321 | 0      |
| 20 | Q9UQR0 SCML2_HUMAN  | R.SPQQTVPYVVPVLS#PKLPK.T              | S511:  | 3 | 3,6855 | 0,104 | 0      |
| 20 | Q12789 TF3C1_HUMAN  | D.LQCVCNLNPLGVVR.C                    |        | 2 | 3,6802 | 0,495 | 0      |

|    |                     |                                |              |   |        |       |        |
|----|---------------------|--------------------------------|--------------|---|--------|-------|--------|
| 20 | Q9UKV3 ACINU_HUMAN  | K.KCEAEEAEPPAATQPQTSE.T        |              | 3 | 3,6773 | 0,33  | 0,176  |
| 20 | Q9HC38 GLOD4_HUMAN  | K.LLDDAMAADKSDE.W              |              | 2 | 3,6708 | 0,403 | -0,088 |
| 20 | P04406 G3P_HUMAN    | E.HQVVSSDFNSDTHSSTFD.A         |              | 2 | 3,6698 | 0,509 | -0,182 |
| 20 | Q96T23 RSF1_HUMAN   | E.IKLS#DDFDSPVKGPLCK.S         | S382:        | 3 | 3,6695 | 0,267 | 0,641  |
| 20 | Q15545 TAF7_HUMAN   | E.NQGLDISS#PGM*SGHRQGHDSLE.H   | S201:        | 3 | 3,6692 | 0,309 | -0,832 |
| 20 | Q96T58 MINT_HUMAN   | R.HGS#FHEDEDPIGS#PR.L          | S1268:S1278: | 3 | 3,669  | 0,194 | -0,099 |
| 20 | P55884 EIF3B_HUMAN  | R.AQAVSEDAGGNEGRAAE.A          |              | 2 | 3,6577 | 0,603 | 0,15   |
| 20 | Q02952 AKA12_HUMAN  | E.KQEKEPSKSAES#PTS#PVTSE.T     | S283:S286:   | 3 | 3,657  | 1     | -0,317 |
| 20 | Q5TGY3 AHDC1_HUMAN  | E.YSDVLAKLAFLNR.Q              |              | 3 | 3,6546 | 0,386 | 0,303  |
| 20 | Q9HAF1 CA149_HUMAN  | K.SSVTSAAAVSALAGVQDQLIEKR.E    |              | 3 | 3,6525 | 0,424 | -0,556 |
| 20 | Q9Y6W5 WASF2_HUMAN  | R.DVVGNDVATILSR.R              |              | 2 | 3,642  | 0,474 | 0,09   |
| 20 | Q9NQW6 ANLN_HUMAN   | K.QNSVQEQPGTACLSK.F            |              | 2 | 3,6388 | 0,433 | -0,37  |
| 20 | P68104 EF1A1_HUMAN  | K.SGDAAIVDM*VPGKPM*CVE.S       |              | 2 | 3,6372 | 0,483 | 0,703  |
| 20 | P07814 SYEP_HUMAN   | K.EYIPGQPPLSQSSDSSPT#R.N       | T888:        | 2 | 3,6363 | 0,294 | 0,115  |
| 20 | P14618 KPYM_HUMAN   | E.KDIQDLKFGVEQD.V              |              | 2 | 3,6317 | 0,367 | -0,238 |
| 20 | P31949 S10AB_HUMAN  | K.KLDTNSDQGQLDFSE.F            |              | 2 | 3,6311 | 0,382 | 0,078  |
| 20 | Q9NYF8 BCLF1_HUMAN  | K.LKDLFDYS#PPLHK.N             | S512:        | 3 | 3,6296 | 0,496 | 0,221  |
| 20 | P40855 PEX19_HUMAN  | K.AKPSPAPPSTTTAPDASGPQK.R      |              | 3 | 3,6285 | 0,306 | 0,274  |
| 20 | Q9Y490 TLN1_HUMAN   | K.KSTVLQQQYNR.V                |              | 3 | 3,6205 | 0,269 | 0,469  |
| 20 | O75152 ZC11A_HUMAN  | E.VKASQLSVQQNK.L               |              | 3 | 3,6197 | 0,254 | 0,344  |
| 20 | Q12996 CSTF3_HUMAN  | E.LAVEGNGPVESNAVLTK.A          |              | 2 | 3,6155 | 0,504 | 0,287  |
| 20 | Q9UHB6 LIMA1_HUMAN  | R.SRPFTVAASFQSTS#VK.S          | S601:        | 3 | 3,615  | 0,205 | 0,204  |
| 20 | Q9Y490 TLN1_HUMAN   | E.STMLEDSVS#PKKSTVLQQQYNR.V    | S425:        | 3 | 3,6108 | 0,435 | 0,489  |
| 20 | Q32MZ4 LRRF1_HUMAN  | E.TGLRDEKPIKTEVPGS#PAGTE.G     | S521:        | 2 | 3,6081 | 0,409 | 0,108  |
| 20 | Q9UGV2 NDRG3_HUMAN  | K.YFLQGM*GYIPSASM*TR.L         |              | 2 | 3,6067 | 0,366 | 0,132  |
| 20 | P06744 G6PI_HUMAN   | E.LDGSAQVTSHDASTNGLINFIKQQRE.A |              | 3 | 3,6002 | 0,392 | 0,97   |
| 20 | P18583 SON_HUMAN    | R.AGIEGPLLASDVGR.D             |              | 2 | 3,5986 | 0,316 | 0,36   |
| 20 | Q9UKV3 ACINU_HUMAN  | K.KCEAEEAEPPAATQPQTSE.T        |              | 2 | 3,5981 | 0,418 | 0,118  |
| 20 | Q9UBU7 DBF4A_HUMAN  | E.KKLLFIS#EPIPHPSNE.L          | S413:        | 3 | 3,5972 | 0,171 | 0,095  |
| 20 | Q5UIP0 RIF1_HUMAN   | K.ATSEEDVSIKS#PICE.K           | S1616:       | 2 | 3,5935 | 0,376 | 0,35   |
| 20 | Q1ED39 TS118_HUMAN  | E.TRYSVLNDDYFADVSPLR.A         |              | 3 | 3,5893 | 0,162 | -0,163 |
| 20 | B2R8U0 B2R8U0_HUMAN | K.AAAGPLDM*SLPSTPDIK.I         |              | 2 | 3,5889 | 0,421 | 0,215  |
| 20 | Q9H8U3 ZFAN3_HUMAN  | R.SCGTDSQS#ENEAS#PVKRPR.L      | S124:S129:   | 3 | 3,5881 | 0,463 | 0,162  |
| 20 | B2CI53 B2CI53_HUMAN | R.NGILASPQSPAGNLDNSK.S         |              | 2 | 3,5858 | 0,461 | 0      |
| 20 | P49792 RBP2_HUMAN   | R.KQS#LPATSIPTPASFKFGTSE.T     | S1509:       | 3 | 3,584  | 0,181 | -0,161 |
| 20 | P11388 TOP2A_HUMAN  | K.GSVPLSS#PPATHFPDETE.I        | S1393:       | 2 | 3,5825 | 0,348 | 0,24   |
| 20 | Q8N0Z3 CCD52_HUMAN  | R.RVM*DS#PERPVVNAVSVPLM*FREE.V | S477:        | 3 | 3,5803 | 0,364 | 0      |
| 20 | Q71RC2 LARP4_HUMAN  | K.DGLNQTTIPVS#PPSTTKPSR.A      | S583:        | 3 | 3,579  | 0,377 | 0      |
| 20 | O75781 PALM_HUMAN   | E.VVM*NSQQTVPVGT#PKDKR.V       | T145:        | 3 | 3,576  | 0,394 | 0      |

|    |                    |                                       |        |   |        |       |        |
|----|--------------------|---------------------------------------|--------|---|--------|-------|--------|
| 20 | Q9UGV2 NDRG3_HUMAN | E.AFKYFLQGM*GYIPSASM*TR.L             |        | 3 | 3,5735 | 0,209 | 0,416  |
| 20 | Q14562 DHX8_HUMAN  | E.IELVEEPPFLR.G                       |        | 2 | 3,5716 | 0,417 | -0,083 |
| 20 | P22314 UBA1_HUMAN  | R.VSGPDPKPGSNCSPAQSVLSEVPSVPTNGM*AK.N |        | 3 | 3,5686 | 0,272 | 0,57   |
| 20 | Q6ZRV2 FA83H_HUMAN | R.HLRPPQYVTR.E                        |        | 3 | 3,5642 | 0,406 | 0,144  |
| 20 | Q9UHR5 S30BP_HUMAN | E.KGGLVSDAYGEDDFSR.L                  |        | 2 | 3,5595 | 0,485 | 0,853  |
| 20 | Q8IXT5 RB12B_HUMAN | E.DFRFPEDFRHS#PE.D                    | S575:  | 3 | 3,5581 | 0,306 | 0,394  |
| 20 | Q9HAF1 CA149_HUMAN | K.SSVTSAAAVSALAGVQDQLIEK.R            |        | 2 | 3,5581 | 0,443 | 0,228  |
| 20 | O15027 SC16A_HUMAN | E.VLPSEPLNLDPS#PSDQFR.Y               | S304:  | 2 | 3,5573 | 0,523 | 0,336  |
| 20 | Q5TCQ9 MAGI3_HUMAN | R.AEVPARPAPQEPYDVVLQR.K               |        | 3 | 3,5573 | 0,271 | -0,086 |
| 20 | P41236 IPP2_HUMAN  | E.AM*APDILARKLAAAEGLEPK.Y             |        | 3 | 3,5533 | 0,394 | 0,088  |
| 20 | P31751 AKT2_HUMAN  | R.THFPQFSYSAS#IRE.-                   | S478:  | 3 | 3,5527 | 0,328 | 0,314  |
| 20 | O75083 WDR1_HUMAN  | E.AKGPVTDVAYSHD.G                     |        | 3 | 3,552  | 0,324 | 0,336  |
| 20 | Q16555 DPYL2_HUMAN | R.NLHQSGFSLSGAQIDD.N                  |        | 2 | 3,5495 | 0,467 | 0,217  |
| 20 | Q9Y490 TLN1_HUMAN  | E.STM*LEDSVS#PKKSTVLQQQYNR.V          | S425:  | 2 | 3,5477 | 0,407 | 0,833  |
| 20 | Q9BX68 HINT2_HUMAN | E.DQQLLGHLLLVAK.Q                     |        | 2 | 3,5396 | 0,397 | -0,084 |
| 20 | P82979 HCC1_HUMAN  | R.FGLNVS#SISR.K                       | S162:  | 2 | 3,536  | 0,379 | -0,316 |
| 20 | Q92598 HS105_HUMAN | E.LNNTCEPVVTQPKPK.I                   |        | 3 | 3,5343 | 0,331 | 0,424  |
| 20 | Q86WB0 NIPA_HUMAN  | R.SQDATFSPGSEQAEKS#PGPIVSR.T          | S344:  | 3 | 3,5317 | 0,293 | 0      |
| 20 | P60709 ACTB_HUMAN  | E.EHPVLLTEAPLNPK.A                    |        | 3 | 3,5268 | 0,264 | 0,47   |
| 20 | P17301 ITA2_HUMAN  | E.NRM*GDVYKCPVDLSTATCE.K              |        | 3 | 3,5198 | 0,407 | -0,164 |
| 20 | P62158 CALM_HUMAN  | R.VFDKDGNGYISAAE.L                    |        | 2 | 3,517  | 0,426 | 0,328  |
| 20 | P04406 G3P_HUMAN   | K.IISNASCTTNCLAPLAK.V                 |        | 2 | 3,5142 | 0,364 | -1,597 |
| 20 | Q9NPQ8 RIC8A_HUMAN | K.YTGYGNAAGLLAAR.G                    |        | 2 | 3,5139 | 0,496 | 0,087  |
| 20 | P02545 LMNA_HUMAN  | R.SGAQASSTPLS#PTR.I                   | S22:   | 2 | 3,5121 | 0,55  | -0,508 |
| 20 | O75410 TACC1_HUMAN | E.HDFSKIS#IVRPFIE.T                   | S147:  | 3 | 3,5113 | 0,304 | 0      |
| 20 | P05787 K2C8_HUMAN  | R.AFSSRS#YTSGPSR.I                    | S24:   | 3 | 3,5075 | 0,369 | 0,238  |
| 20 | Q9UBG0 MRC2_HUMAN  | R.TLGDQLSLLGAR.T                      |        | 2 | 3,5038 | 0,453 | -0,18  |
| 20 | P18754 RCC1_HUMAN  | R.KKPALVSIPEDVVQAE.A                  |        | 2 | 3,5032 | 0,348 | 0,212  |
| 20 | Q8WX92 NELFB_HUMAN | R.KPS#PAQAAETPALE.L                   | S557:  | 2 | 3,498  | 0,447 | 0,164  |
| 20 | P31943 HNRH1_HUMAN | K.HTGPNS#PDTANDGFVR.L                 | S104:  | 2 | 3,4972 | 0,476 | 0,346  |
| 20 | Q71RC2 LARP4_HUMAN | E.KDLIEDSSVQK.D                       |        | 3 | 3,4971 | 0,269 | 0,507  |
| 20 | Q13459 MYO9B_HUMAN | R.VQEKPDS#PGGSTQIQR.Y                 | S1290: | 2 | 3,4971 | 0,399 | 0,405  |
| 20 | P50443 S26A2_HUMAN | E.QHNVSPRDS#AEGNDSYPSGIHLE.L          | S16:   | 3 | 3,497  | 0,444 | 0,212  |
| 20 | Q5QJE6 TDIF2_HUMAN | E.LQDTS#LQQLVSQR.H                    | S330:  | 2 | 3,4912 | 0,433 | -0,229 |
| 20 | Q13813 SPTA2_HUMAN | R.SSLSSAQADFNQLAE.L                   |        | 2 | 3,4895 | 0,45  | -0,233 |
| 20 | Q6ULP2 AFTIN_HUMAN | K.GRKPLSTHSTEYNLDSVPS#PAEE.F          | S226:  | 3 | 3,4879 | 0,433 | 0      |
| 20 | Q7L014 DDX46_HUMAN | R.KLLEPVDHGKIE.Y                      |        | 2 | 3,479  | 0,314 | -0,177 |
| 20 | Q5QJE6 TDIF2_HUMAN | E.LQDTS#LQQLVSQR.H                    |        | 2 | 3,4779 | 0,538 | 0,322  |
| 20 | P25205 MCM3_HUMAN  | E.M*PQVHT#PKTADSQETKE.S               | T722:  | 3 | 3,4776 | 0,162 | 0,09   |



|    |                     |                                   |            |   |        |       |        |
|----|---------------------|-----------------------------------|------------|---|--------|-------|--------|
| 20 | Q96D71 REPS1_HUMAN  | R.TGSDHT#NPTS#PLLVKPSDLLEE.N      | T426:S430: | 3 | 3,4749 | 1     | 0,219  |
| 20 | Q15283 RASA2_HUMAN  | E.LDLKDTQDANTIFR.G                |            | 3 | 3,4711 | 0,14  | 0,665  |
| 20 | Q86YS7 K0528_HUMAN  | R.LLRSQS#ESS#DEVTE.L              | S659:S662: | 2 | 3,4707 | 0,465 | 0,14   |
| 20 | Q9ULU4 PKCB1_HUMAN  | K.ILM*SKPVLSSGGTGR.R              |            | 3 | 3,4669 | 0,384 | 0,447  |
| 20 | Q09666 AHNK_HUMAN   | K.ADIKSPS#LDVTVPE.A               | S4995:     | 2 | 3,4665 | 0,269 | 0,236  |
| 20 | Q02952 AKA12_HUMAN  | E.LQSHAKSPPS#PVERE.M              | S1331:     | 3 | 3,4604 | 0,319 | 0,21   |
| 20 | P49454 CENPF_HUMAN  | E.LNDSRS#ECITATR.K                | S1326:     | 3 | 3,4566 | 0,402 | 0,114  |
| 20 | Q86UE8 TLK2_HUMAN   | R.RVEQPLYGLDGSAAK.E               |            | 3 | 3,4565 | 0,35  | 0,342  |
| 20 | O94925 GLSK_HUMAN   | E.DDKPHNPM*VNAGAIIVTSLIKQGVNNAE.K |            | 3 | 3,4555 | 0,446 | 0,869  |
| 20 | P19338 NUCL_HUMAN   | E.LKTGISDVFAKND.L                 |            | 2 | 3,4503 | 0,43  | -0,347 |
| 20 | Q9Y520 Q9Y520_HUMAN | E.SENSCNKEEVPVFR.Q                |            | 2 | 3,4475 | 0,35  | 0,601  |
| 20 | Q13464 ROCK1_HUMAN  | K.SQTDKDYQLQAILE.A                |            | 2 | 3,447  | 0,325 | 0,067  |
| 20 | Q9NYF8 BCLF1_HUMAN  | K.LKDLFDYS#PPLHK.N                | S512:      | 2 | 3,4446 | 0,409 | 0,148  |
| 20 | P12694 ODBA_HUMAN   | R.IGHHSTS#DDSSAYRS#VDE.V          | S339:S347: | 3 | 3,4445 | 0,322 | 1,465  |
| 20 | Q8N655 CJ012_HUMAN  | K.IKPNLSSS#PRSEE.T                | S295:      | 3 | 3,4442 | 0,281 | 0,78   |
| 20 | Q66K74 MAP1S_HUMAN  | R.ARRS#AS#PHDVLCLVSPCFE.H         | S729:S731: | 3 | 3,4418 | 0,328 | 0      |
| 20 | Q9UQ35 SRRM2_HUMAN  | K.DKFSFPVQDRPE.S                  |            | 2 | 3,4389 | 0,296 | -0,078 |
| 20 | Q9HCN4 GPN1_HUMAN   | K.DSLSPVLHPSDLILTR.G              |            | 2 | 3,4377 | 0,391 | 0,069  |
| 20 | Q9UHV9 PFD2_HUMAN   | E.HSLVIDTLKEVDE.T                 |            | 2 | 3,4375 | 0,443 | 0,163  |
| 20 | P05362 ICAM1_HUMAN  | E.AQVHLALGDQR.L                   |            | 3 | 3,4357 | 0,329 | 0,151  |
| 20 | Q3MHD2 LSM12_HUMAN  | R.TET#PPPLASLNVSK.L               | T75:       | 2 | 3,4346 | 0,425 | 0      |
| 20 | Q63ZY3 KANK2_HUMAN  | R.ERVPSVAEAPQLRPAGTAAK.T          |            | 3 | 3,4339 | 0,198 | 0,259  |
| 20 | A9CQZ4 A9CQZ4_HUMAN | E.VPAFFKNLGS#PKPR.Q               | S27:       | 3 | 3,4332 | 0,362 | 0,513  |
| 20 | Q86TC9 MYPN_HUMAN   | K.TPEPSS#PVKEPPVLAKPKLD.S         | S644:      | 3 | 3,428  | 0,142 | 0      |
| 20 | P52756 RBM5_HUMAN   | R.GLVAAYSGDS#DNEEE.L              | S624:      | 2 | 3,4268 | 0,459 | 0,224  |
| 20 | P61247 RS3A_HUMAN   | E.LHGEGLSS#GKATGDETGAKVE.R        | S238:      | 3 | 3,4265 | 0,424 | 0      |
| 20 | P35908 K22E_HUMAN   | R.NLDLDSIIAEVK.A                  |            | 2 | 3,4225 | 0,383 | -0,183 |
| 20 | Q9UGV2 NDRG3_HUMAN  | R.SRTHSTS#SSLGSGESPFPSR.S         | S333:      | 3 | 3,4179 | 0,328 | -0,715 |
| 20 | Q14676 MDC1_HUMAN   | E.LQPSTSTQPVPT#PEPTSR.A           | T1548:     | 2 | 3,4158 | 0,494 | 0,06   |
| 20 | Q99961 SH3G1_HUMAN  | K.ALYDFEPENDGELGFHE.G             |            | 2 | 3,4158 | 0,435 | 0,185  |
| 20 | Q9NQ55 SSF1_HUMAN   | R.VGGS#DEEASGIPSR.T               | S359:      | 2 | 3,4154 | 0,424 | -0,423 |
| 20 | Q6ZRS2 SRCAP_HUMAN  | R.GRLQPPS#PLGPEGSVEE.S            | S3161:     | 2 | 3,4136 | 0,378 | 0,2    |
| 20 | O60287 NPA1P_HUMAN  | E.THLVTQOPT#KSPGKE.R              | T1141:     | 3 | 3,4098 | 0,354 | 0,528  |
| 20 | O94964 CT117_HUMAN  | E.GTKKPEPLS#PASYHQPE.G            | S449:      | 3 | 3,4034 | 0,223 | -0,282 |
| 20 | Q9H7N4 SFR19_HUMAN  | E.SRS#PFLKPDERAPTE.M              | S874:      | 3 | 3,3983 | 0,139 | 0,101  |
| 20 | P49959 MRE11_HUMAN  | E.SDVEEDIFPTTSK.T                 |            | 2 | 3,3975 | 0,436 | 0,416  |
| 20 | B2RMZ9 B2RMZ9_HUMAN | R.LNS#SPRAPVS#PLKFSPFE.G          | S416:S423: | 3 | 3,3938 | 0,172 | -0,086 |
| 20 | Q9UMZ2 SYNG_HUMAN   | K.FDFLVATSQSK.M                   |            | 2 | 3,3929 | 0,389 | 0,098  |
| 20 | Q68DX9 Q68DX9_HUMAN | R.IDS#PGFKPASQQVYR.K              | S491:      | 3 | 3,391  | 0,453 | 0,619  |

|    |                     |                                   |            |   |        |       |        |
|----|---------------------|-----------------------------------|------------|---|--------|-------|--------|
| 20 | Q96AD5 PLPL2_HUMAN  | E.LRRVQS#LPSVPLSCAAYR.E           | S404:      | 3 | 3,3848 | 0,306 | 0      |
| 20 | P68104 EF1A1_HUMAN  | K.SGDAAIVDMVPGKPMCVE.S            |            | 2 | 3,3845 | 0,466 | -0,065 |
| 20 | O15231 ZN185_HUMAN  | E.RQSSPSGSEQLVR.R                 |            | 3 | 3,3829 | 0,259 | 0,256  |
| 20 | Q92615 LARP5_HUMAN  | E.RSPS#PAHLPPDDPKVAE.K            | S601:      | 3 | 3,3823 | 0,209 | -0,204 |
| 20 | Q9HB09 B2L12_HUMAN  | R.ACPGPPPPS#PEPLAR.L              | S273:      | 2 | 3,381  | 0,456 | -0,301 |
| 20 | P19338 NUCL_HUMAN   | K.GLSEDTTEETLKE.S                 |            | 2 | 3,3793 | 0,412 | 0,336  |
| 20 | P46821 MAP1B_HUMAN  | E.RKLGDV#PTQIDVSQFGSFE.D          | S1501:     | 2 | 3,3777 | 0,303 | 0,706  |
| 20 | Q1ED39 TS118_HUMAN  | R.YSVLNNDDYFADVSPLR.A             |            | 2 | 3,3768 | 0,442 | 0,43   |
| 20 | Q99613 EIF3C_HUMAN  | D.EDEDGVSAAATFLK.K                |            | 2 | 3,3756 | 0,486 | -0,088 |
| 20 | P08651 NFIC_HUMAN   | E.LQGHLAYDLNPASTGLR.R             |            | 3 | 3,3747 | 0,142 | -0,1   |
| 20 | Q9Y6D9 MD1L1_HUMAN  | E.LTPAEYS#PQLTR.R                 | S428:      | 2 | 3,3743 | 0,466 | -0,168 |
| 20 | Q15365 PCBP1_HUMAN  | E.GPPLDAYSIQGQHTISPLDLAK.L        |            | 3 | 3,373  | 0,399 | 0,079  |
| 20 | Q96D71 REPS1_HUMAN  | R.TGSDHT#NPTS#PLLVKPSDLLEE.N      | T426:S430: | 2 | 3,3709 | 0,262 | 0,583  |
| 20 | P40189 IL6RB_HUMAN  | E.DLQLVDHVDGGDGILPR.Q             |            | 3 | 3,3705 | 0,304 | 0,503  |
| 20 | P07355 ANXA2_HUMAN  | K.AYTNFDAERDALNIE.T               |            | 2 | 3,3644 | 0,312 | -0,21  |
| 20 | Q9UQ35 SRRM2_HUMAN  | E.KM*ALPPQEDATAS#PPRQKD.K         | S1179:     | 3 | 3,3639 | 0,205 | -0,504 |
| 20 | Q8NI08 NCOA7_HUMAN  | K.STGHT#PTKPSGSSVSE.K             | T358:      | 2 | 3,3617 | 0,338 | 0,149  |
| 20 | P31946 1433B_HUMAN  | E.SYKDSTLIM*QLLR.D                |            | 2 | 3,3556 | 0,462 | -0,231 |
| 20 | O94762 RECQ5_HUMAN  | R.GGEHEPPSRPCGLLEDEGSEPLPGPR.G    |            | 3 | 3,3498 | 0,42  | 0,797  |
| 20 | Q9Y3F4 STRAP_HUMAN  | K.LYKYDYNSGEE.L                   |            | 2 | 3,3497 | 0,326 | 0,088  |
| 20 | P07814 SYEP_HUMAN   | E.KTGKEYIPQPPLSQSSDS#SPTR.N       | S885:      | 2 | 3,3386 | 0,411 | 0,673  |
| 20 | P05783 K1C18_HUMAN  | R.GGM*GSGGLATGIAGGLAGM*GGIQNEKE.T |            | 3 | 3,3367 | 0,339 | 0,302  |
| 20 | Q12802 AKP13_HUMAN  | E.NYNFLPHS#PSKKDSE.W              | S1731:     | 3 | 3,3359 | 0,234 | 0,199  |
| 20 | Q5R372 Q5R372_HUMAN | K.RPSS#LLVDCQSSSE.I               | S72:       | 2 | 3,335  | 0,414 | -0,074 |
| 20 | Q9NZL9 MAT2B_HUMAN  | D.AFNLPSSHLPITDS#PVLGAQRPR.N      | S282:      | 3 | 3,3336 | 0,363 | 0,338  |
| 20 | Q15029 U5S1_HUMAN   | E.TIVQEEDT#QPLTEPIIKPVK.T         | T86:       | 3 | 3,3312 | 0,228 | 0,465  |
| 20 | P49792 RBP2_HUMAN   | E.SSINYTFKT#PEKAKE.K              | T2613:     | 2 | 3,3308 | 0,4   | -0,402 |
| 20 | Q14980 NUMA1_HUMAN  | K.APVPSTCSSTFPEELS#PPSHQAKRE.I    | S169:      | 3 | 3,3299 | 0,271 | 0,974  |
| 20 | Q96GX5 MASTL_HUMAN  | E.LALS#PIHNSSALPTTGR.S            | S370:      | 3 | 3,3287 | 0,273 | 0,302  |
| 20 | Q9UGV2 NDRG3_HUMAN  | R.SRTHSTS#S#SLGSGESPFSR.S         | S333:S334: | 3 | 3,3287 | 1     | 0,086  |
| 20 | Q9Y490 TLN1_HUMAN   | E.STM*LEDSVS#PK.K                 | S425:      | 2 | 3,3254 | 0,47  | 0,189  |
| 20 | Q0JRZ9 FCHO2_HUMAN  | K.VSIGNITLSPAISR.H                |            | 2 | 3,3164 | 0,37  | -0,256 |
| 20 | Q9Y520 Q9Y520_HUMAN | E.SENSCNKEEVPVFR.Q                |            | 3 | 3,3127 | 0,314 | 0,401  |
| 20 | Q14195 DPYL3_HUMAN  | R.NLHQSGFSLSGTQVDE.G              |            | 2 | 3,3118 | 0,463 | -0,213 |
| 20 | O00244 ATOX1_HUMAN  | E.SEHS#M*DTLLATLKK.T              | S47:       | 3 | 3,3113 | 0,147 | 0,329  |
| 20 | Q9BQK8 LPIN3_HUMAN  | E.NAALYFPQSDSGLGAR.R              |            | 2 | 3,3102 | 0,234 | -0,878 |
| 20 | Q13188 STK3_HUMAN   | K.LADFGVAGQLTDTM*AK.R             |            | 2 | 3,3059 | 0,535 | 0,221  |
| 20 | Q96AQ6 PBIP1_HUMAN  | R.ALQAPHS#PSKTDGKE.L              | S43:       | 3 | 3,3055 | 0,269 | 0,333  |
| 20 | P27816 MAP4_HUMAN   | E.VALAKDM*ES#PTKLDVTLAK.D         | S280:      | 3 | 3,3011 | 0,253 | 0,172  |

|    |                    |                            |            |   |        |       |        |
|----|--------------------|----------------------------|------------|---|--------|-------|--------|
| 20 | Q08J23 NSUN2_HUMAN | E.DVKILLTQENPFFR.K         |            | 2 | 3,3008 | 0,4   | -0,213 |
| 20 | O00418 EF2K_HUMAN  | K.LLQSAKT#ILRGTEE.K        | T348:      | 2 | 3,2979 | 0,436 | 0,074  |
| 20 | P46087 NOL1_HUMAN  | K.KGPQSLFNAPR.G            |            | 3 | 3,29   | 0,298 | 0,752  |
| 20 | Q9C0C2 TB182_HUMAN | E.FGKRDS#LGTYSRR.D         | S872:      | 3 | 3,2882 | 0,327 | 0      |
| 20 | Q8WWY3 PRP31_HUMAN | R.DRS#SGTASSVAFTPLQGLE.I   | S445:      | 2 | 3,2853 | 0,365 | 0,244  |
| 20 | Q96C19 EFHD2_HUMAN | E.AKVQAINVSSRFEEE.I        |            | 3 | 3,2852 | 0,254 | 0,321  |
| 20 | P31949 S10AB_HUMAN | K.LDTNSDGQLDFSE.F          |            | 2 | 3,2841 | 0,346 | 0,339  |
| 20 | Q9H910 HN1L_HUMAN  | E.SSNLFGS#PEEATPSSRPNR.M   | S30:       | 3 | 3,282  | 0,192 | -0,173 |
| 20 | P41091 IF2G_HUMAN  | E.VDDLKGGVAGGSILK.G        |            | 3 | 3,2805 | 0,358 | 0,576  |
| 20 | P05387 RLA2_HUMAN  | K.NIEDVIAQGIGK.L           |            | 2 | 3,2769 | 0,426 | 0      |
| 20 | P52907 CAZA1_HUMAN | D.VRLLLNNNDNLLRE.G         |            | 3 | 3,2755 | 0,235 | 0,462  |
| 20 | Q9Y310 CV028_HUMAN | E.SYKNVTDVVNTCHD.A         |            | 2 | 3,273  | 0,344 | -0,812 |
| 20 | Q9BYW2 SETD2_HUMAN | K.KLDELPIFKSE.F            |            | 2 | 3,2711 | 0,24  | 0,277  |
| 20 | Q8N8K9 K1958_HUMAN | R.KRPGVVPSSLHSSSQTM*VDE.C  |            | 3 | 3,2677 | 0,317 | 0,961  |
| 20 | P21333 FLNA_HUMAN  | K.AFGPGLQGGAGS#PAR.F       | S1084:     | 2 | 3,2646 | 0,413 | -0,404 |
| 20 | Q8NI08 NCOA7_HUMAN | E.CLS#LDPEER.K             | S441:      | 2 | 3,2603 | 0,314 | 0,102  |
| 20 | P31949 S10AB_HUMAN | E.SLIAVFQKYAGKDGYNYSKTE.F  |            | 3 | 3,2603 | 0,268 | 0,07   |
| 20 | Q7L2J0 MEPCE_HUMAN | K.DITDPLSLNTCTDE.G         |            | 2 | 3,2567 | 0,438 | -0,153 |
| 20 | P04264 K2C1_HUMAN  | R.SLDLDSIIAEVK.A           |            | 2 | 3,2549 | 0,41  | 0      |
| 20 | P52701 MSH6_HUMAN  | R.QSTLYSFFPKS#PALSDANK.A   | S14:       | 3 | 3,2517 | 0,271 | 0,252  |
| 20 | P42166 LAP2A_HUMAN | K.DVYVQLYLQHLTAR.N         |            | 2 | 3,2492 | 0,454 | 0,213  |
| 20 | Q8ND56 LS14A_HUMAN | R.S#SPQLDPLRKS#PTM*E.Q     | S182:S192: | 2 | 3,2488 | 0,382 | -0,131 |
| 20 | P48634 BAT2_HUMAN  | R.RGDKEAPPVLLTPK.A         |            | 3 | 3,2486 | 0,228 | 0,339  |
| 20 | O94888 UBXD7_HUMAN | E.HGQLDGLSSS#PPKK.C        | S270:      | 3 | 3,2479 | 0,139 | 0,119  |
| 20 | P35030 TRY3_HUMAN  | D.TLDNDIMLIK.L             |            | 2 | 3,2461 | 0,407 | -0,104 |
| 20 | Q12840 KIF5A_HUMAN | R.ILQDSLGGNCR.T            |            | 2 | 3,2414 | 0,422 | -0,396 |
| 20 | Q9Y490 TLN1_HUMAN  | K.KSTVLQQQYNR.V            |            | 2 | 3,2376 | 0,409 | 0,536  |
| 20 | Q9BTC0 DIDO1_HUMAN | E.KTAAPS#PSLLYK.S          | S523:      | 2 | 3,2368 | 0,305 | -0,27  |
| 20 | Q9NP79 VTA1_HUMAN  | E.DVSTAVQNLQK.A            |            | 2 | 3,2363 | 0,361 | 0,101  |
| 20 | P13861 KAP2_HUMAN  | R.APASVLPAAATPR.Q          |            | 2 | 3,2362 | 0,426 | -0,106 |
| 20 | Q2NX8 ERC6L_HUMAN  | K.GTGSADSIATLPK.G          |            | 2 | 3,2355 | 0,327 | -0,301 |
| 20 | P55884 EIF3B_HUMAN | R.AQAVSEDAGGNEGR.A         |            | 2 | 3,2336 | 0,545 | -0,359 |
| 20 | P00441 SODC_HUMAN  | E.DSVISLSGDHCIIGR.T        |            | 2 | 3,233  | 0,442 | 0      |
| 20 | Q6S8J3 A26CA_HUMAN | E.KLCYVALDFEQE.M           |            | 2 | 3,231  | 0,289 | -0,081 |
| 20 | P40855 PEX19_HUMAN | R.S#PGDTAKDALFASQE.K       | S54:       | 2 | 3,23   | 0,371 | 0,075  |
| 20 | Q9BYD6 RM01_HUMAN  | E.GLLLKIDPLLPKEVK.N        |            | 3 | 3,2296 | 0,271 | 0,327  |
| 20 | Q96Q42 ALS2_HUMAN  | K.SSS#LVDIREETE.G          | S466:      | 2 | 3,2289 | 0,433 | 0,155  |
| 20 | Q13045 FLII_HUMAN  | E.AVLQS#PGLSGK.V           | S856:      | 2 | 3,227  | 0,458 | 0,107  |
| 20 | Q5J8M3 TMM85_HUMAN | R.GRSDRGS#GQGDSLVPVGYLDK.Q | S36:       | 3 | 3,2228 | 0,126 | 0,079  |

|    |                    |                                         |            |   |        |       |        |
|----|--------------------|-----------------------------------------|------------|---|--------|-------|--------|
| 20 | Q9H6Z4 RANB3_HUMAN | E.EKPAIAPPVVFVQK.D                      |            | 3 | 3,2167 | 0,184 | 0,116  |
| 20 | Q0JRZ9 FCHO2_HUMAN | E.LKVSIGNITLS#PAISR.H                   | S387:      | 3 | 3,214  | 0,252 | -0,209 |
| 20 | Q92615 LARP5_HUMAN | R.LSSLIIGPSKE.R                         |            | 2 | 3,2121 | 0,258 | 0,213  |
| 20 | Q6ZRV2 FA83H_HUMAN | E.VRHGS#DPAFAPGPR.G                     | S523:      | 3 | 3,2101 | 0,265 | 0,118  |
| 20 | Q96EV2 RBM33_HUMAN | E.VKVKPAS#PVAQPK.E                      | S775:      | 3 | 3,2086 | 0,328 | 0,64   |
| 20 | P46821 MAP1B_HUMAN | E.RKLGDV5#PTQIDV5QFGSFK.E               | S1501:     | 3 | 3,2075 | 0,327 | 0,32   |
| 20 | O43395 PRPF3_HUMAN | K.QLSFISPTPQPK.T                        |            | 2 | 3,2075 | 0,374 | 0,085  |
| 20 | Q6UB98 ANR12_HUMAN | R.SKS#SEVTDAYTKE.K                      | S1143:     | 2 | 3,2046 | 0,37  | 0,16   |
| 20 | Q00341 VIGLN_HUMAN | R.ILS#IQKDLANIAE.V                      | S645:      | 2 | 3,2026 | 0,41  | 0      |
| 20 | P82979 HCC1_HUMAN  | R.FGLNVSS#ISR.K                         | S163:      | 2 | 3,2021 | 0,387 | 0,316  |
| 20 | P49792 RBP2_HUMAN  | R.KQS#LPATSIPTASFK.F                    | S1509:     | 2 | 3,2012 | 0,426 | -0,139 |
| 20 | P51570 GALK1_HUMAN | R.KDGLVSLTTSE.G                         |            | 2 | 3,1956 | 0,462 | 0,29   |
| 20 | Q6PKG0 LARP1_HUMAN | R.AVT#PVPTKTEE.V                        | T526:      | 2 | 3,195  | 0,407 | -0,292 |
| 20 | Q9Y490 TLN1_HUMAN  | K.STVLQQQYNR.V                          |            | 2 | 3,192  | 0,283 | 0      |
| 20 | P52756 RBM5_HUMAN  | E.LVRNGDEENPLKR.G                       |            | 3 | 3,19   | 0,268 | -0,713 |
| 20 | O94762 RECQ5_HUMAN | R.GEVPGGSAHYGGPS#PE.K                   | S727:      | 2 | 3,1858 | 0,419 | -0,077 |
| 20 | O94763 RMP_HUMAN   | R.NTNVNMAM*HQVTD5HTPCHK.D               |            | 3 | 3,1839 | 0,291 | -0,083 |
| 20 | O94880 PHF14_HUMAN | R.NRPLLDVFSM*EE.L                       |            | 2 | 3,182  | 0,413 | 0,083  |
| 20 | P78371 TCPB_HUMAN  | E.DKLIHFSGVALGE.A                       |            | 2 | 3,1809 | 0,424 | -0,264 |
| 20 | O94964 CT117_HUMAN | R.TKS#VSSM*SEFE.S                       | S55:       | 2 | 3,1778 | 0,238 | 0      |
| 20 | P53985 MOT1_HUMAN  | E.TSIDVAGKPNVTK.A                       |            | 2 | 3,1718 | 0,397 | -0,334 |
| 20 | Q9C0B5 ZDHC5_HUMAN | R.GDS#LKEPTSIAE.S                       | S380:      | 2 | 3,1717 | 0,43  | 0,276  |
| 20 | Q9UPS6 SET1B_HUMAN | E.ARPPLS#PERAPEHDLE.V                   | S1255:     | 3 | 3,1713 | 0,31  | 0,386  |
| 20 | Q9HC35 EMAL4_HUMAN | R.ASPSPQPSSQLQIHR.Q                     |            | 2 | 3,1709 | 0,426 | -0,071 |
| 20 | Q5TDH0 DDI2_HUMAN  | R.IDFSSIAVPGTSSPR.Q                     |            | 2 | 3,1692 | 0,481 | -0,08  |
| 20 | P29966 MARCS_HUMAN | E.AAAERPGEAAVASSPSK.A                   |            | 3 | 3,1689 | 0,384 | 1,373  |
| 20 | P41214 LIGA_HUMAN  | E.DKSLSEAPEDTSTR.G                      |            | 3 | 3,1676 | 0,332 | 0,357  |
| 20 | Q8NCN4 RN169_HUMAN | E.DRQLALQLQR.M                          |            | 3 | 3,1672 | 0,189 | 0,589  |
| 20 | P11387 TOP1_HUMAN  | E.DDLFDRLNTGILNK.H                      |            | 2 | 3,1663 | 0,285 | 0      |
| 20 | Q9H0H5 RGAP1_HUMAN | R.DRCPLPCIPTLIGT#PVK.I                  | T342:      | 3 | 3,1651 | 0,145 | -0,091 |
| 20 | Q15029 U5S1_HUMAN  | E.DT#QPLTEPIIKPVK.T                     | T86:       | 2 | 3,1641 | 0,416 | -0,147 |
| 20 | O43852 CALU_HUMAN  | E.AKTFDQLTPEESKE.R                      |            | 2 | 3,1608 | 0,409 | -0,301 |
| 20 | Q32MZ4 LRRF1_HUMAN | R.NM*PGLSAATLASLGGT#S#SRRGSGDTSISIDTE.A | T114:S115: | 3 | 3,1579 | 1     | 0,446  |
| 20 | P10809 CH60_HUMAN  | R.KPLVIIAEDVDGE.A                       |            | 2 | 3,1577 | 0,461 | 0      |
| 20 | Q96H55 MYO19_HUMAN | R.NFHIFYQICK.G                          |            | 3 | 3,1569 | 0,161 | 0,334  |
| 20 | Q6P1L5 AL2SC_HUMAN | E.GSEESPCSADLLVDPR.D                    |            | 2 | 3,1536 | 0,343 | 0,264  |
| 20 | P18583 SON_HUMAN   | E.RLTSLRAGIEGPLLASDVGR.D                |            | 3 | 3,1523 | 0,249 | 0,088  |
| 20 | P68104 EF1A1_HUMAN | K.FLKSGDAAIVDM*VPGKPM*CVE.S             |            | 3 | 3,1521 | 0,178 | 0,159  |
| 20 | Q15637 SF01_HUMAN  | E.INFVGLLIGPR.G                         |            | 2 | 3,1511 | 0,294 | 0,102  |

|    |                     |                               |                 |   |        |       |        |
|----|---------------------|-------------------------------|-----------------|---|--------|-------|--------|
| 20 | Q13490 BIRC2_HUMAN  | R.NSFAHSLS#PTLE.H             | S140:           | 2 | 3,15   | 0,436 | 0      |
| 20 | Q15742 NAB2_HUMAN   | R.SFSPKS#PLELGE.K             | S162:           | 2 | 3,1469 | 0,208 | 0,445  |
| 20 | Q13523 PRP4B_HUMAN  | R.TKLDDLALLEDE.L.K            |                 | 2 | 3,144  | 0,363 | -0,246 |
| 20 | Q12802 AKP13_HUMAN  | E.M*DS#ITEVPANCSVLR.S         | S1540:          | 2 | 3,1422 | 0,447 | 0,205  |
| 20 | Q61AA8 CK059_HUMAN  | R.KLLLDPS#PPTK.A              | S27:            | 2 | 3,1417 | 0,303 | 0,089  |
| 20 | Q12905 ILF2_HUMAN   | E.ISTWGDVIVTPSEK.A            |                 | 2 | 3,1409 | 0,389 | 0      |
| 20 | Q13510 ASAH1_HUMAN  | E.QLKPLTVNLDFQR.N             |                 | 3 | 3,1409 | 0,265 | 0,116  |
| 20 | Q92615 LARP5_HUMAN  | R.TSKEPPS#SPLQPQKE.Q          | S663:           | 3 | 3,1409 | 0,153 | 0      |
| 20 | Q13428 TCOF_HUMAN   | E.AKPQQAAGM*LS#PK.T           | S1257:          | 3 | 3,1383 | 0,346 | -0,064 |
| 20 | Q09666 AHNK_HUMAN   | E.TGKLQGSVSLASK.K             |                 | 2 | 3,1368 | 0,275 | -0,183 |
| 20 | P49792 RBP2_HUMAN   | E.M*KLHDSSGS#QVGTGFK.S        | S1835:          | 3 | 3,1354 | 0,283 | 0      |
| 20 | P78347 GTF2I_HUMAN  | E.VTIEDDDY#SPPSKRPK.A         | Y318:           | 3 | 3,1353 | 0,335 | 0,38   |
| 20 | P68104 EF1A1_HUMAN  | K.SGDAAIVDMVPGKPM*CVE.S       |                 | 2 | 3,1351 | 0,492 | 0,193  |
| 20 | P55209 NP1L1_HUMAN  | R.QLTVQM*M*QNPQILAALQE.R      |                 | 2 | 3,1348 | 0,366 | 0      |
| 20 | P28066 PSA5_HUMAN   | R.ITS#PLM*EPSSIEK.I           | S56:            | 2 | 3,1338 | 0,368 | 0,16   |
| 20 | Q14126 DSG2_HUMAN   | E.ATM*KGS#SSASIVKGQHE.M       | S699:           | 3 | 3,1313 | 0,235 | 0,504  |
| 20 | O60504 VINEX_HUMAN  | R.DFVYPSSTRDPSASNGGGSPAR.R    |                 | 3 | 3,1296 | 0,371 | 0,411  |
| 20 | P32004 L1CAM_HUMAN  | E.GGKGQLSFNLRDPE.L            |                 | 3 | 3,1292 | 0,222 | -1,084 |
| 20 | P15260 INGR1_HUMAN  | E.SSSPLSSNQSEPGSIALNSYHSR.N   |                 | 3 | 3,1274 | 0,297 | -0,076 |
| 20 | Q9P1G8 Q9P1G8_HUMAN | K.S#TTT#IVEQKFHNGKNQKS#GLKE.N | S103:T106:S120: | 3 | 3,1257 | 0,197 | 0,404  |
| 20 | A9CQZ4 A9CQZ4_HUMAN | K.AAEDEEVPAFFK.N              |                 | 2 | 3,1247 | 0,406 | 0      |
| 20 | P04406 G3P_HUMAN    | R.GALQNIIPASTGAAK.A           |                 | 2 | 3,1244 | 0,213 | 0      |
| 20 | P26639 SYTC_HUMAN   | K.MGGEEKPIGAGEEK.Q            |                 | 3 | 3,122  | 0,255 | -0,064 |
| 20 | P35251 RFC1_HUMAN   | E.AHLTPYSLQAIK.A              |                 | 3 | 3,1208 | 0,134 | 0,204  |
| 20 | O75475 PSIP1_HUMAN  | E.AGVVTTATASVNLKVS#PK.R       | S177:           | 3 | 3,1206 | 0,245 | 0      |
| 20 | P04920 B3A2_HUMAN   | R.KAERTS#PSS#PAPLPHQE.A       | S170:S173:      | 3 | 3,1185 | 0,156 | -0,184 |
| 20 | P08670 VIME_HUMAN   | E.NTLQSFQRQVDNASLAR.L         |                 | 3 | 3,116  | 0,273 | -0,284 |
| 20 | Q05209 PTN12_HUMAN  | R.SCLVEGDAKEE.I               |                 | 2 | 3,1133 | 0,407 | -0,197 |
| 20 | Q86UE8 TLK2_HUMAN   | R.RVEQPLYGLDGSAAKE.A          |                 | 2 | 3,1126 | 0,421 | -0,07  |
| 20 | Q92615 LARP5_HUMAN  | R.TSKEPPS#PLQPQKE.Q           | S664:           | 2 | 3,1077 | 0,359 | -0,07  |
| 20 | O95292 VAPB_HUMAN   | E.LPAENDKPHDVE.I              |                 | 2 | 3,1042 | 0,44  | -0,447 |
| 20 | P31949 S10AB_HUMAN  | E.SLIAVFQKYAGK.D              |                 | 2 | 3,0981 | 0,433 | 0,092  |
| 20 | P35244 RFA3_HUMAN   | K.IIHDFPQFYPLGIVQHD.-         |                 | 3 | 3,0962 | 0,206 | 0      |
| 20 | P07237 PDIA1_HUMAN  | K.VLVGKNFEDVAFDE.K            |                 | 2 | 3,0955 | 0,373 | 0,077  |
| 20 | P04075 ALDOA_HUMAN  | K.RLQSIGTENTEE.N              |                 | 2 | 3,0953 | 0,516 | -0,266 |
| 20 | P55196 AFAD_HUMAN   | E.TTFDLGGDIHSGTALPTSK.S       |                 | 3 | 3,0939 | 0,42  | 0,668  |
| 20 | Q00536 PCTK1_HUMAN  | R.GPLSS#APEIVHE.D             | S65:            | 2 | 3,0934 | 0,41  | 0,278  |
| 20 | P15927 RFA2_HUMAN   | E.KAPTNIYKIDD.M               |                 | 2 | 3,0845 | 0,5   | -0,354 |
| 20 | P04181 OAT_HUMAN    | E.NADKLGILRNE.L               |                 | 3 | 3,0842 | 0,134 | 0      |

|    |                    |                                     |              |   |        |       |        |
|----|--------------------|-------------------------------------|--------------|---|--------|-------|--------|
| 20 | Q9H3Q1 BORG4_HUMAN | R.RNGAAGPHS#PDPLLDE.Q               | S174:        | 2 | 3,0821 | 0,409 | 0,071  |
| 20 | P12270 TPR_HUMAN   | E.VVQS#SPVERPSTSTAVFGTVSATPSSSLPK.R | S1803:       | 3 | 3,0776 | 0,213 | 0,356  |
| 20 | Q13263 TIF1B_HUMAN | E.VSGLM*RKVPRVS#LE.R                | S489:        | 3 | 3,077  | 0,33  | 0,439  |
| 20 | Q14671 PUM1_HUMAN  | R.RDS#LTGSSDLYKR.T                  | S709:        | 3 | 3,077  | 0,297 | 0,58   |
| 20 | Q43395 PRPF3_HUMAN | K.QLSFISPT#PQPK.T                   | T167:        | 2 | 3,0764 | 0,334 | 0,562  |
| 20 | Q99961 SH3G1_HUMAN | K.IAASSS#FRSSDKPIR.T                | S288:        | 3 | 3,0763 | 0,387 | 0,107  |
| 20 | P48643 TCPE_HUMAN  | E.YGRPFLIKD.Q                       |              | 3 | 3,0762 | 0,09  | 0,224  |
| 20 | Q96PK6 RBM14_HUMAN | E.SQLSFRRS#PTKSSLD.Y                | S627:        | 3 | 3,0761 | 0,203 | 0,92   |
| 20 | Q68DH5 LMBD2_HUMAN | R.YLSM*SRS#DIFNDV.-                 | S689:        | 2 | 3,073  | 0,327 | 0,074  |
| 20 | Q9UQ35 SRRM2_HUMAN | E.SYFGVSSLQLK.G                     |              | 2 | 3,0719 | 0,456 | 0      |
| 20 | Q9H3Q1 BORG4_HUMAN | R.NGAAGPHS#PDPLLDE.Q                | S174:        | 2 | 3,0716 | 0,326 | 0,233  |
| 20 | P07814 SYEP_HUMAN  | K.EYIPGQPPLSQSSDSS#PTR.N            | S886:        | 2 | 3,065  | 0,41  | 0,459  |
| 20 | P30414 NKTR_HUMAN  | E.NIPVIPLSDS#PPPSR.W                | S613:        | 2 | 3,064  | 0,436 | 0,146  |
| 20 | Q13464 ROCK1_HUMAN | K.NLICAFITDRE.V                     |              | 2 | 3,0634 | 0,429 | -0,09  |
| 20 | Q00610 CLH1_HUMAN  | E.YLTKVDKLDASE.S                    |              | 2 | 3,0629 | 0,348 | -0,971 |
| 20 | P13639 EF2_HUMAN   | E.DIDKGEVSARQE.L                    |              | 3 | 3,0622 | 0,167 | -0,543 |
| 20 | P06748 NPM_HUMAN   | E.KT#PKT#PKGPPSSVEDIK.A             | T234:T237:   | 3 | 3,0616 | 0,17  | 0      |
| 20 | Q9C0B5 ZDHC5_HUMAN | R.SSS#LKSAQGTGFE.L                  | S429:        | 2 | 3,0608 | 0,334 | 0,354  |
| 20 | Q09666 AHNK_HUMAN  | K.ADIKS#PSLDVTVPE.A                 | S4993:       | 2 | 3,0573 | 0,368 | 0,315  |
| 20 | P40855 PEX19_HUMAN | R.SPGDTAKDALFASQE.K                 |              | 2 | 3,0552 | 0,353 | 0,159  |
| 20 | Q09666 AHNK_HUMAN  | K.ADIKS#PSLDVTVPEAE.L               | S4993:       | 2 | 3,051  | 0,397 | 0,139  |
| 20 | P31948 STIP1_HUMAN | K.ALDLSSCKE.A                       |              | 2 | 3,0504 | 0,255 | 0,214  |
| 20 | P41236 IPP2_HUMAN  | R.KLAAAEGLPK.Y                      |              | 2 | 3,0485 | 0,398 | -0,325 |
| 20 | Q9UER7 DAXX_HUMAN  | R.VDSPSHGLVTSSLCIPSPAR.L            |              | 3 | 3,0483 | 0,096 | 0      |
| 20 | P06753 TPM3_HUMAN  | R.KLVIIEGDLER.T                     |              | 3 | 3,0463 | 0,223 | 0,213  |
| 20 | P37802 TAGL2_HUMAN | K.IEKQYDADLE.Q                      |              | 2 | 3,0404 | 0,408 | 0      |
| 20 | P28290 SSFA2_HUMAN | R.NGGS#FEDDLSLGAEANHLHE.S           | S111:        | 3 | 3,0382 | 0,1   | -0,417 |
| 20 | Q9H2G2 SLK_HUMAN   | D.GDIKLADFGVSAK.N                   |              | 3 | 3,0343 | 0,413 | 0,623  |
| 20 | Q9Y266 NUDC_HUMAN  | K.LKPNLGNADLPNYR.W                  |              | 3 | 3,032  | 0,297 | -0,446 |
| 20 | P26639 SYTC_HUMAN  | K.M*GGEKPIGAGEE.K                   |              | 2 | 3,0283 | 0,426 | -0,092 |
| 20 | Q9Y5J1 UTP18_HUMAN | R.TGNFISTSTSLPR.G                   |              | 2 | 3,0268 | 0,371 | 0      |
| 20 | Q9H7N4 SFR19_HUMAN | E.SRS#PFLKPDER.A                    | S874:        | 3 | 3,0266 | 0,2   | 0,194  |
| 20 | Q9BR76 COR1B_HUMAN | R.KSDLFQDDLYPDTAGPE.A               |              | 2 | 3,0239 | 0,504 | 0,192  |
| 20 | Q9NWH9 SLTM_HUMAN  | R.IVQISGNSM*PR.G                    |              | 2 | 3,0226 | 0,341 | 0      |
| 20 | O60296 TRAK2_HUMAN | R.QHASDALS#PVLAAE.T                 | S84:         | 2 | 3,0224 | 0,295 | 0,079  |
| 20 | Q9H2Y7 ZF106_HUMAN | E.GVSISSSPGLAR.K                    |              | 2 | 3,0211 | 0,306 | 0,324  |
| 20 | Q96Q45 AL2S4_HUMAN | E.GLAQTAGRPRS#EGNEPSTKE.L           | S86:         | 3 | 3,0203 | 0,244 | -0,253 |
| 20 | P41236 IPP2_HUMAN  | K.LAAAEGLPK.Y                       |              | 2 | 3,0192 | 0,38  | 0,244  |
| 20 | Q01082 SPTB2_HUMAN | R.TSSKES#SPIPS#PTSDRKAK.T           | S2164:S2169: | 3 | 3,019  | 0,22  | 0      |

|    |                    |                                  |              |   |        |       |        |
|----|--------------------|----------------------------------|--------------|---|--------|-------|--------|
| 20 | O00231 PSD11_HUMAN | R.AQSLSTDRE.A                    |              | 2 | 3,0188 | 0,405 | 0,218  |
| 20 | Q58FF8 H90B2_HUMAN | K.HSQFLGYPTILYLEK.E              |              | 3 | 3,0184 | 0,184 | 0,101  |
| 20 | Q8N4C8 MINK1_HUMAN | E.RTLDEAPRPPK.K                  |              | 3 | 3,0176 | 0,149 | 0,214  |
| 20 | P06733 ENOA_HUMAN  | K.AGYTDKVVIGM*DVAASE.F           |              | 2 | 3,0158 | 0,361 | 0,07   |
| 20 | P68431 H31_HUMAN   | E.DTNLCAIHAK.R                   |              | 2 | 3,0153 | 0,279 | -0,213 |
| 20 | Q9P275 UBP36_HUMAN | E.GGLHQDPLRHS#CSPM*GDGDPE.A      | S937:        | 3 | 3,0134 | 0,352 | 0,466  |
| 20 | Q9P0K7 RAI14_HUMAN | E.NAGIQSLLSK.I                   |              | 2 | 3,0117 | 0,409 | 0,107  |
| 20 | O14497 ARI1A_HUMAN | R.SHHAPM*S#PGSSGGGQPLAR.T        | S363:        | 3 | 3,0059 | 0,231 | 0,184  |
| 20 | Q32MZ4 LRRF1_HUMAN | R.NM*PGLSAATLASLGGTSSR.R         |              | 3 | 3,0052 | 0,173 | 0,506  |
| 20 | Q9ULU4 PKCB1_HUMAN | E.SM*DFLDKSTASPAST#K.T           | T479:        | 3 | 3,003  | 0,245 | 0,411  |
| 20 | Q9UK76 HN1_HUMAN   | E.EKPVPAAPVPS#PVAPAPVPSRR.N      | S131:        | 3 | 2,9925 | 0,184 | 0,477  |
| 20 | Q9BZ95 NSD3_HUMAN  | R.GLSDLQVGFQK.Q                  |              | 2 | 2,99   | 0,513 | 0,109  |
| 20 | Q08J23 NSUN2_HUMAN | K.ILLTQENPFFR.K                  |              | 2 | 2,9883 | 0,341 | -0,089 |
| 20 | Q15283 RASA2_HUMAN | R.KSQFQVEEEDIE.K                 |              | 2 | 2,988  | 0,2   | 0,082  |
| 20 | Q12888 TP53B_HUMAN | K.M*VIQGPSSPQGE.A                |              | 2 | 2,9878 | 0,302 | -0,294 |
| 20 | Q9H307 PININ_HUMAN | K.S#LSPGKENVSALDM*EKE.S          | S441:        | 2 | 2,9868 | 0,335 | -0,316 |
| 20 | P28749 RBL1_HUMAN  | R.DM*QPLS#PISVHE.R               | S640:        | 2 | 2,9821 | 0,403 | -0,084 |
| 20 | Q9H0E3 SP130_HUMAN | E.RSSLIPISGHRAS#PNPVAM*E.T       | S465:        | 3 | 2,9799 | 0,317 | 0      |
| 20 | P26639 SYTC_HUMAN  | K.M*GGEEKPIGAGEEK.Q              |              | 3 | 2,9797 | 0,36  | 0,063  |
| 20 | P14174 MIF_HUMAN   | R.SYSKLLCGLLAE.R                 |              | 2 | 2,9766 | 0,376 | -0,541 |
| 20 | Q14676 MDC1_HUMAN  | R.SSVKT#PESIVPIAPE.L             | T1567:       | 2 | 2,9723 | 0,312 | 0,523  |
| 20 | P08670 VIME_HUMAN  | E.TNLDS#LPLVDTHSKR.T             | S430:        | 3 | 2,9712 | 0,228 | 0,206  |
| 20 | Q5VT52 K0460_HUMAN | R.GPTSTSIDNIDGT#PVRDER.S         | T723:        | 3 | 2,97   | 0,355 | 0,52   |
| 20 | Q9Y2W1 TR150_HUMAN | R.SPALKSPLQSVVVR.R               |              | 3 | 2,9648 | 0,29  | 0,556  |
| 20 | Q9ULU4 PKCB1_HUMAN | K.TSTTGSILNLDLDR.S               |              | 2 | 2,9627 | 0,369 | 0,243  |
| 20 | Q13123 RED_HUMAN   | K.QLGDFFGM*SNSYAE.C              |              | 2 | 2,9604 | 0,414 | 0,231  |
| 20 | Q13177 PAK2_HUMAN  | K.YLS#FTPPEKD.G                  | S141:        | 2 | 2,9589 | 0,381 | 0,191  |
| 20 | Q9Y5S9 RBM8A_HUMAN | E.ATEEDIHDKFAE.Y                 |              | 2 | 2,9585 | 0,398 | -0,261 |
| 20 | Q6P1L5 AL2SC_HUMAN | R.SIDTQTPGGADR.G                 |              | 2 | 2,9545 | 0,378 | 0,1    |
| 20 | P46934 NEDD4_HUMAN | E.NGNIQLQAQR.A                   |              | 2 | 2,949  | 0,297 | 0,214  |
| 20 | Q14126 DSG2_HUMAN  | K.GQIIGNFQAFDE.D                 |              | 2 | 2,9464 | 0,297 | -0,182 |
| 20 | P11021 GRP78_HUMAN | R.LIGDAAKNQLTSNPE.N              |              | 2 | 2,9447 | 0,3   | -0,155 |
| 20 | O43379 WDR62_HUMAN | R.SIS#LGDSEGPVATLAQPLRRPSS#VGE.L | S1228:S1249: | 3 | 2,9443 | 0,24  | 0,126  |
| 20 | P26639 SYTC_HUMAN  | K.MGGEEKPIGAGEE.K                |              | 2 | 2,9424 | 0,308 | -0,374 |
| 20 | Q9P260 K1468_HUMAN | R.AGSISTLDSLDFAR.Y               |              | 2 | 2,9397 | 0,489 | 0      |
| 20 | Q00341 VIGLN_HUMAN | R.SRIILS#IQKDLANIAEVE.V          | S645:        | 2 | 2,938  | 0,381 | 0,123  |
| 20 | Q14157 UBP2L_HUMAN | R.RYPSSISSS#PQKD.L               | S609:        | 2 | 2,9378 | 0,207 | -0,637 |
| 20 | P46087 NOL1_HUMAN  | K.GISAGAVQTAGK.K                 |              | 2 | 2,9354 | 0,457 | 0,23   |
| 20 | O00418 EF2K_HUMAN  | K.LLQSAKT#ILRGTEE.K              | T348:        | 3 | 2,9318 | 0,277 | 0,558  |

|    |                    |                               |              |   |        |       |        |
|----|--------------------|-------------------------------|--------------|---|--------|-------|--------|
| 20 | P20700 LMNB1_HUMAN | R.AGGPTT#PLSPTR.L             | T20:         | 2 | 2,9314 | 0,387 | -0,198 |
| 20 | O43290 SNUT1_HUMAN | E.DESVDDLAQQKPR.S             |              | 2 | 2,9281 | 0,312 | 0,163  |
| 20 | Q02241 KIF23_HUMAN | R.KRRS#ST#VAPAQPDGAESE.W      | S911:T913:   | 3 | 2,9281 | 0,289 | 0,089  |
| 20 | Q9H8V3 ECT2_HUMAN  | R.KRPS#AEHLSIGSLDISNTPE.S     | S375:        | 3 | 2,9274 | 0,089 | -0,075 |
| 20 | Q9UQ35 SRRM2_HUMAN | R.SGAGSS#PETKEQNSALPTSSQDEE.L | S1219:       | 3 | 2,9273 | 0,315 | 0,145  |
| 20 | Q9Y3I0 CV028_HUMAN | K.NVTDVVNTCHD.A               |              | 2 | 2,9263 | 0,411 | 0      |
| 20 | Q86W56 PARG_HUMAN  | E.NVSQLSLDKS#PTEK.S           | S137:        | 2 | 2,9254 | 0,293 | -0,225 |
| 20 | P00558 PGK1_HUMAN  | K.ITLPVDFVTADKFDE.N           |              | 2 | 2,9229 | 0,492 | 0      |
| 20 | Q13428 TCOF_HUMAN  | K.TVANLLSGKS#PR.K             | S156:        | 2 | 2,9229 | 0,412 | 0,277  |
| 20 | Q6ULP2 AFTIN_HUMAN | E.TVNPQGTDDLNVADSKGR.K        |              | 2 | 2,9223 | 0,333 | 0,609  |
| 20 | P0C0S8 H2A1_HUMAN  | R.NDEELNKLLGK.V               |              | 2 | 2,9217 | 0,302 | 0,288  |
| 20 | Q53F19 CQ085_HUMAN | E.YHEELPALKQPR.E              |              | 3 | 2,9156 | 0,179 | 0,741  |
| 20 | Q9HBT8 Z286A_HUMAN | E.KGALSSQDS#PHFQEK.S          | S19:         | 3 | 2,9138 | 0,137 | 0,526  |
| 20 | Q68DH5 LMBD2_HUMAN | R.YLS#M*SRSDIFNDV.-           | S685:        | 2 | 2,9108 | 0,268 | 0,297  |
| 20 | P46939 UTRO_HUMAN  | E.HYDPSQS#PQLFHDDTHS#RIE.Q    | S3182:S3192: | 3 | 2,9105 | 0,328 | -0,071 |
| 20 | P49790 NU153_HUMAN | R.SGIDITDFQAK.R               |              | 2 | 2,9098 | 0,35  | 0,204  |
| 20 | P41208 CETN2_HUMAN | K.AFKLFDDDE.T                 |              | 2 | 2,9095 | 0,393 | -0,222 |
| 20 | Q9H4A3 WINK1_HUMAN | K.DRPVSQPSLVGSK.E             |              | 2 | 2,9074 | 0,381 | -0,178 |
| 20 | O43166 SI1L1_HUMAN | R.HSAS#PVVFTSARS#SPKEE.L      | S1433:S1442: | 3 | 2,9065 | 0,285 | -0,088 |
| 20 | P04406 G3P_HUMAN   | K.QASEGPKGILGYTE.H            |              | 2 | 2,9045 | 0,445 | -0,312 |
| 20 | Q6NZI2 PTRF_HUMAN  | E.VKLPAKLS#ISK.S              | S167:        | 3 | 2,9002 | 0,121 | 0,651  |
| 20 | P35611 ADDA_HUMAN  | R.TTSAVPNLFVPLNTNPK.E         |              | 2 | 2,8985 | 0,391 | 0      |
| 20 | P04406 G3P_HUMAN   | K.LVINGNPITIFQERDPS#KIK.W     | S83:         | 3 | 2,8954 | 0,148 | 0,31   |
| 20 | P55209 NP1L1_HUMAN | R.QLTVQM*M*QNPQILAALQE.R      |              | 3 | 2,8954 | 0,181 | 0,175  |
| 20 | Q14676 MDC1_HUMAN  | E.LQPSTSTDQPVTSQVTR.G         |              | 3 | 2,8953 | 0,175 | 0,162  |
| 20 | Q9Y6M7 S4A7_HUMAN  | R.KIPTGAEASNVLVGE.V           |              | 2 | 2,8946 | 0,285 | -1,232 |
| 20 | P49736 MCM2_HUMAN  | R.GNDPLTSS#PGR.S              | S27:         | 2 | 2,8928 | 0,401 | -0,207 |
| 20 | Q02952 AKA12_HUMAN | K.STPVIVSATTK.K               |              | 2 | 2,891  | 0,564 | 0,221  |
| 20 | Q15149 PLEC1_HUMAN | K.AQLEPVAS#PAKKPK.V           | S1435:       | 2 | 2,8905 | 0,247 | -0,237 |
| 20 | Q96AD5 PLPL2_HUMAN | R.RVQSLPS#VPLSCAAYRE.A        | S407:        | 3 | 2,8888 | 0,311 | 0,818  |
| 20 | P68371 TBB2C_HUMAN | E.IVHLQAGQCGNQIGAK.F          |              | 3 | 2,8866 | 0,27  | 0,756  |
| 20 | Q8NG31 CASC5_HUMAN | K.TVVFDVNHVELE.M              |              | 2 | 2,8866 | 0,346 | -0,174 |
| 20 | Q5QJE6 TDIF2_HUMAN | K.NAVSVHSNLNSE.A              |              | 2 | 2,8836 | 0,39  | -0,096 |
| 20 | Q9UQ35 SRRM2_HUMAN | K.DKFS#PPVQDRPE.S             | S1188:       | 3 | 2,8828 | 0,157 | 0,557  |
| 20 | P10809 CH60_HUMAN  | E.DVQPHDLGKVGVE.V             |              | 2 | 2,8811 | 0,384 | 0      |
| 20 | Q13409 DC1I2_HUMAN | K.ITQVDFPPRE.I                |              | 2 | 2,8811 | 0,332 | 0,305  |
| 20 | P09525 ANXA4_HUMAN | E.DAIISVLAYR.N                |              | 2 | 2,8772 | 0,395 | 0,109  |
| 20 | Q9UBU7 DBF4A_HUMAN | K.LLFI#EPIPHPSNE.L            | S413:        | 2 | 2,8732 | 0,35  | 0      |
| 20 | Q32MZ4 LRRF1_HUMAN | E.TGLRDEKPIKTEVPGS#PAGTE.G    | S521:        | 3 | 2,8731 | 0,244 | -0,323 |



|    |                    |                           |            |   |        |       |        |
|----|--------------------|---------------------------|------------|---|--------|-------|--------|
| 20 | Q9Y2I7 FYV1_HUMAN  | R.SASITNLSLDR.S           |            | 2 | 2,8719 | 0,459 | -0,104 |
| 20 | O43290 SNUT1_HUMAN | R.SILSKYDEELE.G           |            | 2 | 2,8709 | 0,289 | 0,184  |
| 20 | P49327 FAS_HUMAN   | R.HSQDLAFLSM*LND.I        |            | 2 | 2,8706 | 0,275 | -0,162 |
| 20 | P55072 TERA_HUMAN  | K.GVLFYGPPEGCGK.T         |            | 2 | 2,8663 | 0,47  | -0,195 |
| 20 | P04406 G3P_HUMAN   | K.LVINGNPITIFQER.D        |            | 3 | 2,8658 | 0,19  | 0,34   |
| 20 | Q6NZI2 PTRF_HUMAN  | R.RGS#\$#PDVHALLE.I       | S365:S366: | 2 | 2,8627 | 0,227 | -0,169 |
| 20 | Q13625 ASPP2_HUMAN | R.IPRPLS#PTKLLPFLSNPYR.N  | S698:      | 3 | 2,8624 | 0,134 | 0,16   |
| 20 | P30050 RL12_HUMAN  | K.HSGNITFDEIVNIAR.Q       |            | 3 | 2,8608 | 0,089 | 0,217  |
| 20 | Q9NYF8 BCLF1_HUMAN | E.GEPQEE\$#PLKSK.S        | S177:      | 2 | 2,8596 | 0,157 | -0,173 |
| 20 | P14618 KPYM_HUMAN  | R.AGKPVICATQM*LE.S        |            | 2 | 2,8581 | 0,305 | -0,425 |
| 20 | P28290 SSFA2_HUMAN | E.FTQYTTTHHILKSLAS#IE.A   | S668:      | 3 | 2,8575 | 0,315 | 0,177  |
| 20 | O43290 SNUT1_HUMAN | E.LEGERPHS#FRLE.Q         | S348:      | 3 | 2,8564 | 0,309 | -0,354 |
| 20 | Q86YS7 K0528_HUMAN | E.IIG\$#PIPEPR.Q          | S643:      | 2 | 2,8552 | 0,256 | 0,105  |
| 20 | Q9Y6D5 BIG2_HUMAN  | R.RCS#VTSM*E.S            | S614:      | 2 | 2,8512 | 0,276 | 0,114  |
| 20 | Q6NZI2 PTRF_HUMAN  | E.VKLPAKLS#ISK\$#LKE.S    | S167:S171: | 3 | 2,85   | 0,277 | -0,203 |
| 20 | Q9NZM5 GSCR2_HUMAN | E.DHQTLLSAAHE.V           |            | 2 | 2,8494 | 0,532 | -0,2   |
| 20 | O60256 KPRB_HUMAN  | E.SDLVDGRHS#PPM*VR.S      | S227:      | 3 | 2,8487 | 0,17  | 0      |
| 20 | O14974 MYPT1_HUMAN | R.SAS#SPRLSSSLD.N         | S472:      | 2 | 2,8417 | 0,423 | 0,379  |
| 20 | O75152 ZC11A_HUMAN | R.RLSSASTGKPPLSVEDDFE.K   |            | 3 | 2,8395 | 0,166 | 0,27   |
| 20 | P55060 XPO2_HUMAN  | D.AAIYLVTSLASK.A          |            | 2 | 2,8393 | 0,314 | -0,099 |
| 20 | Q8NKN4 RN169_HUMAN | E.DRQLALQLQR.M            |            | 2 | 2,8365 | 0,229 | -0,393 |
| 20 | Q6NZI2 PTRF_HUMAN  | E.VKLPAKLS#ISK\$#LKE.S    | S167:S171: | 2 | 2,8362 | 0,413 | -0,339 |
| 20 | O95785 WIZ_HUMAN   | E.ARS#PSDLHISPLAK.K       | S1127:     | 3 | 2,8349 | 0,211 | -0,349 |
| 20 | Q9UNI6 DUS12_HUMAN | R.SLFRS#SSILDHRE.G        | S231:      | 3 | 2,8323 | 0,35  | 0,787  |
| 20 | P51572 BAP31_HUMAN | K.GAAVDGGKLDVGNAE.V       |            | 2 | 2,8305 | 0,324 | 0,355  |
| 20 | Q9NSK0 KLC4_HUMAN  | E.WSGDGGSTLQR.S           |            | 2 | 2,8298 | 0,306 | -0,105 |
| 20 | Q12888 TP53B_HUMAN | K.M*VIQGPSS#PQGE.A        | S1114:     | 2 | 2,8284 | 0,369 | 0,184  |
| 20 | Q99613 EIF3C_HUMAN | K.QNPEQS#AEDA\$K.N        | S166:      | 2 | 2,8278 | 0,25  | -0,079 |
| 20 | P54652 HSP72_HUMAN | K.STAGDTHLGGEDFDNR.M      |            | 3 | 2,8272 | 0,462 | 0,324  |
| 20 | P13797 PLST_HUMAN  | K.INNFSADIKD.S            |            | 2 | 2,8269 | 0,196 | 0,107  |
| 20 | Q6NZI2 PTRF_HUMAN  | R.GSS#PDVHALLE.I          | S366:      | 2 | 2,8261 | 0,357 | 0,203  |
| 20 | Q08211 DHX9_HUMAN  | E.QDHDLQAILQERE.L         |            | 3 | 2,826  | 0,147 | 0,688  |
| 20 | O15372 EIF3H_HUMAN | K.NLQLLM*DRVDE.M          |            | 2 | 2,826  | 0,181 | 0      |
| 20 | P10809 CH60_HUMAN  | E.KKISSIQSIVPALE.I        |            | 2 | 2,8255 | 0,363 | 0,081  |
| 20 | Q04637 IF4G1_HUMAN | R.FSALQQAVPT\$TDNRR.V     |            | 3 | 2,8255 | 0,193 | 0      |
| 20 | Q9UER7 DAXX_HUMAN  | K.KICTLPSPPS#PLASLAPVAD.S | S671:      | 2 | 2,8246 | 0,172 | 0      |
| 20 | P62937 PPIA_HUMAN  | K.KITIADCGQLE.-           |            | 2 | 2,8239 | 0,33  | -0,293 |
| 20 | Q14116 IL18_HUMAN  | R.TIFIISM*YKD.S           |            | 2 | 2,8233 | 0,37  | 0,098  |
| 20 | O75607 NPM3_HUMAN  | D.DFQLQPPVTFR.L           |            | 2 | 2,8218 | 0,364 | 0,091  |

|    |                     |                             |        |   |        |       |        |
|----|---------------------|-----------------------------|--------|---|--------|-------|--------|
| 20 | Q9NQW6 ANLN_HUMAN   | K.ATS#PVKSTTSITDAK.S        | S295:  | 2 | 2,8195 | 0,445 | -0,154 |
| 20 | Q13136 LIPA1_HUMAN  | R.LAS#LSSHVTE.L             | S275:  | 2 | 2,8186 | 0,252 | -0,434 |
| 20 | O75528 TAD3L_HUMAN  | R.NQNKPFVPHTK.S             |        | 3 | 2,8167 | 0,163 | 0,262  |
| 20 | P06733 ENOA_HUMAN   | E.KSCNCLLLKVNQIGSVTE.S      |        | 3 | 2,8136 | 0,287 | 0,443  |
| 20 | Q14166 TTL12_HUMAN  | R.RPAERS#SPGQTPEEGAQALAE.F  | S15:   | 2 | 2,8123 | 0,325 | -0,108 |
| 20 | P00558 PGK1_HUMAN   | K.VSHVSTGGGASLE.L           |        | 2 | 2,8101 | 0,393 | 0,102  |
| 20 | Q14596 NBR1_HUMAN   | R.QKS#LQM*TFALPEGPLGNEKEE.I | S673:  | 3 | 2,8089 | 0,086 | 0,599  |
| 20 | Q8NC51 PAIRB_HUMAN  | E.LTES#PKYIQK.Q             | S234:  | 2 | 2,8039 | 0,298 | -0,284 |
| 20 | Q32MZ4 LRRF1_HUMAN  | K.IDGATQSS#PAEPK.S          | S714:  | 2 | 2,8016 | 0,396 | 0,353  |
| 20 | Q8N201 INT1_HUMAN   | K.LSST#PPLSALGR.L           | T83:   | 2 | 2,8008 | 0,334 | -0,095 |
| 20 | Q9UHB6 LIMA1_HUMAN  | R.ETPHS#PGVEDAPIAK.V        | S490:  | 3 | 2,7996 | 0,203 | 0,225  |
| 20 | Q9Y4K4 M4K5_HUMAN   | R.RQS#SPSCGPVAE.T           | S433:  | 2 | 2,7985 | 0,348 | -0,09  |
| 20 | Q96JM3 ZN828_HUMAN  | K.SSFFIEPQKPVFPE.T          |        | 2 | 2,7976 | 0,409 | 0,369  |
| 20 | Q09666 AHNK_HUMAN   | K.LS#GPSLKM*PSLE.I          | S4900: | 2 | 2,7971 | 0,235 | -0,72  |
| 20 | P04181 OAT_HUMAN    | E.NADKLGILR.N               |        | 2 | 2,7963 | 0,322 | 0,329  |
| 20 | Q15149 PLEC1_HUMAN  | E.AQAATGFLVDPVR.N           |        | 2 | 2,7954 | 0,382 | 0,454  |
| 20 | O43809 CPSF5_HUMAN  | K.YIQQTKPLTLE.R             |        | 2 | 2,7945 | 0,333 | -0,183 |
| 20 | Q9NZI8 IF2B1_HUMAN  | K.VSYIPDEQIAQGPE.N          |        | 2 | 2,7941 | 0,403 | 0,237  |
| 20 | P54652 HSP72_HUMAN  | E.VKSTAGDTHLGGEDFD.N        |        | 2 | 2,7919 | 0,397 | -1,48  |
| 20 | O15231 ZN185_HUMAN  | R.RES#CGSSVLDFE.G           | S233:  | 2 | 2,7914 | 0,222 | 0,311  |
| 20 | P04406 G3P_HUMAN    | E.HQVVSSDFNSDTHSSTFD.A      |        | 3 | 2,791  | 0,171 | 0,091  |
| 20 | Q9BX68 HINT2_HUMAN  | E.DQQLLGHLLLVAK.Q           |        | 3 | 2,7905 | 0,3   | 0,189  |
| 20 | Q00341 VIGLN_HUMAN  | R.SRILS#IQKDLANIAE.V        | S645:  | 2 | 2,7904 | 0,384 | 0,139  |
| 20 | P49792 RBP2_HUMAN   | R.FALVT#PKKE.G              | T1412: | 2 | 2,7886 | 0,247 | 0,219  |
| 20 | P11940 PABP1_HUMAN  | R.SKGFVFCVCFSSPE.E          |        | 2 | 2,7879 | 0,163 | 0,168  |
| 20 | P62736 ACTA_HUMAN   | R.HQGVM*VGM*GQK.D           |        | 3 | 2,7875 | 0,123 | 0,608  |
| 20 | A8K269 A8K269_HUMAN | R.LIQNVKIENE.S              |        | 2 | 2,7871 | 0,204 | 0,508  |
| 20 | Q8WU60 Q8WU60_HUMAN | R.KVASPSPSGS#VLFTDE.G       | S104:  | 2 | 2,7868 | 0,268 | -0,072 |
| 20 | P55769 NH2L1_HUMAN  | E.DKNVPYVVR.S               |        | 3 | 2,7861 | 0,086 | 0,148  |
| 20 | Q9H6F5 CCD86_HUMAN  | R.LQQGAGLESPQGQPEPGAASPQR.Q |        | 3 | 2,7849 | 0,207 | 0      |
| 20 | P46939 UTRO_HUMAN   | K.TLKDVLNDSE.N              |        | 2 | 2,7843 | 0,218 | -0,215 |
| 20 | Q58FF8 H90B2_HUMAN  | E.SLTDPSKLDGKE.L            |        | 2 | 2,7831 | 0,384 | -0,089 |
| 20 | P62988 UBIQ_HUMAN   | R.TLSDYNIQKE.S              |        | 2 | 2,7817 | 0,215 | 0      |
| 20 | Q8WXW3 PIBF1_HUMAN  | E.DNIFTPKPTLFTK.K           |        | 3 | 2,7786 | 0,205 | 0      |
| 20 | Q86YC2 PALB2_HUMAN  | R.THLLSLKSELPS#PEPVTE.I     | S209:  | 3 | 2,7785 | 0,38  | 0,168  |
| 20 | Q9Y6G9 DC1L1_HUMAN  | R.KPVTVSPT#TPTSPTEGEAS.-    | T512:  | 3 | 2,7765 | 0,09  | 0,186  |
| 20 | P26639 SYTC_HUMAN   | E.KAS#SPSGKM*GGEEKPIGAGEE.K | S7:    | 3 | 2,7762 | 0,178 | 0,342  |
| 20 | P41208 CETN2_HUMAN  | E.ILKAFKLFDDDE.T            |        | 2 | 2,7719 | 0,333 | 0,168  |
| 20 | Q8ND56 LS14A_HUMAN  | R.SSPQLDPLRKS#PTM*E.Q       | S192:  | 2 | 2,7694 | 0,255 | -0,274 |

|    |                    |                              |            |   |        |       |        |
|----|--------------------|------------------------------|------------|---|--------|-------|--------|
| 20 | P05787 K2C8_HUMAN  | K.SYKVST#SGPR.A              | T14:       | 2 | 2,769  | 0,397 | 0      |
| 20 | Q96T23 RSF1_HUMAN  | E.TLALLKAQIDPVLLK.N          |            | 2 | 2,7674 | 0,304 | 0      |
| 20 | P62701 RS4X_HUMAN  | E.TGKITDFIKFD.T              |            | 3 | 2,7673 | 0,254 | 0,498  |
| 20 | Q9UQ35 SRRM2_HUMAN | K.DKFSFPVQDRPE.S             |            | 3 | 2,7658 | 0,193 | 0,468  |
| 20 | P13639 EF2_HUMAN   | K.SDPVVSRETSEE.S             |            | 2 | 2,7635 | 0,358 | 0,382  |
| 20 | P12694 ODBA_HUMAN  | R.IGHHST#SDDSSAYRS#VDE.V     | T338:S347: | 2 | 2,7611 | 0,315 | -0,115 |
| 20 | O75083 WDR1_HUMAN  | E.AKGPVTDVAISHD.G            |            | 2 | 2,7572 | 0,419 | -0,269 |
| 20 | P04406 G3P_HUMAN   | E.GLM*TTVHAITATQK.T          |            | 2 | 2,7541 | 0,18  | 0,328  |
| 20 | Q96JM3 ZN828_HUMAN | E.LRKPGPPLS#PEIR.S           | S427:      | 2 | 2,7525 | 0,315 | 0,079  |
| 20 | Q9NZM1 MYOF_HUMAN  | R.HTIIPAKS#PE.K              | S1915:     | 2 | 2,7501 | 0,352 | 0,104  |
| 20 | Q9UHB6 LIMA1_HUMAN | E.RPAQLANAR.E                |            | 2 | 2,7495 | 0,211 | 0,489  |
| 20 | Q2NL82 TSR1_HUMAN  | K.QIDAPGDPFPLNPR.G           |            | 2 | 2,7483 | 0,251 | -0,238 |
| 20 | P51858 HDGF_HUMAN  | E.GKLVIDEPAKE.K              |            | 3 | 2,7461 | 0,203 | 0,381  |
| 20 | Q07021 C1QBP_HUMAN | K.ALVLDCHYPEDE.V             |            | 2 | 2,7458 | 0,33  | -0,334 |
| 20 | Q92615 LARP5_HUMAN | E.RSPS#PAHLPPDPKVAE.K        | S601:      | 2 | 2,7419 | 0,285 | -0,747 |
| 20 | Q9UQ35 SRRM2_HUMAN | E.VRQSHSES#PSLQSK.S          | S1083:     | 3 | 2,7411 | 0,263 | 0,443  |
| 20 | Q58FF8 H90B2_HUMAN | K.SIYYITGESKE.Q              |            | 2 | 2,7407 | 0,288 | -0,473 |
| 20 | Q9Y3Q8 T22D4_HUMAN | R.SFTGGLGQLVVPK.A            |            | 2 | 2,7402 | 0,271 | 0,088  |
| 20 | Q5VZ89 DEN4C_HUMAN | E.SGM*TTAFIHALER.R           |            | 2 | 2,7366 | 0,469 | 0      |
| 20 | Q8IU81 I2BP1_HUMAN | R.AGGAS#PAASSTAQPPTQHR.L     | S453:      | 3 | 2,7342 | 0,172 | 0,098  |
| 20 | Q02952 AKA12_HUMAN | K.KGLSSDLEGE.K               |            | 2 | 2,7308 | 0,27  | 0,118  |
| 20 | P55265 DSRAD_HUMAN | K.ALHGATNSM*ASDNQPE.G        |            | 2 | 2,7298 | 0,485 | -0,205 |
| 20 | O94888 UBXD7_HUMAN | R.SESLIDASEDS#QLE.A          | S288:      | 2 | 2,7284 | 0,095 | 0,228  |
| 20 | P60174 TPIS_HUMAN  | K.VVLAYEPVWAIGTGK.T          |            | 2 | 2,727  | 0,407 | 0,152  |
| 20 | Q12888 TP53B_HUMAN | R.QSQQPM*KPIS#PVKDPVSPASQK.M | S1094:     | 3 | 2,7263 | 0,095 | 0,518  |
| 20 | Q12756 KIF1A_HUMAN | R.TPQPCSRPAS#PEPE.L          | S1532:     | 2 | 2,7262 | 0,213 | -0,299 |
| 20 | P12268 IMDH2_HUMAN | E.QGFITDPVVLSPK.D            |            | 2 | 2,7226 | 0,433 | -0,261 |
| 20 | Q96AQ6 PBIP1_HUMAN | R.ALQAPHS#PSKTDGKE.L         | S43:       | 2 | 2,7208 | 0,28  | -0,371 |
| 20 | Q5H9R7 SAPS3_HUMAN | E.KHIAFT#PE.S                | T631:      | 2 | 2,7189 | 0,279 | -0,239 |
| 20 | P04075 ALDOA_HUMAN | R.ALANSLACQGK.Y              |            | 2 | 2,7183 | 0,347 | 0      |
| 20 | Q9BYW2 SETD2_HUMAN | R.LNDS#PTLKKLDELPIFK.S       | S624:      | 3 | 2,7177 | 0,134 | -0,178 |
| 20 | P78332 RBM6_HUMAN  | R.EEQSSDAGLFKEE.G            |            | 2 | 2,717  | 0,359 | 0,083  |
| 20 | P22626 ROA2_HUMAN  | K.LFVGGIKEDTEE.H             |            | 2 | 2,7102 | 0,299 | -0,274 |
| 20 | O94973 AP2A2_HUMAN | R.AVDLLYAM*CDR.S             |            | 2 | 2,7069 | 0,281 | 0,091  |
| 20 | Q99747 SNAG_HUMAN  | K.LGLSLVPPGGGIK.K            |            | 2 | 2,7025 | 0,346 | -0,202 |
| 20 | Q96JM3 ZN828_HUMAN | R.KTS#PASLDFPE.S             | S459:      | 2 | 2,7019 | 0,277 | 0,288  |
| 20 | Q5T6F2 UBAP2_HUMAN | R.EKPQISAAQSTQPQK.Q          |            | 3 | 2,7    | 0,301 | 0,334  |
| 20 | Q00341 VIGLN_HUMAN | R.ILS#IQKDLANIAEVE.V         | S645:      | 2 | 2,6994 | 0,181 | 0      |
| 20 | Q92945 FUBP2_HUMAN | E.EYRVPDGM*VGLIIGR.G         |            | 3 | 2,6992 | 0,26  | 0,433  |

|    |                    |                           |        |   |        |       |        |
|----|--------------------|---------------------------|--------|---|--------|-------|--------|
| 20 | P35998 PRS7_HUMAN  | E.DDIQQLL.K               |        | 2 | 2,6952 | 0,15  | 0,376  |
| 20 | P68104 EF1A1_HUMAN | D.AAIVDM*VPGKPM*CVE.S     |        | 2 | 2,695  | 0,254 | -0,222 |
| 20 | P35579 MYH9_HUMAN  | E.KQIATLHAQVAD.M          |        | 2 | 2,6908 | 0,362 | -0,377 |
| 20 | Q5JSH3 WDR44_HUMAN | R.SNS#GRELTDEE.I          | S344:  | 2 | 2,6873 | 0,332 | -0,649 |
| 20 | P04075 ALDOA_HUMAN | R.LQSIGTENTEE.N           |        | 2 | 2,6852 | 0,316 | 0,2    |
| 20 | Q5VT52 K0460_HUMAN | R.LSSSPGLFGAFSVR.G        |        | 2 | 2,6846 | 0,215 | 0,086  |
| 20 | P12956 KU70_HUMAN  | R.DSLIFLVDASK.A           |        | 2 | 2,6823 | 0,35  | -0,101 |
| 20 | O95359 TACC2_HUMAN | K.KQALYLM*FDTSQESPVK.S    |        | 3 | 2,6794 | 0,172 | 0,274  |
| 20 | Q12789 TF3C1_HUMAN | E.SFGAANISQAAR.E          |        | 2 | 2,6781 | 0,26  | 0,409  |
| 20 | Q16555 DPYL2_HUMAN | R.AITIANQTNCPYITK.V       |        | 2 | 2,6779 | 0,361 | 0,268  |
| 20 | Q09666 AHNK_HUMAN  | K.AGLRVS#APE.V            | S332:  | 2 | 2,6748 | 0,25  | 0,374  |
| 20 | Q9Y2D5 AKAP2_HUMAN | K.NLM*QTLM*EDYE.T         |        | 2 | 2,6746 | 0,235 | -0,172 |
| 20 | Q9BYD6 RM01_HUMAN  | E.GLLLKIDPLPK.E           |        | 2 | 2,6741 | 0,194 | 0      |
| 20 | P62906 RL10A_HUMAN | E.AKAVDIPHM*DIE.A         |        | 2 | 2,674  | 0,348 | -0,18  |
| 20 | P51858 HDGF_HUMAN  | E.GKLVIDEPAKE.K           |        | 2 | 2,674  | 0,232 | 0      |
| 20 | P68104 EF1A1_HUMAN | D.M*RQTVAVGVK.A           |        | 3 | 2,6725 | 0,107 | 0,525  |
| 20 | Q9HB09 B2L12_HUMAN | R.ACPGPPPS#PEPLAR.L       | S273:  | 3 | 2,6715 | 0,242 | 0,113  |
| 20 | O95817 BAG3_HUMAN  | R.GYISIPVIHE.Q            |        | 2 | 2,6715 | 0,328 | 0      |
| 20 | P28066 PSA5_HUMAN  | R.IT#SPLM*EPSSIEKIVE.I    | T55:   | 2 | 2,6688 | 0,169 | 0,131  |
| 20 | Q9H0H5 RGAP1_HUMAN | R.DRCPLPCIPTLIGT#PVKIGE.G | T342:  | 3 | 2,6686 | 0,354 | 0,395  |
| 20 | Q86YS7 K0528_HUMAN | E.IIGSPIPEPR.Q            |        | 2 | 2,6632 | 0,409 | 0,113  |
| 20 | Q96SB3 NEB2_HUMAN  | E.M*DKLLDKISE.L           |        | 3 | 2,6611 | 0,1   | 0,378  |
| 20 | P51784 UBP11_HUMAN | K.AAYVLFYQR.Q             |        | 2 | 2,66   | 0,289 | 0      |
| 20 | Q9C0C2 TB182_HUMAN | E.HGVGGVSQCPEPGLR.H       |        | 3 | 2,6597 | 0,139 | 0,236  |
| 20 | Q9P2K5 MYEF2_HUMAN | R.DFGRGDIGINR.G           |        | 3 | 2,6577 | 0,192 | 1,124  |
| 20 | P05787 K2C8_HUMAN  | K.LLEGEES#RLE.S           | S400:  | 2 | 2,6554 | 0,266 | -0,486 |
| 20 | Q9NQS7 INCE_HUMAN  | E.QHVTQLM*STEPLPR.T       |        | 2 | 2,6538 | 0,38  | -0,074 |
| 20 | P38159 HNRPG_HUMAN | K.LFIGLNTETNE.K           |        | 2 | 2,6516 | 0,264 | 0,093  |
| 20 | Q15149 PLEC1_HUMAN | K.RAS#FAEK.T              | S1721: | 2 | 2,649  | 0,154 | 0,206  |
| 20 | Q9Y3R5 DOP2_HUMAN  | R.VPRVS#LE.R              | S610:  | 2 | 2,6484 | 0,147 | 0,139  |
| 20 | P52907 CAZA1_HUMAN | R.LLLNNDNLLRE.G           |        | 2 | 2,6479 | 0,283 | 0      |
| 20 | P31946 1433B_HUMAN | E.SYKDSTLIM*QLLR.D        |        | 3 | 2,6462 | 0,163 | 0,231  |
| 20 | P24752 THIL_HUMAN  | K.DGLTDVYNK.I             |        | 2 | 2,6444 | 0,409 | 0,119  |
| 20 | Q09666 AHNK_HUMAN  | K.ASLGS#LEGEAE.A          | S5752: | 2 | 2,6414 | 0,229 | 0,214  |
| 20 | Q6ZUT9 RA61L_HUMAN | E.LM*TSASDEDLVK.Q         |        | 2 | 2,6411 | 0,352 | -0,645 |
| 20 | Q8WXI2 CNKR2_HUMAN | K.GSES#PNSFLDQE.Y         | S390:  | 2 | 2,6388 | 0,157 | -0,088 |
| 20 | P42684 ABL2_HUMAN  | E.NSASSLAPGFIR.G          |        | 2 | 2,6368 | 0,352 | 0      |
| 20 | Q96EV2 RBM33_HUMAN | K.VKPAS#PVAQPKEE.A        | S775:  | 2 | 2,6362 | 0,504 | -0,418 |
| 20 | Q86TV6 TTC7B_HUMAN | E.KLPISS#STSNLHVDRE.Q     | S57:   | 3 | 2,6319 | 0,264 | 0,295  |

|    |                    |                               |        |   |        |       |        |
|----|--------------------|-------------------------------|--------|---|--------|-------|--------|
| 20 | P06703 S10A6_HUMAN | R.NKDQEVNFQE.Y                |        | 2 | 2,6315 | 0,152 | -0,195 |
| 20 | P18754 RCC1_HUMAN  | R.KKPALVSIPEDVVQAE.A          |        | 3 | 2,6312 | 0,359 | 0,425  |
| 20 | Q9NZT2 OGFR_HUMAN  | R.SVEPQDAGPLER.S              |        | 2 | 2,6285 | 0,307 | 0,188  |
| 20 | P04406 G3P_HUMAN   | R.DGRGALQNIIPASTGAAK.A        |        | 3 | 2,6266 | 0,188 | 0,315  |
| 20 | Q8ND56 LS14A_HUMAN | R.SLKTQLSQGR.S                |        | 2 | 2,6266 | 0,385 | -0,109 |
| 20 | P31946 1433B_HUMAN | K.DSTLIM*QLLR.D               |        | 2 | 2,6263 | 0,131 | -0,101 |
| 20 | P07814 SYEP_HUMAN  | K.SLCIPFKPLCE.L               |        | 2 | 2,6233 | 0,303 | 0,089  |
| 20 | P51858 HDGF_HUMAN  | E.DAEAPGIRDHE.S               |        | 2 | 2,6223 | 0,227 | -0,605 |
| 20 | Q01433 AMPD2_HUMAN | R.QIS#QDVKLEPDILLR.A          | S168:  | 3 | 2,6218 | 0,171 | 0,198  |
| 20 | Q00266 METK1_HUMAN | E.GHPDKICDQISDAVLD.A          |        | 2 | 2,6208 | 0,322 | 0,205  |
| 20 | P12694 ODBA_HUMAN  | R.KPKPNPNLLFSDVYQE.M          |        | 3 | 2,6205 | 0,198 | 0,29   |
| 20 | Q9H4A3 WNK1_HUMAN  | E.QAVAGPAPSTVPSSTSK.D         |        | 2 | 2,6162 | 0,362 | -0,308 |
| 20 | Q5VT52 K0460_HUMAN | R.RM*S#GEPIQTVE.S             | S1099: | 2 | 2,6162 | 0,304 | -0,091 |
| 20 | O60506 HNRPQ_HUMAN | E.DGALAVLQQFK.D               |        | 2 | 2,6161 | 0,348 | 0,205  |
| 20 | Q9UQ35 SRRM2_HUMAN | K.DKFSPFPVQD.R                |        | 2 | 2,616  | 0,14  | -0,207 |
| 20 | Q04917 1433F_HUMAN | E.DSYKDSTLIM*QLLR.D           |        | 2 | 2,6153 | 0,305 | -0,215 |
| 20 | Q9H009 NACA2_HUMAN | R.ALKNNSENDIVNAIM*E.L         |        | 2 | 2,6149 | 0,233 | 0,073  |
| 20 | Q05524 ENO1B_HUMAN | R.IGAEVYHNLK.N                |        | 2 | 2,6133 | 0,251 | -0,107 |
| 20 | Q99832 TCPH_HUMAN  | R.TM*M*ACGGSIQTSVNALSADVLGR.C |        | 3 | 2,6128 | 0,168 | 0,54   |
| 20 | Q14166 TTL12_HUMAN | R.SS#PGQTPEEGAQALAE.F         | S16:   | 2 | 2,6109 | 0,319 | -0,222 |
| 20 | P80723 BASP_HUMAN  | K.KTEAPAAPAAQE.T              |        | 2 | 2,6069 | 0,439 | -0,206 |
| 20 | P68104 EF1A1_HUMAN | K.STTTGHLIYK.C                |        | 2 | 2,6069 | 0,421 | 0      |
| 20 | P11387 TOP1_HUMAN  | E.DDLFDRLNTGILNK.H            |        | 3 | 2,6062 | 0,222 | 0,224  |
| 20 | Q9UQ35 SRRM2_HUMAN | E.SSLVFKDTRLT#PPR.E           | T1208: | 3 | 2,6056 | 0,131 | 0,323  |
| 20 | Q9H8U3 ZFAN3_HUMAN | D.TAHVSLITPTKR.S              |        | 3 | 2,605  | 0,205 | 0,483  |
| 20 | P68104 EF1A1_HUMAN | K.IGGIGTVPVGRVE.T             |        | 2 | 2,6049 | 0,462 | 0      |
| 20 | P07737 PROF1_HUMAN | K.CSVIRDSLLQDGE.F             |        | 2 | 2,6037 | 0,306 | -0,082 |
| 20 | O94925 GLSK_HUMAN  | R.NFAIGYYLKE.K                |        | 2 | 2,603  | 0,194 | 0,401  |
| 20 | Q865E5 RALYL_HUMAN | R.VFIGNLNTAIVK.K              |        | 2 | 2,597  | 0,288 | 0,095  |
| 20 | Q8N163 K1967_HUMAN | E.VVKEPKDEAQNEGPATE.S         |        | 3 | 2,5948 | 0,291 | -0,298 |
| 20 | O60524 SDCG1_HUMAN | E.LKLQTNHVTM*LLR.N            |        | 2 | 2,5929 | 0,264 | 0,308  |
| 20 | P04264 K2C1_HUMAN  | K.SLNNQFASFIDK.V              |        | 2 | 2,5896 | 0,408 | 0,088  |
| 20 | Q9UBU7 DBF4A_HUMAN | K.LLFISEPIPHPS#NE.L           | S420:  | 2 | 2,5849 | 0,261 | 0,219  |
| 20 | Q6UB99 ANR11_HUMAN | E.NASQAPARPLSTNLYR.S          |        | 2 | 2,5844 | 0,204 | -0,347 |
| 20 | Q8WYQ5 DGCR8_HUMAN | R.ARPFQALPR.E                 |        | 2 | 2,5842 | 0,274 | -0,924 |
| 20 | P00558 PGK1_HUMAN  | K.ITLPVDFVTADKFDE.N           |        | 3 | 2,5833 | 0,177 | 0,107  |
| 20 | P02545 LMNA_HUMAN  | K.TLDS#VAKE.R                 | S94:   | 2 | 2,5819 | 0,271 | 0      |
| 20 | Q7L014 DDX46_HUMAN | K.LLEPVDHGKIE.Y               |        | 2 | 2,581  | 0,249 | 0,098  |
| 20 | Q8TEX9 IPO4_HUMAN  | E.LCGVLKAVLQR.K               |        | 3 | 2,5788 | 0,164 | 0,436  |

|    |                     |                              |          |   |        |       |        |
|----|---------------------|------------------------------|----------|---|--------|-------|--------|
| 20 | P04792 HSPB1_HUMAN  | E.SPAVAAPAYS.R.A             |          | 2 | 2,578  | 0,232 | -0,112 |
| 20 | P14618 KPYM_HUMAN   | E.KDIQDLKFGVEQD.V            |          | 3 | 2,5766 | 0,21  | -0,238 |
| 20 | O60524 SDCG1_HUMAN  | K.LQTNHVTM*LLR.N             |          | 3 | 2,575  | 0,294 | 0,136  |
| 20 | P20700 LMNB1_HUMAN  | R.LKLSPS#PSSR.V              | S393:    | 2 | 2,5739 | 0,252 | -0,212 |
| 20 | Q6NZI2 PTRF_HUMAN   | E.AGDLRRGS#SPDVHALLE.I       | S365:    | 3 | 2,5728 | 0,145 | -0,293 |
| 20 | O60841 IF2P_HUMAN   | E.GNTVHIEVK.E                |          | 2 | 2,5722 | 0,278 | 0,245  |
| 20 | P62736 ACTA_HUMAN   | R.HQGVM*VGM*GQKDSYVGDE.A     |          | 3 | 2,5713 | 0,231 | 0,186  |
| 20 | Q86VP6 CAND1_HUMAN  | K.DSIKLDDDSE.R               |          | 2 | 2,5698 | 0,277 | 0,429  |
| 20 | Q6GYQ0 GRIPE_HUMAN  | E.DFAAQVFSPAPYHHLPSDADH.-    |          | 3 | 2,567  | 0,157 | 0,63   |
| 20 | Q32MZ4 LRRF1_HUMAN  | R.RGS#GDTSISIDTE.A           | S120:    | 2 | 2,5669 | 0,238 | 0,086  |
| 20 | Q05524 ENO1B_HUMAN  | K.DATNVGDEGGFAPNILE.N        |          | 2 | 2,5659 | 0,216 | 0,284  |
| 20 | Q8WXV6 Q8WXV6_HUMAN | R.KRT#S#SEDNLYLAVLR.A        | T19:S20: | 3 | 2,5653 | 0,098 | 0,19   |
| 20 | Q69YN2 C19L1_HUMAN  | R.FIALANVGNPE.K              |          | 2 | 2,565  | 0,17  | 0,107  |
| 20 | Q8WUF5 IASPP_HUMAN  | R.TPLYLQPDAYGSLDR.A          |          | 2 | 2,5649 | 0,328 | -0,071 |
| 20 | P23258 TBG1_HUMAN   | K.DVFFYQADDE.H               |          | 2 | 2,5631 | 0,26  | 0      |
| 20 | Q9H0B6 KLC2_HUMAN   | R.ASS#LNFLNK.S               | S582:    | 2 | 2,5599 | 0,272 | 0      |
| 20 | P46100 ATRX_HUMAN   | K.SCGLNPKLE.K                |          | 2 | 2,5588 | 0,305 | 0,12   |
| 20 | O60256 KPRB_HUMAN   | R.SVAAIHPSLE.I               |          | 2 | 2,5555 | 0,249 | -0,953 |
| 20 | Q32MZ4 LRRF1_HUMAN  | R.KALDS#NSLE.N               | S766:    | 2 | 2,5554 | 0,151 | 0,231  |
| 20 | Q9Y490 TLN1_HUMAN   | E.STM*LEDSVS#PKK.S           | S425:    | 2 | 2,5549 | 0,483 | 0,344  |
| 20 | Q8WX92 NELFB_HUMAN  | E.QLDHRKPS#PAQAAETPALE.L     | S557:    | 3 | 2,5534 | 0,19  | 0,257  |
| 20 | P42166 LAP2A_HUMAN  | D.VYVQLYLQHLTAR.N            |          | 3 | 2,5533 | 0,347 | 0,228  |
| 20 | P40763 STAT3_HUMAN  | E.SHATLVFHNLLGE.I            |          | 2 | 2,5509 | 0,349 | -0,339 |
| 20 | P28066 PSA5_HUMAN   | E.KRITS#PLM*EPSSIEK.I        | S56:     | 2 | 2,5486 | 0,407 | -0,202 |
| 20 | Q6ZUT9 RA61L_HUMAN  | R.RLS#ITSLTGK.N              | S1076:   | 2 | 2,5458 | 0,503 | 0      |
| 20 | P42166 LAP2A_HUMAN  | K.DVYVQLYLQHLTAR.N           |          | 3 | 2,5455 | 0,388 | 0,106  |
| 20 | Q9NWX8 CS062_HUMAN  | R.TRS#NPEGAEDRAVGAQASVGS.R.S | S29:     | 3 | 2,5439 | 0,292 | 0,159  |
| 20 | Q9H0G5 CCD55_HUMAN  | K.CILQTDVK.V                 |          | 2 | 2,5352 | 0,274 | -1,124 |
| 20 | Q2NXX8 ERC6L_HUMAN  | K.ADIGPNLDQLKDDE.I           |          | 2 | 2,53   | 0,182 | 0,079  |
| 20 | P04075 ALDOA_HUMAN  | E.KVLAAYKALSD.H              |          | 3 | 2,5292 | 0,155 | 0,501  |
| 20 | P13667 PDIA4_HUMAN  | E.GFPTIYFAPSGDK.K            |          | 2 | 2,5281 | 0,377 | 0,087  |
| 20 | P68104 EF1A1_HUMAN  | K.SGDAAIVDM*VPGKPMCVE.S      |          | 3 | 2,5269 | 0,108 | 0,29   |
| 20 | Q9H0H5 RGAP1_HUMAN  | R.CPLPCIPTLIGT#PVK.I         | T342:    | 2 | 2,5264 | 0,355 | -0,21  |
| 20 | Q6WKZ4 RFIP1_HUMAN  | E.GLSFLGGLR.S                |          | 2 | 2,5258 | 0,307 | 0      |
| 20 | P16949 STMN1_HUMAN  | K.RAS#GQAFELILS#PR.S         | S16:S25: | 2 | 2,5238 | 0,352 | -0,072 |
| 20 | P29692 EF1D_HUMAN   | E.NGAS#VILRDIAR.A            | S44:     | 3 | 2,5208 | 0,326 | 0,402  |
| 20 | Q09666 AHNK_HUMAN   | K.LSGPSLKM*PS#LE.I           | S4908:   | 2 | 2,5197 | 0,214 | -0,36  |
| 20 | Q96JG6 CC132_HUMAN  | R.DYVDEQTDGDPVK.S            |          | 2 | 2,5167 | 0,24  | 0,257  |
| 20 | O15061 DMN_HUMAN    | R.HVTLGPGQSPLSR.E            |          | 2 | 2,5154 | 0,341 | -0,362 |

|    |                     |                        |            |   |        |       |        |
|----|---------------------|------------------------|------------|---|--------|-------|--------|
| 20 | Q13153 PAK1_HUMAN   | R.SVIEPLVPTPTR.D       |            | 2 | 2,5112 | 0,288 | 0,28   |
| 20 | Q13242 SFRS9_HUMAN  | R.GS#PHYFSPFRPY.-      | S211:      | 3 | 2,5089 | 0,265 | 0,119  |
| 20 | P25440 BRD2_HUMAN   | R.IRKPS#LLYE.G         | S37:       | 2 | 2,5072 | 0,158 | 0,509  |
| 20 | P49755 TMEDA_HUMAN  | K.GKFAFTE.D            |            | 2 | 2,5069 | 0,344 | 0,203  |
| 20 | Q8WYP5 AHTF1_HUMAN  | R.TTSFFLNS#PEKE.H      | S1292:     | 2 | 2,5038 | 0,19  | 0,412  |
| 20 | O60749 SNX2_HUMAN   | E.DHTALSRALSQAE.V      |            | 2 | 2,5017 | 0,267 | 0      |
| 20 | P14618 KPYM_HUMAN   | K.GVNLPGAAVDLPVSE.K    |            | 2 | 2,5014 | 0,325 | 0,081  |
| 20 | P37802 TAGL2_HUMAN  | K.NVIGLQM*GTNR.G       |            | 2 | 2,5012 | 0,428 | -1,001 |
| 20 | P55072 TERA_HUMAN   | E.DIGGLEDVKRE.L        |            | 2 | 2,5006 | 0,308 | 0,099  |
| 20 | P02545 LMNA_HUMAN   | R.SGAQASSTPLS#PTRITR.L | S22:       | 2 | 2,4997 | 0,371 | 0,472  |
| 20 | O15062 ZBTB5_HUMAN  | R.VVVKSEPLS#S#PEPQDE.V | S335:S336: | 2 | 2,4914 | 0,24  | 0,706  |
| 20 | Q2YD98 K1530_HUMAN  | E.SLGM*ASGM*SDALR.S    |            | 2 | 2,4912 | 0,275 | 0,184  |
| 20 | Q9BYW2 SETD2_HUMAN  | K.KLDELPIFKSE.F        |            | 3 | 2,4906 | 0,101 | 0,624  |
| 20 | Q86UU1 PHLB1_HUMAN  | E.DFSLTGAR.G           |            | 2 | 2,4903 | 0,259 | 0,373  |
| 20 | A4LAA3 A4LAA3_HUMAN | K.LTPVLSNS#PIK.G       | S598:      | 2 | 2,4893 | 0,249 | 0      |
| 20 | P41091 IF2G_HUMAN   | E.IEVRPGIVSKDSE.G      |            | 3 | 2,489  | 0,232 | 0,256  |
| 20 | P63241 IF5A1_HUMAN  | E.DICPSTHNM*DVPNIK.R   |            | 2 | 2,4886 | 0,324 | -0,625 |
| 20 | O00170 AIP_HUMAN    | K.YYDAIACLK.N          |            | 2 | 2,4884 | 0,264 | 0,328  |
| 20 | P04075 ALDOA_HUMAN  | E.STGSIKRLQSIGTENTEE.N |            | 3 | 2,4876 | 0,128 | -0,453 |
| 20 | O14745 NHERF_HUMAN  | K.LLVVDRETDE.F         |            | 2 | 2,4863 | 0,25  | -0,513 |
| 20 | Q09666 AHNK_HUMAN   | K.LQSGSVSLASK.K        |            | 2 | 2,4844 | 0,391 | -0,35  |
| 20 | P62701 RS4X_HUMAN   | K.ITDFIKFD.T           |            | 2 | 2,4841 | 0,3   | 0,305  |
| 20 | O15294 OGT1_HUMAN   | K.LVSIVADQLE.K         |            | 2 | 2,4837 | 0,256 | 0,337  |
| 20 | Q15545 TAF7_HUMAN   | E.NQGLDISS#PGM*SGHR.Q  | S201:      | 3 | 2,4821 | 0,216 | 0,111  |
| 20 | Q7Z2W4 ZCCHV_HUMAN  | K.TVFS#PTLPAAR.S       | S378:      | 2 | 2,481  | 0,286 | -0,295 |
| 20 | Q9Y613 EPN1_HUMAN   | K.NIVHNYSEAE.I         |            | 2 | 2,4809 | 0,225 | 0      |
| 20 | Q13330 MTA1_HUMAN   | E.NSSSNPYLIR.R         |            | 2 | 2,4797 | 0,209 | 0,106  |
| 20 | Q15637 SF01_HUMAN   | R.NILKQGIETPEDQND.L    |            | 2 | 2,4787 | 0,218 | -0,214 |
| 20 | Q15424 SAFB1_HUMAN  | K.ADSLLAVVK.R          |            | 2 | 2,478  | 0,385 | 0,067  |
| 20 | P05362 ICAM1_HUMAN  | E.VTTTVLVR.R           |            | 2 | 2,4752 | 0,313 | 0,412  |
| 20 | Q9NQW6 ANLN_HUMAN   | K.STLSQTVPSKGE.L       |            | 2 | 2,4745 | 0,158 | -0,099 |
| 20 | P31949 S10AB_HUMAN  | E.SLIAVFQK.Y           |            | 2 | 2,4739 | 0,26  | -0,337 |
| 20 | P49736 MCM2_HUMAN   | R.RGNDPLTSS#PGR.S      | S27:       | 2 | 2,4691 | 0,291 | -0,456 |
| 20 | Q96HE7 ERO1A_HUMAN  | E.IKSFPLHFDE.N         |            | 2 | 2,4648 | 0,277 | 0,495  |
| 20 | Q9P035 PTAD1_HUMAN  | E.KRPLFLAPDFDR.W       |            | 3 | 2,4633 | 0,138 | 0,124  |
| 20 | P22626 ROA2_HUMAN   | R.GGGGNFGPGGSNFR.G     |            | 2 | 2,463  | 0,437 | 0,089  |
| 20 | P21333 FLNA_HUMAN   | K.DGSCGVAYVVQEPGDYE.V  |            | 2 | 2,4618 | 0,151 | 0,794  |
| 20 | P61247 RS3A_HUMAN   | K.ATGDETGAKVE.R        |            | 2 | 2,4596 | 0,231 | -0,113 |
| 20 | O94804 STK10_HUMAN  | E.NGLAVPVPLR.K         |            | 2 | 2,4593 | 0,347 | 0,118  |

|    |                     |                         |        |   |        |       |        |
|----|---------------------|-------------------------|--------|---|--------|-------|--------|
| 20 | Q13242 SFRS9_HUMAN  | R.GS#PHYFSPFRPY.-       | S211:  | 2 | 2,4561 | 0,467 | -0,079 |
| 20 | Q9HCN4 GPN1_HUMAN   | K.DSLSPVLHPSDLILTR.G    |        | 3 | 2,4559 | 0,235 | 0,207  |
| 20 | O75643 U520_HUMAN   | E.KDTLGLFLRE.G          |        | 2 | 2,4556 | 0,45  | 0,512  |
| 20 | Q9NV70 EXOC1_HUMAN  | E.KQVNILM*KLLDE.A       |        | 3 | 2,4546 | 0,132 | 0,689  |
| 20 | Q13573 SNW1_HUMAN   | R.GLQTVHINE.N           |        | 2 | 2,4541 | 0,358 | 0,121  |
| 20 | P08670 VIME_HUMAN   | R.TYS#LGSALRPSTSR.S     | S39:   | 3 | 2,4528 | 0,123 | 0,348  |
| 20 | Q96JH7 VCIP1_HUMAN  | D.ALGAAFATR.S           |        | 2 | 2,4517 | 0,297 | 0,347  |
| 20 | P51648 AL3A2_HUMAN  | R.YIAPTVLTDVDPK.T       |        | 2 | 2,4517 | 0,393 | 0,256  |
| 20 | O15320 CTGE5_HUMAN  | R.GPGNPLDHQITNE.R       |        | 2 | 2,4498 | 0,245 | -0,263 |
| 20 | Q9NTK5 OLA1_HUMAN   | E.DGDIIFFK.F            |        | 2 | 2,4482 | 0,204 | -0,383 |
| 20 | Q04917 1433F_HUMAN  | E.DRNLLSVAYK.N          |        | 2 | 2,4448 | 0,353 | 0,103  |
| 20 | Q9NRY4 GRLF1_HUMAN  | E.NIYVPHDSTQGK.I        |        | 2 | 2,4435 | 0,343 | 0      |
| 20 | P08107 HSP71_HUMAN  | K.DNNLLGRFE.L           |        | 2 | 2,4433 | 0,256 | 0      |
| 20 | Q8WWY3 PRP31_HUMAN  | E.DAYQEDLGFSLGHLGK.S    |        | 3 | 2,4427 | 0,256 | 0,105  |
| 20 | Q8N488 RYBP_HUMAN   | R.SST#PKGDM*SAVNDEF.-   | T215:  | 2 | 2,4412 | 0,298 | 0,276  |
| 20 | Q8WXD5 GEMI6_HUMAN  | E.KLM*HLFTSGDCK.A       |        | 3 | 2,4391 | 0,247 | 0,315  |
| 20 | P49023 PAXI_HUMAN   | E.HVYSFPNK.Q            |        | 2 | 2,4357 | 0,47  | -0,123 |
| 20 | Q8N201 INT1_HUMAN   | R.AIS#PSIKEPSVPIE.V     | S104:  | 2 | 2,4336 | 0,319 | 0,296  |
| 20 | B2RMZ9 B2RMZ9_HUMAN | R.APVS#PLKFSPFE.G       | S423:  | 2 | 2,4329 | 0,403 | 0,087  |
| 20 | Q9Y2H0 DLGP4_HUMAN  | R.NLS#YGDNSDPALE.A      | S760:  | 2 | 2,4308 | 0,111 | 0,248  |
| 20 | Q9Y2L9 LRCH1_HUMAN  | E.SIDPQFT#IR.R          | T568:  | 2 | 2,4275 | 0,175 | 0,316  |
| 20 | Q92922 SMRC1_HUMAN  | R.SVDLGEDNVTE.Q         |        | 2 | 2,4264 | 0,375 | -0,207 |
| 20 | P55084 ECHB_HUMAN   | E.GLLSDVVPFKVPGK.D      |        | 3 | 2,4254 | 0,168 | 0,314  |
| 20 | P62736 ACTA_HUMAN   | R.GILT#LKYPIE.H         | T68:   | 2 | 2,4253 | 0,293 | -0,597 |
| 20 | Q92616 GCN1L_HUMAN  | R.ALQAAIQQLAE.A         |        | 2 | 2,4248 | 0,238 | 0,317  |
| 20 | A9CQZ4 A9CQZ4_HUMAN | E.EVPAFFKNLGSGS#PKPR.Q  | S27:   | 3 | 2,4246 | 0,357 | 0,287  |
| 20 | P27816 MAP4_HUMAN   | E.RAS#PIKM*DLAPSKD.M    | S358:  | 2 | 2,4245 | 0,524 | -0,3   |
| 20 | P48634 BAT2_HUMAN   | E.ALTTVTVAPAPR.R        |        | 2 | 2,4243 | 0,244 | -0,204 |
| 20 | Q9Y2W1 TR150_HUMAN  | K.SPLQSVVVR.R           |        | 2 | 2,4229 | 0,195 | 1,362  |
| 20 | Q12931 TRAP1_HUMAN  | E.DIAKLLRYE.S           |        | 2 | 2,4223 | 0,122 | 0,218  |
| 20 | Q7Z422 CA144_HUMAN  | R.KS#KSPKVPVIQDD.S      | S37:   | 3 | 2,4221 | 0,16  | 0,317  |
| 20 | Q9UQ35 SRRM2_HUMAN  | R.GEFSAS#PM*LK.S        | S1124: | 2 | 2,4208 | 0,294 | 0,42   |
| 20 | Q6IEG0 CF151_HUMAN  | D.SDLFVDLAAK.I          |        | 2 | 2,4179 | 0,318 | -0,113 |
| 20 | P55084 ECHB_HUMAN   | E.GLLSDVVPFKVPGK.D      |        | 2 | 2,4133 | 0,146 | 0,084  |
| 20 | Q6S8J3 A26CA_HUMAN  | K.AGFAGDDAPR.A          |        | 2 | 2,4114 | 0,27  | 0,125  |
| 20 | Q9H0G5 CCD55_HUMAN  | R.AKDKFLDQE.R           |        | 2 | 2,4082 | 0,129 | 0      |
| 20 | Q9UQ35 SRRM2_HUMAN  | E.KSEEPAGQILSHLSSE.L    |        | 3 | 2,4068 | 0,331 | 0,321  |
| 20 | Q5VT52 K0460_HUMAN  | R.GPTSTSIDNIDGTPVRDER.S |        | 3 | 2,4013 | 0,174 | 0,09   |
| 20 | O14974 MYPT1_HUMAN  | R.KTGS#YGALAE.I         | S445:  | 2 | 2,4007 | 0,104 | -0,113 |



|    |                    |                                         |            |   |        |       |        |
|----|--------------------|-----------------------------------------|------------|---|--------|-------|--------|
| 20 | Q14980 NUMA1_HUMAN | E.AQVAHADQQLRD.L                        |            | 3 | 2,4006 | 0,373 | 0,406  |
| 20 | P27708 PYR1_HUMAN  | R.CFLTSQLNHGFAVE.T                      |            | 2 | 2,3996 | 0,32  | 0      |
| 20 | Q9UNZ2 NSF1C_HUMAN | R.SGQQIVGPPR.K                          |            | 2 | 2,3985 | 0,194 | 0      |
| 20 | Q15424 SAFB1_HUMAN | K.ADSLAVVVKR.E                          |            | 2 | 2,3961 | 0,205 | 0,114  |
| 20 | P20700 LMNB1_HUMAN | R.AGGPTTPLSPTR.L                        |            | 2 | 2,392  | 0,353 | -0,528 |
| 20 | P82979 HCC1_HUMAN  | R.FGLNVSSISR.K                          |            | 2 | 2,3907 | 0,275 | 0,452  |
| 20 | P45974 UBP5_HUMAN  | E.ALLSADSASR.K                          |            | 2 | 2,3901 | 0,404 | -0,123 |
| 20 | Q96PU5 NED4L_HUMAN | R.LRSCS#VTDVAE.Q                        | S342:      | 2 | 2,3872 | 0,222 | 0,088  |
| 20 | Q6NYC8 PHTNS_HUMAN | E.ILVLGGYLR.L                           |            | 2 | 2,3785 | 0,133 | 0,182  |
| 20 | Q92520 FAM3C_HUMAN | R.GINVALANGK.T                          |            | 2 | 2,375  | 0,329 | 0      |
| 20 | P48960 CD97_HUMAN  | R.CNPGFSSFSE.I                          |            | 2 | 2,3736 | 0,297 | 0,431  |
| 20 | Q86UU1 PHLB1_HUMAN | R.TRS#PS#PTLGE.S                        | S518:S520: | 2 | 2,3735 | 0,122 | 0,101  |
| 20 | P13861 KAP2_HUMAN  | E.ARAPASVLPAAATPR.Q                     |            | 3 | 2,372  | 0,245 | -0,332 |
| 20 | Q14103 HNRPD_HUMAN | E.SESVDKVMQKE.H                         |            | 3 | 2,3702 | 0,121 | 0,393  |
| 20 | Q6P1L5 AL2SC_HUMAN | K.YAT#SPKPNNSYM*FK.R                    | T456:      | 3 | 2,3686 | 0,134 | 0      |
| 20 | O75665 OFD1_HUMAN  | R.VVSEQPQVGTLEE.R                       |            | 2 | 2,3676 | 0,246 | 0,172  |
| 20 | P36578 RL4_HUMAN   | E.SSGKNVTLPAVFK.A                       |            | 2 | 2,3672 | 0,238 | 0      |
| 20 | Q9UKV5 AMFR2_HUMAN | E.GRIQVPFPTQR.S                         |            | 2 | 2,3669 | 0,18  | 0,094  |
| 20 | Q2M1Z3 CDGAP_HUMAN | K.NRPS#SLNLDPAPIAD.L                    | S1105:     | 2 | 2,3664 | 0,311 | 0,206  |
| 20 | P32004 L1CAM_HUMAN | E.DGS#FIGQYSGK.K                        | S1224:     | 2 | 2,366  | 0,196 | 0,295  |
| 20 | P11940 PABP1_HUMAN | R.YQGVNLYVK.N                           |            | 2 | 2,366  | 0,183 | 0,113  |
| 20 | P50991 TCPD_HUMAN  | K.IGLIQFCLSAPK.T                        |            | 2 | 2,3657 | 0,262 | -0,362 |
| 20 | P62701 RS4X_HUMAN  | R.IGVITNRE.R                            |            | 2 | 2,364  | 0,168 | -0,068 |
| 20 | Q9UK76 HN1_HUMAN   | E.EKPVPAAPVPS#PVAPAPVPSR.R              | S131:      | 2 | 2,3632 | 0,489 | 0      |
| 20 | Q02952 AKA12_HUMAN | K.SPSP#PVERE.M                          | S1331:     | 2 | 2,3623 | 0,189 | -0,113 |
| 20 | P22314 UBA1_HUMAN  | R.RVS#GPDPKPGSNCSPAQSVLSEVPSVPTNGM*AK.N | S13:       | 3 | 2,3615 | 0,232 | 0,956  |
| 20 | Q9UQ35 SRRM2_HUMAN | K.FSPFPVQDRPE.S                         |            | 2 | 2,3612 | 0,223 | 0,37   |
| 20 | Q96A08 H2B1A_HUMAN | E.IQTAVRLLLPGELAK.H                     |            | 3 | 2,3607 | 0,111 | 0      |
| 20 | Q15223 PVRL1_HUMAN | K.RPYFTVDE.A                            |            | 2 | 2,3604 | 0,255 | 0      |
| 20 | P37802 TAGL2_HUMAN | E.GKNVIGLQM*GTNR.G                      |            | 2 | 2,3593 | 0,189 | 0,087  |
| 20 | P31946 1433B_HUMAN | D.STLIM*QLLR.D                          |            | 2 | 2,3586 | 0,121 | 0,112  |
| 20 | P31751 AKT2_HUMAN  | R.AIQM*VANSLK.Q                         |            | 2 | 2,3584 | 0,243 | -0,559 |
| 20 | Q96SB3 NEB2_HUMAN  | E.M*DKLLDKISE.L                         |            | 2 | 2,3581 | 0,243 | -0,101 |
| 20 | Q32MZ4 LRRF1_HUMAN | R.RGS#GDTS#ISIDTE.A                     | S120:S124: | 2 | 2,3579 | 0,205 | -0,081 |
| 20 | P41236 IPP2_HUMAN  | E.AM*APDILAR.K                          |            | 2 | 2,3551 | 0,248 | 0,689  |
| 20 | Q03468 ERCC6_HUMAN | E.QLS#PQAATSR.D                         | S158:      | 2 | 2,3543 | 0,355 | 0,107  |
| 20 | Q9C0B5 ZDHC5_HUMAN | K.LSRGDS#LKEPTSIAE.S                    | S380:      | 2 | 2,3541 | 0,466 | -0,217 |
| 20 | O15027 SC16A_HUMAN | R.ANVVGEVRE.T                           |            | 2 | 2,3541 | 0,238 | 0      |
| 20 | Q5VWG9 TAF3_HUMAN  | R.LLS#TKGDTLDVVLLE.A                    | S199:      | 2 | 2,3541 | 0,193 | -0,072 |

|    |                     |                              |              |   |        |       |        |
|----|---------------------|------------------------------|--------------|---|--------|-------|--------|
| 20 | P15151 PVR_HUMAN    | R.M*FGLRVEDE.G               |              | 2 | 2,3498 | 0,254 | -0,658 |
| 20 | Q14789 GOGB1_HUMAN  | R.SSSSQTQPLKVQYQR.Q          |              | 3 | 2,3497 | 0,172 | -0,526 |
| 20 | Q96JM3 ZN828_HUMAN  | E.LRKPGPLS#PEIR.S            | S427:        | 3 | 2,3471 | 0,142 | 0,475  |
| 20 | Q6ULP2 AFTIN_HUMAN  | R.KPLSTHSTEYNLDSVPS#PAEE.F   | S226:        | 3 | 2,3447 | 0,292 | -0,538 |
| 20 | Q9UHY1 NRBP_HUMAN   | R.HLS#CDLM*PNENIPE.L         | S477:        | 2 | 2,344  | 0,198 | -0,069 |
| 20 | A9CQZ4 A9CQZ4_HUMAN | R.QKFCGM*FCPVEGSSE.N         |              | 2 | 2,3417 | 0,351 | 0,206  |
| 20 | Q13523 PRP4B_HUMAN  | R.TKLDDLALLE.D               |              | 2 | 2,3411 | 0,219 | -0,108 |
| 20 | Q9Y2W2 WBP11_HUMAN  | E.LTPLQAMM*LR.M              |              | 2 | 2,3384 | 0,268 | -0,103 |
| 20 | Q9UHV9 PFD2_HUMAN   | E.TLTQQLQAK.G                |              | 2 | 2,337  | 0,237 | 0,237  |
| 20 | Q9Y2L9 LRCH1_HUMAN  | E.DSCHRLS#PVKGE.F            | S370:        | 3 | 2,3369 | 0,084 | 0,437  |
| 20 | Q16204 CCDC6_HUMAN  | K.SGGIVISPFRL.EE.L           |              | 2 | 2,3367 | 0,26  | 0,087  |
| 20 | Q99569 PKP4_HUMAN   | R.VSDAVQPNNYLIR.T            |              | 2 | 2,3359 | 0,221 | -0,246 |
| 20 | Q05524 ENO1B_HUMAN  | K.VNQIGSVTE.S                |              | 2 | 2,335  | 0,183 | -0,193 |
| 20 | P26639 SYTC_HUMAN   | E.EKASS#PSGKM*GGEEKPIGAGE.E  | S8:          | 3 | 2,3315 | 0,25  | 0,085  |
| 20 | Q9UGU5 HM2L1_HUMAN  | K.ASSVGVLS#PQKK.S            | S497:        | 2 | 2,3304 | 0,102 | -0,095 |
| 20 | Q96PZ0 PUS7_HUMAN   | E.DVPRPPTVSTGK.G             |              | 2 | 2,3295 | 0,089 | -0,178 |
| 20 | Q9H2G2 SLK_HUMAN    | D.GDIKLADFGVSAK.N            |              | 2 | 2,3294 | 0,412 | 0,092  |
| 20 | B2RMZ9 B2RMZ9_HUMAN | R.LNSS#PRAPVS#PLKFSPFE.G     | S417:S423:   | 2 | 2,3281 | 0,205 | 0      |
| 20 | P00441 SODC_HUMAN   | E.DSVISLSGDHCIIGR.T          |              | 3 | 2,3273 | 0,215 | 0,449  |
| 20 | A9CQZ4 A9CQZ4_HUMAN | K.FCGM*FCPVEGSSE.N           |              | 2 | 2,3252 | 0,118 | -1,683 |
| 20 | Q9UJN7 ZN391_HUMAN  | R.KVS#VTLKE.I                | S47:         | 2 | 2,3237 | 0,132 | -0,248 |
| 20 | Q9H3P7 GCP60_HUMAN  | E.KIQQDADSVITVGRGE.V         |              | 3 | 2,3236 | 0,189 | 0      |
| 20 | Q9ULU4 PKCB1_HUMAN  | K.TSTTGSILNLDLDR.S           |              | 3 | 2,3231 | 0,082 | 0,243  |
| 20 | P16403 H12_HUMAN    | R.SGVSLAALKK.A               |              | 2 | 2,3228 | 0,194 | -1,44  |
| 20 | Q15942 ZYG_HUMAN    | K.FTPVASKFS#PGAPGGSGSQPNQK.L | S281:        | 3 | 2,3227 | 0,162 | 0,315  |
| 20 | P07737 PROF1_HUMAN  | K.TLVLLM*GKE.G               |              | 2 | 2,3223 | 0,243 | 0      |
| 20 | P04406 G3P_HUMAN    | E.RDPS#KIKWGDAGAAYVVE.S      | S83:         | 3 | 2,3216 | 0,151 | 0,436  |
| 20 | Q07666 KHDR1_HUMAN  | K.FLVPDM*M*DDICQE.Q          |              | 2 | 2,3215 | 0,095 | 0,445  |
| 20 | Q99961 SH3G1_HUMAN  | K.IAASS#FR.S                 | S288:        | 2 | 2,3212 | 0,394 | 0,332  |
| 20 | P05023 AT1A1_HUMAN  | E.VSM*DDHKLSLDE.L            |              | 3 | 2,3161 | 0,212 | 0      |
| 20 | P51784 UBP11_HUMAN  | E.GLYNVLM*YR.L               |              | 2 | 2,3134 | 0,249 | 0,32   |
| 20 | P15924 DESP_HUMAN   | K.ISTISSVR.N                 |              | 2 | 2,3127 | 0,259 | 0,283  |
| 20 | P49790 NU153_HUMAN  | R.SHLNFSM*LE.S               |              | 2 | 2,3112 | 0,24  | 0      |
| 20 | Q9UQ35 SRRM2_HUMAN  | K.AQT#PPGPSLSGSKS#PCPQEK.S   | T1003:S1014: | 3 | 2,3087 | 0,154 | 0,165  |
| 20 | Q9Y3F4 STRAP_HUMAN  | K.AATAAADFTAK.V              |              | 2 | 2,3069 | 0,358 | 0,353  |
| 20 | P29401 TKT_HUMAN    | E.DFQVGQAK.V                 |              | 2 | 2,3042 | 0,295 | 0,137  |
| 20 | Q12769 NU160_HUMAN  | E.YAWIVQPVSGAVYDRPGAS#PK.R   | S1123:       | 3 | 2,3027 | 0,096 | 0,234  |
| 20 | Q9Y2W2 WBP11_HUMAN  | E.LTPLQAMMLR.M               |              | 2 | 2,3022 | 0,325 | -0,312 |
| 20 | Q9NZT2 OGFR_HUMAN   | R.SQGDEAGGHGEDRPEPLS#PKE.S   | S378:        | 3 | 2,3008 | 0,157 | -0,322 |

|    |                     |                              |        |   |        |       |        |
|----|---------------------|------------------------------|--------|---|--------|-------|--------|
| 20 | Q9BXF6 RFIP5_HUMAN  | R.SNSS#SEAVLGQEE.L           | S396:  | 2 | 2,2974 | 0,213 | -1,292 |
| 20 | Q13112 CAF1B_HUMAN  | E.IQSETPGDAQGS#PPELKRPR.L    | S538:  | 3 | 2,2956 | 0,129 | 0,326  |
| 20 | O95453 PARN_HUMAN   | R.NNSFTAPSTVGK.R             |        | 2 | 2,2928 | 0,293 | -0,499 |
| 20 | Q9UKS6 PACN3_HUMAN  | E.VTLTSIVPTR.D               |        | 2 | 2,2887 | 0,328 | 0,337  |
| 20 | P23284 PPIB_HUMAN   | E.VEKPFAIAKE.-               |        | 2 | 2,2873 | 0,127 | -0,862 |
| 20 | Q99569 PKP4_HUMAN   | R.SAVS#PDLHITPIYE.G          | S406:  | 2 | 2,2868 | 0,164 | 0,15   |
| 20 | P04083 ANXA1_HUMAN  | E.ATIIDILTK.R                |        | 2 | 2,2838 | 0,255 | 0,309  |
| 20 | Q6UB35 C1TM_HUMAN   | E.DTRVHGLALQISE.N            |        | 2 | 2,2829 | 0,289 | 0,085  |
| 20 | Q09666 AHNK_HUMAN   | E.ASS#PKGKFSLFK.S            | S5763: | 3 | 2,2825 | 0,225 | 0,73   |
| 20 | Q96FV9 THOC1_HUMAN  | R.DKPVTGEQIE.V               |        | 2 | 2,2817 | 0,255 | 0      |
| 20 | O43683 BUB1_HUMAN   | R.LSQPAAGGVLTCE.A            |        | 2 | 2,2813 | 0,319 | 0,187  |
| 20 | P35251 RFC1_HUMAN   | E.AHLTPYSLQAIK.A             |        | 2 | 2,2808 | 0,392 | 0      |
| 20 | A6NJL0 A6NJL0_HUMAN | R.M*LDQTLIDLNEM*.-           |        | 2 | 2,2806 | 0,123 | 0,332  |
| 20 | Q58FF8 H90B2_HUMAN  | K.SLVSVTKE.G                 |        | 2 | 2,2772 | 0,134 | -0,141 |
| 20 | Q01130 SFRS2_HUMAN  | E.GM*TSLKVDNLTY#RTSPDTRLRR.V | Y23:   | 3 | 2,2761 | 0,295 | -0,145 |
| 20 | P49588 SYAC_HUMAN   | E.NTVATVM*ALR.R              |        | 2 | 2,2747 | 0,143 | 0,335  |
| 20 | P46821 MAP1B_HUMAN  | K.LGDVSPT#QIDVSQFGSFKE.D     | T1503: | 3 | 2,2726 | 0,127 | 0      |
| 20 | Q9P107 GMIP_HUMAN   | E.FLPSLNSS#PLDIR.K           | S376:  | 2 | 2,2707 | 0,135 | 0,079  |
| 20 | Q92520 FAM3C_HUMAN  | E.DNVLM*SGVK.N               |        | 2 | 2,2678 | 0,172 | 0,125  |
| 20 | Q96JM3 ZN828_HUMAN  | K.SSFFIEPQKPVFPE.T           |        | 3 | 2,2676 | 0,181 | 0,443  |
| 20 | P38919 IF4A3_HUMAN  | R.LLKEEDM*TKVE.F             |        | 2 | 2,2642 | 0,254 | 0,271  |
| 20 | Q969V6 MKL1_HUMAN   | K.APAATSILHK.A               |        | 2 | 2,2641 | 0,314 | 0,302  |
| 20 | Q9Y2W1 TR150_HUMAN  | R.ERS#PALKSPLQSVVVR.R        | S248:  | 3 | 2,2611 | 0,238 | 0,495  |
| 20 | O94804 STK10_HUMAN  | E.NGLAVPVPLRK.S              |        | 2 | 2,2598 | 0,221 | -0,314 |
| 20 | Q9H0S4 DDX47_HUMAN  | K.TFKDLGVTDVLC.E.A           |        | 2 | 2,2579 | 0,285 | -0,245 |
| 20 | P60174 TPIS_HUMAN   | K.TATPQQAQ.E.V               |        | 2 | 2,2556 | 0,087 | 0      |
| 20 | Q9Y696 CLIC4_HUMAN  | R.GLLKTLQKLDE.Y              |        | 2 | 2,2534 | 0,294 | 0,194  |
| 20 | P24666 PPAC_HUMAN   | R.KLVTDQNISE.N               |        | 2 | 2,2533 | 0,195 | -0,319 |
| 20 | Q14562 DHX8_HUMAN   | E.LVEEPPFLR.G                |        | 2 | 2,249  | 0,267 | -0,199 |
| 20 | O15027 SC16A_HUMAN  | R.YGPLPGPAVPR.H              |        | 2 | 2,2489 | 0,434 | -0,543 |
| 20 | P19634 SL9A1_HUMAN  | R.ILPALSKDKEEE.I             |        | 2 | 2,2471 | 0,295 | -0,711 |
| 20 | P07900 HS90A_HUMAN  | E.M*VS#LKDYCTR.M             | S476:  | 2 | 2,2463 | 0,218 | 0      |
| 20 | O14530 TXND9_HUMAN  | K.FGTNFTKLE.K                |        | 2 | 2,2451 | 0,302 | 0,808  |
| 20 | P63241 IF5A1_HUMAN  | E.DICPSTHNM*DVPNIKR.N        |        | 3 | 2,2424 | 0,164 | 0,478  |
| 20 | P06753 TPM3_HUMAN   | R.KLVIIEGDLE.R               |        | 2 | 2,2405 | 0,2   | 0,432  |
| 20 | P61978 HNRPK_HUMAN  | E.CLNYQHYK.G                 |        | 2 | 2,2395 | 0,215 | -0,108 |
| 20 | P32004 L1CAM_HUMAN  | E.DGS#FIGQYSGKK.E            | S1224: | 3 | 2,2375 | 0,148 | 0,067  |
| 20 | P07900 HS90A_HUMAN  | E.TALLSSGFSLEDPQTHANR.I      |        | 3 | 2,2367 | 0,115 | 0,358  |
| 20 | Q7Z4C7 Q7Z4C7_HUMAN | R.KLKLTFEE.L                 |        | 2 | 2,2357 | 0,112 | -0,424 |

|    |                     |                         |        |   |        |       |        |
|----|---------------------|-------------------------|--------|---|--------|-------|--------|
| 20 | P02768 ALBU_HUMAN   | K.YICENQDSISSK.L        |        | 2 | 2,2344 | 0,133 | -0,253 |
| 20 | Q7Z5J4 RAI1_HUMAN   | R.GLKGAGGSPVGVVEE.G     |        | 2 | 2,2323 | 0,217 | -0,194 |
| 20 | Q86XP3 DDX42_HUMAN  | K.IIDPLPPIDHSE.I        |        | 2 | 2,2319 | 0,089 | -0,272 |
| 20 | Q9P260 K1468_HUMAN  | E.ADSTIPKENS#PNSFPRRE.R | S453:  | 3 | 2,2315 | 0,183 | 0,344  |
| 20 | P35579 MYH9_HUMAN   | K.VLLQGKGDSE.H          |        | 2 | 2,2308 | 0,271 | -0,583 |
| 20 | Q9Y2W2 WBP11_HUMAN  | E.LTPLQAM*M*LR.M        |        | 2 | 2,2304 | 0,339 | -0,506 |
| 20 | Q15311 RBP1_HUMAN   | E.CFLPPTSS#PSEHR.R      | S11:   | 3 | 2,2264 | 0,19  | 0,459  |
| 20 | Q9C0C2 TB182_HUMAN  | R.SPSQDFSFIEDTE.I       |        | 2 | 2,2248 | 0,323 | 0,162  |
| 20 | O00116 ADAS_HUMAN   | E.DFLHDLKE.T            |        | 2 | 2,2201 | 0,165 | 0,18   |
| 20 | Q32MZ4 LRRF1_HUMAN  | K.IDGATQSS#PAEPKSE.D    | S714:  | 2 | 2,2198 | 0,321 | -0,229 |
| 20 | P11142 HSP7C_HUMAN  | E.KVCNPIITK.L           |        | 2 | 2,2196 | 0,103 | -0,341 |
| 20 | Q9UQ35 SRRM2_HUMAN  | E.SSLVFKDTLRT#PPRER.S   | T1208: | 3 | 2,2181 | 0,264 | -0,185 |
| 20 | Q68DH5 LMBD2_HUMAN  | R.YLSM*S#RSDFNDV.-      | S687:  | 2 | 2,2164 | 0,189 | 0      |
| 20 | Q15637 SF01_HUMAN   | R.ILRPWQSSE.T           |        | 2 | 2,2127 | 0,236 | 0,437  |
| 20 | Q9Y2I7 FYV1_HUMAN   | K.SSS#PIRLPE.M          | S1714: | 2 | 2,21   | 0,261 | 0,114  |
| 20 | Q5TDH0 DDI2_HUMAN   | E.NADPRPPVQFPNLPR.I     |        | 3 | 2,2093 | 0,112 | 0,319  |
| 20 | Q6ULP2 AFTIN_HUMAN  | E.TVNPQGTDDLNDVADSKGR.K |        | 3 | 2,2082 | 0,298 | 0      |
| 20 | P09211 GSTP1_HUMAN  | E.DLRCKYISLIYTNYE.A     |        | 3 | 2,208  | 0,188 | 0,094  |
| 20 | P08107 HSP71_HUMAN  | R.ARFEELCSDLFR.S        |        | 3 | 2,2006 | 0,216 | 0,593  |
| 20 | P50897 PPT1_HUMAN   | E.KKIPGIYVLSLE.I        |        | 2 | 2,2001 | 0,182 | -0,09  |
| 20 | Q9BTC0 DIDO1_HUMAN  | K.VTVDDLPNR.M           |        | 2 | 2,198  | 0,244 | -0,119 |
| 20 | Q9Y3T9 NOC2L_HUMAN  | R.GILRPLSTR.H           |        | 2 | 2,1881 | 0,216 | -0,241 |
| 20 | Q09666 AHNK_HUMAN   | E.GDLRGPDPVKLE.G        |        | 3 | 2,1873 | 0,397 | 0,915  |
| 20 | Q9UQ84 EXO1_HUMAN   | R.TPSPSPSTALQQFR.R      |        | 2 | 2,1871 | 0,259 | -0,08  |
| 20 | P54652 HSP72_HUMAN  | R.ARFEELNADLFR.G        |        | 2 | 2,1844 | 0,081 | 0      |
| 20 | P42695 CNDD3_HUMAN  | R.NSSAFSYQR.Q           |        | 2 | 2,1844 | 0,312 | -0,115 |
| 20 | Q6IAA8 CK059_HUMAN  | K.ALNGAEPNYHSLPSAR.T    |        | 3 | 2,18   | 0,18  | 0,323  |
| 20 | Q13263 TIF1B_HUMAN  | R.KVPRVS#LE.R           | S489:  | 2 | 2,1794 | 0,254 | -0,908 |
| 20 | O00762 UBE2C_HUMAN  | E.DLRYKLSLE.F           |        | 2 | 2,179  | 0,164 | 0,107  |
| 20 | P09211 GSTP1_HUMAN  | R.CKYISLIYTNYE.A        |        | 2 | 2,1782 | 0,14  | -0,078 |
| 20 | P06753 TPM3_HUMAN   | K.LVIIEGDLE.R           |        | 2 | 2,1775 | 0,115 | 0,122  |
| 20 | O75152 ZC11A_HUMAN  | K.LSVQSNPS#PQLR.S       | S132:  | 2 | 2,1765 | 0,12  | 0,347  |
| 20 | O95785 WIZ_HUMAN    | R.SPSDLHISPLAK.K        |        | 2 | 2,1762 | 0,269 | 0,193  |
| 20 | Q7Z417 NUFP2_HUMAN  | R.TSPQVLGSILK.S         |        | 2 | 2,1725 | 0,35  | -0,107 |
| 20 | P04406 G3P_HUMAN    | E.GLM*TTVHAITATQK.T     |        | 3 | 2,1682 | 0,319 | 0,615  |
| 20 | Q8TDJ6 DMXL2_HUMAN  | R.LSVPMP*PLPTVLLDR.K    |        | 2 | 2,1656 | 0,278 | -0,234 |
| 20 | B0AZS1 B0AZS1_HUMAN | E.DDRNSFTLKE.D          |        | 2 | 2,1648 | 0,138 | 0,365  |
| 20 | Q5EBL4 RIPL1_HUMAN  | R.IPQPPPIAHPR.T         |        | 3 | 2,164  | 0,134 | 0,15   |
| 20 | P18858 DNL1_HUMAN   | K.AETPTESVSEPE.V        |        | 2 | 2,1618 | 0,106 | 0,478  |

|    |                     |                         |            |   |        |       |        |
|----|---------------------|-------------------------|------------|---|--------|-------|--------|
| 20 | Q6UB99 ANR11_HUMAN  | E.NASQAPARPLSTNLYR.S    |            | 3 | 2,1601 | 0,202 | 0,416  |
| 20 | Q07021 C1QBP_HUMAN  | E.DLKSFVKSQ.-           |            | 2 | 2,1597 | 0,281 | -0,116 |
| 20 | Q6S8J3 A26CA_HUMAN  | E.KSYELPDGQVITIGNE.R    |            | 2 | 2,1563 | 0,291 | 0      |
| 20 | P05787 K2C8_HUMAN   | E.LAIKDANAKLSE.L        |            | 3 | 2,1561 | 0,106 | 0,359  |
| 20 | Q71RC2 LARP4_HUMAN  | K.DLIEDSSVQK.D          |            | 2 | 2,1545 | 0,126 | -0,646 |
| 20 | P05783 K1C18_HUMAN  | D.LAKIM*ADIRAQYDE.L     |            | 3 | 2,1541 | 0,211 | 0,221  |
| 20 | Q9P246 STIM2_HUMAN  | E.IYQTLS#PR.K           | S621:      | 2 | 2,1502 | 0,258 | -0,115 |
| 20 | Q09666 AHNK_HUMAN   | R.LDFEGPDAK.L           |            | 2 | 2,1498 | 0,221 | 0,062  |
| 20 | P62906 RL10A_HUMAN  | K.AVDIPHM*DIE.A         |            | 2 | 2,1468 | 0,246 | -0,211 |
| 20 | Q8N655 CJ012_HUMAN  | K.IKPNLSS#SPRSEE.T      | S294:      | 2 | 2,1467 | 0,257 | 0      |
| 20 | Q6UB35 C1TM_HUMAN   | R.VHGLALQISE.N          |            | 2 | 2,1467 | 0,162 | -0,114 |
| 20 | Q5VT52 K0460_HUMAN  | R.GPTSTSIDNIDGTPVRDER.S |            | 2 | 2,1465 | 0,085 | 0,06   |
| 20 | P33993 MCM7_HUMAN   | R.GFTPAQFQAALDE.Y       |            | 2 | 2,1461 | 0,252 | -0,087 |
| 20 | Q6S8J3 A26CA_HUMAN  | E.TTFNSIM*K.S           |            | 2 | 2,1424 | 0,307 | 0,573  |
| 20 | Q9UQ35 SRRM2_HUMAN  | R.QKDKFS#PFVQDRPE.S     | S1188:     | 3 | 2,1424 | 0,095 | 0,193  |
| 20 | P49411 EFTU_HUMAN   | E.HVVVVYVNKADAVQDSE.M   |            | 3 | 2,1399 | 0,244 | 0,928  |
| 20 | Q13618 CUL3_HUMAN   | E.NSASVYIK.K            |            | 2 | 2,1367 | 0,297 | 0,207  |
| 20 | P48643 TCPE_HUMAN   | E.DYKALQKYE.K           |            | 2 | 2,1303 | 0,224 | 0      |
| 20 | Q13625 ASPP2_HUMAN  | K.LLPFLSNPYR.N          |            | 2 | 2,1297 | 0,408 | 0      |
| 20 | P32004 L1CAM_HUMAN  | E.DGS#FIGQYSGKK.E       | S1224:     | 2 | 2,1287 | 0,226 | -0,268 |
| 20 | Q8NI35 INADL_HUMAN  | E.VPPPFTLVCCR.R         |            | 2 | 2,1239 | 0,205 | 0,091  |
| 20 | Q96JH7 VCIP1_HUMAN  | R.S#RESS#PSHGLLK.L      | S994:S998: | 2 | 2,1224 | 0,22  | 0,084  |
| 20 | Q9Y3U8 RL36_HUMAN   | E.VCGFAPYER.R           |            | 2 | 2,1212 | 0,198 | -0,111 |
| 20 | P61247 RS3A_HUMAN   | E.KACQSIYPLHD.V         |            | 2 | 2,121  | 0,269 | 0,366  |
| 20 | P81605 DCD_HUMAN    | K.GAVHDVKDVLDSVL.-      |            | 2 | 2,1198 | 0,361 | -0,25  |
| 20 | P23588 IF4B_HUMAN   | K.VAPAQPSEEGPGRKDE.N    |            | 2 | 2,1192 | 0,426 | -0,366 |
| 20 | O00566 MPP10_HUMAN  | E.DTGVLVNK.K            |            | 2 | 2,1165 | 0,233 | 0,361  |
| 20 | P23246 SFPQ_HUMAN   | R.FAQHGTFE.Y            |            | 2 | 2,1152 | 0,11  | 0,065  |
| 20 | P68400 CSK21_HUMAN  | R.VYTDVNTHRPR.E         |            | 2 | 2,1121 | 0,2   | -0,449 |
| 20 | Q9HAV4 XPO5_HUMAN   | E.VM*DLITVCCVSKK.G      |            | 3 | 2,1114 | 0,11  | -0,117 |
| 20 | P61758 PFD3_HUMAN   | E.TADTVLKKLDE.Q         |            | 2 | 2,1111 | 0,218 | 0,198  |
| 20 | Q16891 IMMT_HUMAN   | E.KTIPYSDKLFE.M         |            | 2 | 2,1097 | 0,179 | 0      |
| 20 | Q14222 Q14222_HUMAN | K.SGDAAIVDM*VPSKPMCVE.S |            | 2 | 2,1092 | 0,264 | 0,063  |
| 20 | P05787 K2C8_HUMAN   | R.AFSSRS#YTSGPGSR.I     | S24:       | 2 | 2,1064 | 0,491 | -0,317 |
| 20 | Q96AD5 PLPL2_HUMAN  | R.RVQS#LPSVPLSCAAYRE.A  | S404:      | 2 | 2,1003 | 0,387 | 0,485  |
| 20 | Q6PKG0 LARP1_HUMAN  | R.SLPTTVPEP#PNYR.N      | S774:      | 2 | 2,0978 | 0,223 | -0,317 |
| 20 | Q9Y2W2 WBP11_HUMAN  | E.LTPLQAM*MLR.M         |            | 2 | 2,0927 | 0,37  | 0,205  |
| 20 | O15027 SC16A_HUMAN  | K.SHLVGVPFEADR.A        |            | 3 | 2,0925 | 0,11  | 0,377  |
| 20 | P46087 NOL1_HUMAN   | K.KGPQSLFNAPR.G         |            | 2 | 2,0919 | 0,104 | -0,201 |

|    |                     |                          |              |   |        |       |        |
|----|---------------------|--------------------------|--------------|---|--------|-------|--------|
| 20 | P48444 COPD_HUMAN   | E.VDNFVDKLGSE.G          |              | 3 | 2,086  | 0,11  | 0,283  |
| 20 | P19525 E2AK2_HUMAN  | E.AKQLAAKLAYLQILSEE.T    |              | 3 | 2,0822 | 0,082 | 0,29   |
| 20 | Q9Y6G9 DC1L1_HUMAN  | R.KPVTVSPPTPTS#PTEGEAS.- | S516:        | 3 | 2,0818 | 0,095 | 0,744  |
| 20 | P40925 MDHC_HUMAN   | K.DLDVAILVGS*PR.R        |              | 2 | 2,0817 | 0,182 | -0,348 |
| 20 | Q12756 KIF1A_HUMAN  | K.KLPS#PARATE.T          | S1548:       | 2 | 2,0792 | 0,089 | 0      |
| 20 | P07942 LAMB1_HUMAN  | K.KTLDGELDE.K            |              | 2 | 2,0782 | 0,081 | -0,12  |
| 20 | Q66K74 MAP1S_HUMAN  | E.AGLSLPLR.G             |              | 2 | 2,0774 | 0,124 | 0,516  |
| 20 | P56524 HDAC4_HUMAN  | E.AHAQAGVQVK.Q           |              | 2 | 2,0768 | 0,372 | 0      |
| 20 | Q15067 ACOX1_HUMAN  | E.DLNFLTR.S              |              | 2 | 2,0762 | 0,155 | 0,416  |
| 20 | P46821 MAP1B_HUMAN  | K.SDISPLTPR.E            |              | 2 | 2,0759 | 0,281 | 0,433  |
| 20 | A7E2F7 A7E2F7_HUMAN | R.RYS#LIDPSSAPE.L        | S938:        | 2 | 2,0729 | 0,266 | -0,345 |
| 20 | P05787 K2C8_HUMAN   | E.FVLIKKDVDE.A           |              | 2 | 2,0708 | 0,108 | -0,405 |
| 20 | Q9UQ35 SRRM2_HUMAN  | R.GEFSASPM*LK.S          |              | 2 | 2,0647 | 0,222 | 0,338  |
| 20 | P20700 LMNB1_HUMAN  | R.AGGPTTPLS#PTR.L        | S23:         | 2 | 2,0646 | 0,217 | 0,198  |
| 20 | A9CQZ4 A9CQZ4_HUMAN | K.NLGS*PKPR.Q            | S27:         | 2 | 2,053  | 0,145 | -0,112 |
| 20 | Q9H2J4 PDCL3_HUMAN  | E.DVLLSSVR.R             |              | 2 | 2,0472 | 0,312 | 0,069  |
| 20 | P22059 OSBP1_HUMAN  | R.IRLEETLE.Q             |              | 2 | 2,0314 | 0,091 | -0,426 |
| 20 | Q96G25 MED8_HUMAN   | R.NQVIPLVLS#PDRDEDLM*R.Q | S82:         | 3 | 2,0307 | 0,086 | 0,316  |
| 20 | O14745 NHERF_HUMAN  | K.LGVQVREE.L             |              | 2 | 2,029  | 0,167 | -0,262 |
| 20 | O60504 VINEX_HUMAN  | R.DFVYPSSTR.D            |              | 2 | 2,0217 | 0,232 | 0,569  |
| 20 | P62917 RL8_HUMAN    | E.GIHTGQFVYCGK.K         |              | 2 | 2,0165 | 0,2   | 0,446  |
| 20 | P07339 CATD_HUMAN   | E.LM*LG*GTD*SK.Y         |              | 2 | 2,0159 | 0,115 | 0      |
| 20 | P52701 MSH6_HUMAN   | R.QSTLYSFFPKS#PALSDANK.A | S14:         | 2 | 2,0159 | 0,198 | 0,559  |
| 20 | Q6RFH5 WDR74_HUMAN  | E.DGIFQGQR.H             |              | 2 | 2,0143 | 0,125 | 0,331  |
| 20 | P11216 PYGB_HUMAN   | K.QIS#VRGLAGLDVAE.V      | S15:         | 2 | 2,0143 | 0,281 | 0,936  |
| 20 | Q92841 DDX17_HUMAN  | K.GPQIRDLE.R             |              | 2 | 2,0122 | 0,228 | -1,249 |
| 20 | P55209 NP1L1_HUMAN  | R.SVLYFTGEAIED.D         |              | 2 | 2,0121 | 0,143 | -0,091 |
| 20 | Q6ZV73 FGD6_HUMAN   | K.VLKTS#PVRE.I           | S62:         | 2 | 2,0056 | 0,203 | -0,11  |
| 20 | Q03164 HRX_HUMAN    | E.KT#NLDLGP*APSLEK.E     | T972:        | 2 | 2,0055 | 0,163 | -1,466 |
| 20 | P11216 PYGB_HUMAN   | R.GLAGLDVAE.V            |              | 2 | 2,0034 | 0,222 | 0      |
| 20 | Q6PJT7 ZC3HE_HUMAN  | R.LQIDPVM*AE.T           |              | 2 | 1,9993 | 0,225 | 0,118  |
| 20 | Q99613 EIF3C_HUMAN  | D.GVSAATFLKK.K           |              | 2 | 1,9951 | 0,156 | -0,119 |
| 20 | Q9H4A3 WNK1_HUMAN   | R.S#GSGGSAKEPQEE.R       | S183:        | 2 | 1,9932 | 0,301 | -0,174 |
| 20 | P19338 NUCL_HUMAN   | K.TGISDVFAK.N            |              | 2 | 1,9914 | 0,332 | 0      |
| 20 | Q02952 AKA12_HUMAN  | K.STPVIVSATT*KK.G        |              | 2 | 1,9892 | 0,248 | -0,198 |
| 20 | P36507 MP2K2_HUMAN  | R.LNQP*GT#PTRTAV.-       | T394:        | 2 | 1,9822 | 0,209 | -0,091 |
| 20 | Q9BRA2 TXD17_HUMAN  | K.TIFAYFTGSK.D           |              | 2 | 1,9793 | 0,259 | 0,107  |
| 20 | P46100 ATRX_HUMAN   | R.TGKQNEENPGDEE.A        |              | 2 | 1,9777 | 0,254 | 0      |
| 20 | Q9UQ35 SRRM2_HUMAN  | E.HKELS#NS#PLRE.N        | S1318:S1320: | 2 | 1,976  | 0,179 | -0,332 |

|    |                     |                     |            |   |        |       |        |
|----|---------------------|---------------------|------------|---|--------|-------|--------|
| 20 | P04181 OAT_HUMAN    | R.FAPPLVIKE.D       |            | 2 | 1,9749 | 0,289 | 0      |
| 20 | Q9H6U6 BCAS3_HUMAN  | R.RSPLVPGIITVIDTE.T |            | 2 | 1,9744 | 0,343 | -0,076 |
| 20 | Q13541 4EBP1_HUMAN  | R.AGGEESQFE.M       |            | 2 | 1,9742 | 0,166 | 0      |
| 20 | P50990 TCPQ_HUMAN   | K.M*VINHLE.K        |            | 2 | 1,9704 | 0,159 | 0,35   |
| 20 | Q96T88 UHRF1_HUMAN  | D.TIQLLVR.Q         |            | 2 | 1,9684 | 0,125 | 0,145  |
| 20 | P51858 HDGF_HUMAN   | E.APGIRDHE.S        |            | 2 | 1,9641 | 0,323 | -0,204 |
| 20 | Q9H6F5 CCD86_HUMAN  | R.RLGGLRPES#PE.S    | S18:       | 2 | 1,9637 | 0,255 | -0,095 |
| 20 | Q9H0H5 RGAP1_HUMAN  | R.LHDFVSK.T         |            | 2 | 1,9633 | 0,216 | 0,216  |
| 20 | P06396 GELS_HUMAN   | E.DCFILDHGKD.G      |            | 2 | 1,9615 | 0,293 | 0,2    |
| 20 | A9CQZ4 A9CQZ4_HUMAN | E.DEEVPAFFK.N       |            | 2 | 1,9603 | 0,172 | 0,338  |
| 20 | Q6UB99 ANR11_HUMAN  | R.SVS#VDIR.R        | S1793:     | 2 | 1,96   | 0,11  | 0,143  |
| 20 | P51858 HDGF_HUMAN   | K.SCVEEPEPEPE.A     |            | 2 | 1,9587 | 0,149 | 0,094  |
| 20 | Q5SW79 CE170_HUMAN  | R.TLPQLPNEKSLE.S    |            | 2 | 1,9515 | 0,238 | 0,081  |
| 20 | Q13428 TCOF_HUMAN   | R.GPASVPSVGK.A      |            | 2 | 1,9466 | 0,323 | 0,068  |
| 20 | Q9UKV3 ACINU_HUMAN  | R.SAQPLPKIEE.L      |            | 2 | 1,9423 | 0,289 | 0      |
| 20 | P36578 RL4_HUMAN    | K.NVTLPVFK.A        |            | 2 | 1,9403 | 0,177 | -0,062 |
| 20 | Q8TBZ3 WDR20_HUMAN  | E.DVPLLEPLICK.K     |            | 2 | 1,9319 | 0,247 | -0,094 |
| 20 | Q9H4L7 SMRCD_HUMAN  | K.ASISYFK.N         |            | 2 | 1,9289 | 0,114 | 0,449  |
| 20 | P78417 GSTO1_HUMAN  | E.VININLK.N         |            | 2 | 1,9285 | 0,208 | 1,274  |
| 20 | P35030 TRY3_HUMAN   | D.TLDNDIM*LIK.L     |            | 2 | 1,9169 | 0,22  | 0,921  |
| 20 | Q96L73 NSD1_HUMAN   | R.TATS#PKETVEE.G    | S1510:     | 2 | 1,9161 | 0,188 | -0,48  |
| 20 | Q96T23 RSF1_HUMAN   | K.LASEKEVVE.C       |            | 2 | 1,9154 | 0,145 | 0,061  |
| 20 | Q09028 RBBP4_HUMAN  | R.YM*PQNPCIATK.T    |            | 2 | 1,9047 | 0,085 | 0,924  |
| 20 | Q8ND56 LS14A_HUMAN  | R.SLKTQLS#QGR.S     | S178:      | 2 | 1,902  | 0,216 | -0,407 |
| 20 | P98175 RBM10_HUMAN  | K.LASDDRPS#PPR.G    | S722:      | 2 | 1,9003 | 0,233 | -0,189 |
| 20 | A7E2V4 K0913_HUMAN  | R.M*RDGLVIPLVE.L    |            | 2 | 1,8986 | 0,228 | -0,097 |
| 20 | Q9HAB8 PPCS_HUMAN   | R.QSFVFIVTK.D       |            | 2 | 1,8985 | 0,218 | -0,114 |
| 20 | Q99490 CENG1_HUMAN  | R.RKKLT#T#PSKTE.G   | T839:T840: | 2 | 1,8943 | 0,169 | -0,674 |
| 20 | P33176 KINH_HUMAN   | R.TTIVICCSPPSYNE.S  |            | 2 | 1,8923 | 0,158 | -0,15  |
| 20 | P30084 ECHM_HUMAN   | K.ICPVETLVEE.A      |            | 2 | 1,8918 | 0,122 | 0,41   |
| 20 | P61221 ABCE1_HUMAN  | K.KSGNYFFLDD.-      |            | 2 | 1,8877 | 0,17  | 0,304  |
| 20 | Q8IXM2 CQ049_HUMAN  | K.KLNFDQA.-         |            | 2 | 1,8847 | 0,157 | 0,657  |
| 20 | P34931 HS71L_HUMAN  | E.ISSM*VLTK.L       |            | 2 | 1,8824 | 0,243 | 0,068  |
| 20 | P55072 TERA_HUMAN   | R.LIVDEAINE.D       |            | 2 | 1,879  | 0,169 | 0,06   |
| 20 | P06576 ATPB_HUMAN   | R.FLSQPFQVAE.V      |            | 2 | 1,8786 | 0,138 | 0,314  |
| 20 | O00442 RTC1_HUMAN   | E.M*LLANLR.H        |            | 2 | 1,8742 | 0,097 | -0,144 |
| 20 | O94763 RMP_HUMAN    | K.KLLPLSVTPE.A      |            | 2 | 1,8728 | 0,151 | 0,334  |
| 20 | P04075 ALDOA_HUMAN  | R.ALQASALK.A        |            | 2 | 1,8705 | 0,134 | 0,456  |
| 20 | Q08257 QOR_HUMAN    | K.IVLQNGAHE.V       |            | 2 | 1,8596 | 0,083 | 0,062  |

|    |                     |                                  |            |   |        |       |        |
|----|---------------------|----------------------------------|------------|---|--------|-------|--------|
| 20 | P16152 CBR1_HUMAN   | K.FRSETITEEE.L                   |            | 2 | 1,8519 | 0,095 | 0      |
| 20 | Q96L91 EP400_HUMAN  | E.SSLDSGM*SGR.K                  |            | 2 | 1,8504 | 0,13  | -0,12  |
| 20 | Q9Y217 MTMR6_HUMAN  | K.YLNPLYSSE.S                    |            | 2 | 1,8394 | 0,14  | 0      |
| 20 | Q9H6H4 REEP4_HUMAN  | R.SISDAPAPAYHDPLYLE.D            |            | 2 | 1,8355 | 0,266 | 0,197  |
| 20 | P10809 CH60_HUMAN   | K.KISSIQSIVPALE.I                |            | 2 | 1,8322 | 0,182 | 0,44   |
| 20 | Q6ZN18 AEBP2_HUMAN  | E.GLEEPKGPR.G                    |            | 2 | 1,8187 | 0,216 | -0,372 |
| 20 | P04264 K2C1_HUMAN   | K.WELLQQVDTSTR.T                 |            | 2 | 1,8177 | 0,115 | -1,488 |
| 20 | P04406 G3P_HUMAN    | K.VIHDFNGIVE.G                   |            | 2 | 1,8121 | 0,125 | 0,213  |
| 20 | Q6P6C2 ALKB5_HUMAN  | E.AAAAAAAAAAAAAAAAAAAEPYPVSGAK.R |            | 2 | 1,8017 | 0,127 | 0,63   |
| 20 | Q09666 AHNK_HUMAN   | K.VDIKAPDVE.G                    |            | 2 | 1,7974 | 0,185 | 0,371  |
| 20 | P61978 HNRPK_HUMAN  | K.IIPTLEE.G                      |            | 2 | 1,7934 | 0,094 | 0,299  |
| 20 | Q53G15 Q53G15_HUMAN | K.QYRAS#PSFEE.R                  | S378:      | 2 | 1,7887 | 0,12  | -0,377 |
| 20 | Q13011 ECH1_HUMAN   | K.VNLLYSR.D                      |            | 2 | 1,7868 | 0,142 | 0,423  |
| 20 | P51452 DUS3_HUMAN   | K.LGITHVLNAE.G                   |            | 2 | 1,7866 | 0,098 | 0,322  |
| 20 | P62701 RS4X_HUMAN   | E.TGKITDFIKFD.T                  |            | 2 | 1,7782 | 0,093 | 0,285  |
| 20 | Q2V2M9 FHOD3_HUMAN  | E.KFNISGDLGR.G                   |            | 2 | 1,7715 | 0,215 | 0,184  |
| 20 | Q15785 TOM34_HUMAN  | R.ALCYLVLK.Q                     |            | 2 | 1,7667 | 0,139 | -0,311 |
| 20 | Q8WUX9 CHMP7_HUMAN  | R.QLEPTLKPL.-                    |            | 2 | 1,7657 | 0,331 | 0,352  |
| 20 | Q02952 AKA12_HUMAN  | K.KGLSSDLE.G                     |            | 2 | 1,7606 | 0,172 | 0      |
| 20 | Q8IZD4 DCP1B_HUMAN  | E.GTLFVYTR.S                     |            | 2 | 1,7603 | 0,108 | 0,637  |
| 20 | P05787 K2C8_HUMAN   | R.ISSSFSR.V                      |            | 2 | 1,7573 | 0,114 | 0,14   |
| 20 | Q6NZI2 PTRF_HUMAN   | E.AGDLRRGS#SPDVHALLE.I           | S365:      | 2 | 1,7533 | 0,251 | -1,824 |
| 20 | Q9UPS6 SET1B_HUMAN  | R.APAPPLPPAEPLAK.E               |            | 2 | 1,7497 | 0,196 | -0,416 |
| 20 | P18206 VINC_HUMAN   | E.DLVITYTK.N                     |            | 2 | 1,7197 | 0,158 | -0,508 |
| 20 | Q9UBW8 CSN7A_HUMAN  | E.VDYSIGR.D                      |            | 2 | 1,7191 | 0,088 | -0,226 |
| 20 | Q14694 UBP10_HUMAN  | K.LTISNGPK.N                     |            | 2 | 1,7158 | 0,298 | 0,367  |
| 20 | Q9Y232 CDYL1_HUMAN  | K.ILVPKS#PVK.S                   | S201:      | 2 | 1,713  | 0,194 | 0,345  |
| 20 | O75122 CLAP2_HUMAN  | R.NGSIPTYM*R.Q                   |            | 2 | 1,7048 | 0,268 | 0,231  |
| 20 | Q8NCD3 HJURP_HUMAN  | R.GGPAS#PGGLQGLE.T               | S473:      | 2 | 1,694  | 0,185 | 0,3    |
| 20 | Q13242 SFRS9_HUMAN  | R.GS#PHYFS#PFRPY.-               | S211:S216: | 2 | 1,6933 | 0,123 | 0,302  |
| 20 | O75475 PSIP1_HUMAN  | K.FSSQQAATK.Q                    |            | 2 | 1,6905 | 0,258 | 0      |
| 20 | Q13177 PAK2_HUMAN   | K.FYDSNTVK.Q                     |            | 2 | 1,6886 | 0,15  | 0,376  |
| 20 | Q96ST2 IWS1_HUMAN   | K.HM*DFLSDFE.M                   |            | 2 | 1,6884 | 0,103 | 0,211  |
| 20 | Q9BS26 TXND4_HUMAN  | K.ALADYIR.Q                      |            | 2 | 1,6847 | 0,198 | 0,445  |
| 20 | P05556 ITB1_HUMAN   | K.IRPLGFTEE.V                    |            | 2 | 1,683  | 0,172 | -0,115 |
| 20 | P19338 NUCL_HUMAN   | E.LQGPRGS#PNAR.S                 | S563:      | 2 | 1,6812 | 0,123 | 0,099  |
| 20 | Q9BRL6 SFR2B_HUMAN  | K.VDNLYR.T                       |            | 2 | 1,6668 | 0,21  | 0,277  |
| 20 | P49915 GUAA_HUMAN   | K.VILKNFLYD.I                    |            | 2 | 1,6517 | 0,13  | 0,108  |
| 20 | P07602 SAP_HUMAN    | K.LVGYLDR.N                      |            | 2 | 1,6484 | 0,216 | 0      |



|    |                      |                                    |        |   |        |       |        |
|----|----------------------|------------------------------------|--------|---|--------|-------|--------|
| 20 | P00558 PGK1_HUMAN    | K.ITLPVDFVTADK.F                   |        | 2 | 1,6451 | 0,192 | 0      |
| 20 | P33316 DUT_HUMAN     | R.ARPAEVEGGM*QLR.F                 |        | 2 | 1,6313 | 0,149 | 0      |
| 20 | P22626 ROA2_HUMAN    | E.QFRKLFIGGLSFE.T                  |        | 2 | 1,63   | 0,161 | 0,079  |
| 20 | O75569 PRKRA_HUMAN   | R.AEAPPLERE.D                      |        | 2 | 1,6283 | 0,225 | 0,181  |
| 20 | Q9UJY5 GGA1_HUMAN    | E.DFEGPPLATR.L                     |        | 2 | 1,6239 | 0,14  | -0,332 |
| 20 | Q9UQ35 SRRM2_HUMAN   | E.SSLVFKDTLR.T                     |        | 2 | 1,6223 | 0,195 | -0,314 |
| 20 | Q9H0S4 DDX47_HUMAN   | K.DLGVTDVLC.E.A                    |        | 2 | 1,6173 | 0,27  | 0,109  |
| 20 | O95831 AIFM1_HUMAN   | K.LFNIHED.-                        |        | 2 | 1,6164 | 0,117 | 0,206  |
| 20 | P0C7M2 RA1L3_HUMAN   | E.QLRKLFIGGLSFE.T                  |        | 2 | 1,5826 | 0,298 | 0      |
| 20 | O60293 CC131_HUMAN   | R.RRS#FLE.S                        | S1046: | 2 | 1,5773 | 0,111 | 0,275  |
| 20 | P28066 PSA5_HUMAN    | E.KRIT#SPLM*EPSSIEKIVE.I           | T55:   | 2 | 1,5676 | 0,171 | 0,34   |
| 20 | Q9BQA1 MEP50_HUMAN   | -.M*RKET#PPPLVPPAARE.W             | T5:    | 2 | 1,5617 | 0,159 | 0,259  |
| 20 | Q9H7N4 SFR19_HUMAN   | E.SRS#PFLKPDERAPTE.M               | S874:  | 2 | 1,5504 | 0,312 | -0,135 |
| 20 | P52701 MSH6_HUMAN    | R.QSTLYSFFPK.S                     |        | 2 | 1,542  | 0,293 | 0,1    |
| 20 | P06733 ENOA_HUMAN    | E.QEKIDKLM*IE.M                    |        | 2 | 1,5238 | 0,214 | 0,097  |
| 20 | Q15942 ZYG_HUMAN     | K.FS#PVTPK.F                       | S267:  | 2 | 1,5213 | 0,081 | 0      |
| 20 | Q03135 CAV1_HUMAN    | E.LS#EKQVYDAHTKE.I                 | S37:   | 2 | 1,5198 | 0,192 | -0,45  |
| 20 | Q96PK6 RBM14_HUMAN   | R.QPT#PPFFGR.D                     | T206:  | 2 | 1,5097 | 0,251 | 0,325  |
| 20 | P04181 OAT_HUMAN     | R.FAPPLVIKED.E.L                   |        | 2 | 1,4978 | 0,11  | 0,097  |
| 20 | P00533 EGFR_HUMAN    | E.DHFLSLQR.M                       |        | 2 | 1,4687 | 0,125 | -0,18  |
| 20 | ##P62760 VISL1_HUMAN | K.SFIKDVR.Q                        |        | 2 | 1,4428 | 0,081 | 0,423  |
| 20 | P49773 HINT1_HUMAN   | E.DDRCLAFHD.I                      |        | 2 | 1,4419 | 0,25  | -0,106 |
| 20 | Q8NCE2 MTMRE_HUMAN   | E.DICM*LR.R                        |        | 2 | 1,3734 | 0,134 | 0,592  |
| 20 | ##O75592 MYCB2_HUMAN | R.RLLS#TVQR.Q                      | S619:  | 2 | 1,3157 | 0,085 | -1,622 |
| 20 | P49006 MRP_HUMAN     | K.SNGDLSPK.G                       |        | 2 | 1,2659 | 0,158 | 0,597  |
| 20 | Q53EU6 PLCH_HUMAN    | K.GLSGLRGR.D                       |        | 2 | 1,2611 | 0,087 | 0,299  |
| 20 | Q9Y6D9 MD1L1_HUMAN   | E.LTPAEY#SPQLTRR.M                 | Y427:  | 2 | 1,2473 | 0,127 | -0,151 |
| 20 | Q96FV9 THOC1_HUMAN   | E.NES#PDVRR.D                      | S560:  | 2 | 1,1597 | 0,104 | -0,116 |
| 20 | Q96PK6 RBM14_HUMAN   | R.QPTPPFFGR.D                      |        | 2 | 1,0358 | 0,345 | 0,466  |
| 21 | Q9UQ35 SRRM2_HUMAN   | K.SKDSLVSQSCGSLSLCAGVK.S           |        | 2 | 6,5434 | 0,495 | 0,466  |
| 21 | P08238 HS90B_HUMAN   | K.HSQFIGYPITLYLEKER.E              |        | 3 | 6,3439 | 0,585 | 0,524  |
| 21 | Q16555 DPYL2_HUMAN   | R.NLHQSGFSLGAQIDDNIPR.R            |        | 2 | 6,2872 | 0,62  | 0,45   |
| 21 | P35527 K1C9_HUMAN    | R.HGVQELEIELQSLSKK.A               |        | 3 | 6,0552 | 0,33  | 0,372  |
| 21 | Q6Y7W6 PERQ2_HUMAN   | R.VGVEASEETPQTSSSSARPGT#PSDHQSQE.A | T382:  | 3 | 5,9145 | 0,488 | 0,597  |
| 21 | P05783 K1C18_HUMAN   | E.DGEDFNLDALDSSNSM*QTIQK.T         |        | 3 | 5,8841 | 0,515 | 0,305  |
| 21 | Q8N1G0 ZN687_HUMAN   | K.TPLDLFAHFGPEPGDHSPLPPSAPS#PTRE.G | S183:  | 3 | 5,8599 | 0,573 | 0,561  |
| 21 | Q9NQW6 ANLN_HUMAN    | K.ALSSADDAASLVNASISSVK.A           |        | 2 | 5,8592 | 0,56  | 0,486  |
| 21 | Q9Y2D5 AKAP2_HUMAN   | K.GQKS#PGALETPSAAGSQGNTASQGK.E     | S393:  | 3 | 5,8522 | 0,441 | -0,38  |
| 21 | P42704 LPPRC_HUMAN   | E.SDM*VTGGYAALINLCCR.H             |        | 2 | 5,7381 | 0,572 | 0,318  |

|    |                     |                                       |                 |   |        |       |        |
|----|---------------------|---------------------------------------|-----------------|---|--------|-------|--------|
| 21 | O75531 BAF_HUMAN    | D.KAYVVLGQFLVLKKDE.D                  |                 | 3 | 5,6269 | 0,406 | 0      |
| 21 | Q32MZ4 LRRF1_HUMAN  | R.NM*PGLSAATLASLGGTSSR.R              |                 | 2 | 5,5979 | 0,539 | 0,27   |
| 21 | P52594 NUPL_HUMAN   | E.VKPLKSLLGDSAPTLHLNK.G               |                 | 2 | 5,5915 | 0,406 | -0,12  |
| 21 | Q9UK76 HN1_HUMAN    | R.VLRPPGGGSNFSLGFDEPTEQPVR.K          |                 | 3 | 5,5912 | 0,449 | -0,143 |
| 21 | P05783 K1C18_HUMAN  | E.DGEDFNLGDALDSSNSM*QTIQK.T           |                 | 2 | 5,5653 | 0,573 | 0,407  |
| 21 | Q9H9R9 DBND1_HUMAN  | E.VFADS#DDENLNTEPAGLHPLPR.A           | S95:            | 3 | 5,5117 | 0,47  | 0,071  |
| 21 | P60709 ACTB_HUMAN   | D.VDIRKDLYANTVLSGGTTM*YPGIADR.M       |                 | 3 | 5,495  | 0,421 | 0,064  |
| 21 | Q86YP4 P66A_HUMAN   | R.RPPS#PDVIVLS#DNEQPSS#PR.V           | S100:S107:S114: | 3 | 5,4807 | 0,356 | -1,506 |
| 21 | Q8NCM9 Q8NCM9_HUMAN | R.SSDITSDLGNVLTSTPNAK.T               |                 | 2 | 5,4759 | 0,595 | 0      |
| 21 | P05783 K1C18_HUMAN  | E.DFNLGDALDSSNSM*QTIQK.T              |                 | 2 | 5,4715 | 0,476 | 0,116  |
| 21 | P46734 MP2K3_HUMAN  | K.M*CDFGISGYLVDS#VAK.T                | S218:           | 2 | 5,4559 | 0,589 | 0,066  |
| 21 | P49773 HINT1_HUMAN  | R.CLAFHDISPQAPTHFLVIPK.K              |                 | 3 | 5,3415 | 0,397 | 0,319  |
| 21 | Q9H6T3 RPAP3_HUMAN  | E.NNPINLANVIAATGTTSK.K                |                 | 2 | 5,3311 | 0,507 | 0,068  |
| 21 | P05783 K1C18_HUMAN  | E.DFNLGDALDSSNSM*QTIQK.T              |                 | 3 | 5,2748 | 0,479 | 0,436  |
| 21 | Q86TC9 MYPN_HUMAN   | K.TPEPSS#PVKEPPVLAKPK.L               | S644:           | 3 | 5,2712 | 0,418 | -0,176 |
| 21 | P49790 NU153_HUMAN  | R.IPSIVSS#PLNS#PLDR.S                 | S334:S338:      | 2 | 5,2636 | 0,544 | 0,209  |
| 21 | Q99497 PARK7_HUMAN  | E.NRKGLIAAICAGPTALLAHE.I              |                 | 3 | 5,261  | 0,393 | 0,176  |
| 21 | Q9HAW4 CLSPN_HUMAN  | E.DDTQSQLLDADGFLNVR.N                 |                 | 2 | 5,259  | 0,531 | 0,32   |
| 21 | P13056 NR2C1_HUMAN  | K.DLRS#PLTATPTFVTDSE.S                | S215:           | 2 | 5,2316 | 0,563 | 1,012  |
| 21 | Q92625 ANS1A_HUMAN  | R.SLS#KSDSDLTCSPTEDATM*GSR.S          | S624:           | 3 | 5,2212 | 0,325 | 0,501  |
| 21 | P30085 KCY_HUMAN    | R.IQTYLQSTKPIIDLVEE.M                 |                 | 2 | 5,2185 | 0,553 | 0,119  |
| 21 | P60709 ACTB_HUMAN   | R.KDLYANTVLSGGTTM*YPGIADR.M           |                 | 2 | 5,2137 | 0,569 | 0,207  |
| 21 | O43741 AAKB2_HUMAN  | K.IM*VGS#TDDPSVFLPDSK.L               | S39:            | 2 | 5,187  | 0,436 | 0,184  |
| 21 | Q12802 AKP13_HUMAN  | K.ALQLSNS#PGASSAFLKAETE.H             | S983:           | 2 | 5,1418 | 0,505 | 0      |
| 21 | P60709 ACTB_HUMAN   | K.DLYANTVLSGGTTM*YPGIADR.M            |                 | 3 | 5,1415 | 0,528 | 0,246  |
| 21 | P49790 NU153_HUMAN  | E.IKDSTSQHDDDNISTTSGFSSR.A            |                 | 3 | 5,1205 | 0,535 | -0,229 |
| 21 | A0FGR8 ESYT2_HUMAN  | K.SHM*S#GSPGPGSNTAPSTPVIGGSDKPGM*EE.K | S691:           | 3 | 5,0826 | 0,42  | 0,422  |
| 21 | P08670 VIME_HUMAN   | E.NTLQFRQDVNDASLAR.L                  |                 | 3 | 5,0774 | 0,39  | -0,189 |
| 21 | Q3MHD2 LSM12_HUMAN  | E.VEIINDRTET#PPPLASLNVSK.L            | T75:            | 3 | 5,0504 | 0,229 | 0,308  |
| 21 | Q9H4L7 SMRCD_HUMAN  | E.STSTM*DGAIAAALLM*FGDAGGGPR.K        |                 | 2 | 5,0419 | 0,564 | 0,637  |
| 21 | Q12802 AKP13_HUMAN  | K.ALQLSNS#PGASSAFLKAE.T               | S983:           | 2 | 5,0401 | 0,481 | -0,065 |
| 21 | Q96PU5 NED4L_HUMAN  | R.LQITPDSNGEQFSSLIQR.E                |                 | 2 | 5,0352 | 0,53  | 0,06   |
| 21 | P06400 RB_HUMAN     | E.SACPLNLPLQNNHTAADM*YLS#PVRS#PK.K    | S608:S612:      | 3 | 5,0343 | 0,529 | 0,115  |
| 21 | Q9UHB6 LIMA1_HUMAN  | R.SRPFTVAASFQSTSVKS#PK.T              | S604:           | 3 | 5,0284 | 0,498 | 0,087  |
| 21 | P60174 TPIS_HUMAN   | R.KQS#LGLIGTLNAAK.V                   | S21:            | 2 | 5,0091 | 0,517 | -0,15  |
| 21 | Q58FF7 H90B3_HUMAN  | K.HSQFIGYPITLYLEK.E                   |                 | 2 | 5,0083 | 0,526 | -0,337 |
| 21 | P04406 G3P_HUMAN    | E.KYDNSLKIISNASCTTNCLAPLAK.V          |                 | 3 | 5,0049 | 0,488 | 0,477  |
| 21 | Q9UK58 CCNL1_HUMAN  | K.AKGLNPDGTPALSTLGGFS#PAS#KPS#SPR.E   | S335:S338:S341: | 3 | 4,991  | 1     | -0,062 |
| 21 | P40222 TXLNA_HUMAN  | R.VQDLSAGGQGSALTDSGPER.R              |                 | 2 | 4,99   | 0,542 | -0,26  |

|    |                     |                                |                    |   |        |       |        |
|----|---------------------|--------------------------------|--------------------|---|--------|-------|--------|
| 21 | Q9H4L7 SMRCD_HUMAN  | E.STSTM*DGAIAAALLM*FGDAGGGPR.K |                    | 3 | 4,9768 | 0,347 | 0      |
| 21 | Q9UQ35 SRRM2_HUMAN  | K.SKDSLQSCPGSLSLCAGVK.S        |                    | 3 | 4,9437 | 0,411 | 0,262  |
| 21 | Q9GZR7 DDX24_HUMAN  | E.LTDYQLVS#PAKNPSSLFSK.E       | S60:               | 2 | 4,9057 | 0,405 | 0,337  |
| 21 | P51114 FXR1_HUMAN   | K.SSISVLKDPDNPYSLLDNTE.S       |                    | 2 | 4,9013 | 0,474 | 0,512  |
| 21 | P27816 MAP4_HUMAN   | K.VGS#LDNVGHLPAGGAVKTE.G       | S1073:             | 3 | 4,8769 | 0,378 | 0,385  |
| 21 | P35579 MYH9_HUMAN   | K.KANLQIQINTDLNLE.R            |                    | 2 | 4,8748 | 0,391 | 0,397  |
| 21 | Q8IWA0 WDR75_HUMAN  | K.VQDTS#NTGLGEDIIHQLSK.S       | S796:              | 2 | 4,8604 | 0,547 | 0,229  |
| 21 | O94880 PHF14_HUMAN  | K.M*DHILICCVCLGDNSEDADE.I      |                    | 2 | 4,8547 | 0,525 | 0,615  |
| 21 | Q5T1V6 DDX59_HUMAN  | K.ADSEPES#PLNASYVYK.E          | S160:              | 2 | 4,8289 | 0,448 | -0,726 |
| 21 | P22059 OSBP1_HUMAN  | K.RTGS#NISGASSDISLDE.Q         | S379:              | 2 | 4,8263 | 0,398 | 0,273  |
| 21 | Q9H7L9 SDS3_HUMAN   | K.RPAS#PSS#PEHLPATPAESPAQRFE.A | S234:S237:         | 3 | 4,8158 | 0,364 | -1,615 |
| 21 | Q15637 SF01_HUMAN   | R.AYIVQLQIEDLTR.K              |                    | 2 | 4,81   | 0,397 | -0,078 |
| 21 | B1AKC7 B1AKC7_HUMAN | E.KEIPVEGGQEQQTSTK.G           |                    | 3 | 4,778  | 0,414 | -0,098 |
| 21 | Q86WB0 NIPA_HUMAN   | R.SQDATFS#PGSEQAEKS#PGPIVSR.T  | S335:S344:         | 3 | 4,7742 | 0,38  | 0      |
| 21 | Q8IWA0 WDR75_HUMAN  | E.KVQDTS#NTGLGEDIIHQLSK.S      | S796:              | 3 | 4,7704 | 0,296 | 0,243  |
| 21 | O75179 ANR17_HUMAN  | K.SGPS#PLSS#PNGKLTVAS#PK.R     | S1696:S1700:S1709: | 2 | 4,7697 | 1     | -0,355 |
| 21 | Q00839 HNRPU_HUMAN  | E.NGHGEQQPPATQQQPQQQR.G        |                    | 3 | 4,7693 | 0,485 | 0,146  |
| 21 | Q14676 MDC1_HUMAN   | E.LQPSTSTDQPVTSQVTR.G          |                    | 2 | 4,7628 | 0,548 | 0      |
| 21 | Q8NE71 ABCF1_HUMAN  | E.QEVVADETPAVQAVLR.A           |                    | 2 | 4,7572 | 0,475 | 0,283  |
| 21 | Q14676 MDC1_HUMAN   | E.LQPSTSTDQPVTSQVTR.G          |                    | 3 | 4,7562 | 0,431 | 0,081  |
| 21 | Q13263 TIF1B_HUMAN  | E.GYGFSGDDPYSSAEPHVSGVK.R      |                    | 2 | 4,7519 | 0,562 | 0,441  |
| 21 | Q9UQ35 SRRM2_HUMAN  | E.KM*ALPPQEDATAS#PPRQK.D       | S1179:             | 3 | 4,7464 | 0,429 | -0,178 |
| 21 | A4D186 A4D186_HUMAN | K.IQVLQQADDAEERAE.R            |                    | 3 | 4,7424 | 0,48  | 0,298  |
| 21 | Q9P270 SLAI2_HUMAN  | R.RTS#SEELRDATSLAAGE.G         | S87:               | 2 | 4,7294 | 0,472 | 0,43   |
| 21 | Q99961 SH3G1_HUMAN  | K.ALYDFEPENDGELGFHE.G          |                    | 2 | 4,713  | 0,535 | 0,062  |
| 21 | P35568 IRS1_HUMAN   | R.RSS#EDLSAYASISFQK.Q          | S1223:             | 2 | 4,7054 | 0,453 | 1,175  |
| 21 | O43741 AAKB2_HUMAN  | K.IM*VGS#TDDPSVFLPDSKLPDKE.F   | S39:               | 3 | 4,7013 | 0,322 | 0,348  |
| 21 | Q9HCD6 TANC2_HUMAN  | E.RSS#SQLGSPDVSHLIR.R          | S1739:             | 3 | 4,6938 | 0,404 | 0,201  |
| 21 | Q5T1V6 DDX59_HUMAN  | K.LSNPQKADSEPES#PLNASYVYK.E    | S160:              | 3 | 4,6861 | 0,336 | 0,073  |
| 21 | Q8ND56 LS14A_HUMAN  | K.TQLSQGRS#SPQLDPLRKS#PTM*E.Q  | S182:S192:         | 3 | 4,6589 | 0,224 | 0,07   |
| 21 | P60709 ACTB_HUMAN   | K.DLYANTVLSGGTTM*YPGIADR.M     |                    | 2 | 4,6551 | 0,571 | 0,328  |
| 21 | Q9Y5J1 UTP18_HUMAN  | E.LVFGDVENDEALLR.R             |                    | 3 | 4,6449 | 0,379 | 0,107  |
| 21 | Q8WXH0 SYNE2_HUMAN  | R.RGS#M*SYLAAVEEEVEE.S         | S4108:             | 2 | 4,6376 | 0,49  | 0,129  |
| 21 | Q58FF8 H90B2_HUMAN  | K.HSQFLGYPTILYLEKER.E          |                    | 2 | 4,6367 | 0,498 | 0,233  |
| 21 | Q9NZM1 MYOF_HUMAN   | E.DRDHYIPNTLNPVFR.M            |                    | 3 | 4,6219 | 0,306 | 0,382  |
| 21 | Q9P0K8 FOXJ2_HUMAN  | R.KCSPGS#PTDPNATLSKDE.A        | S46:               | 3 | 4,6017 | 0,384 | -0,184 |
| 21 | Q15181 IPYR_HUMAN   | E.KGQYISPFHDIPIYADKD.V         |                    | 3 | 4,5983 | 0,361 | 0,174  |
| 21 | Q9UK76 HN1_HUMAN    | R.NS#SEASSGDFDLK.G             | S87:               | 2 | 4,5905 | 0,437 | 0,157  |
| 21 | Q96RG2 PASK_HUMAN   | R.LNVQVTSTPVIVM*R.G            |                    | 2 | 4,5878 | 0,465 | -0,078 |

|    |                    |                             |            |   |        |       |        |
|----|--------------------|-----------------------------|------------|---|--------|-------|--------|
| 21 | P10809 CH60_HUMAN  | K.NQLKDM*AIATGGAVFGEE.G     |            | 2 | 4,5802 | 0,487 | 0,327  |
| 21 | O95433 AHSA1_HUMAN | K.GHVEIPNLSDENSVDE.V        |            | 2 | 4,5755 | 0,488 | -0,348 |
| 21 | Q06830 PRDX1_HUMAN | E.TLRLVQAFQFTDKHGE.V        |            | 3 | 4,571  | 0,301 | 0,29   |
| 21 | Q96T23 RSF1_HUMAN  | E.TLALLKAQIDPVLLK.N         |            | 2 | 4,5539 | 0,48  | -0,224 |
| 21 | Q9UHB6 LIMA1_HUMAN | R.SRPFTVAASFQSTSVK.S        |            | 2 | 4,539  | 0,472 | -0,071 |
| 21 | Q13428 TCOF_HUMAN  | R.KSAEPSANTTLVS#ETEEE.G     | S171:      | 2 | 4,5028 | 0,609 | 0,244  |
| 21 | P18615 NELFE_HUMAN | K.DPEKGPVPTFQPFQR.S         |            | 3 | 4,4961 | 0,403 | -0,21  |
| 21 | Q96D71 REPS1_HUMAN | R.TGSDHTNPTS#PLLVKPSDLLEE.N | S430:      | 2 | 4,4922 | 0,488 | 0,301  |
| 21 | Q13263 TIF1B_HUMAN | E.GYGFSGDDPYSSAEPHVSGVKR.S  |            | 2 | 4,4837 | 0,494 | 0,309  |
| 21 | Q9Y2W1 TR150_HUMAN | K.KSPVGKS#PPSTGSTYGSSQKEE.S | S320:      | 3 | 4,4685 | 0,319 | -0,079 |
| 21 | P13645 K1C10_HUMAN | K.GSLGGGFSSGGFSSGFSR.G      |            | 2 | 4,465  | 0,465 | -0,214 |
| 21 | Q9Y2D5 AKAP2_HUMAN | R.DALGDSLQVPVS#PSSTSSR.C    | S152:      | 2 | 4,4647 | 0,503 | 0,351  |
| 21 | Q16206 ENOX2_HUMAN | R.LRPPS#PPPVVHYSDHE.C       | S240:      | 3 | 4,4574 | 0,351 | 0,096  |
| 21 | Q8WUD4 CCD12_HUMAN | K.GQEDSLASAVDAATEQK.T       |            | 2 | 4,4531 | 0,522 | 0,213  |
| 21 | Q96D71 REPS1_HUMAN | R.TGSDHTNPTS#PLLVKPSDLLEE.N | S430:      | 3 | 4,434  | 0,204 | 0,452  |
| 21 | Q6P158 DHX57_HUMAN | R.DLQEQDADAGS#ER.G          | S127:      | 2 | 4,4257 | 0,509 | 0,645  |
| 21 | Q14320 FA50A_HUMAN | R.KISSLS#FTLEEEEE.G         | S121:      | 2 | 4,422  | 0,408 | 0      |
| 21 | Q92597 NDRG1_HUMAN | E.AFKYFVQGM*GYM*PSASM*TR.L  |            | 3 | 4,4174 | 0,325 | -1,483 |
| 21 | O14497 ARI1A_HUMAN | R.SHHAPM*#SPGSSGGGQPLAR.T   | S363:      | 3 | 4,4168 | 0,423 | 0,184  |
| 21 | Q99497 PARK7_HUMAN | K.GLIAAICAGPTALLAHE.I       |            | 2 | 4,4146 | 0,406 | -0,073 |
| 21 | Q15942 ZYG_HUMAN   | K.QHPVPPPAQNQNQVR.S         |            | 3 | 4,4023 | 0,385 | 0      |
| 21 | Q13459 MYO9B_HUMAN | R.VQEKPDPSPGGSTQIQR.Y       |            | 3 | 4,3985 | 0,428 | -0,212 |
| 21 | Q5QJE6 TDIF2_HUMAN | E.KQIVGT#PVNSEDSDTR.Q       | T232:      | 3 | 4,3965 | 0,372 | 0,2    |
| 21 | Q8IW35 CEP97_HUMAN | K.LHIACFPVQLDTSLGASVDE.S    |            | 2 | 4,3956 | 0,436 | 0,32   |
| 21 | Q9Y2X7 GIT1_HUMAN  | R.ARS#M*DSSDLSGAVTLQE.Y     | S410:      | 2 | 4,3911 | 0,517 | 0,308  |
| 21 | O94925 GLSK_HUMAN  | E.DDKPHNPM*VNAGAIVVTSLIK.Q  |            | 3 | 4,3846 | 0,312 | -0,164 |
| 21 | Q58FF7 H90B3_HUMAN | K.KHSQFIGYPITLYLEK.E        |            | 2 | 4,3678 | 0,366 | 0,567  |
| 21 | P04406 G3P_HUMAN   | R.VIISAPSADAPM*FVM*GVNHE.K  |            | 2 | 4,3675 | 0,52  | 0,231  |
| 21 | Q14676 MDC1_HUMAN  | E.LQPSTSTDQPVTSEPTYQATR.G   |            | 2 | 4,3648 | 0,438 | 0      |
| 21 | P02545 LMNA_HUMAN  | R.SGAQASST#PLS#PTR.I        | T19:S22:   | 2 | 4,3553 | 1     | -0,803 |
| 21 | Q5VTR2 BRE1A_HUMAN | R.KALVVPEPEPDS#NQER.K       | S138:      | 2 | 4,3533 | 0,389 | 0,467  |
| 21 | P35222 CTNB1_HUMAN | K.HAVVNLINYQDDAE.L          |            | 2 | 4,3521 | 0,438 | 0,381  |
| 21 | Q86YP4 P66A_HUMAN  | R.RPPS#PDVIVLS#DNEQPSSPR.V  | S100:S107: | 3 | 4,345  | 0,145 | -1,946 |
| 21 | O95817 BAG3_HUMAN  | R.SQS#PAASDCSSSSSASLPSSGR.S | S173:      | 3 | 4,3439 | 0,526 | -0,16  |
| 21 | Q6ZV73 FGD6_HUMAN  | E.VEEPYEAPDGQLQLGPR.H       |            | 2 | 4,3415 | 0,42  | 0,193  |
| 21 | P14324 FPPS_HUMAN  | E.KQDFVQHFSQIVR.V           |            | 3 | 4,3413 | 0,407 | 0,224  |
| 21 | Q58FF8 H90B2_HUMAN | E.KHSQFLGYPITLYLEK.E        |            | 3 | 4,3353 | 0,471 | 0      |
| 21 | Q5TAQ9 WD42A_HUMAN | E.ASDLSLSLTGDDGGPNR.T       |            | 2 | 4,3315 | 0,506 | 0      |
| 21 | Q02952 AKA12_HUMAN | E.KQEKEPSKSAESPTS#PVTSE.T   | S286:      | 2 | 4,3239 | 0,41  | 0,439  |

|    |                    |                                        |        |   |        |       |        |
|----|--------------------|----------------------------------------|--------|---|--------|-------|--------|
| 21 | Q05397 FAK1_HUMAN  | K.KPPRPGAPGHLGSLASLSSPADSYNE.G         |        | 3 | 4,3227 | 0,461 | 0,07   |
| 21 | P46734 MP2K3_HUMAN | K.M*CDFGISGYLVDS#VAK.T                 | S218:  | 3 | 4,3223 | 0,414 | 0,197  |
| 21 | Q13614 MTMR2_HUMAN | K.SASVVSSDISISTSADNFS#PDLR.V           | S58:   | 3 | 4,3202 | 0,366 | 0,079  |
| 21 | Q6Y7W6 PERQ2_HUMAN | R.ALSSGGSITS#PPLSPALPK.Y               | S26:   | 2 | 4,3132 | 0,498 | -0,328 |
| 21 | P05387 RLA2_HUMAN  | K.LASVPAGGAVAVSAAPGSAAPAAGSAPAAAAEEK.K |        | 2 | 4,3121 | 0,607 | 0      |
| 21 | Q9GZR7 DDX24_HUMAN | E.LTDYQLVS#PAKNPSSLFSK.E               | S60:   | 3 | 4,3082 | 0,429 | 0,673  |
| 21 | P22314 UBA1_HUMAN  | R.QNRYDGQVAVFGSDLQE.K                  |        | 2 | 4,3072 | 0,317 | 0,38   |
| 21 | Q8ND04 CQ071_HUMAN | K.LDHINFVPVFEPST#PDPAPAKNE.S           | T657:  | 3 | 4,3058 | 0,277 | 0,436  |
| 21 | Q15366 PCBP2_HUMAN | K.LHQLAM*QQSHFPM*THGNTGFSGIESSS#PE.V   | S272:  | 3 | 4,3034 | 0,417 | 0,56   |
| 21 | O95487 SC24B_HUMAN | D.SRPLS#PILHIVKDESPAFAE.F              | S1224: | 3 | 4,3016 | 0,351 | 0,161  |
| 21 | Q9UK76 HN1_HUMAN   | R.RNS#SEASSGDFLDLK.G                   | S87:   | 2 | 4,2958 | 0,478 | 0,215  |
| 21 | P07900 HS90A_HUMAN | K.HSQFIGYPITLVEKER.D                   |        | 3 | 4,2944 | 0,48  | 0,089  |
| 21 | Q9H0D6 XRN2_HUMAN  | R.M*QNNSSPISPNTSFTSDGSPSPLGGIKR.K      |        | 3 | 4,2936 | 0,36  | 0,061  |
| 21 | Q8IWA0 WDR75_HUMAN | K.VQDTSNTGLGEDIIHQLSK.S                |        | 2 | 4,293  | 0,535 | 0,356  |
| 21 | Q32MZ4 LRRF1_HUMAN | E.KGSRNM*PGLSAATLASLGGTSSR.R           |        | 3 | 4,2684 | 0,53  | 0      |
| 21 | P35527 K1C9_HUMAN  | R.HGVQELEIELQSLK.K                     |        | 3 | 4,2651 | 0,333 | 0,299  |
| 21 | Q8IWA0 WDR75_HUMAN | K.VQDTS#NTGLGEDIIHQLSK.S               | S796:  | 3 | 4,2544 | 0,433 | 0,343  |
| 21 | P35568 IRS1_HUMAN  | R.S#SEDLSAYASISFQK.Q                   | S1222: | 2 | 4,2542 | 0,338 | 0      |
| 21 | Q9UKV3 ACINU_HUMAN | K.ASLVALPEQTAS#EEETPPPLLTKE.A          | S410:  | 2 | 4,2529 | 0,549 | 0,557  |
| 21 | Q05655 KPCD_HUMAN  | K.TGVAGEDM*QDNSGTYGK.I                 |        | 2 | 4,2303 | 0,511 | 0,07   |
| 21 | Q3KQU3 MA7D1_HUMAN | R.RSSQPSPT#AVPASDSPPTKQE.V             | T118:  | 3 | 4,2289 | 0,228 | -0,081 |
| 21 | P32969 RL9_HUMAN   | E.LVNSAALIQQATTVK.N                    |        | 2 | 4,228  | 0,497 | 0,074  |
| 21 | P14406 CX7A2_HUMAN | K.LFQEDDEIPLYLK.G                      |        | 2 | 4,2258 | 0,273 | 0      |
| 21 | P13667 PDIA4_HUMAN | K.FAM*EPEEFDSDLRE.F                    |        | 2 | 4,2254 | 0,396 | -0,067 |
| 21 | P40222 TXLNA_HUMAN | R.VQDLSAGGQGLTDSGPER.R                 |        | 3 | 4,2241 | 0,456 | -0,293 |
| 21 | Q9UHR5 S30BP_HUMAN | E.KGGLVSDAYGEDDFSR.L                   |        | 3 | 4,219  | 0,397 | 0,32   |
| 21 | O00116 ADAS_HUMAN  | R.RAAS#AATAAPTATPAAQE.S                | S65:   | 2 | 4,2186 | 0,458 | -0,141 |
| 21 | Q15084 PDIA6_HUMAN | K.LAAVDATVNVQLASR.Y                    |        | 2 | 4,2151 | 0,401 | -0,559 |
| 21 | O14893 GEMI2_HUMAN | E.AAQCPDVVVAQIDPK.K                    |        | 2 | 4,2137 | 0,418 | -0,682 |
| 21 | Q12802 AKP13_HUMAN | K.ALQLS#NSPGASSAFLKAE.T                | S981:  | 3 | 4,2074 | 0,405 | 0,196  |
| 21 | P42224 STAT1_HUMAN | R.FNQAQSGNIQSTVM*LDK.Q                 |        | 2 | 4,2052 | 0,492 | 0      |
| 21 | Q02952 AKA12_HUMAN | K.LTASEQAHPQEPESAHEPR.L                |        | 3 | 4,205  | 0,376 | -0,251 |
| 21 | O14893 GEMI2_HUMAN | K.RKQS#VNISLSGCQPAPE.G                 | S81:   | 2 | 4,2046 | 0,463 | 0,125  |
| 21 | Q7L804 RFIP2_HUMAN | R.TLS#FDTSKM*NQPSIVDE.G                | S277:  | 2 | 4,2041 | 0,427 | 0,46   |
| 21 | Q9UK76 HN1_HUMAN   | R.RNS#SEASSGDFLDLKG.E.G                | S87:   | 2 | 4,2033 | 0,521 | 0,322  |
| 21 | Q13459 MYO9B_HUMAN | R.VQEKPDS#PGGSTQIQR.Y                  | S1290: | 3 | 4,1977 | 0,29  | -0,304 |
| 21 | O43765 SGTA_HUMAN  | R.SRTPS#ASNDDQQE.-                     | S305:  | 2 | 4,1969 | 0,518 | 0,081  |
| 21 | P49736 MCM2_HUMAN  | R.TDALTSS#PGRDLPPFEDE.S                | S41:   | 2 | 4,1921 | 0,476 | 0,421  |
| 21 | Q9UHX1 PUF60_HUMAN | R.IYVASVHQDLSDDDIKS#VFE.A              | S244:  | 2 | 4,1861 | 0,509 | 0,31   |

|    |                     |                                |            |   |        |       |        |
|----|---------------------|--------------------------------|------------|---|--------|-------|--------|
| 21 | Q10713 MPPA_HUMAN   | R.GKPAVAALGDLTDLPTYE.H         |            | 2 | 4,1799 | 0,524 | 0,067  |
| 21 | O00159 MYO1C_HUMAN  | K.QRIDYANLTGISVSSLSD.S         |            | 2 | 4,1778 | 0,472 | 0,063  |
| 21 | Q8IU81 I2BP1_HUMAN  | R.EPAPAEALPQQYPEPAPAALCGPPPR.A |            | 3 | 4,1772 | 0,233 | 0,739  |
| 21 | P42858 HD_HUMAN     | E.LIAGGGSSCS#PVLSR.K           | S434:      | 2 | 4,1754 | 0,43  | -0,079 |
| 21 | P61244 MAX_HUMAN    | R.SSAQLQTNYPSSDNSLYTNAK.G      |            | 3 | 4,1743 | 0,304 | 0      |
| 21 | O96013 PAK4_HUMAN   | R.DKRPLS#GPDVGTQPAGLASGAK.L    | S181:      | 3 | 4,1699 | 0,391 | -0,239 |
| 21 | Q68CZ2 TENS3_HUMAN  | R.KLS#LGQYDNDAGGQLPFSK.C       | S776:      | 3 | 4,1685 | 0,178 | 0,605  |
| 21 | Q02952 AKA12_HUMAN  | E.KQEKEPSKSAESPTS#PVTSE.T      | S286:      | 3 | 4,1601 | 0,428 | 0,247  |
| 21 | Q9GZR7 DDX24_HUMAN  | E.LTDYQLVSPAKNPSSLSFSK.E       |            | 2 | 4,1598 | 0,292 | 0,349  |
| 21 | O60271 JIP4_HUMAN   | K.ERPISLGIFPLPAGDGLLTPDAQK.G   |            | 3 | 4,1574 | 0,287 | 0,146  |
| 21 | Q15149 PLEC1_HUMAN  | R.GYLNKTDHDLSEPSSEVR.S         |            | 3 | 4,1574 | 0,332 | -0,175 |
| 21 | Q8N2Y8 RUSC2_HUMAN  | K.LSSDESPRNPGCSSGSDQHCR.C      |            | 3 | 4,1515 | 0,334 | -0,794 |
| 21 | P19174 PLCG1_HUMAN  | E.RGS#DASGQLFHGR.A             | S1233:     | 3 | 4,1482 | 0,331 | 0,187  |
| 21 | P04083 ANXA1_HUMAN  | K.GGPGSAVSPYPTFNPSDVAALHK.A    |            | 3 | 4,1431 | 0,377 | 0,078  |
| 21 | P53618 COPB_HUMAN   | R.NVTVQPDDPISFM*QLTAK.N        |            | 3 | 4,141  | 0,396 | 0,091  |
| 21 | P63261 ACTG_HUMAN   | E.IAALVIDNGSGM*CK.A            |            | 2 | 4,1248 | 0,462 | 0,167  |
| 21 | O94888 UBXD7_HUMAN  | E.HGQLDGLSSPDKK.C              |            | 3 | 4,1198 | 0,383 | 0      |
| 21 | P32969 RL9_HUMAN    | E.LVNSAALIQQATTVK.N            |            | 3 | 4,1123 | 0,315 | 0,334  |
| 21 | P31943 HNRH1_HUMAN  | R.LRGLPFGCSKEE.I               |            | 3 | 4,1075 | 0,368 | -0,066 |
| 21 | Q66K74 MAP1S_HUMAN  | R.S#ASPHDLDLCLVS#PCEFE.H       | S729:S741: | 2 | 4,1071 | 0,416 | 0,439  |
| 21 | P00558 PGK1_HUMAN   | E.SPERPFLAILGGAK.V             |            | 3 | 4,1046 | 0,336 | 0,502  |
| 21 | O95402 MED26_HUMAN  | R.QLHVLVPQS#PPTDLPLGLTRE.V     | S535:      | 3 | 4,0998 | 0,317 | -0,241 |
| 21 | Q99961 SH3G1_HUMAN  | K.ALYDFEPENDGELGFHE.G          |            | 3 | 4,0976 | 0,497 | 0,185  |
| 21 | O94909 K0819_HUMAN  | E.LSSSSGLLHGSSSNM*K.T          |            | 2 | 4,0874 | 0,61  | -0,293 |
| 21 | P18615 NELFE_HUMAN  | E.GKLDPEKGPVPTFPFQR.S          |            | 3 | 4,0848 | 0,368 | -0,084 |
| 21 | P42704 LPPRC_HUMAN  | E.SDM*VTGGYAALINLCCR.H         |            | 3 | 4,0842 | 0,36  | 0,095  |
| 21 | Q96PK6 RBM14_HUMAN  | R.SPPRAS#YVAPLTAQPATYR.A       | S225:      | 3 | 4,0823 | 0,395 | 0      |
| 21 | Q13416 ORC2_HUMAN   | E.VHFGDDDLNHLNLDRE.G           |            | 3 | 4,0772 | 0,484 | 0,092  |
| 21 | Q96T88 UHRF1_HUMAN  | E.VRLNDTIQLLVR.Q               |            | 2 | 4,0753 | 0,35  | 0      |
| 21 | O43741 AAKB2_HUMAN  | E.HKIM*VGS#TDDPSVFSPLPSK.L     | S39:       | 3 | 4,0712 | 0,378 | 0,405  |
| 21 | Q13428 TCOF_HUMAN   | R.KSAEPSANTTLVSETEEE.G         |            | 2 | 4,069  | 0,486 | 0,063  |
| 21 | Q99497 PARK7_HUMAN  | R.KGLIAAICAGPTALLAHE.I         |            | 3 | 4,0681 | 0,383 | 0,405  |
| 21 | P11940 PABP1_HUMAN  | K.GFGFVCFSSPEEATK.A            |            | 2 | 4,0647 | 0,47  | 0      |
| 21 | Q9UHR5 S30BP_HUMAN  | E.KGGLVSDAYGEDDFSR.L           |            | 2 | 4,0636 | 0,532 | -0,284 |
| 21 | P18615 NELFE_HUMAN  | K.LKDPEKGPVPTFPFQR.S           |            | 3 | 4,0572 | 0,443 | -0,092 |
| 21 | Q92882 OSTF1_HUMAN  | K.LAFDM*ATNAACASLLK.K          |            | 2 | 4,0523 | 0,481 | -0,142 |
| 21 | B2CI53 B2CI53_HUMAN | E.RNGILASPQS#APGNLDNSK.S       | S263:      | 3 | 4,0475 | 0,297 | -0,091 |
| 21 | Q32MZ4 LRRF1_HUMAN  | R.NMPGLSAATLASLGGTSSR.R        |            | 2 | 4,0372 | 0,531 | 0      |
| 21 | Q32MZ4 LRRF1_HUMAN  | R.CTLPEHES#PSQDISDACEAE.S      | S733:      | 2 | 4,0357 | 0,451 | 0,725  |

|    |                     |                               |            |   |        |       |        |
|----|---------------------|-------------------------------|------------|---|--------|-------|--------|
| 21 | Q9UQ35 SRRM2_HUMAN  | E.KM*ALPPQEDATAS#PPR.Q        | S1179:     | 2 | 4,0327 | 0,51  | 0,135  |
| 21 | O60934 NBN_HUMAN    | E.NEPVDTNSDNNLFTDTDLK.S       |            | 2 | 4,0301 | 0,532 | 0,567  |
| 21 | Q9UGV2 NDRG3_HUMAN  | E.AFKYFLQGM*GYIPASM*TR.L      |            | 3 | 4,0294 | 0,14  | 0,249  |
| 21 | P52732 KIF11_HUMAN  | E.QDLKLDIPTGTT#PQRK.S         | T926:      | 3 | 4,027  | 0,262 | 0,29   |
| 21 | A4D186 A4D186_HUMAN | K.IQVLQQQADDAEERAE.R          |            | 2 | 4,0239 | 0,376 | 0,199  |
| 21 | Q04917 1433F_HUMAN  | E.DSYKDSLIM*QLLR.D            |            | 2 | 4,0222 | 0,437 | -0,359 |
| 21 | Q9Y2X7 GIT1_HUMAN   | R.HGS#GADS#DYENTQSGDPLLGLE.G  | S592:S596: | 2 | 4,0215 | 0,468 | 1,008  |
| 21 | P11717 MPRI_HUMAN   | K.ALSSLHGDDQDS#EDE.V          | S2409:     | 2 | 4,021  | 0,544 | 0,216  |
| 21 | Q9H2P0 ADNP_HUMAN   | K.ISNDNPEEHVLK.V              |            | 2 | 4,0203 | 0,321 | -0,437 |
| 21 | Q9UHB6 LIMA1_HUMAN  | R.KIS#ENSYSLDDLE.I            | S225:      | 2 | 4,0198 | 0,407 | 0,153  |
| 21 | Q9Y608 LRRF2_HUMAN  | R.RGS#GDTSSLIDPDTSLSLSE.L     | S328:      | 2 | 4,0106 | 0,44  | -0,127 |
| 21 | P04406 G3P_HUMAN    | R.VIISAPSADAPMFVM*GVNHE.K     |            | 3 | 4,0098 | 0,314 | 0,435  |
| 21 | Q15424 SAFB1_HUMAN  | R.KFDFDACNEVPPAPK.E           |            | 2 | 4,0097 | 0,398 | -1,899 |
| 21 | P46013 KI67_HUMAN   | K.SGGSGLHAVAEPAS#PEQE.L       | S308:      | 2 | 4,0092 | 0,441 | -0,505 |
| 21 | Q9Y6Y8 S23IP_HUMAN  | R.RIDYVLQEKPIESFNE.Y          |            | 2 | 4,0085 | 0,518 | 0,062  |
| 21 | P15559 NQO1_HUMAN   | E.SDLYAM*NFNPIISR.K           |            | 2 | 4,0018 | 0,43  | -0,147 |
| 21 | Q15149 PLEC1_HUMAN  | K.SHRVPLDVACAR.G              |            | 3 | 4,0011 | 0,207 | 0,199  |
| 21 | P33316 DUT_HUMAN    | R.ARPAEVEGGM*QLR.F            |            | 3 | 3,9973 | 0,138 | -0,07  |
| 21 | Q5H9R7 SAPS3_HUMAN  | R.NTVDLVTTCHIHS#SS#DDE.I      | S523:S525: | 2 | 3,9971 | 0,417 | 0,223  |
| 21 | O75351 VPS4B_HUMAN  | K.LQNQLQGAIVIERPNVK.W         |            | 2 | 3,9966 | 0,385 | 0,064  |
| 21 | Q9Y5J1 UTP18_HUMAN  | E.LVFGDVENDEDALLR.R           |            | 2 | 3,9916 | 0,446 | -0,143 |
| 21 | Q9Y618 NCOR2_HUMAN  | R.M*GSKS#PGNTSQPPAFFSK.L      | S2261:     | 3 | 3,9904 | 0,165 | 0,186  |
| 21 | O75376 NCOR1_HUMAN  | E.AAKPPEPEKPV#PPPVEQK.H       | S224:      | 3 | 3,9888 | 0,299 | -0,174 |
| 21 | Q15185 TEBP_HUMAN   | D.S#DEDM*SNDFRFSE.M           | S113:      | 2 | 3,9878 | 0,346 | -0,874 |
| 21 | Q96ST3 SIN3A_HUMAN  | R.RLDDQES#PVYAAQQR.R          | S10:       | 2 | 3,9835 | 0,487 | 0,131  |
| 21 | P49773 HINT1_HUMAN  | K.KHISQISVAEDDDE.S            |            | 2 | 3,9801 | 0,451 | -0,308 |
| 21 | Q9NZ01 GPSN2_HUMAN  | E.KLCFLDKVEPHATIAE.I          |            | 3 | 3,977  | 0,297 | 0,293  |
| 21 | P46013 KI67_HUMAN   | E.VHSQFSTGHANS#PCTIIGK.A      | S713:      | 3 | 3,9763 | 0,41  | 0,082  |
| 21 | Q14195 DPYL3_HUMAN  | R.NLHQSGFSLSGTQVDE.G          |            | 2 | 3,9676 | 0,44  | 0,071  |
| 21 | Q13153 PAK1_HUMAN   | R.DVATSPISPTENNTT#PPDALTR.N   | T230:      | 2 | 3,9644 | 0,503 | -0,103 |
| 21 | Q6FI81 CPIN1_HUMAN  | K.KSS#PSVKPAVDPAAAK.L         | S183:      | 3 | 3,9484 | 0,263 | -0,336 |
| 21 | Q96PU5 NED4L_HUMAN  | R.RLQITPDSNGEQFSSLIQR.E       |            | 3 | 3,9445 | 0,356 | 0,334  |
| 21 | Q03989 ARI5A_HUMAN  | R.HGAEPQASPAVHLPES#PQSPK.G    | S297:      | 3 | 3,9431 | 0,334 | -0,326 |
| 21 | Q7Z333 SETX_HUMAN   | E.M*KNSCNVLHPQS#PNNSNR.Q      | S1663:     | 3 | 3,9385 | 0,238 | -0,167 |
| 21 | Q6P0N0 CN106_HUMAN  | R.ASVQGVPLESSNNDIFLPVK.Q      |            | 2 | 3,9382 | 0,214 | 0,462  |
| 21 | Q9UPN9 TRI33_HUMAN  | R.SACM*LSSPESSLT#PPLSTNLHLE.S | T815:      | 2 | 3,9361 | 0,445 | 0,475  |
| 21 | Q9BPX5 ARP5L_HUMAN  | E.AAAAAAEPGDPPEVDGLLR.Q       |            | 2 | 3,9297 | 0,446 | 0,128  |
| 21 | Q9BVA0 KTNB1_HUMAN  | R.SEPFPAPPEDDAATAKE.A         |            | 2 | 3,9289 | 0,426 | 0,138  |
| 21 | Q13263 TIF1B_HUMAN  | E.GYGFSGDDPYSSAEPHVSGVK.R     |            | 3 | 3,9267 | 0,428 | 0,579  |

|    |                     |                                   |            |   |        |       |        |
|----|---------------------|-----------------------------------|------------|---|--------|-------|--------|
| 21 | Q96HE7 ERO1A_HUMAN  | K.RPLNPLASGQGTSEE.N               |            | 2 | 3,9206 | 0,501 | 0      |
| 21 | P24534 EF1B_HUMAN   | K.YGPADVEDTTGSGATDSKD.D           |            | 2 | 3,9206 | 0,535 | -0,129 |
| 21 | P27816 MAP4_HUMAN   | K.VGS#LDNVGHLPAGGAVKTE.G          | S1073:     | 2 | 3,9198 | 0,492 | 0,128  |
| 21 | Q06830 PRDX1_HUMAN  | E.TLRLVQAFQFTDK.H                 |            | 3 | 3,9183 | 0,375 | 0      |
| 21 | Q5QJE6 TDIF2_HUMAN  | E.KQIVGT#PVNSESDTR.Q              | T232:      | 2 | 3,9172 | 0,478 | -0,134 |
| 21 | O60763 USO1_HUMAN   | E.QDDLLVLLADQDQK.I                |            | 2 | 3,9141 | 0,474 | 0,227  |
| 21 | Q9NPR2 SEM4B_HUMAN  | K.RPLSIQDS#FVEVS#PVCPRPR.V        | S808:S813: | 3 | 3,9116 | 0,35  | -0,073 |
| 21 | O15541 R113A_HUMAN  | E.NYEVGS#DDEEIPFK.C               | S253:      | 2 | 3,9104 | 0,352 | 0,425  |
| 21 | P42166 LAP2A_HUMAN  | E.LVANNVTLPAGEQR.K                |            | 2 | 3,9049 | 0,428 | 0,082  |
| 21 | P05412 JUN_HUMAN    | K.NSDLLT#SPDVGLLK.L               | T62:       | 2 | 3,901  | 0,299 | 0,079  |
| 21 | O14893 GEMI2_HUMAN  | R.KQS#VNISLSGCQPAPE.G             | S81:       | 2 | 3,8989 | 0,436 | -0,272 |
| 21 | P68371 TBB2C_HUMAN  | E.IVHLQAGQCGNQIGAK.F              |            | 3 | 3,8988 | 0,347 | -0,432 |
| 21 | Q9UQ35 SRRM2_HUMAN  | K.DSLVQSCPGSLCAGVK.S              |            | 2 | 3,8959 | 0,452 | -0,26  |
| 21 | Q9UKI8 TLK1_HUMAN   | R.RS#NSSGNLHM*AGLTASPTPPSSSIITY.- | S741:      | 3 | 3,8957 | 0,224 | 1,416  |
| 21 | Q9HB09 B2L12_HUMAN  | K.LVRLS#SDSFAR.L                  | S242:      | 3 | 3,893  | 0,253 | 0,412  |
| 21 | P10809 CH60_HUMAN   | R.KNQLKDM*AIATGGAVFGEE.G          |            | 2 | 3,8907 | 0,477 | 0,122  |
| 21 | Q9UKL0 RCOR1_HUMAN  | R.VGPQYQAVVPDFDPAK.L              |            | 2 | 3,8866 | 0,533 | 0,282  |
| 21 | Q13428 TCOF_HUMAN   | E.KSLGNILQAKPTSS#PAK.G            | S583:      | 3 | 3,8851 | 0,253 | -0,201 |
| 21 | Q92597 NDRG1_HUMAN  | R.SRT#AS#GSSVTSLDGTR.S            | T328:S330: | 2 | 3,8827 | 1     | -0,21  |
| 21 | Q7RTP8 Q7RTP8_HUMAN | K.RASS#LNVLVGGK.A                 | S596:      | 2 | 3,8783 | 0,449 | 0,087  |
| 21 | O60271 JIP4_HUMAN   | R.S#ASQSSLDKLDQE.L                | S728:      | 2 | 3,877  | 0,33  | 0,082  |
| 21 | Q01804 OTUD4_HUMAN  | E.NITDDKYATVSS#PSK.S              | S546:      | 2 | 3,8699 | 0,473 | -0,215 |
| 21 | Q8NEF9 SRFB1_HUMAN  | K.AVTIANS#PSKPSEKDSVVSLE.S        | S203:      | 2 | 3,8672 | 0,416 | 0,218  |
| 21 | Q9ULJ8 NEB1_HUMAN   | E.RRTS#LGEVSKGDTM*E.N             | S840:      | 3 | 3,8662 | 0,337 | 0      |
| 21 | Q14157 UBP2L_HUMAN  | K.STSAPQM*SPGSSDNQSSSPQPAQQK.L    |            | 3 | 3,8631 | 0,447 | 0,144  |
| 21 | Q15424 SAFB1_HUMAN  | E.LAEAPTEAPS#PEAR.D               | S344:      | 2 | 3,8569 | 0,387 | -0,321 |
| 21 | Q13523 PRP4B_HUMAN  | K.LCDFGSASHVADNDITPY#LVSR.F       | Y849:      | 3 | 3,8537 | 0,165 | -0,218 |
| 21 | Q8TE77 SSH3_HUMAN   | E.QGQGGQGEPCISSTPR.F              |            | 2 | 3,8517 | 0,426 | 0,068  |
| 21 | Q9UKV3 ACINU_HUMAN  | K.ASLVALPEQTASEEET#PPPLLTKE.A     | T414:      | 2 | 3,8506 | 0,528 | 0,557  |
| 21 | P08559 ODPA_HUMAN   | R.YHGHS#M*SDPGVS#YR.T             | S293:S300: | 2 | 3,8405 | 0,503 | 0,069  |
| 21 | Q5T5U3 RHG21_HUMAN  | E.TGSDSGTLLTSSQASLAR.F            |            | 2 | 3,8325 | 0,412 | -0,066 |
| 21 | P31949 S10AB_HUMAN  | K.KLDTNSDGQLDFSE.F                |            | 2 | 3,8298 | 0,32  | 0,156  |
| 21 | Q00839 HNRPU_HUMAN  | R.AKS#PQPPVEEED.E.H               | S270:      | 2 | 3,825  | 0,415 | -0,795 |
| 21 | Q9Y2W1 TR150_HUMAN  | K.SPPSTGSTYSSQKEE.S               |            | 2 | 3,8139 | 0,552 | 0,223  |
| 21 | P30622 CLIP1_HUMAN  | K.IILKPGSTALKT#PTAVVAPVEK.T       | T25:       | 3 | 3,8133 | 0,158 | -0,333 |
| 21 | Q06830 PRDX1_HUMAN  | R.TIAQDYGVLKADE.G                 |            | 2 | 3,8109 | 0,293 | -0,257 |
| 21 | P78371 TCPB_HUMAN   | R.SLHDALCVLAQTVKD.S               |            | 2 | 3,8103 | 0,411 | -0,073 |
| 21 | Q02952 AKA12_HUMAN  | K.LTASEQAHPQEPAESAEHEPRLS#AEYE.K  | S371:      | 3 | 3,8054 | 0,457 | 0,124  |
| 21 | P04406 G3P_HUMAN    | R.VIISAPSADAPM*FVMGVNHE.K         |            | 2 | 3,803  | 0,308 | 0,581  |



|    |                    |                                  |            |   |        |       |        |
|----|--------------------|----------------------------------|------------|---|--------|-------|--------|
| 21 | P06748 NPM_HUMAN   | D.M*S#PLRPQNYLFGCELK.A           | S10:       | 3 | 3,8029 | 0,254 | 0,179  |
| 21 | Q86SQ0 PHLB2_HUMAN | K.AHLPLGQSNS#CGSVLPPSLAAM*AK.D   | S934:      | 3 | 3,8027 | 0,151 | 0      |
| 21 | P24534 EF1B_HUMAN  | K.YGPADVEDTTGSGATDSK.D           |            | 2 | 3,8015 | 0,57  | -0,207 |
| 21 | Q9UPY3 DICER_HUMAN | R.TLLES#PGKLVHVE.V               | S1150:     | 2 | 3,8015 | 0,319 | -0,328 |
| 21 | Q14814 MEF2D_HUMAN | K.GFNGCDS#PEPDGEDSLE.Q           | S98:       | 2 | 3,7974 | 0,453 | -0,064 |
| 21 | Q2M2I8 AAK1_HUMAN  | R.ILSDVTHS#AVFGVPASK.S           | S642:      | 3 | 3,797  | 0,118 | 0,405  |
| 21 | O14908 GIPC1_HUMAN | R.SRGPATVEDLPSAFEE.K             |            | 2 | 3,796  | 0,493 | 0,143  |
| 21 | P38646 GRP75_HUMAN | K.LYS#PSQIGAFVLM*K.M             | S162:      | 2 | 3,7951 | 0,324 | -1,109 |
| 21 | Q86X95 CIR_HUMAN   | R.NLTANDPSQEYVAS#EGEEDPEVE.F     | S202:      | 2 | 3,7939 | 0,554 | 0,75   |
| 21 | P04264 K2C1_HUMAN  | R.SLDLDSIIAEVK.A                 |            | 2 | 3,7937 | 0,413 | 0      |
| 21 | Q96N67 DOCK7_HUMAN | K.NLNIVGNISHHTTVPLTE.A           |            | 2 | 3,7919 | 0,423 | 0,125  |
| 21 | Q17RY0 CPEB4_HUMAN | K.IRIES#PVLTGFQYQE.A             | S137:      | 2 | 3,7902 | 0,493 | 0,528  |
| 21 | Q96D71 REPS1_HUMAN | R.TGSDHTNPTS#PLLVKPSDLLE.E       | S430:      | 2 | 3,7888 | 0,431 | 0,848  |
| 21 | Q66K74 MAP1S_HUMAN | R.RSAS#PHDVDLCLVS#PCEFE.H        | S731:S741: | 3 | 3,7874 | 0,238 | 0,231  |
| 21 | P52948 NUP98_HUMAN | K.HSNSNSVDDTIVALNM*R.A           |            | 2 | 3,7869 | 0,515 | 0,452  |
| 21 | Q8TBX8 PI42C_HUMAN | R.FGIDDQDYLVSLTR.N               |            | 2 | 3,7843 | 0,447 | 0      |
| 21 | Q9H7L9 SDS3_HUMAN  | K.RPAS#PSS#PEHLPATPAESPAQR.F     | S234:S237: | 3 | 3,7838 | 0,315 | 0,449  |
| 21 | Q02952 AKA12_HUMAN | E.KLTASEQAHPQEPAESAEHPRLS#AEYE.K | S371:      | 3 | 3,7806 | 0,192 | 0,356  |
| 21 | Q05209 PTN12_HUMAN | E.NM*ISSIEPEKQDS#PPPKPPR.T       | S332:      | 3 | 3,7799 | 0,404 | 0      |
| 21 | P63241 IF5A1_HUMAN | E.DICPSTHNM*DVPNIKR.N            |            | 2 | 3,7776 | 0,409 | -0,702 |
| 21 | P07437 TBB5_HUMAN  | E.HGIDPTGYHGDSDLQLDR.I           |            | 3 | 3,7726 | 0,472 | -0,087 |
| 21 | Q6P6C2 ALKB5_HUMAN | E.AAAAAAAAAAAAAAAAAAAEPYPVSGAK.R |            | 3 | 3,7696 | 0,372 | -0,079 |
| 21 | P23588 IF4B_HUMAN  | E.TLNKEEDCHS#PTSKPPKPDQPLK.V     | S459:      | 3 | 3,7671 | 0,228 | -0,671 |
| 21 | Q04637 IF4G1_HUMAN | R.FSALQQAVPTTESTDNR.R            |            | 2 | 3,7632 | 0,441 | -0,415 |
| 21 | Q86UP2 KTN1_HUMAN  | E.VKFKDFLLSLK.T                  |            | 3 | 3,7629 | 0,362 | 0,273  |
| 21 | P60709 ACTB_HUMAN  | K.DLYANTVLSGGTMYPGIADR.M         |            | 3 | 3,7599 | 0,416 | 0,248  |
| 21 | P50748 KNTC1_HUMAN | K.HKPGSTPEPIAAEVRS#PSM*E.S       | S1045:     | 3 | 3,7597 | 0,331 | 0,413  |
| 21 | Q2M2I8 AAK1_HUMAN  | R.ILS#DVTHSAVFGVPASK.S           | S637:      | 2 | 3,756  | 0,473 | 0,405  |
| 21 | P38919 IF4A3_HUMAN | K.LDYGQHVVAGT#PGRVFD.M           | T163:      | 3 | 3,7539 | 0,285 | 0,287  |
| 21 | P35579 MYH9_HUMAN  | K.ANLQIDQINTDLNLE.R              |            | 2 | 3,7538 | 0,411 | 0,071  |
| 21 | P60709 ACTB_HUMAN  | D.IAALVVDNGSGM*CK.A              |            | 2 | 3,7533 | 0,558 | -0,252 |
| 21 | Q9BVJ6 UT14A_HUMAN | R.KRS#ELSQAEPAGSQE.T             | S434:      | 2 | 3,7515 | 0,549 | 0      |
| 21 | Q14692 BMS1_HUMAN  | K.LVYAPLSGVGGVLYDKD.A            |            | 2 | 3,7504 | 0,447 | -0,138 |
| 21 | Q69YN2 C19L1_HUMAN | K.KAPIQTYVLGANNQE.T              |            | 2 | 3,7487 | 0,433 | -1,038 |
| 21 | Q8N1F7 NUP93_HUMAN | R.ILHTLLASGEDALDFTQE.S           |            | 2 | 3,7474 | 0,573 | 0,062  |
| 21 | P14625 ENPL_HUMAN  | K.ESDDPM*AYIHFTAEGE.V            |            | 2 | 3,7413 | 0,55  | -0,267 |
| 21 | Q8TC05 MDM1_HUMAN  | R.THHDLTTPAVGGAVLVS#PSK.M        | S543:      | 3 | 3,7413 | 0,36  | 0      |
| 21 | P60174 TPIS_HUMAN  | R.KQS#LGLIGTLNAAK.V              | S21:       | 3 | 3,7379 | 0,36  | 0,451  |
| 21 | Q9Y2H0 DLGP4_HUMAN | D.CTPHPNSISIDAGPR.Q              |            | 3 | 3,7377 | 0,319 | 0      |

|    |                     |                              |                 |   |        |       |        |
|----|---------------------|------------------------------|-----------------|---|--------|-------|--------|
| 21 | P35908 K22E_HUMAN   | R.NLDLDSIIAEVK.A             |                 | 2 | 3,7362 | 0,458 | -0,275 |
| 21 | P04406 G3P_HUMAN    | K.RVIISAPSADAPM*FVM*GVNHE.K  |                 | 3 | 3,7328 | 0,352 | 0,563  |
| 21 | Q96RK0 CIC_HUMAN    | E.LLSVAAQTLSSDTK.A           |                 | 2 | 3,7301 | 0,33  | -0,237 |
| 21 | Q15398 DLG7_HUMAN   | K.LFSGLSVSSEGPSQR.L          |                 | 2 | 3,7248 | 0,543 | -0,079 |
| 21 | Q16555 DPYL2_HUMAN  | K.TVT#PASSAKT#S#PAKQQAPPVR.N | T514:T521:S522: | 3 | 3,7244 | 1     | -0,155 |
| 21 | Q06587 RING1_HUMAN  | R.TPQEAIM*DGTEIAVS#PR.S      | S38:            | 2 | 3,7178 | 0,436 | -0,383 |
| 21 | P35659 DEK_HUMAN    | K.LKKPPTDEELKE.T             |                 | 3 | 3,7166 | 0,176 | 0,064  |
| 21 | Q9H019 FA54B_HUMAN  | K.AACSSSEEDDCVLSK.A          |                 | 2 | 3,7135 | 0,496 | -0,21  |
| 21 | Q16555 DPYL2_HUMAN  | R.NLHQSGFSLGAQIDDNIPR.R      |                 | 3 | 3,7132 | 0,367 | 0,675  |
| 21 | O15541 R113A_HUMAN  | E.VGS#DDEEIPFK.C             | S253:           | 2 | 3,7098 | 0,378 | 0,093  |
| 21 | P19338 NUCL_HUMAN   | K.GFGFVDFNSEEDAK.A           |                 | 2 | 3,7093 | 0,426 | 0,078  |
| 21 | Q9UPQ6 Q9UPQ6_HUMAN | E.SETRS#ESS#DFEVVVK.R        | S316:S319:      | 2 | 3,6994 | 1     | 0,46   |
| 21 | P18615 NELFE_HUMAN  | K.LKDPEKGPVPTFQPFQR.S        |                 | 2 | 3,6992 | 0,289 | -0,246 |
| 21 | P04150 GCR_HUMAN    | K.IKDNGDLVLSPPSNVTLQVK.T     |                 | 3 | 3,6863 | 0,242 | 0,411  |
| 21 | P04264 K2C1_HUMAN   | R.THNLEPYFESFINNLR.R         |                 | 3 | 3,6858 | 0,236 | 0,092  |
| 21 | P52815 RM12_HUMAN   | E.IKNYIQGINLVQAK.K           |                 | 3 | 3,6853 | 0,384 | 0,457  |
| 21 | Q96GQ7 DDX27_HUMAN  | R.SADFNPDFVFTEKE.G           |                 | 2 | 3,6822 | 0,473 | 0,074  |
| 21 | Q05682 CALD1_HUMAN  | E.KQSVDKVTS#PTKV.-           | S789:           | 3 | 3,6797 | 0,29  | 0,855  |
| 21 | Q8NCE2 MTMRE_HUMAN  | K.DRGSTTS#LGSDFSLVM*E.S      | S441:           | 2 | 3,6796 | 0,508 | 0,386  |
| 21 | Q71U36 TBA1A_HUMAN  | E.ITNACFEPANQM*VK.C          |                 | 2 | 3,6635 | 0,434 | -0,074 |
| 21 | Q9UGV2 NDRG3_HUMAN  | R.SRTHST#SSSLGSGESPFGR.S     | T332:           | 3 | 3,6617 | 0,159 | -0,357 |
| 21 | Q9Y4B6 VPRBP_HUMAN  | R.KLSSEPLLPLDEEAVDM*D.Y      |                 | 2 | 3,6565 | 0,371 | 0      |
| 21 | P04181 OAT_HUMAN    | D.NGLLAKPTHGDIIR.F           |                 | 3 | 3,6546 | 0,447 | 0,122  |
| 21 | P11717 MPRI_HUMAN   | K.ALSS#LHGDDQDS#EDE.V        | S2401:S2409:    | 2 | 3,6489 | 0,445 | 0,137  |
| 21 | P19338 NUCL_HUMAN   | R.DARTLLAKNLPYKVTQDE.L       |                 | 3 | 3,6478 | 0,162 | 0,264  |
| 21 | P04406 G3P_HUMAN    | R.VIISAPSADAPM*FVM*GVNHE.K   |                 | 3 | 3,647  | 0,433 | 0,173  |
| 21 | Q15019 SEPT2_HUMAN  | K.IYHLPDAES#DEDE.D           | S218:           | 2 | 3,6467 | 0,268 | 0,076  |
| 21 | P18615 NELFE_HUMAN  | R.SIS#ADDDLQE.S              | S115:           | 2 | 3,646  | 0,382 | -0,104 |
| 21 | Q99733 NP1L4_HUMAN  | R.KYAALYQPLFDK.R             |                 | 2 | 3,6451 | 0,475 | 0,251  |
| 21 | P52594 NUPL_HUMAN   | K.SLLGDSAPTLHLNK.G           |                 | 2 | 3,6438 | 0,455 | -0,333 |
| 21 | P28799 GRN_HUMAN    | E.DHIHCCPAGFTCDTQK.G         |                 | 3 | 3,643  | 0,3   | -0,564 |
| 21 | P46937 YAP1_HUMAN   | R.QAS#TDAGTAGALTPQHVR.A      | S109:           | 3 | 3,6385 | 0,413 | -0,295 |
| 21 | O60271 JIP4_HUMAN   | K.VSNS#PEPQKAVEQEDE.L        | S251:           | 2 | 3,6354 | 0,527 | -0,523 |
| 21 | Q15398 DLG7_HUMAN   | E.SPVKLFSGLSVSSEGPSQR.L      |                 | 3 | 3,6201 | 0,323 | 0,28   |
| 21 | Q58FF7 H90B3_HUMAN  | K.KHSQFIGYPITLYLEK.E         |                 | 3 | 3,6177 | 0,156 | 0      |
| 21 | Q86UP2 KTN1_HUMAN   | K.KVEPVVTKQPT#PPSE.A         | T153:           | 2 | 3,617  | 0,41  | -0,202 |
| 21 | Q9C0C2 TB182_HUMAN  | R.RES#AASGLGGLLEEE.G         | S1473:          | 2 | 3,6166 | 0,452 | 0,458  |
| 21 | Q12846 STX4_HUMAN   | R.KTQHGVLSQQFVE.L            |                 | 2 | 3,6155 | 0,331 | -0,325 |
| 21 | P49790 NU153_HUMAN  | K.RIPSIVSS#PLNS#PLDR.S       | S334:S338:      | 2 | 3,6145 | 0,478 | 0,128  |

|    |                    |                              |        |   |        |       |        |
|----|--------------------|------------------------------|--------|---|--------|-------|--------|
| 21 | Q14814 MEF2D_HUMAN | K.KGFNGCDS#PEPDGEDSLE.Q      | S98:   | 2 | 3,6141 | 0,509 | 0,24   |
| 21 | P10809 CH60_HUMAN  | R.KPLVIIAEDVDGE.A            |        | 2 | 3,612  | 0,503 | 0      |
| 21 | P08397 HEM3_HUMAN  | K.DQDILDVLGVLDPE.T           |        | 2 | 3,6069 | 0,475 | 0      |
| 21 | Q5VT52 K0460_HUMAN | E.KGAPIETLGYSASNR.R          |        | 3 | 3,6054 | 0,371 | 0,215  |
| 21 | Q9Y217 MTMR6_HUMAN | E.LLHSVHPES#PNLK.T           | S561:  | 2 | 3,6008 | 0,408 | -0,551 |
| 21 | P0C7M2 RA1L3_HUMAN | K.KIFVGGIKEDTEE.H            |        | 2 | 3,6005 | 0,411 | -0,25  |
| 21 | P55209 NP1L1_HUMAN | R.M*RSEPDDSDPFSFDGPE.I       |        | 2 | 3,5985 | 0,528 | 0,251  |
| 21 | Q9HAW4 CLSPN_HUMAN | E.DDTQSQLLDADGFLNVR.N        |        | 3 | 3,5977 | 0,31  | 0,288  |
| 21 | Q9H0B6 KLC2_HUMAN  | K.SVEEPTQPGGTGLSDSR.T        |        | 2 | 3,5968 | 0,494 | -0,071 |
| 21 | Q9UGV2 NDRG3_HUMAN | R.THSTSS#SLGSGESPFSS.S       | S334:  | 3 | 3,5962 | 0,222 | -0,101 |
| 21 | Q66K74 MAP1S_HUMAN | R.RSAS#PHDVDLCLVSPCEFE.H     | S731:  | 2 | 3,596  | 0,336 | 0,319  |
| 21 | P60709 ACTB_HUMAN  | K.DLYANTVLSGGTMYPGIADR.M     |        | 2 | 3,5957 | 0,462 | 0,992  |
| 21 | P23588 IF4B_HUMAN  | E.DCHS#PTSKPPKPDQPLK.V       | S459:  | 3 | 3,5906 | 0,376 | -0,273 |
| 21 | P05783 K1C18_HUMAN | R.TVQS#LEIDLDSM*R.N          | S305:  | 3 | 3,5861 | 0,263 | 0,342  |
| 21 | O43741 AAKB2_HUMAN | K.IMVGS#TDDPSVFLPSDK.L       | S39:   | 2 | 3,5858 | 0,334 | -0,432 |
| 21 | Q14847 LASP1_HUMAN | K.GKGFVAVADT#PE.L            | T104:  | 2 | 3,5826 | 0,4   | -0,19  |
| 21 | Q86X95 CIR_HUMAN   | R.NLTANDPSQEYVAS#EGEEDPEVE.F | S202:  | 3 | 3,5817 | 0,289 | 0,281  |
| 21 | Q04917 1433F_HUMAN | E.DSYKDSTLIM*QLLR.D          |        | 3 | 3,5798 | 0,259 | 0,108  |
| 21 | P08238 HS90B_HUMAN | E.TALLSSGFSLEDPQTHSNR.I      |        | 3 | 3,5782 | 0,36  | 0,089  |
| 21 | O95400 CD2B2_HUMAN | E.GHFDADGNYFLNR.D            |        | 2 | 3,578  | 0,449 | -0,4   |
| 21 | P04264 K2C1_HUMAN  | K.NKLNLDLEDALQQAQ.E          |        | 3 | 3,5762 | 0,331 | 0,229  |
| 21 | Q58FF8 H90B2_HUMAN | K.HSQFLGYPITLYLEK.E          |        | 3 | 3,5756 | 0,324 | 0,101  |
| 21 | Q92614 MY18A_HUMAN | R.RVS#SSSELDLPSGDHCE.A       | S1067: | 2 | 3,5741 | 0,489 | 0,312  |
| 21 | Q96PU5 NED4L_HUMAN | R.SLS#SPTVTLSPLEGAK.D        | S448:  | 2 | 3,571  | 0,401 | 0,211  |
| 21 | P55209 NP1L1_HUMAN | R.KYAVLYQPLFDKR.F            |        | 3 | 3,5665 | 0,327 | 0,334  |
| 21 | Q92598 HS105_HUMAN | E.LNNTCEPVVTQPKPK.I          |        | 3 | 3,564  | 0,335 | 0      |
| 21 | Q99700 ATX2_HUMAN  | R.QNSIGNTPSGPVLASPQAGIIPTE.A |        | 2 | 3,5604 | 0,438 | 0,624  |
| 21 | Q8IU81 I2BP1_HUMAN | E.ALGHS#PKDPGGGGGPVR.A       | S436:  | 3 | 3,5566 | 0,132 | -0,335 |
| 21 | P04406 G3P_HUMAN   | K.IISNASCTTNCLAPLAK.V        |        | 2 | 3,5526 | 0,468 | -0,399 |
| 21 | Q5T1V6 DDX59_HUMAN | K.EHPFILNLQEDQIE.N           |        | 2 | 3,549  | 0,403 | 0,212  |
| 21 | P11388 TOP2A_HUMAN | K.TLAVSGLGVVGR.D             |        | 2 | 3,5439 | 0,279 | 0,216  |
| 21 | Q96EP0 RNF31_HUMAN | R.RLS#APLPSSCGDPE.K          | S466:  | 2 | 3,5406 | 0,414 | -0,312 |
| 21 | P09622 DLDH_HUMAN  | R.VLGAHILGPGAGEM*VNE.A       |        | 2 | 3,5364 | 0,391 | -0,581 |
| 21 | P52594 NUPL_HUMAN  | E.VKPLKSLGDSAPTLHLNK.G       |        | 3 | 3,5337 | 0,398 | 0,18   |
| 21 | Q9Y608 LRRF2_HUMAN | R.NSASATTPLSGNSSR.R          |        | 2 | 3,5282 | 0,509 | -0,673 |
| 21 | Q13200 PSMD2_HUMAN | R.FAADIISVLAM*TM*SGERE.C     |        | 3 | 3,5281 | 0,325 | 0,185  |
| 21 | Q8N3X1 FNBP4_HUMAN | K.GVAASLLAPLLPEGIKEEEE.R     |        | 2 | 3,528  | 0,231 | 0,591  |
| 21 | Q07021 C1QBP_HUMAN | K.AFVDFLSDEIKE.E             |        | 2 | 3,5264 | 0,364 | 0,345  |
| 21 | Q9UQ35 SRRM2_HUMAN | K.DKFSFPVQDRPE.S             |        | 2 | 3,5261 | 0,312 | -0,312 |

|    |                     |                                 |        |   |        |       |        |
|----|---------------------|---------------------------------|--------|---|--------|-------|--------|
| 21 | Q96JM3 ZN828_HUMAN  | K.SSFFIEPQKPVFPE.T              |        | 2 | 3,525  | 0,413 | -0,148 |
| 21 | A0JLU0 A0JLU0_HUMAN | E.GPATQVDSAVGTLPATS#PQSTSVQAK.G | S1073: | 3 | 3,5214 | 0,358 | -0,355 |
| 21 | P31949 S10AB_HUMAN  | K.LDTNSDGQLDFSE.F               |        | 2 | 3,5189 | 0,433 | 0,339  |
| 21 | Q86X95 CIR_HUMAN    | R.NLTANDPSQEYVAS#EGEEDPE.V      | S202:  | 2 | 3,5171 | 0,227 | 0,514  |
| 21 | Q05209 PTN12_HUMAN  | E.NMISSIEPEKQDS#PPPKPPR.T       | S332:  | 3 | 3,517  | 0,141 | 0      |
| 21 | O75531 BAF_HUMAN    | D.KAYVVLGQFLVLK.K               |        | 2 | 3,5152 | 0,286 | 0,083  |
| 21 | P04264 K2C1_HUMAN   | K.LALDLEIATYR.T                 |        | 2 | 3,5127 | 0,506 | 0      |
| 21 | Q9Y6W5 WASF2_HUMAN  | R.DVVGNDVATILSR.R               |        | 2 | 3,5115 | 0,475 | 0,718  |
| 21 | O43399 TPD54_HUMAN  | K.TSAALSTVGSISR.K               |        | 2 | 3,5096 | 0,389 | -1,016 |
| 21 | Q5VSL9 FA40A_HUMAN  | R.KDS#EGYSESPDLE.F              | S59:   | 2 | 3,5069 | 0,352 | -0,238 |
| 21 | Q6ZU65 K2030_HUMAN  | R.VAFISLS#PVR.R                 | S13:   | 2 | 3,5028 | 0,396 | 0,209  |
| 21 | Q09666 AHNK_HUMAN   | R.LKS#EDGVEGDLE.T               | S135:  | 2 | 3,5014 | 0,444 | -0,085 |
| 21 | Q86VP6 CAND1_HUMAN  | E.QGETPLTM*LQSQVPNIVK.A         |        | 3 | 3,499  | 0,179 | 0,183  |
| 21 | Q9Y6Y8 S23IP_HUMAN  | R.RIDYVLQEKPIESFNE.Y            |        | 3 | 3,4935 | 0,204 | 0,185  |
| 21 | Q9HCN4 GPN1_HUMAN   | K.DS#LSPVLHPSDLILTR.G           | S312:  | 2 | 3,4914 | 0,323 | 0,066  |
| 21 | Q8WUD4 CCD12_HUMAN  | K.GQEDSLASAVDAATEQK.T           |        | 3 | 3,489  | 0,255 | 0,425  |
| 21 | Q15942 ZYG_HUMAN    | R.S#PGAPGLTLKEVEE.L             | S344:  | 2 | 3,4881 | 0,427 | 0,152  |
| 21 | Q58FG0 HS905_HUMAN  | K.KHSQFIGYPITLFVEK.K            |        | 3 | 3,4759 | 0,245 | -0,384 |
| 21 | Q6Q0C0 TRAF7_HUMAN  | E.TTFGPAFSAVTTITK.A             |        | 2 | 3,4755 | 0,512 | -0,158 |
| 21 | Q9P0K8 FOXJ2_HUMAN  | K.CSPGS#PTDPNATLSKDE.A          | S46:   | 2 | 3,4743 | 0,5   | -0,131 |
| 21 | P42694 HELZ_HUMAN   | R.RIS#SSSVQPCSEE.V              | S1763: | 2 | 3,4692 | 0,441 | -0,079 |
| 21 | P22234 PUR6_HUMAN   | E.LLDS#PGKVLLQSK.D              | S27:   | 2 | 3,4687 | 0,355 | 0,578  |
| 21 | P30520 PURA2_HUMAN  | K.VVDLLAQDADIVCR.C              |        | 3 | 3,464  | 0,361 | 0,23   |
| 21 | Q6S8J3 A26CA_HUMAN  | E.KLCYVALDFEQE.M                |        | 2 | 3,4627 | 0,343 | -0,081 |
| 21 | Q6PKG0 LARP1_HUMAN  | R.FSHLTSLPQQQLPSQQLM*SK.D       |        | 3 | 3,461  | 0,255 | 0,418  |
| 21 | Q9UGV2 NDRG3_HUMAN  | K.YFLQGM*GYIPSASM*TR.L          |        | 2 | 3,4544 | 0,207 | 0,329  |
| 21 | Q13459 MYO9B_HUMAN  | R.VQEKPDS#PGGSTQIQR.Y           | S1290: | 2 | 3,4539 | 0,446 | -0,068 |
| 21 | Q15424 SAFB1_HUMAN  | R.KFDFDACNEVPPAPK.E             |        | 3 | 3,4506 | 0,135 | 0,105  |
| 21 | P27816 MAP4_HUMAN   | K.VGS#LDNVGHLPAAGAVK.T          | S1073: | 3 | 3,4505 | 0,294 | 0,438  |
| 21 | O43396 TXNL1_HUMAN  | R.KDTTFLESDCDE.Q                |        | 2 | 3,4505 | 0,384 | -0,084 |
| 21 | P48634 BAT2_HUMAN   | K.IQT#PPPKKEPPKEE.T             | T878:  | 3 | 3,4468 | 0,228 | 0      |
| 21 | P31943 HNRH1_HUMAN  | K.HTGPN#PDTANDGFVR.L            | S104:  | 2 | 3,4458 | 0,351 | -0,622 |
| 21 | Q58FF7 H90B3_HUMAN  | K.HSQFIGYPITLYLEK.E             |        | 3 | 3,4451 | 0,34  | 0,506  |
| 21 | Q14BN4 SLMAP_HUMAN  | K.VSLLKDDLQGAQSE.I              |        | 2 | 3,4427 | 0,306 | -0,649 |
| 21 | P26368 U2AF2_HUMAN  | K.LFIGGLPNYLNDQVKE.L            |        | 2 | 3,4378 | 0,42  | 0,063  |
| 21 | P49736 MCM2_HUMAN   | E.SFTM*ASSPAQR.R                |        | 2 | 3,4364 | 0,458 | 0,204  |
| 21 | Q96A49 SYAP1_HUMAN  | E.AVRPKT#PPVVIK.S               | T248:  | 3 | 3,4288 | 0,202 | 0,198  |
| 21 | Q7Z4V5 HDGR2_HUMAN  | K.LAGEELAGEEAPQEK.A             |        | 2 | 3,4189 | 0,333 | -0,699 |
| 21 | P25705 ATPA_HUMAN   | R.VLS#IGDGIAR.V                 | S76:   | 2 | 3,4187 | 0,329 | 0      |

|    |                     |                                 |                 |   |        |       |        |
|----|---------------------|---------------------------------|-----------------|---|--------|-------|--------|
| 21 | Q92597 NDRG1_HUMAN  | D.M*NPGNLHLFINAYNSR.R           |                 | 3 | 3,4174 | 0,175 | 0,585  |
| 21 | Q86VP6 CAND1_HUMAN  | E.QGETPLTM*LQSQVPNIVK.A         |                 | 2 | 3,4149 | 0,445 | 0,305  |
| 21 | Q02952 AKA12_HUMAN  | E.KQEKEPSKSAES#PTSPVTSE.T       | S283:           | 3 | 3,413  | 0,445 | 0      |
| 21 | Q58FG0 HS905_HUMAN  | K.HSQFIGYPITLFEVK.K             |                 | 2 | 3,4106 | 0,505 | 0      |
| 21 | Q15149 PLEC1_HUMAN  | R.SSS#VGSSSSYPIPAVSR.T          | S4386:          | 2 | 3,4071 | 0,445 | 0,266  |
| 21 | Q15942 ZYX_HUMAN    | E.KQHPVPPPAQNNQVRS#PGAGPPLTLK.E | S344:           | 3 | 3,4063 | 0,423 | 0,498  |
| 21 | Q8NE71 ABCF1_HUMAN  | E.VVADETPAVQAVLR.A              |                 | 2 | 3,4056 | 0,287 | 0      |
| 21 | Q9NVU7 SDA1_HUMAN   | K.YIEIDS#DEEPRGE.L              | S585:           | 2 | 3,4041 | 0,381 | -0,15  |
| 21 | Q14320 FA50A_HUMAN  | R.KIS#SLSFTLEEEEE.G             | S118:           | 2 | 3,4034 | 0,219 | -0,142 |
| 21 | P60709 ACTB_HUMAN   | E.EHPVLLTEAPLNPK.A              |                 | 2 | 3,4007 | 0,55  | -0,392 |
| 21 | Q8WXI9 P66B_HUMAN   | E.DALRLNLLKR.S                  |                 | 3 | 3,4005 | 0,26  | 0,83   |
| 21 | Q9BZE4 NOG1_HUMAN   | E.GHNIADYIDPAIM*KK.L            |                 | 3 | 3,3929 | 0,305 | -0,107 |
| 21 | Q14157 UBP2L_HUMAN  | K.STSAPQM*S#PGSSDNQSSSPQPAQQK.L | S467:           | 3 | 3,3929 | 0,279 | 0,278  |
| 21 | P30520 PURA2_HUMAN  | K.VVDLLAQDADIVCR.C              |                 | 2 | 3,392  | 0,536 | 0,231  |
| 21 | P04264 K2C1_HUMAN   | K.WELLQQVDTSTR.T                |                 | 2 | 3,3899 | 0,483 | -0,083 |
| 21 | Q9BUT9 CP014_HUMAN  | R.RAPSTSPS#FEGTQE.T             | S82:            | 2 | 3,3894 | 0,421 | -0,233 |
| 21 | Q9H3N1 TXND1_HUMAN  | R.S#LGPSLATDKS.-                | S270:           | 2 | 3,3821 | 0,446 | 0,106  |
| 21 | Q7RTP8 Q7RTP8_HUMAN | R.ASS#LNVLNVGK.A                | S596:           | 2 | 3,3792 | 0,387 | 0,197  |
| 21 | Q66K74 MAP1S_HUMAN  | R.SAS#PHDVDLCLVSPCFE.H          | S731:           | 2 | 3,3717 | 0,431 | 0,342  |
| 21 | Q92615 LARP5_HUMAN  | K.RLS#REQS#TPPKS#PQ.-           | S727:S731:S736: | 2 | 3,3649 | 0,519 | -0,066 |
| 21 | Q13442 HAP28_HUMAN  | R.KGVEGLIDIENPNR.V              |                 | 3 | 3,3643 | 0,271 | 0,353  |
| 21 | O15355 PPM1G_HUMAN  | E.GKEEPGSDSGTTAVVALIR.G         |                 | 3 | 3,361  | 0,203 | -0,097 |
| 21 | P43243 MATR3_HUMAN  | R.GDADQASNILASFGLSAR.D          |                 | 2 | 3,3607 | 0,392 | 0      |
| 21 | O43237 DC1L2_HUMAN  | K.DFQDYM*EPEEGCQGS#PQRR.G       | S194:           | 3 | 3,3598 | 0,304 | -0,226 |
| 21 | P53396 ACLY_HUMAN   | R.TAS#FSESRADE.V                | S455:           | 2 | 3,3575 | 0,422 | -0,858 |
| 21 | Q70E73 RAPH1_HUMAN  | K.SSLSVQPGFLADLNR.T             |                 | 2 | 3,3551 | 0,383 | 0,076  |
| 21 | Q2NKX8 ERC6L_HUMAN  | E.DLQNSVTQLQLQSLHAAQR.K         |                 | 3 | 3,3525 | 0,26  | 0      |
| 21 | P27816 MAP4_HUMAN   | K.VGS#LDNVGHLPGGAVK.T           | S1073:          | 2 | 3,3501 | 0,477 | -0,146 |
| 21 | P62750 RL23A_HUMAN  | R.NKLDHYAIKFPLTTE.S             |                 | 3 | 3,3472 | 0,316 | 0,096  |
| 21 | Q13435 SF3B2_HUMAN  | R.SRGSDS#PAADVEIE.Y             | S339:           | 2 | 3,3438 | 0,279 | 0,161  |
| 21 | Q09666 AHNK_HUMAN   | K.FKAEAPLPS#PKLE.G              | S5110:          | 2 | 3,3415 | 0,483 | -0,324 |
| 21 | P60709 ACTB_HUMAN   | E.EHPVLLTEAPLNPK.A              |                 | 3 | 3,3381 | 0,281 | 1,526  |
| 21 | Q00839 HNRPU_HUMAN  | R.AKS#PQPVEEED.E                | S270:           | 2 | 3,3368 | 0,439 | -1,041 |
| 21 | Q16543 CDC37_HUMAN  | K.ASEAKEGEEAGPGDPLLE.A          |                 | 2 | 3,3337 | 0,424 | -0,136 |
| 21 | Q9Y618 NCOR2_HUMAN  | E.AAKPPEPEKPV#PPPIESK.H         | S215:           | 3 | 3,3328 | 0,249 | -0,176 |
| 21 | Q13263 TIF1B_HUMAN  | E.GYGFSGDDPYSSAEPHVSGVKR.S      |                 | 3 | 3,3324 | 0,304 | 0,077  |
| 21 | P31946 1433B_HUMAN  | E.SYKDSTLIM*QLLR.D              |                 | 3 | 3,3309 | 0,214 | 0,231  |
| 21 | Q07352 TISB_HUMAN   | R.LPIFSRLS#ISDD.-               | S334:           | 2 | 3,3301 | 0,391 | -0,169 |
| 21 | P13645 K1C10_HUMAN  | K.SKELTTEIDNIEQISSYK.S          |                 | 3 | 3,3239 | 0,212 | -0,579 |

|    |                    |                                   |        |   |        |       |        |
|----|--------------------|-----------------------------------|--------|---|--------|-------|--------|
| 21 | P49959 MRE11_HUMAN | E.SDVEEDIFPTTSK.T                 |        | 2 | 3,3234 | 0,444 | 0,332  |
| 21 | Q58FF7 H90B3_HUMAN | K.VILHLKEDQTEYLEE.R               |        | 2 | 3,321  | 0,36  | 0,066  |
| 21 | Q15942 ZYX_HUMAN   | E.KQHPVPPPAQNQNQVRS#PGAPGPLTLKE.V | S344:  | 3 | 3,3208 | 0,268 | 0,418  |
| 21 | P06748 NPM_HUMAN   | K.M*QAS#IEKGGSLPKVE.A             | S254:  | 3 | 3,3204 | 0,362 | 0      |
| 21 | Q6UN15 FIP1_HUMAN  | R.RLPGAIDVIGQTITISR.V             |        | 3 | 3,3178 | 0,205 | 0,606  |
| 21 | O94979 SC31A_HUMAN | K.IALALNKVDGANVALK.D              |        | 3 | 3,3175 | 0,327 | -0,114 |
| 21 | O14617 AP3D1_HUMAN | R.ALDIDLKPLADSE.K                 |        | 2 | 3,317  | 0,441 | -0,081 |
| 21 | Q8IU81 I2BP1_HUMAN | R.AGGAS#PAASSTAQPPTQHR.L          | S453:  | 2 | 3,3165 | 0,392 | -0,261 |
| 21 | Q9Y266 NUDC_HUMAN  | K.LKPNLNGADLPNYR.W                |        | 3 | 3,3144 | 0,263 | 0,334  |
| 21 | Q9Y2W1 TR150_HUMAN | E.MKS#PREPGYKAE.G                 | S698:  | 3 | 3,3099 | 0,394 | 0,869  |
| 21 | Q99832 TCPH_HUMAN  | D.NAGFDATNILNK.L                  |        | 2 | 3,3098 | 0,347 | -0,191 |
| 21 | P42345 FRAP_HUMAN  | R.TRTDS#YSAGQSVE.I                | S2448: | 2 | 3,3091 | 0,44  | -0,412 |
| 21 | O15027 SC16A_HUMAN | R.YRPYDGAASAYAQNRY.Y              |        | 3 | 3,3065 | 0,246 | -0,294 |
| 21 | Q9UGV2 NDRG3_HUMAN | E.IERPILGQNDNK.S                  |        | 3 | 3,3061 | 0,299 | 0,131  |
| 21 | Q8N3Z6 ZCHC7_HUMAN | E.VITLS#DEDSIYR.C                 | S94:   | 2 | 3,305  | 0,447 | 0      |
| 21 | Q9Y5B6 GCFC_HUMAN  | E.LGDFTPHDNEPGKGR.L               |        | 3 | 3,3023 | 0,397 | 0,112  |
| 21 | Q05209 PTN12_HUMAN | R.SCLVEGDAKEE.I                   |        | 2 | 3,3011 | 0,425 | -0,69  |
| 21 | O94888 UBXD7_HUMAN | E.HGQLDGLSSPPK.K                  |        | 2 | 3,3008 | 0,412 | -0,092 |
| 21 | Q8IZT6 ASPM_HUMAN  | E.DFHSYLPIDPILSK.S                |        | 3 | 3,2966 | 0,12  | 0,104  |
| 21 | P16949 STMN1_HUMAN | R.SKESVPEFPLS#PPKKK.D             | S38:   | 3 | 3,2932 | 0,266 | -0,195 |
| 21 | P37802 TAGL2_HUMAN | R.TLM*NLGGLAVAR.D                 |        | 2 | 3,2914 | 0,387 | 0,396  |
| 21 | Q6ZU35 K1211_HUMAN | E.NVSVSVQPGSSSVSR.A               |        | 2 | 3,2913 | 0,505 | -0,655 |
| 21 | P0C7M2 RA1L3_HUMAN | K.IFVGGIKEDTEE.H                  |        | 2 | 3,2911 | 0,341 | -0,365 |
| 21 | Q15637 SF01_HUMAN  | E.RAYIVQLQIEDLTR.K                |        | 2 | 3,2899 | 0,261 | -0,142 |
| 21 | P68104 EF1A1_HUMAN | K.YYVTIIDAPGHR.D                  |        | 3 | 3,2899 | 0,394 | 0,456  |
| 21 | P51114 FXR1_HUMAN  | R.EDGM*VPFVFGTKE.S                |        | 2 | 3,2885 | 0,427 | 0,233  |
| 21 | Q6UWZ7 CCD98_HUMAN | K.GFGEYSRS#PTF.-                  | S406:  | 2 | 3,2881 | 0,357 | -0,092 |
| 21 | O43719 HTSF1_HUMAN | R.GFEGSCS#QKESEE.G                | S481:  | 2 | 3,2856 | 0,307 | -0,393 |
| 21 | Q7Z4V5 HDGR2_HUMAN | K.FALKVDS#PDVKR.C                 | S490:  | 3 | 3,2777 | 0,254 | 0,817  |
| 21 | Q8IY81 RRMJ3_HUMAN | E.GLALGAVIASSK.K                  |        | 2 | 3,2756 | 0,481 | 0,337  |
| 21 | Q6PID6 TTC33_HUMAN | K.SEAPAEVTHFS#PK.S                | S197:  | 2 | 3,2754 | 0,426 | -0,33  |
| 21 | Q14562 DHX8_HUMAN  | E.IELVEEPPFLR.G                   |        | 2 | 3,2729 | 0,365 | -0,083 |
| 21 | Q07021 C1QBP_HUMAN | K.AFVDFLSDEIKEE.R                 |        | 2 | 3,2703 | 0,418 | -0,158 |
| 21 | P31943 HNRH1_HUMAN | K.HTGPNS#PDTANDGFVR.L             | S104:  | 3 | 3,2677 | 0,208 | -0,725 |
| 21 | Q12846 STX4_HUMAN  | E.ADENYNS#VNTR.M                  | S117:  | 2 | 3,2649 | 0,385 | -0,09  |
| 21 | P62937 PPIA_HUMAN  | K.KITIADCGQLE.-                   |        | 2 | 3,2624 | 0,439 | -0,098 |
| 21 | Q9BRS2 RIOK1_HUMAN | R.VVPGQFDDADSS#DSENR.D            | S22:   | 2 | 3,2612 | 0,606 | -0,509 |
| 21 | P53618 COPB_HUMAN  | R.NVTVQPDDPISFM*QLTAK.N           |        | 2 | 3,26   | 0,39  | 0,302  |
| 21 | Q9NVR2 INT10_HUMAN | E.NQHQAQDTSDLM*S#PSKR.S           | S231:  | 3 | 3,2593 | 0,405 | 0,087  |

|    |                    |                                 |        |   |        |       |        |
|----|--------------------|---------------------------------|--------|---|--------|-------|--------|
| 21 | O75531 BAF_HUMAN   | D.KAYVVLGQFLVLK.K               |        | 3 | 3,2576 | 0,203 | 0,371  |
| 21 | P46087 NOL1_HUMAN  | K.GISAGAVQTAGK.K                |        | 2 | 3,2576 | 0,454 | -0,23  |
| 21 | Q9UQ35 SRRM2_HUMAN | E.KM*ALPPQEDATAS#PPR.Q          | S1179: | 3 | 3,2569 | 0,398 | 0      |
| 21 | Q9NUQ6 SPS2L_HUMAN | K.AKTS#PVKSNTPAAHLE.I           | S195:  | 3 | 3,251  | 0,221 | 0,211  |
| 21 | O60583 CCNT2_HUMAN | K.QGQSQAASSSVTS#PIKM*KIPIANTE.K | S480:  | 3 | 3,2501 | 0,229 | 0,531  |
| 21 | Q13428 TCOF_HUMAN  | K.TVANLLSGKS#PR.K               | S156:  | 2 | 3,2491 | 0,307 | 0,277  |
| 21 | Q53F19 CQ085_HUMAN | E.YHEELPALKQPR.E                |        | 3 | 3,2477 | 0,301 | 0      |
| 21 | P54578 UBP14_HUMAN | R.YAGALRAS#GE.M                 | S143:  | 2 | 3,2443 | 0,415 | -0,114 |
| 21 | P31946 1433B_HUMAN | E.SYKDSTLIM*QLLR.D              |        | 2 | 3,2433 | 0,403 | -0,231 |
| 21 | Q8NCE2 MTMRE_HUMAN | R.GSTTS#LGSDFLSLVM*E.S          | S441:  | 2 | 3,2433 | 0,176 | 0,075  |
| 21 | Q76FK4 NOL8_HUMAN  | R.TCDSITPSKSS#PVPVSD.T          | S268:  | 2 | 3,2431 | 0,48  | -0,197 |
| 21 | P35251 RFC1_HUMAN  | E.AHLTPYSLQAIK.A                |        | 3 | 3,2399 | 0,11  | -0,204 |
| 21 | P40222 TXLNA_HUMAN | R.RPEGPGAQAPSS#PR.V             | S515:  | 2 | 3,2392 | 0,394 | 0      |
| 21 | P19338 NUCL_HUMAN  | K.GLSEDTEETLKE.S                |        | 2 | 3,2363 | 0,379 | -0,252 |
| 21 | Q13042 CDC16_HUMAN | E.T#SRKTPDSRPSLEE.T             | T585:  | 3 | 3,234  | 0,154 | -0,761 |
| 21 | Q9Y6A5 TACC3_HUMAN | R.KQS#LYLKFDPVLLR.D             | S558:  | 3 | 3,234  | 0,154 | 0,108  |
| 21 | Q12802 AKP13_HUMAN | K.ALQLSNS#PGASSAFLKAETE.H       | S983:  | 3 | 3,2295 | 0,339 | 0,261  |
| 21 | P60709 ACTB_HUMAN  | E.TTFNSIM*KCDVDIRKD.L           |        | 3 | 3,2294 | 0,282 | -0,373 |
| 21 | Q96T23 RSF1_HUMAN  | E.TLALLKAQIDPVLLK.N             |        | 3 | 3,2283 | 0,294 | 0,112  |
| 21 | P05455 LA_HUMAN    | K.FSGDLDDQTCRE.D                |        | 2 | 3,2279 | 0,442 | -0,761 |
| 21 | Q99426 TBCB_HUMAN  | E.DALLGSYPVDDGCR.I              |        | 2 | 3,2232 | 0,524 | 0      |
| 21 | O94888 UBXD7_HUMAN | E.HGQLDGLSSS#PPKK.C             | S270:  | 3 | 3,2197 | 0,354 | 0      |
| 21 | Q09666 AHNK_HUMAN  | R.LKSEGDVEGDLGE.T               |        | 2 | 3,2179 | 0,427 | -0,362 |
| 21 | O60293 CC131_HUMAN | R.RIS#TSDILSEK.K                | S352:  | 2 | 3,2176 | 0,47  | -0,092 |
| 21 | Q86YP4 P66A_HUMAN  | R.GEGLVGDGPVDM*R.T              |        | 2 | 3,2159 | 0,435 | -0,463 |
| 21 | P55209 NP1L1_HUMAN | R.KYAVLYQPLFDK.R                |        | 2 | 3,2158 | 0,413 | 0      |
| 21 | Q14C86 GAPD1_HUMAN | K.RTS#PSDGAM*ANYE.S             | S1044: | 2 | 3,2099 | 0,438 | -0,408 |
| 21 | Q9NYF8 BCLF1_HUMAN | K.LKDLFDYS#PPLHK.N              | S512:  | 3 | 3,2086 | 0,32  | 0,221  |
| 21 | O75351 VPS4B_HUMAN | K.LQNQLQGAIVIERPNVK.W           |        | 3 | 3,2083 | 0,185 | 0,381  |
| 21 | Q658J3 A26CA_HUMAN | E.KSYELPDGQVITIGNER.F           |        | 3 | 3,2064 | 0,279 | -0,095 |
| 21 | P00558 PGK1_HUMAN  | K.ITLPVDFVTADKFDE.N             |        | 2 | 3,2048 | 0,4   | 0      |
| 21 | Q9Y2W1 TR150_HUMAN | K.SPVGKS#PPSTGSTYGSSQKEE.S      | S320:  | 2 | 3,1944 | 0,351 | 0,334  |
| 21 | O60506 HNRPQ_HUMAN | E.DGALAVLQQFK.D                 |        | 2 | 3,1915 | 0,351 | 0,103  |
| 21 | P06748 NPM_HUMAN   | K.GPSSVEDIKAK.M                 |        | 2 | 3,1903 | 0,414 | -0,216 |
| 21 | P40189 IL6RB_HUMAN | E.DLQLVDHVDGGDGILPR.Q           |        | 3 | 3,1862 | 0,22  | 0,201  |
| 21 | P49721 PSB2_HUMAN  | E.YLIGIQGPDYVLVASDR.V           |        | 2 | 3,1856 | 0,443 | 0,065  |
| 21 | Q8WXH0 SYNE2_HUMAN | K.HNLLHSIFM*DLE.D               |        | 2 | 3,1841 | 0,502 | -0,164 |
| 21 | Q14676 MDC1_HUMAN  | E.LQPSTSTDQPVTSEPTYQATR.G       |        | 3 | 3,1836 | 0,382 | -0,317 |
| 21 | P49790 NU153_HUMAN | R.SGIDITDFQAK.R                 |        | 2 | 3,183  | 0,312 | 0,306  |

|    |                      |                                      |                 |   |        |       |        |
|----|----------------------|--------------------------------------|-----------------|---|--------|-------|--------|
| 21 | P04406 G3P_HUMAN     | E.GLM*TTVHAITATQK.T                  |                 | 2 | 3,1811 | 0,395 | -0,082 |
| 21 | Q9UKV3 ACINU_HUMAN   | K.ASLVALPEQTASEEET#PPPLTK.E          | T414:           | 3 | 3,18   | 0,309 | 0,073  |
| 21 | P04264 K2C1_HUMAN    | K.SLNNQFASFIDK.V                     |                 | 2 | 3,179  | 0,449 | 0,264  |
| 21 | Q6XZF7 DNMBP_HUMAN   | R.SLDQTS#PCPLVLR.I                   | S689:           | 2 | 3,1779 | 0,27  | 0      |
| 21 | Q99569 PKP4_HUMAN    | E.GQTLVQPSVANR.A                     |                 | 2 | 3,1759 | 0,421 | -0,192 |
| 21 | P24534 EF1B_HUMAN    | K.YGPADVEDTTGSGATD.S                 |                 | 2 | 3,1759 | 0,543 | -0,392 |
| 21 | P55265 DSRAD_HUMAN   | R.TM*LLLSRS#PE.A                     | S825:           | 2 | 3,1755 | 0,307 | -0,687 |
| 21 | A9CQZ4 A9CQZ4_HUMAN  | K.AAEDEEVPAFFK.N                     |                 | 2 | 3,175  | 0,426 | 0,09   |
| 21 | O95466 FMNL_HUMAN    | E.AGADTPGKGEPPAPKS#PPKAR.R           | S1031:          | 3 | 3,1742 | 0,337 | 0,087  |
| 21 | ##P29973 CNGA1_HUMAN | K.ADPYET#LAEM*LDDKSLCFLD.S           | T105:           | 3 | 3,1736 | 0,151 | -1,049 |
| 21 | P62330 ARF6_HUMAN    | E.M*RDAILIFANK.Q                     |                 | 3 | 3,1706 | 0,248 | 0,322  |
| 21 | Q9Y4B5 K0802_HUMAN   | R.DHAPSIPTS#PFGDSLE.S                | S613:           | 2 | 3,1706 | 0,463 | 0,279  |
| 21 | Q00341 VIGLN_HUMAN   | R.KYKDM*NQFGEQE.Q                    |                 | 2 | 3,1686 | 0,277 | -1,085 |
| 21 | P41250 SYG_HUMAN     | E.IDCTM*LTPEPVLK.T                   |                 | 2 | 3,1653 | 0,217 | -0,239 |
| 21 | P42684 ABL2_HUMAN    | E.NSASSLAPGFIR.G                     |                 | 2 | 3,1545 | 0,431 | 0,3    |
| 21 | Q53GS9 SNUT2_HUMAN   | R.EAPASVVPFVR.V                      |                 | 2 | 3,1516 | 0,475 | 0,312  |
| 21 | P05387 RLA2_HUMAN    | K.LASVPAGGAVAVSAAPGSAAPAAGSAPAAAEK.K |                 | 3 | 3,1513 | 0,169 | -0,594 |
| 21 | P53618 COPB_HUMAN    | K.VTVNTNM*VDLNDYLQHILK.S             |                 | 3 | 3,1478 | 0,361 | 0      |
| 21 | P29590 PML_HUMAN     | K.AVS#PPHLDGPPS#PRS#PVIQSE.V         | S518:S527:S530: | 3 | 3,1474 | 0,254 | 0,157  |
| 21 | P55209 NP1L1_HUMAN   | K.YAVLYQPLFDK.R                      |                 | 2 | 3,1467 | 0,431 | 0,18   |
| 21 | P52948 NUP98_HUMAN   | K.HSNSNSVDDTIVALNM*R.A               |                 | 3 | 3,1434 | 0,397 | 0,581  |
| 21 | P05556 ITB1_HUMAN    | R.SNGLICGGNGVCK.C                    |                 | 2 | 3,1433 | 0,34  | -0,457 |
| 21 | P46777 RL5_HUMAN     | E.DAYKKQFSQYIK.N                     |                 | 3 | 3,14   | 0,226 | -0,12  |
| 21 | O95433 AHTA1_HUMAN   | K.TLFLAVQVQNEE.G                     |                 | 2 | 3,1393 | 0,34  | 0,088  |
| 21 | Q10567 AP1B1_HUMAN   | K.LVYLYLM*NYAK.S                     |                 | 2 | 3,1371 | 0,394 | -0,173 |
| 21 | P08238 HS90B_HUMAN   | K.HLEINPDHPIVETLR.Q                  |                 | 3 | 3,1366 | 0,184 | -0,513 |
| 21 | P37840 SYUA_HUMAN    | E.GAGSIAAATGFVK.K                    |                 | 2 | 3,1312 | 0,445 | -0,212 |
| 21 | Q8IX12 CCAR1_HUMAN   | K.SCALAEDPQELRD.G                    |                 | 2 | 3,1305 | 0,466 | 0,243  |
| 21 | Q5QJE6 TDIF2_HUMAN   | E.KQIVGTPVNSESDTR.Q                  |                 | 3 | 3,1284 | 0,193 | 0,21   |
| 21 | O60841 IF2P_HUMAN    | E.KVEGNTVHIEVK.E                     |                 | 3 | 3,1257 | 0,326 | 0,338  |
| 21 | Q9UQ35 SRRM2_HUMAN   | E.SSLVFKDTRLT#PPR.E                  | T1208:          | 3 | 3,1252 | 0,223 | 0,323  |
| 21 | Q16643 DREB_HUMAN    | R.GPGS#PAEDLM*FM*E.S                 | S416:           | 2 | 3,1226 | 0,355 | -0,245 |
| 21 | P08069 IGF1R_HUMAN   | E.SVPLDPSAS#SSSLPLPDR.H              | S1310:          | 2 | 3,1217 | 0,507 | 0,256  |
| 21 | Q9NYJ8 TAB2_HUMAN    | R.TSSTSSSVNSQTLNR.N                  |                 | 2 | 3,1195 | 0,453 | -0,311 |
| 21 | O00231 PSD11_HUMAN   | E.ASIDLHSIVKR.D                      |                 | 2 | 3,1157 | 0,351 | -0,18  |
| 21 | P18583 SON_HUMAN     | R.AGIEGPLLASDVGR.D                   |                 | 2 | 3,1147 | 0,405 | 0,27   |
| 21 | P49792 RBP2_HUMAN    | E.KDSLITPHVSR.S                      |                 | 3 | 3,114  | 0,313 | -0,292 |
| 21 | Q13077 TRAF1_HUMAN   | K.CRGEDLQISIS#PGSR.L                 | S66:            | 3 | 3,114  | 0,153 | -0,223 |
| 21 | P15531 NDKA_HUMAN    | E.RTFIAIKPDGVQR.G                    |                 | 3 | 3,1137 | 0,214 | 0      |



|    |                    |                                |            |   |        |       |        |
|----|--------------------|--------------------------------|------------|---|--------|-------|--------|
| 21 | Q5VUA4 ZN318_HUMAN | R.SVRIPS#PNILKTGLTE.N          | S2101:     | 3 | 3,1137 | 0,223 | 0,101  |
| 21 | Q15032 R3HD1_HUMAN | K.ASS#FSGISVLTR.G              | S381:      | 2 | 3,1133 | 0,366 | 0,28   |
| 21 | P62736 ACTA_HUMAN  | R.HQGVM*VGM*GQK.D              |            | 3 | 3,1133 | 0,24  | 0,759  |
| 21 | Q8N1G0 ZN687_HUMAN | K.NVLGLVPQALPK.A               |            | 2 | 3,1117 | 0,371 | 0,195  |
| 21 | Q13136 LIPA1_HUMAN | R.SSDGSL#HEEDLAK.V             | S244:      | 2 | 3,1109 | 0,403 | -0,157 |
| 21 | Q9H165 BC11A_HUMAN | K.LLLGS#PSSLS#PFSK.R           | S625:S630: | 2 | 3,1093 | 0,396 | -0,23  |
| 21 | Q00839 HNRPU_HUMAN | R.AKS#PQPPVEE.D                | S270:      | 2 | 3,1043 | 0,429 | 0,189  |
| 21 | Q9Y2W1 TR150_HUMAN | E.KGSFS#DTGLGDGK.M             | S379:      | 2 | 3,1041 | 0,374 | -0,452 |
| 21 | Q02952 AKA12_HUMAN | E.DFAAHPGEDAVPTGPDCAK.S        |            | 3 | 3,1032 | 0,27  | 0,439  |
| 21 | P35222 CTNB1_HUMAN | R.RTS#M*GGTQQQFVE.G            | S552:      | 2 | 3,1009 | 0,337 | -0,234 |
| 21 | Q15942 ZYG_HUMAN   | R.S#PGAGPLTLKE.V               | S344:      | 2 | 3,1009 | 0,486 | -0,489 |
| 21 | P35222 CTNB1_HUMAN | E.GVATYAAAVLFR.M               |            | 2 | 3,1004 | 0,383 | -0,098 |
| 21 | Q9Y2X7 GIT1_HUMAN  | R.HGSGADS#DY#ENTQSGDPLLGL.E    | S596:Y598: | 3 | 3,1004 | 0,294 | 0      |
| 21 | Q6ZRV2 FA83H_HUMAN | R.RGS#PTTGFIQKGS#PTSAYPER.R    | S892:S903: | 3 | 3,1003 | 0,282 | 0,217  |
| 21 | Q92576 PHF3_HUMAN  | E.NLVANTARS#PQFINLK.R          | S1642:     | 3 | 3,0962 | 0,227 | 0,294  |
| 21 | Q9UMZ2 SYNG_HUMAN  | E.LATFDLSVQGSJKR.S             |            | 2 | 3,0953 | 0,472 | -0,235 |
| 21 | Q13177 PAK2_HUMAN  | K.YLS#FTPPEKD.G                | S141:      | 2 | 3,0934 | 0,345 | 0,382  |
| 21 | Q32MZ4 LRRF1_HUMAN | K.IDGATQSSPAEPK.S              |            | 2 | 3,0921 | 0,32  | 0,656  |
| 21 | O95425 SVIL_HUMAN  | K.HAHSSSLQQAASRS#PSFGDPQLSPE.A | S261:      | 3 | 3,0914 | 0,299 | 0,135  |
| 21 | O43683 BUB1_HUMAN  | R.LPS#KPKEEVPHAE.F             | S563:      | 3 | 3,0911 | 0,3   | -0,657 |
| 21 | Q5VTR2 BRE1A_HUMAN | R.KALVPEPEPDS#NQR.K            | S138:      | 3 | 3,0894 | 0,405 | 0      |
| 21 | Q15398 DLG7_HUMAN  | E.DVIHKFNLIKLEE.S              |            | 3 | 3,0891 | 0,349 | 0,107  |
| 21 | Q96JA3 PKHA8_HUMAN | E.LLYRT#PPGS#PQLAM*LK.S        | T185:S189: | 3 | 3,0854 | 0,34  | 0,466  |
| 21 | Q09666 AHNK_HUMAN  | K.VKGDLDIAGPNLE.G              |            | 2 | 3,0817 | 0,294 | -0,091 |
| 21 | P30040 ERP29_HUMAN | K.SLNILTAFAQK.K                |            | 2 | 3,0807 | 0,247 | -0,107 |
| 21 | P27816 MAP4_HUMAN  | E.TERAS#PIKM*DLAPSK.D          | S358:      | 3 | 3,0797 | 0,329 | 0      |
| 21 | P06493 CDC2_HUMAN  | K.IGEGT#Y#GVVYK.G              | T14:Y15:   | 2 | 3,0756 | 0,277 | -0,091 |
| 21 | Q5W0B1 RN219_HUMAN | R.FAVAALQSK.V                  |            | 2 | 3,0744 | 0,199 | -0,13  |
| 21 | P22061 PIMT_HUMAN  | K.M*KPLM*GVIYVPLTDKE.K         |            | 3 | 3,0699 | 0,246 | 0      |
| 21 | P04406 G3P_HUMAN   | R.VVDLM*AHM*ASKE.-             |            | 2 | 3,0682 | 0,401 | -0,269 |
| 21 | Q7Z309 F122B_HUMAN | D.LSQVFQPYTLR.T                |            | 2 | 3,0675 | 0,33  | 0,18   |
| 21 | Q9Y2D9 ZN652_HUMAN | E.SGS#PYSVLVDTK.M              | S57:       | 2 | 3,0649 | 0,407 | -0,732 |
| 21 | Q9P287 BCCIP_HUMAN | E.LTDLLIQNHIGSVIK.Q            |            | 3 | 3,0628 | 0,175 | 0,714  |
| 21 | P05787 K2C8_HUMAN  | K.LVSES#SDVLPK.-               | S477:      | 2 | 3,0627 | 0,228 | -0,195 |
| 21 | Q9H2J4 PDCL3_HUMAN | E.SGAIM*TDLEENPK.K             |            | 2 | 3,0619 | 0,493 | 0,258  |
| 21 | P30622 CLIP1_HUMAN | K.SISITSALLTEKDAE.L            |            | 2 | 3,0568 | 0,381 | 0,387  |
| 21 | P55072 TERA_HUMAN  | K.LAIRES#IESE.I                | S702:      | 2 | 3,0555 | 0,242 | -0,099 |
| 21 | P10809 CH60_HUMAN  | K.NIGAKLVQDVANNTNEE.A          |            | 2 | 3,0549 | 0,346 | 0,067  |
| 21 | Q9NUU7 DD19A_HUMAN | E.DRAAQSLNKLIR.S               |            | 3 | 3,0532 | 0,192 | -0,366 |

|    |                     |                             |            |   |        |       |        |
|----|---------------------|-----------------------------|------------|---|--------|-------|--------|
| 21 | Q9UQ35 SRRM2_HUMAN  | E.SYFGVSSLQLK.G             |            | 2 | 3,0516 | 0,433 | 0,199  |
| 21 | Q9C0C2 TB182_HUMAN  | E.AGKEEPPPLT#PPAR.C         | T131:      | 3 | 3,0511 | 0,132 | -0,119 |
| 21 | P63261 ACTG_HUMAN   | E.IAALVIDNGSGMCK.A          |            | 2 | 3,0501 | 0,31  | -0,253 |
| 21 | Q96T88 UHRF1_HUMAN  | E.VRLNDTIQLLVR.Q            |            | 3 | 3,0483 | 0,193 | 0,19   |
| 21 | Q8NCN4 RN169_HUMAN  | R.LPFSSLSLASHKPER.S         |            | 3 | 3,0457 | 0,274 | -0,098 |
| 21 | P10768 ESTD_HUMAN   | E.HGLVVIAPDTSR.G            |            | 2 | 3,0448 | 0,492 | -0,269 |
| 21 | P78371 TCPB_HUMAN   | K.KLGGSLADSYLDE.G           |            | 2 | 3,0427 | 0,388 | -0,268 |
| 21 | Q5VT06 CE350_HUMAN  | E.DLSGHSVSVSSDKGR.S         |            | 3 | 3,0425 | 0,317 | -0,836 |
| 21 | Q9UK76 HN1_HUMAN    | R.RNSS#EASSGDFDLK.G         | S88:       | 3 | 3,041  | 0,205 | 0,107  |
| 21 | P22314 UBA1_HUMAN   | R.YDGQVAVFGSDLQE.K          |            | 2 | 3,0374 | 0,328 | 0,24   |
| 21 | Q9Y4B6 VPRBP_HUMAN  | R.HLPS#PPTLDSIITE.Y         | S1000:     | 2 | 3,0365 | 0,355 | -0,076 |
| 21 | P00367 DHE3_HUMAN   | E.DFKLQHGSILGFPK.A          |            | 3 | 3,035  | 0,313 | 0,346  |
| 21 | Q9H3N1 TXND1_HUMAN  | E.GTNKDFPQNAIR.Q            |            | 3 | 3,0348 | 0,172 | 0,336  |
| 21 | P00558 PGK1_HUMAN   | K.VADKIQLINNM*LDKVNE.M      |            | 3 | 3,0331 | 0,149 | 0,371  |
| 21 | Q15185 TEBP_HUMAN   | K.LTFSCGGSDNFK.H            |            | 2 | 3,0328 | 0,413 | 0      |
| 21 | P42166 LAP2A_HUMAN  | K.DVYVQLYLQHLTAR.N          |            | 3 | 3,0307 | 0,485 | 0,532  |
| 21 | Q02952 AKA12_HUMAN  | K.SAESPTS#PVTSE.T           | S286:      | 2 | 3,0299 | 0,37  | -0,576 |
| 21 | O14686 MLL2_HUMAN   | E.VSVLSSGS#PR.L             | S48:       | 2 | 3,0257 | 0,241 | 1,027  |
| 21 | P50454 SERPH_HUMAN  | K.AVLSAEQLRDEE.V            |            | 2 | 3,0232 | 0,401 | -0,09  |
| 21 | Q86VS8 HOOK3_HUMAN  | E.KIALLQSLDDANLR.K          |            | 3 | 3,0204 | 0,294 | 0      |
| 21 | Q13428 TCOF_HUMAN   | R.KSAEPSANTTLVSE.T          |            | 2 | 3,0185 | 0,339 | -0,34  |
| 21 | Q99618 CDCA3_HUMAN  | K.TSSGDPPS#PLVK.Q           | S87:       | 2 | 3,0175 | 0,342 | 0,193  |
| 21 | P09525 ANXA4_HUMAN  | E.DAIISVLAYR.N              |            | 2 | 3,017  | 0,44  | 0,218  |
| 21 | Q02880 TOP2B_HUMAN  | E.FSGAPVEGAGEEALT#PSVPINK.G | T1292:     | 3 | 3,0163 | 0,083 | 0,325  |
| 21 | O00148 DDX39_HUMAN  | K.GSYVSIHSSGFRDFLLKPE.L     |            | 3 | 3,0161 | 0,166 | 0,428  |
| 21 | Q13136 LIPA1_HUMAN  | R.SSDGS#LSHEEDLAK.V         | S242:      | 2 | 3,0135 | 0,413 | -0,157 |
| 21 | P18583 SON_HUMAN    | R.SAAS#PVVSSM*PER.A         | S1769:     | 2 | 3,0131 | 0,443 | -0,69  |
| 21 | Q14789 G0GB1_HUMAN  | E.DNCSVLKQDLR.Q             |            | 2 | 3,0123 | 0,417 | -0,815 |
| 21 | Q6FIF0 ZFAN6_HUMAN  | R.QNSSNGRIS#PPATSVSSLSE.S   | S49:       | 2 | 3,0122 | 0,161 | 0,349  |
| 21 | P08559 ODPA_HUMAN   | R.Y#HGHSMSPGV#YR.T          | Y289:S300: | 3 | 3,0104 | 0,139 | 0      |
| 21 | Q9Y5J1 UTP18_HUMAN  | R.TGNFISTSTSLPR.G           |            | 2 | 3,01   | 0,395 | -0,353 |
| 21 | Q147X3 MAK3_HUMAN   | E.VAATTATPDGGPR.A           |            | 2 | 3,0072 | 0,37  | -0,101 |
| 21 | O00534 LHR2A_HUMAN  | K.TFQM*DDYSLCGLISHK.D       |            | 3 | 3,0057 | 0,161 | 0,095  |
| 21 | Q9BTA9 WAC_HUMAN    | R.STCSLTPALAAHFSE.N         |            | 2 | 3,0048 | 0,451 | 0,307  |
| 21 | B2RMZ9 B2RMZ9_HUMAN | R.APVS#PLKFSPFE.G           | S423:      | 2 | 3,0042 | 0,397 | 0,174  |
| 21 | Q6NWX9 PR40B_HUMAN  | R.TLLQQLDDHQ.-              |            | 2 | 3,0029 | 0,422 | -0,202 |
| 21 | P38919 IF4A3_HUMAN  | R.KLDYGQHVAGT#PGRVFD.M      | T163:      | 2 | 3,0027 | 0,339 | -1,077 |
| 21 | Q76I76 SSH2_HUMAN   | K.LGYLDLCKDCLPE.R           |            | 2 | 3,0021 | 0,413 | 0,153  |
| 21 | Q58FF7 H90B3_HUMAN  | K.HSQFIGYPITLYLE.K          |            | 2 | 3,001  | 0,383 | -0,073 |

|    |                     |                                       |            |   |        |       |        |
|----|---------------------|---------------------------------------|------------|---|--------|-------|--------|
| 21 | Q9UJM3 ERRFI_HUMAN  | E.DSTLSDFKYDVPGR.R                    |            | 3 | 2,9988 | 0,415 | -0,343 |
| 21 | P40763 STAT3_HUMAN  | E.NLQDDDFDFNYK.T                      |            | 2 | 2,9976 | 0,281 | 0,258  |
| 21 | P07237 PDIA1_HUMAN  | E.IKTHILLFLPK.S                       |            | 3 | 2,9962 | 0,173 | 0,346  |
| 21 | P05783 K1C18_HUMAN  | R.S#TSFRGGM*GSGGLATGIAGGLAGM*GGIQNE.K | S51:       | 3 | 2,9955 | 0,161 | 0,389  |
| 21 | P17980 PRS6A_HUMAN  | E.KLKPGDLVGVNKDSYLILE.T               |            | 3 | 2,9928 | 0,174 | 0,174  |
| 21 | P22059 OSBP1_HUMAN  | R.TGSNISGAS#SDISLDE.Q                 | S385:      | 2 | 2,9904 | 0,242 | -1,121 |
| 21 | Q9UNZ2 NSF1C_HUMAN  | R.KKS#PNELVDDLFK.G                    | S114:      | 3 | 2,9896 | 0,109 | 0      |
| 21 | P27816 MAP4_HUMAN   | E.RAS#PIKMDLAPSK.D                    | S358:      | 3 | 2,989  | 0,426 | 0,245  |
| 21 | P42684 ABL2_HUMAN   | R.GAQASSGS#PALPR.K                    | S620:      | 2 | 2,9886 | 0,387 | -0,382 |
| 21 | O94842 TOX4_HUMAN   | E.LVSGS#PVALS#PQPR.C                  | S562:S567: | 2 | 2,9884 | 0,203 | 0,311  |
| 21 | Q9ULU4 PKCB1_HUMAN  | E.SVQQQSTPVPLIS#PKR.Q                 | S547:      | 3 | 2,9878 | 0,258 | 0,397  |
| 21 | P46087 NOL1_HUMAN   | K.KGPQSLFNAPR.G                       |            | 3 | 2,9867 | 0,136 | 0,828  |
| 21 | Q09666 AHNK_HUMAN   | K.FKAEAPLPS#PK.L                      | S5110:     | 2 | 2,9834 | 0,336 | -0,289 |
| 21 | P06748 NPM_HUMAN    | D.M*SPLRPQNYLFGCELK.A                 |            | 3 | 2,9821 | 0,233 | 0,186  |
| 21 | Q96N21 CQ056_HUMAN  | E.LSM*GS#PGPVTNK.A                    | S333:      | 2 | 2,98   | 0,342 | -0,285 |
| 21 | Q96RT1 LAP2_HUMAN   | R.TM*S#VSDFNYSR.T                     | S1158:     | 2 | 2,9793 | 0,289 | -0,174 |
| 21 | P49736 MCM2_HUMAN   | E.SFTM*AS#SPAQR.R                     | S12:       | 2 | 2,979  | 0,371 | -0,954 |
| 21 | P40227 TCPZ_HUMAN   | K.GIDPFSLDALSKE.G                     |            | 2 | 2,976  | 0,43  | -0,175 |
| 21 | P27987 IP3KB_HUMAN  | R.ARS#PS#PCPFR.S                      | S174:S176: | 2 | 2,9747 | 0,24  | -0,274 |
| 21 | Q13885 TBB2A_HUMAN  | K.GHYTEGAELVDSVLDVVRK.E               |            | 3 | 2,9744 | 0,386 | 0,088  |
| 21 | P08397 HEM3_HUMAN   | R.AKDQDILDVGVLDHDP.E.T                |            | 3 | 2,9737 | 0,172 | 0,195  |
| 21 | P13861 KAP2_HUMAN   | R.APASVLPAAATPR.Q                     |            | 2 | 2,9707 | 0,441 | -0,212 |
| 21 | Q96T88 UHRF1_HUMAN  | R.LNDTIQLLVR.Q                        |            | 2 | 2,9704 | 0,292 | -0,103 |
| 21 | P16949 STMN1_HUMAN  | R.ASGQAFELILS#PR.S                    | S25:       | 2 | 2,9702 | 0,214 | 0,415  |
| 21 | O00567 NOL5A_HUMAN  | R.LAALALASSENS#SS#TPEECE.E.M          | S465:S467: | 3 | 2,9699 | 1     | -0,155 |
| 21 | Q9NYL2 MLTK_HUMAN   | E.SM*SNDTSLPDKCNS#FLHNK.A             | S275:      | 3 | 2,9691 | 0,363 | 0      |
| 21 | P04075 ALDOA_HUMAN  | R.ALANSLACQGK.Y                       |            | 2 | 2,9682 | 0,433 | -0,215 |
| 21 | O96028 NSD2_HUMAN   | R.ASTAASSALGFSK.S                     |            | 2 | 2,9673 | 0,439 | -0,407 |
| 21 | P11021 GRP78_HUMAN  | K.VTHAVVTVPAYFND.A                    |            | 2 | 2,9658 | 0,228 | 0,318  |
| 21 | Q6UN15 FIP1_HUMAN   | R.KPGADLSDYFNYPFNE.D                  |            | 2 | 2,9648 | 0,415 | 0      |
| 21 | A8MSQ1 A8MSQ1_HUMAN | R.LCYHFGCLDPPLKK.S                    |            | 3 | 2,9632 | 0,307 | 0,105  |
| 21 | Q9UBR2 CATZ_HUMAN   | R.VGDYGSLSGR.E                        |            | 2 | 2,9623 | 0,489 | 0,181  |
| 21 | P40926 MDHM_HUMAN   | E.CTYFSTPLLLGK.K                      |            | 2 | 2,9614 | 0,342 | 0      |
| 21 | Q06830 PRDX1_HUMAN  | R.LVQAFQFTDK.H                        |            | 2 | 2,9612 | 0,396 | 0,408  |
| 21 | P60709 ACTB_HUMAN   | E.TTFNSIM*KCDVDIR.K                   |            | 3 | 2,959  | 0,366 | 0,32   |
| 21 | P08559 ODPA_HUMAN   | R.YHGHS#M*SDPGVSYR.T                  | S293:      | 3 | 2,9589 | 0,211 | 0,217  |
| 21 | P55072 TERA_HUMAN   | K.NM*KLADDVDLE.Q                      |            | 2 | 2,9572 | 0,3   | -0,191 |
| 21 | P51610 HCFC1_HUMAN  | R.SPAPVQLAPLSSK.V                     |            | 2 | 2,9561 | 0,333 | 0      |
| 21 | Q09666 AHNK_HUMAN   | K.VGIDTPDIDIHGPE.G                    |            | 2 | 2,9559 | 0,443 | -0,083 |

|    |                    |                             |            |   |        |       |        |
|----|--------------------|-----------------------------|------------|---|--------|-------|--------|
| 21 | Q09666 AHNK_HUMAN  | K.VKGDVDVTLPKVE.G           |            | 2 | 2,9559 | 0,339 | -0,523 |
| 21 | P35222 CTNB1_HUMAN | R.HAIM*RS#PQM*VSAIVR.T      | S191:      | 3 | 2,9556 | 0,221 | -0,708 |
| 21 | Q9H6Z4 RANB3_HUMAN | E.EKPAIAPPVVFQK.D           |            | 3 | 2,9517 | 0,306 | 0      |
| 21 | Q9NUU7 DD19A_HUMAN | R.SNLVDNTNQVE.V             |            | 2 | 2,9506 | 0,346 | -0,297 |
| 21 | O43741 AAKB2_HUMAN | K.IM*VGST#DDPSVFLPDSK.L     | T40:       | 3 | 2,9494 | 0,275 | 0,276  |
| 21 | O75531 BAF_HUMAN   | K.AYVVLGQFLVLK.K            |            | 2 | 2,949  | 0,468 | 0      |
| 21 | Q76I76 SSH2_HUMAN  | E.SISQGVGQIQLK.G            |            | 2 | 2,9476 | 0,248 | -0,194 |
| 21 | P18669 PGAM1_HUMAN | E.LDKNLKPIKPM*QFLGDEE.T     |            | 2 | 2,946  | 0,225 | -0,229 |
| 21 | Q58FG0 HS905_HUMAN | K.HSQFIGYPITLFEK.K          |            | 3 | 2,9457 | 0,382 | 0      |
| 21 | Q99733 NP1L4_HUMAN | R.KYAALYQPLFDKR.R           |            | 3 | 2,9443 | 0,22  | 0,68   |
| 21 | Q9Y2W1 TR150_HUMAN | R.ERS#PALKS#PLQSVVVR.R      | S248:S253: | 3 | 2,9441 | 0,407 | 0      |
| 21 | P24534 EF1B_HUMAN  | E.AVSS#PPPADLCHALR.W        | S43:       | 2 | 2,9415 | 0,337 | 0,073  |
| 21 | Q5VT52 K0460_HUMAN | R.RM*S#GEPIQTVE.S           | S1099:     | 2 | 2,9415 | 0,258 | -0,363 |
| 21 | A8K0Z3 WASH1_HUMAN | K.YVFLDPLAGAVTK.T           |            | 2 | 2,94   | 0,366 | 0,175  |
| 21 | P07195 LDHB_HUMAN  | K.SADTLWDIQKD.L             |            | 2 | 2,938  | 0,216 | 0,094  |
| 21 | Q9UBG0 MRC2_HUMAN  | R.TLGDQLSLLGAR.T            |            | 2 | 2,9369 | 0,411 | -0,18  |
| 21 | Q13428 TCOF_HUMAN  | K.GSLGQGTAPVLP GK.T         |            | 2 | 2,9359 | 0,358 | 0,095  |
| 21 | P26641 EF1G_HUMAN  | E.CEQALAAEPK.A              |            | 2 | 2,9338 | 0,403 | -0,328 |
| 21 | P10809 CH60_HUMAN  | R.KNQLKDM*AIATGGAVFGEE.G    |            | 3 | 2,9304 | 0,405 | -0,092 |
| 21 | Q02880 TOP2B_HUMAN | K.SLAVSGLGVIGR.D            |            | 2 | 2,9301 | 0,402 | 0,108  |
| 21 | Q8NI22 MCFD2_HUMAN | K.M*HDYDGNNLLDGLE.L         |            | 2 | 2,9265 | 0,336 | 0,15   |
| 21 | Q14694 UBP10_HUMAN | R.QADVFQTPITGIFGGHIR.S      |            | 3 | 2,9265 | 0,242 | 0      |
| 21 | O75896 TUSC2_HUMAN | R.RGS#M*FYDEDGDLAHE.F       | S50:       | 2 | 2,9211 | 0,331 | 0,266  |
| 21 | P37802 TAGL2_HUMAN | R.TLM*NLGGLAVARD.D          |            | 2 | 2,9205 | 0,325 | 0,181  |
| 21 | Q9GZR7 DDX24_HUMAN | E.LTDYQLVSPAK.N             |            | 2 | 2,9189 | 0,388 | 0,198  |
| 21 | P07814 SYEP_HUMAN  | R.DQDLEPGAPSM*GAK.S         |            | 2 | 2,9185 | 0,234 | -0,17  |
| 21 | Q9NQS7 INCE_HUMAN  | E.QHVTQLM*STEPLPR.T         |            | 3 | 2,9179 | 0,143 | 0,111  |
| 21 | Q9NUU7 DD19A_HUMAN | R.AAQSLNKLIR.S              |            | 2 | 2,9166 | 0,267 | -0,298 |
| 21 | P18583 SON_HUMAN   | R.SAASPVVSSM*PER.A          |            | 2 | 2,9135 | 0,497 | -0,366 |
| 21 | Q96A65 EXOC4_HUMAN | K.DPSGLLISVIR.T             |            | 2 | 2,9092 | 0,36  | -0,209 |
| 21 | Q32MZ4 LRRF1_HUMAN | K.IDGATQSS#PAEPK.S          | S714:      | 2 | 2,908  | 0,299 | 0      |
| 21 | P07942 LAMB1_HUMAN | R.KCVCNLGTVQE.H             |            | 2 | 2,9071 | 0,26  | 0,249  |
| 21 | Q9H6T3 RPAP3_HUMAN | E.NNPINLANVIAATGTTSK.K      |            | 3 | 2,907  | 0,273 | 0,407  |
| 21 | Q2NL82 TSR1_HUMAN  | R.AYLFAHAVDFVPSEE.N         |            | 2 | 2,9053 | 0,332 | -0,072 |
| 21 | P62258 1433E_HUMAN | D.KHLIPAANTGE.S             |            | 2 | 2,9049 | 0,355 | -0,212 |
| 21 | Q02952 AKA12_HUMAN | K.EPSKSAESPTS#PVTSE.T       | S286:      | 2 | 2,9037 | 0,444 | -0,356 |
| 21 | O60784 TOM1_HUMAN  | K.GLEFPM*TDLDM*LS#PIHTPQR.T | S160:      | 3 | 2,9037 | 0,454 | 0,304  |
| 21 | Q7Z3K3 POGZ_HUMAN  | E.AAPLTSSM*DPLPVFLYPPVQR.S  |            | 2 | 2,9029 | 0,328 | 0,316  |
| 21 | P06748 NPM_HUMAN   | K.M*QAS#IEKGGSLPKVE.A       | S254:      | 2 | 2,9011 | 0,312 | -0,146 |

|    |                    |                              |              |   |        |       |        |
|----|--------------------|------------------------------|--------------|---|--------|-------|--------|
| 21 | P63241 IF5A1_HUMAN | E.DICPSTHNMDVPNIK.R          |              | 2 | 2,9001 | 0,362 | 0,07   |
| 21 | P00441 SODC_HUMAN  | E.DSVISLSGDHCIIGR.T          |              | 2 | 2,8968 | 0,485 | 0,075  |
| 21 | Q9UQ35 SRRM2_HUMAN | K.DKFSFPVQDRPE.S             |              | 3 | 2,8957 | 0,276 | 1,639  |
| 21 | Q9UPX8 SHAN2_HUMAN | E.KLAKPGEGLDSPM*GAK.S        |              | 3 | 2,8952 | 0,293 | 0,113  |
| 21 | Q8WYP5 AHTF1_HUMAN | R.TTS#FFLNS#PEKE.H           | S1287:S1292: | 2 | 2,8924 | 0,348 | 0      |
| 21 | P68104 EF1A1_HUMAN | K.SGDAAIVDM*VPGKPM*CVE.S     |              | 2 | 2,8921 | 0,161 | -0,448 |
| 21 | O60293 CC131_HUMAN | K.AKEQQNIS#PVVEEPE.F         | S998:        | 2 | 2,8903 | 0,22  | 0,576  |
| 21 | Q9NQZ2 SAS10_HUMAN | K.KLYYDTDYGSK.S              |              | 2 | 2,8899 | 0,298 | -0,271 |
| 21 | Q13442 HAP28_HUMAN | K.GVEGLIDIENPNR.V            |              | 2 | 2,8878 | 0,328 | 0      |
| 21 | P08670 VIME_HUMAN  | E.TNLDS#LPLVDTHSKR.T         | S430:        | 3 | 2,8876 | 0,235 | 0,721  |
| 21 | P27816 MAP4_HUMAN  | E.RAS#PIKM*DLAPSK.D          | S358:        | 3 | 2,8875 | 0,364 | 0,182  |
| 21 | Q14160 LAP4_HUMAN  | R.VPQAEGPPKRV#LVGADDLR.K     | S1378:       | 3 | 2,886  | 0,296 | 0,251  |
| 21 | O00567 NOL5A_HUMAN | R.LAALALASSENSSS#T#PEECE.M   | S467:T468:   | 2 | 2,8857 | 1     | 0,207  |
| 21 | Q15942 ZYG_HUMAN   | R.S#PGAPGLTLK.E              | S344:        | 2 | 2,8838 | 0,331 | -0,982 |
| 21 | Q96PU5 NED4L_HUMAN | R.LRSCS#VTDVAE.Q             | S342:        | 2 | 2,8836 | 0,361 | 0,088  |
| 21 | O15231 ZN185_HUMAN | R.RES#CGSSVLTDFE.G           | S233:        | 2 | 2,8824 | 0,303 | 0,389  |
| 21 | Q09666 AHNK_HUMAN  | E.AEVPDVDLECPDAK.L           |              | 2 | 2,8794 | 0,316 | 0,157  |
| 21 | Q14257 RCN2_HUMAN  | E.HDKNGDGFVSLEE.F            |              | 2 | 2,8769 | 0,332 | -0,169 |
| 21 | P68104 EF1A1_HUMAN | K.IGGIGTVPVGRVE.T            |              | 2 | 2,8767 | 0,452 | -0,097 |
| 21 | A0MZ66 SHOT1_HUMAN | E.NKEDSIENVRE.T              |              | 3 | 2,8764 | 0,102 | 0,48   |
| 21 | O75475 PSIP1_HUMAN | K.QSNASS#DVEVEEKE.T          | S106:        | 2 | 2,875  | 0,38  | -0,524 |
| 21 | Q01804 OTUD4_HUMAN | E.NITDDKYATVSS#PSK.S         | S546:        | 3 | 2,873  | 0,255 | 0,107  |
| 21 | Q9UQ35 SRRM2_HUMAN | K.VKAQT#PPGPSLSGSKS#PCPQEK.S | T1003:S1014: | 3 | 2,8726 | 0,145 | -0,15  |
| 21 | Q96B45 CJ032_HUMAN | K.M*AIITTHLQYQQE.A           |              | 2 | 2,8706 | 0,413 | 0,23   |
| 21 | P13645 K1C10_HUMAN | R.ALEESNYELEGK.I             |              | 2 | 2,8703 | 0,407 | 0,53   |
| 21 | Q9Y2W6 TDRKH_HUMAN | K.SSGEITHTLSCLS#LSE.A        | S542:        | 2 | 2,8673 | 0,329 | 0,678  |
| 21 | P10809 CH60_HUMAN  | K.DMAIATGGAVFGEE.G           |              | 2 | 2,8668 | 0,268 | 0,178  |
| 21 | Q9H078 CLPB_HUMAN  | K.LKQCPNAVVLDFE.V            |              | 2 | 2,8663 | 0,26  | -0,239 |
| 21 | O60271 JIP4_HUMAN  | R.SASQSS#LDKLDQE.L           | S733:        | 2 | 2,8634 | 0,271 | -0,328 |
| 21 | Q8WUA4 TF3C2_HUMAN | R.QPAACPGGEEVDGAPRDE.D       |              | 2 | 2,8612 | 0,419 | 0      |
| 21 | Q9Y2W1 TR150_HUMAN | K.SPVGKS#PPSTGSTYGSSQKEE.S   | S320:        | 3 | 2,8598 | 0,267 | -0,752 |
| 21 | O15027 SC16A_HUMAN | E.HRPASALVNPLAR.G            |              | 3 | 2,8597 | 0,257 | 0,196  |
| 21 | P49773 HINT1_HUMAN | K.HISQISVAEDDDE.S            |              | 2 | 2,8589 | 0,374 | 0,167  |
| 21 | Q4G0J3 LARP7_HUMAN | E.NM*DTSNTSISK.M             |              | 2 | 2,8566 | 0,316 | 0      |
| 21 | P24534 EF1B_HUMAN  | E.AVSS#PPPADLCHALR.W         | S43:         | 3 | 2,8559 | 0,322 | 0,109  |
| 21 | Q5VT52 K0460_HUMAN | R.GPTSTSIDNIDGTPVRDER.S      |              | 2 | 2,8508 | 0,361 | -0,18  |
| 21 | Q6PJG2 CN043_HUMAN | E.DSGM*VPLIIPVSPVR.T         |              | 2 | 2,8504 | 0,439 | -0,144 |
| 21 | P10809 CH60_HUMAN  | K.DM*AIATGGAVFGEE.G          |              | 2 | 2,8502 | 0,334 | 0,176  |
| 21 | Q13838 UAP56_HUMAN | R.KFM*QDPM*EIFVDDE.T         |              | 2 | 2,848  | 0,344 | 0,137  |

|    |                    |                                  |            |   |        |       |        |
|----|--------------------|----------------------------------|------------|---|--------|-------|--------|
| 21 | O94909 K0819_HUMAN | E.GLHLLKPLS#IPK.R                | S524:      | 3 | 2,8471 | 0,332 | 0,196  |
| 21 | Q9UJM3 ERRFI_HUMAN | E.DSTLSDFKYDVPGR.R               |            | 2 | 2,847  | 0,444 | -0,534 |
| 21 | Q9H2J4 PDCL3_HUMAN | K.KPIEDVLLSSVR.R                 |            | 2 | 2,8453 | 0,351 | 0,09   |
| 21 | Q15398 DLG7_HUMAN  | K.FNNLIKLEE.S                    |            | 2 | 2,8438 | 0,208 | 0,218  |
| 21 | Q99733 NP1L4_HUMAN | K.YAALYQPLFDK.R                  |            | 2 | 2,8413 | 0,154 | -0,092 |
| 21 | Q9Y4B5 K0802_HUMAN | R.GRS#PPERPVGTPKEPSLGE.Q         | S297:      | 3 | 2,841  | 0,193 | 0,169  |
| 21 | Q8WWY3 PRP31_HUMAN | E.DLGFSLGHLGK.S                  |            | 2 | 2,84   | 0,474 | -0,107 |
| 21 | Q8IWA0 WDR75_HUMAN | K.VQDTSNTGLGEDIIHQLSKSEE.K       |            | 3 | 2,8386 | 0,179 | 0,152  |
| 21 | Q6DN90 IQEC1_HUMAN | R.SALSSS#LRDLSE.A                | S925:      | 2 | 2,8382 | 0,19  | 0,091  |
| 21 | Q8NFM4 NUP37_HUMAN | R.LFTSDLQDKNE.Y                  |            | 2 | 2,8375 | 0,192 | 0,279  |
| 21 | Q7Z2W4 ZCCHV_HUMAN | K.TVFS#PTLPAAR.S                 | S378:      | 2 | 2,8372 | 0,412 | 0,098  |
| 21 | Q9P0K7 RAI14_HUMAN | E.NAGIQSLLSK.I                   |            | 2 | 2,8369 | 0,335 | 0,32   |
| 21 | Q12846 STX4_HUMAN  | K.TQHGVLSSQQFVE.L                |            | 2 | 2,8351 | 0,193 | -1,244 |
| 21 | O95433 AHSA1_HUMAN | K.TLFLAVQVQNE.E                  |            | 2 | 2,8343 | 0,264 | 0      |
| 21 | Q7KZ85 SPT6H_HUMAN | K.KLPGYTDAALQE.A                 |            | 2 | 2,834  | 0,247 | 0,374  |
| 21 | O95433 AHSA1_HUMAN | K.FHM*VDGNVSGEFTDLVPE.K          |            | 2 | 2,8333 | 0,32  | 0,061  |
| 21 | P37802 TAGL2_HUMAN | K.IQASTM*AFKQM*E.Q               |            | 2 | 2,8329 | 0,277 | -0,431 |
| 21 | P31946 1433B_HUMAN | K.DSTLIM*QLLR.D                  |            | 2 | 2,8321 | 0,202 | -0,101 |
| 21 | Q9UQ35 SRRM2_HUMAN | K.SATRPS#PS#PERSSTGPEPPAPTLLAE.R | S351:S353: | 3 | 2,8317 | 1     | 0,063  |
| 21 | Q9UJM3 ERRFI_HUMAN | E.DSTLSDFKYDVPGR.R               |            | 3 | 2,8294 | 0,353 | 0,521  |
| 21 | Q9UBV2 SE1L1_HUMAN | R.VVAGQIFLDSEESE.L               |            | 2 | 2,8244 | 0,324 | -0,08  |
| 21 | P49736 MCM2_HUMAN  | R.GNDPLTSS#PGR.S                 | S27:       | 2 | 2,8237 | 0,44  | -0,207 |
| 21 | P24539 AT5F1_HUMAN | E.KHVVSQISTQQE.K                 |            | 2 | 2,8233 | 0,266 | -0,353 |
| 21 | Q92576 PHF3_HUMAN  | E.NLVANT#ARSPQFINLK.R            | T1639:     | 2 | 2,8152 | 0,248 | 0,131  |
| 21 | Q8N1F8 S11IP_HUMAN | E.ARGQES#PQKM*SEEV.R             | S493:      | 3 | 2,8151 | 0,259 | -0,095 |
| 21 | P29692 EF1D_HUMAN  | R.ATAPQTQHVS#PM*QVEPPAK.K        | S133:      | 2 | 2,8147 | 0,255 | 0      |
| 21 | P55265 DSRAD_HUMAN | E.M*PSFYSHGLPR.C                 |            | 2 | 2,8146 | 0,402 | -0,28  |
| 21 | Q9UNF1 MAGD2_HUMAN | K.KQNADPQAVTM*PATE.T             |            | 2 | 2,8133 | 0,51  | -0,528 |
| 21 | Q15154 PCM1_HUMAN  | R.KPSASERLPDEKVE.L               |            | 3 | 2,8122 | 0,179 | 0,115  |
| 21 | Q9Y5T5 UBP16_HUMAN | E.SFLDLSLPVLDQSGKK.S             |            | 2 | 2,8107 | 0,335 | 0,262  |
| 21 | P51784 UBP11_HUMAN | E.GLYNVLM*YR.L                   |            | 2 | 2,8105 | 0,387 | 0,213  |
| 21 | Q9H4L7 SMRCD_HUMAN | K.ILHFLQDASIGE.L                 |            | 2 | 2,8097 | 0,347 | 0      |
| 21 | O14497 ARI1A_HUMAN | E.SSKFPFGIS#PAQSHR.N             | S1944:     | 3 | 2,8069 | 0,394 | 0,212  |
| 21 | Q9H4G0 E41L1_HUMAN | E.FLDKPEDVLLK.H                  |            | 2 | 2,8065 | 0,168 | -0,278 |
| 21 | Q9H019 FA54B_HUMAN | K.ASS#FADM*M*GILKD.F             | S238:      | 2 | 2,8042 | 0,237 | 0,326  |
| 21 | P14618 KPYM_HUMAN  | R.LDIDS#PPITAR.N                 | S37:       | 2 | 2,7977 | 0,383 | -0,477 |
| 21 | Q8WXH0 SYNE2_HUMAN | R.RGS#M*SYLAAVEEE.V              | S4108:     | 2 | 2,7963 | 0,323 | 0,159  |
| 21 | P31943 HNRH1_HUMAN | R.LRGLPFGCSKEE.I                 |            | 2 | 2,7962 | 0,39  | -0,263 |
| 21 | Q9Y6M7 S4A7_HUMAN  | R.KIPTGAEASNVLVGE.V              |            | 2 | 2,795  | 0,29  | -0,411 |

|    |                     |                                  |          |   |        |       |        |
|----|---------------------|----------------------------------|----------|---|--------|-------|--------|
| 21 | O75896 TUSC2_HUMAN  | R.RGS#M*FYDEDGDLAHE.F            | S50:     | 3 | 2,7926 | 0,136 | 0,398  |
| 21 | O43237 DC1L2_HUMAN  | R.RGPLTS#GSDEE.N                 | S203:    | 2 | 2,7925 | 0,336 | -0,397 |
| 21 | P28290 SSFA2_HUMAN  | R.SQS#LPTLLSPVR.V                | S739:    | 2 | 2,7925 | 0,408 | 0,495  |
| 21 | Q9H3N1 TXND1_HUMAN  | E.GTNKDFPQNAIR.Q                 |          | 2 | 2,7893 | 0,275 | 0      |
| 21 | Q6PGN9 PSRC1_HUMAN  | R.LSLGPLSPEKLEE.I                |          | 2 | 2,787  | 0,278 | 0      |
| 21 | Q9ULW0 TPX2_HUMAN   | K.SSDQPLTVPV#PK.F                | S738:    | 2 | 2,7865 | 0,389 | 0,085  |
| 21 | Q08378 GOGA3_HUMAN  | R.QQM*TALQSQLQQVQLE.R            |          | 2 | 2,7825 | 0,107 | -0,323 |
| 21 | Q16513 PKN2_HUMAN   | R.FQFNLQDFR.C                    |          | 2 | 2,7812 | 0,246 | -0,201 |
| 21 | P42224 STAT1_HUMAN  | R.FNQAQSGNIQSTVM*LDKQKE.L        |          | 3 | 2,7798 | 0,241 | -0,24  |
| 21 | Q92598 HS105_HUMAN  | E.NKIPDADKANE.K                  |          | 3 | 2,7779 | 0,122 | 0,376  |
| 21 | P54577 SYYC_HUMAN   | R.QVEPLDPPAGSAPGEHVFK.G          |          | 3 | 2,7758 | 0,266 | -0,176 |
| 21 | P42575 CASP2_HUMAN  | E.VFQLFDNANCPSLQNKPK.M           |          | 3 | 2,7754 | 0,228 | 0,086  |
| 21 | Q9Y266 NUDC_HUMAN   | K.LKPNLNGADLPNYR.W               |          | 2 | 2,7749 | 0,42  | -0,074 |
| 21 | Q9UBR2 CATZ_HUMAN   | R.VGDYGSLSGRE.K                  |          | 2 | 2,7743 | 0,469 | -0,642 |
| 21 | P35269 T2FA_HUMAN   | R.LRLDTGPQSLSGK.S                |          | 2 | 2,7733 | 0,287 | 0,178  |
| 21 | Q9P2B4 CT2NL_HUMAN  | K.GTATEPLM*LM*SVFCQTE.S          |          | 2 | 2,773  | 0,366 | 0,188  |
| 21 | P31943 HNRH1_HUMAN  | K.HTGPNS#PDTANDGFVRLR.G          | S104:    | 3 | 2,773  | 0,252 | -0,54  |
| 21 | Q5VZ89 DEN4C_HUMAN  | E.RRS#SLPLDHGSPAQENPE.S          | S1041:   | 3 | 2,7709 | 0,139 | -0,53  |
| 21 | Q16531 DDB1_HUMAN   | R.IGRPSETGIIGIIDPE.C             |          | 2 | 2,7696 | 0,296 | 0,073  |
| 21 | Q9UHB6 LIMA1_HUMAN  | E.VQQPVHPKPLS#PDSR.A             | S362:    | 3 | 2,769  | 0,137 | 0,104  |
| 21 | P02538 K2C6A_HUMAN  | K.ADTLTDEINFLR.A                 |          | 2 | 2,7676 | 0,312 | 0,693  |
| 21 | Q00536 PCTK1_HUMAN  | K.LPDTTSIFALK.E                  |          | 2 | 2,7607 | 0,261 | 0      |
| 21 | B2CI53 B2CI53_HUMAN | E.RNGILASPQSAPGNLDNSK.S          |          | 3 | 2,7543 | 0,256 | 0,189  |
| 21 | Q96EQ7 Q96EQ7_HUMAN | R.APSSSPAKAS#SAISLAPSS#VGSFLVR.S | S19:S28: | 3 | 2,7529 | 0,174 | -1,736 |
| 21 | O95785 WIZ_HUMAN    | K.TPLALAGSPTPK.N                 |          | 2 | 2,7527 | 0,237 | 0,106  |
| 21 | P05362 ICAM1_HUMAN  | R.EPAVGEPAEVTTTVLVR.R            |          | 2 | 2,7519 | 0,53  | 0,483  |
| 21 | P63241 IF5A1_HUMAN  | E.DICPSTHNM*DVPNIK.R             |          | 2 | 2,7517 | 0,343 | -0,694 |
| 21 | Q9HB09 B2L12_HUMAN  | R.SKLVRLS#SDSFAR.L               | S242:    | 3 | 2,7513 | 0,214 | 0      |
| 21 | O95425 SVIL_HUMAN   | R.DSSFTEVPRS#PK.H                | S245:    | 2 | 2,75   | 0,192 | -0,171 |
| 21 | Q9Y2W1 TR150_HUMAN  | K.SPPSTGSTYSSQKEE.S              |          | 3 | 2,7495 | 0,2   | -0,111 |
| 21 | P63000 RAC1_HUMAN   | K.LTPITYPQGLAM*AK.E              |          | 2 | 2,7476 | 0,383 | 0      |
| 21 | P22626 ROA2_HUMAN   | R.GFGVTFSSM*AE.V                 |          | 2 | 2,747  | 0,393 | -0,094 |
| 21 | Q15424 SAFB1_HUMAN  | K.FDFDACNEVPPAPK.E               |          | 2 | 2,7456 | 0,225 | 0,228  |
| 21 | O00712 NFIB_HUMAN   | E.IPSQPYYHDM*NSGVNLQR.S          |          | 3 | 2,7455 | 0,326 | -0,257 |
| 21 | P29692 EF1D_HUMAN   | R.ATAPQTQHVS#PMR.Q               | S133:    | 2 | 2,7378 | 0,278 | -0,325 |
| 21 | Q8IYH0 Q8IYH0_HUMAN | K.TVDLGIS#DLEDDC.-               | S201:    | 2 | 2,7367 | 0,431 | 0,239  |
| 21 | Q01804 OTUD4_HUMAN  | K.TAAAAADVNGFKPLSGNEQLK.N        |          | 3 | 2,7365 | 0,108 | 0      |
| 21 | O43852 CALU_HUMAN   | K.IDGDKDGFVTVDE.L                |          | 2 | 2,7347 | 0,37  | -0,087 |
| 21 | P55201 BRPF1_HUMAN  | E.TGANGTSFSVR.K                  |          | 2 | 2,7318 | 0,404 | 0      |

|    |                    |                                      |            |   |        |       |        |
|----|--------------------|--------------------------------------|------------|---|--------|-------|--------|
| 21 | P18669 PGAM1_HUMAN | E.LDKNLKPIKPMQFLGDEE.T               |            | 3 | 2,7268 | 0,174 | -0,086 |
| 21 | Q5QJE6 TDIF2_HUMAN | E.LQDTSLQQLVSR.H                     |            | 2 | 2,7263 | 0,379 | -0,08  |
| 21 | O14908 GIPC1_HUMAN | R.SRGPATVEDLPSAFE.E                  |            | 2 | 2,7247 | 0,405 | 0,077  |
| 21 | P35251 RFC1_HUMAN  | K.NKPLS#PIKLTPTSVL.D.Y               | S156:      | 2 | 2,724  | 0,295 | 0,068  |
| 21 | Q9UKS6 PACN3_HUMAN | R.ALYDYAGQEAE.L                      |            | 2 | 2,721  | 0,333 | -0,091 |
| 21 | Q9UQ35 SRRM2_HUMAN | R.SRT#PPSAPSQSR.M                    | T2409:     | 2 | 2,7195 | 0,221 | 0,632  |
| 21 | P46087 NOL1_HUMAN  | K.GPQSLFNAPR.G                       |            | 2 | 2,7187 | 0,342 | 1,01   |
| 21 | Q6ULP2 AFTIN_HUMAN | E.KLDLLTSK.C                         |            | 2 | 2,7183 | 0,102 | -0,332 |
| 21 | Q01433 AMPD2_HUMAN | R.QIS#QDVKLEPDILLR.A                 | S168:      | 3 | 2,7182 | 0,134 | 0,495  |
| 21 | P31939 PUR9_HUMAN  | E.QIDIGGVTLR.A                       |            | 2 | 2,7178 | 0,304 | 0,206  |
| 21 | P19634 SL9A1_HUMAN | K.IPSAVS#TVS#M*QNIHPK.S              | S602:S605: | 3 | 2,7177 | 0,295 | 0      |
| 21 | Q32MZ4 LRRF1_HUMAN | R.RGS#GDTISISIDTE.A                  | S120:      | 2 | 2,7176 | 0,396 | -0,344 |
| 21 | P40222 TXLNA_HUMAN | R.RPEGPGAQAPS#SPR.V                  | S514:      | 3 | 2,7173 | 0,296 | 0,369  |
| 21 | O76021 RL1D1_HUMAN | K.ATNES#EDEIPLVPIGK.K                | S361:      | 2 | 2,7152 | 0,186 | 0,127  |
| 21 | Q13188 STK3_HUMAN  | R.AIFM*IPTNPPPTFR.K                  |            | 2 | 2,715  | 0,377 | 0,075  |
| 21 | P33981 TTK_HUMAN   | K.NLSASTVLTAQE.S                     |            | 2 | 2,7137 | 0,22  | 0,198  |
| 21 | P48634 BAT2_HUMAN  | R.RGDKEAPPPVLLTPK.A                  |            | 3 | 2,7134 | 0,2   | 0,226  |
| 21 | O00418 EF2K_HUMAN  | E.SM*GLAPFDLSPR.E                    |            | 2 | 2,7122 | 0,355 | 0,28   |
| 21 | P37802 TAGL2_HUMAN | R.TLM*NLGGLAVARDD.G                  |            | 2 | 2,7102 | 0,267 | 0,083  |
| 21 | P05387 RLA2_HUMAN  | K.NIEDVIAQGIGK.L                     |            | 2 | 2,7092 | 0,415 | 0      |
| 21 | O95785 WIZ_HUMAN   | R.SPSDLHISPLAK.K                     |            | 2 | 2,7088 | 0,464 | 0,289  |
| 21 | Q9Y617 SERC_HUMAN  | E.DVQKLAAFM*KKFLE.M                  |            | 3 | 2,708  | 0,108 | -0,217 |
| 21 | Q09666 AHNK_HUMAN  | K.AEAPLPS#PKLE.G                     | S5110:     | 2 | 2,7074 | 0,385 | -1,486 |
| 21 | Q86UP2 KTN1_HUMAN  | K.FKDFLLSLK.T                        |            | 2 | 2,7058 | 0,169 | 0,11   |
| 21 | Q9HCG8 NCM_HUMAN   | R.DRDYFDYSR.S                        |            | 3 | 2,7028 | 0,158 | 0      |
| 21 | P55060 XPO2_HUMAN  | K.LLTECPPM*M*DTE.Y                   |            | 2 | 2,7011 | 0,204 | -0,083 |
| 21 | A8K0Z3 WASH1_HUMAN | K.YFPVCVSTKPEPEDDAEE.G               |            | 2 | 2,7002 | 0,296 | 0,462  |
| 21 | Q6V1X1 DPP8_HUMAN  | R.LLLLHGFLDE.N                       |            | 2 | 2,7001 | 0,216 | -0,209 |
| 21 | Q15942 ZYX_HUMAN   | E.KQHPVPPPAQNQNQVRS#PGAPGPLTLKEVEE.L | S344:      | 3 | 2,6999 | 0,317 | 0,749  |
| 21 | Q86SQ0 PHLB2_HUMAN | E.GLYLSDTLPR.K                       |            | 2 | 2,6971 | 0,39  | 0,215  |
| 21 | Q8IWZ3 ANKH1_HUMAN | K.TVSLPLSS#PNIK.L                    | S1670:     | 2 | 2,6949 | 0,352 | -0,365 |
| 21 | Q13428 TCOF_HUMAN  | R.TNVVTM*PTAHPR.I                    |            | 2 | 2,6946 | 0,337 | -0,182 |
| 21 | Q8NCN4 RN169_HUMAN | K.NNSYSLAFLAGK.L                     |            | 2 | 2,6945 | 0,421 | -0,095 |
| 21 | Q56P03 EAPP_HUMAN  | E.VDVLLHGTPDQKR.K                    |            | 3 | 2,6938 | 0,236 | -0,681 |
| 21 | Q9NZT2 OGFR_HUMAN  | R.SVEPQDAGPLER.S                     |            | 2 | 2,6929 | 0,346 | -0,282 |
| 21 | Q9Y2W1 TR150_HUMAN | R.ERS#PALKSLQSVVVR.R                 | S248:      | 3 | 2,6926 | 0,233 | 0,396  |
| 21 | P10809 CH60_HUMAN  | E.KGIIDPTKVVRTALLD.A                 |            | 3 | 2,6919 | 0,092 | 0,316  |
| 21 | Q14103 HNRPD_HUMAN | R.GFGFVLFKE.S                        |            | 2 | 2,6906 | 0,255 | 0,234  |
| 21 | Q6PGN9 PSRC1_HUMAN | R.LSLGPLS#PEKLEE.I                   | S70:       | 2 | 2,6905 | 0,337 | 0      |



|    |                    |                            |            |   |        |       |        |
|----|--------------------|----------------------------|------------|---|--------|-------|--------|
| 21 | Q9NUQ6 SPS2L_HUMAN | R.LLQQKLS#LDGNPKPIHGTE.R   | S159:      | 3 | 2,6893 | 0,277 | 0,161  |
| 21 | O60841 IF2P_HUMAN  | E.GNTVHIEVK.E              |            | 2 | 2,6891 | 0,396 | -0,734 |
| 21 | Q9H0B6 KLC2_HUMAN  | R.ASS#LNFLNK.S             | S582:      | 2 | 2,6883 | 0,247 | 0,114  |
| 21 | P23588 IF4B_HUMAN  | E.DCHS#PTSKPPKPDQPLK.V     | S459:      | 2 | 2,6858 | 0,316 | 0,061  |
| 21 | Q15003 CND2_HUMAN  | R.KAPLNIPGT#PVLE.D         | T49:       | 2 | 2,6854 | 0,261 | 0,171  |
| 21 | Q9UQ35 SRRM2_HUMAN | K.AQT#PPGPSLSGSK.S         | T1003:     | 2 | 2,6853 | 0,342 | -0,187 |
| 21 | Q8IY81 RRMJ3_HUMAN | E.IM*SPLYQDEAPK.G          |            | 2 | 2,6838 | 0,252 | 0,26   |
| 21 | P62937 PIIA_HUMAN  | K.SIYGEKFEDE.N             |            | 2 | 2,6818 | 0,353 | -0,301 |
| 21 | Q9Y4L1 HYOU1_HUMAN | K.LQDLTLRDLE.K             |            | 2 | 2,6817 | 0,252 | 0,1    |
| 21 | Q71U36 TBA1A_HUMAN | R.AVFVDLEPTVIDE.V          |            | 2 | 2,6781 | 0,207 | 0,337  |
| 21 | P63313 TYB10_HUMAN | E.KNTLPTKE.T               |            | 2 | 2,6779 | 0,204 | -0,262 |
| 21 | P18583 SON_HUMAN   | E.SKTKS#HDDGNIDLE.S        | S142:      | 2 | 2,6746 | 0,345 | -0,223 |
| 21 | P49411 EFTU_HUMAN  | R.GITINAAHVE.Y             |            | 2 | 2,6742 | 0,283 | 0,238  |
| 21 | P78371 TCPB_HUMAN  | R.VRVDS#TAKVAE.I           | S260:      | 2 | 2,6721 | 0,321 | -0,097 |
| 21 | P42765 THIM_HUMAN  | E.CDKYALQSQQR.W            |            | 3 | 2,6695 | 0,123 | 0,131  |
| 21 | Q9Y4B6 VPRBP_HUMAN | R.KLSSEPLLPLDEEAVD.M       |            | 2 | 2,6677 | 0,366 | 0,139  |
| 21 | Q86UP2 KTN1_HUMAN  | K.VEPVPVTKQPT#PPSE.A       | T153:      | 2 | 2,6675 | 0,392 | -0,145 |
| 21 | Q9Y6W5 WASF2_HUMAN | K.LFDRNS#LPVPVLE.T         | S115:      | 2 | 2,6663 | 0,203 | -0,155 |
| 21 | P42345 FRAP_HUMAN  | K.TGTTVPES#IHSFIGDGLVKPE.A | S2478:     | 3 | 2,6662 | 0,277 | -0,162 |
| 21 | Q14676 MDC1_HUMAN  | R.SSVKT#PETVVPTAPE.L       | T1321:     | 2 | 2,6631 | 0,222 | 0,15   |
| 21 | Q9UFC0 LRWD1_HUMAN | K.RPDDVPLSLSPSK.R          |            | 2 | 2,6624 | 0,335 | 0,173  |
| 21 | Q13873 BMPR2_HUMAN | R.LNINS#SPDEHEPLLR.R       | S862:      | 3 | 2,6624 | 0,14  | -0,504 |
| 21 | Q5T5U3 RHG21_HUMAN | R.HQSYILAVNDQE.T           |            | 2 | 2,6618 | 0,272 | 0,172  |
| 21 | P16401 H15_HUMAN   | R.NGLSLAALK.K              |            | 2 | 2,6589 | 0,366 | 0,275  |
| 21 | Q9UK59 DBR1_HUMAN  | E.SGNGEDLTKVPLK.R          |            | 2 | 2,6573 | 0,18  | -0,629 |
| 21 | Q02952 AKA12_HUMAN | K.SAES#PTSPVTSE.T          | S283:      | 2 | 2,6572 | 0,299 | 0      |
| 21 | Q99747 SNAG_HUMAN  | K.LGLSLVPPGGGIK.K          |            | 2 | 2,656  | 0,369 | 0      |
| 21 | P08133 ANXA6_HUMAN | E.QM*HQLVAAYK.D            |            | 3 | 2,6559 | 0,348 | 0,759  |
| 21 | Q6NZI2 PTRF_HUMAN  | R.RGS#S#PDVHALLE.I         | S365:S366: | 2 | 2,6538 | 0,355 | -1,27  |
| 21 | Q13613 MTMR1_HUMAN | R.GSS#PSHSATSVHTSV.-       | S653:      | 2 | 2,6523 | 0,486 | -0,562 |
| 21 | Q9P0K8 FOXJ2_HUMAN | E.KLGSASQAGPPGSSR.K        |            | 3 | 2,6506 | 0,155 | 0,653  |
| 21 | Q9NQZ2 SAS10_HUMAN | K.LYYDTDYGSK.S             |            | 2 | 2,6483 | 0,337 | 0,1    |
| 21 | Q9ULU4 PKCB1_HUMAN | E.SVQQQSTPVPLIS#PK.R       | S547:      | 2 | 2,6479 | 0,085 | -0,217 |
| 21 | O94804 STK10_HUMAN | R.ILRLS#TFE.K              | S13:       | 2 | 2,6473 | 0,12  | 0      |
| 21 | P28290 SSFA2_HUMAN | K.STIFIS#PSSVK.K           | S803:      | 2 | 2,6465 | 0,346 | -0,685 |
| 21 | O43379 WDR62_HUMAN | R.S#ISLGDSEGPVATLAQPLR.R   | S1226:     | 2 | 2,646  | 0,347 | 0,116  |
| 21 | P27824 CALX_HUMAN  | E.VYFADSFDR.G              |            | 2 | 2,6441 | 0,416 | 0,327  |
| 21 | Q9HCG8 NCM_HUMAN   | R.DRDYFDYSR.S              |            | 2 | 2,644  | 0,237 | -0,69  |
| 21 | Q15424 SAFB1_HUMAN | R.KFDFDACNE.V              |            | 2 | 2,6436 | 0,293 | -0,213 |

|    |                     |                               |                 |   |        |       |        |
|----|---------------------|-------------------------------|-----------------|---|--------|-------|--------|
| 21 | P62753 RS6_HUMAN    | R.RRLS#S#LRASTSKS#E.S         | S235:S236:S244: | 3 | 2,643  | 0,164 | 0,101  |
| 21 | Q99700 ATX2_HUMAN   | R.QNSIGNTPSPGVLASDAQIIPTE.A   |                 | 3 | 2,6417 | 0,255 | 0,156  |
| 21 | P49916 DNL3_HUMAN   | K.LTTTGQVTS#PVK.G             | S123:           | 2 | 2,6392 | 0,221 | -0,186 |
| 21 | Q9H081 MIS12_HUMAN  | K.LKQTLTFFDE.L                |                 | 2 | 2,6376 | 0,334 | -0,196 |
| 21 | P49773 HINT1_HUMAN  | D.ISPQAPTHFLVIPK.K            |                 | 2 | 2,637  | 0,341 | -0,079 |
| 21 | P15408 FOSL2_HUMAN  | E.FM*LVAHGVPVCK.I             |                 | 3 | 2,6367 | 0,209 | 0,574  |
| 21 | P60174 TPIS_HUMAN   | K.SNVSDAVAQSTR.I              |                 | 2 | 2,6353 | 0,118 | -0,198 |
| 21 | Q86XF2 Q86XF2_HUMAN | K.ASPGLLAAALQQSQE.L           |                 | 2 | 2,6287 | 0,283 | 0,247  |
| 21 | Q14676 MDC1_HUMAN   | R.SSVKT#PEPVPTAPE.L           | T1157:          | 2 | 2,6287 | 0,241 | -0,452 |
| 21 | Q13136 LIPA1_HUMAN  | R.VGSGSLDNLGR.F               |                 | 2 | 2,6277 | 0,419 | -0,113 |
| 21 | P61158 ARP3_HUMAN   | R.VM*KGVDLDFFIGDE.A           |                 | 2 | 2,6263 | 0,362 | -0,284 |
| 21 | O94880 PHF14_HUMAN  | K.M*DHILICCVCLGDNSEDADE.I     |                 | 3 | 2,6256 | 0,113 | 0,384  |
| 21 | Q6ZUT9 RA61L_HUMAN  | E.LM*TSASDEDLVK.Q             |                 | 2 | 2,6243 | 0,289 | 0,553  |
| 21 | Q9UQ35 SRRM2_HUMAN  | E.KM*ALPPQEDAT#ASPPR.Q        | T1177:          | 3 | 2,6211 | 0,245 | 0      |
| 21 | Q9Y2K5 R3HD2_HUMAN  | K.ASS#FSGISILTR.G             | S349:           | 2 | 2,6187 | 0,153 | 0,093  |
| 21 | P37802 TAGL2_HUMAN  | K.KIQASTM*AFK.Q               |                 | 2 | 2,6176 | 0,331 | -0,107 |
| 21 | O60271 JIP4_HUMAN   | K.NLPVPVYLRPLDE.K             |                 | 2 | 2,6176 | 0,379 | -0,48  |
| 21 | P13645 K1C10_HUMAN  | R.SLLEGEGSSGGGGR.G            |                 | 2 | 2,6174 | 0,392 | -0,097 |
| 21 | Q9UQ35 SRRM2_HUMAN  | R.VSGRTS#PPLDR.A              | S2398:          | 2 | 2,6173 | 0,17  | -0,089 |
| 21 | O00231 PSD11_HUMAN  | E.ASIDILHSIVK.R               |                 | 2 | 2,6155 | 0,229 | -0,102 |
| 21 | Q9UPX8 SHAN2_HUMAN  | K.SASLAPRS#PE.I               | S1065:          | 2 | 2,6153 | 0,272 | -0,111 |
| 21 | Q8NBJ4 GOLM1_HUMAN  | R.DTINLLDQR.E                 |                 | 2 | 2,6146 | 0,187 | -0,336 |
| 21 | O43395 PRPF3_HUMAN  | K.QLSFISPTPQPK.T              |                 | 2 | 2,6139 | 0,183 | -0,254 |
| 21 | P0C7M2 RA1L3_HUMAN  | R.GFGFVTYATVEE.V              |                 | 2 | 2,6126 | 0,371 | 0,092  |
| 21 | P46087 NOL1_HUMAN   | K.KGPQSLFNAPR.G               |                 | 2 | 2,6091 | 0,336 | 0,1    |
| 21 | O75607 NPM3_HUMAN   | D.DFQLQPPVTFR.L               |                 | 2 | 2,6082 | 0,376 | 0,634  |
| 21 | Q8NFH5 NUP53_HUMAN  | K.ASTSDYQVISDR.Q              |                 | 2 | 2,6067 | 0,412 | -0,091 |
| 21 | Q86VP6 CAND1_HUMAN  | K.CLDAVVSTRHE.M               |                 | 3 | 2,6066 | 0,316 | 0,284  |
| 21 | O60941 DTNB_HUMAN   | R.STSAGSTPTHCPQDSLGSVGGDVQE.A |                 | 3 | 2,6037 | 0,217 | 0      |
| 21 | Q7Z3T8 ZFY16_HUMAN  | K.SILLQSLIEGM*EDR.K           |                 | 2 | 2,6031 | 0,294 | -0,377 |
| 21 | O15085 ARHGB_HUMAN  | R.NSVLSDPGLDSPRT#SPVIM*AR.V   | T254:           | 3 | 2,6007 | 0,121 | 0      |
| 21 | O60502 NCOAT_HUMAN  | R.SFALLFDDIDHNM*CAADKE.V      |                 | 3 | 2,6005 | 0,267 | -0,493 |
| 21 | Q06830 PRDX1_HUMAN  | K.ATAVM*PDGQFKD.I             |                 | 2 | 2,5999 | 0,342 | -0,659 |
| 21 | Q13200 PSMD2_HUMAN  | R.FAADIISVLAM*TM*SGERE.C      |                 | 2 | 2,599  | 0,387 | 0      |
| 21 | Q7Z4V5 HDGR2_HUMAN  | K.FALKVDS#PDVK.R              | S490:           | 2 | 2,5974 | 0,211 | 0,282  |
| 21 | P35232 PHB_HUMAN    | R.FDAGELITQRE.L               |                 | 2 | 2,5959 | 0,242 | -0,191 |
| 21 | Q9HCN4 GPN1_HUMAN   | K.DM*GSVALDAGTAK.D            |                 | 2 | 2,5955 | 0,34  | -0,585 |
| 21 | O75179 ANR17_HUMAN  | K.SGPS#PLSS#PNGK.L            | S1696:S1700:    | 2 | 2,5942 | 0,189 | -0,189 |
| 21 | P02545 LMNA_HUMAN   | R.SGAQASSTPLSPT#R.I           | T24:            | 2 | 2,593  | 0,414 | -0,254 |

|    |                    |                           |            |   |        |       |        |
|----|--------------------|---------------------------|------------|---|--------|-------|--------|
| 21 | Q9NTK5 OLA1_HUMAN  | E.DGDIIFFK.F              |            | 2 | 2,5927 | 0,316 | 0,256  |
| 21 | P38646 GRP75_HUMAN | D.IKNVPFKIVR.A            |            | 3 | 2,5924 | 0,217 | 0,828  |
| 21 | Q9Y2W1 TR150_HUMAN | K.SPLQSVVVR.R             |            | 2 | 2,5913 | 0,169 | 0      |
| 21 | P54652 HSP72_HUMAN | K.LLQDFFNGKE.L            |            | 2 | 2,5901 | 0,381 | 0,907  |
| 21 | Q9Y6W5 WASF2_HUMAN | K.VTQLDPKEEE.V            |            | 2 | 2,59   | 0,178 | 0,103  |
| 21 | P02545 LMNA_HUMAN  | R.LRLSPS#PTSQR.S          | S392:      | 2 | 2,59   | 0,238 | -0,369 |
| 21 | Q8N1G0 ZN687_HUMAN | K.GAGGALLTPK.T            |            | 2 | 2,5894 | 0,165 | 0,345  |
| 21 | Q4J6C6 PPCEL_HUMAN | E.DVLFYTFQR.N             |            | 2 | 2,5893 | 0,372 | 0,103  |
| 21 | P46821 MAP1B_HUMAN | E.HVCVSASKHSPT#EDEE.S     | T972:      | 3 | 2,5885 | 0,188 | -0,387 |
| 21 | Q15029 U5S1_HUMAN  | E.DTQPLTEPIIKPVK.T        |            | 2 | 2,5826 | 0,318 | -0,386 |
| 21 | O60763 USO1_HUMAN  | E.QDDLLVLLADQDQK.I        |            | 3 | 2,5816 | 0,159 | 0      |
| 21 | P06748 NPM_HUMAN   | E.KT#PKTPKGPSS#VEDIK.A    | T234:S243: | 2 | 2,5791 | 0,226 | -0,261 |
| 21 | P23229 ITA6_HUMAN  | E.ITVTNSPSNPR.N           |            | 2 | 2,579  | 0,256 | 0,103  |
| 21 | Q8IXM2 CQ049_HUMAN | E.DSGIPLPAES#PKKGPK.K     | S96:       | 2 | 2,5774 | 0,299 | -0,574 |
| 21 | P31939 PUR9_HUMAN  | E.VSISSDAFFPFR.D          |            | 2 | 2,5722 | 0,411 | -0,178 |
| 21 | P02545 LMNA_HUMAN  | R.LRLS#PS#PTSQR.S         | S390:S392: | 2 | 2,5715 | 0,201 | -0,609 |
| 21 | Q7Z4V5 HDGR2_HUMAN | K.FALKVDS#PDVKR.C         | S490:      | 2 | 2,57   | 0,187 | -0,587 |
| 21 | O43581 SYT7_HUMAN  | R.SS#VSDLVNSLTSE.M        | S102:      | 2 | 2,5699 | 0,334 | -0,172 |
| 21 | Q00536 PCTK1_HUMAN | R.LSLPADIRLPE.G           |            | 2 | 2,569  | 0,361 | 0,199  |
| 21 | P46013 KI67_HUMAN  | K.LDLLGNLPGSK.R           |            | 2 | 2,5672 | 0,334 | 0,325  |
| 21 | Q9Y2D5 AKAP2_HUMAN | R.DALGDSLQVPVS#PSSTTSSR.C | S152:      | 3 | 2,5666 | 0,226 | 0,439  |
| 21 | Q15032 R3HD1_HUMAN | R.DRIFS#QDSLCSQE.N        | S299:      | 2 | 2,566  | 0,252 | -0,513 |
| 21 | Q9UGU5 HM2L1_HUMAN | E.TLTLREPDGLK.M           |            | 2 | 2,5641 | 0,253 | 0,196  |
| 21 | Q12996 CSTF3_HUMAN | E.GNGPVESNAVLTK.A         |            | 2 | 2,5637 | 0,439 | -0,474 |
| 21 | O60684 IMA7_HUMAN  | K.SYKNNALNPEE.M           |            | 2 | 2,5626 | 0,335 | -0,286 |
| 21 | P04049 RAF1_HUMAN  | R.YSTPHAFTFNTS#SPSSE.G    | S243:      | 2 | 2,5612 | 0,241 | 0,566  |
| 21 | Q9UBE0 SAE1_HUMAN  | R.DPPHNNFFFDGM*K.G        |            | 3 | 2,561  | 0,213 | 0,317  |
| 21 | Q86VQ1 GLCI1_HUMAN | R.LLQPIRATVPYQLLR.G       |            | 3 | 2,5605 | 0,197 | 0,513  |
| 21 | Q2M218 AAK1_HUMAN  | R.RILS#DVTHSAVFGVPASK.S   | S637:      | 3 | 2,5604 | 0,177 | -0,093 |
| 21 | Q6P9B6 K1609_HUMAN | E.DLVGSVVHVLSHR.Q         |            | 2 | 2,5593 | 0,297 | 0      |
| 21 | Q9UQ35 SRRM2_HUMAN | E.KM*ALPPQEDATAS#PPRQK.D  | S1179:     | 2 | 2,5574 | 0,185 | 0      |
| 21 | P38646 GRP75_HUMAN | E.DFDQALLR.H              |            | 2 | 2,5564 | 0,247 | 0,187  |
| 21 | Q9C0B5 ZDHC5_HUMAN | R.GVGSPEPGPTAPYLGR.S      |            | 2 | 2,5562 | 0,24  | -0,078 |
| 21 | Q9UIF9 BAZ2A_HUMAN | E.M*EGPEECLGR.R           |            | 2 | 2,5561 | 0,279 | 0,715  |
| 21 | P05783 K1C18_HUMAN | K.VIDDTNITR.L             |            | 2 | 2,5559 | 0,228 | 0      |
| 21 | Q13625 ASPP2_HUMAN | K.RLS#NGKLVVE.I           | S206:      | 2 | 2,5545 | 0,294 | -0,498 |
| 21 | Q1KMD3 HNRL2_HUMAN | R.SKS#PLPPEEE.A           | S228:      | 2 | 2,5531 | 0,383 | -0,102 |
| 21 | Q5VUA4 ZN318_HUMAN | R.IPS#PNILK.T             | S2101:     | 2 | 2,5526 | 0,181 | 0      |
| 21 | Q9UKA4 AKA11_HUMAN | K.VKNPCLNVQSQR.S          |            | 2 | 2,5506 | 0,274 | -0,338 |

|    |                    |                            |            |   |        |       |        |
|----|--------------------|----------------------------|------------|---|--------|-------|--------|
| 21 | Q86YP4 P66A_HUMAN  | R.VNGLTTVALKE.T            |            | 2 | 2,5466 | 0,229 | 0,213  |
| 21 | P78371 TCPB_HUMAN  | R.VRVDS#TAKVAE.I           | S260:      | 3 | 2,5434 | 0,221 | 1,239  |
| 21 | Q15185 TEBP_HUMAN  | D.EDM*SNFDRFSE.M           |            | 2 | 2,5431 | 0,271 | -0,088 |
| 21 | P55010 IF5_HUMAN   | K.VLTLSDDLERTIEE.R         |            | 2 | 2,5425 | 0,251 | 0      |
| 21 | P23588 IF4B_HUMAN  | K.GKTIS#LTDFLAE.D          | S16:       | 2 | 2,5419 | 0,243 | -0,177 |
| 21 | Q9NZT2 OGFR_HUMAN  | R.SQGDEAGGHGEDRPEPLS#PKE.S | S378:      | 3 | 2,5395 | 0,201 | 0,081  |
| 21 | Q99623 PHB2_HUMAN  | R.QKIVQAEGEAE.A            |            | 2 | 2,5393 | 0,408 | -0,711 |
| 21 | P31946 1433B_HUMAN | D.STLIM*QLLR.D             |            | 2 | 2,535  | 0,127 | 0,112  |
| 21 | P55211 CASP9_HUMAN | E.DTGQDM*LASFLR.T          |            | 2 | 2,5344 | 0,239 | 0,178  |
| 21 | Q9NZM1 MYOF_HUMAN  | K.KLEPISNDLLVVE.K          |            | 2 | 2,5342 | 0,299 | 0,077  |
| 21 | O96017 CHK2_HUMAN  | E.STALPQVLAQPSTS#R.K       | S518:      | 2 | 2,5337 | 0,143 | -0,298 |
| 21 | Q8IUD2 RB6I2_HUMAN | R.SVGKVEPSSQSPGRS#PR.L     | S21:       | 3 | 2,5324 | 0,337 | 0,199  |
| 21 | P43686 PRS6B_HUMAN | E.DLEDLYSR.Y               |            | 2 | 2,5316 | 0,113 | 0,422  |
| 21 | P61604 CH10_HUMAN  | K.VVLDDKDYFLFR.D           |            | 3 | 2,5303 | 0,38  | 0,418  |
| 21 | Q8TD19 NEK9_HUMAN  | E.NLQIFTQLQK.L             |            | 2 | 2,5288 | 0,206 | -0,099 |
| 21 | O43399 TPD54_HUMAN | R.NSATFKS#FE.D             | S166:      | 2 | 2,5287 | 0,303 | 0,11   |
| 21 | Q9HCD5 NCOA5_HUMAN | R.LM*RSS#TDS#LPGPISR.Q     | S378:S381: | 2 | 2,5266 | 0,386 | 0,136  |
| 21 | Q9NZW5 MPP6_HUMAN  | R.AGEPLGVTRFE.N            |            | 2 | 2,5236 | 0,333 | 0      |
| 21 | O95817 BAG3_HUMAN  | R.GYISIPVIHE.Q             |            | 2 | 2,5236 | 0,212 | 0,108  |
| 21 | P14625 ENPL_HUMAN  | K.ESDDPM*AYIHFTAE.G        |            | 2 | 2,5224 | 0,323 | -0,446 |
| 21 | Q14676 MDC1_HUMAN  | R.SSVKT#PESIVPIAPE.L       | T1567:     | 2 | 2,5218 | 0,333 | 0,075  |
| 21 | P37837 TALDO_HUMAN | K.FAADAVKLE.R              |            | 2 | 2,5216 | 0,143 | 0,316  |
| 21 | P04075 ALDOA_HUMAN | K.YTPSQAGAAASE.S           |            | 2 | 2,52   | 0,287 | -1,21  |
| 21 | P42858 HD_HUMAN    | K.GKVLLGEEE.A              |            | 2 | 2,5193 | 0,091 | 0,251  |
| 21 | P51114 FXR1_HUMAN  | E.NGLVTVADYISR.A           |            | 2 | 2,5183 | 0,276 | 0,093  |
| 21 | Q9H974 QTRD1_HUMAN | R.LISGVS RPDEVLE.C         |            | 2 | 2,5182 | 0,264 | -0,173 |
| 21 | P49366 DHYS_HUMAN  | E.KKLEPLSQDE.D             |            | 2 | 2,518  | 0,242 | -0,308 |
| 21 | Q09666 AHNK_HUMAN  | K.FKAEAPLPS#PKLE.G         | S5110:     | 3 | 2,5151 | 0,266 | -0,728 |
| 21 | Q96RT1 LAP2_HUMAN  | R.TM*SVSDFNYSR.T           |            | 2 | 2,5151 | 0,381 | 0,092  |
| 21 | Q9UKV3 ACINU_HUMAN | K.SPS#PPRLTE.D             | S388:      | 2 | 2,5149 | 0,187 | 0      |
| 21 | Q9Y2S0 RPAC2_HUMAN | R.YM*IM*KNPEVE.F           |            | 2 | 2,5147 | 0,252 | -0,569 |
| 21 | O43290 SNUT1_HUMAN | E.GERPHS#FRLE.Q            | S348:      | 3 | 2,5145 | 0,245 | 0,489  |
| 21 | P22626 ROA2_HUMAN  | R.GGGGNFGPGPGSNFR.G        |            | 2 | 2,5145 | 0,333 | -0,089 |
| 21 | O00303 EIF3F_HUMAN | R.VIGTLLGTVDK.H            |            | 2 | 2,5139 | 0,154 | 0      |
| 21 | Q9UQ35 SRRM2_HUMAN | E.SSLVFKDTLR.T             |            | 2 | 2,5137 | 0,179 | -1,046 |
| 21 | P54652 HSP72_HUMAN | R.TLSSSTQASIE.I            |            | 2 | 2,5114 | 0,282 | 0      |
| 21 | Q6S8J3 A26CA_HUMAN | R.AVFPISIVGRPR.Q           |            | 2 | 2,5109 | 0,233 | -0,814 |
| 21 | Q9UQ80 PA2G4_HUMAN | R.FDAM*PFTLR.A             |            | 2 | 2,5099 | 0,275 | 0,11   |
| 21 | P29401 TKT_HUMAN   | E.AVSSAVVGEPGITVTHLAVNR.V  |            | 3 | 2,5091 | 0,168 | -0,088 |

|    |                    |                                 |                 |   |        |       |        |
|----|--------------------|---------------------------------|-----------------|---|--------|-------|--------|
| 21 | Q13242 SFRS9_HUMAN | R.GS#PHYFS#PFRPY.-              | S211:S216:      | 2 | 2,509  | 0,203 | 0,378  |
| 21 | Q14676 MDC1_HUMAN  | E.AYGPCLS#PPR.A                 | S780:           | 2 | 2,5087 | 0,31  | -0,102 |
| 21 | Q92499 DDX1_HUMAN  | K.GHVDILAPTVE.L                 |                 | 2 | 2,5065 | 0,297 | -0,191 |
| 21 | Q9NZT2 OGFR_HUMAN  | R.SQGDEAGGHGEDRPEPLS#PKE.S      | S378:           | 2 | 2,5065 | 0,466 | 0,644  |
| 21 | P18669 PGAM1_HUMAN | K.NLKPIKPMQFLGDEE.T             |                 | 3 | 2,5052 | 0,294 | 0,104  |
| 21 | P78417 GSTO1_HUMAN | K.VPSLVGSFIR.S                  |                 | 2 | 2,504  | 0,301 | 0,113  |
| 21 | Q92615 LARP5_HUMAN | K.RLS#REQST#PPKS#PQ.-           | S727:T732:S736: | 3 | 2,5022 | 0,206 | 0      |
| 21 | Q8IYB3 SRRM1_HUMAN | E.KKEKT#PELPEPSVK.V             | T220:           | 3 | 2,5016 | 0,147 | -0,325 |
| 21 | Q96N67 DOCK7_HUMAN | K.QISGQYSGS#PQLLK.N             | S30:            | 2 | 2,5001 | 0,097 | -0,692 |
| 21 | Q9UHX1 PUF60_HUMAN | R.IYVASVHQDLSDDDIKS#VFE.A       | S244:           | 3 | 2,4989 | 0,254 | 0      |
| 21 | P39687 AN32A_HUMAN | E.FLSTINVGLTSIANLPK.L           |                 | 2 | 2,4983 | 0,452 | 0,273  |
| 21 | Q9Y5B6 GCFC_HUMAN  | E.LGDFTPHDNEPGK.G               |                 | 3 | 2,4983 | 0,203 | 0,32   |
| 21 | Q13586 STIM1_HUMAN | R.AEQS#LHDLQE.R                 | S257:           | 2 | 2,4976 | 0,136 | -0,293 |
| 21 | O14974 MYPT1_HUMAN | R.KTGSY#GALAE.I                 | Y446:           | 2 | 2,4976 | 0,243 | 0,113  |
| 21 | P22314 UBA1_HUMAN  | R.LQTSSVLVSGLR.G                |                 | 2 | 2,4962 | 0,466 | 0,194  |
| 21 | P24534 EF1B_HUMAN  | E.AVS#SPPPADLCHALR.W            | S42:            | 3 | 2,4961 | 0,291 | 0,219  |
| 21 | Q96S66 CLCC1_HUMAN | R.FQTGNKS#PEVLR.A               | S438:           | 3 | 2,4948 | 0,289 | -0,754 |
| 21 | Q9C0B5 ZDHC5_HUMAN | K.LSRGDS#LKEPTSIAE.S            | S380:           | 2 | 2,4933 | 0,339 | -0,435 |
| 21 | P63151 2ABA_HUMAN  | R.VPVFRPM*DLM*VE.A              |                 | 2 | 2,4933 | 0,204 | -0,167 |
| 21 | Q66K74 MAP1S_HUMAN | E.AGLSLPLR.G                    |                 | 2 | 2,493  | 0,102 | 0,369  |
| 21 | Q15773 MLF2_HUMAN  | R.LAIQGPEDS#PSR.Q               | S238:           | 2 | 2,4927 | 0,291 | -0,271 |
| 21 | Q9H0G5 CCD55_HUMAN | R.AKDKFLDQE.R                   |                 | 2 | 2,4918 | 0,164 | -0,112 |
| 21 | Q5VUA4 ZN318_HUMAN | R.SVRIPS#PNILK.T                | S2101:          | 2 | 2,4918 | 0,242 | 0      |
| 21 | Q9UQ35 SRRM2_HUMAN | R.VSGRTS#PPLDR.A                | S2398:          | 3 | 2,4914 | 0,201 | 0      |
| 21 | P04792 HSPB1_HUMAN | E.SPAVAAPAYS.R.A                |                 | 2 | 2,4909 | 0,245 | -0,895 |
| 21 | Q53HL2 BOREA_HUMAN | K.TPGLRT#PAAGER.I               | T204:           | 3 | 2,4908 | 0,184 | 0,42   |
| 21 | Q96JP5 ZFP91_HUMAN | R.SKTSGLQLICK.S                 |                 | 3 | 2,4908 | 0,11  | 0,666  |
| 21 | Q9H0H5 RGAP1_HUMAN | K.SALAF.LNR.G                   |                 | 2 | 2,4898 | 0,332 | 0      |
| 21 | Q6NVY1 HIBCH_HUMAN | K.SLGSSDLKF.-                   |                 | 2 | 2,4879 | 0,337 | 0,384  |
| 21 | P11021 GRP78_HUMAN | E.IDVNGILR.V                    |                 | 2 | 2,4863 | 0,237 | 0,271  |
| 21 | Q14004 CD2L5_HUMAN | R.VFSLPQPQQDGGGGASSGGGVT#PLVE.Y | T141:           | 2 | 2,4853 | 0,363 | 0,968  |
| 21 | Q15003 CND2_HUMAN  | K.NAFGLHLIDFM*SE.I              |                 | 2 | 2,484  | 0,223 | -0,081 |
| 21 | Q8NI27 THOC2_HUMAN | K.GGEKT#PVSGLKS#PVPR.S          | T1270:S1278:    | 3 | 2,483  | 0,113 | -0,099 |
| 21 | Q08J23 NSUN2_HUMAN | E.KFHQFLVSETE.S                 |                 | 2 | 2,4828 | 0,214 | -1,162 |
| 21 | Q14166 TTL12_HUMAN | R.S#SPGQTPEEGAQALAE.F           | S15:            | 2 | 2,4828 | 0,105 | -0,222 |
| 21 | Q2M2I8 AAK1_HUMAN  | K.VQTTTPPAVQGQK.V               |                 | 2 | 2,4808 | 0,225 | -0,09  |
| 21 | Q9Y2H0 DLGP4_HUMAN | D.CTPHPNSISIDAGPR.Q             |                 | 2 | 2,4799 | 0,346 | -0,451 |
| 21 | Q9NZM1 MYOF_HUMAN  | E.DRDHYIPNTLNPVFG.R.M           |                 | 2 | 2,4791 | 0,255 | 0,319  |
| 21 | P04075 ALDOA_HUMAN | E.ILPDGDHDLKR.C                 |                 | 2 | 2,4789 | 0,206 | -0,477 |

|    |                    |                              |            |   |        |       |        |
|----|--------------------|------------------------------|------------|---|--------|-------|--------|
| 21 | P08670 VIME_HUMAN  | R.DNLAEDIM*R.L               |            | 2 | 2,4776 | 0,219 | -0,447 |
| 21 | Q9UBW7 ZMYM2_HUMAN | E.NLHYDQGCQTSR.T             |            | 2 | 2,4772 | 0,356 | 1,237  |
| 21 | Q9Y4E8 UBP15_HUMAN | K.ADTIDTIEKE.I               |            | 2 | 2,4724 | 0,27  | 0,322  |
| 21 | Q9P1Y6 K1542_HUMAN | K.AEAPSS#PDVAPAGKEDSPSASGR.V | S1360:     | 3 | 2,4718 | 0,21  | 0,162  |
| 21 | P18669 PGAM1_HUMAN | K.NLKPIKPM*QFLGDEE.T         |            | 2 | 2,4691 | 0,335 | 0,069  |
| 21 | Q8IU81 I2BP1_HUMAN | E.ALGHS#PKDPGGGGGPVR.A       | S436:      | 2 | 2,4683 | 0,34  | -0,298 |
| 21 | Q7Z6Z7 HUWE1_HUMAN | K.YICQKPSIQK.A               |            | 2 | 2,4657 | 0,275 | 0      |
| 21 | Q96T76 MMS19_HUMAN | D.SFLSNILQDCR.H              |            | 2 | 2,4655 | 0,227 | 0,271  |
| 21 | Q9Y490 TLN1_HUMAN  | K.VM*VTNVTSLLK.T             |            | 2 | 2,4649 | 0,261 | -0,3   |
| 21 | P24534 EF1B_HUMAN  | E.KASLPGVKKALGK.Y            |            | 2 | 2,4643 | 0,172 | -0,094 |
| 21 | P04406 G3P_HUMAN   | K.LVINGNPITIFQERDPS#KIK.W    | S83:       | 3 | 2,4643 | 0,12  | 0,155  |
| 21 | P48643 TCPE_HUMAN  | K.IAILTCPEPPKPK.T            |            | 3 | 2,4636 | 0,286 | 0,114  |
| 21 | P05388 RLAO_HUMAN  | K.TSFFQALGITTK.I             |            | 2 | 2,4634 | 0,385 | -0,279 |
| 21 | Q53F19 CQ085_HUMAN | E.LKM*ISTPS#PK.K             | S415:      | 2 | 2,4607 | 0,316 | 0      |
| 21 | P18754 RCC1_HUMAN  | E.SCFIPQNLTSFK.N             |            | 2 | 2,4585 | 0,297 | -0,169 |
| 21 | Q96S90 LYSM1_HUMAN | K.TLYIPILTEPR.D              |            | 2 | 2,4579 | 0,19  | 0,185  |
| 21 | P18669 PGAM1_HUMAN | K.NLKPIKPMQFLGDEE.T          |            | 2 | 2,4575 | 0,288 | -0,139 |
| 21 | Q9H019 FA54B_HUMAN | K.ASS#FADMM*GILKD.F          | S238:      | 2 | 2,4573 | 0,148 | 0,247  |
| 21 | O14514 BAI1_HUMAN  | E.NVATLSVSS#LER.R            | S1469:     | 2 | 2,4557 | 0,209 | 1,17   |
| 21 | Q9UPN3 MACF1_HUMAN | R.M*LASGNQPDQDITHFFQIQE.L    |            | 2 | 2,4536 | 0,233 | 0,396  |
| 21 | P26358 DNMT1_HUMAN | E.AFTFNIKLS#PVKRPR.K         | S954:      | 3 | 2,4524 | 0,33  | 0,188  |
| 21 | O14983 AT2A1_HUMAN | K.STTLRVDQSILTGE.S           |            | 2 | 2,4499 | 0,195 | -0,321 |
| 21 | P25398 RS12_HUMAN  | E.HQINLIKVDD.N               |            | 2 | 2,4483 | 0,289 | -0,204 |
| 21 | Q9H008 LHPP_HUMAN  | E.LEKPVLSLGG.G               |            | 2 | 2,4474 | 0,16  | 0      |
| 21 | Q58FG0 HS905_HUMAN | K.DQVANSAFVE.C               |            | 2 | 2,4454 | 0,19  | 0,113  |
| 21 | Q58FG0 HS905_HUMAN | K.HIYITGETK.D                |            | 2 | 2,4452 | 0,472 | -0,1   |
| 21 | O00418 EF2K_HUMAN  | K.LLQSAKT#ILR.G              | T348:      | 2 | 2,4444 | 0,236 | 0      |
| 21 | Q86U90 YRDC_HUMAN  | R.LFRPPS#PAPAAPGAR.L         | S37:       | 3 | 2,4432 | 0,227 | 0,231  |
| 21 | Q8ND56 LS14A_HUMAN | R.SS#PQLDPLRKS#PTM*E.Q       | S183:S192: | 2 | 2,443  | 0,372 | -0,262 |
| 21 | O75381 PEX14_HUMAN | E.INSLKGLLLNR.R              |            | 3 | 2,4416 | 0,105 | 0,368  |
| 21 | O15067 PUR4_HUMAN  | E.SNALLRS#PNRDFLTHVSAR.E     | S569:      | 3 | 2,4394 | 0,449 | 0,39   |
| 21 | O75569 PRKRA_HUMAN | K.TPIQVLHE.Y                 |            | 2 | 2,4372 | 0,29  | 0,065  |
| 21 | Q9Y490 TLN1_HUMAN  | K.AAAFEEQENE.T               |            | 2 | 2,4362 | 0,228 | -0,107 |
| 21 | Q32MZ4 LRRF1_HUMAN | R.CTLPEHESPS#QDISDACEAE.S    | S735:      | 3 | 2,4342 | 0,165 | 0      |
| 21 | O75528 TAD3L_HUMAN | R.NQNKPFVPHTK.S              |            | 2 | 2,4332 | 0,262 | -0,087 |
| 21 | Q16630 CPSF6_HUMAN | E.TLVTAISLIK.Q               |            | 2 | 2,4309 | 0,346 | 0,115  |
| 21 | Q7Z2T5 TRM1L_HUMAN | K.TTDDTTTDNYIAQGK.R          |            | 2 | 2,4297 | 0,345 | -0,445 |
| 21 | Q13283 G3BP1_HUMAN | K.FYVHNDIFR.Y                |            | 2 | 2,4263 | 0,322 | 0,202  |
| 21 | Q96JM3 ZN828_HUMAN | R.KPALFPEPAK.T               |            | 2 | 2,4261 | 0,277 | -0,222 |

|    |                     |                             |            |   |        |       |        |
|----|---------------------|-----------------------------|------------|---|--------|-------|--------|
| 21 | P16157 ANK1_HUMAN   | R.ITHS#PTVSQVTE.R           | S1686:     | 2 | 2,4245 | 0,287 | -0,354 |
| 21 | P78344 IF4G2_HUMAN  | R.SNQLFNGHGGHIM*PPTQSQFGE.M |            | 3 | 2,4229 | 0,218 | 0      |
| 21 | Q99615 DNJC7_HUMAN  | E.AFTILSDPK.K               |            | 2 | 2,4202 | 0,349 | 0      |
| 21 | P04406 G3P_HUMAN    | E.GLM*TTVHAITATQK.T         |            | 3 | 2,4194 | 0,419 | 0,246  |
| 21 | O95785 WIZ_HUMAN    | R.SPSDLHISPLAK.K            |            | 3 | 2,4192 | 0,286 | 0,795  |
| 21 | Q96JM3 ZN828_HUMAN  | R.KTSPASLDFPE.S             |            | 2 | 2,4191 | 0,265 | -0,512 |
| 21 | Q9H2J4 PDCL3_HUMAN  | K.KPIEDVLLSSVR.R            |            | 3 | 2,4165 | 0,093 | -0,067 |
| 21 | Q9C0C2 TB182_HUMAN  | K.VSAPGVLTAAQDR.V           |            | 2 | 2,4145 | 0,465 | 0,101  |
| 21 | Q9H7T9 CA135_HUMAN  | E.AGLS#PQSLQTSQHHR.M        | S133:      | 3 | 2,4136 | 0,225 | -0,11  |
| 21 | Q7Z417 NUFP2_HUMAN  | R.TSPQVLGSILK.S             |            | 2 | 2,4136 | 0,487 | -0,107 |
| 21 | Q99961 SH3G1_HUMAN  | R.SM*PPLDQPSCK.A            |            | 2 | 2,4126 | 0,261 | 0,096  |
| 21 | O15541 R113A_HUMAN  | R.QSFQNPVVK.C               |            | 2 | 2,4123 | 0,262 | -0,106 |
| 21 | P51397 DAP1_HUMAN   | E.SPS#PPKPTVFISGVIAR.G      | S51:       | 3 | 2,411  | 0,111 | 0,299  |
| 21 | B2RA01 B2RA01_HUMAN | K.AQYEDIAQK.S               |            | 2 | 2,4106 | 0,153 | 0,114  |
| 21 | Q7Z6Z7 HUWE1_HUMAN  | K.VLLSPDYLPAM*R.R           |            | 2 | 2,4102 | 0,131 | 0,263  |
| 21 | O43399 TPD54_HUMAN  | E.TLSQAGQKTSAAALSTVGSISR.K  |            | 3 | 2,4096 | 0,17  | 0,171  |
| 21 | P60709 ACTB_HUMAN   | E.TTFNSIM*KCDVDIR.K         |            | 2 | 2,4095 | 0,25  | 0      |
| 21 | Q9NQ92 CQ079_HUMAN  | R.GTQSIPNDSPAR.G            |            | 2 | 2,4094 | 0,395 | 0,294  |
| 21 | Q9HC38 GLOD4_HUMAN  | K.TM*VGFPEDDHFAE.L          |            | 2 | 2,4083 | 0,363 | 0,293  |
| 21 | Q9Y2W1 TR150_HUMAN  | E.MKS#PREPGYKAE.G           | S698:      | 2 | 2,4082 | 0,171 | 0,911  |
| 21 | O75381 PEX14_HUMAN  | R.GGDGQINEQVE.K             |            | 2 | 2,4079 | 0,292 | 0,106  |
| 21 | Q6PKG0 LARP1_HUMAN  | R.TPRT#PRT#PQLK.D           | T785:T788: | 3 | 2,4056 | 0,114 | -0,063 |
| 21 | P54709 AT1B3_HUMAN  | K.FLKPYTLEE.Q               |            | 2 | 2,4052 | 0,126 | 0,321  |
| 21 | Q6S8J3 A26CA_HUMAN  | K.AGFAGDDAPR.A              |            | 2 | 2,4049 | 0,322 | -0,999 |
| 21 | O14733 MP2K7_HUMAN  | R.HM*LGLPSTLFTPR.S          |            | 2 | 2,4043 | 0,371 | -0,246 |
| 21 | Q9ULR0 ISY1_HUMAN   | K.FIAHVPVPSQQE.I            |            | 2 | 2,404  | 0,265 | 0,361  |
| 21 | Q32MZ4 LRRF1_HUMAN  | R.RGSGDT#SISIDTE.A          | T123:      | 2 | 2,4038 | 0,125 | 0      |
| 21 | O75475 PSIP1_HUMAN  | K.FSSQQAATK.Q               |            | 2 | 2,4032 | 0,345 | -0,063 |
| 21 | Q8NEF9 SRFB1_HUMAN  | K.AVTIANS#PSKPSEK.D         | S203:      | 2 | 2,403  | 0,247 | -0,404 |
| 21 | P51858 HDGF_HUMAN   | E.VERPLPM*EVEK.N            |            | 3 | 2,4023 | 0,217 | 0,34   |
| 21 | Q86TC9 MYPN_HUMAN   | R.SM*AEPEEICTLVIAE.V        |            | 2 | 2,3995 | 0,205 | -0,143 |
| 21 | Q13144 EI2BE_HUMAN  | K.M*KGYNPAEVGAAGK.G         |            | 2 | 2,398  | 0,301 | -0,693 |
| 21 | Q92783 STAM1_HUMAN  | K.TVQFSDDVQVE.T             |            | 2 | 2,398  | 0,147 | -0,385 |
| 21 | Q14195 DPYL3_HUMAN  | R.NLHQSGFSLSGTQVDE.G        |            | 3 | 2,3964 | 0,19  | 0,426  |
| 21 | Q99536 VAT1_HUMAN   | K.VLLVPGPEKEN.-             |            | 2 | 2,394  | 0,267 | -0,102 |
| 21 | Q92878 RAD50_HUMAN  | R.QDIDTQKIQE.R              |            | 2 | 2,3935 | 0,097 | -1,102 |
| 21 | Q8NI08 NCOA7_HUMAN  | K.STGHT#PTKPSGSSVSE.K       | T358:      | 2 | 2,3931 | 0,327 | -0,447 |
| 21 | P28290 SSFA2_HUMAN  | E.VQSTEGEAPHVPATYQLGLTK.S   |            | 3 | 2,3923 | 0,22  | -0,164 |
| 21 | Q9H267 VP33B_HUMAN  | K.VLLNAEDKVFNE.I            |            | 2 | 2,3919 | 0,141 | 0,526  |

|    |                    |                                |                 |   |        |       |        |
|----|--------------------|--------------------------------|-----------------|---|--------|-------|--------|
| 21 | Q13523 PRP4B_HUMAN | R.TKLLDALLELE.K                |                 | 2 | 2,3909 | 0,204 | -0,164 |
| 21 | O15027 SC16A_HUMAN | E.HRPASALVNPLAR.G              |                 | 2 | 2,39   | 0,34  | -0,261 |
| 21 | Q9P2B4 CT2NL_HUMAN | K.VSSPLSPLS#PGIKS#PTIPR.A      | S563:S568:      | 3 | 2,388  | 0,127 | 0,087  |
| 21 | P35269 T2FA_HUMAN  | R.LDTGPQSLSGK.S                |                 | 2 | 2,3877 | 0,338 | -0,774 |
| 21 | Q8NI27 THOC2_HUMAN | E.KTPVSGS#LKSPVPR.S            | S1275:          | 2 | 2,3876 | 0,145 | -0,478 |
| 21 | Q07021 C1QBP_HUMAN | K.AFVDFLSDEIK.E                |                 | 2 | 2,3865 | 0,263 | -0,285 |
| 21 | Q58WW2 IQWD1_HUMAN | R.NTITVPASFM*LR.M              |                 | 2 | 2,3843 | 0,308 | 0      |
| 21 | P62753 RS6_HUMAN   | R.RLS#S#LRAS#SKSE.S            | S235:S236:T241: | 3 | 2,38   | 0,256 | 0      |
| 21 | Q9UPN3 MACF1_HUMAN | R.RGS#DASDFLLE.T               | S5372:          | 2 | 2,3794 | 0,162 | 0,087  |
| 21 | Q13153 PAK1_HUMAN  | R.SVIEPLPVTPT.R                |                 | 2 | 2,3785 | 0,23  | 0,186  |
| 21 | Q14152 EIF3A_HUMAN | R.LES#LNIQRE.K                 | S584:           | 2 | 2,3766 | 0,139 | -0,103 |
| 21 | P30622 CLIP1_HUMAN | K.TPTAVVAPVEK.T                |                 | 2 | 2,3763 | 0,255 | 0      |
| 21 | P54136 SYRC_HUMAN  | E.IAGPGFINVHLR.K               |                 | 3 | 2,3749 | 0,29  | 0,424  |
| 21 | P24534 EF1B_HUMAN  | E.KASLPGVKKALGK.Y              |                 | 3 | 2,3743 | 0,211 | 1,057  |
| 21 | Q13242 SFRS9_HUMAN | R.GSPHYFSPFRPY.-               |                 | 2 | 2,3743 | 0,456 | 0      |
| 21 | Q15029 U5S1_HUMAN  | E.EDTQPLTEPIIKPVK.T            |                 | 2 | 2,3719 | 0,128 | -1,5   |
| 21 | P68431 H31_HUMAN   | E.DTNLCAIHAK.R                 |                 | 2 | 2,3703 | 0,088 | 0      |
| 21 | Q9UQ35 SRRM2_HUMAN | R.VPS#PTPAPK.E                 | S2581:          | 2 | 2,3703 | 0,24  | 0,313  |
| 21 | P62753 RS6_HUMAN   | R.RLS#S#LRAS#SKSE.S            | S235:S236:S244: | 3 | 2,3681 | 0,09  | 0,11   |
| 21 | P52272 HNRPM_HUMAN | K.GCGVVKFESPE.V                |                 | 2 | 2,3673 | 0,31  | -0,101 |
| 21 | Q71U36 TBA1A_HUMAN | E.TGAGKHVPRAVFDLEPTVIDE.V      |                 | 3 | 2,3668 | 0,206 | 0,156  |
| 21 | P23588 IF4B_HUMAN  | K.VAPAQPSEEGPGRKDE.N           |                 | 2 | 2,365  | 0,441 | -0,366 |
| 21 | P98175 RBM10_HUMAN | E.RQHTSM*DLPK.L                |                 | 3 | 2,3631 | 0,109 | 0,521  |
| 21 | P62258 1433E_HUMAN | K.AAFDDAIAE.L                  |                 | 2 | 2,3611 | 0,221 | 0,33   |
| 21 | Q96S59 RANB9_HUMAN | K.GSTAHFSGFE.S                 |                 | 2 | 2,359  | 0,102 | 0,117  |
| 21 | P08559 ODPA_HUMAN  | R.YHGHS#M*SDPGVS#YR.T          | S293:S300:      | 3 | 2,3569 | 0,167 | 0,103  |
| 21 | O95425 SVIL_HUMAN  | E.SSSTFSFSGR.D                 |                 | 2 | 2,3492 | 0,347 | -0,23  |
| 21 | Q15942 ZYG_HUMAN   | E.KQHPVPPPAQNQNQVR.S           |                 | 2 | 2,3466 | 0,149 | -0,066 |
| 21 | Q13428 TCOF_HUMAN  | K.TVANLLSGKS#PRK.S             | S156:           | 2 | 2,3436 | 0,265 | -0,504 |
| 21 | P08670 VIME_HUMAN  | R.FANYIDK.V                    |                 | 2 | 2,3429 | 0,179 | 0,28   |
| 21 | P14618 KPYM_HUMAN  | D.M*VFASFIR.K                  |                 | 2 | 2,3427 | 0,273 | 0,185  |
| 21 | Q15365 PCBP1_HUMAN | R.QQSHFAM*M*HGGTGFAGIDSSS#PE.V | S264:           | 3 | 2,339  | 0,172 | 0,294  |
| 21 | Q01082 SPTB2_HUMAN | K.TALPAQSAATLPAR.T             |                 | 2 | 2,3359 | 0,345 | -0,089 |
| 21 | Q5VT52 K0460_HUMAN | R.GPTSTSIDNIDGTPVRDER.S        |                 | 3 | 2,3338 | 0,203 | -0,18  |
| 21 | P38117 ETFB_HUMAN  | R.LGPLQVAR.V                   |                 | 2 | 2,3321 | 0,392 | 0,643  |
| 21 | Q5MIZ7 SMEK2_HUMAN | K.TTNLPTSVTATK.G               |                 | 2 | 2,3316 | 0,22  | -0,395 |
| 21 | Q96RT1 LAP2_HUMAN  | R.TMSVSDFNYSR.T                |                 | 2 | 2,3312 | 0,405 | -0,093 |
| 21 | Q92545 TM131_HUMAN | R.HSS#EDSDITSLIE.A             | S1293:          | 2 | 2,3305 | 0,241 | 0,161  |
| 21 | P49755 TMEDA_HUMAN | E.KLKPVEVE.L                   |                 | 2 | 2,3286 | 0,193 | 0,064  |



|    |                    |                         |              |   |        |       |        |
|----|--------------------|-------------------------|--------------|---|--------|-------|--------|
| 21 | Q8NB90 SPAT5_HUMAN | R.HFTQALSTVTPR.I        |              | 2 | 2,3283 | 0,338 | 0,449  |
| 21 | P0C0S8 H2A1_HUMAN  | R.HLQLAIRNDEE.L         |              | 2 | 2,3275 | 0,305 | 0,091  |
| 21 | P07942 LAMB1_HUMAN | K.CVCNYLGTVQE.H         |              | 2 | 2,3259 | 0,251 | -0,363 |
| 21 | Q92797 SYMPK_HUMAN | R.LM*ATQM*TAAGLPGVE.Q   |              | 2 | 2,3257 | 0,252 | 0      |
| 21 | P62424 RL7A_HUMAN  | R.TNYNDRYDE.I           |              | 2 | 2,3245 | 0,267 | -0,205 |
| 21 | Q13428 TCOF_HUMAN  | K.TVANLLSGK.S           |              | 2 | 2,324  | 0,382 | -0,338 |
| 21 | Q06830 PRDX1_HUMAN | R.QITVNDLPVGR.S         |              | 2 | 2,3219 | 0,403 | -0,101 |
| 21 | Q12904 MCA1_HUMAN  | R.KHPDADSLYVE.E         |              | 2 | 2,3207 | 0,271 | 0      |
| 21 | Q9BRP4 PAAF1_HUMAN | E.DASCVVTFK.G           |              | 2 | 2,3205 | 0,147 | 0      |
| 21 | P98170 BIRC4_HUMAN | R.RIDDTIFQNPV*VQE.A     |              | 2 | 2,3198 | 0,211 | 0,638  |
| 21 | P25398 RS12_HUMAN  | E.HQINLIK.V             |              | 2 | 2,3185 | 0,156 | 0,141  |
| 21 | Q13428 TCOF_HUMAN  | E.KTGLAVTVGQAK.S        |              | 2 | 2,3181 | 0,285 | -0,312 |
| 21 | P78371 TCPB_HUMAN  | K.LGGSLADSYLDE.G        |              | 2 | 2,3148 | 0,305 | 0,295  |
| 21 | O00629 IMA4_HUMAN  | E.KIEQLQNHENE.D         |              | 3 | 2,3122 | 0,085 | 0,662  |
| 21 | P62330 ARF6_HUMAN  | E.M*RDAILIFANK.Q        |              | 2 | 2,3113 | 0,114 | 0,086  |
| 21 | P40227 TCPZ_HUMAN  | K.DGNVLLHE.M            |              | 2 | 2,3109 | 0,237 | 0,34   |
| 21 | Q14676 MDC1_HUMAN  | K.RGAGNGVVPAGVILE.R     |              | 2 | 2,308  | 0,208 | 0,26   |
| 21 | P68104 EF1A1_HUMAN | R.KDGNASGTTLE.A         |              | 2 | 2,3075 | 0,281 | -0,202 |
| 21 | Q9BRA2 TXD17_HUMAN | K.TIFAYFTGSK.D          |              | 2 | 2,307  | 0,411 | 0,215  |
| 21 | Q2KHR3 QSER1_HUMAN | K.SVSTPLTTLDATSDK.K     |              | 2 | 2,306  | 0,414 | 0,238  |
| 21 | P46821 MAP1B_HUMAN | K.HM*DPPAPVQDRS#PS#PR.H | S2209:S2211: | 3 | 2,3055 | 0,093 | 0      |
| 21 | Q9NPR2 SEM4B_HUMAN | R.LGS#EIRDSVV.-         | S825:        | 2 | 2,3021 | 0,325 | -0,634 |
| 21 | P35527 K1C9_HUMAN  | K.TLNDM*RQEYEQLIAK.N    |              | 3 | 2,3001 | 0,26  | -0,294 |
| 21 | P18669 PGAM1_HUMAN | R.YADLTEDQLPSCE.S       |              | 2 | 2,3    | 0,089 | 0,158  |
| 21 | Q9Y618 NCOR2_HUMAN | R.SAVYPLLYR.D           |              | 2 | 2,2995 | 0,401 | 0,226  |
| 21 | Q96ST2 IWS1_HUMAN  | R.GKHM*DFLSDFE.M        |              | 2 | 2,2982 | 0,218 | -0,091 |
| 21 | Q53F19 CQ085_HUMAN | E.YHEELPALKQPR.E        |              | 2 | 2,2981 | 0,153 | -0,494 |
| 21 | P18615 NELFE_HUMAN | K.DPEKGPVPTFQPFQR.S     |              | 2 | 2,2978 | 0,281 | 0      |
| 21 | P82909 RT36_HUMAN  | R.SAGLPSHSSVISQHSK.G    |              | 3 | 2,2965 | 0,152 | -0,113 |
| 21 | Q9UK59 DBR1_HUMAN  | E.SGNGEDLTKVPLK.R       |              | 3 | 2,2955 | 0,299 | -0,539 |
| 21 | P04264 K2C1_HUMAN  | K.SLNNQFASFIDKVR.F      |              | 2 | 2,2953 | 0,247 | -0,149 |
| 21 | P46459 NSF_HUMAN   | E.NSSLNLIGK.A           |              | 2 | 2,291  | 0,274 | 0,064  |
| 21 | Q03164 HRX_HUMAN   | E.KT#NLDLGPTAPSLEK.E    | T972:        | 2 | 2,2905 | 0,119 | -1,613 |
| 21 | P55209 NP1L1_HUMAN | R.KYAVLYQPLFDK.R        |              | 3 | 2,2903 | 0,253 | 0,246  |
| 21 | O95684 FR1OP_HUMAN | K.SSLHLSHE.T            |              | 2 | 2,2891 | 0,243 | 0,06   |
| 21 | Q9C0D5 TANC1_HUMAN | E.DLSYLDGQR.N           |              | 2 | 2,2871 | 0,322 | 0,114  |
| 21 | Q9NVD7 PARVA_HUMAN | K.SPSVPKS#PTPKS#PPSR.K  | S14:S19:     | 3 | 2,284  | 0,151 | -0,101 |
| 21 | P55786 PSA_HUMAN   | K.LNLGTVGFYR.T          |              | 2 | 2,2839 | 0,295 | -0,214 |
| 21 | Q13042 CDC16_HUMAN | R.KTPDSRPSLEET#FE.I     | T599:        | 2 | 2,283  | 0,256 | 0,213  |

|    |                      |                             |          |   |        |       |        |
|----|----------------------|-----------------------------|----------|---|--------|-------|--------|
| 21 | P06733 ENOA_HUMAN    | K.FGANAILGVSLAVCK.A         |          | 2 | 2,2828 | 0,27  | -0,161 |
| 21 | P06730 IF4E_HUMAN    | K.IVIGYQSHADTATK.S          |          | 2 | 2,2809 | 0,167 | 0,081  |
| 21 | O95400 CD2B2_HUMAN   | E.DEIIVPK.K                 |          | 2 | 2,2794 | 0,101 | 0,375  |
| 21 | Q969S3 ZN622_HUMAN   | E.FADFYDFR.S                |          | 2 | 2,2783 | 0,389 | 0,113  |
| 21 | P08670 VIME_HUMAN    | K.SRLGDLYEEE.M              |          | 2 | 2,2749 | 0,199 | 0,202  |
| 21 | O95453 PARN_HUMAN    | R.NNSFTAPSTVGK.R            |          | 2 | 2,2749 | 0,131 | -0,399 |
| 21 | Q3KR37 GRM1B_HUMAN   | R.STPACS#PILR.K             | S21:     | 2 | 2,2749 | 0,291 | -0,31  |
| 21 | Q9NZJ0 DTL_HUMAN     | R.KALIPVSQK.S               |          | 2 | 2,2727 | 0,349 | -0,124 |
| 21 | Q15181 IPYR_HUMAN    | E.FKDKDFAID.I               |          | 2 | 2,269  | 0,121 | -0,333 |
| 21 | P54886 P5CS_HUMAN    | K.M*IDLIIPR.G               |          | 2 | 2,269  | 0,086 | 0,371  |
| 21 | O95573 ACSL3_HUMAN   | K.TKADFFEDE.N               |          | 2 | 2,2668 | 0,264 | 0,664  |
| 21 | Q9UPN9 TRI33_HUMAN   | R.GPTS#PSVTAIE.L            | S659:    | 2 | 2,2652 | 0,28  | 0,107  |
| 21 | P50395 GDIB_HUMAN    | E.TTCDDIKNIYKR.M            |          | 3 | 2,265  | 0,195 | 0,24   |
| 21 | Q68EM7 RHG17_HUMAN   | R.ILLDIDNDTE.S              |          | 2 | 2,2648 | 0,281 | 0      |
| 21 | P10809 CH60_HUMAN    | R.GYISPYFINTSK.G            |          | 2 | 2,261  | 0,164 | -0,176 |
| 21 | Q9UQ35 SRRM2_HUMAN   | K.FSPFPVQDRPE.S             |          | 2 | 2,2603 | 0,209 | -0,093 |
| 21 | Q13190 STX5_HUMAN    | K.DVAIDM*M*DSR.T            |          | 2 | 2,2557 | 0,225 | -0,412 |
| 21 | Q13541 4EBP1_HUMAN   | R.AGGEESQFE.M               |          | 2 | 2,2548 | 0,241 | 0,064  |
| 21 | O43318 M3K7_HUMAN    | R.M*ITTSGPTSEKPTR.S         |          | 3 | 2,2537 | 0,091 | 0,541  |
| 21 | P12268 IMDH2_HUMAN   | R.DIDFLKEEE.H               |          | 2 | 2,2515 | 0,1   | 0      |
| 21 | ##Q8NAT2 TDRD5_HUMAN | E.Y#S#LILSLQDVSEQR.K        | Y44:S45: | 2 | 2,2509 | 0,129 | 0,809  |
| 21 | P35251 RFC1_HUMAN    | E.AHLTPYSLQAIK.A            |          | 2 | 2,2497 | 0,384 | -0,091 |
| 21 | P02545 LMNA_HUMAN    | R.LRLS#PSPTSQR.S            | S390:    | 2 | 2,2492 | 0,268 | -1,015 |
| 21 | Q04637 IF4G1_HUMAN   | R.FSALQQA VPTESTDNRR.V      |          | 3 | 2,2463 | 0,146 | 0      |
| 21 | P29401 TKT_HUMAN     | E.DFQVGQAK.V                |          | 2 | 2,2458 | 0,271 | 0,205  |
| 21 | Q6ZSZ5 ARHG1_HUMAN   | R.SLS#PILPGR.H              | S1103:   | 2 | 2,2456 | 0,249 | -0,777 |
| 21 | P30622 CLIP1_HUMAN   | K.SISITSALLTEK.D            |          | 2 | 2,2442 | 0,286 | -0,193 |
| 21 | P33991 MCM4_HUMAN    | R.FIDPLAKEEE.N              |          | 2 | 2,2432 | 0,18  | 0,307  |
| 21 | P07814 SYEP_HUMAN    | K.SLCIPFKPLCE.L             |          | 2 | 2,2391 | 0,402 | 0      |
| 21 | P26641 EF1G_HUMAN    | K.AKDPFAHLPK.S              |          | 2 | 2,2384 | 0,316 | 0      |
| 21 | P18084 ITB5_HUMAN    | R.KPISTHTVDFTFNK.F          |          | 3 | 2,2378 | 0,198 | 0,671  |
| 21 | Q96ST2 IWS1_HUMAN    | R.GKHMDFLSDFE.M             |          | 2 | 2,2311 | 0,191 | -0,276 |
| 21 | Q5SSJ5 HP1B3_HUMAN   | R.TVNSTRETPPKS#K.L          | S55:     | 3 | 2,2307 | 0,107 | 0,12   |
| 21 | P06744 G6PI_HUMAN    | R.M*LVDLAK.S                |          | 2 | 2,2299 | 0,091 | 0,53   |
| 21 | Q8WUA4 TF3C2_HUMAN   | E.LSTALPAPVSCPEGPK.V        |          | 2 | 2,2295 | 0,284 | 0,225  |
| 21 | P14618 KPYM_HUMAN    | R.GIFPVLCKDPVQE.A           |          | 2 | 2,226  | 0,133 | 0,325  |
| 21 | Q09028 RBBP4_HUMAN   | K.TIFTGHTAVVE.D             |          | 2 | 2,2238 | 0,309 | -0,208 |
| 21 | P56524 HDAC4_HUMAN   | R.AQS#SPASATFPVSVQEPPTKPR.F | S632:    | 3 | 2,2232 | 0,313 | 0,077  |
| 21 | Q99618 CDCA3_HUMAN   | K.HAQDSDPRS#PTLGIAR.T       | S68:     | 2 | 2,221  | 0,318 | -0,474 |

|    |                     |                            |              |   |        |       |        |
|----|---------------------|----------------------------|--------------|---|--------|-------|--------|
| 21 | Q14160 LAP4_HUMAN   | K.RVS#LVGADDLR.K           | S1378:       | 2 | 2,2207 | 0,112 | -0,571 |
| 21 | Q13242 SFRS9_HUMAN  | R.GS#PHYFSPFRPY.-          | S211:        | 2 | 2,2207 | 0,463 | 0,159  |
| 21 | Q16342 PDCD2_HUMAN  | K.FKTQIALEPE.Q             |              | 2 | 2,2182 | 0,215 | 0,207  |
| 21 | Q14669 TRIPC_HUMAN  | E.RYLVVR.G                 |              | 2 | 2,2172 | 0,21  | -0,227 |
| 21 | Q9Y2W1 TR150_HUMAN  | R.ERS#PALKS#PLQSVVVR.R     | S248:S253:   | 2 | 2,2164 | 0,479 | -0,127 |
| 21 | Q96JM3 ZN828_HUMAN  | R.KTS#PASLDFPE.S           | S459:        | 2 | 2,2147 | 0,363 | 0,384  |
| 21 | Q53H80 CF166_HUMAN  | R.TLDFDPLLSPAS#PK.R        | S21:         | 2 | 2,214  | 0,221 | 0      |
| 21 | O15067 PUR4_HUMAN   | R.CPACFVGTITGDRR.I         |              | 3 | 2,2128 | 0,135 | 0,454  |
| 21 | O00410 IMB3_HUMAN   | K.FKPDCVNVEE.V             |              | 2 | 2,2124 | 0,093 | 0,099  |
| 21 | Q9UKL3 C8AP2_HUMAN  | E.AIS#PLNS#PVRPVAK.V       | S858:S862:   | 2 | 2,2112 | 0,341 | -0,379 |
| 21 | Q96PK6 RBM14_HUMAN  | R.ASYDDPYKK.A              |              | 2 | 2,2109 | 0,435 | -0,449 |
| 21 | Q13459 MYO9B_HUMAN  | E.RRTS#FSTSDVSK.L          | S1354:       | 3 | 2,2107 | 0,247 | 0,693  |
| 21 | P18669 PGAM1_HUMAN  | K.NLKPIKPM*QFLGDEE.T       |              | 3 | 2,2099 | 0,168 | 0,206  |
| 21 | P52948 NUP98_HUMAN  | K.FTSGAFLS#PSVSVQE.C       | S1060:       | 2 | 2,2071 | 0,123 | 0,149  |
| 21 | Q9UMZ2 SYNG_HUMAN   | R.SLS#LGDKE.I              | S1075:       | 2 | 2,206  | 0,082 | -0,328 |
| 21 | Q9UQ35 SRRM2_HUMAN  | K.AQT#PPGPSLSGSKS#PCPQEK.S | T1003:S1014: | 3 | 2,2057 | 0,184 | -0,331 |
| 21 | Q15652 JHD2C_HUMAN  | K.SHIKQDM*DVE.R            |              | 2 | 2,2027 | 0,275 | -0,275 |
| 21 | Q9HC35 EMAL4_HUMAN  | R.ASPS#PQPSSQPLQIHR.Q      | S146:        | 2 | 2,2013 | 0,268 | -0,27  |
| 21 | Q15424 SAFB1_HUMAN  | K.ADSLLAVVKR.E             |              | 2 | 2,2    | 0,15  | 0,228  |
| 21 | A6NJL0 A6NJL0_HUMAN | R.M*LDQTLIDLNEM*.-         |              | 2 | 2,1995 | 0,112 | 0,332  |
| 21 | P04040 CATA_HUMAN   | R.AFYVNVLE.E               |              | 2 | 2,1978 | 0,107 | 0,342  |
| 21 | O15371 EIF3D_HUMAN  | K.YLILKDPNK.Q              |              | 2 | 2,1971 | 0,157 | -0,221 |
| 21 | Q9BW71 HIRP3_HUMAN  | R.TLDS#DEERPRPAPPDWSHM*R.G | S530:        | 3 | 2,1949 | 0,271 | -0,588 |
| 21 | O00299 CLIC1_HUMAN  | R.KFLDGNE.L                |              | 2 | 2,192  | 0,202 | -0,296 |
| 21 | Q8IZD4 DCP1B_HUMAN  | R.SLS#YEEPR.R              | S276:        | 2 | 2,1919 | 0,171 | -0,46  |
| 21 | Q01433 AMPD2_HUMAN  | R.S#LPGPAPCLK.H            | S100:        | 2 | 2,1902 | 0,096 | 0,218  |
| 21 | P52948 NUP98_HUMAN  | R.SLVGGLLQSK.F             |              | 2 | 2,1888 | 0,178 | 0      |
| 21 | P05362 ICAM1_HUMAN  | E.VTTTTLVLR.R              |              | 2 | 2,1883 | 0,269 | -0,206 |
| 21 | Q8NBF2 NHLC2_HUMAN  | K.M*VSVLPIFR.S             |              | 2 | 2,186  | 0,313 | 0      |
| 21 | Q7Z6E9 RBBP6_HUMAN  | R.FLPLNIRNS#PFTR.G         | S873:        | 2 | 2,1842 | 0,229 | 0,295  |
| 21 | Q15003 CND2_HUMAN   | R.KAPLNIPGTPVLE.D          |              | 2 | 2,1816 | 0,28  | 0,452  |
| 21 | Q15149 PLEC1_HUMAN  | R.VPLDVACAR.G              |              | 2 | 2,1782 | 0,203 | -0,244 |
| 21 | P16989 DBPA_HUMAN   | K.YLRS#VGDGETVE.F          | S134:        | 2 | 2,1769 | 0,096 | 1,824  |
| 21 | P17844 DDX5_HUMAN   | E.KNFYQEHPD.L              |              | 2 | 2,1761 | 0,303 | -0,311 |
| 21 | P23528 COF1_HUMAN   | K.AVLFCLSE.D               |              | 2 | 2,1757 | 0,189 | 0,39   |
| 21 | Q14257 RCN2_HUMAN   | K.KIDLSDSGFLTE.S           |              | 2 | 2,175  | 0,258 | 0      |
| 21 | Q86YS7 K0528_HUMAN  | E.IIGSPIPEPR.Q             |              | 2 | 2,1728 | 0,32  | 0,226  |
| 21 | P07602 SAP_HUMAN    | K.LVGYLDR.N                |              | 2 | 2,1724 | 0,332 | 0,073  |
| 21 | P05387 RLA2_HUMAN   | E.DVIAQGIGK.L              |              | 2 | 2,1702 | 0,273 | -0,406 |

|    |                     |                           |            |   |        |       |        |
|----|---------------------|---------------------------|------------|---|--------|-------|--------|
| 21 | P11021 GRP78_HUMAN  | K.ITITNDQNR.L             |            | 2 | 2,1695 | 0,298 | -0,227 |
| 21 | Q6PKG0 LARP1_HUMAN  | R.S#LPTTVPE\$#PNYR.N      | S766:S774: | 2 | 2,1691 | 0,166 | 0,075  |
| 21 | P55072 TERA_HUMAN   | E.VGYDDIGGCR.K            |            | 2 | 2,1686 | 0,324 | 0,329  |
| 21 | P37802 TAGL2_HUMAN  | R.NFSDNQLQE.G             |            | 2 | 2,1684 | 0,129 | 0,111  |
| 21 | Q02952 AKA12_HUMAN  | K.SP\$S#PVERE.M           | S1331:     | 2 | 2,1671 | 0,12  | -0,34  |
| 21 | P09211 GSTP1_HUMAN  | K.ALPGQLKPF\$E.T          |            | 2 | 2,1669 | 0,491 | 0,444  |
| 21 | P55265 DSRAD_HUMAN  | E.MPSFYSHGLPR.C           |            | 3 | 2,1636 | 0,217 | -0,212 |
| 21 | P13861 KAP2_HUMAN   | R.QSLGHPPPEPGPDR.V        |            | 3 | 2,1636 | 0,235 | 0,062  |
| 21 | P00558 PGK1_HUMAN   | K.ITLPVDFVTADK.F          |            | 2 | 2,1614 | 0,292 | 0,277  |
| 21 | P09661 RU2A_HUMAN   | K.GLLQSGQIPGR.E           |            | 2 | 2,1605 | 0,108 | 0,108  |
| 21 | P17480 UBF1_HUMAN   | R.GKLP\$S#PKRAEE.I        | S484:      | 2 | 2,1588 | 0,432 | -0,429 |
| 21 | Q8TF74 WIPF2_HUMAN  | R.EGPPAPPPVKPP\$S#PVNIR.T | S235:      | 3 | 2,1576 | 0,14  | 0      |
| 21 | P16403 H12_HUMAN    | R.SGVSLAALKK.A            |            | 2 | 2,1567 | 0,131 | -0,063 |
| 21 | Q9NPR2 SEM4B_HUMAN  | R.CPFDPNFK.S              |            | 2 | 2,1554 | 0,2   | 0,119  |
| 21 | Q8WUM4 PDC6I_HUMAN  | R.DTIVLLCKPEPE.L          |            | 2 | 2,1551 | 0,215 | -1,381 |
| 21 | P52594 NUPL_HUMAN   | K.GTP\$QS#PVVGR.S         | S181:      | 2 | 2,1507 | 0,409 | -0,419 |
| 21 | P46821 MAP1B_HUMAN  | E.SETIPTDKT\$TYK.H        |            | 2 | 2,1477 | 0,299 | -0,987 |
| 21 | O00443 P3C2A_HUMAN  | R.ALDIDVEKLTQAELE.K       |            | 2 | 2,1476 | 0,133 | 0,072  |
| 21 | O43719 HTSF1_HUMAN  | K.RGFEGSC\$S#QKESEE.G     | S481:      | 3 | 2,1446 | 0,253 | 0,535  |
| 21 | Q58FF7 H90B3_HUMAN  | K.KHSQFIGY\$PITLYLE.K     |            | 2 | 2,1436 | 0,106 | -0,135 |
| 21 | Q5VZK9 LR16A_HUMAN  | K.VALLPPVLK.K             |            | 2 | 2,1429 | 0,145 | 0,257  |
| 21 | Q13428 TCOF_HUMAN   | R.GPASVPSVGK.A            |            | 2 | 2,1414 | 0,364 | 0,068  |
| 21 | Q14694 UBP10_HUMAN  | K.NIEYPVDLE.I             |            | 2 | 2,1398 | 0,201 | 0,223  |
| 21 | Q15149 PLEC1_HUMAN  | E.HVAVAQLREE.A            |            | 2 | 2,1397 | 0,466 | -0,424 |
| 21 | Q9NUU7 DD19A_HUMAN  | R.AAQ\$LLNKLIR.S          |            | 3 | 2,1363 | 0,163 | 0,447  |
| 21 | Q9Y5K6 CD2AP_HUMAN  | R.GIGFGDIFKE.G            |            | 2 | 2,1355 | 0,243 | 0,225  |
| 21 | O95071 UBR5_HUMAN   | R.IGFSVQPDRLE.L           |            | 2 | 2,1355 | 0,185 | 0,097  |
| 21 | Q8N344 MIER2_HUMAN  | E.ASDLF\$PNR.S            |            | 2 | 2,1353 | 0,198 | 0,199  |
| 21 | Q9Y2F5 K0947_HUMAN  | E.NLKEK\$S#PFRE.T         | S1303:     | 2 | 2,1349 | 0,221 | -0,643 |
| 21 | Q6PKG0 LARP1_HUMAN  | R.SLPTTVPE\$S#PNYR.N      | S774:      | 2 | 2,1335 | 0,177 | -0,158 |
| 21 | Q6NYC8 PHTNS_HUMAN  | E.ILVLGGYLR.L             |            | 2 | 2,1322 | 0,205 | 0,182  |
| 21 | A9CQZ4 A9CQZ4_HUMAN | R.QKFCGM*\$FCPVEGSSE.N    |            | 2 | 2,1313 | 0,324 | 0,412  |
| 21 | Q68CP9 ARID2_HUMAN  | E.M*\$HVG\$LLNGR.K        |            | 2 | 2,1299 | 0,385 | -0,444 |
| 21 | Q5UIP0 RIF1_HUMAN   | R.RVS#FADPIYQAGLADDIDRR.C | S2205:     | 3 | 2,1204 | 0,183 | 0,543  |
| 21 | Q96JM3 ZN828_HUMAN  | K.TSPASLDFPE.S            |            | 2 | 2,1154 | 0,175 | 0,459  |
| 21 | P49588 SYAC_HUMAN   | R.GLEVTDD\$SPK.Y          |            | 2 | 2,1137 | 0,325 | -0,805 |
| 21 | Q9H2G2 SLK_HUMAN    | K.LADFGV\$AK.N            |            | 2 | 2,1132 | 0,334 | 0,134  |
| 21 | Q86WB0 NIPA_HUMAN   | E.RLPLVP\$S#PRR.M         | S321:      | 3 | 2,1128 | 0,254 | 0,065  |
| 21 | P18615 NELFE_HUMAN  | K.GPVPTFQP\$FQR.S         |            | 2 | 2,1103 | 0,291 | -0,096 |

|    |                    |                            |        |   |        |       |        |
|----|--------------------|----------------------------|--------|---|--------|-------|--------|
| 21 | P62937 PPIA_HUMAN  | K.ITIADCGQLE.-             |        | 2 | 2,1078 | 0,156 | -1,852 |
| 21 | O75376 NCOR1_HUMAN | E.AAKPPEPEKPVVS#PPPVEQK.H  | S224:  | 2 | 2,1066 | 0,22  | 0,696  |
| 21 | P35222 CTNB1_HUMAN | R.LVQLLVR.A                |        | 2 | 2,1054 | 0,151 | 0,073  |
| 21 | P19338 NUCL_HUMAN  | K.NLPYKVTQDE.L             |        | 2 | 2,1036 | 0,161 | 0,101  |
| 21 | P06748 NPM_HUMAN   | E.KGGSLPKVE.A              |        | 2 | 2,1029 | 0,117 | -0,333 |
| 21 | P48960 CD97_HUMAN  | R.CNPGFSSFSE.I             |        | 2 | 2,102  | 0,229 | 0,216  |
| 21 | Q12913 PTPRJ_HUMAN | K.GASDTYVTYLIR.T           |        | 2 | 2,1018 | 0,201 | 0,09   |
| 21 | P62736 ACTA_HUMAN  | R.HQGVM*VGM*GQK.D          |        | 2 | 2,0993 | 0,126 | 0      |
| 21 | Q8IWA0 WDR75_HUMAN | K.VQDTSNTGLGEDIIHQLSK.S    |        | 3 | 2,0917 | 0,16  | 0,445  |
| 21 | Q9H6Z4 RANB3_HUMAN | E.EKPAIAPPVVFQK.D          |        | 2 | 2,0908 | 0,265 | -0,155 |
| 21 | Q8TF01 SFR18_HUMAN | K.ATEDAEGGDGPRLPQR.S       |        | 3 | 2,0908 | 0,102 | 0,11   |
| 21 | Q6P1L5 AL2SC_HUMAN | R.SIDTQTPGGADR.G           |        | 2 | 2,0901 | 0,267 | -1,102 |
| 21 | Q9UFC0 LRWD1_HUMAN | K.VSFLPTLR.K               |        | 2 | 2,0899 | 0,215 | -0,233 |
| 21 | Q9Y450 HBS1L_HUMAN | R.DKPSVEPVEE.Y             |        | 2 | 2,0876 | 0,169 | -0,108 |
| 21 | P35222 CTNB1_HUMAN | E.GVATYAAAVLFR.M           |        | 3 | 2,086  | 0,231 | 0,517  |
| 21 | Q86UP2 KTN1_HUMAN  | E.VKFKDFLLSLK.T            |        | 2 | 2,0843 | 0,165 | 0      |
| 21 | P62888 RL30_HUMAN  | E.YYAM*LAK.T               |        | 2 | 2,0826 | 0,314 | 0,209  |
| 21 | Q96RS0 TGS1_HUMAN  | K.LYNLGLK.G                |        | 2 | 2,0779 | 0,135 | -0,817 |
| 21 | O43719 HTSF1_HUMAN | K.RGFEGS#CSQKESEE.G        | S479:  | 2 | 2,0726 | 0,362 | 0,071  |
| 21 | Q99729 ROAA_HUMAN  | R.GFGFILFK.D               |        | 2 | 2,0701 | 0,243 | 0,197  |
| 21 | Q13057 COASY_HUMAN | E.LALYQIQLLK.D             |        | 2 | 2,0699 | 0,168 | -0,71  |
| 21 | Q6PKG0 LARP1_HUMAN | R.AVTPVPTKTEE.V            |        | 2 | 2,0682 | 0,31  | 0,104  |
| 21 | Q9Y237 PIN4_HUMAN  | R.GSM*VGPFQE.A             |        | 2 | 2,0669 | 0,102 | 0,315  |
| 21 | P00367 DHE3_HUMAN  | K.AKPYESGILE.A             |        | 2 | 2,0657 | 0,188 | 0      |
| 21 | P02545 LMNA_HUMAN  | R.M*QQQLDEYQE.L            |        | 2 | 2,0649 | 0,122 | -0,551 |
| 21 | Q6ZU65 K2030_HUMAN | R.RVAFISLS#PVR.R           | S13:   | 3 | 2,0644 | 0,087 | 0,483  |
| 21 | P26641 EF1G_HUMAN  | E.KKAAAPAEPEE.M            |        | 2 | 2,0636 | 0,189 | 0,107  |
| 21 | P29692 EF1D_HUMAN  | R.ATAPQTQHVS#PM*RQVEPPAK.K | S133:  | 3 | 2,0636 | 0,113 | -0,484 |
| 21 | P46013 KI67_HUMAN  | K.LDLAGTLPGS#KR.Q          | S1207: | 2 | 2,0634 | 0,289 | -0,373 |
| 21 | P05362 ICAM1_HUMAN | E.VTTTVLVRR.D              |        | 2 | 2,063  | 0,196 | 0,233  |
| 21 | Q13428 TCOF_HUMAN  | K.SAEPSANTTLVSET#EEE.G     | T173:  | 2 | 2,0618 | 0,248 | 0,26   |
| 21 | P35221 CTNA1_HUMAN | R.KAVLM*IR.T               |        | 2 | 2,0609 | 0,149 | -0,144 |
| 21 | O94903 PROSC_HUMAN | K.APLEVAQEH.-              |        | 2 | 2,0605 | 0,287 | -0,675 |
| 21 | Q9BZ67 FRMD8_HUMAN | R.IQHLSTIDYVED.G           |        | 2 | 2,0602 | 0,152 | -1,788 |
| 21 | P51784 UBP11_HUMAN | E.VFFIPM*DPR.R             |        | 2 | 2,0532 | 0,272 | 0,643  |
| 21 | P78527 PRKDC_HUMAN | R.YNFPVEVE.V               |        | 2 | 2,0507 | 0,238 | 0,367  |
| 21 | Q15569 TESK1_HUMAN | E.TLVQPGTPAR.R             |        | 2 | 2,0506 | 0,294 | -0,117 |
| 21 | P61587 RND3_HUMAN  | E.LSAVATDLRK.D             |        | 2 | 2,0472 | 0,206 | -0,795 |
| 21 | P04264 K2C1_HUMAN  | K.SISISVAR.G               |        | 2 | 2,0455 | 0,162 | 1,757  |

|    |                    |                      |        |   |        |       |        |
|----|--------------------|----------------------|--------|---|--------|-------|--------|
| 21 | Q9NPR2 SEM4B_HUMAN | R.VRLGS#EIRDSVV.-    | S825:  | 2 | 2,0422 | 0,591 | -0,087 |
| 21 | Q8N5F7 NKAP_HUMAN  | K.ILASFRE.M          |        | 2 | 2,0404 | 0,184 | 0,438  |
| 21 | P04406 G3P_HUMAN   | R.GALQNIIPASTGAAK.A  |        | 2 | 2,0398 | 0,147 | -0,778 |
| 21 | Q9Y5B0 CTDP1_HUMAN | E.LAGAPEPQGSCAQGGR.V |        | 2 | 2,038  | 0,211 | -0,549 |
| 21 | P49736 MCM2_HUMAN  | R.RGNDPLTSS#PGR.S    | S27:   | 2 | 2,0354 | 0,208 | -0,365 |
| 21 | O00148 DDX39_HUMAN | R.ILVATNLFGR.G       |        | 2 | 2,0343 | 0,299 | -0,11  |
| 21 | Q9UQ35 SRRM2_HUMAN | K.RVPS#PTPAPK.E      | S2581: | 2 | 2,0339 | 0,371 | -0,216 |
| 21 | Q9BX67 JAM3_HUMAN  | R.HKS#SFVI.-         | S306:  | 2 | 2,0312 | 0,172 | -0,204 |
| 21 | Q14692 BMS1_HUMAN  | E.MTDQYM*AVK.G       |        | 2 | 2,0308 | 0,274 | 0,442  |
| 21 | Q9Y4L1 HYOU1_HUMAN | K.LQDLTLR.D          |        | 2 | 2,0307 | 0,159 | 0,568  |
| 21 | Q9HBH9 MKNK2_HUMAN | E.AAGQGQPVLVR.A      |        | 2 | 2,0288 | 0,171 | 0,111  |
| 21 | P26358 DNMT1_HUMAN | R.KEPVDEDLYPE.H      |        | 2 | 2,0288 | 0,341 | 0,091  |
| 21 | P55884 EIF3B_HUMAN | R.VTLM*QLPTRQE.I     |        | 2 | 2,028  | 0,251 | -0,092 |
| 21 | Q86VR2 F134C_HUMAN | E.GVPTT#PGPASGSTFR.G | T10:   | 2 | 2,0279 | 0,364 | 0,565  |
| 21 | Q9UKV3 ACINU_HUMAN | E.VATPPVPQLQVCEPK.E  |        | 2 | 2,0274 | 0,215 | 0,073  |
| 21 | P18859 ATP5J_HUMAN | K.LFVDKIRE.Y         |        | 2 | 2,0272 | 0,09  | -0,359 |
| 21 | P50548 ERF_HUMAN   | E.GAGALAPPPPPQIK.V   |        | 2 | 2,0237 | 0,219 | -0,259 |
| 21 | Q13283 G3BP1_HUMAN | K.FYVHNDIFR.Y        |        | 3 | 2,0216 | 0,166 | 0,755  |
| 21 | O75608 LYPA1_HUMAN | K.TLVNPNANVTFK.T     |        | 2 | 2,0194 | 0,16  | 0,101  |
| 21 | Q99961 SH3G1_HUMAN | E.QSNGGFCTTAPK.I     |        | 2 | 2,0191 | 0,312 | -0,179 |
| 21 | Q99497 PARK7_HUMAN | R.DVVICPDASLE.D      |        | 2 | 2,0175 | 0,136 | 0,1    |
| 21 | Q13523 PRP4B_HUMAN | E.DKFKGSLSE.G        |        | 2 | 2,0162 | 0,209 | 0      |
| 21 | P49189 AL9A1_HUMAN | R.M*GPLINRPHLE.R     |        | 3 | 2,0159 | 0,199 | 0,141  |
| 21 | Q12756 KIF1A_HUMAN | R.LLVPDIQE.I         |        | 2 | 2,0135 | 0,179 | 0,263  |
| 21 | Q9Y4L1 HYOU1_HUMAN | E.GLM*DDVDFK.A       |        | 2 | 2,0129 | 0,308 | 0,347  |
| 21 | Q15545 TAF7_HUMAN  | E.NQGLDISSPGM*SGHR.Q |        | 3 | 2,0089 | 0,35  | 0,116  |
| 21 | Q9UGU0 TCF20_HUMAN | R.GRS#PSQYHDFAE.K    | S1005: | 2 | 2,0063 | 0,086 | -0,166 |
| 21 | P81605 DCD_HUMAN   | K.GAVHDVKDVLDSVL.-   |        | 2 | 2,003  | 0,13  | 0      |
| 21 | P12956 KU70_HUMAN  | R.DSLIFLVDASK.A      |        | 2 | 2,0026 | 0,081 | -0,101 |
| 21 | Q15942 ZYX_HUMAN   | K.FSPGAPGGSGSQPNQK.L |        | 2 | 2,0017 | 0,192 | -0,563 |
| 21 | Q9Y2W2 WBP11_HUMAN | E.LTPLQAM*M*LR.M     |        | 2 | 2,0013 | 0,218 | -0,202 |
| 21 | P13861 KAP2_HUMAN  | R.RVS#VCAE.T         | S99:   | 2 | 2      | 0,225 | 0,203  |
| 21 | Q9BVJ6 UT14A_HUMAN | R.SELS#QDAEPAGSQE.T  | S437:  | 2 | 1,9997 | 0,095 | -0,639 |
| 21 | Q9Y536 PAL4B_HUMAN | R.IIPGFM*CQGGDFTR.H  |        | 2 | 1,9994 | 0,324 | 0,529  |
| 21 | P11717 MPRI_HUMAN  | R.ATLITFLCDR.D       |        | 2 | 1,9991 | 0,086 | -0,504 |
| 21 | Q9UNN5 FAF1_HUMAN  | R.IRTPSGEFLE.R       |        | 2 | 1,9982 | 0,216 | 0      |
| 21 | P31350 RIR2_HUMAN  | R.FVIFPIEYHD.I       |        | 2 | 1,9907 | 0,15  | -0,286 |
| 21 | Q14697 GANAB_HUMAN | R.LSFQHDPE.T         |        | 2 | 1,986  | 0,273 | 0,125  |
| 21 | P14618 KPYM_HUMAN  | D.MVFASFIR.K         |        | 2 | 1,9807 | 0,311 | 0,188  |

|    |                       |                     |       |   |        |       |        |
|----|-----------------------|---------------------|-------|---|--------|-------|--------|
| 21 | Q8TAQ2 SMRC2_HUMAN    | K.NPDLHEDNVTE.Q     |       | 2 | 1,9796 | 0,168 | -0,856 |
| 21 | P27816 MAP4_HUMAN     | K.TDYIPLLDVDEK.T    |       | 2 | 1,9771 | 0,158 | 0      |
| 21 | Q9H4H8 FA83D_HUMAN    | E.LTLGNLLR.M        |       | 2 | 1,9752 | 0,165 | 0,136  |
| 21 | P63220 RS21_HUMAN     | E.SDDSILR.L         |       | 2 | 1,9744 | 0,148 | 0,076  |
| 21 | Q9H792 SG269_HUMAN    | E.FNNCLNR.G         |       | 2 | 1,9712 | 0,144 | 0,325  |
| 21 | P37802 TAGL2_HUMAN    | K.IQASTM*AFK.Q      |       | 2 | 1,9705 | 0,151 | -0,602 |
| 21 | Q9UJM3 ERRFI_HUMAN    | E.DSTLSDFK.Y        |       | 2 | 1,9633 | 0,16  | -0,067 |
| 21 | P29692 EF1D_HUMAN     | R.ATAPQQTQHVSPM*R.Q | S133: | 2 | 1,9633 | 0,209 | -0,321 |
| 21 | Q8NDT2 RB15B_HUMAN    | R.NLFIGNLDHSVSE.V   |       | 2 | 1,9594 | 0,151 | -0,338 |
| 21 | Q7Z5J4 RAI1_HUMAN     | R.SFLYCNQAR.G       |       | 2 | 1,9574 | 0,144 | -0,105 |
| 21 | O76003 GLRX3_HUMAN    | E.ISSVPTFLFFK.N     |       | 2 | 1,9572 | 0,126 | 0      |
| 21 | A9CQZ4 A9CQZ4_HUMAN   | K.FCGM*FCPVEGSSE.N  |       | 2 | 1,9545 | 0,134 | -1,923 |
| 21 | P04075 ALDOA_HUMAN    | R.ALQASALK.A        |       | 2 | 1,9535 | 0,138 | 0,456  |
| 21 | Q9UQ35 SRRM2_HUMAN    | R.SSTGPEPPAPTLLAE.R |       | 2 | 1,9496 | 0,117 | 0,156  |
| 21 | Q9NZI8 IF2B1_HUMAN    | K.ISYSGQFLVK.S      |       | 2 | 1,9487 | 0,26  | 0,107  |
| 21 | Q99829 CPNE1_HUMAN    | D.IVQFVPYR.R        |       | 2 | 1,9461 | 0,18  | 0,298  |
| 21 | Q9Y5B6 GCFC_HUMAN     | R.IVFSVKE.K         |       | 2 | 1,94   | 0,094 | 0,371  |
| 21 | P23588 IF4B_HUMAN     | K.VAPAQPSEEGPGR.K   |       | 2 | 1,9385 | 0,34  | -0,094 |
| 21 | Q9BTW9 TBCD_HUMAN     | E.NRPVTDHLDE.Q      |       | 2 | 1,9363 | 0,245 | -0,918 |
| 21 | Q8NDI1 EHBP1_HUMAN    | K.LGYSYSRD.L        |       | 2 | 1,9352 | 0,144 | 0      |
| 21 | P51858 HDGF_HUMAN     | K.YQVFFFGTHE.T      |       | 2 | 1,9337 | 0,116 | -0,478 |
| 21 | P07814 SYEP_HUMAN     | E.LLAIPVVK.G        |       | 2 | 1,9316 | 0,186 | 0,429  |
| 21 | Q7Z333 SETX_HUMAN     | E.DHLLAGSCLK.Q      |       | 2 | 1,9304 | 0,282 | 0,548  |
| 21 | Q9Y490 TLN1_HUMAN     | E.DVIATANLSR.R      |       | 2 | 1,9299 | 0,132 | 0,115  |
| 21 | P49588 SYAC_HUMAN     | K.GAGGEDLIM*LD.I    |       | 2 | 1,9275 | 0,101 | 0,22   |
| 21 | Q8IXI1 MIRO2_HUMAN    | K.SAFLQAFGR.G       |       | 2 | 1,923  | 0,253 | 0,33   |
| 21 | P16401 H15_HUMAN      | K.ALAAGGYDVEK.N     |       | 2 | 1,922  | 0,213 | 0,446  |
| 21 | Q9H7N4 SFR19_HUMAN    | R.TITVGRDLK.S       |       | 2 | 1,9218 | 0,197 | 0,061  |
| 21 | Q14677 EPN4_HUMAN     | K.SAFPFSDKLGE.L     |       | 2 | 1,9191 | 0,201 | 0      |
| 21 | P11940 PABP1_HUMAN    | K.FGPALSVK.V        |       | 2 | 1,9189 | 0,083 | 0,745  |
| 21 | P02545 LMNA_HUMAN     | R.LAVYIDR.V         |       | 2 | 1,9184 | 0,101 | 0,718  |
| 21 | Q9Y2W1 TR150_HUMAN    | E.M*KS#PREPGYK.A    | S698: | 2 | 1,9149 | 0,195 | 0,095  |
| 21 | Q9Y6W5 WASF2_HUMAN    | K.LFDRNSLPVPVLE.T   |       | 2 | 1,9082 | 0,147 | 0      |
| 21 | O75044 FNBP2_HUMAN    | R.KQDSSQAIPLVE.S    |       | 2 | 1,9081 | 0,119 | -0,086 |
| 21 | P55209 NP1L1_HUMAN    | E.IGHFLRE.R         |       | 2 | 1,9029 | 0,148 | 0,28   |
| 21 | Q92841 DDX17_HUMAN    | E.KNFYVEHPE.V       |       | 2 | 1,902  | 0,195 | -0,21  |
| 21 | ##Q96NU8 Q96NU8_HUMAN | E.KHQGLQM*E.V       |       | 2 | 1,8996 | 0,124 | 0,927  |
| 21 | Q15652 JHD2C_HUMAN    | K.RKS#VDTQLQE.D     | S451: | 2 | 1,8936 | 0,178 | 0,38   |
| 21 | Q14692 BMS1_HUMAN     | K.AGLSPANQCQSDR.V   |       | 2 | 1,8916 | 0,396 | -0,382 |

|    |                    |                      |       |   |        |       |        |
|----|--------------------|----------------------|-------|---|--------|-------|--------|
| 21 | P55072 TERA_HUMAN  | E.ILQIHTK.N          |       | 2 | 1,8903 | 0,083 | 0,072  |
| 21 | P35908 K22E_HUMAN  | K.IEISELNR.V         |       | 2 | 1,8872 | 0,163 | 0,125  |
| 21 | P31943 HNRH1_HUMAN | R.GLFPFGCSKEE.I      |       | 2 | 1,8871 | 0,275 | -0,434 |
| 21 | P31949 S10AB_HUMAN | E.SLIAVFQK.Y         |       | 2 | 1,8832 | 0,223 | -0,135 |
| 21 | Q3ZCQ8 TIM50_HUMAN | E.DDPLAAFK.Q         |       | 2 | 1,8812 | 0,207 | 0,139  |
| 21 | P60660 MYL6_HUMAN  | E.HFLPM*LQTVAK.N     |       | 2 | 1,881  | 0,162 | 0,094  |
| 21 | O15511 ARPC5_HUMAN | R.KVDVDEYDE.N        |       | 2 | 1,8798 | 0,141 | -0,219 |
| 21 | P42704 LPPRC_HUMAN | K.TKDLPVTE.A         |       | 2 | 1,8684 | 0,136 | -0,203 |
| 21 | Q9GZR7 DDX24_HUMAN | K.NPSSLFSK.E         |       | 2 | 1,8677 | 0,241 | -0,139 |
| 21 | P52732 KIF11_HUMAN | K.SYLYPSTLVR.T       |       | 2 | 1,8656 | 0,19  | -0,407 |
| 21 | P13645 K1C10_HUMAN | R.LASYLDK.V          |       | 2 | 1,8646 | 0,2   | 0,226  |
| 21 | Q9BSJ6 FA64A_HUMAN | R.SLQHQEQLE.D        |       | 2 | 1,862  | 0,129 | -0,11  |
| 21 | P33316 DUT_HUMAN   | R.ARPAEVGGMQLR.F     |       | 2 | 1,857  | 0,154 | 0,475  |
| 21 | Q14554 PDIA5_HUMAN | R.LLSTVAQAVK.G       |       | 2 | 1,8564 | 0,094 | 0      |
| 21 | Q8WUM9 S20A1_HUMAN | R.LPS#VDLKEE.T       | S335: | 2 | 1,8531 | 0,187 | -0,44  |
| 21 | Q9H6R7 CB044_HUMAN | E.S#LSPDFCHQNK.G     | S466: | 2 | 1,8516 | 0,267 | 0      |
| 21 | Q9Y2H2 SAC2_HUMAN  | E.DLYSIFTK.E         |       | 2 | 1,8507 | 0,219 | 0,124  |
| 21 | P38398 BRCA1_HUMAN | E.CATFSAHSGSLK.K     |       | 2 | 1,85   | 0,116 | -0,482 |
| 21 | P49189 AL9A1_HUMAN | R.M*GPLINRPHLE.R     |       | 2 | 1,8476 | 0,324 | -0,566 |
| 21 | Q9Y5T5 UBP16_HUMAN | E.SFLDLSLPVLDDQSGK.K |       | 2 | 1,8455 | 0,111 | 0,141  |
| 21 | Q9UPT8 ZC3H4_HUMAN | R.QQTSSRPASVGE.L     |       | 2 | 1,8365 | 0,378 | -0,091 |
| 21 | Q9Y223 GLCNE_HUMAN | E.QDDFDINTR.L        |       | 2 | 1,8288 | 0,25  | 0,217  |
| 21 | Q8NI27 THOC2_HUMAN | R.SDIPEPERE.Q        |       | 2 | 1,8277 | 0,175 | 0,114  |
| 21 | Q9BQ67 GRWD1_HUMAN | K.QHVAPVTSVE.W       |       | 2 | 1,8216 | 0,195 | -0,686 |
| 21 | P53999 TCP4_HUMAN  | K.EQISDIDDAVR.K      |       | 2 | 1,8166 | 0,299 | 0,097  |
| 21 | Q15276 RABE1_HUMAN | D.AGLLPSGDPFSK.S     |       | 2 | 1,8143 | 0,095 | 0,094  |
| 21 | P24534 EF1B_HUMAN  | E.KASLPGVKK.A        |       | 2 | 1,8143 | 0,091 | -0,066 |
| 21 | Q99547 MPH6_HUMAN  | K.M*FLKPQD.-         |       | 2 | 1,813  | 0,087 | 0      |
| 21 | Q6S8J3 A26CA_HUMAN | E.TTFNSIM*K.S        |       | 2 | 1,8121 | 0,24  | -0,7   |
| 21 | P61221 ABCE1_HUMAN | K.SGNYFFLDD.-        |       | 2 | 1,8073 | 0,262 | 0,113  |
| 21 | Q7Z478 DHX29_HUMAN | E.DHPVFNPAM*K.I      |       | 2 | 1,8024 | 0,246 | -1,041 |
| 21 | Q9BYK8 PR285_HUMAN | R.M*HQFLYEEE.A       |       | 2 | 1,8017 | 0,111 | -0,098 |
| 21 | O75569 PRKRA_HUMAN | E.DSGTFSLGK.M        |       | 2 | 1,8009 | 0,221 | 0,067  |
| 21 | P49792 RBP2_HUMAN  | K.LPPTFFCYK.N        |       | 2 | 1,8006 | 0,136 | 0      |
| 21 | Q99956 DUS9_HUMAN  | R.LLLDCR.S           |       | 2 | 1,7842 | 0,105 | -1,148 |
| 21 | P46777 RL5_HUMAN   | K.QFSQYIK.N          |       | 2 | 1,7642 | 0,139 | -1,068 |
| 21 | P14625 ENPL_HUMAN  | K.LIINSLYK.N         |       | 2 | 1,7609 | 0,121 | -0,19  |
| 21 | Q13769 THOC5_HUMAN | R.RRPT#LGVQLD.D      | T328: | 2 | 1,7607 | 0,137 | 0,099  |
| 21 | P22059 OSBP1_HUMAN | K.M*LAESDES#GDEE.S   | S193: | 2 | 1,7492 | 0,102 | 0      |



|    |                       |                     |       |   |        |       |        |
|----|-----------------------|---------------------|-------|---|--------|-------|--------|
| 21 | Q9Y4C8 RBM19_HUMAN    | E.FLSVHQR.R         |       | 2 | 1,7489 | 0,125 | -0,344 |
| 21 | Q9NRL2 BAZ1A_HUMAN    | K.DAIDPLLK.Y        |       | 2 | 1,7445 | 0,107 | 0      |
| 21 | Q9BZE9 ASPC1_HUMAN    | R.RQDFNPCE.Y        |       | 2 | 1,7421 | 0,101 | 0      |
| 21 | P50991 TCPD_HUMAN     | K.GIHPTIIE.S        |       | 2 | 1,742  | 0,099 | 0,189  |
| 21 | Q5T9W8 Q5T9W8_HUMAN   | K.HSQFIGYPITLY.-    |       | 2 | 1,7372 | 0,161 | -0,17  |
| 21 | Q8WVB6 CTF18_HUMAN    | D.LLGVSLAS#LKK.Q    | S225: | 2 | 1,7344 | 0,242 | 0,202  |
| 21 | Q9Y2W1 TR150_HUMAN    | E.M*K#PREPGYKAE.G   | S698: | 2 | 1,7332 | 0,148 | -0,082 |
| 21 | ##A6NM20 A6NM20_HUMAN | K.IPS#TQTVPSAR.R    | S644: | 2 | 1,7279 | 0,121 | 1,973  |
| 21 | Q96T23 RSF1_HUMAN     | K.AQIDPVLLK.N       |       | 2 | 1,7244 | 0,086 | 0      |
| 21 | P31948 STIP1_HUMAN    | K.TVDLKP DWGK.G     |       | 2 | 1,7175 | 0,185 | -0,105 |
| 21 | Q9BSQ5 CCM2_HUMAN     | E.STIDFLDR.A        |       | 2 | 1,716  | 0,157 | 0,379  |
| 21 | P04920 B3A2_HUMAN     | E.LPPPAPPAGITR.S    |       | 2 | 1,7141 | 0,303 | 0      |
| 21 | Q14155 ARHG7_HUMAN    | K.LPTTGM*TITK.L     |       | 2 | 1,7113 | 0,186 | -0,113 |
| 21 | P10809 CH60_HUMAN     | K.IPAM*TIK.N        |       | 2 | 1,7073 | 0,189 | 0,213  |
| 21 | Q9UKY7 CDV3_HUMAN     | E.VDYSGLR.V         |       | 2 | 1,689  | 0,208 | -0,753 |
| 21 | Q86UP2 KTN1_HUMAN     | R.DRLTSKEEE.L       |       | 2 | 1,6835 | 0,087 | -0,22  |
| 21 | Q8N6T3 ARFG1_HUMAN    | R.DVTTFFSGK.A       |       | 2 | 1,6774 | 0,274 | 0,426  |
| 21 | Q9HCG8 NCM_HUMAN      | E.NLNSYQR.N         |       | 2 | 1,6755 | 0,158 | 0,341  |
| 21 | Q6S8J3 A26CA_HUMAN    | E.TTFNSIMK.S        |       | 2 | 1,6708 | 0,139 | 0      |
| 21 | P10599 THIO_HUMAN     | K.CM*PTFQFFK.K      |       | 2 | 1,6586 | 0,086 | 0,1    |
| 21 | Q5SW79 CE170_HUMAN    | R.TLPQLPNEEKSL.E.S  |       | 2 | 1,6504 | 0,12  | 0,244  |
| 21 | P04920 B3A2_HUMAN     | E.KDFSFR.N          |       | 2 | 1,6494 | 0,103 | 0,204  |
| 21 | A9CQZ4 A9CQZ4_HUMAN   | E.DEEVPAFFK.N       |       | 2 | 1,6393 | 0,098 | -0,226 |
| 21 | P05787 K2C8_HUMAN     | R.ISSSFSR.V         |       | 2 | 1,6284 | 0,108 | -0,42  |
| 21 | Q7Z4V5 HDGR2_HUMAN    | K.VDS#PDVKR.C       | S490: | 2 | 1,6258 | 0,201 | 0,184  |
| 21 | Q16643 DREB_HUMAN     | R.M*APTPIPTR.S      |       | 2 | 1,6197 | 0,231 | 0,061  |
| 21 | O14979 HNRDL_HUMAN    | R.GFGFVLFK.D        |       | 2 | 1,6138 | 0,205 | 0,133  |
| 21 | P06576 ATPB_HUMAN     | K.QFAPIHAEAPE.F     |       | 2 | 1,5904 | 0,11  | 0      |
| 21 | P43243 MATR3_HUMAN    | E.NLPQILLQLK.R      |       | 2 | 1,5885 | 0,09  | -0,207 |
| 21 | O75531 BAF_HUMAN      | R.DCFGCLRE.W        |       | 2 | 1,5884 | 0,107 | 0,115  |
| 21 | Q8TAT6 NPL4_HUMAN     | E.NHTVADRFLD.F      |       | 2 | 1,587  | 0,103 | -0,103 |
| 21 | P13861 KAP2_HUMAN     | R.QSLGHPPPPEPGPDR.V |       | 2 | 1,5687 | 0,172 | -0,329 |
| 21 | Q9NX20 RM16_HUMAN     | E.DVSIPEKPK.L       |       | 2 | 1,566  | 0,133 | -0,422 |
| 21 | P04075 ALDOA_HUMAN    | R.LQSIGTENEE.N      |       | 2 | 1,5641 | 0,15  | -0,4   |
| 21 | P35613 BASI_HUMAN     | R.FFVSSSQGR.S       |       | 2 | 1,5513 | 0,102 | 0,361  |
| 21 | Q00537 PCTK2_HUMAN    | R.RLS#LTLR.G        | S9:   | 2 | 1,5163 | 0,208 | -0,065 |
| 21 | Q8N3X1 FNBP4_HUMAN    | R.RPILQLS#PPGPR.G   | S18:  | 2 | 1,4986 | 0,14  | -0,086 |
| 21 | Q9NSV4 DIAP3_HUMAN    | R.QISPQEFIHE.L      |       | 2 | 1,4946 | 0,267 | 0,298  |
| 21 | Q15418 KS6A1_HUMAN    | R.KLPST#TL.-        | T733: | 2 | 1,4771 | 0,114 | 0,363  |

|    |                     |                                       |        |   |        |       |        |
|----|---------------------|---------------------------------------|--------|---|--------|-------|--------|
| 21 | Q7Z6Z7 HUWE1_HUMAN  | K.ADGTATAPPPR.S                       |        | 2 | 1,451  | 0,311 | 0      |
| 21 | O75400 PR40A_HUMAN  | E.DVLFFLSK.K                          |        | 2 | 1,4334 | 0,154 | 0,189  |
| 21 | Q5SW79 CE170_HUMAN  | R.IDLLAQPR.R                          |        | 2 | 1,4145 | 0,132 | 0,461  |
| 21 | Q6PGN9 PSRC1_HUMAN  | D.LLPTVNSLTR.S                        |        | 2 | 1,3881 | 0,161 | 0,11   |
| 21 | O94966 UBP19_HUMAN  | E.NLAPLAGEK.A                         |        | 2 | 1,3381 | 0,144 | 0      |
| 21 | P09493 TPM1_HUMAN   | K.ATDAEADVAS#LNRR.I                   | S87:   | 2 | 1,2697 | 0,15  | -0,467 |
| 21 | Q9UBS0 KS6B2_HUMAN  | E.GFSFQPK.L                           |        | 2 | 1,2643 | 0,126 | 0,301  |
| 21 | Q96PK6 RBM14_HUMAN  | R.QPT#PPFFGR.D                        | T206:  | 2 | 1,2571 | 0,082 | 0,108  |
| 21 | Q6ZU65 K2030_HUMAN  | R.VAFIS#LSPVRR.R                      | S11:   | 2 | 1,0493 | 0,104 | -0,184 |
| 21 | Q9Y2W1 TR150_HUMAN  | R.ERS#PALKSPLQSVVVR.R                 | S248:  | 2 | 1,0456 | 0,19  | -0,132 |
| 22 | Q9NYZ3 GTSE1_HUMAN  | R.VPQALNFSPEESDSTFSK.S                |        | 2 | 6,1141 | 0,519 | 0,062  |
| 22 | P22234 PUR6_HUMAN   | E.LLDS#PGKVLLQSKDQITAGNAAR.K          | S27:   | 3 | 6,0539 | 0,526 | 0,222  |
| 22 | Q7Z422 CA144_HUMAN  | R.KSKS#PPKVPIVIQDDSLPAGPPPQIR.I       | S39:   | 3 | 6,0485 | 0,489 | 0,515  |
| 22 | P60709 ACTB_HUMAN   | E.LRVAPEEHPVLLTEAPLNPK.A              |        | 3 | 5,9995 | 0,442 | 0,247  |
| 22 | P68104 EF1A1_HUMAN  | E.HALLAYTLGVKQLIVGVNK.M               |        | 3 | 5,9967 | 0,491 | 0,269  |
| 22 | P09211 GSTP1_HUMAN  | K.FQDGLTLQSNLILR.H                    |        | 2 | 5,9654 | 0,595 | 0      |
| 22 | A0FGR8 ESYT2_HUMAN  | K.SHM*SGSPGPGGSNTAPSTPVIGGSDKPGM*EE.K |        | 3 | 5,9279 | 0,599 | 1,299  |
| 22 | Q9Y2X9 ZN281_HUMAN  | R.TSVSDFSGYTNM*M*SDVSEPCSTR.V         |        | 3 | 5,9141 | 0,519 | 0,212  |
| 22 | P07900 HS90A_HUMAN  | K.HSQFIGYPITLFVEKER.D                 |        | 3 | 5,8388 | 0,382 | -0,177 |
| 22 | Q92882 OSTF1_HUMAN  | K.LAFDM*ATNAACASLLK.K                 |        | 2 | 5,8298 | 0,475 | -0,356 |
| 22 | P05783 K1C18_HUMAN  | E.DFNLDALDSSNSM*QTIQK.T               |        | 2 | 5,792  | 0,52  | 0,116  |
| 22 | P05783 K1C18_HUMAN  | E.DGEDFNLDALDSSNSM*QTIQK.T            |        | 2 | 5,7548 | 0,567 | 0,508  |
| 22 | P04406 G3P_HUMAN    | E.KYDNSLKIISNASCTTNCLAPLAK.V          |        | 3 | 5,7423 | 0,452 | 0,819  |
| 22 | Q9BRQ6 CHCH6_HUMAN  | R.M*KEPSS#PPPAPTSTFGLQDGNLR.A         | S43:   | 3 | 5,7133 | 0,425 | 0,07   |
| 22 | Q969S3 ZN622_HUMAN  | E.KGLGVDSVDKAM*NAAIQQAIA.A            |        | 3 | 5,6629 | 0,431 | -0,64  |
| 22 | Q8NCM9 Q8NCM9_HUMAN | R.SSDITSDLGNVLTSTPNAK.T               |        | 2 | 5,6216 | 0,554 | -0,064 |
| 22 | P14625 ENPL_HUMAN   | E.KNLLHVTDGTGVGM*TREE.L               |        | 3 | 5,483  | 0,464 | 0      |
| 22 | P50851 LRBA_HUMAN   | R.RRDS#GIGEETATGLGSHVE.V              | S1605: | 3 | 5,4699 | 0,362 | -0,268 |
| 22 | Q8IWA0 WDR75_HUMAN  | K.VQDTSNTGLGEDIIHQLSK.S               |        | 2 | 5,448  | 0,548 | 0,119  |
| 22 | Q9H0D6 XRN2_HUMAN   | E.M*RM*QNNSSPSISPNTSFTSDGSPSPGLGIIK.R |        | 3 | 5,4169 | 0,374 | 0,702  |
| 22 | P05783 K1C18_HUMAN  | E.DGEDFNLDALDSSNSM*QTIQK.T            |        | 3 | 5,3951 | 0,438 | 0      |
| 22 | P61244 MAX_HUMAN    | R.SSAQLQTNYPSSDNSLYTNAK.G             |        | 2 | 5,3775 | 0,544 | 0,426  |
| 22 | Q8WXV6 Q8WXV6_HUMAN | R.KRTSS#EDNLYLAVLR.A                  | S21:   | 3 | 5,3708 | 0,332 | -0,099 |
| 22 | Q68CZ2 TENS3_HUMAN  | R.KLS#LGQYDNDAGGQLPFSK.C              | S776:  | 2 | 5,3572 | 0,516 | 0,115  |
| 22 | Q92597 NDRG1_HUMAN  | K.YFVQGM*GYM*PSASM*TR.L               |        | 2 | 5,2718 | 0,492 | 0      |
| 22 | P60709 ACTB_HUMAN   | K.DLYANTVLSGGTTM*YPGIADR.M            |        | 3 | 5,2572 | 0,434 | -0,246 |
| 22 | Q9H299 SH3L3_HUMAN  | R.IQYQLVDISQDNALRDE.M                 |        | 2 | 5,2326 | 0,429 | -0,06  |
| 22 | P05783 K1C18_HUMAN  | E.DFNLDALDSSNSM*QTIQK.T               |        | 3 | 5,2165 | 0,44  | 0,348  |
| 22 | Q13813 SPTA2_HUMAN  | R.LM*VHTVATFNSIKE.L                   |        | 3 | 5,2075 | 0,343 | -0,342 |

|    |                     |                                    |              |   |        |       |        |
|----|---------------------|------------------------------------|--------------|---|--------|-------|--------|
| 22 | P10809 CH60_HUMAN   | K.NQLKDM*AIATGGAVFGEE.G            |              | 2 | 5,1788 | 0,492 | -0,065 |
| 22 | Q9H4L7 SMRCD_HUMAN  | E.STSTM*DGAAAAALLM*FGDAGGGPR.K     |              | 3 | 5,1774 | 0,478 | 0,159  |
| 22 | Q96PU5 NED4L_HUMAN  | R.LQITPDSNGEQFSSLIQR.E             |              | 2 | 5,1204 | 0,565 | -0,18  |
| 22 | Q9H2J4 PDCL3_HUMAN  | D.LEENPKKPIEDVLLSSVR.R             |              | 3 | 5,0946 | 0,425 | 0,354  |
| 22 | P21127 CD2L1_HUMAN  | R.GT#S#PRPPEGGLGYSQLGDDDLKE.T      | T751:S752:   | 3 | 5,056  | 0,473 | 0,359  |
| 22 | Q9HAW4 CLSPN_HUMAN  | E.DDTQSQLLDADGFLNVR.N              |              | 2 | 5,053  | 0,534 | 0,256  |
| 22 | Q9Y6D5 BIG2_HUMAN   | E.LEKPIQSKPQS#PVIQAAAVS#PK.F       | S218:S227:   | 3 | 5,0489 | 0,446 | 0,222  |
| 22 | P35606 COPB2_HUMAN  | R.STAQQELDGKPPAS#PTPVIVASHTANKEE.K | S859:        | 3 | 5,0428 | 0,405 | 0,123  |
| 22 | Q8IWA0 WDR75_HUMAN  | K.VQDTS#NTGLGEDIIHQLSK.S           | S796:        | 2 | 5,0376 | 0,437 | 0,343  |
| 22 | P40222 TXLNA_HUMAN  | R.VQDLSAGGQGS�TDSGPER.R            |              | 2 | 5,0364 | 0,553 | -0,651 |
| 22 | Q9BY89 K1671_HUMAN  | R.KIT#PPSS#PHSLTSTLVSLGHEE.A       | T1059:S1063: | 3 | 5,0266 | 0,424 | 0      |
| 22 | Q9UQ35 SRRM2_HUMAN  | K.SKDSLQVQSCPGSLCAGVK.S            |              | 3 | 4,9911 | 0,444 | 0,087  |
| 22 | P23193 TCEA1_HUMAN  | K.KKEPAITSQNS#PEAREE.S             | S100:        | 3 | 4,9566 | 0,328 | -0,367 |
| 22 | P38646 GRP75_HUMAN  | E.VKSTNGDTFLGGEDFDQALLR.H          |              | 3 | 4,9564 | 0,419 | -0,08  |
| 22 | O14497 ARI1A_HUMAN  | R.SHHAPM*SPGSSGGGGQPLAR.T          |              | 3 | 4,9337 | 0,493 | -0,48  |
| 22 | Q58FF8 H90B2_HUMAN  | K.HSQFLGYPITLYLEK.E                |              | 2 | 4,8918 | 0,585 | 0      |
| 22 | P28290 SSFA2_HUMAN  | E.GEAPHVPATYQLGLTK.S               |              | 3 | 4,888  | 0,354 | 0,326  |
| 22 | P14625 ENPL_HUMAN   | E.KNLLHVTDGTGVGM*TR.E              |              | 3 | 4,8869 | 0,281 | 0,11   |
| 22 | Q32MZ4 LRRF1_HUMAN  | R.NM*PGLSAATLASLGGTSSR.R           |              | 2 | 4,885  | 0,528 | 0,068  |
| 22 | Q5VTR2 BRE1A_HUMAN  | R.KALVPEPEPDSDS#NQER.K             | S138:        | 2 | 4,8741 | 0,429 | 0      |
| 22 | O00567 NOL5A_HUMAN  | R.LAALALASSENSST#PEECE.E.M         | T468:        | 3 | 4,8733 | 0,497 | 0,241  |
| 22 | P46734 MP2K3_HUMAN  | K.M*CDFGISGYLVD#VAK.T              | S218:        | 2 | 4,8715 | 0,546 | -0,197 |
| 22 | Q9UQ35 SRRM2_HUMAN  | K.DSLVQSCPGSLCAGVK.S               |              | 2 | 4,859  | 0,489 | 0,325  |
| 22 | O95684 FR1OP_HUMAN  | K.ANDEANQSDTSVSLSEPK.S             |              | 2 | 4,8565 | 0,476 | -0,129 |
| 22 | P10809 CH60_HUMAN   | R.KNQLKDM*AIATGGAVFGEE.G           |              | 2 | 4,8532 | 0,532 | 0,306  |
| 22 | Q9Y520 Q9Y520_HUMAN | R.S#VEDVRPHHTDANNQSACFEAPDQK.T     | S878:        | 3 | 4,8199 | 0,501 | 0,125  |
| 22 | Q92597 NDRG1_HUMAN  | E.AFKYFVQGM*GYM*PSASM*TR.L         |              | 3 | 4,783  | 0,389 | -1,236 |
| 22 | Q04637 IF4G1_HUMAN  | R.FSALQQAQVPTDNR.R                 |              | 2 | 4,7806 | 0,462 | -0,553 |
| 22 | Q13428 TCOF_HUMAN   | R.KSAEPSANTTLVS#ETEEE.G            | S171:        | 2 | 4,759  | 0,591 | 0      |
| 22 | P28799 GRN_HUMAN    | E.DHIHCCPAGFTCDTQK.G               |              | 3 | 4,726  | 0,34  | 0      |
| 22 | Q58FG0 HS905_HUMAN  | K.HSQFIGYPITLFVEK.K                |              | 2 | 4,722  | 0,581 | -0,069 |
| 22 | Q9BSJ8 ESYT1_HUMAN  | E.AHSHSYSHSSSS#LSEPE.L             | S933:        | 2 | 4,7143 | 0,476 | -0,12  |
| 22 | P60709 ACTB_HUMAN   | K.DLYANTVLSGGTTM*YPGIADR.M         |              | 2 | 4,7087 | 0,544 | 0,109  |
| 22 | Q01081 U2AF1_HUMAN  | E.M*NVCNLDGHLVGNVYVK.F             |              | 2 | 4,6996 | 0,45  | 0,118  |
| 22 | Q03164 HRX_HUMAN    | R.SPGCRPLPSAGS#PTPTTHE.I           | S2167:       | 3 | 4,696  | 0,352 | 0,09   |
| 22 | Q9C0C2 TB182_HUMAN  | R.RFS#EGVLQS#PSQDQE.K              | S429:S435:   | 2 | 4,6683 | 0,409 | 0,196  |
| 22 | P45974 UBP5_HUMAN   | R.VDYIM*QLPVP#DAALNKEE.L           |              | 2 | 4,6599 | 0,411 | 0,221  |
| 22 | Q8TDD1 DDX54_HUMAN  | R.KLGPGRPLPTFTSECT#SDVEPDRE.M      | T74:         | 3 | 4,6482 | 0,458 | 0,493  |
| 22 | P35637 FUS_HUMAN    | R.HDSEQDNSDNNTIFVQGLGE.N           |              | 2 | 4,6417 | 0,573 | 0,44   |

|    |                    |                                  |            |   |        |       |        |
|----|--------------------|----------------------------------|------------|---|--------|-------|--------|
| 22 | P08651 NFIC_HUMAN  | E.LQGHLAYDLNPASTGLR.R            |            | 2 | 4,6394 | 0,591 | 0,134  |
| 22 | Q9Y6R4 M3K4_HUMAN  | E.IRQPIDNSFDIQSR.D               |            | 3 | 4,6299 | 0,315 | 0,325  |
| 22 | O14893 GEMI2_HUMAN | R.KQS#VNISLSGCQPAPE.G            | S81:       | 2 | 4,6257 | 0,482 | -0,544 |
| 22 | P61244 MAX_HUMAN   | R.SSAQLQTNYPSSDNSLYTNAK.G        |            | 3 | 4,6195 | 0,502 | 0,16   |
| 22 | P31939 PUR9_HUMAN  | R.M*SSFGDFVALSDVCDVPTAK.I        |            | 2 | 4,615  | 0,472 | 0,113  |
| 22 | P42345 FRAP_HUMAN  | K.TGTTVPESIH#FIGDGLVKPE.A        | S2481:     | 2 | 4,5959 | 0,379 | 0,216  |
| 22 | Q96PU5 NED4L_HUMAN | R.RLQITPDSNGEQFSSLIQR.E          |            | 3 | 4,5869 | 0,46  | 0,251  |
| 22 | Q9Y6D5 BIG2_HUMAN  | E.LEKPIQSKPQSPVIAAAVS#PK.F       | S227:      | 3 | 4,5851 | 0,455 | 0,534  |
| 22 | Q8N1G1 REXO1_HUMAN | R.ALS#HADLFGDES#EDE.A            | S517:S526: | 2 | 4,579  | 0,416 | 0,068  |
| 22 | P30085 KCY_HUMAN   | R.IQTYLQSTKPIIDLIEE.M            |            | 2 | 4,5759 | 0,467 | 0,594  |
| 22 | P63241 IF5A1_HUMAN | E.TGDAGASATFPM*QCSALR.K          |            | 2 | 4,5731 | 0,518 | 0      |
| 22 | Q09472 EP300_HUMAN | E.IKEEEDQPSTSATQSS#PAPGQSK.K     | S1038:     | 3 | 4,5635 | 0,48  | -0,074 |
| 22 | P01106 MYC_HUMAN   | R.GHSVCSTSSLYLQDLAAAASE.C        |            | 2 | 4,5609 | 0,449 | 0,224  |
| 22 | P13667 PDIA4_HUMAN | K.FAM*EPEEFSDTLRE.F              |            | 2 | 4,5585 | 0,497 | 0      |
| 22 | P60709 ACTB_HUMAN  | R.VAPEEHPVLLTEAPLNPK.A           |            | 2 | 4,5367 | 0,439 | 0,062  |
| 22 | Q13428 TCOF_HUMAN  | R.TQPSSGVDSAVGTLPATS#PQSTSVQAK.G | S1111:     | 2 | 4,5365 | 1     | 1,001  |
| 22 | Q9UGV2 NDRG3_HUMAN | K.YFLQGM*GYIPASAM*TR.L           |            | 2 | 4,5339 | 0,357 | 0      |
| 22 | Q8NCF5 NF2IP_HUMAN | R.SCLS#PKPPQGQEQQGEDE.V          | S234:      | 2 | 4,5293 | 0,443 | -0,439 |
| 22 | Q8TDD1 DDX54_HUMAN | K.LGPGRPLPTFPTSECTS#DVEPDTR.E    | S75:       | 3 | 4,5283 | 0,493 | 0,387  |
| 22 | P38646 GRP75_HUMAN | K.STNGDTFLGGEDFDQALLR.H          |            | 2 | 4,5281 | 0,527 | 0      |
| 22 | P31939 PUR9_HUMAN  | K.NGNVCVLQM*DQSYKPDENE.V         |            | 3 | 4,5265 | 0,365 | 0,473  |
| 22 | P62195 PRS8_HUMAN  | K.FVVDVDKNIDINDVTPNCR.V          |            | 3 | 4,5225 | 0,366 | -0,819 |
| 22 | Q13200 PSMD2_HUMAN | R.DKAPVQPQQS#PAAAPGGTDEKPSGKE.R  | S16:       | 3 | 4,5192 | 0,369 | -0,274 |
| 22 | Q66K74 MAP1S_HUMAN | R.RSAS#PHDVDLCLVSPCFE.H          | S731:      | 2 | 4,5033 | 0,454 | 0,425  |
| 22 | Q9UNZ2 NSF1C_HUMAN | R.KKS#PNELVDDLK.G                | S114:      | 3 | 4,4971 | 0,291 | 0      |
| 22 | P31939 PUR9_HUMAN  | K.NGNVCVLQM*DQSYKPDENE.V         |            | 2 | 4,4894 | 0,477 | 0,526  |
| 22 | P02545 LMNA_HUMAN  | R.IRISLSAQLSQLKQLAAK.E           |            | 3 | 4,4705 | 0,376 | -0,414 |
| 22 | Q8NE01 CNNM3_HUMAN | E.KTTTAAGSSHSRPGVPVEGS#PGRNPGV.- | S700:      | 3 | 4,4663 | 0,512 | -0,205 |
| 22 | Q5T4S7 UBR4_HUMAN  | E.KAAPPPPPPPPLESS#PR.V           | S620:      | 3 | 4,4601 | 0,334 | -0,287 |
| 22 | Q9Y5J1 UTP18_HUMAN | E.LVFGDVENDEALLR.R               |            | 2 | 4,4467 | 0,416 | 0,072  |
| 22 | P11717 MPRI_HUMAN  | K.ALSSLHGDDQDS#EDE.V             | S2409:     | 2 | 4,4412 | 0,569 | 0      |
| 22 | Q15154 PCM1_HUMAN  | E.YM*AFPKPFESSSS#IGAEPKPR.N      | S1187:     | 3 | 4,4401 | 0,334 | 0,315  |
| 22 | Q8NEF9 SRFB1_HUMAN | K.AVTIANS#PSKPSKDSVVSLE.S        | S203:      | 2 | 4,4214 | 0,522 | 0,436  |
| 22 | Q9NYF8 BCLF1_HUMAN | K.LKDLFDYS#PPLHK.N               | S512:      | 2 | 4,3985 | 0,554 | -0,59  |
| 22 | P25705 ATPA_HUMAN  | E.NAFLSHVVSQHQALLGTIR.A          |            | 3 | 4,38   | 0,502 | 0      |
| 22 | P22234 PUR6_HUMAN  | E.LLDS#PGKVLLQSK.D               | S27:       | 3 | 4,3786 | 0,431 | 0,309  |
| 22 | Q15021 CND1_HUMAN  | K.M*LDNFDFGDKLSDE.S              |            | 2 | 4,374  | 0,508 | -0,201 |
| 22 | Q13200 PSMD2_HUMAN | K.APVQPQQS#PAAAPGGTDEKPSGKE.R    | S16:       | 3 | 4,3679 | 0,374 | -0,151 |
| 22 | P15927 RFA2_HUMAN  | E.GHIYSTVDDDDHFK.S               |            | 3 | 4,3671 | 0,378 | 0      |

|    |                    |                                     |        |   |        |       |        |
|----|--------------------|-------------------------------------|--------|---|--------|-------|--------|
| 22 | Q9BXB4 OSB11_HUMAN | R.RPS#QNAISFFNVGHSK.L               | S189:  | 3 | 4,3595 | 0,539 | 0,098  |
| 22 | O75351 VPS4B_HUMAN | K.LQNQLQGAIVIERPNVK.W               |        | 2 | 4,3527 | 0,375 | 0,127  |
| 22 | Q9GZP8 IMUP_HUMAN  | E.FDLGAALEPTSQKPGVGAGHGGDPKLS#PHK.V | S29:   | 3 | 4,3523 | 0,23  | 0,54   |
| 22 | P28799 GRN_HUMAN   | E.DHIHCCPAGFTCDTQK.G                |        | 2 | 4,3486 | 0,576 | -0,188 |
| 22 | Q9Y5X1 SNX9_HUMAN  | R.ASSSS#M*KIPLNKFPGFAKPGTE.Q        | S200:  | 3 | 4,3416 | 0,287 | 0,383  |
| 22 | P48643 TCPE_HUMAN  | D.SVLVDIKDTEPLIQTAQ.T               |        | 2 | 4,3343 | 0,469 | -0,13  |
| 22 | Q9Y2U5 M3K2_HUMAN  | R.RRGS#DIDNPTLTVM*D.I               | S331:  | 2 | 4,3274 | 0,488 | -0,478 |
| 22 | Q12756 KIF1A_HUMAN | E.SHGSSSASS#PLSAEGRPSPLEAPNER.Q     | S1430: | 3 | 4,3262 | 0,425 | -0,068 |
| 22 | Q14160 LAP4_HUMAN  | K.RVS#LVGADDLRK.M                   | S1378: | 3 | 4,3078 | 0,409 | 0,26   |
| 22 | O43290 SNUT1_HUMAN | R.ADDLLPLGDQTDGDFGSR.L              |        | 2 | 4,2974 | 0,521 | 0,242  |
| 22 | O00116 ADAS_HUMAN  | R.RAASAATAAPTAT#PAAQE.S             | T74:   | 2 | 4,2906 | 0,593 | -0,422 |
| 22 | P04406 G3P_HUMAN   | R.VIISAPSADAPM*FVM*GVNHE.K          |        | 2 | 4,2771 | 0,546 | 0,115  |
| 22 | Q96PU5 NED4L_HUMAN | R.LQITPDSNGEQFSSLIQR.E              |        | 3 | 4,2708 | 0,448 | -0,27  |
| 22 | Q9C0C2 TB182_HUMAN | R.GSGGLFS#PSTAHVPDGalGQR.D          | S1029: | 3 | 4,2637 | 0,244 | -1,837 |
| 22 | P13645 K1C10_HUMAN | K.GSLGGGFSSGGFSGGSFSR.G             |        | 2 | 4,2552 | 0,511 | 0,286  |
| 22 | P06748 NPM_HUMAN   | K.M*QAS#IEKGGSLPKVE.A               | S254:  | 3 | 4,2489 | 0,369 | 0,219  |
| 22 | Q86WB0 NIPA_HUMAN  | R.SQDATFSPGSEQAEKS#PGPIVSR.T        | S344:  | 3 | 4,2471 | 0,469 | 0,149  |
| 22 | Q13428 TCOF_HUMAN  | R.TQPSSGVDSAVGTLPTS#PQSTSVQAK.G     | S1111: | 3 | 4,2345 | 0,304 | 0,205  |
| 22 | P26373 RL13_HUMAN  | E.LKLATQLTGPMV*PVR.N                |        | 3 | 4,2302 | 0,462 | 0,223  |
| 22 | Q9UQ35 SRRM2_HUMAN | E.KM*ALPPQEDATAS#PPRQK.D            | S1179: | 3 | 4,2166 | 0,345 | -0,533 |
| 22 | Q02952 AKA12_HUMAN | E.NQNSALADTDASGGLTK.E               |        | 2 | 4,2109 | 0,512 | 0      |
| 22 | P40222 TXLNA_HUMAN | K.RVQDLSAGGQGS�TDGSPER.R            |        | 3 | 4,2039 | 0,396 | -0,541 |
| 22 | Q9UHB6 LIMA1_HUMAN | R.SRPFTVAASFQSTSVKS#PK.T            | S604:  | 3 | 4,2023 | 0,354 | 0,174  |
| 22 | P04406 G3P_HUMAN   | E.GLM*TTVHAITAT#QK.T                | T184:  | 2 | 4,1908 | 0,41  | -0,467 |
| 22 | O14497 ARI1A_HUMAN | R.SHHAPM*#PGSSGGGQPLAR.T            | S363:  | 3 | 4,1886 | 0,428 | 0,092  |
| 22 | P42858 HD_HUMAN    | E.LIAGGGSS#CSPVLSR.K                | S432:  | 2 | 4,1877 | 0,396 | -0,317 |
| 22 | Q8NEN9 PDZD8_HUMAN | R.VPTTLSIKPLGAIS#PVLNR.K            | S538:  | 3 | 4,185  | 0,4   | -0,267 |
| 22 | Q99439 CNN2_HUMAN  | K.AGQCVIGLQM*GTNK.C                 |        | 2 | 4,181  | 0,534 | -0,245 |
| 22 | O60701 UGDH_HUMAN  | K.NLFFSTNIDDAIKE.A                  |        | 2 | 4,1775 | 0,384 | -0,375 |
| 22 | Q04917 1433F_HUMAN | E.DSYKDSTLIM*QLLR.D                 |        | 3 | 4,168  | 0,224 | 0,323  |
| 22 | Q9NTI5 PDS5B_HUMAN | K.TTNVLGAVNKPLSSAGK.Q               |        | 2 | 4,1639 | 0,442 | -0,074 |
| 22 | Q86TC9 MYPN_HUMAN  | K.TPEPSS#PVKEPPPVLAKPK.L            | S644:  | 3 | 4,163  | 0,305 | 0,088  |
| 22 | Q9Y490 TLN1_HUMAN  | E.KLISSAKQVAASTAQLLVACK.V           |        | 3 | 4,1549 | 0,5   | -0,251 |
| 22 | Q15758 AAAT_HUMAN  | R.GPAGDATVASEKES#VM*.-              | S539:  | 2 | 4,1531 | 0,545 | -0,593 |
| 22 | Q8WUD4 CCD12_HUMAN | K.GQEDSLASAVDAATEQK.T               |        | 2 | 4,1529 | 0,487 | -0,284 |
| 22 | Q9Y6D5 BIG2_HUMAN  | R.LKHSQAQSKPTT#PEKTDLTNGE.H         | T244:  | 3 | 4,1494 | 0,398 | -0,588 |
| 22 | Q13459 MYO9B_HUMAN | R.VQEKPDPSPGGSTQIQR.Y               |        | 3 | 4,1484 | 0,398 | -0,212 |
| 22 | P14625 ENPL_HUMAN  | E.KNLLHVTDGTGVGM*TREE.L             |        | 2 | 4,1447 | 0,524 | 0,127  |
| 22 | Q9H910 HN1L_HUMAN  | R.M*ASNIFGPTEEPQNIK.R               |        | 2 | 4,1395 | 0,427 | -0,065 |

|    |                     |                                  |            |   |        |       |        |
|----|---------------------|----------------------------------|------------|---|--------|-------|--------|
| 22 | P08670 VIME_HUMAN   | E.LNDRFANYIDKVRFLQ               |            | 3 | 4,1339 | 0,139 | 0      |
| 22 | P61604 CH10_HUMAN   | K.VLQATVVAVGS#GSK.G              | S51:       | 2 | 4,131  | 0,503 | -0,612 |
| 22 | Q15424 SAFB1_HUMAN  | R.KFDFDACNEVPPAPK.E              |            | 2 | 4,1247 | 0,478 | -0,492 |
| 22 | P49790 NU153_HUMAN  | R.IPSIVSS#PLNSPLDR.S             | S334:      | 2 | 4,1183 | 0,549 | -0,146 |
| 22 | O00567 NOL5A_HUMAN  | R.LAALALASSENS#STPEECE.M         | S466:      | 2 | 4,1169 | 0,488 | 0,536  |
| 22 | Q9Y2D5 AKAP2_HUMAN  | R.DALGDSLQVPVSPSTSSR.C           |            | 2 | 4,1093 | 0,431 | 0      |
| 22 | Q9UQ35 SRRM2_HUMAN  | E.KDVNPGGKEETPGQRPVTE.T          |            | 3 | 4,1088 | 0,387 | -0,954 |
| 22 | O95999 BCL10_HUMAN  | K.CSSCEPFDGATNLSR.S              |            | 2 | 4,1012 | 0,517 | 0,128  |
| 22 | Q9UHB6 LIMA1_HUMAN  | R.KIS#ENSYSLDDLE.I               | S225:      | 2 | 4,1011 | 0,361 | 0,153  |
| 22 | Q8IYB7 DI3L2_HUMAN  | E.AQFDGS#DSEDGHGITQNVLDGVK.K     | S173:      | 3 | 4,0848 | 0,4   | -0,071 |
| 22 | P48643 TCPE_HUMAN   | E.HLDKISDSVLVDIKD.T              |            | 3 | 4,081  | 0,287 | 0,216  |
| 22 | P55196 AFAD_HUMAN   | E.VAKQGAIIYHGLATLLNQPS#PM*M*QR.I | S1090:     | 3 | 4,0757 | 0,302 | 0,267  |
| 22 | Q8WUA4 TF3C2_HUMAN  | R.AHFNAM*FQPSS#PTR.R             | S893:      | 2 | 4,0667 | 0,447 | -0,289 |
| 22 | O43166 SI1L1_HUMAN  | R.TLS#DESIYNSQRE.H               | S1585:     | 2 | 4,0601 | 0,494 | 0,15   |
| 22 | Q66K74 MAP1S_HUMAN  | R.SAS#PHDVDLCLVSPCFE.H           | S731:      | 2 | 4,0567 | 0,405 | 0,228  |
| 22 | P38646 GRP75_HUMAN  | K.STNGDTFLGGEDFDQALLR.H          |            | 3 | 4,0565 | 0,406 | 0      |
| 22 | P22695 QCR2_HUMAN   | R.NALANPLYCPDYR.I                |            | 2 | 4,0555 | 0,437 | 0,078  |
| 22 | Q96QT6 PHF12_HUMAN  | R.TTS#PSS#DTDLLDR.S              | S131:S134: | 2 | 4,0441 | 1     | 0,156  |
| 22 | Q3KQU3 MA7D1_HUMAN  | R.RSS#QPSPTAVPASDSPPTKQE.V       | S113:      | 3 | 4,0392 | 0,232 | -0,081 |
| 22 | P12694 ODBA_HUMAN   | R.IGHHSTS#DDSSAYRS#VDE.V         | S339:S347: | 3 | 4,0381 | 0,398 | -0,172 |
| 22 | Q8N1G1 REXO1_HUMAN  | R.ALSHADLFGDES#EDE.A             | S526:      | 2 | 4,0333 | 0,508 | 0,213  |
| 22 | P02545 LMNA_HUMAN   | R.IRIDSLSAQLSQLKQLAAKE.A         |            | 3 | 4,0301 | 0,287 | 0,078  |
| 22 | Q96B23 CR025_HUMAN  | E.TAVEGDPSGVSGATVGR.K            |            | 2 | 4,0247 | 0,564 | -0,313 |
| 22 | Q8WXV6 Q8WXV6_HUMAN | R.TSS#EDNLYLAVLR.A               | S21:       | 2 | 4,013  | 0,313 | -0,234 |
| 22 | P28370 SMCA1_HUMAN  | E.LFAHFIQPSAQKS#PTS#PLNM*K.L     | S116:S119: | 3 | 4,0119 | 0,155 | 0,436  |
| 22 | Q9Y520 Q9Y520_HUMAN | E.SENSCNKEEVPFTR.Q               |            | 2 | 4,0035 | 0,503 | -0,401 |
| 22 | Q99497 PARK7_HUMAN  | K.GLIAAICAGPTALLAHE.I            |            | 2 | 4,0019 | 0,449 | -0,218 |
| 22 | Q9NTK5 OLA1_HUMAN   | E.DGDIIFKFNTPPQPK.K              |            | 3 | 4,0008 | 0,426 | 0,29   |
| 22 | Q58FF7 H90B3_HUMAN  | K.HSQFIGYPITLYLEK.E              |            | 3 | 3,996  | 0,345 | 0,202  |
| 22 | Q9UKV3 ACINU_HUMAN  | K.ASLVALPEQTASEEETPPPLTK.E       |            | 2 | 3,9918 | 0,465 | 0,706  |
| 22 | Q13442 HAP28_HUMAN  | R.KGVEGLIDIENPNR.V               |            | 2 | 3,9823 | 0,376 | -0,157 |
| 22 | Q969S3 ZN622_HUMAN  | K.GLGVDSVDKDAM*NAAIQQAIA.A       |            | 3 | 3,9775 | 0,312 | 0,339  |
| 22 | P34931 HS71L_HUMAN  | K.ATAGDTHLGGEDFDNR.L             |            | 2 | 3,9729 | 0,553 | -0,146 |
| 22 | P0C7M2 RA1L3_HUMAN  | K.KIFVGGIKEDTEE.H                |            | 2 | 3,9664 | 0,456 | -0,083 |
| 22 | P24534 EF1B_HUMAN   | K.YGPADVEDTTGSGATDSK.D           |            | 2 | 3,965  | 0,598 | -0,069 |
| 22 | P07437 TBB5_HUMAN   | E.HGIDPTGTYHGSDQLQLDR.I          |            | 3 | 3,9637 | 0,438 | 0,349  |
| 22 | Q8WXV6 Q8WXV6_HUMAN | K.RTSS#EDNLYLAVLR.A              | S21:       | 2 | 3,9621 | 0,54  | -0,071 |
| 22 | Q96SB3 NEB2_HUMAN   | K.IKPVEVEES#GESEAE.S             | S304:      | 2 | 3,9615 | 0,389 | 0,071  |
| 22 | Q14152 EIF3A_HUMAN  | E.VIKPAHILQEKEE.Q                |            | 3 | 3,9604 | 0,301 | -0,119 |

|    |                    |                                         |              |   |        |       |        |
|----|--------------------|-----------------------------------------|--------------|---|--------|-------|--------|
| 22 | O94763 RMP_HUMAN   | E.DRNTNVNAM*HQVTDSTPCHK.D               |              | 3 | 3,9572 | 0,178 | -0,295 |
| 22 | Q9HCH0 K1602_HUMAN | E.KSPSPGGPQLS#PQLPR.N                   | S473:        | 3 | 3,954  | 0,298 | 0,212  |
| 22 | P04792 HSPB1_HUMAN | R.KYTLPPGVDPTQVSSLSPE.G                 |              | 2 | 3,952  | 0,433 | -0,813 |
| 22 | P27694 RFA1_HUMAN  | K.SKDSLVDIIGICK.S                       |              | 2 | 3,9482 | 0,528 | -0,253 |
| 22 | Q9Y2D5 AKAP2_HUMAN | R.DALGDSLQVPVS#PSSTSSR.C                | S152:        | 2 | 3,9476 | 0,485 | 0,234  |
| 22 | Q9GZP8 IMUP_HUMAN  | E.FDLGAALEPTSQKPGVGAGHGGDPKLS#PHKVQGR.S | S29:         | 3 | 3,9457 | 0,318 | 0,734  |
| 22 | P04083 ANXA1_HUMAN | E.ATIIDILTKRNNQRQKIAAYLQE.T             |              | 3 | 3,9432 | 0,458 | 0,316  |
| 22 | Q9UHX1 PUF60_HUMAN | R.IYVASVHQDLSDDDIKSVFE.A                |              | 3 | 3,9325 | 0,313 | 0,08   |
| 22 | Q96T23 RSF1_HUMAN  | E.TLALLKAQIDPVLLK.N                     |              | 2 | 3,9307 | 0,413 | -0,224 |
| 22 | P08651 NFIC_HUMAN  | E.LQGHLAYDLNPASTGLR.R                   |              | 3 | 3,929  | 0,259 | 0,1    |
| 22 | P02545 LMNA_HUMAN  | R.IRIDSLSAQLSQLK.Q                      |              | 2 | 3,9277 | 0,361 | -0,215 |
| 22 | Q8N7R7 CCYL1_HUMAN | R.SFS#ADNFIGIQR.S                       | S344:        | 2 | 3,9261 | 0,378 | 0,085  |
| 22 | Q8N6T3 ARFG1_HUMAN | R.KSPSSDSWTCADTSTER.R                   |              | 3 | 3,9257 | 0,266 | -0,382 |
| 22 | P14618 KPYM_HUMAN  | R.AEGSDVANAVLDGADCIM*LSGE.T             |              | 3 | 3,9196 | 0,323 | -0,166 |
| 22 | P42684 ABL2_HUMAN  | R.DKS#PSSLEDAKE.T                       | S631:        | 2 | 3,9096 | 0,249 | -0,488 |
| 22 | P49761 CLK3_HUMAN  | E.ALLHPFFAGLTPEER.S                     |              | 2 | 3,9091 | 0,505 | -0,072 |
| 22 | Q8NCF5 NF2IP_HUMAN | R.SCLS#PKPPQGQEQGQDE.V                  | S234:        | 3 | 3,9055 | 0,411 | -0,412 |
| 22 | P08107 HSP71_HUMAN | K.HWPFQVINDGDKPK.V                      |              | 3 | 3,8987 | 0,266 | 0,544  |
| 22 | P63261 ACTG_HUMAN  | E.IAALVIDNGSGM*CK.A                     |              | 2 | 3,8932 | 0,545 | 0,083  |
| 22 | P54136 SYRC_HUMAN  | K.VIVDFSSPNIAKE.M                       |              | 2 | 3,8928 | 0,462 | 0,086  |
| 22 | Q70CQ2 UBP34_HUMAN | E.YRM*EVPSSFSEDM*SNIR.S                 |              | 3 | 3,8836 | 0,378 | 0      |
| 22 | Q13813 SPTA2_HUMAN | R.LM*VHTVATFNSIKE.L                     |              | 2 | 3,8834 | 0,445 | -1,14  |
| 22 | P46939 UTRO_HUMAN  | E.HYDPSQS#PQLFHDDTHSRIE.Q               | S3182:       | 3 | 3,8833 | 0,373 | 0,221  |
| 22 | Q16513 PKN2_HUMAN  | E.LNAHIVVSDPEDITDCPR.T                  |              | 3 | 3,883  | 0,356 | 0,089  |
| 22 | P43243 MATR3_HUMAN | R.GDADQASNILASFGLSAR.D                  |              | 2 | 3,883  | 0,531 | -0,068 |
| 22 | Q9C0C2 TB182_HUMAN | R.ASRVPS#S#DEEVVEEPQSR.R                | S1620:S1621: | 3 | 3,8785 | 0,148 | 0,339  |
| 22 | P11021 GRP78_HUMAN | K.VTHAVVTVPAYFNDAQR.Q                   |              | 3 | 3,8749 | 0,287 | 0,097  |
| 22 | P06748 NPM_HUMAN   | E.DVKLLSISGKR.S                         |              | 3 | 3,8699 | 0,271 | 0,075  |
| 22 | O00571 DDX3X_HUMAN | E.NALGLDQQFAGLDLNSS#DNQSGGSTASK.G       | S24:         | 3 | 3,8699 | 0,317 | 0,382  |
| 22 | Q16643 DREB_HUMAN  | R.M*APTIPITRS#PSDSSTASTPVAE.Q           | S337:        | 2 | 3,8656 | 0,414 | 0,611  |
| 22 | Q58FF7 H90B3_HUMAN | K.VILHLKEDQTEYLEE.R                     |              | 2 | 3,8609 | 0,385 | 0,263  |
| 22 | Q05209 PTN12_HUMAN | E.NM*ISSIEPEKQDS#PPPKPPR.T              | S332:        | 3 | 3,8541 | 0,381 | -0,156 |
| 22 | Q69YH5 CDCA2_HUMAN | E.GLSACQSQGFPAVLSSK.R                   |              | 2 | 3,8527 | 0,474 | 0,281  |
| 22 | P60903 S10AA_HUMAN | E.NQKDPLAVDKIM*KD.L                     |              | 3 | 3,8502 | 0,288 | -0,336 |
| 22 | Q9H299 SH3L3_HUMAN | R.IQYQLVDISQDNALR.D                     |              | 2 | 3,8479 | 0,461 | 0      |
| 22 | Q9Y2L1 RRP44_HUMAN | R.HLCICSVDPGCTDIDDALHCRE.L              |              | 3 | 3,8429 | 0,418 | 0,334  |
| 22 | P42166 LAP2A_HUMAN | K.DVYVQLYLQHLTAR.N                      |              | 2 | 3,8385 | 0,486 | 0,426  |
| 22 | Q86XN8 MEX3D_HUMAN | R.SSGAGT#PRHS#PTLPEPGGLRLE.L            | T510:S514:   | 3 | 3,838  | 0,158 | 0,154  |
| 22 | P78371 TCPB_HUMAN  | R.SLHDALCVLAQTVK.D                      |              | 2 | 3,8313 | 0,399 | -0,235 |

|    |                    |                              |        |   |        |       |        |
|----|--------------------|------------------------------|--------|---|--------|-------|--------|
| 22 | Q8IYB3 SRRM1_HUMAN | E.KKEKT#PELPEPSVK.V          | T220:  | 3 | 3,83   | 0,292 | -0,216 |
| 22 | P35580 MYH10_HUMAN | E.KQVLALQSQLADTK.K           |        | 2 | 3,8275 | 0,548 | 0      |
| 22 | Q9UGV2 NDRG3_HUMAN | E.AFKYFLQGM*GYIPASAM*TR.L    |        | 3 | 3,826  | 0,183 | -0,083 |
| 22 | Q92530 PSMF1_HUMAN | E.KANVSS#PHREFPPATARE.V      | S153:  | 3 | 3,8249 | 0,227 | -0,176 |
| 22 | P22314 UBA1_HUMAN  | R.QNRYDGGQVAVFGSDLQE.K       |        | 2 | 3,8201 | 0,511 | 0,19   |
| 22 | Q9BYW2 SETD2_HUMAN | E.GIFLGSES#DEDSVR.T          | S323:  | 2 | 3,8086 | 0,4   | 0,077  |
| 22 | P16401 H15_HUMAN   | E.TAPAETATPAPVEKS#PAK.K      | S18:   | 2 | 3,8082 | 0,549 | -0,33  |
| 22 | Q58FG0 HS905_HUMAN | K.KHSQFIGYPITLFVEK.K         |        | 3 | 3,8078 | 0,255 | -0,096 |
| 22 | Q5JSZ5 K0515_HUMAN | R.LLSFS#PEEFPTLK.A           | S168:  | 2 | 3,8027 | 0,356 | -0,077 |
| 22 | P23588 IF4B_HUMAN  | E.TLNKEEDCHS#PTSKPPKPDQPLK.V | S459:  | 3 | 3,8003 | 0,173 | -0,134 |
| 22 | Q5T5U3 RHG21_HUMAN | E.TGSDSGTLLSTSSQASLAR.F      |        | 2 | 3,7943 | 0,497 | -0,133 |
| 22 | Q8NCD3 HJURP_HUMAN | K.YCLKS#PGQM*TVPLCIGVSTDK.A  | S595:  | 3 | 3,7909 | 0,369 | 0,448  |
| 22 | P22314 UBA1_HUMAN  | R.YDQVAVFGSDLQE.K            |        | 2 | 3,7899 | 0,425 | 0      |
| 22 | P18583 SON_HUMAN   | R.AGIEGPLLASDVGR.D           |        | 2 | 3,7866 | 0,371 | 0,45   |
| 22 | Q5T1V6 DDX59_HUMAN | K.EHPFILNLQEDQIE.N           |        | 2 | 3,7837 | 0,312 | 0,354  |
| 22 | Q9UHR5 S30BP_HUMAN | E.KGGLVSDAYGEDDFSR.L         |        | 3 | 3,7823 | 0,37  | 0,107  |
| 22 | Q8IYB3 SRRM1_HUMAN | K.VPKPEPIPEKEPS#PEKNSK.K     | S260:  | 3 | 3,7758 | 0,249 | -0,079 |
| 22 | Q9UQR0 SCML2_HUMAN | R.SPQQTVPYVVPLS#PK.L         | S511:  | 2 | 3,7755 | 0,45  | 0,071  |
| 22 | Q15019 SEPT2_HUMAN | K.IYHLPDAES#DEDE.D           | S218:  | 2 | 3,7751 | 0,283 | 0,076  |
| 22 | P02545 LMNA_HUMAN  | R.SGAQASSTPLS#PTR.I          | S22:   | 2 | 3,7742 | 0,554 | -0,254 |
| 22 | P54577 SYYC_HUMAN  | E.KHPDADSLYVEK.I             |        | 3 | 3,7727 | 0,16  | 0      |
| 22 | P16220 CREB1_HUMAN | K.ILNDLSSDAPGVPRIEEE.K       |        | 2 | 3,7708 | 0,532 | -1,311 |
| 22 | P51572 BAP31_HUMAN | K.GAAVDGGKLDVGNAE.V          |        | 2 | 3,7707 | 0,419 | -0,267 |
| 22 | O15355 PPM1G_HUMAN | R.KLEEVL#TEGAEE.N            | S527:  | 2 | 3,7677 | 0,456 | 0,242  |
| 22 | P10809 CH60_HUMAN  | R.KPLVIAEDVDGE.A             |        | 2 | 3,767  | 0,501 | 0,087  |
| 22 | P68104 EF1A1_HUMAN | K.THINIVVIGHVDSGK.S          |        | 3 | 3,7657 | 0,32  | 0,921  |
| 22 | Q9C0C2 TB182_HUMAN | R.HNGSLS#PGLEAR.D            | S1385: | 2 | 3,7643 | 0,544 | 0,648  |
| 22 | P05362 ICAM1_HUMAN | K.REPAVGGEPAEVTTTVLVR.R      |        | 3 | 3,7586 | 0,359 | 0,285  |
| 22 | P51572 BAP31_HUMAN | K.LDVGNAEVKLEEE.N            |        | 2 | 3,7562 | 0,396 | 0      |
| 22 | Q8IYB3 SRRM1_HUMAN | K.VPKPEPIPEKEPS#PEK.N        | S260:  | 3 | 3,7533 | 0,138 | -0,462 |
| 22 | O14617 AP3D1_HUMAN | R.ASCILQLVKHIQKLOAK.D        |        | 3 | 3,7514 | 0,345 | 0      |
| 22 | Q9UPX8 SHAN2_HUMAN | E.LDRY#SLDSEDLYSR.N          | Y363:  | 3 | 3,7512 | 0,202 | 0,404  |
| 22 | Q6P158 DHX57_HUMAN | R.DLQEQDADAGSER.G            |        | 2 | 3,7494 | 0,455 | -0,766 |
| 22 | P14866 HNRPL_HUMAN | R.IQHPSNVLHFFNAPLEVTEE.N     |        | 2 | 3,7482 | 0,445 | 0,631  |
| 22 | Q8ND56 LS14A_HUMAN | K.SFFDNISCDNRE.R             |        | 2 | 3,747  | 0,536 | 0,301  |
| 22 | O95239 KIF4A_HUMAN | E.TSRSS#DAFTTQHALR.Q         | S508:  | 3 | 3,7464 | 0,327 | -0,936 |
| 22 | Q92619 HMHA1_HUMAN | R.KSS#FNVS DVARPE.A          | S578:  | 2 | 3,7432 | 0,406 | -1,771 |
| 22 | Q9BTC0 DIDO1_HUMAN | K.HDSSAPDPAPDSADE.V          |        | 2 | 3,7413 | 0,584 | -0,081 |
| 22 | Q9UQR0 SCML2_HUMAN | K.RSPQQTVPYVVPLS#PK.L        | S511:  | 2 | 3,7406 | 0,36  | 0,13   |



|    |                     |                                         |            |   |        |       |        |
|----|---------------------|-----------------------------------------|------------|---|--------|-------|--------|
| 22 | P14618 KPYM_HUMAN   | R.AEGSDVANAVLDGADCIM*LSGE.T             |            | 2 | 3,7331 | 0,4   | 0      |
| 22 | Q99459 CDC5L_HUMAN  | E.HLRGLLGLPAPK.N                        |            | 3 | 3,7307 | 0,38  | 0,066  |
| 22 | P04406 G3P_HUMAN    | K.LVINGNPITIFQER.D                      |            | 2 | 3,7307 | 0,287 | 0      |
| 22 | Q07002 PCTK3_HUMAN  | R.RAS#LSDIGFGKLE.T                      | S130:      | 2 | 3,7271 | 0,455 | 0,166  |
| 22 | Q8IYB3 SRRM1_HUMAN  | E.ATSTSDILKVPKPEIPEPK.E                 |            | 3 | 3,7265 | 0,137 | 0,426  |
| 22 | Q71U36 TBA1A_HUMAN  | E.ITNACFEPANQM*VK.C                     |            | 2 | 3,7216 | 0,433 | 0,074  |
| 22 | Q9Y266 NUDC_HUMAN   | K.LKPNLNGADLPNYR.W                      |            | 3 | 3,7207 | 0,374 | 0,111  |
| 22 | Q9H0B6 KLC2_HUMAN   | K.SVEEPTQPGGTGLSDSR.T                   |            | 2 | 3,7205 | 0,572 | -0,355 |
| 22 | Q9H501 ESF1_HUMAN   | K.NIVQHTTDSS#LEE.K                      | S180:      | 2 | 3,7171 | 0,274 | -0,236 |
| 22 | P21796 VDAC1_HUMAN  | R.VTQSNFAVGKYTDE.F                      |            | 2 | 3,7164 | 0,415 | -0,078 |
| 22 | Q92598 HS105_HUMAN  | E.LNNTCEPVVTQPKPK.I                     |            | 3 | 3,7111 | 0,295 | -0,636 |
| 22 | Q9Y490 TLN1_HUMAN   | K.QVAASTAQLLVACK.V                      |            | 2 | 3,7033 | 0,458 | 0,167  |
| 22 | P08670 VIME_HUMAN   | E.QHVQIDVDVSKPDLTAALR.D                 |            | 3 | 3,6989 | 0,389 | 0,087  |
| 22 | Q09666 AHNK_HUMAN   | R.RVTAYTVDVTGR.E                        |            | 2 | 3,6985 | 0,463 | -0,912 |
| 22 | Q969S3 ZN622_HUMAN  | E.KGLGVDSVDKAM*NAAIQQAIA.A              |            | 2 | 3,6975 | 0,227 | 0,107  |
| 22 | P06493 CDC2_HUMAN   | K.IGEGT#Y#GVVYK.G                       | T14:Y15:   | 2 | 3,6966 | 0,385 | -0,181 |
| 22 | P46939 UTRO_HUMAN   | E.HYDPSQS#PQLFHDDTHSR.I                 | S3182:     | 3 | 3,695  | 0,348 | -0,489 |
| 22 | Q7RTP8 Q7RTP8_HUMAN | R.ASS#LNLVNVGGK.A                       | S596:      | 2 | 3,6919 | 0,542 | 0      |
| 22 | Q58FF7 H90B3_HUMAN  | K.KHSQFIGYPITLYLEK.E                    |            | 3 | 3,6888 | 0,309 | 0,283  |
| 22 | P42694 HELZ_HUMAN   | R.RIS#SSSVQPCSEE.V                      | S1763:     | 2 | 3,6866 | 0,428 | 0      |
| 22 | O60610 DIAP1_HUMAN  | K.QISDVERDVQNFPAATDE.K                  |            | 2 | 3,6859 | 0,456 | 0,36   |
| 22 | P98174 FGD1_HUMAN   | K.S#LSLDPGQSLEPHPE.G                    | S114:      | 2 | 3,6851 | 0,394 | 0,217  |
| 22 | O00244 ATOX1_HUMAN  | E.SEHSM*DTLLATLKK.T                     |            | 3 | 3,6846 | 0,327 | 0      |
| 22 | Q0VDF9 HSP7E_HUMAN  | E.NGLRDILAVLTM*KR.D                     |            | 3 | 3,6819 | 0,279 | 0      |
| 22 | P06748 NPM_HUMAN    | E.HQLSLRTVSLGAGAKDE.L                   |            | 3 | 3,6803 | 0,393 | 0,103  |
| 22 | P32969 RL9_HUMAN    | E.LVNSAALIQQATTVK.N                     |            | 2 | 3,6724 | 0,509 | -0,371 |
| 22 | Q02241 KIF23_HUMAN  | R.RSS#TVAPAQPDGAESE.W                   | S912:      | 2 | 3,6721 | 0,539 | -0,725 |
| 22 | P08559 ODPA_HUMAN   | R.YHGHS#MSDPGVS#YR.T                    | S293:S300: | 2 | 3,6703 | 0,437 | -0,209 |
| 22 | Q9UKV3 ACINU_HUMAN  | K.ASLVALPEQTASEEETPPPLTK.E              |            | 3 | 3,6659 | 0,458 | 0,151  |
| 22 | P40222 TXLNA_HUMAN  | R.VQDLSAGGQGSGLTDSGPERRPEGPGAQAPSS#PR.V | S515:      | 3 | 3,665  | 0,442 | 0,329  |
| 22 | P08670 VIME_HUMAN   | E.NTLQSFQRQVDNANASLAR.L                 |            | 3 | 3,6626 | 0,299 | 0,189  |
| 22 | P49790 NU153_HUMAN  | R.IPSIVSSPLNS#PLDR.S                    | S338:      | 2 | 3,6619 | 0,496 | -0,146 |
| 22 | P60660 MYL6_HUMAN   | E.IRHVLVTLGEK.M                         |            | 3 | 3,6592 | 0,323 | 0,217  |
| 22 | Q53ET0 CRTC2_HUMAN  | E.FQS#PLHS#PLDSSR.S                     | S86:S90:   | 2 | 3,6589 | 0,473 | -0,15  |
| 22 | O60563 CCNT1_HUMAN  | E.NLALTGVDHSLPQDGSNAFISQK.Q             |            | 3 | 3,6514 | 0,222 | 0,303  |
| 22 | P11171 41_HUMAN     | R.SPRPTSAPAITQGQVAE.G                   |            | 2 | 3,6438 | 0,451 | -0,143 |
| 22 | Q09666 AHNK_HUMAN   | K.FKAEAPLPS#PKLE.G                      | S5110:     | 2 | 3,6402 | 0,356 | -0,081 |
| 22 | Q6Y7W6 PERQ2_HUMAN  | R.ALSSGGSITS#PPLSPALPK.Y                | S26:       | 2 | 3,6333 | 0,452 | 0,262  |
| 22 | Q9UHD1 CHRD1_HUMAN  | R.RKT#SDFNTFLAQE.G                      | T199:      | 2 | 3,6307 | 0,371 | 0      |

|    |                     |                                     |                 |   |        |       |        |
|----|---------------------|-------------------------------------|-----------------|---|--------|-------|--------|
| 22 | P05412 JUN_HUMAN    | K.NSDLLT#SPDVGLLK.L                 | T62:            | 2 | 3,6284 | 0,365 | -0,314 |
| 22 | P56545 CTBP2_HUMAN  | E.GIIPGGIPVTHNLPTVAHPSQAPS#PNQPTK.H | S428:           | 3 | 3,6261 | 0,528 | -0,825 |
| 22 | Q06830 PRDX1_HUMAN  | R.TIAQDYGVLLKADE.G                  |                 | 2 | 3,6239 | 0,36  | -0,171 |
| 22 | P04406 G3P_HUMAN    | R.VIISAPSADAPM*FVM*GVNHE.K          |                 | 3 | 3,6237 | 0,378 | -0,346 |
| 22 | P19338 NUCL_HUMAN   | K.GLSEDTTEETLKE.S                   |                 | 2 | 3,6232 | 0,406 | -0,084 |
| 22 | Q6UN15 FIP1_HUMAN   | R.DHS#PTPSVFNSDEE.R                 | S492:           | 2 | 3,615  | 0,413 | 0      |
| 22 | Q9H299 SH3L3_HUMAN  | R.IQYQLVDISQDNALRDE.M               |                 | 3 | 3,6114 | 0,369 | 0,181  |
| 22 | P13861 KAP2_HUMAN   | E.ARAPASVLPAAATPR.Q                 |                 | 2 | 3,6108 | 0,383 | -0,531 |
| 22 | O95400 CD2B2_HUMAN  | E.GHFDADGNYFLNR.D                   |                 | 2 | 3,6098 | 0,501 | 0,32   |
| 22 | Q9UNH7 SNX6_HUMAN   | E.LKHAKGNLQLLQNCLAVLNGDT.-          |                 | 3 | 3,6098 | 0,429 | -0,227 |
| 22 | O43865 SAHH2_HUMAN  | K.KQIQFADDM*QE.F                    |                 | 2 | 3,6091 | 0,288 | -0,267 |
| 22 | Q5QJE6 TDIF2_HUMAN  | E.IVS#EAES#HVS#GISR.I               | S141:S145:S148: | 2 | 3,6068 | 0,507 | -0,357 |
| 22 | Q9UNZ2 NSF1C_HUMAN  | R.KKS#PNELVDDLFK.G                  | S114:           | 2 | 3,604  | 0,348 | -0,227 |
| 22 | Q8WXV6 Q8WXV6_HUMAN | R.TSS#EDNLYLAVLR.A                  | S21:            | 3 | 3,6022 | 0,23  | 0,234  |
| 22 | P55196 AFAD_HUMAN   | K.QGAIYHGLATLLNQPS#PM*M*QR.I        | S1090:          | 3 | 3,5932 | 0,251 | 0,15   |
| 22 | P09936 UCHL1_HUMAN  | E.DTLKDAAKVCRE.F                    |                 | 3 | 3,5927 | 0,389 | 0,241  |
| 22 | P68371 TBB2C_HUMAN  | E.IVHLQAGQCGNQIGAK.F                |                 | 3 | 3,5867 | 0,413 | 0      |
| 22 | Q9UKV3 ACINU_HUMAN  | K.ASLVALPEQTASEEETPPPLLTKE.A        |                 | 2 | 3,5856 | 0,42  | 0,478  |
| 22 | Q7Z478 DHX29_HUMAN  | K.FQSPQIQATIS#PPLQPK.T              | S200:           | 3 | 3,5849 | 0,287 | 0,373  |
| 22 | Q96A49 SYAP1_HUMAN  | E.AVRPKT#PPVVIK.S                   | T248:           | 3 | 3,5842 | 0,257 | -0,132 |
| 22 | P02545 LMNA_HUMAN   | R.IRIDSLSAQLSQLK.Q                  |                 | 3 | 3,5821 | 0,327 | 0,215  |
| 22 | Q9NYF8 BCLF1_HUMAN  | K.DLFDYS#PPLHK.N                    | S512:           | 2 | 3,5782 | 0,443 | -0,346 |
| 22 | Q00839 HNRPU_HUMAN  | E.YTFIQNVPLEDR.V                    |                 | 2 | 3,5713 | 0,472 | -0,163 |
| 22 | P50991 TCPD_HUMAN   | K.GM*DKM*IQDGKGDVTITND.G            |                 | 2 | 3,5683 | 0,431 | -1,053 |
| 22 | Q99613 EIF3C_HUMAN  | R.GCILTVERM*DEE.F                   |                 | 2 | 3,5637 | 0,475 | 0      |
| 22 | Q01804 OTUD4_HUMAN  | K.TAADVVSPGANSVDSR.V                |                 | 2 | 3,563  | 0,312 | -0,316 |
| 22 | Q96T58 MINT_HUMAN   | E.KQSEKPHST#PPQSCTSDLSK.I           | T2393:          | 3 | 3,5599 | 0,266 | -0,394 |
| 22 | Q7Z4V5 HDGR2_HUMAN  | K.LAGEELAGEEAPQEK.A                 |                 | 2 | 3,5531 | 0,364 | -0,311 |
| 22 | Q99497 PARK7_HUMAN  | R.KGLIAAICAGPTALLAHE.I              |                 | 3 | 3,5524 | 0,318 | 0,101  |
| 22 | Q96S66 CLCC1_HUMAN  | K.YGISGEKDVSPDLSCADE.I              |                 | 2 | 3,5462 | 0,509 | 0,251  |
| 22 | P53396 ACLY_HUMAN   | R.TAS#FSEGRADE.V                    | S455:           | 2 | 3,5459 | 0,424 | -0,572 |
| 22 | Q9Y2W2 WBP11_HUMAN  | K.GATAAPQRKS#EDDSAVPLAK.A           | S600:           | 3 | 3,545  | 0,269 | -0,087 |
| 22 | P04406 G3P_HUMAN    | K.RVIISAPSADAPM*FVM*GVNHE.K         |                 | 3 | 3,545  | 0,189 | 0      |
| 22 | P62750 RL23A_HUMAN  | E.DNNTLVFIVDVK.A                    |                 | 2 | 3,5433 | 0,397 | 0      |
| 22 | P61158 ARP3_HUMAN   | R.VM*KGVDLDFFIGDE.A                 |                 | 2 | 3,5398 | 0,323 | 0      |
| 22 | O95239 KIF4A_HUMAN  | K.ILAQDVAQLKE.K                     |                 | 2 | 3,5396 | 0,33  | -0,199 |
| 22 | P41208 CETN2_HUMAN  | K.M*NFGDFLTVM*TQK.M                 |                 | 2 | 3,5392 | 0,381 | 0      |
| 22 | O43488 ARK72_HUMAN  | E.TILGGLGLGGGDCR.V                  |                 | 2 | 3,5344 | 0,543 | 0,161  |
| 22 | Q16555 DPYL2_HUMAN  | R.NLHQSGFSLGAQIDNIPR.R              |                 | 3 | 3,5338 | 0,403 | -0,084 |

|    |                    |                              |              |   |        |       |        |
|----|--------------------|------------------------------|--------------|---|--------|-------|--------|
| 22 | Q08999 RBL2_HUMAN  | E.KIFYYFSNS#PSK.R            | S1080:       | 2 | 3,533  | 0,398 | 0      |
| 22 | P34931 HS71L_HUMAN | E.VKATAGDTHLGGEDFDNR.L       |              | 3 | 3,5305 | 0,456 | -0,481 |
| 22 | Q16881 TRXR1_HUMAN | K.KQLDSTIGIHPVCAE.V          |              | 2 | 3,5271 | 0,409 | -0,146 |
| 22 | Q9C0C2 TB182_HUMAN | E.HGVGGVSQCPEPGLR.H          |              | 2 | 3,5264 | 0,538 | -0,236 |
| 22 | P09211 GSTP1_HUMAN | K.FQDGDLTLYQSNTILR.H         |              | 3 | 3,5231 | 0,329 | 0      |
| 22 | Q12965 MYO1E_HUMAN | R.NFIGDYIGM*EEHPE.L          |              | 2 | 3,5227 | 0,424 | -0,22  |
| 22 | P68104 EF1A1_HUMAN | K.YYVTIIDAPGHR.D             |              | 3 | 3,517  | 0,405 | -0,065 |
| 22 | Q92597 NDRG1_HUMAN | R.SRT#AS#GSSVTSLDGTR.S       | T328:S330:   | 2 | 3,516  | 1     | -0,56  |
| 22 | Q9Y608 LRRF2_HUMAN | R.RGS#GDTSSLIDPDTSLSE.L      | S328:        | 2 | 3,5131 | 0,434 | 0,127  |
| 22 | Q9Y6W5 WASF2_HUMAN | R.DVVGNDVATILSR.R            |              | 2 | 3,5098 | 0,422 | 0,449  |
| 22 | P04406 G3P_HUMAN   | K.IISNASCTTNCLAPLAK.V        |              | 3 | 3,5085 | 0,358 | -0,1   |
| 22 | O60506 HNRPQ_HUMAN | E.DGALAVLQQFK.D              |              | 2 | 3,5084 | 0,447 | 0,205  |
| 22 | Q96D31 CRCM1_HUMAN | R.LQDQLDHRGDHPLT#PGS#HYA.-   | T295:S298:   | 3 | 3,5072 | 0,366 | -0,833 |
| 22 | Q9Y2H0 DLGP4_HUMAN | E.RSLPDCTPHPNSISIDAGPR.Q     |              | 3 | 3,5063 | 0,283 | -0,167 |
| 22 | Q9ULW0 TPX2_HUMAN  | K.ANLQQAIVT#PLKPVDNTYYKE.A   | T72:         | 3 | 3,5056 | 0,314 | 0,074  |
| 22 | Q9NQ55 SSF1_HUMAN  | R.VGGS#DEEASGIPSR.T          | S359:        | 2 | 3,5034 | 0,465 | -0,339 |
| 22 | Q99497 PARK7_HUMAN | R.KGLIAAICAGPTALLAHE.I       |              | 2 | 3,5033 | 0,365 | 0,135  |
| 22 | Q04917 1433F_HUMAN | E.DSYKDSTLIM*QLLR.D          |              | 2 | 3,5016 | 0,435 | -0,144 |
| 22 | P17980 PRS6A_HUMAN | K.VIAATNRVDILDPELLR.S        |              | 3 | 3,499  | 0,133 | 0      |
| 22 | Q9P2N5 RBM27_HUMAN | E.LKTSSAVST#PSKVK.T          | T888:        | 3 | 3,4976 | 0,29  | 0,121  |
| 22 | P49736 MCM2_HUMAN  | R.TDALTS#S#PGRDLPPFEDE.S     | S40:S41:     | 2 | 3,4944 | 0,406 | 0,347  |
| 22 | P60709 ACTB_HUMAN  | R.VAPEEHPVLLTEAPLNPK.A       |              | 3 | 3,494  | 0,216 | 0,374  |
| 22 | P14618 KPYM_HUMAN  | R.NTGIICTIGPASR.S            |              | 2 | 3,4905 | 0,389 | -0,359 |
| 22 | P13056 NR2C1_HUMAN | K.DLRS#PLTATPTFVTDSE.S       | S215:        | 2 | 3,4879 | 0,491 | 0,253  |
| 22 | Q12931 TRAP1_HUMAN | R.SPAAECLSEKETEE.L           |              | 2 | 3,4782 | 0,431 | -0,541 |
| 22 | Q96GQ7 DDX27_HUMAN | R.SADFNPDFVFTEKE.G           |              | 2 | 3,4763 | 0,432 | -0,148 |
| 22 | Q9BSE4 HERP2_HUMAN | E.YHM*VHLVCT#SRTPPSS#PK.S    | T87:S94:     | 3 | 3,4751 | 0,357 | -0,08  |
| 22 | P04406 G3P_HUMAN   | K.IISNASCTTNCLAPLAK.V        |              | 2 | 3,474  | 0,476 | -0,333 |
| 22 | P52594 NUPL_HUMAN  | E.VKPLKSLGDSAPTLHLNK.G       |              | 3 | 3,4736 | 0,202 | 0,18   |
| 22 | Q9H7N4 SFR19_HUMAN | K.DAASAGLSIGVK.F             |              | 2 | 3,4701 | 0,435 | -0,852 |
| 22 | Q9UQ35 SRRM2_HUMAN | K.VKAQT#PPGPSLSGSKS#PCPQEK.S | T1003:S1014: | 3 | 3,4658 | 0,301 | 0      |
| 22 | O94888 UBXD7_HUMAN | E.HGQLDGLSSPPKK.C            |              | 3 | 3,4634 | 0,333 | 0,315  |
| 22 | O94762 RECQ5_HUMAN | R.GEVPGGSAHYGGPS#PE.K        | S727:        | 2 | 3,463  | 0,475 | -0,464 |
| 22 | P35527 K1C9_HUMAN  | R.HGVQELEIELQSQLSK.K         |              | 3 | 3,462  | 0,21  | 0,299  |
| 22 | Q9UPN3 MACF1_HUMAN | K.LKGLNDATTAEEAE.A           |              | 2 | 3,4519 | 0,492 | -0,239 |
| 22 | P04264 K2C1_HUMAN  | R.SLDLDSIIAEVK.A             |              | 2 | 3,4487 | 0,426 | 0      |
| 22 | Q9UNW1 MINP1_HUMAN | K.DILQSCQTSEECE.L            |              | 2 | 3,4469 | 0,418 | 0      |
| 22 | Q9UK76 HN1_HUMAN   | R.NSSEASSGDFLDLKE.G          |              | 2 | 3,4441 | 0,442 | 0      |
| 22 | O14974 MYPT1_HUMAN | R.RLAS#TSDIEEKE.N            | S507:        | 2 | 3,4395 | 0,37  | -0,335 |

|    |                     |                              |            |   |        |       |        |
|----|---------------------|------------------------------|------------|---|--------|-------|--------|
| 22 | P16220 CREB1_HUMAN  | R.KILNDLSSDAPGVPR.I          |            | 2 | 3,4349 | 0,466 | -0,463 |
| 22 | Q12797 ASPH_HUMAN   | R.LHHDTDVTVYQVYEE.Q          |            | 2 | 3,4316 | 0,338 | -0,131 |
| 22 | P22626 ROA2_HUMAN   | K.KLFVGGIKEDTEE.H            |            | 2 | 3,431  | 0,407 | -0,25  |
| 22 | Q9Y6Y8 S23IP_HUMAN  | R.RIDYVLQEKPIESFNE.Y         |            | 3 | 3,4301 | 0,307 | 0,37   |
| 22 | Q5T1M5 FKB15_HUMAN  | R.ERPES#PM*VPSEQVVEE.A       | S979:      | 2 | 3,4272 | 0,463 | 0,189  |
| 22 | O94776 MTA2_HUMAN   | K.LNPADAPNPVVFVATKD.T        |            | 2 | 3,4258 | 0,466 | 0,207  |
| 22 | Q9NR30 DDX21_HUMAN  | R.SDAGLES#DTAM*K.K           | S13:       | 2 | 3,4254 | 0,329 | -0,185 |
| 22 | P37802 TAGL2_HUMAN  | R.TLM*NLGGLAVAR.D            |            | 2 | 3,4253 | 0,432 | 0,198  |
| 22 | Q8IZ21 PHAR4_HUMAN  | R.GVLLEDPEQGGEDPGKPSDAM*LK.N |            | 3 | 3,4167 | 0,291 | -0,229 |
| 22 | Q14696 MESD2_HUMAN  | E.HKRPSAPVDFSK.I             |            | 3 | 3,4153 | 0,344 | 0,134  |
| 22 | Q8TE77 SSH3_HUMAN   | E.QGQGGQGGQGPCISSTPR.F       |            | 2 | 3,4136 | 0,423 | 0,068  |
| 22 | Q5UIPO RIF1_HUMAN   | E.DHHTSQKVEEPSQCLASGTAISE.L  |            | 3 | 3,4131 | 0,451 | -0,146 |
| 22 | Q9UPZ3 HPS5_HUMAN   | E.KIGTLHTS#PDLK.V            | S563:      | 2 | 3,4125 | 0,337 | -0,527 |
| 22 | Q00610 CLH1_HUMAN   | R.NLQNLILTAIK.A              |            | 2 | 3,4102 | 0,342 | 0,09   |
| 22 | O60749 SNX2_HUMAN   | R.AVNTQALSGAGILR.M           |            | 2 | 3,4029 | 0,28  | 0,356  |
| 22 | O75122 CLAP2_HUMAN  | R.SRS#DIDVNAAAGAK.A          | S370:      | 2 | 3,4004 | 0,331 | -0,335 |
| 22 | P06748 NPM_HUMAN    | K.M*QAS#IEKGGSLPKVE.A        | S254:      | 2 | 3,3991 | 0,373 | -0,073 |
| 22 | Q58FG0 HS905_HUMAN  | K.HSQFIGYPITLFVEK.K          |            | 3 | 3,3915 | 0,321 | 0,103  |
| 22 | Q9UK76 HN1_HUMAN    | R.RNSS#EASSGDFLDLK.G         | S88:       | 2 | 3,3909 | 0,278 | 0,215  |
| 22 | Q9UKV3 ACINU_HUMAN  | K.ASLVALPEQTASEEETPPPLLTKE.A |            | 3 | 3,386  | 0,278 | 0,287  |
| 22 | Q8IY81 RRMJ3_HUMAN  | E.IM*SPLYQDEAPK.G            |            | 2 | 3,3833 | 0,265 | -0,173 |
| 22 | Q13442 HAP28_HUMAN  | K.GVEGLIDIENPNR.V            |            | 2 | 3,3829 | 0,373 | -0,086 |
| 22 | O95466 FMNL_HUMAN   | E.AGADTPGKGEPPAPKS#PPK.A     | S1031:     | 3 | 3,3805 | 0,22  | -0,292 |
| 22 | Q14195 DPYL3_HUMAN  | R.NLHQSGFSLSGTQVDE.G         |            | 2 | 3,3792 | 0,477 | -0,284 |
| 22 | Q14320 FA50A_HUMAN  | R.KISSLS#FTLEEEEE.G          | S121:      | 2 | 3,3774 | 0,498 | 0,071  |
| 22 | Q9H2J4 PDCL3_HUMAN  | E.SGAIM*TDLEENPK.K           |            | 2 | 3,372  | 0,474 | -0,086 |
| 22 | Q9H3Q1 BORG4_HUMAN  | K.LPKS#LSSS#PVKK.A           | S138:S142: | 2 | 3,3702 | 0,304 | -0,512 |
| 22 | Q15424 SAFB1_HUMAN  | R.KFDACNEVPPAPK.E            |            | 3 | 3,3699 | 0,16  | -0,211 |
| 22 | Q8WXV6 Q8WXV6_HUMAN | R.KRT#SSEDNLYLAVLR.A         | T19:       | 3 | 3,369  | 0,172 | -0,198 |
| 22 | P08559 ODPA_HUMAN   | R.YHGHS#M*SDPGVS#YR.T        | S293:S300: | 2 | 3,3674 | 0,416 | -0,759 |
| 22 | O14744 ANM5_HUMAN   | E.KDPIKYSQYQQAIYK.C          |            | 3 | 3,3593 | 0,258 | 0      |
| 22 | Q13200 PSMD2_HUMAN  | R.FAADIISVLAM*TM*SGERE.C     |            | 3 | 3,3562 | 0,406 | 0,093  |
| 22 | P04406 G3P_HUMAN    | E.GLM*TTVHAITATQK.T          |            | 2 | 3,3542 | 0,491 | -0,246 |
| 22 | Q13136 LIPA1_HUMAN  | K.TLTDGVLVDINHEQE.N          |            | 2 | 3,3534 | 0,401 | -0,231 |
| 22 | Q8WXH0 SYNE2_HUMAN  | R.RGS#M*SYLAAVEEEVEE.S       | S4108:     | 2 | 3,3477 | 0,45  | -0,064 |
| 22 | Q9ULU4 PKCB1_HUMAN  | K.DKAS#PEPEKDFSE.K           | S668:      | 2 | 3,3443 | 0,442 | -0,391 |
| 22 | P49790 NU153_HUMAN  | E.KQQEPVTSTSLVFGK.K          |            | 2 | 3,3435 | 0,439 | -0,222 |
| 22 | P49736 MCM2_HUMAN   | R.GNDPLTSS#PGR.S             | S27:       | 2 | 3,3419 | 0,398 | -0,517 |
| 22 | P49411 EFTU_HUMAN   | R.AEAGDNLGALVR.G             |            | 2 | 3,3409 | 0,284 | -0,309 |

|    |                    |                                |              |   |        |       |        |
|----|--------------------|--------------------------------|--------------|---|--------|-------|--------|
| 22 | Q9H1B7 EAP1_HUMAN  | E.DTHFVQCPSVPSHK.F             |              | 3 | 3,339  | 0,175 | -0,112 |
| 22 | Q14444 CAPR1_HUMAN | R.LNQDQLDAVSK.Y                |              | 2 | 3,383  | 0,44  | -0,694 |
| 22 | Q4KMP7 TB10B_HUMAN | R.RAS#AGPAPGPVVTA.E.G          | S412:        | 2 | 3,337  | 0,393 | -0,251 |
| 22 | O14646 CHD1_HUMAN  | K.KSS#VSDAPVHITASGEPVPISEESE.L | S1385:       | 3 | 3,364  | 0,206 | 0,133  |
| 22 | Q96JG6 CC132_HUMAN | R.DYVDEQTDGDPVK.S              |              | 2 | 3,332  | 0,489 | -0,686 |
| 22 | Q9P0K7 RAI14_HUMAN | K.ISQDADLKT#PTKPK.Q            | T249:        | 3 | 3,319  | 0,215 | 0,226  |
| 22 | P49321 NASP_HUMAN  | K.HLVM*GDIPAAVNAFQE.A          |              | 2 | 3,274  | 0,367 | -0,071 |
| 22 | P31949 S10AB_HUMAN | K.KLDTNSDQQLDFSE.F             |              | 2 | 3,272  | 0,383 | -0,156 |
| 22 | P10809 CH60_HUMAN  | K.NQLKDM*AIATGGAVFGEE.G        |              | 3 | 3,265  | 0,289 | 0,686  |
| 22 | Q9NVI7 ATD3A_HUMAN | K.DKWSNFDPTGLE.R               |              | 2 | 3,253  | 0,285 | -0,26  |
| 22 | Q96EP0 RNF31_HUMAN | R.RLS#APLPSSCGDPE.K            | S466:        | 2 | 3,217  | 0,484 | 0,156  |
| 22 | P78347 GTF2I_HUMAN | K.ANELPQQPPVPEPANAGK.R         |              | 2 | 3,207  | 0,431 | -0,353 |
| 22 | Q9Y3L3 3BP1_HUMAN  | R.VYGVSLATHLQE.L               |              | 2 | 3,207  | 0,431 | 0,185  |
| 22 | Q14444 CAPR1_HUMAN | R.LNQDQLDAVSKYQE.V             |              | 2 | 3,32   | 0,217 | -0,296 |
| 22 | P06748 NPM_HUMAN   | E.KT#PKT#PKGPPSSVEDIK.A        | T234:T237:   | 3 | 3,195  | 0,18  | -0,391 |
| 22 | O95425 SVIL_HUMAN  | R.DSSFTEVPRS#PK.H              | S245:        | 2 | 3,185  | 0,332 | -0,171 |
| 22 | O95696 BRD1_HUMAN  | R.LDAGLTNGFGGAR.S              |              | 2 | 3,184  | 0,375 | 0,098  |
| 22 | P19338 NUCL_HUMAN  | K.GFGFVDFNSEEDAK.A             |              | 2 | 3,151  | 0,427 | -0,156 |
| 22 | Q9UQ35 SRRM2_HUMAN | K.DKFSFPVQDRPE.S               |              | 2 | 3,129  | 0,377 | 0      |
| 22 | P41250 SYG_HUMAN   | K.TSGHVDKFAFM*VK.D             |              | 3 | 3,111  | 0,25  | 0,687  |
| 22 | Q14562 DHX8_HUMAN  | E.IELVEEPPFLR.G                |              | 2 | 3,103  | 0,363 | -0,166 |
| 22 | O76003 GLRX3_HUMAN | K.HNIQFSSFDIFSDEE.V            |              | 2 | 3,063  | 0,525 | -0,067 |
| 22 | Q5SW79 CE170_HUMAN | R.LGS#LSARS#DSE.A              | S1160:S1165: | 2 | 3,2996 | 0,402 | 0      |
| 22 | Q9Y3F4 STRAP_HUMAN | E.DKQILSADDKTVR.L              |              | 3 | 3,2993 | 0,363 | -0,184 |
| 22 | Q09666 AHNK_HUMAN  | R.VTAYTVDVTGR.E                |              | 2 | 3,285  | 0,463 | -0,516 |
| 22 | Q14676 MDC1_HUMAN  | E.LQASASTDQPVTSPTS.R.T         |              | 2 | 3,2911 | 0,285 | -1,236 |
| 22 | Q8NEF9 SRFB1_HUMAN | K.AVTIANS#PSKPSEKDSVVSLE.S     | S203:        | 3 | 3,2909 | 0,258 | 0,409  |
| 22 | Q8IWA0 WDR75_HUMAN | K.VQDTS#NTGLGEDIIHQLSK.S       | S796:        | 3 | 3,2899 | 0,327 | 0,343  |
| 22 | Q9H019 FA54B_HUMAN | K.AACSSSEEDDCVLSK.A            |              | 2 | 3,2892 | 0,445 | -0,42  |
| 22 | Q14320 FA50A_HUMAN | R.KISSLS#FTLE.E                | S121:        | 2 | 3,288  | 0,318 | 0,203  |
| 22 | Q9H8Y8 GORS2_HUMAN | K.LVYNTDTDNCRE.V               |              | 2 | 3,2876 | 0,436 | -0,514 |
| 22 | Q5VUA4 ZN318_HUMAN | E.VSHPPPS#PVDPYLLTK.N          | S698:        | 3 | 3,2832 | 0,165 | 0      |
| 22 | Q9NYF8 BCLF1_HUMAN | K.LKDLFDYS#PPLHK.N             | S512:        | 3 | 3,2774 | 0,362 | 0,221  |
| 22 | P16435 NCPR_HUMAN  | K.NPFLAAVTNR.K                 |              | 2 | 3,2761 | 0,327 | -0,203 |
| 22 | P29590 PML_HUMAN   | R.LQDLSSCITQ GK.D              |              | 2 | 3,2754 | 0,403 | -0,181 |
| 22 | P38646 GRP75_HUMAN | K.NAVITVPAYFNDSQR.Q            |              | 2 | 3,272  | 0,387 | -0,576 |
| 22 | P09211 GSTP1_HUMAN | R.M*LLADQGGQSWKEE.V            |              | 2 | 3,272  | 0,446 | 0,236  |
| 22 | Q7Z2K8 GRIN1_HUMAN | K.M*DPASSGEGRPVS#GHTDTTASAK.T  | S389:        | 3 | 3,2698 | 0,361 | -0,466 |
| 22 | Q8NEF9 SRFB1_HUMAN | K.AVTIANS#PSKPSEK.D            | S203:        | 2 | 3,2691 | 0,322 | -0,323 |

|    |                     |                                    |            |   |        |       |        |
|----|---------------------|------------------------------------|------------|---|--------|-------|--------|
| 22 | P00558 PGK1_HUMAN   | K.ITLPVDFVTADKFDE.N                |            | 2 | 3,2662 | 0,414 | -0,214 |
| 22 | P22626 ROA2_HUMAN   | K.LFVGGIKEDTEE.H                   |            | 2 | 3,2623 | 0,315 | -0,091 |
| 22 | Q9HCN4 GPN1_HUMAN   | K.DM*GSVALDAGTAK.D                 |            | 2 | 3,2617 | 0,477 | -0,39  |
| 22 | O15027 SC16A_HUMAN  | R.YRPYDGAASAYAQNYR.Y               |            | 3 | 3,2615 | 0,105 | -1,176 |
| 22 | Q7KZI7 MARK2_HUMAN  | K.TTPTSTNSVLSTSTNR.S               |            | 2 | 3,2605 | 0,552 | -0,207 |
| 22 | P07237 PDIA1_HUMAN  | E.DHVLVLRKSNFAE.A                  |            | 2 | 3,2601 | 0,393 | -0,16  |
| 22 | Q9NR12 PDLI7_HUMAN  | R.ILAHLTGTEFM*QDPDEE.H             |            | 2 | 3,2595 | 0,469 | 0,373  |
| 22 | P33316 DUT_HUMAN    | R.ARPAEVGGM*QLR.F                  |            | 3 | 3,2548 | 0,272 | -0,07  |
| 22 | P02545 LMNA_HUMAN   | R.NSNLVGAAHEE.L                    |            | 2 | 3,2475 | 0,366 | -0,214 |
| 22 | P15927 RFA2_HUMAN   | E.GHIYSTVDDDHFK.S                  |            | 2 | 3,2431 | 0,46  | -0,239 |
| 22 | P11717 MPRI_HUMAN   | K.ALSSLHGDDQDSEDE.V                |            | 2 | 3,2419 | 0,422 | -0,528 |
| 22 | Q96GS4 CQ059_HUMAN  | R.LQDS#RSLDGLSE.A                  | S32:       | 2 | 3,2398 | 0,291 | -0,261 |
| 22 | P46379 BAT3_HUMAN   | R.VGDPPQPLPEEPM*EVQGAERAS#PEPQRE.N | S964:      | 3 | 3,2394 | 0,414 | 0,809  |
| 22 | O75376 NCOR1_HUMAN  | D.LYLRPGSEQPGRPGSHGYVR.S           |            | 3 | 3,2392 | 0,38  | -0,657 |
| 22 | P31946 1433B_HUMAN  | E.SYKDSTLIM*QLLR.D                 |            | 3 | 3,2391 | 0,138 | 0,231  |
| 22 | Q96T58 MINT_HUMAN   | R.HGSFHEDEDPIGS#PR.L               | S1278:     | 3 | 3,2383 | 0,424 | -0,312 |
| 22 | Q9Y490 TLN1_HUMAN   | K.QAAASATQTIAAAQHAASTPK.A          |            | 3 | 3,2368 | 0,371 | 0,55   |
| 22 | Q2KHR3 QSER1_HUMAN  | K.SVSTPLTLDATSDKK.K                |            | 2 | 3,2368 | 0,502 | -0,367 |
| 22 | O75351 VPS4B_HUMAN  | K.LQNQLQGAIVIERPNVK.W              |            | 3 | 3,2363 | 0,198 | 0,381  |
| 22 | Q8IYH0 Q8IYH0_HUMAN | K.TVDLGIS#DLEDDC.-                 | S201:      | 2 | 3,2312 | 0,289 | 0,08   |
| 22 | Q8TD19 NEK9_HUMAN   | R.SS#TVTEAPIAVVTSR.T               | S332:      | 2 | 3,2286 | 0,445 | 0,458  |
| 22 | Q96T58 MINT_HUMAN   | R.LLSVKGS#PKVDE.K                  | S1287:     | 2 | 3,2267 | 0,279 | -0,451 |
| 22 | Q96C90 PP14B_HUMAN  | E.AFISGLLDKIR.G                    |            | 2 | 3,2237 | 0,382 | 0,099  |
| 22 | P84103 SFRS3_HUMAN  | K.VYVGNLGNNGNKTE.L                 |            | 2 | 3,2237 | 0,327 | 0      |
| 22 | P38919 IF4A3_HUMAN  | R.LLKEEDM*TKVE.F                   |            | 2 | 3,2231 | 0,228 | -0,813 |
| 22 | O75376 NCOR1_HUMAN  | E.SIPAKS#PVPGVDPVVSHPFDPHHR.G      | S1533:     | 3 | 3,223  | 0,169 | -1,336 |
| 22 | Q02241 KIF23_HUMAN  | R.RSS#TVAPAQPDGAE.S                | S912:      | 2 | 3,222  | 0,469 | -0,666 |
| 22 | O00443 P3C2A_HUMAN  | R.ALDIDVEKLTQAE.L                  |            | 2 | 3,2213 | 0,431 | -0,084 |
| 22 | Q6P0N0 CN106_HUMAN  | R.NTSNIPVILEPETEES#ENE.F           | S824:      | 3 | 3,2202 | 0,081 | 0,165  |
| 22 | P16401 H15_HUMAN    | E.TAPAETATPAPVEKS#PAKK.K           | S18:       | 2 | 3,2172 | 0,431 | 0      |
| 22 | P49792 RBP2_HUMAN   | E.KDSLITPHVSR.S                    |            | 2 | 3,2168 | 0,331 | -0,389 |
| 22 | Q00610 CLH1_HUMAN   | E.LCRPVLQQGR.K                     |            | 3 | 3,2162 | 0,254 | 0,149  |
| 22 | Q86T12 DPP9_HUMAN   | R.LGVFGITSYDFHSE.S                 |            | 2 | 3,2156 | 0,462 | -0,388 |
| 22 | Q9H2P0 ADNP_HUMAN   | K.ISNDNPEEHVLK.V                   |            | 2 | 3,2118 | 0,28  | -0,7   |
| 22 | P56524 HDAC4_HUMAN  | R.AQS#SPASATFPVSVQEPPTKPR.F        | S632:      | 3 | 3,2112 | 0,373 | 0,31   |
| 22 | Q14157 UBP2L_HUMAN  | R.YPSS#ISSS#PQKD.L                 | S605:S609: | 2 | 3,211  | 1     | -0,251 |
| 22 | Q9UQ84 EXO1_HUMAN   | E.DDLSQYSLSFTEK.K                  |            | 2 | 3,209  | 0,382 | 0,08   |
| 22 | P04406 G3P_HUMAN    | E.GLM*TTVHAITATQKTVDGPGSGK.L       |            | 3 | 3,2048 | 0,354 | -0,328 |
| 22 | P49736 MCM2_HUMAN   | R.TDALTSS#PGRDLPPFEDE.S            | S41:       | 2 | 3,204  | 0,434 | 0,301  |

|    |                     |                          |            |   |        |       |        |
|----|---------------------|--------------------------|------------|---|--------|-------|--------|
| 22 | P46087 NOL1_HUMAN   | K.GISAGAVQTAGK.K         |            | 2 | 3,2011 | 0,443 | -0,23  |
| 22 | Q12789 TF3C1_HUMAN  | D.LQCVCNLNPLGVVR.C       |            | 2 | 3,1993 | 0,171 | 0      |
| 22 | P18615 NELFE_HUMAN  | K.LKDPEKGPVPTFQPFQR.S    |            | 3 | 3,1993 | 0,174 | 0,277  |
| 22 | O75420 PERQ1_HUMAN  | R.ALSGGGSVAS#PPSPAM*PK.Y | S24:       | 2 | 3,1987 | 0,434 | 0,068  |
| 22 | Q9NR30 DDX21_HUMAN  | R.SDAGLES#DTAM*KKGE.T    | S13:       | 2 | 3,198  | 0,339 | -0,448 |
| 22 | Q9NYZ3 GTSE1_HUMAN  | R.VPQALNFSPEESDSTFSK.S   |            | 3 | 3,1961 | 0,202 | 0,738  |
| 22 | A9CQZ4 A9CQZ4_HUMAN | K.AAEDEEVPAFFK.N         |            | 2 | 3,1909 | 0,468 | -0,271 |
| 22 | Q56NI9 ESCO2_HUMAN  | K.HCFYQNSDKNEE.N         |            | 2 | 3,1899 | 0,458 | -0,466 |
| 22 | Q5T670 Q5T670_HUMAN | R.LQKS#PEKS#PRPPLKE.R    | S150:S154: | 3 | 3,1866 | 0,222 | -0,676 |
| 22 | Q9NW82 WDR70_HUMAN  | K.AAEDSPYWVSPAYSK.T      |            | 2 | 3,1845 | 0,472 | -0,219 |
| 22 | P29401 TKT_HUMAN    | K.SKDDQVTVIGAVTLHE.A     |            | 3 | 3,184  | 0,274 | 0,62   |
| 22 | P31943 HNRH1_HUMAN  | K.HTGPN#PDTANDGFVR.L     | S104:      | 2 | 3,1839 | 0,449 | -0,415 |
| 22 | P21333 FLNA_HUMAN   | K.AGNM*LLVGVHGPR.T       |            | 3 | 3,1778 | 0,407 | 0,378  |
| 22 | P40222 TXLNA_HUMAN  | R.VQDLSAGGQGS LTDSGPER.R |            | 3 | 3,1775 | 0,225 | -0,39  |
| 22 | P62937 PPIA_HUMAN   | K.KITIADCGQLE.-          |            | 2 | 3,1766 | 0,344 | 0,098  |
| 22 | Q9NPQ8 RIC8A_HUMAN  | R.GHLTSLQDAM*CE.T        |            | 2 | 3,1737 | 0,405 | 0,089  |
| 22 | P68104 EF1A1_HUMAN  | E.TSKYVYTIIDAPGHR.D      |            | 3 | 3,1721 | 0,191 | 0,638  |
| 22 | P54886 P5CS_HUMAN   | E.IIHHLADLLTDQRDE.I      |            | 3 | 3,1718 | 0,209 | 0,409  |
| 22 | Q96AE4 FUBP1_HUMAN  | K.M*VM*IQDGPQNTGADKPLR.I |            | 3 | 3,1671 | 0,273 | -0,365 |
| 22 | Q01433 AMPD2_HUMAN  | E.RQIS#QDVKLEPDILLR.A    | S168:      | 3 | 3,1638 | 0,33  | 0,548  |
| 22 | P07814 SYEP_HUMAN   | R.DQDLEPGAPSM*GAK.S      |            | 2 | 3,1577 | 0,318 | 0,085  |
| 22 | P07737 PROF1_HUMAN  | K.STGGAPTFNVTVK.T        |            | 2 | 3,157  | 0,371 | -0,354 |
| 22 | P49736 MCM2_HUMAN   | E.SFTM*ASSPAQR.R         |            | 2 | 3,1564 | 0,418 | 0,102  |
| 22 | P82979 HCC1_HUMAN   | R.FGLNVSSISR.K           |            | 2 | 3,1552 | 0,384 | 0,113  |
| 22 | Q9H6F5 CCD86_HUMAN  | R.LGGLRPES#PE.S          | S18:       | 2 | 3,1536 | 0,328 | -0,645 |
| 22 | O95400 CD2B2_HUMAN  | K.LVDPVAGSGGPGSR.F       |            | 2 | 3,1533 | 0,518 | -0,192 |
| 22 | Q9Y266 NUDC_HUMAN   | K.LKPNLNGADLPNYR.W       |            | 2 | 3,1518 | 0,394 | -0,149 |
| 22 | P52701 MSH6_HUMAN   | K.IHNVGS#PLKSQNHPSDR.A   | S830:      | 3 | 3,1516 | 0,373 | 0,093  |
| 22 | Q14738 2A5D_HUMAN   | R.RQS#S#SRFNLSK.N        | S88:S89:   | 2 | 3,1516 | 0,541 | -0,166 |
| 22 | P06753 TPM3_HUMAN   | K.LVIIEGDLERTEE.R        |            | 2 | 3,1495 | 0,45  | 0,402  |
| 22 | Q9HCN4 GPN1_HUMAN   | K.DSLSPVLHPSDLILTR.G     |            | 2 | 3,1455 | 0,411 | 0,069  |
| 22 | Q96QT6 PHF12_HUMAN  | K.LSLKPHQGVPVLR.S        |            | 3 | 3,1438 | 0,255 | 0,476  |
| 22 | P41250 SYG_HUMAN    | E.IDCTM*LTPEPVLK.T       |            | 2 | 3,1431 | 0,248 | 0,08   |
| 22 | P06748 NPM_HUMAN    | E.AKFINYVKNCFR.M         |            | 3 | 3,1428 | 0,326 | 0,234  |
| 22 | P07942 LAMB1_HUMAN  | K.CFICNSQDPYHE.T         |            | 2 | 3,1378 | 0,509 | -0,078 |
| 22 | P22626 ROA2_HUMAN   | R.GFGFVTFSSM*AE.V        |            | 2 | 3,1378 | 0,543 | 0      |
| 22 | O60927 PP1RB_HUMAN  | K.CCCIEKPR.A             |            | 3 | 3,1349 | 0,43  | 0,213  |
| 22 | P09622 DLDH_HUMAN   | R.VLGAHILGPGAGEM*VNE.A   |            | 2 | 3,1327 | 0,317 | -0,145 |
| 22 | Q9BY89 K1671_HUMAN  | E.RRS#PTVEPSTLPR.E       | S1224:     | 3 | 3,1315 | 0,23  | -0,696 |

|    |                    |                           |        |   |        |       |        |
|----|--------------------|---------------------------|--------|---|--------|-------|--------|
| 22 | P13861 KAP2_HUMAN  | R.APASVLPAAATPR.Q         |        | 2 | 3,1314 | 0,43  | -0,212 |
| 22 | Q9HAW4 CLSPN_HUMAN | E.DDTQSQLLDADGFLNVR.N     |        | 3 | 3,1307 | 0,101 | 0,192  |
| 22 | P52948 NUP98_HUMAN | K.HSNSNSVDDTIVALNM*R.A    |        | 3 | 3,1305 | 0,151 | 0      |
| 22 | P35222 CTNB1_HUMAN | R.RTS#M*GGTQQQFVE.G       | S552:  | 2 | 3,1274 | 0,298 | -0,546 |
| 22 | Q9NYA4 MTMR4_HUMAN | K.TRS#M*DDLLSACDTSSPLTR.T | S610:  | 3 | 3,1261 | 0,155 | 0,082  |
| 22 | Q9Y5B6 GCFC_HUMAN  | E.LGDFTPHDNEPGKGR.L       |        | 3 | 3,1251 | 0,238 | 1,338  |
| 22 | O14617 AP3D1_HUMAN | R.ALDIDLKPLADSE.K         |        | 2 | 3,1237 | 0,409 | -0,725 |
| 22 | P51858 HDGF_HUMAN  | E.GKLVIDEPAKEK.N          |        | 3 | 3,1225 | 0,298 | 0,551  |
| 22 | P31946 1433B_HUMAN | E.SYKDSTLIM*QLLR.D        |        | 2 | 3,1212 | 0,397 | -0,385 |
| 22 | Q13428 TCOF_HUMAN  | D.SAVGTLPTS#PQSTSVQAK.G   | S1111: | 2 | 3,1128 | 0,397 | 0,192  |
| 22 | P46379 BAT3_HUMAN  | E.HM*PVGPDAILR.Y          |        | 3 | 3,1058 | 0,173 | 0,224  |
| 22 | P08670 VIME_HUMAN  | E.TNLDLPLVDTHSK.R         |        | 2 | 3,1047 | 0,4   | -0,158 |
| 22 | P00441 SODC_HUMAN  | E.DSVISLSGDHCIIGR.T       |        | 2 | 3,1045 | 0,539 | 0      |
| 22 | Q9Y2W2 WBP11_HUMAN | R.KVGFALDLPFR.R           |        | 3 | 3,1033 | 0,21  | 0,377  |
| 22 | Q9NS87 KIF15_HUMAN | K.AQKEPCLFANTE.K          |        | 2 | 3,1004 | 0,34  | -0,173 |
| 22 | P14625 ENPL_HUMAN  | K.ESDDPM*AYIHFTAEGE.V     |        | 2 | 3,1002 | 0,456 | 0      |
| 22 | Q05209 PTN12_HUMAN | R.SCLVEGDAKEE.I           |        | 2 | 3,0985 | 0,391 | -0,296 |
| 22 | P49903 SPS1_HUMAN  | K.VM*PLIIQGFKDAAEE.A      |        | 2 | 3,097  | 0,391 | 0,073  |
| 22 | Q9H3P7 GCP60_HUMAN | E.VGFFDVLGNDR.R           |        | 2 | 3,0965 | 0,316 | 0      |
| 22 | Q92882 OSTF1_HUMAN | K.LAFDM*ATNAACASLLK.K     |        | 3 | 3,0959 | 0,211 | 0      |
| 22 | P34932 HSP74_HUMAN | K.KLM*SANASDLPLSIE.C      |        | 2 | 3,0938 | 0,395 | 0,152  |
| 22 | Q09666 AHNK_HUMAN  | R.EGAKDIDISS#PE.F         | S177:  | 2 | 3,0927 | 0,163 | 0,819  |
| 22 | P10809 CH60_HUMAN  | R.KNQLKDM*AIATGGAVFGEE.G  |        | 3 | 3,0924 | 0,393 | 0,367  |
| 22 | Q96PU5 NED4L_HUMAN | R.SLS#SPTVTLSPLEGAK.D     | S448:  | 2 | 3,0917 | 0,476 | -0,07  |
| 22 | Q9UQ35 SRRM2_HUMAN | E.SYFGVSSLQLK.G           |        | 2 | 3,0909 | 0,461 | -0,199 |
| 22 | P06748 NPM_HUMAN   | E.AKFINYVKNCFR.M          |        | 2 | 3,0903 | 0,427 | 0      |
| 22 | O14908 GIPC1_HUMAN | R.SRGPATVEDLPSAFEE.K      |        | 2 | 3,0899 | 0,381 | 0      |
| 22 | Q92598 HS105_HUMAN | K.IKVNVNVELPIE.A          |        | 2 | 3,0891 | 0,369 | 0,097  |
| 22 | Q14692 BMS1_HUMAN  | K.AGLSPANCSQSDRVNLE.K     |        | 2 | 3,0883 | 0,442 | -0,564 |
| 22 | Q99733 NP1L4_HUMAN | K.YAALYQPLFDK.R           |        | 2 | 3,0874 | 0,24  | 0      |
| 22 | Q13136 LIPA1_HUMAN | R.VGSGSLDNLGR.F           |        | 2 | 3,087  | 0,364 | -0,113 |
| 22 | P18206 VINC_HUMAN  | R.ALASQLQDSLKDLK.A        |        | 2 | 3,0863 | 0,294 | -0,558 |
| 22 | Q00341 VIGLN_HUMAN | R.RCDIIISGR.K             |        | 2 | 3,0861 | 0,271 | -0,203 |
| 22 | Q6UN15 FIP1_HUMAN  | R.KPGADLSDYFNYGFNE.D      |        | 2 | 3,0839 | 0,381 | 0,266  |
| 22 | P52594 NUPL_HUMAN  | K.SLLGDSAPTLHLNK.G        |        | 2 | 3,0832 | 0,361 | -0,166 |
| 22 | Q86TX2 ACOT1_HUMAN | R.YRADT#LGELDLE.R         | T56:   | 2 | 3,0817 | 0,311 | -0,083 |
| 22 | P60953 CDC42_HUMAN | K.TPFLLVGTQIDLR.D         |        | 2 | 3,0809 | 0,356 | 0,166  |
| 22 | P10809 CH60_HUMAN  | K.LVQDVANNTNEE.A          |        | 2 | 3,08   | 0,307 | -0,272 |
| 22 | P28749 RBL1_HUMAN  | R.DM*QPLS#PISVHE.R        | S640:  | 2 | 3,0761 | 0,388 | 0      |



|    |                     |                                    |            |   |        |       |        |
|----|---------------------|------------------------------------|------------|---|--------|-------|--------|
| 22 | P0C7M2 RA1L3_HUMAN  | K.IFVGGIKEDTEE.H                   |            | 2 | 3,0739 | 0,319 | -0,73  |
| 22 | Q9UPY3 DICER_HUMAN  | R.TLLES#PGKLVHE.V                  | S1150:     | 2 | 3,073  | 0,424 | 0,164  |
| 22 | Q6S8J3 A26CA_HUMAN  | E.KLCYVALDFEQE.M                   |            | 2 | 3,0713 | 0,305 | -0,322 |
| 22 | Q8IYT4 KATL2_HUMAN  | K.GLLLYGPPGTGK.T                   |            | 2 | 3,0712 | 0,442 | 0,52   |
| 22 | Q9H165 BC11A_HUMAN  | K.LLLGS#PSSLSPSFK.R                | S625:      | 2 | 3,0688 | 0,404 | -0,081 |
| 22 | P50548 ERF_HUMAN    | R.APPAPPKPEPGEAPGASQCM*PLK.L       |            | 3 | 3,0688 | 0,277 | 0,859  |
| 22 | Q9C0B5 ZDHC5_HUMAN  | R.TKS#KGS#LEITE.S                  | S296:S299: | 2 | 3,0675 | 0,357 | -0,361 |
| 22 | Q13242 SFRS9_HUMAN  | R.GS#PHYFS#PFRPY.-                 | S211:S216: | 2 | 3,067  | 0,473 | -0,076 |
| 22 | Q69YN4 VIR_HUMAN    | R.AYGET#SPHTFQLD.L                 | T62:       | 2 | 3,0625 | 0,23  | -0,158 |
| 22 | Q9Y2W2 WBP11_HUMAN  | R.RRDEDM*LYS#PE.L                  | S237:      | 2 | 3,0624 | 0,243 | -0,162 |
| 22 | Q96AT9 RPE_HUMAN    | R.TQFPSLDIEVDGGVGPDTVHK.C          |            | 3 | 3,0603 | 0,218 | 0,083  |
| 22 | P13056 NR2C1_HUMAN  | R.KDLRS#PLTATPTFVTDS.S             | S215:      | 3 | 3,0595 | 0,324 | 0,533  |
| 22 | Q06830 PRDX1_HUMAN  | R.GLFIIDDKGILR.Q                   |            | 2 | 3,0592 | 0,361 | 0,449  |
| 22 | P08670 VIME_HUMAN   | E.VERDNLAEDIM*R.L                  |            | 3 | 3,0578 | 0,155 | -0,31  |
| 22 | P50991 TCPD_HUMAN   | K.IGLIQFCLSAPK.T                   |            | 2 | 3,0562 | 0,274 | 0,091  |
| 22 | P41252 SYIC_HUMAN   | E.VTDFAGQYVK.D                     |            | 2 | 3,0535 | 0,461 | 0,108  |
| 22 | Q53EP0 FND3B_HUMAN  | R.S#SPKSNDSLDLQEYE.L               | S253:      | 2 | 3,0497 | 0,258 | 0,073  |
| 22 | P08670 VIME_HUMAN   | E.QHVQIDVDVSKPDLTAALR.D            |            | 2 | 3,0469 | 0,358 | 0,58   |
| 22 | P08559 ODPA_HUMAN   | R.YHGHS#MSDPGV#YR.T                | S293:S300: | 3 | 3,0461 | 0,34  | -0,209 |
| 22 | P14618 KPYM_HUMAN   | R.LDIDSPITAR.N                     |            | 2 | 3,0457 | 0,388 | -1,935 |
| 22 | P37802 TAGL2_HUMAN  | D.DGLFSGDPNWFPK.K                  |            | 2 | 3,0446 | 0,338 | -0,082 |
| 22 | B2CI53 B2CI53_HUMAN | E.RNGILASPQSAPGNLNSK.S             |            | 3 | 3,0442 | 0,248 | -0,377 |
| 22 | O43399 TPD54_HUMAN  | K.VVGDRENGSDNLPSSAGS#GDKPLSDPAPF.- | S195:      | 3 | 3,0439 | 0,235 | -0,062 |
| 22 | Q5VTR2 BRE1A_HUMAN  | R.KALVVPEPEPDS#NQER.K              | S138:      | 3 | 3,0429 | 0,354 | -0,088 |
| 22 | Q06830 PRDX1_HUMAN  | K.QGGLGPM*NIPLVSDPK.R              |            | 2 | 3,0427 | 0,338 | 0,298  |
| 22 | Q15942 ZYG_HUMAN    | R.SPGAPGLTLKEVEE.L                 |            | 2 | 3,0425 | 0,464 | 0      |
| 22 | Q9ULH0 ARMS_HUMAN   | R.GIPHSLSGLQDPPIAR.M               |            | 3 | 3,0411 | 0,245 | 0,109  |
| 22 | P07814 SYEP_HUMAN   | K.SLCIPFKPLCE.L                    |            | 2 | 3,0401 | 0,368 | 0      |
| 22 | O95678 K2C75_HUMAN  | E.VKAQYEDIANR.S                    |            | 3 | 3,0381 | 0,292 | 0,35   |
| 22 | Q04637 IF4G1_HUMAN  | R.FSALQQAVPTESDNR.R                |            | 2 | 3,0377 | 0,229 | -0,064 |
| 22 | Q8IZL8 PELP1_HUMAN  | E.ALLTHLLSDISPPADALK.L             |            | 2 | 3,0369 | 0,401 | -0,13  |
| 22 | Q14166 TTL12_HUMAN  | R.S#SPGQTPEEGAQALAE.F              | S15:       | 2 | 3,0348 | 0,326 | 0      |
| 22 | P28749 RBL1_HUMAN   | K.SPVSLTAHSLIGAS#PK.Q              | S762:      | 3 | 3,0317 | 0,165 | 0,222  |
| 22 | Q14157 UBP2L_HUMAN  | R.RYPS#SISS#PQKD.L                 | S604:S609: | 2 | 3,0314 | 0,285 | -0,53  |
| 22 | P47897 SYQ_HUMAN    | K.TPGYVTPHTM*NLLK.Q                |            | 3 | 3,029  | 0,353 | -0,108 |
| 22 | O43399 TPD54_HUMAN  | K.TSAALSTVGSISR.K                  |            | 2 | 3,027  | 0,227 | -0,462 |
| 22 | P60174 TPIS_HUMAN   | K.IAVAAQNCYK.V                     |            | 2 | 3,0267 | 0,408 | -0,322 |
| 22 | Q9BR76 COR1B_HUMAN  | E.RKCEPIVM*TVPR.K                  |            | 3 | 3,0265 | 0,214 | -0,122 |
| 22 | Q92738 US6NL_HUMAN  | R.GLAHPPSYSNPPVYHGNS#PK.H          | S642:      | 3 | 3,0243 | 0,206 | -0,333 |

|    |                    |                        |            |   |        |       |        |
|----|--------------------|------------------------|------------|---|--------|-------|--------|
| 22 | P50991 TCPD_HUMAN  | K.MIQDGKGDVTITND.G     |            | 2 | 3,024  | 0,351 | -0,162 |
| 22 | P04264 K2C1_HUMAN  | K.SLNNQFASFIDK.V       |            | 2 | 3,0236 | 0,304 | -0,264 |
| 22 | Q96T23 RSF1_HUMAN  | K.KPYRIES#DEEE.D       | S1335:     | 2 | 3,0232 | 0,209 | -0,496 |
| 22 | Q9P0L0 VAPA_HUMAN  | E.M*PNENDKLNDM*EPSK.A  |            | 3 | 3,0227 | 0,202 | 0,102  |
| 22 | P04083 ANXA1_HUMAN | E.ATIIDILTKRNNQR.Q     |            | 2 | 3,0208 | 0,255 | -0,141 |
| 22 | O95782 AP2A1_HUMAN | R.AADLLYAM*CDR.S       |            | 2 | 3,0164 | 0,468 | 0      |
| 22 | Q6S8J3 A26CA_HUMAN | E.KSYELPDGQVITIGNE.R   |            | 2 | 3,0155 | 0,322 | -0,138 |
| 22 | Q14157 UBP2L_HUMAN | R.RYPSSISS#PQKDLTQAK.N | S609:      | 3 | 3,0147 | 0,269 | -0,265 |
| 22 | P14618 KPYM_HUMAN  | E.HM*CRLDIDSPITAR.N    |            | 3 | 3,0124 | 0,223 | 0      |
| 22 | P40227 TCPZ_HUMAN  | K.GIDPFSLDALSKE.G      |            | 2 | 3,0118 | 0,255 | -0,088 |
| 22 | Q96Q89 MPPH1_HUMAN | K.FGDFLQHS#PSILQSK.A   | S1740:     | 3 | 3,0079 | 0,231 | 0,103  |
| 22 | Q9UQ35 SRRM2_HUMAN | K.DKFSFPVQDRPE.S       |            | 3 | 3,0071 | 0,111 | 0,585  |
| 22 | Q2NL82 TSR1_HUMAN  | R.AYLFAHAVDFVPSEE.N    |            | 2 | 3,0069 | 0,338 | 0,072  |
| 22 | P47756 CAPZB_HUMAN | E.DLLSSVDQPLK.I        |            | 2 | 3,0062 | 0,319 | -0,201 |
| 22 | Q9Y5T5 UBP16_HUMAN | E.SFLDLSLPVLDQSGKK.S   |            | 2 | 3,003  | 0,281 | 0,197  |
| 22 | P60660 MYL6_HUMAN  | E.IRHVLTVLGEK.M        |            | 2 | 3,0017 | 0,424 | -0,289 |
| 22 | Q9UBR2 CATZ_HUMAN  | R.VGDYGSLSGR.E         |            | 2 | 3,0016 | 0,475 | -0,181 |
| 22 | Q13428 TCOF_HUMAN  | R.NPQNSTVLAR.G         |            | 2 | 3,0008 | 0,434 | -0,111 |
| 22 | O95453 PARN_HUMAN  | R.NNS#FTAPSTVGK.R      | S557:      | 2 | 3,0006 | 0,271 | -0,655 |
| 22 | Q15029 U5S1_HUMAN  | K.ITM*IAEPLK.G         |            | 2 | 2,9994 | 0,392 | 0,315  |
| 22 | Q13435 SF3B2_HUMAN | R.SRGSDS#PAADVEIE.Y    | S339:      | 2 | 2,999  | 0,287 | -0,242 |
| 22 | P08559 ODPA_HUMAN  | R.YHGHS#M*SDPGVS#YR.T  | S293:S300: | 3 | 2,9977 | 0,26  | 0      |
| 22 | Q9BR76 COR1B_HUMAN | R.KSDFLQDDLYPDTAGPE.A  |            | 2 | 2,9976 | 0,395 | 0,128  |
| 22 | Q9UNZ2 NSF1C_HUMAN | K.S#PNELVDDLFK.G       | S114:      | 2 | 2,9953 | 0,377 | -0,09  |
| 22 | P05362 ICAM1_HUMAN | R.EPAVGEPAEVTTTVLVR.R  |            | 2 | 2,9941 | 0,514 | 0,207  |
| 22 | P43246 MSH2_HUMAN  | E.DTTGSQSLAALLNK.C     |            | 2 | 2,9925 | 0,307 | -0,43  |
| 22 | P04406 G3P_HUMAN   | R.VPTANVSVVDLTCR.L     |            | 2 | 2,9925 | 0,367 | 0      |
| 22 | Q96C19 EFHD2_HUMAN | R.RADLNQIGEPQS#PSRR.V  | S74:       | 3 | 2,992  | 0,347 | -0,28  |
| 22 | P04406 G3P_HUMAN   | R.VVDLM*AHM*ASKE.-     |            | 2 | 2,9908 | 0,43  | -0,716 |
| 22 | P35251 RFC1_HUMAN  | K.NKPLS#PIKLTPTSVDL.Y  | S156:      | 2 | 2,989  | 0,295 | -0,203 |
| 22 | P49005 DPOD2_HUMAN | K.YIHPDDELVEDE.L       |            | 2 | 2,9883 | 0,156 | 0,077  |
| 22 | O75531 BAF_HUMAN   | K.AYVVLGQFLVLK.K       |            | 2 | 2,9876 | 0,375 | 0,09   |
| 22 | P37802 TAGL2_HUMAN | E.QILIQWITTQCR.K       |            | 2 | 2,9849 | 0,404 | 0,235  |
| 22 | Q9UJV9 DDX41_HUMAN | K.VPPVLQVLHCGDE.S      |            | 2 | 2,9845 | 0,451 | -0,083 |
| 22 | Q07002 PCTK3_HUMAN | R.RASLS#DIGFGKLE.T     | S132:      | 3 | 2,9838 | 0,199 | 0,372  |
| 22 | Q9BVG9 PTSS2_HUMAN | R.RDAGGPRPES#PVPAGR.A  | S16:       | 3 | 2,9834 | 0,244 | -0,754 |
| 22 | Q86YP4 P66A_HUMAN  | R.VNGLTTVALKE.T        |            | 2 | 2,9824 | 0,422 | 0,107  |
| 22 | Q9Y2W2 WBP11_HUMAN | R.KVGFALDLPFR.R        |            | 2 | 2,9812 | 0,364 | 0,101  |
| 22 | P13667 PDIA4_HUMAN | K.FAM*EPEEFDSDLRE.F    |            | 3 | 2,9809 | 0,295 | 0,3    |

|    |                     |                              |              |   |        |       |        |
|----|---------------------|------------------------------|--------------|---|--------|-------|--------|
| 22 | Q96T58 MINT_HUMAN   | R.HGS#FHEDEDPIGS#PR.L        | S1268:S1278: | 3 | 2,9801 | 0,163 | -0,199 |
| 22 | P43490 NAMPT_HUMAN  | E.YGQDLLHTVFK.N              |              | 3 | 2,9743 | 0,247 | 0,277  |
| 22 | P13667 PDIA4_HUMAN  | K.FAMEPEEFSDTLRE.F           |              | 2 | 2,9724 | 0,331 | 0,134  |
| 22 | P14625 ENPL_HUMAN   | K.ESDDPM*AYIHFTAE.G          |              | 2 | 2,9714 | 0,494 | 0      |
| 22 | Q8NE71 ABCF1_HUMAN  | E.VVADETPAVQAVLR.A           |              | 2 | 2,9709 | 0,37  | 0      |
| 22 | Q9NQ55 SSF1_HUMAN   | K.ARVGG#DEEASGIPSR.T         | S359:        | 2 | 2,9706 | 0,57  | -0,073 |
| 22 | Q86V48 LUZP1_HUMAN  | R.VGPSSGDAPEPSSR.R           |              | 2 | 2,9705 | 0,483 | -0,363 |
| 22 | P62258 1433E_HUMAN  | D.KHLIPAANTGE.S              |              | 2 | 2,9672 | 0,326 | -0,318 |
| 22 | P09525 ANXA4_HUMAN  | E.DAIISVLAYR.N               |              | 2 | 2,9668 | 0,363 | 0      |
| 22 | P29692 EF1D_HUMAN   | R.ATAPQTQHVS#PM*RQVEPPAK.K   | S133:        | 2 | 2,9666 | 0,251 | -0,108 |
| 22 | Q9H6Z4 RANB3_HUMAN  | E.EKPAIAPPVVFVQK.D           |              | 3 | 2,9665 | 0,135 | 0      |
| 22 | Q9Y608 LRRF2_HUMAN  | R.NSASATPLSGNSSR.R           |              | 2 | 2,9657 | 0,41  | -0,926 |
| 22 | Q9Y2X7 GIT1_HUMAN   | E.DDAIYSVHVPAGLYR.I          |              | 3 | 2,9656 | 0,347 | -0,437 |
| 22 | P27694 RFA1_HUMAN   | K.SKDSLVDIIGICK.S            |              | 3 | 2,9632 | 0,207 | -0,189 |
| 22 | P13010 KU86_HUMAN   | K.DKPS#GDAAVFEE.G            | S712:        | 2 | 2,9617 | 0,366 | 0,253  |
| 22 | Q9UBR2 CATZ_HUMAN   | R.VGDYGSLSGRE.K              |              | 2 | 2,9599 | 0,438 | -0,428 |
| 22 | Q8NCM9 Q8NCM9_HUMAN | R.SSDITSDLGNVLTSTPNAK.T      |              | 3 | 2,9595 | 0,235 | 0,191  |
| 22 | Q13428 TCOF_HUMAN   | R.KSAEPSANTTLVS#E.T          | S171:        | 2 | 2,9571 | 0,33  | 0,242  |
| 22 | P10809 CH60_HUMAN   | K.DM*AIATGGAVFGEE.G          |              | 2 | 2,9554 | 0,234 | 0,264  |
| 22 | Q00839 HNRPU_HUMAN  | R.AKS#PQPPVEE.E              | S270:        | 2 | 2,9531 | 0,308 | -0,63  |
| 22 | Q7Z309 F122B_HUMAN  | D.LSQVFQPYTLR.T              |              | 2 | 2,9522 | 0,383 | 0,09   |
| 22 | Q9HC38 GLOD4_HUMAN  | K.TM*VGFPEDDHFVAE.L          |              | 2 | 2,9483 | 0,419 | 0,293  |
| 22 | P48643 TCPE_HUMAN   | K.IAILTCPFEPKPK.T            |              | 3 | 2,9477 | 0,341 | 0,568  |
| 22 | Q3V6T2 GRDN_HUMAN   | R.LPISVDSPPAAADSNTTAASNVDK.V |              | 3 | 2,9454 | 0,202 | 0,313  |
| 22 | Q13242 SFRS9_HUMAN  | R.GSPHYFS#PFRPY.-            | S216:        | 2 | 2,944  | 0,457 | 0      |
| 22 | P04075 ALDOA_HUMAN  | E.GTLLKPNM*VTPGHACTQK.F      |              | 3 | 2,9437 | 0,163 | -0,372 |
| 22 | Q92734 TFG_HUMAN    | R.RIPIHNEDITYDE.L            |              | 2 | 2,9437 | 0,447 | 0,151  |
| 22 | Q6P0N0 CN106_HUMAN  | R.NTSNIPVILEPETEES#ENE.F     | S824:        | 2 | 2,9386 | 0,308 | 0,439  |
| 22 | P30085 KCY_HUMAN    | R.KNPDSQYGELIE.K             |              | 2 | 2,9376 | 0,313 | -0,175 |
| 22 | Q15942 ZYX_HUMAN    | R.SPGAPGPLTLKE.V             |              | 2 | 2,9364 | 0,385 | 0,418  |
| 22 | O14514 BAI1_HUMAN   | E.NVATLSVSSLER.R             |              | 2 | 2,936  | 0,391 | 0      |
| 22 | P68431 H31_HUMAN    | E.DTNLCIAHAK.R               |              | 2 | 2,9293 | 0,319 | -0,32  |
| 22 | Q15154 PCM1_HUMAN   | E.LHTLRDQHLNNSSS#PQR.S       | S431:        | 3 | 2,9291 | 0,319 | -0,506 |
| 22 | Q9Y399 RT02_HUMAN   | E.SEDSTDFNDKILNEPLK.H        |              | 3 | 2,9289 | 0,373 | -0,093 |
| 22 | P02545 LMNA_HUMAN   | R.SGAQASSTPLSPTR.I           |              | 2 | 2,9284 | 0,333 | -0,09  |
| 22 | Q14980 NUMA1_HUMAN  | R.LDFVCSFLQK.N               |              | 2 | 2,9208 | 0,271 | 0      |
| 22 | Q86X95 CIR_HUMAN    | R.NLTANDPSQEYVAS#EGEEDPE.V   | S202:        | 2 | 2,9208 | 0,28  | 0,822  |
| 22 | Q9UJM3 ERRFI_HUMAN  | E.DSTLSDFKYDVPGRR.S          |              | 3 | 2,9178 | 0,238 | 0      |
| 22 | Q5VV41 ARHG_G_HUMAN | R.HQS#FGAAVLSRE.A            | S107:        | 2 | 2,9165 | 0,307 | -0,177 |

|    |                     |                           |        |   |        |       |        |
|----|---------------------|---------------------------|--------|---|--------|-------|--------|
| 22 | P48643 TCPE_HUMAN   | E.M*NPALGIDCLHK.G         |        | 2 | 2,9154 | 0,285 | -0,617 |
| 22 | O60271 JIP4_HUMAN   | K.LHQLS#GSDQLE.S          | S183:  | 2 | 2,9083 | 0,327 | -0,187 |
| 22 | O60271 JIP4_HUMAN   | K.NLPVPVYLRPLDE.K         |        | 2 | 2,9078 | 0,313 | -0,32  |
| 22 | P51858 HDGF_HUMAN   | R.RAGDLLEDS#PKRPK.E       | S165:  | 3 | 2,9065 | 0,107 | -0,11  |
| 22 | O94972 TRI37_HUMAN  | K.SRDLS#PPDNHLSQPNDDALE.T | S454:  | 3 | 2,9039 | 0,165 | 0,239  |
| 22 | O94804 STK10_HUMAN  | R.ILRLS#TFE.K             | S13:   | 2 | 2,9038 | 0,122 | 0      |
| 22 | Q9NPF5 DMAP1_HUMAN  | K.DTIIDVVGAPLT#PNSR.K     | T445:  | 2 | 2,9023 | 0,291 | -0,349 |
| 22 | Q15003 CND2_HUMAN   | R.KAPLNIPGTPVLE.D         |        | 2 | 2,8996 | 0,223 | -0,09  |
| 22 | P51149 RAB7A_HUMAN  | K.ATIGADFLTKE.V           |        | 2 | 2,8985 | 0,43  | 0,419  |
| 22 | Q9HB40 RISC_HUMAN   | R.DALSQLM*NGPIR.K         |        | 2 | 2,8985 | 0,402 | 0      |
| 22 | P09493 TPM1_HUMAN   | K.ATDAEADVASLNR.R         |        | 2 | 2,8965 | 0,377 | 0,092  |
| 22 | P04406 G3P_HUMAN    | K.IKWGDAGAEYVVE.S         |        | 2 | 2,896  | 0,335 | -0,255 |
| 22 | P49790 NU153_HUMAN  | R.SGIDITDFQAK.R           |        | 2 | 2,896  | 0,331 | 0,204  |
| 22 | Q9C0C2 TB182_HUMAN  | R.RES#AASGLGGLLEEE.G      | S1473: | 2 | 2,8952 | 0,328 | 0      |
| 22 | P42858 HD_HUMAN     | R.SDVSSSALTASVKDE.I       |        | 2 | 2,8952 | 0,372 | -0,163 |
| 22 | Q5VZK9 LR16A_HUMAN  | R.YGVQVM*GSGLLAE.M        |        | 2 | 2,8952 | 0,288 | 0,455  |
| 22 | Q99618 CDCA3_HUMAN  | K.TSSGDPPS#PLVK.Q         | S87:   | 2 | 2,8946 | 0,088 | -0,193 |
| 22 | P49790 NU153_HUMAN  | R.IPSIVSS#PLNSPLDR.S      | S334:  | 3 | 2,8946 | 0,089 | 0,218  |
| 22 | P51114 FXR1_HUMAN   | E.NGLVTVADYISR.A          |        | 2 | 2,892  | 0,444 | 0,187  |
| 22 | Q12797 ASPH_HUMAN   | R.LHHDTDDVTVQVYE.E        |        | 2 | 2,892  | 0,406 | -0,141 |
| 22 | Q6KC79 NIPBL_HUMAN  | E.KAAM*YDISS#PSKDSTK.L    | S350:  | 3 | 2,8916 | 0,317 | 0,094  |
| 22 | B2RMZ9 B2RMZ9_HUMAN | R.APVS#PLKFSPFE.G         | S423:  | 2 | 2,8901 | 0,45  | 0      |
| 22 | O96028 NSD2_HUMAN   | R.ASTAASSALGFSK.S         |        | 2 | 2,8895 | 0,461 | -0,204 |
| 22 | O75190 DNJB6_HUMAN  | R.APGPWDPLASAAGLKE.G      |        | 2 | 2,8837 | 0,412 | -0,386 |
| 22 | P04264 K2C1_HUMAN   | K.WELLQQVDTSTR.T          |        | 2 | 2,8832 | 0,324 | -0,331 |
| 22 | P55209 NP1L1_HUMAN  | R.QLTVQM*M*QNPQILAALQE.R  |        | 2 | 2,8832 | 0,317 | 0,467  |
| 22 | P52435 RPB11_HUMAN  | K.SQLLKDPQVLFAGYK.V       |        | 3 | 2,8823 | 0,205 | -0,321 |
| 22 | Q8NBJ4 GOLM1_HUMAN  | R.DTINLLDQRE.K            |        | 2 | 2,8807 | 0,27  | 0,301  |
| 22 | Q53F19 CQ085_HUMAN  | E.YHEELPALKQPR.E          |        | 3 | 2,8783 | 0,126 | 0,494  |
| 22 | Q15545 TAF7_HUMAN   | E.NQGLDIS#SPGM*SGHR.Q     | S200:  | 2 | 2,8743 | 0,383 | -0,369 |
| 22 | P49736 MCM2_HUMAN   | E.SFTMAS#SPAQR.R          | S12:   | 2 | 2,8743 | 0,503 | -0,966 |
| 22 | P22059 OSBP1_HUMAN  | R.GATVLPANTPGNVGSGK.D     |        | 2 | 2,8694 | 0,51  | 0,158  |
| 22 | Q9H3S7 PTN23_HUMAN  | E.AGDFHFQPAVK.K           |        | 3 | 2,8685 | 0,233 | 0,451  |
| 22 | Q53HL2 BOREA_HUMAN  | E.VSM*VKPTPGLTPR.F        |        | 3 | 2,8665 | 0,305 | 0,458  |
| 22 | Q9NTK5 OLA1_HUMAN   | E.DGDIIFFKFNTQQPK.K       |        | 2 | 2,8658 | 0,278 | 0,129  |
| 22 | Q9Y2W1 TR150_HUMAN  | R.ERS#PALKSPLQSVVVR.R     | S248:  | 3 | 2,8609 | 0,453 | 0,396  |
| 22 | Q13153 PAK1_HUMAN   | K.YM*S#FTDKSAE.D          | S144:  | 2 | 2,8603 | 0,199 | -0,383 |
| 22 | P27824 CALX_HUMAN   | E.VYFADSFDR.G             |        | 2 | 2,8582 | 0,409 | 0      |
| 22 | Q9UQ35 SRRM2_HUMAN  | R.VSGRTS#PPLDR.A          | S2398: | 2 | 2,8562 | 0,153 | 0      |

|    |                     |                             |                 |   |        |       |        |
|----|---------------------|-----------------------------|-----------------|---|--------|-------|--------|
| 22 | Q70E73 RAPH1_HUMAN  | R.RTAS#AGTVSDAE.V           | S192:           | 2 | 2,8559 | 0,23  | -0,196 |
| 22 | P46199 IF2M_HUMAN   | K.DAQVPIILAVNK.C            |                 | 2 | 2,8555 | 0,29  | -0,19  |
| 22 | Q08378 GOGA3_HUMAN  | R.RDS#ICSSVSLE.S            | S389:           | 2 | 2,8551 | 0,164 | -0,183 |
| 22 | Q9Y520 Q9Y520_HUMAN | E.NSCNKEEEPVFTR.Q           |                 | 2 | 2,8543 | 0,231 | -0,227 |
| 22 | Q8IU2 RB6I2_HUMAN   | R.SVGKVEPSSQS#PGRS#PR.L     | S17:S21:        | 3 | 2,8537 | 0,345 | -0,191 |
| 22 | Q13428 TCOF_HUMAN   | K.GSLGQGTAPVLP GK.T         |                 | 2 | 2,852  | 0,332 | 0      |
| 22 | P10809 CH60_HUMAN   | R.VTDALNATR.A               |                 | 2 | 2,8511 | 0,419 | -0,762 |
| 22 | Q13627 DYR1A_HUMAN  | R.VYNS#PTNSSTQDSM*E.V       | S635:           | 2 | 2,8506 | 0,497 | -0,066 |
| 22 | Q9Y2W1 TR150_HUMAN  | R.ERS#PALKS#PLQSVVVR.R      | S248:S253:      | 3 | 2,8491 | 0,247 | 0,665  |
| 22 | Q09028 RBBP4_HUMAN  | E.SLFGSVADDQK.L             |                 | 2 | 2,848  | 0,397 | 0      |
| 22 | P63241 IF5A1_HUMAN  | E.DICPSTHNM*DVPNIK.R        |                 | 2 | 2,8474 | 0,368 | -0,556 |
| 22 | Q8NI08 NCOA7_HUMAN  | K.STGHT#PTKPSGSSVSE.K       | T358:           | 2 | 2,8465 | 0,365 | -0,223 |
| 22 | Q15149 PLEC1_HUMAN  | R.QLAEEDLAQQR.A             |                 | 2 | 2,8461 | 0,292 | -0,563 |
| 22 | P40222 TXLNA_HUMAN  | R.RPEGPQAQAPSS#PRVTE.A      | S515:           | 3 | 2,8461 | 0,172 | -0,604 |
| 22 | Q9Y2U5 M3K2_HUMAN   | R.RGS#DIDNPTLTVM*D.I        | S331:           | 2 | 2,846  | 0,315 | 0,225  |
| 22 | Q04637 IF4G1_HUMAN  | R.FSALQQAVPTTESTDNRR.V      |                 | 3 | 2,845  | 0,285 | 0,191  |
| 22 | A6H8Y1 BDP1_HUMAN   | R.EKILDVIDDTIE.M            |                 | 2 | 2,8446 | 0,285 | -0,087 |
| 22 | Q13459 MYO9B_HUMAN  | R.VQEKPDS#PGGSTQIQR.Y       | S1290:          | 3 | 2,8413 | 0,295 | -0,101 |
| 22 | Q15742 NAB2_HUMAN   | R.SFS#PKS#PLELGE.K          | S159:S162:      | 2 | 2,8401 | 0,271 | -1,514 |
| 22 | Q14980 NUMA1_HUMAN  | R.VSLEPHQGP GT#PE.S         | T2000:          | 2 | 2,8397 | 0,287 | -0,256 |
| 22 | P31948 STIP1_HUMAN  | K.ALDLDSSCKE.A              |                 | 2 | 2,8383 | 0,245 | -0,322 |
| 22 | P56537 IF6_HUMAN    | R.HGLLVPNNTTDQE.L           |                 | 2 | 2,8365 | 0,342 | -0,085 |
| 22 | Q96RK0 CIC_HUMAN    | R.AFSHS#GVHSLDGGEVDSQALQE.L | S358:           | 3 | 2,8331 | 0,17  | 0,389  |
| 22 | P62736 ACTA_HUMAN   | R.GILTLKYPIE.H              |                 | 2 | 2,8331 | 0,487 | -0,319 |
| 22 | P35637 FUS_HUMAN    | R.HDSEQDNSDNNTIFVQGLGE.N    |                 | 3 | 2,8329 | 0,268 | 0,165  |
| 22 | P10809 CH60_HUMAN   | E.VIVTKDDAM*LLK.G           |                 | 2 | 2,8318 | 0,345 | -0,627 |
| 22 | Q9Y5J1 UTP18_HUMAN  | R.TGNFISTSTSLPR.G           |                 | 2 | 2,8292 | 0,349 | -0,088 |
| 22 | P28066 PSA5_HUMAN   | R.ITSPLM*EPSSIEK.I          |                 | 2 | 2,8244 | 0,339 | -0,421 |
| 22 | P62753 RS6_HUMAN    | R.RLSS#LRAS#TSKS#E.S        | S236:S240:S244: | 2 | 2,8239 | 0,246 | -0,367 |
| 22 | Q9H019 FA54B_HUMAN  | K.ASS#FADM*M*GILKD.F        | S238:           | 2 | 2,8233 | 0,165 | -0,326 |
| 22 | Q9C0C2 TB182_HUMAN  | R.GS#GGLFSPSTAHVPD GALGQR.D | S1024:          | 2 | 2,8229 | 0,237 | -1,517 |
| 22 | P10809 CH60_HUMAN   | K.DMAIATGGAVFGEE.G          |                 | 2 | 2,8226 | 0,432 | -0,089 |
| 22 | O75607 NPM3_HUMAN   | D.DFQLQPPVTFR.L             |                 | 2 | 2,8221 | 0,428 | 0,362  |
| 22 | Q9Y618 NCOR2_HUMAN  | E.DHGAPFAGHLPR.G            |                 | 3 | 2,8217 | 0,485 | 0,717  |
| 22 | Q9NUQ6 SPS2L_HUMAN  | R.VSQCNLCPTRIE.V            |                 | 2 | 2,8204 | 0,373 | -0,33  |
| 22 | P14866 HNRPL_HUMAN  | R.IQHPSNVLHFFNAPLEVTEE.N    |                 | 3 | 2,8144 | 0,253 | -0,158 |
| 22 | P12814 ACTN1_HUMAN  | R.KDDPLTNLNTAFDVAE.K        |                 | 2 | 2,8126 | 0,45  | 0,761  |
| 22 | Q8WX92 NELFB_HUMAN  | R.KPS#PAQAAETPALE.L         | S557:           | 2 | 2,8109 | 0,387 | -0,328 |
| 22 | P52272 HNRPM_HUMAN  | K.GCGVVKFESPEVAE.R          |                 | 2 | 2,8056 | 0,129 | -1,214 |

|    |                     |                              |                 |   |        |       |        |
|----|---------------------|------------------------------|-----------------|---|--------|-------|--------|
| 22 | P17980 PRS6A_HUMAN  | K.VNKTLPLYLVSNVIE.L          |                 | 2 | 2,8051 | 0,32  | 0,154  |
| 22 | Q2NKX8 ERC6L_HUMAN  | E.HVEKENS#LCGS#APNSR.A       | S980:S984:      | 3 | 2,8039 | 0,166 | 0      |
| 22 | O00567 NOL5A_HUMAN  | R.LAALALASSENSST#PEECEE.M    | T468:           | 2 | 2,8035 | 0,263 | 0,536  |
| 22 | Q9NYL9 TMOD3_HUMAN  | K.FGYQFTQQGPR.T              |                 | 2 | 2,8034 | 0,231 | 0,092  |
| 22 | Q9BUL5 PHF23_HUMAN  | R.LGGPPKS#GEP.-              | S400:           | 2 | 2,8034 | 0,383 | -0,12  |
| 22 | P49790 NU153_HUMAN  | K.CIACQAAKLS#PR.D            | S687:           | 2 | 2,8026 | 0,317 | -0,419 |
| 22 | Q9BZK7 TBL1R_HUMAN  | E.NSTSGSTQLVLR.H             |                 | 2 | 2,8023 | 0,393 | -0,097 |
| 22 | Q00341 VIGLN_HUMAN  | K.ASVITQVFHVPLEE.R           |                 | 2 | 2,801  | 0,421 | 0,078  |
| 22 | Q96PN7 TREF1_HUMAN  | K.SSPS#HSTTSGETDPTTIFPCKE.C  | S1072:          | 3 | 2,8004 | 0,225 | 0,075  |
| 22 | O15372 EIF3H_HUMAN  | K.NLQLLM*DRVDE.M             |                 | 2 | 2,7968 | 0,282 | 0,269  |
| 22 | Q9Y2D5 AKAP2_HUMAN  | R.DALGDSLQVPVSPSSTSSR.C      |                 | 3 | 2,7965 | 0,177 | 0,183  |
| 22 | Q14157 UBP2L_HUMAN  | R.RYPSS#ISSS#PQKD.L          | S605:S609:      | 2 | 2,7962 | 1     | -0,908 |
| 22 | A9CQZ4 A9CQZ4_HUMAN | R.QKFCGM*FCPVEGSSE.N         |                 | 2 | 2,7951 | 0,341 | 0,274  |
| 22 | Q13428 TCOF_HUMAN   | E.KSLGNILQAKPTSS#PAK.G       | S583:           | 3 | 2,7948 | 0,321 | 0,101  |
| 22 | Q6PJT7 ZC3HE_HUMAN  | E.CAYHHPIS#PCK.A             | S620:           | 3 | 2,7947 | 0,264 | 0,252  |
| 22 | P26373 RL13_HUMAN   | K.LATQLTGPVM*PVR.N           |                 | 2 | 2,7946 | 0,451 | -0,087 |
| 22 | Q8N5Y2 MS3L1_HUMAN  | R.SSS#PIPLT#PSKE.G           | S400:T405:      | 2 | 2,7943 | 0,421 | -0,261 |
| 22 | P68104 EF1A1_HUMAN  | K.IGGIGTVPVGRVE.T            |                 | 2 | 2,791  | 0,421 | -0,389 |
| 22 | P04075 ALDOA_HUMAN  | K.ADDGRFPQVIK.S              |                 | 3 | 2,7884 | 0,192 | 0,136  |
| 22 | Q12846 STX4_HUMAN   | K.TQHGVLSSQQFVE.L            |                 | 2 | 2,787  | 0,262 | -0,8   |
| 22 | P42166 LAP2A_HUMAN  | K.LREQGTES#RS#ST#PLPTISSAE.N | S156:S158:T160: | 2 | 2,7869 | 1     | 0,854  |
| 22 | P61970 NTF2_HUMAN   | K.IQHSITAQDHQPTPD.S          |                 | 2 | 2,7867 | 0,432 | -0,434 |
| 22 | Q9BVK6 TMED9_HUMAN  | E.VKDPEDKVILAR.Q             |                 | 3 | 2,7865 | 0,107 | 0,198  |
| 22 | Q9NZ71 RTEL1_HUMAN  | E.AKS#PGPFSTR.K              | S779:           | 3 | 2,7843 | 0,18  | 0,574  |
| 22 | P68104 EF1A1_HUMAN  | K.YYVTIIDAPGHR.D             |                 | 2 | 2,7814 | 0,43  | -0,261 |
| 22 | Q13428 TCOF_HUMAN   | K.TVANLLSGKS#PR.K            | S156:           | 2 | 2,7808 | 0,37  | 0,092  |
| 22 | P0C7M2 RA1L3_HUMAN  | K.KIFVGGIKEDTE.E             |                 | 2 | 2,7799 | 0,312 | -0,365 |
| 22 | Q53GS9 SNUT2_HUMAN  | R.EAPASVVPFVR.V              |                 | 2 | 2,7783 | 0,326 | 0,312  |
| 22 | Q9H412 ZHX3_HUMAN   | R.KVS#PIKINLK.N              | S723:           | 3 | 2,7778 | 0,168 | 0,974  |
| 22 | P14136 GFAP_HUMAN   | K.LALDIEIATYR.K              |                 | 2 | 2,7777 | 0,421 | 0      |
| 22 | P78347 GTF2I_HUMAN  | E.LVISYLPFGM*ASK.I           |                 | 2 | 2,7771 | 0,29  | 0,263  |
| 22 | Q12846 STX4_HUMAN   | R.KTQHGVLSSQQFVE.L           |                 | 2 | 2,7754 | 0,229 | 0,081  |
| 22 | Q9H307 PININ_HUMAN  | R.DLIQDQNM*DE.K              |                 | 2 | 2,7739 | 0,217 | -0,493 |
| 22 | Q7Z589 EMSY_HUMAN   | E.KRHSPES#PSIAVVE.S          | S821:           | 2 | 2,7728 | 0,368 | -0,755 |
| 22 | Q13085 ACACA_HUMAN  | R.HLEPALAFQLE.L              |                 | 2 | 2,7725 | 0,209 | -0,192 |
| 22 | O14908 GIPC1_HUMAN  | R.GPATVEDLPSAFEE.K           |                 | 2 | 2,7723 | 0,253 | 0,25   |
| 22 | Q9Y2W2 WBP11_HUMAN  | K.SGPSVPVSVQTKDDVYE.A        |                 | 2 | 2,7719 | 0,28  | -0,27  |
| 22 | Q7L014 DDX46_HUMAN  | K.LNYVPLEKQEEE.R             |                 | 2 | 2,7716 | 0,134 | -0,082 |
| 22 | Q9Y2W1 TR150_HUMAN  | K.SPVGKS#PPSTGSTYGSSQKEE.S   | S320:           | 3 | 2,7709 | 0,134 | -0,251 |

|    |                    |                           |            |   |        |       |        |
|----|--------------------|---------------------------|------------|---|--------|-------|--------|
| 22 | P13639 EF2_HUMAN   | K.SDPVVSRETSEE.S          |            | 2 | 2,7689 | 0,125 | -0,993 |
| 22 | Q9Y230 RUVB2_HUMAN | R.GLGLDDALEPR.Q           |            | 2 | 2,7683 | 0,426 | 0,528  |
| 22 | Q9UHB6 LIMA1_HUMAN | R.ASSLSES#SPPK.A          | S373:      | 2 | 2,7674 | 0,173 | 0,104  |
| 22 | Q6S8J3 A26CA_HUMAN | R.AVFPSIVGRPR.Q           |            | 2 | 2,7668 | 0,229 | -0,407 |
| 22 | O43399 TPD54_HUMAN | R.NSATFKS#FEDR.V          | S166:      | 2 | 2,7668 | 0,269 | -0,441 |
| 22 | P14625 ENPL_HUMAN  | K.DISTNYYASQK.K           |            | 2 | 2,7665 | 0,384 | -0,284 |
| 22 | P28290 SSFA2_HUMAN | E.VQSTEGEAPHVPATYQLGLTK.S |            | 3 | 2,7662 | 0,337 | 0,329  |
| 22 | P16949 STMN1_HUMAN | R.ASGQAFELILS#PR.S        | S25:       | 2 | 2,7662 | 0,186 | 0,415  |
| 22 | Q99459 CDC5L_HUMAN | R.LGLLGLPAPK.N            |            | 2 | 2,7659 | 0,182 | -0,187 |
| 22 | P06748 NPM_HUMAN   | D.YHFKVDNDENE.H           |            | 2 | 2,7657 | 0,342 | -0,346 |
| 22 | P30622 CLIP1_HUMAN | K.SISITSALLTEKDAE.L       |            | 2 | 2,7631 | 0,404 | 0,077  |
| 22 | Q9C0C2 TB182_HUMAN | E.AADSDAHLFQDSTEPR.A      |            | 3 | 2,7621 | 0,291 | 0,104  |
| 22 | P35606 COPB2_HUMAN | E.SNSIVKIFKNFKE.K         |            | 3 | 2,7619 | 0,402 | 0,235  |
| 22 | Q13242 SFRS9_HUMAN | R.IYVGNLPTDVRE.K          |            | 2 | 2,7616 | 0,339 | -0,177 |
| 22 | Q96RU3 FNBP1_HUMAN | R.TVS#DNSLSNSR.G          | S296:      | 2 | 2,7613 | 0,416 | -0,097 |
| 22 | P20700 LMNB1_HUMAN | R.AGGPTT#PLSPTR.L         | T20:       | 2 | 2,7599 | 0,33  | -0,099 |
| 22 | Q9Y5T5 UBP16_HUMAN | E.SFLDLSLPVLDQSGKK.S      |            | 3 | 2,7587 | 0,097 | 0,589  |
| 22 | Q9NZ52 GGA3_HUMAN  | R.QGIVQSDPPIPVDR.T        |            | 2 | 2,7586 | 0,427 | -0,401 |
| 22 | Q8ND56 LS14A_HUMAN | R.SS#PQLDPLRKS#PTM*E.Q    | S183:S192: | 2 | 2,7586 | 0,3   | 0,066  |
| 22 | Q0VDF9 HSP7E_HUMAN | R.DGSLHVTCTDQE.T          |            | 2 | 2,7578 | 0,248 | -0,538 |
| 22 | Q13642 FHL1_HUMAN  | K.AIVAGDQNV.E.Y           |            | 2 | 2,7559 | 0,352 | -0,841 |
| 22 | Q14671 PUM1_HUMAN  | R.RDS#LTGSSDLYKR.T        | S709:      | 3 | 2,7558 | 0,311 | -0,58  |
| 22 | O43707 ACTN4_HUMAN | K.DDPVTNLNNAFE.V          |            | 2 | 2,7555 | 0,243 | -0,543 |
| 22 | O14893 GEMI2_HUMAN | D.VVVAQIDPK.K             |            | 2 | 2,7551 | 0,384 | -0,063 |
| 22 | Q13617 CUL2_HUMAN  | E.KKNDM*ANM*YVLLR.A       |            | 3 | 2,7517 | 0,195 | 0,337  |
| 22 | P63000 RAC1_HUMAN  | K.LTPITYPQGLAM*AK.E       |            | 2 | 2,7505 | 0,326 | 0,321  |
| 22 | P35222 CTNB1_HUMAN | R.HAIM*RS#PQM*VSAIVR.T    | S191:      | 3 | 2,7499 | 0,103 | -0,506 |
| 22 | O43707 ACTN4_HUMAN | R.KDDPVTNLNNAFE.V         |            | 2 | 2,7499 | 0,333 | -0,165 |
| 22 | P26639 SYTC_HUMAN  | E.LSGALTGLTR.V            |            | 2 | 2,7489 | 0,23  | 0,863  |
| 22 | Q96959 EFG2_HUMAN  | K.AKPLLLQLPIGE.A          |            | 2 | 2,7489 | 0,295 | -0,378 |
| 22 | Q9H0B6 KLC2_HUMAN  | K.LQGGTPQEPPNPR.M         |            | 2 | 2,7478 | 0,391 | -0,614 |
| 22 | O00231 PSD11_HUMAN | E.ASIDILHSIVK.R           |            | 2 | 2,7477 | 0,233 | -0,102 |
| 22 | Q8N556 AFAP1_HUMAN | K.LSSERPSS#DGEVVE.N       | S283:      | 2 | 2,7467 | 0,313 | -0,375 |
| 22 | Q9UPN3 MACF1_HUMAN | E.QDQTTAQLQVQK.A          |            | 2 | 2,7441 | 0,254 | -0,176 |
| 22 | Q9UIF9 BAZ2A_HUMAN | E.M*EGPEECLGR.R           |            | 2 | 2,743  | 0,4   | -0,409 |
| 22 | P50991 TCPD_HUMAN  | K.M*IQDGKGDVITND.G        |            | 2 | 2,7424 | 0,373 | -0,801 |
| 22 | P09211 GSTP1_HUMAN | D.LTLYQSNTILR.H           |            | 2 | 2,7416 | 0,394 | -0,092 |
| 22 | Q9H4L7 SMRCD_HUMAN | K.ILHFLQDASIGE.L          |            | 2 | 2,7414 | 0,372 | -0,273 |
| 22 | Q92576 PHF3_HUMAN  | E.NLVANTARS#PQFINLK.R     | S1642:     | 3 | 2,7409 | 0,285 | 0,392  |

|    |                    |                                 |        |   |        |       |        |
|----|--------------------|---------------------------------|--------|---|--------|-------|--------|
| 22 | P53396 ACLY_HUMAN  | R.TASFESRADE.V                  |        | 2 | 2,7407 | 0,41  | -0,305 |
| 22 | P31946 1433B_HUMAN | K.DSTLIM*QLLR.D                 |        | 2 | 2,7372 | 0,158 | -0,101 |
| 22 | P06753 TPM3_HUMAN  | K.ILTDKLKEAE.T                  |        | 2 | 2,736  | 0,325 | 0,105  |
| 22 | P06748 NPM_HUMAN   | K.GPSSVEDIKAK.M                 |        | 2 | 2,7355 | 0,39  | -0,431 |
| 22 | Q6R327 RICTR_HUMAN | R.SQSFNTDTTSGISSM*S#SSPSRE.T    | S1233: | 3 | 2,7352 | 0,123 | 0,22   |
| 22 | P68104 EF1A1_HUMAN | K.YYVTIIDAPGHRDFIK.N            |        | 3 | 2,7343 | 0,336 | 0,383  |
| 22 | Q9H009 NACA2_HUMAN | K.NNSNDIVNAIM*E.L               |        | 2 | 2,734  | 0,266 | 0,362  |
| 22 | Q02952 AKA12_HUMAN | E.M*KGS#VEEPKPEEPK.R            | S660:  | 3 | 2,7317 | 0,092 | 0      |
| 22 | Q5SW79 CE170_HUMAN | R.IDLLAQPR.R                    |        | 2 | 2,7315 | 0,228 | -0,066 |
| 22 | O14617 AP3D1_HUMAN | R.ASCILQLVK.H                   |        | 2 | 2,7274 | 0,285 | -1,655 |
| 22 | P14618 KPYM_HUMAN  | R.GIFPVLCKDPVQE.A               |        | 2 | 2,7258 | 0,193 | 0,325  |
| 22 | P46087 NOL1_HUMAN  | K.KGPQSLFNAPR.G                 |        | 3 | 2,7244 | 0,224 | 0,677  |
| 22 | P30041 PRDX6_HUMAN | K.LIALSIDSVE.D                  |        | 2 | 2,7236 | 0,247 | 0,115  |
| 22 | P78371 TCPB_HUMAN  | R.SLHDALCVLAQTVK.D              |        | 3 | 2,7212 | 0,177 | -0,235 |
| 22 | Q9NR30 DDX21_HUMAN | K.LRSDAGLES#DTAM*KK.G           | S13:   | 3 | 2,7206 | 0,31  | -0,319 |
| 22 | Q06830 PRDX1_HUMAN | K.KQGGLGPM*NIPLVSDPK.R          |        | 3 | 2,7203 | 0,108 | 0,311  |
| 22 | Q14160 LAP4_HUMAN  | R.LPLLPES#PGPLR.Q               | S853:  | 2 | 2,7193 | 0,237 | -0,083 |
| 22 | Q9Y5B0 CTDP1_HUMAN | R.AVPPPQPM*FGEELPDAQDGEQPGPSR.R |        | 3 | 2,7188 | 0,315 | 0,506  |
| 22 | Q01813 K6PP_HUMAN  | R.M*LAIYDGFDFGFAK.G             |        | 2 | 2,7182 | 0,182 | -0,583 |
| 22 | P49790 NU153_HUMAN | K.CQPVFSGNSEQTKDE.N             |        | 2 | 2,7162 | 0,367 | 0,912  |
| 22 | Q32MZ4 LRRF1_HUMAN | K.IDGATQSSPAEPK.S               |        | 2 | 2,7115 | 0,367 | -0,094 |
| 22 | P42345 FRAP_HUMAN  | K.TGTTVPESIH#FIGDGLVKPE.A       | S2481: | 3 | 2,7086 | 0,226 | -0,242 |
| 22 | O96019 ACL6A_HUMAN | K.QGGPTYIDTNALR.V               |        | 2 | 2,7082 | 0,481 | -0,078 |
| 22 | P27816 MAP4_HUMAN  | K.TDYIPLLDVDEK.T                |        | 2 | 2,7082 | 0,449 | 0      |
| 22 | P08670 VIME_HUMAN  | E.TNLDSLPLVDTHSKR.T             |        | 2 | 2,7071 | 0,424 | -0,072 |
| 22 | Q9P2R3 ANFY1_HUMAN | R.NFLHVAVQNSDIE.S               |        | 2 | 2,7063 | 0,337 | -0,082 |
| 22 | Q9Y2K5 R3HD2_HUMAN | K.ASSFSGISILTR.G                |        | 2 | 2,7044 | 0,177 | 0,197  |
| 22 | Q8TD16 BICD2_HUMAN | R.S#PILLPKGLLAPE.A              | S582:  | 2 | 2,7036 | 0,232 | 0      |
| 22 | P27635 RL10_HUMAN  | K.VDEFPLCGHM*VSDE.Y             |        | 2 | 2,7035 | 0,307 | -0,074 |
| 22 | Q14160 LAP4_HUMAN  | K.RV#LVGADDLR.K                 | S1378: | 2 | 2,7028 | 0,143 | -0,095 |
| 22 | Q86UV5 UBP48_HUMAN | E.YTQATIYVHK.V                  |        | 3 | 2,702  | 0,337 | 0,672  |
| 22 | P08133 ANXA6_HUMAN | E.AILDIIISR.S                   |        | 2 | 2,6972 | 0,234 | 0,183  |
| 22 | Q5JSZ5 K0515_HUMAN | R.LLS#SPEEFPTLK.A               | S166:  | 2 | 2,6963 | 0,405 | -0,154 |
| 22 | P00367 DHE3_HUMAN  | E.DFKLQHGSILGFPK.A              |        | 3 | 2,6959 | 0,258 | 0,461  |
| 22 | Q66PJ3 AR6P4_HUMAN | E.DGPVLTDEQK.S                  |        | 2 | 2,6943 | 0,28  | -0,443 |
| 22 | Q6NWX9 PR40B_HUMAN | R.TLLQQLDDHQ.-                  |        | 2 | 2,6935 | 0,392 | 0,101  |
| 22 | P61586 RHOA_HUMAN  | K.HFCPNVPIILVGNK.K              |        | 3 | 2,6927 | 0,108 | 0,455  |
| 22 | Q92597 NDRG1_HUMAN | R.TAS#GSSVTSLDGTR.S             | S330:  | 2 | 2,6907 | 0,361 | -0,258 |
| 22 | P46087 NOL1_HUMAN  | K.KGPQSLFNAPR.G                 |        | 2 | 2,6883 | 0,326 | 0,1    |



|    |                     |                            |        |   |        |       |        |
|----|---------------------|----------------------------|--------|---|--------|-------|--------|
| 22 | P46777 RL5_HUMAN    | K.GAVDGGLSIPHSTK.R         |        | 2 | 2,6871 | 0,25  | -0,091 |
| 22 | P51784 UBP11_HUMAN  | E.GLYNVLM*YR.L             |        | 2 | 2,6826 | 0,359 | -0,426 |
| 22 | Q99700 ATX2_HUMAN   | R.DLIKDKIEPSAK.D           |        | 2 | 2,6826 | 0,344 | -0,539 |
| 22 | Q14204 DYHC1_HUMAN  | R.TPVIDADKPVSSQLR.V        |        | 3 | 2,6817 | 0,159 | 0,112  |
| 22 | Q99549 MPP8_HUMAN   | E.KLM*PVSAQTPK.G           |        | 2 | 2,6803 | 0,307 | -0,401 |
| 22 | Q6NZI2 PTRF_HUMAN   | E.VKLPAKLSISKS#LKE.S       | S171:  | 3 | 2,6802 | 0,334 | -0,106 |
| 22 | Q15545 TAF7_HUMAN   | E.NQGLDISS#PGM*SGHR.Q      | S201:  | 3 | 2,6747 | 0,13  | -0,221 |
| 22 | O00418 EF2K_HUMAN   | K.LLQSAKT#ILR.G            | T348:  | 2 | 2,6741 | 0,232 | 0,399  |
| 22 | Q04760 LGUL_HUMAN   | R.GFGHIGIAVPDVYSACK.R      |        | 3 | 2,6721 | 0,178 | 0      |
| 22 | Q6S8J3 A26CA_HUMAN  | K.AGFAGDDAPR.A             |        | 2 | 2,6713 | 0,38  | -0,125 |
| 22 | Q01082 SPTB2_HUMAN  | K.TALPAQSAATLPAR.T         |        | 2 | 2,6706 | 0,472 | 0      |
| 22 | Q8WXE1 ATRIP_HUMAN  | K.LAAPSVSHVS#PR.K          | S224:  | 2 | 2,6697 | 0,298 | -0,094 |
| 22 | Q7Z478 DHX29_HUMAN  | K.FQSPQIQATIS#PPLQPK.T     | S200:  | 2 | 2,6694 | 0,251 | -0,062 |
| 22 | Q96EP5 DAZP1_HUMAN  | E.DEQSVDDQAVNM*HFHDIM*GK.K |        | 3 | 2,6689 | 0,231 | -0,328 |
| 22 | Q9UQ80 PA2G4_HUMAN  | R.FDAM*PFTLR.A             |        | 2 | 2,6672 | 0,262 | 0,219  |
| 22 | Q99426 TBCB_HUMAN   | R.LGEYEDVSRVE.K            |        | 2 | 2,6662 | 0,422 | -0,188 |
| 22 | P40222 TXLNA_HUMAN  | R.RPEGPGAQAPS#SPR.V        | S514:  | 2 | 2,6662 | 0,428 | -0,574 |
| 22 | Q2KHR3 QSER1_HUMAN  | K.SVSTPLTTLDATSDK.K        |        | 2 | 2,6661 | 0,506 | 0,159  |
| 22 | Q8IZT6 ASPM_HUMAN   | E.VTPSSTTASVAR.K           |        | 2 | 2,6648 | 0,409 | -0,207 |
| 22 | Q5TFE4 NT5D1_HUMAN  | K.LANNGTVLR.A              |        | 2 | 2,6614 | 0,33  | 0,064  |
| 22 | O43896 KIF1C_HUMAN  | R.AHIDKLTGILQE.V           |        | 2 | 2,6612 | 0,253 | 0,274  |
| 22 | Q8TDM6 DLG5_HUMAN   | R.LGS#SSNLQFK.A            | S1263: | 2 | 2,6607 | 0,228 | 0      |
| 22 | Q14232 EI2BA_HUMAN  | K.ALCHLNVPVTVVLD.A         |        | 2 | 2,6604 | 0,261 | -0,315 |
| 22 | Q3V6T2 GRDN_HUMAN   | E.NM*NLLSDAR.S             |        | 2 | 2,659  | 0,172 | 0,116  |
| 22 | Q03164 HRX_HUMAN    | E.IVTVGDPLLSSGLR.S         |        | 2 | 2,6586 | 0,444 | -0,256 |
| 22 | P04083 ANXA1_HUMAN  | E.ATIIDLTKR.N              |        | 2 | 2,6542 | 0,371 | -0,32  |
| 22 | P49792 RBP2_HUMAN   | E.KDSLITPHVSR.S            |        | 3 | 2,6536 | 0,367 | -0,146 |
| 22 | Q96RI3 Q96RI3_HUMAN | D.DAM*LLKGGDKAQLE.K        |        | 3 | 2,6506 | 0,204 | -0,448 |
| 22 | Q58FF8 H90B2_HUMAN  | K.HSQFLGYPITLYLEK.E        |        | 3 | 2,647  | 0,097 | 0,101  |
| 22 | Q9BR76 COR1B_HUMAN  | R.AIFLADGKVFTTGFSR.M       |        | 3 | 2,6459 | 0,091 | -0,423 |
| 22 | P62906 RL10A_HUMAN  | K.FSVCVLGDQQHCDE.A         |        | 2 | 2,6433 | 0,316 | -0,072 |
| 22 | P41091 IF2G_HUMAN   | K.LDDPSCPRPE.C             |        | 2 | 2,6424 | 0,439 | -0,823 |
| 22 | Q96H55 MYO19_HUMAN  | R.LIHVTSS#AFTGLG.-         | S964:  | 2 | 2,642  | 0,375 | -0,088 |
| 22 | P55769 NH2L1_HUMAN  | E.DKNVPYVFR.S              |        | 3 | 2,6407 | 0,129 | 0,665  |
| 22 | Q9Y2W1 TR150_HUMAN  | K.YKDDPVLDRLDIE.R          |        | 2 | 2,64   | 0,357 | 0      |
| 22 | O14908 GIPC1_HUMAN  | R.SRGPATVEDLPSAFE.E        |        | 2 | 2,6396 | 0,228 | -0,077 |
| 22 | P55198 AF17_HUMAN   | K.VVFSGFGPIM*R.F           |        | 2 | 2,6392 | 0,269 | 0,398  |
| 22 | Q8WWI1 LMO7_HUMAN   | R.RM*YS#FDDVLEE.G          | S805:  | 2 | 2,6391 | 0,286 | -0,163 |
| 22 | Q8IZP0 ABI1_HUMAN   | E.KVVAIYDYTK.D             |        | 2 | 2,6383 | 0,249 | -0,915 |

|    |                    |                        |        |   |        |       |        |
|----|--------------------|------------------------|--------|---|--------|-------|--------|
| 22 | P06733 ENOA_HUMAN  | R.HIADLAGNSE.V         |        | 2 | 2,6358 | 0,245 | -0,713 |
| 22 | O95782 AP2A1_HUMAN | R.GLAVFISDIR.N         |        | 2 | 2,6322 | 0,367 | -0,112 |
| 22 | P14618 KPYM_HUMAN  | R.LNFS#HGTHE.Y         | S77:   | 2 | 2,6318 | 0,273 | -0,218 |
| 22 | Q92622 K0226_HUMAN | E.GQTLTVTSGAK.K        |        | 2 | 2,6312 | 0,383 | -1,033 |
| 22 | Q09666 AHNK_HUMAN  | K.M*PFLSISS#PK.V       | S3412: | 2 | 2,6309 | 0,181 | 0,507  |
| 22 | Q7Z6E9 RBBP6_HUMAN | R.FLPLNIRNS#PFTR.G     | S873:  | 2 | 2,6281 | 0,199 | -0,147 |
| 22 | O14744 ANM5_HUMAN  | K.YSQYQQAIYK.C         |        | 2 | 2,6259 | 0,362 | -0,189 |
| 22 | Q9Y6A5 TACC3_HUMAN | K.FDPLLRS#PGRPVVATE.T  | S570:  | 3 | 2,6229 | 0,112 | 0,536  |
| 22 | P43243 MATR3_HUMAN | R.GDADQASNILASFGLSAR.D |        | 3 | 2,6189 | 0,335 | 0      |
| 22 | Q6T4R5 NHS_HUMAN   | E.GESFVGDHER.T         |        | 2 | 2,6166 | 0,321 | 0      |
| 22 | Q58FF7 H90B3_HUMAN | K.VILHLKEDQTE.Y        |        | 2 | 2,6159 | 0,289 | -0,46  |
| 22 | Q01433 AMPD2_HUMAN | R.S#LPGPAPCLK.H        | S100:  | 2 | 2,6125 | 0,289 | 0      |
| 22 | P55072 TERA_HUMAN  | K.GDDLSTAILK.Q         |        | 2 | 2,6113 | 0,373 | 0,472  |
| 22 | Q6PJF5 RHDF2_HUMAN | K.SVS#LQEPR.S          | S90:   | 2 | 2,6109 | 0,106 | 0      |
| 22 | P40222 TXLNA_HUMAN | R.RPEGPGAQAPSS#PR.V    | S515:  | 3 | 2,6105 | 0,268 | -0,307 |
| 22 | Q9P2B4 CT2NL_HUMAN | E.KQPVCTNPLSILK.V      |        | 2 | 2,6088 | 0,168 | -0,244 |
| 22 | Q8N3U4 STAG2_HUMAN | R.RGTS#LM*EDDEEPIVE.D  | S1161: | 2 | 2,6078 | 0,3   | 0,202  |
| 22 | Q9P258 RCC2_HUMAN  | K.DGQILPVPNVVVRD.V     |        | 2 | 2,6039 | 0,178 | 0,16   |
| 22 | Q9Y4B6 VPRBP_HUMAN | R.KLSSEPLPLDEE.A       |        | 2 | 2,6025 | 0,165 | -0,415 |
| 22 | P51149 RAB7A_HUMAN | E.VELYNEFPEPIKLDK.N    |        | 3 | 2,5985 | 0,139 | 0,1    |
| 22 | Q99426 TBCB_HUMAN  | E.DALLGSYPVDDGCR.I     |        | 2 | 2,597  | 0,251 | 0      |
| 22 | Q8TD19 NEK9_HUMAN  | E.KVTLNAPTK.R          |        | 2 | 2,5963 | 0,31  | -0,337 |
| 22 | P58546 MTPN_HUMAN  | E.VKDYVAKGEDVNR.T      |        | 3 | 2,5957 | 0,308 | 0      |
| 22 | A0FGR8 ESYT2_HUMAN | E.NFTFFIHNPK.R         |        | 2 | 2,5953 | 0,304 | -0,193 |
| 22 | Q99700 ATX2_HUMAN  | R.DLIKDKIEPSAK.D       |        | 3 | 2,5946 | 0,253 | -0,135 |
| 22 | O94833 BPAEA_HUMAN | E.ALQTIQLFLAK.H        |        | 2 | 2,5944 | 0,266 | -0,294 |
| 22 | Q12800 TFCP2_HUMAN | R.VQIDTFKENE.N         |        | 2 | 2,5939 | 0,118 | -0,1   |
| 22 | O43776 SYNC_HUMAN  | E.SDVDVQLNNR.H         |        | 2 | 2,5927 | 0,246 | -0,526 |
| 22 | Q96C90 PP14B_HUMAN | E.AFISGLLDK.I          |        | 2 | 2,5903 | 0,335 | -0,063 |
| 22 | Q96JM3 ZN828_HUMAN | K.DNQESS#DAELSSSE.Y    | S627:  | 2 | 2,5889 | 0,235 | -0,464 |
| 22 | Q09666 AHNK_HUMAN  | E.AEVPDVLDCPDAK.L      |        | 2 | 2,5883 | 0,392 | -0,078 |
| 22 | Q6R327 RICTR_HUMAN | K.ALSYAS#LDKE.D        | S1388: | 2 | 2,5875 | 0,23  | 0      |
| 22 | P04083 ANXA1_HUMAN | E.ATIIDIILTKRNNAQR.Q   |        | 3 | 2,5839 | 0,268 | -0,106 |
| 22 | P15924 DESP_HUMAN  | K.NTKIEVLEEE.L         |        | 2 | 2,5827 | 0,207 | 0,101  |
| 22 | Q07021 C1QBP_HUMAN | K.ALVLDCHYPEDE.V       |        | 2 | 2,5818 | 0,438 | -0,752 |
| 22 | Q9BRA2 TXD17_HUMAN | K.TIFAYFTGSK.D         |        | 2 | 2,5759 | 0,339 | 0,107  |
| 22 | Q9UMX1 SUFU_HUMAN  | K.VSILPDVVFDSD#PLH.-   | S481:  | 2 | 2,5756 | 0,309 | 0,151  |
| 22 | Q2Y0W8 S4A8_HUMAN  | K.HGQTVSPQSVPTTNLE.V   |        | 2 | 2,5739 | 0,295 | 0,144  |
| 22 | Q9NX58 LYAR_HUMAN  | E.QDQRPLHPVANPHAE.I    |        | 3 | 2,5733 | 0,097 | -0,107 |

|    |                    |                           |            |   |        |       |        |
|----|--------------------|---------------------------|------------|---|--------|-------|--------|
| 22 | Q15773 MLF2_HUMAN  | R.LAIQGPEDS#PSR.Q         | S238:      | 2 | 2,5733 | 0,329 | -0,181 |
| 22 | P46013 KI67_HUMAN  | K.AM*DTPKPAVSDE.K         |            | 2 | 2,5732 | 0,392 | -0,287 |
| 22 | O14974 MYPT1_HUMAN | R.LAYVAPTIPR.R            |            | 2 | 2,5732 | 0,314 | 0,111  |
| 22 | Q9UKV3 ACINU_HUMAN | K.SKS#PS#PPRLTE.D         | S386:S388: | 2 | 2,573  | 0,308 | -0,09  |
| 22 | P50851 LRBA_HUMAN  | E.LKAS#PNVEAPQPHR.H       | S1261:     | 2 | 2,5725 | 0,257 | -0,376 |
| 22 | Q9H2J4 PDCL3_HUMAN | K.KPIEDVLLSSVR.R          |            | 2 | 2,57   | 0,332 | 0,45   |
| 22 | Q15398 DLG7_HUMAN  | E.DVIHKFNLIKLEE.S         |            | 3 | 2,5694 | 0,153 | 0      |
| 22 | Q6IQ49 CA055_HUMAN | R.VVNTDHGS#PE.Q           | S278:      | 2 | 2,5663 | 0,32  | -0,323 |
| 22 | Q8N4N4 RN169_HUMAN | K.NNSYSLAFLAGK.L          |            | 2 | 2,5631 | 0,345 | -0,285 |
| 22 | Q96B36 AKTS1_HUMAN | E.AEDTQVFGDLRPRR.L        |            | 3 | 2,5621 | 0,248 | 0,343  |
| 22 | Q9NQS7 INCE_HUMAN  | R.IAQVS#PGPR.D            | S263:      | 2 | 2,5614 | 0,183 | 0,304  |
| 22 | P60903 S10AA_HUMAN | E.NQKDPLAVDK.I            |            | 2 | 2,56   | 0,205 | -0,757 |
| 22 | Q9Y4L1 HYOU1_HUMAN | K.LCQGLFFR.V              |            | 2 | 2,5597 | 0,217 | 0,234  |
| 22 | Q6IAA8 CK059_HUMAN | K.LLLDPSS#PPTK.A          | S27:       | 2 | 2,5566 | 0,174 | 0      |
| 22 | P30044 PRDX5_HUMAN | R.LLADPTGAFGKE.T          |            | 2 | 2,5538 | 0,35  | 0,3    |
| 22 | Q96A72 MGN2_HUMAN  | R.IIDDSEITKE.D            |            | 2 | 2,5534 | 0,305 | -0,525 |
| 22 | O75391 SPAG7_HUMAN | E.AAQQGPVVVS#PASDYKDK.Y   | S158:      | 3 | 2,5529 | 0,197 | -0,754 |
| 22 | Q6PGN9 PSRC1_HUMAN | R.LSLGPLSPEKLEE.I         |            | 2 | 2,5521 | 0,212 | -0,173 |
| 22 | O75400 PR40A_HUMAN | K.NRES#FQIFLDE.L          | S613:      | 2 | 2,55   | 0,194 | 0,248  |
| 22 | Q6NZI2 PTRF_HUMAN  | E.VKLPAKLS#ISK.S          | S167:      | 3 | 2,5493 | 0,226 | 0,217  |
| 22 | P11142 HSP7C_HUMAN | K.DNNLLGKFE.L             |            | 2 | 2,5486 | 0,275 | 0,465  |
| 22 | O60812 HNRCL_HUMAN | R.VFIGNLNTLVVK.K          |            | 2 | 2,5482 | 0,261 | 0,463  |
| 22 | Q12802 AKP13_HUMAN | E.VPANCSVLR.S             |            | 2 | 2,544  | 0,428 | -0,36  |
| 22 | P04264 K2C1_HUMAN  | K.YEELQITAGR.H            |            | 2 | 2,5438 | 0,241 | -0,414 |
| 22 | Q9UHB6 LIMA1_HUMAN | E.VQQPVHPKPLS#PDSR.A      | S362:      | 3 | 2,5437 | 0,141 | -0,207 |
| 22 | P38646 GRP75_HUMAN | E.DFDQALLR.H              |            | 2 | 2,5436 | 0,256 | 0      |
| 22 | Q92598 HS105_HUMAN | E.LNNTCEPVVTQPKPK.I       |            | 2 | 2,54   | 0,208 | -0,849 |
| 22 | P49736 MCM2_HUMAN  | R.RGNDPLTS#SPGR.S         | S26:       | 2 | 2,5395 | 0,245 | -0,821 |
| 22 | P35222 CTNB1_HUMAN | E.GVATYAAAVLFR.M          |            | 2 | 2,5392 | 0,322 | -0,098 |
| 22 | Q9UHD8 SEPT9_HUMAN | E.VLGHKT#PEPAPR.R         | T142:      | 3 | 2,5385 | 0,082 | 0,132  |
| 22 | P31939 PUR9_HUMAN  | E.QIDIGGVTLR.A            |            | 2 | 2,5346 | 0,335 | 0,103  |
| 22 | Q676U5 A16L1_HUMAN | R.S#VSSFPVQDNVDTHPGSGKE.V | S287:      | 3 | 2,5339 | 0,158 | 0      |
| 22 | P30038 AL4A1_HUMAN | K.VANEPVLAFTQGSPE.R       |            | 2 | 2,5335 | 0,149 | -0,313 |
| 22 | P35908 K22E_HUMAN  | R.NLDLDSIIAEVK.A          |            | 2 | 2,533  | 0,287 | -0,092 |
| 22 | P51991 ROA3_HUMAN  | E.DSVKPGAHLTVK.K          |            | 3 | 2,5308 | 0,176 | 1,095  |
| 22 | Q9NRP4 ACN9_HUMAN  | K.ACFGTFLPEEK.L           |            | 2 | 2,5294 | 0,39  | 0      |
| 22 | P55072 TERA_HUMAN  | K.LADDVDLEQVANE.T         |            | 2 | 2,5287 | 0,173 | 0,256  |
| 22 | Q92598 HS105_HUMAN | R.FVVQNVSAQK.D            |            | 2 | 2,5285 | 0,175 | 0      |
| 22 | Q6Y7W6 PERQ2_HUMAN | R.IFREEQNGEDE.D           |            | 2 | 2,5271 | 0,281 | -0,893 |

|    |                     |                           |       |   |        |       |        |
|----|---------------------|---------------------------|-------|---|--------|-------|--------|
| 22 | P13639 EF2_HUMAN    | E.EDHACIPIKK.S            |       | 2 | 2,5264 | 0,333 | -0,403 |
| 22 | P04406 G3P_HUMAN    | E.GLM*TTVHAITATQK.T       |       | 3 | 2,5235 | 0,272 | 0,553  |
| 22 | Q9NR30 DDX21_HUMAN  | R.SDAGLES#DTAM*KKGE.T     | S13:  | 3 | 2,5226 | 0,349 | -0,112 |
| 22 | Q96SU4 OSBL9_HUMAN  | R.LIDSSGSASVLTHSSSGNSLK.R |       | 3 | 2,5219 | 0,312 | -0,179 |
| 22 | Q9C0B5 ZDHC5_HUMAN  | R.GVGSPEPGPTAPYLGR.S      |       | 2 | 2,5213 | 0,312 | -0,235 |
| 22 | Q09666 AHNK_HUMAN   | K.VDVPDVPDVNIEGPAK.L      |       | 2 | 2,5212 | 0,159 | 1,233  |
| 22 | Q9NTK5 OLA1_HUMAN   | E.DGDIFFK.F               |       | 2 | 2,5198 | 0,275 | -0,192 |
| 22 | Q12797 ASPH_HUMAN   | R.LHHDTDDVTYQVYEE.Q       |       | 3 | 2,5196 | 0,103 | 0,196  |
| 22 | Q9Y4F1 FARP1_HUMAN  | K.VSAGEPGSHPS#PAPR.R      | S427: | 2 | 2,5194 | 0,322 | 0      |
| 22 | P61978 HNRPK_HUMAN  | R.GGDLM*AYDR.R            |       | 2 | 2,5169 | 0,264 | 0      |
| 22 | Q9HCG8 NCM_HUMAN    | R.DRDYFDYSR.S             |       | 3 | 2,5131 | 0,201 | 0,739  |
| 22 | Q6UN15 FIP1_HUMAN   | R.KPGADLSDYFNYPFNE.D      |       | 3 | 2,5131 | 0,174 | 0,498  |
| 22 | Q9H074 PAIP1_HUMAN  | K.APGFLQPPPLR.Q           |       | 2 | 2,5112 | 0,445 | -0,102 |
| 22 | Q9BUL5 PHF23_HUMAN  | R.RLGGPPKS#GEP.-          | S400: | 2 | 2,5094 | 0,318 | -0,208 |
| 22 | P46013 KI67_HUMAN   | K.LDLLGNLPGSK.R           |       | 2 | 2,5093 | 0,286 | 0,108  |
| 22 | Q09666 AHNK_HUMAN   | K.AKGEVDVDPKLE.G          |       | 2 | 2,5077 | 0,315 | 0      |
| 22 | P31946 1433B_HUMAN  | D.STLIM*QLLR.D            |       | 2 | 2,5065 | 0,2   | 0,224  |
| 22 | Q96PU5 NED4L_HUMAN  | R.LRSCS#VTDVAE.Q          | S342: | 2 | 2,5064 | 0,309 | 0,088  |
| 22 | P42684 ABL2_HUMAN   | E.NSASSLAPGFIR.G          |       | 2 | 2,5063 | 0,292 | 0      |
| 22 | Q6ZRV2 FA83H_HUMAN  | R.HLRPPQYVTR.E            |       | 3 | 2,5048 | 0,104 | 0,216  |
| 22 | Q9H0B6 KLC2_HUMAN   | R.ASS#LNLFLNK.S           | S582: | 2 | 2,5047 | 0,227 | 0,114  |
| 22 | Q7Z6Z7 HUWE1_HUMAN  | K.YICQKPSIQK.A            |       | 2 | 2,4984 | 0,282 | 0,289  |
| 22 | A4D1P6 WDR91_HUMAN  | R.VGFLSLLPQSK.K           |       | 2 | 2,4939 | 0,124 | -0,191 |
| 22 | Q8WXV6 Q8WXV6_HUMAN | R.KRT#SSEDNLYLAVLR.A      | T19:  | 2 | 2,4937 | 0,339 | -0,066 |
| 22 | P09132 SRP19_HUMAN  | R.FICIYPAYLNNK.K          |       | 2 | 2,49   | 0,317 | -0,161 |
| 22 | P38405 GNAL_HUMAN   | K.HYCYPHFTCAVDTE.N        |       | 2 | 2,4873 | 0,403 | 0,949  |
| 22 | P09211 GSTP1_HUMAN  | R.TLGLYGKDQQE.A           |       | 2 | 2,4864 | 0,359 | -0,682 |
| 22 | B0AZS1 B0AZS1_HUMAN | E.KFVSEDDRNSFTLK.L        |       | 2 | 2,4842 | 0,224 | 0,217  |
| 22 | Q15185 TEBP_HUMAN   | K.LTFSCLGSDNFK.H          |       | 2 | 2,4834 | 0,433 | -0,169 |
| 22 | P54652 HSP72_HUMAN  | K.STAGDTHLGGEDFDNR.M      |       | 3 | 2,4821 | 0,207 | 0,108  |
| 22 | Q9H4I2 ZHX3_HUMAN   | R.KVS#PIKINLK.N           | S723: | 2 | 2,4806 | 0,133 | 0,3    |
| 22 | Q9NRL2 BAZ1A_HUMAN  | K.KKDAIDPLLFK.Y           |       | 3 | 2,4801 | 0,157 | 0,355  |
| 22 | P19338 NUCL_HUMAN   | R.SISLYYTGEK.G            |       | 2 | 2,475  | 0,402 | -0,315 |
| 22 | O60504 VINEX_HUMAN  | R.QGIFPASYVQVSR.E         |       | 2 | 2,4749 | 0,393 | 0,168  |
| 22 | P54819 KAD2_HUMAN   | E.FNPPKEPM*KDDITGEPLIR.R  |       | 3 | 2,4741 | 0,305 | -0,083 |
| 22 | Q9HCG8 NCM_HUMAN    | R.DRDYFDYSR.S             |       | 2 | 2,4739 | 0,159 | -0,296 |
| 22 | O43615 TIM44_HUMAN  | K.GFLSGLLDNVK.Q           |       | 2 | 2,4668 | 0,288 | -0,21  |
| 22 | Q9UBF8 PI4KB_HUMAN  | E.SKEPVFIAAGDIR.R         |       | 2 | 2,4667 | 0,347 | -0,087 |
| 22 | O95425 SVIL_HUMAN   | R.ASDPAS#PHIGR.S          | S50:  | 2 | 2,4623 | 0,389 | -1,438 |

|    |                    |                              |        |   |        |       |        |
|----|--------------------|------------------------------|--------|---|--------|-------|--------|
| 22 | Q92598 HS105_HUMAN | K.KLM*SSNSTDLPLNIE.C         |        | 2 | 2,4621 | 0,307 | 0,364  |
| 22 | P22234 PUR6_HUMAN  | K.DQITAGNAAR.K               |        | 2 | 2,462  | 0,285 | 0,3    |
| 22 | P05387 RLA2_HUMAN  | E.DVIAQGIGK.L                |        | 2 | 2,4591 | 0,151 | -0,203 |
| 22 | P30041 PRDX6_HUMAN | K.LPFPIDDR.N                 |        | 2 | 2,4568 | 0,325 | 0,225  |
| 22 | Q969E8 TSR2_HUMAN  | E.M*ASCITQR.K                |        | 2 | 2,4561 | 0,253 | 0,31   |
| 22 | Q9BX68 HINT2_HUMAN | E.DQQLLGHLLLVAK.Q            |        | 3 | 2,4549 | 0,179 | 0,189  |
| 22 | P06748 NPM_HUMAN   | K.GPSSVEDIK.A                |        | 2 | 2,4547 | 0,318 | -0,262 |
| 22 | Q9C0C2 TB182_HUMAN | K.GDAHLRPTSLVQR.R            |        | 3 | 2,4533 | 0,241 | 0,189  |
| 22 | Q99700 ATX2_HUMAN  | R.QNSIGNTPSGPVLASPQAGIIPTE.A |        | 3 | 2,452  | 0,106 | -0,234 |
| 22 | Q16513 PKN2_HUMAN  | R.FQFNLQDFR.C                |        | 2 | 2,4516 | 0,208 | 0      |
| 22 | Q07157 ZO1_HUMAN   | K.SHS#LAQPPEFDSGVE.T         | S1579: | 2 | 2,4514 | 0,209 | -0,218 |
| 22 | P56537 IF6_HUMAN   | E.LSDTIPVVHASIAGCR.I         |        | 3 | 2,4511 | 0,188 | 0,216  |
| 22 | Q9H2D6 TARA_HUMAN  | E.LSPLTQAS#PQR.A             | S1955: | 2 | 2,4494 | 0,281 | 0      |
| 22 | Q4J6C6 PPCEL_HUMAN | E.ELKLDQPFIDCIR.V            |        | 3 | 2,4487 | 0,222 | 0,333  |
| 22 | Q15121 PEA15_HUMAN | K.DIIRQPSEEE.I               |        | 2 | 2,4484 | 0,141 | -0,602 |
| 22 | P34932 HSP74_HUMAN | K.LM*SANASDLPLSIE.C          |        | 2 | 2,4444 | 0,33  | 0,083  |
| 22 | P30622 CLIP1_HUMAN | K.TPTAVVAPVEK.T              |        | 2 | 2,4442 | 0,223 | 0,11   |
| 22 | P13861 KAP2_HUMAN  | R.QSLGHPPPEPGPDR.V           |        | 3 | 2,4438 | 0,353 | -0,246 |
| 22 | O43865 SAHH2_HUMAN | E.KYSFM*ATVTK.A              |        | 2 | 2,4422 | 0,313 | -0,307 |
| 22 | Q8IWA0 WDR75_HUMAN | K.VQDTSNTGLGEDIIHQLSK.S      |        | 3 | 2,4419 | 0,328 | 1,335  |
| 22 | Q8N3J3 CQ053_HUMAN | R.FTGSLPVNAGR.L              |        | 2 | 2,441  | 0,227 | 0,109  |
| 22 | Q8N5N7 RM50_HUMAN  | K.FNLLAHLADD.L               |        | 2 | 2,44   | 0,278 | 0      |
| 22 | Q15398 DLG7_HUMAN  | K.FNNLIKLEE.S                |        | 2 | 2,44   | 0,165 | -0,109 |
| 22 | P52594 NUPL_HUMAN  | K.GTPSQS#PVVGR.S             | S181:  | 2 | 2,4378 | 0,362 | -0,419 |
| 22 | P41250 SYG_HUMAN   | K.TSGHVDFADFM*VK.D           |        | 2 | 2,4374 | 0,148 | 0,229  |
| 22 | Q14669 TRIPC_HUMAN | E.RYLVVVRYGR.V               |        | 3 | 2,4369 | 0,091 | 0,664  |
| 22 | Q71U36 TBA1A_HUMAN | K.DVNAAIATIK.T               |        | 2 | 2,4362 | 0,126 | -0,48  |
| 22 | O95785 WIZ_HUMAN   | R.SPSDLHISPLAK.K             |        | 3 | 2,4358 | 0,253 | 0,434  |
| 22 | Q08378 GOGA3_HUMAN | R.SRRDS#ICSSVSLE.S           | S389:  | 2 | 2,4353 | 0,368 | 0,077  |
| 22 | Q71U36 TBA1A_HUMAN | R.GHYTIGKE.I                 |        | 2 | 2,4326 | 0,315 | -0,135 |
| 22 | Q9BR77 CCD77_HUMAN | K.KIQNLLALVGTDAGE.V          |        | 2 | 2,4325 | 0,293 | 0,079  |
| 22 | Q32MZ4 LRRF1_HUMAN | E.KHGIIINSE.I                |        | 2 | 2,4322 | 0,242 | -0,241 |
| 22 | P11047 LAMC1_HUMAN | E.ANDILNNLKDFDRR.V           |        | 3 | 2,4307 | 0,136 | -1,825 |
| 22 | Q4G0J3 LARP7_HUMAN | E.NM*DTSNTSISK.M             |        | 2 | 2,427  | 0,309 | -0,101 |
| 22 | O75410 TACC1_HUMAN | K.ISIVRPFSIE.T               |        | 2 | 2,4266 | 0,219 | -0,21  |
| 22 | P04637 P53_HUMAN   | R.ALPNNTSSS#PQPK.K           | S315:  | 2 | 2,4265 | 0,406 | 0      |
| 22 | Q9NYL2 MLTK_HUMAN  | R.SSS#PTQYGLTK.N             | S637:  | 2 | 2,4265 | 0,279 | -0,586 |
| 22 | P06576 ATPB_HUMAN  | R.FLSQPQVAE.V                |        | 2 | 2,4257 | 0,302 | 0,209  |
| 22 | P11310 ACADM_HUMAN | R.QREPGLGFSFE.F              |        | 2 | 2,4242 | 0,313 | 0      |

|    |                     |                            |              |   |        |       |        |
|----|---------------------|----------------------------|--------------|---|--------|-------|--------|
| 22 | Q15181 IPYR_HUMAN   | K.HTGCCGDNDPIDVCE.I        |              | 2 | 2,4222 | 0,244 | -0,07  |
| 22 | Q04721 NOTC2_HUMAN  | K.STM*PTSLPNLAKE.A         |              | 2 | 2,4218 | 0,365 | -0,347 |
| 22 | P46937 YAP1_HUMAN   | R.QAS#TDAGTAGALTPQHVR.A    | S109:        | 3 | 2,4218 | 0,117 | -0,393 |
| 22 | Q13242 SFRS9_HUMAN  | R.IYVGNLPTDVR.E            |              | 2 | 2,4176 | 0,268 | 0,098  |
| 22 | Q01081 U2AF1_HUMAN  | E.M*NVCNDLGDHLVGNVYVK.F    |              | 3 | 2,4134 | 0,185 | 0,266  |
| 22 | Q15811 ITSN1_HUMAN  | E.KQILNDQLK.Q              |              | 2 | 2,4129 | 0,138 | -0,776 |
| 22 | Q00536 PCK1_HUMAN   | R.LSLPADIRLPE.G            |              | 2 | 2,4127 | 0,292 | 0,1    |
| 22 | Q9NWB6 ARGL1_HUMAN  | E.RAS#SPDRIDIFGR.T         | S76:         | 3 | 2,4121 | 0,09  | 0,11   |
| 22 | Q9GZR7 DDX24_HUMAN  | E.LTDYQLVSPAK.N            |              | 2 | 2,4108 | 0,094 | -0,198 |
| 22 | Q9UPZ3 HPS5_HUMAN   | E.KIGTLHT#SPDLK.V          | T562:        | 3 | 2,4097 | 0,197 | 0,329  |
| 22 | P51991 ROA3_HUMAN   | E.DSVKPGAHLTVK.K           |              | 2 | 2,4093 | 0,265 | 0,292  |
| 22 | Q14166 TTL12_HUMAN  | R.RPAERS#SPGQTPEEGAQALAE.F | S15:         | 3 | 2,4087 | 0,306 | -0,566 |
| 22 | P12081 SYHC_HUMAN   | K.LKAQLGPDE.S              |              | 2 | 2,4073 | 0,255 | -0,188 |
| 22 | O95202 LETM1_HUMAN  | K.VNIDDLVK.V               |              | 2 | 2,4073 | 0,259 | 0,067  |
| 22 | Q15102 PA1B3_HUMAN  | R.VVVLGLLPR.G              |              | 2 | 2,4055 | 0,32  | 0,126  |
| 22 | O95229 ZWINT_HUMAN  | K.GLDPLASEDTSR.Q           |              | 2 | 2,4053 | 0,424 | 0      |
| 22 | Q8WYP5 AHTF1_HUMAN  | E.NLLDVIKDTR.S             |              | 2 | 2,4048 | 0,287 | 0      |
| 22 | O95071 UBR5_HUMAN   | E.DISYFGYPSFR.R            |              | 2 | 2,4047 | 0,394 | 0      |
| 22 | Q9NYF8 BCLF1_HUMAN  | R.IDIS#PSTLR.K             | S658:        | 2 | 2,4036 | 0,155 | 0,226  |
| 22 | Q14966 ZN638_HUMAN  | K.SKEEPLFPFNLDE.F          |              | 2 | 2,4025 | 0,301 | 0,078  |
| 22 | Q9Y2W1 TR150_HUMAN  | K.SPLQSVVVR.R              |              | 2 | 2,4008 | 0,303 | 0      |
| 22 | Q32MZ4 LRRF1_HUMAN  | R.RGS#GDTISISIDTE.A        | S120:        | 2 | 2,4008 | 0,192 | -0,258 |
| 22 | Q8IY81 RRMJ3_HUMAN  | E.GLALGAVIASSK.K           |              | 2 | 2,4001 | 0,376 | 0      |
| 22 | Q7RTP8 Q7RTP8_HUMAN | K.AAEDRFQE.R               |              | 2 | 2,4001 | 0,36  | -0,126 |
| 22 | Q9HCN4 GPN1_HUMAN   | K.DSLSPVLHPSDLILTR.G       |              | 3 | 2,3995 | 0,178 | 0,104  |
| 22 | P04406 G3P_HUMAN    | R.GALQNIIPASTGAAK.A        |              | 2 | 2,3991 | 0,271 | 0      |
| 22 | Q86YP4 P66A_HUMAN   | R.RPPS#PDVIVLSDNEQPSSPR.V  | S100:        | 3 | 2,3981 | 0,192 | 0,242  |
| 22 | Q9Y224 CN166_HUMAN  | E.AIVAVQAIADPK.T           |              | 2 | 2,3979 | 0,248 | 0      |
| 22 | Q9UKY7 CDV3_HUMAN   | K.TAPVQAPPAPVIVTE.T        |              | 2 | 2,3968 | 0,366 | -0,164 |
| 22 | P04843 RPN1_HUMAN   | R.LAHLGVQVK.G              |              | 2 | 2,3911 | 0,286 | -0,063 |
| 22 | P09110 THIK_HUMAN   | R.DCLIPM*GITSENVAE.R       |              | 2 | 2,3895 | 0,446 | 0,073  |
| 22 | Q86WR7 CJ047_HUMAN  | R.SRS#FTLDDE.S             | S43:         | 2 | 2,3876 | 0,273 | -0,318 |
| 22 | Q9UQ35 SRRM2_HUMAN  | K.AQT#PPGPSLSGSKS#PCPQEK.S | T1003:S1014: | 3 | 2,386  | 0,209 | -1,157 |
| 22 | Q4J6C6 PPCEL_HUMAN  | E.ELKLDQPFIDCIR.V          |              | 2 | 2,3833 | 0,366 | -0,667 |
| 22 | O43615 TIM44_HUMAN  | K.GFLSGLLDNVKQE.L          |              | 2 | 2,3809 | 0,101 | -0,172 |
| 22 | P46087 NOL1_HUMAN   | K.GPQSLFNAPR.G             |              | 2 | 2,3808 | 0,22  | 0,112  |
| 22 | P11171 41_HUMAN     | R.SLDGAAAVDSADR.S          |              | 2 | 2,3795 | 0,334 | -0,098 |
| 22 | Q9NYF8 BCLF1_HUMAN  | E.TQS#PEQVKSEK.L           | S496:        | 2 | 2,3792 | 0,304 | -0,091 |
| 22 | Q9P287 BCCIP_HUMAN  | E.LTDLLIQNHIGSVIK.Q        |              | 3 | 2,3782 | 0,253 | -0,204 |

|    |                     |                        |            |   |        |       |        |
|----|---------------------|------------------------|------------|---|--------|-------|--------|
| 22 | P08670 VIME_HUMAN   | R.DNLAEDIM*R.L         |            | 2 | 2,3744 | 0,229 | 0,112  |
| 22 | P82094 TMF1_HUMAN   | E.TKDIALEPK.E          |            | 2 | 2,3743 | 0,205 | 0,24   |
| 22 | Q15459 SF3A1_HUMAN  | R.RTDIFGVVEE.T         |            | 2 | 2,373  | 0,286 | 0,114  |
| 22 | Q16649 NFIL3_HUMAN  | K.LSS#PIDM*TSK.R       | S353:      | 2 | 2,3726 | 0,241 | 0,104  |
| 22 | P68104 EF1A1_HUMAN  | K.DGNASGTTLLE.A        |            | 2 | 2,371  | 0,268 | 0,34   |
| 22 | Q8WUA4 TF3C2_HUMAN  | R.AHFNAM*FQPSS#PTR.R   | S893:      | 3 | 2,3682 | 0,121 | -0,108 |
| 22 | P31150 GDIA_HUMAN   | E.CILSGIM*SVNGK.K      |            | 2 | 2,3669 | 0,377 | 0      |
| 22 | Q00610 CLH1_HUMAN   | K.DSLYKDAM*QYASE.S     |            | 2 | 2,3668 | 0,216 | -0,238 |
| 22 | Q562F6 SGOL2_HUMAN  | R.GAEDPGFIFNNE.Q       |            | 2 | 2,364  | 0,187 | -0,186 |
| 22 | Q5QE6 TDIF2_HUMAN   | K.KS#PIKASDLTK.F       | S381:      | 3 | 2,3635 | 0,316 | 0      |
| 22 | P52948 NUP98_HUMAN  | R.SLVGGLLQSK.F         |            | 2 | 2,3614 | 0,336 | 0,061  |
| 22 | P05455 LA_HUMAN     | K.FSGDLDDQTCRE.D       |            | 2 | 2,3591 | 0,212 | -0,93  |
| 22 | Q9H6Z4 RANB3_HUMAN  | E.EKPAIAPPVVFVQK.D     |            | 2 | 2,3584 | 0,382 | -0,155 |
| 22 | Q96FV9 THOC1_HUMAN  | R.DKPVGTGEQIE.V        |            | 2 | 2,3582 | 0,311 | 0      |
| 22 | P05198 IF2A_HUMAN   | R.GVFNVM*EPK.V         |            | 2 | 2,3575 | 0,195 | 0      |
| 22 | Q8N3U4 STAG2_HUMAN  | E.HHQTPLDYNR.R         |            | 3 | 2,3569 | 0,12  | 0,999  |
| 22 | P52272 HNRPM_HUMAN  | K.GCGVVKFESPE.V        |            | 2 | 2,3538 | 0,248 | 0,404  |
| 22 | O14744 ANM5_HUMAN   | K.CLLDRVPEEE.K         |            | 2 | 2,3514 | 0,24  | -0,775 |
| 22 | Q9NTJ3 SMC4_HUMAN   | R.TESPAT#AAETASEE.L    | T44:       | 2 | 2,3513 | 0,14  | -0,083 |
| 22 | Q96C90 PP14B_HUMAN  | E.AFISGLLDKIRGM*QK.L   |            | 3 | 2,3511 | 0,158 | 0,108  |
| 22 | Q96RG2 PASK_HUMAN   | R.LFLASLPGSTHSTAAE.L   |            | 2 | 2,3507 | 0,251 | -0,076 |
| 22 | O95239 KIF4A_HUMAN  | R.RRT#FS#LTEVR.G       | T799:S801: | 3 | 2,3493 | 0,225 | 0,257  |
| 22 | Q99549 MPP8_HUMAN   | E.KLM*PVSAQTPK.G       |            | 3 | 2,3485 | 0,141 | 0,677  |
| 22 | A9CQZ4 A9CQZ4_HUMAN | K.FCGM*FCPVEGSSE.N     |            | 2 | 2,3482 | 0,376 | -1,923 |
| 22 | O95817 BAG3_HUMAN   | R.GYISIPVIHE.Q         |            | 2 | 2,3474 | 0,214 | 0      |
| 22 | Q01968 OCRL_HUMAN   | K.DKPSVFGLLGFE.D       |            | 2 | 2,3426 | 0,361 | -0,262 |
| 22 | P46459 NSF_HUMAN    | R.LGANSGLHIIIFDE.I     |            | 2 | 2,3395 | 0,117 | 0,081  |
| 22 | Q14676 MDC1_HUMAN   | E.LQISTSTDQPV#PKPTSR.T | T1343:     | 3 | 2,3379 | 0,209 | -0,719 |
| 22 | Q9UQ35 SRRM2_HUMAN  | E.SSLVFKDTLR.T         |            | 2 | 2,3372 | 0,197 | -0,628 |
| 22 | Q99618 CDCA3_HUMAN  | K.TSSGDPSPPLVK.Q       |            | 2 | 2,3363 | 0,306 | -0,515 |
| 22 | Q96PZ0 PUS7_HUMAN   | E.DVPRPPDTVSTGK.G      |            | 2 | 2,334  | 0,142 | -0,624 |
| 22 | Q8TF01 SFR18_HUMAN  | K.ATEDAEGGDGPRLPQR.S   |            | 3 | 2,3335 | 0,225 | -0,329 |
| 22 | P46939 UTRO_HUMAN   | K.NIKDQLDKLGE.Q        |            | 2 | 2,3314 | 0,17  | -0,192 |
| 22 | Q8NI27 THOC2_HUMAN  | K.TPVSGSLKS#PVPR.S     | S1278:     | 2 | 2,3296 | 0,143 | -0,434 |
| 22 | O14776 TCRG1_HUMAN  | R.YLVLDVPE.E           |            | 2 | 2,3283 | 0,192 | 0      |
| 22 | Q99618 CDCA3_HUMAN  | K.HAQDSDPRS#PTLGIAR.T  | S68:       | 2 | 2,3274 | 0,459 | -0,135 |
| 22 | P12277 KCRB_HUMAN   | K.DLFDPIEDR.H          |            | 2 | 2,3247 | 0,277 | 0,099  |
| 22 | O15067 PUR4_HUMAN   | R.CPACFVGTITGDRR.I     |            | 3 | 2,3239 | 0,172 | 0,454  |
| 22 | Q969H8 CS010_HUMAN  | K.SYLYFTQFK.A          |            | 2 | 2,3217 | 0,266 | 0      |

|    |                     |                             |        |   |        |       |        |
|----|---------------------|-----------------------------|--------|---|--------|-------|--------|
| 22 | P04083 ANXA1_HUMAN  | E.ATIIDILTK.R               |        | 2 | 2,3216 | 0,224 | -0,803 |
| 22 | P10636 TAU_HUMAN    | E.DHAGTYGLGDR.K             |        | 2 | 2,3212 | 0,263 | -0,63  |
| 22 | Q99959 PKP2_HUMAN   | R.GTAQYSSQKS#VEE.R          | S135:  | 2 | 2,3188 | 0,203 | -0,327 |
| 22 | P18206 VINC_HUMAN   | R.ALASQLQDSLK.D             |        | 2 | 2,3171 | 0,335 | -0,831 |
| 22 | Q8WXE1 ATRIP_HUMAN  | R.KNPSVVIKPE.A              |        | 2 | 2,3124 | 0,192 | -0,439 |
| 22 | P40222 TXLNA_HUMAN  | R.RPEGPGAQAPS#SPRVTE.A      | S514:  | 2 | 2,3075 | 0,149 | -0,336 |
| 22 | P35613 BASI_HUMAN   | E.YSCVFLPEPM*GTANIQLHGPPR.V |        | 3 | 2,3067 | 0,159 | -0,073 |
| 22 | P14678 RSMB_HUMAN   | R.VLGLVLLR.G                |        | 2 | 2,3056 | 0,279 | 0,553  |
| 22 | P62258 1433E_HUMAN  | R.IISSIEQKEE.N              |        | 2 | 2,3032 | 0,257 | -0,311 |
| 22 | Q0IIM8 TBC8B_HUMAN  | K.GFSGTVCGSGGPSEE.K         |        | 2 | 2,3031 | 0,295 | 0,769  |
| 22 | O14908 GIPC1_HUMAN  | R.GPATVEDLPSAFE.E           |        | 2 | 2,3016 | 0,193 | 0      |
| 22 | Q9UKV3 ACINU_HUMAN  | K.FLCADYAEQDE.L             |        | 2 | 2,3008 | 0,124 | 0,09   |
| 22 | P30101 PDIA3_HUMAN  | K.QAGPASVPLRTEEE.F          |        | 2 | 2,2997 | 0,399 | -0,082 |
| 22 | P49591 SYSC_HUMAN   | K.GSEKSDDNSYDE.K            |        | 2 | 2,2988 | 0,272 | -0,453 |
| 22 | O43678 NDUA2_HUMAN  | K.ANPDLPIRE.C               |        | 2 | 2,2985 | 0,323 | 0      |
| 22 | Q6ZSZ5 ARHGI_HUMAN  | R.SLS#PILPGR.H              | S1103: | 2 | 2,2983 | 0,32  | 0,06   |
| 22 | O95425 SVIL_HUMAN   | E.SSSTFSFSGR.D              |        | 2 | 2,2943 | 0,303 | 0,23   |
| 22 | Q6NYC8 PHTNS_HUMAN  | E.ILVGGYLR.L                |        | 2 | 2,2927 | 0,154 | 0,243  |
| 22 | Q56NI9 ESCO2_HUMAN  | K.CDSLLHFTE.N               |        | 2 | 2,2923 | 0,304 | 0,217  |
| 22 | O95433 AHSA1_HUMAN  | K.TLFLAVQVQNEE.G            |        | 2 | 2,2902 | 0,173 | 0,088  |
| 22 | Q05524 ENO1B_HUMAN  | E.KGVPLYR.H                 |        | 2 | 2,2894 | 0,25  | -0,439 |
| 22 | Q7KZ85 SPT6H_HUMAN  | K.KLPGYTDAALQE.A            |        | 2 | 2,2887 | 0,154 | 0,093  |
| 22 | Q13242 SFRS9_HUMAN  | R.GSPHYFSPFRPY.-            |        | 2 | 2,2885 | 0,362 | -0,168 |
| 22 | Q9UNZ2 NSF1C_HUMAN  | R.SGQQIVGPPR.K              |        | 2 | 2,2882 | 0,179 | -0,47  |
| 22 | Q9UQ35 SRRM2_HUMAN  | K.FSPFPVQDRPE.S             |        | 2 | 2,2873 | 0,226 | 0      |
| 22 | Q96H04 Q96H04_HUMAN | K.KITPNVTFCDE.N             |        | 2 | 2,2857 | 0,206 | 0,092  |
| 22 | P48643 TCPE_HUMAN   | K.IAILTCPFEPKPK.T           |        | 2 | 2,2851 | 0,102 | -0,076 |
| 22 | Q15019 SEPT2_HUMAN  | R.TM*LITHM*QDLQE.V          |        | 2 | 2,2811 | 0,174 | -0,818 |
| 22 | Q6ZSR9 YJ005_HUMAN  | R.HYS#PEDEPSPE.A            | S294:  | 2 | 2,2805 | 0,262 | -0,536 |
| 22 | Q86VP6 CAND1_HUMAN  | R.AVAALLTIPE.A              |        | 2 | 2,2796 | 0,16  | -0,244 |
| 22 | P49327 FAS_HUMAN    | K.DTVTISGPQAPVFE.F          |        | 2 | 2,2795 | 0,115 | -0,167 |
| 22 | Q09666 AHNK_HUMAN   | K.GEVDVDVPKLE.G             |        | 2 | 2,2768 | 0,232 | 0      |
| 22 | Q8IY37 DHX37_HUMAN  | E.DSIIGVTEPR.R              |        | 2 | 2,2739 | 0,322 | 0,224  |
| 22 | Q147X3 MAK3_HUMAN   | E.VAATTATPDGGPR.A           |        | 2 | 2,2714 | 0,388 | -0,101 |
| 22 | Q05524 ENO1B_HUMAN  | K.DATNVGDE.G                |        | 2 | 2,27   | 0,102 | 0,817  |
| 22 | Q8NCN4 RN169_HUMAN  | R.VLS#PLIIK.S               | S403:  | 2 | 2,2697 | 0,178 | 0,127  |
| 22 | P98175 RBM10_HUMAN  | K.LASDDRPS#PPR.G            | S722:  | 2 | 2,2696 | 0,185 | -0,189 |
| 22 | O15145 ARPC3_HUMAN  | K.LIGNM*ALLPIR.S            |        | 2 | 2,2695 | 0,138 | -0,099 |
| 22 | P50990 TCPQ_HUMAN   | R.AVDDGVNTFK.V              |        | 2 | 2,2684 | 0,395 | 0,114  |



|    |                      |                          |        |   |        |       |        |
|----|----------------------|--------------------------|--------|---|--------|-------|--------|
| 22 | Q92922 SMRC1_HUMAN   | R.SVDLGEDNVTE.Q          |        | 2 | 2,2683 | 0,312 | 0      |
| 22 | Q7Z6Z7 HUWE1_HUMAN   | K.ADGTATAPPPR.S          |        | 2 | 2,2682 | 0,468 | 0      |
| 22 | Q96I24 FUBP3_HUMAN   | K.RLLGQIVDR.C            |        | 2 | 2,2667 | 0,179 | 0,342  |
| 22 | Q9NY61 AATF_HUMAN    | K.ALLTTNQLPQPD.V         |        | 2 | 2,2648 | 0,229 | 0,186  |
| 22 | P49189 AL9A1_HUMAN   | R.M*GPLINRPHLE.R         |        | 2 | 2,2646 | 0,29  | -0,377 |
| 22 | Q2M2I8 AAK1_HUMAN    | K.VQTTTPPAVQGQK.V        |        | 2 | 2,2641 | 0,187 | -0,09  |
| 22 | Q14103 HNRPD_HUMAN   | R.GFGFVLFKE.S            |        | 2 | 2,2621 | 0,335 | 0,351  |
| 22 | Q9NYL2 MLTK_HUMAN    | K.YQQITPVNQSR.S          |        | 2 | 2,2617 | 0,268 | -0,549 |
| 22 | P82650 RT22_HUMAN    | K.ILTPPIFKEE.N           |        | 2 | 2,2596 | 0,169 | 0,101  |
| 22 | Q9UKV3 ACINU_HUMAN   | K.ASLVALPEQTASEEE.T      |        | 2 | 2,2583 | 0,111 | -0,465 |
| 22 | P78356 PI42B_HUMAN   | E.LSNVPVPVM*LM*PDDFK.A   |        | 2 | 2,256  | 0,125 | 0      |
| 22 | O95684 FR1OP_HUMAN   | K.SSLHLLSHE.T            |        | 2 | 2,2556 | 0,141 | 0      |
| 22 | Q12888 TP53B_HUMAN   | R.TDVGAGALR.R            |        | 2 | 2,2534 | 0,257 | 0,071  |
| 22 | P37837 TALDO_HUMAN   | K.FAADAVKLE.R            |        | 2 | 2,2529 | 0,254 | 0,127  |
| 22 | P49366 DHYS_HUMAN    | E.KKLEPLSQDE.D           |        | 2 | 2,2514 | 0,138 | -0,411 |
| 22 | Q7Z6E9 RBBP6_HUMAN   | E.IVKPS#PK.R             | S1179: | 2 | 2,2501 | 0,177 | 0,431  |
| 22 | P07602 SAP_HUMAN     | E.KEILDAFDK.M            |        | 2 | 2,2461 | 0,1   | -0,226 |
| 22 | Q9Y2W1 TR150_HUMAN   | R.IDIS#PSTFR.K           | S682:  | 2 | 2,2439 | 0,185 | 0,109  |
| 22 | Q9Y2H0 DLGP4_HUMAN   | R.NLS#YGDNSDPALE.A       | S760:  | 2 | 2,2436 | 0,176 | 0,248  |
| 22 | ##Q9BV94 EDEM2_HUMAN | K.SRS#RKLSYFE.R          | S68:   | 2 | 2,2425 | 0,136 | -1,984 |
| 22 | O15533 TPSN_HUMAN    | R.QGPGEPppRPDLDP.E.L     |        | 2 | 2,242  | 0,273 | -0,229 |
| 22 | Q99536 VAT1_HUMAN    | K.VLLVPGPEKEN.-          |        | 2 | 2,2398 | 0,243 | -0,102 |
| 22 | Q99747 SNAG_HUMAN    | K.LGLSLVPPGGGIK.K        |        | 2 | 2,2397 | 0,105 | 0,202  |
| 22 | O60927 PP1RB_HUMAN   | K.CCCIEYKPR.A            |        | 2 | 2,2396 | 0,381 | 0,285  |
| 22 | P22626 ROA2_HUMAN    | R.GGGGNFGPGGSNFR.G       |        | 2 | 2,238  | 0,333 | -0,089 |
| 22 | Q9UQ80 PA2G4_HUMAN   | K.SDQDYILKE.G            |        | 2 | 2,235  | 0,175 | 0,11   |
| 22 | Q8NBJ4 GOLM1_HUMAN   | R.DTINLLDQR.E            |        | 2 | 2,2348 | 0,152 | 0,336  |
| 22 | P78347 GTF2I_HUMAN   | E.LVISYLPPGMASK.I        |        | 2 | 2,2343 | 0,241 | 0      |
| 22 | Q9UHY1 NRBP_HUMAN    | R.HLSCDLM*PNENIPE.L      |        | 2 | 2,2304 | 0,171 | 0,29   |
| 22 | Q70E73 RAPH1_HUMAN   | K.RPSVDSLVS.K.F          |        | 2 | 2,2287 | 0,283 | -0,224 |
| 22 | P08670 VIME_HUMAN    | K.SRLGDLYEEE.M           |        | 2 | 2,227  | 0,376 | -0,202 |
| 22 | O14733 MP2K7_HUMAN   | R.HM*LGLPSTLFTPR.S       |        | 2 | 2,2245 | 0,197 | -0,082 |
| 22 | Q13200 PSMD2_HUMAN   | R.FAADIISVLAM*TM*SGERE.C |        | 2 | 2,2231 | 0,428 | 0,124  |
| 22 | Q14669 TRIPC_HUMAN   | E.RYLVVR.G               |        | 2 | 2,223  | 0,259 | -0,681 |
| 22 | Q13435 SF3B2_HUMAN   | E.KKPGDLSDE.L            |        | 2 | 2,2216 | 0,194 | -0,123 |
| 22 | O15226 NKRF_HUMAN    | E.DNIGNQLLR.K            |        | 2 | 2,2212 | 0,192 | 0,117  |
| 22 | Q15418 KS6A1_HUMAN   | R.KLPST#TL.-             | T733:  | 2 | 2,2207 | 0,298 | 0,508  |
| 22 | P60660 MYL6_HUMAN    | R.HVLVTLGEK.M            |        | 2 | 2,2171 | 0,323 | -0,184 |
| 22 | Q96T37 RBM15_HUMAN   | R.SLS#PGGAALGYR.D        | S294:  | 2 | 2,2156 | 0,34  | 0,099  |

|    |                    |                     |       |   |        |       |        |
|----|--------------------|---------------------|-------|---|--------|-------|--------|
| 22 | Q9NTJ3 SMC4_HUMAN  | R.TES#PATAAETASEE.L | S41:  | 2 | 2,2145 | 0,091 | 0,497  |
| 22 | Q9Y2W2 WBP11_HUMAN | E.LTPLQAM*M*LR.M    |       | 2 | 2,213  | 0,208 | 0,101  |
| 22 | Q13428 TCOF_HUMAN  | K.TVANLLSGK.S       |       | 2 | 2,2112 | 0,379 | -1,081 |
| 22 | Q09666 AHNK_HUMAN  | K.VDIDVPDVNIEGPAK.L |       | 2 | 2,2103 | 0,102 | -0,072 |
| 22 | Q13428 TCOF_HUMAN  | K.VGDVTPQVK.G       |       | 2 | 2,209  | 0,223 | -0,517 |
| 22 | P21675 TAF1_HUMAN  | E.DGSGFDYGFK.L      |       | 2 | 2,2078 | 0,127 | 0      |
| 22 | Q09666 AHNK_HUMAN  | D.VDLNLKGP.K.L      |       | 2 | 2,2071 | 0,253 | 0,062  |
| 22 | P17980 PRS6A_HUMAN | R.VDILDALLR.S       |       | 2 | 2,207  | 0,11  | 0      |
| 22 | Q8TDD1 DDX54_HUMAN | E.IQAEDDAR.A        |       | 2 | 2,2054 | 0,157 | -0,199 |
| 22 | Q9NW13 RBM28_HUMAN | R.GFGYVTFSM*LE.D    |       | 2 | 2,2022 | 0,118 | -0,289 |
| 22 | P21333 FLNA_HUMAN  | K.IQQNTFTR.W        |       | 2 | 2,2019 | 0,151 | -1,089 |
| 22 | Q58FG0 HS905_HUMAN | K.HIYYITGETK.D      |       | 2 | 2,2009 | 0,223 | 0      |
| 22 | Q9C0C2 TB182_HUMAN | K.VSAPGVLTAQDR.V    |       | 2 | 2,2008 | 0,411 | 0,402  |
| 22 | Q8IZ21 PHAR4_HUMAN | R.SS#SPVQVEEPVR.L   | S117: | 2 | 2,2006 | 0,103 | 0,24   |
| 22 | O60229 KALRN_HUMAN | K.LVNASVAFYK.T      |       | 2 | 2,2003 | 0,347 | -0,219 |
| 22 | Q58WW2 IQWD1_HUMAN | R.NTITVPASFM*LR.M   |       | 2 | 2,2003 | 0,31  | -0,625 |
| 22 | O14974 MYPT1_HUMAN | R.LSSSLDNKE.K       |       | 2 | 2,1993 | 0,142 | -0,061 |
| 22 | Q13428 TCOF_HUMAN  | E.KTGLAVTVGQAK.S    |       | 2 | 2,1991 | 0,284 | -0,832 |
| 22 | Q8NCP5 ZBT44_HUMAN | K.TTLPLGTEEDVR.V    |       | 2 | 2,1974 | 0,509 | -0,183 |
| 22 | Q96JM3 ZN828_HUMAN | K.TSPASLDFPE.S      |       | 2 | 2,1967 | 0,184 | 0,573  |
| 22 | P05362 ICAM1_HUMAN | E.VTTTTLVR.R        |       | 2 | 2,1952 | 0,312 | 0,755  |
| 22 | Q15057 CENB2_HUMAN | K.DFSSDDSKLE.Y      |       | 2 | 2,1935 | 0,267 | -0,213 |
| 22 | P02768 ALBU_HUMAN  | K.YICENQDSISSK.L    |       | 2 | 2,1933 | 0,094 | -0,169 |
| 22 | Q13428 TCOF_HUMAN  | R.GPASVPSVGK.A      |       | 2 | 2,1915 | 0,407 | 0,339  |
| 22 | Q9P0K7 RAI14_HUMAN | E.NAGIQSLLSK.I      |       | 2 | 2,1904 | 0,24  | -1,066 |
| 22 | O15372 EIF3H_HUMAN | K.QVQIDGLVVLK.I     |       | 2 | 2,1904 | 0,172 | 0,201  |
| 22 | P35251 RFC1_HUMAN  | E.AHLTPYSLQAIK.A    |       | 2 | 2,1892 | 0,308 | -0,091 |
| 22 | Q9NYF8 BCLF1_HUMAN | E.TQS#PEQVK.S       | S496: | 2 | 2,1838 | 0,119 | 0,122  |
| 22 | P07602 SAP_HUMAN   | K.KLVGYLDR.N        |       | 2 | 2,1836 | 0,112 | -0,063 |
| 22 | Q6Q0C0 TRAF7_HUMAN | E.TTFGPAFSAVTTITK.A |       | 2 | 2,1835 | 0,153 | 0,079  |
| 22 | P29401 TKT_HUMAN   | R.IIALDGDTK.N       |       | 2 | 2,1833 | 0,268 | -0,129 |
| 22 | Q14103 HNRPD_HUMAN | R.GFCFITFKE.E       |       | 2 | 2,1796 | 0,145 | -0,106 |
| 22 | Q9Y266 NUDC_HUMAN  | R.QKSM*GLPTSDE.Q    |       | 2 | 2,1769 | 0,226 | -1,009 |
| 22 | P54709 AT1B3_HUMAN | K.FLKPYTLEE.Q       |       | 2 | 2,1768 | 0,098 | 0,107  |
| 22 | Q05682 CALD1_HUMAN | E.DGLSDDKPKFK.C     |       | 2 | 2,1727 | 0,232 | -0,488 |
| 22 | P62081 RS7_HUMAN   | E.DLVFPSEIVGK.R     |       | 2 | 2,1704 | 0,128 | 0,101  |
| 22 | P13639 EF2_HUMAN   | K.KSDPVVSYR.E       |       | 2 | 2,17   | 0,153 | 0,232  |
| 22 | O95400 CD2B2_HUMAN | E.DEIIVPK.K         |       | 2 | 2,169  | 0,101 | 0,6    |
| 22 | Q9BT78 CSN4_HUMAN  | R.M*LATLFKDE.R      |       | 2 | 2,166  | 0,319 | 0      |

|    |                    |                      |        |   |        |       |        |
|----|--------------------|----------------------|--------|---|--------|-------|--------|
| 22 | O15067 PUR4_HUMAN  | R.IVLVDDRECPVR.R     |        | 2 | 2,1659 | 0,21  | -0,166 |
| 22 | O60256 KPRB_HUMAN  | R.SVAAIHPSLE.I       |        | 2 | 2,1659 | 0,194 | 0,119  |
| 22 | Q96JM3 ZN828_HUMAN | R.KPALFPEPAK.T       |        | 2 | 2,1648 | 0,279 | -0,333 |
| 22 | Q0VDF9 HSP7E_HUMAN | R.DILAVLTM*K.R       |        | 2 | 2,1638 | 0,094 | 0,06   |
| 22 | P37802 TAGL2_HUMAN | R.NFSDNQLQE.G        |        | 2 | 2,1631 | 0,134 | -0,223 |
| 22 | Q7Z589 EMSY_HUMAN  | R.HSPES#PSIAVVE.S    | S821:  | 2 | 2,1615 | 0,154 | -0,092 |
| 22 | Q58FF7 H90B3_HUMAN | D.NSTM*GYM*M*AK.K    |        | 2 | 2,1602 | 0,429 | -0,206 |
| 22 | Q29RF7 PDS5A_HUMAN | R.IISVTPVK.N         |        | 2 | 2,1592 | 0,1   | 0      |
| 22 | P13797 PLST_HUMAN  | K.KLTPFIIQE.N        |        | 2 | 2,1585 | 0,145 | 0      |
| 22 | P05023 AT1A1_HUMAN | R.LNIPVSQVNPR.D      |        | 2 | 2,1584 | 0,217 | -0,592 |
| 22 | P25440 BRD2_HUMAN  | R.IRKPS#LLYE.G       | S37:   | 2 | 2,1528 | 0,167 | 0      |
| 22 | P38571 LICH_HUMAN  | E.DGYILCLNR.I        |        | 2 | 2,1494 | 0,226 | 0,326  |
| 22 | P60983 GMFB_HUMAN  | R.LVVLDEELE.G        |        | 2 | 2,1492 | 0,105 | 0,115  |
| 22 | Q9UIG0 BAZ1B_HUMAN | K.IISNVPADSLIR.T     |        | 2 | 2,1451 | 0,318 | 0      |
| 22 | Q9NQZ2 SAS10_HUMAN | K.LYYDTDYGSK.S       |        | 2 | 2,1435 | 0,213 | -0,1   |
| 22 | Q9UGU5 HM2L1_HUMAN | E.TLTLREPDGLK.M      |        | 2 | 2,1389 | 0,111 | 0,098  |
| 22 | Q9Y4B5 K0802_HUMAN | E.NHALLSNIQR.C       |        | 2 | 2,1373 | 0,319 | -0,105 |
| 22 | P05783 K1C18_HUMAN | R.KVIDDTNITR.L       |        | 2 | 2,1358 | 0,086 | 0,104  |
| 22 | Q9Y3T9 NOC2L_HUMAN | K.KNSVPVTVAM*VE.R    |        | 2 | 2,1348 | 0,238 | -0,473 |
| 22 | P27694 RFA1_HUMAN  | K.DSLVDIIGICK.S      |        | 2 | 2,1342 | 0,413 | -0,297 |
| 22 | Q86YS7 K0528_HUMAN | E.IIGSPIPEPR.Q       |        | 2 | 2,134  | 0,298 | -0,226 |
| 22 | Q16718 NDUA5_HUMAN | R.KYTEQITNE.K        |        | 2 | 2,1326 | 0,207 | -0,325 |
| 22 | P34932 HSP74_HUMAN | K.QSLTM*DPVVK.S      |        | 2 | 2,1298 | 0,082 | -0,215 |
| 22 | O95425 SVIL_HUMAN  | R.DSSFTEVPR.S        |        | 2 | 2,1215 | 0,293 | 0,235  |
| 22 | Q8WWQ0 PHIP_HUMAN  | E.DTS#LTFGTSSR.G     | S1796: | 2 | 2,1191 | 0,177 | -0,292 |
| 22 | O75694 NU155_HUMAN | K.HGEPEEDIVGLQAFQE.R |        | 2 | 2,1178 | 0,088 | 0,475  |
| 22 | Q9H6T3 RPAP3_HUMAN | R.IKSY#DYE.A         | Y88:   | 2 | 2,1134 | 0,121 | -0,245 |
| 22 | Q15003 CND2_HUMAN  | R.KAPLNIPGT#PVLE.D   | T49:   | 2 | 2,1087 | 0,173 | -0,171 |
| 22 | P42285 SK2L2_HUMAN | E.GTDEPIFGK.K        |        | 2 | 2,1062 | 0,321 | 0,316  |
| 22 | Q9Y5K6 CD2AP_HUMAN | K.SVDFDSLTVR.T       |        | 2 | 2,1041 | 0,114 | 0,75   |
| 22 | Q96T23 RSF1_HUMAN  | K.AQIDPVLLK.N        |        | 2 | 2,1038 | 0,303 | 0      |
| 22 | Q13200 PSMD2_HUMAN | K.DTSLYRPALEE.L      |        | 2 | 2,1035 | 0,178 | -0,754 |
| 22 | P05783 K1C18_HUMAN | K.VIDDTNITR.L        |        | 2 | 2,1029 | 0,27  | -0,233 |
| 22 | O95785 WIZ_HUMAN   | K.TPLALAGSPTPK.N     |        | 2 | 2,1027 | 0,325 | -0,106 |
| 22 | P26358 DNMT1_HUMAN | R.KEPVDEDLYPE.H      |        | 2 | 2,1009 | 0,145 | 0,183  |
| 22 | Q9ULU4 PKCB1_HUMAN | K.LNFDM*TASPK.I      |        | 2 | 2,0997 | 0,18  | -0,856 |
| 22 | Q02952 AKA12_HUMAN | E.ALICVGSSK.K        |        | 2 | 2,0975 | 0,304 | -0,261 |
| 22 | Q9BY89 K1671_HUMAN | R.ERPVLGGVE.Q        |        | 2 | 2,0944 | 0,251 | -0,338 |
| 22 | Q9Y2W2 WBP11_HUMAN | E.LTPLQAMM*LR.M      |        | 2 | 2,0933 | 0,318 | 0,103  |

|    |                     |                        |        |   |        |       |        |
|----|---------------------|------------------------|--------|---|--------|-------|--------|
| 22 | O95433 AHSA1_HUMAN  | K.TLFLAVQVQNE.E        |        | 2 | 2,0901 | 0,096 | 0      |
| 22 | O43719 HTSF1_HUMAN  | R.RS#DSVSASE.R         | S385:  | 2 | 2,0899 | 0,132 | 0,06   |
| 22 | Q13523 PRP4B_HUMAN  | R.TKLDDLALLE.D         |        | 2 | 2,0837 | 0,136 | 0      |
| 22 | Q58FF7 H90B3_HUMAN  | K.HFSVEGQLE.F          |        | 2 | 2,0826 | 0,112 | -0,35  |
| 22 | P51452 DUS3_HUMAN   | K.DSGITYLGIK.A         |        | 2 | 2,0819 | 0,305 | 0,457  |
| 22 | Q14677 EPN4_HUMAN   | K.SAFPFSDKLGE.L        |        | 2 | 2,0805 | 0,303 | -0,611 |
| 22 | P42684 ABL2_HUMAN   | R.GAQASSGS#PALPR.K     | S620:  | 2 | 2,0797 | 0,193 | -0,095 |
| 22 | Q15542 TAF5_HUMAN   | K.VFFGLLKEPE.I         |        | 2 | 2,0763 | 0,085 | 0,207  |
| 22 | P31350 RIR2_HUMAN   | R.FVIFPIEYHD.I         |        | 2 | 2,0762 | 0,178 | -0,191 |
| 22 | P07602 SAP_HUMAN    | K.LVGYLDR.N            |        | 2 | 2,0753 | 0,344 | 0,511  |
| 22 | Q9BYP7 WNK3_HUMAN   | R.FCINQTI.R.N          |        | 2 | 2,0742 | 0,244 | -0,464 |
| 22 | Q8ND56 LS14A_HUMAN  | R.S#PVSTRPLPSASQK.A    | S216:  | 2 | 2,073  | 0,283 | -0,397 |
| 22 | Q9Y5U2 TSSC4_HUMAN  | R.VPPVPDYVAHPE.R       |        | 2 | 2,0727 | 0,185 | -0,185 |
| 22 | Q14341 Q14341_HUMAN | E.STVSSVQGS.R.-        |        | 2 | 2,0718 | 0,335 | 0,484  |
| 22 | Q6T4R5 NHS_HUMAN    | E.STLTTAALS#PSK.I      | S1155: | 2 | 2,0713 | 0,277 | -0,097 |
| 22 | Q14004 CD2L5_HUMAN  | R.CVDKFDIIGIIGE.G      |        | 2 | 2,0677 | 0,132 | 0      |
| 22 | P23588 IF4B_HUMAN   | K.VAPAQPSEEGPGR.K      |        | 2 | 2,0672 | 0,361 | -0,188 |
| 22 | Q9BQQ3 GR65_HUMAN   | R.IPTQPPSYHK.K         |        | 2 | 2,0666 | 0,199 | -0,209 |
| 22 | Q96JM3 ZN828_HUMAN  | R.KTS#PASLDFPE.S       | S459:  | 2 | 2,0664 | 0,232 | -0,096 |
| 22 | P27824 CALX_HUMAN   | K.THLYTLILNPDNSFE.I    |        | 2 | 2,0648 | 0,301 | 0      |
| 22 | Q9Y3E2 BOLA1_HUMAN  | R.LVHAALAE.L           |        | 2 | 2,064  | 0,19  | 0,192  |
| 22 | Q8TEW0 PAR3_HUMAN   | R.ELNAEPSQM*QIPK.E     |        | 2 | 2,0626 | 0,119 | -0,65  |
| 22 | P55010 IF5_HUMAN    | R.VKAEPFIK.W           |        | 2 | 2,0602 | 0,107 | 0,196  |
| 22 | P40222 TXLNA_HUMAN  | K.QQLALYTEKFEE.F       |        | 2 | 2,0598 | 0,238 | 0,244  |
| 22 | Q96C90 PP14B_HUMAN  | E.AFISGLLDKIRGM*QK.L   |        | 2 | 2,0597 | 0,226 | -0,577 |
| 22 | Q96RY5 CRML_HUMAN   | R.LAQQLREE.G           |        | 2 | 2,0577 | 0,117 | -0,247 |
| 22 | Q86X29 LSR_HUMAN    | R.GPALTPIRDEE.W        |        | 2 | 2,0541 | 0,345 | -0,407 |
| 22 | Q14160 LAP4_HUMAN   | R.GGGLRLPLLPES#PGPLR.Q | S853:  | 2 | 2,0535 | 0,267 | -0,064 |
| 22 | P49792 RBP2_HUMAN   | K.LPPTFFCYK.N          |        | 2 | 2,0528 | 0,163 | 0      |
| 22 | Q8IU81 I2BP1_HUMAN  | E.GRS#PGPPALK.H        | S66:   | 2 | 2,0526 | 0,201 | -0,691 |
| 22 | P04792 HSPB1_HUMAN  | R.VSLDVNHFAPDE.L       |        | 2 | 2,049  | 0,306 | 0,454  |
| 22 | P54577 SYYC_HUMAN   | E.KHPDADSLYVEK.I       |        | 2 | 2,0469 | 0,317 | -0,609 |
| 22 | Q13242 SFRS9_HUMAN  | R.GS#PHYFSPFRPY.-      | S211:  | 2 | 2,045  | 0,496 | -0,318 |
| 22 | Q02218 ODO1_HUMAN   | R.LNVLANVIR.K          |        | 2 | 2,045  | 0,254 | 0,06   |
| 22 | Q14116 IL18_HUMAN   | K.SDIIFQ.R.S           |        | 2 | 2,0426 | 0,126 | 0,119  |
| 22 | Q96FZ2 DC12_HUMAN   | R.M*LQWLATK.S          |        | 2 | 2,0413 | 0,128 | 0,121  |
| 22 | P04920 B3A2_HUMAN   | E.KDFSFP.R.N           |        | 2 | 2,0404 | 0,129 | 0,204  |
| 22 | P78417 GSTO1_HUMAN  | K.EDPTVSALLTSE.K       |        | 2 | 2,04   | 0,216 | 0,193  |
| 22 | P52732 KIF11_HUMAN  | K.SYLYPSTLVR.T         |        | 2 | 2,0385 | 0,346 | 0      |

|    |                      |                           |       |   |        |       |        |
|----|----------------------|---------------------------|-------|---|--------|-------|--------|
| 22 | Q9NRL2 BAZ1A_HUMAN   | K.DAIDPLLFK.Y             |       | 2 | 2,0263 | 0,085 | 0      |
| 22 | Q9UKS6 PACN3_HUMAN   | R.ALYDYAGQEAE.L           |       | 2 | 2,0261 | 0,209 | -0,181 |
| 22 | P37198 NUP62_HUMAN   | R.M*AQDLKDIIE.H           |       | 2 | 2,0187 | 0,115 | -1,945 |
| 22 | P23588 IF4B_HUMAN    | K.VAPAQPSEEGPGRKDE.N      |       | 2 | 2,0155 | 0,289 | -0,439 |
| 22 | O60784 TOM1_HUMAN    | K.TQEKDDDM*LFAL.-         |       | 2 | 2,0131 | 0,102 | -0,254 |
| 22 | Q71U36 TBA1A_HUMAN   | E.DAANNYAR.G              |       | 2 | 2,0128 | 0,206 | -0,409 |
| 22 | Q5VZK9 LR16A_HUMAN   | K.VALLPPVLK.K             |       | 2 | 2,0121 | 0,165 | 0,064  |
| 22 | A9CQZ4 A9CQZ4_HUMAN  | K.NLGSQS#PKPR.Q           | S27:  | 2 | 2,0073 | 0,216 | -0,67  |
| 22 | O15355 PPM1G_HUMAN   | K.ALDM*SYDHKPEDE.V        |       | 2 | 1,9993 | 0,192 | -0,623 |
| 22 | P21333 FLNA_HUMAN    | R.LYSVSYLLK.D             |       | 2 | 1,9982 | 0,2   | -0,337 |
| 22 | P09972 ALDOC_HUMAN   | K.GVVPLAGTDGETTQGLDGLSE.R |       | 2 | 1,9958 | 0,112 | 0,115  |
| 22 | Q2KHN1 RN151_HUMAN   | R.KTIGRLE.V               |       | 2 | 1,9951 | 0,101 | 0,224  |
| 22 | ##Q01581 HMCS1_HUMAN | E.FLQM*LNTK.V             |       | 2 | 1,995  | 0,162 | -0,724 |
| 22 | P08670 VIME_HUMAN    | E.VERDNLAEDIM*R.L         |       | 2 | 1,9909 | 0,231 | -0,413 |
| 22 | O75608 LYPA1_HUMAN   | K.TLVNAPANVTFK.T          |       | 2 | 1,9852 | 0,082 | 0,304  |
| 22 | P13639 EF2_HUMAN     | R.YFDPANGK.F              |       | 2 | 1,9792 | 0,28  | -0,134 |
| 22 | Q9UQ35 SRRM2_HUMAN   | K.EETPGQRPAVTE.T          |       | 2 | 1,9778 | 0,331 | -0,929 |
| 22 | P46087 NOL1_HUMAN    | K.GPQPPTVS#PIR.S          | S786: | 2 | 1,9759 | 0,082 | -0,298 |
| 22 | P39687 AN32A_HUMAN   | R.NRT#PSDVKE.L            | T15:  | 2 | 1,973  | 0,194 | -0,217 |
| 22 | Q86VP6 CAND1_HUMAN   | R.AVAALLTIPEAE.K          |       | 2 | 1,9729 | 0,14  | -0,306 |
| 22 | O15355 PPM1G_HUMAN   | K.YLPDIKDQK.A             |       | 2 | 1,9695 | 0,106 | -0,594 |
| 22 | P31943 HNRH1_HUMAN   | R.GLPFGCSKEE.I            |       | 2 | 1,968  | 0,176 | 0,217  |
| 22 | Q8NGJ4 O52E2_HUMAN   | K.KILLQEQGM*EKEE.Y        |       | 2 | 1,9653 | 0,138 | 0,383  |
| 22 | Q9BTC0 DIDO1_HUMAN   | K.VTVDDLPNR.M             |       | 2 | 1,9648 | 0,175 | 0,119  |
| 22 | P48643 TCPE_HUMAN    | K.HKLDVTSVE.D             |       | 2 | 1,9639 | 0,18  | -0,356 |
| 22 | P49903 SPS1_HUMAN    | K.VM*PLIQGFK.D            |       | 2 | 1,9627 | 0,223 | 0      |
| 22 | Q13838 UAP56_HUMAN   | K.VAVFFGGLSIK.K           |       | 2 | 1,9596 | 0,298 | 0,107  |
| 22 | Q9H501 ESF1_HUMAN    | R.TLDSGTSEIVKS#PRIE.C     | S198: | 2 | 1,9579 | 0,146 | -0,404 |
| 22 | Q9UQ80 PA2G4_HUMAN   | K.M*GGDIANR.V             |       | 2 | 1,955  | 0,345 | 0,502  |
| 22 | Q16543 CDC37_HUMAN   | D.VQM*LQDAISK.M           |       | 2 | 1,9519 | 0,09  | 0,849  |
| 22 | Q6VY07 PACS1_HUMAN   | R.KVVYDQLNQILVSDAALPE.N   |       | 2 | 1,9498 | 0,108 | 0,692  |
| 22 | P61956 SUMO2_HUMAN   | R.FRFDGQPINE.T            |       | 2 | 1,9471 | 0,106 | -0,2   |
| 22 | A1L390 PKHG3_HUMAN   | E.NM*VEPPLSGR.V           |       | 2 | 1,9433 | 0,222 | -0,219 |
| 22 | Q9P107 GMIP_HUMAN    | E.TPITSVPR.G              |       | 2 | 1,9377 | 0,167 | 0      |
| 22 | P18858 DNL1_HUMAN    | R.VLGSEGEDEE.A            |       | 2 | 1,9338 | 0,235 | -0,205 |
| 22 | ##Q9UPU3 SORC3_HUMAN | D.VFLPVSTFGYK.D           |       | 2 | 1,9287 | 0,18  | -0,582 |
| 22 | Q9Y5B0 CTDP1_HUMAN   | R.GPPAPSSSLPIR.Q          |       | 2 | 1,923  | 0,278 | -0,31  |
| 22 | P02545 LMNA_HUMAN    | R.LAVYIDR.V               |       | 2 | 1,9187 | 0,096 | 0,502  |
| 22 | Q96AG4 LRC59_HUMAN   | K.GGNLRDKLDGNE.L          |       | 2 | 1,9177 | 0,356 | -0,379 |

|    |                       |                                         |        |   |        |       |        |
|----|-----------------------|-----------------------------------------|--------|---|--------|-------|--------|
| 22 | P35579 MYH9_HUMAN     | R.GDLPFVVR.R                            |        | 2 | 1,915  | 0,281 | 0,366  |
| 22 | P54652 HSP72_HUMAN    | E.LNADLFR.G                             |        | 2 | 1,9135 | 0,16  | 0,503  |
| 22 | Q8IZ21 PHAR4_HUMAN    | R.AHS#LLFE.N                            | S443:  | 2 | 1,9121 | 0,143 | 0      |
| 22 | Q5SYE7 NHSL1_HUMAN    | K.LFLVPPPQK.D                           |        | 2 | 1,9118 | 0,093 | 0,107  |
| 22 | P10809 CH60_HUMAN     | K.DDAM*LLK.G                            |        | 2 | 1,9099 | 0,149 | 0,371  |
| 22 | P49757 NUMB_HUMAN     | R.GFPALSQK.M                            |        | 2 | 1,9092 | 0,302 | 0,432  |
| 22 | Q3V6T2 GRDN_HUMAN     | E.DRYNQLLK.Q                            |        | 2 | 1,9072 | 0,094 | 0,116  |
| 22 | Q9Y265 RUVB1_HUMAN    | K.QLKLDPSIFE.S                          |        | 2 | 1,9059 | 0,111 | 0,103  |
| 22 | Q9Y2U5 M3K2_HUMAN     | K.RLS#IIGPTSR.D                         | S153:  | 2 | 1,8995 | 0,165 | -0,207 |
| 22 | Q06323 PSME1_HUMAN    | E.KIVVLLQR.L                            |        | 2 | 1,8899 | 0,091 | 0,126  |
| 22 | Q5T6V5 CI064_HUMAN    | R.DVFIDSGGVR.R                          |        | 2 | 1,8813 | 0,276 | 0      |
| 22 | P62736 ACTA_HUMAN     | K.RGILTLKYPIE.H                         |        | 2 | 1,8793 | 0,24  | 0,187  |
| 22 | P38398 BRCA1_HUMAN    | K.KVDLNADPLCE.R                         |        | 2 | 1,8765 | 0,19  | 0,096  |
| 22 | P15336 ATF2_HUMAN     | R.SKIEPSVVE.T                           |        | 2 | 1,8749 | 0,203 | -0,109 |
| 22 | P46379 BAT3_HUMAN     | E.HM*PVGPDAILR.Y                        |        | 2 | 1,8737 | 0,28  | -0,1   |
| 22 | Q9UGI8 TES_HUMAN      | K.YTTLIAK.L                             |        | 2 | 1,8712 | 0,186 | 0,151  |
| 22 | Q8NI27 THOC2_HUMAN    | R.SDIPEPERE.Q                           |        | 2 | 1,8687 | 0,158 | 0      |
| 22 | Q9ULU4 PKCB1_HUMAN    | K.LNFDM*TAS#PK.I                        | S406:  | 2 | 1,8683 | 0,151 | -0,2   |
| 22 | P11142 HSP7C_HUMAN    | R.M*VNHFIAE.F                           |        | 2 | 1,8662 | 0,151 | -0,874 |
| 22 | ##Q1ED43 Q1ED43_HUMAN | K.LSCVPLLEPY#M.-                        | Y1097: | 2 | 1,8648 | 0,108 | 1,392  |
| 22 | P31350 RIR2_HUMAN     | E.NT#PPALSGTR.V                         | T33:   | 2 | 1,8579 | 0,104 | -0,335 |
| 22 | Q13200 PSMD2_HUMAN    | R.EPLLTLVKE.I                           |        | 2 | 1,8517 | 0,138 | 0,468  |
| 22 | P42695 CNDD3_HUMAN    | R.NSSAFSYQR.Q                           |        | 2 | 1,8515 | 0,255 | -1,036 |
| 22 | P15313 VATB1_HUMAN    | E.IAAQICR.Q                             |        | 2 | 1,8416 | 0,129 | 0,293  |
| 22 | Q8N6T3 ARFG1_HUMAN    | E.TFGSAEPTK.T                           |        | 2 | 1,8406 | 0,174 | -0,13  |
| 22 | P46109 CRKL_HUMAN     | K.GLFPFTHVK.I                           |        | 2 | 1,8403 | 0,17  | 0,233  |
| 22 | P14625 ENPL_HUMAN     | K.LIINSLYK.N                            |        | 2 | 1,834  | 0,085 | 0      |
| 22 | Q7Z478 DHX29_HUMAN    | E.DHPVFNPAM*K.I                         |        | 2 | 1,829  | 0,229 | -0,521 |
| 22 | Q9NPR2 SEM4B_HUMAN    | R.LGS#EIRDSVV.-                         | S825:  | 2 | 1,8277 | 0,196 | 0,106  |
| 22 | Q9Y5X1 SNX9_HUMAN     | K.FPGFAKPGTE.Q                          |        | 2 | 1,8162 | 0,081 | 0      |
| 22 | O60749 SNX2_HUMAN     | E.DAQITLLK.K                            |        | 2 | 1,8126 | 0,098 | -1,758 |
| 22 | Q9NZT2 OGFR_HUMAN     | R.SVEPQDAGPLER.S                        |        | 2 | 1,8113 | 0,189 | 0,376  |
| 22 | P60174 TPIS_HUMAN     | K.TATPQQAQE.V                           |        | 2 | 1,8011 | 0,092 | 0,125  |
| 22 | O00299 CLIC1_HUMAN    | E.LTLADCNLLPK.L                         |        | 2 | 1,8009 | 0,11  | -0,097 |
| 23 | Q8WUD4 CCD12_HUMAN    | K.GQEDSLASAVDAATEQKTCDS#D.-             | S165:  | 2 | 7,001  | 0,637 | 0,513  |
| 23 | Q9UQ35 SRRM2_HUMAN    | K.SKDSLVSQCPGSLSLCAGVK.S                |        | 2 | 6,4839 | 0,542 | -0,466 |
| 23 | P05783 K1C18_HUMAN    | R.STS#FRGGM*GSGGLATGIAGGLAGM*GGIQNEKE.T | S53:   | 3 | 6,398  | 0,498 | 0,475  |
| 23 | Q8TD19 NEK9_HUMAN     | E.RHCDSINSDFGSEGGCGDSS#PGPSASQGPR.A     | S29:   | 3 | 6,311  | 0,619 | 0,451  |
| 23 | P05783 K1C18_HUMAN    | E.DGEDFNLGDALDSSNSM*QTIQK.T             |        | 3 | 6,0881 | 0,458 | 0,762  |

|    |                    |                                      |            |   |        |       |        |
|----|--------------------|--------------------------------------|------------|---|--------|-------|--------|
| 23 | Q8WUD4 CCD12_HUMAN | K.GQEDSLASAVDAATEQKTCDS#D.-          | S165:      | 3 | 6,0345 | 0,467 | 0,231  |
| 23 | Q9H6F5 CCD86_HUMAN | R.LQQGAGLESPQGGQPEPGAAS#PQRQDDLHLE.S | S91:       | 3 | 6,0076 | 0,542 | 0,451  |
| 23 | P17844 DDX5_HUMAN  | E.LSANHNILQIVDVCHDVEKDE.K            |            | 3 | 5,967  | 0,515 | -0,299 |
| 23 | P28749 RBL1_HUMAN  | E.SKVKS#PVSLTAHSLIGAS#PK.Q           | S749:S762: | 3 | 5,966  | 0,457 | -1,097 |
| 23 | Q9H0D6 XRN2_HUMAN  | E.M*RM*QNNSSPSISPTSFTSDGSPSPLGGIK.R  |            | 3 | 5,953  | 0,452 | 0      |
| 23 | P04083 ANXA1_HUMAN | K.GGPGSAVS#PYPTFNPSDVAALHK.A         | S37:       | 3 | 5,8438 | 0,422 | 0,15   |
| 23 | Q9BUG6 ZSCA5_HUMAN | E.NREENPGLTSPPEQLPKS#PTDLVR.A        | S245:      | 3 | 5,8399 | 0,439 | 0,199  |
| 23 | P05783 K1C18_HUMAN | E.DGEDFNLDALDSSNSM*QTIQK.T           |            | 2 | 5,8201 | 0,604 | 0,61   |
| 23 | Q13614 MTMR2_HUMAN | K.SASVVSSDISADSADNFS#PDLR.V          | S58:       | 2 | 5,814  | 1     | 0,315  |
| 23 | Q12792 TWF1_HUMAN  | K.KYLLSQSSPAPLTAEEEE.L               |            | 2 | 5,813  | 0,522 | 0,126  |
| 23 | Q9NSK0 KLC4_HUMAN  | R.AAS#LNYLNQPSAAPLQVSR.G             | S590:      | 2 | 5,8053 | 0,462 | 0,235  |
| 23 | O95817 BAG3_HUMAN  | R.SQS#PAASDCSSSSSASLPSSGR.S          | S173:      | 2 | 5,7868 | 0,595 | 0,535  |
| 23 | Q14562 DHX8_HUMAN  | K.NPDGSLQAAM*M*QSALAK.E              |            | 2 | 5,7193 | 0,589 | -0,132 |
| 23 | P06730 IF4E_HUMAN  | R.LGLPPKIVIGYQSHADTATK.S             |            | 3 | 5,6741 | 0,521 | 0,347  |
| 23 | P78332 RBM6_HUMAN  | E.HESPADFQNSQS#PVQDQDKSQLSGR.E       | S362:      | 3 | 5,6682 | 0,486 | -0,447 |
| 23 | P05783 K1C18_HUMAN | E.DGEDFNLDALDSSNSMQTIQK.T            |            | 2 | 5,6102 | 0,594 | 0,512  |
| 23 | Q92625 ANS1A_HUMAN | R.S#LSKSDSLLTCSPTEATM*GSR.S          | S622:      | 3 | 5,6097 | 0,543 | 0,143  |
| 23 | Q8IWA0 WDR75_HUMAN | K.VQDTSNTGLGEDIHQLSK.S               |            | 2 | 5,5962 | 0,467 | 0,119  |
| 23 | O43379 WDR62_HUMAN | R.SIS#LGDSEGPVATLAQPLR.R             | S1228:     | 2 | 5,5922 | 0,515 | 0,116  |
| 23 | Q71RC2 LARP4_HUMAN | R.ASTASPCNNINATAVALQEPR.K            |            | 2 | 5,547  | 0,576 | 0,824  |
| 23 | P21127 CD2L1_HUMAN | R.GTS#PRPPEGGLGYSQLGDDDLKE.T         | S752:      | 3 | 5,5168 | 0,415 | 0,148  |
| 23 | Q5UIP0 RIF1_HUMAN  | E.LDPSLVSANDSPSGM*QTR.C              |            | 2 | 5,5086 | 0,461 | 0      |
| 23 | Q92625 ANS1A_HUMAN | R.SLS#KSDSLLTCSPTEATM*GSR.S          | S624:      | 3 | 5,4938 | 0,486 | -0,072 |
| 23 | P05783 K1C18_HUMAN | E.DFNLDALDSSNSMQTIQK.T               |            | 2 | 5,4873 | 0,482 | -0,117 |
| 23 | P05783 K1C18_HUMAN | E.DFNLDALDSSNSM*QTIQK.T              |            | 3 | 5,4618 | 0,442 | 0,958  |
| 23 | Q8N1F7 NUP93_HUMAN | R.ILHTLLASGEDALDFT#QE.S              | T159:      | 2 | 5,4591 | 0,519 | 0,119  |
| 23 | Q15942 ZYG_HUMAN   | E.KQHPVPPPAQNQNQVR.S                 |            | 3 | 5,4447 | 0,382 | -0,299 |
| 23 | Q14562 DHX8_HUMAN  | K.NPDGSLQAAM*M*QSALAKE.R             |            | 2 | 5,4135 | 0,567 | 0,185  |
| 23 | Q86WB0 NIPA_HUMAN  | R.SQDATFSPGS#EQAEKS#PGPIVSR.T        | S338:S344: | 3 | 5,4098 | 0,471 | -0,433 |
| 23 | Q9UHB6 LIMA1_HUMAN | R.SRPFTVAASFQSTSVKS#PK.T             | S604:      | 3 | 5,4036 | 0,362 | 0,261  |
| 23 | P78332 RBM6_HUMAN  | E.HESPADFQNSQS#PVQDQDK.S             | S362:      | 3 | 5,3848 | 0,369 | 0      |
| 23 | P04075 ALDOA_HUMAN | E.LSDIAHRIVAPGKGILAADE.S             |            | 3 | 5,3263 | 0,389 | 0      |
| 23 | Q9UK76 HN1_HUMAN   | R.RNS#SEASSGDFLDLKG.E                | S87:       | 2 | 5,324  | 0,562 | -0,129 |
| 23 | P05783 K1C18_HUMAN | E.DFNLDALDSSNSM*QTIQK.T              |            | 2 | 5,3055 | 0,492 | 0,349  |
| 23 | P40189 IL6RB_HUMAN | E.DLQLVDHVDGGDGILPR.Q                |            | 2 | 5,2546 | 0,522 | 0      |
| 23 | Q92882 OSTF1_HUMAN | K.LAFDM*ATNAACASLLK.K                |            | 2 | 5,2441 | 0,488 | 0,427  |
| 23 | Q8NFC6 FA44A_HUMAN | E.KNVLLNSLQKEDKS#PE.T                | S2475:     | 3 | 5,2072 | 0,235 | 0,095  |
| 23 | Q9C0B5 ZDHC5_HUMAN | K.YRPGYSSSSTAAM*PHSSSAK.L            |            | 3 | 5,1866 | 0,424 | -0,673 |
| 23 | P43897 EFTS_HUMAN  | R.LGQHVVGM*APLSVGLDDEPGGAE.T         |            | 2 | 5,1833 | 0,543 | 0,394  |

|    |                     |                                  |            |   |        |       |        |
|----|---------------------|----------------------------------|------------|---|--------|-------|--------|
| 23 | P78332 RBM6_HUMAN   | E.HESPADFQNSQS#PVQDQDK.S         | S362:      | 2 | 5,1784 | 0,522 | -0,109 |
| 23 | Q09666 AHNK_HUMAN   | K.M*KLPQFGISTPGSDLHVNAK.G        |            | 3 | 5,1697 | 0,462 | -0,085 |
| 23 | P78310 CXAR_HUMAN   | R.SYIGSNHSSLGSM*S#PSNM*E.G       | S306:      | 2 | 5,1661 | 0,412 | 0,233  |
| 23 | Q9Y5J1 UTP18_HUMAN  | E.LVFGDVENDEDALLR.R              |            | 2 | 5,1485 | 0,422 | 0,072  |
| 23 | P52594 NUPL_HUMAN   | K.SLLGDSAPTLHLNKGKT#PSQS#PVVGR.S | T177:S181: | 3 | 5,1264 | 0,257 | 0,544  |
| 23 | Q01469 FABP5_HUMAN  | K.TQTVCNFTDGALVQHQE.W            |            | 2 | 5,1227 | 0,436 | 0,626  |
| 23 | P40222 TXLNA_HUMAN  | R.VQDLSAGGQGSALTDSGPER.R         |            | 2 | 5,0894 | 0,551 | -0,456 |
| 23 | Q0JRZ9 FCHO2_HUMAN  | E.LKVSIGNITLS#PAISR.H            | S387:      | 3 | 5,0838 | 0,3   | -0,418 |
| 23 | Q9NSKO KLC4_HUMAN   | R.AAS#LNYLNQPSAAPLQVSR.G         | S590:      | 3 | 5,0831 | 0,402 | 0,264  |
| 23 | Q15042 RB3GP_HUMAN  | E.GKKT#ASDVTNIYPGDAGK.A          | S537:      | 3 | 5,045  | 0,361 | 0,46   |
| 23 | Q9UK76 HN1_HUMAN    | R.RNS#SEASSGDFLDLK.G             | S87:       | 2 | 5,0444 | 0,514 | 0,215  |
| 23 | Q9H9R9 DBND1_HUMAN  | E.VFADS#DDENLNTESPAGLHPLPR.A     | S95:       | 3 | 5,0032 | 0,353 | -0,071 |
| 23 | P04406 G3P_HUMAN    | E.GLM*TTVHAITAT#QKTVDGSPGK.L     | T184:      | 2 | 5,0015 | 0,468 | 0,845  |
| 23 | P39748 FEN1_HUMAN   | E.NGIKPVYVFDGKPPQLK.S            |            | 3 | 4,9626 | 0,459 | 0,289  |
| 23 | P60709 ACTB_HUMAN   | K.DLYANTVLSGGTTM*YPGIADR.M       |            | 2 | 4,9533 | 0,533 | 0,219  |
| 23 | Q92597 NDRG1_HUMAN  | E.AFKYFVQGM*GYM*PSASM*TR.L       |            | 3 | 4,9478 | 0,431 | -1,813 |
| 23 | O75475 PSIP1_HUMAN  | E.AGVVTTATASVNLKVS#PKRGRPAATE.V  | S177:      | 3 | 4,9173 | 0,318 | 0,275  |
| 23 | Q9HC52 CBX8_HUMAN   | R.RQDS#DLVQCGVTSPSSAE.A          | S256:      | 2 | 4,8868 | 0,534 | 0,242  |
| 23 | Q9HB20 PKHA3_HUMAN  | E.M*FQLHHPDPLVSPVSPVQM*M*K.R     |            | 3 | 4,8817 | 0,139 | 0,345  |
| 23 | Q9Y490 TLN1_HUMAN   | E.DSVS#PKKSTVLQQYNR.V            | S425:      | 3 | 4,8809 | 0,247 | -0,089 |
| 23 | Q96C92 SDCG3_HUMAN  | R.HSLGLDHNS#PPSQTGGYGLE.Y        | S147:      | 2 | 4,8735 | 0,502 | 0,341  |
| 23 | Q8WXI9 P66B_HUMAN   | R.LTPSPDIIVLS#DNEASS#PR.S        | S129:S135: | 2 | 4,8647 | 0,505 | 0      |
| 23 | Q9NWH9 SLTM_HUMAN   | E.ASKPKDGQDAIAQS#PEKE.S          | S289:      | 3 | 4,8564 | 0,345 | -0,739 |
| 23 | B2CI53 B2CI53_HUMAN | E.RNGILASPQS#APGNLDNSK.S         | S263:      | 2 | 4,8502 | 0,471 | 0,181  |
| 23 | Q9P2R6 RERE_HUMAN   | K.LPDLQPFP#PDGDTVTQHEE.L         | S304:      | 2 | 4,8439 | 0,501 | 0,424  |
| 23 | Q9Y2W1 TR150_HUMAN  | R.SIFQHIQSAQSQRS#PSE.L           | S622:      | 3 | 4,8323 | 0,406 | 0,455  |
| 23 | Q9Y2Y0 AR2BP_HUMAN  | R.GLDLSSGLVVTSLCK.S              |            | 2 | 4,7861 | 0,586 | -0,236 |
| 23 | Q9C004 SPY4_HUMAN   | E.NDYIDNPSLALTTGPK.R             |            | 2 | 4,7813 | 0,539 | -0,142 |
| 23 | P08670 VIME_HUMAN   | E.NTLQSFQRQVDVDNAS#LAR.L         | S214:      | 3 | 4,7748 | 0,404 | -0,999 |
| 23 | O43379 WDR62_HUMAN  | R.S#ISLGDSEGPVATLAQPLR.R         | S1226:     | 2 | 4,7601 | 0,462 | 0      |
| 23 | P05783 K1C18_HUMAN  | E.DGEDFNLDALDSSNSMQTIQK.T        |            | 3 | 4,751  | 0,491 | 0,077  |
| 23 | Q5QPG4 Q5QPG4_HUMAN | K.RKLS#SIGIQVDCIQVVPK.E          | S126:      | 3 | 4,7374 | 0,438 | 0,605  |
| 23 | Q8WUD4 CCD12_HUMAN  | K.GQEDSLASAVDAATEQK.T            |            | 3 | 4,7304 | 0,46  | 0,213  |
| 23 | P43897 EFTS_HUMAN   | R.RLGQHVVGGM*APLSVGLDDEPGGAE.T   |            | 3 | 4,7145 | 0,44  | 0,208  |
| 23 | Q32MZ4 LRRF1_HUMAN  | R.NM*PGLSAATLASLGGTSSR.R         |            | 2 | 4,7075 | 0,493 | 0      |
| 23 | Q9NQW6 ANLN_HUMAN   | K.TPIS#PLKTGVSKPIVK.S            | S323:      | 3 | 4,6985 | 0,487 | 0,21   |
| 23 | Q32MZ4 LRRF1_HUMAN  | R.CTLPEHES#PSQDISDACEAE.S        | S733:      | 2 | 4,6963 | 0,53  | 0,518  |
| 23 | Q7Z3C6 ATG9A_HUMAN  | R.HPEPVPEEGS#EDELPPQVHKV.-       | S828:      | 3 | 4,6963 | 0,305 | 0,151  |
| 23 | P04406 G3P_HUMAN    | E.GLM*TTVHAITAT#QKTVDGSPGK.L     | T184:      | 3 | 4,6946 | 0,427 | 0,317  |



|    |                    |                                |              |   |        |       |        |
|----|--------------------|--------------------------------|--------------|---|--------|-------|--------|
| 23 | Q13428 TCOF_HUMAN  | R.KSAEPSANTTLVS#ETEEE.G        | S171:        | 2 | 4,6936 | 0,631 | 0,305  |
| 23 | Q9UK76 HN1_HUMAN   | R.NS#SEASSGDFDLK.G             | S87:         | 2 | 4,6921 | 0,522 | 0,236  |
| 23 | P00558 PGK1_HUMAN  | E.SPERPFLAILGGAK.V             |              | 3 | 4,6864 | 0,318 | 0,44   |
| 23 | Q9H9C1 CN133_HUMAN | R.TRPGS#FQSLSDALS DTPAK.S      | S121:        | 3 | 4,677  | 0,416 | 0,444  |
| 23 | P09211 GSTP1_HUMAN | E.AGKDDYVKALPGQLKPF.E.T        |              | 3 | 4,6756 | 0,416 | 0,278  |
| 23 | Q5VT52 K0460_HUMAN | E.KGAPIETLGYHSASNR.R           |              | 2 | 4,6752 | 0,507 | -0,215 |
| 23 | Q12959 DLG1_HUMAN  | R.YQDEDT#PPQEHISPQITNE.V       | T115:        | 2 | 4,673  | 0,405 | 0,631  |
| 23 | P60174 TPIS_HUMAN  | R.KQS#LGLIGTLNAAK.V            | S21:         | 2 | 4,6728 | 0,481 | -0,226 |
| 23 | Q9UQ35 SRRM2_HUMAN | K.SKDSLQVQSCPGSLSLCAGVK.S      |              | 3 | 4,6672 | 0,442 | -0,262 |
| 23 | Q0JRZ9 FCHO2_HUMAN | E.LKVSIGNITLSPAISR.H           |              | 2 | 4,6635 | 0,458 | 0      |
| 23 | Q9ULU4 PKCB1_HUMAN | K.TGQAGSLSGS#PKPFSPQLSAPITTK.T | S490:        | 3 | 4,6615 | 0,389 | 0,072  |
| 23 | Q6P0N0 CN106_HUMAN | E.KKAPLHNLTYELPTLNQEQE.N       | T218:        | 3 | 4,6545 | 0,338 | 0,15   |
| 23 | Q13263 TIF1B_HUMAN | E.GYGFSGDDPYSSAEPHVSGVK.R      |              | 2 | 4,6472 | 0,623 | 0      |
| 23 | Q1ED39 TS118_HUMAN | R.YSVLNNDYFADVSPLR.A           |              | 2 | 4,6362 | 0,491 | 0,307  |
| 23 | O43379 WDR62_HUMAN | R.SIS#LGDESGPIVATLAQPLR.R      | S1228:       | 3 | 4,6352 | 0,265 | 0      |
| 23 | P18615 NELFE_HUMAN | E.GKLDPEKGPVPTFPFQR.S          |              | 3 | 4,6198 | 0,379 | 0,084  |
| 23 | Q96PE2 ARHGH_HUMAN | R.AATSEPTGFSVDSNLLGSLSPK.T     | S764:        | 2 | 4,6155 | 0,552 | 0,409  |
| 23 | Q96D71 REPS1_HUMAN | R.TGSDHTNPTS#PLLVKPSDLLEE.N    | S430:        | 2 | 4,6073 | 0,456 | 0,402  |
| 23 | P10809 CH60_HUMAN  | K.NQLKDM*AIATGGAVFGEE.G        |              | 2 | 4,6057 | 0,487 | 0,131  |
| 23 | Q32MZ4 LRRF1_HUMAN | R.CTLPEHESPSQDISDACEAE.S       |              | 2 | 4,5947 | 0,534 | 0,429  |
| 23 | Q12792 TWF1_HUMAN  | E.DVSLHGKYLKLLSQSSPAPLTAEEEE.L |              | 3 | 4,5915 | 0,431 | -0,84  |
| 23 | P55072 TERA_HUMAN  | K.NM*KLADDVDLEQVANE.T          |              | 2 | 4,5845 | 0,354 | 0      |
| 23 | O96013 PAK4_HUMAN  | R.DKRPLS#GPDVGTQPAGLASGAK.L    | S181:        | 3 | 4,5755 | 0,443 | 0,08   |
| 23 | P49023 PAXI_HUMAN  | R.FIHQQPQSSS#PVYGSSAK.T        | S85:         | 3 | 4,5677 | 0,32  | -0,361 |
| 23 | Q92597 NDRG1_HUMAN | K.YFVQGM*GYM*PSASM*TR.L        |              | 2 | 4,565  | 0,5   | -0,13  |
| 23 | P49792 RBP2_HUMAN  | E.KDSLITPHVSRST#PRESPCGK.I     | S2456:T2458: | 3 | 4,5647 | 1     | -0,141 |
| 23 | Q9ULW0 TPX2_HUMAN  | E.IKSSDQPLTVPVS#PKFSTR.F       | S738:        | 3 | 4,5619 | 0,341 | 0,169  |
| 23 | O75475 PSIP1_HUMAN | E.AGVVTTATASVNLKVS#PK.R        | S177:        | 2 | 4,5539 | 0,577 | -0,067 |
| 23 | Q02952 AKA12_HUMAN | E.KLTASEQAHPQEPESAHEPR.L       |              | 3 | 4,5503 | 0,414 | -0,316 |
| 23 | Q92625 ANS1A_HUMAN | R.SLSKS#DSDLLTCSPTEDATM*GSR.S  | S626:        | 2 | 4,5445 | 0,474 | 0,478  |
| 23 | Q6Y7W6 PERQ2_HUMAN | R.ALSSGGSITS#PPLS#PALPK.Y      | S26:S30:     | 2 | 4,5433 | 1     | 0,126  |
| 23 | Q9NYJ8 TAB2_HUMAN  | R.TLTHSIS#DGQLQGGQSNSE.L       | S108:        | 2 | 4,5345 | 0,459 | 0,12   |
| 23 | Q15424 SAFB1_HUMAN | R.KDFDACNEVPPAPK.E             |              | 2 | 4,5322 | 0,494 | -0,492 |
| 23 | Q9UHR5 S30BP_HUMAN | E.KGGLVSDAYGEDDFSR.L           |              | 2 | 4,5233 | 0,505 | 0,213  |
| 23 | P11717 MPRI_HUMAN  | K.ALSSLHGDDQDS#EDE.V           | S2409:       | 2 | 4,521  | 0,507 | 0      |
| 23 | Q9Y6D5 BIG2_HUMAN  | E.LEKPIQSKPQS#PVIQAAVS#PK.F    | S218:S227:   | 3 | 4,5197 | 0,496 | 0      |
| 23 | Q9P270 SLAI2_HUMAN | R.RT#SSEELRDATSLLAAGE.G        | T86:         | 2 | 4,5132 | 0,463 | -0,184 |
| 23 | Q9NRA8 4ET_HUMAN   | E.NLLSSSVPSADRDS#SPTTNSK.L     | S751:        | 2 | 4,5054 | 0,457 | -0,419 |
| 23 | P28749 RBL1_HUMAN  | K.VKS#PVSLTAHSLIGAS#PK.Q       | S749:S762:   | 3 | 4,4878 | 0,335 | 0,094  |

|    |                    |                                 |                 |   |        |       |        |
|----|--------------------|---------------------------------|-----------------|---|--------|-------|--------|
| 23 | Q02952 AKA12_HUMAN | K.LTASEQAHPQEPESAHEPR.L         |                 | 3 | 4,4721 | 0,369 | 0      |
| 23 | Q8IWA0 WDR75_HUMAN | K.VQDTS#NTGLGEDIIHQLSK.S        | S796:           | 2 | 4,4681 | 0,333 | 0,343  |
| 23 | Q13428 TCOF_HUMAN  | R.KSAEPSANTTLVSETEEE.G          |                 | 2 | 4,4556 | 0,601 | -0,19  |
| 23 | Q9UGV2 NDRG3_HUMAN | K.YFLQGM*GYIPSASM*TR.L          |                 | 2 | 4,4509 | 0,363 | 0,132  |
| 23 | Q9HAF1 CA149_HUMAN | K.SSVTSAAAVSALAGVQDQLIEK.R      |                 | 3 | 4,4508 | 0,268 | -0,085 |
| 23 | O95817 BAG3_HUMAN  | R.SQS#PAASDCSSSSSASLPSSGR.S     | S173:           | 3 | 4,4444 | 0,523 | -0,08  |
| 23 | P21127 CD2L1_HUMAN | R.GTS#PRPPEGGLGYSQLGDDDLKE.T    | S752:           | 2 | 4,4398 | 0,454 | 0,593  |
| 23 | Q8WXH0 SYNE2_HUMAN | R.RGS#M*SYLAAVEEEVEE.S          | S4108:          | 2 | 4,4322 | 0,404 | 0      |
| 23 | P23443 KS6B1_HUMAN | R.KVEPPFKPLLQSEEDVSQFDSK.F      |                 | 3 | 4,4298 | 0,246 | 0,144  |
| 23 | Q01581 HMCS1_HUMAN | E.GVGLVHSNIATEHIPS#PAK.K        | S495:           | 3 | 4,3989 | 0,353 | 0,456  |
| 23 | Q9HC35 EMAL4_HUMAN | E.SHSNDQSPQIRAS#PSPQPSSQLQIHR.Q | S144:           | 3 | 4,3949 | 0,352 | 0,778  |
| 23 | Q13459 MYO9B_HUMAN | R.VQEKPDS#PGGSTQIQR.Y           | S1290:          | 3 | 4,3867 | 0,402 | 0,304  |
| 23 | P15559 NQO1_HUMAN  | E.SDLYAM*NFNPIISR.K             |                 | 2 | 4,3732 | 0,325 | -0,147 |
| 23 | Q8WUD4 CCD12_HUMAN | K.GQEDSLASAVDAATEQK.T           |                 | 2 | 4,3647 | 0,502 | -0,355 |
| 23 | P42704 LPPRC_HUMAN | E.SDM*VTGGYAALINLCCR.H          |                 | 2 | 4,3617 | 0,543 | -0,509 |
| 23 | Q9UK76 HN1_HUMAN   | R.RNSS#EASSGDFDLKGE.G           | S88:            | 3 | 4,3593 | 0,371 | 0      |
| 23 | Q6P158 DHX57_HUMAN | R.DLQEQDADAGS#ER.G              | S127:           | 2 | 4,3554 | 0,469 | -0,322 |
| 23 | Q02880 TOP2B_HUMAN | E.FSGAPVEGAGEEALT#PSVPINK.G     | T1292:          | 3 | 4,3417 | 0,369 | 0,325  |
| 23 | Q9Y2H0 DLGP4_HUMAN | R.SLPDCTPHPNISIDAGPR.Q          |                 | 2 | 4,3336 | 0,449 | 0,24   |
| 23 | P06493 CDC2_HUMAN  | E.KIGEGT#Y#GVVYK.G              | T14:Y15:        | 2 | 4,3252 | 0,333 | -0,414 |
| 23 | Q92734 TFG_HUMAN   | K.QSTQVMAASM*SAFDPLKNQDE.I      |                 | 2 | 4,3246 | 0,466 | 0,422  |
| 23 | P04406 G3P_HUMAN   | R.VIISAPSADAPM*FVM*GVNHE.K      |                 | 3 | 4,318  | 0,477 | 0,173  |
| 23 | P22059 OSBP1_HUMAN | K.RTGS#NISGASSDISLDE.Q          | S379:           | 2 | 4,3117 | 0,314 | 0,136  |
| 23 | O94888 UBXD7_HUMAN | E.HGQLDGLSSSPPKK.C              |                 | 3 | 4,3059 | 0,459 | -0,252 |
| 23 | Q71RC2 LARP4_HUMAN | R.ASTASPCNNNINAATAVALQEPR.K     |                 | 3 | 4,3055 | 0,411 | 0,54   |
| 23 | Q8TF44 NLF3_HUMAN  | E.ATDADPQAQGAM*SLPSVPK.A        |                 | 2 | 4,3031 | 0,479 | 0,257  |
| 23 | P16591 FER_HUMAN   | E.NDGKEPPPVVNYEEDAR.S           |                 | 3 | 4,3021 | 0,367 | 0,095  |
| 23 | Q9Y2X7 GIT1_HUMAN  | R.ARS#M*DSSDLSDGAVTLQE.Y        | S410:           | 2 | 4,2943 | 0,504 | 0,123  |
| 23 | P53618 COPB_HUMAN  | R.NVTVQPDDPISFM*QLTAK.N         |                 | 2 | 4,2931 | 0,455 | 0,423  |
| 23 | Q86YP4 P66A_HUMAN  | R.RPPS#PDVIVLS#DNEQPSS#PR.V     | S100:S107:S114: | 3 | 4,2931 | 0,325 | -1,054 |
| 23 | Q92783 STAM1_HUMAN | E.FKNDPQLSLISAM*IKNLKE.Q        |                 | 3 | 4,2914 | 0,363 | 0,083  |
| 23 | Q96B36 AKTS1_HUMAN | R.SSDEENGPPSS#PDLDR.I           | S212:           | 2 | 4,2913 | 0,467 | -0,137 |
| 23 | Q9UKL0 RCOR1_HUMAN | R.VGPQYQAVVPDFDPAK.L            |                 | 2 | 4,2901 | 0,367 | 0,282  |
| 23 | O43237 DC1L2_HUMAN | K.DFQDYM*EPEEGCQGS#PQR.R        | S194:           | 2 | 4,2881 | 0,6   | 0,215  |
| 23 | P40222 TXLNA_HUMAN | K.RVQDLSAGGQGS LTDSGPER.R       |                 | 3 | 4,2784 | 0,305 | 0,18   |
| 23 | Q9BYW2 SETD2_HUMAN | E.M*DLGT#PTYDENPM*K.A           | T2441:          | 2 | 4,2771 | 0,46  | -0,92  |
| 23 | Q14676 MDC1_HUMAN  | E.LQPSTSTDQPV TSEPTSQVTR.G      |                 | 2 | 4,276  | 0,508 | 0,324  |
| 23 | Q8IWJ2 GCC2_HUMAN  | R.LLPVINTM*LQLS#PEEK.G          | S1548:          | 2 | 4,2709 | 0,419 | 0,064  |
| 23 | Q13614 MTMR2_HUMAN | K.SASVSSDSISTSADNFS#PDLR.V      | S58:            | 3 | 4,2671 | 0,347 | 0,236  |

|    |                    |                                    |              |   |        |       |        |
|----|--------------------|------------------------------------|--------------|---|--------|-------|--------|
| 23 | Q12789 TF3C1_HUMAN | D.LQCVCLNTPLGVVR.C                 |              | 2 | 4,263  | 0,46  | -1,573 |
| 23 | Q9H009 NACA2_HUMAN | R.ALKNNNS#NDIVNAIM*E.L             | S203:        | 2 | 4,2627 | 0,283 | -0,56  |
| 23 | P18615 NELFE_HUMAN | K.LKDPEKGPVPTFQPFQR.S              |              | 3 | 4,2617 | 0,443 | -0,369 |
| 23 | Q86W92 LIPB1_HUMAN | D.TQLCDKLLTSSLQK.S                 |              | 2 | 4,2387 | 0,412 | 0,075  |
| 23 | Q92734 TFG_HUMAN   | K.QSTQVM*AASM*SAFDPLKNQDE.I        |              | 2 | 4,2369 | 0,519 | 0,733  |
| 23 | Q8WUX9 CHMP7_HUMAN | E.LDILLQDTTKEPLDLPDNP.R            |              | 2 | 4,2288 | 0,45  | 0,317  |
| 23 | Q01518 CAP1_HUMAN  | R.GYADS#PSKAGAAPYVQAFD.S           | S34:         | 2 | 4,2263 | 0,448 | 0      |
| 23 | P29374 ARI4A_HUMAN | K.AADEPAYLTVGTDVSAK.Y              |              | 2 | 4,2243 | 0,566 | -0,071 |
| 23 | Q9H6T3 RPAP3_HUMAN | E.NNPINLANVIAATGTTSK.K             |              | 2 | 4,2209 | 0,43  | 0      |
| 23 | P38405 GNAL_HUMAN  | K.HYCYPHFTCAVDTE.N                 |              | 2 | 4,22   | 0,543 | -0,339 |
| 23 | Q9NXD2 MTMRA_HUMAN | R.RNS#LILKPKPDPAQQTDSQNSDTE.Q      | S525:        | 3 | 4,2182 | 0,431 | 0,331  |
| 23 | Q8NEN9 PDZD8_HUMAN | K.RVPTTSLIKPLGAIS#PVLNR.K          | S538:        | 3 | 4,2168 | 0,494 | 0      |
| 23 | Q60684 IMA7_HUMAN  | E.M*LFSDDSDLQLATTQK.F              |              | 2 | 4,21   | 0,533 | -0,267 |
| 23 | Q8ND56 LS14A_HUMAN | K.TQLSQGRS#SPQLDPLRKS#PTM*E.Q      | S182:S192:   | 3 | 4,2072 | 0,271 | -0,348 |
| 23 | Q9ULW0 TPX2_HUMAN  | E.IKSSDQPLTVPVS#PK.F               | S738:        | 2 | 4,2041 | 0,407 | -0,728 |
| 23 | P60709 ACTB_HUMAN  | K.DLYANTVLSGGTTM*YPGIADR.M         |              | 3 | 4,1985 | 0,396 | 0,082  |
| 23 | Q29RF7 PDS5A_HUMAN | R.IISVT#PVKNIDPVKNKE.I             | T1208:       | 3 | 4,1963 | 0,237 | -1,019 |
| 23 | Q9H1B7 EAP1_HUMAN  | E.EGPELNRQS#PNSSSAAASVASR.R        | S215:        | 3 | 4,1961 | 0,238 | -0,153 |
| 23 | Q8NEN9 PDZD8_HUMAN | R.VPTTSLIKPLGAIS#PVLNR.K           | S538:        | 3 | 4,1928 | 0,395 | -0,178 |
| 23 | P50548 ERF_HUMAN   | R.RVS#SDLQHATAQLSLE.H              | S531:        | 2 | 4,1892 | 0,527 | -0,199 |
| 23 | Q9UK76 HN1_HUMAN   | E.EKPVPAAPVSPVAPVPSR.R             |              | 3 | 4,1799 | 0,254 | 0,266  |
| 23 | Q9ULH0 ARMS_HUMAN  | R.RTPS#LSS#LNSQDSSIE.I             | S1359:S1362: | 2 | 4,1797 | 1     | -1,427 |
| 23 | Q5VT52 K0460_HUMAN | E.KGAPIETLGYSASNR.R                |              | 3 | 4,1665 | 0,49  | 0,323  |
| 23 | Q9C0C2 TB182_HUMAN | E.AADSDAHLFQDSTEPR.A               |              | 2 | 4,1656 | 0,436 | -0,347 |
| 23 | Q9H0D6 XRN2_HUMAN  | R.M*QNNSSPSISPNTSFTSDGSPSPLGGIKR.K |              | 3 | 4,1624 | 0,322 | 0,553  |
| 23 | P00558 PGK1_HUMAN  | E.DKVSHVSTGGASLE.L                 |              | 2 | 4,1614 | 0,502 | -0,929 |
| 23 | P40763 STAT3_HUMAN | K.SQGDM*QDLNGNNQSVTR.Q             |              | 2 | 4,1562 | 0,506 | -0,13  |
| 23 | P07437 TBB5_HUMAN  | E.HGIDPTGTYHGSDQLQLDR.I            |              | 3 | 4,1447 | 0,417 | 0,087  |
| 23 | Q562F6 SGOL2_HUMAN | E.KDNFFSLT#PKDKE.T                 | T845:        | 3 | 4,1438 | 0,388 | 0,776  |
| 23 | O75886 STAM2_HUMAN | E.FQKDPQFSLISATIK.S                |              | 3 | 4,1374 | 0,254 | -0,212 |
| 23 | P68104 EF1A1_HUMAN | K.SGDAAIVDM*VPGKPM*CVE.S           |              | 2 | 4,1357 | 0,446 | 0,256  |
| 23 | P04406 G3P_HUMAN   | R.VIISAPSADAPM*FVM*GVNHE.K         |              | 2 | 4,1347 | 0,489 | 0      |
| 23 | P05387 RLA2_HUMAN  | -.M*RYVASYLALGGNSS#PSAK.D          | S17:         | 2 | 4,1327 | 0,493 | 0,217  |
| 23 | P04792 HSPB1_HUMAN | E.SRAQLGGPEAAKSDE.T                |              | 3 | 4,1232 | 0,397 | 0,241  |
| 23 | Q60271 JIP4_HUMAN  | R.SAS#QSSLDKLDQE.L                 | S730:        | 2 | 4,1194 | 0,399 | -0,164 |
| 23 | P11177 ODPB_HUMAN  | E.DAKGLIKSAIRDNNPVVVLE.N           |              | 2 | 4,1175 | 0,363 | 0,113  |
| 23 | Q92619 HMHA1_HUMAN | R.KSS#FNVSDFVARPE.A                | S578:        | 2 | 4,1147 | 0,441 | 0,241  |
| 23 | Q05209 PTN12_HUMAN | E.NM*ISSIEPEKQDS#PPPKPPR.T         | S332:        | 3 | 4,1065 | 0,291 | -0,156 |
| 23 | O75531 BAF_HUMAN   | R.GFDKAYVVLGQFLVLKDE.D             |              | 3 | 4,1013 | 0,361 | -0,169 |

|    |                     |                                      |            |   |        |       |        |
|----|---------------------|--------------------------------------|------------|---|--------|-------|--------|
| 23 | Q96KB5 TOPK_HUMAN   | K.SVLCST#PTINIPAS#PFM*QK.L           | T24:S32:   | 2 | 4,0973 | 0,531 | -0,754 |
| 23 | Q9UKI8 TLK1_HUMAN   | D.VHQLANDPYLLPHM*R.R                 |            | 3 | 4,0931 | 0,261 | -0,101 |
| 23 | P00558 PGK1_HUMAN   | E.KNGVKITLPVDFVTADK.F                |            | 3 | 4,0901 | 0,424 | 0,099  |
| 23 | P55072 TERA_HUMAN   | R.GGNIGDGGGAADRVINQILTE.M            |            | 2 | 4,0877 | 0,39  | 0,181  |
| 23 | Q9UHB6 LIMA1_HUMAN  | R.KIS#ENSYSLDDLE.I                   | S225:      | 2 | 4,0866 | 0,359 | 0      |
| 23 | P49916 DNL3_HUMAN   | E.KLATKSS#PVKVG.E.K                  | S826:      | 2 | 4,0825 | 0,445 | -0,514 |
| 23 | Q92783 STAM1_HUMAN  | E.FKNDPQLSLISAM*IK.N                 |            | 3 | 4,0812 | 0,266 | 0      |
| 23 | Q9Y2W1 TR150_HUMAN  | E.KGSFS#DTGLGDGK.M                   | S379:      | 2 | 4,075  | 0,461 | -0,543 |
| 23 | Q969S3 ZN622_HUMAN  | E.KGLGVDSVDKAM*NAAIQQAIA.A           |            | 3 | 4,0743 | 0,31  | -1,359 |
| 23 | P04406 G3P_HUMAN    | E.GLM*TTVHAITAT#QK.T                 | T184:      | 2 | 4,0667 | 0,497 | -0,467 |
| 23 | Q8WUX9 CHMP7_HUMAN  | E.LDILLQDTTKEPLDLPDNP.R.N            |            | 3 | 4,0611 | 0,378 | 0,238  |
| 23 | Q9P2R6 RERE_HUMAN   | K.LPDLQPFPSP#PDGDTVTQHEE.L           | S304:      | 3 | 4,0592 | 0,452 | 0,238  |
| 23 | O43681 ARSA1_HUMAN  | E.DFHIVKLPLPHE.V                     |            | 3 | 4,0567 | 0,352 | 0,235  |
| 23 | Q0JRZ9 FCHO2_HUMAN  | E.LKVSIGNITLSPAISR.H                 |            | 3 | 4,0444 | 0,284 | 0      |
| 23 | Q13586 STIM1_HUMAN  | E.IVSPLSM*QSPSLQSSVR.Q               |            | 2 | 4,0433 | 0,514 | 0,333  |
| 23 | Q8NCM9 Q8NCM9_HUMAN | R.SSDITSDLGNVLTSTPNAK.T              |            | 2 | 4,0417 | 0,579 | -0,127 |
| 23 | Q15424 SAFB1_HUMAN  | E.LAEAPTEAPS#PEAR.D                  | S344:      | 2 | 4,0384 | 0,394 | -0,402 |
| 23 | P35579 MYH9_HUMAN   | E.LDNVTGLLSQSDSK.S                   |            | 2 | 4,0346 | 0,483 | -0,083 |
| 23 | Q6NZI2 PTRF_HUMAN   | R.RGS#\$#PDVHALLE.I                  | S365:S366: | 2 | 4,0292 | 0,483 | -0,169 |
| 23 | Q14562 DHX8_HUMAN   | K.NPDGSLQAAM*M*QSALAKE.R             |            | 3 | 4,0272 | 0,391 | 0,369  |
| 23 | P18583 SON_HUMAN    | R.LTSLRAGIEGPLLASDVGR.D              |            | 3 | 4,0119 | 0,27  | 0,76   |
| 23 | P04150 GCR_HUMAN    | K.IKDNGDLVLS#PSNVTLQPVK.T            | S267:      | 3 | 4,0092 | 0,315 | -0,238 |
| 23 | Q5VZ89 DEN4C_HUMAN  | E.RRSS#LPLDHGSPAQENPESE.K            | S1042:     | 3 | 4,0088 | 0,513 | -0,24  |
| 23 | P11940 PABP1_HUMAN  | R.SKGFVGFVCFSSPEEATK.A               |            | 2 | 4,0048 | 0,515 | -0,65  |
| 23 | Q9Y3Z3 SAMH1_HUMAN  | R.CDDS#PRTPSNTPSAE.A                 | S18:       | 2 | 3,9957 | 0,459 | 0,214  |
| 23 | B2CI53 B2CI53_HUMAN | E.RNGILASPQS#APGNLDNSK.S             | S263:      | 3 | 3,9948 | 0,392 | 0,272  |
| 23 | Q9UQ35 SRRM2_HUMAN  | R.S#RTPPSAPSQSRM*TSE.R               | S2407:     | 3 | 3,9938 | 0,274 | -0,101 |
| 23 | Q02880 TOP2B_HUMAN  | E.FSGAPVEGAGEEALT#PSVPINK.G          | T1292:     | 2 | 3,9845 | 0,437 | 0,542  |
| 23 | Q96BT3 CENPT_HUMAN  | K.NS#PGKPAQFLAGEAEE.V                | S288:      | 2 | 3,9843 | 0,47  | 0,283  |
| 23 | Q14195 DPYL3_HUMAN  | R.NLHQSGFSLSGTQVDE.G                 |            | 2 | 3,9785 | 0,555 | -0,142 |
| 23 | P09211 GSTP1_HUMAN  | K.FQDGDLTLYQSNTILR.H                 |            | 2 | 3,9773 | 0,48  | -0,907 |
| 23 | O95817 BAG3_HUMAN   | R.SSLGSHQLPRGYISIPVIHE.Q             |            | 3 | 3,9728 | 0,262 | -0,418 |
| 23 | Q15637 SF01_HUMAN   | E.RAYIVQLQIEDLTR.K                   |            | 3 | 3,9702 | 0,258 | 0,106  |
| 23 | P05387 RLA2_HUMAN   | R.YVASYLLAALGGNSS#PSAK.D             | S17:       | 2 | 3,9667 | 0,343 | 0,125  |
| 23 | Q9Y2D5 AKAP2_HUMAN  | R.DALGDSLQVPS#PSSTSSR.C              | S152:      | 2 | 3,9657 | 0,503 | 0,234  |
| 23 | O75531 BAF_HUMAN    | R.DFVAEPM*GEKPVGSLAGIGE.V            |            | 2 | 3,9626 | 0,434 | -0,121 |
| 23 | Q96GQ7 DDX27_HUMAN  | R.SADFNPDFVFTEKE.G                   |            | 2 | 3,9566 | 0,489 | -0,074 |
| 23 | Q96EV2 RBM33_HUMAN  | K.VKPAS#PVAQPKEE.A                   | S775:      | 3 | 3,9526 | 0,142 | 0,313  |
| 23 | Q9NQ57 INCE_HUMAN   | R.TLSPTPASATAPTSQGIPTS#DEESTPKKS#K.A | S214:S223: | 3 | 3,9499 | 1     | 0,231  |

|    |                    |                                      |                 |   |        |       |        |
|----|--------------------|--------------------------------------|-----------------|---|--------|-------|--------|
| 23 | Q9UJU6 DBNL_HUMAN  | E.THFGREPAAAISRPR.A                  |                 | 3 | 3,9469 | 0,366 | 0,22   |
| 23 | Q6Y7W6 PERQ2_HUMAN | R.ALS#SGGSITS#PPLSPALPK.Y            | S19:S26:        | 2 | 3,9446 | 1     | 0,189  |
| 23 | Q15366 PCBP2_HUMAN | K.LHQLAM*QQSHFPM*THGNTGFSGIESS#SPE.V | S271:           | 3 | 3,9204 | 0,558 | 0,336  |
| 23 | P28066 PSA5_HUMAN  | E.KGPQLFHM*DPSGTFVQCDAR.A            |                 | 3 | 3,9189 | 0,347 | 0,079  |
| 23 | Q9H5J8 JOSD3_HUMAN | R.YKFLDDGSGIS#PIEE.S                 | S206:           | 2 | 3,9077 | 0,45  | 0,337  |
| 23 | Q71RC2 LARP4_HUMAN | E.KDLIEDSSVQK.D                      |                 | 3 | 3,9064 | 0,233 | 0,507  |
| 23 | Q99497 PARK7_HUMAN | R.KGLIAAICAGPTALLAHE.I               |                 | 2 | 3,9064 | 0,353 | -0,338 |
| 23 | Q15637 SF01_HUMAN  | R.AYIVQLQIEDLTR.K                    |                 | 2 | 3,9054 | 0,328 | -0,156 |
| 23 | P48634 BAT2_HUMAN  | R.GSEGKPSLTLPASAPGPPEALTTVTVAPAPR.R  |                 | 3 | 3,9053 | 0,326 | 0,305  |
| 23 | Q9HAF1 CA149_HUMAN | K.SSVTSAAAVVSALAGVQDQLIEK.R          |                 | 2 | 3,905  | 0,48  | 0,114  |
| 23 | P05362 ICAM1_HUMAN | K.REPAVGEPAEVTTTVLVR.R               |                 | 3 | 3,8982 | 0,305 | -0,095 |
| 23 | P05783 K1C18_HUMAN | K.SQDLAKIM*ADIRAQYDE.L               |                 | 3 | 3,8979 | 0,419 | -0,184 |
| 23 | Q16204 CCDC6_HUMAN | K.LDQPVS#APPS#PR.D                   | S240:S244:      | 2 | 3,8973 | 0,461 | -0,257 |
| 23 | Q96KN1 FA84B_HUMAN | E.LATHLHPAEEPEGDSNVAR.T              |                 | 2 | 3,8934 | 0,425 | -0,299 |
| 23 | P19338 NUCL_HUMAN  | K.TLFVKGLSEDTTEE.T                   |                 | 2 | 3,8925 | 0,478 | 0      |
| 23 | P62913 RL11_HUMAN  | K.NNFSDTGNFGFGIQE.H                  |                 | 2 | 3,8892 | 0,425 | -0,222 |
| 23 | P19338 NUCL_HUMAN  | R.DARTLLAKNLPYKVTQDE.L               |                 | 3 | 3,8855 | 0,223 | 0,176  |
| 23 | Q9UQ35 SRRM2_HUMAN | E.KM*ALPPQEDATAS#PPRQK.D             | S1179:          | 3 | 3,8848 | 0,41  | -0,799 |
| 23 | Q09666 AHNK_HUMAN  | K.GHYEVTGS#DDE.T                     | S5841:          | 2 | 3,8833 | 0,44  | -0,189 |
| 23 | Q9Y608 LRRF2_HUMAN | R.NSASATPLSGNSSR.R                   |                 | 2 | 3,8788 | 0,469 | -0,757 |
| 23 | Q9H8U3 ZFAN3_HUMAN | R.SCGTDS#QS#ENEAS#PVKRPR.L           | S122:S124:S129: | 3 | 3,8766 | 0,45  | -0,078 |
| 23 | Q01581 HMCS1_HUMAN | E.GVGLVHSNIATEHIPS#PAK.K             | S495:           | 2 | 3,8506 | 0,314 | 0,182  |
| 23 | Q9P270 SLAI2_HUMAN | R.LSLQGHPTDLQTSNVKNEE.K              |                 | 3 | 3,85   | 0,278 | -1,04  |
| 23 | Q86UP2 KTN1_HUMAN  | K.KVEPVPVKQPT#PPSE.A                 | T153:           | 3 | 3,8493 | 0,222 | 0,303  |
| 23 | P36578 RL4_HUMAN   | E.SSGKNVTLPAVFKAPIRPD.I              |                 | 3 | 3,8475 | 0,353 | 0,55   |
| 23 | Q9C0C2 TB182_HUMAN | R.RES#AASGLGGLLEE.G                  | S1473:          | 2 | 3,8352 | 0,456 | -1,069 |
| 23 | P04406 G3P_HUMAN   | K.RVIISAPSADAPM*FVM*GVNHE.K          |                 | 3 | 3,8302 | 0,405 | -0,08  |
| 23 | O43581 SYT7_HUMAN  | R.SS#VSDLVNSLTSE.M                   | S102:           | 2 | 3,8258 | 0,373 | 0,086  |
| 23 | Q8IW35 CEP97_HUMAN | K.LHIACFPVQLDLS#DGASVDE.S            | S813:           | 2 | 3,8224 | 0,425 | 0,206  |
| 23 | Q9P265 DIP2B_HUMAN | R.QAALSAALQQSLQNAE.S                 |                 | 2 | 3,8157 | 0,509 | -0,223 |
| 23 | Q5T1V6 DDX59_HUMAN | K.EHPFILNLQEDQIE.N                   |                 | 2 | 3,8145 | 0,378 | -0,071 |
| 23 | Q6ZRV2 FA83H_HUMAN | R.LS#SATANALYSSNLRDDTK.A             | S1024:          | 2 | 3,8139 | 0,329 | 0,347  |
| 23 | Q15648 MED1_HUMAN  | E.HHS#GSQGPLTTGDLGKE.K               | S951:           | 3 | 3,8113 | 0,403 | 0,478  |
| 23 | P02545 LMNA_HUMAN  | R.IRIDS#LSAQLSQLQK.Q                 | S301:           | 2 | 3,8091 | 0,542 | 0      |
| 23 | P18206 VINC_HUMAN  | K.AQQVSQGLDVLTAKE.N                  |                 | 2 | 3,8089 | 0,441 | -0,289 |
| 23 | Q9NZM4 GSCR1_HUMAN | E.HLQSAIDSILNLQQAPGR.T               |                 | 3 | 3,8057 | 0,185 | -0,093 |
| 23 | Q8TEW0 PARD3_HUMAN | R.SGRES#VSTASDQPSHSLE.R              | S962:           | 3 | 3,8008 | 0,221 | -0,281 |
| 23 | Q15369 ELOC_HUMAN  | E.KTYGGCEGPDAM*YVK.L                 |                 | 3 | 3,7983 | 0,213 | -0,541 |
| 23 | Q9UQR0 SCML2_HUMAN | K.SSSLNSGNYLNPACR.N                  |                 | 2 | 3,797  | 0,345 | -0,074 |

|    |                     |                                         |            |   |        |       |        |
|----|---------------------|-----------------------------------------|------------|---|--------|-------|--------|
| 23 | Q02952 AKA12_HUMAN  | E.LQSHAKSPPS#PVERE.M                    | S1331:     | 3 | 3,7958 | 0,377 | -0,63  |
| 23 | P18583 SON_HUMAN    | R.AGIEGPLLASDVGR.D                      |            | 2 | 3,7942 | 0,383 | 0,18   |
| 23 | Q8WXV6 Q8WXV6_HUMAN | R.KRTSS#EDNLYLAVLR.A                    | S21:       | 3 | 3,7928 | 0,252 | 0,099  |
| 23 | P42166 LAP2A_HUMAN  | K.LREQGT#ESRSST#PLPTISSSAE.N            | T154:T160: | 3 | 3,7847 | 1     | -0,807 |
| 23 | Q6FIF0 ZFAN6_HUMAN  | R.QNSSNGRIS#PPATSVSSLSE.S               | S49:       | 2 | 3,7836 | 0,36  | 0,349  |
| 23 | P00558 PGK1_HUMAN   | R.GCITIIGGGDTATCCA.K.W                  |            | 2 | 3,7808 | 0,464 | 0,209  |
| 23 | Q7L2J0 MEPCE_HUMAN  | R.CAPSAGS#PAAAVGRES#PGAAATSSSGPQAQQHR.G | S60:S69:   | 3 | 3,772  | 0,413 | 0,558  |
| 23 | Q86WB0 NIPA_HUMAN   | R.SQDATFSPGSEQAEKS#PGPIVSR.T            | S344:      | 3 | 3,7686 | 0,274 | 0,373  |
| 23 | Q01581 HMCS1_HUMAN  | E.GVGLVHSNIATEHIPS#PAKK.V               | S495:      | 3 | 3,7649 | 0,342 | 0      |
| 23 | Q9UJX5 APC4_HUMAN   | K.IKEEVLS#ESEAE.N                       | S777:      | 2 | 3,7639 | 0,456 | 0,169  |
| 23 | Q9UBU7 DBF4A_HUMAN  | E.KKLLFISEPIPHPS#NE.L                   | S420:      | 3 | 3,7603 | 0,107 | 0,284  |
| 23 | P19338 NUCL_HUMAN   | K.GFGFVDFNSEEDAK.A                      |            | 2 | 3,7526 | 0,479 | -0,312 |
| 23 | Q14566 MCM6_HUMAN   | K.ASSAAGLTAAVRDEE.S                     |            | 2 | 3,7523 | 0,473 | -0,315 |
| 23 | Q15424 SAFB1_HUMAN  | R.KDFDACCNEVPPAPK.E                     |            | 3 | 3,7501 | 0,224 | -1,476 |
| 23 | Q9Y450 HBS1L_HUMAN  | E.SSNS#VSNHQLSGFDQAR.L                  | S67:       | 3 | 3,7482 | 0,309 | 0      |
| 23 | P11940 PABP1_HUMAN  | R.SKGFVCFVCFSSPEE.A                     |            | 2 | 3,7429 | 0,415 | 0      |
| 23 | P05387 RLA2_HUMAN   | -.M*RYVASYLLAALGGNSSPS#AKDIK.K          | S19:       | 3 | 3,7398 | 0,232 | 0      |
| 23 | P22314 UBA1_HUMAN   | R.VSGPDPKPGSNCSPAQSVLSEVPSVPTNGM*AK.N   |            | 3 | 3,739  | 0,245 | 0,342  |
| 23 | Q92598 HS105_HUMAN  | R.GCALQCAILSPAFAK.V                     |            | 2 | 3,7338 | 0,476 | -0,953 |
| 23 | Q86UP2 KTN1_HUMAN   | K.KVEPVPVTKQPT#PPSE.A                   | T153:      | 2 | 3,7313 | 0,533 | 0,135  |
| 23 | Q09666 AHNK_HUMAN   | K.ISM*QDVDLSLGS#PK.L                    | S511:      | 2 | 3,7305 | 0,39  | 0      |
| 23 | P67870 CSK2B_HUMAN  | K.IHPM*AYQLQLQAASNFK.S                  |            | 2 | 3,7301 | 0,48  | 0,494  |
| 23 | Q9H4L7 SMRCD_HUMAN  | E.STSTM*DGAIAAALLM*FGDAGGGPR.K          |            | 3 | 3,7221 | 0,354 | 0      |
| 23 | P05787 K2C8_HUMAN   | E.TRDGKLV#ESSDVLPK.-                    | S475:      | 3 | 3,7181 | 0,226 | -0,101 |
| 23 | Q96T23 RSF1_HUMAN   | E.IKLSDDFDS#PVKGPLCK.S                  | S387:      | 2 | 3,7152 | 0,464 | 0,122  |
| 23 | Q9NWH9 SLTM_HUMAN   | E.ASKPKDGQDAIAQS#PEKE.S                 | S289:      | 2 | 3,7129 | 0,463 | -0,432 |
| 23 | Q13263 TIF1B_HUMAN  | E.GYFGSGDDPYSSAEPHVSGVK.R               |            | 3 | 3,7116 | 0,443 | -0,165 |
| 23 | Q02952 AKA12_HUMAN  | K.LTASEQAHPQEPESAHEPRLS#AEYE.K          | S371:      | 3 | 3,7076 | 0,375 | 0,248  |
| 23 | P53618 COPB_HUMAN   | R.NVTVPDDPISFM*QLTAK.N                  |            | 3 | 3,7049 | 0,345 | 0,181  |
| 23 | Q8IU81 I2BP1_HUMAN  | R.AGGAS#PAASSTAQPPTQHR.L                | S453:      | 3 | 3,6907 | 0,354 | 0,293  |
| 23 | O75420 PERQ1_HUMAN  | R.ALSGGGSVAS#PPPS#PAM*PK.Y              | S24:S28:   | 2 | 3,6894 | 0,441 | -0,194 |
| 23 | P04075 ALDOA_HUMAN  | E.LSDIAHRIVAPGKGILAADE.S                |            | 2 | 3,6881 | 0,423 | 0      |
| 23 | P15586 GNS_HUMAN    | R.RPNVLLLLTDDQDE.V                      |            | 2 | 3,6856 | 0,342 | 0      |
| 23 | Q58FF8 H90B2_HUMAN  | K.HSQFLGYPITLYLEK.E                     |            | 2 | 3,6827 | 0,424 | -0,202 |
| 23 | Q9Y224 CN166_HUMAN  | D.KHILGFDTGDAVLNE.A                     |            | 2 | 3,6809 | 0,37  | -0,15  |
| 23 | P15408 FOSL2_HUMAN  | R.SGGGSVAVVVKQEPLEE.D                   |            | 2 | 3,6766 | 0,354 | -0,7   |
| 23 | P42166 LAP2A_HUMAN  | K.DVYVQLYLQHLTAR.N                      |            | 2 | 3,6761 | 0,447 | -0,284 |
| 23 | Q9NRG0 CHRC1_HUMAN  | K.VLTYSDLANTAQQSE.T                     |            | 2 | 3,6695 | 0,44  | -0,595 |
| 23 | Q9ULV4 COR1C_HUMAN  | R.AIFLADGNVFTTGFSR.M                    |            | 2 | 3,6631 | 0,444 | 0      |

|    |                    |                                  |            |   |        |       |        |
|----|--------------------|----------------------------------|------------|---|--------|-------|--------|
| 23 | Q9UPS6 SET1B_HUMAN | K.LLFLREPDS#DTELQM*E.G           | S522:      | 2 | 3,6575 | 0,438 | -0,06  |
| 23 | Q9Y624 JAM1_HUMAN  | E.DRVTFPLPTGITFK.S               |            | 2 | 3,6534 | 0,422 | -0,082 |
| 23 | Q9UGV2 NDRG3_HUMAN | R.THSTS#S#SLGSGESPF SR.S         | S333:S334: | 2 | 3,6531 | 1     | 0,324  |
| 23 | Q96JG6 CC132_HUMAN | R.DYVDEQTDGDPVK.S                |            | 2 | 3,6489 | 0,553 | 0,086  |
| 23 | Q13144 EI2BE_HUMAN | K.M*KGYNPAEVGAAGK.G              |            | 2 | 3,6452 | 0,451 | -0,52  |
| 23 | Q9UQ35 SRRM2_HUMAN | R.FQSDSSSYPTVDSNSLLGQSR.L        |            | 3 | 3,6417 | 0,312 | -0,161 |
| 23 | Q71RC2 LARP4_HUMAN | E.KDLIEDSSVQK.D                  |            | 2 | 3,6404 | 0,343 | -0,193 |
| 23 | Q05397 FAK1_HUMAN  | R.THAVS#VSETDDYAEIIDE.E          | S390:      | 2 | 3,6375 | 0,396 | 0,235  |
| 23 | Q0JRZ9 FCHO2_HUMAN | E.LKVSIGNITLS#PAISR.H            | S387:      | 2 | 3,6347 | 0,39  | -0,14  |
| 23 | Q15057 CENB2_HUMAN | K.KSS#PSTGSLDSGNE.S              | S379:      | 2 | 3,6252 | 0,428 | 0,338  |
| 23 | O43707 ACTN4_HUMAN | K.M*LDAEDIVNTARPDE.K             |            | 2 | 3,625  | 0,393 | 0,143  |
| 23 | Q9UQ35 SRRM2_HUMAN | K.DKFS#PPFVQDRPE.S               | S1188:     | 2 | 3,6177 | 0,437 | -0,074 |
| 23 | O43765 SGTA_HUMAN  | R.SRTPS#ASNDQQE.-                | S305:      | 2 | 3,6158 | 0,379 | -0,483 |
| 23 | Q01804 OTUD4_HUMAN | E.NITDDKYATVSS#PSK.S             | S546:      | 2 | 3,6153 | 0,443 | -0,143 |
| 23 | P42126 D3D2_HUMAN  | R.GVILTS DRPGVFSAGLDL TE.M       |            | 2 | 3,6143 | 0,44  | -0,119 |
| 23 | Q8IWA0 WDR75_HUMAN | K.VQDTS#NTGLGEDIIHQLSK.S         | S796:      | 3 | 3,6133 | 0,342 | 0,086  |
| 23 | O75362 ZN217_HUMAN | E.DFLQLFNLRPK.S                  |            | 2 | 3,6091 | 0,324 | -0,351 |
| 23 | Q13510 ASAH1_HUMAN | E.QLKPLTVNLDFQR.N                |            | 3 | 3,609  | 0,286 | 0,233  |
| 23 | O15541 R113A_HUMAN | E.NYEVGS#DDEEIPFK.C              | S253:      | 2 | 3,6075 | 0,304 | 0      |
| 23 | P05787 K2C8_HUMAN  | K.LVS#ESSDVLPK.-                 | S475:      | 2 | 3,6069 | 0,309 | -0,195 |
| 23 | A0MZ66 SHOT1_HUMAN | E.SKS#M*PVLGSVSSVTK.T            | S506:      | 2 | 3,6039 | 0,387 | -0,989 |
| 23 | Q86UL3 PLCF_HUMAN  | R.SGS#SKALDNTPEFE.L              | S100:      | 2 | 3,6006 | 0,472 | 0,234  |
| 23 | Q02880 TOP2B_HUMAN | E.FSGAPVEGAGEEALT#PSVPINKGPKPK.R | T1292:     | 3 | 3,5984 | 0,419 | -1,924 |
| 23 | P78371 TCPB_HUMAN  | R.SLHDALCVLAQTVKDSR.T            |            | 3 | 3,5968 | 0,383 | 0      |
| 23 | Q0JRZ9 FCHO2_HUMAN | K.VSIGNITLS#PAISR.H              | S387:      | 2 | 3,5944 | 0,337 | 0      |
| 23 | Q02952 AKA12_HUMAN | E.KLTASEQAHPQEAESAHEPRLS#AEYE.K  | S371:      | 3 | 3,5892 | 0,383 | 0,356  |
| 23 | Q13813 SPTA2_HUMAN | E.DYGDTLAAIQGLLK.K               |            | 2 | 3,5812 | 0,526 | -0,33  |
| 23 | Q09666 AHNK_HUMAN  | R.LKS#EDGVEGDLGE.T               | S135:      | 2 | 3,579  | 0,401 | -0,085 |
| 23 | Q63ZY3 KANK2_HUMAN | R.SSGLST#PVPPSAGHLA HVRE.Q       | T176:      | 3 | 3,5777 | 0,11  | 0,264  |
| 23 | Q14204 DYHC1_HUMAN | R.FNRYPLIIDPSGQATE.F             |            | 2 | 3,5761 | 0,36  | -0,134 |
| 23 | Q9H6Z4 RANB3_HUMAN | E.EKPAIAPPVVFVQK.D               |            | 3 | 3,5754 | 0,112 | 0,116  |
| 23 | Q9UNZ2 NSF1C_HUMAN | R.KKS#PNELVDDLFK.G               | S114:      | 3 | 3,565  | 0,235 | 0,34   |
| 23 | O43237 DC1L2_HUMAN | K.DFQDYM*EPEEGCQGS#PQRR.G        | S194:      | 3 | 3,5638 | 0,291 | 0,075  |
| 23 | O14908 GIPC1_HUMAN | R.SRGPATVEDLPSAFEE.K             |            | 2 | 3,5614 | 0,469 | -0,143 |
| 23 | Q96RG2 PASK_HUMAN  | R.LNVQVTSTPVIVM*R.G              |            | 2 | 3,5594 | 0,426 | -0,31  |
| 23 | P51572 BAP31_HUMAN | K.LDVGNAEVKLEEE.N                |            | 2 | 3,551  | 0,369 | 0      |
| 23 | Q9Y490 TLN1_HUMAN  | K.KSTVLQQQYNR.V                  |            | 3 | 3,5464 | 0,147 | -0,536 |
| 23 | Q49MG5 MAP9_HUMAN  | E.VFSTTLAYTKS#PK.V               | S15:       | 2 | 3,5463 | 0,351 | 0,16   |
| 23 | Q92545 TM131_HUMAN | E.RLSPAPLAHPSHPER.A              |            | 3 | 3,5442 | 0,239 | -0,439 |

|    |                     |                                 |            |   |        |       |        |
|----|---------------------|---------------------------------|------------|---|--------|-------|--------|
| 23 | Q02952 AKA12_HUMAN  | E.KQEKEPSKSAES#PTSPVTSE.T       | S283:      | 3 | 3,5407 | 0,403 | -0,329 |
| 23 | P37802 TAGL2_HUMAN  | R.TLM*NLGGLAVAR.D               |            | 2 | 3,5378 | 0,384 | 0,297  |
| 23 | Q4KMP7 TB10B_HUMAN  | R.RQQPLPGSSLLSLPGLK.S           |            | 3 | 3,5369 | 0,454 | 0,463  |
| 23 | O95425 SVIL_HUMAN   | K.HAHSSSLQQAASRS#PSFGDPQLS#PE.A | S261:S270: | 3 | 3,5297 | 0,144 | 0,066  |
| 23 | Q9P246 STIM2_HUMAN  | E.KSCS#M*NQLSSGIPVPKPR.H        | S680:      | 3 | 3,5283 | 0,194 | 0      |
| 23 | Q9Y520 Q9Y520_HUMAN | E.NSCNKEEVPVFR.Q                |            | 2 | 3,5261 | 0,383 | -0,076 |
| 23 | P38919 IF4A3_HUMAN  | R.LLKEEDM*TKVE.F                |            | 2 | 3,523  | 0,371 | -0,542 |
| 23 | P07437 TBB5_HUMAN   | E.HGIDPTGTYHGSDQLDR.I           |            | 2 | 3,5188 | 0,529 | 0,465  |
| 23 | P61244 MAX_HUMAN    | R.SSAQLQNTNYPSSDNSLYTNAK.G      |            | 3 | 3,5143 | 0,39  | 0,08   |
| 23 | Q96JM3 ZN828_HUMAN  | K.SSFFIEPQKPVFPE.T              |            | 2 | 3,512  | 0,377 | -0,148 |
| 23 | P18615 NELFE_HUMAN  | K.LKDPEKGPVPTFQPFQR.S           |            | 2 | 3,511  | 0,248 | -0,246 |
| 23 | Q6UN15 FIP1_HUMAN   | R.LPGAIDVIGQTITISR.V            |            | 2 | 3,511  | 0,461 | -0,221 |
| 23 | P02545 LMNA_HUMAN   | R.SGAQASSTPLS#PTR.I             | S22:       | 2 | 3,5104 | 0,492 | 0,339  |
| 23 | P05787 K2C8_HUMAN   | R.AFSSRSY#TSGPGSR.I             | Y25:       | 3 | 3,5056 | 0,239 | 0,238  |
| 23 | Q15084 PDIA6_HUMAN  | K.VKLAAVDATVNQVLASR.Y           |            | 3 | 3,5053 | 0,152 | 0,208  |
| 23 | Q7Z6Z7 HUWE1_HUMAN  | E.TLS#PDGLPEEQPQTTK.L           | S3662:     | 2 | 3,5037 | 0,429 | -0,402 |
| 23 | P60660 MYL6_HUMAN   | K.NKDQGTIEDYVE.G                |            | 2 | 3,5035 | 0,435 | 0,084  |
| 23 | Q13177 PAK2_HUMAN   | K.YLS#FTPPEKD.G                 | S141:      | 2 | 3,5021 | 0,388 | 0      |
| 23 | P18583 SON_HUMAN    | E.RLTSLRAGIEGPLLASDVGR.D        |            | 3 | 3,5015 | 0,324 | 0,264  |
| 23 | Q96T23 RSF1_HUMAN   | K.LSDDFDSPVKGPLCK.S             |            | 2 | 3,5009 | 0,473 | -0,582 |
| 23 | O94888 UBXD7_HUMAN  | E.HGQLDGLSSS#PPKK.C             | S270:      | 3 | 3,5005 | 0,255 | 0,119  |
| 23 | Q15149 PLEC1_HUMAN  | K.GYYSYSPVSGSGSTAGSR.T          |            | 2 | 3,4997 | 0,595 | -1,985 |
| 23 | P51114 FXR1_HUMAN   | E.NGLVTVADYISRAES#QSRQR.N       | S546:      | 3 | 3,4988 | 0,228 | -0,314 |
| 23 | Q8TEW8 PAR3L_HUMAN  | K.KSSS#LES#LQTAVAE.V            | S746:S749: | 2 | 3,4964 | 0,467 | -0,834 |
| 23 | O43237 DC1L2_HUMAN  | R.GGPASVPSS#SPGTSVK.K           | S406:      | 2 | 3,4959 | 0,212 | -0,326 |
| 23 | P00558 PGK1_HUMAN   | E.SPERPFLAILGGAK.V              |            | 2 | 3,4957 | 0,276 | -0,251 |
| 23 | A0AVT1 UBA6_HUMAN   | K.SHVFLSGM*GGLGLE.I             |            | 2 | 3,4925 | 0,426 | 0,258  |
| 23 | Q6Z517 FA65A_HUMAN  | R.FSTYSQS#PPDTPSLRE.Q           | S351:      | 2 | 3,4857 | 0,42  | -0,129 |
| 23 | Q9UQR0 SCML2_HUMAN  | R.S#PQQTVPYVPLS#PK.L            | S499:S511: | 2 | 3,4793 | 0,431 | 0,339  |
| 23 | P42166 LAP2A_HUMAN  | E.LVANNVTLPAGEQR.K              |            | 2 | 3,4776 | 0,496 | 0,165  |
| 23 | Q14247 SRC8_HUMAN   | E.RQDSA AVGF DYKE.K             |            | 2 | 3,4715 | 0,477 | -0,164 |
| 23 | Q14676 MDC1_HUMAN   | E.LQPSTSTDQPVT#PEPTSQATR.G      | T1466:     | 3 | 3,4706 | 0,228 | -0,236 |
| 23 | O60271 JIP4_HUMAN   | R.SAS#QSS#LDKLDQELKE.Q          | S730:S733: | 3 | 3,4651 | 0,188 | 0,094  |
| 23 | Q9Y2K2 QSK_HUMAN    | R.RFS#DGAASIQAFK.A              | S568:      | 2 | 3,463  | 0,465 | 0,248  |
| 23 | P18206 VINC_HUMAN   | K.AQQVSQLDVLTA.V                |            | 2 | 3,4628 | 0,456 | 0,335  |
| 23 | P49792 RBP2_HUMAN   | E.M*KLHDSSGS#QVGTGFK.S          | S1835:     | 3 | 3,4621 | 0,275 | 0,206  |
| 23 | O94864 ST65G_HUMAN  | K.IKEEPVSDITFPVSEE.L            |            | 2 | 3,4605 | 0,234 | -0,134 |
| 23 | P04264 K2C1_HUMAN   | R.SLDLDSIIAEVK.A                |            | 2 | 3,4602 | 0,394 | -0,094 |
| 23 | Q9Y618 NCOR2_HUMAN  | E.GVEPVS#PVSSPSLTHDK.G          | S2057:     | 2 | 3,4571 | 0,425 | 0,134  |



|    |                     |                           |            |   |        |       |        |
|----|---------------------|---------------------------|------------|---|--------|-------|--------|
| 23 | P05783 K1C18_HUMAN  | E.DFNLGDALDSSNSMQTIQK.T   |            | 3 | 3,4559 | 0,248 | 0      |
| 23 | Q96T23 RSF1_HUMAN   | E.IKLSDDFDS#PVKGPLCK.S    | S387:      | 3 | 3,4559 | 0,287 | 0      |
| 23 | Q9Y608 LRRF2_HUMAN  | R.RGS#GDTSSLIDPDTSLSE.L   | S328:      | 2 | 3,4537 | 0,473 | 0,127  |
| 23 | Q9H1A4 APC1_HUMAN   | E.LRDS#SKLHDSLYNE.D       | S563:      | 2 | 3,4506 | 0,512 | 0,486  |
| 23 | O15305 PMM2_HUMAN   | K.TIYFFGDKTM*PGGNDHE.I    |            | 2 | 3,4494 | 0,451 | 0,314  |
| 23 | Q96T23 RSF1_HUMAN   | E.IKLSDDFDS#PVKGPLCK.S    |            | 2 | 3,4441 | 0,458 | -0,445 |
| 23 | Q9BX68 HINT2_HUMAN  | E.DQQLLGHLVVAK.Q          |            | 2 | 3,4434 | 0,413 | -0,084 |
| 23 | Q8IWY9 CDAN1_HUMAN  | R.LRGS#PSRSLTLDPPNLSNLE.E | S158:      | 3 | 3,4419 | 0,251 | -0,782 |
| 23 | P11940 PABP1_HUMAN  | K.GFGFVCFSSPEEATK.A       |            | 2 | 3,4409 | 0,441 | -0,073 |
| 23 | Q9UGV2 NDRG3_HUMAN  | E.AFKYFLQGM*GYIPSASM*TR.L |            | 3 | 3,4387 | 0,2   | 0,333  |
| 23 | Q00839 HNRPU_HUMAN  | R.AKS#PQPVEEED.H          | S270:      | 2 | 3,4386 | 0,43  | -0,238 |
| 23 | Q96AQ6 PBIP1_HUMAN  | R.ALQAPHS#PSKTDGKE.L      | S43:       | 3 | 3,4385 | 0,29  | 0,333  |
| 23 | P52701 MSH6_HUMAN   | R.QSTLYSFFPKS#PALSDANK.A  | S14:       | 3 | 3,4377 | 0,303 | 0      |
| 23 | P17812 PYRG1_HUMAN  | K.TVQVVPHITDAIQE.W        |            | 2 | 3,4367 | 0,453 | 0      |
| 23 | P49321 NASP_HUMAN   | E.KSVSGTDVQEECRE.K        |            | 3 | 3,4296 | 0,159 | -0,451 |
| 23 | Q92598 HS105_HUMAN  | E.LNNTCEPVVTPKPK.I        |            | 3 | 3,4227 | 0,45  | 0      |
| 23 | P49736 MCM2_HUMAN   | R.TDALTS#S#PGRDLPPFEDE.S  | S40:S41:   | 2 | 3,421  | 0,308 | 0,116  |
| 23 | Q04917 1433F_HUMAN  | E.DSYKDSTLIM*QLLR.D       |            | 2 | 3,4161 | 0,45  | -0,359 |
| 23 | P02545 LMNA_HUMAN   | R.IRIDSLS#AQLSQLQK.Q      | S303:      | 3 | 3,4145 | 0,142 | 0,103  |
| 23 | O60271 JIP4_HUMAN   | K.LHQLS#GS#DQLE.S         | S183:S185: | 2 | 3,4142 | 0,263 | -0,264 |
| 23 | Q96GQ7 DDX27_HUMAN  | R.SADFNPDFVFTEK.E         |            | 2 | 3,4138 | 0,314 | 0,08   |
| 23 | Q9NQG5 CT077_HUMAN  | E.RSVYGGFEFIQQLK.L        |            | 3 | 3,413  | 0,239 | 0,36   |
| 23 | Q5VWN6 CJ018_HUMAN  | K.SLSDTLVSTTAPSGIVNVSVK.Q |            | 3 | 3,4124 | 0,336 | 0,441  |
| 23 | Q09666 AHNK_HUMAN   | R.LKSEDGVEGDLGE.T         |            | 2 | 3,4095 | 0,424 | -0,724 |
| 23 | P10398 ARAF_HUMAN   | R.TQADELPACLLSAAR.L       |            | 2 | 3,4055 | 0,33  | -0,075 |
| 23 | Q53EN3 Q53EN3_HUMAN | R.RIS#AHQPGPEGQEE.S       | S289:      | 2 | 3,4034 | 0,29  | -0,831 |
| 23 | Q12888 TP53B_HUMAN  | K.LGKPSAHASQS#FCE.S       | S894:      | 2 | 3,4006 | 0,515 | -0,61  |
| 23 | Q09666 AHNK_HUMAN   | K.FKAEAPLPS#PKLE.G        | S5110:     | 2 | 3,4001 | 0,454 | -0,324 |
| 23 | Q13409 DC112_HUMAN  | K.SVSTPSEAGSQDSGDGAVGSR.T |            | 2 | 3,3978 | 0,5   | -0,438 |
| 23 | Q99471 PFD5_HUMAN   | E.AKDCLNVLNKS#NEGKE.L     | S56:       | 3 | 3,3955 | 0,287 | -0,096 |
| 23 | Q8NA72 CE037_HUMAN  | R.ISTIHDLHSQGNNS#EVRE.T   | S78:       | 3 | 3,3951 | 0,397 | 0,082  |
| 23 | P08670 VIME_HUMAN   | E.TNLDS#LPLVDTHSKR.T      | S430:      | 3 | 3,3912 | 0,285 | 0,721  |
| 23 | P14618 KPYM_HUMAN   | R.NTGIICTIGPASR.S         |            | 2 | 3,3908 | 0,418 | -0,718 |
| 23 | O43719 HTSF1_HUMAN  | E.TATGM*AFEPEIDEK.K       |            | 2 | 3,3876 | 0,428 | -0,157 |
| 23 | Q9H3C7 GGNB2_HUMAN  | E.NTSCTCPSSGNLLGSPK.I     |            | 2 | 3,3873 | 0,46  | -0,411 |
| 23 | P51858 HDGF_HUMAN   | E.VERPLPM*EVEK.N          |            | 3 | 3,3871 | 0,266 | -0,068 |
| 23 | P55209 NP1L1_HUMAN  | R.QLTVQM*M*QNPQILAALQE.R  |            | 2 | 3,3855 | 0,431 | -0,117 |
| 23 | Q9UJU6 DBNL_HUMAN   | R.ADLPAEEPAPST#PPCLVQAE.E | T321:      | 3 | 3,3853 | 0,358 | 0,301  |
| 23 | Q9Y4K4 M4K5_HUMAN   | R.RQS#SPSCGPVAE.T         | S433:      | 2 | 3,3849 | 0,477 | -0,27  |

|    |                     |                                        |       |   |        |       |        |
|----|---------------------|----------------------------------------|-------|---|--------|-------|--------|
| 23 | Q14562 DHX8_HUMAN   | E.IELVEEPPFLR.G                        |       | 2 | 3,3841 | 0,384 | -0,332 |
| 23 | O94874 K0776_HUMAN  | E.KHVQLVLGQLIDE.N                      |       | 2 | 3,3827 | 0,397 | -0,082 |
| 23 | P11387 TOP1_HUMAN   | K.CDFTQM*SQYFK.A                       |       | 2 | 3,3826 | 0,442 | -0,332 |
| 23 | Q9UHR5 S30BP_HUMAN  | E.KGGLVSDAYGEDDFSR.L                   |       | 3 | 3,3812 | 0,24  | 0,533  |
| 23 | Q15424 SAFB1_HUMAN  | K.FDFDACNEVPPAPK.E                     |       | 2 | 3,3812 | 0,299 | 0,228  |
| 23 | P40222 TXLNA_HUMAN  | R.VQDLSAGGQGS�TDSGPERRPEGPGAQAPSS#PR.V | S515: | 3 | 3,3804 | 0,382 | 0,219  |
| 23 | O43865 SAHH2_HUMAN  | K.KQIQFADDM*QE.F                       |       | 2 | 3,3776 | 0,343 | 0      |
| 23 | Q13485 SMAD4_HUMAN  | E.GHSIQTIQHPPSNRAS#TE.T                | S191: | 3 | 3,3766 | 0,398 | -0,538 |
| 23 | P19338 NUCL_HUMAN   | R.DARTLLAKNLPYKVTQDE.L                 |       | 2 | 3,3722 | 0,403 | 0,235  |
| 23 | Q6P4F7 RHGBA_HUMAN  | K.LASLGDTASPLVK.S                      |       | 2 | 3,3699 | 0,5   | -0,096 |
| 23 | Q6ZRV2 FA83H_HUMAN  | R.HLRPPQYVTR.E                         |       | 3 | 3,3675 | 0,228 | 0,072  |
| 23 | Q9UHB6 LIMA1_HUMAN  | R.SRPFTVAASFQSTSVK.S                   |       | 3 | 3,3652 | 0,33  | -0,214 |
| 23 | P40189 IL6RB_HUMAN  | E.DLQLVDHVDGGDGILPR.Q                  |       | 3 | 3,3638 | 0,363 | 0,302  |
| 23 | P46777 RL5_HUMAN    | E.DAYKKQFSQYIK.N                       |       | 3 | 3,3614 | 0,311 | -0,421 |
| 23 | Q6ZRV2 FA83H_HUMAN  | E.VRHGS#DPAFAPGPR.G                    | S523: | 3 | 3,3614 | 0,291 | 0      |
| 23 | P33316 DUT_HUMAN    | E.DYRGNVGVVLFNFGK.E                    |       | 3 | 3,3592 | 0,117 | -0,109 |
| 23 | P63261 ACTG_HUMAN   | E.IAALVIDNGSGM*CK.A                    |       | 2 | 3,3572 | 0,431 | 0,083  |
| 23 | P53396 ACLY_HUMAN   | R.TAS#FSERADE.V                        | S455: | 2 | 3,3557 | 0,431 | 0,286  |
| 23 | P55072 TERA_HUMAN   | K.LADDVDLEQVANE.T                      |       | 2 | 3,3511 | 0,323 | 0,512  |
| 23 | P04792 HSPB1_HUMAN  | R.AQLGGPEAAKSDE.T                      |       | 2 | 3,3455 | 0,469 | -0,479 |
| 23 | O60934 NBN_HUMAN    | R.M*LS#QDAPTVKE.S                      | S397: | 2 | 3,3454 | 0,287 | -0,093 |
| 23 | P08670 VIME_HUMAN   | E.TNLDS#LPLVDTHSKRTLLIKTVE.T           | S430: | 3 | 3,3394 | 0,268 | 0,205  |
| 23 | P00558 PGK1_HUMAN   | K.ITLPVDFVTADKFD.E                     |       | 2 | 3,3368 | 0,363 | -0,154 |
| 23 | P62750 RL23A_HUMAN  | E.DNNTLVFIVDVK.A                       |       | 2 | 3,3363 | 0,392 | -0,177 |
| 23 | P04049 RAF1_HUMAN   | R.STS#TPNVHM*VSTTLPVDSR.M              | S259: | 3 | 3,3339 | 0,339 | 0,258  |
| 23 | Q99961 SH3G1_HUMAN  | K.ALYDFEPENDGELGFHE.G                  |       | 2 | 3,3316 | 0,483 | 0,062  |
| 23 | Q9Y2B0 CNPY2_HUMAN  | R.INPDGSQSVEVPYAR.S                    |       | 2 | 3,331  | 0,209 | -1,833 |
| 23 | P49757 NUMB_HUMAN   | E.WGQSSGAASPLFQAGHR.R                  |       | 3 | 3,3287 | 0,257 | 0,303  |
| 23 | Q8N4C8 MINK1_HUMAN  | E.RSDSVLPASHGHLPQAGS#LE.R              | S763: | 2 | 3,3283 | 0,35  | 0,457  |
| 23 | Q8NCM9 Q8NCM9_HUMAN | R.SSDITSDLGNVLTSTPNAK.T                |       | 3 | 3,3266 | 0,357 | 0,381  |
| 23 | Q8IY81 RRMJ3_HUMAN  | E.VTQGDМ*SAADTFLSDLPR.D                |       | 2 | 3,3261 | 0,472 | 0,314  |
| 23 | O14497 ARI1A_HUMAN  | R.GEDPPPDIFAAADSK.K                    |       | 2 | 3,3251 | 0,503 | 0      |
| 23 | P02545 LMNA_HUMAN   | R.SGAQASST#PLSPTR.I                    | T19:  | 2 | 3,3223 | 0,37  | -0,169 |
| 23 | Q86Y13 DZIP3_HUMAN  | R.LIKDDAS#DVQE.D                       | S707: | 2 | 3,3211 | 0,339 | -0,093 |
| 23 | P52732 KIF11_HUMAN  | E.QDLKLDIPTGTT#PQRK.S                  | T926: | 3 | 3,3209 | 0,27  | 0      |
| 23 | Q9Y266 NUDC_HUMAN   | K.LKPNLNGADLPNYR.W                     |       | 3 | 3,319  | 0,211 | 0,111  |
| 23 | Q9UK76 HN1_HUMAN    | R.RNSS#EASSGDFLDLK.G                   | S88:  | 3 | 3,3178 | 0,37  | 0,429  |
| 23 | Q09666 AHNK_HUMAN   | K.LPQFGISTPGSDLHVNAK.G                 |       | 3 | 3,3085 | 0,325 | 0,097  |
| 23 | P05787 K2C8_HUMAN   | R.VTQKSYKVSTSGPR.A                     |       | 3 | 3,3078 | 0,122 | 0,357  |

|    |                    |                              |            |   |        |       |        |
|----|--------------------|------------------------------|------------|---|--------|-------|--------|
| 23 | Q4G0J3 LARP7_HUMAN | R.SRPTS#EGS#DIE.S            | S258:S261: | 2 | 3,3012 | 0,258 | -0,091 |
| 23 | P68104 EF1A1_HUMAN | R.RGNVAGDSKNDPPM*E.A         |            | 3 | 3,3001 | 0,45  | -0,342 |
| 23 | Q92882 OSTF1_HUMAN | D.M*ATNAACASLLK.K            |            | 2 | 3,2976 | 0,454 | -0,289 |
| 23 | P18858 DNL1_HUMAN  | E.KEGEDGDQPTT#PPKPLK.T       | T183:      | 3 | 3,2965 | 0,18  | -0,382 |
| 23 | Q7Z2W4 ZCCHV_HUMAN | E.RSCTPSPDQISHRAS#LE.D       | S284:      | 3 | 3,2961 | 0,185 | 0,272  |
| 23 | Q15149 PLEC1_HUMAN | E.AQAASGFLLDPVR.N            |            | 2 | 3,2947 | 0,464 | 0,091  |
| 23 | Q9NYF8 BCLF1_HUMAN | K.LKDLFDYS#PPLHK.N           | S512:      | 2 | 3,2913 | 0,265 | -0,148 |
| 23 | Q6UWZ7 CCD98_HUMAN | K.M*KGFGEYSR#PTF.-           | S406:      | 2 | 3,2902 | 0,263 | -0,152 |
| 23 | Q9Y2K5 R3HD2_HUMAN | K.ASS#FSGIS#ILTRGDSIGSSK.G   | S349:S354: | 3 | 3,2894 | 1     | 0      |
| 23 | Q8N3Z6 ZCHC7_HUMAN | E.VITLS#DEDSIYR.C            | S94:       | 2 | 3,2889 | 0,461 | 0,246  |
| 23 | P08670 VIME_HUMAN  | E.TRDGQVINET#SQHHDDLE.-      | T458:      | 3 | 3,2878 | 0,136 | -0,252 |
| 23 | Q9ULQ0 FA40B_HUMAN | R.RES#EGSVDCPTLE.F           | S42:       | 2 | 3,2853 | 0,426 | 0,626  |
| 23 | O00418 EF2K_HUMAN  | K.LLQSAKT#ILRGTEE.K          | T348:      | 2 | 3,2842 | 0,422 | -0,223 |
| 23 | Q9UNE7 STUB1_HUMAN | R.LGAGGGS#PEKSPSAQE.L        | S19:       | 2 | 3,2823 | 0,438 | 0,236  |
| 23 | P18615 NELFE_HUMAN | K.DPEKGPVPTFQPFQR.S          |            | 3 | 3,282  | 0,406 | 0,21   |
| 23 | A1L020 MEX3A_HUMAN | E.NDFLAGSPDAAIDSR.Y          |            | 2 | 3,2806 | 0,392 | -0,551 |
| 23 | P31949 S10AB_HUMAN | K.KLDTNSDGQLDFSE.F           |            | 2 | 3,2788 | 0,397 | -0,467 |
| 23 | Q5VSL9 FA40A_HUMAN | R.KDS#EGYSESPDLE.F           | S59:       | 2 | 3,2788 | 0,36  | -0,397 |
| 23 | P49768 PSN1_HUMAN  | E.DNHLSNTRVRS#QNDNRE.R       | S28:       | 3 | 3,2779 | 0,281 | 0,37   |
| 23 | Q9Y490 TLN1_HUMAN  | K.STVLQQQYNR.V               |            | 2 | 3,276  | 0,268 | 0,099  |
| 23 | O00418 EF2K_HUMAN  | E.RYS#SSGSPANSFHFKE.A        | S70:       | 3 | 3,2746 | 0,168 | 0,389  |
| 23 | Q9Y5B6 GCFC_HUMAN  | K.TGGAFSNALSSLNVLPRGEIPD.A   |            | 2 | 3,2739 | 0,359 | 0,33   |
| 23 | P11021 GRP78_HUMAN | K.TKPYIQVDIGGGQTK.T          |            | 3 | 3,2717 | 0,202 | 0,456  |
| 23 | P82979 HCC1_HUMAN  | R.FGLNVSS#ISR.K              | S163:      | 2 | 3,2695 | 0,324 | 0      |
| 23 | P51114 FXR1_HUMAN  | E.NGLVTVADYISR.A             |            | 3 | 3,2688 | 0,137 | 0,489  |
| 23 | Q9UN36 NDRG2_HUMAN | R.TAS#LTSAAASVDGNR.S         | S332:      | 2 | 3,2688 | 0,489 | 0,085  |
| 23 | P02545 LMNA_HUMAN  | R.SGAQASSTPLSPTR.I           |            | 2 | 3,2669 | 0,416 | 0,09   |
| 23 | P49916 DNL3_HUMAN  | E.KLATKSS#PVKVGE.K           | S826:      | 3 | 3,2611 | 0,208 | -0,064 |
| 23 | P28074 PSB5_HUMAN  | R.ATAGAYIASQTVK.K            |            | 2 | 3,2611 | 0,485 | 0,286  |
| 23 | O95678 K2C75_HUMAN | E.VKAQYEDIANR.S              |            | 3 | 3,261  | 0,261 | 0,14   |
| 23 | Q9BQK8 LPIN3_HUMAN | R.SQHLGPSDIYLLDPLSLDSE.N     |            | 2 | 3,2601 | 0,389 | 0,111  |
| 23 | Q9UGV2 NDRG3_HUMAN | R.SRTHS#TSS#SLGSGESPFSR.S    | S331:S334: | 3 | 3,2551 | 1     | 0,258  |
| 23 | P43897 EFTS_HUMAN  | R.LGQHVVGM*APLSVGLDDEPGGAE.T |            | 3 | 3,2542 | 0,228 | -0,148 |
| 23 | Q6PKG0 LARP1_HUMAN | R.FSHLTSLPQQQLPSQQLM*SK.D    |            | 3 | 3,2541 | 0,262 | -0,084 |
| 23 | Q92734 TFG_HUMAN   | K.QSTQVMAASM*SAFDPLKNQDE.I   |            | 3 | 3,2517 | 0,297 | 0,079  |
| 23 | Q9NWH9 SLTM_HUMAN  | K.DGQDAIAQS#PEKE.S           | S289:      | 2 | 3,2461 | 0,425 | -1,33  |
| 23 | Q96T23 RSF1_HUMAN  | E.TLALLKAQIDPVLLK.N          |            | 2 | 3,2454 | 0,385 | -0,373 |
| 23 | Q8WXG6 MADD_HUMAN  | R.TDQDSVIGVSPAVM*IR.S        |            | 2 | 3,2445 | 0,454 | -0,286 |
| 23 | P35908 K22E_HUMAN  | R.NLDLDSIIAEVK.A             |            | 2 | 3,2384 | 0,338 | -0,55  |

|    |                     |                           |            |   |        |       |        |
|----|---------------------|---------------------------|------------|---|--------|-------|--------|
| 23 | P52732 KIF11_HUMAN  | E.KQHNIFLDQM*TIDE.D       |            | 2 | 3,2374 | 0,351 | -0,349 |
| 23 | Q8TD16 BICD2_HUMAN  | E.GQGGAGRTS#PGGRT#SPEAR.G | S568:T573: | 3 | 3,2368 | 0,278 | -0,467 |
| 23 | Q86XL3 ANKL2_HUMAN  | R.YGGS#PRDPVLTLR.A        | S512:      | 3 | 3,235  | 0,274 | 0,303  |
| 23 | P04406 G3P_HUMAN    | E.GLM*TTVHAITATQK.T       |            | 2 | 3,2335 | 0,474 | 0,246  |
| 23 | Q9HCN4 GPN1_HUMAN   | K.DSLSPVLHPSDLILTR.G      |            | 3 | 3,2326 | 0,291 | 0,104  |
| 23 | Q5JSH3 WDR44_HUMAN  | R.SNS#GRELTDEE.I          | S344:      | 2 | 3,2307 | 0,379 | -0,371 |
| 23 | P18206 VINC_HUMAN   | E.DQILKRD*PPAFIKVE.N      |            | 3 | 3,2285 | 0,182 | 0,191  |
| 23 | Q9Y5A7 NUB1_HUMAN   | K.NFQLEEEEQNE.A           |            | 2 | 3,227  | 0,208 | 0,26   |
| 23 | P00441 SODC_HUMAN   | E.DSVISLSGDHCIIGR.T       |            | 2 | 3,2259 | 0,538 | -0,15  |
| 23 | P0C0S8 H2A1_HUMAN   | K.VTIAQGGVLPNIQAVLLPK.K   |            | 2 | 3,2248 | 0,241 | -0,126 |
| 23 | O00418 EF2K_HUMAN   | E.SM*GLAPFDLSPR.E         |            | 2 | 3,2181 | 0,45  | 0,187  |
| 23 | P04406 G3P_HUMAN    | K.IISNASCTTNCLAPLAK.V     |            | 2 | 3,2163 | 0,351 | -0,2   |
| 23 | Q9P0L0 VAPA_HUMAN   | E.M*PNENDKLNDM*EPSK.A     |            | 3 | 3,214  | 0,183 | -0,51  |
| 23 | P06730 IF4E_HUMAN   | K.IVIGYQSHADTATK.S        |            | 2 | 3,2126 | 0,54  | -0,324 |
| 23 | P49959 MRE11_HUMAN  | E.SDVEEDIFPTTSK.T         |            | 2 | 3,2119 | 0,402 | -0,083 |
| 23 | Q9Y383 LC7L2_HUMAN  | E.LDAM*DHLQSFADCDRR.T     |            | 3 | 3,2116 | 0,299 | 0      |
| 23 | P35611 ADDA_HUMAN   | K.RVS#M*ILQSPAFCEE.L      | S59:       | 2 | 3,2113 | 0,356 | 0      |
| 23 | O15067 PUR4_HUMAN   | R.CPACFVGTITGDR.R         |            | 2 | 3,2104 | 0,618 | -0,252 |
| 23 | P04406 G3P_HUMAN    | E.NGKLVINGNPITIFQER.D     |            | 3 | 3,21   | 0,2   | 0,096  |
| 23 | P49736 MCM2_HUMAN   | E.SFTM*ASSPAQR.R          |            | 2 | 3,2098 | 0,438 | -0,407 |
| 23 | P14618 KPYM_HUMAN   | R.LDIDS#PPITAR.N          | S37:       | 2 | 3,2089 | 0,332 | 0,477  |
| 23 | Q6DN90 IQEC1_HUMAN  | R.SALSSS#LRDLSE.A         | S925:      | 2 | 3,2087 | 0,401 | -0,091 |
| 23 | P00558 PGK1_HUMAN   | K.NGVKITLPVDFVTADK.F      |            | 3 | 3,2065 | 0,242 | 0,213  |
| 23 | A6NH35 A6NH35_HUMAN | R.KLFIGGLSFETTED.S        |            | 2 | 3,2064 | 0,425 | 0      |
| 23 | Q9Y4L1 HYOU1_HUMAN  | K.LPATEKPVLLSKDIE.A       |            | 3 | 3,206  | 0,242 | 0,332  |
| 23 | Q9BWU0 NADAP_HUMAN  | E.TLASQDLSGDFK.K          |            | 2 | 3,2058 | 0,491 | 0,095  |
| 23 | Q8TF44 NLF3_HUMAN   | K.AQTSYGFAM*LAES#PHTR.R   | S156:      | 2 | 3,2042 | 0,45  | -0,124 |
| 23 | P30101 PDIA3_HUMAN  | R.FLQDYFDGNLKR.Y          |            | 2 | 3,2031 | 0,311 | -0,08  |
| 23 | Q9UQ35 SRRM2_HUMAN  | E.SYFGVSSLQLK.G           |            | 2 | 3,203  | 0,441 | -0,199 |
| 23 | Q7RTP8 Q7RTP8_HUMAN | R.ASS#LNVLVNMGK.A         | S596:      | 2 | 3,2    | 0,398 | 0,295  |
| 23 | P00558 PGK1_HUMAN   | K.ITLPVDFVTADKFDE.N       |            | 2 | 3,1984 | 0,406 | -0,143 |
| 23 | O94855 SC24D_HUMAN  | E.DKGLYGGSSYVDFLCCVHKE.I  |            | 3 | 3,1983 | 0,247 | -0,314 |
| 23 | Q32MZ4 LRRF1_HUMAN  | K.IDGATQSSPAEPK.S         |            | 2 | 3,1966 | 0,362 | -0,281 |
| 23 | O75410 TACC1_HUMAN  | K.ISIVRPFS#IE.T           | S153:      | 2 | 3,1965 | 0,301 | -0,098 |
| 23 | Q9NQS1 AVEN_HUMAN   | K.SVAAGCPVLLGK.D          |            | 2 | 3,1938 | 0,432 | 0      |
| 23 | O43581 SYT7_HUMAN   | R.TEPRSS#VSDLVNSLTSE.M    | S102:      | 2 | 3,1936 | 0,429 | -0,257 |
| 23 | Q5VT52 K0460_HUMAN  | R.LSSSPGLFGAFSVR.G        |            | 2 | 3,1928 | 0,288 | -0,428 |
| 23 | P14618 KPYM_HUMAN   | E.HM*CRLDIDS#PPITAR.N     | S37:       | 3 | 3,1919 | 0,263 | 0,292  |
| 23 | Q04917 1433F_HUMAN  | E.DSYKDSTLIM*QLLR.D       |            | 3 | 3,1892 | 0,243 | 0      |

|    |                    |                                  |            |   |        |       |        |
|----|--------------------|----------------------------------|------------|---|--------|-------|--------|
| 23 | P49736 MCM2_HUMAN  | R.GNDPLTSS#PGR.S                 | S27:       | 2 | 3,1891 | 0,374 | -0,517 |
| 23 | P51957 NEK4_HUMAN  | K.DQSLALS#PKLE.C                 | S461:      | 2 | 3,1888 | 0,401 | 0      |
| 23 | Q8NFF5 FAD1_HUMAN  | K.CLS#PGGHPTYRPAYLLE.N           | S563:      | 3 | 3,1884 | 0,124 | 0      |
| 23 | P84103 SFRS3_HUMAN | K.VYVGNLGNNGNKTE.L               |            | 2 | 3,1873 | 0,328 | -0,247 |
| 23 | O75475 PSIP1_HUMAN | E.AGVVTTATASVNLKVS#PK.R          | S177:      | 3 | 3,1848 | 0,333 | 0,201  |
| 23 | P31943 HNRH1_HUMAN | K.HTGPN#PDTANDGFVR.L             | S104:      | 2 | 3,1838 | 0,333 | -0,069 |
| 23 | P22102 PUR2_HUMAN  | E.NHTALTVVM*ASK.G                |            | 3 | 3,1836 | 0,29  | 0,639  |
| 23 | O75475 PSIP1_HUMAN | K.QSNASS#DVEVEEKE.T              | S106:      | 2 | 3,1819 | 0,381 | -0,599 |
| 23 | Q9Y608 LRRF2_HUMAN | R.RGSGDT#SSLIDPDTSLSE.L          | T331:      | 3 | 3,1806 | 0,16  | 0,573  |
| 23 | O75376 NCOR1_HUMAN | R.S#PGSISYLPSFFTK.L              | S2184:     | 2 | 3,1798 | 0,445 | -0,151 |
| 23 | P31946 1433B_HUMAN | E.SYKDSTLIM*QLLR.D               |            | 3 | 3,1779 | 0,205 | 0,231  |
| 23 | Q9BTA9 WAC_HUMAN   | R.STCSLTPALAAHFSE.N              |            | 2 | 3,1764 | 0,418 | 0,307  |
| 23 | P10809 CH60_HUMAN  | R.KPLVIAEDVDGE.A                 |            | 2 | 3,1711 | 0,399 | 0,087  |
| 23 | P52948 NUP98_HUMAN | K.HSNSNSVDDTIVALNM*R.A           |            | 3 | 3,17   | 0,275 | 0      |
| 23 | Q5JWF2 GNAS1_HUMAN | R.ISTAS#GDGRHYCYPHFTCAVDTE.N     | S995:      | 3 | 3,1697 | 0,294 | 0      |
| 23 | Q9ULU4 PKCB1_HUMAN | K.TSTTGSILNLDLDR.S               |            | 2 | 3,1691 | 0,251 | -0,081 |
| 23 | Q96A49 SYAP1_HUMAN | E.AVRPKT#PPVVIKSQLK.T            | T248:      | 3 | 3,1674 | 0,302 | -0,894 |
| 23 | Q8ND56 LS14A_HUMAN | E.QAVQTASAHLPAPAAVGR.R           |            | 2 | 3,1674 | 0,481 | -0,629 |
| 23 | Q13442 HAP28_HUMAN | R.KGVEGLIDIENPNR.V               |            | 3 | 3,1623 | 0,127 | 0,588  |
| 23 | P49588 SYAC_HUMAN  | K.M*HSPQTSAM*LFTVDNE.A           |            | 2 | 3,1606 | 0,357 | -0,332 |
| 23 | Q6P597 KLC3_HUMAN  | R.TLSTASTQDLS#PH.-               | S502:      | 2 | 3,1584 | 0,504 | -0,548 |
| 23 | P04406 G3P_HUMAN   | K.LVINGNPITIFQER.D               |            | 2 | 3,1577 | 0,437 | -0,151 |
| 23 | P46821 MAP1B_HUMAN | E.KEVPSKEEPS#PVKAE.V             | S614:      | 3 | 3,1574 | 0,185 | -0,105 |
| 23 | O14908 GIPC1_HUMAN | R.SRGPATVEDLPSAFE.E              |            | 2 | 3,1572 | 0,413 | 0      |
| 23 | P40222 TXLNA_HUMAN | R.RPEGPGAQAPSS#PR.V              | S515:      | 2 | 3,1559 | 0,44  | -0,41  |
| 23 | Q14157 UBP2L_HUMAN | K.STSAPQM*S#PGSSDNQSSS#PQPAQKK.L | S467:S477: | 3 | 3,1546 | 1     | 0,27   |
| 23 | Q53F19 CQ085_HUMAN | E.YHEELPALKQPR.E                 |            | 3 | 3,1528 | 0,225 | 0,37   |
| 23 | P19338 NUCL_HUMAN  | K.GLSEDTTEETLKE.S                |            | 2 | 3,1528 | 0,328 | 0,084  |
| 23 | P05387 RLA2_HUMAN  | R.YVASYLLAALGGNSS#PSAK.D         | S17:       | 3 | 3,1526 | 0,233 | -0,094 |
| 23 | Q14671 PUM1_HUMAN  | E.YVLSS#SPGDSCLR.K               | S228:      | 2 | 3,1514 | 0,348 | 0,08   |
| 23 | O75528 TAD3L_HUMAN | R.NQNKPFVSPHTK.S                 |            | 3 | 3,151  | 0,12  | 0,327  |
| 23 | Q99733 NP1L4_HUMAN | K.YAALYQPLFDK.R                  |            | 2 | 3,1496 | 0,227 | -0,734 |
| 23 | P52594 NUPL_HUMAN  | K.SLLGDSAPTLHLNKGTP#PSQS#PVVGR.S | T177:S181: | 2 | 3,1493 | 0,32  | 0,997  |
| 23 | O14713 ITBP1_HUMAN | R.SSTVAS#LDTDSTK.S               | S41:       | 2 | 3,1479 | 0,293 | -0,789 |
| 23 | Q9Y6G9 DC1L1_HUMAN | R.SVSSNVAS#VSPIPAGSK.K           | S419:      | 2 | 3,1474 | 0,351 | -0,073 |
| 23 | O43399 TPD54_HUMAN | K.TSAALSTVGSASIR.K               |            | 2 | 3,1467 | 0,361 | -0,831 |
| 23 | P50479 PDLI4_HUMAN | E.ATLPAQM*STLHVS#PPPSADPAR.G     | S165:      | 3 | 3,1433 | 0,244 | 0      |
| 23 | Q92614 MY18A_HUMAN | E.DLHLQIDDIK.A                   |            | 3 | 3,1401 | 0,197 | 0,714  |
| 23 | Q9Y2H0 DLGP4_HUMAN | R.NLS#YGDNSDPALE.A               | S760:      | 2 | 3,1389 | 0,238 | 0,165  |

|    |                     |                             |            |   |        |       |        |
|----|---------------------|-----------------------------|------------|---|--------|-------|--------|
| 23 | Q9C0B5 ZDHC5_HUMAN  | R.SSS#LKSAQGTGFE.L          | S429:      | 2 | 3,1343 | 0,383 | 0,177  |
| 23 | P40937 RFC5_HUMAN   | R.ALNILQSTNM*AFGK.V         |            | 2 | 3,1289 | 0,402 | 0,16   |
| 23 | P22626 ROA2_HUMAN   | K.LFVGGIKEDTEE.H            |            | 2 | 3,1252 | 0,287 | -0,274 |
| 23 | Q9Y5M8 SRPRB_HUMAN  | K.GGRGDVGSADIQDLE.K         |            | 2 | 3,1239 | 0,23  | 0,164  |
| 23 | Q96JP5 ZFP91_HUMAN  | K.TGSLQLICK.S               |            | 2 | 3,1205 | 0,359 | -0,06  |
| 23 | O00231 PSD11_HUMAN  | R.AQSLSTDRE.A               |            | 2 | 3,1188 | 0,387 | -0,109 |
| 23 | Q32MZ4 LRRF1_HUMAN  | K.IDGATQSS#PAEPK.S          | S714:      | 2 | 3,1184 | 0,335 | -0,177 |
| 23 | Q9NYF8 BCLF1_HUMAN  | K.LKDLFDYS#PPLHK.N          | S512:      | 3 | 3,1168 | 0,408 | 0,111  |
| 23 | Q02952 AKA12_HUMAN  | E.LQSHAKS#PPSPVERE.M        | S1328:     | 3 | 3,1166 | 0,187 | -0,525 |
| 23 | P78332 RBM6_HUMAN   | R.EEQSSDAGLFKEE.G           |            | 2 | 3,1155 | 0,403 | -1,08  |
| 23 | P42166 LAP2A_HUMAN  | K.DVYVQLYLQHLTAR.N          |            | 3 | 3,1143 | 0,443 | 0      |
| 23 | Q9UEY8 ADDG_HUMAN   | R.VSRLS#TSTTIENIE.I         | S650:      | 2 | 3,1116 | 0,292 | 0,225  |
| 23 | Q29RF7 PDS5A_HUMAN  | R.IISVT#PVKNIDPVK.N         | T1208:     | 2 | 3,1114 | 0,241 | 0,989  |
| 23 | P55072 TERA_HUMAN   | K.LAIRES#IE.S               | S702:      | 2 | 3,1091 | 0,127 | 0      |
| 23 | O60293 CC131_HUMAN  | R.RIS#TSDILSEK.K            | S352:      | 2 | 3,1068 | 0,425 | 0,275  |
| 23 | Q14683 SMC1A_HUMAN  | R.DKFQETSDEFE.A             |            | 2 | 3,1052 | 0,343 | 0,089  |
| 23 | P49792 RBP2_HUMAN   | E.KDSLITPHVSR.S             |            | 3 | 3,1048 | 0,338 | -0,292 |
| 23 | Q9ULV4 COR1C_HUMAN  | E.IKSIKDTICNQDE.R           |            | 2 | 3,1045 | 0,323 | -0,312 |
| 23 | O43681 ARSA1_HUMAN  | E.DFHIVKLPPLPHE.V           |            | 2 | 3,1016 | 0,448 | -0,157 |
| 23 | Q6UWZ7 CCD98_HUMAN  | K.GFGEYSRS#PTF.-            | S406:      | 2 | 3,0997 | 0,418 | 0,092  |
| 23 | P31629 ZEP2_HUMAN   | R.CS#SEQM*PCPHPAEVPE.V      | S1031:     | 2 | 3,0983 | 0,246 | 0,063  |
| 23 | Q5VWN6 CJ018_HUMAN  | K.SLSDTLVSTTAPSGIVNVSVK.Q   |            | 2 | 3,0971 | 0,391 | 0,353  |
| 23 | P29590 PML_HUMAN    | K.AVSPPHLDGPPS#PRS#PVIQSE.V | S527:S530: | 3 | 3,0954 | 0,376 | -0,081 |
| 23 | Q16555 DPYL2_HUMAN  | R.NLHQSGFSLGAQIDDNIPR.R     |            | 3 | 3,0935 | 0,314 | 0,422  |
| 23 | Q13263 TIF1B_HUMAN  | E.GYGFSGDDPYSSAEPHVSGVKR.S  |            | 3 | 3,089  | 0,259 | 0,309  |
| 23 | P18621 RL17_HUMAN   | E.KEQIVPKPEEE.V             |            | 2 | 3,0885 | 0,254 | -0,092 |
| 23 | P46087 NOL1_HUMAN   | K.GISAGAVQTAGK.K            |            | 2 | 3,0874 | 0,439 | 0      |
| 23 | Q9UQ35 SRRM2_HUMAN  | K.DKFSPPFVQDRPE.S           |            | 2 | 3,0857 | 0,258 | -0,469 |
| 23 | Q9NQG5 CT077_HUMAN  | E.RSVYGGEFIQQLK.L           |            | 2 | 3,0841 | 0,175 | 0,16   |
| 23 | Q02952 AKA12_HUMAN  | E.LQSHAKS#PPSPVERE.M        | S1328:     | 2 | 3,0806 | 0,486 | -0,911 |
| 23 | Q99741 CDC6_HUMAN   | D.NQLTIKS#PSKRE.L           | S106:      | 3 | 3,0792 | 0,17  | 0,37   |
| 23 | Q8N573 OXR1_HUMAN   | E.SLPIDIDQLSGR.D            |            | 2 | 3,0784 | 0,399 | 0,186  |
| 23 | Q6ZRV2 FA83H_HUMAN  | R.RGS#LTLTISGESPK.A         | S936:      | 2 | 3,0755 | 0,475 | 0,08   |
| 23 | Q9NYJ8 TAB2_HUMAN   | R.TLTHSIS#DGQLQGGQSNSE.L    | S108:      | 3 | 3,0753 | 0,165 | 0,179  |
| 23 | B1ALK7 B1ALK7_HUMAN | R.KES#APQVLLPEEE.K          | S619:      | 2 | 3,0744 | 0,439 | 0,079  |
| 23 | Q9NQ55 SSF1_HUMAN   | R.VGGS#DEEASGIPSR.T         | S359:      | 2 | 3,0718 | 0,324 | -0,762 |
| 23 | Q71U36 TBA1A_HUMAN  | E.ITNACFEPANQM*VK.C         |            | 2 | 3,071  | 0,34  | -0,149 |
| 23 | P78347 GTF2I_HUMAN  | E.LVISYLPPGM*ASK.I          |            | 2 | 3,0664 | 0,323 | -0,088 |
| 23 | P82979 HCC1_HUMAN   | R.FGLNVS#SISR.K             | S162:      | 2 | 3,066  | 0,365 | 0,105  |

|    |                    |                              |          |   |        |       |        |
|----|--------------------|------------------------------|----------|---|--------|-------|--------|
| 23 | Q8IVM0 CCD50_HUMAN | E.DHTLAHSLQEQE.I             |          | 2 | 3,0643 | 0,394 | -0,347 |
| 23 | P67936 TPM4_HUMAN  | R.KIQALQQQADE.A              |          | 2 | 3,0641 | 0,338 | -0,48  |
| 23 | P42684 ABL2_HUMAN  | E.NSASSLAPGFIR.G             |          | 2 | 3,0625 | 0,435 | 0,3    |
| 23 | Q14195 DPYL3_HUMAN | R.NLHQSGFSLSGTQVDE.G         |          | 3 | 3,0619 | 0,24  | 0,532  |
| 23 | P33316 DUT_HUMAN   | R.GNVGVVLFNFGK.E             |          | 2 | 3,0617 | 0,461 | -0,293 |
| 23 | P29401 TKT_HUMAN   | K.SKDDQVTVIGAVTLHE.A         |          | 3 | 3,0588 | 0,236 | -0,207 |
| 23 | O95425 SVIL_HUMAN  | R.DSSFTEVPRS#PK.H            | S245:    | 2 | 3,0588 | 0,333 | -0,341 |
| 23 | Q05209 PTN12_HUMAN | R.SCLVEGDAKEE.I              |          | 2 | 3,0581 | 0,388 | 0,197  |
| 23 | Q14738 2A5D_HUMAN  | R.RKS#ELPQDVYTIK.A           | S573:    | 3 | 3,0554 | 0,389 | 0      |
| 23 | Q01804 OTUD4_HUMAN | E.NITDDKYATVSS#PSK.S         | S546:    | 3 | 3,0548 | 0,238 | 0,107  |
| 23 | P40763 STAT3_HUMAN | E.NLQDDDFDFNYK.T             |          | 2 | 3,0526 | 0,3   | 0      |
| 23 | P15559 NQO1_HUMAN  | K.LKDPANFQYPAE.S             |          | 2 | 3,0516 | 0,345 | -0,088 |
| 23 | Q99497 PARK7_HUMAN | K.GLIAAICAGPTALLAHE.I        |          | 2 | 3,0491 | 0,432 | 0      |
| 23 | P27816 MAP4_HUMAN  | E.TERAS#PIKMDLAPSK.D         | S358:    | 3 | 3,0489 | 0,318 | -0,637 |
| 23 | Q99961 SH3G1_HUMAN | K.IAASSS#FRSSDKPIR.T         | S288:    | 3 | 3,0481 | 0,313 | -0,107 |
| 23 | Q9UEY8 ADDG_HUMAN  | R.VSRLS#TSTTIE.N             | S650:    | 2 | 3,0474 | 0,288 | -0,766 |
| 23 | Q2NL82 TSR1_HUMAN  | K.QIDAPGDPFPLNPR.G           |          | 2 | 3,047  | 0,41  | -0,238 |
| 23 | Q86VP6 CAND1_HUMAN | K.CLDAVVSTRHE.M              |          | 3 | 3,0447 | 0,338 | 0,355  |
| 23 | Q9UQ35 SRRM2_HUMAN | K.DKFS#PFVQDRPE.S            | S1188:   | 3 | 3,0428 | 0,212 | 0      |
| 23 | O75386 TULP3_HUMAN | R.CRLS#PSGDSVFHEE.M          | S9:      | 3 | 3,0422 | 0,274 | 0,538  |
| 23 | Q15436 SC23A_HUMAN | R.HLLQAPVDDAQE.I             |          | 2 | 3,0354 | 0,33  | 0,183  |
| 23 | O00562 PITM1_HUMAN | R.SIS#LKLDSEE.-              | S1237:   | 2 | 3,0339 | 0,204 | 0,102  |
| 23 | Q09666 AHNK_HUMAN  | R.VTAYTVDVTGR.E              |          | 2 | 3,0302 | 0,488 | -0,619 |
| 23 | Q9BVC5 ASHWN_HUMAN | R.KLS#NSSSSVSPLILSSNLPVNNK.T | S143:    | 3 | 3,0297 | 0,109 | 0      |
| 23 | P49790 NU153_HUMAN | R.SGIDITDFQAK.R              |          | 2 | 3,0296 | 0,259 | 0      |
| 23 | P46777 RL5_HUMAN   | E.DEDAYKKQFSQYIK.N           |          | 3 | 3,029  | 0,294 | -1,245 |
| 23 | P05783 K1C18_HUMAN | E.DFNLGDALDSSNSM*QTIQKTTTR.R |          | 3 | 3,0271 | 0,17  | 0,214  |
| 23 | Q9Y2V2 CHSP1_HUMAN | R.ERS#PS#PLRGNVVPSPPLPTR.R   | S30:S32: | 3 | 3,022  | 0,129 | -0,247 |
| 23 | Q15942 ZYX_HUMAN   | R.S#PGAPGPLTLKEVEE.L         | S344:    | 2 | 3,0214 | 0,396 | 0,076  |
| 23 | Q6P0N0 CN106_HUMAN | K.APLHNLTY#ELPTLNQEQE.N      | Y219:    | 3 | 3,0205 | 0,101 | 0,084  |
| 23 | P04075 ALDOA_HUMAN | K.RLQSIGTENTEE.N             |          | 2 | 3,0199 | 0,328 | -0,797 |
| 23 | P31949 S10AB_HUMAN | K.LDTNSDGQLDFSE.F            |          | 2 | 3,0196 | 0,336 | 0      |
| 23 | P78316 NOP14_HUMAN | E.LTHYGQSLADIEK.H            |          | 3 | 3,0178 | 0,22  | -0,93  |
| 23 | Q96RS0 TGS1_HUMAN  | E.DRKLYNLGLK.G               |          | 3 | 3,0162 | 0,153 | 0,824  |
| 23 | Q9C0B5 ZDHC5_HUMAN | R.GDS#LKEPTSIAE.S            | S380:    | 2 | 3,0136 | 0,384 | 0,368  |
| 23 | P12814 ACTN1_HUMAN | K.M*LDAEDIVGTARPDE.K         |          | 2 | 3,0123 | 0,344 | -1,629 |
| 23 | P49792 RBP2_HUMAN  | E.KDSLITPHVSR.S              |          | 2 | 3,0118 | 0,285 | -0,389 |
| 23 | Q9P2K3 RCOR3_HUMAN | E.THPM*DGNDSDYDPKKE.A        | S171:    | 3 | 3,0101 | 0,416 | -0,564 |
| 23 | Q8NI22 MCFD2_HUMAN | K.M*HDYDGNLLDGLLE.L          |          | 2 | 3,0086 | 0,354 | -0,15  |

|    |                     |                               |            |   |        |       |        |
|----|---------------------|-------------------------------|------------|---|--------|-------|--------|
| 23 | P31327 CPSM_HUMAN   | E.DRQLFSDKLNE.I               |            | 2 | 3,0081 | 0,279 | 0      |
| 23 | P35611 ADDA_HUMAN   | R.TTSAVPNLFVPLNTNPK.E         |            | 2 | 3,0052 | 0,427 | -0,064 |
| 23 | Q6FIF0 ZFAN6_HUMAN  | E.HLQRQNSSNGRIS#PPATSVSSLSE.S | S49:       | 3 | 3,0028 | 0,167 | 0,348  |
| 23 | Q15742 NAB2_HUMAN   | R.SFSPKS#PLELGE.K             | S162:      | 2 | 3,0021 | 0,218 | 0,089  |
| 23 | Q5VUA4 ZN318_HUMAN  | R.IPS#PNILK.T                 | S2101:     | 2 | 3,0004 | 0,154 | -0,063 |
| 23 | A0MZ66 SHOT1_HUMAN  | E.SKS#M*PVLGSVSSVTK.T         | S506:      | 3 | 2,9996 | 0,107 | 0,342  |
| 23 | O00571 DDX3X_HUMAN  | K.HVINFDLPSDIEE.Y             |            | 2 | 2,9978 | 0,419 | -0,16  |
| 23 | Q9UBR2 CATZ_HUMAN   | R.VGDYGSLSGRE.K               |            | 2 | 2,9975 | 0,428 | -0,321 |
| 23 | Q8TD16 BICD2_HUMAN  | R.GRRS#PILLPKGLLAPE.A         | S582:      | 3 | 2,9958 | 0,248 | 0,305  |
| 23 | Q9ULW0 TPX2_HUMAN   | E.IKSSDQPLTPVVS#PK.F          | S738:      | 3 | 2,9936 | 0,324 | -0,546 |
| 23 | Q9UMZ2 SYNG_HUMAN   | K.FDFLVATSQSK.M               |            | 2 | 2,9927 | 0,381 | 0      |
| 23 | Q9HC35 EMAL4_HUMAN  | R.ASPSPQPSSQPLQIHRQT#PE.S     | T160:      | 2 | 2,9926 | 0,387 | 0,539  |
| 23 | P08133 ANXA6_HUMAN  | K.SLYGKDLIADLKYE.L            |            | 3 | 2,9905 | 0,273 | 0,225  |
| 23 | Q86SQ0 PHLB2_HUMAN  | E.GLYLSDT#LPR.K               | T898:      | 2 | 2,99   | 0,26  | 0,1    |
| 23 | Q02241 KIF23_HUMAN  | R.KRRS#S#TVAPAQPDGAESE.W      | S911:S912: | 3 | 2,9878 | 0,335 | 0,089  |
| 23 | Q96JM3 ZN828_HUMAN  | K.SSFFIEPQKPVFPE.T            |            | 3 | 2,9877 | 0,313 | 0,221  |
| 23 | Q9BSJ6 FA64A_HUMAN  | R.QGFILKDVYAS#P.-             | S247:      | 2 | 2,9875 | 0,342 | -0,688 |
| 23 | Q8ND56 LS14A_HUMAN  | E.QAVQTASAHLPAPAAVGR.R        |            | 3 | 2,9873 | 0,476 | 0,21   |
| 23 | A9CQZ4 A9CQZ4_HUMAN | K.AAEDEEVPAFFK.N              |            | 2 | 2,9856 | 0,399 | 0      |
| 23 | P13861 KAP2_HUMAN   | R.APASVLPAAATPR.Q             |            | 2 | 2,985  | 0,349 | -0,212 |
| 23 | P35579 MYH9_HUMAN   | K.LKDVLLQVDDE.R               |            | 2 | 2,9835 | 0,22  | 0,19   |
| 23 | Q8N3X1 FNBP4_HUMAN  | K.TGRDT#PENGETAIGAE.N         | T479:      | 2 | 2,983  | 0,322 | 0,144  |
| 23 | O14713 ITBP1_HUMAN  | K.SVSSSLGGLSR.S               |            | 2 | 2,9802 | 0,398 | 0,226  |
| 23 | Q9Y2W1 TR150_HUMAN  | R.ERS#PALKS#PLQSVVVR.R        | S248:S253: | 3 | 2,9788 | 0,288 | 0,19   |
| 23 | Q13523 PRP4B_HUMAN  | R.TKLDDLALLEDE.K              |            | 2 | 2,9777 | 0,221 | -0,328 |
| 23 | P15924 DESP_HUMAN   | R.AES#GPDRLRYE.V              | S22:       | 2 | 2,9776 | 0,373 | 0      |
| 23 | O75064 DEN4B_HUMAN  | E.SLQEQP GALPVPGPSR.S         |            | 2 | 2,9774 | 0,372 | 0      |
| 23 | Q9HC35 EMAL4_HUMAN  | R.ASPS#PQPSSQPLQIHR.Q         | S146:      | 2 | 2,974  | 0,175 | -0,067 |
| 23 | Q9Y6D5 BIG2_HUMAN   | R.GSSLSGTDDGAQEVVKDILE.D      |            | 2 | 2,9739 | 0,345 | 0,06   |
| 23 | Q9H4G0 E41L1_HUMAN  | E.GEVRT#PTKIKE.L              | T475:      | 3 | 2,972  | 0,208 | 0,205  |
| 23 | Q9Y450 HBS1L_HUMAN  | E.SSNS#VSNHQLSGFDQAR.L        | S67:       | 2 | 2,9686 | 0,48  | -0,127 |
| 23 | P62937 PPIA_HUMAN   | K.KITIADCGQLE.-               |            | 2 | 2,9674 | 0,425 | -0,196 |
| 23 | Q5VUA4 ZN318_HUMAN  | R.ITVGNDFHFCVST#PE.R          | T161:      | 2 | 2,965  | 0,332 | 0      |
| 23 | Q8IXM3 RM41_HUMAN   | E.KDFKDGTFDPDNLE.K            |            | 2 | 2,9647 | 0,317 | -1,636 |
| 23 | Q58FG1 HS904_HUMAN  | E.GKTLVSVTKE.D                |            | 2 | 2,961  | 0,356 | 0      |
| 23 | Q16555 DPYL2_HUMAN  | E.GHVLSRPEEVEAE.A             |            | 2 | 2,9602 | 0,327 | 0      |
| 23 | Q13136 LIPA1_HUMAN  | K.RSS#DGSLSHEEDLAK.V          | S239:      | 2 | 2,9602 | 0,236 | -0,713 |
| 23 | P49321 NASP_HUMAN   | R.M*AVLNEQVKE.A               |            | 2 | 2,9581 | 0,215 | 0,207  |
| 23 | Q92783 STAM1_HUMAN  | E.FKNDPQLSLISAM*IK.N          |            | 2 | 2,9552 | 0,133 | -0,284 |



|    |                     |                              |              |   |        |       |        |
|----|---------------------|------------------------------|--------------|---|--------|-------|--------|
| 23 | Q9BXS6 NUSAP_HUMAN  | K.TITGNSAAVIT#PFKLTTE.A      | T338:        | 2 | 2,951  | 0,382 | 0,126  |
| 23 | O75531 BAF_HUMAN    | K.AYVVLGQFLVLK.K             |              | 2 | 2,9502 | 0,447 | -0,181 |
| 23 | O75531 BAF_HUMAN    | D.KAYVVLGQFLVLK.K            |              | 3 | 2,9493 | 0,148 | -0,124 |
| 23 | Q5VZK9 LR16A_HUMAN  | R.YGVQVM*GSGLLAE.M           |              | 2 | 2,944  | 0,38  | 0      |
| 23 | Q9Y520 Q9Y520_HUMAN | E.SENSCNKEEVPVFR.Q           |              | 3 | 2,9424 | 0,22  | 0,301  |
| 23 | P22059 OSBP1_HUMAN  | R.GATVLPANTPGNVGSGK.D        |              | 2 | 2,9419 | 0,421 | -0,238 |
| 23 | Q9P2B4 CT2NL_HUMAN  | K.VSSPLSPLS#PGIKS#PTIPRAE.R  | S563:S568:   | 3 | 2,9418 | 0,1   | -0,16  |
| 23 | O95989 NUDT3_HUMAN  | K.VLQYHKPVQASYFE.T           |              | 2 | 2,9415 | 0,438 | 0      |
| 23 | Q8TEX9 IPO4_HUMAN   | E.LCGVLKAVLQR.K              |              | 3 | 2,9387 | 0,177 | 0,436  |
| 23 | Q9HDC9 APMAP_HUMAN  | R.SLHDPDGLVATYISE.V          |              | 2 | 2,9373 | 0,405 | 0      |
| 23 | P42166 LAP2A_HUMAN  | R.EQGT#ESRSST#PLPTISSAE.N    | T154:T160:   | 2 | 2,9351 | 1     | 0,329  |
| 23 | Q9Y4B6 VPRBP_HUMAN  | R.HLPS#PPTLDSIITE.Y          | S1000:       | 2 | 2,9351 | 0,366 | -0,229 |
| 23 | Q9Y3D7 TIM16_HUMAN  | E.LKIQAQEDRE.K               |              | 2 | 2,9336 | 0,329 | -0,496 |
| 23 | Q9NVD7 PARVA_HUMAN  | K.SPSVPKS#PTPKS#PPSR.K       | S14:S19:     | 3 | 2,9326 | 0,263 | -0,607 |
| 23 | Q99569 PKP4_HUMAN   | R.SGM*TAVPQHGLPSLQR.T        |              | 3 | 2,9316 | 0,161 | 0      |
| 23 | P55010 IF5_HUMAN    | K.VLTLSDDLERTIEE.R           |              | 2 | 2,931  | 0,265 | -0,149 |
| 23 | Q9NX24 NOLA2_HUMAN  | K.IKADPDGPEAQAE.A            |              | 2 | 2,9225 | 0,324 | -0,546 |
| 23 | P78316 NOP14_HUMAN  | E.LTHYGQSLADIEK.H            |              | 2 | 2,9189 | 0,31  | -0,827 |
| 23 | Q8N163 K1967_HUMAN  | K.M*LLSLPEKVVS#PPEPEKE.E     | S569:        | 3 | 2,9156 | 0,141 | -0,173 |
| 23 | Q9P0K7 RAI14_HUMAN  | E.NAGIQSLLSK.I               |              | 2 | 2,9154 | 0,368 | 0      |
| 23 | Q13428 TCOF_HUMAN   | K.SPQVKPASTM*GM*GPLGK.G      |              | 3 | 2,9144 | 0,258 | 0      |
| 23 | P18583 SON_HUMAN    | R.SAAS#PVVSSM*PER.A          | S1769:       | 2 | 2,9116 | 0,387 | -0,345 |
| 23 | Q8NI27 THOC2_HUMAN  | K.TPVSGSLKS#PVPR.S           | S1278:       | 3 | 2,9106 | 0,243 | 0,26   |
| 23 | P11021 GRP78_HUMAN  | K.VTHAVVTVPAYFND.A           |              | 2 | 2,9087 | 0,159 | 0,159  |
| 23 | Q8IX12 CCAR1_HUMAN  | K.SCALAEDPQELRD.G            |              | 2 | 2,9058 | 0,389 | 0,162  |
| 23 | Q9NZT2 OGFR_HUMAN   | E.AGGHGEDRPEPLS#PKE.S        | S378:        | 2 | 2,9056 | 0,425 | -0,486 |
| 23 | Q9UQ35 SRRM2_HUMAN  | R.VSGRT#SPLLDR.A             | T2397:       | 2 | 2,9031 | 0,245 | -0,885 |
| 23 | Q12802 AKP13_HUMAN  | E.LRHPSGEER.V                |              | 3 | 2,9026 | 0,301 | 0,521  |
| 23 | Q9HAW4 CLSPN_HUMAN  | E.DDTQSQLLDADGFLNVR.N        |              | 2 | 2,9003 | 0,399 | 0,256  |
| 23 | Q9UJU6 DBNL_HUMAN   | R.ADLPAEPPAPST#PPCLVQAE.EE.A | T321:        | 2 | 2,8983 | 0,42  | 0,703  |
| 23 | P31946 1433B_HUMAN  | E.SYKDSTLIM*QLLR.D           |              | 2 | 2,8978 | 0,345 | 0,077  |
| 23 | P55072 TERA_HUMAN   | R.QTNPSAM*EVEEDDPVPE.I       |              | 2 | 2,8974 | 0,214 | 0,321  |
| 23 | P35269 T2FA_HUMAN   | R.LRLDTGPQS#LSGKST#PQPPSGK.T | S431:T437:   | 3 | 2,8952 | 0,139 | -0,683 |
| 23 | Q4KMP7 TB10B_HUMAN  | R.RAS#AGPAPGPVVTA.E.G        | S412:        | 2 | 2,8914 | 0,344 | 0,752  |
| 23 | Q5TCX8 M3KL4_HUMAN  | E.VIKSS#LFSKGSDIWSY#GVLLWE.L | S319:Y330:   | 3 | 2,8898 | 0,205 | 0,684  |
| 23 | Q9Y2W1 TR150_HUMAN  | R.SPALKSPLQSVVVR.R           |              | 3 | 2,8892 | 0,318 | 1,111  |
| 23 | Q5SW79 CE170_HUMAN  | R.LGS#LSARS#DSE.A            | S1160:S1165: | 2 | 2,889  | 0,395 | -0,095 |
| 23 | Q9NQS7 INCE_HUMAN   | E.QHVTQLM*STEPLPR.T          |              | 3 | 2,8888 | 0,23  | -0,111 |
| 23 | P78371 TCPB_HUMAN   | R.SLHDALCVLAQTVK.D           |              | 3 | 2,8885 | 0,124 | 0      |

|    |                    |                                   |        |   |        |       |        |
|----|--------------------|-----------------------------------|--------|---|--------|-------|--------|
| 23 | P27694 RFA1_HUMAN  | K.VIDQQNGLYR.C                    |        | 2 | 2,8839 | 0,377 | -0,809 |
| 23 | P48634 BAT2_HUMAN  | E.ALTTVTVAPAPR.R                  |        | 2 | 2,8836 | 0,444 | -1,019 |
| 23 | P04406 G3P_HUMAN   | K.LVINGNPITIFQERDPS#KIK.W         | S83:   | 3 | 2,8809 | 0,175 | 0,077  |
| 23 | Q14865 ARI5B_HUMAN | E.DLDLVIAGK.K                     |        | 2 | 2,8758 | 0,302 | 0,129  |
| 23 | P05787 K2C8_HUMAN  | K.LVSES#SDVLPK.-                  | S477:  | 2 | 2,8751 | 0,249 | 0,292  |
| 23 | Q9UBU7 DBF4A_HUMAN | K.LLFISEIPHPS#NE.L                | S420:  | 2 | 2,875  | 0,333 | -0,073 |
| 23 | Q3T8J9 GON4L_HUMAN | E.SPSGIDTSET#SPKAPR.G             | T2106: | 3 | 2,8745 | 0,316 | 0,107  |
| 23 | Q9C0C2 TB182_HUMAN | E.AADSDAHLFQDSTEPR.A              |        | 3 | 2,8729 | 0,316 | -0,208 |
| 23 | Q9Y2K5 R3HD2_HUMAN | K.ASS#FSGISILTR.G                 | S349:  | 2 | 2,872  | 0,303 | 0      |
| 23 | Q12792 TWF1_HUMAN  | K.YLLSQSSPAPLTAEEEE.L             |        | 2 | 2,87   | 0,471 | 0,27   |
| 23 | Q5VZ89 DEN4C_HUMAN | E.SGM*TTAFIHALER.R                |        | 3 | 2,8695 | 0,365 | 0,063  |
| 23 | P50991 TCPD_HUMAN  | K.IGLIQFCLSAPK.T                  |        | 2 | 2,8695 | 0,344 | -0,453 |
| 23 | Q05682 CALD1_HUMAN | E.KQS#VDKVTSPTKV.-                | S783:  | 3 | 2,8694 | 0,211 | -1,1   |
| 23 | Q9Y4B6 VPRBP_HUMAN | R.KLS#SEPLPLDEE.A                 | S202:  | 2 | 2,8694 | 0,152 | 0      |
| 23 | Q56NI9 ESCO2_HUMAN | K.STVYPIFSASSVNSK.R               |        | 2 | 2,8685 | 0,43  | 0,384  |
| 23 | Q6S8J3 A26CA_HUMAN | E.KSYELPDGQVITIGNE.R              |        | 2 | 2,8675 | 0,457 | -0,554 |
| 23 | P42166 LAP2A_HUMAN | R.SSTPLPTISSAENTR.Q               |        | 2 | 2,8667 | 0,438 | 0      |
| 23 | Q8TEW0 PARD3_HUMAN | K.AGS#PSRDVGPSLGLKK.S             | S873:  | 3 | 2,8641 | 0,306 | -0,333 |
| 23 | P40222 TXLNA_HUMAN | R.RPEGPGAQAPSS#PRVTEAPCYPGAPSTE.A | S515:  | 3 | 2,8634 | 0,242 | 0,311  |
| 23 | P04264 K2C1_HUMAN  | K.SLNNQFASFIDK.V                  |        | 2 | 2,8628 | 0,227 | -0,441 |
| 23 | P60709 ACTB_HUMAN  | E.EHPVLLTEAPLNPK.A                |        | 2 | 2,8621 | 0,481 | 0,078  |
| 23 | Q58FF7 H90B3_HUMAN | K.HSQFIGYPITLYLEK.E               |        | 3 | 2,8604 | 0,145 | 0,101  |
| 23 | P54578 UBP14_HUMAN | R.YAGALRAS#GE.M                   | S143:  | 2 | 2,8604 | 0,377 | -0,227 |
| 23 | O60812 HNRCL_HUMAN | R.VFIGNLNTLVVK.K                  |        | 2 | 2,8597 | 0,283 | -0,278 |
| 23 | P49736 MCM2_HUMAN  | E.SFTM*AS#SPAQR.R                 | S12:   | 2 | 2,8588 | 0,414 | -0,572 |
| 23 | Q15084 PDIA6_HUMAN | K.LAAVDATVNQVLASR.Y               |        | 3 | 2,8571 | 0,213 | 0,239  |
| 23 | Q13112 CAF1B_HUMAN | R.LDENKGGTESLDP.-                 |        | 2 | 2,857  | 0,4   | -0,355 |
| 23 | Q9Y2X9 ZN281_HUMAN | E.SQKEDPFNIAEPR.V                 |        | 3 | 2,8562 | 0,126 | 0,538  |
| 23 | P31946 1433B_HUMAN | K.DSTLIM*QLLR.D                   |        | 2 | 2,8561 | 0,181 | -0,202 |
| 23 | O15061 DMN_HUMAN   | K.VALLYLDNEEEEND.G                |        | 2 | 2,856  | 0,337 | -1,025 |
| 23 | Q9Y2L9 LRCH1_HUMAN | E.DSCHRLS#PVKGE.F                 | S370:  | 3 | 2,8543 | 0,134 | -0,874 |
| 23 | Q2M2I8 AAK1_HUMAN  | R.ILSDVT#HSAVFGVPASK.S            | T640:  | 3 | 2,8541 | 0,22  | 0,101  |
| 23 | P41162 ETV3_HUMAN  | R.FHFPLDTHS#PTNDVQPGR.F           | S159:  | 3 | 2,8525 | 0,255 | 0      |
| 23 | P06748 NPM_HUMAN   | K.CGSGPVHISGQHLVAVEED.A           |        | 2 | 2,8497 | 0,327 | -0,735 |
| 23 | P58546 MTPN_HUMAN  | K.GEDVNRT#LE.G                    | T31:   | 2 | 2,8459 | 0,246 | -0,439 |
| 23 | P31943 HNRH1_HUMAN | K.HTGPN#PDTANDGFVR.L              | S104:  | 3 | 2,8458 | 0,12  | 0      |
| 23 | P42356 PI4KA_HUMAN | R.KTS#SVSSISQVSPE.R               | S198:  | 2 | 2,8433 | 0,242 | 0,161  |
| 23 | Q56P03 EAPP_HUMAN  | E.VDVLLHGTPDQKR.K                 |        | 3 | 2,8422 | 0,187 | -0,371 |
| 23 | Q71RC2 LARP4_HUMAN | K.DGLNQTTIPVS#PPSTTKPSR.A         | S583:  | 3 | 2,841  | 0,208 | -0,168 |

|    |                    |                              |            |   |        |       |        |
|----|--------------------|------------------------------|------------|---|--------|-------|--------|
| 23 | Q15085 ARHGB_HUMAN | R.NSVLSDPGLDS#PRT#SPVIM*AR.V | S251:T254: | 3 | 2,8403 | 0,264 | -0,306 |
| 23 | Q00341 VIGLN_HUMAN | R.ILS#IQKDLANIAE.V           | S645:      | 2 | 2,8401 | 0,327 | -0,324 |
| 23 | Q09666 AHNK_HUMAN  | K.LS#GPSLKM*PSLE.I           | S4900:     | 2 | 2,8374 | 0,3   | 0,36   |
| 23 | Q13442 HAP28_HUMAN | K.GVEGLIDIENPNR.V            |            | 2 | 2,8329 | 0,309 | -0,086 |
| 23 | Q9UQ35 SRRM2_HUMAN | R.VSGRTS#PPLDR.A             | S2398:     | 2 | 2,8319 | 0,198 | -0,266 |
| 23 | Q96L73 NSD1_HUMAN  | E.SRHGAVKS#PFLPLAPQTE.T      | S224:      | 3 | 2,8294 | 0,183 | -0,091 |
| 23 | P46777 RL5_HUMAN   | E.DAYKKQFSQYIK.N             |            | 2 | 2,8291 | 0,347 | -0,723 |
| 23 | Q99961 SH3G1_HUMAN | E.QSNGGFPCCTAPK.I            |            | 2 | 2,8291 | 0,411 | 0,268  |
| 23 | Q6P0N0 CN106_HUMAN | R.ASVQGVPLESSNNDIFLPVK.Q     |            | 2 | 2,8276 | 0,312 | 0      |
| 23 | Q9NSK0 KLC4_HUMAN  | R.RTS#QEGPGDSVKFE.G          | S519:      | 2 | 2,8273 | 0,382 | -0,83  |
| 23 | Q86YP4 P66A_HUMAN  | R.VNGLTTVALKE.T              |            | 2 | 2,8262 | 0,326 | 0,213  |
| 23 | Q9NR09 BIRC6_HUMAN | K.IFSQM*NNIM*SK.S            |            | 2 | 2,8259 | 0,439 | -0,635 |
| 23 | Q05682 CALD1_HUMAN | E.KQSVDKVTS#PTKV.-           | S789:      | 3 | 2,8254 | 0,269 | 0,672  |
| 23 | Q09666 AHNK_HUMAN  | E.VQAPDIDVQPGGSK.L           |            | 2 | 2,8252 | 0,334 | 0,173  |
| 23 | Q5VT06 CE350_HUMAN | E.LKS#PTELM*K.S              | S2460:     | 2 | 2,8243 | 0,168 | -0,534 |
| 23 | Q9UER7 DAXX_HUMAN  | K.KICTLPSPPS#PLASLAPVAD.S    | S671:      | 2 | 2,8242 | 0,271 | 0,693  |
| 23 | P23258 TBG1_HUMAN  | R.KDVFFYQADDE.H              |            | 2 | 2,8225 | 0,303 | 0,089  |
| 23 | Q09666 AHNK_HUMAN  | K.FKAEAPLSPKLE.G             |            | 2 | 2,8204 | 0,33  | -1,282 |
| 23 | P51114 FXR1_HUMAN  | E.NGLVTVADYISR.A             |            | 2 | 2,8192 | 0,419 | 0,093  |
| 23 | Q9NYV4 CD2L7_HUMAN | E.SKGS#PVFLPR.K              | S423:      | 2 | 2,8191 | 0,301 | 0      |
| 23 | Q96A49 SYAP1_HUMAN | E.AVRPKT#PPVVIK.S            | T248:      | 3 | 2,8158 | 0,118 | 0      |
| 23 | Q01484 ANK2_HUMAN  | E.KLYLQTTPTSSER.G            |            | 2 | 2,8127 | 0,194 | -0,6   |
| 23 | Q9C0C2 TB182_HUMAN | K.VSAPGVLTAQDR.V             |            | 2 | 2,8112 | 0,494 | 1,005  |
| 23 | P12004 PCNA_HUMAN  | D.LSHIGDAVVISCAK.D           |            | 2 | 2,8094 | 0,347 | 0,166  |
| 23 | Q71RC2 LARP4_HUMAN | K.DGLNQTTIPVSPSTTKPSR.A      |            | 3 | 2,8094 | 0,124 | 0,087  |
| 23 | Q76FK4 NOL8_HUMAN  | R.TCDSITPSKSS#PVPVSD.T       | S268:      | 2 | 2,8072 | 0,431 | -0,263 |
| 23 | Q92945 FUBP2_HUMAN | R.IIGDPYKVVQACE.M            |            | 2 | 2,8069 | 0,433 | -0,241 |
| 23 | Q01433 AMPD2_HUMAN | E.RQIS#QDVKLEPDILLR.A        | S168:      | 3 | 2,8057 | 0,278 | -0,274 |
| 23 | Q15042 RB3GP_HUMAN | K.AGDQLVPDNLKE.T             |            | 2 | 2,8052 | 0,191 | 0,094  |
| 23 | Q13242 SFRS9_HUMAN | R.IYVGNLPTDVR.E              |            | 2 | 2,8052 | 0,401 | 0,294  |
| 23 | P02545 LMNA_HUMAN  | R.KTLD#VAKE.R                | S94:       | 2 | 2,8046 | 0,276 | 0      |
| 23 | P22314 UBA1_HUMAN  | R.RVSGPDPKPGSNCSPAQSVLSE.V   |            | 3 | 2,8035 | 0,158 | -0,806 |
| 23 | Q8TEX9 IPO4_HUMAN  | E.LCGVLKAVLQR.K              |            | 2 | 2,803  | 0,198 | 0,097  |
| 23 | P19338 NUCL_HUMAN  | K.GLSEDTTEE.T                |            | 2 | 2,8019 | 0,332 | -1,555 |
| 23 | Q01518 CAP1_HUMAN  | K.AGAAPYVQAFD.S              |            | 2 | 2,8012 | 0,403 | 0,22   |
| 23 | Q14157 UBP2L_HUMAN | D.LKNPSDSAVHS#PFTKR.Q        | S416:      | 3 | 2,7998 | 0,352 | -0,491 |
| 23 | P33316 DUT_HUMAN   | K.HFIDVGAGVIDE.D             |            | 2 | 2,7991 | 0,232 | 0,096  |
| 23 | Q6ZRV2 FA83H_HUMAN | R.KGS#PTPGFSTR.R             | S881:      | 2 | 2,7943 | 0,181 | 0,402  |
| 23 | Q9NQS7 INCE_HUMAN  | E.QHVTQLM*STEPLPR.T          |            | 2 | 2,7941 | 0,458 | -0,443 |

|    |                    |                           |                 |   |        |       |        |
|----|--------------------|---------------------------|-----------------|---|--------|-------|--------|
| 23 | Q9NS87 KIF15_HUMAN | K.AQKEPCLFANTE.K          |                 | 2 | 2,7915 | 0,212 | -0,26  |
| 23 | P04264 K2C1_HUMAN  | K.LALDLEIATYR.T           |                 | 2 | 2,7913 | 0,424 | 0,191  |
| 23 | Q9Y490 TLN1_HUMAN  | K.TLSHPQQM*ALLDQTK.T      |                 | 3 | 2,7903 | 0,215 | -0,318 |
| 23 | Q9P270 SLAI2_HUMAN | R.RTSS#EELRDATSLAAGE.G    | S88:            | 2 | 2,7898 | 0,403 | 1,659  |
| 23 | Q6FIF0 ZFAN6_HUMAN | R.QNSSNGRIS#PPATSVSSLSE.S | S49:            | 3 | 2,788  | 0,183 | 0,349  |
| 23 | P51570 GALK1_HUMAN | R.KDGLVSLTTSE.G           |                 | 2 | 2,784  | 0,405 | 0,097  |
| 23 | P15408 FOSL2_HUMAN | K.ISPEERRS#PPAPGLQPM*R.S  | S200:           | 3 | 2,7836 | 0,083 | -0,087 |
| 23 | A6NIH7 U119B_HUMAN | E.DNIYSIDFTR.F            |                 | 2 | 2,7828 | 0,393 | 0,098  |
| 23 | P35030 TRY3_HUMAN  | D.TLDNDIMLIK.L            |                 | 2 | 2,7808 | 0,333 | -0,104 |
| 23 | P05787 K2C8_HUMAN  | R.KLLEGEES#RLE.S          | S400:           | 2 | 2,7805 | 0,306 | 0,176  |
| 23 | P11137 MAP2_HUMAN  | R.RKS#VPSETVVE.D          | S833:           | 2 | 2,7801 | 0,296 | -0,279 |
| 23 | P15336 ATF2_HUMAN  | K.M*PLDLSPLATPIIR.S       |                 | 2 | 2,7794 | 0,413 | -0,314 |
| 23 | P15408 FOSL2_HUMAN | E.FM*LVAHGVPVCK.I         |                 | 3 | 2,7764 | 0,289 | 1,004  |
| 23 | Q66GS9 CP135_HUMAN | E.KSSIFRT#PEKGDYNSE.I     | T488:           | 3 | 2,7762 | 0,158 | -0,378 |
| 23 | A1L390 PKHG3_HUMAN | R.HGS#ATDSLSCQLSPE.V      | S656:           | 2 | 2,7762 | 0,152 | -0,219 |
| 23 | Q96EV2 RBM33_HUMAN | K.VKPAS#PVAQPKEE.A        | S775:           | 2 | 2,7731 | 0,463 | -0,334 |
| 23 | Q9Y4B5 K0802_HUMAN | R.GRS#PPERPVPGTPKEPSLGE.Q | S297:           | 3 | 2,7703 | 0,305 | -0,169 |
| 23 | P04181 OAT_HUMAN   | E.NADKLGIIIRNE.L          |                 | 3 | 2,7686 | 0,302 | 0,337  |
| 23 | P45974 UBP5_HUMAN  | R.DGLGGLPDIVR.D           |                 | 2 | 2,7685 | 0,203 | 0,11   |
| 23 | Q8TEW0 PAR3_HUMAN  | K.AGSPS#RDVGPSLGLK.K      | S875:           | 2 | 2,7684 | 0,383 | -0,08  |
| 23 | P14618 KPYM_HUMAN  | D.VDM*VFASFIR.K           |                 | 2 | 2,7668 | 0,263 | 0,102  |
| 23 | P62753 RS6_HUMAN   | R.RLS#S#LRAST#SKSE.S      | S235:S236:T241: | 3 | 2,7667 | 0,327 | 0,33   |
| 23 | Q6ZN30 BNC2_HUMAN  | R.TRS#PSLLAHLE.N          | S294:           | 2 | 2,7637 | 0,306 | 1,123  |
| 23 | Q96T23 RSF1_HUMAN  | K.LSDDFDSPVK.G            |                 | 2 | 2,7632 | 0,303 | 0,326  |
| 23 | Q66K74 MAP1S_HUMAN | R.RSAS#PHDVDLCLVS#PCEFE.H | S731:S741:      | 3 | 2,7605 | 0,095 | -0,385 |
| 23 | Q86YP4 P66A_HUMAN  | E.GLVGDGPPVDM*R.T         |                 | 2 | 2,7585 | 0,501 | -0,862 |
| 23 | Q09666 AHNK_HUMAN  | R.EGAKDIDISS#PE.F         | S177:           | 2 | 2,7578 | 0,12  | 0,182  |
| 23 | Q14157 UBP2L_HUMAN | R.RYPSSISS#PQKD.L         | S609:           | 2 | 2,7543 | 0,263 | -0,717 |
| 23 | P51858 HDGF_HUMAN  | R.AGDLEDS#PKRPK.E         | S165:           | 2 | 2,7533 | 0,372 | -0,486 |
| 23 | Q96Q42 ALS2_HUMAN  | K.SSS#LVDIREEE.T          | S466:           | 2 | 2,753  | 0,253 | 0,363  |
| 23 | O43399 TPD54_HUMAN | R.NSATFKS#FE.D            | S166:           | 2 | 2,7504 | 0,452 | 0,11   |
| 23 | Q9HAU0 PKHA5_HUMAN | K.GSHFVPVGVPPR.A          |                 | 3 | 2,7487 | 0,087 | 0,805  |
| 23 | Q8TBC4 UBA3_HUMAN  | R.TLYLQSVTSIEE.R          |                 | 2 | 2,7471 | 0,094 | -0,265 |
| 23 | Q8N556 AFAP1_HUMAN | K.LSSERPSS#DGEVVE.N       | S283:           | 2 | 2,747  | 0,249 | -0,375 |
| 23 | P19174 PLCG1_HUMAN | R.GSDASGQLFHGR.A          |                 | 3 | 2,7461 | 0,46  | 0,52   |
| 23 | O15075 DCLK1_HUMAN | R.SGKSPS#PSPTS#PGSLRK.Q   | S332:S337:      | 3 | 2,745  | 0,221 | -1     |
| 23 | O15143 ARC1B_HUMAN | R.TQIACPNNE.V             |                 | 2 | 2,7447 | 0,32  | -0,094 |
| 23 | P04181 OAT_HUMAN   | E.NADKLGIIIR.N            |                 | 2 | 2,744  | 0,342 | 0      |
| 23 | Q04637 IF4G1_HUMAN | R.FSALQQAVPTESTDNRR.V     |                 | 3 | 2,7435 | 0,242 | -0,476 |

|    |                     |                                  |              |   |        |       |        |
|----|---------------------|----------------------------------|--------------|---|--------|-------|--------|
| 23 | Q96KN1 FA84B_HUMAN  | R.TT#PPPGRPPAPSSEEDGEAVAH.-      | T289:        | 3 | 2,7393 | 0,286 | -0,076 |
| 23 | Q92619 HMHA1_HUMAN  | R.AGS#PSPQPSGELPR.K              | S23:         | 2 | 2,7377 | 0,318 | 0,084  |
| 23 | Q9Y2W1 TR150_HUMAN  | K.SPLQSVVVR.R                    |              | 2 | 2,7376 | 0,323 | -0,248 |
| 23 | A7E2F7 A7E2F7_HUMAN | R.RYS#LIDPSSAPE.L                | S938:        | 2 | 2,7374 | 0,344 | -0,345 |
| 23 | Q05639 EF1A2_HUMAN  | R.GNVCGDSKSDPPQE.A               |              | 2 | 2,737  | 0,363 | -0,082 |
| 23 | Q96HE7 ERO1A_HUMAN  | E.NSFFAGDKKE.A                   |              | 2 | 2,7369 | 0,31  | -0,213 |
| 23 | P51784 UBP11_HUMAN  | E.GLYNVLM*YR.L                   |              | 2 | 2,736  | 0,394 | 0,107  |
| 23 | Q9UBU7 DBF4A_HUMAN  | K.LLFIS#EPIPHPSNE.L              | S413:        | 2 | 2,7301 | 0,349 | 0,146  |
| 23 | P00558 PGK1_HUMAN   | K.VSHVSTGGGASLE.L                |              | 2 | 2,7299 | 0,325 | 0,203  |
| 23 | Q9UKV3 ACINU_HUMAN  | K.ASLVALPEQTAS#EEET#PPPLLTKE.A   | S410:T414:   | 2 | 2,7295 | 0,239 | 0,9    |
| 23 | O43379 WDR62_HUMAN  | R.SIS#LGDSEGPVATLAQPLRRPSS#VGE.L | S1228:S1249: | 3 | 2,7286 | 0,219 | -0,063 |
| 23 | P52272 HNRPM_HUMAN  | K.GCGVVKFESPEVAE.R               |              | 2 | 2,7277 | 0,257 | -1,214 |
| 23 | P13639 EF2_HUMAN    | K.SDPVVSURE.T                    |              | 2 | 2,7212 | 0,396 | 0,232  |
| 23 | O60287 NPA1P_HUMAN  | E.THLVTQQPT#KSPGKE.R             | T1141:       | 3 | 2,717  | 0,208 | -0,74  |
| 23 | Q9BYW2 SETD2_HUMAN  | K.KDELPIFKSE.F                   |              | 2 | 2,7157 | 0,234 | -0,185 |
| 23 | Q9BRQ0 PYGO2_HUMAN  | E.GGGGPAPPPAPPSTGR.K             |              | 2 | 2,7137 | 0,516 | -0,444 |
| 23 | P04406 G3P_HUMAN    | E.GLM*TTVHAITATQK.T              |              | 3 | 2,7128 | 0,5   | 0,492  |
| 23 | P05387 RLA2_HUMAN   | K.NIEDVIAQGIGK.L                 |              | 2 | 2,7106 | 0,32  | -0,388 |
| 23 | P50897 PPT1_HUMAN   | E.KKIPGIYVLSLE.I                 |              | 2 | 2,7082 | 0,24  | 0,449  |
| 23 | P04406 G3P_HUMAN    | K.IISNASCTT#NCLAPLAK.V           | T154:        | 2 | 2,7082 | 0,095 | -0,064 |
| 23 | Q53H80 CF166_HUMAN  | R.TLDFDPLLSPAS#PK.R              | S21:         | 2 | 2,7074 | 0,374 | -0,232 |
| 23 | P68104 EF1A1_HUMAN  | R.RGNVAGDSKNDPPME.A              |              | 3 | 2,7073 | 0,267 | 0,231  |
| 23 | Q9Y490 TLN1_HUMAN   | K.SIAAATSALVK.A                  |              | 2 | 2,7038 | 0,148 | 0,355  |
| 23 | Q92945 FUBP2_HUMAN  | K.LFIIRGS#PQQIDHAK.Q             | S480:        | 3 | 2,7004 | 0,2   | 0,203  |
| 23 | O94888 UBXD7_HUMAN  | R.SESLIDASEDSQLE.A               |              | 2 | 2,699  | 0,333 | 0,16   |
| 23 | P07737 PROF1_HUMAN  | K.CSVIRDSLLQDGE.F                |              | 2 | 2,695  | 0,294 | -0,245 |
| 23 | Q12849 GRSF1_HUMAN  | E.NGIHFLNLRD.G                   |              | 3 | 2,6948 | 0,348 | -1,449 |
| 23 | P11413 G6PD_HUMAN   | K.KPGM*FFNPEESE.L                |              | 2 | 2,6943 | 0,264 | 0,085  |
| 23 | P07954 FUMH_HUMAN   | K.VAALTGLPFVTAPNKFE.A            |              | 2 | 2,6886 | 0,471 | 0,069  |
| 23 | P51858 HDGF_HUMAN   | R.AGDLEDS#PKRPK.E                | S165:        | 3 | 2,6885 | 0,233 | -0,243 |
| 23 | Q9NZI8 IF2B1_HUMAN  | R.LLVPTQYVGAIGKE.G               |              | 2 | 2,6874 | 0,394 | -0,305 |
| 23 | Q13242 SFRS9_HUMAN  | R.GS#PHYFS#PFRPY.-               | S211:S216:   | 2 | 2,6873 | 0,347 | 0      |
| 23 | Q9NRA8 4ET_HUMAN    | R.SSCSTPLSQANR.Y                 |              | 2 | 2,6869 | 0,347 | -0,187 |
| 23 | Q8IWA0 WDR75_HUMAN  | K.VQDTSNTGLGEDIIHQLSKSEE.K       |              | 3 | 2,6867 | 0,372 | -0,152 |
| 23 | Q96T23 RSF1_HUMAN   | E.IKLSDDFDSPVK.G                 |              | 2 | 2,6851 | 0,233 | -0,716 |
| 23 | Q53H80 CF166_HUMAN  | R.TLDFDPLLS#PASPKR.R             | S18:         | 3 | 2,6848 | 0,146 | 0      |
| 23 | Q15637 SF01_HUMAN   | E.RAYIVQLQIEDLTR.K               |              | 2 | 2,6822 | 0,084 | -0,071 |
| 23 | Q13042 CDC16_HUMAN  | R.KTPDSRPS#LEETFE.I              | S595:        | 2 | 2,6822 | 0,167 | -0,284 |
| 23 | P05787 K2C8_HUMAN   | E.TRDGKLVSESS#DVLPK.-            | S478:        | 2 | 2,68   | 0,365 | 0,067  |

|    |                     |                             |            |   |        |       |        |
|----|---------------------|-----------------------------|------------|---|--------|-------|--------|
| 23 | Q96B01 R51A1_HUMAN  | K.KVS#LSSDTTR.K             | S280:      | 2 | 2,6799 | 0,181 | -0,312 |
| 23 | P25398 RS12_HUMAN   | E.HQINLIKVDD.N              |            | 2 | 2,6797 | 0,288 | -0,306 |
| 23 | O43929 ORC4_HUMAN   | K.SNSLIHTE.C                |            | 2 | 2,6789 | 0,199 | 0,339  |
| 23 | Q7Z4H7 FA29A_HUMAN  | R.KRS#LSPLIKFSPVE.Q         | S906:      | 3 | 2,6776 | 0,124 | 0,109  |
| 23 | Q9BRK4 LZTS2_HUMAN  | R.AAAGVGG#LR.A              | S570:      | 2 | 2,6767 | 0,259 | 0,26   |
| 23 | B2RXH3 B2RXH3_HUMAN | R.GSQRGS#PRPLSFHCTE.S       | S111:      | 3 | 2,676  | 0,095 | -0,096 |
| 23 | Q12802 AKP13_HUMAN  | R.SLS#RPSSLIEQE.K           | S2563:     | 2 | 2,6757 | 0,248 | 0,513  |
| 23 | Q9H0G5 CCD55_HUMAN  | R.AKDKFLDQE.R               |            | 2 | 2,6718 | 0,189 | -0,446 |
| 23 | Q9Y2W1 TR150_HUMAN  | R.SIFQHIQSAQSQR.S           |            | 3 | 2,6701 | 0,291 | 0,418  |
| 23 | Q9UHS9 Q9UHS9_HUMAN | R.KFSVYDAKLTIHVHLSTFS#IED.F | S55:       | 3 | 2,67   | 0,091 | -0,807 |
| 23 | Q9P2M4 TBC14_HUMAN  | E.IGNPEPVPSCSAVHVR.R        |            | 2 | 2,6684 | 0,365 | -0,15  |
| 23 | P68104 EF1A1_HUMAN  | R.GNVAGDSKNDPPME.A          |            | 2 | 2,668  | 0,345 | -0,426 |
| 23 | Q9Y4B6 VPRBP_HUMAN  | R.KLSS#EPLPLDEE.A           | S203:      | 2 | 2,6662 | 0,357 | 0      |
| 23 | Q9UBR2 CATZ_HUMAN   | R.VGDYGSLSGR.E              |            | 2 | 2,6641 | 0,416 | 0,06   |
| 23 | Q9H204 MED28_HUMAN  | K.KPADIPQGSLAYLE.Q          |            | 2 | 2,6633 | 0,265 | -0,244 |
| 23 | O96019 ACL6A_HUMAN  | R.STGLILDGATHHTAIPVHD.G     |            | 3 | 2,6625 | 0,295 | 0,091  |
| 23 | P46821 MAP1B_HUMAN  | E.KEVPSKEEPS#PVKAE.V        | S614:      | 2 | 2,6618 | 0,449 | -0,352 |
| 23 | O75665 OFD1_HUMAN   | K.NITSSS#PERHIFGEDR.V       | S686:      | 3 | 2,6605 | 0,324 | 0,095  |
| 23 | Q8NI08 NCOA7_HUMAN  | K.STGHT#PTKPSGSSVSE.K       | T358:      | 2 | 2,6605 | 0,425 | -0,521 |
| 23 | Q96JM3 ZN828_HUMAN  | R.KTSPASLDFPE.S             |            | 2 | 2,6599 | 0,333 | 0,205  |
| 23 | Q9ULU4 PKCB1_HUMAN  | E.KADPGAVKDKAS#PEPE.K       | S668:      | 3 | 2,658  | 0,128 | -0,213 |
| 23 | P02545 LMNA_HUMAN   | R.LRLS#PS#PTSQR.S           | S390:S392: | 2 | 2,6552 | 0,271 | -0,696 |
| 23 | Q9UQ84 EXO1_HUMAN   | K.KPLS#PVRDNIQLTPE.A        | S815:      | 2 | 2,655  | 0,306 | -0,683 |
| 23 | Q9H6F5 CCD86_HUMAN  | R.LGGLRPES#PE.S             | S18:       | 2 | 2,6537 | 0,203 | 0,107  |
| 23 | O75381 PEX14_HUMAN  | E.INSLKGLLLNR.R             |            | 3 | 2,6509 | 0,143 | 0,516  |
| 23 | Q9HC35 EMAL4_HUMAN  | R.ASPSPQPSSQLQIHR.Q         |            | 2 | 2,6497 | 0,42  | -0,353 |
| 23 | P31040 DHS A_HUMAN  | E.AGFNTACVTK.L              |            | 2 | 2,6483 | 0,319 | -1,484 |
| 23 | Q9NQZ2 SAS10_HUMAN  | K.LYYD TDYGSK.S             |            | 2 | 2,6476 | 0,273 | -0,199 |
| 23 | Q86UP2 KTN1_HUMAN   | K.VEPVPVTKQPT#PPSE.A        | T153:      | 2 | 2,6464 | 0,318 | -0,29  |
| 23 | P22626 ROA2_HUMAN   | R.GGGGNFGPGPGSNFR.G         |            | 2 | 2,646  | 0,408 | -0,354 |
| 23 | P46108 CRK_HUMAN    | E.KYRPASASVSALIGGNQE.G      |            | 3 | 2,6456 | 0,177 | -1,287 |
| 23 | Q32MZ4 LRRF1_HUMAN  | K.DNAKIDGATQSSPAEPK.S       |            | 3 | 2,6451 | 0,249 | 0,317  |
| 23 | P35579 MYH9_HUMAN   | K.ANLQIDQINTDLNLE.R         |            | 2 | 2,6447 | 0,409 | 0      |
| 23 | Q99961 SH3G1_HUMAN  | K.ALYDFEPENDGE.L            |            | 2 | 2,6445 | 0,404 | 0,174  |
| 23 | Q53F19 CQ085_HUMAN  | E.LKM*ISTPS#PK.K            | S415:      | 2 | 2,6404 | 0,327 | -0,713 |
| 23 | P00558 PGK1_HUMAN   | K.DVLFLKDCVGPEVE.K          |            | 2 | 2,6385 | 0,372 | -0,151 |
| 23 | P08133 ANXA6_HUMAN  | R.GSIHDFPGFDPNQDAE.A        |            | 2 | 2,6377 | 0,453 | -0,28  |
| 23 | O95817 BAG3_HUMAN   | R.GYISIPVIHE.Q              |            | 2 | 2,6322 | 0,383 | -0,324 |
| 23 | P30837 AL1B1_HUMAN  | E.IFGPVQPLFK.F              |            | 2 | 2,6318 | 0,266 | -0,106 |

|    |                     |                             |              |   |        |       |        |
|----|---------------------|-----------------------------|--------------|---|--------|-------|--------|
| 23 | Q9Y2H0 DLGP4_HUMAN  | K.RNLS#YGDNSDPALE.A         | S760:        | 2 | 2,6302 | 0,181 | -1,047 |
| 23 | Q9ULH0 ARMS_HUMAN   | E.YLSDALLDKK.D              |              | 2 | 2,6263 | 0,301 | 0,209  |
| 23 | P35579 MYH9_HUMAN   | E.KVAAYDKLE.K               |              | 2 | 2,626  | 0,288 | -0,118 |
| 23 | Q8TDY2 RBCC1_HUMAN  | R.STELVLS#PDM*PR.T          | S243:        | 2 | 2,6231 | 0,301 | 0      |
| 23 | Q9UQR0 SCML2_HUMAN  | R.SVPGTTSPLVGDIS#PK.S       | S590:        | 2 | 2,6222 | 0,188 | -0,213 |
| 23 | Q13112 CAF1B_HUMAN  | E.IQSET#PGDAQGSPPELKRPR.L   | T531:        | 3 | 2,6198 | 0,241 | -0,816 |
| 23 | P12956 KU70_HUMAN   | R.DSLIFLVDASK.A             |              | 2 | 2,6163 | 0,34  | 0      |
| 23 | Q99961 SH3G1_HUMAN  | K.IAASSS#FR.S               | S288:        | 2 | 2,6127 | 0,393 | -0,465 |
| 23 | P35908 K22E_HUMAN   | K.VDLLNQEIEFLK.V            |              | 2 | 2,612  | 0,144 | 0      |
| 23 | P42345 FRAP_HUMAN   | K.TGTTVPES#IHS#FIGDGLVKPE.A | S2478:S2481: | 2 | 2,6114 | 0,273 | 0,416  |
| 23 | P35579 MYH9_HUMAN   | E.KQIATLHAQVAD.M            |              | 2 | 2,6112 | 0,387 | -0,754 |
| 23 | P48960 CD97_HUMAN   | R.CNPGFSSFSE.I              |              | 2 | 2,6107 | 0,292 | 0,108  |
| 23 | P62937 PPIA_HUMAN   | K.SIYGKFEDE.N               |              | 2 | 2,6105 | 0,384 | -0,401 |
| 23 | Q9GZS3 WDR61_HUMAN  | E.TVVTGSLDDLK.V             |              | 2 | 2,6087 | 0,423 | 0      |
| 23 | Q9BTC0 DIDO1_HUMAN  | K.VTVDDLNR.M                |              | 2 | 2,606  | 0,342 | -0,356 |
| 23 | Q66K74 MAP1S_HUMAN  | R.SAS#PHDVDLCLVS#PCEFE.H    | S731:S741:   | 2 | 2,6043 | 0,233 | 0,329  |
| 23 | O95678 K2C75_HUMAN  | E.VKAQYEDIANR.S             |              | 2 | 2,6038 | 0,399 | -0,373 |
| 23 | Q00536 PCTK1_HUMAN  | K.LPDTTSIFALK.E             |              | 2 | 2,6027 | 0,325 | -0,405 |
| 23 | Q07021 C1QBP_HUMAN  | K.AFVDFLSDEIKEE.R           |              | 2 | 2,6025 | 0,282 | -0,237 |
| 23 | Q9ULV4 COR1C_HUMAN  | K.SIKDTICNQDE.R             |              | 2 | 2,6025 | 0,27  | -0,092 |
| 23 | Q9UPN3 MACF1_HUMAN  | R.RGS#DASDFLLE.T            | S5372:       | 2 | 2,5998 | 0,259 | 0,087  |
| 23 | Q5SSJ5 HP1B3_HUMAN  | R.TVNSTRET#PPKSK.L          | T51:         | 3 | 2,5997 | 0,146 | -0,36  |
| 23 | Q9HC35 EMAL4_HUMAN  | E.SHSNDQSPQIR.A             |              | 2 | 2,5987 | 0,323 | -0,385 |
| 23 | Q9NX46 ARHL2_HUMAN  | E.AHDTVDLTSVLR.H            |              | 2 | 2,5979 | 0,385 | 0,092  |
| 23 | Q9UJM3 ERRFI_HUMAN  | E.DSTLSDFKYDVPGRR.S         |              | 3 | 2,5942 | 0,302 | 0,312  |
| 23 | P08670 VIME_HUMAN   | E.TNLDS#LPLVDTHSKR.T        | S430:        | 2 | 2,5941 | 0,271 | -0,069 |
| 23 | Q9BTC0 DIDO1_HUMAN  | E.AKVTVDLPLNR.M             |              | 2 | 2,5934 | 0,387 | -0,497 |
| 23 | P0C0S8 H2A1_HUMAN   | R.HLQLAIRNDEE.L             |              | 2 | 2,5933 | 0,176 | 0      |
| 23 | Q15464 SHB_HUMAN    | R.APGGGFKPIKHGS#PE.F        | S388:        | 3 | 2,5917 | 0,195 | 0,587  |
| 23 | B2RMZ9 B2RMZ9_HUMAN | R.APVS#PLKFSPFE.G           | S423:        | 2 | 2,5901 | 0,232 | -0,087 |
| 23 | Q9Y490 TLN1_HUMAN   | K.VM*VTNVTSLLK.T            |              | 2 | 2,584  | 0,256 | 0      |
| 23 | P00558 PGK1_HUMAN   | K.DVLFLKDCVGP.V             |              | 2 | 2,582  | 0,301 | 0,263  |
| 23 | P00558 PGK1_HUMAN   | K.ITLPVDFVTADK.F            |              | 2 | 2,582  | 0,4   | 0      |
| 23 | P55072 TERA_HUMAN   | E.THGHVGDALALCSE.A          |              | 2 | 2,5816 | 0,393 | 0,159  |
| 23 | Q9UQ35 SRRM2_HUMAN  | R.GEFSAS#PM*LK.S            | S1124:       | 2 | 2,5807 | 0,227 | 0      |
| 23 | P42166 LAP2A_HUMAN  | E.LVANNVTLPAGEQRK.D         |              | 3 | 2,5798 | 0,09  | -0,227 |
| 23 | Q14562 DHX8_HUMAN   | E.LVEEPPFLR.G               |              | 2 | 2,5775 | 0,261 | 0      |
| 23 | Q99569 PKP4_HUMAN   | E.GQTLVQPSVANR.A            |              | 2 | 2,5769 | 0,462 | -0,096 |
| 23 | Q15424 SAFB1_HUMAN  | R.KFDFDACNE.V               |              | 2 | 2,5761 | 0,31  | 0,106  |

|    |                    |                           |            |   |        |       |        |
|----|--------------------|---------------------------|------------|---|--------|-------|--------|
| 23 | P23258 TBG1_HUMAN  | K.DVFFYQADDE.H            |            | 2 | 2,5748 | 0,22  | 0      |
| 23 | Q13428 TCOF_HUMAN  | K.AGPVAVQVK.A             |            | 2 | 2,5738 | 0,118 | 0,14   |
| 23 | O75386 TULP3_HUMAN | R.CRLS#PSGSDSVFHEE.M      | S9:        | 2 | 2,5737 | 0,284 | 0,144  |
| 23 | P04406 G3P_HUMAN   | K.LISWYDNE.F              |            | 2 | 2,573  | 0,215 | 0,352  |
| 23 | P23588 IF4B_HUMAN  | K.VAPAQPSEEGPGRKDE.N      |            | 2 | 2,5728 | 0,294 | -0,22  |
| 23 | P46379 BAT3_HUMAN  | K.AAGARPLTS#PE.S          | S1081:     | 2 | 2,5688 | 0,276 | 0,424  |
| 23 | Q09666 AHNK_HUMAN  | K.AEAPLPS#PKLE.G          | S5110:     | 2 | 2,568  | 0,344 | -0,891 |
| 23 | P11021 GRP78_HUMAN | E.IDVNGILR.V              |            | 2 | 2,5676 | 0,237 | 0,271  |
| 23 | Q9ULW0 TPX2_HUMAN  | K.SSDQPLTVPV#PK.F         | S738:      | 2 | 2,5664 | 0,212 | 0      |
| 23 | Q9Y266 NUDC_HUMAN  | K.LKPNLNGADLPNYR.W        |            | 2 | 2,565  | 0,312 | 0,074  |
| 23 | P35659 DEK_HUMAN   | K.LKKPPTDEELKE.T          |            | 3 | 2,5619 | 0,123 | -0,641 |
| 23 | P51114 FXR1_HUMAN  | E.NGLVTVADYISRAES#QSR.Q   | S546:      | 2 | 2,5599 | 0,216 | 0,239  |
| 23 | O95989 NUDT3_HUMAN | E.DAIKVLQYHKPVQASYFE.T    |            | 3 | 2,5598 | 0,256 | 0      |
| 23 | P51858 HDGF_HUMAN  | K.YQVFFFGTHE.T            |            | 2 | 2,5592 | 0,27  | -0,191 |
| 23 | O95425 SVIL_HUMAN  | E.SSSTFSFSGR.D            |            | 2 | 2,559  | 0,344 | -0,23  |
| 23 | Q15424 SAFB1_HUMAN | K.ADSLLAVVK.R             |            | 2 | 2,5584 | 0,376 | -0,533 |
| 23 | Q5VZK9 LR16A_HUMAN | R.YGVQVMGSGLLAE.M         |            | 2 | 2,5578 | 0,268 | 0,092  |
| 23 | P62424 RL7A_HUMAN  | R.TNYNDRYDE.I             |            | 2 | 2,5577 | 0,349 | 0,103  |
| 23 | Q8TD16 BICD2_HUMAN | R.#PILLPKGLLAPE.A         | S582:      | 2 | 2,5554 | 0,359 | -0,256 |
| 23 | P49411 EFTU_HUMAN  | R.GITINAAHVE.Y            |            | 2 | 2,5542 | 0,286 | 0,476  |
| 23 | Q96RK0 CIC_HUMAN   | E.LLSVAAQTLSSDTK.A        |            | 2 | 2,5525 | 0,305 | 0      |
| 23 | P49321 NASP_HUMAN  | R.MAVLNEQVKE.A            |            | 2 | 2,5497 | 0,162 | 0      |
| 23 | Q15393 SF3B3_HUMAN | E.DHDFQHVVE.M             |            | 2 | 2,549  | 0,388 | 0,104  |
| 23 | P13797 PLST_HUMAN  | R.HVIPM*NPNTDDLK.A        |            | 3 | 2,5482 | 0,186 | -1,545 |
| 23 | Q9UKS6 PACN3_HUMAN | E.VTLTSIVPTR.D            |            | 2 | 2,5471 | 0,439 | -0,112 |
| 23 | Q13586 STIM1_HUMAN | R.LTEPQHGLGSQR.D          |            | 2 | 2,5464 | 0,393 | -0,922 |
| 23 | Q5VZ89 DEN4C_HUMAN | E.SGM*TTAFIHALER.R        |            | 2 | 2,5449 | 0,327 | 0,168  |
| 23 | Q8IVE3 PKHH2_HUMAN | R.LSSLTFGCFLSR.A          |            | 2 | 2,5442 | 0,242 | -0,44  |
| 23 | O60271 JIP4_HUMAN  | R.SASQSS#LDKLDQE.L        | S733:      | 2 | 2,5442 | 0,16  | -0,738 |
| 23 | P22314 UBA1_HUMAN  | R.VSGPDPKPGSNCSQAQSVLSE.V |            | 3 | 2,5423 | 0,19  | 0,173  |
| 23 | P22314 UBA1_HUMAN  | R.VSGPDPKPGSNCSQAQSVLSE.V |            | 2 | 2,5393 | 0,299 | 0,346  |
| 23 | P04075 ALDOA_HUMAN | K.GILAADESTGS#IAKR.L      | S39:       | 2 | 2,5384 | 0,196 | -0,389 |
| 23 | Q9HC52 CBX8_HUMAN  | K.FPAGHSVIQLAR.R          |            | 3 | 2,5382 | 0,095 | 0,282  |
| 23 | P49327 FAS_HUMAN   | R.VAAAVDLI.K.S            |            | 2 | 2,5376 | 0,258 | -0,06  |
| 23 | Q5SRE5 NU188_HUMAN | E.LSTLLSSLSR.Y            |            | 2 | 2,5371 | 0,218 | -0,113 |
| 23 | Q13144 EI2BE_HUMAN | K.GYNPAEVGAAGK.G          |            | 2 | 2,5364 | 0,388 | -0,108 |
| 23 | Q86UP2 KTN1_HUMAN  | E.SDASKIPGK.K             |            | 2 | 2,5358 | 0,234 | 0      |
| 23 | P12694 ODBA_HUMAN  | R.IGHHST#SDDSSAYRS#VDE.V  | T338:S347: | 2 | 2,5358 | 1     | -0,69  |
| 23 | O95678 K2C75_HUMAN | K.AQYEDIANR.S             |            | 2 | 2,5337 | 0,261 | -0,113 |



|    |                     |                             |            |   |        |       |        |
|----|---------------------|-----------------------------|------------|---|--------|-------|--------|
| 23 | P67870 CSK2B_HUMAN  | K.IHPM*AYQLQLQAASNFKS#PVK.T | S209:      | 3 | 2,5327 | 0,298 | -1,335 |
| 23 | Q8IZ21 PHAR4_HUMAN  | R.KLS#QRPTVAE.L             | S628:      | 2 | 2,5325 | 0,226 | 0      |
| 23 | Q7Z4Q2 HEAT3_HUMAN  | R.LGPLLLDPSLAVRE.T          |            | 2 | 2,5318 | 0,322 | -0,49  |
| 23 | P55010 IF5_HUMAN    | E.LGAQTQFDVK.N              |            | 2 | 2,5294 | 0,305 | -0,11  |
| 23 | O00231 PSD11_HUMAN  | E.ASIDILHSIVK.R             |            | 2 | 2,5291 | 0,364 | -0,102 |
| 23 | O75152 ZC11A_HUMAN  | K.LSVQSNPS#PQLR.S           | S132:      | 2 | 2,5285 | 0,31  | 0      |
| 23 | Q13428 TCOF_HUMAN   | R.NPQNSTVLAR.G              |            | 2 | 2,5263 | 0,428 | 0      |
| 23 | P68431 H31_HUMAN    | E.DTNLCAIHAK.R              |            | 2 | 2,525  | 0,108 | 0,32   |
| 23 | Q86YS7 K0528_HUMAN  | E.IIGSPIPEPR.Q              |            | 2 | 2,521  | 0,325 | -0,113 |
| 23 | P68104 EF1A1_HUMAN  | K.IGGIGTVPVGRVE.T           |            | 2 | 2,5205 | 0,38  | -0,389 |
| 23 | Q9Y266 NUDC_HUMAN   | R.QKS#M*GLPTSDE.Q           | S298:      | 2 | 2,5188 | 0,161 | -0,189 |
| 23 | P04264 K2C1_HUMAN   | K.YEELQITAGR.H              |            | 2 | 2,5185 | 0,176 | -0,31  |
| 23 | P49327 FAS_HUMAN    | E.SIIIIHSSLAEP.V            |            | 2 | 2,5175 | 0,178 | 0,32   |
| 23 | Q13136 LIPA1_HUMAN  | K.RSS#DGSLSHEDLAK.V         | S239:      | 3 | 2,5164 | 0,121 | -0,428 |
| 23 | Q09666 AHNK_HUMAN   | R.APKM*#SLPDVDLD.L          | S1068:     | 2 | 2,5149 | 0,156 | 0,349  |
| 23 | Q15003 CND2_HUMAN   | R.KAPLNIPGTPVLE.D           |            | 2 | 2,5133 | 0,387 | 0,09   |
| 23 | Q68DK2 ZFY26_HUMAN  | E.IS#SRSPPEKPKQE.S          | S700:      | 3 | 2,513  | 0,251 | 0,702  |
| 23 | P04075 ALDOA_HUMAN  | R.ALANSLACQGK.Y             |            | 2 | 2,5117 | 0,335 | 0,108  |
| 23 | P31946 1433B_HUMAN  | D.STLIM*QLLR.D              |            | 2 | 2,51   | 0,119 | 0      |
| 23 | Q9NSD9 SYFB_HUMAN   | R.DLLFQALGR.T               |            | 2 | 2,5084 | 0,291 | 0,118  |
| 23 | Q9NQS1 AVEN_HUMAN   | R.DSQKPTS#PLQSAGDHLEEE.L    | S273:      | 3 | 2,5075 | 0,144 | 0      |
| 23 | O94880 PHF14_HUMAN  | R.NRPLDFVSM*EE.L            |            | 2 | 2,506  | 0,4   | -0,499 |
| 23 | P29401 TKT_HUMAN    | E.DFVQGQAK.V                |            | 2 | 2,5054 | 0,316 | -0,068 |
| 23 | Q12888 TP53B_HUMAN  | K.M*VIQGPSS#PQGE.A          | S1114:     | 2 | 2,5053 | 0,337 | -0,552 |
| 23 | Q6NYC8 PHTNS_HUMAN  | E.ILVLGGYLR.L               |            | 2 | 2,5016 | 0,249 | 0,061  |
| 23 | Q13153 PAK1_HUMAN   | R.SVIEPLPVTPTD.D            |            | 2 | 2,5014 | 0,392 | -0,186 |
| 23 | P24941 CDK2_HUMAN   | E.GTY#GVVYKARNKLTGE.V       | Y15:       | 3 | 2,5001 | 0,088 | 0,299  |
| 23 | Q15181 IPYR_HUMAN   | K.HTGCCGDNDPIDVCE.I         |            | 2 | 2,4996 | 0,398 | 0      |
| 23 | Q9NZI8 IF2B1_HUMAN  | R.LLVPTQYVGAIIIGK.E         |            | 2 | 2,4955 | 0,381 | 0,166  |
| 23 | P28066 PSA5_HUMAN   | R.ITSPLM*EPSS#IEKIVE.I      | S63:       | 2 | 2,494  | 0,23  | -0,065 |
| 23 | Q96A33 CCD47_HUMAN  | R.TLLFTFNVPGSGNTYPK.D       |            | 2 | 2,4885 | 0,193 | 0,329  |
| 23 | O60841 IF2P_HUMAN   | E.GNTVHIEVK.E               |            | 2 | 2,4858 | 0,353 | -0,245 |
| 23 | O95239 KIF4A_HUMAN  | R.RRT#FS#LTE.V              | T799:S801: | 2 | 2,4848 | 0,288 | 0,313  |
| 23 | Q9NQW6 ANLN_HUMAN   | E.LLPKTPIS#PLKTGVSKPIVK.S   | S323:      | 3 | 2,4832 | 0,155 | 0,167  |
| 23 | P30101 PDIA3_HUMAN  | R.FLQDYFDGNLK.R             |            | 2 | 2,4827 | 0,244 | 0,09   |
| 23 | P23921 RIR1_HUMAN   | K.SNQQLNGTIK.C              |            | 2 | 2,4826 | 0,318 | -0,332 |
| 23 | P07814 SYEP_HUMAN   | K.EYIPGQPPLSQSSDS#SPTR.N    | S885:      | 2 | 2,4824 | 0,255 | 0,689  |
| 23 | Q9UKV3 ACINU_HUMAN  | K.TTS#PLEEEERE.I            | S365:      | 2 | 2,4824 | 0,301 | -0,261 |
| 23 | Q9NZN5 ARHG_C_HUMAN | E.AETDPGDVLGR.T             |            | 2 | 2,4815 | 0,348 | 0,108  |

|    |                    |                                       |            |   |        |       |        |
|----|--------------------|---------------------------------------|------------|---|--------|-------|--------|
| 23 | Q9Y2W1 TR150_HUMAN | R.ERS#PALKSPLQSVVVR.R                 | S248:      | 3 | 2,4787 | 0,314 | 0,198  |
| 23 | P42684 ABL2_HUMAN  | R.DKS#PSSLE.D                         | S631:      | 2 | 2,4784 | 0,191 | 0,347  |
| 23 | Q99618 CDCA3_HUMAN | K.TSSGDPPS#PLVK.Q                     | S87:       | 2 | 2,4752 | 0,268 | -0,096 |
| 23 | Q8IYB3 SRRM1_HUMAN | E.ATSTSDILK.V                         |            | 2 | 2,4729 | 0,302 | 0,065  |
| 23 | Q9P2B4 CT2NL_HUMAN | K.VSSPLS#PLSPGIKS#PTIPR.A             | S560:S568: | 2 | 2,4719 | 0,161 | 0,583  |
| 23 | Q7L014 DDX46_HUMAN | R.KLLEPVDHGKIE.Y                      |            | 3 | 2,4718 | 0,166 | -0,597 |
| 23 | Q9UPZ3 HPS5_HUMAN  | E.LILKFEPLDSACSSR.R                   |            | 2 | 2,4717 | 0,299 | 0,07   |
| 23 | P05387 RLA2_HUMAN  | K.LASVPAGGAVAVSAAPGSAAPAAGSAPAAAEEK.K |            | 3 | 2,4706 | 0,176 | -0,264 |
| 23 | A4D2B0 YG036_HUMAN | R.ADGSVTLVLPQTR.G                     |            | 2 | 2,4699 | 0,358 | 0      |
| 23 | Q9H2G2 SLK_HUMAN   | K.LADFGVSAK.N                         |            | 2 | 2,4698 | 0,332 | 0,134  |
| 23 | O15305 PMM2_HUMAN  | K.TIYFFGDKTM*PGGNDHE.I                |            | 3 | 2,4691 | 0,102 | 0,282  |
| 23 | Q8NFF5 FAD1_HUMAN  | K.CLS#PGGHPTYPAYLLE.N                 | S563:      | 2 | 2,466  | 0,284 | 0,121  |
| 23 | Q9BSJ8 ESYT1_HUMAN | E.TDLSQGVAR.W                         |            | 2 | 2,4637 | 0,118 | -1,224 |
| 23 | P40222 TXLNA_HUMAN | R.RPEGPGAQAPSS#PR.V                   | S515:      | 3 | 2,463  | 0,257 | -0,43  |
| 23 | P07814 SYEP_HUMAN  | E.KAPKDQVDIAVQE.L                     |            | 2 | 2,4625 | 0,271 | -0,085 |
| 23 | Q96TC7 FA82C_HUMAN | R.KDS#LDLEEE.A                        | S212:      | 2 | 2,4607 | 0,164 | -0,105 |
| 23 | P35251 RFC1_HUMAN  | K.NKPLS#PIKLT#PTSVLD.Y                | S156:T161: | 2 | 2,4574 | 0,225 | -0,13  |
| 23 | Q12996 CSTF3_HUMAN | E.GNGPVESNAVLTK.A                     |            | 2 | 2,4573 | 0,359 | -0,759 |
| 23 | O43852 CALU_HUMAN  | K.IDGDKDGFVTVDE.L                     |            | 2 | 2,4553 | 0,307 | 0      |
| 23 | Q99747 SNAG_HUMAN  | K.LGLSLVVPGGGIK.K                     |            | 2 | 2,4553 | 0,172 | -0,101 |
| 23 | O43719 HTSF1_HUMAN | K.RGFEGSCS#QKESEE.G                   | S481:      | 2 | 2,4549 | 0,383 | -0,143 |
| 23 | Q9Y2W2 WBP11_HUMAN | E.LTPLQAMM*LR.M                       |            | 2 | 2,4538 | 0,093 | 0      |
| 23 | P04406 G3P_HUMAN   | E.GLM*TTVHAITAT#QK.T                  | T184:      | 3 | 2,4535 | 0,174 | 0,117  |
| 23 | Q8IZ21 PHAR4_HUMAN | R.S#SSPVQVEEPPVR.L                    | S116:      | 2 | 2,4527 | 0,16  | -0,16  |
| 23 | Q9H0B6 KLC2_HUMAN  | R.TLSSSSM*DLSR.R                      |            | 2 | 2,4496 | 0,351 | -0,305 |
| 23 | P00519 ABL1_HUMAN  | R.QVTVAPASGLPHKEE.A                   |            | 3 | 2,4485 | 0,206 | 0,117  |
| 23 | Q9UPT6 JIP3_HUMAN  | K.AFGINTDSLYHE.L                      |            | 2 | 2,4475 | 0,275 | 0      |
| 23 | Q9UBG0 MRC2_HUMAN  | R.TLGDQLSLLLGAR.T                     |            | 2 | 2,4474 | 0,291 | -0,27  |
| 23 | Q5W0B1 RN219_HUMAN | R.FAVAALQSK.V                         |            | 2 | 2,447  | 0,255 | 0,261  |
| 23 | P29692 EF1D_HUMAN  | R.ATAPQTQHVS#PM*RQVEPPAK.K            | S133:      | 3 | 2,4464 | 0,119 | -0,403 |
| 23 | Q8IXM2 CQ049_HUMAN | E.DSGIPLPAES#PKKGPK.K                 | S96:       | 2 | 2,446  | 0,304 | -0,574 |
| 23 | Q9Y2H9 MAST1_HUMAN | R.FSALLEPSR.F                         |            | 2 | 2,4457 | 0,305 | -0,658 |
| 23 | P40222 TXLNA_HUMAN | R.VQDLSAGGQGSGLTDSGPER.R              |            | 3 | 2,4423 | 0,089 | -0,098 |
| 23 | Q13427 PPIG_HUMAN  | K.TDAASKPFAE.V                        |            | 2 | 2,442  | 0,267 | 0,118  |
| 23 | O75431 MTX2_HUMAN  | E.LGPIVQFVK.A                         |            | 2 | 2,4413 | 0,354 | 0,305  |
| 23 | O14908 GIPC1_HUMAN | R.GPATVEDLPSAFEE.K                    |            | 2 | 2,4402 | 0,246 | 0,083  |
| 23 | P08670 VIME_HUMAN  | R.DNLAEDIM*R.L                        |            | 2 | 2,4382 | 0,201 | -0,781 |
| 23 | P60660 MYL6_HUMAN  | E.HFLPM*LQTVAK.N                      |            | 3 | 2,4363 | 0,083 | 0,351  |
| 23 | Q0VDF9 HSP7E_HUMAN | R.DGSLHVTCTDQE.T                      |            | 2 | 2,4343 | 0,089 | -0,448 |

|    |                    |                            |        |   |        |       |        |
|----|--------------------|----------------------------|--------|---|--------|-------|--------|
| 23 | Q6Q0C0 TRAF7_HUMAN | E.TTFGPAFSAVTTITK.A        |        | 2 | 2,4339 | 0,48  | -0,237 |
| 23 | O15231 ZN185_HUMAN | R.RES#CGSSVLDFE.G          | S233:  | 2 | 2,4316 | 0,21  | -0,311 |
| 23 | Q9BPX3 CND3_HUMAN  | K.SKLNLAQFLNEDLS.-         |        | 2 | 2,4307 | 0,372 | -0,23  |
| 23 | Q5T5U3 RHG21_HUMAN | E.SVGPPSLDAQPNSK.T         |        | 2 | 2,4301 | 0,499 | -0,175 |
| 23 | Q99426 TBCB_HUMAN  | E.DALLGSYPVDDGCR.I         |        | 2 | 2,4287 | 0,304 | -0,317 |
| 23 | Q9NRY4 GRLF1_HUMAN | E.NIYVPHDSTQGK.I           |        | 2 | 2,4281 | 0,302 | -0,506 |
| 23 | Q00537 PCTK2_HUMAN | R.LSLPADIRIPDGYLE.K        |        | 2 | 2,4234 | 0,44  | -0,146 |
| 23 | Q16222 UAP1_HUMAN  | R.ALAAQNIVEDM*E.Q          |        | 2 | 2,4233 | 0,352 | -0,277 |
| 23 | Q01130 SFRS2_HUMAN | K.VDNLTyrTS#PDTLR.R        | S26:   | 3 | 2,4223 | 0,33  | 0,317  |
| 23 | Q9H7N4 SFR19_HUMAN | E.SRS#PFLKPDER.A           | S874:  | 3 | 2,4216 | 0,167 | 0,453  |
| 23 | O00712 NFIB_HUMAN  | E.IPSQPYYHDM*NSGVNLQR.S    |        | 3 | 2,4171 | 0,181 | 0,086  |
| 23 | P27816 MAP4_HUMAN  | E.TERAS#PIKM*DLAPSK.D      | S358:  | 2 | 2,4169 | 0,344 | -0,351 |
| 23 | P52294 IMA1_HUMAN  | K.LLSKEPNPPIDE.V           |        | 2 | 2,4167 | 0,279 | -0,632 |
| 23 | Q70E73 RAPH1_HUMAN | K.SSLSVQPGFLADLNR.T        |        | 2 | 2,4162 | 0,214 | -0,304 |
| 23 | Q9UQ35 SRRM2_HUMAN | K.DKFSFPVQDRPE.S           |        | 3 | 2,4144 | 0,14  | 0,468  |
| 23 | P49327 FAS_HUMAN   | E.SIISIIHSSLAEP.V          |        | 3 | 2,4124 | 0,204 | 0,3    |
| 23 | Q9H1A4 APC1_HUMAN  | E.LRDS#SKLHDSLYNE.D        | S563:  | 3 | 2,411  | 0,097 | 0,729  |
| 23 | Q96T23 RSF1_HUMAN  | E.TLALLKAQIDPVLLK.N        |        | 3 | 2,4099 | 0,226 | 0,112  |
| 23 | Q15404 RSU1_HUMAN  | K.LQILSLRDND.L             |        | 2 | 2,4091 | 0,239 | 0,206  |
| 23 | Q96A49 SYAP1_HUMAN | E.AVRPKT#PPVVIK.S          | T248:  | 2 | 2,408  | 0,158 | -0,881 |
| 23 | Q13242 SFRS9_HUMAN | R.GS#PHYFSPFRPY.-          | S211:  | 3 | 2,4061 | 0,141 | 0,477  |
| 23 | Q02952 AKA12_HUMAN | K.SPSS#PVERE.M             | S1331: | 2 | 2,4058 | 0,138 | -0,453 |
| 23 | P14174 MIF_HUMAN   | R.SYSKLLCGLLAE.R           |        | 2 | 2,4058 | 0,257 | -0,451 |
| 23 | P10809 CH60_HUMAN  | K.KISSIQSIVPALE.I          |        | 2 | 2,4051 | 0,205 | -0,088 |
| 23 | P31946 1433B_HUMAN | E.KACSLAKTAFDE.A           |        | 2 | 2,4041 | 0,174 | -0,728 |
| 23 | Q9BTC0 DIDO1_HUMAN | R.RNS#VERPAEPVAGAATPSLVE.Q | S1456: | 3 | 2,3996 | 0,259 | -1,559 |
| 23 | P51114 FXR1_HUMAN  | E.NGLVTVADYISRAES#QSR.Q    | S546:  | 3 | 2,3962 | 0,293 | 0,089  |
| 23 | O94967 WDR47_HUMAN | R.LTHDASNIHTSTPR.N         |        | 3 | 2,395  | 0,344 | 0,118  |
| 23 | Q9H4A3 WNK1_HUMAN  | K.EGPVASPPFM*DLE.Q         |        | 2 | 2,3878 | 0,176 | -0,174 |
| 23 | Q14203 DCTN1_HUMAN | E.GLGLKLEDRE.T             |        | 2 | 2,3861 | 0,223 | -0,324 |
| 23 | Q15942 ZYX_HUMAN   | K.FSPGAPGGSGSQPNQK.L       |        | 2 | 2,3841 | 0,411 | -0,644 |
| 23 | O60308 K0562_HUMAN | R.RPFDLPLQPLAR.S           |        | 3 | 2,3816 | 0,107 | 0      |
| 23 | Q13813 SPTA2_HUMAN | R.DLSSVQTLTK.Q             |        | 2 | 2,3815 | 0,243 | 0,304  |
| 23 | Q15428 SF3A2_HUMAN | E.CKLCLTLHNNE.G            |        | 2 | 2,3805 | 0,18  | -0,435 |
| 23 | Q5VT52 K0460_HUMAN | R.RM*S#GEPIQTVE.S          | S1099: | 2 | 2,3802 | 0,275 | -0,091 |
| 23 | Q6S8J3 A26CA_HUMAN | R.AVFPISIVGRPR.Q           |        | 2 | 2,3789 | 0,163 | -0,712 |
| 23 | P52732 KIF11_HUMAN | E.KQHNIFLDQMTIDE.D         |        | 3 | 2,3784 | 0,12  | 0      |
| 23 | O75569 PRKRA_HUMAN | K.TPIQVLHE.Y               |        | 2 | 2,3776 | 0,388 | 0,13   |
| 23 | P55265 DSRAD_HUMAN | E.M*PSFYSHGLPR.C           |        | 3 | 2,3768 | 0,154 | 0,419  |

|    |                     |                              |            |   |        |       |        |
|----|---------------------|------------------------------|------------|---|--------|-------|--------|
| 23 | O95433 AHSA1_HUMAN  | K.TLFLAVQVQNEE.G             |            | 2 | 2,3763 | 0,1   | -0,088 |
| 23 | Q99618 CDCA3_HUMAN  | K.HAQDSDPRS#PTLGIAR.T        | S68:       | 2 | 2,375  | 0,37  | -0,542 |
| 23 | Q8NI27 THOC2_HUMAN  | K.TPVSGSLKS#PVPR.S           | S1278:     | 2 | 2,3723 | 0,266 | -0,347 |
| 23 | Q9P2B4 CT2NL_HUMAN  | K.VSSPLSPLS#PGIKS#PTIPR.A    | S563:S568: | 3 | 2,3719 | 0,19  | 0,35   |
| 23 | P85299 PTOR1_HUMAN  | E.GAAAGGTSIR.R               |            | 2 | 2,371  | 0,277 | 0,992  |
| 23 | Q96AT9 RPE_HUMAN    | R.TQFPSLDIE.V                |            | 2 | 2,3706 | 0,186 | 0,232  |
| 23 | Q13263 TIF1B_HUMAN  | R.KVPRVS#LE.R                | S489:      | 2 | 2,3697 | 0,272 | -0,242 |
| 23 | Q9NTK5 OLA1_HUMAN   | E.DGDIIFFK.F                 |            | 2 | 2,3674 | 0,234 | 0,192  |
| 23 | Q8IWIY9 CDAN1_HUMAN | R.GSGS#PSRPSLTLS DPPNLSNLE.E | S158:      | 2 | 2,3659 | 0,271 | 0,529  |
| 23 | Q9C0B5 ZDHC5_HUMAN  | K.SFHFDPLSSGSR.S             |            | 3 | 2,3657 | 0,173 | 0,41   |
| 23 | P30041 PRDX6_HUMAN  | K.LPFP IIDR.N                |            | 2 | 2,3625 | 0,27  | 0      |
| 23 | Q96S59 RANB9_HUMAN  | K.GSTAHFSGFE.S               |            | 2 | 2,3623 | 0,114 | 0,235  |
| 23 | P52565 GDIR1_HUMAN  | K.KQS#FVLKE.G                | S101:      | 2 | 2,3614 | 0,181 | 0,23   |
| 23 | O95817 BAG3_HUMAN   | R.SSLGSHQLPR.G               |            | 2 | 2,3596 | 0,178 | -0,113 |
| 23 | P68104 EF1A1_HUMAN  | K.IGGIGTVPVGR.V              |            | 2 | 2,3581 | 0,219 | 0,357  |
| 23 | Q5SW79 CE170_HUMAN  | R.IDLLAQPR.R                 |            | 2 | 2,356  | 0,321 | 0,198  |
| 23 | Q9BSQ5 CCM2_HUMAN   | E.STIDFLDR.A                 |            | 2 | 2,3549 | 0,29  | 0,315  |
| 23 | Q8ND82 Z280C_HUMAN  | K.GIKSEPHS#PGIPE.I           | S80:       | 2 | 2,3537 | 0,195 | 0      |
| 23 | Q07021 C1QBP_HUMAN  | K.ALVLDCHYPEDE.V             |            | 2 | 2,3521 | 0,288 | -0,501 |
| 23 | Q07021 C1QBP_HUMAN  | K.AFVDFLSDEIKE.E             |            | 2 | 2,3519 | 0,359 | 0      |
| 23 | Q92499 DDX1_HUMAN   | K.GHVDILAPTQVE.L             |            | 2 | 2,351  | 0,207 | -0,572 |
| 23 | Q9BX68 HINT2_HUMAN  | R.DVAPQAPVHFLVIPK.K          |            | 2 | 2,3489 | 0,336 | -0,15  |
| 23 | P38919 IF4A3_HUMAN  | R.LLKEEDMTKVE.F              |            | 3 | 2,3472 | 0,209 | 0,205  |
| 23 | P18615 NELFE_HUMAN  | K.GPVPTFQPFQR.S              |            | 2 | 2,3469 | 0,351 | -0,192 |
| 23 | Q6PKG0 LARP1_HUMAN  | R.AVT#PVPTKTEE.V             | T526:      | 2 | 2,3431 | 0,328 | -0,585 |
| 23 | P15311 EZRI_HUMAN   | E.LSSEGIRDDRNE.E             |            | 2 | 2,342  | 0,13  | -0,351 |
| 23 | Q9Y6M7 S4A7_HUMAN   | R.KIPTGAEASNVLVGE.V          |            | 2 | 2,3415 | 0,319 | -0,164 |
| 23 | P05787 K2C8_HUMAN   | R.ISSSS#FSR.V                | S37:       | 2 | 2,3405 | 0,112 | -0,192 |
| 23 | O75376 NCOR1_HUMAN  | E.KQDSL LLLSQR.G             |            | 2 | 2,3391 | 0,246 | 0,094  |
| 23 | P61956 SUMO2_HUMAN  | E.NNDHINLK.V                 |            | 2 | 2,3381 | 0,242 | 0,378  |
| 23 | Q29RF7 PDS5A_HUMAN  | R.IIS#VTPVKNIDPVKNKE.I       | S1206:     | 2 | 2,3358 | 0,314 | -1,483 |
| 23 | Q12959 DLG1_HUMAN   | R.YQDEDT#PPQEHIS PQITNE.V    | T115:      | 3 | 2,335  | 0,087 | 0,158  |
| 23 | Q49MG5 MAP9_HUMAN   | E.VFSTTLAYTK.S               |            | 2 | 2,3345 | 0,307 | -0,539 |
| 23 | Q9NQW6 ANLN_HUMAN   | K.T#PISPLKTVGSKPIVK.S        | T320:      | 2 | 2,3342 | 0,253 | -0,07  |
| 23 | Q00610 CLH1_HUMAN   | E.SDKFICIRE.K                |            | 2 | 2,3332 | 0,255 | -0,313 |
| 23 | Q9NPR2 SEM4B_HUMAN  | R.LGS#EIRDSVV.-              | S825:      | 2 | 2,333  | 0,127 | 0,106  |
| 23 | O95453 PARN_HUMAN   | R.NNSFTAPSTVGK.R             |            | 2 | 2,3321 | 0,379 | -0,299 |
| 23 | Q9HB20 PKHA3_HUMAN  | K.KQS#ESED TLPFSS.-          | S289:      | 2 | 2,3308 | 0,11  | -0,677 |
| 23 | P62807 H2B1C_HUMAN  | R.KESYSVYVYK.V               |            | 2 | 2,3286 | 0,278 | -0,193 |

|    |                     |                              |            |   |        |       |        |
|----|---------------------|------------------------------|------------|---|--------|-------|--------|
| 23 | Q9UHB6 LIMA1_HUMAN  | E.RPAQLANAR.E                |            | 2 | 2,3277 | 0,101 | -0,061 |
| 23 | P43686 PRS6B_HUMAN  | R.YIVLAKDFE.K                |            | 2 | 2,3272 | 0,247 | 0,111  |
| 23 | Q9UQ35 SRRM2_HUMAN  | K.FSPFPVQDRPE.S              |            | 2 | 2,3269 | 0,24  | -0,278 |
| 23 | O15400 STX7_HUMAN   | R.ASSRVS#GSFPE.D             | S129:      | 2 | 2,3255 | 0,249 | -0,203 |
| 23 | Q9Y3T9 NOC2L_HUMAN  | R.GILRPLSTR.H                |            | 2 | 2,3247 | 0,258 | -0,482 |
| 23 | Q01433 AMPD2_HUMAN  | R.QISQDVKLEPDILLR.A          |            | 3 | 2,3235 | 0,193 | 0      |
| 23 | P78417 GSTO1_HUMAN  | K.VPSLVGSFIR.S               |            | 2 | 2,322  | 0,339 | -0,227 |
| 23 | O43143 DHX15_HUMAN  | K.YM*TDGM*LLRE.A             |            | 2 | 2,3183 | 0,325 | -0,581 |
| 23 | Q32MZ4 LRRF1_HUMAN  | R.RGS#GDTSISIDTE.A           | S120:      | 2 | 2,3179 | 0,218 | 0,172  |
| 23 | Q9UPX8 SHAN2_HUMAN  | K.APFLGIPR.G                 |            | 2 | 2,3167 | 0,398 | 0,35   |
| 23 | O76021 RL1D1_HUMAN  | K.ATNES#EDEIPQLVPIGK.K       | S361:      | 2 | 2,3154 | 0,151 | -1,462 |
| 23 | P30622 CLIP1_HUMAN  | K.SISITSALLTEKDAELE.K        |            | 2 | 2,3147 | 0,145 | 0      |
| 23 | Q9H7D0 DOCK5_HUMAN  | R.VEDLSLREE.N                |            | 2 | 2,3146 | 0,218 | 0,224  |
| 23 | Q9NZ32 ARP10_HUMAN  | E.M*M*FDVGK.T                |            | 2 | 2,3085 | 0,081 | 0,142  |
| 23 | Q92878 RAD50_HUMAN  | K.LQGIDLDR.T                 |            | 2 | 2,3076 | 0,166 | 0      |
| 23 | P36578 RL4_HUMAN    | K.NVTLPVAFKAPIRPD.I          |            | 2 | 2,3064 | 0,204 | 0      |
| 23 | Q14676 MDC1_HUMAN   | R.SSVKT#PEPVPTAPE.L          | T1157:     | 2 | 2,3053 | 0,319 | -0,151 |
| 23 | Q9UQ35 SRRM2_HUMAN  | K.VKPET#PPRQS#HSGSISPYPK.V   | T983:S988: | 3 | 2,3049 | 0,144 | -0,156 |
| 23 | P10809 CH60_HUMAN   | E.KKISSIQSIVPALE.I           |            | 2 | 2,3044 | 0,242 | 0      |
| 23 | P68104 EF1A1_HUMAN  | R.GNVAGDSKNDPPM*E.A          |            | 2 | 2,3039 | 0,402 | -0,084 |
| 23 | Q53F19 CQ085_HUMAN  | E.LKM*ISTPS#PKK.S            | S415:      | 2 | 2,3033 | 0,168 | -0,184 |
| 23 | Q7Z4H7 FA29A_HUMAN  | R.SLS#PLIKFSPVE.Q            | S908:      | 2 | 2,2999 | 0,125 | 0      |
| 23 | P54760 EPHB4_HUMAN  | R.GAPCTTPPSAPR.S             |            | 2 | 2,299  | 0,237 | -0,906 |
| 23 | Q8IWA0 WDR75_HUMAN  | K.VQDTSNTGLGEDIIHQLSK.S      |            | 3 | 2,2981 | 0,366 | 0,356  |
| 23 | Q96PU5 NED4L_HUMAN  | R.LQITPDSNGEQFSSLIQREPSS#R.L | S336:      | 3 | 2,2977 | 0,103 | -0,069 |
| 23 | P05362 ICAM1_HUMAN  | R.EPAVGEPAEVTTTVLVR.R        |            | 2 | 2,2958 | 0,372 | 0,483  |
| 23 | Q9UFG5 CS025_HUMAN  | E.DAEAPGEQLYQQR.A            |            | 2 | 2,2953 | 0,236 | -0,536 |
| 23 | Q8NCW5 AIBP_HUMAN   | E.KKYQLNLPPYPDTE.C           |            | 2 | 2,2948 | 0,217 | 0,429  |
| 23 | Q8TF44 NLF3_HUMAN   | K.AQTSYGFAM*LAES#PHTR.R      | S156:      | 3 | 2,2947 | 0,301 | 0,373  |
| 23 | Q9P2D1 CHD7_HUMAN   | E.LKGVVEVGADTGSK.S           |            | 3 | 2,293  | 0,144 | 0,435  |
| 23 | Q9UQE7 SMC3_HUMAN   | E.VFQKLVPGGK.A               |            | 2 | 2,2926 | 0,237 | 0,341  |
| 23 | Q09666 AHNK_HUMAN   | K.FKAEAPLPS#PKLE.G           | S5110:     | 3 | 2,2921 | 0,178 | -0,485 |
| 23 | P04075 ALDOA_HUMAN  | K.GILAADESTGS#IAKR.L         | S39:       | 3 | 2,2877 | 0,173 | 0,35   |
| 23 | Q9ULP9 TBC24_HUMAN  | R.HFNLPKTE.S                 |            | 2 | 2,286  | 0,373 | 0,227  |
| 23 | Q14676 MDC1_HUMAN   | E.AYGPCLS#PPR.A              | S780:      | 2 | 2,2833 | 0,271 | 0      |
| 23 | Q96T23 RSF1_HUMAN   | K.LSDDFDSPVKGPLCK.S          |            | 3 | 2,283  | 0,116 | 0,654  |
| 23 | Q9C0B5 ZDHC5_HUMAN  | K.LSRGDS#LKEPTSIAE.S         | S380:      | 2 | 2,2829 | 0,412 | -0,362 |
| 23 | Q86UU1 PHLB1_HUMAN  | R.KLS#SGDLRVPVTRE.R          | S563:      | 3 | 2,2828 | 0,316 | 0,335  |
| 23 | A8K2D9 A8K2D9_HUMAN | E.LLGNFKDKE.R                |            | 2 | 2,2824 | 0,107 | -0,344 |

|    |                       |                         |        |   |        |       |        |
|----|-----------------------|-------------------------|--------|---|--------|-------|--------|
| 23 | Q8N3X1 FNBP4_HUMAN    | R.RPILQLS#PPGPR.G       | S18:   | 3 | 2,2808 | 0,176 | 0,454  |
| 23 | Q9UHI6 DDX20_HUMAN    | E.KATS#PKELGCDR.Q       | S532:  | 3 | 2,2806 | 0,265 | 0,381  |
| 23 | Q96ST2 IWS1_HUMAN     | R.GKHM*DFLS#DFE.M       | S527:  | 2 | 2,2797 | 0,358 | -0,086 |
| 23 | Q12792 TWF1_HUMAN     | E.DVSLHGYK.K            |        | 2 | 2,2758 | 0,291 | -0,133 |
| 23 | Q13242 SFRS9_HUMAN    | R.GS#PHYFSPFRPY.-       | S211:  | 2 | 2,2751 | 0,49  | 0,079  |
| 23 | P78347 GTF2I_HUMAN    | E.LVISYLPFGMASK.I       |        | 2 | 2,2747 | 0,292 | -0,089 |
| 23 | P18669 PGAM1_HUMAN    | E.LDKNLKPIKPM*QFLGDEE.T |        | 3 | 2,2727 | 0,125 | -0,429 |
| 23 | Q9Y490 TLN1_HUMAN     | K.ALGD LISATK.A         |        | 2 | 2,2707 | 0,316 | 0,555  |
| 23 | O75607 NPM3_HUMAN     | D.DFQLQPPVTFR.L         |        | 2 | 2,2687 | 0,254 | 0      |
| 23 | Q9BTC8 MTA3_HUMAN     | R.KPLACIIGYLE.I         |        | 2 | 2,2657 | 0,299 | -0,382 |
| 23 | Q96JM3 ZN828_HUMAN    | R.KT#SPASLDFPE.S        | T458:  | 2 | 2,2657 | 0,297 | -0,192 |
| 23 | Q5VWG9 TAF3_HUMAN     | E.KIKVEPVALAPS#PVIPIR.L | S755:  | 3 | 2,2586 | 0,081 | 0,773  |
| 23 | Q07065 CKAP4_HUMAN    | K.GLLDDL RND.L          |        | 2 | 2,2574 | 0,346 | 0,237  |
| 23 | P09211 GSTP1_HUMAN    | K.YISLIYTNYE.A          |        | 2 | 2,2568 | 0,195 | 0,095  |
| 23 | P26640 SYVC_HUMAN     | E.DNPM*VVPLCNR.S        |        | 2 | 2,2563 | 0,325 | 0,092  |
| 23 | O15417 TNC18_HUMAN    | R.ERALS#PGLEE.S         | S1857: | 2 | 2,2542 | 0,143 | -0,103 |
| 23 | Q96K21 ZFY19_HUMAN    | E.HQTSAYS#PPR.A         | S463:  | 2 | 2,2526 | 0,223 | 0,299  |
| 23 | Q96JP5 ZFP91_HUMAN    | R.SKTGSLQLICK.S         |        | 2 | 2,2522 | 0,374 | 0      |
| 23 | Q96GY3 LIN37_HUMAN    | R.SRIPS#PLQPE.M         | S182:  | 2 | 2,2514 | 0,222 | -0,507 |
| 23 | P30101 PDIA3_HUMAN    | K.DPNIVIAK.M            |        | 2 | 2,2504 | 0,145 | 0      |
| 23 | Q86V48 LUZP1_HUMAN    | K.AIGALASSR.R           |        | 2 | 2,2495 | 0,254 | 0,216  |
| 23 | Q9P2M4 TBC14_HUMAN    | E.IGNPEPVPCSAVHVR.R     |        | 3 | 2,2492 | 0,155 | 0      |
| 23 | P58340 MLF1_HUMAN     | R.SFS#EPFGRD.L          | S34:   | 2 | 2,2483 | 0,158 | 0,109  |
| 23 | P51858 HDGF_HUMAN     | K.KSCVEEPEPEPE.A        |        | 2 | 2,2482 | 0,204 | 0      |
| 23 | P49023 PAXI_HUMAN     | E.HVYSFPNK.Q            |        | 2 | 2,2477 | 0,354 | 0,307  |
| 23 | P14625 ENPL_HUMAN     | R.GTTITLVLKEE.A         |        | 2 | 2,2424 | 0,083 | 0,507  |
| 23 | P18206 VINC_HUMAN     | R.DM*PPAFIKVE.N         |        | 2 | 2,2414 | 0,263 | 0,105  |
| 23 | Q9UQ35 SRRM2_HUMAN    | E.SSLVFKDTRLRT#PPRER.S  | T1208: | 3 | 2,2412 | 0,188 | 0,092  |
| 23 | P62070 RRAS2_HUMAN    | R.LDILD TAGQEE.F        |        | 2 | 2,2411 | 0,219 | 0,304  |
| 23 | Q5QJE6 TDIF2_HUMAN    | K.DLDEDANGITDE.G        |        | 2 | 2,2408 | 0,157 | 0,28   |
| 23 | P52272 HNRPM_HUMAN    | K.GCGVVKFESPE.V         |        | 2 | 2,2385 | 0,206 | 0,303  |
| 23 | P30101 PDIA3_HUMAN    | R.FLQDYFDGNLKR.Y        |        | 3 | 2,2376 | 0,219 | 0,302  |
| 23 | ##Q6PGP3 Q6PGP3_HUMAN | D.FES#AEPVLVE.K         | S1242: | 2 | 2,2371 | 0,181 | -0,813 |
| 23 | Q6PJG2 CN043_HUMAN    | D.SAPQPALPQVQIPFPR.R    |        | 2 | 2,2356 | 0,257 | 0,07   |
| 23 | P61978 HNRPK_HUMAN    | E.CLNYQHYK.G            |        | 2 | 2,2334 | 0,278 | 0      |
| 23 | P08133 ANXA6_HUMAN    | K.DLIADLKYE.L           |        | 2 | 2,231  | 0,255 | 0      |
| 23 | P35579 MYH9_HUMAN     | K.VLLQKGKDSE.H          |        | 2 | 2,2287 | 0,267 | -0,467 |
| 23 | P08758 ANXA5_HUMAN    | R.DLLDDLKSE.L           |        | 2 | 2,2266 | 0,241 | -0,116 |
| 23 | Q8NCW5 AIBP_HUMAN     | E.KKYQLNLPPYPDTE.C      |        | 3 | 2,2261 | 0,082 | 0,429  |

|    |                     |                              |              |   |        |       |        |
|----|---------------------|------------------------------|--------------|---|--------|-------|--------|
| 23 | P46777 RL5_HUMAN    | K.NSVTPDM*M*EE.M             |              | 2 | 2,2259 | 0,306 | -0,309 |
| 23 | P55884 EIF3B_HUMAN  | R.VTLM*QLPTRQE.I             |              | 2 | 2,2228 | 0,307 | 0,183  |
| 23 | Q5VWN6 CJ018_HUMAN  | R.S#RSPLLVTVVE.S             | S2035:       | 2 | 2,2226 | 0,229 | 0,477  |
| 23 | Q01130 SFRS2_HUMAN  | K.VDNLTYRTS#PDTLRR.V         | S26:         | 3 | 2,2202 | 0,244 | -0,775 |
| 23 | O00418 EF2K_HUMAN   | K.LLQSAKT#ILR.G              | T348:        | 2 | 2,2193 | 0,224 | -0,1   |
| 23 | P19338 NUCL_HUMAN   | E.LQGPRGS#PNAR.S             | S563:        | 2 | 2,2175 | 0,167 | 0,099  |
| 23 | Q9Y6M7 S4A7_HUMAN   | E.IKGNNGSGGS#RENST#VDFSK.V   | S403:T408:   | 3 | 2,2171 | 0,116 | 0,261  |
| 23 | Q8WXE1 ATRIP_HUMAN  | R.KNPSVVIKPE.A               |              | 2 | 2,2151 | 0,201 | -0,329 |
| 23 | Q9UMZ2 SYNG_HUMAN   | R.SLS#LGDKE.I                | S1075:       | 2 | 2,2122 | 0,093 | -0,197 |
| 23 | Q9BY89 K1671_HUMAN  | R.ERPVLGGVE.Q                |              | 2 | 2,2118 | 0,301 | 0,113  |
| 23 | Q9UQ35 SRRM2_HUMAN  | E.SSLVFKDTLR.T               |              | 2 | 2,2117 | 0,19  | -0,523 |
| 23 | Q9H6F5 CCD86_HUMAN  | E.SNPEETREPGSPPSVQR.A        |              | 3 | 2,2114 | 0,158 | -0,294 |
| 23 | P11021 GRP78_HUMAN  | K.ITITNDQNR.L                |              | 2 | 2,2047 | 0,279 | -0,454 |
| 23 | P49736 MCM2_HUMAN   | R.RGNDPLTSS#PGR.S            | S27:         | 2 | 2,2023 | 0,321 | -0,183 |
| 23 | Q9HCE3 ZN532_HUMAN  | K.RKLEEVLE.F                 |              | 2 | 2,2007 | 0,131 | -0,329 |
| 23 | Q8NHZ8 CDC26_HUMAN  | R.SSQFGS#LEF.-               | S82:         | 2 | 2,2007 | 0,35  | 0      |
| 23 | P61978 HNRPK_HUMAN  | R.VVLIGGKPD.R.V              |              | 2 | 2,198  | 0,236 | -0,116 |
| 23 | P46734 MP2K3_HUMAN  | K.TM*DAGCKPYM*APER.I         |              | 3 | 2,1912 | 0,238 | 0,11   |
| 23 | P22626 ROA2_HUMAN   | R.GFGFVTFSSM*AE.V            |              | 2 | 2,191  | 0,201 | 0      |
| 23 | O60506 HNRPQ_HUMAN  | E.DGALAVLQQFK.D              |              | 2 | 2,1908 | 0,215 | 0      |
| 23 | O15164 TIF1A_HUMAN  | R.SDAPDSTGDQPGLHQDNSSNGK.S   |              | 3 | 2,185  | 0,284 | 0      |
| 23 | Q9P2K3 RCOR3_HUMAN  | E.THPM*DGNDSDYDPKKE.A        | S171:        | 2 | 2,1845 | 0,181 | -0,125 |
| 23 | P41236 IPP2_HUMAN   | E.AM*APDILAR.K               |              | 2 | 2,1839 | 0,176 | 0,188  |
| 23 | Q8N9B5 JMY_HUMAN    | K.RGPS#QTTEPQSLVQLE.D        | S747:        | 2 | 2,1831 | 0,217 | -0,923 |
| 23 | Q9NQW6 ANLN_HUMAN   | K.TPIS#PLK.T                 | S323:        | 2 | 2,1818 | 0,239 | -0,073 |
| 23 | ##Q8TDW7 FAT3_HUMAN | K.S#LRIAGS#AKDIE.F           | S3595:S3601: | 2 | 2,1808 | 0,097 | 0,43   |
| 23 | Q9Y5K6 CD2AP_HUMAN  | R.GIGFGDIFKE.G               |              | 2 | 2,1792 | 0,23  | -0,113 |
| 23 | P50395 GDIB_HUMAN   | E.TTCDDIKNIYKR.M             |              | 3 | 2,1755 | 0,292 | 0,12   |
| 23 | P42695 CNDD3_HUMAN  | R.NSSAFSYQR.Q                |              | 2 | 2,1738 | 0,263 | -0,345 |
| 23 | Q16555 DPYL2_HUMAN  | K.T#SPAKQQAPPVR.N            | T521:        | 3 | 2,1723 | 0,183 | 0,403  |
| 23 | Q9P287 BCCIP_HUMAN  | E.LTDLLIQNHIGSVIK.Q          |              | 3 | 2,1706 | 0,096 | 0,102  |
| 23 | Q71U36 TBA1A_HUMAN  | K.TIGGGDDSFNTFFSE.T          |              | 2 | 2,17   | 0,198 | -0,077 |
| 23 | P04843 RPN1_HUMAN   | R.TVDLSSHLAK.V               |              | 2 | 2,1686 | 0,242 | -0,342 |
| 23 | Q13428 TCOF_HUMAN   | K.TVANLLSGKS#PR.K            | S156:        | 3 | 2,1674 | 0,212 | 0,207  |
| 23 | Q96ST3 SIN3A_HUMAN  | K.LLFSNTAAQK.L               |              | 2 | 2,1649 | 0,29  | 0,112  |
| 23 | P04637 P53_HUMAN    | R.ALPNNTSSS#PQPK.K           | S315:        | 2 | 2,1628 | 0,444 | -0,343 |
| 23 | Q12888 TP53B_HUMAN  | R.QSQQPM*KPISPVKDPVS#PASQK.M | S1101:       | 3 | 2,1592 | 0,131 | -0,518 |
| 23 | P43357 MAGA3_HUMAN  | K.KLLTQHVVQE.N               |              | 2 | 2,1591 | 0,082 | -0,196 |
| 23 | P14618 KPYM_HUMAN   | R.GIFPVLCCKDPVQE.A           |              | 2 | 2,1546 | 0,24  | 0,081  |

|    |                       |                          |            |   |        |       |        |
|----|-----------------------|--------------------------|------------|---|--------|-------|--------|
| 23 | O75153 EIF3X_HUMAN    | E.IHQVLM*DRE.D           |            | 2 | 2,1518 | 0,386 | -0,105 |
| 23 | Q8IXM3 RM41_HUMAN     | K.DGTFDPDNLE.K           |            | 2 | 2,1437 | 0,245 | 0,326  |
| 23 | Q01433 AMPD2_HUMAN    | R.QIS#QDVKLEPD.I         | S168:      | 2 | 2,1433 | 0,226 | 0,18   |
| 23 | P62306 RUXF_HUMAN     | R.CNNVLYIR.G             |            | 2 | 2,1412 | 0,145 | -0,116 |
| 23 | P19338 NUCL_HUMAN     | K.NLPYKVTQDE.L           |            | 2 | 2,1409 | 0,241 | -0,202 |
| 23 | P08243 ASNS_HUMAN     | E.LTQGYIYFHK.A           |            | 3 | 2,1405 | 0,266 | 0,576  |
| 23 | P24928 RPB1_HUMAN     | K.RVQFGVLPDE.L           |            | 2 | 2,1386 | 0,159 | 0,098  |
| 23 | O94864 ST65G_HUMAN    | K.IKEEPVSDITFPVSE.E      |            | 2 | 2,1374 | 0,183 | -0,361 |
| 23 | P13073 COX41_HUMAN    | E.DFSLPAYM*DR.R          |            | 2 | 2,1369 | 0,332 | 0      |
| 23 | Q15418 KS6A1_HUMAN    | K.KAYS#FCGTVE.Y          | S221:      | 2 | 2,1368 | 0,317 | 0,196  |
| 23 | Q9NYF8 BCLF1_HUMAN    | E.TQS#PEQVKSEK.L         | S496:      | 2 | 2,1359 | 0,204 | -0,455 |
| 23 | Q86VI3 IQGA3_HUMAN    | R.S#LTAHSLPLAE.K         | S1424:     | 2 | 2,1352 | 0,221 | -0,183 |
| 23 | Q14157 UBP2L_HUMAN    | R.RYPSS#ISS#SPQKDLTQAK.N | S605:S608: | 3 | 2,1311 | 0,145 | -0,085 |
| 23 | Q9BPX3 CND3_HUMAN     | E.KSKLNLAQFLNEDLS.-      |            | 2 | 2,1303 | 0,141 | 0,497  |
| 23 | Q6KC79 NIPBL_HUMAN    | K.ACTQLVDNLVE.H          |            | 2 | 2,1267 | 0,123 | 0      |
| 23 | P0C0S8 H2A1_HUMAN     | R.HLQLAIR.N              |            | 2 | 2,1259 | 0,086 | -0,215 |
| 23 | Q15126 PMVK_HUMAN     | E.HGLNFQR.L              |            | 2 | 2,1252 | 0,131 | 0,14   |
| 23 | Q969H8 CS010_HUMAN    | E.RESDVPLKTEE.F          |            | 2 | 2,122  | 0,081 | -0,468 |
| 23 | Q13586 STIM1_HUMAN    | R.LTEPQHGLGSQR.D         |            | 3 | 2,1205 | 0,299 | 0      |
| 23 | Q9BRA2 TXD17_HUMAN    | K.TIFAYFTGSK.D           |            | 2 | 2,1203 | 0,289 | 0,107  |
| 23 | P42166 LAP2A_HUMAN    | R.NRPPLPAGTNSK.G         |            | 2 | 2,1203 | 0,265 | -0,39  |
| 23 | Q9UPZ3 HPS5_HUMAN     | E.SFSILDSGIYR.I          |            | 2 | 2,1186 | 0,351 | -0,679 |
| 23 | P04406 G3P_HUMAN      | K.QASEGPLKILGYTE.H       |            | 2 | 2,115  | 0,184 | 0      |
| 23 | P07602 SAP_HUMAN      | K.LVGYLDR.N              |            | 2 | 2,1146 | 0,376 | -0,292 |
| 23 | P61086 UBE2K_HUMAN    | K.NQIKVDLVDE.N           |            | 2 | 2,1111 | 0,284 | -1,976 |
| 23 | P18669 PGAM1_HUMAN    | R.YADLTEDQLPSCE.S        |            | 2 | 2,1088 | 0,276 | -0,238 |
| 23 | P55072 TERA_HUMAN     | E.ILQIHTK.N              |            | 2 | 2,1055 | 0,121 | 0      |
| 23 | ##Q8N7Q0 Q8N7Q0_HUMAN | R.DLYSALHDNLSQM*#EKE.N   | T140:      | 3 | 2,1051 | 0,111 | 0,7    |
| 23 | P04083 ANXA1_HUMAN    | E.ATIIDILTK.R            |            | 2 | 2,1041 | 0,257 | 0,185  |
| 23 | P62888 RL30_HUMAN     | R.VCTLAIIDPGSDIIR.S      |            | 2 | 2,1026 | 0,25  | 0,139  |
| 23 | O94804 STK10_HUMAN    | E.NGLAVPVPLR.K           |            | 2 | 2,1018 | 0,21  | 0,118  |
| 23 | P04406 G3P_HUMAN      | K.LVINGNPITIFQERDPSK.I   |            | 3 | 2,0993 | 0,124 | 0,269  |
| 23 | Q96JM3 ZN828_HUMAN    | K.TSPASLDFPE.S           |            | 2 | 2,0972 | 0,182 | 0,344  |
| 23 | Q68DX9 Q68DX9_HUMAN   | R.IDSPGFKPASQQVYR.K      |            | 2 | 2,0963 | 0,346 | 0      |
| 23 | Q15653 IKBB_HUMAN     | R.TPLGSAM*LRPNPILAR.L    |            | 3 | 2,0902 | 0,182 | -0,212 |
| 23 | Q13428 TCOF_HUMAN     | R.GPASVPSVGK.A           |            | 2 | 2,0894 | 0,405 | -0,611 |
| 23 | P34932 HSP74_HUMAN    | E.DQYDHLDAADM*TK.V       |            | 3 | 2,0834 | 0,303 | 0,119  |
| 23 | Q9UQ35 SRRM2_HUMAN    | R.SRT#PPSAPSQSR.M        | T2409:     | 3 | 2,0806 | 0,176 | 0,271  |
| 23 | P18754 RCC1_HUMAN     | E.SCFIPQNLTSFK.N         |            | 2 | 2,0782 | 0,244 | -0,846 |



|    |                     |                           |        |   |        |       |        |
|----|---------------------|---------------------------|--------|---|--------|-------|--------|
| 23 | Q4G0J3 LARP7_HUMAN  | E.NM*DTSNTSISK.M          |        | 2 | 2,0775 | 0,238 | 1,206  |
| 23 | O43237 DC1L2_HUMAN  | K.DFQDYM*EPEEGCQGS#PQRR.G | S194:  | 2 | 2,0742 | 0,287 | 0,604  |
| 23 | Q9Y3X0 CCDC9_HUMAN  | E.GVLEPNPVR.N             |        | 2 | 2,0726 | 0,14  | 0,373  |
| 23 | Q13136 LIPA1_HUMAN  | R.DRLLDTLRE.T             |        | 2 | 2,0714 | 0,181 | 0,108  |
| 23 | Q07157 ZO1_HUMAN    | E.NQTYPPYS#PQAQPPIHR.I    | S899:  | 3 | 2,0656 | 0,233 | 0,083  |
| 23 | Q58FG0 HS905_HUMAN  | K.HIYYITGE.T              |        | 2 | 2,065  | 0,157 | 0,367  |
| 23 | P19338 NUCL_HUMAN   | K.SKGYAFIE.F              |        | 2 | 2,0641 | 0,197 | -0,067 |
| 23 | Q01658 NC2B_HUMAN   | K.TIS#PEHVIOALE.S         | S67:   | 2 | 2,0599 | 0,294 | -0,344 |
| 23 | Q15942 ZYG_HUMAN    | R.S#PGAPGPLTLK.E          | S344:  | 2 | 2,0591 | 0,226 | -1,746 |
| 23 | P11586 C1TC_HUMAN   | K.THLSLSHNPE.Q            |        | 2 | 2,0562 | 0,234 | 0      |
| 23 | Q15691 MARE1_HUMAN  | E.TAVAPSLVAPALNKPK.K      |        | 2 | 2,0556 | 0,145 | -0,077 |
| 23 | Q5MIZ7 SMEK2_HUMAN  | K.TTNLPTSVTATK.G          |        | 2 | 2,0528 | 0,148 | 0,099  |
| 23 | O00148 DDX39_HUMAN  | R.AIVDCGFEPSEVQHE.C       |        | 3 | 2,0524 | 0,106 | 0,395  |
| 23 | P37802 TAGL2_HUMAN  | K.KIQASTM*AFK.Q           |        | 2 | 2,0512 | 0,198 | -0,214 |
| 23 | P62736 ACTA_HUMAN   | R.GILTLKYPIE.H            |        | 2 | 2,0467 | 0,106 | 0      |
| 23 | Q8ND56 LS14A_HUMAN  | R.RS#PVSTRPLPSASQK.A      | S216:  | 3 | 2,0417 | 0,14  | -0,541 |
| 23 | Q8ND56 LS14A_HUMAN  | R.S#PVSTRPLPSASQK.A       | S216:  | 2 | 2,0416 | 0,223 | -0,397 |
| 23 | P55265 DSRAD_HUMAN  | E.M*PSFYSHGLPR.C          |        | 2 | 2,0397 | 0,122 | -0,933 |
| 23 | Q92621 NU205_HUMAN  | R.SVSGFLHFD.T             |        | 2 | 2,0374 | 0,296 | -0,06  |
| 23 | Q9NR19 ACSA_HUMAN   | R.ASLQVLGTVGEPINPE.A      |        | 2 | 2,0367 | 0,199 | 0,075  |
| 23 | P68104 EF1A1_HUMAN  | K.STTTGHLIYK.C            |        | 2 | 2,0358 | 0,111 | -0,435 |
| 23 | P05783 K1C18_HUMAN  | E.TM*QSLNDR.L             |        | 2 | 2,0291 | 0,232 | -0,311 |
| 23 | Q3V6T2 GRDN_HUMAN   | E.FSLLHDE.A               |        | 2 | 2,0281 | 0,295 | -0,428 |
| 23 | Q1KMD3 HNRL2_HUMAN  | R.SKS#PLPEEE.A            | S228:  | 2 | 2,0238 | 0,177 | -0,205 |
| 23 | P04406 G3P_HUMAN    | E.KYDNSLK.I               |        | 2 | 2,0213 | 0,188 | 0,211  |
| 23 | P45983 MK08_HUMAN   | K.ILDFGLAR.T              |        | 2 | 2,0209 | 0,142 | 0,135  |
| 23 | P08670 VIME_HUMAN   | R.QDVNASLAR.L             |        | 2 | 2,0164 | 0,148 | -0,112 |
| 23 | Q66K74 MAP1S_HUMAN  | E.AGLSLPLRGPR.A           |        | 2 | 2,0161 | 0,138 | 0      |
| 23 | O15231 ZN185_HUMAN  | E.HSVLSAAK.K              |        | 2 | 2,0117 | 0,333 | -0,375 |
| 23 | Q4KMP7 TB10B_HUMAN  | R.QQPPLGPSSLLSLPGLK.S     |        | 2 | 2,0107 | 0,276 | 0      |
| 23 | Q9Y2W2 WBP11_HUMAN  | E.LTPLQAM*M*LR.M          |        | 2 | 2,0093 | 0,378 | -0,101 |
| 23 | Q9BRL6 SFR2B_HUMAN  | K.VDNLTYSR.T              |        | 2 | 2,009  | 0,162 | 0,138  |
| 23 | Q5VUA4 ZN318_HUMAN  | R.SVRIPS#PNILK.T          | S2101: | 3 | 2,0059 | 0,157 | 0,421  |
| 23 | P11142 HSP7C_HUMAN  | D.M*KHWPFM*VVND.A         |        | 2 | 2,0049 | 0,154 | 0,17   |
| 23 | P11586 C1TC_HUMAN   | K.GVPTGFILPIR.D           |        | 2 | 2,0046 | 0,102 | -0,313 |
| 23 | Q05209 PTN12_HUMAN  | E.STIEQIDK.K              |        | 2 | 2,003  | 0,111 | -0,131 |
| 23 | Q9Y2W2 WBP11_HUMAN  | R.M*AGQEIPEEGR.E          |        | 2 | 2,0015 | 0,293 | -0,792 |
| 23 | Q14694 UBP10_HUMAN  | K.LTISNGPK.N              |        | 2 | 1,9974 | 0,222 | 0,735  |
| 23 | Q05CZ2 Q05CZ2_HUMAN | K.AVVHAVDGTAE.N           |        | 2 | 1,9971 | 0,215 | 0      |

|    |                     |                      |       |   |        |       |        |
|----|---------------------|----------------------|-------|---|--------|-------|--------|
| 23 | P17480 UBF1_HUMAN   | R.GKLPES#PKRAEE.I    | S484: | 2 | 1,9963 | 0,328 | -0,944 |
| 23 | P05783 K1C18_HUMAN  | R.IVDGKVVSE.T        |       | 2 | 1,9931 | 0,119 | 0,322  |
| 23 | Q8TAQ2 SMRC2_HUMAN  | K.NPDLHEDNVTE.Q      |       | 2 | 1,9922 | 0,118 | -0,476 |
| 23 | Q9NSK0 KLC4_HUMAN   | R.GLS#ASTM*DLSSSS.-  | S609: | 2 | 1,9908 | 0,291 | -0,091 |
| 23 | O95678 K2C75_HUMAN  | K.AQYEDIANRS#RAEAE.S | S334: | 2 | 1,9906 | 0,482 | -0,135 |
| 23 | P26639 SYTC_HUMAN   | R.IYGISFPDPK.M       |       | 2 | 1,9888 | 0,236 | 0,215  |
| 23 | P20645 MPRD_HUMAN   | R.HTLADNFPVSEE.R     |       | 2 | 1,9881 | 0,135 | 0,828  |
| 23 | A9CQZ4 A9CQZ4_HUMAN | E.DEEVPAFFK.N        |       | 2 | 1,9865 | 0,117 | 0,338  |
| 23 | Q01130 SFRS2_HUMAN  | K.VDNLTyrTS#PDTLR.R  | S26:  | 2 | 1,985  | 0,093 | 0      |
| 23 | Q9H8U3 ZFAN3_HUMAN  | K.CFADFQK.K          |       | 2 | 1,984  | 0,174 | 0,133  |
| 23 | Q86YA3 CD021_HUMAN  | E.AHISEPEDLGK.I      |       | 2 | 1,9837 | 0,262 | -0,102 |
| 23 | Q6S8J3 A26CA_HUMAN  | E.TTFNSIM*K.S        |       | 2 | 1,9764 | 0,203 | 0,382  |
| 23 | P35251 RFC1_HUMAN   | E.AHLTPYSLQAIK.A     |       | 2 | 1,9733 | 0,256 | -0,545 |
| 23 | P05783 K1C18_HUMAN  | K.IM*ADIRAQYDE.L     |       | 2 | 1,9685 | 0,149 | -0,728 |
| 23 | Q9NQ92 CQ079_HUMAN  | R.GTQSIpNDSPAR.G     |       | 2 | 1,9651 | 0,385 | -0,491 |
| 23 | O00487 PSDE_HUMAN   | E.QVYISSLALLK.M      |       | 2 | 1,9611 | 0,124 | 0,099  |
| 23 | P04075 ALDOA_HUMAN  | R.ALQASALK.A         |       | 2 | 1,9609 | 0,146 | 0,38   |
| 23 | Q99436 PSB7_HUMAN   | K.FRPDM*EEEE.A       |       | 2 | 1,9586 | 0,222 | -0,815 |
| 23 | P05787 K2C8_HUMAN   | R.AFSSRS#YTSGPGSR.I  | S24:  | 2 | 1,958  | 0,366 | -0,238 |
| 23 | P60660 MYL6_HUMAN   | E.HFLPM*LQTVAK.N     |       | 2 | 1,9554 | 0,312 | -0,281 |
| 23 | P06753 TPM3_HUMAN   | E.LKNVTNnlK.S        |       | 2 | 1,952  | 0,085 | 0,467  |
| 23 | P21333 FLNA_HUMAN   | K.IQQNTFTR.W         |       | 2 | 1,9476 | 0,183 | -0,968 |
| 23 | Q9H6Z4 RANB3_HUMAN  | E.EKPAIAPPVVFVQK.D   |       | 2 | 1,9442 | 0,26  | 0,233  |
| 23 | Q00341 VIGLN_HUMAN  | R.SGLVPQqIK.V        |       | 2 | 1,9412 | 0,086 | 0,314  |
| 23 | P11387 TOP1_HUMAN   | E.KNIITNLSK.C        |       | 2 | 1,9395 | 0,203 | -0,592 |
| 23 | Q99961 SH3G1_HUMAN  | R.SM*PPLDQPSCK.A     |       | 2 | 1,9393 | 0,165 | -0,096 |
| 23 | A4D1P6 WDR91_HUMAN  | R.VGFLSLLPQSK.K      |       | 2 | 1,9352 | 0,263 | -0,096 |
| 23 | P23588 IF4B_HUMAN   | K.VAPAQPSEEGPGR.K    |       | 2 | 1,9335 | 0,385 | -0,188 |
| 23 | O94874 K0776_HUMAN  | D.LVLKSRKS#SVTEE.-   | S789: | 2 | 1,9326 | 0,382 | -0,549 |
| 23 | Q09666 AHNK_HUMAN   | K.LQGSGVSLASK.K      |       | 2 | 1,9295 | 0,239 | -0,466 |
| 23 | P61923 COPZ1_HUMAN  | R.VALRGEDVPLTE.Q     |       | 2 | 1,9291 | 0,186 | 0,094  |
| 23 | P52732 KIF11_HUMAN  | K.SYLYPSTLVR.T       |       | 2 | 1,9271 | 0,2   | 0,102  |
| 23 | Q8ND56 LS14A_HUMAN  | R.RS#PVSTRPLPSASQK.A | S216: | 2 | 1,9231 | 0,476 | -0,866 |
| 23 | P78332 RBM6_HUMAN   | R.EEQSSDAGLFKE.E     |       | 2 | 1,9176 | 0,234 | 0,091  |
| 23 | A6NH35 A6NH35_HUMAN | K.LFIGGLSFETTED.S    |       | 2 | 1,9131 | 0,233 | -0,171 |
| 23 | Q86XL3 ANKL2_HUMAN  | R.AFAGPLS#PAKAE.D    | S528: | 2 | 1,9082 | 0,132 | 0,098  |
| 23 | O75083 WDR1_HUMAN   | E.DSKRIAVVGE.G       |       | 2 | 1,9066 | 0,127 | -0,114 |
| 23 | O95425 SVIL_HUMAN   | R.ASDPAS#PHIGR.S     | S50:  | 2 | 1,9065 | 0,209 | -0,719 |
| 23 | O14777 NDC80_HUMAN  | K.LFLDYTIK.C         |       | 2 | 1,904  | 0,18  | 0,06   |

|    |                     |                         |        |   |        |       |        |
|----|---------------------|-------------------------|--------|---|--------|-------|--------|
| 23 | Q92688 AN32B_HUMAN  | K.SNDGKIEGLTAE.F        |        | 2 | 1,9009 | 0,089 | -0,593 |
| 23 | P13073 COX41_HUMAN  | E.DFSLPAYMDR.R          |        | 2 | 1,9001 | 0,196 | 0,1    |
| 23 | P41250 SYG_HUMAN    | K.TFQLTKD.M             |        | 2 | 1,9001 | 0,185 | 0,715  |
| 23 | A8MYB5 A8MYB5_HUMAN | R.RS#PTEDFR.Q           | S638:  | 2 | 1,8991 | 0,094 | -0,112 |
| 23 | P54652 HSP72_HUMAN  | R.TLSSSTQASIE.I         |        | 2 | 1,898  | 0,151 | 0      |
| 23 | P19105 MLRM_HUMAN   | E.AFNM*IDQNR.D          |        | 2 | 1,8967 | 0,141 | -0,217 |
| 23 | P23396 RS3_HUMAN    | K.FVADGIFKAE.L          |        | 2 | 1,8955 | 0,168 | 0      |
| 23 | Q6VY07 PACS1_HUMAN  | R.KVVYDQLNQILVSDAALPE.N |        | 2 | 1,8903 | 0,119 | 0,231  |
| 23 | P60981 DEST_HUMAN   | R.YALYDASFE.T           |        | 2 | 1,8898 | 0,084 | 0      |
| 23 | P08727 K1C19_HUMAN  | R.FGPGVAFR.A            |        | 2 | 1,8885 | 0,295 | -0,43  |
| 23 | P15408 FOSL2_HUMAN  | E.FM*LVAHGVPVCK.I       |        | 2 | 1,8852 | 0,18  | -0,191 |
| 23 | Q07954 LRP1_HUMAN   | R.ILQDDLTCR.A           |        | 2 | 1,8789 | 0,23  | -0,215 |
| 23 | Q53H80 CF166_HUMAN  | D.FDPLLSPAS#PK.R        | S21:   | 2 | 1,8764 | 0,244 | 0,195  |
| 23 | Q9BPX3 CND3_HUMAN   | K.LNLAQFLNE.D           |        | 2 | 1,8693 | 0,082 | -0,115 |
| 23 | Q6PD62 CTR9_HUMAN   | K.NILM*FTGETE.A         |        | 2 | 1,8693 | 0,251 | -0,104 |
| 23 | Q9H0H5 RGAP1_HUMAN  | K.SALAFLNR.G            |        | 2 | 1,8685 | 0,259 | 0,205  |
| 23 | Q15742 NAB2_HUMAN   | R.SFS#PKSPLE.L          | S159:  | 2 | 1,8676 | 0,151 | 0,569  |
| 23 | Q53F19 CQ085_HUMAN  | E.YHEELPALK.Q           |        | 2 | 1,8615 | 0,143 | 0      |
| 23 | Q96L73 NSD1_HUMAN   | D.LIDLTPR.Q             |        | 2 | 1,8598 | 0,217 | 0,442  |
| 23 | Q9C0B5 ZDHC5_HUMAN  | E.SFRSPT#FGK.S          | T411:  | 2 | 1,859  | 0,082 | -0,11  |
| 23 | Q9H8H0 NOL11_HUMAN  | R.AALLNAILHSAYSE.T      |        | 2 | 1,8475 | 0,288 | -0,248 |
| 23 | Q58FG0 HS905_HUMAN  | K.HIYYITGETK.D          |        | 2 | 1,839  | 0,141 | 0,1    |
| 23 | Q92841 DDX17_HUMAN  | E.KNFYVEHPE.V           |        | 2 | 1,8354 | 0,085 | 0      |
| 23 | O43681 ARSA1_HUMAN  | K.LPLLPHE.V             |        | 2 | 1,834  | 0,166 | 0,372  |
| 23 | Q96RS0 TGS1_HUMAN   | K.LYNLGLK.G             |        | 2 | 1,8289 | 0,099 | -0,669 |
| 23 | Q96FV9 THOC1_HUMAN  | R.DKPVTGEQIE.V          |        | 2 | 1,8264 | 0,154 | 0,109  |
| 23 | P13639 EF2_HUMAN    | E.KLDIKLDSE.D           |        | 2 | 1,826  | 0,094 | -0,115 |
| 23 | P25054 APC_HUMAN    | K.SPPEHYVQE.T           |        | 2 | 1,823  | 0,155 | -0,225 |
| 23 | Q9UQ35 SRRM2_HUMAN  | R.SRT#PPSAPSQSR.M       | T2409: | 2 | 1,8224 | 0,083 | -0,09  |
| 23 | Q15276 RABE1_HUMAN  | D.AGLLLPSPGDPFSK.S      |        | 2 | 1,8216 | 0,127 | 0      |
| 23 | P04792 HSPB1_HUMAN  | R.VPFSLLR.G             |        | 2 | 1,8164 | 0,162 | 0,367  |
| 23 | O75475 PSIP1_HUMAN  | K.FSSQQAATK.Q           |        | 2 | 1,8129 | 0,161 | -0,063 |
| 23 | Q96HE7 ERO1A_HUMAN  | R.NLLQNIH.-             |        | 2 | 1,8126 | 0,27  | 0,143  |
| 23 | Q9BVC3 DCC1_HUMAN   | E.DSHCNIIHTE.I          |        | 2 | 1,8083 | 0,088 | 0,1    |
| 23 | Q9NPR2 SEM4B_HUMAN  | R.VRLGS#EIRDSVV.-       | S825:  | 2 | 1,8071 | 0,504 | -0,26  |
| 23 | P09211 GSTP1_HUMAN  | K.ALPGQLKPF.T           |        | 2 | 1,8063 | 0,36  | 0,333  |
| 23 | Q13347 EIF3I_HUMAN  | R.FFHAFEEEE.F           |        | 2 | 1,8055 | 0,115 | 0,104  |
| 23 | O95071 UBR5_HUMAN   | E.DISYFGYPSFR.R         |        | 2 | 1,8017 | 0,304 | -0,09  |
| 23 | Q9BZE9 ASPC1_HUMAN  | R.RQDFNPCEYD.L          |        | 2 | 1,7956 | 0,161 | 0,091  |

|    |                     |                       |       |   |        |       |        |
|----|---------------------|-----------------------|-------|---|--------|-------|--------|
| 23 | P35579 MYH9_HUMAN   | R.GDLPFVVR.R          |       | 2 | 1,7922 | 0,156 | 0,427  |
| 23 | A6NK10 A6NK10_HUMAN | R.VLLSNLQR.C          |       | 2 | 1,7921 | 0,194 | 0,388  |
| 23 | Q7Z3K3 POGZ_HUMAN   | R.SSPEETIEPE.S        |       | 2 | 1,7842 | 0,161 | 0,327  |
| 23 | Q8N6T3 ARFG1_HUMAN  | E.TFGSAEPTK.T         |       | 2 | 1,7811 | 0,213 | 0,78   |
| 23 | P68104 EF1A1_HUMAN  | E.DGPKFLKSGD.A        |       | 2 | 1,7778 | 0,29  | 0,573  |
| 23 | Q8IYB3 SRRM1_HUMAN  | K.EKT#PELPEPSVK.V     | T220: | 2 | 1,7724 | 0,171 | 0      |
| 23 | Q13769 THOC5_HUMAN  | R.RRPT#LGVQLD.D       | T328: | 2 | 1,7697 | 0,188 | 0,099  |
| 23 | Q96T23 RSF1_HUMAN   | K.AQIDPVLLK.N         |       | 2 | 1,7685 | 0,147 | 0      |
| 23 | P17844 DDX5_HUMAN   | R.GYSS#LLKR.D         | S520: | 2 | 1,7683 | 0,225 | 0,122  |
| 23 | P46777 RL5_HUMAN    | K.QFSQYIK.N           |       | 2 | 1,76   | 0,098 | -0,868 |
| 23 | P13010 KU86_HUMAN   | E.QRFNNFLK.A          |       | 2 | 1,7578 | 0,112 | -0,8   |
| 23 | Q8WUX9 CHMP7_HUMAN  | K.RQLEPTLPL.-         |       | 2 | 1,755  | 0,153 | 0      |
| 23 | Q6UB35 C1TM_HUMAN   | R.LVPLVNGVRE.F        |       | 2 | 1,7516 | 0,251 | -0,223 |
| 23 | Q96PE2 ARHGH_HUMAN  | R.SLSDPIPQR.H         |       | 2 | 1,7478 | 0,135 | 0,06   |
| 23 | P49757 NUMB_HUMAN   | R.GFPALSQK.M          |       | 2 | 1,7447 | 0,202 | 0,36   |
| 23 | Q14244 MAP7_HUMAN   | R.LLTPTHSFLAR.S       |       | 2 | 1,7287 | 0,176 | 0,194  |
| 23 | P50897 PPT1_HUMAN   | K.KIPGIYVLSLE.I       |       | 2 | 1,7257 | 0,151 | 0      |
| 23 | Q13523 PRP4B_HUMAN  | R.TKLDLALLE.D         |       | 2 | 1,725  | 0,164 | -0,216 |
| 23 | P06493 CDC2_HUMAN   | E.GTY#GVVYK.G         | Y15:  | 2 | 1,7236 | 0,364 | -0,82  |
| 23 | Q96SB4 SRPK1_HUMAN  | E.SES#PVERPLKENPPNK.M | S482: | 2 | 1,7169 | 0,145 | -0,321 |
| 23 | Q9NPR2 SEM4B_HUMAN  | R.CPFDPNFK.S          |       | 2 | 1,7151 | 0,158 | 0,238  |
| 23 | P16949 STMN1_HUMAN  | E.SVPEFPLSPPK.K       |       | 2 | 1,7108 | 0,498 | 0      |
| 23 | Q9H307 PININ_HUMAN  | K.HVIADQEVN*E.T       |       | 2 | 1,7079 | 0,1   | -0,206 |
| 23 | P68104 EF1A1_HUMAN  | R.RGNVAGDSKNDPPM*E.A  |       | 2 | 1,7039 | 0,087 | -0,076 |
| 23 | Q9BUK6 MSTO1_HUMAN  | E.DRLHFVVEE.C         |       | 2 | 1,7019 | 0,246 | 0,202  |
| 23 | Q6ZRV2 FA83H_HUMAN  | R.RGS#PTTGFIQ.Q       | S892: | 2 | 1,6978 | 0,153 | 0,107  |
| 23 | P54652 HSP72_HUMAN  | E.LNADLFR.G           |       | 2 | 1,692  | 0,115 | 0,359  |
| 23 | A9CQZ4 A9CQZ4_HUMAN | K.NLGSQS#PKPR.Q       | S27:  | 2 | 1,6919 | 0,181 | -0,335 |
| 23 | Q96LT9 RBM40_HUMAN  | E.VDASNIGFGK.I        |       | 2 | 1,6883 | 0,251 | 0      |
| 23 | P13073 COX41_HUMAN  | E.DFSLPAYM*DRR.D      |       | 2 | 1,6873 | 0,104 | -1,583 |
| 23 | Q13428 TCOF_HUMAN   | K.TVANLLSGK.S         |       | 2 | 1,6743 | 0,169 | 0,203  |
| 23 | Q6ZN18 AEBP2_HUMAN  | E.GLEPKGPR.G          |       | 2 | 1,659  | 0,279 | 0,186  |
| 23 | P98175 RBM10_HUMAN  | K.LASDDRPS#PPR.G      | S722: | 2 | 1,6398 | 0,159 | -0,756 |
| 23 | Q14157 UBP2L_HUMAN  | K.ASLTSKIPALAVE.M     |       | 2 | 1,6372 | 0,14  | -0,375 |
| 23 | Q96S55 WRIP1_HUMAN  | E.SYDAPPTPSGAR.L      |       | 2 | 1,6216 | 0,175 | -0,601 |
| 23 | Q09666 AHNK_HUMAN   | K.AEAPLPSPKLE.G       |       | 2 | 1,6138 | 0,293 | 0,318  |
| 23 | P36578 RL4_HUMAN    | K.NVTLPVFK.A          |       | 2 | 1,6137 | 0,101 | 0,062  |
| 23 | Q9Y6M7 S4A7_HUMAN   | K.VDMNFM*R.K          |       | 2 | 1,611  | 0,109 | 0,394  |
| 23 | Q9Y6M7 S4A7_HUMAN   | K.VDM*NFM*R.K         |       | 2 | 1,6098 | 0,116 | 0,516  |

|    |                     |                                   |        |   |        |       |        |
|----|---------------------|-----------------------------------|--------|---|--------|-------|--------|
| 23 | Q9Y2S0 RPAC2_HUMAN  | E.DHTLGNSLR.Y                     |        | 2 | 1,5922 | 0,124 | -1,024 |
| 23 | Q9H0D6 XRN2_HUMAN   | K.AVM*LPGAR.K                     |        | 2 | 1,5881 | 0,128 | 0,073  |
| 23 | Q06830 PRDX1_HUMAN  | K.LNCQVIGASVD.S                   |        | 2 | 1,5742 | 0,159 | 0,207  |
| 23 | P28838 AMPL_HUMAN   | K.GLVLGIYSK.E                     |        | 2 | 1,5567 | 0,132 | 0,385  |
| 23 | P68104 EF1A1_HUMAN  | R.QTVAVGVK.A                      |        | 2 | 1,5462 | 0,128 | 0,067  |
| 23 | Q9Y3Q8 T22D4_HUMAN  | R.GASGGAGGRS#LDSRLE.L             | S123:  | 2 | 1,5299 | 0,213 | -1,243 |
| 23 | Q8IV50 LYSM2_HUMAN  | R.APRPSAPS#PPPR.S                 | S24:   | 2 | 1,5071 | 0,14  | -0,093 |
| 23 | Q16513 PKN2_HUMAN   | R.FQFNLQDFR.C                     |        | 2 | 1,4988 | 0,262 | -0,402 |
| 23 | P12814 ACTN1_HUMAN  | R.KDDPLTNLNTAFDVAE.K              |        | 2 | 1,4881 | 0,12  | 0,138  |
| 23 | P05787 K2C8_HUMAN   | R.ISSSFSR.V                       |        | 2 | 1,4818 | 0,171 | -0,14  |
| 23 | P18615 NELFE_HUMAN  | K.DPEKGPVPTFQPFR.S                |        | 2 | 1,4287 | 0,186 | 0,35   |
| 23 | Q05524 ENO1B_HUMAN  | K.YNQLLR.I                        |        | 2 | 1,4193 | 0,111 | -0,076 |
| 23 | Q99729 ROAA_HUMAN   | R.GFGFILFK.D                      |        | 2 | 1,4122 | 0,164 | 0,131  |
| 23 | Q13308 PTK7_HUMAN   | E.IQPQTQVTLR.C                    |        | 2 | 1,3716 | 0,123 | 0      |
| 23 | Q96PK6 RBM14_HUMAN  | R.QPT#PPFFGR.D                    | T206:  | 2 | 1,3463 | 0,175 | 0,217  |
| 23 | Q68D38 Q68D38_HUMAN | R.HSFGPLDYE.S                     |        | 2 | 1,3096 | 0,092 | 0,115  |
| 23 | P48643 TCPE_HUMAN   | R.AVTIFIR.G                       |        | 2 | 1,1829 | 0,177 | 0,446  |
| 24 | O14974 MYPT1_HUMAN  | K.VKFDDGAVFLAACSSGDTDE.V          |        | 2 | 6,4498 | 0,58  | 0,348  |
| 24 | Q8IYB3 SRRM1_HUMAN  | E.ATSTSDILKVPKPEIPEKPS#PEKNSK.K   | S260:  | 3 | 6,1543 | 0,3   | 0,114  |
| 24 | P49773 HINT1_HUMAN  | R.CLAFHDISPQAPTHFLVIPK.K          |        | 3 | 6,1451 | 0,379 | -0,08  |
| 24 | Q8IY57 YAF2_HUMAN   | K.SPPASSAASADQHSQSGSSDNTE.R       |        | 2 | 6,0541 | 0,623 | 0,953  |
| 24 | Q9NYZ3 GTSE1_HUMAN  | R.VPQALNFSPEESDSTFSK.S            |        | 2 | 5,8719 | 0,51  | 0,123  |
| 24 | O60784 TOM1_HUMAN   | K.AADRLPNLSS#PSAEGPPGPPSGPAPR.K   | S462:  | 3 | 5,8534 | 0,471 | -1,208 |
| 24 | O60506 HNRPQ_HUMAN  | E.DGALAVLQKFKSDLSHVQNK.S          |        | 3 | 5,8194 | 0,476 | 0      |
| 24 | Q13459 MYO9B_HUMAN  | R.VQEKPDS#PGGSTQIQR.Y             | S1290: | 3 | 5,7712 | 0,444 | -0,405 |
| 24 | P23193 TCEA1_HUMAN  | K.KKEPAITSQNS#PEAREE.S            | S100:  | 3 | 5,7348 | 0,387 | -0,183 |
| 24 | Q15084 PDIA6_HUMAN  | K.VKLAAVDATVNQVLASR.Y             |        | 2 | 5,6145 | 0,58  | -0,348 |
| 24 | Q8IYB3 SRRM1_HUMAN  | E.ATSTSDILKVPKPEIPEKPS#PEK.N      | S260:  | 3 | 5,5509 | 0,466 | 0,379  |
| 24 | P05783 K1C18_HUMAN  | E.DGEDFNLGDALDSSNSM*QTIQK.T       |        | 3 | 5,5198 | 0,487 | 0      |
| 24 | O43237 DC1L2_HUMAN  | K.FVKDFQDYM*EPEEGCQGS#PQR.R       | S194:  | 3 | 5,4917 | 0,449 | 0,277  |
| 24 | P21127 CD2L1_HUMAN  | R.GTS#PRPPEGGLGYSQLGDDDLKE.T      | S752:  | 3 | 5,4858 | 0,4   | 0,222  |
| 24 | Q14676 MDC1_HUMAN   | E.LQASASTDQPVTSPTS.R              |        | 2 | 5,4765 | 0,49  | -0,195 |
| 24 | Q6PKG0 LARP1_HUMAN  | R.CPS#QSSSRPAAM*ISQPPTPPTGQPVRE.D | S1056: | 3 | 5,4412 | 0,33  | 0,309  |
| 24 | Q9Y6D5 BIG2_HUMAN   | E.LEKPIQSKPQSPVIAAAVS#PK.F        | S227:  | 3 | 5,4103 | 0,465 | -0,076 |
| 24 | Q92625 ANS1A_HUMAN  | R.SLSKS#DSDLLTCSPTEATM*GSR.S      | S626:  | 3 | 5,3603 | 0,496 | -0,143 |
| 24 | Q9NX40 OCAD1_HUMAN  | K.SKYDSSVSGQSSFVTSPPAADNIE.M      |        | 2 | 5,3401 | 0,579 | 0,514  |
| 24 | Q92882 OSTF1_HUMAN  | K.LAFDMATNAACASLLK.K              |        | 2 | 5,3065 | 0,458 | -0,288 |
| 24 | O43237 DC1L2_HUMAN  | K.DFQDYM*EPEEGCQGS#PQR.R          | S194:  | 2 | 5,2692 | 0,588 | 0,108  |
| 24 | Q09472 EP300_HUMAN  | E.IKEEEDQPSTSATQSS#PAPGQSK.K      | S1038: | 3 | 5,2627 | 0,521 | -0,442 |

|    |                    |                                         |            |   |        |       |        |
|----|--------------------|-----------------------------------------|------------|---|--------|-------|--------|
| 24 | P07900 HS90A_HUMAN | K.HSQFIGYPITLFVEKER.D                   |            | 3 | 5,2515 | 0,378 | -0,266 |
| 24 | O00571 DDX3X_HUMAN | E.NALGLDQQFAGLDLNSSDNQSGGSTASK.G        |            | 2 | 5,2055 | 0,632 | 0,873  |
| 24 | Q14562 DHX8_HUMAN  | K.NPDGSLSQAAAM*M*QSALAK.E               |            | 2 | 5,1933 | 0,516 | -0,264 |
| 24 | Q58FF7 H90B3_HUMAN | K.KHSQFIGYPITLYLEK.E                    |            | 3 | 5,1821 | 0,455 | -0,189 |
| 24 | Q5VZK9 LR16A_HUMAN | R.TASRPDDIPDPSRSS#PKVALLPPVLK.K         | S1291:     | 3 | 5,1388 | 0,383 | 0,137  |
| 24 | Q03164 HRX_HUMAN   | D.GVDDGTES#DTSVTATTR.K                  | S2726:     | 2 | 5,0892 | 0,485 | -0,34  |
| 24 | P61244 MAX_HUMAN   | R.SSAQLQTNYPSSDNSLYTNAK.G               |            | 2 | 5,0866 | 0,525 | 0,64   |
| 24 | P04406 G3P_HUMAN   | K.RVIISAPSADAPM*FVM*GVNHE.K             |            | 3 | 5,0599 | 0,502 | 0,724  |
| 24 | Q92597 NDRG1_HUMAN | K.YFVQGM*GYM*PSASM*TR.L                 |            | 2 | 5,0585 | 0,419 | -0,26  |
| 24 | Q92616 GCN1L_HUMAN | R.KM*AAQIIGNM*YSLTDQKD.L                |            | 3 | 5,0541 | 0,491 | 0,089  |
| 24 | A0FGR8 ESYT2_HUMAN | K.SHM*SGSPGPGSNTAPSTPVIGGSDKPGM*EE.K    |            | 3 | 5,035  | 0,398 | -0,866 |
| 24 | Q96SU4 OSBL9_HUMAN | K.RLIDSSGSASVLTHSSSGNSLK.R              |            | 3 | 5,0177 | 0,435 | 0      |
| 24 | Q58FF7 H90B3_HUMAN | K.HSQFIGYPITLYLEK.E                     |            | 2 | 5,0146 | 0,559 | -0,27  |
| 24 | P04406 G3P_HUMAN   | K.RVIISAPSADAPMFVM*GVNHE.K              |            | 3 | 5,0078 | 0,477 | -0,486 |
| 24 | Q15393 SF3B3_HUMAN | K.HIANYISGIQTIGHR.V                     |            | 3 | 5,0017 | 0,446 | -0,327 |
| 24 | O75616 ERAL_HUMAN  | E.TQVILLDTPGIIS#PGK.Q                   | S173:      | 2 | 4,9886 | 0,397 | -0,282 |
| 24 | Q58FF8 H90B2_HUMAN | E.KHSQFLGYPITLYLEK.E                    |            | 3 | 4,9873 | 0,429 | -0,094 |
| 24 | Q58FF8 H90B2_HUMAN | K.HSQFLGYPITLYLEKER.E                   |            | 3 | 4,9866 | 0,495 | 0,087  |
| 24 | O43399 TPD54_HUMAN | K.VVGDRENGSDNLPSSAGSGDKPLSDPAPF.-       |            | 3 | 4,9858 | 0,395 | 0,19   |
| 24 | P08238 HS90B_HUMAN | K.KHSQFIGYPITLYLEKER.E                  |            | 3 | 4,9806 | 0,503 | -0,329 |
| 24 | Q16891 IMMT_HUMAN  | E.GKLHNM*IVDLDNVVKVQAAQSE.A             |            | 3 | 4,9282 | 0,449 | -0,358 |
| 24 | P10809 CH60_HUMAN  | K.NIGAKLVQDVANNTNEE.A                   |            | 2 | 4,9154 | 0,428 | 0,133  |
| 24 | Q9UER7 DAXX_HUMAN  | E.AAAQPGPSHPLPNAAS#PGAEPSSSEPHGAR.G     | S33:       | 3 | 4,9074 | 0,443 | -0,244 |
| 24 | P46734 MP2K3_HUMAN | K.M*CDFGISGYLVD#VAK.T                   | S218:      | 2 | 4,8873 | 0,518 | 0      |
| 24 | O75896 TUSC2_HUMAN | R.RGS#M*FYDEDGDLAHE.F                   | S50:       | 3 | 4,8871 | 0,446 | -0,498 |
| 24 | P04406 G3P_HUMAN   | K.RVIISAPSADAPMFVM*GVNHE.K              |            | 2 | 4,857  | 0,488 | 0,216  |
| 24 | O43463 SUV91_HUMAN | R.M*DSNFGLAGLPGS#PK.K                   | S391:      | 2 | 4,8456 | 0,538 | 0,154  |
| 24 | P40222 TXLNA_HUMAN | R.VQDLSAGGQGSALTDSGPER.R                |            | 3 | 4,838  | 0,483 | -0,098 |
| 24 | P04406 G3P_HUMAN   | E.KAG AHLQGGAKRVIISAPSADAPM*FVM*GVNHE.K |            | 3 | 4,8253 | 0,495 | 0      |
| 24 | Q92882 OSTF1_HUMAN | K.LAFDM*ATNAACASLLK.K                   |            | 2 | 4,7939 | 0,519 | -0,285 |
| 24 | Q9H2J4 PDCL3_HUMAN | D.LEENPKKPIEDVLLSSVR.R                  |            | 3 | 4,788  | 0,392 | 0,089  |
| 24 | P10809 CH60_HUMAN  | K.NQLKDM*AIATGGAVFGEE.G                 |            | 2 | 4,7863 | 0,561 | -0,131 |
| 24 | P40222 TXLNA_HUMAN | R.VQDLSAGGQGSALTDSGPER.R                |            | 2 | 4,7735 | 0,558 | -0,456 |
| 24 | Q9Y2X7 GIT1_HUMAN  | R.HGS#GADS#DYENTQSGDPLLGLE.G            | S592:S596: | 2 | 4,7549 | 0,531 | 0,705  |
| 24 | Q9H299 SH3L3_HUMAN | R.IQYQLVDISQDNALRDE.M                   |            | 2 | 4,7479 | 0,406 | -0,483 |
| 24 | Q9NYF8 BCLF1_HUMAN | K.LKDLFDYS#PPLHK.N                      | S512:      | 2 | 4,7318 | 0,425 | -0,074 |
| 24 | P36578 RL4_HUMAN   | K.APIRPDIVNFVHTNLR.K                    |            | 3 | 4,727  | 0,298 | -0,295 |
| 24 | Q92625 ANS1A_HUMAN | R.S#LSKSDSLLTCSPTEDATM*GSR.S            | S622:      | 2 | 4,6962 | 0,372 | 0,287  |
| 24 | Q8TDD1 DDX54_HUMAN | R.KLGPGRPLPTFTSECTS#DVEPDTR.E.M         | S75:       | 3 | 4,6875 | 0,429 | 0,123  |

|    |                     |                                    |              |   |        |       |        |
|----|---------------------|------------------------------------|--------------|---|--------|-------|--------|
| 24 | Q9Y6D5 BIG2_HUMAN   | E.LEKPIQSKPQS#PVIQAAAVS#PK.F       | S218:S227:   | 3 | 4,672  | 0,453 | -0,074 |
| 24 | P61244 MAX_HUMAN    | R.SSAQLQTNYPSSDNLTYTNAK.G          |              | 3 | 4,6288 | 0,443 | 0,639  |
| 24 | O00499 BIN1_HUMAN   | K.GNKS#PSPDPGSPAATPE.I             | S296:        | 2 | 4,6259 | 0,469 | -0,867 |
| 24 | Q86SQ0 PHLB2_HUMAN  | R.KDS#LPDADLASCGLSQSSASFFTPR.S     | S513:        | 3 | 4,6208 | 0,463 | 0,259  |
| 24 | Q15637 SF01_HUMAN   | K.DGQM*LPGEDEPLHALVTANTM*E.N       |              | 2 | 4,612  | 0,622 | 0,407  |
| 24 | Q6IFS5 HSN2_HUMAN   | R.LKFHPVFPVPHS#APAVLTHNNE.S        | S249:        | 3 | 4,6006 | 0,453 | 0,225  |
| 24 | Q8WXH0 SYNE2_HUMAN  | R.RGS#M*SYLAAVEEEVEE.S             | S4108:       | 2 | 4,5984 | 0,47  | -0,258 |
| 24 | Q9BTK6 PA1_HUMAN    | R.DLFSLDSEDPSPAS#PPLR.S            | S237:        | 2 | 4,5978 | 0,529 | 0,362  |
| 24 | Q15631 TSN_HUMAN    | E.ILTLQGVHQQGAGFQDIPK.R            |              | 3 | 4,589  | 0,381 | 0,09   |
| 24 | Q15154 PCM1_HUMAN   | R.KPFNFLPM*QINTNK.S                |              | 3 | 4,5836 | 0,326 | 0,857  |
| 24 | Q16643 DREB_HUMAN   | R.M*APTPIPTRSPS#DSSTASTPVAE.Q      | S339:        | 2 | 4,5823 | 0,523 | 0,815  |
| 24 | P23588 IF4B_HUMAN   | E.TLNKEEDCHS#PTSKPPKPDQPLK.V       | S459:        | 3 | 4,5794 | 0,435 | -0,537 |
| 24 | P09622 DLDH_HUMAN   | K.IPNIYAIGDVVAGPM*LAHK.A           |              | 3 | 4,5788 | 0,259 | -0,458 |
| 24 | Q13428 TCOF_HUMAN   | R.KSAEPSANTLVS#ETEEE.G             | S171:        | 2 | 4,577  | 0,602 | 0,183  |
| 24 | Q9NYJ8 TAB2_HUMAN   | R.KLS#MGSDDAAYTQALLVHQA.A          | S524:        | 3 | 4,5469 | 0,333 | -0,487 |
| 24 | P04406 G3P_HUMAN    | K.RVIISAPSADAPM*FVM*GVNHE.K        |              | 2 | 4,5222 | 0,66  | 0,215  |
| 24 | Q6PKG0 LARP1_HUMAN  | R.CPS#QSSSRPAAM*ISQPPT#PPTGQPVRE.D | S1056:T1071: | 3 | 4,5165 | 1     | 0,361  |
| 24 | Q04637 IF4G1_HUMAN  | R.FSALQQAVPTSTDN.R                 |              | 2 | 4,5146 | 0,469 | -0,138 |
| 24 | Q53HL2 BOREA_HUMAN  | R.IYNISGNGS#PLADSKE.I              | S219:        | 2 | 4,5032 | 0,423 | -0,21  |
| 24 | Q58FF8 H90B2_HUMAN  | K.HSQFLGYPTILYLEK.E                |              | 2 | 4,5015 | 0,503 | -0,067 |
| 24 | Q8IWA0 WDR75_HUMAN  | K.VQDTS#NTGLGEDIIHQLSK.S           | S796:        | 2 | 4,4982 | 0,44  | 0,114  |
| 24 | P06396 GELS_HUMAN   | K.VSNGAGTM*SVSLVADENPFAQGALK.S     |              | 3 | 4,4963 | 0,354 | 0,221  |
| 24 | Q9NYJ8 TAB2_HUMAN   | R.KLS#M*GSDDAAYTQALLVHQA.A         | S524:        | 3 | 4,4954 | 0,343 | -0,081 |
| 24 | P25786 PSA1_HUMAN   | R.KAQPAQPADEPAEKADEPM*EH.-         |              | 3 | 4,4909 | 0,411 | -0,079 |
| 24 | Q76M58 Q76M58_HUMAN | R.QAHLCLVLANCDEPM*YVK.L            |              | 3 | 4,4808 | 0,407 | 0,085  |
| 24 | Q6ZVM7 TM1L2_HUMAN  | R.KGVEFPM*ADLDALS#PIHTPQR.S        | S160:        | 3 | 4,4807 | 0,409 | -0,303 |
| 24 | P60709 ACTB_HUMAN   | K.DLYANTVLSGGTTM*YPGIADR.M         |              | 2 | 4,4651 | 0,518 | 0,328  |
| 24 | P25705 ATPA_HUMAN   | E.NAFLSHVVSQHQALLGTIR.A            |              | 3 | 4,4649 | 0,469 | 0,087  |
| 24 | P07910 HNRPC_HUMAN  | R.M*IAGQVLDINLAAEPK.V              |              | 2 | 4,4432 | 0,474 | -0,215 |
| 24 | Q16643 DREB_HUMAN   | R.MAPTPIPTRS#PSDSSTASTPVAE.Q       | S337:        | 2 | 4,4422 | 0,466 | 0,513  |
| 24 | P04406 G3P_HUMAN    | R.VIISAPSADAPM*FVM*GVNHE.K         |              | 2 | 4,4398 | 0,495 | 0,461  |
| 24 | O94763 RMP_HUMAN    | E.DRNTNVNAM*HQVTDSTPCHK.D          |              | 3 | 4,4395 | 0,344 | -0,221 |
| 24 | P50991 TCPD_HUMAN   | K.M*IQDGKGDVTITNDGATILK.Q          |              | 3 | 4,4298 | 0,206 | -0,608 |
| 24 | Q6WKZ4 RFIP1_HUMAN  | R.TAS#TDLKQLNQNFTLPK.K             | S280:        | 3 | 4,4264 | 0,334 | -0,087 |
| 24 | Q9GZR7 DDX24_HUMAN  | K.TGGTVSDQALLFGDDDAGEGSSLIR.E      |              | 2 | 4,4226 | 0,53  | 0,852  |
| 24 | O60506 HNRPQ_HUMAN  | E.DGALAVLQQFKDSDLSHVQNK.S          |              | 2 | 4,406  | 0,444 | 0,211  |
| 24 | Q96T23 RSF1_HUMAN   | E.M*DNLDNAQTSGLIEPSETKGS#M*QK.S    |              | 3 | 4,4035 | 0,481 | 0,139  |
| 24 | Q15084 PDIA6_HUMAN  | K.LAAVDATVNVQLASR.Y                |              | 2 | 4,4021 | 0,529 | -0,24  |
| 24 | P07237 PDIA1_HUMAN  | E.IKTHILLFLPK.S                    |              | 3 | 4,3853 | 0,239 | 0,553  |

|    |                     |                                 |            |   |        |       |        |
|----|---------------------|---------------------------------|------------|---|--------|-------|--------|
| 24 | Q9UK76 HN1_HUMAN    | R.RNS#SEASSGDFLDLKG.E.G         | S87:       | 2 | 4,3731 | 0,539 | 0,064  |
| 24 | P49736 MCM2_HUMAN   | R.SKDAILLADLVDSCKPGDE.I         |            | 3 | 4,3504 | 0,34  | -0,179 |
| 24 | Q96F86 EDC3_HUMAN   | K.SQDVAVS#PQQQCSK.S             | S131:      | 2 | 4,3366 | 0,455 | -0,414 |
| 24 | P49773 HINT1_HUMAN  | R.CLAFHDISPQAPTHFLVIPK.K        |            | 2 | 4,3337 | 0,445 | 0,533  |
| 24 | Q9BQK8 LPIN3_HUMAN  | R.SQHLGPSDIYLLDPLSLDSE.N        |            | 2 | 4,3278 | 0,469 | 0      |
| 24 | Q9UQ35 SRRM2_HUMAN  | K.SKDSLVLQSCPGSLSLCAGVK.S       |            | 3 | 4,3223 | 0,36  | 0,175  |
| 24 | P28370 SMCA1_HUMAN  | E.LFAHFIQPSAQKS#PTS#PLNM*K.L    | S116:S119: | 3 | 4,3212 | 0,303 | 0,218  |
| 24 | Q9Y2W1 TR150_HUMAN  | E.LFAQHIVTIVHHVKE.H             |            | 3 | 4,3153 | 0,38  | -0,413 |
| 24 | Q96B23 CR025_HUMAN  | E.TAVEGDPSGVSGATVGR.K           |            | 2 | 4,3138 | 0,544 | -0,313 |
| 24 | P21127 CD2L1_HUMAN  | R.GTS#PRPPEGGLGYSQLGDDDLKE.T    | S752:      | 2 | 4,3105 | 0,425 | 0,593  |
| 24 | Q8IU81 I2BP1_HUMAN  | E.GRS#PGPPALKHPATKD.L           | S66:       | 3 | 4,31   | 0,347 | -0,214 |
| 24 | Q8WXV6 Q8WXV6_HUMAN | R.KRTSS#EDNLYLAVLR.A            | S21:       | 3 | 4,3084 | 0,247 | 0,198  |
| 24 | P04406 G3P_HUMAN    | R.VIISAPSADAPMFVMGVNHE.K        |            | 3 | 4,3011 | 0,401 | 0      |
| 24 | Q9NYF8 BCLF1_HUMAN  | K.KAEGEPQEES#PLKSK.S            | S177:      | 3 | 4,3004 | 0,304 | -0,421 |
| 24 | Q7L804 RFIP2_HUMAN  | R.TLS#FDTSKM*NQPDSIVDE.G        | S277:      | 2 | 4,2944 | 0,528 | -0,115 |
| 24 | Q8NBS9 TXND5_HUMAN  | K.VDCTAHSVCSAQGVR.G             |            | 3 | 4,2927 | 0,404 | -0,104 |
| 24 | P12532 KCRU_HUMAN   | R.GTGGVDTAATGGVDFDISNLDL.R      |            | 2 | 4,2862 | 0,569 | 0,121  |
| 24 | Q7Z2K8 GRIN1_HUMAN  | E.GKVGSLPLEKGS#PVTTTK.A         | S615:      | 3 | 4,2855 | 0,489 | -0,876 |
| 24 | Q9BQK8 LPIN3_HUMAN  | K.RSQHLGPSDIYLLDPLSLDSE.N       |            | 2 | 4,2815 | 0,422 | 0,518  |
| 24 | P04792 HSPB1_HUMAN  | R.KYTLPPGVDPTQVSSLSPE.G         |            | 2 | 4,2697 | 0,358 | 0,232  |
| 24 | Q32MZ4 LRRF1_HUMAN  | R.NM*PGLSAATLASLGGTSSR.R        |            | 2 | 4,2626 | 0,506 | 0,135  |
| 24 | P04075 ALDOA_HUMAN  | E.KVLAAYKALSDHHIYLE.G           |            | 2 | 4,2615 | 0,544 | 0,236  |
| 24 | Q68E01 INT3_HUMAN   | E.AAFS#DDEEDLNSK.G              | S537:      | 2 | 4,2589 | 0,402 | 0      |
| 24 | P04406 G3P_HUMAN    | R.VIISAPSADAPMFVM*GVNHE.K       |            | 3 | 4,2509 | 0,528 | 0,174  |
| 24 | Q16643 DREB_HUMAN   | R.M*APTPIPTRS#PSDSSTASTPVAE.Q   | S337:      | 2 | 4,2429 | 0,443 | 0,815  |
| 24 | Q9BSJ8 ESYT1_HUMAN  | K.HLS#PYATLTVGDSSHK.T           | S820:      | 3 | 4,2304 | 0,386 | 0      |
| 24 | Q8IYB3 SRRM1_HUMAN  | E.KKEKT#PELPEPSVK.V             | T220:      | 3 | 4,2223 | 0,187 | -0,108 |
| 24 | Q8IUD2 RB6I2_HUMAN  | E.DNLNDSSQQLQDSL.R.K            |            | 2 | 4,217  | 0,483 | -0,634 |
| 24 | Q13813 SPTA2_HUMAN  | R.LM*VHTVATFNSIKE.L             |            | 3 | 4,2149 | 0,381 | -0,911 |
| 24 | P60709 ACTB_HUMAN   | K.DLYANTVLSGGTTM*YPGIADR.M      |            | 3 | 4,2126 | 0,37  | -0,082 |
| 24 | P04406 G3P_HUMAN    | R.VIISAPSADAPMFVM*GVNHE.K       |            | 2 | 4,2027 | 0,51  | 0,232  |
| 24 | P15336 ATF2_HUMAN   | K.KM*PLDLS#PLATPIIR.S           | S94:       | 2 | 4,1821 | 0,447 | -0,485 |
| 24 | Q8TDD1 DDX54_HUMAN  | K.LGPGRPLPTFPTSECTS#DVEPDTR.E.M | S75:       | 3 | 4,1771 | 0,558 | 0,064  |
| 24 | Q43776 SYNC_HUMAN   | K.ALM*TVGKEPFTIYVDSQKE.N        |            | 3 | 4,1764 | 0,423 | -0,081 |
| 24 | Q9ULJ3 ZN295_HUMAN  | R.S#FSASQSTDREGAS#PVTE.V        | S409:S422: | 2 | 4,1685 | 1     | -0,061 |
| 24 | Q04837 SSB_HUMAN    | R.QATTIADNIIFLSDQTK.E           |            | 2 | 4,1612 | 0,508 | 0      |
| 24 | Q1PBM3 Q1PBM3_HUMAN | E.NSLSGSCQSLDSPSFR.K            |            | 2 | 4,1608 | 0,429 | -0,56  |
| 24 | P06748 NPM_HUMAN    | D.M*SPLRPQNYLFGCELK.A           |            | 3 | 4,1568 | 0,332 | 0,093  |
| 24 | A0MZ66 SHOT1_HUMAN  | R.KVTAEADSSS#PTGILATSE.S        | S494:      | 2 | 4,1526 | 0,545 | -0,314 |



|    |                     |                                       |            |   |        |       |        |
|----|---------------------|---------------------------------------|------------|---|--------|-------|--------|
| 24 | P51116 FXR2_HUMAN   | R.RTGGPAYGPSSDVSTAS#ETE.S             | S453:      | 2 | 4,1486 | 0,507 | -0,119 |
| 24 | Q9BRQ6 CHCH6_HUMAN  | R.M*KEPSSPPPAPTSSTFGLQDGNLR.A         |            | 3 | 4,1477 | 0,359 | 0      |
| 24 | Q8N7R7 CCYL1_HUMAN  | R.SFS#ADNFIGIQR.S                     | S344:      | 2 | 4,1417 | 0,391 | 0      |
| 24 | P49736 MCM2_HUMAN   | R.SKDAILLADLVDSCKPGDE.I               |            | 2 | 4,14   | 0,532 | 0,239  |
| 24 | Q99459 CDC5L_HUMAN  | R.SKLVLPAPQIS#DAELQE.V                | S303:      | 2 | 4,1393 | 0,394 | -0,318 |
| 24 | Q9Y2U5 M3K2_HUMAN   | R.RRGS#DIDNPTLTVM*D.I                 | S331:      | 2 | 4,1374 | 0,478 | -0,273 |
| 24 | O60447 EVI5_HUMAN   | R.RNS#GSSLVSSSSASSNLSHLEE.D           | S113:      | 2 | 4,1313 | 0,496 | 1,476  |
| 24 | P05387 RLA2_HUMAN   | K.LASVPAGGAVAVSAAPGSAAPAAGSAPAAAEEK.K |            | 3 | 4,1221 | 0,377 | -0,066 |
| 24 | O14980 XPO1_HUMAN   | E.VDFSSGQITQVK.S                      |            | 2 | 4,1162 | 0,472 | -0,084 |
| 24 | P16220 CREB1_HUMAN  | R.KILNDLSSDAPGVPR.I                   |            | 2 | 4,1056 | 0,441 | -0,386 |
| 24 | P55809 SCOT_HUMAN   | E.DIHIPQIYVHR.L                       |            | 3 | 4,1051 | 0,4   | 0,263  |
| 24 | Q8TEA8 DTD1_HUMAN   | R.SASS#GAEGDVSSEREP.-                 | S197:      | 2 | 4,105  | 0,498 | -0,297 |
| 24 | P49750 YLP1_HUMAN   | K.SQAEPLSGNKEPLADTSSNQQK.N            |            | 3 | 4,1013 | 0,209 | -0,157 |
| 24 | Q00536 PCTK1_HUMAN  | E.KLTLNS#PIFDKPLSR.R                  | S138:      | 3 | 4,0865 | 0,331 | 0,404  |
| 24 | Q14738 2A5D_HUMAN   | R.RKS#ELPQDVYTIK.A                    | S573:      | 3 | 4,0792 | 0,323 | 0,11   |
| 24 | P38159 HNRPG_HUMAN  | R.GFAVTFES#PADAKDAAR.D                | S58:       | 3 | 4,0788 | 0,318 | -0,092 |
| 24 | O00571 DDX3X_HUMAN  | E.NALGLDQQFAGLDLNSSDNQSGGSTASK.G      |            | 3 | 4,0742 | 0,347 | 0,065  |
| 24 | P18754 RCC1_HUMAN   | R.VVLSVSSGGQHTVLLVK.D                 |            | 2 | 4,0651 | 0,403 | -0,283 |
| 24 | Q15554 TERF2_HUMAN  | K.DLVLPQALPAS#PALK.N                  | S323:      | 2 | 4,0609 | 0,433 | 0,285  |
| 24 | Q15057 CENB2_HUMAN  | R.KFVDKYSISLS#PPEQQK.K                | S521:      | 3 | 4,0583 | 0,242 | 0,265  |
| 24 | Q01804 OTUD4_HUMAN  | K.TAADVVS#PGANSVDSR.V                 | S1006:     | 2 | 4,0566 | 0,358 | -0,525 |
| 24 | Q9H7E2 TDRD3_HUMAN  | K.TLQVTM*PVKPTNDNDEFE.K               |            | 2 | 4,0556 | 0,119 | 0,466  |
| 24 | Q9H2J4 PDCL3_HUMAN  | E.ENPKKPIEDVLLSSVR.R                  |            | 3 | 4,0526 | 0,209 | 0,1    |
| 24 | Q8IU81 I2BP1_HUMAN  | E.ALGHSPKDPGGGGPVR.A                  |            | 3 | 4,043  | 0,25  | -0,821 |
| 24 | O94888 UBXD7_HUMAN  | E.HGQLDGLSS#PPKK.C                    | S270:      | 3 | 4,036  | 0,339 | 0,179  |
| 24 | P25786 PSA1_HUMAN   | K.AQPAQPADEPAEKADEPM*EH.-             |            | 2 | 4,0344 | 0,391 | 0,224  |
| 24 | B2RDE1 B2RDE1_HUMAN | R.KIQVLQQQADDAEE.R                    |            | 2 | 4,0327 | 0,425 | -0,907 |
| 24 | Q92882 OSTF1_HUMAN  | K.LAFDM*ATNAACASLLK.K                 |            | 3 | 4,0157 | 0,398 | 0,214  |
| 24 | Q9Y224 CN166_HUMAN  | R.KLTALDYHNPAGFNCKDE.T                |            | 3 | 4,0105 | 0,314 | -0,35  |
| 24 | Q15424 SAFB1_HUMAN  | R.KFDFDACNEVPPAPK.E                   |            | 2 | 4,0093 | 0,519 | -0,563 |
| 24 | Q13428 TCOF_HUMAN   | R.KSAEPSANTTLVSETEEE.G                |            | 2 | 3,9984 | 0,496 | -0,127 |
| 24 | P38646 GRP75_HUMAN  | K.LYSPSQIGAFVLM*K.M                   |            | 3 | 3,9981 | 0,309 | -0,116 |
| 24 | Q9NTK5 OLA1_HUMAN   | E.DGDIIFFKFNTPPQPK.K                  |            | 2 | 3,9967 | 0,348 | -0,193 |
| 24 | P23588 IF4B_HUMAN   | R.SQSS#DTEQQSPTSGGGK.V                | S498:      | 2 | 3,9961 | 0,468 | 0      |
| 24 | Q6S8J3 A26CA_HUMAN  | E.KSYELPDGQVITIGNE.R                  |            | 2 | 3,9949 | 0,454 | -0,484 |
| 24 | Q8WUA4 TF3C2_HUMAN  | R.AHFNAM*FQPSS#PTR.R                  | S893:      | 2 | 3,9891 | 0,456 | -0,579 |
| 24 | Q96QT6 PHF12_HUMAN  | R.TTS#PS#SDTDLDR.S                    | S131:S133: | 2 | 3,988  | 1     | 0,156  |
| 24 | Q9UHB6 LIMA1_HUMAN  | R.KIS#ENSYSLDDLE.I                    | S225:      | 2 | 3,9813 | 0,463 | -0,153 |
| 24 | P62750 RL23A_HUMAN  | E.DNNTLVFIVDK.A                       |            | 2 | 3,9811 | 0,403 | 0,532  |

|    |                     |                            |            |   |        |       |        |
|----|---------------------|----------------------------|------------|---|--------|-------|--------|
| 24 | Q9H6W3 NO66_HUMAN   | R.AKDFIHDSLPPVLTDR.E       |            | 3 | 3,9787 | 0,282 | -0,281 |
| 24 | P10809 CH60_HUMAN   | E.GM*KFDRGYISPYFINTSK.G    |            | 3 | 3,9781 | 0,193 | 0      |
| 24 | P11717 MPRI_HUMAN   | K.ALSSLHGDDQDS#EDE.V       | S2409:     | 2 | 3,9641 | 0,558 | -0,503 |
| 24 | P38919 IF4A3_HUMAN  | R.KLDYGQHVAVGTPGR.V        |            | 2 | 3,9598 | 0,565 | -0,076 |
| 24 | O75896 TUSC2_HUMAN  | R.RGS#M*FYDEDGDLAHE.F      | S50:       | 2 | 3,9567 | 0,526 | 0      |
| 24 | Q13885 TBB2A_HUMAN  | E.IVHIQAGQCGNQIGAK.F       |            | 3 | 3,9515 | 0,255 | 0      |
| 24 | P12268 IMDH2_HUMAN  | K.FVPYLIAGIQHSCQD.I        |            | 2 | 3,9492 | 0,451 | 0,07   |
| 24 | O95453 PARN_HUMAN   | K.RLNQCIPYTLQNHYYR.N       |            | 3 | 3,9444 | 0,18  | 0,082  |
| 24 | Q9H4L4 SENP3_HUMAN  | K.AGQHS#PLREEHVTCVQSILDE.F | S307:      | 3 | 3,9432 | 0,337 | -0,221 |
| 24 | Q8WXX5 DNJC9_HUMAN  | R.FQILGKVYVLSDR.E.Q        |            | 3 | 3,9417 | 0,37  | -0,417 |
| 24 | O43166 SI1L1_HUMAN  | R.TLS#DESIYNSQRE.H         | S1585:     | 2 | 3,9385 | 0,494 | 0,15   |
| 24 | P04406 G3P_HUMAN    | R.VIISAPSADAPMFVMGVNHE.K   |            | 2 | 3,9299 | 0,518 | 0      |
| 24 | Q02952 AKA12_HUMAN  | E.M*KGSVEEPKPEEPKR.K       |            | 3 | 3,9277 | 0,319 | 0,104  |
| 24 | Q00537 PCTK2_HUMAN  | E.KLQINS#PPFDQPM*SR.R      | S165:      | 3 | 3,9258 | 0,235 | -0,197 |
| 24 | Q14676 MDC1_HUMAN   | E.LQPSTSTDQPV#PEPTSR.A     | T1548:     | 2 | 3,9208 | 0,505 | -0,785 |
| 24 | Q9UHB6 LIMA1_HUMAN  | E.VQQPVHPKPLS#PDSR.A       | S362:      | 2 | 3,9142 | 0,421 | -0,207 |
| 24 | Q01082 SPTB2_HUMAN  | R.LQAAYAGDKADDIQR.E        |            | 2 | 3,9105 | 0,455 | -0,484 |
| 24 | Q5VUA4 ZN318_HUMAN  | R.RLS#DRLGS#PVDNLE.D       | S168:S173: | 2 | 3,9049 | 0,396 | 0,07   |
| 24 | Q07157 ZO1_HUMAN    | R.ISKPGAVST#PVKHADDHTPK.T  | T354:      | 3 | 3,9025 | 0,416 | -0,676 |
| 24 | O95793 STAU1_HUMAN  | K.VTFFEPGS#GDENGTSNKEDE.F  | S390:      | 2 | 3,9002 | 0,401 | 0,436  |
| 24 | Q9UNZ2 NSF1C_HUMAN  | R.KKS#PNELVDDLFK.G         | S114:      | 3 | 3,8909 | 0,108 | -0,227 |
| 24 | P12694 ODBA_HUMAN   | R.IGHHSTS#DDSSAYRS#VDE.V   | S339:S347: | 3 | 3,8906 | 0,303 | -0,345 |
| 24 | Q09666 AHNK_HUMAN   | R.LKS#EDGVEGDLGE.T         | S135:      | 2 | 3,8904 | 0,491 | -0,085 |
| 24 | P04156 PRIO_HUMAN   | R.YPNQVYRPM*DE.Y           |            | 2 | 3,8823 | 0,293 | -0,23  |
| 24 | P22314 UBA1_HUMAN   | R.QNRYDGQVAVFGSDLQE.K      |            | 2 | 3,8804 | 0,447 | 0,57   |
| 24 | Q03252 LMNB2_HUMAN  | R.M*RLES#LSYQLSGLQK.Q      | S296:      | 2 | 3,8685 | 0,474 | 0,132  |
| 24 | P54578 UBP14_HUMAN  | R.YAGALRAS#GE.M            | S143:      | 2 | 3,8651 | 0,428 | -0,341 |
| 24 | Q07157 ZO1_HUMAN    | E.TAHKPDLSKT#PTSPK.T       | T1567:     | 3 | 3,8609 | 0,353 | -0,721 |
| 24 | O75396 SC22B_HUMAN  | E.DEQSGRDLQQYQSQAK.Q       |            | 3 | 3,8606 | 0,265 | -0,292 |
| 24 | Q96IF1 JUB_HUMAN    | R.GAQPGRHS#VTGYGDCAVGAR.Y  | S263:      | 3 | 3,8575 | 0,415 | -0,524 |
| 24 | Q96GQ7 DDX27_HUMAN  | R.SADFNPDFVFTEKE.G         |            | 2 | 3,8542 | 0,474 | 0      |
| 24 | Q71U36 TBA1A_HUMAN  | E.ITNACFEPANQMVK.C         |            | 2 | 3,8499 | 0,488 | -0,601 |
| 24 | Q8N6T3 ARFG1_HUMAN  | R.KSPSSDSWTCADTSTER.R      |            | 3 | 3,8477 | 0,293 | -0,287 |
| 24 | P48643 TCPE_HUMAN   | K.GVIVDKDFSHPQM*PK.K       |            | 3 | 3,8461 | 0,345 | -0,534 |
| 24 | Q15154 PCM1_HUMAN   | E.NRKPFNLFPM*QINTNK.S      |            | 3 | 3,8404 | 0,297 | 0,092  |
| 24 | Q8IU81 I2BP1_HUMAN  | R.AGGAS#PAASSTAQPPTQHR.L   | S453:      | 3 | 3,8357 | 0,369 | -0,489 |
| 24 | Q8WXV6 Q8WXV6_HUMAN | R.TSS#EDNLYLAVLR.A         | S21:       | 2 | 3,8328 | 0,322 | -0,469 |
| 24 | Q8NI27 THOC2_HUMAN  | K.LYINHTPPPLSKS#KERE.M     | S1335:     | 3 | 3,8316 | 0,452 | -0,175 |
| 24 | Q6IFS5 HSN2_HUMAN   | K.FHPVFVPHS#APAVLTHNNE.S   | S249:      | 3 | 3,8258 | 0,454 | 0,083  |

|    |                    |                               |            |   |        |       |        |
|----|--------------------|-------------------------------|------------|---|--------|-------|--------|
| 24 | Q12965 MYO1E_HUMAN | R.NFIGDYIGM*EEHPE.L           |            | 2 | 3,8209 | 0,469 | -0,146 |
| 24 | O15446 RPA34_HUMAN | E.QINTEPLEDTVLS#PTK.K         | S285:      | 2 | 3,8178 | 0,405 | 0,065  |
| 24 | Q13459 MYO9B_HUMAN | R.VQEKPDSPGGSTQIQR.Y          | S1290:     | 2 | 3,81   | 0,436 | -0,27  |
| 24 | Q8N4C8 MINK1_HUMAN | R.SNS#AWQIYLQR.R              | S701:      | 2 | 3,8088 | 0,494 | -0,253 |
| 24 | P49773 HINT1_HUMAN | K.KHISQISVAEDDDE.S            |            | 2 | 3,8068 | 0,533 | -0,462 |
| 24 | P42166 LAP2A_HUMAN | R.SHISDQSP#LSSKR.K            | S351:      | 2 | 3,8045 | 0,504 | -0,802 |
| 24 | O43379 WDR62_HUMAN | R.AGTGYAS#PDRTHVLAAGKAEETLE.A | S1144:     | 3 | 3,8033 | 0,164 | -0,362 |
| 24 | O95400 CD2B2_HUMAN | R.LSGLADQM*VAR.G              |            | 2 | 3,7985 | 0,397 | -0,622 |
| 24 | Q9NYF8 BCLF1_HUMAN | K.LKDLFDYSPPLHK.N             |            | 3 | 3,7981 | 0,438 | 0,349  |
| 24 | P04406 G3P_HUMAN   | K.IISNASCTTNCLAPLAK.V         |            | 2 | 3,7959 | 0,404 | -0,665 |
| 24 | Q15057 CENB2_HUMAN | R.KFVDKYSISLS#PPEQQKK.F       | S521:      | 3 | 3,7888 | 0,373 | -0,332 |
| 24 | P22626 ROA2_HUMAN  | R.SRGFGFVTFSSM*AE.V           |            | 2 | 3,7887 | 0,524 | -0,079 |
| 24 | Q9C0C2 TB182_HUMAN | R.RFS#EGVLQSPSQDQE.K          | S429:      | 2 | 3,7751 | 0,38  | 0      |
| 24 | P48643 TCPE_HUMAN  | K.IAILTCPEPPPK.T              |            | 2 | 3,7749 | 0,346 | -0,151 |
| 24 | Q92597 NDRG1_HUMAN | R.SRT#AS#GSSVTSLDGTR.S        | T328:S330: | 3 | 3,7704 | 1     | -0,21  |
| 24 | P00441 SODC_HUMAN  | E.DSVISLSGDHCIIGR.T           |            | 2 | 3,7696 | 0,476 | 0      |
| 24 | P06748 NPM_HUMAN   | E.KT#PKT#PKGSSVEDIK.A         | T234:T237: | 3 | 3,7678 | 0,219 | -0,098 |
| 24 | Q09666 AHNK_HUMAN  | K.VGIDTPDIDIHGPE.G            |            | 2 | 3,7618 | 0,597 | -0,248 |
| 24 | P22087 FBRL_HUMAN  | R.DHAVVVGVYRPPPK.V            |            | 2 | 3,7485 | 0,6   | -0,318 |
| 24 | P09622 DLDH_HUMAN  | K.IPNIYAIGDVVAGPM*LAHKAEDE.G  |            | 3 | 3,7417 | 0,288 | 0,15   |
| 24 | P04632 CPNS1_HUMAN | R.RLFAQLAGDDM*E.V             |            | 2 | 3,7408 | 0,497 | 0      |
| 24 | Q9P0K7 RAI14_HUMAN | K.DLDGNIPLLLAVQNGHSE.I        |            | 2 | 3,7404 | 0,309 | 0,064  |
| 24 | Q8NBS9 TXND5_HUMAN | K.VDCTAHSVCSAQGVR.G           |            | 2 | 3,7354 | 0,526 | -0,277 |
| 24 | P49916 DNL3_HUMAN  | E.KEQITQHIADLSSK.A            |            | 3 | 3,7353 | 0,36  | 0,114  |
| 24 | O15446 RPA34_HUMAN | E.M*PGPPLNS#ESGEEAPTGR.D      | S488:      | 2 | 3,7353 | 0,343 | -0,444 |
| 24 | A6ND36 FA83G_HUMAN | E.LPKEEAPQNGTDHR.L            |            | 3 | 3,7301 | 0,246 | 0,115  |
| 24 | Q13813 SPTA2_HUMAN | R.LM*VHTVATFNSIKE.L           |            | 2 | 3,7297 | 0,357 | -1,064 |
| 24 | Q15084 PDIA6_HUMAN | K.LAAVDATVNQVLASR.Y           |            | 3 | 3,7069 | 0,277 | 0,299  |
| 24 | Q8IYB3 SRRM1_HUMAN | K.VPKPEPIPEPKEPS#PEK.N        | S260:      | 3 | 3,7034 | 0,104 | -0,37  |
| 24 | Q16658 FSCN1_HUMAN | R.YLAADKDGNTCE.R              |            | 2 | 3,6999 | 0,428 | -0,335 |
| 24 | Q13442 HAP28_HUMAN | R.KGVEGLIDIENPNR.V            |            | 2 | 3,6993 | 0,425 | 0      |
| 24 | P31946 1433B_HUMAN | E.SYKDSTLIM*QLLR.D            |            | 3 | 3,6954 | 0,281 | 0,115  |
| 24 | P51991 ROA3_HUMAN  | R.SRGFGFVTYSCVEE.V            |            | 2 | 3,6937 | 0,26  | -0,223 |
| 24 | P67936 TPM4_HUMAN  | R.KIQALQQQADEAE.D             |            | 2 | 3,6882 | 0,47  | -0,166 |
| 24 | Q92597 NDRG1_HUMAN | R.SRT#AS#GSSVTSLDGTR.S        | T328:S330: | 2 | 3,6853 | 1     | -0,49  |
| 24 | P14866 HNRPL_HUMAN | R.IQHPSNVLHFFNAPLEVTEE.N      |            | 3 | 3,6834 | 0,301 | -0,236 |
| 24 | Q58FG0 HS905_HUMAN | K.KHSQFIGYPITLFVEK.K          |            | 3 | 3,6802 | 0,315 | 0      |
| 24 | Q58FG0 HS905_HUMAN | K.HSQFIGYPITLFVEK.K           |            | 2 | 3,6746 | 0,501 | -0,137 |
| 24 | Q04760 LGUL_HUMAN  | R.GFGHIGIAVPDVYSACK.R         |            | 2 | 3,6721 | 0,428 | 0,136  |

|    |                     |                              |            |   |        |       |        |
|----|---------------------|------------------------------|------------|---|--------|-------|--------|
| 24 | Q5JTV8 TOIP1_HUMAN  | R.FSDEPPEVYGD FEPLVAK.E      |            | 2 | 3,6716 | 0,522 | -0,239 |
| 24 | Q01813 K6PP_HUMAN   | R.GRS#FAGNLNTYK.R            | S386:      | 2 | 3,6709 | 0,311 | -0,693 |
| 24 | Q9Y4F1 FARP1_HUMAN  | K.IHS#IRS#LASQPTLNSEVLE.Q    | S370:S373: | 2 | 3,6698 | 0,436 | 0,819  |
| 24 | Q8NCM9 Q8NCM9_HUMAN | R.SSDITSDLGNVLTSTPNAK.T      |            | 2 | 3,6671 | 0,443 | 0,191  |
| 24 | Q9UEY8 ADDG_HUMAN   | R.VTQILQS#PAFREDLE.C         | S64:       | 2 | 3,6645 | 0,418 | 0,067  |
| 24 | P04406 G3P_HUMAN    | D.IKKVVKQASEGPKLGILGYTE.H    |            | 3 | 3,6592 | 0,487 | 0,162  |
| 24 | Q16891 IMMT_HUMAN   | E.GKLHNM*IVDLNVVKK.V         |            | 3 | 3,6584 | 0,268 | -0,099 |
| 24 | Q14195 DPYL3_HUMAN  | R.NLHQSGFSLSGTQVDE.G         |            | 2 | 3,658  | 0,371 | 0,213  |
| 24 | Q9Y5J1 UTP18_HUMAN  | E.LVFGDVENDEALLR.R           |            | 2 | 3,6461 | 0,471 | -0,358 |
| 24 | Q15642 CIP4_HUMAN   | R.HARPPDPASAPPDSSSNSASQDTK.E |            | 3 | 3,6457 | 0,292 | -0,363 |
| 24 | P48634 BAT2_HUMAN   | R.DSQSASGEERPPEADGK.K        |            | 2 | 3,6366 | 0,519 | 0,347  |
| 24 | Q96T58 MINT_HUMAN   | R.HGSFHEDEDPIGS#PR.L         | S1278:     | 3 | 3,6365 | 0,341 | -0,208 |
| 24 | A4D186 A4D186_HUMAN | K.IQVLQQQADDAEE.R            |            | 2 | 3,6322 | 0,46  | 0,082  |
| 24 | P0C7M2 RA1L3_HUMAN  | K.KIFVGGIKEDTEE.H            |            | 2 | 3,631  | 0,436 | -0,416 |
| 24 | Q92597 NDRG1_HUMAN  | E.AFKYFVQGM*GYM*PSASM*TR.L   |            | 3 | 3,6304 | 0,303 | -1,401 |
| 24 | P08238 HS90B_HUMAN  | K.HSQFIGYPITLYLEKER.E        |            | 2 | 3,6279 | 0,556 | 0,117  |
| 24 | Q8IYB3 SRRM1_HUMAN  | E.ATSTSDILKVPKPEPIPEPK.E     |            | 3 | 3,6158 | 0,253 | 0,256  |
| 24 | Q7L014 DDX46_HUMAN  | E.VDLQTALTGYQTK.Q            |            | 2 | 3,614  | 0,314 | 0      |
| 24 | Q04917 1433F_HUMAN  | E.DSYKDSTLIM*QLLR.D          |            | 3 | 3,6139 | 0,178 | 0      |
| 24 | P61221 ABCE1_HUMAN  | E.DDLKAIKPYVDQIPK.A          |            | 3 | 3,6091 | 0,261 | -0,184 |
| 24 | Q09666 AHNK_HUMAN   | K.M*DAEVPDVNIEGPDAK.L        |            | 2 | 3,6083 | 0,477 | -0,213 |
| 24 | P08865 RSSA_HUMAN   | K.RKS#DGIYIINLK.R            | S43:       | 3 | 3,605  | 0,334 | 0,244  |
| 24 | Q9BPX3 CND3_HUMAN   | E.IRAPIVTVGVNNDPADVR.K       |            | 3 | 3,6049 | 0,274 | 0,288  |
| 24 | Q14738 2A5D_HUMAN   | R.RKS#ELPQDVYTIK.A           | S573:      | 2 | 3,6041 | 0,308 | 0,147  |
| 24 | Q9Y2D5 AKAP2_HUMAN  | R.DALGDSLQVPVS#PSSTTSSR.C    | S152:      | 2 | 3,6026 | 0,523 | 0,234  |
| 24 | Q99613 EIF3C_HUMAN  | R.GCILTVERM*DEE.F            |            | 2 | 3,6026 | 0,493 | -0,232 |
| 24 | O00244 ATOX1_HUMAN  | K.LGGVKYDIDLPNKK.V           |            | 3 | 3,6022 | 0,307 | 0,234  |
| 24 | O94916 NFAT5_HUMAN  | R.HTVLYISPPPEDLLDNSR.M       |            | 3 | 3,596  | 0,211 | 0,177  |
| 24 | P27816 MAP4_HUMAN   | K.VGSLDNVGHLPAGGAVK.T        |            | 2 | 3,5959 | 0,386 | -0,383 |
| 24 | O60506 HNRPQ_HUMAN  | E.DGALAVLQQFK.D              |            | 2 | 3,5918 | 0,444 | -0,103 |
| 24 | Q9UKL0 RCOR1_HUMAN  | R.VGPQYQAVVPDFDPAK.L         |            | 2 | 3,5914 | 0,409 | 0,282  |
| 24 | P07737 PROF1_HUMAN  | R.SSFYVNGTLGGQK.C            |            | 2 | 3,5911 | 0,41  | -0,166 |
| 24 | P18754 RCC1_HUMAN   | K.KPALVSIPEDVVQAE.A          |            | 2 | 3,5879 | 0,449 | -0,153 |
| 24 | Q8WWM7 ATX2L_HUMAN  | K.LQPSSS#PENSLDPFPPR.I       | S559:      | 3 | 3,5861 | 0,303 | 0,376  |
| 24 | P09493 TPM1_HUMAN   | E.KKATDAEADVASLNR.R          |            | 3 | 3,5845 | 0,309 | -0,691 |
| 24 | Q9BQK8 LPIN3_HUMAN  | K.RSQHLGPSDIYLLDPLSLDSE.N    |            | 3 | 3,583  | 0,426 | -0,078 |
| 24 | P38919 IF4A3_HUMAN  | R.KLDYGQHVAVGTPGR.V          |            | 3 | 3,5805 | 0,117 | 0,114  |
| 24 | P36551 HEM6_HUMAN   | R.GIGGIFFDDLSPSKEE.V         |            | 2 | 3,5748 | 0,423 | 0,134  |
| 24 | P62917 RL8_HUMAN    | R.ASGNYATVISHNPE.T           |            | 2 | 3,5747 | 0,287 | -0,084 |

|    |                    |                             |            |   |        |       |        |
|----|--------------------|-----------------------------|------------|---|--------|-------|--------|
| 24 | Q9BUH6 CI142_HUMAN | R.KS#PRPAGPQLFLPDPDPQR.G    | S152:      | 3 | 3,574  | 0,339 | -0,083 |
| 24 | Q9UNZ2 NSF1C_HUMAN | R.KKS#PNELVDDLK.G           | S114:      | 2 | 3,5703 | 0,322 | -0,303 |
| 24 | Q13263 TIF1B_HUMAN | E.GYGFSGDDPYSSAEPHVSGVK.R   |            | 3 | 3,5689 | 0,464 | -0,331 |
| 24 | P30041 PRDX6_HUMAN | K.DINAYNCEEPTEK.L           |            | 2 | 3,5668 | 0,46  | -0,385 |
| 24 | P50995 ANX11_HUMAN | R.LLISLSQGNRDE.S            |            | 2 | 3,5641 | 0,427 | 0,272  |
| 24 | Q01804 OTUD4_HUMAN | K.TAADVVSPGANSVDSR.V        |            | 2 | 3,5633 | 0,284 | -0,237 |
| 24 | Q92597 NDRG1_HUMAN | R.TAS#GSSVTSLDGTR.S         | S330:      | 2 | 3,5611 | 0,554 | -0,086 |
| 24 | Q8WXX5 DNJC9_HUMAN | R.RFQILGKVYSVLSRE.Q         |            | 3 | 3,559  | 0,395 | 0,096  |
| 24 | P22626 ROA2_HUMAN  | K.LFVGGIKEDTEE.H            |            | 2 | 3,5577 | 0,366 | -0,365 |
| 24 | Q9UHD8 SEPT9_HUMAN | K.LTVIDTPGFGDHINNE.N        |            | 2 | 3,5567 | 0,411 | 0,63   |
| 24 | Q58FF7 H90B3_HUMAN | K.HSQFIGYPITLYLEK.E         |            | 3 | 3,5558 | 0,367 | 0,607  |
| 24 | P04406 G3P_HUMAN   | R.VIISAPSADAPM*FVMGVNHE.K   |            | 3 | 3,5555 | 0,357 | 0,174  |
| 24 | Q71U36 TBA1A_HUMAN | R.AFVHWYVGEEM*EE.G          |            | 2 | 3,5486 | 0,352 | -0,311 |
| 24 | Q13442 HAP28_HUMAN | K.RKGVEGLIDIENPNR.V         |            | 3 | 3,5478 | 0,233 | -0,428 |
| 24 | Q2M2I8 AAK1_HUMAN  | R.ILS#DVTHSAVFGVPASK.S      | S637:      | 2 | 3,5452 | 0,346 | 0,405  |
| 24 | P13645 K1C10_HUMAN | K.GSLGGGFSSGGFSGGSFSR.G     |            | 2 | 3,5405 | 0,417 | 1,786  |
| 24 | Q724V5 HDGR2_HUMAN | K.LAGEELAGEEAPQEK.A         |            | 2 | 3,5388 | 0,332 | -0,311 |
| 24 | Q05682 CALD1_HUMAN | K.SAKPTKPAASDLPVPAEGVR.N    |            | 3 | 3,5339 | 0,128 | 0      |
| 24 | O75688 PPM1B_HUMAN | R.DNM*SIVLVCFSNAPK.V        |            | 2 | 3,5303 | 0,386 | 0      |
| 24 | P42166 LAP2A_HUMAN | R.SST#PLPTISSAENTR.Q        | T160:      | 2 | 3,5275 | 0,318 | 0,141  |
| 24 | P50454 SERPH_HUMAN | R.LYGPSSVSFADDFVR.S         |            | 2 | 3,5271 | 0,39  | -0,073 |
| 24 | P60174 TPIS_HUMAN  | K.SNVSDAVAQSTR.I            |            | 2 | 3,5266 | 0,452 | -0,494 |
| 24 | Q8N4N4 RN169_HUMAN | R.LPFSSLSLASHKPER.S         |            | 3 | 3,5159 | 0,452 | -0,783 |
| 24 | Q5JRA6 MIA3_HUMAN  | K.KLEDDRNSLQAAK.A           |            | 2 | 3,5119 | 0,3   | -0,738 |
| 24 | Q13501 SQSTM_HUMAN | R.SRLT#PVS#PESSSTEE.K       | T269:S272: | 2 | 3,509  | 0,343 | -0,415 |
| 24 | P49773 HINT1_HUMAN | K.HISQISVAEDDDE.S           |            | 2 | 3,5028 | 0,469 | 0,167  |
| 24 | Q9H0B6 KLC2_HUMAN  | K.SVEEPTQPGGTGLSDSR.T       |            | 2 | 3,501  | 0,552 | -0,071 |
| 24 | P06733 ENOA_HUMAN  | E.HINKTIAPALVSKKLNVT.E.Q    |            | 3 | 3,5009 | 0,435 | 0,617  |
| 24 | P98171 RHG04_HUMAN | R.GPGAPAS#PSASHPQGLDTPKPH.- | S930:      | 3 | 3,5006 | 0,215 | -0,4   |
| 24 | P22087 FBRL_HUMAN  | R.DHAVVVGVYRPPPK.V          |            | 3 | 3,4956 | 0,399 | -0,119 |
| 24 | P13639 EF2_HUMAN   | K.SDPVVSYSRETVSEE.S         |            | 2 | 3,4936 | 0,527 | 0,076  |
| 24 | Q99590 SFRIP_HUMAN | K.TEELIES#PKLE.S            | S293:      | 2 | 3,4933 | 0,338 | 0,089  |
| 24 | Q12906 ILF3_HUMAN  | K.VLQDM*GLPTGAAGR.D         |            | 2 | 3,4905 | 0,382 | -0,919 |
| 24 | P19338 NUCL_HUMAN  | K.GFGFVDFNSEEDAK.A          |            | 2 | 3,4904 | 0,42  | -0,312 |
| 24 | P09110 THIK_HUMAN  | E.KQDTFALASQK.A             |            | 2 | 3,4902 | 0,44  | -0,268 |
| 24 | P62753 RS6_HUMAN   | R.LSS#LRAS#TSKSE.S          | S236:S240: | 2 | 3,4837 | 0,499 | 0,086  |
| 24 | Q9H501 ESF1_HUMAN  | R.TLDSGTSEIVKS#PRIE.C       | S198:      | 3 | 3,4832 | 0,35  | 0,303  |
| 24 | P07355 ANXA2_HUMAN | E.KDIISDTSGDFRK.L           |            | 3 | 3,4799 | 0,442 | 0,185  |
| 24 | O96017 CHK2_HUMAN  | R.KFQDLLSEENE.S             |            | 2 | 3,4781 | 0,283 | 0,09   |

|    |                     |                                      |            |   |        |       |        |
|----|---------------------|--------------------------------------|------------|---|--------|-------|--------|
| 24 | P43246 MSH2_HUMAN   | E.DTTGSQSLAALLNK.C                   |            | 2 | 3,4762 | 0,441 | -0,258 |
| 24 | Q6UB35 C1TM_HUMAN   | K.LGINKTDPSTLTEEE.V                  |            | 2 | 3,4752 | 0,425 | -0,296 |
| 24 | P11021 GRP78_HUMAN  | K.KVTHAVVTVPAYFNDAQR.Q               |            | 3 | 3,4742 | 0,088 | 0,091  |
| 24 | Q71U36 TBA1A_HUMAN  | E.ITNACFEPANQM*VK.C                  |            | 2 | 3,4714 | 0,389 | -0,149 |
| 24 | Q58FF7 H90B3_HUMAN  | E.VVKKHSQFIGYPITLYLEK.E              |            | 3 | 3,4623 | 0,25  | 0,162  |
| 24 | Q15084 PDIA6_HUMAN  | K.VKLAAVDATVNQVLASR.Y                |            | 3 | 3,4615 | 0,194 | 0,104  |
| 24 | Q9NYJ8 TAB2_HUMAN   | R.TSSTSSSVNSQTLNR.N                  |            | 2 | 3,4604 | 0,439 | -0,544 |
| 24 | Q9NX40 OCAD1_HUMAN  | K.SKYDSSVSGQSSFVTSPAADNIE.M          |            | 3 | 3,4597 | 0,263 | 0,077  |
| 24 | Q9UHI6 DDX20_HUMAN  | E.KYQES#PGIQM*K.T                    | S714:      | 2 | 3,4532 | 0,386 | 0      |
| 24 | Q15424 SAFB1_HUMAN  | R.KFDFDACNEVPPAPK.E                  |            | 3 | 3,4529 | 0,19  | -1,16  |
| 24 | P42166 LAP2A_HUMAN  | K.LREQGT#ESRSS#TPLPTISSSAE.N         | T154:S159: | 3 | 3,4497 | 1     | 0,073  |
| 24 | Q9HAW4 CLSPN_HUMAN  | R.NFVFHTLS#PVKAE.A                   | S1289:     | 2 | 3,4474 | 0,394 | -0,233 |
| 24 | Q9H078 CLPB_HUMAN   | K.DAIFIM*TSNVASDE.I                  |            | 2 | 3,447  | 0,409 | 0      |
| 24 | Q9UQ84 EXO1_HUMAN   | E.DDLSQYSLSFTK.K                     |            | 2 | 3,4422 | 0,444 | -0,241 |
| 24 | O43865 SAHH2_HUMAN  | K.KQIQFADDM*QE.F                     |            | 2 | 3,437  | 0,274 | 0,178  |
| 24 | O95782 AP2A1_HUMAN  | R.GLAVFISDIR.N                       |            | 2 | 3,4315 | 0,392 | -0,112 |
| 24 | Q9GZP8 IMUP_HUMAN   | D.LGAALEPTSQKPGVGAGHGDPKLS#PHKVQGR.S | S29:       | 3 | 3,43   | 0,209 | 0,34   |
| 24 | Q9Y520 Q9Y520_HUMAN | E.NSCNKEEEPVFTR.Q                    |            | 2 | 3,4294 | 0,507 | 0,076  |
| 24 | Q15942 ZYG_HUMAN    | R.CSVCSEPIM*PEPGRDE.T                |            | 2 | 3,4294 | 0,323 | -0,649 |
| 24 | P19338 NUCL_HUMAN   | K.GLSEDTEETLKE.S                     |            | 2 | 3,4293 | 0,398 | -0,252 |
| 24 | Q9H7L9 SDS3_HUMAN   | K.RPAS#PSS#PEHLPATPAESPAQRFE.A       | S234:S237: | 3 | 3,4281 | 0,326 | -0,942 |
| 24 | Q9NR30 DDX21_HUMAN  | K.LKNGFPHPEPDCNPSEAASEENSE.I         |            | 3 | 3,428  | 0,328 | 0,4    |
| 24 | Q14847 LASP1_HUMAN  | K.GKGFVSVVADT#PE.L                   | T104:      | 2 | 3,4261 | 0,446 | -0,379 |
| 24 | Q9C0B5 ZDHC5_HUMAN  | R.GVGS#PEPGPTAPYLGR.S                | S621:      | 2 | 3,4215 | 0,343 | -1,418 |
| 24 | A0MZ66 SHOT1_HUMAN  | R.RKVTAEADSSPT#GILATSE.S             | T496:      | 3 | 3,4213 | 0,233 | 0,261  |
| 24 | Q96AQ6 PBIP1_HUMAN  | R.ALQAPHS#PSKTDGKE.L                 | S43:       | 3 | 3,4167 | 0,351 | 1,111  |
| 24 | Q05CK9 Q05CK9_HUMAN | R.NPIPSDRIS#PPQPNGE.I                | S25:       | 2 | 3,4162 | 0,378 | -0,068 |
| 24 | Q15424 SAFB1_HUMAN  | K.FDFDACNEVPPAPK.E                   |            | 2 | 3,4117 | 0,354 | 0      |
| 24 | Q7L014 DDX46_HUMAN  | R.KLLEPVDHGKIE.Y                     |            | 3 | 3,4113 | 0,242 | -0,199 |
| 24 | Q8IWA0 WDR75_HUMAN  | K.VQDTSNT#GLGEDIIHQLSK.S             | T798:      | 3 | 3,4101 | 0,334 | -0,086 |
| 24 | Q9H6Z4 RANB3_HUMAN  | E.EKPAIAPPVVFVQK.D                   |            | 3 | 3,4078 | 0,16  | 0,116  |
| 24 | Q00839 HNRPU_HUMAN  | E.YTFIQNVPLEDR.V                     |            | 2 | 3,4067 | 0,496 | 0,082  |
| 24 | Q15154 PCM1_HUMAN   | R.KPFNFLPMQINTNK.S                   |            | 3 | 3,3959 | 0,268 | -0,108 |
| 24 | P38646 GRP75_HUMAN  | E.AHGKLYSPSQIGAFVLM*K.M              |            | 3 | 3,3913 | 0,377 | 0,28   |
| 24 | O75526 HNRGT_HUMAN  | R.GFAFVTFESPADAK.A                   |            | 2 | 3,3909 | 0,275 | -0,41  |
| 24 | P49368 TCPG_HUMAN   | E.TAVLLLRIDDIVSGHK.K                 |            | 3 | 3,3904 | 0,295 | 0      |
| 24 | Q9HAU0 PKHA5_HUMAN  | K.INS#VKLNSLPSEYE.S                  | S343:      | 2 | 3,3897 | 0,417 | -0,219 |
| 24 | P02545 LMNA_HUMAN   | R.SGAQASSTPLS#PTR.I                  | S22:       | 2 | 3,3855 | 0,464 | 0,085  |
| 24 | Q8ND56 LS14A_HUMAN  | K.SFFDNISCDNRE.R                     |            | 2 | 3,3854 | 0,47  | -0,151 |

|    |                     |                                 |            |   |        |       |        |
|----|---------------------|---------------------------------|------------|---|--------|-------|--------|
| 24 | Q58FG0 HS905_HUMAN  | K.HSQFIGYPITLFVEK.K             |            | 3 | 3,3842 | 0,27  | -0,103 |
| 24 | O43776 SYNC_HUMAN   | K.ALM*TVGKEPFPTIYVDSQKENE.R     |            | 3 | 3,3828 | 0,289 | 0      |
| 24 | Q6WKZ4 RFIP1_HUMAN  | R.T#ASTDLKQLNQNFTLPK.K          | T278:      | 2 | 3,3798 | 0,312 | 0,116  |
| 24 | P49321 NASP_HUMAN   | K.LVPS#QEETKLSVEE.S             | S421:      | 2 | 3,3792 | 0,346 | 0      |
| 24 | P42166 LAP2A_HUMAN  | R.EQGT#ESRSST#PLPTISSAE.N       | T154:T160: | 3 | 3,3788 | 1     | 0      |
| 24 | Q8IYB3 SRRM1_HUMAN  | E.KKEKT#PELPEPSVK.V             | T220:      | 2 | 3,3779 | 0,322 | -0,072 |
| 24 | Q14966 ZN638_HUMAN  | K.STTGRSSKS#KEEPLFPFNLDE.F      | S1528:     | 3 | 3,376  | 0,211 | -0,374 |
| 24 | P43490 NAMPT_HUMAN  | E.YGQDLLHTVFK.N                 |            | 3 | 3,3671 | 0,323 | 0,277  |
| 24 | Q9Y266 NUDC_HUMAN   | K.LKPNLNGADLPNYR.W              |            | 2 | 3,3644 | 0,325 | -0,074 |
| 24 | O75616 ERAL_HUMAN   | E.TQVILLDTPGIIS#PGKQK.R         | S173:      | 2 | 3,3626 | 0,344 | -0,368 |
| 24 | P07954 FUMH_HUMAN   | E.SLM*LVTALNPHIGYDK.A           |            | 3 | 3,3621 | 0,226 | -0,307 |
| 24 | Q9H6F5 CCD86_HUMAN  | R.LGGLRPES#PE.S                 | S18:       | 2 | 3,3611 | 0,301 | -0,107 |
| 24 | Q76M58 Q76M58_HUMAN | R.QAHLCVLASNCDEPM*YVK.L         |            | 2 | 3,3604 | 0,502 | 0      |
| 24 | P06744 G6PI_HUMAN   | R.S#NTPILVDGKDV*PE.V            | S107:      | 2 | 3,3528 | 0,37  | -0,357 |
| 24 | P49790 NU153_HUMAN  | K.CIACQAAKLS#PR.D               | S687:      | 2 | 3,3511 | 0,399 | -0,419 |
| 24 | P23193 TCEA1_HUMAN  | K.KKEPAITSQNS#PEAREE.S          | S100:      | 2 | 3,3481 | 0,548 | -0,061 |
| 24 | Q9Y4F1 FARP1_HUMAN  | K.IHS#IRS#LASQPTLNSEVLE.Q       | S370:S373: | 3 | 3,3451 | 0,208 | 0,307  |
| 24 | Q9NVU7 SDA1_HUMAN   | K.YIEIDS#DEEPRGE.L              | S585:      | 2 | 3,3442 | 0,41  | -0,224 |
| 24 | Q06830 PRDX1_HUMAN  | R.TIAQDYGVLKADE.G               |            | 2 | 3,3434 | 0,34  | 0,171  |
| 24 | P09429 HMGB1_HUMAN  | K.M*SSYAFFVQTCREE.H             |            | 2 | 3,3415 | 0,454 | 0,344  |
| 24 | P29590 PML_HUMAN    | R.LQDLSSCITQGK.D                |            | 2 | 3,3402 | 0,474 | 0,181  |
| 24 | P35658 NU214_HUMAN  | R.TPS#IQPSLLPHAAPFAK.S          | S1023:     | 2 | 3,3362 | 0,486 | 0,066  |
| 24 | P42166 LAP2A_HUMAN  | K.LREQGTESRS#ST#PLPTISSAE.N     | S158:T160: | 3 | 3,332  | 1     | 0,367  |
| 24 | Q96GZ6 S41A3_HUMAN  | R.RLDS#CGKPGELGLPHLSTGGLPVASE.D | S13:       | 3 | 3,3291 | 0,316 | -0,065 |
| 24 | P43243 MATR3_HUMAN  | K.GYPHLCISCDLPVHSNKE.W          |            | 3 | 3,3271 | 0,23  | -0,172 |
| 24 | O94826 TOM70_HUMAN  | E.GFQNNQSM*LLADKVLKLLGKEK.A     |            | 3 | 3,3266 | 0,322 | -0,292 |
| 24 | P16949 STMN1_HUMAN  | R.ASGQAFELILS#PR.S              | S25:       | 2 | 3,3247 | 0,274 | -0,332 |
| 24 | A9CQZ4 A9CQZ4_HUMAN | K.AAEDEEVPAFFK.N                |            | 2 | 3,3243 | 0,431 | -0,18  |
| 24 | Q99733 NP1L4_HUMAN  | K.YAALYQPLFDK.R                 |            | 2 | 3,3213 | 0,219 | 0,092  |
| 24 | P04406 G3P_HUMAN    | R.VIISAPSADAPM*FVM*GVNHE.K      |            | 3 | 3,3195 | 0,29  | 1,987  |
| 24 | Q14562 DHX8_HUMAN   | E.IELVEEPPFLR.G                 |            | 2 | 3,319  | 0,363 | -0,166 |
| 24 | P11940 PABP1_HUMAN  | R.IVATKPLYVALAQR.K              |            | 3 | 3,3098 | 0,273 | 0,711  |
| 24 | O14617 AP3D1_HUMAN  | R.ALDIDLKPLADSE.K               |            | 2 | 3,3085 | 0,441 | -0,161 |
| 24 | Q9C0B5 ZDHC5_HUMAN  | R.GVGSPEPGPTAPYLGR.S            |            | 2 | 3,3075 | 0,36  | -0,078 |
| 24 | P38646 GRP75_HUMAN  | K.LYSPSQIGAFVLM*K.M             |            | 2 | 3,3059 | 0,482 | -0,544 |
| 24 | Q96EA4 CCD99_HUMAN  | E.KSVSIHTPVVSL#PHK.N            | S515:      | 3 | 3,3041 | 0,289 | 0,204  |
| 24 | O15427 MOT4_HUMAN   | E.HFLKAEPEKNGEVVHTPET#SV.-      | T463:      | 3 | 3,3035 | 0,314 | -0,226 |
| 24 | Q4KMP7 TB10B_HUMAN  | R.QQPPLGPSSLLS#LPGLK.S          | S386:      | 2 | 3,301  | 0,439 | -0,064 |
| 24 | Q15154 PCM1_HUMAN   | R.KPFNLFPM*QINTNK.S             |            | 2 | 3,3007 | 0,426 | 0      |

|    |                     |                                   |            |   |        |       |        |
|----|---------------------|-----------------------------------|------------|---|--------|-------|--------|
| 24 | Q01813 K6PP_HUMAN   | R.M*LAIYDGFDFGFAK.G               |            | 2 | 3,298  | 0,429 | -0,083 |
| 24 | Q8TAP8 CG047_HUMAN  | R.APVPEPGLDLSLSPRPDS#PQPR.H       | S52:       | 3 | 3,2947 | 0,261 | -0,304 |
| 24 | P08651 NFIC_HUMAN   | E.LQGHLAYDLNPASTGLR.R             |            | 3 | 3,2921 | 0,157 | 0,301  |
| 24 | Q9UQ35 SRRM2_HUMAN  | K.SATRPS#PS#PERSSTGPEPPAPTLLAE.R  | S351:S353: | 3 | 3,2921 | 1     | 0,253  |
| 24 | O00499 BIN1_HUMAN   | K.AQPSDNAPAKGNKSPS#PPDGS PAATPE.I | S298:      | 3 | 3,2864 | 0,276 | -0,549 |
| 24 | Q13263 TIF1B_HUMAN  | E.GYGFSGDDPYSSAEPHVSGVKR.S        |            | 3 | 3,2793 | 0,378 | 0      |
| 24 | Q9BSE4 HERP2_HUMAN  | E.YHM*VHLVCT#SRTPPSS#PK.S         | T87:S94:   | 3 | 3,2784 | 0,188 | -0,402 |
| 24 | P63208 SKP1_HUMAN   | K.TFNIKNDFTEEEE.A                 |            | 2 | 3,2777 | 0,287 | 0      |
| 24 | Q9Y3F4 STRAP_HUMAN  | E.DKQILSADDKTVR.L                 |            | 3 | 3,2766 | 0,381 | -0,43  |
| 24 | Q13257 MD2L1_HUMAN  | R.SFTTTIHKVNS#M*VAYKIPVND.-       | S195:      | 3 | 3,2739 | 0,323 | 0,074  |
| 24 | Q8WWM7 ATX2L_HUMAN  | K.LQPSSS#PENSLDPFPPR.I            | S559:      | 2 | 3,2684 | 0,334 | -0,063 |
| 24 | Q7RTQ0 Q7RTQ0_HUMAN | E.SGPDGGEEDGTGSLKR.S              |            | 2 | 3,2674 | 0,451 | -0,234 |
| 24 | O94763 RMP_HUMAN    | R.NTNVNMAM*HQVTD SHTPCHK.D        |            | 3 | 3,2621 | 0,273 | 0      |
| 24 | Q03252 LMNB2_HUMAN  | R.LES#LSYQLSGLQK.Q                | S296:      | 2 | 3,2619 | 0,412 | 0,395  |
| 24 | Q92845 KIFA3_HUMAN  | E.VEQLLYYLQNR.R                   |            | 2 | 3,2614 | 0,249 | 0      |
| 24 | Q9NQ55 SSF1_HUMAN   | R.VGGS#DEEASGIPSR.T               | S359:      | 2 | 3,2614 | 0,368 | -0,339 |
| 24 | O43707 ACTN4_HUMAN  | R.KDDPVTNLNNAFE.V                 |            | 2 | 3,2603 | 0,45  | -0,165 |
| 24 | O43847 NRDC_HUMAN   | K.YPDENGFD AFLK.K                 |            | 2 | 3,2594 | 0,403 | -0,172 |
| 24 | Q00653 NFKB2_HUMAN  | R.DKLPS#TAEVKE.D                  | S858:      | 2 | 3,2561 | 0,293 | -0,47  |
| 24 | Q9NYF8 BCLF1_HUMAN  | K.LKDLFDYSPPLHK.N                 |            | 2 | 3,2527 | 0,296 | -0,078 |
| 24 | Q02952 AKA12_HUMAN  | E.M*KGS#VEEPKPEEPK.R              | S660:      | 3 | 3,2506 | 0,163 | -0,435 |
| 24 | P10809 CH60_HUMAN   | K.SIDLKDKYKNIGAK.L                |            | 3 | 3,2438 | 0,326 | -0,574 |
| 24 | Q15121 PEA15_HUMAN  | K.YKDIIRQPS#EEE.I                 | S116:      | 2 | 3,2433 | 0,418 | 0,154  |
| 24 | P49736 MCM2_HUMAN   | E.SFTM*ASSPAQR.R                  |            | 2 | 3,2374 | 0,484 | 0,305  |
| 24 | Q6IBW4 CNDH2_HUMAN  | E.SRS#PQQSAALPR.R                 | S284:      | 2 | 3,2373 | 0,302 | -0,089 |
| 24 | P05362 ICAM1_HUMAN  | R.EPAVGEPAEVTTTTLVLR.R            |            | 2 | 3,2321 | 0,474 | 0      |
| 24 | Q9H1B7 EAP1_HUMAN   | E.DTHFVQCPSVPSHK.F                |            | 3 | 3,2316 | 0,235 | -0,112 |
| 24 | Q07002 PCTK3_HUMAN  | R.RAS#LSDIGFGKLE.T                | S130:      | 2 | 3,2312 | 0,457 | -0,166 |
| 24 | Q9Y5T5 UBP16_HUMAN  | E.SFLDLSLPVLDQSGKK.S              |            | 2 | 3,2296 | 0,191 | -0,131 |
| 24 | P02545 LMNA_HUMAN   | R.NSNLVGAAHEE.L                   |            | 2 | 3,2273 | 0,353 | -0,749 |
| 24 | P11021 GRP78_HUMAN  | K.TKPYIQVDIGGGQTK.T               |            | 2 | 3,227  | 0,423 | -0,228 |
| 24 | Q9HC38 GLOD4_HUMAN  | R.ALLGYADNQCKLE.L                 |            | 2 | 3,2257 | 0,3   | -0,082 |
| 24 | Q01082 SPTB2_HUMAN  | K.DALLSALS IQNYHLE.C              |            | 2 | 3,2252 | 0,491 | 0,072  |
| 24 | P23588 IF4B_HUMAN   | E.DCHSPTS KPPKPDQPLK.V            |            | 3 | 3,225  | 0,332 | -0,095 |
| 24 | O75616 ERAL_HUMAN   | E.TQVILLDTPGIIS#PGKQK.R           | S173:      | 3 | 3,2248 | 0,227 | 0      |
| 24 | Q9NYB9 ABI2_HUMAN   | R.TLEPVRPPVVPNDYVPSPTR.N          |            | 3 | 3,2232 | 0,187 | 0,328  |
| 24 | P13639 EF2_HUMAN    | E.QVVGGIYGV LNR.K                 |            | 3 | 3,2225 | 0,288 | 0,502  |
| 24 | P06748 NPM_HUMAN    | D.M*SPLRPQNYLFGCELK.A             |            | 2 | 3,22   | 0,35  | -0,186 |
| 24 | Q04917 1433F_HUMAN  | E.DSYKDSTLIM*QLLR.D               |            | 2 | 3,2153 | 0,526 | -0,359 |



|    |                     |                              |            |   |        |       |        |
|----|---------------------|------------------------------|------------|---|--------|-------|--------|
| 24 | Q3KQU3 MA7D1_HUMAN  | K.EANANGSS#PEPVKAVE.A        | S742:      | 2 | 3,2151 | 0,328 | -0,218 |
| 24 | P49790 NU153_HUMAN  | R.IPSIVSSPLNSPLDR.S          |            | 2 | 3,2151 | 0,408 | -0,535 |
| 24 | Q09666 AHNK_HUMAN   | R.VTAYTVDVTGR.E              |            | 2 | 3,2148 | 0,401 | -0,206 |
| 24 | Q58FF7 H90B3_HUMAN  | K.KHSQFIGYPITLYLEK.E         |            | 2 | 3,2143 | 0,42  | 0      |
| 24 | P62979 RS27A_HUMAN  | K.CCLTYCFNKPEDK.-            |            | 3 | 3,2072 | 0,291 | -0,105 |
| 24 | Q07021 C1QBP_HUMAN  | K.ALVLDCHYPEDE.V             |            | 2 | 3,2069 | 0,48  | -0,668 |
| 24 | Q6P0Q8 MAST2_HUMAN  | R.SRS#LS#PGRSPVDFSE.I        | S299:S301: | 2 | 3,2062 | 0,332 | -0,457 |
| 24 | Q9BXJ9 NARG1_HUMAN  | E.AQALDTADRFINSK.C           |            | 2 | 3,2047 | 0,336 | 0,394  |
| 24 | Q7Z6E9 RBBP6_HUMAN  | E.HSNKLGVLVS#PPQQIR.R        | S516:      | 3 | 3,2036 | 0,102 | 0,382  |
| 24 | O75396 SC22B_HUMAN  | R.DLQQYQSQAK.Q               |            | 2 | 3,2001 | 0,349 | -0,303 |
| 24 | P55196 AFAD_HUMAN   | K.QGAIYHGLATLLNQPS#PM*M*QR.I | S1090:     | 3 | 3,1989 | 0,241 | -0,15  |
| 24 | Q09666 AHNK_HUMAN   | R.RVTAYTVDVTGR.E             |            | 2 | 3,198  | 0,371 | -0,638 |
| 24 | Q15003 CND2_HUMAN   | K.KNDQVFDINAEVDE.S           |            | 2 | 3,1946 | 0,404 | 0,075  |
| 24 | Q14746 COG2_HUMAN   | E.DFDVDHFVSDCR.K             |            | 2 | 3,1924 | 0,569 | 0      |
| 24 | P82673 RT35_HUMAN   | K.SVVSLKNEEENE.N             |            | 2 | 3,1921 | 0,272 | -0,62  |
| 24 | P52272 HNRPM_HUMAN  | K.GCGVVKFESPEVAE.R           |            | 2 | 3,1911 | 0,248 | -1,456 |
| 24 | Q9NSM8 Q9NSM8_HUMAN | K.NADLNAQTVVK.V              |            | 2 | 3,19   | 0,315 | -0,208 |
| 24 | O94916 NFAT5_HUMAN  | E.KQLTSNTVQQHPSTPK.R         |            | 3 | 3,1841 | 0,28  | -0,714 |
| 24 | P09622 DLDH_HUMAN   | R.VLGAHILGPGAGEM*VNE.A       |            | 2 | 3,1821 | 0,32  | -0,073 |
| 24 | Q7KZF4 SND1_HUMAN   | K.IHVFYIDYGNRE.V             |            | 2 | 3,1805 | 0,476 | -0,16  |
| 24 | P59074 CG301_HUMAN  | E.TVPLPNVPSIALPSKPAK.K       |            | 2 | 3,179  | 0,302 | -0,6   |
| 24 | Q9UNS1 TIM_HUMAN    | E.DAVGKEPLKAAPK.K            |            | 3 | 3,1773 | 0,288 | 0,207  |
| 24 | Q9Y3L3 3BP1_HUMAN   | R.VYGVSLATHLQE.L             |            | 2 | 3,1764 | 0,332 | 0      |
| 24 | P46937 YAP1_HUMAN   | R.QAS#TDAGTAGALTPQHVR.A      | S109:      | 3 | 3,1762 | 0,312 | 0      |
| 24 | Q8IYB3 SRRM1_HUMAN  | K.VPKPEPIPEKPS#PEKNSK.K      | S260:      | 3 | 3,1731 | 0,314 | -0,159 |
| 24 | Q58FF7 H90B3_HUMAN  | K.VILHLKEDQTEYLEE.R          |            | 2 | 3,1711 | 0,353 | 0,066  |
| 24 | P31949 S10AB_HUMAN  | K.LDTNSDGQLDFSE.F            |            | 2 | 3,1701 | 0,347 | 0,085  |
| 24 | Q86SQ0 PHLB2_HUMAN  | K.IKDINDQM*DE.S              |            | 2 | 3,1698 | 0,337 | 0,296  |
| 24 | O95239 KIF4A_HUMAN  | K.ILAQDVAQLKE.K              |            | 2 | 3,1669 | 0,305 | -0,397 |
| 24 | Q9Y2W2 WBP11_HUMAN  | R.KSEDDSAVPLAK.A             |            | 2 | 3,1667 | 0,367 | -0,387 |
| 24 | P30040 ERP29_HUMAN  | K.SLNILTAFAQK.K              |            | 2 | 3,1649 | 0,263 | -0,215 |
| 24 | Q9UQ35 SRRM2_HUMAN  | E.SYFGVSSLQLK.G              |            | 2 | 3,1599 | 0,386 | -0,596 |
| 24 | Q9Y266 NUDC_HUMAN   | K.LKPNLGNADLPNYR.W           |            | 3 | 3,1596 | 0,294 | 0,111  |
| 24 | P42166 LAP2A_HUMAN  | R.EQGTES#RSS#TPLPTISSAE.N    | S156:S159: | 2 | 3,1591 | 1     | 0,329  |
| 24 | Q8WTT2 NOC3L_HUMAN  | K.M*HIAALASAILSDPE.N         |            | 2 | 3,1576 | 0,363 | -0,314 |
| 24 | Q9NTK5 OLA1_HUMAN   | E.DGDIIFFKFNTPPQPK.K         |            | 3 | 3,1567 | 0,306 | 0,386  |
| 24 | P04406 G3P_HUMAN    | E.GLM*TTVHAITATQK.T          |            | 2 | 3,152  | 0,103 | -0,328 |
| 24 | P23396 RS3_HUMAN    | R.KFVADGIFKAE.L              |            | 2 | 3,1489 | 0,302 | 0,1    |
| 24 | O94826 TOM70_HUMAN  | E.GFQNNQSM*LLADK.V           |            | 2 | 3,1479 | 0,266 | 0,163  |

|    |                    |                           |            |   |        |       |        |
|----|--------------------|---------------------------|------------|---|--------|-------|--------|
| 24 | Q14676 MDC1_HUMAN  | E.LQPSTSTDRPVTSEPTSQATR.G |            | 2 | 3,1469 | 0,229 | 0,324  |
| 24 | Q8WYP5 AHTF1_HUMAN | R.TTSFFLNS#PEKE.H         | S1292:     | 2 | 3,1453 | 0,354 | -0,165 |
| 24 | Q9H6Z4 RANB3_HUMAN | E.KPAIAPPVVFQK.D          |            | 3 | 3,1438 | 0,137 | 0,507  |
| 24 | P26639 SYTC_HUMAN  | K.MGGEKPIGAGEEK.Q         |            | 3 | 3,1428 | 0,118 | 0,064  |
| 24 | Q13435 SF3B2_HUMAN | R.SRGSDS#PAADVEIE.Y       | S339:      | 2 | 3,1415 | 0,196 | -0,403 |
| 24 | Q9UNZ2 NSF1C_HUMAN | K.S#PNELVDDLQK.G          | S114:      | 2 | 3,1401 | 0,343 | -0,09  |
| 24 | Q16555 DPYL2_HUMAN | R.NLHQSGFSLGAQIDDNIPR.R   |            | 3 | 3,1364 | 0,266 | 0,253  |
| 24 | Q969J3 L12R1_HUMAN | R.NVSNPDVVKLQE.I          |            | 2 | 3,1356 | 0,33  | -0,581 |
| 24 | Q9ULH0 ARMS_HUMAN  | R.GIPHSLSGLQDPIIAR.M      |            | 3 | 3,134  | 0,203 | 0,219  |
| 24 | Q9Y6M7 S4A7_HUMAN  | K.KHS#DPHLLE.R            | S242:      | 2 | 3,1319 | 0,451 | -0,317 |
| 24 | O75531 BAF_HUMAN   | K.AYVVVLGQFLVK.K          |            | 2 | 3,1302 | 0,484 | -0,09  |
| 24 | Q15121 PEA15_HUMAN | K.DIIHQPS#EEE.I           | S116:      | 2 | 3,1255 | 0,382 | -0,377 |
| 24 | Q5QJE6 TDIF2_HUMAN | E.IVS#EAES#HVSISR.I       | S141:S145: | 2 | 3,125  | 0,529 | 0      |
| 24 | Q9Y224 CN166_HUMAN | K.LTALDYHNPAGFNCKDE.T     |            | 3 | 3,122  | 0,184 | -0,372 |
| 24 | Q13442 HAP28_HUMAN | K.GVEGLIDIENPNR.V         |            | 2 | 3,1102 | 0,421 | -0,77  |
| 24 | P04406 G3P_HUMAN   | K.QASEGPLKILGYTE.H        |            | 2 | 3,1091 | 0,457 | -0,312 |
| 24 | Q9H299 SH3L3_HUMAN | R.IQYQLVDISQDNALRDE.M     |            | 3 | 3,1091 | 0,3   | -0,724 |
| 24 | P17980 PRS6A_HUMAN | E.KLKPGLVGVNKD.S          |            | 3 | 3,109  | 0,185 | 0,066  |
| 24 | P36551 HEM6_HUMAN  | R.ATSLGRPEEEDE.L          |            | 2 | 3,1089 | 0,176 | -0,584 |
| 24 | Q00341 VIGLN_HUMAN | R.RCDIIISGR.K             |            | 2 | 3,1031 | 0,214 | 0      |
| 24 | P78345 RPP38_HUMAN | E.LLDTS#FEDLSKPK.R        | S235:      | 2 | 3,101  | 0,213 | -0,31  |
| 24 | P43358 MAGA4_HUMAN | K.SQHCKPEEGVEAQEE.A       |            | 2 | 3,101  | 0,489 | -0,278 |
| 24 | Q969H8 CS010_HUMAN | K.SYLYFTQFKAE.V           |            | 2 | 3,1    | 0,399 | -0,262 |
| 24 | Q96A65 EXOC4_HUMAN | K.DPSGLLISVIR.T           |            | 2 | 3,0985 | 0,338 | -0,521 |
| 24 | Q9H0B6 KLC2_HUMAN  | R.KLDEDAS#PNEE.K          | S151:      | 2 | 3,0966 | 0,27  | -0,552 |
| 24 | Q13185 CBX3_HUMAN  | K.KVEEAPEEFVVE.K          |            | 2 | 3,0919 | 0,282 | -0,08  |
| 24 | P10809 CH60_HUMAN  | K.FDRGYISPYFINTSK.G       |            | 3 | 3,0903 | 0,155 | 1,012  |
| 24 | O15234 CASC3_HUMAN | R.QRPVPEPPAPPVHISIM*E.G   |            | 3 | 3,0885 | 0,081 | -0,273 |
| 24 | Q92922 SMRC1_HUMAN | R.KHS#PS#PPPPTPTE.S       | S328:S330: | 2 | 3,0852 | 0,416 | -0,08  |
| 24 | Q9NTJ3 SMC4_HUMAN  | R.TESPATAAETASEE.L        |            | 2 | 3,0829 | 0,374 | -0,263 |
| 24 | Q9H501 ESF1_HUMAN  | R.TLDSGTSEIVKS#PR.I       | S198:      | 2 | 3,0757 | 0,242 | -0,466 |
| 24 | Q96RT6 CTGE2_HUMAN | K.VHAEQVLNDKE.N           |            | 2 | 3,0725 | 0,339 | -0,476 |
| 24 | Q7Z6E9 RBBP6_HUMAN | K.LGYLVS#PPQQIR.R         | S516:      | 2 | 3,0714 | 0,253 | -0,084 |
| 24 | P21333 FLNA_HUMAN  | R.RAPS#VANVGSHCDLSLKIPE.I | S2152:     | 3 | 3,0709 | 0,307 | 0,082  |
| 24 | Q9H501 ESF1_HUMAN  | K.NIVQHTTDSLEE.K          |            | 2 | 3,0687 | 0,33  | 0      |
| 24 | P04406 G3P_HUMAN   | K.IKWGDAGAEYVVE.S         |            | 2 | 3,0686 | 0,38  | 0      |
| 24 | O60271 JIP4_HUMAN  | R.SASQSSLDKLDQE.L         |            | 2 | 3,0669 | 0,28  | -0,173 |
| 24 | O00499 BIN1_HUMAN  | E.KQHGSNTFTVK.A           |            | 3 | 3,0624 | 0,307 | 0,293  |
| 24 | P12956 KU70_HUMAN  | R.FQDM*M*GHGSDYSLSE.V     |            | 2 | 3,0617 | 0,438 | -0,492 |

|    |                    |                                  |        |   |        |       |        |
|----|--------------------|----------------------------------|--------|---|--------|-------|--------|
| 24 | P14678 RSMB_HUMAN  | R.VLGLVLLRGE.N                   |        | 2 | 3,0593 | 0,369 | 0      |
| 24 | Q96A65 EXOC4_HUMAN | K.SKDPSSLISVIR.T                 |        | 2 | 3,0588 | 0,35  | -0,176 |
| 24 | P20585 MSH3_HUMAN  | K.DTTLFDLSQFGSSNTSHE.N           |        | 2 | 3,0582 | 0,325 | 0,184  |
| 24 | P13674 P4HA1_HUMAN | E.KDLVTSLKDYIK.A                 |        | 3 | 3,0571 | 0,204 | 0      |
| 24 | O95149 SPN1_HUMAN  | K.LKGSSHS#PDHPGCLM*EN.-          | S350:  | 3 | 3,0522 | 0,127 | 0      |
| 24 | P35579 MYH9_HUMAN  | K.LKDVLQVDDE.R                   |        | 2 | 3,0511 | 0,24  | -0,095 |
| 24 | Q9Y6W5 WASF2_HUMAN | R.DVVGNDVATILSR.R                |        | 2 | 3,0479 | 0,354 | 0      |
| 24 | Q9UHD8 SEPT9_HUMAN | R.ITADLLSNGIDVYPQKE.F            |        | 2 | 3,0472 | 0,337 | 0      |
| 24 | P0C7M2 RA1L3_HUMAN | R.SRGFGVITYATVEE.V               |        | 2 | 3,0468 | 0,382 | -0,234 |
| 24 | Q92878 RAD50_HUMAN | R.ARDSLIIQSLATQLE.L              |        | 2 | 3,0437 | 0,395 | -0,316 |
| 24 | Q9Y530 CF130_HUMAN | R.M*GAGIAVLFK.K                  |        | 2 | 3,0387 | 0,321 | 0,179  |
| 24 | Q8WYP5 AHTF1_HUMAN | K.DRTTSFFLNS#PEKE.H              | S1292: | 3 | 3,0379 | 0,172 | 0,209  |
| 24 | P49321 NASP_HUMAN  | K.LVPSQEETKLS#VEE.S              | S428:  | 2 | 3,0367 | 0,105 | -0,293 |
| 24 | Q9UKK3 PARP4_HUMAN | K.NYDPYKPLDIT#PPPDQK.A           | T101:  | 3 | 3,0351 | 0,253 | 0      |
| 24 | Q6ZWE6 PKHM3_HUMAN | E.ASTFNFFNICQR.R                 |        | 2 | 3,0347 | 0,346 | -0,243 |
| 24 | P61978 HNRPK_HUMAN | D.LGGPIITTQVTIPKDLAGSIIGK.G      |        | 3 | 3,0314 | 0,21  | -0,16  |
| 24 | P49736 MCM2_HUMAN  | R.TDALTSS#PGRDLPPFEDE.S          | S41:   | 2 | 3,0314 | 0,376 | 0,301  |
| 24 | Q8TDH9 MUTED_HUMAN | K.KRDSLGT#AGSAHLIHKD.L           | T28:   | 3 | 3,0301 | 0,28  | -0,491 |
| 24 | Q06830 PRDX1_HUMAN | K.QGGLGPM*NIPLVSDPK.R            |        | 2 | 3,0299 | 0,319 | 0,298  |
| 24 | Q9Y388 RBMX2_HUMAN | E.VQAEQSSSS#PR.R                 | S188:  | 2 | 3,0295 | 0,192 | -0,361 |
| 24 | O94964 CT117_HUMAN | R.RLGVVVDHKE.G                   |        | 3 | 3,0258 | 0,164 | 0,073  |
| 24 | Q04760 LGUL_HUMAN  | R.GFGHIGIAVPDVYSACK.R            |        | 3 | 3,0249 | 0,143 | 0,306  |
| 24 | Q14980 NUMA1_HUMAN | R.LDFVCSFLQK.N                   |        | 2 | 3,024  | 0,27  | -0,291 |
| 24 | Q09666 AHNK_HUMAN  | K.AKGEVDVDVPKLE.G                |        | 3 | 3,0238 | 0,093 | -0,458 |
| 24 | P42166 LAP2A_HUMAN | K.DVYVQLYLQHLTAR.N               |        | 2 | 3,0229 | 0,438 | -0,284 |
| 24 | P19174 PLCG1_HUMAN | K.VLGDTLTKPVE.I                  |        | 2 | 3,0226 | 0,431 | 0,095  |
| 24 | Q9NRX1 PNO1_HUMAN  | K.RPVFPPLCGDGLLSGK.E             |        | 3 | 3,0225 | 0,239 | 0,107  |
| 24 | Q15424 SAFB1_HUMAN | E.LAEAPTEAPS#PEAR.D              | S344:  | 2 | 3,0224 | 0,296 | -0,482 |
| 24 | Q6S8J3 A26CA_HUMAN | E.KLCYVALDFEQE.M                 |        | 2 | 3,0211 | 0,285 | -0,242 |
| 24 | O60313 OPA1_HUMAN  | E.HDDIFDKLKE.A                   |        | 3 | 3,0186 | 0,228 | 0,435  |
| 24 | Q3ZCQ8 TIM50_HUMAN | E.HYALEDDPLAAFQ.Q                |        | 2 | 3,0178 | 0,493 | -0,164 |
| 24 | Q86VP6 CAND1_HUMAN | K.CLDAVVSTRHE.M                  |        | 2 | 3,0157 | 0,412 | -0,474 |
| 24 | Q9Y5A7 NUB1_HUMAN  | R.KNFQLEEEEQNE.A                 |        | 2 | 3,0139 | 0,167 | -0,079 |
| 24 | Q15021 CND1_HUMAN  | E.KNPRES#TGNM*VTGQTVCK.N         | S585:  | 3 | 3,0138 | 0,193 | -0,261 |
| 24 | Q96QT6 PHF12_HUMAN | E.KLSLKP HQGPVLR.S               |        | 3 | 3,0131 | 0,304 | -0,683 |
| 24 | Q9NQW6 ANLN_HUMAN  | K.TQS#LPVTEKVTE.N                | S485:  | 2 | 3,0129 | 0,293 | 0,086  |
| 24 | Q9NYF8 BCLF1_HUMAN | K.LKDLFDYS#PPLHK.N               | S512:  | 3 | 3,0121 | 0,389 | 0,111  |
| 24 | P60660 MYL6_HUMAN  | E.IRHVLVTLGK.M                   |        | 3 | 3,0114 | 0,16  | 0,65   |
| 24 | Q96125 SPF45_HUMAN | E.EQDRPRS#PTGSPNSFLANM*GGTVAHK.I | S222:  | 3 | 3,0113 | 0,301 | -0,193 |

|    |                    |                              |            |   |        |       |        |
|----|--------------------|------------------------------|------------|---|--------|-------|--------|
| 24 | Q9BZF1 OSBL8_HUMAN | D.LHQPSLSPAS#PHSQGFER.G      | S68:       | 3 | 3,0093 | 0,296 | 0,178  |
| 24 | P62750 RL23A_HUMAN | R.LAPDYDALDVANK.I            |            | 2 | 3,0063 | 0,354 | 0,261  |
| 24 | P10809 CH60_HUMAN  | R.KPLVIIAEDVDGE.A            |            | 2 | 3,006  | 0,436 | 0,873  |
| 24 | Q9UNS1 TIM_HUMAN   | E.DAVGKEPLKAAPK.K            |            | 2 | 3,0056 | 0,376 | 0      |
| 24 | Q7KZF4 SND1_HUMAN  | K.LRPLYDIPYM*FE.A            |            | 2 | 3,0055 | 0,293 | -0,155 |
| 24 | O60610 DIAP1_HUMAN | E.GLASLLDILKR.L              |            | 2 | 3,0054 | 0,349 | -0,102 |
| 24 | P0C7M2 RA1L3_HUMAN | K.IFVGGIKEDTE.E              |            | 2 | 3,0028 | 0,357 | -0,101 |
| 24 | Q96AT1 K1143_HUMAN | K.NSSLFSFDNEDENE.-           |            | 2 | 3,0018 | 0,324 | 0,303  |
| 24 | P15336 ATF2_HUMAN  | K.M*PLDLS#PLATPIIR.S         | S94:       | 2 | 3,0017 | 0,281 | -0,299 |
| 24 | P49674 KC1E_HUMAN  | R.SAAEPVASTPASR.I            |            | 2 | 3      | 0,327 | 0,196  |
| 24 | Q9UIF9 BAZ2A_HUMAN | E.M*EGPEECLGR.R              |            | 2 | 2,9985 | 0,33  | -0,92  |
| 24 | Q86X29 LSR_HUMAN   | R.ARS#VDALDDLTPPSTAE.S       | S493:      | 2 | 2,9977 | 0,489 | 0,266  |
| 24 | Q8N3D4 EH1L1_HUMAN | R.LRRPS#VNGEPGSVPPR.A        | S1257:     | 3 | 2,9974 | 0,229 | -0,29  |
| 24 | Q8NCN4 RN169_HUMAN | K.NNSYSLAFLAG.L              |            | 2 | 2,9929 | 0,394 | -0,38  |
| 24 | Q8IY57 YAF2_HUMAN  | K.SPPASSAASADQHSQSGSSDNT.E.R |            | 3 | 2,9922 | 0,335 | 0,397  |
| 24 | P40222 TXLNA_HUMAN | R.RPEGPGAQAPSS#PR.V          | S515:      | 2 | 2,9914 | 0,411 | -0,738 |
| 24 | O94888 UBXD7_HUMAN | E.NRRPLTEPPVR.T              |            | 3 | 2,9841 | 0,178 | 0,068  |
| 24 | P14618 KPYM_HUMAN  | R.NTGIICTIGPASR.S            |            | 2 | 2,9819 | 0,317 | 0,359  |
| 24 | Q3T8J9 GON4L_HUMAN | R.KSTQPDVCAS#PQEKPLR.T       | S206:      | 3 | 2,9814 | 0,243 | -0,272 |
| 24 | Q92616 GCN1L_HUMAN | R.KM*AAQIIGNM*YSLTDQKD.L     |            | 2 | 2,9812 | 0,102 | 0      |
| 24 | Q8NBJ4 GOLM1_HUMAN | R.DTINLLDQRE.K               |            | 2 | 2,9798 | 0,281 | 0,1    |
| 24 | Q2KHR3 QSER1_HUMAN | K.SVSTPLTTLDATSDK.K          |            | 2 | 2,9772 | 0,415 | 0,079  |
| 24 | P18206 VINC_HUMAN  | E.HRVM*LVNSM*NTVK.E          |            | 3 | 2,9762 | 0,103 | 0,117  |
| 24 | Q15121 PEA15_HUMAN | R.RPDLLTM*VVDYR.T            |            | 3 | 2,9736 | 0,374 | 0,428  |
| 24 | Q9NTI5 PDS5B_HUMAN | K.TTNVLGAVNKPLSSAGK.Q        |            | 2 | 2,9698 | 0,308 | -0,884 |
| 24 | Q15942 ZYX_HUMAN   | R.CSVCSEPIPEPGRDE.T          |            | 2 | 2,9671 | 0,288 | 0,393  |
| 24 | Q04637 IF4G1_HUMAN | R.FSALQQAVPTESTDNRR.V        |            | 2 | 2,9667 | 0,336 | 0      |
| 24 | P17980 PRS6A_HUMAN | E.KLKPGLVGVNKD.S             |            | 2 | 2,9635 | 0,329 | -0,265 |
| 24 | P78356 PI42B_HUMAN | K.DLPTFKDNDFLNE.G            |            | 2 | 2,963  | 0,213 | -0,233 |
| 24 | Q16875 F263_HUMAN  | R.RNS#VTPLAS#PEPTKKPR.I      | S461:S467: | 3 | 2,9606 | 0,396 | -0,359 |
| 24 | Q8WUF5 IASPP_HUMAN | R.KAATDGADTPFGR.S            |            | 2 | 2,9602 | 0,427 | -0,373 |
| 24 | Q99618 CDCA3_HUMAN | R.TPM*KTSSGDPPS#PLVK.Q       | S87:       | 3 | 2,9595 | 0,1   | -0,526 |
| 24 | Q9H6S3 ES8L2_HUMAN | R.QSILPPPQGPAPIPFQHR.G       |            | 3 | 2,9577 | 0,269 | 0,277  |
| 24 | P52294 IMA1_HUMAN  | K.LLSKEPNPPIDE.V             |            | 2 | 2,957  | 0,244 | -0,451 |
| 24 | O75569 PRKRA_HUMAN | K.M*ITAKPGKTPIQVLHE.Y        |            | 3 | 2,9556 | 0,308 | 0,206  |
| 24 | Q9UQ35 SRRM2_HUMAN | K.DKFSFPVQDRPE.S             |            | 2 | 2,9534 | 0,18  | -0,234 |
| 24 | P49755 TMEDA_HUMAN | E.ISDQSGGAGGLR.S             |            | 2 | 2,9531 | 0,385 | 0,982  |
| 24 | Q96C19 EFHD2_HUMAN | R.ADLNQGIGEPQS#PSRR.V        | S74:       | 3 | 2,9525 | 0,202 | -0,304 |
| 24 | Q15554 TERF2_HUMAN | D.LVLPTQALPAS#PALK.N         | S323:      | 2 | 2,9478 | 0,371 | -0,229 |

|    |                     |                               |          |   |        |       |        |
|----|---------------------|-------------------------------|----------|---|--------|-------|--------|
| 24 | P50991 TCPD_HUMAN   | K.M*IQDGKGDVITND.G            |          | 2 | 2,9434 | 0,356 | 0      |
| 24 | Q9H2J4 PDCL3_HUMAN  | K.KPIEDVLLSSVR.R              |          | 3 | 2,9433 | 0,171 | 0,337  |
| 24 | Q96A72 MGN2_HUMAN   | R.IIDDSEITKE.D                |          | 2 | 2,9433 | 0,334 | -0,315 |
| 24 | Q15637 SF01_HUMAN   | K.DGQM*LPGEDEPLHALVTANTM*E.N  |          | 3 | 2,9421 | 0,235 | 0      |
| 24 | P05455 LA_HUMAN     | K.IRRS#PSKPLPEVTDE.Y          | S92:     | 3 | 2,9393 | 0,168 | -0,608 |
| 24 | P58546 MTPN_HUMAN   | E.GGRKPLHYAADCGQLE.I          |          | 2 | 2,9391 | 0,481 | -0,689 |
| 24 | Q9ULJ3 ZN295_HUMAN  | E.KTALDDRPQVLQPHR.L           |          | 3 | 2,9388 | 0,326 | -0,103 |
| 24 | Q14966 ZN638_HUMAN  | K.SKEEPLFPFLNDE.F             |          | 2 | 2,9383 | 0,242 | -0,234 |
| 24 | P0C7M2 RA1L3_HUMAN  | E.DSQRPGAHLTVK.K              |          | 3 | 2,9356 | 0,302 | -0,14  |
| 24 | P08133 ANXA6_HUMAN  | E.DTIIDIITHR.S                |          | 2 | 2,9334 | 0,303 | -0,204 |
| 24 | Q9BVL2 NUPL1_HUMAN  | E.GLGGIDFSSSSDK.K             |          | 2 | 2,9333 | 0,432 | -1,537 |
| 24 | Q99615 DNJC7_HUMAN  | K.TRYDSGQDLDEE.G              |          | 2 | 2,9325 | 0,395 | -0,085 |
| 24 | Q9H009 NACA2_HUMAN  | R.ALKNNSNDIVNAIM*E.L          |          | 2 | 2,9274 | 0,321 | -0,22  |
| 24 | P05387 RLA2_HUMAN   | K.NIEDVIAQGIGK.L              |          | 2 | 2,9266 | 0,437 | -0,582 |
| 24 | Q69YQ0 CYTSA_HUMAN  | R.LQDAIAKVEDE.Y               |          | 2 | 2,9264 | 0,394 | 0,198  |
| 24 | Q9NRL2 BAZ1A_HUMAN  | K.KKDAIDPLLFK.Y               |          | 3 | 2,9241 | 0,248 | 0,355  |
| 24 | P29692 EF1D_HUMAN   | R.ATAPQTQHVS#PM*RQVEPPAK.K    | S133:    | 2 | 2,9237 | 0,172 | 0,215  |
| 24 | P0C7M2 RA1L3_HUMAN  | K.KIFVGGIKEDTE.E              |          | 2 | 2,9213 | 0,394 | 0,091  |
| 24 | P08670 VIME_HUMAN   | E.RDNLAEDIM*R.L               |          | 3 | 2,9208 | 0,242 | 0,659  |
| 24 | Q10713 MPPA_HUMAN   | R.GKPAVAALGDLTDLPTYE.H        |          | 2 | 2,9207 | 0,423 | -0,4   |
| 24 | P14868 SYDC_HUMAN   | R.EIM*DAAEDYAKE.R             |          | 2 | 2,9189 | 0,399 | -0,435 |
| 24 | Q15446 RPA34_HUMAN  | R.QKGTEGM*EPEEGVTVS           |          | 2 | 2,9171 | 0,33  | -0,281 |
| 24 | Q8TB72 PUM2_HUMAN   | E.YVLSS#SPADKLSR.F            | S101:    | 2 | 2,9161 | 0,169 | -0,151 |
| 24 | Q95149 SPN1_HUMAN   | K.LKGSSES#PDHPGCLM*EN.-       | S350:    | 2 | 2,9125 | 0,264 | 0,249  |
| 24 | Q9Y490 TLN1_HUMAN   | K.STVLQQQYNR.V                |          | 2 | 2,9113 | 0,221 | 0,099  |
| 24 | Q14204 DYHC1_HUMAN  | K.VAAPDVVVPTLDTVR.H           |          | 2 | 2,9042 | 0,35  | -0,157 |
| 24 | Q9UQ80 PA2G4_HUMAN  | K.VAHSFNCTPIEGM*LSHQLK.Q      |          | 3 | 2,9036 | 0,286 | 0      |
| 24 | P31689 DNJA1_HUMAN  | R.RHYNGEAYEDDE.H              |          | 2 | 2,9012 | 0,382 | -0,896 |
| 24 | Q14320 FA50A_HUMAN  | R.KISSLSFTLEEEEE.G            |          | 2 | 2,9008 | 0,353 | -0,669 |
| 24 | P78347 GTF2I_HUMAN  | K.ANELPQPPVPEPANAGK.R         |          | 2 | 2,9007 | 0,398 | -0,494 |
| 24 | A8K2B4 A8K2B4_HUMAN | R.TNTM*NGSKS#PVISRPK.S        | S508:    | 3 | 2,8997 | 0,202 | -0,605 |
| 24 | Q8NI27 THOC2_HUMAN  | K.TPVSGSLKS#PVPR.S            | S1278:   | 3 | 2,8995 | 0,31  | 0,065  |
| 24 | Q9HCN4 GPN1_HUMAN   | K.DSLS#PVLHPSDLILTR.G         | S314:    | 3 | 2,898  | 0,157 | 0      |
| 24 | Q15637 SF01_HUMAN   | R.KDGQM*LPGEDEPLHALVTANTM*E.N |          | 3 | 2,898  | 0,215 | 0,217  |
| 24 | Q92766 RREB1_HUMAN  | E.NGGS#PQGIKS#PSKPPGPNR.I     | S36:S42: | 3 | 2,8971 | 0,176 | -0,09  |
| 24 | Q06203 PUR1_HUMAN   | K.LYVSNLGIGHTR.Y              |          | 2 | 2,8914 | 0,408 | -0,092 |
| 24 | Q9Y265 RUVB1_HUMAN  | R.AVLLAGPPGTGKTALALIAQE.L     |          | 2 | 2,8906 | 0,362 | -0,118 |
| 24 | P15121 ALDR_HUMAN   | K.TLSDLKLDYLD.L               |          | 2 | 2,8863 | 0,371 | 0      |
| 24 | P33993 MCM7_HUMAN   | R.TQRPADVIFATVRE.L            |          | 2 | 2,8861 | 0,428 | -0,152 |

|    |                      |                            |                 |   |        |       |        |
|----|----------------------|----------------------------|-----------------|---|--------|-------|--------|
| 24 | O43166 SI1L1_HUMAN   | E.GTINSVGFMDTR.K           |                 | 2 | 2,8848 | 0,463 | 0,094  |
| 24 | P52948 NUP98_HUMAN   | E.GDVNLTLNLDIVHIR.R        |                 | 2 | 2,8824 | 0,424 | -0,191 |
| 24 | Q8IVF2 AHNK2_HUMAN   | R.DAHDVS#PTSTDTE.A         | S294:           | 2 | 2,8813 | 0,438 | -0,503 |
| 24 | P16220 CREB1_HUMAN   | K.ILNDLSSDAPGVPR.I         |                 | 2 | 2,8812 | 0,35  | 0,252  |
| 24 | Q9H019 FA54B_HUMAN   | K.ASS#FADM*M*GILKD.F       | S238:           | 2 | 2,8802 | 0,283 | -0,407 |
| 24 | Q09666 AHNK_HUMAN    | K.GEVDVDPKLE.G             |                 | 2 | 2,88   | 0,344 | 0,102  |
| 24 | ##Q05481 ZNF91_HUMAN | E.T#LT#SSWIFAKDCEES#KSPK.E | T294:T296:S308: | 3 | 2,8797 | 0,085 | 1,342  |
| 24 | O43237 DC1L2_HUMAN   | K.DFQDYM*EPEEGCQGS#PQRR.G  | S194:           | 3 | 2,879  | 0,317 | 0      |
| 24 | Q9UKG1 DP13A_HUMAN   | R.YCFQITSFDGKK.S           |                 | 3 | 2,8788 | 0,203 | 0      |
| 24 | Q66GS9 CP135_HUMAN   | R.HGLAT#PPLSSTLRSPS#HSPE.H | T1121:S1132:    | 3 | 2,8765 | 1     | -0,41  |
| 24 | P62937 PPIA_HUMAN    | K.KITIADCGQLE.-            |                 | 2 | 2,8758 | 0,438 | -0,489 |
| 24 | P13639 EF2_HUMAN     | E.QVVGGIYGV LNR.K          |                 | 2 | 2,8756 | 0,407 | -0,191 |
| 24 | Q9UHB6 LIMA1_HUMAN   | R.ASSLSESS#PPKAM*K.K       | S374:           | 2 | 2,8746 | 0,367 | -0,483 |
| 24 | Q9H6Z4 RANB3_HUMAN   | E.EKPAIAPPVVFVQK.D         |                 | 2 | 2,8709 | 0,412 | -0,155 |
| 24 | P63241 IF5A1_HUMAN   | K.VHLVGIDIFTGK.K           |                 | 3 | 2,8654 | 0,222 | 0,563  |
| 24 | O75362 ZN217_HUMAN   | E.DALLTADSAQTK.N           |                 | 2 | 2,8646 | 0,463 | -0,297 |
| 24 | Q6WKZ4 RFIP1_HUMAN   | R.TAS#TDLKQLNQVNFTLPKKE.G  | S280:           | 3 | 2,8622 | 0,384 | -0,078 |
| 24 | O95989 NUDT3_HUMAN   | E.DWEDSVNIGR.K             |                 | 2 | 2,8593 | 0,367 | 0,307  |
| 24 | Q96PU8 QKI_HUMAN     | R.SAELPDAVGPIVQLQE.K       |                 | 2 | 2,859  | 0,25  | -0,073 |
| 24 | Q3MHD2 LSM12_HUMAN   | E.GQQLFQTIHK.T             |                 | 2 | 2,858  | 0,339 | -0,203 |
| 24 | P00441 SODC_HUMAN    | E.FGDNTAGCTSAGPHFNPLSR.K   |                 | 3 | 2,8576 | 0,168 | -1,824 |
| 24 | Q8NEY1 NAV1_HUMAN    | K.AVALDSNISK.S             |                 | 2 | 2,8573 | 0,358 | -1,958 |
| 24 | Q9BYG9 Q9BYG9_HUMAN  | K.M*QAS#IEKAH.-            | S254:           | 2 | 2,8556 | 0,32  | 0,11   |
| 24 | Q04837 SSB_HUMAN     | R.QATTIADNIIFLSDQTKEKE.-   |                 | 3 | 2,8555 | 0,209 | -0,769 |
| 24 | P17812 PYRG1_HUMAN   | K.TVQVPHITDAIQE.W          |                 | 2 | 2,8553 | 0,389 | 0,157  |
| 24 | P51858 HDGF_HUMAN    | R.RAGDLLED#PKRPK.E         | S165:           | 3 | 2,8552 | 0,333 | 0,11   |
| 24 | Q8ND82 Z280C_HUMAN   | E.ISSSKPAISNILNR.G         |                 | 3 | 2,8533 | 0,386 | 0,061  |
| 24 | Q02952 AKA12_HUMAN   | E.M*KGS#VEEPKPEPK.R        | S660:           | 2 | 2,8513 | 0,293 | -0,436 |
| 24 | P06733 ENOA_HUMAN    | E.HINKTIAPALVSKLNVTEQE.K   |                 | 3 | 2,8504 | 0,303 | 0,549  |
| 24 | Q6KC79 NIPBL_HUMAN   | K.AITSLGGGS#PK.N           | S2658:          | 2 | 2,8463 | 0,351 | 0      |
| 24 | P05412 JUN_HUMAN     | K.NSDLLTSPDVGLLK.L         |                 | 2 | 2,8439 | 0,182 | 0,083  |
| 24 | Q6ZWH8 Q6ZWH8_HUMAN  | E.DHGLLAGAQAQVGDYSYR.L     |                 | 3 | 2,8408 | 0,235 | -0,191 |
| 24 | P06748 NPM_HUMAN     | E.HQLSLRTVSLGAGAKDE.L      |                 | 3 | 2,8371 | 0,174 | 1,437  |
| 24 | Q9Y6G9 DC1L1_HUMAN   | E.DNFEDIITKPPVR.K          |                 | 2 | 2,834  | 0,414 | 0,079  |
| 24 | Q9Y230 RUVB2_HUMAN   | R.GLGLDDALEPR.Q            |                 | 2 | 2,8335 | 0,421 | 0      |
| 24 | Q13263 TIF1B_HUMAN   | R.DCQLNAHKDHQYQFLE.D       |                 | 2 | 2,8333 | 0,219 | 0,179  |
| 24 | Q8WVM8 SCFD1_HUMAN   | R.LKSIM*GLEGEDE.G          |                 | 2 | 2,8307 | 0,36  | 0,274  |
| 24 | P0C7M2 RA1L3_HUMAN   | R.GFGFVTYATVEE.V           |                 | 2 | 2,8306 | 0,313 | -0,092 |
| 24 | Q9BRA2 TXD17_HUMAN   | K.TIFAYFTGSKD.A            |                 | 2 | 2,8303 | 0,423 | -0,098 |

|    |                     |                                |            |   |        |       |        |
|----|---------------------|--------------------------------|------------|---|--------|-------|--------|
| 24 | Q9BUB4 ADAT1_HUMAN  | K.SGPIS#PGIHSCDLTVE.G          | S227:      | 2 | 2,8287 | 0,436 | -0,07  |
| 24 | P31939 PUR9_HUMAN   | R.M*SSFGDFVALSDVCDVPTAK.I      |            | 2 | 2,8286 | 0,404 | 0,226  |
| 24 | Q92945 FUBP2_HUMAN  | K.M*M*LDDIVSR.G                |            | 2 | 2,8281 | 0,337 | 0      |
| 24 | A6NJL0 A6NJL0_HUMAN | R.M*LDQTLIDLNEM*.-             |            | 2 | 2,8242 | 0,273 | -0,083 |
| 24 | P06400 RB_HUMAN     | D.M*YLSPVRS#PK.K               | S612:      | 2 | 2,8239 | 0,152 | -0,67  |
| 24 | P58546 MTPN_HUMAN   | R.KPLHYAADCGQLE.I              |            | 2 | 2,8226 | 0,384 | -0,406 |
| 24 | P61978 HNRPK_HUMAN  | D.LGGPIITTQVTIPK.D             |            | 2 | 2,8215 | 0,337 | -0,339 |
| 24 | P49903 SPS1_HUMAN   | K.IKLVVTQEDVE.L                |            | 2 | 2,8191 | 0,299 | 0,096  |
| 24 | P46013 KI67_HUMAN   | K.SGGSQGHAVAEPAS#PEQE.L        | S308:      | 2 | 2,8171 | 0,313 | -0,144 |
| 24 | P49368 TCPG_HUMAN   | R.TLIQNCGASTIR.L               |            | 2 | 2,8165 | 0,494 | -0,091 |
| 24 | Q86Y04 Q86Y04_HUMAN | K.VDLTLLS#PKSE.N               | S239:      | 2 | 2,8164 | 0,27  | 0      |
| 24 | P31946 1433B_HUMAN  | E.SYKDSTLIM*QLLR.D             |            | 2 | 2,8128 | 0,35  | -0,77  |
| 24 | P06576 ATPB_HUMAN   | R.FLSQPFQVAE.V                 |            | 2 | 2,8101 | 0,269 | 0,105  |
| 24 | Q5VSL9 FA40A_HUMAN  | K.ALIKQDNLDAFNE.R              |            | 2 | 2,8067 | 0,373 | -0,245 |
| 24 | P30101 PDIA3_HUMAN  | R.TADGIVSHLKK.Q                |            | 2 | 2,8059 | 0,491 | -0,522 |
| 24 | Q14738 2A5D_HUMAN   | R.KS#ELPQDVYTIK.A              | S573:      | 2 | 2,8058 | 0,346 | 0,569  |
| 24 | Q9GZP8 IMUP_HUMAN   | E.FDLGAALEPTSQKPGVVGAGHGGDPK.L |            | 3 | 2,8033 | 0,176 | 0,38   |
| 24 | Q9UHR5 S30BP_HUMAN  | E.KGGLVSDAYGEDDFSR.L           |            | 3 | 2,8028 | 0,208 | -0,32  |
| 24 | P42694 HELZ_HUMAN   | E.INKIRT#PEKKPTEPK.Q           | T1296:     | 3 | 2,7986 | 0,204 | -0,295 |
| 24 | Q92615 LARP5_HUMAN  | R.LSREQST#PPKS#PQ.-            | T732:S736: | 2 | 2,7975 | 0,289 | -0,227 |
| 24 | Q8WWY3 PRP31_HUMAN  | E.DLGFSLGHLGK.S                |            | 2 | 2,797  | 0,435 | 0,107  |
| 24 | Q58FF7 H90B3_HUMAN  | K.VILHLKEDQTE.Y                |            | 2 | 2,7965 | 0,359 | -0,092 |
| 24 | P22626 ROA2_HUMAN   | K.KLFVGGIKEDTEE.H              |            | 2 | 2,7926 | 0,236 | -0,083 |
| 24 | P31948 STIP1_HUMAN  | K.ALDLDSCKE.A                  |            | 2 | 2,7915 | 0,298 | -0,214 |
| 24 | Q9ULL5 PRR12_HUMAN  | R.LRPEESLDPPGAM*QE.L           |            | 2 | 2,7914 | 0,229 | 0      |
| 24 | Q16891 IMMT_HUMAN   | E.GKLHNM*IVLDNVVK.K            |            | 2 | 2,7911 | 0,367 | -0,143 |
| 24 | Q3ZCQ8 TIM50_HUMAN  | E.HYALEDDPLAAFK.Q              |            | 3 | 2,7899 | 0,246 | 0      |
| 24 | P06733 ENOA_HUMAN   | E.HINKTIAPALVSK.K              |            | 2 | 2,7874 | 0,267 | -0,526 |
| 24 | Q06203 PUR1_HUMAN   | E.DNLKCLYVSNLIGHTR.Y           |            | 3 | 2,7866 | 0,171 | 0      |
| 24 | P49792 RBP2_HUMAN   | R.LLLDIPLQT#PHKLVDTGR.A        | T2153:     | 3 | 2,7861 | 0,352 | 0      |
| 24 | Q12830 BPTF_HUMAN   | K.NLSES#PVITK.A                | S1092:     | 2 | 2,7855 | 0,185 | -0,104 |
| 24 | P31946 1433B_HUMAN  | K.DSTLIM*QLLR.D                |            | 2 | 2,7802 | 0,175 | -0,202 |
| 24 | P27824 CALX_HUMAN   | R.GTLSGWILSK.A                 |            | 2 | 2,7802 | 0,433 | 0      |
| 24 | P08670 VIME_HUMAN   | E.VERDNLAEDIM*R.L              |            | 3 | 2,7788 | 0,143 | -0,31  |
| 24 | O00629 IMA4_HUMAN   | E.QTQVVLNCDALSHFPALLTHPK.E     |            | 3 | 2,7785 | 0,347 | 0      |
| 24 | P21580 TNAP3_HUMAN  | R.FQNTIPCLGRE.C                |            | 2 | 2,7784 | 0,316 | 0,274  |
| 24 | Q9UKV3 ACINU_HUMAN  | K.SKS#PS#PPRLTE.D              | S386:S388: | 2 | 2,7751 | 0,225 | -0,09  |
| 24 | P34931 HS71L_HUMAN  | K.YKAEDEVQRE.K                 |            | 3 | 2,7732 | 0,167 | 0,505  |
| 24 | P49736 MCM2_HUMAN   | E.SFTMASSPAQR.R                |            | 2 | 2,7722 | 0,471 | -0,206 |

|    |                     |                                |            |   |        |       |        |
|----|---------------------|--------------------------------|------------|---|--------|-------|--------|
| 24 | B2R8U0 B2R8U0_HUMAN | K.AAAGPLDM*SLPSTPDIK.I         |            | 2 | 2,7705 | 0,365 | -0,502 |
| 24 | P31930 QCR1_HUMAN   | R.NALVSHLDGTTTPVCE.D           |            | 2 | 2,7676 | 0,473 | -1,059 |
| 24 | Q9H4L7 SMRCD_HUMAN  | E.STSTM*DGAAIAALLM*FGDAGGGPR.K |            | 3 | 2,7675 | 0,123 | -0,08  |
| 24 | P42166 LAP2A_HUMAN  | K.LREQGTES#RS#STPLPTISSSAE.N   | S156:S158: | 2 | 2,767  | 0,408 | 1,077  |
| 24 | P11021 GRP78_HUMAN  | K.VTHAVVTVPAYFNDAQR.Q          |            | 3 | 2,767  | 0,148 | 0      |
| 24 | Q13596 SNX1_HUMAN   | R.AVGTQTLGAGLLK.M              |            | 2 | 2,7664 | 0,297 | 0,185  |
| 24 | P40227 TCPZ_HUMAN   | K.GIDPFSLDALSKE.G              |            | 2 | 2,7634 | 0,297 | -0,701 |
| 24 | Q96AJ1 CLUA1_HUMAN  | R.KSEPLDES#DNDNF.-             | S409:      | 2 | 2,763  | 0,301 | 0      |
| 24 | P68104 EF1A1_HUMAN  | E.HALLAYTLGVK.Q                |            | 2 | 2,762  | 0,406 | -0,103 |
| 24 | Q13242 SFRS9_HUMAN  | R.IYVGNLPTDVR.E                |            | 2 | 2,761  | 0,402 | 0,098  |
| 24 | Q14166 TTL12_HUMAN  | R.RPAERSS#PGQTPEEGAQALAE.F     | S16:       | 3 | 2,7605 | 0,13  | -0,485 |
| 24 | Q02790 FKBP4_HUMAN  | E.GYYKDKLFDQRE.L               |            | 3 | 2,7569 | 0,251 | 0,117  |
| 24 | O95433 AHSA1_HUMAN  | K.FHM*VDGNVSGE.F               |            | 2 | 2,7565 | 0,333 | -0,101 |
| 24 | O15226 NKRF_HUMAN   | K.SGEGIREPISVKE.Q              |            | 3 | 2,7555 | 0,197 | -0,261 |
| 24 | P07942 LAMB1_HUMAN  | K.CFICNSQDPYHE.T               |            | 2 | 2,7528 | 0,388 | 0,233  |
| 24 | Q14204 DYHC1_HUMAN  | E.KTKPVTGNLRPEE.A              |            | 3 | 2,7508 | 0,252 | 0,311  |
| 24 | P49736 MCM2_HUMAN   | R.GNDPLTSS#PGR.S               | S27:       | 2 | 2,7479 | 0,339 | -0,207 |
| 24 | Q9P0K7 RAI14_HUMAN  | K.DLDGNIPLLLAVQNGHSE.I         |            | 3 | 2,746  | 0,082 | -0,48  |
| 24 | Q00341 VIGLN_HUMAN  | K.ASVITQVFHVPLEE.R             |            | 2 | 2,7445 | 0,274 | -0,078 |
| 24 | Q8IYB3 SRRM1_HUMAN  | E.KKEKTPELPEPS#VK.V            | S227:      | 2 | 2,7436 | 0,338 | -0,144 |
| 24 | P51114 FXR1_HUMAN   | E.NGLVTVADYISR.A               |            | 2 | 2,7431 | 0,395 | 0      |
| 24 | P04264 K2C1_HUMAN   | R.SLDLDSIIAEVK.A               |            | 2 | 2,7412 | 0,405 | -0,375 |
| 24 | P54886 P5CS_HUMAN   | R.DSKCEYPAACNALE.T             |            | 2 | 2,7409 | 0,364 | 0      |
| 24 | Q96QT6 PHF12_HUMAN  | K.LSLKPHQGPVLR.S               |            | 3 | 2,7388 | 0,208 | 0,068  |
| 24 | P10809 CH60_HUMAN   | R.VTDALNATR.A                  |            | 2 | 2,7387 | 0,416 | 0      |
| 24 | P42704 LPPRC_HUMAN  | E.KHSLNSSSASTTEPDFQKD.I        |            | 3 | 2,7386 | 0,149 | -0,176 |
| 24 | P49736 MCM2_HUMAN   | R.QINIHNLSAFYDSE.L             |            | 2 | 2,7358 | 0,385 | -0,074 |
| 24 | P68104 EF1A1_HUMAN  | K.IGGIGTVPVGRVE.T              |            | 2 | 2,7339 | 0,403 | 0,292  |
| 24 | Q96QT6 PHF12_HUMAN  | R.TTS#PSSDLDLLDR.S             | S131:      | 2 | 2,7335 | 0,337 | 0,492  |
| 24 | P27694 RFA1_HUMAN   | K.DSLVDIIGICK.S                |            | 2 | 2,7311 | 0,405 | -0,099 |
| 24 | O15541 R113A_HUMAN  | K.AVDQVCTFLFK.K                |            | 2 | 2,7279 | 0,324 | -0,184 |
| 24 | Q14157 UBP2L_HUMAN  | R.RYPSSISSS#PQKD.L             | S609:      | 2 | 2,7273 | 0,129 | -1,513 |
| 24 | Q9UNZ2 NSF1C_HUMAN  | R.KKSPNELVDDLFK.G              |            | 3 | 2,7244 | 0,147 | 0,179  |
| 24 | Q9Y3R0 GRIP1_HUMAN  | R.RQS#IPEEFGSTVVE.L            | S43:       | 2 | 2,7233 | 0,335 | -0,068 |
| 24 | Q5SW79 CE170_HUMAN  | R.IDLLAQPR.R                   |            | 2 | 2,7208 | 0,252 | -0,527 |
| 24 | Q96NB3 CCD16_HUMAN  | E.GFFDDPEVDAR.V                |            | 2 | 2,7202 | 0,333 | -0,192 |
| 24 | P27816 MAP4_HUMAN   | K.VGSLDNVGHLPAGGAVK.T          |            | 3 | 2,72   | 0,109 | 0      |
| 24 | Q8NI27 THOC2_HUMAN  | K.TPVSGSLKS#PVPR.S             | S1278:     | 2 | 2,7199 | 0,213 | -0,347 |
| 24 | Q5T5U3 RHG21_HUMAN  | R.NLAIVFGPTLVR.T               |            | 2 | 2,7192 | 0,353 | 0,469  |



|    |                     |                            |       |   |        |       |        |
|----|---------------------|----------------------------|-------|---|--------|-------|--------|
| 24 | P31948 STIP1_HUMAN  | R.IGNSYFKEE.K              |       | 2 | 2,7177 | 0,338 | 0,112  |
| 24 | P40222 TXLNA_HUMAN  | R.RPEGPGAQAPS#SPR.V        | S514: | 3 | 2,7174 | 0,149 | -0,43  |
| 24 | Q6PJT7 ZC3HE_HUMAN  | R.GLLHPQQLHLLSR.Q          |       | 3 | 2,7166 | 0,263 | 0,423  |
| 24 | Q16643 DREB_HUMAN   | E.DIDAGAIGQR.L             |       | 2 | 2,716  | 0,258 | 0      |
| 24 | Q9BVC3 DCC1_HUMAN   | E.DGHSLVIRGDKDE.Q          |       | 2 | 2,715  | 0,29  | -0,254 |
| 24 | P55786 PSA_HUMAN    | K.KFCAGGSYVGE.D            |       | 2 | 2,7115 | 0,419 | 0,104  |
| 24 | P67936 TPM4_HUMAN   | K.IQALQQQADE.A             |       | 2 | 2,7099 | 0,226 | -0,32  |
| 24 | P25705 ATPA_HUMAN   | K.TSIAIDTIINQK.R           |       | 2 | 2,7097 | 0,188 | -0,093 |
| 24 | P53621 COPA_HUMAN   | K.SLAYLTAATHGLDEE.A        |       | 2 | 2,7081 | 0,366 | 0,077  |
| 24 | P31946 1433B_HUMAN  | D.STLIM*QLLR.D             |       | 2 | 2,7046 | 0,202 | -0,224 |
| 24 | Q15942 ZYX_HUMAN    | E.GTSFIVDQANRPHCVDPYHK.Q   |       | 3 | 2,7035 | 0,148 | 0,547  |
| 24 | P27694 RFA1_HUMAN   | E.DADKFDGSRQPVLAIK.G       |       | 3 | 2,703  | 0,1   | -0,208 |
| 24 | Q86Y04 Q86Y04_HUMAN | K.KVDLTLIS#PKSE.N          | S239: | 2 | 2,7023 | 0,128 | -0,433 |
| 24 | O43399 TPD54_HUMAN  | R.NSATFKS#FE.D             | S166: | 2 | 2,7022 | 0,488 | 0,11   |
| 24 | P63241 IF5A1_HUMAN  | K.VHLVGIDIFTGK.K           |       | 2 | 2,7011 | 0,361 | -0,188 |
| 24 | Q15758 AAAT_HUMAN   | K.HYRGPAGDATVASEKE.S       |       | 3 | 2,701  | 0,167 | -0,217 |
| 24 | Q9Y6M9 NDUB9_HUMAN  | K.ATQLLKEAEEE.F            |       | 2 | 2,6997 | 0,318 | 0,29   |
| 24 | Q15418 KS6A1_HUMAN  | R.DLKPSNILYVDE.S           |       | 2 | 2,695  | 0,228 | -0,174 |
| 24 | P06733 ENOA_HUMAN   | E.KGVPLYRHIADLAGNSE.V      |       | 2 | 2,6944 | 0,285 | 0      |
| 24 | Q8ND56 LS14A_HUMAN  | R.SSPQLDPLRKS#PTM*E.Q      | S192: | 2 | 2,692  | 0,333 | -0,616 |
| 24 | O75127 PTCD1_HUMAN  | E.ADLTFFNTLVR.K            |       | 2 | 2,6919 | 0,458 | 0      |
| 24 | Q13428 TCOF_HUMAN   | R.KSAEPSANTTLVSE.T         |       | 2 | 2,6918 | 0,35  | -0,51  |
| 24 | O15371 EIF3D_HUMAN  | R.NM*LQFNLQILPK.S          |       | 2 | 2,6909 | 0,156 | -0,331 |
| 24 | Q9P0K7 RAI14_HUMAN  | E.NAGIQSLLSK.I             |       | 2 | 2,6904 | 0,353 | 0      |
| 24 | Q8NCN4 RN169_HUMAN  | R.S#VSPESNDSISEE.L         | S366: | 2 | 2,6904 | 0,319 | -0,251 |
| 24 | P34931 HS71L_HUMAN  | E.VTFDIDANGILNVTATDKSTGK.V |       | 3 | 2,6901 | 0,293 | -0,16  |
| 24 | P18669 PGAM1_HUMAN  | R.RYADLTEDQLPSCE.S         |       | 2 | 2,6872 | 0,325 | -0,144 |
| 24 | P43490 NAMPT_HUMAN  | E.YGQDLLHTVFK.N            |       | 2 | 2,686  | 0,386 | -0,462 |
| 24 | Q13428 TCOF_HUMAN   | K.GSLGQGTAPVLP GK.T        |       | 2 | 2,6831 | 0,26  | 0,095  |
| 24 | P04406 G3P_HUMAN    | R.VVDLMAHM*ASKE.-          |       | 2 | 2,6794 | 0,265 | -0,543 |
| 24 | Q16643 DREB_HUMAN   | R.SPS#DSSTASTPVAE.Q        | S339: | 2 | 2,6775 | 0,263 | -0,431 |
| 24 | Q9HBD1 RC3H2_HUMAN  | R.KHS#STGDLLSLE.L          | S982: | 2 | 2,6761 | 0,144 | -0,089 |
| 24 | Q12888 TP53B_HUMAN  | E.DDSGSHFSM*LSR.H          |       | 2 | 2,6758 | 0,307 | -0,991 |
| 24 | Q92879 CELF1_HUMAN  | K.GCCFVTFYTR.K             |       | 2 | 2,6756 | 0,342 | 0      |
| 24 | P05783 K1C18_HUMAN  | K.VIDDTNITR.L              |       | 2 | 2,6747 | 0,212 | -0,35  |
| 24 | Q7L014 DDX46_HUMAN  | K.DAGNFDQNKLEEE.M          |       | 2 | 2,6739 | 0,253 | -1,132 |
| 24 | P51991 ROA3_HUMAN   | R.GFGFVTYSCVEE.V           |       | 2 | 2,673  | 0,228 | -0,175 |
| 24 | Q6NWX9 PR40B_HUMAN  | R.TLLQQLDDHQ.-             |       | 2 | 2,6711 | 0,37  | 0      |
| 24 | P61158 ARP3_HUMAN   | R.VM*KGVDDLDFFIGDE.A       |       | 2 | 2,6706 | 0,31  | -0,427 |

|    |                     |                           |        |   |        |       |        |
|----|---------------------|---------------------------|--------|---|--------|-------|--------|
| 24 | Q9H2J4 PDCL3_HUMAN  | K.KPIEDVLLSSVR.R          |        | 2 | 2,6697 | 0,314 | 0,36   |
| 24 | P30041 PRDX6_HUMAN  | K.LPFPIDDR.N              |        | 2 | 2,6696 | 0,32  | -0,449 |
| 24 | P06744 G6PI_HUMAN   | R.NRSNT#PILVDGKDVDM*PE.V  | T109:  | 3 | 2,6695 | 0,199 | 0,092  |
| 24 | Q8WUA2 PPIL4_HUMAN  | K.QDTKYDLILDE.Q           |        | 2 | 2,6677 | 0,212 | 0,271  |
| 24 | Q9BRA2 TXD17_HUMAN  | K.TIFAYFTGSK.D            |        | 2 | 2,6653 | 0,475 | -0,215 |
| 24 | O60506 HNRPQ_HUMAN  | E.DGALAVLQQFKD.S          |        | 2 | 2,6652 | 0,387 | 0      |
| 24 | P06748 NPM_HUMAN    | R.TVSLGAGAKDE.L           |        | 2 | 2,6641 | 0,404 | -0,931 |
| 24 | Q6S8J3 A26CA_HUMAN  | K.AGFAGDDAPR.A            |        | 2 | 2,6625 | 0,302 | -0,437 |
| 24 | O75607 NPM3_HUMAN   | D.DFQLQPPVTFR.L           |        | 2 | 2,6611 | 0,302 | 0,091  |
| 24 | P08670 VIME_HUMAN   | E.TNLDLPLVDTHSKR.T        |        | 3 | 2,6598 | 0,131 | -0,216 |
| 24 | P12270 TPR_HUMAN    | R.LTIHAPPQE.L             |        | 2 | 2,6589 | 0,23  | -0,606 |
| 24 | Q9Y6G9 DC1L1_HUMAN  | E.DNFEDIITKPPVRK.F        |        | 3 | 2,6585 | 0,356 | 0,328  |
| 24 | O95400 CD2B2_HUMAN  | K.LVDPVAGSGGPGSR.F        |        | 2 | 2,658  | 0,469 | -0,673 |
| 24 | Q6WKZ4 RFIP1_HUMAN  | K.QLNQVNFTLPK.K           |        | 2 | 2,6576 | 0,234 | 0      |
| 24 | P13861 KAP2_HUMAN   | R.APASVLPAATPR.Q          |        | 2 | 2,6565 | 0,371 | -0,212 |
| 24 | Q76FK4 NOL8_HUMAN   | K.LM*DLQSHFGTDDRFR.M      |        | 3 | 2,6563 | 0,32  | -0,099 |
| 24 | Q58FF7 H90B3_HUMAN  | E.DHLAVKHFSVE.G           |        | 2 | 2,654  | 0,342 | 0      |
| 24 | P40692 MLH1_HUMAN   | E.DLFYNIATR.R             |        | 2 | 2,6461 | 0,395 | 0      |
| 24 | Q99549 MPP8_HUMAN   | E.KLM*PVSAQTPK.G          |        | 2 | 2,6459 | 0,238 | -0,301 |
| 24 | P51991 ROA3_HUMAN   | E.DSVKPGAHLTVK.K          |        | 3 | 2,6443 | 0,28  | -0,219 |
| 24 | P12956 KU70_HUMAN   | R.TFNTSTGGLLPSDTK.R       |        | 2 | 2,644  | 0,222 | 0,665  |
| 24 | P63220 RS21_HUMAN   | K.DHASIQM*NVAE.V          |        | 2 | 2,6425 | 0,364 | 0      |
| 24 | P15336 ATF2_HUMAN   | K.QLLLAHKDCPVTAM*QK.K     |        | 3 | 2,6406 | 0,191 | -0,489 |
| 24 | Q12888 TP53B_HUMAN  | K.TSGTEPADFALPSSR.G       |        | 2 | 2,6391 | 0,359 | -1,906 |
| 24 | Q96T37 RBM15_HUMAN  | R.SLS#PGGAALGYR.D         | S294:  | 2 | 2,6391 | 0,338 | 0,099  |
| 24 | Q02790 FKBP4_HUMAN  | K.LYANM*FER.L             |        | 2 | 2,6362 | 0,432 | 0      |
| 24 | Q9Y4X5 ARI1_HUMAN   | R.DISQDSLQDIK.Q           |        | 2 | 2,6358 | 0,304 | 0,29   |
| 24 | Q8WWK9 CKAP2_HUMAN  | K.TKDPTHDVKT#PNTE.T       | T579:  | 3 | 2,6356 | 0,281 | -0,11  |
| 24 | Q8WUA2 PPIL4_HUMAN  | K.QDTKYDLILDEQAE.D        |        | 2 | 2,6351 | 0,237 | -0,073 |
| 24 | Q9UQ35 SRRM2_HUMAN  | R.VSGRT#SPLLDR.A          | T2397: | 2 | 2,6334 | 0,287 | -0,354 |
| 24 | O14974 MYPT1_HUMAN  | R.LAYVAPTIPR.R            |        | 2 | 2,6331 | 0,301 | -0,332 |
| 24 | P29692 EF1D_HUMAN   | R.ATAPQTQHVS#PMRQVEPPAK.K | S133:  | 3 | 2,6314 | 0,267 | 0      |
| 24 | O43237 DC1L2_HUMAN  | R.GPLTSGSDEE.N            |        | 2 | 2,6275 | 0,336 | 0,184  |
| 24 | Q9Y490 TLN1_HUMAN   | K.KSTVLQQQYNR.V           |        | 3 | 2,6259 | 0,102 | 0,335  |
| 24 | P12268 IMDH2_HUMAN  | R.DIDFLKEEE.H             |        | 2 | 2,6247 | 0,329 | 0,107  |
| 24 | Q9UHD1 CHRD1_HUMAN  | D.FSDFLSIVGCTK.G          |        | 2 | 2,6222 | 0,226 | 0,089  |
| 24 | Q8NI27 THOC2_HUMAN  | K.GGEKTPVSGSLKS#PVPR.S    | S1278: | 3 | 2,6222 | 0,311 | 0,206  |
| 24 | Q05CK9 Q05CK9_HUMAN | R.VSRNPIPSDRIS#PPQPNGE.I  | S25:   | 3 | 2,6217 | 0,122 | -0,085 |
| 24 | Q13085 ACACA_HUMAN  | K.VNNADDFPNLFR.Q          |        | 2 | 2,6212 | 0,29  | 0,086  |

|    |                    |                                        |              |   |        |       |        |
|----|--------------------|----------------------------------------|--------------|---|--------|-------|--------|
| 24 | Q9GZR1 SENP6_HUMAN | K.IRLNYSDES#PE.A                       | S919:        | 2 | 2,62   | 0,096 | -0,435 |
| 24 | P31939 PUR9_HUMAN  | E.QIDIGGVTLR.A                         |              | 2 | 2,6182 | 0,341 | -0,103 |
| 24 | O60927 PP1RB_HUMAN | K.CCCYIEKPR.A                          |              | 3 | 2,6181 | 0,403 | 0,071  |
| 24 | Q96T88 UHRF1_HUMAN | R.KAPS#RDEPCSSTSRPALE.E                | S165:        | 3 | 2,6164 | 0,117 | 0      |
| 24 | Q14676 MDC1_HUMAN  | R.SSVKTPET#VVPAAPE.L                   | T1529:       | 2 | 2,6141 | 0,119 | 0,077  |
| 24 | P42858 HD_HUMAN    | R.NSSM*ALQQAHLK.N                      |              | 2 | 2,6135 | 0,287 | -0,67  |
| 24 | O15533 TPSN_HUMAN  | R.QGPGEPppRPDLPE.L                     |              | 2 | 2,6132 | 0,312 | -0,305 |
| 24 | Q9H2J4 PDCL3_HUMAN | E.SGAIM*TDLEENPK.K                     |              | 2 | 2,613  | 0,314 | -0,687 |
| 24 | P06733 ENOA_HUMAN  | E.HINKTIAPALVSK.K                      |              | 3 | 2,6118 | 0,284 | -0,197 |
| 24 | P24386 RAE1_HUMAN  | R.ITYSQIIE.G                           |              | 2 | 2,6116 | 0,16  | 0,223  |
| 24 | P38571 LICH_HUMAN  | E.TEDGYILCLNR.I                        |              | 2 | 2,6112 | 0,291 | -0,18  |
| 24 | P13639 EF2_HUMAN   | K.DLEEDHACIPIKK.S                      |              | 3 | 2,6112 | 0,196 | 1,866  |
| 24 | O95425 SVIL_HUMAN  | R.DSSFTEVPRS#PK.H                      | S245:        | 2 | 2,611  | 0,193 | -0,853 |
| 24 | P46013 KI67_HUMAN  | R.ALEDLVDFKE.L                         |              | 2 | 2,6084 | 0,26  | -0,103 |
| 24 | Q7L2J0 MEPCE_HUMAN | R.CAPSAGS#PAAAVGRES#PGAAATSSSGPQAQHR.G | S60:S69:     | 3 | 2,6067 | 0,096 | 0,558  |
| 24 | Q16643 DREB_HUMAN  | R.M*APTPIPTRSPDSS#TASTPVAE.Q           | S342:        | 3 | 2,6062 | 0,229 | 0,764  |
| 24 | Q6UB98 ANR12_HUMAN | K.IKDEDHS#PTFE.N                       | S630:        | 2 | 2,6052 | 0,343 | -0,349 |
| 24 | Q99618 CDCA3_HUMAN | K.HAQDSDPRS#PTLGIAR.T                  | S68:         | 2 | 2,6036 | 0,419 | 0,068  |
| 24 | P34059 GALNS_HUMAN | K.LPLIFHLGR.D                          |              | 2 | 2,6035 | 0,236 | -0,229 |
| 24 | O96028 NSD2_HUMAN  | R.ASTAASSALGFSK.S                      |              | 2 | 2,6034 | 0,341 | -0,102 |
| 24 | O95453 PARN_HUMAN  | R.NNSFTAPSTVGK.R                       |              | 2 | 2,5989 | 0,36  | 0      |
| 24 | Q14980 NUMA1_HUMAN | R.KRVS#LEPHQGPGT#PE.S                  | S1991:T2000: | 3 | 2,5976 | 0,173 | -0,102 |
| 24 | P24928 RPB1_HUMAN  | K.ILLS#PERVHE.I                        | S217:        | 2 | 2,5972 | 0,267 | -0,096 |
| 24 | Q13435 SF3B2_HUMAN | R.TATVGGAM*M*GSTHIYD.M                 |              | 2 | 2,596  | 0,426 | -0,816 |
| 24 | Q9Y2I7 FYV1_HUMAN  | K.ASGM*LSFFR.G                         |              | 2 | 2,5941 | 0,278 | 0,355  |
| 24 | P46782 RS5_HUMAN   | E.CLADELINAAG.G                        |              | 2 | 2,5936 | 0,282 | -0,301 |
| 24 | P61006 RAB8A_HUMAN | E.NAFFT#LAR.D                          | T164:        | 2 | 2,592  | 0,306 | 0,179  |
| 24 | Q6ZVM7 TM1L2_HUMAN | K.GVEFPM*ADLDALS#PIHTPQR.S             | S160:        | 3 | 2,592  | 0,303 | 0,24   |
| 24 | O95071 UBR5_HUMAN  | E.DISYFGYPSFR.R                        |              | 2 | 2,5899 | 0,474 | -0,361 |
| 24 | Q14247 SRC8_HUMAN  | E.KLQLHES#QKDYK.T                      | S261:        | 3 | 2,5871 | 0,25  | 0      |
| 24 | Q15003 CND2_HUMAN  | R.KAPLNIPGTPVLE.D                      |              | 2 | 2,5868 | 0,419 | -0,181 |
| 24 | P50549 ETV1_HUMAN  | E.SLAFHGLPLK.I                         |              | 2 | 2,5838 | 0,298 | 0,113  |
| 24 | O00203 AP3B1_HUMAN | K.M*HVFNPIDSLEPE.G                     |              | 2 | 2,5814 | 0,277 | 0      |
| 24 | P04792 HSPB1_HUMAN | R.VSLDVNHAFAPDE.L                      |              | 2 | 2,5779 | 0,432 | 0,091  |
| 24 | P31939 PUR9_HUMAN  | E.LGIILAHTNLR.L                        |              | 3 | 2,5776 | 0,169 | 0,449  |
| 24 | Q32P28 P3H1_HUMAN  | R.KDDSHPVHVDNCILNAE.T                  |              | 3 | 2,5774 | 0,118 | -0,28  |
| 24 | Q14562 DHX8_HUMAN  | E.LVEEPPFLR.G                          |              | 2 | 2,5772 | 0,28  | -0,199 |
| 24 | Q96ST2 IWS1_HUMAN  | R.GKHM*DFLS#DFE.M                      | S527:        | 2 | 2,5771 | 0,362 | -0,515 |
| 24 | P63313 TYB10_HUMAN | E.IAS#FDKAK.L                          | S12:         | 2 | 2,5763 | 0,307 | -0,191 |

|    |                     |                               |                 |   |        |       |        |
|----|---------------------|-------------------------------|-----------------|---|--------|-------|--------|
| 24 | Q14566 MCM6_HUMAN   | R.ISNLIVLHLR.K                |                 | 2 | 2,5761 | 0,281 | 0,104  |
| 24 | Q684P5 RPGP2_HUMAN  | R.AALLDNLHDE.L                |                 | 2 | 2,576  | 0,422 | -0,22  |
| 24 | Q69YH5 CDCA2_HUMAN  | E.NFEAPAFNM*R.K               |                 | 2 | 2,5758 | 0,273 | -0,552 |
| 24 | Q92598 HS105_HUMAN  | K.IKVVNVELPIE.A               |                 | 2 | 2,5758 | 0,293 | -0,195 |
| 24 | Q9NTI5 PDS5B_HUMAN  | E.DYTM*SS#PLPGK.K             | S1191:          | 2 | 2,575  | 0,174 | -0,094 |
| 24 | Q15149 PLEC1_HUMAN  | K.QYINAIKDYE.L                |                 | 2 | 2,5747 | 0,318 | -0,679 |
| 24 | Q9ULL5 PRR12_HUMAN  | R.SHGLEPAAPS#PR.L             | S44:            | 2 | 2,5744 | 0,323 | -0,376 |
| 24 | P22234 PUR6_HUMAN   | K.VLLQSKDQITAGNAAR.K          |                 | 3 | 2,5731 | 0,125 | -0,868 |
| 24 | Q53GS9 SNUT2_HUMAN  | R.EAPASVVPFVR.V               |                 | 2 | 2,573  | 0,458 | 0,208  |
| 24 | Q09666 AHNK_HUMAN   | K.AKGEVDVDVPKLE.G             |                 | 2 | 2,5727 | 0,32  | -0,262 |
| 24 | O75643 U520_HUMAN   | E.YKANSNLVLQADRS#LIDR.T       | S26:            | 3 | 2,5722 | 0,182 | 0      |
| 24 | ##Q8IWJ2 GCC2_HUMAN | E.LLLNKY#SEAGQILDRMS#AS#LQD.K | Y666:S677:S679: | 3 | 2,5718 | 0,107 | 0,879  |
| 24 | Q71U36 TBA1A_HUMAN  | E.QLITGKEDAANNYAR.G           |                 | 2 | 2,5702 | 0,46  | -0,073 |
| 24 | Q86V48 LUZP1_HUMAN  | K.VTSSITIYPSDSSS#PR.A         | S805:           | 2 | 2,57   | 0,201 | -0,549 |
| 24 | P47756 CAPZB_HUMAN  | E.DLLSVDQPLK.I                |                 | 2 | 2,5691 | 0,283 | 0      |
| 24 | P10809 CH60_HUMAN   | R.KNQLKDM*AIATGGAVFGEE.G      |                 | 3 | 2,5683 | 0,18  | 0,092  |
| 24 | Q9H0P0 5NT3_HUMAN   | K.IGYLNDRVDE.L                |                 | 2 | 2,5672 | 0,151 | 0,204  |
| 24 | P05023 AT1A1_HUMAN  | R.LNIPVSQVNPR.D               |                 | 2 | 2,567  | 0,221 | 0      |
| 24 | Q15019 SEPT2_HUMAN  | R.TM*LITHM*QDLQE.V            |                 | 2 | 2,5668 | 0,086 | -0,327 |
| 24 | Q96SB4 SRPK1_HUMAN  | K.STAGNFLVNPPEPK.N            |                 | 2 | 2,5648 | 0,227 | 0,164  |
| 24 | P04632 CPNS1_HUMAN  | R.LFAQLAGDDM*E.V              |                 | 2 | 2,5646 | 0,301 | 0,199  |
| 24 | Q9Y6D5 BIG2_HUMAN   | R.LKHSQAQSKPTTPE.K            |                 | 3 | 2,5628 | 0,19  | -0,236 |
| 24 | P54727 RD23B_HUMAN  | K.ILNDDTALKE.Y                |                 | 2 | 2,5622 | 0,135 | -0,431 |
| 24 | Q12906 ILF3_HUMAN   | E.ATDAIGHLDR.Q                |                 | 2 | 2,562  | 0,272 | 0      |
| 24 | P60903 S10AA_HUMAN  | K.FAGDKGYLTKE.D               |                 | 2 | 2,5616 | 0,311 | -0,496 |
| 24 | P51114 FXR1_HUMAN   | K.INTLKEENTQE.A               |                 | 2 | 2,5606 | 0,239 | 0      |
| 24 | Q9UIF9 BAZ2A_HUMAN  | E.MEGPEECLGR.R                |                 | 2 | 2,5569 | 0,265 | -0,621 |
| 24 | P46013 KI67_HUMAN   | K.AMDTPKPAGGDE.K              |                 | 2 | 2,5559 | 0,29  | -0,513 |
| 24 | Q9NYF8 BCLF1_HUMAN  | K.DLFDYS#PPLHK.N              | S512:           | 2 | 2,5543 | 0,271 | 0,086  |
| 24 | Q6S8J3 A26CA_HUMAN  | R.AVFPISVGRPR.Q               |                 | 2 | 2,5541 | 0,271 | 0      |
| 24 | P06733 ENOA_HUMAN   | E.KGVPLYRHIADLAGNSE.V         |                 | 3 | 2,5521 | 0,175 | 0,099  |
| 24 | Q9H6F5 CCD86_HUMAN  | R.RLGGLRPES#PESLTSVSR.T       | S18:            | 3 | 2,5516 | 0,222 | -0,543 |
| 24 | O94903 PROSC_HUMAN  | K.APLEVAQEH.-                 |                 | 2 | 2,5478 | 0,151 | -0,245 |
| 24 | P06748 NPM_HUMAN    | K.KQEKTPKT#PKGSSVE.D          | T234:T237:      | 3 | 2,5472 | 0,131 | -0,77  |
| 24 | Q9UHB6 LIMA1_HUMAN  | E.VQQPVHPKPLS#PDSR.A          | S362:           | 3 | 2,5425 | 0,129 | -0,104 |
| 24 | Q96C19 EFHD2_HUMAN  | R.RADLNQIGEPQS#PSRR.V         | S74:            | 3 | 2,5421 | 0,346 | -0,187 |
| 24 | P49756 RBM25_HUMAN  | K.LPVDSVFNKFE.D               |                 | 2 | 2,5404 | 0,338 | -0,094 |
| 24 | O94826 TOM70_HUMAN  | E.GFQNNQSM*LLADKVLKLLGK.E     |                 | 3 | 2,54   | 0,089 | -0,163 |
| 24 | P07737 PROF1_HUMAN  | K.STGGAPTFFNVTVTK.T           |                 | 2 | 2,5387 | 0,438 | -0,177 |

|    |                    |                            |        |   |        |       |        |
|----|--------------------|----------------------------|--------|---|--------|-------|--------|
| 24 | Q9Y490 TLN1_HUMAN  | K.AGFLDLKDFLPKE.Y          |        | 2 | 2,5385 | 0,197 | -0,245 |
| 24 | O95208 EPN2_HUMAN  | K.QLVALLKDEE.R             |        | 2 | 2,5363 | 0,463 | -0,211 |
| 24 | Q9Y2U5 M3K2_HUMAN  | R.RRGS#DIDNPTLTVM*D.I      | S331:  | 3 | 2,5362 | 0,197 | 0      |
| 24 | P09622 DLDH_HUMAN  | K.STDRVLGAHILGPGAGEM*VNE.A |        | 3 | 2,5361 | 0,098 | 0      |
| 24 | Q01081 U2AF1_HUMAN | E.M*NVCDNLGDHLVGNVYVK.F    |        | 3 | 2,5357 | 0,2   | -0,177 |
| 24 | Q9HCE3 ZN532_HUMAN | K.LSSCIAAIAALSAK.K         |        | 2 | 2,5354 | 0,274 | 0,089  |
| 24 | Q02790 FKBP4_HUMAN | K.DKFSFDLGKGE.V            |        | 2 | 2,5352 | 0,226 | -0,196 |
| 24 | O75044 FNBP2_HUMAN | R.KQDSSQAIPLVVE.S          |        | 2 | 2,5335 | 0,307 | -0,086 |
| 24 | Q8N3U4 STAG2_HUMAN | R.RGTS#LM*EDDEEPIVE.D      | S1161: | 2 | 2,5327 | 0,301 | 0      |
| 24 | P22626 ROA2_HUMAN  | R.GFGFVTFSSM*AE.V          |        | 2 | 2,5302 | 0,298 | -0,377 |
| 24 | Q8IWX8 CHERP_HUMAN | K.DNPKFSFLFGGE.F           |        | 2 | 2,5295 | 0,281 | -0,27  |
| 24 | Q12840 KIF5A_HUMAN | K.LYLVDLAGSEK.V            |        | 2 | 2,5295 | 0,136 | -0,303 |
| 24 | Q9Y2U5 M3K2_HUMAN  | R.DRSS#PPPGYIPDE.L         | S164:  | 2 | 2,5282 | 0,313 | -0,242 |
| 24 | Q9NZM1 MYOF_HUMAN  | R.YGGRDYSLDEFE.A           |        | 2 | 2,5275 | 0,345 | -0,505 |
| 24 | P14866 HNRPL_HUMAN | R.IQHPSNVLHFFNAPLEVTE.E    |        | 3 | 2,525  | 0,265 | -0,584 |
| 24 | Q9HCN4 GPN1_HUMAN  | K.DSLSPVLHPSDLILTR.G       |        | 3 | 2,5241 | 0,279 | 0,519  |
| 24 | Q53GS9 SNUT2_HUMAN | E.APASVVPFVR.V             |        | 2 | 2,5211 | 0,406 | 0      |
| 24 | Q92598 HS105_HUMAN | E.LNNTCEPVVTQPKPK.I        |        | 3 | 2,5193 | 0,081 | -0,106 |
| 24 | P13639 EF2_HUMAN   | K.SDPVVSURE.T              |        | 2 | 2,5193 | 0,411 | 0,348  |
| 24 | Q8IU81 I2BP1_HUMAN | R.AGGAS#PAASSTAQPPTQHR.L   | S453:  | 2 | 2,5192 | 0,417 | -0,13  |
| 24 | Q7Z4V5 HDGR2_HUMAN | R.ARGDS#EALDEES.-          | S664:  | 2 | 2,5184 | 0,344 | -0,539 |
| 24 | O94913 PCF11_HUMAN | R.LSVDANLQIPKE.L           |        | 2 | 2,5178 | 0,1   | -0,184 |
| 24 | Q8IYB3 SRRM1_HUMAN | K.EKT#PELPEPSVK.V          | T220:  | 2 | 2,5158 | 0,087 | -0,34  |
| 24 | P04406 G3P_HUMAN   | R.GALQNIIPASTGAAK.A        |        | 2 | 2,5145 | 0,13  | 0,432  |
| 24 | Q13616 CUL1_HUMAN  | K.YNALVM*SAFNND.A          |        | 2 | 2,5143 | 0,13  | 0      |
| 24 | P41091 IF2G_HUMAN  | R.GVTIKPTVDDD.-            |        | 2 | 2,5119 | 0,423 | -0,841 |
| 24 | P40227 TCPZ_HUMAN  | K.SETDTS#LIRGLVLD.H        | S205:  | 2 | 2,5101 | 0,362 | 0      |
| 24 | P52565 GDIR1_HUMAN | E.HSVNYKPPAQK.S            |        | 3 | 2,5091 | 0,209 | 0,793  |
| 24 | P20042 IF2B_HUMAN  | K.NVKFPDEDEILE.K           |        | 2 | 2,5037 | 0,243 | 0,084  |
| 24 | O15446 RPA34_HUMAN | E.QINTEPLEDT#VLSPTKK.R     | T282:  | 3 | 2,5035 | 0,155 | 0,092  |
| 24 | P61586 RHOA_HUMAN  | K.HFCPNVPIILVGNK.K         |        | 2 | 2,4974 | 0,196 | -0,759 |
| 24 | Q5UIPO RIF1_HUMAN  | E.EKPLQKS#PLHIKDDVLPK.Q    | S1454: | 3 | 2,4967 | 0,095 | -0,253 |
| 24 | P49411 EFTU_HUMAN  | R.TIGTGLVTNTLAM*TE.E       |        | 2 | 2,4964 | 0,213 | -0,238 |
| 24 | P04075 ALDOA_HUMAN | K.GGVVGIKVDKGVVPLAGTNGE.T  |        | 3 | 2,4954 | 0,151 | 0      |
| 24 | Q92598 HS105_HUMAN | K.KLM*SSNSTDLPLNIE.C       |        | 2 | 2,493  | 0,34  | -0,073 |
| 24 | Q9UQ35 SRRM2_HUMAN | K.FSPFPVQDRPE.S            |        | 2 | 2,4923 | 0,212 | -0,185 |
| 24 | P00558 PGK1_HUMAN  | K.ITLPVDFVTADKFDE.N        |        | 2 | 2,491  | 0,249 | 0      |
| 24 | Q9Y2W1 TR150_HUMAN | K.SPLQSVVVR.R              |        | 2 | 2,4902 | 0,199 | -0,124 |
| 24 | P78527 PRKDC_HUMAN | R.LSFAVPFRE.M              |        | 2 | 2,489  | 0,325 | 0,343  |

|    |                    |                         |            |   |        |       |        |
|----|--------------------|-------------------------|------------|---|--------|-------|--------|
| 24 | Q9Y4F5 K0284_HUMAN | R.LAQDFM*AQCLRE.S       |            | 2 | 2,4889 | 0,348 | 0,244  |
| 24 | O43432 IF4G3_HUMAN | R.LVLSGEKKEQE.G         |            | 2 | 2,4888 | 0,277 | -0,678 |
| 24 | Q9NTJ3 SMC4_HUMAN  | K.IIDKEGDDYE.V          |            | 2 | 2,4887 | 0,312 | -0,51  |
| 24 | Q9Y490 TLN1_HUMAN  | K.AGFLDLKDFLPKE.Y       |            | 3 | 2,4881 | 0,083 | 0,184  |
| 24 | P31949 S10AB_HUMAN | K.NQKDPGVLDLDR.M        |            | 2 | 2,4878 | 0,181 | -0,427 |
| 24 | P48426 PI42A_HUMAN | K.ELPTLKDNDFINE.G       |            | 2 | 2,4866 | 0,197 | -0,315 |
| 24 | P09525 ANXA4_HUMAN | E.DAHSVLYR.N            |            | 2 | 2,4855 | 0,305 | 0      |
| 24 | Q96J01 THOC3_HUMAN | K.RPLLAFLACDDKDGK.Y     |            | 3 | 2,4832 | 0,248 | 0,114  |
| 24 | P63220 RS21_HUMAN  | E.FVDLYVPR.K            |            | 2 | 2,482  | 0,334 | -0,242 |
| 24 | Q8N3U4 STAG2_HUMAN | E.HHQTPLDYNR.R          |            | 3 | 2,4816 | 0,278 | -0,357 |
| 24 | P20645 MPRD_HUMAN  | R.HTLADNFPVSEE.R        |            | 2 | 2,4793 | 0,315 | 0      |
| 24 | P08559 ODPA_HUMAN  | R.YHGHS#M*SDPGVS#YR.T   | S293:S300: | 3 | 2,4781 | 0,246 | -0,103 |
| 24 | P02545 LMNA_HUMAN  | R.LRLSPS#PTSQR.S        | S392:      | 2 | 2,4731 | 0,186 | -0,554 |
| 24 | Q92563 TICN2_HUMAN | K.KKPGIFIPSCDE.D        |            | 2 | 2,4729 | 0,343 | -0,088 |
| 24 | Q5VT25 MRCKA_HUMAN | R.GYLQALASK.M           |            | 2 | 2,4729 | 0,255 | -0,128 |
| 24 | P49411 EFTU_HUMAN  | R.TIGTGLVTNTLAM*TEE.E   |            | 2 | 2,4707 | 0,329 | -0,586 |
| 24 | Q99618 CDCA3_HUMAN | K.TSSGDPPSPLVK.Q        |            | 2 | 2,4665 | 0,309 | -0,515 |
| 24 | Q6S8J3 A26CA_HUMAN | K.IWHHTFYNE.L           |            | 2 | 2,464  | 0,275 | 0      |
| 24 | Q9UBR2 CATZ_HUMAN  | R.VGDYGSLSGRE.K         |            | 2 | 2,464  | 0,416 | -0,428 |
| 24 | P14618 KPYM_HUMAN  | E.LKKGATLKITLD.N        |            | 2 | 2,4602 | 0,161 | -0,094 |
| 24 | Q9Y5B0 CTDP1_HUMAN | R.ENS#PAAFDPRE.G        | S740:      | 2 | 2,4564 | 0,155 | -0,465 |
| 24 | P06733 ENOA_HUMAN  | R.HIADLAGNSE.V          |            | 2 | 2,4517 | 0,22  | -0,475 |
| 24 | Q9NTK5 OLA1_HUMAN  | E.DGDIIFFK.F            |            | 2 | 2,4511 | 0,297 | -0,703 |
| 24 | P35579 MYH9_HUMAN  | R.GDLPFVPR.R            |            | 2 | 2,4491 | 0,353 | -0,366 |
| 24 | Q9Y2I7 FYV1_HUMAN  | K.ASGMLSFFR.G           |            | 2 | 2,4481 | 0,365 | -0,42  |
| 24 | P55072 TERA_HUMAN  | D.QLIYIPLPEK.S          |            | 2 | 2,448  | 0,324 | 0,092  |
| 24 | Q8N122 RPTOR_HUMAN | R.YKQSLDPTVDE.V         |            | 2 | 2,4469 | 0,337 | -0,754 |
| 24 | O75569 PRKRA_HUMAN | K.TPIQVLHE.Y            |            | 2 | 2,4452 | 0,367 | -0,521 |
| 24 | Q5VYK3 ECM29_HUMAN | K.IVAISCAADILK.A        |            | 2 | 2,4451 | 0,325 | -0,479 |
| 24 | O75947 ATP5H_HUMAN | K.FNALKVPVPE.D          |            | 2 | 2,4447 | 0,189 | 0      |
| 24 | Q6S8J3 A26CA_HUMAN | E.HGIITNWDDM*EK.I       |            | 2 | 2,4431 | 0,203 | -0,248 |
| 24 | P23588 IF4B_HUMAN  | K.GKTIS#LTDFLAE.D       | S16:       | 2 | 2,4407 | 0,164 | -0,444 |
| 24 | P62753 RS6_HUMAN   | R.RLS#S#LRASTSKSE.S     | S235:S236: | 2 | 2,4364 | 0,38  | -0,154 |
| 24 | Q7Z422 CA144_HUMAN | K.RILGSAS#PEEE.Q        | S107:      | 2 | 2,4344 | 0,296 | -0,192 |
| 24 | P35030 TRY3_HUMAN  | D.TLDNDIMLIK.L          |            | 2 | 2,4342 | 0,373 | -0,207 |
| 24 | Q06830 PRDX1_HUMAN | E.VCPAGWKPGSDTIKPDVQK.S |            | 3 | 2,4326 | 0,13  | 0,088  |
| 24 | O60506 HNRPQ_HUMAN | R.LFVGSIPK.S            |            | 2 | 2,4326 | 0,242 | -0,142 |
| 24 | Q71U36 TBA1A_HUMAN | E.QLITGKEDAANNYAR.G     |            | 3 | 2,4299 | 0,293 | 0      |
| 24 | P49790 NU153_HUMAN | K.CIACQAAKLS#PR.D       | S687:      | 3 | 2,4298 | 0,282 | 0      |

|    |                     |                                 |            |   |        |       |        |
|----|---------------------|---------------------------------|------------|---|--------|-------|--------|
| 24 | P34059 GALNS_HUMAN  | E.DHTKLPLIFHLGR.D               |            | 3 | 2,4291 | 0,205 | 0,236  |
| 24 | O00116 ADAS_HUMAN   | K.ASLNPSDTPPSVVNE.D             |            | 2 | 2,4268 | 0,192 | -0,479 |
| 24 | Q6PH81 U547_HUMAN   | K.SCPCGYIFISR.K                 |            | 2 | 2,425  | 0,325 | 0,09   |
| 24 | P21333 FLNA_HUMAN   | K.IQQNTFTR.W                    |            | 2 | 2,4213 | 0,185 | -0,182 |
| 24 | O43166 SI1L1_HUMAN  | E.GTINSVGFMDTR.K                |            | 2 | 2,4193 | 0,219 | -0,371 |
| 24 | Q9UDI3 Q9UDI3_HUMAN | -.PDYLGADQR.K                   |            | 2 | 2,4191 | 0,36  | -0,118 |
| 24 | Q92576 PHF3_HUMAN   | E.NDFFNSFTTVLHK.Q               |            | 2 | 2,4181 | 0,303 | -0,311 |
| 24 | Q9BUH6 CI142_HUMAN  | E.TAVS#PRKS#PRPAGPQLFLPDPDPQR.G | S148:S152: | 3 | 2,4155 | 0,16  | 0,507  |
| 24 | Q8NE71 ABCF1_HUMAN  | K.LSVPT#SDEEDEVPAKPR.G          | T108:      | 3 | 2,4126 | 0,107 | 0      |
| 24 | P30086 PEBP1_HUMAN  | K.LYTLVLTDPDAPSR.K              |            | 2 | 2,412  | 0,271 | -0,703 |
| 24 | O95678 K2C75_HUMAN  | E.VKAQYEDIANR.S                 |            | 2 | 2,4115 | 0,328 | -0,747 |
| 24 | Q8WVM8 SCFD1_HUMAN  | E.YQNLVDYIK.G                   |            | 2 | 2,4081 | 0,254 | 0,211  |
| 24 | P04637 P53_HUMAN    | K.RALPNNTSSS#PQPK.K             | S315:      | 2 | 2,4072 | 0,083 | -0,774 |
| 24 | P04406 G3P_HUMAN    | E.GLM*TTVHAITATQK.T             |            | 3 | 2,407  | 0,487 | 0,246  |
| 24 | P60983 GMFB_HUMAN   | R.LVVLDEELE.G                   |            | 2 | 2,4041 | 0,213 | 0,23   |
| 24 | P40227 TCPZ_HUMAN   | K.SETDTS#LIR.G                  | S205:      | 2 | 2,4033 | 0,332 | 0,332  |
| 24 | Q86TX2 ACOT1_HUMAN  | R.YRADTLGELDLE.R                |            | 2 | 2,4018 | 0,264 | -0,35  |
| 24 | P0C0S8 H2A1_HUMAN   | R.HLQLAIRNDEE.L                 |            | 2 | 2,4011 | 0,292 | -0,182 |
| 24 | P55072 TERA_HUMAN   | K.LAIRES#IESE.I                 | S702:      | 2 | 2,4005 | 0,108 | 0      |
| 24 | Q9Y2U5 M3K2_HUMAN   | E.DLDNTVFGAER.K                 |            | 2 | 2,3956 | 0,269 | 0,197  |
| 24 | P48681 NEST_HUMAN   | K.VDLEPLKSLDQE.I                |            | 2 | 2,3946 | 0,155 | 0,176  |
| 24 | O15085 ARHGB_HUMAN  | R.LSSLSSLGDSAPER.K              |            | 2 | 2,3932 | 0,322 | -0,258 |
| 24 | Q13885 TBB2A_HUMAN  | K.AFLHWYTGEGM*DE.M              |            | 2 | 2,3923 | 0,33  | -0,155 |
| 24 | O15427 MOT4_HUMAN   | K.AEPEKNGEVVHTPET#SV.-          | T463:      | 2 | 2,3918 | 0,3   | -0,449 |
| 24 | P46087 NOL1_HUMAN   | K.KGPQSLFNAPR.G                 |            | 2 | 2,3907 | 0,318 | 0,402  |
| 24 | Q02952 AKA12_HUMAN  | E.ALICVGSSK.K                   |            | 2 | 2,3905 | 0,207 | -0,522 |
| 24 | P14618 KPYM_HUMAN   | R.LNFSGHTHE.Y                   |            | 2 | 2,3904 | 0,192 | -0,234 |
| 24 | O75351 VPS4B_HUMAN  | K.LQNQLQGAIVIERPNVK.W           |            | 3 | 2,3892 | 0,085 | 0,095  |
| 24 | Q2NKP9 Q2NKP9_HUMAN | K.TDFGPDDDTYR.S                 |            | 2 | 2,3881 | 0,363 | -0,281 |
| 24 | Q4G0A6 U526_HUMAN   | K.NQLLPSDKVDGE.L                |            | 2 | 2,3846 | 0,249 | 0,649  |
| 24 | P08107 HSP71_HUMAN  | K.DNNLLGRFE.L                   |            | 2 | 2,3822 | 0,225 | -0,113 |
| 24 | Q9BRX2 PELO_HUMAN   | K.NIEKDNAGQVTLVPEEPE.D          |            | 2 | 2,3816 | 0,286 | -0,123 |
| 24 | Q5H9R7 SAPS3_HUMAN  | R.NTVDLVTT#CHIHSSSDDE.I         | T518:      | 3 | 2,3799 | 0,129 | 0,52   |
| 24 | O75083 WDR1_HUMAN   | R.IAVVGEGRE.K                   |            | 2 | 2,3791 | 0,249 | -0,197 |
| 24 | P08670 VIME_HUMAN   | K.KLHEEEIQE.L                   |            | 2 | 2,3788 | 0,239 | -0,739 |
| 24 | Q9NYZ3 GTSE1_HUMAN  | K.STATEVAREE.A                  |            | 2 | 2,3774 | 0,37  | -0,447 |
| 24 | Q7L014 DDX46_HUMAN  | R.KLLEPVDHGKIE.Y                |            | 2 | 2,3773 | 0,12  | -0,62  |
| 24 | P13639 EF2_HUMAN    | K.STLTDLSLVCK.A                 |            | 2 | 2,3756 | 0,369 | 0,109  |
| 24 | Q08378 GOGA3_HUMAN  | K.HLVQALQASLE.K                 |            | 2 | 2,3752 | 0,273 | 0      |

|    |                      |                            |              |   |        |       |        |
|----|----------------------|----------------------------|--------------|---|--------|-------|--------|
| 24 | P30101 PDIA3_HUMAN   | R.TADGIVSHLK.K             |              | 2 | 2,375  | 0,364 | -0,234 |
| 24 | Q9Y2Q9 RT28_HUMAN    | E.NDLYIDFGGK.F             |              | 2 | 2,3741 | 0,339 | -0,107 |
| 24 | Q00537 PCTK2_HUMAN   | E.KLQINS#PPFDQPM*SR.R      | S165:        | 2 | 2,374  | 0,174 | -0,197 |
| 24 | B1AND4 B1AND4_HUMAN  | R.SST#PPLHVHVE.N           | T7:          | 2 | 2,374  | 0,285 | 0,175  |
| 24 | Q14166 TTL12_HUMAN   | R.SS#PGQTPEEGAQALAE.F      | S16:         | 2 | 2,3734 | 0,119 | -0,222 |
| 24 | Q9Y6M7 S4A7_HUMAN    | R.AVYIGVHVFPF#KE.S         | S52:         | 3 | 2,3702 | 0,207 | 0,06   |
| 24 | Q15149 PLEC1_HUMAN   | R.SSIAGLLK.A               |              | 2 | 2,3694 | 0,227 | -1,15  |
| 24 | Q13085 ACACA_HUMAN   | R.ITSENPDEGFKPSSGTVQE.L    |              | 2 | 2,369  | 0,308 | -0,603 |
| 24 | O76021 RL1D1_HUMAN   | K.ATNES#EDEIPLVPIGK.K      | S361:        | 2 | 2,3675 | 0,254 | -0,191 |
| 24 | B2RMZ9 B2RMZ9_HUMAN  | R.APVS#PLKFSPFE.G          | S423:        | 2 | 2,3633 | 0,174 | -0,349 |
| 24 | P45974 UBP5_HUMAN    | E.ALLSVLPTIR.V             |              | 2 | 2,3611 | 0,269 | -0,338 |
| 24 | P10809 CH60_HUMAN    | K.SIDLKDKYK.N              |              | 2 | 2,361  | 0,294 | 0,33   |
| 24 | Q05524 ENO1B_HUMAN   | E.KGVPLYR.H                |              | 2 | 2,3601 | 0,301 | -0,366 |
| 24 | Q04837 SSB_HUMAN     | R.VGQDPVLR.Q               |              | 2 | 2,3597 | 0,216 | 0,414  |
| 24 | ##O14732 IMPA2_HUMAN | R.ERLES#IILDE.V            | S222:        | 3 | 2,3564 | 0,083 | 0,352  |
| 24 | Q13509 TBB3_HUMAN    | R.YLTVATVFR.G              |              | 2 | 2,3553 | 0,371 | -0,228 |
| 24 | Q9NYF8 BCLF1_HUMAN   | K.M*IASDSHRPE.V            |              | 2 | 2,3526 | 0,283 | -0,421 |
| 24 | P49736 MCM2_HUMAN    | K.DAILLADLVDSCKPGDE.I      |              | 2 | 2,3517 | 0,343 | -0,2   |
| 24 | Q9NQC3 RTN4_HUMAN    | K.TLLIDRDLTE.F             |              | 2 | 2,347  | 0,201 | 0      |
| 24 | P00558 PGK1_HUMAN    | R.AHSSM*VGVNLPQK.A         |              | 2 | 2,3462 | 0,235 | 0      |
| 24 | P13639 EF2_HUMAN     | K.KSDPVVSYRE.T             |              | 2 | 2,3449 | 0,328 | -0,207 |
| 24 | P04075 ALDOA_HUMAN   | E.KVLAAYK.A                |              | 2 | 2,3442 | 0,162 | -0,205 |
| 24 | P52907 CAZA1_HUMAN   | E.ASDPQPEEADGGLK.S         |              | 2 | 2,3434 | 0,301 | 0,086  |
| 24 | Q96AY3 FKB10_HUMAN   | R.NQDGKITVDE.L             |              | 2 | 2,3425 | 0,249 | 0,763  |
| 24 | P47736 RPGP1_HUMAN   | R.HIGNDIVAVVFQDE.N         |              | 2 | 2,34   | 0,23  | -0,706 |
| 24 | Q9HCG8 NCM_HUMAN     | R.DRDYFDYSR.S              |              | 2 | 2,3388 | 0,194 | 0      |
| 24 | Q96C90 PP14B_HUMAN   | E.AFISGLLDK.I              |              | 2 | 2,3376 | 0,268 | 0,19   |
| 24 | Q53GS9 SNUT2_HUMAN   | E.FEPASAREAPASVVPFVR.V     |              | 3 | 2,3368 | 0,129 | 0      |
| 24 | P06400 RB_HUMAN      | K.LRFDIEGS#DEAD.G          | S882:        | 2 | 2,3345 | 0,193 | -0,169 |
| 24 | Q9Y2A7 NCKP1_HUMAN   | R.SLSLCNM*FLDE.M           |              | 2 | 2,3308 | 0,098 | 0      |
| 24 | Q92597 NDRG1_HUMAN   | R.SRT#ASGSSVTSLDGTR.S      | T328:        | 2 | 2,33   | 0,327 | 0      |
| 24 | Q8WWM7 ATX2L_HUMAN   | R.ILKEEPK.G                |              | 2 | 2,3289 | 0,09  | 0      |
| 24 | Q14980 NUMA1_HUMAN   | R.KRV#LEPHQGPGT#PE.S       | S1991:T2000: | 2 | 2,3288 | 0,415 | -0,477 |
| 24 | Q6NYC8 PHTNS_HUMAN   | E.ILVLGGYLR.L              |              | 2 | 2,3268 | 0,231 | 0,182  |
| 24 | Q15046 SYK_HUMAN     | E.VTCINPTFICDHPQIM*SPLAK.W |              | 3 | 2,3263 | 0,12  | 0      |
| 24 | P11021 GRP78_HUMAN   | K.ITITNDQNR.L              |              | 2 | 2,3259 | 0,259 | -0,34  |
| 24 | P22102 PUR2_HUMAN    | K.KGLAAIKFE.G              |              | 2 | 2,325  | 0,17  | 0,312  |
| 24 | P36776 LONM_HUMAN    | K.LSSDVLTLIK.Q             |              | 2 | 2,3246 | 0,24  | -0,406 |
| 24 | O60220 TIM8A_HUMAN   | R.FQQLVHQM*TE.L            |              | 2 | 2,324  | 0,315 | -0,191 |



|    |                    |                        |            |   |        |       |        |
|----|--------------------|------------------------|------------|---|--------|-------|--------|
| 24 | O95747 OXSR1_HUMAN | E.GKAAISQLRS#PR.V      | S359:      | 3 | 2,3218 | 0,116 | 0,067  |
| 24 | O60927 PP1RB_HUMAN | R.RSS#KCCCIYEKPR.A     | S58:       | 3 | 2,3146 | 0,103 | 0      |
| 24 | P04083 ANXA1_HUMAN | E.ATIIDILTKRNNNAQR.Q   |            | 3 | 2,3144 | 0,136 | -0,106 |
| 24 | Q9Y608 LRRF2_HUMAN | R.NSASATTPLSGNSSR.R    |            | 2 | 2,3136 | 0,272 | 0,168  |
| 24 | Q9Y2W2 WBP11_HUMAN | E.LTPLQAM*M*LR.M       |            | 2 | 2,3134 | 0,347 | -0,101 |
| 24 | Q8NC51 PAIRB_HUMAN | E.DSVMDHHFR.K          |            | 2 | 2,3117 | 0,358 | -0,213 |
| 24 | Q86VM9 ZCH18_HUMAN | R.FTVTIGEDERE.F        |            | 2 | 2,3111 | 0,308 | -0,471 |
| 24 | O75044 FNBP2_HUMAN | R.SKS#FNNHRPM*DPE.V    | S930:      | 3 | 2,3111 | 0,247 | 1,989  |
| 24 | Q03252 LMNB2_HUMAN | R.M*RLESLS#YQLSGLQK.Q  | S298:      | 3 | 2,3107 | 0,201 | -1,088 |
| 24 | Q09028 RBBP4_HUMAN | D.YTKHPSKPDPSGECNPD.L  |            | 3 | 2,3104 | 0,253 | -0,379 |
| 24 | Q9UNZ2 NSF1C_HUMAN | K.SPNELVDDLK.G         |            | 2 | 2,3101 | 0,235 | -0,573 |
| 24 | P78371 TCPB_HUMAN  | D.LM*NIAGTTLSSK.L      |            | 2 | 2,3053 | 0,234 | 0,097  |
| 24 | P02545 LMNA_HUMAN  | R.LRLS#PSPTSQR.S       | S390:      | 2 | 2,302  | 0,314 | -0,461 |
| 24 | P30101 PDIA3_HUMAN | K.QAGPASVPLRTEEE.F     |            | 2 | 2,3012 | 0,312 | -0,493 |
| 24 | Q8WXX5 DNJC9_HUMAN | K.VYVLSDRE.Q           |            | 2 | 2,3012 | 0,253 | 0,228  |
| 24 | Q9UHB6 LIMA1_HUMAN | R.ASSLSESS#PPK.A       | S374:      | 2 | 2,2995 | 0,123 | -1,147 |
| 24 | Q969H8 CS010_HUMAN | K.SYLYFTQFK.A          |            | 2 | 2,2979 | 0,398 | -0,102 |
| 24 | Q03164 HRX_HUMAN   | K.VTLT#PLKM*E.N        | T2525:     | 2 | 2,2908 | 0,17  | 0      |
| 24 | P52272 HNRPM_HUMAN | K.GCGVVKFESPE.V        |            | 2 | 2,2906 | 0,157 | 0,404  |
| 24 | O43399 TPD54_HUMAN | R.NSATFKS#FEDR.V       | S166:      | 2 | 2,2903 | 0,084 | -0,088 |
| 24 | Q8TC76 F110B_HUMAN | E.ADPVEPACGVSR.R       |            | 2 | 2,2896 | 0,333 | -0,388 |
| 24 | Q3KQU3 MA7D1_HUMAN | K.SRGPT#PPAM*GPR.D     | T97:       | 3 | 2,2878 | 0,187 | 0,346  |
| 24 | P07602 SAP_HUMAN   | K.KLVGYLDR.N           |            | 2 | 2,2856 | 0,18  | 0      |
| 24 | Q86WR7 CJ047_HUMAN | R.SRS#FTLDDE.S         | S43:       | 2 | 2,2844 | 0,197 | 0      |
| 24 | P15336 ATF2_HUMAN  | R.SKIEEPSVVE.T         |            | 2 | 2,2799 | 0,306 | -0,328 |
| 24 | O95347 SMC2_HUMAN  | K.GLVASLISVK.D         |            | 2 | 2,2749 | 0,262 | -0,247 |
| 24 | Q8NCN4 RN169_HUMAN | R.VLS#PLIIK.S          | S403:      | 2 | 2,2721 | 0,083 | 0,063  |
| 24 | P06748 NPM_HUMAN   | K.KQEKT#PKT#PKGPSSVE.D | T234:T237: | 2 | 2,2657 | 0,387 | -0,578 |
| 24 | Q01433 AMPD2_HUMAN | E.RQIS#QDVKLEPDILLR.A  | S168:      | 3 | 2,2635 | 0,151 | -0,731 |
| 24 | P17987 TCPA_HUMAN  | R.YPVNSVNIK.A          |            | 2 | 2,263  | 0,209 | 0,106  |
| 24 | Q3B726 RPA43_HUMAN | E.AEFTPPLKCS#PK.R      | S328:      | 2 | 2,2606 | 0,442 | 0,168  |
| 24 | P52209 6PGD_HUMAN  | K.VVGAQSLKE.M          |            | 2 | 2,2603 | 0,133 | 0,066  |
| 24 | Q96EP5 DAZP1_HUMAN | K.IFVGGIPHNCGE.T       |            | 2 | 2,2556 | 0,273 | -0,188 |
| 24 | P13639 EF2_HUMAN   | K.KSDPVVSYR.E          |            | 2 | 2,2554 | 0,183 | 0,116  |
| 24 | P13667 PDIA4_HUMAN | E.DYKFHHTFSTE.I        |            | 2 | 2,2553 | 0,264 | -0,605 |
| 24 | Q99460 PSMD1_HUMAN | K.YKQAIGIALE.T         |            | 2 | 2,2547 | 0,282 | -0,11  |
| 24 | O00499 BIN1_HUMAN  | R.KGPPVPPPK.H          |            | 2 | 2,253  | 0,176 | -0,241 |
| 24 | Q08211 DHX9_HUMAN  | R.GANLKDYYSR.K         |            | 2 | 2,2517 | 0,168 | -0,103 |
| 24 | Q01081 U2AF1_HUMAN | K.VNCSFYFK.I           |            | 2 | 2,2509 | 0,408 | 0,115  |

|    |                    |                         |        |   |        |       |        |
|----|--------------------|-------------------------|--------|---|--------|-------|--------|
| 24 | Q9Y2R4 DDX52_HUMAN | E.VLQGLDFFGNK.K         |        | 2 | 2,2497 | 0,18  | -0,099 |
| 24 | Q09666 AHNK_HUMAN  | K.VKM*PDVDISVPKIE.G     |        | 2 | 2,2487 | 0,343 | 0      |
| 24 | Q99618 CDCA3_HUMAN | K.TSSGDPPS#PLVK.Q       | S87:   | 2 | 2,2485 | 0,279 | -0,386 |
| 24 | Q14116 IL18_HUMAN  | K.SDIIFFQR.S            |        | 2 | 2,2482 | 0,24  | 0,119  |
| 24 | Q7Z2W4 ZCCHV_HUMAN | R.KFTYLGSDQR.A          |        | 2 | 2,2449 | 0,179 | -0,904 |
| 24 | Q8NFP7 NUD10_HUMAN | K.VLQCHKPVHAEYLE.K      |        | 2 | 2,2443 | 0,394 | -0,283 |
| 24 | P04083 ANXA1_HUMAN | E.ATIIDLTK.R            |        | 2 | 2,2438 | 0,285 | -0,679 |
| 24 | P31948 STIP1_HUMAN | K.TVDLKPDWGK.G          |        | 2 | 2,2429 | 0,255 | -0,421 |
| 24 | Q3KQU3 MA7D1_HUMAN | R.GPT#PPAM*GPR.D        | T97:   | 2 | 2,2411 | 0,259 | -0,906 |
| 24 | P61221 ABCE1_HUMAN | K.GTVGSILDRKDE.T        |        | 2 | 2,2397 | 0,32  | -1,135 |
| 24 | Q02952 AKA12_HUMAN | K.STPVIVSATTK.K         |        | 2 | 2,2389 | 0,217 | -0,111 |
| 24 | Q92934 BAD_HUMAN   | E.GM*GEEPSFR.G          |        | 2 | 2,2386 | 0,178 | -0,543 |
| 24 | Q9UPQ9 TNC6B_HUMAN | K.M*DLSVGSLSDK.K        |        | 2 | 2,2346 | 0,249 | 0      |
| 24 | P13010 KU86_HUMAN  | K.KVITM*FVQR.Q          |        | 2 | 2,2331 | 0,211 | -0,858 |
| 24 | O15427 MOT4_HUMAN  | K.AEPEKNGEVVHTPETS#V.-  | S464:  | 3 | 2,2324 | 0,235 | -0,481 |
| 24 | Q03164 HRX_HUMAN   | D.GVDDGTES#DTSVTATTRK.S | S2726: | 3 | 2,232  | 0,221 | -0,191 |
| 24 | P42166 LAP2A_HUMAN | R.NRPPLPAGTNSK.G        |        | 2 | 2,2318 | 0,322 | -0,487 |
| 24 | P62081 RS7_HUMAN   | E.DLVFPSEIVGK.R         |        | 2 | 2,2239 | 0,314 | 0,203  |
| 24 | Q14568 HS902_HUMAN | E.SSAGGSFTVR.T          |        | 2 | 2,2191 | 0,124 | 0      |
| 24 | Q96TA1 NIBL1_HUMAN | K.VEGPAFTDAIR.M         |        | 2 | 2,2164 | 0,254 | 0,207  |
| 24 | P13639 EF2_HUMAN   | E.EDHACIPIKK.S          |        | 2 | 2,2149 | 0,178 | -0,101 |
| 24 | P15170 ERF3A_HUMAN | K.HLIVLINK.M            |        | 2 | 2,2129 | 0,199 | -0,449 |
| 24 | Q96A49 SYAP1_HUMAN | E.AVRPKT#PPVVIK.S       | T248:  | 2 | 2,2093 | 0,171 | 0,352  |
| 24 | Q9BTC0 DIDO1_HUMAN | R.SGPQSASTAVK.E         |        | 2 | 2,2093 | 0,189 | 0      |
| 24 | P38646 GRP75_HUMAN | E.VTFDIDANGIVHVSAD.D    |        | 3 | 2,2058 | 0,137 | -0,217 |
| 24 | O75533 SF3B1_HUMAN | E.RLDPFADGGKT#PDPK.M    | T142:  | 3 | 2,2037 | 0,207 | -0,108 |
| 24 | P22626 ROA2_HUMAN  | R.GGGGNFGPGPSNFR.G      |        | 2 | 2,202  | 0,303 | -0,266 |
| 24 | Q9Y3T9 NOC2L_HUMAN | R.GILRPLSTR.H           |        | 2 | 2,202  | 0,099 | -0,06  |
| 24 | P42704 LPPRC_HUMAN | E.FYAQQLR.K             |        | 2 | 2,2017 | 0,102 | 0,527  |
| 24 | P52272 HNRPM_HUMAN | E.CGHVLYADIK.M          |        | 2 | 2,2012 | 0,202 | 0,311  |
| 24 | Q8NEU8 DP13B_HUMAN | R.LVGFVIRVPE.S          |        | 2 | 2,1989 | 0,173 | -0,108 |
| 24 | Q8TF01 SFR18_HUMAN | K.ATEDAEGGDGPRLPQR.S    |        | 3 | 2,1978 | 0,158 | -0,438 |
| 24 | Q96C90 PP14B_HUMAN | E.AFISGLLDKIRGM*QK.L    |        | 3 | 2,1967 | 0,161 | 0,108  |
| 24 | Q9UJ70 NAGK_HUMAN  | K.AGVDPLVPLR.S          |        | 2 | 2,1936 | 0,242 | 0,235  |
| 24 | P13010 KU86_HUMAN  | K.VITM*FVQR.Q           |        | 2 | 2,1877 | 0,164 | -0,121 |
| 24 | Q14C86 GAPD1_HUMAN | R.FSTLTDDPS#PR.L        | S1019: | 2 | 2,1875 | 0,362 | -0,185 |
| 24 | Q76I76 SSH2_HUMAN  | K.SLSHSPGVVKE.R         |        | 2 | 2,186  | 0,254 | -0,321 |
| 24 | Q13428 TCOF_HUMAN  | R.KGAAPAPPR.K           |        | 2 | 2,1856 | 0,164 | 0,423  |
| 24 | Q8TCS8 PNPT1_HUMAN | K.VLQSPATTVVR.T         |        | 2 | 2,1853 | 0,248 | -0,729 |

|    |                    |                                   |            |   |        |       |        |
|----|--------------------|-----------------------------------|------------|---|--------|-------|--------|
| 24 | P08670 VIME_HUMAN  | D.SLPLVDTHSKR.T                   |            | 2 | 2,1852 | 0,405 | -0,292 |
| 24 | O60784 TOM1_HUMAN  | K.TQEKDDDM*LFAL.-                 |            | 2 | 2,182  | 0,429 | -0,169 |
| 24 | Q8WTT2 NOC3L_HUMAN | E.KKM*HIAALASAILSDP.E.N           |            | 3 | 2,1812 | 0,126 | -0,101 |
| 24 | Q13242 SFRS9_HUMAN | R.GS#PHYFS#PFRPY.-                | S211:S216: | 2 | 2,1808 | 0,3   | 0      |
| 24 | P10109 ADX_HUMAN   | E.DKITVHFINR.D                    |            | 3 | 2,18   | 0,121 | 1,03   |
| 24 | P53814 SMTN_HUMAN  | E.STPLASGPSSFQR.A                 |            | 2 | 2,1793 | 0,289 | 0      |
| 24 | O95149 SPN1_HUMAN  | E.LEHLSTPK.L                      |            | 2 | 2,1777 | 0,224 | -0,198 |
| 24 | Q02952 AKA12_HUMAN | E.ALICVGSS#K.K                    | S688:      | 2 | 2,1771 | 0,271 | 0      |
| 24 | P62937 PIIA_HUMAN  | K.ITIADCGQLE.-                    |            | 2 | 2,1766 | 0,294 | -1,416 |
| 24 | P14678 RSMB_HUMAN  | R.VLGLVLLR.G                      |            | 2 | 2,1766 | 0,296 | 0,345  |
| 24 | P40222 TXLNA_HUMAN | R.RPEGPGAQAPSS#PRVTEAPCYPGAPSTE.A | S515:      | 3 | 2,1765 | 0,249 | 0,248  |
| 24 | P62753 RS6_HUMAN   | R.RLS#S#LRASTSK.S                 | S235:S236: | 2 | 2,1741 | 0,386 | -0,179 |
| 24 | P62906 RL10A_HUMAN | K.FSVCVLGDQQHCDE.A                |            | 2 | 2,1729 | 0,359 | 0,144  |
| 24 | Q8WWK9 CKAP2_HUMAN | K.TKDPTHDVKT#PNTE.T               | T579:      | 2 | 2,1696 | 0,159 | -0,293 |
| 24 | Q13428 TCOF_HUMAN  | K.VGDVTPQVK.G                     |            | 2 | 2,1678 | 0,231 | -0,453 |
| 24 | Q92733 PRCC_HUMAN  | K.TILQGSSE.G                      |            | 2 | 2,1651 | 0,202 | 0      |
| 24 | P54819 KAD2_HUMAN  | R.LQAYHTQTPLIE.Y                  |            | 2 | 2,1649 | 0,142 | -1,289 |
| 24 | Q9Y3M8 STA13_HUMAN | E.NLVVHIPK.D                      |            | 2 | 2,1632 | 0,297 | -0,066 |
| 24 | Q9BXF6 RFIP5_HUMAN | R.SLSIALSSGLE.K                   |            | 2 | 2,1618 | 0,126 | 0,105  |
| 24 | P06753 TPM3_HUMAN  | K.ILTDKLE.A                       |            | 2 | 2,1555 | 0,088 | 0,445  |
| 24 | P02545 LMNA_HUMAN  | R.DLEDLARE.R                      |            | 2 | 2,1531 | 0,211 | 0,466  |
| 24 | O43379 WDR62_HUMAN | R.RGQS#SPPAPPICLR.R               | S32:       | 2 | 2,1528 | 0,103 | 0,071  |
| 24 | P05387 RLA2_HUMAN  | E.DVIAQGIGK.L                     |            | 2 | 2,1515 | 0,2   | -0,406 |
| 24 | O15446 RPA34_HUMAN | R.SALAPNLLTS#GK.K                 | S172:      | 2 | 2,1488 | 0,226 | 0      |
| 24 | Q06203 PUR1_HUMAN  | K.LYVSNLIGHTR.Y                   |            | 3 | 2,1485 | 0,304 | 0,137  |
| 24 | O00567 NOL5A_HUMAN | R.LAALALASSESSSTPEECE.E.M         |            | 2 | 2,1435 | 0,276 | 0,334  |
| 24 | P18583 SON_HUMAN   | E.GNKEPILVDFK.T                   |            | 2 | 2,1415 | 0,23  | 0,484  |
| 24 | Q92598 HS105_HUMAN | K.LM*SSNSTDLPLNIE.C               |            | 2 | 2,1398 | 0,147 | -0,236 |
| 24 | P21980 TGM2_HUMAN  | E.REDITHYKYPE.G                   |            | 3 | 2,1385 | 0,221 | 0,589  |
| 24 | Q13428 TCOF_HUMAN  | K.TVANLLSGK.S                     |            | 2 | 2,1365 | 0,321 | 0,068  |
| 24 | P17480 UBF1_HUMAN  | K.RPVSAM*FIFSEE.K                 |            | 2 | 2,1348 | 0,191 | 0      |
| 24 | P07814 SYEP_HUMAN  | K.SLCIPFKPLCE.L                   |            | 2 | 2,1332 | 0,334 | -0,179 |
| 24 | P40227 TCPZ_HUMAN  | K.M*LVSGAGDIK.L                   |            | 2 | 2,1331 | 0,142 | 0,303  |
| 24 | P17980 PRS6A_HUMAN | R.VDILDALLR.S                     |            | 2 | 2,1329 | 0,129 | -0,108 |
| 24 | O43865 SAHH2_HUMAN | E.KYSFM*ATVTK.A                   |            | 2 | 2,1324 | 0,291 | -0,512 |
| 24 | P46821 MAP1B_HUMAN | D.LTGQVPTPVVK.Q                   |            | 2 | 2,132  | 0,194 | -0,107 |
| 24 | Q86X29 LSR_HUMAN   | R.GPALTPIRDEE.W                   |            | 2 | 2,1293 | 0,304 | -0,407 |
| 24 | Q14789 G0GB1_HUMAN | K.SLSAVPDIGQCHQDE.L               |            | 2 | 2,1285 | 0,317 | 0,221  |
| 24 | Q14677 EPN4_HUMAN  | K.SAFPFSDKLGE.L                   |            | 2 | 2,1284 | 0,304 | 0      |

|    |                     |                          |            |   |        |       |        |
|----|---------------------|--------------------------|------------|---|--------|-------|--------|
| 24 | Q14151 SAFB2_HUMAN  | K.SKGEPVISVK.T           |            | 2 | 2,1279 | 0,259 | -0,351 |
| 24 | O60343 TBCD4_HUMAN  | R.GRLGS#VDSFE.R          | S588:      | 2 | 2,1276 | 0,268 | -0,745 |
| 24 | P10809 CH60_HUMAN   | K.DM*AIATGGAVFGEE.G      |            | 2 | 2,1263 | 0,206 | 0,176  |
| 24 | Q8N3V7 SYNPO_HUMAN  | E.KAPAPQPPSLPDRS#PRPQR.H | S525:      | 3 | 2,1259 | 0,282 | 0,252  |
| 24 | P29692 EF1D_HUMAN   | R.ATAPQTQHVSPMR.Q        |            | 3 | 2,1217 | 0,293 | -0,45  |
| 24 | P07602 SAP_HUMAN    | K.LVGYLDRNLE.K           |            | 2 | 2,1189 | 0,297 | 0,716  |
| 24 | P55809 SCOT_HUMAN   | E.DIHIPQIYVHRLIKGE.K     |            | 3 | 2,1184 | 0,1   | -0,095 |
| 24 | Q13177 PAK2_HUMAN   | R.DIKSDNVLLGM*E.G        |            | 2 | 2,1152 | 0,18  | 0,452  |
| 24 | Q9BST9 RTKN_HUMAN   | R.FRLS#LFSDLPEDTE.L      | S30:       | 2 | 2,1123 | 0,218 | 0      |
| 24 | Q8NBS9 TXND5_HUMAN  | R.FVLSQAKDEL.-           |            | 2 | 2,1121 | 0,274 | -0,106 |
| 24 | O60885 BRD4_HUMAN   | R.SEPFS#PSLRPEPPKHPE.S   | S1126:     | 3 | 2,1106 | 0,319 | -0,455 |
| 24 | P55809 SCOT_HUMAN   | E.DIHIPQIYVHR.L          |            | 2 | 2,1101 | 0,29  | -0,088 |
| 24 | Q9C0C2 TB182_HUMAN  | K.VSAPGVLTAQDR.V         |            | 2 | 2,1092 | 0,369 | 0,402  |
| 24 | P09622 DLDH_HUMAN   | R.VCHAHPTLSE.A           |            | 2 | 2,1083 | 0,295 | -0,106 |
| 24 | Q9Y6M7 S4A7_HUMAN   | K.DRNDLLSGIDE.F          |            | 2 | 2,1075 | 0,232 | 0      |
| 24 | P04637 P53_HUMAN    | R.ALPNNTSSS#PQPK.K       | S315:      | 2 | 2,1066 | 0,469 | -0,258 |
| 24 | Q6PKG0 LARP1_HUMAN  | R.SLPTTVPEP#PNYR.N       | S774:      | 2 | 2,1064 | 0,305 | 0,238  |
| 24 | Q9UUK9 NUDT5_HUMAN  | E.NARPKPKPGDGEFVE.V      |            | 2 | 2,1058 | 0,224 | -0,669 |
| 24 | Q96EP5 DAZP1_HUMAN  | K.IFVGGIPHNCGETE.L       |            | 2 | 2,105  | 0,222 | -0,239 |
| 24 | P29401 TKT_HUMAN    | R.GITGVEDKE.S            |            | 2 | 2,1029 | 0,278 | -0,257 |
| 24 | Q5VZY8 Q5VZY8_HUMAN | E.VNGTPGSQLSTPR.S        |            | 2 | 2,1024 | 0,122 | -0,836 |
| 24 | Q01518 CAP1_HUMAN   | R.ATKKEPAVLE.L           |            | 2 | 2,102  | 0,217 | -0,337 |
| 24 | Q9Y5U2 TSSC4_HUMAN  | R.VPPVPDYVAHPE.R         |            | 2 | 2,1016 | 0,203 | -0,277 |
| 24 | P41212 ETV6_HUMAN   | R.SRS#PITTNHRPS#PDPE.Q   | S184:S193: | 2 | 2,0972 | 0,344 | -0,063 |
| 24 | O60361 NDK8_HUMAN   | R.GDFCIQVGR.N            |            | 2 | 2,0938 | 0,102 | 0      |
| 24 | O60361 NDK8_HUMAN   | R.NIIHGSDSVKS#AEKE.I     | S110:      | 3 | 2,0934 | 0,115 | 0      |
| 24 | P35251 RFC1_HUMAN   | E.DGLLNLR.T              |            | 2 | 2,0915 | 0,141 | 0,2    |
| 24 | Q15398 DLG7_HUMAN   | K.DFM*FQPLDGLK.T         |            | 2 | 2,0862 | 0,284 | -0,736 |
| 24 | P29692 EF1D_HUMAN   | R.ATAPQTQHVS#PM*R.Q      | S133:      | 2 | 2,0859 | 0,29  | -0,883 |
| 24 | O00299 CLIC1_HUMAN  | E.KGLLKALKVLD.N          |            | 2 | 2,0842 | 0,284 | 0      |
| 24 | Q99729 ROAA_HUMAN   | R.GFGFILFK.D             |            | 2 | 2,0841 | 0,138 | 0,394  |
| 24 | Q9P258 RCC2_HUMAN   | R.AQRIEYDCE.L            |            | 2 | 2,0818 | 0,229 | 0,206  |
| 24 | P68371 TBB2C_HUMAN  | R.YLTVAAVFR.G            |            | 2 | 2,0792 | 0,31  | 0,352  |
| 24 | P38571 LICH_HUMAN   | E.DGYILCLNR.I            |            | 2 | 2,0778 | 0,299 | -0,109 |
| 24 | P54652 HSP72_HUMAN  | K.LLQDFFNGKE.L           |            | 2 | 2,0775 | 0,258 | -0,202 |
| 24 | O75475 PSIP1_HUMAN  | R.DFKPGDLIFAK.M          |            | 3 | 2,0774 | 0,172 | 0,512  |
| 24 | O00299 CLIC1_HUMAN  | R.KFLDUNE.L              |            | 2 | 2,0754 | 0,177 | -0,074 |
| 24 | P12081 SYHC_HUMAN   | R.HGAEVIDTPVFE.L         |            | 2 | 2,0692 | 0,226 | 0,093  |
| 24 | Q96AY3 FKB10_HUMAN  | K.TIGDM*FQNQDR.N         |            | 2 | 2,0678 | 0,212 | -0,819 |

|    |                     |                          |        |   |        |       |        |
|----|---------------------|--------------------------|--------|---|--------|-------|--------|
| 24 | A9CQZ4 A9CQZ4_HUMAN | R.QKFCGM*FCPVEGSSE.N     |        | 2 | 2,0669 | 0,301 | -0,069 |
| 24 | P08107 HSP71_HUMAN  | K.VQVSYKGE.T             |        | 2 | 2,0652 | 0,193 | 0,201  |
| 24 | P49736 MCM2_HUMAN   | R.RGNDPLTSS#PGR.S        | S27:   | 2 | 2,0578 | 0,163 | -1,095 |
| 24 | Q9H501 ESF1_HUMAN   | R.TLDSGTSEIVKS#PRIE.C    | S198:  | 2 | 2,0572 | 0,134 | -0,135 |
| 24 | P60174 TPIS_HUMAN   | R.KFFVGGNWK.M            |        | 2 | 2,0563 | 0,198 | 0      |
| 24 | P48643 TCPE_HUMAN   | K.IAILTCPFEPKPK.T        |        | 3 | 2,0542 | 0,231 | 0,341  |
| 24 | O43237 DC1L2_HUMAN  | E.DFIVKPPVR.K            |        | 2 | 2,05   | 0,141 | 0      |
| 24 | P61599 NAT5_HUMAN   | K.SIILPHVPVPEDIE.-       |        | 2 | 2,0488 | 0,363 | -0,356 |
| 24 | Q14C86 GAPD1_HUMAN  | R.TSPSDGAM*ANYE.S        |        | 2 | 2,0461 | 0,345 | -0,097 |
| 24 | Q6S8J3 A26CA_HUMAN  | E.TTFNSIM*K.S            |        | 2 | 2,0454 | 0,315 | -0,064 |
| 24 | P09493 TPM1_HUMAN   | K.M*QM*LKLDKE.N          |        | 2 | 2,0454 | 0,171 | -0,209 |
| 24 | Q14CX7 CL030_HUMAN  | K.VQSSYLHSLLE.M          |        | 2 | 2,045  | 0,149 | 0,096  |
| 24 | P07602 SAP_HUMAN    | K.LVGYLDR.N              |        | 2 | 2,044  | 0,384 | -0,219 |
| 24 | Q96ST2 IWS1_HUMAN   | R.GKHM*DFLSDFE.M         |        | 2 | 2,044  | 0,179 | 0,273  |
| 24 | P10599 THIO_HUMAN   | K.CM*PTFQFFK.K           |        | 2 | 2,0406 | 0,351 | -0,2   |
| 24 | P12956 KU70_HUMAN   | R.DSLIFLVDASK.A          |        | 2 | 2,0365 | 0,278 | 0,101  |
| 24 | Q14160 LAP4_HUMAN   | R.QS#PASPPPLGGGAPVR.T    | S1445: | 2 | 2,0329 | 0,285 | 0,156  |
| 24 | Q8IWA0 WDR75_HUMAN  | K.VQDTSNTGLGEDIHQLSK.S   |        | 3 | 2,0312 | 0,184 | -0,089 |
| 24 | Q96SU4 OSBL9_HUMAN  | R.LIDSSGSASVLTHSSGNSLK.R |        | 3 | 2,0309 | 0,237 | 0,268  |
| 24 | P43243 MATR3_HUMAN  | E.EGPTLSYGR.D            |        | 2 | 2,03   | 0,206 | 0      |
| 24 | Q58WW2 IQWD1_HUMAN  | R.NTITVPASFM*LR.M        |        | 2 | 2,0269 | 0,1   | -0,268 |
| 24 | Q14151 SAFB2_HUMAN  | E.KDIKPIKDE.K            |        | 2 | 2,026  | 0,213 | -0,305 |
| 24 | P07237 PDIA1_HUMAN  | K.THILLFLPK.S            |        | 2 | 2,0232 | 0,215 | 0      |
| 24 | P09110 THIK_HUMAN   | R.DCLIPM*GITSENVAE.R     |        | 2 | 2,0207 | 0,317 | 0,147  |
| 24 | P78371 TCPB_HUMAN   | R.SLHDALCVLAQTVK.D       |        | 2 | 2,0198 | 0,159 | -0,471 |
| 24 | P05387 RLA2_HUMAN   | K.ILDSVGIEADDDR.L        |        | 2 | 2,0152 | 0,099 | -0,086 |
| 24 | Q99832 TCPH_HUMAN   | R.VHTVEDYQAIVDAE.W       |        | 2 | 2,0145 | 0,181 | 0,077  |
| 24 | Q96B23 CR025_HUMAN  | E.TAVEGDPSGVSGATVGRK.S   |        | 3 | 2,013  | 0,117 | 0      |
| 24 | Q9UKY7 CDV3_HUMAN   | K.TAPVQAPPAPVIVTE.T      |        | 2 | 2,0126 | 0,107 | -0,082 |
| 24 | P63220 RS21_HUMAN   | E.FVDLYVPRK.C            |        | 2 | 2,0125 | 0,169 | -0,215 |
| 24 | P23588 IF4B_HUMAN   | K.VAPAQPSEEGPGRKDE.N     |        | 2 | 2,0109 | 0,243 | -0,732 |
| 24 | Q9C0C2 TB182_HUMAN  | K.VNLFPGLSPSALK.A        |        | 2 | 2,0104 | 0,146 | 0,273  |
| 24 | P24534 EF1B_HUMAN   | K.YGPADVEDTTGSGATD.S     |        | 2 | 2,0095 | 0,117 | -0,392 |
| 24 | P13645 K1C10_HUMAN  | R.LAADDFR.L              |        | 2 | 2,0093 | 0,349 | 0      |
| 24 | Q8NBF6 KO241_HUMAN  | E.HGLSDCSQYRPR.K         |        | 3 | 2,0092 | 0,26  | 0,062  |
| 24 | Q9UMY4 SNX12_HUMAN  | R.QLPFRGDEGIFE.E         |        | 2 | 2,0071 | 0,129 | -0,26  |
| 24 | P13798 ACPH_HUMAN   | R.LKKPDQAIKGDQVFVYE.D    |        | 3 | 2,0053 | 0,195 | 0,271  |
| 24 | P09936 UCHL1_HUMAN  | E.DTLLKDAK.V             |        | 2 | 2,0047 | 0,103 | -0,063 |
| 24 | P04083 ANXA1_HUMAN  | K.ALTGHLEE.V             |        | 2 | 2,0035 | 0,26  | -0,28  |

|    |                     |                        |       |   |        |       |        |
|----|---------------------|------------------------|-------|---|--------|-------|--------|
| 24 | Q16643 DREB_HUMAN   | R.LSS#PVLHR.L          | S142: | 2 | 2,0031 | 0,159 | 0,062  |
| 24 | P43243 MATR3_HUMAN  | E.DFHGLLPK.G           |       | 2 | 1,9978 | 0,132 | -0,132 |
| 24 | Q7RTP8 Q7RTP8_HUMAN | K.AAEDRFQE.R           |       | 2 | 1,9961 | 0,232 | 0,063  |
| 24 | Q53G15 Q53G15_HUMAN | K.QYRAS#PSFEE.R        | S378: | 2 | 1,9883 | 0,123 | -0,377 |
| 24 | Q9BR76 COR1B_HUMAN  | R.DADPILISLRE.A        |       | 2 | 1,9798 | 0,191 | -0,295 |
| 24 | Q9H074 PAIP1_HUMAN  | K.APGFLQPPPLR.Q        |       | 2 | 1,9758 | 0,188 | 0      |
| 24 | P62195 PRS8_HUMAN   | E.LQLIVNDK.S           |       | 2 | 1,9723 | 0,117 | -0,129 |
| 24 | P62312 LSM6_HUMAN   | R.GNNVLYISTQK.R        |       | 2 | 1,9682 | 0,16  | 0,197  |
| 24 | P30041 PRDX6_HUMAN  | K.LPFPIIDDRNRE.L       |       | 2 | 1,9671 | 0,145 | 0,411  |
| 24 | Q12906 ILF3_HUMAN   | K.HSSVYPTQEE.L         |       | 2 | 1,964  | 0,356 | -0,311 |
| 24 | P53597 SUCA_HUMAN   | K.IICQGFTGK.Q          |       | 2 | 1,9615 | 0,226 | -0,596 |
| 24 | Q86V48 LUZP1_HUMAN  | R.TFS#DTTHGVSVPDPLGR.A | S512: | 2 | 1,959  | 0,147 | -0,329 |
| 24 | Q99729 ROAA_HUMAN   | R.GFVFITFKE.E          |       | 2 | 1,9588 | 0,248 | 0      |
| 24 | P07602 SAP_HUMAN    | E.KEILDAFDK.M          |       | 2 | 1,9579 | 0,151 | -0,113 |
| 24 | Q9NTI5 PDS5B_HUMAN  | E.DYTM*SSPLPGK.K       |       | 2 | 1,9574 | 0,122 | -0,705 |
| 24 | P06744 G6PI_HUMAN   | R.M*LVDLAK.S           |       | 2 | 1,9535 | 0,112 | 0,53   |
| 24 | Q8NBS9 TXND5_HUMAN  | R.GYPTLLLFR.G          |       | 2 | 1,953  | 0,153 | 0      |
| 24 | P13639 EF2_HUMAN    | E.DHACIPIK.K           |       | 2 | 1,9475 | 0,235 | -1,023 |
| 24 | P09493 TPM1_HUMAN   | K.MQM*LKLDKE.N         |       | 2 | 1,9472 | 0,086 | 0,106  |
| 24 | Q16881 TRXR1_HUMAN  | R.QFVPIKVEQIE.A        |       | 2 | 1,9408 | 0,153 | 0,092  |
| 24 | Q9NVM6 DJC17_HUMAN  | K.GSVLSERDYE.S         |       | 2 | 1,9391 | 0,153 | 0      |
| 24 | Q96QT6 PHF12_HUMAN  | E.LGHVNGLVDK.S         |       | 2 | 1,9347 | 0,206 | 0      |
| 24 | Q00839 HNRPU_HUMAN  | K.SSGPTSLFAVTVAPPGAR.Q |       | 2 | 1,934  | 0,19  | -0,356 |
| 24 | P29692 EF1D_HUMAN   | R.ATAPQTQHVSMP*R.Q     |       | 2 | 1,9327 | 0,155 | 0,169  |
| 24 | Q14847 LASP1_HUMAN  | R.DSQDGSSYR.R          |       | 2 | 1,9316 | 0,099 | -0,301 |
| 24 | Q9NXN4 GDAP2_HUMAN  | R.KLILQGQLSE.A         |       | 2 | 1,9304 | 0,218 | -1,837 |
| 24 | A6NDU8 U600_HUMAN   | K.HCNLLGDELLE.C        |       | 2 | 1,9291 | 0,152 | -0,743 |
| 24 | Q13620 CUL4B_HUMAN  | R.SATDGNTSTT#PPTSAK.K  | T31:  | 2 | 1,9244 | 0,16  | -1,133 |
| 24 | Q96MF7 NSE2_HUMAN   | K.NSDADFQNE.K          |       | 2 | 1,9214 | 0,082 | -0,106 |
| 24 | P54577 SYYC_HUMAN   | E.KYLPALGYSK.R         |       | 2 | 1,9195 | 0,174 | -0,214 |
| 24 | P60228 EIF3E_HUMAN  | R.TTVVAQLK.Q           |       | 2 | 1,9184 | 0,299 | 0,284  |
| 24 | Q6P0Q8 MAST2_HUMAN  | E.DHSDGLAGLK.G         |       | 2 | 1,9159 | 0,188 | -0,06  |
| 24 | P12270 TPR_HUMAN    | R.RPPHPLPPR.L          |       | 2 | 1,9123 | 0,198 | -0,229 |
| 24 | Q15003 CND2_HUMAN   | R.KAPLNIPGT#PVLE.D     | T49:  | 2 | 1,9093 | 0,113 | -0,085 |
| 24 | Q13428 TCOF_HUMAN   | K.TVANLLSGKS#PRK.S     | S156: | 2 | 1,909  | 0,142 | -0,504 |
| 24 | P61764 STXB1_HUMAN  | K.RREPLPSLE.A          |       | 2 | 1,906  | 0,178 | -0,667 |
| 24 | Q9Y3F4 STRAP_HUMAN  | R.LWDHATM*TE.V         |       | 2 | 1,9058 | 0,176 | -0,218 |
| 24 | O43776 SYNC_HUMAN   | K.EPFPTIYVDSQK.E       |       | 2 | 1,9042 | 0,171 | -0,257 |
| 24 | Q5T0B9 ZN362_HUMAN  | R.TESPGIPVRISLI.-      |       | 2 | 1,8972 | 0,118 | -0,706 |

|    |                      |                         |            |   |        |       |        |
|----|----------------------|-------------------------|------------|---|--------|-------|--------|
| 24 | P54886 P5CS_HUMAN    | R.ILHLLTQE.A            |            | 2 | 1,8946 | 0,114 | 0,252  |
| 24 | O75569 PRKRA_HUMAN   | R.EDS#GTFSLGK.M         | S18:       | 2 | 1,8883 | 0,183 | -0,109 |
| 24 | P08670 VIME_HUMAN    | E.VERDNLAEDIM*R.L       |            | 2 | 1,8871 | 0,097 | -0,496 |
| 24 | Q03252 LMNB2_HUMAN   | K.LSSDQNDKAASAAREE.L    |            | 2 | 1,8849 | 0,086 | -0,649 |
| 24 | P46937 YAP1_HUMAN    | R.QAS#TDAGTAGALTPQHVR.A | S109:      | 2 | 1,8834 | 0,186 | 0,066  |
| 24 | Q567U6 CCD93_HUMAN   | K.TALPAGLSATEK.A        |            | 2 | 1,8808 | 0,38  | 0,211  |
| 24 | O15400 STX7_HUMAN    | E.FTSLTNFQK.V           |            | 2 | 1,8807 | 0,386 | -1,439 |
| 24 | P0C7M2 RA1L3_HUMAN   | R.GFAFVTFDHHD.S         |            | 2 | 1,8789 | 0,119 | -0,096 |
| 24 | Q641Q2 FA21A_HUMAN   | K.RS#RPTS#FADE.L        | S284:S288: | 2 | 1,8728 | 0,426 | 0      |
| 24 | Q9Y2W2 WBP11_HUMAN   | R.AQLSQYFDAVK.N         |            | 2 | 1,8693 | 0,173 | 0,288  |
| 24 | Q5VZK9 LR16A_HUMAN   | K.VALLPPVLK.K           |            | 2 | 1,8658 | 0,167 | 0      |
| 24 | Q16658 FSCN1_HUMAN   | R.YLAPSGPSGTLK.A        |            | 2 | 1,8657 | 0,148 | 0      |
| 24 | Q9NY33 DPP3_HUMAN    | E.LM*FSLEPR.L           |            | 2 | 1,865  | 0,14  | 0,242  |
| 24 | Q14493 SLBP_HUMAN    | R.KLLINDFGR.E           |            | 2 | 1,862  | 0,087 | 0      |
| 24 | A9CQZ4 A9CQZ4_HUMAN  | K.NLGS#PKPR.Q           | S27:       | 2 | 1,8543 | 0,104 | -0,335 |
| 24 | Q03164 HRX_HUMAN     | D.GVDDGTES#DTSVTATTRK.S | S2726:     | 2 | 1,854  | 0,28  | -0,254 |
| 24 | P54278 PMS2_HUMAN    | R.VLPQPTNLATPNTK.R      |            | 2 | 1,8529 | 0,286 | 0,327  |
| 24 | Q01518 CAP1_HUMAN    | K.LFNHLSAVSE.S          |            | 2 | 1,8509 | 0,087 | 0      |
| 24 | P62736 ACTA_HUMAN    | R.HQGV#VGM*GQK.D        |            | 2 | 1,8493 | 0,225 | -0,304 |
| 24 | Q3KQU3 MA7D1_HUMAN   | K.SRGPT#PPAM*GPR.D      | T97:       | 2 | 1,8491 | 0,179 | -0,37  |
| 24 | Q00610 CLH1_HUMAN    | R.IAAYLFK.G             |            | 2 | 1,8396 | 0,177 | 0,369  |
| 24 | Q7L7X3 TAOK1_HUMAN   | R.GSSM*GVRNS#PQALR.R    | S965:      | 2 | 1,8368 | 0,11  | -0,392 |
| 24 | Q6ZQX7 YQ022_HUMAN   | K.HLPSDSTVSLPDFAE.I     |            | 2 | 1,8354 | 0,12  | -0,072 |
| 24 | P29692 EF1D_HUMAN    | E.NGASVILR.D            |            | 2 | 1,8335 | 0,222 | -0,147 |
| 24 | Q8N8S7 ENAH_HUMAN    | E.DKGEDSEPVTSK.A        |            | 2 | 1,832  | 0,221 | -0,378 |
| 24 | Q96MF7 NSE2_HUMAN    | K.FLALQSK.N             |            | 2 | 1,832  | 0,126 | 0,756  |
| 24 | P78527 PRKDC_HUMAN   | K.RLS#FAVPFRE.M         | S893:      | 2 | 1,8178 | 0,331 | 0      |
| 24 | P31946 1433B_HUMAN   | R.VISSIEQK.T            |            | 2 | 1,817  | 0,128 | 0,067  |
| 24 | Q71U36 TBA1A_HUMAN   | K.YM*ACLLYR.G           |            | 2 | 1,8146 | 0,21  | -0,096 |
| 24 | Q16643 DREB_HUMAN    | R.M*APTPIPTR.S          |            | 2 | 1,8117 | 0,292 | -0,61  |
| 24 | Q00610 CLH1_HUMAN    | K.DSLYKDAMQYASE.S       |            | 2 | 1,8098 | 0,243 | -0,722 |
| 24 | Q9H4H8 FA83D_HUMAN   | E.LTLGNLLR.M            |            | 2 | 1,8084 | 0,112 | 0      |
| 24 | Q9H6Y2 WDR55_HUMAN   | K.AIHVLDVE.Q            |            | 2 | 1,8038 | 0,105 | 0,136  |
| 24 | Q15418 KS6A1_HUMAN   | R.KLPS#TTL.-            | S732:      | 2 | 1,802  | 0,142 | 0      |
| 24 | Q9Y5W9 SNX11_HUMAN   | K.SCCFLPR.S             |            | 2 | 1,7971 | 0,166 | -0,065 |
| 24 | ##Q14533 KRT81_HUMAN | E.QILAEVNAE.L           |            | 2 | 1,7892 | 0,085 | -0,062 |
| 24 | Q12872 SFRS8_HUMAN   | K.ASFAPISFAIK.A         |            | 2 | 1,7792 | 0,109 | 0      |
| 24 | Q5JWF2 GNAS1_HUMAN   | E.DATPEPAGEDPR.V        |            | 2 | 1,7686 | 0,227 | 0,515  |
| 24 | Q8IVF2 AHNK2_HUMAN   | K.IQLIHDE.K             |            | 2 | 1,7558 | 0,098 | 0,492  |

|    |                      |                         |        |   |        |       |        |
|----|----------------------|-------------------------|--------|---|--------|-------|--------|
| 24 | Q9Y490 TLN1_HUMAN    | R.RAIADM*LR.A           |        | 2 | 1,7508 | 0,142 | -0,127 |
| 24 | O43166 SI1L1_HUMAN   | R.HSASPVVFTSAR.S        |        | 2 | 1,7443 | 0,167 | -0,097 |
| 24 | Q9H6F5 CCD86_HUMAN   | R.RLGGLRPES#PE.S        | S18:   | 2 | 1,7412 | 0,197 | -0,095 |
| 24 | Q9Y2W2 WBP11_HUMAN   | E.LTPLQAMM*LR.M         |        | 2 | 1,7405 | 0,303 | 0      |
| 24 | Q9H3N1 TXND1_HUMAN   | R.SLGPSLATDKS.-         |        | 2 | 1,7344 | 0,115 | 0      |
| 24 | Q8IU81 I2BP1_HUMAN   | E.GRS#PGPPALK.H         | S66:   | 2 | 1,7341 | 0,149 | -0,345 |
| 24 | P38919 IF4A3_HUMAN   | K.FM*TDPIR.I            |        | 2 | 1,7315 | 0,249 | 0,204  |
| 24 | Q4KMP7 TB10B_HUMAN   | R.QQPPLGPPSSLLSLPGLK.S  |        | 2 | 1,7299 | 0,429 | -0,201 |
| 24 | Q6NV74 CB055_HUMAN   | K.RYS#AEVRLE.R          | S710:  | 2 | 1,7287 | 0,331 | 0,101  |
| 24 | P61158 ARP3_HUMAN    | E.FYQVCHTK.K            |        | 2 | 1,7285 | 0,235 | -0,563 |
| 24 | P98175 RBM10_HUMAN   | K.LASDDRPS#PPR.G        | S722:  | 2 | 1,7145 | 0,094 | -0,756 |
| 24 | P49589 SYCC_HUMAN    | R.LHLYNSLTR.N           |        | 2 | 1,7106 | 0,13  | -0,109 |
| 24 | O60885 BRD4_HUMAN    | E.EKIHS#PIIR.S          | S1117: | 2 | 1,7086 | 0,132 | -0,624 |
| 24 | Q15126 PMVK_HUMAN    | R.LVLLFSGK.R            |        | 2 | 1,7077 | 0,125 | 0,139  |
| 24 | ##Q9H1J1 REN3A_HUMAN | R.LQEELQEKT#LGPPLR.R    | T397:  | 2 | 1,6862 | 0,121 | 1,666  |
| 24 | Q96RS0 TGS1_HUMAN    | K.LYNLGLK.G             |        | 2 | 1,683  | 0,138 | -0,446 |
| 24 | Q09666 AHNK_HUMAN    | K.ISM*PDLDLHLKS#PK.A    | S2397: | 2 | 1,6759 | 0,104 | -0,794 |
| 24 | ##Q8N4C6 NIN_HUMAN   | R.LVLVNLE.E             |        | 2 | 1,6746 | 0,083 | -0,305 |
| 24 | P09493 TPM1_HUMAN    | K.ATDAEADVASLNR.R       |        | 2 | 1,6736 | 0,103 | -0,983 |
| 24 | Q5TC84 OGRL1_HUMAN   | K.VAPKEPVEE.T           |        | 2 | 1,6652 | 0,11  | 0      |
| 24 | Q8N1G1 REXO1_HUMAN   | E.YDPLSNYSAR.H          |        | 2 | 1,6529 | 0,182 | 0,514  |
| 24 | Q96ST2 IWS1_HUMAN    | K.HMDFLS#DFE.M          | S527:  | 2 | 1,6487 | 0,111 | -0,2   |
| 24 | Q09666 AHNK_HUMAN    | D.LHLKS#PK.A            | S2397: | 2 | 1,6407 | 0,12  | 0,068  |
| 24 | O95425 SVIL_HUMAN    | R.ASDPASP HIGR.S        |        | 2 | 1,6374 | 0,291 | -0,661 |
| 24 | P35270 SPRE_HUMAN    | K.VSAQKLLSLE.K          |        | 2 | 1,6237 | 0,103 | -0,406 |
| 24 | Q9Y4E5 ZN451_HUMAN   | D.LHLLLDQSK.F           |        | 2 | 1,613  | 0,095 | -0,114 |
| 24 | P10809 CH60_HUMAN    | K.QSKPVTTPEE.I          |        | 2 | 1,606  | 0,155 | -0,437 |
| 24 | O15085 ARHGB_HUMAN   | R.LPQSIDR.L             |        | 2 | 1,605  | 0,251 | -0,074 |
| 24 | P35579 MYH9_HUMAN    | D.LPFVVR.R              |        | 2 | 1,598  | 0,234 | 0,295  |
| 24 | Q9BW61 DDA1_HUMAN    | R.TDS#PDM*HEDT.-        | S95:   | 2 | 1,5916 | 0,208 | -0,883 |
| 24 | Q02790 FKBP4_HUMAN   | K.LYANMFER.L            |        | 2 | 1,5743 | 0,121 | 0,701  |
| 24 | P30153 2AAA_HUMAN    | R.YM*VADKFTE.L          |        | 2 | 1,5506 | 0,143 | 0      |
| 24 | Q8IXM2 CQ049_HUMAN   | E.DSGIPLPAESPK.K        |        | 2 | 1,5488 | 0,218 | 0,202  |
| 24 | Q6ULP2 AFTIN_HUMAN   | E.KLDLLTSK.C            |        | 2 | 1,5451 | 0,106 | 0,066  |
| 24 | P48643 TCPE_HUMAN    | R.AVTIFIR.G             |        | 2 | 1,4826 | 0,204 | 0,298  |
| 24 | P49736 MCM2_HUMAN    | K.DAILLADLVDSCKPGDEIE.L |        | 2 | 1,4815 | 0,211 | 0,235  |
| 24 | Q8IYB3 SRRM1_HUMAN   | E.ATSTSDILK.V           |        | 2 | 1,4701 | 0,129 | -0,847 |
| 24 | Q16204 CCDC6_HUMAN   | E.EEFISNTLFK.K          |        | 2 | 1,4389 | 0,175 | -0,298 |
| 24 | P06733 ENOA_HUMAN    | K.TIAPALVSK.K           |        | 2 | 1,4028 | 0,121 | -0,949 |



|    |                    |                 |   |        |       |       |
|----|--------------------|-----------------|---|--------|-------|-------|
| 24 | P04075 ALDOA_HUMAN | K.GVVPLAGTNGE.T | 2 | 1,3572 | 0,181 | 0,18  |
| 24 | Q9UKG1 DP13A_HUMAN | R.LFGFVLR.T     | 2 | 1,325  | 0,198 | 0,358 |
| 24 | Q13885 TBB2A_HUMAN | E.QFTAM*FR.R    | 2 | 1,3147 | 0,204 | 0,067 |
| 24 | P52294 IMA1_HUMAN  | E.QQLSATQK.F    | 2 | 1,1792 | 0,174 | 0,27  |

**Table S4:** Peptide identification information for GPTS workflow. SCX fraction number, protein reference, peptide sequence, phosphorylation localization, charge state, and SEQUEST scoring metrics (cross correlation, delta correlation, and ppm) are provided. Reverse hits that pass filters are included and used to maintain <1% false positive rate.

| Fraction | Ref                | Sequence                                 | ModSite         | Charge | XCorr  | dCn   | PPM   |
|----------|--------------------|------------------------------------------|-----------------|--------|--------|-------|-------|
| 1        | Q96T23 RSF1_HUMAN  | K.VGS#PLDYSLVDLPSTNGQS#PGK.A             | S1349:S1365:    | 2      | 6,132  | 0,595 | 0,612 |
| 1        | Q9UKN8 TF3C4_HUMAN | K.ILLVDS#PGM*GNADDEQQUEE.G               | S611:           | 2      | 5,5863 | 0,516 | 0,792 |
| 1        | Q8WXI9 P66B_HUMAN  | R.LTPSPDIIVLS#DNEASS#PR.S                | S129:S135:      | 2      | 5,5718 | 0,475 | 0,674 |
| 1        | Q09666 AHNK_HUMAN  | R.LPS#GSGAAS#PTGSAVDIR.A                 | S210:S216:      | 2      | 5,5419 | 1     | 0,271 |
| 1        | Q13263 TIF1B_HUMAN | R.STAPSAASASASAAASS#PAGGGAE.A            | S50:            | 3      | 5,4035 | 0,497 | 0,351 |
| 1        | P05783 K1C18_HUMAN | R.GGM*GS#GGLATGIAGGLAGM*GGIQNE.K         | S60:            | 2      | 5,3583 | 0,594 | 0,761 |
| 1        | Q8WXI9 P66B_HUMAN  | R.GRLT#PS#PDIIVLSDNE.A                   | T120:S122:      | 2      | 5,3501 | 0,45  | 0,259 |
| 1        | Q8NCE2 MTMRE_HUMAN | K.DRGST#TS#LGSDFSLVM*E.S                 | T439:S441:      | 2      | 5,2888 | 1     | 0,679 |
| 1        | P23193 TCEA1_HUMAN | K.KKEPAITSQNS#PEAR.E                     | S100:           | 3      | 5,2691 | 0,37  | 0,211 |
| 1        | P52597 HNRPF_HUMAN | E.SQSVSGCYGAGYSGQNS#M*GGYD.-             | S410:           | 2      | 5,2433 | 0,66  | 0,419 |
| 1        | Q96T23 RSF1_HUMAN  | K.VGS#PLDYSLVDLPSTNGQS#PGKAI.E.N         | S1349:S1365:    | 2      | 5,1461 | 0,454 | 0,632 |
| 1        | Q86W92 LIPB1_HUMAN | K.DFAARS#PSAS#ITDEDSNV.-                 | S999:S1003:     | 2      | 5,1399 | 0,493 | 0,538 |
| 1        | Q92734 TFG_HUMAN   | R.S#GT#PDSIASSSAAHPPGVQPPYTGAAQTQAGQIE.G | S204:T206:      | 3      | 5,1281 | 1     | 0,673 |
| 1        | Q9Y6G9 DC1L1_HUMAN | R.VGSFGSS#PPGLSSTYTGGPLGNE.I             | S13:            | 2      | 5,0979 | 0,597 | 0,326 |
| 1        | P40763 STAT3_HUMAN | K.FICVT#PTTCSNTIDLPM*S#PR.T              | T714:S727:      | 3      | 5,0542 | 0,341 | 0,736 |
| 1        | Q5PRF9 SAM4B_HUMAN | R.M*GLLS#PSGIGGVS#PR.H                   | S592:S600:      | 2      | 4,976  | 0,493 | 0,304 |
| 1        | Q9NQS7 INCE_HUMAN  | R.TLS#PTPASATAPTSQGIPTSDEES#T#PKK.S      | S197:S218:T219: | 3      | 4,9695 | 1     | 0,421 |
| 1        | Q09666 AHNK_HUMAN  | K.SKGHYEVTGS#DDETGK.L                    | S5841:          | 3      | 4,9466 | 0,404 | 0,204 |
| 1        | Q13523 PRP4B_HUMAN | K.VQSGM*GLILQGYES#GS#EEEGEIH.E.K         | S142:S144:      | 2      | 4,8179 | 0,447 | 0,975 |
| 1        | P82094 TMF1_HUMAN  | R.SAT#PVNCEQPDLVLSSTPINE.G               | T401:           | 2      | 4,8065 | 0,541 | 1,557 |
| 1        | Q15007 FL2D_HUMAN  | R.GGSGYVNQLSAGYESVDS#PTGSE.N             | S341:           | 2      | 4,7959 | 0,638 | 0,625 |
| 1        | Q12888 TP53B_HUMAN | D.SLST#NSSDLVAPS#PDAFR.S                 | T357:S366:      | 2      | 4,7686 | 0,499 | 0,663 |
| 1        | Q92598 HS105_HUMAN | E.AGTQPQVQTDAAQTSQSPPS#PELTSEE.N         | S557:           | 3      | 4,7651 | 0,307 | 0,501 |
| 1        | Q92598 HS105_HUMAN | E.AGTQPQVQTDAAQTSQS#PPSPE.L              | S554:           | 3      | 4,7599 | 0,35  | 0,31  |
| 1        | P52597 HNRPF_HUMAN | E.SQSVSGCYGAGYSGQNS#M*GGYD.-             | S410:           | 3      | 4,7429 | 0,544 | 0,236 |
| 1        | Q8WXI9 P66B_HUMAN  | R.LTPSPDIIVLS#DNEASS#PR.S                | S129:S135:      | 3      | 4,7297 | 0,353 | 0,758 |
| 1        | Q8IWE2 NXP20_HUMAN | E.ITDAATDQGAES#PPTS#PSSASR.G             | S196:S200:      | 2      | 4,702  | 1     | 0,609 |

|   |                    |                                            |                 |   |        |       |       |
|---|--------------------|--------------------------------------------|-----------------|---|--------|-------|-------|
| 1 | O95359 TACC2_HUMAN | K.TPSS#PSKS#PASFEIPASAM*E.A                | S2390:S2394:    | 2 | 4,6841 | 1     | 0,666 |
| 1 | Q96JM3 ZN828_HUMAN | K.LAPVPS#PEPQKPAPVS#PE.S                   | S204:S214:      | 2 | 4,6798 | 0,461 | 0,732 |
| 1 | P49281 NRAM2_HUMAN | E.LYLLNTM*DADS#LVS#R.-                     | S564:S567:      | 2 | 4,6747 | 0,464 | 0,453 |
| 1 | Q02952 AKA12_HUMAN | E.M*VSAVSQLTDS#PDTTEEAT#PVQE.V             | S1012:T1020:    | 3 | 4,663  | 1     | 0,28  |
| 1 | P13693 TCTP_HUMAN  | E.GNIDDS#LIGGNASAEGPEGEGTE.S               | S46:            | 2 | 4,6604 | 0,596 | 0,323 |
| 1 | Q96C92 SDCG3_HUMAN | R.VSPAS#PAGS#PSADFAVHGE.S                  | S243:S247:      | 2 | 4,6208 | 0,573 | 0,628 |
| 1 | P82094 TMF1_HUMAN  | R.SSS#ISGVDM*AGLQTSFLSQDE.S                | S937:           | 2 | 4,6115 | 0,448 | 0,866 |
| 1 | O75400 PR40A_HUMAN | E.QAQLTST#PAIQDQSVE.V                      | T345:           | 2 | 4,5947 | 0,539 | 0,747 |
| 1 | P12270 TPR_HUMAN   | E.SGGRS#VPTT#PLQVAAPVTVFTE.S               | S2196:T2200:    | 2 | 4,5873 | 0,543 | 0,411 |
| 1 | Q9NQ57 INCE_HUMAN  | R.TLSPT#PASATAPTSQGIPTSDEE.S               | T199:           | 2 | 4,5833 | 0,604 | 0,939 |
| 1 | Q9Y6G9 DC1L1_HUMAN | R.VGS#FGSS#PPGLSSTYTGGLGNE.I               | S9:S13:         | 2 | 4,5799 | 1     | 0,314 |
| 1 | P40763 STAT3_HUMAN | K.FICVT#PTTCSNTIDLPM*S#PR.T                | T714:S727:      | 2 | 4,5787 | 0,389 | 0,491 |
| 1 | Q15149 PLEC1_HUMAN | R.SS#SVGS#SSSYPIPAVSR.T                    | S4385:S4389:    | 2 | 4,577  | 1     | 0,51  |
| 1 | Q13263 TIF1B_HUMAN | R.STAPSAASASASAAAASS#PAGGGAEALE.L          | S50:            | 2 | 4,5665 | 0,572 | 0,712 |
| 1 | Q96RT1 LAP2_HUMAN  | E.NFNLLQNGDILNSS#TEE.K                     | S715:           | 2 | 4,5589 | 0,378 | 1,529 |
| 1 | Q92598 HS105_HUMAN | E.AGTQPQVQTDAAQTSQSPPS#PE.L                | S557:           | 3 | 4,534  | 0,421 | 0,387 |
| 1 | Q86W56 PARG_HUMAN  | E.IDVVPES#PLS#DVGSEDVGTGPK.N               | S261:S264:      | 2 | 4,5158 | 0,554 | 1,035 |
| 1 | Q13263 TIF1B_HUMAN | R.STAPSAASASASAAAASS#PAGGGAEALE.L          | S50:            | 3 | 4,5111 | 0,468 | 0,916 |
| 1 | P21127 CD2L1_HUMAN | E.GDYVPDS#PALS#PIELKQE.L                   | S410:S414:      | 2 | 4,5087 | 0,503 | 0,807 |
| 1 | P05783 K1C18_HUMAN | R.GGM*GS#GGLATGIAGGLAGM*GGIQNE.K           | S60:            | 3 | 4,5007 | 0,384 | 0,489 |
| 1 | Q8IWW6 RHG12_HUMAN | R.ATT#PPNQGRPDS#PVYANLQE.L                 | T231:S240:      | 2 | 4,4957 | 0,476 | 0,316 |
| 1 | Q9HAW4 CLSPN_HUMAN | E.TIGPLS#EGDS#DEEIFVSK.K                   | S42:S46:        | 2 | 4,4548 | 0,392 | 0,82  |
| 1 | P12270 TPR_HUMAN   | E.S#GGRSVPTT#PLQVAAPVTVFTE.S               | S2192:T2200:    | 2 | 4,4464 | 0,436 | 0,308 |
| 1 | Q7Z3K3 POGZ_HUMAN  | E.GAECLNVDDQDEGS#PVTQEPE.L                 | S949:           | 2 | 4,4411 | 0,459 | 1,03  |
| 1 | P33993 MCM7_HUMAN  | E.TYQPIQS#PTFM*PLIM*CPSQE.C                | S197:           | 3 | 4,4142 | 0,3   | 0     |
| 1 | Q96PK6 RBM14_HUMAN | R.GQPGNAYDGAGQPSAAYLSM*SQGAVANANS#TPPPYE.R | S571:           | 3 | 4,4111 | 0,346 | 0,806 |
| 1 | P55265 DSRAD_HUMAN | K.T#AESQTPT#PSATSFSGK.S                    | T596:T603:      | 2 | 4,3965 | 1     | 0,365 |
| 1 | Q6Y7W6 PERQ2_HUMAN | R.ALSSGGS#ITS#PPLSPALPK.Y                  | S23:S26:        | 2 | 4,3737 | 1     | 0,755 |
| 1 | O95817 BAG3_HUMAN  | K.VPPAPVPCPPPS#PGPSAVPSS#PK.S              | S377:S386:      | 2 | 4,3727 | 0,375 | 1,026 |
| 1 | Q09666 AHNK_HUMAN  | R.LPS#GSGAAS#PTGS#AVDIR.A                  | S210:S216:S220: | 2 | 4,3689 | 1     | 0,648 |
| 1 | Q8N1G1 REXO1_HUMAN | R.ALS#HADLFGDES#EDE.A                      | S517:S526:      | 2 | 4,363  | 0,517 | 0,408 |
| 1 | Q86X95 CIR_HUMAN   | R.NLTANDPSQEYVAS#EGEEDPE.V                 | S202:           | 2 | 4,3494 | 0,469 | 0,72  |
| 1 | Q86WB0 NIPA_HUMAN  | K.DTSATSQSVNGS#PQAEQPSLE.S                 | S62:            | 3 | 4,34   | 0,337 | 0     |

|   |                    |                                    |                 |   |        |       |        |
|---|--------------------|------------------------------------|-----------------|---|--------|-------|--------|
| 1 | Q8WXI9 P66B_HUMAN  | R.VS#SPLPS#PSAM*TDAANSQAAAK.L      | S333:S338:      | 2 | 4,3359 | 0,43  | 0      |
| 1 | Q9UQ35 SRRM2_HUMAN | E.NSFGS#PLEFRNS#GPLGTE.M           | S1329:S1336:    | 2 | 4,3228 | 0,426 | 0,826  |
| 1 | Q9NQW6 ANLN_HUMAN  | K.S#CSPSPVSPQVQQAADTISD.S          | S95:            | 3 | 4,2873 | 0,316 | 0,813  |
| 1 | Q9Y3F4 STRAP_HUMAN | E.IAS#ENS#DCIFPSAPDVK.A            | S335:S338:      | 2 | 4,2719 | 0,39  | 0,607  |
| 1 | Q3KQU3 MA7D1_HUMAN | E.S#AAPASPAPS#PAPS#PTPAPPQK.E      | S539:S548:S552: | 2 | 4,2648 | 0,374 | 0,431  |
| 1 | Q9NYJ8 TAB2_HUMAN  | K.ITVSPNKPPAVS#PGVVS#PTFE.L        | S477:S482:      | 2 | 4,2636 | 0,412 | 0,855  |
| 1 | Q9NYJ8 TAB2_HUMAN  | K.IT#VSPNKPPAVS#PGVVS#PTFE.L       | T467:S477:S482: | 2 | 4,2604 | 0,439 | 0,723  |
| 1 | Q02952 AKA12_HUMAN | E.M*VSAVSQLTDSPTDTEEAT#PVQE.V      | T1020:          | 2 | 4,2436 | 0,524 | 0,771  |
| 1 | O00567 NOL5A_HUMAN | R.LAALALASSESSS#T#PEECEE.M         | S467:T468:      | 2 | 4,2364 | 1     | 0,104  |
| 1 | Q9H6F5 CCD86_HUMAN | R.LQQGAGLES#PQGQPEPGAAS#PQR.Q      | S80:S91:        | 3 | 4,2285 | 0,341 | 0,371  |
| 1 | Q15149 PLEC1_HUMAN | R.SSS#VGS#SSSYPISPAVSR.T           | S4386:S4389:    | 2 | 4,2271 | 1     | 0,446  |
| 1 | P17252 KPCA_HUMAN  | R.GQPVLTP#PPDQLVIANIDQSDFE.G       | T638:           | 3 | 4,2268 | 0,31  | 0,369  |
| 1 | O94842 TOX4_HUMAN  | E.LVSGS#PVALS#PQPR.C               | S562:S567:      | 2 | 4,2095 | 0,285 | -0,078 |
| 1 | Q8WXI9 P66B_HUMAN  | R.VSS#PLSPS#AM*TDAANSQAAAK.L       | S334:S340:      | 3 | 4,2088 | 0,321 | 0,241  |
| 1 | P12270 TPR_HUMAN   | E.SGGRS#VPT#TPLQVAAPVTVFTE.S       | S2196:T2199:    | 3 | 4,204  | 0,386 | 0,925  |
| 1 | Q8N3D4 EH1L1_HUMAN | R.NSS#SFSM*DDPDAGAM*GAAAAE.G       | S1294:          | 2 | 4,1969 | 0,408 | 0,693  |
| 1 | Q02952 AKA12_HUMAN | E.M*VSAVSQLTDS#PDTTEEAT#PVQE.V     | S1012:T1020:    | 2 | 4,1912 | 0,442 | 0,374  |
| 1 | P27816 MAP4_HUMAN  | E.SLQDVGQSAAPTFM*IS#PE.T           | S624:           | 2 | 4,1904 | 0,449 | 0,927  |
| 1 | Q96RR4 KKCC2_HUMAN | R.CICPSLPYS#PVSS#PQSS#PR.L         | S129:S133:S137: | 3 | 4,1668 | 1     | 0,465  |
| 1 | Q99700 ATX2_HUMAN  | E.NSSSNTSGSS#KPNNS#PSIS#PSILSNTE.H | S856:S860:S864: | 3 | 4,1463 | 1     | 0,676  |
| 1 | O14497 ARI1A_HUMAN | K.IQPPSPAGSGS#M*QGPQTPQSTSSSM*AE.G | S1140:          | 3 | 4,1442 | 0,291 | -0,066 |
| 1 | Q12888 TP53B_HUMAN | E.DVCIDLTCDSGS#QAVPS#PATR.S        | S625:S630:      | 2 | 4,1078 | 0,509 | 0,709  |
| 1 | O00567 NOL5A_HUMAN | R.LAALALASSESSS#PEECEE.M           | T468:           | 2 | 4,1009 | 0,504 | 0,751  |
| 1 | Q92974 ARHG2_HUMAN | R.EPALPLEPDSGGNTS#PGVTANGE.A       | S695:           | 2 | 4,0976 | 0,501 | 0,853  |
| 1 | Q8WYQ5 DGCR8_HUMAN | R.EQS#PPPPLQTSSGAE.V               | S35:            | 2 | 4,0901 | 0,423 | 0,152  |
| 1 | Q9BUR4 WDR79_HUMAN | E.FGS#PSELS#PRIEEQE.L              | S85:S90:        | 2 | 4,0785 | 0,399 | 0,785  |
| 1 | Q9NQW6 ANLN_HUMAN  | K.SCSPS#PVSPQVQQAADTISD.S          | S99:            | 2 | 4,0744 | 0,344 | 0,217  |
| 1 | P35658 NU214_HUMAN | K.SPGS#TPTT#PTSSQAPQKLD.A          | S433:T437:      | 2 | 4,0723 | 1     | 0,118  |
| 1 | Q14160 LAP4_HUMAN  | R.NSLES#ISS#IDRE.L                 | S1223:S1226:    | 2 | 4,0628 | 0,475 | 0,485  |
| 1 | O96028 NSD2_HUMAN  | K.GIGT#PPNNTT#PIKNGS#PE.I          | T110:T115:S121: | 2 | 4,0591 | 0,35  | 0,953  |
| 1 | Q9H7N4 SFR19_HUMAN | K.AAPPPPALT#PDSQTVDSCKT#PE.V       | T989:T1001:     | 3 | 4,0556 | 0,395 | 0,072  |
| 1 | Q9Y3F4 STRAP_HUMAN | E.IAS#ENS#DCIFPSAPDVKA.-           | S335:S338:      | 2 | 4,0495 | 0,519 | 0,469  |
| 1 | O15127 SCAM2_HUMAN | R.AASS#AAQGAFAQGN.-                | S320:           | 2 | 4,0404 | 0,418 | 0,387  |

|   |                     |                                   |              |   |        |       |        |
|---|---------------------|-----------------------------------|--------------|---|--------|-------|--------|
| 1 | Q96T23 RSF1_HUMAN   | K.VGS#PLDYSLVDLPSTNGQS#PGK.A      | S1349:S1365: | 3 | 4,038  | 0,378 | 0,612  |
| 1 | P12270 TPR_HUMAN    | R.SVPT#T#PLQVAAPVTVFTE.S          | T2199:T2200: | 2 | 4,0324 | 0,524 | 0,544  |
| 1 | Q15424 SAFB1_HUMAN  | E.TINNLDTSSS#DFTILQE.I            | S197:        | 3 | 4,0179 | 0,335 | 0,37   |
| 1 | Q12948 FOXC1_HUMAN  | E.NGTCPS#PPQPLS#PAAALGSGSAAAVPK.I | S235:S241:   | 3 | 4,0131 | 0,365 | 0,962  |
| 1 | Q9NQ55 SSF1_HUMAN   | E.LLATGAGLS#ES#EAEPDGDHNITE.L     | S238:S240:   | 2 | 4,0095 | 0,492 | 0,589  |
| 1 | P46821 MAP1B_HUMAN  | K.VLS#PLRS#PPLIGSESAYE.S          | S1396:S1400: | 2 | 4,0024 | 0,578 | 0,588  |
| 1 | Q96TA1 NIBL1_HUMAN  | E.VGLPFEASPES#PPPAS#PDGVTE.I      | S628:S633:   | 3 | 3,9919 | 0,381 | 0,782  |
| 1 | Q96TA1 NIBL1_HUMAN  | E.VGLPFEASPESPPPAS#PDGVTE.I       | S633:        | 2 | 3,9817 | 0,46  | 0,756  |
| 1 | Q14247 SRC8_HUMAN   | R.LPSS#PVYEDAAS#FKAEL             | S418:S426:   | 2 | 3,9699 | 0,423 | 0,13   |
| 1 | Q9C0B5 ZDHC5_HUMAN  | R.SSS#LKS#AQGTGFE.L               | S429:S432:   | 2 | 3,9696 | 0,452 | 0,084  |
| 1 | Q9NQG5 CT077_HUMAN  | E.DDDYPGSYS#PQDPSAGPLLTEE.L       | S166:        | 3 | 3,9656 | 0,336 | 0,376  |
| 1 | P98175 RBM10_HUMAN  | E.LQS#PTHPSSALPPATS#PTAQE.S       | S540:S553:   | 2 | 3,9631 | 0,22  | 0,214  |
| 1 | Q02952 AKA12_HUMAN  | E.M*VSAVSQLTDS#PDT#TEE.A          | S1012:T1015: | 2 | 3,961  | 1     | 0,307  |
| 1 | Q8NEL9 DDHD1_HUMAN  | E.NEGISTIPS#PVLSR.R               | S723:S727:   | 2 | 3,9599 | 0,408 | 0,606  |
| 1 | Q6ZML7 Q6ZML7_HUMAN | E.LS#PAALS#PSLEPIR.C              | S499:S504:   | 2 | 3,9546 | 0,397 | 0,53   |
| 1 | Q92597 NDRG1_HUMAN  | R.TAS#GSSVTS#LDGTR.S              | S330:S336:   | 2 | 3,9544 | 1     | 0,244  |
| 1 | Q15642 CIP4_HUMAN   | R.APS#DSS#LGTPSDGRPE.L            | S296:S299:   | 2 | 3,9543 | 0,524 | 0,211  |
| 1 | Q9NRM2 ZN277_HUMAN  | E.NDTLLCTL#DSESDLTAQEQNE.N        | S399:        | 2 | 3,9536 | 0,401 | 0,857  |
| 1 | Q8IWE2 NXP20_HUMAN  | E.ITDAATDQGAES#PPPTS#PSSASR.G     | S196:S200:   | 3 | 3,9476 | 1     | 0,533  |
| 1 | Q86WB0 NIPA_HUMAN   | K.DTSATSQSVNGS#PQAEQPSLE.S        | S62:         | 2 | 3,9394 | 0,428 | 0,331  |
| 1 | P40425 PBX2_HUMAN   | E.AVTPSSVTSPTGPGSVHS#DT#SN.-      | S426:T428:   | 2 | 3,9256 | 1     | 0,617  |
| 1 | Q02952 AKA12_HUMAN  | E.M*VSAVSQLTDS#PDT#TEEATPVQE.V    | S1012:T1015: | 2 | 3,924  | 1     | 0,654  |
| 1 | Q8TF74 WIPF2_HUMAN  | R.QPPGVPNGPSS#PTNE.S              | S267:        | 2 | 3,923  | 0,367 | 0,157  |
| 1 | Q15149 PLEC1_HUMAN  | R.SSS#VGSSSYPIS#PAVSR.T           | S4386:S4396: | 2 | 3,9188 | 1     | -0,064 |
| 1 | Q9H5N1 RABE2_HUMAN  | E.LLPLS#RDPS#PPLELEE.L            | S200:S204:   | 2 | 3,9114 | 0,38  | 0,473  |
| 1 | Q8N0Z3 CCD52_HUMAN  | K.LVGLNLS#PPM*S#PVQLPLR.A         | S760:S764:   | 2 | 3,9107 | 0,231 | 0,695  |
| 1 | Q9Y6A5 TACC3_HUMAN  | E.NQM*VS#PGKVSGS#PEQAVEE.N        | S170:S177:   | 2 | 3,8975 | 0,46  | 0,454  |
| 1 | Q16513 PKN2_HUMAN   | E.LSLVAAS#PTLS#PR.Q               | S302:S306:   | 2 | 3,8896 | 0,499 | 0,58   |
| 1 | Q9NQW6 ANLN_HUMAN   | K.SCS#PSPVSPQVQQAADTISD.S         | S97:         | 2 | 3,8718 | 0,494 | 0,434  |
| 1 | Q9H8G2 CI082_HUMAN  | R.ST#DSSSVGSLQQE.T                | T90:         | 2 | 3,8716 | 0,401 | -0,245 |
| 1 | Q12756 KIF1A_HUMAN  | R.TPQPCS#RPAS#PEPELLPE.A          | S1528:S1532: | 2 | 3,8653 | 0,396 | 0,564  |
| 1 | Q96TA1 NIBL1_HUMAN  | E.VGLPFEASPES#PPPAS#PDGVTE.I      | S628:S633:   | 2 | 3,8634 | 0,493 | 0,834  |
| 1 | Q01433 AMPD2_HUMAN  | E.MLETIPEEAGITM*S#PGPQ.-          | S875:        | 3 | 3,8619 | 0,199 | 0,275  |

|   |                    |                                       |                 |   |        |       |        |
|---|--------------------|---------------------------------------|-----------------|---|--------|-------|--------|
| 1 | Q12888 TP53B_HUMAN | D.SLSTNS#SDLVAPS#PDAFR.S              | S359:S366:      | 2 | 3,8575 | 0,434 | 0,844  |
| 1 | Q15424 SAFB1_HUMAN | E.TINNLDTSS#SDFTILQE.I                | S196:           | 2 | 3,8506 | 0,446 | 0,864  |
| 1 | Q93009 UBP7_HUMAN  | K.AGEQQLS#EPEDM*EM*E.A                | S18:            | 2 | 3,8504 | 0,445 | 0,067  |
| 1 | P42166 LAP2A_HUMAN | R.SST#PLPTISSS#AENTR.Q                | T160:S168:      | 2 | 3,8384 | 1     | 0,405  |
| 1 | Q6Y7W6 PERQ2_HUMAN | R.ALSSGGISITS#PPLS#PALPK.Y            | S26:S30:        | 2 | 3,817  | 0,346 | 0,692  |
| 1 | P21127 CD2L1_HUMAN | E.GDYVPDS#PALS#PIELK.Q                | S410:S414:      | 2 | 3,8101 | 0,412 | 0,656  |
| 1 | O15061 DMN_HUMAN   | E.VSS#PTGFAQSQVLE.D                   | S1107:          | 2 | 3,8055 | 0,459 | 0,558  |
| 1 | Q9Y3F4 STRAP_HUMAN | E.LEEIAS#ENS#DCIFPSAPDVK.A            | S335:S338:      | 2 | 3,7994 | 0,362 | 0,41   |
| 1 | Q9Y3F4 STRAP_HUMAN | E.LEEIAS#ENS#DCIFPSAPDVKA.-           | S335:S338:      | 2 | 3,7858 | 0,482 | 0,995  |
| 1 | Q8IW35 CEP97_HUMAN | E.STFM*PVASGLS#PLS#PTVE.L             | S413:S416:      | 2 | 3,782  | 0,391 | 0,672  |
| 1 | Q13283 G3BP1_HUMAN | K.SSS#PAPADIAQTVQE.D                  | S232:           | 2 | 3,7794 | 0,35  | 1,621  |
| 1 | Q92598 HS105_HUMAN | E.AGTQPQVQTDAAQTSQSPPS#PE.L           | S557:           | 2 | 3,7728 | 0,464 | 0,517  |
| 1 | Q02952 AKA12_HUMAN | E.GS#PPPCLGQEE.A                      | S1395:          | 2 | 3,7574 | 0,357 | 0,195  |
| 1 | Q9UPP1 PHF8_HUMAN  | R.QVGGPDYAALTEAPAS#PSTQE.A            | S751:           | 2 | 3,7531 | 0,549 | 0,675  |
| 1 | O60271 JIP4_HUMAN  | R.SAS#QSS#LDKLDQE.L                   | S730:S733:      | 2 | 3,7391 | 0,33  | 0,233  |
| 1 | Q9HC35 EMAL4_HUMAN | E.SVIQSNT#PT#PPPSQPLNE.T              | T897:T899:      | 2 | 3,7383 | 0,477 | 0,118  |
| 1 | P61978 HNRPK_HUMAN | E.GLQLPS#PTATSQLPLESDAVE.C            | S116:           | 2 | 3,7347 | 0,469 | 1,53   |
| 1 | Q6PJG2 CN043_HUMAN | E.LPPYT#PPPILS#PVRE.G                 | T655:S661:      | 2 | 3,7278 | 0,412 | 0,665  |
| 1 | Q8IWE2 NXP20_HUMAN | E.ITDAATDQGAES#PPTSPS#SASR.G          | S196:S202:      | 3 | 3,7143 | 1     | 0,381  |
| 1 | O00567 NOL5A_HUMAN | R.LAALALASSESSS#TPEECE.E.M            | S467:           | 2 | 3,7118 | 0,478 | 0,751  |
| 1 | Q8N350 DOS_HUMAN   | R.LAEPVVATPALVAAPTS#PDHS#PA.-         | S719:S723:      | 3 | 3,7118 | 0,371 | 0,674  |
| 1 | P49711 CTCF_HUMAN  | E.AQPAATDAPNGDLT#PE.M                 | T717:           | 2 | 3,7067 | 0,411 | 0,592  |
| 1 | Q02952 AKA12_HUMAN | E.M*VSAVSQLTDSPTTTEEAT#PVQE.V         | T1020:          | 3 | 3,6987 | 0,255 | 0,723  |
| 1 | O15027 SC16A_HUMAN | R.GSVS#QPST#PS#PPKPTGIFQTSANSSFEFVK.S | S411:T415:S417: | 3 | 3,6986 | 1     | 0,222  |
| 1 | Q3KQU3 MA7D1_HUMAN | E.SAAPAS#PAPSPAPS#PTPAPPQK.E          | S544:S552:      | 2 | 3,6985 | 0,369 | 0,782  |
| 1 | Q9Y3F4 STRAP_HUMAN | E.LEEIAS#ENS#DCIFPSAPDVK.A            | S335:S338:      | 3 | 3,698  | 0,218 | 0,768  |
| 1 | Q6GYQ0 GRIPE_HUMAN | R.S#SSTSDILEPFTVE.R                   | S795:           | 2 | 3,6891 | 0,32  | 0,613  |
| 1 | Q9UQ35 SRRM2_HUMAN | K.AGM*SSNQSISS#PVL.D.A                | S1404:          | 2 | 3,6774 | 0,48  | 0,23   |
| 1 | Q9H4L7 SMRCD_HUMAN | E.ATPQSQPGPSS#PISLSAEEE.N             | S34:            | 2 | 3,6727 | 0,474 | 0,446  |
| 1 | Q9H2Y7 ZF106_HUMAN | R.SLS#ESS#VIM*DR.A                    | S861:S864:      | 2 | 3,6607 | 0,422 | -0,174 |
| 1 | P24928 RPB1_HUMAN  | K.YSPTS#PTYSPS#PK.Y                   | S1913:S1920:    | 2 | 3,6573 | 1     | 0,292  |
| 1 | Q13627 DYR1A_HUMAN | E.ESPM*TGVCVQQS#PVASS.-               | S758:           | 2 | 3,6572 | 0,499 | 0,066  |
| 1 | Q6FIF0 ZFAN6_HUMAN | E.AQSALDSTSSSM*QPSPVS#NQSLLSE.S       | S91:            | 3 | 3,6541 | 0,38  | 0,484  |

|   |                    |                                      |                 |   |        |       |        |
|---|--------------------|--------------------------------------|-----------------|---|--------|-------|--------|
| 1 | Q9C0B5 ZDHC5_HUMAN | K.SLGSAS#PGPGQPPLSS#PTR.G            | S684:S694:      | 2 | 3,652  | 0,368 | 0,25   |
| 1 | Q14247 SRC8_HUMAN  | K.TQT#PPVS#PAPQPTTEERLPSS#PVYE.D     | T401:S405:S418: | 3 | 3,6516 | 1     | 0,578  |
| 1 | Q13263 TIF1B_HUMAN | R.LASPS#GSTSSGLE.V                   | S596:           | 2 | 3,6497 | 0,331 | 0,096  |
| 1 | Q3KQU3 MA7D1_HUMAN | E.SAAPAS#PAPS#PAPS#PTPAPPQK.E        | S544:S548:S552: | 2 | 3,6462 | 0,397 | 0,539  |
| 1 | P46379 BAT3_HUMAN  | E.QQTM*PPPGS#PSGGAGSPGGLGLE.S        | S680:           | 2 | 3,6459 | 0,476 | 0,337  |
| 1 | Q6Y7W6 PERQ2_HUMAN | R.ALSSGGS#ITS#PPLS#PALPK.Y           | S23:S26:S30:    | 2 | 3,6385 | 1     | 0,483  |
| 1 | Q9H4L7 SMRCD_HUMAN | E.ATPQPSQPGPSS#PISLS#AEEE.N          | S34:S39:        | 2 | 3,6211 | 0,493 | 0,753  |
| 1 | P29590 PML_HUMAN   | K.AVS#PPHLDGPPS#PRS#PVIQSE.V         | S518:S527:S530: | 3 | 3,6112 | 0,317 | 0      |
| 1 | Q9NYJ8 TAB2_HUMAN  | K.ITVSPNKPPAVS#PGVVVS#PTFE.L         | S477:S482:      | 3 | 3,6058 | 0,22  | 1,122  |
| 1 | Q14160 LAP4_HUMAN  | K.M*AESPCS#PSGQQPPSPPS#PDEL PANVK.Q  | S1298:S1309:    | 3 | 3,5991 | 0,389 | 0,982  |
| 1 | P05387 RLA2_HUMAN  | K.LASVPAGGAVAVSAAPGSAAPAAGSAPAAAEK.K |                 | 3 | 3,5959 | 0,28  | 0,659  |
| 1 | Q9NQ88 CL005_HUMAN | E.QFSQGS#NCLC.T                      | S159:           | 2 | 3,5951 | 0,223 | 0,085  |
| 1 | P61978 HNRPK_HUMAN | E.GLQLPS#PTATSQLPLESDAVE.C           | S116:           | 3 | 3,5842 | 0,331 | 1,475  |
| 1 | P23284 PIB_HUMAN   | R.DKPLKDVIIADCGK.I                   |                 | 3 | 3,5797 | 0,249 | 0,233  |
| 1 | Q9NQW6 ANLN_HUMAN  | K.SCS#PSPVS#PQVQQAADTISD.S           | S97:S102:       | 2 | 3,5781 | 0,536 | 0,314  |
| 1 | P53618 COPB_HUMAN  | D.VLVVNQTS#DTLQNCTLE.L               | S750:           | 2 | 3,5741 | 0,414 | 0,485  |
| 1 | O43379 WDR62_HUMAN | E.LSLPEGPSVPS#LPQT#PEQE.K            | S1049:T1053:    | 2 | 3,5732 | 0,492 | 0,835  |
| 1 | Q6XQN6 PNCB_HUMAN  | R.LQALVNSLCAGQS#P.-                  | S537:           | 2 | 3,5728 | 0,347 | 0,714  |
| 1 | P46821 MAP1B_HUMAN | K.T#TSPPEVSGYSYK.K                   | T1963:          | 2 | 3,5706 | 0,271 | 0,571  |
| 1 | Q5JVS0 HABP4_HUMAN | K.GALGS#PVAAAGAAM*QE.S               | S7:             | 2 | 3,5697 | 0,528 | 0,245  |
| 1 | Q9H4A3 WNK1_HUMAN  | K.EGPVAS#PPFMDLE.Q                   | S1978:          | 2 | 3,5649 | 0,265 | 0,249  |
| 1 | Q9H8Y8 GORS2_HUMAN | K.ISLPGQM*AGT#PIT#PLKDGFTV.V         | T222:T225:      | 3 | 3,5602 | 0,281 | 0,467  |
| 1 | P55196 AFAD_HUMAN  | R.S#SPNVANQPPS#PGGK.S                | S1155:S1165:    | 2 | 3,5495 | 0,312 | 0,611  |
| 1 | Q8TB72 PUM2_HUMAN  | E.VNAILS#PRS#ESGGLGVSM*VE.Y          | S82:S85:        | 2 | 3,5398 | 0,391 | 1,569  |
| 1 | P16989 DBPA_HUMAN  | R.NDTKEDVVFVHQTAIK.K                 |                 | 3 | 3,5355 | 0,29  | -0,105 |
| 1 | Q5UIP0 RIF1_HUMAN  | K.ADVQAPVS#PSETS QANPYSE.G           | S1772:          | 2 | 3,5344 | 0,378 | 0,113  |
| 1 | Q12756 KIF1A_HUMAN | R.TPQPCS#RPAS#PEPE.L                 | S1528:S1532:    | 2 | 3,5313 | 0,388 | -0,071 |
| 1 | P46821 MAP1B_HUMAN | R.ESS#PLYS#PTFSDSTSAVKE.K            | S1793:S1797:    | 2 | 3,5287 | 1     | 0,891  |
| 1 | P04792 HSPB1_HUMAN | R.ALS#RQLS#SGVSE.I                   | S78:S82:        | 2 | 3,5247 | 0,379 | 0,088  |
| 1 | Q9HC35 EMAL4_HUMAN | E.SVIQSNTPT#PPSQPLNE.T               | T899:           | 2 | 3,5186 | 0,488 | 0,307  |
| 1 | Q9BUR4 WDR79_HUMAN | E.FGS#PSELS#PR.I                     | S85:S90:        | 2 | 3,5176 | 0,215 | 0,296  |
| 1 | Q9ULJ3 ZN295_HUMAN | K.IQPLEPDSPT#GLSENPTPATE.K           | T1005:          | 2 | 3,5122 | 0,406 | 0,644  |
| 1 | Q96EV8 DTBP1_HUMAN | E.NTVLS#PALGPESSTCQNE.I              | S267:           | 2 | 3,5065 | 0,362 | 0,554  |

|   |                       |                                 |              |   |        |       |        |
|---|-----------------------|---------------------------------|--------------|---|--------|-------|--------|
| 1 | Q9Y618 NCOR2_HUMAN    | K.LEPVS#PPS#PPHTDPELE.L         | S149:S152:   | 2 | 3,5025 | 0,335 | 0,61   |
| 1 | Q8TDY2 RBCC1_HUMAN    | R.ST#ELVLS#PDM*PR.T             | T238:S243:   | 2 | 3,4984 | 0,431 | 0,802  |
| 1 | Q13523 PRP4B_HUMAN    | K.VQSGM*GLILQGYES#GS#EEEGEIHE.K | S142:S144:   | 3 | 3,4905 | 0,204 | 0,598  |
| 1 | O15085 ARHGB_HUMAN    | K.SLGGESS#GGT#TPVGSFHTE.A       | S1458:T1461: | 2 | 3,4768 | 1     | 0,248  |
| 1 | ##Q9UP43 Q9UP43_HUMAN | E.ASANGGILSDDNNGETRS#VMK.G      | S78:         | 3 | 3,4742 | 0,171 | -1,569 |
| 1 | A1L390 PKHG3_HUMAN    | E.SSGQGPPSS#PVALLGQVQDFQQA.E    | S1169:       | 2 | 3,4728 | 0,456 | 0,684  |
| 1 | P06493 CDC2_HUMAN     | K.IGEGT#Y#GVVYK.G               | T14:Y15:     | 2 | 3,4702 | 0,35  | 0,181  |
| 1 | Q9NR30 DDX21_HUMAN    | K.KKEEPSQNDIS#PK.T              | S89:         | 2 | 3,4589 | 0,343 | -0,077 |
| 1 | Q96T58 MINT_HUMAN     | R.HGSFHEDEDPIGS#PR.L            | S1278:       | 3 | 3,4571 | 0,277 | -0,312 |
| 1 | Q8NCF5 NF2IP_HUMAN    | E.FLDLDNS#PLSPPS#PR.T           | S198:S204:   | 2 | 3,4513 | 0,448 | 0,672  |
| 1 | P49023 PAXI_HUMAN     | K.QKS#AEPS#PTVM*STSLGSNLSE.L    | S126:S130:   | 2 | 3,4485 | 0,391 | 0,525  |
| 1 | Q5SW79 CE170_HUMAN    | R.LGS#LSARS#DSE.A               | S1160:S1165: | 2 | 3,4483 | 0,453 | 0,19   |
| 1 | Q9NQ55 SSF1_HUMAN     | E.LLATGAGLS#ES#EAEPDGDHNITE.L   | S238:S240:   | 3 | 3,4457 | 0,257 | 0,589  |
| 1 | O95817 BAG3_HUMAN     | K.VPPAPVPCPPS#PGPSAVPS#SPK.S    | S377:S385:   | 3 | 3,4266 | 0,342 | 0,538  |
| 1 | Q9H063 MAF1_HUMAN     | E.ALS#PPQTSGLS#PSR.L            | S60:S68:     | 2 | 3,423  | 0,307 | 0,548  |
| 1 | Q92994 TF3B_HUMAN     | R.GLSSAGGGS#PHREDAQPEHSASAR.K   | S553:        | 3 | 3,4222 | 0,268 | 0,075  |
| 1 | P61978 HNRPK_HUMAN    | E.GLQLPS#PTATSQLPLE.S           | S116:        | 3 | 3,4163 | 0,292 | 0      |
| 1 | O95155 UBE4B_HUMAN    | E.GVSSLSSS#PSNSLE.T             | S88:         | 2 | 3,4097 | 0,378 | 0,426  |
| 1 | Q86U42 PABP2_HUMAN    | K.QM*NM*S#PPPGNAGPVIMSIEE.K     | S150:        | 2 | 3,4069 | 0,328 | 0      |
| 1 | P55265 DSRAD_HUMAN    | E.S#QTPTPSATSFSGKS#PVTTLLE.C    | S599:S614:   | 2 | 3,4003 | 1     | 0,576  |
| 1 | P61978 HNRPK_HUMAN    | E.EGLQLPS#PTATSQLPLESDAVE.C     | S116:        | 3 | 3,3972 | 0,297 | 0,62   |
| 1 | Q16643 DREB_HUMAN     | R.GPGS#PAEDLM*FM*E.S            | S416:        | 2 | 3,3947 | 0,394 | 0,899  |
| 1 | Q9HC35 EMAL4_HUMAN    | E.SVIQSNT#PT#PPPSQPLNE.T        | T897:T899:   | 3 | 3,3893 | 0,302 | 0,531  |
| 1 | O94916 NFAT5_HUMAN    | E.AFFAAPNSIS#PLQSTSNSE.Q        | S1168:       | 2 | 3,3785 | 0,461 | 0,715  |
| 1 | Q8TC07 TBC15_HUMAN    | E.ILGLQGSEVTTTPDS#DVGEDE.N      | S640:        | 2 | 3,3746 | 0,467 | 0,912  |
| 1 | Q9Y3F4 STRAP_HUMAN    | E.LEEIAS#ENS#DCIFPSAPDVKA.-     | S335:S338:   | 3 | 3,3715 | 0,31  | 0,597  |
| 1 | Q96MW1 CCD43_HUMAN    | K.AALLAQYADVT#DEEDE.A           | T139:        | 2 | 3,3469 | 0,36  | 0,732  |
| 1 | O43741 AAKB2_HUMAN    | R.DLSSS#PPGYPGQE.M              | S184:        | 2 | 3,3452 | 0,389 | 0,173  |
| 1 | O75420 PERQ1_HUMAN    | R.ALSGGGSVAS#PPPS#PAM*PK.Y      | S24:S28:     | 2 | 3,3401 | 0,403 | -0,13  |
| 1 | Q9UBU9 NXF1_HUMAN     | R.AFAM*PAPT#PSSS#PVPTLSPEQQE.M  | T554:S558:   | 2 | 3,3337 | 1     | 0,671  |
| 1 | Q9H3S7 PTN23_HUMAN    | E.STPIPSSS#PPPLS#SPLPEAPQPK.E   | S1544:S1549: | 2 | 3,332  | 1     | 0,593  |
| 1 | Q13523 PRP4B_HUMAN    | R.KKS#PIINESR.S                 | S277:        | 3 | 3,3257 | 0,255 | 0,438  |
| 1 | O43379 WDR62_HUMAN    | E.LSLPEGPSVSSS#LPQT#PEQE.K      | S1049:T1053: | 3 | 3,3154 | 0,211 | 0,86   |



|   |                    |                                    |                 |   |        |       |        |
|---|--------------------|------------------------------------|-----------------|---|--------|-------|--------|
| 1 | Q9BUR4 WDR79_HUMAN | E.FGS#PSELS#PRIEE.Q                | S85:S90:        | 2 | 3,31   | 0,253 | 0,759  |
| 1 | Q6ZTN6 AN13D_HUMAN | R.GPGS#PPRT#PPAPGPPSFEE.Q          | S465:T469:      | 2 | 3,3087 | 0,441 | 0,48   |
| 1 | Q99700 ATX2_HUMAN  | E.AVAM*PIPAAS#PTPAS#PASNR.A        | S727:S732:      | 3 | 3,2963 | 0,384 | 0,439  |
| 1 | Q96T58 MINT_HUMAN  | E.LKT#PPS#VGPPSVTVVTL.E.S          | T1633:S1636:    | 2 | 3,2961 | 0,391 | 1,047  |
| 1 | Q6Y7W6 PERQ2_HUMAN | R.ALSSGGISIT#S#PPLS#PALPK.Y        | T25:S26:S30:    | 2 | 3,2913 | 1     | 0,423  |
| 1 | P23193 TCEA1_HUMAN | K.KKEPAITS#QNSPEAR.E               | S97:            | 2 | 3,2665 | 0,414 | 0,07   |
| 1 | Q9C0C2 TB182_HUMAN | R.LDS#PPPS#PITE.A                  | S494:S498:      | 2 | 3,2616 | 0,344 | 0,186  |
| 1 | O95425 SVIL_HUMAN  | R.SLT#QPITTEE.V                    | T736:           | 2 | 3,2577 | 0,362 | 0,407  |
| 1 | P46821 MAP1B_HUMAN | K.VLS#PLRS#PPLIGSE.S               | S1396:S1400:    | 2 | 3,2543 | 0,403 | 0,526  |
| 1 | Q7Z6Z7 HUWE1_HUMAN | R.DGGS#GNST#IIVSR.S                | S2362:T2366:    | 2 | 3,2478 | 0,291 | -0,086 |
| 1 | Q02952 AKA12_HUMAN | E.VSSLEGS#PPPCLGQEE.A              | S1395:          | 2 | 3,2469 | 0,467 | 0,691  |
| 1 | Q6S8J3 A26CA_HUMAN | E.M*ATAASS#SSLE.K                  | S933:           | 2 | 3,2433 | 0,371 | 0,424  |
| 1 | Q9NWF9 RN216_HUMAN | E.DQQLAS#DDEEPPAFPM*QE.S           | S249:           | 2 | 3,236  | 0,405 | 0,444  |
| 1 | Q01814 AT2B2_HUMAN | K.SATSSSPGS#PIHSLET#SL.-           | S1234:T1241:    | 2 | 3,2357 | 1     | 0,573  |
| 1 | O43598 RCL_HUMAN   | E.ADPPGQVAAS#PDPTT.-               | S169:           | 2 | 3,2306 | 0,513 | 0,243  |
| 1 | Q02750 MP2K1_HUMAN | K.LCDFGVSGQLIDS#M*ANS#FVGTR.S      | S218:S222:      | 3 | 3,2233 | 0,262 | 0,646  |
| 1 | Q53F19 CQ085_HUMAN | K.AEAPAGPALGLPS#PEAE.S             | S25:            | 2 | 3,219  | 0,365 | 0,589  |
| 1 | Q15185 TEBP_HUMAN  | D.S#DDEKM*PDLE.-                   | S151:           | 2 | 3,2187 | 0,246 | 0,383  |
| 1 | Q8NDI1 EHBP1_HUMAN | K.DLSTS#PKPS#PIPS#PVLGR.K          | S428:S432:S436: | 2 | 3,2172 | 0,355 | 0,117  |
| 1 | P29590 PML_HUMAN   | K.AVS#PPHLDGPPS#PRSPVIGS#E.V       | S518:S527:S535: | 2 | 3,213  | 0,32  | 0,522  |
| 1 | Q99638 RAD9A_HUMAN | R.VLPSISLS#PGPQPPKS#PGPHS#EEEEDE.A | S328:S336:S341: | 3 | 3,2111 | 0,261 | 0,496  |
| 1 | Q96E09 F122A_HUMAN | K.VSTTTDSPVS#PAQAASPFILDE.L        | S270:           | 2 | 3,2084 | 0,454 | 0      |
| 1 | Q6NYC8 PHTNS_HUMAN | K.LGLS#PGEPSVLTVE.A                | S54:            | 2 | 3,2062 | 0,34  | 0,748  |
| 1 | Q86TC9 MYPN_HUMAN  | E.AAGGDTT#PGSS#PSSLYEEPLGQPPR.F    | T251:S255:      | 3 | 3,2006 | 0,11  | 0      |
| 1 | Q9UQ35 SRRM2_HUMAN | E.NS#FGS#PLEFR.N                   | S1326:S1329:    | 2 | 3,1912 | 0,461 | 0,371  |
| 1 | P08651 NFIC_HUMAN  | E.GGATSPT#S#PSYSPDTPANR.S          | T472:S473:      | 2 | 3,1888 | 1     | 0,221  |
| 1 | P55209 NP1L1_HUMAN | R.QLT#VQM*M*QNPQILAALQE.R          | T39:            | 3 | 3,1868 | 0,182 | 0,506  |
| 1 | Q01433 AMPD2_HUMAN | E.EAGITM*S#PGPQ.-                  | S875:           | 2 | 3,18   | 0,401 | 0      |
| 1 | Q9UBU9 NXF1_HUMAN  | R.AFAM*PAPTPS#SSPVPT#LSPEQQE.M     | S556:T562:      | 3 | 3,1793 | 0,107 | -0,647 |
| 1 | P07814 SYEP_HUMAN  | E.YIPGQPLSQS#SDSS#PTR.N            | S882:S886:      | 2 | 3,1782 | 1     | -0,117 |
| 1 | Q53EZ4 CEP55_HUMAN | K.VAAS#PKS#PTAALNE.S               | S425:S428:      | 2 | 3,1763 | 0,233 | -0,08  |
| 1 | Q15942 ZYX_HUMAN   | E.IFPS#PPPPPEEE.G                  | S116:           | 2 | 3,1756 | 0,333 | 0,689  |
| 1 | P78316 NOP14_HUMAN | R.FGEYNSNM*S#PEE.K                 | S96:            | 2 | 3,1669 | 0,357 | 0,081  |

|   |                     |                                 |                 |   |        |       |       |
|---|---------------------|---------------------------------|-----------------|---|--------|-------|-------|
| 1 | P28290 SSFA2_HUMAN  | R.SQS#LPTLLS#PVR.V              | S739:S746:      | 2 | 3,1663 | 0,332 | 0,548 |
| 1 | Q12888 TP53B_HUMAN  | E.TSVIS#IDS#PQKLALDQE.L         | S724:S727:      | 2 | 3,165  | 0,352 | 0,576 |
| 1 | Q9NXH9 TRM1_HUMAN   | E.TSNQT#PPGPGAAAGPGID.-         | T646:           | 2 | 3,1639 | 0,388 | 0,289 |
| 1 | Q8N8S7 ENAH_HUMAN   | R.QNS#QLPAQVQNGPSQEE.L          | S125:           | 2 | 3,1614 | 0,345 | 0,442 |
| 1 | Q9Y4W2 LAS1L_HUMAN  | E.VGPFSTGQES#PTAE.N             | S617:           | 2 | 3,1515 | 0,388 | 0,656 |
| 1 | P42166 LAP2A_HUMAN  | R.SST#PLPTISSAE.N               | T160:           | 2 | 3,1502 | 0,37  | 0,09  |
| 1 | P27987 IP3KB_HUMAN  | R.AVLS#PGSVFS#PGR.G             | S43:S49:        | 2 | 3,1501 | 0,37  | 0,511 |
| 1 | Q8IWW6 RHG12_HUMAN  | R.ATT#PPNQGRPDS#PVYANLQE.L      | T231:S240:      | 3 | 3,1491 | 0,163 | 0,79  |
| 1 | Q9H3S7 PTN23_HUMAN  | E.STPIPS#SSPPLSS#PLPEAPQPK.E    | S1542:S1550:    | 3 | 3,1473 | 1     | 0,962 |
| 1 | Q86V48 LUZP1_HUMAN  | K.VIQAEGSNS#SM*LAE.I            | S59:            | 2 | 3,1466 | 0,338 | 0,159 |
| 1 | P51858 HDGF_HUMAN   | R.RAGDLLEDS#PKRPK.E             | S165:           | 3 | 3,1437 | 0,333 | 0,44  |
| 1 | Q9Y2X7 GIT1_HUMAN   | K.SLSS#PTDNLE.L                 | S362:           | 2 | 3,1435 | 0,417 | 0,214 |
| 1 | Q9NQX3 GEPH_HUMAN   | E.LEDLPS#PPPPLS#PPPTTS#PHKQTE.D | S188:S194:S200: | 3 | 3,1422 | 0,204 | 0,849 |
| 1 | Q9Y5K6 CD2AP_HUMAN  | E.AQDDSETVLAGPTS#PIPSLGNVSE.T   | S189:           | 3 | 3,1307 | 0,127 | 0,742 |
| 1 | Q8IYH0 Q8IYH0_HUMAN | K.TVDLGS#DLEDDC.-               | S201:           | 2 | 3,1306 | 0,366 | 0,558 |
| 1 | Q6GYQ0 GRIPE_HUMAN  | R.S#QTPS#PSTLNIDHM*E.Q          | S1000:S1004:    | 2 | 3,1292 | 0,357 | 0,466 |
| 1 | Q9NZM3 ITSN2_HUMAN  | R.T#VSPGVS#PIHGQGQVVE.N         | T881:S888:      | 2 | 3,1286 | 0,333 | 0,378 |
| 1 | Q09666 AHNK_HUMAN   | R.IS#APNVDFNLE.G                | S5448:          | 2 | 3,1283 | 0,321 | 0,47  |
| 1 | Q12888 TP53B_HUMAN  | K.M*VIQGPSS#PQGE.A              | S1114:          | 2 | 3,123  | 0,354 | 0,368 |
| 1 | O75821 EIF3G_HUMAN  | K.GIPLATGDTs#PEPE.L             | S42:            | 2 | 3,1218 | 0,541 | 1,417 |
| 1 | O94909 K0819_HUMAN  | R.GPS#QATS#PIRSPQE.S            | S292:S296:      | 2 | 3,1197 | 0,344 | 0,076 |
| 1 | Q3KQU3 MA7D1_HUMAN  | E.SAAPAS#PAPSPAPS#PTPAPPQK.E    | S544:S552:      | 3 | 3,1144 | 0,301 | 1,173 |
| 1 | Q16643 DREB_HUMAN   | R.GPGS#PAEDLMFM*E.S             | S416:           | 2 | 3,1136 | 0,405 | 0,413 |
| 1 | P05386 RLA1_HUMAN   | E.SEES#DDDM*GFGLFD.-            | S104:           | 2 | 3,1076 | 0,426 | 0,515 |
| 1 | Q15637 SF01_HUMAN   | R.TGDLGIPPNPEDRS#PS#PEPIYNSE.G  | S80:S82:        | 3 | 3,1021 | 0,235 | 0,801 |
| 1 | Q08J23 NSUN2_HUMAN  | E.STQLS#PADLTE.G                | S456:           | 2 | 3,0998 | 0,377 | 0,491 |
| 1 | Q13263 TIF1B_HUMAN  | R.STAPSAASASASAAAASS#PAGGGAE.A  | S50:            | 2 | 3,0958 | 0,419 | 0,468 |
| 1 | Q8WUM0 NU133_HUMAN  | E.NVS#ILAEDLE.G                 | S480:           | 2 | 3,0925 | 0,201 | 0,206 |
| 1 | Q15276 RABE1_HUMAN  | E.T#ASLLSSVTQGM*E.S             | T486:           | 2 | 3,0922 | 0,289 | 0,344 |
| 1 | Q03164 HRX_HUMAN    | R.NS#STPGLQVPVSPT#VPIQNQK.Y     | S3026:T3038:    | 3 | 3,086  | 0,34  | 1,012 |
| 1 | Q8IX21 CJ006_HUMAN  | E.Y#GTPTKS#PPAALE.V             | Y549:S555:      | 2 | 3,0859 | 0,356 | 0,327 |
| 1 | Q9UHR4 BI2L1_HUMAN  | K.TPASTPVSGTPQAS#PM*IE.R        | S261:           | 2 | 3,0844 | 0,436 | 0,327 |
| 1 | Q92597 NDRG1_HUMAN  | R.TAS#GSS#VTSLDGTR.S            | S330:S333:      | 2 | 3,0794 | 0,371 | 0,081 |

|   |                     |                                |                 |   |        |       |        |
|---|---------------------|--------------------------------|-----------------|---|--------|-------|--------|
| 1 | A8K1N6 A8K1N6_HUMAN | K.AT#PPPSPLLSE.L               | T264:           | 2 | 3,0707 | 0,204 | 0,103  |
| 1 | P41229 JAD1C_HUMAN  | E.TGGEGPPAPIPTTGS#PSTQE.N      | S1516:          | 2 | 3,0599 | 0,435 | 0,249  |
| 1 | P49848 TAF6_HUMAN   | E.AGDS#PPPAPGT#PK.A            | S653:T660:      | 2 | 3,0566 | 0,2   | 0,812  |
| 1 | Q15149 PLEC1_HUMAN  | R.YAS#GSSASLGGPE.S             | S4670:          | 2 | 3,0406 | 0,273 | -0,097 |
| 1 | Q3KQU3 MA7D1_HUMAN  | R.SS#QPSPTAVPASDS#PPTKQE.V     | S113:S125:      | 2 | 3,0354 | 1     | 0,562  |
| 1 | Q15025 TNIP1_HUMAN  | E.ALSIQT#PPSSPPT#AFGSPE.G      | T431:T438:      | 2 | 3,034  | 0,265 | 0,836  |
| 1 | Q86UU0 BCL9L_HUMAN  | R.SVSLDS#QM*GYLPAPGGM*ANLPF.-  | S1483:          | 3 | 3,0336 | 0,182 | 0,542  |
| 1 | O43237 DC1L2_HUMAN  | K.LLLGPNPAAVAAAGDLTS#EEEE.G    | S27:            | 2 | 3,0242 | 0,451 | 0,328  |
| 1 | A8K1N6 A8K1N6_HUMAN | K.AT#PPPS#PLLSE.L              | T264:S268:      | 2 | 3,0217 | 0,195 | 0,481  |
| 1 | Q6PJG2 CN043_HUMAN  | R.SFELPPYT#PPPILS#PVRE.G       | T655:S661:      | 2 | 3,0207 | 0,195 | 0,666  |
| 1 | P06241 FYN_HUMAN    | E.DYFTATEPQY#QPGENL.-          | Y531:           | 2 | 3,0204 | 0,42  | 0,5    |
| 1 | Q3KQU3 MA7D1_HUMAN  | E.SAAPAS#PAPS#PAPS#PTPAPPQK.E  | S544:S548:S552: | 3 | 3,0194 | 0,222 | 0,242  |
| 1 | P35222 CTNB1_HUMAN  | R.TS#M*GGTQQQFVE.G             | S552:           | 2 | 3,0139 | 0,287 | -0,173 |
| 1 | Q9Y3X0 CCDC9_HUMAN  | E.GAAS#PAPETPQPTS#PETSPK.E     | S376:S386:      | 2 | 3,0073 | 1     | 0,463  |
| 1 | P11388 TOP2A_HUMAN  | K.GSVPLSS#S#PPATHFPDETE.I      | S1392:S1393:    | 2 | 3,0063 | 0,395 | 0,577  |
| 1 | Q99661 KIF2C_HUMAN  | E.LSSQM*SS#FNE.A               | S633:           | 2 | 3,0061 | 0,31  | 0,498  |
| 1 | Q9UGR2 Z3H7B_HUMAN  | R.GS#PALLPS#TPTM*PLFPHVLD.L    | S233:S239:      | 2 | 3,0044 | 0,431 | 0,646  |
| 1 | P61978 HNRPK_HUMAN  | E.GLQLPS#PTATSQLPLE.S          | S116:           | 2 | 2,9974 | 0,359 | 0,704  |
| 1 | Q14160 LAP4_HUMAN   | E.ACPCQPDGSGS#PLPAEEE.K        | S504:           | 2 | 2,9958 | 0,366 | 0,19   |
| 1 | P05388 RLA0_HUMAN   | E.S#DEDM*GFGLFD.-              | S307:           | 2 | 2,9957 | 0,283 | 0      |
| 1 | P42677 RS27_HUMAN   | K.DLLHPSPEEEKR.K               |                 | 3 | 2,9837 | 0,175 | 0,063  |
| 1 | Q9Y5K6 CD2AP_HUMAN  | E.AQDDSETVLAGPTS#PIPSLGNVSE.T  | S189:           | 2 | 2,9818 | 0,448 | 0,594  |
| 1 | Q9NQW6 ANLN_HUMAN   | K.SCSPSPVS#PQVQQAADTISD.S      | S102:           | 2 | 2,9785 | 0,359 | 0,542  |
| 1 | P15407 FOSL1_HUMAN  | R.KSS#SSSGDPSSDPLGS#PTLLAL.-   | S252:S265:      | 2 | 2,9768 | 1     | 0,863  |
| 1 | A1L390 PKHG3_HUMAN  | E.SSGQGPS#SPVALLGQVQDFQQSAE.C  | S1168:          | 3 | 2,9761 | 0,297 | 0,586  |
| 1 | Q9Y2H6 FND3A_HUMAN  | K.M*S#SPPSS#PQKCPSPINE.H       | S138:S143:      | 2 | 2,9719 | 0,258 | 0,363  |
| 1 | Q7Z406 MYH14_HUMAN  | E.AQPGSGPS#PEPEGS#PPAHPQ.-     | S1983:S1989:    | 2 | 2,9712 | 0,28  | 0,586  |
| 1 | O14514 BAI1_HUMAN   | E.NVATLSVSS#LE.R               | S1469:          | 2 | 2,9706 | 0,361 | 0,407  |
| 1 | Q14157 UBP2L_HUMAN  | E.SGYQS#GPIQSTTYTSQNNAQGPLYE.Q | S573:           | 3 | 2,9679 | 0,221 | 1,585  |
| 1 | Q8N0Z3 CCD52_HUMAN  | K.LVGLNLS#PPM*S#PVQLPLR.A      | S760:S764:      | 3 | 2,9617 | 0,217 | 0,26   |
| 1 | O43379 WDR62_HUMAN  | E.LSLPEGPSVPSSSLPQT#PEQE.K     | T1053:          | 2 | 2,9613 | 0,432 | 0,54   |
| 1 | P17987 TCPA_HUMAN   | K.DDKHGSYEDAVHSGALND.-         |                 | 3 | 2,955  | 0,277 | 0,379  |
| 1 | Q8WVB6 CTF18_HUMAN  | E.NSPQVDGS#PPGLE.G             | S871:           | 2 | 2,9455 | 0,159 | 0,354  |

|   |                     |                              |            |   |        |       |        |
|---|---------------------|------------------------------|------------|---|--------|-------|--------|
| 1 | Q13671 RIN1_HUMAN   | R.SM*S#AAFCSSLAPE.R          | S351:      | 2 | 2,9402 | 0,319 | 0,66   |
| 1 | P25490 TTY1_HUMAN   | E.EQIIGENS#PPDYSE.Y          | S247:      | 2 | 2,9393 | 0,447 | 0,221  |
| 1 | P55072 TERA_HUMAN   | E.DNSVVSLSQPK.M              |            | 2 | 2,937  | 0,338 | 0,104  |
| 1 | Q9UBU7 DBF4A_HUMAN  | K.LLFIS#EPIPHPS#NE.L         | S413:S420: | 2 | 2,9337 | 0,347 | 0,696  |
| 1 | P07355 ANXA2_HUMAN  | E.KDIISDTSQDFRK.L            |            | 3 | 2,9331 | 0,431 | 0,062  |
| 1 | P12270 TPR_HUMAN    | E.TQVYNQDSQDS#IGE.G          | S1893:     | 2 | 2,9327 | 0,434 | 0,147  |
| 1 | Q7Z5K2 WAPL_HUMAN   | E.STGDPFGFDS#DDE.S           | S77:       | 2 | 2,9308 | 0,304 | 0,581  |
| 1 | Q9H0L4 CSTFT_HUMAN  | K.QGGSQPSSFS#PGQSQVTPQDQE.K  | S563:      | 2 | 2,9248 | 0,367 | 0,829  |
| 1 | Q9UQ35 SRRM2_HUMAN  | K.THTTALAGRS#PS#PASGRR.G     | S295:S297: | 3 | 2,9185 | 0,286 | 0      |
| 1 | P52756 RBM5_HUMAN   | R.GLVAAYSGDS#DNEEE.L         | S624:      | 2 | 2,9124 | 0,329 | 0,149  |
| 1 | A8KAP4 A8KAP4_HUMAN | E.VCT#TSFSTS#PPSQLM*VPGKE.G  | T253:S259: | 2 | 2,9071 | 1     | 0,838  |
| 1 | P78362 SRPK2_HUMAN  | R.TVS#ASST#GDLPK.A           | S494:T498: | 2 | 2,9069 | 0,36  | 0,092  |
| 1 | Q9UJU6 DBNL_HUMAN   | R.AM*ST#TSISS#PQPGK.L        | T270:S275: | 2 | 2,9025 | 1     | 0,233  |
| 1 | Q86W50 MET10_HUMAN  | E.ASEQFGS#PVAE.R             | S498:      | 2 | 2,9001 | 0,31  | 0,203  |
| 1 | P42166 LAP2A_HUMAN  | R.EQGTES#RSST#PLPTISSAE.N    | S156:T160: | 2 | 2,8866 | 1     | 0,549  |
| 1 | P49023 PAXI_HUMAN   | E.ANSS#PPLPGALSPLYGVPE.T     | S170:      | 2 | 2,8852 | 0,298 | 0,627  |
| 1 | Q15424 SAFB1_HUMAN  | E.LAEAPTEAPS#PE.A            | S344:      | 2 | 2,8744 | 0,314 | 0,189  |
| 1 | Q6ZS17 FA65A_HUMAN  | R.TLS#HIS#EASVDAALAE.A       | S453:S456: | 2 | 2,8717 | 0,347 | 0,344  |
| 1 | Q9BRT9 SLD5_HUMAN   | E.VDFLGQDS#DGGSEE.V          | S12:       | 2 | 2,8652 | 0,325 | 0,556  |
| 1 | Q02952 AKA12_HUMAN  | K.SAESPTS#PVTSE.T            | S286:      | 2 | 2,8605 | 0,28  | 0,48   |
| 1 | Q00587 BORG5_HUMAN  | R.M*AS#PPAPSPAPPAIS#PIIK.N   | S101:S113: | 2 | 2,8597 | 0,27  | 0,423  |
| 1 | Q2TAL8 QRIC1_HUMAN  | E.VEPQSQPQS#PE.L             | S464:      | 2 | 2,8593 | 0,374 | 0,174  |
| 1 | Q9UBU9 NXF1_HUMAN   | R.AFAM*PAPTSSS#PVPTLSPEQQE.M | S558:      | 2 | 2,8549 | 0,445 | 0,594  |
| 1 | P32004 L1CAM_HUMAN  | E.AAGGND#SGATSPINPAVALE.-    | S1243:     | 2 | 2,8534 | 0,264 | 0,37   |
| 1 | Q9NUA8 ZBT40_HUMAN  | E.ACS#PSPAVQTFSE.A           | S214:      | 2 | 2,846  | 0,384 | -0,167 |
| 1 | P27816 MAP4_HUMAN   | E.SLQDVGQS#AAPTFM*ISPE.T     | S616:      | 2 | 2,8418 | 0,18  | 0,618  |
| 1 | Q00587 BORG5_HUMAN  | K.NAIS#LPQLNQAAYD.S          | S121:      | 2 | 2,8393 | 0,169 | 0,229  |
| 1 | Q12888 TP53B_HUMAN  | R.SEALS#SVLDQEE.A            | S639:      | 2 | 2,8385 | 0,233 | 0,792  |
| 1 | P04183 KITH_HUMAN   | K.LFAPQQILQCS#PAN.-          | S231:      | 2 | 2,8374 | 0,33  | 0,586  |
| 1 | P61978 HNRPK_HUMAN  | E.EGLQLPS#PTATSQLPLESDAVE.C  | S116:      | 2 | 2,8358 | 0,405 | 0,517  |
| 1 | Q9H4A3 WNK1_HUMAN   | K.EGPVAS#PPFM*DLE.Q          | S1978:     | 2 | 2,8324 | 0,352 | 0,575  |
| 1 | Q13127 REST_HUMAN   | K.TALAS#PPATM*AANE.S         | S992:      | 2 | 2,815  | 0,256 | 0,339  |
| 1 | Q8WWQ0 PHIP_HUMAN   | R.TAFYNEDDS#EEE.Q            | S1783:     | 2 | 2,812  | 0,341 | 0,559  |

|   |                     |                              |              |   |        |       |        |
|---|---------------------|------------------------------|--------------|---|--------|-------|--------|
| 1 | O43663 PRC1_HUMAN   | R.NFS#INSVASTYSE.F           | S571:        | 2 | 2,8076 | 0,277 | 0,244  |
| 1 | Q99733 NP1L4_HUMAN  | K.ASGDGES#LDEDSE.F           | S304:        | 2 | 2,7966 | 0,288 | 0,351  |
| 1 | Q9H7N4 SFR19_HUMAN  | K.AAPPPPALT#PDSQTVDSCKT#PE.V | T989:T1001:  | 2 | 2,7933 | 1     | 0,676  |
| 1 | Q7Z6Z7 HUWE1_HUMAN  | R.AGSST#PGDAPPAVAE.V         | T2889:       | 2 | 2,7875 | 0,311 | 0,26   |
| 1 | P07199 CENPB_HUMAN  | E.AGGS#FGAYGAQEE.A           | S486:        | 2 | 2,7865 | 0,318 | 0,276  |
| 1 | Q9HC35 EMAL4_HUMAN  | K.ATLLEDQQDPSPS#S.-          | S980:        | 2 | 2,7836 | 0,413 | 0,233  |
| 1 | B2CI53 B2CI53_HUMAN | K.YSVDPS#IVNISDE.M           | S1073:       | 2 | 2,7817 | 0,285 | 0,723  |
| 1 | P61978 HNRPK_HUMAN  | E.EGLQLPS#PTATSQLPLE.S       | S116:        | 2 | 2,7772 | 0,341 | 0,721  |
| 1 | Q14157 UBP2L_HUMAN  | R.YPSS#IS#SSPQKD.L           | S605:S607:   | 2 | 2,7617 | 1     | 0,168  |
| 1 | Q9NQW6 ANLN_HUMAN   | E.ASNQQPLS#GGEE.K            | S54:         | 2 | 2,7602 | 0,187 | 0,094  |
| 1 | P18583 SON_HUMAN    | R.SAAS#PVVSSM*PE.R           | S1769:       | 2 | 2,7572 | 0,338 | 0,485  |
| 1 | Q12756 KIF1A_HUMAN  | E.ALS#PAFSEDSE.S             | S1413:       | 2 | 2,7503 | 0,327 | 0,396  |
| 1 | P61978 HNRPK_HUMAN  | E.GLQLPSPTAT#SQLPLESDAVE.C   | T120:        | 2 | 2,7444 | 0,3   | 0,328  |
| 1 | Q9UNE7 STUB1_HUMAN  | R.LGAGGGS#PEKS#PSAQE.L       | S19:S23:     | 2 | 2,7431 | 0,312 | 0,15   |
| 1 | Q3MII6 TBC25_HUMAN  | E.ASPTGDM*AVGS#PLM*QE.V      | S581:        | 2 | 2,7389 | 0,336 | 0,573  |
| 1 | Q5JTD0 TJAP1_HUMAN  | R.GS#PEEELPLPAFE.K           | S300:        | 2 | 2,7366 | 0,272 | 0,326  |
| 1 | Q01433 AMPD2_HUMAN  | E.TIPEEAGITM*S#PGPQ.-        | S875:        | 2 | 2,734  | 0,218 | 0,526  |
| 1 | Q9UFM0 Q9UFM0_HUMAN | R.GGPS#PPCSPLSE.A            | S51:         | 2 | 2,7219 | 0,266 | 0,096  |
| 1 | P12931 SRC_HUMAN    | E.DYFTSTEPQY#QPGENL.-        | Y530:        | 2 | 2,7155 | 0,37  | 0,682  |
| 1 | Q92900 RENT1_HUMAN  | E.AYGPSS#QTLTFLDTEE.A        | S10:         | 2 | 2,7148 | 0,29  | 0,531  |
| 1 | O43290 SNUT1_HUMAN  | E.GGAPPPGS#PQVLEEDEAELE.L    | S486:        | 2 | 2,7073 | 0,187 | 1,394  |
| 1 | Q02952 AKA12_HUMAN  | K.VVGQTT#PESFE.K             | T1116:       | 2 | 2,696  | 0,244 | 0,287  |
| 1 | Q7Z6Z7 HUWE1_HUMAN  | R.IALPAPRGS#GTAS#DDEFE.N     | S1903:S1907: | 2 | 2,6909 | 0,239 | 0,857  |
| 1 | Q9UMY1 NOL7_HUMAN   | E.GQLAS#EEEEAE.H             | S26:         | 2 | 2,6893 | 0,208 | 0,096  |
| 1 | Q16643 DREB_HUMAN   | E.GYFSQS#QEEE.F              | S601:        | 2 | 2,6827 | 0,334 | 0,285  |
| 1 | Q14678 KANK1_HUMAN  | R.S#YSAGNASQLE.Q             | S323:        | 2 | 2,682  | 0,275 | 0,303  |
| 1 | Q8N5Y2 MS3L1_HUMAN  | R.SSS#PIPLT#PSKE.G           | S400:T405:   | 2 | 2,681  | 0,327 | 0      |
| 1 | Q15398 DLG7_HUMAN   | E.MGIPQQTTS#PE.N             | S662:        | 2 | 2,6794 | 0,193 | 0,096  |
| 1 | P49736 MCM2_HUMAN   | R.TDALTS#S#PGRDLPPFEDE.S     | S40:S41:     | 2 | 2,6784 | 0,371 | 0,579  |
| 1 | P51610 HCFC1_HUMAN  | E.VDQLS#LPQELM*AE.A          | S1586:       | 2 | 2,6753 | 0,331 | 0,467  |
| 1 | Q8NFH5 NUP53_HUMAN  | K.TLGT#PTQPGS#TPR.I          | T273:S279:   | 2 | 2,6753 | 0,347 | 0      |
| 1 | Q02952 AKA12_HUMAN  | E.MVSAVSQLTDS#PDT#TEE.A      | S1012:T1015: | 2 | 2,6731 | 0,259 | 0,619  |
| 1 | Q6R327 RICTR_HUMAN  | K.FSGISGCS#DGVSQE.G          | S1577:       | 2 | 2,6714 | 0,133 | -0,646 |

|   |                    |                                 |            |   |        |       |        |
|---|--------------------|---------------------------------|------------|---|--------|-------|--------|
| 1 | P21127 CD2L1_HUMAN | E.VGEGT#PQSSALTE.G              | T395:      | 2 | 2,6631 | 0,228 | -0,27  |
| 1 | Q9BPZ3 PAIP2_HUMAN | R.SSTS#PSIINE.D                 | S10:       | 2 | 2,6618 | 0,087 | 0,109  |
| 1 | Q5QJE6 TDIF2_HUMAN | K.FGDCGG#DDEEE.S                | S397:      | 2 | 2,6605 | 0,21  | 0      |
| 1 | Q96PD2 DCBD2_HUMAN | R.TDS#CSS#AAQAYDTPK.A           | S724:S727: | 2 | 2,6541 | 0,405 | 0,067  |
| 1 | Q9H0H5 RGAP1_HUMAN | K.VSLLGPVTT#PE.H                | T580:      | 2 | 2,6533 | 0,344 | 0,614  |
| 1 | Q14247 SRC8_HUMAN  | K.TQTPPV#PAPQPTEE.R             | S405:      | 2 | 2,6448 | 0,261 | 0,221  |
| 1 | Q14247 SRC8_HUMAN  | K.TQT#PPV#PAPQPTEE.R            | T401:S405: | 2 | 2,6422 | 0,311 | 0,281  |
| 1 | Q93009 UBP7_HUMAN  | K.AGEQQLS#EPEDM*E.M             | S18:       | 2 | 2,6391 | 0,266 | 0,078  |
| 1 | P40855 PEX19_HUMAN | K.NATDLQNSS#M*SEEE.L            | S147:      | 2 | 2,6325 | 0,382 | 0,37   |
| 1 | P51114 FXR1_HUMAN  | E.DAVLM*DGM*TESDT#ASVNE.N       | T526:      | 2 | 2,6235 | 0,217 | 0,061  |
| 1 | Q17RY0 CPEB4_HUMAN | R.IES#PVLTFDYQE.A               | S137:      | 2 | 2,6207 | 0,356 | 0,155  |
| 1 | Q9UGU5 HM2L1_HUMAN | K.S#PPTM*LLPAS#PAKAPE.T         | S502:S512: | 2 | 2,6162 | 0,223 | 0,065  |
| 1 | Q9UKA4 AKA11_HUMAN | R.S#VSPTFLNPSDE.N               | S1240:     | 2 | 2,6144 | 0,339 | 0,178  |
| 1 | P10398 ARAF_HUMAN  | E.LLT#PQGPS#PR.T                | T181:S186: | 2 | 2,6128 | 0,168 | -0,199 |
| 1 | O43303 CE110_HUMAN | K.LPS#PEPSM*S#PK.M              | S366:S372: | 2 | 2,6114 | 0,268 | 0,091  |
| 1 | Q92878 RAD50_HUMAN | R.VFQT#EAELQE.V                 | T690:      | 2 | 2,6065 | 0,095 | -0,096 |
| 1 | Q14247 SRC8_HUMAN  | K.TQT#PPVSPAPQPTEE.R            | T401:      | 2 | 2,6026 | 0,336 | 0,147  |
| 1 | Q2NKX8 ERC6L_HUMAN | E.LCTNSS#LGM*E.K                | S829:      | 2 | 2,6016 | 0,197 | 0,303  |
| 1 | P54725 RD23A_HUMAN | E.YLLTGIPGS#PEPE.H              | S205:      | 2 | 2,5993 | 0,423 | 0,672  |
| 1 | Q13404 UB2V1_HUMAN | K.LQPPEGQCYS#N.-                | S220:      | 2 | 2,5975 | 0,541 | 0,415  |
| 1 | Q13263 TIF1B_HUMAN | R.LASPSGS#TSSGLE.V              | S598:      | 2 | 2,5955 | 0,112 | 0,192  |
| 1 | P15923 TFE2_HUMAN  | E.LALNS#PGPLS#PSGM*K.G          | S134:S139: | 2 | 2,5836 | 0,212 | 0,223  |
| 1 | Q6PJT7 ZC3HE_HUMAN | E.TLQM*S#QDYDM*E.S              | S450:      | 2 | 2,5825 | 0,163 | 0,373  |
| 1 | Q14934 NFAC4_HUMAN | R.FGLGS#PLPS#PR.A               | S213:S217: | 2 | 2,5793 | 0,11  | 0      |
| 1 | Q8WWI1 LMO7_HUMAN  | E.IQLPSQS#PVEE.Q                | S867:      | 2 | 2,5663 | 0,377 | 0,187  |
| 1 | Q92598 HS105_HUMAN | E.AGTQPQVQTDAAQTSQS#PPSPE.L     | S554:      | 2 | 2,5634 | 0,278 | 0,207  |
| 1 | Q12888 TP53B_HUMAN | K.MVIQGSS#PQGE.A                | S1114:     | 2 | 2,5633 | 0,383 | 0,745  |
| 1 | Q86SQ0 PHLB2_HUMAN | R.NFSCGS#VEFDEADLE.S            | S387:      | 2 | 2,5522 | 0,158 | 0,61   |
| 1 | Q9BYW2 SETD2_HUMAN | R.SFCPIELNINGS#PGA.E.S          | S676:      | 2 | 2,5518 | 0,265 | 0,615  |
| 1 | P49736 MCM2_HUMAN  | E.SFTM*AS#SPAQR.R               | S12:       | 2 | 2,545  | 0,26  | -0,286 |
| 1 | P52292 IMA2_HUMAN  | R.NVSSFPDDAT#SPLQE.N            | T61:       | 2 | 2,5364 | 0,399 | 0,506  |
| 1 | Q6S8J3 A26CA_HUMAN | E.M*ATAASSSS#LE.K               | S935:      | 2 | 2,5361 | 0,22  | 0      |
| 1 | Q02446 SP4_HUMAN   | R.IVTVAAISQDS#NPATPNVSTNM*EEF.- | S770:      | 2 | 2,5319 | 0,353 | 0,804  |

|   |                    |                                 |            |   |        |       |        |
|---|--------------------|---------------------------------|------------|---|--------|-------|--------|
| 1 | Q5T1V6 DDX59_HUMAN | E.SCPFPS#PGGQLAE.V              | S64:       | 2 | 2,5253 | 0,247 | 0,599  |
| 1 | P29692 EF1D_HUMAN  | R.ATAPQQTQHVS#PM*R.Q            | S133:      | 2 | 2,5122 | 0,208 | 0      |
| 1 | Q9NVE7 PANK4_HUMAN | E.NYAGSSGLM*SAS#PE.L            | S393:      | 2 | 2,5095 | 0,283 | -0,083 |
| 1 | P23396 RS3_HUMAN   | E.ILPTT#PISE.Q                  | T221:      | 2 | 2,504  | 0,237 | -0,116 |
| 1 | Q66K74 MAP1S_HUMAN | E.SLPTLSDDSDPVPLAPGAADSDEDT#E.G | T813:      | 2 | 2,5026 | 0,409 | 0,568  |
| 1 | POC1Z6 TFPT_HUMAN  | K.LLPYPTLSPAS#D.-               | S252:      | 2 | 2,4901 | 0,323 | 0,771  |
| 1 | Q96N67 DOCK7_HUMAN | R.SLSNS#NPDISGTPTSPDDE.V        | S900:      | 2 | 2,49   | 0,279 | 0,424  |
| 1 | P49585 PCY1A_HUMAN | K.T#SPPCS#PANLSR.H              | T342:S347: | 2 | 2,4886 | 0,284 | 0,169  |
| 1 | Q9NQT8 KI13B_HUMAN | E.AQDGPPS#PLSE.A                | S1559:     | 2 | 2,4871 | 0,23  | 0,104  |
| 1 | P17029 ZKSC1_HUMAN | E.ATGLS#PQAAQE.K                | S13:       | 2 | 2,4864 | 0,187 | 0,317  |
| 1 | Q8WWM7 ATX2L_HUMAN | K.GPPQS#PVFE.G                  | S111:      | 2 | 2,4863 | 0,123 | 0      |
| 1 | Q96QT6 PHF12_HUMAN | R.TTS#PSS#DTDLLDR.S             | S131:S134: | 2 | 2,4848 | 0,232 | -0,156 |
| 1 | Q96TA1 NIBL1_HUMAN | E.YSNSGGGGS#PSPST#PE.S          | S588:T593: | 2 | 2,4805 | 0,325 | 0,074  |
| 1 | Q8N3F8 MILK1_HUMAN | E.VAQSPST#AS#LE.S               | T416:S418: | 2 | 2,4773 | 0,173 | 0,291  |
| 1 | P04150 GCR_HUMAN   | E.NCLLS#PLAGEDD.S               | S226:      | 2 | 2,4771 | 0,355 | 0,529  |
| 1 | Q99708 RBBP8_HUMAN | E.SETQGPM*S#PLGDE.L             | S276:      | 2 | 2,4768 | 0,082 | 0,169  |
| 1 | Q9UFW8 CGBP1_HUMAN | E.NQLLNS#QDC.-                  | S164:      | 2 | 2,4755 | 0,357 | 0,208  |
| 1 | Q99755 PI51A_HUMAN | E.GSPIPDPSFS#PLVGE.T            | S534:      | 2 | 2,4702 | 0,289 | 0,773  |
| 1 | P12270 TPR_HUMAN   | E.GVQGPLNVS#LSEE.G              | S1185:     | 2 | 2,4686 | 0,24  | 0,52   |
| 1 | Q9C0C2 TB182_HUMAN | E.GVLQS#PSQDQE.K                | S435:      | 2 | 2,4663 | 0,349 | 0,096  |
| 1 | P51114 FXR1_HUMAN  | E.DAVLM*DGM*TES#DTASVNE.N       | S524:      | 2 | 2,4631 | 0,195 | 0,122  |
| 1 | Q9NWZ3 IRAK4_HUMAN | E.QSYM*PPDSSS#PE.N              | S152:      | 2 | 2,4624 | 0,211 | 0,258  |
| 1 | P68431 H31_HUMAN   | E.DTNLCAIHAK.R                  |            | 2 | 2,4617 | 0,192 | 0      |
| 1 | Q9NQW6 ANLN_HUMAN  | E.M*DQALAES#SEEQE.D             | S594:      | 2 | 2,4616 | 0,157 | -0,078 |
| 1 | Q06210 GFPT1_HUMAN | R.VDS#TTCLFPVEE.K               | S261:      | 2 | 2,4491 | 0,175 | 0,661  |
| 1 | P18583 SON_HUMAN   | E.LQGPPVT#PVLE.L                | T400:      | 2 | 2,4491 | 0,17  | 0,099  |
| 1 | Q6PKG0 LARP1_HUMAN | K.GLSAS#LPDLSE.N                | S548:      | 2 | 2,4478 | 0,255 | 0,19   |
| 1 | Q14847 LASP1_HUMAN | K.QSFTM*VADT#PE.N               | T68:       | 2 | 2,4405 | 0,161 | 0,369  |
| 1 | P08107 HSP71_HUMAN | R.TLS#SSTQASLE.I                | S275:      | 2 | 2,4347 | 0,18  | -0,101 |
| 1 | Q9UQ35 SRRM2_HUMAN | E.M*STSNFESS#PE.V               | S1271:     | 2 | 2,4343 | 0,116 | 0,093  |
| 1 | Q9BXP5 ARS2_HUMAN  | R.HELSP#PPQKR.M                 | S74:       | 2 | 2,4339 | 0,261 | -0,625 |
| 1 | Q8IW35 CEP97_HUMAN | E.STFM*PVASGLSPLSPT#VE.L        | T418:      | 2 | 2,4163 | 0,213 | 0,573  |
| 1 | Q92994 TF3B_HUMAN  | E.LLGGAGGSSEAAGS#PE.W           | S398:      | 2 | 2,4141 | 0,279 | -0,247 |

|   |                      |                             |                 |   |        |       |        |
|---|----------------------|-----------------------------|-----------------|---|--------|-------|--------|
| 1 | Q9NQZ2 SAS10_HUMAN   | K.TSAAACAVTDLS#DDS#DFDE.K   | S365:S368:      | 2 | 2,413  | 0,162 | 0,795  |
| 1 | Q6ZS17 FA65A_HUMAN   | R.TLS#HIS#EAS#VDAALAE.A     | S453:S456:S459: | 2 | 2,4068 | 0,312 | 1,119  |
| 1 | O43149 ZZEF1_HUMAN   | R.LLS#FRS#M*EE.A            | S1537:S1540:    | 2 | 2,4033 | 0,155 | 0,189  |
| 1 | Q9UFM0 Q9UFM0_HUMAN  | R.GGPS#PPCS#PLSE.A          | S51:S55:        | 2 | 2,3999 | 0,189 | -1,27  |
| 1 | POC1Z6 TFPT_HUMAN    | K.LLPYPTLAS#PAS#D.-         | S249:S252:      | 2 | 2,3998 | 0,349 | 0,243  |
| 1 | Q02790 FKBP4_HUMAN   | K.SNTAGS#QSQVETEA.-         | S451:           | 2 | 2,3992 | 0,238 | -0,246 |
| 1 | P46821 MAP1B_HUMAN   | E.VAPVS#PEVTQE.V            | S1298:          | 2 | 2,3931 | 0,331 | 0,197  |
| 1 | Q8IUC6 TCAM1_HUMAN   | E.IASPPELPSS#PPPGLPE.V      | S270:           | 2 | 2,3918 | 0,321 | 0,622  |
| 1 | Q13085 ACACA_HUMAN   | R.FIIGSVSEDNS#EDE.I         | S29:            | 2 | 2,3904 | 0,248 | 0,527  |
| 1 | Q9UQR1 ZN148_HUMAN   | R.AGM*TS#SPDATTGQTFG.-      | S783:           | 2 | 2,3901 | 0,313 | 0,15   |
| 1 | Q02952 AKA12_HUMAN   | K.SAESPT#SPVTSE.T           | T285:           | 2 | 2,3876 | 0,247 | 0,384  |
| 1 | Q70E73 RAPH1_HUMAN   | R.S#QSIVSSVFSE.A            | S621:           | 2 | 2,3864 | 0,143 | 0      |
| 1 | Q6VY07 PACS1_HUMAN   | E.M*YNPSDS#GPEM*EE.T        | S381:           | 2 | 2,381  | 0,217 | 0,305  |
| 1 | Q96RK0 CIC_HUMAN     | R.SS#PPLPPPAEE.R            | S1246:          | 2 | 2,378  | 0,094 | 0      |
| 1 | Q8WXI9 P66B_HUMAN    | R.LTPSPDIIVLS#DNE.A         | S129:           | 2 | 2,3766 | 0,172 | 0,23   |
| 1 | Q8TDY2 RBCC1_HUMAN   | K.ASVS#QTSPQSASS#PRM*E.S    | S644:S653:      | 2 | 2,3726 | 1     | 1,901  |
| 1 | Q9Y2U5 M3K2_HUMAN    | R.NGS#FTSINSE.G             | S182:           | 2 | 2,3712 | 0,217 | 0      |
| 1 | Q9UIS9 MBD1_HUMAN    | E.GAS#SPVQVPGPVAASTE.A      | S464:           | 2 | 2,371  | 0,224 | 0,672  |
| 1 | P08069 IGF1R_HUMAN   | R.ALPLQSSST#C.-             | T1366:          | 2 | 2,3709 | 0,225 | 0,317  |
| 1 | Q96AE4 FUBP1_HUMAN   | R.SCM*LTGT#PE.S             | T153:           | 2 | 2,3696 | 0,208 | 0,447  |
| 1 | ##P49790 NU153_HUMAN | E.TNS#VAPEPTIRGDT#INSSEED.A | S1368:T1379:    | 2 | 2,36   | 0,136 | 0,714  |
| 1 | O00116 ADAS_HUMAN    | R.AASAATAAPTAT#PAAQE.S      | T74:            | 2 | 2,3533 | 0,283 | 0,154  |
| 1 | O75821 EIF3G_HUMAN   | K.GIPLATGDT#S#PEPE.L        | T41:S42:        | 2 | 2,3522 | 0,217 | 0,474  |
| 1 | Q96PU5 NED4L_HUMAN   | R.SLSSPT#VTLSAPLE.G         | T451:           | 2 | 2,3503 | 0,205 | 0,165  |
| 1 | P11388 TOP2A_HUMAN   | E.NT#EGSPQEDGVELE.G         | T1244:          | 2 | 2,3503 | 0,162 | 0      |
| 1 | Q8NCE2 MTMRE_HUMAN   | E.SS#PGATGSFTYE.A           | S453:           | 2 | 2,3475 | 0,257 | 0,38   |
| 1 | Q9NYY8 FAKD2_HUMAN   | E.ALPVAAVNVQST#Q.-          | T709:           | 2 | 2,3333 | 0,305 | 0,885  |
| 1 | Q96JP5 ZFP91_HUMAN   | E.VLIEDSDS#AGP.-            | S567:           | 2 | 2,3281 | 0,37  | 0,103  |
| 1 | Q8IY67 RAVR1_HUMAN   | K.AIGSS#PLGSGE.G            | S512:           | 2 | 2,3242 | 0,376 | 0      |
| 1 | P02743 SAMP_HUMAN    | E.S#VTDHVNLIIT#PLE.K        | S34:T43:        | 2 | 2,3162 | 0,1   | 0,382  |
| 1 | Q6S8J3 A26CA_HUMAN   | K.AGFAGDDAPR.A              |                 | 2 | 2,3144 | 0,235 | 0      |
| 1 | Q9Y6Y0 NS1BP_HUMAN   | K.S#LSFEM*QQDE.L            | S336:           | 2 | 2,3127 | 0,139 | 0,279  |
| 1 | P22626 ROA2_HUMAN    | R.GFGFVTFSS#M*AE.V          | S71:            | 2 | 2,3073 | 0,328 | 0,177  |



|   |                    |                              |                 |   |        |       |        |
|---|--------------------|------------------------------|-----------------|---|--------|-------|--------|
| 1 | O95453 PARN_HUMAN  | R.NLS#PSQEE.A                | S570:           | 2 | 2,3049 | 0,117 | 0,31   |
| 1 | Q13283 G3BP1_HUMAN | E.VFGGFVTEPQEEES#EEE.V       | S149:           | 2 | 2,2926 | 0,163 | 0,451  |
| 1 | Q6PD74 P34_HUMAN   | E.IEGLS#S#DEEH.-             | S310:S311:      | 2 | 2,2913 | 0,091 | 0,096  |
| 1 | P05386 RLA1_HUMAN  | E.S#DDDM*GFGLFD.-            | S104:           | 2 | 2,2845 | 0,241 | 0,278  |
| 1 | P31350 RIR2_HUMAN  | R.M*GVM*SS#PTENSFTLDADF.-    | S377:           | 2 | 2,2818 | 0,228 | 0,71   |
| 1 | Q12792 TWF1_HUMAN  | K.YLLS#QSSPAPLTAEEEE.L       | S158:           | 2 | 2,2807 | 0,192 | 0,647  |
| 1 | Q9C0C2 TB182_HUMAN | R.SPS#QDFSFIEDTE.I           | S1554:          | 2 | 2,2794 | 0,24  | 0,54   |
| 1 | Q96TA1 NIBL1_HUMAN | E.YNSGGGGGS#PSPSTPE.S        | S588:           | 2 | 2,275  | 0,252 | -0,156 |
| 1 | Q14157 UBP2L_HUMAN | R.QAFT#PSSTM*M*E.V           | T425:           | 2 | 2,2706 | 0,162 | 0      |
| 1 | P52292 IMA2_HUMAN  | R.NVSSFPDDATS#PLQE.N         | S62:            | 2 | 2,2681 | 0,254 | 0,506  |
| 1 | P43358 MAGA4_HUMAN | E.AAVSSSS#PLVPGTLEEVPAE.S    | S44:            | 2 | 2,2672 | 0,319 | 1,284  |
| 1 | P42166 LAP2A_HUMAN | R.SS#TPLPTISSAE.N            | S159:           | 2 | 2,2456 | 0,121 | -0,18  |
| 1 | Q01081 U2AF1_HUMAN | R.NPQNSSQSADGLR.C            |                 | 2 | 2,2324 | 0,273 | -0,089 |
| 1 | P14314 GLU2B_HUMAN | R.NKFEEAER.S                 |                 | 2 | 2,2298 | 0,174 | -0,06  |
| 1 | Q86VX9 MON1A_HUMAN | R.AES#PTPGM*AQGM*EPGAGQE.G   | S31:            | 2 | 2,2282 | 0,136 | 0,561  |
| 1 | O75821 EIF3G_HUMAN | K.GIPLAT#GDT#SPEPE.L         | T38:T41:        | 2 | 2,2261 | 0,154 | 0,395  |
| 1 | Q9UKN5 PRDM4_HUMAN | R.VTS#PISTDGM*AEE.L          | S202:           | 2 | 2,2257 | 0,166 | 0,426  |
| 1 | P35222 CTNB1_HUMAN | E.QGFSQS#FTQE.Q              | S73:            | 2 | 2,2186 | 0,104 | 0,197  |
| 1 | Q96JM3 ZN828_HUMAN | K.AVPPVS#PE.L                | S416:           | 2 | 2,2169 | 0,243 | 0,279  |
| 1 | Q3T8J9 GON4L_HUMAN | E.LASS#PVCM*D.S              | S476:           | 2 | 2,2158 | 0,09  | 0,227  |
| 1 | P17252 KPCA_HUMAN  | R.GQPVLTPPDQLVIANIDQSDFE.G   | T638:           | 2 | 2,2147 | 0,32  | 0,296  |
| 1 | P55201 BRPF1_HUMAN | E.GVS#PIPQEIFE.Y             | S238:           | 2 | 2,2146 | 0,115 | 0,377  |
| 1 | Q02952 AKA12_HUMAN | K.SATLSSTES#TASE.M           | S648:           | 2 | 2,2141 | 0,328 | 0,181  |
| 1 | Q8N9M1 CS047_HUMAN | E.SVPCSPS#PLAGE.I            | S126:           | 2 | 2,2086 | 0,193 | -0,572 |
| 1 | Q9HCM4 E41L5_HUMAN | R.SALPVS#PSISSAPVPVEIE.N     | S418:           | 2 | 2,2061 | 0,091 | 0,81   |
| 1 | Q9UJ70 NAGK_HUMAN  | R.SLGLSLS#GGDQE.D            | S76:            | 2 | 2,2059 | 0,312 | 0      |
| 1 | O94888 UBXD7_HUMAN | E.FISVCGS#DEEEE.V            | S335:           | 2 | 2,2053 | 0,188 | 0,494  |
| 1 | Q8WXI9 P66B_HUMAN  | R.VS#SPLSPSAM*TD.A           | S333:           | 2 | 2,2031 | 0,254 | 0,088  |
| 2 | Q6PKG0 LARP1_HUMAN | E.TES#APGS#PRAVT#PVPTKTEE.V  | S517:S521:T526: | 3 | 5,5902 | 0,346 | 0,159  |
| 2 | Q9UHR4 BI2L1_HUMAN | E.IKT#PASTPVSQTPQAS#PM*IE.R  | T248:S261:      | 2 | 5,3591 | 1     | 0,446  |
| 2 | Q8IWE2 NXP20_HUMAN | E.ITDAATDQGAES#PPTS#PSSASR.G | S196:S200:      | 2 | 5,3405 | 1     | 0,305  |
| 2 | Q53EZ4 CEP55_HUMAN | K.VAAS#PKSPT#AALNES#LVECPK.C | S425:T430:S436: | 3 | 5,2401 | 0,304 | 0,228  |
| 2 | Q99700 ATX2_HUMAN  | E.AVAM*PIPAAS#PTPAS#PASNR.A  | S727:S732:      | 2 | 4,9278 | 0,45  | 0,234  |

|   |                    |                                    |                    |   |        |       |        |
|---|--------------------|------------------------------------|--------------------|---|--------|-------|--------|
| 2 | Q14247 SRC8_HUMAN  | R.AKTQT#PPVS#PAPQPTTEERLPSS#PVYE.D | T401:S405:S418:    | 3 | 4,8842 | 1     | 0,3    |
| 2 | P08729 K2C7_HUMAN  | E.LQSQISDTS#VVLS#M*DNSR.S          | S244:S248:         | 2 | 4,8102 | 0,453 | 0,34   |
| 2 | O75179 ANR17_HUMAN | K.SGSP#PLSS#PNGKLTVAS#PK.R         | S1696:S1700:S1709: | 2 | 4,7873 | 0,229 | 0,118  |
| 2 | Q9UHR4 BI2L1_HUMAN | E.IKTPAST#PVSGTPQAS#PM*IE.R        | T252:S261:         | 2 | 4,7822 | 1     | 0,335  |
| 2 | P30622 CLIP1_HUMAN | E.SISNLS#EAGS#IK.K                 | S200:S204:         | 2 | 4,729  | 0,431 | 0,179  |
| 2 | Q9BXB4 OSB11_HUMAN | R.SFS#LASSSNS#PISQR.R              | S174:S181:         | 2 | 4,7021 | 1     | -0,071 |
| 2 | Q99700 ATX2_HUMAN  | E.AVAM*PIPAAS#PTPAS#PASNR.A        | S727:S732:         | 3 | 4,6097 | 0,498 | 0,527  |
| 2 | Q8WXI9 P66B_HUMAN  | R.GRLT#PS#PDIIVLSDNE.A             | T120:S122:         | 2 | 4,6051 | 0,375 | 0      |
| 2 | Q9H0H5 RGAP1_HUMAN | E.NSNAFST#PQT#PDIK.V               | T564:T567:         | 2 | 4,5065 | 0,45  | -0,436 |
| 2 | Q09666 AHNK_HUMAN  | R.LPS#GSGAAS#PTGSAVDIR.A           | S210:S216:         | 2 | 4,3892 | 1     | 0,135  |
| 2 | P17275 JUNB_HUMAN  | R.SRDAT#PPVS#PINM*EDQE.R           | T255:S259:         | 2 | 4,3492 | 0,498 | 0,237  |
| 2 | Q14247 SRC8_HUMAN  | K.TQT#PPVS#PAPQPTTEER.L            | T401:S405:         | 2 | 4,3424 | 0,541 | 1,803  |
| 2 | Q96JM3 ZN828_HUMAN | E.LQT#PLPS#PEPSKPASVS#SPEPPK.S     | T169:S173:S183:    | 3 | 4,3211 | 0,293 | 0,14   |
| 2 | Q9BVC5 ASHWN_HUMAN | K.S#PSGPVKS#PPLS#PVGTTVPK.L        | S182:S189:S193:    | 3 | 4,3174 | 0,351 | -0,084 |
| 2 | Q9H7Z6 MYST1_HUMAN | E.GTAPS#PGRVS#PPT#PARGEPE.V        | S37:S42:T45:       | 3 | 4,3151 | 0,151 | 0,083  |
| 2 | Q8WXI9 P66B_HUMAN  | R.GRLT#PSPDIIVLS#DNE.A             | T120:S129:         | 2 | 4,2752 | 0,483 | -0,194 |
| 2 | Q9Y6G9 DC1L1_HUMAN | R.KPVTVS#PTTPTS#PTEGEAS.-          | S510:S516:         | 2 | 4,2123 | 1     | 0,298  |
| 2 | Q6P2E9 EDC4_HUMAN  | D.GSLTM*SSSGS#LQAS#PR.G            | S672:S676:         | 2 | 4,1845 | 0,422 | 0      |
| 2 | Q9GZM8 NDEL1_HUMAN | K.M*DSAVQASLS#LPAT#PVGK.G          | S215:T219:         | 2 | 4,1807 | 0,518 | 0,125  |
| 2 | Q96G46 DUS3L_HUMAN | E.NCGAQQVPAGPGTST#PPSS#PVR.T       | T273:S277:         | 2 | 4,1603 | 1     | 0,315  |
| 2 | P15923 TFE2_HUMAN  | E.LALNS#PGPLS#PSGM*K.G             | S134:S139:         | 2 | 4,1531 | 0,425 | 0,223  |
| 2 | Q5VT52 K0460_HUMAN | E.AAS#QSTSAS#PANTTVSTIK.G          | S558:S564:         | 2 | 4,1344 | 1     | 0,123  |
| 2 | Q8IWE2 NXP20_HUMAN | E.ITDAATDQGAES#PPTS#PSSASR.G       | S196:S200:         | 3 | 4,1279 | 1     | 0,152  |
| 2 | P27816 MAP4_HUMAN  | E.VGLLKDM*S#PLS#ETE.M              | S507:S510:         | 2 | 4,1154 | 0,416 | 0,144  |
| 2 | Q13263 TIF1B_HUMAN | R.STAPSAASASASAAAASS#PAGGGAE.A     | S50:               | 3 | 4,097  | 0,351 | 0,263  |
| 2 | P02545 LMNA_HUMAN  | R.SGAQASST#PLS#PTR.I               | T19:S22:           | 2 | 4,0947 | 1     | -0,241 |
| 2 | Q3KQU3 MA7D1_HUMAN | E.S#AAPASPAPSPAPS#PTPAPPQK.E       | S539:S552:         | 2 | 4,081  | 0,307 | 0,335  |
| 2 | Q7Z6E9 RBBP6_HUMAN | E.GSSSTLVDTSTSS#TGGS#PVR.K         | S1273:S1277:       | 2 | 4,0603 | 1     | 0,442  |
| 2 | Q9C0B0 UNK_HUMAN   | R.NSSLGSPS#NLCGS#PPGSIR.K          | S380:S385:         | 2 | 4,0374 | 1     | 0,06   |
| 2 | Q9UHB6 LIMA1_HUMAN | R.KIS#ENSY#SLDDLE.I                | S225:Y229:         | 2 | 4,0238 | 0,376 | 0,073  |
| 2 | Q96JM3 ZN828_HUMAN | K.LAPVPS#PEPQKPAPVS#PE.S           | S204:S214:         | 2 | 4,0166 | 0,502 | 0      |
| 2 | Q8NG31 CASC5_HUMAN | R.KSLGT#PTVICT#PTEE.S              | T1011:T1017:       | 2 | 3,9898 | 0,295 | 0,068  |
| 2 | O60716 CTND1_HUMAN | E.GAM*SVVS#VETS#DDGTTR.R           | S125:S129:         | 2 | 3,9239 | 1     | -0,065 |

|   |                     |                               |                 |   |        |       |        |
|---|---------------------|-------------------------------|-----------------|---|--------|-------|--------|
| 2 | P42166 LAP2A_HUMAN  | E.SRS#ST#PLPTISSAE.N          | S158:T160:      | 2 | 3,9189 | 0,424 | 0,145  |
| 2 | Q86YP4 P66A_HUMAN   | R.RPPS#PDVIVLS#DNEQPSS#PR.V   | S100:S107:S114: | 3 | 3,9098 | 0,278 | 0,151  |
| 2 | P15336 ATF2_HUMAN   | R.NDSVIVADQT#PT#PTR.F         | T51:T53:        | 2 | 3,9028 | 0,508 | 0      |
| 2 | Q96G46 DUS3L_HUMAN  | E.NCGAQQVPAGPGTST#PPSS#PVR.T  | T273:S277:      | 3 | 3,9009 | 0,275 | 0,315  |
| 2 | B2CI53 B2CI53_HUMAN | R.NGILAS#PQS#APGNLDNSK.S      | S260:S263:      | 2 | 3,878  | 0,442 | 0,126  |
| 2 | Q8WX93 PALLD_HUMAN  | E.LAACT#PPAS#PEPM*SALASR.S    | T704:S708:      | 2 | 3,8591 | 0,372 | 0,464  |
| 2 | Q9UN36 NDRG2_HUMAN  | R.TAS#L TSAAS#VDGNR.S         | S332:S338:      | 2 | 3,7996 | 0,577 | 0,242  |
| 2 | O94842 TOX4_HUMAN   | E.LVSGS#PVALS#PQPR.C          | S562:S567:      | 3 | 3,7958 | 0,261 | 0,467  |
| 2 | Q6PKG0 LARP1_HUMAN  | K.ET#ESAPGS#PRAVT#PVPTKTEE.V  | T515:S521:T526: | 3 | 3,795  | 0,282 | 0,227  |
| 2 | P22059 OSBP1_HUMAN  | K.RTGS#NISGAS#SDISLDE.Q       | S379:S385:      | 2 | 3,7938 | 0,367 | 0,261  |
| 2 | Q8IWE2 NXP20_HUMAN  | E.ITDAATDQGAES#PPT#SPSSASR.G  | S196:T199:      | 3 | 3,7767 | 1     | 0,457  |
| 2 | Q16513 PKN2_HUMAN   | E.LSLVAAS#PTLS#PR.Q           | S302:S306:      | 2 | 3,773  | 0,485 | 0      |
| 2 | Q8N1G0 ZN687_HUMAN  | E.ASLKLS#PAT#PTSE.G           | S374:T377:      | 2 | 3,7588 | 0,48  | 0,077  |
| 2 | Q13620 CUL4B_HUMAN  | R.SATDGNTS#TTPPTS#AK.K        | S29:S35:        | 2 | 3,7462 | 1     | -0,216 |
| 2 | Q15149 PLEC1_HUMAN  | R.SSS#VGSS#SSYPISPAVSR.T      | S4386:S4390:    | 2 | 3,7232 | 1     | 0      |
| 2 | P42166 LAP2A_HUMAN  | R.SST#PLPTISS#AENTR.Q         | T160:S168:      | 2 | 3,7208 | 1     | 0      |
| 2 | P46821 MAP1B_HUMAN  | E.ASPSTSSAHT#PSQIAS#PLQE.D    | T1737:S1743:    | 2 | 3,7154 | 0,333 | 0,226  |
| 2 | O94842 TOX4_HUMAN   | E.LVSGS#PVALS#PQPR.C          | S562:S567:      | 2 | 3,7082 | 0,334 | 0,233  |
| 2 | Q09666 AHNK_HUMAN   | R.LPSGSGAAS#PTGS#AVDIR.A      | S216:S220:      | 2 | 3,7064 | 0,42  | 0,068  |
| 2 | Q6Y7W6 PERQ2_HUMAN  | R.ALSSGGSITS#PPLS#PALPK.Y     | S26:S30:        | 2 | 3,7048 | 0,457 | 0      |
| 2 | P42167 LAP2B_HUMAN  | E.TIM*ASS#NES#LVVNR.V         | S289:S292:      | 2 | 3,7031 | 0,425 | -0,36  |
| 2 | Q9NPI6 DCP1A_HUMAN  | R.KAS#SPSPLTIGT#PE.S          | S522:T531:      | 2 | 3,6946 | 0,405 | -0,553 |
| 2 | Q9BXB4 OSB11_HUMAN  | R.SFSLAS#SSNS#PISQR.R         | S177:S181:      | 2 | 3,6813 | 1     | -0,141 |
| 2 | Q09666 AHNK_HUMAN   | R.LPSGSGAAS#PT#GSAVDIR.A      | S216:T218:      | 2 | 3,6678 | 0,262 | 0,271  |
| 2 | P17544 ATF7_HUMAN   | R.TDSVIIADQT#PT#PTR.F         | T51:T53:        | 2 | 3,6528 | 0,47  | 0      |
| 2 | P08651 NFIC_HUMAN   | E.GGATSPTS#PSYS#PPDTSPANR.S   | S473:S477:      | 2 | 3,6249 | 1     | 0,442  |
| 2 | O75676 KS6A4_HUMAN  | R.LEPVYS#PPGS#PPPGDPR.I       | S343:S347:      | 2 | 3,5965 | 0,38  | 0,127  |
| 2 | Q15149 PLEC1_HUMAN  | K.GYYSPYSVSGSGST#AGS#R.T      | T4623:S4626:    | 2 | 3,5935 | 1     | 0,188  |
| 2 | P42356 PI4KA_HUMAN  | R.KTS#SVSSIS#QVSPE.R          | S198:S204:      | 2 | 3,5899 | 1     | 0,153  |
| 2 | A0MZ66 SHOT1_HUMAN  | E.AEFNS#PSPPT#PEPGEGPR.K      | S532:T537:      | 2 | 3,5349 | 0,455 | 0,12   |
| 2 | Q9HA05 Q9HA05_HUMAN | R.STT#PTSS#PFRATSTS#PNSQSSK.M | T519:S523:S531: | 3 | 3,5347 | 1     | 0,147  |
| 2 | O75420 PERQ1_HUMAN  | R.ALSGGGSVAS#PPPS#PAM*PK.Y    | S24:S28:        | 2 | 3,5252 | 0,529 | 0,194  |
| 2 | Q9H2Y7 ZF106_HUMAN  | R.SLS#ESS#VIM*DR.A            | S861:S864:      | 2 | 3,5149 | 0,517 | -0,174 |

|   |                     |                              |                 |   |        |       |        |
|---|---------------------|------------------------------|-----------------|---|--------|-------|--------|
| 2 | P49736 MCM2_HUMAN   | R.GNDPLTS#S#PGR.S            | S26:S27:        | 2 | 3,5134 | 0,467 | 0,194  |
| 2 | Q6PKG0 LARP1_HUMAN  | E.T#ESAPGS#PRAVT#PVPTKTEE.V  | T515:S521:T526: | 2 | 3,5123 | 0,403 | 0,319  |
| 2 | Q9UHR4 BI2L1_HUMAN  | E.IKTPAST#PVSGTPQAS#PM*IE.R  | T252:S261:      | 3 | 3,5098 | 0,221 | 0,334  |
| 2 | Q3KQU3 MA7D1_HUMAN  | R.RSS#QPS#PTAVPASDS#PPTKQE.V | S113:S116:S125: | 3 | 3,5084 | 1     | 0      |
| 2 | O15085 ARHGB_HUMAN  | K.SLGGESS#GGT#TPVGSFHTE.A    | S1458:T1461:    | 2 | 3,5069 | 1     | -0,062 |
| 2 | Q9BZ23 PANK2_HUMAN  | R.RAS#SAS#VPAVGASAE.G        | S168:S171:      | 2 | 3,4977 | 0,448 | 0,241  |
| 2 | O75376 NCOR1_HUMAN  | E.VIS#PASS#PAPPQEK.L         | S1977:S1981:    | 2 | 3,49   | 0,448 | -0,078 |
| 2 | Q9UHY1 NRBP_HUMAN   | E.SQTVLS#SGS#DPKVE.S         | S11:S14:        | 2 | 3,4846 | 0,283 | 0,077  |
| 2 | P18206 VINC_HUMAN   | E.VSDVFS#DTTT#PIK.L          | S600:T604:      | 2 | 3,4798 | 0,458 | 0,078  |
| 2 | Q9UHR4 BI2L1_HUMAN  | E.IKT#PASTPVSGTPQAS#PM*IE.R  | T248:S261:      | 3 | 3,4765 | 0,322 | 0,334  |
| 2 | Q09666 AHNK_HUMAN   | K.SSKAS#LGS#LEGEAE.A         | S5749:S5752:    | 2 | 3,4701 | 0,271 | -0,4   |
| 2 | Q08999 RBL2_HUMAN   | E.ICIAGS#PLT#PR.R            | S639:T642:      | 2 | 3,4701 | 0,363 | -0,544 |
| 2 | Q9UBC2 EP15R_HUMAN  | K.FHDTSS#PLM*VT#PPSAE.A      | S108:T113:      | 2 | 3,4625 | 0,367 | -1,29  |
| 2 | P17275 JUNB_HUMAN   | R.SRDAT#PPVS#PINM*EDQE.R     | T255:S259:      | 3 | 3,4542 | 0,256 | 0,177  |
| 2 | A8K1N6 A8K1N6_HUMAN | K.M*LGQKAT#PPPS#PLLSE.L      | T264:S268:      | 2 | 3,4461 | 0,226 | 0,132  |
| 2 | Q9C0B5 ZDHC5_HUMAN  | R.SSS#LKS#AQGTGFE.L          | S429:S432:      | 2 | 3,4454 | 0,445 | -0,251 |
| 2 | P04792 HSPB1_HUMAN  | R.ALS#RQLS#SGVSE.I           | S78:S82:        | 2 | 3,4422 | 0,395 | 0      |
| 2 | P06493 CDC2_HUMAN   | K.IGEGT#Y#GVVYK.G            | T14:Y15:        | 2 | 3,4408 | 0,291 | 0,091  |
| 2 | Q7Z309 F122B_HUMAN  | K.M*FVSSGLPPS#PVPS#PR.R      | S137:S141:      | 2 | 3,4385 | 0,563 | 0,191  |
| 2 | P15408 FOSL2_HUMAN  | R.RS#SSSGDQSSDSLNS#PTLLAL.-  | S307:S320:      | 2 | 3,4371 | 1     | 0,428  |
| 2 | Q4V328 GRAP1_HUMAN  | R.TQTGDSSS#ISS#FSYRE.I       | S666:S669:      | 2 | 3,4334 | 1     | 0,128  |
| 2 | Q15942 ZYG_HUMAN    | R.GPPASS#PAPAPKFS#PVT#PK.F   | S259:S267:T270: | 3 | 3,4188 | 0,409 | 0,088  |
| 2 | P78362 SRPK2_HUMAN  | R.TVSAS#ST#GDLPK.A           | S496:T498:      | 2 | 3,4167 | 0,389 | 0,092  |
| 2 | Q12888 TP53B_HUMAN  | E.TSVIS#IDS#PQK.L            | S724:S727:      | 2 | 3,4089 | 0,393 | 0,274  |
| 2 | Q8NEL9 DDHD1_HUMAN  | E.NEGISTIPS#PVT#PVLSR.R      | S723:S727:      | 2 | 3,4041 | 0,314 | 0      |
| 2 | Q96RG2 PASK_HUMAN   | R.VNKPES#GVLASAAS#LE.M       | S1273:S1280:    | 2 | 3,3994 | 0,356 | 0,514  |
| 2 | Q9C0B0 UNK_HUMAN    | R.NS#SLGSPSNLCGSPPGS#IR.K    | S374:S389:      | 2 | 3,3938 | 0,312 | -0,596 |
| 2 | A6NMQ1 A6NMQ1_HUMAN | E.IGASALS#DSGS#FVSSR.A       | S17:S21:        | 2 | 3,3875 | 1     | 0,215  |
| 2 | P08729 K2C7_HUMAN   | E.LQSQISDTS#VVLS#M*DNSR.S    | S244:S248:      | 3 | 3,382  | 0,249 | -0,17  |
| 2 | P35658 NU214_HUMAN  | K.S#PGSTPTT#PTSSQAPQK.L      | S430:T437:      | 2 | 3,3803 | 1     | -0,067 |
| 2 | Q9NPI6 DCP1A_HUMAN  | R.KAS#SPS#PLTIGTPE.S         | S522:S525:      | 2 | 3,342  | 0,372 | 0,079  |
| 2 | Q9Y4B4 ARIP4_HUMAN  | E.GLARPVS#PDS#PEIISE.L       | S1169:S1172:    | 2 | 3,3392 | 0,429 | 0,2    |
| 2 | P40425 PBX2_HUMAN   | E.AVTPSSVTPTEGPGSVHS#DT#SN.- | S426:T428:      | 2 | 3,3366 | 0,281 | 0,617  |

|   |                    |                             |                 |   |        |       |        |
|---|--------------------|-----------------------------|-----------------|---|--------|-------|--------|
| 2 | Q8NFH5 NUP53_HUMAN | K.TLGTPT#QPGST#PR.I         | T275:T280:      | 2 | 3,3353 | 0,443 | -0,083 |
| 2 | Q53EZ4 CEP55_HUMAN | K.VAAS#PKS#PTAALNE.S        | S425:S428:      | 2 | 3,323  | 0,236 | -0,241 |
| 2 | P24928 RPB1_HUMAN  | K.YSPTS#PTYSPT#SPK.Y        | S1913:T1919:    | 2 | 3,3149 | 1     | 0,073  |
| 2 | Q8TEW8 PAR3L_HUMAN | K.KSSS#LES#LQTAVAE.V        | S746:S749:      | 2 | 3,3115 | 0,404 | 0      |
| 2 | Q9UPT8 ZC3H4_HUMAN | K.TGSGS#PFAGNS#PARE.G       | S1269:S1275:    | 2 | 3,3059 | 0,431 | 0,077  |
| 2 | Q09666 AHNK_HUMAN  | K.SSKAS#LGS#LEGEAEAE.A      | S5749:S5752:    | 2 | 3,3038 | 0,377 | -0,071 |
| 2 | Q9BUR4 WDR79_HUMAN | E.FGS#PSELS#PR.I            | S85:S90:        | 2 | 3,2933 | 0,177 | -0,099 |
| 2 | P15336 ATF2_HUMAN  | D.SVIVADQT#PT#PTR.F         | T51:T53:        | 2 | 3,2924 | 0,318 | 0,395  |
| 2 | P49790 NU153_HUMAN | E.ITTSS#PS#PINSSQALTNK.V    | S498:S500:      | 2 | 3,2877 | 1     | 0,304  |
| 2 | Q9NPI6 DCP1A_HUMAN | R.KASS#PS#PLTIGTPE.S        | S523:S525:      | 2 | 3,2823 | 0,534 | 0,079  |
| 2 | Q9HCH0 K1602_HUMAN | R.NS#GSDGSPS#PLLAR.R        | S487:S494:      | 2 | 3,2794 | 0,39  | -0,322 |
| 2 | Q15751 HERC1_HUMAN | R.RAQT#PPISSLPTS#PSDE.V     | T2701:S2710:    | 2 | 3,2716 | 0,425 | 0,063  |
| 2 | Q8NEL9 DDHD1_HUMAN | E.GISTIPS#PVTS#PVLSR.R      | S723:S727:      | 2 | 3,2689 | 0,298 | -0,069 |
| 2 | P24928 RPB1_HUMAN  | K.YSPTS#PTYSPTS#PK.Y        | S1913:S1920:    | 2 | 3,2662 | 1     | 0,073  |
| 2 | Q8IWC1 MA7D3_HUMAN | E.VFCNTS#M*EAS#PK.A         | S318:S322:      | 2 | 3,2584 | 0,425 | 0,079  |
| 2 | Q86W92 LIPB1_HUMAN | D.FAARS#PSAS#ITDEDSNV.-     | S999:S1003:     | 2 | 3,25   | 0,328 | 0,253  |
| 2 | Q04721 NOTC2_HUMAN | R.RTPS#LALT#PPQAEQE.V       | S1804:T1808:    | 2 | 3,2417 | 0,437 | -0,068 |
| 2 | Q9BZE9 ASPC1_HUMAN | R.AAGS#PS#PLPAPDPAPK.S      | S500:S502:      | 2 | 3,2409 | 0,328 | 0,149  |
| 2 | Q14160 LAP4_HUMAN  | R.NSLES#ISS#IDRE.L          | S1223:S1226:    | 2 | 3,2351 | 0,449 | 0,242  |
| 2 | Q9NW68 BSDC1_HUMAN | E.LM*GIS#PIS#PK.E           | S232:S235:      | 2 | 3,2205 | 0,338 | 0      |
| 2 | P49023 PAXI_HUMAN  | K.QKS#AEPSPTVM*S#TSLGSLSE.L | S126:S135:      | 3 | 3,2197 | 0,276 | -0,079 |
| 2 | Q15154 PCM1_HUMAN  | R.VTNDIS#PES#SPGVGR.R       | S65:S68:        | 2 | 3,2187 | 0,336 | -0,073 |
| 2 | Q9Y6I3 EPN1_HUMAN  | E.AVGSPPPAAT#PT#PTPPTR.K    | T435:T437:      | 3 | 3,2174 | 0,301 | 0,39   |
| 2 | Q9H7N4 SFR19_HUMAN | E.VLYDS#EGLS#GEER.G         | S734:S738:      | 2 | 3,2039 | 0,396 | 0,151  |
| 2 | Q96DF8 DGC14_HUMAN | K.GLS#PAM*S#PALQR.L         | S391:S395:      | 2 | 3,2014 | 0,395 | 0,087  |
| 2 | Q07889 SOS1_HUMAN  | R.SAS#VSS#ISLTK.G           | S1134:S1137:    | 2 | 3,1928 | 0,439 | 0      |
| 2 | Q14247 SRC8_HUMAN  | R.AKT#QTPPVVS#PAPQPTEE.R    | T399:S405:      | 3 | 3,1857 | 0,267 | 1,227  |
| 2 | P49023 PAXI_HUMAN  | K.QKS#AEPS#PTVM*STSLGSLSE.L | S126:S130:      | 2 | 3,1834 | 0,358 | 0,42   |
| 2 | Q6GYQ0 GRIPE_HUMAN | E.VATITGS#ESAS#PVHS#PLGSR.S | S986:S990:S994: | 2 | 3,1833 | 0,27  | 0,334  |
| 2 | P06493 CDC2_HUMAN  | K.IGEGT#YGVVYK.G            | T14:            | 2 | 3,181  | 0,44  | 0,096  |
| 2 | Q12857 NFIA_HUMAN  | E.GGAAS#PTS#PTYSTPSTSPANR.F | S469:S472:      | 2 | 3,1728 | 1     | 0,225  |
| 2 | Q9BVC5 ASHWN_HUMAN | K.SPPLS#PVGTT#TPVK.L        | S193:T197:      | 2 | 3,1696 | 0,386 | -0,085 |
| 2 | Q9H063 MAF1_HUMAN  | E.ALS#PPQTSGLS#PSR.L        | S60:S68:        | 2 | 3,1599 | 0,261 | 0      |

|   |                     |                              |                 |   |        |       |        |
|---|---------------------|------------------------------|-----------------|---|--------|-------|--------|
| 2 | Q96C34 RUND1_HUMAN  | E.ATAEPPGAAPGS#PPDS#PGR.T    | S71:S75:        | 2 | 3,1536 | 0,442 | 0,127  |
| 2 | O75420 PERQ1_HUMAN  | R.ALSGGGSVAS#PPPS#PAM*PK.Y   | S24:S28:        | 3 | 3,1534 | 0,24  | 0,388  |
| 2 | P17544 ATF7_HUMAN   | D.SVIIADQT#PT#PTR.F          | T51:T53:        | 2 | 3,146  | 0,354 | 0,313  |
| 2 | Q86WC4 OSTM1_HUMAN  | R.LKS#STS#FANIQE.N           | S322:S325:      | 2 | 3,1393 | 0,181 | 0      |
| 2 | Q16204 CCDC6_HUMAN  | K.LDQPVS#APPS#PR.D           | S240:S244:      | 2 | 3,1373 | 0,414 | 0,086  |
| 2 | P05787 K2C8_HUMAN   | K.LVS#ESS#DVLPK.-            | S475:S478:      | 2 | 3,1362 | 0,371 | 0,091  |
| 2 | Q14684 RRP1B_HUMAN  | K.TPTSS#PASS#PLVAK.K         | S732:S736:      | 2 | 3,1263 | 0,32  | 0,081  |
| 2 | Q9Y3P9 RBGP1_HUMAN  | K.ASVGKIS#VSS#DSVSTLNSE.D    | S11:S14:        | 2 | 3,1173 | 1     | 0,421  |
| 2 | Q96AQ6 PBIP1_HUMAN  | E.GQSPQGS#LPST#PK.A          | S129:T133:      | 2 | 3,1172 | 0,412 | 0      |
| 2 | Q92609 TBCD5_HUMAN  | K.NISSS#PSVES#LPGGR.E        | S539:S544:      | 2 | 3,1144 | 0,272 | -0,222 |
| 2 | P10809 CH60_HUMAN   | R.VTDALNATR.A                |                 | 2 | 3,1    | 0,377 | 0,19   |
| 2 | Q3KQU3 MA7D1_HUMAN  | E.SAAPASPAPS#PAPS#PTPAPPQK.E | S548:S552:      | 3 | 3,0989 | 0,316 | 0,419  |
| 2 | O60499 STX10_HUMAN  | K.SPSDLLDAS#AVS#ATSR.Y       | S140:S143:      | 2 | 3,0977 | 0,439 | 0,07   |
| 2 | Q92597 NDRG1_HUMAN  | R.TASGS#S#VTSLDGTR.S         | S332:S333:      | 2 | 3,0927 | 1     | -0,163 |
| 2 | Q6NZI2 PTRF_HUMAN   | E.SDAVLVDKS#DS#D.-           | S387:S389:      | 2 | 3,091  | 0,264 | -0,432 |
| 2 | Q52LD0 Q52LD0_HUMAN | K.AGGS#PAS#YHGST#SPR.V       | S192:S195:T200: | 2 | 3,0887 | 0,476 | 0      |
| 2 | Q9BUT9 CP014_HUMAN  | R.RAPS#TSPS#FEGTQE.T         | S78:S82:        | 2 | 3,0756 | 0,34  | -0,516 |
| 2 | Q9C0K0 BC11B_HUMAN  | E.LAGNSS#TPPPVS#PGR.G        | S375:S381:      | 2 | 3,0747 | 0,344 | -0,153 |
| 2 | Q15149 PLEC1_HUMAN  | R.S#SSVGSSSYPIS#PAVSR.T      | S4384:S4396:    | 3 | 3,0642 | 1     | 0,096  |
| 2 | Q92597 NDRG1_HUMAN  | R.TAS#GSSVTS#LDGTR.S         | S330:S336:      | 2 | 3,0609 | 1     | 0,488  |
| 2 | Q96S66 CLCC1_HUMAN  | E.AAGS#PDQGSTYS#PAR.G        | S524:S532:      | 2 | 3,0591 | 0,411 | 0,075  |
| 2 | P23443 KS6B1_HUMAN  | K.FTRQT#PVDS#PDDSTLSE.S      | T390:S394:      | 2 | 3,051  | 0,281 | 0,119  |
| 2 | P49023 PAXI_HUMAN   | K.QKS#AEPSPT#VM*STSLGSNLSE.L | S126:T132:      | 3 | 3,0408 | 0,205 | 0,236  |
| 2 | P49792 RBP2_HUMAN   | R.YIASVQGST#PS#PR.Q          | T19:S21:        | 2 | 3,0289 | 0,321 | 0,24   |
| 2 | Q6NV74 CB055_HUMAN  | E.GGVPGEDPS#SRPAT#PE.L       | S333:T338:      | 2 | 3,027  | 0,179 | 0,499  |
| 2 | P10636 TAU_HUMAN    | K.SPVVS#GDTS#PR.H            | S717:S721:      | 2 | 3,0248 | 0,47  | -0,193 |
| 2 | O15085 ARHGB_HUMAN  | R.SLENPT#PPFT#PK.M           | T668:T672:      | 2 | 3,0239 | 0,261 | -0,492 |
| 2 | Q14CB8 RHG19_HUMAN  | R.NLLFSGS#PAVTM*T#PTR.L      | S470:T476:      | 2 | 3,0224 | 0,409 | 0      |
| 2 | Q15154 PCM1_HUMAN   | R.VTNDIS#PESS#PGVGR.R        | S65:S69:        | 2 | 3,0203 | 0,405 | -0,073 |
| 2 | P49736 MCM2_HUMAN   | E.SFTM*AS#S#PAQR.R           | S12:S13:        | 2 | 3,0193 | 0,342 | -0,09  |
| 2 | P15924 DESP_HUMAN   | K.GLPSPYNM*SS#APGS#R.S       | S2821:S2825:    | 2 | 3,0123 | 0,476 | 0,144  |
| 2 | Q9UJX2 CDC23_HUMAN  | R.RVS#PLNLSSVT#P.-           | S582:T590:      | 2 | 3,0106 | 0,433 | 0,085  |
| 2 | Q03252 LMNB2_HUMAN  | R.AGGPAT#PLS#PTR.L           | T14:S17:        | 2 | 3,0095 | 0,504 | 0,76   |

|   |                     |                               |                 |   |        |       |        |
|---|---------------------|-------------------------------|-----------------|---|--------|-------|--------|
| 2 | Q13459 MYO9B_HUMAN  | R.VSPAPGS#APET#PEDK.S         | S1267:T1271:    | 2 | 2,9984 | 0,369 | 0,281  |
| 2 | P60709 ACTB_HUMAN   | R.GYSFTTTAERE.I               |                 | 2 | 2,9955 | 0,573 | -0,193 |
| 2 | Q9H3S7 PTN23_HUMAN  | E.STPIPSSS#PPPLS#SPLPEAPQPK.E | S1544:S1549:    | 3 | 2,9782 | 0,331 | 0,148  |
| 2 | Q15942 ZYG_HUMAN    | R.GPPAS#SPAPAPKFS#PVT#PK.F    | S258:S267:T270: | 2 | 2,9744 | 0,386 | 0,353  |
| 2 | Q14978 NOLC1_HUMAN  | K.LQT#PNT#FPK.R               | T607:T610:      | 2 | 2,9694 | 0,106 | 0,101  |
| 2 | Q7Z417 NUFP2_HUMAN  | E.SQNPLAS#PTNT#LLGSAKE.Q      | S629:T633:      | 2 | 2,9672 | 0,431 | 0,123  |
| 2 | Q9H2Y7 ZNF106_HUMAN | E.GVS#ISS#SPGLAR.K            | S847:S850:      | 2 | 2,9613 | 0,163 | -0,095 |
| 2 | Q9H0H5 RGAP1_HUMAN  | E.NSNAFS#TPQT#PDIK.V          | S563:T567:      | 2 | 2,9611 | 0,493 | -0,508 |
| 2 | Q8WYP5 AHTF1_HUMAN  | R.LIS#PLAS#PADGVK.S           | S2231:S2235:    | 2 | 2,9584 | 0,412 | -0,085 |
| 2 | P49792 RBP2_HUMAN   | E.TVFT#PKTS#PENVDQ.R          | T1396:S1400:    | 2 | 2,9573 | 0,367 | 0,071  |
| 2 | Q03188 CENPC_HUMAN  | R.TIS#PAES#TALFQGR.K          | S333:S337:      | 2 | 2,9471 | 0,482 | 0,074  |
| 2 | O94964 CT117_HUMAN  | R.TKS#VSS#M*SEFE.S            | S55:S58:        | 2 | 2,9403 | 0,356 | 0,087  |
| 2 | P04792 HSPB1_HUMAN  | E.SPAVAAPAYSR.A               |                 | 2 | 2,9235 | 0,283 | 0      |
| 2 | Q16254 E2F4_HUMAN   | E.ASRPNS#PQLT#PTAVPGSAE.V     | S244:T248:      | 2 | 2,9015 | 0,282 | 0,12   |
| 2 | P10398 ARAF_HUMAN   | E.LLT#PQGPS#PR.T              | T181:S186:      | 2 | 2,8963 | 0,21  | 0,1    |
| 2 | O00116 ADAS_HUMAN   | R.RAAS#AATAAPTAT#PAAQE.S      | S65:T74:        | 2 | 2,8947 | 0,378 | 0,134  |
| 2 | P49848 TAF6_HUMAN   | E.AGDS#PPPAPGT#PK.A           | S653:T660:      | 2 | 2,8929 | 0,192 | -0,181 |
| 2 | Q15742 NAB2_HUMAN   | R.SFS#PKS#PLE.L               | S159:S162:      | 2 | 2,8919 | 0,144 | -0,106 |
| 2 | Q15149 PLEC1_HUMAN  | K.GYYSPYSVS#GSGST#AGSR.T      | S4618:T4623:    | 2 | 2,8919 | 1     | 0,188  |
| 2 | Q9NYL2 MLTK_HUMAN   | R.GSIS#LNSS#PR.G              | S687:S691:      | 2 | 2,8786 | 0,243 | 0,207  |
| 2 | Q9UK76 HN1_HUMAN    | R.RNSS#EASSGDFLDLK.G          | S88:            | 3 | 2,8716 | 0,124 | 0      |
| 2 | Q96SB4 SRPK1_HUMAN  | E.VINYTQNS#NNE.T              | S540:           | 2 | 2,8713 | 0,365 | -0,266 |
| 2 | Q8TA97 Q8TA97_HUMAN | E.GGAAS#PTS#PILVPGIK.V        | S469:S472:      | 2 | 2,8686 | 0,297 | -0,075 |
| 2 | O75781 PALM_HUMAN   | E.VVM*NSQQT#PVTGT#PK.D        | T141:T145:      | 2 | 2,8529 | 0,287 | -0,22  |
| 2 | Q02952 AKA12_HUMAN  | E.ARGDTVVS#EAELT#PEAVTAAE.T   | S967:T972:      | 2 | 2,8465 | 0,359 | 0,214  |
| 2 | Q9NUL3 STAU2_HUMAN  | K.GSS#PT#PPCSPVQPSK.Q         | S486:T488:      | 2 | 2,8458 | 0,242 | -0,289 |
| 2 | Q2M2Z5 CT019_HUMAN  | K.RAS#PPVS#PIPVSE.Y           | S317:S321:      | 2 | 2,8456 | 0,275 | -0,082 |
| 2 | Q5VT06 CE350_HUMAN  | E.TRS#PSPIS#ISSSE.T           | S1828:S1833:    | 2 | 2,8455 | 1     | -0,081 |
| 2 | P42356 PI4KA_HUMAN  | R.KTSS#VS#SISQVSPE.R          | S199:S201:      | 2 | 2,845  | 0,208 | -0,306 |
| 2 | Q9UNE7 STUB1_HUMAN  | R.LGAGGGS#PEKS#PSAQE.L        | S19:S23:        | 2 | 2,8392 | 0,366 | 0      |
| 2 | P62753 RS6_HUMAN    | R.LSS#LRAS#TSKS#E.S           | S236:S240:S244: | 3 | 2,8385 | 0,237 | 0,243  |
| 2 | Q32MZ4 LRRF1_HUMAN  | R.RGS#GDTISIS#IDTE.A          | S120:S126:      | 2 | 2,8379 | 0,342 | -0,326 |
| 2 | P60174 TPIS_HUMAN   | K.SNVSDAVAQSTR.I              |                 | 2 | 2,8289 | 0,483 | 0,198  |

|   |                    |                              |              |   |        |       |        |
|---|--------------------|------------------------------|--------------|---|--------|-------|--------|
| 2 | Q6XQN6 PNCB_HUMAN  | R.LQALVNSLCAGQS#P.-          | S537:        | 2 | 2,8261 | 0,343 | 0      |
| 2 | Q9UJU6 DBNL_HUMAN  | R.AM*S#TTS#ISSPQPGK.L        | S269:S272:   | 2 | 2,8257 | 0,378 | -0,156 |
| 2 | Q9UKI8 TLK1_HUMAN  | R.FTGVASGSGTGS#T#GSCSVGAK.A  | S77:T78:     | 2 | 2,8141 | 1     | 0,37   |
| 2 | P20700 LMNB1_HUMAN | R.AGGPTT#PLS#PTR.L           | T20:S23:     | 2 | 2,8126 | 0,404 | -0,093 |
| 2 | Q3KQU3 MA7D1_HUMAN | E.SAAPAS#PAPSPAPS#PTPAPPQK.E | S544:S552:   | 2 | 2,8123 | 0,388 | 0,447  |
| 2 | P24928 RPB1_HUMAN  | K.YSPT#SPTY#PTTPK.Y          | T1877:S1882: | 2 | 2,8063 | 1     | 0,072  |
| 2 | Q9HC35 EMAL4_HUMAN | E.SRIS#SS#PTLLE.N            | S917:S919:   | 2 | 2,8014 | 0,285 | 0      |
| 2 | Q92870 APBB2_HUMAN | R.KGS#LSSVTPS#PTPE.N         | S334:S341:   | 2 | 2,8012 | 0,365 | -0,158 |
| 2 | Q9C0C2 TB182_HUMAN | R.RES#AAS#GLGGLLEEE.G        | S1473:S1476: | 2 | 2,7937 | 0,414 | -0,073 |
| 2 | Q9UQ35 SRRM2_HUMAN | R.SRS#VS#PCSNVE.S            | S952:S954:   | 2 | 2,7867 | 0,221 | -0,353 |
| 2 | Q9UQ35 SRRM2_HUMAN | E.NS#FGS#PLEFR.N             | S1326:S1329: | 2 | 2,7859 | 0,439 | 0      |
| 2 | Q6VN20 RBP10_HUMAN | K.SQDSYPGS#PSLS#PR.H         | S365:S369:   | 2 | 2,7786 | 0,295 | 0,149  |
| 2 | P82094 TMF1_HUMAN  | K.SNTEPQS#PIIAS#PK.A         | S72:S77:     | 2 | 2,7772 | 0,324 | 0,076  |
| 2 | Q86TB9 PATL1_HUMAN | R.STS#PIIGS#PPVR.A           | S179:S184:   | 2 | 2,7757 | 0,233 | 0,089  |
| 2 | P49792 RBP2_HUMAN  | E.TVFT#PKTS#PE.N             | T1396:S1400: | 2 | 2,7742 | 0,285 | 0      |
| 2 | Q14934 NFAC4_HUMAN | R.FGLGS#PLPS#PR.A            | S213:S217:   | 2 | 2,7733 | 0,181 | -0,095 |
| 2 | Q66K74 MAP1S_HUMAN | K.AVPM*APAPAS#PGS#SNDSSAR.S  | S759:S762:   | 2 | 2,7722 | 0,306 | 0,239  |
| 2 | Q12923 PTN13_HUMAN | R.AIS#TGS#LASSTLNK.L         | S908:S911:   | 2 | 2,7671 | 0,403 | 0,485  |
| 2 | P08651 NFIC_HUMAN  | E.GGATS#PTS#PSYSPDTS PANR.S  | S470:S473:   | 3 | 2,7599 | 0,133 | 0,166  |
| 2 | P55196 AFAD_HUMAN  | E.TSFRTR#IS#NPE.V            | T213:S215:   | 2 | 2,7588 | 0,294 | -0,086 |
| 2 | O94909 K0819_HUMAN | R.GPSQATS#PIRS#PQE.S         | S296:S300:   | 2 | 2,7567 | 0,143 | -0,756 |
| 2 | P35658 NU214_HUMAN | K.SPGST#PTT#PTSSQAPQK.L      | T434:T437:   | 2 | 2,746  | 1     | 0,133  |
| 2 | Q8TB72 PUM2_HUMAN  | E.VNAILS#PRS#E.S             | S82:S85:     | 2 | 2,7434 | 0,22  | 0,098  |
| 2 | Q6NZI2 PTRF_HUMAN  | E.SDAVLVDKS#D.S              | S387:        | 2 | 2,7359 | 0,272 | 0      |
| 2 | Q8NFH5 NUP53_HUMAN | K.TLGT#PTQPGS#TPR.I          | T273:S279:   | 2 | 2,7334 | 0,371 | -0,083 |
| 2 | P78364 PHC1_HUMAN  | E.ALS#PTS#PGPLSVR.A          | S895:S898:   | 2 | 2,7321 | 0,328 | 0,085  |
| 2 | P22059 OSBP1_HUMAN | K.RT#GSNIS#GASSDISLDE.Q      | T377:S382:   | 2 | 2,7317 | 0,141 | 0,065  |
| 2 | Q14160 LAP4_HUMAN  | E.LRS#LEPS#PSPGPQEE.D        | S1575:S1579: | 2 | 2,7134 | 0,402 | 0      |
| 2 | Q86TC9 MYPN_HUMAN  | R.CVS#PIPVN#PTSRI            | S813:S818:   | 2 | 2,7076 | 0,358 | 0,334  |
| 2 | Q9UKI8 TLK1_HUMAN  | R.FTGVASGSGTGS#CS#VGAK.A     | S80:S82:     | 2 | 2,6896 | 1     | 0,123  |
| 2 | Q14694 UBP10_HUMAN | E.TKY#SPPAIS#PLVSE.K         | Y364:S370:   | 2 | 2,6857 | 0,277 | -0,37  |
| 2 | Q9UK76 HN1_HUMAN   | R.RNS#SEASSGDFDLK.G          | S87:         | 2 | 2,679  | 0,36  | 0,429  |
| 2 | O60271 JIP4_HUMAN  | R.SAS#QSS#LDKLDQE.L          | S730:S733:   | 2 | 2,678  | 0,2   | -0,389 |



|   |                    |                                   |                 |   |        |       |        |
|---|--------------------|-----------------------------------|-----------------|---|--------|-------|--------|
| 2 | Q12888 TP53B_HUMAN | K.M*VIQGPSS#PQGE.A                | S1114:          | 2 | 2,6772 | 0,263 | 0,092  |
| 2 | Q8IV63 VRK3_HUMAN  | R.GLNSS#FETS#PK.K                 | S55:S59:        | 2 | 2,6765 | 0,355 | 0,184  |
| 2 | Q9UJU6 DBNL_HUMAN  | R.AM*STTS#ISS#PQPGK.L             | S272:S275:      | 2 | 2,6748 | 1     | -0,156 |
| 2 | P78559 MAP1A_HUMAN | E.LSS#PIS#PK.S                    | S2019:S2022:    | 2 | 2,6713 | 0,246 | 0,062  |
| 2 | Q86X27 RGPS2_HUMAN | E.GALLPQT#PPS#PR.N                | T326:S329:      | 2 | 2,6671 | 0,237 | 0      |
| 2 | Q9NYJ8 TAB2_HUMAN  | K.ITVSPNKPPAVS#PGVVS#PTFE.L       | S477:S482:      | 2 | 2,664  | 0,192 | 0,214  |
| 2 | Q3MIN7 RGL3_HUMAN  | R.DAPAGS#PPAS#PGPQGPSTK.L         | S569:S573:      | 2 | 2,6629 | 0,254 | 0,325  |
| 2 | P62753 RS6_HUMAN   | R.LSS#LRAST#SKS#E.S               | S236:T241:S244: | 2 | 2,6613 | 1     | 0,243  |
| 2 | Q9Y608 LRRF2_HUMAN | R.NSASATPLS#GNS#SR.R              | S320:S323:      | 2 | 2,6605 | 0,355 | -0,076 |
| 2 | O75179 ANR17_HUMAN | K.SGSP#PLSS#PNGK.L                | S1696:S1700:    | 2 | 2,655  | 0,156 | -0,095 |
| 2 | Q9UJM3 ERRFI_HUMAN | K.LTVNGVCAST#PPLT#PIK.N           | T127:T131:      | 2 | 2,6543 | 0,438 | 0,127  |
| 2 | Q5THJ4 VP13D_HUMAN | R.TRS#TAS#LTNLE.H                 | S2861:S2864:    | 2 | 2,6539 | 0,143 | -0,18  |
| 2 | Q16514 TAF12_HUMAN | K.IPGT#PGAGGRLS#PE.N              | T43:S51:        | 2 | 2,644  | 0,327 | 0,166  |
| 2 | P55072 TERA_HUMAN  | E.DNSVVSLSQPK.M                   |                 | 2 | 2,6429 | 0,43  | 0,312  |
| 2 | P49585 PCY1A_HUMAN | K.T#SPPCS#PANLSR.H                | T342:S347:      | 2 | 2,6423 | 0,485 | 0,169  |
| 2 | Q13501 SQSTM_HUMAN | R.SRLT#PVS#PESSSTEE.K             | T269:S272:      | 2 | 2,6393 | 0,089 | 0      |
| 2 | Q9HC35 EMAL4_HUMAN | E.TAEESRISS#S#PTLLE.N             | S918:S919:      | 2 | 2,637  | 0,422 | 0,064  |
| 2 | Q9Y3X0 CCDC9_HUMAN | E.GAASPAPETPQPTS#PET#SPK.E        | S386:T389:      | 2 | 2,6358 | 0,288 | 0,347  |
| 2 | Q15149 PLEC1_HUMAN | K.GYYSPYSVSGSGS#T#AGSR.T          | S4622:T4623:    | 3 | 2,635  | 0,166 | 0,094  |
| 2 | O15047 SET1A_HUMAN | E.RVAGS#PVT#PLPEQE.A              | S1103:T1106:    | 2 | 2,6338 | 0,205 | 0,223  |
| 2 | Q13523 PRP4B_HUMAN | R.TRS#PS#PDDILE.R                 | S578:S580:      | 2 | 2,6311 | 0,135 | 0      |
| 2 | Q13263 TIF1B_HUMAN | R.STAPSAASASASAAAASS#PAGGGAEALE.L | S50:            | 3 | 2,6167 | 0,156 | 0,076  |
| 2 | P11532 DMD_HUMAN   | K.VNGTTVSS#PSTS#LQR.S             | S3613:S3617:    | 2 | 2,6094 | 0,333 | -0,288 |
| 2 | Q96TA1 NIBL1_HUMAN | E.YSNSGGGGSPSPST#PE.S             | T593:           | 2 | 2,6073 | 0,401 | -0,156 |
| 2 | Q9P107 GMIP_HUMAN  | R.S#LDSPTSS#PGAGTR.Q              | S434:S441:      | 2 | 2,6052 | 0,293 | -0,163 |
| 2 | Q9P0K7 RAI14_HUMAN | R.SITST#PLS#GKE.S                 | T297:S300:      | 2 | 2,605  | 0,424 | 0,286  |
| 2 | Q9Y4B5 K0802_HUMAN | R.GRS#PS#PIGVGSE.M                | S1803:S1805:    | 2 | 2,6024 | 0,241 | 0,281  |
| 2 | P05787 K2C8_HUMAN  | K.LVS#ES#SDVLPK.-                 | S475:S477:      | 2 | 2,6015 | 0,257 | -0,823 |
| 2 | Q9P2B4 CT2NL_HUMAN | K.VSSPLS#PLS#PGIK.S               | S560:S563:      | 2 | 2,6002 | 0,327 | -0,254 |
| 2 | P02545 LMNA_HUMAN  | K.ASASGSGAQVGGPISSGSSAS#S#VTVTR.S | S618:S619:      | 3 | 2,5992 | 1     | 0      |
| 2 | Q02952 AKA12_HUMAN | K.SAESPTS#PVTSE.T                 | S286:           | 2 | 2,5957 | 0,308 | 0,863  |
| 2 | Q5VT52 K0460_HUMAN | E.AAS#QSTSAS#PANTTVSTIK.G         | S558:S564:      | 3 | 2,5877 | 0,257 | 0,185  |
| 2 | P01106 MYC_HUMAN   | E.LLPT#PPLS#PSR.R                 | T58:S62:        | 2 | 2,5843 | 0,225 | 0,182  |

|   |                    |                                  |                    |   |        |       |        |
|---|--------------------|----------------------------------|--------------------|---|--------|-------|--------|
| 2 | Q6NZI2 PTRF_HUMAN  | E.SDAVLVDK.S                     |                    | 2 | 2,5815 | 0,281 | 0,504  |
| 2 | P17544 ATF7_HUMAN  | R.TDSVIIADQT#PTPT#R.F            | T51:T55:           | 3 | 2,5794 | 0,118 | 0,206  |
| 2 | Q9UHR4 BI2L1_HUMAN | E.TEAVTVPT#PS#PTPVR.S            | T412:S414:         | 2 | 2,5704 | 0,383 | -0,214 |
| 2 | Q7Z406 MYH14_HUMAN | E.AQPGSGPS#PEPEGS#PPAHPQ.-       | S1983:S1989:       | 3 | 2,5604 | 0,138 | -0,088 |
| 2 | Q14247 SRC8_HUMAN  | R.AKTQT#PPVS#PAPQTE.E            | T401:S405:         | 2 | 2,559  | 0,25  | -0,067 |
| 2 | Q9C0B0 UNK_HUMAN   | R.NSSLGS#PSNLCS#PPGSIR.K         | S378:S385:         | 3 | 2,5583 | 0,159 | 0,268  |
| 2 | Q9P2B4 CT2NL_HUMAN | K.VS#SPLSPLS#PGIK.S              | S556:S563:         | 2 | 2,5579 | 0,286 | -0,338 |
| 2 | Q14157 UBP2L_HUMAN | K.STSAPQM*SPGSS#DNQSS#SPQPAQQK.L | S471:S476:         | 3 | 2,5539 | 0,233 | 0,27   |
| 2 | Q92538 GBF1_HUMAN  | R.AASSS#SPGS#PVASSPSR.L          | S1780:S1784:       | 2 | 2,5529 | 0,289 | 0,288  |
| 2 | Q9UQ35 SRRM2_HUMAN | R.GEFS#AS#PM*LK.S                | S1122:S1124:       | 2 | 2,5518 | 0,308 | 0,098  |
| 2 | Q12756 KIF1A_HUMAN | R.TPQPCS#RPAS#PEPE.L             | S1528:S1532:       | 2 | 2,5493 | 0,309 | -0,214 |
| 2 | Q9H4A3 WNK1_HUMAN  | E.LSEPSHLNGPS#S#DPE.A            | S2011:S2012:       | 2 | 2,5468 | 0,28  | 0,071  |
| 2 | Q9UHR4 BI2L1_HUMAN | E.AVT#VPTPS#PTPVR.S              | T409:S414:         | 2 | 2,537  | 0,162 | -0,412 |
| 2 | Q9UJZ1 STML2_HUMAN | K.AVPVGT#PDS#LSSGSSR.D           | T327:S330:         | 2 | 2,5365 | 0,223 | 0,073  |
| 2 | Q14181 DPOA2_HUMAN | R.AIST#PET#PLTK.R                | T127:T130:         | 2 | 2,5315 | 0,335 | 0      |
| 2 | P68104 EF1A1_HUMAN | K.IGGIGTVPVGR.V                  |                    | 2 | 2,5304 | 0,221 | 0      |
| 2 | O43633 CHM2A_HUMAN | E.LSNLPSTGGS#LS#VAAGGK.K         | S188:S190:         | 2 | 2,5288 | 0,39  | 0,412  |
| 2 | Q9H2Y7 ZF106_HUMAN | E.GVSISS#S#PGLAR.K               | S850:S851:         | 2 | 2,5286 | 0,142 | 0,284  |
| 2 | P35612 ADDB_HUMAN  | E.TAPEEPGS#PAKS#APAS#PVQSPAKE.A  | S592:S596:S600:    | 3 | 2,5283 | 0,25  | 0,213  |
| 2 | Q01850 CDR2_HUMAN  | E.LASVNPEPVSS#PTT#PPEYK.A        | S415:T418:         | 2 | 2,5267 | 0,266 | 0,112  |
| 2 | O96028 NSD2_HUMAN  | K.GIGTPPNTT#PIKNGS#PE.I          | T115:S121:         | 2 | 2,5204 | 0,328 | 0,066  |
| 2 | Q9HC35 EMAL4_HUMAN | E.S#RISSS#PTLLE.N                | S914:S919:         | 2 | 2,5122 | 0,378 | -0,181 |
| 2 | Q6NZI2 PTRF_HUMAN  | E.LGEGERPEED.A                   |                    | 2 | 2,5114 | 0,342 | -0,108 |
| 2 | P15924 DESP_HUMAN  | R.NLTIRSS#S#FSDTLEE.S            | S2607:S2608:       | 2 | 2,511  | 0,207 | 0,066  |
| 2 | O00499 BIN1_HUMAN  | K.GNKS#PS#PPDGSPAATPE.I          | S296:S298:         | 2 | 2,5087 | 0,456 | 0,138  |
| 2 | Q01814 AT2B2_HUMAN | K.SATSS#SPGS#PIHSLE.T            | S1230:S1234:       | 2 | 2,5069 | 1     | 0      |
| 2 | P07711 CATL1_HUMAN | D.TGFVDIPKQE.K                   |                    | 2 | 2,5053 | 0,179 | -0,108 |
| 2 | Q9ULH0 ARMS_HUMAN  | R.RTPSL#S#LNSQDSSIE.I            | S1361:S1362:       | 2 | 2,5032 | 0,332 | -0,13  |
| 2 | Q5SW79 CE170_HUMAN | R.LGS#LSARS#DSE.A                | S1160:S1165:       | 2 | 2,4977 | 0,381 | 0      |
| 2 | Q9NZW4 DSPP_HUMAN  | D.SSDS#S#DSSDSTS#D.S             | S1207:S1208:S1215: | 3 | 2,4963 | 0,091 | 1,387  |
| 2 | Q14847 LASP1_HUMAN | K.QSFTM*VADT#PE.N                | T68:               | 2 | 2,4927 | 0,193 | -0,277 |
| 2 | Q9NPI6 DCP1A_HUMAN | R.KAS#S#PSPLTIGTPE.S             | S522:S523:         | 2 | 2,4866 | 0,088 | 0,158  |
| 2 | Q15149 PLEC1_HUMAN | R.SS#SVGSS#SSYPISPAVSR.T         | S4385:S4390:       | 3 | 2,4861 | 1     | -0,096 |

|   |                     |                          |                    |   |        |       |        |
|---|---------------------|--------------------------|--------------------|---|--------|-------|--------|
| 2 | P49790 NU153_HUMAN  | R.IPSIVSS#PLNS#PLDR.S    | S334:S338:         | 2 | 2,4857 | 0,231 | -0,348 |
| 2 | P06748 NPM_HUMAN    | K.GPSSVEDIK.A            |                    | 2 | 2,4661 | 0,365 | 0,131  |
| 2 | Q9Y6I3 EPN1_HUMAN   | E.AVGSPPPAAT#PTPT#PPTR.K | T435:T439:         | 2 | 2,4626 | 0,249 | 0,13   |
| 2 | Q86WR7 CJ047_HUMAN  | R.M*AGNEALS#PTS#PFRE.G   | S212:S215:         | 2 | 2,4595 | 0,312 | 0,205  |
| 2 | O15297 PPM1D_HUMAN  | E.TCVM*TPSPCS#T#PPVK.S   | S415:T416:         | 2 | 2,4593 | 0,193 | 0,199  |
| 2 | Q13112 CAF1B_HUMAN  | R.TQDPSS#PGT#TPPQAR.Q    | S429:T432:         | 2 | 2,459  | 0,359 | 0,072  |
| 2 | Q9Y6I3 EPN1_HUMAN   | E.AVGS#PPPAATPTPT#PPTR.K | S429:T439:         | 2 | 2,4586 | 0,376 | 0,456  |
| 2 | Q9HCM4 E41L5_HUMAN  | E.M*ENS#PLLS#PR.S        | S517:S521:         | 2 | 2,4577 | 0,245 | 0      |
| 2 | P62937 PIIA_HUMAN   | K.KITIADCGQLE.-          |                    | 2 | 2,4543 | 0,353 | -0,293 |
| 2 | P42356 PI4KA_HUMAN  | R.KTS#SVSS#ISQVSPE.R     | S198:S202:         | 2 | 2,446  | 1     | -0,306 |
| 2 | Q02952 AKA12_HUMAN  | K.SAESPTS#PVT#SETGSTFK.K | S286:T289:         | 2 | 2,4423 | 1     | 0,309  |
| 2 | Q01082 SPTB2_HUMAN  | R.T#SSKESS#PIPS#PTSDR.K  | T2159:S2165:S2169: | 2 | 2,4409 | 0,311 | 0,382  |
| 2 | Q969V6 MKL1_HUMAN   | K.FGSTGST#PPVS#PTPSER.S  | T450:S454:         | 2 | 2,4373 | 0,227 | 0      |
| 2 | Q9HA05 Q9HA05_HUMAN | R.STT#PTSS#PFR.A         | T519:S523:         | 2 | 2,4338 | 0,267 | 0,098  |
| 2 | O94909 K0819_HUMAN  | E.ATVPS#PTQS#PIR.F       | S414:S418:         | 2 | 2,4274 | 0,126 | 0,173  |
| 2 | A8K0M8 A8K0M8_HUMAN | R.AAAS#PPT#PIR.S         | S212:T215:         | 2 | 2,4256 | 0,43  | -0,107 |
| 2 | O15534 PER1_HUMAN   | R.LRGLDSSS#TAPS#ALGE.R   | S811:S815:         | 2 | 2,4186 | 0,213 | 0,142  |
| 2 | Q96JY6 PDLI2_HUMAN  | R.SSYSS#PTSLS#PR.A       | S124:S129:         | 2 | 2,4181 | 0,301 | 0,085  |
| 2 | P05783 K1C18_HUMAN  | R.S#TFST#NYR.S           | S7:T11:            | 2 | 2,4112 | 0,161 | 0      |
| 2 | Q9UQ35 SRRM2_HUMAN  | R.SLS#YS#PVER.R          | S2692:S2694:       | 2 | 2,4102 | 0,277 | 0,102  |
| 2 | O75396 SC22B_HUMAN  | K.ANNLSSLK.K             |                    | 2 | 2,4024 | 0,221 | 0      |
| 2 | Q6ZRS2 SRCAP_HUMAN  | E.ADAGS#GPPT#PGPTTLGPK.K | S568:T572:         | 2 | 2,3994 | 0,253 | 0,411  |
| 2 | P06493 CDC2_HUMAN   | E.GT#Y#GVVYK.G           | T14:Y15:           | 2 | 2,3994 | 0,146 | 0      |
| 2 | Q16643 DREB_HUMAN   | R.GPGS#PAEDLM*FM*E.S     | S416:              | 2 | 2,397  | 0,202 | -0,082 |
| 2 | P17544 ATF7_HUMAN   | R.TDSVIIADQT#PTPT#R.F    | T51:T55:           | 2 | 2,3954 | 0,317 | 0,137  |
| 2 | P23396 RS3_HUMAN    | E.ILPPT#PISE.Q           | T221:              | 2 | 2,3944 | 0,305 | -1,277 |
| 2 | Q9UUU6 DBNL_HUMAN   | R.AM*ST#TSISS#PQPGK.L    | T270:S275:         | 2 | 2,3942 | 1     | -0,078 |
| 2 | Q86X29 LSR_HUMAN    | R.ARS#VDALDDLT#PPSTAE.S  | S493:T501:         | 2 | 2,3806 | 0,152 | 0,127  |
| 2 | P10636 TAU_HUMAN    | E.IVYKS#PVVSGDTS#PR.H    | S713:S721:         | 3 | 2,3801 | 0,138 | 0,104  |
| 2 | Q14247 SRC8_HUMAN   | R.AKT#QTPPV#PAPQPTEE.R   | T399:S405:         | 2 | 2,38   | 0,352 | 0,189  |
| 2 | Q9UHR4 BI2L1_HUMAN  | E.AVTVPT#PS#PTPVR.S      | T412:S414:         | 2 | 2,3694 | 0,246 | -0,082 |
| 2 | A7KAX9 A7KAX9_HUMAN | E.SGAS#FLDS#PGYSK.D      | S817:S821:         | 2 | 2,3582 | 0,299 | 0      |
| 2 | O75781 PALM_HUMAN   | E.VVM*NSQQT#PVGT#PK.D    | T141:T145:         | 3 | 2,3569 | 0,128 | -0,11  |

|   |                     |                                |                 |   |        |       |        |
|---|---------------------|--------------------------------|-----------------|---|--------|-------|--------|
| 2 | Q12873 CHD3_HUMAN   | E.TEADAPS#PAPS#LGER.L          | S1601:S1605:    | 2 | 2,351  | 0,239 | 0,074  |
| 2 | Q9BYW2 SETD2_HUMAN  | R.RSS#LS#PPSSAYE.R             | S2080:S2082:    | 2 | 2,3449 | 0,115 | 0,085  |
| 2 | O75061 AUX1_HUMAN   | R.SATS#TSAS#PTLR.V             | S566:S570:      | 2 | 2,3421 | 0,17  | -0,091 |
| 2 | Q14671 PUM1_HUMAN   | E.VNSVLS#PRS#E.S               | S209:S212:      | 2 | 2,3419 | 0,187 | 0      |
| 2 | Q9BVC5 ASHWN_HUMAN  | K.SPPLS#PVGTT#PVK.L            | S193:T198:      | 2 | 2,3256 | 0,264 | 0,085  |
| 2 | Q16513 PKN2_HUMAN   | E.LSLVAASPT#LS#PR.Q            | T304:S306:      | 2 | 2,3249 | 0,149 | -0,166 |
| 2 | P15924 DESP_HUMAN   | K.GLPS#PYNM*SS#APGSR.S         | S2815:S2821:    | 2 | 2,3227 | 0,276 | 0,144  |
| 2 | Q12873 CHD3_HUMAN   | E.ADAPS#PAPS#LGER.L            | S1601:S1605:    | 2 | 2,3171 | 0,247 | -0,085 |
| 2 | Q14568 HS902_HUMAN  | E.SSAGGSFTVR.T                 |                 | 2 | 2,3139 | 0,233 | 0,063  |
| 2 | Q2M218 AAK1_HUMAN   | K.VGSLT#PPSS#PK.T              | T620:S624:      | 2 | 2,2974 | 0,259 | 0,198  |
| 2 | Q9Y4W2 LAS1L_HUMAN  | E.VGPFSTGQES#PTAE.N            | S617:           | 2 | 2,2966 | 0,286 | 0      |
| 2 | Q99661 KIF2C_HUMAN  | E.LSSQM*SS#FNE.A               | S633:           | 2 | 2,293  | 0,092 | 0,199  |
| 2 | Q9UIS9 MBD1_HUMAN   | E.GASS#PVQVPGPVAASTE.A         | S465:           | 2 | 2,2889 | 0,222 | 0,299  |
| 2 | Q52LD0 Q52LD0_HUMAN | K.AGGS#PAS#Y#HGSTSPR.V         | S192:S195:Y196: | 3 | 2,2876 | 0,168 | 0      |
| 2 | Q14157 UBP2L_HUMAN  | R.YPSS#IS#SSPQKD.L             | S605:S607:      | 2 | 2,2857 | 1     | 0,168  |
| 2 | Q9Y2W6 TDRKH_HUMAN  | E.IHTLS#CLS#LSE.A              | S539:S542:      | 2 | 2,2845 | 0,085 | -0,16  |
| 2 | O43303 CE110_HUMAN  | K.LPS#PEPS#M*SPK.M             | S366:S370:      | 2 | 2,2823 | 0,28  | -0,091 |
| 2 | Q684P5 RPGP2_HUMAN  | E.TSS#NPS#SPEICPNK.E           | S609:S612:      | 2 | 2,2796 | 0,184 | 0,073  |
| 2 | O75396 SC22B_HUMAN  | R.GEALSALDSK.A                 |                 | 2 | 2,2692 | 0,302 | -0,123 |
| 2 | Q8WWK9 CKAP2_HUMAN  | K.YNVSTT#PYLQS#VK.K            | T597:S602:      | 2 | 2,2663 | 0,164 | 0,368  |
| 2 | Q86TB9 PATL1_HUMAN  | R.ST#SPIIGS#PPVR.A             | T178:S184:      | 2 | 2,2626 | 0,223 | -0,089 |
| 2 | Q6ICG6 CV009_HUMAN  | R.VTSFS#TPPT#PER.N             | S289:T293:      | 2 | 2,2561 | 0,244 | -0,248 |
| 2 | Q9NYY8 FAKD2_HUMAN  | E.ALPVAAVNVQST#Q.-             | T709:           | 2 | 2,2536 | 0,38  | 0,089  |
| 2 | P35612 ADDB_HUMAN   | E.TAPEEPGS#PAKS#APASPVQS#PAK.E | S592:S596:S604: | 3 | 2,2514 | 0,12  | 0,075  |
| 2 | O14686 MLL2_HUMAN   | E.VSVLSS#GS#PR.L               | S46:S48:        | 2 | 2,2498 | 0,322 | 0      |
| 2 | P05388 RLA0_HUMAN   | E.S#DEDM*GFGLFD.-              | S307:           | 2 | 2,2493 | 0,335 | -0,092 |
| 2 | Q02952 AKA12_HUMAN  | E.ALICVGSSK.K                  |                 | 2 | 2,242  | 0,358 | 0      |
| 2 | P09651 ROA1_HUMAN   | R.NQGGYGG#SSSS#SYGSGR.R        | S360:S364:      | 2 | 2,2369 | 0,447 | 0,329  |
| 2 | O60911 CATL2_HUMAN  | D.TGFTVVAPGKE.K                |                 | 2 | 2,2262 | 0,309 | -0,11  |
| 2 | Q9BZF3 OSBL6_HUMAN  | E.SRLS#M*SES#VSE.F             | S487:S491:      | 2 | 2,2251 | 0,163 | -0,088 |
| 2 | Q02952 AKA12_HUMAN  | E.LQSHAKSPPS#PVERE.M           | S1331:          | 3 | 2,2241 | 0,191 | 0,105  |
| 2 | Q01484 ANK2_HUMAN   | K.SDS#NAS#FLR.A                | S31:S34:        | 2 | 2,2212 | 0,167 | 0      |
| 2 | Q9UJX2 CDC23_HUMAN  | R.RVS#PLNLS#SVTP.-             | S582:S587:      | 2 | 2,2077 | 0,372 | -0,256 |

|   |                     |                            |                    |   |        |       |        |
|---|---------------------|----------------------------|--------------------|---|--------|-------|--------|
| 2 | P46821 MAP1B_HUMAN  | K.VSPSKS#PSLS#PSPPS#PLEK.T | S1256:S1260:S1265: | 3 | 2,2021 | 0,104 | 0      |
| 2 | Q7Z7A1 CP110_HUMAN  | R.SRS#LS#PLIGSE.T          | S34:S36:           | 2 | 2,1943 | 0,193 | -0,187 |
| 2 | P48553 TMEM1_HUMAN  | R.RQESS#SS#LEM*PSGVALEE.G  | S709:S711:         | 2 | 2,1895 | 0,094 | 0,116  |
| 2 | P46821 MAP1B_HUMAN  | K.SPS#LSPSPS#PLEK.T        | S1258:S1265:       | 2 | 2,1881 | 0,276 | 0,077  |
| 2 | O60716 CTND1_HUMAN  | R.GSLAS#LDS#LR.K           | S349:S352:         | 2 | 2,1837 | 0,338 | -0,103 |
| 2 | Q7Z417 NUFP2_HUMAN  | K.GADNDGS#GS#ESGYTPK.K     | S212:S214:         | 2 | 2,1823 | 0,223 | 0,068  |
| 2 | Q8TDY2 RBCC1_HUMAN  | K.ASVSQTS#PQSASS#PRM*E.S   | S647:S653:         | 2 | 2,178  | 0,267 | 0,253  |
| 2 | Q9UKS6 PACN3_HUMAN  | R.SPDEVT#LT#SIVPTR.D       | T324:T326:         | 2 | 2,1693 | 0,286 | 0      |
| 2 | O15061 DMN_HUMAN    | E.VS#SPTGFAQSQVLE.D        | S1106:             | 2 | 2,1663 | 0,24  | -0,08  |
| 2 | Q8IWB9 TEX2_HUMAN   | K.TAPS#SPLTS#PSDTR.S       | S265:S270:         | 2 | 2,1645 | 1     | 0      |
| 2 | Q5QJE6 TDIF2_HUMAN  | E.IVS#EAES#HVS#GISR.I      | S141:S145:S148:    | 3 | 2,1632 | 0,181 | 0,321  |
| 2 | P42166 LAP2A_HUMAN  | R.EQGTES#RSST#PLPTISSSAE.N | S156:T160:         | 2 | 2,1602 | 0,168 | 0,219  |
| 2 | Q96CX2 KCD12_HUMAN  | E.GASAGAPS#PTLE.L          | S176:              | 2 | 2,1556 | 0,264 | 0,214  |
| 2 | Q9ULU4 PKCB1_HUMAN  | E.SVQQQS#TPVPLIS#PK.R      | S540:S547:         | 2 | 2,1534 | 0,216 | 0,069  |
| 2 | Q14684 RRP1B_HUMAN  | K.TPTSSPAS#S#PLVAK.K       | S735:S736:         | 2 | 2,1503 | 0,105 | -0,162 |
| 2 | Q14980 NUMA1_HUMAN  | E.GT#PLS#ITSK.L            | T1733:S1736:       | 2 | 2,1488 | 0,292 | 0,115  |
| 2 | Q16204 CCDC6_HUMAN  | K.LDQPVS#APPS#PR.D         | S240:S244:         | 3 | 2,147  | 0,142 | -0,064 |
| 2 | B2R8U0 B2R8U0_HUMAN | K.AAAGPLDM*S#LPST#PDIK.I   | S97:T101:          | 2 | 2,1468 | 0,131 | 0,262  |
| 2 | Q96JM3 ZN828_HUMAN  | K.AVPPVS#PE.L              | S416:              | 2 | 2,1414 | 0,228 | 0,279  |
| 2 | P33527 MRP1_HUMAN   | R.QLSS#SS#SYSGDISR.H       | S916:S918:         | 2 | 2,1352 | 0,158 | 0      |
| 2 | Q09666 AHNK_HUMAN   | K.GPAFNM*AS#PE.S           | S5552:             | 2 | 2,1273 | 0,12  | -0,109 |
| 2 | P33527 MRP1_HUMAN   | R.QLSSS#S#SYSGDISR.H       | S917:S918:         | 2 | 2,1197 | 0,151 | 0,224  |
| 2 | Q76176 SSH2_HUMAN   | R.TTNPFYNT#M*.-            | T1422:             | 2 | 2,1138 | 0,264 | -0,206 |
| 2 | Q3KQU3 MA7D1_HUMAN  | R.S#ASASPLT#PCSVTR.S       | S364:T371:         | 2 | 2,108  | 0,221 | 0,077  |
| 2 | O15061 DMN_HUMAN    | E.VSAGGDL#QAAS#PTGASR.S    | S1159:S1163:       | 2 | 2,1055 | 0,201 | -0,34  |
| 2 | Q01433 AMPD2_HUMAN  | E.TIPEEAGITM*S#PGPQ.-      | S875:              | 2 | 2,0936 | 0,211 | 0,15   |
| 2 | A0JNW5 UH1BL_HUMAN  | K.RSSS#QM*S#LDTISLD.S      | S1109:S1112:       | 2 | 2,0917 | 0,176 | -0,427 |
| 2 | P27816 MAP4_HUMAN   | E.AQTLDSQIQETS#I.-         | S1151:             | 2 | 2,085  | 0,142 | 0      |
| 2 | Q96AQ6 PBIP1_HUMAN  | E.GQSPQQS#LPST#PK.A        | S129:T133:         | 3 | 2,082  | 0,196 | 0,308  |
| 2 | Q15942 ZYX_HUMAN    | R.GPPAS#S#PAPAPKFSPT#PK.F  | S258:S259:T270:    | 2 | 2,0801 | 0,118 | 0,353  |
| 2 | Q13263 TIF1B_HUMAN  | R.LAS#PSGSTSSGLE.V         | S594:              | 2 | 2,0774 | 0,284 | 0,383  |
| 2 | Q9BR39 JPH2_HUMAN   | E.GGS#PSPAGT#PPQPK.R       | S484:T490:         | 2 | 2,0743 | 0,256 | 0      |
| 2 | Q9HC35 EMAL4_HUMAN  | E.SVIQSNTPT#PPPSQPLNE.T    | T899:              | 2 | 2,0714 | 0,33  | 0,246  |

|   |                     |                           |              |   |        |       |        |
|---|---------------------|---------------------------|--------------|---|--------|-------|--------|
| 2 | ##P20585 MSH3_HUMAN | E.LPT#YIS#KSR.K           | T908:S911:   | 2 | 2,0499 | 0,318 | 0      |
| 2 | Q15149 PLEC1_HUMAN  | R.SSS#VGSSSYPIS#PAVSR.T   | S4386:S4396: | 2 | 2,0441 | 0,266 | -0,255 |
| 2 | Q01433 AMPD2_HUMAN  | E.EAGITM*S#PGPQ.-         | S875:        | 2 | 2,0318 | 0,15  | 0      |
| 2 | Q86UE8 TLK2_HUMAN   | E.FAGGS#APGTS#PGR.S       | S94:S99:     | 2 | 2,0254 | 0,091 | 0,092  |
| 2 | Q13242 SFRS9_HUMAN  | R.STS#YGYS#R.S            | S189:S193:   | 2 | 2,0249 | 0,137 | -0,113 |
| 2 | Q92870 APBB2_HUMAN  | R.KGS#LSSVTPS#PTPENE.K    | S334:S341:   | 2 | 2,0225 | 0,151 | -0,136 |
| 2 | Q2NKX8 ERC6L_HUMAN  | R.QNFSSQS#LE.H            | S971:        | 2 | 2,0216 | 0,198 | -0,109 |
| 2 | Q2NL81 Q2NL81_HUMAN | R.GYQS#LSDS#PPGAR.V       | S789:S793:   | 2 | 2,0203 | 0,229 | 0,082  |
| 2 | Q9UQ35 SRRM2_HUMAN  | E.NSFGS#PLE.F             | S1329:       | 2 | 2,0201 | 0,14  | 0,262  |
| 2 | Q9NUL3 STAU2_HUMAN  | K.GSSPT#PPCS#PVQPSK.Q     | T488:S492:   | 2 | 2,0057 | 0,225 | -0,072 |
| 2 | Q8NCF5 NF2IP_HUMAN  | D.NSPLS#PPS#PR.T          | S201:S204:   | 2 | 1,9971 | 0,273 | 0,201  |
| 2 | Q9NQ57 INCE_HUMAN   | E.SITVSS#LM*AT#PQDPK.G    | S235:T239:   | 2 | 1,9931 | 0,119 | 0,348  |
| 2 | Q15149 PLEC1_HUMAN  | R.SSSVGSS#S#SYPISPAVSR.T  | S4390:S4391: | 2 | 1,9888 | 1     | 0,127  |
| 2 | P27987 IP3KB_HUMAN  | R.AVLS#PGSVFS#PGR.G       | S43:S49:     | 2 | 1,9834 | 0,187 | -0,34  |
| 2 | O75676 KS6A4_HUMAN  | R.SS#PPLRT#PDVLE.S        | S682:T687:   | 2 | 1,9764 | 0,166 | 0,083  |
| 2 | P55196 AFAD_HUMAN   | K.SVT#PASTLT#K.S          | T1313:T1319: | 2 | 1,9643 | 0,096 | 0      |
| 2 | Q96MH2 HEX12_HUMAN  | K.TSGAPGS#PQT#PPER.H      | S29:T32:     | 2 | 1,9611 | 0,381 | 0      |
| 2 | Q93045 STMN2_HUMAN  | K.ALEENNNFSK.M            |              | 2 | 1,9608 | 0,178 | -0,314 |
| 2 | Q03164 HRX_HUMAN    | E.SSPAS#PLQIE.S           | S2546:       | 2 | 1,959  | 0,183 | 0,11   |
| 2 | Q9Y4M2 Q9Y4M2_HUMAN | R.APDKGTDS#PS#PPPLEE.T    | S20:S22:     | 2 | 1,9533 | 0,211 | 0      |
| 2 | P46821 MAP1B_HUMAN  | K.SPSLS#PSPPS#PLEK.T      | S1260:S1265: | 2 | 1,9407 | 0,165 | 0,077  |
| 2 | Q9H4A3 WNK1_HUMAN   | E.SSVLSSSS#PE.S           | S1899:       | 2 | 1,9403 | 0,3   | 0      |
| 2 | Q9UHB7 AFF4_HUMAN   | K.AVGM*PS#PVS#PK.L        | S1055:S1058: | 2 | 1,9364 | 0,276 | -0,49  |
| 2 | Q5T011 K0467_HUMAN  | R.KIS#DLEFS#E.A           | S581:S586:   | 2 | 1,9357 | 0,204 | 0      |
| 2 | Q9P2J2 TUTLA_HUMAN  | R.SPET#PPVS#PR.E          | T972:S976:   | 2 | 1,9329 | 0,088 | 0,199  |
| 2 | P62736 ACTA_HUMAN   | K.DSYVGDEAQSK.R           |              | 2 | 1,9266 | 0,258 | -0,102 |
| 2 | Q15642 CIP4_HUMAN   | R.APS#DSS#LGTPSDGRPE.L    | S296:S299:   | 2 | 1,9262 | 0,351 | 0      |
| 2 | O15085 ARHGB_HUMAN  | K.SLGGES#SGGTT#PVGSFHTE.A | S1457:T1462: | 2 | 1,9119 | 0,128 | -0,186 |
| 2 | Q3MIN7 RGL3_HUMAN   | R.VIEPPAASCPS#S#PR.I      | S511:S512:   | 2 | 1,9114 | 0,276 | -0,075 |
| 2 | P42166 LAP2A_HUMAN  | R.SST#PLPTISSAE.N         | T160:        | 2 | 1,9102 | 0,184 | 0,09   |
| 2 | Q08J23 NSUN2_HUMAN  | E.STQLS#PADLTE.G          | S456:        | 2 | 1,9005 | 0,228 | 0      |
| 2 | P78316 NOP14_HUMAN  | R.FGEYNSNM*S#PEE.K        | S96:         | 2 | 1,8989 | 0,219 | 0,081  |
| 2 | Q6S8J3 A26CA_HUMAN  | E.TTFNSIM*K.S             |              | 2 | 1,8938 | 0,293 | 0,127  |

|   |                     |                                    |                 |   |        |       |        |
|---|---------------------|------------------------------------|-----------------|---|--------|-------|--------|
| 2 | O60293 CC131_HUMAN  | R.LDSS#PVSS#PR.K                   | S949:S953:      | 2 | 1,8347 | 0,26  | -0,203 |
| 2 | Q5TZA2 CROCC_HUMAN  | R.SS#APFS#PPSGPPEK.-               | S2005:S2009:    | 2 | 1,828  | 0,089 | -0,158 |
| 2 | P49585 PCY1A_HUMAN  | K.TS#PPCS#PANLSR.H                 | S343:S347:      | 2 | 1,826  | 0,12  | 0,169  |
| 2 | Q8TEP8 CE192_HUMAN  | E.LS#PLVCS#PAGVSR.L                | S432:S437:      | 2 | 1,8151 | 0,192 | 0,081  |
| 2 | Q96JM3 ZN828_HUMAN  | R.KTS#PAS#LDFPE.S                  | S459:S462:      | 2 | 1,8072 | 0,245 | 0      |
| 2 | Q9Y6M7 S4A7_HUMAN   | K.YVDAETS#L.-                      | S1213:          | 2 | 1,7994 | 0,143 | 0,062  |
| 2 | P49848 TAF6_HUMAN   | K.ANGSQPNS#GSPQPAP.-               | S670:           | 2 | 1,7702 | 0,234 | 0      |
| 2 | Q15139 KPCD1_HUMAN  | R.T#ISPSTS#NNIPLM*R.V              | T395:S401:      | 2 | 1,7639 | 0,165 | 0,071  |
| 2 | Q96NT5 PCFT_HUMAN   | E.FQQFPQS#P.-                      | S458:           | 2 | 1,7635 | 0,307 | 0,115  |
| 2 | O14497 ARI1A_HUMAN  | R.GPS#PSPVGS#PASVAQSR.S            | S696:S702:      | 2 | 1,7575 | 0,276 | 0,491  |
| 2 | Q6NZY4 ZCHC8_HUMAN  | R.GT#PPPVFT#PPLPK.G                | T479:T485:      | 2 | 1,7519 | 0,095 | 0,081  |
| 2 | P13639 EF2_HUMAN    | K.SDPVVSURE.T                      |                 | 2 | 1,7351 | 0,179 | -0,116 |
| 2 | Q92598 HS105_HUMAN  | K.DISTTLNADE.A                     |                 | 2 | 1,7072 | 0,133 | 0,226  |
| 2 | P12270 TPR_HUMAN    | E.GVQGPLNVS#LSEE.G                 | S1185:          | 2 | 1,7064 | 0,31  | 0      |
| 2 | Q13641 TPBG_HUMAN   | R.LTNLSSNS#DV.-                    | S418:           | 2 | 1,6882 | 0,215 | 0      |
| 2 | P46087 NOL1_HUMAN   | R.GNSQLLS#.-                       | S812:           | 2 | 1,6858 | 0,118 | 0,201  |
| 2 | ##Q7Z5K2 WAPL_HUMAN | E.DDS#DFGFPDGTSE.E                 | S1114:          | 2 | 1,6532 | 0,245 | -0,166 |
| 2 | Q14202 ZMYM3_HUMAN  | E.SLLNSQS#PE.S                     | S774:           | 2 | 1,6078 | 0,092 | 0      |
| 3 | P46939 UTRO_HUMAN   | E.RTNGSFLTDSSS#TTGS#VEDE.H         | S3217:S3221:    | 2 | 5,6474 | 1     | -1,193 |
| 3 | Q9UHR4 BI2L1_HUMAN  | E.IKTPASTPVS#GTPQAS#PM*IE.R        | S255:S261:      | 2 | 5,3907 | 1     | 0      |
| 3 | Q9Y6G9 DC1L1_HUMAN  | R.KPVTVPSTT#PTS#PTEGEAS.-          | T513:S516:      | 2 | 4,9623 | 1     | 0,119  |
| 3 | A8MVB1 A8MVB1_HUMAN | E.KLVSPASAAASS#PSSS#PSPQPVSE.L     | S37:S41:        | 2 | 4,3031 | 1     | 0,387  |
| 3 | P51784 UBP11_HUMAN  | R.RLLSPAGSSGAPAS#PACSS#PPSSE.F     | S905:S910:      | 3 | 4,2376 | 1     | 0,376  |
| 3 | A8MVB1 A8MVB1_HUMAN | E.KLVSPASAAASS#PSSSPS#PQPVSE.L     | S37:S43:        | 3 | 4,2232 | 1     | 0,29   |
| 3 | Q14247 SRC8_HUMAN   | R.AKT#QTPPVVS#PAPQPTEERLPSS#PVYE.D | T399:S405:S418: | 3 | 4,1627 | 1     | 0,3    |
| 3 | P10636 TAU_HUMAN    | E.IVYKS#PVVS#GDT#SPR.H             | S713:S717:T720: | 2 | 4,1182 | 0,364 | 0,066  |
| 3 | Q9H0H5 RGAP1_HUMAN  | E.NSNAFST#PQT#PDIK.V               | T564:T567:      | 2 | 3,8218 | 0,418 | 0      |
| 3 | P51784 UBP11_HUMAN  | R.RLLSPAGSSGAPAS#PACSS#PPSSE.F     | S905:S910:      | 2 | 3,7881 | 0,388 | 0,301  |
| 3 | Q96FF9 CDCA5_HUMAN  | K.THSVPAT#PTST#PVPNPEAE.S          | T111:T115:      | 2 | 3,5462 | 1     | 0,35   |
| 3 | Q14247 SRC8_HUMAN   | R.AKTQT#PPVS#PAPQPTEE.R            | T401:S405:      | 2 | 3,5404 | 0,535 | 0,126  |
| 3 | A8MVB1 A8MVB1_HUMAN | E.KLVSPASAAASS#PSSSPS#PQPVSE.L     | S37:S43:        | 2 | 3,4171 | 1     | 0,483  |
| 3 | Q9UHR4 BI2L1_HUMAN  | E.IKTPASTPVSGT#PQAS#PM*IE.R        | T257:S261:      | 3 | 3,4099 | 0,413 | 0,167  |
| 3 | Q86YP4 P66A_HUMAN   | R.RPPS#PDVIVLS#DNEQPS#SPR.V        | S100:S107:S113: | 3 | 3,3747 | 0,326 | -0,151 |

|   |                    |                             |                    |   |        |       |        |
|---|--------------------|-----------------------------|--------------------|---|--------|-------|--------|
| 3 | Q9NPI6 DCP1A_HUMAN | R.KASSPS#PLTIGT#PE.S        | S525:T531:         | 2 | 3,2891 | 0,376 | -0,553 |
| 3 | Q9Y6G9 DC1L1_HUMAN | R.KPVTVS#PTTPT#SPTEGEAS.-   | S510:T515:         | 2 | 3,2534 | 1     | -0,06  |
| 3 | P17275 JUNB_HUMAN  | R.SRDAT#PPVS#PINM*EDQE.R    | T255:S259:         | 3 | 3,2489 | 0,271 | 0      |
| 3 | P10636 TAU_HUMAN   | E.IVYKS#PVVS#GDT#SPR.H      | S713:S717:T720:    | 3 | 3,1654 | 0,275 | 0      |
| 3 | P02545 LMNA_HUMAN  | R.SGAQASST#PLS#PTR.I        | T19:S22:           | 2 | 3,0786 | 0,419 | -0,321 |
| 3 | Q00613 HSF1_HUMAN  | E.GRPPS#PPPTST#PE.K         | S363:T369:         | 2 | 3,0112 | 0,396 | -0,412 |
| 3 | Q9UJX2 CDC23_HUMAN | R.RVS#PLNLSSVT#P.-          | S582:T590:         | 2 | 3,0039 | 0,447 | -0,256 |
| 3 | P17275 JUNB_HUMAN  | R.SRDAT#PPVS#PINM*EDQE.R    | T255:S259:         | 2 | 3,0022 | 0,353 | 0,118  |
| 3 | P17275 JUNB_HUMAN  | R.SRDAT#PPVS#PINM*E.D       | T255:S259:         | 2 | 2,9941 | 0,486 | -0,144 |
| 3 | P10636 TAU_HUMAN   | E.IVYKS#PVVS#GDTS#PR.H      | S713:S717:S721:    | 3 | 2,9484 | 0,098 | 0      |
| 3 | P10636 TAU_HUMAN   | E.IVYKS#PVVS#GDTS#PR.H      | S713:S717:S721:    | 2 | 2,9342 | 0,299 | 0,132  |
| 3 | Q14247 SRC8_HUMAN  | R.AKTQT#PPVS#PAPQPTEE.R     | T401:S405:         | 3 | 2,9322 | 0,183 | 0,378  |
| 3 | O43399 TPD54_HUMAN | D.SM*TDVPVDTGVAAR.T         |                    | 2 | 2,8499 | 0,498 | -0,17  |
| 3 | P06493 CDC2_HUMAN  | K.IGEGT#Y#GVVYK.G           | T14:Y15:           | 2 | 2,8437 | 0,267 | -0,181 |
| 3 | Q9Y6G9 DC1L1_HUMAN | R.KPVTVSPTT#PT#SPTEGEAS.-   | T513:T515:         | 2 | 2,8106 | 0,312 | 0,06   |
| 3 | Q9NPI6 DCP1A_HUMAN | R.KASS#PSPLTIGT#PE.S        | S523:T531:         | 2 | 2,7938 | 0,42  | -0,079 |
| 3 | P10636 TAU_HUMAN   | E.IVY#KSPVSGDTS#PR.H        | Y711:S721:         | 3 | 2,7577 | 0,091 | 0,311  |
| 3 | O75396 SC22B_HUMAN | R.DLQQYQSQAK.Q              |                    | 2 | 2,7416 | 0,286 | -0,303 |
| 3 | O94842 TOX4_HUMAN  | E.LVSGS#PVALS#PQPR.C        | S562:S567:         | 2 | 2,7119 | 0,392 | -0,078 |
| 3 | Q96QU8 XPO6_HUMAN  | K.HSVTAAT#PPPS#PTSGE.S      | T204:S208:         | 2 | 2,6509 | 0,536 | -0,072 |
| 3 | Q6UN15 FIP1_HUMAN  | R.DHS#PTPSVFNSDEER.Y        | S492:              | 3 | 2,6098 | 0,164 | 0      |
| 3 | P62937 PPIA_HUMAN  | K.KITIADCGQLE.-             |                    | 2 | 2,5884 | 0,406 | -0,391 |
| 3 | P04792 HSPB1_HUMAN | R.ALS#RQLS#SGVSE.I          | S78:S82:           | 2 | 2,5829 | 0,15  | 0,088  |
| 3 | Q9H9R9 DBND1_HUMAN | R.RQPLSS#VSS#LE.V           | S64:S67:           | 2 | 2,4818 | 0,359 | 0      |
| 3 | Q6UN15 FIP1_HUMAN  | R.DHSPT#PSVFNSDEE.R         | T494:              | 2 | 2,4351 | 0,348 | 0,149  |
| 3 | P46821 MAP1B_HUMAN | K.VSPSKS#PSLS#PSPPS#PLEK.T  | S1256:S1260:S1265: | 3 | 2,3171 | 1     | 0,085  |
| 3 | O43399 TPD54_HUMAN | D.VPVDTGVAAR.T              |                    | 2 | 2,3137 | 0,292 | -0,31  |
| 3 | P43243 MATR3_HUMAN | E.TDLANLGDVASDGKK.E         |                    | 3 | 2,3066 | 0,136 | 0,061  |
| 3 | P04792 HSPB1_HUMAN | E.SPAVAAPAYS.R.A            |                    | 2 | 2,2888 | 0,33  | -0,448 |
| 3 | Q14568 HS902_HUMAN | E.SSAGGSFTVR.T              |                    | 2 | 2,2071 | 0,201 | -0,063 |
| 3 | Q9HC35 EMAL4_HUMAN | E.S#RISS#SPTLLE.N           | S914:S918:         | 2 | 2,16   | 0,21  | -0,09  |
| 3 | P35658 NU214_HUMAN | R.QPKSPGS#T#PTT#PTSSQAPQK.L | S433:T434:T437:    | 3 | 2,1278 | 1     | 0      |
| 3 | P68104 EF1A1_HUMAN | K.STTTGHLIYK.C              |                    | 2 | 2,1132 | 0,349 | -0,544 |



|   |                    |                                |                 |   |        |       |        |
|---|--------------------|--------------------------------|-----------------|---|--------|-------|--------|
| 3 | Q13501 SQSTM_HUMAN | R.SRLT#PVS#PE.S                | T269:S272:      | 2 | 2,1091 | 0,141 | -0,213 |
| 3 | O75396 SC22B_HUMAN | R.GEALSALDSK.A                 |                 | 2 | 2,1088 | 0,374 | -0,185 |
| 3 | P42166 LAP2A_HUMAN | E.SRS#STPLPTIS#SSAE.N          | S158:S166:      | 2 | 2,0901 | 1     | -0,508 |
| 3 | Q13283 G3BP1_HUMAN | K.SSS#PAPADIAQTVQE.D           | S232:           | 2 | 2,0127 | 0,163 | -0,154 |
| 3 | Q8N9T8 KRI1_HUMAN  | E.GVHGPPVQLAVDD.S              |                 | 2 | 2,0071 | 0,173 | -0,094 |
| 3 | P10636 TAU_HUMAN   | E.IVYKS#PVVS#GD.T              | S713:S717:      | 2 | 1,9374 | 0,242 | -0,184 |
| 3 | P29692 EF1D_HUMAN  | R.ATAPQQTQHVS#PM*R.Q           | S133:           | 3 | 1,44   | 0,089 | -0,06  |
| 4 | Q9UHR4 BI2L1_HUMAN | E.IKTPASTPVSQT#PQAS#PM*IE.R    | T257:S261:      | 2 | 5,1245 | 0,461 | 0,558  |
| 4 | P68104 EF1A1_HUMAN | K.SGDAIVDM*VPGKPM*CVE.S        |                 | 2 | 4,3689 | 0,442 | -0,192 |
| 4 | Q92615 LARP5_HUMAN | E.KFTSSQTS#PT#PPKPPS#PSFE.L    | S516:T518:S524: | 3 | 4,2918 | 1     | 0,073  |
| 4 | Q7L2J0 MEPCE_HUMAN | K.DITDPLSLNTCTDE.G             |                 | 2 | 4,1736 | 0,477 | 0      |
| 4 | P60709 ACTB_HUMAN  | D.DDIAALVVDNGSGM*CK.A          |                 | 2 | 4,1035 | 0,437 | -0,073 |
| 4 | Q9UK76 HN1_HUMAN   | R.RNS#SEASSGDFLDLK.G           | S87:            | 2 | 4,0352 | 0,378 | 0      |
| 4 | P51114 FXR1_HUMAN  | R.RGPNYTSGYGTNSEL#NPS#ETE.S    | S406:S409:      | 2 | 3,6379 | 0,456 | 0,775  |
| 4 | P24534 EF1B_HUMAN  | K.YGPADVEDTTGSGATDSKD.D        |                 | 2 | 3,4377 | 0,502 | 0,065  |
| 4 | P60709 ACTB_HUMAN  | D.IAALVVDNGSGM*CK.A            |                 | 2 | 3,3388 | 0,521 | -0,168 |
| 4 | P51114 FXR1_HUMAN  | R.RGPNYTSGYGTNSEL#NPS#ETE.S    | S406:S409:      | 3 | 3,2728 | 0,405 | 0,218  |
| 4 | P21333 FLNA_HUMAN  | K.DGSCGVAYVVQEPGDYE.V          |                 | 2 | 3,2233 | 0,16  | 0,198  |
| 4 | Q9H9R9 DBND1_HUMAN | R.RQPLSS#VSS#LE.V              | S64:S67:        | 2 | 3,2118 | 0,306 | -0,269 |
| 4 | Q15477 SKIV2_HUMAN | K.DPPLAAVTTAVQE.L              |                 | 2 | 3,1939 | 0,397 | -0,186 |
| 4 | Q15185 TEBP_HUMAN  | D.SQDS#DDEKM*PDLE.-            | S151:           | 2 | 3,1392 | 0,408 | -0,152 |
| 4 | P60709 ACTB_HUMAN  | D.DIAALVVDNGSGM*CK.A           |                 | 2 | 3,0855 | 0,498 | -0,078 |
| 4 | Q9H773 XTP3A_HUMAN | E.DQAVGPADIPCDSTGQTST.-        |                 | 2 | 3,0774 | 0,372 | 0      |
| 4 | Q96AQ6 PBIP1_HUMAN | R.EAGPPQPM*VPLAVENQAGGEGAGGE.L |                 | 3 | 3,0667 | 0,281 | 0,154  |
| 4 | P21333 FLNA_HUMAN  | K.DGSCGVAYVVQEPGDYE.V          |                 | 3 | 3,0647 | 0,185 | 0      |
| 4 | P25789 PSA4_HUMAN  | E.DM*ACSVAGITSDANVLTNE.L       |                 | 2 | 3,0613 | 0,249 | 0,246  |
| 4 | P10809 CH60_HUMAN  | K.DM*AIATGGAVFGEE.G            |                 | 2 | 2,9618 | 0,392 | 0,176  |
| 4 | P25789 PSA4_HUMAN  | E.DM*ACSVAGITSDANVLTNE.L       |                 | 3 | 2,949  | 0,259 | 0,184  |
| 4 | P05387 RLA2_HUMAN  | K.NIEDVIAQGIGK.L               |                 | 2 | 2,9483 | 0,399 | 0      |
| 4 | Q9NPI6 DCP1A_HUMAN | R.KASSPS#PLTIGT#PE.S           | S525:T531:      | 2 | 2,8925 | 0,348 | -0,237 |
| 4 | P06576 ATPB_HUMAN  | R.IPSAVGYQPTLATDM*GTM*QE.R     |                 | 3 | 2,8873 | 0,086 | -0,171 |
| 4 | Q15185 TEBP_HUMAN  | D.S#QDSDDEKM*PDLE.-            | S148:           | 2 | 2,872  | 0,362 | -0,076 |
| 4 | Q14247 SRC8_HUMAN  | R.AKTQT#PPVS#PAPQPTEE.R        | T401:S405:      | 2 | 2,8388 | 0,479 | 0,063  |

|   |                     |                               |                 |   |        |       |        |
|---|---------------------|-------------------------------|-----------------|---|--------|-------|--------|
| 4 | Q9UKY7 CDV3_HUMAN   | K.TAPVQAPPAPVIVTE.T           |                 | 2 | 2,8145 | 0,483 | -0,164 |
| 4 | P10809 CH60_HUMAN   | K.DMAIATGGAVFGEE.G            |                 | 2 | 2,8018 | 0,368 | 0,178  |
| 4 | Q9UQ35 SRRM2_HUMAN  | R.SSTGPEPPAPTLLAE.R           |                 | 2 | 2,6989 | 0,145 | 0,078  |
| 4 | P37802 TAGL2_HUMAN  | R.TLM*NLGGLAVAR.D             |                 | 2 | 2,6876 | 0,29  | -0,099 |
| 4 | Q92598 HS105_HUMAN  | E.LNNTCEPVVTQPKPK.I           |                 | 3 | 2,6755 | 0,274 | -0,212 |
| 4 | O75717 WDHD1_HUMAN  | R.SHILEDDENS#VDISM*LK.T       | S383:           | 3 | 2,6564 | 0,244 | -0,09  |
| 4 | Q69YN2 C19L1_HUMAN  | K.DFEPYDFTLDD.-               |                 | 2 | 2,6469 | 0,345 | -0,354 |
| 4 | Q05524 ENO1B_HUMAN  | K.DATNVGDEGGFAPNILE.N         |                 | 2 | 2,6289 | 0,429 | -0,142 |
| 4 | Q9NQC3 RTN4_HUMAN   | D.LDQSPLVSSSDS#PPRPQPAFK.Y    | S15:            | 3 | 2,6009 | 0,274 | -0,549 |
| 4 | Q86WB0 NIPA_HUMAN   | K.DTSATSQSVNGSPQAEQPSLE.S     |                 | 3 | 2,5799 | 0,168 | 0      |
| 4 | P10809 CH60_HUMAN   | K.DM*AIAT#GGAVFGEE.G          | T320:           | 2 | 2,5618 | 0,235 | -0,333 |
| 4 | P42166 LAP2A_HUMAN  | K.LREQGT#ESRSS#T#PLPTISSSAE.N | T154:S159:T160: | 3 | 2,5458 | 1     | 0,142  |
| 4 | O75396 SC22B_HUMAN  | R.GEALSALDSK.A                |                 | 2 | 2,5297 | 0,36  | -0,123 |
| 4 | O75396 SC22B_HUMAN  | K.ANNLSSLK.K                  |                 | 2 | 2,5288 | 0,287 | 0      |
| 4 | Q9H8G2 CI082_HUMAN  | K.AATLAVPPPEDVQPSAQQLE.L      |                 | 3 | 2,5162 | 0,159 | -0,089 |
| 4 | Q8IXM2 CQ049_HUMAN  | K.VASGVLSPPPAAPPSSSSVPE.A     |                 | 2 | 2,5058 | 0,178 | -0,06  |
| 4 | Q15185 TEBP_HUMAN   | D.S#DDEKM*PDLE.-              | S151:           | 2 | 2,481  | 0,201 | -0,191 |
| 4 | P0C7M2 RA1L3_HUMAN  | E.DSQRPGAHLTVK.K              |                 | 3 | 2,4427 | 0,252 | 0,21   |
| 4 | O60271 JIP4_HUMAN   | E.DGVVYQEEPPGGSGAVM*SE.R      |                 | 2 | 2,4407 | 0,264 | -0,067 |
| 4 | Q96T60 PNKP_HUMAN   | E.TRTPESQPDT#PPGT#PLVSQDE.K   | T118:T122:      | 3 | 2,4336 | 0,323 | -0,076 |
| 4 | P21333 FLNA_HUMAN   | K.DGSCGVAYVVQEPGD.Y           |                 | 2 | 2,3959 | 0,28  | 0,079  |
| 4 | Q7L2J0 MEPCE_HUMAN  | K.DITDPLSLNTCTD.E             |                 | 2 | 2,3863 | 0,134 | -0,083 |
| 4 | Q8IXM2 CQ049_HUMAN  | K.VASGVLSPPPAAPPSSSSVPE.A     |                 | 3 | 2,3567 | 0,088 | 0      |
| 4 | P40227 TCPZ_HUMAN   | E.DAYILTCNVSLE.Y              |                 | 2 | 2,3266 | 0,151 | -0,087 |
| 4 | O75396 SC22B_HUMAN  | R.DLQQYQSQAK.Q                |                 | 2 | 2,3115 | 0,451 | -0,202 |
| 4 | P62937 PIIA_HUMAN   | K.KITIADCQLE.-                |                 | 2 | 2,3102 | 0,335 | -0,391 |
| 4 | B2RA01 B2RA01_HUMAN | K.AQYEDIAQK.S                 |                 | 2 | 2,2966 | 0,115 | -0,229 |
| 4 | Q96DT7 ZBT10_HUMAN  | E.DCSVM*QPPVAYPEE.N           |                 | 2 | 2,204  | 0,227 | 0      |
| 4 | Q9BX40 LS14B_HUMAN  | K.DLAVVTQSAEAPAE.E.D          |                 | 2 | 2,1562 | 0,355 | -1,116 |
| 4 | Q9H078 CLPB_HUMAN   | K.DAIFIM*TSNVASDE.I           |                 | 2 | 2,1392 | 0,44  | -0,239 |
| 4 | O60716 CTND1_HUMAN  | E.DGYPGGSDNYGS#LSR.V          | S230:           | 2 | 2,1362 | 0,359 | 0,15   |
| 4 | Q8N9T8 KRI1_HUMAN   | E.GVHGGPPVQLAVDD.S            |                 | 2 | 2,1342 | 0,221 | 0      |
| 4 | Q86UP2 KTN1_HUMAN   | E.DDQVAPVPLNVVE.T             |                 | 2 | 2,1246 | 0,166 | -0,437 |

|   |                    |                                       |            |   |        |       |        |
|---|--------------------|---------------------------------------|------------|---|--------|-------|--------|
| 4 | Q13428 TCOF_HUMAN  | R.KSAEPSANTT#LVS#ETEEEE.G             | T168:S171: | 2 | 2,0727 | 0,318 | 0,117  |
| 4 | Q01082 SPTB2_HUMAN | K.TALPAQSAATLPAR.T                    |            | 2 | 2,002  | 0,234 | -0,268 |
| 5 | P51610 HCFC1_HUMAN | E.SLAPSNTFVAPQPVVVAS#PAK.L            | S1771:     | 2 | 5,6764 | 0,538 | 0,113  |
| 5 | P40763 STAT3_HUMAN | K.FICVTPTTCSNTIDLPM*S#PR.T            | S727:      | 2 | 5,5362 | 0,516 | 0,609  |
| 5 | Q96AC1 FERM2_HUMAN | E.LEGPLITPGSGSIYSS#PGLYSK.T           | S181:      | 2 | 5,5181 | 0,467 | 0,106  |
| 5 | P51610 HCFC1_HUMAN | E.SLAPSNTFVAPQPVVVAS#PAK.L            | S1771:     | 3 | 5,4651 | 0,526 | 0,678  |
| 5 | P05783 K1C18_HUMAN | R.GGM*GSGGLATGIAGGLAGM*GGIQNE.K       |            | 2 | 5,3182 | 0,548 | 0,225  |
| 5 | Q8NHZ8 CDC26_HUMAN | E.DVEVVGGS#DGEGAIGLSSDPK.S            | S42:       | 2 | 5,286  | 0,547 | 0,472  |
| 5 | Q14247 SRC8_HUMAN  | E.LSY#RGPVSGTEPEPVYSM*E.A             | Y433:      | 2 | 5,2464 | 0,505 | 0,667  |
| 5 | P31350 RIR2_HUMAN  | R.VPLAPITDPQQQLS#PLK.G                | S20:       | 2 | 5,2128 | 0,584 | 0      |
| 5 | P05783 K1C18_HUMAN | R.GGM*GSGGLATGIAGGLAGM*GGIQNE.K       |            | 3 | 5,1894 | 0,392 | 0,676  |
| 5 | Q9H7D0 DOCK5_HUMAN | R.TLSSPS#LQTDGIAATPVPPPPPK.S          | S1805:     | 3 | 5,0585 | 0,424 | 0,448  |
| 5 | Q92615 LARP5_HUMAN | R.TLS#ADASVNTLPVVVSR.E                | S568:      | 2 | 5,0522 | 0,456 | 0,067  |
| 5 | Q9UKN8 TF3C4_HUMAN | K.ILLVDSPGM*GNADDEQEE.G               |            | 2 | 5,0444 | 0,5   | 0,588  |
| 5 | Q9HBD1 RC3H2_HUMAN | K.IGS#PPKTPVSNVAATSAGPSNVGTE.L        | S549:      | 3 | 5,023  | 0,462 | -0,076 |
| 5 | Q13546 RIPK1_HUMAN | R.SNS#ATEQPSGLHSSQGLGM*GPVEE.S        | S335:      | 2 | 5,0099 | 0,553 | 0,293  |
| 5 | Q8N1G4 LRC47_HUMAN | E.GSLS#DTEADAVSGQLPDPTTNPASAGK.D      | S520:      | 2 | 4,9111 | 0,564 | 0,658  |
| 5 | Q9NQC3 RTN4_HUMAN  | D.LDQSPLVSSSDS#PPRPQPAFK.Y            | S15:       | 3 | 4,9105 | 0,393 | 0,549  |
| 5 | O15027 SC16A_HUMAN | R.LLPSAPQLTPDGPLAS#PAR.V              | S1786:     | 2 | 4,7855 | 0,486 | 0,308  |
| 5 | Q16643 DREB_HUMAN  | R.M*APTPIPTRS#PSDSSTASTPVAE.Q         | S337:      | 2 | 4,7385 | 0,508 | 0,713  |
| 5 | Q9Y6D5 BIG2_HUMAN  | R.GSS#LSGTDDGAQEVVKDILE.D             | S277:      | 2 | 4,7231 | 0,496 | -0,116 |
| 5 | Q9BTK6 PA1_HUMAN   | R.DLFLDSEDPSPAS#PPLR.S                | S237:      | 2 | 4,7213 | 0,544 | 0,241  |
| 5 | P40763 STAT3_HUMAN | R.TLDSLML*QFGNNGEGAEPSAGGQFE.S        |            | 3 | 4,6668 | 0,356 | 0,222  |
| 5 | Q16643 DREB_HUMAN  | R.M*APTPIPTRSPS#DSSTASTPVAE.Q         | S339:      | 2 | 4,6476 | 0,57  | 0,102  |
| 5 | P46821 MAP1B_HUMAN | E.VVS#PSQSVTGSAGHTPYYSPTDE.K          | S1322:     | 3 | 4,6303 | 0,537 | 0,284  |
| 5 | Q04637 IF4G1_HUMAN | E.TGEPYRLS#PEPTPLAEPILV               | S314:      | 2 | 4,6298 | 0,443 | 0,32   |
| 5 | Q8N1G4 LRC47_HUMAN | E.GSLS#DTEADAVSGQLPDPTTNPASAGK.D      | S520:      | 3 | 4,6266 | 0,333 | 0,494  |
| 5 | Q9UQ35 SRRM2_HUMAN | K.S#STPPGESYFGVSSLQLK.G               | S1041:     | 3 | 4,6214 | 0,382 | 0,652  |
| 5 | Q9NQ55 SSF1_HUMAN  | E.LLATGAGLS#ESEAEPDGDHNITE.L          | S238:      | 2 | 4,5695 | 0,506 | 0,609  |
| 5 | O60610 DIAP1_HUMAN | R.NSSASYGDDPTAQLQDVSDE.Q              |            | 2 | 4,552  | 0,616 | 0,223  |
| 5 | O43432 IF4G3_HUMAN | E.LS#SPREDTIPIPSLTSCTE.T              | S304:      | 2 | 4,5343 | 0,54  | 0,224  |
| 5 | P05783 K1C18_HUMAN | R.STS#FRGGM*GSGGLATGIAGGLAGM*GGIQNE.K | S53:       | 3 | 4,5177 | 0,414 | 0,259  |
| 5 | P12270 TPR_HUMAN   | E.SGGRS#VPTTPLQVAAPVTVFTE.S           | S2196:     | 2 | 4,5165 | 0,477 | 0,319  |

|   |                    |                                  |        |   |        |       |        |
|---|--------------------|----------------------------------|--------|---|--------|-------|--------|
| 5 | P40763 STAT3_HUMAN | K.FICVPTTCSNTIDLPM*S#PR.T        | S727:  | 3 | 4,4563 | 0,398 | 0,304  |
| 5 | Q13263 TIF1B_HUMAN | R.STAPSAASASASAAAASSPAGGGAEALE.L |        | 3 | 4,4379 | 0,318 | 1,263  |
| 5 | Q14376 GALE_HUMAN  | E.GDVAACYANPSLAQEE.L             |        | 2 | 4,435  | 0,429 | 0,216  |
| 5 | P55209 NP1L1_HUMAN | R.QLTVQM*M*QNPQILAALQE.R         |        | 3 | 4,4015 | 0,424 | 0,438  |
| 5 | Q12792 TWF1_HUMAN  | K.YLLSQSSPAPLTAEEEE.L            |        | 2 | 4,3965 | 0,4   | 0,203  |
| 5 | Q9UQ35 SRRM2_HUMAN | K.S#STPPGESYFGVSSLQLK.G          | S1041: | 2 | 4,3631 | 0,46  | 0,248  |
| 5 | Q66K74 MAP1S_HUMAN | R.SAS#PHDVDLCLVSPCEFE.H          | S731:  | 2 | 4,3624 | 0,344 | 0,228  |
| 5 | P31350 RIR2_HUMAN  | R.VPLAPITDPQQQLS#PLK.G           | S20:   | 3 | 4,3349 | 0,332 | 0      |
| 5 | Q9H8Y8 GORS2_HUMAN | K.ISLPGQM*AGTPIT#PLKDGfte.V      | T225:  | 2 | 4,3245 | 0,52  | 0,323  |
| 5 | Q9UBU7 DBF4A_HUMAN | K.LLFISEPIPHPS#NE.L              | S420:  | 2 | 4,3137 | 0,33  | 0,073  |
| 5 | P13693 TCTP_HUMAN  | E.GNIDDSLIGGNASAEGPEGEGTE.S      |        | 2 | 4,2587 | 0,587 | 0,78   |
| 5 | Q96T23 RSF1_HUMAN  | K.VGS#PLDYSVLDLPSTNGQSPGK.A      | S1349: | 3 | 4,2381 | 0,38  | 0,158  |
| 5 | Q14103 HNRPD_HUMAN | E.QFGGDGAAAAATAAVGGSAGEQE.G      |        | 3 | 4,1973 | 0,358 | 0,184  |
| 5 | Q96FJ2 DYL2_HUMAN  | K.NADM*SEDM*QQDAVDCATQAM*E.K     |        | 3 | 4,1878 | 0,287 | 0,38   |
| 5 | Q8NCA5 FA98A_HUMAN | E.DGALSQAVSAGASSPE.F             |        | 2 | 4,161  | 0,434 | -0,084 |
| 5 | P17252 KPCA_HUMAN  | E.GFS#YVNPQFVHPILQSAV.-          | S657:  | 2 | 4,1505 | 0,373 | 0      |
| 5 | O43379 WDR62_HUMAN | R.S#ISLGDSEGPVATLAQPLR.R         | S1226: | 2 | 4,134  | 0,475 | 0,348  |
| 5 | Q01167 FOXK2_HUMAN | R.VM*PSDLNLM*ADNSQPENE.K         |        | 2 | 4,1317 | 0,451 | 0,12   |
| 5 | Q5UIP0 RIF1_HUMAN  | K.VEEPSQCLASGTAISE.L             |        | 2 | 4,1015 | 0,541 | -0,073 |
| 5 | P98175 RBM10_HUMAN | E.LQSPT#HPSSALPPATSPTAQE.S       | T542:  | 2 | 4,1004 | 0,415 | 0,111  |
| 5 | P24534 EF1B_HUMAN  | K.YGPADVEDTTGSGATDSKD.D          |        | 2 | 4,0595 | 0,58  | 0,129  |
| 5 | Q92804 RBP56_HUMAN | R.TDADSESDNSDNNTIFVQGLGE.G       |        | 2 | 4,0437 | 0,492 | 0,21   |
| 5 | Q15554 TERF2_HUMAN | K.DLVLPQTALPAS#PALK.N            | S323:  | 2 | 4,0434 | 0,421 | 0      |
| 5 | P18583 SON_HUMAN   | E.SDS#FLKFDSEPSVALE.L            | S154:  | 2 | 4,0165 | 0,449 | 0,19   |
| 5 | O00567 NOL5A_HUMAN | R.LAALALASSENSSTPEECE.E.M        |        | 3 | 4,0034 | 0,297 | 0,5    |
| 5 | P52292 IMA2_HUMAN  | R.NVSSFPDDATSPLQE.N              |        | 2 | 3,9821 | 0,356 | 0,076  |
| 5 | O95295 S25BP_HUMAN | R.VVLVNNILQNAQE.R                |        | 2 | 3,9817 | 0,315 | 0,084  |
| 5 | Q96I25 SPF45_HUMAN | R.S#M*GGAAIAPPTSLVEK.D           | S169:  | 2 | 3,9745 | 0,41  | 0,3    |
| 5 | Q13263 TIF1B_HUMAN | R.STAPSAASASASAAAASSPAGGGAE.A    |        | 2 | 3,9689 | 0,532 | 0,243  |
| 5 | P30101 PDIA3_HUMAN | K.VVVAENFDEIVNNE.N               |        | 2 | 3,9651 | 0,382 | -0,153 |
| 5 | Q14247 SRC8_HUMAN  | E.LS#YRGPVSGTEPEPVYSM*E.A        | S432:  | 3 | 3,8882 | 0,241 | 0,584  |
| 5 | Q6S8J3 A26CA_HUMAN | K.SYELPDGQVITIGNE.R              |        | 2 | 3,8844 | 0,397 | 0      |
| 5 | Q01484 ANK2_HUMAN  | K.AM*IVPSS#SKPTPEEVSTPAEEEE.K    | S3760: | 2 | 3,856  | 0,418 | 0,405  |

|   |                    |                                    |        |   |        |       |        |
|---|--------------------|------------------------------------|--------|---|--------|-------|--------|
| 5 | P22102 PUR2_HUMAN  | E.GDGGPNTGGM*GAYCPAPQVSND.L        |        | 3 | 3,8392 | 0,369 | 0,428  |
| 5 | P49411 EFTU_HUMAN  | R.TIGTGLVTNTLAM*TEEE.K             |        | 2 | 3,8378 | 0,436 | -0,068 |
| 5 | Q15154 PCM1_HUMAN  | R.STSAPSASVGLAPVVNGE.S             |        | 2 | 3,8285 | 0,443 | 0,149  |
| 5 | Q9Y6E2 BZW2_HUMAN  | R.DTLVQGLNEAGDDLE.A                |        | 2 | 3,8248 | 0,409 | -0,154 |
| 5 | Q9UNW1 MINP1_HUMAN | K.DILQSCQTSEECE.L                  |        | 2 | 3,819  | 0,465 | 0,076  |
| 5 | Q9UPN4 AZI1_HUMAN  | R.TQDVLAQDAAGDNLE.M                |        | 2 | 3,7959 | 0,401 | -0,235 |
| 5 | P19338 NUCL_HUMAN  | K.TLVLSNLSYSATEE.T                 |        | 2 | 3,7888 | 0,509 | -0,32  |
| 5 | P49023 PAXI_HUMAN  | K.TGSSS#PPGGPPKPGSQLDSM*LGSLSQSD.L | S322:  | 3 | 3,782  | 0,361 | 0      |
| 5 | P04075 ALDOA_HUMAN | R.TVPPAVTGITFLSGGQSEEE.A           |        | 3 | 3,7804 | 0,294 | -0,181 |
| 5 | Q92616 GCN1L_HUMAN | K.LIAALSTPSQQVQE.S                 |        | 2 | 3,7753 | 0,492 | 0,329  |
| 5 | P49023 PAXI_HUMAN  | K.T#GSSSPPGGPPKPGSQLDSM*LGSLSQSD.L | T318:  | 3 | 3,755  | 0,283 | 0,41   |
| 5 | P22102 PUR2_HUMAN  | E.GDGGPNTGGM*GAYCPAPQVSND.L        |        | 2 | 3,749  | 0,527 | 0,342  |
| 5 | Q9H4A3 WNK1_HUMAN  | E.ATTAQPVSQPQAPQVLPQVS#AGK.Q       | S787:  | 3 | 3,7462 | 0,338 | 0      |
| 5 | Q9UNZ2 NSF1C_HUMAN | K.LGSTAPQVLSTSSPAQQAENE.A          |        | 3 | 3,725  | 0,278 | 0,519  |
| 5 | P31949 S10AB_HUMAN | K.LDTNSDGLDFSE.F                   |        | 2 | 3,716  | 0,384 | 0,508  |
| 5 | Q13546 RIPK1_HUMAN | R.S#NSATEQPGSLHSSQGLGM*GPVEE.S     | S333:  | 3 | 3,711  | 0,364 | 0,367  |
| 5 | Q9UNZ2 NSF1C_HUMAN | K.LGSTAPQVLSTSSPAQQAENE.A          |        | 2 | 3,7096 | 0,451 | 0,346  |
| 5 | Q9H3S7 PTN23_HUMAN | E.STPIPSSS#PPPLSSPLPEAPQPK.E       | S1544: | 3 | 3,7042 | 0,437 | 0,306  |
| 5 | Q05209 PTN12_HUMAN | K.TNISTASATVSAATSTE.S              |        | 2 | 3,7035 | 0,46  | 0,454  |
| 5 | Q92667 AKAP1_HUMAN | E.AAVAPPDAGLPLPGLPAEGS#PPPK.T      | S429:  | 3 | 3,7029 | 0,2   | 0,159  |
| 5 | Q14103 HNRPD_HUMAN | E.QFGGDGAAAAATAAVGGSAGEQE.G        |        | 2 | 3,7025 | 0,408 | 0,061  |
| 5 | O43379 WDR62_HUMAN | R.SIS#LGDSEGPVATLAQPLR.R           | S1228: | 3 | 3,7021 | 0,246 | -0,087 |
| 5 | Q9HAW4 CLSPN_HUMAN | R.LPLASM*DENAM*DANM*DE.L           |        | 2 | 3,6795 | 0,435 | 0,382  |
| 5 | P16615 AT2A2_HUMAN | E.LATICALCNDSDALDYNE.A             |        | 2 | 3,6757 | 0,37  | 0,063  |
| 5 | P46199 IF2M_HUMAN  | K.TGM*DCGLSLDEDNM*E.F              |        | 2 | 3,6687 | 0,438 | 0,355  |
| 5 | Q96AC1 FERM2_HUMAN | E.LEGPLITPGSGSIYSS#PGLYSK.T        | S181:  | 3 | 3,6659 | 0,388 | -0,079 |
| 5 | Q9UGU5 HM2L1_HUMAN | K.SPPTM*LLPAS#PAKAPE.T             | S512:  | 2 | 3,6637 | 0,4   | 0,135  |
| 5 | P55072 TERA_HUMAN  | K.LADDVDLEQVANE.T                  |        | 2 | 3,6603 | 0,287 | 0,256  |
| 5 | Q00613 HSF1_HUMAN  | E.AS#PGRPSSVDTLTLLSPTALID.S        | S314:  | 2 | 3,6378 | 0,329 | 0,235  |
| 5 | P14625 ENPL_HUMAN  | R.LISLTDENALSGNEE.L                |        | 2 | 3,6366 | 0,384 | -0,076 |
| 5 | P78330 SERB_HUMAN  | K.IIM*IGDGATDM*E.A                 |        | 2 | 3,5941 | 0,475 | 0,376  |
| 5 | Q9H3P7 GCP60_HUMAN | R.GPGASGEQPEPGEAAAGGAAEE.A         |        | 2 | 3,5849 | 0,381 | 0,063  |
| 5 | Q96PU5 NED4L_HUMAN | R.SLS#SPTVTLTSLAPLEGAKE.D          | S448:  | 2 | 3,5842 | 0,607 | 0,281  |

|   |                     |                                  |        |   |        |       |        |
|---|---------------------|----------------------------------|--------|---|--------|-------|--------|
| 5 | Q4VCS5 AMOT_HUMAN   | R.DTTVISHS#PNTSYDTALE.A          | S714:  | 2 | 3,5767 | 0,493 | 0,3    |
| 5 | Q8N1G4 LRC47_HUMAN  | E.EGSLSDT#EADAVSGQLPDPTTNPSAGK.D | T522:  | 3 | 3,5684 | 0,242 | 0      |
| 5 | Q8NFD5 ARI1B_HUMAN  | R.SGPISPASIPGSQM*PPQPPGSQSE.S    |        | 3 | 3,5679 | 0,333 | 0,234  |
| 5 | Q8WUM4 PDC6I_HUMAN  | K.FLTALAQDGVINEE.A               |        | 2 | 3,5613 | 0,348 | 0      |
| 5 | Q9NRG0 CHRC1_HUMAN  | K.VLTYSDLANTAQQSE.T              |        | 2 | 3,5586 | 0,431 | -0,074 |
| 5 | Q5C9Z4 NOM1_HUMAN   | R.LSEPNM*ASISGQLEE.L             |        | 2 | 3,5543 | 0,332 | -1,28  |
| 5 | Q9H078 CLPB_HUMAN   | K.DAIFIM*TSNVASDE.I              |        | 2 | 3,5443 | 0,425 | 0,16   |
| 5 | Q15223 PVRL1_HUMAN  | K.GPINYSLAGTYICE.A               |        | 2 | 3,5416 | 0,584 | -0,235 |
| 5 | O43815 STRN_HUMAN   | E.FDFLVTSEEGDNE.S                |        | 2 | 3,52   | 0,388 | -0,406 |
| 5 | Q68EM7 RHG17_HUMAN  | K.QNPSLPAPQTLAGGNPE.T            |        | 2 | 3,5143 | 0,483 | 0,289  |
| 5 | Q9BXF6 RFIP5_HUMAN  | E.SAS#AILPSSAIEDPDLGSLGK.M       | S209:  | 2 | 3,5069 | 0,361 | 0,232  |
| 5 | P55209 NP1L1_HUMAN  | K.FSDAGQPM*SFVLE.F               |        | 2 | 3,4994 | 0,369 | 1,014  |
| 5 | O95292 VAPB_HUMAN   | K.FM*VQSM*FAPTDSDM*E.A           |        | 2 | 3,4986 | 0,374 | 0,194  |
| 5 | P49006 MRP_HUMAN    | E.AGPQATEPSTPSGPESGPTPASAEQNE.-  |        | 3 | 3,4979 | 0,295 | 0,353  |
| 5 | P35579 MYH9_HUMAN   | E.LEDTLDSTAAQQE.L                |        | 2 | 3,4958 | 0,386 | 0,429  |
| 5 | O00512 BCL9_HUMAN   | K.APLTM*ASPAM*LGNVE.S            |        | 2 | 3,4949 | 0,362 | 0,477  |
| 5 | Q14192 FHL2_HUMAN   | E.DQLLCTDCYSNE.Y                 |        | 2 | 3,4914 | 0,287 | 0,402  |
| 5 | Q13263 TIF1B_HUMAN  | R.STAPSAAAASASAAAASSPAGGGAEALE.L |        | 2 | 3,4774 | 0,476 | 0,526  |
| 5 | Q8WXV6 Q8WXV6_HUMAN | R.TSS#EDNLYLAVLR.A               | S21:   | 2 | 3,4755 | 0,236 | -0,86  |
| 5 | P22626 ROA2_HUMAN   | R.GFGFVTFSSM*AE.V                |        | 2 | 3,4753 | 0,548 | 0,188  |
| 5 | Q86UP2 KTN1_HUMAN   | R.DAVSNNTTNQLE.S                 |        | 2 | 3,4743 | 0,321 | -0,102 |
| 5 | Q14126 DSG2_HUMAN   | R.ATQFTGATGAIM*TTE.T             |        | 2 | 3,4685 | 0,421 | 0,241  |
| 5 | Q14203 DCTN1_HUMAN  | E.VAAAAAQLIAPLAENE.G             |        | 2 | 3,459  | 0,422 | -0,079 |
| 5 | Q12905 ILF2_HUMAN   | R.AQDPSEVLTMT*LTNE.T             |        | 2 | 3,4476 | 0,349 | 0      |
| 5 | Q2NKX8 ERC6L_HUMAN  | E.T#SLGAPEPLSGEQLVGSPQDK.A       | T1172: | 2 | 3,4347 | 0,427 | 0,446  |
| 5 | Q9NVP1 DDX18_HUMAN  | E.DTSFASLCNLVNE.N                |        | 2 | 3,419  | 0,449 | 0,083  |
| 5 | P25398 RS12_HUMAN   | E.GIAAGGVM*DVNTALQE.V            |        | 2 | 3,4174 | 0,42  | 0,469  |
| 5 | O00299 CLIC1_HUMAN  | D.NYLTSPLPEEVDE.T                |        | 2 | 3,4128 | 0,293 | 0,162  |
| 5 | Q4KMP7 TB10B_HUMAN  | K.YGFLGGSQYSGSLE.S               |        | 2 | 3,4072 | 0,433 | 0,083  |
| 5 | Q9NVI7 ATD3A_HUMAN  | K.DALNLAQM*QE.Q                  |        | 2 | 3,4072 | 0,245 | 0,212  |
| 5 | Q8WUM4 PDC6I_HUMAN  | K.FLTALAQDGVINE.E                |        | 2 | 3,405  | 0,264 | 0,175  |
| 5 | P49792 RBP2_HUMAN   | K.AVVS#PPKFVFGSE.S               | S2510: | 2 | 3,3999 | 0,338 | -0,169 |
| 5 | P04632 CPNS1_HUMAN  | R.LFAQLAGDDM*E.V                 |        | 2 | 3,3967 | 0,382 | 0,199  |

|   |                     |                                |        |   |        |       |        |
|---|---------------------|--------------------------------|--------|---|--------|-------|--------|
| 5 | P40763 STAT3_HUMAN  | R.TLDSLM*QFGNNGEGAEPSAGGQFE.S  |        | 2 | 3,3945 | 0,402 | 0,592  |
| 5 | P63241 IF5A1_HUMAN  | E.ILITVLSAM*TEE.A              |        | 2 | 3,3913 | 0,415 | 0,457  |
| 5 | Q9UBQ0 VPS29_HUMAN  | K.FYINPGSATGAYNALE.T           |        | 2 | 3,3887 | 0,401 | 0,072  |
| 5 | P28290 SSFA2_HUMAN  | R.SADNLSCPSPLNVM*EPVTE.L       |        | 2 | 3,388  | 0,466 | 0,353  |
| 5 | O75175 CNOT3_HUMAN  | K.AAGALLNGPPQFSTAPE.I          |        | 2 | 3,3748 | 0,387 | -0,297 |
| 5 | P51610 HCFC1_HUMAN  | R.QLLQSASTALM*GE.S             |        | 2 | 3,3587 | 0,367 | 0,358  |
| 5 | Q9Y6A5 TACC3_HUMAN  | K.LEAPFTQDDTLGLE.N             |        | 2 | 3,3461 | 0,326 | 0,315  |
| 5 | Q8NF64 ZMIZ2_HUMAN  | R.T#VSPAHLVM*PSVM*E.M          | T705:  | 2 | 3,3409 | 0,371 | -0,379 |
| 5 | P07737 PROF1_HUMAN  | R.DSLLQDGEFSM*D.L              |        | 2 | 3,3254 | 0,289 | 0,267  |
| 5 | Q7Z2K8 GRIN1_HUMAN  | R.DAGLQVSLGAAE.T               |        | 2 | 3,3234 | 0,308 | 0,432  |
| 5 | P07437 TBB5_HUMAN   | K.M*AVTFIGNSTAIQE.L            |        | 2 | 3,3219 | 0,379 | 0,407  |
| 5 | Q32LY9 Q32LY9_HUMAN | E.ALLQSM*GLTPESPIVPPM*SPSS#K.S | S84:   | 3 | 3,3219 | 0,283 | 0,497  |
| 5 | P10809 CH60_HUMAN   | R.ALM*LQGVDLLAD.A              |        | 2 | 3,3209 | 0,423 | 0      |
| 5 | Q9UMF0 ICAM5_HUMAN  | K.TVVVSAESPPEM*DE.S            |        | 2 | 3,3137 | 0,445 | 0,729  |
| 5 | P55209 NP1L1_HUMAN  | R.QLTVQM*M*QNPQILAALQE.R       |        | 2 | 3,31   | 0,269 | 0,117  |
| 5 | P50990 TCPQ_HUMAN   | K.IAVYSCPFDM*ITE.T             |        | 2 | 3,308  | 0,483 | 0      |
| 5 | P10809 CH60_HUMAN   | E.VGYDAM*AGDFVNM*VE.K          |        | 2 | 3,304  | 0,319 | -0,074 |
| 5 | P22681 CBL_HUMAN    | K.AGSCQQGSGPAASAATASPQLSSE.I   |        | 3 | 3,291  | 0,284 | 0,659  |
| 5 | P18669 PGAM1_HUMAN  | R.YADLTEDQLPSCE.S              |        | 2 | 3,2885 | 0,462 | 0,475  |
| 5 | Q8WXE0 CSK12_HUMAN  | E.LQAAM*AGGGPEPLPPARSPS#QE.S   | S697:  | 3 | 3,2864 | 0,174 | 0,222  |
| 5 | Q13263 TIF1B_HUMAN  | R.STAPSAASASASAAASSPAGGGAE.A   |        | 3 | 3,2763 | 0,314 | 0,091  |
| 5 | Q96IZ0 PAWR_HUMAN   | E.DAITQQNTIQNE.A               |        | 2 | 3,2707 | 0,324 | 0,266  |
| 5 | A6NJL0 A6NJL0_HUMAN | R.M*LDQTLIDLNEM*.-             |        | 2 | 3,2699 | 0,381 | -0,083 |
| 5 | Q9Y6M4 KC1G3_HUMAN  | R.SNAPITAPTEVEVM*DE.T          |        | 2 | 3,2643 | 0,374 | 0      |
| 5 | Q04637 IF4G1_HUMAN  | E.AALPPVS#PLKAALSEEE.L         | S1232: | 2 | 3,2616 | 0,403 | -0,203 |
| 5 | Q8WXF1 PSPC1_HUMAN  | R.LFVGNLPTDITEE.D              |        | 2 | 3,2607 | 0,24  | 0,084  |
| 5 | Q86UU1 PHLB1_HUMAN  | R.GLLTDSPAATVLA.E.A            |        | 2 | 3,2571 | 0,389 | -0,09  |
| 5 | Q92563 TICN2_HUMAN  | K.LDTSADLFLDQTE.L              |        | 2 | 3,2552 | 0,237 | 0,083  |
| 5 | Q70E73 RAPH1_HUMAN  | E.ISEQPTM*ATVVPQVPTS#PK.S      | S1206: | 2 | 3,2517 | 0,379 | 0,463  |
| 5 | O75376 NCOR1_HUMAN  | R.S#PGSISYLPFFTK.L             | S2184: | 2 | 3,2482 | 0,424 | -0,227 |
| 5 | Q13442 HAP28_HUMAN  | R.QYTSPEEIDAQLQAE.K            |        | 2 | 3,2476 | 0,39  | 0,213  |
| 5 | Q08378 GOGA3_HUMAN  | R.QQM*TALQSQLQVQLE.R           |        | 2 | 3,2459 | 0,299 | 0,452  |
| 5 | P22314 UBA1_HUMAN   | R.YDGQVAVFGSDLQE.K             |        | 2 | 3,2429 | 0,355 | 0,559  |

|   |                    |                                |       |   |        |       |        |
|---|--------------------|--------------------------------|-------|---|--------|-------|--------|
| 5 | Q15029 U5S1_HUMAN  | E.M*DFLADLM*DNSE.L             |       | 2 | 3,2417 | 0,27  | 0,085  |
| 5 | Q9UBN7 HDAC6_HUMAN | E.DAVGGATLGQTTSEE.A            |       | 2 | 3,2396 | 0,362 | 0,51   |
| 5 | Q71U36 TBA1A_HUMAN | K.TIGGGDDSFNTFFSE.T            |       | 2 | 3,2357 | 0,355 | 0      |
| 5 | P42166 LAP2A_HUMAN | R.DSGSFVAFQNIPIGSE.L           |       | 2 | 3,2326 | 0,36  | 0,078  |
| 5 | P55209 NP1L1_HUMAN | E.IINAIYEPTTEE.C               |       | 2 | 3,2305 | 0,457 | 0,429  |
| 5 | Q9H3S7 PTN23_HUMAN | K.EEPPVPEAPSSGPPSSSLE.L        |       | 3 | 3,2295 | 0,293 | -0,483 |
| 5 | P29966 MARCS_HUMAN | E.AAPAEPPAAAAASSACAAPSQE.A     |       | 3 | 3,2276 | 0,41  | 0,812  |
| 5 | P49411 EFTU_HUMAN  | R.TIGTGLVTNTLAM*TE.E           |       | 2 | 3,2247 | 0,333 | 0      |
| 5 | O14497 ARI1A_HUMAN | R.SGPLS#PAAVPGNQM*PPRPPSGQSD.S | S715: | 3 | 3,2241 | 0,427 | 0,225  |
| 5 | P22102 PUR2_HUMAN  | K.QVLVAPGNAGTACSE.K            |       | 2 | 3,2199 | 0,331 | 0,745  |
| 5 | Q14974 IMB1_HUMAN  | R.DAAVM*AFGCILE.G              |       | 2 | 3,2135 | 0,405 | -1,487 |
| 5 | P30041 PRDX6_HUMAN | K.DINAYNCEEPTE.K               |       | 2 | 3,1983 | 0,436 | 0,671  |
| 5 | P49588 SYAC_HUMAN  | K.QFIDSNPNQPLVILE.M            |       | 2 | 3,191  | 0,411 | -0,071 |
| 5 | P10809 CH60_HUMAN  | K.DM*AIATGGAVFGEE.G            |       | 2 | 3,1909 | 0,404 | 1,146  |
| 5 | Q9UKN8 TF3C4_HUMAN | K.ILLVDSPGM*GNADDEQEE.G        |       | 3 | 3,1894 | 0,24  | 0,793  |
| 5 | O95400 CD2B2_HUMAN | K.YDILASEDVEGQE.A              |       | 2 | 3,1834 | 0,256 | 0,249  |
| 5 | P49327 FAS_HUMAN   | K.GVDLVLNSLAEE.K               |       | 2 | 3,1686 | 0,309 | 0,194  |
| 5 | Q9NRR5 UBQL4_HUMAN | R.LQLPVFLQQM*QNPE.S            |       | 2 | 3,1627 | 0,328 | -0,072 |
| 5 | Q13885 TBB2A_HUMAN | E.M*EFTEAESNM*NDLVSE.Y         |       | 2 | 3,1542 | 0,461 | 0,065  |
| 5 | P98175 RBM10_HUMAN | E.LQS#PTHSSALPPATSPTAQE.S      | S540: | 2 | 3,1495 | 0,419 | 0,333  |
| 5 | P23246 SFPQ_HUMAN  | R.LFVGNLPADITEDE.F             |       | 2 | 3,1488 | 0,365 | 0,08   |
| 5 | Q96RL1 UIMC1_HUMAN | R.DLNES#PVKSFVSISE.A           | S677: | 2 | 3,1463 | 0,435 | 0      |
| 5 | P30153 2AAA_HUMAN  | R.LNIISNLDCVNE.V               |       | 2 | 3,1459 | 0,271 | -0,348 |
| 5 | Q96115 SCLY_HUMAN  | K.VYM*DYNATTPLEPE.V            |       | 2 | 3,1405 | 0,347 | 0,221  |
| 5 | O00151 PDL1_HUMAN  | R.VITNQYNNPAGLYSSE.N           |       | 2 | 3,1338 | 0,465 | 0,345  |
| 5 | Q9NZI8 IF2B1_HUMAN | K.VSYIPDEQIAQGPE.N             |       | 2 | 3,1287 | 0,449 | 0,474  |
| 5 | Q14247 SRC8_HUMAN  | K.TQTPPVSPAPQPTTEERLPSS#PVYE.D | S418: | 3 | 3,1283 | 0,245 | 0,136  |
| 5 | P06748 NPM_HUMAN   | K.M*SVQPTVSLGGFE.I             |       | 2 | 3,1265 | 0,447 | 1,159  |
| 5 | Q9H8S9 MOL1B_HUMAN | R.QAVM*LPEGEDLNE.W             |       | 2 | 3,1181 | 0,349 | 0      |
| 5 | Q02790 FKBP4_HUMAN | E.IGEGENLDLPYGLE.R             |       | 2 | 3,1156 | 0,372 | 0      |
| 5 | Q13123 RED_HUMAN   | K.QLGDFFGM*SNSYAE.C            |       | 2 | 3,1029 | 0,462 | 0,077  |
| 5 | Q9BT09 CNPY3_HUMAN | E.LGGLEGDPSPEEDE.G             |       | 2 | 3,1026 | 0,278 | 0,507  |
| 5 | Q9UKY7 CDV3_HUMAN  | K.TAPVQAPPAPVIVTE.T            |       | 2 | 3,0998 | 0,502 | 0,328  |



|   |                     |                                |        |   |        |       |        |
|---|---------------------|--------------------------------|--------|---|--------|-------|--------|
| 5 | P13693 TCTP_HUMAN   | E.GNIDDSLIGGNASAEGPEGE.G       |        | 2 | 3,0885 | 0,316 | 0,513  |
| 5 | Q9NQ55 SSF1_HUMAN   | E.LLATGAGLSES#EAEPDGDHnite.L   | S240:  | 3 | 3,0858 | 0,162 | 0,228  |
| 5 | Q70E73 RAPH1_HUMAN  | K.QIASQFPPPTPPAM*E.S           |        | 2 | 3,0825 | 0,368 | -0,142 |
| 5 | P23193 TCEA1_HUMAN  | R.SADEPM*TTFVVCNE.C            |        | 2 | 3,0816 | 0,378 | 0,076  |
| 5 | Q8NHW5 Q8NHW5_HUMAN | D.TTAAPAAAAAPAK.V              |        | 2 | 3,0801 | 0,543 | -0,11  |
| 5 | Q86VP6 CAND1_HUMAN  | R.AVAALLTIPEAE.K               |        | 2 | 3,0795 | 0,325 | 0,102  |
| 5 | Q9Y4W6 AFG32_HUMAN  | K.LASLTPGFSGADVANCNE.A         |        | 2 | 3,071  | 0,334 | -0,254 |
| 5 | Q02241 KIF23_HUMAN  | K.LVQAPLDADGDNLQE.K            |        | 2 | 3,0687 | 0,289 | 0      |
| 5 | P61020 RAB5B_HUMAN  | E.AQAYADDNSLLFM*E.T            |        | 2 | 3,0684 | 0,433 | -0,076 |
| 5 | Q14247 SRC8_HUMAN   | R.GPVSgtePEPVYSM*E.A           |        | 2 | 3,0601 | 0,435 | 0,077  |
| 5 | P51610 HCFC1_HUMAN  | R.QLLQSASTALM*GESAE.V          |        | 2 | 3,0595 | 0,357 | 0,148  |
| 5 | Q9UBB6 NCDN_HUMAN   | K.ASIM*ASDCEPALNQA.E.G         |        | 2 | 3,059  | 0,38  | 0,283  |
| 5 | Q9BSJ8 ESYT1_HUMAN  | R.LTTVLNSGFLDE.W               |        | 2 | 3,0562 | 0,397 | 0,186  |
| 5 | P40227 TCPZ_HUMAN   | E.DAYILTCNVSLE.Y               |        | 2 | 3,0512 | 0,195 | -0,087 |
| 5 | Q15365 PCBP1_HUMAN  | E.STGAQVQVAGDM*LPNSTE.R        |        | 2 | 3,0482 | 0,386 | 0,268  |
| 5 | Q13885 TBB2A_HUMAN  | K.M*SATFIGNSTAIQE.L            |        | 2 | 3,0451 | 0,29  | 0      |
| 5 | P49327 FAS_HUMAN    | K.VVVQVLAEEPE.A                |        | 2 | 3,0427 | 0,3   | 0,805  |
| 5 | P49755 TMEDA_HUMAN  | K.FAFTTEDYDM*FE.V              |        | 2 | 3,0415 | 0,448 | 0      |
| 5 | P54727 RD23B_HUMAN  | E.DATSALVTGQSYE.N              |        | 2 | 3,0381 | 0,414 | 0,546  |
| 5 | Q5VZF2 MBNL2_HUMAN  | E.ILPTTPVIVPGS#PPVTVPGSTATQK.L | S159:  | 3 | 3,0379 | 0,214 | 0,216  |
| 5 | Q8WUA4 TF3C2_HUMAN  | R.AAQVALLYLQE.L                |        | 2 | 3,0371 | 0,281 | 0,3    |
| 5 | P14618 KPYM_HUMAN   | K.GVNLPGAADVLPVSE.K            |        | 2 | 3,0319 | 0,397 | 0,081  |
| 5 | P09960 LKHA4_HUMAN  | R.TLTGTAALTVQSQE.D             |        | 2 | 3,0313 | 0,295 | 0,258  |
| 5 | O95983 MBD3_HUMAN   | K.LSGLNAFDIAEE.L               |        | 2 | 3,0309 | 0,277 | 0,382  |
| 5 | Q9Y3Y2 CA077_HUMAN  | E.LDAYM*AQTDPETND.-            |        | 2 | 3,0283 | 0,428 | 0,153  |
| 5 | P26599 PTBP1_HUMAN  | K.M*ALIQM*GSVEE.A              |        | 2 | 3,0282 | 0,414 | 0,197  |
| 5 | Q9Y2E5 MA2B2_HUMAN  | R.NYYPM*VQSFM*E.D              |        | 2 | 3,028  | 0,337 | 0,081  |
| 5 | Q99961 SH3G1_HUMAN  | E.GDVITLTNQIDE.N               |        | 2 | 3,0216 | 0,334 | 0,463  |
| 5 | Q2NKX8 ERC6L_HUMAN  | E.TS#LGAPEPLSGEQLVGSPODK.A     | S1173: | 3 | 3,0213 | 0,157 | 0,334  |
| 5 | Q9NW15 TM16K_HUMAN  | K.GFDDNDDFLTM*AE.C             |        | 2 | 3,0207 | 0,361 | 0,301  |
| 5 | Q8NC51 PAIRB_HUMAN  | K.QISYNYSDDLQSNVTEETPE.G       |        | 2 | 3,0199 | 0,341 | 0,105  |
| 5 | Q15233 NONO_HUMAN   | R.LFVGNLPPDITEEE.M             |        | 2 | 3,0185 | 0,377 | -0,465 |
| 5 | O43488 ARK72_HUMAN  | E.LDTAFM*YSDGQSE.T             |        | 2 | 3,0159 | 0,341 | 0,577  |

|   |                     |                                        |        |   |        |       |        |
|---|---------------------|----------------------------------------|--------|---|--------|-------|--------|
| 5 | O75533 SF3B1_HUMAN  | E.AQGVGLDSTGYDQE.I                     |        | 2 | 3,0156 | 0,292 | -0,457 |
| 5 | Q9BSC4 NOL10_HUMAN  | K.VM*FENPDFQVDEE.S                     |        | 2 | 3,0126 | 0,246 | -0,227 |
| 5 | P49023 PAXI_HUMAN   | K.TGSSS#PPGGPPKPGSQLDSM*LGSLSQSD.L     | S322:  | 2 | 3,0115 | 0,387 | 0,82   |
| 5 | Q13283 G3BP1_HUMAN  | K.DFFQSYGNVVE.L                        |        | 2 | 3,0076 | 0,444 | 0,561  |
| 5 | Q70E73 RAPH1_HUMAN  | E.ISEQPTM*ATVVQPQVPTS#PK.S             | S1206: | 3 | 3,0049 | 0,189 | 0,521  |
| 5 | Q86U44 MTA70_HUMAN  | R.SDS#PVPTAPTSGGPKPSTASAVPE.L          | S50:   | 2 | 3,0024 | 0,464 | 0,316  |
| 5 | Q96B97 SH3K1_HUMAN  | K.VIFPYEAQNDDE.L                       |        | 2 | 3,0022 | 0,2   | 0,339  |
| 5 | P08133 ANXA6_HUMAN  | K.LSGGDDDAAGQFFPE.A                    |        | 2 | 3,0002 | 0,343 | -0,48  |
| 5 | O43482 OIP5_HUMAN   | R.AIDQASFTTSM*E.W                      |        | 2 | 2,9975 | 0,375 | 0,185  |
| 5 | O75064 DEN4B_HUMAN  | R.LSDTPGSFQSPSLE.I                     |        | 2 | 2,992  | 0,27  | -0,167 |
| 5 | B2RTQ5 B2RTQ5_HUMAN | K.LGNDAVSQDSSSPALSSVE.R                |        | 2 | 2,9879 | 0,409 | 0,262  |
| 5 | P07237 PDIA1_HUMAN  | R.TGPAATLPGAAAE.S                      |        | 2 | 2,9863 | 0,454 | 0      |
| 5 | Q15583 TGIF1_HUMAN  | K.NFTDTSML*YPE.D                       |        | 2 | 2,9807 | 0,344 | 0,457  |
| 5 | Q53F64 Q53F64_HUMAN | K.IFVGGLNPEATE.E                       |        | 2 | 2,9758 | 0,315 | 0,294  |
| 5 | P35658 NU214_HUMAN  | K.DSDPVM*AGIGEE.I                      |        | 2 | 2,9724 | 0,304 | -0,099 |
| 5 | P10809 CH60_HUMAN   | D.M*AIATGGAVFGEE.G                     |        | 2 | 2,9614 | 0,396 | 0,481  |
| 5 | P27816 MAP4_HUMAN   | K.DGVLTLANNVTPAKDVPPLS#ETE.A           | S580:  | 3 | 2,9594 | 0,115 | 0      |
| 5 | Q07021 C1QBP_HUMAN  | R.GVDNTFADELVE.L                       |        | 2 | 2,9549 | 0,152 | 0,186  |
| 5 | Q96B54 ZN428_HUMAN  | R.LCCPATAPQEAPAPE.G                    |        | 3 | 2,9447 | 0,408 | 0,454  |
| 5 | Q9Y3T9 NOC2L_HUMAN  | K.NSVPVTAM*VE.R                        |        | 2 | 2,9439 | 0,281 | 0,315  |
| 5 | Q53F64 Q53F64_HUMAN | K.IFVGGLNPEATEE.K                      |        | 2 | 2,9399 | 0,299 | 0,532  |
| 5 | P62158 CALM_HUMAN   | E.ADIDGDGQVNYEE.F                      |        | 2 | 2,9398 | 0,322 | 0,343  |
| 5 | Q9UQ35 SRRM2_HUMAN  | K.EQNSALPTSSQDEELM*E.V                 |        | 2 | 2,9375 | 0,397 | 0,127  |
| 5 | Q12873 CHD3_HUMAN   | R.FM*FNIADGGFTE.L                      |        | 2 | 2,9344 | 0,252 | 0,447  |
| 5 | Q8WW11 LMO7_HUMAN   | K.ATLSSTSGLDLM*SE.S                    |        | 2 | 2,9293 | 0,421 | 0,513  |
| 5 | P60842 IF4A1_HUMAN  | E.IVDSFDDM*NLSE.S                      |        | 2 | 2,9267 | 0,343 | 0,784  |
| 5 | P05387 RLA2_HUMAN   | K.LASVPAGGAVAVSAAPGS#AAPAAGSAPAAAEEK.K | S79:   | 3 | 2,9263 | 0,253 | 0,513  |
| 5 | Q8TEQ0 SNX29_HUMAN  | E.ASS#PGHGSPLSLLPSASVPE.S              | S60:   | 2 | 2,9212 | 0,251 | -0,356 |
| 5 | Q8N954 CCD75_HUMAN  | E.DYM*SDSFINVQE.D                      |        | 2 | 2,9194 | 0,239 | 0      |
| 5 | Q9H3P7 GCP60_HUMAN  | K.QVLM*GPYNPDTTCPE.V                   |        | 2 | 2,9171 | 0,389 | 0,075  |
| 5 | Q02952 AKA12_HUMAN  | K.S#AVVHDITDDGQEETPE.I                 | S128:  | 2 | 2,9098 | 0,393 | 0,127  |
| 5 | Q13564 ULA1_HUMAN   | K.LLQSIGQAPESISE.K                     |        | 2 | 2,9092 | 0,392 | 0,332  |
| 5 | Q8IZL8 PELP1_HUMAN  | K.VQPEPEPEPGLLE.V                      |        | 2 | 2,9091 | 0,32  | -0,315 |

|   |                     |                                |        |   |        |       |        |
|---|---------------------|--------------------------------|--------|---|--------|-------|--------|
| 5 | P50395 GDIB_HUMAN   | R.TDDYLDQPCYE.T                |        | 2 | 2,9076 | 0,29  | -1,634 |
| 5 | Q9Y696 CLIC4_HUMAN  | E.YLNSPLPDEIDE.N               |        | 2 | 2,9069 | 0,086 | 0,868  |
| 5 | Q9BYT8 NEUL_HUMAN   | K.DGSPADLLLE.K                 |        | 2 | 2,9065 | 0,201 | 0,107  |
| 5 | Q6DD88 ATLA3_HUMAN  | E.DDLQQLQLFTE.Y                |        | 2 | 2,9051 | 0,318 | 0,181  |
| 5 | P30084 ECHM_HUMAN   | K.ALNALCDGLIDE.L               |        | 2 | 2,9028 | 0,37  | 0,468  |
| 5 | Q9H9E3 COG4_HUMAN   | D.S#PPKLSGVQQPSEGVGGGR.C       | S6:    | 3 | 2,9027 | 0,241 | 0,382  |
| 5 | Q8N8S7 ENAH_HUMAN   | R.GNGPLPLGGSGLM*EE.M           |        | 2 | 2,9023 | 0,358 | 0,169  |
| 5 | P0C7M2 RA1L3_HUMAN  | K.LFIGLSFETTDE.S               |        | 2 | 2,9011 | 0,34  | 0,171  |
| 5 | Q13151 ROAO_HUMAN   | K.LFIGGLNVQTSE.S               |        | 2 | 2,8983 | 0,334 | 0,286  |
| 5 | Q9BV73 CP250_HUMAN  | R.DTLAQQTVDLQGE.V              |        | 2 | 2,8912 | 0,195 | 0,725  |
| 5 | Q96IZ0 PAWR_HUMAN   | R.DANVSGTLVSSSTLE.K            |        | 2 | 2,8888 | 0,157 | 0,33   |
| 5 | Q32LY9 Q32LY9_HUMAN | E.ALLQSM*GLTPESPIVPPM*SPS#SK.S | S83:   | 2 | 2,8849 | 0,464 | 0,379  |
| 5 | P09211 GSTP1_HUMAN  | K.YISLIYTNYE.A                 |        | 2 | 2,8828 | 0,253 | 0,286  |
| 5 | P30153 2AAA_HUMAN   | E.IIPM*FSNLASDE.Q              |        | 2 | 2,8754 | 0,351 | 0,09   |
| 5 | O00116 ADAS_HUMAN   | K.ASLNPSDTPPSVNE.D             |        | 2 | 2,8742 | 0,371 | 0,959  |
| 5 | Q13951 PEBB_HUMAN   | E.DALAQQAFFEE.A                |        | 2 | 2,8726 | 0,321 | -0,979 |
| 5 | Q9BXI6 TB10A_HUMAN  | K.FGFIVGSQGAEGALE.E            |        | 2 | 2,8688 | 0,363 | -0,082 |
| 5 | P56182 RRP1_HUMAN   | R.DSGGPVLQFDYE.A               |        | 2 | 2,8676 | 0,225 | -0,368 |
| 5 | Q5VUA4 ZN318_HUMAN  | R.S#PPREQVIEDNM*VPQGM*PEQE.T   | S2243: | 3 | 2,8658 | 0,081 | 0,073  |
| 5 | P29692 EF1D_HUMAN   | K.SLAGSSGPGASSGTSGDHGE.L       |        | 2 | 2,8649 | 0,487 | -0,142 |
| 5 | Q5VZK9 LR16A_HUMAN  | R.YGVQVM*GSGLLAE.M             |        | 2 | 2,8538 | 0,274 | 0,455  |
| 5 | Q6P2E9 EDC4_HUMAN   | K.GPGQVPTATSALSLE.L            |        | 2 | 2,8496 | 0,305 | 0,256  |
| 5 | P17028 ZNF24_HUMAN  | R.EVLVEDM*VSQEE.A              |        | 2 | 2,8477 | 0,344 | 0,171  |
| 5 | O75486 SUPT3_HUMAN  | K.IAQDFLNSIDQTGE.L             |        | 2 | 2,8475 | 0,358 | -0,157 |
| 5 | Q86T24 KAISO_HUMAN  | K.LPTPVNQATLSQTQGE.K           |        | 2 | 2,8467 | 0,402 | -0,069 |
| 5 | O75400 PR40A_HUMAN  | E.QAQLTSTPAIQDQSVE.V           |        | 2 | 2,8465 | 0,263 | 0,284  |
| 5 | P27824 CALX_HUMAN   | K.AADGAAEPGVVGM*IE.A           |        | 2 | 2,8457 | 0,265 | -0,239 |
| 5 | O43432 IF4G3_HUMAN  | E.LSSPREDT#IPIPSLTSCTE.T       | T310:  | 3 | 2,8451 | 0,164 | 0,168  |
| 5 | Q86SX6 GLRX5_HUMAN  | R.DYAAYNVLDLDP.E               |        | 2 | 2,8424 | 0,382 | 0,264  |
| 5 | Q86VP6 CAND1_HUMAN  | R.AVAALLTIPE.A                 |        | 2 | 2,8383 | 0,343 | 0,122  |
| 5 | Q9UKS6 PACN3_HUMAN  | R.ALYDYAGQEADE.L               |        | 2 | 2,8331 | 0,252 | 0,544  |
| 5 | Q9BXI6 TB10A_HUMAN  | K.FGFIVGSQGAEGALEE.V           |        | 2 | 2,8325 | 0,363 | 0,076  |
| 5 | Q13177 PAK2_HUMAN   | K.IISIFSGTE.K                  |        | 2 | 2,8304 | 0,331 | 0,126  |

|   |                     |                                           |       |   |        |       |        |
|---|---------------------|-------------------------------------------|-------|---|--------|-------|--------|
| 5 | P05386 RLA1_HUMAN   | E.SEESDDDM*GFGLFD.-                       |       | 2 | 2,8294 | 0,361 | 0,232  |
| 5 | Q96SB3 NEB2_HUMAN   | R.NEDVDPM*AASAEYE.L                       |       | 2 | 2,8281 | 0,242 | -0,157 |
| 5 | Q92598 HS105_HUMAN  | E.AFYSDPQGVYPPE.A                         |       | 2 | 2,8261 | 0,275 | 0,332  |
| 5 | Q9H1P3 OSBL2_HUMAN  | K.ADSDVADDVPVAQE.T                        |       | 2 | 2,8259 | 0,296 | 0,085  |
| 5 | Q15019 SEPT2_HUMAN  | K.TIISYIDEQFE.R                           |       | 2 | 2,8226 | 0,476 | 0,18   |
| 5 | P50991 TCPD_HUMAN   | R.ALIAGGGAPEIE.L                          |       | 2 | 2,8205 | 0,317 | 0,556  |
| 5 | A6NHR9 SMHD1_HUMAN  | E.NGTAFPFQVEVLDE.S                        |       | 2 | 2,8197 | 0,271 | -0,078 |
| 5 | Q9NYU2 UGGG1_HUMAN  | E.DLLSDGTSENE.S                           |       | 2 | 2,8186 | 0,243 | -0,207 |
| 5 | Q96DY7 MTBP_HUMAN   | E.LS#PGKLQVLPFE.K                         | S639: | 2 | 2,818  | 0,375 | 0,087  |
| 5 | Q9Y6K9 NEMO_HUMAN   | K.AQVTSLLGELQE.S                          |       | 2 | 2,8162 | 0,313 | 0      |
| 5 | P51003 PAPOA_HUMAN  | K.TSPLNSSGSS#QGRNSPAPAVTAASVTNIQATE.V     | S553: | 3 | 2,8147 | 0,293 | 0,345  |
| 5 | Q9H3P7 GCP60_HUMAN  | R.GPGASGEQPEPGEAAAGGAAEE.A                |       | 3 | 2,8081 | 0,208 | 0,283  |
| 5 | P46379 BAT3_HUMAN   | R.DLEAPEVQE.S                             |       | 2 | 2,8069 | 0,224 | 0,118  |
| 5 | Q969W3 F104A_HUMAN  | R.ASGPEGSLSQTM*AGSSPNTQPVPPE.Q            |       | 3 | 2,8048 | 0,134 | 0,075  |
| 5 | P22102 PUR2_HUMAN   | E.DVDAGQIILQE.A                           |       | 2 | 2,8033 | 0,193 | 0,813  |
| 5 | A9CQZ4 A9CQZ4_HUMAN | K.FCGM*FCPVEGSSE.N                        |       | 2 | 2,8006 | 0,273 | 0      |
| 5 | P78527 PRKDC_HUMAN  | K.DLLLNTM*SQEE.K                          |       | 2 | 2,7993 | 0,389 | 0,466  |
| 5 | O75821 EIF3G_HUMAN  | K.GIPLATGDT SPEPE.L                       |       | 2 | 2,7936 | 0,442 | 0,264  |
| 5 | Q71U36 TBA1A_HUMAN  | R.AVFVDLEPTVIDE.V                         |       | 2 | 2,7909 | 0,318 | 0,422  |
| 5 | Q15554 TERF2_HUMAN  | K.DLVLPTQALPAS#PALK.N                     | S323: | 3 | 2,7892 | 0,26  | 0,107  |
| 5 | Q15369 ELOC_HUMAN   | E.LLM*AANFLDC.-                           |       | 2 | 2,7879 | 0,363 | 0,206  |
| 5 | P38398 BRCA1_HUMAN  | K.VADVLDVLNE.V                            |       | 2 | 2,7854 | 0,367 | 0,337  |
| 5 | P06748 NPM_HUMAN    | K.MSVQPTVSLGGFE.I                         |       | 2 | 2,7845 | 0,487 | 0,09   |
| 5 | Q14103 HNRPD_HUMAN  | E.GAM*VAATQGAAAAAGSGAGTGGGTASGGTE.G       |       | 3 | 2,7841 | 0,234 | 0,307  |
| 5 | O15091 K0391_HUMAN  | R.NTIQLPTQPLNSEE.W                        |       | 2 | 2,7829 | 0,409 | -0,077 |
| 5 | Q15181 IPYR_HUMAN   | R.AIVDALPPPCE.S                           |       | 2 | 2,7814 | 0,44  | 0,413  |
| 5 | Q9Y490 TLN1_HUMAN   | R.LLSDSLPPSTGTFQE.A                       |       | 2 | 2,7804 | 0,245 | 0,613  |
| 5 | Q96GQ7 DDX27_HUMAN  | K.GQEAGGFFEDASQYDE.N                      |       | 2 | 2,78   | 0,43  | 0      |
| 5 | P63279 UBC9_HUMAN   | E.LLNEPNIQDPAQAE.A                        |       | 2 | 2,7725 | 0,322 | 0,55   |
| 5 | Q01082 SPTB2_HUMAN  | E.DFM*TTM*DANEE.K                         |       | 2 | 2,7708 | 0,341 | 0,183  |
| 5 | O00429 DNM1L_HUMAN  | K.VPSALAPASQEPSAASAE.A                    |       | 2 | 2,7693 | 0,45  | 0      |
| 5 | Q9BZF1 OSBL8_HUMAN  | K.DVLGPSTVVANSDE.S                        |       | 2 | 2,7616 | 0,454 | 0,261  |
| 5 | Q13263 TIF1B_HUMAN  | R.GAAAAATGQPGTAPAGT#PGAPPLAGM*AIVKEEETE.A | T541: | 3 | 2,761  | 0,144 | 0,557  |

|   |                    |                                  |       |   |        |       |        |
|---|--------------------|----------------------------------|-------|---|--------|-------|--------|
| 5 | Q15418 KS6A1_HUMAN | R.GFSFVATGLM*E.D                 |       | 2 | 2,7584 | 0,355 | 0,415  |
| 5 | P61978 HNRPK_HUMAN | R.AQPYDPNFYDE.T                  |       | 2 | 2,758  | 0,24  | 0,449  |
| 5 | Q9HC35 EMAL4_HUMAN | K.ATLLEDQQDPSPSS.-               |       | 2 | 2,7575 | 0,482 | 0      |
| 5 | P50552 VASP_HUMAN  | E.DAAQFAAGM*ASALE.A              |       | 2 | 2,7559 | 0,416 | 0,535  |
| 5 | P15170 ERF3A_HUMAN | K.SFVPMN*IGGASQAD.L              |       | 2 | 2,7552 | 0,441 | 0      |
| 5 | Q6UB35 C1TM_HUMAN  | K.LQPLSPVPSDIE.I                 |       | 2 | 2,7522 | 0,314 | 0,377  |
| 5 | Q9UKI8 TLK1_HUMAN  | R.SNS#SGNLHM*AGLTASPTPPSSSIITY.- | S743: | 3 | 2,7518 | 0,094 | 0,749  |
| 5 | Q96PZ0 PUS7_HUMAN  | K.IPLFNTDVDNLE.G                 |       | 2 | 2,7508 | 0,23  | -0,527 |
| 5 | Q8TE77 SSH3_HUMAN  | R.GAVLGLQDGGDNDDAAE.A            |       | 2 | 2,7491 | 0,313 | 0      |
| 5 | Q9UBQ7 GRHPR_HUMAN | R.VGYTPDVLDTTAE.L                |       | 2 | 2,7486 | 0,356 | 0,412  |
| 5 | O75396 SC22B_HUMAN | R.GEALSALDSK.A                   |       | 2 | 2,7443 | 0,391 | 0,062  |
| 5 | P55060 XPO2_HUMAN  | K.LLTECPPM*M*DTE.Y               |       | 2 | 2,7403 | 0,208 | 0,665  |
| 5 | Q9H501 ESF1_HUMAN  | K.YYYAVVDCDSPE.T                 |       | 2 | 2,7402 | 0,206 | 0,082  |
| 5 | P11142 HSP7C_HUMAN | K.TVTNAVVTVPAYFND.S              |       | 2 | 2,7386 | 0,394 | 0      |
| 5 | Q13263 TIF1B_HUMAN | E.DNAPATSYCVE.C                  |       | 2 | 2,7381 | 0,36  | 0,099  |
| 5 | P43490 NAMPT_HUMAN | R.VIQGDGVDINTLQE.I               |       | 2 | 2,7338 | 0,189 | 0,081  |
| 5 | Q5JSH3 WDR44_HUMAN | K.NLDTGEEIPLSLAEE.K              |       | 2 | 2,726  | 0,251 | 0,225  |
| 5 | P62333 PRS10_HUMAN | E.VIELPLTNPE.L                   |       | 2 | 2,7253 | 0,279 | 0      |
| 5 | P68104 EF1A1_HUMAN | K.DGNASGTTLLE.A                  |       | 2 | 2,7234 | 0,201 | 0,226  |
| 5 | P41567 EIF1_HUMAN  | K.TLTTVQGIADDYD.K                |       | 2 | 2,7213 | 0,218 | 0,173  |
| 5 | Q13043 STK4_HUMAN  | R.LLALDPM*M*EQE.I                |       | 2 | 2,72   | 0,354 | 0,554  |
| 5 | Q01167 FOXK2_HUMAN | R.VM*PSDLNLM*ADNSQPE.N           |       | 3 | 2,7195 | 0,178 | 0,204  |
| 5 | P06576 ATPB_HUMAN  | R.FLS#QPFQVAE.V                  | S465: | 2 | 2,7189 | 0,164 | 0,098  |
| 5 | P78371 TCPB_HUMAN  | K.ILIANTGM*DTD.K                 |       | 2 | 2,7151 | 0,41  | 0,31   |
| 5 | Q96JM3 ZN828_HUMAN | K.LAPVPS#PEPQKPAPVSPE.S          | S204: | 2 | 2,7139 | 0,213 | -0,064 |
| 5 | O75886 STAM2_HUMAN | E.DICQQM*GPM*IDE.K               |       | 2 | 2,7115 | 0,257 | 0,498  |
| 5 | P28838 AMPL_HUMAN  | E.DDVPQFTSAGE.N                  |       | 2 | 2,71   | 0,353 | 0,105  |
| 5 | O60841 IF2P_HUMAN  | K.NKPGPNIES#GNEDDDASFK.I         | S214: | 3 | 2,7083 | 0,293 | -0,173 |
| 5 | P11142 HSP7C_HUMAN | K.NQVAM*NPTNTVFD.A               |       | 2 | 2,7074 | 0,369 | -0,083 |
| 5 | Q96GQ7 DDX27_HUMAN | R.SADFNPDFVFTE.K                 |       | 2 | 2,7059 | 0,25  | 0      |
| 5 | O15061 DMN_HUMAN   | K.VALLYLDNEEEEND.G               |       | 2 | 2,7039 | 0,339 | -0,073 |
| 5 | Q13671 RIN1_HUMAN  | R.SM*SAAFCSLLAPE.R               |       | 2 | 2,7028 | 0,228 | 0,261  |
| 5 | P23381 SYWC_HUMAN  | K.DYTS GAM*LTGE.L                |       | 2 | 2,7015 | 0,342 | 0,105  |

|   |                    |                                  |   |        |       |        |
|---|--------------------|----------------------------------|---|--------|-------|--------|
| 5 | Q96GX9 APIP_HUMAN  | E.DM*FVCDINE.K                   | 2 | 2,7014 | 0,225 | 0,211  |
| 5 | P16615 AT2A2_HUMAN | K.AM*GVVATGVNTE.I                | 2 | 2,7004 | 0,362 | 0,097  |
| 5 | P46108 CRK_HUMAN   | R.LLDQQNPDEDFS.-                 | 2 | 2,6915 | 0,411 | -0,601 |
| 5 | P67870 CSK2B_HUMAN | E.DNPNQSDLIEQAAE.M               | 2 | 2,6907 | 0,258 | 0,158  |
| 5 | Q6UX04 SDC10_HUMAN | K.DASM*QSDSTFE.I                 | 2 | 2,6907 | 0,324 | 0,29   |
| 5 | Q9UQ35 SRRM2_HUMAN | E.DLNGPFLNQL.E.T                 | 2 | 2,689  | 0,219 | -0,194 |
| 5 | Q7L2J0 MEPCE_HUMAN | K.DITDPLSLNTCTDE.G               | 2 | 2,6885 | 0,305 | -0,077 |
| 5 | P06576 ATPB_HUMAN  | R.FLSQPFQVAE.V                   | 2 | 2,6883 | 0,297 | 0,523  |
| 5 | P62158 CALM_HUMAN  | E.VDADGNGTIDFPE.F                | 2 | 2,6877 | 0,199 | 0,542  |
| 5 | O75083 WDR1_HUMAN  | R.NIDNPALADIYTE.H                | 2 | 2,687  | 0,22  | -0,084 |
| 5 | P08758 ANXA5_HUMAN | K.ALLLLCGEDD.-                   | 2 | 2,686  | 0,373 | 0,218  |
| 5 | Q16643 DREB_HUMAN  | R.GPGSPAEDLM*FM*E.S              | 2 | 2,6809 | 0,286 | -0,086 |
| 5 | Q3KQU3 MA7D1_HUMAN | K.QLPLEPESPSGQVGRPAPPQEES#PSSE.A | 3 | 2,6792 | 0,172 | 0,609  |
| 5 | P29353 SHC1_HUMAN  | R.AADDGEGIVGAAM*PD.S             | 2 | 2,6789 | 0,303 | 0,261  |
| 5 | P30101 PDIA3_HUMAN | R.ISDTGSAGLM*LVE.F               | 2 | 2,674  | 0,29  | 0,373  |
| 5 | Q93008 USP9X_HUMAN | R.DDVFGYPQQFE.D                  | 2 | 2,6701 | 0,148 | 0,363  |
| 5 | P52209 6PGD_HUMAN  | K.DVLGM*AQDE.M                   | 2 | 2,6692 | 0,3   | 0      |
| 5 | P21980 TGM2_HUMAN  | K.TVEIPDPVEAGEE.V                | 2 | 2,6685 | 0,243 | 0,176  |
| 5 | P00558 PGK1_HUMAN  | K.VLPGVDALSNI.-                  | 2 | 2,6674 | 0,355 | 0,111  |
| 5 | P09211 GSTP1_HUMAN | E.AALVDM*VNDGVED.L               | 2 | 2,6641 | 0,371 | 0,358  |
| 5 | P54725 RD23A_HUMAN | E.DAASTLVTGSEYE.T                | 2 | 2,664  | 0,174 | 0      |
| 5 | Q5PRF9 SAM4B_HUMAN | K.YAALFSQM*SYEE.M                | 2 | 2,6637 | 0,326 | 0,503  |
| 5 | Q15149 PLEC1_HUMAN | E.DLLQDAQDE.K                    | 2 | 2,6557 | 0,271 | -0,583 |
| 5 | P78527 PRKDC_HUMAN | K.LAGANPAVITCDE.L                | 2 | 2,6549 | 0,322 | 0,275  |
| 5 | Q8IWE2 NXP20_HUMAN | K.SVLTGGLDALE.F                  | 2 | 2,6538 | 0,315 | 0,34   |
| 5 | Q96B54 ZN428_HUMAN | R.LCCPATAPQEAPAPE.G              | 2 | 2,6513 | 0,467 | 0,53   |
| 5 | P23443 KS6B1_HUMAN | R.GASASTANPQTPVEYPM*E.T          | 3 | 2,6467 | 0,114 | 0,196  |
| 5 | Q6UXD5 SE6L2_HUMAN | R.GTVLTYQCEPGYE.L                | 2 | 2,6464 | 0,414 | 0,161  |
| 5 | P09211 GSTP1_HUMAN | E.AALVDM*VNDGVE.D                | 2 | 2,6441 | 0,449 | 0,293  |
| 5 | A0AVT1 UBA6_HUMAN  | R.LFCDFGDEFE.V                   | 2 | 2,6431 | 0,399 | 0,572  |
| 5 | O15355 PPM1G_HUMAN | K.NLPPEEQM*ISALPD.I              | 2 | 2,6423 | 0,437 | 0,311  |
| 5 | P51991 ROA3_HUMAN  | R.GFGFVTYSCVEE.V                 | 2 | 2,6416 | 0,311 | 0,087  |
| 5 | Q9Y490 TLN1_HUMAN  | K.VVAPTISSPVCQE.Q                | 2 | 2,641  | 0,333 | -1,407 |

|   |                    |                                     |        |   |        |       |        |
|---|--------------------|-------------------------------------|--------|---|--------|-------|--------|
| 5 | Q8TEQ6 GEMI5_HUMAN | R.EPVICTPVSSGFE.K                   |        | 2 | 2,6401 | 0,331 | 0,772  |
| 5 | P30041 PRDX6_HUMAN | K.LIALSIDSVE.D                      |        | 2 | 2,6372 | 0,365 | 0,23   |
| 5 | P54578 UBP14_HUMAN | K.TVFVEDM*TEE.Q                     |        | 2 | 2,6364 | 0,234 | 0,201  |
| 5 | Q15417 CNN3_HUMAN  | R.DYQYSDQGIDY.-                     |        | 2 | 2,634  | 0,465 | 0,446  |
| 5 | P42704 LPPRC_HUMAN | E.DYFTQAM*E.V                       |        | 2 | 2,6296 | 0,193 | 0,418  |
| 5 | Q9UJZ1 STML2_HUMAN | R.DVQGTDSLDEE.L                     |        | 2 | 2,6293 | 0,401 | 0,191  |
| 5 | P16278 BGAL_HUMAN  | K.AGATLDLLVE.N                      |        | 2 | 2,6244 | 0,223 | 0,183  |
| 5 | P17655 CAN2_HUMAN  | K.GSLLGCSIDITSAADSE.A               |        | 2 | 2,6183 | 0,278 | 0,072  |
| 5 | Q9ULH7 MKL2_HUMAN  | R.M*TNNEDSLSPSTLSNLE.L              |        | 2 | 2,611  | 0,262 | 0,475  |
| 5 | P22234 PUR6_HUMAN  | E.IVLADVIDND.S                      |        | 2 | 2,6108 | 0,309 | 0,449  |
| 5 | O43707 ACTN4_HUMAN | K.DDPVTNLNNAFE.V                    |        | 2 | 2,6032 | 0,321 | 0,362  |
| 5 | Q9UJM3 ERRFI_HUMAN | R.QNS#EGSASKVPCILPIIE.N             | S369:  | 2 | 2,6022 | 0,144 | 0      |
| 5 | P35579 MYH9_HUMAN  | R.IIGLDQVAGM*SE.T                   |        | 2 | 2,5994 | 0,299 | 0      |
| 5 | Q9BY89 K1671_HUMAN | K.GVVLSGAESLLE.H                    |        | 2 | 2,5983 | 0,328 | 0,208  |
| 5 | Q14839 CHD4_HUMAN  | K.TPTPSTPGDTP#QPNTAPAPVPPAEDGKIEE.N | T1549: | 3 | 2,5983 | 0,2   | 0,603  |
| 5 | P43358 MAGA4_HUMAN | E.ALGLVGAQAAPTTEEQE.A               |        | 2 | 2,5953 | 0,161 | -0,076 |
| 5 | P06576 ATPB_HUMAN  | E.QAFYM*VGPIIE.A                    |        | 2 | 2,5943 | 0,323 | 0,563  |
| 5 | Q12770 SCAP_HUMAN  | R.GPPPPSLFGDQPD.L                   |        | 2 | 2,5938 | 0,327 | 0,369  |
| 5 | P55209 NP1L1_HUMAN | R.LDGLVETPTGYIE.S                   |        | 2 | 2,5897 | 0,36  | 0,347  |
| 5 | P13667 PDIA4_HUMAN | K.VSQGQLVVM*QPE.K                   |        | 2 | 2,5894 | 0,113 | 0,183  |
| 5 | P25705 ATPA_HUMAN  | E.IVTNFLAGFEA.-                     |        | 2 | 2,586  | 0,392 | 0,206  |
| 5 | Q13033 STRN3_HUMAN | K.IGNEGLAADLTDDPDTE.E               |        | 2 | 2,5852 | 0,244 | 0,21   |
| 5 | Q5SW79 CE170_HUMAN | R.QGS#FTIEKPSNPIIE.L                | S838:  | 2 | 2,5845 | 0,315 | -0,066 |
| 5 | Q92797 SYMPK_HUMAN | R.LM*ATQM*TAAGLPGVE.Q               |        | 2 | 2,5834 | 0,268 | -0,077 |
| 5 | Q9UKV3 ACINU_HUMAN | E.IEPM*EGPAPPVLIQLS#PPNTDADTRE.L    | S453:  | 3 | 2,5812 | 0,2   | 0,254  |
| 5 | Q8WY36 BBX_HUMAN   | K.EM*PQAPVLISCADQ.-                 |        | 2 | 2,5809 | 0,249 | 0,232  |
| 5 | O14980 XPO1_HUMAN  | E.AVGYM*IGAQTDQTVQE.H               |        | 2 | 2,5792 | 0,161 | 0,071  |
| 5 | P60983 GMFB_HUMAN  | R.LVVLDDEEE.G                       |        | 2 | 2,5756 | 0,169 | 0,346  |
| 5 | Q16222 UAP1_HUMAN  | R.ALAAQNIVEDM*E.Q                   |        | 2 | 2,5751 | 0,208 | 0      |
| 5 | P52907 CAZA1_HUMAN | K.DVQDSLTVSNE.A                     |        | 2 | 2,5749 | 0,295 | 0,404  |
| 5 | O00487 PSDE_HUMAN  | D.VFAM*PQSGTGVSVE.A                 |        | 2 | 2,5694 | 0,215 | 0,257  |
| 5 | O43447 PIIH_HUMAN  | K.LPVVISQCGEM*.-                    |        | 2 | 2,569  | 0,326 | 0,195  |
| 5 | P05387 RLA2_HUMAN  | E.DVIAQGIGK.L                       |        | 2 | 2,5668 | 0,159 | 0,135  |

|   |                    |                                         |       |   |        |       |        |
|---|--------------------|-----------------------------------------|-------|---|--------|-------|--------|
| 5 | P55072 TERA_HUMAN  | R.LIVDEAINE.D                           |       | 2 | 2,5658 | 0,266 | 0,24   |
| 5 | Q08378 GOGA3_HUMAN | K.DVLQAAAAE.H                           |       | 2 | 2,5648 | 0,117 | 0,412  |
| 5 | Q92598 HS105_HUMAN | K.VVNVELPIE.A                           |       | 2 | 2,5623 | 0,142 | 0,121  |
| 5 | Q9Y5X3 SNX5_HUMAN  | K.TTLPTFQSPE.F                          |       | 2 | 2,5622 | 0,242 | 0,544  |
| 5 | P12956 KU70_HUMAN  | E.ALALDLM*EPE.Q                         |       | 2 | 2,5617 | 0,419 | 0,546  |
| 5 | O00750 P3C2B_HUMAN | K.ISQPSDINTFSLVE.Q                      |       | 2 | 2,5611 | 0,263 | -0,079 |
| 5 | P39023 RL3_HUMAN   | R.LEQQVPVNQVFGQDE.M                     |       | 2 | 2,5606 | 0,461 | 0,282  |
| 5 | Q8TCS8 PNPT1_HUMAN | R.SSIVM*GEPISQSSNSQ.-                   |       | 3 | 2,5593 | 0,217 | 0      |
| 5 | P29401 TKT_HUMAN   | R.VYCLLDGDELSE.G                        |       | 2 | 2,559  | 0,236 | -0,72  |
| 5 | O14981 BTAF1_HUMAN | K.VLIDNIPDSSSLIEE.T                     |       | 2 | 2,5535 | 0,312 | 0,445  |
| 5 | O95433 AHSA1_HUMAN | K.TLFLAVQVQNE.E                         |       | 2 | 2,5501 | 0,171 | 0      |
| 5 | P18583 SON_HUMAN   | K.ETLPDSGFSANIEDINE.A                   |       | 2 | 2,549  | 0,215 | 0,066  |
| 5 | P42166 LAP2A_HUMAN | R.SSTPLPTISSAE.N                        |       | 2 | 2,5478 | 0,215 | -0,86  |
| 5 | O43719 HTSF1_HUMAN | E.TATGM*AFEPEIDE.K                      |       | 2 | 2,5468 | 0,338 | 0,257  |
| 5 | Q92615 LARP5_HUMAN | R.EPSVPASCAVSATYE.R                     |       | 2 | 2,5461 | 0,099 | 0,156  |
| 5 | P08133 ANXA6_HUMAN | E.DLVQQDVQDLYE.A                        |       | 2 | 2,5454 | 0,235 | -0,333 |
| 5 | P11388 TOP2A_HUMAN | K.SDSVTDSGPTFNILLD.M                    |       | 2 | 2,533  | 0,388 | -0,07  |
| 5 | O43683 BUB1_HUMAN  | R.LSQPAAGGVLTC.E.A                      |       | 2 | 2,5227 | 0,288 | 0,094  |
| 5 | Q8WWY3 PRP31_HUMAN | R.SSGTASSVAFTPLQGLE.I                   |       | 2 | 2,5179 | 0,312 | 0      |
| 5 | Q96RK0 CIC_HUMAN   | K.AAIASIPVGSFE.A                        |       | 2 | 2,5152 | 0,428 | 0,105  |
| 5 | Q13263 TIF1B_HUMAN | R.GAAAAATGQPGTAPAGT#PGAPPLAGM*AIVKEEE.T | T541: | 3 | 2,512  | 0,126 | 0,18   |
| 5 | Q5T6F2 UBAP2_HUMAN | K.LLQLPSTTIE.N                          |       | 2 | 2,5066 | 0,166 | 0,219  |
| 5 | Q9H9J4 UBP42_HUMAN | R.DAQDPSQSLGAPE.A                       |       | 2 | 2,5051 | 0,353 | 0,186  |
| 5 | O95758 ROD1_HUMAN  | K.M*ALIQLGSVEE.A                        |       | 2 | 2,5005 | 0,196 | -0,101 |
| 5 | O15031 PLXB2_HUMAN | K.VYLTPDGTSS.E.Y                        |       | 2 | 2,4962 | 0,364 | 0,209  |
| 5 | P13796 PLSL_HUMAN  | R.VYALPEDLVE.V                          |       | 2 | 2,4939 | 0,273 | 0,319  |
| 5 | P23528 COF1_HUMAN  | K.AVLFCLSE.D                            |       | 2 | 2,4938 | 0,113 | 0,325  |
| 5 | Q13464 ROCK1_HUMAN | R.DM*LLLACSQDE.Q                        |       | 2 | 2,4928 | 0,221 | -0,372 |
| 5 | P50990 TCPQ_HUMAN  | R.LVPGGGATEIE.L                         |       | 2 | 2,4928 | 0,252 | 0,351  |
| 5 | Q00587 BORG5_HUMAN | R.TPVPSTVQANTFE.F                       |       | 2 | 2,4922 | 0,149 | -0,702 |
| 5 | Q7Z6Z7 HUWE1_HUMAN | R.AEDSDALTAVSSQLE.G                     |       | 2 | 2,4906 | 0,195 | 0,159  |
| 5 | Q92900 RENT1_HUMAN | K.SQIDVALSQDSTYQGE.R                    |       | 2 | 2,4871 | 0,184 | -0,14  |
| 5 | Q9P2J5 SYLC_HUMAN  | K.M*IDAGDALIYM*EPE.K                    |       | 2 | 2,4864 | 0,186 | 0,076  |



|   |                     |                                      |       |   |        |       |        |
|---|---------------------|--------------------------------------|-------|---|--------|-------|--------|
| 5 | Q96CT7 CC124_HUMAN  | E.DAIAVLSVAEE.A                      |       | 2 | 2,4824 | 0,175 | 0,218  |
| 5 | Q9BUL5 PHF23_HUMAN  | R.LQAPDSATLLE.K                      |       | 2 | 2,4687 | 0,307 | 0,527  |
| 5 | Q96CS3 UBXD8_HUMAN  | E.VLFVQDLTDE.-                       |       | 2 | 2,4632 | 0,085 | 0,414  |
| 5 | P61011 SRP54_HUMAN  | K.LM*TIM*DSM*NDQE.L                  |       | 2 | 2,4628 | 0,269 | -0,083 |
| 5 | Q9UPQ9 TNC6B_HUMAN  | K.DM*GTTDSGPYFE.K                    |       | 2 | 2,4604 | 0,366 | 0,457  |
| 5 | Q9Y450 HBS1L_HUMAN  | K.GPPIEDAIASSDVLE.T                  |       | 2 | 2,4594 | 0,18  | 0,081  |
| 5 | Q6F113 H2A2A_HUMAN  | R.VGAGAPVYM*AAVLE.Y                  |       | 2 | 2,458  | 0,27  | 0,268  |
| 5 | P10599 THIO_HUMAN   | E.VDVDDCQDVASECE.V                   |       | 2 | 2,4568 | 0,265 | -0,074 |
| 5 | O43301 HS12A_HUMAN  | R.TFLVENVIGE.I                       |       | 2 | 2,4476 | 0,202 | 0,218  |
| 5 | Q15398 DLG7_HUMAN   | E.LNSSITSQDVLVLM*SS#PEKNTASQNSILEE.G | S767: | 3 | 2,4448 | 0,11  | 0,117  |
| 5 | Q9Y4F1 FARP1_HUMAN  | R.SLASQPTELNSEVLE.Q                  |       | 2 | 2,4445 | 0,137 | 0,075  |
| 5 | P01112 RASH_HUMAN   | E.TCLLDILDTAGQEE.Y                   |       | 2 | 2,4421 | 0,332 | -0,387 |
| 5 | Q96AQ6 PBIP1_HUMAN  | R.EAGPPQPM*VPLAVE.N                  |       | 2 | 2,4392 | 0,345 | 0,505  |
| 5 | P0C7M2 RA1L3_HUMAN  | E.DSQRPGAHLTVK.K                     |       | 3 | 2,4371 | 0,122 | 0,07   |
| 5 | P31943 HNRH1_HUMAN  | E.IVQFFSGLE.I                        |       | 2 | 2,4368 | 0,259 | 0,352  |
| 5 | Q9H488 OFUT1_HUMAN  | R.SLDAQSVYVATDSE.S                   |       | 2 | 2,4347 | 0,096 | 0,246  |
| 5 | Q7KZ85 SPT6H_HUMAN  | K.LPGYDAALQEAQE.I                    |       | 2 | 2,4346 | 0,181 | -1,053 |
| 5 | P50897 PPT1_HUMAN   | E.M*DNAGQLVFLATE.G                   |       | 2 | 2,4338 | 0,173 | 0,257  |
| 5 | Q16643 DREB_HUMAN   | R.M*APTPIPTRS#PSDSSTASTPVAE.Q        | S337: | 3 | 2,4325 | 0,124 | -0,076 |
| 5 | P31937 3HIDH_HUMAN  | R.IITM*LPTSINAIE.A                   |       | 2 | 2,4291 | 0,217 | 0,085  |
| 5 | P62070 RRAS2_HUMAN  | R.LDILDTAGQEE.F                      |       | 2 | 2,4279 | 0,311 | 0,304  |
| 5 | Q6XZF7 DNMBP_HUMAN  | R.FQALEPNELDFE.V                     |       | 2 | 2,4157 | 0,299 | 0,084  |
| 5 | Q15021 CND1_HUMAN   | E.LGLVGATADDTEAE.L                   |       | 2 | 2,4144 | 0,134 | 0,09   |
| 5 | Q9H3S7 PTN23_HUMAN  | K.EEPPVPEAPSSGPPSSSLE.L              |       | 2 | 2,4055 | 0,158 | -0,516 |
| 5 | Q8NFC6 FA44A_HUMAN  | K.ADDM*PPVQGTVAE.H                   |       | 2 | 2,4044 | 0,138 | 0,272  |
| 5 | P60709 ACTB_HUMAN   | E.ALFQPSFLGM*E.S                     |       | 2 | 2,4033 | 0,39  | 0,583  |
| 5 | P30040 ERP29_HUMAN  | K.ILDQGEDFPASE.M                     |       | 2 | 2,4002 | 0,309 | 0,369  |
| 5 | P30101 PDIA3_HUMAN  | K.M*DATANDVPSPYE.V                   |       | 2 | 2,3961 | 0,168 | 0,086  |
| 5 | P13010 KU86_HUMAN   | E.GGDVDDLLDM*I.-                     |       | 2 | 2,3949 | 0,247 | -0,103 |
| 5 | B2RA01 B2RA01_HUMAN | K.AQYEDIAQK.S                        |       | 2 | 2,3922 | 0,141 | -0,229 |
| 5 | Q9NS87 KIF15_HUMAN  | K.VVADLM*NQIQE.L                     |       | 2 | 2,3843 | 0,153 | 0      |
| 5 | Q02790 FKBP4_HUMAN  | E.NLDLPYGLE.R                        |       | 2 | 2,3833 | 0,203 | 0,236  |
| 5 | Q9UMX1 SUFU_HUMAN   | K.VSILPDVVFDS#PLH.-                  | S481: | 2 | 2,3775 | 0,204 | 0,075  |

|   |                    |                                |                 |   |        |       |        |
|---|--------------------|--------------------------------|-----------------|---|--------|-------|--------|
| 5 | P85037 FOXK1_HUMAN | R.FVQNVTSDLQLAAE.F             |                 | 2 | 2,3773 | 0,307 | -0,238 |
| 5 | P62263 RS14_HUMAN  | E.EQVISLGPQVAE.G               |                 | 2 | 2,3757 | 0,201 | 0,192  |
| 5 | Q96PU5 NED4L_HUMAN | E.VNIAGDSLGLALPPPPASPGS#R.T    | S300:           | 3 | 2,3721 | 0,139 | -0,169 |
| 5 | ##O15117 FYB_HUMAN | K.S#RVGLPAPS#GKSSSVNKMPS#EDE.H | S551:S559:S570: | 3 | 2,3703 | 0,198 | -1,971 |
| 5 | Q9Y265 RUVB1_HUMAN | E.LVPGVLFVDE.V                 |                 | 2 | 2,3703 | 0,182 | 0,112  |
| 5 | Q10570 CPSF1_HUMAN | E.DSTM*ILQTGQE.I               |                 | 2 | 2,3702 | 0,257 | 0      |
| 5 | Q8N3R9 MPP5_HUMAN  | K.TGIDNPM*FDTEE.G              |                 | 2 | 2,3701 | 0,302 | 0,264  |
| 5 | Q9UPV0 CE164_HUMAN | R.STEPVAPPEQLSE.A              |                 | 2 | 2,3674 | 0,201 | 0,088  |
| 5 | Q07666 KHDR1_HUMAN | K.FLVPDM*M*DDICQE.Q            |                 | 2 | 2,3674 | 0,158 | 0,297  |
| 5 | Q13432 U119A_HUMAN | R.ITGDYLCSPPE.N                |                 | 2 | 2,3665 | 0,233 | 0,19   |
| 5 | P55060 XPO2_HUMAN  | R.VPSM*VSTSLNAE.A              |                 | 2 | 2,3661 | 0,237 | -0,195 |
| 5 | O94804 STK10_HUMAN | R.SLQTTSPVVPAGNE.N             |                 | 2 | 2,3644 | 0,258 | 0,163  |
| 5 | Q3T8J9 GON4L_HUMAN | R.FEEPLANLLNE.Q                |                 | 2 | 2,3633 | 0,084 | -0,568 |
| 5 | P35580 MYH10_HUMAN | R.IVGLDQVTGM*TE.T              |                 | 2 | 2,3613 | 0,1   | 0,477  |
| 5 | Q13263 TIF1B_HUMAN | E.AAIGAPPTATEGPE.T             |                 | 2 | 2,3607 | 0,35  | 0,095  |
| 5 | P04075 ALDOA_HUMAN | R.YASICQQNGIVPIVEPE.I          |                 | 2 | 2,3571 | 0,198 | 0,127  |
| 5 | P43360 MAGA6_HUMAN | K.LLTQYFVQE.N                  |                 | 2 | 2,3565 | 0,156 | 0,107  |
| 5 | P51114 FXR1_HUMAN  | E.DAVLM*DGM*TE.S               |                 | 2 | 2,3565 | 0,361 | 0,219  |
| 5 | Q53SF7 COBL1_HUMAN | R.DTGTAPFAPNLEE.I              |                 | 2 | 2,3491 | 0,159 | 0,538  |
| 5 | O75531 BAF_HUMAN   | R.DFVAEPM*GE.K                 |                 | 2 | 2,3445 | 0,24  | 0      |
| 5 | Q8WUA2 PPIL4_HUMAN | K.YDLILDEQAE.D                 |                 | 2 | 2,3391 | 0,16  | 0,505  |
| 5 | O60716 CTND1_HUMAN | E.DTVISILNTINE.V               |                 | 2 | 2,3377 | 0,19  | 0,366  |
| 5 | P13639 EF2_HUMAN   | K.SDPVVSURE.T                  |                 | 2 | 2,3376 | 0,361 | -0,116 |
| 5 | P51116 FXR2_HUMAN  | R.TVM*DGGLESDGPNM*TE.N         |                 | 2 | 2,334  | 0,247 | 0      |
| 5 | O43809 CPSF5_HUMAN | K.LFLVQLQE.K                   |                 | 2 | 2,3312 | 0,084 | 0,062  |
| 5 | P20618 PSB1_HUMAN  | K.DVFISAAE.R                   |                 | 2 | 2,3294 | 0,183 | 0,358  |
| 5 | P49419 AL7A1_HUMAN | K.QAVSM*FLGAVEE.A              |                 | 2 | 2,3292 | 0,243 | -0,094 |
| 5 | Q8NC51 PAIRB_HUMAN | K.SSASAPDVDDPEAFPALA.-         |                 | 2 | 2,328  | 0,33  | 0,416  |
| 5 | O75643 U520_HUMAN  | K.VVLLTGETSTD.L                |                 | 2 | 2,328  | 0,374 | 0,215  |
| 5 | Q14247 SRC8_HUMAN  | R.AKTQT#PPVS#PAPQPTEE.R        | T401:S405:      | 2 | 2,3272 | 0,32  | 0      |
| 5 | Q14847 LASP1_HUMAN | K.QSFTM*VADTPE.N               |                 | 2 | 2,3267 | 0,168 | 0,393  |
| 5 | P09972 ALDOC_HUMAN | K.GVVPLAGTDGE.T                |                 | 2 | 2,3265 | 0,441 | 0,12   |
| 5 | Q15366 PCBP2_HUMAN | E.AYTIQGQYAIQPD.L              |                 | 2 | 2,3211 | 0,243 | 0,156  |

|   |                     |                           |   |        |       |        |
|---|---------------------|---------------------------|---|--------|-------|--------|
| 5 | A8K1N6 A8K1N6_HUMAN | K.ATPPSPPLLSE.L           | 2 | 2,3185 | 0,27  | 0,44   |
| 5 | Q9NR45 SIAS_HUMAN   | E.VGIFFTASGM*DE.M         | 2 | 2,312  | 0,104 | 0,189  |
| 5 | P11172 PYR5_HUMAN   | E.DVVTSGSSVLE.T           | 2 | 2,3119 | 0,181 | -0,112 |
| 5 | Q08257 QOR_HUMAN    | R.VFTSSTISGGYAE.Y         | 2 | 2,3117 | 0,207 | -0,555 |
| 5 | Q9NZZ3 CHMP5_HUMAN  | E.DM*M*EDANEIQE.A         | 2 | 2,3111 | 0,155 | 0,09   |
| 5 | P14618 KPYM_HUMAN   | R.LAPITSDPTE.A            | 2 | 2,3077 | 0,159 | -0,117 |
| 5 | Q5SW79 CE170_HUMAN  | R.FGYDTNLFTVVQGE.M        | 2 | 2,3035 | 0,19  | -0,384 |
| 5 | Q96EP5 DAZP1_HUMAN  | R.GFGFITFEDE.Q            | 2 | 2,3025 | 0,169 | -0,945 |
| 5 | Q13765 NACA_HUMAN   | E.LEEQDSTQATTQQAQLAAAAE.I | 2 | 2,298  | 0,273 | 0,111  |
| 5 | Q9P258 RCC2_HUMAN   | K.AGGAAVVITEPE.H          | 2 | 2,2976 | 0,225 | -0,11  |
| 5 | P13639 EF2_HUMAN    | K.SDPM*VQCIIEE.S          | 2 | 2,2947 | 0,09  | 0,456  |
| 5 | Q9NX58 LYAR_HUMAN   | K.VLAQYYVTDE.H            | 2 | 2,2901 | 0,205 | 0,469  |
| 5 | Q8IXM3 RM41_HUMAN   | K.DGTFDPDNLE.K            | 2 | 2,289  | 0,15  | 0,326  |
| 5 | Q14257 RCN2_HUMAN   | K.IDLDSGFLTE.S            | 2 | 2,2874 | 0,137 | 0,199  |
| 5 | O00116 ADAS_HUMAN   | R.AASAATAAPTATPAAQE.S     | 2 | 2,2873 | 0,296 | 0,081  |
| 5 | P61586 RHOA_HUMAN   | E.VYVPTVFE.N              | 2 | 2,2861 | 0,202 | 0,32   |
| 5 | Q14847 LASP1_HUMAN  | R.TGDTGM*LPANYVEAI.-      | 2 | 2,2824 | 0,342 | 0      |
| 5 | P04792 HSPB1_HUMAN  | E.SPAVAAPAYSR.A           | 2 | 2,2816 | 0,27  | 0,112  |
| 5 | Q15185 TEBP_HUMAN   | D.EDM*SNFDRFSE.M          | 2 | 2,2811 | 0,215 | -0,35  |
| 5 | Q13523 PRP4B_HUMAN  | K.LLAPDM*FTE.S            | 2 | 2,2794 | 0,155 | 0,463  |
| 5 | Q9Y5K6 CD2AP_HUMAN  | K.ANTTAFITPLE.I           | 2 | 2,2793 | 0,236 | 0,311  |
| 5 | P22061 PIMT_HUMAN   | R.LILPVGPAAGNQM*LE.Q      | 2 | 2,2793 | 0,218 | -0,08  |
| 5 | P25054 APC_HUMAN    | R.SQAQTPVLSPSLPD.M        | 2 | 2,2788 | 0,217 | 0,424  |
| 5 | Q9Y2Y0 AR2BP_HUMAN  | K.LIYTPIFNE.Y             | 2 | 2,2767 | 0,154 | 0      |
| 5 | Q70CQ2 UBP34_HUMAN  | K.FVAAGGLQQLLE.I          | 2 | 2,276  | 0,102 | 0,196  |
| 5 | P12270 TPR_HUMAN    | K.SVTPVGTETEEVM*AEE.S     | 2 | 2,2743 | 0,106 | -0,301 |
| 5 | Q12905 ILF2_HUMAN   | K.ILGQEGDASYLASE.I        | 2 | 2,2742 | 0,11  | 0,168  |
| 5 | Q96CP2 FWCH2_HUMAN  | E.DSGLAAGPPEAAGE.N        | 2 | 2,271  | 0,232 | 0,196  |
| 5 | P63146 UBE2B_HUMAN  | R.LQEDPPVGVSGAPSE.N       | 2 | 2,2692 | 0,27  | 0,329  |
| 5 | P10809 CH60_HUMAN   | R.CIPALDSLTPANE.D         | 2 | 2,2692 | 0,129 | -0,61  |
| 5 | Q96M96 FGD4_HUMAN   | R.TPGIGPVLPLEE.R          | 2 | 2,2677 | 0,168 | 0,699  |
| 5 | O95239 KIF4A_HUMAN  | K.DTLLSPDSSFY.Y           | 2 | 2,267  | 0,091 | 0,302  |
| 5 | Q02809 PLOD1_HUMAN  | R.IFQNLGALDE.V            | 2 | 2,2631 | 0,121 | 0,494  |

|   |                       |                            |          |   |        |       |        |
|---|-----------------------|----------------------------|----------|---|--------|-------|--------|
| 5 | P05388 RLA0_HUMAN     | E.TDYTFPLAE.K              |          | 2 | 2,2588 | 0,141 | 0      |
| 5 | Q9NPF4 OSGEP_HUMAN    | R.AVILDLLQE.A              |          | 2 | 2,2535 | 0,087 | 0,12   |
| 5 | P35222 CTNB1_HUMAN    | R.AAM*FPETLDE.G            |          | 2 | 2,2515 | 0,144 | 0,214  |
| 5 | Q9P2I0 CPSF2_HUMAN    | K.VVLASQPDLE.C             |          | 2 | 2,2481 | 0,237 | 0,114  |
| 5 | A8K5C2 A8K5C2_HUMAN   | R.VQVLAAQLLSE.M            |          | 2 | 2,2457 | 0,189 | 0,104  |
| 5 | Q5VU20 Q5VU20_HUMAN   | E.LTDLDQSNVTEETPE.G        |          | 2 | 2,244  | 0,212 | 0,072  |
| 5 | Q9BW61 DDA1_HUMAN     | R.EYPSEQIIVTE.K            |          | 2 | 2,2399 | 0,113 | 0,56   |
| 5 | Q4KMP7 TB10B_HUMAN    | R.ASAGPAPGPVVTAE.G         |          | 2 | 2,2385 | 0,334 | 0,1    |
| 5 | Q06210 GFPT1_HUMAN    | R.VDSTTCLFPVEE.K           |          | 2 | 2,2371 | 0,119 | 0      |
| 5 | P22314 UBA1_HUMAN     | E.GGEIIVTDM*DTIE.K         |          | 2 | 2,2353 | 0,147 | 0,173  |
| 5 | Q96PE2 ARHG_HUMAN     | R.DGGVLPAAAE.A             |          | 2 | 2,2345 | 0,184 | 0,474  |
| 5 | P14625 ENPL_HUMAN     | E.VIYLTEPVDE.Y             |          | 2 | 2,2302 | 0,103 | 0,311  |
| 5 | P78364 PHC1_HUMAN     | R.DLGNPNTAPPTPE.L          |          | 2 | 2,2244 | 0,26  | 0,461  |
| 5 | P26885 FKBP2_HUMAN    | K.LVIPSELGYGE.R            |          | 2 | 2,2218 | 0,224 | -0,104 |
| 5 | P98175 RBM10_HUMAN    | E.LQSPTHPSS#ALPPATSPTAQE.S | S546:    | 3 | 2,2196 | 0,087 | 0,416  |
| 5 | Q92620 PRP16_HUMAN    | K.LIVTSATM*DAE.K           |          | 2 | 2,2193 | 0,301 | 0,209  |
| 5 | Q9UQ35 SRRM2_HUMAN    | R.SSTGPEPPAPTLLAE.R        |          | 2 | 2,2173 | 0,253 | 0,78   |
| 5 | Q14247 SRC8_HUMAN     | R.YGLFPANYVE.L             |          | 2 | 2,2148 | 0,137 | 0,208  |
| 5 | Q15029 U5S1_HUMAN     | K.FFDDPM*LLE.L             |          | 2 | 2,2147 | 0,206 | 0,213  |
| 5 | Q9UCN2 Q9UCN2_HUMAN   | -.PYQPALTPE.Q              |          | 2 | 2,2139 | 0,184 | 0,517  |
| 5 | Q04837 SSB_HUMAN      | K.NPVTIFSLATNE.M           |          | 2 | 2,2133 | 0,196 | 0,093  |
| 5 | Q9H2Y7 ZF106_HUMAN    | R.APSVYSFFSEE.G            |          | 2 | 2,2122 | 0,209 | 0      |
| 5 | P35908 K22E_HUMAN     | K.AQYEEIAQR.S              |          | 2 | 2,2099 | 0,085 | 0      |
| 5 | Q9Y3F4 STRAP_HUMAN    | K.IGFPETTEEE.L             |          | 2 | 2,2093 | 0,177 | -0,212 |
| 5 | P30876 RPB2_HUMAN     | R.DGAPSPM*M*PNE.A          |          | 2 | 2,2077 | 0,089 | -0,104 |
| 5 | Q6NZY4 ZCHC8_HUMAN    | R.TASGAVDEDALTEE.L         |          | 2 | 2,2045 | 0,105 | 0,321  |
| 5 | P33993 MCM7_HUMAN     | K.M*VVATYTCQCGAE.T         |          | 2 | 2,2035 | 0,183 | 0,226  |
| 5 | P10809 CH60_HUMAN     | K.DM*AIATGGAVFGE.E         |          | 2 | 2,2029 | 0,248 | 0,389  |
| 5 | P33993 MCM7_HUMAN     | E.GGALVLADQGVCCIDE.F       |          | 2 | 2,2029 | 0,121 | 0,218  |
| 5 | Q9NV56 MRGBP_HUMAN    | R.NFVLP EEI IQE.V          |          | 2 | 2,2018 | 0,081 | 0      |
| 5 | P34932 HSP74_HUMAN    | R.AFSDPFVEAE.K             |          | 2 | 2,1993 | 0,255 | 0,219  |
| 5 | P06396 GELS_HUMAN     | R.FVIEEVPGELM*QE.D         |          | 2 | 2,1978 | 0,085 | -0,159 |
| 5 | ##Q495K4 Q495K4_HUMAN | K.GKGSAT#GT#KKKAE.E        | T94:T96: | 2 | 2,1949 | 0,227 | 1,629  |

|   |                     |                          |       |   |        |       |        |
|---|---------------------|--------------------------|-------|---|--------|-------|--------|
| 5 | Q9P270 SLAI2_HUMAN  | R.QVLDYSPDVE.C           |       | 2 | 2,1917 | 0,301 | 0,29   |
| 5 | Q9H2G2 SLK_HUMAN    | K.DVISNTSDVIGTCE.A       |       | 2 | 2,1915 | 0,095 | 0,323  |
| 5 | Q00587 BORG5_HUMAN  | R.LDLDLGPSSLSE.L         |       | 2 | 2,1883 | 0,326 | 0,192  |
| 5 | A0AVT1 UBA6_HUMAN   | K.NLPIM*STASVE.I         |       | 2 | 2,1868 | 0,116 | 0      |
| 5 | O95793 STAU1_HUMAN  | R.ILQNEPLPE.R            |       | 2 | 2,1827 | 0,144 | 0,579  |
| 5 | P78371 TCPB_HUMAN   | R.DASLM*VTND.G           |       | 2 | 2,1804 | 0,311 | 0,062  |
| 5 | P24928 RPB1_HUMAN   | K.YTPTSPSYSPSPE.Y        |       | 2 | 2,1794 | 0,168 | 0,813  |
| 5 | P35579 MYH9_HUMAN   | E.DTLDSTAAQQE.L          |       | 2 | 2,178  | 0,259 | 0,103  |
| 5 | Q05524 ENO1B_HUMAN  | K.VVIGM*DVAASE.F         |       | 2 | 2,1778 | 0,381 | 0,331  |
| 5 | Q93052 LPP_HUMAN    | K.M*LYDM*ENPPADE.Y       |       | 2 | 2,1768 | 0,102 | 0,335  |
| 5 | A4UCT1 A4UCT1_HUMAN | -.DAGA EYVVE.S           |       | 2 | 2,1757 | 0,15  | 0,128  |
| 5 | Q9Y4L1 HYOU1_HUMAN  | K.AEAGPEGVAPAPEGE.K      |       | 2 | 2,1729 | 0,132 | -0,088 |
| 5 | P43490 NAMPT_HUMAN  | K.DPVPGYSVPAAE.H         |       | 2 | 2,1702 | 0,115 | 0,203  |
| 5 | P23381 SYWC_HUMAN   | R.DM*NQVLDAYE.N          |       | 2 | 2,17   | 0,186 | 0,302  |
| 5 | P04040 CATA_HUMAN   | R.GPLLQDVFVFTDE.M        |       | 2 | 2,1676 | 0,401 | -0,17  |
| 5 | P07741 APT_HUMAN    | R.GFLFGPSLAQE.L          |       | 2 | 2,1665 | 0,397 | 0      |
| 5 | Q9UJU6 DBNL_HUMAN   | E.NLITGIEVIDE.G          |       | 2 | 2,1651 | 0,148 | -0,602 |
| 5 | Q9NQC3 RTN4_HUMAN   | D.QSPLVSSSDS#PPRPQPAFK.Y | S15:  | 3 | 2,1622 | 0,196 | 0,435  |
| 5 | P37837 TALDO_HUMAN  | K.LFVLFGAE.I             |       | 2 | 2,1605 | 0,118 | 0,204  |
| 5 | Q9BY42 CTO43_HUMAN  | R.FICPVVGL.E.M           |       | 2 | 2,1603 | 0,092 | 0,236  |
| 5 | O95757 HS74L_HUMAN  | R.SFDDPIVQTE.R           |       | 2 | 2,1585 | 0,152 | 0,53   |
| 5 | P78417 GSTO1_HUMAN  | K.EDPTVSALLTSE.K         |       | 2 | 2,1582 | 0,24  | 0,097  |
| 5 | P52701 MSH6_HUMAN   | R.SVAPAAPTSCDFSPGD.L     |       | 2 | 2,1549 | 0,225 | -0,077 |
| 5 | Q6L8Q7 PDE12_HUMAN  | R.TVSYNILADTYAQTE.F      |       | 2 | 2,1516 | 0,282 | -0,072 |
| 5 | Q58FF7 H90B3_HUMAN  | E.VVYM*TEPIDE.Y          |       | 2 | 2,1514 | 0,167 | 0,805  |
| 5 | Q14247 SRC8_HUMAN   | K.TQTPPVSPAPQPT.EE.R     |       | 2 | 2,1473 | 0,198 | 0,386  |
| 5 | Q8WXF1 PSPC1_HUMAN  | R.ATIPGPPM*GPGPAM*GPE.G  |       | 2 | 2,1458 | 0,181 | 0,227  |
| 5 | P35580 MYH10_HUMAN  | E.DQSILCTGE.S            |       | 2 | 2,1432 | 0,164 | 0,06   |
| 5 | Q12849 GRSF1_HUMAN  | E.DIQPM*TAFE.S           |       | 2 | 2,1397 | 0,233 | 0,343  |
| 5 | Q58FF7 H90B3_HUMAN  | E.GLELPEDEEE.K           |       | 2 | 2,1374 | 0,343 | 0,316  |
| 5 | Q9NR09 BIRC6_HUMAN  | K.S#LHDDGFTVPQIIE.M      | S628: | 2 | 2,1369 | 0,11  | -0,443 |
| 5 | P31948 STIP1_HUMAN  | K.ALSVGNIDDALQCYSE.A     |       | 2 | 2,1356 | 0,29  | 0      |
| 5 | Q9H4A6 GOLP3_HUMAN  | K.SDAPTGDVLLDE.A         |       | 2 | 2,1344 | 0,117 | 0,099  |

|   |                     |                           |            |   |        |       |        |
|---|---------------------|---------------------------|------------|---|--------|-------|--------|
| 5 | Q9BR76 COR1B_HUMAN  | E.NGLTSPLTEPVVLE.G        |            | 2 | 2,1328 | 0,148 | 0,078  |
| 5 | Q96A19 C102A_HUMAN  | K.GSLLTILGSPSPE.R         |            | 2 | 2,13   | 0,262 | 0,096  |
| 5 | P31942 HNRH3_HUMAN  | E.IVQFFQGLE.I             |            | 2 | 2,1238 | 0,373 | 0,339  |
| 5 | Q14974 IMB1_HUMAN   | K.LAATNALLNSLE.F          |            | 2 | 2,1184 | 0,152 | 0,198  |
| 5 | Q9UBT2 SAE2_HUMAN   | K.YLFNQLFGCEEDADQE.V      |            | 2 | 2,1178 | 0,263 | 0,201  |
| 5 | Q9UJM3 ERRFI_HUMAN  | K.NSPSLFPCAPLCE.R         |            | 2 | 2,1147 | 0,13  | 0,245  |
| 5 | Q9H0S4 DDX47_HUMAN  | K.DLGVTDVLC.E.A           |            | 2 | 2,1146 | 0,214 | 0      |
| 5 | A0AVT1 UBA6_HUMAN   | K.QDVIITALDNVE.A          |            | 2 | 2,1133 | 0,116 | -0,275 |
| 5 | Q9UHG3 PCYOX_HUMAN  | R.LATM*M*VQGQEYE.A        |            | 2 | 2,112  | 0,109 | -0,256 |
| 5 | O75534 CSDE1_HUMAN  | K.DQFGFINYE.V             |            | 2 | 2,1093 | 0,097 | 0,215  |
| 5 | Q13428 TCOF_HUMAN   | K.TGPTVTQVK.A             |            | 2 | 2,1069 | 0,22  | 0,262  |
| 5 | P49368 TCPG_HUMAN   | R.IVLLDSLE.Y              |            | 2 | 2,1061 | 0,091 | 0,37   |
| 5 | Q9BST9 RTKN_HUMAN   | R.LSLFSDLPE.D             |            | 2 | 2,1046 | 0,097 | 0,239  |
| 5 | Q92688 AN32B_HUMAN  | R.IFGGLDM*LAE.K           |            | 2 | 2,1045 | 0,162 | 0,226  |
| 5 | Q9H426 RIMS4_HUMAN  | R.QTLATTPM*GDVE.I         |            | 2 | 2,1044 | 0,266 | -0,095 |
| 5 | Q9UMZ2 SYNG_HUMAN   | K.VTTFVSEDALPE.T          |            | 2 | 2,103  | 0,109 | 0,093  |
| 5 | Q7Z3B4 NUP54_HUMAN  | R.LDIISEDISE.L            |            | 2 | 2,1005 | 0,167 | 0,43   |
| 5 | O15061 DMN_HUMAN    | K.VALLYLDNEEEE.N          |            | 2 | 2,0966 | 0,113 | 0,085  |
| 5 | P22314 UBA1_HUMAN   | R.LAGTQPLEVLE.A           |            | 2 | 2,0904 | 0,15  | -0,209 |
| 5 | Q15398 DLG7_HUMAN   | K.TLFLSIPE.S              |            | 2 | 2,0897 | 0,173 | 0,066  |
| 5 | Q9BXB5 OSB10_HUMAN  | D.FM*AHPDLLLAIT#AGAT#PE.E | T446:T450: | 3 | 2,0854 | 0,201 | 1,7    |
| 5 | Q6S8J3 A26CA_HUMAN  | E.TTFNSIM*K.S             |            | 2 | 2,0802 | 0,324 | 0,064  |
| 5 | P78347 GTF21_HUMAN  | E.DFYVEGLPE.G             |            | 2 | 2,0783 | 0,163 | 0,342  |
| 5 | Q96SB3 NEB2_HUMAN   | E.DALSPVDM*EPE.K          |            | 2 | 2,0747 | 0,268 | -1,001 |
| 5 | Q5TGY3 AHDC1_HUMAN  | R.FLDPQALEPLGE.A          |            | 2 | 2,0734 | 0,203 | 0,184  |
| 5 | P06737 PYGL_HUMAN   | R.GIVGVENVAE.L            |            | 2 | 2,0711 | 0,201 | 0      |
| 5 | P55198 AF17_HUMAN   | R.APGAAGLGAM*PM*AE.G      |            | 2 | 2,0708 | 0,142 | 0,191  |
| 5 | Q8WUF5 IASPP_HUMAN  | R.LQPALPPEAQSVPE.L        |            | 2 | 2,0655 | 0,242 | 0,248  |
| 5 | Q13547 HDAC1_HUMAN  | E.DCPVFDGLFE.F            |            | 2 | 2,0649 | 0,206 | -0,102 |
| 5 | Q9NQC3 RTN4_HUMAN   | R.SGAYITCAPFNPAATE.S      |            | 2 | 2,0639 | 0,312 | 0,146  |
| 5 | P23229 ITA6_HUMAN   | R.IEFDNDADPTSE.S          |            | 2 | 2,0628 | 0,147 | -0,09  |
| 5 | A4Z946 A4Z946_HUMAN | R.LGFFQTYDTE.Y            |            | 2 | 2,0623 | 0,11  | 0,2    |
| 5 | Q9Y490 TLN1_HUMAN   | E.LLENPVQPIND.M           |            | 2 | 2,0528 | 0,197 | 0,292  |

|   |                    |                         |        |   |        |       |        |
|---|--------------------|-------------------------|--------|---|--------|-------|--------|
| 5 | Q6S8J3 A26CA_HUMAN | E.M*ATAASSSLE.K         |        | 2 | 2,0515 | 0,16  | 0      |
| 5 | Q96AY3 FKB10_HUMAN | R.GVPGSAVLLFE.V         |        | 2 | 2,0492 | 0,281 | -0,112 |
| 5 | Q71U36 TBA1A_HUMAN | K.VGINYQPPTVVPGGD.L     |        | 2 | 2,0479 | 0,35  | 0,323  |
| 5 | P05386 RLA1_HUMAN  | D.DDM*GFGLFD.-          |        | 2 | 2,0468 | 0,186 | 0,236  |
| 5 | P46013 KI67_HUMAN  | K.SEVPEDLAGFIE.L        |        | 2 | 2,0464 | 0,14  | 0      |
| 5 | P05362 ICAM1_HUMAN | K.DGTFPLPIGE.S          |        | 2 | 2,0462 | 0,366 | 0,35   |
| 5 | Q96G74 OTUD5_HUMAN | R.ATSPLVSLYPALE.C       |        | 2 | 2,0433 | 0,186 | 0,09   |
| 5 | Q09666 AHNK_HUMAN  | K.VSVGAPDLSLE.A         |        | 2 | 2,0396 | 0,23  | 0,786  |
| 5 | P12955 PEPD_HUMAN  | E.DVVVTDSGIE.L          |        | 2 | 2,0377 | 0,311 | 0,354  |
| 5 | P53618 COPB_HUMAN  | R.FPDM*AANVIPVLM*E.F    |        | 2 | 2,0356 | 0,111 | -0,077 |
| 5 | O60610 DIAP1_HUMAN | R.DVQNFPAATDE.K         |        | 2 | 2,0327 | 0,169 | 0,404  |
| 5 | Q14934 NFAC4_HUMAN | K.VGPGYGPGEAPEQE.K      |        | 2 | 2,0314 | 0,18  | -0,422 |
| 5 | Q06323 PSME1_HUMAN | E.DGNNFGVAVQE.K         |        | 2 | 2,0311 | 0,154 | 0,424  |
| 5 | P78356 PI42B_HUMAN | R.FFGPGEFDPSVD.V        |        | 2 | 2,0285 | 0,177 | 0,279  |
| 5 | Q9Y230 RUVB2_HUMAN | R.LLIVSTPYSE.K          |        | 2 | 2,0269 | 0,157 | 0,2    |
| 5 | P46821 MAP1B_HUMAN | R.QDVDLCLVSSCE.Y        |        | 2 | 2,02   | 0,277 | 0,514  |
| 5 | P49023 PAXI_HUMAN  | K.TGSS#SPPGGPPKPGSQLD.S | S321:  | 2 | 2,0192 | 0,154 | 0,419  |
| 5 | P57764 GSDC1_HUMAN | R.FSLPGATCLQGE.G        |        | 2 | 2,0165 | 0,132 | 0,095  |
| 5 | Q12791 KCMA1_HUMAN | R.QPSITTVGNIPITE.L      |        | 2 | 2,016  | 0,119 | -0,308 |
| 5 | Q7Z2Y5 NRK_HUMAN   | R.VYFM*T#LGKLE.E        | T1569: | 2 | 2,0058 | 0,086 | -1,129 |
| 5 | P23443 KS6B1_HUMAN | R.GASASTANQTPVEYPM*E.T  |        | 2 | 2,0019 | 0,158 | 0,131  |
| 5 | Q8IXT5 RB12B_HUMAN | K.DPPIYSVGAFE.N         |        | 2 | 1,9908 | 0,145 | 0,102  |
| 5 | Q12840 KIF5A_HUMAN | K.LYLVDLAGSE.K          |        | 2 | 1,9908 | 0,119 | 0,226  |
| 5 | Q15020 SART3_HUMAN | R.QLAIPLYDM*E.A         |        | 2 | 1,9884 | 0,163 | 0,101  |
| 5 | P09110 THIK_HUMAN  | R.DCLIPM*GITSE.N        |        | 2 | 1,9878 | 0,244 | 0,292  |
| 5 | Q15102 PA1B3_HUMAN | R.LLAQDQGQGAPLLEPAP.-   |        | 2 | 1,9867 | 0,167 | 0,071  |
| 5 | P31939 PUR9_HUMAN  | E.VSDGIIAPGYEEE.A       |        | 2 | 1,98   | 0,128 | 0,442  |
| 5 | O75054 IGSF3_HUMAN | R.TALLSVGPDAVFGPE.G     |        | 2 | 1,977  | 0,264 | -0,331 |
| 5 | P23588 IF4B_HUMAN  | K.TISLTDFLAE.D          |        | 2 | 1,973  | 0,211 | -0,11  |
| 5 | P45974 UBP5_HUMAN  | K.IVILPDYLE.I           |        | 2 | 1,97   | 0,108 | 0      |
| 5 | Q13435 SF3B2_HUMAN | E.DFSDM*VAE.H           |        | 2 | 1,9651 | 0,169 | 0,394  |
| 5 | Q96P16 P15RS_HUMAN | R.IASLPVEVQE.V          |        | 2 | 1,9644 | 0,095 | 0,337  |
| 5 | Q9NW13 RBM28_HUMAN | R.GFGYVTFSM*LE.D        |        | 2 | 1,962  | 0,137 | 0,096  |

|   |                    |                         |   |        |       |        |
|---|--------------------|-------------------------|---|--------|-------|--------|
| 5 | Q14157 UBP2L_HUMAN | K.IPALAVEM*PGSAD.I      | 2 | 1,9557 | 0,223 | 0,284  |
| 5 | Q9Y2Q5 MAPIP_HUMAN | K.FILM*DCM*E.G          | 2 | 1,9556 | 0,089 | 0,112  |
| 5 | P46821 MAP1B_HUMAN | K.IPPM*EEPSYTDNDLSE.L   | 2 | 1,9502 | 0,407 | 0,308  |
| 5 | P51003 PAPOA_HUMAN | R.NSPAPAVTAASVTNIQATE.V | 2 | 1,9484 | 0,303 | 0,331  |
| 5 | O76094 SRP72_HUMAN | R.SLSEDTDGTEDPQAE.L     | 2 | 1,9429 | 0,181 | 0,071  |
| 5 | P00338 LDHA_HUMAN  | E.LALVDVIE.D            | 2 | 1,9419 | 0,177 | 0,35   |
| 5 | Q2NL82 TSR1_HUMAN  | K.LLLLDTQQE.A           | 2 | 1,94   | 0,229 | 0,114  |
| 5 | P46940 IQGA1_HUMAN | R.ILAIGLINE.A           | 2 | 1,9362 | 0,241 | 0,064  |
| 5 | Q99650 OSMR_HUMAN  | K.APSM*LGLM*TSPE.N      | 2 | 1,9357 | 0,137 | -0,193 |
| 5 | P12532 KCRU_HUMAN  | K.TVGM*VAGDEETYE.V      | 2 | 1,9342 | 0,135 | 0,258  |
| 5 | O95340 PAPS2_HUMAN | K.VLSM*APGLTSVE.I       | 2 | 1,9293 | 0,196 | 0,2    |
| 5 | Q07954 LRP1_HUMAN  | K.GPVGLAIDFPE.S         | 2 | 1,9242 | 0,158 | 0,109  |
| 5 | P09131 P3_HUMAN    | R.YLSIGDGSVM*E.F        | 2 | 1,9236 | 0,227 | 0,411  |
| 5 | P13667 PDIA4_HUMAN | K.YGIVDYM*IE.Q          | 2 | 1,919  | 0,171 | 0,109  |
| 5 | O14579 COPE_HUMAN  | K.LQDAYYIFQE.M          | 2 | 1,9184 | 0,106 | 0,284  |
| 5 | Q14676 MDC1_HUMAN  | K.TPEPVVPTAPE.L         | 2 | 1,9169 | 0,189 | 0,215  |
| 5 | Q8N0V3 RBFAL_HUMAN | K.ALTDLLCTPE.V          | 2 | 1,9158 | 0,097 | 0      |
| 5 | O00505 IMA3_HUMAN  | R.DDNPSLQFE.A           | 2 | 1,9104 | 0,147 | 0,115  |
| 5 | P25789 PSA4_HUMAN  | E.DM*ACSVAGITSD.A       | 2 | 1,9095 | 0,23  | 0,393  |
| 5 | Q92598 HS105_HUMAN | K.IES#PKLER.T           | 2 | 1,9049 | 0,135 | 0,116  |
| 5 | P28066 PSA5_HUMAN  | K.LGSTAIGIQTSE.G        | 2 | 1,9041 | 0,166 | -0,207 |
| 5 | P08243 ASNS_HUMAN  | K.LFPGFEIE.T            | 2 | 1,9034 | 0,105 | 0,128  |
| 5 | Q9Y6K1 DNM3A_HUMAN | K.GGAPAEGEGAAETLPE.A    | 2 | 1,8941 | 0,173 | -0,084 |
| 5 | O43399 TPD54_HUMAN | D.SAGQDINLNPNK.G        | 2 | 1,8924 | 0,084 | 0,359  |
| 5 | O75146 HIP1R_HUMAN | K.DGIYPAQLVNY.-         | 2 | 1,8876 | 0,139 | 0,389  |
| 5 | Q8N6T3 ARFG1_HUMAN | E.TFGSAEPTK.T           | 2 | 1,8836 | 0,288 | 0,195  |
| 5 | Q9C0C2 TB182_HUMAN | R.DM*NLTGCLE.S          | 2 | 1,877  | 0,187 | 0,457  |
| 5 | Q15637 SF01_HUMAN  | K.VM*IPQDEYPE.I         | 2 | 1,8764 | 0,182 | 0,296  |
| 5 | Q5F1R6 DJC21_HUMAN | E.DSPQENVSVTE.I         | 2 | 1,8752 | 0,122 | 0,101  |
| 5 | P35579 MYH9_HUMAN  | K.ANLQIDQINTDLNLE.R     | 2 | 1,8642 | 0,103 | 0      |
| 5 | Q9NY33 DPP3_HUMAN  | K.FLTPDFTSLD.V          | 2 | 1,8587 | 0,242 | 0      |
| 5 | P27816 MAP4_HUMAN  | K.DM*SPLSETE.M          | 2 | 1,8582 | 0,213 | 0,119  |
| 5 | Q13432 U119A_HUMAN | R.DM*DSGTVLFE.I         | 2 | 1,8578 | 0,093 | 0,324  |

S809:



|   |                    |                          |       |   |        |       |        |
|---|--------------------|--------------------------|-------|---|--------|-------|--------|
| 5 | P42356 PI4KA_HUMAN | R.SILPSNLLTVCQE.G        |       | 2 | 1,8555 | 0,098 | -0,497 |
| 5 | Q15020 SART3_HUMAN | E.NGPAAAPAVAAPAATE.A     |       | 2 | 1,8447 | 0,159 | 0,619  |
| 5 | O43148 MCES_HUMAN  | R.M*QALEPYPANE.S         |       | 2 | 1,8443 | 0,117 | 0,859  |
| 5 | Q15691 MARE1_HUMAN | R.IVDILYATDE.G           |       | 2 | 1,8296 | 0,274 | 0,424  |
| 5 | Q68EM7 RHG17_HUMAN | R.ILLDIDNDTE.S           |       | 2 | 1,8188 | 0,219 | 0,315  |
| 5 | O43237 DC1L2_HUMAN | K.DFQDYM*EPE.E           |       | 2 | 1,8151 | 0,116 | -0,103 |
| 5 | Q9BQ04 RBM4B_HUMAN | R.AAAM*LPTVGE.G          |       | 2 | 1,8115 | 0,119 | 0,125  |
| 5 | P22670 RF1_HUMAN   | R.GLFVQALPSS.-           |       | 2 | 1,7937 | 0,196 | 0,359  |
| 5 | Q9UHB9 SRP68_HUMAN | R.IFLLGLADNE.A           |       | 2 | 1,7911 | 0,11  | -0,221 |
| 5 | P30042 ES1_HUMAN   | K.VVTPAFM*CE.T           |       | 2 | 1,7816 | 0,307 | -0,104 |
| 5 | Q58EX2 SDK2_HUMAN  | R.APIAGFSSFV.-           |       | 2 | 1,7788 | 0,146 | 0,429  |
| 5 | Q01813 K6PP_HUMAN  | R.NVIFQPVAE.L            |       | 2 | 1,7748 | 0,098 | 0,42   |
| 5 | Q96HY7 DHTK1_HUMAN | K.INPLFTGQALLE.N         |       | 2 | 1,7718 | 0,125 | -0,185 |
| 5 | P46777 RL5_HUMAN   | K.NSVTPDM*M*EE.M         |       | 2 | 1,7688 | 0,135 | 0      |
| 5 | Q96DV4 RM38_HUMAN  | E.DDLM*PVYCGNE.V         |       | 2 | 1,7666 | 0,182 | 0      |
| 5 | P04049 RAF1_HUMAN  | E.DINACTLTT#SPRLPVF.-    | T641: | 2 | 1,7617 | 0,301 | 0,065  |
| 5 | Q06210 GFPT1_HUMAN | E.LTELPVM*VE.L           |       | 2 | 1,7539 | 0,247 | 0,117  |
| 5 | Q9UQ80 PA2G4_HUMAN | E.LLQPFNVLYE.K           |       | 2 | 1,7484 | 0,176 | -0,197 |
| 5 | Q14444 CAPR1_HUMAN | R.LAQPNQVPVQPE.A         |       | 2 | 1,7369 | 0,101 | 0,277  |
| 5 | P05783 K1C18_HUMAN | E.DFNLGDALD.S            |       | 2 | 1,7349 | 0,169 | 0,809  |
| 5 | Q02952 AKA12_HUMAN | E.AALLTEEVLE.R           |       | 2 | 1,733  | 0,122 | 0,112  |
| 5 | P12081 SYHC_HUMAN  | E.AGIPLVAIIGEQE.L        |       | 2 | 1,7154 | 0,105 | 0      |
| 5 | P40123 CAP2_HUMAN  | K.LITEPAEIM*A.-          |       | 2 | 1,7077 | 0,35  | 0,442  |
| 5 | Q07021 C1QBP_HUMAN | K.AFVDFLSDE.I            |       | 2 | 1,694  | 0,084 | 0,234  |
| 5 | P0C0S8 H2A1_HUMAN  | R.VGAGAPVYLA AVL E.Y     |       | 2 | 1,6885 | 0,19  | 0,183  |
| 5 | Q6VMQ6 MCAF1_HUMAN | K.SVPVCEPVPE.I           |       | 2 | 1,6882 | 0,143 | 0,11   |
| 5 | P46778 RL21_HUMAN  | E.LLEPIPYEFM*A.-         |       | 2 | 1,6865 | 0,238 | -0,091 |
| 5 | P55209 NP1L1_HUMAN | D.AGQPM*SFVLE.F          |       | 2 | 1,6785 | 0,16  | 0,334  |
| 5 | Q9UHX1 PUF60_HUMAN | R.VVVGSIYYE.L            |       | 2 | 1,6693 | 0,195 | 0      |
| 5 | P35579 MYH9_HUMAN  | K.DVLLQVDDE.R            |       | 2 | 1,6546 | 0,096 | 0,35   |
| 5 | P49023 PAXI_HUMAN  | K.SAEPSPTVM*STSLGSLNSE.L |       | 2 | 1,6528 | 0,167 | 0,128  |
| 5 | Q92674 CENPI_HUMAN | K.GIYIDPEILE.K           |       | 2 | 1,6409 | 0,189 | -0,84  |
| 5 | P98164 LRP2_HUMAN  | R.DPTPTSATE.D            |       | 2 | 1,6391 | 0,146 | 0,226  |

|   |                      |                        |       |   |        |       |        |
|---|----------------------|------------------------|-------|---|--------|-------|--------|
| 5 | Q9HC35 EMAL4_HUMAN   | E.TVADTTLTK.A          |       | 2 | 1,6326 | 0,149 | 0      |
| 5 | Q9UKL0 RCOR1_HUMAN   | K.M*PEEEDAPVLD.V       |       | 2 | 1,62   | 0,121 | 0,088  |
| 5 | P49736 MCM2_HUMAN    | E.SFTM*ASSPAQR.R       |       | 2 | 1,6184 | 0,235 | 0,102  |
| 5 | Q01167 FOXK2_HUMAN   | R.VM*PSDLNLM*ADNSQPE.N |       | 2 | 1,6165 | 0,084 | 0,068  |
| 5 | P14625 ENPL_HUMAN    | K.TETVEEPM*EEEE.A      |       | 2 | 1,5983 | 0,09  | 0      |
| 5 | ##Q9BYG8 MLZE_HUMAN  | E.DDDS#ILIAKEK.I       | S279: | 2 | 1,597  | 0,133 | -0,828 |
| 5 | P08243 ASNS_HUMAN    | E.DGFLAVCSE.A          |       | 2 | 1,5691 | 0,109 | 0,489  |
| 5 | O95295 S25BP_HUMAN   | R.DLFAEGLLE.F          |       | 2 | 1,5459 | 0,129 | 0,121  |
| 5 | O00571 DDX3X_HUMAN   | R.VGNLGLATSFFNE.R      |       | 2 | 1,5371 | 0,092 | -0,178 |
| 5 | Q9NQW6 ANLN_HUMAN    | K.VINDLFSVDLE.E        |       | 2 | 1,5369 | 0,097 | 0,097  |
| 5 | Q7Z6J0 SH3R1_HUMAN   | K.TGLFPGSFVE.N         |       | 2 | 1,5306 | 0,111 | 0,232  |
| 5 | Q5W0B1 RN219_HUMAN   | K.TILDPLTLVQGNQNE.D    |       | 2 | 1,4914 | 0,096 | -0,074 |
| 5 | P16403 H12_HUMAN     | E.TAPAAPAAAPPAE.K      |       | 2 | 1,4676 | 0,116 | 0,107  |
| 5 | P53618 COPB_HUMAN    | E.DIQSVM*TE.I          |       | 2 | 1,4317 | 0,081 | 0,325  |
| 5 | O43663 PRC1_HUMAN    | R.GLAPNT#PGKARK.L      | T481: | 2 | 1,3793 | 0,218 | 0,851  |
| 5 | O94903 PROSC_HUMAN   | K.LM*AVPNLFM*LE.T      |       | 2 | 1,379  | 0,11  | 0,466  |
| 5 | Q86UU0 BCL9L_HUMAN   | K.QPPLNM*NSSTLSNM*E.Q  |       | 2 | 1,3258 | 0,215 | 0,136  |
| 6 | Q92598 HS105_HUMAN   | R.AGGIETIANE.F         |       | 2 | 1,4511 | 0,134 | 0,188  |
| 6 | P35240 MERL_HUMAN    | R.VAFFEEL.-            |       | 2 | 1,4531 | 0,119 | 0,642  |
| 6 | P55072 TERA_HUMAN    | R.QAAPCVLFFDE.L        |       | 2 | 1,4928 | 0,138 | -0,094 |
| 6 | Q7Z7H5 TMED4_HUMAN   | R.CFIEEIPDE.T          |       | 2 | 1,5024 | 0,175 | 0,318  |
| 6 | P60228 EIF3E_HUMAN   | R.SQM*LAM*NIE.K        |       | 2 | 1,504  | 0,12  | -0,114 |
| 6 | P49792 RBP2_HUMAN    | K.QNQTTSVSTPASSE.T     |       | 2 | 1,5154 | 0,094 | 0      |
| 6 | P16219 ACADS_HUMAN   | K.IAM*QTLD.M           |       | 2 | 1,5228 | 0,15  | 0,755  |
| 6 | P11586 C1TC_HUMAN    | E.AGFGADIGM*E.K        |       | 2 | 1,5362 | 0,091 | 0,372  |
| 6 | Q9NR45 SIAS_HUMAN    | R.ALGS#PTKQLLPCE.M     | S275: | 2 | 1,5447 | 0,173 | -0,082 |
| 6 | Q15233 NONO_HUMAN    | E.EAFSVFGQVE.R         |       | 2 | 1,5481 | 0,121 | 0,329  |
| 6 | P12830 CADH1_HUMAN   | R.TIFFCE.R             |       | 2 | 1,6147 | 0,095 | 0,149  |
| 6 | P61224 RAP1B_HUMAN   | E.VDAQQCM*LE.I         |       | 2 | 1,6346 | 0,121 | 0,66   |
| 6 | ##Q86UA1 PRP39_HUMAN | R.Y#VEDSPKIND.H        | Y518: | 2 | 1,6464 | 0,158 | 1,453  |
| 6 | Q13432 U119A_HUMAN   | R.ITGDYLCSPPE.N        |       | 2 | 1,6755 | 0,092 | 0      |
| 6 | P10809 CH60_HUMAN    | R.CIPALDSLTPANE.D      |       | 2 | 1,6826 | 0,134 | -0,087 |
| 6 | Q9UEY8 ADDG_HUMAN    | E.DDTVPLS#PLK.Y        | S423: | 2 | 1,6945 | 0,193 | 0,209  |

|   |                     |                        |              |   |        |       |        |
|---|---------------------|------------------------|--------------|---|--------|-------|--------|
| 6 | Q96P16 P15RS_HUMAN  | R.IASLPVEVQE.V         |              | 2 | 1,6998 | 0,244 | -0,337 |
| 6 | Q13263 TIF1B_HUMAN  | E.GTSAPGGGGPTLDD.S     |              | 2 | 1,7016 | 0,101 | 0,102  |
| 6 | Q13616 CUL1_HUMAN   | K.YNALVM*SAFNND.A      |              | 2 | 1,7021 | 0,309 | 0,177  |
| 6 | Q99729 ROAA_HUMAN   | K.IFVGGLNPE.S          |              | 2 | 1,7049 | 0,251 | -0,129 |
| 6 | O43290 SNUT1_HUMAN  | K.GAIVFNATSE.F         |              | 2 | 1,7098 | 0,241 | 0,242  |
| 6 | P08670 VIME_HUMAN   | R.QVQSLTCE.V           |              | 2 | 1,7225 | 0,106 | 0      |
| 6 | Q7Z417 NUFP2_HUMAN  | R.TS#PQVLGSILK.S       | S572:        | 2 | 1,7278 | 0,21  | -0,299 |
| 6 | P23528 COF1_HUMAN   | E.LQANCYEE.V           |              | 2 | 1,7643 | 0,098 | -0,356 |
| 6 | Q02790 FKBP4_HUMAN  | E.GENLDLPYGLE.R        |              | 2 | 1,7651 | 0,096 | -0,4   |
| 6 | Q9BQ70 TCF25_HUMAN  | K.GLSFFAFE.H           |              | 2 | 1,7767 | 0,083 | 0      |
| 6 | Q9Y490 TLN1_HUMAN   | K.AVSSAIAQLLGE.V       |              | 2 | 1,7845 | 0,107 | 0      |
| 6 | Q92945 FUBP2_HUMAN  | K.VQISPDSSGGLPE.R      |              | 2 | 1,7891 | 0,262 | 0      |
| 6 | Q5CZC0 FSIP2_HUMAN  | E.T#GTKKS#KDATTE.T     | T453:S458:   | 2 | 1,7896 | 0,124 | 1,71   |
| 6 | Q9UPN9 TRI33_HUMAN  | R.GPTSPSVTAIE.L        |              | 2 | 1,792  | 0,085 | 0,115  |
| 6 | Q504Q3 PAN2_HUMAN   | K.NAAVFSSVLAL.-        |              | 2 | 1,7944 | 0,252 | 0,112  |
| 6 | Q5VY43 PEAR1_HUMAN  | K.GPPSGSPPR.Q          |              | 2 | 1,7969 | 0,162 | 0,215  |
| 6 | Q14240 IF4A2_HUMAN  | E.TFYNTTVEE.M          |              | 2 | 1,8032 | 0,106 | -0,111 |
| 6 | Q9BQA5 MIZF_HUMAN   | K.LQGIAEEPE.I          |              | 2 | 1,8069 | 0,168 | 0,124  |
| 6 | Q5VUA4 ZN318_HUMAN  | K.TLVLDFFE.T           |              | 2 | 1,8086 | 0,1   | 0,364  |
| 6 | Q8IZ21 PHAR4_HUMAN  | K.TFQVVPE.I            |              | 2 | 1,8266 | 0,105 | 0,446  |
| 6 | O00461 GOLI4_HUMAN  | K.SALAAAQTQVAE.Y       |              | 2 | 1,8287 | 0,163 | 0,105  |
| 6 | P55786 PSA_HUMAN    | K.FCAGGSYVGE.D         |              | 2 | 1,8304 | 0,083 | 0      |
| 6 | A9CQZ4 A9CQZ4_HUMAN | K.FCGM*FCPVEGSSE.N     |              | 2 | 1,8371 | 0,412 | 0      |
| 6 | Q9UI46 DNAI1_HUMAN  | K.QS#IS#IGRGT#R.K      | S17:S19:T24: | 2 | 1,8501 | 0,11  | -0,835 |
| 6 | Q9Y2U8 MAN1_HUMAN   | K.APPAPLAASE.V         |              | 2 | 1,853  | 0,105 | 0      |
| 6 | Q92526 TCPW_HUMAN   | K.GIDPFLD.S            |              | 2 | 1,8682 | 0,116 | 0,282  |
| 6 | Q9ULI0 ATD2B_HUMAN  | E.VLPLALPS#PPR.Q       | S939:        | 2 | 1,8866 | 0,139 | 0,098  |
| 6 | P08237 K6PF_HUMAN   | D.VT#KAM*DEK.K         | T359:        | 2 | 1,8887 | 0,091 | -1,678 |
| 6 | P54577 SYYC_HUMAN   | K.AFCEPGNVE.N          |              | 2 | 1,8905 | 0,122 | -0,716 |
| 6 | P07741 APT_HUMAN    | R.GFLFGPSLAQE.L        |              | 2 | 1,895  | 0,146 | -0,209 |
| 6 | Q9H223 EHD4_HUMAN   | K.ISPLM*NLISQEE.T      |              | 2 | 1,8956 | 0,1   | 0,527  |
| 6 | Q9HD15 SRA1_HUMAN   | E.TS#PGPPPM*GPPPPSSK.A | S69:         | 2 | 1,8962 | 0,17  | 0,15   |
| 6 | P13010 KU86_HUMAN   | E.GGDVDDLLDM*I.-       |              | 2 | 1,8983 | 0,15  | 0      |

|   |                     |                    |        |   |        |       |        |
|---|---------------------|--------------------|--------|---|--------|-------|--------|
| 6 | P07355 ANXA2_HUMAN  | R.AEDGSVIDYE.L     |        | 2 | 1,9011 | 0,209 | 0,222  |
| 6 | P13797 PLST_HUMAN   | R.IDINM*SGFNE.T    |        | 2 | 1,9016 | 0,159 | -0,211 |
| 6 | O15085 ARHGB_HUMAN  | R.LSSLSSLGDSAPE.R  |        | 2 | 1,9043 | 0,082 | 0      |
| 6 | Q96T83 SL9A7_HUMAN  | R.LVFPLEDNA.-      |        | 2 | 1,9066 | 0,195 | -0,3   |
| 6 | Q01518 CAP1_HUMAN   | K.AGAAPYVQAFD.S    |        | 2 | 1,9071 | 0,12  | -0,11  |
| 6 | Q09666 AHNK_HUMAN   | E.LS#LPAIHVE.G     | S5125: | 2 | 1,9076 | 0,159 | 0,691  |
| 6 | A0FGR8 ESYT2_HUMAN  | K.VPLSQLLTSE.D     |        | 2 | 1,9088 | 0,157 | -0,112 |
| 6 | Q9UPN3 MACF1_HUMAN  | K.AIAQSQSVQE.S     |        | 2 | 1,9104 | 0,219 | 0,575  |
| 6 | A8K5C2 A8K5C2_HUMAN | R.VQVLAAQLLSE.M    |        | 2 | 1,9121 | 0,159 | 0      |
| 6 | ##P30566 PUR8_HUMAN | K.FDINELNSK.M      |        | 2 | 1,9133 | 0,094 | -0,226 |
| 6 | Q86VP6 CAND1_HUMAN  | R.FM*ATNDLM*TE.L   |        | 2 | 1,9176 | 0,113 | -0,203 |
| 6 | P16949 STMN1_HUMAN  | E.SVPEFPLS#PPK.K   | S38:   | 2 | 1,9202 | 0,274 | -0,191 |
| 6 | Q6UB99 ANR11_HUMAN  | R.GQEPGLTAFLE.V    |        | 2 | 1,9263 | 0,199 | 0,105  |
| 6 | P60709 ACTB_HUMAN   | E.ALFPQSFLGM*E.S   |        | 2 | 1,928  | 0,188 | 0,097  |
| 6 | Q02952 AKA12_HUMAN  | E.ISPPAESGQAVEE.C  |        | 2 | 1,9339 | 0,203 | 0      |
| 6 | P04920 B3A2_HUMAN   | R.TS#PSSPAPLPHQE.A | S170:  | 2 | 1,9354 | 0,392 | 0      |
| 6 | Q9BY77 PDIP3_HUMAN  | K.SSGASVTTQPT.E.F  |        | 2 | 1,9402 | 0,122 | 0,105  |
| 6 | Q15404 RSU1_HUMAN   | E.VLNFFNNQIEE.L    |        | 2 | 1,9419 | 0,115 | -0,089 |
| 6 | O75122 CLAP2_HUMAN  | R.VLNTGSDVEE.A     |        | 2 | 1,942  | 0,181 | 0,459  |
| 6 | Q9UQ35 SRRM2_HUMAN  | K.EQNSALPTSSQDEE.L |        | 2 | 1,9499 | 0,15  | -0,238 |
| 6 | P46777 RL5_HUMAN    | K.NSVTPDM*MEE.M    |        | 2 | 1,9501 | 0,094 | 0,209  |
| 6 | P46777 RL5_HUMAN    | K.NSVTPDM*M*EE.M   |        | 2 | 1,9501 | 0,277 | 0,824  |
| 6 | Q53F64 Q53F64_HUMAN | K.IFVGGLNPEATEE.K  |        | 2 | 1,9527 | 0,144 | 0      |
| 6 | P62258 1433E_HUMAN  | K.EALQDVEDENQ.-    |        | 2 | 1,9539 | 0,103 | 0,568  |
| 6 | Q9Y3F4 STRAP_HUMAN  | K.IGFPETEEEE.L     |        | 2 | 1,9587 | 0,239 | 0      |
| 6 | Q8IX90 CM003_HUMAN  | R.SPQLSDFGLE.R     |        | 2 | 1,9594 | 0,21  | 0,223  |
| 6 | P52888 THOP1_HUMAN  | E.DFLNSLE.K        |        | 2 | 1,965  | 0,096 | 0,437  |
| 6 | Q6S8J3 A26CA_HUMAN  | K.AGFAGDDAPR.A     |        | 2 | 1,9692 | 0,137 | 0,5    |
| 6 | Q8NBJ4 GOLM1_HUMAN  | R.NIDVFNVE.D       |        | 2 | 1,9696 | 0,111 | 0,385  |
| 6 | P46379 BAT3_HUMAN   | E.NASPAPGTAAE.A    |        | 2 | 1,9697 | 0,284 | 0      |
| 6 | Q00839 HNRPU_HUMAN  | R.LSASSLTM*E.S     |        | 2 | 1,9762 | 0,241 | 0,192  |
| 6 | P31946 1433B_HUMAN  | K.YLIPNATQPE.S     |        | 2 | 1,9836 | 0,142 | 0,213  |
| 6 | Q6VMQ6 MCAF1_HUMAN  | K.SVPVCEPVPE.I     |        | 2 | 1,9922 | 0,103 | -0,11  |

|   |                      |                      |        |   |        |       |        |
|---|----------------------|----------------------|--------|---|--------|-------|--------|
| 6 | P35579 MYH9_HUMAN    | R.IIGLDQVAGM*SE.T    |        | 2 | 1,9947 | 0,13  | 0      |
| 6 | P11717 MPRI_HUMAN    | K.GTPVFTGE.V         |        | 2 | 2,0003 | 0,398 | 0,453  |
| 6 | Q9H2Y7 ZF106_HUMAN   | K.IGTLGSATTE.L       |        | 2 | 2,001  | 0,11  | 0,193  |
| 6 | P35222 CTNB1_HUMAN   | R.AAM*FPETLDE.G      |        | 2 | 2,0121 | 0,209 | 0,107  |
| 6 | Q9GZU8 NIP30_HUMAN   | R.TNTFLEAP.-         |        | 2 | 2,0122 | 0,148 | 0,205  |
| 6 | Q659A1 NARG2_HUMAN   | R.SLSQILM*E.Q        |        | 2 | 2,0192 | 0,086 | 0,13   |
| 6 | O95159 ZFPL1_HUMAN   | R.AGLGLPLIDE.V       |        | 2 | 2,0192 | 0,183 | 0,061  |
| 6 | Q9Y6I3 EPN1_HUMAN    | R.TALPTS GSSAGELE.L  |        | 2 | 2,023  | 0,332 | 0,185  |
| 6 | Q9UHB7 AFF4_HUMAN    | R.IQSM*LGNYDE.M      |        | 2 | 2,0328 | 0,177 | 0,206  |
| 6 | P84243 H33_HUMAN     | R.FQSA AIGALQE.A     |        | 2 | 2,0329 | 0,084 | 0,322  |
| 6 | P25205 MCM3_HUMAN    | K.M*QDDNQVM*VSE.G    |        | 2 | 2,0333 | 0,153 | 0,092  |
| 6 | Q13151 ROA0_HUMAN    | K.LFIGGLNVQTSE.S     |        | 2 | 2,0353 | 0,172 | -0,382 |
| 6 | P19525 E2AK2_HUMAN   | K.LAYLQILSEE.T       |        | 2 | 2,0367 | 0,092 | 0      |
| 6 | Q7Z569 BRAP_HUMAN    | K.TTLASAVACLE.G      |        | 2 | 2,0376 | 0,266 | 0,215  |
| 6 | Q9UHB9 SRP68_HUMAN   | R.IFLLGLADNE.A       |        | 2 | 2,0398 | 0,124 | 0      |
| 6 | Q9C0B1 FATSO_HUMAN   | R.VGM*GSSYNGQDE.V    |        | 2 | 2,0405 | 0,235 | 0,194  |
| 6 | Q9Y2Q5 MAPIP_HUMAN   | K.FILM*DCM*E.G       |        | 2 | 2,0471 | 0,095 | 0,224  |
| 6 | Q0IIM8 TBC8B_HUMAN   | K.GFSGTVC GSGGPSEE.K |        | 2 | 2,056  | 0,182 | -0,342 |
| 6 | P13667 PDIA4_HUMAN   | K.VSQQLVVM*QPE.K     |        | 2 | 2,056  | 0,099 | -0,367 |
| 6 | Q9UHB6 LIMA1_HUMAN   | K.VGVLAASM*E.A       |        | 2 | 2,0573 | 0,146 | 0,137  |
| 6 | P05787 K2C8_HUMAN    | R.SLDM*DSIIAE.V      |        | 2 | 2,0575 | 0,095 | 0,33   |
| 6 | O00233 PSMD9_HUMAN   | K.GIGM*NEPLVDCE.G    |        | 2 | 2,0584 | 0,21  | -0,09  |
| 6 | P63096 GNAI1_HUMAN   | E.AAAYIQCFE.D        |        | 2 | 2,0596 | 0,235 | 0,61   |
| 6 | P22314 UBA1_HUMAN    | K.NFAM*IGLGCGE.G     |        | 2 | 2,0611 | 0,265 | 0,206  |
| 6 | P42166 LAP2A_HUMAN   | R.SSTPLPTISSAE.N     |        | 2 | 2,0649 | 0,291 | -0,191 |
| 6 | Q14978 NOLC1_HUMAN   | K.ATGATQQDANASSLLD.I |        | 2 | 2,0763 | 0,128 | -0,078 |
| 6 | Q58EX2 SDK2_HUMAN    | R.APIAGFSSFV.-       |        | 2 | 2,0787 | 0,159 | 0,061  |
| 6 | Q9BX40 LS14B_HUMAN   | K.SFFDNISSE.L        |        | 2 | 2,0818 | 0,137 | 0,35   |
| 6 | P13639 EF2_HUMAN     | K.STAISLFYE.L        |        | 2 | 2,0818 | 0,218 | 0,237  |
| 6 | Q9NPR2 SEM4B_HUMAN   | R.LGS#EIRDSVV.-      | S825:  | 2 | 2,086  | 0,45  | 0      |
| 6 | P04406 G3P_HUMAN     | E.STGVFTTM*E.K       |        | 2 | 2,087  | 0,355 | -0,062 |
| 6 | P28749 RBL1_HUMAN    | K.LTAQANVE.Y         |        | 2 | 2,0873 | 0,204 | 0,433  |
| 6 | ##Q709C8 VP13C_HUMAN | E.LKM*LT#ASTIQE.L    | T3091: | 2 | 2,089  | 0,103 | -1,283 |

|   |                    |                          |        |   |        |       |        |
|---|--------------------|--------------------------|--------|---|--------|-------|--------|
| 6 | P19105 MLRM_HUMAN  | R.NAFACFDEE.A            |        | 2 | 2,0917 | 0,278 | 0,332  |
| 6 | P37840 SYUA_HUMAN  | E.DM*PVDPDNE.A           |        | 2 | 2,0979 | 0,11  | 0,349  |
| 6 | P04075 ALDOA_HUMAN | E.TTTQGLDGLSE.R          |        | 2 | 2,0985 | 0,26  | 0,326  |
| 6 | Q13885 TBB2A_HUMAN | E.AESNM*NDLVSE.Y         |        | 2 | 2,1028 | 0,288 | 0,199  |
| 6 | Q13586 STIM1_HUMAN | E.LSPSAPPGGS#PHLD.S      | S608:  | 2 | 2,1038 | 0,209 | -0,346 |
| 6 | P84090 ERH_HUMAN   | R.M*NPNSPSITYD.I         |        | 2 | 2,1061 | 0,25  | -0,486 |
| 6 | Q7Z3K3 POGZ_HUMAN  | R.SFLVASVLPDPGNINS#PTR.N | S1338: | 3 | 2,1105 | 0,154 | -0,172 |
| 6 | Q13564 ULA1_HUMAN  | K.LLQSIGQAPE.S           |        | 2 | 2,1108 | 0,287 | 0,116  |
| 6 | Q9NQW6 ANLN_HUMAN  | K.ST#TPGGTGKPFLE.R       | T363:  | 2 | 2,1133 | 0,221 | 0,246  |
| 6 | P10644 KAP0_HUMAN  | E.IS#PPPPNPVVK.G         | S83:   | 2 | 2,117  | 0,224 | -0,199 |
| 6 | P49006 MRP_HUMAN   | K.GEGESPPVNGTDE.A        |        | 2 | 2,1197 | 0,188 | 0,189  |
| 6 | P50990 TCPQ_HUMAN  | R.LVPGGGATE.I            |        | 2 | 2,1205 | 0,232 | 0,533  |
| 6 | P17540 KCRS_HUMAN  | K.TVGM*VAGDEE.S          |        | 2 | 2,1208 | 0,221 | 0,119  |
| 6 | Q9Y490 TLN1_HUMAN  | R.M*VAAATNNLCE.A         |        | 2 | 2,1232 | 0,1   | 0,101  |
| 6 | P78316 NOP14_HUMAN | R.FGEYNSNM*SPE.E         |        | 2 | 2,1251 | 0,246 | -0,378 |
| 6 | P62333 PRS10_HUMAN | K.ALQSVGQIVGE.V          |        | 2 | 2,1271 | 0,164 | -0,111 |
| 6 | Q04637 IF4G1_HUMAN | E.NQPPAGSNPGESE.G        |        | 2 | 2,1309 | 0,294 | 0,088  |
| 6 | Q5T6F2 UBAP2_HUMAN | R.IPYQSPVSSE.S           |        | 2 | 2,1322 | 0,083 | -0,102 |
| 6 | Q6P2E9 EDC4_HUMAN  | E.VEPLGLPQASPS#R.T       | S725:  | 2 | 2,1323 | 0,264 | 0,085  |
| 6 | Q86UU1 PHLB1_HUMAN | R.NLAATLQDIE.T           |        | 2 | 2,1328 | 0,177 | 1,458  |
| 6 | Q15058 KIF14_HUMAN | R.INLIDLAGE.R            |        | 2 | 2,1348 | 0,142 | 0,584  |
| 6 | Q8WUQ7 CS029_HUMAN | R.QQLQVTGDASE.S          |        | 2 | 2,1351 | 0,332 | -0,104 |
| 6 | P05787 K2C8_HUMAN  | R.SNM*DNM*FE.S           |        | 2 | 2,1352 | 0,166 | -0,12  |
| 6 | P17987 TCPA_HUMAN  | E.AAM*LGQAEE.V           |        | 2 | 2,1368 | 0,193 | 0,13   |
| 6 | P35269 T2FA_HUMAN  | K.TTPNSGDVQVTE.D         |        | 2 | 2,1389 | 0,251 | -0,293 |
| 6 | P38646 GRP75_HUMAN | D.VTPLSLGIE.T            |        | 2 | 2,1395 | 0,112 | 0,131  |
| 6 | P14618 KPYM_HUMAN  | D.GADCIM*LSGE.T          |        | 2 | 2,1398 | 0,107 | 0      |
| 6 | P11532 DMD_HUMAN   | R.SPAQILISLE.S           |        | 2 | 2,1401 | 0,238 | 0      |
| 6 | Q8NE71 ABCF1_HUMAN | K.IGFFNQYAE.Q            |        | 2 | 2,1423 | 0,245 | -0,1   |
| 6 | Q9H4B7 TBB1_HUMAN  | R.ISVYYNE.A              |        | 2 | 2,1457 | 0,185 | 0,412  |
| 6 | Q12931 TRAP1_HUMAN | K.AFLDALQNQAE.A          |        | 2 | 2,1526 | 0,199 | 0,3    |
| 6 | Q92733 PRCC_HUMAN  | K.TILQGSSE.G             |        | 2 | 2,1554 | 0,141 | 0,511  |
| 6 | O14576 DC11_HUMAN  | K.SVSTPSEAGSQDSGD.L      |        | 2 | 2,1593 | 0,259 | -0,686 |

|   |                     |                       |        |   |        |       |        |
|---|---------------------|-----------------------|--------|---|--------|-------|--------|
| 6 | Q7Z6Z7 HUWE1_HUMAN  | R.AGSSTPGDAPPAVAE.V   |        | 2 | 2,1623 | 0,123 | -0,092 |
| 6 | Q9BSJ8 ESYT1_HUMAN  | R.LTTVLNSGFLDE.W      |        | 2 | 2,1638 | 0,12  | 0      |
| 6 | Q53GS9 SNUT2_HUMAN  | R.SVLDFDFE.K          |        | 2 | 2,1651 | 0,234 | 0,251  |
| 6 | Q15418 KS6A1_HUMAN  | R.GFSFVATGLM*E.D      |        | 2 | 2,1664 | 0,194 | 0,208  |
| 6 | P23634 AT2B4_HUMAN  | R.VLPANSM*AE.S        |        | 2 | 2,1701 | 0,279 | 0,45   |
| 6 | Q7L7X3 TAOK1_HUMAN  | R.AGS#LKDPEIAE.L      | S9:    | 2 | 2,1703 | 0,258 | 1,815  |
| 6 | O95163 ELP1_HUMAN   | R.IVGVQDLLDQE.S       |        | 2 | 2,1705 | 0,184 | 0,199  |
| 6 | Q53H82 LACB2_HUMAN  | E.NAIFSGDCILGE.G      |        | 2 | 2,1708 | 0,139 | -0,188 |
| 6 | Q9NZI8 IF2B1_HUMAN  | K.SGYAFVDCPDE.H       |        | 2 | 2,1714 | 0,157 | 0,387  |
| 6 | P10809 CH60_HUMAN   | K.VGGTSDVEVNE.K       |        | 2 | 2,1717 | 0,184 | -0,11  |
| 6 | P61221 ABCE1_HUMAN  | K.SGNYFFLDD.-         |        | 2 | 2,173  | 0,265 | 0,226  |
| 6 | Q9Y3T9 NOC2L_HUMAN  | K.NSVPVTVM*VE.R       |        | 2 | 2,1749 | 0,262 | -0,315 |
| 6 | P55196 AFAD_HUMAN   | K.FVAYNEEEEE.D        |        | 2 | 2,1761 | 0,252 | -0,176 |
| 6 | Q9C0C2 TB182_HUMAN  | R.SPSQDFSFIEDTE.I     |        | 2 | 2,18   | 0,081 | 0,162  |
| 6 | P06748 NPM_HUMAN    | D.M*#PLRPQNYLFGCE.L   | S10:   | 3 | 2,1859 | 0,224 | 0,304  |
| 6 | Q9Y266 NUDC_HUMAN   | K.GQPAIIDGELYNE.V     |        | 2 | 2,1862 | 0,167 | -0,086 |
| 6 | Q8N3L3 TXLNB_HUMAN  | E.EAGREPVAS#GEPPTVK.E | S116:  | 2 | 2,1879 | 0,176 | 1,36   |
| 6 | Q02952 AKA12_HUMAN  | E.LQSHAKS#PPSPVERE.M  | S1328: | 3 | 2,1908 | 0,147 | 0,42   |
| 6 | P61586 RHOA_HUMAN   | E.VYVPTVFE.N          |        | 2 | 2,1936 | 0,24  | 0,192  |
| 6 | Q08378 GOGA3_HUMAN  | E.ISLS#PDTDDRLE.N     | S290:  | 2 | 2,1977 | 0,301 | -0,254 |
| 6 | P51957 NEK4_HUMAN   | K.DQSLALS#PKLE.C      | S461:  | 2 | 2,1994 | 0,17  | -0,381 |
| 6 | Q15029 U5S1_HUMAN   | K.TCFVDCLIE.Q         |        | 2 | 2,1999 | 0,307 | 0,105  |
| 6 | Q969U6 FBXW5_HUMAN  | R.IFDLGS DNEE.V       |        | 2 | 2,201  | 0,174 | -0,321 |
| 6 | Q63HJ5 Q63HJ5_HUMAN | K.LANDFPLDLS#PVK.K    | S688:  | 2 | 2,203  | 0,154 | 0,728  |
| 6 | P36542 ATPG_HUMAN   | E.LLNSGYEFDE.G        |        | 2 | 2,2034 | 0,203 | -0,206 |
| 6 | Q9Y6W5 WASF2_HUMAN  | K.LFDRNS#LPVPVLE.T    | S115:  | 2 | 2,2057 | 0,109 | -0,077 |
| 6 | P34932 HSP74_HUMAN  | R.AFSDPFVEAE.K        |        | 2 | 2,2088 | 0,253 | 0,11   |
| 6 | Q7Z2W4 ZCCHV_HUMAN  | R.SSLGSLQTPE.A        |        | 2 | 2,2096 | 0,331 | 0,299  |
| 6 | Q09666 AHNK_HUMAN   | K.ASLGSLEGEAEAE.A     |        | 2 | 2,2108 | 0,13  | 0,29   |
| 6 | Q13615 MTMR3_HUMAN  | R.LPQTM*EPSPSE.T      |        | 2 | 2,2168 | 0,194 | -0,099 |
| 6 | Q5T8P6 RBM26_HUMAN  | K.TLLVSTSAVDNNE.A     |        | 2 | 2,2255 | 0,242 | -0,09  |
| 6 | Q15942 ZYX_HUMAN    | R.S#PGAPGPLTLK.E      | S344:  | 2 | 2,2285 | 0,174 | -0,109 |
| 6 | Q05524 ENO1B_HUMAN  | R.AAVPSGASTGIYE.A     |        | 2 | 2,2287 | 0,347 | 0,1    |

|   |                     |                            |        |   |        |       |        |
|---|---------------------|----------------------------|--------|---|--------|-------|--------|
| 6 | O43765 SGTA_HUMAN   | K.LGNYAGAVQDCE.R           |        | 2 | 2,229  | 0,144 | -0,282 |
| 6 | O00429 DNM1L_HUMAN  | K.ALQGASQIIAE.I            |        | 2 | 2,2332 | 0,183 | 0,222  |
| 6 | B2RDE1 B2RDE1_HUMAN | D.QTLIDLNEM*.-             |        | 2 | 2,2384 | 0,325 | -0,223 |
| 6 | P11388 TOP2A_HUMAN  | K.GSVPLSSS#PPATHFPDETE.I   | S1393: | 3 | 2,2419 | 0,085 | 0,18   |
| 6 | P61962 WDR68_HUMAN  | R.LALGSFVEE.Y              |        | 2 | 2,2451 | 0,22  | 0,379  |
| 6 | P61978 HNRPK_HUMAN  | R.YDGM*VGFSAD.E.T          |        | 2 | 2,2464 | 0,326 | 0      |
| 6 | Q8IWX8 CHERP_HUMAN  | K.GVGVALDDPYE.N            |        | 2 | 2,247  | 0,193 | 0      |
| 6 | P54652 HSP72_HUMAN  | R.TLSSSTQASIE.I            |        | 2 | 2,2504 | 0,242 | 0,109  |
| 6 | Q13885 TBB2A_HUMAN  | R.INVYYNE.A                |        | 2 | 2,2511 | 0,127 | 0,2    |
| 6 | Q96I99 SUCB2_HUMAN  | R.FFVADTANE.A              |        | 2 | 2,2528 | 0,188 | -0,241 |
| 6 | Q02790 FKBP4_HUMAN  | E.NLDLPYGLE.R              |        | 2 | 2,2535 | 0,087 | 0,118  |
| 6 | Q9BXP5 ARS2_HUMAN   | K.NITDYLIEE.V              |        | 2 | 2,2587 | 0,113 | 0,22   |
| 6 | Q66K74 MAP1S_HUMAN  | K.AVPM*APAPAS#PGSSNDSSAR.S | S759:  | 2 | 2,2588 | 0,262 | 0,124  |
| 6 | P23528 COF1_HUMAN   | K.AVLFLCLSE.D              |        | 2 | 2,2616 | 0,192 | 0      |
| 6 | Q9P266 K1462_HUMAN  | K.AGASGQPPSGPPGTGNE.Y      |        | 2 | 2,2627 | 0,355 | 0,659  |
| 6 | O75376 NCOR1_HUMAN  | R.S#PGSISYLPFFTK.L         | S2184: | 2 | 2,2629 | 0,27  | 0,151  |
| 6 | Q96DY7 MTBP_HUMAN   | E.LS#PGKLVLPFE.K           | S639:  | 2 | 2,2651 | 0,267 | -0,087 |
| 6 | Q15181 IPYR_HUMAN   | K.GISCM*NTTLSE.S           |        | 2 | 2,2655 | 0,23  | 0,099  |
| 6 | P18754 RCC1_HUMAN   | K.SGQVYFSGCNDE.G           |        | 2 | 2,266  | 0,219 | 0      |
| 6 | P48960 CD97_HUMAN   | R.CNPGFSSFSE.I             |        | 2 | 2,2668 | 0,248 | 0,108  |
| 6 | Q96QC0 PP1RA_HUMAN  | K.GPQGPGGGGINVQE.I         |        | 2 | 2,2673 | 0,112 | -0,193 |
| 6 | Q2NL82 TSR1_HUMAN   | K.LLLDQTQEQE.A             |        | 2 | 2,2682 | 0,128 | 0,341  |
| 6 | P13674 P4HA1_HUMAN  | K.SFLTAEDCFE.L             |        | 2 | 2,2689 | 0,203 | 0,1    |
| 6 | P35579 MYH9_HUMAN   | E.M*ETLQSQLM*AE.K          |        | 2 | 2,2696 | 0,145 | 0,093  |
| 6 | P59074 CG301_HUMAN  | E.LM*QDIADQEQE.L           |        | 2 | 2,2702 | 0,144 | 0,101  |
| 6 | Q14008 CKAP5_HUMAN  | K.NSSQFFQSYVE.R            |        | 2 | 2,2749 | 0,143 | 0      |
| 6 | Q9UMS4 PRP19_HUMAN  | E.NGTDPINNQPLSE.E          |        | 2 | 2,2793 | 0,269 | 0      |
| 6 | Q9Y490 TLN1_HUMAN   | E.NIFSSM*GDAGE.M           |        | 2 | 2,2806 | 0,245 | -0,107 |
| 6 | Q86UP2 KTN1_HUMAN   | K.QNDQVSFASLVEE.L          |        | 2 | 2,2836 | 0,3   | -1,332 |
| 6 | Q92616 GCN1L_HUMAN  | R.ALQAAIQQLAE.A            |        | 2 | 2,2843 | 0,255 | -0,106 |
| 6 | Q14568 HS902_HUMAN  | E.SSAGGSFTVR.T             |        | 2 | 2,2891 | 0,237 | -0,063 |
| 6 | O00139 KIF2A_HUMAN  | E.VS#PQLFTFHE.A            | S604:  | 2 | 2,2903 | 0,426 | -0,095 |
| 6 | Q68CZ2 TENS3_HUMAN  | R.FPGDQVVNGAGPE.L          |        | 2 | 2,2908 | 0,081 | 0,19   |



|   |                     |                    |        |   |        |       |        |
|---|---------------------|--------------------|--------|---|--------|-------|--------|
| 6 | B2RDY9 B2RDY9_HUMAN | R.SALFAQINQGE.S    |        | 2 | 2,2919 | 0,285 | 0,104  |
| 6 | Q99666 RGPD5_HUMAN  | K.AVVS#PPKFVSE.S   | S1534: | 2 | 2,2947 | 0,196 | -0,082 |
| 6 | Q8N3D4 EH1L1_HUMAN  | K.GPEATGVM*PE.A    |        | 2 | 2,2958 | 0,085 | 0,365  |
| 6 | P31943 HNRH1_HUMAN  | E.IVQFFSGLE.I      |        | 2 | 2,2996 | 0,331 | 0      |
| 6 | Q9Y237 PIN4_HUMAN   | R.GSM*VGPFQE.A     |        | 2 | 2,3    | 0,085 | 0,441  |
| 6 | Q9NTM9 CUTC_HUMAN   | K.AGAANGFLM*E.V    |        | 2 | 2,3047 | 0,107 | 0      |
| 6 | O95983 MBD3_HUMAN   | K.LSGLNAFDIAEE.L   |        | 2 | 2,3048 | 0,293 | 0      |
| 6 | P54278 PMS2_HUMAN   | R.GM*LSSSTSGAID.K  |        | 2 | 2,3076 | 0,247 | 0,099  |
| 6 | P48307 TFPI2_HUMAN  | R.LQVSVDDQCE.G     |        | 2 | 2,3086 | 0,342 | -0,205 |
| 6 | P11142 HSP7C_HUMAN  | K.NQVAM*NPTNTVFD.A |        | 2 | 2,3106 | 0,349 | 0,083  |
| 6 | P09211 GSTP1_HUMAN  | E.AALVDM*VND.G     |        | 2 | 2,3112 | 0,461 | 0      |
| 6 | P46108 CRK_HUMAN    | R.LLDQQNPDEDFS.-   |        | 2 | 2,3183 | 0,405 | 0      |
| 6 | Q96TA1 NIBL1_HUMAN  | K.QVVSVVQDEE.V     |        | 2 | 2,3192 | 0,137 | 0,431  |
| 6 | O15031 PLXB2_HUMAN  | K.VYLTPDGTSSSE.Y   |        | 2 | 2,3247 | 0,34  | -0,104 |
| 6 | P49792 RBP2_HUMAN   | K.NLFASFPTEE.S     |        | 2 | 2,3249 | 0,285 | -0,106 |
| 6 | P17301 ITA2_HUMAN   | K.NM*VVNQAQSCPE.H  |        | 2 | 2,3269 | 0,308 | -0,526 |
| 6 | Q5H9R7 SAPS3_HUMAN  | R.VSDINFTLNTNE.S   |        | 2 | 2,3279 | 0,191 | -0,179 |
| 6 | Q9Y5L4 TIM13_HUMAN  | K.VQIAVANAQE.L     |        | 2 | 2,3309 | 0,214 | -0,234 |
| 6 | P25705 ATPA_HUMAN   | R.NVQAEEM*VE.F     |        | 2 | 2,334  | 0,266 | 0      |
| 6 | Q8WU90 ZC3HF_HUMAN  | E.IS#LEDLIERE.R    | S231:  | 2 | 2,338  | 0,146 | -0,188 |
| 6 | Q13671 RIN1_HUMAN   | R.SM*SAAFCSLLAPE.R |        | 2 | 2,3402 | 0,227 | 0      |
| 6 | Q6S8J3 A26CA_HUMAN  | E.LPDGQVITIGNE.R   |        | 2 | 2,3461 | 0,318 | -0,389 |
| 6 | Q16718 NDUA5_HUMAN  | E.DQLQGGQLEE.V     |        | 2 | 2,3494 | 0,128 | 0,109  |
| 6 | Q15185 TEBP_HUMAN   | K.DVNVNFE.K        |        | 2 | 2,3497 | 0,131 | 0,437  |
| 6 | P78371 TCPB_HUMAN   | K.LGGSLADSYLDE.G   |        | 2 | 2,3501 | 0,213 | 0,197  |
| 6 | Q9BUJ2 HNRL1_HUMAN  | R.SSGYPLTIE.G      |        | 2 | 2,351  | 0,232 | 0,063  |
| 6 | P39023 RL3_HUMAN    | E.QQVPVNQVFGQDE.M  |        | 2 | 2,3513 | 0,373 | 0,082  |
| 6 | Q58FF7 H90B3_HUMAN  | E.GLELPEDEEE.K     |        | 2 | 2,3513 | 0,195 | 0,736  |
| 6 | Q9UHD1 CHRD1_HUMAN  | K.TSDFNTFLAQE.G    |        | 2 | 2,3513 | 0,172 | 0,288  |
| 6 | Q86VI3 IQGA3_HUMAN  | R.S#LTAHSLPLAE.K   | S1424: | 2 | 2,3534 | 0,116 | -0,458 |
| 6 | Q86XR8 CEP57_HUMAN  | R.S#PSKPTLAYPE.S   | S53:   | 2 | 2,3535 | 0,274 | 0,096  |
| 6 | P37802 TAGL2_HUMAN  | E.QISQFLQAAE.R     |        | 2 | 2,3541 | 0,143 | 0,107  |
| 6 | Q15149 PLEC1_HUMAN  | R.LEDLLQDAQDE.K    |        | 2 | 2,3562 | 0,131 | -0,947 |

|   |                     |                             |       |   |        |       |        |
|---|---------------------|-----------------------------|-------|---|--------|-------|--------|
| 6 | P52272 HNRPM_HUMAN  | R.M*VPAGM*GAGLE.R           |       | 2 | 2,358  | 0,124 | 0,115  |
| 6 | Q499L7 Q499L7_HUMAN | K.SVAQQASLTE.Q              |       | 2 | 2,3588 | 0,106 | 0,118  |
| 6 | P10809 CH60_HUMAN   | K.LVQDVANNT#NEE.A           | T105: | 2 | 2,3598 | 0,156 | -0,086 |
| 6 | P50990 TCPQ_HUMAN   | R.LVPGGGATEIE.L             |       | 2 | 2,3601 | 0,316 | 0      |
| 6 | Q96FV9 THOC1_HUMAN  | E.NVTVFNTNEQE.S             |       | 2 | 2,3603 | 0,236 | -0,094 |
| 6 | Q14694 UBP10_HUMAN  | E.SASPPADGTGSAS#GTLPVSQPK.S | S331: | 3 | 2,3603 | 0,102 | 0      |
| 6 | Q9UBU7 DBF4A_HUMAN  | K.LLFISEPIPHPS#NE.L         | S420: | 2 | 2,3624 | 0,23  | 0,073  |
| 6 | P55197 AF10_HUMAN   | R.YDQPGNSSLE.N              |       | 2 | 2,3625 | 0,278 | -0,11  |
| 6 | Q02241 KIF23_HUMAN  | R.SSTVAPAQPDGAESE.W         |       | 2 | 2,3656 | 0,255 | 0      |
| 6 | Q16643 DREB_HUMAN   | R.SPSDSSTASTPVAE.Q          |       | 2 | 2,3668 | 0,361 | 0,183  |
| 6 | Q9H2W6 RM46_HUMAN   | R.TLATLSENNM*E.A            |       | 2 | 2,367  | 0,321 | -0,689 |
| 6 | P06748 NPM_HUMAN    | K.MSVQPTVSLGGFE.I           |       | 2 | 2,3691 | 0,225 | 0,09   |
| 6 | Q8IZT6 ASPM_HUMAN   | E.SESVNPILS#PNQFLKD.N       | S392: | 2 | 2,3693 | 0,23  | -0,131 |
| 6 | P62913 RL11_HUMAN   | K.NNFSDTGNFGFIQE.H          |       | 2 | 2,3705 | 0,134 | -0,222 |
| 6 | Q9UP95 S12A4_HUMAN  | R.NLALFEEE.L                |       | 2 | 2,3723 | 0,214 | 0,063  |
| 6 | Q12772 SRBP2_HUMAN  | K.GIDLGLVDNE.V              |       | 2 | 2,3727 | 0,168 | 0,216  |
| 6 | Q13564 ULA1_HUMAN   | E.IISSM*DNPDNE.I            |       | 2 | 2,3765 | 0,274 | 0,195  |
| 6 | O95831 AIFM1_HUMAN  | K.LNDGSQITYE.K              |       | 2 | 2,3825 | 0,207 | -0,321 |
| 6 | Q8WXV6 Q8WXV6_HUMAN | R.TSSEDNLY#LAVLR.A          | Y26:  | 2 | 2,3875 | 0,172 | -0,078 |
| 6 | P27816 MAP4_HUMAN   | K.DM*ES#PTKLD.V             | S280: | 2 | 2,3902 | 0,082 | 0,108  |
| 6 | P08133 ANXA6_HUMAN  | K.ALLALCGGED.-              |       | 2 | 2,3919 | 0,355 | 0,299  |
| 6 | P02545 LMNA_HUMAN   | R.TALINSTGEE.V              |       | 2 | 2,3923 | 0,291 | 0,118  |
| 6 | P39687 AN32A_HUMAN  | K.SLDLFNCE.V                |       | 2 | 2,3926 | 0,281 | 0,306  |
| 6 | Q70CQ2 UBP34_HUMAN  | R.TGDFLGETIGNE.L            |       | 2 | 2,3927 | 0,343 | 0,292  |
| 6 | Q9NR45 SIAS_HUMAN   | K.QLLPCEM*ACNE.K            |       | 2 | 2,3927 | 0,126 | 0,265  |
| 6 | P12830 CADH1_HUMAN  | K.LADM*YGGGEDD.-            |       | 2 | 2,3936 | 0,319 | -0,421 |
| 6 | O75717 WDHD1_HUMAN  | K.LNAGYSNTATE.W             |       | 2 | 2,3938 | 0,416 | -0,642 |
| 6 | Q9GZS3 WDR61_HUMAN  | K.IVSVGDDQE.I               |       | 2 | 2,394  | 0,228 | 0,19   |
| 6 | Q3KQU3 MA7D1_HUMAN  | K.SLSRT#PETLLPFAEAE.A       | T813: | 2 | 2,396  | 0,37  | 0      |
| 6 | Q9UPN3 MACF1_HUMAN  | K.NSVFVLDDEE.I              |       | 2 | 2,3963 | 0,354 | 0,107  |
| 6 | Q9BSJ8 ESYT1_HUMAN  | R.FFLQDPQSQE.L              |       | 2 | 2,3991 | 0,166 | -0,197 |
| 6 | Q12923 PTN13_HUMAN  | E.LS#LYQPLQNSSKE.K          | S941: | 2 | 2,4    | 0,267 | 0      |
| 6 | O75822 EIF3J_HUMAN  | K.LQEESDL.E.L               |       | 2 | 2,4027 | 0,252 | 0,063  |

|   |                    |                                |        |   |        |       |        |
|---|--------------------|--------------------------------|--------|---|--------|-------|--------|
| 6 | Q00610 CLH1_HUMAN  | K.IYIDSNNNPE.R                 |        | 2 | 2,4042 | 0,287 | -0,207 |
| 6 | Q16643 DREB_HUMAN  | K.LAASGEGGLQE.L                |        | 2 | 2,4076 | 0,11  | 0,355  |
| 6 | P04075 ALDOA_HUMAN | R.LQSIGTENTEE.N                |        | 2 | 2,4097 | 0,277 | -0,3   |
| 6 | Q58FF7 H90B3_HUMAN | R.VFIM*DSCDE.L                 |        | 2 | 2,4102 | 0,31  | 0,108  |
| 6 | P42704 LPPRC_HUMAN | R.LIASYCNVGDIE.G               |        | 2 | 2,4116 | 0,232 | 0,18   |
| 6 | Q96AE4 FUBP1_HUMAN | R.QQAAYYAQTS#PQGM*PQHPPAPQGQ.- | S630:  | 3 | 2,4138 | 0,212 | 0,068  |
| 6 | Q9Y2W2 WBP11_HUMAN | E.LT#PLQAM*M*LR.M              | T328:  | 2 | 2,4144 | 0,369 | 0      |
| 6 | P67936 TPM4_HUMAN  | K.IQALQQQADEAE.D               |        | 2 | 2,415  | 0,302 | -0,363 |
| 6 | Q8NCE2 MTMRE_HUMAN | K.DRGS#TTLGSDFLVM*E.S          | S438:  | 2 | 2,4187 | 0,163 | 0,321  |
| 6 | Q8IWI9 MGAP_HUMAN  | E.SDSIS#PLLLHLE.D              | S2859: | 2 | 2,4192 | 0,387 | -0,087 |
| 6 | Q9UNN5 FAF1_HUMAN  | K.SPM*M*PENAENE.G              |        | 2 | 2,4224 | 0,136 | 0      |
| 6 | P29401 TKT_HUMAN   | E.NAIYYNNE.D                   |        | 2 | 2,4262 | 0,126 | 0      |
| 6 | Q01082 SPTB2_HUMAN | R.TQETPSAQM*E.G                |        | 2 | 2,4316 | 0,367 | 0,107  |
| 6 | Q05524 ENO1B_HUMAN | E.GGFAPNILE.N                  |        | 2 | 2,434  | 0,202 | 0,266  |
| 6 | P46013 KI67_HUMAN  | K.AQPLEDLASFQE.L               |        | 2 | 2,4351 | 0,239 | -0,272 |
| 6 | Q99661 KIF2C_HUMAN | E.M*EACNSGALIPGNLS#KEEEE.L     | S621:  | 3 | 2,4387 | 0,141 | 0,161  |
| 6 | O43237 DC1L2_HUMAN | R.GPLTSGSDEE.N                 |        | 2 | 2,4392 | 0,226 | 0,123  |
| 6 | Q01196 RUNX1_HUMAN | R.ASGM*TTLSAE.L                |        | 2 | 2,4411 | 0,164 | 0,186  |
| 6 | Q99081 HTF4_HUMAN  | E.GLS#PTPFM*NSNLM*GK.T         | S98:   | 2 | 2,4416 | 0,418 | 0,286  |
| 6 | Q9NS87 KIF15_HUMAN | K.VVADLM*NQIQE.L               |        | 2 | 2,4431 | 0,127 | 0,191  |
| 6 | Q93052 LPP_HUMAN   | K.EPIM*PAPGQEE.T               |        | 2 | 2,4463 | 0,211 | -0,302 |
| 6 | Q14974 IMB1_HUMAN  | K.LAATNALLNSLE.F               |        | 2 | 2,4474 | 0,233 | 0      |
| 6 | O14686 MLL2_HUMAN  | R.VS#PAAAQLADTLFSK.G           | S4084: | 2 | 2,4512 | 0,346 | 0      |
| 6 | P57764 GSDC1_HUMAN | R.FSLPGATCLQGE.G               |        | 2 | 2,4519 | 0,419 | -0,095 |
| 6 | P06748 NPM_HUMAN   | K.M*SVQPTVSLGGFE.I             |        | 2 | 2,4537 | 0,339 | -0,178 |
| 6 | Q9BXI6 TB10A_HUMAN | K.FGFIVGSQGAE.G                |        | 2 | 2,4549 | 0,156 | 0      |
| 6 | P60709 ACTB_HUMAN  | R.GYSFTTTAE.R                  |        | 2 | 2,4551 | 0,241 | 0,312  |
| 6 | Q86WB0 NIPA_HUMAN  | R.SQDATFSPGSEQAE.K             |        | 2 | 2,4604 | 0,242 | -0,168 |
| 6 | Q08J23 NSUN2_HUMAN | E.SAASTGQPDNDVTE.G             |        | 2 | 2,4611 | 0,386 | -0,175 |
| 6 | Q5JPI3 CC038_HUMAN | R.NLLGLLDNDE.I                 |        | 2 | 2,4623 | 0,242 | -0,219 |
| 6 | P24928 RPB1_HUMAN  | K.YTPTSPSYSPSSPE.Y             |        | 2 | 2,4633 | 0,262 | -0,163 |
| 6 | Q9H009 NACA2_HUMAN | K.NNSNDIVNAIME.L               |        | 2 | 2,4669 | 0,138 | 0,183  |
| 6 | Q9Y5X3 SNX5_HUMAN  | K.TTLPTFQSPE.F                 |        | 2 | 2,4688 | 0,321 | 0,109  |

|   |                    |                            |       |   |        |       |        |
|---|--------------------|----------------------------|-------|---|--------|-------|--------|
| 6 | P61764 STXB1_HUMAN | R.VEQDLAM*GTDAE.G          |       | 2 | 2,4696 | 0,259 | -0,471 |
| 6 | Q8IZT6 ASPM_HUMAN  | E.SVNPILS#PNQFLKD.N        | S392: | 2 | 2,4704 | 0,318 | 0,222  |
| 6 | Q96EB6 SIRT1_HUMAN | R.DGPGLEERS#PGEPPGAAPE.R   | S47:  | 2 | 2,4732 | 0,334 | -0,138 |
| 6 | Q01433 AMPD2_HUMAN | R.S#LPGPAPCLK.H            | S100: | 2 | 2,4751 | 0,403 | 0,109  |
| 6 | Q9BUJ2 HNRL1_HUMAN | E.NDVIGCFADFE.C            |       | 2 | 2,4758 | 0,295 | -0,095 |
| 6 | P43243 MATR3_HUMAN | K.LCSLFYTN.E               |       | 2 | 2,4773 | 0,18  | 0,319  |
| 6 | Q7Z7G8 VP13B_HUMAN | R.TGLFQYVQDAE.S            |       | 2 | 2,4775 | 0,266 | 0,288  |
| 6 | P08758 ANXA5_HUMAN | R.GVTDFPGFDE.R             |       | 2 | 2,4812 | 0,246 | 0,103  |
| 6 | P42677 RS27_HUMAN  | K.DLLHPS#PEEE.K            | S11:  | 2 | 2,4838 | 0,259 | 0      |
| 6 | Q06210 GFPT1_HUMAN | R.AVQTLQM*E.L              |       | 2 | 2,4846 | 0,259 | -0,196 |
| 6 | Q99567 NUP88_HUMAN | R.NVVVFLGGE.L              |       | 2 | 2,4858 | 0,285 | -0,137 |
| 6 | Q16186 ADRM1_HUMAN | R.SQSAAVTPSSTTSSTR.A       |       | 2 | 2,4873 | 0,339 | 0,078  |
| 6 | P56537 IF6_HUMAN   | E.LSS#LLQVPLVAGTVNR.G      | S175: | 2 | 2,4888 | 0,327 | -0,07  |
| 6 | P05783 K1C18_HUMAN | K.GLQAQIASSGLTVE.V         |       | 2 | 2,4899 | 0,219 | -0,178 |
| 6 | Q13371 PHLP_HUMAN  | R.CAPASSSVPAEAE.L          |       | 2 | 2,4903 | 0,305 | 0,191  |
| 6 | Q7Z3C6 ATG9A_HUMAN | E.NALFTSIQSLQSE.S          |       | 2 | 2,4929 | 0,278 | 0      |
| 6 | P16949 STMN1_HUMAN | K.ESVPEFPLS#PPK.K          | S38:  | 2 | 2,493  | 0,319 | -0,347 |
| 6 | O15027 SC16A_HUMAN | R.SNFSSGPGFPE.Y            |       | 2 | 2,4966 | 0,291 | 0,108  |
| 6 | A8MT69 STR13_HUMAN | K.VSGDALQLM*VE.L           |       | 2 | 2,4978 | 0,274 | -0,104 |
| 6 | Q9H0X9 OSBL5_HUMAN | R.GTTYVEVQVEE.L            |       | 2 | 2,5048 | 0,241 | -0,38  |
| 6 | P68371 TBB2C_HUMAN | E.YQQYQDATAEEE.G           |       | 2 | 2,5067 | 0,104 | -0,083 |
| 6 | Q9NYL2 MLTK_HUMAN  | E.M*S#VYASLFKE.N           | S362: | 2 | 2,5075 | 0,267 | 0      |
| 6 | P33176 KINH_HUMAN  | R.VFQSSTSQEQVYND.C         |       | 2 | 2,5128 | 0,241 | 0,449  |
| 6 | Q9UK45 LSM7_HUMAN  | E.AIPNPF1QQQDA.-           |       | 2 | 2,5176 | 0,268 | -0,091 |
| 6 | Q8WUA4 TF3C2_HUMAN | R.AAQVALLYLQE.L            |       | 2 | 2,5262 | 0,218 | 0      |
| 6 | P40261 NNMT_HUMAN  | E.VISQSYSSTM*ANNE.G        |       | 2 | 2,5278 | 0,238 | -0,158 |
| 6 | P05455 LA_HUMAN    | R.S#PSKPLPEVTDE.Y          | S92:  | 2 | 2,5327 | 0,248 | -1,062 |
| 6 | Q01831 XPC_HUMAN   | E.LS#EPVLGDVRE.S           | S140: | 2 | 2,5341 | 0,381 | 0      |
| 6 | Q66K89 E4F1_HUMAN  | E.M*AEAPGS#PHQQGLGLAGEGE.Q | S165: | 3 | 2,5383 | 0,089 | 0      |
| 6 | Q13427 PIIG_HUMAN  | R.GGESIYGGFFEDE.S          |       | 2 | 2,5435 | 0,208 | 0,087  |
| 6 | Q96PK6 RBM14_HUMAN | K.IFVGNVSAACTSQE.L         |       | 2 | 2,5437 | 0,335 | 0,165  |
| 6 | P08133 ANXA6_HUMAN | K.LSGGDDDAAGQFFPE.A        |       | 2 | 2,5447 | 0,109 | -0,16  |
| 6 | P13798 ACPH_HUMAN  | E.NVQYAGLDFE.A             |       | 2 | 2,5452 | 0,161 | 0,317  |

|   |                    |                              |        |   |        |       |        |
|---|--------------------|------------------------------|--------|---|--------|-------|--------|
| 6 | P08107 HSP71_HUMAN | R.TLSSSTQASLE.I              |        | 2 | 2,5498 | 0,325 | 0,109  |
| 6 | P83916 CBX1_HUMAN  | R.IIGATDSSGE.L               |        | 2 | 2,552  | 0,163 | 0,128  |
| 6 | Q8IZT6 ASPM_HUMAN  | K.ILS#PDSFIKD.N              | S367:  | 2 | 2,5569 | 0,29  | 0      |
| 6 | Q9C0C2 TB182_HUMAN | K.VNLFPGLS#PSALK.A           | S1652: | 2 | 2,5569 | 0,443 | -0,171 |
| 6 | O75674 TM1L1_HUMAN | E.ATNTTSEPSAPSQDLLDLSPS#PR.M | S323:  | 3 | 2,557  | 0,185 | 0      |
| 6 | O75643 U520_HUMAN  | R.NALLQLTDSQIAD.V            |        | 2 | 2,5602 | 0,22  | -0,174 |
| 6 | Q6NZY4 ZCHC8_HUMAN | R.GT#PPPVFPTPLPK.G           | T479:  | 2 | 2,5637 | 0,329 | -0,256 |
| 6 | P38398 BRCA1_HUMAN | K.VADVLDVLE.V                |        | 2 | 2,5654 | 0,172 | 0,337  |
| 6 | P22626 ROA2_HUMAN  | R.GFGFVTFSSM*AE.V            |        | 2 | 2,5662 | 0,346 | 0,094  |
| 6 | Q92688 AN32B_HUMAN | R.IFGGLDM*LAE.K              |        | 2 | 2,5674 | 0,301 | -0,113 |
| 6 | Q92616 GCN1L_HUMAN | K.AYS#FKEQIIE.L              | S800:  | 2 | 2,5675 | 0,354 | -0,28  |
| 6 | Q96I59 SYNM_HUMAN  | R.DALGAQNASGE.R              |        | 2 | 2,5688 | 0,26  | 0,118  |
| 6 | Q02952 AKA12_HUMAN | E.LVTTCQAE.T                 |        | 2 | 2,5734 | 0,225 | 0,132  |
| 6 | Q6P1L5 AL2SC_HUMAN | R.TS#PTVATQTGASATSTR.G       | S106:  | 2 | 2,579  | 0,404 | 0      |
| 6 | Q9H773 XTP3A_HUMAN | R.FSFSPEPTLE.D               |        | 2 | 2,5791 | 0,307 | -0,106 |
| 6 | P55036 PSMD4_HUMAN | E.NNVGLITLANDCE.V            |        | 2 | 2,5817 | 0,292 | -0,085 |
| 6 | P55209 NP1L1_HUMAN | K.FSDAGQPM*SFVLE.F           |        | 2 | 2,5843 | 0,238 | -0,338 |
| 6 | Q7Z3K3 POGZ_HUMAN  | R.SFLVASVLPDPGNINS#PTR.N     | S1338: | 2 | 2,5859 | 0,424 | 0,115  |
| 6 | Q8IXB1 DJC10_HUMAN | K.GLEDNQGGQYE.S              |        | 2 | 2,5861 | 0,223 | 0      |
| 6 | Q96RL1 UIMC1_HUMAN | R.DLINES#PVKSFVSISE.A        | S677:  | 2 | 2,5867 | 0,177 | -0,141 |
| 6 | Q02952 AKA12_HUMAN | K.NGQLSTINGVAEQDE.L          |        | 2 | 2,5915 | 0,312 | 0      |
| 6 | Q15819 UB2V2_HUMAN | K.LPQPPEGQTYNN.-             |        | 2 | 2,5946 | 0,243 | -0,09  |
| 6 | Q9UNZ2 NSF1C_HUMAN | K.S#PNELVDDLK.G              | S114:  | 2 | 2,5959 | 0,157 | 0,09   |
| 6 | Q9NRN7 ADPPT_HUMAN | R.QFTILNFND.L                |        | 2 | 2,5981 | 0,235 | -0,549 |
| 6 | Q04637 IF4G1_HUMAN | R.M*DQYFNQM*E.K              |        | 2 | 2,6014 | 0,176 | -0,197 |
| 6 | Q96P48 CEND2_HUMAN | R.LGS#VSLIPLR.G              | S1179: | 2 | 2,6032 | 0,289 | 0,107  |
| 6 | Q92797 SYMPK_HUMAN | K.ASAQISGQSDTDITAE.F         |        | 2 | 2,6035 | 0,286 | -0,995 |
| 6 | Q9UQ35 SRRM2_HUMAN | K.SST#PPGESYFGVSSLQK.G       | T1043: | 2 | 2,6092 | 0,323 | -0,311 |
| 6 | Q96AT9 RPE_HUMAN   | R.TQFPSLDIE.V                |        | 2 | 2,6142 | 0,185 | 0,116  |
| 6 | Q5TA31 RN187_HUMAN | R.NLGLSM*LLQ.-               |        | 2 | 2,6158 | 0,172 | 0      |
| 6 | Q14126 DSG2_HUMAN  | K.VVPSFLPVDQGG#LVGR.N        | S680:  | 2 | 2,6207 | 0,14  | 0,135  |
| 6 | Q9Y6A5 TACC3_HUMAN | K.VSGSPEQAVEE.N              |        | 2 | 2,6221 | 0,327 | 0,216  |
| 6 | Q7Z3C6 ATG9A_HUMAN | R.SAS#YPCAAPRPGAPE.T         | S761:  | 2 | 2,6241 | 0,276 | -0,379 |

|   |                     |                             |        |   |        |       |        |
|---|---------------------|-----------------------------|--------|---|--------|-------|--------|
| 6 | P00558 PGK1_HUMAN   | K.VLPGVDALSNI.-             |        | 2 | 2,6245 | 0,392 | 0      |
| 6 | Q9BZE9 ASPC1_HUMAN  | R.AAGSPS#PLPAPDPAPK.S       | S502:  | 2 | 2,6264 | 0,36  | -0,471 |
| 6 | Q96S94 CCNL2_HUMAN  | R.GLLPGGTQVLDGTSGFS#PAPK.L  | S330:  | 3 | 2,6279 | 0,088 | 0,264  |
| 6 | P23246 SFPQ_HUMAN   | E.AFSQFGPIE.R               |        | 2 | 2,6282 | 0,24  | 0,184  |
| 6 | O75486 SUPT3_HUMAN  | K.IAQDFLNSIDQTGE.L          |        | 2 | 2,6298 | 0,384 | 0,315  |
| 6 | Q9UBC2 EP15R_HUMAN  | K.ALLFSNNTQE.L              |        | 2 | 2,6302 | 0,187 | 0,322  |
| 6 | Q9HCM4 E41L5_HUMAN  | K.NANVQDAATNSAVLNE.N        |        | 2 | 2,6374 | 0,262 | -0,299 |
| 6 | Q96B97 SH3K1_HUMAN  | K.VIFPYEAQNDDE.L            |        | 2 | 2,6421 | 0,147 | 0,339  |
| 6 | P15927 RFA2_HUMAN   | R.APISNPGM*SE.A             |        | 2 | 2,6441 | 0,428 | 0,239  |
| 6 | Q9BPX3 CND3_HUMAN   | K.TS#QDYQALTVDH.N           | S818:  | 2 | 2,6491 | 0,315 | -0,167 |
| 6 | P38646 GRP75_HUMAN  | K.SQVFSTAADGQTQVE.I         |        | 2 | 2,6499 | 0,119 | -0,233 |
| 6 | Q15648 MED1_HUMAN   | R.SQT#PPGVATPPIPK.I         | T1051: | 2 | 2,6508 | 0,22  | 0,249  |
| 6 | Q5QJE6 TDIF2_HUMAN  | K.SLTDPQSQE.S               |        | 2 | 2,6545 | 0,278 | 0,278  |
| 6 | O60271 JIP4_HUMAN   | E.NLDSVFAQDQE.H             |        | 2 | 2,6578 | 0,215 | 0      |
| 6 | Q8WTT2 NOC3L_HUMAN  | K.FLQGDSFLNE.D              |        | 2 | 2,6586 | 0,219 | -0,209 |
| 6 | Q9Y2A7 NCKP1_HUMAN  | R.SLSLCNM*FLDE.M            |        | 2 | 2,6623 | 0,246 | -0,091 |
| 6 | Q9P258 RCC2_HUMAN   | K.AGGAAVVITEPE.H            |        | 2 | 2,6632 | 0,186 | -0,11  |
| 6 | A4D186 A4D186_HUMAN | K.IQVLQQQADDAEE.R           |        | 2 | 2,6644 | 0,267 | 0      |
| 6 | O95819 M4K4_HUMAN   | R.AASSLNLSNGETE.S           |        | 2 | 2,6658 | 0,305 | -0,189 |
| 6 | Q9Y2K5 R3HD2_HUMAN  | K.ASS#FSGISILTR.G           | S349:  | 2 | 2,6745 | 0,332 | -0,278 |
| 6 | Q9UKV3 ACINU_HUMAN  | K.FLCADYAEQDE.L             |        | 2 | 2,675  | 0,241 | 0      |
| 6 | Q01081 U2AF1_HUMAN  | R.CAVSDVEM*QE.H             |        | 2 | 2,6779 | 0,287 | -0,206 |
| 6 | P18858 DNL1_HUMAN   | R.VLGSEGEDE.A               |        | 2 | 2,6791 | 0,257 | -0,205 |
| 6 | Q14157 UBP2L_HUMAN  | R.TS#TSTLLHTSVESE.A         | S714:  | 2 | 2,6812 | 0,341 | 0,31   |
| 6 | P00441 SODC_HUMAN   | K.GDGPVQGIINFE.Q            |        | 2 | 2,6847 | 0,175 | -0,098 |
| 6 | Q8NG31 CASC5_HUMAN  | K.TILYSCQDDM*E.I            |        | 2 | 2,6848 | 0,381 | -0,421 |
| 6 | P19634 SL9A1_HUMAN  | E.TSSPGTDDVFTPAPSDS#PSSQR.I | S785:  | 3 | 2,6878 | 0,1   | 0,158  |
| 6 | P46459 NSF_HUMAN    | K.ICSPDKM*IGFSE.T           | S569:  | 2 | 2,6888 | 0,321 | 0,412  |
| 6 | Q01814 AT2B2_HUMAN  | K.SATSSSPGS#PIHSLE.T        | S1234: | 2 | 2,6896 | 0,203 | -0,318 |
| 6 | P51587 BRCA2_HUMAN  | E.QGLTLPLYQS#PVKE.L         | S93:   | 2 | 2,6905 | 0,423 | -0,074 |
| 6 | P07910 HNRPC_HUMAN  | K.GFAFVQYVNE.R              |        | 2 | 2,6945 | 0,24  | 0,104  |
| 6 | P62937 PIIA_HUMAN   | K.ITIADCGQLE.-              |        | 2 | 2,6954 | 0,432 | 0,872  |
| 6 | Q99615 DNJC7_HUMAN  | R.AQCYM*DTEQYE.E            |        | 2 | 2,6982 | 0,321 | -0,168 |

|   |                    |                            |       |   |        |       |        |
|---|--------------------|----------------------------|-------|---|--------|-------|--------|
| 6 | Q14789 GOGB1_HUMAN | R.TPIIGSCGTQE.Q            |       | 2 | 2,6988 | 0,42  | 0      |
| 6 | Q14839 CHD4_HUMAN  | R.APEPTPQQVAQQQ.-          |       | 2 | 2,7008 | 0,171 | -0,429 |
| 6 | Q9NZN5 ARHGC_HUMAN | R.TASQGPQTDSVIQNSE.N       |       | 2 | 2,7028 | 0,268 | -0,22  |
| 6 | Q15326 ZMY11_HUMAN | E.AVSSS#QEIPTM*PQPIEK.V    | S381: | 2 | 2,7036 | 0,276 | 0,126  |
| 6 | O00139 KIF2A_HUMAN | K.LLCEQNEEE.V              |       | 2 | 2,704  | 0,145 | -0,105 |
| 6 | Q86UP2 KTN1_HUMAN  | K.VEPVPVTKQPT#PPSE.A       | T153: | 2 | 2,7071 | 0,422 | -0,362 |
| 6 | P11172 PYR5_HUMAN  | E.AGGDNLGQQYNPQE.V         |       | 2 | 2,7079 | 0,197 | 0      |
| 6 | Q12846 STX4_HUMAN  | K.ITNAGM*VSDEE.L           |       | 2 | 2,708  | 0,322 | 0      |
| 6 | Q13177 PAK2_HUMAN  | K.IISIFSGTE.K              |       | 2 | 2,7092 | 0,364 | -0,063 |
| 6 | Q99666 RGPD5_HUMAN | R.NSLLNM*ICQQVE.A          |       | 2 | 2,7112 | 0,139 | 0,083  |
| 6 | P16152 CBR1_HUMAN  | R.GQAAVQQLQAE.G            |       | 2 | 2,7161 | 0,269 | 0,32   |
| 6 | O60271 JIP4_HUMAN  | K.ASLCGSM*TSNSSAE.T        |       | 2 | 2,7218 | 0,379 | -0,172 |
| 6 | Q86UP2 KTN1_HUMAN  | R.DAVSNNTTNQLE.S           |       | 2 | 2,7244 | 0,334 | -0,205 |
| 6 | O75165 DNJCD_HUMAN | R.SLQYGEQVNE.I             |       | 2 | 2,7246 | 0,434 | -0,105 |
| 6 | P50748 KNTC1_HUMAN | K.VAQAFM*LSDDE.I           |       | 2 | 2,7259 | 0,199 | 0      |
| 6 | Q12888 TP53B_HUMAN | E.DGENTQIEDTEPM*S#PVLNSK.F | S552: | 3 | 2,7264 | 0,291 | 0,08   |
| 6 | Q12888 TP53B_HUMAN | K.TM*SVLSCICE.A            |       | 2 | 2,7264 | 0,266 | 0,702  |
| 6 | Q9BWF3 RBM4_HUMAN  | R.VADLTEQYNE.Q             |       | 2 | 2,7288 | 0,324 | 0      |
| 6 | P23434 GCSH_HUMAN  | E.NGIGTVGISNFAQE.A         |       | 2 | 2,7302 | 0,284 | -0,607 |
| 6 | Q14202 ZMYM3_HUMAN | K.TGS#PGPELLFHE.G          | S464: | 2 | 2,7311 | 0,183 | -0,089 |
| 6 | Q99569 PKP4_HUMAN  | R.VGS#PLTLTDAQTR.V         | S314: | 2 | 2,7342 | 0,456 | 0      |
| 6 | P04792 HSPB1_HUMAN | E.SPAVAAPAYSR.A            |       | 2 | 2,7362 | 0,391 | 0,224  |
| 6 | Q9BUB4 ADAT1_HUMAN | K.SGPIS#PGIHSCDLTVE.G      | S227: | 2 | 2,737  | 0,384 | -0,07  |
| 6 | O15446 RPA34_HUMAN | R.VLSSCPQAGE.A             |       | 2 | 2,7395 | 0,137 | 0      |
| 6 | Q9BVV5 TIPIN_HUMAN | E.TLLDQS#FKNVQQQLD.A       | S282: | 2 | 2,741  | 0,26  | 1,248  |
| 6 | Q8IY92 BTBDC_HUMAN | E.GGS#PVSGQLLAGVQVQK.Q     | S201: | 3 | 2,7424 | 0,151 | 0      |
| 6 | Q96RY5 CRML_HUMAN  | E.LS#LLDPLPR.Y             | S553: | 2 | 2,7518 | 0,302 | -0,663 |
| 6 | P43243 MATR3_HUMAN | K.LCSLFYTNEE.V             |       | 2 | 2,7522 | 0,089 | -0,861 |
| 6 | Q32MZ4 LRRF1_HUMAN | R.NM*PGLSAAATLASLGGTSS#R.R | S116: | 3 | 2,756  | 0,117 | 0,291  |
| 6 | Q8NFH5 NUP53_HUMAN | R.CALSS#PSLAFTPPIK.T       | S259: | 2 | 2,7586 | 0,268 | 0,366  |
| 6 | P12829 MYL4_HUMAN  | R.ALQNPPTNAE.V             |       | 2 | 2,7661 | 0,204 | 0,18   |
| 6 | Q6ZRV2 FA83H_HUMAN | K.AGPAEEGPSGPM*E.V         |       | 2 | 2,767  | 0,316 | 0      |
| 6 | Q8N1G2 K0082_HUMAN | K.ASTTSLSGSDSETE.G         |       | 2 | 2,776  | 0,474 | 0,178  |

|   |                    |                            |        |   |        |       |        |
|---|--------------------|----------------------------|--------|---|--------|-------|--------|
| 6 | P26641 EF1G_HUMAN  | K.AAAPAPEEEM*DE.C          |        | 2 | 2,7767 | 0,46  | 0      |
| 6 | Q9H2U2 IPYR2_HUMAN | K.STNCFGDNDPIDVCE.I        |        | 2 | 2,7782 | 0,377 | 0,14   |
| 6 | Q9UBU7 DBF4A_HUMAN | K.LLFIS#EPIPHPSNE.L        | S413:  | 2 | 2,7789 | 0,353 | 0,073  |
| 6 | Q86WB0 NIPA_HUMAN  | R.SM*GTGDTPGLE.V           |        | 2 | 2,7794 | 0,478 | 0,226  |
| 6 | Q13435 SF3B2_HUMAN | K.LAQQQAALLM*QQEE.R        |        | 2 | 2,7795 | 0,382 | -0,377 |
| 6 | Q9Y2D5 AKAP2_HUMAN | K.NLM*QTLM*EDYE.T          |        | 2 | 2,7811 | 0,246 | -0,344 |
| 6 | P49023 PAXI_HUMAN  | K.TGSSS#PPGGPPKPGSQLD.S    | S322:  | 2 | 2,7813 | 0,309 | -0,21  |
| 6 | P60002 ELOF1_HUMAN | R.NTGVISCTVCLE.E           |        | 2 | 2,7837 | 0,152 | -0,09  |
| 6 | Q13642 FHL1_HUMAN  | K.AIVAGDQNVE.Y             |        | 2 | 2,7865 | 0,304 | -0,3   |
| 6 | Q8TCS8 PNPT1_HUMAN | R.SSIVM*GEPISQSSNSQ.-      |        | 2 | 2,787  | 0,406 | 0,07   |
| 6 | Q66K74 MAP1S_HUMAN | K.AVPM*APAPAS#PGSSNDSSAR.S | S759:  | 3 | 2,7883 | 0,201 | 0,093  |
| 6 | Q5SW79 CE170_HUMAN | R.QGS#FTIEKPSNPIE.L        | S838:  | 2 | 2,7896 | 0,217 | 0      |
| 6 | Q7Z6Z7 HUWE1_HUMAN | E.LS#PAPTITSLSPER.A        | S2826: | 2 | 2,7923 | 0,464 | -0,158 |
| 6 | Q02952 AKA12_HUMAN | E.LS#LQEGDLNGQK.G          | S75:   | 2 | 2,7952 | 0,42  | -0,353 |
| 6 | P52732 KIF11_HUMAN | K.FCADSDGFSQE.L            |        | 2 | 2,7961 | 0,341 | -0,193 |
| 6 | P55060 XPO2_HUMAN  | R.VPSM*VSTSLNAE.A          |        | 2 | 2,7968 | 0,299 | -0,293 |
| 6 | Q7Z3K3 POGZ_HUMAN  | K.SLDSEPSVPSAAKPPS#PE.K    | S425:  | 2 | 2,7987 | 0,31  | 0,195  |
| 6 | P28838 AMPL_HUMAN  | K.TIQVDNTDAE.G             |        | 2 | 2,7999 | 0,357 | 0,11   |
| 6 | Q13426 XRCC4_HUMAN | K.M*APQENQLQE.K            |        | 2 | 2,8011 | 0,116 | -0,101 |
| 6 | Q96GA7 SDSL_HUMAN  | E.AVSAVQQLDDE.R            |        | 2 | 2,8016 | 0,29  | 0      |
| 6 | Q13442 HAP28_HUMAN | R.QYTSPEEIDAQLQAE.K        |        | 2 | 2,8022 | 0,24  | 0      |
| 6 | P35579 MYH9_HUMAN  | E.DTLDSTAAQQE.L            |        | 2 | 2,8124 | 0,277 | 0      |
| 6 | Q16658 FSCN1_HUMAN | E.QSCAQVVLQAANE.R          |        | 2 | 2,8143 | 0,144 | 0      |
| 6 | P33993 MCM7_HUMAN  | R.GFTPAQFQAALDE.Y          |        | 2 | 2,815  | 0,386 | 0,262  |
| 6 | Q9Y3F4 STRAP_HUMAN | K.YDYNSGEELE.S             |        | 2 | 2,819  | 0,255 | 0,2    |
| 6 | Q9Y490 TLN1_HUMAN  | K.VLVQNAAGSQE.K            |        | 2 | 2,8252 | 0,388 | -0,328 |
| 6 | P06576 ATPB_HUMAN  | R.FLS#QPFQVAE.V            | S465:  | 2 | 2,8272 | 0,173 | 0      |
| 6 | Q9UQ88 CD2L2_HUMAN | E.GDYVPDS#PALLPIELK.Q      | S395:  | 2 | 2,8294 | 0,295 | -0,135 |
| 6 | Q12888 TP53B_HUMAN | E.TSVISIDS#PQKLAILDQE.L    | S727:  | 2 | 2,8294 | 0,231 | 0,06   |
| 6 | Q9H307 PININ_HUMAN | R.DLIQDQNM*DE.K            |        | 2 | 2,8368 | 0,171 | -0,197 |
| 6 | Q8TE77 SSH3_HUMAN  | K.VGGVS#PEEHPAPE.V         | S484:  | 2 | 2,8372 | 0,311 | -0,529 |
| 6 | Q9UKV3 ACINU_HUMAN | E.VAT#PPVPQLQVCEPK.E       | T682:  | 2 | 2,84   | 0,383 | 0,07   |
| 6 | Q9H9P8 L2HDH_HUMAN | R.QVALSFAQDFQE.A           |        | 2 | 2,8425 | 0,33  | -0,176 |



|   |                    |                               |        |   |        |       |        |
|---|--------------------|-------------------------------|--------|---|--------|-------|--------|
| 6 | Q9BZD3 GRL1B_HUMAN | R.ITIADQGEQQSEE.N             |        | 2 | 2,8435 | 0,313 | -0,337 |
| 6 | P62158 CALM_HUMAN  | E.ADIDGDGQVNYEE.F             |        | 2 | 2,8509 | 0,243 | 0      |
| 6 | P26599 PTBP1_HUMAN | K.M*ALIQM*GSVEE.A             |        | 2 | 2,8516 | 0,37  | 0      |
| 6 | Q2NKX8 ERC6L_HUMAN | E.VM*LLTLS#LYK.Q              | S1242: | 2 | 2,8592 | 0,351 | -0,096 |
| 6 | Q13435 SF3B2_HUMAN | R.TATVGGAM*M*GS#THIYD.M       | S779:  | 2 | 2,8605 | 0,295 | -0,212 |
| 6 | P18859 ATP5J_HUMAN | R.QTSGGPVDASSEYQQE.L          |        | 2 | 2,8628 | 0,344 | -0,145 |
| 6 | Q9HC35 EMAL4_HUMAN | K.ATLLEDQQDPSPSS.-            |        | 2 | 2,8634 | 0,351 | -0,246 |
| 6 | P22234 PUR6_HUMAN  | E.IVLADVIDND.S                |        | 2 | 2,8686 | 0,382 | -0,112 |
| 6 | Q9Y3Q8 T22D4_HUMAN | R.S#FTGGLGQLVPSK.A            | S165:  | 2 | 2,8741 | 0,111 | 0      |
| 6 | P30084 ECHM_HUMAN  | K.ALNALCDGLIDE.L              |        | 2 | 2,8742 | 0,361 | 0,281  |
| 6 | Q05524 ENO1B_HUMAN | K.VNQIGSVTE.S                 |        | 2 | 2,8748 | 0,276 | -0,193 |
| 6 | Q8TAQ2 SMRC2_HUMAN | E.DLTKDM*DEPS#PVPNVEE.V       | S347:  | 2 | 2,8764 | 0,192 | 0,243  |
| 6 | P55196 AFAD_HUMAN  | K.TQVLS#PDSLFTAK.F            | S1704: | 2 | 2,8778 | 0,293 | -0,246 |
| 6 | Q71U36 TBA1A_HUMAN | K.TIGGGDDSFNTFFSE.T           |        | 2 | 2,8854 | 0,257 | 0      |
| 6 | O60610 DIAP1_HUMAN | R.EQLIDM*NAEGDE.T             |        | 2 | 2,8927 | 0,362 | -0,265 |
| 6 | Q8TEV9 SMCR8_HUMAN | K.VLISVGS#YKSSVE.S            | S417:  | 2 | 2,8947 | 0,412 | -0,421 |
| 6 | Q12802 AKP13_HUMAN | E.M*DS#ITEVPANCSVLR.S         | S1540: | 2 | 2,8955 | 0,464 | -0,341 |
| 6 | Q6NZI2 PTRF_HUMAN  | R.GSS#PDVHALLE.I              | S366:  | 2 | 2,9025 | 0,357 | 0,101  |
| 6 | Q16643 DREB_HUMAN  | R.M*APTPIPTRS#PSDSSTASTPVAE.Q | S337:  | 3 | 2,9035 | 0,175 | 0,229  |
| 6 | Q15554 TERF2_HUMAN | D.LVLPTQALPAS#PALK.N          | S323:  | 2 | 2,9042 | 0,349 | -0,076 |
| 6 | O75116 ROCK2_HUMAN | R.TLTSDEVANLANE.K             |        | 2 | 2,9136 | 0,259 | -0,489 |
| 6 | O76021 RL1D1_HUMAN | K.ATNES#EDEIPQLVPIGK.K        | S361:  | 2 | 2,9189 | 0,407 | 0,191  |
| 6 | Q14669 TRIPC_HUMAN | K.AQQLLQGLQASDE.S             |        | 2 | 2,9207 | 0,355 | 0      |
| 6 | Q9P219 DAPLE_HUMAN | R.AFS#LASADLLR.A              | S1806: | 2 | 2,9209 | 0,187 | -0,196 |
| 6 | P49736 MCM2_HUMAN  | E.SFTM*ASSPAQR.R              |        | 2 | 2,9227 | 0,425 | -0,509 |
| 6 | O00505 IMA3_HUMAN  | R.AVGNIVTGTDE.Q               |        | 2 | 2,9241 | 0,333 | 0,454  |
| 6 | Q14160 LAP4_HUMAN  | R.LPLLPES#PGPLR.Q             | S853:  | 2 | 2,9254 | 0,456 | -0,25  |
| 6 | P36915 GNL1_HUMAN  | R.NPYALLGEDEC.-               |        | 2 | 2,9259 | 0,513 | 0,476  |
| 6 | P35527 K1C9_HUMAN  | K.SDLEM*QYETLQEE.L            |        | 2 | 2,9278 | 0,237 | -0,224 |
| 6 | Q9Y2L5 TRS85_HUMAN | K.NSDNNLLSLDGLDNE.V           |        | 2 | 2,9296 | 0,314 | -0,075 |
| 6 | Q9Y490 TLN1_HUMAN  | K.AAAFEQEENE.T                |        | 2 | 2,9312 | 0,159 | 0,107  |
| 6 | Q5T4S7 UBR4_HUMAN  | R.SSAYGDATAE.G                |        | 2 | 2,9323 | 0,223 | 0,251  |
| 6 | P07814 SYEP_HUMAN  | E.YIPGQPPLSQSSDSS#PTR.N       | S886:  | 2 | 2,9354 | 0,333 | 0,244  |

|   |                    |                              |        |   |        |       |        |
|---|--------------------|------------------------------|--------|---|--------|-------|--------|
| 6 | Q15149 PLEC1_HUMAN | R.SSS#VGSSSYPIPAVSR.T        | S4386: | 3 | 2,9363 | 0,304 | -0,199 |
| 6 | Q99961 SH3G1_HUMAN | E.GDVITLTNQIDE.N             |        | 2 | 2,9364 | 0,318 | 0,185  |
| 6 | Q09666 AHNK_HUMAN  | K.LS#GPSLKM*PSLE.I           | S4900: | 2 | 2,9493 | 0,39  | 0,09   |
| 6 | Q9UPN9 TRI33_HUMAN | E.SSLT#PPLSTNLHLE.S          | T815:  | 2 | 2,9549 | 0,384 | -0,384 |
| 6 | Q9H3P7 GCP60_HUMAN | E.GAPLLPPLPPPS#PPGSGR.G      | S43:   | 2 | 2,955  | 0,332 | -0,194 |
| 6 | Q00839 HNRPU_HUMAN | K.SSGPTS#LFAVTVAPPGAR.Q      | S192:  | 2 | 2,9566 | 0,227 | -0,136 |
| 6 | Q2M2I8 AAK1_HUMAN  | K.STQLLQAAAAE.A              |        | 2 | 2,9643 | 0,133 | 0,553  |
| 6 | P35221 CTNA1_HUMAN | K.IAEQVASFQEE.K              |        | 2 | 2,9729 | 0,312 | 0,293  |
| 6 | O75643 U520_HUMAN  | R.CTLSANLVASGE.L             |        | 2 | 2,9765 | 0,255 | 0,3    |
| 6 | Q8IWE2 NXP20_HUMAN | K.SVLTGGLDALE.F              |        | 2 | 2,978  | 0,45  | -0,113 |
| 6 | Q13158 FADD_HUMAN  | R.SCQM*NLVADLVQE.V           |        | 2 | 2,9782 | 0,307 | 0      |
| 6 | P43686 PRS6B_HUMAN | K.ISGADINSICQE.S             |        | 2 | 2,9796 | 0,467 | 0,093  |
| 6 | P15927 RFA2_HUMAN  | K.IM*PLEDM*NE.F              |        | 2 | 2,9805 | 0,256 | 0,109  |
| 6 | Q6Y7W6 PERQ2_HUMAN | R.ALSSGGSITS#PPLSPALPK.Y     | S26:   | 3 | 2,9832 | 0,173 | -0,393 |
| 6 | P16070 CD44_HUMAN  | E.SSETPDQFM*TADE.T           |        | 2 | 2,9832 | 0,446 | 0      |
| 6 | O15354 GPR37_HUMAN | E.M*S#TFASVGH.C-             | S604:  | 2 | 2,984  | 0,4   | -0,377 |
| 6 | P09960 LKHA4_HUMAN | R.TLTGTAALTVQSQE.D           |        | 2 | 2,9842 | 0,32  | -0,086 |
| 6 | Q9H3N1 TXND1_HUMAN | R.S#LGPSLATDKS.-             | S270:  | 2 | 2,9858 | 0,471 | -0,211 |
| 6 | P11388 TOP2A_HUMAN | K.GSVPLSSS#PPATHFPDE.T       | S1393: | 2 | 2,9877 | 0,353 | 0,203  |
| 6 | P51610 HCFC1_HUMAN | R.QLLQSASTALM*GE.S           |        | 2 | 2,991  | 0,415 | -0,089 |
| 6 | O43166 SI1L1_HUMAN | E.Y#GSTSSIDKQGTSGE.S         | Y206:  | 2 | 2,9911 | 0,427 | -0,306 |
| 6 | Q12888 TP53B_HUMAN | E.TSVISIDS#PQKLAILDQE.L      | S727:  | 3 | 2,9927 | 0,132 | 0      |
| 6 | Q15390 MTFR1_HUMAN | R.QIS#LPDLSQEEPQLK.T         | S119:  | 2 | 2,9956 | 0,411 | -0,068 |
| 6 | Q12888 TP53B_HUMAN | R.STPFIVPSSPT#EQEGR.Q        | T382:  | 2 | 2,997  | 0,311 | 0,067  |
| 6 | Q69YN4 VIR_HUMAN   | R.AYGET#SPHTFQLD.L           | T62:   | 2 | 2,9971 | 0,454 | 0      |
| 6 | Q16658 FSCN1_HUMAN | R.QGM*DLSANQDEETDQE.T        |        | 2 | 2,9977 | 0,426 | 0      |
| 6 | Q86YS7 K0528_HUMAN | K.LSSPAAFLPACNS#PSKE.M       | S260:  | 2 | 3,0044 | 0,509 | 0,066  |
| 6 | Q96A49 SYAP1_HUMAN | E.FVSDAFDACNLNQE.D           |        | 2 | 3,0056 | 0,247 | -0,449 |
| 6 | P55327 TPD52_HUMAN | E.VLNSAANASATTEPLPEKTQES#L.- | S183:  | 3 | 3,0068 | 0,172 | -0,143 |
| 6 | Q6S8J3 A26CA_HUMAN | E.M*ATAASSSLE.K              |        | 2 | 3,0081 | 0,281 | 0,114  |
| 6 | P19419 ELK1_HUMAN  | E.LPLS#PSLLGGPGPER.T         | S324:  | 2 | 3,0099 | 0,339 | -0,155 |
| 6 | Q9UNP9 PPIE_HUMAN  | E.DAAAAIDNM*NE.S             |        | 2 | 3,0132 | 0,298 | 0,318  |
| 6 | P51608 MECP2_HUMAN | K.TQPAVATAATAAE.K            |        | 2 | 3,0136 | 0,411 | -0,406 |

|   |                    |                                     |        |   |        |       |        |
|---|--------------------|-------------------------------------|--------|---|--------|-------|--------|
| 6 | Q09666 AHNK_HUMAN  | K.AEAPLPS#PKLE.G                    | S5110: | 2 | 3,0137 | 0,363 | 0,099  |
| 6 | O00233 PSMD9_HUMAN | R.QSGGSSQAGAVTVSDVQE.L              |        | 2 | 3,0151 | 0,379 | -0,214 |
| 6 | Q15942 ZYX_HUMAN   | R.S#PGAPGPLTLKE.V                   | S344:  | 2 | 3,018  | 0,397 | 0,098  |
| 6 | Q8WUQ7 CS029_HUMAN | R.AAAAALSQQQLQE.R                   |        | 2 | 3,0192 | 0,348 | 0      |
| 6 | P08047 SP1_HUMAN   | R.SSSTGSSSTGGGGQESQPS#PLALLAATCSR.I | S59:   | 3 | 3,023  | 0,095 | 0,183  |
| 6 | Q14C86 GAPD1_HUMAN | R.TSPSDGAM*ANYE.S                   |        | 2 | 3,0287 | 0,358 | 0,097  |
| 6 | Q9UQ80 PA2G4_HUMAN | E.ASSGVSVLSLCE.K                    |        | 2 | 3,0301 | 0,337 | 0      |
| 6 | Q09666 AHNK_HUMAN  | K.ADIKS#PSLDVTVPEAE.L               | S4993: | 2 | 3,032  | 0,318 | 0      |
| 6 | Q96PZ0 PUS7_HUMAN  | K.GQDGLQNDFLSISE.D                  |        | 2 | 3,0359 | 0,418 | 0,32   |
| 6 | Q12888 TP53B_HUMAN | E.TEPVEQDSS#QPSLPLVR.A              | S831:  | 2 | 3,0417 | 0,291 | -0,435 |
| 6 | P42356 PI4KA_HUMAN | R.GM*PPSS#PGGSFAHYFE.A              | S217:  | 2 | 3,0433 | 0,23  | -0,262 |
| 6 | Q9UJM3 ERRFI_HUMAN | K.LTVNGVCASTPPLT#PIK.N              | T131:  | 2 | 3,0438 | 0,396 | 0,396  |
| 6 | Q9HAW4 CLSPN_HUMAN | K.SLSSDS#TLLLFK.D                   | S723:  | 2 | 3,0445 | 0,195 | 0      |
| 6 | Q9Y2Z0 SUGT1_HUMAN | R.LFQQIYSDGSDE.V                    |        | 2 | 3,0458 | 0,421 | -0,087 |
| 6 | P17301 ITA2_HUMAN  | E.GTVQGGDNFQM*E.M                   |        | 2 | 3,0473 | 0,369 | 0      |
| 6 | Q00839 HNRPU_HUMAN | E.NDVITCFANFE.S                     |        | 2 | 3,0536 | 0,347 | 0,092  |
| 6 | Q9UQR0 SCML2_HUMAN | R.SVPGTTSSPLVGDIS#PK.S              | S590:  | 2 | 3,0541 | 0,52  | -0,283 |
| 6 | Q9BY44 EIF2A_HUMAN | R.NTVSQSISGDPE.I                    |        | 2 | 3,0595 | 0,417 | -0,099 |
| 6 | Q09666 AHNK_HUMAN  | R.AGAISASGPE.L                      |        | 2 | 3,0621 | 0,4   | 0,284  |
| 6 | Q9Y490 TLN1_HUMAN  | E.M*DSALSVVQNLE.K                   |        | 2 | 3,0644 | 0,347 | 0      |
| 6 | P62140 PP1B_HUMAN  | E.FDNAGGM*M*SVDE.T                  |        | 2 | 3,0703 | 0,364 | -0,281 |
| 6 | Q15185 TEBP_HUMAN  | D.S#DDEKM*PDLE.-                    | S151:  | 2 | 3,0728 | 0,184 | -0,191 |
| 6 | Q8N201 INT1_HUMAN  | E.LLIAEEKLS#PEQE.G                  | S307:  | 2 | 3,0737 | 0,416 | -0,232 |
| 6 | Q6P597 KLC3_HUMAN  | R.TLS#ASTQDLSPH.-                   | S495:  | 2 | 3,0755 | 0,38  | -0,365 |
| 6 | P63104 1433Z_HUMAN | K.GIVDQSQAYQE.A                     |        | 2 | 3,0789 | 0,37  | -0,179 |
| 6 | Q96IZ7 RSRC1_HUMAN | E.IEAIES#DSFVQQTFR.S                | S237:  | 2 | 3,0801 | 0,299 | -0,857 |
| 6 | Q86UP2 KTN1_HUMAN  | K.QM*QSSFTSSEQE.L                   |        | 2 | 3,0824 | 0,299 | 0,347  |
| 6 | Q14160 LAP4_HUMAN  | E.VALVLLGRPS#PGAVGPE.D              | S1600: | 3 | 3,086  | 0,269 | 0,321  |
| 6 | Q00613 HSF1_HUMAN  | E.LLS#PQEP RPPEAE.N                 | S444:  | 2 | 3,0946 | 0,157 | -0,074 |
| 6 | Q8N1G0 ZN687_HUMAN | E.NGPGM*QPPVSS#PPLGALKQE.S          | S215:  | 2 | 3,0979 | 0,342 | 0,465  |
| 6 | Q9Y490 TLN1_HUMAN  | R.GVGAAATAVTQALNE.L                 |        | 2 | 3,1006 | 0,304 | 0,089  |
| 6 | Q9Y295 DRG1_HUMAN  | K.GGINLTATCPQSE.L                   |        | 2 | 3,1027 | 0,182 | 0,905  |
| 6 | P08670 VIME_HUMAN  | R.QDVDNAS#LARLDLE.R                 | S214:  | 2 | 3,1037 | 0,466 | -0,074 |

|   |                    |                                |        |   |        |       |        |
|---|--------------------|--------------------------------|--------|---|--------|-------|--------|
| 6 | O14686 MLL2_HUMAN  | R.ALS#PVIPLIPR.D               | S4463: | 2 | 3,1069 | 0,464 | -0,583 |
| 6 | Q15365 PCBP1_HUMAN | R.VM*TIPYQPM*PASS#PVICAGGQDR.C | S190:  | 2 | 3,1081 | 0,356 | 0,566  |
| 6 | Q8WWM7 ATX2L_HUMAN | K.LQPSSS#PENSLDPFPPR.I         | S559:  | 3 | 3,1088 | 0,244 | -0,094 |
| 6 | Q5T4S7 UBR4_HUMAN  | K.ALGTGLGM*TTNE.K              |        | 2 | 3,1157 | 0,362 | 0,109  |
| 6 | Q53H80 CF166_HUMAN | R.TLDFDPLLSPAS#PK.R            | S21:   | 2 | 3,1164 | 0,386 | 0,077  |
| 6 | Q5JRX3 PREP_HUMAN  | R.CSVNATPQQM*PQTE.K            |        | 2 | 3,1167 | 0,449 | -0,076 |
| 6 | P46821 MAP1B_HUMAN | E.SSPLYS#PTFSDSTS AVKE.K       | S1797: | 2 | 3,1181 | 0,4   | -0,185 |
| 6 | Q92900 RENT1_HUMAN | E.LS#QDSYLGDEFK.S              | S1089: | 2 | 3,1187 | 0,323 | -0,494 |
| 6 | P78527 PRKDC_HUMAN | E.LAS#LDCYNHLAE.W              | S2998: | 2 | 3,124  | 0,321 | -0,164 |
| 6 | P67936 TPM4_HUMAN  | K.IQALQQQADE.A                 |        | 2 | 3,1284 | 0,206 | 0      |
| 6 | P01106 MYC_HUMAN   | R.SGLCS#PSYVAVTPFSLR.G         | S71:   | 2 | 3,1329 | 0,404 | 0,064  |
| 6 | Q9UGY1 NOL12_HUMAN | R.LLGLTPPEGGAGDRS#EEE.A        | S134:  | 2 | 3,1361 | 0,264 | -0,064 |
| 6 | Q8WWM7 ATX2L_HUMAN | K.LQPSSS#PENSLDPFPPR.I         | S559:  | 2 | 3,1382 | 0,335 | 0,376  |
| 6 | P06744 G6PI_HUMAN  | R.S#NTPILVDGKDVM*PE.V          | S107:  | 2 | 3,1383 | 0,339 | -0,214 |
| 6 | P31689 DNJA1_HUMAN | E.NGFLS#PDKLSLLE.K             | S335:  | 2 | 3,1399 | 0,352 | 0      |
| 6 | Q09666 AHNK_HUMAN  | K.LSGPS#LKM*PSLE.I             | S4903: | 2 | 3,14   | 0,424 | 0,27   |
| 6 | Q96QC0 PP1RA_HUMAN | E.ILTSIM*GS#PNSHPSEE.L         | S591:  | 2 | 3,1461 | 0,393 | -0,068 |
| 6 | Q96QC0 PP1RA_HUMAN | K.VLS#PTAAKPSPFE.G             | S313:  | 2 | 3,1466 | 0,311 | 0,171  |
| 6 | Q9Y6V0 PCLO_HUMAN  | K.SLTET#YVVITL PSEP GTPTD.S    | T2510: | 3 | 3,1469 | 0,195 | -0,998 |
| 6 | Q9Y6I3 EPN1_HUMAN  | E.AVG S#PPPAATPTPTPTR.K        | S429:  | 2 | 3,1488 | 0,489 | -0,544 |
| 6 | Q8IZT6 ASPM_HUMAN  | E.SESVNPILS#PNQFLK.D           | S392:  | 2 | 3,1511 | 0,452 | 0,139  |
| 6 | P07814 SYEP_HUMAN  | K.EYIPGQPPLSQSSDSS#PTR.N       | S886:  | 3 | 3,1531 | 0,371 | 0,43   |
| 6 | P08047 SP1_HUMAN   | E.SQPS#PLALLAATCSR.I           | S59:   | 2 | 3,1547 | 0,475 | 0,295  |
| 6 | P68104 EF1A1_HUMAN | E.S#FSDY PPLGR.F               | S414:  | 2 | 3,1598 | 0,428 | 0      |
| 6 | P18669 PGAM1_HUMAN | R.YADLTEDQLPSCE.S              |        | 2 | 3,1613 | 0,323 | 0,238  |
| 6 | Q76021 RL1D1_HUMAN | K.ATNES#EIDEIPQLVPIGK.K        | S361:  | 3 | 3,1638 | 0,178 | 0,572  |
| 6 | Q32MZ4 LRRF1_HUMAN | K.AM*VSNAQLDNE.K               |        | 2 | 3,1665 | 0,413 | 0,101  |
| 6 | Q15029 U5S1_HUMAN  | E.M*DFLADLM*DNSE.L             |        | 2 | 3,1727 | 0,388 | -0,085 |
| 6 | Q75400 PR40A_HUMAN | R.TLLEQLDDDQ.-                 |        | 2 | 3,1761 | 0,237 | 0,41   |
| 6 | Q86W92 LIPB1_HUMAN | R.SPASITDEDSNV.-               |        | 2 | 3,1779 | 0,245 | 0,277  |
| 6 | Q99569 PKP4_HUMAN  | R.SSTQM*NSYSDSGYQE.A           |        | 2 | 3,1787 | 0,389 | -0,144 |
| 6 | Q14202 ZMYM3_HUMAN | K.M*ANVLDEPGQDLE.A             |        | 2 | 3,1796 | 0,26  | 0      |
| 6 | Q9NR48 ASH1L_HUMAN | E.SNLPS#PSPTVSVNPLTR.S         | S557:  | 2 | 3,1834 | 0,295 | 0,991  |

|   |                    |                                 |        |   |        |       |        |
|---|--------------------|---------------------------------|--------|---|--------|-------|--------|
| 6 | Q9C0B5 ZDHC5_HUMAN | R.GDS#LKEPTSIAE.S               | S380:  | 2 | 3,187  | 0,364 | -0,092 |
| 6 | Q9UBW8 CSN7A_HUMAN | K.VTAAAAAATSQDPE.Q              |        | 2 | 3,1918 | 0,366 | -0,261 |
| 6 | Q8WXI9 P66B_HUMAN  | R.LTPSPDIIVLS#DNEASSPR.S        | S129:  | 3 | 3,1919 | 0,202 | 0      |
| 6 | O75717 WDHD1_HUMAN | R.SNILSDNPDFSDE.A               |        | 2 | 3,1926 | 0,342 | -0,252 |
| 6 | P78347 GTF2I_HUMAN | K.INSSPNVNTTASGVED.L            |        | 2 | 3,1937 | 0,337 | -0,152 |
| 6 | Q13151 ROAO_HUMAN  | E.ADAAM*AAS#PHAVDGNTVE.L        | S68:   | 2 | 3,2006 | 0,457 | -0,067 |
| 6 | Q15390 MTFR1_HUMAN | R.QIS#LPDLSQEELQLK.T            | S119:  | 3 | 3,201  | 0,2   | 0,101  |
| 6 | Q7Z401 MYCPP_HUMAN | R.NLS#GGVLM*GFM*LNR.I           | S1035: | 2 | 3,2067 | 0,372 | 0,075  |
| 6 | P40123 CAP2_HUMAN  | R.SALFAQLNQGE.A                 |        | 2 | 3,2106 | 0,439 | -0,414 |
| 6 | Q9NQC3 RTN4_HUMAN  | E.TAASLPSLS#PLSAASFKE.H         | S239:  | 2 | 3,2133 | 0,347 | 0,263  |
| 6 | Q1KMD3 HNRL2_HUMAN | E.NDVIGCFANFE.T                 |        | 2 | 3,2173 | 0,332 | 0,19   |
| 6 | P62263 RS14_HUMAN  | E.SSPYAAM*LAAQD.V               |        | 2 | 3,2184 | 0,419 | 0      |
| 6 | Q8N108 MIER1_HUMAN | E.LLS#LYGYGSTVR.L               | S95:   | 2 | 3,221  | 0,339 | -0,173 |
| 6 | Q99832 TCPH_HUMAN  | K.NDSVVAGGGAIEM*E.L             |        | 2 | 3,221  | 0,405 | 0      |
| 6 | P04075 ALDOA_HUMAN | K.YTPSQAGAAASE.S                |        | 2 | 3,2261 | 0,441 | 0      |
| 6 | Q15652 JHD2C_HUMAN | K.ATYVNSQATGE.R                 |        | 2 | 3,2292 | 0,416 | -0,107 |
| 6 | Q5TDH0 DDI2_HUMAN  | R.IDFSSIAVPGTSS#PR.Q            | S106:  | 2 | 3,2305 | 0,472 | -0,302 |
| 6 | Q9BR61 ACBD6_HUMAN | K.ALGDSSPSQAM*QE.Y              |        | 2 | 3,2315 | 0,301 | -0,548 |
| 6 | P35579 MYH9_HUMAN  | K.IAQLEEQLDNE.T                 |        | 2 | 3,2322 | 0,246 | -0,375 |
| 6 | Q9GZR1 SENP6_HUMAN | E.S#ISPQPADSACSSPAPSTGKVE.A     | S350:  | 3 | 3,2329 | 0,335 | -0,406 |
| 6 | Q99661 KIF2C_HUMAN | E.ACSNGALIPGNLS#KEEEE.L         | S621:  | 2 | 3,2402 | 0,339 | -0,061 |
| 6 | Q9H307 PININ_HUMAN | K.SLS#PGKENVSALDM*E.K           | S443:  | 2 | 3,2434 | 0,423 | 0      |
| 6 | Q05209 PTN12_HUMAN | K.TNISTASATVSAATSTE.S           |        | 2 | 3,2455 | 0,496 | -0,303 |
| 6 | Q9UQ35 SRRM2_HUMAN | E.GDAPFSEPGTTSTQRPSS#PE.T       | S323:  | 3 | 3,2478 | 0,199 | 0,086  |
| 6 | Q68EM7 RHG17_HUMAN | K.LPLTALAQNM*QE.A               |        | 2 | 3,2501 | 0,329 | -0,272 |
| 6 | P78347 GTF2I_HUMAN | K.INSSPNVNTTASGVE.D             |        | 2 | 3,2583 | 0,364 | -0,082 |
| 6 | O95365 ZBT7A_HUMAN | R.GGAPDPSPGATATPGAPAQPSS#PDAR.R | S526:  | 3 | 3,2612 | 0,315 | 0      |
| 6 | P31949 S10AB_HUMAN | K.LDTNSDGQLDFSE.F               |        | 2 | 3,2621 | 0,415 | 0,254  |
| 6 | Q9H009 NACA2_HUMAN | K.NNSNDIVNAIM*E.L               |        | 2 | 3,2701 | 0,331 | 0,181  |
| 6 | Q9NYL2 MLTK_HUMAN  | R.DSGFSSGNTDTSSE.R              |        | 2 | 3,2706 | 0,493 | -0,175 |
| 6 | Q15477 SKIV2_HUMAN | R.ASS#LEDLVLKE.A                | S256:  | 2 | 3,2727 | 0,258 | 0,19   |
| 6 | P07814 SYEP_HUMAN  | K.EYIPGQPPLSQSSDSS#PTR.N        | S886:  | 2 | 3,2746 | 0,362 | 1,377  |
| 6 | O43663 PRC1_HUMAN  | R.NFSINSVASTYSE.F               |        | 2 | 3,2753 | 0,321 | 0,172  |

|   |                     |                                |        |   |        |       |        |
|---|---------------------|--------------------------------|--------|---|--------|-------|--------|
| 6 | Q00653 NFKB2_HUMAN  | K.LNSS#IIVEPKAPE.T             | S23:   | 2 | 3,2798 | 0,369 | -1,305 |
| 6 | Q92797 SYMPK_HUMAN  | E.AALLDS#SLEGPLK.E             | S1221: | 2 | 3,2886 | 0,341 | -0,327 |
| 6 | Q3T8J9 GON4L_HUMAN  | K.LEPQELS#PLSATVFPK.V          | S1255: | 2 | 3,2892 | 0,379 | 0      |
| 6 | P28066 PSA5_HUMAN   | R.ITS#PLM*EPSSIEK.I            | S56:   | 2 | 3,2902 | 0,358 | -0,16  |
| 6 | Q9UNX4 WDR3_HUMAN   | E.VM*FFADATS#HLEE.K            | S923:  | 2 | 3,2953 | 0,357 | 0,077  |
| 6 | Q15369 ELOC_HUMAN   | K.AM*LSGPGQFAENE.T             |        | 2 | 3,2954 | 0,248 | -0,089 |
| 6 | O75582 KS6A5_HUMAN  | K.TLQPSNPADSNNPE.T             |        | 2 | 3,2961 | 0,335 | -0,082 |
| 6 | P05783 K1C18_HUMAN  | E.DFNLDGALDSS#NSM*QTIQK.T      | S399:  | 3 | 3,299  | 0,244 | 0      |
| 6 | O00178 GTPB1_HUMAN  | R.SAM*DSPVPASM*FAPEPS#SPGAAR.A | S24:   | 3 | 3,3001 | 0,4   | 0,231  |
| 6 | Q6PGN9 PSRC1_HUMAN  | R.LSLGPLS#PEKLEE.I             | S70:   | 2 | 3,3062 | 0,296 | 0,082  |
| 6 | Q9UKS6 PACN3_HUMAN  | R.ALYDYAGQEADE.L               |        | 2 | 3,312  | 0,335 | 0,272  |
| 6 | P06748 NPM_HUMAN    | D.M*S#PLRPQNYLFGCE.L           | S10:   | 2 | 3,3149 | 0,481 | 0,135  |
| 6 | P31946 1433B_HUMAN  | K.QTTVSNSQAYQE.A               |        | 2 | 3,3194 | 0,372 | 0,576  |
| 6 | P46100 ATRX_HUMAN   | E.TFS#SAEGTVDKDTTIM*E.L        | S889:  | 2 | 3,3212 | 0,242 | -0,127 |
| 6 | Q9NTJ3 SMC4_HUMAN   | R.TESPATAAETASEE.L             |        | 2 | 3,3279 | 0,527 | -0,175 |
| 6 | Q96QT6 PHF12_HUMAN  | R.VLT#PPQAAGDGILATTANQR.F      | T671:  | 3 | 3,3305 | 0,247 | -0,441 |
| 6 | Q92804 RBP56_HUMAN  | K.QSSYSQQPYNNQGGQQNM*E.S       |        | 2 | 3,3364 | 0,446 | 0,322  |
| 6 | B2R8U0 B2R8U0_HUMAN | K.AAAGPLDM*SLPST#PDIK.I        | T101:  | 2 | 3,3446 | 0,413 | -0,069 |
| 6 | Q9H165 BC11A_HUMAN  | K.LLLGSPSSLS#PFSK.R            | S630:  | 2 | 3,3468 | 0,477 | -0,081 |
| 6 | Q96JM3 ZN828_HUMAN  | K.LAPVPSPEPQKPAPVS#PE.S        | S214:  | 3 | 3,3674 | 0,212 | 0      |
| 6 | Q9HAW4 CLSPN_HUMAN  | K.SLS#SDSTLLLFK.D              | S720:  | 2 | 3,3735 | 0,275 | -0,088 |
| 6 | Q02952 AKA12_HUMAN  | K.GALNGQGALNSQEEEE.V           |        | 2 | 3,3744 | 0,377 | 0      |
| 6 | Q6PGQ7 BORA_HUMAN   | E.M*FYSIDLS#PVK.C              | S233:  | 2 | 3,3747 | 0,318 | -0,35  |
| 6 | O15446 RPA34_HUMAN  | E.QINTEPLEDTVLS#PTK.K          | S285:  | 2 | 3,3751 | 0,31  | -0,065 |
| 6 | Q6P2E9 EDC4_HUMAN   | E.VEPLGLPQAS#PSR.T             | S723:  | 2 | 3,3778 | 0,484 | 0,256  |
| 6 | Q3KQU3 MA7D1_HUMAN  | E.SAAPAS#PAPSPAPSPTAPPQK.E     | S544:  | 2 | 3,3804 | 0,372 | 0      |
| 6 | Q96L14 C170L_HUMAN  | E.ALNNM*GFPSAM*LPS#PPK.Q       | S224:  | 2 | 3,3956 | 0,479 | -0,259 |
| 6 | P21127 CD2L1_HUMAN  | E.GDYVPDS#PALSPIELK.Q          | S410:  | 2 | 3,4155 | 0,438 | 0      |
| 6 | Q15785 TOM34_HUMAN  | R.VLQAQGSSEPEEE.S              |        | 2 | 3,4177 | 0,471 | -0,088 |
| 6 | Q00653 NFKB2_HUMAN  | E.DSAYGSQSVEQE.A               |        | 2 | 3,4204 | 0,398 | 0,282  |
| 6 | P62241 RS8_HUMAN    | R.IIDVVYNASNNE.L               |        | 2 | 3,4213 | 0,342 | 0,181  |
| 6 | O00257 CBX4_HUMAN   | E.VILLDS#DLDEPIDLR.S           | S465:  | 2 | 3,4214 | 0,229 | -0,068 |
| 6 | P10809 CH60_HUMAN   | K.LVQDVANNTNEE.A               |        | 2 | 3,4239 | 0,476 | 1,088  |

|   |                       |                                |          |   |        |       |        |
|---|-----------------------|--------------------------------|----------|---|--------|-------|--------|
| 6 | Q13263 TIF1B_HUMAN    | R.STAPSAASASASAAASSPAGGGAE.A   |          | 3 | 3,4301 | 0,094 | 0,182  |
| 6 | P02545 LMNA_HUMAN     | R.S#GAQASSTPLSPTR.I            | S12:     | 2 | 3,4314 | 0,493 | 0,254  |
| 6 | P15336 ATF2_HUMAN     | K.M*PLDLS#PLATPIIR.S           | S94:     | 2 | 3,4372 | 0,474 | 0      |
| 6 | Q9Y2X9 ZN281_HUMAN    | E.NLS#PGTQTPSNDKASM*LQE.Y      | S651:    | 3 | 3,4381 | 0,326 | 0      |
| 6 | Q99996 AKAP9_HUMAN    | E.FGVDDSYSEQGAQDS#PTHLE.M      | S165:    | 3 | 3,4418 | 0,14  | -0,081 |
| 6 | Q99569 PKP4_HUMAN     | R.SAVS#PDLHITPIYE.G            | S406:    | 2 | 3,4425 | 0,29  | 0      |
| 6 | P35658 NU214_HUMAN    | E.ST#PVPSVSAPNIAM*K.S          | T560:    | 2 | 3,4497 | 0,312 | -0,153 |
| 6 | Q9H019 FA54B_HUMAN    | K.ASS#FADM*M*GILKD.F           | S238:    | 2 | 3,4525 | 0,305 | 0,081  |
| 6 | Q12888 TP53B_HUMAN    | E.DVCIDLTCDSGSQAVPS#PATR.S     | S630:    | 2 | 3,4585 | 0,411 | 0,314  |
| 6 | P40763 STAT3_HUMAN    | R.TLDSLM*QFGNNGE.G             |          | 2 | 3,4644 | 0,438 | 0,169  |
| 6 | Q16204 CCDC6_HUMAN    | K.SGGIVIS#PFRLEE.L             | S52:     | 2 | 3,4646 | 0,388 | 0,164  |
| 6 | Q8TDM6 DLG5_HUMAN     | R.LGS#SSNLQFKAE.R              | S1263:   | 2 | 3,4719 | 0,348 | -0,179 |
| 6 | P49736 MCM2_HUMAN     | R.TDALTSS#PGRDLPPFEDE.S        | S41:     | 2 | 3,4732 | 0,506 | 0,241  |
| 6 | Q9P265 DIP2B_HUMAN    | R.QAALSAAALQQSLQNAE.S          |          | 3 | 3,4777 | 0,246 | 0,111  |
| 6 | Q02880 TOP2B_HUMAN    | E.FSGAPVEGAGEEALT#PSVPINK.G    | T1292:   | 3 | 3,4849 | 0,205 | -0,163 |
| 6 | Q12888 TP53B_HUMAN    | K.M*VIQGPSSPQGE.A              |          | 2 | 3,4851 | 0,35  | 0,294  |
| 6 | Q7Z309 F122B_HUMAN    | E.S#LSLSDSDFDKPE.K             | S89:     | 2 | 3,4851 | 0,426 | -0,241 |
| 6 | P05387 RLA2_HUMAN     | R.YVASYLLAALGGNSS#PSAK.D       | S17:     | 3 | 3,4883 | 0,234 | 0,094  |
| 6 | Q96IZ0 PAWR_HUMAN     | E.DAITQQNTIQNE.A               |          | 2 | 3,4897 | 0,367 | -0,266 |
| 6 | P49454 CENPF_HUMAN    | K.LALS#PLSLGKENLAE.S           | S3119:   | 2 | 3,4997 | 0,389 | 0      |
| 6 | P21359 NF1_HUMAN      | E.GYLAATYPTVGQT#SPR.A          | T2514:   | 2 | 3,5106 | 0,522 | -0,485 |
| 6 | Q9NPF5 DMAP1_HUMAN    | K.DTIIDVVGAPLT#PNSR.K          | T445:    | 2 | 3,5191 | 0,367 | 0      |
| 6 | Q96FV9 THOC1_HUMAN    | K.SGLSDLAESLTNDNE.T            |          | 2 | 3,5204 | 0,409 | -0,468 |
| 6 | O00257 CBX4_HUMAN     | E.VILLDS#DLDEPIDLR.S           | S465:    | 3 | 3,5295 | 0,282 | 0,203  |
| 6 | O00358 FOXO1_HUMAN    | R.VFGLVPERPLS#PE.L             | S231:    | 2 | 3,5305 | 0,488 | 0,08   |
| 6 | O75385 ULK1_HUMAN     | K.TPS#SQNLLALLAR.Q             | S638:    | 2 | 3,5323 | 0,486 | 0      |
| 6 | O00178 GTPB1_HUMAN    | R.SAM*DSPVPASM*FAPEPSS#PGAAR.A | S25:     | 3 | 3,5373 | 0,158 | 0      |
| 6 | Q9UPX8 SHAN2_HUMAN    | R.QGIIVM*TPTVPGS#PK.A          | S235:    | 2 | 3,5406 | 0,441 | 0      |
| 6 | Q86XF2 Q86XF2_HUMAN   | K.ASPGLLAAAALQQSQE.L           |          | 2 | 3,5463 | 0,459 | 0,082  |
| 6 | P28290 SSFA2_HUMAN    | R.SQS#LPPTLLSPVR.V             | S739:    | 2 | 3,5482 | 0,335 | -0,165 |
| 6 | O43166 SI1L1_HUMAN    | E.LDVDSFDECIS#PTYK.T           | S193:    | 2 | 3,5516 | 0,456 | -0,326 |
| 6 | P19634 SL9A1_HUMAN    | R.IGS#DPLAYEPK.E               | S703:    | 2 | 3,5545 | 0,495 | 0      |
| 6 | ##Q53S13 Q53S13_HUMAN | -.NRDEKAVM*VS#APSSS#ATSALLR.K  | S10:S15: | 3 | 3,5607 | 0,12  | -0,594 |

|   |                     |                                |        |   |        |       |        |
|---|---------------------|--------------------------------|--------|---|--------|-------|--------|
| 6 | Q9H3R5 CENPH_HUMAN  | R.AGGPPQVAGAQAACSE.D           |        | 2 | 3,5608 | 0,453 | -0,083 |
| 6 | P46013 KI67_HUMAN   | E.AQS#LEDLAGFKE.L              | S1098: | 2 | 3,5623 | 0,396 | -0,176 |
| 6 | Q7Z309 F122B_HUMAN  | E.SLSLS#DSDFDKPE.K             | S93:   | 2 | 3,5632 | 0,377 | 0,08   |
| 6 | P52756 RBM5_HUMAN   | E.AQPSTSTSTQAPAAS#PTGVVPGTK.Y  | S444:  | 3 | 3,5661 | 0,395 | 0,236  |
| 6 | B2RMZ9 B2RMZ9_HUMAN | R.APVS#PLKFSPFE.G              | S423:  | 2 | 3,5692 | 0,47  | 0,087  |
| 6 | P20810 ICAL_HUMAN   | E.DFSGPQNASS#LKFE.D            | S527:  | 2 | 3,5731 | 0,286 | -0,076 |
| 6 | Q12888 TP53B_HUMAN  | E.S#VASPQKTM*SVLSCICE.A        | S1025: | 2 | 3,5748 | 0,483 | 0      |
| 6 | Q14807 KIF22_HUMAN  | E.IGS#PEPM*AAPASASQK.L         | S412:  | 2 | 3,5789 | 0,414 | 0,149  |
| 6 | P49792 RBP2_HUMAN   | K.AVVS#PPKFVFGSE.S             | S2510: | 2 | 3,5812 | 0,389 | 0      |
| 6 | P98174 FGD1_HUMAN   | K.S#LSLDPGQSLEPHPE.G           | S114:  | 2 | 3,583  | 0,413 | -0,724 |
| 6 | P13056 NR2C1_HUMAN  | K.DLRS#PLTATPTFVTDSE.S         | S215:  | 2 | 3,599  | 0,446 | 0,569  |
| 6 | O75376 NCOR1_HUMAN  | E.TAPSTS#PSLAVPSTKPAEDE.S      | S764:  | 2 | 3,6128 | 0,466 | 0      |
| 6 | Q8N1G0 ZN687_HUMAN  | K.ATDIPASAS#PPPVAGVPFFK.Q      | S253:  | 2 | 3,6158 | 0,469 | 0      |
| 6 | Q8N0Z3 CCD52_HUMAN  | R.FLQQLTEENFE.L                |        | 2 | 3,6164 | 0,299 | 0,087  |
| 6 | Q9HCD6 TANC2_HUMAN  | E.LSPVS#PTQGGYPSEPTR.S         | S1827: | 2 | 3,6169 | 0,406 | -0,395 |
| 6 | Q9NXV6 CARF_HUMAN   | R.NAGDLAPAGGAASASTDE.A         |        | 2 | 3,6234 | 0,4   | 0      |
| 6 | Q9H5N1 RABE2_HUMAN  | K.QM*QVLLAQVQNSE.Q             |        | 2 | 3,6273 | 0,394 | 0,568  |
| 6 | Q6UUV9 CRTC1_HUMAN  | R.TNS#DSALHQSTM*TPTQPE.S       | S151:  | 2 | 3,6338 | 0,389 | 0,06   |
| 6 | P40855 PEX19_HUMAN  | R.S#PGDTAKDALFASQE.K           | S54:   | 2 | 3,6352 | 0,407 | 0,075  |
| 6 | Q70E73 RAPH1_HUMAN  | E.ISEQPTM*ATVVPQVPTS#PK.S      | S1206: | 2 | 3,6372 | 0,358 | 0,232  |
| 6 | Q9NZM3 ITSN2_HUMAN  | R.TVSPGSVS#PIHGQQQVVE.N        | S888:  | 2 | 3,6375 | 0,408 | 0,066  |
| 6 | Q13263 TIF1B_HUMAN  | R.STAPSAASASASAAAASSPAGGGAE.A  |        | 2 | 3,6403 | 0,402 | 0      |
| 6 | Q99700 ATX2_HUMAN   | E.AVAM*PIPAASPTPAS#PASNR.A     | S732:  | 2 | 3,6461 | 0,56  | -0,244 |
| 6 | P05783 K1C18_HUMAN  | R.TVQS#LEIDLDSM*R.N            | S305:  | 2 | 3,6502 | 0,282 | 0,076  |
| 6 | P54578 UBP14_HUMAN  | E.NQLQLSCFINQE.V               |        | 2 | 3,651  | 0,354 | -0,082 |
| 6 | Q5H9F3 BCRL1_HUMAN  | E.GTSVTF#PLKSPQLE.R            | S599:  | 2 | 3,6516 | 0,485 | 0      |
| 6 | Q92734 TFG_HUMAN    | K.NVM*SAFGLTDDQVSGPPS#APAEDR.S | S197:  | 3 | 3,6526 | 0,191 | 0,286  |
| 6 | P56537 IF6_HUMAN    | E.AQPSTIATS#M*RDSLIDSLT.-      | S235:  | 2 | 3,654  | 0,506 | 0,116  |
| 6 | Q8N3Z6 ZCHC7_HUMAN  | E.VITLS#DEDSIYR.C              | S94:   | 2 | 3,6549 | 0,489 | -0,818 |
| 6 | O60508 PRP17_HUMAN  | K.SPS#SKPSLAVAVDSAPE.V         | S45:   | 2 | 3,6564 | 0,455 | 0      |
| 6 | Q12888 TP53B_HUMAN  | D.SLSTNSSDLVAPS#PDAFR.S        | S366:  | 2 | 3,6575 | 0,47  | -0,314 |
| 6 | P43358 MAGA4_HUMAN  | R.QPNEGSSSQEEGPSTSPDAE.S       |        | 2 | 3,6576 | 0,44  | 0,226  |
| 6 | Q96GQ7 DDX27_HUMAN  | K.GQEAGGFEDASQYDE.N            |        | 2 | 3,6594 | 0,382 | 0      |



|   |                    |                             |        |   |        |       |        |
|---|--------------------|-----------------------------|--------|---|--------|-------|--------|
| 6 | Q92797 SYMPK_HUMAN | E.AALLDSS#LEGPLPK.E         | S1222: | 2 | 3,6597 | 0,44  | -0,327 |
| 6 | O75717 WDHD1_HUMAN | E.DDENS#VDISM*LK.T          | S383:  | 2 | 3,6686 | 0,41  | 0,25   |
| 6 | Q9H3S7 PTN23_HUMAN | E.STPIPS#SSPPLSSPLPEAPQPK.E | S1542: | 3 | 3,6771 | 0,312 | 0,383  |
| 6 | P52292 IMA2_HUMAN  | R.NVSSFPDDATSPLQE.N         |        | 2 | 3,6807 | 0,296 | -0,152 |
| 6 | Q9H8Y8 GORS2_HUMAN | K.ISLPGQM*AGT#PITPLKDGTFE.V | T222:  | 2 | 3,6899 | 0,318 | 0,108  |
| 6 | Q9H0H5 RGAP1_HUMAN | R.CPLPCIPTLIGT#PVK.I        | T342:  | 2 | 3,698  | 0,286 | 0,07   |
| 6 | P11388 TOP2A_HUMAN | K.GSVPLSSS#PPATHFPDETE.I    | S1393: | 2 | 3,7064 | 0,401 | -0,18  |
| 6 | Q12873 CHD3_HUMAN  | E.LQGDGPPS#SPTNDPTVKYE.T    | S712:  | 3 | 3,7158 | 0,239 | 0      |
| 6 | P30153 2AAA_HUMAN  | R.LNIISNLDCVNE.V            |        | 2 | 3,7227 | 0,312 | 0      |
| 6 | Q9Y6M7 S4A7_HUMAN  | R.M*LQDDDDT#VHLPE.G         | T1167: | 2 | 3,731  | 0,243 | 0      |
| 6 | Q13283 G3BP1_HUMAN | E.DAQKSS#SPAPADIAQTVQE.D    | S231:  | 2 | 3,7311 | 0,473 | -0,181 |
| 6 | Q3T8J9 GON4L_HUMAN | K.LEPQELSPLS#ATVFPK.V       | S1258: | 2 | 3,7338 | 0,422 | 0,066  |
| 6 | Q14694 UBP10_HUMAN | E.SAS#PPADGTGSASGTLVPSQPK.S | S321:  | 2 | 3,7464 | 0,261 | -0,583 |
| 6 | Q9C0B5 ZDHC5_HUMAN | R.GVGS#PEPGPTAPYLGR.S       | S621:  | 2 | 3,7645 | 0,423 | -0,224 |
| 6 | Q6GYQ0 GRIPE_HUMAN | E.VAS#LTTLHIDSE.T           | S958:  | 2 | 3,768  | 0,457 | -0,447 |
| 6 | P49023 PAXI_HUMAN  | K.QKS#AEPSTVM*STSLGSNLSE.L  | S126:  | 2 | 3,7682 | 0,405 | 0,326  |
| 6 | Q8WUA4 TF3C2_HUMAN | E.M*SLPTPLPGFEDS#PDQR.R     | S63:   | 2 | 3,7724 | 0,398 | 0,185  |
| 6 | Q14692 BMS1_HUMAN  | E.T#SDIENLLKEEE.D           | T638:  | 2 | 3,7753 | 0,344 | 0,163  |
| 6 | Q12888 TP53B_HUMAN | E.DVCIDLTCDSGSQAVPS#PATR.S  | S630:  | 3 | 3,7769 | 0,258 | 0,157  |
| 6 | Q8WUI4 HDAC7_HUMAN | R.AQS#SPAAPASLSAPEPASQAR.V  | S486:  | 3 | 3,7804 | 0,463 | -0,353 |
| 6 | P49790 NU153_HUMAN | E.ITTSS#PSPINSSQALTNK.V     | S498:  | 2 | 3,7867 | 0,391 | 0,19   |
| 6 | Q2NKX8 ERC6L_HUMAN | E.TSLGAPEPLSGEQLVGS#PQDK.A  | S1188: | 3 | 3,7945 | 0,302 | 0      |
| 6 | Q7KZ85 SPT6H_HUMAN | E.STPM*SIAGDAT#PLLDEM*DR.-  | T1718: | 2 | 3,7958 | 0,573 | 0,229  |
| 6 | Q3KQU3 MA7D1_HUMAN | E.SAAPASPAPS#PAPSPTAPPQK.E  | S548:  | 3 | 3,7971 | 0,296 | 0,348  |
| 6 | Q09666 AHNK_HUMAN  | K.VGIDT#PDIDIHGPE.G         | T4564: | 2 | 3,7977 | 0,507 | -0,627 |
| 6 | Q3MHD2 LSM12_HUMAN | R.TET#PPPLASLNVSK.L         | T75:   | 2 | 3,7979 | 0,42  | -0,159 |
| 6 | Q9H5N1 RAB2_HUMAN  | E.LLPLSRDPS#PPLEPLEE.L      | S204:  | 2 | 3,8261 | 0,349 | -0,492 |
| 6 | Q96GV9 CE030_HUMAN | R.STLTTLPPFGAEANS#PGKAE.A   | S25:   | 2 | 3,8287 | 0,452 | 0      |
| 6 | Q69YH5 CDCA2_HUMAN | R.VASDS#PKPALTLQQGQE.F      | S727:  | 2 | 3,8407 | 0,459 | 0,528  |
| 6 | Q8WWM7 ATX2L_HUMAN | E.VDGLLTSEPM*GS#PVSSKTE.S   | S594:  | 3 | 3,843  | 0,4   | 0,36   |
| 6 | P22314 UBA1_HUMAN  | R.YDGQVAVFGSDLQE.K          |        | 2 | 3,8432 | 0,345 | -0,16  |
| 6 | Q9BUR4 WDR79_HUMAN | E.FGSPSELS#PRIEEQE.L        | S90:   | 2 | 3,866  | 0,448 | 0,205  |
| 6 | Q9H3P7 GCP60_HUMAN | R.GPGASGEQPEPGEAAGGAAEE.A   |        | 2 | 3,87   | 0,53  | 0      |

|   |                     |                                 |            |   |        |       |        |
|---|---------------------|---------------------------------|------------|---|--------|-------|--------|
| 6 | Q13671 RIN1_HUMAN   | R.SM*S#AAFCSLLAPER.Q            | S351:      | 2 | 3,8727 | 0,369 | -0,298 |
| 6 | Q16643 DREB_HUMAN   | R.M*APTPIPTRS#PSDSSTASTPVAE.Q   | S337:      | 2 | 3,8792 | 0,47  | 0,407  |
| 6 | P78536 ADA17_HUMAN  | E.SLS#LFHPSNVE.M                | S706:      | 2 | 3,8814 | 0,387 | -0,093 |
| 6 | Q9ULU4 PKCB1_HUMAN  | K.TGQAGS#LSGS#PKPFSPQLSAPITTK.T | S486:S490: | 3 | 3,8846 | 0,315 | -0,21  |
| 6 | P19532 TFE3_HUMAN   | E.EGVVGGSLGGALS#PLR.A           | S542:      | 2 | 3,8858 | 0,358 | -0,236 |
| 6 | Q04637 IF4G1_HUMAN  | E.FSSS#PLQAPTPLASHTVE.I         | S343:      | 2 | 3,8876 | 0,431 | 0,188  |
| 6 | P61978 HNRPK_HUMAN  | K.IILDILISES#PIK.G              | S216:      | 2 | 3,8965 | 0,424 | 0,086  |
| 6 | Q96PU5 NED4L_HUMAN  | R.SLS#SPTVTL SAPLEGA.K.D        | S448:      | 2 | 3,8998 | 0,539 | 0,14   |
| 6 | Q8WXV6 Q8WXV6_HUMAN | R.TSS#EDNLYLAVLR.A              | S21:       | 2 | 3,9    | 0,296 | 0      |
| 6 | Q13188 STK3_HUMAN   | K.LADFGVAGQLTDT#M*AK.R          | T174:      | 2 | 3,902  | 0,414 | -0,07  |
| 6 | Q92841 DDX17_HUMAN  | R.TTSSANNPNLM*YQDE.C            |            | 2 | 3,9061 | 0,353 | -0,143 |
| 6 | Q96JM3 ZN828_HUMAN  | K.LAPVPS#PEPQKPAPVSPE.S         | S204:      | 2 | 3,9237 | 0,384 | 0      |
| 6 | P05387 RLA2_HUMAN   | R.YVASYLLAALGGNSS#PSAK.D        | S17:       | 2 | 3,9237 | 0,278 | 0,188  |
| 6 | Q9UGU5 HM2L1_HUMAN  | K.SPPTM*LLPAS#PAKAPE.T          | S512:      | 2 | 3,9278 | 0,45  | 0      |
| 6 | Q99700 ATX2_HUMAN   | E.AVAM*PIPAAS#PTPASPASNR.A      | S727:      | 2 | 3,9314 | 0,494 | 0,183  |
| 6 | Q8NCF5 NF2IP_HUMAN  | E.FLDLDNSPLSPS#PR.T             | S204:      | 2 | 3,9333 | 0,39  | 0      |
| 6 | Q8IY81 RRMJ3_HUMAN  | E.IM*S#PLYQDEAPK.G              | S584:      | 2 | 3,9361 | 0,317 | -0,082 |
| 6 | Q9H467 CUED2_HUMAN  | E.NLQPQSSGVQGVVIS#PEPLQRPE.M    | S110:      | 3 | 3,9367 | 0,456 | 0,481  |
| 6 | Q5VTR2 BRE1A_HUMAN  | K.ALVVPEPEPDSDS#NQER.K          | S138:      | 2 | 3,9619 | 0,51  | 0,062  |
| 6 | P42695 CNDD3_HUMAN  | R.SLGVLPFTLNSGS#PEK.T           | S1384:     | 2 | 3,9628 | 0,328 | 0,071  |
| 6 | O15446 RPA34_HUMAN  | K.QEQINTEPLEDTVLS#PTK.K         | S285:      | 2 | 3,967  | 0,408 | 0,805  |
| 6 | Q9UPN4 AZI1_HUMAN   | R.TQDVLAQDAAGDNLE.M             |            | 2 | 3,972  | 0,432 | -0,391 |
| 6 | Q6PGN9 PSRC1_HUMAN  | E.TLDFGGLS#PSDSREEE.D           | S22:       | 2 | 3,9801 | 0,463 | -0,402 |
| 6 | O14950 O14950_HUMAN | K.NPTDAYLDAM*M*NE.A             |            | 2 | 3,9832 | 0,419 | 0,08   |
| 6 | P55265 DSRAD_HUMAN  | E.SQT#PTPSATSFSGK.S             | T601:      | 2 | 3,9964 | 0,394 | -0,15  |
| 6 | Q9P260 K1468_HUMAN  | R.AGS#ISTLDSLDFAR.Y             | S180:      | 2 | 4,0022 | 0,449 | -0,08  |
| 6 | P42566 EP15_HUMAN   | K.NIIGSS#PVADFSAIKE.L           | S324:      | 2 | 4,0076 | 0,435 | 0,212  |
| 6 | Q7Z417 NUFP2_HUMAN  | E.SQNPLAS#PTNTLLGSAKE.Q         | S629:      | 2 | 4,008  | 0,552 | 0,128  |
| 6 | O43432 IF4G3_HUMAN  | E.LSS#PREDTIPIPSLTSCTE.T        | S305:      | 2 | 4,0147 | 0,396 | 0,112  |
| 6 | Q9UKV3 ACINU_HUMAN  | E.VAT#PPVPQLQVCEPK.E            | T682:      | 3 | 4,0195 | 0,343 | -0,105 |
| 6 | Q04637 IF4G1_HUMAN  | E.AALPPVS#PLKAALSEEE.L          | S1232:     | 2 | 4,0204 | 0,357 | -0,068 |
| 6 | Q8IZM8 ZN654_HUMAN  | E.NGS#PNNSLNNVFKPLTE.C          | S134:      | 2 | 4,0214 | 0,389 | 0,127  |
| 6 | Q9Y3X0 CCDC9_HUMAN  | E.GAASPAPETPQPTS#PETS PK.E      | S386:      | 2 | 4,0243 | 0,478 | -0,301 |

|   |                     |                                    |        |   |        |       |        |
|---|---------------------|------------------------------------|--------|---|--------|-------|--------|
| 6 | Q9UQE7 SMC3_HUMAN   | R.GSGS#QSSVPSVDQFTGVGIR.V          | S1083: | 2 | 4,029  | 0,383 | 0      |
| 6 | Q15365 PCBP1_HUMAN  | R.VM*TIPYQPM*PASS#PVICAGGQDR.C     | S190:  | 3 | 4,0293 | 0,276 | 0,141  |
| 6 | Q8N7R7 CCYL1_HUMAN  | R.SFS#ADNFIGIQR.S                  | S344:  | 2 | 4,0329 | 0,359 | 0      |
| 6 | Q9BZE9 ASPC1_HUMAN  | R.AAGS#PSPLPAPDPAPK.S              | S500:  | 2 | 4,0356 | 0,472 | -0,079 |
| 6 | Q92738 US6NL_HUMAN  | E.VLPVDTGAGGYSNGSGS#PK.N           | S716:  | 2 | 4,0537 | 0,498 | -0,199 |
| 6 | Q96SB3 NEB2_HUMAN   | E.SGCVEIPGLS#EEEDPAPSR.K           | S436:  | 2 | 4,0538 | 0,408 | 0,347  |
| 6 | Q14692 BMS1_HUMAN   | K.AGLS#PANCQSDRVNLE.K              | S552:  | 2 | 4,0573 | 0,418 | -0,067 |
| 6 | Q15942 ZYX_HUMAN    | R.S#PGAGPPLTLKEVEE.L               | S344:  | 2 | 4,0598 | 0,448 | 0,609  |
| 6 | Q14493 SLBP_HUMAN   | E.SAESSSEPQTSSQDDFDVYSGT#PTK.V     | T238:  | 3 | 4,0603 | 0,379 | -0,268 |
| 6 | Q32MZ4 LRRF1_HUMAN  | R.NM*PGLSAAATLASLGGTSS#R.R         | S116:  | 2 | 4,063  | 0,419 | -0,065 |
| 6 | Q9Y6A5 TACC3_HUMAN  | E.NQM*VS#PGKVSQSPEQAVEE.N          | S170:  | 2 | 4,064  | 0,421 | 0      |
| 6 | P46821 MAP1B_HUMAN  | R.ASVS#PM*DEPVPDESPIEK.V           | S1378: | 2 | 4,0755 | 0,495 | 0,231  |
| 6 | Q9H6F5 CCD86_HUMAN  | R.LQQGAGLESPQGQPEPGAAS#PQRQQD.L    | S91:   | 3 | 4,0781 | 0,452 | -0,199 |
| 6 | Q9Y446 PKP3_HUMAN   | R.LS#SGFDDIDLPSAVK.Y               | S313:  | 2 | 4,0807 | 0,506 | 0,074  |
| 6 | Q9UQ35 SRRM2_HUMAN  | E.GDAPFSEPGTTSTQRPSS#PE.T          | S323:  | 2 | 4,0813 | 0,459 | 0,229  |
| 6 | P41212 ETV6_HUMAN   | E.SYPLSVS#PM*ENNHCPASSE.S          | S238:  | 2 | 4,0836 | 0,305 | 0,111  |
| 6 | Q9BQ85 Q9BQ85_HUMAN | R.EGS#PGDQAAALLTAR.Y               | S60:   | 2 | 4,0847 | 0,491 | -0,079 |
| 6 | Q9H0H5 RGAP1_HUMAN  | E.SGSILS#DISFDKTDE.S               | S154:  | 2 | 4,0894 | 0,453 | -0,144 |
| 6 | Q9H9J4 UBP42_HUMAN  | R.DSALAEAPEGLS#PAPPAR.S            | S856:  | 2 | 4,1074 | 0,481 | -0,2   |
| 6 | Q9Y2X9 ZN281_HUMAN  | E.NLS#PGTQTPSNDKASM*LQE.Y          | S651:  | 2 | 4,1083 | 0,501 | 0      |
| 6 | O76080 ZFAN5_HUMAN  | R.M*S#PM*GTASGSNSPTSASVQR.A        | S48:   | 3 | 4,1135 | 0,402 | 0,081  |
| 6 | P46937 YAP1_HUMAN   | K.QPPPLAPQS#PQGGVM*GGSNSNQQQQM*R.L | S251:  | 3 | 4,1161 | 0,43  | -0,25  |
| 6 | Q09666 AHNK_HUMAN   | R.ISM*S#EVDLNVAAAPK.V              | S572:  | 2 | 4,1211 | 0,397 | -0,078 |
| 6 | B2R8U0 B2R8U0_HUMAN | K.AAAGPLDM*S#LPSTPDIK.I            | S97:   | 2 | 4,1225 | 0,483 | 0,137  |
| 6 | Q86SQ0 PHLB2_HUMAN  | K.TSASEGNPYVSSTLSVPAS#PR.V         | S334:  | 2 | 4,1236 | 0,408 | -0,446 |
| 6 | Q6ZSR9 YJ005_HUMAN  | K.LGGAVPFAPPEVS#PEQAK.T            | S93:   | 2 | 4,1333 | 0,393 | -0,26  |
| 6 | Q9Y2D5 AKAP2_HUMAN  | R.DALGDSLQVPVS#PSSTSSR.C           | S152:  | 2 | 4,1353 | 0,519 | -0,117 |
| 6 | O43237 DC1L2_HUMAN  | K.DFQDYM*EPEEGCQGS#PQR.R           | S194:  | 3 | 4,1373 | 0,501 | -0,161 |
| 6 | Q15642 CIP4_HUMAN   | R.APS#DSSLGTPSDGRPE.L              | S296:  | 2 | 4,1421 | 0,49  | -0,221 |
| 6 | Q14839 CHD4_HUMAN   | E.VTAVDGYET#DHQDYCE.V              | T367:  | 2 | 4,1511 | 0,491 | -0,185 |
| 6 | Q9GZR1 SENPE6_HUMAN | E.S#ISPQPADSACSSPAPSTGKVE.A        | S350:  | 2 | 4,1619 | 0,582 | -0,108 |
| 6 | Q99661 KIF2C_HUMAN  | E.LSPHS#GPSGEQLIQM*E.T             | S592:  | 2 | 4,1699 | 0,354 | -0,608 |
| 6 | Q13263 TIF1B_HUMAN  | E.DGSL#LDGADSTGVVAK.L              | S683:  | 2 | 4,1709 | 0,525 | -0,292 |

|   |                    |                                   |        |   |        |       |        |
|---|--------------------|-----------------------------------|--------|---|--------|-------|--------|
| 6 | P78344 IF4G2_HUMAN | R.TQT#PPLGQTPQLGLK.T              | T508:  | 2 | 4,1863 | 0,37  | -0,147 |
| 6 | Q14566 MCM6_HUMAN  | E.GAGGINGHADS#PAPVNGINGYNEDINQE.S | S689:  | 3 | 4,1909 | 0,199 | 0,576  |
| 6 | P56537 IF6_HUMAN   | E.AQPSTIATSM*RDS#LIDSLT.-         | S239:  | 2 | 4,1959 | 0,425 | 0,116  |
| 6 | O00267 SPT5H_HUMAN | R.DVTNFTVGGFAPM*S#PR.I            | S666:  | 2 | 4,2011 | 0,47  | -0,204 |
| 6 | Q09666 AHNK_HUMAN  | R.LPS#GSGAASPTGSAVDIR.A           | S210:  | 2 | 4,2116 | 0,534 | -0,142 |
| 6 | Q8NG08 HELB_HUMAN  | R.TCGVNDDDES#PSKIFM*VGE.S         | S1048: | 2 | 4,2134 | 0,419 | -0,117 |
| 6 | Q8WVT3 TTC15_HUMAN | E.TAS#EGSSPLADKLINE.H             | S52:   | 2 | 4,2263 | 0,362 | -0,076 |
| 6 | Q6P597 KLC3_HUMAN  | R.AM*S#LNTLNVDAPR.A               | S466:  | 2 | 4,2355 | 0,466 | -0,896 |
| 6 | Q8TD19 NEK9_HUMAN  | R.SS#TVTEAPIAVVTSR.T              | S332:  | 2 | 4,2548 | 0,494 | -0,153 |
| 6 | Q01518 CAP1_HUMAN  | R.GYADS#PSKAGAAPYVQAFD.S          | S34:   | 2 | 4,2587 | 0,374 | -0,061 |
| 6 | Q6Y7W6 PERQ2_HUMAN | R.ALSSGGSITS#PPLSPALPK.Y          | S26:   | 2 | 4,2598 | 0,484 | -0,262 |
| 6 | Q8WWM7 ATX2L_HUMAN | E.VDGLLTSEPM*GS#PVSSKTE.S         | S594:  | 2 | 4,2612 | 0,514 | 0,06   |
| 6 | Q16186 ADRM1_HUMAN | E.YLNNPPM*PGALGASGS#SGHE.L        | S142:  | 3 | 4,2637 | 0,393 | 0,089  |
| 6 | Q9Y2K5 R3HD2_HUMAN | K.SAS#TDLGTADVVLGR.V              | S855:  | 2 | 4,2776 | 0,3   | 0,079  |
| 6 | P22466 GALA_HUMAN  | R.LLDLPAAAS#SEDIERS.-             | S116:  | 2 | 4,2915 | 0,467 | 0,069  |
| 6 | Q9C0G0 ZN407_HUMAN | E.SLS#PGGAVIQVTKQE.I              | S1958: | 2 | 4,3224 | 0,326 | -0,85  |
| 6 | Q96B01 R51A1_HUMAN | E.LPTVTTNVQNS#QDKSIE.K            | S120:  | 2 | 4,3274 | 0,455 | -0,187 |
| 6 | Q10570 CPSF1_HUMAN | E.M*LYGDSGSLFS#PSKE.E             | S756:  | 2 | 4,3477 | 0,481 | 0      |
| 6 | Q16186 ADRM1_HUMAN | E.YLNNPPM*PGALGASGSS#GHE.L        | S143:  | 2 | 4,3687 | 0,443 | 0,119  |
| 6 | Q13153 PAK1_HUMAN  | R.DVATSPISPTENNTT#PPDALTR.N       | T230:  | 3 | 4,3692 | 0,361 | 0,077  |
| 6 | Q8WWM7 ATX2L_HUMAN | E.VDGLLTSEPM*GS#PVSSK.T           | S594:  | 2 | 4,4051 | 0,493 | -0,136 |
| 6 | Q99700 ATX2_HUMAN  | E.AVAM*PIPAAS#PTPASPASNR.A        | S727:  | 3 | 4,4082 | 0,501 | 0,365  |
| 6 | Q96QF0 RAB3I_HUMAN | K.TLVLSSSPTS#PTQEPLPGGK.T         | S266:  | 2 | 4,4228 | 0,546 | 0,235  |
| 6 | P78310 CXAR_HUMAN  | R.S#YIGSNHSSLGSM*SPSNM*E.G        | S293:  | 2 | 4,4481 | 0,592 | -0,233 |
| 6 | Q641Q2 FA21A_HUMAN | K.LTDEDFS#PFGSGGGLFSGGK.G         | S352:  | 2 | 4,4515 | 0,53  | -0,238 |
| 6 | Q6Y7W6 PERQ2_HUMAN | E.M*GTFDSS#GAFLSLK.K              | S303:  | 2 | 4,4592 | 0,442 | -0,157 |
| 6 | P43358 MAGA4_HUMAN | R.QPNEGSSSQEEEGPSTSPDAE.S         |        | 3 | 4,4619 | 0,409 | 0,169  |
| 6 | Q8WXI9 P66B_HUMAN  | R.LQQQAALS#PTTAPAVSSVSKQE.T       | S486:  | 2 | 4,4703 | 0,497 | 0,105  |
| 6 | Q14694 UBP10_HUMAN | E.SAS#PPADGTGSASGTLPVSQPK.S       | S321:  | 3 | 4,4729 | 0,394 | 0,175  |
| 6 | Q86VP1 TAXB1_HUMAN | E.LLTM*EDEGNS#DM*LVVTK.A          | S138:  | 2 | 4,4735 | 0,404 | -0,116 |
| 6 | O43663 PRC1_HUMAN  | E.LNGS#ILSGGYPGSAPLQR.N           | S554:  | 2 | 4,4898 | 0,505 | -0,588 |
| 6 | Q66K89 E4F1_HUMAN  | E.M*AEAPGS#PHQQGLGLAGEGE.Q        | S165:  | 2 | 4,4917 | 0,533 | 0,12   |
| 6 | Q12888 TP53B_HUMAN | K.NS#PEDLGLSLTGDSC.L              | S500:  | 2 | 4,4961 | 0,422 | 0      |

|   |                     |                                 |        |   |        |       |        |
|---|---------------------|---------------------------------|--------|---|--------|-------|--------|
| 6 | Q9H3S7 PTN23_HUMAN  | E.STPIPSSS#PPPLSSPLPEAPQPK.E    | S1544: | 2 | 4,4992 | 0,329 | 0,408  |
| 6 | Q9BQL6 FERM1_HUMAN  | E.SSPT#ASGSSVSPGLYSK.T          | T172:  | 2 | 4,4996 | 0,505 | -0,433 |
| 6 | A6NHU9 A6NHU9_HUMAN | R.SLS#PQLLQQM*PSKPE.G           | S447:  | 2 | 4,517  | 0,317 | -0,343 |
| 6 | Q9BZV1 UBXD1_HUMAN  | E.ATVSGS#PEAPGTNVVSEPRE.E       | S96:   | 3 | 4,5178 | 0,265 | 0      |
| 6 | P55036 PSMD4_HUMAN  | E.AGIATTGTEDS#DDALLK.M          | S256:  | 2 | 4,5418 | 0,47  | -0,139 |
| 6 | P46821 MAP1B_HUMAN  | K.VLSPLRS#PPLIGSESAYE.S         | S1400: | 2 | 4,5473 | 0,482 | 0,183  |
| 6 | Q96JM3 ZN828_HUMAN  | K.LAPVPSPEPQKPAPVS#PE.S         | S214:  | 2 | 4,5561 | 0,427 | -0,127 |
| 6 | Q9P289 MST4_HUMAN   | K.LADFGVAGQLTDT#QIK.R           | T172:  | 2 | 4,5611 | 0,473 | -0,208 |
| 6 | Q9H6F5 CCD86_HUMAN  | R.LQQGAGLESPQGQPEPGAAS#PQR.Q    | S91:   | 3 | 4,5651 | 0,296 | -0,461 |
| 6 | Q2KHR2 RFXD2_HUMAN  | R.NLS#GSTLYPVSNIPIR.S           | S1081: | 2 | 4,5718 | 0,452 | 0      |
| 6 | Q9BTK6 PA1_HUMAN    | R.DLFLSDEDPSPAS#PPLR.S          | S237:  | 2 | 4,5919 | 0,492 | 0,121  |
| 6 | P52565 GDIR1_HUMAN  | E.QLAQIAEENEDE.H                |        | 2 | 4,5932 | 0,542 | -0,084 |
| 6 | Q16186 ADRM1_HUMAN  | E.YLNNPPM*PGALGASGSS#GHE.L      | S143:  | 3 | 4,5983 | 0,393 | 0,267  |
| 6 | P40763 STAT3_HUMAN  | K.FICVTPTTCSNTIDLPM*S#PR.T      | S727:  | 2 | 4,6039 | 0,48  | 0,304  |
| 6 | Q12873 CHD3_HUMAN   | E.LQGDGPSS#PTNDPTVKYE.T         | S713:  | 2 | 4,6064 | 0,497 | -0,352 |
| 6 | Q2NKX8 ERC6L_HUMAN  | E.TSLGAPEPLSGEQLVGS#PQDK.A      | S1188: | 2 | 4,6184 | 0,446 | 0,334  |
| 6 | P27816 MAP4_HUMAN   | K.TDYIPLLDVDEKTGNS#E.S          | S60:   | 2 | 4,6386 | 0,421 | 0,123  |
| 6 | P08047 SP1_HUMAN    | R.IESPENENSNSQGPSQSGGTGE.L      |        | 3 | 4,6462 | 0,532 | -0,084 |
| 6 | Q04637 IF4G1_HUMAN  | E.SEFSSS#PLQAPTPLASHTVE.I       | S343:  | 2 | 4,6463 | 0,471 | 0,225  |
| 6 | Q9Y3F4 STRAP_HUMAN  | E.IASENS#DCIFPSAPDVKA.-         | S338:  | 2 | 4,6528 | 0,276 | 0,061  |
| 6 | Q9UMZ2 SYNG_HUMAN   | E.TSFGS#SENITM*TSLSK.V          | S935:  | 2 | 4,6542 | 0,51  | 0,137  |
| 6 | Q15027 SC16A_HUMAN  | R.LLPSAPQTLPDGPLAS#PAR.V        | S1786: | 2 | 4,6667 | 0,503 | 0,062  |
| 6 | P21580 TNAP3_HUMAN  | E.STGGPHS#APPTAPSPFLFSE.T       | S459:  | 2 | 4,6714 | 0,572 | 1,419  |
| 6 | Q8NBN3 TM87A_HUMAN  | E.NVPSSVTDVALPALLDS#DEER.M      | S540:  | 2 | 4,6765 | 0,487 | 0,74   |
| 6 | Q15149 PLEC1_HUMAN  | R.SSS#VGSSSYPISPAVSR.T          | S4386: | 2 | 4,6858 | 0,548 | -0,133 |
| 6 | Q13428 TCOF_HUMAN   | R.TQPSSGVDSAVGTLPAT#PQSTSVQAK.G | S1111: | 2 | 4,6984 | 0,419 | 0,273  |
| 6 | O60306 AQR_HUMAN    | E.AM*TVQADIIPS#PTDTSR.Q         | S1420: | 2 | 4,7021 | 0,493 | -0,237 |
| 6 | Q9Y3F4 STRAP_HUMAN  | E.IAS#ENSDFPSAPDVKA.-           | S335:  | 2 | 4,7094 | 0,482 | -0,122 |
| 6 | Q99661 KIF2C_HUMAN  | E.M*EACNSGALIPGNLS#KEEEE.L      | S621:  | 2 | 4,7115 | 0,493 | 0,322  |
| 6 | Q9NWQ4 CN118_HUMAN  | E.VAPVTNFS#DSDDTM*VAK.R         | S86:   | 2 | 4,7397 | 0,549 | 0,064  |
| 6 | O00178 GTPB1_HUMAN  | R.SAM*DSPVPASM*FAPEPSS#PGAAR.A  | S25:   | 2 | 4,7504 | 0,543 | 0,309  |
| 6 | Q9H0H5 RGAP1_HUMAN  | E.SGSILSDIS#FDKTD.E.S           | S157:  | 2 | 4,7508 | 0,443 | 0      |
| 6 | P46821 MAP1B_HUMAN  | E.FGQES#PEQSLAM*DFSR.Q          | S1653: | 2 | 4,7573 | 0,467 | -0,127 |

|   |                     |                                |        |   |        |       |        |
|---|---------------------|--------------------------------|--------|---|--------|-------|--------|
| 6 | Q9P265 DIP2B_HUMAN  | R.QAALSAALQQSLQNAE.S           |        | 2 | 4,76   | 0,582 | 0,074  |
| 6 | P40763 STAT3_HUMAN  | K.FICVPTTCSNTIDLPM*S#PR.T      | S727:  | 3 | 4,7602 | 0,42  | 0,076  |
| 6 | Q561V9 Q561V9_HUMAN | E.M*LVAGHEDS#NGCINYEE.L        | S135:  | 2 | 4,7872 | 0,386 | -0,18  |
| 6 | O95359 TACC2_HUMAN  | K.TPSSPS#KSPASFEIPASAM*E.A     | S2392: | 2 | 4,7896 | 0,498 | 0,115  |
| 6 | Q96S94 CCNL2_HUMAN  | R.GLLPGGTQVLDGTSGFS#PAPK.L     | S330:  | 2 | 4,8002 | 0,487 | 0,117  |
| 6 | Q641Q2 FA21A_HUMAN  | R.TPS#DDEEDNLFAPPK.L           | S333:  | 2 | 4,8295 | 0,417 | -0,07  |
| 6 | P52756 RBM5_HUMAN   | E.AQPSTSTSTQAPAAS#PTGVVPGTK.Y  | S444:  | 2 | 4,8318 | 0,57  | 0,526  |
| 6 | Q9UK76 HN1_HUMAN    | R.NS#SEASSGDFLDLKE.G           | S87:   | 2 | 4,8741 | 0,439 | 0,141  |
| 6 | Q2NKX8 ERC6L_HUMAN  | E.ALQEDPLES#FNYVLSK.S          | S864:  | 2 | 4,8791 | 0,377 | 0,063  |
| 6 | Q9NSK0 KLC4_HUMAN   | R.AAS#LNLYLNQPSAAPLQVSR.G      | S590:  | 3 | 4,8793 | 0,338 | 0,352  |
| 6 | Q14160 LAP4_HUMAN   | E.VALVLLGRPS#PGAVGPE.D         | S1600: | 2 | 4,8816 | 0,385 | -0,143 |
| 6 | Q15942 ZYX_HUMAN    | E.ALSAGTGS#PQPPSFTYAQQR.E      | S308:  | 2 | 4,8968 | 0,415 | 0,114  |
| 6 | Q9BZV1 UBXD1_HUMAN  | E.ATVSGS#PEAPGTNVVSEPREE.G     | S96:   | 2 | 4,928  | 0,461 | 0,111  |
| 6 | P19634 SL9A1_HUMAN  | E.TSSPGTDDVFTPAPSDS#PSSQR.I    | S785:  | 2 | 4,9435 | 0,549 | 0,421  |
| 6 | O43399 TPD54_HUMAN  | K.GLLSDS#M*TDVPVDTGVAAR.T      | S21:   | 2 | 4,9755 | 0,458 | 0,122  |
| 6 | Q561V9 Q561V9_HUMAN | E.VEM*LVAGHEDS#NGCINYEE.L      | S135:  | 2 | 4,9949 | 0,473 | 0,432  |
| 6 | Q8WXI9 P66B_HUMAN   | R.LTPSPDIIVLS#DNEASSPR.S       | S129:  | 2 | 4,9949 | 0,452 | 0,233  |
| 6 | Q8WUA4 TF3C2_HUMAN  | E.M*SLPTPLPGFEDS#PDQR.R        | S63:   | 3 | 5,0166 | 0,445 | 0,092  |
| 6 | Q10570 CPSF1_HUMAN  | E.M*LYGDSGSLFS#PSKEE.A         | S756:  | 2 | 5,0208 | 0,418 | -0,066 |
| 6 | Q7Z5K2 WAPL_HUMAN   | E.STGDPFGFDS#DDESLPVSSK.N      | S77:   | 2 | 5,0836 | 0,511 | 0,225  |
| 6 | Q14966 ZN638_HUMAN  | E.SEVQTATDS#PSVKPNELEEE.S      | S1119: | 2 | 5,1089 | 0,543 | 0,323  |
| 6 | Q86VR2 F134C_HUMAN  | E.LAAFQPQLDDS#TVARE.L          | S274:  | 2 | 5,1579 | 0,409 | -0,326 |
| 6 | P46821 MAP1B_HUMAN  | R.ASVSPM*DEPVDPSES#PIEK.V      | S1389: | 2 | 5,1807 | 0,45  | -0,347 |
| 6 | Q9HD15 SRA1_HUMAN   | K.APRS#PPVSGSPASGVEPTSFPVESE.A | S87:   | 2 | 5,2006 | 0,587 | 0,969  |
| 6 | Q99996 AKAP9_HUMAN  | E.FGVDDSYSEQGAQDS#PTHLE.M      | S165:  | 2 | 5,2234 | 0,442 | -0,324 |
| 6 | O60499 STX10_HUMAN  | K.SPS#DLLDASAVSATSR.Y          | S134:  | 2 | 5,2236 | 0,573 | -0,074 |
| 6 | P02545 LMNA_HUMAN   | R.S#VGGSGGGSFGDNLVTR.S         | S628:  | 2 | 5,3046 | 0,552 | 0,296  |
| 6 | Q8N1G0 ZN687_HUMAN  | E.NGPGM*QPPVSS#PPLGALKQE.S     | S215:  | 3 | 5,3493 | 0,39  | 0      |
| 6 | O43237 DC1L2_HUMAN  | K.DFQDYM*EPEEGCQGS#PQR.R       | S194:  | 2 | 5,3643 | 0,56  | 0,323  |
| 6 | Q9H6F5 CCD86_HUMAN  | R.LQQGAGLESQGGQPEPGAAS#PQR.Q   | S91:   | 2 | 5,4118 | 0,388 | 0      |
| 6 | Q7Z417 NUFP2_HUMAN  | E.IESQNPLAS#PTNTLLGSAKE.Q      | S629:  | 3 | 5,4211 | 0,377 | -0,085 |
| 6 | Q8WUI4 HDAC7_HUMAN  | R.AQS#SPAAPASLSAPEPASQAR.V     | S486:  | 2 | 5,4319 | 0,56  | -0,118 |
| 6 | Q8IY92 BTBDC_HUMAN  | E.GGS#PVSGQLLAGVQVQK.Q         | S201:  | 2 | 5,4398 | 0,541 | -0,644 |

|   |                     |                                        |            |   |        |       |        |
|---|---------------------|----------------------------------------|------------|---|--------|-------|--------|
| 6 | O14964 HGS_HUMAN    | R.KS#PTPSAPVPLTEPAAQPGE.G              | S345:      | 2 | 5,5293 | 0,491 | 0,119  |
| 6 | Q71RC2 LARP4_HUMAN  | R.ASTAS#PCNNNINAATAVALQEPR.K           | S597:      | 3 | 5,5812 | 0,454 | 0,224  |
| 6 | Q92615 LARP5_HUMAN  | R.TLS#ADASVNTLPVVVSR.E                 | S568:      | 2 | 5,5988 | 0,416 | 0      |
| 6 | Q9UQ35 SRRM2_HUMAN  | K.SST#PPGESYFGVSSLQLK.G                | T1043:     | 3 | 5,634  | 0,375 | 0,279  |
| 6 | Q7Z417 NUFP2_HUMAN  | E.IESQNPLAS#PTNTLLGSAK.E               | S629:      | 2 | 5,6436 | 0,453 | 0      |
| 6 | Q13283 G3BP1_HUMAN  | E.TAPEDAQKSSS#PAPADIAQTVQE.D           | S232:      | 2 | 5,7132 | 0,581 | 0,202  |
| 6 | Q7Z417 NUFP2_HUMAN  | E.IESQNPLAS#PTNTLLGSAKE.Q              | S629:      | 2 | 5,717  | 0,566 | -0,114 |
| 6 | Q92804 RBP56_HUMAN  | K.QSSYSQQPYNNQGGQQNM*E.S               |            | 3 | 5,8347 | 0,415 | 0,08   |
| 6 | Q71RC2 LARP4_HUMAN  | R.AS#TASPCNNNINAATAVALQEPR.K           | S594:      | 2 | 5,9156 | 0,467 | 0,598  |
| 6 | Q7Z7F0 K0907_HUMAN  | E.VTSSGGS#PGGTAAAPSGALDAAAATAAK.I      | S44:       | 3 | 5,9853 | 0,408 | 0,075  |
| 6 | Q8IX01 SFR14_HUMAN  | E.AS#GPSKPKAGVDISEAPQTSS#PCPSADIDM*K.T | S754:S773: | 3 | 6,3129 | 1     | 0,335  |
| 6 | P46821 MAP1B_HUMAN  | K.AAEAGGAEQYGFLLT#PTK.Q                | T1067:     | 2 | 6,3889 | 0,542 | 0      |
| 7 | P46821 MAP1B_HUMAN  | K.AAEAGGAEQYGFLLT#PTK.Q                | T1067:     | 2 | 6,6778 | 0,563 | 0,121  |
| 7 | Q12888 TP53B_HUMAN  | E.NTQIEDTEPM*#PVLNSK.F                 | S552:      | 2 | 6,1621 | 0,527 | 0,061  |
| 7 | Q07866 KLC1_HUMAN   | E.SLNVDVVKYES#GPDGGEE.V                | S530:      | 2 | 6,1451 | 0,484 | 0,556  |
| 7 | Q7Z6E9 RBBP6_HUMAN  | E.GSSSTLVDYTTSTSTGGS#PVR.K             | S1277:     | 2 | 6,1251 | 0,625 | 0      |
| 7 | Q075179 ANR17_HUMAN | R.NSPLDCGSAS#PNKVASSEQE.A              | S2067:     | 2 | 6,0408 | 0,556 | -0,109 |
| 7 | Q095817 BAG3_HUMAN  | R.SQS#PAASDCSSSSASLPSSGR.S             | S173:      | 2 | 5,9589 | 0,599 | 0,107  |
| 7 | Q8WUD4 CCD12_HUMAN  | K.GQEDSLASAVDAATEQKTCDS#D.-            | S165:      | 2 | 5,9228 | 0,582 | 0,308  |
| 7 | Q075691 UTP20_HUMAN | K.SLSDNGQPGT#PDPADSGGTSAKE.S           | T1741:     | 2 | 5,9178 | 0,623 | 0,215  |
| 7 | P08729 K2C7_HUMAN   | E.LQSQISDTS#VVLSM*DNSR.S               | S244:      | 2 | 5,8884 | 0,552 | 0,118  |
| 7 | Q9UKI8 TLK1_HUMAN   | R.FTGVASGSTGS#TGSCSVGAK.A              | S77:       | 2 | 5,8734 | 0,516 | -0,321 |
| 7 | Q14566 MCM6_HUMAN   | E.GAGGINGHADS#PAPVNGINGYNE.D           | S689:      | 2 | 5,8295 | 0,426 | 0,108  |
| 7 | P08729 K2C7_HUMAN   | E.LQSQISDTS#VVLSM*DNSR.S               | S248:      | 2 | 5,7957 | 0,453 | 0,353  |
| 7 | P18031 PTN1_HUMAN   | E.KGS#PLNAAPYGIEM*SQDTE.V              | S352:      | 2 | 5,7596 | 0,57  | 0,334  |
| 7 | Q8WVT3 TTC15_HUMAN  | E.SVLISDSPNS#EGDAGDLGR.V               | S78:       | 2 | 5,7086 | 0,484 | -0,62  |
| 7 | P52756 RBM5_HUMAN   | E.AQPSTSTQAPAAS#PTGVVPGTK.Y            | S444:      | 2 | 5,7063 | 0,575 | 0,315  |
| 7 | Q15424 SAFB1_HUMAN  | E.SSELEQPFQDTS#VGPDR.K                 | S247:      | 2 | 5,687  | 0,511 | 0      |
| 7 | Q9H8Y8 GORS2_HUMAN  | R.VGDSTPVEKPVSAVDANASES#P.-            | S451:      | 2 | 5,6354 | 0,511 | 0,408  |
| 7 | Q060499 STX10_HUMAN | K.SPSDLLDASAVS#ATSR.Y                  | S143:      | 2 | 5,6032 | 0,61  | -0,221 |
| 7 | Q6WCQ1 MRIP_HUMAN   | R.TLLTGDGGGEATGS#PLAQGK.D              | S890:      | 2 | 5,5898 | 0,507 | -0,192 |
| 7 | Q02952 AKA12_HUMAN  | E.TCVSGEDPTQGADLS#PDEK.V               | S483:      | 2 | 5,5664 | 0,517 | -0,936 |
| 7 | Q15398 DLG7_HUMAN   | E.M*GIPQQTS#PENAGPQNTK.S               | S662:      | 2 | 5,537  | 0,421 | 0      |

|   |                     |                               |            |   |        |       |        |
|---|---------------------|-------------------------------|------------|---|--------|-------|--------|
| 7 | P08621 RU17_HUMAN   | R.GGGGGQDNGLEGLGND#RDM*YM*E.S | S410:      | 2 | 5,5239 | 0,6   | 0,5    |
| 7 | Q9P289 MST4_HUMAN   | K.LADFGVAGQLTDT#QIK.R         | T172:      | 2 | 5,4789 | 0,496 | -0,278 |
| 7 | Q13283 G3BP1_HUMAN  | E.DAQSSS#PAPADIAQTVQE.D       | S232:      | 2 | 5,4779 | 0,545 | 0      |
| 7 | Q14201 BTG3_HUMAN   | E.M*EVKPSVTAAS#PVYQISE.L      | S169:      | 2 | 5,4541 | 0,494 | 0,111  |
| 7 | Q32MZ4 LRRF1_HUMAN  | R.NM*PGLSAATLASLGGTSS#R.R     | S116:      | 2 | 5,443  | 0,443 | 0,065  |
| 7 | Q6P0Q8 MAST2_HUMAN  | R.NQSLGQS#APSLTAGLKE.L        | S148:      | 2 | 5,4407 | 0,545 | -0,137 |
| 7 | Q9Y6D5 BIG2_HUMAN   | E.NSQTNGIADDRQS#LSSADNLE.S    | S346:      | 2 | 5,4309 | 0,545 | 0,105  |
| 7 | Q5VT52 K0460_HUMAN  | E.AASQSTSAS#PANTTVSTIK.G      | S564:      | 2 | 5,3912 | 0,315 | -0,321 |
| 7 | Q8NCM9 Q8NCM9_HUMAN | R.SSDITSDLGNVLTST#PNAK.T      | T84:       | 2 | 5,3789 | 0,528 | -0,061 |
| 7 | Q9GZU1 MCLN1_HUMAN  | E.LQAYIAQCQDS#PTSGK.F         | S547:      | 2 | 5,362  | 0,457 | 0,132  |
| 7 | P18858 DNL1_HUMAN   | E.NNASLSDTSPM*DSS#PSGIPK.R    | S114:      | 2 | 5,3589 | 0,564 | 0,348  |
| 7 | Q13263 TIF1B_HUMAN  | E.GTSAPGGGPGTLDDDS#ATICR.V    | S624:      | 2 | 5,3053 | 0,604 | -0,805 |
| 7 | Q8WXI9 P66B_HUMAN   | R.LQQAALS#PTTAPAVSSVSK.Q      | S486:      | 2 | 5,2888 | 0,583 | -0,236 |
| 7 | O94915 FRYL_HUMAN   | E.VAVEDNSS#EQQFGVFK.D         | S2418:     | 2 | 5,2792 | 0,466 | -0,196 |
| 7 | Q00587 BORG5_HUMAN  | R.APQAGSRT#PVPSTVQANTFE.F     | T367:      | 2 | 5,2727 | 0,533 | 0,342  |
| 7 | O60716 CTND1_HUMAN  | R.VSPQDANPLM*ANGT#LTR.R       | T59:       | 2 | 5,2131 | 0,495 | -0,389 |
| 7 | Q15398 DLG7_HUMAN   | E.LNSSITSQDVLN*SS#PEK.N       | S767:      | 2 | 5,2114 | 0,542 | -0,695 |
| 7 | Q9NYZ3 GTSE1_HUMAN  | R.VPQALNFS#PEESDSTFSK.S       | S592:      | 2 | 5,2086 | 0,418 | 0,118  |
| 7 | O75330 HMMR_HUMAN   | R.FNDPSGCAPS#PGAYDVK.T        | S20:       | 2 | 5,1643 | 0,433 | 0,066  |
| 7 | Q8IZH2 XRN1_HUMAN   | E.SSSASLKSS#PIAQPASSFQVE.T    | S1657:     | 2 | 5,1322 | 0,565 | 0,112  |
| 7 | Q15149 PLEC1_HUMAN  | K.GYYS#PYSVSGSGSTAGSR.T       | S4613:     | 2 | 5,0935 | 0,64  | -0,066 |
| 7 | Q9C0C2 TB182_HUMAN  | E.SQEPLAQES#PLPLATR.E         | S601:      | 2 | 5,0812 | 0,437 | -0,13  |
| 7 | P42566 EP15_HUMAN   | E.SPARSS#PELLPSGVTDENE.V      | S563:      | 2 | 5,0698 | 0,507 | -0,118 |
| 7 | Q9P107 GMIP_HUMAN   | R.SQGS#PEDSAPQASPGPSK.Q       | S234:      | 2 | 5,0661 | 0,482 | -0,068 |
| 7 | Q01167 FOXK2_HUMAN  | E.SLS#REGS#PAPLEPEPGAAQPK.L   | S394:S398: | 3 | 5,0658 | 0,373 | -0,161 |
| 7 | Q12802 AKP13_HUMAN  | K.ALQLSNS#PGASSAFLK.A         | S983:      | 2 | 5,0588 | 0,485 | -0,073 |
| 7 | Q99575 POP1_HUMAN   | R.VQAYEEPSVASS#PNGKE.S        | S730:      | 3 | 5,0477 | 0,374 | -0,098 |
| 7 | Q8WYA1 BMAL2_HUMAN  | R.LQSSYLDDSS#PTGLM*K.D        | S540:      | 2 | 5,036  | 0,562 | -0,127 |
| 7 | Q9Y2X7 GIT1_HUMAN   | R.ARS#M*DSSDLSDGAVTLQE.Y      | S410:      | 2 | 5,0286 | 0,527 | 0,185  |
| 7 | Q5TAQ9 WD42A_HUMAN  | E.ASDLSL#LTGDDGGPNR.T         | S49:       | 2 | 5,0193 | 0,505 | 0,07   |
| 7 | Q8N0Z3 CCD52_HUMAN  | K.IATQSQIT#PPGTPSSALSSGEQR.A  | T235:      | 3 | 5,0012 | 0,342 | 0,382  |
| 7 | Q7Z417 NUFP2_HUMAN  | E.SQNPLAS#PTNTLLGSAKE.Q       | S629:      | 2 | 4,9952 | 0,512 | -0,256 |
| 7 | Q15398 DLG7_HUMAN   | E.M*GIPQQTTS#PENAGPQNTKSE.H   | S662:      | 2 | 4,9926 | 0,428 | 0,422  |



|   |                    |                               |        |   |        |       |        |
|---|--------------------|-------------------------------|--------|---|--------|-------|--------|
| 7 | O15541 R113A_HUMAN | E.NYEVG#DDEEIPFK.C            | S253:  | 2 | 4,9802 | 0,392 | -0,071 |
| 7 | Q53HL2 BOREA_HUMAN | R.IYNISGN#PLADSK.E.I          | S219:  | 2 | 4,9549 | 0,477 | 1,049  |
| 7 | Q86W92 LIPB1_HUMAN | K.DFAARS#PSASITDEDSNV.-       | S999:  | 2 | 4,93   | 0,378 | -0,062 |
| 7 | Q15398 DLG7_HUMAN  | E.M*GIPQQTTS#PENAGPQNTKSE.H   | S662:  | 3 | 4,927  | 0,57  | 0,237  |
| 7 | Q8IY17 PLPL6_HUMAN | R.CVS#M*PGDISGLQGGPR.S        | S411:  | 2 | 4,9114 | 0,57  | 0      |
| 7 | Q9C0C2 TB182_HUMAN | E.SQEPLAGQES#PLPLATRE.A       | S601:  | 2 | 4,9101 | 0,496 | 0      |
| 7 | P42679 MATK_HUMAN  | R.SAGAPASVSGQDADGSTS#PR.S     | S501:  | 2 | 4,9054 | 0,629 | 0,321  |
| 7 | P98175 RBM10_HUMAN | E.ASSSQGTAANSQSYTIM*S#PAVLK.S | S530:  | 3 | 4,8975 | 0,393 | -0,458 |
| 7 | Q09666 AHNK_HUMAN  | R.LPS#GSGAASPTGSAVDIR.A       | S210:  | 2 | 4,8816 | 0,575 | -0,283 |
| 7 | Q9UHB6 LIMA1_HUMAN | E.NGADS#DEDDNSFLK.Q           | S686:  | 2 | 4,8723 | 0,473 | 0,152  |
| 7 | O43633 CHM2A_HUMAN | E.LSNLPSTGGS#LSVAAGGK.K       | S188:  | 2 | 4,8478 | 0,494 | -0,072 |
| 7 | Q9NRM7 LATS2_HUMAN | R.SKS#EQYDLDSLACAGM*E.Q       | S528:  | 2 | 4,8478 | 0,561 | -0,19  |
| 7 | Q9C0B0 UNK_HUMAN   | R.NSSLGSPSNLCGS#PPGSIR.K      | S385:  | 2 | 4,8254 | 0,354 | 0,124  |
| 7 | O60306 AQR_HUMAN   | E.AM*TVQADIIPS#PTDTSCR.Q      | S1420: | 2 | 4,8217 | 0,488 | 0,119  |
| 7 | Q3T8J9 GON4L_HUMAN | K.VEHS#PGPPLADAECQE.G         | S1268: | 2 | 4,8213 | 0,508 | 0,672  |
| 7 | P60174 TPIS_HUMAN  | K.VTNGAFTGEIS#PGM*IK.D        | S80:   | 2 | 4,8071 | 0,528 | -0,213 |
| 7 | Q03164 HRX_HUMAN   | D.GVDDGTES#DTSVTATTR.K        | S2726: | 2 | 4,7986 | 0,5   | 0      |
| 7 | P49790 NU153_HUMAN | R.IPSIVSS#PLNSPLDR.S          | S334:  | 2 | 4,7986 | 0,49  | -0,146 |
| 7 | Q09666 AHNK_HUMAN  | R.LPSGSGAAS#PTGSAVDIR.A       | S216:  | 2 | 4,7895 | 0,41  | -0,425 |
| 7 | Q96P16 P15RS_HUMAN | E.NENCSSLGS#PSEPPQTLDLVR.A    | S156:  | 2 | 4,7613 | 0,479 | 0,718  |
| 7 | P49116 NR2C2_HUMAN | R.IQIISTDSAVAS#PQR.I          | S19:   | 2 | 4,7542 | 0,505 | 0      |
| 7 | Q9UNX4 WDR3_HUMAN  | K.IKGSS#PGIQDTLEAEDGAFE.T     | S241:  | 2 | 4,7451 | 0,415 | 0,228  |
| 7 | Q15149 PLEC1_HUMAN | K.GYSPYSVSGSGST#AGSR.T        | T4623: | 2 | 4,7446 | 0,501 | -0,066 |
| 7 | Q8NEY1 NAV1_HUMAN  | K.GQLTNIVS#PTAATTPR.I         | S1000: | 2 | 4,7419 | 0,511 | -0,357 |
| 7 | P42858 HD_HUMAN    | E.LIAGGGSSCS#PVLSR.K          | S434:  | 2 | 4,7362 | 0,458 | 0,079  |
| 7 | P46821 MAP1B_HUMAN | E.SSPLYS#PTFSDSTS AVKE.K      | S1797: | 2 | 4,7235 | 0,431 | 0,062  |
| 7 | P42345 FRAP_HUMAN  | R.TRTDS#YSAGQSVEILDGVE.L      | S2448: | 2 | 4,7231 | 0,511 | 0,232  |
| 7 | O95453 PARN_HUMAN  | R.SQANGAGALSIVS#PNTSK.C       | S163:  | 2 | 4,7227 | 0,571 | 0,533  |
| 7 | Q15398 DLG7_HUMAN  | E.S#RSSIEDAQCPGLPDLEE.N       | S687:  | 2 | 4,7064 | 0,521 | 0,222  |
| 7 | P38398 BRCA1_HUMAN | K.NSLNDCSNQVILAKAS#QE.H       | S1280: | 2 | 4,6921 | 0,327 | 0,236  |
| 7 | P49790 NU153_HUMAN | E.ITTSSPS#PINSSQALTNK.V       | S500:  | 2 | 4,6868 | 0,467 | -0,38  |
| 7 | Q7Z417 NUFP2_HUMAN | K.NLS#SDEATNPISR.V            | S112:  | 2 | 4,6864 | 0,364 | 0      |
| 7 | O15085 ARHGB_HUMAN | K.SLGGESS#GGTTPVGSFHTE.A      | S1458: | 2 | 4,6862 | 0,428 | 0      |

|   |                     |                             |            |   |        |       |        |
|---|---------------------|-----------------------------|------------|---|--------|-------|--------|
| 7 | Q7Z4S6 KI21A_HUMAN  | R.KLS#SSDAPAQDTGSSAAAVE.T   | S853:      | 2 | 4,6837 | 0,57  | -0,371 |
| 7 | Q05CK9 Q05CK9_HUMAN | R.NPIPSDRIS#PPQPNGE.I       | S25:       | 2 | 4,6817 | 0,407 | 0,204  |
| 7 | Q6P0N0 CN106_HUMAN  | K.TPFNTDLGENS#GIGK.L        | S1104:     | 2 | 4,6793 | 0,516 | 0,299  |
| 7 | Q15742 NAB2_HUMAN   | R.APS#PTAEQPPGGGDSAR.R      | S6:        | 2 | 4,6747 | 0,482 | -0,728 |
| 7 | Q9UPN3 MACF1_HUMAN  | E.LATSGGQS#PTGEQIPQFQQR.Q   | S3634:     | 2 | 4,6614 | 0,44  | 0,331  |
| 7 | Q7KZ85 SPT6H_HUMAN  | E.STPM*SIAGDAT#PLLEDEM*DR.- | T1718:     | 2 | 4,6581 | 0,506 | 0      |
| 7 | P15924 DESP_HUMAN   | R.NLTIRSS#SFSDTLEE.S        | S2607:     | 2 | 4,6559 | 0,368 | -0,069 |
| 7 | P28290 SSFA2_HUMAN  | R.TPLGAS#LDEQSSSTLK.G       | S92:       | 2 | 4,6504 | 0,352 | 0,498  |
| 7 | Q15648 MED1_HUMAN   | K.LPSTSDDCPAIGT#PLR.D       | T805:      | 2 | 4,6426 | 0,599 | 0,137  |
| 7 | Q96NC0 ZMAT2_HUMAN  | E.M*AAVM*GFSGFGS#TK.K       | S194:      | 2 | 4,6183 | 0,499 | -0,325 |
| 7 | Q92754 AP2C_HUMAN   | K.SYM*NPGDQS#PADSNKTLE.K    | S434:      | 2 | 4,6175 | 0,459 | 0,714  |
| 7 | O43815 STRN_HUMAN   | E.LNQGDM*KPPSYDS#DEGNETE.V  | S137:      | 2 | 4,6158 | 0,483 | 0,105  |
| 7 | Q9BYW2 SETD2_HUMAN  | E.M*DLGT#PTYDENPM*K.A       | T2441:     | 2 | 4,6155 | 0,45  | 0      |
| 7 | P08729 K2C7_HUMAN   | E.LQSQIS#DTSVVLMS*DNSR.S    | S241:      | 3 | 4,6093 | 0,286 | 0      |
| 7 | P98175 RBM10_HUMAN  | E.LQSPHPSALPPATS#PTAQE.S    | S553:      | 2 | 4,5877 | 0,48  | 0      |
| 7 | Q8N1G0 ZN687_HUMAN  | E.NGPGM*QPPVSS#PPLGALKQE.S  | S215:      | 3 | 4,5657 | 0,376 | 0,174  |
| 7 | P49790 NU153_HUMAN  | E.ITTSS#PSPINSSQALTNK.V     | S498:      | 2 | 4,5617 | 0,434 | -0,19  |
| 7 | Q15942 ZYG_HUMAN    | E.ALSAGTGS#PQPPSFTYAQQR.E   | S308:      | 2 | 4,5564 | 0,515 | 0,228  |
| 7 | Q5T5Y3 CAMP1_HUMAN  | R.ALGLTANARS#PQGQLDTSE.S    | S575:      | 2 | 4,5542 | 0,591 | 0,243  |
| 7 | Q7Z417 NUFP2_HUMAN  | E.SQNPLAS#PTNTLLGSAK.E      | S629:      | 2 | 4,5523 | 0,467 | -0,343 |
| 7 | O60499 STX10_HUMAN  | K.SPSDLLDAS#AVSATSR.Y       | S140:      | 2 | 4,5429 | 0,468 | 0,295  |
| 7 | Q8ND24 RN214_HUMAN  | E.VAGVVANAPS#PPESSSLCASK.S  | S15:       | 2 | 4,5365 | 0,366 | 0,347  |
| 7 | P04075 ALDOA_HUMAN  | K.GILAADES#TGSIK.R          | S36:       | 2 | 4,531  | 0,598 | 0,173  |
| 7 | P04406 G3P_HUMAN    | K.IISNASCT#TNCLAPLAK.V      | T153:      | 2 | 4,5278 | 0,411 | 0      |
| 7 | Q9H0H5 RGAP1_HUMAN  | E.SGSILSDIS#FDKTD.E.S       | S157:      | 2 | 4,5243 | 0,461 | -0,216 |
| 7 | Q99700 ATX2_HUMAN   | R.GPEVTSQGVQTSS#PACKQE.K    | S888:      | 2 | 4,5225 | 0,422 | 0      |
| 7 | Q9H910 HN1L_HUMAN   | K.TSDIFGS#PVTATSR.L         | S97:       | 2 | 4,5188 | 0,397 | -0,241 |
| 7 | Q9UK76 HN1_HUMAN    | R.NS#SEASSGDFLDLK.G         | S87:       | 2 | 4,4965 | 0,39  | -0,236 |
| 7 | Q6P2E9 EDC4_HUMAN   | D.GSLTM*SSSGSLQAS#PR.G      | S676:      | 2 | 4,4938 | 0,371 | 0,22   |
| 7 | Q561V9 Q561V9_HUMAN | E.M*LVAGHEDS#NGCINYEE.L     | S135:      | 2 | 4,4869 | 0,42  | 0      |
| 7 | P02545 LMNA_HUMAN   | R.SVGGG#GGGSGFDNLVTR.S      | S632:      | 2 | 4,4793 | 0,591 | -0,074 |
| 7 | P08651 NFIC_HUMAN   | E.GGATSPTS#PSYSPDTPANR.S    | S473:      | 2 | 4,4785 | 0,553 | 0,115  |
| 7 | Q14207 NPAT_HUMAN   | E.NLPTIILSS#PTKS#PTKNAE.L   | S775:S779: | 2 | 4,4749 | 1     | 0,337  |

|   |                     |                            |        |   |        |       |        |
|---|---------------------|----------------------------|--------|---|--------|-------|--------|
| 7 | Q9ULH0 ARMS_HUMAN   | R.TPS#TVTLNNSAPANR.A       | S1681: | 2 | 4,4614 | 0,491 | -0,281 |
| 7 | P61604 CH10_HUMAN   | K.VLQATTVAVGS#GSK.G        | S51:   | 2 | 4,453  | 0,569 | 0,612  |
| 7 | O60271 JIP4_HUMAN   | R.SAS#QSSLDKLDQE.L         | S730:  | 2 | 4,4522 | 0,427 | -0,82  |
| 7 | Q9H3C7 GGNB2_HUMAN  | E.NTSCTCPSSGNLLGS#PK.I     | S450:  | 2 | 4,4475 | 0,457 | -0,525 |
| 7 | Q13620 CUL4B_HUMAN  | E.DFDSTSSSSST#PPLQPR.D     | T67:   | 2 | 4,4402 | 0,51  | -0,452 |
| 7 | Q9H7N4 SFR19_HUMAN  | R.APEGDDFLSLHAES#DGE.G     | S453:  | 2 | 4,4349 | 0,485 | -0,065 |
| 7 | Q92794 MYST3_HUMAN  | E.TVQAVQSLTQEES#EHE.G      | S1437: | 2 | 4,4273 | 0,476 | -0,369 |
| 7 | Q08378 GOGA3_HUMAN  | E.TQLCSTDS#PLPLEKEE.Q      | S140:  | 2 | 4,4218 | 0,231 | 0,127  |
| 7 | P21675 TAF1_HUMAN   | E.SNM*SVLIDIPSAT#PEK.Q     | T1680: | 2 | 4,4172 | 0,328 | -0,145 |
| 7 | Q14676 MDC1_HUMAN   | E.LQPSTSTDQPV#PEPTSR.A     | T1548: | 2 | 4,4165 | 0,489 | 0,362  |
| 7 | P30414 NKTR_HUMAN   | K.DDSKLSIS#PTALNTEE.N      | S1092: | 2 | 4,4128 | 0,491 | 0,271  |
| 7 | Q86VR2 F134C_HUMAN  | E.LAAFCPLDDST#VAR.E        | T275:  | 3 | 4,4069 | 0,347 | 0,42   |
| 7 | Q7Z417 NUFP2_HUMAN  | E.IESQNPLAS#PTNTLLGSAKE.Q  | S629:  | 2 | 4,398  | 0,332 | 0,114  |
| 7 | Q86WB0 NIPA_HUMAN   | R.SM*GTGDTPLGLEVPSS#PLR.K  | S395:  | 2 | 4,3952 | 0,431 | -0,257 |
| 7 | Q86VR2 F134C_HUMAN  | E.LAAFCPLDDS#TVAR.E        | S274:  | 2 | 4,3899 | 0,476 | 0,14   |
| 7 | Q9NVP2 ASF1B_HUMAN  | E.TQDPSLGCGLPLNCT#PIK.G    | T179:  | 2 | 4,3766 | 0,413 | -0,119 |
| 7 | A6NMQ1 A6NMQ1_HUMAN | E.IGASALS#DSGSFVSSR.A      | S17:   | 2 | 4,3673 | 0,55  | -0,151 |
| 7 | Q9Y6A5 TACC3_HUMAN  | E.NQM*VS#PGKVSGSPE.Q       | S170:  | 2 | 4,3671 | 0,391 | 0,081  |
| 7 | Q15398 DLG7_HUMAN   | E.M*GIPQQTS#PENAGPQNTK.S   | S662:  | 3 | 4,3502 | 0,361 | 0      |
| 7 | O15231 ZN185_HUMAN  | R.GGQGDPAVPAQQPADPST#PER.Q | T215:  | 2 | 4,3406 | 0,319 | 0,453  |
| 7 | Q15424 SAFB1_HUMAN  | E.SSELEQPFAQDTSS#VGPDR.K   | S247:  | 3 | 4,335  | 0,53  | 0      |
| 7 | Q8IWS0 PHF6_HUMAN   | K.CM*LFSSALVSSH#DNE.S      | S57:   | 2 | 4,3229 | 0,491 | 0,195  |
| 7 | Q99575 POP1_HUMAN   | R.VQAYEEPSVASS#PNGKE.S     | S730:  | 2 | 4,3229 | 0,511 | -0,196 |
| 7 | Q9C0C2 TB182_HUMAN  | E.SQEPLAQES#PLPLATRE.A     | S601:  | 3 | 4,3165 | 0,418 | 0,183  |
| 7 | P05412 JUN_HUMAN    | K.NSDLLT#SPDVGLLK.L        | T62:   | 2 | 4,3016 | 0,47  | 0      |
| 7 | Q92598 HS105_HUMAN  | R.GCALQCAILS#PAFK.V        | S384:  | 2 | 4,294  | 0,452 | 0      |
| 7 | Q7Z417 NUFP2_HUMAN  | E.IESQNPLAS#PTNTLLGSAK.E   | S629:  | 2 | 4,29   | 0,469 | 0,121  |
| 7 | Q6P2H3 CCD21_HUMAN  | E.DFCSSGS#PPFQPIK.S        | S77:   | 2 | 4,2656 | 0,424 | -0,211 |
| 7 | Q12888 TP53B_HUMAN  | K.NSPEDLGLS#LTGDSC.L       | S507:  | 2 | 4,254  | 0,583 | -0,206 |
| 7 | P12270 TPR_HUMAN    | E.LAAM*S#PTAAAVAK.I        | S379:  | 2 | 4,2498 | 0,305 | 0      |
| 7 | A6NMQ1 A6NMQ1_HUMAN | E.IGASALSDSGS#FVSSR.A      | S21:   | 2 | 4,2401 | 0,56  | -0,376 |
| 7 | Q5UIP0 RIF1_HUMAN   | E.LDPSLVSANDS#PSGM*QTR.C   | S2161: | 2 | 4,24   | 0,53  | -0,124 |
| 7 | O00512 BCL9_HUMAN   | R.AVT#PVSQGSNSSADPK.A      | T315:  | 2 | 4,2298 | 0,59  | 0,071  |

|   |                    |                             |        |   |        |       |        |
|---|--------------------|-----------------------------|--------|---|--------|-------|--------|
| 7 | Q99700 ATX2_HUMAN  | E.AVAM*PIPAAS#PTPASPASNR.A  | S727:  | 2 | 4,2295 | 0,514 | 0,122  |
| 7 | Q12904 MCA1_HUMAN  | E.NVIQSTAVTTVSS#GTKE.Q      | S107:  | 2 | 4,2271 | 0,547 | -0,339 |
| 7 | O14893 GEMI2_HUMAN | R.KQS#VNISLSGCQPAPE.G       | S81:   | 2 | 4,2251 | 0,51  | 0,136  |
| 7 | P51991 ROA3_HUMAN  | E.GGNFGGGNYGGGGNYND.F       |        | 2 | 4,2217 | 0,519 | -0,464 |
| 7 | Q6ZRV2 FA83H_HUMAN | E.GGFPVPQENGQPES#PR.R       | S998:  | 2 | 4,2161 | 0,429 | -0,275 |
| 7 | P19338 NUCL_HUMAN  | K.GFGFVDFNS#EEDAK.A         | S619:  | 2 | 4,2146 | 0,329 | -0,149 |
| 7 | Q0VDD7 CS057_HUMAN | E.VAGPDGQASAI SPAS#PR.R     | S370:  | 2 | 4,2092 | 0,403 | -1,102 |
| 7 | Q8IWC1 MA7D3_HUMAN | E.M*FPSAILNGTGS#PTK.F       | S770:  | 2 | 4,2038 | 0,425 | -0,453 |
| 7 | P55265 DSRAD_HUMAN | K.TAESQT#PTPSATSFSGK.S      | T601:  | 2 | 4,2032 | 0,451 | -0,127 |
| 7 | O43524 FOXO3_HUMAN | R.TNSNASTVSGRLS#PIM*ASTE.L  | S325:  | 2 | 4,1967 | 0,552 | 0      |
| 7 | Q13033 STRN3_HUMAN | R.VRS#LLGLSNSEPNGSVE.T      | S202:  | 2 | 4,1914 | 0,492 | -0,332 |
| 7 | O75955 FLOT1_HUMAN | K.ITLVSSGS#GTM*GAAK.V       | S385:  | 2 | 4,1824 | 0,476 | -0,661 |
| 7 | Q9NYJ8 TAB2_HUMAN  | R.TLTHSIS#DGQLQGGQSNSE.L    | S108:  | 2 | 4,1815 | 0,529 | -0,06  |
| 7 | Q13112 CAF1B_HUMAN | E.IQSETPGDAQGS#PPELK.R      | S538:  | 2 | 4,1763 | 0,548 | -0,599 |
| 7 | P41743 KPCI_HUMAN  | E.GLRPGDTTST#FCGTPNYIAPE.I  | T403:  | 2 | 4,1735 | 0,547 | 0,418  |
| 7 | O15446 RPA34_HUMAN | E.M*PGPPLNSES#GEEAPTGR.D    | S490:  | 2 | 4,1705 | 0,395 | 0      |
| 7 | Q92667 AKAP1_HUMAN | R.SES#SGILPNTTDM*R.L        | S107:  | 2 | 4,17   | 0,358 | -0,228 |
| 7 | P48730 KC1D_HUMAN  | R.GAPVNIS#SSDLTGR.Q         | S382:  | 2 | 4,1689 | 0,256 | -0,168 |
| 7 | Q9Y608 LRRF2_HUMAN | R.RGS#GDTSSLIDPDTSLSE.L     | S328:  | 2 | 4,168  | 0,574 | 0,127  |
| 7 | P55196 AFAD_HUMAN  | K.ITSVSTGNLCTEEQT#PPRPE.A   | T1194: | 3 | 4,1671 | 0,373 | -0,076 |
| 7 | O14641 DVL2_HUMAN  | E.STSLGDS#DEEDTM*SR.F       | S211:  | 2 | 4,1667 | 0,519 | -0,071 |
| 7 | O95817 BAG3_HUMAN  | R.SQS#PAASDCSSSSSASLPSSGR.S | S173:  | 3 | 4,1661 | 0,474 | 0,16   |
| 7 | Q15276 RABE1_HUMAN | R.AQSTDS#LGTSGSLQSK.A       | S410:  | 2 | 4,1634 | 0,488 | 0,593  |
| 7 | P27816 MAP4_HUMAN  | E.TEM*ALGKDVTPPPETE.V       | T521:  | 2 | 4,1602 | 0,465 | 0      |
| 7 | Q15233 NONO_HUMAN  | E.GIGAIGGT#PPAFNR.A         | T450:  | 2 | 4,1591 | 0,584 | 0      |
| 7 | Q9C0G0 ZN407_HUMAN | E.SLS#PGGAVIQVTK.Q          | S1958: | 2 | 4,1566 | 0,502 | 0      |
| 7 | O43432 IF4G3_HUMAN | R.GGS#SKDLLDNQSQEE.Q        | S1156: | 2 | 4,1486 | 0,416 | -0,579 |
| 7 | Q09666 AHNK_HUMAN  | K.ISM*QDVDSLGS#PK.L         | S511:  | 2 | 4,143  | 0,36  | -0,231 |
| 7 | Q9UHR5 S30BP_HUMAN | K.GGLVS#DAYGEDDFSR.L        | S43:   | 2 | 4,1397 | 0,529 | 0,073  |
| 7 | Q9Y3X0 CCDC9_HUMAN | E.GAASPAPETPQPTS#PETS PK.E  | S386:  | 2 | 4,1378 | 0,495 | 0,06   |
| 7 | O75781 PALM_HUMAN  | E.VVM*NSQQTPVGT#PK.D        | T145:  | 2 | 4,1371 | 0,466 | -0,154 |
| 7 | Q8N3D4 EH1L1_HUMAN | E.AGGQVGPEAPRPETS#PE.M      | S285:  | 2 | 4,1342 | 0,363 | -0,066 |
| 7 | Q16181 SEPT7_HUMAN | K.GQLTKS#PLAQM*EEE.R        | S334:  | 2 | 4,1316 | 0,511 | -0,515 |

|   |                     |                               |            |   |        |       |        |
|---|---------------------|-------------------------------|------------|---|--------|-------|--------|
| 7 | Q7LBC6 JHD2B_HUMAN  | R.HS#GGFLSSPADFSQE.N          | S773:      | 2 | 4,1279 | 0,51  | 0      |
| 7 | Q8WWM7 ATX2L_HUMAN  | E.VDGLLTSEPM*GS#PVSSK.T       | S594:      | 2 | 4,1234 | 0,523 | -0,271 |
| 7 | Q8NCF5 NF2IP_HUMAN  | R.SCLS#PKPPQGQEQQGQEDE.V      | S234:      | 3 | 4,1217 | 0,409 | 0      |
| 7 | Q15942 ZYG_HUMAN    | E.ALSAGTGS#PQPPSFTYAQQR.E     | S308:      | 3 | 4,116  | 0,41  | 0,256  |
| 7 | Q8TC07 TBC15_HUMAN  | R.NDS#PTQIPVSSDVCR.L          | S675:      | 2 | 4,1117 | 0,454 | -0,209 |
| 7 | Q96EB6 SIRT1_HUMAN  | E.AALALQPGGS#PSAAGADR.E       | S14:       | 2 | 4,1034 | 0,377 | 0,361  |
| 7 | Q6PIR0 Q6PIR0_HUMAN | K.TSVSQNVIPSS#AQK.R           | S177:      | 2 | 4,103  | 0,392 | -0,16  |
| 7 | P63261 ACTG_HUMAN   | E.IAALVIDNGS#GM*CK.A          | S14:       | 2 | 4,1028 | 0,54  | 0      |
| 7 | Q5VTR2 BRE1A_HUMAN  | K.ALVPEPEPDSDS#NQER.K         | S138:      | 2 | 4,1016 | 0,507 | 0,56   |
| 7 | P49454 CENPF_HUMAN  | K.LALS#PLSLGKE.N              | S3119:     | 2 | 4,0947 | 0,483 | -0,101 |
| 7 | Q14676 MDC1_HUMAN   | E.LQPSTSTDQPV#PEPTSQATR.G     | T1466:     | 2 | 4,0941 | 1     | 0      |
| 7 | Q9UKI8 TLK1_HUMAN   | R.FTGVASGSTGSGSCS#VGAK.A      | S82:       | 2 | 4,0907 | 0,55  | -0,129 |
| 7 | P51659 DHB4_HUMAN   | R.AT#STATSGFAGAIGQK.L         | T317:      | 2 | 4,0851 | 0,51  | -0,236 |
| 7 | O60716 CTND1_HUMAN  | R.SQS#SHS#YDDSTLPLIDR.N       | S861:S864: | 3 | 4,0841 | 1     | 0,176  |
| 7 | O75717 WDHD1_HUMAN  | E.DDENS#VDISM*LK.T            | S383:      | 2 | 4,0788 | 0,349 | 0,083  |
| 7 | Q9NQ57 INCE_HUMAN   | E.IANSTPNPKPAASS#PETPSAGQQE.A | S421:      | 2 | 4,0752 | 0,447 | 0,298  |
| 7 | Q04721 NOTC2_HUMAN  | R.GPDGCT#PLM*LASLR.G          | T1830:     | 2 | 4,0697 | 0,509 | 0,077  |
| 7 | Q6PGN9 PSRC1_HUMAN  | E.TLDFGGLS#PSDSREEE.D         | S22:       | 2 | 4,0694 | 0,476 | -0,067 |
| 7 | Q8NFC6 FA44A_HUMAN  | K.TDTGIVTVEQS#PSSSK.L         | S2905:     | 2 | 4,0687 | 0,504 | -0,498 |
| 7 | P57081 WDR4_HUMAN   | E.GSAGADAS#FSSLYK.A           | S356:      | 2 | 4,0625 | 0,472 | 0,508  |
| 7 | P28290 SSFA2_HUMAN  | R.NIM*TQKDS#FEM*EE.V          | S466:      | 2 | 4,0611 | 0,402 | -0,199 |
| 7 | Q5QJE6 TDIF2_HUMAN  | E.LQDTS#LQQLVSQR.H            | S330:      | 3 | 4,0537 | 0,281 | 0,115  |
| 7 | Q6ZS17 FA65A_HUMAN  | R.FSTYSQS#PPDTPSLRE.Q         | S351:      | 2 | 4,0472 | 0,486 | 0,129  |
| 7 | Q15642 CIP4_HUMAN   | R.APS#DSSLGTPSDGRPE.L         | S296:      | 2 | 4,0461 | 0,538 | -0,148 |
| 7 | Q9UJ70 NAGK_HUMAN   | R.SLGLSLS#GGDQEDAGR.I         | S76:       | 2 | 4,0461 | 0,517 | -0,149 |
| 7 | P52272 HNRPM_HUMAN  | R.M*GLAM*GGGGAS#FDR.A         | S618:      | 2 | 4,043  | 0,536 | 0      |
| 7 | Q9C0C2 TB182_HUMAN  | R.RES#AASGLGGLLEE.G           | S1473:     | 2 | 4,0421 | 0,454 | -0,153 |
| 7 | P19532 TFE3_HUMAN   | E.EGVVGGLSGGALS#PLR.A         | S542:      | 2 | 4,0355 | 0,448 | 0      |
| 7 | P20020 AT2B1_HUMAN  | K.SATSSSPGS#PLHSLE.T          | S1249:     | 2 | 4,0342 | 1     | 0,476  |
| 7 | Q9UER7 DAXX_HUMAN   | K.DGDKS#PM*SSLQISNE.K         | S495:      | 2 | 4,0339 | 0,328 | -0,215 |
| 7 | Q14686 MLL2_HUMAN   | R.CPSLDNLAVPES#PGVGGGK.A      | S1985:     | 2 | 4,0331 | 0,391 | 0,442  |
| 7 | O60716 CTND1_HUMAN  | E.DGYPGGSDNYGS#LSR.V          | S230:      | 2 | 4,0328 | 0,521 | 0,901  |
| 7 | Q15446 RPA34_HUMAN  | E.M*PGPPLNS#ESGEEAPTGR.D      | S488:      | 2 | 4,0275 | 0,375 | -0,063 |

|   |                     |                               |            |   |        |       |        |
|---|---------------------|-------------------------------|------------|---|--------|-------|--------|
| 7 | Q9NZI7 UBIP1_HUMAN  | E.SGLVHDFDAS#LSGIGQE.L        | S22:       | 2 | 4,0268 | 0,515 | -0,067 |
| 7 | Q96JM3 ZN828_HUMAN  | E.LQTPLPS#PEPSKPASVS#SPEPPK.S | S173:S183: | 3 | 4,0188 | 1     | 0,434  |
| 7 | Q9UPW0 FOXJ3_HUMAN  | K.VTLYNTDQDGS#PR.S            | S223:      | 2 | 4,0153 | 0,487 | -0,838 |
| 7 | O14641 DVL2_HUMAN   | E.LSSYTYGGGSASS#QHSE.G        | S583:      | 2 | 4,012  | 0,46  | 0,136  |
| 7 | O95793 STAU1_HUMAN  | K.VTFFEPGS#GDENGTSNKEDE.F     | S390:      | 2 | 4,0092 | 0,408 | 0,218  |
| 7 | P85299 PTOR1_HUMAN  | K.FM*#SPSLSDLGK.R             | S11:       | 2 | 4,0076 | 0,445 | -0,179 |
| 7 | O60716 CTND1_HUMAN  | E.GAM*SVVS#VETSDDGTTR.R       | S125:      | 2 | 4,0045 | 0,504 | -0,405 |
| 7 | Q8TD19 NEK9_HUMAN   | R.SST#VTEAPIAVVTSR.T          | T333:      | 2 | 4,0044 | 0,489 | -0,229 |
| 7 | Q5TAQ9 WD42A_HUMAN  | E.ASDL#LSLTGDDGGPNR.T         | S47:       | 2 | 4,0017 | 0,431 | -0,139 |
| 7 | O75420 PERQ1_HUMAN  | R.ALSGGGSVAS#PPSPAM*PK.Y      | S24:       | 2 | 3,9976 | 0,536 | -0,068 |
| 7 | Q14980 NUMA1_HUMAN  | R.TQPDGTSVPGEPAS#PISQR.L      | S1757:     | 2 | 3,9974 | 0,364 | 0,974  |
| 7 | P19532 TFE3_HUMAN   | E.GVVGGLSGGALS#PLR.A          | S542:      | 2 | 3,9968 | 0,518 | 0,086  |
| 7 | Q7Z4H7 FA29A_HUMAN  | E.FEVENS#PLSDVAK.N            | S507:      | 2 | 3,9942 | 0,488 | -0,081 |
| 7 | Q99728 BARD1_HUMAN  | E.VSLPLAEQIES#PDTK.S          | S288:      | 2 | 3,9896 | 0,558 | 0      |
| 7 | P27694 RFA1_HUMAN   | E.GQALDGV#ISDLK.S             | S426:      | 2 | 3,9829 | 0,48  | 0,088  |
| 7 | Q92797 SYMPK_HUMAN  | E.AALLDSS#LEGPLK.E            | S1222:     | 2 | 3,9796 | 0,393 | 0,082  |
| 7 | Q9NVU7 SDA1_HUMAN   | K.YIEIDS#DEEPRGE.L            | S585:      | 2 | 3,9795 | 0,524 | -0,299 |
| 7 | A5YM69 A5YM69_HUMAN | R.YYS#PCEEHPAETNQNE.G         | S184:      | 2 | 3,9791 | 0,527 | -0,119 |
| 7 | P40818 UBP8_HUMAN   | E.SIPSKPAAQT#PPASIEVDE.N      | T351:      | 2 | 3,9771 | 0,381 | 0,06   |
| 7 | Q7Z434 MAVS_HUMAN   | R.GPVS#PSVSFQPLAR.S           | S222:      | 2 | 3,9753 | 0,57  | 0,08   |
| 7 | Q9NTJ3 SMC4_HUMAN   | E.GPPPPSPDGAS#SDAEPEPPSGR.T   | S27:       | 2 | 3,9719 | 0,421 | 0,224  |
| 7 | P57764 GSDC1_HUMAN  | E.GS#GRFSLPGATCLQGE.G         | S181:      | 2 | 3,966  | 0,35  | 0,426  |
| 7 | P78310 CXAR_HUMAN   | R.SYIGSNHSS#LGSM*SPSNM*E.G    | S301:      | 2 | 3,9647 | 0,495 | -1,047 |
| 7 | P78344 IF4G2_HUMAN  | R.TQT#PPLGQTPQLGLK.T          | T508:      | 2 | 3,9606 | 0,359 | 0,147  |
| 7 | Q9Y5K6 CD2AP_HUMAN  | K.ANTTAFLT#PLEIK.A            | T565:      | 2 | 3,9586 | 0,312 | -0,081 |
| 7 | O95831 AIFM1_HUMAN  | R.SLS#AIDRAGAE.V              | S268:      | 2 | 3,9586 | 0,464 | 0,104  |
| 7 | P27816 MAP4_HUMAN   | E.VGLLKDM*S#PLSETE.M          | S507:      | 2 | 3,9568 | 0,479 | 0      |
| 7 | O00161 SNP23_HUMAN  | E.NLTQVGS#ILGNLK.D            | S161:      | 2 | 3,9544 | 0,482 | -0,34  |
| 7 | P35658 NU214_HUMAN  | R.SAQGSSS#PVPSM*VQK.S         | S657:      | 2 | 3,9541 | 0,391 | -0,231 |
| 7 | Q13144 EI2BE_HUMAN  | R.GGS#PQM*DDIKVFQNE.V         | S544:      | 2 | 3,9493 | 0,33  | 0,069  |
| 7 | Q6GYQ0 GRIPE_HUMAN  | E.VASLTTLHIDS#E.T             | S966:      | 2 | 3,9489 | 0,466 | 0,179  |
| 7 | P11532 DMD_HUMAN    | R.SDS#SQPM*LLR.V              | S3623:     | 2 | 3,9478 | 0,318 | 0,099  |
| 7 | Q9Y4X0 AMER1_HUMAN  | K.LSSS#PPSGSGGGGGASSSSHCSGE.S | S16:       | 2 | 3,9458 | 0,37  | 0,449  |

|   |                     |                                   |            |   |        |       |        |
|---|---------------------|-----------------------------------|------------|---|--------|-------|--------|
| 7 | Q9Y2I7 FYV1_HUMAN   | R.SAS#ITNLSLDR.S                  | S307:      | 2 | 3,943  | 0,558 | -0,097 |
| 7 | P04075 ALDOA_HUMAN  | K.GILAADESTGS#IAK.R               | S39:       | 2 | 3,9421 | 0,432 | -0,173 |
| 7 | Q7RTP8 Q7RTP8_HUMAN | R.ASS#LNVLVGGK.A                  | S596:      | 2 | 3,9371 | 0,5   | 0      |
| 7 | Q9NYB0 TE2IP_HUMAN  | K.YLLGDAPVS#PSSQK.L               | S203:      | 2 | 3,9358 | 0,431 | -1,583 |
| 7 | Q5TDH0 DDI2_HUMAN   | R.IDFSSIAVPGTSS#PR.Q              | S106:      | 2 | 3,9342 | 0,645 | -0,076 |
| 7 | P60660 MYL6_HUMAN   | E.M*LVAGHEDS#NGCINYE.A            | S135:      | 2 | 3,9317 | 0,421 | 0      |
| 7 | Q5JW51 Q5JW51_HUMAN | E.LALSS#DAESAAGGPAGVR.T           | S142:      | 3 | 3,9277 | 0,17  | 0,321  |
| 7 | P49023 PAXI_HUMAN   | K.QKS#AEPSPTVM*STSLGSNLSE.L       | S126:      | 2 | 3,9247 | 0,431 | 0,326  |
| 7 | O14907 TX1B3_HUMAN  | K.GIYVTRVS#EGGPAE.I               | S61:       | 2 | 3,9241 | 0,495 | -0,403 |
| 7 | Q8TDY2 RBCC1_HUMAN  | K.ASVSQTSPQSASS#PRM*E.S           | S653:      | 2 | 3,9166 | 0,543 | -0,066 |
| 7 | Q14573 ITPR3_HUMAN  | R.LGFVDVQNCIS#R.-                 | S2670:     | 2 | 3,9158 | 0,457 | 0,41   |
| 7 | Q6UB98 ANR12_HUMAN  | E.SNQGSLTVPGDTSPP#PKPE.V          | S1345:     | 2 | 3,9121 | 0,434 | 0,934  |
| 7 | O14641 DVL2_HUMAN   | R.HLAGYESS#STLM*TSELE.S           | S195:      | 2 | 3,9117 | 0,464 | 0,063  |
| 7 | O94842 TOX4_HUMAN   | E.LVSGSPVALS#PQPR.C               | S567:      | 2 | 3,9115 | 0,35  | 0,246  |
| 7 | Q8IVF2 AHNK2_HUMAN  | E.SSILS#PCEDVTTLTK.Y              | S4785:     | 2 | 3,9084 | 0,513 | -0,15  |
| 7 | Q13263 TIF1B_HUMAN  | E.GTSAPGGGPGTLDDDS#ATICR.V        | S624:      | 3 | 3,9066 | 0,49  | -0,371 |
| 7 | Q00613 HSF1_HUMAN   | E.LAPAS#PM*ASPGGSIDERPLSSS#PLVR.V | S275:S292: | 3 | 3,9049 | 0,382 | 0,264  |
| 7 | Q9HD15 SRA1_HUMAN   | R.VAAPQDGS#PRVPASE.T              | S60:       | 2 | 3,9018 | 0,411 | -0,234 |
| 7 | P02545 LMNA_HUMAN   | R.S#GAQASSTPLSPTR.I               | S12:       | 2 | 3,9011 | 0,507 | -0,169 |
| 7 | P46821 MAP1B_HUMAN  | K.SPSPSPSPS#PLEK.T                | S1265:     | 2 | 3,8988 | 0,353 | -0,081 |
| 7 | Q13112 CAF1B_HUMAN  | E.IQSETPGDAQGS#PPELK.R            | S538:      | 3 | 3,8983 | 0,291 | -0,1   |
| 7 | Q02952 AKA12_HUMAN  | E.QDELS#LQEGDLNGQK.G              | S75:       | 2 | 3,8977 | 0,386 | -0,278 |
| 7 | O60271 JIP4_HUMAN   | K.VSNS#PEPQKAVEQEDE.L             | S251:      | 2 | 3,8964 | 0,419 | -1,504 |
| 7 | Q8N1G0 ZN687_HUMAN  | E.NGPGM*QPPVSS#PPLGALKQE.S        | S215:      | 2 | 3,8963 | 0,356 | 0      |
| 7 | P24928 RPB1_HUMAN   | K.YSPTSPTY#PTSPK.Y                | S1917:     | 2 | 3,8956 | 0,499 | -0,23  |
| 7 | P62258 1433E_HUMAN  | E.LDTLS#EESYKD.S                  | S210:      | 2 | 3,8931 | 0,348 | -0,884 |
| 7 | P49790 NU153_HUMAN  | R.IPSIVSSPLNS#PLDR.S              | S338:      | 2 | 3,8892 | 0,489 | -0,146 |
| 7 | Q9UPS6 SET1B_HUMAN  | K.EKPGT#PPGPPPDNTSM*E.L           | T450:      | 2 | 3,8852 | 0,531 | 0      |
| 7 | P60174 TPIS_HUMAN   | R.IYGG#VTGATCKE.L                 | S212:      | 2 | 3,8797 | 0,291 | -0,635 |
| 7 | Q9GZM8 NDEL1_HUMAN  | K.M*DSAVQASLS#LPATPVGK.G          | S215:      | 2 | 3,8765 | 0,463 | 0,196  |
| 7 | O15234 CASC3_HUMAN  | E.QTSVRDPS#PEADAPVLGSPE.K         | S363:      | 2 | 3,8763 | 0,238 | 0,229  |
| 7 | O96018 APBA3_HUMAN  | R.SPS#GPPAM*DLEGPR.D              | S11:       | 2 | 3,8746 | 0,472 | -0,729 |
| 7 | Q9NTJ3 SMC4_HUMAN   | E.EGPPPPSPDGASS#DAEPEPPSGR.T      | S28:       | 2 | 3,8745 | 0,373 | 0      |

|   |                    |                              |        |   |        |       |        |
|---|--------------------|------------------------------|--------|---|--------|-------|--------|
| 7 | Q9P1Y6 K1542_HUMAN | R.LPALGAEHVS#PE.V            | S1229: | 2 | 3,8744 | 0,541 | -0,094 |
| 7 | P24928 RPB1_HUMAN  | K.YSPTS#PTYSPSPK.Y           | S1913: | 2 | 3,8741 | 0,534 | -0,766 |
| 7 | P38432 P80C_HUMAN  | E.LTSSYS#PDVSDYKE.G          | S489:  | 2 | 3,8722 | 0,418 | -0,073 |
| 7 | Q86X29 LSR_HUMAN   | R.ARS#VDALDDLTPPSTAE.S       | S493:  | 2 | 3,8713 | 0,414 | 0,066  |
| 7 | Q8TC76 F110B_HUMAN | R.ANS#DIISLNFR.S             | S301:  | 2 | 3,8652 | 0,407 | -0,275 |
| 7 | Q6P2E9 EDC4_HUMAN  | R.TRS#PDVISSASTALSQDIPE.I    | S729:  | 2 | 3,8645 | 0,473 | 0,113  |
| 7 | Q15149 PLEC1_HUMAN | R.SSS#VGSSSYPISPAVSR.T       | S4386: | 2 | 3,8629 | 0,535 | -0,066 |
| 7 | Q5QE6 TDIF2_HUMAN  | E.LQDTS#LQQLVSQR.H           | S330:  | 2 | 3,8579 | 0,443 | -0,229 |
| 7 | Q08378 GOGA3_HUMAN | E.ISLS#PDTDDRLE.N            | S290:  | 2 | 3,8555 | 0,447 | 0,085  |
| 7 | Q9NYJ8 TAB2_HUMAN  | R.T#LTHSISDGLQGGQSNSE.L      | T102:  | 3 | 3,8543 | 0,272 | -0,09  |
| 7 | Q86UL3 PLCF_HUMAN  | R.SGS#SKALDNTPEFE.L          | S100:  | 2 | 3,8538 | 0,47  | 0,156  |
| 7 | O14578 CTRO_HUMAN  | E.SVVSGLDS#PAKTSSM*E.K       | S440:  | 2 | 3,8536 | 0,508 | -0,289 |
| 7 | Q8WXI9 P66B_HUMAN  | R.GRLT#PSPDIIVLSDNE.A        | T120:  | 2 | 3,8472 | 0,381 | -0,135 |
| 7 | Q07021 C1QBP_HUMAN | E.AES#DIFSIRE.V              | S201:  | 2 | 3,8455 | 0,399 | 0,783  |
| 7 | P19532 TFE3_HUMAN  | R.AASDLLSSVS#PAVSK.A         | S556:  | 2 | 3,8451 | 0,472 | -0,076 |
| 7 | Q6Y7W6 PERQ2_HUMAN | R.ALSSGGSITS#PPLSPALPK.Y     | S26:   | 2 | 3,8436 | 0,427 | 0,131  |
| 7 | P55196 AFAD_HUMAN  | K.TQVLS#PDSLFTAK.F           | S1704: | 2 | 3,839  | 0,353 | 0,082  |
| 7 | Q14839 CHD4_HUMAN  | E.VM*LQNGET#PKDLNDE.K        | T1679: | 2 | 3,8374 | 0,49  | -0,136 |
| 7 | Q9UJM3 ERRFI_HUMAN | K.LTVNGVCAS#TPPLTPIK.N       | S126:  | 2 | 3,8364 | 0,493 | 0,132  |
| 7 | O94782 UBP1_HUMAN  | E.IDQVVPAAQSS#PINCEK.R       | S67:   | 2 | 3,8359 | 0,463 | 0,315  |
| 7 | Q7Z406 MYH14_HUMAN | E.AQPGSGPSPEPEGS#PPAHPQ.-    | S1989: | 2 | 3,8326 | 0,378 | -0,183 |
| 7 | Q12888 TP53B_HUMAN | D.SLSTNSSDLVAPS#PDAFR.S      | S366:  | 2 | 3,8309 | 0,37  | 0,063  |
| 7 | Q9P1Y6 K1542_HUMAN | E.LSANPLS#PLSAK.R            | S455:  | 2 | 3,83   | 0,457 | 0,191  |
| 7 | Q9NWH9 SLTM_HUMAN  | K.DGQDAIAQS#PEKE.S           | S289:  | 2 | 3,8283 | 0,42  | -0,083 |
| 7 | Q02446 SP4_HUMAN   | K.TSGSQDSQPS#PLALLAATCSK.I   | S46:   | 2 | 3,8223 | 0,438 | 0,222  |
| 7 | Q9NTJ3 SMC4_HUMAN  | E.EGPPPPSPDGAS#SDAEPEPPSGR.T | S27:   | 3 | 3,8201 | 0,289 | -0,475 |
| 7 | Q6Y7W6 PERQ2_HUMAN | E.M*GTFDSS#GAFLSK.K          | S303:  | 2 | 3,8162 | 0,458 | -0,157 |
| 7 | Q7Z6E9 RBBP6_HUMAN | E.GSSSTLVDTSTST#GGSPVR.K     | T1274: | 3 | 3,8147 | 0,373 | 0,172  |
| 7 | P08670 VIME_HUMAN  | R.SLYASS#PGGVYATR.S          | S56:   | 2 | 3,814  | 0,506 | -0,081 |
| 7 | O14686 MLL2_HUMAN  | E.LGVSTDVS#PARDE.G           | S974:  | 2 | 3,8134 | 0,524 | -0,171 |
| 7 | Q16659 MK06_HUMAN  | E.GFLNNS#GEFLFNK.Q           | S665:  | 2 | 3,8109 | 0,366 | -0,311 |
| 7 | Q9H307 PININ_HUMAN | K.SLS#PGKENVSALDM*E.K        | S443:  | 2 | 3,8056 | 0,383 | 0,073  |
| 7 | Q92597 NDRG1_HUMAN | R.TAS#GSSVTSLDGTR.S          | S330:  | 2 | 3,805  | 0,557 | -0,086 |



|   |                     |                               |        |   |        |       |        |
|---|---------------------|-------------------------------|--------|---|--------|-------|--------|
| 7 | Q96RG2 PASK_HUMAN   | R.LNVQVTST#PVIVM*R.G          | T874:  | 2 | 3,8036 | 0,465 | 0,074  |
| 7 | A8MVB1 A8MVB1_HUMAN | E.LDLS#SEPQQLTAK.G            | S53:   | 2 | 3,8025 | 0,495 | -0,162 |
| 7 | Q9Y3C5 RNF11_HUMAN  | K.SPTSDDIS#LLHE.S             | S14:   | 2 | 3,8025 | 0,43  | -0,088 |
| 7 | O96028 NSD2_HUMAN   | K.GIGTPPNTTPIKNGS#PE.I        | S121:  | 2 | 3,8015 | 0,387 | 0,069  |
| 7 | Q9UKV8 I2C2_HUMAN   | R.SAS#FNTDPYVRE.F             | S379:  | 2 | 3,8009 | 0,374 | -0,083 |
| 7 | Q9NQS7 INCE_HUMAN   | E.IANSTPNPKPAASS#PETPSAGQQE.A | S421:  | 3 | 3,7939 | 0,356 | -0,298 |
| 7 | Q5JW51 Q5JW51_HUMAN | E.LALSS#DAESAAGGPAGVR.T       | S142:  | 2 | 3,7932 | 0,389 | 0,071  |
| 7 | O43395 PRPF3_HUMAN  | K.QLSFISPT#PQPK.T             | T167:  | 2 | 3,7902 | 0,305 | 0      |
| 7 | Q7Z478 DHX29_HUMAN  | K.FQSPQIQATIS#PPLQPK.T        | S200:  | 3 | 3,7871 | 0,204 | 0,093  |
| 7 | Q16513 PKN2_HUMAN   | E.LSLVAAS#PTLSPR.Q            | S302:  | 2 | 3,7858 | 0,298 | -0,175 |
| 7 | O94885 SASH1_HUMAN  | R.TCS#FGGFDLTNR.S             | S407:  | 2 | 3,7852 | 0,445 | 0,084  |
| 7 | P20020 AT2B1_HUMAN  | K.SATSSSPGSPLHSLETS#L.-       | S1257: | 2 | 3,7837 | 0,4   | 0      |
| 7 | P21359 NF1_HUMAN    | E.GYLAATYPTVGQTS#PR.A         | S2515: | 2 | 3,7769 | 0,378 | -0,069 |
| 7 | O15027 SC16A_HUMAN  | E.ARS#PDPGIVPQEAPVGNLSLSE.L   | S1844: | 2 | 3,7719 | 0,31  | 0,444  |
| 7 | P35580 MYH10_HUMAN  | E.GASLELS#DDDTESK.T           | S1956: | 2 | 3,7712 | 0,444 | 0,158  |
| 7 | O94906 PRP6_HUMAN   | R.LSQVSDSVSGQT#VVDPK.G        | T266:  | 2 | 3,7704 | 0,456 | -0,134 |
| 7 | Q9NRA8 4ET_HUMAN    | R.APS#PPLSQVFQTR.A            | S564:  | 2 | 3,7695 | 0,466 | -0,081 |
| 7 | Q9Y6I3 EPN1_HUMAN   | R.SPGAADM*SGVRRGS#LAE.A       | S422:  | 2 | 3,7681 | 0,343 | 0,146  |
| 7 | Q6KC79 NIPBL_HUMAN  | K.AITSLGGGS#PK.N              | S2658: | 2 | 3,7653 | 0,388 | -0,31  |
| 7 | P10114 RAP2A_HUMAN  | E.ILDTAGTEQFAS#M*RD.L         | S66:   | 2 | 3,7641 | 0,537 | -0,348 |
| 7 | P18615 NELFE_HUMAN  | R.TQIVYS#DDVYKE.N             | S368:  | 2 | 3,7638 | 0,246 | -0,238 |
| 7 | Q8N2Y8 RUSC2_HUMAN  | R.LSEGPAAM*AGPGS#PPR.R        | S536:  | 2 | 3,7621 | 0,543 | -0,383 |
| 7 | Q9UNS2 CSN3_HUMAN   | K.SM*GS#QEDDSGNKPSSYS.-       | S410:  | 2 | 3,7584 | 0,514 | 0,196  |
| 7 | Q7Z417 NUFP2_HUMAN  | E.S#QNPLASPTNTLLGSAKE.Q       | S623:  | 3 | 3,7501 | 0,164 | 1,438  |
| 7 | O95684 FR1OP_HUMAN  | K.SGLSSLAGAPS#LKDSE.S         | S301:  | 2 | 3,7501 | 0,459 | -0,229 |
| 7 | Q3KQU3 MA7D1_HUMAN  | R.SSQPSPTAVPASDS#PPTKQE.V     | S125:  | 2 | 3,7501 | 0,358 | 0,35   |
| 7 | P49116 NR2C2_HUMAN  | K.IQIVTAVDASGS#PK.Q           | S46:   | 2 | 3,746  | 0,498 | 0      |
| 7 | Q9BUA3 YK007_HUMAN  | R.AES#PSPAPPPGLR.G            | S308:  | 2 | 3,7445 | 0,394 | -0,54  |
| 7 | Q9NSM8 Q9NSM8_HUMAN | K.LPDL#PVENKE.H               | S652:  | 2 | 3,7439 | 0,377 | 0,092  |
| 7 | Q92547 TOPB1_HUMAN  | R.NAVALSAS#PQLKE.A            | S888:  | 2 | 3,7429 | 0,386 | 0,173  |
| 7 | Q9NZ63 CI078_HUMAN  | E.DLHLGT#SFSAE.T              | T100:  | 2 | 3,7408 | 0,372 | 0,194  |
| 7 | Q6UN15 FIP1_HUMAN   | R.DHS#PTPSVFNSDEE.R           | S492:  | 2 | 3,7407 | 0,514 | -0,297 |
| 7 | Q92543 SNX19_HUMAN  | E.GRAS#PVAAPVFLSYSEPE.G       | S306:  | 2 | 3,7401 | 0,428 | 0      |

|   |                     |                                 |            |   |        |       |        |
|---|---------------------|---------------------------------|------------|---|--------|-------|--------|
| 7 | Q7Z5Y7 KCD20_HUMAN  | R.SKS#LTNLVAAGDDVLE.D           | S374:      | 2 | 3,7358 | 0,361 | -0,071 |
| 7 | Q96JM3 ZN828_HUMAN  | E.LQT#PLPS#PEPSKPASVSSPEPPK.S   | T169:S173: | 3 | 3,7336 | 0,103 | -0,072 |
| 7 | Q9UHY1 NRBP_HUMAN   | E.SQTVLSSGS#DPKVE.S             | S14:       | 2 | 3,7303 | 0,482 | -1,37  |
| 7 | P09496 CLCA_HUMAN   | E.SNGPTDS#YAAISQVDR.L           | S93:       | 2 | 3,7281 | 0,413 | -0,208 |
| 7 | Q16254 E2F4_HUMAN   | E.ASRPNS#PQLTPTAVPGSAE.V        | S244:      | 2 | 3,7267 | 0,448 | -0,125 |
| 7 | Q9Y3F4 STRAP_HUMAN  | E.IASENS#DCIFPSAPDVK.A          | S338:      | 2 | 3,7255 | 0,287 | -0,253 |
| 7 | Q92797 SYMPK_HUMAN  | E.AALLDS#SLEGPLK.E              | S1221:     | 2 | 3,7235 | 0,396 | -0,164 |
| 7 | Q9UQ35 SRRM2_HUMAN  | R.FQSDSSSYPTVDSNS#LLGQSR.L      | S1152:     | 3 | 3,7222 | 0,283 | 0      |
| 7 | Q6PGQ7 BORA_HUMAN   | E.M*FYSIDL#PVK.C                | S233:      | 2 | 3,7187 | 0,404 | -0,262 |
| 7 | Q9NQ55 SSF1_HUMAN   | R.VGGS#DEEASGIPSR.T             | S359:      | 2 | 3,7162 | 0,434 | -0,254 |
| 7 | Q8NDI1 EHBP1_HUMAN  | K.DLS#TSPKPSPIPS#PVLGR.K        | S426:S436: | 2 | 3,7109 | 0,365 | -0,304 |
| 7 | Q8IZT6 ASPM_HUMAN   | E.SESVNPILS#PNQFLK.D            | S392:      | 2 | 3,7099 | 0,416 | 0,07   |
| 7 | P08648 ITA5_HUMAN   | E.SSLSS#SEGEETVEYK.S            | S127:      | 2 | 3,7098 | 0,392 | 0      |
| 7 | P50851 LRBA_HUMAN   | E.AVAISSNS#FITTK.D              | S1064:     | 2 | 3,7083 | 0,531 | 0      |
| 7 | Q9UHB6 LIMA1_HUMAN  | R.KIS#ENSYSLDDLE.I              | S225:      | 2 | 3,7042 | 0,328 | 0,306  |
| 7 | Q16513 PKN2_HUMAN   | E.LSLVAASPTLS#PR.Q              | S306:      | 2 | 3,7018 | 0,522 | -0,088 |
| 7 | P55327 TPD52_HUMAN  | K.ASAAFSSVGS#VITK.K             | S119:      | 2 | 3,7003 | 0,353 | 0,347  |
| 7 | Q9NUJ3 T11L1_HUMAN  | E.VSSCLSLCGSS#PFTTDKE.T         | S414:      | 3 | 3,6973 | 0,321 | -0,178 |
| 7 | Q9UN36 NDRG2_HUMAN  | R.TAS#LTSAAASVDGMR.S            | S332:      | 2 | 3,6972 | 0,613 | -0,427 |
| 7 | Q9NQW6 ANLN_HUMAN   | K.TQS#LPVTEKVTE.N               | S485:      | 2 | 3,6907 | 0,342 | -0,259 |
| 7 | P25054 APC_HUMAN    | R.SGRS#PTGNTPPVIDSVSE.K         | S2674:     | 2 | 3,6906 | 0,451 | -0,13  |
| 7 | Q9COD5 TANC1_HUMAN  | K.TAANKS#PCETISSPSSTLE.S        | S207:      | 2 | 3,6889 | 0,285 | 0,355  |
| 7 | Q13428 TCOF_HUMAN   | K.LDSS#PSVSSTLAAK.D             | S1228:     | 2 | 3,6874 | 0,39  | 0,254  |
| 7 | P30279 CCND2_HUMAN  | E.LDQAST#PTDVRDIDL.-            | T280:      | 2 | 3,6848 | 0,463 | 0,14   |
| 7 | Q15149 PLEC1_HUMAN  | K.GYSPYSVSGSGSTAGS#R.T          | S4626:     | 3 | 3,6829 | 0,47  | 0      |
| 7 | Q5UIP0 RIF1_HUMAN   | K.ATSEEDVSIKS#PICE.K            | S1616:     | 2 | 3,6796 | 0,405 | 0,07   |
| 7 | Q8WU60 Q8WU60_HUMAN | R.KVAS#PSPSGSVLFTDE.G           | S98:       | 2 | 3,6767 | 0,48  | -0,143 |
| 7 | P21333 FLNA_HUMAN   | K.AFGPGLQGGGAGS#PAR.F           | S1084:     | 2 | 3,676  | 0,488 | 0,162  |
| 7 | Q16181 SEPT7_HUMAN  | K.GQLTKS#PLAQM*E.E              | S334:      | 2 | 3,6752 | 0,297 | -0,785 |
| 7 | Q6ZU65 K2030_HUMAN  | R.VAFISLS#PVR.R                 | S13:       | 2 | 3,675  | 0,35  | -0,104 |
| 7 | Q9P260 K1468_HUMAN  | R.AGSISTLDS#LDFAR.Y             | S186:      | 2 | 3,6746 | 0,495 | 0      |
| 7 | A1L020 MEX3A_HUMAN  | E.NDFLAGS#PDAAIDSR.Y            | S308:      | 2 | 3,6666 | 0,364 | -0,15  |
| 7 | Q14157 UBP2L_HUMAN  | K.STSAPQM*SPGSSDNQSSS#PQPAQQK.L | S477:      | 3 | 3,6651 | 0,469 | 0,627  |

|   |                     |                             |            |   |        |       |        |
|---|---------------------|-----------------------------|------------|---|--------|-------|--------|
| 7 | O95196 CSPG5_HUMAN  | E.SFNIQNSM*S#PKLE.G         | S543:      | 2 | 3,6645 | 0,4   | 0      |
| 7 | Q5HYW3 RGAG4_HUMAN  | E.NFLGAS#PPIIQPSR.R         | S497:      | 2 | 3,664  | 0,326 | -0,077 |
| 7 | Q8NC44 F134A_HUMAN  | E.LAGFS#PVVDVK.K            | S291:      | 2 | 3,6595 | 0,452 | -0,201 |
| 7 | O60749 SNX2_HUMAN   | R.AVNTQALS#GAGILR.M         | S277:      | 2 | 3,6526 | 0,183 | 0,252  |
| 7 | O60264 SMCA5_HUMAN  | E.M*EEIFDDAS#PGK.Q          | S66:       | 2 | 3,6485 | 0,428 | -0,34  |
| 7 | A9CQZ4 A9CQZ4_HUMAN | K.TIDFDSL#VGR.G             | S56:       | 2 | 3,6484 | 0,42  | -0,095 |
| 7 | Q9H4A3 WNK1_HUMAN   | R.VSSQQTVSYG#QHE.Q          | S679:      | 2 | 3,6481 | 0,455 | -0,075 |
| 7 | Q9C0C2 TB182_HUMAN  | E.AQDLCRAS#PEPPGPE.S        | S672:      | 2 | 3,6425 | 0,413 | -0,215 |
| 7 | P46013 KI67_HUMAN   | E.AQ#LEDLAGFKE.L            | S1098:     | 2 | 3,6381 | 0,447 | -0,088 |
| 7 | Q14247 SRC8_HUMAN   | R.AKTQT#PPVSPAPQPTEE.R      | T401:      | 2 | 3,6369 | 0,556 | -0,263 |
| 7 | Q9NS91 RAD18_HUMAN  | K.LNES#VM*VFTK.D            | S322:      | 2 | 3,6344 | 0,31  | 0,676  |
| 7 | Q10570 CPSF1_HUMAN  | E.M*LYGDSGLFS#PSKE.E        | S756:      | 2 | 3,6337 | 0,482 | 0,071  |
| 7 | P16220 CREB1_HUMAN  | K.ILNDLS#SDAPGVPR.I         | S142:      | 2 | 3,6331 | 0,383 | -0,159 |
| 7 | P49321 NASP_HUMAN   | E.SSTSGFTPGGGSSVS#M*IASR.K  | S692:      | 2 | 3,6327 | 0,409 | 0,06   |
| 7 | Q9Y3F4 STRAP_HUMAN  | E.IASENS#DCIFSPADVKA.-      | S338:      | 2 | 3,6296 | 0,446 | 0,183  |
| 7 | Q6NYC8 PHTNS_HUMAN  | R.AKGLS#PGEPSPVLGTVE.A      | S54:       | 2 | 3,6281 | 0,378 | 0,133  |
| 7 | P29692 EF1D_HUMAN   | K.SLAGSSGPGASSGTS#GDHGE.L   | S74:       | 2 | 3,6225 | 0,525 | -0,543 |
| 7 | Q14694 UBP10_HUMAN  | E.TKYS#PPAISPLVSE.K         | S365:      | 2 | 3,6221 | 0,445 | 0,078  |
| 7 | O75781 PALM_HUMAN   | E.NAAAPS#PVRAPAPS#PAKEE.R   | S116:S124: | 2 | 3,6217 | 0,191 | -0,362 |
| 7 | O94876 TMCC1_HUMAN  | K.ALGVISNFQSS#PK.Y          | S414:      | 2 | 3,6208 | 0,484 | 0,342  |
| 7 | P16949 STMN1_HUMAN  | R.ASGQAFELILS#PR.S          | S25:       | 2 | 3,6179 | 0,353 | -0,083 |
| 7 | Q96IZ7 RSRC1_HUMAN  | E.IEAIES#DSFVQQTFR.S        | S237:      | 2 | 3,617  | 0,397 | -0,198 |
| 7 | Q99767 APBA2_HUMAN  | E.LAALRPES#PAPEEQE.C        | S55:       | 2 | 3,6155 | 0,386 | 0,284  |
| 7 | Q9Y2F5 K0947_HUMAN  | E.AGCIPVTSAEKS#PE.A         | S1470:     | 2 | 3,6143 | 0,303 | -0,4   |
| 7 | O60716 CTND1_HUMAN  | E.GAM*SVVSVETS#DDGTTR.R     | S129:      | 2 | 3,6123 | 0,446 | -0,27  |
| 7 | Q14157 UBP2L_HUMAN  | E.GATGSAVKSDS#PSTSSIPPLNE.T | S647:      | 2 | 3,6101 | 0,367 | 0,671  |
| 7 | Q6P4F7 RHGBA_HUMAN  | K.LASLGDTAS#PLVK.S          | S868:      | 2 | 3,6095 | 0,445 | 0      |
| 7 | Q04721 NOTC2_HUMAN  | R.GPDGCTPLM*LAS#LR.G        | S1836:     | 2 | 3,6094 | 0,425 | 0,231  |
| 7 | Q8N0S6 CENPL_HUMAN  | E.DYFIGAT#PLQK.R            | T25:       | 2 | 3,6073 | 0,415 | 0,183  |
| 7 | Q5UIP0 RIF1_HUMAN   | E.LIIEDNNAS#PQK.L           | S2144:     | 2 | 3,607  | 0,273 | -0,172 |
| 7 | Q4KMP7 TB10B_HUMAN  | R.RAS#AGPAPGPVVTAE.G        | S412:      | 2 | 3,6005 | 0,379 | -1,086 |
| 7 | Q9UPS6 SET1B_HUMAN  | K.LLFLREPDS#DTE.L           | S522:      | 2 | 3,5993 | 0,373 | -0,242 |
| 7 | Q15003 CND2_HUMAN   | R.VFDLQFSTDS#PR.L           | S81:       | 2 | 3,5972 | 0,485 | 0      |

|   |                     |                            |        |   |        |       |        |
|---|---------------------|----------------------------|--------|---|--------|-------|--------|
| 7 | Q9UBU7 DBF4A_HUMAN  | K.FAQLGRIS#PVPSPE.S        | S103:  | 2 | 3,5962 | 0,406 | 0,145  |
| 7 | Q15154 PCM1_HUMAN   | E.GCPVSINLS#KAE.T          | S1785: | 2 | 3,5954 | 0,253 | 1,081  |
| 7 | Q5VT52 K0460_HUMAN  | K.ASIGQS#PGLPSTTFK.L       | S614:  | 2 | 3,5929 | 0,367 | -0,078 |
| 7 | P37840 SYUA_HUMAN   | E.GAGS#IAAATGFVK.K         | S87:   | 2 | 3,5907 | 0,445 | 0,298  |
| 7 | Q8WU20 FRS2_HUMAN   | R.LTS#TSTSDTQININNSAQR.R   | S327:  | 2 | 3,5858 | 0,547 | -0,242 |
| 7 | Q14692 BMS1_HUMAN   | K.AGLS#PANCQSDRVNLE.K      | S552:  | 2 | 3,5853 | 0,52  | -0,067 |
| 7 | B2R8U0 B2R8U0_HUMAN | K.AAAGPLDM*SLPST#PDIK.I    | T101:  | 2 | 3,5818 | 0,481 | -0,411 |
| 7 | P32004 L1CAM_HUMAN  | E.DGS#FIGQYSGK.K           | S1224: | 2 | 3,5774 | 0,372 | 0      |
| 7 | P46821 MAP1B_HUMAN  | R.SVNFSLT#PNEIK.V          | T1282: | 2 | 3,5753 | 0,384 | 0      |
| 7 | Q9H0F6 SHRPN_HUMAN  | K.GPPPEADLPRS#PGNLTE.R     | S165:  | 2 | 3,5747 | 0,412 | -1,069 |
| 7 | Q05BP1 Q05BP1_HUMAN | E.VGPLAHLAPS#PQSE.A        | S22:   | 2 | 3,5588 | 0,473 | 0      |
| 7 | Q8WWM7 ATX2L_HUMAN  | K.LQPSSS#PENSLDPFPPR.I     | S559:  | 2 | 3,5583 | 0,419 | 0,188  |
| 7 | Q6FIF0 ZFAN6_HUMAN  | R.QNSSNGRIS#PPATSVSSLSE.S  | S49:   | 2 | 3,557  | 0,391 | 0,233  |
| 7 | Q14160 LAP4_HUMAN   | R.NSLES#ISSIDRE.L          | S1223: | 2 | 3,5549 | 0,519 | -0,256 |
| 7 | Q14721 KCNB1_HUMAN  | K.TQS#QPILNTKE.S           | S541:  | 2 | 3,5477 | 0,445 | -0,182 |
| 7 | P30414 NKTR_HUMAN   | E.NIPVIPLSDS#PPPSR.W       | S613:  | 3 | 3,5476 | 0,311 | 0,219  |
| 7 | O14639 ABLM1_HUMAN  | R.STS#QGSINSPVYSR.H        | S452:  | 2 | 3,5434 | 0,394 | -0,156 |
| 7 | Q13428 TCOF_HUMAN   | R.SPAGPAATPAQAQAAST#PR.K   | T983:  | 3 | 3,5428 | 0,315 | -0,1   |
| 7 | Q02952 AKA12_HUMAN  | K.GALNGQGALNSQEEEE.V       |        | 2 | 3,5425 | 0,357 | 0      |
| 7 | Q07021 C1QBP_HUMAN  | E.AESDIFS#IRE.V            | S205:  | 2 | 3,5386 | 0,292 | 0,391  |
| 7 | Q13409 DC1I2_HUMAN  | K.SVS#TPSEAGSQDSGDGAVGSR.T | S94:   | 2 | 3,535  | 0,445 | -0,06  |
| 7 | Q6ZML7 Q6ZML7_HUMAN | E.LSPAALS#PSLEPIR.C        | S504:  | 2 | 3,5344 | 0,323 | 0      |
| 7 | Q14684 RRP1B_HUMAN  | K.TPTSS#PASSPLVAK.K        | S732:  | 2 | 3,5333 | 0,425 | -0,171 |
| 7 | Q9UQ35 SRRM2_HUMAN  | R.TPAAAAAM*NLAS#PR.T       | S2272: | 2 | 3,5317 | 0,511 | -0,085 |
| 7 | O00161 SNP23_HUMAN  | E.M*EENLTQVGS#ILGNLK.D     | S161:  | 2 | 3,5304 | 0,394 | -0,132 |
| 7 | Q96FF9 CDCA5_HUMAN  | E.GLLGAEDLSGVS#PVVCSK.L    | S181:  | 2 | 3,529  | 0,431 | 0,523  |
| 7 | Q9UPS8 ANR26_HUMAN  | R.NVGM*PVAHM*ES#PE.R       | S489:  | 2 | 3,5273 | 0,475 | -0,162 |
| 7 | Q8WYL5 SSH1_HUMAN   | R.RLS#DPLLPSPEDE.T         | S515:  | 2 | 3,5262 | 0,395 | 0      |
| 7 | Q9UPU5 UBP24_HUMAN  | R.IILNSHS#PAGSAAISQQD.F    | S862:  | 2 | 3,5251 | 0,209 | 0,065  |
| 7 | Q8WXI9 P66B_HUMAN   | R.LQQAALS#PTTAPAVSSVSK.Q   | S486:  | 3 | 3,525  | 0,349 | 0,089  |
| 7 | Q12888 TP53B_HUMAN  | E.NTQIEDTEPM*S#PVLNSK.F    | S552:  | 3 | 3,5205 | 0,345 | -0,183 |
| 7 | Q9BUR4 WDR79_HUMAN  | E.FGSPSELS#PRIEEQE.L       | S90:   | 2 | 3,5204 | 0,404 | 0,068  |
| 7 | Q9UQ35 SRRM2_HUMAN  | R.M*APALSGANLTS#PR.V       | S2382: | 2 | 3,5146 | 0,478 | -0,165 |

|   |                     |                                       |            |   |        |       |        |
|---|---------------------|---------------------------------------|------------|---|--------|-------|--------|
| 7 | B2CI53 B2CI53_HUMAN | R.NGILASPQS#APGNLDNSK.S               | S263:      | 3 | 3,5141 | 0,235 | -0,491 |
| 7 | P55072 TERA_HUMAN   | E.DNS#VVLSLQPK.M                      | S37:       | 2 | 3,512  | 0,377 | -0,097 |
| 7 | Q8TBN0 R3GEF_HUMAN  | K.TLVITSTPAS#PNRE.L                   | S168:      | 2 | 3,5059 | 0,425 | -0,234 |
| 7 | O60504 VINEX_HUMAN  | R.LCDDGPQLPTS#PR.L                    | S530:      | 2 | 3,5038 | 0,52  | -0,079 |
| 7 | O14578 CTRO_HUMAN   | R.QQIAM*SAIVRS#PE.H                   | S1322:     | 2 | 3,5028 | 0,298 | -0,56  |
| 7 | Q8TF05 PP4R1_HUMAN  | E.SEGPVPSS#PNITM*ATR.K                | S496:      | 2 | 3,5016 | 0,49  | -0,14  |
| 7 | P49840 GSK3A_HUMAN  | R.TSS#FAEPGGGGGGGGGGPGGSASGPGGTGGGK.A | S21:       | 3 | 3,5016 | 0,327 | 0,218  |
| 7 | Q96DA6 TIM14_HUMAN  | E.AALILGVS#PTANK.G                    | S70:       | 2 | 3,5012 | 0,52  | 0      |
| 7 | Q13177 PAK2_HUMAN   | K.YLS#FTPPEKD.G                       | S141:      | 2 | 3,5002 | 0,385 | 0,191  |
| 7 | Q16204 CCDC6_HUMAN  | K.SGGIVIS#PFRLEE.L                    | S52:       | 2 | 3,4992 | 0,418 | -0,329 |
| 7 | Q92785 REQU_HUMAN   | R.VDDDS#LGEFVPTNSR.A                  | S142:      | 2 | 3,4985 | 0,241 | -0,07  |
| 7 | O75691 UTP20_HUMAN  | K.SLSDNGQPGT#PDPADSGGTSAKE.S          | T1741:     | 3 | 3,4984 | 0,487 | 0      |
| 7 | Q15477 SKIV2_HUMAN  | R.GDTVSA#PCSAPLAR.A                   | S245:      | 2 | 3,4978 | 0,51  | -0,544 |
| 7 | P46937 YAP1_HUMAN   | E.STDSGLS#M*SSYSVPR.T                 | S353:      | 2 | 3,4969 | 0,362 | -0,146 |
| 7 | Q9NZJ4 SACS_HUMAN   | R.IADLQS#PLFR.G                       | S1779:     | 2 | 3,4955 | 0,391 | -0,197 |
| 7 | Q9UJU6 DBNL_HUMAN   | R.AM*S#TTSISSPQPGK.L                  | S269:      | 2 | 3,4933 | 0,52  | -0,246 |
| 7 | Q99590 SFRIP_HUMAN  | K.TEELIES#PKLE.S                      | S293:      | 2 | 3,4919 | 0,33  | -0,446 |
| 7 | Q14157 UBP2L_HUMAN  | K.STSAPQM*S#PGSSDNQSSSPQAQK.L         | S467:      | 2 | 3,4898 | 0,472 | 0,464  |
| 7 | A8K1N6 A8K1N6_HUMAN | K.M*LGQKAT#PPPSPLLSE.L                | T264:      | 2 | 3,488  | 0,298 | 0      |
| 7 | Q9NZN3 EHD3_HUMAN   | E.IFYTLS#PVDGK.I                      | S456:      | 2 | 3,4867 | 0,473 | 0      |
| 7 | Q99700 ATX2_HUMAN   | E.AVAM*PIPAASPT#PASPASNR.A            | T729:      | 3 | 3,4823 | 0,4   | 0,274  |
| 7 | Q9Y4B6 VPRBP_HUMAN  | R.KLS#SEPLLPLDEE.A                    | S202:      | 2 | 3,4818 | 0,34  | -0,079 |
| 7 | P46013 KI67_HUMAN   | K.AM*LT#PKPAGGDE.K                    | T1176:     | 2 | 3,4802 | 0,459 | -0,095 |
| 7 | Q8TEA8 DTD1_HUMAN   | R.SASS#GAEGDVSSEREP.-                 | S197:      | 2 | 3,4801 | 0,505 | 0      |
| 7 | P49023 PAXI_HUMAN   | K.TGSS#PPGGPPKPGSQLD.S                | S322:      | 2 | 3,4794 | 0,266 | -0,699 |
| 7 | O15155 BET1_HUMAN   | K.VTAIKS#LSIE.I                       | S48:       | 2 | 3,4754 | 0,22  | 0,214  |
| 7 | Q92797 SYMPK_HUMAN  | E.AALLDSS#LEGPLPK.E                   | S1222:     | 3 | 3,4752 | 0,381 | 0,184  |
| 7 | Q9Y5K6 CD2AP_HUMAN  | K.DT#CYSPKPSVYLSTPSS#ASK.A            | T539:S554: | 3 | 3,4746 | 0,12  | 0,47   |
| 7 | P15408 FOSL2_HUMAN  | R.RSS#SSGDQSSDSLNSPTLLAL.-            | S308:      | 2 | 3,4704 | 0,355 | 0,443  |
| 7 | Q7Z3C6 ATG9A_HUMAN  | R.SFS#PLQPGQAPTGR.A                   | S656:      | 2 | 3,4699 | 0,394 | 0,16   |
| 7 | P55196 AFAD_HUMAN   | K.ITSVSTGNLCTEEQT#PPRPE.A             | T1194:     | 2 | 3,469  | 0,423 | 0,102  |
| 7 | O60749 SNX2_HUMAN   | K.SM*S#APVIFDR.S                      | S119:      | 2 | 3,4661 | 0,387 | 0,2    |
| 7 | Q96T37 RBM15_HUMAN  | R.SLS#PGGAALGYRD.Y                    | S294:      | 2 | 3,4654 | 0,495 | 0,182  |

|   |                     |                            |        |   |        |       |        |
|---|---------------------|----------------------------|--------|---|--------|-------|--------|
| 7 | P40818 UBP8_HUMAN   | R.STKPVVFS#PTLM*LTDEE.K    | S452:  | 2 | 3,465  | 0,491 | -0,061 |
| 7 | Q8TDY2 RBCC1_HUMAN  | R.TTNES#LLTSFPK.S          | S253:  | 2 | 3,4626 | 0,385 | -0,086 |
| 7 | Q9UFC0 LRWD1_HUMAN  | E.GS#PVAGSDGSQPAVK.L       | S259:  | 2 | 3,4599 | 0,523 | 0,255  |
| 7 | Q6NV74 CB055_HUMAN  | R.IGTEPSTAPAPS#PPAPK.S     | S490:  | 2 | 3,4599 | 0,403 | -0,216 |
| 7 | Q96AY4 TTC28_HUMAN  | K.M*TLIPSPNS#PFQK.V        | S1355: | 2 | 3,4594 | 0,244 | -0,314 |
| 7 | Q8N201 INT1_HUMAN   | E.LLIAEEKLS#PEQE.G         | S307:  | 2 | 3,4588 | 0,3   | 0,232  |
| 7 | Q03135 CAV1_HUMAN   | K.AM*ADELS#EKQVYD.A        | S37:   | 2 | 3,4577 | 0,345 | 0,383  |
| 7 | Q6S8J3 A26CA_HUMAN  | E.M*ATAASSS#SLEK.S         | S934:  | 2 | 3,4542 | 0,396 | -0,095 |
| 7 | Q9UBW7 ZMYM2_HUMAN  | K.M*TGSAPPPS#PTPNKE.M      | S838:  | 2 | 3,4542 | 0,496 | 0,076  |
| 7 | P46734 MP2K3_HUMAN  | D.FGISGYLVDS#VAK.T         | S218:  | 2 | 3,4523 | 0,44  | -0,425 |
| 7 | P49023 PAXI_HUMAN   | K.TSS#VSNPQDSVGSPCR.V      | S96:   | 2 | 3,4514 | 0,416 | -0,265 |
| 7 | Q9NQW6 ANLN_HUMAN   | E.SSLFS#PM*PSEEK.A         | S172:  | 2 | 3,4509 | 0,354 | -0,425 |
| 7 | P18583 SON_HUMAN    | R.SAAS#PVVSSM*PER.A        | S1769: | 2 | 3,4505 | 0,479 | -0,173 |
| 7 | Q9ULU4 PKCB1_HUMAN  | E.SVQQQSTPVLIS#PK.R        | S547:  | 2 | 3,4503 | 0,284 | 0,072  |
| 7 | Q15027 SC16A_HUMAN  | E.LVPPQQQAS#PPQLPK.A       | S891:  | 3 | 3,4499 | 0,371 | 0,107  |
| 7 | Q9UPN9 TRI33_HUMAN  | E.DAGSSS#LDNLLSR.Y         | S695:  | 2 | 3,445  | 0,402 | -0,345 |
| 7 | Q9BQL6 FERM1_HUMAN  | E.SSPTASGSSVS#PGLYSK.T     | S179:  | 2 | 3,4441 | 0,417 | -0,505 |
| 7 | Q15424 SAFB1_HUMAN  | E.LEQPFAQDTSS#VGPDR.K      | S247:  | 2 | 3,4415 | 0,492 | -0,334 |
| 7 | Q5R372 Q5R372_HUMAN | E.ISTPRSS#PGGLPEED.S       | S119:  | 2 | 3,4412 | 0,425 | -0,142 |
| 7 | Q86XP3 DDX42_HUMAN  | D.SSNVDLPYIPAENS#PTR.Q     | S96:   | 2 | 3,4395 | 0,302 | 0,314  |
| 7 | Q9UNE7 STUB1_HUMAN  | R.LGAGGGS#PEKSPSAQE.L      | S19:   | 2 | 3,4373 | 0,439 | 0,157  |
| 7 | Q9Y2U5 M3K2_HUMAN   | R.RGS#DIDNPTLTVM*D.I       | S331:  | 2 | 3,4357 | 0,431 | -0,075 |
| 7 | Q76FK4 NOL8_HUMAN   | R.NSS#PGEASLLEKE.T         | S1099: | 2 | 3,4349 | 0,329 | -0,085 |
| 7 | Q02952 AKA12_HUMAN  | K.SAVVHDIT#DDGQEETPE.I     | T135:  | 2 | 3,4345 | 0,35  | -0,063 |
| 7 | Q43237 DC1L2_HUMAN  | K.TGSPGS#PGAGGVQSTAK.K     | S446:  | 2 | 3,4302 | 0,362 | 0,238  |
| 7 | Q9BZ23 PANK2_HUMAN  | R.LGS#YSGPVSRSR.Q          | S189:  | 2 | 3,43   | 0,522 | -1,229 |
| 7 | O75376 NCOR1_HUMAN  | K.AQLS#PGIYDDTSAR.R        | S1472: | 2 | 3,4244 | 0,393 | 0,078  |
| 7 | Q15424 SAFB1_HUMAN  | E.LAEAPTEAPS#PEAR.D        | S344:  | 2 | 3,424  | 0,369 | 0      |
| 7 | P55265 DSRAD_HUMAN  | E.SQT#PTPSATSFSGK.S        | T601:  | 2 | 3,4182 | 0,504 | -0,075 |
| 7 | Q9NRL3 STRN4_HUMAN  | E.FDFLGS#GEDGEGAPDPR.R     | S324:  | 2 | 3,4163 | 0,456 | -0,198 |
| 7 | Q9UPQ3 CENG2_HUMAN  | R.FVLM*AT#PNLSR.R          | T836:  | 2 | 3,416  | 0,402 | 0,091  |
| 7 | Q86SQ0 PHLB2_HUMAN  | E.GNPYVSSTLSVPAS#PR.V      | S334:  | 2 | 3,4112 | 0,37  | -0,214 |
| 7 | Q8IXM2 CQ049_HUMAN  | K.KVASGVLS#PPPAAPSSSSVPE.A | S110:  | 2 | 3,4094 | 0,478 | 0,545  |

|   |                    |                           |        |   |        |       |        |
|---|--------------------|---------------------------|--------|---|--------|-------|--------|
| 7 | Q32MZ4 LRRF1_HUMAN | R.NM*PGLSAATLASLGGTSS#R.R | S116:  | 3 | 3,4093 | 0,279 | 0,872  |
| 7 | Q96AD5 PLPL2_HUMAN | R.NNLS#LGDALAK.W          | S428:  | 2 | 3,4065 | 0,347 | 0,204  |
| 7 | Q7Z739 YTHD3_HUMAN | R.GAGFNQNNAGSE.N          |        | 2 | 3,4062 | 0,446 | -0,299 |
| 7 | Q9H3Q1 BORG4_HUMAN | R.NGAAGPHS#PDPLLDE.Q      | S174:  | 2 | 3,4048 | 0,37  | 0      |
| 7 | Q9Y6Q9 NCOA3_HUMAN | E.GVGTSLSTLSS#PGPK.L      | S543:  | 2 | 3,404  | 0,387 | 0,232  |
| 7 | Q09666 AHNK_HUMAN  | K.GPRIS#APNVDFNLE.G       | S5448: | 2 | 3,4027 | 0,341 | -0,152 |
| 7 | Q99666 RGPD5_HUMAN | R.YVASVLGLTPS#PR.Q        | S21:   | 2 | 3,4027 | 0,47  | -0,085 |
| 7 | Q6T4R5 NHS_HUMAN   | E.SVDVITSQSDS#PTR.A       | S1308: | 2 | 3,4015 | 0,395 | -0,854 |
| 7 | Q15233 NONO_HUMAN  | E.GIGAIGGT#PPAFNR.A       | T450:  | 3 | 3,3999 | 0,327 | 0,714  |
| 7 | P28715 ERCC5_HUMAN | E.LTPAS#PTCTNSVSKNE.T     | S526:  | 2 | 3,3984 | 0,577 | -0,205 |
| 7 | O60303 K0556_HUMAN | E.GRSS#PGPDTLVVLE.F       | S253:  | 2 | 3,3976 | 0,346 | -0,243 |
| 7 | Q14934 NFAC4_HUMAN | R.FGLGS#PLPSR.A           | S213:  | 2 | 3,3975 | 0,383 | 0      |
| 7 | Q03188 CENPC_HUMAN | R.TIS#PAESTALFQGR.K       | S333:  | 2 | 3,3921 | 0,524 | -0,235 |
| 7 | O14514 BAI1_HUMAN  | E.NVATLSVSS#LER.R         | S1469: | 2 | 3,3916 | 0,443 | 0,09   |
| 7 | Q9NUJ3 T11L1_HUMAN | E.VSSCLSLCGSS#PFTTDKE.T   | S414:  | 2 | 3,3912 | 0,52  | 0,238  |
| 7 | Q9UJX4 APC5_HUMAN  | E.FFLSQQAS#LLKNDE.T       | S221:  | 2 | 3,3908 | 0,28  | 0      |
| 7 | Q9C0C2 TB182_HUMAN | R.NM*APGAVCS#PGESKE.L     | S1297: | 2 | 3,3908 | 0,404 | -0,374 |
| 7 | P29374 ARI4A_HUMAN | K.STLS#SNM*PYGLSK.T       | S676:  | 2 | 3,39   | 0,34  | -0,33  |
| 7 | Q9H3P2 NELFA_HUMAN | K.NALTTLAGPLT#PPVK.H      | T178:  | 2 | 3,3888 | 0,421 | -0,078 |
| 7 | Q05397 FAK1_HUMAN  | K.LQPQEIS#PPPTANLDR.S     | S910:  | 2 | 3,3883 | 0,336 | -0,066 |
| 7 | Q6FI81 CPIN1_HUMAN | K.VLLS#DSNLHDA.-          | S305:  | 2 | 3,3878 | 0,46  | -0,097 |
| 7 | Q8ND24 RN214_HUMAN | K.NSPLLSVSS#QTITKE.N      | S54:   | 2 | 3,3854 | 0,318 | -0,145 |
| 7 | Q6P1L5 AL2SC_HUMAN | R.TS#PTVATQTGASATSTR.G    | S106:  | 2 | 3,3849 | 0,562 | -0,213 |
| 7 | Q09666 AHNK_HUMAN  | K.ISM*PDIDLNLT#GPK.I      | T2845: | 2 | 3,3836 | 0,272 | 0,682  |
| 7 | Q8WWM7 ATX2L_HUMAN | K.LQPSSS#PENSLDPFPPR.I    | S559:  | 3 | 3,3813 | 0,281 | 0,094  |
| 7 | Q6S8J3 A26CA_HUMAN | E.M*ATAASSS#SLEKSYE.L     | S934:  | 2 | 3,3797 | 0,481 | 0,074  |
| 7 | Q15003 CND2_HUMAN  | E.M*IS#LGDGDIR.T          | S408:  | 2 | 3,3791 | 0,253 | 0,208  |
| 7 | Q14CB8 RHG19_HUMAN | R.NLLFSGS#PAVTM*TPTR.L    | S470:  | 2 | 3,3791 | 0,438 | 0,409  |
| 7 | Q5JTV8 TOIP1_HUMAN | E.ASS#QTDLSTQISK.K        | S164:  | 2 | 3,3774 | 0,426 | 0      |
| 7 | Q9H8Y8 GORS2_HUMAN | K.ADAASSLTVDVT#PPATAK.A   | T415:  | 2 | 3,376  | 0,368 | 0,071  |
| 7 | P05787 K2C8_HUMAN  | K.LVSES#SDVLPK.-          | S477:  | 2 | 3,3751 | 0,313 | -0,292 |
| 7 | P49790 NU153_HUMAN | K.VQM*TS#PSSTGSPM*FK.F    | S516:  | 2 | 3,3751 | 0,413 | -0,216 |
| 7 | Q9H223 EHD4_HUMAN  | E.LFYTLS#PINGK.I          | S459:  | 2 | 3,3715 | 0,482 | -0,092 |

|   |                     |                                |        |   |        |       |        |
|---|---------------------|--------------------------------|--------|---|--------|-------|--------|
| 7 | P11831 SRF_HUMAN    | K.ALIQTCLNSPDS#PPR.S           | S224:  | 2 | 3,3701 | 0,359 | -1,116 |
| 7 | Q9NRS6 SNX15_HUMAN  | E.STEEASGS#PARGPLTEAE.L        | S201:  | 2 | 3,3693 | 0,393 | 0,065  |
| 7 | Q86UP2 KTN1_HUMAN   | K.QM*QSSFTSSEQE.L              |        | 2 | 3,3677 | 0,294 | -0,087 |
| 7 | Q14160 LAP4_HUMAN   | R.ALAAVPS#AGSVQR.V             | S1276: | 2 | 3,3672 | 0,436 | -0,28  |
| 7 | P05787 K2C8_HUMAN   | K.LVS#ESSDVLPK.-               | S475:  | 2 | 3,3669 | 0,32  | -0,097 |
| 7 | Q8N108 MIER1_HUMAN  | R.APS#PPPTASNSSNSQSEKE.D       | S401:  | 2 | 3,3599 | 0,393 | 0,245  |
| 7 | P35611 ADDA_HUMAN   | K.RVS#M*ILQSPAFCEE.L           | S59:   | 2 | 3,3595 | 0,54  | 0,069  |
| 7 | Q8TE76 MORC4_HUMAN  | K.SSSERS#TPPYLFPEYPE.A         | S620:  | 2 | 3,3587 | 0,323 | 0,236  |
| 7 | Q9UQ35 SRRM2_HUMAN  | E.GDAPFSEPGTTSTQRPSS#PE.T      | S323:  | 3 | 3,3577 | 0,266 | 0,86   |
| 7 | Q9H410 DSN1_HUMAN   | E.SSL#PVEVFAK.T                | S30:   | 2 | 3,3571 | 0,31  | 0,098  |
| 7 | O95295 S25BP_HUMAN  | R.AM*LDSGIYPPGS#PGK.-          | S133:  | 2 | 3,3568 | 0,508 | 0,539  |
| 7 | P14618 KPYM_HUMAN   | R.LDIDS#PPITAR.N               | S37:   | 2 | 3,355  | 0,416 | 0      |
| 7 | Q9H009 NACA2_HUMAN  | K.NNSNDIVNAIM*E.L              |        | 2 | 3,3541 | 0,352 | 0,362  |
| 7 | Q9UCN2 Q9UCN2_HUMAN | -.PYQYPALT#PEQK.K              | T8:    | 2 | 3,3532 | 0,264 | 0,242  |
| 7 | Q9NUL3 STAU2_HUMAN  | K.VISGTTLGYLS#PK.D             | S440:  | 2 | 3,3474 | 0,356 | -0,172 |
| 7 | Q9ULW0 TPX2_HUMAN   | K.SSDQPLTVVVS#PK.F             | S738:  | 2 | 3,3468 | 0,471 | -0,085 |
| 7 | Q9H3P2 NELFA_HUMAN  | E.NAT#PDYAAGLVSTQK.L           | T318:  | 2 | 3,3461 | 0,309 | 1,737  |
| 7 | O14545 TRAD1_HUMAN  | R.LDSQPQETS#PELPR.R            | S415:  | 2 | 3,3453 | 0,316 | 0      |
| 7 | Q6NYC1 JMJD6_HUMAN  | E.SFSL#PAAVADNVER.A            | S38:   | 2 | 3,3448 | 0,372 | 0,074  |
| 7 | Q92547 TOPB1_HUMAN  | K.TM*PNSST#PTSQINTIDSR.T       | T298:  | 2 | 3,3429 | 0,454 | 0,239  |
| 7 | Q92615 LARP5_HUMAN  | R.LSS#LIIGPSKE.R               | S556:  | 2 | 3,3415 | 0,258 | 0,299  |
| 7 | Q66K74 MAP1S_HUMAN  | K.AVPM*APAPAS#PGSSNDSSAR.S     | S759:  | 2 | 3,3409 | 0,423 | 0      |
| 7 | O60504 VINEX_HUMAN  | R.SPADPTDLGGQTS#PR.R           | S563:  | 2 | 3,3408 | 0,378 | -0,464 |
| 7 | Q9H4L4 SENP3_HUMAN  | E.DGVRGS#PPVPSGPPM*EE.D        | S212:  | 2 | 3,34   | 0,437 | -0,541 |
| 7 | P02545 LMNA_HUMAN   | R.SVGGSGGGS#FGDNLVTR.S         | S636:  | 2 | 3,339  | 0,162 | -0,445 |
| 7 | P27816 MAP4_HUMAN   | E.VGLLKDM*S#PLSE.T             | S507:  | 2 | 3,3373 | 0,395 | 0      |
| 7 | Q8TD19 NEK9_HUMAN   | R.SSTVT#EAPIAVVTSR.T           | T335:  | 3 | 3,334  | 0,236 | 0,458  |
| 7 | Q6P4R8 NFRKB_HUMAN  | K.AVSTVVVTTAPS#PK.Q            | S1291: | 2 | 3,3335 | 0,37  | -0,255 |
| 7 | P52756 RBM5_HUMAN   | E.AQPSTSTSTQAPAAAS#PTGVVPGTK.Y | S444:  | 3 | 3,3331 | 0,327 | 0      |
| 7 | Q99733 NP1L4_HUMAN  | R.LDNVPHT#PSSYIE.T             | T51:   | 2 | 3,3328 | 0,183 | 0,079  |
| 7 | Q8N108 MIER1_HUMAN  | R.APS#PPPTASNSSNSQSEKE.D       | S401:  | 3 | 3,3317 | 0,331 | 0,275  |
| 7 | P18206 VINC_HUMAN   | E.VSDVFSDTT#PIK.L              | T604:  | 2 | 3,3297 | 0,484 | -0,901 |
| 7 | P08069 IGF1R_HUMAN  | E.SVPLDPSASSSS#LPLPDR.H        | S1313: | 2 | 3,3293 | 0,428 | 0,192  |



|   |                    |                          |          |   |        |       |        |
|---|--------------------|--------------------------|----------|---|--------|-------|--------|
| 7 | Q00536 PCTK1_HUMAN | R.GPLSS#APEIVHE.D        | S65:     | 2 | 3,3281 | 0,513 | 0,093  |
| 7 | Q14814 MEF2D_HUMAN | R.LLS#PQQPALQR.N         | S180:    | 2 | 3,3275 | 0,377 | 0,367  |
| 7 | Q9H4M9 EHD1_HUMAN  | E.IFYTLS#PVNGK.I         | S456:    | 2 | 3,3267 | 0,432 | 0,185  |
| 7 | Q969R5 LMBL2_HUMAN | E.LPT#SPLHLLSPGT#PR.S    | T66:T76: | 3 | 3,3251 | 0,206 | 0,105  |
| 7 | O75526 HNRGT_HUMAN | R.GFAFVTFES#PADAK.A      | S58:     | 2 | 3,322  | 0,425 | -0,156 |
| 7 | P07814 SYEP_HUMAN  | K.EYIPGQPPLSQSSDSS#PTR.N | S886:    | 2 | 3,3198 | 0,376 | 0,23   |
| 7 | Q76FK4 NOL8_HUMAN  | R.TCDSITPSKSS#PVPVSD.T   | S268:    | 2 | 3,3194 | 0,471 | -0,263 |
| 7 | Q8N3Z6 ZCHC7_HUMAN | E.VITLS#DEDSIYR.C        | S94:     | 2 | 3,3193 | 0,428 | 0      |
| 7 | Q9Y6M7 S4A7_HUMAN  | E.NS#TVDFSKVD.M          | S407:    | 2 | 3,3171 | 0,277 | -0,205 |
| 7 | Q9NVP2 ASF1B_HUMAN | E.TQDPSLGCGLPLNCT#PIK.G  | T179:    | 3 | 3,3161 | 0,271 | 0,268  |
| 7 | P49454 CENPF_HUMAN | K.ILNDDS#GLLHGE.L        | S1353:   | 2 | 3,3134 | 0,391 | -0,269 |
| 7 | P49790 NU153_HUMAN | K.VQM*TSPTSSTGS#PM*FK.F  | S522:    | 2 | 3,3125 | 0,379 | -0,216 |
| 7 | P63241 IF5A1_HUMAN | D.GYLSLLQDS#GEVRE.D      | S105:    | 2 | 3,3122 | 0,272 | -0,222 |
| 7 | Q9BQ67 GRWD1_HUMAN | E.S#GDTSESGPAQVYLPGR.G   | S21:     | 2 | 3,3116 | 0,308 | -0,135 |
| 7 | Q13416 ORC2_HUMAN  | K.SVS#FSLKNDPE.I         | S122:    | 2 | 3,3115 | 0,347 | 0,094  |
| 7 | Q15032 R3HD1_HUMAN | K.ASS#FSGISVLTR.G        | S381:    | 2 | 3,3073 | 0,396 | -0,374 |
| 7 | Q9C0B5 ZDHC5_HUMAN | R.SSS#LKSAQGTGFE.L       | S429:    | 2 | 3,3036 | 0,458 | -0,177 |
| 7 | Q6T4R5 NHS_HUMAN   | E.STLTTAALS#PSK.I        | S1155:   | 2 | 3,3012 | 0,389 | -0,291 |
| 7 | Q13523 PRP4B_HUMAN | E.DSNM*SVSEPSS#PQSSTR.T  | S569:    | 2 | 3,2949 | 0,366 | 0,061  |
| 7 | Q8ND76 CCNY_HUMAN  | R.SAS#ADNLTLP.R.W        | S326:    | 2 | 3,2937 | 0,158 | 0,1    |
| 7 | Q9UNE7 STUB1_HUMAN | R.LGAGGGSPEKS#PSAQE.L    | S23:     | 2 | 3,2921 | 0,357 | 0,079  |
| 7 | Q96E22 NGBR_HUMAN  | E.LLGLDCSKYS#PE.F        | S168:    | 2 | 3,2919 | 0,35  | -0,417 |
| 7 | Q765P7 MTSSL_HUMAN | K.TPTVPDS#PGYM*GPTR.A    | S601:    | 2 | 3,2904 | 0,473 | -0,073 |
| 7 | Q9H307 PININ_HUMAN | K.SLS#PGKENVSALD.M       | S443:    | 2 | 3,2872 | 0,405 | -0,349 |
| 7 | Q15424 SAFB1_HUMAN | K.ADS#LLAVVK.R           | S288:    | 2 | 3,2836 | 0,343 | 0,061  |
| 7 | P17544 ATF7_HUMAN  | R.TDSVIIADQTPTR#PTR.F    | T53:     | 2 | 3,2828 | 0,41  | -0,216 |
| 7 | P42166 LAP2A_HUMAN | R.SST#PLPTISSAENTR.Q     | T160:    | 2 | 3,279  | 0,44  | -0,282 |
| 7 | Q9Y2U8 MAN1_HUMAN  | E.T#SVQGGGGLAM*NDR.A     | T308:    | 2 | 3,2781 | 0,432 | -0,084 |
| 7 | Q8N488 RYBP_HUMAN  | R.SST#PKGDM*SAVNDES.F.-  | T215:    | 2 | 3,276  | 0,496 | -0,138 |
| 7 | Q9UQ35 SRRM2_HUMAN | K.M*ALPPQEDATAS#PPR.Q    | S1179:   | 2 | 3,275  | 0,527 | -0,146 |
| 7 | O95239 KIF4A_HUMAN | K.KT#PPAPSPFDLPE.L       | T1181:   | 2 | 3,2749 | 0,399 | -0,165 |
| 7 | Q9BZE9 ASPC1_HUMAN | R.AAGS#PSPLPAPDPAPK.S    | S500:    | 2 | 3,2718 | 0,297 | 0,314  |
| 7 | Q9UQ35 SRRM2_HUMAN | E.NSFGS#PLEFR.N          | S1329:   | 2 | 3,2701 | 0,448 | 0,494  |

|   |                     |                              |        |   |        |       |        |
|---|---------------------|------------------------------|--------|---|--------|-------|--------|
| 7 | Q02952 AKA12_HUMAN  | K.ST#PVIVSATTK.K             | T1484: | 2 | 3,2696 | 0,467 | -0,309 |
| 7 | Q9BZE9 ASPC1_HUMAN  | R.AAGSPS#PLPAPDPAPK.S        | S502:  | 2 | 3,2681 | 0,414 | 0,157  |
| 7 | Q94915 FRYL_HUMAN   | E.AALTAS#QILSR.T             | S2499: | 2 | 3,2664 | 0,286 | 0,101  |
| 7 | Q09666 AHNK_HUMAN   | K.AEAPLPS#PKLE.G             | S5110: | 2 | 3,2654 | 0,408 | -0,396 |
| 7 | Q14676 MDC1_HUMAN   | E.LQPSTSTDQPV#PEPTSQATR.G    | T1466: | 3 | 3,2643 | 0,297 | -0,394 |
| 7 | Q12888 TP53B_HUMAN  | R.GNLLHFSS#QGEEE.K           | S1068: | 2 | 3,263  | 0,438 | 0,301  |
| 7 | Q9Y6Q9 NCOA3_HUMAN  | K.LDNS#PNM*NITQPSK.V         | S551:  | 2 | 3,2629 | 0,383 | -0,369 |
| 7 | Q96L73 NSD1_HUMAN   | R.AAS#PHQVTPQADE.K           | S2471: | 2 | 3,2612 | 0,264 | -0,171 |
| 7 | Q2NKX8 ERC6L_HUMAN  | K.GTGS#ADSIATLPK.G           | S807:  | 2 | 3,2604 | 0,356 | -0,47  |
| 7 | Q15185 TEBP_HUMAN   | K.LTFS#CLGGSDFNK.H           | S39:   | 2 | 3,2598 | 0,359 | -0,16  |
| 7 | Q8WUM9 S20A1_HUMAN  | R.LPS#VDLKEE.T               | S335:  | 2 | 3,2577 | 0,403 | -1,319 |
| 7 | Q9Y4X0 AMER1_HUMAN  | K.LSSPPSGS#GGGGGASSSSHCSGE.S | S21:   | 3 | 3,2573 | 0,227 | 0,168  |
| 7 | Q9Y2K5 R3HD2_HUMAN  | K.ASS#FSGISILTR.G            | S349:  | 2 | 3,2542 | 0,457 | 0,093  |
| 7 | Q9UKS6 PACN3_HUMAN  | R.SPDEVTLTS#IVPTR.D          | S327:  | 2 | 3,2541 | 0,275 | -0,841 |
| 7 | Q68104 EF1A1_HUMAN  | E.S#FSDYPLGR.F               | S414:  | 2 | 3,2532 | 0,381 | 0      |
| 7 | Q32MZ4 LRRF1_HUMAN  | K.AM*VSNAQLDNE.K             |        | 2 | 3,2531 | 0,462 | 0      |
| 7 | Q14997 PSME4_HUMAN  | K.NPSINQILLS#PEK.I           | S1121: | 2 | 3,2525 | 0,243 | -0,318 |
| 7 | Q92539 LPIN2_HUMAN  | E.TTYPQTACPKS#DSELE.V        | S243:  | 2 | 3,2514 | 0,419 | 0      |
| 7 | Q5T1M5 FKB15_HUMAN  | R.ERPES#PM*VPSEQVVEE.A       | S979:  | 2 | 3,2512 | 0,483 | -0,315 |
| 7 | Q9H0B6 KLC2_HUMAN   | R.TLS#SSSM*DLSR.R            | S608:  | 2 | 3,2511 | 0,448 | -0,286 |
| 7 | Q6P2E9 EDC4_HUMAN   | E.VEPLGLPQAS#PSR.T           | S723:  | 2 | 3,2505 | 0,537 | 0,682  |
| 7 | Q15052 ARHG6_HUMAN  | R.M*S#GFIYQGK.I              | S488:  | 2 | 3,2492 | 0,307 | 0      |
| 7 | Q9UPN3 MACF1_HUMAN  | E.LATSGGQS#PTGEQIPQFQQR.Q    | S3634: | 3 | 3,2485 | 0,305 | 0      |
| 7 | Q96JM7 LMBL3_HUMAN  | R.LSGEM*PPAS#PSFPR.N         | S608:  | 2 | 3,2475 | 0,291 | 0,078  |
| 7 | Q96CB8 INT12_HUMAN  | E.SSS#PSASLKGPTSQE.S         | S427:  | 2 | 3,2474 | 0,406 | -0,15  |
| 7 | Q12802 AKP13_HUMAN  | R.SLS#RPSSLIEQE.K            | S2563: | 2 | 3,2432 | 0,23  | -0,257 |
| 7 | Q8NCF5 NF2IP_HUMAN  | E.FLDLNSPLSPPS#PR.T          | S204:  | 2 | 3,2419 | 0,311 | -0,141 |
| 7 | Q09666 AHNK_HUMAN   | R.LKS#EDGVEGDLGE.T           | S135:  | 2 | 3,2397 | 0,264 | -0,342 |
| 7 | Q00358 FOXO1_HUMAN  | R.VFGLVPERPLS#PE.L           | S231:  | 2 | 3,2397 | 0,433 | -0,241 |
| 7 | Q8WXV6 Q8WXV6_HUMAN | R.TSS#EDNLYLAVLR.A           | S21:   | 2 | 3,2394 | 0,274 | -0,078 |
| 7 | Q9UKA4 AKA11_HUMAN  | E.DSGLFS#PIR.S               | S448:  | 2 | 3,2393 | 0,263 | 0      |
| 7 | Q57740 NU107_HUMAN  | R.SGLFTNTEPHS#ITE.D          | S129:  | 2 | 3,2391 | 0,406 | -0,076 |
| 7 | Q15054 DPOD3_HUMAN  | R.VALS#DDETKE.T              | S307:  | 2 | 3,2385 | 0,257 | -0,206 |

|   |                    |                            |        |   |        |       |        |
|---|--------------------|----------------------------|--------|---|--------|-------|--------|
| 7 | Q8NHV4 NEDD1_HUMAN | E.AQLICEPPINGSST#PNPK.I    | T550:  | 2 | 3,2381 | 0,351 | -0,914 |
| 7 | Q92870 APBB2_HUMAN | R.KGS#LSSVTPSPTE.K         | S334:  | 2 | 3,238  | 0,263 | -0,285 |
| 7 | P18583 SON_HUMAN   | E.SDQTLAALLS#PK.E          | S1697: | 2 | 3,2373 | 0,41  | -0,092 |
| 7 | P04075 ALDOA_HUMAN | K.YTPSGQAGAAASE.S          |        | 2 | 3,2359 | 0,376 | -0,303 |
| 7 | Q14721 KCNB1_HUMAN | E.M*ESIPS#PVAPLPTR.T       | S567:  | 2 | 3,2337 | 0,429 | -0,537 |
| 7 | P18206 VINC_HUMAN  | E.AIDTKS#LLDASEE.A         | S721:  | 2 | 3,2324 | 0,283 | 0      |
| 7 | Q9Y6M4 KC1G3_HUMAN | R.GTGS#SSSGVLM*VGPNFR.V    | S31:   | 2 | 3,2298 | 0,371 | 0,419  |
| 7 | Q6DN90 IQEC1_HUMAN | R.SALSSS#LRDLSE.A          | S925:  | 2 | 3,2285 | 0,41  | -0,454 |
| 7 | P98175 RBM10_HUMAN | E.LQSPHTPSSALPPATS#PTAQE.S | S553:  | 3 | 3,2273 | 0,131 | -0,167 |
| 7 | Q9NR82 KCNQ5_HUMAN | K.SLS#VQNLIR.S             | S831:  | 2 | 3,2251 | 0,142 | 0      |
| 7 | Q3KQU3 MA7D1_HUMAN | R.SAS#ASPLTPCSVTR.S        | S366:  | 2 | 3,2248 | 0,43  | -0,242 |
| 7 | Q684P5 RPGP2_HUMAN | E.GDSGGSQPSTTS#PFKQE.V     | S668:  | 2 | 3,2241 | 0,327 | -0,341 |
| 7 | P19174 PLCG1_HUMAN | E.NGDLSPFSG#GTSRE.R        | S1224: | 2 | 3,2239 | 0,336 | -0,313 |
| 7 | P08047 SP1_HUMAN   | E.SQPS#PLALLAATCSR.I       | S59:   | 2 | 3,2239 | 0,576 | -0,295 |
| 7 | P49790 NU153_HUMAN | E.ITT#SSPSINSSQALTNK.V     | T496:  | 3 | 3,2229 | 0,349 | 0,285  |
| 7 | Q04721 NOTC2_HUMAN | R.RTPS#LALTPPQAEQE.V       | S1804: | 2 | 3,2219 | 0,363 | -0,071 |
| 7 | P17812 PYRG1_HUMAN | R.GLGLS#PDLVVCR.C          | S210:  | 2 | 3,2218 | 0,271 | -0,179 |
| 7 | Q8IY17 PLPL6_HUMAN | R.CVS#M*PGDISGLQGGPR.S     | S411:  | 3 | 3,2217 | 0,299 | -0,106 |
| 7 | Q6PFW1 VIP1_HUMAN  | R.ALQTS#PQPPEGPLPR.R       | S964:  | 2 | 3,2195 | 0,43  | 0,637  |
| 7 | P98172 EFNB1_HUMAN | E.M*PPQS#PANIYYKV.-        | S338:  | 2 | 3,2178 | 0,237 | 0,152  |
| 7 | Q9NQW6 ANLN_HUMAN  | K.QNS#VQEQGTACLK.F         | S225:  | 2 | 3,2169 | 0,287 | -0,212 |
| 7 | P49792 RBP2_HUMAN  | K.AVVS#PPKFVFGSE.S         | S2510: | 2 | 3,216  | 0,335 | 0,085  |
| 7 | Q5QJE6 TDIF2_HUMAN | R.QILACS#PVSSVR.K          | S117:  | 2 | 3,2148 | 0,509 | 0      |
| 7 | P45880 VDAC2_HUMAN | K.LTFDTTFS#PNTGK.K         | S115:  | 2 | 3,2137 | 0,427 | 0      |
| 7 | O95674 CDS2_HUMAN  | K.VDGETAS#DSESRAE.S        | S33:   | 2 | 3,2113 | 0,344 | -0,08  |
| 7 | Q8NFH5 NUP53_HUMAN | R.CALSSPSLAFT#PPIK.T       | T265:  | 2 | 3,2089 | 0,376 | -0,292 |
| 7 | Q02952 AKA12_HUMAN | E.VAS#EKLTAASE.Q           | S347:  | 2 | 3,2076 | 0,337 | 0,109  |
| 7 | Q9P0K8 FOXJ2_HUMAN | K.CSPGS#PTDPNATLSKDE.A     | S46:   | 2 | 3,2056 | 0,457 | -0,066 |
| 7 | Q9HAW4 CLSPN_HUMAN | K.QSDIRPS#PGDSSVLQQE.S     | S421:  | 2 | 3,2056 | 0,357 | 0,254  |
| 7 | Q9P0K7 RAI14_HUMAN | E.NAGIQS#LLLSK.I           | S235:  | 2 | 3,2039 | 0,425 | 0,299  |
| 7 | O95425 SVIL_HUMAN  | R.SVDYNM*PRS#PVEM*DE.D     | S1322: | 2 | 3,2032 | 0,394 | -0,195 |
| 7 | Q14980 NUMA1_HUMAN | R.TQPDGTSVPGEPAS#PISQR.L   | S1757: | 3 | 3,2029 | 0,222 | 0      |
| 7 | Q9UJX4 APC5_HUMAN  | E.FFLSQQAS#LLK.N           | S221:  | 2 | 3,2016 | 0,107 | -0,179 |

|   |                     |                              |        |   |        |       |        |
|---|---------------------|------------------------------|--------|---|--------|-------|--------|
| 7 | Q13045 FLII_HUMAN   | E.AVLQS#PGLSGK.V             | S856:  | 2 | 3,2    | 0,495 | -0,429 |
| 7 | Q9Y490 TLN1_HUMAN   | K.VM*VTNVTS#LLK.T            | S2127: | 2 | 3,198  | 0,351 | 0,188  |
| 7 | O75970 MPDZ_HUMAN   | R.GSLPQLVS#PIVSR.S           | S230:  | 2 | 3,1961 | 0,36  | -0,085 |
| 7 | Q99590 SFRIP_HUMAN  | E.SS#EGEIIQTVDR.Q            | S299:  | 2 | 3,194  | 0,423 | -0,173 |
| 7 | Q14676 MDC1_HUMAN   | R.SSVKT#PESIVPIAPE.L         | T1567: | 2 | 3,1934 | 0,409 | -0,373 |
| 7 | P24928 RPB1_HUMAN   | K.YSPTS#PTYSPTPK.Y           | S1878: | 2 | 3,1914 | 0,387 | -0,228 |
| 7 | Q9NTJ3 SMC4_HUMAN   | E.EGPPPPSPDGASS#DAEPEPPSGR.T | S28:   | 3 | 3,191  | 0,245 | -0,475 |
| 7 | P00519 ABL1_HUMAN   | K.GSALGTPAAAEPVT#PTSK.A      | T852:  | 2 | 3,1886 | 0,219 | -0,774 |
| 7 | Q562F6 SGOL2_HUMAN  | E.CSAPFQVS#DDEHE.K           | S1187: | 2 | 3,1868 | 0,35  | 0,076  |
| 7 | Q05655 KPCD_HUMAN   | R.RS#DSASSEPVGIYQGF.E.K      | S302:  | 2 | 3,1867 | 0,464 | 0,128  |
| 7 | Q00653 NFKB2_HUMAN  | K.LNSS#IVEPKPEAPE.T          | S23:   | 2 | 3,1846 | 0,287 | -0,23  |
| 7 | P25705 ATPA_HUMAN   | R.VLS#IGDGIAR.V              | S76:   | 2 | 3,1841 | 0,315 | 0,226  |
| 7 | Q01814 AT2B2_HUMAN  | K.SATSSS#PGSPIHSLE.T         | S1231: | 2 | 3,1838 | 1     | -0,476 |
| 7 | Q12756 KIF1A_HUMAN  | E.DGGTLGVFS#PK.K             | S487:  | 2 | 3,1828 | 0,415 | 0,527  |
| 7 | O94992 HEX11_HUMAN  | R.AFPQLGGRPGPEGECS#LE.S      | S66:   | 2 | 3,1777 | 0,381 | -0,195 |
| 7 | Q5VSL9 FA40A_HUMAN  | R.KDS#EGYSESPDLE.F           | S59:   | 2 | 3,1766 | 0,184 | -0,238 |
| 7 | Q9P266 K1462_HUMAN  | R.GQAGLPGGLVS#PGSGDR.A       | S1304: | 2 | 3,1759 | 0,342 | -0,076 |
| 7 | O14497 ARI1A_HUMAN  | R.GPS#PSPVGPASVAQSR.S        | S696:  | 2 | 3,1754 | 0,453 | -0,955 |
| 7 | Q8IYA6 CKP2L_HUMAN  | E.NES#LDNFLKE.T              | S175:  | 2 | 3,173  | 0,187 | 0      |
| 7 | Q9H7N4 SFR19_HUMAN  | E.VLYDS#EGLSGEER.G           | S734:  | 2 | 3,173  | 0,332 | 0,239  |
| 7 | P49454 CENPF_HUMAN  | R.LQLQLDLS#SR.S              | S1747: | 2 | 3,1715 | 0,409 | -0,559 |
| 7 | O75362 ZN217_HUMAN  | R.AGAES#PTM*SVDGR.Q          | S407:  | 2 | 3,1698 | 0,365 | -0,089 |
| 7 | P05387 RLA2_HUMAN   | K.NIEDVIAQGIGK.L             |        | 2 | 3,1696 | 0,376 | 0,097  |
| 7 | Q9H8G2 CI082_HUMAN  | E.LFLAEHS#DLEE.G             | S120:  | 2 | 3,1684 | 0,224 | 0,176  |
| 7 | Q8WXI9 P66B_HUMAN   | R.GRLTPS#PDIIVLSDNE.A        | S122:  | 3 | 3,1636 | 0,264 | 0,203  |
| 7 | Q27J81 INF2_HUMAN   | R.GS#SPQNTTTPKPSVE.G         | S371:  | 2 | 3,1617 | 0,349 | -0,227 |
| 7 | Q96FC9 DDX11_HUMAN  | E.LVLAEYES#DEEK.K            | S204:  | 2 | 3,1614 | 0,398 | 0      |
| 7 | Q5JS72 Q5JS72_HUMAN | R.TQSSS#CEDLPSTTQPK.G        | S192:  | 2 | 3,1596 | 0,418 | 0,397  |
| 7 | Q07889 SOS1_HUMAN   | R.SAS#VSSISLTK.G             | S1134: | 2 | 3,159  | 0,462 | -0,21  |
| 7 | Q8IXT5 RB12B_HUMAN  | R.GRPGS#GTSGVDSLNFIE.S       | S98:   | 2 | 3,1585 | 0,329 | 0      |
| 7 | Q8N3U4 STAG2_HUMAN  | R.RGTS#LM*EDDEEPIVE.D        | S1161: | 2 | 3,1569 | 0,474 | 0      |
| 7 | Q13428 TCOF_HUMAN   | R.SPAGPAATPAQAQAAS#PR.K      | T983:  | 2 | 3,1559 | 0,431 | -0,2   |
| 7 | Q12888 TP53B_HUMAN  | R.VDVS#CEPLEGVEK.C           | S771:  | 2 | 3,1558 | 0,345 | 1,742  |

|   |                     |                           |            |   |        |       |        |
|---|---------------------|---------------------------|------------|---|--------|-------|--------|
| 7 | P04406 G3P_HUMAN    | R.GALQNIIPAS#TGAAK.A      | S210:      | 2 | 3,1548 | 0,297 | -0,082 |
| 7 | Q969S2 NEIL2_HUMAN  | E.M*GPPGSS#PTPEPPQKE.V    | S68:       | 2 | 3,1527 | 0,447 | -0,704 |
| 7 | Q969R5 LMBL2_HUMAN  | E.AGELPTS#PLHLLSPGT#PR.S  | S67:T76:   | 2 | 3,1515 | 0,18  | 0,792  |
| 7 | Q8ND56 LS14A_HUMAN  | R.S#SPQLDPLRKS#PTM*E.Q    | S182:S192: | 2 | 3,1511 | 0,349 | -0,328 |
| 7 | P42166 LAP2A_HUMAN  | E.SSQLIS#PPLAQAIR.D       | S370:      | 2 | 3,1504 | 0,214 | -0,156 |
| 7 | Q92797 SYMPK_HUMAN  | E.AALLDSS#LEGPLPKE.T      | S1222:     | 2 | 3,1502 | 0,358 | -0,226 |
| 7 | Q8N6H7 ARFG2_HUMAN  | K.AIS#SDM*FFGR.E          | S432:      | 2 | 3,1497 | 0,432 | -0,298 |
| 7 | Q9Y613 FHOD1_HUMAN  | R.TPQS#PAPCVLLR.A         | S498:      | 2 | 3,1482 | 0,436 | 0,172  |
| 7 | Q5QP82 WDR32_HUMAN  | R.TTSS#SDLTSSSSSGPR.V     | S350:      | 2 | 3,1445 | 0,459 | -0,351 |
| 7 | Q15477 SKIV2_HUMAN  | R.ASS#LEDLVLK.E           | S256:      | 2 | 3,1427 | 0,375 | -0,106 |
| 7 | Q9UEY8 ADDG_HUMAN   | R.VSRLS#TSTTIENIE.I       | S650:      | 2 | 3,141  | 0,267 | -0,225 |
| 7 | Q14686 MLL2_HUMAN   | R.CPSLDNLAVPES#PGVGGGK.A  | S1985:     | 3 | 3,1384 | 0,11  | 0,189  |
| 7 | P51149 RAB7A_HUMAN  | R.FQS#LGVAFYR.G           | S72:       | 2 | 3,1375 | 0,244 | 0      |
| 7 | Q15642 CIP4_HUMAN   | R.APSDS#SLGTPSDGRPE.L     | S298:      | 2 | 3,1367 | 0,285 | -0,295 |
| 7 | Q03164 HRX_HUMAN    | K.VTLT#PLKM*E.N           | T2525:     | 2 | 3,1365 | 0,344 | 0      |
| 7 | Q9UQ35 SRRM2_HUMAN  | E.NSFGSPLEFRNS#GPLGTE.M   | S1336:     | 2 | 3,1351 | 0,312 | 0,491  |
| 7 | Q8NCN4 RN169_HUMAN  | E.GLGST#PDAKLD.K          | T554:      | 2 | 3,1347 | 0,123 | -0,846 |
| 7 | P28290 SSFA2_HUMAN  | K.STIFIS#PSSVK.K          | S803:      | 2 | 3,1318 | 0,429 | 0,098  |
| 7 | P02545 LMNA_HUMAN   | R.SGAQASSTPLS#PTR.I       | S22:       | 2 | 3,1279 | 0,392 | 0      |
| 7 | Q9UPS6 SET1B_HUMAN  | E.GAM*LLS#PEPPAKE.V       | S1240:     | 2 | 3,1272 | 0,21  | -0,255 |
| 7 | Q92625 ANS1A_HUMAN  | R.SLSKS#DSDLLTCSPT.E.D    | S626:      | 2 | 3,1261 | 0,232 | -0,402 |
| 7 | Q14671 PUM1_HUMAN   | E.YVLSSS#PGDSCLR.K        | S229:      | 2 | 3,1228 | 0,344 | 0      |
| 7 | Q9UIF9 BAZ2A_HUMAN  | R.AGDPGEM*PQS#PTGLGQPK.R  | S1370:     | 2 | 3,1179 | 0,352 | -0,066 |
| 7 | Q96GE4 CCD45_HUMAN  | E.TLS#VSGIPNAR.K          | S243:      | 2 | 3,1176 | 0,23  | 0,204  |
| 7 | Q9HAV7 GRPE1_HUMAN  | K.NSGQNLEEDM*GQSE.Q       |            | 2 | 3,117  | 0,337 | 0      |
| 7 | Q15446 RPA34_HUMAN  | E.M*KPLES#PGGTM*APQQPE.G  | S359:      | 2 | 3,1152 | 0,348 | -0,319 |
| 7 | Q13127 REST_HUMAN   | E.SVSTEDLSPPS#PPLPK.E     | S864:      | 2 | 3,1125 | 0,201 | -0,211 |
| 7 | Q03164 HRX_HUMAN    | K.VTLT#PLKM*ENE.S         | T2525:     | 2 | 3,1091 | 0,298 | 0,178  |
| 7 | Q6SPF0 SAMD1_HUMAN  | R.AAAAAATAPPS#PGPAQPGPR.A | S161:      | 2 | 3,1087 | 0,409 | 0,332  |
| 7 | Q16186 ADRM1_HUMAN  | R.S#QSAAVTPSSTTSSTR.A     | S211:      | 2 | 3,1059 | 0,42  | 0      |
| 7 | Q13546 RIPK1_HUMAN  | R.M*QS#LQLDCVAVPSSR.S     | S320:      | 2 | 3,1033 | 0,456 | 0,068  |
| 7 | Q15276 RABE1_HUMAN  | R.AQS#TDSLGTSGSLQSK.A     | S407:      | 2 | 3,1024 | 0,419 | -0,445 |
| 7 | A8MQ02 A8MQ02_HUMAN | R.LFS#QQQDVSNK.V          | S1799:     | 2 | 3,1016 | 0,266 | -0,094 |

|   |                     |                              |            |   |        |       |        |
|---|---------------------|------------------------------|------------|---|--------|-------|--------|
| 7 | P08670 VIME_HUMAN   | R.QDVNDAS#LARLDLE.R          | S214:      | 2 | 3,1001 | 0,44  | -0,074 |
| 7 | P18031 PTN1_HUMAN   | E.KGS#PLNAAPYIE.S            | S352:      | 2 | 3,0998 | 0,426 | -0,349 |
| 7 | Q6S8J3 A26CA_HUMAN  | E.M*ATAASSSLE.K              |            | 2 | 3,0977 | 0,306 | -0,456 |
| 7 | Q5VZ89 DEN4C_HUMAN  | K.VPS#GIFDVNSR.K             | S753:      | 2 | 3,097  | 0,334 | 0,096  |
| 7 | Q6P996 PDXD1_HUMAN  | E.TSS#VSHIEDLE.K             | S722:      | 2 | 3,0945 | 0,321 | -0,094 |
| 7 | Q8WYP5 AHTF1_HUMAN  | R.CLVAGLLS#PR.F              | S537:      | 2 | 3,0926 | 0,293 | 0      |
| 7 | Q8NCM9 Q8NCM9_HUMAN | R.SSDITSDLGNVLTST#PNAK.T     | T84:       | 3 | 3,0912 | 0,223 | -0,366 |
| 7 | Q00341 VIGLN_HUMAN  | K.VATLNS#EEESDPPTYK.D        | S31:       | 2 | 3,0909 | 0,346 | 0,131  |
| 7 | Q12888 TP53B_HUMAN  | E.TSVISIDS#PQK.L             | S727:      | 2 | 3,0904 | 0,386 | 0      |
| 7 | Q71RC2 LARP4_HUMAN  | R.SNVVS#PTKNEDNGAPE.N        | S647:      | 2 | 3,0899 | 0,374 | -0,07  |
| 7 | P20810 ICAL_HUMAN   | E.DFSGPQNASS#LKFE.D          | S527:      | 2 | 3,0884 | 0,198 | 0,38   |
| 7 | Q02790 FKBP4_HUMAN  | K.SNTAGSQSQVETEA.-           |            | 2 | 3,0883 | 0,467 | -0,087 |
| 7 | O15085 ARHGB_HUMAN  | R.NSVLSDPGLDS#PRT#SPVIM*AR.V | S251:T254: | 3 | 3,0882 | 0,267 | 0,23   |
| 7 | Q9BX63 FANCI_HUMAN  | E.AASHLS#PENFVEDE.A          | S930:      | 2 | 3,0864 | 0,374 | -0,075 |
| 7 | P22670 RFX1_HUMAN   | E.LQS#PQPQAQPPGGQK.Q         | S60:       | 2 | 3,0863 | 0,267 | -0,223 |
| 7 | Q9HB09 B2L12_HUMAN  | R.ACPGPPPPS#PEPLAR.L         | S273:      | 2 | 3,0844 | 0,096 | -0,226 |
| 7 | Q14181 DPOA2_HUMAN  | E.ILLNSYTT#PSK.G             | T115:      | 2 | 3,0836 | 0,401 | 0,093  |
| 7 | Q9BSC4 NOL10_HUMAN  | R.LLNPLVSKIS#E.K             | S514:      | 2 | 3,0823 | 0,295 | -0,944 |
| 7 | P14921 ETS1_HUMAN   | E.CADVPLLT#PSSKE.M           | T38:       | 2 | 3,0795 | 0,422 | -0,326 |
| 7 | Q15149 PLEC1_HUMAN  | R.SSS#VGSSSSYPISPAVSR.T      | S4386:     | 3 | 3,0791 | 0,162 | 0,199  |
| 7 | O60499 STX10_HUMAN  | K.DHM*VSPT#AVAFLE.R          | T110:      | 2 | 3,0778 | 0,373 | -0,161 |
| 7 | P46013 KI67_HUMAN   | K.AQSLVISPPAPS#PR.K          | S584:      | 2 | 3,0772 | 0,221 | 0,325  |
| 7 | Q15398 DLG7_HUMAN   | K.LFSGLS#VSSEGPSQR.L         | S627:      | 2 | 3,0763 | 0,385 | -1,945 |
| 7 | O94916 NFAT5_HUMAN  | E.ISS#PARPCSFEE.A            | S561:      | 2 | 3,075  | 0,376 | 0,585  |
| 7 | P49756 RBM25_HUMAN  | K.LGASNS#PGQPNSVK.R          | S618:      | 2 | 3,0719 | 0,243 | 0,17   |
| 7 | P04626 ERBB2_HUMAN  | R.EGPLPAARPAGAT#LE.R         | T1166:     | 2 | 3,0718 | 0,526 | 0,478  |
| 7 | P49023 PAXI_HUMAN   | E.LM*AS#LSDFK.I              | S272:      | 2 | 3,0703 | 0,478 | 0,22   |
| 7 | Q9UQ84 EXO1_HUMAN   | R.TIS#PPTLGLTLR.S            | S598:      | 2 | 3,07   | 0,414 | 0,099  |
| 7 | Q6LCG8 Q6LCG8_HUMAN | R.TGS#VGIGNLQR.T             | S299:      | 2 | 3,0699 | 0,264 | 0      |
| 7 | Q8WTT2 NOC3L_HUMAN  | E.VATES#PLDFTK.Y             | S787:      | 2 | 3,0687 | 0,457 | 0,095  |
| 7 | Q9HC44 GPBL1_HUMAN  | E.GEVLSSH#LEAE.H             | S384:      | 2 | 3,0678 | 0,318 | 0,293  |
| 7 | Q96H55 MYO19_HUMAN  | R.LIHVTSS#AFTGLG.-           | S964:      | 2 | 3,0671 | 0,497 | -0,176 |
| 7 | P52789 H XK2_HUMAN  | R.GS#GTQLFDHIAE.C            | S122:      | 2 | 3,0665 | 0,336 | 0,09   |

|   |                     |                            |        |   |        |       |        |
|---|---------------------|----------------------------|--------|---|--------|-------|--------|
| 7 | Q9NUU7 DD19A_HUMAN  | R.DPNS#PLYSVK.S            | S85:   | 2 | 3,0664 | 0,377 | -0,102 |
| 7 | Q7Z2W4 ZCCHV_HUMAN  | K.TVFS#PTLPAAR.S           | S378:  | 2 | 3,0653 | 0,349 | -0,197 |
| 7 | Q9HCM7 AUT2L_HUMAN  | R.DYS#PSRNPPEVE.A          | S961:  | 2 | 3,0626 | 0,303 | 0,249  |
| 7 | Q9BTT0 AN32E_HUMAN  | E.VGLS#YLM*K.E             | S219:  | 2 | 3,0625 | 0,315 | 0,061  |
| 7 | Q9C0C2 TB182_HUMAN  | R.VSGAGFS#PSSKM*E.G        | S1138: | 2 | 3,062  | 0,305 | -0,265 |
| 7 | Q9Y6D9 MD1L1_HUMAN  | E.LTPAEYS#PQLTR.R          | S428:  | 2 | 3,0607 | 0,399 | 0      |
| 7 | O00562 PITM1_HUMAN  | R.SIS#LKLDSEE.-            | S1237: | 2 | 3,059  | 0,27  | 0,305  |
| 7 | Q8N2Y8 RUSC2_HUMAN  | E.GPAAM*AGPGS#PPR.R        | S536:  | 2 | 3,0581 | 0,505 | -0,097 |
| 7 | Q9NW68 BSDC1_HUMAN  | E.LM*GISPIS#PK.E           | S235:  | 2 | 3,0571 | 0,308 | 0,321  |
| 7 | Q03164 HRX_HUMAN    | R.NSSTPGLQVPVS#PTVPIQNQK.Y | S3036: | 2 | 3,0531 | 0,43  | 0,43   |
| 7 | O15155 BET1_HUMAN   | K.SLS#IEIGHE.V             | S50:   | 2 | 3,0526 | 0,23  | 0,115  |
| 7 | Q15836 VAMP3_HUMAN  | R.LQQTQNQVDE.V             |        | 2 | 3,0517 | 0,231 | 0      |
| 7 | Q5TGY3 AHDC1_HUMAN  | R.ASTVS#PGGYM*VPK.G        | S1064: | 2 | 3,0504 | 0,225 | 0,614  |
| 7 | P14868 SYDC_HUMAN   | D.LT#IQKADE.V              | T52:   | 2 | 3,0474 | 0,229 | 0      |
| 7 | P05787 K2C8_HUMAN   | E.AES#M*YQIKYEE.L          | S280:  | 2 | 3,047  | 0,223 | 0      |
| 7 | P10809 CH60_HUMAN   | K.LVQDVANNTNE.E            |        | 2 | 3,0411 | 0,275 | 0,201  |
| 7 | P20020 AT2B1_HUMAN  | K.SATSS#SPGSPLHSLE.T       | S1245: | 2 | 3,041  | 1     | -0,079 |
| 7 | Q86WR7 CJ047_HUMAN  | R.M*AGNEALS#PTSPFRE.G      | S212:  | 2 | 3,0401 | 0,276 | 0,072  |
| 7 | Q7Z6E9 RBBP6_HUMAN  | K.LGYLV#PPQQR.R            | S516:  | 2 | 3,0393 | 0,321 | 0      |
| 7 | Q9UPN6 RBM16_HUMAN  | E.TVQTTQS#PTPVEKE.T        | S617:  | 2 | 3,0392 | 0,345 | -0,3   |
| 7 | O95544 NADK_HUMAN   | R.SLS#ASPALGSTKE.F         | S48:   | 2 | 3,039  | 0,21  | -0,184 |
| 7 | Q12888 TP53B_HUMAN  | E.TEPVEQDSS#QPSLPLVR.A     | S831:  | 2 | 3,0385 | 0,296 | -0,187 |
| 7 | P78559 MAP1A_HUMAN  | K.VPPPRS#PQAQEAPVNIDE.G    | S1069: | 2 | 3,0379 | 0,322 | 0      |
| 7 | Q92625 ANS1A_HUMAN  | E.QFSGLLHGSS#PVCE.V        | S507:  | 2 | 3,0376 | 0,44  | 0,229  |
| 7 | P27815 PDE4A_HUMAN  | R.SLS#LSLPGPRE.G           | S13:   | 2 | 3,0369 | 0,325 | 0,099  |
| 7 | Q13330 MTA1_HUMAN   | K.VAPVINNGS#PTILGK.R       | S576:  | 2 | 3,0364 | 0,393 | -0,078 |
| 7 | Q96QD9 FYTD1_HUMAN  | R.LVGATATSS#PPPK.A         | S16:   | 2 | 3,036  | 0,397 | -0,28  |
| 7 | P49757 NUMB_HUMAN   | R.TNPS#PTNPFSSDLQK.T       | S634:  | 2 | 3,035  | 0,446 | -0,142 |
| 7 | Q03164 HRX_HUMAN    | E.SIPSRSS#PEGDPDPVLT.E.V   | S1685: | 2 | 3,0347 | 0,374 | -0,376 |
| 7 | B1ALK7 B1ALK7_HUMAN | R.KES#APQVLLPEEE.K         | S619:  | 2 | 3,0324 | 0,371 | -0,079 |
| 7 | Q8IZH2 XRN1_HUMAN   | E.SSSASLKS#SPIAQPASSFQVE.T | S1656: | 3 | 3,0269 | 0,201 | -0,167 |
| 7 | Q9Y512 SAM50_HUMAN  | E.LAGYTGGDVS#FIKE.D        | S294:  | 2 | 3,0263 | 0,084 | 0,318  |
| 7 | Q6PJF5 RHDF2_HUMAN  | E.SPPLS#ASYFR.G            | S313:  | 2 | 3,0256 | 0,22  | -0,304 |

|   |                    |                          |        |   |        |       |        |
|---|--------------------|--------------------------|--------|---|--------|-------|--------|
| 7 | Q9P2N5 RBM27_HUMAN | R.LQLGT#PPLLAAR.L        | T447:  | 2 | 3,0251 | 0,342 | -0,086 |
| 7 | Q6Y7W6 PERQ2_HUMAN | R.SGS#GSIDDDRDSLPE.W     | S275:  | 2 | 3,025  | 0,256 | 0,075  |
| 7 | Q0JRZ9 FCHO2_HUMAN | K.VSIGNITLS#PAISR.H      | S387:  | 2 | 3,0247 | 0,352 | -0,243 |
| 7 | Q96L73 NSD1_HUMAN  | K.SIGAAS#PRPQSLE.K       | S2369: | 2 | 3,0222 | 0,484 | -0,263 |
| 7 | Q09666 AHNK_HUMAN  | K.ADIKSPS#LDVTVPE.A      | S4995: | 2 | 3,019  | 0,213 | 0      |
| 7 | Q9H4L5 OSBL3_HUMAN | E.SLLLDS#PAVAK.S         | S410:  | 2 | 3,0133 | 0,377 | 0,102  |
| 7 | Q15742 NAB2_HUMAN  | R.SFSPKS#PLELGE.K        | S162:  | 2 | 3,0133 | 0,263 | -0,089 |
| 7 | P68371 TBB2C_HUMAN | R.IM*NTFSVVPS#PK.V       | S172:  | 2 | 3,0131 | 0,26  | 0,345  |
| 7 | Q96T37 RBM15_HUMAN | R.SLS#PGGAALGYR.D        | S294:  | 2 | 3,011  | 0,41  | 0,099  |
| 7 | Q8WYP5 AHTF1_HUMAN | R.TTS#FFLNSPEKE.H        | S1287: | 2 | 3,0109 | 0,433 | 0,165  |
| 7 | Q9C0B5 ZDHC5_HUMAN | E.LGQLQS#IRSE.G          | S445:  | 2 | 3,0087 | 0,307 | 0,101  |
| 7 | P55265 DSRAD_HUMAN | K.TAESQT#PTPSATSFSGK.S   | T601:  | 3 | 3,006  | 0,201 | 0,285  |
| 7 | Q69YU3 AN34A_HUMAN | E.VIIITDTS#PSGTK.K       | S149:  | 2 | 3,005  | 0,386 | -0,323 |
| 7 | Q96N21 CQ056_HUMAN | E.LSM*GS#PGPVTK.A        | S333:  | 2 | 3,0039 | 0,341 | -0,19  |
| 7 | P49792 RBP2_HUMAN  | K.GSGTGAAGAS#DTTIKPNPE.N | S2207: | 2 | 3,0037 | 0,166 | -0,606 |
| 7 | Q9Y4B4 ARIP4_HUMAN | E.GLARPV#PDSPEIISE.L     | S1169: | 2 | 3,0036 | 0,413 | -0,07  |
| 7 | Q12888 TP53B_HUMAN | E.IEPKNS#PEDLGLSLTGD.S   | S500:  | 2 | 3,0036 | 0,42  | 0,262  |
| 7 | Q6XQN6 PNCB_HUMAN  | R.ALAQLSLSRLS#PE.H       | S505:  | 2 | 3,0033 | 0,207 | -0,167 |
| 7 | Q13151 ROAO_HUMAN  | E.ADAAM*AAS#PHAVD.G      | S68:   | 2 | 2,9985 | 0,459 | 0      |
| 7 | Q16643 DREB_HUMAN  | E.TQEPS#PILDSEETR.A      | S381:  | 2 | 2,9971 | 0,446 | -0,145 |
| 7 | Q7Z7G8 VP13B_HUMAN | E.TM*AGPVPT#SPVR.S       | T1262: | 2 | 2,9968 | 0,393 | -0,093 |
| 7 | P21796 VDAC1_HUMAN | K.LTFDSSFS#PNTGK.K       | S104:  | 2 | 2,9963 | 0,381 | 0      |
| 7 | Q99700 ATX2_HUMAN  | E.VTSQGVQTSS#PACKQE.K    | S888:  | 3 | 2,9947 | 0,214 | -0,102 |
| 7 | O75376 NCOR1_HUMAN | E.VIS#PASSPAPPQEK.L      | S1977: | 2 | 2,994  | 0,411 | -0,082 |
| 7 | O60716 CTND1_HUMAN | R.GSLAS#LDSL.R.K         | S349:  | 2 | 2,9925 | 0,238 | 0      |
| 7 | Q9H0B6 KLC2_HUMAN  | R.ASS#LNFLNK.S           | S582:  | 2 | 2,9901 | 0,244 | 0      |
| 7 | P60174 TPIS_HUMAN  | K.VTNGAFTGEIS#PGM*IK.D   | S80:   | 3 | 2,9878 | 0,229 | 0,106  |
| 7 | Q15477 SKIV2_HUMAN | R.ASS#LEDLVLKE.A         | S256:  | 2 | 2,9855 | 0,229 | -0,095 |
| 7 | Q5VVJ2 MYSM1_HUMAN | R.QLPS#PEPCEIQK.N        | S340:  | 2 | 2,9842 | 0,237 | -0,81  |
| 7 | Q02447 SP3_HUMAN   | E.VLSAT#PTTIKDE.A        | T115:  | 2 | 2,9841 | 0,416 | 0,991  |
| 7 | Q6PGN9 PSRC1_HUMAN | E.TLDFGGLS#PSDSR.E       | S22:   | 2 | 2,9837 | 0,288 | -1,022 |
| 7 | P98168 ZXDA_HUMAN  | K.NSS#PEPQALTPSSK.L      | S714:  | 2 | 2,9811 | 0,381 | -0,32  |
| 7 | O75145 LIPA3_HUMAN | R.GEGPAIPGDT#PPPTPR.S    | T714:  | 2 | 2,9801 | 0,262 | -0,223 |



|   |                     |                                   |            |   |        |       |        |
|---|---------------------|-----------------------------------|------------|---|--------|-------|--------|
| 7 | Q8ND30 LIPB2_HUMAN  | K.LSCS#LEDLRSE.S                  | S387:      | 2 | 2,9796 | 0,342 | -0,527 |
| 7 | Q9UHR4 BI2L1_HUMAN  | E.TEAVTVPTPS#PTPVR.S              | S414:      | 2 | 2,9786 | 0,377 | -0,075 |
| 7 | Q9UKS6 PACN3_HUMAN  | R.SPDEVTLTTSIVPTR.D               | T324:      | 2 | 2,9777 | 0,28  | -0,535 |
| 7 | Q00613 HSF1_HUMAN   | E.LAPAS#PM*AS#PGGSIDERPLSSSPLVR.V | S275:S279: | 3 | 2,9766 | 0,325 | 0,264  |
| 7 | Q2M2I8 AAK1_HUMAN   | K.VQTT#PPPAVQGQK.V                | T606:      | 2 | 2,9763 | 0,337 | -0,171 |
| 7 | P21359 NF1_HUMAN    | E.GYLAATYPTVGQTS#PR.A             | S2515:     | 3 | 2,975  | 0,267 | 0,208  |
| 7 | P08621 RU17_HUMAN   | E.GLGND#RDM*YM*E.S                | S410:      | 2 | 2,973  | 0,272 | 0,325  |
| 7 | Q7Z4M8 Q7Z4M8_HUMAN | E.ISGALPVAS#PASSR.T               | S171:      | 2 | 2,9722 | 0,396 | -0,35  |
| 7 | Q9NQG7 HPS4_HUMAN   | E.VLGLSS#LGKE.L                   | S355:      | 2 | 2,972  | 0,37  | 0,209  |
| 7 | Q15942 ZYX_HUMAN    | R.S#PGAPGPLTLKE.V                 | S344:      | 2 | 2,9717 | 0,397 | -1,174 |
| 7 | P15924 DESP_HUMAN   | K.GLPSYNYM*SS#APGSR.S             | S2821:     | 2 | 2,9706 | 0,454 | 0,151  |
| 7 | Q14573 ITPR3_HUMAN  | R.VAS#FSIPGSSSR.Y                 | S1832:     | 2 | 2,9697 | 0,344 | 0,191  |
| 7 | Q9H3N1 TXND1_HUMAN  | R.S#LGPSLATDKS.-                  | S270:      | 2 | 2,9695 | 0,503 | -0,422 |
| 7 | Q6R327 RICTR_HUMAN  | K.ALS#YASLDKE.D                   | S1385:     | 2 | 2,9688 | 0,108 | 0      |
| 7 | A6NGB9 WIPF3_HUMAN  | K.TISGPIPPAS#PR.L                 | S149:      | 2 | 2,9687 | 0,357 | 0,088  |
| 7 | P35658 NU214_HUMAN  | K.SPGS#TPTTPTSSQAPQK.L            | S433:      | 2 | 2,9679 | 0,373 | 0      |
| 7 | Q8NEY1 NAV1_HUMAN   | K.AVALDSDNIS#LK.S                 | S754:      | 2 | 2,9677 | 0,409 | -0,092 |
| 7 | O60524 SDCG1_HUMAN  | K.KLPS#DSGDLEALE.G                | S831:      | 2 | 2,9674 | 0,17  | 0,168  |
| 7 | Q09666 AHNK_HUMAN   | R.AGAISASGPE.L                    |            | 2 | 2,9661 | 0,329 | 0,567  |
| 7 | O43432 IF4G3_HUMAN  | E.LPLPPS#PTTVSSVAR.S              | S267:      | 2 | 2,9658 | 0,318 | 0,152  |
| 7 | Q9BQC3 DPH2_HUMAN   | E.LAESS#PAASFLSSR.S               | S446:      | 2 | 2,9655 | 0,431 | 0,325  |
| 7 | Q9Y2D9 ZN652_HUMAN  | E.SGS#PYSVLVDTK.M                 | S57:       | 2 | 2,9638 | 0,334 | 0      |
| 7 | Q92576 PHF3_HUMAN   | K.GNIDGNVSCSE.N                   |            | 2 | 2,9636 | 0,381 | 0      |
| 7 | P50542 PEX5_HUMAN   | E.VTDPLSVS#PAR.W                  | S155:      | 2 | 2,9619 | 0,189 | -0,1   |
| 7 | P49792 RBP2_HUMAN   | E.STTGFNFS#FK.S                   | S2270:     | 2 | 2,9597 | 0,384 | 0,1    |
| 7 | Q96D46 NMD3_HUMAN   | E.DLHIS#QDATGEE.G                 | S490:      | 2 | 2,9595 | 0,202 | 0,087  |
| 7 | Q6NZI2 PTRF_HUMAN   | R.GSS#PDVHALLE.I                  | S366:      | 2 | 2,9587 | 0,238 | 0,101  |
| 7 | Q53F19 CQ085_HUMAN  | E.M*ST#QDVFYSYFK.E                | T138:      | 2 | 2,9556 | 0,284 | -0,168 |
| 7 | Q8WZ73 RFFL_HUMAN   | R.RAS#LSDLTLEDIE.G                | S240:      | 2 | 2,955  | 0,358 | -0,295 |
| 7 | Q66K64 DCA15_HUMAN  | R.SSGS#PEPSPAIK.A                 | S310:      | 2 | 2,9515 | 0,432 | 0      |
| 7 | P98082 DAB2_HUMAN   | K.S#SPNPFVGSPPK.G                 | S393:      | 2 | 2,95   | 0,29  | -0,283 |
| 7 | P46937 YAP1_HUMAN   | E.ST#DSGLSM*SSYSVPR.T             | T348:      | 2 | 2,9492 | 0,392 | -0,877 |
| 7 | Q01813 K6PP_HUMAN   | R.S#FAGNLNTYK.R                   | S386:      | 2 | 2,949  | 0,306 | -0,102 |

|   |                     |                            |        |   |        |       |        |
|---|---------------------|----------------------------|--------|---|--------|-------|--------|
| 7 | P15056 BRAF1_HUMAN  | E.DFSLYACAS#PK.T           | S750:  | 2 | 2,9488 | 0,23  | 0      |
| 7 | P18433 PTPRA_HUMAN  | E.YIDAFSDY#ANFK.-          | Y798:  | 2 | 2,9486 | 0,329 | 0,239  |
| 7 | Q6NZY4 ZCHC8_HUMAN  | K.LFPADTS#PSTATK.I         | S649:  | 2 | 2,9485 | 0,362 | 0,517  |
| 7 | Q09666 AHNK_HUMAN   | K.ADIKS#PSLDVTVPE.A        | S4993: | 2 | 2,9471 | 0,266 | -0,157 |
| 7 | Q02952 AKA12_HUMAN  | E.LS#LQEGDLNGQK.G          | S75:   | 2 | 2,9465 | 0,506 | -0,265 |
| 7 | P28290 SSFA2_HUMAN  | R.SQS#LPTLLSPVR.V          | S739:  | 2 | 2,9442 | 0,338 | -0,165 |
| 7 | Q9NYL2 MLTK_HUMAN   | E.M*SVYAS#LFKE.N           | S366:  | 2 | 2,9426 | 0,253 | -1,248 |
| 7 | Q07157 ZO1_HUMAN    | K.S#HSLAQPFEDSGVE.T        | S1577: | 2 | 2,9426 | 0,311 | 0,073  |
| 7 | Q9NRS6 SNX15_HUMAN  | E.STEEASGS#PARGPLTE.A      | S201:  | 2 | 2,9418 | 0,397 | -0,366 |
| 7 | P82094 TMF1_HUMAN   | E.TLAAGTSS#PKTE.G          | S170:  | 2 | 2,9415 | 0,456 | 0      |
| 7 | O43166 SI1L1_HUMAN  | E.YGS#TSSIDK.Q             | S208:  | 2 | 2,941  | 0,365 | 0,588  |
| 7 | Q9Y490 TLN1_HUMAN   | E.STM*LEDSVS#PK.K          | S425:  | 2 | 2,9408 | 0,341 | 0,378  |
| 7 | P08621 RU17_HUMAN   | E.GLGND5#RDM*YM*ESE.G      | S410:  | 2 | 2,9395 | 0,102 | -0,071 |
| 7 | Q9Y6S1 Q9Y6S1_HUMAN | E.VSPAEPAS#PGTPQQVK.D      | S71:   | 2 | 2,9394 | 0,406 | -0,146 |
| 7 | Q03164 HRX_HUMAN    | R.NSSTPGLQVPVS#PTVPIQNQK.Y | S3036: | 3 | 2,9365 | 0,301 | 0,161  |
| 7 | O15417 TNC18_HUMAN  | R.LAERLS#PFLAE.S           | S263:  | 2 | 2,9359 | 0,199 | -0,184 |
| 7 | Q08AD1 CA1L1_HUMAN  | K.LNSS#LHFLQQE.M           | S901:  | 2 | 2,9351 | 0,237 | -0,087 |
| 7 | P19532 TFE3_HUMAN   | E.GVVGGLSGGALS#PLR.A       | S542:  | 3 | 2,9348 | 0,192 | 0,708  |
| 7 | Q9Y4B6 VPRBP_HUMAN  | R.HLPS#PPTLDSIITE.Y        | S1000: | 2 | 2,9348 | 0,38  | 0      |
| 7 | Q86UP2 KTN1_HUMAN   | K.VEPVPVTQKPT#PPSE.A       | T153:  | 2 | 2,9333 | 0,281 | -0,145 |
| 7 | P28066 PSA5_HUMAN   | R.ITS#PLM*EPSSIEK.I        | S56:   | 2 | 2,9315 | 0,303 | -0,319 |
| 7 | O94868 FCSD2_HUMAN  | R.SSLYFPRS#PSANE.K         | S681:  | 2 | 2,9288 | 0,402 | -0,079 |
| 7 | Q9Y490 TLN1_HUMAN   | K.AAAFEQEENE.T             |        | 2 | 2,9284 | 0,212 | 0      |
| 7 | Q6P158 DHX57_HUMAN  | E.FTVS#PFAVQK.L            | S182:  | 2 | 2,9271 | 0,322 | 0,101  |
| 7 | Q09666 AHNK_HUMAN   | K.M*PFLSISS#PK.V           | S3412: | 2 | 2,9267 | 0,307 | 0      |
| 7 | P16949 STMN1_HUMAN  | K.ESVPEFPPLS#PPK.K         | S38:   | 2 | 2,9246 | 0,369 | 0,173  |
| 7 | Q14103 HNRPD_HUMAN  | E.VES#IELPM*DNK.T          | S210:  | 2 | 2,9236 | 0,328 | 0,89   |
| 7 | P49792 RBP2_HUMAN   | E.TVFTPPTS#PENVD.R         | S1400: | 2 | 2,918  | 0,258 | 0,223  |
| 7 | Q92797 SYMPK_HUMAN  | K.TPS#PAAEDAREPE.A         | S1259: | 2 | 2,9178 | 0,451 | -0,084 |
| 7 | Q96AP0 ACD_HUMAN    | E.LILGSETPSS#PR.A          | S111:  | 2 | 2,915  | 0,396 | -0,091 |
| 7 | Q8WYP5 AHTF1_HUMAN  | R.TTSFFLNS#PEKE.H          | S1292: | 2 | 2,9142 | 0,279 | 0      |
| 7 | Q9C0H5 K1688_HUMAN  | R.AELPGSSS#PLLAQPR.K       | S286:  | 2 | 2,9103 | 0,318 | -0,076 |
| 7 | Q9Y4E8 UBP15_HUMAN  | K.S#PGASNFSTLPK.I          | S229:  | 2 | 2,9084 | 0,393 | 0,285  |

|   |                     |                               |        |   |        |       |        |
|---|---------------------|-------------------------------|--------|---|--------|-------|--------|
| 7 | Q6IFS5 HSN2_HUMAN   | E.GIPYNSSVLSS#PM*K.Q          | S176:  | 2 | 2,9073 | 0,365 | -0,31  |
| 7 | Q5BJF6 ODFP2_HUMAN  | E.LLLQKLS#TFEE.T              | S261:  | 2 | 2,9072 | 0,216 | -0,348 |
| 7 | Q9UQ35 SRRM2_HUMAN  | R.SGAGSS#PETKEQNSALPTSSQDEE.L | S1219: | 3 | 2,9051 | 0,229 | -0,145 |
| 7 | P22670 RFX1_HUMAN   | E.LQS#PQPQAQPPGGQK.Q          | S60:   | 3 | 2,9037 | 0,095 | 0      |
| 7 | P49454 CENPF_HUMAN  | K.LALS#PLSLGK.E               | S3119: | 2 | 2,9029 | 0,336 | -0,113 |
| 7 | Q14676 MDC1_HUMAN   | R.SSVKT#PEPVVPTAPE.L          | T1157: | 2 | 2,8978 | 0,212 | 0      |
| 7 | Q02880 TOP2B_HUMAN  | E.ALT#PSVPINK.G               | T1292: | 2 | 2,8974 | 0,317 | -0,109 |
| 7 | O75815 BCAR3_HUMAN  | R.TGSEPALS#PAVVR.R            | S375:  | 2 | 2,8968 | 0,357 | 0,089  |
| 7 | O75410 TACC1_HUMAN  | K.ISIVRPF#E.T                 | S153:  | 2 | 2,8944 | 0,256 | -0,295 |
| 7 | Q9UGU0 TCF20_HUMAN  | E.NDVTIS#PKQE.G               | S1522: | 2 | 2,893  | 0,313 | 0,093  |
| 7 | Q9NWT1 PK1IP_HUMAN  | E.SLPPAAEPS#PVSKE.Q           | S320:  | 2 | 2,8926 | 0,507 | -0,819 |
| 7 | Q66K74 MAP1S_HUMAN  | R.LSLS#PLRGGE.A               | S657:  | 2 | 2,8922 | 0,289 | 0,11   |
| 7 | Q63ZY6 NSN5C_HUMAN  | R.QLEEPGAGTPS#PVR.L           | S143:  | 2 | 2,8919 | 0,349 | 0,563  |
| 7 | Q8WX92 NELFB_HUMAN  | R.KPS#PAQAAETPALE.L           | S557:  | 2 | 2,8915 | 0,349 | 0,409  |
| 7 | Q9UHR4 BI2L1_HUMAN  | E.AVTVTPSPT#PVR.S             | T416:  | 2 | 2,8905 | 0,18  | -0,087 |
| 7 | P42166 LAP2A_HUMAN  | R.SSTPLPTIS#SSAENTR.Q         | S166:  | 2 | 2,8893 | 0,319 | 0      |
| 7 | O43318 M3K7_HUMAN   | R.KTAS#FGNILDVPE.I            | S417:  | 2 | 2,8891 | 0,335 | -0,083 |
| 7 | Q9UPX8 SHAN2_HUMAN  | R.QGIAVM*TPTVPGS#PK.A         | S235:  | 2 | 2,8891 | 0,275 | 0,155  |
| 7 | Q9NQW6 ANLN_HUMAN   | K.STLS#QTVPSKGE.L             | S339:  | 2 | 2,8889 | 0,314 | -0,464 |
| 7 | P30414 NKTR_HUMAN   | E.NIPVIPLSDS#PPPSR.W          | S613:  | 2 | 2,8867 | 0,409 | -0,146 |
| 7 | O60238 BNI3L_HUMAN  | R.GSSHCDSPS#PQEDGQIM*FDVE.M   | S97:   | 3 | 2,8856 | 0,141 | 0,378  |
| 7 | Q66K74 MAP1S_HUMAN  | K.AVPM*APAPAS#PGSSNDSSAR.S    | S759:  | 3 | 2,8843 | 0,161 | 0,651  |
| 7 | Q86YS7 K0528_HUMAN  | E.IIGS#PIPEPR.Q               | S643:  | 2 | 2,8835 | 0,379 | 0      |
| 7 | Q32MZ4 LRRF1_HUMAN  | K.IDGATQSS#PAEPKSE.D          | S714:  | 2 | 2,8826 | 0,364 | -0,153 |
| 7 | Q8IXQ3 CIO40_HUMAN  | K.IDAGTM*AEPSAS#PSK.R         | S69:   | 2 | 2,8817 | 0,323 | 0,157  |
| 7 | Q15185 TEBP_HUMAN   | K.LTFSCGG#DNFK.H              | S44:   | 2 | 2,8817 | 0,384 | -0,08  |
| 7 | O00512 BCL9_HUMAN   | E.VM*VRPPTVM*S#PSGNPQLD.S     | S35:   | 2 | 2,8808 | 0,126 | 0,779  |
| 7 | Q9Y4W2 LAS1L_HUMAN  | E.GSEAS#PIGKSPYTLD.S          | S523:  | 2 | 2,8805 | 0,306 | 0      |
| 7 | Q9Y3X0 CCDC9_HUMAN  | E.GAASPAPETPQPTS#PETS PK.E    | S386:  | 3 | 2,873  | 0,233 | 0,36   |
| 7 | Q9UQ84 EXO1_HUMAN   | R.TPS#PSPSTALQQFR.R           | S623:  | 2 | 2,8724 | 0,365 | 0,535  |
| 7 | P42166 LAP2A_HUMAN  | E.RDS#GSFVAFQNI PGSE.L        | S442:  | 2 | 2,8707 | 0,304 | -0,136 |
| 7 | A7MD96 A7MD96_HUMAN | R.SVS#PLRPETE.A               | S738:  | 2 | 2,8707 | 0,383 | -0,204 |
| 7 | Q9UHY1 NRBP_HUMAN   | E.VTS#PVVPPSVK.T              | S422:  | 2 | 2,8706 | 0,33  | -0,103 |

|   |                    |                             |        |   |        |       |        |
|---|--------------------|-----------------------------|--------|---|--------|-------|--------|
| 7 | Q9BWG4 SSBP4_HUMAN | K.S#SPGAVAGLSNAPGTPR.D      | S341:  | 2 | 2,8705 | 0,347 | -0,301 |
| 7 | Q9UGU0 TCF20_HUMAN | R.SVICDIS#PLR.Q             | S871:  | 2 | 2,8702 | 0,394 | 0,295  |
| 7 | P51149 RAB7A_HUMAN | E.FLIQAS#PRDPE.N            | S111:  | 2 | 2,8691 | 0,238 | 0,451  |
| 7 | Q6XZF7 DNMBP_HUMAN | R.SLDQTS#PCPLVLVR.I         | S689:  | 2 | 2,8685 | 0,306 | -0,366 |
| 7 | P04049 RAF1_HUMAN  | E.DINACTLTTS#PR.L           | S642:  | 2 | 2,8684 | 0,181 | -0,683 |
| 7 | Q9UQ35 SRRM2_HUMAN | E.SYFGVSS#LQLK.G            | S1054: | 2 | 2,866  | 0,366 | 0      |
| 7 | P49711 CTCF_HUMAN  | E.LQGAYENEVS#KEGLAE.S       | S143:  | 2 | 2,8645 | 0,348 | -0,067 |
| 7 | Q13428 TCOF_HUMAN  | D.SAVGTLPATS#PQSTSVQAK.G    | S1111: | 2 | 2,8633 | 0,461 | 0,064  |
| 7 | Q14151 SAFB2_HUMAN | E.TSSLNFKVT#PDIEE.S         | T201:  | 2 | 2,8628 | 0,325 | 0      |
| 7 | P27987 IP3KB_HUMAN | R.AVLS#PGSVFSPGR.G          | S43:   | 2 | 2,8607 | 0,41  | -0,09  |
| 7 | Q96AY4 TTC28_HUMAN | D.VLSLLNLS#PR.H             | S1633: | 2 | 2,8587 | 0,366 | -0,205 |
| 7 | Q99567 NUP88_HUMAN | E.DVEVAES#PLR.V             | S517:  | 2 | 2,8568 | 0,372 | -0,102 |
| 7 | Q8WUA4 TF3C2_HUMAN | E.M*SLPTPLPGFEDS#PDQR.R     | S63:   | 2 | 2,8561 | 0,362 | 0,123  |
| 7 | Q9Y6M7 S4A7_HUMAN  | E.GGS#LLQIPVK.A             | S1176: | 2 | 2,8553 | 0,215 | 0,112  |
| 7 | O95067 CCNB2_HUMAN | K.GPS#PTPEDVSM*KEE.N        | S92:   | 2 | 2,8551 | 0,421 | 0,076  |
| 7 | O15400 STX7_HUMAN  | E.FGSLPTT#PSEQR.Q           | T79:   | 2 | 2,8526 | 0,33  | -0,174 |
| 7 | O95453 PARN_HUMAN  | R.NNS#FTAPSTVGK.R           | S557:  | 2 | 2,8515 | 0,503 | -0,094 |
| 7 | P27816 MAP4_HUMAN  | E.VGLLKDMS#PLSETE.M         | S507:  | 2 | 2,851  | 0,33  | 0,076  |
| 7 | Q9H8Y8 GORS2_HUMAN | K.ISLPGQM*AGT#PITPLK.D      | T222:  | 2 | 2,8501 | 0,144 | -0,213 |
| 7 | P42166 LAP2A_HUMAN | R.SSTPLPTISS#AENTR.Q        | S168:  | 2 | 2,85   | 0,342 | -0,141 |
| 7 | Q6IAA8 CK059_HUMAN | K.LLLDPSS#PPTK.A            | S27:   | 2 | 2,8484 | 0,314 | -0,098 |
| 7 | P51826 AFF3_HUMAN  | E.LLS#PLKDSDE.I             | S755:  | 2 | 2,8476 | 0,252 | 0,204  |
| 7 | Q3MII6 TBC25_HUMAN | R.QAS#LDGLQLR.D             | S506:  | 2 | 2,8452 | 0,271 | 0      |
| 7 | P42684 ABL2_HUMAN  | K.VPVLIS#PTLK.H             | S936:  | 2 | 2,8433 | 0,33  | 0,213  |
| 7 | Q14676 MDC1_HUMAN  | K.LEPSTSTDQPVTP#PEPTSQATR.G | T1425: | 3 | 2,8416 | 0,279 | -0,158 |
| 7 | Q8TDJ6 DMXL2_HUMAN | R.TIS#VSGSTAKE.T            | S1400: | 2 | 2,8395 | 0,335 | -0,21  |
| 7 | Q86YS7 K0528_HUMAN | R.QSS#SSDLDLSTPK.T          | S305:  | 2 | 2,8388 | 0,185 | 0,158  |
| 7 | Q92574 TSC1_HUMAN  | E.ASASIPTTVGS#LPSSK.S       | S1080: | 2 | 2,838  | 0,398 | 0      |
| 7 | Q6ZN18 AEBP2_HUMAN | R.LSPLPPGS#PGSAAR.G         | S24:   | 2 | 2,8352 | 0,454 | -0,704 |
| 7 | P78364 PHC1_HUMAN  | E.ALSPTS#PGPLSVR.A          | S898:  | 2 | 2,8341 | 0,455 | 0,09   |
| 7 | Q9UPN9 TRI33_HUMAN | E.SSLT#PPLSTNLHLE.S         | T815:  | 2 | 2,8326 | 0,306 | -0,154 |
| 7 | O95997 PTTG1_HUMAN | K.LFQLGPPS#PVK.M            | S165:  | 2 | 2,8317 | 0,244 | 1,159  |
| 7 | Q04759 KPCT_HUMAN  | R.ALINS#M*DQNM*FR.N         | S685:  | 2 | 2,8315 | 0,207 | -0,079 |

|   |                     |                                  |            |   |        |       |        |
|---|---------------------|----------------------------------|------------|---|--------|-------|--------|
| 7 | Q9NUL3 STAU2_HUMAN  | K.GILHLS#PDVYQE.M                | S416:      | 2 | 2,831  | 0,208 | -0,084 |
| 7 | P49848 TAF6_HUMAN   | E.AGDS#PPPAPGTPK.A               | S653:      | 2 | 2,8306 | 0,212 | -0,096 |
| 7 | Q76L83 ASXL2_HUMAN  | E.KAPS#PTGPALISGAS#PVHCAADGTVE.L | S834:S845: | 3 | 2,83   | 0,201 | -0,207 |
| 7 | B2RDY9 B2RDY9_HUMAN | R.SALFAQINQGE.S                  |            | 2 | 2,8261 | 0,395 | 0,518  |
| 7 | Q9BZL6 KPCD2_HUMAN  | K.AQSS#LGYIPLM*R.V               | S375:      | 2 | 2,8259 | 0,266 | 0,17   |
| 7 | Q9NYV4 CD2L7_HUMAN  | K.AIT#PPQQPYK.K                  | T692:      | 2 | 2,8256 | 0,224 | -0,898 |
| 7 | Q96RT1 LAP2_HUMAN   | R.TM*S#VSDFNYSR.T                | S1158:     | 2 | 2,8229 | 0,234 | -0,087 |
| 7 | O94967 WDR47_HUMAN  | K.AAYADLLT#PLISK.L               | T285:      | 2 | 2,8223 | 0,282 | -0,168 |
| 7 | Q6PGQ7 BORA_HUMAN   | E.FADQSPGNLSS#SSLR.R             | S189:      | 2 | 2,8222 | 0,114 | -0,297 |
| 7 | Q2KHT3 CL16A_HUMAN  | E.TASLSPS#LVPAR.Q                | S982:      | 2 | 2,8212 | 0,288 | -0,095 |
| 7 | Q9UMN6 MLL4_HUMAN   | R.FAPVVTT#PVKAE.V                | T713:      | 2 | 2,8207 | 0,119 | -0,091 |
| 7 | Q9Y365 PCTL_HUMAN   | E.LSVQHADS#LENIDE.S              | S259:      | 2 | 2,8206 | 0,236 | -0,148 |
| 7 | O43524 FOXO3_HUMAN  | E.LQAS#PAKPSGE.T                 | S43:       | 2 | 2,8161 | 0,368 | -0,419 |
| 7 | Q6VY07 PACS1_HUMAN  | K.TDLQGSAS#PSKVE.G               | S495:      | 2 | 2,8154 | 0,163 | -0,087 |
| 7 | Q5VZK9 LR16A_HUMAN  | E.DLDTCM*M*T#PK.S                | T916:      | 2 | 2,8095 | 0,227 | 0      |
| 7 | P78364 PHC1_HUMAN   | E.ALS#PTSPGPLSVR.A               | S895:      | 2 | 2,8086 | 0,395 | 0,627  |
| 7 | Q9P1Y5 K1543_HUMAN  | R.APS#PSGLM*SPSR.L               | S1074:     | 2 | 2,8047 | 0,449 | 0      |
| 7 | Q6ZRV2 FA83H_HUMAN  | R.AVPAPS#PGPTHNSPE.L             | S1061:     | 2 | 2,8046 | 0,339 | -0,159 |
| 7 | Q9H7P9 PKHG2_HUMAN  | R.AS#SPPPQPQPPPAAR.R             | S1317:     | 3 | 2,8045 | 0,148 | -0,109 |
| 7 | Q8NG31 CASC5_HUMAN  | R.TPS#SCSSSLDSIK.A               | S1845:     | 2 | 2,8019 | 0,219 | 0      |
| 7 | Q8NCF5 NF2IP_HUMAN  | E.LADSS#GLYHE.G                  | S161:      | 2 | 2,7985 | 0,274 | 1,041  |
| 7 | Q8N1Q3 Q8N1Q3_HUMAN | E.AS#SM*VNFPAYSVR.S              | S103:      | 2 | 2,7984 | 0,323 | -0,16  |
| 7 | Q13425 SNTB2_HUMAN  | R.GLGPPS#PPAPPR.G                | S95:       | 2 | 2,7963 | 0,355 | 0      |
| 7 | Q13885 TBB2A_HUMAN  | E.GAELVDS#VLDVVVR.K              | S115:      | 2 | 2,7956 | 0,125 | -0,42  |
| 7 | Q6ZQN7 SO4C1_HUMAN  | E.NLAFVPSS#PDILR.R               | S16:       | 2 | 2,7945 | 0,366 | -0,243 |
| 7 | P49916 DNL3_HUMAN   | K.LTTTGQVTS#PVK.G                | S123:      | 2 | 2,7941 | 0,317 | 0,186  |
| 7 | Q8TE77 SSH3_HUMAN   | R.GVM*RS#ISLLEPSLE.L             | S540:      | 2 | 2,792  | 0,286 | -0,225 |
| 7 | Q9NUU7 DD19A_HUMAN  | R.SNLVDNTNQVE.V                  |            | 2 | 2,7914 | 0,268 | -0,099 |
| 7 | Q9BUR4 WDR79_HUMAN  | E.FGS#PSELSPR.I                  | S85:       | 2 | 2,7872 | 0,18  | 0,105  |
| 7 | Q9NRA8 4ET_HUMAN    | R.APS#PPLSQVFQTR.A               | S564:      | 3 | 2,7823 | 0,123 | 0,182  |
| 7 | P53396 ACLY_HUMAN   | R.TAS#FSEGRADE.V                 | S455:      | 2 | 2,7822 | 0,449 | -0,095 |
| 7 | Q9UHB7 AFF4_HUMAN   | R.M*FS#PM*EEKE.L                 | S694:      | 2 | 2,7812 | 0,195 | -0,197 |
| 7 | Q13426 XRCC4_HUMAN  | E.TLRNS#SPEDLFDEI.-              | S327:      | 2 | 2,7804 | 0,297 | 0      |

|   |                    |                             |            |   |        |       |        |
|---|--------------------|-----------------------------|------------|---|--------|-------|--------|
| 7 | Q5VWN6 CJ018_HUMAN | R.LDLEDS#YTLR.G             | S1848:     | 2 | 2,7797 | 0,259 | 0,374  |
| 7 | Q14160 LAP4_HUMAN  | R.LPLLPES#PGPLR.Q           | S853:      | 2 | 2,7788 | 0,369 | -0,083 |
| 7 | O95208 EPN2_HUMAN  | R.GSS#QPNLSTSHSEQE.Y        | S173:      | 2 | 2,777  | 0,301 | -0,293 |
| 7 | P05787 K2C8_HUMAN  | K.LVSESS#DVLPK.-            | S478:      | 2 | 2,7768 | 0,243 | -0,097 |
| 7 | Q8NB78 AOF1_HUMAN  | R.AAATGNAS#PGKLE.H          | S247:      | 2 | 2,7747 | 0,25  | -0,096 |
| 7 | O15085 ARHGB_HUMAN | R.SLENPT#PPFTP.K.M          | T668:      | 2 | 2,7743 | 0,288 | -0,26  |
| 7 | Q96PK6 RBM14_HUMAN | R.LSES#QLSFR.R              | S620:      | 2 | 2,7732 | 0,262 | 0      |
| 7 | Q5VUA4 ZN318_HUMAN | R.IPS#PNILK.T               | S2101:     | 2 | 2,7715 | 0,241 | 0,254  |
| 7 | Q02952 AKA12_HUMAN | E.TVS#ILSKTE.G              | S1256:     | 2 | 2,7712 | 0,086 | 0,346  |
| 7 | Q86WR7 CJ047_HUMAN | E.ALS#PTSPFRE.G             | S212:      | 2 | 2,7657 | 0,314 | 0      |
| 7 | O95819 M4K4_HUMAN  | K.SS#SSFTPFIDPR.L           | S853:      | 2 | 2,7638 | 0,417 | 0,086  |
| 7 | Q00613 HSF1_HUMAN  | E.LLS#PQEPPRPEAENS#SPDSGK.Q | S444:S457: | 3 | 2,7635 | 0,236 | -0,22  |
| 7 | Q8TC05 MDM1_HUMAN  | R.AVSLTTS#PAAGIK.T          | S584:      | 2 | 2,7633 | 0,319 | 0,187  |
| 7 | P49792 RBP2_HUMAN  | E.GFSIPVS#ADGFK.F           | S1894:     | 2 | 2,7627 | 0,363 | -0,094 |
| 7 | Q13177 PAK2_HUMAN  | K.YLS#FTPPEK.D              | S141:      | 2 | 2,762  | 0,365 | 0,105  |
| 7 | Q16649 NFIL3_HUMAN | K.LSS#PIDM*TSK.R            | S353:      | 2 | 2,7587 | 0,282 | -0,312 |
| 7 | P18583 SON_HUMAN   | E.SDQTLAALLS#PKE.S          | S1697:     | 2 | 2,7575 | 0,343 | -0,084 |
| 7 | Q8TC05 MDM1_HUMAN  | K.FLS#PAQYLYK.A             | S314:      | 2 | 2,7575 | 0,291 | 0      |
| 7 | P17275 JUNB_HUMAN  | R.GGGSGGGAGGAGGGVTEE.QE.G   |            | 2 | 2,7574 | 0,387 | 0,077  |
| 7 | Q15047 SETB1_HUMAN | R.NYGYNPS#PVKPE.G           | S1066:     | 2 | 2,7573 | 0,301 | 0,169  |
| 7 | Q8IZT6 ASPM_HUMAN  | E.VT#PSSTTASVAR.K           | T563:      | 2 | 2,7566 | 0,445 | 0,194  |
| 7 | P78536 ADA17_HUMAN | E.SLSLFHPS#NVE.M            | S711:      | 2 | 2,7563 | 0,291 | -0,093 |
| 7 | Q16625 OCLN_HUMAN  | E.LPLTS#PVDDFR.Q            | S358:      | 2 | 2,7553 | 0,384 | -0,455 |
| 7 | Q14157 UBP2L_HUMAN | R.YPSSISS#PQKD.L            | S609:      | 2 | 2,7552 | 0,308 | 0      |
| 7 | Q9H0B6 KLC2_HUMAN  | R.TLSSSS#M*DLSR.R           | S611:      | 2 | 2,7547 | 0,33  | -0,191 |
| 7 | Q6PKG0 LARP1_HUMAN | R.AVT#PVPTKTEE.V            | T526:      | 2 | 2,7533 | 0,383 | -0,39  |
| 7 | Q15648 MED1_HUMAN  | R.SQT#PPGVATPPIPK.I         | T1051:     | 2 | 2,7529 | 0,365 | 0,166  |
| 7 | O95239 KIF4A_HUMAN | R.TFS#LTEVR.G               | S801:      | 2 | 2,7488 | 0,218 | 0,236  |
| 7 | Q7Z309 F122B_HUMAN | R.SSS#APLIHGLSD.L           | S25:       | 2 | 2,7487 | 0,431 | -0,193 |
| 7 | Q9NRJ4 TULP4_HUMAN | E.VLSLTES#PVPQRTE.K         | S1325:     | 2 | 2,7478 | 0,247 | -0,97  |
| 7 | Q8IYB3 SRRM1_HUMAN | K.T#PELPEPSVK.V             | T220:      | 2 | 2,7473 | 0,315 | 0      |
| 7 | Q9Y6G9 DC1L1_HUMAN | R.SVSSNVAS#VSPIPAGSK.K      | S419:      | 2 | 2,7455 | 0,091 | -0,293 |
| 7 | Q32MZ4 LRRF1_HUMAN | K.IDGATQSS#PAEPK.S          | S714:      | 2 | 2,7437 | 0,291 | 0      |

|   |                    |                         |        |   |        |       |        |
|---|--------------------|-------------------------|--------|---|--------|-------|--------|
| 7 | Q96N67 DOCK7_HUMAN | K.QISGQYSGS#PQLLK.N     | S30:   | 2 | 2,7421 | 0,281 | -0,385 |
| 7 | Q9NXE4 NSMA3_HUMAN | E.DGLILT#PLGR.Y         | T669:  | 2 | 2,7417 | 0,241 | 0,215  |
| 7 | Q86SQ0 PHLB2_HUMAN | E.GLYLSDT#LPR.K         | T898:  | 2 | 2,7409 | 0,252 | 0      |
| 7 | Q3KQU3 MA7D1_HUMAN | K.SLSRT#PETLLPFAEAE.A   | T813:  | 2 | 2,7375 | 0,245 | -0,133 |
| 7 | Q9NP61 ARFG3_HUMAN | D.SCVVPLS#PPPKEE.D      | S143:  | 2 | 2,735  | 0,423 | -0,075 |
| 7 | P46087 NOL1_HUMAN  | K.GTDTQTPAVLS#PSK.T     | S732:  | 2 | 2,735  | 0,3   | -0,165 |
| 7 | Q9UP95 S12A4_HUMAN | E.SSPFLS#PLEASR.G       | S51:   | 2 | 2,7347 | 0,201 | -0,356 |
| 7 | Q9UKX7 NUP50_HUMAN | E.TQS#PSLFGSTK.L        | S221:  | 2 | 2,7342 | 0,339 | -0,198 |
| 7 | Q8TEV9 SMCR8_HUMAN | K.SDSQASLTVPLS#PQVV.R.S | S498:  | 2 | 2,7312 | 0,32  | 0,065  |
| 7 | Q9NYV4 CD2L7_HUMAN | K.NSS#PAPPQPAPGKVE.S    | S1083: | 2 | 2,7307 | 0,403 | -0,47  |
| 7 | P46013 KI67_HUMAN  | K.AFM*GT#PVQKLD.L       | T1193: | 2 | 2,7299 | 0,238 | -0,562 |
| 7 | Q9Y490 TLN1_HUMAN  | E.GS#FVDYQTTM*VR.T      | S1849: | 2 | 2,7269 | 0,233 | 0,488  |
| 7 | Q9UID6 ZN639_HUMAN | R.NQNYLVPS#PVLR.I       | S88:   | 2 | 2,7264 | 0,305 | -0,082 |
| 7 | P07814 SYEP_HUMAN  | E.YIPGQPPLSQSSDS#SPTR.N | S885:  | 2 | 2,7257 | 0,17  | 0,367  |
| 7 | P61247 RS3A_HUMAN  | E.VSLADLQNDE.V          |        | 2 | 2,7236 | 0,219 | 0,221  |
| 7 | O94909 K0819_HUMAN | R.GPSQATS#PIRSPQE.S     | S296:  | 2 | 2,7225 | 0,261 | -0,238 |
| 7 | Q96MU7 YTDC1_HUMAN | R.GIS#PIVFDR.S          | S308:  | 2 | 2,7223 | 0,239 | 0,563  |
| 7 | Q13425 SNTB2_HUMAN | E.GAAPQSPSFGSEDSGS#PK.H | S233:  | 2 | 2,7219 | 0,344 | -0,261 |
| 7 | Q6P597 KLC3_HUMAN  | R.TLSASTQDLS#PH.-       | S502:  | 2 | 2,7218 | 0,424 | -0,091 |
| 7 | P46013 KI67_HUMAN  | D.IIFVGT#PVQK.L         | T1315: | 2 | 2,7204 | 0,277 | 0      |
| 7 | P46087 NOL1_HUMAN  | K.GPQPPTVS#PIR.S        | S786:  | 2 | 2,7193 | 0,365 | 0,199  |
| 7 | P23193 TCEA1_HUMAN | K.EPAITSQNS#PEAREE.S    | S100:  | 2 | 2,7191 | 0,368 | -0,07  |
| 7 | Q92733 PRCC_HUMAN  | E.GLGLGLPS#PR.G         | S114:  | 2 | 2,7188 | 0,251 | 0,35   |
| 7 | P31689 DNJA1_HUMAN | E.NGFLSPDKLS#LLE.K      | S340:  | 2 | 2,7187 | 0,209 | -0,161 |
| 7 | Q86YC2 PALB2_HUMAN | E.GSCIFPEELS#PK.R       | S660:  | 2 | 2,7185 | 0,346 | 0,254  |
| 7 | Q8WXI2 CNKR2_HUMAN | K.LGDS#LQDLYR.A         | S908:  | 2 | 2,7184 | 0,369 | 0,194  |
| 7 | O95405 ZFYV9_HUMAN | R.TDLGS#PNSFSHM*SE.G    | S306:  | 2 | 2,7178 | 0,178 | -0,152 |
| 7 | Q9UJU6 DBNL_HUMAN  | R.AM*STTSIS#SPQPGK.L    | S274:  | 2 | 2,7168 | 0,427 | 0,082  |
| 7 | Q8N201 INT1_HUMAN  | K.LSST#PPLSALGR.L       | T83:   | 2 | 2,7166 | 0,287 | -0,382 |
| 7 | Q7L3B6 CD37L_HUMAN | E.SDFDVFSS#PR.C         | S32:   | 2 | 2,7157 | 0,395 | 0      |
| 7 | Q8IZT6 ASPM_HUMAN  | E.SVNPILS#PNQFLK.D      | S392:  | 2 | 2,7157 | 0,384 | -0,079 |
| 7 | Q9Y2W2 WBP11_HUMAN | E.LT#PLQAM*M*LR.M       | T328:  | 2 | 2,7146 | 0,317 | 0,095  |
| 7 | Q92888 ARHG1_HUMAN | R.DGDGVPGGGPLS#PAR.T    | S863:  | 2 | 2,7105 | 0,091 | 0      |

|   |                    |                           |        |   |        |       |        |
|---|--------------------|---------------------------|--------|---|--------|-------|--------|
| 7 | P31948 STIP1_HUMAN | E.IAT#PPPPPPK.K           | T198:  | 2 | 2,7067 | 0,316 | 0,102  |
| 7 | Q8TEH3 DEN1A_HUMAN | E.AALQLPLGQAKS#LE.D       | S592:  | 2 | 2,705  | 0,354 | -0,26  |
| 7 | Q8TAQ2 SMRC2_HUMAN | E.DLTKDM*DEPS#PVPNVEE.V   | S347:  | 2 | 2,7042 | 0,327 | -0,425 |
| 7 | Q2M3G4 SHRM1_HUMAN | E.ALGPGGDRAS#PASSTSSLD.L  | S12:   | 2 | 2,7041 | 0,382 | -0,134 |
| 7 | Q9P289 MST4_HUMAN  | K.LADFGVAGQLT#DTQIK.R     | T170:  | 3 | 2,7035 | 0,141 | 1,249  |
| 7 | A4D1S0 KLRG2_HUMAN | R.FLTVPVPES#PAFSR.H       | S158:  | 2 | 2,7028 | 0,2   | -0,075 |
| 7 | Q8NEY8 PPHLN_HUMAN | E.LFEDS#QLTTR.S           | S285:  | 2 | 2,7014 | 0,249 | -0,284 |
| 7 | O15027 SC16A_HUMAN | E.ARS#PDPGIVQEAPVGNLSLE.L | S1844: | 3 | 2,7005 | 0,133 | 0,333  |
| 7 | Q9H063 MAF1_HUMAN  | E.ALSPQTSGLS#PSR.L        | S68:   | 2 | 2,6999 | 0,317 | -0,248 |
| 7 | Q9Y2D5 AKAP2_HUMAN | E.LSVRS#QDTTVLE.T         | S482:  | 2 | 2,6981 | 0,182 | 0      |
| 7 | Q5T1M5 FKB15_HUMAN | E.QLAINTS#PDAVK.A         | S356:  | 2 | 2,694  | 0,299 | 0,091  |
| 7 | Q99590 SFRIP_HUMAN | E.LIES#PKLE.S             | S293:  | 2 | 2,6939 | 0,162 | 0      |
| 7 | P13051 UNG_HUMAN   | R.HAPS#PEPAVQGTGVAGVPE.E  | S23:   | 2 | 2,6932 | 0,288 | 0,195  |
| 7 | Q04721 NOTC2_HUMAN | K.STM*PTS#LPNLAKE.A       | S2115: | 2 | 2,6918 | 0,394 | 0      |
| 7 | Q8IXB1 DJC10_HUMAN | K.GLEDNQGGQYE.S           |        | 2 | 2,6911 | 0,266 | 0,101  |
| 7 | Q12888 TP53B_HUMAN | R.STPFIVPSS#PTEQEGR.Q     | S380:  | 2 | 2,6864 | 0,329 | -0,067 |
| 7 | Q05524 ENO1B_HUMAN | K.VNQIGSVTE.S             |        | 2 | 2,686  | 0,148 | 0,129  |
| 7 | Q4G0A6 U526_HUMAN  | E.EVILS#PVPSVLK.L         | S392:  | 2 | 2,6841 | 0,151 | 0      |
| 7 | O95359 TACC2_HUMAN | K.TPSSPS#KSPASFE.I        | S2392: | 2 | 2,6825 | 0,179 | -0,261 |
| 7 | Q9NYV4 CD2L7_HUMAN | R.TFS#GSLSHLGE.S          | S1377: | 2 | 2,6821 | 0,34  | 0      |
| 7 | P26651 TTP_HUMAN   | E.LSPSPTSPT#ATSTTPSR.Y    | T95:   | 2 | 2,6819 | 0,426 | 0,138  |
| 7 | Q9P2B4 CT2NL_HUMAN | K.VSSPLSPLS#PGIK.S        | S563:  | 2 | 2,6817 | 0,337 | -0,09  |
| 7 | P51148 RAB5C_HUMAN | R.QAS#PNIVIALAGNK.A       | S124:  | 2 | 2,6816 | 0,39  | -0,083 |
| 7 | P13051 UNG_HUMAN   | K.TLYSFFSPS#PAR.K         | S14:   | 2 | 2,6805 | 0,161 | -0,504 |
| 7 | Q00341 VIGLN_HUMAN | R.ILS#IQKD.L              | S645:  | 2 | 2,6724 | 0,113 | 0,068  |
| 7 | Q02952 AKA12_HUMAN | E.VVLPS#EEEEGGAGTK.S      | S1663: | 2 | 2,6714 | 0,415 | 0,162  |
| 7 | Q14721 KCNB1_HUMAN | E.GQLLYSDSS#PPK.S         | S773:  | 2 | 2,6696 | 0,42  | 0,083  |
| 7 | Q8IWA0 WDR75_HUMAN | K.VQDTSNTGLGE.D           |        | 2 | 2,6686 | 0,357 | -0,218 |
| 7 | Q9Y2W1 TR150_HUMAN | R.IDIS#PSTFR.K            | S682:  | 2 | 2,6675 | 0,261 | 0,109  |
| 7 | Q15398 DLG7_HUMAN  | E.LFDNKS#LTTE.C           | S796:  | 2 | 2,6674 | 0,295 | -0,684 |
| 7 | O95759 TBCD8_HUMAN | R.ASAPS#PEDSVFADTGK.T     | S811:  | 2 | 2,6673 | 0,273 | 0      |
| 7 | P78356 PI42B_HUMAN | D.S#PGNLLSFPR.F           | S326:  | 2 | 2,6604 | 0,383 | -0,209 |
| 7 | Q9Y4W6 AFG32_HUMAN | R.GNFGGQSEQE.N            |        | 2 | 2,6582 | 0,326 | 0,116  |



|   |                    |                           |          |   |        |       |        |
|---|--------------------|---------------------------|----------|---|--------|-------|--------|
| 7 | Q969R5 LMBL2_HUMAN | E.LPTS#PLHLLSPGT#PR.S     | S67:T76: | 2 | 2,6522 | 0,397 | 0      |
| 7 | Q9Y2W1 TR150_HUMAN | K.GSFS#DTGLGDGK.M         | S379:    | 2 | 2,652  | 0,241 | -0,2   |
| 7 | Q15773 MLF2_HUMAN  | R.LAIQGPEDS#PSR.Q         | S238:    | 2 | 2,651  | 0,416 | -0,362 |
| 7 | P52294 IMA1_HUMAN  | E.VM*S#DGGFHE.A           | S63:     | 2 | 2,6495 | 0,29  | -0,227 |
| 7 | Q14676 MDC1_HUMAN  | E.AYGPCLS#PPR.A           | S780:    | 2 | 2,6475 | 0,366 | -0,306 |
| 7 | Q2M1Z3 CDGAP_HUMAN | K.NRPS#SLNLDPAPIAD.L      | S1105:   | 2 | 2,6415 | 0,393 | -0,138 |
| 7 | Q15398 DLG7_HUMAN  | K.NTASQNSILEEGE.T         |          | 2 | 2,6399 | 0,297 | 0,088  |
| 7 | O14686 MLL2_HUMAN  | R.APVAPT#PPTLIK.S         | T920:    | 2 | 2,6384 | 0,368 | -0,38  |
| 7 | Q15942 ZYG_HUMAN   | K.FS#PGAPGGSGSQPNQK.L     | S281:    | 2 | 2,6379 | 0,35  | -0,076 |
| 7 | Q5M775 SPEC1_HUMAN | E.LSLAS#LTEK.I            | S372:    | 2 | 2,6365 | 0,294 | 0,117  |
| 7 | Q96N67 DOCK7_HUMAN | R.S#M*SIDDTPR.G           | S180:    | 2 | 2,6357 | 0,301 | -0,218 |
| 7 | Q6WKZ4 RFIP1_HUMAN | E.GLS#FLGGLR.S            | S300:    | 2 | 2,6352 | 0,198 | 0,061  |
| 7 | Q01433 AMPD2_HUMAN | R.QIS#QDVKLEPD.I          | S168:    | 2 | 2,6343 | 0,349 | 0,271  |
| 7 | P28715 ERCC5_HUMAN | E.LTPAS#PTCTNSVSK.N       | S526:    | 2 | 2,634  | 0,368 | 0,079  |
| 7 | Q9GZR7 DDX24_HUMAN | E.LTDYQLVS#PAK.N          | S60:     | 2 | 2,6293 | 0,258 | 0,557  |
| 7 | Q5T4S7 UBR4_HUMAN  | R.SSAYGDATAE.G            |          | 2 | 2,6278 | 0,239 | -0,251 |
| 7 | Q66K74 MAP1S_HUMAN | K.AVPMAPAPAS#PGSSNDSSAR.S | S759:    | 2 | 2,6267 | 0,236 | -0,063 |
| 7 | O75794 CD123_HUMAN | E.VTVQPS#PYLSYR.L         | S299:    | 2 | 2,6223 | 0,364 | -0,328 |
| 7 | P49321 NASP_HUMAN  | K.SLQENEEEE.I             |          | 2 | 2,6208 | 0,146 | 0      |
| 7 | Q9UDT6 CLIP2_HUMAN | R.IGFPSTS#PAK.A           | S294:    | 2 | 2,6155 | 0,434 | -0,112 |
| 7 | Q12756 KIF1A_HUMAN | R.TPQPCSRPAS#PEPE.L       | S1532:   | 2 | 2,613  | 0,245 | -0,149 |
| 7 | O43379 WDR62_HUMAN | R.GQSS#PPPAPPICLR.R       | S33:     | 2 | 2,6129 | 0,232 | -0,157 |
| 7 | P51587 BRCA2_HUMAN | K.LSISNSNFE.V             |          | 2 | 2,612  | 0,281 | -0,542 |
| 7 | P40763 STAT3_HUMAN | E.ADPGS#AAPYLK.T          | S701:    | 2 | 2,6115 | 0,413 | -0,73  |
| 7 | Q92870 APBB2_HUMAN | R.T#KSFLNYADLE.T          | T158:    | 2 | 2,6108 | 0,362 | -0,079 |
| 7 | Q6KC79 NIPBL_HUMAN | K.AAM*YDISS#PSKD.S        | S350:    | 2 | 2,6082 | 0,335 | -0,245 |
| 7 | P35658 NU214_HUMAN | K.SPGST#PTTPTSSQAPQK.L    | T434:    | 3 | 2,6054 | 0,235 | 0,418  |
| 7 | Q92576 PHF3_HUMAN  | R.M*APPVDDL#PK.K          | S1133:   | 2 | 2,6001 | 0,313 | -1,157 |
| 7 | O15446 RPA34_HUMAN | E.M*PGPPLNSES#GEEAPTGR.D  | S490:    | 3 | 2,5993 | 0,28  | -0,381 |
| 7 | O00231 PSD11_HUMAN | R.AQS#LLSTDRE.A           | S14:     | 2 | 2,5985 | 0,329 | -0,508 |
| 7 | Q92619 HMHA1_HUMAN | E.ASALGHLS#FLEQQQSE.A     | S1053:   | 2 | 2,5982 | 0,257 | 0      |
| 7 | Q15149 PLEC1_HUMAN | K.AQLEPVAS#PAK.K          | S1435:   | 2 | 2,5968 | 0,349 | -0,205 |
| 7 | Q9UHR4 BI2L1_HUMAN | R.SISTVNLSE.N             |          | 2 | 2,5968 | 0,276 | 0,578  |

|   |                      |                            |          |   |        |       |        |
|---|----------------------|----------------------------|----------|---|--------|-------|--------|
| 7 | P55265 DSRAD_HUMAN   | E.SQTPT#PSATSFSGK.S        | T603:    | 2 | 2,5964 | 0,276 | 0      |
| 7 | Q96PK6 RBM14_HUMAN   | R.AQPSVS#LGAPYR.G          | S280:    | 2 | 2,5962 | 0,18  | 0,092  |
| 7 | Q8WU79 SMAP2_HUMAN   | D.LDLLASVPS#PSSSGSR.K      | S219:    | 2 | 2,5956 | 0,328 | 0      |
| 7 | Q96RK0 CIC_HUMAN     | R.TQS#LSALPK.E             | S173:    | 2 | 2,5951 | 0,176 | 0,238  |
| 7 | A6NNK3 A6NNK3_HUMAN  | E.SGDIVS#LIHD.-            | S234:    | 2 | 2,5945 | 0,366 | 0      |
| 7 | Q92609 TBCD5_HUMAN   | K.SES#M*PVQLNK.G           | S522:    | 2 | 2,5938 | 0,199 | 0,199  |
| 7 | O94964 CT117_HUMAN   | E.SLLDCS#PYLAGGDAR.G       | S69:     | 2 | 2,5921 | 0,12  | 0,291  |
| 7 | Q9NQX3 GEPH_HUMAN    | K.GVQCEEEEE.K              |          | 2 | 2,5912 | 0,132 | 0,197  |
| 7 | Q8IZ21 PHAR4_HUMAN   | R.SSS#PVQVEEEPVR.L         | S118:    | 2 | 2,591  | 0,235 | -1,122 |
| 7 | ##Q8N5D0 WDTC1_HUMAN | D.AAGT#ILIR.D              | T569:    | 2 | 2,5905 | 0,119 | -0,136 |
| 7 | P07814 SYEP_HUMAN    | E.YIPGQPPLSQSSDSS#PTR.N    | S886:    | 2 | 2,586  | 0,423 | -0,122 |
| 7 | Q15942 ZYX_HUMAN     | R.S#PGAPGPLTK.E            | S344:    | 2 | 2,5858 | 0,308 | -0,437 |
| 7 | Q6NZI2 PTRF_HUMAN    | R.GS#SPDVHALLE.I           | S365:    | 2 | 2,5817 | 0,367 | 0,304  |
| 7 | Q9H4A3 WNK1_HUMAN    | E.GPVLATS#SGAGVFK.M        | S1849:   | 2 | 2,5814 | 0,186 | 0,178  |
| 7 | P27707 DCK_HUMAN     | E.FEELTM*S#QK.N            | S74:     | 2 | 2,5801 | 0,17  | -0,706 |
| 7 | Q8TAP6 CEP76_HUMAN   | E.LPSS#PKQPICFD.R          | S83:     | 2 | 2,5785 | 0,278 | -0,083 |
| 7 | Q96FF9 CDCA5_HUMAN   | R.S#QQRKSGS#ELPSILPE.I     | S29:S35: | 2 | 2,5781 | 0,144 | 0,205  |
| 7 | P34931 HS71L_HUMAN   | E.GIDFYTS#ITR.A            | S298:    | 2 | 2,5772 | 0,382 | 0,097  |
| 7 | O95613 PCNT_HUMAN    | E.ALES#PLCIQHE.G           | S610:    | 2 | 2,5749 | 0,192 | -0,089 |
| 7 | Q9NYF8 BCLF1_HUMAN   | E.ALDFYS#DKE.S             | S385:    | 2 | 2,574  | 0,32  | -0,418 |
| 7 | O95785 WIZ_HUMAN     | K.TPLALAGS#PTPK.N          | S996:    | 2 | 2,571  | 0,156 | -0,198 |
| 7 | P41743 KPCI_HUMAN    | E.GLRPGDTTST#FCGTPNYIAPE.I | T403:    | 3 | 2,567  | 0,226 | 0,627  |
| 7 | Q9Y2D8 ADIP_HUMAN    | E.M*ISLLS#PQK.K            | S293:    | 2 | 2,5663 | 0,137 | -0,11  |
| 7 | Q9H2Y7 ZF106_HUMAN   | E.LSTS#PCNPIVR.Q           | S641:    | 2 | 2,5659 | 0,214 | 0,461  |
| 7 | Q5VWN6 CJ018_HUMAN   | K.TGTLQDLIQHGS#PINNE.C     | S1025:   | 2 | 2,5649 | 0,281 | 0,318  |
| 7 | Q9NQS7 INCE_HUMAN    | E.SITVSSLM*AT#PQDPK.G      | T239:    | 2 | 2,5632 | 0,194 | 0,365  |
| 7 | P35658 NU214_HUMAN   | D.LES#LCNALLK.T            | S915:    | 2 | 2,5612 | 0,178 | -0,197 |
| 7 | Q9Y580 RBM7_HUMAN    | R.M*NS#YPLYADR.H           | S204:    | 2 | 2,56   | 0,246 | -0,276 |
| 7 | Q8NEY8 PPHLN_HUMAN   | E.SNT#THGIELFE.D           | T275:    | 2 | 2,5598 | 0,18  | 0      |
| 7 | Q96JN8 K1787_HUMAN   | E.AFM*VS#PAQARPE.T         | S247:    | 2 | 2,5595 | 0,235 | 0      |
| 7 | Q16514 TAF12_HUMAN   | K.IPGTPGAGGRLS#PE.N        | S51:     | 2 | 2,5591 | 0,432 | -0,264 |
| 7 | Q9UFC0 LRWD1_HUMAN   | R.ACASPSAQVE.G             |          | 2 | 2,5587 | 0,222 | 0      |
| 7 | O75807 PR15A_HUMAN   | R.APLS#PSLLIR.T            | S143:    | 2 | 2,5526 | 0,146 | -0,319 |

|   |                    |                        |        |   |        |       |        |
|---|--------------------|------------------------|--------|---|--------|-------|--------|
| 7 | Q13464 ROCK1_HUMAN | K.VSQNSQLANE.K         |        | 2 | 2,5517 | 0,264 | 0      |
| 7 | P54278 PMS2_HUMAN  | K.ICPGENQAAEDE.L       |        | 2 | 2,5503 | 0,227 | -0,915 |
| 7 | Q9UKV3 ACINU_HUMAN | K.SPS#PPRLTE.D         | S388:  | 2 | 2,5486 | 0,18  | 0      |
| 7 | Q09666 AHNK_HUMAN  | K.LSGPS#LKM*PSLE.I     | S4903: | 2 | 2,5477 | 0,166 | 0,09   |
| 7 | Q53LP3 ANR57_HUMAN | R.DLVM*GSS#PQLK.R      | S213:  | 2 | 2,5465 | 0,203 | -0,192 |
| 7 | Q99549 MPP8_HUMAN  | D.IQRLS#LNNDIFE.A      | S126:  | 2 | 2,5457 | 0,352 | -0,158 |
| 7 | Q12888 TP53B_HUMAN | E.SVPLHLS#LTE.T        | S692:  | 2 | 2,5439 | 0,242 | 0,104  |
| 7 | Q9BWG6 SCNM1_HUMAN | E.SATVSAPAPM*S#PTR.R   | S183:  | 2 | 2,5424 | 0,356 | -0,415 |
| 7 | Q8N5Y2 MS3L1_HUMAN | R.SSS#PIPLTPSKE.G      | S400:  | 2 | 2,5411 | 0,344 | -0,277 |
| 7 | Q14676 MDC1_HUMAN  | R.SSVKT#PETVVPTAPE.L   | T1321: | 2 | 2,5402 | 0,203 | -0,301 |
| 7 | Q17R89 RICH2_HUMAN | E.LGSTLRLS#PLE.H       | S793:  | 2 | 2,5361 | 0,224 | 0,193  |
| 7 | O94986 CE152_HUMAN | K.LGIHPSDS#EGELNIE.L   | S404:  | 2 | 2,5346 | 0,169 | -0,289 |
| 7 | Q15126 PMVK_HUMAN  | R.LLDS#TYKE.A          | S66:   | 2 | 2,5341 | 0,206 | -0,212 |
| 7 | O75427 LRCH4_HUMAN | E.AAATTSVPGS#PGLPGR.R  | S25:   | 2 | 2,5327 | 0,321 | 0,643  |
| 7 | P46821 MAP1B_HUMAN | K.VLSPLRS#PPLIGSE.S    | S1400: | 2 | 2,5322 | 0,265 | -0,237 |
| 7 | Q9H5V8 CDCP1_HUMAN | K.LATEEPPPRS#PPESE.S   | S797:  | 2 | 2,5319 | 0,306 | -0,071 |
| 7 | Q76L83 ASXL2_HUMAN | R.FCLSS#PTEALK.M       | S1154: | 2 | 2,5279 | 0,399 | 0,092  |
| 7 | P15408 FOSL2_HUMAN | R.S#PPAPGLQPM*R.S      | S200:  | 2 | 2,5274 | 0,379 | -0,098 |
| 7 | Q9BRS2 RIOK1_HUMAN | R.VVPGQFDDADSS#DSENR.D | S22:   | 2 | 2,5214 | 0,321 | 0      |
| 7 | P27348 1433T_HUMAN | E.QGAELSNEE.R          |        | 2 | 2,5208 | 0,152 | -0,375 |
| 7 | Q9BQ67 GRWD1_HUMAN | E.SGDTS#SEGPAQVYLPGR.G | S25:   | 3 | 2,5201 | 0,21  | 0,102  |
| 7 | Q96PE2 ARHG_HUMAN  | R.SVS#FKLLE.R          | S15:   | 2 | 2,5152 | 0,123 | 0,122  |
| 7 | Q9C073 F117A_HUMAN | K.ASS#PGHPAFLE.D       | S306:  | 2 | 2,5148 | 0,232 | 0      |
| 7 | Q01433 AMPD2_HUMAN | R.S#LPGPAPCLK.H        | S100:  | 2 | 2,5142 | 0,245 | 0      |
| 7 | Q14839 CHD4_HUMAN  | E.KS#AIDLTPIVVE.D      | S1648: | 2 | 2,5119 | 0,197 | -0,179 |
| 7 | Q9Y448 T4AF1_HUMAN | E.QQTLCNNQVND.L        |        | 2 | 2,5114 | 0,347 | -0,274 |
| 7 | Q9UER7 DAXX_HUMAN  | R.KQS#EEPFTTVLE.N      | S593:  | 2 | 2,5096 | 0,112 | -0,082 |
| 7 | Q08209 PP2BA_HUMAN | R.VFS#VLREE.S          | S411:  | 2 | 2,5084 | 0,31  | -0,115 |
| 7 | Q9NYF8 BCLF1_HUMAN | R.IDIS#PSTLR.K         | S658:  | 2 | 2,5079 | 0,271 | -0,226 |
| 7 | P42765 THIM_HUMAN  | K.AANDAGYFNDE.M        |        | 2 | 2,5051 | 0,209 | -0,103 |
| 7 | O60701 UGDH_HUMAN  | E.ADLVFISVNT#PTK.T     | T91:   | 2 | 2,5031 | 0,222 | -0,493 |
| 7 | Q86XL3 ANKL2_HUMAN | K.TSLPLS#PVK.T         | S268:  | 2 | 2,5029 | 0,159 | 0,119  |
| 7 | Q5TGL8 CF145_HUMAN | K.IQPSFQS#PVKISE.I     | S150:  | 2 | 2,5017 | 0,107 | -0,158 |

|   |                      |                                 |            |   |        |       |        |
|---|----------------------|---------------------------------|------------|---|--------|-------|--------|
| 7 | P49790 NU153_HUMAN   | K.TSQLGDS#PFYPGK.T              | S257:      | 2 | 2,5    | 0,248 | 0      |
| 7 | Q4KMP7 TB10B_HUMAN   | R.AAGGAPS#PPPPVR.R              | S403:      | 2 | 2,4967 | 0,328 | 0,097  |
| 7 | Q9NYZ3 GTSE1_HUMAN   | E.NVDS#PLLKF.-                  | S715:      | 2 | 2,4924 | 0,342 | -0,329 |
| 7 | Q8NCE2 MTMRE_HUMAN   | K.DRGSTTS#LGSDFSLVM*E.S         | S441:      | 2 | 2,49   | 0,366 | -0,064 |
| 7 | P18583 SON_HUMAN     | E.SDS#FLKFD.S                   | S154:      | 2 | 2,4873 | 0,29  | 0      |
| 7 | Q12834 CDC20_HUMAN   | E.VAS#FLLSKE.N                  | S92:       | 2 | 2,4863 | 0,292 | 0      |
| 7 | Q9BXX1 KLF16_HUMAN   | R.GGPGAAPGGASPASSSSAASS#PSSGR.A | S109:      | 3 | 2,4778 | 0,175 | -0,083 |
| 7 | P21127 CD2L1_HUMAN   | E.GDYVPDS#PALSPIELK.Q           | S410:      | 2 | 2,4757 | 0,283 | 0      |
| 7 | Q99439 CNN2_HUMAN    | K.GLQS#GVDIGVK.Y                | S138:      | 2 | 2,4756 | 0,213 | -0,635 |
| 7 | Q8WXH0 SYNE2_HUMAN   | R.RGS#M*SYLAAVEEEVEE.S          | S4108:     | 2 | 2,4747 | 0,474 | 0,258  |
| 7 | Q08999 RBL2_HUMAN    | R.SITS#PTTLYDR.Y                | S662:      | 2 | 2,4745 | 0,225 | 0,732  |
| 7 | Q12888 TP53B_HUMAN   | E.SGLQIQKS#PEPE.V               | S294:      | 2 | 2,4711 | 0,291 | -1,401 |
| 7 | O75534 CSDE1_HUMAN   | E.SKS#PAAPGQSPTGVCYE.R          | S116:      | 2 | 2,4707 | 0,332 | -0,962 |
| 7 | Q8IY92 BTBDC_HUMAN   | R.FLLGPPQGG#PR.G                | S361:      | 2 | 2,4705 | 0,431 | -0,093 |
| 7 | Q9NZM5 GSCR2_HUMAN   | K.LFFVDTGS#KE.K                 | S93:       | 2 | 2,4699 | 0,164 | -0,299 |
| 7 | P30307 MPIP3_HUMAN   | K.YLGS#PITTVPK.L                | S168:      | 2 | 2,4665 | 0,211 | 0,097  |
| 7 | Q8TEP8 CE192_HUMAN   | R.ITS#LCLLK.D                   | S321:      | 2 | 2,4662 | 0,182 | 0,356  |
| 7 | Q96A19 C102A_HUMAN   | K.GSLLTILGSPS#PER.M             | S28:       | 2 | 2,4653 | 0,156 | -0,405 |
| 7 | Q7KZ85 SPT6H_HUMAN   | R.LTPRSPS#PM*IE.S               | S1703:     | 2 | 2,4634 | 0,343 | -0,086 |
| 7 | O43815 STRN_HUMAN    | E.LNQGDM*KPPSYDS#DEGNETE.V      | S137:      | 3 | 2,4625 | 0,245 | 0,158  |
| 7 | Q8TEV9 SMCR8_HUMAN   | K.VLISVGSY#K.S                  | Y418:      | 2 | 2,4604 | 0,228 | 0,35   |
| 7 | Q8TEW0 PARD3_HUMAN   | R.RS#SDPALIGLSTSVSD.S           | S143:      | 2 | 2,4589 | 0,25  | -0,145 |
| 7 | O43426 SYNJ1_HUMAN   | R.SS#PNPFITGLTR.T               | S1394:     | 2 | 2,4567 | 0,235 | -0,267 |
| 7 | Q7Z4Q2 HEAT3_HUMAN   | R.NSIENIANE.T                   |            | 2 | 2,4537 | 0,116 | -1,276 |
| 7 | Q7Z406 MYH14_HUMAN   | E.AQPGSGPSPEPEGS#PPAHPQ.-       | S1989:     | 3 | 2,4536 | 0,239 | -0,274 |
| 7 | ##Q9Y4W6 AFG32_HUMAN | D.VVGKS#LY#NNVFDK.W             | S617:Y619: | 2 | 2,4518 | 0,1   | -1,411 |
| 7 | Q17RV1 Q17RV1_HUMAN  | K.SQSVNGYNE.I                   |            | 2 | 2,4518 | 0,293 | 0,245  |
| 7 | Q09666 AHNK_HUMAN    | E.APLPS#PKLE.G                  | S5110:     | 2 | 2,451  | 0,157 | 0,236  |
| 7 | Q9Y3Q8 T22D4_HUMAN   | R.AAT#PLPSLRVE.A                | T211:      | 2 | 2,4503 | 0,217 | -0,494 |
| 7 | Q6P0N0 CN106_HUMAN   | K.AYILVT#PLK.S                  | T653:      | 2 | 2,4489 | 0,231 | -0,111 |
| 7 | Q8IVF2 AHNK2_HUMAN   | E.ASVDVS#PPKVE.A                | S2179:     | 2 | 2,4484 | 0,286 | -0,101 |
| 7 | Q8NG31 CASC5_HUMAN   | K.QDQSNVQIAAAPT#PEKE.M          | T539:      | 2 | 2,4478 | 0,283 | 1,408  |
| 7 | Q12874 SF3A3_HUMAN   | E.SLDTS#LFAK.N                  | S299:      | 2 | 2,4474 | 0,193 | 0      |

|   |                     |                                      |        |   |        |       |        |
|---|---------------------|--------------------------------------|--------|---|--------|-------|--------|
| 7 | Q15185 TEBP_HUMAN   | D.S#DEDM*SNFDR.F                     | S113:  | 2 | 2,4466 | 0,354 | -0,186 |
| 7 | Q9C0C2 TB182_HUMAN  | R.SFGTRPLS#SGFSPEE.A                 | S983:  | 2 | 2,4451 | 0,152 | -0,364 |
| 7 | Q8NFH5 NUP53_HUMAN  | K.TLGT#PTQPGSTPR.I                   | T273:  | 2 | 2,4445 | 0,247 | -0,263 |
| 7 | P52948 NUP98_HUMAN  | R.FSFLS#KPVDE.N                      | S638:  | 2 | 2,4442 | 0,202 | -0,977 |
| 7 | Q9UQ80 PA2G4_HUMAN  | E.NATSGETLEENE.A                     |        | 2 | 2,4441 | 0,229 | 0,189  |
| 7 | Q7Z3B3 K1267_HUMAN  | R.TFPLAHS#PQAE.C                     | S1045: | 2 | 2,4428 | 0,18  | -0,286 |
| 7 | P21127 CD2L1_HUMAN  | K.YLPALQGCRS#VEE.F                   | S434:  | 2 | 2,4409 | 0,212 | -0,228 |
| 7 | Q8IY81 RRMJ3_HUMAN  | E.GLALGAVIAS#SK.K                    | S676:  | 2 | 2,4385 | 0,377 | -0,418 |
| 7 | Q14160 LAP4_HUMAN   | R.QSPAS#PPPLGGGAPVR.T                | S1448: | 2 | 2,4358 | 0,281 | -0,233 |
| 7 | O75400 PR40A_HUMAN  | R.TLLEQLDDDQ.-                       |        | 2 | 2,4299 | 0,146 | 0,103  |
| 7 | Q9UQ35 SRRM2_HUMAN  | R.SSGHSS#SELSPDAVE.K                 | S1383: | 2 | 2,4287 | 0,211 | -0,544 |
| 7 | P05387 RLA2_HUMAN   | R.YVASYLLAALGGNSS#PSAK.D             | S17:   | 2 | 2,4277 | 0,28  | 0,313  |
| 7 | Q8NCN4 RN169_HUMAN  | R.VLS#PLIIK.S                        | S403:  | 2 | 2,4267 | 0,19  | -0,19  |
| 7 | Q9UL46 PSME2_HUMAN  | K.CGFLPGNE.K                         |        | 2 | 2,4237 | 0,204 | 0,273  |
| 7 | Q9H9B1 EHMT1_HUMAN  | E.VS#LDSLDR.V                        | S452:  | 2 | 2,4212 | 0,352 | 0,222  |
| 7 | O75400 PR40A_HUMAN  | E.GYQNTIVAGS#LITK.S                  | S229:  | 2 | 2,4143 | 0,246 | 0,316  |
| 7 | P09132 SRP19_HUMAN  | K.TGGADQSLQQGE.G                     |        | 2 | 2,4107 | 0,136 | 0,307  |
| 7 | P35612 ADDB_HUMAN   | E.AAS#PPPPQGQPYFDR.F                 | S11:   | 2 | 2,4091 | 0,289 | 0      |
| 7 | Q8TEP8 CE192_HUMAN  | R.ITS#LCLLKDCEE.I                    | S321:  | 2 | 2,408  | 0,258 | -0,078 |
| 7 | Q9NTI5 PDS5B_HUMAN  | E.DYTM*SS#PLPGK.K                    | S1191: | 2 | 2,4037 | 0,292 | 0,094  |
| 7 | Q9UBC2 EP15R_HUMAN  | K.FHDTSS#PLM*VTPPSAE.A               | S108:  | 2 | 2,4025 | 0,113 | 0,067  |
| 7 | Q15398 DLG7_HUMAN   | K.NTASQNSILEE.G                      |        | 2 | 2,4021 | 0,115 | -0,202 |
| 7 | Q96G74 OTUD5_HUMAN  | R.QAPGVGAVGGGS#PEREE.V               | S165:  | 2 | 2,4019 | 0,26  | 0,146  |
| 7 | P08047 SP1_HUMAN    | R.SSSTGSSSSTGGGGQESQPS#PLALLAATCSR.I | S59:   | 3 | 2,4017 | 0,096 | 0,183  |
| 7 | P04920 B3A2_HUMAN   | R.TSPSS#PAPLPHQE.A                   | S173:  | 2 | 2,4001 | 0,274 | -0,085 |
| 7 | P50443 S26A2_HUMAN  | R.ESS#TDFKQFE.T                      | S36:   | 2 | 2,3982 | 0,266 | 0      |
| 7 | Q9C0H5 K1688_HUMAN  | E.LPGSS#SPLLAQPR.K                   | S285:  | 2 | 2,3967 | 0,103 | -0,435 |
| 7 | Q14157 UBP2L_HUMAN  | K.STSAPQM*SPGS#SDNQSSSPQAQK.L        | S470:  | 3 | 2,3965 | 0,335 | 0,627  |
| 7 | Q96CS3 UBXD8_HUMAN  | D.FLFLSKES#PE.K                      | S397:  | 2 | 2,3963 | 0,189 | -0,191 |
| 7 | P24928 RPB1_HUMAN   | K.YSPTSPTYSPS#PK.Y                   | S1920: | 2 | 2,3917 | 0,382 | -0,306 |
| 7 | Q9Y4M2 Q9Y4M2_HUMAN | R.EGPSCPS#PGPFCREE.L                 | S116:  | 2 | 2,3915 | 0,293 | -0,273 |
| 7 | Q86UU1 PHLB1_HUMAN  | K.SALLTQNGTGS#LPR.N                  | S1017: | 2 | 2,3905 | 0,201 | 0,49   |
| 7 | Q69YU3 AN34A_HUMAN  | E.SLPGAVS#PLSGR.R                    | S392:  | 2 | 2,3903 | 0,486 | 0,699  |

|   |                      |                          |            |   |        |       |        |
|---|----------------------|--------------------------|------------|---|--------|-------|--------|
| 7 | P31946 1433B_HUMAN   | R.NLLS#VAYK.N            | S47:       | 2 | 2,3889 | 0,179 | 0,185  |
| 7 | P18206 VINC_HUMAN    | E.LT#PQVVAAR.I           | T672:      | 2 | 2,3879 | 0,323 | -0,109 |
| 7 | Q5SS95 Q5SS95_HUMAN  | E.NGERTPLANENT#TTSPT.E.S | T108:      | 2 | 2,3864 | 0,286 | -1,759 |
| 7 | Q01082 SPTB2_HUMAN   | K.TALPAQSAAT#LPAR.T      | T2187:     | 2 | 2,3862 | 0,086 | 0      |
| 7 | Q8NFH5 NUP53_HUMAN   | K.TLGTPTQPGST#PR.I       | T280:      | 2 | 2,3827 | 0,25  | -0,35  |
| 7 | Q9P107 GMIP_HUMAN    | E.FLPSLNSS#PLDIR.K       | S376:      | 2 | 2,3816 | 0,137 | -0,238 |
| 7 | Q5M775 SPEC1_HUMAN   | R.T#SPTPPESATTVK.S       | T809:      | 2 | 2,3806 | 0,324 | -0,262 |
| 7 | A5D6Y2 A5D6Y2_HUMAN  | R.Y#RGFSAPYQILME.Y       | Y298:      | 3 | 2,3784 | 0,138 | -0,962 |
| 7 | Q9Y2W6 TDRKH_HUMAN   | E.ITHTLS#CLSLSE.A        | S539:      | 2 | 2,3781 | 0,12  | -0,169 |
| 7 | P55209 NP1L1_HUMAN   | K.FSDAGQPM*SFVLE.F       |            | 2 | 2,3725 | 0,143 | -0,338 |
| 7 | Q92621 NU205_HUMAN   | R.SVS#GFLHFD.T           | S1167:     | 2 | 2,3691 | 0,37  | -0,112 |
| 7 | ##Q8N9B8 RGF1A_HUMAN | E.DCQT#VRHTIAKLEAM*AKE.D | T333:      | 3 | 2,3676 | 0,09  | 1,249  |
| 7 | Q8NDI1 EHBP1_HUMAN   | K.DLSTS#PKPSPIPS#PVLGR.K | S428:S436: | 3 | 2,3674 | 0,095 | -0,273 |
| 7 | P42695 CNDD3_HUMAN   | K.ALSS#FAHCLE.L          | S467:      | 2 | 2,3662 | 0,275 | 0,502  |
| 7 | P20700 LMNB1_HUMAN   | R.AGGPTTPLS#PTR.L        | S23:       | 2 | 2,3661 | 0,324 | -0,099 |
| 7 | Q99459 CDC5L_HUMAN   | K.TVGFGTNNSE.H           |            | 2 | 2,365  | 0,272 | 0,238  |
| 7 | Q6NZY4 ZCHC8_HUMAN   | K.LFPADT#SPSTATK.I       | T648:      | 2 | 2,3625 | 0,345 | -0,086 |
| 7 | Q9NYL2 MLTK_HUMAN    | R.SSS#PTQYGLTK.N         | S637:      | 2 | 2,3516 | 0,407 | -0,586 |
| 7 | Q96FW1 OTUB1_HUMAN   | E.LS#VLYKE.Y             | S55:       | 2 | 2,3515 | 0,146 | 0,655  |
| 7 | Q9UGU0 TCF20_HUMAN   | R.GAAAAAAM*ASE.T         |            | 2 | 2,3482 | 0,313 | 0,303  |
| 7 | O95644 NFAC1_HUMAN   | K.RSPST#ATLSLPSLE.A      | T154:      | 2 | 2,3472 | 0,207 | 0      |
| 7 | P30622 CLIP1_HUMAN   | K.IGFPSTT#PAK.A          | T287:      | 2 | 2,3456 | 0,301 | -0,111 |
| 7 | Q8TA97 Q8TA97_HUMAN  | E.GGAASPTS#PILVPGIK.V    | S472:      | 2 | 2,3454 | 0,157 | 0,079  |
| 7 | Q9H6Z4 RANB3_HUMAN   | R.VLS#PPKLE.V            | S333:      | 2 | 2,3454 | 0,197 | 0      |
| 7 | P51955 NEK2_HUMAN    | E.LLNLPSS#VIK.K          | S378:      | 2 | 2,3417 | 0,267 | 0,21   |
| 7 | Q9H5Y7 SLIK6_HUMAN   | E.FLSFQDASS#LYR.N        | S754:      | 2 | 2,341  | 0,284 | -0,322 |
| 7 | Q86TB9 PATL1_HUMAN   | R.STS#PIIGSPPVR.A        | S179:      | 2 | 2,3409 | 0,112 | -0,095 |
| 7 | Q76FK4 NOL8_HUMAN    | D.SITPSKSS#PVPVSD.T      | S268:      | 2 | 2,3404 | 0,389 | -0,165 |
| 7 | O43290 SNUT1_HUMAN   | R.S#ILSKYDEE.L           | S332:      | 2 | 2,3375 | 0,129 | -0,314 |
| 7 | Q9UQ35 SRRM2_HUMAN   | K.AQT#PPGPSLSGSK.S       | T1003:     | 2 | 2,3351 | 0,302 | -0,093 |
| 7 | P11387 TOP1_HUMAN    | E.NGFS#SPPQIKDEPEDD.G    | S111:      | 2 | 2,3347 | 0,135 | -0,395 |
| 7 | Q14202 ZMYM3_HUMAN   | K.APS#PPEVDHGPE.G        | S91:       | 2 | 2,3347 | 0,323 | -0,465 |
| 7 | P49848 TAF6_HUMAN    | K.QEAGDS#PPPAPGTPK.A     | S653:      | 2 | 2,3347 | 0,149 | -0,559 |

|   |                     |                      |        |   |        |       |        |
|---|---------------------|----------------------|--------|---|--------|-------|--------|
| 7 | P82094 TMF1_HUMAN   | K.SNTEPQSPPIAS#PK.A  | S77:   | 2 | 2,3343 | 0,331 | -0,159 |
| 7 | Q8N3V7 SYNPO_HUMAN  | R.AAATTPT#KVYSE.V    | T463:  | 2 | 2,3341 | 0,14  | 0      |
| 7 | Q5W0B1 RN219_HUMAN  | R.FGS#SLFK.M         | S670:  | 2 | 2,3338 | 0,121 | 0,423  |
| 7 | Q03188 CENPC_HUMAN  | K.KS#FSTLFLE.T       | S261:  | 2 | 2,3257 | 0,107 | -0,212 |
| 7 | Q6DEN2 Q6DEN2_HUMAN | K.TLDFDALS#VGQR.G    | S56:   | 2 | 2,3253 | 0,319 | 0,087  |
| 7 | Q9P0W5 SCHI1_HUMAN  | E.TSLDTPLS#PM*SK.Q   | S330:  | 2 | 2,3252 | 0,399 | -0,444 |
| 7 | Q9NRS6 SNX15_HUMAN  | E.GAAPS#PTHVAE.L     | S227:  | 2 | 2,3233 | 0,316 | -0,218 |
| 7 | Q53T59 H1BP3_HUMAN  | R.S#PGAAGLTSR.D      | S139:  | 2 | 2,3202 | 0,395 | -0,184 |
| 7 | P06576 ATPB_HUMAN   | R.FLSQPFQVAE.V       |        | 2 | 2,3171 | 0,217 | -0,523 |
| 7 | P08134 RHOC_HUMAN   | R.DM*ANRIS#AFGYLE.C  | S152:  | 2 | 2,3168 | 0,345 | 0,385  |
| 7 | O14545 TRAD1_HUMAN  | R.ALPSLNTGSSS#PR.G   | S327:  | 2 | 2,3166 | 0,169 | -0,089 |
| 7 | Q08499 PDE4D_HUMAN  | E.VEIPSPT#QKE.K      | T350:  | 2 | 2,3127 | 0,114 | -0,505 |
| 7 | P14625 ENPL_HUMAN   | D.EAAVEEEEE.E        |        | 2 | 2,3104 | 0,11  | -0,118 |
| 7 | O00410 IMB3_HUMAN   | E.VM*GDGCLNNE.H      |        | 2 | 2,3083 | 0,094 | -0,325 |
| 7 | P10243 MYBA_HUMAN   | K.FST#PPAILR.K       | T442:  | 2 | 2,3079 | 0,167 | 0,451  |
| 7 | Q9NYF3 FA53C_HUMAN  | R.SLS#VPVDLSR.W      | S122:  | 2 | 2,3034 | 0,101 | 0,212  |
| 7 | Q6UN15 FIP1_HUMAN   | E.FTS#PPSLFK.T       | S259:  | 2 | 2,3022 | 0,162 | 0,111  |
| 7 | Q6ZRV2 FA83H_HUMAN  | R.AVPAPSPGPTHNS#PE.L | S1068: | 2 | 2,3017 | 0,245 | -0,238 |
| 7 | Q6P9B9 INT5_HUMAN   | R.FQAPS#PSTLLR.Q     | S1010: | 2 | 2,3009 | 0,127 | -0,188 |
| 7 | P13489 RINI_HUMAN   | E.LTVSNNDINE.A       |        | 2 | 2,2975 | 0,219 | -0,327 |
| 7 | Q69YN4 VIR_HUMAN    | E.DYFEPIS#PDR.N      | S222:  | 2 | 2,2973 | 0,197 | 0,093  |
| 7 | P37802 TAGL2_HUMAN  | R.NFSDNQLQE.G        |        | 2 | 2,2968 | 0,195 | 0,557  |
| 7 | Q96FF9 CDCA5_HUMAN  | R.KS#GSELP SILPE.I   | S33:   | 2 | 2,2931 | 0,17  | 0      |
| 7 | Q6W2J9 BCOR_HUMAN   | E.QGLPVFSGS#PPM*K.S  | S1290: | 2 | 2,2896 | 0,266 | 0,085  |
| 7 | Q8NI08 NCOA7_HUMAN  | K.FNIT#PNKLVE.L      | T134:  | 2 | 2,2891 | 0,164 | 0      |
| 7 | Q86UU0 BCL9L_HUMAN  | R.GLLS#PPM*GQSGFRE.V | S750:  | 2 | 2,2874 | 0,435 | 0,079  |
| 7 | P22681 CBL_HUMAN    | E.FVSISS#PAHVAT.-    | S900:  | 2 | 2,2868 | 0,337 | -0,094 |
| 7 | Q14676 MDC1_HUMAN   | R.SSVKT#PETVVPAAPE.L | T1526: | 2 | 2,2849 | 0,277 | -0,46  |
| 7 | P53814 SMTN_HUMAN   | R.STS#FGVNPANSIK.Q   | S792:  | 2 | 2,2846 | 0,354 | 0,609  |
| 7 | Q04637 IF4G1_HUMAN  | E.AALPPVS#PLK.A      | S1232: | 2 | 2,2783 | 0,311 | 0,227  |
| 7 | Q68DN6 RGPD1_HUMAN  | D.ESTTGFNFS#FK.S     | S1279: | 2 | 2,2736 | 0,432 | -0,454 |
| 7 | P46013 KI67_HUMAN   | K.AFM*ES#PKQILD.S    | S1679: | 2 | 2,2727 | 0,084 | 0,089  |
| 7 | O00401 WASL_HUMAN   | K.VIY#DFIEK.T        | Y256:  | 2 | 2,2724 | 0,215 | 0,441  |

|   |                      |                              |            |   |        |       |        |
|---|----------------------|------------------------------|------------|---|--------|-------|--------|
| 7 | Q9NYV4 CD2L7_HUMAN   | R.TFSGS#LSHLGE.S             | S1379:     | 2 | 2,2716 | 0,232 | -0,502 |
| 7 | Q8WXH0 SYNE2_HUMAN   | R.FIQNTCNE.V                 |            | 2 | 2,2705 | 0,134 | -0,595 |
| 7 | Q9C0B1 FATSO_HUMAN   | R.VGM*GSSYNGQDE.V            |            | 2 | 2,2679 | 0,319 | 0,097  |
| 7 | Q86UU1 PHLB1_HUMAN   | E.LPPLS#PSLSR.R              | S461:      | 2 | 2,2648 | 0,314 | 0,319  |
| 7 | Q9NQW6 ANLN_HUMAN    | K.TQS#LPVTEK.V               | S485:      | 2 | 2,2635 | 0,179 | 0,338  |
| 7 | P52732 KIF11_HUMAN   | K.LDIPTGTT#PQR.K             | T926:      | 2 | 2,2594 | 0,174 | 0      |
| 7 | Q15651 HMG3_HUMAN    | K.EGTAPS#ENGETKAE.E          | S78:       | 2 | 2,2592 | 0,107 | 0,599  |
| 7 | Q9Y6Q9 NCOA3_HUMAN   | E.GVGTSLSTLSS#PGPK.L         | S543:      | 3 | 2,2559 | 0,114 | 0,231  |
| 7 | Q9NQS7 INCE_HUMAN    | R.VLAPILPDNFST#PTGSR.T       | T292:      | 2 | 2,2534 | 0,1   | 0,393  |
| 7 | Q9NRS6 SNX15_HUMAN   | E.AS#GSPARGPLTE.A            | S199:      | 2 | 2,2509 | 0,337 | -0,2   |
| 7 | O75909 CCNK_HUMAN    | R.AVVVS#PKEE.N               | S340:      | 2 | 2,2509 | 0,204 | 0,118  |
| 7 | Q7Z2Z1 CO042_HUMAN   | E.GVCQLPDQS#PPR.N            | S1750:     | 2 | 2,2497 | 0,188 | 0,17   |
| 7 | P49736 MCM2_HUMAN    | E.SFTM*AS#SPAQR.R            | S12:       | 2 | 2,2483 | 0,289 | -0,191 |
| 7 | Q14160 LAP4_HUMAN    | R.ALAAVPSAGS#VQR.V           | S1279:     | 2 | 2,2434 | 0,345 | -0,653 |
| 7 | Q9UHV7 MED13_HUMAN   | D.AM*SLFS#PSIK.Q             | S749:      | 2 | 2,243  | 0,13  | 0,104  |
| 7 | Q9UIF9 BAZ2A_HUMAN   | E.VPLTASVT#SPK.A             | T464:      | 2 | 2,2426 | 0,294 | -0,31  |
| 7 | Q5QJE6 TDIF2_HUMAN   | K.SLTDPSE.S                  |            | 2 | 2,2424 | 0,177 | 0,417  |
| 7 | O15062 ZBTB5_HUMAN   | E.FFS#PDSLK.I                | S234:      | 2 | 2,2395 | 0,099 | 0,06   |
| 7 | P54259 ATN1_HUMAN    | R.TGT#PPGYR.G                | T664:      | 2 | 2,2376 | 0,125 | -0,066 |
| 7 | ##Q9H2X9 S12A5_HUMAN | E.M*VLTKEY#T#YASIDSEHMEVVE.V | Y214:T215: | 3 | 2,2329 | 0,165 | -1,036 |
| 7 | P28290 SSFA2_HUMAN   | R.ASVALTPTAPS#R.T            | S1161:     | 2 | 2,2316 | 0,156 | 0,195  |
| 7 | P17858 K6PL_HUMAN    | R.TLS#M*DKGF.-               | S775:      | 2 | 2,229  | 0,408 | -0,061 |
| 7 | O94804 STK10_HUMAN   | R.ILRSL#TFE.K                | S13:       | 2 | 2,2287 | 0,182 | -0,23  |
| 7 | Q969R5 LMBL2_HUMAN   | E.AGELPTS#PLHLLS#PGTPR.S     | S67:S73:   | 2 | 2,2252 | 0,159 | 0,061  |
| 7 | Q09666 AHNK_HUMAN    | R.LPSGS#GAASPTGSAVDIR.A      | S212:      | 3 | 2,2252 | 0,144 | 0,212  |
| 7 | Q13642 FHL1_HUMAN    | K.FCANTCVE.C                 |            | 2 | 2,2238 | 0,245 | 0,061  |
| 7 | P06748 NPM_HUMAN     | K.M*SVQPTVSLGGFE.I           |            | 2 | 2,2235 | 0,34  | 0      |
| 7 | Q96RK0 CIC_HUMAN     | E.GAPQPS#PPPPGPSTAATGR.-     | S1595:     | 2 | 2,2216 | 0,278 | 0,067  |
| 7 | P27816 MAP4_HUMAN    | E.AT#PVPIKDM*E.I             | T585:      | 2 | 2,2208 | 0,337 | 0,102  |
| 7 | O14974 MYPT1_HUMAN   | E.NGANINQPDNE.G              |            | 2 | 2,2196 | 0,126 | 0,103  |
| 7 | Q15154 PCM1_HUMAN    | E.TAS#PVAVSLR.S              | S861:      | 2 | 2,2189 | 0,233 | -0,79  |
| 7 | O15213 WDR46_HUMAN   | E.TVPTTAGAS#PGPPR.N          | S41:       | 2 | 2,2188 | 0,412 | -0,088 |
| 7 | Q5JRA6 MIA3_HUMAN    | R.GSS#PTRVLDE.G              | S1745:     | 2 | 2,2168 | 0,141 | 0,107  |



|   |                    |                           |            |   |        |       |        |
|---|--------------------|---------------------------|------------|---|--------|-------|--------|
| 7 | O43237 DC1L2_HUMAN | R.GPLTSGSDEE.N            |            | 2 | 2,2157 | 0,169 | 0,062  |
| 7 | Q92844 TANK_HUMAN  | R.SLGS#PLLHE.R            | S129:      | 2 | 2,2152 | 0,259 | 0,118  |
| 7 | O15354 GPR37_HUMAN | E.LELS#PFSTIR.R           | S594:      | 2 | 2,2141 | 0,191 | 0      |
| 7 | Q13541 4EBP1_HUMAN | R.AGGEESQFE.M             |            | 2 | 2,2102 | 0,156 | 0,831  |
| 7 | Q9P1Y6 K1542_HUMAN | E.AS#PAPLAQGEPIRE.D       | S1202:     | 2 | 2,2099 | 0,423 | 0      |
| 7 | Q5T200 ZC3HD_HUMAN | R.SLS#PSHLTE.D            | S877:      | 2 | 2,2084 | 0,361 | -0,464 |
| 7 | Q6ZSZ5 ARHGI_HUMAN | R.SLS#PILPGR.H            | S1103:     | 2 | 2,2061 | 0,279 | -0,12  |
| 7 | Q9Y4W2 LAS1L_HUMAN | E.ASPIGKS#PYTLD.S         | S528:      | 2 | 2,2033 | 0,277 | 0,184  |
| 7 | P04075 ALDOA_HUMAN | E.SLFVS#NHAY.-            | S360:      | 2 | 2,2033 | 0,196 | 0,327  |
| 7 | Q9BVC5 ASHWN_HUMAN | K.SPPLS#PVGTTVPK.L        | S193:      | 2 | 2,202  | 0,243 | 0,09   |
| 7 | Q9NWH9 SLTM_HUMAN  | R.ISS#KS#PGHM*VILD.Q      | S551:S553: | 2 | 2,1995 | 0,357 | -0,156 |
| 7 | Q6T4R5 NHS_HUMAN   | E.NT#PTKNCAFTE.G          | T1241:     | 2 | 2,1984 | 0,205 | -0,334 |
| 7 | P13010 KU86_HUMAN  | E.QGGAHFS#VSSLAE.G        | S577:      | 2 | 2,1972 | 0,285 | 0      |
| 7 | Q9UQ35 SRRM2_HUMAN | R.VPS#PTPAPK.E            | S2581:     | 2 | 2,193  | 0,258 | 0,125  |
| 7 | Q9Y2H0 DLGP4_HUMAN | E.TS#SSSPAEPAPGACR.R      | S784:      | 2 | 2,1928 | 0,228 | 0,073  |
| 7 | Q13459 MYO9B_HUMAN | R.VSPAPGAPET#PEDK.S       | T1271:     | 2 | 2,1916 | 0,351 | -0,147 |
| 7 | P54725 RD23A_HUMAN | E.SAPT#TSPESVSGVPSGSSGR.E | T131:      | 2 | 2,1872 | 0,117 | -0,116 |
| 7 | P48436 SOX9_HUMAN  | K.ALQADS#PHSSSGM*SE.V     | S211:      | 2 | 2,1862 | 0,306 | 0,229  |
| 7 | Q96JM3 ZN828_HUMAN | E.TDPVKS#PPLPE.H          | S108:      | 2 | 2,1832 | 0,205 | 0,097  |
| 7 | O75676 KS6A4_HUMAN | R.S#SPPLRTPDVLE.S         | S681:      | 2 | 2,1822 | 0,155 | 0,175  |
| 7 | Q16643 DREB_HUMAN  | E.GYFSQSQEEE.F            |            | 2 | 2,1821 | 0,135 | -0,101 |
| 7 | Q9UHB7 AFF4_HUMAN  | R.TIS#QSSSLK.S            | S836:      | 2 | 2,1682 | 0,227 | 0      |
| 7 | P38398 BRCA1_HUMAN | E.LLQIT#PQGTRDE.I         | T208:      | 2 | 2,1652 | 0,121 | 0,252  |
| 7 | Q8N1F7 NUP93_HUMAN | R.GLDIS#HIS#QRLE.S        | S72:S75:   | 3 | 2,1614 | 0,258 | 0,239  |
| 7 | P19338 NUCL_HUMAN  | K.GLSEDTEE.T              |            | 2 | 2,1585 | 0,25  | -0,249 |
| 7 | Q5SWX8 ODR4_HUMAN  | E.M*LDHT#IQIEDLE.I        | T381:      | 2 | 2,1579 | 0,104 | 0,236  |
| 7 | O75674 TM1L1_HUMAN | D.LLDLSPS#PR.M            | S323:      | 2 | 2,1573 | 0,212 | 0,34   |
| 7 | Q9NQW6 ANLN_HUMAN  | K.TPIS#PLK.T              | S323:      | 2 | 2,1555 | 0,198 | 0,438  |
| 7 | Q9Y4G6 TLN2_HUMAN  | E.STM*LEESVS#PK.K         | S428:      | 2 | 2,1528 | 0,085 | -0,936 |
| 7 | Q8WYP5 AHTF1_HUMAN | E.FT#PQSILR.S             | T1207:     | 2 | 2,1524 | 0,177 | -0,234 |
| 7 | Q8N122 RPTOR_HUMAN | D.TSSLTQSAPAS#PTNK.G      | S863:      | 2 | 2,1507 | 0,218 | 0,233  |
| 7 | Q09666 AHNK_HUMAN  | K.MPFLSISS#PK.V           | S3412:     | 2 | 2,1501 | 0,274 | -0,308 |
| 7 | Q92733 PRCC_HUMAN  | K.TILQGSSE.G              |            | 2 | 2,1493 | 0,215 | 0,146  |

|   |                    |                         |            |   |        |       |        |
|---|--------------------|-------------------------|------------|---|--------|-------|--------|
| 7 | Q9UNI6 DUS12_HUMAN | K.ILPVLGS#QTGKI.-       | S335:      | 2 | 2,1487 | 0,163 | 0      |
| 7 | Q96EQ0 SGTB_HUMAN  | R.SFS#SSAEHS.-          | S297:      | 2 | 2,1436 | 0,113 | -0,213 |
| 7 | Q02952 AKA12_HUMAN | K.S#TPVIVSATTK.K        | S1483:     | 2 | 2,1397 | 0,198 | -0,103 |
| 7 | O15027 SC16A_HUMAN | E.LVPPQQQAS#PPQLPK.A    | S891:      | 2 | 2,1381 | 0,133 | 0,071  |
| 7 | Q8N4X5 AF1L2_HUMAN | R.VYLDLT#PVK.S          | T541:      | 2 | 2,133  | 0,266 | -0,108 |
| 7 | Q9C0C2 TB182_HUMAN | E.FS#LSVGPQRE.A         | S1091:     | 2 | 2,1317 | 0,131 | 0,508  |
| 7 | Q7KZF4 SND1_HUMAN  | R.LGTLS#PAFSTR.V        | S781:      | 2 | 2,1271 | 0,311 | 0,198  |
| 7 | Q3V6T2 GRDN_HUMAN  | K.SLS#VSSDFLGK.D        | S1715:     | 2 | 2,1236 | 0,292 | 0,2    |
| 7 | P98082 DAB2_HUMAN  | K.SSPNPFVGS#PPK.G       | S401:      | 2 | 2,122  | 0,238 | 0,283  |
| 7 | Q92576 PHF3_HUMAN  | R.S#PQFINLK.R           | S1642:     | 2 | 2,1189 | 0,347 | 0,238  |
| 7 | P55265 DSRAD_HUMAN | E.SQTPT#PSATSFSGK.S     | T603:      | 3 | 2,1152 | 0,122 | 0,338  |
| 7 | Q8IZT6 ASPM_HUMAN  | K.ILS#PDSFIK.D          | S367:      | 2 | 2,1103 | 0,166 | 0      |
| 7 | Q66K14 TBC9B_HUMAN | R.QFSTAS#DHEQPGVSG.-    | S1241:     | 2 | 2,1103 | 0,136 | 0,15   |
| 7 | Q5VZL5 ZMYM4_HUMAN | K.TLSQGESQTS#EHE.L      | S1071:     | 2 | 2,1097 | 0,329 | 0,161  |
| 7 | P05023 AT1A1_HUMAN | R.AVFQANQE.N            |            | 2 | 2,1079 | 0,12  | 0,336  |
| 7 | Q96QT6 PHF12_HUMAN | K.TPPT#PPSSIVAK.V       | T880:      | 2 | 2,0965 | 0,145 | 0,287  |
| 7 | Q2NWX8 ERC6L_HUMAN | R.QNFSSQSLE.H           |            | 2 | 2,0962 | 0,159 | -0,235 |
| 7 | P43243 MATR3_HUMAN | R.GAPPSSNIE.D           |            | 2 | 2,0961 | 0,197 | 0,28   |
| 7 | P48634 BAT2_HUMAN  | R.SFS#SQRPGM*E.R        | S1386:     | 2 | 2,0933 | 0,175 | -0,2   |
| 7 | P08238 HS90B_HUMAN | R.NPDDITQEE.Y           |            | 2 | 2,0894 | 0,276 | 0      |
| 7 | Q02952 AKA12_HUMAN | K.AITPQAQEE.L           |            | 2 | 2,0892 | 0,224 | 0,247  |
| 7 | P80723 BASP_HUMAN  | K.ETPAATEAPSST#PK.A     | T196:      | 2 | 2,0869 | 0,357 | -0,25  |
| 7 | Q86UE4 LYRIC_HUMAN | R.DKVLTDSGS#LDSTIPGIE.N | S216:      | 2 | 2,0864 | 0,352 | -0,38  |
| 7 | Q13017 RHG05_HUMAN | E.DVFLPS#PR.D           | S968:      | 2 | 2,0863 | 0,31  | 0,181  |
| 7 | Q9UP95 S12A4_HUMAN | E.SS#PFLSPLEASR.G       | S47:       | 2 | 2,085  | 0,176 | -0,267 |
| 7 | P11021 GRP78_HUMAN | K.NQLTSNPE.N            |            | 2 | 2,0822 | 0,149 | -0,54  |
| 7 | Q8N556 AFAP1_HUMAN | E.AVPLS#PGKAPE.Y        | S101:      | 2 | 2,08   | 0,22  | 0      |
| 7 | Q13242 SFRS9_HUMAN | R.GS#PHYFS#PFRPY.-      | S211:S216: | 2 | 2,0715 | 0,265 | -0,227 |
| 7 | Q9Y2N3 PO121_HUMAN | K.ETVLS#ALKE.K          | S291:      | 2 | 2,0613 | 0,228 | 0,114  |
| 7 | Q9Y6I3 EPN1_HUMAN  | R.S#PGAFFDM*SGVR.G      | S410:      | 2 | 2,0612 | 0,438 | -0,3   |
| 7 | P60174 TPIS_HUMAN  | K.TATPQQAQE.V           |            | 2 | 2,061  | 0,111 | 0,313  |
| 7 | Q9H1A4 APC1_HUMAN  | E.GSLS#PVIAPK.K         | S688:      | 2 | 2,0593 | 0,212 | -0,116 |
| 7 | O75569 PRKRA_HUMAN | R.EDS#GTFSLGK.M         | S18:       | 2 | 2,0576 | 0,183 | 0,109  |

|   |                     |                        |        |   |        |       |        |
|---|---------------------|------------------------|--------|---|--------|-------|--------|
| 7 | Q9UFW8 CGBP1_HUMAN  | E.NQLNSQDC.-           |        | 2 | 2,0528 | 0,116 | -1,006 |
| 7 | P46821 MAP1B_HUMAN  | E.QYGLTT#PTK.Q         | T1067: | 2 | 2,0507 | 0,337 | -0,395 |
| 7 | Q9UHB7 AFF4_HUMAN   | K.AVGM*PSPVS#PK.L      | S1058: | 2 | 2,0499 | 0,175 | -0,105 |
| 7 | P50402 EMD_HUMAN    | K.GYNDDYEE.S           |        | 2 | 2,0479 | 0,158 | -0,209 |
| 7 | Q96BD0 SO4A1_HUMAN  | R.ASPGTLPSPGS#LR.S     | S43:   | 2 | 2,0444 | 0,137 | -0,462 |
| 7 | Q09666 AHNK_HUMAN   | K.FGTFGGLGS#K.S        | S5830: | 2 | 2,0431 | 0,134 | -0,116 |
| 7 | Q01082 SPTB2_HUMAN  | R.TQETPSAQM*E.G        |        | 2 | 2,0417 | 0,298 | -0,107 |
| 7 | Q92616 GCN1L_HUMAN  | K.SIIQSAQQD.S          |        | 2 | 2,04   | 0,121 | -1,109 |
| 7 | P29966 MARCS_HUMAN  | K.LSGFS#FK.K           | S170:  | 2 | 2,0399 | 0,16  | 0,282  |
| 7 | Q08AD1 CA1L1_HUMAN  | E.ALS#PCPSTVSTK.S      | S673:  | 2 | 2,0355 | 0,209 | -0,276 |
| 7 | Q32LY9 Q32LY9_HUMAN | E.SPIVPPPM*S#PSSK.S    | S81:   | 2 | 2,0344 | 0,156 | 0,258  |
| 7 | Q96GQ7 DDX27_HUMAN  | K.GQEAGGFFE.D          |        | 2 | 2,0344 | 0,101 | 0,065  |
| 7 | O00151 PDL1_HUMAN   | K.M*NLASEPQE.V         |        | 2 | 2,0335 | 0,125 | -0,472 |
| 7 | P48634 BAT2_HUMAN   | K.EAPPPVLLT#PK.A       | T1347: | 2 | 2,0327 | 0,142 | 1,277  |
| 7 | Q2TA77 Q2TA77_HUMAN | E.TQSS#PTKGFVNL.-      | S499:  | 2 | 2,0302 | 0,136 | -0,18  |
| 7 | Q9BTE3 CJ119_HUMAN  | R.VS#PSTSYTPSR.H       | S154:  | 2 | 2,03   | 0,343 | 0      |
| 7 | Q8IX90 CM003_HUMAN  | R.TPT#PPEVTKIPE.D      | T360:  | 2 | 2,0293 | 0,155 | -0,176 |
| 7 | Q9UHY1 NRBP_HUMAN   | R.HLS#CDLM*PNENIPE.L   | S477:  | 2 | 2,0204 | 0,226 | 0,207  |
| 7 | Q3KQU3 MA7D1_HUMAN  | K.SLS#RTPETLLPFAE.A    | S811:  | 2 | 2,0158 | 0,161 | -0,595 |
| 7 | Q3KQU3 MA7D1_HUMAN  | R.GPT#PPAM*GPR.D       | T97:   | 2 | 2,0097 | 0,097 | -0,113 |
| 7 | Q5H9F3 BCRL1_HUMAN  | E.GTSVTFS#PLK.S        | S599:  | 2 | 2,0066 | 0,162 | -0,218 |
| 7 | P20042 IF2B_HUMAN   | E.M*IFDPTM*S#K.K       | S13:   | 2 | 2,0055 | 0,241 | 0,103  |
| 7 | Q96PE2 ARHGH_HUMAN  | R.SLS#DPIPQR.H         | S735:  | 2 | 2,0052 | 0,147 | -0,223 |
| 7 | A6NGB9 WIPF3_HUMAN  | K.LNPPPAPPARS#PTTE.L   | S383:  | 2 | 2,0048 | 0,164 | -0,45  |
| 7 | P05787 K2C8_HUMAN   | R.SNM*DNM*FE.S         |        | 2 | 1,9895 | 0,132 | -0,12  |
| 7 | Q9P2B4 CT2NL_HUMAN  | K.VSSPLS#PLSPGIK.S     | S560:  | 2 | 1,9893 | 0,228 | 0      |
| 7 | Q14118 DAG1_HUMAN   | K.NM*TPYRS#PPPYVPP.-   | S888:  | 2 | 1,9866 | 0,081 | -0,214 |
| 7 | P33993 MCM7_HUMAN   | R.SPQNQYPAE.L          |        | 2 | 1,9794 | 0,102 | -0,118 |
| 7 | P35658 NU214_HUMAN  | K.SPGSTPTT#PTSSQAPQK.L | T437:  | 2 | 1,976  | 0,223 | -0,348 |
| 7 | P07195 LDHB_HUMAN   | K.GM*YGIENE.V          |        | 2 | 1,9755 | 0,16  | 0,263  |
| 7 | Q08945 SSRP1_HUMAN  | E.IS#FVNFR.G           | S375:  | 2 | 1,9744 | 0,344 | -0,118 |
| 7 | Q96RY5 CRML_HUMAN   | K.LFS#PSKEAE.L         | S845:  | 2 | 1,9734 | 0,171 | 1,009  |
| 7 | Q9BUA3 YK007_HUMAN  | E.QEFLVGSS#PGGSGR.A    | S82:   | 2 | 1,9714 | 0,248 | -0,167 |

|   |                      |                        |              |   |        |       |        |
|---|----------------------|------------------------|--------------|---|--------|-------|--------|
| 7 | Q12857 NFIA_HUMAN    | E.VEPGM*PS#PTTLK.K     | S319:        | 2 | 1,9708 | 0,199 | -0,631 |
| 7 | Q14451 GRB7_HUMAN    | R.RATS#LPSIPNPFPE.L    | S63:         | 2 | 1,9621 | 0,212 | -0,304 |
| 7 | O94854 K0754_HUMAN   | R.RDS#DSFLNIFPE.K      | S666:        | 2 | 1,9588 | 0,185 | -0,241 |
| 7 | P23528 COF1_HUMAN    | E.LQANCYEE.V           |              | 2 | 1,9523 | 0,21  | 0,119  |
| 7 | Q15057 CENB2_HUMAN   | K.SSPSTGSLDSGNE.S      |              | 2 | 1,9482 | 0,115 | 0,296  |
| 7 | Q6NYC8 PHTNS_HUMAN   | R.LS#PGESAYQK.L        | S224:        | 2 | 1,9477 | 0,304 | -0,105 |
| 7 | Q9UKM9 RALY_HUMAN    | E.GLLTHS#EEEELE.H      | S288:        | 2 | 1,9433 | 0,113 | 0,183  |
| 7 | Q68DA7 FMN1_HUMAN    | K.TTAEPQHQS#PPGISSE.G  | S620:        | 2 | 1,9415 | 0,127 | -0,978 |
| 7 | Q53H80 CF166_HUMAN   | D.FDLLSPAS#PK.R        | S21:         | 2 | 1,9397 | 0,36  | 0,097  |
| 7 | Q9H4B7 TBB1_HUMAN    | R.ISVYYNE.A            |              | 2 | 1,9341 | 0,179 | 0,412  |
| 7 | Q9UHD8 SEPT9_HUMAN   | E.LS#IDISSK.Q          | S111:        | 2 | 1,9246 | 0,293 | 0,323  |
| 7 | Q86Y04 Q86Y04_HUMAN  | K.VDLTLLS#PK.S         | S239:        | 2 | 1,9219 | 0,174 | 0      |
| 7 | Q9Y618 NCOR2_HUMAN   | R.EGT#PPPPPSR.D        | T1383:       | 2 | 1,9217 | 0,213 | 0,101  |
| 7 | Q5JSZ5 K0515_HUMAN   | R.S#SPYGTLKPEE.M       | S996:        | 2 | 1,9157 | 0,209 | -0,284 |
| 7 | B2RMZ9 B2RMZ9_HUMAN  | R.APVS#PLKFSPFE.G      | S423:        | 2 | 1,9117 | 0,293 | -0,174 |
| 7 | Q9BW91 NUDT9_HUMAN   | R.T#SPYPGSKVE.R        | T67:         | 2 | 1,9095 | 0,146 | 0      |
| 7 | Q15054 DPOD3_HUMAN   | R.QVS#ITGFFQR.K        | S458:        | 2 | 1,8985 | 0,317 | -0,193 |
| 7 | ##Q8WUY3 PRUN2_HUMAN | K.LVLS#S#SSER.F        | S114:S115:   | 2 | 1,8861 | 0,118 | 0,214  |
| 7 | Q8N1F8 S11IP_HUMAN   | E.LELM*SS#FRE.R        | S432:        | 2 | 1,8844 | 0,168 | -0,909 |
| 7 | Q14938 NFX_HUMAN     | R.S#ITSPSTSTTK.R       | S265:        | 2 | 1,8818 | 0,142 | 0,19   |
| 7 | Q99832 TCPH_HUMAN    | R.GGAEQFM*EE.T         |              | 2 | 1,8774 | 0,089 | 0,602  |
| 7 | ##Q92750 TAF4B_HUMAN | K.T#AT#LS#STGSALLNDK.L | T39:T41:S43: | 2 | 1,8747 | 0,152 | 0,639  |
| 7 | Q8WXX5 DNJC9_HUMAN   | K.KIS#LEDIQAFE.K       | S109:        | 2 | 1,8693 | 0,174 | -0,089 |
| 7 | Q9UKG1 DP13A_HUMAN   | E.AVTPS#PSFQQR.H       | S401:        | 2 | 1,8679 | 0,098 | -0,188 |
| 7 | P16949 STMN1_HUMAN   | E.SVPEFPLS#PPK.K       | S38:         | 2 | 1,8651 | 0,3   | 0      |
| 7 | Q9H2G2 SLK_HUMAN     | K.FYPIPSLHS#TGS.-      | S1232:       | 2 | 1,8583 | 0,089 | -0,176 |
| 7 | Q8N1F7 NUP93_HUMAN   | R.GLDIS#HIS#QRLE.S     | S72:S75:     | 2 | 1,8559 | 0,304 | 0,24   |
| 7 | Q13310 PABP4_HUMAN   | E.FS#PFGSITSAK.V       | S315:        | 2 | 1,8507 | 0,18  | 0,499  |
| 7 | Q5T5U3 RHG21_HUMAN   | K.SNTAVCVCNE.S         |              | 2 | 1,8478 | 0,113 | 0      |
| 7 | Q6IAA8 CK059_HUMAN   | E.QALLSS#ILAK.T        | S56:         | 2 | 1,8313 | 0,284 | -0,217 |
| 7 | P51149 RAB7A_HUMAN   | K.NNIPYFE.T            |              | 2 | 1,8272 | 0,218 | 0,476  |
| 7 | P49790 NU153_HUMAN   | K.VQM*TSPPS#TGSPM*FK.F | S519:        | 2 | 1,8242 | 0,136 | 0,072  |
| 7 | Q96IF1 JUB_HUMAN     | R.LEPTAPALS#PR.S       | S119:        | 2 | 1,8199 | 0,23  | 0      |

|   |                     |                         |        |   |        |       |        |
|---|---------------------|-------------------------|--------|---|--------|-------|--------|
| 7 | Q8TER5 SOLO_HUMAN   | R.ALALDLGS#PAALRE.W     | S931:  | 2 | 1,7991 | 0,203 | -0,165 |
| 7 | P42166 LAP2A_HUMAN  | E.TEFLS#PPR.K           | S424:  | 2 | 1,7984 | 0,124 | 0,356  |
| 7 | Q86VR2 F134C_HUMAN  | E.GVPTT#PGPASGSTFR.G    | T10:   | 2 | 1,7976 | 0,201 | 0,161  |
| 7 | O95292 VAPB_HUMAN   | K.SLSSSLDDTE.V          |        | 2 | 1,7904 | 0,222 | 0,463  |
| 7 | P06748 NPM_HUMAN    | E.IT#PPVVL.R            | T95:   | 2 | 1,785  | 0,229 | 0,375  |
| 7 | O94909 K0819_HUMAN  | E.ATVPS#PTQSPIR.F       | S414:  | 2 | 1,7802 | 0,204 | 0,366  |
| 7 | P12270 TPR_HUMAN    | K.RPST#SQTVSTPAPVPVIE.S | T647:  | 2 | 1,773  | 0,237 | 0,125  |
| 7 | Q9UQ35 SRRM2_HUMAN  | R.TS#PPLDR.A            | S2398: | 2 | 1,7524 | 0,28  | 0,062  |
| 7 | O94854 K0754_HUMAN  | R.RSDS#FLNIFPE.K        | S668:  | 2 | 1,7446 | 0,189 | -0,482 |
| 7 | P40763 STAT3_HUMAN  | E.ADPGSAAPY#LK.T        | Y705:  | 2 | 1,7436 | 0,411 | -0,626 |
| 7 | P04406 G3P_HUMAN    | K.LVINGNPITIFQE.R       |        | 2 | 1,7407 | 0,112 | -0,167 |
| 7 | Q6U841 S4A10_HUMAN  | R.S#FADIGK.K            | S238:  | 2 | 1,736  | 0,416 | 0,522  |
| 7 | Q15742 NAB2_HUMAN   | R.SFS#PKSPLE.L          | S159:  | 2 | 1,7315 | 0,134 | 0,228  |
| 7 | Q86Z20 CC125_HUMAN  | R.SHS#LPSSIIF.-         | S504:  | 2 | 1,7189 | 0,219 | -0,313 |
| 7 | Q9P1Y6 K1542_HUMAN  | K.ENPS#PLFSIK.K         | S814:  | 2 | 1,7161 | 0,185 | 0,403  |
| 7 | Q9UGU0 TCF20_HUMAN  | K.AGSS#PAQGAQNEPPR.L    | S559:  | 2 | 1,6899 | 0,359 | 0,158  |
| 7 | Q6PJG2 CN043_HUMAN  | E.AT#PVSIEPR.I          | T715:  | 2 | 1,6716 | 0,318 | 0      |
| 7 | Q9C0B5 ZDHC5_HUMAN  | K.DSPPT#PTM*YK.Y        | T348:  | 2 | 1,6677 | 0,427 | 0      |
| 7 | Q8TD16 BICD2_HUMAN  | R.S#PILLPK.G            | S582:  | 2 | 1,6568 | 0,153 | 0,935  |
| 7 | P30305 MPIP2_HUMAN  | E.LS#PLALGR.F           | S249:  | 2 | 1,6541 | 0,371 | 0,202  |
| 7 | Q01081 U2AF1_HUMAN  | E.LS#PVTDFRE.A          | S145:  | 2 | 1,6524 | 0,232 | -0,32  |
| 7 | Q12905 ILF2_HUMAN   | R.NQDLAPNSAE.Q          |        | 2 | 1,6431 | 0,172 | 0,115  |
| 7 | Q86WB0 NIPA_HUMAN   | R.LPLVPES#PR.R          | S321:  | 2 | 1,635  | 0,201 | -0,673 |
| 7 | Q8IXM2 CQ049_HUMAN  | E.DSGIPLAES#PK.K        | S96:   | 2 | 1,6275 | 0,186 | 0,378  |
| 7 | Q92540 SMG7_HUMAN   | R.S#PGVFRPE.Q           | S897:  | 2 | 1,6246 | 0,163 | 0,504  |
| 7 | P49585 PCY1A_HUMAN  | K.TS#PPCSPANLSR.H       | S343:  | 2 | 1,5988 | 0,128 | -0,446 |
| 7 | P08107 HSP71_HUMAN  | R.TLSSSTQASLE.I         |        | 2 | 1,5692 | 0,137 | 0,109  |
| 7 | O76071 CIAO1_HUMAN  | R.QYLPNE.Q              |        | 2 | 1,5674 | 0,099 | 0,446  |
| 7 | Q5T5P2 SKT_HUMAN    | R.AT#KYPAE.E            | T1097: | 2 | 1,5208 | 0,15  | -1,561 |
| 7 | Q92667 AKAP1_HUMAN  | K.SIPLECPLS#SPK.G       | S150:  | 2 | 1,4993 | 0,107 | 0,173  |
| 7 | ##Q92538 GBF1_HUMAN | E.MGGVDAPSINE.L         |        | 2 | 1,4768 | 0,095 | -1,791 |
| 7 | Q9HCM7 AUT2L_HUMAN  | D.SVLEAT#SSR.D          | T112:  | 2 | 1,4204 | 0,085 | 0,829  |
| 7 | Q96JM7 LMBL3_HUMAN  | R.SAVFLS#FK.S           | S675:  | 2 | 1,3392 | 0,131 | 0,062  |

|   |                     |                                      |              |   |        |       |        |
|---|---------------------|--------------------------------------|--------------|---|--------|-------|--------|
| 7 | Q92766 RREB1_HUMAN  | K.AATTATPAATTS#PK.E                  | S1122:       | 2 | 1,3317 | 0,097 | 0      |
| 7 | P10243 MYBA_HUMAN   | E.AVPLT#SPNIAK.F                     | T433:        | 2 | 1,2302 | 0,084 | 0,307  |
| 8 | Q5UIP0 RIF1_HUMAN   | E.SKENT#PPVVISADQM*VNE.D             | T1388:       | 2 | 5,7967 | 0,57  | 0,119  |
| 8 | P19525 E2AK2_HUMAN  | K.KAVS#PLLLTTTNSSE.G                 | S83:         | 2 | 5,7757 | 0,555 | 0      |
| 8 | Q9UQ35 SRRM2_HUMAN  | K.AGM*SSNQSISS#PVLDAVPRT#PSR.E       | S1404:T1413: | 3 | 5,585  | 1     | 0,217  |
| 8 | P02545 LMNA_HUMAN   | R.SVGGSGGGS#FGDNLVTR.S               | S636:        | 2 | 5,3796 | 0,593 | -0,667 |
| 8 | Q9NV56 MRGBP_HUMAN  | E.VGGGGAAGDKGPGEAATS#PAEE.T          | S23:         | 2 | 5,363  | 0,557 | 0      |
| 8 | Q12888 TP53B_HUMAN  | E.NTQIEDTEPM*S#PVLNSK.F              | S552:        | 2 | 5,2189 | 0,522 | 0,122  |
| 8 | Q08J23 NSUN2_HUMAN  | R.AGEPNS#PDAEEANS#PDVTAGCDPAGVHPPR.- | S743:S751:   | 3 | 5,181  | 0,446 | 0,576  |
| 8 | P78310 CXAR_HUMAN   | R.SYIGSNHSSLGSM*S#PSNM*E.G           | S306:        | 2 | 5,1338 | 0,403 | 0,116  |
| 8 | Q9UHR4 BI2L1_HUMAN  | E.IKTPASTPVSGTPQAS#PM*IE.R           | S261:        | 2 | 5,1261 | 0,498 | 0,116  |
| 8 | Q5UIP0 RIF1_HUMAN   | E.FNSDISLSDNTT#PVK.L                 | T1980:       | 2 | 5,1237 | 0,412 | -0,639 |
| 8 | Q86WBO NIPA_HUMAN   | R.SQDATFS#PGSEQAEKS#PGPIVSR.T        | S335:S344:   | 3 | 5,0936 | 0,468 | 0      |
| 8 | Q9C0B0 UNK_HUMAN    | R.NSSLGSPSNLCGS#PPGSIR.K             | S385:        | 2 | 5,0714 | 0,41  | 0,124  |
| 8 | O95453 PARN_HUMAN   | R.SQANGAGALSYS#PNTSK.C               | S163:        | 2 | 5,0662 | 0,644 | 0      |
| 8 | Q6GYQ0 GRIPE_HUMAN  | E.VATITGESAS#PVHS#PLGSR.S            | S990:S994:   | 2 | 4,9771 | 1     | -0,115 |
| 8 | Q5JVS0 HABP4_HUMAN  | -.M*KGALGS#PVAAAGAAM*QE.S            | S7:          | 2 | 4,9748 | 0,517 | -0,275 |
| 8 | Q8NCN1 Q8NCN1_HUMAN | R.RGSGS#GSASALNAAGTGVSNTSSE.D        | S79:         | 3 | 4,9508 | 0,471 | 0,078  |
| 8 | Q9Y6G9 DC1L1_HUMAN  | R.KPVTVSPPTPTS#PTEGEAS.-             | S516:        | 2 | 4,9291 | 0,605 | 0      |
| 8 | Q13136 LIPA1_HUMAN  | R.GLAAGSAET#LPANFR.V                 | T1159:       | 2 | 4,9192 | 0,52  | -0,157 |
| 8 | Q9UNE7 STUB1_HUMAN  | R.LGAGGGS#PEKS#PSAQELKE.Q            | S19:S23:     | 3 | 4,8716 | 0,423 | 0,183  |
| 8 | Q14247 SRC8_HUMAN   | R.AKTQT#PPVSPAPQPTEERLPSS#PVYE.D     | T401:S418:   | 3 | 4,8499 | 1     | 0,493  |
| 8 | P22059 OSBP1_HUMAN  | K.RTGS#NISGASSDISLDE.Q               | S379:        | 2 | 4,831  | 0,345 | 0,205  |
| 8 | Q92754 AP2C_HUMAN   | K.SYM*NPGDQS#PADSNK.T                | S434:        | 2 | 4,8098 | 0,543 | 0      |
| 8 | Q6P2E9 EDC4_HUMAN   | D.GSLTM*SSGSLQAS#PR.G                | S676:        | 2 | 4,8096 | 0,366 | -0,294 |
| 8 | Q4V328 GRAP1_HUMAN  | R.TQTGDSSS#ISSFSYRE.I                | S666:        | 2 | 4,8093 | 0,546 | -0,067 |
| 8 | P35568 IRS1_HUMAN   | R.RSS#ASVSGSPSDGGFISSDE.Y            | S413:        | 2 | 4,8009 | 0,545 | 0,182  |
| 8 | P39880 CUX1_HUMAN   | E.IQAGSQGQAGASDS#PSAR.S              | S1321:       | 3 | 4,7678 | 0,383 | 0,103  |
| 8 | Q969K3 RNF34_HUMAN  | R.VRAS#LSDLSSLDVVE.G                 | S254:        | 2 | 4,767  | 0,531 | -0,217 |
| 8 | O14641 DVL2_HUMAN   | E.STSLGDS#DEEDTM*SR.F                | S211:        | 2 | 4,7648 | 0,514 | -0,353 |
| 8 | Q9UHR4 BI2L1_HUMAN  | E.IKTPASTPVSGT#PQASPM*IE.R           | T257:        | 2 | 4,7465 | 0,488 | 0,116  |
| 8 | Q9Y6G9 DC1L1_HUMAN  | R.KPVTVSPPTPTS#PTEGEAS.-             | S510:        | 2 | 4,6925 | 0,514 | 0,062  |
| 8 | Q9UQ35 SRRM2_HUMAN  | E.VEERPAVSLTLDQSQSQAS#LE.A           | S1292:       | 2 | 4,6918 | 0,503 | 0,412  |

|   |                     |                               |            |   |        |       |        |
|---|---------------------|-------------------------------|------------|---|--------|-------|--------|
| 8 | Q9NWX8 CS062_HUMAN  | E.AASADDGSLNTS#GAGPK.S        | S66:       | 2 | 4,6889 | 0,523 | -0,153 |
| 8 | Q13620 CUL4B_HUMAN  | E.DFDSTSSSST#PPLQPR.D         | T67:       | 2 | 4,6877 | 0,381 | -0,258 |
| 8 | O15085 ARHGB_HUMAN  | R.NSVLSDPGLDS#PRT#SPVIM*AR.V  | S251:T254: | 2 | 4,6596 | 0,596 | 0,409  |
| 8 | P48553 TMEM1_HUMAN  | R.RQES#SSSLEM*PSGVALEE.G      | S708:      | 2 | 4,653  | 0,435 | 0,06   |
| 8 | Q9Y6G9 DC1L1_HUMAN  | R.SVSSNVAVS#PIPAGSK.K         | S421:      | 2 | 4,6481 | 0,505 | -0,073 |
| 8 | Q15007 FL2D_HUMAN   | E.GNTTEDDFPSS#PGNGNK.S        | S306:      | 2 | 4,6465 | 0,521 | 0      |
| 8 | Q5TAQ9 WD42A_HUMAN  | E.ASDLALS#LTGDDGGPNR.T        | S49:       | 2 | 4,6436 | 0,52  | 0,209  |
| 8 | Q53EZ4 CEP55_HUMAN  | K.SPTAALNES#LVECPK.C          | S436:      | 2 | 4,6228 | 0,479 | 0      |
| 8 | Q96G46 DUS3L_HUMAN  | E.NCGAQVVPAGGTST#PPSSPVR.T    | T273:      | 3 | 4,5627 | 0,483 | -0,326 |
| 8 | A8MVB1 A8MVB1_HUMAN | E.KLVSPPASAAAS#PSSSPSPQPVSE.L | S37:       | 3 | 4,5612 | 0,382 | -0,15  |
| 8 | Q9C0C2 TB182_HUMAN  | K.RDS#LGAYASQDANE.Q           | S893:      | 2 | 4,5383 | 0,54  | -0,077 |
| 8 | Q9H910 HN1L_HUMAN   | K.TSDIFGS#PVTATSR.L           | S97:       | 2 | 4,5276 | 0,398 | 0      |
| 8 | P78310 CXAR_HUMAN   | R.SYIGSNHSSLGSM*S#PSNM*E.G    | S306:      | 3 | 4,5192 | 0,472 | 0,174  |
| 8 | Q9BST9 RTKN_HUMAN   | R.TFS#LDAVPPDHS#PR.A          | S520:S529: | 2 | 4,5161 | 0,46  | 0,144  |
| 8 | Q01804 OTUD4_HUMAN  | K.TAADVVS#PGANSVDSR.V         | S1006:     | 2 | 4,5142 | 0,397 | -0,825 |
| 8 | P52948 NUP98_HUMAN  | K.NLNNS#NLFSPVNR.D            | S608:      | 2 | 4,5131 | 0,383 | -0,233 |
| 8 | Q14676 MDC1_HUMAN   | E.LQPSTSTDQPV#PEPTSR.A        | T1548:     | 2 | 4,4947 | 0,483 | -0,181 |
| 8 | O00116 ADAS_HUMAN   | R.RAAS#AATAAPTATPAAQE.S       | S65:       | 2 | 4,4904 | 0,507 | -0,281 |
| 8 | Q08378 GOGA3_HUMAN  | E.VDGND#DSSSYSSASTR.G         | S315:      | 2 | 4,489  | 0,652 | 0      |
| 8 | Q9H307 PININ_HUMAN  | K.S#LSPGKENV#ALDM*EKE.S       | S441:S450: | 2 | 4,4823 | 0,47  | 0,182  |
| 8 | P46821 MAP1B_HUMAN  | E.ASPSTSSAHTPSQIAS#PLQE.D     | S1743:     | 2 | 4,4817 | 0,392 | 0,235  |
| 8 | O43815 STRN_HUMAN   | E.LNQGDM*KPPSYDS#DEGNETE.V    | S137:      | 2 | 4,4814 | 0,512 | 0,105  |
| 8 | Q01082 SPTB2_HUMAN  | K.TALPAQSAAT#LPAR.T           | T2187:     | 3 | 4,471  | 0,374 | 0,505  |
| 8 | Q96TA1 NIBL1_HUMAN  | K.AAPEAS#SPPAS#PLQHLLPGK.A    | S678:S683: | 2 | 4,4555 | 0,396 | 0,115  |
| 8 | O15234 CASC3_HUMAN  | E.QTSVRDPS#PEADAPVLGS#PEKE.E  | S363:S373: | 3 | 4,4551 | 0,322 | 0,148  |
| 8 | Q9UQR0 SCML2_HUMAN  | K.RS#PQQTVPYVPLS#PK.L         | S499:S511: | 2 | 4,4509 | 0,46  | 0,187  |
| 8 | Q9NYJ8 TAB2_HUMAN   | R.TLTHSIS#DGQLQGGQSNSE.L      | S108:      | 2 | 4,4462 | 0,484 | 0      |
| 8 | Q99618 CDCA3_HUMAN  | R.VADPRS#PSAGILRT#PIQVE.S     | S29:T37:   | 3 | 4,4454 | 0,311 | -0,084 |
| 8 | Q5W0B1 RN219_HUMAN  | E.LNLSKGS#LTNDQLE.N           | S595:      | 2 | 4,4229 | 0,406 | 0,378  |
| 8 | Q6ZRV2 FA83H_HUMAN  | R.RLS#LGQGDSTEATEE.R          | S1003:     | 2 | 4,4097 | 0,456 | -0,35  |
| 8 | P42167 LAP2B_HUMAN  | E.TIM*ASSNES#LVVNR.V          | S292:      | 2 | 4,3962 | 0,434 | -0,226 |
| 8 | O75688 PPM1B_HUMAN  | E.SGLAELDS#SNEDAGTK.M         | S465:      | 2 | 4,3734 | 0,494 | 0      |
| 8 | P39880 CUX1_HUMAN   | E.IQAGSQGQAGASDS#PSAR.S       | S1321:     | 2 | 4,3718 | 0,513 | 0      |

|   |                     |                              |            |   |        |       |        |
|---|---------------------|------------------------------|------------|---|--------|-------|--------|
| 8 | Q14978 NOLC1_HUMAN  | R.GGSISVQVNSIKFDS#E.-        | S698:      | 2 | 4,3564 | 0,425 | -0,21  |
| 8 | Q9C0C2 TB182_HUMAN  | R.NM*APGAVCS#PGESKE.L        | S1297:     | 2 | 4,3564 | 0,419 | -0,374 |
| 8 | P46013 KI67_HUMAN   | K.TPVQYSQQNS#PQK.H           | S357:      | 2 | 4,3464 | 0,5   | -0,285 |
| 8 | Q4KMP7 TB10B_HUMAN  | R.RAS#AGPAPGPVVTA.E.G        | S412:      | 2 | 4,3381 | 0,533 | -0,334 |
| 8 | Q9H0H5 RGAP1_HUMAN  | R.SIGSAVDQGNES#IVAK.T        | S214:      | 2 | 4,3353 | 0,46  | 0,147  |
| 8 | Q9NYJ8 TAB2_HUMAN   | R.TLTHSIS#DGQLQGGQSNSE.L     | S108:      | 3 | 4,3267 | 0,274 | 0,269  |
| 8 | Q14126 DSG2_HUMAN   | R.NYFTDKAAS#YTEEDE.N         | S782:      | 2 | 4,3258 | 0,5   | 0,393  |
| 8 | Q9Y3Q8 T22D4_HUMAN  | E.TGESAGT#SRAAT#PLPSLRVE.A   | T206:T211: | 3 | 4,3226 | 0,189 | 0,423  |
| 8 | O00512 BCL9_HUMAN   | R.AVT#PVSQGSNSSSADPK.A       | T315:      | 2 | 4,3144 | 0,59  | 0      |
| 8 | Q9NTI5 PDS5B_HUMAN  | R.M*ETVSNASSSSNPSS#PGR.I     | S1166:     | 2 | 4,3091 | 0,487 | 0,258  |
| 8 | Q15942 ZYX_HUMAN    | R.GPPASS#PAPAPKFS#PVTPK.F    | S259:S267: | 2 | 4,309  | 0,373 | 0,367  |
| 8 | Q05BP1 Q05BP1_HUMAN | E.VGPLAHLAPS#PQSE.A          | S22:       | 2 | 4,2898 | 0,508 | 0,082  |
| 8 | O14893 GEMI2_HUMAN  | R.KQS#VNISLSGCQPAPE.G        | S81:       | 2 | 4,2853 | 0,518 | 0,068  |
| 8 | Q14247 SRC8_HUMAN   | R.AKTQT#PPVSPAPQPTEE.R       | T401:      | 2 | 4,2764 | 0,397 | -0,197 |
| 8 | P14868 SYDC_HUMAN   | K.NNAYLAQS#PQLYK.Q           | S249:      | 2 | 4,2656 | 0,55  | -0,307 |
| 8 | Q6T4R5 NHS_HUMAN    | E.SVDVITSQSDS#PTR.A          | S1308:     | 2 | 4,2633 | 0,427 | 0,078  |
| 8 | O15061 DMN_HUMAN    | E.VSAGGDLQAAS#PTGASR.S       | S1163:     | 2 | 4,2598 | 0,436 | 0,071  |
| 8 | P42858 HD_HUMAN     | E.LIAGGGSSCS#PVLSR.K         | S434:      | 2 | 4,2549 | 0,482 | -0,238 |
| 8 | Q96SB3 NEB2_HUMAN   | E.NGSTVATAAS#PAPEEPK.A       | S338:      | 2 | 4,2543 | 0,5   | -0,214 |
| 8 | Q15477 SKIV2_HUMAN  | R.GDTVSAAS#PCSAPLAR.A        | S245:      | 2 | 4,2469 | 0,499 | -0,389 |
| 8 | O15061 DMN_HUMAN    | E.VSAGGDLQAAS#PTGASR.S       | S1163:     | 3 | 4,2372 | 0,373 | -0,107 |
| 8 | O94910 LPHN1_HUMAN  | E.SSFM*AGDINST#PTLNR.G       | T1173:     | 2 | 4,2351 | 0,517 | -0,203 |
| 8 | Q9Y608 LRRF2_HUMAN  | R.RGS#GDTSSLIDPDTSLSE.L      | S328:      | 2 | 4,2328 | 0,568 | 0,191  |
| 8 | Q15149 PLEC1_HUMAN  | R.SSSVGSSSYPIS#PAVSR.T       | S4396:     | 2 | 4,2289 | 0,443 | -0,399 |
| 8 | Q96GX5 MASTL_HUMAN  | E.NIVNSFTDKQQT#PE.K          | T519:      | 2 | 4,2189 | 0,424 | -0,072 |
| 8 | Q96CV9 OPTN_HUMAN   | K.LNSSGSSSEDS#FVEIR.M        | S177:      | 2 | 4,2061 | 0,293 | 0,071  |
| 8 | O43399 TPD54_HUMAN  | K.TSAALS#TVGSAISR.K          | S145:      | 2 | 4,2042 | 0,49  | 0,087  |
| 8 | Q2M218 AAK1_HUMAN   | K.VQTT#PPPAVQGQK.V           | T606:      | 3 | 4,2009 | 0,285 | 0,256  |
| 8 | Q16181 SEPT7_HUMAN  | K.GQLTKS#PLAQM*EEE.R         | S334:      | 2 | 4,1768 | 0,574 | 0,074  |
| 8 | Q13620 CUL4B_HUMAN  | E.SSSSSSSS#PTAATSQQQLK.N     | S128:      | 2 | 4,171  | 1     | -0,226 |
| 8 | Q9C0B0 UNK_HUMAN    | R.NSSLGSPSNLCS#PPGSIR.K      | S385:      | 3 | 4,1689 | 0,302 | 0,279  |
| 8 | Q9H7Z6 MYST1_HUMAN  | E.GTAPS#PGRVS#PPTPARGEPE.V   | S37:S42:   | 3 | 4,1613 | 0,374 | -0,173 |
| 8 | Q09666 AHNK_HUMAN   | K.TVIRLPS#GSGAAS#PTGSAVDIR.A | S210:S216: | 3 | 4,1503 | 0,223 | 0      |



|   |                     |                                      |            |   |        |       |        |
|---|---------------------|--------------------------------------|------------|---|--------|-------|--------|
| 8 | Q96JN8 K1787_HUMAN  | E.GNNQVSPSS#PSSGAGGSDLR.F            | S707:      | 2 | 4,149  | 0,443 | -0,25  |
| 8 | P49023 PAXI_HUMAN   | K.TSSVSNPQDSVGS#PCSR.V               | S106:      | 2 | 4,1456 | 0,316 | -0,265 |
| 8 | Q147X3 MAK3_HUMAN   | R.LLSSS#LTADCLSR#PSGR.E              | S190:S199: | 3 | 4,1449 | 1     | -0,531 |
| 8 | Q15149 PLEC1_HUMAN  | K.GYYPYSVSGSGS#TAGSR.T               | S4622:     | 2 | 4,1379 | 0,527 | 0,131  |
| 8 | Q5SYE7 NHSL1_HUMAN  | R.GGPVRSR#PGAPSAGEAE.A               | S1167:     | 2 | 4,1373 | 0,498 | -0,076 |
| 8 | P46100 ATRX_HUMAN   | E.NLVLSSTGFCQSS#GDE.A                | S1245:     | 2 | 4,1155 | 0,446 | 0      |
| 8 | P11717 MPRI_HUMAN   | K.ALSSLHGDDQDS#EDE.V                 | S2409:     | 2 | 4,11   | 0,542 | -0,072 |
| 8 | A6NMQ1 A6NMQ1_HUMAN | E.IGASALSDSGS#FVSSR.A                | S21:       | 2 | 4,0971 | 0,597 | 0,075  |
| 8 | O00562 PITM1_HUMAN  | E.FFDAHEGFS#DSEE.V                   | S358:      | 2 | 4,0943 | 0,384 | 0,153  |
| 8 | Q9NWX8 CS062_HUMAN  | R.AVGAQASVGSRS#EGEGE.A               | S49:       | 2 | 4,0902 | 0,531 | -0,365 |
| 8 | O14974 MYPT1_HUMAN  | R.RST#QGVTLTDLQAE.K                  | T696:      | 2 | 4,0818 | 0,572 | -0,071 |
| 8 | Q8N122 RPTOR_HUMAN  | D.TSSLTQSAPAS#PTNK.G                 | S863:      | 2 | 4,0763 | 0,502 | -0,311 |
| 8 | Q9UHB6 LIMA1_HUMAN  | E.NGADS#DEDDNSFLK.Q                  | S686:      | 2 | 4,0713 | 0,433 | 0,076  |
| 8 | P21333 FLNA_HUMAN   | K.AFGPGLQGGSAGS#PAR.F                | S1084:     | 2 | 4,0524 | 0,535 | -0,323 |
| 8 | P35580 MYH10_HUMAN  | E.GASLELS#DDDTESK.T                  | S1956:     | 2 | 4,0491 | 0,528 | -0,079 |
| 8 | Q5JSH3 WDR44_HUMAN  | E.LSDQATAS#PIVAR.T                   | S96:       | 2 | 4,0472 | 0,387 | -0,26  |
| 8 | Q86VR2 F134C_HUMAN  | E.VSCTDNGTFNLS#R.G                   | S303:      | 2 | 4,0398 | 0,509 | 0,157  |
| 8 | Q07157 ZO1_HUMAN    | E.TLNDEVGT#PPESAIR.S                 | T868:      | 2 | 4,0331 | 0,489 | 0,206  |
| 8 | P05387 RLA2_HUMAN   | K.LASVPAGGAVAVSAAPGSAAPAAGSAPAAAEK.K |            | 2 | 4,0254 | 0,556 | 0,528  |
| 8 | O75691 UTP20_HUMAN  | K.SLSDNGQPQT#PDPADSGGTSK.E           | T1741:     | 2 | 4,0219 | 0,432 | -0,228 |
| 8 | Q9UQ35 SRRM2_HUMAN  | R.TPAAAAAM*NLAS#PR.T                 | S2272:     | 2 | 4,0219 | 0,546 | -0,509 |
| 8 | Q9UHY1 NRBP_HUMAN   | E.SQTVLSSGS#DPKVE.S                  | S14:       | 2 | 4,0202 | 0,447 | -0,645 |
| 8 | Q15942 ZYX_HUMAN    | R.GPPAS#SPAPAPKFS#PVTPK.F            | S258:S267: | 2 | 4,0109 | 0,342 | 0,245  |
| 8 | Q12968 NFAC3_HUMAN  | E.LCSDDQGSL#PARE.T                   | S366:      | 2 | 4,0059 | 0,515 | -0,227 |
| 8 | A7KAX9 A7KAX9_HUMAN | E.SGASFLDS#PGYSK.D                   | S821:      | 2 | 4,0024 | 0,438 | 0      |
| 8 | P49756 RBM25_HUMAN  | K.LGASNS#PGQPNSVK.R                  | S618:      | 2 | 3,9942 | 0,409 | -0,17  |
| 8 | P04792 HSPB1_HUMAN  | R.AQLGGPEAAKS#DE.T                   | S199:      | 2 | 3,9891 | 0,417 | 0,18   |
| 8 | O00139 KIF2A_HUMAN  | E.QSSSAQNGSVSDIS#PVQAAK.K            | S140:      | 3 | 3,9863 | 0,31  | 0,253  |
| 8 | Q9UN36 NDRG2_HUMAN  | R.TASLTSAA#VDGNR.S                   | S338:      | 2 | 3,9855 | 0,513 | -0,256 |
| 8 | O60716 CTND1_HUMAN  | E.DGYPGGSDNYGS#LSR.V                 | S230:      | 2 | 3,9839 | 0,52  | -0,15  |
| 8 | P19174 PLCG1_HUMAN  | E.NGDLS#PFSGTSRE.R                   | S1221:     | 2 | 3,9827 | 0,506 | -0,156 |
| 8 | Q12789 TF3C1_HUMAN  | E.SFGAANIS#QAAR.E                    | S1969:     | 2 | 3,9776 | 0,468 | -0,383 |
| 8 | Q8IWC1 MA7D3_HUMAN  | E.VFCNTSM*EAS#PK.A                   | S322:      | 2 | 3,9668 | 0,436 | -0,25  |

|   |                     |                            |              |   |        |       |        |
|---|---------------------|----------------------------|--------------|---|--------|-------|--------|
| 8 | O60271 JIP4_HUMAN   | R.NVSTGS#AENEKSE.V         | S332:        | 2 | 3,9647 | 0,393 | 0      |
| 8 | Q9H307 PININ_HUMAN  | K.SLS#PGKENVS#ALDM*EKE.S   | S443:S450:   | 3 | 3,9513 | 0,391 | 0,182  |
| 8 | Q96T58 MINT_HUMAN   | E.SGVVAVS#PEKSES#PQKE.D    | S2120:S2126: | 2 | 3,9379 | 0,493 | -0,382 |
| 8 | Q12830 BPTF_HUMAN   | R.VLDDVSIRS#PE.T           | S1161:       | 2 | 3,923  | 0,398 | -0,279 |
| 8 | O75145 LIPA3_HUMAN  | R.RGS#ALGPDEAGGELE.R       | S17:         | 2 | 3,9225 | 0,401 | -0,079 |
| 8 | Q9H118 ASCC2_HUMAN  | E.AVSQASSHPENS#EEEE.C      | S447:        | 2 | 3,914  | 0,402 | -0,135 |
| 8 | O75152 ZC11A_HUMAN  | R.RLS#SAS#TGKPPLSVEDDFE.K  | S758:S761:   | 3 | 3,9135 | 0,215 | 0,083  |
| 8 | P42166 LAP2A_HUMAN  | E.SRS#STPLPTISSAE.N        | S158:        | 2 | 3,9126 | 0,436 | 0,076  |
| 8 | Q9H307 PININ_HUMAN  | R.GFS#DSGGGPPAK.Q          | S66:         | 2 | 3,9076 | 0,474 | 0      |
| 8 | Q8TF15 Q8TF15_HUMAN | E.VELSST#PPLPASR.I         | T188:        | 2 | 3,9034 | 0,389 | 0,17   |
| 8 | P27816 MAP4_HUMAN   | E.M*ALGKDVTPPPETE.V        | T521:        | 2 | 3,8945 | 0,501 | -0,154 |
| 8 | Q6P0N0 CN106_HUMAN  | K.TPFNTDLGENS#GIGK.L       | S1104:       | 2 | 3,893  | 0,521 | 0,749  |
| 8 | Q02241 KIF23_HUMAN  | R.RSS#TVAPAQPDGAESE.W      | S912:        | 2 | 3,8874 | 0,523 | -0,29  |
| 8 | Q04656 ATP7A_HUMAN  | E.VESTSNS#PSSSLQK.I        | S357:        | 2 | 3,884  | 0,406 | -0,075 |
| 8 | Q5THJ4 VP13D_HUMAN  | K.EKDDL#PQPLM*TDRE.R       | S1138:       | 2 | 3,8815 | 0,446 | -0,525 |
| 8 | O94909 K0819_HUMAN  | E.ATVPS#PTQS#PIRFQPAPAK.T  | S414:S418:   | 2 | 3,881  | 0,348 | 0,453  |
| 8 | Q9UQ35 SRRM2_HUMAN  | E.VEERPAVSLTLDQSQSQAS#LE.A | S1292:       | 3 | 3,8788 | 0,406 | -0,232 |
| 8 | P55196 AFAD_HUMAN   | R.SSPNVANQPPS#PGGK.S       | S1165:       | 2 | 3,8769 | 0,523 | -0,08  |
| 8 | Q96T37 RBM15_HUMAN  | E.FSQQLDLS#PAK.A           | S935:        | 2 | 3,8701 | 0,371 | 0      |
| 8 | P05387 RLA2_HUMAN   | K.NIEDVIAQGIGK.L           |              | 2 | 3,8536 | 0,486 | -0,097 |
| 8 | O14641 DVL2_HUMAN   | R.HLAGYESS#STLM*TSELE.S    | S195:        | 2 | 3,8495 | 0,444 | 0,125  |
| 8 | Q96FF9 CDCA5_HUMAN  | K.THSVPAT#PTSTPVPNPEAE.S   | T111:        | 2 | 3,8484 | 0,478 | -0,243 |
| 8 | O95835 LATS1_HUMAN  | R.SNS#FNNPLGNR.A           | S464:        | 2 | 3,8453 | 0,297 | -0,188 |
| 8 | Q14676 MDC1_HUMAN   | E.LQPSTSTDQPVTP#PEPTSR.A   | T1548:       | 3 | 3,8447 | 0,371 | -0,272 |
| 8 | Q9H6U6 BCAS3_HUMAN  | E.TLSNSSGSGS#IPR.N         | S900:        | 2 | 3,8442 | 0,589 | -0,319 |
| 8 | Q92597 NDRG1_HUMAN  | R.TASGS#SVTSLDGTR.S        | S332:        | 2 | 3,8427 | 0,526 | 0      |
| 8 | O14514 BAI1_HUMAN   | E.NVATLSVSS#LER.R          | S1469:       | 2 | 3,8387 | 0,474 | 0,36   |
| 8 | O95104 SFR15_HUMAN  | E.NVTNNEGS#PPPPVK.V        | S154:        | 2 | 3,8377 | 0,473 | -0,159 |
| 8 | Q9C0C2 TB182_HUMAN  | R.RES#AASGLGGLLEE.G        | S1473:       | 2 | 3,837  | 0,465 | -0,153 |
| 8 | P28290 SSFA2_HUMAN  | R.NIM*TQQKDS#FE.M          | S466:        | 2 | 3,831  | 0,396 | -0,34  |
| 8 | Q96QC0 PP1RA_HUMAN  | E.TLEPGSGGS#PDGAGGSK.L     | S545:        | 2 | 3,8294 | 0,524 | 0      |
| 8 | Q15398 DLG7_HUMAN   | E.M*GIPQQTTS#PENAGPQNTK.S  | S662:        | 3 | 3,8293 | 0,391 | -0,087 |
| 8 | Q8N122 RPTOR_HUMAN  | R.S#LNKSLQNLSTEE.S         | S734:        | 2 | 3,8187 | 0,294 | 0      |

|   |                     |                                     |        |   |        |       |        |
|---|---------------------|-------------------------------------|--------|---|--------|-------|--------|
| 8 | Q6ZNB6 NFXL1_HUMAN  | R.HS#PAGSQALQTTAASE.L               | S65:   | 2 | 3,8097 | 0,331 | -0,149 |
| 8 | P05388 RLA0_HUMAN   | K.AFLADPSAFVAAAPVAAATTAAPAAAAAPAK.V |        | 2 | 3,808  | 0,566 | 0,532  |
| 8 | Q86U44 MTA70_HUMAN  | R.NPEAALS#PTFR.S                    | S43:   | 2 | 3,8015 | 0,44  | 0,095  |
| 8 | P49023 PAXI_HUMAN   | K.TSSVSNPQDSVGS#PCSR.V              | S106:  | 3 | 3,7992 | 0,331 | 0,297  |
| 8 | P45880 VDAC2_HUMAN  | E.FSTSGSSNTDTGKVTGT#LE.T            | T68:   | 2 | 3,7989 | 0,451 | -0,062 |
| 8 | Q9ULH0 ARMS_HUMAN   | R.RTPS#LSSLNSQDSSIE.I               | S1359: | 2 | 3,795  | 0,484 | 0,135  |
| 8 | Q9H0H5 RGAP1_HUMAN  | E.NSNAFSTPQT#PDIK.V                 | T567:  | 2 | 3,7945 | 0,501 | -0,076 |
| 8 | Q8N3D4 EH1L1_HUMAN  | E.AGGQVGPPEAPRPETS#PE.M             | S285:  | 2 | 3,7917 | 0,401 | -0,197 |
| 8 | Q5JSH3 WDR44_HUMAN  | K.ELSDQATAS#PIVAR.T                 | S96:   | 2 | 3,7914 | 0,489 | -0,159 |
| 8 | P08670 VIME_HUMAN   | E.VDALKGTNES#LE.R                   | S339:  | 2 | 3,7877 | 0,425 | -0,09  |
| 8 | O15541 R113A_HUMAN  | E.NYEVGS#DDEEIPFK.C                 | S253:  | 2 | 3,7859 | 0,337 | 0,354  |
| 8 | P33981 TTK_HUMAN    | R.VPVNLLNS#PDCDVK.T                 | S281:  | 2 | 3,7856 | 0,373 | 0      |
| 8 | Q8N0Z3 CCD52_HUMAN  | K.CSTVS#PVSGINTR.R                  | S800:  | 2 | 3,7833 | 0,452 | -0,335 |
| 8 | A1L020 MEX3A_HUMAN  | E.NDFLAGS#PDAAIDSR.Y                | S308:  | 2 | 3,782  | 0,405 | 0      |
| 8 | P04150 GCR_HUMAN    | E.FSSGS#PGKETNE.S                   | S203:  | 2 | 3,7777 | 0,39  | 0,185  |
| 8 | P21333 FLNA_HUMAN   | K.CSGPGLS#PGM*VR.A                  | S1459: | 2 | 3,7746 | 0,462 | -0,186 |
| 8 | O15446 RPA34_HUMAN  | E.M*KPLES#PGGTM*APQQPE.G            | S359:  | 2 | 3,7744 | 0,341 | -0,128 |
| 8 | P78347 GTF2I_HUMAN  | E.VTIEDDDYS#PPSK.R                  | S319:  | 2 | 3,7734 | 0,397 | -0,237 |
| 8 | Q92878 RAD50_HUMAN  | E.DKLFVDCGS#QDFE.S                  | S635:  | 2 | 3,7721 | 0,432 | -0,298 |
| 8 | Q15233 NONO_HUMAN   | E.GIGAIGGT#PPAFNR.A                 | T450:  | 2 | 3,7659 | 0,409 | -0,347 |
| 8 | Q12888 TP53B_HUMAN  | R.GNLLHFPS#QGEEE.K                  | S1068: | 2 | 3,7628 | 0,434 | -0,15  |
| 8 | Q8TCN5 ZN507_HUMAN  | E.NEKL#PTSNTSYSLE.K                 | S780:  | 2 | 3,7589 | 0,455 | 0,07   |
| 8 | P57078 RIPK4_HUMAN  | K.RAS#APTFDNDYSLSE.L                | S370:  | 2 | 3,7544 | 0,548 | -0,07  |
| 8 | Q14444 CAPR1_HUMAN  | E.YTEQSEVES#TEYVNR.Q                | S291:  | 2 | 3,7493 | 0,415 | -0,255 |
| 8 | P28290 SSFA2_HUMAN  | R.NIM*TQQKDS#FEM*EE.V               | S466:  | 2 | 3,7479 | 0,32  | -0,132 |
| 8 | P08670 VIME_HUMAN   | R.SLYASS#PGGVYATR.S                 | S56:   | 2 | 3,7439 | 0,469 | 0,243  |
| 8 | Q9H4A3 WNK1_HUMAN   | E.LSEPSHLNGPSS#DPE.A                | S2012: | 2 | 3,741  | 0,488 | 0      |
| 8 | Q9HC52 CBX8_HUMAN   | R.RQDS#DLVQCQGVTSPPSAE.A            | S256:  | 2 | 3,7326 | 0,465 | -0,303 |
| 8 | O00499 BIN1_HUMAN   | K.GNKS#PSPPDGSPAATPE.I              | S296:  | 2 | 3,732  | 0,455 | -0,433 |
| 8 | Q03188 CENPC_HUMAN  | K.ILATDVSSKNT#PD.S                  | T130:  | 2 | 3,7316 | 0,376 | 0      |
| 8 | Q9H3C7 GGNB2_HUMAN  | E.NTSCTCPSSGNLLGS#PK.I              | S450:  | 2 | 3,7308 | 0,463 | -0,131 |
| 8 | Q7RTP8 Q7RTP8_HUMAN | R.ASS#LNVLVNMGK.A                   | S596:  | 2 | 3,7278 | 0,5   | 0,295  |
| 8 | Q9BZ23 PANK2_HUMAN  | R.RAS#SASVPAVGASAE.G                | S168:  | 2 | 3,7218 | 0,566 | -0,169 |

|   |                    |                              |              |   |        |       |        |
|---|--------------------|------------------------------|--------------|---|--------|-------|--------|
| 8 | P21359 NF1_HUMAN   | R.RM*S#HVS#GGGSIDLSDTDSLQE.W | S818:S821:   | 3 | 3,7181 | 0,352 | 0,386  |
| 8 | Q9C0C2 TB182_HUMAN | R.RFS#EGVLQSPSQDQE.K         | S429:        | 2 | 3,7177 | 0,415 | 0,478  |
| 8 | O95425 SVIL_HUMAN  | K.FSSSIENS#PVR.S             | S920:        | 2 | 3,7172 | 0,519 | -0,081 |
| 8 | Q13136 LIPA1_HUMAN | R.VGSGS#LDNLGR.F             | S668:        | 2 | 3,7152 | 0,408 | -0,106 |
| 8 | Q9BUU2 CP068_HUMAN | R.AAS#DSNPAGPLR.D            | S132:        | 2 | 3,7071 | 0,424 | -0,691 |
| 8 | Q14493 SLBP_HUMAN  | E.ACLTEPLRDFSAM*S#.-         | S270:        | 2 | 3,7051 | 0,541 | -0,072 |
| 8 | Q9H009 NACA2_HUMAN | R.ALKNNS#NDIVNAIM*E.L        | S203:        | 2 | 3,6998 | 0,291 | 0      |
| 8 | O95644 NFAC1_HUMAN | R.GLGACTLLGS#PR.H            | S233:        | 2 | 3,6936 | 0,378 | -0,095 |
| 8 | Q96F86 EDC3_HUMAN  | K.SQDVAVS#PQQQCSK.S          | S131:        | 2 | 3,6914 | 0,327 | 0,138  |
| 8 | Q86UP2 KTN1_HUMAN  | E.IQNGNLHES#DSE.S            | S75:         | 2 | 3,6713 | 0,413 | 0,172  |
| 8 | Q9UPS8 ANR26_HUMAN | R.NVGM*PVAHM*ES#PE.R         | S489:        | 2 | 3,6709 | 0,502 | -0,566 |
| 8 | Q9UQ35 SRRM2_HUMAN | K.AQTPPGPS#LSGSKS#PCPQEK.S   | S1008:S1014: | 2 | 3,6708 | 1     | 0,221  |
| 8 | Q9C0C2 TB182_HUMAN | E.AQDLCRAS#PEPPGPE.S         | S672:        | 2 | 3,6615 | 0,471 | -0,43  |
| 8 | Q7L2J0 MEPCE_HUMAN | R.CAPSAGS#PAAAVGR.E          | S60:         | 2 | 3,6589 | 0,441 | 0      |
| 8 | Q5UIP0 RIF1_HUMAN  | R.RAS#QGLLSSIENSE.S          | S1542:       | 2 | 3,6532 | 0,48  | -0,233 |
| 8 | Q86W56 PARG_HUMAN  | E.NVSQSLDKS#PTE.K            | S137:        | 2 | 3,64   | 0,355 | 0,57   |
| 8 | P29692 EF1D_HUMAN  | K.SLAGSSGPGAS#SGTSGDHGE.L    | S70:         | 2 | 3,6347 | 0,556 | -0,339 |
| 8 | Q96QR8 PURB_HUMAN  | E.HYAQLGPSS#PEQLAAGAE.E.G    | S101:        | 2 | 3,6324 | 0,416 | 0,06   |
| 8 | P14618 KPYM_HUMAN  | R.LDIDS#PPITAR.N             | S37:         | 2 | 3,6319 | 0,399 | 0,286  |
| 8 | Q5UIP0 RIF1_HUMAN  | E.SKENT#PPVVISADQM*VNE.D     | T1388:       | 3 | 3,6267 | 0,279 | 0,267  |
| 8 | O75152 ZC11A_HUMAN | R.RLS#SAS#TGKPLSVEDDFE.K     | S758:S761:   | 2 | 3,6246 | 0,476 | 0,334  |
| 8 | P54578 UBP14_HUMAN | R.YAGALRAS#GE.M              | S143:        | 2 | 3,623  | 0,43  | 0      |
| 8 | Q9UHB6 LIMA1_HUMAN | R.KIS#ENSYSLDDLE.I           | S225:        | 2 | 3,6228 | 0,45  | 0,077  |
| 8 | Q14207 NPAT_HUMAN  | E.NLPTIILSS#PTKS#PTK.N       | S775:S779:   | 2 | 3,6194 | 0,307 | -0,066 |
| 8 | Q9BX40 LS14B_HUMAN | K.SKS#FFDNISSE.L             | S317:        | 2 | 3,6098 | 0,262 | -0,091 |
| 8 | Q9NZ5 ARHGC_HUMAN  | R.TGTGDIATCYS#PR.T           | S1327:       | 2 | 3,6084 | 0,358 | -0,413 |
| 8 | Q16181 SEPT7_HUMAN | K.GQLTKS#PLAQM*E.E           | S334:        | 2 | 3,6064 | 0,438 | -0,087 |
| 8 | Q6S8J3 A26CA_HUMAN | E.M*ATAAS#SSSLEK.S           | S932:        | 2 | 3,6061 | 0,333 | 0,191  |
| 8 | Q14493 SLBP_HUMAN  | R.HM*DS#QVEDEFDLE.A          | S247:        | 2 | 3,603  | 0,408 | -0,144 |
| 8 | Q96CW6 S7A6O_HUMAN | E.FGYDSPHDLDS#D.-            | S308:        | 2 | 3,6022 | 0,433 | 0,253  |
| 8 | Q9BXB4 OSB11_HUMAN | R.SFSLASSSNS#PISQR.R         | S181:        | 2 | 3,5958 | 0,389 | 0,074  |
| 8 | Q8WWK9 CKAP2_HUMAN | K.YNVSTT#PYLQSVK.K           | T597:        | 2 | 3,5936 | 0,413 | -0,077 |
| 8 | Q14694 UBP10_HUMAN | E.TKYS#PPAISPLVSE.K          | S365:        | 2 | 3,5905 | 0,427 | -0,156 |

|   |                    |                         |            |   |        |       |        |
|---|--------------------|-------------------------|------------|---|--------|-------|--------|
| 8 | Q96EP0 RNF31_HUMAN | R.RLS#APLPSSCGDPE.K     | S466:      | 2 | 3,5841 | 0,501 | -0,234 |
| 8 | Q03188 CENPC_HUMAN | E.ISRCS#LSEPLESDE.A     | S613:      | 2 | 3,583  | 0,38  | 0,215  |
| 8 | O43293 DAPK3_HUMAN | K.SHSS#LPPNNSYADFE.R    | S312:      | 2 | 3,5817 | 0,405 | 0,35   |
| 8 | Q96EZ8 MCRS1_HUMAN | D.SSLM*ASGTASRS#EDEE.S  | S22:       | 2 | 3,5769 | 0,471 | -0,07  |
| 8 | A1L390 PKHG3_HUMAN | R.HGS#ATDSLSCQLSPE.V    | S656:      | 2 | 3,5711 | 0,446 | -0,146 |
| 8 | Q8WX92 NELFB_HUMAN | R.KPS#PAQAAETPALE.L     | S557:      | 2 | 3,5707 | 0,451 | -0,164 |
| 8 | Q9Y2H0 DLGP4_HUMAN | E.TSSSS#PAEPAQPGACR.R   | S787:      | 2 | 3,5641 | 0,441 | -0,29  |
| 8 | P46013 KI67_HUMAN  | K.NINTFVET#PVQK.L       | T2406:     | 2 | 3,5606 | 0,412 | -0,166 |
| 8 | Q96S66 CLCC1_HUMAN | E.AAGSPDQGSTYS#PAR.G    | S532:      | 2 | 3,5578 | 0,486 | -0,316 |
| 8 | Q92625 ANS1A_HUMAN | R.SES#LSNCSIGK.K        | S647:      | 2 | 3,5571 | 0,429 | 0      |
| 8 | Q9P2B7 K1430_HUMAN | E.GEVDHSFFDS#DFEE.G     | S19:       | 2 | 3,5564 | 0,32  | -0,21  |
| 8 | P46821 MAP1B_HUMAN | R.TTKS#PSDSGYSYE.T      | S1915:     | 2 | 3,5557 | 0,481 | -0,162 |
| 8 | Q9H6Z4 RANB3_HUMAN | E.RTS#SLTQFPQSQSEE.R    | S125:      | 2 | 3,5532 | 0,318 | 0      |
| 8 | O60749 SNX2_HUMAN  | R.AVNTQALS#GAGILR.M     | S277:      | 2 | 3,5527 | 0,237 | 0      |
| 8 | P02545 LMNA_HUMAN  | R.SGAQASSTPLS#PTR.I     | S22:       | 2 | 3,543  | 0,499 | -0,508 |
| 8 | Q9BZF3 OSBL6_HUMAN | R.LHSS#NPNLCADIE.F      | S344:      | 2 | 3,5349 | 0,223 | -0,079 |
| 8 | P52272 HNRPM_HUMAN | K.GCGVVKFES#PEVAE.R     | S701:      | 2 | 3,5251 | 0,412 | -0,077 |
| 8 | Q15019 SEPT2_HUMAN | K.IYHLPDAES#DEDE.D      | S218:      | 2 | 3,5246 | 0,343 | 0,076  |
| 8 | P82979 HCC1_HUMAN  | R.FGLNVS#SISR.K         | S162:      | 2 | 3,522  | 0,364 | -0,21  |
| 8 | Q96SK2 TM209_HUMAN | R.TLDTFLRS#EEE.K        | S248:      | 2 | 3,522  | 0,315 | -0,258 |
| 8 | O95785 WIZ_HUMAN   | K.TPLALAGS#PTPK.N       | S996:      | 2 | 3,5182 | 0,465 | 0      |
| 8 | Q9NRA8 4ET_HUMAN   | R.KPM*S#PITAQM*SQLE.L   | S611:      | 2 | 3,5156 | 0,308 | 0,583  |
| 8 | P15924 DESP_HUMAN  | K.GLPSYNM*SS#APGSR.S    | S2821:     | 2 | 3,5146 | 0,484 | -0,151 |
| 8 | P46100 ATRX_HUMAN  | E.VQSSVDHQGDGSS#GTEQE.V | S550:      | 2 | 3,5123 | 0,313 | -0,19  |
| 8 | Q9HCH0 K1602_HUMAN | R.NSGSDGSPS#PLLAR.R     | S494:      | 2 | 3,5117 | 0,386 | -0,085 |
| 8 | O95684 FR1OP_HUMAN | E.GALDLSDVHS#PPKS#PE.G  | S156:S160: | 3 | 3,5071 | 0,337 | 0,404  |
| 8 | Q9Y490 TLN1_HUMAN  | E.GSFVDYQTT#M*VR.T      | T1856:     | 2 | 3,5071 | 0,384 | 0,163  |
| 8 | P49792 RBP2_HUMAN  | E.SPATGILS#PR.G         | S955:      | 2 | 3,5063 | 0,367 | 0      |
| 8 | O95239 KIF4A_HUMAN | K.LTLLQVAS#R.Q          | S1001:     | 2 | 3,5052 | 0,344 | 0,226  |
| 8 | P40818 UBP8_HUMAN  | K.RSYS#SPDITQAIQE.E     | S718:      | 2 | 3,5036 | 0,365 | 0      |
| 8 | Q6P0N0 CN106_HUMAN | R.NSS#LLEPQK.S          | S135:      | 2 | 3,5026 | 0,353 | 0      |
| 8 | P07737 PROF1_HUMAN | K.CSVIRDS#LLQDGE.F      | S77:       | 2 | 3,5    | 0,374 | -0,078 |
| 8 | Q9UPY3 DICER_HUMAN | K.KISLS#PFSTTDSAYE.W    | S1460:     | 2 | 3,4984 | 0,455 | -0,071 |

|   |                     |                            |              |   |        |       |        |
|---|---------------------|----------------------------|--------------|---|--------|-------|--------|
| 8 | Q96T58 MINT_HUMAN   | E.SGVVAVS#PEKSES#PQKE.D    | S2120:S2126: | 3 | 3,4964 | 0,281 | -0,286 |
| 8 | P17480 UBF1_HUMAN   | K.RPVS#AM*FIFSEE.K         | S412:        | 2 | 3,4946 | 0,342 | -0,081 |
| 8 | Q15742 NAB2_HUMAN   | R.SFSPKS#PLELGE.K          | S162:        | 2 | 3,4946 | 0,318 | -0,089 |
| 8 | P25098 ARBK1_HUMAN  | K.VPLVQRGS#ANGL.-          | S685:        | 2 | 3,4945 | 0,518 | -0,189 |
| 8 | Q8TB72 PUM2_HUMAN   | R.AGAGQRPLT#PNQGQQGQAE.S   | T396:        | 2 | 3,4906 | 0,547 | 0,115  |
| 8 | Q01082 SPTB2_HUMAN  | K.TALPAQSAAT#LPAR.T        | T2187:       | 2 | 3,4877 | 0,445 | -0,337 |
| 8 | O43399 TPD54_HUMAN  | K.TSAALSTVGS#AISR.K        | S149:        | 2 | 3,4863 | 0,346 | 0,087  |
| 8 | Q6P6C2 ALKB5_HUMAN  | R.RGS#VTVLSGYAADE.I        | S252:        | 2 | 3,4861 | 0,486 | -0,162 |
| 8 | Q9BVJ6 UT14A_HUMAN  | E.LSQDAEPAGS#QETK.D        | S445:        | 2 | 3,4856 | 0,411 | -0,238 |
| 8 | Q6BDS2 URFB1_HUMAN  | R.LKPSAS#FGSPVQSE.A        | S755:        | 2 | 3,484  | 0,413 | -0,322 |
| 8 | Q6GYQ0 GRIPE_HUMAN  | E.VATITGS#ESAS#PVHSPLGSR.S | S986:S990:   | 3 | 3,4828 | 0,2   | 0,346  |
| 8 | Q0VGA0 Q0VGA0_HUMAN | E.GLRPAS#PLALTQE.Q         | S388:        | 2 | 3,4803 | 0,381 | 0      |
| 8 | P46013 KI67_HUMAN   | K.LDLTENLT#GSK.R           | T1327:       | 2 | 3,4773 | 0,268 | -0,288 |
| 8 | Q6PD62 CTR9_HUMAN   | E.FVNDT#DDDLPIK.K          | T925:        | 2 | 3,4735 | 0,349 | 0      |
| 8 | O60664 M6PBP_HUMAN  | E.LVSSKVS#GAQE.M           | S130:        | 2 | 3,4727 | 0,31  | -0,412 |
| 8 | Q96K76 UBP47_HUMAN  | E.TSDFENIES#PLNER.D        | S910:        | 2 | 3,4674 | 0,41  | 0,07   |
| 8 | Q641Q2 FA21A_HUMAN  | K.AKS#PM*FPALGE.A          | S1169:       | 2 | 3,4656 | 0,363 | 0,196  |
| 8 | O14578 CTRO_HUMAN   | R.QQIAM*SAIVRS#PE.H        | S1322:       | 2 | 3,4647 | 0,318 | -0,08  |
| 8 | P98196 AT11A_HUMAN  | E.SSGIDM*IDSS#PSVNGR.E     | S459:        | 2 | 3,4631 | 0,319 | -0,213 |
| 8 | Q5SW79 CE170_HUMAN  | R.LGSLSARS#DSE.A           | S1165:       | 2 | 3,4607 | 0,385 | -0,305 |
| 8 | O94868 FCSD2_HUMAN  | R.SSLYFPRS#PSANE.K         | S681:        | 2 | 3,452  | 0,455 | 0      |
| 8 | Q2M2I8 AAK1_HUMAN   | K.VQTT#PPPAVQGQK.V         | T606:        | 2 | 3,4517 | 0,383 | -0,085 |
| 8 | O43293 DAPK3_HUMAN  | K.S#HSSLPPNNSYADFE.R       | S309:        | 2 | 3,4514 | 0,35  | 0,07   |
| 8 | Q7Z589 EMSY_HUMAN   | E.SCSS#PSTVGSLLTR.K        | S1213:       | 2 | 3,4495 | 0,403 | -0,456 |
| 8 | Q9Y6G9 DC1L1_HUMAN  | R.SVSSNVASVS#PIPAGSK.K     | S421:        | 3 | 3,4493 | 0,219 | -0,219 |
| 8 | Q6NZ12 PTRF_HUMAN   | E.SDAVLVDKS#DSD.-          | S387:        | 2 | 3,4468 | 0,415 | -0,55  |
| 8 | Q9UQB8 BAIP2_HUMAN  | K.LSDSYSNT#LPVR.K          | T340:        | 2 | 3,4456 | 0,344 | -0,085 |
| 8 | Q8N1I0 DOCK4_HUMAN  | E.SKT#PPPYSVYE.R           | T1899:       | 2 | 3,4447 | 0,38  | -0,272 |
| 8 | P24278 ZBT25_HUMAN  | E.SVISQSHPS#PSSE.V         | S220:        | 2 | 3,4396 | 0,32  | -0,343 |
| 8 | Q8N2Y8 RUSC2_HUMAN  | E.GPAAM*AGPGS#PPR.R        | S536:        | 2 | 3,4363 | 0,524 | -0,193 |
| 8 | Q15942 ZYG_HUMAN    | K.FS#PGAPGGSGSQPNQK.L      | S281:        | 2 | 3,4295 | 0,353 | -0,306 |
| 8 | P48307 TFPI2_HUMAN  | E.GLCS#ANVTR.Y             | S168:        | 2 | 3,4294 | 0,469 | -0,115 |
| 8 | Q13045 FLII_HUMAN   | E.AVLQS#PGLSGK.V           | S856:        | 2 | 3,4283 | 0,49  | -0,429 |

|   |                    |                                 |        |   |        |       |        |
|---|--------------------|---------------------------------|--------|---|--------|-------|--------|
| 8 | Q9UPY3 DICER_HUMAN | K.KSS#LGSM*PFSSDFE.D            | S1478: | 2 | 3,4213 | 0,364 | -0,68  |
| 8 | P07196 NFL_HUMAN   | R.RSYS#SSSGSLM*PSLE.N           | S58:   | 2 | 3,4199 | 0,334 | 0,217  |
| 8 | Q3KQU3 MA7D1_HUMAN | R.LSASTASELS#PK.S               | S460:  | 2 | 3,4184 | 0,467 | -0,48  |
| 8 | Q14676 MDC1_HUMAN  | E.RS#QASTTVDINTQVE.K            | S513:  | 2 | 3,4178 | 0,358 | -0,141 |
| 8 | Q53HL2 BOREA_HUMAN | R.IYNISGNCS#PLADSKE.I           | S219:  | 2 | 3,4173 | 0,311 | -0,14  |
| 8 | Q6WCQ1 MRIP_HUMAN  | E.TNAVGPSPSS#DTR.Q              | S328:  | 2 | 3,417  | 0,432 | 0,178  |
| 8 | P29375 JAD1A_HUMAN | E.VLSTDTQTS#PEPGTR.M            | S204:  | 2 | 3,4086 | 0,384 | -0,146 |
| 8 | Q96HN2 SAHH3_HUMAN | E.VELKDL#PSEAE.S                | S23:   | 2 | 3,408  | 0,303 | 0      |
| 8 | Q5VZL5 ZMYM4_HUMAN | E.SIGSELGNS#FASNIR.I            | S242:  | 2 | 3,4026 | 0,378 | -0,299 |
| 8 | P30260 CDC27_HUMAN | E.ITKLDSS#IISE.G                | S435:  | 2 | 3,4012 | 0,421 | -0,19  |
| 8 | O94964 CT117_HUMAN | R.TKS#VSSM*SEFE.S               | S55:   | 2 | 3,3973 | 0,295 | -0,276 |
| 8 | A1X283 SPD2B_HUMAN | R.KAS#SDM*SASAGYEE.I            | S499:  | 2 | 3,3955 | 0,303 | 0,16   |
| 8 | Q7L7X3 TAOK1_HUMAN | R.ASDPQS#PPQVSR.H               | S421:  | 2 | 3,3897 | 0,356 | -0,724 |
| 8 | Q8IWQ3 BRK2_HUMAN  | E.VLSVTDGGS#PVPAR.R             | S393:  | 2 | 3,3782 | 0,413 | 0,085  |
| 8 | O14545 TRAD1_HUMAN | R.LDSQPQETS#PELPR.R             | S415:  | 2 | 3,376  | 0,349 | -0,146 |
| 8 | Q12888 TP53B_HUMAN | E.SGLQIQKS#PEPE.V               | S294:  | 2 | 3,3757 | 0,41  | -0,526 |
| 8 | O95235 KI20A_HUMAN | E.STAADLGS#VVR.K                | S33:   | 2 | 3,3715 | 0,32  | -0,211 |
| 8 | Q9NPI6 DCP1A_HUMAN | R.KASS#PSPLTIGTPE.S             | S523:  | 2 | 3,3711 | 0,523 | -0,999 |
| 8 | P51826 AFF3_HUMAN  | R.SPIS#PLSDASK.H                | S881:  | 2 | 3,3698 | 0,376 | 0      |
| 8 | Q9Y2U5 M3K2_HUMAN  | R.RGS#DIDNPTLTVM*D.I            | S331:  | 2 | 3,3689 | 0,438 | 0,374  |
| 8 | Q15054 DPOD3_HUMAN | R.VALS#DDETKE.T                 | S307:  | 2 | 3,3666 | 0,322 | 0      |
| 8 | Q9Y6Y8 S23IP_HUMAN | R.KPNGGS#GGASTSSSGTNLLFSSSATE.F | S10:   | 3 | 3,3652 | 0,278 | -0,295 |
| 8 | Q14157 UBP2L_HUMAN | K.STSAPQM*SPGSSDNQS#SSPQPAQK.L  | S475:  | 3 | 3,3631 | 0,398 | 0,278  |
| 8 | P78312 CD008_HUMAN | E.SKADS#PPPSYPTQAE.Q            | S393:  | 2 | 3,3608 | 0,453 | -0,137 |
| 8 | Q4AC94 C2CD3_HUMAN | R.NAM*VISAM*KSS#PE.T            | S339:  | 2 | 3,3579 | 0,338 | -0,083 |
| 8 | Q96RL1 UIMC1_HUMAN | E.TGAFRVPS#PGM*EE.A             | S653:  | 2 | 3,3573 | 0,411 | 0      |
| 8 | Q9H501 ESF1_HUMAN  | K.NIVQHTTDS#SLEE.K              | S179:  | 2 | 3,3545 | 0,302 | -0,314 |
| 8 | Q9UBB5 MBD2_HUMAN  | E.QGGQGSALAPS#PVSGVR.R          | S44:   | 2 | 3,352  | 0,44  | -0,296 |
| 8 | P02545 LMNA_HUMAN  | R.SGAQASS#TPLSPTR.I             | S18:   | 2 | 3,3519 | 0,42  | -0,254 |
| 8 | Q9UBW7 ZMYM2_HUMAN | K.M*TGSAAPPS#PTPNKE.M           | S838:  | 2 | 3,3516 | 0,504 | 0      |
| 8 | Q13490 BIRC2_HUMAN | R.NSFAHSL#PTLE.H                | S140:  | 2 | 3,3498 | 0,341 | 0,088  |
| 8 | Q9H0H5 RGAP1_HUMAN | E.SGSILSDIS#FDKTDE.S            | S157:  | 2 | 3,3486 | 0,436 | 0,072  |
| 8 | Q9BXF6 RFIP5_HUMAN | R.TYS#DEANQM*R.V                | S307:  | 2 | 3,3484 | 0,364 | -0,186 |

|   |                    |                                      |              |   |        |       |        |
|---|--------------------|--------------------------------------|--------------|---|--------|-------|--------|
| 8 | Q9UQ35 SRRM2_HUMAN | E.NSFGS#PLEFR.N                      | S1329:       | 2 | 3,3474 | 0,477 | 0,791  |
| 8 | O60583 CCNT2_HUMAN | K.QGQSQAASSSVTS#PIK.M                | S480:        | 2 | 3,3447 | 0,515 | 0      |
| 8 | Q9HCM4 E41L5_HUMAN | E.M*ENS#PLLSPR.S                     | S517:        | 2 | 3,343  | 0,406 | -0,098 |
| 8 | Q92538 GBF1_HUMAN  | R.AASSSSPGS#PVASSPSR.L               | S1784:       | 2 | 3,3429 | 0,38  | 0,303  |
| 8 | Q9Y4E8 UBP15_HUMAN | R.GPST#PKS#PGASNFSTLPK.I             | T226:S229:   | 3 | 3,3424 | 0,171 | -0,189 |
| 8 | Q9BTX7 CT121_HUMAN | E.SDSLRTS#PSVASLSE.N                 | S11:         | 2 | 3,3423 | 0,464 | 0      |
| 8 | Q9UPW0 FOXJ3_HUMAN | K.VTLYNTDQDGS#PR.S                   | S223:        | 2 | 3,3402 | 0,339 | -0,349 |
| 8 | Q9H6K1 CF106_HUMAN | E.GNFNPFAS#PQK.N                     | S215:        | 2 | 3,3387 | 0,398 | 0,19   |
| 8 | Q8N3P4 VPS8_HUMAN  | K.TSEELNKS#FNLE.A                    | S26:         | 2 | 3,3379 | 0,244 | -0,075 |
| 8 | Q9UNE7 STUB1_HUMAN | R.LGAGGGSPEKS#PSAQE.L                | S23:         | 2 | 3,337  | 0,466 | -0,157 |
| 8 | Q08AD1 CA1L1_HUMAN | K.LNQSS#PDNVTDTK.G                   | S599:        | 2 | 3,3316 | 0,44  | -0,57  |
| 8 | Q9NZJ4 SACS_HUMAN  | E.RYAS#NVCFTTLGTE.F                  | S2511:       | 2 | 3,3289 | 0,481 | -0,503 |
| 8 | Q6S8J3 A26CA_HUMAN | E.M*ATAASSS#SLEK.S                   | S934:        | 2 | 3,3267 | 0,41  | -0,286 |
| 8 | Q09666 AHNK_HUMAN  | R.LKS#EDGVEGDLGE.T                   | S135:        | 2 | 3,3258 | 0,482 | -0,085 |
| 8 | Q15642 CIP4_HUMAN  | R.APSDSSLGT#PSDGRPE.L                | T302:        | 2 | 3,3207 | 0,269 | 0,221  |
| 8 | Q9Y5U2 TSSC4_HUMAN | E.LAHLAGPGS#PEAEE.W                  | S265:        | 2 | 3,3179 | 0,385 | 0,084  |
| 8 | P55209 NP1L1_HUMAN | E.RLDGLVET#PTGYIE.S                  | T62:         | 2 | 3,3178 | 0,439 | -0,297 |
| 8 | P46013 KI67_HUMAN  | E.LFQT#PICTDKPTT#HE.K                | T2203:T2212: | 2 | 3,3166 | 0,478 | 0,188  |
| 8 | P48681 NEST_HUMAN  | E.NQEPLRS#PEVGDEE.A                  | S680:        | 2 | 3,3165 | 0,49  | -0,799 |
| 8 | A0FGR8 ESYT2_HUMAN | R.SSSS#LLAS#PGHISVK.E                | S739:S743:   | 2 | 3,3159 | 1     | -0,225 |
| 8 | P12956 KU70_HUMAN  | K.IM*AT#PEQV GK.M                    | T455:        | 2 | 3,3157 | 0,334 | -0,417 |
| 8 | Q15398 DLG7_HUMAN  | E.LFDNKS#LTTE.C                      | S796:        | 2 | 3,3153 | 0,285 | -0,098 |
| 8 | P35658 NU214_HUMAN | K.SPGSTPTT#PTSSQAPQK.L               | T437:        | 2 | 3,3142 | 0,485 | -0,07  |
| 8 | P32004 L1CAM_HUMAN | E.KEAAGGNDSS#GATSPINPAVALE.-         | S1244:       | 2 | 3,3141 | 0,319 | -0,109 |
| 8 | Q9UQ35 SRRM2_HUMAN | R.M*APALSGANLTS#PR.V                 | S2382:       | 2 | 3,3137 | 0,501 | 0      |
| 8 | Q8N1F7 NUP93_HUMAN | E.SEPSYIS#DVGPPGR.S                  | S168:        | 2 | 3,3116 | 0,41  | -0,633 |
| 8 | Q9C0C2 TB182_HUMAN | R.VSGAGFS#PSSKM*E.G                  | S1138:       | 2 | 3,3107 | 0,487 | -1,061 |
| 8 | P05387 RLA2_HUMAN  | K.LASVPAGGAVAVSAAPGSAAPAAGSAPAAAEK.K |              | 3 | 3,3104 | 0,344 | 0,132  |
| 8 | Q99618 CDCA3_HUMAN | K.TSSGDPPS#PLVK.Q                    | S87:         | 2 | 3,3101 | 0,381 | 0      |
| 8 | Q9UPT8 ZC3H4_HUMAN | K.TGSGS#PFAGNSPAR.E                  | S1269:       | 2 | 3,3069 | 0,34  | -0,616 |
| 8 | Q5VSL9 FA40A_HUMAN | R.KDS#EGYSESPDLE.F                   | S59:         | 2 | 3,3035 | 0,356 | 0      |
| 8 | Q9BU19 ZN692_HUMAN | E.GSRPSAS#PQAPTL PQQ.-               | S509:        | 2 | 3,3034 | 0,263 | -0,134 |
| 8 | P27816 MAP4_HUMAN  | E.VGLLKDM*S#PLSE.T                   | S507:        | 2 | 3,303  | 0,524 | 0,176  |



|   |                     |                                |            |   |        |       |        |
|---|---------------------|--------------------------------|------------|---|--------|-------|--------|
| 8 | Q4W5T8 Q4W5T8_HUMAN | R.TGS#GIGNLQR.T                | S403:      | 2 | 3,2978 | 0,097 | 0      |
| 8 | P49736 MCM2_HUMAN   | R.GNDPLTSS#PGR.S               | S27:       | 2 | 3,297  | 0,442 | -0,413 |
| 8 | Q8NFH5 NUP53_HUMAN  | K.TLGT#PTQPGSTPR.I             | T273:      | 2 | 3,2963 | 0,469 | -0,175 |
| 8 | P46100 ATRX_HUMAN   | E.SSNYDS#ELEKE.I               | S819:      | 2 | 3,2943 | 0,257 | -0,353 |
| 8 | P55265 DSRAD_HUMAN  | R.TM*LLLSRS#PE.A               | S825:      | 2 | 3,291  | 0,313 | 0,196  |
| 8 | P55265 DSRAD_HUMAN  | E.SQT#PTPSATSFSGK.S            | T601:      | 2 | 3,2909 | 0,452 | -0,601 |
| 8 | Q9NYJ8 TAB2_HUMAN   | R.TSS#TSSSVNSQTLNR.N           | S350:      | 2 | 3,2862 | 0,354 | -0,296 |
| 8 | Q9Y2W6 TDRKH_HUMAN  | K.SSGEITHLSCLS#LSE.A           | S542:      | 2 | 3,2851 | 0,336 | 0      |
| 8 | P35658 NU214_HUMAN  | R.SAQGSSS#PVPSM*VQK.S          | S657:      | 2 | 3,2848 | 0,351 | -0,077 |
| 8 | O75781 PALM_HUMAN   | E.NAAAPS#PVRAPAPS#PAKE.E       | S116:S124: | 2 | 3,2834 | 0,428 | -0,194 |
| 8 | Q02952 AKA12_HUMAN  | K.ERPPAPS#SFVFQEE.T            | S1225:     | 2 | 3,2832 | 0,211 | -0,287 |
| 8 | Q9C0B5 ZDHC5_HUMAN  | R.SSSLKS#AQGTGFE.L             | S432:      | 2 | 3,2804 | 0,386 | -0,088 |
| 8 | Q9H4I2 ZH3_HUMAN    | E.ASSEPFDTSS#PQAGR.Q           | S946:      | 2 | 3,2785 | 0,466 | 0,453  |
| 8 | Q1W6H9 F110C_HUMAN  | E.NFTAGS#DCVTLK.V              | S241:      | 2 | 3,2766 | 0,351 | 0,175  |
| 8 | Q13620 CUL4B_HUMAN  | R.SATDGNTSTT#PPTSAK.K          | T31:       | 2 | 3,276  | 0,343 | 0      |
| 8 | Q15750 TAB1_HUMAN   | E.M*SQPTPS#PAPAAGGR.V          | S378:      | 2 | 3,2759 | 0,494 | -0,16  |
| 8 | Q9UPT8 ZC3H4_HUMAN  | K.TGSGSPFAGNS#PARE.G           | S1275:     | 2 | 3,2759 | 0,431 | 0      |
| 8 | P46013 KI67_HUMAN   | K.TPVQYSQQQNS#PQK.H            | S357:      | 3 | 3,2753 | 0,278 | 0,214  |
| 8 | P85037 FOXK1_HUMAN  | R.SGGLQT#PECLSR.E              | T436:      | 2 | 3,2749 | 0,365 | -0,264 |
| 8 | Q6ZRS2 SRCAP_HUMAN  | E.KNLSLT#PSAPSLTLE.A           | T2603:     | 2 | 3,2738 | 0,387 | -0,074 |
| 8 | Q9UNX4 WDR3_HUMAN   | K.IKGSS#PGIQDTLE.A             | S241:      | 2 | 3,2732 | 0,416 | -0,171 |
| 8 | P46782 RS5_HUMAN    | E.TAAPAVAET#PDIK.L             | T14:       | 2 | 3,2711 | 0,449 | -0,447 |
| 8 | P16615 AT2A2_HUMAN  | E.FDELNPS#AQR.D                | S663:      | 2 | 3,2666 | 0,31  | 0      |
| 8 | Q9Y2X9 ZN281_HUMAN  | E.NLS#PGTQTPSNDK.A             | S651:      | 2 | 3,2622 | 0,365 | -0,509 |
| 8 | Q9Y5U2 TSSC4_HUMAN  | E.LAHLAGPGS#PEAE.E             | S265:      | 2 | 3,2591 | 0,344 | -0,092 |
| 8 | Q92797 SYMPK_HUMAN  | E.AALLDSS#LEGPLK.E             | S1222:     | 2 | 3,2566 | 0,351 | -0,082 |
| 8 | O94762 RECQ5_HUMAN  | R.GEVPGGSAHYGGPS#PE.K          | S727:      | 2 | 3,2545 | 0,47  | 0      |
| 8 | Q6DN90 IQEC1_HUMAN  | R.SALSSS#LRDLSE.A              | S925:      | 2 | 3,2537 | 0,434 | -0,726 |
| 8 | Q8TDY2 RBCC1_HUMAN  | K.ASVSQTSPQSASS#PR.M           | S653:      | 2 | 3,2534 | 0,445 | -0,078 |
| 8 | Q9Y5K6 CD2AP_HUMAN  | K.SVDFDS#LTVR.T                | S463:      | 2 | 3,2516 | 0,32  | -0,601 |
| 8 | Q8WU60 Q8WU60_HUMAN | R.KVAS#PSPSGSVLFTDE.G          | S98:       | 2 | 3,2503 | 0,411 | -0,215 |
| 8 | Q659A1 NARG2_HUMAN  | K.VS#KSPS#PASTSTVPM*TDAPTAPK.A | S414:S418: | 3 | 3,2477 | 0,105 | -1,58  |
| 8 | Q14676 MDC1_HUMAN   | E.AYGPCLS#PPR.A                | S780:      | 2 | 3,2459 | 0,451 | 0,407  |

|   |                     |                         |        |   |        |       |        |
|---|---------------------|-------------------------|--------|---|--------|-------|--------|
| 8 | Q15154 PCM1_HUMAN   | R.INFS#DLDQR.S          | S110:  | 2 | 3,2427 | 0,279 | 0      |
| 8 | Q9UGU0 TCF20_HUMAN  | E.NDTVITIS#PKQE.G       | S1522: | 2 | 3,2417 | 0,336 | 0      |
| 8 | P19532 TFE3_HUMAN   | E.GVVGGLSGGALS#PLR.A    | S542:  | 2 | 3,2412 | 0,456 | -0,258 |
| 8 | Q8N1Q3 Q8N1Q3_HUMAN | E.NSS#LNNM*PLR.G        | S79:   | 2 | 3,2386 | 0,375 | -0,393 |
| 8 | Q96F24 NRBF2_HUMAN  | E.GQSPLSQKYS#PSTE.K     | S120:  | 2 | 3,2382 | 0,367 | -0,154 |
| 8 | Q5VUA4 ZN318_HUMAN  | R.ITVGNDFHFCVST#PE.R    | T161:  | 2 | 3,2376 | 0,295 | 0,147  |
| 8 | Q9Y2W1 TR150_HUMAN  | K.GSFS#DTGLGDGK.M       | S379:  | 2 | 3,2366 | 0,474 | 0,3    |
| 8 | Q96AQ6 PBIP1_HUMAN  | E.GQSPQSQS#LPSTPK.A     | S129:  | 2 | 3,2357 | 0,349 | -0,521 |
| 8 | Q12872 SFRS8_HUMAN  | E.AGKIEES#PFSVEE.S      | S709:  | 2 | 3,2341 | 0,345 | 0      |
| 8 | P08651 NFIC_HUMAN   | K.SPFNSPS#PQDSPLR.L     | S339:  | 2 | 3,2341 | 0,237 | -0,082 |
| 8 | P34931 HS71L_HUMAN  | E.GIDFYTS#ITR.A         | S298:  | 2 | 3,2315 | 0,38  | 0      |
| 8 | O75534 CSDE1_HUMAN  | E.S#KSPAAPGQSPTGSVCYE.R | S114:  | 2 | 3,2313 | 0,602 | -0,064 |
| 8 | P25054 APC_HUMAN    | E.TFDNIDNLS#PK.A        | S780:  | 2 | 3,2307 | 0,352 | -0,272 |
| 8 | O75781 PALM_HUMAN   | E.VVM*NSQQT#PVGTPK.D    | T141:  | 2 | 3,2304 | 0,244 | 0,077  |
| 8 | P11532 DMD_HUMAN    | K.VNGTTVSS#PSTSLQR.S    | S3613: | 2 | 3,2299 | 0,406 | -0,076 |
| 8 | P19338 NUCL_HUMAN   | E.FAS#FEDAKE.A          | S532:  | 2 | 3,2277 | 0,227 | -0,109 |
| 8 | P02545 LMNA_HUMAN   | R.SGAQASST#PLSPTR.I     | T19:   | 2 | 3,2255 | 0,44  | -0,169 |
| 8 | Q04721 NOTC2_HUMAN  | R.RTPS#LALTPPAEQE.V     | S1804: | 2 | 3,2223 | 0,432 | -0,142 |
| 8 | O15119 TBX3_HUMAN   | R.SSTLSSSSM*SLS#PK.L    | S707:  | 2 | 3,2205 | 0,267 | -0,49  |
| 8 | B2RDY9 B2RDY9_HUMAN | E.SASRS#ALFAQINQGE.S    | S255:  | 2 | 3,2193 | 0,349 | 0,074  |
| 8 | Q499G6 Q499G6_HUMAN | E.M*EVPAEDDDYS#PPSK.R   | S297:  | 2 | 3,219  | 0,469 | -0,069 |
| 8 | Q14126 DSG2_HUMAN   | E.NTYSSGSS#FPVVK.S      | S887:  | 2 | 3,2175 | 0,292 | 0,42   |
| 8 | Q9Y6A5 TACC3_HUMAN  | E.NCDFLFS#PPEVTGR.S     | S25:   | 2 | 3,2151 | 0,392 | 0,142  |
| 8 | O60271 JIP4_HUMAN   | R.SASQSS#LSDKLDQE.L     | S733:  | 2 | 3,2142 | 0,287 | -0,082 |
| 8 | Q13425 SNTB2_HUMAN  | R.GLGPPS#PPAPPR.G       | S95:   | 2 | 3,2137 | 0,365 | 0,1    |
| 8 | Q5VZ89 DEN4C_HUMAN  | K.VPS#GIFDVNSR.K        | S753:  | 2 | 3,2119 | 0,296 | -0,192 |
| 8 | Q2KHR3 QSER1_HUMAN  | E.SSTQRLS#DGEINAQE.S    | S586:  | 2 | 3,2058 | 0,353 | 0,071  |
| 8 | P60709 ACTB_HUMAN   | R.GYSFTTT#AERE.I        | T203:  | 2 | 3,1992 | 0,474 | -0,364 |
| 8 | Q9H6Z4 RANB3_HUMAN  | E.RTSS#LTQFPQSQSEE.R    | S126:  | 2 | 3,1989 | 0,449 | 0,344  |
| 8 | P18583 SON_HUMAN    | E.SDQTLAALLS#PK.E       | S1697: | 2 | 3,1982 | 0,268 | -0,276 |
| 8 | O60293 CC131_HUMAN  | R.LDSS#PVSSPR.K         | S949:  | 2 | 3,1942 | 0,309 | 0      |
| 8 | Q7Z2K8 GRIN1_HUMAN  | R.SPS#GAGEGASCSDGPR.G   | S75:   | 2 | 3,1925 | 0,444 | 0      |
| 8 | O75116 ROCK2_HUMAN  | E.NLLSDS#PSCRE.N        | S425:  | 2 | 3,1923 | 0,403 | 0,083  |

|   |                     |                      |        |   |        |       |        |
|---|---------------------|----------------------|--------|---|--------|-------|--------|
| 8 | Q92733 PRCC_HUMAN   | E.GLGLGLPS#PR.G      | S114:  | 2 | 3,1906 | 0,286 | -0,117 |
| 8 | P78527 PRKDC_HUMAN  | E.TQAS#QGTLQTR.T     | S2612: | 2 | 3,1885 | 0,367 | 0,096  |
| 8 | P04792 HSPB1_HUMAN  | R.ALSRQLS#SGVSE.I    | S82:   | 2 | 3,1865 | 0,311 | -0,279 |
| 8 | Q02241 KIF23_HUMAN  | R.RS#STVAPAQPDGAE.S  | S911:  | 2 | 3,1845 | 0,33  | -0,583 |
| 8 | Q86YS7 K0528_HUMAN  | E.IIGS#PIPEPR.Q      | S643:  | 2 | 3,1824 | 0,395 | 0      |
| 8 | Q9H4A3 WNK1_HUMAN   | K.KEGPVAS#PPFM*DLE.Q | S1978: | 2 | 3,1821 | 0,404 | -0,076 |
| 8 | P49790 NU153_HUMAN  | R.SVYFKPSLT#PSGE.F   | T388:  | 2 | 3,1806 | 0,315 | -0,164 |
| 8 | Q96A19 C102A_HUMAN  | R.LAES#PQLSK.G       | S12:   | 2 | 3,1791 | 0,242 | 0      |
| 8 | Q8N3P4 VPS8_HUMAN   | E.LNKS#FNLE.A        | S26:   | 2 | 3,1788 | 0,082 | 0,117  |
| 8 | Q2M3G4 SHRM1_HUMAN  | E.AAAQAAEPPS#PPASR.A | S133:  | 2 | 3,1731 | 0,252 | -0,325 |
| 8 | O94915 FRYL_HUMAN   | E.VLQIRDDET#PTLE.A   | T2547: | 2 | 3,1706 | 0,309 | -0,082 |
| 8 | O60271 JIP4_HUMAN   | K.LHQLS#GSDQLE.S     | S183:  | 2 | 3,1705 | 0,376 | 0,093  |
| 8 | Q96I24 FUBP3_HUMAN  | R.IQFKPDDGIS#PE.R    | S296:  | 2 | 3,1698 | 0,326 | 0,086  |
| 8 | Q9UHB6 LIMA1_HUMAN  | R.ASSLSESS#PPK.A     | S374:  | 2 | 3,1684 | 0,192 | -0,313 |
| 8 | P08559 ODPA_HUMAN   | R.YGM*GT#SVER.A      | T231:  | 2 | 3,1682 | 0,321 | -0,111 |
| 8 | Q9C0C2 TB182_HUMAN  | R.VSGAGFS#PSSK.M     | S1138: | 2 | 3,1679 | 0,322 | 0,332  |
| 8 | Q96R06 SPAG5_HUMAN  | K.STNT#SQTGLVGTK.H   | T400:  | 2 | 3,1671 | 0,334 | -0,355 |
| 8 | Q66K64 DCA15_HUMAN  | R.SSGS#PEPSPAIAK.A   | S310:  | 2 | 3,1671 | 0,277 | -0,28  |
| 8 | P51608 MECP2_HUMAN  | K.M*PFQTS#PGGKAE.G   | S229:  | 2 | 3,1589 | 0,294 | -0,363 |
| 8 | Q5M775 SPEC1_HUMAN  | R.TAPAAAVS#PM*QR.H   | S863:  | 2 | 3,1587 | 0,433 | 0      |
| 8 | O14907 TX1B3_HUMAN  | K.GIYVTRVS#E.G       | S61:   | 2 | 3,1538 | 0,397 | 0,111  |
| 8 | Q9H4N4 Q9H4N4_HUMAN | E.TRLS#FSDTYQDYE.E   | S47:   | 2 | 3,1534 | 0,416 | -0,215 |
| 8 | Q14980 NUMA1_HUMAN  | R.KNS#LISSLEEE.V     | S1225: | 2 | 3,1521 | 0,339 | -0,092 |
| 8 | Q96RU3 FNBP1_HUMAN  | R.TVS#DNSLSNSRGE.G   | S296:  | 2 | 3,1495 | 0,396 | -0,338 |
| 8 | P15822 ZEP1_HUMAN   | K.ISVGRLS#PQQE.S     | S1734: | 2 | 3,1493 | 0,372 | 0,094  |
| 8 | Q8WWY3 PRP31_HUMAN  | E.TQLDLS#GDSVK.T     | S44:   | 2 | 3,148  | 0,278 | 0,098  |
| 8 | Q14188 TFDP2_HUMAN  | R.GFIDQNLS#PTK.G     | S24:   | 2 | 3,1477 | 0,276 | 0      |
| 8 | Q14671 PUM1_HUMAN   | E.YVLSS#SPGDSCLR.K   | S228:  | 2 | 3,1455 | 0,386 | -0,08  |
| 8 | P28749 RBL1_HUMAN   | R.SFAPST#PLTGR.R     | T369:  | 2 | 3,1445 | 0,366 | 0,101  |
| 8 | Q69YN4 VIR_HUMAN    | R.SFLSEPSS#PGR.T     | S1579: | 2 | 3,1417 | 0,399 | 0,098  |
| 8 | Q01081 U2AF1_HUMAN  | K.VNCS#FYFK.I        | S19:   | 2 | 3,1329 | 0,35  | 0,213  |
| 8 | P35269 T2FA_HUMAN   | R.LDTGPQSL#GK.S      | S433:  | 2 | 3,1329 | 0,394 | -0,516 |
| 8 | Q08999 RBL2_HUMAN   | E.ICIAGS#PLTPR.R     | S639:  | 2 | 3,1328 | 0,463 | 0      |

|   |                    |                              |            |   |        |       |        |
|---|--------------------|------------------------------|------------|---|--------|-------|--------|
| 8 | P26045 PTN3_HUMAN  | K.GSLAPQDS#DSEVSQNR.S        | S425:      | 2 | 3,1322 | 0,371 | 0,276  |
| 8 | Q9P2M7 CING_HUMAN  | K.QPAQSQNLS#PLSGFSR.S        | S252:      | 2 | 3,1293 | 0,425 | 0,068  |
| 8 | Q9Y6M7 S4A7_HUMAN  | K.TSS#TVNTKFE.K              | S26:       | 2 | 3,1291 | 0,412 | -0,715 |
| 8 | Q2TBE0 C19L2_HUMAN | K.STFAGS#PERE.S              | S475:      | 2 | 3,1288 | 0,345 | 0,315  |
| 8 | Q68CQ4 DEF_HUMAN   | E.TNFLEES#GDNSSLK.A          | S177:      | 2 | 3,1285 | 0,273 | 0,488  |
| 8 | Q14980 NUMA1_HUMAN | E.SRPS#LSLGTITDEE.M          | S1945:     | 2 | 3,127  | 0,308 | 0,308  |
| 8 | Q8ND56 LS14A_HUMAN | K.TQLS#QGRSS#PQLDPLR.K       | S178:S183: | 3 | 3,1258 | 0,177 | 0,094  |
| 8 | Q12888 TP53B_HUMAN | K.TVSSDGCST#PSREE.G          | T321:      | 2 | 3,1245 | 0,404 | -0,383 |
| 8 | Q13029 PRDM2_HUMAN | E.YNGIDLIVENPADGT#RSPS#PCK.S | T910:S914: | 3 | 3,1236 | 0,193 | -0,287 |
| 8 | P48681 NEST_HUMAN  | E.YQESLRS#LEEE.G             | S934:      | 2 | 3,122  | 0,272 | 0      |
| 8 | Q8N6T3 ARFG1_HUMAN | R.YVGFNT#PPPQK.K             | T189:      | 2 | 3,1208 | 0,435 | 0      |
| 8 | Q9UEY8 ADDG_HUMAN  | R.VSRLS#TSTTIE.N             | S650:      | 2 | 3,1201 | 0,299 | -0,192 |
| 8 | O43829 ZF161_HUMAN | E.SKDLGSQT#PQALTFNDGM*SE.V   | T235:      | 3 | 3,1187 | 0,273 | -0,082 |
| 8 | Q8IXW5 RPAP2_HUMAN | E.SQNSLDES#LPFR.G            | S433:      | 2 | 3,1117 | 0,308 | -0,497 |
| 8 | Q9H2Y7 ZF106_HUMAN | E.GVSISS#PGLAR.K             | S851:      | 2 | 3,1103 | 0,278 | 0,101  |
| 8 | Q5H9R7 SAPS3_HUMAN | K.DSLRSNS#PVEM*E.T           | S740:      | 2 | 3,1086 | 0,278 | -0,251 |
| 8 | Q13330 MTA1_HUMAN  | K.SVSVLSSLT#PAK.V            | T564:      | 2 | 3,1073 | 0,317 | -0,45  |
| 8 | Q5T5C0 STXB5_HUMAN | E.LFTPVET#PEAPNR.G           | T1039:     | 2 | 3,1066 | 0,295 | -0,079 |
| 8 | Q15007 FL2D_HUMAN  | E.GNTTEDDFPSS#PGNGNK.S       | S306:      | 3 | 3,1058 | 0,119 | 0,403  |
| 8 | Q15233 NONO_HUMAN  | E.GIGAIGGT#PPAFNR.A          | T450:      | 3 | 3,102  | 0,469 | 0,52   |
| 8 | Q13112 CAF1B_HUMAN | R.TQDPSS#PGTTPQAR.Q          | S429:      | 2 | 3,1018 | 0,357 | -0,151 |
| 8 | Q9Y4E8 UBP15_HUMAN | R.GPST#PKS#PGASNFSTLPK.I     | T226:S229: | 2 | 3,1012 | 1     | 0,189  |
| 8 | Q9Y490 TLN1_HUMAN  | E.STM*LEDSVS#PK.K            | S425:      | 2 | 3,0966 | 0,464 | -0,284 |
| 8 | Q15003 CND2_HUMAN  | R.VLGGKGDAPS#LEE.V           | S189:      | 2 | 3,0952 | 0,319 | -0,333 |
| 8 | P48730 KC1D_HUMAN  | R.GAPVNIS#SSDLTGR.Q          | S382:      | 2 | 3,0938 | 0,332 | -0,42  |
| 8 | P04792 HSPB1_HUMAN | E.SPAVAAPAYS#R.A             | S74:       | 2 | 3,0919 | 0,38  | -0,209 |
| 8 | O60238 BNI3L_HUMAN | K.NGGLEHVPS#SSS#IHNGDM*E.K   | S62:S65:   | 3 | 3,0906 | 0,277 | -0,085 |
| 8 | Q9BUH8 BEGIN_HUMAN | R.AGGDLSL#PGR.S              | S502:      | 2 | 3,0893 | 0,303 | -0,11  |
| 8 | Q00839 HNRPU_HUMAN | R.AKS#PQPPVEEED.E.H          | S270:      | 2 | 3,0892 | 0,371 | -0,397 |
| 8 | P49792 RBP2_HUMAN  | E.TVFTPPTS#PENVD.R           | S1400:     | 2 | 3,0886 | 0,354 | -0,297 |
| 8 | Q7Z4H7 FA29A_HUMAN | R.NQIPRT#PENLITE.I           | T584:      | 2 | 3,0872 | 0,419 | 0,076  |
| 8 | Q2NKX8 ERC6L_HUMAN | E.LCTNS#SLGM*EKS#FATKNE.A    | S828:S835: | 3 | 3,0841 | 0,256 | -0,501 |
| 8 | Q9NYV4 CD2L7_HUMAN | R.HSS#IS#PVRLPLNSSLGA.E.L    | S383:S385: | 2 | 3,0839 | 0,32  | 0,301  |

|   |                     |                            |            |   |        |       |        |
|---|---------------------|----------------------------|------------|---|--------|-------|--------|
| 8 | P68104 EF1A1_HUMAN  | E.S#FSDYPPLGR.F            | S414:      | 2 | 3,0801 | 0,362 | 0,3    |
| 8 | Q8WXI9 P66B_HUMAN   | R.GRLT#PSPDIIVLSDNE.A      | T120:      | 2 | 3,0792 | 0,309 | -0,405 |
| 8 | P42684 ABL2_HUMAN   | R.GAQASSGS#PALPR.K         | S620:      | 2 | 3,0776 | 0,397 | -0,382 |
| 8 | Q2NL81 Q2NL81_HUMAN | R.GYQSLSDS#PPGAR.V         | S793:      | 2 | 3,077  | 0,486 | 0,172  |
| 8 | P10636 TAU_HUMAN    | K.SPVVSGDTS#PR.H           | S721:      | 2 | 3,0735 | 0,359 | -0,619 |
| 8 | Q9ULU4 PKCB1_HUMAN  | K.ATSSHFS#ASEE.S           | S460:      | 2 | 3,073  | 0,287 | 0,099  |
| 8 | Q9UPQ3 CENG2_HUMAN  | R.FVLM*AT#PNLSR.R          | T836:      | 2 | 3,0715 | 0,361 | 0,091  |
| 8 | Q14692 BMS1_HUMAN   | K.AGLS#PANCSQSDR.V         | S552:      | 2 | 3,0703 | 0,521 | -0,27  |
| 8 | P04406 G3P_HUMAN    | R.GALQNIIPAST#GAAK.A       | T211:      | 2 | 3,0696 | 0,296 | -0,409 |
| 8 | Q13573 SNW1_HUMAN   | R.GPPS#PPAPVM*HS#PSR.K     | S224:S232: | 3 | 3,0673 | 0,36  | 0,108  |
| 8 | Q7Z2W4 ZCCHV_HUMAN  | K.TVFS#PTLPAAR.S           | S378:      | 2 | 3,0672 | 0,358 | -0,295 |
| 8 | Q14126 DSG2_HUMAN   | E.NTYSS#GSSFPVVK.S         | S884:      | 2 | 3,0663 | 0,318 | 0,084  |
| 8 | Q9Y613 FHOD1_HUMAN  | R.TPQS#PAPCVLLR.A          | S498:      | 2 | 3,0653 | 0,396 | 0,086  |
| 8 | Q6T4R5 NHS_HUMAN    | E.STLTTAALS#PSK.I          | S1155:     | 2 | 3,0644 | 0,371 | 0,097  |
| 8 | Q13112 CAF1B_HUMAN  | E.IQSETPGDAQGS#PPELK.R     | S538:      | 2 | 3,0642 | 0,459 | 0,133  |
| 8 | P27816 MAP4_HUMAN   | E.VGLLKDM*S#PLSETE.M       | S507:      | 2 | 3,0626 | 0,33  | 0,076  |
| 8 | Q66K64 DCA15_HUMAN  | R.AHS#EPLALCGE.T           | S359:      | 2 | 3,0619 | 0,334 | -0,193 |
| 8 | Q9NQ57 INCE_HUMAN   | E.SITVSSLM*AT#PQDPK.G      | T239:      | 2 | 3,0612 | 0,32  | -0,073 |
| 8 | Q9NPI6 DCP1A_HUMAN  | R.QRS#PLLNPVPE.L           | S353:      | 2 | 3,0601 | 0,333 | -0,335 |
| 8 | O14893 GEMI2_HUMAN  | R.KQS#VNISLSGCQPAPE.G      | S81:       | 3 | 3,0595 | 0,262 | 0,611  |
| 8 | Q9Y2X7 GIT1_HUMAN   | R.ARS#M*DSSDLSDGAVTLQE.Y   | S410:      | 2 | 3,0577 | 0,386 | 0,123  |
| 8 | Q6P2E9 EDC4_HUMAN   | R.T#RSPDVISSASTALSQDIPE.I  | T727:      | 2 | 3,0568 | 0,185 | 0,227  |
| 8 | Q9UPN6 RBM16_HUMAN  | E.TVQTTQS#PTPVEKE.T        | S617:      | 2 | 3,0508 | 0,315 | -0,3   |
| 8 | Q99536 VAT1_HUMAN   | E.GAAAAAAS#PPLL.R.C        | S44:       | 2 | 3,0505 | 0,314 | 0,098  |
| 8 | Q9Y388 RBMX2_HUMAN  | E.VQAEQPSSSS#PR.R          | S188:      | 2 | 3,0492 | 0,272 | 0      |
| 8 | A8K5L5 A8K5L5_HUMAN | E.SQLDGS#LISR.R            | S470:      | 2 | 3,0454 | 0,288 | 0,106  |
| 8 | O14641 DVL2_HUMAN   | R.HLAGYES#SSTLM*TSE.L      | S194:      | 2 | 3,0436 | 0,467 | -0,357 |
| 8 | Q8NEF9 SRFB1_HUMAN  | K.AVTIANS#PSKPEKDSVVS#LE.S | S203:S215: | 3 | 3,0425 | 0,157 | -0,316 |
| 8 | Q9UNE7 STUB1_HUMAN  | R.LGAGGGS#PEKSPSAQE.L      | S19:       | 2 | 3,0409 | 0,355 | -0,236 |
| 8 | Q96AD5 PLPL2_HUMAN  | R.NNLS#LGDALAK.W           | S428:      | 2 | 3,039  | 0,273 | 0,204  |
| 8 | Q16204 CCDC6_HUMAN  | K.SGGIVIS#PFR.L            | S52:       | 2 | 3,0385 | 0,326 | -0,219 |
| 8 | Q147X3 MAK3_HUMAN   | R.LLSSS#LTADCSLRS#PSGR.E   | S190:S199: | 2 | 3,0365 | 0,222 | -0,472 |
| 8 | O75179 ANR17_HUMAN  | R.NSPLDCGSAS#PNK.V         | S2067:     | 2 | 3,0365 | 0,413 | -0,257 |

|   |                    |                              |            |   |        |       |        |
|---|--------------------|------------------------------|------------|---|--------|-------|--------|
| 8 | O15355 PPM1G_HUMAN | K.AYTGFSSNS#ERGTE.A          | S218:      | 2 | 3,0347 | 0,421 | -0,154 |
| 8 | Q96GS4 CQ059_HUMAN | R.LQDSRS#LDGLSE.A            | S34:       | 2 | 3,0334 | 0,378 | 0,349  |
| 8 | Q9ULL5 PRR12_HUMAN | E.GLGLGCP#PCK.R              | S540:      | 2 | 3,0331 | 0,388 | -0,1   |
| 8 | Q9H4A3 WNK1_HUMAN  | K.SIS#NPPGSNLR.T             | S2372:     | 2 | 3,0323 | 0,41  | 0      |
| 8 | Q8TC76 F110B_HUMAN | R.ANSDIIS#LNFR.S             | S305:      | 2 | 3,0321 | 0,333 | -0,917 |
| 8 | Q9UHB6 LIMA1_HUMAN | E.FTTQNQKS#QDVE.L            | S726:      | 2 | 3,0319 | 0,267 | 0,162  |
| 8 | Q12888 TP53B_HUMAN | E.TSVISIDS#PQK.L             | S727:      | 2 | 3,0318 | 0,36  | -0,194 |
| 8 | P49736 MCM2_HUMAN  | E.SFTM*AS#SPAQR.R            | S12:       | 2 | 3,0313 | 0,432 | -0,095 |
| 8 | P26651 TTP_HUMAN   | R.QSIS#FSGLP#SGR.R           | S186:      | 2 | 3,0308 | 0,26  | -0,093 |
| 8 | Q15032 R3HD1_HUMAN | R.DRIFS#QDSLCSQE.N           | S299:      | 2 | 3,0274 | 0,321 | 0      |
| 8 | Q6UWZ7 CCD98_HUMAN | K.GFGEYSR#PTF.-              | S406:      | 2 | 3,0269 | 0,413 | -0,276 |
| 8 | Q9UHJ3 SMBT1_HUMAN | R.TFSFS#DDENKPPS#PK.E        | S767:S775: | 2 | 3,0268 | 0,4   | -0,263 |
| 8 | Q9Y4X0 AMER1_HUMAN | K.LSSPPSGS#GGGGGASSSSHCSGE.S | S21:       | 3 | 3,0263 | 0,293 | 0      |
| 8 | Q8NDI1 EHBP1_HUMAN | E.VQPQVANS#PSSAAQK.A         | S964:      | 2 | 3,0253 | 0,525 | -0,383 |
| 8 | Q6DN90 IQEC1_HUMAN | R.M*QFS#FEGPEK.V             | S180:      | 2 | 3,0252 | 0,304 | -0,282 |
| 8 | O95674 CDS2_HUMAN  | K.VDGETAS#DSESRAE.S          | S33:       | 2 | 3,0222 | 0,344 | 0,318  |
| 8 | O75362 ZN217_HUMAN | R.AGAES#PTM*SVDGR.Q          | S407:      | 2 | 3,0209 | 0,429 | -0,178 |
| 8 | O00231 PSD11_HUMAN | R.AQS#LLSTDRE.A              | S14:       | 2 | 3,0173 | 0,396 | 0      |
| 8 | Q5BKZ1 ZN326_HUMAN | R.FGGS#YGGRF.E.S             | S106:      | 2 | 3,0171 | 0,261 | 0      |
| 8 | Q96B54 ZN428_HUMAN | R.SPLGEAPPGT#PPCR.L          | T108:      | 2 | 3,0169 | 0,367 | -0,322 |
| 8 | Q15121 PEA15_HUMAN | K.DIIRQPS#EEE.I              | S116:      | 2 | 3,0168 | 0,36  | -0,094 |
| 8 | Q15773 MLF2_HUMAN  | R.LAIQGPEDS#PSR.Q            | S238:      | 2 | 3,0159 | 0,354 | -0,181 |
| 8 | P78559 MAP1A_HUMAN | E.LSSEPQT#PPAQK.G            | T504:      | 2 | 3,014  | 0,461 | 0      |
| 8 | A2RRP1 NAG_HUMAN   | E.GGENISAS#PLTSK.A           | S1384:     | 2 | 3,0132 | 0,295 | 0      |
| 8 | Q5JTW2 CEP78_HUMAN | R.M*CS#PSPDATSGTGSQR.K       | S654:      | 2 | 3,0092 | 0,512 | 0,07   |
| 8 | Q6NUJ5 PWP2B_HUMAN | E.VM*QLGSSS#PPPAR.G          | S84:       | 2 | 3,0089 | 0,384 | -1,286 |
| 8 | P42356 PI4KA_HUMAN | R.KTS#SVSSISQVSPE.R          | S198:      | 2 | 3,0085 | 0,368 | -0,322 |
| 8 | P62158 CALM_HUMAN  | R.VFDKDGNGYIS#AAE.L          | S102:      | 2 | 3,0073 | 0,319 | 0,468  |
| 8 | P49792 RBP2_HUMAN  | E.SSINYTFKT#PE.K             | T2613:     | 2 | 3,0067 | 0,272 | 0,089  |
| 8 | Q9NYL2 MLTK_HUMAN  | K.YQQITPVNQS#R.S             | S633:      | 2 | 3,0067 | 0,332 | -0,345 |
| 8 | O15085 ARHGB_HUMAN | R.NSVLSDPGLDS#PRTS#PVIM*AR.V | S251:S255: | 3 | 3,0064 | 0,306 | 0,23   |
| 8 | Q13625 ASPP2_HUMAN | E.NIYSNSQKPGS#PEPE.T         | S673:      | 2 | 3,0057 | 0,325 | -0,41  |
| 8 | Q9UBC2 EP15R_HUMAN | D.GAHGAS#LTDLANLSE.G         | S575:      | 2 | 3,0054 | 0,285 | 0,079  |

|   |                     |                              |              |   |        |       |        |
|---|---------------------|------------------------------|--------------|---|--------|-------|--------|
| 8 | Q09666 AHNK_HUMAN   | R.APKM*S#LPDVDLD.L           | S1068:       | 2 | 3,0048 | 0,111 | 0      |
| 8 | P42684 ABL2_HUMAN   | R.DKS#PSSLLE.D               | S631:        | 2 | 3,0046 | 0,098 | 0      |
| 8 | Q96E22 NGBR_HUMAN   | E.LLGLDCSKYS#PE.F            | S168:        | 2 | 3,0037 | 0,313 | -0,334 |
| 8 | Q9UJU6 DBNL_HUMAN   | R.AM*STTSSIS#PQPGK.L         | S275:        | 2 | 3,0005 | 0,468 | -0,328 |
| 8 | Q9UQ35 SRRM2_HUMAN  | E.LSNS#PLRE.N                | S1320:       | 2 | 3,0004 | 0,221 | -0,184 |
| 8 | Q15K36 Q15K36_HUMAN | R.LTHFPTVS#GSPASLAD.S        | S366:        | 2 | 3,0002 | 0,397 | 0,073  |
| 8 | P78310 CXAR_HUMAN   | R.TPQS#PTLPPAK.V             | S332:        | 2 | 3,0001 | 0,327 | -0,401 |
| 8 | P50548 ERF_HUMAN    | R.GEGPGEAGGPLT#PR.R          | T526:        | 2 | 2,9989 | 0,38  | -0,355 |
| 8 | O75691 UTP20_HUMAN  | K.SLSDNGQPGT#PDPADSGGTSAKE.S | T1741:       | 3 | 2,9984 | 0,181 | 0,081  |
| 8 | Q8WXH0 SYNE2_HUMAN  | R.RGS#M*SYLAAVEEE.V          | S4108:       | 2 | 2,9981 | 0,399 | -0,238 |
| 8 | Q12857 NFIA_HUMAN   | E.SSSYSM*S#PGAM*R.R          | S258:        | 2 | 2,9935 | 0,269 | -0,477 |
| 8 | A4D1S0 KLRG2_HUMAN  | R.ASPAEGSAGSPGS#PTCCR.C      | S215:        | 2 | 2,9933 | 0,547 | -0,067 |
| 8 | Q9Y6Y0 NS1BP_HUMAN  | K.LSKS#LSFE.M                | S336:        | 2 | 2,9923 | 0,175 | 0,308  |
| 8 | O00443 P3C2A_HUMAN  | K.VSNLQVS#PK.S               | S259:        | 2 | 2,9916 | 0,331 | 0,116  |
| 8 | Q8TF15 Q8TF15_HUMAN | K.KPPVS#PLLLLVQDSE.T         | S155:        | 2 | 2,9895 | 0,397 | -0,215 |
| 8 | O95831 AIFM1_HUMAN  | K.IGDFRS#LE.K                | S292:        | 2 | 2,9865 | 0,264 | 0,06   |
| 8 | P82094 TMF1_HUMAN   | K.SNTEPQS#PPIASPK.A          | S72:         | 2 | 2,9863 | 0,351 | -0,398 |
| 8 | Q9BQK8 LPIN3_HUMAN  | E.LTSPKS#DSELE.V             | S224:        | 2 | 2,9851 | 0,375 | -0,19  |
| 8 | P49810 PSN2_HUMAN   | R.TSLM*SAES#PTPR.S           | S25:         | 2 | 2,9837 | 0,317 | -0,355 |
| 8 | P18031 PTN1_HUMAN   | E.EKGS#PLNAAPYGIE.S          | S352:        | 2 | 2,9806 | 0,224 | -0,08  |
| 8 | Q8IYB3 SRRM1_HUMAN  | R.APQTSSS#PPPVR.R            | S696:        | 2 | 2,9801 | 0,14  | -0,187 |
| 8 | Q86T74 Q86T74_HUMAN | R.NINPSTANS#PKCQE.L          | S233:        | 2 | 2,9764 | 0,42  | -0,223 |
| 8 | Q9BRK4 LZTS2_HUMAN  | R.AAAGVGGGS#LR.A             | S570:        | 2 | 2,9759 | 0,254 | 0,195  |
| 8 | Q8NFH5 NUP53_HUMAN  | R.CALSSPSLAFT#PPIK.T         | T265:        | 2 | 2,9746 | 0,475 | -0,219 |
| 8 | Q6ZRS2 SRCAP_HUMAN  | E.AKTPTS#S#PEKPQELVTAE.V     | S2685:S2686: | 3 | 2,974  | 0,195 | 0,176  |
| 8 | Q8NG31 CASC5_HUMAN  | R.KSLGT#PTVICTPTEE.S         | T1011:       | 2 | 2,973  | 0,415 | 0,285  |
| 8 | Q92754 AP2C_HUMAN   | K.SYM*NPGDQS#PADSNK.T        | S434:        | 3 | 2,9717 | 0,343 | -0,107 |
| 8 | Q13442 HAP28_HUMAN  | R.M*QS#LSLNK.-               | S176:        | 2 | 2,9714 | 0,161 | 0      |
| 8 | Q8WYP5 AHTF1_HUMAN  | E.LNHLS#PVQGTE.A             | S1411:       | 2 | 2,9701 | 0,349 | 0      |
| 8 | Q6NZI2 PTRF_HUMAN   | E.SDAVLVDKSDS#D.-            | S389:        | 2 | 2,9697 | 0,217 | -0,458 |
| 8 | P82094 TMF1_HUMAN   | E.TLAAGTS#SPKTE.G            | S169:        | 2 | 2,9696 | 0,381 | 0,294  |
| 8 | Q9UK61 CC063_HUMAN  | K.GGNLPPVS#PNDSGAK.I         | S1103:       | 2 | 2,9691 | 0,228 | -0,164 |
| 8 | O75410 TACC1_HUMAN  | E.NTS#PLLGDAR.F              | S276:        | 2 | 2,9674 | 0,365 | 0,109  |

|   |                    |                               |              |   |        |       |        |
|---|--------------------|-------------------------------|--------------|---|--------|-------|--------|
| 8 | P29692 EF1D_HUMAN  | E.NGAS#VILRD.I                | S44:         | 2 | 2,9653 | 0,141 | 0,119  |
| 8 | Q9P1Y5 K1543_HUMAN | R.APS#PSGLM*SPSR.L            | S1074:       | 2 | 2,963  | 0,443 | -0,38  |
| 8 | P46013 KI67_HUMAN  | E.LFQT#PICTDKPTT#HE.K         | T2203:T2212: | 3 | 2,9612 | 0,245 | 0      |
| 8 | Q02952 AKA12_HUMAN | K.VLSKPPEGVVS#EVE.M           | S498:        | 2 | 2,9591 | 0,199 | 0,079  |
| 8 | Q13428 TCOF_HUMAN  | K.VGDVT#PQVK.G                | T249:        | 2 | 2,9578 | 0,266 | -0,119 |
| 8 | Q15020 SART3_HUMAN | K.VFRYS#TSLE.K                | S795:        | 2 | 2,9552 | 0,346 | 0      |
| 8 | Q96JY6 PDLI2_HUMAN | R.SSYSSPTSLS#PR.A             | S129:        | 2 | 2,9534 | 0,429 | 0      |
| 8 | Q8IYB3 SRRM1_HUMAN | R.TAS#PPPPPK.R                | S616:        | 2 | 2,9515 | 0,34  | 0,251  |
| 8 | P42694 HELZ_HUMAN  | R.RIS#SSSVQPCSEE.V            | S1763:       | 2 | 2,9497 | 0,444 | -0,237 |
| 8 | Q86TI0 TBCD1_HUMAN | E.LIDSS#PLSDNQR.M             | S1072:       | 2 | 2,9481 | 0,359 | -0,257 |
| 8 | Q9Y4X0 AMER1_HUMAN | K.LSS#SPPSGSGGGGGASSSSHCSGE.S | S15:         | 3 | 2,945  | 0,17  | 0,168  |
| 8 | P05787 K2C8_HUMAN  | E.VDPNIQAVRT#QE.K             | T89:         | 2 | 2,9449 | 0,269 | -0,168 |
| 8 | O75385 ULK1_HUMAN  | R.SGSTS#PLGFAR.A              | S469:        | 2 | 2,9449 | 0,358 | 0,105  |
| 8 | Q9Y365 PCTL_HUMAN  | E.LSVQHADS#LENIDE.S           | S259:        | 2 | 2,944  | 0,242 | 0,074  |
| 8 | O60343 TBCD4_HUMAN | E.SLSVGGTSVT#PR.R             | T766:        | 2 | 2,9439 | 0,311 | -0,492 |
| 8 | O94992 HEXI1_HUMAN | R.APLS#KFGD.-                 | S355:        | 2 | 2,9434 | 0,477 | 0,267  |
| 8 | Q147X3 MAK3_HUMAN  | E.VAATTAT#PDGGPR.A            | T117:        | 2 | 2,9422 | 0,418 | -0,094 |
| 8 | Q9Y6D9 MD1L1_HUMAN | E.LTPAEYS#PQLTR.R             | S428:        | 2 | 2,9421 | 0,352 | -0,084 |
| 8 | Q9UBC2 EP15R_HUMAN | K.FHDTSS#PLM*VTPPSAE.A        | S108:        | 2 | 2,9411 | 0,374 | 0,135  |
| 8 | Q96T23 RSF1_HUMAN  | E.SEKPGS#PEAAETS#PPSNIIDHCE.K | S612:S619:   | 3 | 2,9397 | 0,21  | 0,35   |
| 8 | Q9H6U6 BCAS3_HUMAN | R.NFDGYRS#PLPTNE.S            | S910:        | 2 | 2,9381 | 0,248 | 0,077  |
| 8 | P20700 LMNB1_HUMAN | R.AGGPTT#PLSPTR.L             | T20:         | 2 | 2,9376 | 0,297 | -0,198 |
| 8 | Q9Y2D5 AKAP2_HUMAN | D.SLQVPVS#PSSTSSR.C           | S152:        | 2 | 2,9359 | 0,417 | -0,454 |
| 8 | Q9H6Z4 RANB3_HUMAN | R.ERT#SSLTQFPQSSEE.R          | T124:        | 2 | 2,9357 | 0,41  | 0,128  |
| 8 | Q9UQ35 SRRM2_HUMAN | K.AQT#PPGPSLSGSK.S            | T1003:       | 2 | 2,9355 | 0,242 | -0,84  |
| 8 | Q00839 HNRPU_HUMAN | R.AKS#PQPVEEE.D               | S270:        | 2 | 2,9333 | 0,453 | -0,473 |
| 8 | Q8WXH0 SYNE2_HUMAN | R.RGS#M*SYLAAVEEEVEE.S        | S4108:       | 2 | 2,9332 | 0,372 | -0,322 |
| 8 | Q86V48 LUZP1_HUMAN | E.LTSVSNHVSS#PFE.L            | S840:        | 2 | 2,9328 | 0,362 | -0,247 |
| 8 | Q12980 CP035_HUMAN | E.LLPSGDS#PLNQR.M             | S476:        | 2 | 2,9311 | 0,414 | 0,089  |
| 8 | Q8TEW0 PARD3_HUMAN | K.SKS#M*DLGIADE.T             | S852:        | 2 | 2,9297 | 0,301 | -0,097 |
| 8 | Q9UKA4 AKA11_HUMAN | E.DSGLFS#PIR.S                | S448:        | 2 | 2,9285 | 0,272 | 0,114  |
| 8 | Q16584 M3K11_HUMAN | E.VGPGDS#PTFPR.F              | S524:        | 2 | 2,9257 | 0,258 | -0,101 |
| 8 | Q9H0B6 KLC2_HUMAN  | R.TLSSS#SM*DLSR.R             | S610:        | 2 | 2,925  | 0,224 | -0,191 |



|   |                    |                              |            |   |        |       |        |
|---|--------------------|------------------------------|------------|---|--------|-------|--------|
| 8 | Q96QD9 FYTD1_HUMAN | R.LVGATATSS#PPPK.A           | S16:       | 2 | 2,9249 | 0,276 | -0,093 |
| 8 | O75061 AUX1_HUMAN  | R.SATSTSAS#PTLR.V            | S570:      | 2 | 2,9237 | 0,444 | 0,485  |
| 8 | Q14157 UBP2L_HUMAN | E.KS#PAVATSTAAPPPPS#SPLPSK.S | S439:S453: | 3 | 2,9234 | 0,164 | -0,651 |
| 8 | Q53T59 H1BP3_HUMAN | R.S#PGAAGLTSR.D              | S139:      | 2 | 2,9228 | 0,468 | 0,367  |
| 8 | Q9NYL2 MLTK_HUMAN  | R.SSS#PTQYGLTK.N             | S637:      | 2 | 2,9172 | 0,392 | -0,098 |
| 8 | Q9ULJ3 ZN295_HUMAN | R.SFS#ASQSTDRE.G             | S411:      | 2 | 2,9162 | 0,274 | -0,094 |
| 8 | Q92797 SYMPK_HUMAN | E.RS#PQTLAPVGE.D             | S1243:     | 2 | 2,9149 | 0,39  | 0,099  |
| 8 | Q9P2B4 CT2NL_HUMAN | K.VSSPLSPLS#PGIKSPT#IPR.A    | S563:T570: | 3 | 2,9147 | 0,254 | -0,35  |
| 8 | P50542 PEX5_HUMAN  | E.VTDPLSVS#PAR.W             | S155:      | 2 | 2,9144 | 0,371 | 0,1    |
| 8 | Q08211 DHX9_HUMAN  | K.LAQFEPS#QR.Q               | S321:      | 2 | 2,9139 | 0,242 | -0,106 |
| 8 | O43318 M3K7_HUMAN  | R.KTAS#FGNILDVPE.I           | S417:      | 2 | 2,9135 | 0,181 | -0,249 |
| 8 | Q02952 AKA12_HUMAN | E.GSIDTGITVS#R.E             | S1295:     | 2 | 2,9107 | 0,188 | -0,926 |
| 8 | O14901 KLF11_HUMAN | R.TPVS#PQVTDSK.A             | S124:      | 2 | 2,9097 | 0,258 | 0,098  |
| 8 | P19174 PLCG1_HUMAN | E.NGDLS#PFSGTSLR.E           | S1221:     | 2 | 2,9091 | 0,228 | -0,426 |
| 8 | Q6S8J3 A26CA_HUMAN | E.KLCY#VALDFEQE.M            | Y918:      | 2 | 2,9077 | 0,2   | -0,535 |
| 8 | O94992 HEX11_HUMAN | E.LLAQPCHDS#E.A              | S125:      | 2 | 2,9074 | 0,328 | -0,098 |
| 8 | Q96DQ3 YN003_HUMAN | R.KDS#LSVGVSSSE.Q            | S379:      | 2 | 2,9073 | 0,338 | 0,205  |
| 8 | Q13620 CUL4B_HUMAN | E.DFDSTSSSSST#PPLQPR.D       | T67:       | 3 | 2,9071 | 0,304 | -0,097 |
| 8 | P14866 HNRPL_HUMAN | K.LCFSTAQHAS#.-              | S558:      | 2 | 2,905  | 0,374 | 0,203  |
| 8 | P31629 ZEP2_HUMAN  | K.LALRLS#E.K                 | S374:      | 2 | 2,9047 | 0,206 | 0,415  |
| 8 | P20700 LMNB1_HUMAN | E.M*NTST#VNSAREE.L           | T285:      | 2 | 2,9019 | 0,384 | -0,17  |
| 8 | O15085 ARHGB_HUMAN | R.SLENPTPPFT#PK.M            | T672:      | 2 | 2,9014 | 0,333 | -0,433 |
| 8 | Q6ZRV2 FA83H_HUMAN | R.LRSS#LIFSTSQAE.G           | S685:      | 2 | 2,9013 | 0,249 | 0,241  |
| 8 | P49736 MCM2_HUMAN  | E.SFTM*ASS#PAQR.R            | S13:       | 2 | 2,9012 | 0,386 | -0,382 |
| 8 | P78310 CXAR_HUMAN  | R.SYIGSNHSSLGS#M*SPSNM*E.G   | S304:      | 2 | 2,9006 | 0,339 | 0,349  |
| 8 | Q9H6F5 CCD86_HUMAN | R.LGGLRPES#PE.S              | S18:       | 2 | 2,8997 | 0,301 | -0,323 |
| 8 | P49454 CENPF_HUMAN | D.SSSLSSLDSS#FYR.A           | S1494:     | 2 | 2,8987 | 0,286 | -0,233 |
| 8 | Q86TI2 DPP9_HUMAN  | E.VIHVPS#PALE.E              | S292:      | 2 | 2,8986 | 0,365 | 0,107  |
| 8 | Q16352 AINX_HUMAN  | R.LS#GAGGAGGFR.S             | S30:       | 2 | 2,8973 | 0,322 | -0,948 |
| 8 | Q9UMN6 MLL4_HUMAN  | R.GQGT#PPSGPGVVR.A           | T2083:     | 2 | 2,8953 | 0,456 | -0,189 |
| 8 | Q9Y2W6 TDRKH_HUMAN | E.ITHTLS#CLSLSE.A            | S539:      | 2 | 2,8947 | 0,207 | -0,508 |
| 8 | Q9UKS6 PACN3_HUMAN | R.SPDEVTLT#SIVPTR.D          | T326:      | 2 | 2,8944 | 0,219 | -0,306 |
| 8 | Q9NTI5 PDS5B_HUMAN | E.TVSNASSSSNPSS#PGR.I        | S1166:     | 2 | 2,8938 | 0,376 | 0,151  |

|   |                    |                           |            |   |        |       |        |
|---|--------------------|---------------------------|------------|---|--------|-------|--------|
| 8 | P18583 SON_HUMAN   | R.SAAS#PVVSSM*PER.A       | S1769:     | 2 | 2,8928 | 0,257 | -1,036 |
| 8 | Q9GZZ9 UBA5_HUMAN  | E.LKNFS#GPVPDLPE.G        | S358:      | 2 | 2,8927 | 0,287 | -0,163 |
| 8 | Q14157 UBP2L_HUMAN | R.YPSSISS#PQKD.L          | S609:      | 2 | 2,8911 | 0,381 | -0,443 |
| 8 | Q12756 KIF1A_HUMAN | R.TPQPCSRPAS#PEPE.L       | S1532:     | 2 | 2,8905 | 0,352 | -0,448 |
| 8 | Q9UGU5 HM2L1_HUMAN | K.KS#PPTTM*LLPAS#PAKAPE.T | S502:S512: | 3 | 2,8896 | 0,089 | 0      |
| 8 | Q96CB8 INT12_HUMAN | E.TQSS#PITVQSSK.D         | S128:      | 2 | 2,8853 | 0,416 | -0,999 |
| 8 | P27816 MAP4_HUMAN  | E.VGLLKDM*SPLS#ETE.M      | S510:      | 2 | 2,8848 | 0,419 | 0      |
| 8 | Q9UHR4 BI2L1_HUMAN | E.IKTPASTPVSQAS#PM*IE.R   | S261:      | 3 | 2,8827 | 0,115 | -0,174 |
| 8 | Q5VZK9 LR16A_HUMAN | K.RSS#GFISELPSEE.G        | S968:      | 2 | 2,8774 | 0,245 | 0,322  |
| 8 | Q9H7N4 SFR19_HUMAN | E.AYS#PPPAPQK.Y           | S239:      | 2 | 2,8773 | 0,237 | -0,868 |
| 8 | Q9Y2W6 TDRKH_HUMAN | E.ITHTLSCLS#LSE.A         | S542:      | 2 | 2,8773 | 0,145 | 0,169  |
| 8 | P08238 HS90B_HUMAN | E.TQKS#IYYITGE.S          | S482:      | 2 | 2,8748 | 0,292 | -0,265 |
| 8 | Q9P107 GMIP_HUMAN  | R.SQGS#PEDSAPQASPGPSK.Q   | S234:      | 2 | 2,8739 | 0,338 | -0,068 |
| 8 | O15047 SET1A_HUMAN | E.RVAGS#PVTPLPEQE.A       | S1103:     | 2 | 2,8729 | 0,277 | -0,156 |
| 8 | Q96RU3 FNBP1_HUMAN | R.TVS#DNSLSNSR.G          | S296:      | 2 | 2,8727 | 0,446 | -0,194 |
| 8 | Q14185 DOCK1_HUMAN | R.AKLS#FSM*QSSLE.L        | S1778:     | 2 | 2,8725 | 0,236 | -0,171 |
| 8 | Q15678 PTN14_HUMAN | K.YVSGSS#PDLVTR.K         | S594:      | 2 | 2,8717 | 0,376 | -0,269 |
| 8 | Q9H1B7 EAP1_HUMAN  | R.NSSS#PVSPASVPGQR.R      | S659:      | 2 | 2,8701 | 0,301 | -0,079 |
| 8 | Q92609 TBCD5_HUMAN | E.FTGS#PPSSATK.K          | S554:      | 2 | 2,8682 | 0,307 | -0,316 |
| 8 | Q86UU1 PHLB1_HUMAN | R.TFS#DGLATR.T            | S430:      | 2 | 2,8673 | 0,332 | 0,466  |
| 8 | Q7LBC6 JHD2B_HUMAN | E.SLADDS#SSRDS#FKQSLE.S   | S551:S556: | 3 | 2,8671 | 0,224 | -0,09  |
| 8 | Q6PJF5 RHDF2_HUMAN | E.SPPLS#ASYFR.G           | S313:      | 2 | 2,8656 | 0,245 | -0,506 |
| 8 | Q15025 TNIP1_HUMAN | K.YLQDQLS#PLTR.Q          | S403:      | 2 | 2,8651 | 0,281 | 0,173  |
| 8 | Q13153 PAK1_HUMAN  | K.YM*S#FTDK.S             | S144:      | 2 | 2,8633 | 0,24  | -0,062 |
| 8 | Q9BUR4 WDR79_HUMAN | E.FGSPSELS#PR.I           | S90:       | 2 | 2,8627 | 0,249 | 0,105  |
| 8 | Q9UGU0 TCF20_HUMAN | K.AGS#SPAQGAQNEPPR.L      | S558:      | 2 | 2,8579 | 0,409 | -0,079 |
| 8 | P04792 HSPB1_HUMAN | R.QLS#SGVSEIR.H           | S82:       | 2 | 2,8578 | 0,216 | 0,211  |
| 8 | Q9Y6U3 ADSV_HUMAN  | E.GGET#PIFK.Q             | T337:      | 2 | 2,8568 | 0,145 | 0,131  |
| 8 | Q96DF8 DGC14_HUMAN | K.GLSPAM*S#PALQR.L        | S395:      | 2 | 2,8564 | 0,239 | -0,276 |
| 8 | Q8N680 ZBTB2_HUMAN | E.GRS#ILLGSGDSE.V         | S483:      | 2 | 2,8563 | 0,376 | -0,192 |
| 8 | Q8NEJ9 NGDN_HUMAN  | R.ALSSS#VIRE.L            | S204:      | 2 | 2,8556 | 0,259 | 0,234  |
| 8 | Q9P2G1 AKIB1_HUMAN | E.ASLGAIGTS#LPSR.L        | S891:      | 2 | 2,8551 | 0,361 | 0,186  |
| 8 | Q96S55 WRIP1_HUMAN | E.SYDAPPT#PSGAR.L         | T116:      | 2 | 2,8533 | 0,368 | 0      |

|   |                    |                           |            |   |        |       |        |
|---|--------------------|---------------------------|------------|---|--------|-------|--------|
| 8 | Q9H2D6 TARA_HUMAN  | E.LSPLTQAS#PQR.A          | S1955:     | 2 | 2,8509 | 0,434 | -0,382 |
| 8 | Q15942 ZYX_HUMAN   | R.GPPASS#PAPAPK.F         | S259:      | 2 | 2,8496 | 0,372 | 0      |
| 8 | Q8TD26 CHD6_HUMAN  | E.SKSST#SGITGDIGDELQE.A   | T2057:     | 2 | 2,8492 | 0,475 | -0,192 |
| 8 | Q8WZ73 RFFL_HUMAN  | E.TQSIDSEDS#FVPGR.R       | S232:      | 2 | 2,8491 | 0,329 | -0,151 |
| 8 | O75417 DPOLQ_HUMAN | R.ILDKVSS#PLENE.K         | S823:      | 2 | 2,8477 | 0,228 | -0,086 |
| 8 | Q9H7P9 PKHG2_HUMAN | E.LFS#GSNPGK.L            | S714:      | 2 | 2,8474 | 0,28  | 0,309  |
| 8 | Q9BW91 NUDT9_HUMAN | E.SNFS#PKFNE.K            | S121:      | 2 | 2,8472 | 0,281 | 0,637  |
| 8 | Q12888 TP53B_HUMAN | D.SLSTNSSDLVAPS#PDAFR.S   | S366:      | 2 | 2,847  | 0,185 | 0,063  |
| 8 | P05023 AT1A1_HUMAN | R.LNIPVS#QVNPR.D          | S653:      | 2 | 2,8468 | 0,243 | -0,648 |
| 8 | Q96RG2 PASK_HUMAN  | E.M*GNRS#LSDVAQAQE.L      | S1287:     | 2 | 2,8463 | 0,261 | -0,076 |
| 8 | Q9NYF8 BCLF1_HUMAN | E.ALDFYS#DKE.S            | S385:      | 2 | 2,8457 | 0,341 | 0      |
| 8 | Q02297 NRG1_HUMAN  | E.GAYVSSES#PIR.I          | S152:      | 2 | 2,8453 | 0,42  | 0,098  |
| 8 | O60307 MAST3_HUMAN | E.M*VPLSHLEEEQPPAPES#PE.S | S348:      | 2 | 2,8453 | 0,31  | -0,552 |
| 8 | Q12923 PTN13_HUMAN | K.NSSGLGFS#FSRE.D         | S1514:     | 2 | 2,845  | 0,374 | -0,178 |
| 8 | P57740 NU107_HUMAN | E.ISS#PVIRE.A             | S11:       | 2 | 2,8443 | 0,139 | 0,062  |
| 8 | Q9BYI3 HYCCI_HUMAN | R.NAVTSM*#S#IR.G          | S321:      | 2 | 2,8441 | 0,263 | 0      |
| 8 | Q8N201 INT1_HUMAN  | K.LSST#PPLSALGR.L         | T83:       | 2 | 2,8439 | 0,365 | 0,095  |
| 8 | Q8N137 CNTRB_HUMAN | E.LS#RSLSVGLE.K           | S76:       | 2 | 2,8428 | 0,209 | -0,107 |
| 8 | O94909 K0819_HUMAN | R.GPSQATS#PIRSPQE.S       | S296:      | 2 | 2,8416 | 0,357 | -0,238 |
| 8 | Q15057 CENB2_HUMAN | K.YSISLS#PPEQQK.K         | S521:      | 2 | 2,8413 | 0,285 | 0      |
| 8 | Q12982 BNIP2_HUMAN | R.KGS#ITEYTAAEE.K         | S114:      | 2 | 2,8378 | 0,279 | -0,177 |
| 8 | Q96N67 DOCK7_HUMAN | R.SM*S#IDDTPR.G           | S182:      | 2 | 2,8377 | 0,332 | -0,437 |
| 8 | Q9H4G0 E41L1_HUMAN | R.LPSSPAS#PSPK.G          | S544:      | 2 | 2,8376 | 0,298 | -0,106 |
| 8 | Q96N21 CQ056_HUMAN | E.LSM*GS#PGPVTNK.A        | S333:      | 2 | 2,8375 | 0,303 | -0,19  |
| 8 | P06748 NPM_HUMAN   | K.M*QAS#IEKGG#LPKVE.A     | S254:S260: | 2 | 2,8373 | 0,381 | 0      |
| 8 | Q9HCD6 TANC2_HUMAN | R.SQSGS#PVRVQQE.T         | S1560:     | 2 | 2,8361 | 0,422 | -0,338 |
| 8 | O75179 ANR17_HUMAN | K.SGPS#PLSSPNGK.L         | S1696:     | 2 | 2,8354 | 0,418 | 0      |
| 8 | A0FGR8 ESYT2_HUMAN | R.S#SSLLAS#PGHISVK.E      | S736:S743: | 2 | 2,8353 | 1     | -0,374 |
| 8 | O75531 BAF_HUMAN   | R.DFVAEPM*GEKPVGSLAGIGE.V |            | 2 | 2,8346 | 0,322 | 0      |
| 8 | O95684 FR1OP_HUMAN | E.GALDLSDVHS#PPKS#PE.G    | S156:S160: | 2 | 2,8336 | 0,428 | 0,067  |
| 8 | P29692 EF1D_HUMAN  | E.NGAS#VILR.D             | S44:       | 2 | 2,8317 | 0,257 | 0,201  |
| 8 | Q13439 GOGA4_HUMAN | K.LQLRVPS#VE.S            | S71:       | 2 | 2,8315 | 0,23  | 0      |
| 8 | O60583 CCNT2_HUMAN | K.QGQSQAASSSVTS#PIK.M     | S480:      | 3 | 2,8302 | 0,191 | 0,105  |

|   |                     |                             |            |   |        |       |        |
|---|---------------------|-----------------------------|------------|---|--------|-------|--------|
| 8 | Q9Y6I3 EPN1_HUMAN   | R.SPGAFDM*SGVRGS#LAE.A      | S422:      | 2 | 2,8301 | 0,405 | -0,073 |
| 8 | Q15067 ACOX1_HUMAN  | E.LLTHILDGS#PE.K            | S26:       | 2 | 2,8293 | 0,221 | 0      |
| 8 | Q96T37 RBM15_HUMAN  | R.SLS#PGGAALGYR.D           | S294:      | 2 | 2,8292 | 0,407 | 0,298  |
| 8 | P55072 TERA_HUMAN   | K.LAIRES#IE.S               | S702:      | 2 | 2,8289 | 0,154 | -0,241 |
| 8 | Q8IY81 RRMJ3_HUMAN  | R.DLIDNS#FNR.Y              | S688:      | 2 | 2,8288 | 0,234 | 1,767  |
| 8 | Q9ULA0 DNPEP_HUMAN  | E.LEKGT#PEPGPLNAVDE.R       | T203:      | 2 | 2,8286 | 0,362 | -0,21  |
| 8 | Q9NWH9 SLTM_HUMAN   | R.IVQISGNS#M*PR.G           | S1014:     | 2 | 2,8258 | 0,39  | -0,376 |
| 8 | Q9UKX7 NUP50_HUMAN  | E.TQS#PSLFGSTK.L            | S221:      | 2 | 2,823  | 0,341 | -0,198 |
| 8 | Q92609 TBCD5_HUMAN  | R.EFTGS#PPSSATK.K           | S554:      | 2 | 2,8196 | 0,316 | -0,189 |
| 8 | Q03252 LMNB2_HUMAN  | R.ATSS#SSGSLSATGR.L         | S400:      | 2 | 2,8188 | 0,329 | -0,452 |
| 8 | A8K0M8 A8K0M8_HUMAN | R.AAAS#PPTPIR.S             | S212:      | 2 | 2,8173 | 0,421 | -0,575 |
| 8 | Q12851 M4K2_HUMAN   | R.SLTIRS#ASEFQE.L           | S384:      | 2 | 2,8172 | 0,278 | -0,084 |
| 8 | Q14151 SAFB2_HUMAN  | E.TSSLNFKVT#PDIEE.S         | T201:      | 2 | 2,8167 | 0,323 | -0,735 |
| 8 | Q9GZM8 NDEL1_HUMAN  | K.GTENTFPS#PK.A             | S231:      | 2 | 2,8167 | 0,44  | 0      |
| 8 | Q13263 TIF1B_HUMAN  | E.KLS#PPYSSPQE.F            | S752:      | 2 | 2,816  | 0,29  | 0,093  |
| 8 | P29590 PML_HUMAN    | K.AVSPPHLDGPPS#PRS#PVIGSE.V | S527:S530: | 3 | 2,8159 | 0,33  | 0,243  |
| 8 | P46821 MAP1B_HUMAN  | K.SDIS#PLTPR.E              | S1785:     | 2 | 2,8154 | 0,271 | -0,229 |
| 8 | Q674X7 KAZRN_HUMAN  | K.M*GFGS#ISR.V              | S387:      | 2 | 2,8147 | 0,149 | -0,064 |
| 8 | P42166 LAP2A_HUMAN  | R.SSTPLTISS#SAENTR.Q        | S167:      | 2 | 2,8136 | 0,301 | 0      |
| 8 | Q5SYE7 NHSL1_HUMAN  | R.GGPVRSR#PGAPSAGE.A        | S1167:     | 2 | 2,8133 | 0,322 | -0,694 |
| 8 | Q9C0C2 TB182_HUMAN  | R.RES#AASGLGGLLE.E          | S1473:     | 2 | 2,8133 | 0,323 | -0,091 |
| 8 | Q9Y4B5 K0802_HUMAN  | R.DHAPSIPTS#PFGDSLE.S       | S613:      | 2 | 2,8109 | 0,446 | -0,07  |
| 8 | Q5T1M5 FKB15_HUMAN  | E.QLAINTS#PDAVK.A           | S356:      | 2 | 2,809  | 0,316 | -0,091 |
| 8 | Q8ND56 LS14A_HUMAN  | R.SS#PQLDPLRKS#PTM*E.Q      | S183:S192: | 2 | 2,8086 | 0,211 | -0,131 |
| 8 | Q99459 CDC5L_HUMAN  | E.SDFSGVT#PQR.Q             | T396:      | 2 | 2,8083 | 0,341 | -0,208 |
| 8 | Q86X29 LSR_HUMAN    | R.SSSAGGQGS#YVPLLR.D        | S371:      | 2 | 2,8083 | 0,42  | -0,704 |
| 8 | Q9Y4E1 FA21C_HUMAN  | R.KVQS#TADIFGDEE.G          | S478:      | 2 | 2,8069 | 0,329 | -0,161 |
| 8 | P50443 S26A2_HUMAN  | E.SS#TDFKQFE.T              | S36:       | 2 | 2,8059 | 0,322 | 0,209  |
| 8 | Q8N3U4 STAG2_HUMAN  | E.THFSS#DTDFEDIE.G          | S23:       | 2 | 2,8059 | 0,254 | 0      |
| 8 | Q13330 MTA1_HUMAN   | E.ASQS#PLVLK.Q              | S522:      | 2 | 2,8016 | 0,319 | -0,119 |
| 8 | Q9UGU0 TCF20_HUMAN  | R.LNAS#PAAREE.A             | S574:      | 2 | 2,8012 | 0,243 | -0,214 |
| 8 | Q9NR30 DDX21_HUMAN  | R.NGIDILVGT#PGR.I           | T315:      | 2 | 2,8    | 0,239 | -0,472 |
| 8 | Q9Y3A2 UTP11_HUMAN  | E.TVNS#PAIYK.F              | S241:      | 2 | 2,798  | 0,297 | -0,227 |

|   |                    |                               |        |   |        |       |        |
|---|--------------------|-------------------------------|--------|---|--------|-------|--------|
| 8 | P61006 RAB8A_HUMAN | E.NAFFT#LAR.D                 | T164:  | 2 | 2,7958 | 0,316 | 0,12   |
| 8 | Q6PCB5 RSBNL_HUMAN | E.LCPGNLS#LVDTR.Q             | S819:  | 2 | 2,7956 | 0,329 | 0      |
| 8 | Q9UNX4 WDR3_HUMAN  | K.IKGSS#PGIQDTLEAE.D          | S241:  | 2 | 2,7953 | 0,454 | 0      |
| 8 | Q9Y4X0 AMER1_HUMAN | K.LSSS#PPSGSGGGGGASSSSHCSGE.S | S16:   | 2 | 2,7932 | 0,36  | 0,225  |
| 8 | Q96RY5 CRML_HUMAN  | E.NS#IDYISR.F                 | S1226: | 2 | 2,7924 | 0,3   | 0,116  |
| 8 | Q92625 ANS1A_HUMAN | E.QFSGLLHGSS#PVCE.V           | S507:  | 2 | 2,7919 | 0,402 | -0,076 |
| 8 | Q15057 CENB2_HUMAN | R.FQQDS#QKF.-                 | S775:  | 2 | 2,7892 | 0,379 | -0,22  |
| 8 | Q7Z3E2 CJ118_HUMAN | K.IKS#VSASEDLLEE.I            | S155:  | 2 | 2,7887 | 0,32  | 0,081  |
| 8 | Q5UIP0 RIF1_HUMAN  | E.DSQVQIT#PNQK.T              | T1408: | 2 | 2,7884 | 0,281 | -0,456 |
| 8 | P46013 KI67_HUMAN  | K.AFM*GT#PVQK.L               | T1193: | 2 | 2,7877 | 0,327 | -0,341 |
| 8 | P27448 MARK3_HUMAN | K.SST#VPSSNTASGGM*TR.R        | T514:  | 2 | 2,7863 | 0,388 | 0,075  |
| 8 | Q02952 AKA12_HUMAN | K.VLSKPPEGVVS#E.V             | S498:  | 2 | 2,7857 | 0,173 | -0,092 |
| 8 | A1L390 PKHG3_HUMAN | E.KGPLPS#PTAGLEE.S            | S1154: | 2 | 2,7831 | 0,376 | 0,266  |
| 8 | P19484 TFEB_HUMAN  | R.VHGLPTTS#PSGM*NM*AE.L       | S332:  | 2 | 2,7795 | 0,468 | 0      |
| 8 | Q8TEA8 DTD1_HUMAN  | R.S#ASSGAEGDVSSEREP.-         | S194:  | 2 | 2,7771 | 0,402 | -0,371 |
| 8 | O76003 GLRX3_HUMAN | R.HAS#SGSFLPSANE.H            | S117:  | 2 | 2,7763 | 0,317 | 0,088  |
| 8 | Q9NW75 GPTC2_HUMAN | E.LVHDLVS#ALEE.S              | S34:   | 2 | 2,7756 | 0,156 | -0,187 |
| 8 | Q5TC82 RC3H1_HUMAN | K.IDHLSSAPGS#PPDLLE.S         | S535:  | 2 | 2,7754 | 0,478 | 0,269  |
| 8 | Q9H3N1 TXND1_HUMAN | R.SLGP SLATDKS#.-             | S280:  | 2 | 2,7728 | 0,396 | -0,317 |
| 8 | Q5VUA4 ZN318_HUMAN | R.IPS#PNILK.T                 | S2101: | 2 | 2,7714 | 0,228 | -0,127 |
| 8 | O00443 P3C2A_HUMAN | K.SLS#VATVTR.S                | S329:  | 2 | 2,7699 | 0,217 | 0,361  |
| 8 | P46013 KI67_HUMAN  | D.INTFLGT#PVQK.L              | T1801: | 2 | 2,7687 | 0,404 | 0,094  |
| 8 | O43237 DC1L2_HUMAN | R.GGPASVPSSS#PGTSVK.K         | S407:  | 2 | 2,7683 | 0,298 | -0,49  |
| 8 | Q9NZ63 CI078_HUMAN | E.DLHLGT#SFSAE.T              | T100:  | 2 | 2,7678 | 0,244 | -0,097 |
| 8 | Q16630 CPSF6_HUMAN | E.M*DTART#PLSEAE.F            | T407:  | 2 | 2,767  | 0,271 | -0,172 |
| 8 | Q9BUA3 YK007_HUMAN | E.FLVGSS#PGGSGR.A             | S82:   | 2 | 2,7669 | 0,305 | -0,406 |
| 8 | Q8NCF5 NF2IP_HUMAN | E.TELS#PTATPR.T               | S314:  | 2 | 2,7659 | 0,312 | -0,212 |
| 8 | Q8N201 INT1_HUMAN  | E.LLIAEEKLS#PEQE.G            | S307:  | 2 | 2,7648 | 0,285 | -0,077 |
| 8 | O75179 ANR17_HUMAN | K.SGPSPLSS#PNGK.L             | S1700: | 2 | 2,7642 | 0,406 | 0,202  |
| 8 | P23193 TCEA1_HUMAN | K.EPAITSQNS#PEAREE.S          | S100:  | 2 | 2,7629 | 0,451 | -0,14  |
| 8 | Q09472 EP300_HUMAN | E.DQPSTSATQSS#PAPGQSK.K       | S1038: | 2 | 2,7597 | 0,4   | 0      |
| 8 | Q9H5J0 ZBTB3_HUMAN | R.APHPPVADVSLAS#PSSSTE.T      | S271:  | 2 | 2,7582 | 0,123 | 0      |
| 8 | P31943 HNRH1_HUMAN | E.GRPS#GEAFVELE.S             | S54:   | 2 | 2,7567 | 0,318 | -0,267 |

|   |                     |                           |              |   |        |       |        |
|---|---------------------|---------------------------|--------------|---|--------|-------|--------|
| 8 | Q14683 SMC1A_HUMAN  | R.ISS#IYARE.A             | S971:        | 2 | 2,7564 | 0,148 | 0,239  |
| 8 | Q92870 APBB2_HUMAN  | R.NSPAT#PPNTLNLR.S        | T34:         | 2 | 2,7544 | 0,461 | -0,083 |
| 8 | Q9H8Y8 GORS2_HUMAN  | K.ADAASSLTVDVT#PPTAK.A    | T415:        | 2 | 2,7523 | 0,352 | -0,071 |
| 8 | Q8N4N4 RN169_HUMAN  | E.GLGST#PDAKLD.K          | T554:        | 2 | 2,7522 | 0,195 | 0,211  |
| 8 | P49915 GUAA_HUMAN   | K.TLNM*TTS#PEEK.R         | S332:        | 2 | 2,7519 | 0,221 | 0      |
| 8 | Q9H6Z4 RANB3_HUMAN  | E.RT#SSLTQFPSSQSEE.R      | T124:        | 2 | 2,7512 | 0,329 | 0      |
| 8 | Q969V6 MKL1_HUMAN   | E.SQGSVPS#PLEAR.V         | S139:        | 2 | 2,7509 | 0,203 | 0,187  |
| 8 | Q5H9R7 SAPS3_HUMAN  | K.FADQDDIGNVS#FDR.V       | S579:        | 2 | 2,7484 | 0,358 | -0,145 |
| 8 | Q96PK6 RBM14_HUMAN  | R.AQPSVS#LGAPYR.G         | S280:        | 2 | 2,7475 | 0,29  | 0,184  |
| 8 | Q6P2E9 EDC4_HUMAN   | E.VEPLGLPQAS#PSR.T        | S723:        | 2 | 2,7469 | 0,492 | 0      |
| 8 | Q9NY27 PP4R2_HUMAN  | E.SEVSSVS#PLK.N           | S226:        | 2 | 2,7428 | 0,33  | 0      |
| 8 | Q5VZL5 ZMYM4_HUMAN  | K.TLSQGSEQTS#EHE.L        | S1071:       | 2 | 2,7422 | 0,279 | -0,161 |
| 8 | P27816 MAP4_HUMAN   | E.ALNSPHSES#FVSPE.A       | S202:        | 2 | 2,7413 | 0,278 | -0,232 |
| 8 | Q6VMQ6 MCAF1_HUMAN  | E.SSFGS#PSKQE.S           | S477:        | 2 | 2,7412 | 0,237 | -0,43  |
| 8 | O60303 K0556_HUMAN  | E.GRS#SPGPDTLVVLE.F       | S252:        | 2 | 2,7392 | 0,276 | -0,162 |
| 8 | Q7Z2Z1 CO042_HUMAN  | E.GVCQLPDQS#PPR.N         | S1750:       | 2 | 2,7382 | 0,219 | -0,255 |
| 8 | Q9HC44 GPBL1_HUMAN  | E.GEVLSHS#LE.A            | S384:        | 2 | 2,7379 | 0,23  | 0      |
| 8 | O95785 WIZ_HUMAN    | K.SPQLSLS#PRPAS#PK.A      | S1012:S1017: | 2 | 2,7363 | 0,372 | -0,15  |
| 8 | Q9UGU0 TCF20_HUMAN  | R.SVICDIS#PLR.Q           | S871:        | 2 | 2,7357 | 0,332 | 0,098  |
| 8 | P07355 ANXA2_HUMAN  | E.ILCKLS#LE.G             | S12:         | 2 | 2,7328 | 0,325 | 0,116  |
| 8 | Q8NEZ4 MLL3_HUMAN   | E.VLS#PNSKVE.S            | S2828:       | 2 | 2,7328 | 0,16  | -0,348 |
| 8 | Q08AD1 CA1L1_HUMAN  | E.SVEGFLS#PSR.C           | S1319:       | 2 | 2,7325 | 0,318 | 0      |
| 8 | Q5R372 Q5R372_HUMAN | E.ISTPRPSS#PGGLPEED.S     | S119:        | 2 | 2,7324 | 0,423 | 0,071  |
| 8 | P11137 MAP2_HUMAN   | R.RLS#NVSSSGSINLLE.S      | S1795:       | 2 | 2,7298 | 0,373 | -0,516 |
| 8 | Q9P266 K1462_HUMAN  | E.LAGS#PPVTR.M            | S971:        | 2 | 2,7266 | 0,329 | 0,542  |
| 8 | Q9ULI2 RIMKB_HUMAN  | R.RM*S#LLSVVSTASE.T       | S317:        | 2 | 2,7264 | 0,241 | -0,331 |
| 8 | Q9UHB7 AFF4_HUMAN   | R.M*FS#PM*EEKE.L          | S694:        | 2 | 2,725  | 0,267 | -0,295 |
| 8 | Q9BUA3 YK007_HUMAN  | E.QEFLVGSS#PGGSGR.A       | S82:         | 2 | 2,7245 | 0,393 | 0,167  |
| 8 | Q8TB72 PUM2_HUMAN   | R.AGAGQRPLT#PNQGGQQGQAE.S | T396:        | 3 | 2,7236 | 0,303 | -0,173 |
| 8 | Q68E01 INT3_HUMAN   | E.FCSSPS#PPVEVK.I         | S502:        | 2 | 2,7222 | 0,307 | 0      |
| 8 | Q14980 NUMA1_HUMAN  | E.SLYFT#PIPAR.S           | T1776:       | 2 | 2,72   | 0,433 | 0      |
| 8 | Q13425 SNTB2_HUMAN  | R.GPAGEAGAS#PPVR.R        | S110:        | 2 | 2,7175 | 0,472 | 0,392  |
| 8 | Q8WUM0 NU133_HUMAN  | R.GPLAGLPGST#PR.T         | T28:         | 2 | 2,7167 | 0,492 | 0      |

|   |                    |                            |            |   |        |       |        |
|---|--------------------|----------------------------|------------|---|--------|-------|--------|
| 8 | Q96TA1 NIBL1_HUMAN | E.ASS#PPAS#PLQHLLPGK.A     | S679:S683: | 2 | 2,7112 | 0,263 | -0,277 |
| 8 | P49915 GUAA_HUMAN  | E.SASLVAS#GKAE.L           | S382:      | 2 | 2,7099 | 0,295 | -0,444 |
| 8 | P18031 PTN1_HUMAN  | E.KGS#PLNAAPYGIE.S         | S352:      | 2 | 2,7093 | 0,432 | -0,087 |
| 8 | Q9H118 ASCC2_HUMAN | R.GRLT#PSDM*PLLE.L         | T233:      | 2 | 2,7089 | 0,22  | 0      |
| 8 | Q15003 CND2_HUMAN  | D.LQFSTDS#PR.L             | S81:       | 2 | 2,7085 | 0,21  | 0      |
| 8 | Q86X29 LSR_HUMAN   | R.GPALT#PIRDEE.W           | T453:      | 2 | 2,7081 | 0,434 | -0,095 |
| 8 | Q9Y266 NUDC_HUMAN  | E.TSGPQIKELT#DEEAE.R       | T108:      | 2 | 2,704  | 0,266 | -0,071 |
| 8 | Q9NRY4 GRLF1_HUMAN | E.ACSTTEEVFNS#PR.A         | S970:      | 3 | 2,7035 | 0,129 | 0,348  |
| 8 | Q12770 SCAP_HUMAN  | R.RDS#GVGSGLEAQE.S         | S822:      | 2 | 2,7027 | 0,38  | 0      |
| 8 | Q8IVH2 FOXP4_HUMAN | K.M*TGS#PTLVK.N            | S554:      | 2 | 2,7023 | 0,251 | 0      |
| 8 | Q9NQR1 SETD8_HUMAN | K.IYSYM*S#PNK.C            | S100:      | 2 | 2,7015 | 0,183 | -0,814 |
| 8 | Q9P2G1 AKIB1_HUMAN | R.GVAPADS#PEAPR.R          | S737:      | 2 | 2,7004 | 0,347 | -0,783 |
| 8 | Q92844 TANK_HUMAN  | R.GAPSITSVT#PR.G           | T213:      | 2 | 2,7    | 0,238 | -0,105 |
| 8 | Q92628 K0232_HUMAN | E.KALYS#PLFPASECEE.C       | S1294:     | 2 | 2,6996 | 0,465 | 0      |
| 8 | Q9UNN5 FAF1_HUMAN  | R.IRTPS#GEFLE.R            | S582:      | 2 | 2,6985 | 0,333 | 0      |
| 8 | Q5VZ89 DEN4C_HUMAN | R.STS#LSALVR.S             | S1089:     | 2 | 2,6977 | 0,171 | 0,18   |
| 8 | Q9NQW6 ANLN_HUMAN  | E.ASNQQPLS#GGEEK.S         | S54:       | 2 | 2,6951 | 0,121 | -0,086 |
| 8 | Q8WYP5 AHTF1_HUMAN | R.TTSFFLNS#PEKE.H          | S1292:     | 2 | 2,6935 | 0,234 | -0,165 |
| 8 | Q9H6Z4 RANB3_HUMAN | R.ERTSS#LTQFPQSSEE.R       | S126:      | 2 | 2,6927 | 0,305 | 0,192  |
| 8 | O00443 P3C2A_HUMAN | K.VSNLQVS#PKSE.D           | S259:      | 2 | 2,6923 | 0,453 | -0,289 |
| 8 | P16435 NCPR_HUMAN  | K.IQTLTSS#VRE.S            | S63:       | 2 | 2,6911 | 0,371 | 1,106  |
| 8 | Q9UK59 DBR1_HUMAN  | E.FSAS#FSDVR.I             | S464:      | 2 | 2,69   | 0,312 | -0,111 |
| 8 | Q53HL2 BOREA_HUMAN | E.AIQT#PLK.S               | T106:      | 2 | 2,6896 | 0,093 | 0,143  |
| 8 | O95817 BAG3_HUMAN  | R.SQS#PLRGM*PE.T           | S136:      | 2 | 2,6873 | 0,398 | -0,102 |
| 8 | Q8NCF5 NF2IP_HUMAN | D.NSPLSPPS#PR.T            | S204:      | 2 | 2,6863 | 0,359 | -0,539 |
| 8 | Q13620 CUL4B_HUMAN | E.SSSSSSS#SSPTAATSQQQQLK.N | S126:      | 3 | 2,6837 | 1     | -0,93  |
| 8 | O75044 FNBP2_HUMAN | R.GGSM*EDYCDS#PHGE.T       | S702:      | 2 | 2,6829 | 0,358 | -0,298 |
| 8 | Q8IY17 PLPL6_HUMAN | R.LFPS#PGLPTRTS#PVR.G      | S345:S353: | 2 | 2,6808 | 0,322 | -0,273 |
| 8 | Q68E01 INT3_HUMAN  | E.FCSS#PSPPEVK.I           | S500:      | 2 | 2,6802 | 0,208 | -0,431 |
| 8 | Q16649 NFIL3_HUMAN | K.LSS#PIDM*TSK.R           | S353:      | 2 | 2,6799 | 0,254 | 0,104  |
| 8 | P46821 MAP1B_HUMAN | R.SVNFSLT#PNEIK.V          | T1282:     | 2 | 2,6797 | 0,339 | -0,256 |
| 8 | Q13077 TRAF1_HUMAN | E.DLQIS#PGSR.L             | S66:       | 2 | 2,6769 | 0,216 | -1,605 |
| 8 | Q9Y5B0 CTDP1_HUMAN | E.NS#PAAFPDRE.G            | S740:      | 2 | 2,6768 | 0,367 | 0,309  |

|   |                     |                           |            |   |        |       |        |
|---|---------------------|---------------------------|------------|---|--------|-------|--------|
| 8 | O14974 MYPT1_HUMAN  | R.RST#QGVTLTDLQEAE.K      | T696:      | 3 | 2,6767 | 0,121 | 0,529  |
| 8 | Q52LW3 RHG29_HUMAN  | R.LLLAS#PPNER.N           | S1029:     | 2 | 2,6755 | 0,372 | -0,103 |
| 8 | O75400 PR40A_HUMAN  | K.NRES#FQIFLDE.L          | S613:      | 2 | 2,6752 | 0,156 | -0,33  |
| 8 | Q5T8P6 RBM26_HUMAN  | E.GSTQQLQTTS#PK.V         | S616:      | 2 | 2,6751 | 0,284 | -0,09  |
| 8 | Q9ULU4 PKCB1_HUMAN  | K.LNFDM*TAS#PK.I          | S406:      | 2 | 2,6731 | 0,309 | -0,2   |
| 8 | Q9NYF8 BCLF1_HUMAN  | R.IDIS#PSTLR.K            | S658:      | 2 | 2,6727 | 0,24  | -0,226 |
| 8 | P30260 CDC27_HUMAN  | R.LFTSDSST#TKE.N          | T388:      | 2 | 2,6724 | 0,199 | -1,318 |
| 8 | Q66K74 MAP1S_HUMAN  | E.LPLAASSIPRPRT#PS#PE.S   | T638:S640: | 3 | 2,6722 | 0,168 | -0,094 |
| 8 | Q1RMC1 Q1RMC1_HUMAN | K.RQS#FALFSNPGNAEEE.C     | S338:      | 2 | 2,6698 | 0,297 | -0,325 |
| 8 | Q9HB09 B2L12_HUMAN  | R.LSSDS#FAR.L             | S245:      | 2 | 2,6689 | 0,247 | -0,063 |
| 8 | Q8IZT6 ASPM_HUMAN   | E.ENKIPISPIS#PAFNE.C      | S225:      | 2 | 2,6687 | 0,243 | -0,211 |
| 8 | Q14152 EIF3A_HUMAN  | R.LES#LNIQR.E             | S584:      | 2 | 2,6651 | 0,089 | 0      |
| 8 | O15015 ZN646_HUMAN  | E.AAPARS#PPLQLSE.A        | S930:      | 2 | 2,6637 | 0,303 | 0      |
| 8 | P48634 BAT2_HUMAN   | K.GNS#PNSEPTPK.T          | S380:      | 2 | 2,6637 | 0,32  | -0,187 |
| 8 | Q6FIF0 ZFAN6_HUMAN  | R.QNSSNGRIS#PPATSVSSLSE.S | S49:       | 2 | 2,6627 | 0,182 | 0,116  |
| 8 | Q6P4R8 NFRKB_HUMAN  | R.SPS#PAVPLR.V            | S228:      | 2 | 2,6625 | 0,266 | -0,061 |
| 8 | Q12789 TF3C1_HUMAN  | R.GYYS#PGIVSTR.N          | S1653:     | 2 | 2,658  | 0,379 | -0,095 |
| 8 | Q86V48 LUZP1_HUMAN  | K.AIGALASS#R.R            | S570:      | 2 | 2,6578 | 0,204 | -0,395 |
| 8 | Q96MH2 HEXI2_HUMAN  | K.TSGAPGS#PQTPPER.H       | S29:       | 2 | 2,6578 | 0,301 | -0,417 |
| 8 | Q02952 AKA12_HUMAN  | E.ALICVGS#SK.K            | S687:      | 2 | 2,6576 | 0,381 | -0,661 |
| 8 | A4D2P0 A4D2P0_HUMAN | R.LRPLS#YPQTVGE.T         | S71:       | 2 | 2,6576 | 0,385 | 0      |
| 8 | Q9NZN5 ARHGC_HUMAN  | E.TSAPGDTLDGT#PR.T        | T703:      | 2 | 2,6567 | 0,364 | -0,714 |
| 8 | P55010 IF5_HUMAN    | R.SVS#DQFYR.Y             | S10:       | 2 | 2,6557 | 0,209 | -0,226 |
| 8 | O75122 CLAP2_HUMAN  | K.SSGS#VASLPQSDR.S        | S313:      | 2 | 2,6537 | 0,091 | -0,979 |
| 8 | Q9P270 SLAI2_HUMAN  | R.AGASIPSSGAAS#PR.G       | S63:       | 2 | 2,6537 | 0,282 | -0,373 |
| 8 | Q14847 LASP1_HUMAN  | K.KGKFS#VVADTPE.L         | S99:       | 2 | 2,6536 | 0,177 | -0,569 |
| 8 | Q12766 SMF_HUMAN    | E.LCVAQNQM*S#PK.G         | S403:      | 2 | 2,6534 | 0,238 | -0,889 |
| 8 | Q69YQ0 CYTSA_HUMAN  | K.TPPAAAVS#PM*QR.H        | S881:      | 2 | 2,6516 | 0,108 | -0,277 |
| 8 | Q07021 C1QBP_HUMAN  | E.SDIFS#IRE.V             | S205:      | 2 | 2,6512 | 0,261 | 0      |
| 8 | O60502 NCOAT_HUMAN  | E.SKS#PEM*SM*QEDCISD.I    | S511:      | 2 | 2,6511 | 0,394 | 0,131  |
| 8 | P27816 MAP4_HUMAN   | K.KCS#LPAEEDSVLE.K        | S636:      | 2 | 2,6506 | 0,281 | 0,078  |
| 8 | Q6P0N0 CN106_HUMAN  | E.NQVAM*S#FYK.H           | S761:      | 2 | 2,6478 | 0,261 | -0,103 |
| 8 | Q96HB5 CC120_HUMAN  | R.NSVASPTSPT#R.S          | T288:      | 2 | 2,6473 | 0,326 | -0,102 |



|   |                      |                               |            |   |        |       |        |
|---|----------------------|-------------------------------|------------|---|--------|-------|--------|
| 8 | Q9UBU7 DBF4A_HUMAN   | K.APFHT#PPEEPNE.C             | T553:      | 2 | 2,6462 | 0,092 | 0,253  |
| 8 | O94854 K0754_HUMAN   | K.NLS#GDCQDFR.F               | S77:       | 2 | 2,6453 | 0,291 | 0,283  |
| 8 | Q9Y6N7 ROBO1_HUMAN   | K.TFNS#PNLKD.G                | S1055:     | 2 | 2,6445 | 0,395 | 0      |
| 8 | Q16851 UGPA_HUMAN    | R.RFES#IPDM*LE.L              | S448:      | 2 | 2,6418 | 0,281 | -0,458 |
| 8 | Q8WZ73 RFFL_HUMAN    | R.RAS#LSDLTDLEDIE.G           | S240:      | 2 | 2,6417 | 0,343 | -0,221 |
| 8 | O95340 PAPS2_HUMAN   | E.FDFISGT#R.M                 | T579:      | 2 | 2,6388 | 0,201 | 0,179  |
| 8 | Q5QE6 TDIF2_HUMAN    | E.IVSEAES#HVS#GISR.I          | S145:S148: | 2 | 2,6386 | 0,082 | -0,075 |
| 8 | P29590 PML_HUMAN     | K.AVS#PPHLDGPPS#PR.S          | S518:S527: | 2 | 2,6385 | 0,204 | -0,384 |
| 8 | Q86VM9 ZCH18_HUMAN   | K.LGVSVS#PSR.A                | S534:      | 2 | 2,6385 | 0,232 | 0,248  |
| 8 | Q00613 HSF1_HUMAN    | E.GRPPS#PPPTSTPE.K            | S363:      | 2 | 2,6355 | 0,333 | -0,174 |
| 8 | Q9NQZ2 SAS10_HUMAN   | K.LYYDT#DYGSK.S               | T139:      | 2 | 2,6351 | 0,376 | -0,094 |
| 8 | Q13627 DYR1A_HUMAN   | R.QGADREESPM*TGVCVQQS#PVASS.- | S758:      | 3 | 2,6326 | 0,27  | 0,218  |
| 8 | Q9NRA8 4ET_HUMAN     | R.SSS#PVGLAK.W                | S951:      | 2 | 2,6304 | 0,3   | -0,593 |
| 8 | Q9NPI6 DCP1A_HUMAN   | R.KAS#SPSPLTIGTPE.S           | S522:      | 2 | 2,6301 | 0,217 | 0,083  |
| 8 | O75691 UTP20_HUMAN   | K.SLSDNGQPPT#PDPADSGGTSK.E    | T1741:     | 3 | 2,6285 | 0,091 | 0,171  |
| 8 | Q00537 PCTK2_HUMAN   | E.VQS#PTGVCLR.N               | S122:      | 2 | 2,6284 | 0,248 | -0,51  |
| 8 | Q96QE3 ATAD5_HUMAN   | E.ASLNVST#PK.S                | T590:      | 2 | 2,628  | 0,339 | -0,11  |
| 8 | Q9H4G0 E41L1_HUMAN   | R.LPSSPASPS#PK.G              | S546:      | 2 | 2,6266 | 0,235 | 0      |
| 8 | O14686 MLL2_HUMAN    | E.LKGS#PVLLDPEE.L             | S876:      | 2 | 2,6256 | 0,298 | -0,266 |
| 8 | P28715 ERCC5_HUMAN   | K.FDSSLSS#DDETK.C             | S563:      | 2 | 2,625  | 0,336 | 0,801  |
| 8 | O14686 MLL2_HUMAN    | E.VSVLSSGS#PR.L               | S48:       | 2 | 2,6245 | 0,238 | -1,94  |
| 8 | ##Q9P2D6 F135A_HUMAN | E.VGS#DSFR.S                  | S746:      | 2 | 2,6181 | 0,134 | 0,36   |
| 8 | Q09666 AHNK_HUMAN    | K.LQGSGVS#LASK.K              | S5854:     | 2 | 2,6179 | 0,273 | -0,541 |
| 8 | Q9Y490 TLN1_HUMAN    | E.STMLEDSVS#PK.K              | S425:      | 2 | 2,6175 | 0,38  | 1,054  |
| 8 | P46087 NOL1_HUMAN    | K.GPQPPTVS#PIR.S              | S786:      | 2 | 2,6163 | 0,272 | -0,199 |
| 8 | Q14126 DSG2_HUMAN    | E.TSM*NTASHS#LCE.Q            | S869:      | 2 | 2,6156 | 0,181 | -0,255 |
| 8 | P51858 HDGF_HUMAN    | R.AGDLLDS#PK.R                | S165:      | 2 | 2,6155 | 0,286 | 0      |
| 8 | P36507 MP2K2_HUMAN   | R.LNQPGT#PTRTAV.-             | T394:      | 2 | 2,615  | 0,477 | -0,548 |
| 8 | P18084 ITB5_HUMAN    | E.M*AS#NPLYR.K                | S770:      | 2 | 2,6148 | 0,206 | 0,116  |
| 8 | P08621 RU17_HUMAN    | E.GLGNDS#RDM*YM*E.S           | S410:      | 2 | 2,6144 | 0,199 | -0,325 |
| 8 | Q6Z16 M3K15_HUMAN    | E.HGSVS#PDSDAQPDALFE.R        | S952:      | 2 | 2,6113 | 0,304 | -0,329 |
| 8 | P18583 SON_HUMAN     | E.SDQTLAALLS#PK.E             | S1697:     | 3 | 2,6092 | 0,117 | 0,483  |
| 8 | Q96GX5 MASTL_HUMAN   | R.NTAQHLLTVS#GFSL.-           | S875:      | 2 | 2,6081 | 0,327 | -0,168 |

|   |                    |                            |            |   |        |       |        |
|---|--------------------|----------------------------|------------|---|--------|-------|--------|
| 8 | Q96QT4 TRPM7_HUMAN | K.FFVS#TPSQPSCK.S          | S1404:     | 2 | 2,6066 | 0,168 | -0,25  |
| 8 | O95696 BRD1_HUMAN  | R.IVEYS#PPSAPR.R           | S128:      | 2 | 2,6049 | 0,352 | -0,282 |
| 8 | O43303 CE110_HUMAN | K.NPS#PLLM*QNNQTR.Q        | S551:      | 2 | 2,6047 | 0,344 | -1,137 |
| 8 | O15213 WDR46_HUMAN | E.TVPTTAGAS#PGPPR.N        | S41:       | 2 | 2,6036 | 0,438 | -0,176 |
| 8 | O60673 DPOLZ_HUMAN | K.LGFLS#ER.S               | S1114:     | 2 | 2,6026 | 0,112 | 0,271  |
| 8 | Q13257 MD2L1_HUMAN | K.VNS#M*VAYK.I             | S195:      | 2 | 2,6019 | 0,143 | 0,182  |
| 8 | Q9P1Y6 K1542_HUMAN | R.TIS#INS#PKAQTVQAVR.C     | S864:S867: | 3 | 2,6015 | 0,178 | -0,293 |
| 8 | Q03989 ARI5A_HUMAN | R.AVS#PFLKE.A              | S463:      | 2 | 2,6012 | 0,105 | -0,063 |
| 8 | Q9P0W5 SCHI1_HUMAN | E.TSLDTPLS#PM*SK.Q         | S330:      | 2 | 2,6008 | 0,322 | -0,355 |
| 8 | P29590 PML_HUMAN   | K.AVS#PPHLDGPPS#PR.S       | S518:S527: | 3 | 2,6008 | 0,333 | 0,231  |
| 8 | Q8IZD2 MLL5_HUMAN  | K.TIGYTS#PR.S              | S1002:     | 2 | 2,6008 | 0,194 | -0,063 |
| 8 | Q9C0C2 TB182_HUMAN | E.AQDLCRAS#PEPPGPE.S       | S672:      | 3 | 2,6007 | 0,28  | 0,322  |
| 8 | Q8WZ73 RFFL_HUMAN  | E.TQSIDS#EDSFVPR.R         | S229:      | 2 | 2,6007 | 0,236 | -0,905 |
| 8 | P36507 MP2K2_HUMAN | R.LNQPGT#PTR.T             | T394:      | 2 | 2,5998 | 0,116 | -0,115 |
| 8 | Q9H4M9 EHD1_HUMAN  | E.IFYTLS#PVNGK.I           | S456:      | 2 | 2,5989 | 0,398 | -0,278 |
| 8 | Q9BSQ5 CCM2_HUMAN  | R.GIITDS#FGR.H             | S384:      | 2 | 2,5989 | 0,341 | 0,117  |
| 8 | Q9NPR2 SEM4B_HUMAN | K.RPLS#IQDSFVE.V           | S804:      | 2 | 2,5974 | 0,248 | -0,356 |
| 8 | Q01082 SPTB2_HUMAN | E.QVSQNGLPAEQGS#PR.M       | S2138:     | 2 | 2,5972 | 0,338 | -0,222 |
| 8 | Q9NQW6 ANLN_HUMAN  | R.TPIIT#PNTK.A             | T401:      | 2 | 2,5955 | 0,305 | 0      |
| 8 | Q69YQ0 CYTSA_HUMAN | R.TPLS#PSPM*K.T            | S868:      | 2 | 2,5955 | 0,261 | 0,116  |
| 8 | Q5M775 SPEC1_HUMAN | K.SSKS#STSLAFE.S           | S37:       | 2 | 2,5932 | 0,222 | 0,1    |
| 8 | P05783 K1C18_HUMAN | R.ST#FSTNYR.S              | T8:        | 2 | 2,5928 | 0,429 | 0,116  |
| 8 | O94909 K0819_HUMAN | K.DRLGS#PLAVDE.A           | S450:      | 2 | 2,5916 | 0,235 | 0      |
| 8 | Q9UGU0 TCF20_HUMAN | E.GSSQPEEQLS#PM*AE.S       | S513:      | 2 | 2,5903 | 0,288 | -0,285 |
| 8 | Q9Y6M7 S4A7_HUMAN  | R.IPLVRS#FAD.I             | S233:      | 2 | 2,5898 | 0,425 | -0,111 |
| 8 | Q8TB72 PUM2_HUMAN  | E.VNAILS#PR.S              | S82:       | 2 | 2,5894 | 0,257 | 0,193  |
| 8 | P46821 MAP1B_HUMAN | K.SDISPLT#PRE.S            | T1788:     | 2 | 2,5874 | 0,305 | 0      |
| 8 | Q5UIP0 RIF1_HUMAN  | K.KADVQAPVSPS#ETSQANPYSE.G | S1774:     | 3 | 2,587  | 0,171 | 0,4    |
| 8 | Q8IZT6 ASPM_HUMAN  | E.ENKIPIS#PISPAFNE.C       | S222:      | 2 | 2,5841 | 0,42  | -0,141 |
| 8 | Q02952 AKA12_HUMAN | K.SPPS#PVERE.M             | S1331:     | 2 | 2,5833 | 0,23  | -0,34  |
| 8 | Q9UJZ1 STML2_HUMAN | K.APVPGT#PDSLSSGSSR.D      | T327:      | 2 | 2,5828 | 0,375 | -0,306 |
| 8 | Q5C9Z4 NOM1_HUMAN  | E.FVHATS#EGEAPGGCE.G       | S57:       | 2 | 2,5819 | 0,364 | -0,525 |
| 8 | Q86U44 MTA70_HUMAN | E.AALS#PTFR.S              | S43:       | 2 | 2,5812 | 0,249 | 0,129  |

|   |                    |                            |            |   |        |       |        |
|---|--------------------|----------------------------|------------|---|--------|-------|--------|
| 8 | O15027 SC16A_HUMAN | K.FANLT#PSR.T              | T1876:     | 2 | 2,581  | 0,281 | -0,742 |
| 8 | P52294 IMA1_HUMAN  | E.VM*S#DGGFHE.A            | S63:       | 2 | 2,5799 | 0,271 | -0,114 |
| 8 | Q9UQ35 SRRM2_HUMAN | R.GEFSAS#PM*LK.S           | S1124:     | 2 | 2,577  | 0,344 | 0,629  |
| 8 | P48634 BAT2_HUMAN  | R.SFS#SQRPGM*E.R           | S1386:     | 2 | 2,5763 | 0,225 | 0,2    |
| 8 | Q15942 ZYX_HUMAN   | R.EKVSS#IDLE.I             | S143:      | 2 | 2,5751 | 0,121 | 0,111  |
| 8 | Q09666 AHNK_HUMAN  | K.GPRIS#APNVDFNLE.G        | S5448:     | 2 | 2,5747 | 0,411 | 0,152  |
| 8 | O15400 STX7_HUMAN  | E.FGSLPTT#PSEQR.Q          | T79:       | 2 | 2,5735 | 0,365 | 0,087  |
| 8 | Q5T230 UTF1_HUMAN  | R.TPGDAPGTPRRPAS#PS#ALGE.L | S42:S44:   | 3 | 2,5733 | 0,121 | 0      |
| 8 | Q5T200 ZC3HD_HUMAN | R.LIS#DSVER.D              | S1364:     | 2 | 2,5721 | 0,206 | -0,183 |
| 8 | Q8N0Z3 CCD52_HUMAN | K.SNLKFS#PLQD.V            | S548:      | 2 | 2,5687 | 0,193 | 0,199  |
| 8 | Q9UKV3 ACINU_HUMAN | R.TAQVPS#PPR.G             | S1004:     | 2 | 2,5663 | 0,264 | -0,591 |
| 8 | P54259 ATN1_HUMAN  | R.APS#PGAYK.T              | S640:      | 2 | 2,5654 | 0,308 | 0,35   |
| 8 | Q16799 RTN1_HUMAN  | E.AGSGPARQS#PVAM*E.T       | S71:       | 2 | 2,5649 | 0,123 | -0,168 |
| 8 | Q96LR5 UB2E2_HUMAN | R.VDDSPSTSGGSS#DGDQRE.S    | S19:       | 2 | 2,5634 | 0,349 | 0,195  |
| 8 | Q14160 LAP4_HUMAN  | R.LRVQS#PEPPAPE.R          | S1475:     | 2 | 2,563  | 0,453 | -0,261 |
| 8 | Q9BY89 K1671_HUMAN | R.TSS#PLFNK.A              | S128:      | 2 | 2,5626 | 0,306 | 0,689  |
| 8 | Q9UKE5 TNIK_HUMAN  | R.TTSS#PALAR.K             | S680:      | 2 | 2,5626 | 0,34  | -0,222 |
| 8 | Q02952 AKA12_HUMAN | K.SAVVHDIT#DDGQEETPE.I     | T135:      | 2 | 2,5616 | 0,283 | 0,127  |
| 8 | P55072 TERA_HUMAN  | K.LAIRES#IESE.I            | S702:      | 2 | 2,5611 | 0,213 | 0      |
| 8 | POC1Z6 TFPT_HUMAN  | R.GPDKLLPYPTLASPAS#D.-     | S252:      | 2 | 2,5593 | 0,301 | -0,268 |
| 8 | P55201 BRPF1_HUMAN | R.KTEGV#PIPQEIFE.Y         | S238:      | 2 | 2,5587 | 0,24  | -0,295 |
| 8 | P58340 MLF1_HUMAN  | R.SFS#EPFGRD.L             | S34:       | 2 | 2,5569 | 0,254 | 0,109  |
| 8 | P85037 FOXK1_HUMAN | R.S#APASPTHPLM*S#PR.S      | S416:S428: | 2 | 2,5558 | 0,285 | -0,363 |
| 8 | Q16514 TAF12_HUMAN | K.IPGTPGAGGRLS#PE.N        | S51:       | 2 | 2,5556 | 0,344 | -0,088 |
| 8 | Q9Y2U5 M3K2_HUMAN  | R.DRSS#PPPGYIPDE.L         | S164:      | 2 | 2,5538 | 0,272 | 0,081  |
| 8 | Q8NEB9 PK3C3_HUMAN | E.KDGEDESS#PILTSFE.L       | S244:      | 2 | 2,5534 | 0,231 | 0      |
| 8 | Q9BYW2 SETD2_HUMAN | R.LNDS#PTLK.K              | S624:      | 2 | 2,5527 | 0,166 | 0,063  |
| 8 | Q99569 PKP4_HUMAN  | R.VASPSQGVGSSS#PK.R        | S337:      | 2 | 2,5522 | 0,439 | -0,163 |
| 8 | O14686 MLL2_HUMAN  | E.LVNRPPSS#TE.L            | S2695:     | 2 | 2,5509 | 0,187 | -0,414 |
| 8 | P40227 TCPZ_HUMAN  | K.SETDTS#LIR.G             | S205:      | 2 | 2,5491 | 0,307 | -0,775 |
| 8 | Q8WWI1 LMO7_HUMAN  | R.SLTSCSS#DITLR.G          | S263:      | 2 | 2,5488 | 0,238 | -0,086 |
| 8 | Q86V48 LUZP1_HUMAN | R.HTS#TSNIQVGLAE.L         | S820:      | 2 | 2,547  | 0,354 | 0      |
| 8 | O14545 TRAD1_HUMAN | R.ALPSLNTGSSS#PR.G         | S327:      | 2 | 2,5454 | 0,284 | -0,268 |

|   |                     |                            |              |   |        |       |        |
|---|---------------------|----------------------------|--------------|---|--------|-------|--------|
| 8 | Q9BUL5 PHF23_HUMAN  | R.LGGPPKS#GEP.-            | S400:        | 2 | 2,5453 | 0,414 | 0,299  |
| 8 | O14545 TRAD1_HUMAN  | E.NIVPSFS#PGPSGR.Y         | S530:        | 2 | 2,5435 | 0,265 | 0,525  |
| 8 | Q9B XK5 B2L13_HUMAN | E.KSS#PATSLFVE.L           | S371:        | 2 | 2,5417 | 0,36  | -0,098 |
| 8 | P15880 RS2_HUMAN    | E.TVFTKS#PYQE.F            | S264:        | 2 | 2,54   | 0,301 | 0,095  |
| 8 | Q7RTX8 HIN1L_HUMAN  | R.TPS#QIIR.K               | S415:        | 2 | 2,5394 | 0,115 | 0,204  |
| 8 | O60343 TBCD4_HUMAN  | E.INLIS#PDTK.S             | S370:        | 2 | 2,5367 | 0,292 | 0      |
| 8 | Q9N XR1 NDE1_HUMAN  | R.NLVYDQS#PNR.T            | S282:        | 2 | 2,5346 | 0,353 | -0,095 |
| 8 | Q9UKM9 RALY_HUMAN   | E.GLLTHS#EEE.L             | S288:        | 2 | 2,5305 | 0,281 | -0,78  |
| 8 | Q9UHD1 CHRD1_HUMAN  | R.KTS#DFNTFLAQE.G          | S200:        | 2 | 2,5264 | 0,212 | -0,082 |
| 8 | Q6NZY4 ZCHC8_HUMAN  | E.NSGLALYDGKDGTDGETE.V     | T342:        | 2 | 2,5255 | 0,31  | 0,063  |
| 8 | Q9P206 K1522_HUMAN  | K.GLAGPPAS#PGK.A           | S545:        | 2 | 2,5255 | 0,39  | 0      |
| 8 | P78527 PRKDC_HUMAN  | R.RGS#CVTQVGLLE.S          | S1790:       | 2 | 2,525  | 0,187 | -0,087 |
| 8 | Q2M2I8 AAK1_HUMAN   | K.VGSLT#PPSSPK.T           | T620:        | 2 | 2,524  | 0,238 | 0,106  |
| 8 | Q3KQU3 MA7D1_HUMAN  | E.ANANGSS#PEPVKAVE.A       | S742:        | 2 | 2,5204 | 0,268 | -0,157 |
| 8 | Q6PJT7 ZC3HE_HUMAN  | E.TYS#PFFR.N               | S274:        | 2 | 2,5198 | 0,285 | -0,122 |
| 8 | Q96F46 I17RA_HUMAN  | E.ACPLLS#PGAGR.N           | S708:        | 2 | 2,5187 | 0,312 | -0,197 |
| 8 | Q2M3G4 SHRM1_HUMAN  | R.SAS#LSHPGGE.G            | S188:        | 2 | 2,5184 | 0,268 | 0      |
| 8 | Q9UQ35 SRRM2_HUMAN  | K.AQT#PPGPSLSGSKS#PCPQEK.S | T1003:S1014: | 3 | 2,5178 | 0,154 | 0,331  |
| 8 | Q7Z589 EMSY_HUMAN   | R.HSPES#PSIAVVE.S          | S821:        | 2 | 2,5154 | 0,379 | 0,092  |
| 8 | Q14152 EIF3A_HUMAN  | R.LGDSS#LSR.K              | S882:        | 2 | 2,5126 | 0,116 | -0,133 |
| 8 | Q96AY4 TTC28_HUMAN  | K.RLS#LDSSSSLE.S           | S1183:       | 2 | 2,5119 | 0,127 | 0,192  |
| 8 | Q504Q3 PAN2_HUMAN   | K.VPEPEGQTS#PK.N           | S1189:       | 2 | 2,5112 | 0,19  | -0,098 |
| 8 | Q9H7N4 SFR19_HUMAN  | E.GLS#QISISR.I             | S291:        | 2 | 2,5095 | 0,156 | 0,329  |
| 8 | Q9HAW4 CLSPN_HUMAN  | R.SPS#PGLFR.A              | S810:        | 2 | 2,5095 | 0,213 | 0,13   |
| 8 | O60264 SMCA5_HUMAN  | E.IFDDAS#PGK.Q             | S66:         | 2 | 2,5071 | 0,319 | 0      |
| 8 | P54259 ATN1_HUMAN   | R.TGT#PPGYR.G              | T664:        | 2 | 2,5055 | 0,189 | 0,263  |
| 8 | Q3KQU3 MA7D1_HUMAN  | R.GPT#PPAM*GPR.D           | T97:         | 2 | 2,5049 | 0,189 | 0      |
| 8 | Q9P2F8 SI1L2_HUMAN  | K.FSYGNLS#PR.R             | S1478:       | 2 | 2,5048 | 0,415 | -0,481 |
| 8 | Q66K74 MAP1S_HUMAN  | E.LPLAASSIPRPT#PS#PE.S     | T638:S640:   | 2 | 2,5046 | 0,262 | -0,063 |
| 8 | Q8TEW0 PARD3_HUMAN  | E.GLGFS#ITSR.D             | S474:        | 2 | 2,5043 | 0,315 | 0      |
| 8 | Q9UKV5 AMFR2_HUMAN  | R.VPLDLS#PR.L              | S542:        | 2 | 2,5042 | 0,267 | 0,25   |
| 8 | Q9H6Z4 RANB3_HUMAN  | R.ERTSSLT#QFPSSQSEE.R      | T128:        | 2 | 2,5031 | 0,294 | 0,449  |
| 8 | P55327 TPD52_HUMAN  | K.NSPTFKS#FEE.K            | S136:        | 2 | 2,5022 | 0,352 | 0,096  |

|   |                    |                         |            |   |        |       |        |
|---|--------------------|-------------------------|------------|---|--------|-------|--------|
| 8 | Q9H6H4 REEP4_HUMAN | R.SFS#M*QDLR.S          | S152:      | 2 | 2,4991 | 0,104 | 0,565  |
| 8 | Q96JM3 ZN828_HUMAN | E.TDPVKS#PPLPE.H        | S108:      | 2 | 2,4989 | 0,316 | -0,097 |
| 8 | Q9H5H4 ZN768_HUMAN | R.YEPQS#PGYEPR.S        | S125:      | 2 | 2,4979 | 0,276 | 0      |
| 8 | O95671 ASML_HUMAN  | R.VVLASAS#PR.R          | S21:       | 2 | 2,4969 | 0,251 | 0,747  |
| 8 | Q14160 LAP4_HUMAN  | R.ALS#PAELR.A           | S1486:     | 2 | 2,4959 | 0,289 | -0,065 |
| 8 | Q92900 RENT1_HUMAN | R.AYQHGGVTGLS#QY.-      | S1127:     | 2 | 2,4956 | 0,305 | -0,251 |
| 8 | O95295 S25BP_HUMAN | D.SGIYPPGS#PGK.-        | S133:      | 2 | 2,4937 | 0,341 | 0,107  |
| 8 | Q01814 AT2B2_HUMAN | K.SATSSSPGSPHSLET#SL.-  | T1241:     | 2 | 2,492  | 0,373 | -0,066 |
| 8 | Q9NWX5 UCKL1_HUMAN | R.ADADPSPTS#PPTAR.D     | S16:       | 2 | 2,492  | 0,203 | -0,834 |
| 8 | Q6PJF5 RHDF2_HUMAN | K.SVS#LQEPR.S           | S90:       | 2 | 2,4914 | 0,081 | 0,061  |
| 8 | Q8IWC1 MA7D3_HUMAN | K.NCPPS#PLPLISK.Q       | S524:      | 2 | 2,4894 | 0,336 | 0      |
| 8 | P29375 JAD1A_HUMAN | R.VVSSVSS#PR.Q          | S1331:     | 2 | 2,4892 | 0,319 | -0,225 |
| 8 | P80723 BASP_HUMAN  | K.ETPAATEAPSST#PK.A     | T196:      | 2 | 2,4891 | 0,352 | -0,582 |
| 8 | Q7Z628 ARHG8_HUMAN | R.RAST#VSSVTQVE.V       | T540:      | 2 | 2,4886 | 0,248 | 0,182  |
| 8 | P30307 MPIP3_HUMAN | E.QIALLVKDM*S#P.-       | S472:      | 2 | 2,4885 | 0,344 | 0,465  |
| 8 | Q9Y2W1 TR150_HUMAN | E.QTFSGGTS#QDTK.A       | S211:      | 2 | 2,4881 | 0,394 | 0      |
| 8 | Q8WY36 BBX_HUMAN   | R.QKS#PLFQFAE.I         | S243:      | 2 | 2,4877 | 0,25  | -0,191 |
| 8 | O15085 ARHGB_HUMAN | R.SRS#DVDM*DAAAE.A      | S635:      | 2 | 2,4876 | 0,241 | -0,179 |
| 8 | Q9UGU0 TCF20_HUMAN | K.AGSS#PAQGAQNEPPR.L    | S559:      | 2 | 2,4861 | 0,36  | 0,237  |
| 8 | Q12888 TP53B_HUMAN | K.TVSS#DGCSTPSREE.G     | S316:      | 2 | 2,4856 | 0,37  | 0      |
| 8 | Q9UNS2 CSN3_HUMAN  | K.SM*GSQEDDSGNKPSS#YS.- | S421:      | 2 | 2,4849 | 0,312 | -0,261 |
| 8 | Q96JM3 ZN828_HUMAN | R.KTS#PASLDFPE.S        | S459:      | 2 | 2,4847 | 0,407 | -0,096 |
| 8 | P28370 SMCA1_HUMAN | K.SPTS#PLNM*K.L         | S119:      | 2 | 2,4834 | 0,142 | 0,114  |
| 8 | Q9C0C2 TB182_HUMAN | R.RES#AASGLGGLLEE.E     | S1473:     | 2 | 2,4819 | 0,377 | -0,249 |
| 8 | A1L390 PKHG3_HUMAN | K.GPLS#PFNSR.A          | S76:       | 2 | 2,4805 | 0,338 | 0,463  |
| 8 | P42702 LIFR_HUMAN  | E.IVSFGS#PCSINSR.Q      | S1059:     | 2 | 2,4793 | 0,161 | -0,325 |
| 8 | Q96PK6 RBM14_HUMAN | R.AQPSAS#LGVGYR.T       | S256:      | 2 | 2,4788 | 0,372 | -0,095 |
| 8 | Q9H2Y7 ZF106_HUMAN | E.LSTS#PCNPVIR.Q        | S641:      | 2 | 2,4785 | 0,314 | 0      |
| 8 | Q86WBO NIPA_HUMAN  | R.LPLVPES#PR.R          | S321:      | 2 | 2,4781 | 0,3   | 0      |
| 8 | Q8WUF5 IASPP_HUMAN | R.IPM*PPSS#PQPR.G       | S358:      | 2 | 2,4779 | 0,132 | -0,936 |
| 8 | Q03164 HRX_HUMAN   | R.TIAHS#PTSFTE.S        | S2098:     | 2 | 2,476  | 0,381 | 0,192  |
| 8 | Q9BST9 RTKN_HUMAN  | R.TFS#LDAVPPDHS#PR.A    | S520:S529: | 3 | 2,4749 | 0,087 | 0,323  |
| 8 | Q4KMP7 TB10B_HUMAN | R.AAGGAPS#PPPPVR.R      | S403:      | 2 | 2,474  | 0,18  | -0,486 |

|   |                    |                                |            |   |        |       |        |
|---|--------------------|--------------------------------|------------|---|--------|-------|--------|
| 8 | Q14152 EIF3A_HUMAN | R.LGDS#SLSR.K                  | S881:      | 2 | 2,473  | 0,108 | 0,333  |
| 8 | Q13115 DUS4_HUMAN  | E.AAS#PSGPLRE.R                | S345:      | 2 | 2,4703 | 0,368 | -0,115 |
| 8 | Q9NSI2 CU070_HUMAN | E.LLAS#PAYR.A                  | S203:      | 2 | 2,4692 | 0,09  | 0,126  |
| 8 | P46821 MAP1B_HUMAN | E.QYGFLT#PTK.Q                 | T1067:     | 2 | 2,4687 | 0,407 | 0,691  |
| 8 | P15924 DESP_HUMAN  | R.SM*S#FQGIR.Q                 | S2209:     | 2 | 2,4657 | 0,217 | 0,06   |
| 8 | Q8WWI1 LMO7_HUMAN  | R.RM*YS#FDDVLEE.G              | S805:      | 2 | 2,4637 | 0,287 | -0,244 |
| 8 | Q92841 DDX17_HUMAN | E.VARLT#PYEVDE.L               | T66:       | 2 | 2,4634 | 0,168 | 0,089  |
| 8 | Q8ND56 LS14A_HUMAN | K.T#QLSQGRSS#QLDPLR.K          | T175:S183: | 2 | 2,4634 | 0,337 | -0,063 |
| 8 | Q32MZ4 LRRF1_HUMAN | R.RGS#GDTSISIDTE.A             | S120:      | 2 | 2,4622 | 0,13  | 0,172  |
| 8 | O14545 TRAD1_HUMAN | D.SQPQETS#PELPR.R              | S415:      | 2 | 2,4602 | 0,286 | -0,168 |
| 8 | Q9UQ35 SRRM2_HUMAN | R.GEFSAS#PMLK.S                | S1124:     | 2 | 2,459  | 0,137 | 0,213  |
| 8 | Q9BRP8 WIBG_HUMAN  | R.TLDKVS#LEE.T                 | S117:      | 2 | 2,4571 | 0,247 | -0,438 |
| 8 | Q9UJX2 CDC23_HUMAN | R.RVS#PLNLSSVTP.-              | S582:      | 2 | 2,4556 | 0,411 | -0,09  |
| 8 | O75674 TM1L1_HUMAN | D.LLDLSPS#PR.M                 | S323:      | 2 | 2,4547 | 0,213 | 0,34   |
| 8 | O96007 MOS2L_HUMAN | E.TKLPLS#PPLVE.D               | S20:       | 2 | 2,4532 | 0,292 | -0,479 |
| 8 | P30622 CLIP1_HUMAN | E.ANGLQTPAS#R.A                | S143:      | 2 | 2,4509 | 0,319 | -0,102 |
| 8 | P13861 KAP2_HUMAN  | R.APASVLPAAAT#PR.Q             | T54:       | 2 | 2,4504 | 0,337 | -0,198 |
| 8 | P49790 NU153_HUMAN | E.GSVLDILKS#PGFAS#PK.I         | S614:S619: | 2 | 2,4483 | 0,171 | 0,275  |
| 8 | Q9Y2W1 TR150_HUMAN | R.IDIS#PSTFR.K                 | S682:      | 2 | 2,4469 | 0,179 | 0,437  |
| 8 | P46937 YAP1_HUMAN  | R.ISQS#APVK.Q                  | S238:      | 2 | 2,4458 | 0,132 | 0      |
| 8 | Q6VEQ5 WASH2_HUMAN | R.QDDSSSSAS#PSVQGAPR.E         | S144:      | 2 | 2,4457 | 0,234 | 0,069  |
| 8 | Q2TB10 ZN800_HUMAN | E.SPPSITHS#PQNE.L              | S426:      | 2 | 2,4429 | 0,237 | -0,167 |
| 8 | Q15036 SNX17_HUMAN | K.LSAVS#LR.G                   | S440:      | 2 | 2,441  | 0,13  | 0,222  |
| 8 | P37802 TAGL2_HUMAN | R.GPAYGLS#RE.V                 | S11:       | 2 | 2,4401 | 0,406 | -0,592 |
| 8 | Q9H5Y7 SLIK6_HUMAN | R.SPS#FGPK.H                   | S694:      | 2 | 2,4368 | 0,124 | 0,458  |
| 8 | P52594 NUPL_HUMAN  | K.GTPSQS#PVVGR.S               | S181:      | 2 | 2,4362 | 0,441 | -0,314 |
| 8 | Q13627 DYR1A_HUMAN | R.IYQY#IQSR.F                  | Y321:      | 2 | 2,4361 | 0,168 | 0      |
| 8 | P98171 RHG04_HUMAN | E.KQVVGAGLQTAGES#GSSPEGLLASE.L | S821:      | 3 | 2,4342 | 0,101 | -0,298 |
| 8 | Q9NQW6 ANLN_HUMAN  | K.TQS#LPVTEK.V                 | S485:      | 2 | 2,433  | 0,266 | -0,789 |
| 8 | Q9BSJ8 ESYT1_HUMAN | E.LSGGPPHITSS#APE.L            | S950:      | 2 | 2,4329 | 0,086 | -0,085 |
| 8 | Q9Y5K3 PCY1B_HUMAN | R.M*LQALS#PK.Q                 | S315:      | 2 | 2,4305 | 0,098 | -0,558 |
| 8 | O95340 PAPS2_HUMAN | E.FDFIS#GTR.M                  | S577:      | 2 | 2,4296 | 0,083 | 0,179  |
| 8 | P85037 FOXK1_HUMAN | R.SAPAS#PTHPLM*S#PR.S          | S420:S428: | 2 | 2,4294 | 0,161 | -0,073 |

|   |                     |                               |            |   |        |       |        |
|---|---------------------|-------------------------------|------------|---|--------|-------|--------|
| 8 | Q7L3B6 CD37L_HUMAN  | E.SDFDVPSS#PR.C               | S32:       | 2 | 2,4277 | 0,454 | -0,274 |
| 8 | Q96RV3 PCX1_HUMAN   | R.SRNS#LPNQVAFPE.G            | S752:      | 2 | 2,427  | 0,408 | 0,238  |
| 8 | Q8IY18 SMC5_HUMAN   | E.SDYM*AAS#SQLR.L             | S792:      | 2 | 2,4255 | 0,352 | -0,46  |
| 8 | Q9BQ67 GRWD1_HUMAN  | K.SGS#PVATFK.Q                | S344:      | 2 | 2,4202 | 0,174 | 0,376  |
| 8 | A7E2F7 A7E2F7_HUMAN | R.RYS#LIDPSSAPE.L             | S938:      | 2 | 2,4184 | 0,374 | -0,172 |
| 8 | Q02446 SP4_HUMAN    | E.NNVSQPASSSSSSSSNNGSASPT#K.T | T138:      | 3 | 2,4166 | 0,179 | 0,149  |
| 8 | P07195 LDHB_HUMAN   | R.GLTS#VINQK.L                | S303:      | 2 | 2,4162 | 0,149 | 0      |
| 8 | Q8N556 AFAP1_HUMAN  | K.LSSERPSS#DGEGVVE.N          | S283:      | 2 | 2,4132 | 0,158 | -1,124 |
| 8 | Q96L14 C170L_HUMAN  | R.ALHPAAVS#AAAEFE.N           | S259:      | 2 | 2,4109 | 0,196 | -0,667 |
| 8 | P55196 AFAD_HUMAN   | E.YFT#FPASK.S                 | T1215:     | 2 | 2,4053 | 0,249 | -0,117 |
| 8 | O95163 ELP1_HUMAN   | K.LGAVGGS#GFK.V               | S471:      | 2 | 2,4043 | 0,179 | 0,564  |
| 8 | Q04637 IF4G1_HUMAN  | R.SFS#KEVEE.R                 | S1188:     | 2 | 2,4035 | 0,225 | -0,472 |
| 8 | P61254 RL26_HUMAN   | K.IM*SS#PLSKE.L               | S32:       | 2 | 2,4029 | 0,243 | 1,234  |
| 8 | P56537 IF6_HUMAN    | E.AQPS#TIATSM*R.D             | S230:      | 2 | 2,4011 | 0,401 | -0,194 |
| 8 | O94913 PCF11_HUMAN  | R.IDGPPT#PASLR.F              | T785:      | 2 | 2,4008 | 0,226 | 0,304  |
| 8 | Q6XZF7 DNMBP_HUMAN  | R.HFS#IM*DFNSE.K              | S578:      | 2 | 2,3989 | 0,277 | 0      |
| 8 | Q9NRY5 F1142_HUMAN  | E.KAETSLGIPSPS#EISTE.V        | S131:      | 2 | 2,3983 | 0,193 | 0,134  |
| 8 | Q86Y91 KI18B_HUMAN  | E.GGGQPPPQDLPGS#PK.S          | S404:      | 2 | 2,396  | 0,295 | -0,323 |
| 8 | Q13242 SFRS9_HUMAN  | R.GS#PHYFS#PFRPY.-            | S211:S216: | 2 | 2,394  | 0,415 | -0,227 |
| 8 | P53814 SMTN_HUMAN   | R.SLS#VLSPR.Q                 | S301:      | 2 | 2,3924 | 0,206 | 0,195  |
| 8 | O75381 PEX14_HUMAN  | R.QFPPS#PSAPK.I               | S232:      | 2 | 2,3911 | 0,203 | -0,215 |
| 8 | O60293 CC131_HUMAN  | R.RIS#TSDILSE.K               | S352:      | 2 | 2,39   | 0,14  | 0      |
| 8 | Q8N3U4 STAG2_HUMAN  | E.SETHFSS#DTDFEDIE.G          | S23:       | 2 | 2,3879 | 0,201 | -0,265 |
| 8 | Q14596 NBR1_HUMAN   | E.TVIRS#LTLD.A                | S656:      | 2 | 2,3863 | 0,222 | 0,222  |
| 8 | Q8TEV9 SMCR8_HUMAN  | K.VLISVGS#YK.S                | S417:      | 2 | 2,3835 | 0,249 | 0,467  |
| 8 | O95251 MYST2_HUMAN  | R.SQQQPTPVT#PK.K              | T88:       | 2 | 2,3821 | 0,243 | 0,095  |
| 8 | P29353 SHC1_HUMAN   | K.YNPLRNES#LSSLEE.G           | S17:       | 2 | 2,3811 | 0,129 | -0,634 |
| 8 | Q8N2M8 SFR16_HUMAN  | K.KAS#IGYTYE.D                | S147:      | 2 | 2,3762 | 0,31  | 0,219  |
| 8 | Q86XL3 ANKL2_HUMAN  | K.M*SLS#PSSPR.H               | S804:      | 2 | 2,3724 | 0,252 | 0,346  |
| 8 | P16157 ANK1_HUMAN   | R.ITHS#PTVSQVTE.R             | S1686:     | 2 | 2,3685 | 0,361 | -0,354 |
| 8 | O15085 ARHGB_HUMAN  | K.SSSQSTFHIPLS#PVE.V          | S556:      | 2 | 2,3675 | 0,287 | 0,072  |
| 8 | Q6ZNP1 Q6ZNP1_HUMAN | E.LSLTNIS#PK.F                | S39:       | 2 | 2,3662 | 0,272 | 0      |
| 8 | Q9UHD8 SEPT9_HUMAN  | R.VQT#PLLR.A                  | T49:       | 2 | 2,366  | 0,131 | 0,269  |

|   |                    |                             |            |   |        |       |        |
|---|--------------------|-----------------------------|------------|---|--------|-------|--------|
| 8 | Q99618 CDCA3_HUMAN | R.VADPRS#PSAGILRT#PIQVE.S   | S29:T37:   | 2 | 2,3654 | 0,365 | -0,338 |
| 8 | Q7Z4S6 KI21A_HUMAN | K.IPEPS#PVTR.R              | S1239:     | 2 | 2,3653 | 0,346 | -1,928 |
| 8 | O43293 DAPK3_HUMAN | K.SHS#SLPPNNSYADFE.R        | S311:      | 2 | 2,3653 | 0,343 | 0,28   |
| 8 | P54259 ATN1_HUMAN  | K.TAT#PPGYKPGS#PPSFR.T      | T648:S656: | 3 | 2,3636 | 0,271 | 0,101  |
| 8 | Q14568 HS902_HUMAN | E.SSAGGS#FTVR.T             | S169:      | 2 | 2,3632 | 0,119 | -1,047 |
| 8 | Q9NPD8 UBE2T_HUMAN | R.KAS#QLVGIE.K              | S184:      | 2 | 2,3629 | 0,224 | -0,238 |
| 8 | Q9C0C2 TB182_HUMAN | R.SFGTRPLS#SGFSPE.E         | S983:      | 2 | 2,3629 | 0,285 | -0,315 |
| 8 | Q9C0C2 TB182_HUMAN | R.DS#LGTYSR.D               | S872:      | 2 | 2,3614 | 0,221 | 0,114  |
| 8 | Q8IWI9 MGAP_HUMAN  | E.VLS#PTVK.G                | S1195:     | 2 | 2,3612 | 0,11  | 0,148  |
| 8 | Q8IY81 RRMJ3_HUMAN | E.LKM*DLPGV#IADEGE.T        | S411:      | 2 | 2,3602 | 0,274 | 0,219  |
| 8 | Q96CV9 OPTN_HUMAN  | R.TVS#TGTSK.Y               | S206:      | 2 | 2,3581 | 0,179 | 0,234  |
| 8 | Q9H6Z4 RANB3_HUMAN | R.VLS#PPKLE.V               | S333:      | 2 | 2,3571 | 0,154 | -0,113 |
| 8 | Q14671 PUM1_HUMAN  | E.VNSVLSPRS#E.S             | S212:      | 2 | 2,357  | 0,188 | 0,104  |
| 8 | P02545 LMNA_HUMAN  | R.SYLLGNSS#PR.T             | S652:      | 2 | 2,356  | 0,401 | 0,312  |
| 8 | P35908 K22E_HUMAN  | K.FAS#FIDK.V                | S197:      | 2 | 2,3553 | 0,144 | 0,134  |
| 8 | Q5JSJ4 DX26B_HUMAN | E.LHPLNS#PLPGE.L            | S150:      | 2 | 2,3546 | 0,265 | 0      |
| 8 | Q9NZJ5 E2AK3_HUMAN | E.IIAPS#PQR.S               | S714:      | 2 | 2,3531 | 0,219 | 0,063  |
| 8 | Q8IWY9 CDAN1_HUMAN | E.LGS#PLPSR.T               | S277:      | 2 | 2,3529 | 0,199 | 0,202  |
| 8 | Q9H792 SG269_HUMAN | K.SAPTS#PTATNISSK.T         | S572:      | 2 | 2,3521 | 0,406 | -0,254 |
| 8 | Q5VT52 K0460_HUMAN | K.IIS#PGSSTPS#STRSPPPGRDE.S | S758:S765: | 3 | 2,3514 | 0,104 | -0,4   |
| 8 | O94804 STK10_HUMAN | R.ILRSL#TFE.K               | S13:       | 2 | 2,3498 | 0,156 | -0,23  |
| 8 | Q93073 K0256_HUMAN | K.LPFDL#PPIGK.Q             | T914:      | 2 | 2,3496 | 0,129 | -0,105 |
| 8 | P42166 LAP2A_HUMAN | E.TEFLS#PPR.K               | S424:      | 2 | 2,3483 | 0,233 | -0,238 |
| 8 | Q14160 LAP4_HUMAN  | R.GLGLS#IAGGK.G             | S875:      | 2 | 2,3482 | 0,274 | 0,185  |
| 8 | Q96EB6 SIRT1_HUMAN | E.AASS#PAGEPLR.K            | S27:       | 2 | 2,3474 | 0,43  | -0,215 |
| 8 | Q86UU0 BCL9L_HUMAN | K.TAM*PS#PGVSQNK.Q          | S1017:     | 2 | 2,3474 | 0,32  | -0,186 |
| 8 | Q16584 M3K11_HUMAN | R.GGTVS#PPPGTSR.S           | S740:      | 2 | 2,3472 | 0,304 | -0,307 |
| 8 | Q7L8J4 3BP5L_HUMAN | R.TVAS#DLQK.C               | S343:      | 2 | 2,3462 | 0,176 | -0,065 |
| 8 | Q6U841 S4A10_HUMAN | E.NS#TVDFSK.G               | S280:      | 2 | 2,3454 | 0,242 | 0,25   |
| 8 | Q641Q2 FA21A_HUMAN | K.TQRVS#LLFE.D              | S688:      | 2 | 2,3439 | 0,185 | -0,312 |
| 8 | Q9UQ35 SRRM2_HUMAN | R.VPS#PTPAPK.E              | S2581:     | 2 | 2,3438 | 0,257 | 0,125  |
| 8 | Q92667 AKAP1_HUMAN | K.GVLFSSKS#AE.V             | S161:      | 2 | 2,3428 | 0,302 | 0      |
| 8 | Q9UQ35 SRRM2_HUMAN | R.SLSYS#PVER.R              | S2694:     | 2 | 2,3427 | 0,22  | 0,437  |



|   |                     |                       |        |   |        |       |        |
|---|---------------------|-----------------------|--------|---|--------|-------|--------|
| 8 | Q14151 SAFB2_HUMAN  | E.TSSLNFKVT#PDIE.E    | T201:  | 2 | 2,3421 | 0,251 | -0,319 |
| 8 | Q96GF2 Q96GF2_HUMAN | E.NLS#AAFSR.Q         | S59:   | 2 | 2,3415 | 0,14  | 0,322  |
| 8 | Q12774 ARHG5_HUMAN  | E.SLSETPGPSS#PR.Q     | S48:   | 2 | 2,3414 | 0,275 | 0,094  |
| 8 | Q9UMZ2 SYNG_HUMAN   | R.SLS#LGDKE.I         | S1075: | 2 | 2,3412 | 0,158 | 0      |
| 8 | Q12888 TP53B_HUMAN  | R.SEDPPTT#PIR.G       | T1056: | 2 | 2,3394 | 0,262 | 0,102  |
| 8 | P50443 S26A2_HUMAN  | R.ESS#TDFKQFE.T       | S36:   | 2 | 2,3391 | 0,208 | 0,282  |
| 8 | Q8WYP5 AHTF1_HUMAN  | R.CLVAGLLS#PR.F       | S537:  | 2 | 2,3355 | 0,357 | -0,105 |
| 8 | Q9H6Z4 RANB3_HUMAN  | K.FVFGQNM*S#ER.V      | S328:  | 2 | 2,3352 | 0,086 | 0      |
| 8 | Q96AQ6 PBIP1_HUMAN  | E.GQSPQSLPST#PK.A     | T133:  | 2 | 2,3351 | 0,36  | -0,087 |
| 8 | Q9BST9 RTKN_HUMAN   | K.QGS#LYHE.M          | S448:  | 2 | 2,3349 | 0,129 | 0,2    |
| 8 | O14686 MLL2_HUMAN   | R.SGITS#PVEK.R        | S2365: | 2 | 2,3347 | 0,16  | 0,183  |
| 8 | Q86WR7 CJ047_HUMAN  | K.LGLLRESS#.-         | S435:  | 2 | 2,3322 | 0,166 | 0,319  |
| 8 | O43896 KIF1C_HUMAN  | R.YPPYTT#PPR.M        | T1083: | 2 | 2,3296 | 0,23  | -0,937 |
| 8 | O60293 CC131_HUMAN  | R.LDSSPVSS#PR.K       | S953:  | 2 | 2,329  | 0,295 | 0      |
| 8 | P82979 HCC1_HUMAN   | R.FGLNVSSIS#R.K       | S165:  | 2 | 2,3273 | 0,197 | -0,421 |
| 8 | P13010 KU86_HUMAN   | E.QGGAHFS#VSSLAE.G    | S577:  | 2 | 2,3269 | 0,31  | -0,089 |
| 8 | P29374 ARI4A_HUMAN  | R.SVKS#ESDITIE.V      | S1021: | 2 | 2,3254 | 0,111 | 0      |
| 8 | Q9UQ35 SRRM2_HUMAN  | E.FSAS#PM*LK.S        | S1124: | 2 | 2,3249 | 0,228 | -0,125 |
| 8 | Q56NI9 ESCO2_HUMAN  | R.LPSANQGS#PFK.S      | S75:   | 2 | 2,3199 | 0,232 | 0      |
| 8 | Q92667 AKAP1_HUMAN  | R.DKAIT#PPLPE.S       | T533:  | 2 | 2,3177 | 0,212 | 0,105  |
| 8 | O94909 K0819_HUMAN  | R.GPSQATSPIRS#PQE.S   | S300:  | 2 | 2,3162 | 0,193 | -0,397 |
| 8 | Q8NFB5 NUP53_HUMAN  | K.TLGTPTQPGST#PR.I    | T280:  | 2 | 2,3135 | 0,276 | -0,438 |
| 8 | Q9Y5B0 CTDP1_HUMAN  | R.LVLS#PDAPDR.A       | S674:  | 2 | 2,313  | 0,324 | -0,315 |
| 8 | O15231 ZN185_HUMAN  | R.RES#CGSSVLTFE.G     | S233:  | 2 | 2,312  | 0,28  | 0      |
| 8 | Q9HB20 PKHA3_HUMAN  | K.KQS#ESEDTLPSFSS.-   | S289:  | 2 | 2,3106 | 0,205 | 0,075  |
| 8 | P54819 KAD2_HUMAN   | R.LQAYHTQTT#PLIE.Y    | T195:  | 2 | 2,3101 | 0,24  | 0,077  |
| 8 | Q5R372 Q5R372_HUMAN | E.ISTPRPS#SPGGLPE.E   | S118:  | 2 | 2,31   | 0,219 | -0,165 |
| 8 | Q09666 AHNK_HUMAN   | K.SSKAS#LGSLEGEAEAE.A | S5749: | 2 | 2,3086 | 0,295 | 0      |
| 8 | P49840 GSK3A_HUMAN  | R.GEPNVSY#ICSR.Y      | Y279:  | 2 | 2,3081 | 0,387 | 0      |
| 8 | Q14980 NUMA1_HUMAN  | R.LPPKVES#LE.S        | S1769: | 2 | 2,3076 | 0,337 | 0,335  |
| 8 | Q9Y2V2 CHSP1_HUMAN  | R.GNVVPS#PLPTR.R      | S41:   | 2 | 2,3071 | 0,287 | -0,301 |
| 8 | O43572 AKA10_HUMAN  | R.NSPAS#PLKE.L        | S281:  | 2 | 2,3051 | 0,18  | 0,119  |
| 8 | Q14690 RRP5_HUMAN   | E.YVEAKSS#VLED.-      | S1867: | 2 | 2,303  | 0,127 | 0      |

|   |                     |                        |            |   |        |       |        |
|---|---------------------|------------------------|------------|---|--------|-------|--------|
| 8 | Q6IPM2 IQCE_HUMAN   | R.VLSTS#PTISK.T        | S322:      | 2 | 2,3029 | 0,178 | -0,219 |
| 8 | Q9H4G0 E41L1_HUMAN  | R.SLS#PIIGK.D          | S784:      | 2 | 2,3018 | 0,17  | 0      |
| 8 | Q5T200 ZC3HD_HUMAN  | E.DGQVFS#PK.K          | S993:      | 2 | 2,3012 | 0,125 | -0,382 |
| 8 | Q9H9J4 UBP42_HUMAN  | E.GLS#PAPPAR.S         | S856:      | 2 | 2,3001 | 0,151 | 0,322  |
| 8 | Q9NR09 BIRC6_HUMAN  | E.LNS#PLVR.R           | S592:      | 2 | 2,2998 | 0,141 | 0,278  |
| 8 | Q6NZY4 ZCHC8_HUMAN  | K.GTPPLTPSDS#PQTR.T    | S500:      | 2 | 2,2994 | 0,368 | -1,829 |
| 8 | Q96EQ0 SGTB_HUMAN   | R.SFS#SSAEEHS.-        | S297:      | 2 | 2,2993 | 0,178 | 0,106  |
| 8 | Q13561 DCTN2_HUMAN  | K.Y#ADLPGIAR.N         | Y6:        | 2 | 2,2966 | 0,259 | 0      |
| 8 | P21359 NF1_HUMAN    | E.M*ESGIT#PPK.M        | T2565:     | 2 | 2,2951 | 0,316 | -0,633 |
| 8 | Q05209 PTN12_HUMAN  | E.SFVLAS#EHNT#PVRSE.W  | S689:T693: | 2 | 2,2941 | 0,281 | -0,2   |
| 8 | Q96GS4 CQ059_HUMAN  | R.RAT#ISSPLELE.G       | T62:       | 2 | 2,2939 | 0,161 | 0,188  |
| 8 | Q9NQW6 ANLN_HUMAN   | K.TPIS#PLK.T           | S323:      | 2 | 2,2937 | 0,208 | -0,146 |
| 8 | Q7KZ85 SPT6H_HUMAN  | R.LTPRPSPS#PM*IE.S     | S1703:     | 2 | 2,292  | 0,272 | -0,258 |
| 8 | Q9HA05 Q9HA05_HUMAN | R.STT#PTSSPFR.A        | T519:      | 2 | 2,2917 | 0,397 | 0      |
| 8 | P38432 P80C_HUMAN   | K.LGFSLT#PSK.G         | T303:      | 2 | 2,2905 | 0,375 | -0,118 |
| 8 | Q9Y4M2 Q9Y4M2_HUMAN | K.SSFLSS#PER.A         | S134:      | 2 | 2,2901 | 0,177 | -0,112 |
| 8 | O60307 MAST3_HUMAN  | E.RGSPSPS#LLNTISLD.T   | S776:      | 2 | 2,2881 | 0,273 | -0,315 |
| 8 | Q9HCM4 E41L5_HUMAN  | E.NS#PLLSR.S           | S517:      | 2 | 2,2872 | 0,215 | 0,127  |
| 8 | Q96PE2 ARHGH_HUMAN  | D.SNLLGSL#PK.T         | S764:      | 2 | 2,2864 | 0,156 | 0,111  |
| 8 | Q8WZ73 RFFL_HUMAN   | R.RAS#LSDLTDL.D        | S240:      | 2 | 2,2863 | 0,173 | -0,657 |
| 8 | P46013 KI67_HUMAN   | K.IPCKSS#PELE.D        | S2828:     | 2 | 2,2861 | 0,182 | -1,87  |
| 8 | Q8IZ21 PHAR4_HUMAN  | R.TRS#LPITIE.M         | S464:      | 2 | 2,2849 | 0,129 | -0,11  |
| 8 | Q99961 SH3G1_HUMAN  | K.IAASSS#FR.S          | S288:      | 2 | 2,2824 | 0,362 | -0,465 |
| 8 | Q9Y3L3 3BP1_HUMAN   | K.VTRS#PPETAAPVED.M    | S550:      | 2 | 2,2818 | 0,244 | -0,394 |
| 8 | Q96QT6 PHF12_HUMAN  | K.TPPT#PPSSIVAK.V      | T880:      | 2 | 2,279  | 0,271 | -0,096 |
| 8 | P11766 ADHX_HUMAN   | E.FVTHNLS#FDE.I        | S351:      | 2 | 2,2762 | 0,086 | 0,473  |
| 8 | P31946 1433B_HUMAN  | R.NLLS#VAYK.N          | S47:       | 2 | 2,2758 | 0,115 | 0,37   |
| 8 | Q99638 RAD9A_HUMAN  | E.AEPSTVPGT#PPP.K      | T355:      | 2 | 2,2745 | 0,41  | -0,18  |
| 8 | Q86SQ0 PHLB2_HUMAN  | E.KLQLS#DEESVFE.E      | S489:      | 2 | 2,271  | 0,319 | -0,081 |
| 8 | Q9C0B5 ZDHC5_HUMAN  | K.KVS#GVGGTTYE.I       | S704:      | 2 | 2,2683 | 0,289 | -0,207 |
| 8 | Q9BWG6 SCNM1_HUMAN  | E.SATVSAPAPM*S#PTR.R   | S183:      | 2 | 2,2666 | 0,212 | -0,249 |
| 8 | P35658 NU214_HUMAN  | K.SPGSTPT#TPTSSQAPQK.L | T436:      | 3 | 2,2664 | 0,17  | 0,104  |
| 8 | Q14671 PUM1_HUMAN   | E.VNSVLS#PR.S          | S209:      | 2 | 2,2653 | 0,295 | -0,128 |

|   |                    |                       |              |   |        |       |        |
|---|--------------------|-----------------------|--------------|---|--------|-------|--------|
| 8 | Q6ZSZ5 ARHGI_HUMAN | R.SLS#PILPGR.H        | S1103:       | 2 | 2,2624 | 0,273 | 0,12   |
| 8 | O75145 LIPA3_HUMAN | R.GEGPAIPGDT#PPPTPR.S | T714:        | 2 | 2,2591 | 0,188 | 0      |
| 8 | Q13029 PRDM2_HUMAN | R.TAS#PPALPK.I        | S643:        | 2 | 2,259  | 0,203 | 0,761  |
| 8 | Q9H5H4 ZN768_HUMAN | R.FEPES#PGFESR.S      | S83:         | 2 | 2,2527 | 0,23  | -0,09  |
| 8 | P46100 ATRX_HUMAN  | E.LS#DYAEK.S          | S1061:       | 2 | 2,2526 | 0,275 | 0,269  |
| 8 | Q9NYZ3 GTSE1_HUMAN | R.AVGS#PLCVPAR.R      | S536:        | 2 | 2,2523 | 0,178 | 0,404  |
| 8 | Q8IZ21 PHAR4_HUMAN | R.AHS#LLFE.N          | S443:        | 2 | 2,2513 | 0,136 | -0,816 |
| 8 | O95835 LATS1_HUMAN | R.SVT#PPPPPR.G        | T246:        | 2 | 2,2506 | 0,095 | 0,119  |
| 8 | Q96H22 CENPN_HUMAN | R.SLGLDINM*DS#R.I     | S235:        | 2 | 2,2485 | 0,155 | 0,463  |
| 8 | Q03468 ERCC6_HUMAN | E.QLS#PQAATSR.D       | S158:        | 2 | 2,2403 | 0,403 | -0,214 |
| 8 | Q8N1F7 NUP93_HUMAN | R.GLDIS#HIS#QRLE.S    | S72:S75:     | 2 | 2,2383 | 0,481 | 0,24   |
| 8 | Q9Y4H2 IRS2_HUMAN  | R.TYS#LTPPAR.Q        | S577:        | 2 | 2,2379 | 0,147 | -0,336 |
| 8 | Q6PJG2 CN043_HUMAN | E.AT#PVSIEPR.I        | T715:        | 2 | 2,2378 | 0,366 | 0,93   |
| 8 | P0C7M2 RA1L3_HUMAN | K.SES#PKEPE.Q         | S6:          | 2 | 2,2378 | 0,109 | -0,062 |
| 8 | P13639 EF2_HUMAN   | K.FSVS#PVVR.V         | S502:        | 2 | 2,2358 | 0,154 | 0,063  |
| 8 | Q14191 WRN_HUMAN   | K.SIM*VQS#PEK.A       | S1133:       | 2 | 2,2356 | 0,244 | 0,109  |
| 8 | P26038 MOES_HUMAN  | E.LTARIS#QLE.M        | S429:        | 2 | 2,2336 | 0,124 | 0,22   |
| 8 | Q9UFC0 LRWD1_HUMAN | K.IRS#LDLSGLE.L       | S25:         | 2 | 2,2326 | 0,176 | -0,825 |
| 8 | Q63HR2 TENC1_HUMAN | R.KLSY#EIPTEE.G       | Y846:        | 2 | 2,2285 | 0,122 | 0,189  |
| 8 | P12268 IMDH2_HUMAN | R.LVGISS#R.D          | S160:        | 2 | 2,2264 | 0,163 | 0      |
| 8 | O15400 STX7_HUMAN  | R.ASSRV#GSFPE.D       | S129:        | 2 | 2,2252 | 0,273 | 0      |
| 8 | Q7L9L4 MOL1A_HUMAN | E.ATLGS#GNLR.M        | S38:         | 2 | 2,2199 | 0,206 | 0      |
| 8 | O15344 TRI18_HUMAN | K.ASVSGPNSPS#ETR.R    | S98:         | 2 | 2,2188 | 0,294 | -0,178 |
| 8 | Q15149 PLEC1_HUMAN | K.AQLEPVAS#PAK.K      | S1435:       | 2 | 2,2166 | 0,1   | -0,205 |
| 8 | Q7Z4H7 FA29A_HUMAN | R.SLS#PLIK.F          | S908:        | 2 | 2,2161 | 0,115 | 0,364  |
| 8 | Q5TKA1 LIN9_HUMAN  | R.FFM*T#PPR.L         | T297:        | 2 | 2,2136 | 0,16  | 0,184  |
| 8 | Q9UPZ3 HPS5_HUMAN  | K.FEPLDSACSS#R.R      | S433:        | 2 | 2,2129 | 0,142 | -0,09  |
| 8 | Q15648 MED1_HUMAN  | K.NYGS#PLIS#GSTPKHE.R | S1433:S1437: | 3 | 2,2091 | 0,131 | -0,209 |
| 8 | P53602 ERG19_HUMAN | K.LTGS#TVGM*R.A       | S211:        | 2 | 2,2073 | 0,288 | 0,36   |
| 8 | P18583 SON_HUMAN   | K.RLS#ENAFDLE.A       | S2238:       | 2 | 2,2059 | 0,148 | -0,096 |
| 8 | Q14203 DCTN1_HUMAN | E.ANVRLS#LLE.K        | S974:        | 2 | 2,2029 | 0,167 | -0,223 |
| 8 | P06748 NPM_HUMAN   | K.GPSS#VEDIK.A        | S243:        | 2 | 2,202  | 0,223 | -1,748 |
| 8 | P22694 KAPCB_HUMAN | E.DIRVS#ITE.K         | S339:        | 2 | 2,1988 | 0,146 | 0,181  |

|   |                    |                        |            |   |        |       |        |
|---|--------------------|------------------------|------------|---|--------|-------|--------|
| 8 | Q9P107 GMIP_HUMAN  | E.NGLGS#PFGK.W         | S480:      | 2 | 2,198  | 0,147 | 0,382  |
| 8 | Q9H2U1 DHX36_HUMAN | R.RY#SASTVDVIE.M       | Y454:      | 2 | 2,1968 | 0,13  | 0      |
| 8 | Q9Y6D9 MD1L1_HUMAN | E.NTM*VLS#TLR.S        | S12:       | 2 | 2,1958 | 0,15  | -0,647 |
| 8 | P23588 IF4B_HUMAN  | K.GKTIS#LTDFLAE.D      | S16:       | 2 | 2,1958 | 0,162 | -0,177 |
| 8 | Q8NCN4 RN169_HUMAN | R.VLS#PLIIKS#TPR.N     | S403:S409: | 2 | 2,1939 | 0,224 | -0,247 |
| 8 | P04637 P53_HUMAN   | R.ALPNNTSSS#PQPK.K     | S315:      | 2 | 2,1937 | 0,429 | -0,172 |
| 8 | Q9BQS8 FYCO1_HUMAN | R.RLES#M*LQPLAQE.L     | S342:      | 2 | 2,1937 | 0,13  | -0,242 |
| 8 | P78559 MAP1A_HUMAN | E.GGPYS#PLGK.D         | S1903:     | 2 | 2,193  | 0,288 | -0,064 |
| 8 | Q15418 KS6A1_HUMAN | R.KLPS#TTL.-           | S732:      | 2 | 2,1918 | 0,392 | -0,073 |
| 8 | Q3KR37 GRM1B_HUMAN | R.STPACS#PILR.K        | S21:       | 2 | 2,1903 | 0,356 | 0,206  |
| 8 | Q7Z4H7 FA29A_HUMAN | E.TFS#PAVGNR.I         | S715:      | 2 | 2,1878 | 0,169 | 0      |
| 8 | O94782 UBP1_HUMAN  | E.SSEIS#PEPK.T         | S475:      | 2 | 2,1868 | 0,149 | 0,116  |
| 8 | Q8N3F8 MILK1_HUMAN | E.QM*PQAS#PGLAPR.T     | S578:      | 2 | 2,1829 | 0,123 | -0,362 |
| 8 | P08670 VIME_HUMAN  | R.SY#VTTSTR.T          | Y30:       | 2 | 2,1788 | 0,402 | 0,123  |
| 8 | Q7KZ85 SPT6H_HUMAN | K.LNITPT#K.K           | T621:      | 2 | 2,1752 | 0,175 | 0      |
| 8 | O75676 KS6A4_HUMAN | E.GFFLKS#VE.N          | S721:      | 2 | 2,1745 | 0,095 | 0,121  |
| 8 | Q9Y3Q8 T22D4_HUMAN | R.AAT#PLPSLR.V         | T211:      | 2 | 2,1734 | 0,197 | 0,182  |
| 8 | Q6IAA8 CK059_HUMAN | K.LLLDPSS#PPTK.A       | S27:       | 2 | 2,1732 | 0,273 | 0,098  |
| 8 | P12270 TPR_HUMAN   | R.QITLKT#PASGE.R       | T1650:     | 2 | 2,1726 | 0,335 | -0,552 |
| 8 | Q9NYV4 CD2L7_HUMAN | K.AIT#PPQQPYK.K        | T692:      | 2 | 2,1725 | 0,208 | 0,1    |
| 8 | Q5VYS8 ZCHC6_HUMAN | E.SFGS#PPKEE.M         | S706:      | 2 | 2,1724 | 0,096 | -0,115 |
| 8 | Q9UKV3 ACINU_HUMAN | K.SPS#PPRLTE.D         | S388:      | 2 | 2,169  | 0,151 | -0,115 |
| 8 | Q99549 MPP8_HUMAN  | K.LM*PVSAQT#PK.G       | T385:      | 2 | 2,1686 | 0,277 | -0,313 |
| 8 | P46934 NEDD4_HUMAN | R.RGS#LQAYTFE.E        | S428:      | 2 | 2,1609 | 0,222 | 0,097  |
| 8 | O94964 CT117_HUMAN | R.VYYS#PPVAR.R         | S146:      | 2 | 2,1603 | 0,152 | 0,323  |
| 8 | Q14980 NUMA1_HUMAN | R.QSM*AFSILNT#PK.K     | T2055:     | 2 | 2,1593 | 0,368 | -0,17  |
| 8 | Q8TDR0 MIPT3_HUMAN | E.SHNS#DNEEDDQFVVE.A   | S501:      | 2 | 2,1567 | 0,16  | -0,066 |
| 8 | P23193 TCEA1_HUMAN | K.EPAITSQNS#PEAR.E     | S100:      | 2 | 2,1564 | 0,355 | -0,082 |
| 8 | P62753 RS6_HUMAN   | R.LSS#LRASTS#KSE.S     | S236:S242: | 2 | 2,1541 | 0,241 | -0,428 |
| 8 | Q8IZQ1 WDFY3_HUMAN | R.VSS#GFGLSK.L         | S2278:     | 2 | 2,1539 | 0,178 | -0,19  |
| 8 | Q96TA1 NIBL1_HUMAN | E.AS#S#PPASPLQHLLPGK.A | S678:S679: | 2 | 2,1527 | 0,157 | -0,208 |
| 8 | Q86X27 RGPS2_HUMAN | K.SAT#FPNAGPR.H        | T361:      | 2 | 2,1514 | 0,303 | -0,889 |
| 8 | Q96TA1 NIBL1_HUMAN | E.ASS#PPAS#PLQHLLPGK.A | S679:S683: | 3 | 2,1511 | 0,401 | 0,104  |

|   |                     |                      |            |   |        |       |        |
|---|---------------------|----------------------|------------|---|--------|-------|--------|
| 8 | Q8WWH5 TRUB1_HUMAN  | E.AAVVSS#PSLK.T      | S11:       | 2 | 2,1506 | 0,26  | -1,761 |
| 8 | Q15398 DLG7_HUMAN   | K.TYQVTPM*#T#PR.S    | T329:      | 2 | 2,1506 | 0,314 | -1,513 |
| 8 | Q9Y2D8 ADIP_HUMAN   | E.M*ISLLS#PQK.K      | S293:      | 2 | 2,1499 | 0,22  | 0,219  |
| 8 | O15075 DCLK1_HUMAN  | K.SPSPSPTS#PGSLR.K   | S337:      | 2 | 2,1481 | 0,117 | -0,09  |
| 8 | Q1MSJ5 CSPP1_HUMAN  | R.AQS#PPVPAR.K       | S885:      | 2 | 2,1468 | 0,192 | -0,182 |
| 8 | Q96H55 MYO19_HUMAN  | R.LIHVTSS#AFTGLG.-   | S964:      | 2 | 2,1465 | 0,262 | -0,176 |
| 8 | Q9Y566 SHAN1_HUMAN  | R.RAPS#PSLLPASE.H    | S2000:     | 2 | 2,1438 | 0,217 | 0,094  |
| 8 | Q9UPN3 MACF1_HUMAN  | R.RGS#DASDFDLLE.T    | S5372:     | 2 | 2,1438 | 0,145 | -0,261 |
| 8 | P49848 TAF6_HUMAN   | R.AAAPPQPS#PPPTK.F   | S532:      | 2 | 2,1399 | 0,292 | -0,273 |
| 8 | P60981 DEST_HUMAN   | E.KLGGs#LIVAFE.G     | S155:      | 2 | 2,1396 | 0,157 | -0,301 |
| 8 | Q9H019 FA54B_HUMAN  | R.NAS#VPNLR.G        | S103:      | 2 | 2,1381 | 0,174 | -0,064 |
| 8 | Q9Y2F5 K0947_HUMAN  | K.SIS#PEVSASR.R      | S925:      | 2 | 2,1364 | 0,108 | 0,219  |
| 8 | Q14678 KANK1_HUMAN  | E.AIS#PDVLR.Y        | S1147:     | 2 | 2,1357 | 0,178 | 0,128  |
| 8 | P05787 K2C8_HUMAN   | R.VGS#SNFR.G         | S43:       | 2 | 2,1356 | 0,231 | -0,144 |
| 8 | P49792 RBP2_HUMAN   | E.STTGFNFS#FK.S      | S2270:     | 2 | 2,1333 | 0,189 | -0,1   |
| 8 | P49790 NU153_HUMAN  | K.FSS#PIVK.S         | S529:      | 2 | 2,1331 | 0,11  | -0,569 |
| 8 | P49848 TAF6_HUMAN   | E.AGDSPPAPGT#PK.A    | T660:      | 2 | 2,1298 | 0,19  | 0      |
| 8 | Q9UMD9 COHA1_HUMAN  | R.NSS#NT#LPIPK.K     | S180:T182: | 2 | 2,1264 | 0,245 | -1,982 |
| 8 | A8MQ54 A8MQ54_HUMAN | R.DASLHGLSQYNS#L.-   | S1671:     | 2 | 2,1254 | 0,334 | 0,082  |
| 8 | Q14451 GRB7_HUMAN   | R.RATS#LPSIPNPFPE.L  | S63:       | 2 | 2,1249 | 0,416 | -0,076 |
| 8 | P30622 CLIP1_HUMAN  | K.EPSAT#PPISNLTK.T   | T182:      | 2 | 2,1248 | 0,331 | 0,085  |
| 8 | ##Q13177 PAK2_HUMAN | D.SPSS#IEPRE.K       | S450:      | 2 | 2,1247 | 0,083 | 0      |
| 8 | Q9UHB7 AFF4_HUMAN   | R.TIS#QSSSLK.S       | S836:      | 2 | 2,1219 | 0,297 | 0,237  |
| 8 | Q9UKG1 DP13A_HUMAN  | E.AVTPS#PSFQQR.H     | S401:      | 2 | 2,1184 | 0,154 | -0,376 |
| 8 | Q9H1A4 APC1_HUMAN   | E.GSLs#PVIAPK.K      | S688:      | 2 | 2,1162 | 0,272 | 0      |
| 8 | Q8NFB2 T185A_HUMAN  | R.VVITQS#PGK.Y       | S333:      | 2 | 2,1157 | 0,327 | 0,06   |
| 8 | P05549 AP2A_HUMAN   | R.LSLLSS#TSK.Y       | S223:      | 2 | 2,1153 | 0,151 | 0,06   |
| 8 | Q9H6F5 CCD86_HUMAN  | E.SPQQQPEPGAAS#PQR.Q | S91:       | 2 | 2,1007 | 0,292 | -0,154 |
| 8 | Q6V1X1 DPP8_HUMAN   | E.IIHVTS#PM*LE.T     | S318:      | 2 | 2,0998 | 0,089 | -0,296 |
| 8 | Q9H0X9 OSBL5_HUMAN  | R.QTTFLGS#PGPR.H     | S747:      | 2 | 2,0923 | 0,369 | 0      |
| 8 | P21127 CD2L1_HUMAN  | E.GT#YGVVYR.A        | T448:      | 2 | 2,0919 | 0,206 | 0,061  |
| 8 | P57740 NU107_HUMAN  | E.ISS#PVIR.E         | S11:       | 2 | 2,0908 | 0,171 | 0,143  |
| 8 | Q9Y3E2 BOLA1_HUMAN  | E.GLS#PLQR.H         | S81:       | 2 | 2,0851 | 0,162 | 0,215  |

|   |                     |                      |        |   |        |       |        |
|---|---------------------|----------------------|--------|---|--------|-------|--------|
| 8 | Q6UN15 FIP1_HUMAN   | E.FTS#PPSLFK.T       | S259:  | 2 | 2,0837 | 0,191 | 0      |
| 8 | Q8IWX8 CHERP_HUMAN  | K.SYS#FIAR.M         | S904:  | 2 | 2,0813 | 0,218 | 0,132  |
| 8 | P29966 MARCS_HUMAN  | K.LSGFS#FK.K         | S170:  | 2 | 2,0806 | 0,206 | 0,282  |
| 8 | Q15435 PP1R7_HUMAN  | K.HSS#GIVADLSE.Q     | S37:   | 2 | 2,0772 | 0,153 | -0,204 |
| 8 | Q92667 AKAP1_HUMAN  | K.SLLSS#PTKD.S       | S445:  | 2 | 2,0756 | 0,205 | -0,356 |
| 8 | Q8ND82 Z280C_HUMAN  | K.SEPHS#PGIPE.I      | S80:   | 2 | 2,0751 | 0,094 | -0,216 |
| 8 | Q15003 CND2_HUMAN   | E.YSYFS#PR.T         | S432:  | 2 | 2,0698 | 0,298 | 0,183  |
| 8 | Q8WYP5 AHTF1_HUMAN  | E.AFFGT#PISK.A       | T1114: | 2 | 2,0693 | 0,252 | 0,116  |
| 8 | P22234 PUR6_HUMAN   | E.LLDS#PGK.V         | S27:   | 2 | 2,0684 | 0,083 | 0,301  |
| 8 | Q86Y04 Q86Y04_HUMAN | D.LTLLS#PK.S         | S239:  | 2 | 2,0653 | 0,085 | 0,644  |
| 8 | Q6UB99 ANR11_HUMAN  | R.SVS#VDIR.R         | S1793: | 2 | 2,0648 | 0,133 | 0,428  |
| 8 | Q13115 DUS4_HUMAN   | E.AAS#PSGPLR.E       | S345:  | 2 | 2,0641 | 0,106 | 0,196  |
| 8 | Q63HQ0 CD016_HUMAN  | R.SSRLS#SDATVLPNTE.S | S174:  | 2 | 2,0598 | 0,133 | -0,208 |
| 8 | Q92797 SYMPK_HUMAN  | E.ERS#PQTLAPVGE.D    | S1243: | 2 | 2,0595 | 0,291 | 0      |
| 8 | Q5VWN6 CJ018_HUMAN  | R.S#RSPLLVTVVE.S     | S2035: | 2 | 2,0582 | 0,131 | -0,191 |
| 8 | Q96P47 CENG3_HUMAN  | R.ATPATAPGTS#PR.A    | S443:  | 2 | 2,0581 | 0,233 | 0      |
| 8 | Q96TC7 FA82C_HUMAN  | R.KDS#LDLEEE.A       | S212:  | 2 | 2,0579 | 0,175 | 0,105  |
| 8 | Q6P4R8 NFRKB_HUMAN  | R.KGS#LAALYD.L       | S298:  | 2 | 2,0521 | 0,124 | 0      |
| 8 | Q9Y2D5 AKAP2_HUMAN  | R.QVLQSTQS#PR.T      | S748:  | 2 | 2,0515 | 0,168 | -0,299 |
| 8 | O75381 PEX14_HUMAN  | R.QFPPSPS#APK.I      | S234:  | 2 | 2,0507 | 0,113 | 0,107  |
| 8 | Q9UQB8 BAIP2_HUMAN  | K.SLS#PPQSQSK.L      | S325:  | 2 | 2,0486 | 0,266 | 0      |
| 8 | Q9H1E3 NUCKS_HUMAN  | K.ATVTPS#PVK.G       | S181:  | 2 | 2,048  | 0,139 | 0      |
| 8 | Q9NPQ8 RIC8A_HUMAN  | R.VIQPM*GM*S#PR.G    | S501:  | 2 | 2,045  | 0,146 | 0      |
| 8 | P20700 LMNB1_HUMAN  | R.AGGPTTPLS#PTR.L    | S23:   | 2 | 2,0449 | 0,438 | -1,186 |
| 8 | P68104 EF1A1_HUMAN  | K.FLKS#GDAAIVD.M     | S396:  | 2 | 2,044  | 0,124 | 0,201  |
| 8 | Q9BT25 NYS48_HUMAN  | E.STS#FSAPR.K        | S131:  | 2 | 2,0429 | 0,367 | 0,523  |
| 8 | Q6WCQ1 MRIP_HUMAN   | E.VDRS#PGLPM*SD.L    | S618:  | 2 | 2,0426 | 0,296 | -1,249 |
| 8 | P37802 TAGL2_HUMAN  | R.NFSDNQLQE.G        |        | 2 | 2,042  | 0,108 | 0      |
| 8 | P15559 NQO1_HUMAN   | E.GHLS#PDIVAE.Q      | S82:   | 2 | 2,0412 | 0,101 | 0,327  |
| 8 | Q03252 LMNB2_HUMAN  | R.AGGPATPLS#PTR.L    | S17:   | 2 | 2,0395 | 0,279 | -0,405 |
| 8 | Q9H0E9 BRD8_HUMAN   | E.SGTIFGS#QIK.D      | S621:  | 2 | 2,039  | 0,163 | -0,218 |
| 8 | Q96RK0 CIC_HUMAN    | K.VFS#PVIR.S         | S496:  | 2 | 2,0353 | 0,21  | 0,136  |
| 8 | P16949 STMN1_HUMAN  | E.SVPEFPLS#PPK.K     | S38:   | 2 | 2,0347 | 0,28  | -0,191 |

|   |                      |                        |            |   |        |       |        |
|---|----------------------|------------------------|------------|---|--------|-------|--------|
| 8 | Q86US8 EST1A_HUMAN   | K.TQTPQLHFLDT#DDE.V    | T479:      | 2 | 2,0346 | 0,312 | 0      |
| 8 | Q9Y3M8 STA13_HUMAN   | R.TGS#ISLGR.E          | S430:      | 2 | 2,0341 | 0,217 | -0,14  |
| 8 | Q8IY67 RAVR1_HUMAN   | E.LVRPFGS#LE.R         | S157:      | 2 | 2,0337 | 0,204 | -0,222 |
| 8 | P30622 CLIP1_HUMAN   | K.IGFPSTT#PAK.A        | T287:      | 2 | 2,0293 | 0,259 | 0      |
| 8 | P04083 ANXA1_HUMAN   | R.NALLS#LAK.G          | S182:      | 2 | 2,0279 | 0,093 | 0,134  |
| 8 | P48681 NEST_HUMAN    | E.TLKS#LGEEIQE.S       | S548:      | 2 | 2,0277 | 0,096 | -0,276 |
| 8 | Q6PKG0 LARP1_HUMAN   | R.SLPTTVPE#PNYR.N      | S774:      | 2 | 2,0235 | 0,298 | 0,079  |
| 8 | Q86TI0 TBCD1_HUMAN   | K.SFS#QPGLR.S          | S237:      | 2 | 2,0191 | 0,24  | 0,126  |
| 8 | A3KN83 SBNO1_HUMAN   | R.SFS#PTM*K.V          | S214:      | 2 | 2,0183 | 0,15  | 0      |
| 8 | P84098 RL19_HUMAN    | R.LASS#VLR.C           | S13:       | 2 | 2,0178 | 0,173 | 0,443  |
| 8 | Q5VZK9 LR16A_HUMAN   | R.FGLGT#PEK.N          | T1228:     | 2 | 2,0161 | 0,126 | 0,197  |
| 8 | Q9Y2V2 CHSP1_HUMAN   | R.TFS#ATVR.A           | S52:       | 2 | 2,0155 | 0,166 | 0,142  |
| 8 | P35222 CTNB1_HUMAN   | E.LTSS#LFR.T           | S681:      | 2 | 2,0089 | 0,084 | 0,27   |
| 8 | Q9C0C2 TB182_HUMAN   | E.ALSFGAS#PGR.C        | S1439:     | 2 | 2,0064 | 0,19  | 0      |
| 8 | Q96JH7 VCIP1_HUMAN   | R.DGPSS#APATPTK.A      | S757:      | 2 | 2,0055 | 0,267 | -0,202 |
| 8 | Q09666 AHNK_HUMAN    | K.AGLRVS#APE.V         | S332:      | 2 | 2,0019 | 0,132 | 0      |
| 8 | Q9UPS8 ANR26_HUMAN   | K.ESVNS#PVFGK.A        | S630:      | 2 | 2,0008 | 0,244 | 0      |
| 8 | Q12873 CHD3_HUMAN    | E.ADAPS#PAPSLGER.L     | S1601:     | 2 | 1,9973 | 0,348 | -0,543 |
| 8 | Q6ZRV2 FA83H_HUMAN   | K.GS#PTSAYPER.K        | S870:      | 2 | 1,9953 | 0,423 | -0,32  |
| 8 | Q9BX66 SRBS1_HUMAN   | R.SAT#LPLPAR.S         | T497:      | 2 | 1,9924 | 0,144 | 0,182  |
| 8 | Q14980 NUMA1_HUMAN   | E.GTPLS#ITSK.L         | S1736:     | 2 | 1,9913 | 0,332 | 0,372  |
| 8 | Q58FF7 H90B3_HUMAN   | K.HFS#VEGQLE.F         | S264:      | 2 | 1,9892 | 0,143 | 0      |
| 8 | P85037 FOXK1_HUMAN   | R.S#APAS#PTHPGLM*SPR.S | S416:S420: | 2 | 1,989  | 0,353 | -0,435 |
| 8 | Q8IWU2 LMTK2_HUMAN   | K.YFS#PPPPAR.S         | S1450:     | 2 | 1,9829 | 0,095 | -0,219 |
| 8 | Q96T58 MINT_HUMAN    | E.AAVPT#TPR.R          | T1946:     | 2 | 1,9818 | 0,266 | 0,19   |
| 8 | Q9BQS8 FYCO1_HUMAN   | E.ICLLKS#GE.L          | S1343:     | 2 | 1,98   | 0,167 | -0,549 |
| 8 | Q86WH2 RASF3_HUMAN   | E.DFFFT#AR.T           | T18:       | 2 | 1,9764 | 0,081 | 0      |
| 8 | ##Q14CZ7 FAKD3_HUMAN | E.NAT#SPLVFGE.E        | T81:       | 2 | 1,9759 | 0,138 | 0,438  |
| 8 | P06493 CDC2_HUMAN    | E.GTY#GVVYK.G          | Y15:       | 2 | 1,975  | 0,358 | -0,505 |
| 8 | Q6ZRV2 FA83H_HUMAN   | R.RGS#PVPPVPE.R        | S914:      | 2 | 1,968  | 0,106 | 0,219  |
| 8 | Q8IVF2 AHNK2_HUMAN   | K.LQM*PS#FK.V          | S1418:     | 2 | 1,9666 | 0,134 | 0      |
| 8 | Q5VWN6 CJ018_HUMAN   | K.QVS#PAASLR.H         | S1087:     | 2 | 1,9612 | 0,091 | -0,423 |
| 8 | P21359 NF1_HUMAN     | E.SGITT#PPK.M          | T2565:     | 2 | 1,9611 | 0,3   | 0,415  |

|   |                     |                        |        |   |        |       |        |
|---|---------------------|------------------------|--------|---|--------|-------|--------|
| 8 | Q9P227 RHG23_HUMAN  | R.RSSY#LLAITTE.R       | Y612:  | 2 | 1,96   | 0,144 | 0,091  |
| 8 | Q9NPR2 SEM4B_HUMAN  | R.LGS#EIRD.S           | S825:  | 2 | 1,9587 | 0,188 | 0,351  |
| 8 | Q86SQ0 PHLB2_HUMAN  | E.EALM*S#PDTR.Y        | S501:  | 2 | 1,9526 | 0,231 | -0,109 |
| 8 | P53814 SMTN_HUMAN   | R.SLSVLS#PR.Q          | S304:  | 2 | 1,9496 | 0,202 | 0,065  |
| 8 | Q14151 SAFB2_HUMAN  | E.TSS#LNFK.V           | S195:  | 2 | 1,9471 | 0,262 | 0,417  |
| 8 | Q8TDY2 RBCC1_HUMAN  | K.SPAIDSTRGDSSS#LVAE.L | S1286: | 2 | 1,945  | 0,151 | -0,344 |
| 8 | Q9NS56 TOPRS_HUMAN  | R.RTTT#PPDSGVLFE.G     | T205:  | 2 | 1,9396 | 0,205 | -0,163 |
| 8 | Q15742 NAB2_HUMAN   | R.SFS#PKSPLE.L         | S159:  | 2 | 1,9318 | 0,214 | 0,228  |
| 8 | Q8N3U4 STAG2_HUMAN  | R.RGTS#LM*EDDEEPIVE.D  | S1161: | 2 | 1,9307 | 0,136 | -0,269 |
| 8 | Q12834 CDC20_HUMAN  | E.AAGPAPS#PM*R.A       | S41:   | 2 | 1,9281 | 0,236 | 0      |
| 8 | Q9NQW6 ANLN_HUMAN   | E.SLVST#PRLE.L         | T628:  | 2 | 1,9265 | 0,166 | -0,113 |
| 8 | P18583 SON_HUMAN    | E.SDQTLAALLS#PKE.S     | S1697: | 2 | 1,9247 | 0,183 | -0,168 |
| 8 | Q7L4I2 RSRC2_HUMAN  | E.QSEVSVS#PR.A         | S32:   | 2 | 1,9239 | 0,347 | -0,114 |
| 8 | Q92545 TM131_HUMAN  | R.HSS#EDSDITSLIE.A     | S1293: | 2 | 1,9205 | 0,238 | -0,242 |
| 8 | Q7Z6M1 RABEK_HUMAN  | E.VTS#PPPSPR.T         | S133:  | 2 | 1,9104 | 0,236 | 0,36   |
| 8 | Q01082 SPTB2_HUMAN  | E.S#SPIPSPTSDR.K       | S2164: | 2 | 1,9081 | 0,133 | -0,399 |
| 8 | P10243 MYBA_HUMAN   | K.FST#PPAILR.K         | T442:  | 2 | 1,9018 | 0,166 | 0,564  |
| 8 | Q92466 DDB2_HUMAN   | R.SRS#PLELEPE.A        | S26:   | 2 | 1,9002 | 0,107 | 0,099  |
| 8 | P58340 MLF1_HUMAN   | R.SFS#EPFGR.D          | S34:   | 2 | 1,8968 | 0,16  | 0,303  |
| 8 | Q9H792 SG269_HUMAN  | R.ANTLS#PVR.F          | S281:  | 2 | 1,893  | 0,19  | 0,455  |
| 8 | Q13017 RHG05_HUMAN  | E.DVFLPS#PR.D          | S968:  | 2 | 1,8923 | 0,204 | 0,121  |
| 8 | P28290 SSFA2_HUMAN  | R.TGVPSTAS#VGK.S       | S1134: | 2 | 1,8911 | 0,229 | 0      |
| 8 | P18858 DNL1_HUMAN   | K.TLSSFFT#PR.K         | T233:  | 2 | 1,8901 | 0,196 | -0,322 |
| 8 | Q6P995 K1946_HUMAN  | E.NFTQT#LPK.M          | T587:  | 2 | 1,8895 | 0,16  | -0,711 |
| 8 | Q86UP2 KTN1_HUMAN   | E.LNAIRT#E.N           | T770:  | 2 | 1,8842 | 0,114 | -0,068 |
| 8 | Q6P0N0 CN106_HUMAN  | R.YNLS#AGTIK.A         | S671:  | 2 | 1,8842 | 0,175 | 0,117  |
| 8 | A8K1N6 A8K1N6_HUMAN | K.GSLLPTS#PR.L         | S284:  | 2 | 1,8819 | 0,139 | 0      |
| 8 | P09874 PARP1_HUMAN  | E.YSAS#QLK.G           | S179:  | 2 | 1,8815 | 0,191 | 0,209  |
| 8 | O94804 STK10_HUMAN  | E.QGGDLS#PAANR.S       | S438:  | 2 | 1,8798 | 0,246 | 0      |
| 8 | Q86XL3 ANKL2_HUMAN  | K.TSLPLS#PVK.T         | S268:  | 2 | 1,8776 | 0,11  | 0,239  |
| 8 | Q96JH7 VCIP1_HUMAN  | R.TVS#PSTIR.D          | S747:  | 2 | 1,8752 | 0,088 | 0,065  |
| 8 | Q13535 ATR_HUMAN    | E.NLSSNSDGIS#PK.R      | S428:  | 2 | 1,8684 | 0,201 | -0,564 |
| 8 | Q4ZG52 Q4ZG52_HUMAN | R.VRIS#SSTPVVE.D       | S167:  | 2 | 1,8683 | 0,159 | 0      |



|   |                    |                      |        |   |        |       |        |
|---|--------------------|----------------------|--------|---|--------|-------|--------|
| 8 | O75694 NU155_HUMAN | K.AAPQSPS#VPK.K      | S994:  | 2 | 1,8677 | 0,253 | 0,23   |
| 8 | Q9UHD8 SEPT9_HUMAN | E.VETPNST#PPR.R      | T42:   | 2 | 1,8654 | 0,337 | -0,311 |
| 8 | Q9BPZ7 SIN1_HUMAN  | R.TS#FSFQKE.K        | S510:  | 2 | 1,8616 | 0,172 | 0,463  |
| 8 | A6NHQ4 YQ017_HUMAN | R.LAVPAS#PR.G        | S15:   | 2 | 1,8576 | 0,279 | 0,205  |
| 8 | Q9Y2Z0 SUGT1_HUMAN | K.NLYPSSS#PYTR.N     | S281:  | 2 | 1,8574 | 0,103 | -0,179 |
| 8 | Q86UU0 BCL9L_HUMAN | R.EAPGS#PPLSPR.G     | S21:   | 2 | 1,8524 | 0,141 | -0,205 |
| 8 | Q86WB0 NIPA_HUMAN  | E.VPSS#PLR.K         | S395:  | 2 | 1,8444 | 0,158 | 0,511  |
| 8 | Q86VR2 F134C_HUMAN | E.GVPTT#PGPASGSTR.G  | T10:   | 2 | 1,8409 | 0,19  | -0,323 |
| 8 | Q9BRD0 BUD13_HUMAN | E.YDPDIS#PPR.K       | S325:  | 2 | 1,8401 | 0,165 | 0,428  |
| 8 | P49792 RBP2_HUMAN  | R.FALVT#PK.K         | T1412: | 2 | 1,8356 | 0,114 | -0,071 |
| 8 | Q8WWM7 ATX2L_HUMAN | E.IESS#PQYR.L        | S306:  | 2 | 1,8327 | 0,126 | 0,576  |
| 8 | Q9BY89 K1671_HUMAN | K.CIS#LFRE.D         | S442:  | 2 | 1,8312 | 0,242 | 0,061  |
| 8 | Q8TDY2 RBCC1_HUMAN | E.LVLS#PDM*PR.T      | S243:  | 2 | 1,8301 | 0,113 | 0,109  |
| 8 | Q02880 TOP2B_HUMAN | E.YTFS#PGK.S         | S1424: | 2 | 1,8274 | 0,168 | 0,347  |
| 8 | Q9UHR4 BI2L1_HUMAN | E.AVT#VPTSPPTPVR.S   | T409:  | 2 | 1,8254 | 0,13  | -0,261 |
| 8 | O75694 NU155_HUMAN | K.AAPQS#PSVVK.K      | S992:  | 2 | 1,8193 | 0,156 | -0,115 |
| 8 | P78362 SRPK2_HUMAN | E.LLGS#IPR.H         | S608:  | 2 | 1,8151 | 0,09  | 0,292  |
| 8 | P43358 MAGA4_HUMAN | R.IAYPS#LRE.A        | S304:  | 2 | 1,8115 | 0,155 | 0,356  |
| 8 | Q9Y6M5 ZNT1_HUMAN  | K.DAEKTPAVISIS#CLE.L | S468:  | 2 | 1,8024 | 0,095 | 0      |
| 8 | Q96HP0 DOCK6_HUMAN | R.RCSS#SLGVPLTE.V    | S41:   | 2 | 1,8023 | 0,338 | 0,44   |
| 8 | P06748 NPM_HUMAN   | K.M*SVQPTVSLGGFE.I   |        | 2 | 1,7921 | 0,139 | -0,178 |
| 8 | O75864 K1986_HUMAN | R.ISVSS#PGR.G        | S557:  | 2 | 1,7901 | 0,185 | 0,553  |
| 8 | Q86UU1 PHLB1_HUMAN | R.ALS#PLPTR.T        | S470:  | 2 | 1,7863 | 0,127 | -0,065 |
| 8 | P49006 MRP_HUMAN   | K.LSGLS#FK.R         | S104:  | 2 | 1,7753 | 0,177 | 0,513  |
| 8 | A6NIE6 RN3L1_HUMAN | E.NDFNS#PPR.K        | S44:   | 2 | 1,7745 | 0,119 | -0,104 |
| 8 | O14686 MLL2_HUMAN  | E.VLFPES#PAR.G       | S4547: | 2 | 1,7727 | 0,14  | 0      |
| 8 | Q14517 FAT1_HUMAN  | R.DM*PAAGS#LGSSSR.N  | S4475: | 2 | 1,7631 | 0,114 | -0,641 |
| 8 | Q9UBH6 XPR1_HUMAN  | K.ESTGVTT#LR.Q       | T106:  | 2 | 1,7605 | 0,1   | -0,117 |
| 8 | Q86SQ0 PHLB2_HUMAN | R.QASGT#PQPALRE.R    | T404:  | 2 | 1,7528 | 0,255 | -0,366 |
| 8 | O15061 DMN_HUMAN   | K.GLQT#PVKD.A        | T598:  | 2 | 1,7491 | 0,18  | 0,26   |
| 8 | P40763 STAT3_HUMAN | E.ADPGSAAPY#LK.T     | Y705:  | 2 | 1,7287 | 0,204 | -1,773 |
| 8 | Q96PK6 RBM14_HUMAN | R.QPT#PPFFGR.D       | T206:  | 2 | 1,7239 | 0,381 | -0,217 |
| 8 | Q8IVF2 AHNK2_HUMAN | K.LGFSSS#PTK.K       | S5707: | 2 | 1,722  | 0,175 | -0,668 |

|   |                       |                       |            |   |        |       |        |
|---|-----------------------|-----------------------|------------|---|--------|-------|--------|
| 8 | Q12756 KIF1A_HUMAN    | R.NLFGSGS#LR.A        | S1312:     | 2 | 1,7199 | 0,132 | 0,237  |
| 8 | Q63HQ0 CD016_HUMAN    | E.LS#DSGIR.H          | S288:      | 2 | 1,7178 | 0,118 | 0,516  |
| 8 | Q6U841 S4A10_HUMAN    | R.S#FADIGK.K          | S238:      | 2 | 1,7143 | 0,426 | 0,82   |
| 8 | Q32MZ4 LRRF1_HUMAN    | K.IDGATQSS#PAEPKSE.D  | S714:      | 2 | 1,7112 | 0,113 | -0,229 |
| 8 | P05787 K2C8_HUMAN     | R.S#YTSGPSR.I         | S24:       | 2 | 1,7107 | 0,267 | 0,123  |
| 8 | P15880 RS2_HUMAN      | R.VSVQRT#QAPAVATT.-   | T285:      | 2 | 1,704  | 0,141 | -1,132 |
| 8 | Q9NQ92 CQ079_HUMAN    | R.GTQSI PND S#PARGE.G | S66:       | 2 | 1,7027 | 0,136 | -0,162 |
| 8 | Q8IXM2 CQ049_HUMAN    | E.GLGET#PPAK.K        | T161:      | 2 | 1,6969 | 0,198 | 0,257  |
| 8 | Q8IZT6 ASPM_HUMAN     | E.VS#PPIPE.C          | S435:      | 2 | 1,6917 | 0,186 | 0,347  |
| 8 | P85037 FOXK1_HUMAN    | R.QS#PGPALAR.L        | S101:      | 2 | 1,6889 | 0,209 | 0,25   |
| 8 | Q6U841 S4A10_HUMAN    | R.ENS#TVDFSK.G        | S280:      | 2 | 1,6826 | 0,146 | 0      |
| 8 | P42167 LAP2B_HUMAN    | K.HAS#PILPITE.F       | S306:      | 2 | 1,6749 | 0,128 | -0,316 |
| 8 | Q4AC94 C2CD3_HUMAN    | E.LDFSS#PGR.S         | S1829:     | 2 | 1,6564 | 0,084 | -0,127 |
| 8 | Q9Y6M5 ZNT1_HUMAN     | R.VTS#SLAMLSD.S       | S33:       | 2 | 1,6524 | 0,187 | -0,884 |
| 8 | P17152 TMM11_HUMAN    | R.LGPGS#SGGSARE.R     | S13:       | 2 | 1,6503 | 0,128 | -0,106 |
| 8 | Q659C4 LARP2_HUMAN    | E.LQVPINS#PR.R        | S900:      | 2 | 1,6492 | 0,135 | 0,332  |
| 8 | Q14966 ZN638_HUMAN    | K.AVIVSS#PK.A         | S1401:     | 2 | 1,6483 | 0,135 | 0      |
| 8 | P08107 HSP71_HUMAN    | E.LCS#DLFR.S          | S307:      | 2 | 1,6347 | 0,139 | -0,369 |
| 8 | Q9UHB6 LIMA1_HUMAN    | K.TVS#PPIR.K          | S609:      | 2 | 1,6329 | 0,152 | 0,144  |
| 8 | Q9C0B5 ZDHC5_HUMAN    | K.DSPPT#PTM*YK.Y      | T348:      | 2 | 1,6252 | 0,251 | 0,396  |
| 8 | Q9H9L7 CA108_HUMAN    | E.AALLSPGS#PK.R       | S22:       | 2 | 1,6222 | 0,23  | 0      |
| 8 | P05198 IF2A_HUMAN     | K.TVYS#ILR.H          | S110:      | 2 | 1,6112 | 0,083 | 0,065  |
| 8 | P16949 STMN1_HUMAN    | K.DLSLEEIQK.K         |            | 2 | 1,6097 | 0,082 | 0      |
| 8 | B2RXF5 B2RXF5_HUMAN   | D.LSLKS#GPR.Q         | S194:      | 2 | 1,5782 | 0,147 | 0,26   |
| 8 | O95801 TTC4_HUMAN     | R.APS#EIDPR.E         | S51:       | 2 | 1,5724 | 0,135 | -0,063 |
| 8 | Q9UKV3 ACINU_HUMAN    | E.AS#SPPHPQLHS#EEE.I  | S424:S434: | 2 | 1,5576 | 0,139 | -0,068 |
| 8 | Q4VXC3 Q4VXC3_HUMAN   | R.QFS#APNLK.A         | S1141:     | 2 | 1,5572 | 0,158 | 0,124  |
| 8 | ##Q68D39 Q68D39_HUMAN | E.TKPS#PGRS#RSGR.A    | S280:S284: | 2 | 1,5551 | 0,1   | 0,675  |
| 8 | ##O95602 RPA1_HUMAN   | D.IAILS#DK.E          | S1352:     | 2 | 1,5513 | 0,083 | 1,017  |
| 8 | Q8WUA7 TB22A_HUMAN    | E.AEPPS#PPSGDLR.L     | S132:      | 2 | 1,5362 | 0,23  | -0,187 |
| 8 | Q9Y3Q8 T22D4_HUMAN    | R.NGS#PPPGAPSSR.F     | S62:       | 2 | 1,5359 | 0,237 | 0      |
| 8 | Q9NRG9 AAAS_HUMAN     | R.FS#PVLGR.A          | S495:      | 2 | 1,5344 | 0,205 | 0,356  |
| 8 | Q14721 KCNB1_HUMAN    | E.SSPLPTS#PK.F        | S805:      | 2 | 1,533  | 0,204 | -0,43  |

|   |                      |                                        |            |   |        |       |        |
|---|----------------------|----------------------------------------|------------|---|--------|-------|--------|
| 8 | A7KAX9 A7KAX9_HUMAN  | E.KLS#PFFTL.D.L                        | S863:      | 2 | 1,4819 | 0,144 | -0,319 |
| 8 | Q8NC06 ACBD4_HUMAN   | E.LS#SGQHLE.E                          | S192:      | 2 | 1,3738 | 0,223 | 0,064  |
| 8 | Q96JG6 CC132_HUMAN   | R.S#PSVSPS#KQPVSTSSK.T                 | S494:S500: | 2 | 1,28   | 0,175 | -0,138 |
| 8 | Q15942 ZYG_HUMAN     | K.FS#PVTPK.F                           | S267:      | 2 | 1,2588 | 0,126 | -0,071 |
| 8 | Q9Y618 NCOR2_HUMAN   | E.GT#PPPPPSR.D                         | T1383:     | 2 | 1,232  | 0,178 | 0      |
| 8 | ##Q96PZ2 F111A_HUMAN | E.YGFT#VR.V                            | T201:      | 2 | 1,2292 | 0,081 | 0,593  |
| 8 | ##O00522 KRIT1_HUMAN | K.LKT#VPVIS#K.L                        | T149:S154: | 2 | 1,1963 | 0,115 | -1,385 |
| 8 | P02545 LMNA_HUMAN    | R.LSPSPTS#QR.S                         | S395:      | 2 | 1,1655 | 0,087 | 0,232  |
| 8 | O95453 PARN_HUMAN    | E.LS#PAGSISK.N                         | S619:      | 2 | 1,0448 | 0,089 | -0,195 |
| 9 | Q8WXI9 P66B_HUMAN    | R.GRLT#PSPDIIVLS#DNEASSPR.S            | T120:S129: | 3 | 6,6397 | 0,373 | -0,23  |
| 9 | Q96S66 CLCC1_HUMAN   | E.SSQSAKPVSGQDTSNGTEGS#PAAE.K          | S509:      | 2 | 6,2819 | 0,63  | 0,412  |
| 9 | Q96L14 C170L_HUMAN   | R.ALHPAAVSAAAEFENAES#E.A               | S269:      | 2 | 6,2207 | 0,589 | 0,061  |
| 9 | Q8NDX5 PHC3_HUMAN    | R.M*DRT#PPPPTLS#PAAITVGR.G             | T609:S616: | 3 | 5,7212 | 0,316 | 0,425  |
| 9 | P05387 RLA2_HUMAN    | K.LASVPAGGAVAVSAAPGSAAPAAGSAPAAAEEK.K  |            | 3 | 5,659  | 0,506 | 1,319  |
| 9 | Q3B820 YB032_HUMAN   | E.KVAQPAGASADLNTS#FSGVDE.H             | S67:       | 2 | 5,5101 | 0,561 | 0,228  |
| 9 | Q5UIP0 RIF1_HUMAN    | K.KADVQAPVS#PSETSQANPYSE.G             | S1772:     | 2 | 5,5028 | 0,475 | 0,534  |
| 9 | Q8N9T8 KRI1_HUMAN    | E.GVHGPPVQLAVDDSS#DEGE.L               | S287:      | 2 | 5,4063 | 0,531 | 0,061  |
| 9 | O95817 BAG3_HUMAN    | E.VKVPPAPVPCPPPS#PGPSAVPSS#PK.S        | S377:S386: | 3 | 5,4062 | 0,382 | 0,281  |
| 9 | Q13263 TIF1B_HUMAN   | K.RSTAPSAAASASASAAASS#PAGGGAEALE.L     | S50:       | 3 | 5,3682 | 0,544 | 0,215  |
| 9 | Q96T60 PNKP_HUMAN    | E.TRTPESQPDTPPGTPLVSQDE.K              | T118:      | 2 | 5,2846 | 0,552 | 0,628  |
| 9 | Q2TAL8 QRIC1_HUMAN   | D.SAHLYSATGTITS#PTGE.T                 | S303:      | 2 | 5,2745 | 0,461 | 0,413  |
| 9 | Q02952 AKA12_HUMAN   | E.ARGDTVVSEAEELT#PEAVTAAE.T            | T972:      | 2 | 5,2515 | 0,503 | 0,445  |
| 9 | P05387 RLA2_HUMAN    | K.LASVPAGGAVAVSAAPGS#AAPAAGSAPAAAEEK.K | S79:       | 3 | 5,2173 | 0,368 | 0,449  |
| 9 | P05387 RLA2_HUMAN    | K.LAS#VPAGGAVAVSAAPGSAAPAAGSAPAAAEEK.K | S64:       | 3 | 5,2083 | 0,533 | -0,897 |
| 9 | P05783 K1C18_HUMAN   | E.DGEDFNLDALDSSNSM*QTIQK.T             |            | 3 | 5,1758 | 0,456 | 0      |
| 9 | Q08J23 NSUN2_HUMAN   | R.AGEPNS#PDAEEANS#PDVTAGCDPAGVHPPR.-   | S743:S751: | 3 | 5,1624 | 0,486 | 0,576  |
| 9 | Q96QR8 PURB_HUMAN    | E.HYAQLGPSS#PEQLAAGAE.E.G              | S101:      | 2 | 5,162  | 0,535 | -0,24  |
| 9 | Q92917 GPKOW_HUMAN   | E.LHYDAICQYM*GPS#DTDDD.-               | S471:      | 2 | 5,1514 | 0,586 | 0,221  |
| 9 | Q13428 TCOF_HUMAN    | R.KSAEPSANTTLVS#ETEEE.G                | S171:      | 2 | 5,1423 | 0,555 | 0,244  |
| 9 | P05783 K1C18_HUMAN   | E.DGEDFNLDALDSSNSM*QTIQK.T             |            | 2 | 5,1204 | 0,539 | 0,407  |
| 9 | Q09666 AHNK_HUMAN    | K.TVIRLPSGS#GAAS#PTGSAVDIR.A           | S212:S216: | 3 | 5,0979 | 1     | 0,161  |
| 9 | Q9NYL9 TMOD3_HUMAN   | E.KVSLDPELEEALTSAS#DTE.L               | S127:      | 2 | 5,0734 | 0,485 | 0,346  |
| 9 | A8MVB1 A8MVB1_HUMAN  | E.KLVSPPASAAASSPSSPS#PQPVSE.L          | S43:       | 2 | 5,0342 | 0,49  | 0,399  |

|   |                     |                                         |                    |   |        |       |        |
|---|---------------------|-----------------------------------------|--------------------|---|--------|-------|--------|
| 9 | Q86YP4 P66A_HUMAN   | R.RPPS#PDVIVLSDNEQPSS#PR.V              | S100:S114:         | 3 | 4,9504 | 0,475 | -0,234 |
| 9 | Q9UQ35 SRRM2_HUMAN  | E.TKEQNSALPTSS#QDEELM*E.V               | S1233:             | 2 | 4,9227 | 0,566 | 0,437  |
| 9 | Q6PJF5 RHDF2_HUMAN  | R.GIPHSAS#PV#PDGVIPLKE.Y                | S325:S328:         | 2 | 4,9029 | 0,466 | 0,446  |
| 9 | P49792 RBP2_HUMAN   | E.DALDDSVSS#SSVHAS#PLASS#PVRK.N         | S2240:S2246:S2251: | 3 | 4,8963 | 1     | 0,345  |
| 9 | Q96S82 UBL7_HUMAN   | E.SSSHTPTPGTQGHSS#GTSPM*#SGVQSGTPTIND.L | S298:S304:         | 3 | 4,8444 | 1     | 0,653  |
| 9 | Q92797 SYMPK_HUMAN  | K.LKPGGVGAPSSSS#PSPS#PSARPGPPPSEE.A     | S1171:S1175:       | 3 | 4,7794 | 1     | 0,382  |
| 9 | P16989 DBPA_HUMAN   | E.AKAGEAPTENPAPPTQSS#AE.-               | S370:              | 2 | 4,7608 | 0,345 | 0,339  |
| 9 | Q96GI7 FA89A_HUMAN  | E.YKGACQAASS#PDCTYALE.N                 | S130:              | 2 | 4,7494 | 0,516 | 0,353  |
| 9 | Q9BTU6 P4K2A_HUMAN  | R.VAAAAGSGPS#PPGS#PGHDRE.R              | S47:S51:           | 2 | 4,7404 | 0,489 | 0,062  |
| 9 | O75970 MPDZ_HUMAN   | E.RTAPTALGITLSSS#PTSTPE.L               | S354:              | 2 | 4,7252 | 0,526 | 0,236  |
| 9 | Q9ULJ3 ZN295_HUMAN  | R.IKT#EPSS#PLSDPSDIIR.V                 | T431:S435:         | 2 | 4,7111 | 0,456 | 0,182  |
| 9 | P05387 RLA2_HUMAN   | K.LASVPAGGAVAVSAAPGSAAPAAGSAPAAAEK.K    |                    | 2 | 4,6955 | 0,59  | 1,232  |
| 9 | Q8N5P1 ZC3H8_HUMAN  | R.SKDYDVYS#DNDICSQE.S                   | S77:               | 2 | 4,6818 | 0,444 | -0,121 |
| 9 | Q09666 AHNK_HUMAN   | K.TVIRLPS#GSGAAS#PTGSAVDIR.A            | S210:S216:         | 3 | 4,6735 | 0,363 | 0,242  |
| 9 | Q76L83 ASXL2_HUMAN  | E.TNM*KEPLATLVDQS#PE.S                  | S562:              | 2 | 4,6607 | 0,5   | -0,131 |
| 9 | Q15059 BRD3_HUMAN   | K.M*PDEPVEAPALPAPAAPM*VSK.G             |                    | 2 | 4,658  | 0,457 | 1,021  |
| 9 | Q9UHR4 BI2L1_HUMAN  | E.IKTPASTPVSGTPQAS#PM*IE.R              | S261:              | 2 | 4,6462 | 0,602 | 0,463  |
| 9 | P49916 DNL3_HUMAN   | E.KADFTVVAGDEGS#STTGSSEE.N              | S760:              | 2 | 4,6425 | 0,503 | 0,552  |
| 9 | Q92917 GPKOW_HUMAN  | E.LHYDAICQYM*GPS#DTDDD.-                | S471:              | 3 | 4,6419 | 0,406 | 0,248  |
| 9 | Q96T23 RSF1_HUMAN   | E.SEKPGS#PEAAETS#PPSNIIDHCE.K           | S612:S619:         | 3 | 4,5585 | 0,46  | 0,14   |
| 9 | P46100 ATRX_HUMAN   | E.NLVLSSTGFCQS#S#GDEALSK.S              | S1244:S1245:       | 3 | 4,5123 | 1     | 0,076  |
| 9 | Q9UHW9 S12A6_HUMAN  | R.TSHPDQVIEDLSQNS#ITGE.H                | S96:               | 2 | 4,5097 | 0,49  | 0,114  |
| 9 | Q92917 GPKOW_HUMAN  | E.LHYDAICQYM*GPSDT#DDD.-                | T473:              | 2 | 4,5034 | 0,498 | 0,11   |
| 9 | A8MVB1 A8MVB1_HUMAN | E.KLVSPPASAAASSPS#SSPSPQPVSE.L          | S39:               | 3 | 4,4805 | 0,379 | 0,299  |
| 9 | Q96S66 CLCC1_HUMAN  | E.SSQSAKPVSGQDTSGNTEGS#PAAE.K           | S509:              | 3 | 4,4758 | 0,434 | 0,386  |
| 9 | P53667 LIMK1_HUMAN  | R.SCS#IDRSPGAGSLGS#PASQR.K              | S298:S310:         | 3 | 4,4513 | 0,325 | -0,255 |
| 9 | Q14201 BTG3_HUMAN   | E.VKPSSVTAAS#PVYQISE.L                  | S169:              | 2 | 4,4382 | 0,386 | -0,255 |
| 9 | O75531 BAF_HUMAN    | R.DFVAEPM*GEKPVGSLAGIGE.V               |                    | 2 | 4,4301 | 0,505 | 0,363  |
| 9 | Q3KQU3 MA7D1_HUMAN  | R.RS#SQPS#PTAVPASDSPPTKQE.V             | S112:S116:         | 2 | 4,4219 | 0,412 | 0,21   |
| 9 | Q5THK1 CV030_HUMAN  | R.KSIVSLM*PEDQIS#PVSE.V                 | S582:              | 2 | 4,4136 | 0,378 | 0,125  |
| 9 | Q09666 AHNK_HUMAN   | K.TVIRLPS#GSGAAS#PTGSAVDIR.A            | S210:S216:         | 2 | 4,4113 | 1     | 0,215  |
| 9 | P51116 FXR2_HUMAN   | R.RTGGPAYGPSSDVSTASET#E.S               | T455:              | 2 | 4,4112 | 0,502 | 0,119  |
| 9 | P18583 SON_HUMAN    | E.M*EHNTVCAAGTS#PVGE.I                  | S1556:             | 2 | 4,4099 | 0,51  | -0,486 |

|   |                     |                                         |                 |   |        |       |        |
|---|---------------------|-----------------------------------------|-----------------|---|--------|-------|--------|
| 9 | Q9ULJ3 ZN295_HUMAN  | R.IKT#EPS#SPLSDPSDIIR.V                 | T431:S434:      | 3 | 4,4084 | 0,287 | 0,182  |
| 9 | Q9UBQ5 EIF3K_HUMAN  | E.KIDFDSVSSIM*ASS#Q.-                   | S217:           | 2 | 4,3981 | 0,43  | 0,071  |
| 9 | Q9UQ35 SRRM2_HUMAN  | K.VKAQT#PPGPSLSGSKS#PCPQE.K             | T1003:S1014:    | 3 | 4,3855 | 0,199 | 0,079  |
| 9 | Q13263 TIF1B_HUMAN  | E.KLSPPYSS#PQEFAQD.V                    | S757:           | 2 | 4,3785 | 0,308 | 0      |
| 9 | Q96DF8 DGC14_HUMAN  | E.NT#PLRVEGSET#PYVDR.T                  | T324:T333:      | 2 | 4,3765 | 0,383 | 0,122  |
| 9 | P46013 KI67_HUMAN   | K.SGGSGHAVAEPAS#PEQE.L                  | S308:           | 2 | 4,3694 | 0,446 | -0,217 |
| 9 | P52948 NUP98_HUMAN  | K.NLNNSNLFS#PVNR.D                      | S612:           | 2 | 4,3673 | 0,508 | 0,156  |
| 9 | Q02952 AKA12_HUMAN  | K.SAVVHDITDDGQEET#PE.I                  | T142:           | 2 | 4,3624 | 0,327 | 0,127  |
| 9 | O14964 HGS_HUMAN    | R.KSPT#PSAPVPLTEPAAQPGEHAAPTNVVENPLPE.T | T347:           | 3 | 4,3608 | 0,391 | 0,613  |
| 9 | P19484 TFEB_HUMAN   | K.FAAHIS#PAQGS#PKPPAAS#PGVR.A           | S109:S114:S122: | 3 | 4,3567 | 0,304 | 0,664  |
| 9 | P78347 GTF2I_HUMAN  | R.KINSS#PNVNTTASGVED.L                  | S831:           | 2 | 4,3369 | 0,569 | 0,135  |
| 9 | Q9BVC5 ASHWN_HUMAN  | K.SPSGPVKSS#PPLS#PVGTTVPK.L             | S189:S193:      | 3 | 4,294  | 0,099 | -0,087 |
| 9 | O15355 PPM1G_HUMAN  | R.KLEEVLS#TEGAE.E.N                     | S527:           | 2 | 4,2548 | 0,456 | 0,081  |
| 9 | P62158 CALM_HUMAN   | R.VFDKDGNGYIS#AAE.L                     | S102:           | 2 | 4,2498 | 0,426 | 0,156  |
| 9 | A0MZ66 SHOT1_HUMAN  | R.KVTAEADSSS#PTGILATSE.S                | S494:           | 2 | 4,2446 | 0,527 | -0,063 |
| 9 | P10636 TAU_HUMAN    | E.IVYKS#PVVSGDT#SPR.H                   | S713:T720:      | 3 | 4,2339 | 0,396 | 0      |
| 9 | P04406 G3P_HUMAN    | R.VIISAPSADAPM*FVM*GVNHE.K              |                 | 3 | 4,2307 | 0,445 | 1,901  |
| 9 | Q9H5J8 JOSD3_HUMAN  | R.YKFLDDGSGIS#PIEE.S                    | S206:           | 2 | 4,2232 | 0,27  | 0      |
| 9 | P19532 TFE3_HUMAN   | E.AAHTTGPTGS#APNS#PM*ALLTIGSSSEKE.I     | S242:S246:      | 3 | 4,2219 | 1     | 0      |
| 9 | Q12888 TP53B_HUMAN  | E.IEPKNS#PEDLGLS#LTGDSC.L               | S500:S507:      | 3 | 4,1975 | 0,45  | 0,237  |
| 9 | Q8IZT6 ASPM_HUMAN   | E.NKIPISPIS#PAFNE.C                     | S225:           | 2 | 4,1941 | 0,404 | -0,228 |
| 9 | Q9C0B5 ZDHC5_HUMAN  | E.DSSLLAKDS#PPT#PTM*YK.Y                | S345:T348:      | 2 | 4,1909 | 0,419 | 0,06   |
| 9 | Q96B54 ZN428_HUMAN  | E.GTYHCTECEDS#FDNLGE.L                  | S169:           | 2 | 4,1859 | 0,465 | 0,231  |
| 9 | Q7L2J0 MEPCE_HUMAN  | R.TLNAET#PKSS#PLPAK.G                   | T213:S217:      | 2 | 4,1819 | 0,375 | -0,427 |
| 9 | Q09666 AHNK_HUMAN   | K.GPKVDIDT#PDINIEGSE.G                  | T3716:          | 2 | 4,1649 | 0,468 | 0,26   |
| 9 | Q8N2M8 SFR16_HUMAN  | E.KITFITSFGGS#DEE.A                     | S320:           | 2 | 4,1496 | 0,433 | -0,151 |
| 9 | O43426 SYNJ1_HUMAN  | E.LLPQHLQPSSSSGLGTS#PS#SSPR.T           | S1041:S1043:    | 3 | 4,1485 | 1     | -1,697 |
| 9 | Q6NZI2 PTRF_HUMAN   | R.RGS#S#PDVHALLE.I                      | S365:S366:      | 2 | 4,1463 | 0,472 | 0      |
| 9 | P49792 RBP2_HUMAN   | E.TVFT#PKTS#PENVDQR.F                   | T1396:S1400:    | 2 | 4,1404 | 0,556 | 0      |
| 9 | Q8N1Q3 Q8N1Q3_HUMAN | R.GGLSVHTCSS#ASQSE.A                    | S96:            | 2 | 4,1395 | 0,39  | -0,231 |
| 9 | Q13017 RHG05_HUMAN  | K.IRNS#FVNNTQGD.E.N                     | S1124:          | 2 | 4,1299 | 0,562 | -0,143 |
| 9 | Q96DF8 DGC14_HUMAN  | E.NT#PLRVEGSET#PYVDR.T                  | T324:T333:      | 3 | 4,1171 | 0,405 | 0,275  |
| 9 | P22059 OSBP1_HUMAN  | K.RTGSNIS#GASSDISLDE.Q                  | S382:           | 2 | 4,1167 | 0,444 | 0,477  |

|   |                     |                                      |            |   |        |       |        |
|---|---------------------|--------------------------------------|------------|---|--------|-------|--------|
| 9 | Q6ZTU2 E400N_HUMAN  | E.RTPGVLLPGAGGAAGFGM*TS#PPPPTS#PSR.T | S304:S310: | 3 | 4,11   | 0,378 | -0,755 |
| 9 | Q12792 TWF1_HUMAN   | K.KYLLSQSS#PAPLTAEEEE.L              | S161:      | 2 | 4,104  | 0,484 | 0,121  |
| 9 | Q9H9C1 CN133_HUMAN  | R.TRPGS#FQSLSDALSDT#PAK.S            | S121:T132: | 3 | 4,0984 | 0,296 | 0,599  |
| 9 | P16949 STMN1_HUMAN  | K.RAS#GQAFELILS#PR.S                 | S16:S25:   | 2 | 4,0906 | 0,503 | -0,286 |
| 9 | Q9UGV2 NDRG3_HUMAN  | R.THS#TSS#SLGSGESPF SR.S             | S331:S334: | 2 | 4,0884 | 1     | 0,065  |
| 9 | P16989 DBPA_HUMAN   | E.NQQATSGPNQPS#VR.R                  | S324:      | 2 | 4,0876 | 0,466 | 0      |
| 9 | O95817 BAG3_HUMAN   | E.VKVPPAPVPCPPPS#PGPSAVPS#SPK.S      | S377:S385: | 3 | 4,0869 | 0,401 | -0,562 |
| 9 | Q8NDX5 PHC3_HUMAN   | R.M*DRT#PPPPTS#PAAITVGR.G            | T609:S616: | 2 | 4,0573 | 0,414 | 0,453  |
| 9 | O95104 SFR15_HUMAN  | E.NVTNNEGS#PPPPVK.V                  | S154:      | 2 | 4,0552 | 0,464 | -0,159 |
| 9 | Q6ZN18 AEBP2_HUMAN  | E.LSRLS#PLPPGS#PGSAAR.G              | S18:S24:   | 2 | 4,0474 | 0,442 | -0,134 |
| 9 | Q8WWM7 ATX2L_HUMAN  | R.GQSTGKGPPQS#PVFE.G                 | S111:      | 2 | 4,0419 | 0,48  | 0,306  |
| 9 | Q9ULU4 PKCB1_HUMAN  | E.SM*DFLDKS#TAS#PASTK.T              | S472:S475: | 3 | 4,0314 | 0,355 | 0,196  |
| 9 | Q9Y6G9 DC1L1_HUMAN  | R.KPVTVSPTTPTS#PTEGEAS.-             | S516:      | 2 | 4,0166 | 0,529 | 0,621  |
| 9 | Q9NX63 CHCH3_HUMAN  | K.SQRYS#GAYGASVSDEE.L                | S50:       | 2 | 4,0109 | 0,552 | -0,137 |
| 9 | Q96SB3 NEB2_HUMAN   | K.IKPVEVEESGES#EAE.S                 | S307:      | 2 | 4,0046 | 0,398 | 0,57   |
| 9 | Q86UU0 BCL9L_HUMAN  | K.SPQVLGSSLSVRS#PTGS#PSR.L           | S987:S991: | 2 | 4,0021 | 1     | 0,339  |
| 9 | Q9Y6G9 DC1L1_HUMAN  | R.KPVTVSPTTPTS#PTEGE.A               | S516:      | 2 | 3,9903 | 0,361 | 0,27   |
| 9 | Q9H4A3 WNK1_HUMAN   | K.KEGPVAS#PPFM*DLE.Q                 | S1978:     | 2 | 3,9865 | 0,533 | -0,076 |
| 9 | Q92615 LARP5_HUMAN  | E.EKFTSSQTQSPT#PPKPPSPS#FE.L         | T518:S526: | 3 | 3,9804 | 0,299 | 0,143  |
| 9 | P08621 RU17_HUMAN   | R.GGGGGQDNGLEGLGND#R.D               | S410:      | 2 | 3,9786 | 0,392 | 0,14   |
| 9 | P04406 G3P_HUMAN    | R.VIISAPSADAPM*FVM*GVNHE.K           |            | 2 | 3,9756 | 0,506 | 0,346  |
| 9 | Q0JRZ9 FCHO2_HUMAN  | E.IPRPFS#PPVTSNTS#PPPAAPLAR.A        | S488:S496: | 3 | 3,9596 | 0,31  | -0,217 |
| 9 | Q8NHV4 NEDD1_HUMAN  | E.SGNLNTSPSSNQTRNS#E.K               | S525:      | 2 | 3,9591 | 0,476 | 0,065  |
| 9 | O95714 HERC2_HUMAN  | E.STHPSS#PGFEDCSSSE.A                | S2423:     | 2 | 3,9489 | 0,458 | -0,341 |
| 9 | Q9UGV2 NDRG3_HUMAN  | R.T#HS#TSSSLGSGESPF SR.S             | T329:S331: | 3 | 3,9297 | 1     | 0,097  |
| 9 | Q9H165 BC11A_HUMAN  | E.LAGNTSS#PPLS#PGRPSPM*QR.L          | S328:S332: | 3 | 3,9266 | 0,303 | 0,247  |
| 9 | Q96JA3 PKHA8_HUMAN  | E.LLYRT#PPGS#PQLAM*LK.S              | T185:S189: | 3 | 3,923  | 0,352 | 0,187  |
| 9 | Q9UK76 HN1_HUMAN    | R.RNS#S#EASSGDFLDLKG.E.G             | S87:S88:   | 2 | 3,9183 | 0,523 | 0,248  |
| 9 | P28290 SSFA2_HUMAN  | R.NIM*TQQKDS#FE.M                    | S466:      | 2 | 3,9143 | 0,371 | -0,17  |
| 9 | P10636 TAU_HUMAN    | E.IVYKS#PVVSGDTS#PR.H                | S713:S721: | 2 | 3,9012 | 0,405 | -0,207 |
| 9 | A8MVB1 A8MVB1_HUMAN | E.KLVSPPASAAASS#PSSSPSPQPVSE.L       | S37:       | 3 | 3,9    | 0,373 | 0      |
| 9 | A8K630 A8K630_HUMAN | R.LQQQHS#EQPPLQPS#PVTTR.R            | S14:S22:   | 3 | 3,8918 | 0,401 | -0,078 |
| 9 | Q13263 TIF1B_HUMAN  | E.DGSLSLDGADSTGVVAK.L                |            | 2 | 3,864  | 0,467 | 0      |

|   |                     |                                         |                 |   |        |       |        |
|---|---------------------|-----------------------------------------|-----------------|---|--------|-------|--------|
| 9 | Q9NQX3 GEPH_HUMAN   | E.LEDLPS#PPPPLS#PPPTTSPHK.Q             | S188:S194:      | 3 | 3,8614 | 0,343 | 0,31   |
| 9 | P49023 PAXI_HUMAN   | K.TSSVSNPQDSVGS#PCSR.V                  | S106:           | 2 | 3,8502 | 0,353 | -0,132 |
| 9 | Q14814 MEF2D_HUMAN  | K.KGFNGCDS#PEPDGEDSLE.Q                 | S98:            | 2 | 3,8362 | 0,458 | 0,06   |
| 9 | Q8NHV4 NEDD1_HUMAN  | E.SGNLNTS#PSSNQTR.N                     | S516:           | 2 | 3,8361 | 0,472 | 0,237  |
| 9 | P42345 FRAP_HUMAN   | R.TRTDS#YSAGQSVE.I                      | S2448:          | 2 | 3,831  | 0,381 | -0,165 |
| 9 | Q9P2M7 CING_HUMAN   | R.SHS#QAS#LAGPGVPDPSNR.S                | S131:S134:      | 2 | 3,8206 | 0,432 | 0,063  |
| 9 | Q9Y2L9 LRCH1_HUMAN  | E.NS#PAVS#PTTNSTAPFLKPR.S               | S532:S536:      | 2 | 3,8034 | 0,311 | 0,332  |
| 9 | Q52LD0 Q52LD0_HUMAN | K.AGGS#PAS#YHGSTSPR.V                   | S192:S195:      | 2 | 3,7958 | 0,506 | 0,077  |
| 9 | Q04721 NOTC2_HUMAN  | R.RTPSLALT#PPQAEQE.V                    | T1808:          | 2 | 3,7957 | 0,473 | 0,071  |
| 9 | P08670 VIME_HUMAN   | E.VDALKGTNES#LE.R                       | S339:           | 2 | 3,7933 | 0,394 | -0,09  |
| 9 | O43572 AKA10_HUMAN  | E.SSSTLTVASRNS#PAS#PLKE.L               | S278:S281:      | 2 | 3,7771 | 0,376 | 0,35   |
| 9 | P04183 KITH_HUMAN   | R.KLFAPQQILQCS#PAN.-                    | S231:           | 2 | 3,7721 | 0,385 | -0,068 |
| 9 | Q6PJF5 RHDF2_HUMAN  | R.GIPHSAS#PVS#PDGVQIPLKE.Y              | S325:S328:      | 3 | 3,766  | 0,118 | 0,084  |
| 9 | Q9UK76 HN1_HUMAN    | R.RNS#SEASSGDFLD.L                      | S87:            | 2 | 3,7572 | 0,465 | 0      |
| 9 | Q16512 PKN1_HUMAN   | K.SSRDPPSSPS#SLSSPIQE.S                 | S575:           | 2 | 3,7504 | 0,283 | 0,252  |
| 9 | O60306 AQR_HUMAN    | K.KIVAPTVS#QINAE.F                      | S16:            | 2 | 3,7304 | 0,403 | -0,084 |
| 9 | Q8WU79 SMAP2_HUMAN  | R.KVVGSM*PTAGSAGS#VPE.N                 | S240:           | 2 | 3,7266 | 0,421 | -0,219 |
| 9 | P53671 LIMK2_HUMAN  | R.S#NSISKSPGPS#S#PKPELLFSR.D            | S287:S297:S298: | 3 | 3,7108 | 1     | -0,149 |
| 9 | Q8IWZ3 ANKH1_HUMAN  | E.THPSSS#PTPTSSNTQEE.A                  | S2069:          | 2 | 3,7038 | 0,473 | -0,131 |
| 9 | Q6NV74 CB055_HUMAN  | R.LQHSSALTAS#VEE.G                      | S321:           | 2 | 3,6971 | 0,466 | 0      |
| 9 | O00567 NOL5A_HUMAN  | K.SFSKEELM*SS#DLEE.T                    | S520:           | 2 | 3,6969 | 0,51  | 0,212  |
| 9 | Q9NPI6 DCP1A_HUMAN  | R.KASSPS#PLTIGTPE.S                     | S525:           | 2 | 3,6949 | 0,504 | 0,083  |
| 9 | Q9UHB6 LIMA1_HUMAN  | R.KIS#ENSYSLDDLE.I                      | S225:           | 2 | 3,6928 | 0,305 | -0,153 |
| 9 | P15822 ZEP1_HUMAN   | E.SHVLGTGQS#LDE.S                       | S917:           | 2 | 3,692  | 0,452 | -0,184 |
| 9 | Q9Y608 LRRF2_HUMAN  | R.NSASATPLSGNSS#R.R                     | S324:           | 2 | 3,6916 | 0,473 | 0,718  |
| 9 | A6NDU5 A6NDU5_HUMAN | E.AVPAPAAAPVPAPAPASDSASGPSSDSGPEAGSQR.L |                 | 3 | 3,6853 | 0,204 | 0,819  |
| 9 | Q8N9T8 KRI1_HUMAN   | E.GVHGPPVQLAVDDSS#DE.G                  | S287:           | 2 | 3,6846 | 0,396 | 0,406  |
| 9 | P04075 ALDOA_HUMAN  | K.RLQS#IGTENTEE.N                       | S46:            | 2 | 3,6796 | 0,477 | 0      |
| 9 | Q8N1G0 ZN687_HUMAN  | E.ASLKLS#PAT#PTSEGPK.V                  | S374:T377:      | 2 | 3,6725 | 1     | 0,066  |
| 9 | O60664 M6PBP_HUMAN  | E.LVSSKVS#GAQE.M                        | S130:           | 2 | 3,6552 | 0,3   | -0,206 |
| 9 | Q96GX5 MASTL_HUMAN  | E.NIVNSFTDKQQT#PE.K                     | T519:           | 2 | 3,6534 | 0,369 | 0,143  |
| 9 | Q15019 SEPT2_HUMAN  | K.IYHLPDAES#DEDE.D                      | S218:           | 2 | 3,653  | 0,257 | 0,076  |
| 9 | O15320 CTGE5_HUMAN  | R.FCSNSGRSL#GPAE.L                      | S635:           | 2 | 3,6502 | 0,465 | 0,167  |

|   |                     |                                  |            |   |        |       |        |
|---|---------------------|----------------------------------|------------|---|--------|-------|--------|
| 9 | Q8N1G1 REXO1_HUMAN  | R.ALSHADLFGDES#EDE.A             | S526:      | 2 | 3,648  | 0,536 | 0,071  |
| 9 | Q7Z3C6 ATG9A_HUMAN  | E.VASALRS#FS#PLQPGQAPTGR.A       | S654:S656: | 3 | 3,6445 | 0,182 | -0,333 |
| 9 | Q9HAU5 RENT2_HUMAN  | E.NKEVSS#PDDLELE.L               | S514:      | 2 | 3,6416 | 0,327 | 0      |
| 9 | Q7Z460 CLAP1_HUMAN  | K.NSSNTSVGS#PSNTIGR.T            | S1091:     | 2 | 3,6294 | 0,456 | -0,294 |
| 9 | Q8NG31 CASC5_HUMAN  | R.KSLGTPTVICT#PTEE.S             | T1017:     | 2 | 3,6182 | 0,453 | 0,142  |
| 9 | Q92576 PHF3_HUMAN   | E.NNLQDNQTSNSS#PCR.S             | S1614:     | 2 | 3,6133 | 0,536 | 0,067  |
| 9 | P42166 LAP2A_HUMAN  | E.SRSST#PLPTISSAE.N              | T160:      | 2 | 3,6092 | 0,373 | 0,229  |
| 9 | P42166 LAP2A_HUMAN  | K.LREQGT#ESRSS#TPLPTISSAE.N      | T154:S159: | 3 | 3,6077 | 1     | 0,294  |
| 9 | Q9BRK4 LZTS2_HUMAN  | R.KAVPVTS#FTYINE.D               | S87:       | 2 | 3,6032 | 0,286 | 0,079  |
| 9 | Q15365 PCBP1_HUMAN  | R.VM*TIPYQPM*PASSPVICAGGQDR.C    |            | 3 | 3,598  | 0,424 | 0,438  |
| 9 | O60296 TRAK2_HUMAN  | R.QHASDALS#PVLAAE.T              | S84:       | 2 | 3,5892 | 0,256 | 0,079  |
| 9 | Q53ET0 CRTC2_HUMAN  | E.FQS#PLHS#PLDSSR.S              | S86:S90:   | 2 | 3,5889 | 0,5   | 0,15   |
| 9 | Q9UGV2 NDRG3_HUMAN  | R.THS#TSSS#LGSGESPFSSR.S         | S331:S335: | 2 | 3,5873 | 1     | 0,13   |
| 9 | O15234 CASC3_HUMAN  | E.QTSVRDPS#PEADAPVLGS#PEKE.E     | S363:S373: | 3 | 3,5838 | 0,154 | 0,074  |
| 9 | Q15365 PCBP1_HUMAN  | R.VM*TIPYQPM*PASSPVICAGGQDR.C    |            | 2 | 3,5825 | 0,548 | 0,876  |
| 9 | P42694 HELZ_HUMAN   | R.RIS#SSSVQPCSEE.V               | S1763:     | 2 | 3,5797 | 0,413 | -0,237 |
| 9 | Q9Y5U2 TSSC4_HUMAN  | E.LAHLAGPGS#PEAAE.W              | S265:      | 2 | 3,5777 | 0,338 | 0,084  |
| 9 | Q7LBC6 JHD2B_HUMAN  | R.HSGGFLSS#PADFSQE.N             | S779:      | 2 | 3,5766 | 0,396 | -0,074 |
| 9 | Q86UP2 KTN1_HUMAN   | E.IQNGNLHES#DSE.S                | S75:       | 2 | 3,5736 | 0,471 | -0,172 |
| 9 | Q09666 AHNK_HUMAN   | R.EGAKDIDISS#PE.F                | S177:      | 2 | 3,5686 | 0,193 | 0      |
| 9 | Q9UPQ6 Q9UPQ6_HUMAN | E.VVAVPTNGTVNNVAQEPVNTLGDISGNK.T |            | 3 | 3,5647 | 0,436 | 0,065  |
| 9 | Q9BTU6 P4K2A_HUMAN  | R.VAAAAGSGPS#PPGS#PGHDRE.R       | S47:S51:   | 3 | 3,5625 | 0,423 | 0,185  |
| 9 | Q9NZN8 CNOT2_HUMAN  | R.GM*SNNT#PQLNR.S                | T93:       | 2 | 3,5623 | 0,41  | 0      |
| 9 | Q8N556 AFAP1_HUMAN  | K.KLSS#ERPS#SDGEGVVE.N           | S278:S282: | 2 | 3,5605 | 0,458 | 0,066  |
| 9 | O60238 BNI3L_HUMAN  | K.NGGLEHVPS#SSS#IHNGDM*E.K       | S62:S65:   | 3 | 3,5592 | 0,293 | 0      |
| 9 | Q53ET0 CRTC2_HUMAN  | R.HIDSSPYSPAYLS#PPPE.S           | S136:      | 2 | 3,5539 | 0,342 | 0,189  |
| 9 | Q9BVIO PHF20_HUMAN  | E.NTM*KTEPTS#PLVE.L              | S415:      | 2 | 3,5515 | 0,42  | -0,237 |
| 9 | Q03164 HRX_HUMAN    | E.VHPPLPISQS#PENE.S              | S518:      | 2 | 3,5456 | 0,438 | 0,075  |
| 9 | Q15233 NONO_HUMAN   | E.GIGAIGGT#PPAFNR.A              | T450:      | 2 | 3,5429 | 0,535 | 0      |
| 9 | Q9P2M7 CING_HUMAN   | R.SHS#QAS#LAGPGPVDPSNR.S         | S131:S134: | 3 | 3,5372 | 0,374 | 0,094  |
| 9 | Q7L7X3 TAOK1_HUMAN  | R.ASDPQS#PPQVSR.H                | S421:      | 2 | 3,5365 | 0,339 | -0,452 |
| 9 | Q9H0H5 RGAP1_HUMAN  | E.NSNAFSTPQT#PDIK.V              | T567:      | 2 | 3,5355 | 0,47  | 0      |
| 9 | P17275 JUNB_HUMAN   | R.SRDAT#PPVSPINM*EDQE.R          | T255:      | 2 | 3,5317 | 0,469 | 0,185  |



|   |                     |                               |              |   |        |       |        |
|---|---------------------|-------------------------------|--------------|---|--------|-------|--------|
| 9 | B2RMZ9 B2RMZ9_HUMAN | R.LNSS#PRAPVS#PLK.F           | S417:S423:   | 2 | 3,5301 | 0,351 | 0,4    |
| 9 | Q9H5J0 ZBTB3_HUMAN  | R.APHPPVADVSLAS#PSSSTE.T      | S271:        | 2 | 3,528  | 0,331 | 0,127  |
| 9 | P02545 LMNA_HUMAN   | R.SGAQASST#PLSPTR.I           | T19:         | 2 | 3,5255 | 0,439 | -0,339 |
| 9 | Q7Z3K3 POGZ_HUMAN   | E.SLHQLFEGES#E.T              | S1392:       | 2 | 3,5228 | 0,246 | 0,09   |
| 9 | Q9HC35 EMAL4_HUMAN  | E.SRISS#PTLLENLE.Q            | S919:        | 2 | 3,5159 | 0,332 | 0      |
| 9 | Q9Y608 LRRF2_HUMAN  | R.NSASATT#PLSGNSSR.R          | T317:        | 2 | 3,5083 | 0,523 | -0,239 |
| 9 | P45974 UBP5_HUMAN   | R.VDYIM*QLPVP*DAALNKEE.L      |              | 2 | 3,505  | 0,392 | 0      |
| 9 | Q86YP4 P66A_HUMAN   | R.RPPS#PDVIVLS#DNEQPSSPR.V    | S100:S107:   | 3 | 3,4977 | 0,216 | 0,234  |
| 9 | Q92734 TFG_HUMAN    | K.NVM*SAFGLTDDQVSGPPSAPAEDR.S |              | 3 | 3,4972 | 0,11  | -0,517 |
| 9 | Q66K74 MAP1S_HUMAN  | E.LPLAASSIPRRT#PS#PE.S        | T638:S640:   | 3 | 3,4918 | 0,422 | 0,375  |
| 9 | Q9UPN3 MACF1_HUMAN  | R.RM*LS#SSDAITQE.F            | S1376:       | 2 | 3,4915 | 0,291 | -0,085 |
| 9 | Q9UPU5 UBP24_HUMAN  | R.HLQQGSES#PM*M*IGE.L         | S1854:       | 2 | 3,4861 | 0,461 | -0,147 |
| 9 | P67936 TPM4_HUMAN   | E.NVGLHQTLDQT#LNE.L           | T241:        | 2 | 3,4842 | 0,277 | 0,294  |
| 9 | Q9C0C2 TB182_HUMAN  | K.RDS#LGAYASQDANE.Q           | S893:        | 2 | 3,4823 | 0,418 | 0,464  |
| 9 | Q8WXI9 P66B_HUMAN   | R.GRLTSPDIIVLS#DNE.A          | S129:        | 2 | 3,4811 | 0,338 | -0,068 |
| 9 | O75534 CSDE1_HUMAN  | E.SKSPAAPGQS#PTGSVCYE.R       | S123:        | 2 | 3,4757 | 0,515 | -0,128 |
| 9 | A5YM69 A5YM69_HUMAN | E.HLDM*APFSSDLGS#EEEE.V       | S145:        | 2 | 3,4728 | 0,421 | 0,736  |
| 9 | Q3KQU3 MA7D1_HUMAN  | R.RSS#QPSPTAVPASDS#PPTKQE.V   | S113:S125:   | 3 | 3,4689 | 0,131 | 1,337  |
| 9 | A1L390 PKHG3_HUMAN  | R.SSSVLS#LEGS#EKGLAR.H        | S643:S647:   | 2 | 3,4623 | 0,334 | -0,548 |
| 9 | P55265 DSRAD_HUMAN  | K.ALHGEATNSM*AS#DNQPE.G       | S690:        | 2 | 3,4575 | 0,441 | 0,523  |
| 9 | P04637 P53_HUMAN    | K.LM*FKTEGPDS#D.-             | S392:        | 2 | 3,4557 | 0,417 | 0,274  |
| 9 | Q7Z3K3 POGZ_HUMAN   | E.SLHQLFEGES#ETE.S            | S1392:       | 2 | 3,4544 | 0,444 | 0      |
| 9 | Q7L2Z9 CENPQ_HUMAN  | K.KM*EDLTNVS#SLLNM*E.R        | S138:        | 2 | 3,4512 | 0,392 | -0,199 |
| 9 | Q16512 PKN1_HUMAN   | K.SSRDPSS#PSSLSSPIQE.S        | S573:        | 2 | 3,4492 | 0,469 | 0,063  |
| 9 | Q14980 NUMA1_HUMAN  | E.SRPSLS#LGTITDEE.M           | S1947:       | 2 | 3,449  | 0,412 | 0      |
| 9 | Q9H0H5 RGAP1_HUMAN  | K.TRS#IGSAVDQGNE.S            | S203:        | 2 | 3,4464 | 0,492 | 0,431  |
| 9 | Q9UQ35 SRRM2_HUMAN  | R.SS#GHSSSELS#PDAVEK.A        | S1379:S1387: | 2 | 3,4444 | 1     | 0,137  |
| 9 | Q9H307 PININ_HUMAN  | E.TNRVES#VEPSENE.A            | S413:        | 2 | 3,4436 | 0,283 | 0,078  |
| 9 | Q92615 LARP5_HUMAN  | E.KFTSSQTQS#PTPPKPPS#PSFE.L   | S516:S524:   | 3 | 3,4402 | 0,168 | 0      |
| 9 | Q15019 SEPT2_HUMAN  | K.IYHLPDAES#DE.D              | S218:        | 2 | 3,4314 | 0,348 | 0      |
| 9 | Q16186 ADRM1_HUMAN  | R.SQSAAVT#PSSTTSSTR.A         | T217:        | 2 | 3,4299 | 1     | 0      |
| 9 | Q9H6F5 CCD86_HUMAN  | R.LGGLRPES#PE.S               | S18:         | 2 | 3,428  | 0,358 | 0,215  |
| 9 | Q13043 STK4_HUMAN   | E.NQINS#FGKS#VPGPLK.N         | S410:S414:   | 2 | 3,4251 | 0,213 | 0,07   |

|   |                    |                                  |                    |   |        |       |        |
|---|--------------------|----------------------------------|--------------------|---|--------|-------|--------|
| 9 | Q8NFA0 UBP32_HUMAN | K.SPSSLSANIIS#PKGS#PSSSR.K       | S1372:S1376:       | 3 | 3,4238 | 1     | 0      |
| 9 | Q9Y4F5 K0284_HUMAN | R.KM*IDQVFGVLES#PE.L             | S597:              | 2 | 3,4233 | 0,334 | 0      |
| 9 | Q96SB3 NEB2_HUMAN  | K.IKPVEVEES#GESEAE.S             | S304:              | 2 | 3,421  | 0,467 | -0,071 |
| 9 | O60271 JIP4_HUMAN  | K.LHQLS#GSDQLE.S                 | S183:              | 2 | 3,4196 | 0,326 | 0,187  |
| 9 | P62263 RS14_HUMAN  | K.KEEQVIS#LGPQVAE.G              | S16:               | 2 | 3,4195 | 0,435 | 0,152  |
| 9 | A0FGR8 ESYT2_HUMAN | R.SS#SS#LLASPGHISVK.E            | S737:S739:         | 2 | 3,4095 | 0,375 | -0,299 |
| 9 | Q92878 RAD50_HUMAN | E.DKLFDVCGS#QDFE.S               | S635:              | 2 | 3,4061 | 0,401 | -0,149 |
| 9 | Q16204 CCDC6_HUMAN | E.KLDQPVS#APPS#PRDISM*E.I        | S240:S244:         | 3 | 3,4026 | 0,224 | 0,171  |
| 9 | Q9UJX5 APC4_HUMAN  | K.IKEEVLS#ESEAE.N                | S777:              | 2 | 3,4005 | 0,441 | -0,169 |
| 9 | P04406 G3P_HUMAN   | R.VIISAPS#ADAPM*FVM*GVNHE.K      | S125:              | 3 | 3,3971 | 0,089 | 1,082  |
| 9 | Q96QR8 PURB_HUMAN  | E.HYAQLGPSS#PEQLAAGAE.G          | S101:              | 3 | 3,3932 | 0,185 | 0,36   |
| 9 | Q14498 RBM39_HUMAN | E.RTDASSASS#FLDSDELE.R           | S337:              | 2 | 3,3924 | 0,523 | 0      |
| 9 | Q8IZT6 ASPM_HUMAN  | E.ENKIPISPIS#PAFNE.C             | S225:              | 2 | 3,3899 | 0,166 | -0,211 |
| 9 | Q96FF9 CDA5_HUMAN  | K.THSVPAT#PTSTPVPNPEAE.S         | T111:              | 2 | 3,3889 | 0,539 | 0,061  |
| 9 | Q9Y2X7 GIT1_HUMAN  | R.KGVSASAVPFTPSS#PLLSCSQE.G      | S571:              | 2 | 3,3807 | 0,343 | 0,419  |
| 9 | Q9UHB6 LIMA1_HUMAN | R.KISENS#YSLDDLE.I               | S228:              | 2 | 3,378  | 0,332 | -0,077 |
| 9 | Q9UQ35 SRRM2_HUMAN | E.NSFGS#PLEFR.N                  | S1329:             | 2 | 3,3766 | 0,44  | 0      |
| 9 | P53667 LIMK1_HUMAN | R.SPGAGSLGS#PASQR.K              | S310:              | 2 | 3,3725 | 0,353 | 0,271  |
| 9 | Q9UGV2 NDRG3_HUMAN | R.THSTS#S#SLGSGESPFSS.S          | S333:S334:         | 3 | 3,3719 | 1     | 0,194  |
| 9 | Q3B820 YB032_HUMAN | K.VRCPT#PDFEDLPE.R               | T428:              | 2 | 3,3697 | 0,298 | 0,147  |
| 9 | Q14247 SRC8_HUMAN  | R.AKTQTPPVVS#PAPQPTEE.R          | S405:              | 2 | 3,3678 | 0,452 | -0,197 |
| 9 | Q8N1G0 ZN687_HUMAN | E.ASLLKLS#PAT#PTSEGPK.V          | S374:T377:         | 3 | 3,367  | 0,164 | 0,296  |
| 9 | P16401 H15_HUMAN   | E.TAPAET#ATPAPVEKS#PAK.K         | T9:S18:            | 2 | 3,3655 | 0,359 | -0,19  |
| 9 | P29353 SHC1_HUMAN  | K.YNPLRNES#LSSLEE.G              | S17:               | 2 | 3,3648 | 0,227 | 0,141  |
| 9 | Q99661 KIF2C_HUMAN | R.GSSSANPVNS#VR.R                | S187:              | 2 | 3,3596 | 0,263 | -0,389 |
| 9 | O95817 BAG3_HUMAN  | R.SST#PLHS#PSPIR.V               | T285:S289:         | 3 | 3,3554 | 0,16  | 0,318  |
| 9 | P18084 ITB5_HUMAN  | K.FNKS#YNGTVD.-                  | S793:              | 2 | 3,3539 | 0,346 | -0,498 |
| 9 | Q8IW35 CEP97_HUMAN | E.HSS#PVQDCQISQE.S               | S331:              | 2 | 3,3493 | 0,37  | -1,071 |
| 9 | Q15149 PLEC1_HUMAN | K.GYSPYSVSGSGSTAGS#RTGS#RT#GSR.A | S4626:S4630:T4632: | 3 | 3,3436 | 1     | 0,065  |
| 9 | Q99590 SFRIP_HUMAN | E.IIQTVDRQS#VKS#PE.V             | S311:S314:         | 2 | 3,3407 | 0,305 | -0,139 |
| 9 | P38398 BRCA1_HUMAN | E.KAVLT#S#QKSSEYPISQNPE.G        | T1456:S1457:       | 3 | 3,3398 | 0,223 | -0,404 |
| 9 | P04792 HSPB1_HUMAN | R.ALSRQLS#SGVSE.I                | S82:               | 2 | 3,3371 | 0,345 | 0,186  |
| 9 | Q8IYL2 U383_HUMAN  | R.GPGPGQGS#PGGGPGPR.S            | S78:               | 2 | 3,335  | 0,618 | 0      |

|   |                    |                                       |              |   |        |       |        |
|---|--------------------|---------------------------------------|--------------|---|--------|-------|--------|
| 9 | Q9BXS6 NUSAP_HUMAN | E.ATQT#PVS#NKKPVFD.L                  | T349:S352:   | 2 | 3,3284 | 0,436 | -0,505 |
| 9 | Q8IXT5 RB12B_HUMAN | R.GRPGSGTSGVDS#LSNFIE.S               | S105:        | 2 | 3,3174 | 0,438 | -0,131 |
| 9 | Q8N0Z3 CCD52_HUMAN | K.SNLKFS#PLQD.V                       | S548:        | 2 | 3,3168 | 0,365 | 0,099  |
| 9 | O60885 BRD4_HUMAN  | K.M*PDEPEEPVAVSSPAVPPPTK.V            |              | 3 | 3,3158 | 0,235 | 0      |
| 9 | Q8WW11 LMO7_HUMAN  | D.VTRLPS#PTS#PFSSLSQDQAATSK.A         | S988:S991:   | 3 | 3,3153 | 1     | 0,071  |
| 9 | Q08499 PDE4D_HUMAN | E.ACVIDDRS#PDT.-                      | S806:        | 2 | 3,3142 | 0,372 | -0,092 |
| 9 | Q96QT4 TRPM7_HUMAN | K.HGVVNTLSSS#LPQGDLE.S                | S1301:       | 2 | 3,3126 | 0,468 | 0,333  |
| 9 | Q9UPT8 ZC3H4_HUMAN | R.AAKPGPAEAPSPT#ASPSGDAS#PPATAPYDPR.V | T1106:S1114: | 3 | 3,3123 | 0,087 | 0,71   |
| 9 | P78347 GTF2I_HUMAN | R.KINSS#PNVNTTASGVE.D                 | S831:        | 2 | 3,3123 | 0,479 | 0,144  |
| 9 | Q9NWS9 ZN446_HUMAN | R.THTSGPGVQS#PGLATGE.S                | S362:        | 2 | 3,3082 | 0,372 | -0,073 |
| 9 | Q9H8E8 CSR2B_HUMAN | E.AAGFLDRSTS#ST#PVK.F                 | S287:T289:   | 2 | 3,3012 | 0,288 | 0,216  |
| 9 | Q9H8Y5 ANKZ1_HUMAN | R.RLAAQLGAPTS#PIPD.S                  | S675:        | 2 | 3,301  | 0,451 | -0,231 |
| 9 | Q12873 CHD3_HUMAN  | E.TEADAPS#PAPS#LGERLEPR.K             | S1601:S1605: | 3 | 3,2952 | 0,385 | -0,425 |
| 9 | P19838 NFKB1_HUMAN | K.TTSQAHS#LPLS#PASTR.Q                | S903:S907:   | 3 | 3,2931 | 0,237 | 0,706  |
| 9 | P22736 NR4A1_HUMAN | E.FIKPTM*DLAS#PE.A                    | S39:         | 2 | 3,2891 | 0,23  | -0,338 |
| 9 | P31949 S10AB_HUMAN | K.KLDTNS#DGQLDFSE.F                   | S71:         | 2 | 3,2876 | 0,364 | -0,148 |
| 9 | Q8IZT6 ASPM_HUMAN  | E.NKIPIS#PISPAFNE.C                   | S222:        | 2 | 3,2823 | 0,337 | 0      |
| 9 | O43829 ZF161_HUMAN | E.SKDLGSQT#PQALTFNDGM*SE.V            | T235:        | 3 | 3,2814 | 0,102 | 0      |
| 9 | Q14839 CHD4_HUMAN  | K.TPTPSTPGDTPNTAPVPPAEDGIK.I          |              | 3 | 3,281  | 0,183 | 0,637  |
| 9 | Q6BDS2 URFB1_HUMAN | R.LKPSASFGS#PVQSE.A                   | S758:        | 2 | 3,2794 | 0,423 | 0,564  |
| 9 | Q14527 HLTF_HUMAN  | R.KTAVQYIESS#DSEEIE.T                 | S398:        | 2 | 3,2791 | 0,418 | -0,128 |
| 9 | Q5UIP0 RIF1_HUMAN  | R.RAS#QGLLSSIENSE.S                   | S1542:       | 2 | 3,2683 | 0,52  | -0,078 |
| 9 | Q09666 AHNK_HUMAN  | K.GPKVDIDT#PDINIE.G                   | T3716:       | 2 | 3,2645 | 0,182 | -0,836 |
| 9 | O60220 TIM8A_HUMAN | K.SKPVFS#ESLSD.-                      | S92:         | 2 | 3,2632 | 0,372 | 0,574  |
| 9 | Q641Q2 FA21A_HUMAN | E.KAVAS#PEATVSQTDE.N                  | S498:        | 2 | 3,2573 | 0,49  | -0,151 |
| 9 | P32004 L1CAM_HUMAN | E.KEAAGGNDSSGATS#PINPAVALE.-          | S1248:       | 2 | 3,2568 | 0,295 | 0,655  |
| 9 | Q92854 SEM4D_HUMAN | E.LKFADS#DADGD.-                      | S857:        | 2 | 3,2553 | 0,377 | 0,297  |
| 9 | O15427 MOT4_HUMAN  | K.NGEVVHTPETS#V.-                     | S464:        | 2 | 3,2513 | 0,464 | 0,814  |
| 9 | Q9Y6Q9 NCOA3_HUMAN | K.TPHDILEDINAS#PE.M                   | S214:        | 2 | 3,2491 | 0,352 | 0,075  |
| 9 | Q9Y2W6 TDRKH_HUMAN | E.ITHTLSCLS#LSE.A                     | S542:        | 2 | 3,2456 | 0,307 | -0,085 |
| 9 | P49736 MCM2_HUMAN  | R.GNDPLTSS#PGR.S                      | S27:         | 2 | 3,2447 | 0,434 | -0,207 |
| 9 | P22626 ROA2_HUMAN  | R.GGGGNFGPGPGS#NFR.G                  | S225:        | 2 | 3,2425 | 0,489 | 0,084  |
| 9 | O43164 PJA2_HUMAN  | R.KLIS#SSQVDQE.T                      | S323:        | 2 | 3,2398 | 0,366 | 0,093  |

|   |                    |                                   |              |   |        |       |        |
|---|--------------------|-----------------------------------|--------------|---|--------|-------|--------|
| 9 | Q7LBC6 JHD2B_HUMAN | R.HSGGFSL#SPADFSQE.N              | S778:        | 2 | 3,2342 | 0,33  | 0,148  |
| 9 | Q9C0C2 TB182_HUMAN | R.RES#AASGLGGLLEEE.G              | S1473:       | 2 | 3,2304 | 0,37  | -0,229 |
| 9 | Q96RK0 CIC_HUMAN   | E.NRGEPTPPS#PAPAPAVAPGGSSE.S      | S1294:       | 3 | 3,2202 | 0,208 | 0,473  |
| 9 | Q13501 SQSTM_HUMAN | R.SRLTPVS#PESSSTEE.K              | S272:        | 2 | 3,2159 | 0,344 | 0,507  |
| 9 | O94842 TOX4_HUMAN  | E.AHTVEAPS#PETICE.M               | S533:        | 2 | 3,2082 | 0,356 | 0,075  |
| 9 | Q96QR8 PURB_HUMAN  | E.HYAQLGPS#SPEQLAAGAE.E.G         | S100:        | 2 | 3,205  | 0,437 | 0,18   |
| 9 | Q8IXT5 RB12B_HUMAN | R.GRPGSGTSGVDSL#NFIE.S            | S107:        | 2 | 3,2036 | 0,288 | -0,262 |
| 9 | Q6ZRV2 FA83H_HUMAN | R.RLS#LGQGDSTE.A                  | S1003:       | 2 | 3,2017 | 0,416 | -0,098 |
| 9 | Q8WUF5 IASPP_HUMAN | E.SAPTLHPYS#PLS#PK.G              | S110:S113:   | 2 | 3,1998 | 0,307 | 0      |
| 9 | Q9UHV7 MED13_HUMAN | R.KYS#ASSGGLCEE.A                 | S395:        | 2 | 3,1985 | 0,417 | 0,178  |
| 9 | Q96M11 HYLS1_HUMAN | R.KLPFLSPS#.-                     | S299:        | 2 | 3,1942 | 0,27  | -0,229 |
| 9 | Q14694 UBP10_HUMAN | E.TKYSPPAIS#PLVSE.K               | S370:        | 2 | 3,1937 | 0,425 | -0,078 |
| 9 | Q96I24 FUBP3_HUMAN | R.IQFKPDDGIS#PE.R                 | S296:        | 2 | 3,1919 | 0,331 | 0,257  |
| 9 | Q9Y519 T184B_HUMAN | E.KTLLSS#DDEF.-                   | S403:        | 2 | 3,1867 | 0,34  | -0,181 |
| 9 | Q8IW35 CEP97_HUMAN | E.SHGIS#PPLQGE.I                  | S825:        | 2 | 3,1858 | 0,441 | 0,305  |
| 9 | P52948 NUP98_HUMAN | E.NGERFS#FLS#KPVDE.N              | S635:S638:   | 3 | 3,1836 | 0,234 | 0      |
| 9 | O00273 DFFA_HUMAN  | E.KQAPELS#LSSQDLE.L               | S254:        | 2 | 3,1795 | 0,378 | 0,826  |
| 9 | Q66K89 E4F1_HUMAN  | E.HAGELVIAS#PEGQLE.V              | S772:        | 2 | 3,1743 | 0,457 | 0,15   |
| 9 | P12270 TPR_HUMAN   | K.RPSTSQTVST#PAPVPVIE.S           | T653:        | 2 | 3,1729 | 0,498 | 0,125  |
| 9 | Q5UIP0 RIF1_HUMAN  | K.KADVQAPVSPS#ETSQANPYSE.G        | S1774:       | 3 | 3,1724 | 0,31  | 0,48   |
| 9 | P17275 JUNB_HUMAN  | R.SRDAT#PPVSPINM*EDQE.R           | T255:        | 3 | 3,1697 | 0,136 | 0,277  |
| 9 | Q14C86 GAPD1_HUMAN | K.RTS#PSDGAM*ANYE.S               | S1044:       | 2 | 3,1696 | 0,359 | -0,245 |
| 9 | Q96JM3 ZN828_HUMAN | K.LGSVLSPE#PKPTPLTLEPQKPGSVVSPE.L | S145:        | 3 | 3,1685 | 0,349 | 0,233  |
| 9 | P42695 CNDD3_HUMAN | R.ASAGHVAVSS#PTPE.T               | S1329:       | 2 | 3,1633 | 0,498 | -0,088 |
| 9 | Q9H2G2 SLK_HUMAN   | K.TKDSGS#ISLQE.T                  | S779:        | 2 | 3,1613 | 0,239 | -0,098 |
| 9 | Q9P270 SLAI2_HUMAN | K.SSDRNPPLS#PQSSIDSE.L            | S247:        | 2 | 3,1593 | 0,506 | 0      |
| 9 | Q9H7P9 PKHG2_HUMAN | E.SSDLT#PPHS#PPSSR.Q              | T1257:S1261: | 3 | 3,1482 | 0,092 | -0,212 |
| 9 | P35251 RFC1_HUMAN  | K.NKPLS#PIKLT#PTSVLD.Y            | S156:T161:   | 2 | 3,1475 | 0,36  | 0,065  |
| 9 | Q01081 U2AF1_HUMAN | R.NPQNSSQS#ADGLR.C                | S61:         | 2 | 3,1465 | 0,312 | -0,252 |
| 9 | Q96N67 DOCK7_HUMAN | E.RSPS#GSAFGSQE.N                 | S1432:       | 2 | 3,1437 | 0,447 | -0,189 |
| 9 | P17980 PRS6A_HUMAN | R.KM*NVS#PDVNYEE.L                | S376:        | 2 | 3,1411 | 0,211 | -0,16  |
| 9 | Q96B36 AKTS1_HUMAN | R.LNT#SDFQK.L                     | T246:        | 2 | 3,1369 | 0,297 | -0,591 |
| 9 | Q9UKV3 ACINU_HUMAN | E.M*KTTS#PLEEEE.R                 | S365:        | 2 | 3,1313 | 0,224 | 0,088  |

|   |                    |                                        |                 |   |        |       |        |
|---|--------------------|----------------------------------------|-----------------|---|--------|-------|--------|
| 9 | Q01518 CAP1_HUMAN  | R.SGPKPFSAPKPQT#SPSPK.R                | T307:           | 3 | 3,1297 | 0,228 | -0,381 |
| 9 | P37802 TAGL2_HUMAN | K.NVIGLQM*GT#NR.G                      | T180:           | 2 | 3,1193 | 0,489 | 0,188  |
| 9 | P19484 TFEB_HUMAN  | R.VHGLPTTS#PSGM*NM*AE.L                | S332:           | 2 | 3,1122 | 0,419 | 0      |
| 9 | Q9C0C9 UBE2O_HUMAN | E.QLLTGS#PTS#PTVEPEKPTRE.K             | S836:S839:      | 3 | 3,1053 | 0,18  | -0,236 |
| 9 | Q6PGQ7 BORA_HUMAN  | K.CTNINSDS#PVGK.K                      | S137:           | 2 | 3,1021 | 0,352 | -0,623 |
| 9 | Q14157 UBP2L_HUMAN | E.AKGGs#TTGSQFLE.Q                     | S356:           | 2 | 3,1018 | 0,291 | 0,179  |
| 9 | O43166 SI1L1_HUMAN | K.KLIDLES#PTPE.S                       | S1549:          | 2 | 3,0996 | 0,41  | 0,185  |
| 9 | Q9Y6G9 DC1L1_HUMAN | R.KPVTVSPTTPTS#PTEGEAS.-               | S516:           | 3 | 3,0948 | 0,26  | 0,186  |
| 9 | Q9BTC0 DIDO1_HUMAN | R.RNS#VERPAEPVAGAAT#PSLVE.Q            | S1456:T1469:    | 3 | 3,0941 | 0,165 | 0,079  |
| 9 | P35612 ADDB_HUMAN  | E.TKS#PLVSPS#KSLLEE.G                  | S613:S619:      | 2 | 3,0909 | 0,246 | 0,073  |
| 9 | Q4LE39 ARI4B_HUMAN | R.LSKPPFQTNPS#PE.M                     | S675:           | 2 | 3,0843 | 0,25  | 0,401  |
| 9 | Q13009 TIAM1_HUMAN | R.SNATNSSYS#PTTGR.A                    | S358:           | 2 | 3,084  | 0,309 | -0,08  |
| 9 | Q5JSJ4 DX26B_HUMAN | E.LHLPLNS#PLPGSE.L                     | S150:           | 2 | 3,0788 | 0,458 | 0,084  |
| 9 | P05387 RLA2_HUMAN  | K.LASVPAGGAVAVSAAPGSAAPAAGS#APAAAEEK.K | S86:            | 3 | 3,0769 | 0,188 | 0,385  |
| 9 | Q15059 BRD3_HUMAN  | K.M*PDEPVEAPALPAPAAPM*VSK.G            |                 | 3 | 3,0764 | 0,277 | 1,106  |
| 9 | Q13573 SNW1_HUMAN  | R.GPPS#PPAPVM*HS#PSR.K                 | S224:S232:      | 3 | 3,0756 | 0,326 | 0,216  |
| 9 | Q9Y3X0 CCDC9_HUMAN | R.TTHLAGALS#PGE.A                      | S521:           | 2 | 3,0737 | 0,326 | 0,198  |
| 9 | Q5U5Q3 MEX3C_HUMAN | R.RGS#QPSTPRLS#PTFPE.S                 | S537:S545:      | 2 | 3,0731 | 0,403 | 0,255  |
| 9 | P52948 NUP98_HUMAN | K.NLNNSNLFS#PVNR.D                     | S612:           | 3 | 3,0661 | 0,266 | 0      |
| 9 | O95644 NFAC1_HUMAN | R.GLGACTLLGS#PRHS#PSTS#PR.A            | S233:S237:S241: | 3 | 3,0628 | 1     | 0,479  |
| 9 | Q9Y4K4 M4K5_HUMAN  | R.RQS#SPSCGPVAE.T                      | S433:           | 2 | 3,0627 | 0,489 | -0,45  |
| 9 | O77932 DOM3Z_HUMAN | E.AM*TQDLPSPPKT#PS#PK.-                | T392:S394:      | 3 | 3,0623 | 0,244 | -0,196 |
| 9 | P15407 FOSL1_HUMAN | K.FHLVPSINTM*SGS#QE.L                  | S47:            | 2 | 3,0598 | 0,374 | 0,21   |
| 9 | O95714 HERC2_HUMAN | E.GDM*HLLSGPLS#PNE.S                   | S368:           | 2 | 3,0563 | 0,287 | 0,078  |
| 9 | Q5JSZ5 K0515_HUMAN | R.HIISATSLSTS#PTE.L                    | S226:           | 2 | 3,0514 | 0,504 | -0,4   |
| 9 | Q96T37 RBM15_HUMAN | K.ISHLSGS#GSGDE.R                      | S210:           | 2 | 3,0495 | 0,339 | -0,1   |
| 9 | Q02952 AKA12_HUMAN | K.SAESPTS#PVT#SETGSTFKK.F              | S286:T289:      | 2 | 3,0475 | 0,26  | 0,232  |
| 9 | Q9P2F8 SI1L2_HUMAN | E.FM*DTTGERS#PS#PLTGK.V                | S1650:S1652:    | 3 | 3,044  | 0,242 | 0,481  |
| 9 | P27816 MAP4_HUMAN  | E.M*ALGKDVT#PPPETE.V                   | T521:           | 2 | 3,0409 | 0,364 | -0,077 |
| 9 | Q99459 CDC5L_HUMAN | R.S#GTTPKPVINS#TPGRT#PLR.D             | S427:S437:T442: | 3 | 3,0352 | 0,203 | -0,082 |
| 9 | P11766 ADHX_HUMAN  | E.FVTHNLS#FDE.I                        | S351:           | 2 | 3,0315 | 0,25  | 0,379  |
| 9 | Q6UB99 ANR11_HUMAN | E.GVFFSLQAKPS#PS#PRAE.L                | S1892:S1894:    | 3 | 3,0303 | 0,18  | 0,477  |
| 9 | P35251 RFC1_HUMAN  | R.HSTS#PSLDSEYNEE.L                    | S1088:          | 2 | 3,0255 | 0,388 | 0,146  |

|   |                    |                                 |            |   |        |       |        |
|---|--------------------|---------------------------------|------------|---|--------|-------|--------|
| 9 | Q6IN85 SMEK1_HUMAN | E.RFDDM*SS#PGLELPSCE.L          | S127:      | 2 | 3,0249 | 0,457 | 0,252  |
| 9 | Q8N2Y8 RUSC2_HUMAN | E.GGYGCPHASS#PE.L               | S356:      | 2 | 3,0205 | 0,403 | -0,094 |
| 9 | Q5VT52 K0460_HUMAN | K.IIS#PGSSTPSST#RSPPPGRDE.S     | S758:T767: | 3 | 3,0186 | 0,087 | 0,16   |
| 9 | P53367 ARFP1_HUMAN | K.HSLPS#GLGLSE.T                | S39:       | 2 | 3,0175 | 0,215 | 0,104  |
| 9 | Q92560 BAP1_HUMAN  | E.IGSAFNS#PLRS#PIR.S            | S505:S509: | 3 | 3,0157 | 0,239 | 0,328  |
| 9 | Q8TDJ6 DMXL2_HUMAN | E.M*VDKPDIGS#YE.R               | S2123:     | 2 | 3,0114 | 0,308 | -0,09  |
| 9 | P55197 AF10_HUMAN  | R.GS#LSPRS#PVSSLQIR.Y           | S700:S705: | 2 | 3,0107 | 0,277 | -0,07  |
| 9 | Q9UHR4 BI2L1_HUMAN | E.IKTPASTPVSQAS#PM*IE.R         | S261:      | 3 | 3,0076 | 0,189 | 0,087  |
| 9 | P46821 MAP1B_HUMAN | E.GTVSDKSAT#PVDE.G              | T1532:     | 2 | 3,0061 | 0,307 | -0,704 |
| 9 | Q9BRS8 LARP6_HUMAN | E.M*GT#QEKSPGTS#PLLSR.K         | T443:S451: | 3 | 3,0054 | 0,278 | 0,294  |
| 9 | Q13620 CUL4B_HUMAN | R.SATDGNTSTT#PPTSAK.K           | T31:       | 2 | 3,0004 | 0,501 | 0,151  |
| 9 | Q14320 FA50A_HUMAN | R.KISLS#FTLE.E                  | S121:      | 2 | 2,9954 | 0,33  | -0,405 |
| 9 | P42684 ABL2_HUMAN  | R.GAQASSGS#PALPR.K              | S620:      | 2 | 2,9947 | 0,29  | -0,954 |
| 9 | P05387 RLA2_HUMAN  | K.NIEDVIAQGIGK.L                |            | 2 | 2,9944 | 0,412 | 0      |
| 9 | P54578 UBP14_HUMAN | R.YAGALRAS#GE.M                 | S143:      | 2 | 2,9943 | 0,318 | -0,227 |
| 9 | Q86TX2 ACOT1_HUMAN | R.YRADT#LGELDLE.R               | T56:       | 2 | 2,9894 | 0,257 | -0,165 |
| 9 | Q9BYG5 PAR6B_HUMAN | R.HGAGS#GCLGTM*E.V              | S11:       | 2 | 2,9855 | 0,382 | 0,863  |
| 9 | Q96FF9 CDCA5_HUMAN | K.THSVPAT#PTSTPVPNPE.A          | T111:      | 2 | 2,9736 | 0,441 | 0,135  |
| 9 | P49736 MCM2_HUMAN  | E.SFTM*ASS#PAQR.R               | S13:       | 2 | 2,9706 | 0,282 | -0,191 |
| 9 | Q9H7Z6 MYST1_HUMAN | E.GTAPS#PGRVS#PPTPAR.G          | S37:S42:   | 2 | 2,9698 | 0,46  | 0,071  |
| 9 | Q9UQ35 SRRM2_HUMAN | R.SSGHSSSELS#PDAVE.K            | S1387:     | 2 | 2,9635 | 0,337 | 0      |
| 9 | Q8IYB3 SRRM1_HUMAN | R.HRPS#PPAT#PPPK.T              | S402:T406: | 3 | 2,9588 | 0,136 | 0,127  |
| 9 | O43399 TPD54_HUMAN | R.NSATFKS#FE.D                  | S166:      | 2 | 2,9571 | 0,352 | -0,22  |
| 9 | Q02952 AKA12_HUMAN | K.VLSKPPEGVVS#E.V               | S498:      | 2 | 2,954  | 0,23  | 0,092  |
| 9 | Q7Z4H7 FA29A_HUMAN | E.SYLSNSQT#PER.H                | T858:      | 2 | 2,9528 | 0,525 | -0,179 |
| 9 | Q02952 AKA12_HUMAN | K.ERPPAPSS#FVFQEE.T             | S1226:     | 2 | 2,9499 | 0,241 | -0,215 |
| 9 | P18846 ATF1_HUMAN  | R.TTPSATSPLQTVVM*TSPVTLTSQTTK.T |            | 3 | 2,9426 | 0,22  | 0,204  |
| 9 | P43243 MATR3_HUMAN | R.IGPYQPNVPVIGIDYVIPK.T         |            | 2 | 2,9366 | 0,326 | 0,062  |
| 9 | O43572 AKA10_HUMAN | E.SSSTLTVASRNS#PAS#PLKE.L       | S278:S281: | 3 | 2,9332 | 0,346 | 0,087  |
| 9 | A1L390 PKHG3_HUMAN | R.SSSVLS#LEGS#EKGLAR.H          | S643:S647: | 3 | 2,9296 | 0,222 | -0,206 |
| 9 | P42166 LAP2A_HUMAN | E.ISTRPPLGS#TE.L                | S235:      | 2 | 2,9293 | 0,476 | 0      |
| 9 | Q12923 PTN13_HUMAN | K.SVASLNRS#PE.R                 | S1033:     | 2 | 2,9292 | 0,251 | -0,428 |
| 9 | Q96GD4 AURKB_HUMAN | E.NSSGT#PDILTR.H                | T64:       | 2 | 2,929  | 0,439 | -0,393 |

|   |                     |                              |                 |   |        |       |        |
|---|---------------------|------------------------------|-----------------|---|--------|-------|--------|
| 9 | Q66K74 MAP1S_HUMAN  | R.SPAEGSERLS#LS#PLR.G        | S655:S657:      | 3 | 2,9269 | 0,274 | 0      |
| 9 | Q14247 SRC8_HUMAN   | R.AKTQT#PPVSPAPQPTEE.R       | T401:           | 2 | 2,9268 | 0,3   | 0,066  |
| 9 | P55209 NP1L1_HUMAN  | E.RLDGLVET#PTGYIE.S          | T62:            | 2 | 2,9257 | 0,382 | -0,149 |
| 9 | Q9UJH3 SMBT1_HUMAN  | E.LRTFS#FSDDE.N              | S765:           | 2 | 2,9192 | 0,33  | 0,094  |
| 9 | Q02952 AKA12_HUMAN  | E.ARGDTVVS#EAELTPE.A         | S967:           | 2 | 2,9153 | 0,38  | 0,148  |
| 9 | P19634 SL9A1_HUMAN  | K.IPSAVS#TVS#M*QNIHPK.S      | S602:S605:      | 2 | 2,9146 | 0,448 | 0,129  |
| 9 | Q8IU85 KCC1D_HUMAN  | E.GKGDVM*S#TACGTPGVVAPE.V    | S179:           | 2 | 2,9115 | 0,418 | 0,122  |
| 9 | Q96FF7 YS003_HUMAN  | R.ARS#PPQPLGE.L              | S233:           | 2 | 2,908  | 0,271 | -0,216 |
| 9 | P38159 HNRPG_HUMAN  | R.DSYS#SSRS#DLYSSGR.D        | S328:S332:      | 2 | 2,9072 | 0,343 | 0      |
| 9 | Q92576 PHF3_HUMAN   | E.NNLQDNQTSNNS#PCR.S         | S1614:          | 3 | 2,9072 | 0,357 | 0,101  |
| 9 | Q12846 STX4_HUMAN   | E.ADENYNS#VNTR.M             | S117:           | 2 | 2,8991 | 0,297 | -0,269 |
| 9 | Q9UGU0 TCF20_HUMAN  | R.SSLHTPFS#PNSE.T            | S1053:          | 2 | 2,8979 | 0,262 | 0,088  |
| 9 | Q9UHW9 S12A6_HUMAN  | R.TSHPDQVIEDLSQNS#ITGE.H     | S96:            | 3 | 2,8962 | 0,221 | 0,34   |
| 9 | Q9NWH9 SLTM_HUMAN   | E.VSKPLPSEGS#LAE.A           | S217:           | 2 | 2,895  | 0,235 | -0,263 |
| 9 | Q00839 HNRPU_HUMAN  | R.AKS#PQPPVEE.E              | S270:           | 2 | 2,8947 | 0,35  | 0,105  |
| 9 | O60684 IMA7_HUMAN   | E.HYFGVEDDDSS#LAPQVDE.T      | S510:           | 2 | 2,891  | 0,409 | 0,116  |
| 9 | Q92615 LARP5_HUMAN  | E.EKFTSSQT#QSPT#PPKPPSPSFE.L | T514:T518:      | 3 | 2,8887 | 0,121 | 0,428  |
| 9 | Q99459 CDC5L_HUMAN  | E.SDFSGVT#PQR.Q              | T396:           | 2 | 2,8886 | 0,359 | 0      |
| 9 | Q96M11 HYLS1_HUMAN  | R.KLPFPLS#PS.-               | S297:           | 2 | 2,8885 | 0,381 | -0,114 |
| 9 | P17275 JUNB_HUMAN   | R.SRDAT#PPVSPINM*E.D         | T255:           | 2 | 2,8877 | 0,505 | 0,303  |
| 9 | B2CI53 B2CI53_HUMAN | R.SNM*S#PDKPVS#VK.I          | S1105:S1111:    | 2 | 2,8832 | 0,207 | -0,167 |
| 9 | Q6P2E9 EDC4_HUMAN   | E.TCSTLAES#PR.N              | S844:           | 2 | 2,8822 | 0,343 | -0,203 |
| 9 | Q14160 LAP4_HUMAN   | R.LRVQS#PEPPAPE.R            | S1475:          | 2 | 2,8819 | 0,363 | 0,349  |
| 9 | Q6NZI2 PTRF_HUMAN   | R.RGSS#PDVHALLE.I            | S366:           | 2 | 2,8814 | 0,361 | -0,09  |
| 9 | Q9UQ35 SRRM2_HUMAN  | E.LSNS#PLRE.N                | S1320:          | 2 | 2,881  | 0,201 | 0,061  |
| 9 | P37802 TAGL2_HUMAN  | R.GPAY#GLSRE.V               | Y8:             | 2 | 2,8754 | 0,309 | -0,118 |
| 9 | Q9BRQ6 CHCH6_HUMAN  | R.RVS#FGVDEEE.R              | S13:            | 2 | 2,8708 | 0,271 | -0,098 |
| 9 | Q9Y624 JAM1_HUMAN   | E.FKQTSS#FLV.-               | S296:           | 2 | 2,8674 | 0,362 | 0      |
| 9 | Q5VUA4 ZN318_HUMAN  | R.ITVGNDFHFCVST#PE.R         | T161:           | 2 | 2,8649 | 0,278 | -0,221 |
| 9 | O60271 JIP4_HUMAN   | K.LHQLSGS#DQLE.S             | S185:           | 2 | 2,8625 | 0,291 | 0,467  |
| 9 | Q9NPI1 BRD7_HUMAN   | R.KAM*GISIPS#PVM*E.N         | S621:           | 2 | 2,8616 | 0,178 | -0,166 |
| 9 | Q8IX90 CM003_HUMAN  | E.KS#PRS#PQLSDFGLE.R         | S152:S155:      | 2 | 2,8614 | 0,479 | 0      |
| 9 | Q07955 SFRS1_HUMAN  | R.VKVDGPRS#PSY#GRS#R.S       | S199:Y202:S205: | 3 | 2,8614 | 0,194 | 0,096  |

|   |                      |                                    |                 |   |        |       |        |
|---|----------------------|------------------------------------|-----------------|---|--------|-------|--------|
| 9 | Q9UQ35 SRRM2_HUMAN   | E.TKEQNSALPTSS#QDEELM*E.V          | S1233:          | 3 | 2,8589 | 0,147 | 0,328  |
| 9 | Q9BQY9 DBND2_HUMAN   | E.SQRPPIGS#ISSM*E.V                | S151:           | 2 | 2,8564 | 0,306 | 0      |
| 9 | Q9H6Z4 RANB3_HUMAN   | E.HALEPPAPAGASAST#PPPPAPE.A        | T75:            | 3 | 2,8498 | 0,31  | 0      |
| 9 | Q14152 EIF3A_HUMAN   | R.LGDSS#LSR.K                      | S882:           | 2 | 2,8497 | 0,168 | 0,2    |
| 9 | Q6P0Q8 MAST2_HUMAN   | R.SRS#LS#PGRSPVFDSE.I              | S299:S301:      | 2 | 2,8484 | 0,342 | -0,457 |
| 9 | Q92576 PHF3_HUMAN    | E.STEFNKS#NLE.V                    | S419:           | 2 | 2,8451 | 0,192 | 0,098  |
| 9 | Q15785 TOM34_HUMAN   | K.NRVPS#AGDVE.K                    | S186:           | 2 | 2,8434 | 0,411 | 0      |
| 9 | O43194 GPR39_HUMAN   | E.KIFLS#TFQSE.A                    | S411:           | 2 | 2,8424 | 0,284 | -0,572 |
| 9 | P49736 MCM2_HUMAN    | E.SFTM*AS#SPAQR.R                  | S12:            | 2 | 2,8418 | 0,451 | -0,095 |
| 9 | Q15942 ZYX_HUMAN     | K.FTPVASKFS#PGAPGGSGS#QPNQK.L      | S281:S290:      | 3 | 2,8401 | 0,327 | 0,304  |
| 9 | Q52LA3 LIN52_HUMAN   | E.FAASFKS#PITSS#PPK.W              | S48:S53:        | 2 | 2,8354 | 0,422 | 0,354  |
| 9 | O00273 DFFA_HUMAN    | E.KQAPELSLS#SQDLE.L                | S256:           | 2 | 2,8339 | 0,271 | 1,652  |
| 9 | O15534 PER1_HUMAN    | R.LRGLDSSSTAPS#ALGE.R              | S815:           | 2 | 2,8307 | 0,413 | 0,074  |
| 9 | P50548 ERF_HUMAN     | R.GEGPGEAGGPLT#PR.R                | T526:           | 2 | 2,8295 | 0,226 | -0,177 |
| 9 | P09211 GSTP1_HUMAN   | E.YVNLPIPINGNGKQ.-                 |                 | 2 | 2,8282 | 0,301 | 0,371  |
| 9 | Q13425 SNTB2_HUMAN   | R.GPAGEAGAS#PPVR.R                 | S110:           | 2 | 2,8263 | 0,511 | -0,294 |
| 9 | A8K3B1 A8K3B1_HUMAN  | -.MSLNLPEAS#LLS#RASWPE.Q           | S9:S12:         | 3 | 2,8219 | 0,187 | 0,339  |
| 9 | O75113 N4BP1_HUMAN   | K.KQFS#LENVQE.G                    | S300:           | 2 | 2,8212 | 0,164 | 0,187  |
| 9 | O43432 IF4G3_HUMAN   | E.QKLDFIEDSDS#PCSSE.A              | S1409:          | 2 | 2,8192 | 0,447 | 0,067  |
| 9 | Q68CZ2 TENS3_HUMAN   | R.KLS#LGQYDND.A                    | S776:           | 2 | 2,8191 | 0,301 | 0,198  |
| 9 | ##Q86UR5 RIMS1_HUMAN | R.S#VIAVVKASLSSRRKKGGAGVT#GVAT#D.S | S250:T271:T275: | 3 | 2,8177 | 0,154 | 0      |
| 9 | Q02880 TOP2B_HUMAN   | K.VKAS#PITNDGEDE.F                 | S1400:          | 2 | 2,8174 | 0,22  | 0,084  |
| 9 | Q9H7N4 SFR19_HUMAN   | E.GLSQS#ISR.I                      | S293:           | 2 | 2,8128 | 0,207 | 0,197  |
| 9 | Q8WVB6 CTF18_HUMAN   | E.LEGAST#PSPS#GVPLFTAGRPPR.T       | T34:S38:        | 3 | 2,8103 | 0,16  | 0,155  |
| 9 | Q9NPI6 DCP1A_HUMAN   | R.QRS#PLLNQPVPE.L                  | S353:           | 2 | 2,8086 | 0,397 | 0,167  |
| 9 | Q7Z6Z7 HUWE1_HUMAN   | R.DGGSGNS#TIIVSR.S                 | S2365:          | 2 | 2,8078 | 0,102 | -0,091 |
| 9 | Q8N1G2 K0082_HUMAN   | E.LALSLS#STS#DDEPPSSVSHGAK.A       | S28:S31:        | 2 | 2,8062 | 0,131 | 0,416  |
| 9 | Q8IWZ3 ANKH1_HUMAN   | R.RLTS#SVSCALDE.A                  | S177:           | 2 | 2,8054 | 0,482 | 0,602  |
| 9 | O43829 ZF161_HUMAN   | R.KQVT#PSAIQSE.T                   | T419:           | 2 | 2,8048 | 0,15  | -0,096 |
| 9 | Q8IYW5 RN168_HUMAN   | E.GSISAS#PLNSR.K                   | S197:           | 2 | 2,7992 | 0,362 | -0,209 |
| 9 | B2CI53 B2CI53_HUMAN  | R.SNM*S#PDKPVS#VK.I                | S1105:S1111:    | 3 | 2,7979 | 0,237 | 0,437  |
| 9 | O14974 MYPT1_HUMAN   | R.KTGS#YGALAE.I                    | S445:           | 2 | 2,7977 | 0,22  | 0      |
| 9 | Q8TD19 NEK9_HUMAN    | E.SGGCGDSS#PGPSASQGPR.A            | S29:            | 2 | 2,7953 | 0,409 | 0      |



|   |                    |                                       |              |   |        |       |        |
|---|--------------------|---------------------------------------|--------------|---|--------|-------|--------|
| 9 | Q01484 ANK2_HUMAN  | K.SDSNAS#FLR.A                        | S34:         | 2 | 2,7952 | 0,217 | 0,453  |
| 9 | Q13177 PAK2_HUMAN  | K.ERPEIS#PPSDFE.H                     | S75:         | 2 | 2,793  | 0,315 | -0,082 |
| 9 | Q14444 CAPR1_HUMAN | E.VVNSLQQPQAASPS#VPEPHSLTPVAQADPLVR.R | S337:        | 3 | 2,7898 | 0,306 | 0,103  |
| 9 | Q06265 EXOS9_HUMAN | E.KAPIDTS#DVEE.K                      | S306:        | 2 | 2,7873 | 0,41  | 0,285  |
| 9 | Q8IYB3 SRRM1_HUMAN | R.APQTSSS#PPPVR.R                     | S696:        | 2 | 2,7864 | 0,161 | -0,187 |
| 9 | P35658 NU214_HUMAN | R.SAQGSSS#PVPS#M*VQKSPR.I             | S657:S661:   | 3 | 2,785  | 1     | -0,182 |
| 9 | Q96J02 ITCH_HUMAN  | R.RPAS#VNGSPSATSE.S                   | S269:        | 2 | 2,7807 | 0,321 | 0      |
| 9 | Q15942 ZYX_HUMAN   | R.EKVSS#IDLE.I                        | S143:        | 2 | 2,7787 | 0,13  | 0,555  |
| 9 | P46013 KI67_HUMAN  | K.IPCKSS#PELE.D                       | S2828:       | 2 | 2,7753 | 0,282 | -0,098 |
| 9 | Q05209 PTN12_HUMAN | R.TPLSFTNPLHS#DD.S                    | S603:        | 2 | 2,7748 | 0,36  | -0,16  |
| 9 | Q8NFD5 ARI1B_HUMAN | E.SSSHPLALSQS#PM*PQE.R                | S771:        | 2 | 2,7748 | 0,441 | -0,145 |
| 9 | Q9H5H4 ZN768_HUMAN | E.LKTQS#PEFE.A                        | S160:        | 2 | 2,7743 | 0,261 | -0,421 |
| 9 | O94833 BPAAE_HUMAN | R.RGS#DASDFDISE.I                     | S5111:       | 2 | 2,7734 | 0,322 | 0,177  |
| 9 | Q2NKX8 ERC6L_HUMAN | E.NS#LCGSAPNSR.A                      | S980:        | 2 | 2,7665 | 0,491 | 0      |
| 9 | Q9P266 K1462_HUMAN | E.DVGFGRGNS#PE.M                      | S885:        | 2 | 2,7635 | 0,298 | -0,316 |
| 9 | Q9H1Z4 WDR13_HUMAN | R.SVS#RGS#YQLQAQM*NR.A                | S113:S116:   | 3 | 2,7597 | 0,194 | 0      |
| 9 | Q09666 AHNK_HUMAN  | K.LKGPQITGPS#LE.G                     | S379:        | 2 | 2,7585 | 0,25  | -0,555 |
| 9 | Q92667 AKAP1_HUMAN | E.AAVAPPDAGLPLPGLPAEGSPPPK.T          |              | 3 | 2,7582 | 0,226 | -0,165 |
| 9 | Q9UKI8 TLK1_HUMAN  | E.YQGGNGSS#PVR.G                      | S159:        | 2 | 2,7569 | 0,389 | -0,305 |
| 9 | Q02952 AKA12_HUMAN | E.RPPAPSS#FVFQEE.T                    | S1226:       | 2 | 2,7561 | 0,256 | 0,155  |
| 9 | O95872 BAT4_HUMAN  | E.NRS#PTPSLQYCE.N                     | S210:        | 2 | 2,7549 | 0,426 | -0,239 |
| 9 | Q9BRS8 LARP6_HUMAN | E.M*GTQEKSPGT#S#PLLSR.K               | T450:S451:   | 2 | 2,7538 | 0,261 | 0,131  |
| 9 | Q9H2Y7 ZF106_HUMAN | R.RATGDGSS#PELPSLE.R                  | S1026:       | 2 | 2,7531 | 0,182 | 0,229  |
| 9 | Q9Y6G9 DC1L1_HUMAN | R.KPVTVSPPTPT#SPTEGEAS.-              | T515:        | 2 | 2,7524 | 0,324 | -0,124 |
| 9 | O75449 KTNA1_HUMAN | K.NKS#PAAVTEPE.T                      | S170:        | 2 | 2,7502 | 0,283 | 0      |
| 9 | O95425 SVIL_HUMAN  | E.NFSNVS#LR.S                         | S1422:       | 2 | 2,7487 | 0,267 | 0,42   |
| 9 | Q13043 STK4_HUMAN  | E.NQINS#FGK.S                         | S410:        | 2 | 2,7484 | 0,161 | 0      |
| 9 | P38159 HNRPG_HUMAN | R.DSYSSS#RS#DLYSSGR.D                 | S330:S332:   | 3 | 2,7465 | 1     | 0,2    |
| 9 | P46013 KI67_HUMAN  | K.AFM*GT#PVQK.L                       | T1193:       | 2 | 2,7463 | 0,344 | 0      |
| 9 | O95425 SVIL_HUMAN  | R.DS#SFTEVPRS#PK.H                    | S237:S245:   | 2 | 2,746  | 0,294 | -0,162 |
| 9 | Q5T200 ZC3HD_HUMAN | E.SRS#LS#PSHLTE.D                     | S875:S877:   | 2 | 2,7446 | 0,39  | -0,089 |
| 9 | O15211 RGL2_HUMAN  | R.RSAS#CGSPLSGGAE.A                   | S619:        | 2 | 2,7305 | 0,425 | -0,395 |
| 9 | P49792 RBP2_HUMAN  | E.TVFTPKT#S#PENVQDR.F                 | T1399:S1400: | 3 | 2,7294 | 0,291 | -0,292 |

|   |                     |                             |              |   |        |       |        |
|---|---------------------|-----------------------------|--------------|---|--------|-------|--------|
| 9 | O95251 MYST2_HUMAN  | R.SQQQPTPVT#PK.K            | T88:         | 2 | 2,7272 | 0,344 | -0,284 |
| 9 | Q13535 ATR_HUMAN    | E.NLSSNSDGIS#PK.R           | S428:        | 2 | 2,7225 | 0,319 | -0,282 |
| 9 | Q13439 GOGA4_HUMAN  | R.SRTSS#FTEQLDE.G           | S41:         | 2 | 2,7224 | 0,231 | -0,082 |
| 9 | Q92538 GBF1_HUMAN   | E.KSQSASVES#IPEVLEE.C       | S352:        | 2 | 2,722  | 0,337 | 0,135  |
| 9 | Q12802 AKP13_HUMAN  | E.CSTPLPEDCS#PHTS#PR.V      | S2398:S2402: | 3 | 2,722  | 0,331 | 0,457  |
| 9 | Q9UKL3 C8AP2_HUMAN  | E.AIS#PLNS#PVRPVAK.V        | S858:S862:   | 2 | 2,7198 | 0,435 | -0,227 |
| 9 | Q2NL81 Q2NL81_HUMAN | R.GYQSLSDS#PPGAR.V          | S793:        | 2 | 2,7163 | 0,383 | -0,259 |
| 9 | Q86YS7 K0528_HUMAN  | K.TGM*GS#GS#AGKEGGPFK.A     | S321:S323:   | 2 | 2,7118 | 0,364 | -0,52  |
| 9 | Q9BRS8 LARP6_HUMAN  | E.M*GTQEK#PGTS#PLLSR.K      | S447:S451:   | 3 | 2,7114 | 0,097 | -0,098 |
| 9 | P46821 MAP1B_HUMAN  | K.SDISPLT#PR.E              | T1788:       | 2 | 2,7082 | 0,318 | 0,229  |
| 9 | Q02952 AKA12_HUMAN  | K.SPPS#PVERE.M              | S1331:       | 2 | 2,7041 | 0,245 | -0,226 |
| 9 | Q43149 ZZEF1_HUMAN  | E.VERPVS#SPGDPE.Q           | S2443:       | 2 | 2,6992 | 0,311 | 0      |
| 9 | Q15773 MLF2_HUMAN   | R.LAIQGPEDS#PSRQS#R.R       | S238:S243:   | 3 | 2,6982 | 0,199 | -0,102 |
| 9 | Q9HC35 EMAL4_HUMAN  | E.SRISS#PTLLE.N             | S919:        | 2 | 2,6978 | 0,368 | 0,48   |
| 9 | Q92917 GPKOW_HUMAN  | E.AQALT#PTGPR.M             | T216:        | 2 | 2,6949 | 0,386 | 0,103  |
| 9 | Q9C0B5 ZDHC5_HUMAN  | E.DSLLAKDS#PPTPT#M*YK.Y     | S345:T350:   | 3 | 2,6892 | 0,279 | 0,09   |
| 9 | Q9NQW6 ANLN_HUMAN   | E.LLPKT#PIS#PLK.T           | T320:S323:   | 2 | 2,6836 | 0,298 | 0,268  |
| 9 | Q9P107 GMIP_HUMAN   | R.GRGPS#PAAASPE.G           | S914:        | 2 | 2,6826 | 0,301 | -0,104 |
| 9 | Q969Z4 TR19L_HUMAN  | R.YVVRLS#E.S                | S424:        | 2 | 2,6822 | 0,277 | 0,387  |
| 9 | P25445 TNR6_HUMAN   | E.NQGSHE#PTLNPE.T           | S212:        | 2 | 2,6805 | 0,208 | -0,246 |
| 9 | Q96B36 AKTS1_HUMAN  | E.NGPPSS#PDLDR.I            | S212:        | 2 | 2,6791 | 0,318 | -0,593 |
| 9 | Q8IX90 CM003_HUMAN  | E.NLLRT#PT#PPEVTKIPE.D      | T358:T360:   | 3 | 2,6774 | 0,247 | 0      |
| 9 | Q9P2R6 RERE_HUMAN   | E.ISRPNS#PSEGE.S            | S679:        | 2 | 2,6769 | 0,391 | 0,17   |
| 9 | Q14980 NUMA1_HUMAN  | R.KNS#LISSLEE.V             | S1225:       | 2 | 2,6763 | 0,303 | 0,184  |
| 9 | P22314 UBA1_HUMAN   | R.RVS#GPDPKPGSNC#PAQSVLSE.V | S13:S24:     | 3 | 2,6757 | 0,177 | 0,226  |
| 9 | Q6ZN18 AEBP2_HUMAN  | E.LSRLS#PLPPGS#PGSAAR.G     | S18:S24:     | 3 | 2,6743 | 0,222 | 0,602  |
| 9 | Q02750 MP2K1_HUMAN  | D.SM*ANS#FVGTR.S            | S222:        | 2 | 2,6742 | 0,3   | 0      |
| 9 | Q641Q2 FA21A_HUMAN  | R.SRPTS#FADE.L              | S288:        | 2 | 2,674  | 0,184 | 0,224  |
| 9 | Q9NQS7 INCE_HUMAN   | R.IAQVS#PGPR.D              | S263:        | 2 | 2,6711 | 0,122 | -0,182 |
| 9 | Q8N9T8 KRI1_HUMAN   | E.GVHGPPVQLAVDDSS#DEGE.L    | S287:        | 3 | 2,6698 | 0,171 | 0,46   |
| 9 | P55209 NP1L1_HUMAN  | E.RLDGLVETPT#GYIE.S         | T64:         | 2 | 2,6673 | 0,388 | -0,149 |
| 9 | O95235 KI20A_HUMAN  | E.HSLQVS#PSLE.K             | S532:        | 2 | 2,6663 | 0,156 | 0,415  |
| 9 | P02545 LMNA_HUMAN   | R.SGAQASSTPLS#PTR.I         | S22:         | 2 | 2,6651 | 0,248 | -0,085 |

|   |                    |                             |            |   |        |       |        |
|---|--------------------|-----------------------------|------------|---|--------|-------|--------|
| 9 | Q15573 TAF1A_HUMAN | E.LKGPVT#DDEEVE.T           | T13:       | 2 | 2,6618 | 0,308 | -0,173 |
| 9 | Q96PE2 ARHG_HUMAN  | R.KSL#NPDIASE.T             | S463:      | 2 | 2,6572 | 0,196 | 0,295  |
| 9 | Q9HC35 EMAL4_HUMAN | R.AS#PS#PQPSSQPLQIHR.Q      | S144:S146: | 2 | 2,6567 | 0,363 | 0,258  |
| 9 | Q15742 NAB2_HUMAN  | R.SFS#PKS#PLELGEK.L         | S159:S162: | 2 | 2,654  | 0,253 | -0,077 |
| 9 | Q9UPN4 AZI1_HUMAN  | R.SSSALDS#PAGPR.R           | S150:      | 2 | 2,6502 | 0,317 | 0,1    |
| 9 | O15027 SC16A_HUMAN | K.FANLT#PSR.T               | T1876:     | 2 | 2,6474 | 0,248 | 0,309  |
| 9 | O00443 P3C2A_HUMAN | E.KLLDD#FE.T                | S108:      | 2 | 2,646  | 0,173 | -0,21  |
| 9 | O15014 ZN609_HUMAN | R.LVEPHS#PS#PSSK.F          | S576:S578: | 2 | 2,6448 | 0,325 | -0,257 |
| 9 | Q5T230 UTF1_HUMAN  | R.RPAS#PSALGE.L             | S42:       | 2 | 2,6431 | 0,354 | 0,458  |
| 9 | Q12830 BPTF_HUMAN  | K.KVTSS#PITSEEE.S           | S1534:     | 2 | 2,6408 | 0,283 | -0,088 |
| 9 | Q8WYP5 AHTF1_HUMAN | E.TRIS#FVEE.D               | S1241:     | 2 | 2,637  | 0,288 | 0,23   |
| 9 | Q32MZ4 LRRF1_HUMAN | R.RGS#GDTISISIDTE.A         | S120:      | 2 | 2,6312 | 0,271 | 0,172  |
| 9 | Q99700 ATX2_HUMAN  | E.NKGIS#PVVSE.H             | S783:      | 2 | 2,6273 | 0,339 | -0,769 |
| 9 | P25054 APC_HUMAN   | R.RTGS#SSSILSASSE.S         | S2569:     | 2 | 2,6264 | 0,231 | 0,084  |
| 9 | Q96GY3 LIN37_HUMAN | E.RECSPSS#PLPLPEDEE.G       | S138:      | 2 | 2,6245 | 0,403 | 0,544  |
| 9 | P67809 YBOX1_HUMAN | R.NYQQNYQNS#ESGEKNE.G       | S165:      | 2 | 2,6241 | 0,383 | 0,121  |
| 9 | O15400 STX7_HUMAN  | R.ASSRV#GSFPE.D             | S129:      | 2 | 2,6231 | 0,293 | 0,304  |
| 9 | Q9H501 ESF1_HUMAN  | K.NIVQHTDSS#LEE.K           | S180:      | 2 | 2,6193 | 0,217 | 0,157  |
| 9 | Q5VT52 K0460_HUMAN | K.IIS#PGSSTPSSTRS#PPPGRDE.S | S758:S769: | 3 | 2,6186 | 0,164 | 0,08   |
| 9 | Q15788 NCOA1_HUMAN | R.KGS#PCDTLASSTE.K          | S22:       | 2 | 2,6173 | 0,284 | 0      |
| 9 | Q8N568 DCLK2_HUMAN | R.CIS#PEGVNGNR.C            | S375:      | 2 | 2,6128 | 0,287 | -0,285 |
| 9 | Q15418 KS6A1_HUMAN | K.KAYS#FCGTVE.Y             | S221:      | 2 | 2,6081 | 0,322 | 0,196  |
| 9 | Q8N3R9 MPP5_HUMAN  | E.LDLNSS#M*R.L              | S84:       | 2 | 2,6042 | 0,315 | 0,118  |
| 9 | Q9UMZ2 SYNG_HUMAN  | E.NKPLGES#FAE.F             | S557:      | 2 | 2,6033 | 0,222 | 0,104  |
| 9 | Q9Y4C1 JHD2A_HUMAN | E.HAPS#PSDVSNAPE.V          | S445:      | 2 | 2,6033 | 0,304 | -0,352 |
| 9 | Q66K14 TBC9B_HUMAN | R.KAS#VVDPSTE.S             | S411:      | 2 | 2,6026 | 0,206 | -0,219 |
| 9 | Q6BDS2 URFB1_HUMAN | R.LKPSAS#FGSPVQSE.A         | S755:      | 2 | 2,601  | 0,238 | 0,322  |
| 9 | Q2M218 AAK1_HUMAN  | K.VGSLT#PPSS#PKTQR.A        | T620:S624: | 3 | 2,601  | 0,259 | 0,34   |
| 9 | Q96TA1 NIBL1_HUMAN | E.ASS#PPAS#PLQHLLPGK.A      | S679:S683: | 2 | 2,599  | 0,306 | -0,139 |
| 9 | P06400 RB_HUMAN    | E.GLPT#PTKMT#PR.S           | T821:T826: | 2 | 2,5985 | 0,309 | -0,359 |
| 9 | Q12923 PTN13_HUMAN | K.RFES#SSGLPGVDE.T          | S442:      | 2 | 2,5963 | 0,431 | -0,084 |
| 9 | Q8N2M8 SFR16_HUMAN | K.LTRPAAS#PAVGE.K           | S532:      | 2 | 2,5926 | 0,309 | -0,488 |
| 9 | Q9Y5U2 TSSC4_HUMAN | E.LAHLAGPGS#PE.A            | S265:      | 2 | 2,5921 | 0,512 | -0,108 |

|   |                    |                            |              |   |        |       |        |
|---|--------------------|----------------------------|--------------|---|--------|-------|--------|
| 9 | Q8WWM7 ATX2L_HUMAN | E.IESS#PQYR.L              | S306:        | 2 | 2,5863 | 0,349 | 0,691  |
| 9 | O95785 WIZ_HUMAN   | K.SPQLSLS#PRPAS#PK.A       | S1012:S1017: | 3 | 2,5829 | 0,127 | 0,225  |
| 9 | P48960 CD97_HUMAN  | R.ALRAS#ESGI.-             | S831:        | 2 | 2,5785 | 0,333 | 0,062  |
| 9 | Q9NQC7 CYLD_HUMAN  | R.FHS#LPFS#LTK.M           | S418:S422:   | 2 | 2,577  | 0,264 | -0,091 |
| 9 | Q9C0B5 ZDHC5_HUMAN | K.SKGS#LEITE.S             | S299:        | 2 | 2,5759 | 0,081 | 0,467  |
| 9 | Q9Y3R5 DOP2_HUMAN  | R.VPRVS#LE.R               | S610:        | 2 | 2,574  | 0,296 | 0,485  |
| 9 | Q9Y2J4 AMOL2_HUMAN | D.TTLIRHS#PQPS#PSSSFNE.G   | S602:S606:   | 2 | 2,5728 | 0,234 | 0,114  |
| 9 | Q9C0C2 TB182_HUMAN | R.VSGAGFS#PSSK.M           | S1138:       | 2 | 2,5725 | 0,246 | -0,332 |
| 9 | Q7L2J0 MEPCE_HUMAN | R.TLNAET#PKS#SPLPAK.G      | T213:S216:   | 3 | 2,5715 | 0,27  | 0,213  |
| 9 | Q7L1V2 MON1B_HUMAN | K.DKDQPPSPS#PPPQSE.A       | S61:         | 2 | 2,5713 | 0,202 | -0,362 |
| 9 | Q12888 TP53B_HUMAN | R.SEDPPTT#PIR.G            | T1056:       | 2 | 2,5711 | 0,344 | -0,716 |
| 9 | O60684 IMA7_HUMAN  | E.HYFGVEDDDS#SLAPQVDE.T    | S509:        | 2 | 2,5701 | 0,308 | 0,116  |
| 9 | Q9H7P9 PKHG2_HUMAN | E.SSDLT#PPHS#PPSSR.Q       | T1257:S1261: | 2 | 2,5689 | 0,274 | -0,283 |
| 9 | Q9HC35 EMAL4_HUMAN | E.KLS#LPQNE.T              | S869:        | 2 | 2,5649 | 0,238 | 0,242  |
| 9 | P04406 G3P_HUMAN   | D.APM*FVM*GVNHE.K          |              | 2 | 2,5628 | 0,439 | -0,193 |
| 9 | P49454 CENPF_HUMAN | E.QHPVSLAPLDES#NSYE.H      | S1387:       | 2 | 2,561  | 0,31  | 0,981  |
| 9 | P25054 APC_HUMAN   | R.KLPPNLS#PTIE.Y           | S2512:       | 2 | 2,5559 | 0,251 | 0      |
| 9 | Q8N122 RPTOR_HUMAN | R.SVSS#YGNIR.A             | S722:        | 2 | 2,5532 | 0,199 | 0,23   |
| 9 | Q8IWZ8 SF04_HUMAN  | E.IKVS#PPEGAE.T            | S181:        | 2 | 2,5499 | 0,273 | 0,441  |
| 9 | Q9BTL3 F103A_HUMAN | K.RPPES#PPIVEE.W           | S36:         | 2 | 2,5451 | 0,225 | 0,092  |
| 9 | Q13563 PKD2_HUMAN  | R.RGS#ISSGVSYEE.F          | S829:        | 2 | 2,5422 | 0,362 | -0,09  |
| 9 | P46013 KI67_HUMAN  | K.IACKS#PPPE.S             | S1131:       | 2 | 2,5406 | 0,128 | -0,792 |
| 9 | Q15283 RASA2_HUMAN | E.KSLS#PPFSEE.F            | S84:         | 2 | 2,5399 | 0,237 | -0,195 |
| 9 | Q8WVB6 CTF18_HUMAN | E.GAST#PS#PSGVPLFTAGRPPR.T | T34:S36:     | 3 | 2,5396 | 0,089 | -0,173 |
| 9 | Q8TER5 SOLO_HUMAN  | R.T#RASVAVSSFE.H           | T1418:       | 2 | 2,5394 | 0,2   | 0,297  |
| 9 | Q9P2D0 IBTK_HUMAN  | E.GSYAGVGS#PR.D            | S1039:       | 2 | 2,5365 | 0,371 | 0      |
| 9 | Q9UKV3 ACINU_HUMAN | K.SKS#PS#PPRLTE.D          | S386:S388:   | 2 | 2,5355 | 0,298 | -0,269 |
| 9 | O14686 MLL2_HUMAN  | E.LVNRPPS#STE.L            | S2694:       | 2 | 2,5347 | 0,365 | 0,414  |
| 9 | O94880 PHF14_HUMAN | R.NRPLDFVS#M*EE.L          | S196:        | 2 | 2,5339 | 0,4   | -0,316 |
| 9 | Q7Z4V5 HDGR2_HUMAN | R.ARGDS#EALDEES.-          | S664:        | 2 | 2,5295 | 0,296 | 0      |
| 9 | Q9NRY5 F1142_HUMAN | E.KAETSLGIPS#PSEISTE.V     | S129:        | 2 | 2,5288 | 0,346 | 0,134  |
| 9 | Q6P0N0 CN106_HUMAN | E.TDFST#PTPR.R             | T1087:       | 2 | 2,5286 | 0,405 | -0,111 |
| 9 | Q32MZ4 LRRF1_HUMAN | R.KALDS#NSLE.N             | S766:        | 2 | 2,5259 | 0,201 | 0,115  |

|   |                    |                          |            |   |        |       |        |
|---|--------------------|--------------------------|------------|---|--------|-------|--------|
| 9 | Q99961 SH3G1_HUMAN | K.IAASSS#FR.S            | S288:      | 2 | 2,5228 | 0,419 | -0,73  |
| 9 | O95817 BAG3_HUMAN  | R.SST#PLHS#PSPIR.V       | T285:S289: | 2 | 2,522  | 0,315 | 0,085  |
| 9 | P55072 TERA_HUMAN  | K.LAIRES#IE.S            | S702:      | 2 | 2,521  | 0,129 | 0,121  |
| 9 | P27987 IP3KB_HUMAN | K.SGGGPGPSGSET#PPPPR.R   | T33:       | 2 | 2,5203 | 0,365 | 0      |
| 9 | P50851 LRBA_HUMAN  | E.LKVEGS#PTEE.A          | S1118:     | 2 | 2,5187 | 0,171 | -0,731 |
| 9 | P62753 RS6_HUMAN   | R.LS#SLRASTS#KSE.S       | S235:S242: | 2 | 2,5182 | 0,419 | -0,086 |
| 9 | Q9C0B5 ZDHC5_HUMAN | E.DSSLLAKDS#PPT#PTM*YK.Y | S345:T348: | 3 | 2,518  | 0,234 | -0,09  |
| 9 | Q13523 PRP4B_HUMAN | R.TRSPS#PDDILE.R         | S580:      | 2 | 2,5162 | 0,26  | 0,093  |
| 9 | Q96JA3 PKHA8_HUMAN | E.LLYRT#PPGS#PQLAM*LK.S  | T185:S189: | 2 | 2,5131 | 0,271 | 0,249  |
| 9 | Q9H7Z6 MYST1_HUMAN | E.GTAPS#PGRVS#PPTPAR.G   | S37:S42:   | 3 | 2,5123 | 0,185 | 0      |
| 9 | Q6NZI2 PTRF_HUMAN  | R.RGS#SPDVHALLE.I        | S365:      | 2 | 2,5114 | 0,27  | 0,179  |
| 9 | Q16514 TAF12_HUMAN | K.IPGT#PGAGGR.L          | T43:       | 2 | 2,5112 | 0,308 | 0      |
| 9 | Q1KMD3 HNRL2_HUMAN | R.SKS#PLPPEEE.A          | S228:      | 2 | 2,5072 | 0,397 | -0,102 |
| 9 | Q14C86 GAPD1_HUMAN | R.SSDIVSS#VR.R           | S908:      | 2 | 2,5064 | 0,265 | 0,237  |
| 9 | Q8IX90 CM003_HUMAN | E.NLLRT#PT#PPEVTKIPE.D   | T358:T360: | 2 | 2,5033 | 0,215 | 0,31   |
| 9 | Q12851 M4K2_HUMAN  | R.SLTIRS#ASE.F           | S384:      | 2 | 2,5032 | 0,268 | 0,234  |
| 9 | Q96BZ8 LENG1_HUMAN | R.HQNS#LPELE.A           | S59:       | 2 | 2,5025 | 0,114 | 0,319  |
| 9 | Q13490 BIRC2_HUMAN | R.NSFAHSLS#PTLE.H        | S140:      | 2 | 2,4993 | 0,298 | 0,176  |
| 9 | Q8NC44 F134A_HUMAN | E.SGGFSVS#R.A            | S326:      | 2 | 2,4982 | 0,365 | 0,278  |
| 9 | P49736 MCM2_HUMAN  | E.SFTMAS#SPAQR.R         | S12:       | 2 | 2,4961 | 0,409 | -0,29  |
| 9 | Q9Y6G9 DC1L1_HUMAN | R.KPVTVSPPTPTSPT#EGEAS.- | T518:      | 2 | 2,4936 | 0,322 | -0,062 |
| 9 | Q16513 PKN2_HUMAN  | E.YKPDT#PQSGLE.Y         | T628:      | 2 | 2,4887 | 0,303 | -0,278 |
| 9 | P35222 CTNB1_HUMAN | R.RTS#M*GGTQQQFVE.G      | S552:      | 2 | 2,4876 | 0,299 | 0,234  |
| 9 | Q6I9Y2 THOC7_HUMAN | E.NDEKLS#EVEE.A          | S188:      | 2 | 2,4847 | 0,147 | 0,192  |
| 9 | Q96GX5 MASTL_HUMAN | R.NTAQHILTVSGFS#L.-      | S878:      | 2 | 2,4817 | 0,366 | -0,335 |
| 9 | Q9H792 SG269_HUMAN | K.HVILSGST#EVISNE.G      | T215:      | 2 | 2,4794 | 0,171 | 0,39   |
| 9 | Q659C4 LARP2_HUMAN | R.IGS#PLS#PKKNSE.T       | S340:S343: | 2 | 2,4749 | 0,308 | -0,172 |
| 9 | Q14247 SRC8_HUMAN  | E.RLPSS#PVYE.D           | S418:      | 2 | 2,474  | 0,356 | 0      |
| 9 | Q13185 CBX3_HUMAN  | K.KVEEAPEEFVVE.K         |            | 2 | 2,4731 | 0,24  | -0,875 |
| 9 | Q96B23 CR025_HUMAN | E.TAKEEDGS#VELE.S        | S34:       | 2 | 2,4708 | 0,189 | 0,088  |
| 9 | O94804 STK10_HUMAN | E.QGGDLS#PAANR.S         | S438:      | 2 | 2,4684 | 0,352 | 0,209  |
| 9 | Q9GZZ9 UBA5_HUMAN  | E.LKNFS#GPVPDLPE.G       | S358:      | 2 | 2,4648 | 0,145 | -0,245 |
| 9 | Q00839 HNRPU_HUMAN | R.AKS#PQPVEEE.D          | S270:      | 2 | 2,4645 | 0,296 | -0,095 |

|   |                      |                             |              |   |        |       |        |
|---|----------------------|-----------------------------|--------------|---|--------|-------|--------|
| 9 | Q92667 AKAP1_HUMAN   | R.DKAIT#PPLPE.S             | T533:        | 2 | 2,4621 | 0,224 | 0,105  |
| 9 | P46379 BAT3_HUMAN    | K.AAGARPLTS#PE.S            | S1081:       | 2 | 2,4537 | 0,266 | 0,106  |
| 9 | Q7Z6E9 RBBP6_HUMAN   | E.GSSSTLVDTST#SS#TGGSPVRK.S | T1271:S1273: | 3 | 2,4536 | 1     | -0,078 |
| 9 | Q9Y467 SALL2_HUMAN   | E.RSSS#PASALTPEGE.A         | S874:        | 2 | 2,4521 | 0,443 | -0,249 |
| 9 | ##P05023 AT1A1_HUMAN | E.LY#ANQFADKLE.E            | Y482:        | 2 | 2,4453 | 0,092 | 0,175  |
| 9 | O14974 MYPT1_HUMAN   | R.RLAS#TSDIEE.K             | S507:        | 2 | 2,4449 | 0,343 | -0,305 |
| 9 | Q8N565 MREG_HUMAN    | E.LHYLPFPS#P.-              | S213:        | 2 | 2,4426 | 0,384 | -0,318 |
| 9 | Q92797 SYMPK_HUMAN   | E.ERS#PQTLAPVGE.D           | S1243:       | 2 | 2,4403 | 0,274 | 0,268  |
| 9 | P04792 HSPB1_HUMAN   | E.SPAVAAPAYS.R              |              | 2 | 2,4394 | 0,298 | -0,448 |
| 9 | Q6PID6 TTC33_HUMAN   | E.VTHFS#PKS#IPDYDFE.S       | S197:S200:   | 2 | 2,4386 | 0,316 | 0,88   |
| 9 | Q9NR48 ASH1L_HUMAN   | R.SVGHSIS#IE.C              | S623:        | 2 | 2,4358 | 0,383 | 0,242  |
| 9 | Q8IXT5 RB12B_HUMAN   | R.SGGFIKSS#VE.L             | S68:         | 2 | 2,4353 | 0,246 | 0,202  |
| 9 | O60343 TBCD4_HUMAN   | R.GRLGS#VDSFE.R             | S588:        | 2 | 2,4349 | 0,232 | -0,106 |
| 9 | O15417 TNC18_HUMAN   | K.SAHS#PFASE.V              | S1720:       | 2 | 2,4345 | 0,107 | 0,06   |
| 9 | Q13546 RIPK1_HUMAN   | R.KLGFTQS#QIDE.I            | S610:        | 2 | 2,4341 | 0,255 | 0,181  |
| 9 | O60716 CTND1_HUMAN   | K.SLDNNYST#PNER.G           | T906:        | 2 | 2,434  | 0,389 | -0,246 |
| 9 | Q12888 TP53B_HUMAN   | D.SLSTNSSDLVAPS#PDAFR.S     | S366:        | 2 | 2,433  | 0,32  | 0,188  |
| 9 | Q96JM3 ZN828_HUMAN   | R.KTS#PASLDFPE.S            | S459:        | 2 | 2,4325 | 0,216 | 0,096  |
| 9 | Q9P206 K1522_HUMAN   | R.FSSVSS#PQPR.S             | S342:        | 2 | 2,4312 | 0,317 | -0,312 |
| 9 | P39687 AN32A_HUMAN   | E.GKLEGLT#DEFEE.L           | T38:         | 2 | 2,4281 | 0,323 | 0,506  |
| 9 | Q15262 PTPRK_HUMAN   | E.GT#ESPYQT#GQLHPAIR.V      | T854:T860:   | 3 | 2,4277 | 0,272 | 0,382  |
| 9 | Q9BW71 HIRP3_HUMAN   | K.RPPT#PCSDPE.R             | T84:         | 2 | 2,4252 | 0,377 | 0,099  |
| 9 | O43847 NRDC_HUMAN    | R.RGS#LSNAGDPE.I            | S94:         | 2 | 2,4249 | 0,267 | 0,619  |
| 9 | Q9P107 GMIP_HUMAN    | E.NGLGS#PFGK.W              | S480:        | 2 | 2,4213 | 0,211 | 0      |
| 9 | P62753 RS6_HUMAN     | R.LSS#LRASTKS#E.S           | S236:S244:   | 3 | 2,4189 | 0,174 | -0,064 |
| 9 | Q5HYI7 MTX3_HUMAN    | E.NNSFQRLS#P.-              | S311:        | 2 | 2,4124 | 0,095 | 0,534  |
| 9 | Q96TA1 NIBL1_HUMAN   | K.AAPEASS#PPAS#PLQHLLPGK.A  | S679:S683:   | 3 | 2,4124 | 0,266 | -0,086 |
| 9 | Q92597 NDRG1_HUMAN   | R.SRT#ASGSSVTS.LD.G         | T328:        | 2 | 2,412  | 0,344 | -0,453 |
| 9 | Q99547 MPH6_HUMAN    | E.NGDIT#PIK.A               | T147:        | 2 | 2,4086 | 0,276 | 1,496  |
| 9 | Q9BQ39 DDX50_HUMAN   | E.GFNRLS#DE.F               | S82:         | 2 | 2,4013 | 0,215 | 0,3    |
| 9 | Q92845 KIFA3_HUMAN   | R.LKS#LNANTD.I              | S60:         | 2 | 2,3973 | 0,246 | 0,116  |
| 9 | Q9P2L0 WDR35_HUMAN   | E.GKLPTCVATGS#PITE.Y        | S1145:       | 2 | 2,394  | 0,247 | 1,136  |
| 9 | Q99459 CDC5L_HUMAN   | R.SKLVLPAPQIS#DAE.L         | S303:        | 2 | 2,3923 | 0,238 | -0,158 |

|   |                    |                        |            |   |        |       |        |
|---|--------------------|------------------------|------------|---|--------|-------|--------|
| 9 | Q9UKM9 RALY_HUMAN  | E.HS#QDTDADDGALQ.-     | S295:      | 2 | 2,3913 | 0,204 | 0,084  |
| 9 | Q99618 CDCA3_HUMAN | K.TSSGDPPS#PLVK.Q      | S87:       | 2 | 2,3911 | 0,101 | -0,193 |
| 9 | Q9NWB7 IFT57_HUMAN | R.TRLLS#EVM*EE.L       | S347:      | 2 | 2,3903 | 0,158 | 0,187  |
| 9 | Q14980 NUMA1_HUMAN | R.VSLEPHQGPQT#PE.S     | T2000:     | 2 | 2,3891 | 0,233 | 1,196  |
| 9 | Q9Y446 PKP3_HUMAN  | R.ADYDTLS#LRS#LR.L     | S180:S183: | 2 | 2,388  | 0,21  | 0      |
| 9 | Q9BXM0 PRAX_HUMAN  | R.VRLPS#VGFSE.T        | S1439:     | 2 | 2,3837 | 0,126 | 0      |
| 9 | Q8N4C6 NIN_HUMAN   | R.HLS#M*QSFDE.S        | S269:      | 2 | 2,3765 | 0,208 | -0,308 |
| 9 | O96007 MOS2L_HUMAN | E.TKLPLS#PPLVE.D       | S20:       | 2 | 2,3724 | 0,342 | -0,287 |
| 9 | Q96S55 WRIP1_HUMAN | E.SYDAPPT#PSGAR.L      | T116:      | 2 | 2,3658 | 0,431 | -0,751 |
| 9 | Q15418 KS6A1_HUMAN | R.KLPS#TTL.-           | S732:      | 2 | 2,3625 | 0,469 | 0,436  |
| 9 | P49790 NU153_HUMAN | K.FSS#PIVK.S           | S529:      | 2 | 2,3619 | 0,101 | 0,427  |
| 9 | Q8TB72 PUM2_HUMAN  | E.VNAILS#PR.S          | S82:       | 2 | 2,3589 | 0,267 | 0,193  |
| 9 | P31946 1433B_HUMAN | K.DSTLIM*QLLR.D        |            | 2 | 2,3569 | 0,193 | -0,405 |
| 9 | Q14137 BOP1_HUMAN  | E.EQVQAST#PCPR.T       | T106:      | 2 | 2,3511 | 0,395 | 0      |
| 9 | Q96GY3 LIN37_HUMAN | R.SRIPS#PLQPE.M        | S182:      | 2 | 2,3499 | 0,244 | 0,304  |
| 9 | P50552 VASP_HUMAN  | K.NSTT#LPR.M           | T316:      | 2 | 2,3386 | 0,253 | 0,281  |
| 9 | Q16851 UGPA_HUMAN  | R.RFES#IPDM*LE.L       | S448:      | 2 | 2,3376 | 0,215 | 0,183  |
| 9 | Q08050 FOXM1_HUMAN | K.SVLPRT#PE.S          | T620:      | 2 | 2,3349 | 0,204 | 0,187  |
| 9 | Q9UMX3 BOK_HUMAN   | R.RSS#VFAAE.I          | S8:        | 2 | 2,3335 | 0,216 | 0,193  |
| 9 | Q9UKV3 ACINU_HUMAN | E.ASS#PPHPQLHS#EEE.I   | S425:S434: | 2 | 2,3285 | 0,421 | -0,271 |
| 9 | Q86WB0 NIPA_HUMAN  | E.VPSS#PLR.K           | S395:      | 2 | 2,3258 | 0,34  | 0,292  |
| 9 | Q13573 SNW1_HUMAN  | R.GPPS#PPAPVM*HS#PSR.K | S224:S232: | 2 | 2,3221 | 0,184 | -0,072 |
| 9 | Q99569 PKP4_HUMAN  | R.VAS#PSQGQVGSSS#PKR.S | S327:S337: | 2 | 2,3213 | 0,319 | -0,211 |
| 9 | Q9BX40 LS14B_HUMAN | K.SKS#FFDNISSE.L       | S317:      | 2 | 2,3171 | 0,15  | 0,091  |
| 9 | P46020 KPB1_HUMAN  | R.RLS#ISAE.S           | S1018:     | 2 | 2,3142 | 0,092 | 0,356  |
| 9 | Q15021 CND1_HUMAN  | E.FHLPLS#PEE.L         | S13:       | 2 | 2,3138 | 0,213 | -0,319 |
| 9 | Q6PL24 TMED8_HUMAN | E.HTGAIDVLS#ADLE.S     | S137:      | 2 | 2,3129 | 0,195 | -0,343 |
| 9 | Q00613 HSF1_HUMAN  | E.GRPPS#PPPTSTPE.K     | S363:      | 2 | 2,3124 | 0,278 | 0      |
| 9 | Q9ULW0 TPX2_HUMAN  | K.RCAT#PVIIDE.I        | T147:      | 2 | 2,3117 | 0,114 | 0,097  |
| 9 | P06400 RB_HUMAN    | E.GLPT#PTKM*T#PR.S     | T821:T826: | 2 | 2,3092 | 0,266 | -0,444 |
| 9 | Q9UIF9 BAZZA_HUMAN | E.KALLST#PNGAPE.G      | T1594:     | 2 | 2,3085 | 0,191 | 0,573  |
| 9 | Q8WWQ0 PHIP_HUMAN  | E.SSTSAFST#PTR.S       | T1480:     | 2 | 2,2944 | 0,326 | -0,399 |
| 9 | Q6ZRS2 SRCAP_HUMAN | E.KNLSLTSPAPS#LTLE.A   | S2608:     | 2 | 2,2869 | 0,123 | 0,074  |

|   |                    |                          |            |   |        |       |        |
|---|--------------------|--------------------------|------------|---|--------|-------|--------|
| 9 | Q14966 ZN638_HUMAN | E.KATCDS#DFAVETLE.L      | S1158:     | 2 | 2,2854 | 0,232 | 0      |
| 9 | P30622 CLIP1_HUMAN | E.ANGLQTT#PASR.A         | T140:      | 2 | 2,2843 | 0,334 | 0      |
| 9 | Q8IZ21 PHAR4_HUMAN | R.TRS#LPITIE.M           | S464:      | 2 | 2,2811 | 0,234 | 0      |
| 9 | Q96KQ7 EHMT2_HUMAN | R.KLNS#GGGLSEE.L         | S232:      | 2 | 2,2792 | 0,156 | 0      |
| 9 | O15427 MOT4_HUMAN  | E.VVHTPETS#V.-           | S464:      | 2 | 2,2744 | 0,244 | 0,233  |
| 9 | P04406 G3P_HUMAN   | K.VIHDFGIVE.G            |            | 2 | 2,2726 | 0,201 | 0,107  |
| 9 | O75792 RNH2A_HUMAN | R.KITS#YFLNE.G           | S270:      | 2 | 2,2673 | 0,197 | -0,204 |
| 9 | O00443 P3C2A_HUMAN | R.SQS#LNIR.T             | S338:      | 2 | 2,2673 | 0,105 | -0,068 |
| 9 | P11940 PABP1_HUMAN | E.LLHM*LES#PE.S          | S599:      | 2 | 2,2624 | 0,198 | 0,209  |
| 9 | O43765 SGTA_HUMAN  | R.SPART#PPSEEDSAE.A      | T81:       | 2 | 2,255  | 0,275 | 0,236  |
| 9 | Q9NTI5 PDS5B_HUMAN | E.TVSNASSSSNPSS#PGR.I    | S1166:     | 2 | 2,247  | 0,296 | -0,151 |
| 9 | A1L390 PKHG3_HUMAN | R.FVSSFS#R.R             | S614:      | 2 | 2,2429 | 0,309 | 0,737  |
| 9 | Q02952 AKA12_HUMAN | E.SDKAIT#PQAQEE.L        | T1760:     | 2 | 2,2364 | 0,272 | -0,087 |
| 9 | Q14684 RRP1B_HUMAN | K.SILVS#PTGPSR.V         | S706:      | 2 | 2,2353 | 0,278 | -0,102 |
| 9 | Q9H583 HEAT1_HUMAN | K.AVSNKSES#QEE.M         | S1492:     | 2 | 2,232  | 0,191 | -0,085 |
| 9 | Q5TBA9 FRY_HUMAN   | E.HSDLIM*TLS#PSEE.T      | S2544:     | 2 | 2,2299 | 0,147 | -0,314 |
| 9 | O75531 BAF_HUMAN   | D.FVAEPM*GEKPVGSLAGIGE.V |            | 2 | 2,2296 | 0,18  | 0,064  |
| 9 | Q13523 PRP4B_HUMAN | R.TRS#PSPDDILE.R         | S578:      | 2 | 2,2282 | 0,237 | 0      |
| 9 | Q92993 TIP60_HUMAN | K.NGLPGS#RPGS#PERE.V     | S86:S90:   | 2 | 2,2276 | 0,207 | -0,303 |
| 9 | O94804 STK10_HUMAN | K.ASQSRPNS#SALE.T        | S454:      | 2 | 2,2251 | 0,203 | 0,092  |
| 9 | O43379 WDR62_HUMAN | E.TVQNRVS#LE.K           | S61:       | 2 | 2,22   | 0,165 | 0,108  |
| 9 | Q9NYF8 BCLF1_HUMAN | E.ALDYFS#DKE.S           | S385:      | 2 | 2,2156 | 0,318 | 0,104  |
| 9 | Q9H1B7 EAP1_HUMAN  | R.KAS#PEPPDSAE.G         | S547:      | 2 | 2,2092 | 0,307 | -0,202 |
| 9 | Q8WYL5 SSH1_HUMAN  | R.RLSDPLLPS#PEDE.T       | S521:      | 2 | 2,206  | 0,112 | 0,158  |
| 9 | Q9Y4F5 K0284_HUMAN | R.TSFSGRS#VE.L           | S1199:     | 2 | 2,2043 | 0,287 | 0      |
| 9 | O75061 AUX1_HUMAN  | R.SATSTSAS#PTLR.V        | S570:      | 2 | 2,2022 | 0,247 | 0,969  |
| 9 | Q7L9L4 MOL1A_HUMAN | E.ATLGS#GNLR.M           | S38:       | 2 | 2,1982 | 0,241 | 0,126  |
| 9 | P83369 LSM11_HUMAN | R.SAGAGS#PARPPS#PR.L     | S15:S21:   | 2 | 2,1972 | 0,201 | 0,166  |
| 9 | Q9H5Y7 SLIK6_HUMAN | R.SPS#FGPK.H             | S694:      | 2 | 2,1965 | 0,136 | 0,458  |
| 9 | P19532 TFE3_HUMAN  | R.RSS#FSM*EEES.-         | S568:      | 2 | 2,1922 | 0,314 | -0,285 |
| 9 | Q9UPS6 SET1B_HUMAN | E.RSGPLAS#PVLE.T         | S1421:     | 2 | 2,187  | 0,09  | 0      |
| 9 | Q6NYC8 PHTNS_HUMAN | E.VESRLS#PGE.S           | S224:      | 2 | 2,1862 | 0,248 | 0      |
| 9 | Q66K74 MAP1S_HUMAN | E.LPLAASSIPRPRRT#PS#PE.S | T638:S640: | 2 | 2,1845 | 0,087 | 0,125  |



|   |                      |                          |            |   |        |       |        |
|---|----------------------|--------------------------|------------|---|--------|-------|--------|
| 9 | P52594 NUPL_HUMAN    | K.GTPSQS#PVVGR.S         | S181:      | 2 | 2,1842 | 0,428 | -0,419 |
| 9 | Q12888 TP53B_HUMAN   | E.SGLQIQKS#PEPE.V        | S294:      | 2 | 2,1776 | 0,169 | 0,526  |
| 9 | Q4KWH8 PLCH1_HUMAN   | E.SNLPGS#PNTSR.G         | S1307:     | 2 | 2,1743 | 0,26  | 0,303  |
| 9 | O15231 ZN185_HUMAN   | R.RES#CGSSVLTDFF.E       | S233:      | 2 | 2,171  | 0,283 | -0,156 |
| 9 | Q14839 CHD4_HUMAN    | E.KSAIDL#PIVVE.D         | T1653:     | 2 | 2,1708 | 0,193 | -0,268 |
| 9 | Q8IVF2 AHNK2_HUMAN   | E.VTIHSIVT#PE.F          | T5484:     | 2 | 2,1702 | 0,082 | -0,83  |
| 9 | Q9UPT8 ZC3H4_HUMAN   | E.GS#LHSS#PVGPSSSK.G     | S904:S908: | 2 | 2,17   | 0,327 | -0,082 |
| 9 | Q9UI10 EI2BD_HUMAN   | E.SGIQLGT#PR.E           | T86:       | 2 | 2,1692 | 0,199 | 0,423  |
| 9 | O15417 TNC18_HUMAN   | E.RLS#PFLAE.S            | S263:      | 2 | 2,166  | 0,111 | 0,06   |
| 9 | Q9H726 MYST1_HUMAN   | E.GT#APSPGRVS#PPTPAR.G   | T34:S42:   | 2 | 2,1657 | 0,23  | 0      |
| 9 | Q08378 GOGA3_HUMAN   | K.TRLFS#TLDPE.L          | S185:      | 2 | 2,1549 | 0,163 | -0,194 |
| 9 | Q15773 MLF2_HUMAN    | R.LAIQGPEDS#PSRQS#R.R    | S238:S243: | 2 | 2,1535 | 0,168 | 0,068  |
| 9 | Q96FF9 CDCA5_HUMAN   | K.THSVPATPTS#TPVNPPEAE.S | S114:      | 2 | 2,1532 | 0,428 | 0,182  |
| 9 | P37198 NUP62_HUMAN   | R.SFRIT#FD.-             | T520:      | 2 | 2,1529 | 0,111 | 0,316  |
| 9 | Q14671 PUM1_HUMAN    | E.VNSVLS#PR.S            | S209:      | 2 | 2,1489 | 0,27  | 0,256  |
| 9 | Q9H410 DSN1_HUMAN    | K.SLHLS#PQE.Q            | S81:       | 2 | 2,1485 | 0,146 | 0,123  |
| 9 | Q15154 PCM1_HUMAN    | E.TLKEPETVGAQS#I.-       | S2022:     | 2 | 2,1448 | 0,139 | 1,595  |
| 9 | Q8N350 DOS_HUMAN     | E.AAGGASPD#PPER.G        | S419:      | 2 | 2,1417 | 0,261 | -0,189 |
| 9 | Q96BH1 RNF25_HUMAN   | R.RES#LGL.E.S            | S450:      | 2 | 2,1406 | 0,16  | 0,552  |
| 9 | Q53G15 Q53G15_HUMAN  | K.QYRAS#PSFEE.R          | S378:      | 2 | 2,1398 | 0,231 | 0,189  |
| 9 | P05787 K2C8_HUMAN    | R.AFS#SRSY#TSGPGSR.I     | S21:Y25:   | 2 | 2,139  | 0,145 | 0,151  |
| 9 | Q8IZM8 ZN654_HUMAN   | K.KCQTLFGFDS#DDESA.-     | S576:      | 2 | 2,1368 | 0,31  | 0,068  |
| 9 | O95644 NFAC1_HUMAN   | K.RSPSTATLS#LPSLE.A      | S158:      | 2 | 2,1333 | 0,197 | -0,317 |
| 9 | Q13242 SFRS9_HUMAN   | R.GS#PHYFS#PFRPY.-       | S211:S216: | 2 | 2,1331 | 0,276 | -0,076 |
| 9 | Q14118 DAG1_HUMAN    | E.KAPLPPPEYPNQS#VPE.T    | S835:      | 2 | 2,1286 | 0,223 | -0,132 |
| 9 | P50548 ERF_HUMAN     | E.AGGPLT#PR.R            | T526:      | 2 | 2,1284 | 0,349 | 0,287  |
| 9 | O60293 CC131_HUMAN   | R.RIS#TSDILSE.K          | S352:      | 2 | 2,1279 | 0,101 | 0,305  |
| 9 | Q92738 US6NL_HUMAN   | R.S#VGRPS#PLASGR.R       | S391:S396: | 2 | 2,1232 | 0,444 | -0,272 |
| 9 | P05783 K1C18_HUMAN   | R.NLKAS#LE.N             | S319:      | 2 | 2,123  | 0,102 | 0,856  |
| 9 | ##Q5T8A7 K0649_HUMAN | K.AKLY#EQIAE.E           | Y1070:     | 2 | 2,1193 | 0,172 | -0,213 |
| 9 | Q6ZRV2 FA83H_HUMAN   | R.RGS#PTTGFI.E.Q         | S892:      | 2 | 2,1187 | 0,179 | -1,066 |
| 9 | Q9Y3X0 CCDC9_HUMAN   | E.VELNS#PR.T             | S510:      | 2 | 2,1085 | 0,122 | 0,204  |
| 9 | Q2M218 AAK1_HUMAN    | K.VGSLT#PPSS#PKTQR.A     | T620:S624: | 2 | 2,1068 | 0,34  | 0,151  |

|    |                     |                                         |              |   |        |       |        |
|----|---------------------|-----------------------------------------|--------------|---|--------|-------|--------|
| 9  | Q3KQU3 MA7D1_HUMAN  | R.ARLS#ASTASE.L                         | S452:        | 2 | 2,102  | 0,136 | 0,455  |
| 9  | Q09666 AHNK_HUMAN   | K.TGTCRIS#M*SE.V                        | S570:        | 2 | 2,1017 | 0,249 | 0,099  |
| 9  | Q7Z4H7 FA29A_HUMAN  | E.TFS#PAVGNR.I                          | S715:        | 2 | 2,1003 | 0,086 | 0      |
| 9  | Q8TAP9 TTDN1_HUMAN  | R.TST#PFGSGR.V                          | T120:        | 2 | 2,0969 | 0,195 | 0,062  |
| 9  | Q8NFC6 FA44A_HUMAN  | R.RTS#TPVIM*E.G                         | S659:        | 2 | 2,0901 | 0,147 | 0      |
| 9  | Q9UKV3 ACINU_HUMAN  | E.AS#SPPPHQLHS#EEE.I                    | S424:S434:   | 2 | 2,0868 | 0,22  | 0      |
| 9  | P05787 K2C8_HUMAN   | R.VGS#SNFR.G                            | S43:         | 2 | 2,0601 | 0,216 | 0,36   |
| 9  | Q15746 MYLK_HUMAN   | R.QVTVELT#VE.G                          | T122:        | 2 | 2,0537 | 0,084 | 0,222  |
| 9  | Q86SQ0 PHLB2_HUMAN  | E.KLQLS#DEESVFE.E                       | S489:        | 2 | 2,046  | 0,197 | 0,081  |
| 9  | Q9H2M9 RBGPR_HUMAN  | K.EGVNRS#FLE.V                          | S978:        | 2 | 2,0454 | 0,135 | 0,539  |
| 9  | A8MQ54 A8MQ54_HUMAN | R.DASLHGLSQYNS#L.-                      | S1671:       | 2 | 2,0435 | 0,171 | 0,411  |
| 9  | P49790 NU153_HUMAN  | K.SPGFAS#PK.I                           | S619:        | 2 | 2,0385 | 0,252 | 0,42   |
| 9  | P61006 RAB8A_HUMAN  | E.NAFFT#LAR.D                           | T164:        | 2 | 2,0367 | 0,186 | 0      |
| 9  | Q8WYP5 AHTF1_HUMAN  | R.STPLAS#PSPS#PGRSPQR.L                 | S1223:S1227: | 2 | 2,0342 | 0,113 | -0,13  |
| 9  | Q9UBF8 PI4KB_HUMAN  | R.STRS#VENLPE.C                         | S428:        | 2 | 2,0295 | 0,141 | 0,201  |
| 9  | P33991 MCM4_HUMAN   | R.IAEPS#VCGR.C                          | S326:        | 2 | 2,0274 | 0,112 | -0,114 |
| 9  | Q9Y2H2 SAC2_HUMAN   | E.KIIPS#PD.D                            | S123:        | 2 | 2,0247 | 0,09  | 0,072  |
| 9  | Q86XL3 ANKL2_HUMAN  | K.M*SLS#PSSPR.H                         | S804:        | 2 | 2,0209 | 0,096 | 0,115  |
| 9  | Q8TDC3 BRK1_HUMAN   | R.NSFLGS#PR.F                           | S579:        | 2 | 2,0194 | 0,207 | 0,191  |
| 9  | P05787 K2C8_HUMAN   | R.VGSS#NFR.G                            | S44:         | 2 | 2,0166 | 0,086 | 0,288  |
| 9  | O95425 SVIL_HUMAN   | E.SSSTFS#FSGR.D                         | S231:        | 2 | 2,0166 | 0,196 | 0,214  |
| 9  | P06576 ATPB_HUMAN   | R.FLSQPFQVAE.V                          |              | 2 | 2,0135 | 0,12  | -0,105 |
| 9  | Q14160 LAP4_HUMAN   | R.AFAAVPTSHPPED.A                       |              | 2 | 2,0134 | 0,242 | -0,456 |
| 9  | P30305 MPIP2_HUMAN  | E.AFAQRPS#APD.L                         | S230:        | 2 | 2,0065 | 0,264 | -0,199 |
| 9  | Q15365 PCBP1_HUMAN  | E.TLSQS#PQGR.V                          | S173:        | 2 | 2,0018 | 0,309 | 0,116  |
| 10 | Q13263 TIF1B_HUMAN  | K.RSTAPSAASASASAAASS#PAGGGAE.A          | S50:         | 2 | 6,8371 | 0,587 | 0,327  |
| 10 | Q8IX01 SFR14_HUMAN  | E.ASGPS#PKPAGVDISEAPQTSSPCPSADIDM*K.T   | S757:        | 3 | 6,8059 | 0,536 | 0,115  |
| 10 | P60709 ACTB_HUMAN   | K.DLYANTVLSGGTTM*YPGIADR.M              |              | 3 | 6,525  | 0,499 | 0,656  |
| 10 | P05783 K1C18_HUMAN  | R.STS#FRGGM*GSGGLATGIAGGLAGM*GGIQNEKE.T | S53:         | 3 | 6,4215 | 0,419 | 0,475  |
| 10 | Q7LBC6 JHD2B_HUMAN  | K.LVSGVLGSALTSGGPSLSAM*GNR.S            |              | 3 | 6,3056 | 0,422 | 0,415  |
| 10 | Q9BTK6 PA1_HUMAN    | E.GEVTSGLQALAVEDTGGPSASAGK.A            |              | 2 | 6,2005 | 0,562 | 0,554  |
| 10 | P09110 THIK_HUMAN   | K.DGSTTAGNSSQVSDGAAAILLAR.R             |              | 2 | 5,9865 | 0,602 | 0,226  |
| 10 | Q9H6F5 CCD86_HUMAN  | R.LQQGAGLESPQQPEPGAAS#PQRQQDLHLE.S      | S91:         | 3 | 5,9856 | 0,525 | 0,451  |

|    |                    |                                       |                 |   |        |       |        |
|----|--------------------|---------------------------------------|-----------------|---|--------|-------|--------|
| 10 | P05783 K1C18_HUMAN | E.DGEDFNLGDALDSSNSM*QTIQK.T           |                 | 2 | 5,9515 | 0,587 | 0,407  |
| 10 | P46939 UTRO_HUMAN  | E.RTNGSFLTDSSS#TTGSVEDE.H             | S3217:          | 2 | 5,8229 | 0,582 | 0,337  |
| 10 | P43308 SSRB_HUMAN  | E.DGPVVGSTAPGQGGILAQRE.F              |                 | 2 | 5,7929 | 0,545 | 0,347  |
| 10 | Q8IVF2 AHNK2_HUMAN | E.GDLHAAVVGAPVM*S#PLS#PGER.V          | S4894:S4897:    | 3 | 5,6821 | 0,38  | 0,342  |
| 10 | Q14694 UBP10_HUMAN | E.TKYS#PPAIS#PLVSEK.Q                 | S365:S370:      | 3 | 5,6563 | 0,334 | 0,206  |
| 10 | P22314 UBA1_HUMAN  | E.M*ILTDSNGEQPLSAM*VSM*VTK.D          |                 | 3 | 5,5878 | 0,549 | -0,318 |
| 10 | P60174 TPIS_HUMAN  | E.LASQPDVDGFLVGGASLKPE.F              |                 | 2 | 5,5318 | 0,542 | 0,244  |
| 10 | Q7Z6Z7 HUWE1_HUMAN | E.DVLM*DEAPSNLSQASTLQANR.E            |                 | 2 | 5,5153 | 0,481 | 0,536  |
| 10 | Q7LBC6 JHD2B_HUMAN | K.LVSGVLGSALTSGGPSLSAM*GNR.S          |                 | 2 | 5,5032 | 0,603 | 0,332  |
| 10 | P08651 NFIC_HUMAN  | R.TGM*GSDQEDSKPITLDTDFQE.S            |                 | 2 | 5,4422 | 0,561 | 0,602  |
| 10 | Q01970 PLCB3_HUMAN | R.LVAGQQVQLQLAEPEP.K                  |                 | 2 | 5,3331 | 0,457 | 0,182  |
| 10 | Q6WCQ1 MRIP_HUMAN  | R.TKDQPDGSSLS#PAQS#PSQSPPAASSLR.E     | S219:S223:      | 3 | 5,3123 | 1     | 0,307  |
| 10 | Q92734 TFG_HUMAN   | K.NVM*SAFGLTDDQVSGPPSAPAEDR.S         |                 | 2 | 5,3068 | 0,577 | 0,493  |
| 10 | P38646 GRP75_HUMAN | R.VINEPTAAALAYGLDKSE.D                |                 | 2 | 5,2866 | 0,54  | 0,066  |
| 10 | Q96QC0 PP1RA_HUMAN | E.LM*DTASLEPGALDAKPVES#PGDPNQLTR.K    | S382:           | 3 | 5,2498 | 0,522 | 0,424  |
| 10 | Q9HC52 CBX8_HUMAN  | R.RQSDLVQCGVTS#PSSAE.A                | S265:           | 2 | 5,2409 | 0,5   | 0,363  |
| 10 | P51116 FXR2_HUMAN  | R.RTGGPAYGPSSDVSTAS#ETE.S             | S453:           | 2 | 5,1829 | 0,6   | -0,715 |
| 10 | Q53EZ4 CEP55_HUMAN | E.KVAAS#PKS#PTAALNES#LVECPK.C         | S425:S428:S436: | 3 | 5,1554 | 0,361 | 0,144  |
| 10 | Q14444 CAPR1_HUMAN | E.VVNSLQQPQAAS#PSVPEPHSLTPVAQADPLVR.R | S335:           | 3 | 5,1463 | 0,396 | 0,517  |
| 10 | Q5VUA4 ZN318_HUMAN | E.VAILQVDDSDGDLNLVK.A                 |                 | 2 | 5,1355 | 0,453 | 0      |
| 10 | P10809 CH60_HUMAN  | K.LVQDVANNTNEEAGDGTATVLR.S            |                 | 2 | 5,1237 | 0,612 | 0,667  |
| 10 | P30622 CLIP1_HUMAN | R.ATS#PLCTSTASM*VSSPSTPSNIPQKPSQPAK.E | S147:           | 3 | 5,0718 | 0,398 | 0,536  |
| 10 | P43308 SSRB_HUMAN  | E.DGPVVGSTAPGQGGILAQRE.F              |                 | 3 | 5,0679 | 0,452 | 0,347  |
| 10 | P05783 K1C18_HUMAN | E.DGEDFNLGDALDSSNSM*QTIQK.T           |                 | 3 | 5,0653 | 0,43  | 1,295  |
| 10 | P38398 BRCA1_HUMAN | E.LEDLTANTNTQDPFLIGSSK.Q              |                 | 2 | 5,0585 | 0,584 | 0,338  |
| 10 | Q5T8P6 RBM26_HUMAN | K.VM*QPLVQQPILPVVK.Q                  |                 | 2 | 5,0404 | 0,319 | 0,072  |
| 10 | P23528 COF1_HUMAN  | E.ILVGDVGQTVDDPYATFVK.M               |                 | 2 | 5,0323 | 0,515 | -0,06  |
| 10 | Q9ULT8 HECD1_HUMAN | E.GHDSLS#VGS#FEEDSKSE.F               | S2317:S2320:    | 2 | 5,0197 | 0,396 | 0,186  |
| 10 | P61978 HNRPK_HUMAN | R.GSYGDLGGPIITTQVTIPK.D               |                 | 2 | 5,0151 | 0,548 | 0,064  |
| 10 | Q9Y478 AAKB1_HUMAN | K.ILM*DSPEDADLFHSEE.I                 |                 | 2 | 5,0099 | 0,43  | 0,262  |
| 10 | Q15417 CNN3_HUMAN  | K.LTLQPVDNSTISLQM*GTNK.V              |                 | 2 | 4,9866 | 0,527 | 0,235  |
| 10 | P05783 K1C18_HUMAN | R.GGM*GSGGLATGIAGGLAGM*GGIQNEKE.T     |                 | 2 | 4,9777 | 0,501 | 0,302  |
| 10 | Q01804 OTUD4_HUMAN | E.HVSLSNPAPLLVS#PE.V                  | S578:           | 2 | 4,9412 | 0,428 | 0,446  |

|    |                    |                                     |                 |   |        |       |        |
|----|--------------------|-------------------------------------|-----------------|---|--------|-------|--------|
| 10 | P60709 ACTB_HUMAN  | K.DLYANTVLSGGTTM*YPGIADR.M          |                 | 2 | 4,933  | 0,59  | 0,438  |
| 10 | Q9BXF6 RFIP5_HUMAN | E.SASAILPSSAIEDPDLGSLGK.M           |                 | 2 | 4,9146 | 0,441 | 0,301  |
| 10 | Q9UQ35 SRRM2_HUMAN | R.M*GQAPSQSLPPAQDQPRSPVPS#AFSDQSR.C | S2453:          | 3 | 4,9038 | 0,47  | 0,223  |
| 10 | P10636 TAU_HUMAN   | E.IVYKS#PVVSGDTS#PR.H               | S713:S721:      | 3 | 4,8539 | 0,381 | 0,104  |
| 10 | P62158 CALM_HUMAN  | R.EADIDGDGQVNYEEFVQM*M*TAK.-        |                 | 3 | 4,8504 | 0,446 | 0,145  |
| 10 | Q14694 UBP10_HUMAN | E.SIDLDPKPEAS#PPADGTGSASGTLPVSQPK.S | S321:           | 3 | 4,8279 | 0,37  | 0,574  |
| 10 | Q15648 MED1_HUMAN  | E.KSYQNS#PSS#DDGIRPLPE.Y            | S1479:S1482:    | 2 | 4,8223 | 1     | 0,454  |
| 10 | Q9P1Z2 CACO1_HUMAN | E.KSVLM*AAVQS#GGEE.A                | S612:           | 2 | 4,8127 | 0,426 | 0,162  |
| 10 | Q05682 CALD1_HUMAN | E.KGNVFSS#PTAAGT#PNKE.T             | S724:T730:      | 2 | 4,7776 | 0,521 | 0,196  |
| 10 | Q9HAF1 CA149_HUMAN | K.SSVTSAAAVSALAGVQDQLIEK.R          |                 | 3 | 4,7773 | 0,455 | -0,171 |
| 10 | P35568 IRS1_HUMAN  | R.RSSASVSGS#PSDGGFISSDE.Y           | S419:           | 2 | 4,7451 | 0,517 | 0,061  |
| 10 | P98171 RHG04_HUMAN | E.KQVVGAGLQTAGESGSS#PE.G            | S824:           | 2 | 4,7438 | 0,578 | -0,065 |
| 10 | Q9NQS7 INCE_HUMAN  | R.TDSQSVRHS#PIAPS#SPS#PQVLAQK.Y     | S306:S311:S314: | 3 | 4,7143 | 1     | 0,465  |
| 10 | Q92733 PRCC_HUMAN  | K.TSSLAPVVGTTTTTSPSAIK.A            |                 | 2 | 4,6974 | 0,447 | 0,242  |
| 10 | Q96QF0 RAB3I_HUMAN | K.TLVLSSSPTSPTQEPLPGGK.T            |                 | 2 | 4,6969 | 0,508 | 0,489  |
| 10 | Q9NRA8 4ET_HUMAN   | E.VEVILAQEPAADQEVPR.D               |                 | 3 | 4,6946 | 0,293 | 0,393  |
| 10 | P55795 HNRH2_HUMAN | E.GRPSGEAFVELES#EEE.V               | S63:            | 2 | 4,6863 | 0,521 | 0,265  |
| 10 | Q8IY81 RRMJ3_HUMAN | E.VTQGDM*SAADTFLSDLPR.D             |                 | 2 | 4,6744 | 0,484 | 0,063  |
| 10 | Q9UKL0 RCOR1_HUMAN | R.VGPQYQAVVPDFDPAK.L                |                 | 2 | 4,6498 | 0,294 | 0,07   |
| 10 | Q9GZV5 WWTR1_HUMAN | E.TLAPVQAAVNPPTM*TPDM*R.S           |                 | 2 | 4,6492 | 0,49  | 0,119  |
| 10 | Q7Z417 NUFP2_HUMAN | K.RIITYNEAM*DS#PDQ.-                | S692:           | 2 | 4,6287 | 0,493 | -0,349 |
| 10 | P06493 CDC2_HUMAN  | E.KIGEGT#Y#GVVYK.G                  | T14:Y15:        | 2 | 4,6269 | 0,398 | 0,083  |
| 10 | Q15149 PLEC1_HUMAN | R.SRSSS#VGS#SSSYPIPAVSR.T           | S4386:S4389:    | 2 | 4,6246 | 1     | 0,113  |
| 10 | Q14247 SRC8_HUMAN  | R.AKTQT#PPVS#PAPQPTEER.L            | T401:S405:      | 2 | 4,6213 | 0,509 | 0,117  |
| 10 | P24928 RPB1_HUMAN  | K.YSPTSPTYSPVYTPSPK.Y               |                 | 2 | 4,6177 | 0,474 | 0,324  |
| 10 | P53618 COPB_HUMAN  | R.NVTVQPDDPISFM*QLTAK.N             |                 | 3 | 4,6175 | 0,391 | 0,453  |
| 10 | Q13428 TCOF_HUMAN  | R.KSAEPSANTTLVS#ETEEE.G             | S171:           | 2 | 4,5941 | 0,536 | 0,183  |
| 10 | P20042 IF2B_HUMAN  | E.SDVQEPEPEDDLDIM*LGNK.K            |                 | 2 | 4,5794 | 0,482 | 0,324  |
| 10 | Q53EZ4 CEP55_HUMAN | E.KVAAS#PKS#PTAALNE.S               | S425:S428:      | 2 | 4,5787 | 0,456 | 0,148  |
| 10 | Q9NRA8 4ET_HUMAN   | E.VEVILAQEPAADQEVPR.D               |                 | 2 | 4,5695 | 0,479 | 0,196  |
| 10 | P38398 BRCA1_HUMAN | E.LEDLTANTNTQDPFLIGSSK.Q            |                 | 3 | 4,5678 | 0,384 | 0,254  |
| 10 | Q5JSZ5 K0515_HUMAN | R.HIISATSLSTS#PTE.L                 | S226:           | 2 | 4,5671 | 0,585 | 0,48   |
| 10 | P08195 4F2_HUMAN   | E.KQPM*NAASGAAM*S#LAGAE.K           | S33:            | 2 | 4,5486 | 0,236 | 0      |

|    |                    |                                 |                    |   |        |       |        |
|----|--------------------|---------------------------------|--------------------|---|--------|-------|--------|
| 10 | O15056 SYNJ2_HUMAN | E.LGGDDLSVPGPTALAPPSKSPALT#K.K  | T1060:             | 3 | 4,5411 | 0,347 | 0      |
| 10 | Q5VV67 PPRC1_HUMAN | E.IVQQAATAGDDLEIPVVVR.Q         |                    | 2 | 4,5305 | 0,387 | 0,127  |
| 10 | Q96AC1 FERM2_HUMAN | E.LEGPLITPGSGSIYSSPGLYSK.T      |                    | 2 | 4,5298 | 0,437 | 0,439  |
| 10 | P05783 K1C18_HUMAN | E.DFNLGDALDSSNSM*QTIQK.T        |                    | 3 | 4,5163 | 0,427 | 0,523  |
| 10 | Q9C0C2 TB182_HUMAN | E.ASQASPCPAVTPSAPSAALPDEGSR.H   |                    | 2 | 4,5158 | 0,48  | 0,302  |
| 10 | O94842 TOX4_HUMAN  | R.GLQLGQTSTATIQPSQQAQIVTR.S     |                    | 3 | 4,4834 | 0,271 | 0,151  |
| 10 | Q9H4A3 WNK1_HUMAN  | E.ATTAQPVSQPQAPQVLPQVSAGK.Q     |                    | 2 | 4,474  | 0,447 | 0,424  |
| 10 | P52292 IMA2_HUMAN  | R.RNVSSFPDDATS#PLQE.N           | S62:               | 2 | 4,4704 | 0,557 | 0,199  |
| 10 | P53618 COPB_HUMAN  | R.NVTVQPDDPISFM*QLTAK.N         |                    | 2 | 4,4302 | 0,371 | 1,087  |
| 10 | Q9BVC5 ASHWN_HUMAN | R.KS#PSGPVKS#PPLSPVGT#TPVK.L    | S182:S189:T197:    | 3 | 4,4265 | 0,352 | 0,08   |
| 10 | Q66K74 MAP1S_HUMAN | R.KAVPM*APAPAS#PGSSND.S         | S759:              | 2 | 4,4091 | 0,542 | -0,216 |
| 10 | Q92882 OSTF1_HUMAN | K.LAFDM*ATNAACASLLK.K           |                    | 2 | 4,3945 | 0,54  | -0,071 |
| 10 | Q9H4A3 WNK1_HUMAN  | E.ATTAQPVSQPQAPQVLPQVSAGK.Q     |                    | 3 | 4,3893 | 0,456 | 0,397  |
| 10 | Q14686 NCOA6_HUMAN | R.KM*VYQESPQNPSSS#PLAE.M        | S1124:             | 2 | 4,3842 | 0,388 | 0      |
| 10 | O75376 NCOR1_HUMAN | K.HEAPS#SPISGQPCGDDQNAS#PSK.L   | S157:S172:         | 3 | 4,3739 | 0,265 | 0      |
| 10 | Q13813 SPTA2_HUMAN | K.DLNSQADSLM*TSSAFDTSQVK.D      |                    | 3 | 4,3686 | 0,495 | 0,081  |
| 10 | Q5TC82 RC3H1_HUMAN | E.VGLPSAAILPDEGAVDLPSR.K        |                    | 2 | 4,3651 | 0,473 | 0,432  |
| 10 | Q9UBQ5 EIF3K_HUMAN | E.KIDFDSVSSIM*ASS#Q.-           | S217:              | 2 | 4,3644 | 0,396 | 0,143  |
| 10 | Q6XQN6 PNCB_HUMAN  | E.RLQALVNSLCAGQS#P.-            | S537:              | 2 | 4,3626 | 0,53  | 0,216  |
| 10 | Q14693 LPIN1_HUMAN | R.GLDPSTPAQVIAPSETPSSSSVVK.K    |                    | 2 | 4,358  | 0,501 | 1,659  |
| 10 | O43399 TPD54_HUMAN | K.GLLSDSM*TDVPVDTGVAAR.T        |                    | 2 | 4,3538 | 0,61  | 0,318  |
| 10 | Q15059 BRD3_HUMAN  | K.M*PDEPVEAPALPAPAAPM*VSK.G     |                    | 2 | 4,3363 | 0,401 | 0,227  |
| 10 | Q9UKY1 ZHX1_HUMAN  | E.LISDLDEGPPVLTPVENTR.A         |                    | 2 | 4,3204 | 0,529 | 0,354  |
| 10 | O14979 HNRDL_HUMAN | K.VFVGGLSPDTSEEQIKE.Y           |                    | 2 | 4,3189 | 0,427 | -0,066 |
| 10 | Q8TBA6 GOGA5_HUMAN | K.TPVFQSSQTSSVSSVNPSVTTIK.T     |                    | 3 | 4,3169 | 0,539 | 0,23   |
| 10 | P18583 SON_HUMAN   | E.HDM*VISTS#PSGGS#EADIEGPLPAK.D | S1646:S1651:       | 3 | 4,3122 | 1     | 0,213  |
| 10 | Q8N2Y8 RUSC2_HUMAN | E.TSRPS#PLGYSYS#PIR.S           | S775:S781:         | 3 | 4,3023 | 0,393 | 0,218  |
| 10 | O95785 WIZ_HUMAN   | K.NPEDKS#PQLSLS#PRPAS#PK.A      | S1006:S1012:S1017: | 3 | 4,3003 | 0,384 | 0,08   |
| 10 | Q9UJM3 ERRFI_HUMAN | K.KLTVNGVCAS#TPPLT#PIK.N        | S126:T131:         | 2 | 4,2777 | 0,427 | 0,356  |
| 10 | O94864 ST65G_HUMAN | E.RFPSNLEVEAS#PQASSAE.V         | S323:              | 2 | 4,2772 | 0,457 | -0,549 |
| 10 | Q13428 TCOF_HUMAN  | R.TQPSSGVDSAVGTLPATSPQSTSVQAK.G |                    | 2 | 4,2679 | 0,506 | 0,657  |
| 10 | Q09161 NCBP1_HUMAN | R.M*FDYTDDEGPEPVM*PGSHSVE.R     |                    | 2 | 4,2562 | 0,483 | 0,435  |
| 10 | P55209 NP1L1_HUMAN | R.QLTVQM*M*QNPQILAALQER.L       |                    | 2 | 4,256  | 0,464 | 0,652  |

|    |                     |                                    |              |   |        |       |        |
|----|---------------------|------------------------------------|--------------|---|--------|-------|--------|
| 10 | P05783 K1C18_HUMAN  | E.DFNLGDALDSSNSM*QTIQK.T           |              | 2 | 4,2481 | 0,471 | 0,116  |
| 10 | P04406 G3P_HUMAN    | R.VIISAPSADAPM*FVM*GVNHE.K         |              | 2 | 4,2362 | 0,468 | 1,844  |
| 10 | O00178 GTPB1_HUMAN  | R.SAM*DSPVPASM*FAPEPSSPGAAR.A      |              | 2 | 4,2326 | 0,542 | 0,319  |
| 10 | P04183 KITH_HUMAN   | R.KLFAPQQILQCS#PAN.-               | S231:        | 2 | 4,2296 | 0,376 | 0,068  |
| 10 | P68104 EF1A1_HUMAN  | E.TGVCLKPGM*VVTFAPVNVNTE.V         |              | 2 | 4,2265 | 0,447 | 0,235  |
| 10 | Q05639 EF1A2_HUMAN  | K.SGDAAIVEM*VPGKPM*CVE.S           |              | 2 | 4,2239 | 0,323 | 0,127  |
| 10 | Q13263 TIF1B_HUMAN  | K.RSTAPSAASASASAAAASS#PAGGGAEALE.L | S50:         | 3 | 4,2145 | 0,493 | 0,501  |
| 10 | Q72627 HUWE1_HUMAN  | E.DVLM*DEAPSNLSQASTLQANR.E         |              | 3 | 4,2088 | 0,369 | 0,482  |
| 10 | Q92615 LARP5_HUMAN  | E.KFTSSQTQSPT#PPKPPS#PSFE.L        | T518:S524:   | 3 | 4,2046 | 0,351 | 0,376  |
| 10 | Q63ZY3 KANK2_HUMAN  | E.RSCDGAAGLPEVPAESSSS#PPGSE.V      | S428:        | 2 | 4,1964 | 0,47  | 0,503  |
| 10 | Q96S94 CCNL2_HUMAN  | R.GLLPGGTQVLDGTSGFSPAPK.L          |              | 2 | 4,1885 | 0,494 | 0,183  |
| 10 | P43308 SSRB_HUMAN   | E.DGPVVGSTAPGQGGILAQR.E            |              | 3 | 4,1881 | 0,418 | 0,37   |
| 10 | Q9H000 MKRN2_HUMAN  | R.KTQPSM*VSNPGSCSDPQPS#PE.M        | S139:        | 2 | 4,1687 | 0,396 | 0,42   |
| 10 | P26640 SYVC_HUMAN   | R.DPGVITYDLPTPPGEK.K               |              | 2 | 4,1679 | 0,503 | 0,287  |
| 10 | Q16626 MEA1_HUMAN   | E.VELAPVGDGDVVADIQDR.I             |              | 2 | 4,1676 | 0,624 | 0,065  |
| 10 | Q9ULK2 AT7L1_HUMAN  | E.ILPSQSGPAQDSSLGSSGSGPEPK.V       |              | 3 | 4,1665 | 0,502 | 0      |
| 10 | Q6P0N0 CN106_HUMAN  | R.ASVQGVPLESSNNDIFLPVK.Q           |              | 2 | 4,1583 | 0,356 | 0,346  |
| 10 | P46821 MAP1B_HUMAN  | R.ASVSPM*DEVPDSESPIEK.V            |              | 2 | 4,1581 | 0,404 | 0,12   |
| 10 | O75179 ANR17_HUMAN  | E.HYPVSSPS#SPS#PPAQGGVSR.N         | S2044:S2047: | 3 | 4,1549 | 1     | -0,163 |
| 10 | P31943 HNRH1_HUMAN  | E.GRPSGEAFVELES#EDE.V              | S63:         | 2 | 4,1546 | 0,403 | 0,067  |
| 10 | O75179 ANR17_HUMAN  | E.HYPVSSPSS#PS#PPAQGGVSR.N         | S2045:S2047: | 2 | 4,1505 | 1     | 1,193  |
| 10 | Q6ZML7 Q6ZML7_HUMAN | E.SRAEELS#PAALS#PSLEPIR.C          | S499:S504:   | 3 | 4,1434 | 0,277 | 0      |
| 10 | P55209 NP1L1_HUMAN  | R.QLTVQM*M*QNPQILAALQER.L          |              | 3 | 4,1431 | 0,357 | 0,408  |
| 10 | Q9UN36 NDRG2_HUMAN  | R.SRT#AS#LTSAAASVDGNR.S            | T330:S332:   | 3 | 4,1391 | 1     | 0,313  |
| 10 | Q14721 KCNB1_HUMAN  | E.AGVHQYIDADT#DDE.G                | T760:        | 2 | 4,1273 | 0,519 | 0,225  |
| 10 | Q8WTT2 NOC3L_HUMAN  | E.ALPLDM*M*DEDDLQLM*K.D            |              | 2 | 4,1213 | 0,447 | 0,19   |
| 10 | Q9UGV2 NDRG3_HUMAN  | R.THS#T#SSSLGSGESPFSS.S            | S331:T332:   | 2 | 4,12   | 1     | 0,324  |
| 10 | Q9ULT8 HECD1_HUMAN  | E.GHDS#LSVGS#FEEDSKSE.F            | S2315:S2320: | 3 | 4,1198 | 0,45  | 0,371  |
| 10 | Q8NE71 ABCF1_HUMAN  | K.LSVPT#S#DEEDEVPAKPR.G            | T108:S109:   | 2 | 4,1193 | 0,411 | 0,115  |
| 10 | O00273 DFFA_HUMAN   | E.DGTIVDDDDYFLCLPSNTK.F            |              | 2 | 4,1191 | 0,426 | 0,112  |
| 10 | Q9UJM3 ERRFI_HUMAN  | K.KLTVNGVCAST#PPLT#PIK.N           | T127:T131:   | 3 | 4,0984 | 0,202 | -0,089 |
| 10 | Q15459 SF3A1_HUMAN  | K.ASKPLPPAPAPDEYLVSPITGE.K         |              | 2 | 4,0956 | 0,473 | 0,325  |
| 10 | P78356 PI42B_HUMAN  | R.FFGPGEFDPSVDVYAM*K.S             |              | 2 | 4,0953 | 0,296 | -0,063 |

|    |                     |                                     |                 |   |        |       |        |
|----|---------------------|-------------------------------------|-----------------|---|--------|-------|--------|
| 10 | P08651 NFIC_HUMAN   | E.M*DKS#PFNSPS#PQDSPL.L             | S333:S339:      | 3 | 4,0773 | 0,136 | -0,093 |
| 10 | Q9H8Y8 GORS2_HUMAN  | E.LLSSLPPTSNAPSDPATTAK.A            |                 | 2 | 4,0705 | 0,43  | 0,354  |
| 10 | O75179 ANR17_HUMAN  | E.HYPVSSPS#S#PSPPAQGGVSR.N          | S2044:S2045:    | 3 | 4,06   | 1     | 0,081  |
| 10 | Q9BTK6 PA1_HUMAN    | E.EGEVTSGLQALAVEDTGGPSASAGK.A       |                 | 3 | 4,038  | 0,448 | -0,392 |
| 10 | P41162 ETV3_HUMAN   | R.YPGLM*VPPLQCQM*HPEE.S             |                 | 3 | 4,0363 | 0,274 | 0,089  |
| 10 | Q0VG05 Q0VG05_HUMAN | E.VGLGTEEDPSLPALLTQPR.K             |                 | 3 | 4,0362 | 0,301 | -0,092 |
| 10 | Q6PK04 CC137_HUMAN  | R.M*LLSPGGVSQPLTASLAR.Q             |                 | 2 | 4,0304 | 0,458 | 0,538  |
| 10 | O95793 STAU1_HUMAN  | R.KVTFEPGS#GDE.N                    | S390:           | 2 | 4,0194 | 0,316 | 0,088  |
| 10 | P08651 NFIC_HUMAN   | D.LVSLACDPASQQPGPLNGSGQLK.M         |                 | 3 | 4,018  | 0,384 | 0,157  |
| 10 | P18858 DNL1_HUMAN   | K.GQKPALDCSQVS#PPRPATS#PE.N         | S91:S98:        | 3 | 4,0141 | 0,262 | 0,23   |
| 10 | P42166 LAP2A_HUMAN  | K.LREQGT#ESRSS#TPLPTISSAE.N         | T154:S159:      | 3 | 4,014  | 1     | 0,514  |
| 10 | P62158 CALM_HUMAN   | R.EADIDGDGQVNYEEFVQM*M*TAK.-        |                 | 2 | 4,0099 | 0,494 | 0,677  |
| 10 | P42025 ACTY_HUMAN   | K.DQLQTFSEEHVLLTE.A                 |                 | 2 | 4,0076 | 0,424 | 0      |
| 10 | O60271 JIP4_HUMAN   | E.KFIEFEDS#QEQE.K                   | S109:           | 2 | 4,0028 | 0,278 | 0,228  |
| 10 | Q02952 AKA12_HUMAN  | E.HDPGQGSSSPEQAGS#PTEGE.G           | S749:           | 2 | 3,9939 | 0,46  | 0,18   |
| 10 | Q7Z6Z7 HUWE1_HUMAN  | E.LLERDGGG#GNS#TIIVSR.S             | S2362:S2365:    | 2 | 3,989  | 0,247 | 0,126  |
| 10 | Q96QF0 RAB3I_HUMAN  | K.TLVLSSSPTSPTQEPLPGGK.T            |                 | 3 | 3,9814 | 0,257 | 0,733  |
| 10 | Q562F6 SGOL2_HUMAN  | E.FHQSS#FLLS#ASK.K                  | S134:S138:      | 2 | 3,9804 | 0,371 | 0,242  |
| 10 | Q99961 SH3G1_HUMAN  | K.ALYDFEPENDGELGFHE.G               |                 | 2 | 3,9771 | 0,46  | 0,369  |
| 10 | Q96EB6 SIRT1_HUMAN  | E.RAGGAGFGT#DGDDQEAINE.A            | T719:           | 2 | 3,9741 | 0,381 | 0      |
| 10 | Q6S8J3 A26CA_HUMAN  | R.TTGIVM*DSGDGVTHTVPIYE.G           |                 | 2 | 3,9689 | 0,422 | 0,81   |
| 10 | Q8N3F8 MILK1_HUMAN  | R.APS#AS#PLALHASR.L                 | S484:S486:      | 3 | 3,9683 | 0,464 | 0,254  |
| 10 | Q13813 SPTA2_HUMAN  | K.DLNSQADSLM*TSSAFDTSQVK.D          |                 | 2 | 3,9675 | 0,552 | 0,432  |
| 10 | P46100 ATRX_HUMAN   | R.RPTETNPVTSNS#DEECNE.T             | S677:           | 2 | 3,9672 | 0,38  | 0,339  |
| 10 | Q3MIN7 RGL3_HUMAN   | E.KSSSPSGSPGDPSSPTSSVSPGS#PPSS#PR.S | S555:S559:      | 3 | 3,9598 | 0,338 | 0,192  |
| 10 | Q13428 TCOF_HUMAN   | R.TQPSSGVDSAVGTLPATSPQSTSVQAK.G     |                 | 3 | 3,9489 | 0,316 | 0,422  |
| 10 | P27816 MAP4_HUMAN   | E.AVAEPPQPTAVPLELAKE.I              |                 | 2 | 3,9461 | 0,508 | 0,394  |
| 10 | Q6NZI2 PTRF_HUMAN   | R.RGS#S#PDVHALLE.I                  | S365:S366:      | 2 | 3,9385 | 0,496 | 0,254  |
| 10 | Q9BPX5 ARP5L_HUMAN  | E.AAAAAAEPGPDPEVDGLLR.Q             |                 | 3 | 3,9288 | 0,387 | 0,48   |
| 10 | Q4KMP7 TB10B_HUMAN  | E.GLHPSLPSPG#GNST#PLGSSKE.T         | T434:T438:      | 3 | 3,9192 | 1     | 0,329  |
| 10 | Q9UJU6 DBNL_HUMAN   | E.RAM*S#TTSIS#SPQPGK.L              | S269:S274:      | 2 | 3,9144 | 1     | -0,142 |
| 10 | Q5SW79 CE170_HUMAN  | R.RFPTDYASTS#EDE.F                  | S1241:          | 2 | 3,9088 | 0,482 | 0,229  |
| 10 | Q9BVC5 ASHWN_HUMAN  | R.KS#PSGPVKS#PPLS#PVGTTTPVK.L       | S182:S189:S193: | 3 | 3,9004 | 0,173 | 0,477  |

|    |                     |                                      |                    |   |        |       |        |
|----|---------------------|--------------------------------------|--------------------|---|--------|-------|--------|
| 10 | Q8NE71 ABCF1_HUMAN  | K.LSVPT#S#DEEDEVPAKPR.G              | T108:S109:         | 3 | 3,8888 | 0,263 | 0,344  |
| 10 | P24928 RPB1_HUMAN   | K.YSPTSPTYSPVYTPSPK.Y                |                    | 3 | 3,8878 | 0,472 | 0,162  |
| 10 | Q66K74 MAP1S_HUMAN  | E.RAGGLGAEET#PPTSVE.S                | T782:              | 2 | 3,8785 | 0,474 | 0,14   |
| 10 | Q15365 PCBP1_HUMAN  | R.VM*TIPYQM*PASSPVICAGGQDR.C         |                    | 3 | 3,8753 | 0,518 | 0,511  |
| 10 | O43237 DC1L2_HUMAN  | K.KTGS#PGS#PGAGGVQSTAK.K             | S443:S446:         | 3 | 3,8677 | 0,278 | 0      |
| 10 | P49321 NASP_HUMAN   | K.DGAVNGPSVVGDDQTPIEPQTSIER.L        |                    | 3 | 3,8676 | 0,205 | 0,074  |
| 10 | Q3B820 YB032_HUMAN  | E.KVAQPAGASADLNTS#FSGVDE.H           | S67:               | 2 | 3,8648 | 0,464 | 0,114  |
| 10 | P20042 IF2B_HUMAN   | E.SDVQEPTPEDDLDM*LGNK.K              |                    | 3 | 3,8567 | 0,458 | 0,647  |
| 10 | P08779 K1C16_HUMAN  | K.IIAATIENAQPILQIDNAR.L              |                    | 3 | 3,8522 | 0,368 | -0,177 |
| 10 | P16949 STMN1_HUMAN  | K.RAS#GQAFELILS#PR.S                 | S16:S25:           | 2 | 3,8479 | 0,253 | 0      |
| 10 | Q9H0W8 CS061_HUMAN  | E.GKGPVAVTGAST#PE.G                  | T118:              | 2 | 3,8447 | 0,385 | -0,271 |
| 10 | B1Q2X3 B1Q2X3_HUMAN | E.GIILPSIIAPSSLASEK.V                |                    | 2 | 3,8272 | 0,339 | 0      |
| 10 | Q13084 RM28_HUMAN   | E.LIQQLQQQALSEPAVVQK.R               |                    | 3 | 3,8218 | 0,188 | 0,272  |
| 10 | O95155 UBE4B_HUMAN  | R.DENPFASLTATSQPIAAAAR.S             |                    | 3 | 3,8174 | 0,427 | 0,721  |
| 10 | O75531 BAF_HUMAN    | R.DFVAEPM*GEKPVGS#LAGIGE.V           | S22:               | 2 | 3,8119 | 0,497 | 0      |
| 10 | Q96MH2 HEX12_HUMAN  | K.TSGAPGS#PQT#PPERHDSGSLPLT#PR.M     | S29:T32:T46:       | 3 | 3,8021 | 1     | 0,064  |
| 10 | P05387 RLA2_HUMAN   | K.LASVPAGGAVAVSAAPGSAAPAAGSAPAAAEK.K |                    | 2 | 3,7976 | 0,461 | 0,968  |
| 10 | P46821 MAP1B_HUMAN  | E.GEKLS#PKS#DISPLT#PR.E              | S1779:S1782:T1788: | 3 | 3,7938 | 0,248 | 0,186  |
| 10 | P62988 UBIQ_HUMAN   | K.TITLEVEPSDTIENVK.A                 |                    | 2 | 3,7933 | 0,355 | 0,478  |
| 10 | P08758 ANXA5_HUMAN  | R.M*LVVLLQANRDPDAGIDE.A              |                    | 2 | 3,7817 | 0,448 | -1,721 |
| 10 | P12004 PCNA_HUMAN   | R.AEDNADTLALVFEAPNQEK.V              |                    | 2 | 3,7794 | 0,341 | 0,235  |
| 10 | P49643 PRI2_HUMAN   | K.TKDASSALASLNSS#LE.M                | S493:              | 2 | 3,7764 | 0,544 | -0,073 |
| 10 | Q659C4 LARP2_HUMAN  | E.TKLNGPGENVS#EDE.A                  | S60:               | 2 | 3,7745 | 0,453 | -0,311 |
| 10 | P17275 JUNB_HUMAN   | E.ARS#RDAT#PPVSPINM*EDQE.R           | S251:T255:         | 3 | 3,7671 | 0,095 | 0,08   |
| 10 | Q6DEN2 Q6DEN2_HUMAN | E.SREPAPAS#PAPAGVE.I                 | S102:              | 2 | 3,7658 | 0,427 | 0      |
| 10 | Q7Z309 F122B_HUMAN  | K.RIDFTPVS#PAPS#PTR.G                | S115:S119:         | 2 | 3,7528 | 0,404 | -0,203 |
| 10 | Q9Y6Q9 NCOA3_HUMAN  | K.TPHDILEDINAS#PE.M                  | S214:              | 2 | 3,7455 | 0,372 | -0,075 |
| 10 | Q9ULH7 MKL2_HUMAN   | E.IM*TM*M*SPSQFLSSSPLR.M             |                    | 2 | 3,7444 | 0,401 | 0,249  |
| 10 | P55072 TERA_HUMAN   | R.LDQLIYIPLPEK.S                     |                    | 2 | 3,738  | 0,226 | -0,078 |
| 10 | Q3KQU3 MA7D1_HUMAN  | R.RS#SQPSPTAVPASDS#PPTKQE.V          | S112:S125:         | 3 | 3,7366 | 1     | -0,157 |
| 10 | Q3V6T2 GRDN_HUMAN   | R.LPISVDSPPAAADSNTTAASNVDK.V         |                    | 3 | 3,7356 | 0,247 | -0,078 |
| 10 | Q8IZL8 PELP1_HUMAN  | K.LRS#PRGS#PDGSLQTGKPSAPK.K          | S477:S481:         | 3 | 3,7351 | 0,207 | -0,08  |
| 10 | P08651 NFIC_HUMAN   | R.TGM*GSDQEDSKPITLDTDFQE.S           |                    | 3 | 3,7272 | 0,283 | 0,226  |



|    |                    |                                      |              |   |        |       |        |
|----|--------------------|--------------------------------------|--------------|---|--------|-------|--------|
| 10 | Q9BUT9 CP014_HUMAN | R.RAPSTSPS#FEGTQE.T                  | S82:         | 2 | 3,7272 | 0,485 | -0,31  |
| 10 | O43166 SI1L1_HUMAN | K.FHALSS#PQS#PFPSTPTR.R              | S1565:S1568: | 3 | 3,7253 | 0,279 | 0,522  |
| 10 | P26358 DNMT1_HUMAN | E.KLSIFDANES#GFE.S                   | S394:        | 2 | 3,7212 | 0,354 | 0,079  |
| 10 | P43308 SSRB_HUMAN  | E.DGPVVIGSTSAPGQGGILAQR.E            |              | 2 | 3,7198 | 0,499 | 0,493  |
| 10 | P29401 TKT_HUMAN   | R.SVPTSTVFYPSDGVATEK.A               |              | 2 | 3,7184 | 0,472 | 0,194  |
| 10 | Q9C0C2 TB182_HUMAN | E.ASQASPCPAVTPSAPSAALPDEGSR.H        |              | 3 | 3,7178 | 0,352 | 0,226  |
| 10 | Q8IZL8 PELP1_HUMAN | R.GADTAPTLAPEALPSQGEVER.E            |              | 2 | 3,7163 | 0,522 | 0,231  |
| 10 | O60245 PCDH7_HUMAN | R.Y#RSVNGGPGS#PDLAR.H                | Y980:S989:   | 3 | 3,7119 | 0,225 | 0,214  |
| 10 | P19838 NFKB1_HUMAN | K.TTSQAHS#LPLS#PASTR.Q               | S903:S907:   | 3 | 3,7037 | 0,446 | 0,101  |
| 10 | Q92922 SMRC1_HUMAN | R.KHS#PS#PPPTPTE.S                   | S328:S330:   | 2 | 3,7019 | 0,426 | -0,239 |
| 10 | Q96JG8 MAGD4_HUMAN | E.AQGPTPEPPLASPQTSQM*LVTSK.M         |              | 3 | 3,6957 | 0,38  | -0,461 |
| 10 | Q3KQU3 MA7D1_HUMAN | E.SAAPASPAPSPAPSPPTAPPQK.E           |              | 2 | 3,6954 | 0,429 | 0,121  |
| 10 | Q9Y2D5 AKAP2_HUMAN | R.DALGDSLQVPVSPSTSSR.C               |              | 2 | 3,6946 | 0,475 | 0,244  |
| 10 | O60271 JIP4_HUMAN  | K.ATTPASTANSDVATIPTDTPLKEENE.G       |              | 2 | 3,6926 | 0,476 | 0,548  |
| 10 | Q14847 LASP1_HUMAN | K.KGKFSVADT#PE.L                     | T104:        | 2 | 3,6898 | 0,476 | 0,19   |
| 10 | P62191 PRS4_HUMAN  | R.M*TLADDVTLDDLIM*AK.D               |              | 2 | 3,6881 | 0,546 | -0,204 |
| 10 | Q9Y5J1 UTP18_HUMAN | E.LVFGDVENEDALLR.R                   |              | 2 | 3,6851 | 0,441 | -0,358 |
| 10 | P28715 ERCC5_HUMAN | E.SKFDSSLLSS#DDE.T                   | S563:        | 2 | 3,678  | 0,347 | 0,081  |
| 10 | Q9UK76 HN1_HUMAN   | R.RNS#SEAS#SGDFLDLKG.E               | S87:S91:     | 2 | 3,6735 | 0,454 | 0,186  |
| 10 | Q13428 TCOF_HUMAN  | R.KSAEPSANTTLVS#ETEEE.G              | S171:        | 3 | 3,6727 | 0,347 | 0,091  |
| 10 | Q96TA1 NIBL1_HUMAN | R.GLLAQGLRPES#PPPAGPLLNGAPAGESPQPK.A | S652:        | 3 | 3,6717 | 0,256 | 0,473  |
| 10 | Q9H488 OFUT1_HUMAN | R.STAAPLTM*TM*CLPDLKE.I              |              | 2 | 3,6698 | 0,396 | 0,255  |
| 10 | Q9NXR1 NDE1_HUMAN  | R.TDTAVQATGS#VPST#PIAHR.G            | S211:T215:   | 3 | 3,668  | 0,207 | -0,442 |
| 10 | Q9H6H4 REEP4_HUMAN | R.SISDAPAPAYHDPLYE.D                 |              | 2 | 3,6678 | 0,401 | 0      |
| 10 | Q6UB99 ANR11_HUMAN | K.VDALHCPPAAVVTVTPSPE.G              |              | 2 | 3,6667 | 0,342 | 0,249  |
| 10 | Q9NQ8 KI13B_HUMAN  | E.M*GPDVLVQTM*GAPALK.I               |              | 2 | 3,6633 | 0,41  | 0,294  |
| 10 | Q9Y365 PCTL_HUMAN  | E.RM*GGAGGEGS#DDDTSLT.-              | S284:        | 2 | 3,6562 | 0,322 | 0      |
| 10 | Q7Z2W4 ZCCHV_HUMAN | R.SCT#PS#PDQISHR.A                   | T273:S275:   | 3 | 3,6462 | 0,294 | 0,237  |
| 10 | Q8N122 RPTOR_HUMAN | R.LRS#VSS#YGNIR.A                    | S719:S722:   | 2 | 3,6449 | 0,368 | -0,259 |
| 10 | Q92615 LARP5_HUMAN | E.KFTSSQTQS#PTPPKPPS#PSFE.L          | S516:S524:   | 3 | 3,6445 | 0,162 | 0,075  |
| 10 | Q3KQU3 MA7D1_HUMAN | E.KESAAPAS#PAPSPAPSPPTAPPQK.E        | S544:S552:   | 3 | 3,644  | 0,238 | 0      |
| 10 | Q8N5C8 TAB3_HUMAN  | R.SAAPEPIQPISVIPGSGGEK.G             |              | 2 | 3,6434 | 0,4   | 0,757  |
| 10 | Q14839 CHD4_HUMAN  | K.TPTPSTPGDTQPNTAPVPPAEDGIK.I        |              | 3 | 3,6329 | 0,352 | 0,495  |

|    |                    |                                   |              |   |        |       |        |
|----|--------------------|-----------------------------------|--------------|---|--------|-------|--------|
| 10 | Q15365 PCBP1_HUMAN | R.VM*TIPYQPM*PASSPVICAGGQDR.C     |              | 2 | 3,6316 | 0,445 | 0,584  |
| 10 | P00558 PGK1_HUMAN  | K.ITLPVDFVTADKFDE.N               |              | 2 | 3,6092 | 0,501 | -0,143 |
| 10 | Q5VUA4 ZN318_HUMAN | E.LTALGNLGDGM*PVDFACTTR.V         |              | 2 | 3,6024 | 0,401 | 0,305  |
| 10 | Q14247 SRC8_HUMAN  | R.AKTQT#PPVS#PAPQPTEER.L          | T401:S405:   | 3 | 3,6008 | 0,137 | 0,699  |
| 10 | O14531 DPYL4_HUMAN | E.NEFVAVTSTNAAK.I                 |              | 2 | 3,6007 | 0,432 | -0,541 |
| 10 | Q5W0B1 RN219_HUMAN | E.KTELNLS#KGS#LTNDQLE.N           | S592:S595:   | 2 | 3,6    | 0,419 | 0,357  |
| 10 | Q5VZL5 ZMYM4_HUMAN | E.KDQGSTYS#GDLE.S                 | S1091:       | 2 | 3,5969 | 0,337 | -0,531 |
| 10 | P42166 LAP2A_HUMAN | E.SRSST#PLPTISSSAE.N              | T160:        | 2 | 3,594  | 0,446 | -0,229 |
| 10 | O14497 ARI1A_HUMAN | R.SGPLSPAAPVGNQM*PPRPPSGQSD.S     |              | 3 | 3,5932 | 0,284 | 0,078  |
| 10 | Q32MZ4 LRRF1_HUMAN | R.NM*PGLSAATLASLGGTSSR.R          |              | 2 | 3,5885 | 0,506 | 0,54   |
| 10 | O00116 ADAS_HUMAN  | R.RAASAATAAPTAT#PAAQE.S           | T74:         | 2 | 3,5855 | 0,538 | -0,141 |
| 10 | Q8IZL8 PELP1_HUMAN | R.GADTAPTLAPEALPSQGEVER.E         |              | 3 | 3,5792 | 0,356 | 0,26   |
| 10 | Q9Y478 AAKB1_HUMAN | K.ILM*DSPEDADLFHSEE.I             |              | 3 | 3,5734 | 0,25  | 0,393  |
| 10 | Q99569 PKP4_HUMAN  | R.TSS#QRST#LTYQR.N                | S458:T462:   | 2 | 3,5715 | 0,141 | -0,077 |
| 10 | Q92615 LARP5_HUMAN | E.KFTSSQTQS#PTPPKPPS#PSFE.L       | S516:S524:   | 2 | 3,5714 | 1     | 0,301  |
| 10 | Q9UQ35 SRRM2_HUMAN | R.TAVAPSAVNLADPRT#PTAPAVNLAGAR.T  | T2289:       | 3 | 3,5709 | 0,326 | 0,136  |
| 10 | Q6ZVM7 TM1L2_HUMAN | K.TVTYEDPQAVGGLASALDNR.K          |              | 3 | 3,57   | 0,33  | 0,264  |
| 10 | O95433 AHSA1_HUMAN | K.GHVEIPNLSDENS#VDE.V             | S113:        | 2 | 3,5685 | 0,381 | 0,067  |
| 10 | Q8NC44 F134A_HUMAN | K.KTALALAITDSELS#DEE.A            | S311:        | 2 | 3,5683 | 0,524 | 0,194  |
| 10 | Q8WYP5 AHTF1_HUMAN | R.STLRS#TPLAS#PSPSPGR.S           | S1218:S1223: | 3 | 3,568  | 0,3   | 0,391  |
| 10 | Q9UQ35 SRRM2_HUMAN | E.KAGM*SSNQSISS#PVL.D.A           | S1404:       | 2 | 3,5654 | 0,426 | 0,142  |
| 10 | Q9P2J5 SYLC_HUMAN  | K.GTGVVTSVPSDSPDDIAALR.D          |              | 2 | 3,5644 | 0,525 | 0,249  |
| 10 | Q8NFD5 ARI1B_HUMAN | K.VM*PTVPTSQVTGPPPQPPPIR.R        |              | 3 | 3,5596 | 0,124 | 0,248  |
| 10 | Q92597 NDRG1_HUMAN | R.SRT#AS#GSSVSLDGTR.S             | T328:S330:   | 2 | 3,5543 | 1     | 0      |
| 10 | P27816 MAP4_HUMAN  | K.DM*ESPT#KLDVTLAK.D              | T282:        | 3 | 3,5493 | 0,324 | 0,223  |
| 10 | P18583 SON_HUMAN   | E.HNTVCAAGTS#PVGE.I               | S1556:       | 2 | 3,5374 | 0,553 | -0,412 |
| 10 | P18583 SON_HUMAN   | R.AGIEGPLLASDVGR.D                |              | 2 | 3,5358 | 0,371 | 0,36   |
| 10 | Q96SB3 NEB2_HUMAN  | K.IKPVEVEESGES#EAE.S              | S307:        | 2 | 3,5351 | 0,57  | -0,356 |
| 10 | P05783 K1C18_HUMAN | R.GGM*GSGGLATGIAGGLAGM*GGIQNEKE.T |              | 3 | 3,5335 | 0,223 | 0,076  |
| 10 | Q4LE39 ARI4B_HUMAN | R.RLS#KPPFQTNPS#PE.M              | S666:S675:   | 2 | 3,5324 | 0,477 | 0,486  |
| 10 | P42166 LAP2A_HUMAN | K.LREQGTESRS#ST#PLPTISSSAE.N      | S158:T160:   | 3 | 3,5313 | 1     | 0,514  |
| 10 | Q8NG31 CASC5_HUMAN | R.KSLGTPTVICT#PTEE.S              | T1017:       | 2 | 3,5266 | 0,395 | 0,142  |
| 10 | P04406 G3P_HUMAN   | K.IISNASCTTNCLAPLAK.V             |              | 2 | 3,5167 | 0,335 | -0,133 |

|    |                    |                                      |              |   |        |       |        |
|----|--------------------|--------------------------------------|--------------|---|--------|-------|--------|
| 10 | Q96T37 RBM15_HUMAN | K.ISHLSGSGS#GDE.R                    | S212:        | 2 | 3,5145 | 0,463 | 0      |
| 10 | Q04721 NOTC2_HUMAN | R.RTPSLALT#PPQAEQE.V                 | T1808:       | 2 | 3,5094 | 0,461 | -0,071 |
| 10 | Q7L2J0 MEPCE_HUMAN | R.TLNAET#PKSS#PLPAK.G                | T213:S217:   | 2 | 3,5086 | 0,342 | -0,214 |
| 10 | Q5THJ4 VP13D_HUMAN | E.VQDKDYPLT#PPPS#PTVDEPK.I           | T1761:S1765: | 3 | 3,4973 | 0,169 | 0,614  |
| 10 | Q6PKG0 LARP1_HUMAN | R.CPS#QSSSRPAAM*ISQPPTPPTGQPVRE.D    | S1056:       | 3 | 3,4951 | 0,361 | 0,185  |
| 10 | P43243 MATR3_HUMAN | R.IGPYQPNVPVGIDYVIPK.T               |              | 2 | 3,4878 | 0,427 | -0,186 |
| 10 | Q8N1G4 LRC47_HUMAN | E.NKEEGSL#DTEAD.A                    | S520:        | 2 | 3,4842 | 0,44  | -0,248 |
| 10 | P43243 MATR3_HUMAN | R.IGPYQPNVPVGIDYVIPK.T               |              | 3 | 3,479  | 0,371 | 0,093  |
| 10 | Q12888 TP53B_HUMAN | E.TAVPGPLGIEDISPNLSPDDK.S            |              | 2 | 3,4782 | 0,434 | 0      |
| 10 | P10244 MYBB_HUMAN  | E.VGGSGIGT#PPS#VLKR.Q                | T405:S408:   | 2 | 3,4778 | 0,31  | -0,154 |
| 10 | Q9UGV2 NDRG3_HUMAN | R.THS#TSSS#LGSGESPFSSR.S             | S331:S335:   | 3 | 3,4766 | 1     | -0,097 |
| 10 | Q96QG7 MTMR9_HUMAN | R.RQLAELETEDGM*QES#P.-               | S548:        | 2 | 3,4759 | 0,452 | 0,443  |
| 10 | P43351 RAD52_HUMAN | E.KDFLAGVT#QE.L                      | T318:        | 2 | 3,4682 | 0,278 | 0,103  |
| 10 | Q9P1Y6 K1542_HUMAN | E.SIFGTEPEPPLGPSSAM*SK.L             |              | 2 | 3,4645 | 0,506 | 0,188  |
| 10 | Q14980 NUMA1_HUMAN | E.SRPSLSLGTIT#DEE.M                  | T1952:       | 2 | 3,4636 | 0,36  | 0      |
| 10 | Q00613 HSF1_HUMAN  | R.VKEEPPS#PPQS#PRVEE.A               | S303:S307:   | 3 | 3,4615 | 0,205 | -0,093 |
| 10 | P05387 RLA2_HUMAN  | K.LASVPAGGAVAVSAAPGSAAPAAGSAPAAAEK.K |              | 3 | 3,4597 | 0,195 | 0,659  |
| 10 | Q14686 NCOA6_HUMAN | R.KM*VYQESPQNPS#SSPLAE.M             | S1122:       | 3 | 3,4561 | 0,291 | 0,263  |
| 10 | Q92882 OSTF1_HUMAN | K.LAFDM*ATNAACASLLK.K                |              | 3 | 3,4515 | 0,301 | 0,32   |
| 10 | Q8WVT3 TTC15_HUMAN | E.QEPPVAEPVPVCTIFSQR.A               |              | 3 | 3,4506 | 0,153 | 0,089  |
| 10 | Q00613 HSF1_HUMAN  | R.VKEEPPS#PPQS#PRVEE.A               | S303:S307:   | 2 | 3,4467 | 0,356 | -0,248 |
| 10 | Q12905 ILF2_HUMAN  | R.VKPAPDETS#FSE.A                    | S52:         | 2 | 3,4426 | 0,373 | 0,264  |
| 10 | Q96RV3 PCX1_HUMAN  | E.SSKPLSGS#KES#LVE.N                 | S325:S328:   | 2 | 3,4384 | 0,456 | -0,379 |
| 10 | Q96EB6 SIRT1_HUMAN | R.TSPDSSVIVTLLDQAAK.S                |              | 2 | 3,438  | 0,424 | -0,066 |
| 10 | Q02952 AKA12_HUMAN | K.SAESPTS#PVT#SETGSTFKK.F            | S286:T289:   | 2 | 3,4352 | 0,298 | 0,116  |
| 10 | P46013 KI67_HUMAN  | K.M*KT#PVQYSQQNS#PQK.H               | T347:S357:   | 3 | 3,4338 | 0,302 | 0,088  |
| 10 | Q9H3Q1 BORG4_HUMAN | K.LPKS#LSS#SPVK.K                    | S138:S141:   | 2 | 3,4332 | 0,317 | 0      |
| 10 | Q9UJU6 DBNL_HUMAN  | E.RAM*#TTS#ISSPQPGK.L                | S269:S272:   | 2 | 3,4323 | 1     | -0,142 |
| 10 | Q8WTT2 NOC3L_HUMAN | E.ALPLDM*M*DEDDLQLM*K.D              |              | 3 | 3,4285 | 0,403 | 0,285  |
| 10 | O60885 BRD4_HUMAN  | K.M*PDEPEEPVAVSSPAVPPPTK.V           |              | 3 | 3,4229 | 0,213 | 0,559  |
| 10 | Q9UQ35 SRRM2_HUMAN | E.TKEQNSALPTSS#QDEE.L                | S1233:       | 2 | 3,4167 | 0,408 | 0,066  |
| 10 | Q9UGP5 DPOLL_HUMAN | E.ALLQTALSPPPPTRPVS#PPQK.A           | S177:        | 3 | 3,4151 | 0,205 | 0,077  |
| 10 | P68104 EF1A1_HUMAN | K.SGDAIVDM*VPGKPM*CVE.S              |              | 2 | 3,411  | 0,489 | 0,512  |

|    |                    |                                     |              |   |        |       |        |
|----|--------------------|-------------------------------------|--------------|---|--------|-------|--------|
| 10 | A0AVK6 E2F8_HUMAN  | R.KINS#APSS#PIK.T                   | S413:S417:   | 2 | 3,4082 | 0,305 | 0,187  |
| 10 | P05387 RLA2_HUMAN  | K.NIEDVIAQGIGK.L                    |              | 2 | 3,4072 | 0,439 | 0,097  |
| 10 | Q9UJX2 CDC23_HUMAN | E.VPAPFFLPASLSANNTPTR.R             |              | 2 | 3,4066 | 0,297 | 0      |
| 10 | Q9UD71 PPR1B_HUMAN | E.SHLQISISNLNENQAS#EEEDE.L          | S102:        | 3 | 3,4035 | 0,214 | 0,078  |
| 10 | Q99594 TEAD3_HUMAN | K.ALQSM*ASM*SSAQIVSASVLQNK.F        |              | 3 | 3,4033 | 0,206 | 0      |
| 10 | Q96J02 ITCH_HUMAN  | R.RPASVNGS#PSATSE.S                 | S273:        | 2 | 3,4026 | 0,464 | -0,085 |
| 10 | Q7Z422 CA144_HUMAN | K.RILGSAS#PEEE.Q                    | S107:        | 2 | 3,3893 | 0,276 | -0,385 |
| 10 | Q7Z3K3 POGZ_HUMAN  | E.SLHQLFEGES#E.T                    | S1392:       | 2 | 3,3884 | 0,197 | 0,18   |
| 10 | Q92734 TFG_HUMAN   | D.DQVSGPPSAPAEDR.S                  |              | 2 | 3,3824 | 0,444 | 0      |
| 10 | Q15149 PLEC1_HUMAN | R.SRSSS#VGS#SSYPISPAVSR.T           | S4386:S4389: | 3 | 3,3807 | 1     | 0      |
| 10 | Q9BPX5 ARP5L_HUMAN | E.AAAAAAEPGPDPEVDGLLR.Q             |              | 2 | 3,3794 | 0,445 | 0,32   |
| 10 | Q9UKY1 ZHX1_HUMAN  | E.LISDLDEGPPVLTVENTR.A              |              | 3 | 3,3778 | 0,204 | 0,266  |
| 10 | P12270 TPR_HUMAN   | E.VVQSS#PVERPSTSTAVFGTVSATPSSSLPK.R | S1804:       | 3 | 3,3755 | 0,377 | 0,356  |
| 10 | Q9HBM0 VEZA_HUMAN  | K.SLSPVDPVEPISNSEPSM*NSDM*GK.V      |              | 3 | 3,3741 | 0,406 | 0,431  |
| 10 | Q9H000 MKRN2_HUMAN | R.KTQPSM*VSNPGSCSDPQPS#PE.M         | S139:        | 3 | 3,3717 | 0,254 | 0,079  |
| 10 | O95503 CBX6_HUMAN  | E.ASAPGPGLLLAAPAAPYDAR.S            |              | 3 | 3,3665 | 0,189 | 0,097  |
| 10 | Q06587 RING1_HUMAN | R.LHNQQALSSS#IEE.G                  | S140:        | 2 | 3,3658 | 0,433 | -0,318 |
| 10 | O14920 IKKB_HUMAN  | R.LSQPGQLM*SQPSTASNSLPEPAK.K        |              | 3 | 3,3655 | 0,292 | 0,307  |
| 10 | Q13017 RHG05_HUMAN | E.DM*DPSDNYAEPIDTIFK.Q              |              | 2 | 3,3647 | 0,388 | -0,737 |
| 10 | P27816 MAP4_HUMAN  | E.EGRPVVSGTGNDITT#PPNKELPPS#PE.K    | T687:S696:   | 3 | 3,363  | 0,132 | 0,385  |
| 10 | P38398 BRCA1_HUMAN | E.KAVLTS#QKS#SEYPISQNPE.G           | S1457:S1460: | 3 | 3,3618 | 0,144 | 0,081  |
| 10 | Q8N3F8 MILK1_HUMAN | R.APS#AS#PLALHASR.L                 | S484:S486:   | 2 | 3,3595 | 0,472 | 0,17   |
| 10 | O95714 HERC2_HUMAN | E.TAPVQLPVSGPELAAM*M*K.I            |              | 2 | 3,3587 | 0,406 | 0,717  |
| 10 | P37802 TAGL2_HUMAN | R.TLM*NLGGLAVAR.D                   |              | 2 | 3,3455 | 0,397 | 0      |
| 10 | O00273 DFFA_HUMAN  | E.KQAPELSLS#SQDLE.L                 | S256:        | 2 | 3,3431 | 0,462 | -0,075 |
| 10 | Q8IX03 WWC1_HUMAN  | E.TNTET#PAPS#PTVVRPK.D              | T895:S899:   | 2 | 3,3411 | 0,249 | -0,066 |
| 10 | Q7Z4H8 KDEL2_HUMAN | R.DVVLPTYDITHSM*LE.A                |              | 2 | 3,3383 | 0,412 | -0,07  |
| 10 | P05783 K1C18_HUMAN | D.ALDSSNSM*QTIQK.T                  |              | 2 | 3,3362 | 0,439 | -0,339 |
| 10 | Q92733 PRCC_HUMAN  | K.TSSLAPVVGTTTTTSPSAIK.A            |              | 3 | 3,3275 | 0,252 | 0,635  |
| 10 | Q9GZV5 WWTR1_HUMAN | E.TLAPVQAAVNPTM*TPDM*R.S            |              | 3 | 3,3267 | 0,236 | 0,717  |
| 10 | O75061 AUX1_HUMAN  | E.DHAALVNQESEQS#DDE.L               | S456:        | 2 | 3,3197 | 0,464 | 0,261  |
| 10 | Q6R327 RICTR_HUMAN | K.HIEDTGSTPS#IGE.N                  | S1177:       | 2 | 3,3192 | 0,393 | 0      |
| 10 | Q6GYQ0 GRIPE_HUMAN | R.RGS#S#PGSLEIPK.D                  | S860:S861:   | 2 | 3,3098 | 0,378 | 0      |

|    |                    |                              |                    |   |        |       |        |
|----|--------------------|------------------------------|--------------------|---|--------|-------|--------|
| 10 | P08651 NFIC_HUMAN  | D.LVSLACDPASQQPGLNGSGQLK.M   |                    | 2 | 3,3096 | 0,369 | 0,104  |
| 10 | Q96T58 MINT_HUMAN  | R.RPQS#PGAS#PSQAERLPSDSE.R   | S736:S740:         | 3 | 3,3081 | 0,435 | -0,405 |
| 10 | Q9UJM3 ERRFI_HUMAN | K.SLPSYLNQVM*PPTQSFAPDPK.Y   |                    | 2 | 3,3079 | 0,445 | 0,432  |
| 10 | O15075 DCLK1_HUMAN | R.SGKSPS#PSPTS#PGSLR.K       | S332:S337:         | 2 | 3,3064 | 1     | 0      |
| 10 | Q96AJ1 CLUA1_HUMAN | R.KSEPLDES#DNDF.-            | S409:              | 2 | 3,2996 | 0,411 | 0,248  |
| 10 | Q15059 BRD3_HUMAN  | K.M*PDEPVEAPALPAPAAPM*VSK.G  |                    | 3 | 3,2992 | 0,342 | 1,276  |
| 10 | Q01082 SPTB2_HUMAN | R.TSS#KES#SPIPS#PTSDRK.A     | S2161:S2164:S2169: | 3 | 3,2973 | 1     | 0,089  |
| 10 | O75616 ERAL_HUMAN  | E.TQVILLDTPGIISPGK.Q         |                    | 2 | 3,2957 | 0,353 | 0      |
| 10 | Q8TEH3 DEN1A_HUMAN | R.RT#SVPS#PEQPQPYR.T         | T519:S523:         | 3 | 3,2939 | 0,179 | 0,508  |
| 10 | O43353 RIPK2_HUMAN | E.SCGSSQLHENSQS#PE.T         | S357:              | 2 | 3,2936 | 0,376 | 0,074  |
| 10 | Q6ZTU2 E400N_HUMAN | R.TAVPPGLSSLPLTSVGNTGM*K.K   |                    | 2 | 3,2932 | 0,466 | 0,119  |
| 10 | Q9UL46 PSME2_HUMAN | R.APLDIPDPKDDDE.M            |                    | 2 | 3,2902 | 0,268 | 0,071  |
| 10 | Q8IU81 I2BP1_HUMAN | E.ALPPQYPEPAPAALCGPPPR.A     |                    | 3 | 3,2818 | 0,19  | 0,601  |
| 10 | Q6ZTU2 E400N_HUMAN | R.TAVPPGLSSLPLTSVGNTGM*K.K   |                    | 3 | 3,2811 | 0,212 | 0,179  |
| 10 | Q13885 TBB2A_HUMAN | K.VSDTVVEPYNATLSVHQLVENTDE.T |                    | 2 | 3,2807 | 0,349 | 0,459  |
| 10 | P08651 NFIC_HUMAN  | E.M*DKS#PFNSPS#PQDSR.L       | S333:S339:         | 2 | 3,2767 | 0,353 | 0,124  |
| 10 | Q13428 TCOF_HUMAN  | R.KSAEPSANTTLVS#E.T          | S171:              | 2 | 3,2766 | 0,321 | -0,403 |
| 10 | P23528 COF1_HUMAN  | E.ILVGDVGQTVDDPYATFVK.M      |                    | 3 | 3,2763 | 0,317 | 0      |
| 10 | Q9NYF3 FA53C_HUMAN | R.RFS#LS#PSLGPQASR.F         | S232:S234:         | 2 | 3,2718 | 0,194 | 0      |
| 10 | Q12906 ILF3_HUMAN  | K.LVSQTGVPVHAPIFTM*SVE.V     |                    | 2 | 3,2708 | 0,331 | 0,253  |
| 10 | Q96PK6 RBM14_HUMAN | R.ASYVAPLTAQPATYR.A          |                    | 2 | 3,2702 | 0,382 | -1,137 |
| 10 | Q562F6 SGOL2_HUMAN | K.HITSEADS#DPGNPVE.L         | S1032:             | 2 | 3,2697 | 0,419 | -0,074 |
| 10 | O43237 DC1L2_HUMAN | K.KTGS#PGS#PGAGGVQSTAK.K     | S443:S446:         | 2 | 3,2679 | 0,433 | -0,279 |
| 10 | O14757 CHK1_HUMAN  | K.HIQSNLDFS#PVNSASSE.N       | S301:              | 2 | 3,2679 | 0,392 | 0,12   |
| 10 | P48634 BAT2_HUMAN  | K.EGPEPPEEVPPTTPPVPK.V       |                    | 2 | 3,2642 | 0,219 | 0,428  |
| 10 | Q96A37 RN166_HUMAN | K.FVPVPTSQPIPSNIPNR.S        |                    | 2 | 3,264  | 0,364 | 0,497  |
| 10 | Q9C0H5 K1688_HUMAN | E.AGGGYQAGS#PQRS#PGR.K       | S344:S348:         | 3 | 3,2604 | 0,237 | -0,107 |
| 10 | Q92854 SEM4D_HUMAN | E.LKFADS#DADGD.-             | S857:              | 2 | 3,2558 | 0,51  | 0,396  |
| 10 | Q15149 PLEC1_HUMAN | R.RYASGSSAS#LGGPE.S          | S4675:             | 2 | 3,2536 | 0,453 | -0,344 |
| 10 | P50991 TCPD_HUMAN  | K.VVSQYSSLLSPM*SVNAVMM*K.V   |                    | 3 | 3,2528 | 0,224 | 0,441  |
| 10 | Q8NEF9 SRFB1_HUMAN | E.KEYFDDS#TEE.R              | S264:              | 2 | 3,2521 | 0,447 | 0,091  |
| 10 | Q8TCT7 PSL1_HUMAN  | E.GRDQAQPS#PVTQPGASA.-       | S583:              | 2 | 3,2469 | 0,232 | 0,21   |
| 10 | O14980 XPO1_HUMAN  | R.QM*SVPGIFNPHEIPEEM*CD.-    |                    | 2 | 3,2453 | 0,312 | 0      |

|    |                    |                                |              |   |        |       |        |
|----|--------------------|--------------------------------|--------------|---|--------|-------|--------|
| 10 | P42167 LAP2B_HUMAN | E.HNQSYS#QAGITE.T              | S224:        | 2 | 3,2451 | 0,335 | -0,172 |
| 10 | P18206 VINC_HUMAN  | K.LVQAAQM*LQSDPYVSPAR.D        |              | 3 | 3,2437 | 0,255 | 0,368  |
| 10 | P28749 RBL1_HUMAN  | R.VIAIDS#DAES#PAKR.V           | S1037:S1041: | 2 | 3,2399 | 0,28  | 0      |
| 10 | O96028 NSD2_HUMAN  | E.M*KGIGT#PPNNTPIKNGS#PE.I     | T110:S121:   | 3 | 3,2399 | 0,084 | -0,346 |
| 10 | Q6ZN18 AEBP2_HUMAN | E.LSRLS#PLPPGS#PGSAAR.G        | S18:S24:     | 2 | 3,2397 | 0,362 | 0,402  |
| 10 | Q96EV8 DTBP1_HUMAN | R.REPIGS#M*SSM*E.V             | S227:        | 2 | 3,2395 | 0,306 | -0,091 |
| 10 | Q8TEH3 DEN1A_HUMAN | R.RTS#VPS#PEQPQPYR.T           | S520:S523:   | 2 | 3,2387 | 0,115 | 0,609  |
| 10 | Q8IX03 WWC1_HUMAN  | E.TNTET#PAPS#PTVVRPK.D         | T895:S899:   | 3 | 3,2379 | 0,319 | 0      |
| 10 | O60271 JIP4_HUMAN  | K.ATTPASTANSDVATIPTDTPLKEE.N   |              | 2 | 3,237  | 0,257 | 0,502  |
| 10 | Q03164 HRX_HUMAN   | E.VHPLPISQS#PENE.S             | S518:        | 2 | 3,2318 | 0,391 | 0,225  |
| 10 | O95155 UBE4B_HUMAN | R.DENPFASLTATSQPIAAAAR.S       |              | 2 | 3,2261 | 0,394 | 0,06   |
| 10 | P18583 SON_HUMAN   | E.M*EHNTVCAAGTS#PVGE.I         | S1556:       | 2 | 3,2246 | 0,399 | 0      |
| 10 | Q9UQ35 SRRM2_HUMAN | E.NSFGS#PLEFR.N                | S1329:       | 2 | 3,216  | 0,397 | 0      |
| 10 | Q9H8Y8 GORS2_HUMAN | E.LLSSLPPTSNA PSDPATTAK.A      |              | 3 | 3,2156 | 0,302 | 0      |
| 10 | O95831 AIFM1_HUMAN | E.AIGLVDSLPTVGVFAK.A           |              | 2 | 3,2085 | 0,52  | -0,146 |
| 10 | Q15154 PCM1_HUMAN  | R.VTNDIS#PESS#PGVGRR.R         | S65:S69:     | 3 | 3,2011 | 0,12  | -0,2   |
| 10 | Q8NCF5 NF2IP_HUMAN | R.LVLDPGEAPLVPVYSGK.V          |              | 2 | 3,1998 | 0,285 | -0,209 |
| 10 | O95639 CPSF4_HUMAN | E.LPM*GTTEQPPLPQQTQPPAK.Q      |              | 3 | 3,1994 | 0,273 | -0,252 |
| 10 | Q9NPI6 DCP1A_HUMAN | R.KASSPSLTIGT#PE.S             | T531:        | 2 | 3,1915 | 0,484 | 0,333  |
| 10 | Q96RS0 TGS1_HUMAN  | E.KCQSVS#SAGELE.T              | S577:        | 2 | 3,1908 | 0,254 | -0,177 |
| 10 | P55072 TERA_HUMAN  | E.TDPSYCVIAPDTVIHCE.G          |              | 2 | 3,189  | 0,466 | 0,118  |
| 10 | Q92597 NDRG1_HUMAN | R.SRT#AS#GSSVSLDGTR.S          | T328:S330:   | 3 | 3,1855 | 1     | 0,315  |
| 10 | Q9NPR2 SEM4B_HUMAN | K.RPLSIQDS#FVE.V               | S808:        | 2 | 3,1825 | 0,436 | 0      |
| 10 | P61978 HNRPK_HUMAN | D.LGGPIITTQVTIPK.D             |              | 2 | 3,1809 | 0,327 | -0,085 |
| 10 | Q13263 TIF1B_HUMAN | K.RSTAPSAASASASAAASS#PAGGGAE.A | S50:         | 3 | 3,1736 | 0,231 | 0,163  |
| 10 | Q15036 SNX17_HUMAN | K.LSSKLS#AVS#LR.G              | S437:S440:   | 2 | 3,1725 | 0,126 | 0      |
| 10 | P25685 DNJB1_HUMAN | K.EGDQTSNNIPADIVFLK.D          |              | 2 | 3,1701 | 0,447 | 0,062  |
| 10 | Q96MW1 CCD43_HUMAN | R.KAALLAQYADV#DE.E             | T139:        | 2 | 3,1693 | 0,28  | -0,615 |
| 10 | P63000 RAC1_HUMAN  | K.LTPITYPQGLAM*AKE.I           |              | 2 | 3,1688 | 0,493 | 0,074  |
| 10 | Q96GX5 MASTL_HUMAN | E.KNQDPANILSACLS#E.T           | S240:        | 2 | 3,1686 | 0,336 | 0,14   |
| 10 | Q6PL18 ATAD2_HUMAN | E.LRNNS#NTCNIENE.L             | S1243:       | 2 | 3,1684 | 0,166 | 0,074  |
| 10 | Q12923 PTN13_HUMAN | E.SQHGS#PS#PSVISK.A            | S1281:S1283: | 2 | 3,1667 | 0,307 | -1,742 |
| 10 | P43246 MSH2_HUMAN  | E.DILFGNNDM*SASIGVVGVK.M       |              | 2 | 3,1665 | 0,464 | 0,188  |

|    |                    |                                     |                    |   |        |       |        |
|----|--------------------|-------------------------------------|--------------------|---|--------|-------|--------|
| 10 | Q5VT52 K0460_HUMAN | R.SLFSPQNTLAAPTGHPPPTSGVE.K         |                    | 3 | 3,1631 | 0,221 | -0,166 |
| 10 | Q9UBF8 PI4KB_HUMAN | R.IRS#TRS#VENLPE.C                  | S425:S428:         | 2 | 3,1621 | 0,335 | -0,156 |
| 10 | O60506 HNRPQ_HUMAN | E.DGALAVLQQFK.D                     |                    | 2 | 3,1619 | 0,434 | -0,103 |
| 10 | Q9UPU5 UBP24_HUMAN | R.HLQQGSE#PM*M*IGE.L                | S1854:             | 2 | 3,1617 | 0,467 | -0,147 |
| 10 | Q09666 AHNK_HUMAN  | K.GHYEVTGS#DDE.T                    | S5841:             | 2 | 3,1598 | 0,376 | -0,189 |
| 10 | Q7Z3B3 K1267_HUMAN | E.YSHGQS#PRS#PISPE.L                | S988:S991:         | 2 | 3,1588 | 0,439 | -0,143 |
| 10 | A8K0Z3 WASH1_HUMAN | E.VLASASPLPPSTAAPVGQGAR.Q           |                    | 3 | 3,1538 | 0,179 | 0,282  |
| 10 | Q14684 RRP1B_HUMAN | E.AIVDQSPFVPEETM*EEQK.T             |                    | 3 | 3,1534 | 0,224 | 0,35   |
| 10 | Q14694 UBP10_HUMAN | E.TKY#SPPAIS#PLVSEK.Q               | Y364:S370:         | 2 | 3,1531 | 0,36  | 0,343  |
| 10 | Q9HCD5 NCOA5_HUMAN | R.LM*RSS#TDS#LPGPISR.Q              | S378:S381:         | 3 | 3,1507 | 0,258 | 0,306  |
| 10 | Q02952 AKA12_HUMAN | K.SAESPT#SPVTS#ETGSTFKK.F           | T285:S290:         | 3 | 3,1484 | 0,32  | 0,348  |
| 10 | Q99700 ATX2_HUMAN  | E.AVAM*PIPAASPTASPASNR.A            |                    | 2 | 3,1471 | 0,425 | 0      |
| 10 | Q5UIP0 RIF1_HUMAN  | K.KADVQAPVS#PSE.T                   | S1772:             | 2 | 3,1414 | 0,317 | 0,093  |
| 10 | P62753 RS6_HUMAN   | R.LSS#LRASTSKS#E.S                  | S236:S244:         | 2 | 3,1392 | 0,43  | -0,171 |
| 10 | Q86W56 PARG_HUMAN  | E.IDVVPESPLSDVGSDEVGTGPK.N          |                    | 2 | 3,1386 | 0,446 | 0,333  |
| 10 | Q9Y6R0 NUMBL_HUMAN | E.AAAAPTVPAGPAQPGHVS#PTPATTSPGKGE.A | S263:              | 3 | 3,1378 | 0,369 | 0,375  |
| 10 | P49756 RBM25_HUMAN | K.LGASNS#PGQPN#VKR.K                | S618:S624:         | 3 | 3,1365 | 0,236 | -0,109 |
| 10 | Q14157 UBP2L_HUMAN | R.RYPSS#ISS#PQKD.L                  | S605:S609:         | 2 | 3,1348 | 1     | -0,076 |
| 10 | O43143 DHX15_HUMAN | E.LGSM*M*AEFPLDPLAK.M               |                    | 2 | 3,1329 | 0,387 | 0,069  |
| 10 | Q9UQ35 SRRM2_HUMAN | K.GQSQT#PDHRS#DTS#SPEVR.Q           | S1064:S1069:S1072: | 3 | 3,1269 | 1     | -0,238 |
| 10 | Q02952 AKA12_HUMAN | E.KAPQVTES#IE.S                     | S1129:             | 2 | 3,1266 | 0,258 | 0,103  |
| 10 | Q14684 RRP1B_HUMAN | E.AIVDQSPFVPEETM*EEQK.T             |                    | 2 | 3,1259 | 0,469 | 0,117  |
| 10 | Q99567 NUP88_HUMAN | K.NQS#PTEAEKPASSSLPSSPPPQLLTR.N     | S35:               | 3 | 3,1237 | 0,242 | 0,196  |
| 10 | Q9BVS4 RIOK2_HUMAN | E.KAEVYGS#ENESE.R                   | S350:              | 2 | 3,1227 | 0,396 | -0,343 |
| 10 | O43432 IF4G3_HUMAN | E.QKLDFIESDS#PCSSE.A                | S1409:             | 2 | 3,1157 | 0,358 | 0,201  |
| 10 | Q9C0C9 UBE2O_HUMAN | E.QLLTGS#PTS#PTVEPEKPTRE.K          | S836:S839:         | 3 | 3,111  | 0,17  | 0,472  |
| 10 | P27816 MAP4_HUMAN  | K.DM*ES#PTKLDVTLAK.D                | S280:              | 2 | 3,1083 | 0,182 | 0,223  |
| 10 | P28290 SSFA2_HUMAN | E.SKLDSDFNIS#HS#ELE.N               | S425:S427:         | 2 | 3,1052 | 0,417 | 0,062  |
| 10 | Q8IZM8 ZN654_HUMAN | K.KCQTLFGFDS#DDESA.-                | S576:              | 2 | 3,1024 | 0,398 | 0,068  |
| 10 | O43166 SI1L1_HUMAN | R.HSAS#PVVFTS#ARS#SPKEE.L           | S1433:S1439:S1442: | 3 | 3,0999 | 1     | -0,255 |
| 10 | Q92785 REQU_HUMAN  | E.GEDKEDS#QPPT#PVSQR.S              | S244:T248:         | 2 | 3,0995 | 0,459 | 0      |
| 10 | Q7Z2W4 ZCCHV_HUMAN | R.SCT#PS#PDQISHR.A                  | T273:S275:         | 2 | 3,0988 | 0,394 | -0,158 |
| 10 | Q9H2G2 SLK_HUMAN   | K.TKDSGS#ISLQE.T                    | S779:              | 2 | 3,0985 | 0,215 | 0      |

|    |                     |                                    |              |   |        |       |        |
|----|---------------------|------------------------------------|--------------|---|--------|-------|--------|
| 10 | Q5T200 ZC3HD_HUMAN  | E.SRS#LS#PSHLTE.D                  | S875:S877:   | 2 | 3,0968 | 0,413 | 0,178  |
| 10 | Q12756 KIF1A_HUMAN  | E.SHGSSAS#SPLSAE.G                 | S1429:       | 2 | 3,096  | 0,452 | 0,176  |
| 10 | Q15139 KPCD1_HUMAN  | R.RLS#NVS#LTGVSTIR.T               | S205:S208:   | 2 | 3,0959 | 0,411 | 0,367  |
| 10 | Q9Y5K6 CD2AP_HUMAN  | R.FNGGHS#PTHS#PE.K                 | S510:S514:   | 2 | 3,0945 | 0,3   | 0      |
| 10 | Q7Z6Z7 HUWE1_HUMAN  | K.TT#PLKPSLPIVDTIKE.V              | T1928:       | 3 | 3,0941 | 0,127 | 0,181  |
| 10 | P21333 FLNA_HUMAN   | E.AIGDDVGTLGFSVEGPSQAK.I           |              | 2 | 3,0921 | 0,432 | 0,125  |
| 10 | Q71U36 TBA1A_HUMAN  | K.VGINYQPPTVVPGGDLAK.V             |              | 2 | 3,0893 | 0,455 | 0,535  |
| 10 | Q9UJX2 CDC23_HUMAN  | R.RVSPLNLSSVT#P.-                  | T590:        | 2 | 3,0881 | 0,352 | 0      |
| 10 | P49736 MCM2_HUMAN   | R.TSGVVTSTCTGVLPQLSM*VK.Y          |              | 3 | 3,083  | 0,136 | 0,37   |
| 10 | P49790 NU153_HUMAN  | K.RIPSIVSS#PLNS#PLDR.S             | S334:S338:   | 3 | 3,081  | 0,153 | 0,383  |
| 10 | Q9Y6M7 S4A7_HUMAN   | K.GNGS#GGS#RENTVDFSK.V             | S400:S403:   | 2 | 3,0796 | 0,188 | -0,066 |
| 10 | Q08211 DHX9_HUMAN   | E.ILPPPDPSPVVALNIGK.L              |              | 3 | 3,0759 | 0,238 | 0,591  |
| 10 | P50851 LRBA_HUMAN   | E.TRNADDLEVS#SDIIE.A               | S1051:       | 2 | 3,0737 | 0,268 | 0      |
| 10 | Q14008 CKAP5_HUMAN  | K.LDDIFEPVLIPEK.I                  |              | 2 | 3,0717 | 0,418 | -0,075 |
| 10 | P98082 DAB2_HUMAN   | K.DISSDAFTALDPLGDKE.I              |              | 2 | 3,0708 | 0,529 | 0      |
| 10 | P19634 SL9A1_HUMAN  | K.IPSAVS#TVS#M*QNIHPK.S            | S602:S605:   | 3 | 3,069  | 0,086 | 0,291  |
| 10 | O00178 GTPB1_HUMAN  | R.SAM*DSPVPASM*FAPEPSSPGAAR.A      |              | 3 | 3,0563 | 0,427 | 0,559  |
| 10 | P49810 PSN2_HUMAN   | E.RTS#LM*S#AESPTPR.S               | S19:S22:     | 3 | 3,0509 | 0,137 | 0,227  |
| 10 | P31939 PUR9_HUMAN   | R.SGVAYIAAPSGSAADKVVIE.A           |              | 2 | 3,0501 | 0,239 | 0,064  |
| 10 | Q96T58 MINT_HUMAN   | K.IKLSVLNS#EDE.L                   | S1333:       | 2 | 3,0494 | 0,308 | 0      |
| 10 | Q5VV67 PPRC1_HUMAN  | E.IVGQAATAGDDLEIPVVVR.Q            |              | 3 | 3,0483 | 0,128 | 0      |
| 10 | B2R8U0 B2R8U0_HUMAN | K.KAAAGPLDM*S#LPST#PDIK.I          | S97:T101:    | 3 | 3,0469 | 0,223 | 0,368  |
| 10 | O15534 PER1_HUMAN   | R.LRGLDSSSTAPS#ALGE.R              | S815:        | 2 | 3,0461 | 0,359 | 0,372  |
| 10 | Q14966 ZN638_HUMAN  | E.KES#PGLKNS#PIDE.S                | S1100:S1106: | 2 | 3,046  | 0,342 | 0,078  |
| 10 | O15355 PPM1G_HUMAN  | K.NLPPEEQM*ISALPDIK.V              |              | 3 | 3,0406 | 0,103 | 0,303  |
| 10 | P07947 YES_HUMAN    | E.NT#PEPVSTSVSHYGAEPSTVSPCPSSSAK.G | T21:         | 3 | 3,038  | 0,143 | 0,3    |
| 10 | Q96HC4 PDLI5_HUMAN  | K.APRPFGSVS#S#PK.V                 | S136:S137:   | 2 | 3,0353 | 0,208 | 0,088  |
| 10 | O15355 PPM1G_HUMAN  | K.NLPPEEQM*ISALPDIK.V              |              | 2 | 3,0306 | 0,347 | 0,337  |
| 10 | Q66K74 MAP1S_HUMAN  | E.LPLAASSIPRPT#PS#PE.S             | T638:S640:   | 3 | 3,0294 | 0,179 | 0,469  |
| 10 | Q17RY0 CPEB4_HUMAN  | E.KQQLS#PSPGQE.A                   | S97:         | 2 | 3,0258 | 0,336 | -0,095 |
| 10 | O75427 LRCH4_HUMAN  | E.AAATTS#VPGS#PGLPGRR.S            | S21:S25:     | 3 | 3,0253 | 0,141 | 0,208  |
| 10 | Q9UL46 PSME2_HUMAN  | R.APLDIPDPKDDDEM*E.T               |              | 2 | 3,0247 | 0,417 | 0,304  |
| 10 | O00161 SNP23_HUMAN  | K.QPGPVTNGQLQQPTTGAASGGYIK.R       |              | 3 | 3,0239 | 0,159 | 0,54   |



|    |                     |                                       |                 |   |        |       |        |
|----|---------------------|---------------------------------------|-----------------|---|--------|-------|--------|
| 10 | Q9BUT9 CP014_HUMAN  | R.RAPSTSPS#FE.G                       | S82:            | 2 | 3,0228 | 0,298 | -0,105 |
| 10 | O43237 DC1L2_HUMAN  | R.RGPLTS#GSDEE.N                      | S203:           | 2 | 3,0205 | 0,26  | 0      |
| 10 | Q13428 TCOF_HUMAN   | R.KSAEPSANTTLVS#ETEE.E                | S171:           | 2 | 3,0204 | 0,397 | 0,326  |
| 10 | Q9UQ35 SRRM2_HUMAN  | R.SSGHSSSELS#PDAVE.K                  | S1387:          | 2 | 3,0191 | 0,387 | -0,311 |
| 10 | Q6ZMI0 CC128_HUMAN  | K.AVLEPIQSTSLIGTLTR.T                 |                 | 2 | 3,0172 | 0,54  | -0,203 |
| 10 | P46531 NOTC1_HUMAN  | R.M*SAM*APTPPQGEVDADCM*DVNVR.G        |                 | 3 | 3,0166 | 0,352 | 0,288  |
| 10 | Q5VZK9 LR16A_HUMAN  | E.NRFGLGT#PE.K                        | T1228:          | 2 | 3,0163 | 0,385 | 0,114  |
| 10 | P06493 CDC2_HUMAN   | E.KIGEGT#Y#GVVYK.G                    | T14:Y15:        | 3 | 3,0095 | 0,361 | 0,496  |
| 10 | Q09666 AHNK_HUMAN   | R.EGAKDIDISS#PE.F                     | S177:           | 2 | 3,0093 | 0,164 | 0,091  |
| 10 | Q9ULU4 PKCB1_HUMAN  | E.SVQQQST#PVPLIS#PKR.Q                | T541:S547:      | 3 | 3,009  | 0,262 | 0,095  |
| 10 | Q13501 SQSTM_HUMAN  | R.SRLTPVS#PESSTEE.K                   | S272:           | 2 | 3,0064 | 0,242 | -0,145 |
| 10 | O94909 K0819_HUMAN  | E.RGPS#QAT#SPIRSPQE.S                 | S292:T295:      | 2 | 3,0063 | 0,351 | -0,069 |
| 10 | P21333 FLNA_HUMAN   | E.DGTFDIFYTAPQPGK.Y                   |                 | 2 | 3,0049 | 0,434 | -0,147 |
| 10 | Q9H1B7 EAP1_HUMAN   | R.RNS#SS#PVSPASVPGQR.R                | S657:S659:      | 2 | 3,0049 | 0,414 | -0,068 |
| 10 | P46020 KPB1_HUMAN   | R.SVRPTDSNVS#PAIS#IHE.I               | S981:S985:      | 2 | 3,0006 | 0,358 | -0,062 |
| 10 | Q5HYI7 MTX3_HUMAN   | E.NNSFQRLS#P.-                        | S311:           | 2 | 2,995  | 0,292 | -0,213 |
| 10 | Q9Y2L1 RRP44_HUMAN  | E.KGALTLSS#PE.V                       | S634:           | 2 | 2,9859 | 0,29  | 0,113  |
| 10 | Q02790 FKBP4_HUMAN  | E.SGAQSAPLPM*EGVDISPKQDE.G            |                 | 3 | 2,9791 | 0,184 | 0,084  |
| 10 | B2R8U0 B2R8U0_HUMAN | K.KAAAGPLDM*S#LPS#TPDIK.I             | S97:S100:       | 2 | 2,9757 | 0,315 | 0,43   |
| 10 | Q16555 DPYL2_HUMAN  | K.TVT#PAS#SAKT#SPAKQQAPPVR.N          | T514:S517:T521: | 3 | 2,9715 | 1     | -0,077 |
| 10 | B2R8U0 B2R8U0_HUMAN | K.AAAGPLDM*SLPSTPDIK.I                |                 | 2 | 2,9639 | 0,541 | 0,072  |
| 10 | Q9GZR1 SENP6_HUMAN  | K.IRLNYSDES#PE.A                      | S919:           | 2 | 2,961  | 0,392 | 0      |
| 10 | Q15058 KIF14_HUMAN  | K.TSNKFGS#LE.K                        | S272:           | 2 | 2,9548 | 0,387 | 0      |
| 10 | O75531 BAF_HUMAN    | D.FVAEPM*GEKPVGSLAGIGE.V              |                 | 2 | 2,9532 | 0,234 | 0,128  |
| 10 | Q14694 UBP10_HUMAN  | E.TKYSPPAIS#PLVSE.K                   | S370:           | 2 | 2,9491 | 0,507 | 0,156  |
| 10 | P30622 CLIP1_HUMAN  | R.AT#SPLCTSTASM*VSSPSTPSNIPQKPSQPAK.E | T146:           | 3 | 2,9483 | 0,127 | 0,536  |
| 10 | Q9H165 BC11A_HUMAN  | K.KLLLS#PSSLS#PFSK.R                  | S625:S630:      | 2 | 2,9471 | 0,419 | -0,142 |
| 10 | P29401 TKT_HUMAN    | K.ILATPPQEDAPSVDIANIR.M               |                 | 3 | 2,9458 | 0,195 | 0,272  |
| 10 | Q7Z6B7 SRGP1_HUMAN  | E.KCM*AGDDYCDSD#PYSE.H                | S717:           | 2 | 2,9453 | 0,228 | 0      |
| 10 | Q9Y2V2 CHSP1_HUMAN  | R.ERS#PS#PLRGNVVPS#PLPTR.R            | S30:S32:S41:    | 2 | 2,9445 | 0,375 | 0,637  |
| 10 | O75531 BAF_HUMAN    | R.DFVAEPM*GEKPVGSLAGIGE.V             |                 | 3 | 2,9418 | 0,339 | 1,359  |
| 10 | Q15003 CND2_HUMAN   | R.KAPLNIPGT#PVLE.D                    | T49:            | 2 | 2,9415 | 0,337 | 0,768  |
| 10 | Q8WXI9 P66B_HUMAN   | E.RGRLT#PS#PDIIVLSDNE.A               | T120:S122:      | 2 | 2,9407 | 0,446 | 0,119  |

|    |                    |                                  |                 |   |        |       |        |
|----|--------------------|----------------------------------|-----------------|---|--------|-------|--------|
| 10 | P05023 AT1A1_HUMAN | R.DKYEPAAVS#E.Q                  | S16:            | 2 | 2,9395 | 0,296 | 0,205  |
| 10 | P12268 IMDH2_HUMAN | E.DLVVAPAGITLKE.A                |                 | 2 | 2,9352 | 0,307 | 0,276  |
| 10 | P46100 ATRX_HUMAN  | R.RPTETNPVTSNS#DEECNE.T          | S677:           | 3 | 2,9301 | 0,218 | 0,339  |
| 10 | Q9Y2K1 ZBTB1_HUMAN | E.NM*RPPNNS#PVQE.D               | S412:           | 2 | 2,9228 | 0,397 | -0,234 |
| 10 | P49810 PSN2_HUMAN  | E.RTS#LM*S#AESPTPR.S             | S19:S22:        | 2 | 2,9204 | 0,195 | -0,152 |
| 10 | Q8TAD8 SNIP1_HUMAN | R.DGDVVLPAVVVKQE.R               |                 | 2 | 2,9194 | 0,306 | 0      |
| 10 | Q8N7H5 PAF1_HUMAN  | R.VTPVEVM*PVFPDFK.M              |                 | 2 | 2,9191 | 0,369 | 0      |
| 10 | Q9Y6M5 ZNT1_HUMAN  | E.KTPAVSIS#CLE.L                 | S468:           | 2 | 2,9151 | 0,191 | 0,19   |
| 10 | Q8N2M8 SFR16_HUMAN | E.KITFITSFGGS#DEE.A              | S320:           | 2 | 2,9144 | 0,394 | -0,151 |
| 10 | P10515 ODP2_HUMAN  | K.VPLPSLSPTM*QAGTIAR.W           |                 | 2 | 2,91   | 0,397 | 0      |
| 10 | Q92734 TFG_HUMAN   | K.QSTQVM*AASM*SAFDPLKNQDE.I      |                 | 2 | 2,9096 | 0,302 | 0,733  |
| 10 | O00425 IF2B3_HUMAN | E.KSITILST#PE.G                  | T249:           | 2 | 2,9087 | 0,117 | 0      |
| 10 | Q15910 EZH2_HUMAN  | R.GRLPNNS#SRPST#PTINVLE.S        | S362:T367:      | 3 | 2,9044 | 0,236 | 0,165  |
| 10 | Q17RY0 CPEB4_HUMAN | E.KQQLSPS#PGQE.A                 | S99:            | 2 | 2,9039 | 0,336 | -0,477 |
| 10 | O75161 NPHP4_HUMAN | R.KPPT#SPSS#PPAPVPR.V            | T477:S481:      | 2 | 2,9028 | 0,424 | -0,437 |
| 10 | Q7Z5K2 WAPL_HUMAN  | K.RPES#PSEIS#PIK.G               | S221:S226:      | 3 | 2,9019 | 0,237 | -0,244 |
| 10 | P47756 CAPZB_HUMAN | E.DLLSSVDQPLK.I                  |                 | 2 | 2,9016 | 0,354 | 0      |
| 10 | P02545 LMNA_HUMAN  | R.LRLS#PSPTS#QR.S                | S390:S395:      | 2 | 2,8996 | 0,318 | -0,174 |
| 10 | Q9UQ35 SRRM2_HUMAN | K.SGT#PPRQGSITS#PQANEQSVT#PQRR.S | T848:S857:T866: | 3 | 2,8949 | 1     | 0,251  |
| 10 | Q01518 CAP1_HUMAN  | R.SGPKPFSAPKPQT#SPS#PKR.A        | T307:S310:      | 3 | 2,8911 | 0,205 | 0,085  |
| 10 | Q8IYA6 CKP2L_HUMAN | E.HDLVVAS#LDE.L                  | S713:           | 2 | 2,8895 | 0,29  | 0,104  |
| 10 | Q15154 PCM1_HUMAN  | R.VTNDIS#PES#SPGVGRR.R           | S65:S68:        | 2 | 2,8889 | 0,307 | 0,466  |
| 10 | Q9NQX3 GEPH_HUMAN  | K.DLVQDPSLLGGTISAYK.I            |                 | 2 | 2,8875 | 0,437 | -0,137 |
| 10 | Q6ZSZ5 ARHGI_HUMAN | K.FKQTADDSLSLTS#PNTE.S           | S209:           | 2 | 2,8859 | 0,257 | 0,631  |
| 10 | Q9Y6W5 WASF2_HUMAN | R.DVVGNVDVATILSR.R               |                 | 2 | 2,8857 | 0,37  | 0,269  |
| 10 | Q9HBW0 LPAR2_HUMAN | E.NGHPLM*DST#L.-                 | T350:           | 2 | 2,8849 | 0,338 | 0,62   |
| 10 | O15027 SC16A_HUMAN | R.LLPSAPQTLPDGPLASPAR.V          |                 | 2 | 2,8826 | 0,405 | 0,385  |
| 10 | Q02952 AKA12_HUMAN | E.AAPDTTADPAIAASDPATK.L          |                 | 2 | 2,879  | 0,268 | 0      |
| 10 | Q9HCD5 NCOA5_HUMAN | R.LM*RSS#TDS#LPGPISR.Q           | S378:S381:      | 2 | 2,8769 | 0,467 | -0,204 |
| 10 | Q6WKZ4 RFIP1_HUMAN | E.KDTAAVVS#RQGS#SLNFLFE.D        | S496:S500:      | 2 | 2,8763 | 0,396 | 0,234  |
| 10 | Q9UGV2 NDRG3_HUMAN | R.THS#TSSS#LGSGESPFPSR.S         | S331:S335:      | 2 | 2,8761 | 1     | 0,065  |
| 10 | Q8NEL9 DDHD1_HUMAN | E.NEGISTIPS#PVTS#PVLRR.H         | S723:S727:      | 3 | 2,8754 | 0,169 | 0,169  |
| 10 | Q09666 AHNK_HUMAN  | E.GAKDIDISS#PE.F                 | S177:           | 2 | 2,8754 | 0,112 | 0,101  |

|    |                    |                                   |                 |   |        |       |        |
|----|--------------------|-----------------------------------|-----------------|---|--------|-------|--------|
| 10 | Q9NTI5 PDS5B_HUMAN | K.GRLDS#SEM*DHS#ENE.D             | S1176:S1182:    | 2 | 2,8742 | 0,324 | 0,068  |
| 10 | O00418 EF2K_HUMAN  | K.LLQSAKT#ILRGT#EE.K              | T348:T353:      | 3 | 2,8715 | 0,196 | 0,213  |
| 10 | O60664 M6PBP_HUMAN | R.VASM*PLISSTCDM*VSAAYASTKE.S     |                 | 3 | 2,8701 | 0,219 | 0,448  |
| 10 | Q01105 SET_HUMAN   | E.IDRLNEQAS#EE.I                  | S63:            | 2 | 2,8694 | 0,266 | 1,499  |
| 10 | Q6P6C2 ALKB5_HUMAN | E.AAAAAAAVAAAAAAAAAAAAEPYPVSGAK.R |                 | 3 | 2,8671 | 0,312 | -0,236 |
| 10 | P50990 TCPQ_HUMAN  | E.DGAISTIVLR.G                    |                 | 2 | 2,8668 | 0,219 | 0,117  |
| 10 | Q9BUK6 MSTO1_HUMAN | K.GSSPLPTATTPKLIPT.E.A            |                 | 2 | 2,8589 | 0,29  | 0,203  |
| 10 | Q8TBX8 PI42C_HUMAN | E.LSQVPPPVM*LLPDDFK.A             |                 | 2 | 2,8589 | 0,145 | 0,539  |
| 10 | P10636 TAU_HUMAN   | E.IVYKS#PVVS#GDTSPR.H             | S713:S717:      | 2 | 2,8576 | 0,431 | -0,277 |
| 10 | Q96D31 CRCM1_HUMAN | R.GDHPLT#PGS#HYA.-                | T295:S298:      | 2 | 2,8531 | 0,429 | -0,346 |
| 10 | P0C7M2 RA1L3_HUMAN | E.DSQRPGAHLTVK.K                  |                 | 3 | 2,8493 | 0,334 | 0,21   |
| 10 | P63165 SUMO1_HUMAN | K.LKVIGQDSS#E.I                   | S32:            | 2 | 2,849  | 0,377 | 0      |
| 10 | O60716 CTND1_HUMAN | E.RGS#LAS#LDSL.R.K                | S346:S349:      | 2 | 2,8457 | 0,478 | 0      |
| 10 | P40763 STAT3_HUMAN | R.LLQTAATAAQGGQANHPTAAVVTE.K      |                 | 3 | 2,8439 | 0,31  | 0,448  |
| 10 | Q14157 UBP2L_HUMAN | R.RYPSS#ISS#PQK.D                 | S605:S609:      | 2 | 2,8416 | 1     | -0,163 |
| 10 | P02545 LMNA_HUMAN  | R.LRLS#PS#PTSQR.S                 | S390:S392:      | 2 | 2,8412 | 0,277 | -0,174 |
| 10 | Q9P246 STIM2_HUMAN | E.TKS#M*IFS#PASK.V                | S661:S665:      | 2 | 2,8409 | 0,373 | -0,978 |
| 10 | Q9C0B5 ZDHC5_HUMAN | R.HPS#Y#RSEPSLEPE.S               | S395:Y396:      | 2 | 2,8398 | 0,151 | 0,145  |
| 10 | O15075 DCLK1_HUMAN | R.SGKSPSPS#PTS#PGSLR.K            | S334:S337:      | 3 | 2,8393 | 0,129 | -0,107 |
| 10 | P62753 RS6_HUMAN   | R.LSS#LRASTSKS#ES#SQK.-           | S236:S244:S246: | 2 | 2,839  | 0,262 | 0,063  |
| 10 | Q9UGP4 LIMD1_HUMAN | R.LPCQPLVPGPELRPSAAE.L            |                 | 2 | 2,8338 | 0,251 | 0,126  |
| 10 | Q9UH99 UN84B_HUMAN | R.LSPAPQLGPSSDAHTSYSE.S           |                 | 2 | 2,8335 | 0,366 | 0,811  |
| 10 | Q16630 CPSF6_HUMAN | R.DYM*DTLPPTVGDDVGK.G             |                 | 2 | 2,8325 | 0,267 | 0,14   |
| 10 | Q3KQU3 MA7D1_HUMAN | K.KAVVQS#PQVTE.V                  | S834:           | 2 | 2,8294 | 0,32  | 0      |
| 10 | Q6P2Q9 PRP8_HUMAN  | K.HGDEIITSTS#NYE.T                | S2060:          | 2 | 2,8285 | 0,291 | 0,445  |
| 10 | P49848 TAF6_HUMAN  | K.LVSTATTAPPSTAPSGPGSVQK.Y        |                 | 2 | 2,8276 | 0,455 | 0,238  |
| 10 | P29374 ARI4A_HUMAN | E.SRSVKS#ES#DITIE.V               | S1021:S1023:    | 2 | 2,8262 | 0,291 | 0,076  |
| 10 | P43897 EFTS_HUMAN  | R.LGQHVVGM*APLSVGLDDEPGGAE.T      |                 | 3 | 2,8174 | 0,171 | 0,959  |
| 10 | Q7Z569 BRAP_HUMAN  | R.SAM*LCILTVPAAM*TSHD.L           |                 | 2 | 2,8145 | 0,443 | 0,132  |
| 10 | Q96AY2 EME1_HUMAN  | E.KIVVVDIS#DCE.A                  | S50:            | 2 | 2,8136 | 0,337 | 0,09   |
| 10 | Q9Y6M7 S4A7_HUMAN  | K.GNGSGGS#RENS#TVDFSK.V           | S403:S407:      | 3 | 2,8135 | 0,121 | 0,197  |
| 10 | Q86UU1 PHLB1_HUMAN | R.TRSPS#PTLGE.S                   | S520:           | 2 | 2,8134 | 0,27  | -0,217 |
| 10 | Q16626 MEA1_HUMAN  | E.VELAPVGDGDVVADIQDR.I            |                 | 3 | 2,8078 | 0,292 | 0,196  |

|    |                    |                             |                 |   |        |       |        |
|----|--------------------|-----------------------------|-----------------|---|--------|-------|--------|
| 10 | P28066 PSA5_HUMAN  | E.YDRGVNTFS#PE.G            | S16:            | 2 | 2,8061 | 0,245 | 0,268  |
| 10 | P68104 EF1A1_HUMAN | E.TGV LKPGM*VVTFAPVNVVTE.V  |                 | 3 | 2,8059 | 0,208 | 0,088  |
| 10 | Q86UE4 LYRIC_HUMAN | E.AAAVPA AAPDDLALLK.N       |                 | 2 | 2,804  | 0,37  | 0,081  |
| 10 | Q99471 PFD5_HUMAN  | E.LLVPLTSSM*YVPGK.L         |                 | 2 | 2,8024 | 0,309 | 0,16   |
| 10 | P61247 RS3A_HUMAN  | E.RADGYEPPVQES#V.-          | S263:           | 2 | 2,8021 | 0,326 | 0,479  |
| 10 | Q15648 MED1_HUMAN  | E.KSYQNSPS#S#DDGIRPLPE.Y    | S1481:S1482:    | 3 | 2,7977 | 1     | 0,34   |
| 10 | O95235 KI20A_HUMAN | E.HSLQVS#PSLE.K             | S532:           | 2 | 2,7964 | 0,347 | 0,104  |
| 10 | P10809 CH60_HUMAN  | R.VTDALNATR.A               |                 | 2 | 2,7958 | 0,351 | 0,063  |
| 10 | P49711 CTCF_HUMAN  | E.IEPEPEPQPVTPAPPPAK.K      |                 | 2 | 2,7892 | 0,318 | 0,064  |
| 10 | Q76L83 ASXL2_HUMAN | E.DRFCLSS#PTE.A             | S1154:          | 2 | 2,7874 | 0,184 | 0,283  |
| 10 | Q02952 AKA12_HUMAN | E.LQSHAKSPPS#PVERE.M        | S1331:          | 3 | 2,7835 | 0,159 | -0,105 |
| 10 | Q96JM3 ZN828_HUMAN | R.KTAPTLS#PE.H              | S405:           | 2 | 2,7814 | 0,327 | 0      |
| 10 | P78332 RBM6_HUMAN  | E.KLQSFDS#PE.R              | S1025:          | 2 | 2,779  | 0,274 | -0,324 |
| 10 | Q9P1Y6 K1542_HUMAN | E.SIFGTEPEPLGPSSAM*SK.L     |                 | 3 | 2,7789 | 0,164 | 0,282  |
| 10 | O75376 NCOR1_HUMAN | R.VSAAVLPLVHPLPE.G          |                 | 2 | 2,7724 | 0,293 | 0      |
| 10 | P62753 RS6_HUMAN   | R.RLS#S#LRAS#TSKSE.S        | S235:S236:S240: | 2 | 2,7724 | 0,119 | -0,22  |
| 10 | Q96Q42 ALS2_HUMAN  | E.NHASTALS#PSTE.T           | S277:           | 2 | 2,7708 | 0,37  | 0,094  |
| 10 | P05388 RLA0_HUMAN  | R.AGAIAPCEVTVPAQNTGLGPEK.T  |                 | 3 | 2,7676 | 0,257 | 0,42   |
| 10 | P42166 LAP2A_HUMAN | K.LREQGTES#RS#STPLPTISSAE.N | S156:S158:      | 2 | 2,7662 | 0,48  | 0,392  |
| 10 | Q5T5C0 STXB5_HUMAN | R.RPVSVS#PSSSQE.I           | S902:           | 2 | 2,7653 | 0,344 | 0,182  |
| 10 | Q14694 UBP10_HUMAN | K.KLLS#PSNE.K               | S547:           | 2 | 2,7637 | 0,164 | 0      |
| 10 | Q96JM3 ZN828_HUMAN | K.SSFFIEPQKPVFPE.T          |                 | 2 | 2,7636 | 0,419 | 0      |
| 10 | P09110 THIK_HUMAN  | K.DGSTTAGNSSQVSDGAAAILLAR.R |                 | 3 | 2,7618 | 0,172 | 0,254  |
| 10 | Q15910 EZH2_HUMAN  | R.GRLPNNSS#RPST#PTINVLE.S   | S363:T367:      | 2 | 2,7615 | 0,248 | 0,441  |
| 10 | Q96QR8 PURB_HUMAN  | E.HYAQLGPSS#PE.Q            | S101:           | 2 | 2,7603 | 0,155 | -0,096 |
| 10 | Q6P0N0 CN106_HUMAN | E.KDYFNSDS#A.-              | S1131:          | 2 | 2,7593 | 0,184 | 0,354  |
| 10 | Q8TAP8 CG047_HUMAN | E.AAAVPGPPPEPQVPQLR.A       |                 | 2 | 2,758  | 0,311 | 0      |
| 10 | Q96T23 RSF1_HUMAN  | K.VGSPLDYSLV DLPSTNGQSPGK.A |                 | 3 | 2,7567 | 0,112 | 0,082  |
| 10 | POC7M2 RA1L3_HUMAN | K.SES#PKEPEQLRK.L           | S6:             | 3 | 2,7561 | 0,18  | 0,182  |
| 10 | O00566 MPP10_HUMAN | D.S#DLDFDISKLE.Q            | S171:           | 2 | 2,7552 | 0,099 | -0,179 |
| 10 | Q5T4S7 UBR4_HUMAN  | R.HVT#LPSS#PR.S             | T2715:S2719:    | 2 | 2,7525 | 0,412 | -0,317 |
| 10 | P62899 RL31_HUMAN  | K.LYTLVTVPVVTTFK.N          |                 | 2 | 2,7522 | 0,325 | -0,074 |
| 10 | P04792 HSPB1_HUMAN | E.SPAVAAPAYSR.A             |                 | 2 | 2,752  | 0,336 | -0,112 |

|    |                      |                               |                    |   |        |       |        |
|----|----------------------|-------------------------------|--------------------|---|--------|-------|--------|
| 10 | Q7Z6Z7 HUWE1_HUMAN   | E.NKGNDD#PLALE.S              | T1722:             | 2 | 2,7465 | 0,393 | 0,097  |
| 10 | P40939 ECHA_HUMAN    | K.DLNSDM*DSILASLK.L           |                    | 2 | 2,7433 | 0,287 | 0,555  |
| 10 | P12004 PCNA_HUMAN    | R.AEDNADTLALVFEAPNQEK.V       |                    | 3 | 2,7392 | 0,273 | 0,088  |
| 10 | Q9UKV3 ACINU_HUMAN   | K.SKS#PS#PPRLTE.D             | S386:S388:         | 2 | 2,7387 | 0,27  | 0,449  |
| 10 | Q99700 ATX2_HUMAN    | E.AVAM*PIPAASPTPASPASNR.A     |                    | 3 | 2,7328 | 0,082 | 0,095  |
| 10 | Q96ST2 IWS1_HUMAN    | R.KAAVLSDS#EDEE.K             | S400:              | 2 | 2,7312 | 0,277 | 0,178  |
| 10 | Q13404 UB2V1_HUMAN   | E.NM*KLPQPPEGQCYS#N.-         | S220:              | 2 | 2,7301 | 0,154 | 0,131  |
| 10 | Q6GMV2 SMYD5_HUMAN   | E.NYLFVCSCP.K                 |                    | 2 | 2,7284 | 0,322 | 0      |
| 10 | ##P05023 AT1A1_HUMAN | E.LY#ANQFADKLE.E              | Y482:              | 2 | 2,7255 | 0,092 | 0,263  |
| 10 | Q7Z6E9 RBBP6_HUMAN   | E.GSSSTLVDTST#SSTGGG#PVRK.S   | T1271:S1277:       | 3 | 2,7245 | 0,112 | -0,078 |
| 10 | Q9H4A3 WNK1_HUMAN    | K.RAS#FAKS#VIGTPE.F           | S378:S382:         | 2 | 2,7242 | 0,285 | 0      |
| 10 | Q8NC44 F134A_HUMAN   | E.SGGFSVS#R.A                 | S326:              | 2 | 2,7195 | 0,376 | 0,348  |
| 10 | P49916 DNL3_HUMAN    | K.DYIPQAFPGGHSM*ILDSE.V       |                    | 2 | 2,7194 | 0,32  | 0,429  |
| 10 | Q96L14 C170L_HUMAN   | E.ALNNM*GFPSAM*LPSPPK.Q       |                    | 2 | 2,7163 | 0,295 | 0      |
| 10 | P55072 TERA_HUMAN    | E.DNSVVSLSQPK.M               |                    | 2 | 2,7155 | 0,385 | 0      |
| 10 | P11388 TOP2A_HUMAN   | K.GSVPLSSPPATHFPDETE.I        |                    | 2 | 2,7107 | 0,325 | 0,374  |
| 10 | Q01082 SPTB2_HUMAN   | K.TALPAQSAATLPAR.T            |                    | 2 | 2,7096 | 0,376 | -0,892 |
| 10 | Q8N2Y8 RUSC2_HUMAN   | E.TSRPS#PLGS#YSPIR.S          | S775:S779:         | 2 | 2,7063 | 0,344 | -0,218 |
| 10 | Q7Z5K2 WAPL_HUMAN    | K.RPES#PSEIS#PIK.G            | S221:S226:         | 2 | 2,7051 | 0,411 | -0,488 |
| 10 | Q9NXN4 GDAP2_HUMAN   | R.KLILQGLS#E.A                | S307:              | 2 | 2,7048 | 0,352 | 0,101  |
| 10 | P68104 EF1A1_HUMAN   | D.AAIVDM*VPGKPM*CVE.S         |                    | 2 | 2,7044 | 0,309 | 0,296  |
| 10 | Q9BRF8 CSTP1_HUMAN   | R.AIPLVLVSGNHDIGNTPTAE.T      |                    | 2 | 2,7034 | 0,427 | 0,363  |
| 10 | P04183 KITH_HUMAN    | R.KLFAPQQILQCS#PAN.-          | S231:              | 3 | 2,7023 | 0,221 | 0,408  |
| 10 | P68104 EF1A1_HUMAN   | K.SGDAIVDMVPGKPM*CVE.S        |                    | 2 | 2,7015 | 0,294 | 0      |
| 10 | Q9UQ35 SRRM2_HUMAN   | K.VKAQT#PPGPSLS#GSKS#PCPQEK.S | T1003:S1010:S1014: | 3 | 2,6976 | 0,125 | 0,073  |
| 10 | Q13435 SF3B2_HUMAN   | R.SRGSDS#PAADVE.I             | S339:              | 2 | 2,6966 | 0,299 | 0      |
| 10 | Q641Q2 FA21A_HUMAN   | R.SRPTS#FADE.L                | S288:              | 2 | 2,6906 | 0,227 | 0,336  |
| 10 | P05362 ICAM1_HUMAN   | R.EPAVGEPAEVTTTLVLR.R         |                    | 2 | 2,6901 | 0,513 | 0      |
| 10 | P14314 GLU2B_HUMAN   | E.ALPTDLPAPSAPDLTEPK.E        |                    | 3 | 2,688  | 0,299 | 0,2    |
| 10 | Q13263 TIF1B_HUMAN   | E.KLSPPYSS#PQE.F              | S757:              | 2 | 2,6862 | 0,32  | -0,093 |
| 10 | Q92576 PHF3_HUMAN    | E.NNLQDNQTSNSS#PCR.S          | S1614:             | 2 | 2,6854 | 0,332 | -0,067 |
| 10 | O43815 STRN_HUMAN    | R.ALAFHPIEPVLITASE.D          |                    | 2 | 2,6809 | 0,406 | 0,071  |
| 10 | Q9UKV3 ACINU_HUMAN   | E.VATPPVPLQVCEPK.E            |                    | 3 | 2,6788 | 0,101 | 0,11   |

|    |                     |                               |                 |   |        |       |        |
|----|---------------------|-------------------------------|-----------------|---|--------|-------|--------|
| 10 | Q9Y6M5 ZNT1_HUMAN   | K.NM*PNKQPES#L.-              | S506:           | 2 | 2,6769 | 0,256 | 0,091  |
| 10 | O75143 K0652_HUMAN  | K.DDILPM*DLGTFYRE.F           |                 | 2 | 2,6745 | 0,395 | -0,215 |
| 10 | Q9ULM3 YETS2_HUMAN  | E.SDISDAPPSLPLTIPAPVK.A       |                 | 2 | 2,6744 | 0,267 | 0,127  |
| 10 | P51858 HDGF_HUMAN   | R.AGDLEDS#PKRPK.E             | S165:           | 3 | 2,6695 | 0,233 | 0,304  |
| 10 | Q9NWH9 SLTM_HUMAN   | R.DRFVQGS#E.G                 | S800:           | 2 | 2,6689 | 0,196 | 0,18   |
| 10 | P49368 TCPG_HUMAN   | E.DIIQLKPDVVITE.K             |                 | 2 | 2,6665 | 0,375 | 0,494  |
| 10 | P24928 RPB1_HUMAN   | K.RVQFGVLS#PDE.L              | S27:            | 2 | 2,6613 | 0,279 | 0,368  |
| 10 | Q15942 ZYX_HUMAN    | R.EKVSS#IDLE.I                | S143:           | 2 | 2,6586 | 0,111 | 0      |
| 10 | P20700 LMNB1_HUMAN  | R.LKLS#PS#PSSR.V              | S391:S393:      | 2 | 2,6553 | 0,273 | -0,297 |
| 10 | Q5VUA4 ZN318_HUMAN  | R.RLS#DRLGS#PVDNLE.D          | S168:S173:      | 2 | 2,6549 | 0,261 | -0,282 |
| 10 | O14744 ANM5_HUMAN   | R.VPLVAPEDLRDDIIE.N           |                 | 2 | 2,6534 | 0,268 | -0,072 |
| 10 | Q9NTK5 OLA1_HUMAN   | E.DGDIIFK.F                   |                 | 2 | 2,6532 | 0,28  | 0,128  |
| 10 | Q9Y2U8 MAN1_HUMAN   | R.ISASGPESLLGGPGGASAAPAAGSK.V |                 | 3 | 2,6516 | 0,138 | 0,26   |
| 10 | P54136 SYRC_HUMAN   | K.AAYPDLENPPLLVTSPQQAK.F      |                 | 3 | 2,6475 | 0,12  | -0,17  |
| 10 | O60841 IF2P_HUMAN   | K.NKPGPNIES#GNE.D             | S214:           | 2 | 2,6473 | 0,333 | -0,091 |
| 10 | Q9UJ14 GGT7_HUMAN   | E.DAFLGDPDTPDSFLK.S           |                 | 2 | 2,6461 | 0,378 | -0,209 |
| 10 | O00418 EF2K_HUMAN   | K.LLQSAKT#ILRG#EE.K           | T348:T353:      | 2 | 2,6454 | 0,189 | 0,071  |
| 10 | A8K5L5 A8K5L5_HUMAN | E.SQLDGS#LIS#RR.A             | S470:S473:      | 2 | 2,6438 | 0,37  | 0,351  |
| 10 | Q7Z7L8 AG2_HUMAN    | K.KSFLQS#LE.C                 | S399:           | 2 | 2,6437 | 0,116 | 0      |
| 10 | O43399 TPD54_HUMAN  | R.NSATFKS#FE.D                | S166:           | 2 | 2,6358 | 0,218 | 0      |
| 10 | P26358 DNMT1_HUMAN  | R.VPTLAVPAISLPDDVR.R          |                 | 2 | 2,6358 | 0,429 | -0,22  |
| 10 | Q9NZ63 CI078_HUMAN  | R.VGDTEKPEPERS#PPNR.K         | S261:           | 3 | 2,6349 | 0,106 | -0,194 |
| 10 | Q15785 TOM34_HUMAN  | K.NRVPS#AGDVE.K               | S186:           | 2 | 2,6333 | 0,347 | 0      |
| 10 | O94842 TOX4_HUMAN   | R.LST#TPS#PTSS#LHEDGVEDFRR.Q  | T175:S178:S182: | 3 | 2,6329 | 1     | 0,498  |
| 10 | O43237 DC1L2_HUMAN  | R.KPDSM*VTNSS#TENEA.-         | S487:           | 2 | 2,6295 | 0,177 | 0      |
| 10 | P43243 MATR3_HUMAN  | R.CRDDS#FFGE.T                | S234:           | 2 | 2,6244 | 0,242 | 0,201  |
| 10 | P06400 RB_HUMAN     | K.LRFDIEGS#DEAD.G             | S882:           | 2 | 2,6243 | 0,417 | 0,084  |
| 10 | Q5VUA4 ZN318_HUMAN  | K.DKLC#PLS#EPGDPSK.C          | S2189:S2192:    | 2 | 2,624  | 0,137 | 0,136  |
| 10 | O60271 JIP4_HUMAN   | K.ATTPASTANSDVATIPTDTPLKEE.N  |                 | 3 | 2,6211 | 0,213 | -0,075 |
| 10 | Q9H1E3 NUCKS_HUMAN  | R.LKATVTPS#PVKKG.G            | S181:           | 3 | 2,619  | 0,211 | 0,195  |
| 10 | P42167 LAP2B_HUMAN  | E.HNQS#YSQAGITE.T             | S222:           | 2 | 2,6178 | 0,262 | -0,259 |
| 10 | P48730 KC1D_HUMAN   | R.GLPS#T#ASGR.LR.G            | S328:T329:      | 2 | 2,6132 | 0,314 | 0,096  |
| 10 | Q13367 AP3B2_HUMAN  | E.KAFYGS#EEDE.A               | S272:           | 2 | 2,6087 | 0,3   | -0,194 |

|    |                     |                                    |                    |   |        |       |        |
|----|---------------------|------------------------------------|--------------------|---|--------|-------|--------|
| 10 | Q9Y2X9 ZN281_HUMAN  | E.KQIYTT#PLE.C                     | S714:              | 2 | 2,6053 | 0,319 | 0,194  |
| 10 | Q14978 NOLC1_HUMAN  | K.IKLQT#PNT#FPK.R                  | T607:T610:         | 2 | 2,6031 | 0,341 | 0,169  |
| 10 | Q8IWZ2 Q8IWZ2_HUMAN | R.GHNSSNS#PSLQAGGAE.G              | S2598:             | 2 | 2,6015 | 0,264 | 0      |
| 10 | P78356 PI42B_HUMAN  | E.LSNVVPVPM*LM*PDDFK.A             |                    | 2 | 2,6006 | 0,329 | 0,067  |
| 10 | Q8N122 RPTOR_HUMAN  | R.LRSVS#S#YGNIR.A                  | S721:S722:         | 3 | 2,5998 | 0,266 | -0,065 |
| 10 | Q01082 SPTB2_HUMAN  | R.TS#SKES#SPIPS#PTSDRK.A           | S2160:S2164:S2169: | 3 | 2,5963 | 1     | -0,179 |
| 10 | Q9NYF3 FA53C_HUMAN  | R.RFS#LS#PSLGPQASR.F               | S232:S234:         | 3 | 2,5931 | 0,118 | 0,11   |
| 10 | Q9BST9 RTKN_HUMAN   | R.LATKLS#SS#LGR.S                  | S218:S220:         | 2 | 2,5862 | 0,199 | 0,094  |
| 10 | Q9Y4E6 WDR7_HUMAN   | E.ASRPNTALIS#PE.N                  | S716:              | 2 | 2,5841 | 0,111 | 0,183  |
| 10 | O14646 CHD1_HUMAN   | R.ASS#S#GPRSPDQR.S                 | S1672:S1673:       | 3 | 2,5819 | 0,216 | 0,181  |
| 10 | Q8WU79 SMAP2_HUMAN  | R.KVVGSM*PTAGSAGS#VPE.N            | S240:              | 2 | 2,5784 | 0,31  | 0,146  |
| 10 | Q5M775 SPEC1_HUMAN  | E.TPSRPLS#S#TSNPFK.S               | S344:S345:         | 2 | 2,5755 | 0,279 | 0,218  |
| 10 | P51858 HDGF_HUMAN   | R.AGDLEDS#PKRPK.E                  | S165:              | 2 | 2,574  | 0,237 | 0      |
| 10 | Q9Y2V2 CHSP1_HUMAN  | R.ERS#PS#PLRGNVPS#PLPTR.R          | S30:S32:S41:       | 3 | 2,5731 | 0,348 | 0,557  |
| 10 | Q92574 TSC1_HUMAN   | R.LM*LLNM*PGQLPQTLSSPSTR.L         |                    | 3 | 2,5672 | 0,162 | 0,33   |
| 10 | Q14978 NOLC1_HUMAN  | K.LQT#PNT#FPKR.K                   | T607:T610:         | 2 | 2,5638 | 0,322 | -0,269 |
| 10 | P41162 ETV3_HUMAN   | R.YPGLM*VPPLQCQM*HPEE.S            |                    | 2 | 2,5572 | 0,141 | 0,237  |
| 10 | P35611 ADDA_HUMAN   | R.TTSAVPNLFVPLNTNPK.E              |                    | 2 | 2,5563 | 0,354 | 0,064  |
| 10 | P20700 LMNB1_HUMAN  | R.LKLS#PSPS#SR.V                   | S391:S395:         | 2 | 2,5515 | 0,174 | 0      |
| 10 | Q9NQS7 INCE_HUMAN   | R.VLAPILPDNFSTPTGSR.T              |                    | 2 | 2,5492 | 0,346 | -0,068 |
| 10 | Q6PGQ7 BORA_HUMAN   | E.NSHM*CM*S#PLAE.S                 | S478:              | 2 | 2,5475 | 0,195 | 0      |
| 10 | Q5TBA9 FRY_HUMAN    | E.HSDLIM*TLS#PSEE.T                | S2544:             | 2 | 2,5451 | 0,185 | 0,314  |
| 10 | Q9H3C7 GGNB2_HUMAN  | K.NVPQFAEPTETLFGPDSGK.G            |                    | 2 | 2,5436 | 0,351 | -0,48  |
| 10 | Q5JVS0 HABP4_HUMAN  | R.KPANDITS#QLE.I                   | S355:              | 2 | 2,543  | 0,228 | -0,565 |
| 10 | O15427 MOT4_HUMAN   | E.VVHTPETS#V.-                     | S464:              | 2 | 2,5428 | 0,548 | 0,116  |
| 10 | Q9UJM3 ERRFI_HUMAN  | K.SLPSYLNQVM*PPTQSFAPDPK.Y         |                    | 3 | 2,5421 | 0,264 | -0,323 |
| 10 | P19838 NFKB1_HUMAN  | K.TTSAHS#LPLS#PASTR.Q              | S903:S907:         | 2 | 2,5344 | 0,186 | 0,067  |
| 10 | O75694 NU155_HUMAN  | K.AAPQS#PSVPPKPGPPVLSSDPNM*LSNEE.A | S992:              | 3 | 2,5319 | 0,097 | 0,493  |
| 10 | P51116 FXR2_HUMAN   | K.AGYST#DESS#SSSLHATR.T            | T411:S415:         | 2 | 2,5306 | 1     | 0      |
| 10 | Q15796 SMAD2_HUMAN  | R.VETPVLPPVLVPR.H                  |                    | 2 | 2,5285 | 0,354 | -0,172 |
| 10 | O15014 ZN609_HUMAN  | R.LVEPHS#PS#PSSK.F                 | S576:S578:         | 2 | 2,528  | 0,266 | -0,257 |
| 10 | P18669 PGAM1_HUMAN  | R.S#YDVPPPPM*EPDHPFYSNISK.D        | S118:              | 2 | 2,5266 | 0,254 | 0,583  |
| 10 | Q8IYI6 EXOC8_HUMAN  | R.RQLES#GGFE.A                     | S19:               | 2 | 2,5227 | 0,337 | 0,332  |

|    |                     |                                  |                    |   |        |       |        |
|----|---------------------|----------------------------------|--------------------|---|--------|-------|--------|
| 10 | P49736 MCM2_HUMAN   | R.RGLLYDS#DEE.D                  | S139:              | 2 | 2,5188 | 0,348 | 0,096  |
| 10 | Q32MZ4 LRRF1_HUMAN  | R.RGS#GDTSISIDTE.A               | S120:              | 2 | 2,5188 | 0,207 | 0,516  |
| 10 | Q7LBC6 JHD2B_HUMAN  | R.HSGGFLSS#PADFSQE.N             | S779:              | 2 | 2,5085 | 0,219 | 0      |
| 10 | Q96Q15 SMG1_HUMAN   | E.LRVNNVTS#PE.F                  | S111:              | 2 | 2,5083 | 0,207 | -0,303 |
| 10 | Q9Y4H2 IRS2_HUMAN   | R.QRPVPQPSSAS#LDE.Y              | S594:              | 2 | 2,5082 | 0,395 | -0,153 |
| 10 | P42566 EP15_HUMAN   | E.SEPIHQES#PARS#SPE.L            | S558:S562:         | 2 | 2,507  | 0,21  | -0,135 |
| 10 | P06576 ATPB_HUMAN   | E.LGIYPAVDPLDSTR.I               |                    | 2 | 2,5037 | 0,341 | 0,609  |
| 10 | Q7Z3B3 K1267_HUMAN  | E.LHS#APLT#PVAR.D                | S999:T1003:        | 2 | 2,5    | 0,181 | -0,554 |
| 10 | P10809 CH60_HUMAN   | K.LVQDVANNTNEE.A                 |                    | 2 | 2,4973 | 0,241 | 0,181  |
| 10 | P27987 IP3KB_HUMAN  | R.ARS#PS#PCPFR.S                 | S174:S176:         | 2 | 2,4962 | 0,089 | -0,274 |
| 10 | Q96R06 SPAG5_HUMAN  | E.KGVNTS#VM*LE.N                 | S353:              | 2 | 2,493  | 0,228 | -0,104 |
| 10 | Q96BT3 CENPT_HUMAN  | E.LEPPTTLAPGLLAPGR.R             |                    | 2 | 2,4928 | 0,403 | 0,228  |
| 10 | Q9Y2K1 ZBTB1_HUMAN  | E.NM*RPPNNS#SPVQEDAE.N           | S411:              | 2 | 2,4918 | 0,382 | 0,259  |
| 10 | Q96PD2 DCBD2_HUMAN  | K.ATGNQPPPLVGTYNLLSR.T           |                    | 2 | 2,4866 | 0,3   | 0,183  |
| 10 | Q01082 SPTB2_HUMAN  | R.TSSKES#PIPS#PTSDR.K            | S2165:S2169:       | 2 | 2,4865 | 0,228 | 0      |
| 10 | Q9UKL3 C8AP2_HUMAN  | E.AIS#PLNS#PVRPVAK.V             | S858:S862:         | 2 | 2,4847 | 0,113 | -0,379 |
| 10 | P61158 ARP3_HUMAN   | R.HNPVFGVM*S#.-                  | S418:              | 2 | 2,4802 | 0,414 | 0,113  |
| 10 | Q9H307 PININ_HUMAN  | K.LTEVPVEPVLTVHPE.S              |                    | 2 | 2,479  | 0,182 | 0,368  |
| 10 | P62753 RS6_HUMAN    | R.LSSLRAS#TSKS#E.S               | S240:S244:         | 2 | 2,4782 | 0,185 | -0,171 |
| 10 | O15270 SPTC2_HUMAN  | E.DSPVVPLM*LYM*PAK.I             |                    | 2 | 2,4779 | 0,221 | 0,077  |
| 10 | Q13459 MYO9B_HUMAN  | R.VSPAPGS#APET#PEDKSKPCGS#PR.V   | S1267:T1271:S1281: | 3 | 2,4775 | 0,301 | 0,136  |
| 10 | O43166 SI1L1_HUMAN  | K.KLIDLES#PTPE.S                 | S1549:             | 2 | 2,4757 | 0,217 | 0,092  |
| 10 | A7MD40 A7MD40_HUMAN | E.KM*SSAIS#PTPE.I                | S387:              | 2 | 2,4733 | 0,304 | -0,098 |
| 10 | P45974 UBP5_HUMAN   | E.LPDIAPPLVTPDEPK.G              |                    | 2 | 2,4705 | 0,31  | 0,305  |
| 10 | O00161 SNP23_HUMAN  | R.AHQITDES#LE.S                  | S20:               | 2 | 2,4662 | 0,217 | -0,1   |
| 10 | Q9P107 GMIP_HUMAN   | R.GRGPS#PAAASPE.G                | S914:              | 2 | 2,4645 | 0,218 | -0,207 |
| 10 | Q01082 SPTB2_HUMAN  | E.S#SPIPSPT#SDRK.A               | S2164:T2171:       | 2 | 2,4626 | 0,436 | -0,17  |
| 10 | O95470 SGPL1_HUMAN  | E.LSSVFLDSLSTDTVQGSQM*NGS#PKPH.- | S564:              | 3 | 2,4604 | 0,149 | 0,237  |
| 10 | Q6S8J3 A26CA_HUMAN  | K.AGFAGDDAPR.A                   |                    | 2 | 2,4586 | 0,288 | 0      |
| 10 | Q06265 EXOS9_HUMAN  | E.KAPIDTS#DVEE.K                 | S306:              | 2 | 2,4575 | 0,389 | 0,19   |
| 10 | Q9H9R9 DBND1_HUMAN  | R.RQPLSS#VSSLE.V                 | S64:               | 2 | 2,457  | 0,299 | 0      |
| 10 | Q9UKM9 RALY_HUMAN   | E.HSQDT#DADDGALQ.-               | T298:              | 2 | 2,4536 | 0,241 | -0,252 |
| 10 | Q9Y3B9 RRP15_HUMAN  | R.DDFM*M*GASM*K.D                |                    | 2 | 2,4527 | 0,317 | 0,103  |



|    |                    |                                |              |   |        |       |        |
|----|--------------------|--------------------------------|--------------|---|--------|-------|--------|
| 10 | P14314 GLU2B_HUMAN | E.ALPTDLPAPSAPDLTEPK.E         |              | 2 | 2,4497 | 0,101 | 0,067  |
| 10 | Q96RT6 CTGE2_HUMAN | E.DGAYLDNPPK.G                 |              | 2 | 2,4427 | 0,261 | -0,56  |
| 10 | Q9UL54 TAOK2_HUMAN | E.ITPSPLQPPAAPAPTSTSSAR.R      |              | 2 | 2,4389 | 0,273 | 0,568  |
| 10 | Q9Y4P1 ATG4B_HUMAN | E.RFFDS#EDE.D                  | S383:        | 2 | 2,4366 | 0,293 | 0,325  |
| 10 | Q13029 PRDM2_HUMAN | E.RETVS#PPCFDE.Y               | S796:        | 2 | 2,4356 | 0,226 | 0,344  |
| 10 | Q9H6F5 CCD86_HUMAN | R.AGLGS#PERPPKTS#PGS#PR.L      | S58:S66:S69: | 2 | 2,4347 | 0,153 | 0,06   |
| 10 | O95359 TACC2_HUMAN | E.TKFSS#PTEE.L                 | S2512:       | 2 | 2,4336 | 0,256 | 0      |
| 10 | O00443 P3C2A_HUMAN | E.KLLDDSD#FE.T                 | S108:        | 2 | 2,4277 | 0,233 | -0,105 |
| 10 | Q86T24 KAISO_HUMAN | K.M*QIPTLLQEPLSNLKI            |              | 2 | 2,4259 | 0,251 | 0      |
| 10 | Q70E73 RAPH1_HUMAN | E.ISEQPTM*ATVVPQVPTSPK.S       |              | 2 | 2,4255 | 0,263 | 0      |
| 10 | P10244 MYBB_HUMAN  | R.RVALS#PVTE.N                 | S421:        | 2 | 2,4208 | 0,281 | 0,232  |
| 10 | Q6PJG2 CN043_HUMAN | E.DSGM*VPLIIPVSVPR.T           |              | 2 | 2,4199 | 0,386 | -0,216 |
| 10 | P05387 RLA2_HUMAN  | E.DVIAQGIGK.L                  |              | 2 | 2,4086 | 0,194 | 0,203  |
| 10 | Q9UJX2 CDC23_HUMAN | E.VPAPFFLPASLSANNTPTR.R        |              | 3 | 2,4051 | 0,138 | -0,091 |
| 10 | Q9P1Y6 K1542_HUMAN | E.AS#PAPLAQGEPGREDLPTRLPALGE.A | S1202:       | 3 | 2,4041 | 0,239 | 0,07   |
| 10 | Q9ULH7 MKL2_HUMAN  | R.EQLVDQGIM*PPLKS#PAAFHE.Q     | S66:         | 3 | 2,3975 | 0,195 | 0,556  |
| 10 | Q8TB72 PUM2_HUMAN  | K.GKAS#PFEE.D                  | S136:        | 2 | 2,3974 | 0,199 | 0,323  |
| 10 | Q9BQG0 MBB1A_HUMAN | E.SRDPAQPM*S#PGE.A             | S11:         | 2 | 2,3955 | 0,264 | -0,178 |
| 10 | O43237 DC1L2_HUMAN | R.RGPLTSGS#DEE.N               | S205:        | 2 | 2,3954 | 0,126 | -0,497 |
| 10 | P30837 AL1B1_HUMAN | K.TFPTVNPTTGEVIGHVAE.G         |              | 2 | 2,394  | 0,34  | -0,065 |
| 10 | Q86U44 MTA70_HUMAN | R.SDSPVPTAPTSGGPKPSTASAVPE.L   |              | 2 | 2,3919 | 0,134 | 0,109  |
| 10 | Q96PM5 ZN363_HUMAN | R.RIS#LDQQ.-                   | S257:        | 2 | 2,3896 | 0,261 | -0,13  |
| 10 | P63104 1433Z_HUMAN | E.KFLIPNAS#QAE.S               | S110:        | 2 | 2,3889 | 0,106 | -0,376 |
| 10 | P83369 LSM11_HUMAN | R.SAGAGS#PARPPS#PR.L           | S15:S21:     | 2 | 2,3853 | 0,259 | -0,166 |
| 10 | Q16825 PTN21_HUMAN | R.RPVVGAVS#VPE.L               | S538:        | 2 | 2,3788 | 0,234 | 0      |
| 10 | P51116 FXR2_HUMAN  | K.AGYST#DES#SSSSLHATR.T        | T411:S414:   | 3 | 2,3764 | 0,287 | -0,382 |
| 10 | Q9HCD5 NCOA5_HUMAN | R.LM*RS#STDS#LPGPISR.Q         | S377:S381:   | 2 | 2,3753 | 0,281 | -0,408 |
| 10 | Q86XP3 DDX42_HUMAN | K.DIPVLVATDVAAR.G              |              | 2 | 2,3716 | 0,271 | 0,273  |
| 10 | Q9BZ95 NSD3_HUMAN  | E.HDPM*APVS#PE.Y               | S1415:       | 2 | 2,3682 | 0,268 | -0,104 |
| 10 | Q9H1E3 NUCKS_HUMAN | K.ATVT#PS#PVKGGK.G             | T179:S181:   | 2 | 2,3673 | 0,443 | -0,098 |
| 10 | P06400 RB_HUMAN    | E.GLPT#PTKM*#PR.S              | T821:T826:   | 2 | 2,3579 | 0,244 | 0,089  |
| 10 | Q15036 SNX17_HUMAN | K.LSSKLS#AVS#LR.G              | S437:S440:   | 3 | 2,3542 | 0,128 | 0,485  |
| 10 | O75531 BAF_HUMAN   | E.KPVGSLAGIGE.V                |              | 2 | 2,3493 | 0,277 | -0,119 |

|    |                     |                                  |                    |   |        |       |        |
|----|---------------------|----------------------------------|--------------------|---|--------|-------|--------|
| 10 | Q00613 HSF1_HUMAN   | E.LAPASPM*ASPGGSIDERPLSSS#PLVR.V | S292:              | 3 | 2,3484 | 0,268 | 0,272  |
| 10 | Q86TB9 PATL1_HUMAN  | R.RST#SPIIGS#PPVR.A              | T178:S184:         | 2 | 2,3457 | 0,16  | 0,32   |
| 10 | P62805 H4_HUMAN     | R.DAVTYTEHAK.R                   |                    | 2 | 2,345  | 0,353 | -0,215 |
| 10 | P24941 CDK2_HUMAN   | R.AFGVPVRT#YT#HE.V               | T158:T160:         | 2 | 2,3395 | 0,112 | 0      |
| 10 | Q7Z4S6 KI21A_HUMAN  | E.ASL#PPSSPPS#RPR.N              | S1271:S1278:       | 2 | 2,3392 | 0,095 | -0,459 |
| 10 | Q9H7D0 DOCK5_HUMAN  | R.KSGIPTSEPGS#Q.-                | S1869:             | 2 | 2,3388 | 0,166 | 0      |
| 10 | P98168 ZXDA_HUMAN   | E.VSSVSVGPLGSLDSLAM*K.N          |                    | 2 | 2,337  | 0,246 | 0      |
| 10 | Q14157 UBP2L_HUMAN  | R.RYPSS#ISSS#PQKD.L              | S605:S609:         | 3 | 2,3317 | 0,161 | 0,567  |
| 10 | Q9BY89 K1671_HUMAN  | R.VHSEAIS#PAPE.E                 | S749:              | 2 | 2,3317 | 0,299 | -0,1   |
| 10 | Q13200 PSMD2_HUMAN  | E.DVLTLLLPVM*GDSK.S              |                    | 2 | 2,3211 | 0,419 | -0,161 |
| 10 | Q9BRS8 LARP6_HUMAN  | E.M*GTQEK#PGTS#PLLSR.K           | S447:S451:         | 3 | 2,3207 | 0,088 | -0,687 |
| 10 | O60716 CTND1_HUMAN  | R.GSLAS#LDS#LRK.G                | S349:S352:         | 2 | 2,3197 | 0,085 | 0      |
| 10 | Q6NZI2 PTRF_HUMAN   | R.RGSS#PDVHALLE.I                | S366:              | 2 | 2,3192 | 0,231 | 0      |
| 10 | Q6ZNP1 Q6ZNP1_HUMAN | K.EKPCVS#PTVGE.K                 | S325:              | 2 | 2,3147 | 0,414 | 0      |
| 10 | Q96A65 EXOC4_HUMAN  | K.DASVPLIDVTNLPTPR.K             |                    | 2 | 2,3131 | 0,283 | 0,143  |
| 10 | Q14247 SRC8_HUMAN   | E.RLPSS#PVYE.D                   | S418:              | 2 | 2,3123 | 0,34  | -0,325 |
| 10 | P36507 MP2K2_HUMAN  | R.LNQPGT#PTR.T                   | T394:              | 2 | 2,3077 | 0,143 | -0,115 |
| 10 | Q01082 SPTB2_HUMAN  | R.TSSKES#SPIPS#PT#SDRK.A         | S2164:S2169:T2171: | 2 | 2,3075 | 1     | 0,119  |
| 10 | Q14568 HS902_HUMAN  | E.SSAGGSFTVR.T                   |                    | 2 | 2,3074 | 0,235 | -0,063 |
| 10 | Q9BUT9 CP014_HUMAN  | R.RAPSTS#PSFE.G                  | S80:               | 2 | 2,2987 | 0,335 | -0,105 |
| 10 | Q9UPS6 SET1B_HUMAN  | R.APAPPPLPPAEPLAK.E              |                    | 2 | 2,2948 | 0,332 | 0,25   |
| 10 | Q96N67 DOCK7_HUMAN  | K.IDISPAPENPHYCLTPE.L            |                    | 2 | 2,2861 | 0,093 | 0,125  |
| 10 | Q01082 SPTB2_HUMAN  | E.S#SPIPS#PTSDRK.A               | S2164:S2169:       | 2 | 2,2841 | 0,225 | -0,256 |
| 10 | Q9NZI8 IF2B1_HUMAN  | R.LLVPTQYVGAIIIGKE.G             |                    | 2 | 2,2661 | 0,474 | -0,229 |
| 10 | Q9Y2U5 M3K2_HUMAN   | K.ASRPALS#LQE.T                  | S26:               | 2 | 2,2606 | 0,186 | -0,212 |
| 10 | Q9Y5B9 SP16H_HUMAN  | E.DGPATVLTSVK.K                  |                    | 2 | 2,26   | 0,38  | 0      |
| 10 | Q15942 ZYG_HUMAN    | E.GGPEAPIPPPPQPR.E               |                    | 2 | 2,2581 | 0,334 | 0,087  |
| 10 | P08670 VIME_HUMAN   | R.DNLAEDIM*R.L                   |                    | 2 | 2,2574 | 0,255 | 0      |
| 10 | Q9UK76 HN1_HUMAN    | R.RNS#SEASSGDFLDLK.G             | S87:               | 2 | 2,2561 | 0,222 | 0,358  |
| 10 | Q92734 TFG_HUMAN    | D.QVSGPPSAPAEDR.S                |                    | 2 | 2,2544 | 0,266 | 0,093  |
| 10 | P51946 CCNH_HUMAN   | K.VLPNDPVFLEPHEE.M               |                    | 2 | 2,2486 | 0,187 | 0,149  |
| 10 | Q09666 AHNK_HUMAN   | E.VHAQLPS#LE.G                   | S5261:             | 2 | 2,2468 | 0,194 | -0,114 |
| 10 | Q9BTL3 F103A_HUMAN  | K.RPPES#PPIVEE.W                 | S36:               | 2 | 2,2455 | 0,254 | -0,183 |

|    |                      |                          |              |   |        |       |        |
|----|----------------------|--------------------------|--------------|---|--------|-------|--------|
| 10 | O15355 PPM1G_HUMAN   | R.KLEEVLS#TE.G           | S527:        | 2 | 2,2448 | 0,099 | 0      |
| 10 | Q15149 PLEC1_HUMAN   | R.VVIVDPETGKEM*SVYE.A    |              | 2 | 2,2447 | 0,211 | 0,135  |
| 10 | Q9HCM1 CL035_HUMAN   | K.RSFS#ADGFE.M           | S1708:       | 2 | 2,2442 | 0,218 | 0,334  |
| 10 | O75396 SC22B_HUMAN   | R.RNLGS#INTE.L           | S137:        | 2 | 2,2439 | 0,261 | -0,45  |
| 10 | Q96JM3 ZN828_HUMAN   | E.IRSPAGS#PE.L           | S436:        | 2 | 2,2428 | 0,31  | 0      |
| 10 | Q06210 GFPT1_HUMAN   | R.VIFLEDDDDVAAVVDGR.L    |              | 2 | 2,2397 | 0,333 | -0,211 |
| 10 | Q9UMX3 BOK_HUMAN     | R.RSS#VFAAE.I            | S8:          | 2 | 2,2392 | 0,206 | 0,258  |
| 10 | Q5TCU3 Q5TCU3_HUMAN  | E.IHQTLDCQT#LLE.L        | T277:        | 2 | 2,2363 | 0,103 | 0      |
| 10 | Q8IWC1 MA7D3_HUMAN   | K.ESVKGS#PKESM*EAS#PE.A  | S433:S441:   | 2 | 2,2341 | 0,328 | -0,065 |
| 10 | Q5T230 UTF1_HUMAN    | R.RPAS#PSALGE.L          | S42:         | 2 | 2,2313 | 0,212 | -0,115 |
| 10 | Q14126 DSG2_HUMAN    | K.GSS#S#ASIVKGQHE.M      | S700:S701:   | 2 | 2,2282 | 0,27  | -0,337 |
| 10 | P06576 ATPB_HUMAN    | R.FLSQPFQVAE.V           |              | 2 | 2,2277 | 0,168 | 0,105  |
| 10 | Q96JM3 ZN828_HUMAN   | R.KPGPPLS#PE.I           | S427:        | 2 | 2,2261 | 0,111 | 0      |
| 10 | Q8IZV2 CKLF8_HUMAN   | R.SHTVTTTAS#SFAE.N       | S17:         | 2 | 2,2251 | 0,154 | 0,344  |
| 10 | P68104 EF1A1_HUMAN   | K.SGDAAIVDM*VPGKPMCVE.S  |              | 2 | 2,2219 | 0,152 | 0,516  |
| 10 | ##Q96CK0 ZN653_HUMAN | E.LLGDADM*VRS#RKS#R.R    | S161:S164:   | 2 | 2,2216 | 0,185 | -0,206 |
| 10 | Q9HC35 EMAL4_HUMAN   | R.AS#PS#PQPSSQPLQIHR.Q   | S144:S146:   | 2 | 2,2151 | 0,372 | 0,194  |
| 10 | Q13501 SQSTM_HUMAN   | R.SRLTPVS#PE.S           | S272:        | 2 | 2,2106 | 0,212 | 0,114  |
| 10 | Q00587 BORG5_HUMAN   | R.M*ASPPAPSPAPPAISPIIK.N |              | 2 | 2,2102 | 0,374 | 0,328  |
| 10 | Q00613 HSF1_HUMAN    | E.GRPPSPPTS#T#PEK.C      | S368:T369:   | 2 | 2,2082 | 0,146 | -0,152 |
| 10 | Q9C0C2 TB182_HUMAN   | R.HNGSLS#PGLA.A          | S1385:       | 2 | 2,1995 | 0,179 | 0      |
| 10 | Q8WYP5 AHTF1_HUMAN   | R.STPLAS#PSPS#PGRSPQR.L  | S1223:S1227: | 2 | 2,1975 | 0,425 | -0,065 |
| 10 | Q9UBQ7 GRHPR_HUMAN   | K.VISTM*SVGIDHLALDE.I    |              | 2 | 2,1961 | 0,177 | 0      |
| 10 | Q9NSI2 CU070_HUMAN   | E.LDVRS#VTS#VR.R         | S73:S76:     | 2 | 2,1933 | 0,112 | -0,189 |
| 10 | Q32MZ4 LRRF1_HUMAN   | R.KALDS#NSLE.N           | S766:        | 2 | 2,1923 | 0,083 | -0,231 |
| 10 | O43765 SGTA_HUMAN    | R.S#QIRS#RTPSASNDDQQE.-  | S297:S301:   | 2 | 2,1922 | 0,176 | 0,117  |
| 10 | P62736 ACTA_HUMAN    | R.DLTDYLM*K.I            |              | 2 | 2,1912 | 0,219 | 0,12   |
| 10 | Q14222 Q14222_HUMAN  | K.SGDAAIVDM*VPSKPMCVE.S  |              | 2 | 2,1907 | 0,088 | -0,063 |
| 10 | Q9H6K5 YS027_HUMAN   | R.LTLALAPGPPPPPSR.S      |              | 2 | 2,1882 | 0,144 | 0,082  |
| 10 | P55196 AFAD_HUMAN    | K.TPAAIPATPVAVSQPIR.T    |              | 2 | 2,1807 | 0,241 | 0,072  |
| 10 | Q9C0H5 K1688_HUMAN   | E.AGGGYQAGS#PQRS#PGR.K   | S344:S348:   | 2 | 2,18   | 0,333 | 0,072  |
| 10 | P20700 LMNB1_HUMAN   | R.LKLS#PSPSS#R.V         | S391:S396:   | 2 | 2,1784 | 0,129 | -0,198 |
| 10 | Q00613 HSF1_HUMAN    | E.GRPPS#PPPTS#TPEK.C     | S363:S368:   | 2 | 2,1774 | 0,316 | -0,228 |

|    |                    |                         |              |   |        |       |        |
|----|--------------------|-------------------------|--------------|---|--------|-------|--------|
| 10 | P05783 K1C18_HUMAN | R.STFST#NYR.S           | T11:         | 2 | 2,1742 | 0,16  | -0,231 |
| 10 | Q9UJ83 HACL1_HUMAN | E.RCM*S#PPISM*AE.T      | S192:        | 2 | 2,1671 | 0,227 | 0,263  |
| 10 | Q13426 XRCC4_HUMAN | K.DDSIISSLDVTDIAPSR.K   |              | 2 | 2,1662 | 0,369 | 0,135  |
| 10 | P16949 STMN1_HUMAN | K.RAS#GQAFE.L           | S16:         | 2 | 2,1634 | 0,197 | 0,064  |
| 10 | Q7KZ17 MARK2_HUMAN | R.SRNS#PLLE.R           | S486:        | 2 | 2,1601 | 0,095 | -0,551 |
| 10 | Q02952 AKA12_HUMAN | E.ARGDTVVS#EAE.L        | S967:        | 2 | 2,1548 | 0,087 | 0,101  |
| 10 | Q12767 K0195_HUMAN | E.TKLG M*NS#PF.-        | S1354:       | 2 | 2,1465 | 0,221 | 0,112  |
| 10 | O00178 GTPB1_HUMAN | K.LVLVSPTSEQYDSSLR.Q    |              | 2 | 2,1445 | 0,359 | -0,134 |
| 10 | Q8NEL9 DDHD1_HUMAN | E.GISTIPS#PVTS#PVLSSR.H | S723:S727:   | 2 | 2,1422 | 0,27  | 0,063  |
| 10 | Q9H4H8 FA83D_HUMAN | R.LARLSS#T#PR.K         | S339:T340:   | 2 | 2,1357 | 0,107 | -0,42  |
| 10 | P62937 PIIA_HUMAN  | K.SIYGKFEDE.N           |              | 2 | 2,1348 | 0,112 | 0      |
| 10 | Q8IY92 BTBDC_HUMAN | E.SIT#PPSR#PTK.E        | T993:S998:   | 2 | 2,1343 | 0,28  | -0,183 |
| 10 | O15075 DCLK1_HUMAN | K.SPS#PSPTS#PGSLRK.Q    | S332:S337:   | 2 | 2,1301 | 0,206 | -0,157 |
| 10 | Q9Y4G2 PKHM1_HUMAN | K.LVVSS#PTS#PKNK.S      | S432:S435:   | 2 | 2,1258 | 0,308 | -0,172 |
| 10 | Q9H4A3 WNK1_HUMAN  | K.VPPAVIIPPAAPLSGR.R    |              | 2 | 2,1226 | 0,162 | 0,157  |
| 10 | O75396 SC22B_HUMAN | R.DLQQYQSQAK.Q          |              | 2 | 2,1153 | 0,22  | 0,404  |
| 10 | P31946 1433B_HUMAN | K.DSTLIM*QLLR.D         |              | 2 | 2,1131 | 0,219 | -0,405 |
| 10 | Q8WXD9 CSKI1_HUMAN | K.KVPLPGPGS#PE.V        | S1257:       | 2 | 2,1091 | 0,287 | 0,211  |
| 10 | Q9Y3L3 3BP1_HUMAN  | R.APTVPPPLPPTPPQPAR.R   |              | 2 | 2,1075 | 0,185 | 0,141  |
| 10 | Q12830 BPTF_HUMAN  | E.DAM*TVLTLTEKDYE.G     |              | 2 | 2,1017 | 0,169 | -0,63  |
| 10 | O00566 MPP10_HUMAN | D.LDFDISKLE.Q           |              | 2 | 2,0997 | 0,241 | 0,226  |
| 10 | Q01082 SPTB2_HUMAN | E.SS#PIPSPT#SDRK.A      | S2165:T2171: | 2 | 2,0912 | 0,131 | -0,341 |
| 10 | Q15911 ZFH3_HUMAN  | R.NRLS#FNSE.G           | S571:        | 2 | 2,0882 | 0,224 | 0,233  |
| 10 | O14818 PSA7_HUMAN  | R.AITVFS PDGHLFQVE.Y    |              | 2 | 2,0842 | 0,197 | 0      |
| 10 | Q66K74 MAP1S_HUMAN | E.RLS#LS#PLR.G          | S655:S657:   | 2 | 2,0822 | 0,189 | -0,111 |
| 10 | Q92844 TANK_HUMAN  | R.GLCRDEEDTS#FE.S       | S225:        | 2 | 2,0777 | 0,205 | -0,476 |
| 10 | Q9NY61 AATF_HUMAN  | E.LLFQYPDTR.Y           |              | 2 | 2,0758 | 0,207 | 0,212  |
| 10 | Q8WYA6 CTBL1_HUMAN | R.LLQIIDRD.G            |              | 2 | 2,075  | 0,141 | 0,186  |
| 10 | P19532 TFE3_HUMAN  | R.RSS#FSM*EEES.-        | S568:        | 2 | 2,074  | 0,262 | -0,19  |
| 10 | P31946 1433B_HUMAN | D.STLIM*QLLR.D          |              | 2 | 2,0655 | 0,178 | 0,224  |
| 10 | Q96FF9 CDCA5_HUMAN | E.T#LGSASTST#PGRR.S     | T151:T159:   | 2 | 2,0467 | 1     | -0,336 |
| 10 | O95819 M4K4_HUMAN  | R.T#TSRS#PVLSSR.R       | T627:S631:   | 2 | 2,0373 | 0,098 | -0,097 |
| 10 | P05787 K2C8_HUMAN  | R.ISSS#FSR.V            | S37:         | 2 | 2,0364 | 0,095 | 0,385  |

|    |                    |                         |              |   |        |       |        |
|----|--------------------|-------------------------|--------------|---|--------|-------|--------|
| 10 | O43379 WDR62_HUMAN | R.TRLS#TASEE.T          | S49:         | 2 | 2,0325 | 0,096 | -0,341 |
| 10 | O95251 MYST2_HUMAN | R.SSARLS#QSSQDSS#PVR.N  | S50:S57:     | 2 | 2,0323 | 0,36  | 0,132  |
| 10 | Q09666 AHNK_HUMAN  | K.LQSGSVS#LAS#KK.S      | S5854:S5857: | 2 | 2,029  | 0,168 | 0,091  |
| 10 | Q8TAT6 NPL4_HUMAN  | E.M*CSLPR#.-            | T608:        | 2 | 2,0249 | 0,272 | 0      |
| 10 | Q6UWZ7 CCD98_HUMAN | E.YSRS#PTF.-            | S406:        | 2 | 2,0233 | 0,267 | -0,26  |
| 10 | Q96EQ0 SGTB_HUMAN  | R.SRSFSS#SAEE.H         | S298:        | 2 | 2,0167 | 0,111 | -0,105 |
| 10 | Q02952 AKA12_HUMAN | E.ALICVGSSK.K           |              | 2 | 2,0103 | 0,338 | 0      |
| 10 | P49736 MCM2_HUMAN  | R.GNDPLTSS#PGRSS#R.R    | S27:S32:     | 2 | 2,0069 | 0,083 | -0,077 |
| 10 | Q9UQ35 SRRM2_HUMAN | E.SYFGVSSLQK.G          |              | 2 | 2,0055 | 0,306 | -0,099 |
| 10 | Q15652 JHD2C_HUMAN | K.FVS#RPPT#PK.C         | S501:T505:   | 2 | 2,0036 | 0,149 | 0,103  |
| 10 | Q9ULQ0 FA40B_HUMAN | E.LGLPPLAEDSIQVVK.S     |              | 2 | 2,0021 | 0,142 | 0,695  |
| 10 | Q96T58 MINT_HUMAN  | R.S#QS#PVHLR.R          | S725:S727:   | 2 | 1,9979 | 0,298 | 0      |
| 10 | P49790 NU153_HUMAN | R.SHLNFS#M*LE.S         | S139:        | 2 | 1,9885 | 0,185 | -0,104 |
| 10 | P05783 K1C18_HUMAN | E.DGEDFNLDALD.S         |              | 2 | 1,9762 | 0,184 | 0,095  |
| 10 | Q969T3 SNX21_HUMAN | R.HALAGDGPGEAAAS#PE.A   | S33:         | 2 | 1,967  | 0,163 | 0,08   |
| 10 | Q07065 CKAP4_HUMAN | E.DGVLSM*QVASAR.Q       |              | 2 | 1,965  | 0,271 | 0,195  |
| 10 | Q9H4G0 E41L1_HUMAN | R.RLPS#SPASPS#PK.G      | S540:S546:   | 2 | 1,9646 | 0,12  | 0      |
| 10 | Q8IWC1 MA7D3_HUMAN | E.AM*VKAS#PKTS#LE.A     | S449:S453:   | 2 | 1,964  | 0,14  | -0,17  |
| 10 | Q96NM4 TOX2_HUMAN  | R.SSIAHSS#PS#PPGSK.S    | S199:S201:   | 2 | 1,9619 | 0,227 | -0,326 |
| 10 | Q8IZT6 ASPM_HUMAN  | R.VRS#PLQACE.N          | S190:        | 2 | 1,9573 | 0,236 | 0,214  |
| 10 | P21333 FLNA_HUMAN  | R.VTYTPM*APGSYLISIK.Y   |              | 2 | 1,953  | 0,291 | -0,208 |
| 10 | Q4G0J3 LARP7_HUMAN | R.SRPTSEGS#DIE.S        | S261:        | 2 | 1,9525 | 0,3   | -0,388 |
| 10 | O95777 LSM8_HUMAN  | E.RVFSSS#QGV.E.Q        | S49:         | 2 | 1,9509 | 0,132 | -0,519 |
| 10 | P05787 K2C8_HUMAN  | R.AFS#SRS#YTSGPGSR.I    | S21:S24:     | 2 | 1,936  | 0,122 | -1,055 |
| 10 | Q9UBG0 MRC2_HUMAN  | E.KNILVS#DM*E.M         | S1470:       | 2 | 1,9359 | 0,139 | 0,107  |
| 10 | Q9BW71 HIRP3_HUMAN | K.RPPT#PCSDPE.R         | T84:         | 2 | 1,9286 | 0,161 | 0,395  |
| 10 | Q14181 DPOA2_HUMAN | R.AIST#PET#PLTKR.S      | T127:T130:   | 2 | 1,9209 | 0,279 | -0,248 |
| 10 | P49321 NASP_HUMAN  | R.AKLVPS#QEE.T          | S421:        | 2 | 1,9171 | 0,306 | 0,226  |
| 10 | O75427 LRCH4_HUMAN | E.AAATTS#VPGS#PGLPGRR.S | S21:S25:     | 2 | 1,9154 | 0,121 | 0,139  |
| 10 | O60216 RAD21_HUMAN | R.DVIDEPIIEEPSRLQE.S    |              | 2 | 1,8949 | 0,157 | 0      |
| 10 | P35611 ADDA_HUMAN  | K.SRSPGS#PVGE.G         | S358:        | 2 | 1,8922 | 0,178 | -0,116 |
| 10 | Q63ZY3 KANK2_HUMAN | R.ERVPS#VAE.A           | S540:        | 2 | 1,8779 | 0,106 | 0,252  |
| 10 | Q9H0G5 CCD55_HUMAN | R.EKVIET#PE.N           | T275:        | 2 | 1,875  | 0,215 | 0      |

|    |                      |                          |            |   |        |       |        |
|----|----------------------|--------------------------|------------|---|--------|-------|--------|
| 10 | ##P11940 PABP1_HUMAN | -.VTPVGT#AS#NVAK.Q       | T6:S8:     | 2 | 1,8686 | 0,182 | -1,123 |
| 10 | Q12756 KIF1A_HUMAN   | E.DGGTLGVFSPK.K          |            | 2 | 1,864  | 0,185 | -0,113 |
| 10 | Q9BRS8 LARP6_HUMAN   | E.KS#PGTS#PLLSR.K        | S447:S451: | 2 | 1,8541 | 0,251 | 0,562  |
| 10 | Q4KMP7 TB10B_HUMAN   | R.QQPPLGPSSLLSLPGLK.S    |            | 2 | 1,8535 | 0,251 | -0,268 |
| 10 | Q02952 AKA12_HUMAN   | K.SPPS#PVERE.M           | S1331:     | 2 | 1,8431 | 0,092 | -0,226 |
| 10 | P37837 TALDO_HUMAN   | K.QFTTVVADTGDFHAIDE.Y    |            | 2 | 1,8395 | 0,206 | 0,262  |
| 10 | Q8NAG6 ANKL1_HUMAN   | E.ADPGPPSLPVPLETVDK.H    |            | 2 | 1,8274 | 0,231 | -0,211 |
| 10 | Q14247 SRC8_HUMAN    | E.RLPSSPVY#E.D           | Y421:      | 2 | 1,8262 | 0,3   | 0,108  |
| 10 | Q9ULX9 MAFF_HUMAN    | R.GPATLVAPASVITIVK.S     |            | 2 | 1,8248 | 0,187 | 0,079  |
| 10 | Q8NFA0 UBP32_HUMAN   | R.GHVLGGS#QPE.L          | S1454:     | 2 | 1,8238 | 0,113 | 0,115  |
| 10 | Q5JTJ3 CA031_HUMAN   | K.LRSS#FE.S              | S85:       | 2 | 1,8184 | 0,258 | 0,298  |
| 10 | Q03164 HRX_HUMAN     | E.KT#NLDLGPAPTASLEK.E    | T972:      | 2 | 1,8094 | 0,154 | -1,32  |
| 10 | P49756 RBM25_HUMAN   | K.LGASNS#PGQPNS#VKR.K    | S618:S624: | 2 | 1,7923 | 0,097 | -0,146 |
| 10 | Q53GS9 SNUT2_HUMAN   | R.EAPASVVPFVR.V          |            | 2 | 1,7913 | 0,28  | 0      |
| 10 | Q15459 SF3A1_HUMAN   | E.DSAPSKPVVGIIPPPE.V     |            | 2 | 1,7833 | 0,221 | 0,069  |
| 10 | Q9UNX4 WDR3_HUMAN    | E.KLILTL#.-              | T943:      | 2 | 1,7831 | 0,357 | 0,415  |
| 10 | Q9P266 K1462_HUMAN   | D.VGFRGNS#PE.M           | S885:      | 2 | 1,7638 | 0,115 | -0,234 |
| 10 | P01106 MYC_HUMAN     | E.LLPT#PPLS#PSRR.S       | T58:S62:   | 2 | 1,7604 | 0,186 | -0,082 |
| 10 | Q9HCU9 BRMS1_HUMAN   | D.LEKQFS#E.L             | S72:       | 2 | 1,7307 | 0,112 | 0,063  |
| 10 | P52948 NUP98_HUMAN   | K.VGYTIPSM*DDLAK.I       |            | 2 | 1,7266 | 0,14  | 0,461  |
| 10 | P05783 K1C18_HUMAN   | R.ISVS#RSTS#FR.G         | S49:S53:   | 2 | 1,7195 | 0,124 | -0,094 |
| 10 | P51648 AL3A2_HUMAN   | E.IFGPILPIVPVK.N         |            | 2 | 1,7057 | 0,263 | -0,283 |
| 10 | Q70CQ2 UBP34_HUMAN   | E.M*NATHIAQGS#QE.S       | S567:      | 2 | 1,7012 | 0,103 | -0,265 |
| 10 | Q5VT25 MRCKA_HUMAN   | D.GT#VQSSVAVGT#PD.Y      | T231:T240: | 2 | 1,6853 | 0,113 | 0      |
| 10 | Q63ZY6 NSN5C_HUMAN   | K.ASAPERT#PS#PAPK.R      | T258:S260: | 2 | 1,6708 | 0,139 | -0,166 |
| 10 | Q8WXD5 GEMI6_HUMAN   | E.DGSM*SVTGIM*GHAVQTVE.T |            | 2 | 1,6586 | 0,258 | 0,33   |
| 10 | Q9Y536 PAL4B_HUMAN   | R.IIPGFM*CQGGDFTR.H      |            | 2 | 1,6492 | 0,356 | 0      |
| 10 | Q09666 AHNK_HUMAN    | K.VKGS#LGATGE.I          | S5464:     | 2 | 1,6475 | 0,199 | -0,183 |
| 10 | P29692 EF1D_HUMAN    | R.ATAPQTQHVS#PM*R.Q      | S133:      | 2 | 1,6473 | 0,155 | 0,08   |
| 10 | O95402 MED26_HUMAN   | R.CSFS#PR.N              | S274:      | 2 | 1,6301 | 0,153 | 0,293  |
| 10 | O43765 SGTA_HUMAN    | R.SRTPS#ASNDQQE.-        | S305:      | 2 | 1,6221 | 0,385 | -0,322 |
| 10 | Q15637 SF01_HUMAN    | K.TVIPGM*PTVIPGLTR.E     |            | 2 | 1,6188 | 0,284 | -0,366 |
| 10 | Q9P0V9 SEP10_HUMAN   | R.KNS#NFL.-              | S451:      | 2 | 1,6074 | 0,273 | 0,38   |

|    |                      |                                         |              |   |        |       |        |
|----|----------------------|-----------------------------------------|--------------|---|--------|-------|--------|
| 10 | Q9UBB9 TFP11_HUMAN   | R.RM*QPDCS#NPLTLDE.C                    | S392:        | 2 | 1,5931 | 0,185 | -0,344 |
| 10 | P52701 MSH6_HUMAN    | R.LDAIEDLM*VVPDKISE.V                   |              | 2 | 1,5533 | 0,083 | 0,068  |
| 10 | P62753 RS6_HUMAN     | R.LSS#LRAS#TSK.S                        | S236:S240:   | 2 | 1,5404 | 0,383 | -0,202 |
| 10 | Q04637 IF4G1_HUMAN   | R.VVQRSS#LS#RE.R                        | S1146:S1148: | 2 | 1,5363 | 0,185 | -0,092 |
| 10 | Q8TDJ6 DMXL2_HUMAN   | R.LSVPM*PLPTVLLDR.K                     |              | 2 | 1,5232 | 0,38  | -0,311 |
| 10 | P31946 1433B_HUMAN   | R.VISSIEQK.T                            |              | 2 | 1,486  | 0,152 | 0,135  |
| 10 | Q9UQ35 SRRM2_HUMAN   | R.S#RT#PPSAPSQSR.M                      | S2407:T2409: | 2 | 1,328  | 0,12  | -0,171 |
| 10 | Q9H0D6 XRN2_HUMAN    | D.GSPSPLGGIK.R                          |              | 2 | 1,2914 | 0,084 | 0,2    |
| 10 | ##Q9P2P1 K1305_HUMAN | D.TLGGQAVPK.G                           |              | 2 | 1,273  | 0,106 | 0,07   |
| 10 | Q08211 DHX9_HUMAN    | E.ILPPPEDPSVPVALNIGK.L                  |              | 2 | 1,2138 | 0,306 | 0,066  |
| 10 | Q13242 SFRS9_HUMAN   | R.STS#YGYRS#R.S                         | S189:S195:   | 2 | 1,1115 | 0,119 | -0,092 |
| 10 | O75494 FUSIP_HUMAN   | R.S#RS#FDYNYR.R                         | S131:S133:   | 2 | 1,0755 | 0,144 | 0,089  |
| 10 | Q13671 RIN1_HUMAN    | R.GS#PATS#PHLGR.R                       | S333:S337:   | 2 | 1,0487 | 0,335 | -0,098 |
| 11 | P05783 K1C18_HUMAN   | R.STS#FRGGM*GSGGLATGIAGGLAGM*GGIQNEKE.T | S53:         | 3 | 6,8305 | 0,442 | 0,238  |
| 11 | P14314 GLU2B_HUMAN   | E.AQALLSGDTQTDATSFYDR.V                 |              | 2 | 6,5919 | 0,566 | -0,118 |
| 11 | Q9BTK6 PA1_HUMAN     | E.VTSGLQALAVEDTGGPSASAGK.A              |              | 2 | 6,5619 | 0,645 | 0,303  |
| 11 | Q8IWZ3 ANKH1_HUMAN   | E.AGPASGVGSSGGGSGSGTGGGDAALDFK.L        |              | 2 | 6,3247 | 0,665 | 0,522  |
| 11 | Q9UER7 DAXX_HUMAN    | R.VDS#PSHGLVTSSLCIPSPAR.L               | S688:        | 3 | 6,1858 | 0,466 | 0,169  |
| 11 | Q9NQW6 ANLN_HUMAN    | K.ALSSSADDASLVNASISSVK.A                |              | 2 | 6,025  | 0,619 | 0,972  |
| 11 | Q7LBC6 JHD2B_HUMAN   | K.LVSGVLGSALTSGGPSLSAM*GNR.S            |              | 3 | 6,0152 | 0,445 | 0,332  |
| 11 | Q7Z698 SPRE2_HUMAN   | E.AELGDDDVFTTATDSSSNSSQK.R              |              | 2 | 5,9572 | 0,679 | 0,322  |
| 11 | Q9NY33 DPP3_HUMAN    | K.LAQDFLDSQNL SAYNTR.L                  |              | 2 | 5,9249 | 0,486 | 0,25   |
| 11 | Q9C0C2 TB182_HUMAN   | R.DSLGAYASQDANEQQDLGK.R                 |              | 2 | 5,9043 | 0,559 | 0,118  |
| 11 | Q9BTK6 PA1_HUMAN     | E.GEVTSGLQALAVEDTGGPSASAGK.A            |              | 2 | 5,8498 | 0,605 | 0,332  |
| 11 | Q641Q2 FA21A_HUMAN   | K.LTDEDFSPFGSGGLFSGGK.G                 |              | 2 | 5,8464 | 0,542 | 0,185  |
| 11 | P21127 CD2L1_HUMAN   | R.GTS#PRPPEGGLGYSQLGDDDLKE.T            | S752:        | 3 | 5,8428 | 0,448 | 0,371  |
| 11 | Q9Y5Q9 TF3C3_HUMAN   | K.LSAEENPDDSEVPSSSGINSTK.S              |              | 2 | 5,8393 | 0,633 | 0,324  |
| 11 | Q6IAA8 CK059_HUMAN   | K.TASNIIDVSAADSQGM*EQHE.Y               |              | 3 | 5,8356 | 0,469 | 0,173  |
| 11 | P08729 K2C7_HUMAN    | E.LQSQISDTSVVLMS*DNSR.S                 |              | 2 | 5,7735 | 0,604 | 0,061  |
| 11 | P46821 MAP1B_HUMAN   | K.AAEAGGAEQYGFLLTPK.Q                   |              | 2 | 5,752  | 0,561 | 0,063  |
| 11 | Q9BTK6 PA1_HUMAN     | E.GEVTSGLQALAVEDTGGPSASAGK.A            |              | 3 | 5,7471 | 0,569 | 0,582  |
| 11 | Q6ZVM7 TM1L2_HUMAN   | K.TVTYEDPQAVGGLASALDNR.K                |              | 2 | 5,7273 | 0,545 | 0      |
| 11 | Q92625 ANS1A_HUMAN   | R.SLS#KSDSLLTCSPTEDATM*GSR.S            | S624:        | 3 | 5,7217 | 0,512 | 0,215  |

|    |                    |                                      |       |   |        |       |        |
|----|--------------------|--------------------------------------|-------|---|--------|-------|--------|
| 11 | P05783 K1C18_HUMAN | E.DGEDFNLGDALDSSNSM*QTIQK.T          |       | 2 | 5,714  | 0,622 | 0,305  |
| 11 | Q9UQ35 SRRM2_HUMAN | R.FQSDSSSYPTVDSNSLLGQSR.L            |       | 2 | 5,6978 | 0,607 | 0,429  |
| 11 | Q9Y2U8 MAN1_HUMAN  | R.ISASGPESLLGGPGGASAAPAAGSK.V        |       | 3 | 5,6697 | 0,503 | 0,26   |
| 11 | Q8ND56 LS14A_HUMAN | E.TSNSGTLPOSSAVGSAFTQDTR.S           |       | 3 | 5,6605 | 0,537 | 0,414  |
| 11 | Q7Z6Z7 HUWE1_HUMAN | E.VGQLLQDM*GDDVYQQYR.S               |       | 2 | 5,6555 | 0,62  | 0,119  |
| 11 | O75157 T22D2_HUMAN | D.LSQFQTQTQPLVGQVDDTR.R              |       | 2 | 5,6534 | 0,532 | 0      |
| 11 | Q14186 TFDP1_HUMAN | E.M*AQGTVGGVFITTAGSTSNTR.F           |       | 2 | 5,6488 | 0,675 | 0,458  |
| 11 | O00629 IMA4_HUMAN  | E.AIVQNASSDNQGIQLSAVQAAR.K           |       | 3 | 5,6274 | 0,409 | 0,163  |
| 11 | Q8IX01 SFR14_HUMAN | E.ASGPSPKAGVDISEAPQTSS#PCPSADIDM*K.T | S773: | 3 | 5,6113 | 0,463 | 1,031  |
| 11 | Q9UQ35 SRRM2_HUMAN | R.TPM*SVLQQAGGSM*M*DGPGPR.I          |       | 3 | 5,5903 | 0,484 | 0,62   |
| 11 | Q6IAA8 CK059_HUMAN | K.TASNIIDVSAADSQGM*EQHE.Y            |       | 2 | 5,585  | 0,597 | 0      |
| 11 | Q99747 SNAG_HUMAN  | E.GYDQQDQDQVSDVCNSPLFK.Y             |       | 2 | 5,5738 | 0,341 | 0,521  |
| 11 | P38646 GRP75_HUMAN | R.VINEPTAAALAYGLDKSE.D               |       | 2 | 5,556  | 0,56  | -0,066 |
| 11 | Q8NA72 CE037_HUMAN | R.AASASSVHVPVSAALGAGSAATAASEE.M      |       | 2 | 5,5493 | 0,578 | 0,106  |
| 11 | P38646 GRP75_HUMAN | K.STNGDTFLGGEDFDQALLR.H              |       | 2 | 5,5447 | 0,548 | 0,119  |
| 11 | Q13033 STRN3_HUMAN | E.FDFLVTAEDGEGAGEAR.S                |       | 2 | 5,5073 | 0,575 | 0,137  |
| 11 | P04264 K2C1_HUMAN  | E.LSQM*QTQISETNVILSM*DNNR.S          |       | 3 | 5,5038 | 0,384 | 0,298  |
| 11 | Q01970 PLCB3_HUMAN | R.LVAGQQQVLQQLAEEEPK.L               |       | 2 | 5,4972 | 0,481 | 0,304  |
| 11 | P31948 STIP1_HUMAN | R.AM*ADPEVQQIM*SDPAM*R.L             |       | 3 | 5,4846 | 0,463 | 0,378  |
| 11 | Q9UPW0 FOXJ3_HUMAN | E.CIISGSASPTLAINTVTNK.V              |       | 2 | 5,4653 | 0,601 | 0      |
| 11 | Q32MZ4 LRRF1_HUMAN | R.NM*PGLSAATLASLGGTSSR.R             |       | 2 | 5,4446 | 0,519 | -0,388 |
| 11 | Q9ULU4 PKCB1_HUMAN | K.TGQAGSLSGS#PKPFSPQLSAPITTK.T       | S490: | 3 | 5,4384 | 0,372 | 0,072  |
| 11 | P09211 GSTP1_HUMAN | K.FQDGDLTLYQSNTILR.H                 |       | 2 | 5,4304 | 0,54  | 0,194  |
| 11 | Q8IY81 RRMJ3_HUMAN | E.VTQGDM*SAADTFLSDLPR.D              |       | 2 | 5,4244 | 0,536 | 0,314  |
| 11 | Q9Y2U8 MAN1_HUMAN  | R.ISASGPESLLGGPGGASAAPAAGSK.V        |       | 2 | 5,424  | 0,544 | 0,347  |
| 11 | Q9Y3F4 STRAP_HUMAN | K.TVDFTQDSNYLLTGGQDK.L               |       | 2 | 5,4139 | 0,545 | 0,061  |
| 11 | P05783 K1C18_HUMAN | E.DFNLGDALDSSNSM*QTIQK.T             |       | 2 | 5,402  | 0,529 | 0,697  |
| 11 | Q99747 SNAG_HUMAN  | E.GYDQQDQDQVSDVCNSPLFK.Y             |       | 3 | 5,3761 | 0,284 | 0,547  |
| 11 | P43897 EFTS_HUMAN  | R.LGQHVVGM*APLSVGSLLDDEPGGAE.T       |       | 2 | 5,3697 | 0,546 | 0,492  |
| 11 | Q02952 AKA12_HUMAN | D.DPENQNSALADTDASGGLTK.E             |       | 2 | 5,3542 | 0,569 | -0,061 |
| 11 | Q14CW9 AT7L3_HUMAN | E.SSLDNDSDFM*TDSQALISR.L             |       | 2 | 5,343  | 0,572 | 0,23   |
| 11 | Q9Y5J1 UTP18_HUMAN | E.LVFGDVENDEALLR.R                   |       | 3 | 5,3349 | 0,393 | 0,429  |
| 11 | P05783 K1C18_HUMAN | E.DGEDFNLGDALDSSNSM*QTIQK.T          |       | 3 | 5,3323 | 0,49  | 0,381  |



|    |                    |                                    |        |   |        |       |        |
|----|--------------------|------------------------------------|--------|---|--------|-------|--------|
| 11 | P06733 ENOA_HUMAN  | K.FTASAGIQVVGDDLTVTNPK.R           |        | 2 | 5,3241 | 0,485 | 0,06   |
| 11 | Q01970 PLCB3_HUMAN | R.LVAGQQQLVQLLAEIEPK.L             |        | 3 | 5,3148 | 0,417 | 0,547  |
| 11 | Q92734 TFG_HUMAN   | K.NVM*SAFGLTDDQVSGPPSAPAEDR.S      |        | 3 | 5,3125 | 0,455 | 0,591  |
| 11 | Q99567 NUP88_HUMAN | K.LASGEDDPFDSDFSCPVK.L             |        | 2 | 5,3027 | 0,422 | 0,061  |
| 11 | Q9NYV4 CD2L7_HUMAN | E.TTSGTSTEPVKNSS#PAPPQPAPGKVE.S    | S1083: | 3 | 5,275  | 0,513 | -0,208 |
| 11 | O60566 BUB1B_HUMAN | E.DQQTACGTIYSQTLSEK.K              |        | 2 | 5,2667 | 0,488 | 0,255  |
| 11 | Q9UQ35 SRRM2_HUMAN | K.DSLVQSCPGSLSLCAGVK.S             |        | 3 | 5,2591 | 0,495 | 0,487  |
| 11 | Q9UJY5 GGA1_HUMAN  | E.ILQANDNLTQVINLYK.Q               |        | 2 | 5,2509 | 0,434 | 0,066  |
| 11 | Q8IYL3 CA174_HUMAN | E.DVQKPPLQM*DNSVFLDDDS#NQPM*PVSR.F | S189:  | 3 | 5,2472 | 0,419 | 0,46   |
| 11 | P37840 SYUA_HUMAN  | K.EQVTNVGGAVVTGVTAVAQK.T           |        | 3 | 5,23   | 0,531 | 0,285  |
| 11 | P27816 MAP4_HUMAN  | K.VGS#LDNVGHLPAGGAVKTE.G           | S1073: | 3 | 5,2298 | 0,29  | 0,289  |
| 11 | Q8ND56 LS14A_HUMAN | E.TSNSGTLQSSAVGSAFTQDTR.S          |        | 2 | 5,2291 | 0,539 | 0,11   |
| 11 | P61244 MAX_HUMAN   | R.SSAQLQTNYPSSDNSLYTNAK.G          |        | 2 | 5,2215 | 0,533 | 0,213  |
| 11 | Q14974 IMB1_HUMAN  | E.AIGYICQDIDPEQLQDK.S              |        | 2 | 5,2194 | 0,362 | 0,365  |
| 11 | Q92945 FUBP2_HUMAN | K.IGGDAATTVNNSTPDFGFGGQK.R         |        | 2 | 5,2142 | 0,552 | 0,227  |
| 11 | Q71RC2 LARP4_HUMAN | R.ASTASPCNNNINAATAVALQEPR.K        |        | 2 | 5,2129 | 0,553 | 0,824  |
| 11 | Q6UN15 FIP1_HUMAN  | K.TGAPQYGSYGTAPVNLNIK.T            |        | 2 | 5,1834 | 0,465 | 0,313  |
| 11 | Q92797 SYMPK_HUMAN | R.LM*ATQM*TAAGLPGVEQTK.Q           |        | 2 | 5,1467 | 0,56  | 0      |
| 11 | P60709 ACTB_HUMAN  | D.LYANTVLSGGTTM*YPGIADR.M          |        | 2 | 5,1445 | 0,598 | 0,346  |
| 11 | P11021 GRP78_HUMAN | R.IINEPTAAAIAYGLDK.R               |        | 2 | 5,142  | 0,482 | -0,294 |
| 11 | Q9H6F5 CCD86_HUMAN | R.LQQGAGLESPQGQPEPGAASPQR.Q        |        | 2 | 5,1374 | 0,445 | 0,318  |
| 11 | Q9HB07 MYG1_HUMAN  | K.LASCDIVVDVGGEDPR.R               |        | 2 | 5,1365 | 0,486 | -0,262 |
| 11 | P21333 FLNA_HUMAN  | E.AIGDDVGTGLGFSVEGPSQAK.I          |        | 3 | 5,1252 | 0,419 | 0,188  |
| 11 | O43707 ACTN4_HUMAN | K.ACLISLGYDVENDRQGEAE.F            |        | 2 | 5,1129 | 0,584 | 0,228  |
| 11 | P05783 K1C18_HUMAN | R.GGM*GSGGLATGIAGGLAGM*GGIQNEKE.T  |        | 2 | 5,1075 | 0,548 | 0,605  |
| 11 | Q7Z6Z7 HUWE1_HUMAN | E.VGQLLQDM*GDDVYQQYR.S             |        | 3 | 5,1051 | 0,45  | 0,537  |
| 11 | Q9H299 SH3L3_HUMAN | R.IQYQLVDISQDNALRDE.M              |        | 2 | 5,091  | 0,397 | 0,121  |
| 11 | Q92734 TFG_HUMAN   | K.NVM*SAFGLTDDQVSGPPSAPAEDR.S      |        | 2 | 5,085  | 0,586 | 0,493  |
| 11 | Q9BVW5 TIPIN_HUMAN | K.LLSNSQTLGNDM*LM*NTPR.A           |        | 2 | 5,0813 | 0,518 | 0,06   |
| 11 | O75694 NU155_HUMAN | E.DQACATCLILACSTAACDRE.V           |        | 2 | 5,0779 | 0,591 | 0,747  |
| 11 | O60269 GRIN2_HUMAN | E.ASPLSAQDAGVQAAPVAACK.A           |        | 2 | 5,0742 | 0,551 | 0,191  |
| 11 | P20290 BTF3_HUMAN  | K.VQASLAANTFTITGHAE.T              |        | 2 | 5,068  | 0,454 | 0,282  |
| 11 | Q7Z698 SPRE2_HUMAN | E.AELGDDDVFTTATDSSSNSSQK.R         |        | 3 | 5,0673 | 0,528 | 0,241  |

|    |                     |                                       |       |   |        |       |        |
|----|---------------------|---------------------------------------|-------|---|--------|-------|--------|
| 11 | Q05524 ENO1B_HUMAN  | K.DATNVGDEGGFAPNILENK.E               |       | 2 | 5,041  | 0,515 | 0,124  |
| 11 | P04264 K2C1_HUMAN   | E.LSQM*QTQISETNVILSM*DNNR.S           |       | 2 | 5,0385 | 0,467 | 0,497  |
| 11 | Q16626 MEA1_HUMAN   | E.VELAPVGDGDVVADIQDR.I                |       | 2 | 5,038  | 0,647 | -0,196 |
| 11 | Q68EM7 RHG17_HUMAN  | R.S#PSPPTQHTGQPPGQPSAPSQLSAPR.R       | S674: | 3 | 5,035  | 0,356 | 0,272  |
| 11 | Q92766 RREB1_HUMAN  | K.VADPGPASTGSNTTASDSLGGSVPK.A         |       | 2 | 5,028  | 0,64  | 0,107  |
| 11 | O95613 PCNT_HUMAN   | K.NQAIDACDANTTPGGVTDVIK.N             |       | 2 | 5,023  | 0,435 | 0,113  |
| 11 | Q02952 AKA12_HUMAN  | E.AAPDTTADPAIAASDPATK.L               |       | 2 | 5,02   | 0,454 | 0,068  |
| 11 | P35222 CTNB1_HUMAN  | E.TADLGLDIGAQGEPLGYR.Q                |       | 3 | 5,0191 | 0,414 | 0,297  |
| 11 | P30281 CCND3_HUMAN  | R.GSSSQGPSQTSTPTDVTAIHL.-             |       | 2 | 5,0144 | 0,512 | 0,353  |
| 11 | Q9UMX0 UBQL1_HUMAN  | E.SGGPPGSQDSAAGAEGAGAPAAAASAEPK.I     |       | 3 | 5,0127 | 0,32  | 0,375  |
| 11 | Q8N163 K1967_HUMAN  | E.AQGETEPTAQAPDALEQAADTSR.R           |       | 3 | 4,9968 | 0,553 | 0,303  |
| 11 | Q9C0C2 TB182_HUMAN  | R.DSLGAYASQDANEQGQDLGK.R              |       | 3 | 4,9884 | 0,363 | 0,266  |
| 11 | Q15036 SNX17_HUMAN  | R.GIGSPSTDASASDVHGNFAFE.G             |       | 2 | 4,9873 | 0,554 | 0,118  |
| 11 | Q05209 PTN12_HUMAN  | E.LSSDLNVGDTSQNSCVDCSVTQSNK.V         |       | 2 | 4,9778 | 0,591 | 0,539  |
| 11 | Q9UNN5 FAF1_HUMAN   | E.FGVDDGEVFGM*ASSALR.K                |       | 2 | 4,9724 | 0,486 | -0,275 |
| 11 | Q9BTK6 PA1_HUMAN    | E.VTSGLQALAVEDTGGPSASAGK.A            |       | 3 | 4,9559 | 0,409 | 0,726  |
| 11 | P08651 NFIC_HUMAN   | R.TGM*GSDQEDSKPITLDTDFQE.S            |       | 2 | 4,9532 | 0,452 | 0,602  |
| 11 | Q13432 U119A_HUMAN  | R.ITGDYLCSPENIYK.I                    |       | 2 | 4,9476 | 0,505 | 0,203  |
| 11 | Q9Y478 AAKB1_HUMAN  | K.ILM*DSPEDADLFHSEE.I                 |       | 2 | 4,9462 | 0,359 | 0,196  |
| 11 | O00571 DDX3X_HUMAN  | E.NALGLDQQFAGLDLNSSDNQSGGSTASK.G      |       | 3 | 4,9392 | 0,513 | 0,524  |
| 11 | O43847 NRDC_HUMAN   | K.LQNGLQALLISDLSNM*EGK.T              |       | 2 | 4,9377 | 0,55  | 0,118  |
| 11 | P60709 ACTB_HUMAN   | D.LYANTVLSGGTTM*YPGIADR.M             |       | 3 | 4,9266 | 0,433 | 0,519  |
| 11 | O60934 NBN_HUMAN    | E.NEPVDTNSDNNLFTDIDLK.S               |       | 2 | 4,9219 | 0,564 | 0,34   |
| 11 | A4D186 A4D186_HUMAN | K.IQVLQQQADDAEERAE.R                  |       | 3 | 4,9201 | 0,411 | 0      |
| 11 | Q14694 UBP10_HUMAN  | R.TAGQPEGGPGADFGQSCFPAAEAGR.D         |       | 2 | 4,9165 | 0,524 | 0,31   |
| 11 | O43290 SNUT1_HUMAN  | R.ADDLLPLGDQTQDGFGRS.L                |       | 2 | 4,8491 | 0,537 | 0,423  |
| 11 | A3KN83 SBNO1_HUMAN  | K.SIDPDSIQSALLASGLGSK.R               |       | 2 | 4,8439 | 0,562 | 0,263  |
| 11 | Q99459 CDC5L_HUMAN  | K.LNINPEDGM*ADYSDPSYVK.Q              |       | 3 | 4,8411 | 0,429 | 0,597  |
| 11 | Q9GZR7 DDX24_HUMAN  | E.LTDYQLVS#PAKNPSSLFSK.E              | S60:  | 2 | 4,829  | 0,398 | 0,449  |
| 11 | P17676 CEBPB_HUMAN  | K.APPTACYAGAAPAPSQVK.S                |       | 2 | 4,8278 | 0,614 | 0      |
| 11 | A0FGR8 ESYT2_HUMAN  | K.SHM*S#GSPGPGSNTAPSTPVIGGSDKPGM*EE.K | S691: | 3 | 4,8226 | 0,448 | 0,301  |
| 11 | Q9UQ35 SRRM2_HUMAN  | R.FQSDSSSYPTVDSNSLLGQSR.L             |       | 3 | 4,8194 | 0,508 | 1,206  |
| 11 | P55327 TPD52_HUMAN  | E.VLNSAANASATTEPLPEK.T                |       | 2 | 4,7993 | 0,529 | 0,127  |

|    |                     |                               |              |   |        |       |        |
|----|---------------------|-------------------------------|--------------|---|--------|-------|--------|
| 11 | Q92882 OSTF1_HUMAN  | K.LAFDM*ATNAACASLLK.K         |              | 2 | 4,7976 | 0,572 | -0,214 |
| 11 | BOQY74 BOQY74_HUMAN | E.LVSQGIM*PPLKS#PAAFHE.Q      | S33:         | 2 | 4,796  | 0,445 | 0,302  |
| 11 | P20042 IF2B_HUMAN   | E.SDVQEPTPEDDLDIM*LGNK.K      |              | 2 | 4,793  | 0,514 | 0,432  |
| 11 | Q6R327 RICTR_HUMAN  | E.ALAS#PAKDVLFDTITM*K.A       | S1353:       | 2 | 4,788  | 0,519 | 0,242  |
| 11 | Q9NXG2 THUM1_HUMAN  | E.AYSLLENEYGDDM*YGPEK.F       |              | 3 | 4,7872 | 0,425 | 0,831  |
| 11 | O94876 TMCC1_HUMAN  | K.TNTLDM*QSSGFDALLHE.I        |              | 2 | 4,7872 | 0,561 | 0,129  |
| 11 | P14314 GLU2B_HUMAN  | E.AQALLSGDTQTDATSFYDR.V       |              | 3 | 4,7794 | 0,455 | 0,799  |
| 11 | O75179 ANR17_HUMAN  | E.HYPVSSPSS#PS#PPAQGGVSR.N    | S2045:S2047: | 3 | 4,7688 | 1     | 0,081  |
| 11 | Q12888 TP53B_HUMAN  | E.VSPSQTGGSSGDLGDISSFSSK.A    |              | 2 | 4,7644 | 0,669 | 0,349  |
| 11 | P05783 K1C18_HUMAN  | E.DFNLGDALDSSNSM*QTIQK.T      |              | 3 | 4,7597 | 0,427 | 1,481  |
| 11 | Q9UQ35 SRRM2_HUMAN  | R.TPM*SVLQQAGGSM*M*DGPGPR.I   |              | 2 | 4,7583 | 0,415 | -0,118 |
| 11 | P61160 ARP2_HUMAN   | E.LLFNTIQAADIDTR.S            |              | 2 | 4,7568 | 0,434 | 0,23   |
| 11 | Q8IYB7 DI3L2_HUMAN  | E.AQFDGS#DSEDGHGITQNVLVDGVK.K | S173:        | 3 | 4,7435 | 0,49  | 0      |
| 11 | Q02790 FKBP4_HUMAN  | E.SGAQSAPLPM*EGVDISPQDE.G     |              | 2 | 4,7409 | 0,431 | 0,337  |
| 11 | Q9NXG2 THUM1_HUMAN  | E.AYSLLENEYGDDM*YGPEK.F       |              | 2 | 4,7391 | 0,609 | 0,37   |
| 11 | Q9UPW0 FOXJ3_HUMAN  | E.CIISGSASPTLAINVTNK.V        |              | 3 | 4,7338 | 0,473 | 0,658  |
| 11 | P09884 DPOLA_HUMAN  | K.DTGNFVIGQILSDQSR.D          |              | 2 | 4,7273 | 0,436 | 0      |
| 11 | Q92597 NDRG1_HUMAN  | K.YFVQGM*GYM*PSASM*TR.L       |              | 2 | 4,7204 | 0,469 | 0,13   |
| 11 | Q6ZV73 FGD6_HUMAN   | E.VEEPYEAPDGQLQLGPR.H         |              | 2 | 4,7081 | 0,448 | 0,193  |
| 11 | P00558 PGK1_HUMAN   | K.ALES#PERPFLAILGGAK.V        | S203:        | 3 | 4,7036 | 0,366 | -0,099 |
| 11 | O60716 CTND1_HUMAN  | R.SM*GYDDL DYGM*M*SDYGTAR.R   |              | 2 | 4,7017 | 0,538 | 0,111  |
| 11 | Q71U36 TBA1A_HUMAN  | K.TIGGGDDSFNTFFSETGAGK.H      |              | 2 | 4,6949 | 0,538 | 1,155  |
| 11 | P80723 BASP_HUMAN   | E.AAAAPAESAAPAAGEEPSKEE.G     |              | 2 | 4,6885 | 0,501 | -0,25  |
| 11 | Q00610 CLH1_HUMAN   | R.TSIDAYDNFDNISLAQR.L         |              | 2 | 4,6715 | 0,513 | 0,314  |
| 11 | P62191 PRS4_HUMAN   | R.M*TLADDVTLDDLIM*AK.D        |              | 2 | 4,6685 | 0,584 | -0,136 |
| 11 | P08670 VIME_HUMAN   | R.EM*EENFAVEAANYQDTIGR.L      |              | 2 | 4,6631 | 0,57  | 0,332  |
| 11 | Q96RK0 CIC_HUMAN    | K.SAAATS#PAPHLVAGPLLGTVGK.A   | S739:        | 3 | 4,6591 | 0,485 | 0,175  |
| 11 | O75179 ANR17_HUMAN  | E.HYPVSSPSS#PS#PPAQGGVSR.N    | S2045:S2047: | 2 | 4,6456 | 1     | 0,542  |
| 11 | O60684 IMA7_HUMAN   | E.M*LFSDSDSLQLATTQK.F         |              | 2 | 4,6438 | 0,559 | 0,2    |
| 11 | Q14676 MDC1_HUMAN   | E.LQPSTSTDQPVTSEPTSQVTR.G     |              | 3 | 4,6427 | 0,349 | 0,648  |
| 11 | P12004 PCNA_HUMAN   | R.AEDNADTLALVFEAPNQEK.V       |              | 2 | 4,6383 | 0,456 | 0,235  |
| 11 | Q86WC4 OSTM1_HUMAN  | R.LCQTCYPLFQQVVSK.M           |              | 3 | 4,6336 | 0,379 | 0,293  |
| 11 | O43379 WDR62_HUMAN  | R.FATSLPHFPGCAGPTEDE.L        |              | 2 | 4,6251 | 0,475 | 0,442  |

|    |                    |                                   |            |   |        |       |        |
|----|--------------------|-----------------------------------|------------|---|--------|-------|--------|
| 11 | Q01167 FOXK2_HUMAN | R.VM*PSDLNLM*ADNSQPENEKE.A        |            | 3 | 4,6204 | 0,347 | 0,16   |
| 11 | Q9Y3F4 STRAP_HUMAN | K.TVDFTQDSNYLLTGGQDK.L            |            | 3 | 4,6185 | 0,386 | 0,365  |
| 11 | P18206 VINC_HUMAN  | K.LVQAAQM*LQSDPYVPAR.D            |            | 3 | 4,6183 | 0,501 | 0,46   |
| 11 | Q14694 UBP10_HUMAN | R.TAGQPEGGPGADFGQSCFP AEAGR.D     |            | 3 | 4,6163 | 0,397 | 0,232  |
| 11 | Q99459 CDC5L_HUMAN | K.LNINPEDGM*ADYSDPSYVK.Q          |            | 2 | 4,6162 | 0,438 | 0,455  |
| 11 | O15355 PPM1G_HUMAN | E.AGQVGEPIPTGEAGPSCSSASDK.L       |            | 2 | 4,6065 | 0,491 | 0,216  |
| 11 | Q8N556 AFAP1_HUMAN | E.AYSGCSGPVDSECPPPPSS#PVHKA.E.L   | S265:      | 3 | 4,5965 | 0,412 | 0,204  |
| 11 | Q14789 GGOB1_HUMAN | E.LQAGPLNIDVAPGAPQE.K.N           |            | 2 | 4,587  | 0,397 | -0,067 |
| 11 | Q06787 FMR1_HUMAN  | R.RGPGYSGTGNSEASNAS#ETE.S         | S500:      | 2 | 4,5851 | 0,49  | 0,349  |
| 11 | Q93008 USP9X_HUMAN | E.LFVGELIDPADDR.K                 |            | 2 | 4,5823 | 0,311 | 0,402  |
| 11 | P32969 RL9_HUMAN   | E.LVNSAALIQQATTVK.N               |            | 3 | 4,5814 | 0,41  | 0,667  |
| 11 | Q53GS7 GLE1_HUMAN  | E.TSPSSTSASALDQPSFVPK.S           |            | 2 | 4,5794 | 0,48  | 0,256  |
| 11 | Q9GZR7 DDX24_HUMAN | E.LTDYQLVS#PAKNPSSLFSK.E          | S60:       | 3 | 4,5703 | 0,396 | 0,589  |
| 11 | Q02952 AKA12_HUMAN | K.LT#ASEQAHPQEPAESAEHEPRLS#AEYE.K | T351:S371: | 3 | 4,5703 | 0,349 | 0,241  |
| 11 | Q9UN86 G3BP2_HUMAN | K.FM*QTFVLAPEGSVPNK.F             |            | 2 | 4,5671 | 0,469 | 0,548  |
| 11 | P31942 HNRH3_HUMAN | E.LFLNSTPGGGSGM*GGSGM*GGYGR.D     |            | 3 | 4,5576 | 0,443 | 0,936  |
| 11 | Q9H444 CHM4B_HUMAN | E.ISTAISKPVGFGEFEDE.L             |            | 2 | 4,5549 | 0,383 | 1,179  |
| 11 | O75691 UTP20_HUMAN | E.YYPADLQVAPTQDLR.R               |            | 2 | 4,5517 | 0,463 | 0,279  |
| 11 | Q9NQC1 JADE2_HUMAN | K.GVQVPAGAEAIPEPVVR.I             |            | 2 | 4,5517 | 0,351 | 0,361  |
| 11 | O75531 BAF_HUMAN   | D.FVAEPM*GEKPVGSLAGIGE.V          |            | 2 | 4,5516 | 0,444 | 0,577  |
| 11 | P12268 IMDH2_HUMAN | K.FVPYLIAGIQHSCQD.I               |            | 2 | 4,5419 | 0,424 | 0,07   |
| 11 | P09972 ALDOC_HUMAN | K.VDKGVVPLAGTDGETTTQGLDGLSE.R     |            | 2 | 4,5397 | 0,514 | 0,695  |
| 11 | Q15020 SART3_HUMAN | K.LFISGLPFSCTKEE.L                |            | 2 | 4,5313 | 0,357 | 0,15   |
| 11 | P05386 RLA1_HUMAN  | E.LACIYSALILHDDE.V                |            | 2 | 4,5295 | 0,508 | 0,448  |
| 11 | Q05682 CALD1_HUMAN | E.KGNVFS#PTAAGT#PNKE.T            | S724:T730: | 2 | 4,5292 | 0,533 | 0,131  |
| 11 | Q9H8Y8 GORS2_HUMAN | K.ADAASSLTVDTVPTAK.A              |            | 3 | 4,5181 | 0,213 | 0,223  |
| 11 | Q5VUA4 ZN318_HUMAN | E.LTALGNLGDGM*PVDFCTTR.V          |            | 3 | 4,5126 | 0,393 | 0,366  |
| 11 | P48960 CD97_HUMAN  | E.GSYDCVCSPGYEPVSGAK.T            |            | 2 | 4,5048 | 0,492 | -0,063 |
| 11 | Q9UBR2 CATZ_HUMAN  | E.IYANGPISCGIM*ATER.L             |            | 2 | 4,5046 | 0,532 | 0,345  |
| 11 | Q14676 MDC1_HUMAN  | E.LQPSTSTDQPVTSPTYQATR.G          |            | 3 | 4,5008 | 0,495 | 0,396  |
| 11 | Q9UBW8 CSN7A_HUMAN | K.VTTAAAAAATSQDPEQHLTE.L          |            | 2 | 4,4943 | 0,606 | 0,243  |
| 11 | Q9UHD8 SEPT9_HUMAN | K.LTVIDTPGFGDHINNE.N              |            | 2 | 4,494  | 0,505 | 0,07   |
| 11 | Q13158 FADD_HUMAN  | E.DLCAAFNVICDNVVK.D               |            | 2 | 4,4905 | 0,499 | -0,144 |

|    |                    |                                  |                 |   |        |       |        |
|----|--------------------|----------------------------------|-----------------|---|--------|-------|--------|
| 11 | P26640 SYVC_HUMAN  | R.DPGVITYDLPTPPGEK.K             |                 | 2 | 4,4876 | 0,477 | -0,359 |
| 11 | P12532 KCRU_HUMAN  | R.GTGGVDTAATGGVFDISNLDR.L        |                 | 2 | 4,4852 | 0,582 | 0,121  |
| 11 | Q9NR12 PDLI7_HUMAN | R.ILAHLTGTEFM*QDPDEE.H           |                 | 2 | 4,4827 | 0,513 | 0,249  |
| 11 | Q5VUA4 ZN318_HUMAN | E.LTALGNLGDGM*PVDFCTTR.V         |                 | 2 | 4,4773 | 0,5   | 0,183  |
| 11 | Q8IZH2 XRN1_HUMAN  | E.AQSSQATPVQTSQPSSNIVKVS#PRE.S   | S1645:          | 3 | 4,473  | 0,342 | 0,259  |
| 11 | Q92616 GCN1L_HUMAN | K.M*AAQIIGNM*YSLTDQKD.L          |                 | 2 | 4,4685 | 0,556 | -0,063 |
| 11 | Q6PJG6 CG027_HUMAN | R.ASAVTAM*GQLSSQGLHAPTS#PEHAE.A  | S582:           | 3 | 4,4653 | 0,421 | 0,284  |
| 11 | Q92734 TFG_HUMAN   | K.QSTQVM*AASM*SAFDPLKNQDE.I      |                 | 2 | 4,4523 | 0,486 | 0,628  |
| 11 | Q9UQ35 SRRM2_HUMAN | K.DSLVQSCPGSLSLCAGVK.S           |                 | 2 | 4,4399 | 0,557 | 0,065  |
| 11 | P12277 KCRB_HUMAN  | R.GTGGVDTAAVGGVFDVSNADR.L        |                 | 2 | 4,4377 | 0,634 | -0,124 |
| 11 | P21333 FLNA_HUMAN  | E.AIGDDVGTLGFSVEGPSQAK.I         |                 | 2 | 4,4371 | 0,562 | 0      |
| 11 | Q3MHD2 LSM12_HUMAN | E.VEIINDRTET#PPPLASLNVSK.L       | T75:            | 3 | 4,4281 | 0,226 | 0,385  |
| 11 | P19634 SL9A1_HUMAN | E.TSSPGTDDVFTAPSDSPSSQR.I        |                 | 2 | 4,4268 | 0,529 | 0,218  |
| 11 | P08670 VIME_HUMAN  | R.EM*EENFAVEAANYQDTIGR.L         |                 | 3 | 4,4247 | 0,409 | 0,332  |
| 11 | Q8IWZ3 ANKH1_HUMAN | E.AGPASGVGSSGGGSGSGTGGGDAALDFK.L |                 | 3 | 4,4235 | 0,267 | 0,548  |
| 11 | P25685 DNJB1_HUMAN | K.EGDQTSNNIPADIVFLK.D            |                 | 2 | 4,4212 | 0,417 | -0,062 |
| 11 | P31629 ZEP2_HUMAN  | R.GPHALQSSGPPS#TPSS#PR.L         | S2297:S2301:    | 2 | 4,4182 | 0,452 | 0,064  |
| 11 | O43399 TPD54_HUMAN | K.GLLSDSM*TDVPVDTGVAAR.T         |                 | 2 | 4,4167 | 0,488 | 0,381  |
| 11 | P30533 AMRP_HUMAN  | R.QVTSNSLSGTQEDGLDDPRLE.K        |                 | 2 | 4,4091 | 0,519 | 0,432  |
| 11 | Q9Y5J1 UTP18_HUMAN | E.LVFGDVENEDALLR.R               |                 | 2 | 4,409  | 0,446 | -0,072 |
| 11 | Q86T24 KAISO_HUMAN | K.M*QIPTLLQEPLSNLKI              |                 | 2 | 4,4025 | 0,336 | -0,067 |
| 11 | Q09666 AHNK_HUMAN  | K.APDVDVNIAGPDAALK.V             |                 | 2 | 4,3991 | 0,459 | -0,078 |
| 11 | Q01167 FOXK2_HUMAN | R.VM*PSDLNLM*ADNSQPENEKE.A       |                 | 2 | 4,3991 | 0,484 | 0,106  |
| 11 | P55327 TPD52_HUMAN | K.VEEIQTLSQVLAKE                 |                 | 2 | 4,3973 | 0,381 | 0,221  |
| 11 | P38646 GRP75_HUMAN | R.VINEPTAAALAYGLDK.S             |                 | 2 | 4,3911 | 0,513 | 0      |
| 11 | Q15417 CNN3_HUMAN  | K.LTLQPVDNSTISLQM*GTNK.V         |                 | 3 | 4,3809 | 0,335 | 0,617  |
| 11 | P07910 HNRPC_HUMAN | R.M*IAGQVLDINLAAEPK.V            |                 | 2 | 4,3738 | 0,467 | -0,287 |
| 11 | Q15084 PDIA6_HUMAN | K.LAAVDATVNVQLASR.Y              |                 | 2 | 4,3737 | 0,508 | -0,479 |
| 11 | Q9BVC5 ASHWN_HUMAN | R.KSPSGPVKS#PPLS#PVGT#TPVK.L     | S189:S193:T197: | 3 | 4,3729 | 0,168 | 0,159  |
| 11 | Q14676 MDC1_HUMAN  | E.LQPSTSTDQPVTSPTYQATR.G         |                 | 2 | 4,3723 | 0,495 | 0,212  |
| 11 | P25205 MCM3_HUMAN  | R.DSEEPFSSVEIQAAASK.M            |                 | 2 | 4,3722 | 0,488 | -0,133 |
| 11 | Q6UB99 ANR11_HUMAN | K.VDALHCPPAAVVTVTPSPE.G          |                 | 2 | 4,3694 | 0,421 | 0,249  |
| 11 | Q02952 AKA12_HUMAN | K.QLLQTVNVPIIDGAK.E              |                 | 2 | 4,3672 | 0,272 | 0,379  |

|    |                    |                                   |            |   |        |       |        |
|----|--------------------|-----------------------------------|------------|---|--------|-------|--------|
| 11 | Q14562 DHX8_HUMAN  | K.NPDGSLQAAM*M*QSALAKE.R          |            | 2 | 4,3667 | 0,536 | 0,185  |
| 11 | P29401 TKT_HUMAN   | R.ISSIQATTAAGSGHPTSCCSAAE.I       |            | 2 | 4,3593 | 0,608 | 0,216  |
| 11 | Q96PK6 RBM14_HUMAN | R.ASYVAPLTAQPATYR.A               |            | 3 | 4,3583 | 0,484 | 0,227  |
| 11 | Q92882 OSTF1_HUMAN | K.LAFDM*ATNAACASLLK.K             |            | 3 | 4,3568 | 0,482 | 0,427  |
| 11 | Q9NQ3 RTN4_HUMAN   | D.LDQSPLVSSSDS#PPRPQPAFK.Y        | S15:       | 3 | 4,3486 | 0,305 | 0,157  |
| 11 | Q13263 TIF1B_HUMAN | E.DGSLSLDGADSTGVVAK.L             |            | 2 | 4,344  | 0,543 | -0,077 |
| 11 | Q9Y490 TLN1_HUMAN  | K.ASVPTIQDQASAM*QLSQCAK.N         |            | 3 | 4,3377 | 0,385 | 0,511  |
| 11 | Q15149 PLEC1_HUMAN | R.DPYSGSTISLFQAM*QK.G             |            | 2 | 4,334  | 0,461 | 0,205  |
| 11 | P80723 BASP_HUMAN  | K.AQGPAASAEKPKVEAPAANS#DQTVTVKE.- | S219:      | 3 | 4,3332 | 0,384 | 0,492  |
| 11 | P13688 CEAM1_HUMAN | R.QIVGYAIGTQQATPGPANSGR.E         |            | 2 | 4,3221 | 0,58  | -0,351 |
| 11 | Q9UNX4 WDR3_HUMAN  | D.IAYLQEIEDPEEPDPK.K              |            | 2 | 4,3163 | 0,437 | 0,065  |
| 11 | O43399 TPD54_HUMAN | E.NGSDNLPSSAGSGDKPLSDPAPF.-       |            | 2 | 4,3118 | 0,519 | 0,219  |
| 11 | O95340 PAPS2_HUMAN | K.GFTGIDSDYKPEPTE.R               |            | 2 | 4,3116 | 0,412 | -0,137 |
| 11 | Q7Z4Q2 HEAT3_HUMAN | K.TFVSDLLPPTDKE.L                 |            | 2 | 4,3112 | 0,479 | 0,835  |
| 11 | P11142 HSP7C_HUMAN | K.TVTNAVVTVPAYFNDSQR.Q            |            | 3 | 4,3    | 0,371 | 0,923  |
| 11 | O15355 PPM1G_HUMAN | E.AGQVGEPIPTGEAGPSCSSASDK.L       |            | 3 | 4,2988 | 0,351 | 0,324  |
| 11 | Q96E09 F122A_HUMAN | K.RIDFIPVS#PAPS#PTR.G             | S143:S147: | 2 | 4,2959 | 0,412 | 0,269  |
| 11 | P08729 K2C7_HUMAN  | E.LQSQISDTSVVLMS*DNSR.S           |            | 3 | 4,2785 | 0,298 | 0,733  |
| 11 | Q8NA72 CE037_HUMAN | R.AASASSVHVPVSAAGSAAATAASEE.M     |            | 3 | 4,272  | 0,358 | 0,239  |
| 11 | Q8NE71 ABCF1_HUMAN | E.VVADETPAVQAVLR.A                |            | 3 | 4,2677 | 0,245 | 0,374  |
| 11 | Q8NE71 ABCF1_HUMAN | E.QEVVADETPAVQAVLR.A              |            | 2 | 4,2672 | 0,497 | 0,283  |
| 11 | Q14676 MDC1_HUMAN  | E.LQPSTSTDQPVTPPEPTSQATR.G        |            | 2 | 4,2532 | 0,538 | 0,109  |
| 11 | O15226 NKRF_HUMAN  | D.SFSIQDGNSQYCDSSGFILTK.D         |            | 2 | 4,2523 | 0,509 | 0,518  |
| 11 | Q14676 MDC1_HUMAN  | E.LQPSTSTDQPVTPSEPTSQVTR.G        |            | 2 | 4,2478 | 0,565 | 0,324  |
| 11 | Q8TAT6 NPL4_HUMAN  | K.FVTAVATGGPDNQVHFE.G             |            | 2 | 4,2464 | 0,519 | 0      |
| 11 | Q9UKL0 RCOR1_HUMAN | R.VGPQYQAVVPDFDPAK.L              |            | 2 | 4,2409 | 0,506 | 0,07   |
| 11 | Q86VQ1 GLCI1_HUMAN | R.GPSPSSPTPPAAAAPAEQAPR.A         |            | 2 | 4,2406 | 0,516 | 0,312  |
| 11 | Q15814 TBCC_HUMAN  | E.DCSDCVLAVACQQLR.I               |            | 3 | 4,2382 | 0,261 | 0,204  |
| 11 | O95613 PCNT_HUMAN  | R.LLYSM*TFQNVDAADTK.S             |            | 2 | 4,2374 | 0,514 | 0,266  |
| 11 | Q05209 PTN12_HUMAN | E.LSSDLNVGDTSQNSCVDCSVTQSNK.V     |            | 3 | 4,2294 | 0,368 | 0,202  |
| 11 | Q6F5E8 LR16C_HUMAN | R.TSPSPDSLGLPEDPCLGPR.N           |            | 2 | 4,2254 | 0,531 | 0,367  |
| 11 | P46821 MAP1B_HUMAN | R.ASVSPM*DEPVPDESPIEK.V           |            | 2 | 4,2241 | 0,421 | 0,06   |
| 11 | Q6NZY4 ZCHC8_HUMAN | E.GALLDNGSVVPCDISNGGSQK.L         |            | 2 | 4,2215 | 0,542 | 0,554  |

|    |                     |                                   |            |   |        |       |        |
|----|---------------------|-----------------------------------|------------|---|--------|-------|--------|
| 11 | O43290 SNUT1_HUMAN  | K.QQQDFSASSTTILDEEPIVNR.G         |            | 3 | 4,2206 | 0,354 | 0,308  |
| 11 | P38646 GRP75_HUMAN  | R.EQQIVIQSSGGLSKDDIE.N            |            | 2 | 4,2173 | 0,354 | 0,063  |
| 11 | P18583 SON_HUMAN    | K.SVESTS#PEPSKIM*LVEPPVAK.V       | S283:      | 3 | 4,2126 | 0,39  | 0,394  |
| 11 | P07602 SAP_HUMAN    | D.NGDVCQDCIQM*VTDIQTAVR.T         |            | 3 | 4,2048 | 0,356 | 0,235  |
| 11 | Q9BSL1 UBAC1_HUMAN  | E.ENIQDQDVLILLIK.K                |            | 2 | 4,2042 | 0,277 | 0,317  |
| 11 | Q15648 MED1_HUMAN   | K.LPSTSDDCPAIGTPLR.D              |            | 2 | 4,2032 | 0,542 | -0,502 |
| 11 | Q6IBW4 CNDH2_HUMAN  | E.GM*SPM*EPAGVSPM*PGTQK.D         |            | 2 | 4,2003 | 0,467 | -0,198 |
| 11 | A4D186 A4D186_HUMAN | K.IQVLQQQADDAERAE.R               |            | 2 | 4,1984 | 0,344 | 0,066  |
| 11 | Q5H9R7 SAPS3_HUMAN  | E.NATITDQDSTGDNLLLK.H             |            | 2 | 4,1953 | 0,509 | -0,134 |
| 11 | P49790 NU153_HUMAN  | E.ITTSSPSPINSSQALTNK.V            |            | 2 | 4,195  | 0,376 | 0      |
| 11 | A6H8W4 A6H8W4_HUMAN | R.VGVASEETPQTSSSS#ARPGTPSDHQSQE.A | S398:      | 3 | 4,1948 | 0,439 | 0,187  |
| 11 | Q14676 MDC1_HUMAN   | K.LEPSTSTDQPVTPEPTSQATR.G         |            | 2 | 4,192  | 0,453 | 0,327  |
| 11 | Q9BVG9 PTSS2_HUMAN  | R.ASLEPPDGPAGQATGPGEGR.R          |            | 2 | 4,1901 | 0,521 | 0,352  |
| 11 | Q92922 SMRC1_HUMAN  | R.KHS#PS#PPPPTPE.S                | S328:S330: | 2 | 4,1876 | 0,475 | -0,159 |
| 11 | Q92734 TFG_HUMAN    | K.QSTQVM*AASM*SAFDPLKNQDE.I       |            | 3 | 4,1868 | 0,4   | 0,864  |
| 11 | Q8NCM9 Q8NCM9_HUMAN | R.SSDITSDLGNVLTSTPNAK.T           |            | 2 | 4,1819 | 0,574 | 0      |
| 11 | Q7Z309 F122B_HUMAN  | K.RIDFTPVS#PAPS#PTR.G             | S115:S119: | 2 | 4,1724 | 0,511 | 0,068  |
| 11 | Q16881 TRXR1_HUMAN  | D.LIIIGGGSGGLAAAKE.A              |            | 2 | 4,1711 | 0,48  | 0,171  |
| 11 | P52701 MSH6_HUMAN   | K.AGFDSYDQALADIRE.N               |            | 2 | 4,1668 | 0,439 | 0,137  |
| 11 | Q9UJY5 GGA1_HUMAN   | E.ILQANDNLTQVINLYK.Q              |            | 3 | 4,1649 | 0,405 | 0      |
| 11 | O43707 ACTN4_HUMAN  | R.M*APYQGPDAVPGALDYK.S            |            | 2 | 4,1607 | 0,483 | -0,405 |
| 11 | Q9Y490 TLN1_HUMAN   | R.ILAQATSDLVNAIK.A                |            | 2 | 4,1561 | 0,393 | 0,754  |
| 11 | Q96T23 RSF1_HUMAN   | E.M*DNLDNAQTSGIEEPSETK.G          |            | 2 | 4,1557 | 0,442 | 0,466  |
| 11 | P50991 TCPD_HUMAN   | K.TDM*DNQIVVSDYAQM*DR.V           |            | 2 | 4,1547 | 0,534 | 0,24   |
| 11 | Q96L14 C170L_HUMAN  | E.ALNNM*GFPSAM*LPSPPK.Q           |            | 3 | 4,1533 | 0,376 | 0,304  |
| 11 | Q86WC4 OSTM1_HUMAN  | R.LCQTCYPLFQQVVS.K.M              |            | 2 | 4,1529 | 0,529 | 0,261  |
| 11 | Q9ULJ3 ZN295_HUMAN  | R.VTVGDAATTAASSSSVTRD.L           |            | 2 | 4,1501 | 0,606 | -0,131 |
| 11 | Q92945 FUBP2_HUMAN  | K.IGQQPQQPGAPPQQDYTK.A            |            | 2 | 4,1424 | 0,436 | 0      |
| 11 | Q9NRA8 4ET_HUMAN    | E.VILAQEPAADQEVPR.D               |            | 3 | 4,1364 | 0,401 | 0,335  |
| 11 | Q9P2M7 CING_HUMAN   | R.VQGIAGQPFVVLNSGEK.G             |            | 3 | 4,1289 | 0,356 | 0,21   |
| 11 | P31949 S10AB_HUMAN  | E.FLNLIIGGLAM*ACHD.S              |            | 2 | 4,122  | 0,493 | 0,631  |
| 11 | P40222 TXLNA_HUMAN  | R.VQDLSAGGQGSGLTDSGPER.R          |            | 2 | 4,1213 | 0,483 | 1,497  |
| 11 | P06733 ENOA_HUMAN   | R.AAVPSGASTGIYEALER.D             |            | 2 | 4,1207 | 0,419 | 0,135  |

|    |                     |                                |                    |   |        |       |        |
|----|---------------------|--------------------------------|--------------------|---|--------|-------|--------|
| 11 | P37275 ZEB1_HUMAN   | K.AYYALNAQPSAEELSK.I           |                    | 2 | 4,118  | 0,454 | 0,209  |
| 11 | Q16555 DPYL2_HUMAN  | R.AITIANQTNCPYITK.V            |                    | 2 | 4,1153 | 0,527 | 0,201  |
| 11 | P82094 TMF1_HUMAN   | K.GYALVPIIVNSSTPK.S            |                    | 3 | 4,1063 | 0,363 | 0,352  |
| 11 | P46821 MAP1B_HUMAN  | E.GEKLS#PKS#DISPLT#PR.E        | S1779:S1782:T1788: | 3 | 4,1035 | 0,323 | 0,186  |
| 11 | Q01518 CAP1_HUMAN   | R.ALLVTASQCQQAENK.L            |                    | 3 | 4,1035 | 0,344 | 0,208  |
| 11 | P55327 TPD52_HUMAN  | K.VEEEIQTLSQVLAKE.E            |                    | 3 | 4,1024 | 0,371 | 0,331  |
| 11 | Q9UQ35 SRRM2_HUMAN  | R.M*GQAPSQSLPPAQDQPR.S         |                    | 2 | 4,094  | 0,525 | -0,126 |
| 11 | P21127 CD2L1_HUMAN  | R.GTS#PRPPEGGLGYSQLGDDDLKE.T   | S752:              | 2 | 4,0934 | 0,426 | 0,692  |
| 11 | Q96KP4 CNDP2_HUMAN  | K.NVM*LLPVGSAADDGAHSQNE.K      |                    | 3 | 4,0811 | 0,252 | 0,371  |
| 11 | P42126 D3D2_HUMAN   | R.DADVQNFVSFISK.D              |                    | 2 | 4,0807 | 0,496 | 0,249  |
| 11 | P49790 NU153_HUMAN  | K.RIPSIVSS#PLNS#PLDR.S         | S334:S338:         | 3 | 4,0792 | 0,228 | 0      |
| 11 | P49354 FNTPA_HUMAN  | E.LEFIADILNQDAK.N              |                    | 2 | 4,0762 | 0,3   | 0      |
| 11 | Q9NZ23 Q9NZ23_HUMAN | E.DQVSSDIVNNTHGSIFD.A          |                    | 2 | 4,076  | 0,457 | 0,251  |
| 11 | O75794 CD123_HUMAN  | K.DYLLDDGTLVVSGR.D             |                    | 2 | 4,0669 | 0,536 | 0,401  |
| 11 | O60664 M6PBP_HUMAN  | R.TLTAASVGAQPILSK.L            |                    | 3 | 4,0551 | 0,351 | 0,299  |
| 11 | Q969R5 LMBL2_HUMAN  | E.AGELPT#SPLHLLSPGTPR.S        | T66:               | 2 | 4,0516 | 0,445 | 0,254  |
| 11 | Q13765 NACA_HUMAN   | K.DIELVM*SQANVSR.A             |                    | 3 | 4,0506 | 0,471 | 0,247  |
| 11 | P18583 SON_HUMAN    | R.AGIEGPLLASDVGR.D             |                    | 2 | 4,0426 | 0,308 | 0,45   |
| 11 | Q5GLZ8 HERC4_HUMAN  | K.LIQPDHPQISQQVAASLE.K         |                    | 2 | 4,0419 | 0,358 | 0,185  |
| 11 | Q13151 ROAO_HUMAN   | E.AFGTLTDCVVVNPQTK.R           |                    | 3 | 4,0408 | 0,089 | 0,297  |
| 11 | Q9UQ35 SRRM2_HUMAN  | D.SLVQSCPGSLSLCAGVK.S          |                    | 2 | 4,0395 | 0,445 | 0      |
| 11 | Q15149 PLEC1_HUMAN  | R.LLDAQLSTGGIVDPSK.S           |                    | 2 | 4,0392 | 0,48  | 0,227  |
| 11 | Q12888 TP53B_HUMAN  | D.SLSTNSSDLVAPSPDAFR.S         |                    | 2 | 4,0358 | 0,463 | 0      |
| 11 | P05023 AT1A1_HUMAN  | R.QGAIVAVTGDGVNDSPALK.K        |                    | 2 | 4,0196 | 0,526 | 0,135  |
| 11 | Q15084 PDIA6_HUMAN  | K.LAAVDATVNQVLASR.Y            |                    | 3 | 4,0176 | 0,428 | 0,359  |
| 11 | O94776 MTA2_HUMAN   | K.LNPADAPNPVVFVATKD.T          |                    | 2 | 4,0148 | 0,425 | -0,069 |
| 11 | Q15021 CND1_HUMAN   | R.YQPLASTASDNDFVTPEPR.R        |                    | 2 | 4,0135 | 0,537 | 0,116  |
| 11 | Q9P260 K1468_HUMAN  | R.QSGTPPGM*GAPGVPGAAGVGGAGGR.E |                    | 3 | 4,0102 | 0,416 | 0,176  |
| 11 | Q8IZH2 XRN1_HUMAN   | E.AQSSQATPVQTSQPDSNIVK.V       |                    | 2 | 4,0084 | 0,379 | 0,449  |
| 11 | Q14789 GOGB1_HUMAN  | E.DASALQGGTSVAQIK.A            |                    | 2 | 4,0084 | 0,376 | 0,338  |
| 11 | Q15149 PLEC1_HUMAN  | R.DPYTGQSVSLFQALK.K            |                    | 2 | 4,0079 | 0,444 | 0,074  |
| 11 | Q6ZWH8 Q6ZWH8_HUMAN | R.AGPAPPASDGVDIQDVK.F          |                    | 2 | 4,0035 | 0,457 | 0,216  |
| 11 | Q14694 UBP10_HUMAN  | E.SASPPADGTGSASGTLPVSQPK.S     |                    | 2 | 3,997  | 0,255 | 0,243  |



|    |                    |                            |                    |   |        |       |        |
|----|--------------------|----------------------------|--------------------|---|--------|-------|--------|
| 11 | Q8IZL8 PELP1_HUMAN | R.GADTAPTLAPEALPSQGEVER.E  |                    | 2 | 3,993  | 0,513 | 0,116  |
| 11 | Q5T4S7 UBR4_HUMAN  | R.M*PGNPYSSNEPGIGPLM*R.D   |                    | 2 | 3,9914 | 0,482 | 0,25   |
| 11 | P17676 CEBPB_HUMAN | E.AGAPGGGAGM*AAGFPYALR.A   |                    | 2 | 3,9887 | 0,438 | 0      |
| 11 | P11586 C1TC_HUMAN  | E.DLGVSGALTVLM*K.D         |                    | 2 | 3,9885 | 0,516 | 0,277  |
| 11 | P29374 ARI4A_HUMAN | K.AADEPAYLTVGTDVSAK.Y      |                    | 2 | 3,9877 | 0,545 | -0,786 |
| 11 | Q92733 PRCC_HUMAN  | K.TSSLAPVVGTTTTTSPSAIK.A   |                    | 2 | 3,9847 | 0,509 | 0      |
| 11 | P09211 GSTP1_HUMAN | E.AALVDM*VNDGVEDLR.C       |                    | 2 | 3,9835 | 0,492 | 0,224  |
| 11 | P09211 GSTP1_HUMAN | E.AALVDM*VNDGVEDLR.C       |                    | 3 | 3,9823 | 0,373 | 0,336  |
| 11 | O75157 T22D2_HUMAN | D.LSQFQTQTQPLVGQVDDTR.R    |                    | 3 | 3,9781 | 0,426 | 0,085  |
| 11 | P08107 HSP71_HUMAN | R.IINEPTAAAIAYGLDR.T       |                    | 2 | 3,9764 | 0,445 | -0,217 |
| 11 | Q9UJF2 NGAP_HUMAN  | R.QQTQQVQSPVDSATM*SPVER.T  |                    | 3 | 3,9757 | 0,382 | 0,328  |
| 11 | Q05209 PTN12_HUMAN | E.NAIPDLSEGNSSDINYQTR.K    |                    | 2 | 3,9751 | 0,544 | 0,318  |
| 11 | O14893 GEMI2_HUMAN | E.AAQCPDVVVAQIDPK.K        |                    | 2 | 3,9749 | 0,453 | 0,303  |
| 11 | Q53T59 H1BP3_HUMAN | K.AGPAEAVAGQQKPEQIQAM*DE.M |                    | 2 | 3,9704 | 0,476 | 0,528  |
| 11 | P09211 GSTP1_HUMAN | K.FQDGLTLYQSNTILR.H        |                    | 3 | 3,9694 | 0,326 | 0,388  |
| 11 | P51397 DAP1_HUMAN  | E.SPS#PPKPTVFISGVIAR.G     | S51:               | 3 | 3,9688 | 0,316 | -0,2   |
| 11 | Q9NPF4 OSGEP_HUMAN | R.TYVTPPGTGFLPGDTAR.H      |                    | 2 | 3,9657 | 0,394 | 0,209  |
| 11 | Q13586 STIM1_HUMAN | E.IVSPLSM*QSPSLQSSVR.Q     |                    | 3 | 3,9629 | 0,339 | 0,3    |
| 11 | P17980 PRS6A_HUMAN | E.LLNQLDGFQPNQVK.V         |                    | 2 | 3,9613 | 0,455 | 0,783  |
| 11 | Q9P2M7 CING_HUMAN  | R.VQGIAGQPFVVLNSGEK.G      |                    | 2 | 3,9572 | 0,472 | 0,07   |
| 11 | O15231 ZN185_HUMAN | R.GGQGDPAVPAQQPADPSTPER.Q  |                    | 2 | 3,9528 | 0,451 | 0,235  |
| 11 | P50548 ERF_HUMAN   | E.GAGALAPPPPPQIK.V         |                    | 3 | 3,9478 | 0,443 | 0,324  |
| 11 | Q13765 NACA_HUMAN  | K.DIELVM*SQANVSR.A         |                    | 2 | 3,9471 | 0,469 | 0,083  |
| 11 | Q3ZCQ8 TIM50_HUMAN | K.IPDEFDNDPILVQQLR.R       |                    | 2 | 3,9449 | 0,445 | -0,064 |
| 11 | Q14527 HLTF_HUMAN  | R.AGPSYSM*PVHAAVQM*TTE.Q   |                    | 2 | 3,9442 | 0,385 | -0,447 |
| 11 | Q12905 ILF2_HUMAN  | K.ILPTLEAVAALGNK.V         |                    | 2 | 3,9404 | 0,42  | -0,087 |
| 11 | Q8IY81 RRMJ3_HUMAN | E.VTQGDM*SAADTFLSDLPR.D    |                    | 3 | 3,94   | 0,418 | 0,66   |
| 11 | P37837 TALDO_HUMAN | K.QFTTVVADTGDFHAIDE.Y      |                    | 2 | 3,94   | 0,453 | 0,131  |
| 11 | P46821 MAP1B_HUMAN | E.GEKLS#PKS#DISPLT#PR.E    | S1779:S1782:T1788: | 2 | 3,9394 | 0,411 | 0,062  |
| 11 | P07737 PROF1_HUMAN | K.TFVNITPAEVGVLVGK.D       |                    | 2 | 3,9383 | 0,393 | 0,297  |
| 11 | P30837 AL1B1_HUMAN | K.VGNPFELDTQQGPQVDKE.Q     |                    | 2 | 3,9374 | 0,466 | 0,305  |
| 11 | Q9BVG9 PTSS2_HUMAN | R.ASLEPPDGPSAGQATGPGEGR.R  |                    | 3 | 3,9351 | 0,343 | 0,176  |
| 11 | Q8NE71 ABCF1_HUMAN | E.VVADETPAVQAVLR.A         |                    | 2 | 3,932  | 0,476 | 0,499  |

|    |                    |                                      |       |   |        |       |        |
|----|--------------------|--------------------------------------|-------|---|--------|-------|--------|
| 11 | Q9P2I0 CPSF2_HUMAN | R.QLIIVHGPPEASQDLAE.C                |       | 2 | 3,9319 | 0,407 | 0,134  |
| 11 | Q96RG2 PASK_HUMAN  | R.LNVQVTSTPVIVM*R.G                  |       | 2 | 3,9312 | 0,506 | 0,155  |
| 11 | P27816 MAP4_HUMAN  | E.DTPSSKPTLLANGGHVEGSDTTGSPT#EFLEE.K | T101: | 3 | 3,9301 | 0,403 | 0,553  |
| 11 | P14618 KPYM_HUMAN  | K.IYVDDGLISLQVK.Q                    |       | 2 | 3,9268 | 0,504 | 0,667  |
| 11 | Q6Q0C0 TRAF7_HUMAN | E.TTFGPAFSAVTTITK.A                  |       | 2 | 3,9249 | 0,548 | 0,396  |
| 11 | Q14562 DHX8_HUMAN  | K.NPDGSLQAAM*M*QSALAK.E              |       | 2 | 3,9231 | 0,547 | 0,198  |
| 11 | Q9NVC6 MED17_HUMAN | E.TYLPPLSM*SQNLAR.L                  |       | 3 | 3,9194 | 0,417 | 0,455  |
| 11 | P55036 PSMD4_HUMAN | E.AGIATTGTEDSDDALLK.M                |       | 2 | 3,9193 | 0,478 | 0,364  |
| 11 | Q6UN15 FIP1_HUMAN  | R.LPGAIDVIGQTITISR.V                 |       | 2 | 3,9191 | 0,501 | 0,074  |
| 11 | P30086 PEBP1_HUMAN | K.LYTLVLTDPDAPSR.K                   |       | 2 | 3,9189 | 0,455 | 0,156  |
| 11 | P10515 ODP2_HUMAN  | K.VPLPSLSPTM*QAGTIAR.W               |       | 2 | 3,9178 | 0,446 | 0      |
| 11 | Q9UNH7 SNX6_HUMAN  | R.IGSSLYALGTQDSTDICK.F               |       | 2 | 3,9177 | 0,595 | 0,316  |
| 11 | Q16718 NDUA5_HUMAN | K.TTGLVGLAVCNTPHE.R                  |       | 2 | 3,909  | 0,446 | -0,078 |
| 11 | Q96GQ7 DDX27_HUMAN | R.SADFNPDFVFTEKE.G                   |       | 2 | 3,9082 | 0,445 | 0,371  |
| 11 | Q9H910 HN1L_HUMAN  | R.M*ASNIFGPTEEPQNIPK.R               |       | 2 | 3,9081 | 0,368 | 0      |
| 11 | Q9UBD5 ORC3_HUMAN  | E.ALQNNVTPYVVSQAK.D                  |       | 3 | 3,907  | 0,38  | 0,21   |
| 11 | Q9NXC5 MIO_HUMAN   | E.DSAATLLSINSDTPYM*K.C               |       | 2 | 3,907  | 0,279 | 0,132  |
| 11 | P04844 RPN2_HUMAN  | E.DQVIQLM*NAIFSK.K                   |       | 2 | 3,9037 | 0,442 | -0,24  |
| 11 | Q15942 ZYG_HUMAN   | E.IDSLSSLLDDM*TK.N                   |       | 2 | 3,9033 | 0,437 | 0,252  |
| 11 | Q08378 GOGA3_HUMAN | K.DVLQAAAAEHQDQGGQEVNGE.V            |       | 2 | 3,9016 | 0,455 | -0,231 |
| 11 | P05387 RLA2_HUMAN  | R.YVASYLALGGSPPSAK.D                 |       | 2 | 3,8987 | 0,408 | 0,065  |
| 11 | Q53LP3 ANR57_HUMAN | R.IQVTAEPDGPAGPEAR.D                 |       | 2 | 3,8964 | 0,458 | 0,128  |
| 11 | P43243 MATR3_HUMAN | R.GDADQASNILASFGLSAR.D               |       | 2 | 3,8914 | 0,417 | -0,136 |
| 11 | Q9BX66 SRBS1_HUMAN | R.VGEQDSAPTQEKPT#SPGKAIE.K           | T349: | 3 | 3,8913 | 0,295 | -1,383 |
| 11 | O94906 PRP6_HUMAN  | R.LSQVSDSVSGQTVVDPK.G                |       | 2 | 3,8892 | 0,497 | -0,21  |
| 11 | P16220 CREB1_HUMAN | K.ILNDLSSDAPGVPRIEEE.K               |       | 2 | 3,8873 | 0,447 | 0,125  |
| 11 | Q6Y7W6 PERQ2_HUMAN | R.VGVEASEETPQTSSSSARPGT#PSDHQSQE.A   | T382: | 3 | 3,8862 | 0,381 | 0,358  |
| 11 | Q14186 TFDP1_HUMAN | E.M*AQGTGGVFITTAGSTSNCTR.F           |       | 3 | 3,8847 | 0,497 | 0,43   |
| 11 | P42704 LPPRC_HUMAN | K.M*VFINNIALAQIK.N                   |       | 2 | 3,8816 | 0,448 | 0,491  |
| 11 | Q00610 CLH1_HUMAN  | R.TSIDAYDNFDNISLAQR.L                |       | 3 | 3,8816 | 0,212 | 0,753  |
| 11 | P29401 TKT_HUMAN   | R.SVPTSTVFYPSDGVATEK.A               |       | 2 | 3,8808 | 0,485 | 0,259  |
| 11 | O14617 AP3D1_HUMAN | R.YQDTPGVEHIPVVQID.L                 |       | 2 | 3,8805 | 0,475 | -0,202 |
| 11 | O75526 HNRGT_HUMAN | R.GFAFVTFESPADAK.A                   |       | 2 | 3,8789 | 0,463 | 0,246  |

|    |                     |                                   |            |   |        |       |        |
|----|---------------------|-----------------------------------|------------|---|--------|-------|--------|
| 11 | Q9HCK8 CHD8_HUMAN   | K.VVLQPQAGSSQGASSGLSVVK.V         |            | 3 | 3,8775 | 0,346 | 0,092  |
| 11 | P78347 GTF2I_HUMAN  | K.ANELPQPPVPEPANAGK.R             |            | 2 | 3,8709 | 0,412 | 0,282  |
| 11 | P05783 K1C18_HUMAN  | R.GGM*GSGGLATGIAGGLAGM*GGIQNEKE.T |            | 3 | 3,8704 | 0,302 | 0,453  |
| 11 | Q86UU1 PHLB1_HUMAN  | E.IM*DSLVLLEEPGAAGK.K             |            | 2 | 3,8688 | 0,521 | 0,158  |
| 11 | Q00610 CLH1_HUMAN   | R.NLQNLILITAIK.A                  |            | 2 | 3,8678 | 0,355 | -0,18  |
| 11 | Q05048 CSTF1_HUMAN  | K.LGM*ENDDTAVQYAIGR.S             |            | 2 | 3,866  | 0,524 | -0,69  |
| 11 | Q8N3V7 SYNPO_HUMAN  | R.AAS#PAKPSSLDLVPNLPK.G           | S833:      | 2 | 3,8633 | 0,501 | -0,065 |
| 11 | Q9Y478 AAKB1_HUMAN  | K.ILM*DSPEDADLFHSEE.I             |            | 3 | 3,8621 | 0,273 | 0,393  |
| 11 | Q68D20 PMS2L_HUMAN  | K.FQVLPQPTNLTSPNTK.V              |            | 2 | 3,8618 | 0,415 | -0,273 |
| 11 | O95359 TACC2_HUMAN  | K.QALYLM*FDTSQESPVK.S             |            | 2 | 3,8617 | 0,476 | 0,261  |
| 11 | Q9ULM3 YETS2_HUMAN  | K.QGTAGSVINNPYVIM*DK.Q            |            | 2 | 3,8585 | 0,464 | 0,535  |
| 11 | P53621 COPA_HUMAN   | E.DGFVEATEGLGDDALGK.G             |            | 2 | 3,8581 | 0,514 | -0,072 |
| 11 | Q9NQT8 KI13B_HUMAN  | E.M*GPDVLVQTM*GAPALK.I            |            | 2 | 3,8552 | 0,456 | 0,147  |
| 11 | P02545 LMNA_HUMAN   | K.ASASGSGAQVGGPISSGSSASSVTVTR.S   |            | 3 | 3,8524 | 0,481 | -0,077 |
| 11 | Q5R372 Q5R372_HUMAN | E.ISTPRPS#SPGGLPEEDSVLFNK.L       | S118:      | 3 | 3,8499 | 0,377 | 0,304  |
| 11 | P49790 NU153_HUMAN  | K.RIPSIVSS#PLNS#PLDR.S            | S334:S338: | 2 | 3,8499 | 0,346 | -0,766 |
| 11 | Q6UXD5 SE6L2_HUMAN  | E.LLVLAGGGSPGLAPR.L               |            | 2 | 3,8498 | 0,487 | 0,089  |
| 11 | Q02952 AKA12_HUMAN  | E.ESQLPGTGGPEDVLQPVQR.A           |            | 3 | 3,8496 | 0,228 | 0,365  |
| 11 | Q96TA1 NIBL1_HUMAN  | R.DSM*VM*HNS#DPNLHLLAE.G          | S561:      | 2 | 3,8464 | 0,49  | 0,24   |
| 11 | P30520 PURA2_HUMAN  | K.VVDLLAQDADIVCR.C                |            | 3 | 3,8426 | 0,409 | 0,23   |
| 11 | P62750 RL23A_HUMAN  | E.DNNTLVFIVDVK.A                  |            | 2 | 3,8418 | 0,388 | 0,266  |
| 11 | Q02952 AKA12_HUMAN  | K.QLLQTVNVPIIDGAKE.V              |            | 2 | 3,8407 | 0,421 | -0,211 |
| 11 | P50990 TCPQ_HUMAN   | K.NVGLDIEAEVPAVK.D                |            | 2 | 3,8337 | 0,427 | 0,252  |
| 11 | P40189 IL6RB_HUMAN  | E.GHSSGIGGSSCM*SSSRPSIS#SS#DENE.S | S742:S744: | 3 | 3,8302 | 1     | 0,198  |
| 11 | Q9BPX5 ARP5L_HUMAN  | E.AAAAAAEPGDPSEVDGLLR.Q           |            | 2 | 3,8291 | 0,288 | 0,192  |
| 11 | Q16626 MEA1_HUMAN   | E.LAPVGDGDVVADIQDR.I              |            | 2 | 3,8216 | 0,528 | 0,372  |
| 11 | P27816 MAP4_HUMAN   | K.DM*ES#PTKLDVTLAK.D              | S280:      | 2 | 3,82   | 0,342 | 0,074  |
| 11 | Q9UER7 DAXX_HUMAN   | R.VDS#PSHGLVTSSLCIPSPAR.L         | S688:      | 2 | 3,8198 | 0,493 | 0,113  |
| 11 | Q86VR2 F134C_HUMAN  | R.SPPGAEQPAPPASRDEAALPE.L         |            | 2 | 3,8125 | 0,454 | -0,22  |
| 11 | Q9UBC2 EP15R_HUMAN  | E.VTLSNLNLSM*PPPK.F               |            | 3 | 3,8093 | 0,181 | 0,539  |
| 11 | P06576 ATPB_HUMAN   | K.GFQQILAGEYDHLPE.Q               |            | 2 | 3,8079 | 0,37  | 0      |
| 11 | Q9P2K5 MYEF2_HUMAN  | K.AEVPGATGGDS#PHLQPAEPPGEPR.R     | S17:       | 2 | 3,8062 | 0,388 | 0,2    |
| 11 | Q9H3S7 PTN23_HUMAN  | R.RGAAAADLLSSS#PE.S               | S1123:     | 2 | 3,8044 | 0,318 | 0,171  |

|    |                    |                                |   |        |       |        |
|----|--------------------|--------------------------------|---|--------|-------|--------|
| 11 | O75362 ZN217_HUMAN | K.APLTSGIDSSTLAPSNLK.S         | 2 | 3,8042 | 0,564 | 0,275  |
| 11 | Q9NQV6 PRD10_HUMAN | E.SVDGSDPLATLQTPPLGR.L         | 2 | 3,8022 | 0,454 | -0,283 |
| 11 | P08779 K1C16_HUMAN | R.GQTGGDVNVEM*DAAPGVLSR.I      | 2 | 3,8018 | 0,537 | -0,116 |
| 11 | Q9P1Y6 K1542_HUMAN | E.SIFGTEPEPPLGPSSAM*SK.L       | 2 | 3,8013 | 0,454 | 0,188  |
| 11 | O15355 PPM1G_HUMAN | K.EEPGSDSGTTAVVALIR.G          | 2 | 3,8006 | 0,51  | 0,215  |
| 11 | P07737 PROF1_HUMAN | R.DSLLQDGEFSM*DLR.T            | 2 | 3,8006 | 0,434 | 0,297  |
| 11 | P07910 HNRPC_HUMAN | R.M*IAGQVLDINLAAEPK.V          | 3 | 3,797  | 0,393 | 0,431  |
| 11 | O43847 NRDC_HUMAN  | K.LQNGLQALLISDLSNM*EGK.T       | 3 | 3,7929 | 0,416 | -0,089 |
| 11 | O15042 SR140_HUMAN | K.NPPNQSSNERPPSLLVIE.T         | 2 | 3,7894 | 0,466 | 0,245  |
| 11 | Q9Y490 TLN1_HUMAN  | R.DPVQLNLLVYQAR.D              | 2 | 3,7891 | 0,298 | 0,479  |
| 11 | Q14157 UBP2L_HUMAN | K.STSAPQM*SPGSSDNQSSSPQPAQQK.L | 3 | 3,7889 | 0,432 | -0,072 |
| 11 | O75616 ERAL_HUMAN  | E.TQVILLDTPGIISPGK.Q           | 2 | 3,7849 | 0,431 | 0,074  |
| 11 | P13667 PDIA4_HUMAN | K.FAM*EPEEFSDTLRE.F            | 2 | 3,7835 | 0,375 | 0,067  |
| 11 | Q99832 TCPH_HUMAN  | K.LPIGDVATQYFADR.D             | 2 | 3,7823 | 0,584 | -0,435 |
| 11 | Q71RC2 LARP4_HUMAN | R.ASTASPCNNNINAATAVALQEPR.K    | 3 | 3,782  | 0,285 | 1,081  |
| 11 | Q14974 IMB1_HUMAN  | K.LAATNALLNSLEFTK.A            | 2 | 3,7787 | 0,396 | 0      |
| 11 | Q14676 MDC1_HUMAN  | E.LQPSTSTDQPVTPPEPTSQATR.G     | 3 | 3,7748 | 0,364 | -0,163 |
| 11 | O43395 PRPF3_HUMAN | K.QLSFISPTPQPK.T               | 2 | 3,7735 | 0,461 | 0,085  |
| 11 | Q02218 ODO1_HUMAN  | E.M*DEPM*FTQPLM*YK.Q           | 2 | 3,7725 | 0,382 | 0,218  |
| 11 | Q9HAV4 XPO5_HUMAN  | E.VM*DLITVCCVSK.K              | 2 | 3,7718 | 0,285 | 0,339  |
| 11 | P12270 TPR_HUMAN   | E.ASDQVSDDTVEM*PLPK.K          | 2 | 3,7698 | 0,511 | 0      |
| 11 | O00754 MA2B1_HUMAN | E.LVDYFLNVATAQGR.Y             | 2 | 3,7689 | 0,399 | 0,156  |
| 11 | P54105 ICLN_HUMAN  | E.VDTTPTVAGQFEDADVDH.-         | 2 | 3,7689 | 0,493 | 0,382  |
| 11 | O60341 LSD1_HUMAN  | R.IADQFLGAM*YTLPR.Q            | 2 | 3,766  | 0,402 | 0,53   |
| 11 | Q9Y678 COPG_HUMAN  | K.ILYLINQGEHLGTTE.A            | 2 | 3,7647 | 0,361 | -0,072 |
| 11 | Q96QC0 PP1RA_HUMAN | K.LPPVLANLM*GSM*GAGK.G         | 3 | 3,7638 | 0,397 | 0,346  |
| 11 | Q9Y4L1 HYOU1_HUMAN | K.LGNTISSLFGGGTTTDAK.E         | 2 | 3,7619 | 0,543 | -0,07  |
| 11 | O15355 PPM1G_HUMAN | K.EEPGSDSGTTAVVALIR.G          | 3 | 3,7615 | 0,192 | 0,537  |
| 11 | Q96KP4 CNDP2_HUMAN | K.NVM*LLPVGSADDGAHSQNE.K       | 2 | 3,7611 | 0,395 | 0,124  |
| 11 | P09960 LKHA4_HUMAN | R.TLTGTAALTVQSQEDNLR.S         | 3 | 3,76   | 0,309 | 0,381  |
| 11 | O14617 AP3D1_HUMAN | R.ALDIDLKPLADSE.K              | 2 | 3,7587 | 0,499 | 0,966  |
| 11 | P11831 SRF_HUMAN   | K.ALIQTCLNSPDS#PPRSDPTTDQR.M   | 3 | 3,7518 | 0,334 | 0,207  |
| 11 | Q9Y2D5 AKAP2_HUMAN | R.DALGDSLQVPVSPSSTSSR.C        | 2 | 3,7487 | 0,495 | 0,244  |

S224:

|    |                    |                                 |       |   |        |       |        |
|----|--------------------|---------------------------------|-------|---|--------|-------|--------|
| 11 | Q16626 MEA1_HUMAN  | E.LAPVGDGDVVADIQDR.I            |       | 3 | 3,7455 | 0,398 | 0,781  |
| 11 | Q02446 SP4_HUMAN   | K.TSGSQDSQPSPLALLAATCSK.I       |       | 3 | 3,7447 | 0,374 | 0,259  |
| 11 | P11310 ACADM_HUMAN | E.GNSLGQM*PIIIAGNDQQK.K         |       | 3 | 3,7441 | 0,313 | 0,963  |
| 11 | O60763 USO1_HUMAN  | K.EQDDLLVLLADQDQK.I             |       | 2 | 3,7434 | 0,503 | 0,21   |
| 11 | Q5UIP0 RIF1_HUMAN  | E.LDPSLVSANDSPSGM*QTR.C         |       | 2 | 3,7426 | 0,446 | -0,323 |
| 11 | P23443 KS6B1_HUMAN | E.GGQLNES#M*DHGGVGPYELGM*EHCE.K | S53:  | 3 | 3,7394 | 0,3   | 0,27   |
| 11 | Q14807 KIF22_HUMAN | E.IGSPEPM*AAPASASQKLS#PLQK.L    | S427: | 3 | 3,7377 | 0,37  | 0,079  |
| 11 | P08069 IGF1R_HUMAN | E.SVPLDPSASSSLPLPDR.H           |       | 2 | 3,7337 | 0,599 | 0,067  |
| 11 | P21333 FLNA_HUMAN  | R.VGEPGHGGDPGLVSAYGAGLE.G       |       | 2 | 3,7315 | 0,528 | 0,252  |
| 11 | Q8IX07 FOG1_HUMAN  | E.AAPILGPGEPPQAPSR.T            |       | 2 | 3,7293 | 0,399 | 0      |
| 11 | P06748 NPM_HUMAN   | E.AEAM*NYEGS#PIKVTLATLK.M       | S70:  | 3 | 3,7253 | 0,357 | -0,343 |
| 11 | Q8NCD3 HJURP_HUMAN | K.SLLGSTAIEAPSSTCVAR.A          |       | 2 | 3,7241 | 0,355 | 0,201  |
| 11 | P04843 RPN1_HUMAN  | K.TILPAAAQDVYYRDE.I             |       | 3 | 3,724  | 0,406 | 0,424  |
| 11 | Q8WWM7 ATX2L_HUMAN | E.VDGLLTSEPM*GSPVSSK.T          |       | 2 | 3,718  | 0,452 | 0,071  |
| 11 | Q00653 NFKB2_HUMAN | E.TADGPYLVIVEQPK.Q              |       | 2 | 3,7165 | 0,278 | 1,116  |
| 11 | Q96QC0 PP1RA_HUMAN | K.LPPVLANLM*GSM*GAGK.G          |       | 2 | 3,7108 | 0,478 | 0      |
| 11 | O94804 STK10_HUMAN | K.LANGSLEPPAQAAPGPSK.R          |       | 2 | 3,7078 | 0,272 | -0,072 |
| 11 | P49750 YLPM1_HUMAN | K.SQLLAPPPSAPPGNK.T             |       | 3 | 3,7064 | 0,359 | -0,116 |
| 11 | Q9BZK7 TBL1R_HUMAN | E.SLSLIDAVM*PDVVQTR.Q           |       | 2 | 3,7041 | 0,448 | 0,208  |
| 11 | Q5VZL5 ZMYM4_HUMAN | K.DNLVSSIHTDDSLE.V              |       | 2 | 3,7029 | 0,465 | 0,395  |
| 11 | P05387 RLA2_HUMAN  | K.NIEDVIAQGIGK.L                |       | 2 | 3,6998 | 0,452 | 0,291  |
| 11 | Q15637 SF01_HUMAN  | R.AYIVQLQIEDLTR.K               |       | 2 | 3,6993 | 0,427 | 0,156  |
| 11 | O15355 PPM1G_HUMAN | K.NLPPEEQM*ISALPDIK.V           |       | 3 | 3,697  | 0,248 | 0,303  |
| 11 | Q9BZL4 PP12C_HUMAN | R.IPEPES#PAKPNVPTASTAPPADSR.D   | S509: | 3 | 3,6956 | 0,186 | 0,219  |
| 11 | Q2NKX8 ERC6L_HUMAN | K.M*ASVVDDLPEKEG.K              |       | 2 | 3,6948 | 0,433 | 0,321  |
| 11 | P13667 PDIA4_HUMAN | E.NGVLVLNDANFDNFVADKD.T         |       | 2 | 3,6938 | 0,411 | 0      |
| 11 | P38646 GRP75_HUMAN | K.STNGDTFLGGEDFDQALLR.H         |       | 3 | 3,6906 | 0,33  | -0,089 |
| 11 | Q12996 CSTF3_HUMAN | E.LAVEGNGPVESNAVLTK.A           |       | 2 | 3,6897 | 0,521 | 0,144  |
| 11 | P20042 IF2B_HUMAN  | K.DASDDLDDLNFFNQK.K             |       | 2 | 3,686  | 0,414 | -0,139 |
| 11 | O43290 SNUT1_HUMAN | E.DVLVNVNLVDKE.R                |       | 2 | 3,6845 | 0,361 | -0,899 |
| 11 | Q14676 MDC1_HUMAN  | K.LEPSTSTDQPVTPPTSQATR.G        |       | 3 | 3,6843 | 0,337 | 0,082  |
| 11 | Q09666 AHNK_HUMAN  | K.ISM*PDIDLNLGPK.I              |       | 2 | 3,6816 | 0,459 | -0,159 |
| 11 | Q147X3 MAK3_HUMAN  | R.TAVPSPVEAAAASDPAAAR.N         |       | 2 | 3,6792 | 0,459 | -0,139 |

|    |                    |                                     |                    |   |        |       |        |
|----|--------------------|-------------------------------------|--------------------|---|--------|-------|--------|
| 11 | P31949 S10AB_HUMAN | E.FLNLIIGLAM*ACHD.S                 |                    | 3 | 3,6764 | 0,429 | 0,473  |
| 11 | P05362 ICAM1_HUMAN | R.EPAVGGEPAEVTTTLVLR.R              |                    | 2 | 3,6764 | 0,543 | 0,069  |
| 11 | Q86VP6 CAND1_HUMAN | E.TIVDTLCTNM*LSDKE.Q                |                    | 2 | 3,6755 | 0,442 | 0,278  |
| 11 | P40939 ECHA_HUMAN  | K.DLNSDM*DSILASLK.L                 |                    | 2 | 3,6727 | 0,491 | 0,555  |
| 11 | Q14CW9 AT7L3_HUMAN | E.SSLDNDSFDM*TDSQALISR.L            |                    | 3 | 3,668  | 0,427 | 0,345  |
| 11 | Q9P289 MST4_HUMAN  | K.LADFGVAGQLTDTQIK.R                |                    | 3 | 3,6674 | 0,367 | 0,545  |
| 11 | Q08J23 NSUN2_HUMAN | R.AGEPNS#PDAEEANSPDVTAGCDPAGVHPPR.- | S743:              | 3 | 3,6668 | 0,458 | 0,473  |
| 11 | Q7LBC6 JHD2B_HUMAN | K.LFNLLGPTASNNKTE.G                 |                    | 2 | 3,6659 | 0,439 | -0,067 |
| 11 | Q5T1M5 FKB15_HUMAN | R.LASLFLDQAAAGHGNE.F                |                    | 3 | 3,6648 | 0,163 | 0,219  |
| 11 | Q92734 TFG_HUMAN   | K.QSTQVM*AASM*SAFDPLK.N             |                    | 2 | 3,6623 | 0,5   | 0,199  |
| 11 | P35222 CTNB1_HUMAN | E.TADLGLDIGAQGEPLGYR.Q              |                    | 2 | 3,6596 | 0,587 | -0,066 |
| 11 | Q53T59 H1BP3_HUMAN | K.AGPAAEAVAGQQKPEQIQAM*DE.M         |                    | 3 | 3,6579 | 0,42  | 0,079  |
| 11 | Q09666 AHNK_HUMAN  | K.VGIDTPDIDIHGPE.G                  |                    | 2 | 3,6564 | 0,531 | 0,248  |
| 11 | O60841 IF2P_HUMAN  | R.IPGM*LIIDTPGHE.S                  |                    | 2 | 3,6553 | 0,54  | 0,26   |
| 11 | Q9Y478 AAKB1_HUMAN | E.LSSS#PPGPYHQEPYVCKPEE.R           | S182:              | 3 | 3,654  | 0,322 | 0      |
| 11 | Q14160 LAP4_HUMAN  | E.ACPCQPDSGSPLPAEEK.R               |                    | 2 | 3,6539 | 0,394 | -0,433 |
| 11 | P51114 FXR1_HUMAN  | R.RGPNYTSGYGT#NSE.L                 | T401:              | 2 | 3,6522 | 0,419 | -0,154 |
| 11 | P04843 RPN1_HUMAN  | K.TILPAAQDVYYRDE.I                  |                    | 2 | 3,6506 | 0,639 | 0,424  |
| 11 | P35908 K22E_HUMAN  | K.VDLLNQEIEFLK.V                    |                    | 2 | 3,6463 | 0,378 | 0,167  |
| 11 | P24534 EF1B_HUMAN  | K.SPAGLQVLNDYLADK.S                 |                    | 2 | 3,6447 | 0,446 | 0,38   |
| 11 | Q8TF44 NLF3_HUMAN  | E.ATDADPQAQGAM*SLPSVPK.A            |                    | 2 | 3,6377 | 0,494 | 0      |
| 11 | Q9NQR4 NIT2_HUMAN  | K.LYNTCAVFGPDGTLAK.Y                |                    | 2 | 3,6368 | 0,492 | 0      |
| 11 | Q92615 LARP5_HUMAN | R.TLSADASVNTLPVVVSR.E               |                    | 2 | 3,635  | 0,493 | 0      |
| 11 | P24534 EF1B_HUMAN  | E.DYVQSM*DVAAFNKI.-                 |                    | 2 | 3,6339 | 0,429 | 0,453  |
| 11 | Q9BTC8 MTA3_HUMAN  | R.DISNTLIM*LADK.H                   |                    | 2 | 3,633  | 0,479 | 0,181  |
| 11 | P55072 TERA_HUMAN  | R.LDQLIYIPLPDEK.S                   |                    | 2 | 3,6327 | 0,287 | 0,47   |
| 11 | O95155 UBE4B_HUMAN | R.LAGGQTSQPTPLTSPQR.E               |                    | 2 | 3,6326 | 0,354 | -0,265 |
| 11 | P51948 MAT1_HUMAN  | R.VQLFEDPTVDKEVE.I                  |                    | 2 | 3,6307 | 0,297 | 0,222  |
| 11 | P06733 ENOA_HUMAN  | R.AAVPSGASTGIYEALELR.D              |                    | 3 | 3,6294 | 0,371 | 0,101  |
| 11 | Q01082 SPTB2_HUMAN | R.TSS#KESS#PIPSPTS#DRK.A            | S2161:S2165:S2172: | 2 | 3,6289 | 1     | 0,179  |
| 11 | Q92797 SYMPK_HUMAN | R.LSDVLKPLTDAQVE.A                  |                    | 2 | 3,6275 | 0,389 | 0,24   |
| 11 | A6NDG6 PGP_HUMAN   | K.TILTLTGVSTLGDVK.N                 |                    | 2 | 3,6274 | 0,492 | -0,08  |
| 11 | Q9NX62 IMPA3_HUMAN | K.VLALLDVPDKSQE.K                   |                    | 2 | 3,6253 | 0,473 | 0,256  |

|    |                    |                             |                 |   |        |       |        |
|----|--------------------|-----------------------------|-----------------|---|--------|-------|--------|
| 11 | Q6P4Q7 CNNM4_HUMAN | E.TGAFSYYGTM*ALTSVPSDR.S    |                 | 2 | 3,6238 | 0,464 | 0,359  |
| 11 | P05387 RLA2_HUMAN  | R.YVASYLLAALGGNSSPSAK.D     |                 | 3 | 3,6238 | 0,353 | -0,098 |
| 11 | Q08211 DHX9_HUMAN  | R.LSM*SQLNEKETPFELIE.A      |                 | 2 | 3,6234 | 0,426 | 0,241  |
| 11 | Q01518 CAP1_HUMAN  | K.LSDLLAPISEIQIKE.V         |                 | 2 | 3,6227 | 0,505 | 0,235  |
| 11 | Q4KMQ1 CI075_HUMAN | E.IEVIGGYLALQK.S            |                 | 2 | 3,618  | 0,386 | 0,094  |
| 11 | P68104 EF1A1_HUMAN | K.SGDAAIVDM*VPGKPM*CVE.S    |                 | 2 | 3,6173 | 0,399 | 0      |
| 11 | Q96D71 REPS1_HUMAN | K.TIQPDLNGFIPGSAAKE.F       |                 | 2 | 3,616  | 0,468 | -0,139 |
| 11 | Q13586 STIM1_HUMAN | E.IVSPLSM*QSPSLQSSVR.Q      |                 | 2 | 3,6105 | 0,456 | 0      |
| 11 | P12956 KU70_HUMAN  | R.DSLIFLVDASK.A             |                 | 2 | 3,6099 | 0,441 | -0,101 |
| 11 | Q9Y6I3 EPN1_HUMAN  | E.LLAGEVPARS#PGAFDM*SGVR.G  | S410:           | 3 | 3,6087 | 0,368 | -0,43  |
| 11 | Q14676 MDC1_HUMAN  | E.LQPSTSTDQPVTPPEPTR.A      |                 | 2 | 3,6053 | 0,514 | 0      |
| 11 | Q14103 HNRPD_HUMAN | K.IFVGGLSPDTPEEK.I          |                 | 2 | 3,6047 | 0,409 | 0,246  |
| 11 | P62753 RS6_HUMAN   | R.RLS#S#LRAS#TSKSE.S        | S235:S236:S240: | 2 | 3,6045 | 0,285 | -0,147 |
| 11 | P30040 ERP29_HUMAN | R.DGDFENPVPTGAVK.V          |                 | 2 | 3,6018 | 0,463 | 0,227  |
| 11 | Q3MIN7 RGL3_HUMAN  | R.SRDAPAGS#PPAS#PGPQGPSTK.L | S569:S573:      | 3 | 3,6007 | 0,342 | 0      |
| 11 | Q9HAW4 CLSPN_HUMAN | E.DDTQSQLLDADGFLNVR.N       |                 | 2 | 3,6    | 0,463 | 0,192  |
| 11 | O60306 AQR_HUMAN   | K.VTVEDPALQIPFR.I           |                 | 3 | 3,598  | 0,279 | 0,462  |
| 11 | Q9P2J5 SYLC_HUMAN  | R.VDIGDTIYLVH.-             |                 | 2 | 3,5958 | 0,52  | -0,18  |
| 11 | P55786 PSA_HUMAN   | K.VTSLFPSTLQTGTGTLK.I       |                 | 2 | 3,5937 | 0,375 | 0,07   |
| 11 | P42126 D3D2_HUMAN  | R.VLVEPDAGAGVAVM*K.F        |                 | 2 | 3,5931 | 0,499 | -0,166 |
| 11 | Q8NC56 LEMD2_HUMAN | E.LQALGFQPGPITDTTR.D        |                 | 2 | 3,5909 | 0,363 | 0      |
| 11 | P31040 DHSA_HUMAN  | K.VSDSISAQYPVVDHE.F         |                 | 2 | 3,5891 | 0,347 | 0,074  |
| 11 | O60341 LSD1_HUMAN  | R.IADQFLGAM*YTLPR.Q         |                 | 3 | 3,5873 | 0,348 | 0,34   |
| 11 | P19388 RPAB1_HUMAN | R.ALIVVQQGM*TPSAK.Q         |                 | 2 | 3,5863 | 0,449 | 0,251  |
| 11 | Q09666 AHNK_HUMAN  | K.M*DAEVPDVNIEGPDAK.L       |                 | 2 | 3,5849 | 0,503 | 0,213  |
| 11 | P78371 TCPB_HUMAN  | R.DASLM*VTNDGATILK.N        |                 | 2 | 3,5843 | 0,537 | 0,156  |
| 11 | O14640 DVL1_HUMAN  | K.AYTVVGGPPGPPVRE.L         |                 | 2 | 3,5825 | 0,333 | 0,079  |
| 11 | P46100 ATRX_HUMAN  | R.RPTETNPVTSNS#DEECNE.T     | S677:           | 2 | 3,582  | 0,462 | -0,113 |
| 11 | Q86UU1 PHLB1_HUMAN | E.IM*DSLVLLEPGAAGK.K        |                 | 3 | 3,5805 | 0,221 | 0,237  |
| 11 | P61978 HNRPK_HUMAN | D.LGGPIITTQVTIPK.D          |                 | 2 | 3,5801 | 0,479 | 0,339  |
| 11 | Q9BVA0 KTNB1_HUMAN | R.SEPFPAPPEDDAATAKE.A       |                 | 2 | 3,5798 | 0,404 | 0      |
| 11 | Q86W92 LIPB1_HUMAN | R.DLGQSNSDLDM*PFAK.W        |                 | 2 | 3,5795 | 0,353 | -1,107 |
| 11 | Q9H299 SH3L3_HUMAN | R.IQYQLVDISQDNALRDE.M       |                 | 3 | 3,5723 | 0,336 | 0,724  |

|    |                    |                                  |            |   |        |       |        |
|----|--------------------|----------------------------------|------------|---|--------|-------|--------|
| 11 | Q53GS7 GLE1_HUMAN  | E.TSPSSTSASALDQPSFVPK.S          |            | 3 | 3,5708 | 0,239 | 0,384  |
| 11 | Q6PKG0 LARP1_HUMAN | R.CPS#QSSSRPAAM*ISQPPTPTGQPVRE.D | S1056:     | 3 | 3,5702 | 0,318 | 0,124  |
| 11 | P49006 MRP_HUMAN   | E.AAGATGDAIEPAPPSQGAEEK.G        |            | 2 | 3,5688 | 0,462 | 0,128  |
| 11 | Q16204 CCDC6_HUMAN | E.KLDQPVSV#APPS#PR.D             | S240:S244: | 3 | 3,5607 | 0,272 | 0,118  |
| 11 | P04406 G3P_HUMAN   | K.LVINGNPITIFQER.D               |            | 2 | 3,5604 | 0,296 | 0,302  |
| 11 | O60307 MAST3_HUMAN | E.FLAVQPTPTFAER.S                |            | 2 | 3,5593 | 0,396 | 0,661  |
| 11 | Q9BVW5 TIPIN_HUMAN | K.LLSNSQTLGNDM*LM*NTPR.A         |            | 3 | 3,5583 | 0,487 | 0,18   |
| 11 | Q14562 DHX8_HUMAN  | K.NPDGSLQAAM*M*QSALAK.E          |            | 3 | 3,5571 | 0,195 | 0,691  |
| 11 | Q96RT1 LAP2_HUMAN  | K.M*VLTNYM*FPQQR.T               |            | 2 | 3,5552 | 0,393 | -0,074 |
| 11 | O43290 SNUT1_HUMAN | D.LLPLGDQTDGDFGSR.L              |            | 2 | 3,5523 | 0,525 | 0,213  |
| 11 | P55072 TERA_HUMAN  | E.DNSVVLSLQPKM*DE.L              |            | 2 | 3,5495 | 0,456 | 0,078  |
| 11 | O14980 XPO1_HUMAN  | R.QM*SVPGIFNPHEIPEEM*CD.-        |            | 2 | 3,5487 | 0,399 | 0,324  |
| 11 | P55072 TERA_HUMAN  | R.IVSQLLTLM*DGLK.Q               |            | 2 | 3,5483 | 0,223 | 0,337  |
| 11 | Q8N4C8 MINK1_HUMAN | R.SDGDTSVSTM*VVHDVEE.I           |            | 2 | 3,5431 | 0,535 | 0,189  |
| 11 | P42285 SK2L2_HUMAN | R.DVDFEGTDEPIFGK.K               |            | 2 | 3,543  | 0,393 | 0,078  |
| 11 | Q02790 FKBP4_HUMAN | E.SGAQSAPLPM*EGVDISPK.Q          |            | 3 | 3,5421 | 0,266 | 0,406  |
| 11 | Q8NEF9 SRFB1_HUMAN | K.AVTIANS#PSKPSKDSVVSLE.S        | S203:      | 2 | 3,5415 | 0,359 | 0,327  |
| 11 | P55072 TERA_HUMAN  | R.LGDVISIQPCPDVK.Y               |            | 2 | 3,5415 | 0,434 | 0,475  |
| 11 | Q16204 CCDC6_HUMAN | E.KLDQPVSV#APPS#PR.D             | S240:S244: | 2 | 3,5278 | 0,43  | 0,079  |
| 11 | Q2M2I8 AAK1_HUMAN  | R.I LSDVT#HSAVFGVPASK.S          | T640:      | 3 | 3,5261 | 0,32  | 0,607  |
| 11 | P36578 RL4_HUMAN   | E.VPELPLVVEDKVE.G                |            | 2 | 3,5258 | 0,336 | 0,499  |
| 11 | Q14137 BOP1_HUMAN  | E.DSVLLLNPALGDR.L                |            | 2 | 3,5238 | 0,528 | 0,088  |
| 11 | P52565 GDIR1_HUMAN | E.YEFLTPVEEAPK.G                 |            | 2 | 3,5215 | 0,312 | -0,857 |
| 11 | Q68EM7 RHG17_HUMAN | R.SPSPTQHT#GQPPGQPSAPSQLSAPR.R   | T682:      | 3 | 3,52   | 0,137 | 0,34   |
| 11 | O60506 HNRPQ_HUMAN | E.DGALAVLQQFK.D                  |            | 2 | 3,5181 | 0,431 | 0,205  |
| 11 | P04264 K2C1_HUMAN  | R.SLDLDSIIAEVK.A                 |            | 2 | 3,5176 | 0,434 | -0,094 |
| 11 | O60318 MCM3A_HUMAN | E.DLLTAATTGILR.H                 |            | 2 | 3,5163 | 0,47  | -0,098 |
| 11 | P62316 SMD2_HUMAN  | E.EFNTGPLSVLTQSVK.N              |            | 2 | 3,5159 | 0,463 | 0,226  |
| 11 | Q9UH99 UN84B_HUMAN | R.LSPAPQLGPSSDAHTSYSE.S          |            | 2 | 3,515  | 0,472 | 0,347  |
| 11 | Q9UKS6 PACN3_HUMAN | R.SPDEVTLTSIVPTR.D               |            | 2 | 3,5112 | 0,498 | 0,161  |
| 11 | Q06210 GFPT1_HUMAN | R.VIFLEDDDDVAAVVDGR.L            |            | 2 | 3,5104 | 0,459 | 0,07   |
| 11 | Q58FG1 HS904_HUMAN | R.TLTIVDTGIGM*TK.A               |            | 2 | 3,5088 | 0,53  | 0,089  |
| 11 | A3KN83 SBNO1_HUMAN | K.SIDPDSIQSALLASGLGSK.R          |            | 3 | 3,508  | 0,408 | 0,295  |



|    |                    |                             |              |   |        |       |        |
|----|--------------------|-----------------------------|--------------|---|--------|-------|--------|
| 11 | O94842 TOX4_HUMAN  | R.INLQQQPPPLQIK.S           |              | 2 | 3,5074 | 0,355 | 0,563  |
| 11 | Q6PIW4 FIGL1_HUMAN | R.ILVVGATNRPQEIDE.A         |              | 2 | 3,5017 | 0,411 | -0,074 |
| 11 | Q06830 PRDX1_HUMAN | K.QGGLGPM*NIPLVSDPK.R       |              | 2 | 3,5014 | 0,433 | 0,298  |
| 11 | O14979 HNRDL_HUMAN | K.VFVGGLSPDTSEEQIKE.Y       |              | 2 | 3,5005 | 0,406 | 0,332  |
| 11 | Q12802 AKP13_HUMAN | E.M*DSITEVPANCSVLR.S        |              | 2 | 3,5001 | 0,457 | 0,286  |
| 11 | P50616 TOB1_HUMAN  | R.STQPLTFTTATFAATK.F        |              | 2 | 3,4987 | 0,607 | -0,362 |
| 11 | Q9UQ84 EXO1_HUMAN  | E.DDLSQYSLSFTK.K            |              | 2 | 3,4985 | 0,436 | -0,402 |
| 11 | Q15468 STIL_HUMAN  | R.STVGLSLISPNNM*SFATK.K     |              | 2 | 3,4977 | 0,457 | 0,259  |
| 11 | Q08378 GOGA3_HUMAN | K.DVLQAAAAEHQDQGQEVNGE.V    |              | 3 | 3,4976 | 0,387 | -0,347 |
| 11 | P20042 IF2B_HUMAN  | E.SDVQEPTPEDDLDIM*LGNK.K    |              | 3 | 3,4971 | 0,218 | 0,728  |
| 11 | Q05682 CALD1_HUMAN | E.KGNVFSS#PTAAGT#PNKE.T     | S724:T730:   | 3 | 3,4957 | 0,299 | 0,392  |
| 11 | O43172 PRP4_HUMAN  | R.ALGEPITLFGGPAER.R         |              | 2 | 3,4954 | 0,422 | -0,074 |
| 11 | P15559 NQO1_HUMAN  | E.SDLYAM*NFNPIISR.K         |              | 2 | 3,4918 | 0,362 | -1,105 |
| 11 | Q7Z6Z7 HUWE1_HUMAN | E.RDGG#GNS#TIIVSR.S         | S2362:S2365: | 2 | 3,4905 | 0,291 | 0,541  |
| 11 | P63000 RAC1_HUMAN  | K.LTPITYPQGLAM*AKE.I        |              | 2 | 3,4904 | 0,551 | -1,184 |
| 11 | O60701 UGDH_HUMAN  | R.EQIVVDLSHPGVSE.D          |              | 2 | 3,4904 | 0,513 | 0,323  |
| 11 | Q9P0V3 SH3B4_HUMAN | E.M*GYIPSSYVQPLNYR.N        |              | 2 | 3,4903 | 0,306 | 0,203  |
| 11 | Q9BSL1 UBAC1_HUMAN | E.NIQDQDVLLLIK.K            |              | 2 | 3,486  | 0,251 | -0,173 |
| 11 | Q8N163 K1967_HUMAN | K.M*LLSLPEKVV#PPEPEKE.E     | S569:        | 3 | 3,4845 | 0,342 | 0,345  |
| 11 | Q14562 DHX8_HUMAN  | E.IELVEEPPFLR.G             |              | 2 | 3,4844 | 0,355 | -0,249 |
| 11 | P13010 KU86_HUMAN  | E.IVVQDGITLITKEE.A          |              | 2 | 3,4827 | 0,322 | -0,157 |
| 11 | P23528 COF1_HUMAN  | K.LGGSAVISLEGKPL.-          |              | 2 | 3,4824 | 0,426 | 0,182  |
| 11 | Q7Z6Z7 HUWE1_HUMAN | R.AIAM*SLGQDIPM*DQR.A       |              | 2 | 3,4821 | 0,401 | 0      |
| 11 | P80723 BASP_HUMAN  | E.AAAAPAESAAPAAGEEPSKEE.G   |              | 3 | 3,4796 | 0,308 | -0,187 |
| 11 | Q9Y6W5 WASF2_HUMAN | R.DVVGNDVATILSR.R           |              | 2 | 3,4794 | 0,47  | -0,539 |
| 11 | Q9Y4C1 JHD2A_HUMAN | K.ILDDIFASLVQNK.T           |              | 2 | 3,4788 | 0,435 | -0,331 |
| 11 | P46063 RECQ1_HUMAN | R.VAGVVAPTLPPREDLE.K        |              | 2 | 3,4785 | 0,432 | 0,234  |
| 11 | Q9ULL5 PRR12_HUMAN | E.SISSAISALDDPPLAGPK.D      |              | 2 | 3,4755 | 0,325 | 0,07   |
| 11 | Q13428 TCOF_HUMAN  | K.LDSSPSVSSTLAAKDDPD.G      |              | 2 | 3,4752 | 0,499 | -0,068 |
| 11 | O43237 DC1L2_HUMAN | K.DFQDYM*EPEEGCQGSPQR.R     |              | 3 | 3,4729 | 0,46  | 0      |
| 11 | Q06787 FMR1_HUMAN  | R.VLVASSVVAGESQKPE.L        |              | 3 | 3,4727 | 0,209 | 0,343  |
| 11 | Q6P4F7 RHGBA_HUMAN | K.HNSNITSS#PLS#GDENNM*TKE.T | S582:S585:   | 3 | 3,4726 | 1     | 0,156  |
| 11 | Q9H6X2 ANTR1_HUMAN | R.DLGAIVYCVGVK.D            |              | 2 | 3,4721 | 0,448 | 0,377  |

|    |                     |                             |                 |   |        |       |        |
|----|---------------------|-----------------------------|-----------------|---|--------|-------|--------|
| 11 | Q9UEY8 ADDG_HUMAN   | R.VTQILQSPAFREDLE.C         |                 | 2 | 3,471  | 0,261 | -0,489 |
| 11 | Q13885 TBB2A_HUMAN  | R.AILVDLEPGTM*DSVR.S        |                 | 2 | 3,4684 | 0,303 | -0,075 |
| 11 | Q92797 SYMPK_HUMAN  | E.AALLDSSLEGPLPK.E          |                 | 2 | 3,4664 | 0,444 | 0,086  |
| 11 | P11586 C1TC_HUMAN   | R.AAQAPSSFQLLYDLK.L         |                 | 2 | 3,4658 | 0,472 | 0,074  |
| 11 | P55060 XPO2_HUMAN   | K.DAAIYLVTSLASK.A           |                 | 2 | 3,4583 | 0,517 | 0,09   |
| 11 | Q9UM22 EPDR1_HUMAN  | K.DGVM*FQIDQATK.Q           |                 | 2 | 3,4582 | 0,452 | 0      |
| 11 | O60664 M6PBP_HUMAN  | R.TLTAADVSGAQPILSK.L        |                 | 2 | 3,455  | 0,485 | 0,24   |
| 11 | Q07021 C1QBP_HUMAN  | K.AFVDFLSDEIKE.E            |                 | 2 | 3,4546 | 0,494 | 0,345  |
| 11 | P38646 GRP75_HUMAN  | R.VINEPTAAALAYGLDKSE.D      |                 | 3 | 3,4536 | 0,335 | 0,491  |
| 11 | Q9HAS0 NJMU_HUMAN   | R.FLSVASLQGLIHE.G           |                 | 2 | 3,4531 | 0,431 | -0,173 |
| 11 | Q8WVM8 SCFD1_HUMAN  | K.SLLDIISDPDAGTPEDK.M       |                 | 2 | 3,4529 | 0,501 | -0,068 |
| 11 | Q86SX6 GLRX5_HUMAN  | R.DYAAYNVLDDPELR.Q          |                 | 2 | 3,4519 | 0,358 | -0,664 |
| 11 | Q13085 ACACA_HUMAN  | R.ITSENPDEGFKPSSGTVQE.L     |                 | 2 | 3,4464 | 0,415 | 0,302  |
| 11 | B2RMZ9 B2RMZ9_HUMAN | R.RLNS#S#PRAPVS#PLK.F       | S416:S417:S423: | 2 | 3,4458 | 0,317 | 0,277  |
| 11 | Q9BV44 THUM3_HUMAN  | E.DVSTLIGDDLASCKDE.T        |                 | 2 | 3,4453 | 0,406 | -0,351 |
| 11 | Q15149 PLEC1_HUMAN  | R.DDGTGQLLLPLSDAR.K         |                 | 2 | 3,4395 | 0,475 | 0      |
| 11 | Q02952 AKA12_HUMAN  | E.ESQLPGTGGPEDVLQPVQR.A     |                 | 2 | 3,4389 | 0,393 | 0,182  |
| 11 | Q86XP3 DDX42_HUMAN  | K.DIPVLVATDVAAR.G           |                 | 2 | 3,4332 | 0,398 | 0,182  |
| 11 | Q9UGV2 NDRG3_HUMAN  | R.T#HSTSSSLGS#GESPF.S       | T329:S338:      | 3 | 3,4315 | 1     | 0,097  |
| 11 | Q05639 EF1A2_HUMAN  | K.SGDAAIVEM*VPGKPM*CVE.S    |                 | 3 | 3,4301 | 0,171 | 0,19   |
| 11 | Q14204 DYHC1_HUMAN  | R.VLLTTQGVDM*ISK.M          |                 | 2 | 3,4295 | 0,408 | 0,258  |
| 11 | Q8TF74 WIPF2_HUMAN  | R.TGPSGQSLAPPPPYR.Q         |                 | 2 | 3,4285 | 0,417 | 0,226  |
| 11 | Q6UB35 C1TM_HUMAN   | E.DDVILLAAALR.I             |                 | 2 | 3,4284 | 0,418 | 0,73   |
| 11 | Q9H4A3 WNK1_HUMAN   | K.QSSTPGSLFLSPPAPAPK.N      |                 | 2 | 3,4234 | 0,502 | 0,137  |
| 11 | Q08AD1 CA1L1_HUMAN  | R.DYTVSLSDSM*DDASK.F        |                 | 2 | 3,4217 | 0,461 | 0,291  |
| 11 | Q8N554 ZN276_HUMAN  | K.TLPSTDVAQPPSDSDAVGPR.S    |                 | 2 | 3,418  | 0,137 | -0,607 |
| 11 | Q9UBC2 EP15R_HUMAN  | E.VTSLNLSM*PPPK.F           |                 | 2 | 3,4165 | 0,469 | 0,559  |
| 11 | P31629 ZEP2_HUMAN   | R.GPHALQSSGPPST#PSS#PR.L    | T2298:S2301:    | 3 | 3,4165 | 0,269 | 0      |
| 11 | Q8WXI9 P66B_HUMAN   | E.RGRLT#PS#PDIIVLSDNE.A     | T120:S122:      | 2 | 3,4161 | 0,296 | 0,359  |
| 11 | Q96DH6 MSI2H_HUMAN  | R.GFGFVTFADPASVDK.V         |                 | 2 | 3,4152 | 0,417 | 0,078  |
| 11 | Q96B23 CR025_HUMAN  | E.LRRDS#SES#QLASTE.S        | S66:S69:        | 2 | 3,4138 | 0,466 | -0,07  |
| 11 | P63208 SKP1_HUMAN   | E.LILAANYLDIK.G             |                 | 2 | 3,4114 | 0,481 | 0,196  |
| 11 | Q9BQG0 MBB1A_HUMAN  | K.KNQKPSQVNGAPGS#PTEPAGQK.Q | S1267:          | 3 | 3,4114 | 0,269 | -0,398 |

|    |                    |                             |              |   |        |       |        |
|----|--------------------|-----------------------------|--------------|---|--------|-------|--------|
| 11 | Q8N3V7 SYNPO_HUMAN | R.AAS#PAKPSSLDLVPNLPK.G     | S833:        | 3 | 3,4114 | 0,081 | 0,388  |
| 11 | Q9BQC3 DPH2_HUMAN  | R.RGIAIAYEDEGS#G.-          | S488:        | 2 | 3,4114 | 0,449 | 0      |
| 11 | Q92917 GPKOW_HUMAN | E.NAGVDPTLAIPM*IQK.G        |              | 2 | 3,4086 | 0,454 | 0,385  |
| 11 | P09622 DLDH_HUMAN  | R.VLGAHILGPGAGEM*VNE.A      |              | 2 | 3,4084 | 0,342 | 0,218  |
| 11 | P43034 LIS1_HUMAN  | K.TAPYVVTGSDQTVK.V          |              | 2 | 3,4069 | 0,471 | 0,078  |
| 11 | Q15029 U5S1_HUMAN  | K.TCFVDCLIEQTHPE.I          |              | 2 | 3,4068 | 0,404 | -0,14  |
| 11 | P53618 COPB_HUMAN  | E.DQFQLSLLAAM*GNTQR.K       |              | 2 | 3,4064 | 0,432 | 0,674  |
| 11 | Q04727 TLE4_HUMAN  | K.DAPISPASIASSSSTPSSK.S     |              | 2 | 3,4064 | 0,49  | 0,204  |
| 11 | P33778 H2B1B_HUMAN | K.AM*GIM*NSFVNDIFER.I       |              | 2 | 3,404  | 0,518 | -0,069 |
| 11 | Q9Y2H0 DLGP4_HUMAN | R.GGVAPAPEAPEPPPK.H         |              | 2 | 3,4032 | 0,5   | -0,604 |
| 11 | P04792 HSPB1_HUMAN | K.LATQSNEITIPVTFESR.A       |              | 2 | 3,4031 | 0,491 | 0,128  |
| 11 | O00418 EF2K_HUMAN  | R.KYES#DEDS#LGSSGR.V        | S470:S474:   | 2 | 3,4029 | 0,544 | -0,433 |
| 11 | O75531 BAF_HUMAN   | R.DFVAEPM*GEKPVGSLAGIGE.V   |              | 2 | 3,3992 | 0,494 | -0,121 |
| 11 | Q3KQU3 MA7D1_HUMAN | R.SSQPSPTAVPASDSPPTKQE.V    |              | 3 | 3,3978 | 0,181 | 0,091  |
| 11 | O14979 HNRDL_HUMAN | K.VFVGGLSPDTSEEQIKE.Y       |              | 3 | 3,3967 | 0,185 | 0,897  |
| 11 | Q04323 SAKS1_HUMAN | E.LGGGQDPVQLLSGFPR.R        |              | 2 | 3,3935 | 0,477 | 0      |
| 11 | P05198 IF2A_HUMAN  | E.GLSVLSQAM*AVIKE.K         |              | 2 | 3,3918 | 0,269 | 0,334  |
| 11 | Q6POQ8 MAST2_HUMAN | E.QDVVTGVSPLLFR.K           |              | 2 | 3,3914 | 0,426 | 0,512  |
| 11 | O75376 NCOR1_HUMAN | R.ALDPAAAAYLFR.Q            |              | 2 | 3,3909 | 0,451 | 0,173  |
| 11 | Q5VUA4 ZN318_HUMAN | K.VAQILGINIFDK.S            |              | 2 | 3,3908 | 0,459 | -0,092 |
| 11 | P04406 G3P_HUMAN   | K.IISNASCTTNCLAPLAK.V       |              | 2 | 3,3888 | 0,413 | 0,399  |
| 11 | Q13151 ROA0_HUMAN  | E.AFGTLTDCVVVNPQTK.R        |              | 2 | 3,3878 | 0,29  | 0,066  |
| 11 | Q9P2J5 SYLC_HUMAN  | K.GTGVVTSVPSDSPDDIAALR.D    |              | 2 | 3,3875 | 0,54  | 0,187  |
| 11 | P06576 ATPB_HUMAN  | K.TVLIM*ELINNVAK.A          |              | 2 | 3,3861 | 0,413 | -0,331 |
| 11 | Q14562 DHX8_HUMAN  | K.NPDGSLQAAM*M*QSALAKE.R    |              | 3 | 3,3856 | 0,292 | 0,554  |
| 11 | Q03188 CENPC_HUMAN | E.ASLQFVVEPSEAT#NRSVQAHE.V  | T107:        | 3 | 3,3851 | 0,315 | 0,308  |
| 11 | Q96RK0 CIC_HUMAN   | K.S#AAATSPAPHLVAGPLLGTVGK.A | S734:        | 2 | 3,3815 | 0,322 | 0,349  |
| 11 | P61978 HNRPK_HUMAN | K.IILDISESPIK.G             |              | 2 | 3,3796 | 0,345 | -0,182 |
| 11 | Q9UHD1 CHRD1_HUMAN | R.TTDFSDFLSIVGCTK.G         |              | 2 | 3,378  | 0,473 | -0,072 |
| 11 | P26640 SYVC_HUMAN  | R.AASGYPVKVPLEVQE.A         |              | 2 | 3,3776 | 0,295 | 0,231  |
| 11 | P13489 RINI_HUMAN  | E.LLPLLQQCQVVR.L            |              | 2 | 3,3762 | 0,414 | 0,416  |
| 11 | O15391 TYY2_HUMAN  | K.LPPGGLPGIDLSDPK.Q         |              | 2 | 3,3762 | 0,432 | 0,083  |
| 11 | O75179 ANR17_HUMAN | E.HYPVSSPS#SPS#PPAQGGVSR.N  | S2044:S2047: | 3 | 3,3742 | 1     | 0,244  |

|    |                    |                             |                    |   |        |       |        |
|----|--------------------|-----------------------------|--------------------|---|--------|-------|--------|
| 11 | O75643 U520_HUMAN  | R.NALLQLTDSQIADVAR.F        |                    | 2 | 3,3733 | 0,417 | 0,071  |
| 11 | Q9UQ35 SRRM2_HUMAN | K.SSTPPGESYFGVSSLQLK.G      |                    | 2 | 3,371  | 0,431 | 0,389  |
| 11 | P05412 JUN_HUMAN   | K.NSDLLTSPDVGLLK.L          |                    | 2 | 3,3697 | 0,213 | 0,414  |
| 11 | P46821 MAP1B_HUMAN | K.DLTGQVPTPVVK.Q            |                    | 2 | 3,3695 | 0,399 | 0,097  |
| 11 | Q9H0X4 ITFG3_HUMAN | R.YLM*HVPGNAGADVLLVGSE.A    |                    | 2 | 3,3693 | 0,344 | 0,436  |
| 11 | Q96QE3 ATAD5_HUMAN | E.DSVIIIDSS#PTALKHPE.K      | S756:              | 2 | 3,3689 | 0,41  | 0,192  |
| 11 | P05023 AT1A1_HUMAN | K.DM*TSEQLDDILK.Y           |                    | 2 | 3,3685 | 0,442 | 0,086  |
| 11 | Q9H6F5 CCD86_HUMAN | R.LQQGAGLESPQQPEPGAASPQR.Q  |                    | 3 | 3,3669 | 0,281 | 0,238  |
| 11 | Q00613 HSF1_HUMAN  | R.GHTDTEGRPPS#PPPTST#PE.K   | S363:T369:         | 2 | 3,364  | 0,299 | -0,115 |
| 11 | Q9P287 BCCIP_HUMAN | K.FLNDTTKPVGLLSE.R          |                    | 2 | 3,3639 | 0,356 | 0,222  |
| 11 | Q01518 CAP1_HUMAN  | R.ALLVTASQCQQAENK.L         |                    | 2 | 3,3638 | 0,344 | 0,139  |
| 11 | P53814 SMTN_HUMAN  | E.GTSQDVTTVLLLR.A           |                    | 3 | 3,3625 | 0,361 | 0,122  |
| 11 | Q15911 ZFH3_HUMAN  | K.DSGLTSVGTDTFRL.-          |                    | 2 | 3,3625 | 0,387 | 0,581  |
| 11 | Q8TF44 NLF3_HUMAN  | E.ATDADPQAQGAM*SLPSVPK.A    |                    | 3 | 3,3624 | 0,227 | 0,193  |
| 11 | Q15424 SAFB1_HUMAN | K.LAEEDLFDSEAHPE.E          |                    | 2 | 3,3624 | 0,414 | 0,381  |
| 11 | P62330 ARF6_HUMAN  | R.DAIIIFANK.Q               |                    | 2 | 3,3619 | 0,394 | 0      |
| 11 | Q9UHR4 BI2L1_HUMAN | E.TEAVTVPTSPTPVR.S          |                    | 2 | 3,3615 | 0,268 | -0,157 |
| 11 | Q8WU79 SMAP2_HUMAN | D.LLGLDAPVACSIANSK.T        |                    | 2 | 3,3606 | 0,498 | -0,524 |
| 11 | P62988 UBIQ_HUMAN  | K.TITLEVEPSDTIENVK.A        |                    | 2 | 3,3603 | 0,404 | 0,205  |
| 11 | Q13564 ULA1_HUMAN  | K.LLQSIGQAPESISEKE.L        |                    | 2 | 3,3596 | 0,484 | 0,141  |
| 11 | Q01082 SPTB2_HUMAN | R.TSSKES#S#PIPS#PTSDRK.A    | S2164:S2165:S2169: | 3 | 3,3535 | 0,093 | 0      |
| 11 | P62258 1433E_HUMAN | K.LICCDILDVLDK.H            |                    | 2 | 3,353  | 0,381 | -0,165 |
| 11 | Q9UNI6 DUS12_HUMAN | R.SVAIITAFKM*K.T            |                    | 2 | 3,3521 | 0,462 | -0,202 |
| 11 | P43897 EFTS_HUMAN  | R.LGQHVVM*APLSVGLDDEPGGAE.T |                    | 3 | 3,3515 | 0,355 | 0,295  |
| 11 | Q9H211 CDT1_HUMAN  | K.STPAAGQPPHLTSAQDQDTISE.L  |                    | 2 | 3,3492 | 0,349 | 0,217  |
| 11 | Q05639 EF1A2_HUMAN | K.SGDAIVEM*VPGKPM*CVE.S     |                    | 2 | 3,349  | 0,38  | -0,127 |
| 11 | P24534 EF1B_HUMAN  | E.DYVQSM*DVAAFNKI.-         |                    | 3 | 3,3468 | 0,316 | 0,452  |
| 11 | Q96RG2 PASK_HUMAN  | R.LNVQVTSTPVIVM*R.G         |                    | 3 | 3,3418 | 0,35  | 0,233  |
| 11 | P04818 TYSY_HUMAN  | R.DFLDSLGFSTREE.G           |                    | 2 | 3,3413 | 0,481 | 0,08   |
| 11 | P40939 ECHA_HUMAN  | K.DLNSDM*DSILASLK.L         |                    | 3 | 3,3387 | 0,14  | 0,595  |
| 11 | P49458 SRP09_HUMAN | K.VTDDLVLVYK.T              |                    | 2 | 3,3367 | 0,477 | 0,368  |
| 11 | Q96A65 EXOC4_HUMAN | K.DPSGLLISVIR.T             |                    | 2 | 3,3347 | 0,392 | -0,104 |
| 11 | O95347 SMC2_HUMAN  | E.FVFGTTFVCDNM*DNAK.K       |                    | 2 | 3,3326 | 0,491 | -0,065 |

|    |                    |                                    |                    |   |        |       |        |
|----|--------------------|------------------------------------|--------------------|---|--------|-------|--------|
| 11 | Q96PU8 QKI_HUMAN   | E.YPIEPSGVLGAVATK.V                |                    | 2 | 3,3318 | 0,358 | 0,812  |
| 11 | P62316 SMD2_HUMAN  | E.FNTGPLSVLTQSVK.N                 |                    | 2 | 3,3307 | 0,36  | 0,573  |
| 11 | P35611 ADDA_HUMAN  | R.TSTSAVPNLFLVPLNTNPK.E            |                    | 2 | 3,3242 | 0,448 | 0      |
| 11 | P49790 NU153_HUMAN | E.ITTSSPSPINSSQALTNK.V             |                    | 3 | 3,3221 | 0,306 | 0,396  |
| 11 | O75694 NU155_HUMAN | K.AAPQS#PSVPPKPGPPVLSSDPNM*LSNEE.A | S992:              | 3 | 3,3215 | 0,381 | 0,246  |
| 11 | Q12888 TP53B_HUMAN | D.SLSTNSSDLVAPSPDAFR.S             |                    | 3 | 3,319  | 0,165 | 0,393  |
| 11 | P31937 3HIDH_HUMAN | K.GSLIDSSTIDPAVSKE.L               |                    | 2 | 3,3184 | 0,325 | 0,423  |
| 11 | O60664 M6PBP_HUMAN | R.LGQM*VLSGVDTVLGK.S               |                    | 2 | 3,3176 | 0,417 | 0,239  |
| 11 | Q9UKK9 NUDT5_HUMAN | K.EQTADGVAVIPVLQR.T                |                    | 2 | 3,3126 | 0,413 | 0,229  |
| 11 | O15446 RPA34_HUMAN | E.TLEPLGVLPSTTK.K                  |                    | 2 | 3,311  | 0,492 | 0      |
| 11 | Q9UQ35 SRRM2_HUMAN | R.NHS#GS#RT#PPVALNSSR.M            | S2100:S2102:T2104: | 3 | 3,3065 | 0,346 | 0,095  |
| 11 | Q9NRA8 4ET_HUMAN   | E.VILAQEPAADQEVPR.D                |                    | 2 | 3,3033 | 0,354 | 0      |
| 11 | O75794 CD123_HUMAN | K.DYLLDDGTLVVSGR.D                 |                    | 3 | 3,3025 | 0,36  | 0,24   |
| 11 | Q9H6T0 RB35B_HUMAN | E.TAALYPSSALLPAAR.V                |                    | 2 | 3,3006 | 0,391 | 0,162  |
| 11 | Q07954 LRP1_HUMAN  | K.AVTDEEPFLIFANR.Y                 |                    | 3 | 3,2967 | 0,165 | -0,226 |
| 11 | O75694 NU155_HUMAN | E.DQACATCLILACSTAACDRE.V           |                    | 3 | 3,2954 | 0,424 | 0,32   |
| 11 | Q13188 STK3_HUMAN  | E.DSLTKQPEEVFDVLE.K                |                    | 2 | 3,2932 | 0,266 | -0,07  |
| 11 | Q9UHY7 ENOPH_HUMAN | E.DAHLDGAVPIPAASGNVDD.L            |                    | 2 | 3,29   | 0,229 | 0,065  |
| 11 | P16402 H13_HUMAN   | E.TAPLAPTIPAPAEKT#PVK.K            | T18:               | 2 | 3,289  | 0,127 | 0,194  |
| 11 | O95394 AGM1_HUMAN  | K.STIGVM*VTAS#HNPEEDNGVK.L         | S64:               | 3 | 3,2888 | 0,178 | -0,084 |
| 11 | O60934 NBN_HUMAN   | E.NEPVDTNSDNNLFTDTDLK.S            |                    | 3 | 3,2877 | 0,286 | 0      |
| 11 | O14617 AP3D1_HUMAN | R.ALDIDLKPLAD.S                    |                    | 2 | 3,285  | 0,463 | 0,282  |
| 11 | P18583 SON_HUMAN   | E.HNTVCAAGTS#PVGE.I                | S1556:             | 2 | 3,2847 | 0,453 | -0,33  |
| 11 | Q14684 RRP1B_HUMAN | E.AIVDQSPFVPEETM*EEQK.T            |                    | 2 | 3,2834 | 0,345 | 0,233  |
| 11 | Q71U36 TBA1A_HUMAN | K.VGINYQPPTVVPGGDLAK.V             |                    | 2 | 3,2832 | 0,367 | 0,334  |
| 11 | P08651 NFIC_HUMAN  | R.TGM*GSDQEDSKPITLDTDFQE.S         |                    | 3 | 3,2824 | 0,25  | 0,452  |
| 11 | P43246 MSH2_HUMAN  | E.DTTGSQSLAALLNK.C                 |                    | 2 | 3,2811 | 0,299 | 0,516  |
| 11 | O43395 PRPF3_HUMAN | R.VLGTEAVQDPTKVE.A                 |                    | 2 | 3,279  | 0,321 | 0,411  |
| 11 | P12270 TPR_HUMAN   | R.GIASTSDPPTANIKPT#PVVSTPSK.V      | T1672:             | 3 | 3,2757 | 0,388 | 0      |
| 11 | Q01813 K6PP_HUMAN  | K.FTTDDSIKVLGISK.R                 |                    | 2 | 3,2708 | 0,271 | 0,314  |
| 11 | Q9BYC5 FUT8_HUMAN  | R.VYLATDDPSLLKE.A                  |                    | 2 | 3,2688 | 0,337 | 0,25   |
| 11 | P40227 TCPZ_HUMAN  | K.GIDPFSLDALSKE.G                  |                    | 2 | 3,2679 | 0,458 | 0,263  |
| 11 | Q9Y3I0 CV028_HUMAN | E.AVVSPGGVGFDFINCGVR.L             |                    | 2 | 3,2667 | 0,4   | 0,286  |

|    |                     |                                   |            |   |        |       |        |
|----|---------------------|-----------------------------------|------------|---|--------|-------|--------|
| 11 | Q9ULT8 HECD1_HUMAN  | R.IYGFTAVDLKPSGEDE.M              |            | 2 | 3,2642 | 0,489 | -0,42  |
| 11 | Q13435 SF3B2_HUMAN  | R.TATVGGAM*M*GSTHIYD.M            |            | 2 | 3,2642 | 0,462 | 0,223  |
| 11 | Q96L14 C170L_HUMAN  | E.ALNNM*GFPS#AM*LPSPPKQK.S        | S219:      | 3 | 3,2639 | 0,162 | 0,256  |
| 11 | Q9ULL5 PRR12_HUMAN  | E.SISSAISALDDPPLAGPK.D            |            | 3 | 3,2624 | 0,192 | 0,421  |
| 11 | Q7Z6Z7 HUWE1_HUMAN  | R.AIAM*SLGQDIPM*DQR.A             |            | 3 | 3,2616 | 0,246 | 0,218  |
| 11 | O43829 ZF161_HUMAN  | E.DVNLM*M*SSGQILGIR.F             |            | 2 | 3,2591 | 0,387 | 0,293  |
| 11 | O15446 RPA34_HUMAN  | K.QEQINTEPLEDTVLSPTK.K            |            | 2 | 3,2573 | 0,376 | -0,179 |
| 11 | Q9NYZ3 GTSE1_HUMAN  | R.VPQALNFSPEESDSTFSK.S            |            | 3 | 3,2569 | 0,148 | 0,553  |
| 11 | Q96JM3 ZN828_HUMAN  | K.SSFFIEPQKPVFPE.T                |            | 3 | 3,2555 | 0,273 | 0,221  |
| 11 | Q96L14 C170L_HUMAN  | E.ALNNM*GFPSAM*LPSPPK.Q           |            | 2 | 3,2553 | 0,473 | 0,068  |
| 11 | P51116 FXR2_HUMAN   | E.LFILSTTEAPVK.R                  |            | 2 | 3,255  | 0,423 | 0,74   |
| 11 | Q9NR31 SAR1A_HUMAN  | E.TISNVPIILGNK.I                  |            | 2 | 3,2538 | 0,473 | 0,353  |
| 11 | Q9UIU6 SIX4_HUMAN   | R.DIADSQPM*SAPVASK.S              |            | 2 | 3,2521 | 0,419 | -0,239 |
| 11 | Q9UNI6 DUS12_HUMAN  | E.LFAVDPTTVSQGLKDE.V              |            | 2 | 3,2518 | 0,425 | 0,426  |
| 11 | Q8IUD2 RB6I2_HUMAN  | R.DNTIM*DLQTLKE.V                 |            | 2 | 3,2506 | 0,274 | 0,39   |
| 11 | Q96JM3 ZN828_HUMAN  | E.LQTPLPSPEPSKPAS#VSSPEPPK.S      | S181:      | 3 | 3,2481 | 0,202 | 0,448  |
| 11 | P37275 ZEB1_HUMAN   | K.NNDQPQSANANEPQDSTVNLQSPLK.M     |            | 3 | 3,2481 | 0,165 | 0,203  |
| 11 | Q9HCD6 TANC2_HUMAN  | E.LSPVSPTQGGYPSEPTR.S             |            | 2 | 3,2477 | 0,561 | 0,069  |
| 11 | P11233 RALA_HUMAN   | E.DENVPFLLVGNK.S                  |            | 2 | 3,2472 | 0,425 | 0,272  |
| 11 | Q7KZJ3 Q7KZJ3_HUMAN | R.SGDLGDM*EPLKGT#PLM*QKI.-        | T604:      | 3 | 3,2456 | 0,215 | 1,06   |
| 11 | P15586 GNS_HUMAN    | K.TQM*DGM*SLLPILR.G               |            | 2 | 3,2449 | 0,508 | 0,081  |
| 11 | P39687 AN32A_HUMAN  | K.LLPQLTYLDGYDR.D                 |            | 2 | 3,2434 | 0,521 | 0,234  |
| 11 | Q15365 PCBP1_HUMAN  | R.IITLTGPTNAIFK.A                 |            | 2 | 3,2427 | 0,363 | 0,176  |
| 11 | P14923 PLAK_HUMAN   | R.ALM*GSPQLVAAVVR.T               |            | 2 | 3,2414 | 0,383 | 0,513  |
| 11 | O43237 DC1L2_HUMAN  | K.DFQDYM*EPEEGCQGSPQR.R           |            | 2 | 3,2351 | 0,492 | 0,334  |
| 11 | Q07020 RL18_HUMAN   | K.ILTFDQLALDSPK.G                 |            | 2 | 3,2333 | 0,32  | -1,086 |
| 11 | P20248 CCNA2_HUMAN  | E.DALAFNSAISLPGPR.K               |            | 2 | 3,2331 | 0,446 | 0,798  |
| 11 | O60353 FZD6_HUMAN   | R.LREQDCGEPAS#PAAS#ISR.L          | S620:S624: | 3 | 3,2288 | 0,188 | 0,087  |
| 11 | Q96GW9 SYMM_HUMAN   | E.DYALVSAVATLPK.Q                 |            | 2 | 3,2273 | 0,497 | 0,815  |
| 11 | P37802 TAGL2_HUMAN  | R.TLM*NLGGLAVAR.D                 |            | 2 | 3,2273 | 0,348 | 0,198  |
| 11 | P18858 DNL1_HUMAN   | E.ALS#PAKGQKPALDCSQVS#PPRPATSPE.N | S76:S91:   | 3 | 3,2238 | 0,251 | 0,186  |
| 11 | P22234 PUR6_HUMAN   | R.VVVLN*GSTSDLGHCE.K              |            | 2 | 3,2206 | 0,446 | 0,226  |
| 11 | P43243 MATR3_HUMAN  | R.DSFDDRGPVSLNPVLDYD.H            |            | 2 | 3,2127 | 0,324 | 0,38   |

|    |                     |                                  |            |   |        |       |        |
|----|---------------------|----------------------------------|------------|---|--------|-------|--------|
| 11 | Q9Y478 AAKB1_HUMAN  | K.ILM*DSPEDADLFHSE.E             |            | 2 | 3,2105 | 0,436 | -0,281 |
| 11 | Q9UK22 FBX2_HUMAN   | R.VEELPGDSGVEFTHDE.S             |            | 2 | 3,2086 | 0,511 | 0,069  |
| 11 | P04075 ALDOA_HUMAN  | R.VNPCIGGVILFHE.T                |            | 3 | 3,2077 | 0,245 | 0,377  |
| 11 | O60763 USO1_HUMAN   | K.EQDDLLVLLADQDQK.I              |            | 3 | 3,2067 | 0,281 | 0,105  |
| 11 | Q8IY81 RRMJ3_HUMAN  | K.SDDDDGFEIVPIEDPAK.H            |            | 2 | 3,2051 | 0,418 | 0,21   |
| 11 | P12004 PCNA_HUMAN   | R.AEDNADTLALVFEAPNQEK.V          |            | 3 | 3,2018 | 0,15  | 0,264  |
| 11 | Q15149 PLEC1_HUMAN  | R.LLDPEDVDVPQPDEK.S              |            | 2 | 3,2018 | 0,327 | 0,214  |
| 11 | P18827 SDC1_HUMAN   | E.AVVLPEVEPGLTAR.E               |            | 2 | 3,2014 | 0,48  | -0,42  |
| 11 | Q99426 TBCB_HUMAN   | E.DALLGSYPVDDGCR.I               |            | 2 | 3,2008 | 0,508 | 0,397  |
| 11 | Q86TB9 PATL1_HUMAN  | R.RSTS#PIIGS#PPVR.A              | S179:S184: | 2 | 3,1922 | 0,355 | 0      |
| 11 | Q96R06 SPAG5_HUMAN  | K.TSEEAVDPLGNYM*VK.T             |            | 2 | 3,1921 | 0,104 | -0,292 |
| 11 | Q92945 FUBP2_HUMAN  | K.IGGDAATTVNNSTPDFGFGGQK.R       |            | 3 | 3,1903 | 0,298 | 0,34   |
| 11 | Q9UGV2 NDRG3_HUMAN  | K.YFLQGM*GYIPSASM*TR.L           |            | 2 | 3,1902 | 0,344 | 0,132  |
| 11 | Q12756 KIF1A_HUMAN  | E.SHGSSASS#PLSAE.G               | S1430:     | 2 | 3,1899 | 0,363 | -0,265 |
| 11 | Q6UX04 SDC10_HUMAN  | E.DQTLALLNQFK.S                  |            | 2 | 3,1886 | 0,412 | 0,095  |
| 11 | Q9NPI6 DCP1A_HUMAN  | E.RKASS#PS#PLTIGTPE.S            | S523:S525: | 2 | 3,1871 | 1     | -0,287 |
| 11 | P84077 ARF1_HUMAN   | R.DAVLLVFANK.Q                   |            | 2 | 3,1871 | 0,398 | 0,336  |
| 11 | Q6NXG5 Q6NXG5_HUMAN | R.S#PSTTYLHTPTSEDAAIPSK.S        | S775:      | 3 | 3,1866 | 0,36  | 0,241  |
| 11 | Q15555 MARE2_HUMAN  | R.LM*DILYASEEHE.G                |            | 2 | 3,1859 | 0,375 | 0,333  |
| 11 | P68104 EF1A1_HUMAN  | K.SGDAAIVDMVPGKPM*CVE.S          |            | 2 | 3,1856 | 0,527 | 0,193  |
| 11 | P46087 NOL1_HUMAN   | R.VLLDAPCSGTGVISK.D              |            | 2 | 3,1837 | 0,473 | -0,161 |
| 11 | P53350 PLK1_HUMAN   | K.AGVPGVAAPGAPAAAPPAK.E          |            | 2 | 3,1828 | 0,48  | -0,078 |
| 11 | Q9Y6Q9 NCOA3_HUMAN  | E.GVGTSLSTLSSPGPK.L              |            | 2 | 3,1801 | 0,336 | -0,163 |
| 11 | P17020 ZNF16_HUMAN  | R.VRDAPAVTHPGSAACGT#PCCS#DTELE.A | T47:S51:   | 3 | 3,1797 | 0,216 | 0,251  |
| 11 | Q2M2I8 AAK1_HUMAN   | R.ILS#DVTHSAVFGVPASK.S           | S637:      | 2 | 3,1795 | 0,482 | 0,067  |
| 11 | Q16626 MEA1_HUMAN   | D.GDVVADIQDR.I                   |            | 2 | 3,1788 | 0,35  | 0      |
| 11 | Q9H6H4 REEP4_HUMAN  | R.SISDAPAPAYHDPLYLE.D            |            | 2 | 3,1788 | 0,439 | -0,131 |
| 11 | Q7Z4V5 HDGR2_HUMAN  | E.LGTLQVTSQILQK.N                |            | 2 | 3,1785 | 0,313 | 0,085  |
| 11 | Q92844 TANK_HUMAN   | E.IQGIDPIASAIQNLK.T              |            | 2 | 3,1778 | 0,417 | 0      |
| 11 | P20674 COX5A_HUMAN  | K.GINTLVTYDM*VPEPK.I             |            | 2 | 3,1765 | 0,271 | 0,144  |
| 11 | Q5SXM2 SNPC4_HUMAN  | R.LPAFGGVIPATEPR.G               |            | 2 | 3,1753 | 0,41  | -0,342 |
| 11 | P20585 MSH3_HUMAN   | K.STLIGEDVNPLIK.L                |            | 2 | 3,1752 | 0,346 | 0,262  |
| 11 | Q7Z589 EMSY_HUMAN   | D.LSQM*AVPIQM*TQEK.R             |            | 2 | 3,1741 | 0,244 | -0,075 |

|    |                    |                             |            |   |        |       |        |
|----|--------------------|-----------------------------|------------|---|--------|-------|--------|
| 11 | Q6UB99 ANR11_HUMAN | K.VDALHCPPAAVVTVTPSPE.G     |            | 3 | 3,1722 | 0,161 | 0,467  |
| 11 | Q7Z589 EMSY_HUMAN  | K.RHS#PES#PSIAVVE.S         | S818:S821: | 2 | 3,1719 | 0,41  | 0,078  |
| 11 | Q92597 NDRG1_HUMAN | K.YFVQGM*GYM*PSASM*TR.L     |            | 3 | 3,1713 | 0,169 | 0,39   |
| 11 | Q09666 AHNK_HUMAN  | K.VDIDAPDVSIEGPDAAK.L       |            | 2 | 3,1711 | 0,307 | 0,372  |
| 11 | Q9UNH7 SNX6_HUMAN  | R.IGSSLYALGTQDSTDICK.F      |            | 3 | 3,1701 | 0,343 | 0,474  |
| 11 | P19419 ELK1_HUMAN  | E.LPLSPSLLGGPGER.T          |            | 2 | 3,1655 | 0,428 | 0,164  |
| 11 | P37275 ZEB1_HUMAN  | K.IADSVNLPLDVVK.K           |            | 2 | 3,1646 | 0,3   | -0,088 |
| 11 | P62834 RAP1A_HUMAN | E.ILDTAGTEQFTAM*RD.L        |            | 2 | 3,1621 | 0,444 | -0,362 |
| 11 | Q00839 HNRPU_HUMAN | K.SSGPTSLFAVTVAPPGAR.Q      |            | 3 | 3,162  | 0,233 | 0,32   |
| 11 | Q7Z4V5 HDGR2_HUMAN | E.LGTLQVTSQILQK.N           |            | 3 | 3,1618 | 0,301 | 0,192  |
| 11 | Q05086 UBE3A_HUMAN | K.LGPDDVSDIDAIR.R           |            | 2 | 3,1607 | 0,523 | 0,329  |
| 11 | P34931 HS71L_HUMAN | K.DAGVIAGLNVLR.I            |            | 2 | 3,1606 | 0,3   | 0      |
| 11 | Q9BUF5 TBB6_HUMAN  | R.AALVDLEPGTM*DSVR.S        |            | 2 | 3,1606 | 0,366 | 0,077  |
| 11 | O75581 LRP6_HUMAN  | R.TCSAPTTFLFSQK.S           |            | 2 | 3,1596 | 0,297 | 0      |
| 11 | P21333 FLNA_HUMAN  | E.TDLSLLTATVPPSGR.E         |            | 3 | 3,1559 | 0,266 | 0,225  |
| 11 | O14734 ACOT8_HUMAN | R.LFGGQIVGQALVAAAK.S        |            | 2 | 3,1534 | 0,278 | 0,316  |
| 11 | P62888 RL30_HUMAN  | R.VCTLAIIDPGDSDIIR.S        |            | 2 | 3,1528 | 0,444 | 0,278  |
| 11 | Q9BW27 NUP85_HUMAN | E.LDGEPTVTLIPGVNSK.K        |            | 2 | 3,1518 | 0,346 | 0,149  |
| 11 | P21333 FLNA_HUMAN  | K.SPFSVAVSPSLDSK.I          |            | 2 | 3,1517 | 0,274 | 1,273  |
| 11 | P19174 PLCG1_HUMAN | K.VLGDTLTKPVE.I             |            | 2 | 3,1512 | 0,445 | 0,475  |
| 11 | Q9BRG2 SH23A_HUMAN | K.APAPLGTVADSLRAS#DGQLQAK.A | S201:      | 3 | 3,1493 | 0,126 | 0,407  |
| 11 | Q9Y6N7 ROBO1_HUMAN | K.TLEEAPSAPPQGVTVSK.N       |            | 2 | 3,149  | 0,483 | 0      |
| 11 | Q3KQU3 MA7D1_HUMAN | R.SSQPSPTAVPASDSPPTKQE.V    |            | 2 | 3,149  | 0,575 | -0,061 |
| 11 | P49750 YLPM1_HUMAN | E.DYLQLPDDYDTR.A            |            | 2 | 3,1479 | 0,284 | 0,322  |
| 11 | Q8WUZ0 BCL7C_HUMAN | R.DPGGITAGSTDEPPM*LTK.E     |            | 2 | 3,1475 | 0,497 | 0,271  |
| 11 | Q9BYT8 NEUL_HUMAN  | E.LGALPDDFIDSLEK.T          |            | 2 | 3,1473 | 0,336 | 0      |
| 11 | Q13573 SNW1_HUMAN  | K.EVM*NADDPDLQRPDEE.A       |            | 2 | 3,1445 | 0,402 | 0,388  |
| 11 | Q96EW2 HBAP1_HUMAN | E.AASPFPGDLVPVAQR.S         |            | 2 | 3,1435 | 0,256 | 0,08   |
| 11 | P36776 LONM_HUMAN  | K.LSSDVLTLLIK.Q             |            | 2 | 3,1404 | 0,372 | -0,203 |
| 11 | O60506 HNRPQ_HUMAN | E.DGALAVLQQFKD.S            |            | 2 | 3,1368 | 0,385 | 0      |
| 11 | Q71U36 TBA1A_HUMAN | K.VGINYQPPTVPPGGDLAK.V      |            | 3 | 3,1349 | 0,206 | 0,301  |
| 11 | P62316 SMD2_HUMAN  | E.EEFNTGPLSVLTQSVK.N        |            | 2 | 3,1345 | 0,464 | 0      |
| 11 | P05362 ICAM1_HUMAN | R.EPAVGEPAEVTTTVLVR.R       |            | 3 | 3,1344 | 0,369 | 0,931  |



|    |                     |                            |              |   |        |       |        |
|----|---------------------|----------------------------|--------------|---|--------|-------|--------|
| 11 | P27694 RFA1_HUMAN   | K.DSLVDIIGICK.S            |              | 2 | 3,1323 | 0,517 | 0,396  |
| 11 | P54136 SYRC_HUMAN   | K.VIVDFSSPNIAKE.M          |              | 2 | 3,1317 | 0,154 | 0,602  |
| 11 | Q96JM3 ZN828_HUMAN  | K.SSFFIEPQKPVFPE.T         |              | 2 | 3,1312 | 0,454 | 0,074  |
| 11 | O75886 STAM2_HUMAN  | K.DPQFSLISATIK.S           |              | 2 | 3,1309 | 0,385 | 0      |
| 11 | Q00839 HNRPU_HUMAN  | R.AKS#PQPPVEEED.E          | S270:        | 2 | 3,1291 | 0,365 | -0,174 |
| 11 | Q13439 GOGA4_HUMAN  | E.QQQLQQALAPAQASSNSSTPTR.M |              | 3 | 3,1283 | 0,185 | 0,158  |
| 11 | Q99832 TCPH_HUMAN   | K.LPIGDVATQYFADR.D         |              | 2 | 3,1262 | 0,395 | 0,312  |
| 11 | P07814 SYEP_HUMAN   | R.DQDLEPGAPSM*GAK.S        |              | 2 | 3,1232 | 0,346 | 0      |
| 11 | Q8NBU5 ATAD1_HUMAN  | K.DAAFQNVLTHVCLD.-         |              | 2 | 3,1223 | 0,473 | 0,304  |
| 11 | Q13085 ACACA_HUMAN  | R.DFTVASPAEFVTR.F          |              | 2 | 3,1194 | 0,403 | 0,424  |
| 11 | P41250 SYG_HUMAN    | E.IDCTM*LTPEPVLK.T         |              | 2 | 3,1191 | 0,124 | 0,398  |
| 11 | Q9NVI7 ATD3A_HUMAN  | E.GAGPPPPLPPAQPGEAGGGDR.G  |              | 2 | 3,119  | 0,255 | 0,064  |
| 11 | P61758 PFD3_HUMAN   | E.AVFVEDVDSFM*K.Q          |              | 2 | 3,1185 | 0,444 | 0,261  |
| 11 | Q9UL54 TAOK2_HUMAN  | K.AGNILLSEPLVK.L           |              | 2 | 3,1162 | 0,307 | 0,186  |
| 11 | Q8NBZ0 CCD95_HUMAN  | R.GSGAGVGTTLTPLPPK.M       |              | 2 | 3,1106 | 0,465 | 0,472  |
| 11 | Q03518 TAP1_HUMAN   | R.CPPSGLLTPHLE.G           |              | 2 | 3,1087 | 0,324 | -0,17  |
| 11 | P00558 PGK1_HUMAN   | K.ITLPVDFVTADKFDE.N        |              | 2 | 3,1071 | 0,407 | -0,071 |
| 11 | Q9BYG3 MK67I_HUMAN  | K.GIDYDFPSLILQK.T          |              | 2 | 3,1056 | 0,512 | 0,323  |
| 11 | Q96PK6 RBM14_HUMAN  | R.ASYVAPLTAQPATYR.A        |              | 2 | 3,1054 | 0,446 | 1,213  |
| 11 | Q8IWI9 MGAP_HUMAN   | R.VTLGPTQVFLANK.D          |              | 2 | 3,1039 | 0,43  | 0,439  |
| 11 | B2R5M9 B2R5M9_HUMAN | E.DNLLVITVATKE.T           |              | 2 | 3,1005 | 0,367 | 0,834  |
| 11 | Q9H1B7 EAP1_HUMAN   | R.VFAFDAVSKPGM*DYE.L       |              | 2 | 3,0998 | 0,208 | -0,288 |
| 11 | Q9H6P5 TASP1_HUMAN  | E.DGVLGGVIVLR.S            |              | 2 | 3,099  | 0,313 | 0,111  |
| 11 | P47756 CAPZB_HUMAN  | E.DLLSSVDQPLK.I            |              | 2 | 3,0979 | 0,347 | 0,301  |
| 11 | O15047 SET1A_HUMAN  | R.RKT#VS#FSAIE.V           | T1167:S1169: | 2 | 3,0974 | 0,233 | 0,188  |
| 11 | O14893 GEMI2_HUMAN  | E.AAQCPDVVVAQIDPK.K        |              | 3 | 3,0973 | 0,195 | 0,454  |
| 11 | Q02952 AKA12_HUMAN  | E.TGETLEPAGAHVLEE.K        |              | 2 | 3,0969 | 0,243 | -0,659 |
| 11 | Q9GZR1 SENPE6_HUMAN | K.IRLNYSDES#PE.A           | S919:        | 2 | 3,0922 | 0,379 | 0,087  |
| 11 | P05783 K1C18_HUMAN  | D.ALDSSNSM*QTIQK.T         |              | 2 | 3,0853 | 0,34  | -0,085 |
| 11 | Q92609 TBCD5_HUMAN  | E.DQILVSLAGLK.Q            |              | 2 | 3,0849 | 0,254 | 0,211  |
| 11 | P46821 MAP1B_HUMAN  | R.ASVSPM*DEPVPDESPIEK.V    |              | 3 | 3,0812 | 0,274 | 0,451  |
| 11 | P78347 GTF2I_HUMAN  | E.LVISYLPPGM*ASK.I         |              | 2 | 3,0803 | 0,241 | 0,175  |
| 11 | Q9H4A3 WNK1_HUMAN   | K.QSSTPGSLFLSPPAPAPK.N     |              | 3 | 3,0793 | 0,223 | 0,308  |

|    |                     |                             |              |   |        |       |        |
|----|---------------------|-----------------------------|--------------|---|--------|-------|--------|
| 11 | Q96JH7 VCIP1_HUMAN  | E.TTDGCVADALGAAFATR.S       |              | 3 | 3,077  | 0,257 | 0,539  |
| 11 | Q9Y265 RUVB1_HUMAN  | R.YSVQLLTPANLLAK.I          |              | 2 | 3,0744 | 0,465 | -0,08  |
| 11 | Q6ZRV2 FA83H_HUMAN  | R.QPGAASLTAQAQLDTLGR.S      |              | 2 | 3,074  | 0,473 | -0,068 |
| 11 | A8MVJ6 A8MVJ6_HUMAN | K.SGDAAIIDM*VPGNLMCIE.S     |              | 2 | 3,072  | 0,116 | 0,127  |
| 11 | Q05524 ENO1B_HUMAN  | K.DATNVGDEGGFAPNILENK.E     |              | 3 | 3,0683 | 0,227 | 0      |
| 11 | Q7Z309 F122B_HUMAN  | E.LDLEPDTSYGGTLR.R          |              | 2 | 3,0665 | 0,36  | 0,159  |
| 11 | P29401 TKT_HUMAN    | R.SVPTSTVFYPSDGVATEK.A      |              | 3 | 3,0661 | 0,246 | 0,388  |
| 11 | P46108 CRK_HUMAN    | R.ALDFFNNGDEEDLPFK.K        |              | 2 | 3,0654 | 0,475 | 0,391  |
| 11 | O15355 PPM1G_HUMAN  | K.NLPPEEQM*ISALPDIK.V       |              | 2 | 3,0653 | 0,208 | 0,269  |
| 11 | Q9BR76 COR1B_HUMAN  | E.ASGGGAFLVPLSK.T           |              | 2 | 3,0644 | 0,462 | 0,093  |
| 11 | Q15424 SAFB1_HUMAN  | E.LAEAPTEAPS#PEAR.D         | S344:        | 2 | 3,0638 | 0,4   | -1,526 |
| 11 | P40818 UBP8_HUMAN   | R.M*GPLNISTPVEPVAASK.S      |              | 2 | 3,0607 | 0,478 | 0,212  |
| 11 | Q92598 HS105_HUMAN  | K.VLGTAFDPFLGGK.N           |              | 2 | 3,0606 | 0,417 | 0,185  |
| 11 | Q92615 LARP5_HUMAN  | R.TLSADASVNTLPVVVSR.E       |              | 3 | 3,06   | 0,158 | 0,529  |
| 11 | P00558 PGK1_HUMAN   | K.ALES#PERPFLAILGGAK.V      | S203:        | 2 | 3,0584 | 0,354 | -0,198 |
| 11 | Q9Y2D5 AKAP2_HUMAN  | R.DALGDSLQVPVSPSTSSR.C      |              | 3 | 3,0551 | 0,105 | 0,456  |
| 11 | Q14185 DOCK1_HUMAN  | R.FSVSPSSPSSQQTTPPVTPR.A    |              | 3 | 3,0551 | 0,207 | 0      |
| 11 | P27816 MAP4_HUMAN   | K.VGS#LDNVGHLPAGGAVKTE.G    | S1073:       | 2 | 3,055  | 0,478 | -0,128 |
| 11 | O95400 CD2B2_HUMAN  | K.LVDPVAGSGGPGSR.F          |              | 2 | 3,0534 | 0,433 | 0,192  |
| 11 | Q9NQ57 INCE_HUMAN   | E.SITVSSLM*ATPQDPK.G        |              | 2 | 3,0514 | 0,214 | 0,153  |
| 11 | Q9UQ35 SRRM2_HUMAN  | R.SSTGPEPPAPTLLAER.H        |              | 2 | 3,0502 | 0,435 | 0,071  |
| 11 | P68104 EF1A1_HUMAN  | D.AAIVDM*VPGKPM*CVE.S       |              | 2 | 3,0496 | 0,396 | 0,074  |
| 11 | O14744 ANM5_HUMAN   | R.VPLVAPEDLRDDIIE.N         |              | 2 | 3,0481 | 0,414 | -0,216 |
| 11 | O43491 E41L2_HUMAN  | R.SLDGAPIGVM*DQSLM*K.D      |              | 2 | 3,0469 | 0,422 | 0,432  |
| 11 | Q9NQ84 GPC5C_HUMAN  | K.VPSEGAYDIILPR.A           |              | 2 | 3,0464 | 0,443 | 0      |
| 11 | Q14690 RRP5_HUMAN   | E.DDSLVDVYYRE.G             |              | 2 | 3,0462 | 0,371 | 0,178  |
| 11 | P50991 TCPD_HUMAN   | K.IGLIQFCLSAPK.T            |              | 2 | 3,0456 | 0,46  | 0      |
| 11 | O60812 HNRCL_HUMAN  | R.VFIGNLNTLVVK.K            |              | 2 | 3,0448 | 0,282 | 0,185  |
| 11 | P06733 ENOA_HUMAN   | K.FTASAGIQVVGDDLTVTNPK.R    |              | 3 | 3,0444 | 0,222 | 1,8    |
| 11 | Q969R5 LMBL2_HUMAN  | E.AGELPT#SPLHLLSPGTPR.S     | T66:         | 3 | 3,0441 | 0,116 | 0,38   |
| 11 | P11310 ACADM_HUMAN  | E.GNSLGQM*PIIIAGNDQQK.K     |              | 2 | 3,0441 | 0,395 | -0,45  |
| 11 | Q70CQ2 UBP34_HUMAN  | E.TREVLTP#PTST#SDNETR.D     | T3230:T3234: | 3 | 3,0431 | 0,267 | -0,93  |
| 11 | Q9NQC3 RTN4_HUMAN   | E.DLDQSPLVSSSDS#PPRPQPAFK.Y | S15:         | 3 | 3,0415 | 0,164 | 0,523  |

|    |                     |                               |            |   |        |       |        |
|----|---------------------|-------------------------------|------------|---|--------|-------|--------|
| 11 | Q13546 RIPK1_HUMAN  | R.SNSATEQPGSLHSSQGLGM*GPVEE.S |            | 3 | 3,0398 | 0,228 | 0,076  |
| 11 | O95336 6PGL_HUMAN   | E.LPAAVAPAGPASLAR.W           |            | 2 | 3,0378 | 0,454 | -0,09  |
| 11 | P49591 SYSC_HUMAN   | K.DPGLVDQLVKADSE.W            |            | 2 | 3,037  | 0,397 | 0,082  |
| 11 | P17812 PYRG1_HUMAN  | K.TVQVPHITDAIQE.W             |            | 2 | 3,0312 | 0,347 | 0,079  |
| 11 | Q53GS7 GLE1_HUMAN   | K.AATIPVSQISTIAGSK.L          |            | 2 | 3,0291 | 0,286 | -0,079 |
| 11 | P04083 ANXA1_HUMAN  | K.GVDEATIIDILTK.R             |            | 2 | 3,0283 | 0,334 | -0,352 |
| 11 | P35908 K22E_HUMAN   | R.NLDLDSIIAEVK.A              |            | 2 | 3,0273 | 0,418 | -0,092 |
| 11 | P07814 SYEP_HUMAN   | K.EYIPGQPPLSQSSDSSPTR.N       |            | 2 | 3,027  | 0,379 | 0,239  |
| 11 | O60507 TPST1_HUMAN  | K.DM*PLIFIGGVPR.S             |            | 2 | 3,026  | 0,482 | 0,092  |
| 11 | Q8N999 CL029_HUMAN  | K.ALDADIYSAIPTEK.V            |            | 2 | 3,0238 | 0,461 | 0,081  |
| 11 | Q9UBG0 MRC2_HUMAN   | R.TLGDQLSLLLGAR.T             |            | 2 | 3,0226 | 0,479 | -0,45  |
| 11 | P21333 FLNA_HUMAN   | E.AGAGGLAIAVEGPSKAE.I         |            | 2 | 3,0221 | 0,391 | 0,896  |
| 11 | P17980 PRS6A_HUMAN  | R.VDILDPELLR.S                |            | 2 | 3,0221 | 0,267 | 0      |
| 11 | Q6P2E9 EDC4_HUMAN   | R.GLLPGLLPAPADKLT#PK.G        | T693:      | 2 | 3,0219 | 0,45  | 0      |
| 11 | Q99733 NP1L4_HUMAN  | K.YAALYQPLFDK.R               |            | 2 | 3,0207 | 0,269 | 0,275  |
| 11 | Q6UN15 FIP1_HUMAN   | K.TGAPQYGSYGTAPVNLNIK.T       |            | 3 | 3,0201 | 0,245 | 0,469  |
| 11 | Q96AG4 LRC59_HUMAN  | K.LVTLPVSAQK.N                |            | 2 | 3,0192 | 0,451 | 0,093  |
| 11 | Q00341 VIGLN_HUMAN  | K.ASVITQVFHVPLEE.R            |            | 2 | 3,0176 | 0,459 | 0,156  |
| 11 | O94909 K0819_HUMAN  | E.RGPSQATS#PIRS#PQE.S         | S296:S300: | 2 | 3,0171 | 0,248 | -0,413 |
| 11 | Q9BZF3 OSBL6_HUMAN  | R.QLLEPEPVPLSKE.A             |            | 2 | 3,0129 | 0,338 | 0,082  |
| 11 | Q96M96 FGD4_HUMAN   | R.TPGIGPVLPLEER.G             |            | 2 | 3,0111 | 0,464 | 0      |
| 11 | P56537 IF6_HUMAN    | E.TEEILADVVKVE.V              |            | 2 | 3,0108 | 0,287 | 0,18   |
| 11 | Q01518 CAP1_HUMAN   | K.LSDLLAPISEIQKE.V            |            | 3 | 3,0107 | 0,346 | 0,235  |
| 11 | P78318 IGBP1_HUMAN  | K.YLLVPAFQGALTM*K.Q           |            | 2 | 3,0032 | 0,334 | 0,233  |
| 11 | Q12906 ILF3_HUMAN   | E.ILQSVDDAAIVIK.N             |            | 2 | 3,0027 | 0,376 | 0,176  |
| 11 | Q6ZU35 K1211_HUMAN  | R.SVPVAHPGPPASSQTPAPE.H       |            | 2 | 3,0026 | 0,349 | 0,127  |
| 11 | Q6UUV9 CRTC1_HUMAN  | R.LPPGGPLLPSASLTR.G           |            | 2 | 3,0008 | 0,239 | 0,165  |
| 11 | Q13330 MTA1_HUMAN   | R.DISSTLIALADK.H              |            | 2 | 3      | 0,384 | 0      |
| 11 | Q8IXB1 DJC10_HUMAN  | K.ILYDILAFKE.S                |            | 2 | 2,9995 | 0,293 | -0,282 |
| 11 | Q9P2K5 MYEF2_HUMAN  | K.AEVPGATGGDS#PHLQPAEPPGEPR.R | S17:       | 3 | 2,9981 | 0,31  | 0,075  |
| 11 | A4QPA1 A4QPA1_HUMAN | E.VATVVIQPTVLR.A              |            | 2 | 2,9976 | 0,402 | 0,471  |
| 11 | P12004 PCNA_HUMAN   | E.DNADTLALVFEAPNQEK.V         |            | 2 | 2,9969 | 0,327 | 0,325  |
| 11 | Q9NZ23 Q9NZ23_HUMAN | E.DQVSSDIVNNTHGSIFD.A         |            | 3 | 2,9948 | 0,309 | 0,564  |

|    |                    |                             |              |   |        |       |        |
|----|--------------------|-----------------------------|--------------|---|--------|-------|--------|
| 11 | Q09666 AHNK_HUMAN  | K.GHYEVTGS#DDE.T            | S5841:       | 2 | 2,9812 | 0,382 | -0,284 |
| 11 | Q99941 ATF6B_HUMAN | E.TVQINVIPSTDDSSDVQTK.I     |              | 2 | 2,9809 | 0,266 | 0,238  |
| 11 | Q3V6T2 GRDN_HUMAN  | E.VTDM*SQEDIEPLLK.N         |              | 2 | 2,9797 | 0,286 | 1,045  |
| 11 | P00558 PGK1_HUMAN  | E.M*IIGGGM*AFTFLK.V         |              | 2 | 2,9786 | 0,272 | 1,205  |
| 11 | Q96EV2 RBM33_HUMAN | E.DDLLGEDLLSGK.K            |              | 2 | 2,9777 | 0,504 | 0,574  |
| 11 | P11388 TOP2A_HUMAN | E.LKPQKS#VVS#DLE.A          | S1374:S1377: | 2 | 2,9763 | 0,407 | 0      |
| 11 | Q5M775 SPEC1_HUMAN | K.ASLSPDASDFEHITAE.T        |              | 2 | 2,9761 | 0,413 | 0      |
| 11 | Q6EMK4 VASN_HUMAN  | R.SLTLGIEPVSPSLR.V          |              | 2 | 2,9758 | 0,432 | -0,078 |
| 11 | O75937 DNJC8_HUMAN | E.VLQIDPEVTDEEIK.K          |              | 2 | 2,9752 | 0,355 | 0,45   |
| 11 | Q01813 K6PP_HUMAN  | R.M*LAIYDGFDFGFAK.G         |              | 2 | 2,9746 | 0,376 | 0,417  |
| 11 | Q9Y4F1 FARP1_HUMAN | K.QASPLISPLLNDQACPR.T       |              | 3 | 2,973  | 0,396 | 0,681  |
| 11 | A8K0Z3 WASH1_HUMAN | K.YVFLDPLAGAVTK.T           |              | 2 | 2,9728 | 0,447 | 0,175  |
| 11 | P78310 CXAR_HUMAN  | R.M*GAIPVM*IPAQSK.D         |              | 2 | 2,9713 | 0,425 | 0,089  |
| 11 | Q14566 MCM6_HUMAN  | R.LVFLACCVAPTNP.R.F         |              | 2 | 2,9693 | 0,353 | 0,377  |
| 11 | Q9Y5Q9 TF3C3_HUMAN | K.LSAEENPDDSEVPSSSGINSTK.S  |              | 3 | 2,968  | 0,223 | 0,566  |
| 11 | Q5HYW2 NHSL2_HUMAN | K.TNPNQPIPM*PM*VTQSDLR.S    |              | 2 | 2,9645 | 0,358 | 0,185  |
| 11 | Q13885 TBB2A_HUMAN | E.GAELVDSVLDVVR.K           |              | 2 | 2,964  | 0,305 | 0,089  |
| 11 | P31948 STIP1_HUMAN | R.AM*ADPEVQQIM*SDPAM*R.L    |              | 2 | 2,9637 | 0,405 | 0,126  |
| 11 | P54278 PMS2_HUMAN  | E.DIFIVDQHATDE.K            |              | 2 | 2,9632 | 0,297 | 0,174  |
| 11 | P30086 PEBP1_HUMAN | K.LYTLVLTDPDAPSR.K          |              | 3 | 2,9631 | 0,194 | 0,234  |
| 11 | P06753 TPM3_HUMAN  | K.LVIIEGDLERTEE.R           |              | 2 | 2,9628 | 0,409 | 0,402  |
| 11 | Q9P2N6 K1310_HUMAN | K.LPASPSGSEDLSSVSSSPTSSPK.T |              | 3 | 2,9619 | 0,272 | -0,249 |
| 11 | Q8IXM2 CQ049_HUMAN | K.KVASGVLSPPPAAPPSSSSVPE.A  |              | 2 | 2,9593 | 0,388 | 0,226  |
| 11 | Q96I25 SPF45_HUMAN | R.SM*GGAAIAPPTSLVEK.D       |              | 2 | 2,9583 | 0,378 | 0,079  |
| 11 | P07737 PROF1_HUMAN | R.DSLLQDGEFSM*DLR.T         |              | 3 | 2,9562 | 0,271 | 0,668  |
| 11 | P31946 1433B_HUMAN | K.DSTLIM*QLLR.D             |              | 2 | 2,9556 | 0,191 | 0,405  |
| 11 | Q9Y224 CN166_HUMAN | K.AGVM*ALANLLQIQR.H         |              | 2 | 2,9526 | 0,34  | 0,242  |
| 11 | Q9UHF7 TRPS1_HUMAN | K.HPNY#SPPGS#PIEK.Y         | Y1080:S1085: | 2 | 2,952  | 0,4   | -0,077 |
| 11 | P30414 NKTR_HUMAN  | R.DM*PVVTAPEPEK.I           |              | 2 | 2,9513 | 0,411 | 0,275  |
| 11 | O75531 BAF_HUMAN   | K.AYVVLGQFLVLK.K            |              | 2 | 2,9512 | 0,502 | -0,361 |
| 11 | Q9NR31 SAR1A_HUMAN | E.TISNVPIILGNK.I            |              | 3 | 2,9504 | 0,26  | 0,397  |
| 11 | Q684P5 RPGP2_HUMAN | E.IKS#ETSSNPS#SPEICPNK.E    | S605:S612:   | 3 | 2,9497 | 0,212 | 0,6    |
| 11 | P04626 ERBB2_HUMAN | E.DLGPASPLDSTFYR.S          |              | 2 | 2,9467 | 0,511 | 0,238  |

|    |                     |                                |                 |   |        |       |        |
|----|---------------------|--------------------------------|-----------------|---|--------|-------|--------|
| 11 | Q7Z434 MAVS_HUMAN   | K.VPTTLM*PVNTVALK.V            |                 | 2 | 2,9434 | 0,37  | 0,244  |
| 11 | Q9NWS0 PIHD1_HUMAN  | R.LVM*GGPQQLYHLD.A             |                 | 2 | 2,9384 | 0,556 | 0,821  |
| 11 | P04183 KITH_HUMAN   | R.GQIQVILGPM*FSGK.S            |                 | 2 | 2,938  | 0,394 | 0,082  |
| 11 | P11362 FGFR1_HUMAN  | K.IGPDNLPLYVQILK.T             |                 | 2 | 2,9371 | 0,447 | 0,249  |
| 11 | P12268 IMDH2_HUMAN  | E.DLVVAPAGITLKE.A              |                 | 2 | 2,9367 | 0,306 | 0,644  |
| 11 | Q9UHD8 SEPT9_HUMAN  | K.VPEVPTAPATDAAPK.R            |                 | 2 | 2,936  | 0,484 | -0,167 |
| 11 | Q8TCS8 PNPT1_HUMAN  | E.TFSVFAPTPSAM*HE.A            |                 | 2 | 2,9354 | 0,408 | 0,159  |
| 11 | Q96N67 DOCK7_HUMAN  | K.NSLPDALLPNLLDR.T             |                 | 2 | 2,9339 | 0,441 | 0,079  |
| 11 | O43155 FLRT2_HUMAN  | E.TSFQIVSLNNDQLLK.G            |                 | 2 | 2,9325 | 0,176 | 0,142  |
| 11 | P55084 ECHB_HUMAN   | K.DQLLLGPTYATPK.V              |                 | 2 | 2,9318 | 0,297 | 0,258  |
| 11 | Q6KB66 K2C80_HUMAN  | K.VTVNPGLLVPLDVK.L             |                 | 2 | 2,9308 | 0,383 | 0,167  |
| 11 | B0QY74 B0QY74_HUMAN | E.LVSQGIM*PPLKS#PAAFHE.Q       | S33:            | 3 | 2,9305 | 0,312 | 0,635  |
| 11 | P49848 TAF6_HUMAN   | K.LVSTATTAPPSTAPSGPGSVQK.Y     |                 | 2 | 2,9303 | 0,327 | 0,238  |
| 11 | Q9Y3C0 CCD53_HUMAN  | K.M*VQVGVPM*AIR.N              |                 | 2 | 2,9286 | 0,371 | 0,366  |
| 11 | Q7L2J0 MEPCE_HUMAN  | R.DAPQPYELNTAINCRDE.V          |                 | 2 | 2,9283 | 0,181 | 0,243  |
| 11 | Q9Y312 CT004_HUMAN  | R.QICAFSDVLPVLSM*K.H           |                 | 2 | 2,9269 | 0,392 | 0,071  |
| 11 | B2RTT8 B2RTT8_HUMAN | K.DSGLESPAAAEAPLR.G            |                 | 2 | 2,9267 | 0,394 | 0,658  |
| 11 | P18206 VINC_HUMAN   | K.LLAVAATAPPDAPNREE.V          |                 | 2 | 2,9251 | 0,4   | -0,07  |
| 11 | P40926 MDHM_HUMAN   | K.IFGVTTLDIR.A                 |                 | 2 | 2,9249 | 0,319 | 0,099  |
| 11 | P18850 ATF6A_HUMAN  | K.AEPQPLSPASSYSVSSPR.S         |                 | 2 | 2,9245 | 0,333 | 0      |
| 11 | P29350 PTN6_HUMAN   | R.DSNIPGSDYINANYIK.N           |                 | 2 | 2,9201 | 0,363 | 0,205  |
| 11 | O94833 BPAAE_HUMAN  | R.STSVSSQAAQAASPQVPATTPK.I     |                 | 3 | 2,9201 | 0,104 | 0,33   |
| 11 | O15372 EIF3H_HUMAN  | E.YM*FEEVPIVIK.N               |                 | 2 | 2,9196 | 0,336 | -0,088 |
| 11 | Q9Y230 RUVB2_HUMAN  | R.LLIVSTTPYSEKD.T              |                 | 2 | 2,9192 | 0,385 | 0,25   |
| 11 | Q8N163 K1967_HUMAN  | K.M*LLSLPEKVV#PPEPEKEE.A       | S569:           | 3 | 2,9187 | 0,167 | 0,326  |
| 11 | P09211 GSTP1_HUMAN  | -.M*PPYTVVYFPVR.G              |                 | 2 | 2,9163 | 0,352 | 0,657  |
| 11 | Q9NTJ3 SMC4_HUMAN   | E.GPPPPSPDGASSDAEPEPPSGR.T     |                 | 3 | 2,9145 | 0,105 | 0,348  |
| 11 | Q86T24 KAISO_HUMAN  | K.M*QIPTLLQEPLSNLKI            |                 | 3 | 2,9139 | 0,161 | 0,1    |
| 11 | Q13111 CAF1A_HUMAN  | K.EDSGSVPSTGSPQGTPISLK.R       |                 | 2 | 2,9138 | 0,417 | -0,126 |
| 11 | P62753 RS6_HUMAN    | R.RLS#S#LRAST#SKSE.S           | S235:S236:T241: | 3 | 2,9138 | 0,192 | 0,22   |
| 11 | P48681 NEST_HUMAN   | E.ASTGQSPEDHASLAPPLS#PDHSSLE.A | S471:           | 3 | 2,9101 | 0,126 | 0,28   |
| 11 | Q8N1F8 S11IP_HUMAN  | R.YLVLEPDAHAAVQE.L             |                 | 2 | 2,9021 | 0,117 | 0,314  |
| 11 | O00754 MA2B1_HUMAN  | R.DLFSTFITR.L                  |                 | 2 | 2,9011 | 0,398 | 0,102  |

|    |                    |                                  |       |   |        |       |        |
|----|--------------------|----------------------------------|-------|---|--------|-------|--------|
| 11 | Q14697 GANAB_HUMAN | R.VPDVLVADPPIAR.L                |       | 2 | 2,9005 | 0,399 | 0,269  |
| 11 | Q9NQT8 KI13B_HUMAN | E.M*GPDVLVQTM*GAPALK.I           |       | 3 | 2,8995 | 0,216 | 0,22   |
| 11 | Q96RT1 LAP2_HUMAN  | K.M*VLTYNM*FPQQPR.T              |       | 3 | 2,8992 | 0,084 | 0      |
| 11 | P11021 GRP78_HUMAN | R.IINEPTAAAIAYGLDK.R             |       | 3 | 2,8987 | 0,221 | 0,11   |
| 11 | Q00613 HSF1_HUMAN  | E.LAPASPM*ASPGGSIDERPLSSS#PLVR.V | S292: | 3 | 2,8948 | 0,4   | 0,136  |
| 11 | O43776 SYNC_HUMAN  | K.EPFPTIYVDSQKENE.R              |       | 2 | 2,8948 | 0,26  | 0,068  |
| 11 | Q8WUF8 CE021_HUMAN | E.DLDSGTQIPFIK.R                 |       | 2 | 2,8944 | 0,388 | 0      |
| 11 | Q15398 DLG7_HUMAN  | K.DFM*FQPLDGLK.T                 |       | 2 | 2,8914 | 0,425 | 0,368  |
| 11 | Q9BY89 K1671_HUMAN | K.ATFFAVTYQIPNTQK.A              |       | 2 | 2,8912 | 0,454 | -1,976 |
| 11 | Q02790 FKBP4_HUMAN | E.SGAQSAPLPM*EGVDISPK.Q          |       | 2 | 2,8901 | 0,244 | 0      |
| 11 | P06744 G6PI_HUMAN  | R.SNTPILVDGKDVM*PE.V             |       | 2 | 2,8898 | 0,195 | 0      |
| 11 | P06748 NPM_HUMAN   | K.VKLAADEDDE.D                   |       | 2 | 2,8889 | 0,385 | -0,112 |
| 11 | Q15637 SF01_HUMAN  | R.AYIVQLQIEDLTR.K                |       | 3 | 2,8889 | 0,204 | 0,351  |
| 11 | P31150 GDIA_HUMAN  | K.FLVFVANFDENDPK.T               |       | 2 | 2,8886 | 0,324 | 0      |
| 11 | Q00613 HSF1_HUMAN  | E.LAPAS#PM*ASPGGSIDERPLSSSPLVR.V | S275: | 3 | 2,8874 | 0,29  | 0,544  |
| 11 | Q16656 NRF1_HUMAN  | R.VGQQAIIVLCIS#PSKPNPVFK.V       | S136: | 3 | 2,887  | 0,138 | 0,404  |
| 11 | Q8NI08 NCOA7_HUMAN | K.SASLDSPVLLVIK.D                |       | 2 | 2,8862 | 0,247 | 0,273  |
| 11 | Q6R327 RICTR_HUMAN | E.DLLSPINQNTLQR.S                |       | 2 | 2,8861 | 0,402 | -0,242 |
| 11 | P12268 IMDH2_HUMAN | E.QGFITDPVVLSPK.D                |       | 2 | 2,8848 | 0,366 | 0,087  |
| 11 | Q9BR76 COR1B_HUMAN | R.DADPILISLRE.A                  |       | 2 | 2,8825 | 0,355 | 0,295  |
| 11 | Q04721 NOTC2_HUMAN | R.GPDGCTPLM*LASLR.G              |       | 2 | 2,882  | 0,27  | -0,325 |
| 11 | P60174 TPIS_HUMAN  | K.SNVSDAVAQSTR.I                 |       | 2 | 2,8792 | 0,417 | -0,099 |
| 11 | Q13428 TCOF_HUMAN  | K.LDSSPSVSSTLAAK.D               |       | 2 | 2,8787 | 0,267 | 0,179  |
| 11 | Q9UBQ7 GRHPR_HUMAN | R.NTM*SLLAANNLLAGLR.G            |       | 2 | 2,8783 | 0,233 | 0,578  |
| 11 | Q9NR12 PDLI7_HUMAN | R.ILAHLTGTEFM*QDPDEE.H           |       | 3 | 2,8735 | 0,334 | 0,559  |
| 11 | Q14789 GGOB1_HUMAN | K.AQGGTVLPTEPQSEEQLSK.H          |       | 2 | 2,8721 | 0,451 | 0,122  |
| 11 | Q9UMZ2 SYNG_HUMAN  | E.ASPVPLTSNVGSTVK.G              |       | 2 | 2,8712 | 0,403 | 0,502  |
| 11 | Q9NQS7 INCE_HUMAN  | R.VLAPILPDNFSTPTGSR.T            |       | 2 | 2,8701 | 0,463 | -0,137 |
| 11 | P36551 HEM6_HUMAN  | R.GIGGIFDLDLSPSKEE.V             |       | 2 | 2,8664 | 0,32  | 0,267  |
| 11 | O15047 SET1A_HUMAN | K.LIVDPALDPALR.R                 |       | 2 | 2,8603 | 0,392 | 0,094  |
| 11 | Q9HCN4 GPN1_HUMAN  | K.DM*GSVALDAGTAK.D               |       | 2 | 2,8564 | 0,366 | -0,292 |
| 11 | Q9HC38 GLOD4_HUMAN | K.ATVQVVILADPDGHE.I              |       | 2 | 2,8546 | 0,144 | 0,39   |
| 11 | Q9Y6B6 SAR1B_HUMAN | E.TIANVPILILGNK.I                |       | 2 | 2,8541 | 0,416 | 0      |

|    |                     |                            |   |        |       |        |
|----|---------------------|----------------------------|---|--------|-------|--------|
| 11 | P61158 ARP3_HUMAN   | E.DHYFLLTEPPLNTPE.N        | 2 | 2,8531 | 0,369 | 0,205  |
| 11 | P35611 ADDA_HUMAN   | R.TSTSAVPNLFVPLNTNPK.E     | 3 | 2,8512 | 0,275 | 0,193  |
| 11 | Q9P266 K1462_HUMAN  | K.M*PPYPPTCAPNLDSTR.N      | 2 | 2,8505 | 0,412 | 0,266  |
| 11 | P62834 RAP1A_HUMAN  | E.DVPM*ILVGNKCDLE.D        | 2 | 2,8504 | 0,295 | 0,151  |
| 11 | Q86VW2 GEFT_HUMAN   | E.LTLLTTLLEGPGDK.T         | 2 | 2,8468 | 0,369 | -0,083 |
| 11 | Q15154 PCM1_HUMAN   | K.YM*PAVTSTPTVNQHE.T       | 2 | 2,8462 | 0,406 | -0,289 |
| 11 | P42166 LAP2A_HUMAN  | E.LTNEDLLDQLVK.Y           | 2 | 2,8436 | 0,103 | 0,087  |
| 11 | Q07021 C1QBP_HUMAN  | K.AFVDFLSDEIKEE.R          | 2 | 2,8425 | 0,34  | 0,158  |
| 11 | Q15020 SART3_HUMAN  | E.NGPAAAPAVAAPAATEAPK.M    | 2 | 2,842  | 0,51  | -0,219 |
| 11 | Q05524 ENO1B_HUMAN  | R.YISPDQLADLYK.G           | 2 | 2,8419 | 0,333 | 0,599  |
| 11 | P04792 HSPB1_HUMAN  | E.SPAVAAPAYS.R.A           | 2 | 2,8418 | 0,365 | 0,112  |
| 11 | Q969J3 L12R1_HUMAN  | K.LQEIPTFQPLLK.G           | 2 | 2,8359 | 0,248 | 0,171  |
| 11 | B1GXI8 B1GXI8_HUMAN | R.SLAGSAPVAIPGSLPR.A       | 2 | 2,8354 | 0,442 | 0,163  |
| 11 | P04075 ALDOA_HUMAN  | R.VNPCIGGVILFHE.T          | 2 | 2,8326 | 0,432 | 0,419  |
| 11 | O75909 CCNK_HUMAN   | K.DPQQPAQQQPAQQPK.K        | 3 | 2,8292 | 0,158 | 0      |
| 11 | P50395 GDIB_HUMAN   | K.FVSISDLLVPK.D            | 2 | 2,827  | 0,319 | -0,3   |
| 11 | Q7L2Z9 CENPQ_HUMAN  | E.ILALIPNQALLK.D           | 2 | 2,8263 | 0,316 | 0,258  |
| 11 | P30153 2AAA_HUMAN   | E.NVIM*SQILPCIKE.L         | 2 | 2,8228 | 0,202 | 0      |
| 11 | Q06323 PSME1_HUMAN  | K.APLDIPVPDPVKE.K          | 2 | 2,8215 | 0,379 | 0,176  |
| 11 | Q06210 GFPT1_HUMAN  | R.VIFLEDDDDVAAVDGR.L       | 3 | 2,8193 | 0,336 | 0,211  |
| 11 | Q99700 ATX2_HUMAN   | E.AVAM*PIPAASPTPASPASNR.A  | 2 | 2,8192 | 0,353 | 0      |
| 11 | Q86XP3 DDX42_HUMAN  | K.IIDPLPIDHSE.I            | 2 | 2,8188 | 0,345 | 0,634  |
| 11 | Q99640 PMYT1_HUMAN  | R.DALDLSINSEPPR.G          | 2 | 2,8169 | 0,258 | 1,82   |
| 11 | Q96PD2 DCBD2_HUMAN  | K.ATGNQPPPLVGTYNLLSR.T     | 2 | 2,8168 | 0,329 | 0,122  |
| 11 | O75534 CSDE1_HUMAN  | K.DVEGSTSPQIGDKVE.F        | 2 | 2,8157 | 0,218 | -0,313 |
| 11 | P49848 TAF6_HUMAN   | K.LVSTATTAPPSTAPSGPGSVQK.Y | 3 | 2,8146 | 0,246 | 0,356  |
| 11 | Q9HB40 RISC_HUMAN   | E.DFM*KPVISIVDE.L          | 2 | 2,8144 | 0,276 | 0,346  |
| 11 | Q6SZW1 SARM1_HUMAN  | R.NFVLVLSPGALDK.C          | 2 | 2,8128 | 0,225 | -0,267 |
| 11 | Q9UK22 FBX2_HUMAN   | E.LLDTTQPAIVVK.D           | 2 | 2,8118 | 0,252 | 0,094  |
| 11 | P55327 TPD52_HUMAN  | E.VLNSAANASATTTEPLPEK.T    | 3 | 2,8096 | 0,212 | -0,191 |
| 11 | Q9UBQ7 GRHPR_HUMAN  | K.VISTM*SVGIDHLALDE.I      | 2 | 2,8096 | 0,384 | 0,213  |
| 11 | Q15365 PCBP1_HUMAN  | R.LVVPATQCGSLIGK.G         | 2 | 2,8096 | 0,469 | 0,423  |
| 11 | Q9UL46 PSME2_HUMAN  | R.APLDIPDPKDDDE.M          | 2 | 2,8092 | 0,224 | 0,282  |

|    |                    |                               |            |   |        |       |        |
|----|--------------------|-------------------------------|------------|---|--------|-------|--------|
| 11 | Q9P1Y6 K1542_HUMAN | E.SIFGTEPEPPLGPSSAM*SK.L      |            | 3 | 2,8077 | 0,082 | 0,563  |
| 11 | Q9Y2W2 WBP11_HUMAN | K.SGSPVPSVQTKDDVYE.A          |            | 2 | 2,8064 | 0,329 | 0,405  |
| 11 | O75607 NPM3_HUMAN  | D.DFQLQPPVTFR.L               |            | 2 | 2,8061 | 0,328 | 0,272  |
| 11 | O60566 BUB1B_HUMAN | E.DQQTACGTIYSQTLSEI.K         |            | 3 | 2,8058 | 0,148 | 0,191  |
| 11 | Q6R327 RICTR_HUMAN | E.TVGVDATTM*DTDCGSM*STVVSTK.T |            | 3 | 2,8032 | 0,281 | 0,229  |
| 11 | P30153 2AAA_HUMAN  | K.TDLVPAFQNLN*K.D             |            | 2 | 2,8026 | 0,193 | -0,088 |
| 11 | P11388 TOP2A_HUMAN | K.GSVPLSSPPATHFPDETE.I        |            | 2 | 2,8024 | 0,397 | 0      |
| 11 | P52292 IMA2_HUMAN  | D.AGALAVFPSLLTNP.K            |            | 2 | 2,8022 | 0,388 | 0      |
| 11 | Q9H0F6 SHRPN_HUMAN | E.ACPVSLPSPPEASTLK.G          |            | 2 | 2,8017 | 0,276 | 0,148  |
| 11 | P61956 SUMO2_HUMAN | K.VAGQDGSVVQFK.I              |            | 2 | 2,8    | 0,35  | 0      |
| 11 | P46109 CRKL_HUMAN  | R.VGM*IPVPYVEK.L              |            | 2 | 2,7997 | 0,266 | 0,098  |
| 11 | P20248 CCNA2_HUMAN | E.DALAFNSAISLPGPR.K           |            | 3 | 2,7992 | 0,17  | 0,239  |
| 11 | O95613 PCNT_HUMAN  | K.NQAIDACDANTTPGGVTDVIK.N     |            | 3 | 2,798  | 0,167 | 0,254  |
| 11 | Q9HC38 GLOD4_HUMAN | K.TM*VGFQPEDDHFVAE.L          |            | 2 | 2,7952 | 0,392 | -0,146 |
| 11 | Q96PD2 DCBD2_HUMAN | K.ATGNQPPPLVGTYNLLSR.T        |            | 3 | 2,7946 | 0,171 | 0,366  |
| 11 | Q9Y490 TLN1_HUMAN  | K.VM*VTNVTSLLK.T              |            | 2 | 2,7945 | 0,335 | 0,2    |
| 11 | P50995 ANX11_HUMAN | R.GTITDAPGFDPLRDAE.V          |            | 2 | 2,7945 | 0,428 | -0,146 |
| 11 | P62805 H4_HUMAN    | K.TVTAM*DVVYALK.R             |            | 2 | 2,7934 | 0,494 | 0,276  |
| 11 | P09874 PARP1_HUMAN | R.M*AIM*VQSPM*FDGK.V          |            | 2 | 2,7928 | 0,361 | -0,325 |
| 11 | Q96S21 RB40C_HUMAN | K.FLLVGSDVVGKGEILE.S          |            | 2 | 2,7902 | 0,209 | -0,289 |
| 11 | Q9UBW8 CSN7A_HUMAN | K.VTTAAAAAATSQDPEQHLTE.L      |            | 3 | 2,7902 | 0,233 | 0,364  |
| 11 | Q14157 UBP2L_HUMAN | R.RYPSS#ISSS#PQKD.L           | S605:S609: | 2 | 2,79   | 0,235 | -0,151 |
| 11 | Q8WXD5 GEMI6_HUMAN | E.DGSM*SVTGIM*GHAVQTVE.T      |            | 2 | 2,7884 | 0,296 | 0,461  |
| 11 | Q9NRR5 UBQL4_HUMAN | E.APGLVPSLGSFGISR.T           |            | 2 | 2,7864 | 0,268 | 0,167  |
| 11 | Q96EB6 SIRT1_HUMAN | R.TSPDSSVIVTLLDQAAK.S         |            | 2 | 2,7853 | 0,407 | 0      |
| 11 | Q96T58 MINT_HUMAN  | R.RPQS#PGAS#PSQAER.L          | S736:S740: | 3 | 2,7852 | 0,244 | -0,225 |
| 11 | P30040 ERP29_HUMAN | K.GALPLDVTVFYK.V              |            | 2 | 2,7849 | 0,565 | 0,645  |
| 11 | P27987 IP3KB_HUMAN | R.ARS#PS#PCPFR.S              | S174:S176: | 2 | 2,7845 | 0,34  | -1,828 |
| 11 | P04406 G3P_HUMAN   | K.IISNASCTTNCLAPLAK.V         |            | 3 | 2,7836 | 0,304 | 0,997  |
| 11 | Q9UGV2 NDRG3_HUMAN | K.YFLQGM*GYIPSASM*TR.L        |            | 3 | 2,7812 | 0,217 | 0,592  |
| 11 | O75369 FLNB_HUMAN  | K.AGSNM*LLIGVHGPTTPCEE.V      |            | 2 | 2,7793 | 0,154 | 0,427  |
| 11 | Q53GS9 SNUT2_HUMAN | R.EAPASVVPFVR.V               |            | 2 | 2,7792 | 0,42  | 0,312  |
| 11 | P46821 MAP1B_HUMAN | R.QS#PDHPTVGAGVLHITE.N        | S1666:     | 3 | 2,7787 | 0,123 | 0,398  |



|    |                    |                                    |            |   |        |       |        |
|----|--------------------|------------------------------------|------------|---|--------|-------|--------|
| 11 | Q8NB46 ANR52_HUMAN | E.ALAPLLSSLNVADR.S                 |            | 2 | 2,7779 | 0,489 | -0,085 |
| 11 | P20674 COX5A_HUMAN | E.LGISTPEELGLDKV.-                 |            | 2 | 2,7759 | 0,301 | -0,166 |
| 11 | Q96IF1 JUB_HUMAN   | R.ALPLPQSLPPDFR.L                  |            | 2 | 2,7744 | 0,382 | 0,168  |
| 11 | P29374 ARI4A_HUMAN | K.AADEPAYLTVGTDVSAK.Y              |            | 3 | 2,7741 | 0,276 | -0,214 |
| 11 | Q99747 SNAG_HUMAN  | K.LGLSLVVPGGGIK.K                  |            | 2 | 2,773  | 0,361 | 0,403  |
| 11 | P27635 RL10_HUMAN  | K.VDEFPLCGHM*VSDE.Y                |            | 2 | 2,7728 | 0,322 | 0,222  |
| 11 | Q9HAV7 GRPE1_HUMAN | K.DLLEVADVLEK.A                    |            | 2 | 2,7691 | 0,397 | -0,196 |
| 11 | P50479 PDLI4_HUMAN | E.ATLPAQM*STLHVS#PPPSADPAR.G       | S165:      | 3 | 2,769  | 0,117 | 0,313  |
| 11 | P46940 IQGA1_HUMAN | K.TLINAEDPPM*VVVR.K                |            | 2 | 2,7686 | 0,378 | 0,389  |
| 11 | Q02952 AKA12_HUMAN | E.LVEM*DAEPQEAEPKE.L               |            | 2 | 2,7672 | 0,3   | 0      |
| 11 | P07947 YES_HUMAN   | E.NTPEPVSTSVSHYGAEPTTVS#PCPSSSAK.G | S40:       | 3 | 2,7666 | 0,252 | 0,18   |
| 11 | Q9UJD0 RIMS3_HUMAN | K.LFPTSSVADSTLGLSTR.R              |            | 2 | 2,7662 | 0,475 | 0,07   |
| 11 | Q5JRA6 MIA3_HUMAN  | R.AVLGTIHPDPEIEE.S                 |            | 2 | 2,7637 | 0,132 | -0,08  |
| 11 | P51114 FXR1_HUMAN  | R.EDGM*VPFVFGTKE.S                 |            | 2 | 2,7626 | 0,452 | 0      |
| 11 | Q9UKJ3 GPTC8_HUMAN | E.TTGPLLDPPPEESK.S                 |            | 2 | 2,7604 | 0,304 | 0,247  |
| 11 | Q2LD37 K1109_HUMAN | E.TTVFYIPGVDVK.L                   |            | 2 | 2,7594 | 0,384 | 0      |
| 11 | Q9H7N4 SFR19_HUMAN | R.FDIYDPFHPTDE.A                   |            | 2 | 2,7566 | 0,305 | 0,082  |
| 11 | P35658 NU214_HUMAN | K.AAPGPGPSTFSFVPPSK.A              |            | 3 | 2,7558 | 0,245 | 0,334  |
| 11 | Q96E09 F122A_HUMAN | K.RIDFIPVS#PAPS#PTR.G              | S143:S147: | 3 | 2,7553 | 0,222 | 0,404  |
| 11 | P54577 SYYC_HUMAN  | R.TVVSGLVQFVPKEE.L                 |            | 3 | 2,7536 | 0,311 | 0,478  |
| 11 | Q8TAD8 SNIP1_HUMAN | R.DGDVVLPAVVVK.Q                   |            | 2 | 2,7511 | 0,252 | 0,385  |
| 11 | O75122 CLAP2_HUMAN | R.VLTTTALSTVSSGVQR.V               |            | 2 | 2,7483 | 0,326 | 0,151  |
| 11 | P17676 CEBPB_HUMAN | E.AGAPGGGAGM*AAGFPYALR.A           |            | 3 | 2,7476 | 0,126 | 0      |
| 11 | P38646 GRP75_HUMAN | K.LYSPSQIGAFVLM*K.M                |            | 3 | 2,7473 | 0,141 | 0,349  |
| 11 | P35658 NU214_HUMAN | R.TPS#IQPSLLPHAAPFAK.S             | S1023:     | 3 | 2,7467 | 0,155 | 0,296  |
| 11 | Q9Y4L1 HYOU1_HUMAN | E.AEAPVEDGSQPPPEPK.G               |            | 2 | 2,7463 | 0,432 | -0,21  |
| 11 | P10589 COT1_HUMAN  | R.DPQDDVAGGNPGGNPAAQAAR.G          |            | 3 | 2,7447 | 0,212 | -0,088 |
| 11 | P38646 GRP75_HUMAN | K.LYSPSQIGAFVLM*K.M                |            | 2 | 2,7441 | 0,364 | 0,078  |
| 11 | P26373 RL13_HUMAN  | K.LATQLTGPVM*PVR.N                 |            | 2 | 2,7431 | 0,411 | 0,262  |
| 11 | Q8WU20 FRS2_HUMAN  | R.DCTPTVFNFDIR.R                   |            | 2 | 2,7403 | 0,393 | 0      |
| 11 | P06576 ATPB_HUMAN  | E.LGIYPAVDPLDSTR.I                 |            | 2 | 2,7368 | 0,37  | 0,456  |
| 11 | Q32MZ4 LRRF1_HUMAN | R.NM*PGLSAATLASLGGTSSR.R           |            | 3 | 2,7366 | 0,12  | 0,709  |
| 11 | P48634 BAT2_HUMAN  | E.ALTTVTVAPAPR.R                   |            | 2 | 2,7301 | 0,249 | 0,102  |

|    |                       |                                |        |   |        |       |        |
|----|-----------------------|--------------------------------|--------|---|--------|-------|--------|
| 11 | Q16881 TRXR1_HUMAN    | K.QLDSTIGIHPVCAE.V             |        | 2 | 2,7282 | 0,309 | 0,317  |
| 11 | Q5JVS0 HABP4_HUMAN    | K.SLPAPVAQRPS#PGGGLQAPGQK.R    | S108:  | 3 | 2,7282 | 0,389 | 0,079  |
| 11 | Q02241 KIF23_HUMAN    | R.LLFQPDQNAPPPIR.L             |        | 2 | 2,7251 | 0,287 | 0,647  |
| 11 | Q09666 AHNK_HUMAN     | K.VDVPDPVNIIEGPDPAK.L          |        | 2 | 2,7243 | 0,364 | 0      |
| 11 | Q9H4A3 WNK1_HUMAN     | E.QAVAGPAPSTVPSSTSK.D          |        | 2 | 2,7217 | 0,122 | -0,308 |
| 11 | Q9Y314 NOSIP_HUMAN    | K.ALSGTSPDDVQPGPSVGGPPSK.D     |        | 2 | 2,7146 | 0,224 | -0,245 |
| 11 | Q9NYF8 BCLF1_HUMAN    | K.KAEGEPQEES#PLKSK.S           | S177:  | 3 | 2,7119 | 0,229 | -0,211 |
| 11 | O60934 NBN_HUMAN      | E.IGLAVIFM*TTK.N               |        | 2 | 2,7107 | 0,363 | -0,202 |
| 11 | Q02952 AKA12_HUMAN    | E.LQSHAKSPPS#PVERE.M           | S1331: | 3 | 2,7089 | 0,188 | 0,105  |
| 11 | Q13620 CUL4B_HUMAN    | E.DFDSTSSSSSTPPLQPR.D          |        | 2 | 2,7071 | 0,253 | 0      |
| 11 | Q9NYF3 FA53C_HUMAN    | K.EQPFSQVLRPEPPDPE.K           |        | 2 | 2,705  | 0,26  | 0,458  |
| 11 | Q14738 2A5D_HUMAN     | E.SSLTEPVIVGLLK.F              |        | 2 | 2,7049 | 0,29  | 0      |
| 11 | Q9Y6Q9 NCOA3_HUMAN    | E.DLVNTSVYNILHE.E              |        | 2 | 2,7038 | 0,313 | -0,161 |
| 11 | Q76176 SSH2_HUMAN     | K.LGYLDLCKDCLPE.R              |        | 2 | 2,7003 | 0,236 | 0      |
| 11 | O75153 EIF3X_HUMAN    | E.DVLNIFPVVK.H                 |        | 2 | 2,6998 | 0,258 | 0,213  |
| 11 | Q15365 PCBP1_HUMAN    | E.LTIPNNLIGCIIGR.Q             |        | 2 | 2,6994 | 0,401 | -0,393 |
| 11 | Q8N7H5 PAF1_HUMAN     | R.IDPNVLLDPADEK.L              |        | 2 | 2,6989 | 0,303 | -0,254 |
| 11 | P08621 RU17_HUMAN     | R.DPIPYLPPLEK.L                |        | 2 | 2,6926 | 0,179 | 0,095  |
| 11 | Q9Y678 COPG_HUMAN     | K.ILYLINQGEHLGTTE.A            |        | 3 | 2,6894 | 0,21  | 0,215  |
| 11 | Q15398 DLG7_HUMAN     | R.VES#PVKLFSGLSVSSEGPSQR.L     | S618:  | 3 | 2,6892 | 0,126 | 0,322  |
| 11 | Q99460 PSMD1_HUMAN    | E.ALQLM*ATYLPK.D               |        | 2 | 2,6889 | 0,342 | 0,289  |
| 11 | P12268 IMDH2_HUMAN    | K.NLIDAGVDALR.V                |        | 2 | 2,6883 | 0,182 | 0,422  |
| 11 | Q9NYV4 CD2L7_HUMAN    | E.TTSGTSTEPVKNS#SPAPPQAPGKVE.S | S1082: | 2 | 2,6874 | 0,33  | 0,369  |
| 11 | Q01518 CAP1_HUMAN     | K.LSDLLAPISESIK.E              |        | 2 | 2,6849 | 0,204 | -0,256 |
| 11 | P60174 TPIS_HUMAN     | E.VVCAPPTAYIDFAR.Q             |        | 2 | 2,6845 | 0,483 | -0,618 |
| 11 | Q99550 MPP9_HUMAN     | E.IM*LTPVTVAISPK.R             |        | 2 | 2,6832 | 0,3   | 0      |
| 11 | P48634 BAT2_HUMAN     | K.AVGTPGGGGGAVPGISAM*SR.G      |        | 2 | 2,6825 | 0,485 | 0      |
| 11 | ##Q53S13 Q53S13_HUMAN | -.NRDEKAVM*VSAPSS#SATSALLR.K   | S14:   | 3 | 2,6795 | 0,086 | -0,307 |
| 11 | O14818 PSA7_HUMAN     | R.AITVFSFDGHLFQVE.Y            |        | 2 | 2,6785 | 0,304 | 0,147  |
| 11 | P38919 IF4A3_HUMAN    | E.VDVTPTFTDM*GLRE.D            |        | 2 | 2,6782 | 0,455 | 0,611  |
| 11 | Q6ZV73 FGD6_HUMAN     | E.VEEPYEAPDGQLQLGPR.H          |        | 3 | 2,6762 | 0,324 | 0,867  |
| 11 | O43639 NCK2_HUMAN     | R.IYDLNIPAFVK.F                |        | 2 | 2,6754 | 0,247 | 0,377  |
| 11 | P35520 CBS_HUMAN      | E.GIGYDFIPTVLDR.T              |        | 2 | 2,6747 | 0,454 | -0,083 |

|    |                    |                              |                 |   |        |       |        |
|----|--------------------|------------------------------|-----------------|---|--------|-------|--------|
| 11 | P49736 MCM2_HUMAN  | E.SFTM*AS#SPAQR.R            | S12:            | 2 | 2,6728 | 0,276 | -0,286 |
| 11 | Q9UKX7 NUP50_HUMAN | K.DTTQSKPVSS#PFPTKPLEGQAE.G  | S315:           | 3 | 2,6711 | 0,115 | 0,83   |
| 11 | P80723 BASP_HUMAN  | E.AAAAPAESAAPAAGEEPSKE.E     |                 | 2 | 2,6684 | 0,461 | -0,535 |
| 11 | P04083 ANXA1_HUMAN | K.DITSDTSGDFR.N              |                 | 2 | 2,6657 | 0,402 | 0      |
| 11 | Q7Z309 F122B_HUMAN | K.RIDFTPVS#PAPS#PTR.G        | S115:S119:      | 3 | 2,6629 | 0,191 | 0,406  |
| 11 | Q00613 HSF1_HUMAN  | E.SEPAPASVTALTDAR.G          |                 | 2 | 2,6624 | 0,516 | 0,657  |
| 11 | P46087 NOL1_HUMAN  | K.GISAGAVQTAGK.K             |                 | 2 | 2,6624 | 0,482 | 0,115  |
| 11 | P52701 MSH6_HUMAN  | E.DLM*VVPDKISE.V             |                 | 2 | 2,6623 | 0,237 | 0,193  |
| 11 | Q8IXQ4 K1704_HUMAN | R.DLIGPALPPGFK.A             |                 | 2 | 2,6597 | 0,352 | 0,299  |
| 11 | P07437 TBB5_HUMAN  | R.ALTVPELTQQVFDK.N           |                 | 2 | 2,658  | 0,268 | 0      |
| 11 | P49368 TCPG_HUMAN  | E.DIIQLKPDVVITE.K            |                 | 2 | 2,6575 | 0,319 | -0,082 |
| 11 | P49848 TAF6_HUMAN  | K.VPGSIALPVQTLVSAR.A         |                 | 2 | 2,656  | 0,389 | -0,076 |
| 11 | P22681 CBL_HUMAN   | K.GTEPIVVDPFDPR.G            |                 | 2 | 2,6549 | 0,352 | -0,169 |
| 11 | Q8NEY1 NAV1_HUMAN  | K.VAPGPSSGSTPGQVPGSSALSSPR.R |                 | 3 | 2,6544 | 0,225 | 0      |
| 11 | P18206 VINC_HUMAN  | K.LVQAAQM*LQSDPYVSPAR.D      |                 | 2 | 2,654  | 0,221 | 0,245  |
| 11 | P50548 ERF_HUMAN   | E.GAGALAPPPPPQIK.V           |                 | 2 | 2,6531 | 0,146 | -0,086 |
| 11 | Q16630 CPSF6_HUMAN | R.DYM*DTLPPTVGDDVGK.G        |                 | 2 | 2,6522 | 0,432 | 0,351  |
| 11 | Q9H4L4 SENP3_HUMAN | R.GSPPVPSGPPM*EEDGLR.W       |                 | 2 | 2,6517 | 0,542 | 0,211  |
| 11 | Q9BZC7 ABCA2_HUMAN | R.LQALLGDLDAQK.V             |                 | 2 | 2,6515 | 0,35  | 0,262  |
| 11 | P27816 MAP4_HUMAN  | K.TDYIPLLDVDEK.T             |                 | 2 | 2,6463 | 0,381 | 0,515  |
| 11 | P12755 SKI_HUMAN   | E.TAVAPNVALAPPAQQK.V         |                 | 2 | 2,6461 | 0,308 | 0,155  |
| 11 | P61978 HNRPK_HUMAN | D.LGGPIITTQVTIPK.D           |                 | 3 | 2,6454 | 0,241 | 0,445  |
| 11 | P06756 ITAV_HUMAN  | K.IYIGDDNPLTLIVK.A           |                 | 2 | 2,6453 | 0,406 | -0,388 |
| 11 | P02545 LMNA_HUMAN  | R.LRLS#PS#PTSQR.S            | S390:S392:      | 2 | 2,6445 | 0,208 | -0,174 |
| 11 | Q92597 NDRG1_HUMAN | R.SRT#AS#GSSVTSLDGT#RSR.S    | T328:S330:T340: | 3 | 2,6436 | 0,327 | 0,089  |
| 11 | O60271 JIP4_HUMAN  | K.NLPVPVYLRPLDE.K            |                 | 2 | 2,6433 | 0,283 | 0,08   |
| 11 | P15144 AMPN_HUMAN  | K.DLTALSNM*LPK.G             |                 | 2 | 2,643  | 0,383 | 0,2    |
| 11 | P61160 ARP2_HUMAN  | E.LLFNTIQAADIDTR.S           |                 | 3 | 2,6429 | 0,162 | -0,23  |
| 11 | Q8NHP8 PLBL2_HUMAN | R.SVLLDVSAGQLLM*VDGR.H       |                 | 2 | 2,6426 | 0,341 | 0,273  |
| 11 | P78332 RBM6_HUMAN  | E.KLQSFDS#PE.R               | S1025:          | 2 | 2,6417 | 0,271 | -0,108 |
| 11 | Q9Y6X4 K0888_HUMAN | E.LEPM*NGEIM*DDSLK.T         |                 | 2 | 2,6399 | 0,393 | 0,075  |
| 11 | Q9UQQ2 SH2B3_HUMAN | E.ASPEPGPGAAPGLPK.A          |                 | 2 | 2,6374 | 0,331 | -0,085 |
| 11 | Q0ZGT2 NEXN_HUMAN  | E.GDDSLITVVPVK.S             |                 | 2 | 2,6374 | 0,178 | 0,27   |

|    |                     |                           |            |   |        |       |        |
|----|---------------------|---------------------------|------------|---|--------|-------|--------|
| 11 | Q9P258 RCC2_HUMAN   | K.DGQILPVPNVVVRD.V        |            | 2 | 2,6336 | 0,149 | 0,401  |
| 11 | Q9UMS0 NFU1_HUMAN   | K.SVFFGPDFITVTK.E         |            | 2 | 2,6331 | 0,357 | 0,251  |
| 11 | Q8NBZ0 CCD95_HUMAN  | K.M*PPPTILSTVPR.Q         |            | 2 | 2,6322 | 0,32  | 0,368  |
| 11 | Q59EP6 Q59EP6_HUMAN | E.ALLQAVDPGLPSVK.Q        |            | 2 | 2,6318 | 0,297 | 0,087  |
| 11 | Q96JM3 ZN828_HUMAN  | E.IRS#PAGS#PELR.K         | S432:S436: | 2 | 2,6316 | 0,256 | -0,182 |
| 11 | O14730 RIOK3_HUMAN  | K.AASFLKDDGDPPLLYDE.-     |            | 2 | 2,6289 | 0,459 | 0      |
| 11 | Q6IBW4 CNDH2_HUMAN  | E.GM*SPM*EPAGVSPM*PGTQK.D |            | 3 | 2,6287 | 0,212 | -0,099 |
| 11 | O14980 XPO1_HUMAN   | R.QM*SVPGIFNPHEIPE.E      |            | 2 | 2,6271 | 0,331 | -0,285 |
| 11 | Q15029 U5S1_HUMAN   | K.IAVEPVNPSELPK.M         |            | 2 | 2,6267 | 0,255 | -0,263 |
| 11 | O76031 CLPX_HUMAN   | R.LPVVVPLHSLDE.K          |            | 2 | 2,6233 | 0,385 | 0,278  |
| 11 | Q8NCM9 Q8NCM9_HUMAN | R.SSDITSDLGNVLTSTPNAK.T   |            | 3 | 2,6222 | 0,279 | 0,476  |
| 11 | Q7L2J0 MEPCE_HUMAN  | R.DPVEILIPK.D             |            | 2 | 2,6208 | 0,199 | 0,238  |
| 11 | Q9Y5G3 PCDGD_HUMAN  | E.DSDLGTVIALIK.V          |            | 2 | 2,6204 | 0,442 | 0      |
| 11 | Q7Z460 CLAP1_HUMAN  | E.FTM*LLGALPK.T           |            | 2 | 2,6198 | 0,241 | 0,22   |
| 11 | P49454 CENPF_HUMAN  | R.DANSSFFDNSSS#PHLLDQLK.A | S276:      | 3 | 2,6198 | 0,221 | 0,238  |
| 11 | Q6PGN9 PSRC1_HUMAN  | R.LSLGPLSPEKLEE.I         |            | 2 | 2,619  | 0,255 | 0,605  |
| 11 | Q8IUD2 RB6I2_HUMAN  | R.DNTIM*DLQTLKE.V         |            | 3 | 2,6157 | 0,2   | 0,467  |
| 11 | P45974 UBP5_HUMAN   | E.EALLSVLPTIR.V           |            | 2 | 2,6154 | 0,282 | -0,101 |
| 11 | P54577 SYYC_HUMAN   | R.TVVSGLVQFVPKEE.L        |            | 2 | 2,6154 | 0,302 | 0,478  |
| 11 | Q15185 TEBP_HUMAN   | D.S#DEDM*SNFDR.F          | S113:      | 2 | 2,6152 | 0,355 | -0,093 |
| 11 | Q9UDI2 Q9UDI2_HUMAN | E.AILAALEPPEPK.-          |            | 2 | 2,6147 | 0,319 | 0,391  |
| 11 | Q8WUQ7 CS029_HUMAN  | E.QGVESEPLFPILK.Q         |            | 2 | 2,6099 | 0,319 | 0,084  |
| 11 | O75122 CLAP2_HUMAN  | R.VLTTTALSTVSSGVQR.V      |            | 3 | 2,6094 | 0,334 | 0,339  |
| 11 | Q8NEN9 PDZD8_HUMAN  | R.LSEPGTDLVEPSPK.H        |            | 2 | 2,6092 | 0,275 | 0,332  |
| 11 | P61758 PFD3_HUMAN   | E.DLDFLRDQFTTTE.V         |            | 2 | 2,6084 | 0,437 | 0,152  |
| 11 | Q99471 PFD5_HUMAN   | E.LLVPLTSSM*YVPGK.L       |            | 2 | 2,6055 | 0,398 | 0,241  |
| 11 | Q12802 AKP13_HUMAN  | E.SADAPVDQNSVVIPAAAK.D    |            | 2 | 2,6051 | 0,244 | -0,07  |
| 11 | O43776 SYNC_HUMAN   | K.EPFPTIYVDSQKENE.R       |            | 3 | 2,6023 | 0,092 | 0,204  |
| 11 | Q6P2E9 EDC4_HUMAN   | R.GLLPGLLPAPADK.L         |            | 2 | 2,5985 | 0,478 | 0,387  |
| 11 | Q92560 BAP1_HUMAN   | K.VLFGEDDSLRRVD.C         |            | 2 | 2,597  | 0,336 | -0,248 |
| 11 | O94910 LPHN1_HUMAN  | K.ALEEPLLLPR.A            |            | 2 | 2,5943 | 0,311 | 0,212  |
| 11 | Q7KZF4 SND1_HUMAN   | K.VNVTVDYIRPASPATE.T      |            | 2 | 2,5895 | 0,28  | 0,775  |
| 11 | Q9ULX6 AKP8L_HUMAN  | D.LFIPM*QFGIIQK.H         |            | 2 | 2,5881 | 0,393 | 0,252  |

|    |                    |                         |            |   |        |       |        |
|----|--------------------|-------------------------|------------|---|--------|-------|--------|
| 11 | P55072 TERA_HUMAN  | E.VDIGIPDATGRLE.I       |            | 2 | 2,5881 | 0,412 | 0,36   |
| 11 | Q8TAP8 CG047_HUMAN | E.AAAVPGPPPEPQVPQLR.A   |            | 2 | 2,5864 | 0,344 | 0      |
| 11 | Q53F19 CQ085_HUMAN | E.LKM*IST#PS#PK.K       | T413:S415: | 2 | 2,5863 | 0,294 | -0,286 |
| 11 | P13667 PDIA4_HUMAN | K.FAM*EPEEFSDTLRE.F     |            | 3 | 2,5854 | 0,127 | 0,399  |
| 11 | Q96T58 MINT_HUMAN  | R.RPQS#PGAS#PSQAER.L    | S736:S740: | 2 | 2,5814 | 0,296 | 0      |
| 11 | Q5T5Y3 CAMP1_HUMAN | R.ADVVPQQADPEFPR.A      |            | 2 | 2,5806 | 0,355 | 0,233  |
| 11 | P61160 ARP2_HUMAN  | K.ILLTEPPM*NPTK.N       |            | 2 | 2,5773 | 0,331 | -0,089 |
| 11 | P42858 HD_HUMAN    | K.LLSPQM*SGEEEDSDLAAK.L |            | 2 | 2,5734 | 0,368 | -0,378 |
| 11 | Q02952 AKA12_HUMAN | E.AAPDTTADPAIAASDPATK.L |            | 3 | 2,572  | 0,246 | 0,308  |
| 11 | Q2NKX8 ERC6L_HUMAN | E.VM*LLTSLYK.Q          |            | 2 | 2,572  | 0,322 | 0      |
| 11 | Q86UW6 N4BP2_HUMAN | E.DLDSLIQNAFEK.L        |            | 2 | 2,5702 | 0,172 | -0,263 |
| 11 | O94909 K0819_HUMAN | K.TSTPLAPLPVQSQSDTK.D   |            | 2 | 2,5696 | 0,348 | 0      |
| 11 | Q92738 US6NL_HUMAN | K.LIIPVDYLPDNR.T        |            | 2 | 2,5688 | 0,455 | 0,16   |
| 11 | P05023 AT1A1_HUMAN | R.QGAIVAVTGDGVNDSPALK.K |            | 3 | 2,5656 | 0,104 | 0,202  |
| 11 | Q9C0H9 SNIP_HUMAN  | R.SLVGFGPPVPAKDTE.T     |            | 2 | 2,5655 | 0,315 | 0,242  |
| 11 | O60828 PQBP1_HUMAN | E.LDPM*DPSSYSAPR.G      |            | 2 | 2,5654 | 0,332 | -0,234 |
| 11 | Q9C0C2 TB182_HUMAN | K.VNLFPGLSALK.A         |            | 2 | 2,5645 | 0,355 | -0,091 |
| 11 | Q13740 CD166_HUMAN | K.SM*IASTAITVHYLD.L     |            | 2 | 2,5609 | 0,262 | -0,079 |
| 11 | P17706 PTN2_HUMAN  | E.DLSPAFDHS#PNKIM*TE.K  | S304:      | 2 | 2,5592 | 0,235 | -0,643 |
| 11 | Q96Q15 SMG1_HUMAN  | E.LRVNNVTS#PE.F         | S111:      | 2 | 2,556  | 0,206 | -0,202 |
| 11 | P16402 H13_HUMAN   | E.TAPLAPTIPAPAEK.T      |            | 2 | 2,552  | 0,38  | 0,354  |
| 11 | P00519 ABL1_HUMAN  | R.GAVSTLLQAPLPTK.T      |            | 2 | 2,5515 | 0,121 | 0,16   |
| 11 | Q14978 NOLC1_HUMAN | K.LQT#PNT#FPKR.K        | T607:T610: | 2 | 2,5513 | 0,223 | -0,269 |
| 11 | Q9UBB9 TFP11_HUMAN | R.DYSAPVNFISAGLK.K      |            | 2 | 2,5492 | 0,173 | 0,165  |
| 11 | O95817 BAG3_HUMAN  | R.GYISIPVIHE.Q          |            | 2 | 2,5479 | 0,298 | 0,324  |
| 11 | Q7Z7H8 RM10_HUMAN  | K.DSVM*SANGKPPDTPVDS.-  |            | 2 | 2,5475 | 0,251 | 0,462  |
| 11 | P60900 PSA6_HUMAN  | K.YGYEIPVDM*LCK.R       |            | 2 | 2,5459 | 0,186 | 0      |
| 11 | P16383 GCF_HUMAN   | K.AVEDDVFIPLYPK.S       |            | 2 | 2,5453 | 0,256 | 0,405  |
| 11 | P45974 UBP5_HUMAN  | E.ALLSVLPTIR.V          |            | 2 | 2,5431 | 0,336 | 0,113  |
| 11 | Q8N5A5 ZGPAT_HUMAN | E.AVVEGDGILPLR.T        |            | 2 | 2,5431 | 0,398 | 0,365  |
| 11 | Q5TDH0 DDI2_HUMAN  | R.IDFSSIAVPGTSSPR.Q     |            | 2 | 2,5429 | 0,236 | 0      |
| 11 | O43252 PAPS1_HUMAN | K.GFTGIDSEYEKPEAPE.L    |            | 2 | 2,5427 | 0,258 | 0,207  |
| 11 | P38435 VKGC_HUMAN  | K.GGPEPTPLVQTFLR.R      |            | 2 | 2,5362 | 0,381 | 0      |

|    |                    |                                          |            |   |        |       |        |
|----|--------------------|------------------------------------------|------------|---|--------|-------|--------|
| 11 | O75376 NCOR1_HUMAN | R.ALDPAAAAAYLFQR.Q                       |            | 3 | 2,5355 | 0,206 | 0,26   |
| 11 | Q9NQC7 CYLD_HUMAN  | K.ILEQPHAVLVFVDE.K                       |            | 2 | 2,5344 | 0,253 | 0,889  |
| 11 | Q9Y4L1 HYOU1_HUMAN | E.LVVLDLPDLPEDK.L                        |            | 2 | 2,5336 | 0,317 | 0,333  |
| 11 | O95361 TRI16_HUMAN | E.LDLM*APGPLPR.A                         |            | 2 | 2,5332 | 0,289 | 0,102  |
| 11 | Q6S8J3 A26CA_HUMAN | K.AGFAGDDAPR.A                           |            | 2 | 2,5321 | 0,286 | -0,062 |
| 11 | Q96JM3 ZN828_HUMAN | E.LQTPLPSPEPS#KPASVSSPEPPK.S             | S177:      | 3 | 2,5318 | 0,17  | 0,523  |
| 11 | O60684 IMA7_HUMAN  | E.M*LFSDSDLQLATTQK.F                     |            | 3 | 2,5277 | 0,218 | 0,7    |
| 11 | Q13153 PAK1_HUMAN  | R.SVIEPLPVTPTTR.D                        |            | 2 | 2,5259 | 0,389 | 0,28   |
| 11 | P08195 4F2_HUMAN   | K.GQSEDPGSLLSLFR.R                       |            | 2 | 2,5249 | 0,291 | -0,324 |
| 11 | O75351 VPS4B_HUMAN | K.LLEPVVSM*SDM*LR.S                      |            | 2 | 2,5238 | 0,27  | 0,16   |
| 11 | Q13045 FLII_HUMAN  | K.ADLTALFLPR.Q                           |            | 2 | 2,5225 | 0,262 | -0,109 |
| 11 | Q99700 ATX2_HUMAN  | E.AVAM*PIPAASPTPASPASNR.A                |            | 3 | 2,52   | 0,13  | 0,19   |
| 11 | P09874 PARP1_HUMAN | E.TSASVAAT#PPPSTASAPAAVNSSASADKPLSNM*K.I | T368:      | 3 | 2,5196 | 0,249 | 0,335  |
| 11 | Q13428 TCOF_HUMAN  | D.SAVGTLPATSPQSTSVQAK.G                  |            | 2 | 2,5179 | 0,354 | 0,067  |
| 11 | Q14160 LAP4_HUMAN  | R.LPLLPESPGPLR.Q                         |            | 2 | 2,5132 | 0,331 | 0,088  |
| 11 | Q96RT6 CTGE2_HUMAN | E.DGAYLDNPPK.G                           |            | 2 | 2,5104 | 0,305 | -0,224 |
| 11 | Q9Y224 CN166_HUMAN | E.AIVAVQAIADPK.T                         |            | 2 | 2,505  | 0,286 | 0,186  |
| 11 | Q8NEF9 SRFB1_HUMAN | K.AVTIANS#PSKPSEKDSVVSLE.S               | S203:      | 3 | 2,5021 | 0,196 | 0,654  |
| 11 | Q5VYS8 ZCHC6_HUMAN | R.IQLEPLPLTPK.F                          |            | 2 | 2,4989 | 0,117 | 0      |
| 11 | Q15796 SMAD2_HUMAN | R.VETPVLPPVLVPR.H                        |            | 2 | 2,4982 | 0,411 | 0,345  |
| 11 | Q9HC38 GLOD4_HUMAN | K.ILTPLVSLDTPGK.A                        |            | 2 | 2,4965 | 0,436 | 0,36   |
| 11 | Q9H0C8 ILKAP_HUMAN | R.FILLACDGLFK.V                          |            | 2 | 2,4959 | 0,321 | -0,188 |
| 11 | Q10469 MGAT2_HUMAN | E.ALAPLLDAEPAR.G                         |            | 2 | 2,4957 | 0,364 | 0,274  |
| 11 | O60343 TBCD4_HUMAN | E.VILVLSAPFLR.C                          |            | 2 | 2,4948 | 0,41  | -0,397 |
| 11 | O94842 TOX4_HUMAN  | R.INLQQQPPPLQIK.S                        |            | 3 | 2,4946 | 0,141 | 0,422  |
| 11 | Q14157 UBP2L_HUMAN | R.RYPSS#ISS#SPQK.D                       | S605:S608: | 2 | 2,4933 | 0,265 | -0,082 |
| 11 | O43776 SYNC_HUMAN  | K.EPFPTIYVDSQKE.N                        |            | 2 | 2,4925 | 0,275 | 0,236  |
| 11 | P62081 RS7_HUMAN   | E.DLVFPSEIVGK.R                          |            | 2 | 2,4924 | 0,335 | 0,405  |
| 11 | Q9ULX6 AKP8L_HUMAN | D.LFIPM*QFGIIQK.H                        |            | 3 | 2,4917 | 0,19  | 0,315  |
| 11 | O14617 AP3D1_HUMAN | D.LDKPLADSE.K                            |            | 2 | 2,4882 | 0,246 | 0,062  |
| 11 | Q9Y5J1 UTP18_HUMAN | D.VENDEDAALLR.R                          |            | 2 | 2,4869 | 0,265 | 0      |
| 11 | Q9POL0 VAPA_HUMAN  | E.QILVLDPPTDLK.F                         |            | 2 | 2,486  | 0,157 | 0,18   |
| 11 | Q00613 HSF1_HUMAN  | R.VKEEPPS#PPQS#PR.V                      | S303:S307: | 2 | 2,4857 | 0,203 | 0,607  |

|    |                    |                               |            |   |        |       |        |
|----|--------------------|-------------------------------|------------|---|--------|-------|--------|
| 11 | P11142 HSP7C_HUMAN | K.TVTNAVVTVPAYFNDSQR.Q        |            | 2 | 2,4834 | 0,216 | 0,554  |
| 11 | O75351 VPS4B_HUMAN | K.LLEPVVSM*SDM*LR.S           |            | 3 | 2,4827 | 0,091 | 0,421  |
| 11 | O75064 DEN4B_HUMAN | E.SLQEQPGALPVPGPSR.S          |            | 2 | 2,4807 | 0,211 | 0,149  |
| 11 | Q96BJ3 CA080_HUMAN | R.LPSEPGM*TLTIR.I             |            | 2 | 2,4744 | 0,262 | -0,169 |
| 11 | Q07889 SOS1_HUMAN  | K.GTDEVVPPPVPFR.R             |            | 2 | 2,4728 | 0,187 | 0,084  |
| 11 | P30048 PRDX3_HUMAN | R.GLFIIDPNGVIK.H              |            | 2 | 2,4719 | 0,147 | 0,19   |
| 11 | O75607 NPM3_HUMAN  | D.DFQLQPPVTFR.L               |            | 3 | 2,4714 | 0,153 | 0,339  |
| 11 | Q96RK0 CIC_HUMAN   | E.T#RERSM*SET#GTAAAPGVSSE.L   | T295:T303: | 3 | 2,4703 | 0,135 | 0,083  |
| 11 | P13861 KAP2_HUMAN  | R.APASVLPAAVPR.Q              |            | 2 | 2,4682 | 0,305 | 0      |
| 11 | P12277 KCRB_HUMAN  | K.DLFDPIEDR.H                 |            | 2 | 2,4667 | 0,341 | 0,198  |
| 11 | Q3KQU3 MA7D1_HUMAN | K.RQS#LPAS#PR.A               | S442:S446: | 2 | 2,4639 | 0,184 | -0,104 |
| 11 | Q86SX6 GLRX5_HUMAN | K.GTPEQPQCGFSNAVQILR.L        |            | 3 | 2,463  | 0,118 | -0,087 |
| 11 | Q5ZPR3 CD276_HUMAN | R.TALFPDLAQGNASLR.L           |            | 2 | 2,4621 | 0,315 | 0,072  |
| 11 | Q8IWX8 CHERP_HUMAN | E.FDNLLQPIIDTCTK.D            |            | 3 | 2,4597 | 0,116 | 0,218  |
| 11 | P07195 LDHB_HUMAN  | E.VFLSLPCILNAR.G              |            | 2 | 2,4569 | 0,165 | -0,261 |
| 11 | P12814 ACTN1_HUMAN | K.M*LDAEDIVGTARPDE.K          |            | 3 | 2,4568 | 0,126 | 0,333  |
| 11 | Q9H4G0 E41L1_HUMAN | R.RLPSSPAS#PS#PK.G            | S544:S546: | 2 | 2,4568 | 0,339 | -0,176 |
| 11 | Q13496 MTM1_HUMAN  | K.LSDPPTSPSS#PSQM*M*PHVQTHF.- | S591:      | 3 | 2,4553 | 0,216 | 0,073  |
| 11 | O75153 EIF3X_HUMAN | E.EDVLNIFPVVK.H               |            | 2 | 2,4533 | 0,218 | -0,383 |
| 11 | P13667 PDIA4_HUMAN | K.DGDDVIIIIGVFK.G             |            | 2 | 2,4474 | 0,321 | -1,04  |
| 11 | Q15942 ZYX_HUMAN   | E.GGPEAPIPPPPQPR.E            |            | 3 | 2,4466 | 0,175 | 0,454  |
| 11 | Q9NZI8 IF2B1_HUMAN | R.LLVPTQYVGAIGKE.G            |            | 2 | 2,4439 | 0,268 | 0      |
| 11 | Q7Z6Z7 HUWE1_HUMAN | E.LSPAPTITSLSPER.A            |            | 2 | 2,4407 | 0,399 | 0      |
| 11 | P52948 NUP98_HUMAN | K.VGYYTIPSM*DDLAK.I           |            | 2 | 2,4389 | 0,427 | 0,538  |
| 11 | Q9HCN4 GPN1_HUMAN  | K.DS#LSPVLHPSDLILTR.G         | S312:      | 2 | 2,4342 | 0,333 | 0,265  |
| 11 | P20810 ICAL_HUMAN  | R.TSM*CSIQSAPPEPATLK.G        |            | 2 | 2,4338 | 0,223 | 0,2    |
| 11 | O75396 SC22B_HUMAN | R.GEALSALDSK.A                |            | 2 | 2,4331 | 0,418 | 0,123  |
| 11 | Q16822 PPCKM_HUMAN | R.AIDTTQLFSLPK.D              |            | 2 | 2,4319 | 0,245 | 0,183  |
| 11 | Q99569 PKP4_HUMAN  | R.SAVSPDLHITPIYE.G            |            | 2 | 2,4316 | 0,46  | 0,237  |
| 11 | Q8IWZ3 ANKH1_HUMAN | R.SAPAGASEPPPPGGVGLGIR.T      |            | 2 | 2,4287 | 0,341 | 0,068  |
| 11 | P49750 YLP1_HUMAN  | K.SQLLAPPPSAPPGNK.T           |            | 2 | 2,4236 | 0,107 | 0,078  |
| 11 | P53396 ACLY_HUMAN  | K.DGVYVLDLAAK.V               |            | 2 | 2,4212 | 0,195 | 0      |
| 11 | Q8IXB1 DJC10_HUMAN | K.ILYDILAFK.E                 |            | 2 | 2,4206 | 0,339 | -0,209 |

|    |                     |                               |            |   |        |       |        |
|----|---------------------|-------------------------------|------------|---|--------|-------|--------|
| 11 | Q6UWZ7 CCD98_HUMAN  | E.HTDIPEAS#PAST#PQIIK.H       | S336:T340: | 3 | 2,4171 | 0,181 | 0,931  |
| 11 | P34932 HSP74_HUMAN  | D.IVQLPTGLTGIK.V              |            | 2 | 2,4151 | 0,329 | 0      |
| 11 | Q96T37 RBM15_HUMAN  | R.TAATSVPAYEPLDSLDR.R         |            | 2 | 2,4111 | 0,36  | 0,203  |
| 11 | Q09666 AHNK_HUMAN   | K.M*PDVDISVPKIE.G             |            | 2 | 2,4084 | 0,202 | 0,539  |
| 11 | P31946 1433B_HUMAN  | D.STLIM*QLLR.D                |            | 2 | 2,4077 | 0,145 | 0      |
| 11 | Q9UGU0 TCF20_HUMAN  | E.AGGDTVTLDDILSLK.S           |            | 2 | 2,4068 | 0,371 | -0,241 |
| 11 | P40925 MDHC_HUMAN   | K.DLDVAILVGSM*PR.R            |            | 2 | 2,4066 | 0,359 | 0,348  |
| 11 | Q96FS4 SIPA1_HUMAN  | E.FLHSQNS#LS#PR.S             | S837:S839: | 2 | 2,4017 | 0,188 | 0,169  |
| 11 | Q9H3P2 NELFA_HUMAN  | K.NALTTLAGPLTPPVK.H           |            | 2 | 2,4014 | 0,234 | 0,572  |
| 11 | Q9Y6X4 K0888_HUMAN  | E.SELEPM*NGEIM*DDSLK.T        |            | 2 | 2,3935 | 0,279 | 0,199  |
| 11 | Q96HY7 DHDK1_HUMAN  | K.DVIIDLLCYR.Q                |            | 2 | 2,3906 | 0,215 | -0,191 |
| 11 | Q96AE4 FUBP1_HUMAN  | E.RSCM*LTGT#PE.S              | T153:      | 2 | 2,3883 | 0,147 | 0,293  |
| 11 | P36776 LONM_HUMAN   | R.LAQPYVGVFLK.R               |            | 2 | 2,3865 | 0,37  | 0,198  |
| 11 | P18206 VINC_HUMAN   | R.DM*PPAFIKVE.N               |            | 2 | 2,3836 | 0,322 | 0,315  |
| 11 | Q9UQ35 SRRM2_HUMAN  | R.RSCFESS#PDPE.L              | S876:      | 2 | 2,3813 | 0,263 | 0,351  |
| 11 | Q5UIP0 RIF1_HUMAN   | R.GLEEIPVFDISEK.T             |            | 2 | 2,3805 | 0,165 | 0,248  |
| 11 | P05386 RLA1_HUMAN   | E.ES#DDDM*GFLFD.-             | S104:      | 2 | 2,3792 | 0,202 | 0,254  |
| 11 | O94854 K0754_HUMAN  | E.DLDSLFGIKE.V                |            | 2 | 2,379  | 0,255 | -0,592 |
| 11 | O15145 ARPC3_HUMAN  | K.LIGNM*ALLPIR.S              |            | 2 | 2,3787 | 0,259 | 0,099  |
| 11 | Q7L8L6 FAKD5_HUMAN  | K.AAVPLGGFLCNVADK.S           |            | 2 | 2,3769 | 0,267 | 0,239  |
| 11 | P11586 C1TC_HUMAN   | K.GVPTGFILPIRD.I              |            | 2 | 2,3745 | 0,402 | 0,57   |
| 11 | Q9H8Y8 GORS2_HUMAN  | K.ADAASSLTVDTPPTAK.A          |            | 2 | 2,3699 | 0,269 | 0,148  |
| 11 | Q9H6K5 YS027_HUMAN  | R.LTLALAPGPPPPSR.S            |            | 2 | 2,3699 | 0,273 | 0,329  |
| 11 | Q9UQ35 SRRM2_HUMAN  | D.SNSLLGQSR.L                 |            | 2 | 2,3695 | 0,376 | 0,127  |
| 11 | Q13885 TBB2A_HUMAN  | R.AILVDLEPGTM*DSVR.S          |            | 3 | 2,3687 | 0,147 | 0      |
| 11 | O00629 IMA4_HUMAN   | K.SGILPILVHCLE.R              |            | 2 | 2,3677 | 0,256 | -0,271 |
| 11 | Q8N0S5 Q8N0S5_HUMAN | R.DGAAA EVGR.A                |            | 2 | 2,3674 | 0,129 | 0,361  |
| 11 | P25685 DNJB1_HUMAN  | E.GDQTSNIPADIVFLK.D           |            | 2 | 2,3672 | 0,34  | 0,267  |
| 11 | Q9Y6Q9 NCOA3_HUMAN  | R.M*GPSQNPM*M*QHPQAASIYQSSE.M |            | 3 | 2,3664 | 0,11  | 0,371  |
| 11 | P05556 ITB1_HUMAN   | K.TVM*PYISTTPAK.L             |            | 2 | 2,3648 | 0,098 | -0,092 |
| 11 | P09429 HMGB1_HUMAN  | K.KHPDASVNFSE.F               |            | 2 | 2,3641 | 0,157 | -0,099 |
| 11 | P0C7M2 RA1L3_HUMAN  | E.DSQRPGAHLTVK.K              |            | 3 | 2,358  | 0,268 | 0,349  |
| 11 | P49754 VPS41_HUMAN  | K.ILVADSLSLK.K                |            | 2 | 2,3564 | 0,267 | 0      |



|    |                     |                              |                 |   |        |       |        |
|----|---------------------|------------------------------|-----------------|---|--------|-------|--------|
| 11 | Q8TF39 ZN483_HUMAN  | D.ESALDKIIER.C               |                 | 2 | 2,3515 | 0,091 | 0      |
| 11 | O75864 K1986_HUMAN  | R.DTGSSEPPPPPEPR.S           |                 | 2 | 2,3514 | 0,331 | 0,153  |
| 11 | P68104 EF1A1_HUMAN  | K.IGGIGTVPVGRVE.T            |                 | 2 | 2,3488 | 0,444 | 0,195  |
| 11 | O75864 K1986_HUMAN  | R.VTFPSDEDIVSGAVEPK.D        |                 | 2 | 2,3466 | 0,093 | 0,136  |
| 11 | P12268 IMDH2_HUMAN  | K.FVPYLIAGIQHSCQD.I          |                 | 3 | 2,3455 | 0,256 | 0,419  |
| 11 | Q4G0J3 LARP7_HUMAN  | R.SRPTSEGS#DIE.S             | S261:           | 2 | 2,3441 | 0,208 | -0,291 |
| 11 | P06748 NPM_HUMAN    | K.GPSSVEDIK.A                |                 | 2 | 2,3429 | 0,212 | -0,393 |
| 11 | Q14258 TRI25_HUMAN  | K.FDTIYQILLK.K               |                 | 2 | 2,3405 | 0,116 | -0,195 |
| 11 | Q96RG2 PASK_HUMAN   | R.LFLASLPGSTHSTAAE.L         |                 | 2 | 2,3394 | 0,185 | 0,457  |
| 11 | Q9UQR0 SCML2_HUMAN  | R.SVPGTTSSPLVGDSPK.S         |                 | 2 | 2,3345 | 0,221 | -0,074 |
| 11 | P62191 PRS4_HUMAN   | R.M*TLADDVTLDDLIM*AK.D       |                 | 3 | 2,3328 | 0,258 | 0,305  |
| 11 | Q09666 AHNK_HUMAN   | K.VDIDVPDVNIEGPDAL.L         |                 | 2 | 2,3321 | 0,255 | 0,504  |
| 11 | P21283 VATC1_HUMAN  | E.DQDSYLCNVTLFR.K            |                 | 3 | 2,3293 | 0,14  | 0,449  |
| 11 | P61923 COPZ1_HUMAN  | E.ALILEPSLYTVK.A             |                 | 2 | 2,3268 | 0,242 | 0      |
| 11 | Q5BKX6 S45A4_HUMAN  | E.LALDYPDVIDIM*R.S           |                 | 2 | 2,3241 | 0,324 | 0,425  |
| 11 | P20749 BCL3_HUMAN   | R.GAAGLVVPLDPLR.G            |                 | 2 | 2,3183 | 0,305 | 0,191  |
| 11 | ##Q9P121 NTRI_HUMAN | R.S#T#KPHNDTQVS#CTYPGED.Y    | S219:T220:S229: | 2 | 2,3144 | 0,197 | 0,107  |
| 11 | Q9HCK8 CHD8_HUMAN   | R.LALCQPPGPELPK.W            |                 | 2 | 2,314  | 0,214 | 0,172  |
| 11 | P19532 TFE3_HUMAN   | E.EGVVGGGLSGGALSPLR.A        |                 | 2 | 2,3135 | 0,154 | 0,498  |
| 11 | Q66K74 MAP1S_HUMAN  | K.AVPM*APAPASPGSSNDSSAR.S    |                 | 3 | 2,3114 | 0,113 | 0      |
| 11 | P05387 RLA2_HUMAN   | E.DVIAQGIGK.L                |                 | 2 | 2,3102 | 0,194 | 0,068  |
| 11 | Q6UB99 ANR11_HUMAN  | K.VANSPTM*VNLLLGK.G          |                 | 2 | 2,3098 | 0,315 | 0,248  |
| 11 | P49588 SYAC_HUMAN   | R.DAAHLVNQDDPNVLE.I          |                 | 2 | 2,3092 | 0,162 | -0,592 |
| 11 | P54278 PMS2_HUMAN   | K.VVPLDFSM*SSLAK.R           |                 | 2 | 2,3091 | 0,298 | -0,346 |
| 11 | Q8IYB7 DI3L2_HUMAN  | E.AQFDGS#DSEDGHGITQNVLDGVK.K | S173:           | 2 | 2,3058 | 0,292 | 0,665  |
| 11 | P48634 BAT2_HUMAN   | E.EALTTVTVAPAPR.R            |                 | 2 | 2,3046 | 0,426 | 0,276  |
| 11 | Q969J3 L12R1_HUMAN  | E.SRPNDLNSVT#PS#PAK.H        | T21:S23:        | 2 | 2,3042 | 0,143 | -0,067 |
| 11 | P30622 CLIP1_HUMAN  | K.SISITSALLTEKDAELE.K        |                 | 2 | 2,3037 | 0,352 | 0,469  |
| 11 | Q3KQU3 MA7D1_HUMAN  | E.LGAGAPPVAVART#PPEPRPSPE.G  | T21:            | 3 | 2,3012 | 0,179 | 0,326  |
| 11 | Q96PU8 QKI_HUMAN    | E.YPIEPSGVLGAVATK.V          |                 | 3 | 2,3011 | 0,191 | 0,365  |
| 11 | O60841 IF2P_HUMAN   | K.NKPGPNIES#GNE.D            | S214:           | 2 | 2,3008 | 0,261 | -0,091 |
| 11 | P29083 T2EA_HUMAN   | E.ILEPEPTEIPALK.Q            |                 | 2 | 2,2896 | 0,272 | -0,084 |
| 11 | Q9HD15 SRA1_HUMAN   | E.TSPGPPPM*GPPPPSK.A         |                 | 2 | 2,2896 | 0,319 | 0      |

|    |                      |                               |                 |   |        |       |        |
|----|----------------------|-------------------------------|-----------------|---|--------|-------|--------|
| 11 | ##A0MZ66 SHOT1_HUMAN | K.LSRS#S#TSKNLT#GLIGK.L       | S170:S171:T177: | 3 | 2,2882 | 0,175 | 1,539  |
| 11 | O14686 MLL2_HUMAN    | R.APVAPTPTLIK.S               |                 | 2 | 2,2864 | 0,233 | 0      |
| 11 | Q9BRT8 CBWD1_HUMAN   | K.IPVTIITGYLGAGK.T            |                 | 2 | 2,2845 | 0,311 | -0,087 |
| 11 | P27816 MAP4_HUMAN    | E.QVVDPIQTDPFK.M              |                 | 2 | 2,2758 | 0,195 | 0,176  |
| 11 | Q14676 MDC1_HUMAN    | R.IPATPVVIPM*K.K              |                 | 2 | 2,2724 | 0,268 | 0,619  |
| 11 | P12268 IMDH2_HUMAN   | E.DLVVAPAGITLK.E              |                 | 2 | 2,2697 | 0,129 | 0,204  |
| 11 | P55072 TERA_HUMAN    | D.QLIYIPLPEK.S                |                 | 2 | 2,2686 | 0,409 | 0,275  |
| 11 | Q8IZL8 PELP1_HUMAN   | R.TILM*CGPLIKEE.T             |                 | 2 | 2,2668 | 0,254 | 0,172  |
| 11 | Q7Z2Z1 CO042_HUMAN   | K.GLS#LSPQS#PPERR.G           | S1428:S1433:    | 3 | 2,2637 | 0,225 | 0,115  |
| 11 | Q5VTR2 BRE1A_HUMAN   | K.ALVVPEPEPDSNQR.K            |                 | 2 | 2,2633 | 0,341 | 0,065  |
| 11 | P26045 PTN3_HUMAN    | R.NLPIYPLDIVR.K               |                 | 2 | 2,2604 | 0,155 | 0,186  |
| 11 | Q9Y5K6 CD2AP_HUMAN   | K.LGLFSPNFVKE.L               |                 | 2 | 2,2579 | 0,329 | 0      |
| 11 | Q9Y5K6 CD2AP_HUMAN   | K.DTCYS#PKPSVYLSTPSSASK.A     | S542:           | 3 | 2,2556 | 0,171 | 0,243  |
| 11 | P18206 VINC_HUMAN    | E.LLPVLISAM*K.I               |                 | 2 | 2,2524 | 0,264 | 0,332  |
| 11 | P02545 LMNA_HUMAN    | R.LRLS#PS#PTSQRS#R.G          | S390:S392:S398: | 2 | 2,2506 | 0,347 | -0,707 |
| 11 | Q14181 DPOA2_HUMAN   | R.AIST#PET#PLTKR.S            | T127:T130:      | 2 | 2,2466 | 0,255 | -1,076 |
| 11 | P98168 ZXDA_HUMAN    | E.VSSVSVGPLGSLDSLAM*K.N       |                 | 2 | 2,2462 | 0,268 | -0,138 |
| 11 | Q9H7D0 DOCK5_HUMAN   | R.TGSIVLPYIM*SSTLR.R          |                 | 2 | 2,2426 | 0,261 | 0,221  |
| 11 | P68431 H31_HUMAN     | E.DTNLCAIHAK.R                |                 | 2 | 2,2354 | 0,255 | 0,534  |
| 11 | Q14444 CAPR1_HUMAN   | E.AAAGAGAAAPASQHPATGTGAVQTE.A |                 | 3 | 2,2345 | 0,21  | -0,169 |
| 11 | Q9HAV7 GRPE1_HUMAN   | K.NSGQNLEEDM*GQSEQKADPPATE.K  |                 | 2 | 2,2337 | 0,233 | 0,686  |
| 11 | Q13867 BLMH_HUMAN    | K.IGPITPLEFYRE.H              |                 | 2 | 2,2291 | 0,245 | -0,17  |
| 11 | Q9NVC6 MED17_HUMAN   | E.TYLPPLSM*SQNLAR.L           |                 | 2 | 2,2276 | 0,312 | 0,456  |
| 11 | Q9Y490 TLN1_HUMAN    | R.DPVQLNLLVQAR.D              |                 | 3 | 2,2266 | 0,146 | 0,478  |
| 11 | Q92841 DDX17_HUMAN   | R.GDGPICLVLAPTRE.L            |                 | 2 | 2,2265 | 0,094 | 1,222  |
| 11 | Q5VSL9 FA40A_HUMAN   | R.SILGLPPLPEDIK.V             |                 | 2 | 2,2245 | 0,12  | 0,082  |
| 11 | Q9H0H5 RGAP1_HUMAN   | E.M*LM*CDTSGSIQLSEEQK.S       |                 | 2 | 2,2233 | 0,309 | -0,123 |
| 11 | Q9Y6A5 TACC3_HUMAN   | K.FDPLLRDS#PGRPVPVATE.T       | S570:           | 3 | 2,2233 | 0,112 | 0,268  |
| 11 | Q92738 US6NL_HUMAN   | K.LIIPPVDYLPDNR.T             |                 | 3 | 2,2233 | 0,159 | 0,18   |
| 11 | Q05682 CALD1_HUMAN   | E.FDPTITDASLSLPSR.R           |                 | 3 | 2,2194 | 0,091 | 0,339  |
| 11 | P20810 ICAL_HUMAN    | K.GTVPPDDAVEALADSLGK.K        |                 | 2 | 2,2184 | 0,315 | 0,074  |
| 11 | P42224 STAT1_HUMAN   | E.LSAVTFPDIIR.N               |                 | 2 | 2,2177 | 0,357 | 0,099  |
| 11 | P29966 MARCS_HUMAN   | K.GEPAAAAAPEAGASPVEK.E        |                 | 2 | 2,217  | 0,306 | 0,376  |

|    |                     |                           |            |   |        |       |        |
|----|---------------------|---------------------------|------------|---|--------|-------|--------|
| 11 | O75396 SC22B_HUMAN  | K.ANNLSSLSK.K             |            | 2 | 2,2131 | 0,189 | -0,588 |
| 11 | Q8TBZ3 WDR20_HUMAN  | E.DVPLLEPLICK.K           |            | 2 | 2,2117 | 0,321 | 0,188  |
| 11 | O15085 ARHGB_HUMAN  | R.LHQSSASS#STSS#LSTR.S    | S654:S658: | 3 | 2,2106 | 0,114 | 0,214  |
| 11 | Q2NL82 TSR1_HUMAN   | R.AYLFAHAVDFVPSEE.N       |            | 2 | 2,2105 | 0,146 | -0,072 |
| 11 | O75061 AUXI_HUMAN   | R.RSATS#TSAS#PTLR.V       | S566:S570: | 2 | 2,206  | 0,26  | -0,082 |
| 11 | O60506 HNRPQ_HUMAN  | E.DGALAVLQQFKDSD.L        |            | 2 | 2,2    | 0,243 | 0,243  |
| 11 | Q16630 CPSF6_HUMAN  | E.TLVTAISLIK.Q            |            | 2 | 2,199  | 0,337 | 0,115  |
| 11 | Q66K74 MAP1S_HUMAN  | K.AVPM*APAPASPGSSNDSSAR.S |            | 2 | 2,1976 | 0,36  | -0,259 |
| 11 | Q9NS68 TNR19_HUMAN  | R.RDS#VQT#CGPV.R.L        | S241:T244: | 2 | 2,1966 | 0,253 | -0,425 |
| 11 | Q13595 TRA2A_HUMAN  | R.RS#PS#PYYSR.Y           | S260:S262: | 2 | 2,1944 | 0,173 | -0,192 |
| 11 | P51946 CCNH_HUMAN   | K.VLPNDPVFLEPHEE.M        |            | 2 | 2,1899 | 0,334 | 0,224  |
| 11 | Q9BVJ6 UT14A_HUMAN  | K.LVLADLLEPVK.T           |            | 2 | 2,186  | 0,289 | -0,202 |
| 11 | Q9NQC3 RTN4_HUMAN   | R.GPLPAAPPVAPER.Q         |            | 2 | 2,1827 | 0,365 | 0,575  |
| 11 | Q7Z2E3 APTX_HUMAN   | K.QVGVNPTSIDSVVIGK.D      |            | 2 | 2,1808 | 0,169 | 0,151  |
| 11 | P85037 FOXK1_HUMAN  | E.EAPASPLRPLYPQIS#PLK.I   | S223:      | 3 | 2,1783 | 0,216 | 0,711  |
| 11 | Q5SYE7 NHSL1_HUMAN  | K.LFLVVPPPQK.D            |            | 2 | 2,1729 | 0,16  | 0,214  |
| 11 | Q53EP0 FND3B_HUMAN  | R.RVVVTPQS#PE.C           | S105:      | 2 | 2,1677 | 0,268 | -0,102 |
| 11 | P06748 NPM_HUMAN    | K.VKLAADED.D              |            | 2 | 2,164  | 0,277 | 0,313  |
| 11 | O00629 IMA4_HUMAN   | E.QTQAVVQSNAPLFLR.L       |            | 2 | 2,1603 | 0,347 | 0,138  |
| 11 | Q9Y4F1 FARP1_HUMAN  | K.QASPLISPLLNDQACPR.T     |            | 2 | 2,1586 | 0,298 | 0,26   |
| 11 | Q14222 Q14222_HUMAN | K.SGDAAIVDM*VPSKPMCVE.S   |            | 2 | 2,1555 | 0,169 | 0,127  |
| 11 | P55263 ADK_HUMAN    | R.IVIFTQGRDDTIM*ATE.S     |            | 2 | 2,1545 | 0,23  | 0,134  |
| 11 | Q4KMP7 TB10B_HUMAN  | R.QQPPLGPSSLLSLPGLK.S     |            | 2 | 2,1539 | 0,336 | 0,469  |
| 11 | Q9UQ35 SRRM2_HUMAN  | R.NSGPLGTEM*NTGFSSEVKE.D  |            | 2 | 2,1486 | 0,239 | -0,549 |
| 11 | O60610 DIAP1_HUMAN  | E.M*ASLSAAAITVPPSVPSR.A   |            | 2 | 2,144  | 0,223 | 0,964  |
| 11 | Q9H4H8 FA83D_HUMAN  | R.LARLS#ST#PR.K           | S338:T340: | 2 | 2,1417 | 0,171 | -0,631 |
| 11 | Q96I25 SPF45_HUMAN  | K.QSTVLAPVIDLK.R          |            | 2 | 2,1407 | 0,302 | 0,19   |
| 11 | Q9Y5U2 TSSC4_HUMAN  | R.VPPVPDYVAHPE.R          |            | 2 | 2,1278 | 0,33  | 0,555  |
| 11 | O76021 RL1D1_HUMAN  | K.ATNESEDEIPQLVPIGK.K     |            | 2 | 2,1264 | 0,23  | 0,066  |
| 11 | Q9C0B1 FATSO_HUMAN  | E.DAVPLCM*SADFPR.V        |            | 2 | 2,1243 | 0,256 | 0,408  |
| 11 | Q00610 CLH1_HUMAN   | R.NLQNLILITAIK.A          |            | 3 | 2,1201 | 0,092 | 0      |
| 11 | O75390 CISY_HUMAN   | K.DILADLIPKE.Q            |            | 2 | 2,119  | 0,301 | 0      |
| 11 | P18583 SON_HUMAN    | K.DTEEPLPVKE.S            |            | 2 | 2,1186 | 0,126 | 0,105  |

|    |                      |                                   |                    |   |        |       |        |
|----|----------------------|-----------------------------------|--------------------|---|--------|-------|--------|
| 11 | Q86UU1 PHLB1_HUMAN   | D.SLVLEEPGAAGK.K                  |                    | 2 | 2,1146 | 0,109 | -0,104 |
| 11 | P62249 RS16_HUMAN    | K.LLEPVLLLGK.E                    |                    | 2 | 2,1144 | 0,134 | 0      |
| 11 | P17676 CEBPB_HUMAN   | K.APPTACYAGAAPAPSQVK.S            |                    | 3 | 2,1123 | 0,123 | 0,208  |
| 11 | O75940 SPF30_HUMAN   | E.VTPLLNLPVVEE.G                  |                    | 2 | 2,1061 | 0,102 | 0,271  |
| 11 | Q15154 PCM1_HUMAN    | K.RVTNDIS#PE.S                    | S65:               | 2 | 2,1015 | 0,149 | -0,988 |
| 11 | Q9H4G0 E41L1_HUMAN   | R.RLPSS#PAS#PSPK.G                | S541:S544:         | 2 | 2,1002 | 0,178 | -0,088 |
| 11 | Q7Z2Z1 CO042_HUMAN   | K.GLSLS#PQS#PPERR.G               | S1430:S1433:       | 2 | 2,0992 | 0,087 | 0,231  |
| 11 | Q9HAV4 XPO5_HUMAN    | R.DPLLLAIPK.Y                     |                    | 2 | 2,0892 | 0,126 | -0,335 |
| 11 | Q9UKV3 ACINU_HUMAN   | E.VATPPVPQLQVCEPK.E               |                    | 3 | 2,0734 | 0,188 | 0,44   |
| 11 | Q01082 SPTB2_HUMAN   | R.TSS#KESS#PIPS#PTSDRK.A          | S2161:S2165:S2169: | 2 | 2,0734 | 1     | 0,179  |
| 11 | P05556 ITB1_HUMAN    | K.LGGIVLPNDGQCHLE.N               |                    | 2 | 2,0659 | 0,189 | 0,451  |
| 11 | Q9HAV7 GRPE1_HUMAN   | K.NSGQNLEEDM*GQSEQKADPPATE.K      |                    | 3 | 2,0646 | 0,176 | 0,073  |
| 11 | Q9BW71 HIRP3_HUMAN   | K.RPPT#PCS#DPER.K                 | T84:S87:           | 2 | 2,0596 | 0,251 | -0,332 |
| 11 | P42345 FRAP_HUMAN    | R.DFSHDDTLDVPTQVE.L               |                    | 2 | 2,0587 | 0,263 | 0,852  |
| 11 | Q8IX12 CCAR1_HUMAN   | R.LLLPTPTVKQE.S                   |                    | 2 | 2,0567 | 0,304 | 0,098  |
| 11 | Q9Y606 TRUA_HUMAN    | K.VDVPKAPGLGLVLE.R                |                    | 2 | 2,0552 | 0,183 | 0,087  |
| 11 | Q14137 BOP1_HUMAN    | R.DLQPFPTCQALVYR.G                |                    | 2 | 2,0551 | 0,215 | -1     |
| 11 | Q9P275 UBP36_HUMAN   | E.DLVSLPHQLPE.A                   |                    | 2 | 2,0531 | 0,152 | 0,098  |
| 11 | Q9UJU6 DBNL_HUMAN    | E.RAM*STTS#ISS#PQPGK.L            | S272:S275:         | 2 | 2,0523 | 1     | 0,212  |
| 11 | Q15276 RABE1_HUMAN   | D.AGLLLPSPGDPFSK.S                |                    | 2 | 2,0347 | 0,235 | 0,281  |
| 11 | Q8IWZ3 ANKH1_HUMAN   | R.SAPAGASEPPPPGGVGLGIR.T          |                    | 3 | 2,0292 | 0,221 | 0,716  |
| 11 | P10809 CH60_HUMAN    | K.LVQDVANNTNEE.A                  |                    | 2 | 2,0255 | 0,176 | -0,453 |
| 11 | Q8WUA4 TF3C2_HUMAN   | E.LSTALPAPVSCPEGPK.V              |                    | 2 | 2,0232 | 0,131 | -0,676 |
| 11 | Q8IYB8 SUV3_HUMAN    | R.LTPISVLDALE.S                   |                    | 2 | 2,0199 | 0,304 | -0,839 |
| 11 | P40227 TCPZ_HUMAN    | K.GIDPFSLDALSK.E                  |                    | 2 | 2,0162 | 0,328 | 0,483  |
| 11 | Q9C0B5 ZDHC5_HUMAN   | R.GVGSPEPGPTAPYLGR.S              |                    | 2 | 2,0152 | 0,315 | 0,157  |
| 11 | Q13492 PICAL_HUMAN   | R.ATTLNAVSSLASTGLSLTK.V           |                    | 2 | 2,0149 | 0,379 | 0      |
| 11 | Q16186 ADRM1_HUMAN   | R.SQSAAVTPSSTTSSTR.A              |                    | 2 | 2,0145 | 0,094 | 0      |
| 11 | P00558 PGK1_HUMAN    | K.ITLPVDFVTADK.F                  |                    | 2 | 2,0122 | 0,202 | 0,185  |
| 11 | Q86TJ2 TAD2B_HUMAN   | R.DYNLVP AFLGK.D                  |                    | 2 | 2,0074 | 0,242 | 0,197  |
| 11 | Q9BUR4 WDR79_HUMAN   | E.LM*PPPPERGDPPRLS#PDPVAGSAVSQE.L | S54:               | 3 | 2,003  | 0,14  | 0,127  |
| 11 | ##Q76L83 ASXL2_HUMAN | E.KMNT#EQPGAGAT#PK.V              | T887:T895:         | 3 | 2,0022 | 0,1   | -0,115 |
| 11 | P06748 NPM_HUMAN     | K.M*SVQPTVSLGGFE.I                |                    | 2 | 1,9999 | 0,252 | 0,178  |

|    |                    |                           |            |   |        |       |        |
|----|--------------------|---------------------------|------------|---|--------|-------|--------|
| 11 | Q684P5 RPGP2_HUMAN | K.TTFSPVVAATVK.N          |            | 2 | 1,9937 | 0,153 | 0,463  |
| 11 | Q14914 LTB4D_HUMAN | E.ALFLTVDPYM*R.V          |            | 2 | 1,9916 | 0,148 | 0,364  |
| 11 | Q9NZI8 IF2B1_HUMAN | R.LLVPTQYVGAIIIGK.E       |            | 2 | 1,9903 | 0,308 | 0,166  |
| 11 | Q96AQ6 PBIP1_HUMAN | D.MEGLRRRRRGR.E           |            | 2 | 1,984  | 0,14  | 1,422  |
| 11 | Q5T200 ZC3HD_HUMAN | R.SKLS#PS#PSLR.K          | S207:S209: | 2 | 1,9798 | 0,119 | -1,089 |
| 11 | O94830 DDHD2_HUMAN | R.IDYVLQEKPIESFNE.Y       |            | 2 | 1,9794 | 0,153 | -0,134 |
| 11 | O43815 STRN_HUMAN  | R.ALAFHPIEPVLITASE.D      |            | 2 | 1,9705 | 0,202 | 0,286  |
| 11 | Q9Y6D5 BIG2_HUMAN  | K.DILEDVVTSAIKE.A         |            | 2 | 1,96   | 0,189 | -0,426 |
| 11 | Q6GMV2 SMYD5_HUMAN | E.NYLFVCSCP.K             |            | 2 | 1,9583 | 0,206 | 0,189  |
| 11 | P29692 EF1D_HUMAN  | R.ATAPQQTQHV#PM*R.Q       | S133:      | 2 | 1,9467 | 0,175 | -0,241 |
| 11 | Q9C0J8 WDR33_HUMAN | K.GLLPTPDEFPRFE.G         |            | 2 | 1,9448 | 0,192 | 0,241  |
| 11 | Q8NB90 SPAT5_HUMAN | R.IIYVPLPDAATR.R          |            | 2 | 1,9438 | 0,106 | 0,092  |
| 11 | P31949 S10AB_HUMAN | K.DGYNYTLSK.T             |            | 2 | 1,9405 | 0,177 | -0,46  |
| 11 | P13693 TCTP_HUMAN  | E.DGVTPYM*IFFK.D          |            | 2 | 1,9297 | 0,266 | -0,457 |
| 11 | P11586 C1TC_HUMAN  | K.GVPTGFILPIR.D           |            | 2 | 1,9278 | 0,15  | -0,313 |
| 11 | Q99549 MPP8_HUMAN  | E.KFVESQVES#E.S           | S264:      | 2 | 1,9271 | 0,136 | 0      |
| 11 | Q13501 SQSTM_HUMAN | K.LAFSPFGHLSE.G           |            | 2 | 1,9268 | 0,166 | -0,375 |
| 11 | P68104 EF1A1_HUMAN | K.STTTGHLIYK.C            |            | 2 | 1,9244 | 0,303 | -0,218 |
| 11 | Q9NRL2 BAZ1A_HUMAN | K.DAIDPLLFK.Y             |            | 2 | 1,9138 | 0,088 | 0,118  |
| 11 | Q9Y6I3 EPN1_HUMAN  | E.LLAGEVPAR#PGAFDM*SGVR.G | S410:      | 2 | 1,9102 | 0,328 | -1,951 |
| 11 | A5A3E0 A26CB_HUMAN | R.VAPEEHPVLLTE.A          |            | 2 | 1,9032 | 0,159 | 0,274  |
| 11 | Q6P1L5 AL2SC_HUMAN | K.SALIPVIPITK.S           |            | 2 | 1,9026 | 0,299 | 0,212  |
| 11 | Q9UL26 RB22A_HUMAN | K.DYADSIHAIFVE.T          |            | 2 | 1,8973 | 0,119 | 0      |
| 11 | Q8IWI9 MGAP_HUMAN  | K.VM*PTLAPVVAK.L          |            | 2 | 1,8875 | 0,409 | 0,107  |
| 11 | P35658 NU214_HUMAN | K.AAPGPGPSTFSFVPPSK.A     |            | 2 | 1,8745 | 0,372 | -0,074 |
| 11 | Q99638 RAD9A_HUMAN | R.SLFFGSILAPVR.S          |            | 2 | 1,8629 | 0,185 | -0,28  |
| 11 | P49411 EFTU_HUMAN  | R.DLEKPFLLPVE.A           |            | 2 | 1,8546 | 0,203 | 0      |
| 11 | P49903 SPS1_HUMAN  | K.VM*PLIIQGFK.D           |            | 2 | 1,8497 | 0,158 | -0,105 |
| 11 | Q9GZR7 DDX24_HUMAN | E.DIPLFPVQTK.Y            |            | 2 | 1,8433 | 0,239 | -1,896 |
| 11 | P63241 IF5A1_HUMAN | E.TGDAGASATFPM*QCSALR.K   |            | 2 | 1,8426 | 0,169 | -0,46  |
| 11 | Q6S8J3 A26CA_HUMAN | R.VAPEEHPILLTE.A          |            | 2 | 1,8395 | 0,081 | 0,362  |
| 11 | Q9NYR9 KBR52_HUMAN | R.SLLEPFVYLASK.M          |            | 2 | 1,8331 | 0,226 | -0,357 |
| 11 | Q86UK7 ZN598_HUMAN | E.LLVLLPDTAK.Q            |            | 2 | 1,8296 | 0,145 | 0,113  |

|    |                    |                         |            |   |        |       |        |
|----|--------------------|-------------------------|------------|---|--------|-------|--------|
| 11 | P11586 C1TC_HUMAN  | E.DSTVHGFLVQLPLDSE.N    |            | 2 | 1,8252 | 0,09  | -0,208 |
| 11 | Q7Z5N4 SDK1_HUMAN  | K.VLFLPEPVVR.L          |            | 2 | 1,8184 | 0,115 | 0      |
| 11 | O60645 EXOC3_HUMAN | K.DIVVPSLNVAK.L         |            | 2 | 1,8164 | 0,116 | 0,106  |
| 11 | Q641Q2 FA21A_HUMAN | K.RS#RPTS#FADE.L        | S284:S288: | 2 | 1,7968 | 0,253 | 0,092  |
| 11 | P49915 GUAA_HUMAN  | E.DGVFNISVDNTCSLFR.G    |            | 2 | 1,769  | 0,221 | 0,199  |
| 11 | Q7Z6B7 SRGP1_HUMAN | K.TNPTIGPAPPPQGPTDK.S   |            | 2 | 1,7656 | 0,192 | -0,145 |
| 11 | Q96PY5 FMNL2_HUMAN | K.TTPPSVFFPVFVR.F       |            | 2 | 1,7654 | 0,224 | -0,245 |
| 11 | O00221 IKBE_HUMAN  | E.SLVLLPFDDLK.I         |            | 2 | 1,7652 | 0,136 | -0,484 |
| 11 | P06733 ENOA_HUMAN  | R.HIADLAGNSE.V          |            | 2 | 1,7636 | 0,146 | 0      |
| 11 | Q8IY81 RRMJ3_HUMAN | D.TFLSDLPR.D            |            | 2 | 1,7607 | 0,212 | 0,064  |
| 11 | P82930 RT34_HUMAN  | E.DSLASVPYPLL.R.A       |            | 2 | 1,7592 | 0,21  | 0,342  |
| 11 | P38159 HNRPG_HUMAN | E.RGLPSS#M*E.R          | S352:      | 2 | 1,7456 | 0,095 | -0,186 |
| 11 | Q96T37 RBM15_HUMAN | R.LPPPPPPPLPR.D         |            | 2 | 1,7356 | 0,126 | 0,311  |
| 11 | O75122 CLAP2_HUMAN | R.IPRPSVS#QGCS#R.E      | S525:S529: | 2 | 1,7343 | 0,241 | -0,162 |
| 11 | O14545 TRAD1_HUMAN | K.EIPVFNFTIHE.I         |            | 2 | 1,733  | 0,237 | -0,544 |
| 11 | Q12931 TRAP1_HUMAN | E.DIPLNLSRE.L           |            | 2 | 1,72   | 0,163 | 0,115  |
| 11 | P48634 BAT2_HUMAN  | K.EAPPPVLLTPK.A         |            | 2 | 1,7002 | 0,169 | -0,105 |
| 11 | Q00839 HNRPU_HUMAN | K.SSGPTSLSFAVTVAPPGAR.Q |            | 2 | 1,6995 | 0,184 | 0      |
| 11 | P31946 1433B_HUMAN | K.DSTLIM*QLLRD.N        |            | 2 | 1,6691 | 0,177 | -0,277 |
| 11 | Q15393 SF3B3_HUMAN | R.IVPGQFLAVDPK.G        |            | 2 | 1,6537 | 0,136 | 0,19   |
| 11 | Q96JM3 ZN828_HUMAN | E.IRSPAGS#PE.L          | S436:      | 2 | 1,6423 | 0,221 | -0,061 |
| 11 | P49419 AL7A1_HUMAN | E.TFAPILYVFK.F          |            | 2 | 1,6297 | 0,28  | -0,407 |
| 11 | P68104 EF1A1_HUMAN | D.M*VPGKPM*CVE.S        |            | 2 | 1,6149 | 0,093 | -0,207 |
| 11 | Q9P0P0 RN181_HUMAN | E.NLHGAM*YT#.-          | T153:      | 2 | 1,5906 | 0,148 | -0,122 |
| 11 | P30050 RL12_HUMAN  | E.VVPSASALIK.A          |            | 2 | 1,5684 | 0,118 | 0,333  |
| 11 | Q14008 CKAP5_HUMAN | K.NLGIPITVLGDSK.N       |            | 2 | 1,4908 | 0,096 | -0,424 |
| 11 | O43175 SERA_HUMAN  | R.DLPLLLFR.T            |            | 2 | 1,4811 | 0,1   | -0,185 |
| 11 | Q8TDP1 RNH2C_HUMAN | R.DAVPATLHLLPCE.V       |            | 2 | 1,4789 | 0,093 | 0,34   |
| 11 | Q16626 MEA1_HUMAN  | D.VVADIQDR.I            |            | 2 | 1,4666 | 0,225 | -0,133 |
| 11 | O76003 GLRX3_HUMAN | E.ISSVPTFLFFK.N         |            | 2 | 1,4625 | 0,09  | -0,285 |
| 11 | P04920 B3A2_HUMAN  | R.ELPPPAPPAGITR.S       |            | 2 | 1,3455 | 0,121 | 0,093  |
| 11 | Q9NZI6 TF2L1_HUMAN | R.DVLALPIFK.Q           |            | 2 | 1,3151 | 0,114 | -0,42  |
| 11 | Q6UVK1 CSPG4_HUMAN | E.EPEAYR.L              |            | 2 | 1,3075 | 0,095 | 0,438  |

|    |                     |                                   |        |   |        |       |        |
|----|---------------------|-----------------------------------|--------|---|--------|-------|--------|
| 11 | Q9NZL9 MAT2B_HUMAN  | E.DIPAPLNLYGK.T                   |        | 2 | 1,1768 | 0,094 | 0,914  |
| 12 | Q8IWZ3 ANKH1_HUMAN  | E.AGPASGVGSSGGGSGSGTGGGDAALDFK.L  |        | 2 | 6,5078 | 0,7   | 0,313  |
| 12 | Q5T4S7 UBR4_HUMAN   | R.TSPADHGGSVGSESGGSAVDSVAGE.H     |        | 2 | 6,2512 | 0,58  | 0,11   |
| 12 | O14497 ARI1A_HUMAN  | R.GYQGYPGGDYSGGPQDGGAGK.G         |        | 2 | 6,2097 | 0,543 | 0,061  |
| 12 | Q8NI27 THOC2_HUMAN  | R.NAVASVQNGPGGGPSSSSIGSASK.S      |        | 2 | 6,1347 | 0,604 | 0,115  |
| 12 | Q9NWW8 CS062_HUMAN  | R.SEGEGEAASADDGSLNTSGAGPK.S       |        | 2 | 6,0873 | 0,596 | 0,116  |
| 12 | P12277 KCRB_HUMAN   | R.GTGGVDTAAVGGVFDVSNADR.L         |        | 2 | 5,9598 | 0,451 | -0,062 |
| 12 | Q32MZ4 LRRF1_HUMAN  | R.NM*PGLSAATLASLGGTSSR.R          |        | 2 | 5,8835 | 0,522 | -0,203 |
| 12 | A8K040 A8K040_HUMAN | K.NQVVSSTNGELNTDDPTAGR.S          |        | 2 | 5,8783 | 0,574 | 0,47   |
| 12 | P42892 ECE1_HUMAN   | K.NSNSNVIQVDQSGGLPSR.D            |        | 2 | 5,7602 | 0,477 | -0,369 |
| 12 | P46100 ATRX_HUMAN   | R.LAM*NQNTDKISGSGNSDM*M*E.N       |        | 2 | 5,7483 | 0,54  | 0,214  |
| 12 | Q9UER7 DAXX_HUMAN   | E.ASLDSGEGPSGM*ASQGCPASR.A        |        | 3 | 5,7168 | 0,484 | 0,172  |
| 12 | O15355 PPM1G_HUMAN  | K.SGGGTGEEPGSQGLNGEAGPEDSTR.E     |        | 2 | 5,7088 | 0,579 | 0,312  |
| 12 | O94880 PHF14_HUMAN  | R.NSADDEELTNDSLTSLQSK.S           |        | 2 | 5,6948 | 0,575 | -0,826 |
| 12 | Q9H6T3 RPAP3_HUMAN  | E.NNPINLANVIAATGTTSK.K            |        | 2 | 5,6104 | 0,497 | -0,61  |
| 12 | Q9UQ35 SRRM2_HUMAN  | R.FQSDSSSYPTVDSNLLGQSR.L          |        | 2 | 5,5647 | 0,596 | 0,215  |
| 12 | Q9NY33 DPP3_HUMAN   | K.LAQDFLDSQNLSAYNTR.L             |        | 2 | 5,4879 | 0,46  | -0,25  |
| 12 | Q92625 ANS1A_HUMAN  | R.SLSKS#DSDLLTCSPTEDATM*GSR.S     | S626:  | 3 | 5,4825 | 0,47  | 0      |
| 12 | Q9Y4F1 FARP1_HUMAN  | R.TQQSKPQPQPSTGSLTGS#PHLSE.L      | S477:  | 3 | 5,454  | 0,401 | -0,071 |
| 12 | Q14676 MDC1_HUMAN   | E.LQASASTDQPVTSPTSR.T             |        | 2 | 5,4176 | 0,476 | -0,26  |
| 12 | Q92576 PHF3_HUMAN   | E.DAGSSDISSDAACTNPNKTE.N          |        | 2 | 5,4142 | 0,556 | 0,179  |
| 12 | Q9ULJ3 ZN295_HUMAN  | R.VTVGDAATTAASSSSVTRD.L           |        | 2 | 5,4124 | 0,555 | -0,131 |
| 12 | Q7Z2W4 ZCCHV_HUMAN  | R.VALVNDLSLSDVTSTSSR.V            |        | 2 | 5,3774 | 0,449 | -0,066 |
| 12 | O15355 PPM1G_HUMAN  | K.SGGGTGEEPGSQGLNGEAGPEDSTR.E     |        | 3 | 5,3401 | 0,471 | 0,234  |
| 12 | P08729 K2C7_HUMAN   | E.LQSQISDTSVVLMS*DNSR.S           |        | 2 | 5,3345 | 0,572 | 0      |
| 12 | P12814 ACTN1_HUMAN  | E.TADTDTADQVM*ASFK.I              |        | 2 | 5,3041 | 0,567 | -0,075 |
| 12 | Q5JRA6 MIA3_HUMAN   | D.LLPSGSRDEPPASQSTSQDCSQALKQS#P.- | S1906: | 3 | 5,2981 | 0,48  | 0,116  |
| 12 | Q96T23 RSF1_HUMAN   | E.M*DNLDNAQTSGIEEPSETK.G          |        | 2 | 5,2658 | 0,494 | 0      |
| 12 | Q12888 TP53B_HUMAN  | E.VSPSQTGGSSGDLGDISSFSSK.A        |        | 2 | 5,211  | 0,593 | -0,116 |
| 12 | P18858 DNL1_HUMAN   | E.NNASLSDTSPM*DSSPSGIPK.R         |        | 2 | 5,1875 | 0,53  | 0,121  |
| 12 | O75376 NCOR1_HUMAN  | E.VSQASQLLQQQQQQQLR.R             |        | 3 | 5,1642 | 0,334 | 0,819  |
| 12 | P49327 FAS_HUMAN    | E.LACPT#PKEDGLAQQQTQLNLR.S        | T2204: | 3 | 5,1546 | 0,319 | 0      |
| 12 | P00558 PGK1_HUMAN   | R.GCITIIGGGDTATCCA.W              |        | 2 | 5,1433 | 0,523 | 0      |

|    |                    |                                     |        |   |        |       |        |
|----|--------------------|-------------------------------------|--------|---|--------|-------|--------|
| 12 | Q8ND56 LS14A_HUMAN | E.TSNSGTLQSSAVGSAFTQDTR.S           |        | 2 | 5,137  | 0,582 | 0,11   |
| 12 | P48960 CD97_HUMAN  | E.GSYDCVCSPGYEPVSGAK.T              |        | 2 | 5,1157 | 0,505 | 0,063  |
| 12 | Q9UQ35 SRRM2_HUMAN | R.TPM*SVLQQAGGSM*M*DGPGPR.I         |        | 3 | 5,0728 | 0,479 | -0,266 |
| 12 | Q86TC9 MYPN_HUMAN  | E.STTSDDDGNITIM*AANPQGR.I           |        | 2 | 5,061  | 0,519 | 0,229  |
| 12 | Q92597 NDRG1_HUMAN | K.YFVQGM*GYM*PSASM*TR.L             |        | 2 | 5,0428 | 0,484 | -0,716 |
| 12 | Q3MHD2 LSM12_HUMAN | E.VEIINDRTET#PPPLASLNVSK.L          | T75:   | 3 | 5,0089 | 0,367 | -0,385 |
| 12 | Q13439 GOGA4_HUMAN | E.QQQLQQALAPAQASSNSSTPTR.M          |        | 2 | 4,9964 | 0,589 | 0,422  |
| 12 | O14497 ARI1A_HUMAN | E.LSQDSFGSQASSAPSM*TSSK.G           |        | 2 | 4,9873 | 0,635 | -0,06  |
| 12 | Q5T5U3 RHG21_HUMAN | E.TGSDSGTLLSTSSQASLAR.F             |        | 2 | 4,9857 | 0,481 | -0,066 |
| 12 | P54105 ICLN_HUMAN  | E.GM*LSQSVSSQYNM*AGVR.T             |        | 3 | 4,9726 | 0,481 | 0      |
| 12 | P42224 STAT1_HUMAN | R.FNQAQSGNIQSTVM*LDK.Q              |        | 2 | 4,9696 | 0,491 | -0,129 |
| 12 | Q96AE4 FUBP1_HUMAN | K.IGGDAGTSLNSNDYGYGGQK.R            |        | 2 | 4,9673 | 0,422 | -0,68  |
| 12 | P61244 MAX_HUMAN   | R.SSAQLQTNYPSSDNSLYTNAK.G           |        | 2 | 4,9357 | 0,545 | 0,107  |
| 12 | O95104 SFR15_HUMAN | D.NAVM*AQVQAITAQLK.T                |        | 2 | 4,9343 | 0,48  | -0,152 |
| 12 | Q9NVA2 SEP11_HUMAN | K.AAAQLLQSQAQQSGAQQT.K              |        | 3 | 4,9048 | 0,407 | 0,374  |
| 12 | O60343 TBCD4_HUMAN | R.VASPM*NKS*PSAM*QQQDGLDRNE.L       | S787:  | 3 | 4,8846 | 0,491 | -0,145 |
| 12 | Q96JH7 VCIP1_HUMAN | E.TTDGCVADALGAAFATR.S               |        | 2 | 4,8106 | 0,541 | -0,359 |
| 12 | Q08J23 NSUN2_HUMAN | R.AGEPNS#PDAEEANSPDVTAGCDPAGVHPPR.- | S743:  | 3 | 4,807  | 0,525 | 0,473  |
| 12 | Q9UQ35 SRRM2_HUMAN | R.NSGPLGTEM*NTGFSSEVKE.D            |        | 2 | 4,7939 | 0,596 | 0,244  |
| 12 | P51610 HCFC1_HUMAN | E.AAASLVTSTVGQQNGSVVR.V             |        | 2 | 4,7926 | 0,58  | -0,066 |
| 12 | Q86W92 LIPB1_HUMAN | K.M*QDTVVLAQKGDGEYEE.L              |        | 2 | 4,7814 | 0,443 | -0,127 |
| 12 | Q9NQS1 AVEN_HUMAN  | R.DSQKPTS#PLQSAGDHLEEE.L            | S273:  | 2 | 4,7777 | 0,368 | 0,341  |
| 12 | Q9NYV4 CD2L7_HUMAN | E.TTSGTSTEPVKNSS#PAPPQPAPGK.V       | S1083: | 3 | 4,7687 | 0,244 | 0      |
| 12 | P60228 EIF3E_HUMAN | K.LGHVVM*GNNAVSPYQQVIE.K            |        | 2 | 4,7639 | 0,446 | 0,353  |
| 12 | O95104 SFR15_HUMAN | D.NAVM*AQVQAITAQLK.T                |        | 3 | 4,7597 | 0,274 | 0,114  |
| 12 | Q6P1L5 AL2SC_HUMAN | E.GSEEPSASDALLVDPR.D                |        | 2 | 4,7277 | 0,443 | 0,066  |
| 12 | P46013 KI67_HUMAN  | K.IPCDSPQSDPVDTPSTK.Q               |        | 2 | 4,7267 | 0,503 | 0,188  |
| 12 | Q92625 ANS1A_HUMAN | R.SLSKS#DSDLLTCSPTEDATM*GSR.S       | S626:  | 2 | 4,7102 | 0,363 | 0,86   |
| 12 | P62834 RAP1A_HUMAN | E.ILDTAGTEQFTAM*RD.L                |        | 2 | 4,7058 | 0,613 | -0,362 |
| 12 | Q8NEF9 SRFB1_HUMAN | K.AVTIANS#PSKPSEKDSVVSLE.S          | S203:  | 2 | 4,7053 | 0,571 | 0,109  |
| 12 | Q13111 CAF1A_HUMAN | E.VQAPCGAASGAGGGVGVDTGK.A           |        | 2 | 4,6976 | 0,625 | -0,269 |
| 12 | Q9Y5J1 UTP18_HUMAN | E.LVFGDVENDEALLR.R                  |        | 2 | 4,6932 | 0,482 | -0,429 |
| 12 | Q96D71 REPS1_HUMAN | R.TGSDHTNPTS#PLLVKPSDLLEE.N         | S430:  | 3 | 4,6812 | 0,268 | -0,075 |



|    |                    |                                       |              |   |        |       |        |
|----|--------------------|---------------------------------------|--------------|---|--------|-------|--------|
| 12 | Q09666 AHNK_HUMAN  | E.VT#GSDDDETGKLQGGVSLASK.K            | T5839:       | 2 | 4,6577 | 0,607 | -0,115 |
| 12 | O95487 SC24B_HUMAN | K.SSPVSTVLSGSSGSSSTR.T                |              | 2 | 4,6428 | 0,524 | -0,137 |
| 12 | P49321 NASP_HUMAN  | E.SSTSGFTPGGGSSVSM*IASR.K             |              | 2 | 4,638  | 0,466 | 0,439  |
| 12 | P49792 RBP2_HUMAN  | E.DALDDSVSSSVHAS#PLASS#PVRK.N         | S2246:S2251: | 3 | 4,6214 | 1     | 0      |
| 12 | Q9H0E9 BRD8_HUMAN  | R.SGVAEAPVGSKAPS#IDGKEE.L             | S387:        | 2 | 4,6206 | 0,455 | -0,122 |
| 12 | Q562F6 SGOL2_HUMAN | E.SNNLSADTPCATVLDK.Q                  |              | 2 | 4,6184 | 0,45  | -0,358 |
| 12 | Q9NVA2 SEP11_HUMAN | K.AAAQLLQSQAQSGAQQTK.K                |              | 2 | 4,6159 | 0,478 | 0,249  |
| 12 | Q9NRR5 UBQL4_HUMAN | R.FQQQLEQLNSM*GFINR.E                 |              | 3 | 4,6056 | 0,32  | 0      |
| 12 | P68104 EF1A1_HUMAN | K.SGDAAIVDM*VPGKPM*CVE.S              |              | 2 | 4,5966 | 0,392 | -0,128 |
| 12 | Q14562 DHX8_HUMAN  | K.NPDGSLQAAM*M*QSALAKE.R              |              | 2 | 4,5963 | 0,584 | 0,246  |
| 12 | Q8N556 AFAP1_HUMAN | E.AYSGCSGPDVSECPPPS#SPVHKA.E.L        | S264:        | 3 | 4,5889 | 0,357 | -0,272 |
| 12 | Q12904 MCA1_HUMAN  | E.NVIQSTAVTTVSSGTKE.Q                 |              | 2 | 4,5854 | 0,544 | -0,354 |
| 12 | P43686 PRS6B_HUMAN | E.LLNQM*DGFDQNVNVK.V                  |              | 2 | 4,5779 | 0,414 | -0,07  |
| 12 | Q92540 SMG7_HUMAN  | K.TDKPAM*GGFGIDYLSATSSSE.S            |              | 2 | 4,5713 | 0,524 | 0      |
| 12 | P14314 GLU2B_HUMAN | E.LQTHPELDTDGDGALAE.A                 |              | 2 | 4,5657 | 0,518 | 0,244  |
| 12 | Q09666 AHNK_HUMAN  | K.TVIRLPS#GSGAASPTGSAVDIR.A           | S210:        | 3 | 4,5644 | 0,399 | 0,25   |
| 12 | Q14C86 GAPD1_HUMAN | R.FSLCSDNLEGISEGPSNR.S                |              | 2 | 4,5643 | 0,519 | -0,123 |
| 12 | Q9UKI8 TLK1_HUMAN  | R.FTGVASGSGTGSCSVGAK.A                |              | 2 | 4,5615 | 0,494 | -0,067 |
| 12 | P09211 GSTP1_HUMAN | K.FQDGLTLYQSNTILR.H                   |              | 2 | 4,5512 | 0,575 | 0,259  |
| 12 | O00629 IMA4_HUMAN  | E.DSDIDGDYRVQNTSLE.A                  |              | 2 | 4,5483 | 0,467 | 0,2    |
| 12 | Q99497 PARK7_HUMAN | K.KEGPYDVVVLPGGNLGAQNLSE.S            |              | 2 | 4,5388 | 0,462 | 0,108  |
| 12 | Q8NI27 THOC2_HUMAN | R.NAVASVQNGPGGPPSSSIGSASK.S           |              | 3 | 4,5361 | 0,414 | 0,259  |
| 12 | O15533 TPSN_HUMAN  | K.GHLLAATPGLNGQM*PAAQE.G              |              | 2 | 4,5266 | 0,587 | 0,061  |
| 12 | Q15021 CND1_HUMAN  | E.TM*ASQTNLVDLGLGK.G                  |              | 2 | 4,5233 | 0,49  | -0,073 |
| 12 | A0FGR8 ESYT2_HUMAN | K.SHM*S#GSPGPGSNTAPSTPVIGGSDKPGM*EE.K | S691:        | 3 | 4,5067 | 0,363 | 0,301  |
| 12 | P13693 TCTP_HUMAN  | E.NM*NPDGM*VALLDYRE.D                 |              | 2 | 4,5028 | 0,456 | -0,758 |
| 12 | Q9Y6D6 BIG1_HUMAN  | R.SVDNRQPAPLVSASAVNEE.V               |              | 2 | 4,4846 | 0,579 | 0,123  |
| 12 | Q8WVT3 TTC15_HUMAN | E.SVLISDPNSEGDAGDLGR.V                |              | 2 | 4,4841 | 0,568 | -0,258 |
| 12 | Q14562 DHX8_HUMAN  | K.NPDGSLQAAM*M*QSALAK.E               |              | 2 | 4,4742 | 0,58  | -0,725 |
| 12 | Q15418 KS6A1_HUMAN | R.GFS#FVATGLM*EDDGKPR.A               | S380:        | 2 | 4,4675 | 0,545 | -0,063 |
| 12 | Q9UKI8 TLK1_HUMAN  | R.FTGVASGSGTGSCSVGAK.A                |              | 3 | 4,4667 | 0,451 | 0,402  |
| 12 | Q9UK76 HN1_HUMAN   | K.GEGDIHENVDTLPGSLGQSE.E              |              | 2 | 4,4605 | 0,536 | 0      |
| 12 | Q9NY61 AATF_HUMAN  | E.GEDGEGDFLVVGSIR.K                   |              | 2 | 4,4562 | 0,465 | -0,551 |

|    |                     |                                |       |   |        |       |        |
|----|---------------------|--------------------------------|-------|---|--------|-------|--------|
| 12 | Q96S66 CLCC1_HUMAN  | K.YGISGEKDVSPDLSCADE.I         |       | 2 | 4,4532 | 0,547 | 0,063  |
| 12 | P40222 TXLNA_HUMAN  | R.VQDLSAGGQGS LTDSGPER.R       |       | 2 | 4,4463 | 0,584 | -0,195 |
| 12 | Q969J3 L12R1_HUMAN  | K.M*DDIVVVAQGSQASR.N           |       | 2 | 4,4428 | 0,488 | -0,92  |
| 12 | P04792 HSPB1_HUMAN  | R.KYTLPPGVDPTQVSSLSPE.G        |       | 2 | 4,4291 | 0,42  | -0,116 |
| 12 | A4D186 A4D186_HUMAN | K.IQVLQQQADDAEERAE.R           |       | 2 | 4,4289 | 0,382 | -0,066 |
| 12 | Q8NCM9 Q8NCM9_HUMAN | R.SSDITSDLGNVLTSTPNAK.T        |       | 2 | 4,4265 | 0,597 | -0,064 |
| 12 | Q8IU2 RB6I2_HUMAN   | E.DNLNDSSQQLQDSL.R.K           |       | 2 | 4,4228 | 0,449 | -0,141 |
| 12 | Q13111 CAF1A_HUMAN  | E.VQAPCGAASGAGGGVGVDTGK.A      |       | 3 | 4,4196 | 0,479 | 0,403  |
| 12 | Q13765 NACA_HUMAN   | K.SPASDTYIVFGEAK.I             |       | 2 | 4,4166 | 0,428 | 0,082  |
| 12 | O94906 PRP6_HUMAN   | R.LSQVSDSVSGQTVVDPK.G          |       | 2 | 4,4156 | 0,529 | 0      |
| 12 | P62191 PRS4_HUMAN   | E.IIDDNHAIVSTSVGSE.H           |       | 2 | 4,414  | 0,457 | 0,663  |
| 12 | Q9HAV7 GRPE1_HUMAN  | K.NSGQNLEEDM*GQSEQKADPPATE.K   |       | 2 | 4,408  | 0,533 | 0,294  |
| 12 | Q9ULV3 CIZ1_HUMAN   | R.VLQVQAQVQSQTQPR.I            |       | 3 | 4,3826 | 0,416 | 0      |
| 12 | Q32MZ4 LRRF1_HUMAN  | R.CTLPEHESPSQDISDACEAE.S       |       | 2 | 4,3811 | 0,587 | 0,429  |
| 12 | P09429 HMGB1_HUMAN  | K.M*SSYAFFVQTCREE.H            |       | 2 | 4,3762 | 0,549 | -0,207 |
| 12 | Q9ULJ3 ZN295_HUMAN  | R.VTVGDAATTAASSSSVTR.D         |       | 2 | 4,3725 | 0,371 | -0,348 |
| 12 | Q9ULJ8 NEB1_HUMAN   | E.LAGGDFTSPDASASSCGK.E         |       | 2 | 4,3717 | 0,538 | -0,212 |
| 12 | O95232 CROP_HUMAN   | R.LALSQNQQSSGAAGPTGKNEE.K      |       | 3 | 4,3704 | 0,364 | 0,351  |
| 12 | O60763 USO1_HUMAN   | E.QDDLVLADQDQK.I               |       | 2 | 4,3578 | 0,395 | -0,378 |
| 12 | Q96D71 REPS1_HUMAN  | R.TGSDHTNPTS#PLLVKPSDLLEE.N    | S430: | 2 | 4,3556 | 0,43  | -0,1   |
| 12 | Q14789 GOGB1_HUMAN  | E.NLDSTVTQLAAFTK.S             |       | 2 | 4,3531 | 0,529 | -0,889 |
| 12 | O94992 HEX1_HUMAN   | R.AFPQLGGRPGPEGEGLS.E          |       | 2 | 4,3444 | 0,502 | 0      |
| 12 | P05362 ICAM1_HUMAN  | E.DSQPM*CYSNCPDGGQSTAK.T       |       | 2 | 4,3301 | 0,518 | 0      |
| 12 | P00558 PGK1_HUMAN   | K.ALES#PERPFLAILGGAK.V         | S203: | 3 | 4,3278 | 0,46  | -0,495 |
| 12 | Q6P1L5 AL2SC_HUMAN  | R.TSPTVATQTGASATSTR.G          |       | 2 | 4,3248 | 0,638 | -0,894 |
| 12 | Q02952 AKA12_HUMAN  | E.TCVSGEDPTQGADLSPDEK.V        |       | 2 | 4,3218 | 0,558 | -0,182 |
| 12 | P49841 GSK3B_HUMAN  | R.IQAASTPTNATAASDANTGDR.G      |       | 2 | 4,3202 | 0,567 | 0,348  |
| 12 | P13010 KU86_HUMAN   | E.QFLDTNETPYFM*K.S             |       | 2 | 4,3194 | 0,391 | -0,074 |
| 12 | P11831 SRF_HUMAN    | K.ALIQTCLNSPDS#PPRSPTTDQR.M    | S224: | 3 | 4,3144 | 0,415 | 0,207  |
| 12 | Q04637 IF4G1_HUMAN  | R.FSALQQAVPTSTDN.R             |       | 2 | 4,3101 | 0,453 | -0,484 |
| 12 | Q14157 UBP2L_HUMAN  | K.STSAPQM*SPGSSDNQSSSPQPAQQK.L |       | 3 | 4,3086 | 0,42  | 0,287  |
| 12 | Q9H1K1 ISCU_HUMAN   | K.NVGTGLVGAPACGDVM*K.L         |       | 2 | 4,3074 | 0,495 | -0,147 |
| 12 | P04406 G3P_HUMAN    | K.IISNASCTTNCLAPLAK.V          |       | 2 | 4,3071 | 0,341 | -1,331 |

|    |                    |                                    |            |   |        |       |        |
|----|--------------------|------------------------------------|------------|---|--------|-------|--------|
| 12 | Q9H7P9 PKHG2_HUMAN | R.YLAASYISQSLAR.R                  |            | 2 | 4,3039 | 0,46  | -0,423 |
| 12 | O14980 XPO1_HUMAN  | E.VFDSSGQITQVK.S                   |            | 2 | 4,2974 | 0,447 | -0,084 |
| 12 | Q92797 SYMPK_HUMAN | K.LKPGGVGAPSSSS#PSPSPSARPGPPPSEE.A | S1171:     | 3 | 4,2953 | 0,384 | 0,197  |
| 12 | Q9UHR5 S30BP_HUMAN | K.GGLVSDAYGEDDFSR.L                |            | 2 | 4,2947 | 0,541 | -0,154 |
| 12 | P27816 MAP4_HUMAN  | K.DM*ES#PTKLDVTLAKD.M              | S280:      | 2 | 4,2874 | 0,417 | 0,069  |
| 12 | Q9UQ35 SRRM2_HUMAN | R.TPM*SVLQQAGGSM*M*DGPGPR.I        |            | 2 | 4,2872 | 0,494 | -0,473 |
| 12 | Q9Y5K8 VATD_HUMAN  | K.FTAGDFSTTVIQNVNK.A               |            | 2 | 4,2792 | 0,56  | -0,21  |
| 12 | O43318 M3K7_HUMAN  | K.SDTNM*EQVPATNDTIK.R              |            | 2 | 4,278  | 0,497 | -0,274 |
| 12 | P24534 EF1B_HUMAN  | K.SPAGLQVLNDYLADK.S                |            | 2 | 4,2665 | 0,484 | -0,228 |
| 12 | O95793 STAU1_HUMAN | K.VTFFEPGSGDENGTSNKEDE.F           |            | 2 | 4,2608 | 0,451 | -0,339 |
| 12 | P27448 MARK3_HUMAN | E.LDASDSSSSNLSLAK.V                |            | 2 | 4,2521 | 0,589 | -0,308 |
| 12 | Q9H307 PININ_HUMAN | K.SLS#PGKENVSALDM*EKE.S            | S443:      | 3 | 4,2515 | 0,348 | 0,474  |
| 12 | O75439 MPPB_HUMAN  | R.IVLAAGGVSHDE.L                   |            | 2 | 4,2457 | 0,505 | -0,394 |
| 12 | Q15029 U5S1_HUMAN  | E.TIVQEEDT#QPLTEPIIKPVK.T          | T86:       | 3 | 4,2419 | 0,445 | -0,31  |
| 12 | Q8IWS0 PHF6_HUMAN  | K.CM*LFSSALVSSHSDNE.S              |            | 2 | 4,2397 | 0,532 | -0,339 |
| 12 | Q9H2U1 DHX36_HUMAN | E.EQIVQLLNSVQAK.N                  |            | 2 | 4,2352 | 0,455 | -0,498 |
| 12 | O75381 PEX14_HUMAN | E.STSSS#PGKEGHS#PEGSTVYHLLGPQEE.G  | S275:S282: | 3 | 4,2352 | 1     | 0,359  |
| 12 | Q05655 KPCD_HUMAN  | K.TGVAGEDM*QDNSGTYGK.I             |            | 2 | 4,2229 | 0,535 | -0,14  |
| 12 | O00148 DDX39_HUMAN | K.GLAITFVSDENDAK.I                 |            | 2 | 4,2211 | 0,57  | 0      |
| 12 | Q69YH5 CDCA2_HUMAN | E.GLSACQQSGFPAVLSSK.R              |            | 2 | 4,2208 | 0,506 | -0,351 |
| 12 | Q8N680 ZBTB2_HUMAN | E.ASQLSQLTSNLAQVNR.T               |            | 2 | 4,22   | 0,452 | -0,141 |
| 12 | P11142 HSP7C_HUMAN | K.NQVAM*NPTNTVFDK.R                |            | 2 | 4,2126 | 0,456 | -0,22  |
| 12 | Q5T1M5 FKB15_HUMAN | R.LASLFGLDQAAAGHGNE.F              |            | 2 | 4,2002 | 0,591 | -0,511 |
| 12 | Q96B23 CR025_HUMAN | E.TAVEGDPSGVSGATVGR.K              |            | 2 | 4,1964 | 0,596 | -0,235 |
| 12 | Q5TAQ9 WD42A_HUMAN | E.ASDLSLSLTGDDGGPNR.T              |            | 2 | 4,1897 | 0,481 | -0,583 |
| 12 | P09622 DLDH_HUMAN  | R.VLGAHILGPGAGEM*VNE.A             |            | 2 | 4,189  | 0,366 | -0,29  |
| 12 | P21333 FLNA_HUMAN  | E.ISIQDM*TAQVTSPSGK.T              |            | 2 | 4,1853 | 0,527 | -0,291 |
| 12 | P34931 HS71L_HUMAN | D.IDANGILNVTATDK.S                 |            | 2 | 4,1818 | 0,502 | 0,169  |
| 12 | P49790 NU153_HUMAN | K.CQPVFSFGNSEQTKDE.N               |            | 2 | 4,1811 | 0,516 | -0,261 |
| 12 | Q86VR2 F134C_HUMAN | E.LAAFCPQLDDSTVAR.E                |            | 2 | 4,1705 | 0,556 | -1,027 |
| 12 | Q14247 SRC8_HUMAN  | K.NASTFEDVTQVSSAYQK.T              |            | 2 | 4,1673 | 0,564 | 0      |
| 12 | Q14160 LAP4_HUMAN  | E.ACPCQPDSGSPLPAEEK.R              |            | 2 | 4,1664 | 0,539 | -0,248 |
| 12 | Q9UBR2 CATZ_HUMAN  | E.IYANGPISCGIM*ATER.L              |            | 2 | 4,1654 | 0,532 | -0,207 |

|    |                     |                             |        |   |        |       |        |
|----|---------------------|-----------------------------|--------|---|--------|-------|--------|
| 12 | P08648 ITA5_HUMAN   | E.FSGDDTEDFVAGVPK.G         |        | 2 | 4,1649 | 0,573 | 0,231  |
| 12 | B2CI53 B2CI53_HUMAN | R.NGILASPQSAPGNLNSK.S       |        | 2 | 4,1641 | 0,533 | 0,068  |
| 12 | Q9UER7 DAXX_HUMAN   | E.ASLDSGEGPSGM*ASQGCPASR.A  |        | 2 | 4,1634 | 0,611 | 0,115  |
| 12 | Q9P0U3 SENP1_HUMAN  | E.DQLSLSDQQILSSR.Q          |        | 2 | 4,1624 | 0,421 | 0,691  |
| 12 | P16401 H15_HUMAN    | E.TAPAETATPAPVEKS#PAK.K     | S18:   | 2 | 4,1566 | 0,496 | -0,198 |
| 12 | Q9UHV7 MED13_HUMAN  | R.VSVSDDVGM*DADSASQR.L      |        | 2 | 4,1557 | 0,547 | 0,07   |
| 12 | P50502 F10A1_HUMAN  | K.VAAIEALNDGELQK.A          |        | 2 | 4,1543 | 0,419 | -0,083 |
| 12 | O00267 SPT5H_HUMAN  | E.IEASNIDNVVLEDR.S          |        | 2 | 4,1535 | 0,553 | -0,358 |
| 12 | O43707 ACTN4_HUMAN  | E.TTDTDTADQVIASFV.V         |        | 2 | 4,153  | 0,566 | -0,303 |
| 12 | Q96B23 CR025_HUMAN  | E.TAVEGDPSGVSGATVGR.K       |        | 3 | 4,151  | 0,314 | 0,469  |
| 12 | Q9Y559 RBM8A_HUMAN  | E.DYDSVEQDGDPEPQR.S         |        | 2 | 4,1488 | 0,409 | 0,203  |
| 12 | P18206 VINC_HUMAN   | K.AQQVSQGLDVLTA.V           |        | 2 | 4,1485 | 0,59  | -0,669 |
| 12 | Q08378 GOGA3_HUMAN  | K.DVLQAAAAEHQDQGQE.V        |        | 2 | 4,137  | 0,431 | 0,214  |
| 12 | P35579 MYH9_HUMAN   | E.LDNVTGLLSQSDSK.S          |        | 2 | 4,1352 | 0,522 | -0,413 |
| 12 | P05362 ICAM1_HUMAN  | E.DSQPM*CYSNCPDGQSTAK.T     |        | 3 | 4,1327 | 0,386 | 0      |
| 12 | Q9Y259 CHKB_HUMAN   | E.ATAVAGSGAVGGCLAK.D        |        | 2 | 4,1301 | 0,456 | -0,351 |
| 12 | O95628 CNOT4_HUMAN  | K.LNPNFLQLSTGSVDK.N         |        | 2 | 4,1268 | 0,574 | -0,448 |
| 12 | O43242 PSMD3_HUMAN  | K.AKPPPGGGEQEP PPPPAPQDVE.M |        | 2 | 4,1266 | 0,432 | -0,111 |
| 12 | P54105 ICLN_HUMAN   | E.GM*LSQSVSSQYNM*AGVR.T     |        | 2 | 4,1228 | 0,54  | -0,132 |
| 12 | Q02952 AKA12_HUMAN  | E.DSIAGSGVEHS#TPDTEPGKEE.S  | S792:  | 2 | 4,1177 | 0,432 | 0,22   |
| 12 | Q6S8J3 A26CA_HUMAN  | K.SYELPDGQVITIGNER.F        |        | 2 | 4,1119 | 0,368 | -0,545 |
| 12 | O95208 EPN2_HUMAN   | R.M*AQVATGM*GSNQITFGR.G     |        | 2 | 4,1064 | 0,591 | -0,135 |
| 12 | Q9Y2U8 MAN1_HUMAN   | E.SLLGGPGGASAAPAAGSK.V      |        | 2 | 4,1045 | 0,601 | 0,249  |
| 12 | P15559 NQO1_HUMAN   | E.SDLYAM*NFNPIISR.K         |        | 2 | 4,1027 | 0,302 | -0,589 |
| 12 | Q13263 TIF1B_HUMAN  | E.GTSAPGGPGTLLDSATICR.V     |        | 2 | 4,1014 | 0,533 | -0,387 |
| 12 | P40222 TXLNA_HUMAN  | R.VQDLSAGGQGLTDSGPER.R      |        | 3 | 4,099  | 0,432 | -0,098 |
| 12 | Q6P4A8 PLBL1_HUMAN  | E.DLNSPNPSPGGCYDTK.V        |        | 2 | 4,0943 | 0,343 | -0,071 |
| 12 | P61604 CH10_HUMAN   | K.VLQATVVAVGSGSK.G          |        | 2 | 4,0861 | 0,608 | 0,556  |
| 12 | Q13428 TCOF_HUMAN   | K.LDSS#PSVSSTLAAKDDPDGKQE.A | S1228: | 2 | 4,0838 | 0,382 | 0,21   |
| 12 | P09211 GSTP1_HUMAN  | E.AALVDM*VNDGVEDLR.C        |        | 2 | 4,0817 | 0,496 | -0,448 |
| 12 | Q76176 SSH2_HUMAN   | E.IESISQGVGQIQLK.G          |        | 2 | 4,079  | 0,412 | 0,488  |
| 12 | Q15424 SAFB1_HUMAN  | K.ILDILGETCKS#EPVKEE.S      | S227:  | 3 | 4,078  | 0,219 | 0,269  |
| 12 | P23193 TCEA1_HUMAN  | K.KKEPAITSQNS#PEAR.E        | S100:  | 3 | 4,0778 | 0,277 | -0,211 |

|    |                    |                                      |        |   |        |       |        |
|----|--------------------|--------------------------------------|--------|---|--------|-------|--------|
| 12 | P56192 SYMC_HUMAN  | E.TVTTAKPQQIQALM*DE.V                |        | 2 | 4,0742 | 0,376 | -0,273 |
| 12 | P11717 MPRI_HUMAN  | K.LVSFHDDS#DEDLLHI.-                 | S2484: | 2 | 4,0735 | 0,511 | -0,731 |
| 12 | Q49A88 CCD14_HUMAN | R.AATTQLVSNGLAVSGKE.N                |        | 2 | 4,0726 | 0,461 | -0,07  |
| 12 | Q9P2D0 IBTK_HUMAN  | R.DLQS#PDFTTGFHSDKIE.A               | S1045: | 2 | 4,0666 | 0,488 | 0      |
| 12 | Q8WUA4 TF3C2_HUMAN | E.SEGPSESSEPEPVPR.S                  |        | 2 | 4,0647 | 0,423 | -0,276 |
| 12 | Q5VT52 K0460_HUMAN | E.AASQSTSASPANTTVSTIK.G              |        | 2 | 4,0646 | 0,374 | -0,335 |
| 12 | Q96GX5 MASTL_HUMAN | R.DYLSSSFLCSDDDR.A                   |        | 2 | 4,0646 | 0,502 | -0,508 |
| 12 | Q13409 DC1I2_HUMAN | K.SVSTPSEAGSQSDGAVGSR.T              |        | 2 | 4,0608 | 0,509 | -0,188 |
| 12 | Q6UX04 SDC10_HUMAN | R.EDQTLALLNQFK.S                     |        | 2 | 4,0523 | 0,392 | -0,945 |
| 12 | P21283 VATC1_HUMAN | E.DQDSYLCNVTLFR.K                    |        | 2 | 4,0437 | 0,536 | -0,449 |
| 12 | O75909 CCNK_HUMAN  | K.DPQQPAQQQPAQQPK.K                  |        | 3 | 4,0437 | 0,2   | -0,101 |
| 12 | Q9Y490 TLN1_HUMAN  | R.ILAQATSDLVNAIK.A                   |        | 2 | 4,043  | 0,451 | -0,837 |
| 12 | P46937 YAP1_HUMAN  | E.M*DTGDTINQSTLPSQQNR.F              |        | 2 | 4,0362 | 0,524 | 0,121  |
| 12 | Q8ND56 LS14A_HUMAN | E.TSNSGTLPQSSAVGSAFTQDTR.S           |        | 3 | 4,0343 | 0,477 | 0,248  |
| 12 | Q13200 PSMD2_HUMAN | K.SGALLACGIVNSGVR.N                  |        | 2 | 4,0195 | 0,581 | 0      |
| 12 | P63261 ACTG_HUMAN  | E.IAALVIDNGSGM*CK.A                  |        | 2 | 4,0191 | 0,559 | 0      |
| 12 | P27816 MAP4_HUMAN  | K.DM*ES#PTKLDVTLAKD.M                | S280:  | 3 | 4,019  | 0,303 | 0,312  |
| 12 | Q9ULH0 ARMS_HUMAN  | R.S#SPHSTYYM*GQSSSGGSIHSNLE.Q        | S1410: | 3 | 4,0164 | 0,285 | -0,292 |
| 12 | O94776 MTA2_HUMAN  | R.DISSSLNSLADSNARE.F                 |        | 2 | 4,0098 | 0,442 | 0,145  |
| 12 | Q01082 SPTB2_HUMAN | R.AQTLPTSVVITSESS#PGKR.E             | S2341: | 2 | 4,005  | 0,503 | -0,228 |
| 12 | P10809 CH60_HUMAN  | E.IAQVATISANGDKE.I                   |        | 2 | 4,001  | 0,434 | 0,172  |
| 12 | Q8IWA0 WDR75_HUMAN | K.VQDTS#NTGLGEDIIHQLSK.S             | S796:  | 3 | 3,9907 | 0,307 | -0,857 |
| 12 | Q12888 TP53B_HUMAN | D.SLSTNSSDLVAPSPDAFR.S               |        | 2 | 3,9906 | 0,479 | 0      |
| 12 | Q6PIJ6 FBX38_HUMAN | R.TVNSGGSSPTEVDVSR.Q                 |        | 2 | 3,9859 | 0,449 | 0      |
| 12 | P49840 GSK3A_HUMAN | R.TSSFAEPGGGGGGGGGGPGGSASGPGGTGGGK.A |        | 3 | 3,9845 | 0,475 | 0,226  |
| 12 | Q15181 IPYR_HUMAN  | K.GISCM*NTTLESPEFK.C                 |        | 2 | 3,9833 | 0,421 | -0,361 |
| 12 | Q96SB3 NEB2_HUMAN  | E.NGSTVATAAS#PAPEEPKAQAAPEKE.A       | S338:  | 3 | 3,9804 | 0,394 | 0,072  |
| 12 | P50990 TCPQ_HUMAN  | K.AIADTGANVVVTGGK.V                  |        | 2 | 3,9721 | 0,525 | 0,089  |
| 12 | Q6ULP2 AFTIN_HUMAN | E.TVNPQGTDDLNDVADSK.G                |        | 2 | 3,9641 | 0,581 | 0,068  |
| 12 | P04083 ANXA1_HUMAN | E.DFGVNEDLADSDAR.A                   |        | 2 | 3,9624 | 0,501 | -1,041 |
| 12 | P12814 ACTN1_HUMAN | K.M*LDAEDIVGTARPDE.K                 |        | 2 | 3,9624 | 0,468 | -0,666 |
| 12 | P78527 PRKDC_HUMAN | K.CLM*DQATDPNILGR.T                  |        | 2 | 3,9556 | 0,507 | 0      |
| 12 | P22695 QCR2_HUMAN  | K.TIAQGNLSNTDVQAAK.N                 |        | 2 | 3,9555 | 0,38  | -0,673 |

|    |                     |                                  |       |   |        |       |        |
|----|---------------------|----------------------------------|-------|---|--------|-------|--------|
| 12 | Q8IWE2 NXP20_HUMAN  | R.GM*LSAITNVVQNTGK.S             |       | 2 | 3,9524 | 0,453 | 0      |
| 12 | P09960 LKHA4_HUMAN  | E.IVDTCSLASPASVCR.T              |       | 2 | 3,9482 | 0,473 | -0,149 |
| 12 | Q96R06 SPAG5_HUMAN  | K.TSEEAVDPLGNM*VK.T              |       | 2 | 3,9435 | 0,463 | -0,439 |
| 12 | Q6IEG0 CF151_HUMAN  | E.NSDSLFVLAIAK.I                 |       | 2 | 3,9382 | 0,445 | -0,187 |
| 12 | Q9UKN8 TF3C4_HUMAN  | R.GLCNFLM*SDEEYDDR.T             |       | 2 | 3,9381 | 0,572 | -0,195 |
| 12 | Q9NR12 PDLI7_HUMAN  | R.ILAHLTGTEFM*QDPDEE.H           |       | 2 | 3,9364 | 0,539 | -0,124 |
| 12 | P18583 SON_HUMAN    | R.AGIEGPLLASDVGR.D               |       | 2 | 3,9336 | 0,323 | 0,09   |
| 12 | Q12888 TP53B_HUMAN  | E.VLSTQEDLFDQSNK.T               |       | 2 | 3,9272 | 0,494 | -0,225 |
| 12 | Q7Z6Z7 HUWE1_HUMAN  | R.AIAM*SLGQDIPM*DQR.A            |       | 2 | 3,9207 | 0,468 | -0,073 |
| 12 | P13674 P4HA1_HUMAN  | R.LQDTYNLDTDTISK.G               |       | 2 | 3,9206 | 0,488 | 0,225  |
| 12 | Q7Z4V5 HDGR2_HUMAN  | K.LAGEELAGEEAPQEK.A              |       | 2 | 3,9181 | 0,328 | -0,155 |
| 12 | Q96GQ7 DDX27_HUMAN  | R.SADFNPDFVFTEKE.G               |       | 2 | 3,9169 | 0,466 | 1,26   |
| 12 | O75534 CSDE1_HUMAN  | K.EAEDGIIAYDDCGVK.L              |       | 2 | 3,9149 | 0,442 | 0,074  |
| 12 | Q6MZP7 Q6MZP7_HUMAN | E.SGVIGSTLNSTTQTPNK.I            |       | 2 | 3,9091 | 0,511 | -0,072 |
| 12 | Q99549 MPP8_HUMAN   | E.VEEGVGVVGEDNDAAAR.G            |       | 2 | 3,909  | 0,521 | 0,072  |
| 12 | P61978 HNRPK_HUMAN  | K.IILDILISES#PIKGR.A             | S216: | 2 | 3,9064 | 0,522 | -0,747 |
| 12 | P51572 BAP31_HUMAN  | K.LDVGNAEVKLEEE.N                |       | 2 | 3,8925 | 0,396 | -0,422 |
| 12 | Q9Y490 TLN1_HUMAN   | K.QVAASTAQLLVACK.V               |       | 3 | 3,8916 | 0,24  | 0,251  |
| 12 | Q9P265 DIP2B_HUMAN  | K.GTSGSLADV FANTRIE.N            |       | 2 | 3,8828 | 0,527 | -0,149 |
| 12 | Q14004 CD2L5_HUMAN  | R.TNTPQGVLPS SQLK.S              |       | 2 | 3,8791 | 0,376 | -0,083 |
| 12 | P27797 CALR_HUMAN   | E.YNIM*FGPDICGPGTK.K             |       | 2 | 3,8718 | 0,424 | -0,217 |
| 12 | Q12888 TP53B_HUMAN  | K.NSPEDLGLSLTGDSCK.L             |       | 2 | 3,8712 | 0,567 | -0,144 |
| 12 | Q13765 NACA_HUMAN   | K.DIELVM*SQANVSR.A               |       | 2 | 3,8706 | 0,466 | -0,248 |
| 12 | Q12802 AKP13_HUMAN  | E.M*DSITEVPANCSVLR.S             |       | 2 | 3,87   | 0,494 | -1,286 |
| 12 | O43172 PRP4_HUMAN   | K.DVNLASCAADGSVK.L               |       | 2 | 3,8695 | 0,457 | 0,434  |
| 12 | Q8N6T3 ARFG1_HUMAN  | R.VSGQPQSVTASSDKAFE.D            |       | 2 | 3,8684 | 0,451 | -0,281 |
| 12 | O75526 HNRGT_HUMAN  | R.GFAFVTFESPADAK.A               |       | 2 | 3,8659 | 0,467 | -0,246 |
| 12 | Q8NB90 SPAT5_HUMAN  | K.GADGM*ILGGPQSDSDTDAQR.M        |       | 2 | 3,8637 | 0,547 | -0,061 |
| 12 | Q561V9 Q561V9_HUMAN | E.M*LVAGHEDSNGCIN YEE.L          |       | 2 | 3,8602 | 0,34  | 0,5    |
| 12 | O75787 REN R_HUMAN  | E.NSVLSSLPLNLSLR.N               |       | 2 | 3,8584 | 0,494 | -0,41  |
| 12 | Q9HC38 GLOD4_HUMAN  | K.LLDDAM*AADKSDE.W               |       | 2 | 3,8527 | 0,38  | 0,087  |
| 12 | Q9Y6Y0 NS1BP_HUMAN  | K.QISSSTGCLSSPNATVQSPK.H         |       | 3 | 3,8522 | 0,272 | -0,171 |
| 12 | Q8IWZ3 ANKH1_HUMAN  | E.AGPASGVGSSGGGSGSGTGGGDAALDFK.L |       | 3 | 3,8473 | 0,327 | -0,235 |

|    |                     |                                         |                 |   |        |       |        |
|----|---------------------|-----------------------------------------|-----------------|---|--------|-------|--------|
| 12 | P18206 VINC_HUMAN   | R.VDQLTAQLADLAAR.G                      |                 | 2 | 3,8454 | 0,498 | -0,657 |
| 12 | P60709 ACTB_HUMAN   | D.IAALVVDNGSGM*CK.A                     |                 | 2 | 3,8438 | 0,604 | 0,168  |
| 12 | O15231 ZN185_HUMAN  | R.GGQGDPVPAQQPADPSTPER.Q                |                 | 2 | 3,8404 | 0,46  | 0,235  |
| 12 | Q9Y4E5 ZN451_HUMAN  | E.GDM*M*CALLNSISDTTK.E                  |                 | 2 | 3,8391 | 0,385 | -0,682 |
| 12 | Q96TA1 NIBL1_HUMAN  | K.AVDLGPCKPSDQETGE.Q                    |                 | 2 | 3,8389 | 0,479 | -0,521 |
| 12 | P05387 RLA2_HUMAN   | K.NIEDVIAQGIGK.L                        |                 | 2 | 3,836  | 0,458 | 0,582  |
| 12 | P27694 RFA1_HUMAN   | E.GQALDGVVISDLK.S                       |                 | 2 | 3,8359 | 0,467 | 0,094  |
| 12 | Q9NY61 AATF_HUMAN   | K.TPGFSVQSISDFEK.F                      |                 | 2 | 3,8315 | 0,445 | -0,475 |
| 12 | Q8IY81 RRMJ3_HUMAN  | K.GTEASSGTEAATGLEGEEK.D                 |                 | 2 | 3,8295 | 0,4   | -0,201 |
| 12 | Q8N1G0 ZN687_HUMAN  | E.ALAGGSAGDGAQAAGVTK.E                  |                 | 2 | 3,8215 | 0,541 | -0,406 |
| 12 | O14617 AP3D1_HUMAN  | R.ALDIDLKPLADSE.K                       |                 | 2 | 3,8214 | 0,52  | -0,403 |
| 12 | P33981 TTK_HUMAN    | R.VPVNLLNSPDCDVK.T                      |                 | 2 | 3,8209 | 0,295 | -0,233 |
| 12 | P26641 EF1G_HUMAN   | K.ALIAAQYSGAQVR.V                       |                 | 2 | 3,8181 | 0,547 | 0,453  |
| 12 | P27816 MAP4_HUMAN   | K.VGS#LDNVGHLPAGGAVK.T                  | S1073:          | 3 | 3,8125 | 0,338 | 0,328  |
| 12 | P54136 SYRC_HUMAN   | K.VIVDFSSPNIAKE.M                       |                 | 2 | 3,8102 | 0,482 | 0      |
| 12 | P17987 TCPA_HUMAN   | R.SQNVM*AAASIANIVK.S                    |                 | 2 | 3,8099 | 0,452 | -0,557 |
| 12 | P05556 ITB1_HUMAN   | E.CSTDEVNSEDMD*DAYCR.K                  |                 | 2 | 3,804  | 0,506 | -0,062 |
| 12 | Q5R372 Q5R372_HUMAN | E.ISTPRPSS#PGGLPEEDSVLFNK.L             | S119:           | 3 | 3,7995 | 0,388 | 0,228  |
| 12 | Q14997 PSME4_HUMAN  | K.NPSINQILLS#PEKIKE.G                   | S1121:          | 3 | 3,7971 | 0,405 | -0,096 |
| 12 | Q12968 NFAC3_HUMAN  | R.DM*SQISVSQGAGVSR.Q                    |                 | 2 | 3,786  | 0,454 | -0,079 |
| 12 | P62308 RUXG_HUMAN   | E.M*ATSGQQNNIGM*VVIR.G                  |                 | 2 | 3,7845 | 0,483 | -0,07  |
| 12 | O14893 GEMI2_HUMAN  | E.AAQCPDVVVAQIDPK.K                     |                 | 2 | 3,7814 | 0,426 | 0,076  |
| 12 | O94842 TOX4_HUMAN   | R.INLQQQPPPLQIK.S                       |                 | 2 | 3,7806 | 0,297 | -0,402 |
| 12 | P35658 NU214_HUMAN  | E.GERQPKS#PGS#TPTT#PTSSQAPQK.L          | S430:S433:T437: | 3 | 3,7798 | 1     | 0      |
| 12 | P05388 RLA0_HUMAN   | K.AFLADPSAFVAAAPVAAATTAAPAAAAAPAKVEAK.E |                 | 3 | 3,7775 | 0,461 | 0,23   |
| 12 | O94763 RMP_HUMAN    | K.M*SDAAGDIVDIREE.I                     |                 | 2 | 3,7756 | 0,458 | -0,397 |
| 12 | Q13765 NACA_HUMAN   | K.DIELVM*SQANVSR.A                      |                 | 3 | 3,7722 | 0,431 | 0,309  |
| 12 | P84103 SFRS3_HUMAN  | K.VYVGNLGNNGNKTELE.R                    |                 | 2 | 3,7701 | 0,388 | -0,142 |
| 12 | Q12888 TP53B_HUMAN  | K.TSGTEPADFALPSSR.G                     |                 | 2 | 3,7696 | 0,531 | -1,112 |
| 12 | O95865 DDAH2_HUMAN  | E.NATLDGTDVLFITGRE.F                    |                 | 2 | 3,7689 | 0,534 | -0,152 |
| 12 | O95425 SVIL_HUMAN   | K.LLGGQTSYQSAGDPKEDE.L                  |                 | 2 | 3,7683 | 0,466 | 0,129  |
| 12 | P09382 LEG1_HUMAN   | E.VCITFDQANLTVK.L                       |                 | 2 | 3,7655 | 0,352 | -0,485 |
| 12 | Q02952 AKA12_HUMAN  | E.DSIAGSGVEHST#PDTEPGKEE.S              | T793:           | 3 | 3,7613 | 0,343 | 0,165  |

|    |                     |                                  |            |   |        |       |        |
|----|---------------------|----------------------------------|------------|---|--------|-------|--------|
| 12 | Q96GQ7 DDX27_HUMAN  | R.SADFNPDFVFTEK.E                |            | 2 | 3,7561 | 0,452 | 0,08   |
| 12 | Q93052 LPP_HUMAN    | R.CSVCKEPIIM*PAPGQEE.T           |            | 2 | 3,7538 | 0,434 | -0,264 |
| 12 | Q96JH7 VCIP1_HUMAN  | E.TTDGCVADALGAAFATR.S            |            | 3 | 3,752  | 0,275 | 0,108  |
| 12 | P52701 MSH6_HUMAN   | K.AGFDSYDQALADIRE.N              |            | 2 | 3,7518 | 0,492 | -0,41  |
| 12 | Q13308 PTK7_HUMAN   | E.VALTSLGSGPAATNK.R              |            | 2 | 3,7483 | 0,501 | 0,088  |
| 12 | Q96TA1 NIBL1_HUMAN  | E.DQYGVALFNSM*R.H                |            | 2 | 3,7463 | 0,474 | -0,603 |
| 12 | P28290 SSFA2_HUMAN  | R.TPLGASLDEQSSSTLK.G             |            | 2 | 3,7455 | 0,527 | -0,299 |
| 12 | Q15742 NAB2_HUMAN   | R.RSS#VKVEAEASRQ.-               | S515:      | 3 | 3,7439 | 0,287 | -0,299 |
| 12 | Q92539 LPIN2_HUMAN  | K.SGGDETPSQSSDISHVLE.T           |            | 2 | 3,7428 | 0,402 | -0,198 |
| 12 | P14618 KPYM_HUMAN   | K.ITLDNAYM*EKUDE.N               |            | 2 | 3,7389 | 0,483 | -0,151 |
| 12 | Q53F64 Q53F64_HUMAN | K.IFVGGLNPEATEEK.I               |            | 2 | 3,7362 | 0,396 | -0,487 |
| 12 | Q92616 GCN1L_HUMAN  | R.AYSDQAIVNLLK.M                 |            | 2 | 3,7354 | 0,42  | -0,274 |
| 12 | P51610 HCFC1_HUMAN  | R.SPAFVQLAPLSSK.V                |            | 2 | 3,7337 | 0,43  | 0      |
| 12 | P18583 SON_HUMAN    | E.FTTASTLSLVNK.Y                 |            | 2 | 3,733  | 0,391 | 0,285  |
| 12 | P19838 NFKB1_HUMAN  | E.VIQAAS#SPVKTTTQAHSLPLS#PASTR.Q | S892:S907: | 3 | 3,7329 | 1     | 0      |
| 12 | Q14155 ARHG7_HUMAN  | K.LPTTGM*TITKLEDSE.N             |            | 2 | 3,7299 | 0,452 | -0,369 |
| 12 | Q2NKX8 ERC6L_HUMAN  | K.ADIGNLDQLKDDE.I                |            | 2 | 3,7247 | 0,448 | -0,554 |
| 12 | Q8N163 K1967_HUMAN  | R.CCM*LFVDDM*AEPR.E              |            | 2 | 3,7215 | 0,45  | -0,364 |
| 12 | O75665 OFD1_HUMAN   | R.VVSEQPQVGTLEER.N               |            | 2 | 3,7213 | 0,533 | -0,233 |
| 12 | P35579 MYH9_HUMAN   | K.IAQLEEQLDNETKE.R               |            | 2 | 3,717  | 0,376 | -0,662 |
| 12 | P04083 ANXA1_HUMAN  | K.GTDVNVFNTILTTR.S               |            | 2 | 3,7112 | 0,367 | -0,393 |
| 12 | Q9H4Z2 ZN335_HUMAN  | E.LGGTALQVAVVK.S                 |            | 2 | 3,7099 | 0,508 | 0      |
| 12 | P46013 KI67_HUMAN   | K.M*PCESSPPESADTPTSTR.R          |            | 2 | 3,7082 | 0,503 | -0,31  |
| 12 | Q13428 TCOF_HUMAN   | R.SPAGPAATPAQAQAASTPR.K          |            | 2 | 3,7075 | 0,671 | -0,209 |
| 12 | Q14676 MDC1_HUMAN   | E.LQPSTSTDQPVTPEPTR.A            |            | 2 | 3,6991 | 0,48  | 0      |
| 12 | P11177 ODPB_HUMAN   | E.GPAFNFLDAPAVR.V                |            | 2 | 3,6978 | 0,441 | -0,621 |
| 12 | Q9GZR7 DDX24_HUMAN  | E.LTDYQLVS#PAKNPSSLFSK.E         | S60:       | 3 | 3,6956 | 0,315 | 0      |
| 12 | Q9UHB6 LIMA1_HUMAN  | E.IGPGQLSSSTFDSEKNE.S            |            | 2 | 3,6948 | 0,534 | 0      |
| 12 | Q8NC51 PAIRB_HUMAN  | R.TDKSSASAPDVEDDPEAFPALA.-       |            | 2 | 3,6945 | 0,378 | -0,348 |
| 12 | P08729 K2C7_HUMAN   | E.LQSQISDTSVVLMS*DNSR.S          |            | 3 | 3,6926 | 0,335 | 0,183  |
| 12 | Q701P4 Q701P4_HUMAN | R.NPQNSAQTADGSHCAVSDVE.M         |            | 2 | 3,692  | 0,535 | -0,234 |
| 12 | P04264 K2C1_HUMAN   | R.SLDLDSIIAEVK.A                 |            | 2 | 3,6919 | 0,4   | 0      |
| 12 | Q15459 SF3A1_HUMAN  | K.VM*QQQQTTQQQLPQK.V             |            | 2 | 3,6917 | 0,449 | -0,125 |



|    |                    |                                 |        |   |        |       |        |
|----|--------------------|---------------------------------|--------|---|--------|-------|--------|
| 12 | Q13573 SNW1_HUMAN  | K.EVM*NADDPDLQRPDEE.A           |        | 2 | 3,687  | 0,399 | -0,065 |
| 12 | Q16626 MEA1_HUMAN  | E.LAPVGDGDVVADIQDR.I            |        | 2 | 3,6857 | 0,526 | -1,86  |
| 12 | Q7Z4H7 FA29A_HUMAN | E.LIDSLGSNPFLTR.N               |        | 2 | 3,6817 | 0,434 | -0,341 |
| 12 | O75581 LRP6_HUMAN  | R.TCSAPTTFLFSQK.S               |        | 2 | 3,6806 | 0,42  | -0,914 |
| 12 | P31948 STIP1_HUMAN | K.FM*NPFNM*PNLYQK.L             |        | 2 | 3,679  | 0,369 | -0,291 |
| 12 | Q14103 HNRPD_HUMAN | K.IFVGGLSPDTPEEK.I              |        | 2 | 3,6785 | 0,427 | -0,082 |
| 12 | O75909 CCNK_HUMAN  | K.DPQQPAQQQPAQQPK.K             |        | 2 | 3,6783 | 0,245 | -0,134 |
| 12 | Q8NFC6 FA44A_HUMAN | E.GSTASTS#PADHSALPNQSLTVRE.S    | S1318: | 3 | 3,6773 | 0,215 | 0,076  |
| 12 | Q01518 CAP1_HUMAN  | R.ALLVTASQCQQAENK.L             |        | 2 | 3,6766 | 0,281 | 0,139  |
| 12 | P13646 K1C13_HUMAN | R.ALEEANADLEVK.I                |        | 2 | 3,6751 | 0,354 | -0,562 |
| 12 | P51948 MAT1_HUMAN  | R.VQLFEDPTVDKE.V                |        | 2 | 3,675  | 0,297 | -0,687 |
| 12 | Q86WB0 NIPA_HUMAN  | R.SQDATFSPGSEQAEKS#PGPIVSR.T    | S344:  | 3 | 3,674  | 0,388 | -0,149 |
| 12 | P11388 TOP2A_HUMAN | K.TLAVSGLGVVGR.D                |        | 2 | 3,6696 | 0,307 | 0,216  |
| 12 | Q12893 TM115_HUMAN | K.VDS#PLPSDKAPTPPGK.G           | S320:  | 3 | 3,6691 | 0,347 | 0,108  |
| 12 | Q99832 TCPH_HUMAN  | R.QLCDNAGFDATNILNK.L            |        | 2 | 3,6685 | 0,288 | -0,068 |
| 12 | Q9P270 SLAI2_HUMAN | K.LNDVTDVQILAR.M                |        | 2 | 3,6662 | 0,415 | -0,18  |
| 12 | Q92797 SYMPK_HUMAN | E.DAM*KTPS#PAAEDAREPE.A         | S1259: | 3 | 3,6651 | 0,338 | 0,191  |
| 12 | Q13546 RIPK1_HUMAN | R.M*QSLQLDCVAVPSSR.S            |        | 2 | 3,6645 | 0,509 | -0,214 |
| 12 | Q86WB0 NIPA_HUMAN  | R.SQDATFSPGSEQAEKS#PGPIVSR.T    | S344:  | 2 | 3,6642 | 0,332 | 0,298  |
| 12 | Q6P2E9 EDC4_HUMAN  | R.AAADTLQGPM*QAAYRE.A           |        | 2 | 3,664  | 0,42  | -0,286 |
| 12 | P55327 TPD52_HUMAN | K.ASAAFSSVGSVITK.K              |        | 2 | 3,663  | 0,481 | -0,368 |
| 12 | P05362 ICAM1_HUMAN | R.GGSVLVTCSTSCDQPK.L            |        | 2 | 3,663  | 0,514 | -0,216 |
| 12 | P35658 NU214_HUMAN | K.SSATVTGEPSPSYSSGSDSSK.A       |        | 2 | 3,6606 | 0,485 | -0,19  |
| 12 | P10809 CH60_HUMAN  | E.GIVLGGGCALLR.C                |        | 2 | 3,6591 | 0,325 | -0,309 |
| 12 | Q99497 PARK7_HUMAN | K.KEGPYDVVVLPGGNLGAQNLSE.S      |        | 3 | 3,6584 | 0,19  | 0,081  |
| 12 | P18206 VINC_HUMAN  | R.VM*LVNSM*NTVKE.L              |        | 2 | 3,6576 | 0,386 | 0,175  |
| 12 | P27797 CALR_HUMAN  | E.YNIM*FGPDICGPGTK.K            |        | 3 | 3,6569 | 0,333 | 0,325  |
| 12 | Q71U36 TBA1A_HUMAN | E.ITNACFEPANQM*VK.C             |        | 2 | 3,6566 | 0,452 | -0,223 |
| 12 | Q99832 TCPH_HUMAN  | K.LPIGDVATQYFADR.D              |        | 2 | 3,6548 | 0,523 | -1,306 |
| 12 | P40937 RFC5_HUMAN  | R.ALNILQSTNM*AFGK.V             |        | 2 | 3,6545 | 0,501 | -0,24  |
| 12 | P27816 MAP4_HUMAN  | K.DMES#PTKLDVTLAK.D             | S280:  | 2 | 3,6533 | 0,421 | 0      |
| 12 | Q7Z3K3 POGZ_HUMAN  | K.VPEPNENVGDAVQTK.L             |        | 2 | 3,6532 | 0,346 | -0,382 |
| 12 | Q9H4H8 FA83D_HUMAN | R.SSS#LKSSSVSSQGSVASSTGSPASIR.T | S474:  | 3 | 3,6518 | 0,3   | 0,14   |

|    |                    |                           |       |   |        |       |        |
|----|--------------------|---------------------------|-------|---|--------|-------|--------|
| 12 | Q8IWT3 PARC_HUMAN  | E.GSTLNDLLNSQIYTK.Y       |       | 2 | 3,6503 | 0,479 | -1,025 |
| 12 | Q9Y6W5 WASF2_HUMAN | R.DVVGNDVATILSR.R         |       | 2 | 3,6486 | 0,474 | -0,359 |
| 12 | Q9NY61 AATF_HUMAN  | R.NSEDDGVVM*TFSSVK.V      |       | 2 | 3,6446 | 0,522 | -0,449 |
| 12 | Q7Z2T5 TRM1L_HUMAN | K.TTDDTTTDNYIAQGK.R       |       | 2 | 3,6428 | 0,532 | -0,297 |
| 12 | Q9UK76 HN1_HUMAN   | K.GEGDIHENVDLPGSLGQSE.E   |       | 3 | 3,6394 | 0,264 | 0,337  |
| 12 | Q9UKS6 PACN3_HUMAN | R.SPDEVTLTSIVPTR.D        |       | 2 | 3,6394 | 0,473 | -0,644 |
| 12 | A8K0Z3 WASH1_HUMAN | R.ATSQGGDLM*SDLFNK.L      |       | 2 | 3,6379 | 0,4   | -0,381 |
| 12 | Q9HCN4 GPN1_HUMAN  | K.DM*GSVALDAGTAK.D        |       | 2 | 3,6375 | 0,458 | 0,292  |
| 12 | Q969R5 LMBL2_HUMAN | E.LPTS#PLHLLSPGTPR.S      | S67:  | 3 | 3,6339 | 0,263 | 0,22   |
| 12 | P35580 MYH10_HUMAN | E.DQSILCTGESGAGKTE.N      |       | 2 | 3,6309 | 0,533 | -0,074 |
| 12 | Q99459 CDC5L_HUMAN | E.DGM*ADYSDPSYVK.Q        |       | 2 | 3,6292 | 0,423 | -0,083 |
| 12 | Q13480 GAB1_HUMAN  | R.APSASVDSSLYNLPR.S       |       | 2 | 3,6259 | 0,488 | -0,155 |
| 12 | Q86VR2 F134C_HUMAN | R.SPPGAEEPQAPPASRDE.A     |       | 2 | 3,6242 | 0,587 | -0,211 |
| 12 | P41091 IF2G_HUMAN  | R.SCGSSTPDEFPTDIPGTK.G    |       | 2 | 3,624  | 0,507 | -0,386 |
| 12 | O00754 MA2B1_HUMAN | E.LVDYFLNVATAQGR.Y        |       | 2 | 3,6239 | 0,453 | -0,234 |
| 12 | P37802 TAGL2_HUMAN | R.TLM*NLGGLAVAR.D         |       | 2 | 3,6228 | 0,403 | -0,099 |
| 12 | P08729 K2C7_HUMAN  | R.SLDLDGIIAEVK.A          |       | 2 | 3,6225 | 0,416 | -0,383 |
| 12 | Q14676 MDC1_HUMAN  | E.LQASASTDQPVTSPTSRT.T    |       | 3 | 3,6219 | 0,337 | 0,098  |
| 12 | Q9UER7 DAXX_HUMAN  | R.VDSPSHGLVTSSLCIPS#PAR.L | S702: | 3 | 3,6212 | 0,213 | -0,169 |
| 12 | Q5TDH0 DDI2_HUMAN  | R.IDFSSIAVPGTSSPR.Q       |       | 2 | 3,6209 | 0,503 | -0,636 |
| 12 | Q14671 PUM1_HUMAN  | R.SQDDAM*VDYFFQR.Q        |       | 2 | 3,6146 | 0,425 | -0,298 |
| 12 | O00410 IMB3_HUMAN  | E.FVNLGDQQSFGIK.T         |       | 2 | 3,614  | 0,439 | -0,588 |
| 12 | O95684 FR1OP_HUMAN | K.ANDEANQSDTSVSLSEPK.S    |       | 2 | 3,6118 | 0,443 | -0,129 |
| 12 | P18206 VINC_HUMAN  | R.DPSASPGDAGEQAIR.Q       |       | 2 | 3,6091 | 0,516 | 0,249  |
| 12 | Q03252 LMNB2_HUMAN | R.TVLVNADGEEVAM*R.T       |       | 2 | 3,6082 | 0,496 | -0,401 |
| 12 | Q92797 SYMPK_HUMAN | E.AALLDSSLEGPLPK.E        |       | 2 | 3,6075 | 0,416 | -0,346 |
| 12 | Q9Y6Q9 NCOA3_HUMAN | E.GVGTSLSTLSSPGPK.L       |       | 2 | 3,6059 | 0,487 | -0,488 |
| 12 | O95340 PAPS2_HUMAN | K.GFTGIDSDYEKPETPE.R      |       | 2 | 3,6038 | 0,403 | -0,41  |
| 12 | Q8IXQ3 CI040_HUMAN | K.IDAGTM*AEPSASPSK.R      |       | 2 | 3,6025 | 0,583 | 0,083  |
| 12 | Q66K14 TBC9B_HUMAN | R.QSFCAQEAPTASQGLLK.L     |       | 2 | 3,6022 | 0,402 | -0,066 |
| 12 | P49959 MRE11_HUMAN | E.SDVEEDIFPTTSK.T         |       | 2 | 3,5995 | 0,471 | -0,083 |
| 12 | Q8N954 CCD75_HUMAN | E.DLSSNCPGPTSADHD.-       |       | 2 | 3,5978 | 0,364 | 0      |
| 12 | Q09666 AHNK_HUMAN  | K.M*DAEVPDVNIEGPDAK.L     |       | 2 | 3,5961 | 0,516 | -0,071 |

|    |                     |                            |       |   |        |       |        |
|----|---------------------|----------------------------|-------|---|--------|-------|--------|
| 12 | P48730 KC1D_HUMAN   | R.GAPVNISSSDLTGRQD.T       |       | 2 | 3,5959 | 0,421 | -0,226 |
| 12 | P49790 NU153_HUMAN  | E.GSVLDILKS#PGFASPK.I      | S614: | 2 | 3,5924 | 0,303 | -0,504 |
| 12 | P63241 IF5A1_HUMAN  | D.GYLSLLQDSGEVRE.D         |       | 2 | 3,5904 | 0,406 | -0,623 |
| 12 | Q9UKF6 CPSF3_HUMAN  | E.SDQLLIRPLGAGQE.V         |       | 2 | 3,5854 | 0,151 | 0,082  |
| 12 | Q12906 ILF3_HUMAN   | K.VLQDM*GLPTGAEGR.D        |       | 2 | 3,5852 | 0,505 | -0,167 |
| 12 | P08758 ANXA5_HUMAN  | E.DDVVGDTSGYYQR.M          |       | 2 | 3,5841 | 0,517 | -0,083 |
| 12 | P43246 MSH2_HUMAN   | E.DTTGSQSLAALLNK.C         |       | 2 | 3,5818 | 0,395 | -0,774 |
| 12 | P49790 NU153_HUMAN  | E.GSVLDILKS#PGFASPK.I      | S614: | 3 | 3,5788 | 0,277 | -0,216 |
| 12 | Q8IZL8 PELP1_HUMAN  | R.LHDLVLPVLM*GVQQGE.V      |       | 2 | 3,5788 | 0,429 | -0,207 |
| 12 | P49792 RBP2_HUMAN   | K.IIDSDSNLSVVK.K           |       | 2 | 3,5763 | 0,438 | 0      |
| 12 | O75534 CSDE1_HUMAN  | K.DVEGSTSPQIGDKVE.F        |       | 2 | 3,576  | 0,437 | 0,391  |
| 12 | P10412 H14_HUMAN    | E.TAPAAPAAPAPAEKT#PVK.K    | T18:  | 2 | 3,5755 | 0,319 | -0,138 |
| 12 | Q13428 TCOF_HUMAN   | K.LDSSPSVSSTLAAKDDPD.G     |       | 2 | 3,5754 | 0,499 | -0,406 |
| 12 | Q9BR76 COR1B_HUMAN  | E.ASGGGAFLVPLSK.T          |       | 2 | 3,5738 | 0,522 | -0,278 |
| 12 | Q15596 NCOA2_HUMAN  | R.LLQDSSSPVDLAK.L          |       | 2 | 3,5738 | 0,403 | 0,089  |
| 12 | P13639 EF2_HUMAN    | R.ETVSEESNVLCLSK.S         |       | 2 | 3,5726 | 0,43  | -1,147 |
| 12 | P17706 PTN2_HUMAN   | E.DLSPAFDHS#PNKIM*TE.K     | S304: | 2 | 3,572  | 0,419 | -0,193 |
| 12 | P29558 RBMS1_HUMAN  | K.GYGFVDFDSPAQAQK.A        |       | 2 | 3,5701 | 0,445 | -0,543 |
| 12 | Q8TF74 WIPF2_HUMAN  | R.TGSPGQSLAPPPPPYR.Q       |       | 2 | 3,5692 | 0,348 | 0,301  |
| 12 | P26038 MOES_HUMAN   | K.TAM*STPHVAEPAENEQDEQDE.N |       | 3 | 3,5687 | 0,353 | -0,078 |
| 12 | P40926 MDHM_HUMAN   | K.GYLGPQLPDCLK.G           |       | 2 | 3,5661 | 0,354 | -0,246 |
| 12 | O75643 U520_HUMAN   | K.EIDLLLGQTDDTR.Y          |       | 2 | 3,5657 | 0,361 | -0,246 |
| 12 | Q5W0B1 RN219_HUMAN  | K.SSQGSEFLEEPDKLEE.K       |       | 2 | 3,5619 | 0,385 | -0,067 |
| 12 | Q6ZQU7 Q6ZQU7_HUMAN | R.SPDQPPPQCFM*AQ GK.T      |       | 3 | 3,5617 | 0,355 | 0,305  |
| 12 | O95251 MYST2_HUMAN  | R.NLQSGTEEPAYSTR.R         |       | 2 | 3,5614 | 0,391 | -0,359 |
| 12 | Q9C0B5 ZDHC5_HUMAN  | R.GVGSPEPGTAPYLGR.S        |       | 2 | 3,5595 | 0,425 | 0,235  |
| 12 | Q14697 GANAB_HUMAN  | K.DPAEGDGAQPEETPR.D        |       | 2 | 3,557  | 0,402 | -0,078 |
| 12 | O60506 HNRPQ_HUMAN  | E.DGALAVLQQFK.D            |       | 2 | 3,5561 | 0,443 | 0,615  |
| 12 | P21333 FLNA_HUMAN   | K.VTAQPGLEPSGNIANK.T       |       | 2 | 3,5536 | 0,41  | -0,221 |
| 12 | P18206 VINC_HUMAN   | K.M*LGQM*TDQVADLR.A        |       | 2 | 3,5532 | 0,41  | -0,889 |
| 12 | P11940 PABP1_HUMAN  | K.GFGFVCFSSPEEATK.A        |       | 2 | 3,5531 | 0,489 | -0,367 |
| 12 | Q13263 TIF1B_HUMAN  | E.DGSLSLDGADSTGVVAK.L      |       | 2 | 3,5502 | 0,414 | 0,23   |
| 12 | Q92841 DDX17_HUMAN  | R.GDGPICLVLAPTRE.L         |       | 2 | 3,5477 | 0,383 | -0,814 |

|    |                     |                               |        |   |        |       |        |
|----|---------------------|-------------------------------|--------|---|--------|-------|--------|
| 12 | Q9H0B6 KLC2_HUMAN   | K.SVEEPTQPGGTGLSDSR.T         |        | 2 | 3,5473 | 0,52  | -0,213 |
| 12 | Q13740 CD166_HUMAN  | R.QIGDALPVSTISASR.N           |        | 2 | 3,5471 | 0,547 | -0,291 |
| 12 | P49821 NDUV1_HUMAN  | K.YLVVNADEGEPGTCK.D           |        | 2 | 3,547  | 0,421 | -1,403 |
| 12 | O75781 PALM_HUMAN   | E.VVM*NSQQTTPVGTTPK.D         |        | 2 | 3,5442 | 0,453 | -0,162 |
| 12 | Q8TEU7 RPGF6_HUMAN  | E.VNSYLSLPADLTK.M             |        | 2 | 3,5434 | 0,38  | -0,172 |
| 12 | O43379 WDR62_HUMAN  | E.VEAGPGDQQGDSYLR.V           |        | 2 | 3,5403 | 0,494 | 0,077  |
| 12 | A8MVB1 A8MVB1_HUMAN | E.LDLSSEPQQLTAK.G             |        | 2 | 3,5385 | 0,485 | 0,341  |
| 12 | P27816 MAP4_HUMAN   | K.VGS#LDNVGHLPAGGAVK.T        | S1073: | 2 | 3,5359 | 0,412 | -0,219 |
| 12 | Q13439 GOGA4_HUMAN  | E.QQQLQQALAPAQASSNSSTPTR.M    |        | 3 | 3,5351 | 0,39  | 0,158  |
| 12 | Q9HC35 EMAL4_HUMAN  | R.ASPSPQPSSQPLQIHRQT#PE.S     | T160:  | 2 | 3,5351 | 0,498 | 0,431  |
| 12 | O94763 RMP_HUMAN    | R.AFVDVNGEYVPR.K              |        | 2 | 3,5327 | 0,484 | 0      |
| 12 | Q53F19 CQ085_HUMAN  | R.ALINM*SSLPAQDK.I            |        | 2 | 3,5316 | 0,27  | 0,087  |
| 12 | Q9Y6A5 TACC3_HUMAN  | E.NCDFLFSPPEVTGR.S            |        | 2 | 3,5313 | 0,403 | -0,447 |
| 12 | Q9HCK8 CHD8_HUMAN   | R.IDLVCQAVLSGK.W              |        | 2 | 3,5301 | 0,398 | 0      |
| 12 | P46100 ATRX_HUMAN   | R.LAM*NQNTDKISGSGSNSDM*M*E.N  |        | 3 | 3,5267 | 0,247 | 0,161  |
| 12 | P62316 SMD2_HUMAN   | E.FNTGPLSVLTQSVK.N            |        | 2 | 3,5255 | 0,371 | -0,164 |
| 12 | P04049 RAF1_HUMAN   | R.STST#PNVHM*VSTTLPVDSR.M     | T260:  | 2 | 3,5228 | 0,377 | 0,115  |
| 12 | Q16643 DREB_HUMAN   | E.TQEPSILDSEETR.A             |        | 2 | 3,5223 | 0,428 | 0      |
| 12 | O95239 KIF4A_HUMAN  | K.ILAQDVAQLKE.K               |        | 2 | 3,5164 | 0,305 | 0      |
| 12 | P04406 G3P_HUMAN    | K.IISNASCTTNCLAPLAK.V         |        | 3 | 3,5136 | 0,288 | -1,097 |
| 12 | O43290 SNUT1_HUMAN  | D.LLPLGDQTDGDFGSR.L           |        | 2 | 3,5113 | 0,535 | -0,213 |
| 12 | Q8IWE2 NXP20_HUMAN  | R.GMLSAITNVVQNTGK.S           |        | 2 | 3,5105 | 0,411 | -0,875 |
| 12 | Q00839 HNRPU_HUMAN  | E.YTFIQNVPLEDR.V              |        | 2 | 3,5092 | 0,486 | -0,408 |
| 12 | Q12906 ILF3_HUMAN   | E.LEAVQNM*VSHT.E.R            |        | 2 | 3,5065 | 0,467 | 0,178  |
| 12 | P24534 EF1B_HUMAN   | K.YGPADVEDTTGSGATDSK.D        |        | 2 | 3,5059 | 0,58  | 0,344  |
| 12 | Q8IWB9 TEX2_HUMAN   | K.M*LLDYSVYM*GR.C             |        | 2 | 3,5051 | 0,322 | -0,619 |
| 12 | Q8NE71 ABCF1_HUMAN  | E.VVADETPAVQAVLR.A            |        | 2 | 3,5046 | 0,442 | 0,166  |
| 12 | Q9C0C2 TB182_HUMAN  | R.GSGGLFS#PSTAHVPDGalGQR.D    | S1029: | 3 | 3,4995 | 0,137 | -0,35  |
| 12 | P38646 GRP75_HUMAN  | E.DKVIAYVDLGGGTFD.I           |        | 2 | 3,4991 | 0,498 | -0,544 |
| 12 | O94979 SC31A_HUMAN  | R.AQGEPVAGHES#PKIPYE.K        | S799:  | 2 | 3,4977 | 0,436 | -0,129 |
| 12 | Q9HC38 GLOD4_HUMAN  | R.ALLGYADNQCKLE.L             |        | 2 | 3,4972 | 0,398 | -0,408 |
| 12 | P15374 UCHL3_HUMAN  | K.SQGQDVTSSVYFM*K.Q           |        | 2 | 3,497  | 0,465 | 0,077  |
| 12 | Q5TZA2 CROCC_HUMAN  | R.APSPAPRPVPGS#PARDAPAEGSGE.G | S1460: | 3 | 3,4969 | 0,186 | -0,078 |

|    |                     |                                     |                 |   |        |       |        |
|----|---------------------|-------------------------------------|-----------------|---|--------|-------|--------|
| 12 | Q12857 NFIA_HUMAN   | E.M*DSPGEEPFTGQGR.S                 |                 | 2 | 3,4955 | 0,515 | -0,145 |
| 12 | Q01804 OTUD4_HUMAN  | K.TAADVVSPGANSVDSR.V                |                 | 2 | 3,4951 | 0,29  | -0,158 |
| 12 | Q09472 EP300_HUMAN  | E.DQPSTSATQSSPAPGQSK.K              |                 | 2 | 3,4944 | 0,573 | -0,138 |
| 12 | Q58FG1 HS904_HUMAN  | R.TLTIVDTGIGM*TK.A                  |                 | 2 | 3,494  | 0,502 | -0,982 |
| 12 | Q8NBZ0 CCD95_HUMAN  | R.GSGAGVGTTLPLPPK.M                 |                 | 2 | 3,4929 | 0,542 | -0,157 |
| 12 | O15067 PUR4_HUMAN   | E.LSDPAGAIYTSR.F                    |                 | 2 | 3,492  | 0,336 | 0,089  |
| 12 | P30044 PRDX5_HUMAN  | R.FSM*VVQDGIVK.A                    |                 | 2 | 3,4897 | 0,406 | 0,394  |
| 12 | P46821 MAP1B_HUMAN  | E.AEDYVM*AVVDK.A                    |                 | 2 | 3,4894 | 0,406 | 0,097  |
| 12 | O95785 WIZ_HUMAN    | K.TPLALAGSPTPK.N                    |                 | 2 | 3,489  | 0,519 | 0,106  |
| 12 | Q701P4 Q701P4_HUMAN | R.NPQNSAQTADGSHCAVSDVEM*QE.H        |                 | 3 | 3,4875 | 0,25  | 0      |
| 12 | Q9HAV4 XPO5_HUMAN   | E.VM*DLITVCCVSK.K                   |                 | 2 | 3,4855 | 0,384 | -0,085 |
| 12 | P42126 D3D2_HUMAN   | R.DADVQNFVSFISK.D                   |                 | 2 | 3,4847 | 0,422 | -0,166 |
| 12 | P54578 UBP14_HUMAN  | K.AQLFALTGVQPAR.Q                   |                 | 2 | 3,4822 | 0,338 | -0,178 |
| 12 | P12270 TPR_HUMAN    | E.ASDQVSDDTVEM*PLPK.K               |                 | 2 | 3,4819 | 0,498 | -0,209 |
| 12 | Q14692 BMS1_HUMAN   | K.AGLSPANCQSDRVNLE.K                |                 | 2 | 3,4788 | 0,423 | -0,352 |
| 12 | Q9BXF6 RFIP5_HUMAN  | R.SSISGSLPSSGSLQAVSSR.F             |                 | 2 | 3,4783 | 0,525 | -0,473 |
| 12 | P37275 ZEB1_HUMAN   | K.IADSVNLPLDVVK.K                   |                 | 2 | 3,4779 | 0,326 | -0,265 |
| 12 | P81605 DCD_HUMAN    | K.DAVEDLESVGK.G                     |                 | 2 | 3,4778 | 0,49  | -0,21  |
| 12 | P11142 HSP7C_HUMAN  | K.DAGTIAGLNVLR.I                    |                 | 2 | 3,4767 | 0,347 | 0      |
| 12 | Q14160 LAP4_HUMAN   | E.NAVTITPLRPEDDYS#PRE.R             | S835:           | 2 | 3,4745 | 0,4   | 0,793  |
| 12 | Q9Y580 RBM7_HUMAN   | R.TM*DNM*TSSAQIIQR.S                |                 | 2 | 3,4734 | 0,404 | 0      |
| 12 | P16220 CREB1_HUMAN  | K.ILNDLSSDAPGVPR.I                  |                 | 2 | 3,473  | 0,516 | 0,168  |
| 12 | P62753 RS6_HUMAN    | R.RLSS#LRAS#TSKS#E.S                | S236:S240:S244: | 2 | 3,4722 | 0,419 | -0,147 |
| 12 | Q969F1 TF3C6_HUMAN  | E.IQM*NDSSNLS#CEQEKPM*HLE.I         | S177:           | 3 | 3,4707 | 0,447 | -0,073 |
| 12 | Q00839 HNRPU_HUMAN  | E.EYTFIQNVPLEDR.V                   |                 | 2 | 3,4689 | 0,476 | -0,225 |
| 12 | Q27J81 INF2_HUMAN   | R.QDAKDPTSLLGVLQAE.A                |                 | 2 | 3,4683 | 0,247 | -0,072 |
| 12 | O43815 STRN_HUMAN   | K.STSLDVEPIYFR.A                    |                 | 2 | 3,4677 | 0,445 | -0,719 |
| 12 | Q96AP0 ACD_HUMAN    | E.NDQLILSSLGPCQR.T                  |                 | 2 | 3,4674 | 0,453 | -0,305 |
| 12 | Q06587 RING1_HUMAN  | R.GGGAGGSSVGTGGGGTGGVGGGAGSEDSGDR.G |                 | 2 | 3,4662 | 0,372 | -0,102 |
| 12 | O60841 IF2P_HUMAN   | K.LLQAQGVVPSK.D                     |                 | 2 | 3,4655 | 0,453 | 0,385  |
| 12 | O94876 TMCC1_HUMAN  | K.ALGVISNFQSSPK.Y                   |                 | 2 | 3,4647 | 0,383 | 0,362  |
| 12 | P12956 KU70_HUMAN   | R.DSLIFLVDASK.A                     |                 | 2 | 3,4646 | 0,423 | 0,303  |
| 12 | P50851 LRBA_HUMAN   | E.AVAISSNSFITGK.D                   |                 | 2 | 3,4645 | 0,454 | -0,612 |

|    |                    |                              |       |   |        |       |        |
|----|--------------------|------------------------------|-------|---|--------|-------|--------|
| 12 | O43615 TIM44_HUMAN | E.IDDSVLGQTGPYR.R            |       | 2 | 3,4633 | 0,489 | -0,429 |
| 12 | Q9UL46 PSME2_HUMAN | E.DSLNVADLTSR.A              |       | 2 | 3,4631 | 0,442 | 0,094  |
| 12 | P07814 SYEP_HUMAN  | K.AYVDDTPAEQM*KAE.R          |       | 2 | 3,4626 | 0,49  | 0,077  |
| 12 | P07602 SAP_HUMAN   | D.CIQM*VTDIQTAVR.T           |       | 2 | 3,4624 | 0,464 | -0,236 |
| 12 | Q86UU1 PHLB1_HUMAN | D.SLVLEPGAAGK.K              |       | 2 | 3,4607 | 0,281 | 0,313  |
| 12 | P30101 PDIA3_HUMAN | E.STAGEIPVVAIR.T             |       | 2 | 3,4605 | 0,445 | 0,101  |
| 12 | P46821 MAP1B_HUMAN | R.TPEEGGYSYDISEK.T           |       | 2 | 3,46   | 0,499 | -0,155 |
| 12 | Q02952 AKA12_HUMAN | D.GSTPVADFDAPGTTQKDE.I       |       | 2 | 3,459  | 0,387 | 0,399  |
| 12 | Q9BTC8 MTA3_HUMAN  | R.DISNTLIM*LADK.H            |       | 2 | 3,4583 | 0,43  | -0,904 |
| 12 | P42166 LAP2A_HUMAN | E.LVANNVTLPAGEQR.K           |       | 2 | 3,4581 | 0,44  | -0,165 |
| 12 | Q9BQK8 LPIN3_HUMAN | E.NAALYFPQSDSGLGAR.R         |       | 2 | 3,4527 | 0,463 | -0,073 |
| 12 | P62316 SMD2_HUMAN  | E.EFNTGPLSVLTQSVK.N          |       | 2 | 3,452  | 0,346 | -0,527 |
| 12 | Q9BSL1 UBAC1_HUMAN | E.NIQDQDVLILLIK.K            |       | 2 | 3,452  | 0,242 | -0,432 |
| 12 | Q02040 SF17A_HUMAN | R.CPGGVLSCIPDNNQQPK.G        |       | 2 | 3,451  | 0,306 | 0,194  |
| 12 | P10398 ARAF_HUMAN  | R.TQADELPACLLSAAR.L          |       | 3 | 3,4476 | 0,25  | -0,113 |
| 12 | P22234 PUR6_HUMAN  | E.LLDS#PGKVLLQSK.D           | S27:  | 2 | 3,4455 | 0,234 | 0      |
| 12 | Q15365 PCBP1_HUMAN | R.LVVPATQCGSLIGK.G           |       | 2 | 3,4439 | 0,433 | -0,338 |
| 12 | Q9Y310 CV028_HUMAN | R.GLPQLGTLGAGNHYAE.I         |       | 2 | 3,4436 | 0,386 | -0,076 |
| 12 | P35908 K22E_HUMAN  | E.VSVNQSLQLPLNVK.V           |       | 2 | 3,4435 | 0,391 | -0,079 |
| 12 | Q5T4S7 UBR4_HUMAN  | R.TSPADHGGVSGSESGSAVDSVAGE.H |       | 3 | 3,4435 | 0,356 | -0,083 |
| 12 | Q15942 ZYX_HUMAN   | E.IDSLSSLLDDM*TK.N           |       | 2 | 3,4417 | 0,411 | -0,42  |
| 12 | P27816 MAP4_HUMAN  | K.DM*ES#PTKLDVTLAK.D         | S280: | 3 | 3,4417 | 0,326 | 1,446  |
| 12 | Q9ULR0 ISY1_HUMAN  | K.FIAHVPVPSQQEIEE.A          |       | 2 | 3,4414 | 0,351 | -0,212 |
| 12 | Q5T4S7 UBR4_HUMAN  | K.M*VDGVGCTVCAK.V            |       | 2 | 3,4392 | 0,29  | 0      |
| 12 | P13051 UNG_HUMAN   | K.TLYSFFSPSPAR.K             |       | 2 | 3,4391 | 0,455 | -0,267 |
| 12 | Q9UGP4 LIMD1_HUMAN | R.TPSVSAPLALSCPR.Q           |       | 3 | 3,4388 | 0,19  | 0,44   |
| 12 | Q9Y613 FHOD1_HUMAN | E.IM*DLLVQSVTK.S             |       | 2 | 3,4371 | 0,292 | -0,097 |
| 12 | P49458 SRP09_HUMAN | K.VTDDLVLCLVYK.T             |       | 2 | 3,4369 | 0,496 | -0,092 |
| 12 | Q9HA64 KT3K_HUMAN  | K.LGAQLADLHLD.N              |       | 2 | 3,433  | 0,386 | 0,105  |
| 12 | P52594 NUPL_HUMAN  | K.VVASVHASISGSSASSTSSTPE.V   |       | 2 | 3,4326 | 0,489 | 0      |
| 12 | Q5BJF6 ODFP2_HUMAN | K.IDSLM*NAVGLK.S             |       | 2 | 3,4314 | 0,349 | 0,456  |
| 12 | Q14191 WRN_HUMAN   | E.QQSQEEYLSDIAYK.S           |       | 2 | 3,4295 | 0,477 | -0,358 |
| 12 | P35908 K22E_HUMAN  | R.NLDLDSIIAEVK.A             |       | 2 | 3,4271 | 0,415 | -0,275 |

|    |                    |                         |        |   |        |       |        |
|----|--------------------|-------------------------|--------|---|--------|-------|--------|
| 12 | P61916 NPC2_HUMAN  | E.VNVSPCPTQPCQLSK.G     |        | 2 | 3,4265 | 0,452 | -0,142 |
| 12 | P16615 AT2A2_HUMAN | R.IGIFGQDEEDVTSK.A      |        | 2 | 3,4263 | 0,389 | -0,346 |
| 12 | Q7L014 DDX46_HUMAN | E.VDLQTALTGYQTK.Q       |        | 2 | 3,426  | 0,379 | -0,424 |
| 12 | P61289 PSME3_HUMAN | E.AEDLVANFFPK.K         |        | 2 | 3,4229 | 0,381 | -0,195 |
| 12 | P55072 TERA_HUMAN  | E.DNSVVSLSQPKM*DE.L     |        | 2 | 3,4218 | 0,41  | -0,156 |
| 12 | Q9UPN9 TRI33_HUMAN | E.DAGSSSLDNLLSR.Y       |        | 2 | 3,4194 | 0,337 | -0,091 |
| 12 | Q9Y580 RBM7_HUMAN  | R.TM*DNM*TSSAQIIQR.S    |        | 3 | 3,4187 | 0,233 | 0,225  |
| 12 | Q6P2E9 EDC4_HUMAN  | E.QQAAVTSSIM*QAM*R.S    |        | 2 | 3,4171 | 0,525 | -0,079 |
| 12 | Q00839 HNRPU_HUMAN | K.YNILGTNTIM*DK.M       |        | 2 | 3,4154 | 0,397 | -0,174 |
| 12 | Q08211 DHX9_HUMAN  | K.LAAQSCALSLVR.Q        |        | 2 | 3,415  | 0,39  | 0      |
| 12 | P67775 PP2AA_HUMAN | K.YSFLQFDPAPR.R         |        | 2 | 3,4142 | 0,445 | 0      |
| 12 | P41252 SYIC_HUMAN  | K.APLKPYVVS#PSDKVLIQE.K | S1051: | 3 | 3,4133 | 0,187 | -0,266 |
| 12 | Q15424 SAFB1_HUMAN | K.ILDILGETCKS#EPVKEE.S  | S227:  | 2 | 3,4125 | 0,369 | 0      |
| 12 | O15371 EIF3D_HUMAN | K.LGDDIDLIVR.C          |        | 2 | 3,4125 | 0,393 | -0,216 |
| 12 | Q92922 SMRC1_HUMAN | E.GNVATAAAAALASAATK.A   |        | 3 | 3,4109 | 0,431 | 0,251  |
| 12 | P37802 TAGL2_HUMAN | R.TLMNLGGLAVAR.D        |        | 2 | 3,4092 | 0,35  | -0,301 |
| 12 | P33176 KINH_HUMAN  | E.IGIAVGNNDVKQPE.G      |        | 2 | 3,4091 | 0,26  | -0,42  |
| 12 | Q13029 PRDM2_HUMAN | E.YNGIDLPVENPADGTR.S    |        | 2 | 3,4089 | 0,405 | -0,211 |
| 12 | O75864 K1986_HUMAN | R.DTGSSEPQPPPEPPR.S     |        | 2 | 3,4062 | 0,478 | -0,153 |
| 12 | P19532 TFE3_HUMAN  | E.GVVGGLSGGALSPLR.A     |        | 2 | 3,3995 | 0,387 | -0,091 |
| 12 | Q92841 DDX17_HUMAN | K.GTAYTFFTPGNLK.Q       |        | 2 | 3,3984 | 0,484 | 0      |
| 12 | Q7Z4V5 HDGR2_HUMAN | K.LAGEELAGEEAPQEK.A     |        | 3 | 3,3967 | 0,213 | 0,233  |
| 12 | Q8WUM4 PDC6I_HUMAN | K.LANQAADYFGDAFK.Q      |        | 2 | 3,3966 | 0,385 | -0,239 |
| 12 | P19338 NUCL_HUMAN  | K.GLSEDTTEETLKE.S       |        | 2 | 3,3924 | 0,32  | 0,42   |
| 12 | Q9Y2X3 NOL5_HUMAN  | K.TYDPSGDSTLPTCSK.K     |        | 2 | 3,3923 | 0,49  | -0,075 |
| 12 | Q3LXA3 DHAK_HUMAN  | K.SPGADLLQVLTK.A        |        | 2 | 3,3912 | 0,427 | -0,393 |
| 12 | Q9UMZ2 SYNG_HUMAN  | K.FDFLVATSQSK.M         |        | 2 | 3,3887 | 0,426 | -0,098 |
| 12 | Q92990 GLMN_HUMAN  | E.DFGLFQLAGQR.C         |        | 2 | 3,3832 | 0,357 | -0,39  |
| 12 | Q0JRZ9 FCHO2_HUMAN | K.VSIGNITLSPAISR.H      |        | 2 | 3,3819 | 0,467 | -0,513 |
| 12 | Q8IY81 RRMJ3_HUMAN | E.IM*SPLYQDEAPK.G       |        | 2 | 3,3811 | 0,258 | 0,087  |
| 12 | Q15149 PLEC1_HUMAN | R.SSSVGSSSYPISPAVSR.T   |        | 2 | 3,3805 | 0,368 | -0,139 |
| 12 | Q03518 TAP1_HUMAN  | R.QVAAVGQEPQVFGR.S      |        | 2 | 3,3801 | 0,451 | 0,082  |
| 12 | Q9UMZ2 SYNG_HUMAN  | R.SNT#LNEKPALPVIR.D     | T1100: | 3 | 3,379  | 0,198 | 0      |

|    |                    |                              |       |   |        |       |        |
|----|--------------------|------------------------------|-------|---|--------|-------|--------|
| 12 | P27816 MAP4_HUMAN  | K.DM*ES#PTKLDVTLAK.D         | S280: | 2 | 3,3786 | 0,314 | 0,445  |
| 12 | P49815 TSC2_HUMAN  | E.LQTLQDILGDPGDK.A           |       | 2 | 3,3763 | 0,488 | -0,968 |
| 12 | Q12888 TP53B_HUMAN | E.DLGLSLTGDSCCK.L            |       | 2 | 3,3748 | 0,364 | 0,289  |
| 12 | O75818 RPP40_HUMAN | K.LILSLDKDITYEE.T            |       | 2 | 3,3748 | 0,389 | 1,017  |
| 12 | Q12959 DLG1_HUMAN  | K.FGDILHVINASDDE.W           |       | 2 | 3,3747 | 0,398 | -0,158 |
| 12 | Q12756 KIF1A_HUMAN | R.VLDTSVAVVRGEE.N            |       | 2 | 3,3722 | 0,423 | 0,424  |
| 12 | Q00610 CLH1_HUMAN  | R.NLQNLLILTAIK.A             |       | 2 | 3,372  | 0,294 | -0,18  |
| 12 | Q07020 RL18_HUMAN  | K.TAVVVGTITDDVR.V            |       | 2 | 3,3717 | 0,458 | -0,544 |
| 12 | P08195 4F2_HUMAN   | K.GQSEDPGSLLSLFR.R           |       | 2 | 3,3703 | 0,386 | -0,405 |
| 12 | P15170 ERF3A_HUMAN | E.ISEAEPGGGS#LGDGRPPEESAHE.M | S36:  | 3 | 3,369  | 0,439 | 0,388  |
| 12 | P13861 KAP2_HUMAN  | R.APASVLPAAATPR.Q            |       | 2 | 3,369  | 0,41  | 0,106  |
| 12 | Q8NI08 NCOA7_HUMAN | R.VLSSTSEEDPGVVK.F           |       | 2 | 3,369  | 0,397 | 0,232  |
| 12 | O00512 BCL9_HUMAN  | R.AVTPVSQGSNSSSADPK.A        |       | 2 | 3,3686 | 0,422 | -0,598 |
| 12 | Q14247 SRC8_HUMAN  | E.DVTQVSSAYQK.T              |       | 2 | 3,368  | 0,448 | 0,299  |
| 12 | O14730 RIOK3_HUMAN | K.AASFLKDDGDPPLLYDE.-        |       | 2 | 3,3676 | 0,483 | -0,523 |
| 12 | Q9P2J5 SYLC_HUMAN  | K.STGNFLTLTQAIDK.F           |       | 2 | 3,3673 | 0,355 | -0,485 |
| 12 | O75874 IDHC_HUMAN  | R.LIDDM*VAQAM*K.S            |       | 2 | 3,3668 | 0,487 | -0,193 |
| 12 | P40227 TCPZ_HUMAN  | K.GIDPFSLDALSKE.G            |       | 2 | 3,3666 | 0,47  | -0,175 |
| 12 | Q03518 TAP1_HUMAN  | E.NIAYGLTQKPTM*EE.I          |       | 2 | 3,3661 | 0,307 | -0,076 |
| 12 | O43707 ACTN4_HUMAN | E.TTDTADQVIASFK.V            |       | 3 | 3,3652 | 0,256 | 0,567  |
| 12 | P15408 FOSL2_HUMAN | K.QEPLEEDSPSSSAGLDK.A        |       | 2 | 3,3652 | 0,533 | 0,26   |
| 12 | P60174 TPIS_HUMAN  | K.QSLGELIGTLNAAK.V           |       | 2 | 3,3627 | 0,439 | -0,948 |
| 12 | Q96L14 C170L_HUMAN | E.ALNNM*GFPSAM*LPS#PPKQK.S   | S224: | 3 | 3,3615 | 0,28  | -0,256 |
| 12 | Q00839 HNRPU_HUMAN | E.QQPQPATQQQPQQQR.G          |       | 3 | 3,3609 | 0,258 | -0,363 |
| 12 | P27694 RFA1_HUMAN  | K.DSLVDIIGICK.S              |       | 2 | 3,3596 | 0,472 | -0,297 |
| 12 | Q15054 DPOD3_HUMAN | K.TYLDGEGCIVTEK.V            |       | 2 | 3,3579 | 0,471 | -0,164 |
| 12 | O95359 TACC2_HUMAN | K.IGSSLPQDDDAPK.K            |       | 2 | 3,3554 | 0,327 | -0,091 |
| 12 | Q07021 C1QBP_HUMAN | K.AFVDFLSDEIKE.E             |       | 2 | 3,3553 | 0,412 | -0,259 |
| 12 | Q8NEY1 NAV1_HUMAN  | K.GQLTNIVSPTAATTPR.I         |       | 2 | 3,3551 | 0,499 | 0      |
| 12 | Q12931 TRAP1_HUMAN | R.GVVDEDIPLNLSRE.L           |       | 2 | 3,3547 | 0,29  | -0,446 |
| 12 | P61978 HNRPK_HUMAN | R.TDYNASVSPDSSGPER.I         |       | 2 | 3,3532 | 0,547 | -0,206 |
| 12 | Q5VT52 K0460_HUMAN | R.LSSSPGLFGAFSVR.G           |       | 2 | 3,353  | 0,469 | -0,342 |
| 12 | O95155 UBE4B_HUMAN | R.LAGGQTSQPTTPLTSPQR.E       |       | 2 | 3,3523 | 0,329 | -0,066 |



|    |                     |                            |       |   |        |       |        |
|----|---------------------|----------------------------|-------|---|--------|-------|--------|
| 12 | P46013 KI67_HUMAN   | K.FTQTSGETTDADKEPAGE.D     |       | 2 | 3,3507 | 0,552 | -0,065 |
| 12 | Q15084 PDIA6_HUMAN  | E.AIVDAALSALR.Q            |       | 2 | 3,3503 | 0,387 | -0,111 |
| 12 | Q86V15 CASZ1_HUMAN  | E.SSNDLVDIFSALSSK.N        |       | 2 | 3,3501 | 0,422 | -0,308 |
| 12 | P30041 PRDX6_HUMAN  | K.DINAYNCEEPTEK.L          |       | 2 | 3,3501 | 0,511 | -0,154 |
| 12 | Q9BRX2 PELO_HUMAN   | E.QLSQLTGVAAILR.F          |       | 2 | 3,3467 | 0,424 | -0,356 |
| 12 | Q9HCE1 MOV10_HUMAN  | K.LDLQQGQNLQGLSK.L         |       | 2 | 3,3451 | 0,479 | -0,221 |
| 12 | P13645 K1C10_HUMAN  | R.ALEESNYELEGK.I           |       | 2 | 3,3439 | 0,421 | 0,177  |
| 12 | O75144 ICOSL_HUMAN  | R.GLYDVVSVLR.I             |       | 2 | 3,3405 | 0,432 | -0,762 |
| 12 | P14625 ENPL_HUMAN   | K.GVVSDDLPLNVSRE.T         |       | 2 | 3,3403 | 0,435 | -0,604 |
| 12 | Q9UHW5 GPN3_HUMAN   | K.AICGLIDDYSM*VR.F         |       | 2 | 3,3384 | 0,359 | -0,798 |
| 12 | Q04721 NOTC2_HUMAN  | R.GPDGCTPLM*LASLR.G        |       | 2 | 3,3375 | 0,484 | 0,081  |
| 12 | Q06830 PRDX1_HUMAN  | R.TIAQDYGVKADE.G           |       | 2 | 3,3374 | 0,304 | -0,429 |
| 12 | Q01433 AMPD2_HUMAN  | R.QIS#QDVKLEPDILLR.A       | S168: | 3 | 3,3338 | 0,298 | -0,297 |
| 12 | Q9Y6I3 EPN1_HUMAN   | E.LLAGEVPARS#PGAFDM*SGVR.G | S410: | 3 | 3,3327 | 0,343 | -0,516 |
| 12 | Q6ZP91 Q6ZP91_HUMAN | E.SSFVEPADM*SDAVTK.A       |       | 2 | 3,3326 | 0,449 | -0,076 |
| 12 | O43719 HTSF1_HUMAN  | E.TATGM*AFEEPIDEK.K        |       | 2 | 3,3326 | 0,436 | -0,078 |
| 12 | Q8N8S7 ENAH_HUMAN   | E.DTSFSPGGNAIGVNSASSK.T    |       | 2 | 3,3325 | 0,456 | 0      |
| 12 | O43237 DC1L2_HUMAN  | K.DFQDYM*EPEEGCQGS#PQRR.G  | S194: | 3 | 3,3319 | 0,24  | -0,226 |
| 12 | Q2M2I8 AAK1_HUMAN   | R.ILS#DVTHSAVFGVPASK.S     | S637: | 2 | 3,3296 | 0,442 | -0,337 |
| 12 | P49790 NU153_HUMAN  | E.ITTSSPSPINSSQALTNK.V     |       | 2 | 3,329  | 0,475 | -0,595 |
| 12 | O95793 STAU1_HUMAN  | K.VTFFEPGSGDENGTSNKEDE.F   |       | 3 | 3,3222 | 0,321 | 0      |
| 12 | Q13596 SNX1_HUMAN   | R.AVGTQTLGAGLLK.M          |       | 2 | 3,3191 | 0,419 | -0,093 |
| 12 | O95793 STAU1_HUMAN  | R.ILQNEPLPERLE.V           |       | 2 | 3,3191 | 0,268 | -0,42  |
| 12 | P15531 NDKA_HUMAN   | K.FM*QASEDLLKE.H           |       | 2 | 3,3186 | 0,367 | 0,092  |
| 12 | P05412 JUN_HUMAN    | K.NSDLLTSPDVGLLK.L         |       | 2 | 3,3182 | 0,326 | -0,414 |
| 12 | P60842 IF4A1_HUMAN  | K.ATQALVLAPTRE.L           |       | 2 | 3,3155 | 0,307 | 0,192  |
| 12 | O14617 AP3D1_HUMAN  | R.ALDIDLKPLAD.S            |       | 2 | 3,315  | 0,44  | 0      |
| 12 | Q9H9B1 EHMT1_HUMAN  | E.DSYLFDLDNKDGE.V          |       | 2 | 3,3135 | 0,295 | -0,319 |
| 12 | Q8WVM8 SCFD1_HUMAN  | E.DDM*FVLCNQNKE.L          |       | 2 | 3,3132 | 0,392 | -0,319 |
| 12 | A8K0Z3 WASH1_HUMAN  | E.YGSIFTGAQDPGLQR.R        |       | 2 | 3,3121 | 0,44  | -0,227 |
| 12 | Q969V6 MKL1_HUMAN   | E.AIIVGQVNYPK.V            |       | 2 | 3,3118 | 0,435 | -0,507 |
| 12 | P00505 AATM_HUMAN   | R.IAAAILNTPDLR.K           |       | 2 | 3,3111 | 0,439 | -0,096 |
| 12 | P49841 GSK3B_HUMAN  | R.IQAAASTPTNATAASDANTGDR.G |       | 3 | 3,3101 | 0,416 | -0,087 |

|    |                     |                             |        |   |        |       |        |
|----|---------------------|-----------------------------|--------|---|--------|-------|--------|
| 12 | Q9NPJ3 THEM2_HUMAN  | K.TLAFTSVDLTNK.A            |        | 2 | 3,3095 | 0,445 | 0,186  |
| 12 | Q9UL54 TAOK2_HUMAN  | K.AGNILLSEPLVK.L            |        | 2 | 3,3092 | 0,297 | -0,279 |
| 12 | Q9H4L4 SENP3_HUMAN  | K.SGGGFGPDPGSGTTVPAR.R      |        | 2 | 3,3074 | 0,537 | 0,226  |
| 12 | Q9H7N4 SFR19_HUMAN  | R.VFVVGTEAEACRE.G           |        | 2 | 3,3073 | 0,274 | 0,499  |
| 12 | P84077 ARF1_HUMAN   | R.DAVLLVFANK.Q              |        | 2 | 3,3069 | 0,375 | -0,336 |
| 12 | P14618 KPYM_HUMAN   | D.VDM*VFASFIR.K             |        | 2 | 3,3062 | 0,451 | 0      |
| 12 | Q7Z4Q2 HEAT3_HUMAN  | K.TFVSDLLPPTDKE.L           |        | 2 | 3,3059 | 0,427 | -0,167 |
| 12 | P09525 ANXA4_HUMAN  | E.DAIISVLAYR.N              |        | 2 | 3,3054 | 0,503 | 0,327  |
| 12 | Q16181 SEPT7_HUMAN  | K.DRLPLAVVGSNTIIE.V         |        | 2 | 3,3041 | 0,454 | -0,306 |
| 12 | P24534 EF1B_HUMAN   | K.SSILLDVKPWDDE.T           |        | 2 | 3,3036 | 0,363 | -0,322 |
| 12 | Q9UMZ2 SYNG_HUMAN   | E.LACGVCLLNVDNR.S           |        | 2 | 3,3007 | 0,423 | -0,578 |
| 12 | O60506 HNRPQ_HUMAN  | E.DGALAVLQQFKDSD.L          |        | 2 | 3,2998 | 0,443 | -0,243 |
| 12 | Q05524 ENO1B_HUMAN  | R.YISPDQLADLYK.G            |        | 2 | 3,2994 | 0,472 | -0,086 |
| 12 | P02538 K2C6A_HUMAN  | R.AIGGGLSSVGGGSSSTIK.Y      |        | 2 | 3,2992 | 0,384 | 0,084  |
| 12 | A1L020 MEX3A_HUMAN  | E.NDFLAGSPDAAIDSR.Y         |        | 2 | 3,2975 | 0,409 | -0,158 |
| 12 | Q9Y2W2 WBP11_HUMAN  | K.VGFALDLPPR.R              |        | 2 | 3,2972 | 0,417 | -0,112 |
| 12 | Q15477 SKIV2_HUMAN  | R.GDTVSAASPCAPLAR.A         |        | 2 | 3,2968 | 0,543 | -0,41  |
| 12 | Q99832 TCPH_HUMAN   | K.LPIGDVATQYFADR.D          |        | 3 | 3,2937 | 0,205 | 0,35   |
| 12 | Q96GQ7 DDX27_HUMAN  | R.SADFNPDFVFTEKE.G          |        | 3 | 3,293  | 0,324 | 0,445  |
| 12 | Q9UQ35 SRRM2_HUMAN  | R.TAAALAPASLTSAR.M          |        | 2 | 3,2898 | 0,539 | 0      |
| 12 | P29317 EPHA2_HUMAN  | E.DACQACSPGFFKFE.A          |        | 2 | 3,2893 | 0,394 | -0,293 |
| 12 | Q641Q2 FA21A_HUMAN  | K.DNDPDVDFLAGTK.K           |        | 2 | 3,2884 | 0,382 | -0,26  |
| 12 | Q6ZQU7 Q6ZQU7_HUMAN | R.SPDQPPPCQFM*AQGK.T        |        | 2 | 3,2865 | 0,309 | -0,203 |
| 12 | P09211 GSTP1_HUMAN  | D.AFPLLSAYVGR.L             |        | 2 | 3,2857 | 0,429 | -0,204 |
| 12 | Q8TCG1 K1524_HUMAN  | K.DLQITCDLTK.Q              |        | 2 | 3,2857 | 0,373 | 0,187  |
| 12 | O95394 AGM1_HUMAN   | K.STIGVM*VTAS#HNPEEDNGVK.L  | S64:   | 3 | 3,2855 | 0,42  | 0,168  |
| 12 | Q9BSC4 NOL10_HUMAN  | E.DQQTVLKQFYI.I             |        | 2 | 3,2842 | 0,318 | -0,245 |
| 12 | Q99439 CNN2_HUMAN   | E.GLTGLSIGPDFQK.G           |        | 2 | 3,2828 | 0,423 | 0,275  |
| 12 | O95208 EPN2_HUMAN   | R.M*AQVATGM*GSNQITFGR.G     |        | 3 | 3,2801 | 0,416 | 0,609  |
| 12 | Q13428 TCOF_HUMAN   | K.LDSS#PSVSSTLAAKDDPDGKQE.A | S1228: | 3 | 3,2798 | 0,411 | 0,236  |
| 12 | Q9H3P7 GCP60_HUMAN  | E.VVVAGSSLPTSSK.V           |        | 2 | 3,2795 | 0,501 | 0,297  |
| 12 | Q9H4B0 OSGP2_HUMAN  | K.NCDFSFGLQHVTD.K           |        | 2 | 3,2795 | 0,442 | -0,223 |
| 12 | Q9BRS8 LARP6_HUMAN  | K.M*QTADGLPVGVLR.L          |        | 2 | 3,2783 | 0,436 | 0      |

|    |                     |                              |       |   |        |       |        |
|----|---------------------|------------------------------|-------|---|--------|-------|--------|
| 12 | Q9UGU0 TCF20_HUMAN  | K.DM*PLSSDGNPKVNE.K          |       | 2 | 3,277  | 0,258 | 0      |
| 12 | Q96EP5 DAZP1_HUMAN  | K.IFVGGIPHNCGETE.L           |       | 2 | 3,2756 | 0,436 | -0,08  |
| 12 | Q13425 SNTB2_HUMAN  | R.LGDAILYVNGTDLR.Q           |       | 2 | 3,2751 | 0,457 | -0,422 |
| 12 | Q9ULJ3 ZN295_HUMAN  | R.VTVGDAATTAASSSSVTR.D       |       | 3 | 3,2714 | 0,239 | -0,418 |
| 12 | P50991 TCPD_HUMAN   | K.VIDPATATSVDLR.D            |       | 2 | 3,2712 | 0,474 | -0,449 |
| 12 | P68104 EF1A1_HUMAN  | K.IGGIGTVPVGRVE.T            |       | 2 | 3,2705 | 0,497 | 0      |
| 12 | Q8IY81 RRMJ3_HUMAN  | E.GLALGAVIASSK.K             |       | 2 | 3,2689 | 0,548 | 0,112  |
| 12 | Q8IXM2 CQ049_HUMAN  | K.KVASGVLSPPPAAPPPSSSSVPE.A  |       | 2 | 3,2678 | 0,386 | 0,226  |
| 12 | O15321 TM9S1_HUMAN  | K.SLSLGEVLGDGRM*AE.S         |       | 2 | 3,2676 | 0,513 | -0,531 |
| 12 | O75362 ZN217_HUMAN  | E.DALLTADSAQTK.N             |       | 2 | 3,2658 | 0,528 | 0      |
| 12 | P68371 TBB2C_HUMAN  | R.IM*NTFSVVPSPK.V            |       | 2 | 3,2654 | 0,307 | 0,183  |
| 12 | P42574 CASP3_HUMAN  | R.SSFVCVLLSHGEE.G            |       | 2 | 3,2614 | 0,443 | -0,167 |
| 12 | P18206 VINC_HUMAN   | K.AGEVINQPM*M*M*AAR.Q        |       | 2 | 3,261  | 0,301 | 0,078  |
| 12 | O60216 RAD21_HUMAN  | K.GGEADNLDEFLE.F             |       | 2 | 3,2609 | 0,1   | -0,255 |
| 12 | P20810 ICAL_HUMAN   | E.VVSQTPASTTQAGAPPR.D        |       | 2 | 3,2605 | 0,557 | -0,146 |
| 12 | P05787 K2C8_HUMAN   | R.LEGLTDEINFLR.Q             |       | 2 | 3,2589 | 0,497 | -0,859 |
| 12 | Q08J23 NSUN2_HUMAN  | K.ILLTQENPFFR.K              |       | 2 | 3,2574 | 0,346 | 0,089  |
| 12 | P49327 FAS_HUMAN    | E.TM*STNDTIVSGTLPQR.M        |       | 2 | 3,2566 | 0,325 | 0      |
| 12 | Q9H8W4 PKHF2_HUMAN  | D.LLSAGDM*ATCQPAR.S          |       | 2 | 3,2554 | 0,39  | -0,081 |
| 12 | Q9BTA9 WAC_HUMAN    | R.STCSLTPALAAHFSE.N          |       | 2 | 3,2554 | 0,535 | -0,153 |
| 12 | A9CQZ4 A9CQZ4_HUMAN | K.AAEDEEVPAFFK.N             |       | 2 | 3,2551 | 0,479 | -0,18  |
| 12 | Q92615 LARP5_HUMAN  | R.LSSLIGPSKE.R               |       | 2 | 3,2551 | 0,23  | 0,427  |
| 12 | Q8N573 OXR1_HUMAN   | E.DQIADNFQGISGPK.E           |       | 2 | 3,2549 | 0,236 | -1,556 |
| 12 | Q10713 MPPA_HUMAN   | R.DTTM*YAVSADSK.G            |       | 2 | 3,2543 | 0,542 | 0,468  |
| 12 | Q12888 TP53B_HUMAN  | R.VDVSCEPLEGVEK.C            |       | 2 | 3,2534 | 0,388 | -0,418 |
| 12 | Q9UPP1 PHF8_HUMAN   | K.LGNGSGAGGILDLLK.A          |       | 2 | 3,252  | 0,482 | -0,44  |
| 12 | Q99832 TCPH_HUMAN   | K.LPIGDVATQYFADR.D           |       | 2 | 3,2518 | 0,511 | 0,156  |
| 12 | Q96D71 REPS1_HUMAN  | R.TGSDHTNPTS#PLLVKPSDLLE.E   | S430: | 3 | 3,2511 | 0,176 | -0,239 |
| 12 | P15170 ERF3A_HUMAN  | E.ISEAEPGGGS#LGDGRPPEESAHE.M | S36:  | 2 | 3,2493 | 0,434 | 0,724  |
| 12 | Q5VZL5 ZMYM4_HUMAN  | R.SDPLGSTQDHALSQE.S          |       | 2 | 3,249  | 0,481 | -0,385 |
| 12 | Q5JTH9 RRP12_HUMAN  | E.GGGDEPLNFLDPK.V            |       | 2 | 3,248  | 0,267 | -0,18  |
| 12 | Q71RC2 LARP4_HUMAN  | K.DGLNQTTIPVS#PPSTTKPSR.A    | S583: | 3 | 3,2467 | 0,289 | 0      |
| 12 | Q9ULU4 PKCB1_HUMAN  | K.TSTTGSILNINLDR.S           |       | 2 | 3,2456 | 0,295 | -0,243 |

|    |                     |                             |       |   |        |       |        |
|----|---------------------|-----------------------------|-------|---|--------|-------|--------|
| 12 | Q04637 IF4G1_HUMAN  | E.AVGDLLDAFKE.A             |       | 2 | 3,2454 | 0,345 | -0,104 |
| 12 | P49790 NU153_HUMAN  | K.VQM*TSPSSTGSPM*FK.F       |       | 2 | 3,2446 | 0,456 | 0,226  |
| 12 | O75122 CLAP2_HUMAN  | R.VLTTTALSTVSSGVQR.V        |       | 2 | 3,2433 | 0,443 | 0      |
| 12 | Q09666 AHNK_HUMAN   | R.VTAYTVDVTGR.E             |       | 2 | 3,2429 | 0,481 | 0,206  |
| 12 | Q9NP73 ALG13_HUMAN  | K.ADLVISHAGAGSCLE.T         |       | 2 | 3,2408 | 0,463 | -0,813 |
| 12 | P46531 NOTC1_HUMAN  | E.INVDDCNPPVDPVSR.S         |       | 2 | 3,2406 | 0,323 | -0,863 |
| 12 | P08238 HS90B_HUMAN  | R.TLTLVDTGIGM*TK.A          |       | 2 | 3,2399 | 0,451 | -0,179 |
| 12 | Q8NFG4 FLCN_HUMAN   | E.GAPTEDTLVQM*EK.L          |       | 2 | 3,2398 | 0,319 | 0,34   |
| 12 | Q49A26 NP60_HUMAN   | K.ALDQSDNDM*SAVYR.A         |       | 2 | 3,2395 | 0,41  | -0,152 |
| 12 | O60506 HNRPQ_HUMAN  | E.NFQTLLDAGLPQK.V           |       | 2 | 3,2353 | 0,378 | -0,253 |
| 12 | Q9NRR5 UBQL4_HUMAN  | K.AQQDQLVLIFAGK.I           |       | 2 | 3,2327 | 0,45  | -0,597 |
| 12 | P23229 ITA6_HUMAN   | E.DGPYEVGGETEHEDE.S         |       | 2 | 3,2317 | 0,445 | -0,239 |
| 12 | P46087 NOL1_HUMAN   | K.GISAGAVQTAGK.K            |       | 2 | 3,2313 | 0,5   | 0      |
| 12 | P02545 LMNA_HUMAN   | R.TALINSTGEEVAM*R.K         |       | 2 | 3,2311 | 0,494 | 0,162  |
| 12 | Q6UX04 SDC10_HUMAN  | E.DQTLALLNQFK.S             |       | 2 | 3,2302 | 0,35  | -0,378 |
| 12 | P20700 LMNB1_HUMAN  | E.GDLEDLKDQIAQLE.A          |       | 2 | 3,2286 | 0,138 | -0,923 |
| 12 | Q09666 AHNK_HUMAN   | K.TVIRLPS#GSGAASPTGSAVDIR.A | S210: | 2 | 3,2285 | 0,425 | -0,111 |
| 12 | Q641Q2 FA21A_HUMAN  | E.DFSPFGSGGGLFSGGK.G        |       | 2 | 3,227  | 0,436 | -0,724 |
| 12 | A8K2S4 A8K2S4_HUMAN | R.FSDQAGPAIPTSNSYSK.K       |       | 2 | 3,2237 | 0,351 | -0,414 |
| 12 | P13667 PDIA4_HUMAN  | K.IDATSASVLASR.F            |       | 2 | 3,2225 | 0,47  | 0,307  |
| 12 | Q9Y450 HBS1L_HUMAN  | R.SLGVTQLAVAVNK.M           |       | 2 | 3,2223 | 0,421 | 0,094  |
| 12 | P08047 SP1_HUMAN    | E.SQPSPLALLAATCSR.I         |       | 2 | 3,2221 | 0,469 | -0,155 |
| 12 | P61158 ARP3_HUMAN   | R.LPACVVDCGTGYTK.L          |       | 2 | 3,2217 | 0,247 | -0,158 |
| 12 | P05787 K2C8_HUMAN   | R.SLDM*DSIIAEVK.A           |       | 2 | 3,2213 | 0,404 | -0,091 |
| 12 | P49770 EI2BB_HUMAN  | R.M*TAAQPSETTVGNM*VR.R      |       | 2 | 3,2207 | 0,533 | -0,283 |
| 12 | Q7KZ17 MARK2_HUMAN  | K.TTPTPSTNSVLSTSTNR.S       |       | 2 | 3,2204 | 0,515 | -0,899 |
| 12 | P40939 ECHA_HUMAN   | K.DTSASAVAVGLK.Q            |       | 2 | 3,2203 | 0,41  | 0,436  |
| 12 | P52907 CAZA1_HUMAN  | R.LLLNNDNLLRE.G             |       | 2 | 3,2185 | 0,316 | 0,368  |
| 12 | Q9H5V8 CDCP1_HUMAN  | K.LATEEPPPRSPPESE.S         |       | 2 | 3,2184 | 0,434 | 0      |
| 12 | P48634 BAT2_HUMAN   | E.ALTTVTVAPAPR.R            |       | 2 | 3,2156 | 0,437 | -0,306 |
| 12 | P42166 LAP2A_HUMAN  | R.SSTPLPTISSAENTR.Q         |       | 2 | 3,2154 | 0,432 | 0,222  |
| 12 | P51946 CCNH_HUMAN   | R.TCLSQLLDIM*K.S            |       | 2 | 3,2153 | 0,316 | -0,365 |
| 12 | Q9Y3B9 RRP15_HUMAN  | R.GVVQLFNAVQK.H             |       | 2 | 3,2143 | 0,381 | -0,101 |

|    |                    |                           |       |   |        |       |        |
|----|--------------------|---------------------------|-------|---|--------|-------|--------|
| 12 | Q6NVY1 HIBCH_HUMAN | K.FLNALTLNM*IR.Q          |       | 2 | 3,2139 | 0,224 | 0,092  |
| 12 | P46777 RL5_HUMAN   | R.YLM*EEDEDAYK.K          |       | 2 | 3,2104 | 0,418 | 0,172  |
| 12 | O75531 BAF_HUMAN   | R.DFVAEPM*GEKPVGSLAGIGE.V |       | 2 | 3,2083 | 0,504 | 0,242  |
| 12 | Q5C9Z4 NOM1_HUMAN  | K.DGSSSVPLSFAR.D          |       | 2 | 3,2075 | 0,423 | 0,2    |
| 12 | O14745 NHERF_HUMAN | E.ALAEAALES#PRPALVR.S     | S280: | 3 | 3,2064 | 0,409 | -0,315 |
| 12 | P04406 G3P_HUMAN   | R.GALQNIIPASTGAAK.A       |       | 2 | 3,2058 | 0,362 | -0,432 |
| 12 | Q9UJZ1 STML2_HUMAN | E.YAVTQLAQTTM*R.S         |       | 2 | 3,2044 | 0,467 | 0,174  |
| 12 | Q13442 HAP28_HUMAN | K.GVEGLIDIENPNR.V         |       | 2 | 3,2038 | 0,372 | 0,086  |
| 12 | Q70E73 RAPH1_HUMAN | K.SSLSVQPGFLADLNR.T       |       | 2 | 3,2025 | 0,348 | -0,228 |
| 12 | P22626 ROA2_HUMAN  | K.LFVGGIKEDTEE.H          |       | 2 | 3,2021 | 0,369 | -0,091 |
| 12 | Q9Y2D5 AKAP2_HUMAN | K.TIEEQLDEEHLE.S          |       | 2 | 3,2016 | 0,376 | -0,657 |
| 12 | P31946 1433B_HUMAN | E.LLDKYLIPNATQPE.S        |       | 2 | 3,2004 | 0,299 | -0,151 |
| 12 | Q9BRK5 CAB45_HUMAN | K.DLGGFDEDAEPR.R          |       | 2 | 3,1999 | 0,39  | 0,185  |
| 12 | O15042 SR140_HUMAN | E.SLCDS#PHQNLRSRPLLE.N    | S67:  | 2 | 3,1986 | 0,428 | -0,251 |
| 12 | Q8N108 MIER1_HUMAN | E.LLSLYGYGSTVR.L          |       | 2 | 3,1978 | 0,479 | -1,469 |
| 12 | Q9P260 K1468_HUMAN | R.AGSISTLDSLDFAR.Y        |       | 2 | 3,1978 | 0,431 | -0,336 |
| 12 | Q14320 FA50A_HUMAN | K.SGPLFNFDVHDD.V          |       | 2 | 3,1925 | 0,405 | -0,269 |
| 12 | O75821 EIF3G_HUMAN | E.DLNCQEEEDPM*NK.L        |       | 2 | 3,1924 | 0,291 | -0,074 |
| 12 | Q58FF8 H90B2_HUMAN | K.ADLINNLGTIAK.F          |       | 2 | 3,1901 | 0,477 | 0      |
| 12 | P05387 RLA2_HUMAN  | K.ILDSVGIEADDDR.L         |       | 2 | 3,19   | 0,41  | -0,172 |
| 12 | Q99733 NP1L4_HUMAN | K.YAALYQPLFDK.R           |       | 2 | 3,1891 | 0,266 | -0,643 |
| 12 | Q5TAQ9 WD42A_HUMAN | E.ASDLSLSLTGDDGGPNR.T     |       | 3 | 3,1873 | 0,205 | -0,437 |
| 12 | P04049 RAF1_HUMAN  | R.STS#TPNVHM*VSTTLPVDSR.M | S259: | 3 | 3,1869 | 0,357 | 0,172  |
| 12 | Q96A65 EXOC4_HUMAN | K.DPSGLLISVIR.T           |       | 2 | 3,1836 | 0,322 | -0,313 |
| 12 | Q13151 ROA0_HUMAN  | K.LFVGGLKGDVAE.G          |       | 2 | 3,1828 | 0,313 | 0,607  |
| 12 | Q71U36 TBA1A_HUMAN | K.DVNAAIATIK.T            |       | 2 | 3,1826 | 0,379 | 0,18   |
| 12 | Q13242 SFRS9_HUMAN | R.IYVGNLPTDVRE.K          |       | 2 | 3,1822 | 0,432 | -0,089 |
| 12 | P55072 TERA_HUMAN  | R.GILLYGPPGTGK.T          |       | 2 | 3,182  | 0,488 | 0,104  |
| 12 | Q9Y3S1 WNK2_HUMAN  | K.QASLPVSGSVAGDFVK.K      |       | 2 | 3,1802 | 0,428 | -0,234 |
| 12 | P09211 GSTP1_HUMAN | D.LTLYQSNTILR.H           |       | 2 | 3,1787 | 0,27  | -0,461 |
| 12 | Q14004 CD2L5_HUMAN | K.INLPAGILATGEK.Q         |       | 2 | 3,1773 | 0,385 | -0,47  |
| 12 | Q16881 TRXR1_HUMAN | K.QLDSTIGIHPVCAE.V        |       | 2 | 3,1768 | 0,413 | -0,158 |
| 12 | Q15185 TEBP_HUMAN  | K.LTFSCGGSDNFK.H          |       | 2 | 3,176  | 0,467 | -0,422 |

|    |                    |                           |          |   |        |       |        |
|----|--------------------|---------------------------|----------|---|--------|-------|--------|
| 12 | Q9NZW5 MPP6_HUMAN  | R.AGEPLGVTRVE.N           |          | 2 | 3,1742 | 0,383 | 0,383  |
| 12 | Q96C92 SDCG3_HUMAN | R.TLQISYDALKDE.N          |          | 2 | 3,1736 | 0,361 | -0,175 |
| 12 | Q96EY7 PTCD3_HUMAN | K.VAVLQALASTVNR.D         |          | 2 | 3,1725 | 0,479 | -0,727 |
| 12 | P30291 WEE1_HUMAN  | R.RRS#PGPAPGS#PGELEE.D    | S78:S85: | 2 | 3,1723 | 0,334 | -0,272 |
| 12 | P27707 DCK_HUMAN   | K.NGGNVLQM*M*YEKPE.R      |          | 2 | 3,1713 | 0,28  | -0,743 |
| 12 | Q10713 MPPA_HUMAN  | R.GKPAVAALGDLTDLPTYE.H    |          | 2 | 3,1709 | 0,432 | -0,267 |
| 12 | P55072 TERA_HUMAN  | E.EAEKNAPAIIFIDE.L        |          | 2 | 3,1703 | 0,286 | -0,86  |
| 12 | O43572 AKA10_HUMAN | E.DSGSAQLFM*THSE.G        |          | 2 | 3,1693 | 0,319 | -0,599 |
| 12 | O43847 NRDC_HUMAN  | K.YPDENGFDALFK.K          |          | 2 | 3,1688 | 0,322 | -0,345 |
| 12 | O75164 JHD3A_HUMAN | E.AAALDSLVPASVGGGR.L      |          | 2 | 3,1676 | 0,373 | -0,163 |
| 12 | P04632 CPNS1_HUMAN | R.SM*VAVM*DSDTTGK.L       |          | 2 | 3,1665 | 0,359 | -0,444 |
| 12 | P19338 NUCL_HUMAN  | E.DEDEIEPAAM*K.A          |          | 2 | 3,1663 | 0,365 | -0,097 |
| 12 | Q6S8J3 A26CA_HUMAN | E.KSYELPDGQVITIGNE.R      |          | 3 | 3,1662 | 0,155 | 0,104  |
| 12 | Q9UKL0 RCOR1_HUMAN | R.DFQAISDVIGNK.S          |          | 2 | 3,1648 | 0,374 | 0,093  |
| 12 | Q14562 DHX8_HUMAN  | E.IELVEEPPFLR.G           |          | 2 | 3,1634 | 0,344 | -0,581 |
| 12 | Q8WVT3 TTC15_HUMAN | R.APPASGDGFEPQM*VK.S      |          | 2 | 3,1633 | 0,418 | -0,237 |
| 12 | O60271 JIP4_HUMAN  | R.DGGSVVGASVFYK.D         |          | 2 | 3,1621 | 0,363 | 0,285  |
| 12 | Q14980 NUMA1_HUMAN | E.SSLDSLGDVFLDSGR.K       |          | 2 | 3,1614 | 0,514 | -0,389 |
| 12 | O00425 IF2B3_HUMAN | R.DQTPDENDQVVVK.I         |          | 2 | 3,1596 | 0,257 | 0,082  |
| 12 | P11216 PYGB_HUMAN  | K.QAVDQISSGFFSPK.E        |          | 2 | 3,159  | 0,407 | 0      |
| 12 | Q9UMS4 PRP19_HUMAN | E.NGYLATAADDSSVK.L        |          | 2 | 3,1587 | 0,389 | -0,077 |
| 12 | P23193 TCEA1_HUMAN | K.LLDGPSTEKDLDE.K         |          | 2 | 3,1575 | 0,308 | -0,17  |
| 12 | O60763 USO1_HUMAN  | D.LLVLLADQDQK.I           |          | 2 | 3,1573 | 0,399 | -0,583 |
| 12 | Q53F19 CQ085_HUMAN | K.AGSFITGIDVTSKE.A        |          | 2 | 3,1545 | 0,33  | 1,284  |
| 12 | P42704 LPPRC_HUMAN | K.LQDAINILKE.M            |          | 2 | 3,1532 | 0,323 | 0,211  |
| 12 | Q8IWZ8 SF04_HUMAN  | K.ASSTGSFTAPDPLK.R        |          | 2 | 3,1529 | 0,347 | 0      |
| 12 | Q92820 GGH_HUMAN   | K.SINGILFPGGSVDLR.R       |          | 2 | 3,1516 | 0,417 | -0,553 |
| 12 | O75781 PALM_HUMAN  | E.NAAAPS#PVRAPAPSPAKE.E   | S116:    | 2 | 3,1466 | 0,378 | -0,202 |
| 12 | Q15398 DLG7_HUMAN  | K.DFM*FQPLDGLK.T          |          | 2 | 3,1464 | 0,387 | -0,46  |
| 12 | Q5VT52 K0460_HUMAN | K.ISSILSSLTSVM*K.N        |          | 2 | 3,1458 | 0,391 | 0      |
| 12 | Q14203 DCTN1_HUMAN | E.DGADTTSPETPDSSASK.V     |          | 2 | 3,1455 | 0,469 | -0,22  |
| 12 | P20042 IF2B_HUMAN  | K.IFDIDEAEEGVK.D          |          | 2 | 3,145  | 0,314 | -1,341 |
| 12 | Q6WCQ1 MRIP_HUMAN  | E.ALGEKS#PDSATVSGYDIM*K.S | S976:    | 3 | 3,1449 | 0,231 | 0,354  |

|    |                    |                          |       |   |        |       |        |
|----|--------------------|--------------------------|-------|---|--------|-------|--------|
| 12 | P05543 THBG_HUMAN  | K.NALALFVLPK.E           |       | 2 | 3,1431 | 0,453 | -0,225 |
| 12 | Q9H5Y7 SLIK6_HUMAN | K.VLSPSGLLIHCQE.R        |       | 2 | 3,143  | 0,356 | -0,084 |
| 12 | P27635 RL10_HUMAN  | K.VDEFPLCGHM*VSDE.Y      |       | 2 | 3,1411 | 0,309 | -0,296 |
| 12 | P24928 RPB1_HUMAN  | K.YSPTSPTYSPK.Y          |       | 2 | 3,141  | 0,465 | -0,323 |
| 12 | Q86VX9 MON1A_HUMAN | R.SSECLDGLTLPDGDQSM*ER.A |       | 2 | 3,1405 | 0,527 | -0,468 |
| 12 | P25098 ARBK1_HUMAN | R.ISDLGLACDFSK.K         |       | 2 | 3,1388 | 0,385 | 0,184  |
| 12 | Q13620 CUL4B_HUMAN | E.DFDSTSSSSTPPLQPR.D     |       | 2 | 3,1381 | 0,343 | -0,472 |
| 12 | P50990 TCPQ_HUMAN  | E.VGDTQVVVFK.H           |       | 2 | 3,138  | 0,429 | 0,894  |
| 12 | Q02127 PYRD_HUMAN  | K.LTEDGLPLGVNLGK.N       |       | 2 | 3,1359 | 0,483 | -0,342 |
| 12 | Q08209 PP2BA_HUMAN | R.DAM*PSDANLNSINK.A      |       | 2 | 3,1359 | 0,416 | -0,081 |
| 12 | P62857 RS28_HUMAN  | R.EGDVLTLESER.E          |       | 2 | 3,1347 | 0,468 | -0,359 |
| 12 | O14640 DVL1_HUMAN  | K.AYTVVGGPPGPPVRE.L      |       | 2 | 3,1346 | 0,205 | -0,236 |
| 12 | P21333 FLNA_HUMAN  | R.IANLQTDLSGGLR.L        |       | 2 | 3,1342 | 0,461 | 0,258  |
| 12 | Q9C0C2 TB182_HUMAN | R.SLPSDLAFNGDLAK.A       |       | 2 | 3,1322 | 0,563 | -0,337 |
| 12 | P27695 APEX1_HUMAN | K.GAVAEDGDELRTPE.A       |       | 2 | 3,1308 | 0,382 | -0,077 |
| 12 | P18031 PTN1_HUMAN  | E.DNDYINASLIK.M          |       | 2 | 3,1305 | 0,379 | 0,193  |
| 12 | P09622 DLDH_HUMAN  | E.TLGGTCLNVGCIPSK.A      |       | 2 | 3,13   | 0,474 | -0,155 |
| 12 | Q14444 CAPR1_HUMAN | E.LQYVLDKLGDDDE.V        |       | 2 | 3,1294 | 0,389 | 0      |
| 12 | P17174 AATC_HUMAN  | R.LALGDDSPALKE.K         |       | 2 | 3,1287 | 0,4   | 0,199  |
| 12 | Q8IZD4 DCP1B_HUMAN | E.FFTGPVQPGS#PHNIGTSR.G  | S337: | 3 | 3,1273 | 0,22  | 0,832  |
| 12 | P62266 RS23_HUMAN  | K.VANVLLALYK.G           |       | 2 | 3,1258 | 0,499 | -0,307 |
| 12 | Q13464 ROCK1_HUMAN | K.NSLTFPDDNDISKE.A       |       | 2 | 3,1249 | 0,401 | -0,612 |
| 12 | P48730 KC1D_HUMAN  | R.GAPVNISSDLTGR.Q        |       | 2 | 3,124  | 0,306 | 0,178  |
| 12 | P20810 ICAL_HUMAN  | E.VVSQTPASTTQAGAPPR.D    |       | 3 | 3,1234 | 0,313 | -0,329 |
| 12 | Q5T5Y3 CAMP1_HUMAN | R.ADVVPQQADPEFPRAS#PR.A  | S563: | 2 | 3,123  | 0,426 | 0,474  |
| 12 | Q86W56 PARG_HUMAN  | E.SPLSDVGSSEVGTGPK.N     |       | 2 | 3,1227 | 0,403 | -0,237 |
| 12 | Q15427 SF3B4_HUMAN | E.FLSEEDADYAIK.I         |       | 2 | 3,1224 | 0,403 | -0,348 |
| 12 | Q15418 KS6A1_HUMAN | K.NLVFSDGYVVKE.T         |       | 2 | 3,1224 | 0,355 | -0,178 |
| 12 | Q9HAV4 XPO5_HUMAN  | R.LIAGCIGKPLGE.Q         |       | 2 | 3,122  | 0,369 | -0,099 |
| 12 | P13010 KU86_HUMAN  | R.YGSDIVPFSKVDEE.Q       |       | 2 | 3,1203 | 0,261 | -0,539 |
| 12 | P18206 VINC_HUMAN  | R.DPSASPGDAGEQAIR.Q      |       | 3 | 3,1201 | 0,185 | 0,373  |
| 12 | P78371 TCPB_HUMAN  | R.QDLM*NIAGTTLSSK.L      |       | 2 | 3,12   | 0,426 | 0,49   |
| 12 | P40926 MDHM_HUMAN  | K.GCDVVVIPAGVPR.K        |       | 2 | 3,1198 | 0,386 | 0,091  |

|    |                     |                              |        |   |        |       |        |
|----|---------------------|------------------------------|--------|---|--------|-------|--------|
| 12 | Q14980 NUMA1_HUMAN  | R.LDFVCSFLQK.N               |        | 2 | 3,1196 | 0,388 | -0,194 |
| 12 | P04406 G3P_HUMAN    | R.VPTANVSVDLTCR.L            |        | 2 | 3,1195 | 0,474 | 0,08   |
| 12 | P26640 SYVC_HUMAN   | E.FVDM*DFGTGAVK.I            |        | 2 | 3,1193 | 0,337 | -0,094 |
| 12 | P35568 IRS1_HUMAN   | E.NGLNYIDLVLK.D              |        | 2 | 3,1193 | 0,322 | -0,975 |
| 12 | Q15149 PLEC1_HUMAN  | E.AQAATGFLVDPVR.N            |        | 2 | 3,1182 | 0,42  | 0,181  |
| 12 | Q9NY61 AATF_HUMAN   | E.ELLFQYPDTR.Y               |        | 2 | 3,1182 | 0,218 | 0,095  |
| 12 | Q05D32 CTSL2_HUMAN  | R.DIDNNLITSTPR.A             |        | 2 | 3,1179 | 0,43  | 0,09   |
| 12 | Q9Y315 DEOC_HUMAN   | K.GITTAAVCVYPAR.V            |        | 2 | 3,1171 | 0,265 | -0,177 |
| 12 | Q8NBF6 K0241_HUMAN  | K.TEEPLFQVEDSSK.G            |        | 2 | 3,1163 | 0,438 | -0,404 |
| 12 | P08758 ANXA5_HUMAN  | K.NFATSLYSM*K.G              |        | 2 | 3,1138 | 0,429 | -0,189 |
| 12 | P51531 SMCA2_HUMAN  | E.DSIVLQSVFK.S               |        | 2 | 3,1137 | 0,353 | -0,215 |
| 12 | Q9BSJ8 ESYT1_HUMAN  | R.QLLDDEEQLTAK.T             |        | 2 | 3,1132 | 0,422 | -0,783 |
| 12 | P29375 JAD1A_HUMAN  | E.VLSTDTQTSPEPGTR.M          |        | 2 | 3,1131 | 0,464 | -0,154 |
| 12 | P05387 RLA2_HUMAN   | K.NIEDVIAQGIGK.L             |        | 3 | 3,1125 | 0,156 | 0,8    |
| 12 | P49750 YLPM1_HUMAN  | E.DYLQLPDDYDTR.A             |        | 2 | 3,1119 | 0,26  | -0,403 |
| 12 | P19174 PLCG1_HUMAN  | K.NGILYLEDPVNHE.W            |        | 2 | 3,1105 | 0,309 | -0,242 |
| 12 | Q6PD54 Q6PD54_HUMAN | K.AAGSPSSDQDEKLPQDE.S        |        | 2 | 3,1095 | 0,358 | -0,064 |
| 12 | Q12986 NFX1_HUMAN   | K.ITKEPIIDYFDVQD.-           |        | 2 | 3,1088 | 0,386 | -0,576 |
| 12 | Q02952 AKA12_HUMAN  | K.SAVVHDITDDGQEETPE.I        |        | 2 | 3,107  | 0,506 | 0,199  |
| 12 | Q86UP2 KTN1_HUMAN   | E.VIDLKPDQVE.G               |        | 2 | 3,1036 | 0,366 | 0      |
| 12 | Q6WCQ1 MRIP_HUMAN   | K.SPDSATVSGYDIM*K.S          |        | 2 | 3,1036 | 0,345 | -0,41  |
| 12 | P23284 PIIB_HUMAN   | K.DVIIADCGKIE.V              |        | 2 | 3,1026 | 0,227 | 0,198  |
| 12 | P62906 RL10A_HUMAN  | K.FSVCVLGDQQHCDE.A           |        | 2 | 3,1012 | 0,453 | -0,72  |
| 12 | P27695 APEX1_HUMAN  | K.GAVAEDGDELRTPE.A           |        | 3 | 3,1009 | 0,254 | 0,23   |
| 12 | P49588 SYAC_HUMAN   | R.DAAHLVNQDDPNVLE.I          |        | 2 | 3,1    | 0,393 | -0,148 |
| 12 | Q92797 SYMPK_HUMAN  | K.ETAAGGLTLKEERS#PQTLAPVGE.D | S1243: | 2 | 3,0979 | 0,395 | -0,1   |
| 12 | Q9HAW4 CLSPN_HUMAN  | K.SLSSDSTLLLFK.D             |        | 2 | 3,0948 | 0,334 | -0,093 |
| 12 | P33316 DUT_HUMAN    | R.GNVGVVLFNFGK.E             |        | 2 | 3,0919 | 0,537 | 0      |
| 12 | P27695 APEX1_HUMAN  | E.AAGEGPALYEDPPDQK.T         |        | 2 | 3,091  | 0,264 | -0,147 |
| 12 | Q29RF7 PDS5A_HUMAN  | R.IISVT#PVKNIDPVK.N          | T1208: | 2 | 3,0905 | 0,289 | 0,685  |
| 12 | Q2NL82 TSR1_HUMAN   | K.QIDAPGDPFLNPR.G            |        | 2 | 3,0867 | 0,428 | -0,635 |
| 12 | Q9P2R7 SUCB1_HUMAN  | E.DSDGAVLCM*DAK.I            |        | 2 | 3,0862 | 0,375 | 0,376  |
| 12 | P52701 MSH6_HUMAN   | R.QSTLYSFFPKS#PALSDANK.A     | S14:   | 3 | 3,0861 | 0,235 | -0,503 |



|    |                     |                          |   |        |       |        |
|----|---------------------|--------------------------|---|--------|-------|--------|
| 12 | Q499G6 Q499G6_HUMAN | E.M*EVPAEDDDYSPSK.R      | 2 | 3,0854 | 0,158 | -0,36  |
| 12 | O60812 HNRCL_HUMAN  | R.VFIGNLNTLVVK.K         | 2 | 3,0839 | 0,274 | -0,278 |
| 12 | Q16543 CDC37_HUMAN  | K.DVQM*LQDAISK.M         | 2 | 3,0825 | 0,387 | 0,29   |
| 12 | Q9UQE7 SMC3_HUMAN   | K.ALDQFVNFSEQKE.K        | 3 | 3,0819 | 0,188 | 0,353  |
| 12 | P16333 NCK1_HUMAN   | R.LYDLNM*PAYVK.F         | 2 | 3,0811 | 0,395 | -0,454 |
| 12 | O60749 SNX2_HUMAN   | R.AVNTQALSGAGILR.M       | 2 | 3,0798 | 0,27  | -0,712 |
| 12 | Q07021 C1QBP_HUMAN  | K.ALVLDCHYPEDE.V         | 2 | 3,0791 | 0,472 | 0,167  |
| 12 | Q9NTK5 OLA1_HUMAN   | R.AFEDDDITHVE.G          | 2 | 3,0784 | 0,456 | 0,095  |
| 12 | Q9HB71 CYBP_HUMAN   | E.TDPSEGLM*NVLK.K        | 2 | 3,0766 | 0,513 | 0,185  |
| 12 | Q9NR30 DDX21_HUMAN  | R.APQVLVLAPTRE.L         | 2 | 3,0758 | 0,329 | -0,66  |
| 12 | Q13671 RIN1_HUMAN   | R.GPAGGPVLPQLK.A         | 2 | 3,074  | 0,466 | 0,108  |
| 12 | Q5QE6 TDIF2_HUMAN   | K.LTSSSIDPGLSIK.Q        | 2 | 3,0718 | 0,435 | -0,185 |
| 12 | Q5JTV8 TOIP1_HUMAN  | R.SQPAILLLTAAR.D         | 2 | 3,0685 | 0,41  | -0,097 |
| 12 | Q9Y613 FHOD1_HUMAN  | K.SGLGDDLQALGLSK.G       | 2 | 3,0684 | 0,483 | 0,828  |
| 12 | P61158 ARP3_HUMAN   | R.YSYVCPDLVKE.F          | 2 | 3,0682 | 0,278 | -0,089 |
| 12 | Q9POL0 VAPA_HUMAN   | K.GPFTDVVTTNLK.L         | 2 | 3,0672 | 0,393 | 0,189  |
| 12 | P09488 GSTM1_HUMAN  | K.ITQSNAILCYIAR.K        | 2 | 3,0646 | 0,312 | 1,522  |
| 12 | P55196 AFAD_HUMAN   | K.TQVLPDSLFTAK.F         | 2 | 3,0642 | 0,309 | -0,52  |
| 12 | Q9NR09 BIRC6_HUMAN  | E.ADILVDGSLSK.G          | 2 | 3,064  | 0,34  | 0,218  |
| 12 | Q58FF7 H90B3_HUMAN  | R.DNSTM*GYM*M*AK.K       | 2 | 3,0635 | 0,354 | -0,282 |
| 12 | Q14690 RRP5_HUMAN   | K.AINIGQLVDVK.V          | 2 | 3,0633 | 0,413 | -0,209 |
| 12 | O00148 DDX39_HUMAN  | R.ILVATNLFGR.G           | 2 | 3,0627 | 0,44  | -0,332 |
| 12 | Q16204 CCDC6_HUMAN  | K.SGGIVISPFRLKE.L        | 2 | 3,0607 | 0,345 | -0,261 |
| 12 | Q9UMZ2 SYNG_HUMAN   | E.ASPVPLTSNVGSTVK.G      | 2 | 3,0601 | 0,45  | 0,419  |
| 12 | Q14207 NPAT_HUMAN   | K.FLTSDNIAQVPK.Q         | 2 | 3,0598 | 0,37  | -0,675 |
| 12 | Q08211 DHX9_HUMAN   | E.GETVEPYKVNLSQDLE.H     | 2 | 3,0579 | 0,382 | 0,067  |
| 12 | P02545 LMNA_HUMAN   | R.NSNLVGAAHEE.L          | 2 | 3,0576 | 0,409 | 0,107  |
| 12 | Q9NQS1 AVEN_HUMAN   | R.DSQKPTS#PLQSAGDHLEEE.L | 3 | 3,0572 | 0,314 | 0,341  |
| 12 | Q9Y2K5 R3HD2_HUMAN  | K.SASTDLGTADVVLGR.V      | 2 | 3,0569 | 0,435 | -0,668 |
| 12 | P08559 ODPA_HUMAN   | R.VDGM*DILCVRE.A         | 2 | 3,0561 | 0,473 | -0,461 |
| 12 | Q9Y2H0 DLGP4_HUMAN  | R.GGVAPAPEAPEPPPK.H      | 2 | 3,0539 | 0,413 | -0,086 |
| 12 | P20585 MSH3_HUMAN   | K.STLIGEDVNPLIK.L        | 2 | 3,0514 | 0,352 | -0,349 |
| 12 | P13667 PDIA4_HUMAN  | E.GFPTIYFAPSGDK.K        | 2 | 3,0501 | 0,52  | -0,436 |

S273:

|    |                     |                                |          |   |        |       |        |
|----|---------------------|--------------------------------|----------|---|--------|-------|--------|
| 12 | Q15154 PCM1_HUMAN   | R.ALYALQDIVSR.H                |          | 2 | 3,0482 | 0,415 | 1,661  |
| 12 | Q16658 FSCN1_HUMAN  | R.LVARPEPATGYTLE.F             |          | 2 | 3,0474 | 0,402 | -0,08  |
| 12 | P51659 DHB4_HUMAN   | R.VVLVTGAGAGLGR.A              |          | 2 | 3,047  | 0,443 | 0,209  |
| 12 | Q99747 SNAG_HUMAN   | K.LGLSLVPPGGGIK.K              |          | 2 | 3,0453 | 0,389 | -0,101 |
| 12 | P40227 TCPZ_HUMAN   | K.GIDPFSLDALSKE.G              |          | 3 | 3,0447 | 0,147 | 0,328  |
| 12 | Q9BVC5 ASHWN_HUMAN  | R.KLS#NSSSSVSPLILSSNLPVNNKTE.H | S143:    | 3 | 3,0442 | 0,164 | 0,272  |
| 12 | P19623 SPEE_HUMAN   | K.VLIIGGGDGGVLR.V              |          | 2 | 3,0437 | 0,451 | -0,18  |
| 12 | Q92615 LARP5_HUMAN  | R.SPS#PAHLPPDDPKVAE.K          | S601:    | 3 | 3,043  | 0,248 | 0,223  |
| 12 | P07602 SAP_HUMAN    | K.DVVTAAGDM*LK.D               |          | 2 | 3,042  | 0,49  | 0,107  |
| 12 | Q9H3N1 TXND1_HUMAN  | K.DFINFISDKE.W                 |          | 2 | 3,0417 | 0,334 | -0,199 |
| 12 | Q96BU1 S1PBP_HUMAN  | R.VPSEQSSGTSLLPK.D             |          | 2 | 3,0413 | 0,269 | -0,171 |
| 12 | P55036 PSMD4_HUMAN  | R.NAM*GSLASQATK.D              |          | 2 | 3,0408 | 0,399 | 0,204  |
| 12 | P52435 RPB11_HUMAN  | K.DPQVLFAGYK.V                 |          | 2 | 3,0397 | 0,35  | 0,322  |
| 12 | Q12849 GRSF1_HUMAN  | E.DVLNFFSDCR.I                 |          | 2 | 3,0393 | 0,447 | 0      |
| 12 | Q15046 SYK_HUMAN    | R.VAM*FLTDSNNIKE.V             |          | 2 | 3,0392 | 0,147 | -0,814 |
| 12 | P47756 CAPZB_HUMAN  | E.DLLSSVDQPLK.I                |          | 2 | 3,0391 | 0,298 | 0,201  |
| 12 | P54840 GYS2_HUMAN   | K.VGGIYTVIQTK.A                |          | 2 | 3,0364 | 0,332 | 0,207  |
| 12 | Q14980 NUMA1_HUMAN  | R.TTQIINITM*TK.K               |          | 2 | 3,0349 | 0,299 | -0,191 |
| 12 | Q9P219 DAPLE_HUMAN  | R.AFSLASADLLR.A                |          | 2 | 3,0343 | 0,268 | -0,419 |
| 12 | Q9Y490 TLN1_HUMAN   | E.SALQLLYTAKE.A                |          | 2 | 3,0315 | 0,396 | -0,296 |
| 12 | P42704 LPPRC_HUMAN  | K.GAYDIFLNAKE.Q                |          | 2 | 3,0311 | 0,221 | 0      |
| 12 | Q15019 SEPT2_HUMAN  | R.TM*LITHM*QDLQE.V             |          | 2 | 3,0306 | 0,427 | -0,327 |
| 12 | Q9GZR7 DDX24_HUMAN  | E.LTDYQLVSPAK.N                |          | 2 | 3,0303 | 0,338 | 0      |
| 12 | O75607 NPM3_HUMAN   | D.DFQLQPPVTFR.L                |          | 2 | 3,0261 | 0,439 | 0,453  |
| 12 | P61758 PFD3_HUMAN   | E.AVFVEDVDSFM*K.Q              |          | 2 | 3,025  | 0,367 | 0,087  |
| 12 | Q92598 HS105_HUMAN  | E.LNNTCEPVVTQPKPK.I            |          | 3 | 3,0248 | 0,336 | -0,106 |
| 12 | O75592 MYCB2_HUMAN  | K.M*PCLYLQTLAR.H               |          | 2 | 3,0246 | 0,381 | 0,177  |
| 12 | O75140 DEPD5_HUMAN  | E.SSSVAM*TPTYM*DSPR.K          |          | 2 | 3,0239 | 0,402 | 1,028  |
| 12 | Q01813 K6PP_HUMAN   | R.M*LAIYDGFDFGFAK.G            |          | 2 | 3,0239 | 0,415 | -0,25  |
| 12 | P43034 LIS1_HUMAN   | K.LLASCSADM*TIK.L              |          | 2 | 3,0238 | 0,384 | 0,184  |
| 12 | Q9H6D7 CN094_HUMAN  | E.DLLQNPYFSK.L                 |          | 2 | 3,0237 | 0,363 | 0,498  |
| 12 | Q8N1Q3 Q8N1Q3_HUMAN | E.ASSM*VNFPAYSVR.S             |          | 2 | 3,0233 | 0,325 | 0      |
| 12 | P49736 MCM2_HUMAN   | R.RGNDPLTS#S#PGR.S             | S26:S27: | 2 | 3,0204 | 0,23  | 0      |

|    |                    |                         |   |        |       |        |
|----|--------------------|-------------------------|---|--------|-------|--------|
| 12 | Q16513 PKN2_HUMAN  | K.LDFSDTM*VQQK.L        | 2 | 3,0193 | 0,275 | 0,827  |
| 12 | Q8WU76 SCFD2_HUMAN | E.NYNVVAPGCLSQSSDTTAK.A | 2 | 3,0191 | 0,357 | 0,182  |
| 12 | P06744 G6PI_HUMAN  | R.SNTPILVDGKDVM*PE.V    | 2 | 3,0173 | 0,433 | 0      |
| 12 | Q8IZT6 ASPM_HUMAN  | K.DNM*AYM*CTSQQTCK.V    | 2 | 3,0164 | 0,464 | 0,069  |
| 12 | Q9UNS1 TIM_HUMAN   | K.LASSILPNGAESLK.D      | 2 | 3,0162 | 0,282 | -0,349 |
| 12 | O00512 BCL9_HUMAN  | R.STAPLNTQISALR.N       | 2 | 3,0161 | 0,418 | -0,711 |
| 12 | Q6PGN9 PSRC1_HUMAN | R.LSLGPLSPEKLEE.I       | 2 | 3,0138 | 0,351 | -0,173 |
| 12 | Q13435 SF3B2_HUMAN | R.TATVGGAM*M*GSTHIYD.M  | 2 | 3,0125 | 0,537 | 0      |
| 12 | P62750 RL23A_HUMAN | R.LAPDYDALDVANK.I       | 2 | 3,0124 | 0,362 | 0      |
| 12 | Q06830 PRDX1_HUMAN | K.QGGLGPM*NIPLVSDPK.R   | 2 | 3,0103 | 0,343 | -0,372 |
| 12 | Q9NX62 IMPA3_HUMAN | K.VLALLDVPDKSQE.K       | 2 | 3,0102 | 0,412 | -0,94  |
| 12 | P29401 TKT_HUMAN   | R.LGQSDPAPLQHQM*D.I     | 2 | 3,0099 | 0,329 | -0,079 |
| 12 | Q9BS26 TXND4_HUMAN | K.TPADCPVIAIDFR.H       | 2 | 3,0074 | 0,288 | 0,156  |
| 12 | O75581 LRP6_HUMAN  | K.ILISEDLEPR.A          | 2 | 3,0072 | 0,307 | 0,743  |
| 12 | O43149 ZZEF1_HUMAN | E.AAPPATGDQSPGLGTQPK.L  | 2 | 3,0069 | 0,456 | -0,288 |
| 12 | Q9H4A3 WNK1_HUMAN  | E.QAVAGPAPSTVPSSTSK.D   | 2 | 3,0065 | 0,318 | -0,077 |
| 12 | Q86VR2 F134C_HUMAN | R.SPPGAEEPQAPPASR.D     | 2 | 3,0063 | 0,363 | 0,082  |
| 12 | Q92665 RT31_HUMAN  | R.LNIFDM*M*AVTK.E       | 2 | 3,0038 | 0,364 | -0,278 |
| 12 | Q6UXD5 SE6L2_HUMAN | E.LLVLAGGGSPGLAPR.L     | 2 | 3,0037 | 0,306 | -0,089 |
| 12 | Q9BTC0 DIDO1_HUMAN | K.ICTGQVPSAEDEPAPK.K    | 2 | 3,0028 | 0,434 | 0,144  |
| 12 | Q9GZZ1 NAT13_HUMAN | R.LNQVIFPVSYNDF.F       | 2 | 3,0025 | 0,261 | 1,349  |
| 12 | Q86UE4 LYRIC_HUMAN | R.DKVLTDSGSLDSTIPGIE.N  | 2 | 3,0024 | 0,509 | -0,396 |
| 12 | Q02338 BDH_HUMAN   | K.GFLVFAGCLM*K.D        | 2 | 3,0019 | 0,275 | -0,775 |
| 12 | Q92900 RENT1_HUMAN | E.LSQDSYLGDEFK.S        | 2 | 3,0017 | 0,393 | 0      |
| 12 | P40926 MDHM_HUMAN  | K.IFGVTTLDIVR.A         | 2 | 3      | 0,305 | -0,099 |
| 12 | P25685 DNJB1_HUMAN | R.DGSDVIYPAR.I          | 2 | 3      | 0,4   | 0,223  |
| 12 | Q8N350 DOS_HUMAN   | K.ATLAIFQPPGK.A         | 2 | 2,9998 | 0,315 | 0,534  |
| 12 | Q09666 AHNK_HUMAN  | K.AEGPEVDVNLPK.A        | 2 | 2,9988 | 0,405 | 0,192  |
| 12 | Q9Y2U5 M3K2_HUMAN  | E.DLDNTVFGAER.K         | 2 | 2,9986 | 0,454 | 0,493  |
| 12 | O95757 HS74L_HUMAN | K.SIDLPIQSSLCR.Q        | 2 | 2,9973 | 0,295 | 0,439  |
| 12 | Q9H974 QTRD1_HUMAN | R.SLLFLDNCLR.L          | 2 | 2,9968 | 0,393 | 0,683  |
| 12 | P28074 PSB5_HUMAN  | R.ATAGAYIASQTVK.K       | 2 | 2,9963 | 0,403 | -0,19  |
| 12 | Q9Y4L1 HYOU1_HUMAN | E.DEGVGATTVM*LK.E       | 2 | 2,9948 | 0,298 | 0,197  |

|    |                    |                           |   |        |       |        |
|----|--------------------|---------------------------|---|--------|-------|--------|
| 12 | O43379 WDR62_HUMAN | E.GPIVATLAQPLR.R          | 2 | 2,993  | 0,309 | 0      |
| 12 | Q6KC79 NIPBL_HUMAN | E.NDIPFNVQYPGQTSK.T       | 2 | 2,993  | 0,399 | -0,571 |
| 12 | P04406 G3P_HUMAN   | K.QASEGPLKGLGYTE.H        | 2 | 2,9921 | 0,413 | -0,39  |
| 12 | Q8IWE2 NXP20_HUMAN | R.GM*LSAITNVVQNTGK.S      | 3 | 2,9921 | 0,284 | 0,236  |
| 12 | P11717 MPRI_HUMAN  | R.ATLITFLCDR.D            | 2 | 2,992  | 0,46  | -0,101 |
| 12 | O60244 MED14_HUMAN | K.TFLNM*FVDSNQDAR.R       | 2 | 2,9918 | 0,203 | 0,146  |
| 12 | Q14008 CKAP5_HUMAN | K.YSDADIEPFLK.N           | 2 | 2,9914 | 0,339 | 0,188  |
| 12 | Q9P107 GMIP_HUMAN  | E.FLPSLNSSPLDIR.K         | 2 | 2,991  | 0,353 | -0,167 |
| 12 | P46459 NSF_HUMAN   | E.DYASYIM*NGIHK.W         | 2 | 2,9899 | 0,314 | -0,261 |
| 12 | O43390 HNRPR_HUMAN | R.NLATTVTEEILEK.S         | 2 | 2,9899 | 0,354 | -0,668 |
| 12 | Q9H6T3 RPAP3_HUMAN | E.NNPINLANVIAATGTTSK.K    | 3 | 2,9894 | 0,106 | 0,203  |
| 12 | O15231 ZN185_HUMAN | R.GGQGDPAVPAQQPADPSTPER.Q | 3 | 2,9885 | 0,256 | 0,529  |
| 12 | Q99569 PKP4_HUMAN  | R.VGSPLTLTDAQTR.V         | 2 | 2,988  | 0,408 | 0,09   |
| 12 | P56192 SYMC_HUMAN  | K.ITQDIFQQLK.R            | 2 | 2,9865 | 0,361 | -0,362 |
| 12 | P05787 K2C8_HUMAN  | E.LGNM*QGLVEDFK.N         | 2 | 2,9852 | 0,345 | -0,089 |
| 12 | P14923 PLAK_HUMAN  | K.LLNDEDPVVVTK.A          | 2 | 2,9848 | 0,297 | -0,364 |
| 12 | P62241 RS8_HUMAN   | K.NCIVLIDSTPYR.Q          | 2 | 2,9848 | 0,379 | 0      |
| 12 | Q7Z309 F122B_HUMAN | D.LSQVFQPYTLR.T           | 2 | 2,9847 | 0,395 | -0,09  |
| 12 | Q6IBW4 CNDH2_HUMAN | E.GM*SPM*EPAGVSPM*PGTQK.D | 2 | 2,9846 | 0,442 | -0,528 |
| 12 | Q96PE2 ARHG_HUMAN  | E.VIQSIVQGPGTLGR.V        | 2 | 2,9845 | 0,326 | -0,257 |
| 12 | Q08379 GOGA2_HUMAN | R.DNPTAQQIM*QLLRE.M       | 2 | 2,9808 | 0,312 | -0,292 |
| 12 | O14686 MLL2_HUMAN  | R.ISTEELPKM*E.S           | 2 | 2,9789 | 0,444 | 0,102  |
| 12 | Q02952 AKA12_HUMAN | K.LTASEQAHPQEPAE.S        | 2 | 2,9762 | 0,333 | 0      |
| 12 | Q96SB4 SRPK1_HUMAN | K.STAGNFLVNPLEPK.N        | 2 | 2,9761 | 0,26  | -0,328 |
| 12 | O43707 ACTN4_HUMAN | K.M*LDAEDIVNTARPDE.K      | 2 | 2,975  | 0,304 | 0,072  |
| 12 | Q9BYG5 PAR6B_HUMAN | K.SLDQVTDMM*MIANSR.N      | 3 | 2,9737 | 0,261 | 0,227  |
| 12 | Q7L7X3 TAOK1_HUMAN | K.AGNILLTEPGQVK.L         | 2 | 2,9723 | 0,356 | -0,273 |
| 12 | Q32MZ4 LRRF1_HUMAN | R.NM*PGLSAATLASLGGTSSR.R  | 3 | 2,9691 | 0,272 | 0,607  |
| 12 | Q96EV2 RBM33_HUMAN | E.DDLLGEDLLSGK.K          | 2 | 2,9686 | 0,415 | 0,096  |
| 12 | O75064 DEN4B_HUMAN | E.SLQECPGALPVPGPSR.S      | 2 | 2,9678 | 0,4   | 0      |
| 12 | P20810 ICAL_HUMAN  | E.DFSGPQNASSLKFE.D        | 2 | 2,9666 | 0,324 | 0,08   |
| 12 | Q13641 TPBG_HUMAN  | R.DVLAQLPSLR.H            | 2 | 2,966  | 0,377 | -0,219 |
| 12 | Q9NZM1 MYOF_HUMAN  | E.FEGLTDFSDTFK.L          | 2 | 2,9655 | 0,36  | -0,087 |

|    |                     |                           |   |        |       |        |
|----|---------------------|---------------------------|---|--------|-------|--------|
| 12 | Q13045 FLII_HUMAN   | K.ADLTALFLPR.Q            | 2 | 2,9649 | 0,293 | -0,109 |
| 12 | P07195 LDHB_HUMAN   | E.LALVDVLEDK.L            | 2 | 2,9641 | 0,429 | -0,438 |
| 12 | Q68EM7 RHG17_HUMAN  | K.DPVSAAVPAPGR.N          | 2 | 2,9639 | 0,391 | 0,215  |
| 12 | A8K818 A8K818_HUMAN | E.GAEPQAQAALAAPK.K        | 2 | 2,9635 | 0,437 | 0,092  |
| 12 | Q04724 TLE1_HUMAN   | K.DASSSPASTASSASSTSLK.S   | 2 | 2,9625 | 0,525 | 0      |
| 12 | P61956 SUMO2_HUMAN  | K.VAGQDGSVVQFK.I          | 2 | 2,9623 | 0,462 | 0,296  |
| 12 | P33991 MCM4_HUMAN   | R.ALADDDFLVTGK.T          | 2 | 2,9615 | 0,411 | 0,179  |
| 12 | P48681 NEST_HUMAN   | K.VDLEPLKSLDQE.I          | 2 | 2,9598 | 0,287 | -0,264 |
| 12 | Q16630 CPSF6_HUMAN  | K.GAAPNVVYTYTGK.R         | 2 | 2,9597 | 0,612 | -0,182 |
| 12 | P78371 TCPB_HUMAN   | D.LM*NIAGTTLSSK.L         | 2 | 2,9596 | 0,31  | 0,292  |
| 12 | Q01973 ROR1_HUMAN   | E.VVSSTGVLFVK.F           | 2 | 2,9582 | 0,431 | 0,322  |
| 12 | Q13428 TCOF_HUMAN   | R.SPAGPAATPAQAQAASTPR.K   | 3 | 2,9582 | 0,212 | 0,314  |
| 12 | P07954 FUMH_HUMAN   | R.AAAEVNQDYGLDPK.I        | 2 | 2,9568 | 0,171 | 0,409  |
| 12 | Q16822 PPCKM_HUMAN  | R.AIDTTQLFSLPK.D          | 2 | 2,9568 | 0,412 | 0,091  |
| 12 | Q6UN15 FIP1_HUMAN   | K.VKGVLDLAPGSINGVPLLE.V   | 2 | 2,9557 | 0,333 | 0      |
| 12 | Q43815 STRN_HUMAN   | E.VGYTDTILDVK.S           | 2 | 2,952  | 0,437 | -0,199 |
| 12 | Q96J84 KIRR1_HUMAN  | R.FSQEPADQTVVAGQR.A       | 3 | 2,9515 | 0,286 | 0,336  |
| 12 | P10809 CH60_HUMAN   | E.VVVTEIPKEE.K            | 2 | 2,9494 | 0,397 | -0,107 |
| 12 | Q9UBP9 GULP1_HUMAN  | R.ITQVSAPPAGSM*TPK.S      | 2 | 2,9477 | 0,272 | -0,081 |
| 12 | Q9H8W4 PKHF2_HUMAN  | D.LLSAGDM*ATCQPAR.S       | 3 | 2,9468 | 0,406 | 0,364  |
| 12 | P06748 NPM_HUMAN    | D.M*SPLRPQNYLFGCE.L       | 2 | 2,9464 | 0,38  | -0,071 |
| 12 | P46821 MAP1B_HUMAN  | E.AGGAEQYGFLLTPTK.Q       | 2 | 2,9452 | 0,274 | -0,658 |
| 12 | P18583 SON_HUMAN    | R.SAASPVVSSM*PER.A        | 2 | 2,9434 | 0,417 | 0      |
| 12 | P13667 PDIA4_HUMAN  | R.FDVSGYPTIK.I            | 2 | 2,9433 | 0,353 | 0,217  |
| 12 | P29350 PTN6_HUMAN   | E.YGNITYPPAM*K.N          | 2 | 2,9427 | 0,42  | 0,288  |
| 12 | Q96M96 FGD4_HUMAN   | R.TPGIGPVLPLEER.G         | 2 | 2,9423 | 0,361 | -0,443 |
| 12 | Q6ZUT9 RA61L_HUMAN  | E.LM*TSASDEDLVK.Q         | 2 | 2,9411 | 0,361 | 0,184  |
| 12 | Q53RE8 ANR39_HUMAN  | R.LACDLLPCNSDLR.D         | 2 | 2,9404 | 0,323 | -0,315 |
| 12 | Q02447 SP3_HUMAN    | D.TQPSPLALLAATCSK.I       | 2 | 2,9399 | 0,366 | -0,861 |
| 12 | Q9BVG9 PTSS2_HUMAN  | R.ASLEPPDGPSAGQATGPGEGR.R | 3 | 2,9394 | 0,239 | 0      |
| 12 | P49840 GSK3A_HUMAN  | K.VTTVVATLQGGER.S         | 2 | 2,9389 | 0,278 | 0,085  |
| 12 | P43243 MATR3_HUMAN  | R.DSFDDRGPSLNPLVD.Y       | 2 | 2,9355 | 0,424 | -0,222 |
| 12 | Q04864 REL_HUMAN    | R.TLPSNSQGIPPFLR.I        | 2 | 2,9354 | 0,251 | -0,559 |

|    |                     |                            |                 |   |        |       |        |
|----|---------------------|----------------------------|-----------------|---|--------|-------|--------|
| 12 | P49454 CENPF_HUMAN  | K.LALSPLSLGKE.N            |                 | 2 | 2,9352 | 0,388 | -0,216 |
| 12 | P14678 RSMB_HUMAN   | R.VLGLVLLRGE.N             |                 | 2 | 2,9334 | 0,453 | -0,228 |
| 12 | P08621 RU17_HUMAN   | D.GPPGELGPDGPDGPEEK.G      |                 | 2 | 2,9333 | 0,431 | 0,074  |
| 12 | P04792 HSPB1_HUMAN  | E.SPAVAAPAYSR.A            |                 | 2 | 2,9328 | 0,361 | -0,112 |
| 12 | Q00536 PCTK1_HUMAN  | R.LSLPADIRLPE.G            |                 | 2 | 2,9325 | 0,47  | -1,595 |
| 12 | O60506 HNRPQ_HUMAN  | E.DGALAVLQQFKD.S           |                 | 2 | 2,9319 | 0,324 | -0,187 |
| 12 | Q9P107 GMIP_HUMAN   | R.GRGPS#PAAAS#PEGS#PLRR.T  | S914:S919:S923: | 3 | 2,9306 | 0,26  | 0,731  |
| 12 | O94979 SC31A_HUMAN  | E.LDLSDPSLDM*K.S           |                 | 2 | 2,93   | 0,37  | 0,098  |
| 12 | O15541 R113A_HUMAN  | K.AVDQVCTFLFK.K            |                 | 2 | 2,9298 | 0,325 | -0,184 |
| 12 | Q9Y3Q8 T22D4_HUMAN  | R.SFTGGLGQLVVPK.A          |                 | 2 | 2,9295 | 0,295 | 0,176  |
| 12 | P38646 GRP75_HUMAN  | R.TTPSVVAFTADGER.L         |                 | 2 | 2,9266 | 0,533 | 0,084  |
| 12 | P31327 CPSM_HUMAN   | K.TLGVDFIDVATK.V           |                 | 2 | 2,9249 | 0,411 | -0,191 |
| 12 | P25208 NFYB_HUMAN   | E.QDIYLIPIANVAR.I          |                 | 2 | 2,9248 | 0,403 | -0,089 |
| 12 | Q13442 HAP28_HUMAN  | K.VTQLDLDPKE.L             |                 | 2 | 2,9228 | 0,337 | 0,402  |
| 12 | Q7Z4S6 KI21A_HUMAN  | E.DSTGGIYTVGVTR.T          |                 | 2 | 2,9191 | 0,448 | 0,513  |
| 12 | Q9Y265 RUVB1_HUMAN  | R.AVLLAGPPGTGK.T           |                 | 2 | 2,9174 | 0,361 | 0,451  |
| 12 | Q12959 DLG1_HUMAN   | K.DSGLPSQGLNFK.F           |                 | 2 | 2,9162 | 0,396 | -0,097 |
| 12 | Q96G74 OTUD5_HUMAN  | R.AVADQVYGDQDM*HE.V        |                 | 2 | 2,9155 | 0,473 | 0,077  |
| 12 | P48634 BAT2_HUMAN   | K.AVGTPGGGGGGAVPGISAM*SR.G |                 | 3 | 2,914  | 0,166 | 0,516  |
| 12 | Q15942 ZYX_HUMAN    | R.SPGAPGPTLKEVEE.L         |                 | 2 | 2,9134 | 0,431 | -0,4   |
| 12 | P49756 RBM25_HUMAN  | K.LPVDSVFNKFE.D            |                 | 2 | 2,912  | 0,377 | -0,283 |
| 12 | P08107 HSP71_HUMAN  | K.FGDPVVQSDM*K.H           |                 | 2 | 2,9097 | 0,305 | -0,295 |
| 12 | Q7Z460 CLAP1_HUMAN  | E.FTM*LLGALPK.T            |                 | 2 | 2,9091 | 0,241 | 0      |
| 12 | B2RTR1 B2RTR1_HUMAN | R.SFQPLGPGYISQSSR.L        |                 | 3 | 2,9085 | 0,389 | 0,109  |
| 12 | P02538 K2C6A_HUMAN  | K.ADTLTDEINFLR.A           |                 | 2 | 2,9068 | 0,349 | -0,78  |
| 12 | P19838 NFKB1_HUMAN  | -.M*AEDDPYLGRPE.Q          |                 | 2 | 2,9055 | 0,483 | -0,26  |
| 12 | Q16594 TAF9_HUMAN   | K.DAQM*M*AQILK.D           |                 | 2 | 2,902  | 0,297 | 0,413  |
| 12 | P51149 RAB7A_HUMAN  | K.ATIGADFLTKE.V            |                 | 2 | 2,8997 | 0,492 | -0,314 |
| 12 | Q12965 MYO1E_HUMAN  | R.VDFLVDKINK.A             |                 | 2 | 2,8995 | 0,322 | -0,188 |
| 12 | Q2KHR3 QSER1_HUMAN  | K.SVSTPLTLDATSDK.K         |                 | 2 | 2,898  | 0,497 | -0,556 |
| 12 | Q9NYZ3 GTSE1_HUMAN  | R.LLASSPALPSSGAQAR.L       |                 | 2 | 2,8974 | 0,342 | 0,16   |
| 12 | P33316 DUT_HUMAN    | R.GNVGVVLFNFGKE.K          |                 | 2 | 2,8943 | 0,254 | -0,177 |
| 12 | Q15642 CIP4_HUMAN   | R.APSDSSLGTPSDGRPE.L       |                 | 2 | 2,8937 | 0,383 | -0,078 |

|    |                    |                              |        |   |        |       |        |
|----|--------------------|------------------------------|--------|---|--------|-------|--------|
| 12 | Q14160 LAP4_HUMAN  | R.ALAAVPSAGSVQR.V            |        | 2 | 2,8927 | 0,517 | 0,199  |
| 12 | O43776 SYNC_HUMAN  | K.EPFPTIYVDSQKENE.R          |        | 2 | 2,8923 | 0,3   | 0,068  |
| 12 | Q92797 SYMPK_HUMAN | R.LSDVLKPLTDAQVE.A           |        | 2 | 2,8921 | 0,332 | -0,559 |
| 12 | P13010 KU86_HUMAN  | R.YGSDIVPFKVD.E              |        | 2 | 2,8914 | 0,364 | 1,592  |
| 12 | P31939 PUR9_HUMAN  | E.QIDIGGVTLR.A               |        | 2 | 2,8909 | 0,298 | -0,412 |
| 12 | Q16630 CPSF6_HUMAN | E.TLVTAISLIK.Q               |        | 2 | 2,8908 | 0,522 | -0,115 |
| 12 | P14625 ENPL_HUMAN  | K.SILFVPTSAPR.G              |        | 2 | 2,8906 | 0,282 | 0,411  |
| 12 | Q13033 STRN3_HUMAN | E.VGYTDTILDVR.S              |        | 2 | 2,8904 | 0,438 | 0      |
| 12 | P46013 KI67_HUMAN  | R.ALEDLVDFKE.L               |        | 2 | 2,8894 | 0,318 | -0,103 |
| 12 | Q9UIW2 PLXA1_HUMAN | R.IILQDEDVTTK.I              |        | 2 | 2,8878 | 0,326 | 0,478  |
| 12 | Q2NKX8 ERC6L_HUMAN | K.M*ASVVIDDLPKEGE.K          |        | 2 | 2,8877 | 0,41  | 0,482  |
| 12 | Q71U36 TBA1A_HUMAN | E.DM*AALKDYEE.V              |        | 2 | 2,8865 | 0,252 | 0,367  |
| 12 | O15372 EIF3H_HUMAN | E.SVVLIYDPIK.T               |        | 2 | 2,8862 | 0,377 | -0,106 |
| 12 | Q92560 BAP1_HUMAN  | K.VLFGEDDSLLR.V              |        | 2 | 2,8861 | 0,446 | -0,579 |
| 12 | Q15149 PLEC1_HUMAN | E.TGLCLLPLTDK.A              |        | 2 | 2,8858 | 0,415 | -0,198 |
| 12 | Q9BYG5 PAR6B_HUMAN | E.ADYSAFGTDTLIK.K            |        | 2 | 2,8857 | 0,367 | -0,435 |
| 12 | P15927 RFA2_HUMAN  | K.IDDM*TAAPM*DVR.Q           |        | 2 | 2,8842 | 0,415 | 0,179  |
| 12 | Q8NI36 WDR36_HUMAN | R.EPLLVTNGADNALR.I           |        | 2 | 2,8832 | 0,229 | 0      |
| 12 | Q06203 PUR1_HUMAN  | E.SAGIVTSDGSSVPTFK.S         |        | 2 | 2,8827 | 0,336 | -1,886 |
| 12 | Q14676 MDC1_HUMAN  | E.LQPSTSTDQPVTPPTSRA         |        | 3 | 2,8824 | 0,237 | 0,377  |
| 12 | P78527 PRKDC_HUMAN | E.DNSM*NVDQDGDPSDRM*E.V      |        | 2 | 2,8822 | 0,427 | 0      |
| 12 | Q99848 EBP2_HUMAN  | R.QAQAAVLAVLPR.L             |        | 2 | 2,8811 | 0,326 | 0      |
| 12 | P49327 FAS_HUMAN   | R.SLLVNPEGPTLM*R.L           |        | 2 | 2,881  | 0,33  | -0,676 |
| 12 | Q13151 ROAO_HUMAN  | E.ADAAM*AASPHAVDGNTVE.L      |        | 2 | 2,8807 | 0,42  | 0      |
| 12 | Q96R06 SPAG5_HUMAN | E.LTLQPGALTNSGK.R            |        | 2 | 2,8807 | 0,286 | 0,094  |
| 12 | Q9H3P2 NELFA_HUMAN | E.NATPDYAAGLVSTQK.L          |        | 2 | 2,8807 | 0,418 | -0,159 |
| 12 | P54725 RD23A_HUMAN | E.AAGENPLEFLR.D              |        | 2 | 2,8806 | 0,237 | -0,1   |
| 12 | Q92797 SYMPK_HUMAN | E.TAAGGLTLKEERS#PQTLAPVGE.D  | S1243: | 3 | 2,8804 | 0,336 | -0,317 |
| 12 | Q13123 RED_HUMAN   | E.DIGDYVPSTTK.T              |        | 2 | 2,8799 | 0,437 | 0,408  |
| 12 | Q9NZN5 ARHGC_HUMAN | R.IAPHIIGAEDDDFGTE.H         |        | 2 | 2,8798 | 0,427 | -0,646 |
| 12 | O75179 ANR17_HUMAN | R.APS#PAPSSVPLGSEKPSNVSQDR.K | S2401: | 3 | 2,8785 | 0,101 | -0,077 |
| 12 | Q9Y2U8 MAN1_HUMAN  | E.SLLGGPGGASAAPAAGSK.V       |        | 3 | 2,8783 | 0,312 | 0,249  |
| 12 | Q9HC77 CENPJ_HUMAN | R.AAVDISTSFPIK.G             |        | 2 | 2,8782 | 0,342 | 0,391  |

|    |                     |                          |       |   |        |       |        |
|----|---------------------|--------------------------|-------|---|--------|-------|--------|
| 12 | A0A5E8 A0A5E8_HUMAN | E.AVASVTPGAPDPAR.A       |       | 2 | 2,8775 | 0,281 | -0,081 |
| 12 | P50990 TCPQ_HUMAN   | K.M*IVM*ASHM*QEQE.V      |       | 2 | 2,8767 | 0,341 | -0,329 |
| 12 | P09382 LEG1_HUMAN   | E.AINYM*AADGDFK.I        |       | 2 | 2,8765 | 0,375 | -1,832 |
| 12 | P35813 PPM1A_HUMAN  | E.DAHTAVIGLPSGLE.S       |       | 2 | 2,8761 | 0,404 | -0,53  |
| 12 | O95782 AP2A1_HUMAN  | R.GLAVFISDIR.N           |       | 2 | 2,8741 | 0,407 | -0,671 |
| 12 | O43707 ACTN4_HUMAN  | K.AGTQIENIDEDFRD.G       |       | 2 | 2,8737 | 0,162 | -0,15  |
| 12 | Q15750 TAB1_HUMAN   | E.M*SQPTSPAPAAGGR.V      |       | 2 | 2,8717 | 0,445 | -0,762 |
| 12 | P49406 RM19_HUMAN   | R.LDDSLLYLR.D            |       | 2 | 2,8713 | 0,344 | 0,551  |
| 12 | P08195 4F2_HUMAN    | E.DFDSLLQSAK.K           |       | 2 | 2,867  | 0,428 | 0      |
| 12 | P06733 ENOA_HUMAN   | R.GNPTVEVDLFTSK.G        |       | 2 | 2,8667 | 0,496 | -0,52  |
| 12 | Q9P1Q0 VPS54_HUMAN  | E.LTPIAVDTTSQR.N         |       | 2 | 2,8666 | 0,511 | 0      |
| 12 | Q14204 DYHC1_HUMAN  | E.FGPVVIDYGK.V           |       | 2 | 2,8663 | 0,292 | 0,223  |
| 12 | Q659A1 NARG2_HUMAN  | K.AGTTTVAPSAPDISANSR.S   |       | 2 | 2,865  | 0,396 | -0,142 |
| 12 | P98170 BIRC4_HUMAN  | E.VLVADLVNAQK.D          |       | 2 | 2,8649 | 0,473 | 0,209  |
| 12 | O43395 PRPF3_HUMAN  | K.QLSFISPTPQPK.T         |       | 2 | 2,8643 | 0,272 | -0,678 |
| 12 | Q3KQU3 MA7D1_HUMAN  | R.SSQPSPTAVPASDSPPTKQE.V |       | 2 | 2,8642 | 0,435 | 0      |
| 12 | P27708 PYR1_HUMAN   | E.SIVVAPSQTLNDRE.Y       |       | 2 | 2,8641 | 0,423 | -0,319 |
| 12 | Q8IWI9 MGAP_HUMAN   | R.VTLGPTQVFLANK.D        |       | 2 | 2,8635 | 0,411 | -0,352 |
| 12 | Q9P2D6 F135A_HUMAN  | E.GLDPTICGYNFDPK.T       |       | 2 | 2,8633 | 0,386 | 0,153  |
| 12 | Q9H2J4 PDCL3_HUMAN  | E.SGAIM*TDLEENPK.K       |       | 2 | 2,8629 | 0,406 | -0,172 |
| 12 | Q14684 RRP1B_HUMAN  | K.TPTSSPASSPLVAK.K       |       | 2 | 2,8624 | 0,45  | -0,091 |
| 12 | Q15418 KS6A1_HUMAN  | R.GFS#FVATGLM*EDDGKPR.A  | S380: | 3 | 2,8607 | 0,323 | 0,381  |
| 12 | Q8WUA4 TF3C2_HUMAN  | R.QPAACPGGEEVDGAPRDE.D   |       | 2 | 2,8603 | 0,44  | 0      |
| 12 | P55072 TERA_HUMAN   | E.DNSVVSLSQPK.M          |       | 2 | 2,8602 | 0,407 | 0,727  |
| 12 | P34931 HS71L_HUMAN  | D.AGVIAGLNVL.R.I         |       | 2 | 2,8592 | 0,231 | -0,113 |
| 12 | Q5JTH9 RRP12_HUMAN  | E.M*ADPM*EDVIIR.N        |       | 2 | 2,8591 | 0,365 | 0,461  |
| 12 | P53621 COPA_HUMAN   | K.SLAYLTAATHGLDEE.A      |       | 2 | 2,859  | 0,409 | -0,153 |
| 12 | P54278 PMS2_HUMAN   | E.DIFIVDQHATDE.K         |       | 2 | 2,8586 | 0,224 | 0      |
| 12 | Q9Y224 CN166_HUMAN  | K.AGVM*ALANLLQIQR.H      |       | 2 | 2,858  | 0,268 | 0,081  |
| 12 | Q8NI22 MCFD2_HUMAN  | E.LINIIDGVL.R.D          |       | 2 | 2,8577 | 0,27  | -0,433 |
| 12 | Q92974 ARHG2_HUMAN  | E.DGGSGM*ALPTLPR.G       |       | 2 | 2,8574 | 0,259 | -0,284 |
| 12 | Q96B54 ZN428_HUMAN  | R.SPLGEAPPGTPPCR.L       |       | 2 | 2,8565 | 0,362 | -0,17  |
| 12 | P12268 IMDH2_HUMAN  | K.NLIDAGVDALR.V          |       | 2 | 2,8563 | 0,216 | 0,316  |



|    |                    |                      |      |   |        |       |        |
|----|--------------------|----------------------|------|---|--------|-------|--------|
| 12 | P14868 SYDC_HUMAN  | K.IYVISLAEPR.L       |      | 2 | 2,8556 | 0,218 | 0,21   |
| 12 | P24534 EF1B_HUMAN  | E.DDKVGTDM*LEE.Q     |      | 2 | 2,8552 | 0,341 | 0,096  |
| 12 | P56537 IF6_HUMAN   | E.ILADVLKVE.V        |      | 2 | 2,8547 | 0,34  | 0,488  |
| 12 | Q96K76 UBP47_HUMAN | K.IYLDGAPNKDLTQD.-   |      | 2 | 2,8546 | 0,305 | 0,078  |
| 12 | P15151 PVR_HUMAN   | K.VQLTGEPVPM*AR.C    |      | 2 | 2,8508 | 0,406 | 0,279  |
| 12 | P39880 CUX1_HUMAN  | E.LVQQPCPIEASK.D     |      | 2 | 2,8506 | 0,316 | -0,25  |
| 12 | Q14155 ARHG7_HUMAN | K.LPTTGM*TITKLE.D    |      | 2 | 2,8485 | 0,125 | 0,185  |
| 12 | Q9Y490 TLN1_HUMAN  | K.VM*VTNVTSLK.T      |      | 2 | 2,8484 | 0,365 | 0,2    |
| 12 | Q53H80 CF166_HUMAN | R.TLDFDPLLSPAS#PKR.R | S21: | 2 | 2,8479 | 0,308 | -0,07  |
| 12 | Q14247 SRC8_HUMAN  | K.TQTPPVSPAPQTEER.L  |      | 2 | 2,8474 | 0,304 | 0,211  |
| 12 | O00754 MA2B1_HUMAN | R.DLFSTFTITR.L       |      | 2 | 2,8471 | 0,318 | -0,508 |
| 12 | Q9H307 PININ_HUMAN | R.IFGLLM*GTLQK.F     |      | 2 | 2,8471 | 0,39  | -0,69  |
| 12 | P42224 STAT1_HUMAN | E.LSAVTFPDIIR.N      |      | 2 | 2,8468 | 0,351 | -0,495 |
| 12 | Q9NQ84 GPC5C_HUMAN | K.VPSEGAYDIILPR.A    |      | 2 | 2,8464 | 0,42  | -0,171 |
| 12 | P49755 TMEDA_HUMAN | R.IPDQLVILDM*K.H     |      | 2 | 2,8453 | 0,265 | 0      |
| 12 | Q9UJY5 GGA1_HUMAN  | E.DFEGPPLATR.L       |      | 2 | 2,8439 | 0,41  | 0,332  |
| 12 | P08133 ANXA6_HUMAN | R.DAFVAIVQSVK.N      |      | 2 | 2,8439 | 0,338 | 0      |
| 12 | Q9NR31 SAR1A_HUMAN | E.TISNVPIILGNK.I     |      | 2 | 2,8433 | 0,335 | -0,618 |
| 12 | P19174 PLCG1_HUMAN | K.VLGDLLTKPVE.I      |      | 2 | 2,8426 | 0,408 | 0,475  |
| 12 | Q53LP3 ANR57_HUMAN | R.DLVM*GSSPQLK.R     |      | 2 | 2,8425 | 0,386 | -0,512 |
| 12 | P45974 UBP5_HUMAN  | E.ALLSVLPTIR.V       |      | 2 | 2,8419 | 0,432 | -0,451 |
| 12 | P40227 TCPZ_HUMAN  | E.AVVDSILAIK.K       |      | 2 | 2,8388 | 0,328 | 0      |
| 12 | O95361 TRI16_HUMAN | E.LDLM*APGPLPR.A     |      | 2 | 2,8375 | 0,36  | 0,102  |
| 12 | P07737 PROF1_HUMAN | K.STGGAPTFNVTVK.T    |      | 2 | 2,8372 | 0,458 | 0      |
| 12 | A4D1P6 WDR91_HUMAN | R.VGFLSLLPQSK.K      |      | 2 | 2,837  | 0,359 | -0,287 |
| 12 | Q14116 IL18_HUMAN  | R.TIFIISM*YKD.S      |      | 2 | 2,8369 | 0,364 | -0,881 |
| 12 | Q05524 ENO1B_HUMAN | D.LVVGLCTGQIK.T      |      | 2 | 2,8363 | 0,295 | 0,205  |
| 12 | P55072 TERA_HUMAN  | R.LDQLIYIPLDEK.S     |      | 2 | 2,8359 | 0,31  | -0,078 |
| 12 | Q04695 K1C17_HUMAN | R.ALEEANTELEVK.I     |      | 2 | 2,8355 | 0,248 | 0,453  |
| 12 | Q04721 NOTC2_HUMAN | K.STM*PTSLPNLAKE.A   |      | 2 | 2,8344 | 0,345 | -0,087 |
| 12 | Q14247 SRC8_HUMAN  | K.TQTPPVSPAPQTEER.L  |      | 3 | 2,8316 | 0,184 | 0,527  |
| 12 | Q9UQ35 SRRM2_HUMAN | R.TPAIPTAVNLADSR.T   |      | 2 | 2,8278 | 0,489 | -0,257 |
| 12 | Q12840 KIF5A_HUMAN | K.LYLVDLGSEK.V       |      | 2 | 2,8272 | 0,344 | 0      |

|    |                    |                               |              |   |        |       |        |
|----|--------------------|-------------------------------|--------------|---|--------|-------|--------|
| 12 | O75152 ZC11A_HUMAN | R.YVDGLFLPPSK.T               |              | 2 | 2,8259 | 0,405 | 0,395  |
| 12 | Q9H1P3 OSBL2_HUMAN | K.VTGM*IDLDTSK.N              |              | 2 | 2,8248 | 0,444 | 0,204  |
| 12 | P13639 EF2_HUMAN   | E.ESQVAGTPM*FVVK.A            |              | 2 | 2,8244 | 0,241 | 0,433  |
| 12 | P22102 PUR2_HUMAN  | E.SGVDIAAGNM*LVK.K            |              | 2 | 2,8242 | 0,381 | 0,189  |
| 12 | P42166 LAP2A_HUMAN | E.ATQILSVPKVDDE.I             |              | 2 | 2,8234 | 0,293 | -0,172 |
| 12 | P50990 TCPQ_HUMAN  | E.DGAISTIVLR.G                |              | 2 | 2,8226 | 0,267 | 0,35   |
| 12 | O95202 LETM1_HUMAN | E.IPTSLILSR.A                 |              | 2 | 2,822  | 0,264 | 0,11   |
| 12 | P37802 TAGL2_HUMAN | R.TLM*NLGGLAVARDD.G           |              | 2 | 2,8219 | 0,227 | -0,334 |
| 12 | P55198 AF17_HUMAN  | K.VVFSFGPIM*R.F               |              | 2 | 2,8203 | 0,366 | -0,995 |
| 12 | Q9Y536 PAL4B_HUMAN | R.IIPGFM*CQGGDFTR.H           |              | 3 | 2,8188 | 0,212 | 0,453  |
| 12 | Q9Y696 CLIC4_HUMAN | E.M*TLADCNLLPK.L              |              | 2 | 2,818  | 0,307 | -0,094 |
| 12 | Q9NRF9 DPOE3_HUMAN | E.DLNLPNAVITR.I               |              | 2 | 2,8167 | 0,321 | -0,299 |
| 12 | P13639 EF2_HUMAN   | E.SQVAGTPM*FVVK.A             |              | 2 | 2,8166 | 0,331 | -0,191 |
| 12 | P17980 PRS6A_HUMAN | R.VDILDPELLR.S                |              | 2 | 2,8152 | 0,238 | -1,084 |
| 12 | Q6PGN9 PSRC1_HUMAN | R.SDPNAVAPAPQGV.R             |              | 2 | 2,8116 | 0,364 | 0      |
| 12 | P07814 SYEP_HUMAN  | R.DQDLEPGAPSM*GAK.S           |              | 2 | 2,8108 | 0,325 | 0      |
| 12 | Q15118 PDK1_HUMAN  | K.AIYDFTDTVIR.I               |              | 2 | 2,8096 | 0,458 | -0,371 |
| 12 | Q8NC44 F134A_HUMAN | E.LAGFSPVVDVK.K               |              | 2 | 2,809  | 0,29  | 0,216  |
| 12 | Q12888 TP53B_HUMAN | R.QSQQPM*KPIS#PVKDPVS#PASQK.M | S1094:S1101: | 3 | 2,8079 | 0,246 | -0,358 |
| 12 | Q5T5Y3 CAMP1_HUMAN | E.VDPSSGDSISLAR.S             |              | 2 | 2,8071 | 0,436 | 0,187  |
| 12 | Q9NYV4 CD2L7_HUMAN | K.DGSGGASGTLQPSSGGSSNSRE.R    |              | 2 | 2,8059 | 0,306 | -0,238 |
| 12 | Q9P206 K1522_HUMAN | K.GLAGPPAS#PGKAQPPKPE.R       | S545:        | 3 | 2,8056 | 0,12  | 0,206  |
| 12 | P14927 QCR7_HUMAN  | E.NFYLEPYLKE.V                |              | 2 | 2,8051 | 0,27  | 0,464  |
| 12 | O94864 ST65G_HUMAN | E.VGIGSVLSLQK.F               |              | 2 | 2,8045 | 0,343 | 0,111  |
| 12 | Q9ULH1 DDEF1_HUMAN | E.ANLPS#PSPKPTSSDM*TVR.K      | S525:        | 3 | 2,8042 | 0,302 | 0,176  |
| 12 | P40222 TXLNA_HUMAN | K.DLQQLVDAK.L                 |              | 2 | 2,8034 | 0,387 | 0,211  |
| 12 | Q9UQ35 SRRM2_HUMAN | E.SYFGVSSLQK.G                |              | 2 | 2,803  | 0,401 | 0,099  |
| 12 | Q15036 SNX17_HUMAN | K.SPPLLESPDATRE.S             |              | 2 | 2,8024 | 0,245 | -0,259 |
| 12 | Q9HCD6 TANC2_HUMAN | E.LSPVSPTQGGYPSEPTR.S         |              | 2 | 2,8019 | 0,468 | -0,688 |
| 12 | P16401 H15_HUMAN   | E.TAPAETATPAPVEK.S            |              | 2 | 2,8013 | 0,49  | -0,176 |
| 12 | Q7Z309 F122B_HUMAN | E.LDLEPDTSYGGTLR.R            |              | 2 | 2,801  | 0,338 | -0,318 |
| 12 | P07919 QCR6_HUMAN  | E.LVDPLTTVRE.Q                |              | 2 | 2,801  | 0,4   | -0,107 |
| 12 | Q9H501 ESF1_HUMAN  | E.M*QSVVQLIM*TR.D             |              | 2 | 2,8001 | 0,319 | -0,365 |

|    |                    |                                |       |   |        |       |        |
|----|--------------------|--------------------------------|-------|---|--------|-------|--------|
| 12 | P30622 CLIP1_HUMAN | K.TPTAVVAPVEK.T                |       | 2 | 2,7993 | 0,397 | 0,219  |
| 12 | P04792 HSPB1_HUMAN | E.GTLTVEAPM*PK.L               |       | 2 | 2,7992 | 0,435 | 0,105  |
| 12 | Q9UGP4 LIMD1_HUMAN | R.TPSVSAPLALSCPR.Q             |       | 2 | 2,7979 | 0,429 | 0,168  |
| 12 | Q16563 SYPL1_HUMAN | K.TVTATFGYPFR.L                |       | 2 | 2,7961 | 0,418 | 0,097  |
| 12 | P51114 FXR1_HUMAN  | E.NGLVTVADYISR.A               |       | 2 | 2,7931 | 0,369 | 0,187  |
| 12 | Q9NZ52 GGA3_HUMAN  | R.QGIVQSDPPIPVDR.T             |       | 2 | 2,7908 | 0,413 | -0,642 |
| 12 | O15212 PFD6_HUMAN  | K.LLGPVLVKQE.L                 |       | 2 | 2,789  | 0,277 | -0,445 |
| 12 | P61129 ZC3H6_HUMAN | E.FAQQQPPVVQDS#PNHGSQSDGSSTR.T | S636: | 3 | 2,7872 | 0,26  | 0,137  |
| 12 | P30044 PRDX5_HUMAN | R.LLADPTGAFGKE.T               |       | 2 | 2,7872 | 0,348 | 0,2    |
| 12 | Q15257 PTPA_HUMAN  | K.LVALLNTLDR.W                 |       | 2 | 2,7871 | 0,254 | 0,649  |
| 12 | P04632 CPNS1_HUMAN | E.AAAQYNPEPPPPR.T              |       | 2 | 2,7854 | 0,405 | -0,26  |
| 12 | Q9P2B2 FPRP_HUMAN  | K.YIISLDQDSVVK.L               |       | 2 | 2,7844 | 0,373 | 0,088  |
| 12 | P14625 ENPL_HUMAN  | R.LSLNIDPDAK.V                 |       | 2 | 2,7841 | 0,204 | -0,112 |
| 12 | P63208 SKP1_HUMAN  | E.LILAANYLDIK.G                |       | 2 | 2,784  | 0,396 | -0,293 |
| 12 | P35222 CTNB1_HUMAN | E.GVATYAAAVLFR.M               |       | 2 | 2,7835 | 0,385 | 0,098  |
| 12 | Q9Y478 AAKB1_HUMAN | E.LSS#SPPGPYHQEPYVCKPE.E       | S181: | 3 | 2,7822 | 0,135 | 0      |
| 12 | Q13547 HDAC1_HUMAN | E.FCQLSTGGSVASAVK.L            |       | 2 | 2,7801 | 0,221 | 0,161  |
| 12 | P30414 NKTR_HUMAN  | R.DM*PVVTAEPEPK.I              |       | 2 | 2,7794 | 0,339 | -0,275 |
| 12 | Q10567 AP1B1_HUMAN | R.LLSTDPVAAKE.V                |       | 2 | 2,7794 | 0,392 | 0,213  |
| 12 | P07737 PROF1_HUMAN | K.TLVLLM*GKE.G                 |       | 2 | 2,7765 | 0,346 | 0,299  |
| 12 | O75815 BCAR3_HUMAN | R.TGSEPALSPAVVR.R              |       | 2 | 2,7752 | 0,263 | 0,285  |
| 12 | Q12904 MCA1_HUMAN  | R.ITFDAFPGEPDKE.L              |       | 2 | 2,7746 | 0,48  | 0,083  |
| 12 | O96019 ACL6A_HUMAN | K.QGGPTYIIDTNALR.V             |       | 2 | 2,7736 | 0,429 | -0,156 |
| 12 | Q15102 PA1B3_HUMAN | R.VVVLGLLPR.G                  |       | 2 | 2,7721 | 0,211 | -0,126 |
| 12 | Q9NR31 SAR1A_HUMAN | K.LVFLGLDNAGK.T                |       | 2 | 2,7675 | 0,199 | -0,745 |
| 12 | P17181 INAR1_HUMAN | E.VDIIDDNFILR.W                |       | 2 | 2,7674 | 0,444 | -0,275 |
| 12 | Q9NY61 AATF_HUMAN  | E.GDFLVVGSIR.K                 |       | 2 | 2,7672 | 0,242 | 0,115  |
| 12 | P28331 NDUS1_HUMAN | K.VVAACAM*PVM*K.G              |       | 2 | 2,7667 | 0,501 | 0,101  |
| 12 | Q15424 SAFB1_HUMAN | E.LAEAPTEAPSPEAR.D             |       | 2 | 2,7646 | 0,293 | -0,085 |
| 12 | Q9NZI8 IF2B1_HUMAN | R.DQTPDENDQVIVK.I              |       | 2 | 2,7646 | 0,14  | -0,488 |
| 12 | P60174 TPIS_HUMAN  | D.GFLVGGASLKPE.F               |       | 2 | 2,7645 | 0,337 | 0,312  |
| 12 | Q92542 NICA_HUMAN  | K.ALADVATVLGR.A                |       | 2 | 2,7634 | 0,205 | 0,112  |
| 12 | P28066 PSA5_HUMAN  | R.ITSPML*EPSSIEK.I             |       | 2 | 2,763  | 0,34  | 0,169  |

|    |                     |                               |       |   |        |       |        |
|----|---------------------|-------------------------------|-------|---|--------|-------|--------|
| 12 | O95628 CNOT4_HUMAN  | K.SNPVIPISS#SNHSARSPFEGAVTE.S | S317: | 3 | 2,7619 | 0,104 | 0,071  |
| 12 | O15027 SC16A_HUMAN  | R.YGPLPGPAVPR.H               |       | 2 | 2,7617 | 0,428 | -0,434 |
| 12 | Q9H2J9 Q9H2J9_HUMAN | R.DALSQLM*DGPIR.K             |       | 2 | 2,7616 | 0,478 | 0,458  |
| 12 | Q01813 K6PP_HUMAN   | K.FTTDDSIQVGLGSK.R            |       | 2 | 2,7603 | 0,387 | -0,314 |
| 12 | P29317 EPHA2_HUMAN  | K.FADIVSILDK.L                |       | 2 | 2,7598 | 0,219 | 0,871  |
| 12 | P48634 BAT2_HUMAN   | E.EALTTVTVAPAPR.R             |       | 2 | 2,7595 | 0,248 | -0,092 |
| 12 | Q9BRX5 PSF3_HUMAN   | E.NADISQSLQTFIGR.F            |       | 2 | 2,7595 | 0,428 | -0,073 |
| 12 | Q9UJC3 HOOK1_HUMAN  | K.VLQGIM*SYHE.F               |       | 2 | 2,7588 | 0,394 | -0,54  |
| 12 | Q9NYB0 TE2IP_HUMAN  | K.YLLGDAPVSPSSQK.L            |       | 2 | 2,7585 | 0,348 | 0,334  |
| 12 | P13645 K1C10_HUMAN  | R.VLDELTLTK.A                 |       | 2 | 2,7577 | 0,306 | 0,236  |
| 12 | Q9NQC3 RTN4_HUMAN   | R.GPLPAAPPVAPER.Q             |       | 2 | 2,7573 | 0,399 | 0,096  |
| 12 | O75376 NCOR1_HUMAN  | R.ALDPAAAAYLFQR.Q             |       | 3 | 2,7567 | 0,125 | 0,195  |
| 12 | P30101 PDIA3_HUMAN  | K.QAGPASVPLRTEEE.F            |       | 2 | 2,7555 | 0,438 | 0      |
| 12 | P07355 ANXA2_HUMAN  | K.DIISDTSGDFR.K               |       | 2 | 2,7546 | 0,314 | 0      |
| 12 | Q2M2I8 AAK1_HUMAN   | K.VQTTPPPVAVQGQK.V            |       | 3 | 2,7546 | 0,109 | 0,338  |
| 12 | P62805 H4_HUMAN     | K.TVTAM*DVVYALK.R             |       | 2 | 2,7508 | 0,54  | 0,184  |
| 12 | Q8WUF5 IASPP_HUMAN  | R.QQGPPTPFDFLGR.A             |       | 2 | 2,7508 | 0,345 | -0,251 |
| 12 | Q9UBC2 EP15R_HUMAN  | E.VTSLNLSM*PPPK.F             |       | 2 | 2,7507 | 0,315 | -0,399 |
| 12 | O14744 ANM5_HUMAN   | E.YTSFLAPISSSK.L              |       | 2 | 2,7506 | 0,374 | 0,094  |
| 12 | O75607 NPM3_HUMAN   | D.DFQLQPPVTFR.L               |       | 3 | 2,75   | 0,198 | 0,339  |
| 12 | P63010 AP2B1_HUMAN  | E.VVLSEKPLISEE.T              |       | 2 | 2,7497 | 0,442 | -0,091 |
| 12 | O15027 SC16A_HUMAN  | R.GLANPEPAPEPK.V              |       | 2 | 2,7495 | 0,278 | -0,1   |
| 12 | Q9UPY6 WASF3_HUMAN  | R.EPVGNDVATILSR.R             |       | 2 | 2,7485 | 0,245 | 0,356  |
| 12 | Q96SB3 NEB2_HUMAN   | E.NGSTVATAASPAPEPK.A          |       | 2 | 2,7469 | 0,186 | 0,225  |
| 12 | Q02952 AKA12_HUMAN  | K.STPVIVSATTK.K               |       | 2 | 2,7469 | 0,537 | -0,332 |
| 12 | Q09666 AHNK_HUMAN   | K.ISM*PDLNLK.G                |       | 2 | 2,7456 | 0,298 | -0,096 |
| 12 | Q9H974 QTRD1_HUMAN  | R.LISGSRPDEVLE.C              |       | 2 | 2,7455 | 0,278 | -0,259 |
| 12 | P04406 G3P_HUMAN    | K.LVINGNPITIFQER.D            |       | 2 | 2,7442 | 0,435 | -0,227 |
| 12 | P80723 BASP_HUMAN   | K.ETPAATEAPSSTPK.A            |       | 2 | 2,7423 | 0,385 | -0,176 |
| 12 | O75127 PTCD1_HUMAN  | E.ADLTFFNTLVR.K               |       | 2 | 2,7406 | 0,413 | -0,282 |
| 12 | Q9P2W9 STX18_HUMAN  | K.DYINAYSHTM*SE.Y             |       | 2 | 2,7405 | 0,259 | 0,506  |
| 12 | P08133 ANXA6_HUMAN  | R.DLM*TDLKSE.I                |       | 2 | 2,7395 | 0,227 | 0,228  |
| 12 | Q13428 TCOF_HUMAN   | D.SSPSVSSTLAAK.D              |       | 2 | 2,7393 | 0,4   | 0,215  |

|    |                    |                       |        |   |        |       |        |
|----|--------------------|-----------------------|--------|---|--------|-------|--------|
| 12 | Q5VT52 K0460_HUMAN | K.SAVSTSVPTKPE.N      |        | 2 | 2,7375 | 0,294 | 0      |
| 12 | Q9COD5 TANC1_HUMAN | R.VPGDAVIM*PFRE.V     |        | 2 | 2,7372 | 0,349 | -0,634 |
| 12 | Q5TDH0 DDI2_HUMAN  | R.DM*LLANPHE.L        |        | 2 | 2,7361 | 0,297 | 0,116  |
| 12 | P45974 UBP5_HUMAN  | R.DGLGGLPDIVR.D       |        | 2 | 2,7342 | 0,302 | 0,11   |
| 12 | Q9BVL2 NUPL1_HUMAN | K.ALKDENLPPVICQDVE.N  |        | 2 | 2,734  | 0,438 | 0      |
| 12 | P52565 GDIR1_HUMAN | E.YEFLTPVEEAPK.G      |        | 2 | 2,7335 | 0,337 | -0,6   |
| 12 | P08651 NFIC_HUMAN  | R.TGM*GSDQEDSKPITLD.T |        | 2 | 2,7315 | 0,105 | 0,856  |
| 12 | Q9BVG4 CX026_HUMAN | E.DFNYGTLR.L          |        | 2 | 2,7312 | 0,386 | 0,222  |
| 12 | Q9BY44 EIF2A_HUMAN | K.SPDLAPTAPQSTPR.N    |        | 2 | 2,7311 | 0,377 | -0,954 |
| 12 | Q9HB40 RISC_HUMAN  | R.DALSQLM*NGPIR.K     |        | 2 | 2,7291 | 0,238 | -0,092 |
| 12 | Q12756 KIF1A_HUMAN | R.VLDTSVAYVR.G        |        | 2 | 2,729  | 0,422 | 0,109  |
| 12 | Q96FS4 SIPA1_HUMAN | E.VQGVTLPTTK.Q        |        | 2 | 2,7284 | 0,433 | -0,105 |
| 12 | Q4VC31 CCD58_HUMAN | E.LNTTVPTASFAGK.I     |        | 2 | 2,7274 | 0,17  | 0      |
| 12 | P07355 ANXA2_HUMAN | K.AYTNFDAERDALNIE.T   |        | 2 | 2,7274 | 0,369 | -0,21  |
| 12 | P10809 CH60_HUMAN  | R.GYISPYFINTSK.G      |        | 2 | 2,726  | 0,333 | -0,088 |
| 12 | P22059 OSBP1_HUMAN | R.GATVLPANTPGNVGSGK.D |        | 2 | 2,7258 | 0,48  | 0,238  |
| 12 | P52272 HNRPM_HUMAN | R.AFITNIPFDVK.W       |        | 2 | 2,7257 | 0,348 | -0,964 |
| 12 | Q13011 ECH1_HUMAN  | E.ASGVALGEAPDHSYE.S   |        | 2 | 2,7255 | 0,237 | -1,055 |
| 12 | P10253 LYAG_HUMAN  | R.GAYTQVIFLAR.N       |        | 2 | 2,7253 | 0,264 | -0,394 |
| 12 | Q9H6D7 CN094_HUMAN | K.LLLNLSQHVDE.S       |        | 2 | 2,7241 | 0,279 | -0,571 |
| 12 | Q9UPT6 JIP3_HUMAN  | K.AFGINTDSLYHE.L      |        | 2 | 2,7238 | 0,222 | -0,179 |
| 12 | Q12872 SFRS8_HUMAN | K.AALFLQTLK.N         |        | 2 | 2,7236 | 0,223 | 0,182  |
| 12 | Q9HCK8 CHD8_HUMAN  | R.TAS#PLPLRPDAPVEK.S  | S1716: | 2 | 2,7212 | 0,222 | 0,073  |
| 12 | Q9Y6N7 ROBO1_HUMAN | E.SYDQEM*PCPVPPAR.M   |        | 2 | 2,7207 | 0,308 | -0,147 |
| 12 | Q9Y613 FHOD1_HUMAN | E.IM*DLLVQSVTKS#SPR.A | S1118: | 3 | 2,7204 | 0,286 | 0,31   |
| 12 | P31948 STIP1_HUMAN | K.FM*NPFNM*PNLYQK.L   |        | 3 | 2,7196 | 0,238 | 0,327  |
| 12 | P14678 RSMB_HUMAN  | R.VLGLVLLR.G          |        | 2 | 2,719  | 0,274 | 0,138  |
| 12 | Q13308 PTK7_HUMAN  | R.SSLQPITTLGK.S       |        | 2 | 2,7182 | 0,399 | 0,32   |
| 12 | Q9UHV7 MED13_HUMAN | E.DAM*SLFSPSIK.Q      |        | 2 | 2,7158 | 0,267 | 0      |
| 12 | P11717 MPRI_HUMAN  | K.VPIDGPPIDIGR.V      |        | 2 | 2,7158 | 0,514 | -0,195 |
| 12 | P38646 GRP75_HUMAN | K.NAVITVPAYFNDSQR.Q   |        | 2 | 2,7153 | 0,163 | -0,648 |
| 12 | P15121 ALDR_HUMAN  | K.TLSDLKLDYLD.L       |        | 2 | 2,715  | 0,356 | -0,282 |
| 12 | P52907 CAZA1_HUMAN | E.ASDPQPEEADGGLK.S    |        | 2 | 2,7146 | 0,398 | 0      |

|    |                     |                                |   |        |       |        |
|----|---------------------|--------------------------------|---|--------|-------|--------|
| 12 | Q9NXR1 NDE1_HUMAN   | R.GLDDSTGGTPLTPAAR.I           | 2 | 2,7145 | 0,413 | -0,958 |
| 12 | A2RU21 A2RU21_HUMAN | E.AAVADALLLGDSR.S              | 2 | 2,7142 | 0,275 | -0,192 |
| 12 | Q9BX68 HINT2_HUMAN  | K.AQQATPGGAAPTIFSR.I           | 2 | 2,714  | 0,131 | -0,853 |
| 12 | Q14204 DYHC1_HUMAN  | R.KLVPLLEDGGEAPAAL.E           | 2 | 2,7139 | 0,415 | -0,133 |
| 12 | P52701 M5H6_HUMAN   | R.LANLPEEVIQK.G                | 2 | 2,7133 | 0,199 | 0      |
| 12 | P30101 PDIA3_HUMAN  | R.GFPTIYFSPANK.K               | 2 | 2,7131 | 0,325 | -0,455 |
| 12 | Q9UNZ2 NSF1C_HUMAN  | K.SPNELVDDLK.G                 | 2 | 2,7122 | 0,312 | -0,191 |
| 12 | Q96T58 MINT_HUMAN   | R.FDVSPNSIIK.R                 | 2 | 2,7122 | 0,284 | -1,059 |
| 12 | Q15326 ZMY11_HUMAN  | E.IPTM*PQPIEK.V                | 2 | 2,7113 | 0,335 | 0,104  |
| 12 | Q8IWB9 TEX2_HUMAN   | R.DQILYLFR.T                   | 2 | 2,7112 | 0,376 | -0,217 |
| 12 | Q5JTD0 TJAP1_HUMAN  | R.LDCNLAVQLL.C                 | 2 | 2,7098 | 0,248 | 0,853  |
| 12 | P84077 ARF1_HUMAN   | D.AVLLVFANK.Q                  | 2 | 2,7071 | 0,28  | 0,438  |
| 12 | Q03164 HRX_HUMAN    | D.IGSISNLLIK.A                 | 2 | 2,7043 | 0,334 | 0,231  |
| 12 | P0C7M2 RA1L3_HUMAN  | E.DSQRPGAHLTVK.K               | 3 | 2,7035 | 0,202 | 0,349  |
| 12 | Q07065 CKAP4_HUMAN  | E.DGVLSM*QVASAR.Q              | 2 | 2,7028 | 0,395 | -0,878 |
| 12 | Q5JWF2 GNAS1_HUMAN  | R.YTTPEDATPEPGEDPR.V           | 2 | 2,7017 | 0,352 | -0,069 |
| 12 | Q8IWE2 NXP20_HUMAN  | E.DQTVVSDVAK.V                 | 2 | 2,7016 | 0,322 | 0      |
| 12 | O94910 LPHN1_HUMAN  | K.ALEEPLLLPR.A                 | 2 | 2,7004 | 0,299 | 0,318  |
| 12 | O00299 CLIC1_HUMAN  | E.LTLADCNLLPK.L                | 2 | 2,6993 | 0,366 | -0,582 |
| 12 | Q9H0B6 KLC2_HUMAN   | K.SVEEPTQPGGTGLSDSR.T          | 3 | 2,6993 | 0,296 | 0,32   |
| 12 | Q86VR2 F134C_HUMAN  | R.SPPGAEQPAPPASRDE.A           | 3 | 2,6985 | 0,251 | 0,211  |
| 12 | Q16625 OCLN_HUMAN   | E.LPLTSPVDDFR.Q                | 2 | 2,6972 | 0,394 | 0      |
| 12 | A8K7V5 A8K7V5_HUMAN | E.VSTAPAGTDM*PAAK.K            | 2 | 2,6965 | 0,45  | 0      |
| 12 | Q9UHY7 ENOPH_HUMAN  | E.FFADVPAVR.K                  | 2 | 2,6949 | 0,311 | -0,109 |
| 12 | P49247 RPIA_HUMAN   | R.GGAGNTSTSCGDSNSICPAPSTM*SK.A | 3 | 2,6934 | 0,107 | 0,149  |
| 12 | P35251 RFC1_HUMAN   | K.NKPLS#PIKLTPTSVDL.Y          | 2 | 2,6922 | 0,295 | -0,406 |
| 12 | Q6GYQ0 GRIPE_HUMAN  | R.SQTPSPSTLNIDHM*E.Q           | 2 | 2,6908 | 0,389 | -0,292 |
| 12 | P00558 PGK1_HUMAN   | K.IQLINNM*LDKVNE.M             | 2 | 2,6895 | 0,304 | -0,235 |
| 12 | P05388 RLA0_HUMAN   | K.IIQLDDYPK.C                  | 2 | 2,6892 | 0,19  | -0,2   |
| 12 | O60341 LSD1_HUMAN   | E.FANATPLSTLSLK.H              | 2 | 2,6885 | 0,296 | -0,269 |
| 12 | P50548 ERF_HUMAN    | R.VSSDLQHATAQLSLE.H            | 2 | 2,6883 | 0,194 | -0,076 |
| 12 | P08133 ANXA6_HUMAN  | K.DLIADLKYE.L                  | 2 | 2,6879 | 0,232 | 0,113  |
| 12 | Q14919 NC2A_HUMAN   | E.LEQQDFLK.D                   | 2 | 2,6876 | 0,202 | 0,313  |

S156:

|    |                    |                       |       |   |        |       |        |
|----|--------------------|-----------------------|-------|---|--------|-------|--------|
| 12 | Q4J6C6 PPCEL_HUMAN | E.DVLFYTFQR.N         |       | 2 | 2,6874 | 0,231 | -0,103 |
| 12 | Q8NBZ0 CCD95_HUMAN | K.M*PPPTILSTVPR.Q     |       | 2 | 2,687  | 0,394 | -0,368 |
| 12 | P22736 NR4A1_HUMAN | K.LFPSQATHQLGEGE.S    |       | 2 | 2,6843 | 0,361 | -0,403 |
| 12 | Q13330 MTA1_HUMAN  | R.DISSTLIALADK.H      |       | 2 | 2,6837 | 0,357 | -0,489 |
| 12 | Q9UBG0 MRC2_HUMAN  | R.CLTALPYICK.R        |       | 2 | 2,6824 | 0,289 | 0,098  |
| 12 | Q13642 FHL1_HUMAN  | K.AIVAGDQNVVEYK.G     |       | 2 | 2,6821 | 0,277 | 0      |
| 12 | Q86V48 LUZP1_HUMAN | K.VTSSITIYPSDSSSPR.A  |       | 2 | 2,6813 | 0,339 | -0,359 |
| 12 | Q9NY61 AATF_HUMAN  | E.LLFQYPDTR.Y         |       | 2 | 2,6806 | 0,266 | 0,317  |
| 12 | Q8NCP5 ZBT44_HUMAN | K.TTLPLGTEEDVR.V      |       | 2 | 2,6792 | 0,455 | 0,183  |
| 12 | O00186 STXB3_HUMAN | R.GFDPVSTVLHE.L       |       | 2 | 2,679  | 0,223 | 0,102  |
| 12 | Q8IWX8 CHERP_HUMAN | E.YEAPGGVQDPAAAGPR.G  |       | 2 | 2,6789 | 0,416 | -0,157 |
| 12 | Q13263 TIF1B_HUMAN | K.M*IVDPVEPHGE.M      |       | 2 | 2,678  | 0,272 | 0,098  |
| 12 | Q14517 FAT1_HUMAN  | K.VVDLDPCLSK.K        |       | 2 | 2,6772 | 0,262 | 0,106  |
| 12 | P61978 HNRPK_HUMAN | K.IILDILISES#PIKGR.A  | S216: | 3 | 2,6764 | 0,28  | -0,336 |
| 12 | Q9NW68 BSDC1_HUMAN | E.LM*GISPISPK.E       |       | 2 | 2,6754 | 0,252 | 0,691  |
| 12 | Q96KP4 CNDP2_HUMAN | K.TVFGVEPDLTRE.G      |       | 2 | 2,6751 | 0,317 | -0,269 |
| 12 | Q2NXX8 ERC6L_HUMAN | K.M*ASVVIDDLPK.E      |       | 2 | 2,6746 | 0,365 | -0,405 |
| 12 | P27708 PYR1_HUMAN  | R.ASDPGLPAEEPKE.K     |       | 2 | 2,6743 | 0,299 | 0,182  |
| 12 | Q13813 SPTA2_HUMAN | R.DLSSVQTLTK.Q        |       | 2 | 2,673  | 0,271 | -0,506 |
| 12 | Q8NDX5 PHC3_HUMAN  | R.GEDLTSEHPLE.Q       |       | 2 | 2,6725 | 0,346 | -0,091 |
| 12 | Q01968 OCRL_HUMAN  | K.DKPSVFSGLLGE.D      |       | 2 | 2,6718 | 0,428 | -0,524 |
| 12 | P09543 CN37_HUMAN  | R.ILVLDDTNHE.R        |       | 2 | 2,6706 | 0,263 | 0,104  |
| 12 | O75940 SPF30_HUMAN | K.DLQEVIELTK.D        |       | 2 | 2,6686 | 0,246 | -0,616 |
| 12 | Q86V48 LUZP1_HUMAN | R.T#FSDTTHGVSVDPLGR.A | T510: | 2 | 2,668  | 0,241 | -0,724 |
| 12 | O14744 ANM5_HUMAN  | R.VPLVAPEDLR.D        |       | 2 | 2,6668 | 0,327 | 0,11   |
| 12 | P49792 RBP2_HUMAN  | R.ITPDM*TLQNM*K.G     |       | 2 | 2,6666 | 0,363 | 0,092  |
| 12 | Q3V6T2 GRDN_HUMAN  | E.DISPQGVSDSSTGSR.V   |       | 2 | 2,666  | 0,451 | 0,152  |
| 12 | P22413 ENPP1_HUMAN | K.VSYGFLSPPQLNK.N     |       | 2 | 2,6652 | 0,096 | 0,084  |
| 12 | P30279 CCND2_HUMAN | E.AVLLNSLQQYR.Q       |       | 2 | 2,6641 | 0,288 | 0      |
| 12 | O43166 SI1L1_HUMAN | K.GSGFSLDVIDGPISQRE.N |       | 2 | 2,664  | 0,448 | -1,373 |
| 12 | Q96TA1 NIBL1_HUMAN | E.ASS#PPASPLQHLLPGK.A | S679: | 2 | 2,6638 | 0,255 | -0,726 |
| 12 | P04818 TYSY_HUMAN  | R.DFLDSLGFSTR.E       |       | 2 | 2,6619 | 0,374 | -0,291 |
| 12 | Q15942 ZYX_HUMAN   | E.GGPEAPIPPPPQPR.E    |       | 3 | 2,659  | 0,17  | 0,259  |

|    |                    |                               |       |   |        |       |        |
|----|--------------------|-------------------------------|-------|---|--------|-------|--------|
| 12 | Q14669 TRIPC_HUMAN | E.GIFAVDTM*LK.K               |       | 2 | 2,6588 | 0,32  | 0,439  |
| 12 | P22314 UBA1_HUMAN  | R.VSGPDPKPGSNCSPAQSVLSE.V     |       | 2 | 2,6587 | 0,301 | 0,231  |
| 12 | P06756 ITAV_HUMAN  | R.TLGM*VYIYDGK.N              |       | 2 | 2,6563 | 0,305 | -0,669 |
| 12 | P31946 1433B_HUMAN | K.DST#LIM*QLLR.D              | T217: | 2 | 2,6547 | 0,284 | -0,19  |
| 12 | Q96RE7 BTB14_HUMAN | K.VLKAEDDAYTTFISE.T           |       | 2 | 2,6539 | 0,207 | -0,143 |
| 12 | Q9BRD0 BUD13_HUMAN | K.TGLVLTDIQRE.Q               |       | 2 | 2,6531 | 0,36  | -0,098 |
| 12 | Q07812 BAX_HUMAN   | K.TGALLLQGFIQDR.A             |       | 2 | 2,6523 | 0,419 | -0,426 |
| 12 | P27816 MAP4_HUMAN  | K.TDYIPLLDVDEK.T              |       | 2 | 2,6517 | 0,314 | -0,773 |
| 12 | P27816 MAP4_HUMAN  | E.VALTEDQVPALK.T              |       | 2 | 2,6508 | 0,404 | 0,285  |
| 12 | P12532 KCRU_HUMAN  | R.VVVDALSGLK.G                |       | 2 | 2,6503 | 0,385 | -0,183 |
| 12 | Q9BYW2 SETD2_HUMAN | R.SLKEPPIIIVPE.S              |       | 2 | 2,6502 | 0,253 | -0,366 |
| 12 | Q9P287 BCCIP_HUMAN | E.SGVPQPPDPPVQR.D             |       | 2 | 2,6479 | 0,292 | -0,266 |
| 12 | P60983 GMFB_HUMAN  | E.GISPDELKDELPE.R             |       | 2 | 2,6476 | 0,266 | -0,169 |
| 12 | Q15942 ZYX_HUMAN   | E.GGPEAPIPPPPQPR.E            |       | 2 | 2,6466 | 0,381 | 0,606  |
| 12 | P56524 HDAC4_HUMAN | R.AQS#SPASATFPVSVQEPPTKPR.F   | S632: | 3 | 2,6466 | 0,219 | 0      |
| 12 | Q99460 PSMD1_HUMAN | K.EPEPNFQLLDNPAR.V            |       | 2 | 2,6454 | 0,405 | -0,446 |
| 12 | Q5H9F3 BCRL1_HUMAN | E.LILDVVPSSR.R                |       | 2 | 2,6453 | 0,154 | 0,111  |
| 12 | O95396 MOC53_HUMAN | E.GAAVPIYVICK.L               |       | 2 | 2,6451 | 0,384 | 0,205  |
| 12 | Q9NP79 VTA1_HUMAN  | R.DPVVAYYCR.L                 |       | 2 | 2,6445 | 0,353 | 0,107  |
| 12 | P35221 CTNA1_HUMAN | R.AIM*AQLPQEQK.A              |       | 2 | 2,6443 | 0,136 | -0,479 |
| 12 | Q9BZK7 TBL1R_HUMAN | K.LAQQQAAAAAAAAAAAAASQQGSAK.N |       | 3 | 2,643  | 0,099 | -0,089 |
| 12 | P25205 MCM3_HUMAN  | K.VALLDVFRE.A                 |       | 2 | 2,6425 | 0,373 | -0,23  |
| 12 | O75794 CD123_HUMAN | E.VTVQSPSYLSYR.L              |       | 2 | 2,6422 | 0,396 | -0,606 |
| 12 | P11940 PABP1_HUMAN | R.ALDTM*NFDVIK.G              |       | 2 | 2,642  | 0,142 | -0,095 |
| 12 | O60504 VINEX_HUMAN | R.QGIFPASYVQVSR.E             |       | 2 | 2,6419 | 0,232 | -0,336 |
| 12 | P07814 SYEP_HUMAN  | K.SLCIPFKPLCE.L               |       | 2 | 2,6408 | 0,296 | -0,179 |
| 12 | Q9Y5U2 TSSC4_HUMAN | R.VPPVPDYVAHPE.R              |       | 2 | 2,6399 | 0,316 | -1,109 |
| 12 | Q8WTT2 NOC3L_HUMAN | E.VATESPLDFTK.Y               |       | 2 | 2,6398 | 0,523 | -0,303 |
| 12 | O43290 SNUT1_HUMAN | R.GLAAAALLCQNK.G              |       | 2 | 2,638  | 0,393 | -0,096 |
| 12 | O75962 TRIO_HUMAN  | R.LLVRPTSSETPSAAE.L           |       | 2 | 2,6378 | 0,424 | -0,157 |
| 12 | P51452 DUS3_HUMAN  | K.DSGITYLGIK.A                |       | 2 | 2,6344 | 0,288 | 0,229  |
| 12 | P08047 SP1_HUMAN   | E.SQPSPLALLAATCSR.I           |       | 3 | 2,6342 | 0,289 | 0,465  |
| 12 | Q9Y446 PKP3_HUMAN  | R.LGPGGLDDRYSLVSE.Q           |       | 2 | 2,6335 | 0,277 | -0,541 |



|    |                    |                        |   |        |       |        |
|----|--------------------|------------------------|---|--------|-------|--------|
| 12 | P07195 LDHB_HUMAN  | K.M*VVESAYEVIK.L       | 2 | 2,632  | 0,275 | -0,95  |
| 12 | Q9Y490 TLN1_HUMAN  | R.AAM*EPIVISAK.T       | 2 | 2,631  | 0,237 | 0,639  |
| 12 | P62191 PRS4_HUMAN  | E.SVELPLTHPE.Y         | 2 | 2,63   | 0,322 | 0      |
| 12 | P50395 GDIB_HUMAN  | K.FVSISDLLVPK.D        | 2 | 2,6287 | 0,352 | -0,401 |
| 12 | Q15029 U5S1_HUMAN  | K.ITM*IAEPLEK.G        | 2 | 2,6271 | 0,331 | 0,21   |
| 12 | O15294 OGT1_HUMAN  | K.AFLDSLDPVK.I         | 2 | 2,6261 | 0,367 | 0,331  |
| 12 | P17174 AATC_HUMAN  | K.NLDYVATSIHE.A        | 2 | 2,6257 | 0,092 | 0,387  |
| 12 | Q09666 AHNK_HUMAN  | K.ISM*PDVNLNLK.G       | 2 | 2,6252 | 0,201 | 0,484  |
| 12 | Q49A88 CCD14_HUMAN | E.ASAPGIISALSK.Q       | 2 | 2,623  | 0,399 | 0      |
| 12 | Q9Y2W2 WBP11_HUMAN | K.SGPSVPVSVQTKDDVYE.A  | 2 | 2,6228 | 0,294 | -0,135 |
| 12 | Q06830 PRDX1_HUMAN | R.LVQAFQFTDK.H         | 2 | 2,6225 | 0,252 | -0,102 |
| 12 | P17844 DDX5_HUMAN  | K.QVSDLISVLR.E.A       | 2 | 2,6212 | 0,378 | -0,194 |
| 12 | O75794 CD123_HUMAN | K.SVILPLQNVK.D         | 2 | 2,6205 | 0,283 | 0,101  |
| 12 | Q13438 OS9_HUMAN   | R.AM*LALTSTLNK.L       | 2 | 2,619  | 0,331 | -0,31  |
| 12 | Q86UP2 KTN1_HUMAN  | E.ALCVVDLLKE.K         | 2 | 2,6188 | 0,286 | 0,316  |
| 12 | Q9HAV4 XPO5_HUMAN  | K.AVTVM*M*DPNSTQR.Y    | 2 | 2,6182 | 0,471 | -0,659 |
| 12 | P36776 LONM_HUMAN  | R.LAQPYPVGVFLK.R       | 2 | 2,6182 | 0,401 | -0,198 |
| 12 | P49750 YLPM1_HUMAN | K.SQLLAPPPSAPPGNK.T    | 2 | 2,6168 | 0,126 | -0,466 |
| 12 | Q13190 STX5_HUMAN  | K.DVAIDM*M*DSR.T       | 2 | 2,6165 | 0,338 | 0      |
| 12 | Q9H074 PAIP1_HUMAN | K.APGFLQPPPLR.Q        | 2 | 2,616  | 0,324 | 0,205  |
| 12 | O15031 PLXB2_HUMAN | R.QM*VQVSDQDM*NTHLAE.I | 2 | 2,6149 | 0,219 | -0,195 |
| 12 | P61158 ARP3_HUMAN  | E.DHYFLLTEPPLNTPE.N    | 2 | 2,6148 | 0,284 | -0,068 |
| 12 | Q53GS9 SNUT2_HUMAN | R.EAPASVVPFVR.V        | 2 | 2,6134 | 0,293 | 0,312  |
| 12 | Q9Y4B4 ARIP4_HUMAN | R.VLVNLNHPPEEE.N       | 2 | 2,6128 | 0,139 | 0      |
| 12 | O95071 UBR5_HUMAN  | R.VLLLPLERDSE.L        | 2 | 2,6124 | 0,284 | -0,095 |
| 12 | Q99717 SMAD5_HUMAN | R.DVQPVAAYECPK.H       | 2 | 2,6123 | 0,463 | 0,191  |
| 12 | Q92598 HS105_HUMAN | K.VLGTAFDPFLGGK.N      | 2 | 2,6121 | 0,444 | 0,461  |
| 12 | P40692 MLH1_HUMAN  | E.DLFYNIATR.R          | 2 | 2,6117 | 0,254 | 0      |
| 12 | Q9NQW6 ANLN_HUMAN  | E.SSLFSPM*PSEEK.A      | 2 | 2,6115 | 0,307 | 0,18   |
| 12 | Q9Y490 TLN1_HUMAN  | E.DVIATANLSR.R         | 2 | 2,6108 | 0,265 | 0,345  |
| 12 | P45974 UBP5_HUMAN  | E.EALLSVLPTIR.V        | 2 | 2,6102 | 0,218 | -0,101 |
| 12 | O95295 S25BP_HUMAN | K.VALDLDPYVK.K         | 2 | 2,6085 | 0,29  | 0      |
| 12 | Q15020 SART3_HUMAN | K.LFISGLPFSCTK.E       | 2 | 2,6069 | 0,378 | -0,178 |

|    |                     |                               |       |   |        |       |        |
|----|---------------------|-------------------------------|-------|---|--------|-------|--------|
| 12 | O75534 CSDE1_HUMAN  | E.DGIIAYDDCGVK.L              |       | 2 | 2,6065 | 0,368 | 0,092  |
| 12 | P40926 MDHM_HUMAN   | K.TIPLISQCTPK.V               |       | 2 | 2,6064 | 0,311 | -0,356 |
| 12 | Q86XP3 DDX42_HUMAN  | K.IIDPLPPIDHSE.I              |       | 2 | 2,6051 | 0,396 | 0,181  |
| 12 | Q08629 TICN1_HUMAN  | R.FDTSILPICK.D                |       | 2 | 2,604  | 0,227 | 0,102  |
| 12 | Q9UQ35 SRRM2_HUMAN  | E.GDAPFSEPGTTSTQRPSS#PETATK.Q | S323: | 3 | 2,6006 | 0,189 | 0      |
| 12 | P17568 NDUB7_HUMAN  | R.DSFPNFLACKQE.R              |       | 2 | 2,5996 | 0,161 | -0,084 |
| 12 | P27816 MAP4_HUMAN   | E.QVVDPIQTDPFK.M              |       | 2 | 2,5977 | 0,319 | -0,176 |
| 12 | Q92917 GPKOW_HUMAN  | E.DVLSPTDCVCR.T               |       | 2 | 2,5974 | 0,327 | 0,277  |
| 12 | Q8WWM7 ATX2L_HUMAN  | K.ISLAPTDVKE.L                |       | 2 | 2,5967 | 0,26  | 0,227  |
| 12 | Q7Z6Z7 HUWE1_HUMAN  | R.DLSM*SEEDQM*M*R.A           |       | 2 | 2,5961 | 0,391 | -0,642 |
| 12 | P31946 1433B_HUMAN  | D.STLIM*QLLR.D                |       | 2 | 2,5957 | 0,102 | -0,112 |
| 12 | Q8NEN9 PDZD8_HUMAN  | R.LSEPGTDLVEPSPK.H            |       | 2 | 2,5953 | 0,217 | 0,249  |
| 12 | Q9Y5K6 CD2AP_HUMAN  | K.LGLFPSNFVKE.L               |       | 2 | 2,5934 | 0,256 | -0,975 |
| 12 | Q9H6R7 CB044_HUMAN  | D.AEPVTQPASLPR.H              |       | 2 | 2,5922 | 0,094 | 0      |
| 12 | Q10567 AP1B1_HUMAN  | E.VVLAEKPLISEE.T              |       | 2 | 2,5911 | 0,298 | -0,552 |
| 12 | Q7Z4V5 HDGR2_HUMAN  | K.YPIFFFGTHE.T                |       | 2 | 2,591  | 0,38  | -0,388 |
| 12 | Q9UL42 PNMA2_HUMAN  | E.DTDVSAIPSEVQ GK.G           |       | 2 | 2,5905 | 0,216 | -0,253 |
| 12 | Q93034 CUL5_HUMAN   | K.LALPADSVNIK.I               |       | 2 | 2,5848 | 0,351 | -0,321 |
| 12 | Q9Y536 PAL4B_HUMAN  | R.IIPGFMCQGGDFTR.H            |       | 2 | 2,5809 | 0,534 | -0,153 |
| 12 | Q99615 DNJC7_HUMAN  | K.LDDAIEDCTNAVK.L             |       | 2 | 2,5795 | 0,213 | -1,083 |
| 12 | Q8NHW5 Q8NHW5_HUMAN | D.TTAAPAAAAAPAK.V             |       | 2 | 2,5775 | 0,484 | -0,549 |
| 12 | P05388 RLA0_HUMAN   | R.GNVGFVFTKEDLTE.I            |       | 2 | 2,5757 | 0,352 | -0,784 |
| 12 | P05362 ICAM1_HUMAN  | K.VTLNGVPAQPLGPR.A            |       | 2 | 2,5744 | 0,33  | 0,086  |
| 12 | Q15154 PCM1_HUMAN   | K.YM*PAVTSTPTVNQHE.T          |       | 2 | 2,5733 | 0,395 | -0,433 |
| 12 | O95347 SMC2_HUMAN   | K.ILTTIEDLDQK.K               |       | 2 | 2,5716 | 0,22  | -0,757 |
| 12 | Q14562 DHX8_HUMAN   | E.LVEEPPFLR.G                 |       | 2 | 2,5712 | 0,196 | 0      |
| 12 | Q9Y490 TLN1_HUMAN   | K.ASAGPQPLLQ SCK.A            |       | 2 | 2,5711 | 0,357 | 0,67   |
| 12 | Q02880 TOP2B_HUMAN  | K.DLIQM*LVQR.G                |       | 2 | 2,5699 | 0,22  | -0,216 |
| 12 | Q9GZS3 WDR61_HUMAN  | E.TVVTGSLDDLVK.V              |       | 2 | 2,5694 | 0,4   | -0,098 |
| 12 | Q96TA1 NIBL1_HUMAN  | K.AVDLGP PPSDQE.T             |       | 2 | 2,5684 | 0,418 | -0,09  |
| 12 | Q09666 AHNK_HUMAN   | K.ISM*PDIDLNLK.G              |       | 2 | 2,5667 | 0,294 | 0,287  |
| 12 | P11142 HSP7C_HUMAN  | R.FDDAVVQSDM*K.H              |       | 2 | 2,5664 | 0,353 | 0,096  |
| 12 | Q7Z6Z7 HUWE1_HUMAN  | R.AIAM*SLGQDIPM*DQR.A         |       | 3 | 2,5655 | 0,256 | 0,327  |

|    |                     |                           |        |   |        |       |        |
|----|---------------------|---------------------------|--------|---|--------|-------|--------|
| 12 | Q53T59 H1BP3_HUMAN  | E.VDPDEGLFGPGR.K          |        | 2 | 2,565  | 0,262 | -0,097 |
| 12 | P62736 ACTA_HUMAN   | K.EITALAPSTM*K.I          |        | 2 | 2,564  | 0,298 | 0      |
| 12 | P46100 ATRX_HUMAN   | E.VIEIEDAS#PTKCPITTK.L    | S1527: | 3 | 2,5627 | 0,2   | 0,277  |
| 12 | Q8IWI9 MGAP_HUMAN   | R.EEDKDPVLYFE.S           |        | 2 | 2,5599 | 0,393 | -0,237 |
| 12 | Q5VWQ8 DAB2P_HUMAN  | R.ATPVNLAGLATVR.R         |        | 2 | 2,5596 | 0,112 | 0      |
| 12 | Q7KZJ3 Q7KZJ3_HUMAN | R.SGDLGDM*EPLKGT#PLM*QK.I | T604:  | 3 | 2,5596 | 0,164 | 0,086  |
| 12 | Q8NI27 THOC2_HUMAN  | K.LTM*VVLSEK.M            |        | 2 | 2,5591 | 0,335 | 0,109  |
| 12 | Q86V48 LUZP1_HUMAN  | R.ASTNTM*ELPDTNGAGVK.S    |        | 2 | 2,559  | 0,378 | -0,071 |
| 12 | Q86SE5 RALYL_HUMAN  | R.VFIGNLNTAIVK.K          |        | 2 | 2,5584 | 0,161 | -0,284 |
| 12 | Q9UFC0 LRWD1_HUMAN  | K.VSFLPTLR.K              |        | 2 | 2,5578 | 0,292 | 0      |
| 12 | P02008 HBAZ_HUMAN   | K.FLS#VVSSVLTEK.Y         | S131:  | 2 | 2,5575 | 0,116 | 0,615  |
| 12 | Q8TB52 FBX30_HUMAN  | R.SLAAALDILNTATR.D        |        | 2 | 2,5572 | 0,221 | -0,341 |
| 12 | P14868 SYDC_HUMAN   | R.EIM*DAAEDYAKE.R         |        | 2 | 2,5565 | 0,47  | -0,174 |
| 12 | Q14157 UBP2L_HUMAN  | R.LAQM*ISDHNDADFEE.K      |        | 2 | 2,5563 | 0,308 | -0,418 |
| 12 | P52789 HXK2_HUMAN   | K.VTVGVDGTYK.L            |        | 2 | 2,5552 | 0,305 | 0,212  |
| 12 | O60244 MED14_HUMAN  | R.AGTSSQTM*PTNM*PPPR.K    |        | 2 | 2,5522 | 0,342 | 0      |
| 12 | Q92615 LARP5_HUMAN  | R.LSSLIGPSK.E             |        | 2 | 2,5517 | 0,361 | -0,361 |
| 12 | Q9Y2W1 TR150_HUMAN  | E.DLARPSGLLAQE.R          |        | 2 | 2,5511 | 0,259 | -0,096 |
| 12 | Q8N567 ZCHC9_HUMAN  | K.VDPALGEFFAK.C           |        | 2 | 2,5503 | 0,308 | -0,189 |
| 12 | Q9UBB5 MBD2_HUMAN   | E.EALM*ADILSR.A           |        | 2 | 2,5491 | 0,326 | 0,322  |
| 12 | P29692 EF1D_HUMAN   | R.ATAPQTHVS#PM*R.Q        | S133:  | 2 | 2,5488 | 0,359 | -0,161 |
| 12 | O43683 BUB1_HUMAN   | K.LPVESVHILE.D            |        | 2 | 2,5487 | 0,377 | 0,215  |
| 12 | O75083 WDR1_HUMAN   | R.DYSGQGVVKLD.V           |        | 2 | 2,548  | 0,378 | 0,413  |
| 12 | P62310 LSM3_HUMAN   | R.GDGVVLVAPPLR.V          |        | 2 | 2,5463 | 0,139 | 0,102  |
| 12 | Q13490 BIRC2_HUMAN  | E.DAVM*M*NTPVVK.S         |        | 2 | 2,5462 | 0,336 | -0,197 |
| 12 | O00170 AIP_HUMAN    | E.LDPALAPVVSRE.L          |        | 2 | 2,5456 | 0,425 | 0,193  |
| 12 | Q14738 2A5D_HUMAN   | K.SELPQDVYTIK.A           |        | 2 | 2,5447 | 0,405 | -0,472 |
| 12 | O14974 MYPT1_HUMAN  | R.LAYVAPTIPR.R            |        | 2 | 2,5437 | 0,305 | 0,332  |
| 12 | P12956 KU70_HUMAN   | E.QAVDLTLPKVE.A           |        | 2 | 2,5432 | 0,308 | -0,402 |
| 12 | P49792 RBP2_HUMAN   | R.VIPDFVCQGGDITK.H        |        | 2 | 2,5412 | 0,32  | -0,473 |
| 12 | Q15393 SF3B3_HUMAN  | E.DTPQLYVACGR.G           |        | 2 | 2,5382 | 0,525 | 0,381  |
| 12 | Q86TC9 MYPN_HUMAN   | R.LAINYDPLEKADE.T         |        | 2 | 2,5378 | 0,081 | -0,082 |
| 12 | O75083 WDR1_HUMAN   | R.LYSILGTTLKDE.G          |        | 2 | 2,5377 | 0,284 | -0,812 |

|    |                    |                            |       |   |        |       |        |
|----|--------------------|----------------------------|-------|---|--------|-------|--------|
| 12 | Q9Y6I3 EPN1_HUMAN  | E.LLAGEVPARS#PGAFDM*SGVR.G | S410: | 2 | 2,5365 | 0,303 | -0,23  |
| 12 | Q02040 SF17A_HUMAN | R.CPGGVLSICIPDNNQPK.G      |       | 3 | 2,5361 | 0,106 | 0,68   |
| 12 | Q03164 HRX_HUMAN   | R.NLM*LPDGPKPQE.D          |       | 2 | 2,5352 | 0,13  | -0,81  |
| 12 | P22626 ROA2_HUMAN  | K.IDTIEITDR.Q              |       | 2 | 2,5339 | 0,278 | 1,129  |
| 12 | O60828 PQBP1_HUMAN | E.LDPM*DPSSYSAPR.G         |       | 2 | 2,5334 | 0,293 | -0,467 |
| 12 | Q96KC8 DNJC1_HUMAN | K.TATTLPDDM*ITQR.E         |       | 2 | 2,5319 | 0,363 | -0,742 |
| 12 | Q5QJE6 TDIF2_HUMAN | K.LYTSAPNTSQGK.D           |       | 2 | 2,5318 | 0,401 | -0,481 |
| 12 | Q7Z3U7 MON2_HUMAN  | E.ILQIVSPVR.D              |       | 2 | 2,5304 | 0,242 | 0,714  |
| 12 | Q7LOY3 RG9D1_HUMAN | K.VYVIGSFVDK.S             |       | 2 | 2,53   | 0,295 | 0,217  |
| 12 | P08621 RU17_HUMAN  | E.LRGGGGDM*AEPS#EAGD.A     | S320: | 2 | 2,5292 | 0,333 | -0,227 |
| 12 | P46013 KI67_HUMAN  | K.LDLLGNLPGSK.R            |       | 2 | 2,5266 | 0,348 | -0,217 |
| 12 | O43491 E41L2_HUMAN | R.ITPLSLQTQGSSE.T          |       | 2 | 2,5254 | 0,391 | -0,733 |
| 12 | Q8IYB7 DI3L2_HUMAN | K.DCIFTIDPSTAR.D           |       | 2 | 2,5249 | 0,284 | 0,087  |
| 12 | Q9Y4F3 LKAP_HUMAN  | R.LVCLLPSSQAR.Q            |       | 2 | 2,5213 | 0,199 | 0,098  |
| 12 | Q13596 SNX1_HUMAN  | K.ITTSLLPINNGSK.E          |       | 2 | 2,5211 | 0,345 | -0,539 |
| 12 | P28070 PSB4_HUMAN  | R.TQNPM*VTGTSVLGVK.F       |       | 2 | 2,5209 | 0,322 | -0,394 |
| 12 | Q9Y265 RUVB1_HUMAN | E.LTPCETENPM*GGYGK.T       |       | 2 | 2,5202 | 0,443 | 0      |
| 12 | Q9UIW2 PLXA1_HUMAN | K.LLLLDYAANR.L             |       | 2 | 2,5199 | 0,201 | -0,735 |
| 12 | A6NDB9 PALM3_HUMAN | R.EDVLGFLPGPR.Q            |       | 2 | 2,5199 | 0,396 | -0,61  |
| 12 | Q2M2I8 AAK1_HUMAN  | K.VQTTTPPAVQGQK.V          |       | 2 | 2,5179 | 0,401 | -0,09  |
| 12 | P52434 RPAB3_HUMAN | E.DIFDVKDIDPE.G            |       | 2 | 2,517  | 0,362 | -0,28  |
| 12 | POC7M2 RA1L3_HUMAN | R.DYFEQYGKIE.V             |       | 2 | 2,5168 | 0,211 | 0,283  |
| 12 | Q13428 TCOF_HUMAN  | K.LDSSPSVSSTLAAK.D         |       | 2 | 2,5164 | 0,401 | 0,179  |
| 12 | Q99638 RAD9A_HUMAN | R.SLFFGSILAPVR.S           |       | 2 | 2,5159 | 0,262 | -0,28  |
| 12 | Q9Y608 LRRF2_HUMAN | R.NSASATTPLSGNSSR.R        |       | 2 | 2,5141 | 0,2   | -0,168 |
| 12 | Q71U36 TBA1A_HUMAN | R.IHFPLATYAPVISAE.K        |       | 2 | 2,5139 | 0,43  | -0,225 |
| 12 | P15586 GNS_HUMAN   | D.GM*SLLPILR.G             |       | 2 | 2,5132 | 0,105 | -0,48  |
| 12 | Q15942 ZYX_HUMAN   | R.CSVCSEPIM*PEPGRDE.T      |       | 2 | 2,5127 | 0,376 | -0,195 |
| 12 | P11279 LAMP1_HUMAN | K.TSASGSCGAHLVTLE.L        |       | 2 | 2,5108 | 0,13  | -0,409 |
| 12 | Q58EX7 PKHG4_HUMAN | K.DPGPPRPAGATQDEE.L        |       | 2 | 2,5106 | 0,382 | -0,448 |
| 12 | P46776 RL27A_HUMAN | K.TGAAPIIDVVR.S            |       | 2 | 2,5104 | 0,455 | 0,219  |
| 12 | P78362 SRPK2_HUMAN | R.AADLLVNPLDPR.A           |       | 2 | 2,5098 | 0,294 | -0,66  |
| 12 | Q8WUA4 TF3C2_HUMAN | R.QPAACPGGEEVDGAPRDE.D     |       | 3 | 2,5056 | 0,096 | 0,296  |

|    |                     |                              |        |   |        |       |        |
|----|---------------------|------------------------------|--------|---|--------|-------|--------|
| 12 | Q14807 KIF22_HUMAN  | E.IGSPEPM*AAPASASQK.L        |        | 2 | 2,5045 | 0,084 | -0,392 |
| 12 | Q92797 SYMPK_HUMAN  | K.ETAAGGLT#LKEERSPQTLAPVGE.D | T1237: | 3 | 2,5032 | 0,28  | -0,225 |
| 12 | Q09666 AHNK_HUMAN   | K.GDVDVSLPKVE.G              |        | 2 | 2,5002 | 0,081 | 0,316  |
| 12 | Q8NE01 CNNM3_HUMAN  | R.DTPDATFLLR.L               |        | 2 | 2,4985 | 0,266 | 0      |
| 12 | P61160 ARP2_HUMAN   | E.ALFPHLINVE.G               |        | 2 | 2,496  | 0,314 | -0,19  |
| 12 | Q00613 HSF1_HUMAN   | E.LLSPQEPPRPPEAENS#SPDSGK.Q  | S457:  | 3 | 2,4916 | 0,108 | -0,152 |
| 12 | A6ZJA4 A6ZJA4_HUMAN | K.TFLSVVLP.L                 |        | 2 | 2,4906 | 0,34  | -0,709 |
| 12 | P13639 EF2_HUMAN    | K.SDPVVSURE.T                |        | 2 | 2,4895 | 0,344 | 0,232  |
| 12 | Q12851 M4K2_HUMAN   | E.LDSPDDTM*GTIK.R            |        | 2 | 2,4887 | 0,336 | 0,093  |
| 12 | P62269 RS18_HUMAN   | K.IAFAITAIK.G                |        | 2 | 2,4863 | 0,242 | 0,257  |
| 12 | P53367 ARFP1_HUMAN  | R.LAQQGSDLIVPAGGQR.T         |        | 2 | 2,4856 | 0,189 | -0,076 |
| 12 | Q6PKG0 LARP1_HUMAN  | R.DFVEAPPPK.V                |        | 2 | 2,4824 | 0,253 | 0,244  |
| 12 | Q08J23 NSUN2_HUMAN  | R.ILCDVPCSGDGTM*R.K          |        | 2 | 2,4815 | 0,385 | -0,535 |
| 12 | O43264 ZW10_HUMAN   | R.DSVVLSLLK.Q                |        | 2 | 2,4797 | 0,17  | 0      |
| 12 | P26640 SYVC_HUMAN   | K.DVSGPM*PDSYSR.Y            |        | 2 | 2,4794 | 0,406 | 0      |
| 12 | A4D118 A4D118_HUMAN | R.DEPLHALYDNVE.K             |        | 2 | 2,4781 | 0,212 | 0,086  |
| 12 | P50548 ERF_HUMAN    | E.GAGALAPPPPPQIK.V           |        | 2 | 2,4771 | 0,315 | 0,086  |
| 12 | Q9H4L4 SENP3_HUMAN  | R.LGLLGALM*AEDGVR.G          |        | 2 | 2,4748 | 0,318 | 0      |
| 12 | Q15054 DPOD3_HUMAN  | D.GEGCIVTEK.V                |        | 2 | 2,4734 | 0,28  | 0,123  |
| 12 | P19419 ELK1_HUMAN   | E.LPLSPSLLGGPGER.T           |        | 2 | 2,4732 | 0,159 | -0,491 |
| 12 | Q15058 KIF14_HUMAN  | R.DTPISEGPKDFE.F             |        | 2 | 2,4731 | 0,308 | -0,091 |
| 12 | P04792 HSPB1_HUMAN  | R.LFDQAFGLPR.L               |        | 2 | 2,473  | 0,211 | -0,524 |
| 12 | O14737 PDCD5_HUMAN  | R.LSNLALVKPE.K               |        | 2 | 2,473  | 0,116 | -0,9   |
| 12 | P11441 UBL4A_HUMAN  | K.LNLVVKPLE.K                |        | 2 | 2,4691 | 0,214 | 0,119  |
| 12 | P09874 PARP1_HUMAN  | K.AEPVEVVAPR.G               |        | 2 | 2,4688 | 0,315 | 0,114  |
| 12 | Q9Y5B0 CTDP1_HUMAN  | R.GPPAPSSSLPIR.Q             |        | 2 | 2,4681 | 0,284 | -0,31  |
| 12 | Q9UKD1 GMEB2_HUMAN  | K.VVSTLPSTVLGK.G             |        | 2 | 2,467  | 0,374 | 0,102  |
| 12 | P31946 1433B_HUMAN  | K.DSTLIMQLLR.D               |        | 2 | 2,4643 | 0,083 | -0,308 |
| 12 | Q6R327 RICTR_HUMAN  | E.DLLSPINQNTLQR.S            |        | 2 | 2,4637 | 0,231 | -0,242 |
| 12 | Q7Z3C6 ATG9A_HUMAN  | R.SASYPCAAPRPGAPE.T          |        | 2 | 2,4637 | 0,321 | -0,239 |
| 12 | Q9UQ84 EXO1_HUMAN   | R.TPSPSPSTALQQFR.R           |        | 2 | 2,4631 | 0,315 | -0,322 |
| 12 | P29218 IMPA1_HUMAN  | E.IQVIPLQRDDED.-             |        | 2 | 2,4625 | 0,126 | -0,423 |
| 12 | P49848 TAF6_HUMAN   | K.NVEPLYGFHAQE.F             |        | 2 | 2,4601 | 0,344 | -0,695 |

|    |                     |                        |   |        |       |        |
|----|---------------------|------------------------|---|--------|-------|--------|
| 12 | P23528 COF1_HUMAN   | K.AVLFCLSEDK.K         | 2 | 2,4591 | 0,314 | 0,413  |
| 12 | Q13330 MTA1_HUMAN   | K.SVSSVLSSLTPAK.V      | 2 | 2,4581 | 0,116 | -0,382 |
| 12 | Q12789 TF3C1_HUMAN  | K.TSQPPVPQGEAEEDSQGK.E | 2 | 2,4579 | 0,416 | -0,065 |
| 12 | Q92499 DDX1_HUMAN   | K.NQALFPACVLK.N        | 2 | 2,4576 | 0,172 | -0,097 |
| 12 | P09525 ANXA4_HUMAN  | R.DLIDDLKSE.L          | 2 | 2,457  | 0,384 | 0,349  |
| 12 | P18754 RCC1_HUMAN   | E.SCFIPQNLTSFK.N       | 2 | 2,4563 | 0,348 | -0,592 |
| 12 | Q969H8 CS010_HUMAN  | K.SYLYFTQFK.A          | 2 | 2,4559 | 0,441 | -0,306 |
| 12 | P62736 ACTA_HUMAN   | E.ITALAPSTM*K.I        | 2 | 2,4556 | 0,275 | 0,233  |
| 12 | Q9UJ70 NAGK_HUMAN   | K.AGVDPLVPLR.S         | 2 | 2,4556 | 0,355 | 0,118  |
| 12 | Q9P287 BCCIP_HUMAN  | R.TVM*LIPGDKM*NE.I     | 2 | 2,454  | 0,183 | 0      |
| 12 | Q6S8J3 A26CA_HUMAN  | K.AGFAGDDAPR.A         | 2 | 2,4537 | 0,384 | -0,062 |
| 12 | Q06203 PUR1_HUMAN   | R.IVLVDDSIVR.G         | 2 | 2,4536 | 0,153 | 0,216  |
| 12 | P53597 SUCA_HUMAN   | R.LIGPNCPGVINPGECK.I   | 2 | 2,4535 | 0,342 | 0,283  |
| 12 | P28066 PSA5_HUMAN   | E.IDAHIGCAM*SGLIAD.A   | 2 | 2,4534 | 0,327 | -0,704 |
| 12 | P40227 TCPZ_HUMAN   | K.GIDPFSLDALSK.E       | 2 | 2,4529 | 0,403 | -0,386 |
| 12 | Q00839 HNRPU_HUMAN  | E.VVM*M*IGLPGAGK.T     | 2 | 2,4492 | 0,284 | 0,203  |
| 12 | Q0VDF9 HSP7E_HUMAN  | R.DILAVLTM*K.R         | 2 | 2,4475 | 0,273 | 0,718  |
| 12 | O95425 SVIL_HUMAN   | R.GTTPVSKPLEDIE.A      | 2 | 2,446  | 0,164 | 0,088  |
| 12 | Q9UNI6 DUS12_HUMAN  | R.LFVPALDKPE.T         | 2 | 2,4459 | 0,271 | 0,648  |
| 12 | O00571 DDX3X_HUMAN  | R.VGNLGLATSFNER.N      | 2 | 2,4455 | 0,274 | -0,32  |
| 12 | Q96115 SCLY_HUMAN   | R.DAPAPAASQPSGCGK.H    | 2 | 2,4431 | 0,376 | 0      |
| 12 | Q8TER5 SOLO_HUMAN   | R.YTLDFLVPK.H          | 2 | 2,4427 | 0,272 | -0,418 |
| 12 | Q8TEW0 PARD3_HUMAN  | R.ELNAEPSQM*QIPK.E     | 2 | 2,4424 | 0,221 | -0,163 |
| 12 | P35251 RFC1_HUMAN   | R.TLAM*LDEEPK.T        | 2 | 2,4419 | 0,277 | 0,21   |
| 12 | O43809 CPSF5_HUMAN  | K.YIQQTKPLTLE.R        | 2 | 2,4409 | 0,166 | 0,274  |
| 12 | Q9NTK5 OLA1_HUMAN   | E.DGDIFFK.F            | 2 | 2,4407 | 0,302 | -0,064 |
| 12 | P34932 HSP74_HUMAN  | D.IVQLPTGLTGIK.V       | 2 | 2,4406 | 0,23  | 0,394  |
| 12 | O15355 PPM1G_HUMAN  | E.DAFLAIDAK.L          | 2 | 2,4392 | 0,155 | 0,063  |
| 12 | Q86Y82 STX12_HUMAN  | E.ADILDVNQIFKD.L       | 2 | 2,4368 | 0,243 | 0,263  |
| 12 | P12268 IMDH2_HUMAN  | R.DIDFLKEEE.H          | 2 | 2,4363 | 0,127 | 0,322  |
| 12 | Q9NWS8 RMND1_HUMAN  | E.DLM*HCTAFATADE.Y     | 2 | 2,436  | 0,257 | -0,081 |
| 12 | A8K710 A8K710_HUMAN | E.QSNTPLLLPLAAR.M      | 2 | 2,4359 | 0,344 | 0      |
| 12 | O95402 MED26_HUMAN  | R.LLQAIDPQSNIR.N       | 2 | 2,4355 | 0,237 | -0,446 |

|    |                     |                             |            |   |        |       |        |
|----|---------------------|-----------------------------|------------|---|--------|-------|--------|
| 12 | Q96TA1 NIBL1_HUMAN  | R.DSM*VM*HNS#DPNLHLLAE.G    | S561:      | 3 | 2,4333 | 0,083 | 0,09   |
| 12 | O95347 SMC2_HUMAN   | K.GLVASLISVKD.T             |            | 2 | 2,4332 | 0,357 | 0,221  |
| 12 | P27816 MAP4_HUMAN   | K.DM*ELPTEKE.V              |            | 2 | 2,4331 | 0,266 | 0      |
| 12 | P15923 TFE2_HUMAN   | R.AGAPGALSPS#YDGGHLHGLQSK.I | S381:      | 3 | 2,4314 | 0,364 | -0,355 |
| 12 | Q9Y2B1 TMEM5_HUMAN  | K.SM*GAPFIFIK.N             |            | 2 | 2,4301 | 0,312 | -0,108 |
| 12 | Q9Y230 RUVB2_HUMAN  | R.AVLIAGQPGTGK.T            |            | 2 | 2,4298 | 0,35  | -0,219 |
| 12 | Q9BRT6 CL031_HUMAN  | K.LDGDVLM*KDVQE.I           |            | 2 | 2,4293 | 0,234 | -0,354 |
| 12 | Q03164 HRX_HUMAN    | K.SAFDM*FNFLASK.H           |            | 2 | 2,4293 | 0,27  | -0,263 |
| 12 | Q12931 TRAP1_HUMAN  | E.DIPLNLSRE.L               |            | 2 | 2,4273 | 0,323 | 0      |
| 12 | P16219 ACADS_HUMAN  | K.DSILGEPGM*GFK.I           |            | 2 | 2,4272 | 0,201 | -0,289 |
| 12 | Q8WXH0 SYNE2_HUMAN  | K.SFLDVLSIK.R               |            | 2 | 2,4255 | 0,255 | -0,119 |
| 12 | Q15149 PLEC1_HUMAN  | K.LISLFQAM*K.K              |            | 2 | 2,4239 | 0,36  | 0,572  |
| 12 | Q96HY6 CT116_HUMAN  | R.VAQPGPLEPEEPR.A           |            | 2 | 2,4239 | 0,302 | -0,258 |
| 12 | O75534 CSDE1_HUMAN  | E.FTVVPDM*LSAQR.N           |            | 2 | 2,4218 | 0,28  | 0      |
| 12 | Q13200 PSMD2_HUMAN  | K.DTSLYRPALEE.L             |            | 2 | 2,42   | 0,203 | -0,66  |
| 12 | Q9UQ35 SRRM2_HUMAN  | K.THTTALAGRS#PSPAS#GRR.G    | S295:S300: | 3 | 2,4188 | 0,145 | 0      |
| 12 | P98174 FGD1_HUMAN   | R.CLFLAPGPR.D               |            | 2 | 2,4178 | 0,248 | 0,533  |
| 12 | P12270 TPR_HUMAN    | R.FGPPEDM*PQTSSSHSD.L       |            | 2 | 2,417  | 0,379 | -0,211 |
| 12 | Q9NYK5 RM39_HUMAN   | K.TDPGTVFVM*NK.N            |            | 2 | 2,4166 | 0,442 | 0,1    |
| 12 | Q14137 BOP1_HUMAN   | R.VNVDPEDLIPK.L             |            | 2 | 2,4165 | 0,205 | 0      |
| 12 | Q99459 CDC5L_HUMAN  | R.LGLLGLPAPK.N              |            | 2 | 2,4155 | 0,152 | 0,125  |
| 12 | P42166 LAP2A_HUMAN  | E.LVANNVTLPAGEQR.K          |            | 3 | 2,4154 | 0,182 | 0,494  |
| 12 | Q14202 ZMYM3_HUMAN  | E.LLGLGGLLYK.A              |            | 2 | 2,4123 | 0,27  | -0,35  |
| 12 | Q9BXP5 ARS2_HUMAN   | E.VAFFNFLTDAK.R             |            | 2 | 2,4122 | 0,351 | -0,44  |
| 12 | O00442 RTC1_HUMAN   | R.AFVAGVLPFK.V              |            | 2 | 2,4113 | 0,217 | 0      |
| 12 | Q6PJM5 Q6PJM5_HUMAN | K.RGS#IGENQIKDEK.I          | S196:      | 3 | 2,4097 | 0,113 | 0,235  |
| 12 | Q00613 HSF1_HUMAN   | K.LLTDVQLM*K.G              |            | 2 | 2,4085 | 0,318 | 0,113  |
| 12 | P56524 HDAC4_HUMAN  | K.DGPVVTALK.K               |            | 2 | 2,4082 | 0,353 | 0,271  |
| 12 | A4D1P6 WDR91_HUMAN  | R.LSPAQGGPPQPQSSAK.K        |            | 2 | 2,4072 | 0,243 | -0,163 |
| 12 | P43686 PRS6B_HUMAN  | E.AVELPLTHFE.L              |            | 2 | 2,4071 | 0,281 | -0,211 |
| 12 | P07814 SYEP_HUMAN   | E.DIQVTLFTR.A               |            | 2 | 2,406  | 0,221 | 0,223  |
| 12 | Q15121 PEA15_HUMAN  | K.DNLSYIEHIFE.I             |            | 2 | 2,4058 | 0,177 | -0,265 |
| 12 | Q02952 AKA12_HUMAN  | E.ALICVGSSK.K               |            | 2 | 2,4052 | 0,352 | 0,065  |

|    |                    |                             |       |   |        |       |        |
|----|--------------------|-----------------------------|-------|---|--------|-------|--------|
| 12 | P49366 DHYS_HUMAN  | R.EAPAGALAAVLK.H            |       | 2 | 2,4044 | 0,314 | 0,22   |
| 12 | P04075 ALDOA_HUMAN | K.IGEHTPSALAIM*E.N          |       | 2 | 2,4041 | 0,196 | 0,088  |
| 12 | P55072 TERA_HUMAN  | E.VDIGIPDATGRLE.I           |       | 2 | 2,4025 | 0,372 | 0      |
| 12 | Q9UIG0 BAZ1B_HUMAN | K.IISNVPADSLIR.T            |       | 2 | 2,4012 | 0,291 | 0,188  |
| 12 | Q9UNE7 STUB1_HUMAN | R.LNFGDDIPSALR.I            |       | 2 | 2,399  | 0,169 | -0,278 |
| 12 | Q9UQ35 SRRM2_HUMAN | K.FSPFPVQDRPE.S             |       | 2 | 2,3971 | 0,196 | -0,093 |
| 12 | P00558 PGK1_HUMAN  | K.ALES#PERPFLAILGGAK.V      | S203: | 2 | 2,3968 | 0,381 | -0,198 |
| 12 | Q9Y5K6 CD2AP_HUMAN | K.LGLFPSNFVK.E              |       | 2 | 2,3963 | 0,286 | -0,326 |
| 12 | Q9Y5B9 SP16H_HUMAN | E.DGPATVLTSVK.K             |       | 2 | 2,3933 | 0,341 | 0,224  |
| 12 | O95470 SGPL1_HUMAN | D.SLYSTDTVTQGSQM*NGS#PKPH.- | S564: | 3 | 2,3932 | 0,368 | -0,157 |
| 12 | Q96B54 ZN428_HUMAN | R.AAQPPAQPCQLCGR.S          |       | 2 | 2,3927 | 0,447 | -0,393 |
| 12 | Q96FN4 CPNE2_HUMAN | R.DIVQFVPR.E                |       | 2 | 2,3922 | 0,278 | 0,327  |
| 12 | Q99536 VAT1_HUMAN  | K.VLLVPGPEKEN.-             |       | 2 | 2,3912 | 0,364 | 0,204  |
| 12 | Q9BZK7 TBL1R_HUMAN | E.DGTLFDGRPIE.S             |       | 2 | 2,3832 | 0,369 | 0,3    |
| 12 | P42166 LAP2A_HUMAN | E.DLLDQLVK.Y                |       | 2 | 2,3796 | 0,13  | -0,258 |
| 12 | P22102 PUR2_HUMAN  | E.CQVILPLLK.S               |       | 2 | 2,3773 | 0,092 | -0,225 |
| 12 | P01112 RASH_HUMAN  | E.DAFYTLVRE.I               |       | 2 | 2,3772 | 0,394 | 0,219  |
| 12 | Q15003 CND2_HUMAN  | R.TM*CPLLSM*KPGE.Y          |       | 2 | 2,3739 | 0,099 | -1,398 |
| 12 | P49023 PAXI_HUMAN  | K.DYFDM*FAPK.C              |       | 2 | 2,3735 | 0,256 | 0,212  |
| 12 | Q14554 PDIA5_HUMAN | R.LLSTVAQAVK.G              |       | 2 | 2,3735 | 0,217 | 0,474  |
| 12 | Q9P243 ZN406_HUMAN | E.VITLLLSK.A                |       | 2 | 2,373  | 0,168 | 0,275  |
| 12 | Q9H773 XTP3A_HUMAN | R.VDLPLAVLSK.M              |       | 2 | 2,3722 | 0,311 | 0      |
| 12 | Q5T1M5 FKB15_HUMAN | R.TILGTIM*NTIK.M            |       | 2 | 2,3714 | 0,24  | -0,4   |
| 12 | P04083 ANXA1_HUMAN | E.ATIIDILTK.R               |       | 2 | 2,3701 | 0,355 | 0      |
| 12 | Q9Y6Q9 NCOA3_HUMAN | K.LDNSPNM*NITQPSK.V         |       | 2 | 2,3679 | 0,206 | 0,232  |
| 12 | Q96J84 KIRR1_HUMAN | K.LTVLIPPEDTR.I             |       | 2 | 2,3679 | 0,266 | 0      |
| 12 | P18583 SON_HUMAN   | K.IM*LVEPPVAK.V             |       | 2 | 2,3678 | 0,089 | 0,219  |
| 12 | Q9NRV9 HEBP1_HUMAN | R.IPNQFQSDPPAPSDK.S         |       | 2 | 2,3667 | 0,266 | -0,074 |
| 12 | Q15293 RCN1_HUMAN  | E.FTAFLHPEEFE.H             |       | 2 | 2,3628 | 0,323 | -0,714 |
| 12 | Q8IY17 PLPL6_HUMAN | R.LFSPGLPTRTS#PVR.G         | S353: | 2 | 2,3612 | 0,278 | -0,358 |
| 12 | Q8N3V7 SYNPO_HUMAN | R.TPPASLYHGYLPE.N           |       | 2 | 2,361  | 0,133 | -0,169 |
| 12 | O15042 SR140_HUMAN | E.SLCDS#PHQNLRSRPLLE.N      | S67:  | 3 | 2,3606 | 0,221 | 0,094  |
| 12 | Q9BYW2 SETD2_HUMAN | K.LDELPIFK.S                |       | 2 | 2,36   | 0,171 | 0,25   |



|    |                     |                         |                 |   |        |       |        |
|----|---------------------|-------------------------|-----------------|---|--------|-------|--------|
| 12 | P61163 ACTZ_HUMAN   | E.LLFRPDLIGEES.E.G      |                 | 2 | 2,3593 | 0,218 | -0,804 |
| 12 | O75691 UTP20_HUMAN  | K.NIQGTITGDILPR.L       |                 | 2 | 2,359  | 0,12  | 0,087  |
| 12 | Q59FG6 Q59FG6_HUMAN | K.SQLDILSLK.Q           |                 | 2 | 2,3586 | 0,188 | -0,216 |
| 12 | Q86TI0 TBCD1_HUMAN  | E.DGPFPPPEEK.K          |                 | 2 | 2,3571 | 0,252 | 0,521  |
| 12 | P05556 ITB1_HUMAN   | K.TVM*PYISTTPAK.L       |                 | 2 | 2,3571 | 0,283 | -0,552 |
| 12 | Q9H3P7 GCP60_HUMAN  | K.VNATVPSNM*M*SVNGQAK.T |                 | 2 | 2,356  | 0,362 | -0,274 |
| 12 | Q9UBG0 MRC2_HUMAN   | R.DCSIALPYVCK.K         |                 | 2 | 2,3551 | 0,249 | 0      |
| 12 | P46821 MAP1B_HUMAN  | E.DYVM*AVVDK.A          |                 | 2 | 2,3506 | 0,311 | -0,116 |
| 12 | O95881 TXD12_HUMAN  | R.IFLDPSGK.V            |                 | 2 | 2,3501 | 0,257 | -0,062 |
| 12 | Q8N5D0 WDTC1_HUMAN  | R.DITAALFSK.N           |                 | 2 | 2,3477 | 0,367 | 0,126  |
| 12 | Q14160 LAP4_HUMAN   | E.ACPCQPDSGSPLPAEEK.R   |                 | 3 | 2,3476 | 0,105 | -0,093 |
| 12 | Q8NCM9 Q8NCM9_HUMAN | R.SSDITSDLGNVLTSTPNAK.T |                 | 3 | 2,3468 | 0,229 | 0,286  |
| 12 | O00505 IMA3_HUMAN   | K.SGILPILVK.C           |                 | 2 | 2,3466 | 0,105 | 0,065  |
| 12 | P23396 RS3_HUMAN    | K.GGKPEPPAM*PQPVPPTA.-  |                 | 2 | 2,3455 | 0,306 | -0,23  |
| 12 | Q9H0H5 RGAP1_HUMAN  | R.VRS#T#LT#KNTPR.F      | S600:T601:T603: | 2 | 2,344  | 0,121 | -0,081 |
| 12 | Q15833 STXB2_HUMAN  | R.AADPVSPLLHE.L         |                 | 2 | 2,3428 | 0,384 | 0,212  |
| 12 | P31146 COR1A_HUMAN  | R.DAGPLLISLK.D          |                 | 2 | 2,3428 | 0,272 | -0,119 |
| 12 | P49903 SPS1_HUMAN   | K.VM*PLIQGFK.D          |                 | 2 | 2,3415 | 0,284 | 0,21   |
| 12 | P78559 MAP1A_HUMAN  | R.VPSAPGQESPIPPK.L      |                 | 2 | 2,34   | 0,278 | 0,161  |
| 12 | P56545 CTBP2_HUMAN  | E.SEPFSAQGPKL.D         |                 | 2 | 2,3398 | 0,298 | 0,466  |
| 12 | Q9UKK3 PARP4_HUMAN  | K.SPVDVLQIFR.V          |                 | 2 | 2,3367 | 0,349 | 0      |
| 12 | Q9NTI5 PDS5B_HUMAN  | E.DYTM*SSPLPGK.K        |                 | 2 | 2,3365 | 0,315 | 0      |
| 12 | O14497 ARI1A_HUMAN  | R.ITATM*DDM*LSTR.S      |                 | 2 | 2,3324 | 0,449 | 0      |
| 12 | Q9Y536 PAL4B_HUMAN  | R.IIPGFM*CQGGD.F        |                 | 2 | 2,331  | 0,205 | -0,403 |
| 12 | P31689 DNJA1_HUMAN  | E.NGFLSPDKLSLLE.K       |                 | 2 | 2,3303 | 0,313 | -0,426 |
| 12 | Q9NPB8 GDE5_HUMAN   | E.LTFDQLQLLK.L          |                 | 2 | 2,3293 | 0,266 | 0,1    |
| 12 | Q9UMZ2 SYNG_HUMAN   | E.EASPVPLTSNVGSTVK.G    |                 | 2 | 2,3287 | 0,178 | -0,692 |
| 12 | Q02127 PYRD_HUMAN   | E.DGLPLGVNLGK.N         |                 | 2 | 2,3286 | 0,409 | 0,451  |
| 12 | O43290 SNUT1_HUMAN  | E.AAGTTAAAGTGGATEQPPR.H |                 | 3 | 2,3273 | 0,348 | -0,109 |
| 12 | Q9NR33 DPOE4_HUMAN  | E.AAASQPQAPTSVPGAR.L    |                 | 2 | 2,3271 | 0,222 | -0,081 |
| 12 | Q9Y490 TLN1_HUMAN   | E.LGPLANQLTSDYGR.L      |                 | 2 | 2,3222 | 0,364 | -0,649 |
| 12 | Q14160 LAP4_HUMAN   | R.QSPASPPPLGGGAPVR.T    |                 | 2 | 2,3207 | 0,176 | 0,246  |
| 12 | P04843 RPN1_HUMAN   | E.DLLDYGPFR.D           |                 | 2 | 2,3195 | 0,309 | 0,111  |

|    |                     |                              |        |   |        |       |        |
|----|---------------------|------------------------------|--------|---|--------|-------|--------|
| 12 | Q14160 LAP4_HUMAN   | E.VS#PGVIANPFAAGIGHR.N       | S1203: | 2 | 2,3173 | 0,491 | -0,42  |
| 12 | Q14980 NUMA1_HUMAN  | E.SLYFTPIPAR.S               |        | 2 | 2,3157 | 0,33  | 0,209  |
| 12 | Q13322 GRB10_HUMAN  | E.DSNIFSLIAGR.K              |        | 2 | 2,3137 | 0,311 | -0,205 |
| 12 | P43243 MATR3_HUMAN  | E.NLPQILLQLK.R               |        | 2 | 2,3135 | 0,169 | 0,207  |
| 12 | Q9Y6M1 IF2B2_HUMAN  | K.LPLAGQVLLK.S               |        | 2 | 2,3126 | 0,324 | 0,58   |
| 12 | Q96ST3 SIN3A_HUMAN  | K.NPSIAVPIVLK.R              |        | 2 | 2,3126 | 0,36  | -0,212 |
| 12 | Q86VI3 IQGA3_HUMAN  | R.SLTAHSLPLAE.K              |        | 2 | 2,3126 | 0,139 | -0,195 |
| 12 | A8K6V7 A8K6V7_HUMAN | K.STT#PPPAEPLVSLPQEPKPR.V    | T227:  | 2 | 2,3119 | 0,184 | 0,221  |
| 12 | Q09028 RBBP4_HUMAN  | R.YM*PQNPCIATK.T             |        | 2 | 2,3086 | 0,421 | -1,008 |
| 12 | Q9UJV9 DDX41_HUMAN  | K.VPPVLQVLHCGDE.S            |        | 2 | 2,3069 | 0,16  | 0,751  |
| 12 | P30101 PDIA3_HUMAN  | K.DPNIVIAK.M                 |        | 2 | 2,3055 | 0,211 | 0,28   |
| 12 | Q9HAV7 GRPE1_HUMAN  | K.NSGQNLEEDM*GQSEQKADPPATE.K |        | 3 | 2,3055 | 0,241 | 0,147  |
| 12 | Q9BR76 COR1B_HUMAN  | R.DADPILISLRE.A              |        | 2 | 2,3041 | 0,283 | -0,393 |
| 12 | P46821 MAP1B_HUMAN  | D.LTGQVPTPVVK.Q              |        | 2 | 2,304  | 0,272 | -0,107 |
| 12 | O14776 TCRG1_HUMAN  | R.GPPPPPTASEPTR.R            |        | 2 | 2,3033 | 0,167 | -0,281 |
| 12 | Q9BVP2 GNL3_HUMAN   | R.SFILDKIIIE.D               |        | 2 | 2,2984 | 0,155 | -0,101 |
| 12 | Q9HAU5 RENT2_HUMAN  | K.AFVPAILFK.D                |        | 2 | 2,2961 | 0,198 | 0,061  |
| 12 | Q13185 CBX3_HUMAN   | E.AEPEEFVVEK.V               |        | 2 | 2,2956 | 0,098 | 0,829  |
| 12 | P14406 CX7A2_HUMAN  | E.DDEIPLYLK.G                |        | 2 | 2,2936 | 0,307 | 0,331  |
| 12 | P55809 SCOT_HUMAN   | E.EAITGDFALVK.A              |        | 2 | 2,2924 | 0,414 | 0,524  |
| 12 | P40925 MDHC_HUMAN   | E.LQDCALPLLK.D               |        | 2 | 2,292  | 0,2   | 0,313  |
| 12 | Q9Y2H0 DLGP4_HUMAN  | R.GGVAPAPEAPEPPPK.H          |        | 3 | 2,2915 | 0,159 | 0,194  |
| 12 | Q9Y3B9 RRP15_HUMAN  | R.DDFM*M*GASM*K.D            |        | 2 | 2,2913 | 0,29  | -0,31  |
| 12 | Q8IYS1 P20D2_HUMAN  | E.NAAYLPDM*AEHD.V            |        | 2 | 2,2897 | 0,328 | 0,09   |
| 12 | O14976 GAK_HUMAN    | E.VGAGPAVPPQACK.A            |        | 2 | 2,2892 | 0,263 | -0,195 |
| 12 | Q9Y448 T4AF1_HUMAN  | K.GLDPALGSETLASR.Q           |        | 2 | 2,2892 | 0,359 | -0,352 |
| 12 | P78364 PHC1_HUMAN   | E.ALSPTSPGPLSVR.A            |        | 2 | 2,2855 | 0,335 | 0,19   |
| 12 | A8K6V7 A8K6V7_HUMAN | K.STT#PPPAEPLVSLPQEPKPR.V    | T227:  | 3 | 2,2833 | 0,084 | -0,083 |
| 12 | Q9H9A6 LRC40_HUMAN  | K.SVPDEIILLR.S               |        | 2 | 2,2823 | 0,096 | -0,317 |
| 12 | Q9Y5Q8 TF3C5_HUMAN  | E.DEEVPKQPLE.A               |        | 2 | 2,2813 | 0,162 | 0,103  |
| 12 | O15355 PPM1G_HUMAN  | K.VLTLTDDHE.F                |        | 2 | 2,2811 | 0,275 | 0,234  |
| 12 | P46013 KI67_HUMAN   | K.AQPLEDLAGLKE.L             |        | 2 | 2,2804 | 0,185 | -0,095 |
| 12 | Q8WU20 FRS2_HUMAN   | R.DCTPTVFNFDIR.R             |        | 2 | 2,2741 | 0,392 | -0,986 |

|    |                    |                        |       |   |        |       |        |
|----|--------------------|------------------------|-------|---|--------|-------|--------|
| 12 | Q6P2E9 EDC4_HUMAN  | E.VEPLGLPQASPSR.T      |       | 2 | 2,2736 | 0,326 | 0      |
| 12 | Q12888 TP53B_HUMAN | E.DSSVVIVDVKEPS#PR.V   | S765: | 3 | 2,2728 | 0,194 | -1,929 |
| 12 | P35579 MYH9_HUMAN  | R.GDLPFVVR.R           |       | 2 | 2,2716 | 0,146 | 0,122  |
| 12 | Q8TF39 ZN483_HUMAN | D.ESALDKIIEER.C        |       | 2 | 2,2713 | 0,089 | -0,208 |
| 12 | P61289 PSME3_HUMAN | E.DLVANFFPK.K          |       | 2 | 2,271  | 0,252 | -0,58  |
| 12 | P31948 STIP1_HUMAN | E.CIQLEPTFIK.G         |       | 2 | 2,2685 | 0,196 | -0,684 |
| 12 | Q92995 UBP13_HUMAN | R.DM*GYPLAVK.L         |       | 2 | 2,2677 | 0,264 | 0,06   |
| 12 | P18206 VINC_HUMAN  | R.DM*PPAFIKVE.N        |       | 2 | 2,2666 | 0,327 | 0,21   |
| 12 | Q9NRL2 BAZ1A_HUMAN | K.DAIDPLLFK.Y          |       | 2 | 2,2648 | 0,131 | -0,118 |
| 12 | P68402 PA1B2_HUMAN | K.IIVLGLLPR.G          |       | 2 | 2,2617 | 0,131 | -0,061 |
| 12 | P35908 K22E_HUMAN  | K.DVDNAYM*IK.V         |       | 2 | 2,2614 | 0,256 | 0,112  |
| 12 | P09622 DLDH_HUMAN  | R.VLGAHILGPGAGEM*VNE.A |       | 3 | 2,2579 | 0,32  | -0,327 |
| 12 | Q6QNY0 BL1S3_HUMAN | R.DLPLLVQRE.S          |       | 2 | 2,2563 | 0,453 | 0,105  |
| 12 | Q02952 AKA12_HUMAN | K.VLSKPPEGVVSE.V       |       | 2 | 2,255  | 0,291 | -0,197 |
| 12 | Q58WW2 IQWD1_HUMAN | R.NTITVPASFM*LR.M      |       | 2 | 2,2543 | 0,381 | -1,25  |
| 12 | Q969S9 EFG2_HUMAN  | K.AKPLLLQLPIGE.A       |       | 2 | 2,2532 | 0,251 | -0,189 |
| 12 | P11310 ACADM_HUMAN | K.TGEYPVPLIR.R         |       | 2 | 2,253  | 0,159 | 0,32   |
| 12 | Q16881 TRXR1_HUMAN | E.TDLPVVFVK.Q          |       | 2 | 2,2525 | 0,288 | -0,06  |
| 12 | Q14204 DYHC1_HUMAN | E.DLDKVEPAVIE.A        |       | 2 | 2,2508 | 0,217 | 0,099  |
| 12 | P55072 TERA_HUMAN  | E.LVQYPVEHPD.K         |       | 2 | 2,2501 | 0,272 | 0,204  |
| 12 | Q9Y6N7 ROBO1_HUMAN | E.EAPSAPPQGVTVSK.N     |       | 2 | 2,25   | 0,29  | 0,089  |
| 12 | Q9BQG0 MBB1A_HUMAN | E.QLM*TVLQAGK.A        |       | 2 | 2,249  | 0,296 | 0,221  |
| 12 | Q8WUD4 CCD12_HUMAN | K.GQEDSLASAVDAATEQK.T  |       | 3 | 2,2462 | 0,182 | 0,106  |
| 12 | P56182 RRP1_HUMAN  | R.KLQDLGAGGIFPEDEIPE.K |       | 2 | 2,2462 | 0,415 | 0,065  |
| 12 | P04264 K2C1_HUMAN  | R.SLDLDSIAEVK.A        |       | 3 | 2,2442 | 0,28  | 0,421  |
| 12 | Q8NBF2 NHLC2_HUMAN | K.M*VSVLPIFR.S         |       | 2 | 2,2436 | 0,316 | -0,34  |
| 12 | P09960 LKHA4_HUMAN | R.AILPCQDTPSVK.L       |       | 2 | 2,2396 | 0,39  | 0,275  |
| 12 | Q6ZQX7 YQ022_HUMAN | K.LLHSDLAPTLLE.-       |       | 2 | 2,2381 | 0,157 | -0,461 |
| 12 | Q9UQ35 SRRM2_HUMAN | R.TAVAPSAVNLADPR.T     |       | 2 | 2,2374 | 0,291 | 0,265  |
| 12 | Q16186 ADRM1_HUMAN | R.SQSAAVTPSSTTSSTR.A   |       | 2 | 2,2373 | 0,246 | -0,233 |
| 12 | Q6PJT7 ZC3HE_HUMAN | R.TGSISSSVSPAKPE.R     |       | 2 | 2,2333 | 0,195 | 0,169  |
| 12 | Q9Y617 SERC_HUMAN  | R.DDLLGFALR.E          |       | 2 | 2,2317 | 0,144 | 0      |
| 12 | Q9HD15 SRA1_HUMAN  | E.TSPGPPPM*GPPPPSK.A   |       | 2 | 2,2316 | 0,349 | 0      |

|    |                    |                          |       |   |        |       |        |
|----|--------------------|--------------------------|-------|---|--------|-------|--------|
| 12 | P0C7M2 RA1L3_HUMAN | R.GFGFVYAT#VE.E          | T64:  | 2 | 2,2298 | 0,226 | -1,344 |
| 12 | Q5W0B1 RN219_HUMAN | E.DFSLHSSSCPVTNE.I       |       | 2 | 2,2293 | 0,273 | -0,463 |
| 12 | Q96GQ7 DDX27_HUMAN | R.VLVLPVPTRE.L           |       | 2 | 2,2288 | 0,33  | -1,189 |
| 12 | Q13445 TMED1_HUMAN | E.FTFLLPAGR.K            |       | 2 | 2,2277 | 0,216 | -0,239 |
| 12 | Q12872 SFRS8_HUMAN | K.ASFAPISFAIK.A          |       | 2 | 2,2269 | 0,301 | 0,53   |
| 12 | Q86YW9 MD12L_HUMAN | R.LGPPDVYPQDPK.Q         |       | 2 | 2,2249 | 0,478 | 0,46   |
| 12 | Q6PJT7 ZC3HE_HUMAN | R.DLVQPDKPAS#PK.F        | S515: | 2 | 2,2225 | 0,222 | -0,266 |
| 12 | Q86Y91 KI18B_HUMAN | K.DLTFVFDR.V             |       | 2 | 2,2219 | 0,192 | 0,241  |
| 12 | P06576 ATPB_HUMAN  | K.VVDLLAPYAK.G           |       | 2 | 2,221  | 0,335 | -0,448 |
| 12 | O75781 PALM_HUMAN  | E.NAAAPS#PVRAPAPSPAKEE.R | S116: | 2 | 2,2199 | 0,394 | 0      |
| 12 | P23588 IF4B_HUMAN  | K.VM*PAPPPKE.N           |       | 2 | 2,2185 | 0,175 | 0,124  |
| 12 | Q13523 PRP4B_HUMAN | R.ISINQALQHAFIQE.K       |       | 2 | 2,2181 | 0,153 | -0,227 |
| 12 | Q9H0A0 NAT10_HUMAN | K.DVVM*EPTM*K.T          |       | 2 | 2,217  | 0,268 | -0,113 |
| 12 | P30041 PRDX6_HUMAN | K.LPFPIIDDR.N            |       | 2 | 2,2166 | 0,245 | -0,112 |
| 12 | Q8TCS8 PNPT1_HUMAN | K.VLQSPATTVVR.T          |       | 2 | 2,2155 | 0,34  | 0,104  |
| 12 | Q16531 DDB1_HUMAN  | E.DLNLLIAK.N             |       | 2 | 2,2143 | 0,101 | 0,068  |
| 12 | Q9BYD6 RM01_HUMAN  | K.FQILDFTSPK.Q           |       | 2 | 2,2143 | 0,229 | -0,612 |
| 12 | Q5VZK9 LR16A_HUMAN | K.VALLPPVLK.K            |       | 2 | 2,2072 | 0,126 | -0,064 |
| 12 | P60174 TPIS_HUMAN  | E.GLGVIACIGEKLDE.R       |       | 2 | 2,2061 | 0,094 | -0,248 |
| 12 | Q9H1K0 RBNS5_HUMAN | D.LGSSPVPSSTAPK.T        |       | 2 | 2,2056 | 0,399 | -0,099 |
| 12 | P78310 CXAR_HUMAN  | R.M*GAIPVM*IPAQSK.D      |       | 2 | 2,2054 | 0,197 | 0,266  |
| 12 | Q09666 AHNK_HUMAN  | K.M*PDVDISVPKIE.G        |       | 2 | 2,2027 | 0,191 | -0,09  |
| 12 | O94804 STK10_HUMAN | K.LANGSLEPPAQAAPGPSK.R   |       | 2 | 2,1984 | 0,249 | -0,286 |
| 12 | Q14160 LAP4_HUMAN  | E.NAVTITPLRPEDDYS#PRE.R  | S835: | 3 | 2,1982 | 0,12  | -0,17  |
| 12 | Q6PKG0 LARP1_HUMAN | K.LFGAPEPSTIAR.S         |       | 2 | 2,1958 | 0,173 | 0,388  |
| 12 | Q96EQ0 SGTB_HUMAN  | E.DTHLAVSQPLTE.M         |       | 2 | 2,1952 | 0,257 | 0,465  |
| 12 | Q15019 SEPT2_HUMAN | K.VNIVPVIK.A             |       | 2 | 2,1951 | 0,256 | 0,064  |
| 12 | P55072 TERA_HUMAN  | R.EVDIGIPDATGRLE.I       |       | 2 | 2,192  | 0,152 | -0,411 |
| 12 | P54727 RD23B_HUMAN | E.YLLM*GIPGDRE.S         |       | 2 | 2,1917 | 0,251 | 0,095  |
| 12 | Q9NPH3 IL1AP_HUMAN | K.VAFPLEVVQK.D           |       | 2 | 2,1913 | 0,161 | -0,108 |
| 12 | Q8WYL5 SSH1_HUMAN  | R.LAGLTVSSPLK.R          |       | 2 | 2,1868 | 0,239 | 0      |
| 12 | P30566 PUR8_HUMAN  | R.VLSQQAASVVKQE.G        |       | 2 | 2,1822 | 0,214 | 0      |
| 12 | P38571 LICH_HUMAN  | E.DGYILCLNR.I            |       | 2 | 2,1772 | 0,132 | 0      |

|    |                     |                        |   |        |       |        |
|----|---------------------|------------------------|---|--------|-------|--------|
| 12 | O60244 MED14_HUMAN  | R.AGTSSQTM*PTNM*PPPR.K | 3 | 2,1756 | 0,212 | 0,107  |
| 12 | P10599 THIO_HUMAN   | E.ALDAAGDKLVVVD.F      | 2 | 2,1743 | 0,1   | 0,379  |
| 12 | O15031 PLXB2_HUMAN  | R.DGATLILSK.V          | 2 | 2,1736 | 0,176 | 0,399  |
| 12 | P31946 1433B_HUMAN  | K.DSTLIM*QLLRD.N       | 2 | 2,1724 | 0,256 | -0,277 |
| 12 | Q9BWG6 SCNM1_HUMAN  | E.SATVSAPAPM*SPTR.R    | 2 | 2,17   | 0,182 | 0,439  |
| 12 | O15533 TPSN_HUMAN   | R.QGPGEPPIPRDLPE.L     | 2 | 2,1668 | 0,396 | -0,533 |
| 12 | O00186 STXB3_HUMAN  | R.VLLPVLLNK.N          | 2 | 2,1668 | 0,217 | 0,121  |
| 12 | P11387 TOP1_HUMAN   | R.AVALYFIDK.L          | 2 | 2,1655 | 0,132 | 0,235  |
| 12 | Q9NQX3 GEPH_HUMAN   | R.M*SPFPLTSM*DK.A      | 2 | 2,1651 | 0,12  | -0,095 |
| 12 | Q96PY5 FMNL2_HUMAN  | K.IAQDAFDDVVK.Y        | 2 | 2,1648 | 0,217 | -0,3   |
| 12 | Q8TEW0 PARD3_HUMAN  | K.QFSDASQLDFVK.T       | 2 | 2,1624 | 0,162 | -0,529 |
| 12 | Q9Y6X7 Q9Y6X7_HUMAN | D.GTLLPGQPQATR.A       | 2 | 2,1592 | 0,365 | 0      |
| 12 | P18206 VINC_HUMAN   | E.VINQPM*M*M*AAR.Q     | 2 | 2,1531 | 0,278 | 0,559  |
| 12 | P62736 ACTA_HUMAN   | R.DLTDYLM*K.I          | 2 | 2,1517 | 0,318 | 0,421  |
| 12 | P06748 NPM_HUMAN    | K.GPSSVEDIK.A          | 2 | 2,1508 | 0,28  | 0,196  |
| 12 | P78527 PRKDC_HUMAN  | R.DPTVHDDVLE.L         | 2 | 2,1459 | 0,312 | 0,428  |
| 12 | Q12906 ILF3_HUMAN   | K.VLGM*DPLPSK.M        | 2 | 2,1448 | 0,356 | 0      |
| 12 | P40616 ARL1_HUMAN   | E.M*ANSLGLPALK.D       | 2 | 2,1442 | 0,099 | 1,187  |
| 12 | Q9UJU6 DBNL_HUMAN   | R.AM*STTSISSPQPGK.L    | 2 | 2,1418 | 0,303 | -0,087 |
| 12 | A2AB28 A2AB28_HUMAN | R.AAAVDPTPAAPAR.K      | 2 | 2,1414 | 0,165 | -0,101 |
| 12 | P35658 NU214_HUMAN  | K.SPGSTPTTPTSSQAPQK.L  | 2 | 2,1397 | 0,251 | -0,292 |
| 12 | Q13501 SQSTM_HUMAN  | K.LAFPSPFGHLSE.G       | 2 | 2,1369 | 0,181 | -0,375 |
| 12 | P11717 MPRI_HUMAN   | K.SFSLGDIYFK.L         | 2 | 2,1295 | 0,274 | -0,207 |
| 12 | Q9P270 SLAI2_HUMAN  | K.QLILPGNSGNLK.S       | 2 | 2,1294 | 0,081 | -0,778 |
| 12 | Q3KQU3 MA7D1_HUMAN  | E.LGAGAPPAVVAR.T       | 2 | 2,1201 | 0,39  | 0      |
| 12 | Q9HCK8 CHD8_HUMAN   | R.TAS#PLPLRPDAPVEK.S   | 3 | 2,1198 | 0,132 | 0,547  |
| 12 | Q15020 SART3_HUMAN  | D.YPEHVCE.V            | 2 | 2,1158 | 0,278 | -0,457 |
| 12 | P18615 NELFE_HUMAN  | K.GPVPTFQPFQR.S        | 2 | 2,1156 | 0,322 | 0      |
| 12 | P15056 BRAF1_HUMAN  | K.SIPIQPFRPADE.D       | 2 | 2,1147 | 0,218 | -0,25  |
| 12 | Q5VZK9 LR16A_HUMAN  | E.DLDTCM*M*TPK.S       | 2 | 2,1137 | 0,174 | -0,098 |
| 12 | P98171 RHG04_HUMAN  | R.CLVPASPEQHVE.V       | 2 | 2,1067 | 0,297 | 0,357  |
| 12 | Q11206 SIA4C_HUMAN  | R.DQPIFLRLE.D          | 2 | 2,1064 | 0,141 | 0,647  |
| 12 | O75607 NPM3_HUMAN   | D.FLQPPVTFR.L          | 2 | 2,1032 | 0,104 | 0,099  |

|    |                     |                                    |                 |   |        |       |        |
|----|---------------------|------------------------------------|-----------------|---|--------|-------|--------|
| 12 | O75494 FUSIP_HUMAN  | D.VYVPLDFYTR.R                     |                 | 2 | 2,1026 | 0,258 | 0,383  |
| 12 | Q6AI08 HEAT6_HUMAN  | R.QGALVCFLSTIK.S                   |                 | 2 | 2,0944 | 0,251 | -0,274 |
| 12 | P60900 PSA6_HUMAN   | K.YGYEIPVDM*LCK.R                  |                 | 2 | 2,0928 | 0,249 | -0,243 |
| 12 | A9CQZ4 A9CQZ4_HUMAN | E.DEEVPAFFK.N                      |                 | 2 | 2,0877 | 0,168 | 0,451  |
| 12 | Q8NBS9 TXND5_HUMAN  | R.GYPTLLFR.G                       |                 | 2 | 2,084  | 0,162 | 0      |
| 12 | Q96EZ8 MCRS1_HUMAN  | E.DQTVQPLPK.G                      |                 | 2 | 2,0833 | 0,214 | 0,357  |
| 12 | Q6NV74 CB055_HUMAN  | K.M*GPPPPGGLPAK.R                  |                 | 2 | 2,0833 | 0,174 | -0,198 |
| 12 | Q9UBW7 ZMYM2_HUMAN  | E.TDIIGSDLLK.N                     |                 | 2 | 2,0814 | 0,189 | 0      |
| 12 | P11413 G6PD_HUMAN   | R.IFTPLLHQIE.L                     |                 | 2 | 2,081  | 0,082 | -0,302 |
| 12 | P50990 TCPQ_HUMAN   | E.ILPNLVCCSAK.N                    |                 | 2 | 2,0804 | 0,347 | 0,191  |
| 12 | Q9NZI6 TF2L1_HUMAN  | D.VLALPIFK.Q                       |                 | 2 | 2,0792 | 0,204 | -0,068 |
| 12 | Q8N6T3 ARFG1_HUMAN  | R.DVTTFFSGK.A                      |                 | 2 | 2,0788 | 0,162 | 0      |
| 12 | Q8NCA5 FA98A_HUMAN  | E.DLGYKGPLE.D                      |                 | 2 | 2,0781 | 0,232 | 0,331  |
| 12 | P62273 RS29_HUMAN   | K.DIGFIKLD.-                       |                 | 2 | 2,0769 | 0,18  | -0,199 |
| 12 | P30414 NKTR_HUMAN   | R.LDTPDINIVLK.Q                    |                 | 2 | 2,075  | 0,285 | 0,393  |
| 12 | Q7L2J0 MEPCE_HUMAN  | R.DPVEILIPK.D                      |                 | 2 | 2,0735 | 0,14  | -0,119 |
| 12 | P13667 PDIA4_HUMAN  | K.QLEPVYNSLAK.K                    |                 | 2 | 2,0707 | 0,263 | 0,193  |
| 12 | O95400 CD2B2_HUMAN  | E.DEIIVPK.K                        |                 | 2 | 2,0695 | 0,091 | 0,225  |
| 12 | A5A3E0 A26CB_HUMAN  | R.VAPEEHPVLLTE.A                   |                 | 2 | 2,0689 | 0,191 | -1,372 |
| 12 | Q5H9F3 BCRL1_HUMAN  | R.DFIPVVLSTR.T                     |                 | 2 | 2,0682 | 0,126 | -0,213 |
| 12 | Q96T23 RSF1_HUMAN   | K.AQIDPVLLK.N                      |                 | 2 | 2,0671 | 0,335 | -0,245 |
| 12 | O95071 UBR5_HUMAN   | R.IGFSVQPDRLE.L                    |                 | 2 | 2,0667 | 0,105 | 0,29   |
| 12 | Q15181 IPYR_HUMAN   | K.DFAIDIK.S                        |                 | 2 | 2,0661 | 0,196 | -0,065 |
| 12 | P48730 KC1D_HUMAN   | E.VAPPTPLT#PTSHTANT#SPRPVSGM*ERE.R | T347:T355:      | 3 | 2,0622 | 0,136 | 0,426  |
| 12 | Q92615 LARP5_HUMAN  | K.RLS#REQST#PPKS#PQ.-              | S727:T732:S736: | 2 | 2,0608 | 0,255 | -0,461 |
| 12 | Q9Y5W9 SNX11_HUMAN  | R.AVGGDHAVPLDPGQLE.T               |                 | 2 | 2,0581 | 0,338 | -0,077 |
| 12 | Q9Y2W2 WBP11_HUMAN  | E.LTPLQAM*M*LR.M                   |                 | 2 | 2,0543 | 0,377 | 0,708  |
| 12 | Q9H0F7 ARL6_HUMAN   | R.IPILFFANK.M                      |                 | 2 | 2,0541 | 0,147 | -0,23  |
| 12 | Q9HCM7 AUT2L_HUMAN  | K.LFAPGTDKGPAL.E.K                 |                 | 2 | 2,054  | 0,135 | -1,391 |
| 12 | O00186 STXB3_HUMAN  | K.ALYFITPTSK.S                     |                 | 2 | 2,0515 | 0,226 | 0,107  |
| 12 | Q9NQC3 RTN4_HUMAN   | D.QSPLVSS#SDSPPRPQPAFK.Y           | S12:            | 3 | 2,0482 | 0,122 | 0,521  |
| 12 | Q8WXF7 ATLA1_HUMAN  | E.DDLQHLQLFTE.Y                    |                 | 2 | 2,0481 | 0,112 | -0,09  |
| 12 | Q58FF7 H90B3_HUMAN  | R.DNSTM*GYM*MAK.K                  |                 | 2 | 2,0478 | 0,258 | -0,381 |

|    |                     |                            |       |   |        |       |        |
|----|---------------------|----------------------------|-------|---|--------|-------|--------|
| 12 | Q8NI35 INADL_HUMAN  | E.VPPPFTLVCCR.R            |       | 2 | 2,0463 | 0,288 | -0,181 |
| 12 | Q5SSJ5 HP1B3_HUMAN  | E.DVLPLAFTR.L              |       | 2 | 2,0456 | 0,299 | 0      |
| 12 | Q9NX24 NOLA2_HUMAN  | R.NLPYVYIPSK.T             |       | 2 | 2,0446 | 0,088 | 0,613  |
| 12 | ##Q9HCN4 GPN1_HUMAN | D.KATGADLAVSGM*D.K         |       | 3 | 2,0442 | 0,139 | 0,511  |
| 12 | P46063 RECQ1_HUMAN  | K.DILQNVFKLE.K             |       | 2 | 2,0434 | 0,148 | 1,401  |
| 12 | P27797 CALR_HUMAN   | K.LFPNSLDQTDMM*HGDSE.Y     |       | 2 | 2,0369 | 0,178 | 0,067  |
| 12 | Q9UPN9 TRI33_HUMAN  | R.QIDLVDNYFVK.D            |       | 2 | 2,0368 | 0,213 | -0,18  |
| 12 | Q8IWI9 MGAP_HUMAN   | K.ISM*PSCQDQDDM*AEK.S      |       | 2 | 2,035  | 0,315 | -0,205 |
| 12 | Q15435 PP1R7_HUMAN  | K.VM*LALPSVR.Q             |       | 2 | 2,03   | 0,128 | 0,365  |
| 12 | Q9Y2W2 WBP11_HUMAN  | E.LTPLQAM*M*LR.M           |       | 3 | 2,0297 | 0,212 | 0,682  |
| 12 | Q9UNK0 STX8_HUMAN   | E.QDAGLDALSSIISR.Q         |       | 2 | 2,0279 | 0,275 | -0,084 |
| 12 | P10412 H14_HUMAN    | E.TAPAAPAAPAPAEK.T         |       | 2 | 2,0215 | 0,205 | 0      |
| 12 | Q13428 TCOF_HUMAN   | K.S#PQVKPASTM*GM*GPLGK.G   | S503: | 3 | 2,0198 | 0,123 | 0,407  |
| 12 | Q92621 NU205_HUMAN  | E.LALLTGIISK.A             |       | 2 | 2,0122 | 0,318 | 0      |
| 12 | Q676U5 A16L1_HUMAN  | R.S#VSSFVPVQDNVDTHPGSGKE.V | S287: | 3 | 2,0109 | 0,202 | 0,162  |
| 12 | Q96RP9 EFG1_HUMAN   | R.SFTPVFLGSALK.N           |       | 2 | 2,0089 | 0,276 | 0      |
| 12 | Q13813 SPTA2_HUMAN  | E.DLFLTFAK.K               |       | 2 | 1,9946 | 0,257 | -0,319 |
| 12 | Q9H7N4 SFR19_HUMAN  | R.FDIYDPFHPTDE.A           |       | 2 | 1,9934 | 0,171 | -0,245 |
| 12 | P00558 PGK1_HUMAN   | K.IQLINNM*LDK.V            |       | 2 | 1,9932 | 0,102 | 0,1    |
| 12 | Q9Y3C8 UFC1_HUMAN   | R.VVSEIPVLK.T              |       | 2 | 1,9932 | 0,223 | -0,062 |
| 12 | Q9BRQ0 PYGO2_HUMAN  | E.GGGGPAPPAPPSTGR.K        |       | 2 | 1,9924 | 0,175 | 0,178  |
| 12 | O75864 K1986_HUMAN  | R.SGPPLPNGLKPE.F           |       | 2 | 1,9911 | 0,197 | -0,607 |
| 12 | Q9UM11 FZR_HUMAN    | K.DGLAYSALLK.N             |       | 2 | 1,9885 | 0,127 | 0      |
| 12 | Q9ULT8 HECD1_HUMAN  | E.YSLYDFLDSR.A             |       | 2 | 1,9884 | 0,087 | -0,339 |
| 12 | Q8NFA0 UBP32_HUMAN  | E.QQGIDYAQFLPK.T           |       | 2 | 1,9803 | 0,305 | -0,693 |
| 12 | P15822 ZEP1_HUMAN   | R.VGVTGHVPLLE.R            |       | 2 | 1,9743 | 0,101 | 0      |
| 12 | P23258 TBG1_HUMAN   | E.DIFDIIDRE.A              |       | 2 | 1,9708 | 0,134 | -0,215 |
| 12 | Q14258 TRI25_HUMAN  | K.FDTIYQILLK.K             |       | 2 | 1,9692 | 0,163 | -0,389 |
| 12 | P68371 TBB2C_HUMAN  | R.YLTVAAVFR.G              |       | 2 | 1,9683 | 0,276 | -0,469 |
| 12 | Q12893 TM115_HUMAN  | K.VDS#PLPSDKAPTPPGK.G      | S320: | 2 | 1,9632 | 0,173 | -0,434 |
| 12 | Q9UHV7 MED13_HUMAN  | K.DFSYVYKPE.N              |       | 2 | 1,9602 | 0,093 | 0,106  |
| 12 | P49327 FAS_HUMAN    | R.VLEALLPLK.G              |       | 2 | 1,9569 | 0,223 | 0,061  |
| 12 | P10244 MYBB_HUMAN   | E.NSTSLSFLDSCNSLTPK.S      |       | 2 | 1,9554 | 0,192 | -0,587 |

|    |                    |                        |       |   |        |       |        |
|----|--------------------|------------------------|-------|---|--------|-------|--------|
| 12 | Q14103 HNRPD_HUMAN | R.GFGFVLFKE.S          |       | 2 | 1,9442 | 0,202 | -0,117 |
| 12 | O00425 IF2B3_HUMAN | K.IPVSGPFLVK.T         |       | 2 | 1,9436 | 0,283 | -0,462 |
| 12 | P13861 KAP2_HUMAN  | E.DLEVPVPSR.F          |       | 2 | 1,9406 | 0,131 | 0,06   |
| 12 | P61978 HNRPK_HUMAN | R.NLPLPPPPPPR.G        |       | 2 | 1,9404 | 0,203 | 0,204  |
| 12 | P16383 GCF_HUMAN   | R.ELPVPGSAAEEPPSGGGR.A |       | 2 | 1,9369 | 0,257 | 0      |
| 12 | P30050 RL12_HUMAN  | E.VVPSASALIK.A         |       | 2 | 1,9322 | 0,306 | 0,111  |
| 12 | Q02952 AKA12_HUMAN | K.SVPEDDGHALLAE.R      |       | 2 | 1,9303 | 0,245 | -0,631 |
| 12 | Q9Y624 JAM1_HUMAN  | K.DGIVM*PTNPK.S        |       | 2 | 1,9255 | 0,206 | 0      |
| 12 | Q14568 HS902_HUMAN | E.SSAGGSFTVR.T         |       | 2 | 1,9246 | 0,284 | 0,063  |
| 12 | Q7KZ85 SPT6H_HUMAN | R.GQIFPTVNGLFR.W       |       | 2 | 1,9234 | 0,181 | -0,452 |
| 12 | Q92560 BAP1_HUMAN  | K.DLSIPLSIK.T          |       | 2 | 1,9227 | 0,114 | -0,247 |
| 12 | Q03164 HRX_HUMAN   | E.KT#NLDLGPAPSLEK.E    | T972: | 2 | 1,9226 | 0,146 | -0,66  |
| 12 | P04792 HSPB1_HUMAN | D.VNHFAPDE.L           |       | 2 | 1,9225 | 0,102 | -0,131 |
| 12 | Q9BRA2 TXD17_HUMAN | K.VTAVPTLLK.Y          |       | 2 | 1,9218 | 0,138 | -0,259 |
| 12 | P16403 H12_HUMAN   | E.TAAPAAAPPAEK.A       |       | 2 | 1,9208 | 0,318 | 0,193  |
| 12 | Q96TC7 FA82C_HUMAN | E.DLAIQKDLEELE.V       |       | 2 | 1,9206 | 0,193 | -0,172 |
| 12 | Q3KQU3 MA7D1_HUMAN | R.LM*TPTLSFLAR.S       |       | 2 | 1,9206 | 0,311 | -0,385 |
| 12 | Q8N3F8 MILK1_HUMAN | E.LLEPPAVPK.S          |       | 2 | 1,9186 | 0,19  | 0,38   |
| 12 | P34897 GLYM_HUMAN  | R.AFPM*PGFDEH.-        |       | 2 | 1,9172 | 0,424 | 0,105  |
| 12 | Q58FF7 H90B3_HUMAN | R.DNSTMGYM*M*AK.K      |       | 2 | 1,9171 | 0,131 | 0,191  |
| 12 | Q9UBC2 EP15R_HUMAN | E.SLLPINGLLSGDK.V      |       | 2 | 1,9169 | 0,261 | -0,46  |
| 12 | Q9Y2W2 WBP11_HUMAN | E.DDSAVPLAK.A          |       | 2 | 1,9143 | 0,335 | 0,4    |
| 12 | Q15276 RABE1_HUMAN | D.AGLLLPSGDPPFSK.S     |       | 2 | 1,9141 | 0,208 | 0      |
| 12 | Q9Y3C4 TPRKB_HUMAN | R.VTLLLFK.D            |       | 2 | 1,9133 | 0,28  | 0,366  |
| 12 | Q92542 NICA_HUMAN  | R.LLYGFLIK.A           |       | 2 | 1,9127 | 0,172 | -0,189 |
| 12 | Q16204 CCDC6_HUMAN | E.EEFISNTLFK.K         |       | 2 | 1,9082 | 0,23  | -0,199 |
| 12 | Q15393 SF3B3_HUMAN | R.IVPGQFLAVDPK.G       |       | 2 | 1,9077 | 0,289 | -0,19  |
| 12 | P16949 STMN1_HUMAN | E.SVPEFPLSPPK.K        |       | 2 | 1,9052 | 0,509 | 0,204  |
| 12 | Q14CZ0 CP072_HUMAN | E.DLISFLCGK.V          |       | 2 | 1,9019 | 0,106 | -0,348 |
| 12 | P49848 TAF6_HUMAN  | E.AGDSPPPAPGTPK.A      |       | 2 | 1,9012 | 0,164 | 0,102  |
| 12 | Q8N5A5 ZGPAT_HUMAN | E.AVVEGDGILPPLR.T      |       | 2 | 1,8993 | 0,136 | -0,274 |
| 12 | P62805 H4_HUMAN    | K.TVTAMDVVYALK.R       |       | 2 | 1,8992 | 0,222 | -0,465 |
| 12 | O95071 UBR5_HUMAN  | R.VLLLPLER.D           |       | 2 | 1,8893 | 0,087 | 0,192  |



|    |                      |                            |        |   |        |       |        |
|----|----------------------|----------------------------|--------|---|--------|-------|--------|
| 12 | ##Q7Z5H3 RHG22_HUMAN | D.TT#SDFLPKE.G             | T478:  | 2 | 1,8892 | 0,138 | -0,873 |
| 12 | Q13617 CUL2_HUMAN    | R.LTSFITVFK.Y              |        | 2 | 1,8886 | 0,203 | -0,116 |
| 12 | P68104 EF1A1_HUMAN   | K.STTTGHLIYK.C             |        | 2 | 1,8875 | 0,192 | 0      |
| 12 | P31930 QCR1_HUMAN    | E.DAVPTLTPCR.F             |        | 2 | 1,8863 | 0,153 | -0,216 |
| 12 | Q92766 RREB1_HUMAN   | K.AATTATPAATTSPK.E         |        | 2 | 1,8827 | 0,26  | 0      |
| 12 | Q03111 ENL_HUMAN     | K.GGPPPPPPPPR.A            |        | 2 | 1,8814 | 0,334 | -0,21  |
| 12 | P14923 PLAK_HUMAN    | R.LNYGIPAIVK.L             |        | 2 | 1,8781 | 0,141 | 0      |
| 12 | P23258 TBG1_HUMAN    | E.DIFDIIDR.E               |        | 2 | 1,8747 | 0,189 | 0,424  |
| 12 | Q8WUF5 IASPP_HUMAN   | E.AGDVDEGPVARPLS#PTR.L     | S489:  | 2 | 1,8694 | 0,314 | -0,403 |
| 12 | Q9Y5B0 CTDP1_HUMAN   | E.LAGAPEPQGSCAQGGR.V       |        | 2 | 1,8691 | 0,274 | 0,549  |
| 12 | P17987 TCPA_HUMAN    | K.QAGVFTEPTIVK.V           |        | 2 | 1,8642 | 0,32  | -0,103 |
| 12 | Q9NVC6 MED17_HUMAN   | E.TYLPPLSM*SQNLAR.L        |        | 2 | 1,8588 | 0,421 | -0,304 |
| 12 | Q02218 ODO1_HUMAN    | R.DM*VGQVAITR.I            |        | 2 | 1,8587 | 0,125 | 0,11   |
| 12 | O00139 KIF2A_HUMAN   | E.VSPQLFTFHE.A             |        | 2 | 1,8501 | 0,107 | 0,203  |
| 12 | P47756 CAPZB_HUMAN   | K.YDPPLEDGAM*PSAR.L        |        | 2 | 1,8409 | 0,277 | -0,079 |
| 12 | Q13459 MYO9B_HUMAN   | R.VSPAPGSAPETPEDK.S        |        | 2 | 1,8258 | 0,366 | -0,309 |
| 12 | Q8IWW6 RHG12_HUMAN   | R.LQEPIVLTK.W              |        | 2 | 1,8179 | 0,144 | 0      |
| 12 | P13073 COX41_HUMAN   | E.DFSLPAYM*DR.R            |        | 2 | 1,8026 | 0,241 | 0      |
| 12 | Q9NTK5 OLA1_HUMAN    | E.M*IGPIIDKLE.K            |        | 2 | 1,8012 | 0,11  | 0,107  |
| 12 | P21333 FLNA_HUMAN    | K.IQQNTFTR.W               |        | 2 | 1,8009 | 0,133 | -0,182 |
| 12 | Q13432 U119A_HUMAN   | K.QPIGPEDVLGLQR.I          |        | 2 | 1,7999 | 0,3   | -0,172 |
| 12 | Q96GY3 LIN37_HUMAN   | K.LPPPTPPGPPGDACR.S        |        | 2 | 1,7974 | 0,304 | 0      |
| 12 | P42566 EP15_HUMAN    | K.SGLPDLILGK.I             |        | 2 | 1,797  | 0,302 | 0,241  |
| 12 | P14735 IDE_HUMAN     | K.IAGILHYPLEE.V            |        | 2 | 1,7922 | 0,101 | -0,172 |
| 12 | Q9BYJ9 YTHD1_HUMAN   | R.DTQEVPLEK.A              |        | 2 | 1,7912 | 0,273 | 0,115  |
| 12 | P34932 HSP74_HUMAN   | K.QSLTM*DPVVK.S            |        | 2 | 1,7817 | 0,098 | 0,323  |
| 12 | Q96I25 SPF45_HUMAN   | R.SPT#GPSNSFLANM*GGTVAHK.I | T224:  | 2 | 1,7798 | 0,16  | 0,236  |
| 12 | P09211 GSTP1_HUMAN   | K.ALPGQLKPF.T              |        | 2 | 1,7745 | 0,307 | -0,222 |
| 12 | P01112 RASH_HUMAN    | D.DVPM*VLVGNK.C            |        | 2 | 1,7733 | 0,222 | 0,336  |
| 12 | O75663 TIPRL_HUMAN   | K.VVPTTDHIDTE.K            |        | 2 | 1,7718 | 0,171 | 0      |
| 12 | Q8WUQ7 CS029_HUMAN   | E.S#EPLFPILK.Q             | S408:  | 2 | 1,7665 | 0,177 | -0,109 |
| 12 | Q1L5Z9 LONF2_HUMAN   | E.SILPTAPSAGLK.R           |        | 2 | 1,7663 | 0,104 | 0,106  |
| 12 | P46821 MAP1B_HUMAN   | R.QS#PDHPTVGAGVLHITE.N     | S1666: | 2 | 1,7655 | 0,242 | -0,266 |

|    |                     |                     |            |   |        |       |        |
|----|---------------------|---------------------|------------|---|--------|-------|--------|
| 12 | P42224 STAT1_HUMAN  | K.EAPEPM*ELDGPK.G   |            | 2 | 1,7622 | 0,331 | 0,092  |
| 12 | P52565 GDIR1_HUMAN  | E.FLTPVEEAPK.G      |            | 2 | 1,7621 | 0,249 | 0,324  |
| 12 | O00148 DDX39_HUMAN  | R.DFLKPE.L          |            | 2 | 1,7561 | 0,096 | 0,071  |
| 12 | P02545 LMNA_HUMAN   | R.LRLS#PS#PTSQR.S   | S390:S392: | 2 | 1,7458 | 0,205 | -0,087 |
| 12 | Q99638 RAD9A_HUMAN  | E.AEPSTVPGTPPP.K    |            | 2 | 1,733  | 0,201 | -0,095 |
| 12 | Q6NZY4 ZCHC8_HUMAN  | K.LFPADTSPSTATK.I   |            | 2 | 1,7322 | 0,193 | 0,091  |
| 12 | Q6ZRV2 FA83H_HUMAN  | R.AVPAPSPGPTHNSPE.L |            | 2 | 1,7302 | 0,191 | -0,335 |
| 12 | Q2LD37 K1109_HUMAN  | K.ATGFAAVHQLFTE.R   |            | 2 | 1,7264 | 0,234 | 0,088  |
| 12 | P04920 B3A2_HUMAN   | E.LPPPAPPAGITR.S    |            | 2 | 1,7222 | 0,302 | 0      |
| 12 | P27708 PYR1_HUMAN   | R.LSLDLLQR.L        |            | 2 | 1,7201 | 0,142 | -0,91  |
| 12 | Q9HD15 SRA1_HUMAN   | E.DVLRPLEQALE.D     |            | 2 | 1,7159 | 0,103 | -0,761 |
| 12 | O75390 CISY_HUMAN   | K.DILADLIPK.E       |            | 2 | 1,7157 | 0,092 | 0      |
| 12 | Q9Y2F5 K0947_HUMAN  | E.DLQAAIDFFK.L      |            | 2 | 1,7152 | 0,267 | 1,462  |
| 12 | O75400 PR40A_HUMAN  | E.DVLFFLSK.K        |            | 2 | 1,712  | 0,229 | -0,063 |
| 12 | Q9Y230 RUVB2_HUMAN  | K.VQAGDVITDK.A      |            | 2 | 1,712  | 0,12  | 0,526  |
| 12 | Q8IX12 CCAR1_HUMAN  | R.LLLPTPTVK.Q       |            | 2 | 1,708  | 0,086 | 0,248  |
| 12 | Q8IWC1 MA7D3_HUMAN  | R.AVM*FPM*STM*K.I   |            | 2 | 1,7071 | 0,221 | -0,307 |
| 12 | Q9Y2H2 SAC2_HUMAN   | E.DLYSIFTK.E        |            | 2 | 1,6965 | 0,112 | -0,371 |
| 12 | Q15543 TAF13_HUMAN  | E.DIVFLIR.K         |            | 2 | 1,6862 | 0,174 | 0,279  |
| 12 | O75170 SAPS2_HUMAN  | R.DAPGAGAPPAPGK.K   |            | 2 | 1,6849 | 0,182 | 0      |
| 12 | Q96T37 RBM15_HUMAN  | R.LPPPPPPPLPR.D     |            | 2 | 1,6667 | 0,127 | 0,414  |
| 12 | O94909 K0819_HUMAN  | R.LFPEPLPK.E        |            | 2 | 1,6515 | 0,19  | 0      |
| 12 | P39656 OST48_HUMAN  | K.TADDPSSLIK.Y      |            | 2 | 1,6424 | 0,106 | -0,421 |
| 12 | P30622 CLIP1_HUMAN  | K.EPSATPPISNLTK.T   |            | 2 | 1,64   | 0,298 | 0,27   |
| 12 | P15311 EZRI_HUMAN   | K.APDFVFYAPR.L      |            | 2 | 1,6343 | 0,319 | -1,031 |
| 12 | O00391 QSOX1_HUMAN  | R.AAPGQEPPEHM*AE.L  |            | 2 | 1,6204 | 0,469 | -0,177 |
| 12 | P11177 ODPB_HUMAN   | K.DFLIPIGK.A        |            | 2 | 1,6155 | 0,157 | 0,068  |
| 12 | P23443 KS6B1_HUMAN  | R.DGFYPAPDFR.D      |            | 2 | 1,6126 | 0,153 | 0,412  |
| 12 | P61978 HNRPK_HUMAN  | K.DLAGSIIGK.G       |            | 2 | 1,6024 | 0,095 | 0      |
| 12 | Q6IAA8 CK059_HUMAN  | E.QALLSSILAK.T      |            | 2 | 1,598  | 0,288 | 0,117  |
| 12 | P23588 IF4B_HUMAN   | K.VAPAQPSEEGPGR.K   |            | 2 | 1,5929 | 0,283 | 0,188  |
| 12 | ##P49759 CLK1_HUMAN | K.IDPNILTRE.D       |            | 2 | 1,5926 | 0,137 | 0,114  |
| 12 | Q6NZY4 ZCHC8_HUMAN  | K.GTPPLTPSDSPQTR.T  |            | 2 | 1,5803 | 0,247 | 0,084  |

|    |                       |                                     |       |   |        |       |        |
|----|-----------------------|-------------------------------------|-------|---|--------|-------|--------|
| 12 | Q9BUL9 RPP25_HUMAN    | K.NVPLAILLSK.D                      |       | 2 | 1,5793 | 0,106 | -0,108 |
| 12 | O75369 FLNB_HUMAN     | K.IFFAGDTIPK.S                      |       | 2 | 1,5721 | 0,259 | 0,11   |
| 12 | Q01433 AMPD2_HUMAN    | K.LEPDILLR.A                        |       | 2 | 1,5708 | 0,191 | 0,063  |
| 12 | P12532 KCRU_HUMAN     | R.LYPPSAEYDPLR.K                    |       | 2 | 1,5681 | 0,114 | -0,172 |
| 12 | P11388 TOP2A_HUMAN    | E.VTFVPGLYK.I                       |       | 2 | 1,5398 | 0,098 | -0,119 |
| 12 | O75420 PERQ1_HUMAN    | E.LTPLPQEEK.S                       |       | 2 | 1,538  | 0,167 | 0,318  |
| 12 | P04083 ANXA1_HUMAN    | D.EATIIDILTK.R                      |       | 2 | 1,5253 | 0,108 | -0,218 |
| 12 | Q9HAV7 GRPE1_HUMAN    | E.DM*GQSEQKADPPATE.K                |       | 2 | 1,5091 | 0,153 | -0,301 |
| 12 | Q9Y536 PAL4B_HUMAN    | R.IIPGFM*CQGGDFTR.H                 |       | 2 | 1,4922 | 0,257 | 0,831  |
| 12 | ##Q5TCY1 TTBK1_HUMAN  | K.M*DGPS#VLVLT.K.S                  | S482: | 2 | 1,486  | 0,083 | 1,651  |
| 12 | Q8IXM2 CQ049_HUMAN    | E.DSGIPLPAESPK.K                    |       | 2 | 1,4805 | 0,312 | 0,504  |
| 12 | P05362 ICAM1_HUMAN    | K.LLGIETPLPK.K                      |       | 2 | 1,4469 | 0,119 | 0,113  |
| 12 | Q8NAF0 ZN579_HUMAN    | E.GLPLPLANIK.E                      |       | 2 | 1,3493 | 0,141 | -0,118 |
| 12 | Q92570 NR4A3_HUMAN    | E.VLPSTSM*YFK.Q                     |       | 2 | 1,3423 | 0,179 | -0,205 |
| 12 | P54278 PMS2_HUMAN     | R.VLPQPTNLATPNTK.R                  |       | 2 | 1,3333 | 0,234 | -0,163 |
| 12 | Q8TEH3 DEN1A_HUMAN    | R.DPFEDLLQK.T                       |       | 2 | 1,3238 | 0,081 | 0      |
| 12 | Q99729 ROAA_HUMAN     | R.GFGFILFK.D                        |       | 2 | 1,3141 | 0,176 | -0,131 |
| 12 | Q96RK0 CIC_HUMAN      | R.FLPM*DPATFR.R                     |       | 2 | 1,3036 | 0,086 | 0,403  |
| 12 | Q8WUQ7 CS029_HUMAN    | E.SEPLFPILK.Q                       |       | 2 | 1,2907 | 0,172 | 0,234  |
| 12 | ##Q53F68 Q53F68_HUMAN | R.LLPAAQWPQTHM*D.C                  |       | 2 | 1,258  | 0,202 | 0      |
| 12 | Q9H4A3 WNK1_HUMAN     | K.IGDLGLATLK.R                      |       | 2 | 1,2043 | 0,188 | 0,061  |
| 12 | Q96GQ7 DDX27_HUMAN    | R.ILPQDVILK.F                       |       | 2 | 1,1914 | 0,161 | 0,117  |
| 13 | Q06587 RING1_HUMAN    | R.GGGAGGSSVGTGGGGTGGVGGGAGSEDSGDR.G |       | 3 | 6,8351 | 0,549 | 0,229  |
| 13 | O14974 MYPT1_HUMAN    | K.VKFDDGAVFLAACSSGDTDE.V            |       | 2 | 6,6574 | 0,58  | -0,464 |
| 13 | Q06587 RING1_HUMAN    | R.GGGAGGSSVGTGGGGTGGVGGGAGSEDSGDR.G |       | 2 | 6,077  | 0,631 | 0,102  |
| 13 | Q8IY57 YAF2_HUMAN     | K.SPPASSAASADQHSQSGSSDNTE.R         |       | 2 | 6,0288 | 0,673 | 0,318  |
| 13 | O60716 CTND1_HUMAN    | R.VRV#PQDANPLM*ANGLTR.R             | S47:  | 3 | 5,7272 | 0,425 | -0,942 |
| 13 | Q9Y2D5 AKAP2_HUMAN    | K.GQKS#PGALETPSAAGSQGNTASQGK.E      | S393: | 3 | 5,6905 | 0,463 | -0,304 |
| 13 | Q8IWA0 WDR75_HUMAN    | K.VQDTS#NTGLGEDIIHQLSK.S            | S796: | 2 | 5,5949 | 0,528 | -0,114 |
| 13 | Q9H4H8 FA83D_HUMAN    | K.SSSSVSSQGSVASSTGSPASIR.T          |       | 2 | 5,5874 | 0,656 | 0      |
| 13 | O95999 BCL10_HUMAN    | K.CSSCEPFPDGATNLSR.S                |       | 2 | 5,3411 | 0,466 | -0,128 |
| 13 | P27824 CALX_HUMAN     | K.THLYTLILNPDNSFE.I                 |       | 2 | 5,1829 | 0,454 | -0,618 |
| 13 | Q12888 TP53B_HUMAN    | E.IEPKNS#PEDLGLSLTGDSCK.L           | S500: | 2 | 5,1698 | 0,392 | 0,109  |

|    |                     |                                   |            |   |        |       |        |
|----|---------------------|-----------------------------------|------------|---|--------|-------|--------|
| 13 | O60264 SMCA5_HUMAN  | E.LFAHFIQPAAQKT#PTS#PLK.M         | T113:S116: | 3 | 5,1281 | 0,423 | -0,243 |
| 13 | P18858 DNL1_HUMAN   | K.GQKPALDCSQVS#PPRPATSPE.N        | S91:       | 3 | 5,0551 | 0,219 | -0,159 |
| 13 | Q9NX40 OCAD1_HUMAN  | K.SKYDSSVSGQSSFVTSPAADNIE.M       |            | 2 | 5,0421 | 0,564 | 0      |
| 13 | Q15424 SAFB1_HUMAN  | E.SSELEQPFAQDTS#VGPDRK.L          | S247:      | 2 | 5,0287 | 0,511 | 0,108  |
| 13 | P05198 IF2A_HUMAN   | K.HAVSDPSILDSLNEDE.R              |            | 2 | 5,0244 | 0,554 | -0,248 |
| 13 | P78310 CXAR_HUMAN   | R.SYIGSNHSSLGSM*SPSNM*E.G         |            | 2 | 5,0097 | 0,537 | 0,121  |
| 13 | Q5GLZ8 HERC4_HUMAN  | R.HTVFVLDDGTVYTCGCND.L            |            | 2 | 4,9818 | 0,529 | 0      |
| 13 | P54105 ICLN_HUMAN   | E.GM*LSQSVSSQYNM*AGVR.T           |            | 2 | 4,9684 | 0,548 | -0,727 |
| 13 | Q9Y4W6 AFG32_HUMAN  | R.KLASLTPGFSGADVANCNE.A           |            | 2 | 4,9674 | 0,638 | 0      |
| 13 | Q9BY44 EIF2A_HUMAN  | R.SDKS#PDLAPTAPQSTPR.N            | S506:      | 2 | 4,9671 | 0,483 | -0,502 |
| 13 | P18583 SON_HUMAN    | E.SDQTLAALLS#PKESSGGEK.E          | S1697:     | 2 | 4,9303 | 0,557 | -0,305 |
| 13 | P0C7M2 RA1L3_HUMAN  | R.KLFIGLSFETTDE.S                 |            | 2 | 4,8565 | 0,527 | -0,392 |
| 13 | P52594 NUPL_HUMAN   | K.SLLGDSAPTLHLNKG#PSQS#PVVGR.S    | T177:S181: | 3 | 4,8225 | 0,335 | -0,136 |
| 13 | Q8N1G2 K0082_HUMAN  | E.LALSLSSTS#DDEPPSSVSHGAK.A       | S31:       | 2 | 4,7991 | 0,401 | -0,431 |
| 13 | Q9NZT2 OGFR_HUMAN   | E.GAGDAAVASGGAQTLALAGS#PAPSGHPK.A | S484:      | 3 | 4,7947 | 0,397 | -0,283 |
| 13 | O95232 CROP_HUMAN   | R.LALSQNNQSSGAAGPTGK.N            |            | 2 | 4,7823 | 0,434 | -0,427 |
| 13 | Q9ULT8 HECD1_HUMAN  | R.SKDTDALIDAIDTGAFE.V             |            | 2 | 4,7729 | 0,523 | -0,753 |
| 13 | Q09666 AHNK_HUMAN   | E.VTGS#DDETGKLGSGVSLASK.K         | S5841:     | 3 | 4,7691 | 0,521 | -0,778 |
| 13 | Q701P4 Q701P4_HUMAN | R.NPQNQAQTADGSHCAVSDVE.M          |            | 2 | 4,7568 | 0,571 | -0,468 |
| 13 | P35527 K1C9_HUMAN   | K.VQALEEANNNDLENK.I               |            | 2 | 4,7513 | 0,445 | -0,538 |
| 13 | P46100 ATRX_HUMAN   | E.NLVLSSHTGFCQSS#GDEALSK.S        | S1245:     | 3 | 4,7267 | 0,516 | -0,237 |
| 13 | P51991 ROA3_HUMAN   | D.FGNYSQSSNYGPM*K.G               |            | 2 | 4,6824 | 0,458 | -0,469 |
| 13 | P28749 RBL1_HUMAN   | K.SPVSLTAHSLIGAS#PK.Q             | S762:      | 2 | 4,654  | 0,492 | -1,038 |
| 13 | Q15942 ZYX_HUMAN    | K.FTPVASKFS#PGAPGSGSQPNQK.L       | S281:      | 2 | 4,6468 | 0,441 | 0      |
| 13 | Q9H9C1 CN133_HUMAN  | R.TRPGS#FQSLSDALSDTPAK.S          | S121:      | 2 | 4,6412 | 0,456 | -0,356 |
| 13 | Q9UH99 UN84B_HUMAN  | K.RLS#PAPQLGPSSDAHTSYYS.S         | S54:       | 3 | 4,6312 | 0,471 | -0,468 |
| 13 | Q8WXG6 MADD_HUMAN   | K.SQISADSGVSLTSSSQR.T             |            | 2 | 4,6299 | 0,531 | -0,642 |
| 13 | Q09666 AHNK_HUMAN   | E.VTGS#DDETGKLGSGVSLASK.K         | S5841:     | 2 | 4,6208 | 0,56  | 0,231  |
| 13 | Q9UKI8 TLK1_HUMAN   | R.FTGVASGSTGSGSCSVGAK.A           |            | 2 | 4,6198 | 0,544 | -0,537 |
| 13 | Q5H9R7 SAPS3_HUMAN  | R.NTVDLVTTCHIHSS#SDDE.I           | S524:      | 2 | 4,5727 | 0,543 | 0      |
| 13 | Q6Y7W6 PERQ2_HUMAN  | R.LQQQQQQQLAQM*K.L                |            | 3 | 4,5694 | 0,363 | -0,105 |
| 13 | P10809 CH60_HUMAN   | K.NQLKDM*AIATGGAVFGEE.G           |            | 2 | 4,5517 | 0,478 | -0,784 |
| 13 | P22626 ROA2_HUMAN   | D.FGNYNQPSNYGPM*K.S               |            | 2 | 4,5513 | 0,388 | 0,97   |

|    |                    |                                   |            |   |        |       |        |
|----|--------------------|-----------------------------------|------------|---|--------|-------|--------|
| 13 | Q13200 PSMD2_HUMAN | K.APVQPQQS#PAAAPGGTDEKPSGKE.R     | S16:       | 3 | 4,5506 | 0,452 | -0,302 |
| 13 | P55196 AFAD_HUMAN  | K.QGAIYHGLATLLNQPS#PM*M*QR.I      | S1090:     | 3 | 4,5385 | 0,248 | -0,15  |
| 13 | Q7Z6E9 RBBP6_HUMAN | E.GSSSTLVDTSTSTSGGS#PVRK.S        | S1277:     | 2 | 4,534  | 0,536 | -0,108 |
| 13 | P35611 ADDA_HUMAN  | E.AHRPPS#PTEAPTEASPEPAPDPAPVAEE.A | S669:      | 3 | 4,509  | 0,434 | 0,25   |
| 13 | P13645 K1C10_HUMAN | K.GSLGGGFSSGGFSGGSFSR.G           |            | 2 | 4,5014 | 0,578 | -0,429 |
| 13 | Q9UPN3 MACF1_HUMAN | R.TSLAGDTSNSSSPASTGAK.T           |            | 2 | 4,4936 | 0,583 | -0,14  |
| 13 | Q13765 NACA_HUMAN  | R.ALKNNNSNDIVNAIM*ELTM*.-         |            | 2 | 4,486  | 0,28  | -0,121 |
| 13 | Q14562 UBFD1_HUMAN | E.AEAAAAGAAAEDSGAAR.G             |            | 2 | 4,4747 | 0,53  | -0,088 |
| 13 | P05556 ITB1_HUMAN  | E.CSTDEVNSEDM*DAYCR.K             |            | 2 | 4,461  | 0,602 | -0,31  |
| 13 | Q9HCG8 NCM_HUMAN   | E.TSVTQSSAQDEPATK.K               |            | 2 | 4,452  | 0,458 | -0,671 |
| 13 | O95251 MYST2_HUMAN | R.NLQSFQTEEPAYSTR.R               |            | 2 | 4,4513 | 0,547 | -0,574 |
| 13 | Q8N680 ZBTB2_HUMAN | E.ASQLSQLTSNLAQVNR.T              |            | 3 | 4,4271 | 0,428 | -0,846 |
| 13 | Q9UHK0 NUFP1_HUMAN | E.NQVLDSSAPKS#PSQDVK.A            | S403:      | 2 | 4,4268 | 0,491 | -0,13  |
| 13 | Q5VUA4 ZN318_HUMAN | K.VVIKLS#PQACSFTK.A               | S1856:     | 2 | 4,418  | 0,354 | -0,442 |
| 13 | P21333 FLNA_HUMAN  | K.NGQHVASSPIPVVISQSE.I            |            | 2 | 4,4167 | 0,457 | -0,792 |
| 13 | Q03468 ERCC6_HUMAN | E.LSVISGNGECSNSSGTGK.T            |            | 2 | 4,4096 | 0,583 | -0,557 |
| 13 | Q96SB3 NEB2_HUMAN  | K.IHFSTAPIQVFSTYSNE.D             |            | 2 | 4,4001 | 0,523 | -0,251 |
| 13 | Q8WYP5 AHTF1_HUMAN | R.TTSFFLNS#PEKEHQE.M              | S1292:     | 2 | 4,3933 | 0,523 | -0,391 |
| 13 | Q96KR1 ZFR_HUMAN   | K.GLTTTGNSSLNSTSNTK.V             |            | 2 | 4,3918 | 0,516 | -1,45  |
| 13 | P02545 LMNA_HUMAN  | R.SVGGSGGGSFGDNLVTR.S             |            | 2 | 4,3911 | 0,493 | -0,156 |
| 13 | P35579 MYH9_HUMAN  | E.LDNVTGLLSQSDSK.S                |            | 2 | 4,372  | 0,549 | -0,496 |
| 13 | Q6P1L5 AL2SC_HUMAN | R.TSPTVATQTGASATSTR.G             |            | 2 | 4,3703 | 0,608 | -0,224 |
| 13 | P61978 HNRPK_HUMAN | K.IILDISES#PIKGR.A                | S216:      | 2 | 4,3692 | 0,493 | -0,523 |
| 13 | Q9UK76 HN1_HUMAN   | E.EKPVPAAPVPS#PVAPAPVPSR.R        | S131:      | 3 | 4,3575 | 0,26  | -0,768 |
| 13 | Q15276 RABE1_HUMAN | R.AQSTDSLGTSGSLQSK.A              |            | 2 | 4,3574 | 0,59  | -0,467 |
| 13 | O75694 NU155_HUMAN | K.KPGPPVLSSDPNM*LSNEE.A           |            | 2 | 4,3458 | 0,391 | -0,507 |
| 13 | Q99832 TCPH_HUMAN  | R.AIKNDSVVAGGGAIEM*E.L            |            | 2 | 4,3423 | 0,524 | -0,364 |
| 13 | Q9Y6Y0 NS1BP_HUMAN | E.VFGS#DDDDHIQFVQK.K              | S246:      | 2 | 4,3265 | 0,322 | -0,711 |
| 13 | Q92797 SYMPK_HUMAN | E.DAM*KTPS#PAAEDAREPE.A           | S1259:     | 3 | 4,3146 | 0,388 | -0,766 |
| 13 | Q9Y6D5 BIG2_HUMAN  | E.LEKPIQSKPQS#PVIQAAAVS#PK.F      | S218:S227: | 3 | 4,3145 | 0,441 | -0,665 |
| 13 | Q6S8J3 A26CA_HUMAN | E.KSYELPDGQVITIGNE.R              |            | 2 | 4,2997 | 0,408 | -0,346 |
| 13 | Q12857 NFIA_HUMAN  | E.M*DSPGEEPFTGQGR.S               |            | 2 | 4,2978 | 0,51  | -0,289 |
| 13 | P11413 G6PD_HUMAN  | R.NSYVAGQYDDAASYQR.L              |            | 2 | 4,2956 | 0,567 | -0,607 |

|    |                    |                               |            |   |        |       |        |
|----|--------------------|-------------------------------|------------|---|--------|-------|--------|
| 13 | Q13188 STK3_HUMAN  | K.LADFGVAGQLTDT#M*AKR.N       | T174:      | 2 | 4,2893 | 0,513 | -0,452 |
| 13 | P02538 K2C6A_HUMAN | R.AIGGGLSSVGGGSSTIK.Y         |            | 2 | 4,2867 | 0,546 | -0,59  |
| 13 | Q96B23 CR025_HUMAN | E.TAVEGDPSGVSGATVGR.K         |            | 2 | 4,2738 | 0,572 | -0,626 |
| 13 | Q7Z460 CLAP1_HUMAN | R.SS#SPGKLLGSGYGGLTGGSSR.G    | S687:      | 3 | 4,2711 | 0,374 | -0,274 |
| 13 | Q9UN79 SOX13_HUMAN | R.ASQDSADPQAPAQGNFR.G         |            | 2 | 4,2708 | 0,563 | -0,555 |
| 13 | Q12792 TWF1_HUMAN  | K.KYLLSQSSPAPLTAEEEE.L        |            | 2 | 4,2651 | 0,493 | -0,568 |
| 13 | Q3KQU3 MA7D1_HUMAN | R.RS#SQPSPTAVPASDSPPTKQE.V    | S112:      | 3 | 4,2512 | 0,195 | -0,57  |
| 13 | Q9NY61 AATF_HUMAN  | R.AGDRNS#EDDGVVM*TFSSVK.V     | S203:      | 3 | 4,2455 | 0,341 | -0,694 |
| 13 | Q9Y2W1 TR150_HUMAN | K.SPPSTGSTYGSSQKEE.S          |            | 2 | 4,245  | 0,533 | -0,297 |
| 13 | Q7Z6I8 CE024_HUMAN | R.AADQFDIYSSQSK.Y             |            | 2 | 4,2336 | 0,511 | -0,461 |
| 13 | Q5TAQ9 WD42A_HUMAN | E.ASDLSLSLTGDDGGPNR.T         |            | 2 | 4,2294 | 0,464 | -0,51  |
| 13 | Q8WW11 LMO7_HUMAN  | K.SM*SDVSAEDVQNL.R            |            | 2 | 4,2093 | 0,477 | -1,012 |
| 13 | Q9ULJ8 NEB1_HUMAN  | E.LAGGDFTSPDASASSCGK.E        |            | 2 | 4,2017 | 0,552 | -0,212 |
| 13 | Q3KQU3 MA7D1_HUMAN | R.RSS#QPSPTAVPASDSPPTKQE.V    | S113:      | 2 | 4,2014 | 0,466 | -0,326 |
| 13 | Q05655 KPCD_HUMAN  | K.TGVAGEDM*QDNSGTYGK.I        |            | 2 | 4,2008 | 0,563 | -0,21  |
| 13 | P04406 G3P_HUMAN   | E.GLM*TTVHAITAT#QK.T          | T184:      | 2 | 4,1888 | 0,414 | -0,233 |
| 13 | P78345 RPP38_HUMAN | E.LLDT#FEDLSKPK.R             | S235:      | 2 | 4,1697 | 0,4   | -0,233 |
| 13 | Q9NWW8 CS062_HUMAN | E.AASADDGSLNTSGAGPK.S         |            | 2 | 4,1384 | 0,547 | -0,402 |
| 13 | Q9H1B7 EAP1_HUMAN  | E.EGPELNRQSPNS#SSAAASVASR.R   | S218:      | 3 | 4,1366 | 0,47  | -0,765 |
| 13 | P61978 HNRPK_HUMAN | R.TDYNASVSPDSSGPER.I          |            | 2 | 4,1299 | 0,575 | -0,137 |
| 13 | Q12802 AKP13_HUMAN | K.GPEGQSQAPASTSASTR.L         |            | 2 | 4,1298 | 0,588 | -0,224 |
| 13 | Q6PID6 TTC33_HUMAN | K.SEAPAEVTHFS#PK.S            | S197:      | 2 | 4,1223 | 0,506 | -0,907 |
| 13 | Q96PE2 ARHGH_HUMAN | R.STISSSFGNEETPSSK.E          |            | 2 | 4,1115 | 0,441 | -0,589 |
| 13 | P09496 CLCA_HUMAN  | E.SNGPTDSYAAISQVDR.L          |            | 2 | 4,1103 | 0,481 | -0,798 |
| 13 | Q86V48 LUZP1_HUMAN | R.TSLFENDKDAGM*ENE.S          |            | 2 | 4,1066 | 0,443 | -0,284 |
| 13 | P62917 RL8_HUMAN   | K.KAQLNIGNVLPVGTM*PE.G        |            | 2 | 4,0942 | 0,434 | -0,407 |
| 13 | Q5UIP0 RIF1_HUMAN  | E.NRPFS#PSPLNNISSTVTVK.N      | S1236:     | 3 | 4,0851 | 0,358 | -0,856 |
| 13 | Q15742 NAB2_HUMAN  | E.LGEKLS#PLPGGPGAGDPR.I       | S171:      | 2 | 4,0844 | 0,362 | 0      |
| 13 | Q8ND56 LS14A_HUMAN | K.TQLSQGRS#SPQLDPLRKS#PTM*E.Q | S182:S192: | 3 | 4,0723 | 0,276 | -0,626 |
| 13 | Q95819 M4K4_HUMAN  | R.DSPLQSGSQQNSQAGQR.N         |            | 2 | 4,0718 | 0,504 | -0,069 |
| 13 | P51572 BAP31_HUMAN | K.LDVGNAEVKLEEE.N             |            | 2 | 4,0619 | 0,412 | -0,422 |
| 13 | O14737 PDCD5_HUMAN | R.NSILAQVLDQSAR.A             |            | 2 | 4,0579 | 0,473 | -0,431 |
| 13 | Q9Y5B0 CTDP1_HUMAN | E.LAGAPEPQGSCAQGGR.V          |            | 3 | 4,0496 | 0,461 | 0,353  |

|    |                    |                             |        |   |        |       |        |
|----|--------------------|-----------------------------|--------|---|--------|-------|--------|
| 13 | P46821 MAP1B_HUMAN | K.KTDDVEAM*SSQPALALDE.R     |        | 2 | 4,048  | 0,496 | -0,567 |
| 13 | O14981 BTAF1_HUMAN | K.IANVVINQSANDSK.V          |        | 2 | 4,0281 | 0,487 | -1,491 |
| 13 | Q15427 SF3B4_HUMAN | R.NQDATVYVGGGLDEK.V         |        | 2 | 4,0268 | 0,554 | -0,323 |
| 13 | Q92616 GCN1L_HUMAN | K.KLASQADSTEQVDDTILT.-      |        | 2 | 4,0267 | 0,494 | -1,639 |
| 13 | Q8ND56 LS14A_HUMAN | K.SFFDNISCDNRE.R            |        | 2 | 4,0081 | 0,524 | -0,98  |
| 13 | P30084 ECHM_HUMAN  | E.M*QNLSFQDCYSSK.F          |        | 2 | 4,0057 | 0,43  | -0,301 |
| 13 | Q9NY12 NOLA1_HUMAN | E.NKVYPFNAPVYLE.N           |        | 2 | 4,0045 | 0,346 | -0,942 |
| 13 | P29966 MARCS_HUMAN | E.AAAERPGEAAVASS#PSKANGQE.N | S27:   | 2 | 4,0035 | 0,514 | 0,336  |
| 13 | Q6VEQ5 WASH2_HUMAN | R.QDDSSSSASPSVQGAPR.E       |        | 2 | 3,9961 | 0,574 | -0,364 |
| 13 | Q15398 DLG7_HUMAN  | K.LFSGLSVSSEGPSQR.L         |        | 2 | 3,9959 | 0,559 | -0,157 |
| 13 | Q9UHR5 S30BP_HUMAN | K.GGLVSDAYGEDDFSR.L         |        | 2 | 3,9813 | 0,545 | -0,692 |
| 13 | P04264 K2C1_HUMAN  | K.LNDLEDALQQAK.E            |        | 2 | 3,9735 | 0,422 | -0,629 |
| 13 | Q15149 PLEC1_HUMAN | K.GYSPYSVSGSGSTAGSR.T       |        | 2 | 3,9677 | 0,507 | 0,547  |
| 13 | P42345 FRAP_HUMAN  | E.SIHS#FIGDGLVKPE.A         | S2481: | 3 | 3,9637 | 0,302 | 0      |
| 13 | P39880 CUX1_HUMAN  | E.IQAGSQGQAGASDPSAR.S       |        | 2 | 3,9621 | 0,601 | -0,145 |
| 13 | P48553 TMEM1_HUMAN | R.SPSDNLNTTGIICR.N          |        | 2 | 3,9526 | 0,53  | -0,97  |
| 13 | Q96H12 CI030_HUMAN | R.SVS#PLLSTHVLGKE.K         | S98:   | 2 | 3,9461 | 0,49  | -0,473 |
| 13 | Q8IXJ6 SIRT2_HUMAN | R.NLFSQTLSLGSQKE.R          |        | 2 | 3,9445 | 0,534 | -0,865 |
| 13 | Q13263 TIF1B_HUMAN | R.VCQKPGDLVM*CNQCE.F        |        | 2 | 3,9341 | 0,51  | -0,461 |
| 13 | P00519 ABL1_HUMAN  | E.SDPLDHEPAVS#PLLPR.K       | S569:  | 2 | 3,93   | 0,366 | -0,469 |
| 13 | P49792 RBP2_HUMAN  | R.KQS#LPATSIPTPASFK.F       | S1509: | 2 | 3,9284 | 0,536 | 0,07   |
| 13 | P36578 RL4_HUMAN   | K.AAAAAAALQAK.S             |        | 2 | 3,9271 | 0,395 | -0,51  |
| 13 | Q9BYD6 RM01_HUMAN  | E.NGAAGAGGTSLIQK.I          |        | 2 | 3,9269 | 0,39  | -1,828 |
| 13 | O60504 VINEX_HUMAN | R.SPADPTDLGGQTSPR.R         |        | 2 | 3,925  | 0,548 | -0,163 |
| 13 | Q07866 KLC1_HUMAN  | K.QLNNLALLCQNQGK.Y          |        | 2 | 3,9207 | 0,517 | -1,134 |
| 13 | Q13153 PAK1_HUMAN  | K.SAEDYNSSNALNVK.A          |        | 2 | 3,9203 | 0,528 | 0,646  |
| 13 | P07737 PROF1_HUMAN | R.SSFYVNGLTGGQK.C           |        | 2 | 3,915  | 0,421 | -0,829 |
| 13 | O75122 CLAP2_HUMAN | R.AGGDATDSSQTALDNK.A        |        | 2 | 3,9115 | 0,469 | -0,236 |
| 13 | Q92615 LARP5_HUMAN | R.SPS#PAHLPDDPKVAE.K        | S601:  | 3 | 3,8917 | 0,25  | -0,558 |
| 13 | P29375 JAD1A_HUMAN | E.VLSTDTQTSPEPGTR.M         |        | 2 | 3,8873 | 0,437 | -0,845 |
| 13 | Q7Z2W4 ZCCHV_HUMAN | K.ATDLGGTSQAGTSQR.F         |        | 2 | 3,886  | 0,535 | -0,084 |
| 13 | Q9Y6X4 K0888_HUMAN | E.ASSEQLDQFTQSAEK.A         |        | 2 | 3,8857 | 0,401 | -0,439 |
| 13 | O75643 U520_HUMAN  | R.CTDKGVESVFDIM*E.M         |        | 2 | 3,8804 | 0,455 | -0,741 |

|    |                     |                         |       |   |        |       |        |
|----|---------------------|-------------------------|-------|---|--------|-------|--------|
| 13 | P49023 PAXI_HUMAN   | K.TSSVSNPQDSVGSPCR.V    |       | 2 | 3,877  | 0,431 | -0,207 |
| 13 | B2RTR1 B2RTR1_HUMAN | R.SFQPLPGYGISQSSR.L     |       | 2 | 3,8768 | 0,464 | -0,363 |
| 13 | P06748 NPM_HUMAN    | K.M*QAS#IEKGGSLPKVE.A   | S254: | 3 | 3,8692 | 0,357 | 0      |
| 13 | P50454 SERPH_HUMAN  | R.TGLYNYDDDEKE.K        |       | 2 | 3,869  | 0,438 | -0,242 |
| 13 | O95292 VAPB_HUMAN   | K.IISTTASKTET#PIVSK.S   | T150: | 2 | 3,8651 | 0,501 | -0,625 |
| 13 | Q6P158 DHX57_HUMAN  | R.DLQEQDADAGSER.G       |       | 2 | 3,8609 | 0,439 | -0,17  |
| 13 | Q15464 SHB_HUMAN    | E.SAAGGGAGDPLGGACAGGR.T |       | 2 | 3,8593 | 0,491 | -0,391 |
| 13 | Q15464 SHB_HUMAN    | R.LDYCGSGEPGGVQR.A      |       | 2 | 3,8516 | 0,495 | -0,55  |
| 13 | Q13885 TBB2A_HUMAN  | E.GAELVDS#VLDVVRKE.S    | S115: | 2 | 3,8511 | 0,459 | -0,143 |
| 13 | P08670 VIME_HUMAN   | E.TNLDS#LPLVDTHSK.R     | S430: | 2 | 3,8509 | 0,58  | -0,452 |
| 13 | P22314 UBA1_HUMAN   | E.LQSANASVDDSRLEE.L     |       | 2 | 3,8467 | 0,335 | 1,045  |
| 13 | O43303 CE110_HUMAN  | R.TSSACHILINNPINACE.L   |       | 2 | 3,8447 | 0,567 | 0,064  |
| 13 | P10809 CH60_HUMAN   | E.IAQVATISANGDKE.I      |       | 2 | 3,8439 | 0,46  | -1,464 |
| 13 | P04264 K2C1_HUMAN   | K.QISNLQQSISDAEQR.G     |       | 2 | 3,8431 | 0,533 | -0,711 |
| 13 | Q01804 OTUD4_HUMAN  | K.TAADVVSPGANSVDSR.V    |       | 2 | 3,8415 | 0,412 | -0,395 |
| 13 | P12814 ACTN1_HUMAN  | R.KDDPLTNLNTAFDVAE.K    |       | 2 | 3,835  | 0,522 | -0,208 |
| 13 | Q9ULH0 ARMS_HUMAN   | R.TPSTVTLNNSAPANR.A     |       | 2 | 3,8206 | 0,517 | -0,589 |
| 13 | Q92878 RAD50_HUMAN  | E.DKLFVCGSQDFE.S        |       | 2 | 3,8178 | 0,395 | -0,469 |
| 13 | P09429 HMGB1_HUMAN  | K.M*SSYAFFVQTCREE.H     |       | 2 | 3,813  | 0,561 | -0,276 |
| 13 | Q99832 TCPH_HUMAN   | D.NAGFDATNILNK.L        |       | 2 | 3,8123 | 0,386 | -0,955 |
| 13 | Q9BZX2 UCK2_HUMAN   | K.GQFNFDHPDAFDNE.L      |       | 2 | 3,8071 | 0,413 | -0,591 |
| 13 | Q13813 SPTA2_HUMAN  | R.VNDVCTNGQDLIK.K       |       | 2 | 3,8062 | 0,451 | -0,579 |
| 13 | P49354 FNNTA_HUMAN  | R.YFVISNTTGYNDR.A       |       | 2 | 3,8012 | 0,519 | -0,708 |
| 13 | Q96PE2 ARHG_HUMAN   | R.STISSFGNEETPSSKE.A    |       | 2 | 3,7999 | 0,546 | -1,161 |
| 13 | Q9UQR1 ZN148_HUMAN  | E.FSEFPLVNVNDR.A        |       | 2 | 3,7944 | 0,53  | -0,708 |
| 13 | P35520 CBS_HUMAN    | R.NASNPLAHYDTTAE.I      |       | 2 | 3,7941 | 0,482 | -0,452 |
| 13 | P14618 KPYM_HUMAN   | K.KGVNLPGAAVDLPVSE.K    |       | 2 | 3,7864 | 0,373 | -0,671 |
| 13 | Q86VR2 F134C_HUMAN  | R.SPPGAEQPAPPASRDE.A    |       | 2 | 3,7829 | 0,553 | -0,422 |
| 13 | O14974 MYPT1_HUMAN  | K.FPTTATKIS#PKEEE.R     | S422: | 2 | 3,775  | 0,498 | -0,294 |
| 13 | O43493 TGON2_HUMAN  | K.SSAEAQTPEDTPNKSGAE.A  |       | 2 | 3,7722 | 0,404 | -0,067 |
| 13 | O00512 BCL9_HUMAN   | R.AVTPVSQGSNSSADPK.A    |       | 2 | 3,7697 | 0,417 | -0,822 |
| 13 | Q93009 UBP7_HUMAN   | E.DQFCGHQGNM*YDEE.K     |       | 2 | 3,7655 | 0,296 | -0,328 |
| 13 | Q9H6F5 CCD86_HUMAN  | R.LGGLRPES#PESLTSVSR.T  | S18:  | 3 | 3,7586 | 0,405 | 0,098  |



|    |                     |                              |       |   |        |       |        |
|----|---------------------|------------------------------|-------|---|--------|-------|--------|
| 13 | P22234 PUR6_HUMAN   | E.LLDS#PGKVLQSK.D            | S27:  | 2 | 3,7529 | 0,446 | -0,991 |
| 13 | Q13409 DC1I2_HUMAN  | K.SVSTPSEAGSQDSGDGAVGSR.T    |       | 2 | 3,7416 | 0,54  | -0,5   |
| 13 | Q68DX9 Q68DX9_HUMAN | R.IDS#PGFKPASQVYR.K          | S491: | 3 | 3,7401 | 0,355 | 0,206  |
| 13 | O14737 PDCD5_HUMAN  | R.NSILAQVLDQSAR.A            |       | 3 | 3,7399 | 0,251 | 0,323  |
| 13 | Q9UDT6 CLIP2_HUMAN  | R.TSTGSASSAAVAASSKE.G        |       | 2 | 3,7337 | 0,501 | -0,229 |
| 13 | Q70E73 RAPH1_HUMAN  | E.SQPLKVPANVAPQS#PPAVK.A     | S946: | 3 | 3,7306 | 0,239 | -0,434 |
| 13 | Q96T23 RSF1_HUMAN   | K.LSDDFDS#PVKGPLCK.S         | S387: | 2 | 3,73   | 0,507 | -0,486 |
| 13 | Q13136 LIPA1_HUMAN  | E.AEGPPGGGGHGS#PSQPDADSHFE.Q | S26:  | 3 | 3,7293 | 0,276 | -0,37  |
| 13 | P04264 K2C1_HUMAN   | K.WELLQQVDTSTR.T             |       | 2 | 3,7275 | 0,538 | -0,744 |
| 13 | Q9NY74 ETAA1_HUMAN  | E.AAFNAIFDGSTQK.C            |       | 2 | 3,7221 | 0,398 | -0,356 |
| 13 | P30101 PDIA3_HUMAN  | E.LSDFISYLQR.E               |       | 2 | 3,7202 | 0,411 | -0,589 |
| 13 | P62829 RL23_HUMAN   | E.DNAGVIVNNKGE.M             |       | 2 | 3,7163 | 0,386 | -0,099 |
| 13 | Q8NDC0 MISSL_HUMAN  | E.FSLADALPEHS#PAK.T          | S15:  | 2 | 3,7104 | 0,484 | -0,859 |
| 13 | Q9BWT3 PAPOG_HUMAN  | R.DTDNGTPFNPAK.S             |       | 2 | 3,7093 | 0,42  | -0,42  |
| 13 | Q2YD98 K1530_HUMAN  | E.VSDPTSAAAQLR.Q             |       | 2 | 3,7076 | 0,409 | -0,1   |
| 13 | Q9H0H5 RGAP1_HUMAN  | E.NSNAFSTPQTPDIK.V           |       | 2 | 3,7074 | 0,503 | 0      |
| 13 | Q7Z6Z7 HUWE1_HUMAN  | E.EAVGD TSAAGSSEQPR.A        |       | 2 | 3,7037 | 0,564 | -0,391 |
| 13 | O43237 DC1L2_HUMAN  | K.DFQDYM*EPEEGCQGS#PQRR.G    | S194: | 3 | 3,7032 | 0,36  | -0,453 |
| 13 | Q86VM9 ZCH18_HUMAN  | R.DSGSDQDLGAGVR.A            |       | 2 | 3,6933 | 0,438 | 0,175  |
| 13 | P49792 RBP2_HUMAN   | K.APGTNVAM*ASNQAVR.I         |       | 2 | 3,6894 | 0,513 | -0,244 |
| 13 | Q9HC38 GLOD4_HUMAN  | K.LLDDAM*AADKSDE.W           |       | 2 | 3,6858 | 0,358 | 0      |
| 13 | Q8N1G2 K0082_HUMAN  | E.LALSLSSTS#DDEPPSSVSHGAK.A  | S31:  | 3 | 3,6856 | 0,327 | -0,646 |
| 13 | Q9HC52 CBX8_HUMAN   | R.NM*GLSPPASSTSTSSTCR.A      |       | 2 | 3,6845 | 0,47  | -0,394 |
| 13 | P41236 IPP2_HUMAN   | K.TSTTSSM*VASAEQPR.G         |       | 3 | 3,6833 | 0,319 | 0,233  |
| 13 | Q9NPQ8 RIC8A_HUMAN  | K.YTGYGNAAGLLAAR.G           |       | 2 | 3,6828 | 0,489 | -0,611 |
| 13 | P10809 CH60_HUMAN   | R.KPLVIIAEDVDGE.A            |       | 2 | 3,6788 | 0,485 | -0,087 |
| 13 | Q9BQ52 RNZ2_HUMAN   | E.LAGGLEDEGEPQK.R            |       | 2 | 3,6784 | 0,42  | -0,546 |
| 13 | Q9C004 SPY4_HUMAN   | R.LLDHM*APPPVADQAS#PR.A      | S125: | 2 | 3,677  | 0,31  | -0,638 |
| 13 | Q56NI9 ESCO2_HUMAN  | K.SALSTVSFYNQNK.W            |       | 2 | 3,6714 | 0,376 | -0,502 |
| 13 | Q8NDI1 EHBP1_HUMAN  | E.AFVTIKDS#PPQSTK.R          | S335: | 2 | 3,667  | 0,244 | -0,61  |
| 13 | Q9BUF5 TBB6_HUMAN   | E.HGIDPAGGYVGDALQLE.R        |       | 2 | 3,6658 | 0,528 | -0,271 |
| 13 | P15336 ATF2_HUMAN   | K.KM*PLDLS#PLATPIIR.S        | S94:  | 2 | 3,6652 | 0,407 | -0,485 |
| 13 | P37802 TAGL2_HUMAN  | R.TLM*NLGGLAVAR.D            |       | 2 | 3,6648 | 0,381 | -0,396 |

|    |                    |                               |            |   |        |       |        |
|----|--------------------|-------------------------------|------------|---|--------|-------|--------|
| 13 | O76094 SRP72_HUMAN | K.VVCLIQNGSFKE.A              |            | 2 | 3,6629 | 0,373 | -0,35  |
| 13 | Q0JRZ9 FCHO2_HUMAN | K.VSIGNITLS#PAISRHS#PVQM*NR.N | S387:S394: | 3 | 3,6621 | 0,308 | -0,43  |
| 13 | Q4KMP7 TB10B_HUMAN | K.TDKYGFLGGSQYSGSLE.S         |            | 2 | 3,6596 | 0,479 | 0,27   |
| 13 | Q8IWE2 NXP20_HUMAN | R.GM*LSAITNVVQNTGK.S          |            | 2 | 3,6565 | 0,429 | -0,473 |
| 13 | Q13509 TBB3_HUMAN  | E.HGIDPSGNVVGSDSLQLE.R        |            | 2 | 3,6512 | 0,419 | -0,573 |
| 13 | Q15018 K0157_HUMAN | K.YPGSGADLPPPQR.A             |            | 2 | 3,6444 | 0,473 | -1,081 |
| 13 | Q9NQ84 GPC5C_HUMAN | R.ATANSQVM*GSANSTLR.A         |            | 2 | 3,6414 | 0,478 | -0,826 |
| 13 | Q8NB7 SUMF2_HUMAN  | R.M*GNTPDASDNLGFR.C           |            | 2 | 3,6371 | 0,558 | -0,153 |
| 13 | Q08378 GOGA3_HUMAN | E.DSNAGNSGGNVPAPDSTK.G        |            | 2 | 3,6359 | 0,58  | -0,289 |
| 13 | P39880 CUX1_HUMAN  | E.IQAGSQGQAGASDPSAR.S         |            | 3 | 3,6355 | 0,416 | 0,325  |
| 13 | P49790 NU153_HUMAN | E.GSVLDILKS#PGFASPK.I         | S614:      | 2 | 3,6345 | 0,318 | -0,288 |
| 13 | O75937 DNJC8_HUMAN | R.ALDVIQAGKE.Y                |            | 2 | 3,6343 | 0,356 | 0,117  |
| 13 | Q9GZZ9 UBA5_HUMAN  | E.GKPVLDLVLSCVDNFE.A          |            | 2 | 3,6341 | 0,335 | -0,072 |
| 13 | O75122 CLAP2_HUMAN | E.TLYNSLEPSYQK.S              |            | 2 | 3,6341 | 0,386 | -0,676 |
| 13 | Q7L2J0 MEPCE_HUMAN | R.TLNAETPKSS#PLPAK.G          | S217:      | 2 | 3,6312 | 0,443 | -0,373 |
| 13 | Q13435 SF3B2_HUMAN | E.TGKPLYGDFVGTNAAE.F          |            | 2 | 3,631  | 0,407 | -0,67  |
| 13 | Q5T1M5 FKB15_HUMAN | E.QSASASSQPQAPLNR.E           |            | 2 | 3,6284 | 0,459 | -0,534 |
| 13 | Q14966 ZN638_HUMAN | K.SKEEPLFPNLDE.F              |            | 2 | 3,6267 | 0,415 | -0,39  |
| 13 | O00512 BCL9_HUMAN  | R.SST#PSHGQTTATEPTPAQK.T      | T155:      | 2 | 3,6247 | 0,371 | -0,182 |
| 13 | Q8TDY2 RBCC1_HUMAN | E.M*SQTITDLLSEQK.A            |            | 2 | 3,6234 | 0,419 | -0,323 |
| 13 | Q9UPY3 DICER_HUMAN | R.TLLES#PGKLHVE.V             | S1150:     | 2 | 3,6225 | 0,39  | -0,491 |
| 13 | Q8WXI9 P66B_HUMAN  | K.ENINDEPVDM*SAR.R            |            | 2 | 3,6222 | 0,362 | -0,567 |
| 13 | Q7Z2K8 GRIN1_HUMAN | K.VGSLPLEKGS#PVTTTK.A         | S615:      | 2 | 3,6217 | 0,456 | -0,432 |
| 13 | Q86WB0 NIPA_HUMAN  | R.SM*GTGDTPGLEVPS#SPLRK.A     | S394:      | 3 | 3,62   | 0,266 | -0,361 |
| 13 | Q13200 PSMD2_HUMAN | K.APVQPQQS#PAAAPGGTDEKPSGK.E  | S16:       | 3 | 3,6186 | 0,323 | -0,08  |
| 13 | Q5T1V6 DDX59_HUMAN | K.EHPFILNLQEDQIE.N            |            | 2 | 3,6176 | 0,305 | -0,283 |
| 13 | P18206 VINC_HUMAN  | K.AVAGNISDPGLQK.S             |            | 2 | 3,6131 | 0,436 | -1,249 |
| 13 | Q14166 TTL12_HUMAN | K.FNQTYQLAHGTAAE.K            |            | 2 | 3,6116 | 0,235 | -1,137 |
| 13 | Q9UBB4 ATX10_HUMAN | R.NLTEDNSQNQDLIAK.M           |            | 2 | 3,6097 | 0,369 | -1,218 |
| 13 | Q4V328 GRAP1_HUMAN | R.TQTGDSSSISFSYRE.I           |            | 2 | 3,6094 | 0,535 | -0,488 |
| 13 | Q8WUA2 PPIL4_HUMAN | K.QDTKYDLILDEQAE.D            |            | 2 | 3,6092 | 0,317 | -1,016 |
| 13 | O75152 ZC11A_HUMAN | R.RLS#SASTGKPLSVEDDFE.K       | S758:      | 2 | 3,6089 | 0,469 | 0,577  |
| 13 | P08670 VIME_HUMAN  | R.LQDEIQNM*KEE.M              |            | 2 | 3,6072 | 0,179 | -0,613 |

|    |                    |                             |        |   |        |       |        |
|----|--------------------|-----------------------------|--------|---|--------|-------|--------|
| 13 | Q6P3X3 TTC27_HUMAN | E.LNDDTILNDIK.L             |        | 2 | 3,6058 | 0,286 | -0,67  |
| 13 | O00512 BCL9_HUMAN  | R.SST#PSHGQTTATEPTPAQK.T    | T155:  | 3 | 3,603  | 0,294 | -0,182 |
| 13 | P19338 NUCL_HUMAN  | K.GLSEDTTEETLKE.S           |        | 2 | 3,6025 | 0,391 | -1,933 |
| 13 | Q96GQ7 DDX27_HUMAN | R.SADFNPDFVFTEKE.G          |        | 2 | 3,5981 | 0,443 | -0,371 |
| 13 | Q8IX12 CCAR1_HUMAN | K.SCALAEDPQELR.D            |        | 2 | 3,5963 | 0,447 | -0,966 |
| 13 | P46821 MAP1B_HUMAN | R.TPEEGGYSYDISEK.T          |        | 2 | 3,5955 | 0,481 | -1,24  |
| 13 | P0C7M2 RA1L3_HUMAN | K.IFVGGIKEDTEE.H            |        | 2 | 3,5933 | 0,34  | 0,365  |
| 13 | Q4KMP7 TB10B_HUMAN | E.GLHPSLPS#PTGNSTPLGSSKE.T  | S432:  | 3 | 3,5916 | 0,259 | 1,963  |
| 13 | P00519 ABL1_HUMAN  | E.SDPLDHEPAVS#PLLPR.K       | S569:  | 3 | 3,5833 | 0,375 | -0,301 |
| 13 | O95429 BAG4_HUMAN  | K.DSSYPYSQSDQSM*NR.H        |        | 2 | 3,583  | 0,516 | -0,137 |
| 13 | P04632 CPNS1_HUMAN | R.SM*VAVM*DSDTTGK.L         |        | 2 | 3,5823 | 0,404 | -0,178 |
| 13 | P05783 K1C18_HUMAN | R.AQIFANTVDNAR.I            |        | 2 | 3,5805 | 0,473 | -0,092 |
| 13 | P29966 MARCS_HUMAN | E.AAAERPGEAAVASSPS#KANGQE.N | S29:   | 3 | 3,5797 | 0,253 | 0,168  |
| 13 | Q9NQG5 CT077_HUMAN | K.LSM*EDSKS#PPPKATEE.K      | S134:  | 2 | 3,5773 | 0,516 | -0,132 |
| 13 | O00257 CBX4_HUMAN  | E.VSGVSDPQPQDAGSR.K         |        | 2 | 3,5762 | 0,493 | -0,488 |
| 13 | Q9NQW6 ANLN_HUMAN  | K.ATS#PVKSTTSITDAK.S        | S295:  | 3 | 3,5755 | 0,48  | -0,231 |
| 13 | Q99613 EIF3C_HUMAN | R.GCILTIVERM*DEE.F          |        | 2 | 3,575  | 0,483 | -1,544 |
| 13 | Q9Y6W5 WASF2_HUMAN | R.DVVGNDVATILSR.R           |        | 2 | 3,571  | 0,47  | -1,526 |
| 13 | P18583 SON_HUMAN   | E.FTTASTLSLVNK.Y            |        | 2 | 3,5697 | 0,443 | 0      |
| 13 | P13667 PDIA4_HUMAN | K.IDATSASVLASR.F            |        | 2 | 3,5685 | 0,435 | -0,922 |
| 13 | P22695 QCR2_HUMAN  | R.NALANPLYCPDYR.I           |        | 2 | 3,5642 | 0,461 | -0,779 |
| 13 | Q15652 JHD2C_HUMAN | R.IIDNSSEQKPENE.L           |        | 2 | 3,5632 | 0,34  | -0,081 |
| 13 | Q92797 SYMPK_HUMAN | E.DAM*KTPS#PAAEDAREPE.A     | S1259: | 2 | 3,5626 | 0,474 | -0,83  |
| 13 | O43399 TPD54_HUMAN | K.TSAALSTVGSISR.K           |        | 2 | 3,562  | 0,342 | -0,185 |
| 13 | P33176 KINH_HUMAN  | R.GGGAFVQNSQPVAVR.G         |        | 2 | 3,5605 | 0,463 | -1,231 |
| 13 | O43290 SNUT1_HUMAN | R.GLAAALLLCQNK.G            |        | 3 | 3,5602 | 0,338 | -0,144 |
| 13 | P25098 ARBK1_HUMAN | R.ISDLGLACDFSK.K            |        | 2 | 3,5597 | 0,469 | -0,368 |
| 13 | P05387 RLA2_HUMAN  | K.NIEDVIAQGIGK.L            |        | 3 | 3,5594 | 0,152 | 1,018  |
| 13 | O95782 AP2A1_HUMAN | R.GLAVFISDIR.N              |        | 2 | 3,5562 | 0,399 | -0,447 |
| 13 | Q9UER7 DAXX_HUMAN  | K.DGDKSPM*SSLQISNE.K        |        | 2 | 3,5554 | 0,386 | -0,601 |
| 13 | P55263 ADK_HUMAN   | R.SLIANLAAANCYK.K           |        | 2 | 3,5545 | 0,374 | -0,693 |
| 13 | Q96QD8 S38A2_HUMAN | K.SHYADVDPENQNFLLE.S        |        | 2 | 3,5534 | 0,336 | -0,452 |
| 13 | P49750 YLPM1_HUMAN | K.M*QSAAFSIAADV.K           |        | 2 | 3,5513 | 0,359 | -0,81  |

|    |                     |                           |       |   |        |       |        |
|----|---------------------|---------------------------|-------|---|--------|-------|--------|
| 13 | P63241 IF5A1_HUMAN  | D.GYLSLLQDSGEVRE.D        |       | 2 | 3,5459 | 0,4   | -0,156 |
| 13 | Q9NYF8 BCLF1_HUMAN  | K.DLFDYS#PPLHK.N          | S512: | 2 | 3,5456 | 0,435 | -0,518 |
| 13 | P42566 EP15_HUMAN   | R.SATSSSVSNVVITK.N        |       | 2 | 3,5428 | 0,513 | -0,53  |
| 13 | P14314 GLU2B_HUMAN  | E.TM*VTSTTEPSRCE.Y        |       | 2 | 3,5427 | 0,559 | -0,161 |
| 13 | P31942 HNRH3_HUMAN  | R.DGM*DNQGGYGSVGR.M       |       | 2 | 3,5382 | 0,452 | -0,085 |
| 13 | Q96J84 KIRR1_HUMAN  | R.FSQEPADQTVVAGQR.A       |       | 2 | 3,5364 | 0,507 | -0,523 |
| 13 | Q14247 SRC8_HUMAN   | R.QDSAAVGFYKE.K           |       | 2 | 3,5358 | 0,351 | -0,55  |
| 13 | O60216 RAD21_HUMAN  | K.GGEADNLDEFLKE.F         |       | 2 | 3,5322 | 0,161 | -0,679 |
| 13 | Q2M2I8 AAK1_HUMAN   | K.VQTTPPPAVQGQK.V         |       | 3 | 3,5306 | 0,232 | 0,203  |
| 13 | P04264 K2C1_HUMAN   | K.SLNNQFASFIDK.V          |       | 2 | 3,5301 | 0,44  | -0,353 |
| 13 | P63244 GBLP_HUMAN   | D.GGDIINALCFSPNR.Y        |       | 2 | 3,529  | 0,525 | -0,557 |
| 13 | A8K630 A8K630_HUMAN | R.LQQQHSEQPPLQPS#PVTTTR.R | S22:  | 3 | 3,5281 | 0,229 | 0,406  |
| 13 | P05783 K1C18_HUMAN  | D.ALDSSNSM*QTIQK.T        |       | 2 | 3,5279 | 0,368 | -0,254 |
| 13 | Q9NZT2 OGFR_HUMAN   | R.DCNGDTPNLSFYR.N         |       | 2 | 3,526  | 0,396 | -0,548 |
| 13 | Q29RF7 PDS5A_HUMAN  | R.TVTAAGAENIQK.T          |       | 2 | 3,5258 | 0,287 | -1,008 |
| 13 | O60232 SSA27_HUMAN  | E.TCADCGTILLQDK.Q         |       | 2 | 3,5227 | 0,313 | -0,816 |
| 13 | O94833 BPAEA_HUMAN  | E.AGADDINGLM*TK.L         |       | 2 | 3,5208 | 0,456 | 0      |
| 13 | Q9UPN3 MACF1_HUMAN  | K.AALLDQALSNA.R           |       | 2 | 3,5203 | 0,381 | -0,883 |
| 13 | Q6U841 S4A10_HUMAN  | R.IPIVRS#FADIGK.K         | S238: | 2 | 3,5195 | 0,297 | -0,699 |
| 13 | Q14247 SRC8_HUMAN   | E.DVTQVSSAYQK.T           |       | 2 | 3,5192 | 0,396 | -0,597 |
| 13 | Q14202 ZMYM3_HUMAN  | K.TNCCDQCGAYIYTK.T        |       | 2 | 3,5185 | 0,432 | -0,557 |
| 13 | O15067 PUR4_HUMAN   | R.CPACFVGTITGDR.R         |       | 2 | 3,5182 | 0,561 | -0,42  |
| 13 | Q71RC2 LARP4_HUMAN  | K.DGLNQTTIPVS#PPSTTKPSR.A | S583: | 2 | 3,5176 | 0,358 | -0,224 |
| 13 | Q9H019 FA54B_HUMAN  | K.AACSSSEEDDCVSLSK.A      |       | 2 | 3,5174 | 0,362 | -0,42  |
| 13 | Q8TE77 SSH3_HUMAN   | E.QGQGQGQGEPCISSTPR.F     |       | 2 | 3,5165 | 0,537 | -0,478 |
| 13 | Q9Y580 RBM7_HUMAN   | R.TM*DNM*TSSAQIIQR.S      |       | 2 | 3,5158 | 0,376 | -0,45  |
| 13 | P21291 CSR1_HUMAN   | K.NLDSTTVAVHGEE.I         |       | 2 | 3,5149 | 0,407 | -0,623 |
| 13 | Q16643 DREB_HUMAN   | E.TQEPSILDSEETR.A         |       | 2 | 3,5148 | 0,437 | -0,076 |
| 13 | Q8IXM2 CQ049_HUMAN  | E.LTM*QLHPVADS#SPAGAK.W   | S35:  | 3 | 3,5142 | 0,354 | -0,302 |
| 13 | P11388 TOP2A_HUMAN  | K.TLAVSGLGVVGR.D          |       | 2 | 3,5137 | 0,276 | -0,216 |
| 13 | Q96EP5 DAZP1_HUMAN  | K.IFVGGIPHNCGETE.L        |       | 2 | 3,513  | 0,437 | -0,718 |
| 13 | Q16181 SEPT7_HUMAN  | K.LAAVTYNGVDNKN.N         |       | 2 | 3,5129 | 0,491 | 1,416  |
| 13 | P41236 IPP2_HUMAN   | K.TSTSSM*VASAEQPR.G       |       | 2 | 3,508  | 0,425 | -0,233 |

|    |                     |                              |        |   |        |       |        |
|----|---------------------|------------------------------|--------|---|--------|-------|--------|
| 13 | Q12888 TP53B_HUMAN  | R.GNLLHFPSSQGEED.K           |        | 2 | 3,507  | 0,401 | -0,632 |
| 13 | O60506 HNRPQ_HUMAN  | E.DGALAVLQQFK.D              |        | 2 | 3,5055 | 0,338 | 0      |
| 13 | Q86WBO NIPA_HUMAN   | R.SQDATFSPGSEQAEKS#PGPIVSR.T | S344:  | 3 | 3,5034 | 0,285 | -0,671 |
| 13 | Q86WBO NIPA_HUMAN   | R.SM*GTGDTPLGLEVPSS#PLRK.A   | S395:  | 2 | 3,4984 | 0,46  | -0,362 |
| 13 | Q5UIP0 RIF1_HUMAN   | E.LIIEDNNAS#PQKLRE.L         | S2144: | 2 | 3,4966 | 0,378 | -0,134 |
| 13 | Q9NQT8 KI13B_HUMAN  | K.LSLVDLAGSER.A              |        | 2 | 3,4943 | 0,488 | -0,21  |
| 13 | P10809 CH60_HUMAN   | E.GIVLGGGCALLR.C             |        | 2 | 3,4935 | 0,316 | -1,44  |
| 13 | Q08945 SSRP1_HUMAN  | E.IPLSNVSQCTTGKNE.V          |        | 2 | 3,4919 | 0,475 | -0,814 |
| 13 | O00303 EIF3F_HUMAN  | E.VTNCFSVPHNESEDE.V          |        | 2 | 3,4911 | 0,415 | -1,107 |
| 13 | P11388 TOP2A_HUMAN  | K.SVVDLEADDVK.G              |        | 2 | 3,4903 | 0,528 | -0,382 |
| 13 | B2RBN7 B2RBN7_HUMAN | R.CTGGVVVRPQAVTE.Q           |        | 2 | 3,489  | 0,47  | -1,242 |
| 13 | Q96AP0 ACD_HUMAN    | E.NDQLILSSLGPCQR.T           |        | 2 | 3,4872 | 0,479 | -0,229 |
| 13 | Q8IXM2 CQ049_HUMAN  | E.LTM*QLHPVADSS#PAGAK.W      | S36:   | 2 | 3,4858 | 0,397 | -0,201 |
| 13 | Q15054 DPOD3_HUMAN  | K.TYLDGEGCIVTEK.V            |        | 2 | 3,4857 | 0,456 | -0,411 |
| 13 | P05787 K2C8_HUMAN   | K.LSELEAALQR.A               |        | 2 | 3,4843 | 0,101 | 0      |
| 13 | Q8NCN4 RN169_HUMAN  | K.NNSYSLAFLAGK.L             |        | 2 | 3,4832 | 0,389 | -1,519 |
| 13 | O43379 WDR62_HUMAN  | E.VEAGPGDQQGDSYLR.V          |        | 2 | 3,4824 | 0,47  | -0,69  |
| 13 | P35658 NU214_HUMAN  | K.SPGSTPTTPTSSQAPQK.L        |        | 2 | 3,482  | 0,537 | -0,365 |
| 13 | Q14258 TRI25_HUMAN  | R.ASAPS#PNAQVACDHCLKE.A      | S100:  | 2 | 3,4798 | 0,494 | 0,12   |
| 13 | P29692 EF1D_HUMAN   | K.SLAGSSGPGASSGTSGDHGE.L     |        | 2 | 3,4787 | 0,551 | -0,639 |
| 13 | Q9H467 CUED2_HUMAN  | R.YIDNQVVSTKGE.R             |        | 2 | 3,4762 | 0,461 | -0,361 |
| 13 | Q02241 KIF23_HUMAN  | D.M*IFNSIGSFQAK.R            |        | 2 | 3,4753 | 0,326 | -0,898 |
| 13 | P11172 PYR5_HUMAN   | E.NVFVAANHNGS#PLSIK.E        | S214:  | 2 | 3,4745 | 0,305 | -0,558 |
| 13 | P84103 SFRS3_HUMAN  | K.VYVGNLGNNGNKTELE.R         |        | 2 | 3,473  | 0,417 | -0,354 |
| 13 | Q6S8J3 A26CA_HUMAN  | E.LPDGQVITIGNER.F            |        | 2 | 3,4711 | 0,375 | -0,691 |
| 13 | Q14566 MCM6_HUMAN   | K.ASSAAGLTAAVVRDEE.S         |        | 2 | 3,4631 | 0,486 | -0,552 |
| 13 | Q8NFH4 NUP37_HUMAN  | R.LFTSDLQDKNE.Y              |        | 2 | 3,4623 | 0,234 | -0,093 |
| 13 | P63098 CANB1_HUMAN  | R.IYDM*DKDGYISNGE.L          |        | 2 | 3,4619 | 0,454 | -0,82  |
| 13 | A7E2E7 A7E2E7_HUMAN | R.SGVTNM*S#SPHKNSVPSSLNE.Y   | S183:  | 3 | 3,4616 | 0,223 | -0,169 |
| 13 | Q9P2J5 SYLC_HUMAN   | K.KM*IDAGDALIYM*EPE.K        |        | 2 | 3,4586 | 0,391 | -0,353 |
| 13 | P21796 VDAC1_HUMAN  | R.VTQSNFAVGKYKTDE.F          |        | 2 | 3,4579 | 0,459 | 0,157  |
| 13 | Q7Z5K2 WAPL_HUMAN   | R.IVEDDASISSCNK.L            |        | 2 | 3,4574 | 0,416 | -0,848 |
| 13 | P30520 PURA2_HUMAN  | R.CQGGNNAGHTVVVDSVEYD.F      |        | 2 | 3,4566 | 0,224 | -0,181 |

|    |                    |                                |        |   |        |       |        |
|----|--------------------|--------------------------------|--------|---|--------|-------|--------|
| 13 | Q14444 CAPR1_HUMAN | R.SFM*ALSQDIQK.T               |        | 2 | 3,4558 | 0,389 | -0,475 |
| 13 | Q9H0B6 KLC2_HUMAN  | K.SVEEPTQPGGTGLSDSR.T          |        | 2 | 3,4547 | 0,516 | -0,355 |
| 13 | Q12906 ILF3_HUMAN  | K.VLQDM*GLPTGAEGR.D            |        | 2 | 3,4539 | 0,518 | -0,334 |
| 13 | Q5VT06 CE350_HUMAN | R.FLNDRPAIDALQNSE.C            |        | 2 | 3,4538 | 0,294 | 0,143  |
| 13 | P49792 RBP2_HUMAN  | D.LASSNSGDFAFGSK.D             |        | 2 | 3,4504 | 0,474 | -0,352 |
| 13 | P09493 TPM1_HUMAN  | K.ATDAEADVASLNR.R              |        | 2 | 3,4465 | 0,288 | -0,275 |
| 13 | Q9UMZ2 SYNG_HUMAN  | K.FDFLVATSQSK.M                |        | 2 | 3,4462 | 0,436 | -0,687 |
| 13 | O75376 NCOR1_HUMAN | R.NDARS#PGSISYLPSFFTK.L        | S2184: | 2 | 3,4446 | 0,378 | -0,118 |
| 13 | O95373 IPO7_HUMAN  | E.TENDDLTNVIQK.M               |        | 2 | 3,444  | 0,444 | -0,527 |
| 13 | P15374 UCHL3_HUMAN | K.SQGQDVTSSVYFM*K.Q            |        | 2 | 3,4429 | 0,539 | -0,306 |
| 13 | Q5QJE6 TDIF2_HUMAN | E.LQDTSLQQLVSQR.H              |        | 2 | 3,4426 | 0,505 | -0,241 |
| 13 | Q5VZ89 DEN4C_HUMAN | K.TPDESKLFS#PVIAR.N            | S989:  | 2 | 3,441  | 0,547 | -0,278 |
| 13 | P49327 FAS_HUMAN   | K.EDGLAQQQTQLNLR.S             |        | 2 | 3,4363 | 0,346 | -0,227 |
| 13 | P12268 IMDH2_HUMAN | D.SSQGNSIFQINM*IK.Y            |        | 2 | 3,4324 | 0,417 | -0,54  |
| 13 | Q15043 S39AE_HUMAN | R.YGEGDSLTLQQLK.A              |        | 2 | 3,4319 | 0,432 | -0,504 |
| 13 | Q6PJF5 RHDF2_HUMAN | R.GIPHSASPV#PDGVQIPLKE.Y       | S328:  | 3 | 3,4296 | 0,268 | -0,434 |
| 13 | Q86V81 THOC4_HUMAN | E.LDAQLDAYNAR.M                |        | 2 | 3,4273 | 0,474 | -0,586 |
| 13 | Q9H2J4 PDCL3_HUMAN | E.SGAIM*TDLEENPK.K             |        | 2 | 3,4273 | 0,484 | 1,288  |
| 13 | O95819 M4K4_HUMAN  | R.DSPLQGSGQQNSQAGQR.N          |        | 3 | 3,4271 | 0,342 | 0,416  |
| 13 | Q92696 PGTA_HUMAN  | K.LYQSATQAVFQK.R               |        | 2 | 3,4266 | 0,308 | -0,617 |
| 13 | Q04760 LGUL_HUMAN  | E.AALSCCSDADPSTK.D             |        | 2 | 3,4256 | 0,485 | -0,165 |
| 13 | P13645 K1C10_HUMAN | R.ALEESNYELEGK.I               |        | 2 | 3,4242 | 0,443 | -0,088 |
| 13 | P27816 MAP4_HUMAN  | E.EGRPVVSGTGNDITPPNKELPPS#PE.K | S696:  | 3 | 3,4226 | 0,389 | -0,066 |
| 13 | Q9UER7 DAXX_HUMAN  | D.SGEGPSGM*ASQGCPSASR.A        |        | 2 | 3,4225 | 0,415 | 0,14   |
| 13 | P09429 HMGB1_HUMAN | K.M*SSYAFFVQTCRE.E             |        | 2 | 3,4218 | 0,497 | -0,52  |
| 13 | Q99439 CNN2_HUMAN  | K.AGQCIVIGLQM*GTNK.C           |        | 2 | 3,4206 | 0,3   | -1,144 |
| 13 | P82094 TMF1_HUMAN  | R.IDSFSVQSLDSR.S               |        | 2 | 3,4196 | 0,454 | -1,352 |
| 13 | Q8IZD4 DCP1B_HUMAN | E.FFTGPVQPGS#PHNIGTSR.G        | S337:  | 2 | 3,4195 | 0,346 | -0,617 |
| 13 | Q9BY44 EIF2A_HUMAN | R.SDKS#PDLAPTAPQSTPR.N         | S506:  | 3 | 3,4185 | 0,276 | -0,564 |
| 13 | O75376 NCOR1_HUMAN | R.SHVSSEPYEPIS#PPQVPVVE.K      | S2151: | 3 | 3,418  | 0,114 | -0,382 |
| 13 | P52701 MSH6_HUMAN  | R.LGHM*ACM*VENECEDPSQE.T       |        | 2 | 3,4172 | 0,497 | -0,113 |
| 13 | P04150 GCR_HUMAN   | K.SSASTAVSAAPTKE.F             |        | 2 | 3,4163 | 0,326 | 0      |
| 13 | Q14692 BMS1_HUMAN  | K.AGLSPANQCSDRVNLE.K           |        | 2 | 3,4148 | 0,572 | -0,282 |

|    |                     |                           |        |   |        |       |        |
|----|---------------------|---------------------------|--------|---|--------|-------|--------|
| 13 | O75071 K0494_HUMAN  | K.FSQFLGDPVEK.A           |        | 2 | 3,4129 | 0,408 | -1,156 |
| 13 | Q5VZL5 ZMYM4_HUMAN  | R.SDPLGSTQDHALSQE.S       |        | 2 | 3,412  | 0,458 | -0,924 |
| 13 | Q00839 HNRPU_HUMAN  | K.YNILGTNTIM*DK.M         |        | 2 | 3,4119 | 0,331 | -0,436 |
| 13 | P33176 KINH_HUMAN   | K.LITDLQDQNQK.M           |        | 2 | 3,4089 | 0,361 | 1,298  |
| 13 | Q99759 M3K3_HUMAN   | E.NM*GLAVQYLDPR.G         |        | 2 | 3,4078 | 0,371 | -0,526 |
| 13 | O95373 IPO7_HUMAN   | K.QLQDIATLADQR.R          |        | 2 | 3,406  | 0,378 | -0,534 |
| 13 | Q96JG6 CC132_HUMAN  | R.DYVDEQTDGDPVK.S         |        | 2 | 3,4058 | 0,493 | -0,257 |
| 13 | P04792 HSPB1_HUMAN  | R.LFDQAFGLPR.L            |        | 2 | 3,4057 | 0,404 | -0,105 |
| 13 | Q13136 LIPA1_HUMAN  | R.LSDTVDKLLSESNE.R        |        | 2 | 3,399  | 0,358 | -0,63  |
| 13 | Q13409 DC1I2_HUMAN  | K.SVSTPSEAGSQDSGDGAVGSR.T |        | 3 | 3,3983 | 0,312 | -0,469 |
| 13 | P04264 K2C1_HUMAN   | K.YEELQITAGR.H            |        | 2 | 3,3957 | 0,254 | -0,517 |
| 13 | A1L020 MEX3A_HUMAN  | E.NDFLAGSPDAAIDSR.Y       |        | 2 | 3,3953 | 0,442 | -0,473 |
| 13 | Q13444 ADA15_HUMAN  | R.DAICGQLQCQTGR.T         |        | 2 | 3,3949 | 0,469 | -0,243 |
| 13 | Q08J23 NSUN2_HUMAN  | E.ANS#PDVTAGCDPAGVHPPR.-  | S751:  | 3 | 3,394  | 0,431 | -0,916 |
| 13 | P07355 ANXA2_HUMAN  | K.DIISDTSQDFR.K           |        | 2 | 3,3919 | 0,458 | 0      |
| 13 | Q7KZ17 MARK2_HUMAN  | K.TTPTSTNSVLSTSTNR.S      |        | 2 | 3,3906 | 0,539 | -1,937 |
| 13 | Q7Z2Z1 CO042_HUMAN  | E.NKS#PLLSVPFLSSAR.R      | S820:  | 2 | 3,3904 | 0,456 | -0,36  |
| 13 | Q8IXJ6 SIRT2_HUMAN  | R.NLFSQTLSLGSQK.E         |        | 2 | 3,3893 | 0,486 | -1,629 |
| 13 | P62917 RL8_HUMAN    | R.ASGNYATVISHNPE.T        |        | 2 | 3,3882 | 0,419 | -0,501 |
| 13 | Q02809 PLOD1_HUMAN  | E.GQDSDSQQLFYTK.I         |        | 2 | 3,3835 | 0,446 | -0,568 |
| 13 | Q09666 AHNK_HUMAN   | R.VTAYTVDTVTR.E           |        | 2 | 3,3834 | 0,449 | -0,723 |
| 13 | P05787 K2C8_HUMAN   | R.ASLEAAIADAEQR.G         |        | 2 | 3,3823 | 0,405 | -0,363 |
| 13 | Q29RF7 PDS5A_HUMAN  | R.IISVT#PVKNIDPVK.N       | T1208: | 2 | 3,381  | 0,355 | -0,457 |
| 13 | Q3YEC7 PARF_HUMAN   | R.LKNDSDFLGLLEE.A         |        | 2 | 3,3793 | 0,491 | -0,551 |
| 13 | Q5CZB5 Q5CZB5_HUMAN | E.GEGAAGAGDHQDPSLGAGE.A   |        | 2 | 3,3782 | 0,55  | -0,432 |
| 13 | Q96A73 K1191_HUMAN  | R.QPASAQSTPSTT#PHSSPK.Q   | T179:  | 3 | 3,3769 | 0,417 | 0,097  |
| 13 | O75376 NCOR1_HUMAN  | R.NDARS#PGSISYLPFFTK.L    | S2184: | 3 | 3,3757 | 0,248 | -0,266 |
| 13 | Q6UB35 C1TM_HUMAN   | K.LGINKTDPSTLTEEE.V       |        | 2 | 3,3754 | 0,455 | -0,074 |
| 13 | Q96D71 REPS1_HUMAN  | E.NQGSYSGVIPPGR.G         |        | 2 | 3,3753 | 0,459 | -0,48  |
| 13 | Q7L9B9 EYPD1_HUMAN  | R.M*DGINAFLDR.I           |        | 2 | 3,3744 | 0,384 | -0,492 |
| 13 | Q13620 CUL4B_HUMAN  | R.SATDGNTSTPPTSAK.K       |        | 2 | 3,3744 | 0,398 | -0,238 |
| 13 | Q9UJZ1 STML2_HUMAN  | E.YAVTQLAQTTM*R.S         |        | 2 | 3,3739 | 0,455 | -0,61  |
| 13 | Q9NS56 TOPRS_HUMAN  | E.NQPSNIVSLQTEPSR.Q       |        | 2 | 3,3716 | 0,438 | -0,438 |

|    |                    |                              |        |   |        |       |        |
|----|--------------------|------------------------------|--------|---|--------|-------|--------|
| 13 | P09543 CN37_HUMAN  | R.LDEDLAAYCR.R               |        | 2 | 3,3714 | 0,531 | -0,398 |
| 13 | O15372 EIF3H_HUMAN | K.NLQLLM*DRVDE.M             |        | 2 | 3,3701 | 0,351 | -0,269 |
| 13 | P55809 SCOT_HUMAN  | K.GM*GGAM*DLVSSAK.T          |        | 2 | 3,37   | 0,494 | -0,291 |
| 13 | Q8IY57 YAF2_HUMAN  | K.SPPASSAASADQHSQSGSSSDNTE.R |        | 3 | 3,3696 | 0,471 | -0,079 |
| 13 | P35611 ADDA_HUMAN  | R.AAVVTS#PPPTTAPHKE.R        | S12:   | 2 | 3,3673 | 0,358 | -0,507 |
| 13 | Q9H0C8 ILKAP_HUMAN | R.GSADNVTVM*VVR.I            |        | 2 | 3,367  | 0,444 | -0,772 |
| 13 | Q8WUF5 IASPP_HUMAN | E.AGDVDEGPVARPLS#PTR.L       | S489:  | 3 | 3,366  | 0,324 | -1,208 |
| 13 | P22626 ROA2_HUMAN  | K.LFVGGIKEDTEE.H             |        | 2 | 3,3652 | 0,341 | 0      |
| 13 | Q7Z4V5 HDGR2_HUMAN | K.AEDKPSTDLAPVNGE.A          |        | 2 | 3,365  | 0,418 | -0,299 |
| 13 | Q7Z6Z7 HUWE1_HUMAN | R.DSAVAISGADSR.G             |        | 2 | 3,3638 | 0,406 | 0,319  |
| 13 | P04632 CPNS1_HUMAN | E.AAAQYNPEPPPPR.T            |        | 2 | 3,3568 | 0,381 | -0,693 |
| 13 | P07311 ACYP1_HUMAN | R.GTVQGQLQGPIISK.V           |        | 2 | 3,3566 | 0,37  | 0,093  |
| 13 | P27348 1433T_HUMAN | E.LLDKYLIANATNPE.S           |        | 2 | 3,3565 | 0,251 | -0,62  |
| 13 | Q15149 PLEC1_HUMAN | E.FADM*LSGNAGGFR.S           |        | 2 | 3,3562 | 0,455 | -0,359 |
| 13 | Q6P2E9 EDC4_HUMAN  | E.NDSLGAADGTHGAGAM*E.S       |        | 2 | 3,3531 | 0,5   | 0      |
| 13 | Q9NQW6 ANLN_HUMAN  | K.QNSVQEQPGTACLSK.F          |        | 2 | 3,3514 | 0,437 | -0,963 |
| 13 | Q86W92 LIPB1_HUMAN | K.M*QDTVVLAQGK.D             |        | 2 | 3,3495 | 0,444 | -0,506 |
| 13 | Q9UL18 I2C1_HUMAN  | K.LTDNQSTM*IK.A              |        | 2 | 3,3494 | 0,374 | -0,385 |
| 13 | P20020 AT2B1_HUMAN | K.NNNAVDSGIHLTIE.M           |        | 2 | 3,3493 | 0,365 | -0,082 |
| 13 | Q86VR2 F134C_HUMAN | R.SPPGAEEPQAPPASR.D          |        | 2 | 3,3493 | 0,499 | -0,245 |
| 13 | P10809 CH60_HUMAN  | K.NAGVEGSLIVEK.I             |        | 2 | 3,3486 | 0,376 | -0,201 |
| 13 | Q14966 ZN638_HUMAN | E.SADITFATLNTK.G             |        | 2 | 3,3477 | 0,491 | 0,286  |
| 13 | Q03701 CEBPZ_HUMAN | K.FDNIGM*NAM*ANK.D           |        | 2 | 3,346  | 0,409 | -0,629 |
| 13 | Q7Z6Z7 HUWE1_HUMAN | E.AVGDTSAAGSSEQPR.A          |        | 2 | 3,3453 | 0,47  | -0,426 |
| 13 | Q9UIW2 PLXA1_HUMAN | K.QTSAYNISNSSTFTK.S          |        | 2 | 3,3431 | 0,601 | -0,592 |
| 13 | P11021 GRP78_HUMAN | K.VTHAVVTVPAYFND.A           |        | 2 | 3,3407 | 0,196 | -0,239 |
| 13 | P38398 BRCA1_HUMAN | K.NSLNDCSNQVILAK.A           |        | 2 | 3,3345 | 0,231 | -0,465 |
| 13 | P30050 RL12_HUMAN  | E.ILGTAQSVGCNVDGR.H          |        | 2 | 3,333  | 0,438 | -1,656 |
| 13 | Q96EL3 RM53_HUMAN  | R.STNLNCSVIADVR.H            |        | 2 | 3,3323 | 0,467 | -1,01  |
| 13 | P30040 ERP29_HUMAN | E.VGISDYGDKLNLM*E.L          |        | 2 | 3,3306 | 0,406 | -1,172 |
| 13 | Q13459 MYO9B_HUMAN | R.SPLEHSS#PEKEAPSPE.K        | S1115: | 2 | 3,3294 | 0,42  | -0,271 |
| 13 | Q8WYP5 AHTF1_HUMAN | E.FIQQSSM*KS#PLYLVS.R.S      | S1151: | 3 | 3,3292 | 0,229 | -0,462 |
| 13 | Q7Z2T5 TRM1L_HUMAN | E.VAQQVPTPAR.D               |        | 2 | 3,3292 | 0,398 | 0,314  |



|    |                    |                             |       |   |        |       |        |
|----|--------------------|-----------------------------|-------|---|--------|-------|--------|
| 13 | Q9UMX0 UBQL1_HUMAN | E.GAGAPAAAASAEPK.I          |       | 2 | 3,3266 | 0,565 | 0      |
| 13 | Q00839 HNRPU_HUMAN | E.YTFIQNVPLEDR.V            |       | 2 | 3,3264 | 0,435 | -1,306 |
| 13 | O00571 DDX3X_HUMAN | R.DLM*ACAQTGSGK.T           |       | 2 | 3,3256 | 0,448 | 0      |
| 13 | P35579 MYH9_HUMAN  | R.SM*M*QDREDQSILCTGE.S      |       | 2 | 3,3255 | 0,432 | -0,316 |
| 13 | Q13885 TBB2A_HUMAN | K.EVDEQM*LNVQNK.N           |       | 2 | 3,3233 | 0,312 | -0,167 |
| 13 | Q02952 AKA12_HUMAN | K.SAVVHDITDDGQEETPE.I       |       | 2 | 3,3233 | 0,548 | -1,126 |
| 13 | Q96RQ3 MCCA_HUMAN  | E.DKTFQVLGNLYSE.G           |       | 2 | 3,3205 | 0,45  | -0,645 |
| 13 | O94876 TMCC1_HUMAN | K.ALGVISNFQSSPK.Y           |       | 2 | 3,3196 | 0,299 | -0,634 |
| 13 | Q8ND24 RN214_HUMAN | K.LSQNIAVQTDfk.T            |       | 2 | 3,3157 | 0,37  | -0,626 |
| 13 | Q9NR30 DDX21_HUMAN | K.NGFPHPEPDCNPSEAASEE.S     |       | 2 | 3,312  | 0,419 | -0,234 |
| 13 | P12268 IMDH2_HUMAN | K.VAQGVSGAVQDK.G            |       | 2 | 3,3107 | 0,289 | 0,211  |
| 13 | P07355 ANXA2_HUMAN | K.SLYYYIQDtk.G              |       | 2 | 3,3104 | 0,398 | -0,858 |
| 13 | Q5T5C0 STXB5_HUMAN | K.GLFGGAQSLDREE.L           |       | 2 | 3,3092 | 0,274 | -0,425 |
| 13 | Q9H3P2 NELFA_HUMAN | E.ASRPPEEPSAPS#PTLPAQFK.Q   | S384: | 3 | 3,3077 | 0,313 | -0,669 |
| 13 | Q8NHP8 PLBL2_HUMAN | D.VSAGQLLM*VDGR.H           |       | 2 | 3,3076 | 0,471 | -0,483 |
| 13 | O75694 NU155_HUMAN | K.HGEPEEDIVGLQAFQE.R        |       | 2 | 3,3067 | 0,338 | -0,407 |
| 13 | P21333 FLNA_HUMAN  | R.AGQSAAGAAPGGGVDTR.D       |       | 2 | 3,3051 | 0,483 | -1,86  |
| 13 | Q2YD98 K1530_HUMAN | E.SLGM*ASGM*SDALR.S         |       | 2 | 3,301  | 0,468 | -0,551 |
| 13 | Q86YP4 P66A_HUMAN  | R.GEGLVGDGPVDM*R.T          |       | 2 | 3,2986 | 0,481 | -0,093 |
| 13 | Q86UU0 BCL9L_HUMAN | K.SPQVLGSSLSVR.S            |       | 2 | 3,2953 | 0,403 | -1,885 |
| 13 | Q9ULU4 PKCB1_HUMAN | K.TSTTGSILNLNDR.S           |       | 2 | 3,2943 | 0,265 | -0,567 |
| 13 | Q9NW13 RBM28_HUMAN | K.DTQSVSAIGEEK.S            |       | 2 | 3,2942 | 0,456 | -0,386 |
| 13 | Q9UPN3 MACF1_HUMAN | K.DKNSVFSVLDEE.I            |       | 2 | 3,293  | 0,338 | -0,618 |
| 13 | P42696 RBM34_HUMAN | R.LGQVASSLFR.G              |       | 2 | 3,2921 | 0,421 | -0,34  |
| 13 | P12814 ACTN1_HUMAN | E.LDYDSPSVNAR.C             |       | 2 | 3,2919 | 0,456 | -0,959 |
| 13 | P29350 PTN6_HUMAN  | E.YGNITYPPAM*K.N            |       | 2 | 3,2904 | 0,445 | -0,48  |
| 13 | P14618 KPYM_HUMAN  | K.ITLDNAYM*EKcDE.N          |       | 2 | 3,2874 | 0,48  | -0,452 |
| 13 | Q9NYV4 CD2L7_HUMAN | K.DGSGGASGTLQPSSGGGSSNSRE.R |       | 3 | 3,2853 | 0,256 | -1,07  |
| 13 | Q9Y2K5 R3HD2_HUMAN | D.IIQLHISCPS#DKEEE.K        | S109: | 2 | 3,285  | 0,47  | -0,325 |
| 13 | P42704 LPPRC_HUMAN | K.LQDAINILKE.M              |       | 2 | 3,2841 | 0,261 | -0,105 |
| 13 | Q6ZU35 K1211_HUMAN | E.NVSVSVQPGSSSVSR.A         |       | 2 | 3,2798 | 0,409 | -0,246 |
| 13 | Q03164 HRX_HUMAN   | E.NAGTLNILSTLSNGNSSK.Q      |       | 2 | 3,2788 | 0,498 | -0,204 |
| 13 | O60508 PRP17_HUMAN | K.SPSSKPSLAVAVDSAPE.V       |       | 2 | 3,2783 | 0,449 | -0,297 |

|    |                    |                               |              |   |        |       |        |
|----|--------------------|-------------------------------|--------------|---|--------|-------|--------|
| 13 | Q9Y5P4 C43BP_HUMAN | K.YFDACADAVSKDE.L             |              | 2 | 3,2761 | 0,453 | 0,082  |
| 13 | O43592 XPOT_HUMAN  | E.FCQALQQPDAK.V               |              | 2 | 3,274  | 0,406 | -1,775 |
| 13 | Q15019 SEPT2_HUMAN | R.TM*LITHM*QDLQE.V            |              | 2 | 3,2723 | 0,351 | -0,491 |
| 13 | Q96F45 ZN503_HUMAN | R.VPSATCQPFTPR.T              |              | 2 | 3,2716 | 0,463 | -0,538 |
| 13 | Q96T88 UHRF1_HUMAN | R.LNDTIQLLVR.Q                |              | 2 | 3,2711 | 0,323 | 0,103  |
| 13 | Q8NBJ4 GOLM1_HUMAN | R.DTINLLDQRE.K                |              | 2 | 3,2699 | 0,217 | -0,201 |
| 13 | Q5SW79 CE170_HUMAN | K.QTSSTPSSLALTSASR.I          |              | 2 | 3,2689 | 0,48  | -0,612 |
| 13 | Q9H8Y8 GORS2_HUMAN | K.LYVYNTDTDNCRE.V             |              | 2 | 3,2669 | 0,382 | -0,44  |
| 13 | Q9Y5J1 UTP18_HUMAN | R.TGNFISTSTSLPR.G             |              | 2 | 3,2669 | 0,354 | -0,265 |
| 13 | P40222 TXLNA_HUMAN | D.LSAGGQGSLTDSGPER.R          |              | 2 | 3,2663 | 0,471 | -0,478 |
| 13 | P29590 PML_HUMAN   | R.LQDLSSCITQGK.D              |              | 2 | 3,266  | 0,464 | -0,271 |
| 13 | P50995 ANX11_HUMAN | R.LLISLSQGNRDE.S              |              | 2 | 3,2658 | 0,43  | 0      |
| 13 | Q2NKX8 ERC6L_HUMAN | K.GTGSADSIATLPK.G             |              | 2 | 3,2656 | 0,398 | -0,701 |
| 13 | Q9H1A4 APC1_HUMAN  | E.GSGNLVLYTGVR.V              |              | 2 | 3,264  | 0,425 | -0,091 |
| 13 | Q13185 CBX3_HUMAN  | K.KVEEAPEEFVVE.K              |              | 2 | 3,2542 | 0,338 | -0,557 |
| 13 | P31948 STIP1_HUMAN | E.IAT#PPPPPPKKE.T             | T198:        | 3 | 3,2529 | 0,236 | -0,063 |
| 13 | P12956 KU70_HUMAN  | R.FQDM*M*GHGSDYSLSE.V         |              | 2 | 3,2526 | 0,371 | -0,703 |
| 13 | O95400 CD2B2_HUMAN | R.LSGLADQM*VAR.G              |              | 2 | 3,2498 | 0,348 | -0,207 |
| 13 | Q9Y2Q5 MAPIP_HUMAN | E.GSLLAYSGYDGDAR.V            |              | 2 | 3,2495 | 0,335 | -0,395 |
| 13 | Q14444 CAPR1_HUMAN | E.LQYVLDKLGDE.V               |              | 2 | 3,2464 | 0,497 | -0,347 |
| 13 | Q8NDI1 EHBP1_HUMAN | K.YLYADSSKTEEEE.L             |              | 2 | 3,246  | 0,38  | -0,234 |
| 13 | Q99549 MPP8_HUMAN  | E.GVGVVGEDNDAAAR.G            |              | 2 | 3,2442 | 0,484 | -0,55  |
| 13 | P08758 ANXA5_HUMAN | K.NFATSLYSM*IK.G              |              | 2 | 3,2421 | 0,442 | -0,473 |
| 13 | Q9BY67 CADM1_HUMAN | K.SDDSVIQLLNPQR.Q             |              | 3 | 3,2415 | 0,117 | 0,249  |
| 13 | P26639 SYTC_HUMAN  | K.M*GGEEKPIGAGEE.K            |              | 2 | 3,2414 | 0,423 | -0,185 |
| 13 | Q13409 DC1I2_HUMAN | K.ITQVDFPPRE.I                |              | 2 | 3,2389 | 0,349 | -0,305 |
| 13 | P02533 K1C14_HUMAN | R.APSTYGGGLSVSSSR.F           |              | 2 | 3,2387 | 0,407 | -0,941 |
| 13 | Q15006 TTC35_HUMAN | R.ILQEDPTNTAAR.K              |              | 2 | 3,2377 | 0,374 | -0,551 |
| 13 | P05556 ITB1_HUMAN  | K.NVLSLTNKGEVFNE.L            |              | 2 | 3,2363 | 0,326 | -0,624 |
| 13 | P30566 PUR8_HUMAN  | R.VLSQQAASVVK.Q               |              | 2 | 3,2361 | 0,404 | 0,108  |
| 13 | P50991 TCPD_HUMAN  | K.M*IQDGKGDVTITND.G           |              | 2 | 3,2359 | 0,46  | 0,08   |
| 13 | P49792 RBP2_HUMAN  | E.DALDDSVSSSVHAS#PLASS#PVRK.N | S2246:S2251: | 3 | 3,2357 | 1     | -0,427 |
| 13 | P48637 GSHB_HUMAN  | K.CPDIAQLAGTK.K               |              | 2 | 3,2345 | 0,469 | 0,096  |

|    |                     |                               |              |   |        |       |        |
|----|---------------------|-------------------------------|--------------|---|--------|-------|--------|
| 13 | Q9Y6X4 K0888_HUMAN  | E.LEDVPFQSNAGQK.N             |              | 2 | 3,2343 | 0,362 | -0,596 |
| 13 | Q71F56 MD13L_HUMAN  | E.VEDGLGS#PKPEEIKD.F          | S923:        | 2 | 3,2323 | 0,28  | -0,36  |
| 13 | O94822 ZN294_HUMAN  | E.IDSLVDSDFR.M                |              | 2 | 3,2297 | 0,316 | -0,627 |
| 13 | P14618 KPYM_HUMAN   | R.NTGIICTIGPASR.S             |              | 2 | 3,2288 | 0,098 | 0,538  |
| 13 | Q12888 TP53B_HUMAN  | R.QSQQPM*KPIS#PVKDPVS#PASQK.M | S1094:S1101: | 3 | 3,2282 | 0,094 | 0,43   |
| 13 | P35658 NU214_HUMAN  | K.SSATVTGEPSPSYSSGSDSSK.A     |              | 2 | 3,2265 | 0,492 | -0,442 |
| 13 | Q68EM7 RHG17_HUMAN  | R.LVACFQGQHGTDAE.R            |              | 2 | 3,226  | 0,474 | -0,478 |
| 13 | Q15020 SART3_HUMAN  | R.AVQCTSDYPEHVCE.V            |              | 2 | 3,2248 | 0,498 | -0,36  |
| 13 | Q92900 RENT1_HUMAN  | E.LSQDSYLGDEFK.S              |              | 2 | 3,2242 | 0,41  | -0,435 |
| 13 | P18583 SON_HUMAN    | R.SAASPVSSM*PER.A             |              | 2 | 3,2241 | 0,475 | -1,006 |
| 13 | Q9NQG5 CT077_HUMAN  | R.SVYGGEFIQQLK.L              |              | 2 | 3,2241 | 0,302 | -0,535 |
| 13 | O95400 CD2B2_HUMAN  | K.LVDPVAGSGGPGSR.F            |              | 2 | 3,2239 | 0,487 | -0,192 |
| 13 | Q15006 TTC35_HUMAN  | R.YDDAIQLYDR.I                |              | 2 | 3,2233 | 0,487 | -0,959 |
| 13 | Q13136 LIPA1_HUMAN  | K.M*QM*DGNVSGTQRLD.S          |              | 2 | 3,2231 | 0,409 | -0,77  |
| 13 | Q14152 EIF3A_HUMAN  | R.NQLTAM*SSVLAK.A             |              | 2 | 3,2215 | 0,447 | -0,477 |
| 13 | Q96AP0 ACD_HUMAN    | E.NDQLILSSLGPCQR.T            |              | 3 | 3,2202 | 0,306 | 0,571  |
| 13 | Q96RE7 BTB14_HUMAN  | E.M*NAIAADM*CTNAR.R           |              | 2 | 3,2188 | 0,348 | -0,498 |
| 13 | P41250 SYG_HUMAN    | K.TVNVVQFEPK.G                |              | 2 | 3,2165 | 0,363 | 1,564  |
| 13 | P35908 K22E_HUMAN   | K.YEELQVTVGR.H                |              | 2 | 3,2165 | 0,391 | -1,022 |
| 13 | Q8N122 RPTOR_HUMAN  | D.TSSLTQSAPASPTNK.G           |              | 2 | 3,2152 | 0,294 | -0,819 |
| 13 | P84103 SFRS3_HUMAN  | K.VYVGNLGNNGNKTE.L            |              | 2 | 3,2152 | 0,266 | -0,66  |
| 13 | P23229 ITA6_HUMAN   | R.TGGLYSCDITAR.G              |              | 2 | 3,2146 | 0,466 | 0,65   |
| 13 | Q92598 HS105_HUMAN  | K.IKVNVVELPIE.A               |              | 2 | 3,2144 | 0,308 | -0,487 |
| 13 | Q12959 DLG1_HUMAN   | K.FGDILHVINASDDE.W            |              | 2 | 3,2127 | 0,356 | -0,316 |
| 13 | Q8TE01 Q8TE01_HUMAN | K.KLVIIAGAPISLE.F             |              | 2 | 3,2124 | 0,301 | -0,466 |
| 13 | P06748 NPM_HUMAN    | K.M*QAS#IEKGGSLPKVE.A         | S254:        | 2 | 3,2107 | 0,374 | -0,292 |
| 13 | Q6P2E9 EDC4_HUMAN   | E.QQAAVTSSIM*QAM*R.S          |              | 2 | 3,2102 | 0,494 | 0      |
| 13 | Q16643 DREB_HUMAN   | E.DGSDDLKLAASGE.G             |              | 2 | 3,2067 | 0,478 | -0,668 |
| 13 | O75821 EIF3G_HUMAN  | E.DLNCQEEEDPM*NK.L            |              | 2 | 3,206  | 0,317 | -0,372 |
| 13 | Q08211 DHX9_HUMAN   | K.LAAQSCALSLVR.Q              |              | 2 | 3,2058 | 0,448 | -0,284 |
| 13 | P11171 41_HUMAN     | R.SPRPTSAPAITQGQVAE.G         |              | 2 | 3,2051 | 0,453 | -0,499 |
| 13 | O60749 SNX2_HUMAN   | R.AVNTQALSGAGILR.M            |              | 2 | 3,2045 | 0,247 | -1,424 |
| 13 | Q13151 ROAO_HUMAN   | K.LFVGGLKGDVAE.G              |              | 2 | 3,204  | 0,344 | -0,911 |

|    |                    |                        |        |   |        |       |        |
|----|--------------------|------------------------|--------|---|--------|-------|--------|
| 13 | O43432 IF4G3_HUMAN | R.RS#PVPAQIAITVPK.T    | S495:  | 2 | 3,2034 | 0,509 | -0,548 |
| 13 | Q13190 STX5_HUMAN  | K.NTDQGVYLGSK.T        |        | 2 | 3,2032 | 0,4   | 1,131  |
| 13 | Q9BRA2 TXD17_HUMAN | K.TIFAYFTGSKD.A        |        | 2 | 3,2012 | 0,505 | 0,781  |
| 13 | Q9Y5B9 SP16H_HUMAN | E.VGEITTDLGK.H         |        | 2 | 3,2001 | 0,419 | 0,827  |
| 13 | Q14011 CIRBP_HUMAN | R.DSYDSYATHNE.-        |        | 2 | 3,1979 | 0,396 | 0,187  |
| 13 | O75643 U520_HUMAN  | R.FYDDAIVSQK.K         |        | 2 | 3,1974 | 0,258 | -0,72  |
| 13 | P00390 GSHR_HUMAN  | R.LNAIQNNLTK.S         |        | 2 | 3,1959 | 0,41  | -0,567 |
| 13 | Q9H009 NACA2_HUMAN | K.LVM*SQANVSR.A        |        | 2 | 3,195  | 0,289 | 0      |
| 13 | P27816 MAP4_HUMAN  | D.M*ES#PTKLDVTLAK.D    | S280:  | 2 | 3,1949 | 0,311 | -0,559 |
| 13 | Q8NE71 ABCF1_HUMAN | K.LSVPTS#DEEDEVPAKPR.G | S109:  | 2 | 3,1942 | 0,289 | -0,179 |
| 13 | O14686 MLL2_HUMAN  | R.LQETPQDCSGGPVR.R     |        | 2 | 3,1932 | 0,203 | -0,553 |
| 13 | Q92576 PHF3_HUMAN  | E.NLVANTARS#PQFINLK.R  | S1642: | 3 | 3,193  | 0,307 | 1,078  |
| 13 | Q99961 SH3G1_HUMAN | E.VKQNFIDPLQNLCE.K     |        | 2 | 3,1882 | 0,404 | -0,426 |
| 13 | P14625 ENPL_HUMAN  | E.LISNASDALDK.I        |        | 2 | 3,1881 | 0,34  | -0,106 |
| 13 | P31948 STIP1_HUMAN | E.VQQIM*SDPAM*R.L      |        | 2 | 3,188  | 0,306 | -0,187 |
| 13 | Q9HB09 B2L12_HUMAN | R.SPAQEEPTDFLSR.L      |        | 2 | 3,1868 | 0,439 | -0,33  |
| 13 | P16435 NCPR_HUMAN  | K.NPFLAAVTTNR.K        |        | 2 | 3,186  | 0,314 | -0,203 |
| 13 | P12004 PCNA_HUMAN  | K.CAGNEDIITLR.A        |        | 2 | 3,1851 | 0,289 | -1,837 |
| 13 | P30101 PDIA3_HUMAN | E.LSDFISYLQRE.A        |        | 2 | 3,1841 | 0,47  | -0,623 |
| 13 | O15400 STX7_HUMAN  | E.FGSLPTTPSEQR.Q       |        | 2 | 3,1814 | 0,343 | -1,017 |
| 13 | Q01433 AMPD2_HUMAN | K.TSDSDLQLYKE.Q        |        | 2 | 3,1813 | 0,339 | -0,086 |
| 13 | P17174 AATC_HUMAN  | K.NLDYVATSIHE.A        |        | 2 | 3,1809 | 0,43  | -0,58  |
| 13 | P57081 WDR4_HUMAN  | E.GSAGADASFSSLYK.A     |        | 2 | 3,1807 | 0,329 | -0,538 |
| 13 | P09429 HMGB1_HUMAN | K.M*SSYAFFVQTCR.E      |        | 2 | 3,1792 | 0,386 | -0,726 |
| 13 | P42858 HD_HUMAN    | R.SDVSSSALTASVKDE.I    |        | 2 | 3,1774 | 0,42  | -1,142 |
| 13 | O00429 DNM1L_HUMAN | K.LYTFDEIRQE.I         |        | 2 | 3,1746 | 0,37  | -1,11  |
| 13 | O43166 SI1L1_HUMAN | E.GTINSVGFMD*TR.K      |        | 2 | 3,174  | 0,231 | -0,093 |
| 13 | Q9UNF0 PACN2_HUMAN | R.LCSDLM*NCLHE.R       |        | 2 | 3,1721 | 0,448 | -0,52  |
| 13 | Q86X29 LSR_HUMAN   | R.SSSAGGQGSYVPLLR.D    |        | 2 | 3,172  | 0,506 | -0,412 |
| 13 | Q9H5X1 FA96A_HUMAN | R.VAAAM*ENPNLRE.I      |        | 2 | 3,1717 | 0,352 | -0,55  |
| 13 | O75691 UTP20_HUMAN | K.NIQGTITGDILPR.L      |        | 2 | 3,1702 | 0,445 | -1,309 |
| 13 | Q58FF7 H90B3_HUMAN | E.LKIDIIPNPQE.R        |        | 2 | 3,1701 | 0,395 | -0,572 |
| 13 | P18858 DNL1_HUMAN  | E.QATTSQVACLYR.K       |        | 2 | 3,1691 | 0,546 | -0,332 |

|    |                    |                              |        |   |        |       |        |
|----|--------------------|------------------------------|--------|---|--------|-------|--------|
| 13 | Q92797 SYMPK_HUMAN | K.TPSPAEDAREPE.A             |        | 2 | 3,1682 | 0,436 | -0,178 |
| 13 | P47736 RPGP1_HUMAN | K.AAGISLIVPGKS#PTR.K         | S484:  | 2 | 3,1671 | 0,282 | -0,552 |
| 13 | A2AJT9 CX023_HUMAN | K.LLDGDQDFSDGR.T             |        | 2 | 3,1666 | 0,432 | -0,547 |
| 13 | P61626 LYSC_HUMAN  | R.STDYGIFQINSR.Y             |        | 2 | 3,1664 | 0,328 | -1,045 |
| 13 | P00747 PLMN_HUMAN  | E.NYPNAGLTM*NYCR.N           |        | 2 | 3,1657 | 0,499 | -0,844 |
| 13 | Q6ZRV2 FA83H_HUMAN | R.APAGDLLPSAFR.V             |        | 2 | 3,1635 | 0,366 | 0,201  |
| 13 | Q9HAW4 CLSPN_HUMAN | R.NFVFHTLS#PVKAE.A           | S1289: | 2 | 3,1635 | 0,399 | -0,778 |
| 13 | Q9P1Y6 K1542_HUMAN | K.AEAPS#SPDVAPAGKEDSPSASGR.V | S1359: | 3 | 3,163  | 0,208 | -0,162 |
| 13 | Q9Y230 RUVB2_HUMAN | K.VQAGDVITIDK.A              |        | 2 | 3,1586 | 0,355 | -0,316 |
| 13 | Q9H9C1 CN133_HUMAN | E.YVNLVEDVDTK.L              |        | 2 | 3,1566 | 0,276 | -0,942 |
| 13 | P07814 SYEP_HUMAN  | K.AYVDDTPAEQM*K.A            |        | 2 | 3,1546 | 0,423 | -0,705 |
| 13 | Q92769 HDAC2_HUMAN | E.FCQLSTGGSVAGAVK.L          |        | 2 | 3,1534 | 0,476 | -0,576 |
| 13 | P09382 LEG1_HUMAN  | E.AINYM*AADGDFK.I            |        | 2 | 3,1532 | 0,481 | -0,366 |
| 13 | Q9UID6 ZN639_HUMAN | R.NQNYLVSPVLR.I              |        | 2 | 3,1531 | 0,356 | -0,349 |
| 13 | Q9BUA3 YK007_HUMAN | E.GVALLQDVR.A                |        | 2 | 3,1519 | 0,303 | 0,063  |
| 13 | Q8N6T3 ARFG1_HUMAN | R.VSQPQSVTASSDK.A            |        | 2 | 3,1511 | 0,454 | -0,351 |
| 13 | Q9UHB6 LIMA1_HUMAN | E.ISKPEVPEDVDLD.L            |        | 2 | 3,1506 | 0,306 | -0,922 |
| 13 | P09874 PARP1_HUMAN | R.TTNFAGILSQGLR.I            |        | 2 | 3,1503 | 0,427 | -0,177 |
| 13 | Q15058 KIF14_HUMAN | R.INLIDLASER.C               |        | 2 | 3,1501 | 0,331 | -0,711 |
| 13 | Q6ZUT9 RA61L_HUMAN | E.LM*TSASDEDLVK.Q            |        | 2 | 3,1493 | 0,372 | -0,276 |
| 13 | Q6KC79 NIPBL_HUMAN | R.YVQSGM*M*M*SQYK.L          |        | 2 | 3,1485 | 0,433 | -0,406 |
| 13 | P84090 ERH_HUMAN   | D.LADLSCLVYR.A               |        | 2 | 3,1484 | 0,426 | 0,403  |
| 13 | P11586 C1TC_HUMAN  | E.VNKGDILVVATGQPE.M          |        | 2 | 3,1484 | 0,449 | -0,158 |
| 13 | Q92616 GCN1L_HUMAN | R.AYSDQAIVNLLK.M             |        | 2 | 3,1477 | 0,384 | -0,457 |
| 13 | P10809 CH60_HUMAN  | R.GYISPYFINTSK.G             |        | 2 | 3,1473 | 0,43  | -0,176 |
| 13 | Q99623 PHB2_HUMAN  | K.IVQAEGEAEAAK.M             |        | 2 | 3,147  | 0,455 | -0,301 |
| 13 | Q8WXI9 P66B_HUMAN  | E.VVQSVIDSQGK.S              |        | 2 | 3,1461 | 0,397 | -0,526 |
| 13 | Q9BST9 RTKN_HUMAN  | R.TFS#LDAVPPDHSPR.A          | S520:  | 2 | 3,1455 | 0,559 | -0,829 |
| 13 | Q9H6F5 CCD86_HUMAN | R.LGGLRPES#PESLTSVSR.T       | S18:   | 2 | 3,1451 | 0,414 | -0,327 |
| 13 | O95782 AP2A1_HUMAN | R.AADLLYAM*CDR.S             |        | 2 | 3,1449 | 0,376 | -0,464 |
| 13 | Q9BZE4 NOG1_HUMAN  | E.DDQKIFTDLQSE.G             |        | 2 | 3,1433 | 0,401 | -0,678 |
| 13 | Q14320 FA50A_HUMAN | R.LLSDATVEKDE.S              |        | 2 | 3,1425 | 0,43  | 0      |
| 13 | Q9Y6G9 DC1L1_HUMAN | K.NVLLLGEDGAGK.T             |        | 2 | 3,1424 | 0,2   | -0,206 |

|    |                    |                               |       |   |        |       |        |
|----|--------------------|-------------------------------|-------|---|--------|-------|--------|
| 13 | P11717 MPRI_HUMAN  | R.ATLITFLCDR.D                |       | 2 | 3,1424 | 0,49  | -1,008 |
| 13 | Q14692 BMS1_HUMAN  | E.NAEM*TDQYM*AVK.G            |       | 2 | 3,1414 | 0,397 | -0,511 |
| 13 | Q16186 ADRM1_HUMAN | R.SQSAAVTPSSTTSSTR.A          |       | 2 | 3,141  | 0,466 | -0,311 |
| 13 | Q00341 VIGLN_HUMAN | R.CDIIISGR.K                  |       | 2 | 3,1354 | 0,336 | 1,049  |
| 13 | Q13242 SFRS9_HUMAN | R.IYVGNLPTDVRE.K              |       | 2 | 3,1351 | 0,408 | -0,443 |
| 13 | Q05524 ENO1B_HUMAN | R.YISPDQLADLYK.G              |       | 2 | 3,1341 | 0,377 | -0,684 |
| 13 | Q9HCD5 NCOA5_HUMAN | R.DSFDGRGPPGPE.S              |       | 2 | 3,131  | 0,516 | -0,991 |
| 13 | P54725 RD23A_HUMAN | E.AAGENPLEFLR.D               |       | 2 | 3,1295 | 0,268 | -0,401 |
| 13 | O95757 HS74L_HUMAN | K.SIDLPIQSSLCR.Q              |       | 2 | 3,1288 | 0,388 | -0,615 |
| 13 | P25786 PSA1_HUMAN  | K.NVSIGIVGKDLE.F              |       | 2 | 3,1286 | 0,404 | -0,687 |
| 13 | P02545 LMNA_HUMAN  | R.TVLCGTCGQPADK.A             |       | 2 | 3,1276 | 0,411 | -0,347 |
| 13 | P49321 NASP_HUMAN  | K.HLVM*GDIPAAVNAFQE.A         |       | 2 | 3,127  | 0,398 | -0,706 |
| 13 | Q13442 HAP28_HUMAN | K.GVEGLIDIENPNR.V             |       | 2 | 3,1268 | 0,369 | 0,941  |
| 13 | Q9NPI1 BRD7_HUMAN  | K.QSIDFM*ADLQK.T              |       | 2 | 3,1268 | 0,438 | -0,465 |
| 13 | O95999 BCL10_HUMAN | K.LLDYLQENPK.G                |       | 2 | 3,1267 | 0,19  | -0,396 |
| 13 | Q9Y5B6 GCFC_HUMAN  | E.LNSSAESEQPLDK.T             |       | 2 | 3,126  | 0,24  | -0,43  |
| 13 | Q53GS9 SNUT2_HUMAN | R.EAPASVVPFVR.V               |       | 2 | 3,1238 | 0,463 | 0,833  |
| 13 | Q9Y310 CV028_HUMAN | K.NVTDVVNTCHD.A               |       | 2 | 3,1235 | 0,423 | -0,575 |
| 13 | P46108 CRK_HUMAN   | R.VPNAYDKTALALE.V             |       | 2 | 3,1235 | 0,238 | -0,347 |
| 13 | Q9NQW6 ANLN_HUMAN  | K.AT#SPVKSTTSITDAK.S          | T294: | 2 | 3,123  | 0,5   | -0,923 |
| 13 | Q8TF05 PP4R1_HUMAN | E.LDINELPNCK.I                |       | 2 | 3,1224 | 0,24  | 0      |
| 13 | Q9H4L4 SENP3_HUMAN | K.SGGGFPGDPGSGTTVPAR.R        |       | 2 | 3,1223 | 0,463 | -1,509 |
| 13 | P62158 CALM_HUMAN  | R.VFDKDGNGYISAAE.L            |       | 2 | 3,12   | 0,38  | 0,164  |
| 13 | Q12756 KIF1A_HUMAN | R.VLDTSVAYVR.G                |       | 2 | 3,119  | 0,464 | 0,109  |
| 13 | P46777 RL5_HUMAN   | R.YLM*EEDEDAYK.K              |       | 2 | 3,1185 | 0,463 | -0,515 |
| 13 | Q16658 FSCN1_HUMAN | D.SLITLAFQDQR.Y               |       | 2 | 3,1182 | 0,396 | -0,85  |
| 13 | P08133 ANXA6_HUMAN | E.AQFIYILGNR.S                |       | 2 | 3,1178 | 0,321 | -0,306 |
| 13 | Q6Y7W6 PERQ2_HUMAN | E.ASEETPQTSSSARPGT#PSDHQSQE.A | T382: | 3 | 3,116  | 0,273 | -0,273 |
| 13 | P67775 PP2AA_HUMAN | K.YSFLQFDPAPR.R               |       | 2 | 3,1157 | 0,427 | -0,637 |
| 13 | Q15185 TEBP_HUMAN  | E.FCVEDSKDVNVNFE.K            |       | 2 | 3,1156 | 0,282 | -1,004 |
| 13 | Q96H12 CI030_HUMAN | R.SVS#PLLSTHVLGK.E            | S98:  | 2 | 3,1155 | 0,455 | -0,43  |
| 13 | Q12888 TP53B_HUMAN | E.IEPKNS#PEDLGLSLTGDSCK.L     | S500: | 3 | 3,1143 | 0,182 | -0,327 |
| 13 | P10809 CH60_HUMAN  | E.AGDGTTTATVLAR.S             |       | 2 | 3,1136 | 0,428 | -0,791 |

|    |                     |                       |        |   |        |       |        |
|----|---------------------|-----------------------|--------|---|--------|-------|--------|
| 13 | P22234 PUR6_HUMAN   | E.LLDS#PGKVLLQSK.D    | S27:   | 3 | 3,1117 | 0,371 | -1,423 |
| 13 | Q13464 ROCK1_HUMAN  | K.NSLTFPDDNDISKE.A    |        | 2 | 3,1098 | 0,349 | -0,841 |
| 13 | O14893 GEMI2_HUMAN  | K.SQQLDSNVTM*PK.S     |        | 2 | 3,1079 | 0,38  | -0,358 |
| 13 | P21953 ODBB_HUMAN   | R.SGDLFNCGLTIR.S      |        | 2 | 3,1059 | 0,396 | -0,254 |
| 13 | Q92576 PHF3_HUMAN   | E.NLVANTARS#PQFINLK.R | S1642: | 2 | 3,1053 | 0,215 | 0,588  |
| 13 | P55072 TERA_HUMAN   | K.GDDLSTAILK.Q        |        | 2 | 3,0995 | 0,272 | 0,236  |
| 13 | P13647 K2C5_HUMAN   | R.SFSTASAITPSVSR.T    |        | 2 | 3,0992 | 0,382 | -0,519 |
| 13 | Q14CX7 CL030_HUMAN  | K.VQSSYLHSLLE.M       |        | 2 | 3,0972 | 0,247 | 0      |
| 13 | Q15185 TEBP_HUMAN   | K.LTFSCGGSDNFK.H      |        | 2 | 3,0941 | 0,538 | -0,591 |
| 13 | Q9UNF0 PACN2_HUMAN  | R.ALYDYEGQEHE.L       |        | 2 | 3,0934 | 0,415 | -0,332 |
| 13 | Q14204 DYHC1_HUMAN  | K.TLM*AQSIYGGR.V      |        | 2 | 3,0931 | 0,411 | 0,302  |
| 13 | Q8NEM2 SHCBP_HUMAN  | R.DKPGSSLQSFM*PE.G    |        | 2 | 3,0915 | 0,314 | -0,339 |
| 13 | Q86V48 LUZP1_HUMAN  | R.VGPSSGDAPEPSSR.R    |        | 2 | 3,0894 | 0,475 | -0,999 |
| 13 | Q86YP4 P66A_HUMAN   | R.VNGLTTVALKE.T       |        | 2 | 3,0894 | 0,333 | -1,065 |
| 13 | Q9P265 DIP2B_HUMAN  | R.NQTPAPSAQAQTSAPSK.Y |        | 2 | 3,0865 | 0,447 | -0,235 |
| 13 | O96028 NSD2_HUMAN   | R.ASTAASSALGFSK.S     |        | 2 | 3,086  | 0,479 | -0,407 |
| 13 | Q5W0B1 RN219_HUMAN  | R.FAVAALQSK.V         |        | 2 | 3,0857 | 0,215 | 0,261  |
| 13 | P12268 IMDH2_HUMAN  | K.NLIDAGVDALR.V       |        | 2 | 3,0855 | 0,206 | 0,422  |
| 13 | Q8IUI8 CRLF3_HUMAN  | K.VDDDFTAQDYR.L       |        | 2 | 3,0808 | 0,466 | -0,454 |
| 13 | Q9UBB4 ATX10_HUMAN  | E.DNSQNQDLIAK.M       |        | 2 | 3,0806 | 0,325 | -0,392 |
| 13 | P34931 HS71L_HUMAN  | E.GIDFYTSITR.A        |        | 2 | 3,0792 | 0,393 | 1,56   |
| 13 | Q96EP5 DAZP1_HUMAN  | K.IFVGGIPHNCGE.T      |        | 2 | 3,0774 | 0,364 | -0,657 |
| 13 | Q9NQW6 ANLN_HUMAN   | K.DKSTT#PGGTGIKPFLE.R | T364:  | 2 | 3,077  | 0,327 | -1,271 |
| 13 | Q05DR4 Q05DR4_HUMAN | R.SLAALSQIAYQR.N      |        | 2 | 3,0761 | 0,365 | -0,462 |
| 13 | P21333 FLNA_HUMAN   | R.ANLPQSFQVDTSK.A     |        | 2 | 3,0742 | 0,515 | -0,935 |
| 13 | P13639 EF2_HUMAN    | E.QVVGGIYGLNR.K       |        | 2 | 3,0739 | 0,458 | -0,191 |
| 13 | Q9BR76 COR1B_HUMAN  | R.KSDFQDDLYPDTAGPE.A  |        | 2 | 3,0734 | 0,44  | -0,702 |
| 13 | P19838 NFKB1_HUMAN  | E.VIQAASSPVK.T        |        | 2 | 3,0729 | 0,453 | -0,427 |
| 13 | Q9HB96 FANCE_HUMAN  | K.TGEDGSNLDDAKGLAE.S  |        | 2 | 3,0717 | 0,5   | -1,916 |
| 13 | P52272 HNRPM_HUMAN  | R.M*GLAM*GGGGGASFDR.A |        | 2 | 3,071  | 0,328 | -0,603 |
| 13 | P00558 PGK1_HUMAN   | K.IQLINNM*LDK.V       |        | 2 | 3,0697 | 0,197 | -0,3   |
| 13 | P52294 IMA1_HUMAN   | K.LLSKEPNPPIDE.V      |        | 2 | 3,0691 | 0,348 | -0,451 |
| 13 | Q14671 PUM1_HUMAN   | E.YVLSSSPGDSCLR.K     |        | 2 | 3,0683 | 0,224 | -0,762 |

|    |                    |                            |            |   |        |       |        |
|----|--------------------|----------------------------|------------|---|--------|-------|--------|
| 13 | Q7L014 DDX46_HUMAN | K.DAGNFDQNKLEEE.M          |            | 2 | 3,0672 | 0,234 | -0,323 |
| 13 | P49790 NU153_HUMAN | E.GSVLDILKS#PGFASPK.I      | S614:      | 3 | 3,067  | 0,252 | 0,216  |
| 13 | P49756 RBM25_HUMAN | K.LGASNSPGQPNSVK.R         |            | 2 | 3,0661 | 0,449 | -1,44  |
| 13 | P40222 TXLNA_HUMAN | K.DLQQQLVDAK.L             |            | 2 | 3,0658 | 0,365 | -0,632 |
| 13 | P46821 MAP1B_HUMAN | R.KLGDVSPT#QIDVSQFGSFKE.D  | T1503:     | 3 | 3,0641 | 0,104 | -0,404 |
| 13 | P46937 YAP1_HUMAN  | E.STDSGLSM*SSYSVPR.T       |            | 2 | 3,0626 | 0,393 | -0,537 |
| 13 | O75781 PALM_HUMAN  | E.NAAAPS#PVRAPAPS#PAKEER.K | S116:S124: | 3 | 3,0618 | 0,252 | -0,084 |
| 13 | P07355 ANXA2_HUMAN | E.VTIVNILTNR.S             |            | 2 | 3,0607 | 0,477 | -0,32  |
| 13 | O95684 FR1OP_HUMAN | K.SGLSSLAGAPSLK.D          |            | 2 | 3,0602 | 0,248 | 0,205  |
| 13 | Q96BU1 S1PBP_HUMAN | R.VPSEQSSGTSLLPK.D         |            | 2 | 3,0584 | 0,366 | -0,683 |
| 13 | Q13428 TCOF_HUMAN  | K.TGPAAAQVQVGK.Q           |            | 2 | 3,058  | 0,476 | -0,325 |
| 13 | Q8NDT2 RB15B_HUMAN | E.GDQGVISLLK.D             |            | 2 | 3,0579 | 0,417 | 0,218  |
| 13 | Q9BVK6 TMED9_HUMAN | K.FSLFAGGM*LR.V            |            | 2 | 3,0569 | 0,342 | 0,219  |
| 13 | P55084 ECHB_HUMAN  | E.AFSGQILANFK.A            |            | 2 | 3,0553 | 0,421 | 0      |
| 13 | Q9UQ35 SRRM2_HUMAN | E.SYFGVSSLQLK.G            |            | 2 | 3,0537 | 0,334 | -0,893 |
| 13 | P13639 EF2_HUMAN   | R.CLYASVLTQPR.L            |            | 2 | 3,0533 | 0,49  | -0,265 |
| 13 | Q9UQ35 SRRM2_HUMAN | R.M*APALSGANLTSR.V         |            | 2 | 3,053  | 0,457 | -0,435 |
| 13 | Q9Y223 GLCNE_HUMAN | K.SIDLQEPLQK.K             |            | 2 | 3,0521 | 0,262 | -0,313 |
| 13 | P07900 HS90A_HUMAN | K.DQVANSFAVER.L            |            | 2 | 3,0518 | 0,383 | -0,395 |
| 13 | Q13459 MYO9B_HUMAN | R.ATGAALTPTEER.R           |            | 2 | 3,0508 | 0,321 | -1,203 |
| 13 | Q9H307 PININ_HUMAN | K.S#LSPGKENVSAIDM*EKE.S    | S441:      | 2 | 3,0504 | 0,388 | -0,443 |
| 13 | Q9UHB6 LIMA1_HUMAN | R.ETPHS#PGVEDAPIAK.V       | S490:      | 3 | 3,0488 | 0,212 | -0,112 |
| 13 | P60900 PSA6_HUMAN  | K.AINQGGLTSVAVR.G          |            | 2 | 3,0466 | 0,282 | -0,285 |
| 13 | P31946 1433B_HUMAN | D.ST#LIM*QLLR.D            | T217:      | 2 | 3,0461 | 0,255 | -0,729 |
| 13 | O75935 DCTN3_HUMAN | R.LAQIHQQDQCVE.I           |            | 2 | 3,0436 | 0,322 | -0,143 |
| 13 | Q04721 NOTC2_HUMAN | E.VDVLDVNV.R.G             |            | 2 | 3,0434 | 0,44  | -0,593 |
| 13 | P51784 UBP11_HUMAN | K.ISDLCVALSK.H             |            | 2 | 3,0392 | 0,395 | -0,441 |
| 13 | Q9Y3P9 RBGP1_HUMAN | K.IVGNQSEQQLQKE.L          |            | 2 | 3,0384 | 0,328 | -0,512 |
| 13 | Q96B54 ZN428_HUMAN | R.SPLGEAPPPTPCR.L          |            | 2 | 3,0383 | 0,409 | -0,425 |
| 13 | Q16658 FSCN1_HUMAN | R.YLAADKDGNTCE.R           |            | 2 | 3,0375 | 0,446 | -0,335 |
| 13 | Q96JM3 ZN828_HUMAN | R.NVLQFTEEKE.A             |            | 2 | 3,037  | 0,355 | -0,69  |
| 13 | P46013 KI67_HUMAN  | K.M*DFKEDLSGIAE.M          |            | 2 | 3,0356 | 0,364 | -0,623 |
| 13 | Q12849 GRSF1_HUMAN | E.DVLNFFSDCR.I             |            | 2 | 3,0355 | 0,443 | -0,383 |



|    |                     |                           |        |   |        |       |        |
|----|---------------------|---------------------------|--------|---|--------|-------|--------|
| 13 | Q7Z460 CLAP1_HUMAN  | K.LLGSYGGLTGGSSR.G        |        | 2 | 3,0351 | 0,445 | -0,618 |
| 13 | Q5JTH9 RRP12_HUMAN  | E.GGGDEPLNFLDPK.V         |        | 2 | 3,035  | 0,372 | -0,718 |
| 13 | P13647 K2C5_HUMAN   | K.LAELEEALQK.A            |        | 2 | 3,0347 | 0,163 | -0,213 |
| 13 | P20042 IF2B_HUMAN   | K.NVKFPDEDEILE.K          |        | 2 | 3,0346 | 0,259 | -0,506 |
| 13 | Q12873 CHD3_HUMAN   | E.ASATNS#PCTSKPATPAPSEK.G | S1549: | 3 | 3,0343 | 0,195 | -0,527 |
| 13 | Q9Y3L3 3BP1_HUMAN   | R.VYGVSLATHLQE.L          |        | 2 | 3,0337 | 0,384 | -0,741 |
| 13 | Q9Y2X3 NOL5_HUMAN   | K.IISDNLYCK.C             |        | 2 | 3,0304 | 0,361 | -0,298 |
| 13 | Q9Y6Q9 NCOA3_HUMAN  | K.LDNSPNM*NITQPSK.V       |        | 2 | 3,0302 | 0,273 | -0,697 |
| 13 | Q9UPN9 TRI33_HUMAN  | E.DAGSSSLDNLLSR.Y         |        | 2 | 3,0275 | 0,314 | -0,64  |
| 13 | Q16543 CDC37_HUMAN  | K.YLSDNVHLVCE.E           |        | 2 | 3,0264 | 0,444 | -0,362 |
| 13 | P23434 GCSH_HUMAN   | E.ALAENPGLVNK.S           |        | 2 | 3,0261 | 0,394 | -1,409 |
| 13 | Q9UQ35 SRRM2_HUMAN  | R.TAAALAPASLTSAR.M        |        | 2 | 3,0243 | 0,356 | -0,844 |
| 13 | P04264 K2C1_HUMAN   | R.TNAENEFVTIK.K           |        | 2 | 3,0241 | 0,469 | -0,578 |
| 13 | Q9Y696 CLIC4_HUMAN  | E.M*TLADCNLLPK.L          |        | 2 | 3,0227 | 0,215 | -0,567 |
| 13 | Q09666 AHNK_HUMAN   | K.VDINAPDVDVR.G           |        | 2 | 3,0223 | 0,284 | -0,302 |
| 13 | P30044 PRDX5_HUMAN  | R.FSM*VVQDGIVK.A          |        | 2 | 3,0223 | 0,399 | -0,295 |
| 13 | Q9H9E3 COG4_HUMAN   | K.LSGVQQPSEGVGGGR.C       |        | 2 | 3,0222 | 0,36  | -0,598 |
| 13 | P12277 KCRB_HUMAN   | E.ALSSLDGDLAGR.Y          |        | 2 | 3,0212 | 0,39  | -0,208 |
| 13 | P49023 PAXI_HUMAN   | R.CYCYNGPILDK.V           |        | 2 | 3,0203 | 0,327 | -0,522 |
| 13 | Q14690 RRP5_HUMAN   | K.AINIGQLVDVK.V           |        | 2 | 3,0194 | 0,436 | -0,417 |
| 13 | Q15750 TAB1_HUMAN   | E.M*SQPTSPAPAAGGR.V       |        | 2 | 3,0176 | 0,438 | -0,762 |
| 13 | Q92576 PHF3_HUMAN   | E.VGNTCPSEFPSK.S          |        | 2 | 3,0161 | 0,396 | -0,461 |
| 13 | Q9Y5B0 CTDP1_HUMAN  | E.LAGAPEPQGSCAQGGR.V      |        | 2 | 3,016  | 0,476 | -0,157 |
| 13 | Q08J23 NSUN2_HUMAN  | E.SAASTGQPDNDVTEGQR.A     |        | 2 | 3,015  | 0,517 | -0,563 |
| 13 | P42566 EP15_HUMAN   | K.GSDPFASDCFFR.Q          |        | 2 | 3,0148 | 0,37  | -0,607 |
| 13 | Q8WU90 ZC3HF_HUMAN  | E.ISLEDLIERE.R            |        | 2 | 3,0137 | 0,359 | -0,401 |
| 13 | P24534 EF1B_HUMAN   | E.DDKVGTDM*LEE.Q          |        | 2 | 3,0132 | 0,405 | -0,192 |
| 13 | Q13464 ROCK1_HUMAN  | K.NLICAFLTDRE.V           |        | 2 | 3,0128 | 0,354 | -0,632 |
| 13 | P54136 SYRC_HUMAN   | R.AYQCVVLLQGK.N           |        | 2 | 3,0127 | 0,237 | -1,049 |
| 13 | Q71U36 TBA1A_HUMAN  | E.DM*AAL EKDYEE.V         |        | 2 | 3,011  | 0,205 | 1,193  |
| 13 | Q6NWWY9 PR40B_HUMAN | R.TLLQLDDHQ.-             |        | 2 | 3,0089 | 0,413 | -0,806 |
| 13 | P49736 MCM2_HUMAN   | K.M*ITSLSKDQQIGE.K        |        | 2 | 3,0088 | 0,337 | -0,666 |
| 13 | Q96T23 RSF1_HUMAN   | K.LSDDFDS#PVKGPLCK.S      | S387:  | 3 | 3,0084 | 0,288 | -0,208 |

|    |                    |                           |       |   |        |       |        |
|----|--------------------|---------------------------|-------|---|--------|-------|--------|
| 13 | P08240 SRPR_HUMAN  | E.AALSEDINLIR.G           |       | 2 | 3,0078 | 0,301 | -0,502 |
| 13 | P23246 SFPQ_HUMAN  | R.M*GGGGAM*NM*GDPYGGGQK.F |       | 2 | 3,0071 | 0,457 | 0      |
| 13 | P50570 DYN2_HUMAN  | K.FTDFDEVRQE.I            |       | 2 | 3,0055 | 0,28  | -0,19  |
| 13 | P07942 LAMB1_HUMAN | K.CFICNSQDPYHE.T          |       | 2 | 3,0036 | 0,505 | -0,466 |
| 13 | Q14103 HNRPD_HUMAN | R.GFGFVLFKE.S             |       | 2 | 3,0025 | 0,272 | -0,117 |
| 13 | P62306 RUXF_HUMAN  | E.YIDGALSGLHGE.V          |       | 2 | 3,0021 | 0,38  | -0,495 |
| 13 | P38646 GRP75_HUMAN | D.AGQISGLNVLR.V           |       | 2 | 3,002  | 0,344 | -0,433 |
| 13 | P53582 AMPM1_HUMAN | K.SGHVFTIEPM*ICE.G        |       | 2 | 3,0014 | 0,464 | -0,477 |
| 13 | O00193 SMAP_HUMAN  | E.LESQYQQSM*DSK.L         |       | 2 | 3,0005 | 0,39  | -0,669 |
| 13 | P62753 RS6_HUMAN   | K.LNISFPATGCQK.L          |       | 2 | 2,9988 | 0,369 | 0,731  |
| 13 | Q14571 ITPR2_HUMAN | R.STVTVNTIDLGNK.K         |       | 2 | 2,9988 | 0,265 | -0,179 |
| 13 | P22413 ENPP1_HUMAN | E.DFSNCLYQDFR.I           |       | 2 | 2,9982 | 0,274 | -0,416 |
| 13 | Q16204 CCDC6_HUMAN | K.SGGIVISPFRLLE.L         |       | 2 | 2,996  | 0,334 | -0,087 |
| 13 | P49790 NU153_HUMAN | R.SGIDITDFQAK.R           |       | 2 | 2,9953 | 0,204 | -0,817 |
| 13 | Q8IWA0 WDR75_HUMAN | K.VQDTS#NTGLGEDIIHQLSK.S  | S796: | 3 | 2,9934 | 0,292 | 0      |
| 13 | Q99614 TTC1_HUMAN  | E.AECAGPPVPDPK.N          |       | 2 | 2,9932 | 0,396 | -0,296 |
| 13 | O15014 ZN609_HUMAN | K.TYVGTLLDCTR.H           |       | 2 | 2,9921 | 0,424 | 1,127  |
| 13 | Q96ER3 SAAL1_HUMAN | E.VAGGDCIGSTVYSK.H        |       | 2 | 2,992  | 0,417 | -0,69  |
| 13 | Q9Y2U5 M3K2_HUMAN  | E.DLDNTVFGAER.K           |       | 2 | 2,9888 | 0,413 | 0      |
| 13 | Q9P0K7 RAI14_HUMAN | E.NAGIQSLLSK.I            |       | 2 | 2,9882 | 0,379 | -0,533 |
| 13 | P35232 PHB_HUMAN   | E.AAEDIAYQLSR.S           |       | 2 | 2,987  | 0,179 | 1,775  |
| 13 | P54278 PMS2_HUMAN  | R.GM*LSSSTSGAISDK.G       |       | 2 | 2,987  | 0,297 | -0,18  |
| 13 | Q9H3P7 GCP60_HUMAN | E.VGFFDVLGNDR.R           |       | 2 | 2,9864 | 0,386 | -0,098 |
| 13 | Q15653 IKBB_HUMAN  | R.EAPDTYLAQGPD.R.T        |       | 2 | 2,9855 | 0,454 | -0,341 |
| 13 | Q16881 TRXR1_HUMAN | R.VVGFHVLGPNAGE.V         |       | 2 | 2,9847 | 0,49  | -0,282 |
| 13 | O94826 TOM70_HUMAN | R.QAYTGNNSSQIQAAAM*K.G    |       | 2 | 2,9786 | 0,427 | -0,777 |
| 13 | P62906 RL10A_HUMAN | K.FSVCVLGDQQHCDE.A        |       | 2 | 2,9785 | 0,416 | -0,432 |
| 13 | O60506 HNRPQ_HUMAN | E.NFQTLLDAGLPQK.V         |       | 2 | 2,9774 | 0,293 | -0,591 |
| 13 | Q9P265 DIP2B_HUMAN | K.GTSGSLADVFNANTR.I       |       | 2 | 2,9771 | 0,437 | 0,524  |
| 13 | Q13233 M3K1_HUMAN  | R.AAQQTQVQQPLAGSR.R       |       | 2 | 2,9769 | 0,315 | -0,57  |
| 13 | Q9UKV8 I2C2_HUMAN  | K.LTDNQSTSTM*IR.A         |       | 2 | 2,9763 | 0,471 | -0,282 |
| 13 | P13010 KU86_HUMAN  | K.DKPSGDAAVFEE.G          |       | 2 | 2,9753 | 0,356 | -0,268 |
| 13 | P18206 VINC_HUMAN  | R.SLGEISALTSK.L           |       | 2 | 2,9753 | 0,405 | -0,772 |

|    |                     |                         |       |   |        |       |        |
|----|---------------------|-------------------------|-------|---|--------|-------|--------|
| 13 | Q3LXA3 DHAK_HUMAN   | K.SPGADLLQVLTK.A        |       | 2 | 2,9751 | 0,347 | -0,884 |
| 13 | O75534 CSDE1_HUMAN  | E.ILDGNQLHIAD.E.V       |       | 2 | 2,9746 | 0,377 | -0,547 |
| 13 | Q9UN52 CSN3_HUMAN   | E.ITVNPQFVQK.S          |       | 2 | 2,9741 | 0,369 | -0,312 |
| 13 | P50990 TCPQ_HUMAN   | E.VGDTQVVVFK.H          |       | 2 | 2,9729 | 0,474 | 0      |
| 13 | Q63ZY3 KANK2_HUMAN  | E.VVASTAAGAPAQR.A       |       | 2 | 2,9727 | 0,459 | 0,305  |
| 13 | Q9Y383 LC7L2_HUMAN  | R.AM*LDQLM*GTSR.D       |       | 2 | 2,9705 | 0,407 | -0,097 |
| 13 | Q14137 BOP1_HUMAN   | K.TTEEQVQASTPCPR.T      |       | 2 | 2,9693 | 0,326 | -0,456 |
| 13 | Q09666 AHNK_HUMAN   | K.GEGPEVDVNLPK.A        |       | 2 | 2,9686 | 0,225 | -1,265 |
| 13 | P17050 NAGAB_HUMAN  | K.ASALVFFSCR.T          |       | 2 | 2,968  | 0,196 | -0,211 |
| 13 | A8K1J3 A8K1J3_HUMAN | E.AGENPLEFLR.D          |       | 2 | 2,9678 | 0,31  | -0,213 |
| 13 | P34932 HSP74_HUMAN  | K.KLM*SANASDLPLSIE.C    |       | 2 | 2,9664 | 0,392 | -1,14  |
| 13 | P04792 HSPB1_HUMAN  | E.GTLTVEAPM*PK.L        |       | 2 | 2,9659 | 0,41  | 0      |
| 13 | Q93052 LPP_HUMAN    | R.CSVCKEPIM*PAPGQEE.T   |       | 2 | 2,9656 | 0,439 | -0,33  |
| 13 | Q9Y4E8 UBP15_HUMAN  | R.GPSTPKS#PGASNFSTLPK.I | S229: | 2 | 2,9641 | 0,339 | -0,395 |
| 13 | P15531 NDKA_HUMAN   | K.FM*QASEDLLKE.H        |       | 2 | 2,9636 | 0,38  | -0,276 |
| 13 | Q9BQA1 MEP50_HUMAN  | R.KET#PPPLVPPAARE.W     | T5:   | 2 | 2,9629 | 0,257 | -0,308 |
| 13 | O15042 SR140_HUMAN  | E.SLCDS#PHQNLRSRPLLE.N  | S67:  | 2 | 2,9624 | 0,392 | -0,376 |
| 13 | Q9BRA2 TXD17_HUMAN  | K.TIFAYFTGSK.D          |       | 2 | 2,9614 | 0,564 | 0,537  |
| 13 | P54277 PMS1_HUMAN   | K.VTAYDLLSNR.V          |       | 2 | 2,9612 | 0,442 | -0,53  |
| 13 | P62701 RS4X_HUMAN   | R.LSNIFVIGK.G           |       | 2 | 2,9611 | 0,378 | -1,6   |
| 13 | P46734 MP2K3_HUMAN  | E.FVDFTAQCLR.K          |       | 2 | 2,9608 | 0,286 | 0,291  |
| 13 | P27448 MARK3_HUMAN  | K.SSTVPSNTASGGM*TR.R    |       | 2 | 2,9604 | 0,451 | -0,235 |
| 13 | P62736 ACTA_HUMAN   | K.DSYVGDEAQSK.R         |       | 2 | 2,958  | 0,353 | -0,102 |
| 13 | P53396 ACLY_HUMAN   | R.QHFPATPLLDYALE.V      |       | 2 | 2,9579 | 0,233 | -0,151 |
| 13 | Q96G46 DUS3L_HUMAN  | R.TCGPLTDEDVVR.L        |       | 2 | 2,9577 | 0,452 | -0,538 |
| 13 | Q9NWH9 SLTM_HUMAN   | R.IVQISGNSM*PR.G        |       | 2 | 2,9567 | 0,36  | -0,401 |
| 13 | Q6S8J3 A26CA_HUMAN  | E.KLCYVALDFEQE.M        |       | 2 | 2,9561 | 0,269 | -0,483 |
| 13 | P04843 RPN1_HUMAN   | R.SEDLLDYGPF.R.D        |       | 2 | 2,9559 | 0,234 | -0,744 |
| 13 | P60900 PSA6_HUMAN   | E.NIGCVM*TGM*TADSR.S    |       | 2 | 2,9545 | 0,461 | -0,553 |
| 13 | Q16513 PKN2_HUMAN   | R.FQFNLQDFR.C           |       | 2 | 2,9534 | 0,342 | -0,201 |
| 13 | P09661 RU2A_HUMAN   | K.GLLQSGQIPGR.E         |       | 2 | 2,9533 | 0,324 | -0,325 |
| 13 | Q7Z6Z7 HUWE1_HUMAN  | R.DGGSGNSTIIVSR.S       |       | 2 | 2,9523 | 0,398 | -0,193 |
| 13 | POC7M2 RA1L3_HUMAN  | K.IFVGGIKEDTE.E         |       | 2 | 2,9513 | 0,313 | -0,202 |

|    |                     |                      |       |   |        |       |        |
|----|---------------------|----------------------|-------|---|--------|-------|--------|
| 13 | P28838 AMPL_HUMAN   | R.SAGACTAAAFLE.F     |       | 2 | 2,951  | 0,342 | -0,188 |
| 13 | Q8NHW5 Q8NHW5_HUMAN | D.TTAAPAAAAAPAK.V    |       | 2 | 2,9478 | 0,451 | -0,439 |
| 13 | P10809 CH60_HUMAN   | E.IGNISDAM*K.K       |       | 2 | 2,9465 | 0,345 | -0,453 |
| 13 | Q9HC35 EMAL4_HUMAN  | R.ASPS#PQPSSQLQIHR.Q | S146: | 2 | 2,9465 | 0,57  | -0,607 |
| 13 | P13639 EF2_HUMAN    | E.LSENDLNFIK.Q       |       | 2 | 2,946  | 0,303 | -0,102 |
| 13 | Q99543 DNJC2_HUMAN  | R.TLVDNAYSCDPR.I     |       | 2 | 2,946  | 0,447 | -0,605 |
| 13 | P30040 ERP29_HUMAN  | K.FDTQYPYGEKQDE.F    |       | 2 | 2,9458 | 0,289 | -0,603 |
| 13 | P35579 MYH9_HUMAN   | K.TDLLLEPYNK.Y       |       | 2 | 2,9457 | 0,115 | -0,809 |
| 13 | Q92945 FUBP2_HUMAN  | K.M*M*LDDIVSR.G      |       | 2 | 2,9452 | 0,371 | -0,11  |
| 13 | Q6PGN9 PSRC1_HUMAN  | R.SDPNAVAPAPQGVR.L   |       | 2 | 2,9444 | 0,256 | -0,708 |
| 13 | Q9H974 QTRD1_HUMAN  | R.SLLFLDNCLR.L       |       | 2 | 2,9434 | 0,393 | -0,098 |
| 13 | O95391 SLU7_HUMAN   | R.NLDPNSAYYDPK.T     |       | 2 | 2,9428 | 0,346 | -0,611 |
| 13 | Q32MZ4 LRRF1_HUMAN  | K.IDGATQSSPAEPK.S    |       | 2 | 2,9425 | 0,395 | -0,375 |
| 13 | Q8TEW0 PARD3_HUMAN  | K.QFSDASQLDFVK.T     |       | 2 | 2,9421 | 0,355 | -0,176 |
| 13 | P24928 RPB1_HUMAN   | K.DVLSNAHIQNE.L      |       | 2 | 2,9417 | 0,304 | -0,689 |
| 13 | O60716 CTND1_HUMAN  | E.DGYPGGSDNYGSLSR.V  |       | 2 | 2,9409 | 0,513 | -0,316 |
| 13 | Q5T4S7 UBR4_HUMAN   | K.AVSNINTLLDK.A      |       | 2 | 2,9399 | 0,242 | 0      |
| 13 | O76071 CIAO1_HUMAN  | E.LLASASYDDTVK.L     |       | 2 | 2,9396 | 0,332 | -0,666 |
| 13 | Q9GZR7 DDX24_HUMAN  | E.LTDYQLVSPAK.N      |       | 2 | 2,9391 | 0,287 | -1,087 |
| 13 | Q5T6F2 UBAP2_HUMAN  | E.NSNQIPISLYSK.S     |       | 2 | 2,9391 | 0,333 | -0,447 |
| 13 | Q70EL1 UBP54_HUMAN  | E.SLNIDSIFSK.D       |       | 2 | 2,9387 | 0,38  | -0,109 |
| 13 | Q969X6 CIR1A_HUMAN  | R.TVAHSPTALISGGTD.T  |       | 2 | 2,9383 | 0,178 | -0,769 |
| 13 | Q6ZWE6 PKHM3_HUMAN  | E.ASTFNFFNICQR.R     |       | 2 | 2,9373 | 0,375 | -0,486 |
| 13 | Q9BVI0 PHF20_HUMAN  | E.ISDTSQEPPPK.A      |       | 2 | 2,9372 | 0,348 | -0,664 |
| 13 | P19623 SPEE_HUMAN   | R.YQDILVFR.S         |       | 2 | 2,936  | 0,314 | -0,232 |
| 13 | Q5H9R7 SAPS3_HUMAN  | K.GPNSALVQQLIK.D     |       | 2 | 2,9342 | 0,311 | -0,289 |
| 13 | Q9Y3Q8 T22D4_HUMAN  | K.SPDPFGAVAAQK.F     |       | 2 | 2,9337 | 0,41  | -0,308 |
| 13 | O15085 ARHGB_HUMAN  | K.DVVAGLTQRE.I       |       | 2 | 2,9317 | 0,389 | 0,336  |
| 13 | Q9BVG4 CX026_HUMAN  | K.AVYISVQDKEGE.K     |       | 2 | 2,9308 | 0,172 | -0,729 |
| 13 | Q93050 VPP1_HUMAN   | R.LGFVAGVINRE.R      |       | 2 | 2,9304 | 0,277 | -0,519 |
| 13 | Q9HC38 GLOD4_HUMAN  | E.LTYNYGVGDYK.L      |       | 2 | 2,93   | 0,463 | -0,377 |
| 13 | P62258 1433E_HUMAN  | R.IISSIEQKEE.N       |       | 2 | 2,93   | 0,27  | 0      |
| 13 | P22626 ROA2_HUMAN   | K.LFVGGIKEDTE.E      |       | 2 | 2,9274 | 0,256 | -0,707 |

|    |                    |                          |        |   |        |       |        |
|----|--------------------|--------------------------|--------|---|--------|-------|--------|
| 13 | Q9BY89 K1671_HUMAN | E.SLATESPDSSATSTR.K      |        | 2 | 2,9261 | 0,318 | -0,646 |
| 13 | Q96C19 EFHD2_HUMAN | R.VFNPYTEFKE.F           |        | 2 | 2,9258 | 0,297 | -0,766 |
| 13 | Q9BSR8 YIPF4_HUMAN | K.LNLGGDFIKE.S           |        | 2 | 2,9242 | 0,318 | 0      |
| 13 | P60709 ACTB_HUMAN  | R.GYSFTTTAERE.I          |        | 2 | 2,924  | 0,536 | -1,354 |
| 13 | Q96Q89 MPPH1_HUMAN | K.FGDFLQHS#PSILQSK.A     | S1740: | 3 | 2,9239 | 0,358 | -0,41  |
| 13 | Q8TF01 SFR18_HUMAN | R.QRS#PIALPVKQEPPIQID.A  | S211:  | 3 | 2,9232 | 0,143 | -0,55  |
| 13 | P48643 TCPE_HUMAN  | K.LDVTSVEDYK.A           |        | 2 | 2,9229 | 0,384 | -1,566 |
| 13 | Q5C9Z4 NOM1_HUMAN  | K.DGSSSVPLSFAR.D         |        | 2 | 2,9225 | 0,347 | 0,399  |
| 13 | P27708 PYR1_HUMAN  | R.LSLDLLQR.L             |        | 2 | 2,9221 | 0,246 | -0,455 |
| 13 | P22234 PUR6_HUMAN  | K.ACGNFGIPCELR.V         |        | 2 | 2,9219 | 0,377 | -0,875 |
| 13 | P62873 GBB1_HUMAN  | R.LFVSGACDASAK.L         |        | 2 | 2,9211 | 0,438 | -0,597 |
| 13 | Q16543 CDC37_HUMAN | D.VQM*LQDAISK.M          |        | 2 | 2,9209 | 0,359 | 1,911  |
| 13 | O94909 K0819_HUMAN | E.GEPLSLPTPRS#PSDRE.L    | S546:  | 2 | 2,9192 | 0,389 | -0,537 |
| 13 | P31948 STIP1_HUMAN | K.ALDLDSSCKE.A           |        | 2 | 2,9182 | 0,246 | 0,214  |
| 13 | Q9UJU6 DBNL_HUMAN  | R.AM*STTSISSPQPGK.L      |        | 2 | 2,9177 | 0,462 | -0,347 |
| 13 | P05023 AT1A1_HUMAN | K.VDNSSLTGESEPQTR.S      |        | 2 | 2,9175 | 0,291 | -0,075 |
| 13 | P34931 HS71L_HUMAN | R.TTPSYVAFTDTER.L        |        | 2 | 2,9172 | 0,511 | -0,656 |
| 13 | Q9UKV3 ACINU_HUMAN | K.SGVSITIDDPVR.T         |        | 2 | 2,9167 | 0,37  | -0,872 |
| 13 | Q9Y2K5 R3HD2_HUMAN | D.IIQLHISCP#DKEEE.K      | S109:  | 3 | 2,9165 | 0,233 | -0,097 |
| 13 | Q8IZD4 DCP1B_HUMAN | E.FFTGVPVQPGS#PHNIGTSR.G | S337:  | 3 | 2,9163 | 0,249 | -0,647 |
| 13 | P49790 NU153_HUMAN | E.SSTSQSLFSDQSK.L        |        | 2 | 2,9163 | 0,302 | -0,564 |
| 13 | Q96HC4 PDLI5_HUMAN | R.GPFLVALGK.S            |        | 2 | 2,9137 | 0,251 | 0,068  |
| 13 | P10398 ARAF_HUMAN  | K.IGDFGLATVK.T           |        | 2 | 2,9136 | 0,375 | 0,299  |
| 13 | Q07955 SFRS1_HUMAN | E.AGDVCYADVYR.D          |        | 2 | 2,9135 | 0,396 | -0,379 |
| 13 | P20618 PSB1_HUMAN  | E.DFAIVASDTR.L           |        | 2 | 2,913  | 0,309 | 0,557  |
| 13 | P09874 PARP1_HUMAN | E.DFLQDVSASTK.S          |        | 2 | 2,9126 | 0,337 | -0,202 |
| 13 | P52788 SPSY_HUMAN  | E.IDQM*VIDGCK.K          |        | 2 | 2,9126 | 0,422 | -0,817 |
| 13 | Q86TI2 DPP9_HUMAN  | E.NSLLYSEIPK.K           |        | 2 | 2,9123 | 0,271 | -0,629 |
| 13 | Q9C0C2 TB182_HUMAN | R.CPARPPPSGSQGLLEE.M     |        | 2 | 2,9123 | 0,464 | -0,648 |
| 13 | P83731 RL24_HUMAN  | K.VFQFLNAK.C             |        | 2 | 2,9115 | 0,221 | 0,252  |
| 13 | O00299 CLIC1_HUMAN | E.SNTAGLDIFAK.F          |        | 2 | 2,9099 | 0,473 | -0,644 |
| 13 | Q9UKS6 PACN3_HUMAN | E.VTLTSIVPTR.D           |        | 2 | 2,9098 | 0,363 | -0,561 |
| 13 | P05556 ITB1_HUMAN  | E.CECQSEGIPEPK.C         |        | 2 | 2,9094 | 0,44  | -0,481 |

|    |                     |                           |       |   |        |       |        |
|----|---------------------|---------------------------|-------|---|--------|-------|--------|
| 13 | Q8N3R9 MPP5_HUMAN   | E.M*AVDCPGDLGTR.M         |       | 2 | 2,9078 | 0,44  | -0,093 |
| 13 | Q92609 TBCD5_HUMAN  | R.GNSDDFILISK.D           |       | 2 | 2,9072 | 0,437 | -0,505 |
| 13 | Q9UPQ9 TNC6B_HUMAN  | K.M*DLSVGSLSDK.K          |       | 2 | 2,9065 | 0,252 | -0,418 |
| 13 | Q9H501 ESF1_HUMAN   | E.M*QSVVQLIM*TR.D         |       | 2 | 2,9058 | 0,345 | -0,638 |
| 13 | Q13428 TCOF_HUMAN   | K.LDSSPSVSSTLAAK.D        |       | 2 | 2,9055 | 0,323 | -0,806 |
| 13 | Q99496 RING2_HUMAN  | R.FCADCIITALR.S           |       | 2 | 2,9053 | 0,398 | -0,364 |
| 13 | A7MD96 A7MD96_HUMAN | K.SPGILGYNICPR.G          |       | 2 | 2,9035 | 0,388 | -0,543 |
| 13 | Q12959 DLG1_HUMAN   | K.DSGLPSQGLNFK.F          |       | 2 | 2,9026 | 0,349 | -0,386 |
| 13 | Q71RC2 LARP4_HUMAN  | K.DGLNQTTIPVS#PPSTTKPSR.A | S583: | 3 | 2,902  | 0,252 | -0,42  |
| 13 | Q16181 SEPT7_HUMAN  | K.DRLPLAVVGSNTIIE.V       |       | 2 | 2,9019 | 0,361 | -0,382 |
| 13 | P06748 NPM_HUMAN    | D.M*SPLRPQNYLFGCE.L       |       | 2 | 2,901  | 0,49  | -0,212 |
| 13 | P40227 TCPZ_HUMAN   | K.M*LVSGAGDIK.L           |       | 2 | 2,9009 | 0,19  | 0,182  |
| 13 | P40227 TCPZ_HUMAN   | K.KQDEPIDLFM*IE.I         |       | 2 | 2,8988 | 0,368 | -0,327 |
| 13 | Q9C0B0 UNK_HUMAN    | R.SQEQPLLQPK.Q            |       | 2 | 2,8975 | 0,388 | 0,418  |
| 13 | P32004 L1CAM_HUMAN  | K.DATQITQGPR.S            |       | 2 | 2,8952 | 0,422 | -0,561 |
| 13 | P04264 K2C1_HUMAN   | R.SLDLDSIAEVK.A           |       | 2 | 2,8947 | 0,345 | -0,187 |
| 13 | Q9Y6V0 PCLO_HUMAN   | K.TAPVTTTSAVSK.S          |       | 2 | 2,8946 | 0,582 | 0,105  |
| 13 | P23193 TCEA1_HUMAN  | K.LLDGPSTEKDLDE.K         |       | 2 | 2,8934 | 0,248 | -0,256 |
| 13 | P21580 TNAP3_HUMAN  | R.FQNTIPCLGRE.C           |       | 2 | 2,8928 | 0,345 | -0,64  |
| 13 | P12814 ACTN1_HUMAN  | K.ILAGDKNYITM*DE.L        |       | 2 | 2,892  | 0,395 | -0,814 |
| 13 | Q7Z4H3 HDDC2_HUMAN  | R.LQDFYDSTAGK.F           |       | 2 | 2,8919 | 0,341 | -0,882 |
| 13 | Q14746 COG2_HUMAN   | E.GLQTSDVDIIR.H           |       | 2 | 2,8918 | 0,208 | -0,602 |
| 13 | P50416 CPT1A_HUMAN  | R.SEDPDTSM*DSYAK.S        |       | 2 | 2,8907 | 0,292 | -0,751 |
| 13 | P49736 MCM2_HUMAN   | R.QINIHNLSAFYDSE.L        |       | 2 | 2,8903 | 0,337 | -0,37  |
| 13 | P45880 VDAC2_HUMAN  | R.TGDFQLHTNVNDGTE.F       |       | 2 | 2,8888 | 0,303 | -0,814 |
| 13 | Q12931 TRAP1_HUMAN  | E.NAM*IAAGLVDDPR.A        |       | 2 | 2,8879 | 0,305 | -1,167 |
| 13 | Q8NBJ4 GOLM1_HUMAN  | R.QQLQALSEPQPR.L          |       | 2 | 2,8874 | 0,394 | -0,7   |
| 13 | Q8IU4 ABC3F_HUMAN   | K.YNFLFLDSK.L             |       | 2 | 2,887  | 0,333 | -0,532 |
| 13 | P43358 MAGA4_HUMAN  | E.LGVM*GVYDGRE.H          |       | 2 | 2,8862 | 0,364 | 0,101  |
| 13 | Q9ULV4 COR1C_HUMAN  | K.NM*QEPIALHE.M           |       | 2 | 2,8862 | 0,235 | 0      |
| 13 | Q13523 PRP4B_HUMAN  | R.TKLDLLEDLE.K            |       | 2 | 2,8849 | 0,31  | -0,574 |
| 13 | O75937 DNJC8_HUMAN  | R.ALDVIQAGK.E             |       | 2 | 2,884  | 0,227 | 0,267  |
| 13 | Q9Y3B8 ORN_HUMAN    | R.IIDVSTVKE.L             |       | 2 | 2,884  | 0,368 | -0,911 |

|    |                    |                             |        |   |        |       |        |
|----|--------------------|-----------------------------|--------|---|--------|-------|--------|
| 13 | Q5TC12 ATPF1_HUMAN | K.DKTLSSIFNIE.M             |        | 2 | 2,8826 | 0,3   | -0,578 |
| 13 | Q96FW1 OTUB1_HUMAN | E.YAEDDNIYQQK.I             |        | 2 | 2,8819 | 0,326 | -0,44  |
| 13 | Q15057 CENB2_HUMAN | K.AVQTSIATAYR.E             |        | 2 | 2,8808 | 0,455 | -0,723 |
| 13 | Q9Y508 ZN313_HUMAN | E.DM*M*NQVLQR.S             |        | 2 | 2,8805 | 0,192 | -0,105 |
| 13 | Q71U36 TBA1A_HUMAN | R.AFVHWYVGEGM*EE.G          |        | 2 | 2,8794 | 0,356 | -0,777 |
| 13 | O75044 FNBP2_HUMAN | R.SAST#AGDIACAFRPVK.S       | T1014: | 2 | 2,8794 | 0,123 | -0,564 |
| 13 | Q92615 LARP5_HUMAN | E.EKFTSSQTQSPTPPKPPS#PSFE.L | S524:  | 3 | 2,8789 | 0,277 | -0,442 |
| 13 | O95777 LSM8_HUMAN  | E.TDSALDLGNIR.A             |        | 2 | 2,8788 | 0,316 | -0,831 |
| 13 | Q9Y2J4 AMOL2_HUMAN | R.TLLAIQQQALR.G             |        | 2 | 2,8768 | 0,32  | -0,875 |
| 13 | P51784 UBP11_HUMAN | E.GLYNVLM*YR.L              |        | 2 | 2,8767 | 0,388 | -0,852 |
| 13 | Q96T58 MINT_HUMAN  | K.LQVSQTEPAKSD.L            |        | 2 | 2,8766 | 0,466 | -0,375 |
| 13 | Q8N2Y8 RUSC2_HUMAN | R.LVVATQNYK.L               |        | 2 | 2,8763 | 0,451 | 0,204  |
| 13 | Q9HBH9 MKNK2_HUMAN | K.ICDFDLGSGIK.L             |        | 2 | 2,8747 | 0,257 | -0,498 |
| 13 | O60664 M6PBP_HUMAN | K.SVVTGGVQSV*GSR.L          |        | 2 | 2,8746 | 0,396 | -0,53  |
| 13 | O94885 SASH1_HUMAN | R.DVAANM*DQIR.V             |        | 2 | 2,8701 | 0,347 | 0,212  |
| 13 | O95400 CD2B2_HUMAN | R.LSGLADQMVAR.G             |        | 2 | 2,8696 | 0,288 | 0,315  |
| 13 | O43681 ARSA1_HUMAN | K.TTCSCSLAVQLSK.G           |        | 2 | 2,8693 | 0,383 | -0,335 |
| 13 | Q09666 AHNK_HUMAN  | K.GEGPEFDVNLSK.A            |        | 2 | 2,869  | 0,411 | -0,283 |
| 13 | Q9NRL3 STRN4_HUMAN | K.LQGILADLR.D               |        | 2 | 2,8661 | 0,196 | -0,55  |
| 13 | O60684 IMA7_HUMAN  | E.HYFGVEDDDSSLAPQVDE.T      |        | 2 | 2,8655 | 0,383 | -0,965 |
| 13 | P54652 HSP72_HUMAN | K.LLQDFFNGKE.L              |        | 2 | 2,8648 | 0,35  | -0,504 |
| 13 | Q96TC7 FA82C_HUMAN | E.DALQSFLKAE.L              |        | 2 | 2,8644 | 0,279 | -0,488 |
| 13 | Q8NC60 CD014_HUMAN | E.NCILNLLTEKE.V             |        | 2 | 2,8627 | 0,196 | -0,181 |
| 13 | Q8N163 K1967_HUMAN | E.LLLLRDDGEEE.F             |        | 2 | 2,8621 | 0,387 | -0,75  |
| 13 | Q9UJA5 TRM6_HUMAN  | K.GIKGEEIVQQLIE.N           |        | 2 | 2,862  | 0,17  | -0,419 |
| 13 | P16401 H15_HUMAN   | E.TATPAPVEKS#PAK.K          | S18:   | 2 | 2,8616 | 0,288 | -0,709 |
| 13 | Q96SB4 SRPK1_HUMAN | E.SSTIGQDQTL*ER.D           |        | 2 | 2,8603 | 0,253 | -0,494 |
| 13 | P35998 PRS7_HUMAN  | K.QVEDDIQQLK.K              |        | 2 | 2,8595 | 0,306 | -0,734 |
| 13 | P11717 MPRI_HUMAN  | R.VQSSIAFLCGK.T             |        | 2 | 2,8586 | 0,255 | -0,706 |
| 13 | P28331 NDUS1_HUMAN | R.VAGM*LQSFQGK.D            |        | 2 | 2,8585 | 0,321 | -0,31  |
| 13 | P00390 GSHR_HUMAN  | K.LGGTCVNVGCVPK.K           |        | 2 | 2,8581 | 0,344 | -0,179 |
| 13 | P09211 GSTP1_HUMAN | D.LTLYQSNTILR.H             |        | 2 | 2,8575 | 0,313 | -0,646 |
| 13 | Q9Y490 TLN1_HUMAN  | E.DVIATANLSR.R              |        | 2 | 2,8572 | 0,229 | -0,921 |

|    |                    |                     |   |        |       |        |
|----|--------------------|---------------------|---|--------|-------|--------|
| 13 | P42166 LAP2A_HUMAN | R.SSTPLPTISSAENTR.Q | 2 | 2,857  | 0,376 | -0,518 |
| 13 | Q9H6Y2 WDR55_HUMAN | E.NVLATGDDTGGIR.L   | 2 | 2,8569 | 0,373 | -1,609 |
| 13 | P38571 LICH_HUMAN  | E.TEDGYILCLNR.I     | 2 | 2,8561 | 0,391 | -0,901 |
| 13 | Q9NYF8 BCLF1_HUMAN | K.TIAPQNAPRDE.S     | 2 | 2,8553 | 0,365 | 0      |
| 13 | P23528 COF1_HUMAN  | R.YALYDATYETK.E     | 2 | 2,8542 | 0,134 | -0,456 |
| 13 | P09493 TPM1_HUMAN  | R.IQLVEEELDR.A      | 2 | 2,8532 | 0,228 | -0,49  |
| 13 | Q5VSL9 FA40A_HUMAN | K.ALIKQDNLDAFNE.R   | 2 | 2,8506 | 0,224 | -0,491 |
| 13 | P47755 CAZA2_HUMAN | K.FIIHAPPGEFNE.V    | 2 | 2,8501 | 0,281 | -0,356 |
| 13 | Q13428 TCOF_HUMAN  | K.GSLGQGTAPVLP GK.T | 2 | 2,8498 | 0,363 | -0,285 |
| 13 | P26572 MGAT1_HUMAN | R.GLLQQIGDALSSQR.G  | 2 | 2,8498 | 0,403 | 0,082  |
| 13 | Q13952 NFYC_HUMAN  | R.NDIAM*AITK.F      | 2 | 2,8497 | 0,352 | 0,614  |
| 13 | P31949 S10AB_HUMAN | K.DGYNYTLSK.T       | 2 | 2,8481 | 0,466 | -0,575 |
| 13 | P55072 TERA_HUMAN  | E.M*FAQTLQQR.G      | 2 | 2,8475 | 0,313 | -0,697 |
| 13 | P55212 CASP6_HUMAN | R.GIALIFNHE.R       | 2 | 2,842  | 0,309 | 0,602  |
| 13 | A6NIH7 U119B_HUMAN | E.DNIYSIDFTR.F      | 2 | 2,8407 | 0,4   | -0,687 |
| 13 | Q99614 TTC1_HUMAN  | K.AIQLNPSYIR.A      | 2 | 2,8405 | 0,291 | -0,519 |
| 13 | Q70CQ4 UBP31_HUMAN | R.FSGDSPIHSSASTLE.K | 2 | 2,8404 | 0,424 | -0,238 |
| 13 | Q86U06 RBM23_HUMAN | R.TVFCM*QLAAR.I     | 2 | 2,8383 | 0,415 | -0,201 |
| 13 | Q9NUU7 DD19A_HUMAN | R.GLAVNM*VDSK.H     | 2 | 2,8351 | 0,399 | -0,116 |
| 13 | P46821 MAP1B_HUMAN | R.SVNFSLTPNEIK.V    | 2 | 2,8329 | 0,345 | -0,09  |
| 13 | P08195 4F2_HUMAN   | K.GQSEDPGSLLSLFR.R  | 2 | 2,8313 | 0,304 | -0,729 |
| 13 | Q9NWS0 PIHD1_HUMAN | E.GLEDKYNLQLNPE.W   | 2 | 2,8295 | 0,302 | -0,716 |
| 13 | Q8WUD4 CCD12_HUMAN | R.VPQAKPVAVEE.K     | 2 | 2,8286 | 0,441 | -0,523 |
| 13 | Q96NB3 CCD16_HUMAN | E.GFFDDPEVDAR.V     | 2 | 2,8276 | 0,302 | -0,866 |
| 13 | Q13111 CAF1A_HUMAN | K.SAGSM*CITQFM*K.K  | 2 | 2,8276 | 0,415 | -0,788 |
| 13 | Q13636 RAB31_HUMAN | K.VCLLGDTGVGK.S     | 2 | 2,8271 | 0,304 | -0,654 |
| 13 | Q12802 AKP13_HUMAN | K.GGNANLVFM*LK.R    | 2 | 2,8268 | 0,45  | -0,414 |
| 13 | P08047 SP1_HUMAN   | E.SQPSPLALLAATCSR.I | 2 | 2,826  | 0,453 | 0      |
| 13 | P27824 CALX_HUMAN  | E.VYFADSFDR.G       | 2 | 2,8255 | 0,369 | 0      |
| 13 | Q15021 CND1_HUMAN  | R.ESTGNM*VTGQTVCK.N | 2 | 2,8246 | 0,377 | -0,639 |
| 13 | P50990 TCPO_HUMAN  | R.GSTDNLM*DDIER.A   | 2 | 2,8234 | 0,391 | -0,618 |
| 13 | P23396 RS3_HUMAN   | K.FVADGIFKAE.L      | 2 | 2,8233 | 0,309 | 0      |
| 13 | Q99661 KIF2C_HUMAN | K.GKEIDFDDVAAINPE.L | 2 | 2,8222 | 0,313 | -0,822 |



|    |                    |                      |   |        |       |        |
|----|--------------------|----------------------|---|--------|-------|--------|
| 13 | P28290 SSFA2_HUMAN | R.GDPDAAAAPYSTQK.S   | 2 | 2,8218 | 0,439 | -0,655 |
| 13 | Q99633 PRP18_HUMAN | K.AALDKIDQQYLNE.I    | 2 | 2,8201 | 0,292 | -0,16  |
| 13 | Q9NYU2 UGGG1_HUMAN | K.TIDLCNNPM*TK.E     | 2 | 2,8194 | 0,432 | -0,461 |
| 13 | P50990 TCPQ_HUMAN  | R.AVDDGVNTEFK.V      | 2 | 2,8185 | 0,439 | -1,145 |
| 13 | P20073 ANXA7_HUMAN | R.LLVSM*CQGNRDE.N    | 2 | 2,8182 | 0,304 | -0,679 |
| 13 | Q9UIG0 BAZ1B_HUMAN | E.AEDM*ISAVK.S       | 2 | 2,8177 | 0,193 | -0,498 |
| 13 | Q9ULV3 CIZ1_HUMAN  | R.IPSTDTQVQPK.L      | 2 | 2,8171 | 0,49  | -1,206 |
| 13 | Q9HB07 MYG1_HUMAN  | E.DSM*VGTLYDK.M      | 2 | 2,817  | 0,366 | 0      |
| 13 | Q15642 CIP4_HUMAN  | R.APSDSSLGTPSDGRPE.L | 2 | 2,8164 | 0,398 | -0,388 |
| 13 | Q5VWN6 CJ018_HUMAN | R.LDLEDSYTLR.G       | 2 | 2,8135 | 0,278 | -1,096 |
| 13 | Q86YS7 K0528_HUMAN | E.IIGSPIPEPR.Q       | 2 | 2,8133 | 0,372 | 0,113  |
| 13 | Q01082 SPTB2_HUMAN | K.LPEELGRDQNTVE.T    | 2 | 2,8133 | 0,292 | -1,383 |
| 13 | Q9NR09 BIRC6_HUMAN | K.IFSQM*NNIM*SK.S    | 2 | 2,8126 | 0,368 | -0,635 |
| 13 | P60174 TPIS_HUMAN  | K.IAVAAQNCYK.V       | 2 | 2,8119 | 0,43  | 0,75   |
| 13 | Q9Y230 RUVB2_HUMAN | R.GLGLDDALEPR.Q      | 2 | 2,8117 | 0,398 | -0,528 |
| 13 | P41250 SYG_HUMAN   | E.TAQGIFLNFK.R       | 2 | 2,8115 | 0,393 | -0,107 |
| 13 | O14686 MLL2_HUMAN  | R.ISTEELPKM*E.S      | 2 | 2,8106 | 0,402 | -0,818 |
| 13 | Q8N1F7 NUP93_HUMAN | E.SEPSYISDVGPPGR.S   | 2 | 2,8087 | 0,312 | -1,002 |
| 13 | O14893 GEMI2_HUMAN | D.VVVAQIDPK.K        | 2 | 2,8075 | 0,459 | -0,189 |
| 13 | Q96S82 UBL7_HUMAN  | E.LIDLIIYCGR.K       | 2 | 2,8071 | 0,309 | -0,978 |
| 13 | P35998 PRS7_HUMAN  | E.DDIQQLK.K          | 2 | 2,8068 | 0,178 | -1,003 |
| 13 | P61956 SUMO2_HUMAN | K.VAGQDGSVVQFK.I     | 2 | 2,8053 | 0,429 | -0,889 |
| 13 | P46087 NOL1_HUMAN  | R.DLAQALINR.G        | 2 | 2,8048 | 0,288 | -1,143 |
| 13 | Q5T5U3 RHG21_HUMAN | E.SVGPPSLDAQNSK.T    | 2 | 2,8045 | 0,338 | -0,524 |
| 13 | P46060 RAGP1_HUMAN | R.LRTEIPPALISLGE.G   | 2 | 2,8021 | 0,462 | -0,323 |
| 13 | Q92945 FUBP2_HUMAN | K.DAFADAVQR.A        | 2 | 2,8008 | 0,177 | -0,061 |
| 13 | P25705 ATPA_HUMAN  | K.TSIAIDTIINQK.R     | 2 | 2,7986 | 0,27  | -0,556 |
| 13 | P04792 HSPB1_HUMAN | E.SPAAAPAYS.R        | 2 | 2,7979 | 0,434 | -0,56  |
| 13 | P30101 PDIA3_HUMAN | K.DPNIVIAK.M         | 2 | 2,7977 | 0,225 | 0,28   |
| 13 | O95602 RPA1_HUMAN  | R.TALSAVDM*TQRE.A    | 2 | 2,7977 | 0,291 | -0,547 |
| 13 | P14868 SYDC_HUMAN  | R.EIM*DAAEDYAKE.R    | 2 | 2,7957 | 0,431 | -0,261 |
| 13 | P30837 AL1B1_HUMAN | E.LDTQQGPQVDKE.Q     | 2 | 2,7956 | 0,362 | -1,258 |
| 13 | Q8WW11 LMO7_HUMAN  | R.SLTSCSSDITLR.G     | 2 | 2,7954 | 0,354 | 0,182  |

|    |                    |                    |   |        |       |        |
|----|--------------------|--------------------|---|--------|-------|--------|
| 13 | P12268 IMDH2_HUMAN | K.QLLCGAAIGTHE.D   | 2 | 2,7949 | 0,477 | -0,288 |
| 13 | Q4VC31 CCD58_HUMAN | K.NCIAQTSAVVK.N    | 2 | 2,7943 | 0,253 | -0,615 |
| 13 | O00151 PDLI1_HUMAN | K.CGTGIVGVFVK.L    | 2 | 2,7936 | 0,347 | -0,215 |
| 13 | P08133 ANXA6_HUMAN | R.DLM*TDLKSE.I     | 2 | 2,7932 | 0,224 | -0,343 |
| 13 | O94888 UBXD7_HUMAN | R.SIFDGRDFQTE.T    | 2 | 2,7932 | 0,3   | -0,501 |
| 13 | Q01082 SPTB2_HUMAN | K.TALPAQSAATLPAR.T | 2 | 2,7887 | 0,348 | -0,803 |
| 13 | P49790 NU153_HUMAN | K.TSQLGDSFPYPGK.T  | 2 | 2,7877 | 0,36  | -0,961 |
| 13 | O00567 NOL5A_HUMAN | K.VLLGVGDPK.I      | 2 | 2,7876 | 0,337 | 0,068  |
| 13 | Q99569 PKP4_HUMAN  | E.GQTLVQPSVANR.A   | 2 | 2,7875 | 0,333 | -0,384 |
| 13 | Q92619 HMHA1_HUMAN | R.AGSPSPQPSGELPR.K | 2 | 2,7871 | 0,407 | -0,442 |
| 13 | Q6UWP7 LYCAT_HUMAN | R.YPIDTLPTSKE.D    | 2 | 2,7867 | 0,325 | -0,869 |
| 13 | Q8IWI9 MGAP_HUMAN  | E.CLIASSFEDDSR.V   | 2 | 2,7861 | 0,462 | -0,523 |
| 13 | P16615 AT2A2_HUMAN | K.TGTLTTNQM*SVCR.M | 2 | 2,7855 | 0,5   | -0,329 |
| 13 | P20700 LMNB1_HUMAN | E.GDLEDLKDQIAQLE.A | 2 | 2,7851 | 0,255 | -0,538 |
| 13 | P13861 KAP2_HUMAN  | R.APASVLPAAATPR.Q  | 2 | 2,7835 | 0,371 | -0,636 |
| 13 | Q5JTH9 RRP12_HUMAN | E.M*ADPM*EDVIIR.N  | 2 | 2,7827 | 0,368 | -0,554 |
| 13 | P55060 XPO2_HUMAN  | R.IVEDEPNKICE.A    | 2 | 2,7824 | 0,325 | -0,635 |
| 13 | P15121 ALDR_HUMAN  | K.TLSDLKLDYLD.L    | 2 | 2,7823 | 0,328 | -0,471 |
| 13 | Q16851 UGPA_HUMAN  | R.GLPDNISVNLK.L    | 2 | 2,7823 | 0,423 | -0,388 |
| 13 | Q8NG31 CASC5_HUMAN | K.DSGIGSVAGK.L     | 2 | 2,7821 | 0,218 | 0,342  |
| 13 | O60502 NCOAT_HUMAN | K.SM*M*ACLLSLK.A   | 2 | 2,7814 | 0,389 | -0,767 |
| 13 | P10809 CH60_HUMAN  | K.VGLQVVAVK.A      | 2 | 2,7811 | 0,327 | 0,267  |
| 13 | Q9Y2W1 TR150_HUMAN | E.DLARPSGLLAQE.R   | 2 | 2,781  | 0,24  | -0,288 |
| 13 | Q01804 OTUD4_HUMAN | K.FLNADVQGIHSE.N   | 2 | 2,7805 | 0,216 | -1,651 |
| 13 | Q9ULR0 ISY1_HUMAN  | K.FIAHVVPVPSQQE.I  | 2 | 2,7796 | 0,397 | 0,632  |
| 13 | Q01433 AMPD2_HUMAN | K.TDSDSDLQLYK.E    | 2 | 2,7787 | 0,233 | -0,475 |
| 13 | Q69YQ0 CYTSA_HUMAN | K.TPPAAAVSPM*QR.H  | 2 | 2,7768 | 0,398 | 0      |
| 13 | Q14814 MEF2D_HUMAN | R.LLSPQQPALQR.N    | 2 | 2,7768 | 0,301 | -0,488 |
| 13 | P42696 RBM34_HUMAN | R.LGQVASSLFRGE.H   | 2 | 2,7765 | 0,383 | -0,386 |
| 13 | Q9UMS0 NFU1_HUMAN  | K.GFEDGIVQLK.L     | 2 | 2,7763 | 0,319 | 0,441  |
| 13 | P18206 VINC_HUMAN  | R.LANVM*M*GPYR.Q   | 2 | 2,7761 | 0,323 | -0,309 |
| 13 | Q5T4S7 UBR4_HUMAN  | E.DGSCLALVK.R      | 2 | 2,7733 | 0,18  | -0,253 |
| 13 | Q13185 CBX3_HUMAN  | E.LIEAFLNSQK.A     | 2 | 2,7728 | 0,331 | -0,315 |

|    |                    |                         |       |   |        |       |        |
|----|--------------------|-------------------------|-------|---|--------|-------|--------|
| 13 | P00813 ADA_HUMAN   | K.STLDTDYQM*TK.R        |       | 2 | 2,7709 | 0,502 | 0,278  |
| 13 | O15027 SC16A_HUMAN | R.YGPLPGPAVPR.H         |       | 2 | 2,77   | 0,454 | 1,845  |
| 13 | P39748 FEN1_HUMAN  | E.AHQFLFLEPEVLDPE.S     |       | 2 | 2,7692 | 0,401 | -0,298 |
| 13 | P51114 FXR1_HUMAN  | K.AINGPTSASGDDISK.L     |       | 2 | 2,7692 | 0,23  | -1,362 |
| 13 | Q6Y7W6 PERQ2_HUMAN | R.ISDQNIIPSVTR.S        |       | 2 | 2,769  | 0,291 | -0,363 |
| 13 | P49366 DHYS_HUMAN  | R.LINTQAIFAK.C          |       | 2 | 2,7671 | 0,396 | -0,436 |
| 13 | Q13136 LIPA1_HUMAN | E.FNNLLVM*GTDR.R        |       | 2 | 2,7668 | 0,331 | -1,789 |
| 13 | Q6NSJ2 PHLB3_HUMAN | E.ASEVLAEPSSR.G         |       | 2 | 2,7623 | 0,299 | -0,106 |
| 13 | O75122 CLAP2_HUMAN | K.LSAPLAGM*GNAK.A       |       | 2 | 2,7615 | 0,403 | -0,426 |
| 13 | Q9BQ39 DDX50_HUMAN | E.NGVTDLDLDPK.A         |       | 2 | 2,7597 | 0,424 | 0,32   |
| 13 | Q15750 TAB1_HUMAN  | E.M*SQPTSPAPAAGGR.V     |       | 3 | 2,7592 | 0,281 | -0,19  |
| 13 | Q9NR30 DDX21_HUMAN | R.NGIDILVGTGPR.I        |       | 2 | 2,7585 | 0,374 | -0,403 |
| 13 | Q9Y490 TLN1_HUMAN  | K.ALGD LISATK.A         |       | 2 | 2,7572 | 0,329 | -0,493 |
| 13 | Q96JP5 ZFP91_HUMAN | K.TGSLQLICK.S           |       | 2 | 2,7568 | 0,277 | -0,12  |
| 13 | P10809 CH60_HUMAN  | K.LSDGVAVLK.V           |       | 2 | 2,7565 | 0,287 | -0,947 |
| 13 | Q96RF0 SNX18_HUMAN | R.APEPGPAGDGGPGAPAR.Y   |       | 2 | 2,7561 | 0,458 | -0,248 |
| 13 | P31150 GDIA_HUMAN  | E.CILSGIM*SVNGK.K       |       | 2 | 2,7546 | 0,44  | -1,225 |
| 13 | P68104 EF1A1_HUMAN | K.IGGIGTVPVGR.V         |       | 2 | 2,7546 | 0,326 | -0,476 |
| 13 | O43852 CALU_HUMAN  | K.IDGDKDGFVTVDE.L       |       | 2 | 2,7545 | 0,364 | -0,26  |
| 13 | P42766 RL35_HUMAN  | R.VLTVINQ TQKE.N        |       | 2 | 2,7545 | 0,282 | -1,246 |
| 13 | P09972 ALDOC_HUMAN | K.VDKGVVPLAGTDGE.T      |       | 2 | 2,7544 | 0,455 | -0,539 |
| 13 | O95983 MBD3_HUMAN  | K.AFM*VTDEDIR.K         |       | 2 | 2,7543 | 0,33  | -1,006 |
| 13 | P08107 HSP71_HUMAN | K.FGDPVVQSDM*K.H        |       | 2 | 2,754  | 0,297 | -1,576 |
| 13 | Q12765 SCRN1_HUMAN | K.TQSPCFGDDDPK.K        |       | 2 | 2,7507 | 0,4   | -0,594 |
| 13 | Q9Y265 RUVB1_HUMAN | R.AVLLAGPPGTGK.T        |       | 2 | 2,7507 | 0,296 | -1,241 |
| 13 | Q9Y2R4 DDX52_HUMAN | E.VLQGLDFFGNK.K         |       | 2 | 2,7503 | 0,442 | 0      |
| 13 | Q9HCN4 GPN1_HUMAN  | D.M*GSVALDAGTAK.D       |       | 2 | 2,7498 | 0,293 | -0,215 |
| 13 | O43852 CALU_HUMAN  | K.TFDQLTPEESKE.R        |       | 2 | 2,7485 | 0,086 | -0,514 |
| 13 | Q13308 PTK7_HUMAN  | R.SSLQPITTLGK.S         |       | 2 | 2,7473 | 0,411 | -0,213 |
| 13 | P04075 ALDOA_HUMAN | K.VDKGVVPLAGTNGE.T      |       | 2 | 2,747  | 0,299 | -0,63  |
| 13 | Q9GZR2 REXO4_HUMAN | E.TS#PQVKGEEM*PAGKDQE.A | S111: | 2 | 2,7468 | 0,488 | -0,317 |
| 13 | Q7Z3C6 ATG9A_HUMAN | R.SFSPLQPGQAPTGR.A      |       | 2 | 2,7459 | 0,335 | -0,507 |
| 13 | P40937 RFC5_HUMAN  | K.ALVTLSGSDM*R.R        |       | 2 | 2,7455 | 0,356 | -0,209 |

|    |                    |                        |       |   |        |       |        |
|----|--------------------|------------------------|-------|---|--------|-------|--------|
| 13 | Q9Y2D5 AKAP2_HUMAN | E.SDVM*VGPFK.L         |       | 2 | 2,744  | 0,296 | 0,367  |
| 13 | P38159 HNRPG_HUMAN | R.DVYLS#PRDDGYSTK.D    | S208: | 2 | 2,7432 | 0,422 | -0,504 |
| 13 | Q9P219 DAPLE_HUMAN | R.AFSLASADLLR.A        |       | 2 | 2,7428 | 0,216 | -1,258 |
| 13 | Q9Y230 RUVB2_HUMAN | R.QASQGM*VGQLAAR.R     |       | 2 | 2,7425 | 0,172 | -0,549 |
| 13 | P54727 RD23B_HUMAN | K.ILNDDTALKE.Y         |       | 2 | 2,7413 | 0,322 | -1,078 |
| 13 | Q9NWH9 SLTM_HUMAN  | R.ISSKS#PGHM*VILD.Q    | S553: | 2 | 2,7405 | 0,345 | -0,577 |
| 13 | P50990 TCPQ_HUMAN  | K.M*IVM*ASHM*QEQE.V    |       | 2 | 2,7395 | 0,353 | 0      |
| 13 | Q6ZRS2 SRCAP_HUMAN | R.AGAPVGGSPGLAK.R      |       | 2 | 2,7389 | 0,485 | -0,113 |
| 13 | Q9Y5N6 ORC6_HUMAN  | K.IVVEAPAKE.M          |       | 2 | 2,7387 | 0,222 | -0,064 |
| 13 | O00148 DDX39_HUMAN | R.ILVATNLFGR.G         |       | 2 | 2,738  | 0,138 | -0,442 |
| 13 | O14617 AP3D1_HUMAN | R.ASCILQLVK.H          |       | 2 | 2,7377 | 0,281 | -0,591 |
| 13 | Q9P2J5 SYLC_HUMAN  | R.FDDPLLGP.R           |       | 2 | 2,7372 | 0,295 | 0,592  |
| 13 | Q86SQ0 PHLB2_HUMAN | E.GLYLSDTLPR.K         |       | 2 | 2,7367 | 0,38  | 0,537  |
| 13 | Q9UPZ3 HPS5_HUMAN  | E.SFSILDSGIYR.I        |       | 2 | 2,7366 | 0,434 | -0,388 |
| 13 | P56537 IF6_HUMAN   | E.ILADV LKVE.V         |       | 2 | 2,7364 | 0,382 | -0,183 |
| 13 | Q8TF05 PP4R1_HUMAN | R.SLLDTLREVCDDDE.R     |       | 2 | 2,7364 | 0,377 | -0,702 |
| 13 | Q14554 PDIA5_HUMAN | R.LLSTVAQAVK.G         |       | 2 | 2,7363 | 0,307 | -0,237 |
| 13 | Q14157 UBP2L_HUMAN | R.IDLAVLLGK.T          |       | 2 | 2,7353 | 0,286 | 0      |
| 13 | Q969S9 EFG2_HUMAN  | K.AKPLLLQLPIGE.A       |       | 2 | 2,7352 | 0,31  | -0,472 |
| 13 | Q8NE71 ABCF1_HUMAN | K.LSVPTS#DEEDEVPAKPR.G | S109: | 3 | 2,7349 | 0,18  | 0,089  |
| 13 | P13010 KU86_HUMAN  | R.YGSDIVPFSK.V         |       | 2 | 2,7346 | 0,479 | -0,987 |
| 13 | Q99816 TS101_HUMAN | R.ASLISAVSDK.L         |       | 2 | 2,7343 | 0,379 | 0,492  |
| 13 | P58107 EPIPL_HUMAN | E.NLTYLQLLER.C         |       | 2 | 2,7341 | 0,32  | -0,386 |
| 13 | Q14643 ITPR1_HUMAN | K.ATVTVNTSDLGNK.K      |       | 2 | 2,7338 | 0,182 | -0,739 |
| 13 | Q04837 SSB_HUMAN   | E.VYQLGDVSQK.T         |       | 2 | 2,7322 | 0,175 | -1,18  |
| 13 | Q93009 UBP7_HUMAN  | R.IQDYDVSLDK.A         |       | 2 | 2,7316 | 0,377 | -0,306 |
| 13 | Q3KQU3 MA7D1_HUMAN | E.LGAGAPPAVVAR.T       |       | 2 | 2,7295 | 0,376 | -0,226 |
| 13 | P48643 TCPE_HUMAN  | K.M*M*VDKGDVTVTND.G    |       | 2 | 2,7294 | 0,421 | -1,242 |
| 13 | Q9NXG2 THUM1_HUMAN | E.YGDDM*YGPEK.F        |       | 2 | 2,7284 | 0,418 | -0,717 |
| 13 | P55072 TERA_HUMAN  | E.DNSVVSLSQPK.M        |       | 2 | 2,7278 | 0,454 | -0,624 |
| 13 | Q7L014 DDX46_HUMAN | K.LNYVPLEKQEEE.R       |       | 2 | 2,7272 | 0,215 | -0,491 |
| 13 | Q2M1Z3 CDGAP_HUMAN | K.AQVQGLQGHQLE.K       |       | 2 | 2,727  | 0,328 | -0,746 |
| 13 | Q16643 DREB_HUMAN  | E.DIDAGAIGQR.L         |       | 2 | 2,7268 | 0,224 | -0,24  |

|    |                    |                        |       |   |        |       |        |
|----|--------------------|------------------------|-------|---|--------|-------|--------|
| 13 | Q9UNN8 EPCR_HUMAN  | E.DTCVQYVQK.H          |       | 2 | 2,7268 | 0,363 | 0      |
| 13 | Q9ULU4 PKCB1_HUMAN | K.TDKTSTTGSILNLD.R     |       | 2 | 2,726  | 0,344 | -0,288 |
| 13 | Q9H267 VP33B_HUMAN | K.VLLNAEDKVFE.I        |       | 2 | 2,7259 | 0,23  | 0,175  |
| 13 | P11362 FGFR1_HUMAN | K.SDATEKDLSDLISE.M     |       | 2 | 2,7252 | 0,287 | -1,522 |
| 13 | P50454 SERPH_HUMAN | K.AVLSAEQLRDEE.V       |       | 2 | 2,7238 | 0,308 | -0,718 |
| 13 | Q9Y2U8 MAN1_HUMAN  | R.GLKAPPAPLAASE.V      |       | 2 | 2,7234 | 0,314 | -0,799 |
| 13 | P68371 TBB2C_HUMAN | R.YLTVAAVFR.G          |       | 2 | 2,7226 | 0,43  | -0,704 |
| 13 | Q6IA86 ELP2_HUMAN  | E.GATVPALGLSNK.A       |       | 2 | 2,7221 | 0,362 | -0,324 |
| 13 | Q15424 SAFB1_HUMAN | K.ADSLLAVVK.R          |       | 2 | 2,7205 | 0,24  | -0,666 |
| 13 | Q15435 PP1R7_HUMAN | K.LTM*LDIASNR.I        |       | 2 | 2,7194 | 0,406 | 0,106  |
| 13 | O75581 LRP6_HUMAN  | E.VLCLIDQFR.C          |       | 2 | 2,7182 | 0,258 | -0,419 |
| 13 | Q96TA1 NIBL1_HUMAN | K.AVDLGPPKPSDQE.T      |       | 2 | 2,7171 | 0,323 | -0,361 |
| 13 | Q6GMV2 SMYD5_HUMAN | E.NYLFVCSCP.K          |       | 2 | 2,7167 | 0,321 | 0      |
| 13 | P30530 UFO_HUMAN   | R.APLQGTLLGYR.L        |       | 2 | 2,7153 | 0,341 | 0,513  |
| 13 | P00491 PNPH_HUMAN  | R.VFGFSLITNK.V         |       | 2 | 2,7151 | 0,335 | 0,108  |
| 13 | Q8N2M8 SFR16_HUMAN | K.QATTYGM*ADGDFVR.M    |       | 2 | 2,715  | 0,5   | -0,552 |
| 13 | P58107 EPIPL_HUMAN | E.NLTYLQLLQR.A         |       | 2 | 2,7113 | 0,282 | 0,097  |
| 13 | P80723 BASP_HUMAN  | K.ETPAATEAPSSTPK.A     |       | 2 | 2,7108 | 0,449 | -0,44  |
| 13 | P47756 CAPZB_HUMAN | K.DYLLCDYNR.D          |       | 2 | 2,7106 | 0,386 | -0,297 |
| 13 | Q16543 CDC37_HUMAN | K.YLSDNVHLVCEE.T       |       | 2 | 2,7085 | 0,326 | -0,826 |
| 13 | Q7Z3C6 ATG9A_HUMAN | R.SASYPCAAPRGAPE.T     |       | 2 | 2,7071 | 0,45  | -0,478 |
| 13 | Q15003 CND2_HUMAN  | R.KAPLNIPGTPVLE.D      |       | 2 | 2,7068 | 0,406 | -1,537 |
| 13 | P10809 CH60_HUMAN  | K.VGEVIVTK.D           |       | 2 | 2,704  | 0,282 | 1,372  |
| 13 | Q07157 ZO1_HUMAN   | K.YQINNISTVPK.A        |       | 2 | 2,7036 | 0,383 | -0,478 |
| 13 | Q00536 PCTK1_HUMAN | K.RLS#LPADIRLPE.G      | S119: | 2 | 2,7032 | 0,197 | -0,418 |
| 13 | Q53EP0 FND3B_HUMAN | E.ITTAAGPPGQCK.A       |       | 2 | 2,7028 | 0,394 | 0,102  |
| 13 | Q5VT52 K0460_HUMAN | K.SAVSTSVPTKPE.N       |       | 2 | 2,7011 | 0,311 | -0,468 |
| 13 | O14745 NHERF_HUMAN | K.LLVVDRETDE.F         |       | 2 | 2,7006 | 0,335 | -1,231 |
| 13 | O00418 EF2K_HUMAN  | E.SM*GLAPFDLSPR.E      |       | 2 | 2,6995 | 0,15  | -0,934 |
| 13 | Q9H0B6 KLC2_HUMAN  | K.LQGGTPQEPPNPR.M      |       | 2 | 2,6993 | 0,358 | -1,316 |
| 13 | Q9UHN6 TMEM2_HUMAN | E.LTPLGIFYNNR.V        |       | 2 | 2,6983 | 0,418 | -0,187 |
| 13 | Q92541 RTF1_HUMAN  | K.SQPVSLPEELNR.V       |       | 2 | 2,6983 | 0,384 | -0,802 |
| 13 | Q9NQG5 CT077_HUMAN | K.LSM*EDSKS#PPPKATEE.K | S134: | 3 | 2,6978 | 0,196 | 0,695  |

|    |                    |                       |      |   |        |       |        |
|----|--------------------|-----------------------|------|---|--------|-------|--------|
| 13 | Q00796 DHSO_HUMAN  | R.VAIEPGAPRENDE.F     |      | 2 | 2,6974 | 0,453 | -0,262 |
| 13 | P23528 COF1_HUMAN  | K.AVLFCLSEDK.K        |      | 2 | 2,6965 | 0,367 | -0,103 |
| 13 | Q9H9E3 COG4_HUMAN  | R.ADDILDLK.F          |      | 2 | 2,6953 | 0,223 | 0,203  |
| 13 | Q15149 PLEC1_HUMAN | D.AQLSTGGIVDPSK.S     |      | 2 | 2,6945 | 0,197 | -0,479 |
| 13 | Q9Y4L1 HYOU1_HUMAN | K.LQDLTLRDLE.K        |      | 2 | 2,6939 | 0,294 | -0,502 |
| 13 | Q9HCM7 AUT2L_HUMAN | R.TTPLGGLGPGEAR.D     |      | 2 | 2,6935 | 0,395 | -0,299 |
| 13 | Q15393 SF3B3_HUMAN | E.DTPQLYVACGR.G       |      | 2 | 2,6923 | 0,519 | -0,191 |
| 13 | Q96D46 NMD3_HUMAN  | E.DLHISQDATGEE.G      |      | 2 | 2,6921 | 0,203 | -0,742 |
| 13 | Q13033 STRN3_HUMAN | E.LAGGGGGGPGM*AAPPR.Q |      | 2 | 2,6909 | 0,469 | -0,182 |
| 13 | Q09666 AHNK_HUMAN  | K.ISM*PGFKGEGPE.V     |      | 2 | 2,6909 | 0,375 | 0,096  |
| 13 | O00139 KIF2A_HUMAN | E.DGKQQVQVVLQE.R      |      | 2 | 2,6906 | 0,172 | -0,427 |
| 13 | Q96AQ6 PBIP1_HUMAN | E.GQSPQSLPSTPK.A      |      | 2 | 2,6906 | 0,343 | -0,553 |
| 13 | Q96PK6 RBM14_HUMAN | R.AQPSVSLGAAYR.A      |      | 2 | 2,6901 | 0,37  | -0,4   |
| 13 | P02545 LMNA_HUMAN  | K.EAALSTALSEK.R       |      | 2 | 2,6897 | 0,407 | -0,763 |
| 13 | P55072 TERA_HUMAN  | E.EAEKNAPAIIFIDE.L    |      | 2 | 2,6885 | 0,268 | -0,86  |
| 13 | Q53H80 CF166_HUMAN | R.M*EPSPFGDVSSR.L     |      | 2 | 2,6885 | 0,338 | -0,368 |
| 13 | Q13642 FHL1_HUMAN  | K.AIVAGDQNVVEYK.G     |      | 2 | 2,6863 | 0,251 | -1,027 |
| 13 | Q8WUA2 PPIL4_HUMAN | K.QDTKYDLILDE.Q       |      | 2 | 2,6858 | 0,131 | -0,451 |
| 13 | P62879 GBB2_HUMAN  | R.TFVSGACDASIK.L      |      | 2 | 2,6854 | 0,135 | 0,389  |
| 13 | Q14203 DCTN1_HUMAN | E.TVADYQQTIK.K        |      | 2 | 2,6846 | 0,46  | -0,418 |
| 13 | Q96H12 CI030_HUMAN | R.SVS#PLLSTHVLGK.E    | S98: | 3 | 2,6837 | 0,349 | 0,258  |
| 13 | P08107 HSP71_HUMAN | K.LLQDFFNDR.D         |      | 2 | 2,6821 | 0,197 | -0,22  |
| 13 | Q6IBW4 CNDH2_HUMAN | E.FLSLDDFPDSR.T       |      | 2 | 2,6814 | 0,183 | -0,465 |
| 13 | O14976 GAK_HUMAN   | E.VGAGPAVPPQACK.A     |      | 2 | 2,6795 | 0,272 | -0,487 |
| 13 | P20618 PSB1_HUMAN  | R.LVKDVFISAAE.R       |      | 2 | 2,6787 | 0,352 | -0,614 |
| 13 | Q96S38 KS6C1_HUMAN | E.LLGLDFGEK.L         |      | 2 | 2,6781 | 0,236 | 0,43   |
| 13 | O95394 AGM1_HUMAN  | R.M*GLLAVLR.S         |      | 2 | 2,678  | 0,176 | 0,137  |
| 13 | P35527 K1C9_HUMAN  | R.QGVDADINGLR.Q       |      | 2 | 2,6777 | 0,326 | -0,421 |
| 13 | P13645 K1C10_HUMAN | R.VLDELTLTK.A         |      | 2 | 2,6772 | 0,32  | -0,473 |
| 13 | P00558 PGK1_HUMAN  | E.GKVLPGVDALSNI.-     |      | 2 | 2,6771 | 0,292 | -0,571 |
| 13 | Q8WWM7 ATX2L_HUMAN | K.ISLAPTDVKE.L        |      | 2 | 2,6757 | 0,275 | -0,227 |
| 13 | Q13426 XRCC4_HUMAN | K.M*APQENQLQEKE.N     |      | 2 | 2,6757 | 0,24  | -0,418 |
| 13 | Q99700 ATX2_HUMAN  | R.DAFTDSAISAK.V       |      | 2 | 2,6756 | 0,237 | -0,325 |

|    |                     |                     |        |   |        |       |        |
|----|---------------------|---------------------|--------|---|--------|-------|--------|
| 13 | Q9C0D5 TANC1_HUMAN  | E.DLSYLDGQR.N       |        | 2 | 2,6752 | 0,317 | 0      |
| 13 | P51157 RAB28_HUMAN  | K.IVVLGDGASGK.T     |        | 2 | 2,6749 | 0,193 | 0      |
| 13 | Q5T200 ZC3HD_HUMAN  | K.VETPHVTIE.D       |        | 2 | 2,6747 | 0,218 | -0,119 |
| 13 | O94967 WDR47_HUMAN  | R.NPGSTNHIPFLE.E    |        | 2 | 2,6744 | 0,188 | -0,736 |
| 13 | P51572 BAP31_HUMAN  | K.LQAAVDGM*DK.K     |        | 2 | 2,6731 | 0,239 | -0,946 |
| 13 | Q9NS91 RAD18_HUMAN  | E.FQLLVQAR.K        |        | 2 | 2,6729 | 0,229 | 0      |
| 13 | P49721 PSB2_HUMAN   | R.VAASNIVQM*K.D     |        | 2 | 2,6719 | 0,428 | 0      |
| 13 | Q9NTK5 OLA1_HUMAN   | E.DGDIFFK.F         |        | 2 | 2,6705 | 0,275 | 0,256  |
| 13 | P68371 TBB2C_HUMAN  | E.LTQQM*FDAK.N      |        | 2 | 2,6705 | 0,283 | -0,333 |
| 13 | Q9Y277 VDAC3_HUMAN  | K.LTSLALIDGK.N      |        | 2 | 2,6701 | 0,327 | 0,237  |
| 13 | P35221 CTNA1_HUMAN  | R.AIM*AQLPQEQK.A    |        | 2 | 2,6698 | 0,165 | 0,767  |
| 13 | P23786 CPT2_HUMAN   | K.TLTIDCVQFQR.G     |        | 2 | 2,6694 | 0,325 | -0,442 |
| 13 | Q96T58 MINT_HUMAN   | K.LQVSQTEPAK.S      |        | 2 | 2,6693 | 0,253 | -0,111 |
| 13 | O60313 OPA1_HUMAN   | R.VVVVGDQSAGK.T     |        | 2 | 2,6691 | 0,249 | -0,346 |
| 13 | P57076 CU059_HUMAN  | R.GQGAPAREPIISSEE.Q |        | 2 | 2,6682 | 0,331 | -0,396 |
| 13 | P09525 ANXA4_HUMAN  | R.VLVSLSAGGRDE.G    |        | 2 | 2,6677 | 0,344 | -0,811 |
| 13 | P07814 SYEP_HUMAN   | R.VAVQGDVVRE.L      |        | 2 | 2,6674 | 0,256 | 0,114  |
| 13 | Q9Y3B9 RRP15_HUMAN  | R.DDFM*M*GASM*K.D   |        | 2 | 2,666  | 0,278 | 0,207  |
| 13 | P08648 ITA5_HUMAN   | E.GQQLLYVTR.V       |        | 2 | 2,6653 | 0,338 | -0,226 |
| 13 | Q9BY67 CADM1_HUMAN  | K.SDDSVIQLLNPNR.Q   |        | 2 | 2,6647 | 0,166 | -0,498 |
| 13 | Q68D10 SPT2_HUMAN   | K.GVQSAAVQAFLK.R    |        | 2 | 2,6639 | 0,435 | -0,1   |
| 13 | Q9Y2W1 TR150_HUMAN  | K.SPLQSVVVR.R       |        | 2 | 2,6637 | 0,194 | -0,062 |
| 13 | O75976 CBPD_HUMAN   | R.FVAGIHGNAPVGTE.L  |        | 2 | 2,6634 | 0,274 | -0,178 |
| 13 | Q9UQ35 SRRM2_HUMAN  | K.DKFS#PFVQDRPE.S   | S1188: | 3 | 2,6627 | 0,142 | 0,223  |
| 13 | Q5T200 ZC3HD_HUMAN  | R.LLSQVVRPQE.S      |        | 2 | 2,6619 | 0,261 | -0,731 |
| 13 | Q8N1Q3 Q8N1Q3_HUMAN | E.ASSM*VNFPAYSVR.S  |        | 2 | 2,6618 | 0,273 | -0,507 |
| 13 | P62875 RPAB5_HUMAN  | E.GDALDALGLK.R      |        | 2 | 2,66   | 0,236 | -1,066 |
| 13 | Q9BZJ0 CRNL1_HUMAN  | R.GIEDIIVSK.R       |        | 2 | 2,6594 | 0,355 | -0,063 |
| 13 | Q14160 LAP4_HUMAN   | R.ALAAVPSAGSVQR.V   |        | 2 | 2,6583 | 0,48  | -0,099 |
| 13 | Q5T5Y3 CAMP1_HUMAN  | E.VDPSSGDSISLAR.S   |        | 2 | 2,6578 | 0,416 | -0,561 |
| 13 | P62750 RL23A_HUMAN  | K.VNTLIRPDGE.K      |        | 2 | 2,6552 | 0,283 | -1,095 |
| 13 | Q02218 ODO1_HUMAN   | R.LNVLANVIR.K       |        | 2 | 2,655  | 0,263 | -0,121 |
| 13 | Q9NY61 AATF_HUMAN   | E.GDFLVVGSIR.K      |        | 2 | 2,6546 | 0,106 | -0,344 |

|    |                    |                          |       |   |        |       |        |
|----|--------------------|--------------------------|-------|---|--------|-------|--------|
| 13 | Q09666 AHNK_HUMAN  | E.VQAPDIDVQGGPSK.L       |       | 2 | 2,6534 | 0,274 | -0,173 |
| 13 | Q9UQB8 BAIP2_HUMAN | K.LSDSYSNTLPVR.K         |       | 2 | 2,6526 | 0,438 | -0,451 |
| 13 | P35244 RFA3_HUMAN  | K.M*FILSDGEGK.N          |       | 2 | 2,6525 | 0,38  | 0,11   |
| 13 | Q9UBG0 MRC2_HUMAN  | R.CLTALPYICK.R           |       | 2 | 2,6512 | 0,269 | 0,197  |
| 13 | P49792 RBP2_HUMAN  | K.KPEDSPSDDDLIVYE.L      |       | 2 | 2,6507 | 0,307 | -0,067 |
| 13 | P55209 NP1L1_HUMAN | E.RLDGLVETPTGYIE.S       |       | 2 | 2,6484 | 0,424 | -0,468 |
| 13 | Q9H2G2 SLK_HUMAN   | E.TENSLPIPASK.R          |       | 2 | 2,6484 | 0,284 | -0,105 |
| 13 | Q96TA1 NIBL1_HUMAN | E.ASS#PPASPLQHLLPGK.A    | S679: | 2 | 2,6475 | 0,292 | -1,017 |
| 13 | Q3V6T2 GRDN_HUMAN  | K.SLSVSSDFLGK.D          |       | 2 | 2,6475 | 0,343 | -0,214 |
| 13 | P30260 CDC27_HUMAN | R.LFTSDSSTTKE.N          |       | 2 | 2,6467 | 0,357 | -0,702 |
| 13 | P08758 ANXA5_HUMAN | R.SEIDLFNIR.K            |       | 2 | 2,646  | 0,274 | 0      |
| 13 | P85037 FOXK1_HUMAN | R.SAPAS#PTHPGLM*SPR.S    | S420: | 2 | 2,6458 | 0,479 | -0,533 |
| 13 | P16401 H15_HUMAN   | K.ALAAGGYDVEK.N          |       | 2 | 2,645  | 0,395 | -1,115 |
| 13 | P08670 VIME_HUMAN  | R.DNLAEDIMR.L            |       | 2 | 2,643  | 0,272 | -0,227 |
| 13 | P61978 HNRPK_HUMAN | K.IDEPLGSEDR.I           |       | 2 | 2,642  | 0,306 | -0,291 |
| 13 | Q5T8A7 K0649_HUMAN | K.SGAAQPGAGGAQPGAAQPSR.A |       | 2 | 2,6419 | 0,5   | 0,351  |
| 13 | P40763 STAT3_HUMAN | K.TQIQSVEPYTK.Q          |       | 2 | 2,6415 | 0,238 | -1,037 |
| 13 | Q9Y4F3 LKAP_HUMAN  | R.LVCLLPSSQAR.Q          |       | 2 | 2,6411 | 0,154 | -0,196 |
| 13 | P51003 PAPOA_HUMAN | K.GADIDALCVAPR.H         |       | 2 | 2,6395 | 0,394 | -0,776 |
| 13 | Q9UM50 NFU1_HUMAN  | E.DGGDVIYK.G             |       | 2 | 2,6355 | 0,184 | -0,07  |
| 13 | Q9NQ92 CQ079_HUMAN | D.LQAAGAQAQGAAPSR.G      |       | 2 | 2,6353 | 0,3   | -0,08  |
| 13 | Q6RFH5 WDR74_HUMAN | K.SQLNCLLLSGR.D          |       | 2 | 2,6334 | 0,292 | -0,484 |
| 13 | Q12851 M4K2_HUMAN  | R.ALLTQLLDK.A            |       | 2 | 2,6332 | 0,187 | -0,541 |
| 13 | P22102 PUR2_HUMAN  | R.VLAVTAIRE.N            |       | 2 | 2,6314 | 0,295 | 0,314  |
| 13 | P62736 ACTA_HUMAN  | K.EITALAPSTM*K.I         |       | 2 | 2,6309 | 0,292 | -0,104 |
| 13 | O15062 ZBTB5_HUMAN | K.STFSISNFLNK.S          |       | 2 | 2,629  | 0,103 | -0,097 |
| 13 | Q68DN6 RGPD1_HUMAN | D.ESTTGFNFSFK.S          |       | 2 | 2,6288 | 0,494 | 1,447  |
| 13 | Q13242 SFRS9_HUMAN | R.GS#PHYFSPFRPY.-        | S211: | 2 | 2,6284 | 0,47  | -1,033 |
| 13 | Q15046 SYK_HUMAN   | K.IILDDICVAK.A           |       | 2 | 2,6282 | 0,208 | 0      |
| 13 | Q14191 WRN_HUMAN   | E.QQSQEYLSDIAYK.S        |       | 2 | 2,6261 | 0,387 | -0,072 |
| 13 | P24928 RPB1_HUMAN  | K.YSPTSPTYSPSPK.Y        |       | 2 | 2,6258 | 0,485 | -0,564 |
| 13 | Q03468 ERCC6_HUMAN | K.HDAIM*DGASPDYVLVE.A    |       | 2 | 2,6255 | 0,117 | -0,907 |
| 13 | Q8TC76 F110B_HUMAN | R.ANSDIISLNR.S           |       | 2 | 2,6232 | 0,401 | -1,074 |



|    |                    |                      |       |   |        |       |        |
|----|--------------------|----------------------|-------|---|--------|-------|--------|
| 13 | Q9NZT2 OGFR_HUMAN  | R.SVEPQDAGPLER.S     |       | 2 | 2,6228 | 0,351 | 0      |
| 13 | Q9P287 BCCIP_HUMAN | E.SGVPQPPDPPVQR.D    |       | 2 | 2,6224 | 0,318 | -0,799 |
| 13 | Q9H8Y5 ANKZ1_HUMAN | K.DKPLLSALDFE.K      |       | 2 | 2,6217 | 0,325 | -0,391 |
| 13 | Q9Y535 RPC8_HUMAN  | R.CVVFHPFLDE.I       |       | 2 | 2,6213 | 0,223 | -0,386 |
| 13 | Q9BVJ6 UT14A_HUMAN | E.LSQDAEPAGSQETK.D   |       | 2 | 2,6208 | 0,344 | -0,418 |
| 13 | Q8WVM8 SCFD1_HUMAN | E.YQNLVDYIK.G        |       | 2 | 2,6204 | 0,198 | -0,95  |
| 13 | Q14103 HNRPD_HUMAN | R.GFCFITKE.E         |       | 2 | 2,6204 | 0,356 | -0,425 |
| 13 | P07737 PROF1_HUMAN | K.TLVLLM*GKE.G       |       | 2 | 2,62   | 0,347 | -0,12  |
| 13 | Q6PKG0 LARP1_HUMAN | R.LDIFKDFQEE.T       |       | 2 | 2,6179 | 0,123 | -0,095 |
| 13 | P08473 NEP_HUMAN   | K.TEDIVAVQK.A        |       | 2 | 2,6174 | 0,24  | 0,182  |
| 13 | Q7Z4S6 KI21A_HUMAN | E.VLDLFDTR.D         |       | 2 | 2,617  | 0,372 | -0,565 |
| 13 | Q8NG31 CASC5_HUMAN | K.ADGTSLDFSTYR.S     |       | 2 | 2,6145 | 0,295 | -0,092 |
| 13 | P22307 NLTP_HUMAN  | K.IGGIFAFK.V         |       | 2 | 2,6145 | 0,223 | -0,072 |
| 13 | Q9BQP7 CT072_HUMAN | E.DALLCGPVSK.H       |       | 2 | 2,6137 | 0,254 | 0,46   |
| 13 | Q9Y4B6 VPRBP_HUMAN | R.KLSSEPLLPLDEE.A    |       | 2 | 2,6137 | 0,312 | -0,581 |
| 13 | Q71F56 MD13L_HUMAN | E.VEDGLGS#PKPEEIKD.F | S923: | 3 | 2,6136 | 0,124 | -0,108 |
| 13 | Q9UEE9 CFDP1_HUMAN | K.VDFDAGEEVR.V       |       | 2 | 2,6123 | 0,352 | 0,104  |
| 13 | Q5T4S7 UBR4_HUMAN  | K.LCTFTITQKE.F       |       | 2 | 2,6121 | 0,309 | -0,295 |
| 13 | Q6WKZ4 RFIP1_HUMAN | E.GLSFLGGLR.S        |       | 2 | 2,6119 | 0,181 | -0,066 |
| 13 | Q96GE4 CCD45_HUMAN | R.LQLASFQYSK.S       |       | 2 | 2,6113 | 0,381 | -0,412 |
| 13 | Q8WU90 ZC3HF_HUMAN | R.SVYIDARDEELE.K     |       | 2 | 2,6109 | 0,269 | -1,781 |
| 13 | Q13177 PAK2_HUMAN  | R.LLQTSNITKLE.Q      |       | 2 | 2,6086 | 0,169 | -0,581 |
| 13 | O00512 BCL9_HUMAN  | R.STAPLNTQISALR.N    |       | 2 | 2,608  | 0,344 | -0,711 |
| 13 | P49674 KC1E_HUMAN  | R.SAAEPVASTPASR.I    |       | 2 | 2,6076 | 0,27  | -0,196 |
| 13 | Q13347 EIF3I_HUMAN | E.GDLLFTVAK.D        |       | 2 | 2,6071 | 0,38  | 0,506  |
| 13 | P14174 MIF_HUMAN   | K.LLCGLLAER.L        |       | 2 | 2,6061 | 0,336 | 0,233  |
| 13 | P05783 K1C18_HUMAN | E.QLNGILLHLE.S       |       | 2 | 2,6053 | 0,317 | -0,212 |
| 13 | P09622 DLDH_HUMAN  | R.VLGAHILGPGAGE.M    |       | 2 | 2,6053 | 0,117 | 0,512  |
| 13 | O94913 PCF11_HUMAN | R.IDGPPTPASLR.F      |       | 2 | 2,6046 | 0,171 | 0,217  |
| 13 | P01024 CO3_HUMAN   | K.ACEPGVDYVYK.T      |       | 2 | 2,6024 | 0,278 | 0,281  |
| 13 | Q58FF7 H90B3_HUMAN | R.DNSTM*GYM*M*AK.K   |       | 2 | 2,6015 | 0,511 | -0,282 |
| 13 | Q13546 RIPK1_HUMAN | K.IADLGLASF.K        |       | 2 | 2,6008 | 0,348 | -1,179 |
| 13 | P52907 CAZA1_HUMAN | E.ASDPQPEEADGGLK.S   |       | 2 | 2,5998 | 0,341 | -1,035 |

|    |                     |                         |   |        |       |        |
|----|---------------------|-------------------------|---|--------|-------|--------|
| 13 | Q9NQW6 ANLN_HUMAN   | E.SSLFSPM*PSEEK.A       | 2 | 2,5994 | 0,297 | -0,36  |
| 13 | P78527 PRKDC_HUMAN  | K.GLSSLLCNFTK.S         | 2 | 2,5994 | 0,274 | -0,197 |
| 13 | Q502X6 Q502X6_HUMAN | K.GIGIENIHYLND.G        | 2 | 2,5985 | 0,275 | -0,539 |
| 13 | Q4VCS5 AMOT_HUMAN   | K.GSLGILLGGDYR.A        | 2 | 2,5981 | 0,252 | -0,5   |
| 13 | Q9BUQ8 DDX23_HUMAN  | R.GFIAGIDLK.Q           | 2 | 2,5981 | 0,289 | 0,131  |
| 13 | Q9NTX7 RN146_HUMAN  | R.LLVSNANQTVPDR.S       | 2 | 2,598  | 0,248 | -1,71  |
| 13 | O75935 DCTN3_HUMAN  | K.VQVALGNISSK.R         | 2 | 2,5977 | 0,317 | 0,875  |
| 13 | Q9UIW2 PLXA1_HUMAN  | R.IILQDEDEVTTK.I        | 2 | 2,5967 | 0,331 | 0      |
| 13 | Q06203 PUR1_HUMAN   | E.DQM*VYTVR.Y           | 2 | 2,5964 | 0,223 | 0      |
| 13 | O15143 ARC1B_HUMAN  | R.TQIAICPNNHE.V         | 2 | 2,5964 | 0,187 | -0,753 |
| 13 | Q14692 BMS1_HUMAN   | E.MTDQYM*AVK.G          | 2 | 2,5947 | 0,296 | -0,111 |
| 13 | O15270 SPTC2_HUMAN  | E.VGDLLQLK.Y            | 2 | 2,5927 | 0,09  | 0,275  |
| 13 | Q14746 COG2_HUMAN   | R.VQLEELRDDLE.L         | 2 | 2,5919 | 0,096 | 0,09   |
| 13 | P32314 FOXN2_HUMAN  | E.SDSLATSIDPK.E         | 2 | 2,5918 | 0,369 | -0,108 |
| 13 | Q8TE77 SSH3_HUMAN   | E.QEQGQGQGQGEPCISSTPR.F | 3 | 2,59   | 0,089 | -0,537 |
| 13 | P08758 ANXA5_HUMAN  | E.SILLLTSR.S            | 2 | 2,5897 | 0,308 | 0,061  |
| 13 | O95831 AIFM1_HUMAN  | E.TDHIVAAVGLEPNVE.L     | 2 | 2,5894 | 0,347 | -0,546 |
| 13 | Q7Z4K8 TRI46_HUMAN  | E.SFQGAPDVISPR.Y        | 2 | 2,5886 | 0,354 | -0,096 |
| 13 | P52789 HXK2_HUMAN   | R.GSGTQLFDHIAE.C        | 2 | 2,5886 | 0,235 | -0,67  |
| 13 | O95721 SNP29_HUMAN  | R.GAGSAM*STDAYPK.N      | 2 | 2,5881 | 0,287 | 0,576  |
| 13 | Q99439 CNN2_HUMAN   | D.GTILCTLM*NK.L         | 2 | 2,588  | 0,333 | -1,045 |
| 13 | Q02790 FKBP4_HUMAN  | E.GTGTEM*PM*IGDR.V      | 2 | 2,5876 | 0,345 | -1,317 |
| 13 | Q15691 MARE1_HUMAN  | E.SLQLNLTKIE.Q          | 2 | 2,5874 | 0,161 | -0,737 |
| 13 | P27708 PYR1_HUMAN   | R.ASDPGLPAEEPKE.K       | 2 | 2,5873 | 0,399 | -0,091 |
| 13 | Q96JC1 VPS39_HUMAN  | K.NLYAFNLFCQK.R         | 2 | 2,5867 | 0,327 | -0,602 |
| 13 | P08238 HS90B_HUMAN  | E.LFSELAEDKE.N          | 2 | 2,5863 | 0,09  | -0,413 |
| 13 | Q8N1Q3 Q8N1Q3_HUMAN | R.VPFDLQNNLK.N          | 2 | 2,5859 | 0,2   | -0,822 |
| 13 | O95340 PAPS2_HUMAN  | E.GENPPDGF*APK.A        | 2 | 2,5858 | 0,313 | -0,956 |
| 13 | P08069 IGF1R_HUMAN  | E.NGPGPGVLVLR.A         | 2 | 2,5857 | 0,484 | -0,339 |
| 13 | Q9Y4P1 ATG4B_HUMAN  | K.KLSLLGGALPM*FE.L      | 2 | 2,5852 | 0,189 | -0,438 |
| 13 | Q2TAA2 IAH1_HUMAN   | E.LSLLGDGDH.-           | 2 | 2,5848 | 0,327 | -0,461 |
| 13 | Q14919 NC2A_HUMAN   | E.LEQQFDLKD.D           | 2 | 2,583  | 0,189 | -0,313 |
| 13 | Q13162 PRDX4_HUMAN  | E.GTAVIDGEFKE.L         | 2 | 2,5825 | 0,286 | 0,523  |

|    |                    |                              |       |   |        |       |        |
|----|--------------------|------------------------------|-------|---|--------|-------|--------|
| 13 | Q16401 PSMD5_HUMAN | K.ILTLSQIGR.I                |       | 2 | 2,5819 | 0,251 | 0      |
| 13 | P26572 MGAT1_HUMAN | R.GLLQQIGDALSSQR.G           |       | 3 | 2,5805 | 0,186 | 0,062  |
| 13 | P62937 PIIA_HUMAN  | D.IAVDGEPLGR.V               |       | 2 | 2,5793 | 0,212 | -0,475 |
| 13 | Q92598 HS105_HUMAN | R.FVVQNVSAQK.D               |       | 2 | 2,5788 | 0,199 | -1,307 |
| 13 | P31946 1433B_HUMAN | D.STLIM*QLLR.D               |       | 2 | 2,5781 | 0,128 | 0,447  |
| 13 | O75431 MTX2_HUMAN  | R.LGTQPYFFNK.Q               |       | 2 | 2,5776 | 0,081 | -0,803 |
| 13 | P43304 GPDH_HUMAN  | E.YACTAVDM*ISR.R             |       | 2 | 2,5774 | 0,313 | -0,655 |
| 13 | Q99829 CPNE1_HUMAN | R.FGIYDIDNK.T                |       | 2 | 2,5772 | 0,324 | -0,45  |
| 13 | O94885 SASH1_HUMAN | R.LGGGLAPDTSK.S              |       | 2 | 2,5772 | 0,301 | -0,18  |
| 13 | Q9BRQ0 PYGO2_HUMAN | E.GGGGPAPPPAPPSTGR.K         |       | 2 | 2,5767 | 0,42  | -0,622 |
| 13 | P38646 GRP75_HUMAN | R.QAASSLQQASLK.L             |       | 2 | 2,5762 | 0,369 | -0,495 |
| 13 | Q9Y3U8 RL36_HUMAN  | E.LSNVLAAM*R.K               |       | 2 | 2,5758 | 0,317 | -0,123 |
| 13 | Q9HAW4 CLSPN_HUMAN | K.AVGFLSVPK.S                |       | 2 | 2,5757 | 0,271 | 0,664  |
| 13 | Q12874 SF3A3_HUMAN | R.LM*DVM*AKE.M               |       | 2 | 2,5754 | 0,217 | -0,063 |
| 13 | P31946 1433B_HUMAN | K.DSTLIM*QLLR.D              |       | 2 | 2,5753 | 0,15  | -1,012 |
| 13 | P05556 ITB1_HUMAN  | E.CSTDEVNSEDN*DAYCR.K        |       | 3 | 2,575  | 0,158 | 0,558  |
| 13 | P61978 HNRPK_HUMAN | K.IILDILISE#PIKGR.A          | S216: | 3 | 2,5747 | 0,231 | 0,224  |
| 13 | Q09666 AHNK_HUMAN  | K.VSAPGVQGDVK.G              |       | 2 | 2,5738 | 0,355 | -0,231 |
| 13 | Q2NKX8 ERC6L_HUMAN | E.AEALS#PEQAAHYLR.Y          | S14:  | 2 | 2,5733 | 0,374 | -0,298 |
| 13 | Q9Y4F5 K0284_HUMAN | K.SGPSPTTPQPLR.A             |       | 2 | 2,5717 | 0,354 | -0,197 |
| 13 | Q6PJT7 ZC3HE_HUMAN | R.DLVQPDKPAS#PK.F            | S515: | 2 | 2,571  | 0,291 | -0,71  |
| 13 | Q12996 CSTF3_HUMAN | E.GNGPVESNAVLT.K.A           |       | 2 | 2,57   | 0,427 | -0,474 |
| 13 | Q99417 MYCBP_HUMAN | K.LAQYEPPEEK.R               |       | 2 | 2,5698 | 0,231 | -0,458 |
| 13 | Q6VY07 PACS1_HUMAN | K.TDLQGSASPSKVE.G            |       | 2 | 2,5697 | 0,294 | -0,37  |
| 13 | P17844 DDX5_HUMAN  | R.LM*EEIM*SEKE.N             |       | 2 | 2,5695 | 0,235 | -0,672 |
| 13 | O75431 MTX2_HUMAN  | E.DVDQCCQALSQR.L             |       | 2 | 2,5693 | 0,342 | -0,33  |
| 13 | Q9NY33 DPP3_HUMAN  | E.LM*FSLEPR.L                |       | 2 | 2,5673 | 0,226 | -0,121 |
| 13 | P19367 HXK1_HUMAN  | K.GAALITAVGVR.L              |       | 2 | 2,5663 | 0,245 | 0,119  |
| 13 | O14964 HGS_HUMAN   | E.ARKSPTPS#APVPLTEPAAQPG.E.G | S349: | 3 | 2,565  | 0,143 | -0,882 |
| 13 | O75676 KS6A4_HUMAN | K.IIDFGFAR.L                 |       | 2 | 2,5648 | 0,335 | 0      |
| 13 | P42704 LPPRC_HUMAN | R.LLAEILRE.G                 |       | 2 | 2,5639 | 0,147 | 0,127  |
| 13 | Q6SPF0 SAMD1_HUMAN | R.LGALALPR.G                 |       | 2 | 2,5636 | 0,166 | 0,526  |
| 13 | P38571 LICH_HUMAN  | E.DGYILCLNR.I                |       | 2 | 2,5633 | 0,329 | -0,217 |

|    |                    |                     |   |        |       |        |
|----|--------------------|---------------------|---|--------|-------|--------|
| 13 | O14713 ITBP1_HUMAN | R.SSTVASLDTDSTK.S   | 2 | 2,5632 | 0,373 | 0,279  |
| 13 | P04075 ALDOA_HUMAN | E.IAM*ATVTALR.R     | 2 | 2,5626 | 0,267 | -1,492 |
| 13 | O94915 FRYL_HUMAN  | D.ISETPIIGNK.Y      | 2 | 2,5621 | 0,304 | -1,366 |
| 13 | P46013 KI67_HUMAN  | K.SPQPDPVDTASTK.Q   | 2 | 2,5613 | 0,407 | -0,339 |
| 13 | Q9UG63 ABCF2_HUMAN | K.LVDEEQLTK.R       | 2 | 2,561  | 0,195 | -0,521 |
| 13 | Q969H8 CS010_HUMAN | K.SYLYFTQFK.A       | 2 | 2,5605 | 0,441 | -0,408 |
| 13 | Q8N3R9 MPP5_HUMAN  | E.IEDLFSSLK.H       | 2 | 2,5604 | 0,231 | 0,116  |
| 13 | P52701 MSH6_HUMAN  | E.DYSQNVAVR.L       | 2 | 2,5594 | 0,407 | -0,116 |
| 13 | Q9Y5B0 CTDP1_HUMAN | R.GPPAPSSSLPIR.Q    | 2 | 2,5588 | 0,424 | -0,517 |
| 13 | Q99460 PSMD1_HUMAN | K.VFYHLGAFEE.S      | 2 | 2,5575 | 0,13  | -0,604 |
| 13 | Q09666 AHNK_HUMAN  | K.M*PDVDISVPK.I     | 2 | 2,5566 | 0,104 | 0,328  |
| 13 | P32119 PRDX2_HUMAN | E.DYGVLTDE.G        | 2 | 2,5563 | 0,156 | -0,821 |
| 13 | P25205 MCM3_HUMAN  | R.LIVNVNDLR.R       | 2 | 2,5547 | 0,254 | -0,809 |
| 13 | Q9H1A4 APC1_HUMAN  | E.GSLSPVIAPK.K      | 2 | 2,5545 | 0,287 | -0,126 |
| 13 | Q96A73 K1191_HUMAN | K.M*SLPIGIYR.R      | 2 | 2,5531 | 0,31  | -0,114 |
| 13 | P08670 VIME_HUMAN  | R.DNLAEDIM*R.L      | 2 | 2,5522 | 0,158 | -0,781 |
| 13 | P46459 NSF_HUMAN   | K.GILLYGPPGCGK.T    | 2 | 2,5506 | 0,223 | -0,297 |
| 13 | Q96B54 ZN428_HUMAN | R.AAQPPAQPCQLCGR.S  | 2 | 2,5502 | 0,528 | -0,707 |
| 13 | P50416 CPT1A_HUMAN | K.GDINPNIPYPTR.L    | 2 | 2,5496 | 0,427 | -0,899 |
| 13 | Q99729 ROAA_HUMAN  | E.AIELPM*DPK.L      | 2 | 2,5491 | 0,306 | 0,237  |
| 13 | Q9C0D5 TANC1_HUMAN | R.SQPSSVPSSYIR.N    | 2 | 2,5486 | 0,376 | -0,962 |
| 13 | Q9UPV0 CE164_HUMAN | K.GLLGSIYEDK.T      | 2 | 2,5479 | 0,287 | -0,111 |
| 13 | P36915 GNL1_HUMAN  | R.LNQQPSQGLGPR.G    | 2 | 2,5467 | 0,275 | -0,754 |
| 13 | P06733 ENOA_HUMAN  | E.VDLFTS#KGLFR.A    | 2 | 2,5441 | 0,138 | -0,269 |
| 13 | Q9ULU4 PKCB1_HUMAN | K.LNFDM*TASPK.I     | 2 | 2,5441 | 0,319 | -0,428 |
| 13 | Q9BRR8 GPTC1_HUMAN | K.GLDPHQALFGTSGE.H  | 2 | 2,5425 | 0,513 | -0,598 |
| 13 | Q8N5D0 WDTC1_HUMAN | E.VM*LLNM*GYR.I     | 2 | 2,5419 | 0,304 | -0,54  |
| 13 | P05387 RLA2_HUMAN  | E.DVIAQGIGK.L       | 2 | 2,5416 | 0,189 | 0,406  |
| 13 | Q9NZW5 MPP6_HUMAN  | K.AVVDAGITTK.L      | 2 | 2,5414 | 0,459 | 0,25   |
| 13 | O94864 ST65G_HUMAN | K.IKEEPVDITFPVSEE.L | 2 | 2,5408 | 0,387 | -0,268 |
| 13 | Q14677 EPN4_HUMAN  | K.SAFPFSDKLGE.L     | 2 | 2,5405 | 0,444 | -0,611 |
| 13 | P24534 EF1B_HUMAN  | E.DDKVGTDM*LE.E     | 2 | 2,5398 | 0,258 | 0,321  |
| 13 | P49023 PAXI_HUMAN  | R.GLEDVRPSVE.S      | 2 | 2,5397 | 0,345 | 0      |

S27:

|    |                    |                            |       |   |        |       |        |
|----|--------------------|----------------------------|-------|---|--------|-------|--------|
| 13 | Q13330 MTA1_HUMAN  | K.SVSSVLSSLTPAK.V          |       | 2 | 2,5388 | 0,13  | -1,052 |
| 13 | Q6WKZ4 RFIP1_HUMAN | K.QLNQVNFTLPK.K            |       | 2 | 2,5376 | 0,128 | -0,094 |
| 13 | Q8IZT6 ASPM_HUMAN  | E.VTPSSTTASVAR.K           |       | 2 | 2,537  | 0,479 | 0      |
| 13 | Q9UIF9 BAZ2A_HUMAN | R.VIM*SDLQIR.G             |       | 2 | 2,5367 | 0,319 | 0,112  |
| 13 | P07437 TBB5_HUMAN  | E.LTQQVFDK.N               |       | 2 | 2,5365 | 0,309 | -0,465 |
| 13 | P62826 RAN_HUMAN   | K.LVLVGDGGTGK.T            |       | 2 | 2,5354 | 0,172 | -0,3   |
| 13 | Q9Y530 CF130_HUMAN | R.M*GAGIAVLFK.K            |       | 2 | 2,5349 | 0,187 | -0,179 |
| 13 | P46087 NOL1_HUMAN  | E.GEALLPIER.A              |       | 2 | 2,534  | 0,15  | -0,367 |
| 13 | P52907 CAZA1_HUMAN | K.FITHAPPGEFNE.V           |       | 2 | 2,5338 | 0,192 | 0,718  |
| 13 | A0MZ66 SHOT1_HUMAN | R.ISM*LYM*AK.L             |       | 2 | 2,5338 | 0,326 | 0,123  |
| 13 | P82650 RT22_HUMAN  | R.M*IQVYFPKE.G             |       | 2 | 2,5338 | 0,224 | -0,521 |
| 13 | Q5VT52 K0460_HUMAN | K.IISPGSSTPSSTRS#PPPGRDE.S | S769: | 3 | 2,5334 | 0,175 | -0,166 |
| 13 | Q9BVP2 GNL3_HUMAN  | R.SFILDKIIIE.D             |       | 2 | 2,5325 | 0,121 | 0,101  |
| 13 | Q9H2W6 RM46_HUMAN  | R.NLVLLVRE.K               |       | 2 | 2,5308 | 0,197 | -0,191 |
| 13 | Q00765 REEP5_HUMAN | K.ATVNLLGEEK.K             |       | 2 | 2,5306 | 0,14  | -0,341 |
| 13 | Q06830 PRDX1_HUMAN | R.QITVNDLPVGR.S            |       | 2 | 2,5305 | 0,393 | -0,403 |
| 13 | P17812 PYRG1_HUMAN | E.QGVVDYFLR.R              |       | 2 | 2,53   | 0,169 | 0,334  |
| 13 | P29692 EF1D_HUMAN  | R.ATAPQTQHVS#PM*R.Q        | S133: | 2 | 2,5296 | 0,388 | -0,482 |
| 13 | A1L390 PKHG3_HUMAN | R.FFFNPSAVSQR.T            |       | 2 | 2,5286 | 0,358 | 1,126  |
| 13 | P31949 S10AB_HUMAN | K.DGYNYTLSKTE.F            |       | 2 | 2,5284 | 0,307 | -0,473 |
| 13 | Q6ZV73 FGD6_HUMAN  | K.LPHPILPFSGNPE.F          |       | 2 | 2,5281 | 0,212 | -0,774 |
| 13 | Q9P270 SLAI2_HUMAN | K.LDQTM*SALK.R             |       | 2 | 2,5279 | 0,258 | 0      |
| 13 | Q9Y5K6 CD2AP_HUMAN | R.GIGFGDIFKE.G             |       | 2 | 2,5268 | 0,262 | -0,225 |
| 13 | Q86WB0 NIPA_HUMAN  | E.GIAPEEGVDAK.D            |       | 2 | 2,5264 | 0,431 | -0,32  |
| 13 | O60307 MAST3_HUMAN | E.RGSPSPS#LLNTISLDTM*PK.F  | S776: | 3 | 2,5264 | 0,202 | -1,356 |
| 13 | P54259 ATN1_HUMAN  | K.TATPPGYKPGS#PPSFR.T      | S656: | 2 | 2,5259 | 0,16  | -0,421 |
| 13 | Q9Y383 LC7L2_HUMAN | R.AM*LDQLM*GTS#RDGDTTR.Q   | S18:  | 3 | 2,5257 | 0,108 | -0,462 |
| 13 | Q8NFH5 NUP53_HUMAN | K.TLGTPTQPGSTPR.I          |       | 2 | 2,5253 | 0,319 | -0,465 |
| 13 | Q06830 PRDX1_HUMAN | R.TIAQDYGVLK.A             |       | 2 | 2,5248 | 0,376 | -0,33  |
| 13 | Q49A88 CCD14_HUMAN | E.ASAPGIISALSK.Q           |       | 2 | 2,5241 | 0,375 | -0,438 |
| 13 | Q27J81 INF2_HUMAN  | R.GSSPQNTTTPKPSVE.G        |       | 2 | 2,522  | 0,324 | -0,478 |
| 13 | Q00610 CLH1_HUMAN  | K.DSLYKDAM*QYASE.S         |       | 2 | 2,5219 | 0,392 | -0,476 |
| 13 | Q69YH5 CDCA2_HUMAN | E.NFEAPAFLNM*R.K           |       | 2 | 2,5212 | 0,343 | -0,828 |

|    |                    |                         |        |   |        |       |        |
|----|--------------------|-------------------------|--------|---|--------|-------|--------|
| 13 | Q9UQ35 SRRM2_HUMAN | K.M*ALPPQEDATAS#PPRQK.D | S1179: | 3 | 2,5199 | 0,298 | -0,189 |
| 13 | Q15691 MARE1_HUMAN | K.LTVEDELEKE.R          |        | 2 | 2,5196 | 0,191 | -0,454 |
| 13 | Q9NZI8 IF2B1_HUMAN | K.ISYSQQFLVK.S          |        | 2 | 2,5193 | 0,355 | -0,214 |
| 13 | Q15043 S39AE_HUMAN | E.GDSLTLQQLK.A          |        | 2 | 2,5185 | 0,193 | -0,332 |
| 13 | Q15121 PEA15_HUMAN | K.DIIRQPSEEE.I          |        | 2 | 2,5178 | 0,121 | -0,301 |
| 13 | Q9P2R3 ANFY1_HUMAN | E.NNEPTACFLIR.S         |        | 2 | 2,5169 | 0,258 | -0,823 |
| 13 | P05787 K2C8_HUMAN  | E.VDPNIQAVR.T           |        | 2 | 2,5166 | 0,347 | 0,06   |
| 13 | Q9H2G2 SLK_HUMAN   | K.LADFGVSAK.N           |        | 2 | 2,5161 | 0,39  | -0,134 |
| 13 | P49792 RBP2_HUMAN  | R.ITPDM*TLQNM*K.G       |        | 2 | 2,5157 | 0,43  | -0,184 |
| 13 | P62913 RL11_HUMAN  | K.YDGII LPGK.-          |        | 2 | 2,5155 | 0,406 | -0,313 |
| 13 | Q9NZ63 CI078_HUMAN | E.DLHLGTSFSAE.T         |        | 2 | 2,5129 | 0,292 | -0,518 |
| 13 | P00505 AATM_HUMAN  | R.VGAFTM*VCK.D          |        | 2 | 2,5128 | 0,288 | -1,541 |
| 13 | Q9NWM8 FKB14_HUMAN | K.GGDLM*LVHYE.G         |        | 2 | 2,5123 | 0,369 | -0,53  |
| 13 | Q9Y3F4 STRAP_HUMAN | K.AATAAADFTAK.V         |        | 2 | 2,5115 | 0,403 | 0,118  |
| 13 | Q9H501 ESF1_HUMAN  | R.TLDSGTSEIVKS#PRIE.C   | S198:  | 2 | 2,5115 | 0,158 | -0,337 |
| 13 | Q02539 H11_HUMAN   | K.ALAAAGYDVEK.N         |        | 2 | 2,5114 | 0,34  | 0,11   |
| 13 | P63220 RS21_HUMAN  | E.FVDLYVPR.K            |        | 2 | 2,5103 | 0,265 | -0,484 |
| 13 | Q9NRV9 HEBP1_HUMAN | R.IPNQFQSDPPAPSDK.S     |        | 2 | 2,5102 | 0,384 | -0,744 |
| 13 | Q13347 EIF3I_HUMAN | D.M*TM*FVTASK.D         |        | 2 | 2,5094 | 0,38  | 0,116  |
| 13 | O75962 TRIO_HUMAN  | R.LLVRPTSSETPSAAE.L     |        | 2 | 2,5094 | 0,403 | -1,723 |
| 13 | O43143 DHX15_HUMAN | R.LDLGEDYPSGK.K         |        | 2 | 2,5091 | 0,087 | -0,409 |
| 13 | Q96EP1 CHFR_HUMAN  | K.ITQDM*LQPK.V          |        | 2 | 2,5086 | 0,318 | 0,112  |
| 13 | Q96JY6 PDLI2_HUMAN | R.ALAT#PPKLHTCE.K       | T279:  | 2 | 2,506  | 0,216 | -1,205 |
| 13 | Q01082 SPTB2_HUMAN | K.LYAGLKDLAEE.R         |        | 2 | 2,5055 | 0,111 | -0,699 |
| 13 | Q13148 TADBP_HUMAN | E.VLM*VQVK.K            |        | 2 | 2,5048 | 0,144 | -0,146 |
| 13 | Q5QE6 TDIF2_HUMAN  | K.LYTSAPNTSQGK.D        |        | 2 | 2,5046 | 0,382 | -0,481 |
| 13 | Q13428 TCOF_HUMAN  | K.TGPTVTQVK.A           |        | 2 | 2,5042 | 0,408 | 0,524  |
| 13 | Q96PK6 RBM14_HUMAN | R.AQPSVSLGAPYR.G        |        | 2 | 2,5034 | 0,322 | -0,685 |
| 13 | Q13017 RHG05_HUMAN | K.VNLFILGK.D            |        | 2 | 2,5031 | 0,39  | -0,067 |
| 13 | P28290 SSFA2_HUMAN | R.ASVALTPTAPSR.T        |        | 2 | 2,5022 | 0,226 | -0,313 |
| 13 | P20073 ANXA7_HUMAN | E.QAIVDVVANR.S          |        | 2 | 2,5017 | 0,32  | -0,112 |
| 13 | Q9BTX1 NDC1_HUMAN  | R.VSSSYVPEPK.K          |        | 2 | 2,4994 | 0,331 | -0,335 |
| 13 | Q6NWX9 PR40B_HUMAN | E.LQQAELPNRS#PGFGIK.K   | S832:  | 2 | 2,4979 | 0,48  | -0,864 |

|    |                    |                         |        |   |        |       |        |
|----|--------------------|-------------------------|--------|---|--------|-------|--------|
| 13 | Q8IY92 BTBDC_HUMAN | R.DCRS#PGLDTPPIR.G      | S786:  | 3 | 2,4978 | 0,151 | -0,109 |
| 13 | Q99459 CDC5L_HUMAN | R.SGTT#PKPVINSTPGR.T    | T430:  | 2 | 2,4967 | 0,105 | -0,23  |
| 13 | O75607 NPM3_HUMAN  | D.FQLQPPVTFR.L          |        | 2 | 2,4965 | 0,176 | 0,594  |
| 13 | Q8TCS8 PNPT1_HUMAN | K.VLQSPATTVVVR.T        |        | 2 | 2,4961 | 0,343 | -0,104 |
| 13 | P49736 MCM2_HUMAN  | R.FDILCVVR.D            |        | 2 | 2,496  | 0,098 | -0,239 |
| 13 | P45880 VDAC2_HUMAN | K.LTLSALVDGK.S          |        | 2 | 2,4954 | 0,322 | 0,36   |
| 13 | Q9GZL7 WDR12_HUMAN | K.APLYDLAAHE.D          |        | 2 | 2,4941 | 0,115 | -0,333 |
| 13 | P31946 1433B_HUMAN | D.STLIMQLLR.D           |        | 2 | 2,4939 | 0,178 | -0,227 |
| 13 | P18621 RL17_HUMAN  | E.LKGLDVDSLVI.E         |        | 2 | 2,4935 | 0,16  | -1,407 |
| 13 | O60869 EDF1_HUMAN  | K.INEKPVVIADYE.S        |        | 2 | 2,4918 | 0,154 | -1,462 |
| 13 | P16989 DBPA_HUMAN  | E.AAAAAAQDPAPK.S        |        | 2 | 2,4915 | 0,311 | 0      |
| 13 | P10809 CH60_HUMAN  | K.NQLKDM*AIATGGAVFGEE.G |        | 3 | 2,4911 | 0,205 | -0,98  |
| 13 | P35612 ADDB_HUMAN  | K.SAPASPVQSPAKE.A       |        | 2 | 2,4908 | 0,4   | -1,058 |
| 13 | Q04726 TLE3_HUMAN  | R.NDAPTPGTSTTPGLR.S     |        | 2 | 2,4906 | 0,397 | -0,082 |
| 13 | P28340 DPOD1_HUMAN | R.DCPIFYM*R.K           |        | 2 | 2,4897 | 0,189 | 0      |
| 13 | Q7Z5J4 RAI1_HUMAN  | K.APLICTKEEVEE.V        |        | 2 | 2,4884 | 0,291 | -0,086 |
| 13 | Q58FF7 H90B3_HUMAN | R.DNSTM*GYMM*AK.K       |        | 2 | 2,4882 | 0,378 | -0,572 |
| 13 | P62841 RS15_HUMAN  | E.M*VGSM*VGVIYNGK.T     |        | 2 | 2,4881 | 0,416 | -0,192 |
| 13 | Q09666 AHNK_HUMAN  | K.LQSGVSLASK.K          |        | 2 | 2,488  | 0,194 | 0,233  |
| 13 | P09493 TPM1_HUMAN  | R.LATALQKLEE.A          |        | 2 | 2,488  | 0,214 | -1,312 |
| 13 | Q6Y7W6 PERQ2_HUMAN | E.M*GTFDSS#GAFLSLKK.V   | S303:  | 2 | 2,487  | 0,237 | -0,29  |
| 13 | Q8WXH0 SYNE2_HUMAN | K.SILTTLIQKEE.S         |        | 2 | 2,4863 | 0,252 | -0,478 |
| 13 | Q13509 TBB3_HUMAN  | R.YLTVATVFR.G           |        | 2 | 2,4847 | 0,334 | -0,456 |
| 13 | Q16531 DDB1_HUMAN  | R.KTEPATGFIDGDLIE.S     |        | 2 | 2,483  | 0,31  | -0,608 |
| 13 | Q96MX3 ZN553_HUMAN | R.TFSLSSTLLR.H          |        | 2 | 2,4812 | 0,313 | -0,325 |
| 13 | Q9NQZ2 SAS10_HUMAN | K.LYDTDYGSK.S           |        | 2 | 2,481  | 0,343 | 0      |
| 13 | P27708 PYR1_HUMAN  | E.NLDPLGIHTGE.S         |        | 2 | 2,4778 | 0,26  | -0,628 |
| 13 | Q99848 EBP2_HUMAN  | K.GFSDKLDLFLE.G         |        | 2 | 2,4773 | 0,22  | -0,313 |
| 13 | Q5T1M5 FKB15_HUMAN | E.SLAAS#PM*AAKPDNPSGK.V | S1065: | 2 | 2,4765 | 0,341 | -0,351 |
| 13 | Q99961 SH3G1_HUMAN | E.QSNGGFPCTTAPK.I       |        | 2 | 2,4764 | 0,237 | -0,626 |
| 13 | Q71U36 TBA1A_HUMAN | K.YM*ACCLLYR.G          |        | 2 | 2,4764 | 0,377 | -0,771 |
| 13 | Q8IZD4 DCP1B_HUMAN | R.SADLHPLSELPE.N        |        | 2 | 2,476  | 0,332 | -0,373 |
| 13 | Q9ULU4 PKCB1_HUMAN | R.FQLNLDKTIE.S          |        | 2 | 2,4753 | 0,101 | -1,299 |

|    |                    |                       |        |   |        |       |        |
|----|--------------------|-----------------------|--------|---|--------|-------|--------|
| 13 | P22314 UBA1_HUMAN  | K.ATLPS#PDKLPGFK.M    | S835:  | 2 | 2,4715 | 0,331 | -0,42  |
| 13 | Q4G148 GL8D3_HUMAN | R.SLLKPLELE.L         |        | 2 | 2,4713 | 0,215 | -0,117 |
| 13 | Q14204 DYHC1_HUMAN | K.DIQM*PDGIR.R        |        | 2 | 2,4712 | 0,238 | 0,115  |
| 13 | Q96AX9 MIB2_HUMAN  | K.CLLDTDVLR.E.M       |        | 2 | 2,4711 | 0,299 | -0,297 |
| 13 | Q9UKV3 ACINU_HUMAN | K.LLDDLFR.K           |        | 2 | 2,4707 | 0,2   | -1,641 |
| 13 | P46937 YAP1_HUMAN  | K.TANVPQTVPM*R.L      |        | 2 | 2,4707 | 0,29  | -0,099 |
| 13 | Q02790 FKBP4_HUMAN | K.VLQLYPNNK.A         |        | 2 | 2,4698 | 0,242 | 0      |
| 13 | Q9NQW6 ANLN_HUMAN  | K.STLSQTVPSKGE.L      |        | 2 | 2,4696 | 0,254 | -0,297 |
| 13 | O75822 EIF3J_HUMAN | K.VLT#PEEQLADKLR.L    | T109:  | 2 | 2,4694 | 0,119 | -0,536 |
| 13 | Q9Y6X9 MORC2_HUMAN | R.TNIVALLQK.V         |        | 2 | 2,4693 | 0,325 | -1,159 |
| 13 | O14686 MLL2_HUMAN  | E.DRALS#PVIPLIPR.D    | S4463: | 3 | 2,468  | 0,137 | 0,539  |
| 13 | Q07955 SFRS1_HUMAN | R.IYVGNLPPDIR.T       |        | 2 | 2,4668 | 0,288 | -0,388 |
| 13 | Q9UBC2 EP15R_HUMAN | K.NDPFTSDPFTK.N       |        | 2 | 2,4655 | 0,492 | -0,385 |
| 13 | O60716 CTND1_HUMAN | R.QDVYGPQPQVR.V       |        | 2 | 2,4647 | 0,318 | 1,612  |
| 13 | Q5JSH3 WDR44_HUMAN | K.GPYDFDQIK.V         |        | 2 | 2,4646 | 0,358 | -0,563 |
| 13 | Q13428 TCOF_HUMAN  | K.AGPVAVQVK.A         |        | 2 | 2,4642 | 0,107 | 0,842  |
| 13 | Q8WVN8 UB2Q2_HUMAN | E.LCSLYNLPK.H         |        | 2 | 2,4632 | 0,255 | -0,22  |
| 13 | O95772 MENTO_HUMAN | R.LLIVQDASER.A        |        | 2 | 2,4603 | 0,202 | -0,533 |
| 13 | Q99832 TCPH_HUMAN  | K.ATISNDGATILK.L      |        | 2 | 2,459  | 0,306 | 0,405  |
| 13 | Q9UBN6 TR10D_HUMAN | E.TIQDQLVGSEK.L       |        | 2 | 2,458  | 0,168 | 0      |
| 13 | Q9NZM1 MYOF_HUMAN  | R.TQGLVPEHVE.T        |        | 2 | 2,4556 | 0,124 | -0,44  |
| 13 | Q15003 CND2_HUMAN  | R.SIDISATIPK.F        |        | 2 | 2,455  | 0,323 | 0,35   |
| 13 | Q9Y450 HBS1L_HUMAN | R.DKPSVEPVEE.Y        |        | 2 | 2,4545 | 0,228 | -0,108 |
| 13 | O60879 DIAP2_HUMAN | K.LALNFATQIK.V        |        | 2 | 2,4528 | 0,313 | -0,436 |
| 13 | Q16204 CCDC6_HUMAN | K.SGGIVISPF.R.L       |        | 2 | 2,4521 | 0,315 | -0,354 |
| 13 | Q567U6 CCD93_HUMAN | K.TALPAGLSATEK.A      |        | 2 | 2,451  | 0,38  | 0,316  |
| 13 | P04264 K2C1_HUMAN  | R.DYQELM*NTK.L        |        | 2 | 2,4507 | 0,282 | -0,421 |
| 13 | O15042 SR140_HUMAN | E.SLCDS#PHQNLSRPLLE.N | S67:   | 3 | 2,4504 | 0,172 | -1,786 |
| 13 | Q6NYC8 PHTNS_HUMAN | E.ILVLGGYLR.L         |        | 2 | 2,4493 | 0,225 | -0,061 |
| 13 | Q02297 NRG1_HUMAN  | R.YVSAM*TTPAR.M       |        | 2 | 2,4481 | 0,24  | 0,11   |
| 13 | P30101 PDIA3_HUMAN | K.QAGPASVPLRTEEE.F    |        | 2 | 2,4476 | 0,395 | -0,493 |
| 13 | Q02952 AKA12_HUMAN | K.VLSKPPEGVSE.V       |        | 2 | 2,447  | 0,325 | -0,786 |
| 13 | Q16513 PKN2_HUMAN  | K.SLAYVDNILK.K        |        | 2 | 2,4465 | 0,14  | 0,43   |



|    |                    |                         |      |   |        |       |        |
|----|--------------------|-------------------------|------|---|--------|-------|--------|
| 13 | P53999 TCP4_HUMAN  | K.EQISDIDDAVR.K         |      | 2 | 2,4459 | 0,465 | -0,581 |
| 13 | Q15633 TRBP2_HUMAN | R.VTVGDTSTCTGQGPSK.K    |      | 2 | 2,4419 | 0,275 | -0,49  |
| 13 | Q9H074 PAIP1_HUMAN | E.VPAS#PQRPSRPGALPE.Q   | S77: | 3 | 2,441  | 0,308 | -0,105 |
| 13 | Q9H1P3 OSBL2_HUMAN | K.VTGM*IDLDTSK.N        |      | 2 | 2,4404 | 0,29  | -0,51  |
| 13 | P55786 PSA_HUMAN   | R.SPVYLTVLK.H           |      | 2 | 2,4397 | 0,366 | -0,538 |
| 13 | O95819 M4K4_HUMAN  | K.SSSSFTPFIDPR.L        |      | 2 | 2,4389 | 0,32  | -0,182 |
| 13 | O75420 PERQ1_HUMAN | R.GGDQNLLPTM*SR.S       |      | 2 | 2,4376 | 0,144 | -1,215 |
| 13 | Q9UGU0 TCF20_HUMAN | R.QLSGQSTSSDTTYKGGASE.K |      | 2 | 2,4374 | 0,377 | -0,385 |
| 13 | P78417 GSTO1_HUMAN | K.VPSLVGSFIR.S          |      | 2 | 2,437  | 0,255 | -0,454 |
| 13 | O75569 PRKRA_HUMAN | K.TPIQVLHE.Y            |      | 2 | 2,4366 | 0,303 | -0,716 |
| 13 | O43913 ORC5_HUMAN  | K.AM*QTVYLRE.I          |      | 2 | 2,4357 | 0,246 | 0      |
| 13 | P46013 KI67_HUMAN  | K.AM*DTPKPAVSDE.K       |      | 2 | 2,4338 | 0,262 | -0,191 |
| 13 | Q9Y2W2 WBP11_HUMAN | K.SEDDSAVPLAK.A         |      | 2 | 2,4335 | 0,219 | 0,647  |
| 13 | Q9BUF5 TBB6_HUMAN  | R.SGPFQQLFRPD.N         |      | 2 | 2,4323 | 0,309 | -0,3   |
| 13 | P21333 FLNA_HUMAN  | K.AGVAPLQVK.V           |      | 2 | 2,4308 | 0,133 | 0,207  |
| 13 | Q92499 DDX1_HUMAN  | K.NQALFPACVLK.N         |      | 2 | 2,4297 | 0,12  | -1,161 |
| 13 | Q8WWH5 TRUB1_HUMAN | E.AAVVSSPSLK.T          |      | 2 | 2,4296 | 0,365 | 0,064  |
| 13 | Q9Y6I3 EPN1_HUMAN  | E.LLAGEVPAR.S           |      | 2 | 2,4292 | 0,24  | 0,263  |
| 13 | O14744 ANM5_HUMAN  | K.YSQYQQAIYK.C          |      | 2 | 2,4264 | 0,194 | -0,755 |
| 13 | Q9GZT3 SLIRP_HUMAN | R.SINQPVAFVR.R          |      | 2 | 2,4255 | 0,259 | -1,294 |
| 13 | P13667 PDIA4_HUMAN | R.FDVSGYPTLK.I          |      | 2 | 2,4242 | 0,3   | -0,325 |
| 13 | Q8WXH0 SYNE2_HUMAN | K.LTDLQVIKNE.T          |      | 2 | 2,4238 | 0,158 | -0,416 |
| 13 | O14974 MYPT1_HUMAN | R.LAYVAPTIPR.R          |      | 2 | 2,4235 | 0,189 | -0,332 |
| 13 | P11021 GRP78_HUMAN | E.ISAM*VLT.K.M          |      | 2 | 2,4232 | 0,211 | 0,208  |
| 13 | P49915 GUAA_HUMAN  | K.IVADFSASVK.K          |      | 2 | 2,423  | 0,291 | 0,235  |
| 13 | Q13625 ASPP2_HUMAN | K.LLPFLSNPYR.N          |      | 2 | 2,4222 | 0,349 | -0,2   |
| 13 | P11717 MPRI_HUMAN  | R.LVLSVREE.A            |      | 2 | 2,4213 | 0,251 | -0,11  |
| 13 | O43707 ACTN4_HUMAN | K.VLAGDKNFITAE.L        |      | 2 | 2,421  | 0,219 | -0,607 |
| 13 | P49790 NU153_HUMAN | R.SVYFKPSLTSPGE.F       |      | 2 | 2,4191 | 0,348 | -0,432 |
| 13 | P38432 P80C_HUMAN  | K.LGFSLTPSK.G           |      | 2 | 2,4168 | 0,369 | -0,257 |
| 13 | P30876 RPB2_HUMAN  | R.VSGDDVIIGK.T          |      | 2 | 2,4162 | 0,224 | -0,304 |
| 13 | P35221 CTNA1_HUMAN | K.QDLLAYLQR.I           |      | 2 | 2,4159 | 0,264 | -0,218 |
| 13 | Q96JM3 ZN828_HUMAN | K.TDLDAM*DIK.G          |      | 2 | 2,4159 | 0,387 | -0,705 |

|    |                    |                     |        |   |        |       |        |
|----|--------------------|---------------------|--------|---|--------|-------|--------|
| 13 | Q6IE81 JADE1_HUMAN | R.TDLITAM*K.L       |        | 2 | 2,4159 | 0,178 | 0,201  |
| 13 | Q6NVY1 HIBCH_HUMAN | K.IAPVFFREE.Y       |        | 2 | 2,4152 | 0,486 | -0,661 |
| 13 | P49815 TSC2_HUMAN  | D.LSFQPSQPLSK.S     |        | 2 | 2,4147 | 0,251 | 0,198  |
| 13 | Q68CZ2 TENS3_HUMAN | E.LVFSATPEK.I       |        | 2 | 2,4144 | 0,345 | -0,061 |
| 13 | P51114 FXR1_HUMAN  | K.CTVDPEDLRE.A      |        | 2 | 2,4122 | 0,245 | -0,275 |
| 13 | P35658 NU214_HUMAN | R.ITPPAAKPGS#PQAK.S | S678:  | 2 | 2,4101 | 0,312 | -0,254 |
| 13 | P48634 BAT2_HUMAN  | K.YSSLNLFDTYK.G     |        | 2 | 2,4096 | 0,243 | -0,632 |
| 13 | Q5MIZ7 SMEK2_HUMAN | K.TTNLPTSVTATK.G    |        | 2 | 2,4079 | 0,204 | -0,692 |
| 13 | Q5VV41 ARHGG_HUMAN | K.VDATIVVK.S        |        | 2 | 2,4079 | 0,287 | 1,66   |
| 13 | P56537 IF6_HUMAN   | E.AQPSTIATSM*R.D    |        | 2 | 2,4071 | 0,327 | 0,31   |
| 13 | Q9H446 RWDD1_HUMAN | E.DNDVSDILK.L       |        | 2 | 2,4063 | 0,12  | -0,18  |
| 13 | P07814 SYEP_HUMAN  | K.SLCIPFKPLCE.L     |        | 2 | 2,4061 | 0,105 | -0,626 |
| 13 | O14686 MLL2_HUMAN  | E.DRALS#PVIPLIPR.D  | S4463: | 2 | 2,4057 | 0,304 | -0,399 |
| 13 | Q09666 AHNK_HUMAN  | K.FSMPGFKGEGPE.V    |        | 2 | 2,4051 | 0,291 | -0,19  |
| 13 | Q6UWZ7 CCD98_HUMAN | E.ASPASTPQIIK.H     |        | 2 | 2,405  | 0,339 | -0,219 |
| 13 | P14618 KPYM_HUMAN  | D.M*VFASFIR.K       |        | 2 | 2,4042 | 0,376 | 0      |
| 13 | Q92520 FAM3C_HUMAN | E.DNVLM*SGVK.N      |        | 2 | 2,403  | 0,285 | 0      |
| 13 | P62333 PRS10_HUMAN | R.DHQPCIIFM*DE.I    |        | 2 | 2,4016 | 0,105 | -0,945 |
| 13 | Q13009 TIAM1_HUMAN | E.GATTDTDLLSR.R     |        | 2 | 2,3993 | 0,285 | 0,106  |
| 13 | P62736 ACTA_HUMAN  | E.ITALAPSTM*K.I     |        | 2 | 2,3992 | 0,327 | -0,814 |
| 13 | Q99460 PSMD1_HUMAN | E.SLGFILFR.T        |        | 2 | 2,3959 | 0,246 | 0      |
| 13 | O60841 IF2P_HUMAN  | E.ATDILVSK.I        |        | 2 | 2,3955 | 0,452 | 0,072  |
| 13 | O60749 SNX2_HUMAN  | K.SM*SAPVIFDR.S     |        | 2 | 2,3954 | 0,122 | -0,214 |
| 13 | Q96C90 PP14B_HUMAN | E.AFISGLLDK.I       |        | 2 | 2,394  | 0,23  | 0,19   |
| 13 | O95239 KIF4A_HUMAN | K.LTLLQVASR.Q       |        | 2 | 2,3936 | 0,311 | 0,548  |
| 13 | Q5JSH3 WDR44_HUMAN | K.VGLSTFKETE.N      |        | 2 | 2,3916 | 0,132 | -0,11  |
| 13 | P41236 IPP2_HUMAN  | E.AM*APDILAR.K      |        | 2 | 2,3911 | 0,134 | 0,313  |
| 13 | Q96B54 ZN428_HUMAN | R.AAQPPAQCQLCGR.S   |        | 3 | 2,3882 | 0,19  | 0,588  |
| 13 | P37198 NUP62_HUMAN | R.M*AQDLKDIIIE.H    |        | 2 | 2,3871 | 0,192 | -0,307 |
| 13 | Q15149 PLEC1_HUMAN | R.SSIAGLLLK.A       |        | 2 | 2,3869 | 0,258 | -1,217 |
| 13 | O00410 IMB3_HUMAN  | R.VQAHAAAALINFTE.D  |        | 2 | 2,3866 | 0,282 | 1,006  |
| 13 | P49589 SYCC_HUMAN  | E.ILQLSDALR.D       |        | 2 | 2,3844 | 0,177 | 0,237  |
| 13 | P07686 HEXB_HUMAN  | K.VEPLDFGGTQK.Q     |        | 2 | 2,3843 | 0,117 | -0,205 |

|    |                     |                      |       |   |        |       |        |
|----|---------------------|----------------------|-------|---|--------|-------|--------|
| 13 | Q9Y230 RUVB2_HUMAN  | E.DAYTVLTR.I         |       | 2 | 2,3836 | 0,175 | 0      |
| 13 | O43583 DENR_HUMAN   | K.LDADYPLR.V         |       | 2 | 2,383  | 0,253 | 0,317  |
| 13 | Q96R06 SPAG5_HUMAN  | E.LTLQPGALTNSGK.R    |       | 2 | 2,3819 | 0,145 | -0,375 |
| 13 | Q2M2I8 AAK1_HUMAN   | K.VQTTPPPAVQGQK.V    |       | 2 | 2,3814 | 0,342 | -0,361 |
| 13 | Q01082 SPTB2_HUMAN  | R.ALVADSHPESE.R      |       | 2 | 2,381  | 0,305 | -1,268 |
| 13 | Q92620 PRP16_HUMAN  | R.VETPSHPGGVSEE.F    |       | 2 | 2,3804 | 0,351 | -1,381 |
| 13 | Q53T59 H1BP3_HUMAN  | E.VDPDEGLFGPGR.K     |       | 2 | 2,3791 | 0,14  | -0,291 |
| 13 | P13639 EF2_HUMAN    | K.STLTDSLVC.A        |       | 2 | 2,3786 | 0,393 | -0,109 |
| 13 | P04264 K2C1_HUMAN   | K.QISNLQQSISDAEQR.G  |       | 3 | 2,3778 | 0,169 | -0,32  |
| 13 | P49790 NU153_HUMAN  | R.LM*T#PKPVSIAATNR.S | T369: | 2 | 2,3757 | 0,289 | -0,881 |
| 13 | Q8WXH0 SYNE2_HUMAN  | K.SFLDVLSIK.R        |       | 2 | 2,3746 | 0,199 | -0,06  |
| 13 | Q12849 GRSF1_HUMAN  | E.VDDVFLIR.A         |       | 2 | 2,3734 | 0,255 | 0,125  |
| 13 | Q9UJW0 DCTN4_HUMAN  | R.APLSQLYFCR.Y       |       | 2 | 2,3727 | 0,295 | -0,681 |
| 13 | P21333 FLNA_HUMAN   | E.VVIQDPM*GQK.G      |       | 2 | 2,3726 | 0,231 | 0      |
| 13 | Q9BV38 WDR18_HUMAN  | R.DLFDSTR.F          |       | 2 | 2,3714 | 0,374 | -0,122 |
| 13 | Q86U90 YRDC_HUMAN   | R.LFRPPS#PAPAAPGAR.L | S37:  | 3 | 2,3711 | 0,21  | -0,115 |
| 13 | Q8NI22 MCFD2_HUMAN  | E.LINIIDGVL.R.D      |       | 2 | 2,3707 | 0,094 | -1,083 |
| 13 | Q3ZCQ8 TIM50_HUMAN  | K.QNLFLGSLTSR.L      |       | 2 | 2,3699 | 0,269 | -1,382 |
| 13 | P60228 EIF3E_HUMAN  | R.M*LFDYLADK.H       |       | 2 | 2,3685 | 0,151 | -0,539 |
| 13 | A8K7V5 A8K7V5_HUMAN | E.VSTAPAGTDM*PAAK.K  |       | 2 | 2,3682 | 0,427 | -0,458 |
| 13 | P30084 ECHM_HUMAN   | K.IVVAM*AKE.S        |       | 2 | 2,3672 | 0,35  | 0,209  |
| 13 | P52701 MSH6_HUMAN   | K.FFIGQFSDDR.H       |       | 2 | 2,3668 | 0,222 | 0      |
| 13 | Q8N655 CJ012_HUMAN  | E.AAQVNPIM*PK.E      |       | 2 | 2,3641 | 0,383 | -0,225 |
| 13 | Q9Y6Q9 NCOA3_HUMAN  | K.QQVFQGTNSLGLK.S    |       | 2 | 2,3641 | 0,341 | -0,601 |
| 13 | Q9BVG4 CX026_HUMAN  | K.AVYISVQDK.E        |       | 2 | 2,3612 | 0,255 | -0,179 |
| 13 | P04083 ANXA1_HUMAN  | E.ATIIDLTK.R         |       | 2 | 2,3611 | 0,287 | -0,679 |
| 13 | Q6P1J9 CDC73_HUMAN  | K.NIFAILQSVK.A       |       | 2 | 2,3578 | 0,303 | 0      |
| 13 | Q14789 GOGB1_HUMAN  | E.ISIVDIANK.R        |       | 2 | 2,3547 | 0,243 | 0,125  |
| 13 | Q8NG31 CASC5_HUMAN  | R.CSLGIFLPR.L        |       | 2 | 2,3545 | 0,267 | -0,803 |
| 13 | Q15181 IPYR_HUMAN   | R.YVANLFPYK.G        |       | 2 | 2,3539 | 0,255 | -0,109 |
| 13 | Q9UQ35 SRRM2_HUMAN  | K.FSPFPVQDRPE.S      |       | 2 | 2,3525 | 0,213 | -0,74  |
| 13 | P61247 RS3A_HUMAN   | K.LIPDSIGKDIE.K      |       | 2 | 2,3516 | 0,303 | -0,203 |
| 13 | Q9H845 ACAD9_HUMAN  | K.VSTVM*DTVGR.R      |       | 2 | 2,3515 | 0,129 | 0      |

|    |                    |                        |        |   |        |       |        |
|----|--------------------|------------------------|--------|---|--------|-------|--------|
| 13 | Q09028 RBBP4_HUMAN | E.FILATGSADK.T         |        | 2 | 2,3513 | 0,326 | 0,358  |
| 13 | O75534 CSDE1_HUMAN | E.DISIEHFE.G           |        | 2 | 2,3509 | 0,147 | -0,308 |
| 13 | P78559 MAP1A_HUMAN | E.LSSEPQTTPPAQK.G      |        | 2 | 2,3508 | 0,349 | 0,475  |
| 13 | P42704 LPPRC_HUMAN | K.NVQGIIEILK.G         |        | 2 | 2,3498 | 0,319 | -0,108 |
| 13 | P54709 AT1B3_HUMAN | K.FLKPYTLEE.Q          |        | 2 | 2,3496 | 0,1   | -0,214 |
| 13 | Q03164 HRX_HUMAN   | R.LAVISDSGEK.R         |        | 2 | 2,3483 | 0,226 | 1,497  |
| 13 | Q96MW1 CCD43_HUMAN | E.DSLLNICKE.I          |        | 2 | 2,3474 | 0,176 | -0,223 |
| 13 | P04792 HSPB1_HUMAN | R.VSLDVNHFAPDE.L       |        | 2 | 2,3431 | 0,404 | 0,363  |
| 13 | P13010 KU86_HUMAN  | K.VITM*FVQR.Q          |        | 2 | 2,3429 | 0,198 | -0,181 |
| 13 | Q9UNN5 FAF1_HUMAN  | K.TGDVEDSTVLK.S        |        | 2 | 2,342  | 0,332 | -0,21  |
| 13 | O43776 SYNC_HUMAN  | E.DLVCDVVDR.I          |        | 2 | 2,3395 | 0,257 | -0,783 |
| 13 | Q9Y3L3 3BP1_HUMAN  | E.DSYANYFIR.L          |        | 2 | 2,3392 | 0,221 | -0,106 |
| 13 | Q9NQW6 ANLN_HUMAN  | K.LNQVLVDIR.L          |        | 2 | 2,3382 | 0,209 | -0,114 |
| 13 | Q99615 DNJC7_HUMAN | E.AFTILSDPK.K          |        | 2 | 2,3381 | 0,327 | -0,184 |
| 13 | P78318 IGBP1_HUMAN | K.YGALPDQGIK.A         |        | 2 | 2,3358 | 0,255 | 0,538  |
| 13 | Q14103 HNRPD_HUMAN | E.SIELPM*DNK.T         |        | 2 | 2,335  | 0,16  | 0      |
| 13 | Q9H6X2 ANTR1_HUMAN | E.DLFFYSER.E           |        | 2 | 2,3339 | 0,23  | -0,793 |
| 13 | Q13564 ULA1_HUMAN  | K.LLCSNSAFLR.V         |        | 2 | 2,3337 | 0,229 | -0,103 |
| 13 | Q9UMZ2 SYNG_HUMAN  | R.SNT#LNEKPALPVIR.D    | T1100: | 3 | 2,3332 | 0,153 | 0,112  |
| 13 | P40227 TCPZ_HUMAN  | K.DGNVLLHE.M           |        | 2 | 2,3317 | 0,19  | 0      |
| 13 | Q9NZM1 MYOF_HUMAN  | K.KLEPISNDDLVE.K       |        | 2 | 2,3297 | 0,121 | -0,462 |
| 13 | A0AVT1 UBA6_HUMAN  | R.YVLGDTAM*QK.M        |        | 2 | 2,3265 | 0,345 | 0,214  |
| 13 | P15336 ATF2_HUMAN  | E.TPAS#PAHTTPTQSTSGR.R | S310:  | 3 | 2,3264 | 0,249 | -0,192 |
| 13 | Q9BUL5 PHF23_HUMAN | R.AAQAGPTQGPGR.S       |        | 2 | 2,3264 | 0,222 | 0,293  |
| 13 | Q13371 PHLP_HUMAN  | E.VLVLTSVR.N           |        | 2 | 2,3262 | 0,297 | -0,756 |
| 13 | P62861 RS30_HUMAN  | R.FVNVVPTFGK.K         |        | 2 | 2,3259 | 0,259 | -0,11  |
| 13 | Q03701 CEBPZ_HUMAN | K.DDM*DFAGNVK.K        |        | 2 | 2,3247 | 0,1   | -0,433 |
| 13 | Q9NZN8 CNOT2_HUMAN | R.SSPSIICM*PK.Q        |        | 2 | 2,3228 | 0,403 | -0,537 |
| 13 | Q6I9Y2 THOC7_HUMAN | R.LLIDGDGAGDDR.R       |        | 2 | 2,3212 | 0,159 | -0,1   |
| 13 | Q05086 UBE3A_HUMAN | R.IDFKDVTYLTE.E        |        | 2 | 2,3207 | 0,207 | -0,363 |
| 13 | P15924 DESP_HUMAN  | K.GLPSPYNM*SSAPGSR.S   |        | 2 | 2,3206 | 0,269 | 1,111  |
| 13 | P14625 ENPL_HUMAN  | R.LSLNIDPAK.V          |        | 2 | 2,3199 | 0,191 | 0      |
| 13 | Q02127 PYRD_HUMAN  | K.IAPDLTSQDKE.D        |        | 2 | 2,3194 | 0,123 | -0,301 |

|    |                     |                       |        |   |        |       |        |
|----|---------------------|-----------------------|--------|---|--------|-------|--------|
| 13 | P20248 CCNA2_HUMAN  | R.VAPLKDLPVNDE.H      |        | 2 | 2,3167 | 0,364 | -1,583 |
| 13 | Q99590 SFRIP_HUMAN  | E.GEIIQTVDR.Q         |        | 2 | 2,3145 | 0,124 | -0,118 |
| 13 | Q99459 CDC5L_HUMAN  | K.DLPRPSEVNE.T        |        | 2 | 2,314  | 0,233 | -0,844 |
| 13 | Q9UJM3 ERRFI_HUMAN  | E.DQVVCQFK.K          |        | 2 | 2,3139 | 0,142 | 1,472  |
| 13 | Q7Z417 NUFP2_HUMAN  | R.LSQVPM*SALK.S       |        | 2 | 2,3138 | 0,219 | -0,224 |
| 13 | A8K2X8 A8K2X8_HUMAN | R.TSLGPDGLDK.M        |        | 2 | 2,3115 | 0,323 | -0,243 |
| 13 | P26640 SYVC_HUMAN   | E.DNPM*VVPLCNR.S      |        | 2 | 2,3112 | 0,085 | -0,917 |
| 13 | Q58FF7 H90B3_HUMAN  | E.DLPLNISRE.M         |        | 2 | 2,31   | 0,313 | -0,231 |
| 13 | P12755 SKI_HUMAN    | R.APEPLATCTQPR.K      |        | 2 | 2,3096 | 0,359 | -0,455 |
| 13 | P55072 TERA_HUMAN   | E.VYLKPYFLE.A         |        | 2 | 2,3082 | 0,26  | -0,625 |
| 13 | Q9UJZ1 STML2_HUMAN  | K.APVPGTPDSSLSSGSSR.D |        | 2 | 2,3055 | 0,394 | 0,081  |
| 13 | Q99961 SH3G1_HUMAN  | K.LTM*LNTVSK.I        |        | 2 | 2,3052 | 0,148 | -0,358 |
| 13 | Q8NEJ9 NGDN_HUMAN   | R.LVPVHYDETE.A        |        | 2 | 2,3049 | 0,225 | -0,406 |
| 13 | Q02952 AKA12_HUMAN  | E.GSIDTGITVS#REKVTE.V | S1295: | 2 | 2,302  | 0,336 | -0,207 |
| 13 | P05362 ICAM1_HUMAN  | K.CLKDGTFPLPIGE.S     |        | 2 | 2,2992 | 0,27  | -0,506 |
| 13 | P31948 STIP1_HUMAN  | E.IAT#PPPPPPKKE.T     | T198:  | 2 | 2,2978 | 0,378 | -0,758 |
| 13 | P37840 SYUA_HUMAN   | E.GAGSIAAATGFVK.K     |        | 2 | 2,2969 | 0,122 | 0      |
| 13 | Q14157 UBP2L_HUMAN  | R.TSTSTLLHTSVESE.A    |        | 2 | 2,296  | 0,169 | -0,491 |
| 13 | Q8N1Q3 Q8N1Q3_HUMAN | K.NLTPGEQIDKNPS.-     |        | 2 | 2,2951 | 0,269 | -0,432 |
| 13 | P20042 IF2B_HUMAN   | E.M*IFDPTM*SK.K       |        | 2 | 2,2937 | 0,222 | -0,332 |
| 13 | Q9UHD8 SEPT9_HUMAN  | K.STLINTLFK.S         |        | 2 | 2,2937 | 0,25  | 0,118  |
| 13 | Q9UNQ2 DIMT1_HUMAN  | R.SM*DIDDFIR.L        |        | 2 | 2,2933 | 0,299 | 1,947  |
| 13 | Q09666 AHNK_HUMAN   | K.FSM*PGFKGEGPE.V     |        | 2 | 2,2919 | 0,395 | -1,691 |
| 13 | Q9H5V8 CDCP1_HUMAN  | K.ISFLCDDLTR.L        |        | 2 | 2,2914 | 0,28  | 0      |
| 13 | P55010 IF5_HUMAN    | K.VLTLSDDLTR.T        |        | 2 | 2,2888 | 0,231 | -0,21  |
| 13 | O15355 PPM1G_HUMAN  | K.LTTEEVIKE.L         |        | 2 | 2,2884 | 0,209 | 0,345  |
| 13 | Q96C57 CL043_HUMAN  | R.LFFTSVPGGR.E        |        | 2 | 2,2884 | 0,402 | 0      |
| 13 | P48436 SOX9_HUMAN   | K.ALQADSPHSSSGM*SE.V  |        | 2 | 2,2874 | 0,337 | -0,642 |
| 13 | Q9Y3Q8 T22D4_HUMAN  | R.LPNGEPSDPGGK.G      |        | 2 | 2,2872 | 0,197 | -0,579 |
| 13 | Q9UNX4 WDR3_HUMAN   | E.IEDPEEPDPK.K        |        | 2 | 2,2856 | 0,134 | -0,835 |
| 13 | Q03154 ACY1_HUMAN   | K.VVNSILAFR.E         |        | 2 | 2,2851 | 0,305 | -0,718 |
| 13 | Q86V48 LUZP1_HUMAN  | E.DGISSTLPSKE.S       |        | 2 | 2,285  | 0,136 | 0,753  |
| 13 | Q9UBB5 MBD2_HUMAN   | E.EALM*ADILSR.A       |        | 2 | 2,285  | 0,25  | -0,215 |

|    |                     |                           |       |   |        |       |        |
|----|---------------------|---------------------------|-------|---|--------|-------|--------|
| 13 | Q99996 AKAP9_HUMAN  | R.ALTDYITRLE.A            |       | 2 | 2,2847 | 0,248 | -0,408 |
| 13 | Q07866 KLC1_HUMAN   | K.LGPDDPNVAK.T            |       | 2 | 2,2839 | 0,241 | -0,832 |
| 13 | Q16851 UGPA_HUMAN   | K.IQRPPEDSIQPYE.K         |       | 2 | 2,2838 | 0,208 | -0,621 |
| 13 | Q9C0C9 UBE2O_HUMAN  | E.QLLTGSPTS#PTVEPEKPTRE.K | S839: | 2 | 2,2836 | 0,298 | 0      |
| 13 | P07355 ANXA2_HUMAN  | K.AYTNFDAERDALNIE.T       |       | 2 | 2,2827 | 0,19  | -0,28  |
| 13 | Q9UQ84 EXO1_HUMAN   | R.TPSPSPSTALQQFR.R        |       | 2 | 2,2822 | 0,339 | -0,885 |
| 13 | Q13428 TCOF_HUMAN   | K.VGPATPSAQVGK.W          |       | 2 | 2,2818 | 0,412 | -1,426 |
| 13 | P48047 ATPO_HUMAN   | K.VAASVLNPPYVK.R          |       | 2 | 2,281  | 0,176 | -0,736 |
| 13 | Q9UHB7 AFF4_HUMAN   | K.IDLNLTR.I               |       | 2 | 2,2782 | 0,086 | 0,318  |
| 13 | Q7Z417 NUFP2_HUMAN  | R.TSPQVLGSILK.S           |       | 2 | 2,277  | 0,459 | 0      |
| 13 | Q8NEM2 SHCBP_HUMAN  | E.GILIKDFLDE.H            |       | 2 | 2,2764 | 0,253 | 1,049  |
| 13 | Q06830 PRDX1_HUMAN  | E.IIAFSDRAEE.F            |       | 2 | 2,2747 | 0,201 | 0,106  |
| 13 | O94762 RECQ5_HUMAN  | E.GVQGPPM*APEK.Y          |       | 2 | 2,2739 | 0,303 | 0,108  |
| 13 | P31946 1433B_HUMAN  | D.STLIM*QLLRD.N           |       | 2 | 2,2729 | 0,221 | -0,303 |
| 13 | P35232 PHB_HUMAN    | K.AAIISAEGDSK.A           |       | 2 | 2,2716 | 0,272 | 0,689  |
| 13 | Q9UHD8 SEPT9_HUMAN  | E.AAPSCVGDM*ADTPR.D       |       | 2 | 2,2712 | 0,116 | -0,25  |
| 13 | P23526 SAHH_HUMAN   | K.YPQLLPGIR.G             |       | 2 | 2,2709 | 0,119 | -0,462 |
| 13 | Q6FI81 CPIN1_HUMAN  | K.VLLSDSNLHDA.-           |       | 2 | 2,2706 | 0,216 | 0      |
| 13 | Q5SYE7 NHSL1_HUMAN  | K.DTRPPFTNSGQPE.S         |       | 2 | 2,269  | 0,237 | -0,591 |
| 13 | P00558 PGK1_HUMAN   | R.VDFNVPM*K.N             |       | 2 | 2,269  | 0,237 | -0,884 |
| 13 | Q2M1Z3 CDGAP_HUMAN  | R.TDLYIDQLK.S             |       | 2 | 2,2687 | 0,19  | -0,22  |
| 13 | Q02952 AKA12_HUMAN  | E.ALICVGSSK.K             |       | 2 | 2,267  | 0,302 | 0,326  |
| 13 | O95299 NDUAA_HUMAN  | R.LLVQDKFE.V              |       | 2 | 2,2667 | 0,213 | -0,246 |
| 13 | Q7Z5K2 WAPL_HUMAN   | K.LM*DGTSQALAK.A          |       | 2 | 2,2642 | 0,117 | 0,212  |
| 13 | P78362 SRPK2_HUMAN  | R.TVSASSTGDLPK.A          |       | 2 | 2,2642 | 0,283 | -1,679 |
| 13 | Q9Y5K8 VATD_HUMAN   | K.KDNVAGVTLPVFE.H         |       | 2 | 2,2636 | 0,193 | -0,439 |
| 13 | Q5TDH0 DDI2_HUMAN   | R.DM*LLANPHE.L            |       | 2 | 2,2633 | 0,213 | -0,809 |
| 13 | P41091 IF2G_HUMAN   | R.GVTIKPTVDDD.-           |       | 2 | 2,2632 | 0,286 | -1,262 |
| 13 | Q4ZG04 Q4ZG04_HUMAN | E.LLLSTLVR.E              |       | 2 | 2,2605 | 0,28  | -1,067 |
| 13 | Q9HBB9 MKNK2_HUMAN  | E.AAGQGQPVLVR.A           |       | 2 | 2,2599 | 0,102 | -0,111 |
| 13 | P18621 RL17_HUMAN   | R.INPYM*SSPCHIE.M         |       | 2 | 2,2589 | 0,14  | -0,333 |
| 13 | Q15287 RNPS1_HUMAN  | K.M*IDM*PVER.M            |       | 2 | 2,2584 | 0,245 | 0      |
| 13 | Q9HAW0 BRF2_HUMAN   | E.VGNNSLGLPQGK.R          |       | 2 | 2,2575 | 0,235 | 1,752  |

|    |                     |                         |       |   |        |       |        |
|----|---------------------|-------------------------|-------|---|--------|-------|--------|
| 13 | P54760 EPHB4_HUMAN  | R.GAPCTPPSAPR.S         |       | 2 | 2,2551 | 0,189 | -0,302 |
| 13 | Q9UHK0 NUFP1_HUMAN  | E.NQVLDSSAPKS#PSQDVK.A  | S403: | 3 | 2,2546 | 0,241 | -0,195 |
| 13 | Q6QNY0 BL1S3_HUMAN  | E.LYLGPSGPTR.G          |       | 2 | 2,2538 | 0,242 | -0,23  |
| 13 | Q8TEJ3 SH3R3_HUMAN  | E.LPANILLVR.L           |       | 2 | 2,2522 | 0,309 | 0,121  |
| 13 | P46013 KI67_HUMAN   | K.SPPPEM*DTPTSTR.R      |       | 2 | 2,2515 | 0,35  | -0,08  |
| 13 | Q8TF44 NLF3_HUMAN   | K.AQTSYGFAM*LAESPHT#R.R | T159: | 3 | 2,25   | 0,131 | -0,746 |
| 13 | P54132 BLM_HUMAN    | K.SSTAAYQPIKE.G         |       | 2 | 2,2485 | 0,206 | -0,408 |
| 13 | Q96TA1 NIBL1_HUMAN  | R.FDVSSTSVFK.Q          |       | 2 | 2,2478 | 0,209 | 0      |
| 13 | Q13428 TCOF_HUMAN   | K.LPEVQQATK.A           |       | 2 | 2,2474 | 0,156 | 0,241  |
| 13 | P26599 PTBP1_HUMAN  | K.VLFSSNGGVVK.G         |       | 2 | 2,2453 | 0,282 | -0,661 |
| 13 | O95229 ZWINT_HUMAN  | K.GLDPLASEDTSR.Q        |       | 2 | 2,2447 | 0,445 | -0,387 |
| 13 | Q9Y490 TLN1_HUMAN   | E.QIPLLQVGR.G           |       | 2 | 2,2418 | 0,353 | -0,326 |
| 13 | Q7Z406 MYH14_HUMAN  | E.AAQPFLLTPR.G          |       | 2 | 2,2409 | 0,185 | -0,425 |
| 13 | P11177 ODPB_HUMAN   | K.SAIRDNNPVVLE.N        |       | 2 | 2,2408 | 0,179 | -0,342 |
| 13 | Q9Y5K6 CD2AP_HUMAN  | K.SVDFDSLTVR.T          |       | 2 | 2,2408 | 0,149 | -0,964 |
| 13 | P25205 MCM3_HUMAN   | K.VALLDVFR.E            |       | 2 | 2,2395 | 0,288 | -1,046 |
| 13 | Q6PJG2 CN043_HUMAN  | R.FQAEIPLM*R.D          |       | 2 | 2,2364 | 0,176 | -0,327 |
| 13 | Q86WJ1 CHD1L_HUMAN  | K.LLQPFLLR.R            |       | 2 | 2,2362 | 0,106 | 0,183  |
| 13 | Q9HCC0 MCCB_HUMAN   | R.ERIDNLIDPGSPFLE.L     |       | 2 | 2,2359 | 0,256 | -0,356 |
| 13 | Q08J23 NSUN2_HUMAN  | R.ILCDVPCSGDGTMR.K      |       | 2 | 2,2359 | 0,189 | 0      |
| 13 | P04075 ALDOA_HUMAN  | R.QLLLTADDR.V           |       | 2 | 2,2359 | 0,209 | -0,7   |
| 13 | Q68E09 Q68E09_HUMAN | R.DSGRPPGDSSGQAVAPSE.G  |       | 2 | 2,2356 | 0,204 | -0,142 |
| 13 | Q9Y5Q8 TF3C5_HUMAN  | R.DTM*SLM*IR.Q          |       | 2 | 2,2349 | 0,265 | -0,366 |
| 13 | Q07065 CKAP4_HUMAN  | E.DGVLSM*QVASAR.Q       |       | 2 | 2,2348 | 0,369 | -0,781 |
| 13 | P30041 PRDX6_HUMAN  | K.LPFPIDDR.N            |       | 2 | 2,2345 | 0,287 | -0,112 |
| 13 | Q16643 DREB_HUMAN   | R.M*APTPIPTR.S          |       | 2 | 2,233  | 0,247 | -0,366 |
| 13 | A8MT69 STR13_HUMAN  | E.DALRVDVDQLE.K         |       | 2 | 2,2303 | 0,185 | -0,767 |
| 13 | Q8N6N7 ACBD7_HUMAN  | E.DATSAYISK.A           |       | 2 | 2,2293 | 0,197 | -0,319 |
| 13 | P04075 ALDOA_HUMAN  | K.IGEHTPSALAIM*E.N      |       | 2 | 2,2292 | 0,114 | 0,176  |
| 13 | Q13618 CUL3_HUMAN   | E.YLSLFIDDK.L           |       | 2 | 2,2283 | 0,226 | 0      |
| 13 | P11177 ODPB_HUMAN   | E.DNSIPQVKD.I           |       | 2 | 2,2276 | 0,358 | 0,24   |
| 13 | P41252 SYIC_HUMAN   | K.SVVTIFGVK.N           |       | 2 | 2,2272 | 0,279 | 0,353  |
| 13 | Q96C36 P5CR2_HUMAN  | K.LM*AFQPAPK.V          |       | 2 | 2,2266 | 0,222 | 1,676  |

|    |                    |                      |       |   |        |       |        |
|----|--------------------|----------------------|-------|---|--------|-------|--------|
| 13 | P78371 TCPB_HUMAN  | K.LIHFSGVALGE.A      |       | 2 | 2,2241 | 0,251 | 0,213  |
| 13 | Q14676 MDC1_HUMAN  | K.APQAVPLEK.S        |       | 2 | 2,2238 | 0,335 | -0,128 |
| 13 | Q9HB07 MYG1_HUMAN  | R.YALTTTLSAR.V       |       | 2 | 2,2234 | 0,348 | 0,334  |
| 13 | P08473 NEP_HUMAN   | R.NDPM*LLYNK.M       |       | 2 | 2,2233 | 0,275 | -1,303 |
| 13 | P09382 LEG1_HUMAN  | K.SFVLNLGK.D         |       | 2 | 2,2226 | 0,212 | 0,347  |
| 13 | P10809 CH60_HUMAN  | K.DDAM*LLK.G         |       | 2 | 2,2222 | 0,3   | 0,297  |
| 13 | Q13017 RHG05_HUMAN | E.IYVVPDDSQNR.I      |       | 2 | 2,2214 | 0,299 | -0,561 |
| 13 | Q53FT3 CK073_HUMAN | E.DKFVFDLPDYE.S      |       | 2 | 2,2204 | 0,084 | -0,352 |
| 13 | O75071 K0494_HUMAN | E.DLQDLFR.K          |       | 2 | 2,2171 | 0,138 | 0,404  |
| 13 | Q15398 DLG7_HUMAN  | K.TYQVTPM*TPR.S      |       | 2 | 2,2164 | 0,27  | -0,504 |
| 13 | Q9H0A0 NAT10_HUMAN | K.AGPNASIILK.S       |       | 2 | 2,2162 | 0,177 | -0,683 |
| 13 | Q9UGP4 LIMD1_HUMAN | E.NGAPAVGPVQPR.T     |       | 2 | 2,216  | 0,163 | -1,154 |
| 13 | Q16186 ADRM1_HUMAN | R.SQSAAVTPSSTTSSTR.A |       | 3 | 2,213  | 0,087 | 0      |
| 13 | Q9UQ35 SRRM2_HUMAN | R.GEFSASPM*LK.S      |       | 2 | 2,2127 | 0,282 | -1,127 |
| 13 | O43143 DHX15_HUMAN | K.YM*TDGM*LLRE.A     |       | 2 | 2,2117 | 0,183 | -0,871 |
| 13 | Q9UKA4 AKA11_HUMAN | E.DSGLFSPIR.S        |       | 2 | 2,2108 | 0,176 | -0,553 |
| 13 | Q12849 GRSF1_HUMAN | E.DAVAAM*LK.D        |       | 2 | 2,2103 | 0,239 | 0      |
| 13 | Q14004 CD2L5_HUMAN | R.CVDKFDIIGIGE.G     |       | 2 | 2,2102 | 0,156 | 0,495  |
| 13 | P46063 RECQ1_HUMAN | R.VLM*AQHFDE.V       |       | 2 | 2,208  | 0,234 | 1,544  |
| 13 | P17302 CXA1_HUMAN  | E.LQPLAIVDQRPS#R.A   | S365: | 2 | 2,2065 | 0,308 | -0,294 |
| 13 | Q13045 FLII_HUMAN  | D.LTALFLPR.Q         |       | 2 | 2,2055 | 0,352 | 0,59   |
| 13 | Q9BQY9 DBND2_HUMAN | E.ELSLPVPTSDR.T      |       | 2 | 2,205  | 0,188 | 0,101  |
| 13 | P35612 ADDB_HUMAN  | K.SAPASPVQSPAK.E     |       | 2 | 2,2049 | 0,455 | -0,214 |
| 13 | P40763 STAT3_HUMAN | E.ADPGSAAPYLK.T      |       | 2 | 2,2032 | 0,468 | -0,448 |
| 13 | Q13445 TMED1_HUMAN | E.FTFLLPAGR.K        |       | 2 | 2,2023 | 0,4   | 0      |
| 13 | Q75N03 HAKAI_HUMAN | E.LSM*APPPR.S        |       | 2 | 2,201  | 0,3   | 0,373  |
| 13 | P19838 NFKB1_HUMAN | K.LGLGILNNAFR.L      |       | 2 | 2,201  | 0,081 | -0,513 |
| 13 | P58107 EPIPL_HUMAN | R.VLADPSDDTK.G       |       | 2 | 2,2003 | 0,297 | 0,23   |
| 13 | Q13045 FLII_HUMAN  | E.AVLQSPGLSGK.V      |       | 2 | 2,1991 | 0,283 | -0,115 |
| 13 | O95425 SVIL_HUMAN  | R.DSSFTEVPR.S        |       | 2 | 2,1985 | 0,311 | -0,353 |
| 13 | P42704 LPPRC_HUMAN | K.LDDLFLK.R          |       | 2 | 2,1959 | 0,184 | -0,071 |
| 13 | P27694 RFA1_HUMAN  | R.NIYLM*DTSGK.V      |       | 2 | 2,1958 | 0,141 | 0      |
| 13 | Q9Y2W2 WBP11_HUMAN | E.LTPLQAM*M*LR.M     |       | 2 | 2,1955 | 0,394 | -0,304 |



|    |                    |                             |        |   |        |       |        |
|----|--------------------|-----------------------------|--------|---|--------|-------|--------|
| 13 | Q12888 TP53B_HUMAN | E.ILM*TGGAASVK.Q            |        | 2 | 2,1952 | 0,187 | 0      |
| 13 | Q14683 SMC1A_HUMAN | K.LVIDVIR.Y                 |        | 2 | 2,1942 | 0,113 | -0,295 |
| 13 | Q99618 CDCA3_HUMAN | K.TSSGDPPSPLVK.Q            |        | 2 | 2,1934 | 0,276 | -0,103 |
| 13 | Q7KZ85 SPT6H_HUMAN | R.LTPRPSPSPM*IE.S           |        | 2 | 2,1933 | 0,124 | 1,092  |
| 13 | Q08945 SSRP1_HUMAN | K.LFDFVNAK.K                |        | 2 | 2,193  | 0,16  | 0      |
| 13 | Q9H6U6 BCAS3_HUMAN | R.DVVGSGTELQR.E             |        | 2 | 2,1925 | 0,201 | 0      |
| 13 | P31930 QCR1_HUMAN  | E.DAVPTLTPCR.F              |        | 2 | 2,1922 | 0,274 | -0,756 |
| 13 | O75390 CISY_HUMAN  | E.DSM*DLIAK.L               |        | 2 | 2,1921 | 0,165 | -0,604 |
| 13 | Q9Y6M7 S4A7_HUMAN  | R.IPLVRS#FADIGK.K           | S233:  | 3 | 2,1915 | 0,105 | 0,197  |
| 13 | Q9Y266 NUDC_HUMAN  | K.DM*VVDIQR.R               |        | 2 | 2,1882 | 0,124 | 0,184  |
| 13 | Q9NQW6 ANLN_HUMAN  | R.TPIITPNTK.A               |        | 2 | 2,1881 | 0,237 | 0,248  |
| 13 | Q5JTV8 TOIP1_HUMAN | R.ISHLVLPVQPE.N             |        | 2 | 2,1877 | 0,195 | -0,396 |
| 13 | Q8TEU7 RPGF6_HUMAN | E.VEPTDSEPYSCSK.S           |        | 2 | 2,1856 | 0,208 | -0,244 |
| 13 | O00303 EIF3F_HUMAN | R.LHPVILASIVD.S             |        | 2 | 2,1852 | 0,305 | -0,622 |
| 13 | P35080 PROF2_HUMAN | E.AAIVGYCDAK.Y              |        | 2 | 2,1848 | 0,362 | 0      |
| 13 | Q9GZR2 REXO4_HUMAN | E.T#SPQVKGEEM*PAGKDQE.A     | T110:  | 3 | 2,1838 | 0,108 | -0,57  |
| 13 | P30622 CLIP1_HUMAN | K.IGFPSTTPAK.A              |        | 2 | 2,1826 | 0,34  | -0,539 |
| 13 | Q92879 CELF1_HUMAN | K.LFIGM*ISK.K               |        | 2 | 2,1822 | 0,107 | -0,132 |
| 13 | Q14839 CHD4_HUMAN  | R.IGVM*SLIR.K               |        | 2 | 2,1822 | 0,118 | 1,82   |
| 13 | P62750 RL23A_HUMAN | K.LYDIDVAK.V                |        | 2 | 2,1816 | 0,138 | -0,586 |
| 13 | P35658 NU214_HUMAN | E.SDDLHTFLE.I               |        | 2 | 2,1799 | 0,151 | -0,205 |
| 13 | Q06830 PRDX1_HUMAN | K.ATAVM*PDGQFK.D            |        | 2 | 2,1794 | 0,206 | -0,723 |
| 13 | P11137 MAP2_HUMAN  | E.DLGVCVFNK.Y               |        | 2 | 2,1781 | 0,26  | -0,109 |
| 13 | Q0JRZ9 FCHO2_HUMAN | K.TFALPGIHK.K               |        | 2 | 2,1774 | 0,161 | -0,762 |
| 13 | Q15019 SEPT2_HUMAN | R.TM*LITHM*QD.L             |        | 2 | 2,1759 | 0,204 | 0,109  |
| 13 | Q7Z3V4 UBE3B_HUMAN | K.DLKPSVLFQE.L              |        | 2 | 2,1755 | 0,103 | -0,519 |
| 13 | P17987 TCPA_HUMAN  | K.QAGVFTEPTIVK.V            |        | 2 | 2,1746 | 0,299 | -0,41  |
| 13 | Q16881 TRXR1_HUMAN | E.VFTTLSVTK.R               |        | 2 | 2,174  | 0,196 | 0,061  |
| 13 | P60174 TPIS_HUMAN  | E.FVDIINAK.Q                |        | 2 | 2,1739 | 0,165 | -0,597 |
| 13 | O75864 K1986_HUMAN | R.SGPPLPNGLKPE.F            |        | 2 | 2,1704 | 0,353 | 0      |
| 13 | Q9UKV3 ACINU_HUMAN | R.SAQPLPLKIEE.L             |        | 2 | 2,1694 | 0,191 | -0,299 |
| 13 | Q14674 ESPL1_HUMAN | E.ILRGS#DGEDSASGGKTPAPGPE.A | S1508: | 3 | 2,1685 | 0,086 | -0,42  |
| 13 | P33981 TTK_HUMAN   | E.LTIDSIM*NK.V              |        | 2 | 2,1657 | 0,172 | -0,116 |

|    |                    |                           |       |   |        |       |        |
|----|--------------------|---------------------------|-------|---|--------|-------|--------|
| 13 | Q9H6S3 ES8L2_HUMAN | E.DAGAPFEQAGQK.Y          |       | 2 | 2,1638 | 0,244 | -0,2   |
| 13 | Q8NBS9 TXND5_HUMAN | R.FVLSQAKDEL.-            |       | 2 | 2,162  | 0,169 | -0,637 |
| 13 | P16949 STMN1_HUMAN | E.SVPEFPLS#PPKK.K         | S38:  | 2 | 2,1614 | 0,284 | -0,694 |
| 13 | Q8WYA6 CTBL1_HUMAN | K.FVDILGLR.T              |       | 2 | 2,1609 | 0,351 | -0,131 |
| 13 | Q14554 PDIA5_HUMAN | K.IACAAVDCVK.D            |       | 2 | 2,1602 | 0,117 | 0,11   |
| 13 | Q8IUH3 RBM45_HUMAN | R.IFLVISK.Y               |       | 2 | 2,1584 | 0,091 | 0,223  |
| 13 | P78527 PRKDC_HUMAN | R.LSFAVPFRE.M             |       | 2 | 2,1583 | 0,134 | 0,687  |
| 13 | Q8IXM2 CQ049_HUMAN | E.DSGIPLPAES#PKK.G        | S96:  | 2 | 2,1571 | 0,199 | -0,86  |
| 13 | P53999 TCP4_HUMAN  | K.VLIDIRE.Y               |       | 2 | 2,1563 | 0,161 | 0,284  |
| 13 | P08107 HSP71_HUMAN | K.DNNLLGRFE.L             |       | 2 | 2,1554 | 0,151 | -0,566 |
| 13 | Q03164 HRX_HUMAN   | D.IGSISNLLIK.A            |       | 2 | 2,1546 | 0,23  | -0,231 |
| 13 | Q96FX7 TRM61_HUMAN | E.VLPQVYNVR.T             |       | 2 | 2,1544 | 0,283 | -0,673 |
| 13 | Q86UU1 PHLB1_HUMAN | E.DFSLTLGAR.G             |       | 2 | 2,1527 | 0,198 | 0,124  |
| 13 | O75909 CCNK_HUMAN  | K.DLAHTPSQLE.G            |       | 2 | 2,1519 | 0,247 | -0,879 |
| 13 | P09874 PARP1_HUMAN | K.AEPVEVVAPR.G            |       | 2 | 2,1506 | 0,168 | 0,229  |
| 13 | P07602 SAP_HUMAN   | D.VVTAAGDM*LK.D           |       | 2 | 2,1493 | 0,424 | 0,119  |
| 13 | Q6PKG0 LARP1_HUMAN | R.AVTPVPTKTEE.V           |       | 2 | 2,1485 | 0,242 | -0,521 |
| 13 | P42574 CASP3_HUMAN | R.SSFVCVLLSHGE.E          |       | 2 | 2,1485 | 0,191 | -0,457 |
| 13 | Q8WV99 ZFN2B_HUMAN | R.LDFLPLK.C               |       | 2 | 2,1451 | 0,081 | 0,721  |
| 13 | P26639 SYTC_HUMAN  | R.IYGISFPDPK.M            |       | 2 | 2,144  | 0,36  | -0,322 |
| 13 | P63272 SPT4H_HUMAN | R.ACLLCSLVK.T             |       | 2 | 2,1407 | 0,268 | -0,803 |
| 13 | Q9Y4C8 RBM19_HUMAN | E.LSDM*DYLK.S             |       | 2 | 2,1404 | 0,16  | 0,122  |
| 13 | Q14C86 GAPD1_HUMAN | E.M*TPYNTPQLS#PATTPANKK.N | S466: | 3 | 2,1395 | 0,181 | -0,339 |
| 13 | Q9UPT5 EXOC7_HUMAN | D.KHGPLAGRDDM*LDVE.T      |       | 2 | 2,1393 | 0,129 | -0,731 |
| 13 | Q58FF7 H90B3_HUMAN | R.APFDLFENK.K             |       | 2 | 2,1378 | 0,264 | -0,451 |
| 13 | P25786 PSA1_HUMAN  | K.AQPAQPADEPAEK.A         |       | 2 | 2,137  | 0,292 | -1,444 |
| 13 | Q8TAP6 CEP76_HUMAN | R.GIIDDVM*KE.L            |       | 2 | 2,1368 | 0,164 | -0,118 |
| 13 | Q8NFA0 UBP32_HUMAN | E.QQGIDYAQFLPK.T          |       | 2 | 2,1363 | 0,099 | -0,087 |
| 13 | P49411 EFTU_HUMAN  | K.TTLTAAITK.I             |       | 2 | 2,1363 | 0,247 | -1,26  |
| 13 | Q16881 TRXR1_HUMAN | R.QFVPIKVEQIE.A           |       | 2 | 2,1361 | 0,108 | -0,55  |
| 13 | P52701 MSH6_HUMAN  | E.M*EVGTTYVTDK.S          |       | 2 | 2,1345 | 0,236 | -0,387 |
| 13 | Q92974 ARHG2_HUMAN | R.ILSQSTDSLNM*R.N         |       | 2 | 2,1327 | 0,261 | -0,707 |
| 13 | P46937 YAP1_HUMAN  | E.ALFNVM*NPK.T            |       | 2 | 2,1325 | 0,187 | 0,109  |

|    |                      |                      |       |   |        |       |        |
|----|----------------------|----------------------|-------|---|--------|-------|--------|
| 13 | O94979 SC31A_HUMAN   | E.NGNIILYDPSK.I      |       | 2 | 2,1323 | 0,306 | -0,692 |
| 13 | O75144 ICOSL_HUMAN   | R.ALM*SPAGM*LR.G     |       | 2 | 2,1322 | 0,305 | 0,226  |
| 13 | P15927 RFA2_HUMAN    | E.NTVVPPETYVK.V      |       | 2 | 2,1298 | 0,176 | 0,098  |
| 13 | Q9NQS7 INCE_HUMAN    | R.LLNVEVPQK.V        |       | 2 | 2,1293 | 0,091 | -0,587 |
| 13 | Q9UJY5 GGA1_HUMAN    | E.DFEGPPLATR.L       |       | 2 | 2,1288 | 0,199 | -0,442 |
| 13 | P06744 G6PI_HUMAN    | R.M*LVDLAK.S         |       | 2 | 2,1288 | 0,128 | 0,53   |
| 13 | P05026 AT1B1_HUMAN   | E.DCGDVPSEPK.E       |       | 2 | 2,128  | 0,173 | 0,332  |
| 13 | Q8NG31 CASC5_HUMAN   | K.IDFNDFIK.R         |       | 2 | 2,128  | 0,099 | -0,181 |
| 13 | Q68DX9 Q68DX9_HUMAN  | R.IDS#PGFKPASQVVYR.K | S491: | 2 | 2,1241 | 0,394 | -0,069 |
| 13 | P30153 2AAA_HUMAN    | R.YM*VADKFTE.L       |       | 2 | 2,1222 | 0,317 | -0,327 |
| 13 | Q9H2P0 ADNP_HUMAN    | E.QM*EFPLLK.K        |       | 2 | 2,1186 | 0,089 | -0,657 |
| 13 | P68104 EF1A1_HUMAN   | R.GNVAGDSKNDPPM*E.A  |       | 2 | 2,1186 | 0,263 | -0,253 |
| 13 | P30085 KCY_HUMAN     | K.FLIDGFPR.N         |       | 2 | 2,1181 | 0,179 | -0,126 |
| 13 | Q16822 PPCKM_HUMAN   | K.EGALDLSGLR.A       |       | 2 | 2,115  | 0,131 | -0,828 |
| 13 | P23193 TCEA1_HUMAN   | R.DTYVSSFPR.A        |       | 2 | 2,1119 | 0,187 | -0,228 |
| 13 | ##Q8IVF5 TIAM2_HUMAN | E.YFLLTCGK.L         |       | 2 | 2,1116 | 0,091 | -0,365 |
| 13 | P07237 PDIA1_HUMAN   | E.VAVIGFFK.D         |       | 2 | 2,1076 | 0,211 | 0,069  |
| 13 | P30050 RL12_HUMAN    | K.IGPLGLSPK.K        |       | 2 | 2,1064 | 0,29  | 0,069  |
| 13 | Q9BWG6 SCNM1_HUMAN   | E.SATVSAPAPM*SPTR.R  |       | 2 | 2,1031 | 0,261 | -0,615 |
| 13 | O60613 SEP15_HUMAN   | R.FPQVQAFVR.S        |       | 2 | 2,1029 | 0,165 | 0,112  |
| 13 | Q9BYK8 PR285_HUMAN   | E.QAAVVTAM*VK.A      |       | 2 | 2,1022 | 0,308 | 0      |
| 13 | P23526 SAHH_HUMAN    | R.IAGCLHM*TVE.T      |       | 2 | 2,0989 | 0,196 | -0,106 |
| 13 | Q8N2Q7 NLGN1_HUMAN   | K.TGDPNQVPVQDTK.F    |       | 2 | 2,0971 | 0,182 | 0,611  |
| 13 | Q8TF05 PP4R1_HUMAN   | E.QTIM*ALQM*DR.D     |       | 2 | 2,0916 | 0,251 | -0,197 |
| 13 | P09211 GSTP1_HUMAN   | K.ALPGQLKPF.T        |       | 2 | 2,0904 | 0,33  | -1,109 |
| 13 | P0C7M2 RA1L3_HUMAN   | R.DYFEQYGK.I         |       | 2 | 2,0904 | 0,281 | 0,349  |
| 13 | P54886 P5CS_HUMAN    | K.M*IDLIIPR.G        |       | 2 | 2,0902 | 0,12  | 0,062  |
| 13 | Q9NR56 MBNL1_HUMAN   | R.VIACFDSLK.G        |       | 2 | 2,0902 | 0,252 | 0,116  |
| 13 | P35251 RFC1_HUMAN    | R.TLAM*LDEEPK.T      |       | 2 | 2,0899 | 0,348 | -0,839 |
| 13 | Q00341 VIGLN_HUMAN   | E.DSM*LVDPK.H        |       | 2 | 2,0892 | 0,173 | -0,331 |
| 13 | Q86TI2 DPP9_HUMAN    | E.VTLLHFLQE.Y        |       | 2 | 2,086  | 0,201 | -1,109 |
| 13 | P55072 TERA_HUMAN    | R.IHVLPIDDTVE.G      |       | 2 | 2,0856 | 0,258 | 0,098  |
| 13 | P50402 EMD_HUMAN     | R.GDADM*YDLPK.K      |       | 2 | 2,0848 | 0,24  | -0,321 |

|    |                    |                                |            |   |        |       |        |
|----|--------------------|--------------------------------|------------|---|--------|-------|--------|
| 13 | P02768 ALBU_HUMAN  | K.YICENQDSISSK.L               |            | 2 | 2,083  | 0,146 | -0,507 |
| 13 | P49790 NU153_HUMAN | E.GSVLDILK.S                   |            | 2 | 2,0817 | 0,243 | 0,722  |
| 13 | P61978 HNRPK_HUMAN | K.DLAGSIIGK.G                  |            | 2 | 2,0817 | 0,245 | 0      |
| 13 | Q9UKG1 DP13A_HUMAN | R.YCFQITSFDGK.K                |            | 2 | 2,0799 | 0,271 | -0,357 |
| 13 | Q9Y490 TLN1_HUMAN  | E.SALQLLYTAKE.A                |            | 2 | 2,0797 | 0,162 | -0,789 |
| 13 | P12956 KU70_HUMAN  | K.FTVPM*LKE.A                  |            | 2 | 2,0797 | 0,158 | -0,062 |
| 13 | P60174 TPIS_HUMAN  | E.LIGTLNAAK.V                  |            | 2 | 2,0792 | 0,109 | -0,271 |
| 13 | P42694 HELZ_HUMAN  | E.LAEM*PPPQSR.L                |            | 2 | 2,0782 | 0,282 | -0,107 |
| 13 | Q15019 SEPT2_HUMAN | K.VNIVPIAK.A                   |            | 2 | 2,078  | 0,207 | 0,256  |
| 13 | Q5JSZ5 K0515_HUMAN | E.IFSSLQPR.S                   |            | 2 | 2,0765 | 0,214 | -0,334 |
| 13 | P35611 ADDA_HUMAN  | R.AAVVTS#PPPTTAPHKE.R          | S12:       | 3 | 2,0762 | 0,161 | 0      |
| 13 | P18583 SON_HUMAN   | E.SDQTLAALLSPK.E               |            | 2 | 2,076  | 0,089 | -0,098 |
| 13 | P30622 CLIP1_HUMAN | R.VM*ATTSASLK.R                |            | 2 | 2,0749 | 0,319 | 0      |
| 13 | Q9Y3C4 TPRKB_HUMAN | R.VTLLLFK.D                    |            | 2 | 2,0747 | 0,183 | 0,146  |
| 13 | Q641Q2 FA21A_HUMAN | K.KVTLSS#S#KNLKPSETKTQKGLFSD.E | S521:S522: | 3 | 2,0745 | 0,151 | 1,594  |
| 13 | Q9ULH7 MKL2_HUMAN  | K.AELPPTGTSNATR.V              |            | 2 | 2,0722 | 0,243 | -0,464 |
| 13 | Q15185 TEBP_HUMAN  | E.IDLFHCIDPND.S                |            | 2 | 2,0702 | 0,108 | -0,359 |
| 13 | Q15631 TSN_HUMAN   | E.ILGIEPDRE.K                  |            | 2 | 2,07   | 0,127 | -0,117 |
| 13 | O60282 KIF5C_HUMAN | E.ILNLK.D                      |            | 2 | 2,0689 | 0,119 | 0,295  |
| 13 | Q6P0N0 CN106_HUMAN | E.TLSTNCIPIK.N                 |            | 2 | 2,0683 | 0,153 | -0,532 |
| 13 | Q29RF7 PDS5A_HUMAN | R.IISVTPVK.N                   |            | 2 | 2,0674 | 0,164 | 0,214  |
| 13 | Q14980 NUMA1_HUMAN | R.VSLEPHQGPGTPE.S              |            | 2 | 2,0665 | 0,291 | -0,091 |
| 13 | Q5T1M5 FKB15_HUMAN | E.QLAINTSPDAVK.A               |            | 2 | 2,066  | 0,235 | -0,679 |
| 13 | Q5T4S7 UBR4_HUMAN  | E.M*KELPQLVASVIE.S             |            | 2 | 2,065  | 0,229 | -0,248 |
| 13 | P21333 FLNA_HUMAN  | R.LSPFMADIR.D                  |            | 2 | 2,0643 | 0,281 | -0,116 |
| 13 | Q8WVCO LEO1_HUMAN  | R.ILPM*AGRDPE.C                |            | 2 | 2,0621 | 0,17  | -1,313 |
| 13 | P49590 SYHM_HUMAN  | R.DLS#PQHM*VVRE.K              | S67:       | 2 | 2,061  | 0,283 | -0,434 |
| 13 | Q66K74 MAP1S_HUMAN | E.LGPIPAGEEK.A                 |            | 2 | 2,0599 | 0,276 | 0,302  |
| 13 | Q9UBP0 SPAST_HUMAN | K.M*M*TNLVM*AK.D               |            | 2 | 2,0599 | 0,166 | 0,112  |
| 13 | Q9UM22 EPDR1_HUMAN | E.YILLYK.D                     |            | 2 | 2,0592 | 0,118 | 0,375  |
| 13 | Q9BRX5 PSF3_HUMAN  | E.DTSALVAR.L                   |            | 2 | 2,0555 | 0,17  | 0,073  |
| 13 | P14618 KPYM_HUMAN  | R.APIIAVTR.N                   |            | 2 | 2,0553 | 0,192 | 0,363  |
| 13 | O43900 PRIC3_HUMAN | E.LAPATGPEEPSR.F               |            | 2 | 2,0545 | 0,547 | -1,096 |

|    |                    |                            |       |   |        |       |        |
|----|--------------------|----------------------------|-------|---|--------|-------|--------|
| 13 | Q8TD19 NEK9_HUMAN  | E.NLQIFTQLQK.L             |       | 2 | 2,0538 | 0,125 | -0,693 |
| 13 | Q7Z6Z7 HUWE1_HUMAN | K.ADGTATAPPPR.S            |       | 2 | 2,052  | 0,382 | -0,579 |
| 13 | P07737 PROF1_HUMAN | K.STGGAPTFNVTVK.T          |       | 2 | 2,052  | 0,376 | -0,354 |
| 13 | Q14103 HNRPD_HUMAN | R.GFCFITFK.E               |       | 2 | 2,0518 | 0,185 | -0,359 |
| 13 | P52732 KIF11_HUMAN | K.SYLYPSTLVR.T             |       | 2 | 2,0512 | 0,215 | -0,712 |
| 13 | P49848 TAF6_HUMAN  | E.AGDSPPPAPGTPK.A          |       | 2 | 2,0509 | 0,103 | 0,102  |
| 13 | P42166 LAP2A_HUMAN | E.DLLDQLVK.Y               |       | 2 | 2,0487 | 0,093 | 0,065  |
| 13 | Q9UIF9 BAZ2A_HUMAN | E.VPLTASVTSPK.A            |       | 2 | 2,0477 | 0,363 | -0,665 |
| 13 | O60506 HNRPQ_HUMAN | K.SAFLCGVM*K.T             |       | 2 | 2,0465 | 0,241 | 0,119  |
| 13 | O75417 DPOLQ_HUMAN | E.SYLFGSPSDIK.N            |       | 2 | 2,0455 | 0,189 | -1,005 |
| 13 | Q86X29 LSR_HUMAN   | R.GPALTPIRDEE.W            |       | 2 | 2,0445 | 0,289 | -0,306 |
| 13 | P78417 GSTO1_HUMAN | K.KNPFGLVPVLE.N            |       | 2 | 2,0438 | 0,152 | 0      |
| 13 | Q8WZ73 RFFL_HUMAN  | E.TQSIDSEDSFVPGR.R         |       | 2 | 2,0428 | 0,113 | 0,079  |
| 13 | Q8NFD5 ARI1B_HUMAN | R.SQGSPPM*DPM*VM*K.R       |       | 2 | 2,0378 | 0,121 | -0,81  |
| 13 | Q9H2P0 ADNP_HUMAN  | K.QFEPNDFYK.N              |       | 2 | 2,036  | 0,113 | -1,125 |
| 13 | P61353 RL27_HUMAN  | R.YSVDIPLDK.T              |       | 2 | 2,0345 | 0,353 | 0,116  |
| 13 | P17812 PYRG1_HUMAN | E.EQGVVDYFLR.R             |       | 2 | 2,0331 | 0,258 | -0,995 |
| 13 | Q9UK76 HN1_HUMAN   | E.EKPVPAAPVPS#PVAPAPVPSR.R | S131: | 2 | 2,0312 | 0,396 | -0,342 |
| 13 | P35222 CTNB1_HUMAN | R.LVQLLVR.A                |       | 2 | 2,0299 | 0,142 | -0,145 |
| 13 | Q7Z739 YTHD3_HUMAN | K.IGGDLTAAVTK.T            |       | 2 | 2,025  | 0,228 | -0,233 |
| 13 | Q9NSD9 SYFB_HUMAN  | D.LLFQALGR.T               |       | 2 | 2,0238 | 0,173 | 0,199  |
| 13 | P50548 ERF_HUMAN   | E.LEEPLGEDPR.A             |       | 2 | 2,0237 | 0,21  | -0,211 |
| 13 | Q15233 NONO_HUMAN  | R.AVVIVDDR.G               |       | 2 | 2,0225 | 0,211 | 0,344  |
| 13 | P27816 MAP4_HUMAN  | K.DVAPSTVKE.V              |       | 2 | 2,0212 | 0,219 | 0,064  |
| 13 | P62736 ACTA_HUMAN  | R.DLTDYLM*K.I              |       | 2 | 2,0212 | 0,36  | -0,12  |
| 13 | Q5VWG9 TAF3_HUMAN  | K.SQM*PTAKPLE.T            |       | 2 | 2,02   | 0,292 | -0,109 |
| 13 | Q7L014 DDX46_HUMAN | K.VVTVVTTK.K               |       | 2 | 2,0184 | 0,384 | 0,432  |
| 13 | Q86SQ4 GP126_HUMAN | K.CLLNNALPVKE.K            |       | 2 | 2,0169 | 0,095 | -0,672 |
| 13 | O95429 BAG4_HUMAN  | K.DSSYPYSQSDQSM*NR.H       |       | 3 | 2,0132 | 0,189 | 0,103  |
| 13 | Q6PGN9 PSRC1_HUMAN | D.LLPTVNSLTR.S             |       | 2 | 2,0123 | 0,362 | 0      |
| 13 | Q99729 ROAA_HUMAN  | R.GFVFITFK.E               |       | 2 | 2,0109 | 0,248 | -0,064 |
| 13 | Q92917 GPKOW_HUMAN | E.DVLSPTDCVCR.T            |       | 2 | 2,0064 | 0,116 | -0,092 |
| 13 | P08174 DAF_HUMAN   | E.DTVITYK.C                |       | 2 | 2,0059 | 0,306 | 0,29   |

|    |                     |                     |   |        |       |        |
|----|---------------------|---------------------|---|--------|-------|--------|
| 13 | P11233 RALA_HUMAN   | K.VFFDLM*RE.I       | 2 | 2,004  | 0,202 | -0,227 |
| 13 | Q9H0C8 ILKAP_HUMAN  | K.ASSVIFGLK.G       | 2 | 2,0037 | 0,262 | -0,86  |
| 13 | Q9H1E3 NUCKS_HUMAN  | K.ATVTPSPVK.G       | 2 | 2,0037 | 0,31  | 0,339  |
| 13 | O60701 UGDH_HUMAN   | K.M*LKPAFIFD.G      | 2 | 1,9999 | 0,209 | -1,445 |
| 13 | ##P18031 PTN1_HUMAN | D.ESILTLK.L         | 2 | 1,9998 | 0,127 | 0,455  |
| 13 | Q13308 PTK7_HUMAN   | E.IQPQTQVTLR.C      | 2 | 1,999  | 0,284 | -0,618 |
| 13 | P22626 ROA2_HUMAN   | K.LTDCVVM*R.D       | 2 | 1,9942 | 0,234 | 0      |
| 13 | Q6ZUM4 RHG27_HUMAN  | K.QM*LYTNHFTQE.Q    | 2 | 1,9929 | 0,098 | -0,427 |
| 13 | O14979 HNRDL_HUMAN  | R.GFGFVLFK.D        | 2 | 1,9928 | 0,267 | 0      |
| 13 | Q14554 PDIA5_HUMAN  | R.NNVLVLYSK.S       | 2 | 1,9921 | 0,085 | -0,465 |
| 13 | Q9BZL6 KPCD2_HUMAN  | E.M*LFGLVR.Q        | 2 | 1,9916 | 0,162 | 0,286  |
| 13 | Q92667 AKAP1_HUMAN  | E.STVPFSGVVK.G      | 2 | 1,9915 | 0,298 | -0,319 |
| 13 | Q99956 DUS9_HUMAN   | R.LLLLCDR.S         | 2 | 1,9915 | 0,191 | -0,338 |
| 13 | P42566 EP15_HUMAN   | K.IDPFGGDPFK.G      | 2 | 1,988  | 0,136 | -0,893 |
| 13 | O14776 TCRG1_HUMAN  | R.VFFYNPTTR.L       | 2 | 1,9831 | 0,111 | -0,746 |
| 13 | Q15435 PP1R7_HUMAN  | K.VM*LALPSVR.Q      | 2 | 1,9816 | 0,11  | -0,061 |
| 13 | Q9P289 MST4_HUMAN   | R.VLFLIPK.N         | 2 | 1,9809 | 0,117 | 0      |
| 13 | P80723 BASP_HUMAN   | E.QAAPGPAAGGEAPK.A  | 2 | 1,9797 | 0,346 | 0      |
| 13 | O00159 MYO1C_HUMAN  | R.NPQSYLYLVK.G      | 2 | 1,9771 | 0,144 | -0,697 |
| 13 | P35250 RFC2_HUMAN   | E.DIIGNIFR.V        | 2 | 1,9744 | 0,127 | 0,193  |
| 13 | P38117 ETFB_HUMAN   | K.VDLVLLGK.Q        | 2 | 1,9728 | 0,221 | 0,285  |
| 13 | P54277 PMS1_HUMAN   | E.DIQDIIYR.M        | 2 | 1,9721 | 0,186 | -0,118 |
| 13 | Q9H4H8 FA83D_HUMAN  | E.LTLGNLLR.M        | 2 | 1,9713 | 0,156 | -0,068 |
| 13 | Q9UDY2 ZO2_HUMAN    | K.LQLVVLR.D         | 2 | 1,9679 | 0,131 | 0      |
| 13 | Q14155 ARHG7_HUMAN  | K.LPTTGM*TITK.L     | 2 | 1,965  | 0,366 | -0,339 |
| 13 | Q9BYJ9 YTHD1_HUMAN  | R.DTQEVPLEK.A       | 2 | 1,9638 | 0,101 | -0,922 |
| 13 | P43686 PRS6B_HUMAN  | R.LIFSTITSK.M       | 2 | 1,9623 | 0,214 | -0,846 |
| 13 | O95793 STAU1_HUMAN  | K.ATVTAM*IAR.E      | 2 | 1,9618 | 0,229 | -0,128 |
| 13 | P35579 MYH9_HUMAN   | R.GDLPFVPR.R        | 2 | 1,9564 | 0,251 | -0,122 |
| 13 | Q8N6T3 ARFG1_HUMAN  | R.DVTTFFSGK.A       | 2 | 1,9553 | 0,241 | -0,122 |
| 13 | Q86VR2 F134C_HUMAN  | E.GVPTTPGPASGSTFR.G | 2 | 1,9547 | 0,212 | -0,426 |
| 13 | P49736 MCM2_HUMAN   | E.VVLAM*YPK.Y       | 2 | 1,9533 | 0,228 | -0,456 |
| 13 | P78527 PRKDC_HUMAN  | K.DYVDLFR.H         | 2 | 1,9492 | 0,211 | 0,066  |

|    |                      |                        |       |   |        |       |        |
|----|----------------------|------------------------|-------|---|--------|-------|--------|
| 13 | Q03252 LMNB2_HUMAN   | R.AGGPATPLSPTR.L       |       | 2 | 1,949  | 0,198 | -0,217 |
| 13 | Q92615 LARP5_HUMAN   | R.SPS#PAHLRDDPKVAE.K   | S601: | 2 | 1,9473 | 0,245 | -0,893 |
| 13 | Q96N64 PWP2A_HUMAN   | R.VTLDDHIE.D           |       | 2 | 1,9465 | 0,135 | -0,065 |
| 13 | Q8WUF5 IASPP_HUMAN   | E.AGDVDEGPVARPLS#PTR.L | S489: | 2 | 1,9449 | 0,334 | -1,746 |
| 13 | P21127 CD2L1_HUMAN   | K.TLM*IQLLR.G          |       | 2 | 1,944  | 0,09  | 0,304  |
| 13 | P08670 VIME_HUMAN    | R.FANYIDKVR.F          |       | 2 | 1,9396 | 0,134 | 0,108  |
| 13 | P60228 EIF3E_HUMAN   | R.TTVVAQLK.Q           |       | 2 | 1,9392 | 0,137 | 0,213  |
| 13 | P34931 HS71L_HUMAN   | E.TAGGVM*TALIK.R       |       | 2 | 1,9385 | 0,352 | -0,226 |
| 13 | Q16563 SYPL1_HUMAN   | K.TVTATFGYPFR.L        |       | 2 | 1,937  | 0,284 | 1,743  |
| 13 | Q10570 CPSF1_HUMAN   | K.VITLCLYR.D           |       | 2 | 1,9363 | 0,192 | -0,353 |
| 13 | P51114 FXR1_HUMAN    | E.DFIQVPR.N            |       | 2 | 1,935  | 0,103 | 0,07   |
| 13 | Q3ZCQ8 TIM50_HUMAN   | E.DDPLAAFQ.Q           |       | 2 | 1,9284 | 0,196 | 0,07   |
| 13 | Q8WZA0 LZIC_HUMAN    | K.VEILTALR.K           |       | 2 | 1,9243 | 0,124 | 0,2    |
| 13 | P07900 HS90A_HUMAN   | R.DNSTM*GYM*AAK.K      |       | 2 | 1,9241 | 0,246 | -0,2   |
| 13 | P31150 GDIA_HUMAN    | E.LLEPIDQK.F           |       | 2 | 1,9175 | 0,137 | -0,51  |
| 13 | P23246 SFPQ_HUMAN    | K.GFGFIKLE.S           |       | 2 | 1,9161 | 0,169 | 0,201  |
| 13 | ##Q9ULI1 K1239_HUMAN | E.ASLSGPFATVK.N        |       | 2 | 1,9156 | 0,164 | 0,113  |
| 13 | Q9HCE9 TM16H_HUMAN   | R.LPAFLSFK.F           |       | 2 | 1,9133 | 0,304 | -0,33  |
| 13 | P16615 AT2A2_HUMAN   | E.DSANFIKYE.T          |       | 2 | 1,911  | 0,118 | -0,112 |
| 13 | Q96EZ8 MCRS1_HUMAN   | R.ASSQALGTIPK.R        |       | 2 | 1,9104 | 0,09  | 1,706  |
| 13 | Q99961 SH3G1_HUMAN   | R.SM*PPLDQPSC.A        |       | 2 | 1,9089 | 0,136 | 0      |
| 13 | Q96HS1 PGAM5_HUMAN   | R.EPLSLINVR.K          |       | 2 | 1,9084 | 0,267 | -0,586 |
| 13 | Q9ULH1 DDEF1_HUMAN   | K.LALPGFSTPR.D         |       | 2 | 1,907  | 0,264 | -1,037 |
| 13 | P10244 MYBB_HUMAN    | K.LM*M*STLPK.S         |       | 2 | 1,9051 | 0,136 | 0,192  |
| 13 | P54277 PMS1_HUMAN    | K.AVDAPVM*AM*K.Y       |       | 2 | 1,9035 | 0,085 | 0,115  |
| 13 | O94826 TOM70_HUMAN   | R.AS#PAPGSGHPEGPAHLD.M | S91:  | 2 | 1,9016 | 0,274 | -0,493 |
| 13 | Q9UNN5 FAF1_HUMAN    | E.VFGM*ASSALR.K        |       | 2 | 1,8978 | 0,24  | 0,116  |
| 13 | Q63ZY3 KANK2_HUMAN   | R.LDLDFLK.Y            |       | 2 | 1,8974 | 0,099 | 0,141  |
| 13 | Q8NBT2 SPC24_HUMAN   | E.VSQLLSLLGANR.A       |       | 2 | 1,8964 | 0,183 | -0,367 |
| 13 | P25098 ARBK1_HUMAN   | K.LGYLLFR.D            |       | 2 | 1,8963 | 0,286 | 0,346  |
| 13 | P63010 AP2B1_HUMAN   | K.VIAAM*TVGK.D         |       | 2 | 1,8956 | 0,327 | 0,269  |
| 13 | Q9Y4C8 RBM19_HUMAN   | E.DASALGSSSYK.K        |       | 2 | 1,8955 | 0,098 | 0      |
| 13 | Q9Y4L1 HYOU1_HUMAN   | E.GLM*DDVDFK.A         |       | 2 | 1,8944 | 0,3   | -0,578 |

|    |                      |                        |       |   |        |       |        |
|----|----------------------|------------------------|-------|---|--------|-------|--------|
| 13 | O15305 PMM2_HUMAN    | K.TIYFFGDK.T           |       | 2 | 1,892  | 0,303 | -0,369 |
| 13 | P35222 CTNB1_HUMAN   | R.LAEPSQM*LK.H         |       | 2 | 1,8914 | 0,161 | -0,354 |
| 13 | P06576 ATPB_HUMAN    | K.QFAPIHAEAPE.F        |       | 2 | 1,891  | 0,211 | -0,403 |
| 13 | Q7Z6Z7 HUWE1_HUMAN   | E.TSASGTSQGEASTPEESR.D |       | 2 | 1,8909 | 0,274 | 0      |
| 13 | ##Q7Z4L9 YH003_HUMAN | R.AILDLTR.V            |       | 2 | 1,8877 | 0,134 | 0,133  |
| 13 | Q15149 PLEC1_HUMAN   | R.LGFHLPLE.V           |       | 2 | 1,8844 | 0,147 | -0,329 |
| 13 | P23588 IF4B_HUMAN    | K.VAPAQPSEEGPGR.K      |       | 2 | 1,8813 | 0,391 | -0,283 |
| 13 | Q99700 ATX2_HUMAN    | E.VTSQGVQTSSPACK.Q     |       | 2 | 1,88   | 0,244 | -0,252 |
| 13 | Q8TD26 CHD6_HUMAN    | K.SLLIGVFK.H           |       | 2 | 1,8784 | 0,092 | 0,278  |
| 13 | P23588 IF4B_HUMAN    | K.VM*PAPPPKE.N         |       | 2 | 1,8754 | 0,099 | -0,062 |
| 13 | Q86UU1 PHLB1_HUMAN   | D.SLVLEEPGAAGK.K       |       | 2 | 1,8749 | 0,151 | 0,625  |
| 13 | P46013 KI67_HUMAN    | K.AFM*GTPVQK.L         |       | 2 | 1,8746 | 0,208 | -1,471 |
| 13 | P21333 FLNA_HUMAN    | K.VEPGLGADNSVVR.F      |       | 2 | 1,8743 | 0,262 | -1,115 |
| 13 | P31939 PUR9_HUMAN    | K.SLFSNVVTK.N          |       | 2 | 1,8737 | 0,092 | 0      |
| 13 | P51003 PAPOA_HUMAN   | K.IPTPIVGVK.R          |       | 2 | 1,8732 | 0,162 | -0,396 |
| 13 | O14497 ARI1A_HUMAN   | R.TPQPSSPM*DQM*GK.M    |       | 2 | 1,871  | 0,413 | -0,17  |
| 13 | P08133 ANXA6_HUMAN   | R.DLM*TDLK.S           |       | 2 | 1,8696 | 0,114 | -0,143 |
| 13 | Q96EZ8 MCRS1_HUMAN   | E.DQTVQPLPK.G          |       | 2 | 1,8689 | 0,124 | 0,238  |
| 13 | Q9UMZ3 PTPRQ_HUMAN   | D.VS#IRVEDILTGK.L      | S247: | 2 | 1,8686 | 0,169 | 1,731  |
| 13 | Q99829 CPNE1_HUMAN   | D.IVQFVPIR.R           |       | 2 | 1,8678 | 0,259 | 0,298  |
| 13 | Q00536 PCTK1_HUMAN   | R.LSLPADIR.L           |       | 2 | 1,8662 | 0,229 | 0,069  |
| 13 | Q9NW68 BSDC1_HUMAN   | E.LM*GISPISPK.E        |       | 2 | 1,8645 | 0,143 | 0,23   |
| 13 | Q6PH81 U547_HUMAN    | K.SCPCGYIFISR.K        |       | 2 | 1,8602 | 0,158 | -0,09  |
| 13 | P55809 SCOT_HUMAN    | E.NLIDALLK.T           |       | 2 | 1,8593 | 0,092 | 0,068  |
| 13 | P21333 FLNA_HUMAN    | K.IQQNTFTR.W           |       | 2 | 1,8577 | 0,099 | -0,363 |
| 13 | P06493 CDC2_HUMAN    | K.TTGQVVAM*K.K         |       | 2 | 1,8527 | 0,263 | 0      |
| 13 | Q8N5A5 ZGPAT_HUMAN   | E.GDGILPPLR.T          |       | 2 | 1,8504 | 0,099 | -0,325 |
| 13 | Q96T88 UHRF1_HUMAN   | D.TIQLLVR.Q            |       | 2 | 1,8499 | 0,122 | -0,145 |
| 13 | Q86WH2 RASF3_HUMAN   | E.DFFFTAR.T            |       | 2 | 1,8463 | 0,179 | 0      |
| 13 | Q9Y2H9 MAST1_HUMAN   | R.SPAVRPRS#R.S         | S159: | 2 | 1,8442 | 0,111 | 0,883  |
| 13 | Q15126 PMVK_HUMAN    | R.LLDTSTYKE.A          |       | 2 | 1,8428 | 0,124 | -1,938 |
| 13 | Q99729 ROAA_HUMAN    | R.GFGFILFK.D           |       | 2 | 1,8344 | 0,221 | -0,131 |
| 13 | P15336 ATF2_HUMAN    | K.DCPVTAM*QK.K         |       | 2 | 1,8343 | 0,232 | -0,229 |



|    |                      |                           |       |   |        |       |        |
|----|----------------------|---------------------------|-------|---|--------|-------|--------|
| 13 | O43237 DC1L2_HUMAN   | K.DFQDYM*EPEEGCQGS#PQRR.G | S194: | 2 | 1,832  | 0,325 | 0,101  |
| 13 | P19338 NUCL_HUMAN    | K.GIAYIEFK.T              |       | 2 | 1,8313 | 0,097 | 0,13   |
| 13 | O60504 VINEX_HUMAN   | R.DFVYPSSTR.D             |       | 2 | 1,8313 | 0,097 | -0,797 |
| 13 | P34931 HS71L_HUMAN   | E.ISSM*VLTK.L             |       | 2 | 1,8305 | 0,121 | 0,068  |
| 13 | ##O75164 JHD3A_HUMAN | K.KLMLPS#ILTMK.H          | S819: | 2 | 1,8305 | 0,106 | -1,801 |
| 13 | Q9BQY9 DBND2_HUMAN   | E.LSLPVPTSDR.T            |       | 2 | 1,8279 | 0,188 | -1,237 |
| 13 | Q14696 MESD2_HUMAN   | E.GSPGTPDESTPPPR.K        |       | 2 | 1,8265 | 0,12  | -0,612 |
| 13 | P11586 C1TC_HUMAN    | K.TPVPSDIDISR.S           |       | 2 | 1,8232 | 0,344 | 0,305  |
| 13 | Q9ULX3 NOB1_HUMAN    | E.LQELLIDR.G              |       | 2 | 1,8228 | 0,097 | 0,122  |
| 13 | Q5T4S7 UBR4_HUMAN    | K.LCTFTITQK.E             |       | 2 | 1,8221 | 0,134 | 0      |
| 13 | P23258 TBG1_HUMAN    | E.DIFDIIDR.E              |       | 2 | 1,8215 | 0,257 | -0,061 |
| 13 | P42704 LPPRC_HUMAN   | K.DILIACR.L               |       | 2 | 1,8181 | 0,17  | 0,142  |
| 13 | Q12888 TP53B_HUMAN   | K.DGDM*HSSSLTVE.C         |       | 2 | 1,8179 | 0,085 | 0,094  |
| 13 | Q09472 EP300_HUMAN   | E.NVVEPGPPSAK.R           |       | 2 | 1,817  | 0,225 | -0,446 |
| 13 | Q9NYV4 CD2L7_HUMAN   | K.AITPPQQPYK.K            |       | 2 | 1,8146 | 0,264 | -0,32  |
| 13 | P62258 1433E_HUMAN   | E.DLVYQAK.L               |       | 2 | 1,8121 | 0,157 | 0      |
| 13 | P0C7M2 RA1L3_HUMAN   | K.IFVGGIKED.T             |       | 2 | 1,808  | 0,118 | 0,125  |
| 13 | P37802 TAGL2_HUMAN   | K.IQASTM*AFK.Q            |       | 2 | 1,8065 | 0,162 | -0,12  |
| 13 | Q96T23 RSF1_HUMAN    | K.AQIDPVLLK.N             |       | 2 | 1,8056 | 0,2   | 0      |
| 13 | Q5T1M5 FKB15_HUMAN   | R.TILGTIM*NTIK.M          |       | 2 | 1,8046 | 0,316 | -0,5   |
| 13 | P29317 EPHA2_HUMAN   | R.IAYSLGLK.D              |       | 2 | 1,8019 | 0,232 | 0,187  |
| 13 | P68104 EF1A1_HUMAN   | D.M*VPGKPM*CVE.S          |       | 2 | 1,8001 | 0,196 | 0      |
| 13 | P18858 DNL1_HUMAN    | E.ALS#PAKGQKPALD.C        | S76:  | 2 | 1,7997 | 0,254 | -0,621 |
| 13 | Q99497 PARK7_HUMAN   | E.TVIPVDVM*R.R            |       | 2 | 1,7993 | 0,189 | -0,467 |
| 13 | Q9UQ35 SRRM2_HUMAN   | R.TPTAPAVNLAGAR.T         |       | 2 | 1,797  | 0,171 | -0,394 |
| 13 | Q9NRM7 LATS2_HUMAN   | K.GLM*PTPVTR.R            |       | 2 | 1,7951 | 0,148 | 0      |
| 13 | P49458 SRP09_HUMAN   | K.LYLADPM*K.A             |       | 2 | 1,7907 | 0,081 | 0,379  |
| 13 | P01130 LDLR_HUMAN    | R.LAHPFSLAVFE.D           |       | 2 | 1,786  | 0,112 | -0,496 |
| 13 | P85299 PTOR1_HUMAN   | E.GIFIDFGR.G              |       | 2 | 1,7856 | 0,173 | 0      |
| 13 | O43156 K0406_HUMAN   | E.QFLLNYLK.E              |       | 2 | 1,7813 | 0,106 | -0,235 |
| 13 | P27816 MAP4_HUMAN    | R.AS#PIKM*DLAPSK.D        | S358: | 2 | 1,7805 | 0,184 | -0,631 |
| 13 | Q14203 DCTN1_HUMAN   | E.TVNVEPLTK.A             |       | 2 | 1,7784 | 0,133 | -0,183 |
| 13 | P19404 NDUV2_HUMAN   | E.TTPDKLFTLIE.V           |       | 2 | 1,7774 | 0,12  | -0,477 |

|    |                     |                          |              |   |        |       |        |
|----|---------------------|--------------------------|--------------|---|--------|-------|--------|
| 13 | Q9H4A3 WNK1_HUMAN   | R.DVDDGS#GSPHS#PHQLSSK.S | S2027:S2032: | 2 | 1,7772 | 0,374 | -0,121 |
| 13 | Q9UNI6 DUS12_HUMAN  | R.M*TPSSM*LTTGR.Q        |              | 2 | 1,7742 | 0,103 | 0,201  |
| 13 | Q96A73 K1191_HUMAN  | R.QPASAQSTPSTTPHS#SPK.Q  | S182:        | 2 | 1,7704 | 0,225 | -0,194 |
| 13 | O00391 QSOX1_HUMAN  | R.AAPGQEPPEHM*AE.L       |              | 2 | 1,77   | 0,311 | -0,531 |
| 13 | Q14566 MCM6_HUMAN   | R.DQVAIHE.A              |              | 2 | 1,769  | 0,092 | -0,826 |
| 13 | Q9BQG0 MBB1A_HUMAN  | R.VVVTDDSDER.R           |              | 2 | 1,765  | 0,166 | 0,107  |
| 13 | Q86VQ1 GLCI1_HUMAN  | R.ATVPYQLLR.G            |              | 2 | 1,7603 | 0,27  | -0,115 |
| 13 | Q9H2W6 RM46_HUMAN   | R.NLVLLVR.E              |              | 2 | 1,7539 | 0,122 | 0,221  |
| 13 | Q07820 MCL1_HUMAN   | R.LLFFAPTR.R             |              | 2 | 1,7512 | 0,146 | -0,19  |
| 13 | P11216 PYGB_HUMAN   | E.NLFIFGLR.V             |              | 2 | 1,7501 | 0,114 | 0,062  |
| 13 | Q01433 AMPD2_HUMAN  | R.SLPGPAPCLK.H           |              | 2 | 1,7486 | 0,335 | 0      |
| 13 | O60507 TPST1_HUMAN  | E.FQLPDFLK.E             |              | 2 | 1,7448 | 0,089 | -0,061 |
| 13 | Q9HBM0 VEZA_HUMAN   | R.DSLQPSIK.Q             |              | 2 | 1,7438 | 0,184 | -0,069 |
| 13 | Q14151 SAFB2_HUMAN  | R.DILSFDK.I              |              | 2 | 1,7403 | 0,087 | 0,218  |
| 13 | O95873 CF047_HUMAN  | R.AASEPSKEEPQVE.Q        |              | 2 | 1,7389 | 0,135 | -0,697 |
| 13 | O95870 BAT5_HUMAN   | R.QLALFLAR.K             |              | 2 | 1,7377 | 0,282 | 0      |
| 13 | Q9H7P9 PKHG2_HUMAN  | R.TAPAAPTM*ASPR.G        |              | 2 | 1,7376 | 0,283 | -0,103 |
| 13 | Q9UKV3 ACINU_HUMAN  | E.AS#SPPPHPQLHSEEE.I     | S424:        | 2 | 1,7353 | 0,214 | -0,496 |
| 13 | Q8N6N3 CA052_HUMAN  | R.LPGPDELFR.S            |              | 2 | 1,7308 | 0,342 | 0,351  |
| 13 | P01106 MYC_HUMAN    | E.LLPTPPLS#PSRR.S        | S62:         | 2 | 1,729  | 0,34  | -0,604 |
| 13 | Q4G0J5 Q4G0J5_HUMAN | R.AGGTAPLSAQQQHE.C       |              | 2 | 1,7161 | 0,155 | -0,35  |
| 13 | Q12767 K0195_HUMAN  | E.TVLFMSGK.V             |              | 2 | 1,711  | 0,137 | 0,204  |
| 13 | Q8TDZ2 MICA1_HUMAN  | E.GAGPVPDPSQPTR.R        |              | 2 | 1,6995 | 0,319 | 0,095  |
| 13 | P34932 HSP74_HUMAN  | K.QVYVDKLAE.L            |              | 2 | 1,6985 | 0,305 | -0,344 |
| 13 | P13010 KU86_HUMAN   | E.DIIQGFR.Y              |              | 2 | 1,6948 | 0,12  | 0,647  |
| 13 | Q9Y6Q2 STON1_HUMAN  | K.AGTHVLYPIPE.S          |              | 2 | 1,692  | 0,118 | 0      |
| 13 | Q12888 TP53B_HUMAN  | R.SEDPPTPIR.G            |              | 2 | 1,6893 | 0,203 | -0,329 |
| 13 | O43151 TET3_HUMAN   | R.DAGKMGKTPLE.V          |              | 2 | 1,6835 | 0,09  | -0,297 |
| 13 | P21333 FLNA_HUMAN   | R.LSPFM*ADIR.D           |              | 2 | 1,6819 | 0,085 | -0,229 |
| 13 | Q96E22 NGBR_HUMAN   | E.DFFSALR.Q              |              | 2 | 1,6808 | 0,127 | 0,57   |
| 13 | P28290 SSFA2_HUMAN  | E.TDPPPLTR.S             |              | 2 | 1,6775 | 0,219 | 0,061  |
| 13 | P46821 MAP1B_HUMAN  | E.QYGFLTTPTK.Q           |              | 2 | 1,6766 | 0,228 | -0,528 |
| 13 | P28066 PSA5_HUMAN   | E.LEEVIKDI.-             |              | 2 | 1,6763 | 0,216 | 0      |

|    |                    |                      |       |   |        |       |        |
|----|--------------------|----------------------|-------|---|--------|-------|--------|
| 13 | Q9UQ80 PA2G4_HUMAN | K.IDLGVHVD.G         |       | 2 | 1,6732 | 0,155 | 0,141  |
| 13 | Q9Y243 AKT3_HUMAN  | K.SLLSGLLIK.D        |       | 2 | 1,6649 | 0,096 | -0,452 |
| 13 | Q01433 AMPD2_HUMAN | K.LEPDILLR.A         |       | 2 | 1,6594 | 0,171 | -0,378 |
| 13 | O95202 LETM1_HUMAN | K.DFSVFFQK.I         |       | 2 | 1,6586 | 0,123 | 0,12   |
| 13 | P69905 HBA_HUMAN   | R.M*FLSFPTTK.T       |       | 2 | 1,6372 | 0,147 | -0,561 |
| 13 | P36578 RL4_HUMAN   | K.NVTLPVAVFK.A       |       | 2 | 1,6301 | 0,165 | 0,432  |
| 13 | Q14160 LAP4_HUMAN  | E.LTLTILR.Q          |       | 2 | 1,6259 | 0,237 | -0,147 |
| 13 | P00558 PGK1_HUMAN  | K.ALM*DEVVK.A        |       | 2 | 1,6152 | 0,162 | 0,331  |
| 13 | Q9BYW2 SETD2_HUMAN | R.LQSVVVVVK.N        |       | 2 | 1,6141 | 0,093 | 0,441  |
| 13 | Q86XP3 DDX42_HUMAN | R.GLDIPSIK.T         |       | 2 | 1,6137 | 0,165 | 0      |
| 13 | Q02880 TOP2B_HUMAN | E.TEPVVIPR.D         |       | 2 | 1,6087 | 0,139 | -1,004 |
| 13 | P07237 PDIA1_HUMAN | K.ENLLDFIK.H         |       | 2 | 1,6076 | 0,091 | -0,43  |
| 13 | P48634 BAT2_HUMAN  | E.ASPVEPQLPSK.E      |       | 2 | 1,6046 | 0,11  | -0,212 |
| 13 | Q15742 NAB2_HUMAN  | K.LSPLPGGPGAGDPR.I   |       | 2 | 1,5971 | 0,174 | -0,473 |
| 13 | O95757 HS74L_HUMAN | K.LSLTQDPVVK.V       |       | 2 | 1,5818 | 0,176 | -0,333 |
| 13 | Q8IZP0 ABI1_HUMAN  | K.VVAIYDYTK.D        |       | 2 | 1,5782 | 0,166 | -0,228 |
| 13 | Q6P4E1 CASC4_HUMAN | R.LIPGSNLDSEPR.I     |       | 2 | 1,5757 | 0,247 | -0,94  |
| 13 | O14745 NHERF_HUMAN | E.AALES#PRPALVR.S    | S280: | 2 | 1,5734 | 0,157 | -0,987 |
| 13 | Q9HC35 EMAL4_HUMAN | E.TVADTTLTK.A        |       | 2 | 1,572  | 0,218 | -0,642 |
| 13 | P28290 SSFA2_HUMAN | R.TGVPSTASVGK.S      |       | 2 | 1,5698 | 0,117 | -1,276 |
| 13 | Q9Y536 PAL4B_HUMAN | R.IIPGFM*CQGGDFTR.H  |       | 2 | 1,5691 | 0,364 | -0,529 |
| 13 | Q9UJM3 ERRFI_HUMAN | E.DSTLSDFK.Y         |       | 2 | 1,5681 | 0,113 | 0,2    |
| 13 | Q9NQ84 GPC5C_HUMAN | E.GAYDIILPR.A        |       | 2 | 1,564  | 0,119 | 0,12   |
| 13 | P48637 GSHB_HUMAN  | E.IAVVYFR.D          |       | 2 | 1,5603 | 0,081 | 0      |
| 13 | P52789 HXK2_HUMAN  | K.VTVGVDGTLK.L       |       | 2 | 1,5587 | 0,203 | -0,318 |
| 13 | Q99549 MPP8_HUMAN  | K.LM*PVSAQTPK.G      |       | 2 | 1,5578 | 0,21  | -0,224 |
| 13 | Q13432 U119A_HUMAN | R.YQFTPAFLR.L        |       | 2 | 1,5576 | 0,1   | -0,213 |
| 13 | P35232 PHB_HUMAN   | E.DIAYQLSR.S         |       | 2 | 1,5557 | 0,1   | 0,695  |
| 13 | Q9Y3B9 RRP15_HUMAN | K.DFISVLR.G          |       | 2 | 1,5498 | 0,094 | 0,431  |
| 13 | P48643 TCPE_HUMAN  | R.AVTIFIR.G          |       | 2 | 1,549  | 0,14  | 0,074  |
| 13 | Q9UHB6 LIMA1_HUMAN | R.ETPHS#PGVEDAPIAK.V | S490: | 2 | 1,5365 | 0,207 | -0,6   |
| 13 | Q8IXJ9 ASXL1_HUMAN | R.ISLFTLK.K          |       | 2 | 1,5339 | 0,088 | 0,668  |
| 13 | Q8WW12 PCNP_HUMAN  | K.ETVPTLAPK.T        |       | 2 | 1,5257 | 0,18  | -1,212 |

|    |                      |                                        |            |   |        |       |        |
|----|----------------------|----------------------------------------|------------|---|--------|-------|--------|
| 13 | Q14194 DPYL1_HUMAN   | K.AVGKDNFTLIPE.G                       |            | 2 | 1,5237 | 0,147 | -0,842 |
| 13 | Q9BRQ0 PYGO2_HUMAN   | R.GGGTPDANSLAPPK.A                     |            | 2 | 1,5201 | 0,132 | -0,364 |
| 13 | Q06323 PSME1_HUMAN   | E.NLLGSYFPK.K                          |            | 2 | 1,513  | 0,084 | -1,174 |
| 13 | O00499 BIN1_HUMAN    | K.GPPVPPPPK.H                          |            | 2 | 1,511  | 0,124 | 0,275  |
| 13 | Q9UDT6 CLIP2_HUMAN   | R.IGFPSTSPAK.A                         |            | 2 | 1,5006 | 0,102 | -0,121 |
| 13 | Q5T8A7 K0649_HUMAN   | K.LVPGSGGGPGSQVGSK.D                   |            | 2 | 1,5001 | 0,154 | -0,581 |
| 13 | ##Q96SR6 ZN382_HUMAN | K.EIFAIGDK.N                           |            | 2 | 1,4983 | 0,164 | 0,068  |
| 13 | P16152 CBR1_HUMAN    | K.IGVTVLSR.I                           |            | 2 | 1,478  | 0,125 | 0,072  |
| 13 | Q6NZY4 ZCHC8_HUMAN   | K.GTPPLTPSDSPQTR.T                     |            | 2 | 1,4769 | 0,247 | -0,336 |
| 13 | P41227 ARD1A_HUMAN   | K.IVGIVLAK.M                           |            | 2 | 1,4642 | 0,096 | 0,565  |
| 13 | P06748 NPM_HUMAN     | E.GS#PIKVTLATLK.M                      | S70:       | 2 | 1,4495 | 0,266 | 0,746  |
| 13 | O00170 AIP_HUMAN     | K.AVPLIHQE.G                           |            | 2 | 1,4142 | 0,268 | 0,404  |
| 13 | P22102 PUR2_HUMAN    | R.AIAFLQQPR.S                          |            | 2 | 1,406  | 0,083 | -0,584 |
| 13 | Q15003 CND2_HUMAN    | R.VFPM*PLPR.K                          |            | 2 | 1,4048 | 0,195 | -0,188 |
| 13 | Q8WUD4 CCD12_HUMAN   | E.VDLANLAPR.K                          |            | 2 | 1,3903 | 0,283 | -0,189 |
| 13 | P07355 ANXA2_HUMAN   | R.DLYDAGVK.R                           |            | 2 | 1,3521 | 0,233 | 1,8    |
| 13 | P16949 STMN1_HUMAN   | E.LILS#PRSK.E                          | S25:       | 2 | 1,2918 | 0,088 | 1,35   |
| 13 | Q92896 GSLG1_HUMAN   | K.LDPVLYR.K                            |            | 2 | 1,252  | 0,125 | 0,209  |
| 13 | ##Q96QF7 ACRC_HUMAN  | R.LPEVINK.T                            |            | 2 | 1,2116 | 0,136 | 0,075  |
| 13 | Q9BUR4 WDR79_HUMAN   | E.LM*PPPPER.G                          |            | 2 | 1,1906 | 0,12  | 0,448  |
| 14 | P04264 K2C1_HUMAN    | R.GGGGGGYGSGSSYGS GGGSYGSGGGGGGGR.G    |            | 3 | 6,6638 | 0,554 | -0,998 |
| 14 | Q9P2Y5 UVRAG_HUMAN   | R.KITSLSSS#LDTSLDFSKE.N                | S550:      | 2 | 6,4591 | 0,598 | -0,06  |
| 14 | Q14157 UBP2L_HUMAN   | E.KSPAVATSTAAPPPSS#PLPSK.S             | S454:      | 2 | 5,9756 | 0,554 | 0,675  |
| 14 | Q9Y2D5 AKAP2_HUMAN   | K.GQKS#PGALETPSAAGSQGNTASQGK.E         | S393:      | 3 | 5,8728 | 0,493 | -0,911 |
| 14 | Q5JRA6 MIA3_HUMAN    | E.ASGKPSDPGSGTATM*M*NSSS#R.G           | S1741:     | 3 | 5,8107 | 0,479 | 0,394  |
| 14 | O75717 WDHD1_HUMAN   | R.SHILEDDENS#VDISM*LK.T                | S383:      | 2 | 5,6865 | 0,524 | 0,12   |
| 14 | P04264 K2C1_HUMAN    | R.GGGGGGYGSGSSYGS GGGSYGSGGGGGGGR.G    |            | 2 | 5,5588 | 0,542 | -0,717 |
| 14 | O94876 TMCC1_HUMAN   | R.NKFGS#ADNIPNLKDSLEE.G                | S382:      | 2 | 5,5419 | 0,531 | -0,118 |
| 14 | O15534 PER1_HUMAN    | R.KEPVVGGTLS#PLALANK.A                 | S704:      | 2 | 5,4298 | 0,499 | -0,344 |
| 14 | Q04637 IF4G1_HUMAN   | R.TASTPTPPQTGGGLEPQANGETPQVAVIVRPDDR.S |            | 3 | 5,3063 | 0,495 | 0,212  |
| 14 | P28749 RBL1_HUMAN    | K.VKS#PVSLTAHSLIGAS#PK.Q               | S749:S762: | 2 | 5,268  | 1     | -0,188 |
| 14 | Q7Z3T8 ZFY16_HUMAN   | E.KNVTGLDLLSSVDGGTSDE.I                |            | 2 | 5,2566 | 0,524 | -0,384 |
| 14 | O60264 SMCA5_HUMAN   | E.LFAHFIQPAAQKT#PTS#PLK.M              | T113:S116: | 3 | 5,2318 | 0,479 | 0      |

|    |                     |                                      |            |   |        |       |        |
|----|---------------------|--------------------------------------|------------|---|--------|-------|--------|
| 14 | Q00839 HNRPU_HUMAN  | E.AGGRPAM*EPGNGS#LDLGGDSAGR.S        | S59:       | 3 | 5,2104 | 0,495 | -0,49  |
| 14 | Q8IY57 YAF2_HUMAN   | K.TKSPPAS#SAASADQHSQSGSSSDNTE.R      | S140:      | 3 | 5,2051 | 0,427 | -0,07  |
| 14 | Q9UK76 HN1_HUMAN    | R.RNS#SEASSGDFLDLKG.E                | S87:       | 2 | 5,1178 | 0,567 | -0,774 |
| 14 | Q03164 HRX_HUMAN    | R.SPGCRPLPSAGS#PTPTTHE.I             | S2167:     | 3 | 5,1149 | 0,278 | -0,721 |
| 14 | Q5T4S7 UBR4_HUMAN   | E.KAAPPPPPPPPLESS#PR.V               | S620:      | 3 | 5,1143 | 0,313 | -0,861 |
| 14 | O15534 PER1_HUMAN   | R.KEPVVGGTSL#PLALANK.A               | S704:      | 3 | 5,0455 | 0,393 | -0,309 |
| 14 | P42166 LAP2A_HUMAN  | E.HSAM*LVSTAAS#PSLIKE.T              | S310:      | 2 | 5,0201 | 0,357 | -0,531 |
| 14 | P24928 RPB1_HUMAN   | E.KINAGFGDDLNCIFNDNAE.K              |            | 2 | 4,9616 | 0,514 | 0      |
| 14 | Q13509 TBB3_HUMAN   | E.HGIDPSGNVVGSDSLQLE.R               |            | 2 | 4,9203 | 0,475 | -0,573 |
| 14 | P39880 CUX1_HUMAN   | E.IQAGSQGQAGASDPSAR.S                |            | 2 | 4,8835 | 0,625 | -0,217 |
| 14 | Q9HAV7 GRPE1_HUMAN  | K.NSGQNLEEDM*GQSEQK.A                |            | 3 | 4,8585 | 0,46  | -0,606 |
| 14 | Q969R5 LMBL2_HUMAN  | E.HLDVASPKAS#SPELVSVE.N              | S688:      | 2 | 4,843  | 0,494 | 0      |
| 14 | Q9Y6D5 BIG2_HUMAN   | E.LEKPIQSKPQS#PVIQAAAVS#PK.F         | S218:S227: | 2 | 4,8328 | 0,411 | 0,296  |
| 14 | O94887 FARP2_HUMAN  | E.FKDSSSLTDPQVSYVKS#PAAE.R           | S439:      | 3 | 4,8032 | 0,454 | -0,075 |
| 14 | P60174 TPIS_HUMAN   | R.KQS#LGELIGTLNAAK.V                 | S21:       | 2 | 4,7931 | 0,593 | -1,052 |
| 14 | Q96K76 UBP47_HUMAN  | K.SLSLQQQDGDNGDSSK.S                 |            | 2 | 4,7576 | 0,64  | -0,54  |
| 14 | Q13506 NAB1_HUMAN   | E.SEHSLPADLGPAS#PKESSE.A             | S183:      | 3 | 4,7526 | 0,352 | -0,501 |
| 14 | O14964 HGS_HUMAN    | E.ARKS#PTPSAPVPLTEPAAQPG.E           | S345:      | 2 | 4,6989 | 0,506 | -0,535 |
| 14 | Q00839 HNRPU_HUMAN  | E.AGGRPAM*EPGNGSLDLGGDS#AGR.S        | S66:       | 3 | 4,6975 | 0,361 | -0,817 |
| 14 | Q9UHK0 NUFP1_HUMAN  | E.NQVLDSSAPKS#PSQDVK.A               | S403:      | 2 | 4,6803 | 0,51  | -0,584 |
| 14 | Q7Z6E9 RBBP6_HUMAN  | E.GSSSTLVDTSTSTGGS#PVRK.S            | S1277:     | 2 | 4,673  | 0,555 | 0,541  |
| 14 | Q9Y6D5 BIG2_HUMAN   | E.LEKPIQSKPQS#PVIQAAAVS#PK.F         | S218:S227: | 3 | 4,6691 | 0,439 | -0,222 |
| 14 | O95433 AHSA1_HUMAN  | K.GHVEIPNLSDESVDE.V                  |            | 2 | 4,6292 | 0,427 | -0,278 |
| 14 | Q9Y4E8 UBP15_HUMAN  | K.ISPSSLSNNYNNM*NNR.N                |            | 2 | 4,6247 | 0,496 | -0,729 |
| 14 | Q04837 SSB_HUMAN    | E.GKNPVTIFSLATNE.M                   |            | 2 | 4,6118 | 0,469 | -0,164 |
| 14 | P05198 IF2A_HUMAN   | K.HAVSDPSILDSLNEDE.R                 |            | 2 | 4,5977 | 0,563 | -0,124 |
| 14 | P05387 RLA2_HUMAN   | K.LASVPAGGAVAVSAAPGSAAPAAGSAPAAAEK.K |            | 3 | 4,5817 | 0,474 | -0,066 |
| 14 | P0C7M2 RA1L3_HUMAN  | R.KLFIGGLSFETTDE.S                   |            | 2 | 4,5775 | 0,509 | -0,157 |
| 14 | Q8TEW0 PARD3_HUMAN  | R.ISHSLSYSGIEGLDES#PSR.N             | S728:      | 3 | 4,5409 | 0,263 | -0,271 |
| 14 | P61106 RAB14_HUMAN  | K.KIYQNIQDGSIDLNAE.S                 |            | 2 | 4,5156 | 0,326 | -0,258 |
| 14 | A8K630 A8K630_HUMAN | R.LQQQHSEQPPLQPS#PVTR.R              | S22:       | 2 | 4,5122 | 0,454 | 0      |
| 14 | P52948 NUP98_HUMAN  | R.CLIKS#PDRLADINYE.G                 | S839:      | 2 | 4,5104 | 0,408 | 0,259  |
| 14 | Q99961 SH3G1_HUMAN  | E.VKQNFIDPLQNLCE.K                   |            | 2 | 4,4994 | 0,373 | -0,497 |

|    |                     |                                |              |   |        |       |        |
|----|---------------------|--------------------------------|--------------|---|--------|-------|--------|
| 14 | Q96FF9 CDCA5_HUMAN  | R.IVAHAVEVPAVQS#PR.R           | S75:         | 2 | 4,4968 | 0,411 | -0,664 |
| 14 | Q86UP2 KTN1_HUMAN   | K.KVEPVPVTKQPT#PPSE.A          | T153:        | 3 | 4,4954 | 0,155 | -0,605 |
| 14 | Q9NQ57 INCE_HUMAN   | R.TDSQSVRHS#PIAPSSPS#PQVLAQK.Y | S306:S314:   | 3 | 4,4788 | 1     | 0,205  |
| 14 | Q9P209 CEP72_HUMAN  | R.HLLS#PQLVQYQCGDSGK.Q         | S237:        | 3 | 4,4634 | 0,418 | -0,182 |
| 14 | P23443 KS6B1_HUMAN  | E.SIHDTVTHT#FCGTIE.Y           | T252:        | 2 | 4,4509 | 0,498 | -0,46  |
| 14 | P46013 KI67_HUMAN   | K.IACRS#PQPDPVGT#PTIFKPQSK.R   | S2223:T2231: | 3 | 4,4121 | 0,36  | -0,496 |
| 14 | Q96IF1 JUB_HUMAN    | R.SSFASSASDASKPSS#PR.G         | S137:        | 2 | 4,4121 | 0,371 | -0,465 |
| 14 | P40763 STAT3_HUMAN  | K.SQGDM*QDLNGNNSVTR.Q          |              | 2 | 4,4004 | 0,538 | -0,195 |
| 14 | Q8IY57 YAF2_HUMAN   | K.SPPASSAASADQHSQSGS#SSDNTER.G | S153:        | 3 | 4,3956 | 0,533 | 0,072  |
| 14 | A8K630 A8K630_HUMAN | R.LQQQHSEQPPLQPS#PVTR.R        | S22:         | 3 | 4,3875 | 0,251 | -0,894 |
| 14 | P15336 ATF2_HUMAN   | K.KM*PLDLS#PLATPIIR.S          | S94:         | 2 | 4,3662 | 0,4   | -0,416 |
| 14 | P28749 RBL1_HUMAN   | K.VKS#PVSLTAHSLIGAS#PK.Q       | S749:S762:   | 3 | 4,3659 | 0,339 | -0,094 |
| 14 | Q15042 RB3GP_HUMAN  | K.KTS#ASDVTNIYPGDAGK.A         | S537:        | 2 | 4,3172 | 0,539 | -0,879 |
| 14 | Q14694 UBP10_HUMAN  | E.TKYS#PPAISPLVSEK.Q           | S365:        | 3 | 4,3098 | 0,256 | -0,108 |
| 14 | Q8NC51 PAIRB_HUMAN  | K.SAAQAAAQTNSNAAGK.Q           |              | 2 | 4,2953 | 0,576 | -0,251 |
| 14 | P35637 FUS_HUMAN    | R.HDSEQDNSDNNTIFVQGLGE.N       |              | 2 | 4,2676 | 0,518 | -0,22  |
| 14 | Q29RF7 PDS5A_HUMAN  | E.INSQATQGNISDR.G              |              | 2 | 4,2656 | 0,562 | -0,684 |
| 14 | Q9UBQ5 EIF3K_HUMAN  | E.KIDFDSVSSIM*ASSQ.-           |              | 2 | 4,2643 | 0,545 | -0,374 |
| 14 | Q9BY44 EIF2A_HUMAN  | R.SDKS#PDLAPTAPQSTPR.N         | S506:        | 2 | 4,2549 | 0,498 | -0,188 |
| 14 | Q86UP2 KTN1_HUMAN   | E.IQNGNLHES#DSESVPR.D          | S75:         | 2 | 4,2477 | 0,542 | -1,311 |
| 14 | O75896 TUSC2_HUMAN  | R.RGS#M*FYDEDGDLAHE.F          | S50:         | 2 | 4,2458 | 0,511 | -1,328 |
| 14 | Q8IU81 I2BP1_HUMAN  | R.AGGAS#PAASSTAQPPTQHR.L       | S453:        | 3 | 4,2239 | 0,389 | 0,195  |
| 14 | P50548 ERF_HUMAN    | R.RVS#SDLQHATAQLSLE.H          | S531:        | 2 | 4,2181 | 0,605 | -0,864 |
| 14 | P11172 PYR5_HUMAN   | E.NVFVAANHNGS#PLSIK.E          | S214:        | 2 | 4,2082 | 0,323 | -0,768 |
| 14 | O00273 DFFA_HUMAN   | R.SISASKAS#PPGDLQNP.K.R        | S315:        | 2 | 4,2012 | 0,463 | 0      |
| 14 | P22314 UBA1_HUMAN   | R.QNRYDGQVAVFGSDLQE.K          |              | 2 | 4,1853 | 0,351 | -0,063 |
| 14 | Q13428 TCOF_HUMAN   | R.KSAEPSANTTLVSETEEE.G         |              | 2 | 4,1831 | 0,557 | -0,381 |
| 14 | Q92615 LARP5_HUMAN  | E.KFTSSQTQSPTPKPPS#PSFE.L      | S524:        | 3 | 4,1811 | 0,36  | -1,088 |
| 14 | Q96RR4 KKCC2_HUMAN  | R.SQGGLAAGGSLDM*NGR.C          |              | 2 | 4,1801 | 0,577 | -0,567 |
| 14 | P10276 RARA_HUMAN   | E.NSEGLDTLSGQPGGGGR.D          |              | 2 | 4,1789 | 0,443 | -0,99  |
| 14 | Q05655 KPCD_HUMAN   | R.RSDSASS#EPVGIYQGF.K          | S307:        | 3 | 4,1771 | 0,185 | -0,718 |
| 14 | Q07866 KLC1_HUMAN   | K.ACKVDS#PTVTTLK.N             | S456:        | 2 | 4,1769 | 0,482 | -0,686 |
| 14 | P38159 HNRPG_HUMAN  | R.DSYS#SSRSDLYSSGR.D           | S328:        | 3 | 4,1717 | 0,34  | -0,838 |

|    |                     |                                      |              |   |        |       |        |
|----|---------------------|--------------------------------------|--------------|---|--------|-------|--------|
| 14 | P55036 PSMD4_HUMAN  | E.KVNVDIINFGEEE.V                    |              | 2 | 4,1669 | 0,481 | -0,081 |
| 14 | P02545 LMNA_HUMAN   | R.IRIDS#LSAQLSQLQK.Q                 | S301:        | 2 | 4,1669 | 0,628 | -0,343 |
| 14 | Q99832 TCPH_HUMAN   | D.NAGFDATNILNK.L                     |              | 2 | 4,1653 | 0,395 | -0,286 |
| 14 | O95819 M4K4_HUMAN   | K.LVPRPGSGSSSGSSNSGSPGSHPGSQSGS#GE.R | S700:        | 3 | 4,1591 | 0,342 | 0      |
| 14 | Q14247 SRC8_HUMAN   | R.AKTQT#PPVSPAPQPTEER.L              | T401:        | 2 | 4,157  | 0,488 | -0,242 |
| 14 | Q9Y2W1 TR150_HUMAN  | K.SPVGKSPPS#TGSTYGSSQKEE.S           | S323:        | 3 | 4,145  | 0,394 | -1,002 |
| 14 | O00401 WASL_HUMAN   | R.RVTNVGSLLLTPQENE.S                 |              | 2 | 4,1439 | 0,356 | -0,207 |
| 14 | P28482 MK01_HUMAN   | R.VADPDHDHTGFLT#EY#VATR.W            | T185:Y187:   | 3 | 4,1417 | 0,484 | -0,397 |
| 14 | Q5JTD0 TJAP1_HUMAN  | R.AFVDRT#PPPAVAQR.T                  | T422:        | 3 | 4,1127 | 0,501 | -0,764 |
| 14 | P51003 PAPOA_HUMAN  | K.HYGITS#PISLAAPKE.T                 | S24:         | 2 | 4,1114 | 0,48  | -0,88  |
| 14 | A8K1U6 A8K1U6_HUMAN | E.TGVFVINHFTCRS#.-                   | S523:        | 2 | 4,1108 | 0,382 | -0,377 |
| 14 | P04075 ALDOA_HUMAN  | K.GILADEST#GSIKR.L                   | T37:         | 2 | 4,1032 | 0,57  | -0,778 |
| 14 | Q08378 GOGA3_HUMAN  | E.VDGNDSOSSSYSSASTR.G                |              | 2 | 4,0895 | 0,592 | -0,281 |
| 14 | Q3KR37 GRM1B_HUMAN  | K.SSIETKPDAS#PQLPK.K                 | S274:        | 2 | 4,0843 | 0,513 | -0,8   |
| 14 | Q32MZ4 LRRF1_HUMAN  | R.DEKPIKTEVPGS#PAGTEGNCQE.A          | S521:        | 3 | 4,0809 | 0,378 | -0,453 |
| 14 | Q9P2Y5 UVRAG_HUMAN  | R.KITSLSSS#LDTSLDFSKE.N              | S550:        | 3 | 4,0777 | 0,369 | -0,269 |
| 14 | P08621 RU17_HUMAN   | R.GGGGGQDNGLEGLGNSR.D                |              | 2 | 4,0754 | 0,551 | -0,735 |
| 14 | Q4KMP7 TB10B_HUMAN  | E.GLHPSLPS#PTGNSTPLGSSKE.T           | S432:        | 3 | 4,0706 | 0,373 | -0,683 |
| 14 | Q9Y2W1 TR150_HUMAN  | R.SPALKS#PLQSVVVR.R                  | S253:        | 2 | 4,0511 | 0,489 | -0,938 |
| 14 | Q9H0K1 SN1L2_HUMAN  | R.RAS#DTSLTQGIVAFR.Q                 | S587:        | 2 | 4,0325 | 0,473 | 0,215  |
| 14 | Q16555 DPYL2_HUMAN  | R.NLHQSGFSLGAQIDD.N                  |              | 2 | 4,0293 | 0,467 | -0,072 |
| 14 | Q96SB3 NEB2_HUMAN   | E.SGCVEIPGLS#EEEDPAPSRK.I            | S436:        | 3 | 4,0269 | 0,324 | -0,164 |
| 14 | Q6Y7W6 PERQ2_HUMAN  | E.TPQTSSSSARPGT#PSDHQSQE.A           | T382:        | 3 | 4,0252 | 0,231 | 0,081  |
| 14 | Q9UQ35 SRRM2_HUMAN  | K.VKAQT#PPGPSLSGSKS#PCPQEK.S         | T1003:S1014: | 3 | 4,0087 | 0,336 | -0,225 |
| 14 | Q5JSH3 WDR44_HUMAN  | E.DVHLGGGYVPGS#PGK.V                 | S27:         | 2 | 4,0069 | 0,478 | -0,401 |
| 14 | Q08499 PDE4D_HUMAN  | R.NNFAALTNLQDR.A                     |              | 2 | 4,0011 | 0,495 | -0,354 |
| 14 | P28749 RBL1_HUMAN   | R.VIAIDSDAES#PAKR.V                  | S1041:       | 2 | 3,9992 | 0,384 | -0,708 |
| 14 | Q92615 LARP5_HUMAN  | E.KFTSSQTQSPTPPKPPS#PSFE.L           | S524:        | 2 | 3,9988 | 0,473 | -0,725 |
| 14 | P30084 ECHM_HUMAN   | E.M*QNLSFQDCYSSK.F                   |              | 2 | 3,9981 | 0,4   | -0,075 |
| 14 | B2RDE1 B2RDE1_HUMAN | R.KIQVLQQQADDAEE.R                   |              | 2 | 3,9845 | 0,429 | -0,831 |
| 14 | Q86UP2 KTN1_HUMAN   | K.AKQNDQVSFASLVEE.L                  |              | 2 | 3,982  | 0,464 | -0,513 |
| 14 | Q01804 OTUD4_HUMAN  | E.NITDDKYATVSS#PSK.S                 | S546:        | 2 | 3,981  | 0,478 | -0,644 |
| 14 | P61421 VA0D1_HUMAN  | K.LHLQSTDYGNFLANE.A                  |              | 2 | 3,9772 | 0,484 | -0,496 |

|    |                     |                             |            |   |        |       |        |
|----|---------------------|-----------------------------|------------|---|--------|-------|--------|
| 14 | A0FGR8 ESYT2_HUMAN  | R.SSSLLAS#PGHISVK.E         | S743:      | 2 | 3,9746 | 0,33  | -1,023 |
| 14 | Q9UQ35 SRRM2_HUMAN  | K.DKFS#PFVQDRPE.S           | S1188:     | 2 | 3,9669 | 0,381 | -0,446 |
| 14 | Q5VT52 K0460_HUMAN  | R.GPTSTSIDNIDGT#PVRDER.S    | T723:      | 2 | 3,9666 | 0,306 | -0,231 |
| 14 | P29966 MARCS_HUMAN  | E.AAAERPGEAAVASS#PSKANGQE.N | S27:       | 2 | 3,9647 | 0,43  | -0,336 |
| 14 | Q5QP82 WDR32_HUMAN  | R.TTSSSDLTSSSSSGPR.V        |            | 2 | 3,952  | 0,449 | -0,368 |
| 14 | O15446 RPA34_HUMAN  | R.QKGTEGM*EPEEGVTV.E.S      |            | 2 | 3,9501 | 0,396 | -0,773 |
| 14 | Q9BY44 EIF2A_HUMAN  | R.SDKS#PDLAPTPAPQSTPR.N     | S506:      | 3 | 3,9476 | 0,311 | -0,47  |
| 14 | P35579 MYH9_HUMAN   | K.KANLQIDQINTDLNLE.R        |            | 2 | 3,9468 | 0,409 | -0,199 |
| 14 | Q13153 PAK1_HUMAN   | K.SAEDYNSSNALNVK.A          |            | 2 | 3,9395 | 0,476 | -1,372 |
| 14 | P28370 SMCA1_HUMAN  | E.LFAHQPSAQKS#PTS#PLNM*K.L  | S116:S119: | 3 | 3,9349 | 0,292 | -0,291 |
| 14 | Q9UBW7 ZMYM2_HUMAN  | R.TNDVDFSTSSFSR.S           |            | 2 | 3,9328 | 0,503 | -0,751 |
| 14 | P04406 G3P_HUMAN    | E.GLM*TTVHAITAT#QK.T        | T184:      | 2 | 3,9231 | 0,44  | -0,545 |
| 14 | O95671 ASML_HUMAN   | K.HDSIPAADTFEDLSDVE.G       |            | 2 | 3,9225 | 0,567 | -0,328 |
| 14 | Q6PID6 TTC33_HUMAN  | K.SEAPAEVTHFS#PK.S          | S197:      | 2 | 3,9186 | 0,425 | -1,154 |
| 14 | Q14195 DPYL3_HUMAN  | R.NLHQSGFSLSGTQVDE.G        |            | 2 | 3,9168 | 0,481 | -0,355 |
| 14 | P49023 PAXI_HUMAN   | K.TSSVSNPQDSVGSPCR.V        |            | 2 | 3,9057 | 0,358 | -0,899 |
| 14 | P35908 K22E_HUMAN   | R.GFSSGSAVVGGSR.R           |            | 2 | 3,8973 | 0,422 | -0,681 |
| 14 | Q53F64 Q53F64_HUMAN | K.KIFVGGLNPEATEE.K          |            | 2 | 3,8938 | 0,477 | -1,136 |
| 14 | Q7Z333 SETX_HUMAN   | R.CFTANQNNVGDTSR.G          |            | 2 | 3,8927 | 0,543 | -0,924 |
| 14 | Q96GQ7 DDX27_HUMAN  | K.KGQEAGGFEDASQYDE.N        |            | 2 | 3,8887 | 0,513 | -0,455 |
| 14 | Q96I24 FUBP3_HUMAN  | R.NGPGFHNDIDSNTIQE.I        |            | 2 | 3,885  | 0,259 | -0,529 |
| 14 | Q09666 AHNK_HUMAN   | K.FKAEAPLPS#PKLE.G          | S5110:     | 2 | 3,8841 | 0,398 | -0,567 |
| 14 | Q9HAV7 GRPE1_HUMAN  | K.NSGQNLEEDM*GQSEQK.A       |            | 2 | 3,8789 | 0,4   | -0,404 |
| 14 | Q8N4C8 MINK1_HUMAN  | K.SLQQQQQQQLQK.Q            |            | 2 | 3,8784 | 0,447 | -0,454 |
| 14 | Q15424 SAFB1_HUMAN  | E.LEQPFAQDTSS#VGPDRK.L      | S247:      | 2 | 3,8742 | 0,461 | -0,25  |
| 14 | Q96RE7 BTB14_HUMAN  | E.M*NAIAADM*CTNAR.R         |            | 2 | 3,8741 | 0,454 | -0,415 |
| 14 | P29692 EF1D_HUMAN   | K.SLAGSSGPGASSGTS GDHGE.L   |            | 2 | 3,8643 | 0,55  | -0,426 |
| 14 | Q8IZ21 PHAR4_HUMAN  | E.NSDSFSSEDSSTLGR.T         |            | 2 | 3,8501 | 0,542 | -0,812 |
| 14 | P05387 RLA2_HUMAN   | K.NIEDVIAQGIGK.L            |            | 2 | 3,848  | 0,468 | -0,194 |
| 14 | P39880 CUX1_HUMAN   | E.IQAGSQGQAGASDPSAR.S       |            | 3 | 3,8285 | 0,43  | 0,108  |
| 14 | Q9NP61 ARFG3_HUMAN  | R.KQPAGNYLSSVLPNAPD.M       |            | 2 | 3,8272 | 0,442 | -0,131 |
| 14 | Q13263 TIF1B_HUMAN  | R.VCQKPGDLVM*CNQCE.F        |            | 2 | 3,8217 | 0,515 | -1,382 |
| 14 | P55884 EIF3B_HUMAN  | R.AQAVSEDAAGNEGR.A          |            | 2 | 3,8207 | 0,549 | -0,179 |



|    |                    |                                       |            |   |        |       |        |
|----|--------------------|---------------------------------------|------------|---|--------|-------|--------|
| 14 | Q9UK76 HN1_HUMAN   | R.RNS#SEASSGDFLDLK.G                  | S87:       | 2 | 3,8062 | 0,399 | 0      |
| 14 | Q96T23 RSF1_HUMAN  | E.SEKPGS#PEAAETS#PPSNIIDHCEK.L        | S612:S619: | 3 | 3,7937 | 0,329 | -0,401 |
| 14 | Q99832 TCPH_HUMAN  | R.AIKNDSVVAGGGAIE.M                   |            | 2 | 3,791  | 0,375 | -0,871 |
| 14 | Q96GQ7 DDX27_HUMAN | R.SADFNPDFVFTEKE.G                    |            | 2 | 3,7887 | 0,403 | -0,297 |
| 14 | Q6S8J3 A26CA_HUMAN | E.KLCYVALDFEQE.M                      |            | 2 | 3,7844 | 0,346 | -0,403 |
| 14 | Q07002 PCTK3_HUMAN | R.RAS#LSDIGFGKLE.T                    | S130:      | 2 | 3,7785 | 0,503 | -0,497 |
| 14 | Q5H9R7 SAPS3_HUMAN | R.NTVDLVTTCHIHSSS#DDE.I               | S525:      | 2 | 3,7782 | 0,523 | -0,694 |
| 14 | Q86W56 PARG_HUMAN  | E.NVSQSLDKS#PTEK.S                    | S137:      | 2 | 3,7739 | 0,42  | -0,975 |
| 14 | P42684 ABL2_HUMAN  | R.DKS#PSSLLEDAKE.T                    | S631:      | 2 | 3,7724 | 0,436 | -0,407 |
| 14 | P43243 MATR3_HUMAN | R.RDS#FDDRGPSLNPVLD.Y                 | S188:      | 2 | 3,7697 | 0,419 | -0,324 |
| 14 | Q86UP2 KTN1_HUMAN  | K.KVEPVPVTKQPT#PPSE.A                 | T153:      | 2 | 3,7674 | 0,472 | -0,404 |
| 14 | Q8ND56 LS14A_HUMAN | K.SFFDNISCDNRE                        |            | 2 | 3,7635 | 0,425 | -0,491 |
| 14 | O76080 ZFAN5_HUMAN | R.QQNSGRM*SPM*GT#ASGSNSPTS SDSASVQR.A | T52:       | 3 | 3,7533 | 0,275 | 0      |
| 14 | O75694 NU155_HUMAN | R.HLLVSNVGGDGEEIE.R                   |            | 2 | 3,7499 | 0,447 | 0      |
| 14 | P55209 NP1L1_HUMAN | R.M*RSEPDSDPFSFDGPE.I                 |            | 2 | 3,7464 | 0,564 | -0,377 |
| 14 | Q14247 SRC8_HUMAN  | R.AKTQT#PPVSPAPQPTTEER.L              | T401:      | 3 | 3,7445 | 0,293 | -0,454 |
| 14 | P46937 YAP1_HUMAN  | R.TM*TTNSS#DPFLNSGTYHSR.D             | S332:      | 3 | 3,7444 | 0,37  | -0,91  |
| 14 | P16949 STMN1_HUMAN | R.SKESVPEFPLS#PPK.K                   | S38:       | 3 | 3,7414 | 0,301 | -0,564 |
| 14 | Q9UQ35 SRRM2_HUMAN | R.M*SCFSRPSM*S#PTPLDR.C               | S2123:     | 3 | 3,7399 | 0,325 | -1,016 |
| 14 | Q9Y3A5 SBDS_HUMAN  | K.KEDLISAFGTDDQTE.I                   |            | 2 | 3,7392 | 0,427 | -0,219 |
| 14 | Q9Y608 LRRF2_HUMAN | R.NSASATTPLSGNSSR.R                   |            | 2 | 3,7385 | 0,484 | -0,673 |
| 14 | Q6U841 S4A10_HUMAN | R.IPIVRS#FADIGK.K                     | S238:      | 2 | 3,7348 | 0,415 | -0,699 |
| 14 | Q96SB3 NEB2_HUMAN  | E.SGCVEIPGLS#EEEDPAPSRK.I             | S436:      | 2 | 3,7326 | 0,486 | 0,327  |
| 14 | O75531 BAF_HUMAN   | R.DFVAEPM*GEKPVGSLAGIGE.V             |            | 2 | 3,7244 | 0,479 | -0,363 |
| 14 | Q8NDI1 EHBP1_HUMAN | E.AFVTIKDS#PPQSTK.R                   | S335:      | 2 | 3,7242 | 0,411 | -0,61  |
| 14 | Q5T1M5 FKB15_HUMAN | E.QSASASSQPQAPLNR.E                   |            | 2 | 3,7235 | 0,41  | -0,61  |
| 14 | Q8ND56 LS14A_HUMAN | K.SFFDNISCDNRE.R                      |            | 2 | 3,7232 | 0,514 | -0,151 |
| 14 | Q14011 CIRBP_HUMAN | R.DSYDSYATHNE.-                       |            | 2 | 3,7207 | 0,512 | -0,187 |
| 14 | O95295 S25BP_HUMAN | R.RVVLVNNilQNAQE.R                    |            | 2 | 3,7176 | 0,399 | -0,152 |
| 14 | Q96T23 RSF1_HUMAN  | D.AQRLS#PIPEEVPK.S                    | S594:      | 2 | 3,7163 | 0,287 | -0,474 |
| 14 | Q13765 NACA_HUMAN  | E.AKIEDLSQQAQLAAAE.K                  |            | 2 | 3,7135 | 0,44  | -0,507 |
| 14 | P80303 NUCB2_HUMAN | K.LHDVNSDGFLDEQE.L                    |            | 2 | 3,7046 | 0,33  | -0,452 |
| 14 | Q00536 PCTK1_HUMAN | K.RLS#LPADIRLPE.G                     | S119:      | 3 | 3,6936 | 0,3   | 0,063  |

|    |                    |                                   |            |   |        |       |        |
|----|--------------------|-----------------------------------|------------|---|--------|-------|--------|
| 14 | Q5UIP0 RIF1_HUMAN  | E.LIEDNNAS#PQKLR.E                | S2144:     | 2 | 3,6933 | 0,19  | -0,216 |
| 14 | Q8TE77 SSH3_HUMAN  | E.QGQGQGQGEPCISSTPR.F             |            | 2 | 3,6871 | 0,528 | -0,341 |
| 14 | P19838 NFKB1_HUMAN | K.TTQAHSPLS#PASTR.Q               | S907:      | 2 | 3,6862 | 0,47  | -0,633 |
| 14 | Q7L2J0 MEPCE_HUMAN | E.SHPVPPTAPLT#PLLHGE.G            | T291:      | 2 | 3,6858 | 0,525 | -0,331 |
| 14 | Q8WYP5 AHTF1_HUMAN | R.SLPSSSQLKGS#PQAISR.A            | S1169:     | 2 | 3,673  | 0,095 | -0,602 |
| 14 | Q9P270 SLAI2_HUMAN | R.RTSS#EELRDATSLLAAGE.G           | S88:       | 2 | 3,6709 | 0,486 | 0      |
| 14 | Q9UQ35 SRRM2_HUMAN | E.KSATRPS#PS#PERSSTGPEPPAPTLLAE.R | S351:S353: | 3 | 3,6705 | 1     | -0,243 |
| 14 | P25705 ATPA_HUMAN  | E.ERILGADTSVDLEE.T                |            | 2 | 3,6686 | 0,402 | -0,394 |
| 14 | Q9UK22 FBX2_HUMAN  | R.NLLRNPCGEEDLE.G                 |            | 2 | 3,6561 | 0,434 | -0,157 |
| 14 | Q9NYF8 BCLF1_HUMAN | E.ALDYFS#DKESGK.Q                 | S385:      | 2 | 3,6504 | 0,637 | -0,678 |
| 14 | O15143 ARC1B_HUMAN | K.NSVSQISVLSGGK.A                 |            | 2 | 3,6484 | 0,529 | -0,478 |
| 14 | P10809 CH60_HUMAN  | R.KPLVIIAEDVDGE.A                 |            | 2 | 3,6466 | 0,526 | -0,262 |
| 14 | Q15424 SAFB1_HUMAN | E.SSELEQPFAQDTSS#VGPDRK.L         | S247:      | 3 | 3,6457 | 0,231 | -0,243 |
| 14 | Q9H6F5 CCD86_HUMAN | E.FESNPEETREPGS#PPSVQR.A          | S47:       | 3 | 3,6442 | 0,345 | -0,494 |
| 14 | Q96T58 MINT_HUMAN  | R.LLSVKGS#PKVDE.K                 | S1287:     | 2 | 3,6402 | 0,443 | -0,812 |
| 14 | Q7LBC6 JHD2B_HUMAN | E.SLADSSS#RDSFKQSLE.S             | S553:      | 3 | 3,6393 | 0,347 | -0,469 |
| 14 | Q9UKV3 ACINU_HUMAN | K.KCEAEEAEPAAATQPQTSE.T           |            | 2 | 3,638  | 0,445 | 0,118  |
| 14 | Q9H307 PININ_HUMAN | E.IAIVHS#DAEKEQEE.E               | S347:      | 2 | 3,6368 | 0,374 | -0,582 |
| 14 | P02545 LMNA_HUMAN  | R.IRIDSL#AQLSQLK.Q                | S303:      | 3 | 3,6363 | 0,287 | -0,103 |
| 14 | Q8TB72 PUM2_HUMAN  | E.YVLS#PADKLSR.F                  | S102:      | 2 | 3,6303 | 0,298 | -0,754 |
| 14 | Q96EV2 RBM33_HUMAN | K.NQDVSISNVQPK.T                  |            | 2 | 3,6281 | 0,317 | -0,275 |
| 14 | Q9UQR0 SCML2_HUMAN | K.SSSLNSGNYLNPACR.N               |            | 2 | 3,6251 | 0,407 | -0,521 |
| 14 | Q8NE71 ABCF1_HUMAN | K.LSVPTS#DEEDEVPAKPR.G            | S109:      | 2 | 3,622  | 0,357 | -0,239 |
| 14 | Q08999 RBL2_HUMAN  | R.GILLEDGSES#PAKR.I               | S1112:     | 2 | 3,6135 | 0,114 | -0,943 |
| 14 | Q7L2J0 MEPCE_HUMAN | E.SHPVPPTAPLT#PLLHGE.G            | T291:      | 3 | 3,6087 | 0,375 | -0,199 |
| 14 | Q96T23 RSF1_HUMAN  | E.IKLS#DDFDS#PVKGPLCK.S           | S382:S387: | 3 | 3,607  | 0,323 | -0,528 |
| 14 | O15085 ARHGB_HUMAN | E.NNQYDAPEPGTQR.L                 |            | 2 | 3,6035 | 0,496 | -0,603 |
| 14 | Q96EV2 RBM33_HUMAN | K.VKPAS#PVAQPKEE.A                | S775:      | 3 | 3,5925 | 0,198 | 0,125  |
| 14 | Q69YN2 C19L1_HUMAN | K.KAPIQTYVLGANNQE.T               |            | 2 | 3,5891 | 0,437 | -0,222 |
| 14 | Q6KC79 NIPBL_HUMAN | K.GSRPPLILQSQLPCSS#PR.D           | S306:      | 3 | 3,5863 | 0,336 | -0,339 |
| 14 | Q9H307 PININ_HUMAN | E.IAIVHS#DAEKE.Q                  | S347:      | 2 | 3,5858 | 0,422 | -1,133 |
| 14 | Q9UN36 NDRG2_HUMAN | R.TASLTSAAASVDGNR.S               |            | 2 | 3,5836 | 0,545 | -1,265 |
| 14 | P62917 RL8_HUMAN   | R.ASGNYATVISHNPE.T                |            | 2 | 3,5814 | 0,445 | -0,084 |

|    |                    |                               |        |   |        |       |        |
|----|--------------------|-------------------------------|--------|---|--------|-------|--------|
| 14 | Q9Y2K5 R3HD2_HUMAN | E.VCNQVTSSQSVR.G              |        | 2 | 3,5802 | 0,471 | -0,804 |
| 14 | Q8NHG8 ZNR2_HUMAN  | R.SLGGAVGVSASGAR.A            |        | 2 | 3,5763 | 0,524 | -0,103 |
| 14 | Q07157 ZO1_HUMAN   | K.SHSLAQPFEDSGVE.T            |        | 2 | 3,5752 | 0,453 | -0,61  |
| 14 | P15586 GNS_HUMAN   | R.RPNVVLLLTDDQDE.V            |        | 2 | 3,5721 | 0,387 | -0,6   |
| 14 | Q92540 SMG7_HUMAN  | R.SVM*AAQANIDR.R              |        | 2 | 3,561  | 0,403 | 0,781  |
| 14 | Q13459 MYO9B_HUMAN | R.VQEKPDS#PGGSTQIQR.Y         | S1290: | 2 | 3,5578 | 0,458 | -0,473 |
| 14 | P35611 ADDA_HUMAN  | R.AAVVTS#PPPTTAPHKE.R         | S12:   | 2 | 3,5541 | 0,451 | -0,435 |
| 14 | Q8IVF2 AHNK2_HUMAN | K.VDLKS#PQVDIK.G              | S3408: | 2 | 3,5488 | 0,249 | -0,277 |
| 14 | P12268 IMDH2_HUMAN | K.VAQGVSGAVQDK.G              |        | 2 | 3,545  | 0,292 | 0      |
| 14 | Q9HCD6 TANC2_HUMAN | E.VQDENQTSAITQR.I             |        | 2 | 3,5421 | 0,412 | -0,737 |
| 14 | P04264 K2C1_HUMAN  | R.SGGGFSSGSAGIINYQR.R         |        | 2 | 3,5382 | 0,464 | -0,736 |
| 14 | O00418 EF2K_HUMAN  | K.LLQSAKT#ILRGTEE.K           | T348:  | 2 | 3,5377 | 0,387 | -0,596 |
| 14 | P31942 HNRH3_HUMAN | R.DGM*DNQGGYGSVGR.M           |        | 2 | 3,5305 | 0,455 | -1,195 |
| 14 | Q8IU81 I2BP1_HUMAN | R.AGGAS#PAASSTAQPPTQHR.L      | S453:  | 2 | 3,5172 | 0,319 | -0,065 |
| 14 | Q00839 HNRPU_HUMAN | E.AGGRPAM*EPGNCS#LDLGGDSAGR.S | S59:   | 2 | 3,5133 | 0,375 | -0,436 |
| 14 | O60264 SMCA5_HUMAN | E.IFDDAS#PGKQKE.I             | S66:   | 2 | 3,513  | 0,383 | -0,776 |
| 14 | O75694 NU155_HUMAN | K.HGEPEEDIVGLQAFQE.R          |        | 2 | 3,5098 | 0,305 | -0,543 |
| 14 | O75643 U520_HUMAN  | K.M*KGYTLLSEGIDE.M            |        | 2 | 3,5069 | 0,45  | -0,663 |
| 14 | O43592 XPOT_HUMAN  | E.FCQALQQPDAK.V               |        | 2 | 3,5064 | 0,395 | -0,28  |
| 14 | Q13077 TRAF1_HUMAN | R.ALCCAGCLSENPR.N             |        | 2 | 3,5058 | 0,431 | -0,89  |
| 14 | Q13428 TCOF_HUMAN  | K.TSQVGAASAPAKES#PR.K         | S381:  | 2 | 3,5047 | 0,509 | -0,224 |
| 14 | Q7Z309 F122B_HUMAN | E.SLSLS#DSDFDKPEK.L           | S93:   | 2 | 3,5036 | 0,388 | -0,592 |
| 14 | P18583 SON_HUMAN   | D.SAM*LGSKS#PDPYR.L           | S910:  | 2 | 3,503  | 0,434 | -0,405 |
| 14 | P49454 CENPF_HUMAN | K.NSAILQNRVDSLE.F             |        | 2 | 3,4991 | 0,483 | -0,92  |
| 14 | O95235 KI20A_HUMAN | E.STAADLGSVVR.K               |        | 2 | 3,4969 | 0,461 | -0,794 |
| 14 | Q92560 BAP1_HUMAN  | K.GSSPSIRPIQGSQGS#SSPVEKE.V   | S595:  | 3 | 3,4967 | 0,381 | -0,797 |
| 14 | Q96L14 C170L_HUMAN | K.SSPVNNHHS#PGQTPTLGQPE.A     | S238:  | 2 | 3,4937 | 0,35  | -0,226 |
| 14 | Q9Y2W1 TR150_HUMAN | K.SPPSTGSTYGSSQKEE.S          |        | 2 | 3,4935 | 0,543 | -0,074 |
| 14 | Q15650 TRIP4_HUMAN | R.NRQEVPAFTEPDTTAE.V          |        | 2 | 3,4913 | 0,614 | -0,541 |
| 14 | O75362 ZN217_HUMAN | R.TKADVT#PPPDGSTTHNLE.V       | T648:  | 3 | 3,4893 | 0,327 | -0,373 |
| 14 | P40222 TXLNA_HUMAN | D.LSAGQGSLTDSGPER.R           |        | 2 | 3,4892 | 0,491 | -1,035 |
| 14 | Q9Y2W1 TR150_HUMAN | K.SPVGKS#PPSTGSTYGSSQKEE.S    | S320:  | 2 | 3,4891 | 0,292 | -0,78  |
| 14 | Q9UEY8 ADDG_HUMAN  | E.ITIKS#PEKIEE.V              | S664:  | 2 | 3,489  | 0,341 | -0,625 |

|    |                    |                                    |        |   |        |       |        |
|----|--------------------|------------------------------------|--------|---|--------|-------|--------|
| 14 | O14908 GIPC1_HUMAN | R.SRGPATVEDLPSAFEE.K               |        | 2 | 3,4877 | 0,512 | -0,429 |
| 14 | P49792 RBP2_HUMAN  | E.SSINYTFKT#PEK.A                  | T2613: | 2 | 3,4863 | 0,357 | -0,408 |
| 14 | Q7KZ85 SPT6H_HUMAN | K.KLPGYTDAALQEAQE.I                |        | 2 | 3,4848 | 0,225 | -0,971 |
| 14 | P52948 NUP98_HUMAN | E.NGERFS#FLSKPVDE.N                | S635:  | 3 | 3,4834 | 0,175 | -0,215 |
| 14 | Q9UER7 DAXX_HUMAN  | D.SGEGPSGM*ASQGCPASR.A             |        | 2 | 3,4773 | 0,479 | -0,07  |
| 14 | Q13459 MYO9B_HUMAN | R.VQEKPDS#PGGSTQIQR.Y              | S1290: | 3 | 3,477  | 0,344 | -0,202 |
| 14 | Q96QD8 S38A2_HUMAN | K.SHYADVDPENQNFLLE.S               |        | 2 | 3,4763 | 0,416 | -0,323 |
| 14 | O75643 U520_HUMAN  | K.ANSNLVLQADR.S                    |        | 2 | 3,4726 | 0,274 | -0,305 |
| 14 | O60343 TBCD4_HUMAN | K.SPSAM*QQQDGLDRNE.L               |        | 2 | 3,4706 | 0,462 | -0,433 |
| 14 | P48634 BAT2_HUMAN  | R.GSEGKPSLTPASAPGPEEALTTVTVAPAPR.R |        | 3 | 3,4702 | 0,266 | 0,305  |
| 14 | Q96DT7 ZBT10_HUMAN | E.GASLGDGSGAEGGSCSSR.R             |        | 2 | 3,4697 | 0,589 | -0,431 |
| 14 | P35221 CTNA1_HUMAN | R.NAGNEQDLGIQYK.A                  |        | 2 | 3,4617 | 0,303 | 0      |
| 14 | Q13685 AAMP_HUMAN  | K.TFQGPNCPCATCGR.V                 |        | 2 | 3,4597 | 0,385 | -0,916 |
| 14 | Q15018 K0157_HUMAN | K.YPGSGADLPPQR.A                   |        | 2 | 3,4571 | 0,407 | -0,27  |
| 14 | P61160 ARP2_HUMAN  | E.KLCYVGYNIEQE.Q                   |        | 2 | 3,4535 | 0,321 | -0,644 |
| 14 | Q9UGV2 NDRG3_HUMAN | E.SCES#PDVLDLRHQT*E.V              | S361:  | 2 | 3,4531 | 0,429 | 0,064  |
| 14 | Q9UBR2 CATZ_HUMAN  | R.NVDGVNYASITR.N                   |        | 2 | 3,4506 | 0,36  | -0,466 |
| 14 | Q6S8J3 A26CA_HUMAN | E.KSYELPDGQVITIGNE.R               |        | 2 | 3,4475 | 0,467 | -0,484 |
| 14 | O60716 CTND1_HUMAN | K.SDFQVNLNNASR.S                   |        | 2 | 3,4463 | 0,413 | -1,162 |
| 14 | Q9UPN4 AZI1_HUMAN  | K.ANNAGGGLPAAGPGDR.C               |        | 2 | 3,4411 | 0,527 | -0,525 |
| 14 | Q9Y6V0 PCLO_HUMAN  | R.RFS#LNLGSITDAPK.S                | S852:  | 2 | 3,441  | 0,322 | -0,076 |
| 14 | Q9H6U6 BCAS3_HUMAN | E.TLSNSSGSTSGSIPR.N                |        | 2 | 3,4392 | 0,582 | -1,682 |
| 14 | Q96FW1 OTUB1_HUMAN | E.YAEDDNIYQQK.I                    |        | 2 | 3,4387 | 0,391 | -1,232 |
| 14 | P04183 KITH_HUMAN  | R.KLFAPQQILQCSPAN.-                |        | 2 | 3,4376 | 0,399 | 0,498  |
| 14 | P35579 MYH9_HUMAN  | K.LKDVLQVDDE.R                     |        | 2 | 3,4352 | 0,261 | -0,284 |
| 14 | P84103 SFRS3_HUMAN | K.VYVGNLGNNGNKTE.L                 |        | 2 | 3,4322 | 0,401 | -1,485 |
| 14 | P24534 EF1B_HUMAN  | E.AVSS#PPPADLCHALR.W               | S43:   | 2 | 3,4317 | 0,442 | -0,876 |
| 14 | Q6P0Q8 MAST2_HUMAN | R.KATM*AGGLANLQDLE.N               |        | 2 | 3,4281 | 0,332 | -1,182 |
| 14 | Q01518 CAP1_HUMAN  | E.M*NDAAM*FYTNR.V                  |        | 2 | 3,4254 | 0,416 | -0,893 |
| 14 | Q7Z2W4 ZCCHV_HUMAN | E.FLASASASAER.S                    |        | 2 | 3,425  | 0,481 | -1,759 |
| 14 | Q9NU19 TB22B_HUMAN | R.SQSTTSVDPANYK.V                  |        | 2 | 3,4246 | 0,451 | -0,96  |
| 14 | P0C7M2 RA1L3_HUMAN | D.FGNYNQSSNFGPM*K.G                |        | 2 | 3,4229 | 0,245 | -0,851 |
| 14 | Q09666 AHNK_HUMAN  | K.VKGDLDIAGPNLE.G                  |        | 2 | 3,4225 | 0,319 | -0,091 |

|    |                    |                              |              |   |        |       |        |
|----|--------------------|------------------------------|--------------|---|--------|-------|--------|
| 14 | Q14669 TRIPC_HUMAN | R.NTAGAQPQDDSIGGR.S          |              | 2 | 3,4178 | 0,54  | -0,656 |
| 14 | Q9Y295 DRG1_HUMAN  | K.DKGGINLTATCPQSE.L          |              | 2 | 3,4174 | 0,409 | -0,844 |
| 14 | O75534 CSDE1_HUMAN | E.KLLTSYGFIQCSE.R            |              | 2 | 3,4126 | 0,423 | -0,158 |
| 14 | Q9NQG5 CT077_HUMAN | K.LSM*EDSKS#PPPKATEE.K       | S134:        | 2 | 3,4123 | 0,407 | -0,066 |
| 14 | A0FGR8 ESYT2_HUMAN | R.SSSS#LLASPGHISVK.E         | S739:        | 2 | 3,4122 | 0,357 | -0,551 |
| 14 | Q8IYB3 SRRM1_HUMAN | K.VPKPEPIPEPKEPS#PE.K        | S260:        | 2 | 3,412  | 0,311 | -0,528 |
| 14 | Q7LBC6 JHD2B_HUMAN | E.SLADSSS#RDSFKQSLE.S        | S553:        | 2 | 3,4105 | 0,358 | -0,5   |
| 14 | A0MZ66 SHOT1_HUMAN | E.SKS#M*PVLGSVSSVTK.T        | S506:        | 2 | 3,4054 | 0,506 | -0,685 |
| 14 | Q9P2R3 ANFY1_HUMAN | R.NFLHVAVQNSDIE.S            |              | 2 | 3,4054 | 0,301 | -1,149 |
| 14 | Q9Y6W5 WASF2_HUMAN | R.DVVGNDVATILSR.R            |              | 2 | 3,3997 | 0,376 | -0,718 |
| 14 | P52948 NUP98_HUMAN | K.NLNNSNLFSPVNR.D            |              | 2 | 3,3993 | 0,313 | -0,574 |
| 14 | P40123 CAP2_HUMAN  | E.M*NDAATFYTNR.V             |              | 2 | 3,3962 | 0,463 | -0,555 |
| 14 | O95405 ZFYV9_HUMAN | E.ISTRPCLALAPDS#PDNDLR.A     | S668:        | 3 | 3,396  | 0,082 | -0,334 |
| 14 | Q02952 AKA12_HUMAN | K.ERPPAPSSFVFQEE.T           |              | 2 | 3,3952 | 0,22  | -0,603 |
| 14 | Q05209 PTN12_HUMAN | D.LSEGNSSDINYQTR.K           |              | 2 | 3,3932 | 0,494 | -1,078 |
| 14 | P05783 K1C18_HUMAN | R.AQIFANTVDNAR.I             |              | 2 | 3,3896 | 0,503 | -0,462 |
| 14 | Q99714 HCD2_HUMAN  | K.KLGNNCVFAPADVTSE.K         |              | 2 | 3,3891 | 0,431 | -0,142 |
| 14 | Q12756 KIF1A_HUMAN | R.CNAVINEDPNNK.L             |              | 2 | 3,3884 | 0,436 | -0,527 |
| 14 | Q7L2J0 MEPCE_HUMAN | R.TLNAETPKSS#PLPAK.G         | S217:        | 2 | 3,3871 | 0,424 | -0,821 |
| 14 | Q56P03 EAPP_HUMAN  | E.VDVLLHGT#PDQK.R            | T37:         | 2 | 3,3816 | 0,414 | 0      |
| 14 | Q7Z460 CLAP1_HUMAN | K.NSSNTSVGSPSNTIGR.T         |              | 2 | 3,3795 | 0,481 | -0,928 |
| 14 | P42684 ABL2_HUMAN  | E.NSASSLAPGFIR.G             |              | 2 | 3,3763 | 0,427 | -0,7   |
| 14 | Q8NCN4 RN169_HUMAN | K.NNSYSLAFLAGK.L             |              | 2 | 3,3723 | 0,397 | -0,38  |
| 14 | Q13085 ACACA_HUMAN | R.SSM*S#GLHLVK.Q             | S80:         | 2 | 3,3699 | 0,281 | -0,634 |
| 14 | Q16555 DPYL2_HUMAN | K.DRFQLTDCQIYE.V             |              | 2 | 3,3694 | 0,46  | -0,692 |
| 14 | Q9UQ35 SRRM2_HUMAN | K.VKAQT#PPGPSLSGSKS#PCPQEK.S | T1003:S1014: | 2 | 3,3689 | 0,41  | -0,7   |
| 14 | P27816 MAP4_HUMAN  | E.VALAKDM*ES#PTKLD.V         | S280:        | 2 | 3,3686 | 0,432 | -0,378 |
| 14 | P61163 ACTZ_HUMAN  | E.KAQQYLPDGSTIE.I            |              | 2 | 3,363  | 0,296 | -0,822 |
| 14 | Q49A88 CCD14_HUMAN | E.VQTDGNSQFASQGK.T           |              | 2 | 3,361  | 0,467 | -0,416 |
| 14 | Q92541 RTF1_HUMAN  | K.NISAIYINQR.N               |              | 2 | 3,3601 | 0,484 | -0,859 |
| 14 | Q8N6T3 ARFG1_HUMAN | R.YVGFNT#PPPQKKE.D           | T189:        | 2 | 3,3584 | 0,504 | -0,297 |
| 14 | O15234 CASC3_HUMAN | R.GGGSCSGSAGGGGSGSLPSQR.G    |              | 2 | 3,3575 | 0,53  | -0,343 |
| 14 | P40763 STAT3_HUMAN | E.NLQDDDFDFNYK.T             |              | 2 | 3,3572 | 0,354 | -0,086 |

|    |                     |                          |        |   |        |       |        |
|----|---------------------|--------------------------|--------|---|--------|-------|--------|
| 14 | P51957 NEK4_HUMAN   | R.ASGLLKS#PASLK.A        | S340:  | 2 | 3,3571 | 0,343 | -0,292 |
| 14 | Q9H9A7 RMI1_HUMAN   | R.CFTTGSSENTIPTR.Q       |        | 2 | 3,3555 | 0,468 | -0,479 |
| 14 | Q6Y7W6 PERQ2_HUMAN  | E.M*GTFDSS#GAFLSLKK.V    | S303:  | 2 | 3,3546 | 0,343 | -0,652 |
| 14 | Q8N1Q3 Q8N1Q3_HUMAN | R.GGLSVHTCSSASQSE.A      |        | 2 | 3,3526 | 0,36  | -1,053 |
| 14 | Q3YEC7 PARF_HUMAN   | R.LKNDSDLFGLGLEE.A       |        | 2 | 3,3521 | 0,487 | -0,551 |
| 14 | P31946 1433B_HUMAN  | E.SYKDST#LIM*QLLR.D      | T217:  | 2 | 3,3505 | 0,403 | -0,44  |
| 14 | Q00613 HSF1_HUMAN   | K.CLSVACLKNE.L           |        | 2 | 3,3487 | 0,401 | -1,119 |
| 14 | Q9UKV3 ACINU_HUMAN  | K.KASLVALPEQTASEEE.T     |        | 2 | 3,345  | 0,352 | -0,645 |
| 14 | P59074 CG301_HUMAN  | E.KQLAQIDGTLSTIE.F       |        | 2 | 3,3403 | 0,511 | -0,241 |
| 14 | Q6P0N0 CN106_HUMAN  | K.ANYES#PGKIFLR.M        | S110:  | 2 | 3,3382 | 0,308 | -0,248 |
| 14 | P31947 1433S_HUMAN  | K.GAVEKGEELSCEE.R        |        | 2 | 3,3365 | 0,322 | 1,019  |
| 14 | Q9Y224 CN166_HUMAN  | K.HILGFDTGDAVLNE.A       |        | 2 | 3,3359 | 0,407 | -0,244 |
| 14 | Q15758 AAAT_HUMAN   | R.GPAGDATVASEKE.S        |        | 2 | 3,3357 | 0,534 | 0      |
| 14 | P46821 MAP1B_HUMAN  | E.ECPRPM*SISPPDFS#PK.T   | S1625: | 3 | 3,333  | 0,235 | -1,037 |
| 14 | P20042 IF2B_HUMAN   | K.KPFM*LDEEGDTQTEE.T     |        | 2 | 3,3321 | 0,459 | -0,615 |
| 14 | Q13615 MTMR3_HUMAN  | K.DRLPQTM*EPSPSE.T       |        | 2 | 3,332  | 0,307 | 0,812  |
| 14 | Q8N3V7 SYNPO_HUMAN  | E.ASNFQQEPAPR.D          |        | 2 | 3,3308 | 0,364 | -0,392 |
| 14 | Q86VP6 CAND1_HUMAN  | K.CLDAVVSTR.H            |        | 2 | 3,3306 | 0,425 | -1,075 |
| 14 | Q6UN15 FIP1_HUMAN   | R.KPGADLSDFNYGFNE.D      |        | 2 | 3,3275 | 0,46  | -0,399 |
| 14 | Q9NS87 KIF15_HUMAN  | K.AQKEPCLFANTE.K         |        | 2 | 3,3266 | 0,425 | -0,087 |
| 14 | Q9UIF9 BAZ2A_HUMAN  | E.M*EGPEECLGR.R          |        | 2 | 3,3246 | 0,427 | -0,307 |
| 14 | Q86WV7 Q86WV7_HUMAN | R.NTNVEDVLNAR.K          |        | 2 | 3,3236 | 0,488 | -0,588 |
| 14 | Q9H4A3 WNK1_HUMAN   | E.KQSSTPGSLFLS#PPAPAPK.N | S19:   | 3 | 3,3216 | 0,303 | 0,46   |
| 14 | P31939 PUR9_HUMAN   | K.HVSPAGAAVGIPLSEDE.A    |        | 2 | 3,3213 | 0,5   | -0,444 |
| 14 | Q9NYF8 BCLF1_HUMAN  | K.DLFDYS#PPLHK.N         | S512:  | 2 | 3,3181 | 0,42  | -0,518 |
| 14 | O43865 SAHH2_HUMAN  | K.NSCIVCNM*GHSNTE.I      |        | 2 | 3,3178 | 0,408 | -0,67  |
| 14 | P04792 HSPB1_HUMAN  | R.AQLGGPEAAKSDE.T        |        | 2 | 3,3146 | 0,398 | -1,15  |
| 14 | O95671 ASML_HUMAN   | K.KAEDLFQDAYYSPE.T       |        | 2 | 3,3134 | 0,459 | -0,541 |
| 14 | P62269 RS18_HUMAN   | K.YSQVLANGLDNK.L         |        | 2 | 3,3124 | 0,391 | -0,554 |
| 14 | Q68EM7 RHG17_HUMAN  | K.KLPLTALAQNM*QE.A       |        | 2 | 3,3122 | 0,342 | -0,994 |
| 14 | Q71U36 TBA1A_HUMAN  | E.HSDCAFV*VDNEAIYD.I     |        | 2 | 3,3103 | 0,52  | -0,406 |
| 14 | P11171 41_HUMAN     | R.SLDGAAAVDSADR.S        |        | 2 | 3,3089 | 0,525 | -0,587 |
| 14 | Q6ZU80 CN145_HUMAN  | E.SLEQSIDQLR.S           |        | 2 | 3,3088 | 0,316 | -0,616 |

|    |                     |                                |        |   |        |       |        |
|----|---------------------|--------------------------------|--------|---|--------|-------|--------|
| 14 | Q99549 MPP8_HUMAN   | E.GVGVVGEDNDAAAR.G             |        | 2 | 3,3048 | 0,551 | -0,917 |
| 14 | P60174 TPIS_HUMAN   | K.SNVSDAVAQSTR.I               |        | 2 | 3,3026 | 0,317 | -0,296 |
| 14 | P00558 PGK1_HUMAN   | E.KACANPAAGSVILLE.N            |        | 2 | 3,3011 | 0,246 | -0,403 |
| 14 | Q9NWH9 SLTM_HUMAN   | R.AGAGM*ITQHSSNAS#PINR.I       | S1002: | 2 | 3,3007 | 0,546 | -0,384 |
| 14 | Q6PGN9 PSRC1_HUMAN  | E.TFVLKDS#PVRD.L               | S122:  | 2 | 3,298  | 0,394 | -0,629 |
| 14 | Q6UN15 FIP1_HUMAN   | R.DHSPTPSVFNSEEE.R             |        | 2 | 3,2968 | 0,377 | -0,547 |
| 14 | Q16643 DREB_HUMAN   | R.RM*APTPIPTRS#PSDSSTASTPVAE.Q | S337:  | 3 | 3,296  | 0,346 | -0,574 |
| 14 | P55327 TPD52_HUMAN  | K.NSPTFKS#FEEKVE.N             | S136:  | 2 | 3,2956 | 0,423 | -0,527 |
| 14 | Q8WTT2 NOC3L_HUMAN  | K.M*HIAALASAILSDPE.N           |        | 2 | 3,2933 | 0,335 | -0,785 |
| 14 | Q12756 KIF1A_HUMAN  | E.LSLCHVADAGS#PGM*QR.R         | S1337: | 3 | 3,293  | 0,277 | -0,204 |
| 14 | Q13642 FHL1_HUMAN   | K.CFDKFCANTCVE.C               |        | 2 | 3,2921 | 0,399 | -0,629 |
| 14 | Q9Y3U8 RL36_HUMAN   | E.LSNVLAAM*R.K                 |        | 2 | 3,2894 | 0,374 | -1,046 |
| 14 | Q9UPW0 FOXJ3_HUMAN  | K.KNALLDPNTTLDQEE.V            |        | 2 | 3,2877 | 0,353 | -0,574 |
| 14 | Q9Y2D9 ZN652_HUMAN  | E.VNLNNQTLNVSK.G               |        | 2 | 3,2874 | 0,412 | -0,635 |
| 14 | P05556 ITB1_HUMAN   | E.CECQSEGIPESPK.C              |        | 2 | 3,2842 | 0,482 | -0,481 |
| 14 | P05455 LA_HUMAN     | K.FSGDLDDQTCRE.D               |        | 2 | 3,2822 | 0,465 | -1,438 |
| 14 | Q9UQ35 SRRM2_HUMAN  | R.QGSITSPQANEQSVT#PQRR.S       | T866:  | 3 | 3,2777 | 0,372 | -0,507 |
| 14 | Q00536 PCTK1_HUMAN  | K.RLS#LPADIRLPE.G              | S119:  | 2 | 3,2711 | 0,455 | -0,418 |
| 14 | O95785 WIZ_HUMAN    | R.SPSDLHIS#PLAK.K              | S1134: | 2 | 3,2696 | 0,394 | -0,816 |
| 14 | P02545 LMNA_HUMAN   | R.NSNLVGAAHEE.L                |        | 2 | 3,2646 | 0,377 | -1,069 |
| 14 | Q12888 TP53B_HUMAN  | R.GNLLHFPSSQGEED.K             |        | 2 | 3,2635 | 0,404 | -0,237 |
| 14 | Q8WXV6 Q8WXV6_HUMAN | K.RT#SSEDNLYLAVLR.A            | T19:   | 3 | 3,2611 | 0,189 | -0,426 |
| 14 | Q71F56 MD13L_HUMAN  | K.NAM*SIFSSATK.T               |        | 2 | 3,261  | 0,413 | -0,728 |
| 14 | P35908 K22E_HUMAN   | R.YLDGLTAER.T                  |        | 2 | 3,258  | 0,412 | -0,353 |
| 14 | P21333 FLNA_HUMAN   | K.FADQHVPGS#PFSVK.V            | S2128: | 3 | 3,2571 | 0,257 | 0,115  |
| 14 | Q5SW79 CE170_HUMAN  | K.SIKS#DVPVYLK.R               | S359:  | 2 | 3,2541 | 0,319 | -0,275 |
| 14 | P63098 CANB1_HUMAN  | K.KLDLDNSGSLVEE.F              |        | 2 | 3,2536 | 0,47  | -0,405 |
| 14 | Q13308 PTK7_HUMAN   | R.LQDSGTFQCVAR.D               |        | 2 | 3,2532 | 0,454 | -0,795 |
| 14 | P49736 MCM2_HUMAN   | E.SFTM*ASSPAQR.R               |        | 2 | 3,2522 | 0,473 | 0,204  |
| 14 | Q99615 DNJC7_HUMAN  | K.ILGVDKNASEDE.I               |        | 2 | 3,2517 | 0,423 | -1,04  |
| 14 | P05787 K2C8_HUMAN   | K.LSELEAALQR.A                 |        | 2 | 3,249  | 0,126 | -0,864 |
| 14 | Q96KM6 Z512B_HUMAN  | R.RTS#AQVAVFHLQE.I             | S686:  | 2 | 3,2483 | 0,307 | -0,623 |
| 14 | P04264 K2C1_HUMAN   | K.YEELQITAGR.H                 |        | 2 | 3,247  | 0,225 | -0,517 |

|    |                    |                                |                 |   |        |       |        |
|----|--------------------|--------------------------------|-----------------|---|--------|-------|--------|
| 14 | Q12851 M4K2_HUMAN  | R.TPS#EIQFHQVK.F               | S327:           | 2 | 3,247  | 0,406 | 0      |
| 14 | Q7Z417 NUFP2_HUMAN | K.RTS#PQVLGSILK.S              | S572:           | 2 | 3,2445 | 0,348 | -1,062 |
| 14 | P04264 K2C1_HUMAN  | K.SLNNQFASFIDK.V               |                 | 2 | 3,2413 | 0,409 | -0,264 |
| 14 | Q86XN8 MEX3D_HUMAN | R.RSS#GAGT#PRHS#PTLPEPGGLRLE.L | S506:T510:S514: | 3 | 3,2391 | 0,155 | -0,42  |
| 14 | Q96TA2 YMEL1_HUMAN | E.AKANAPCVIFIDE.L              |                 | 2 | 3,2385 | 0,323 | -0,337 |
| 14 | Q9Y3P9 RBGP1_HUMAN | K.IVGNQSEQQQLQKE.L             |                 | 2 | 3,2305 | 0,351 | -1,109 |
| 14 | Q92878 RAD50_HUMAN | E.DKLFVCGSQDFE.S               |                 | 2 | 3,2285 | 0,4   | -0,235 |
| 14 | Q86VR2 F134C_HUMAN | E.VSCTDNGTFNLSR.G              |                 | 2 | 3,2283 | 0,511 | -0,581 |
| 14 | Q12756 KIF1A_HUMAN | E.LSLCHVADAGS#PGM*QR.R         | S1337:          | 2 | 3,2233 | 0,466 | -0,476 |
| 14 | Q9H0K1 SN1L2_HUMAN | R.RAS#DTSLTQGIVAFR.Q           | S587:           | 3 | 3,2228 | 0,344 | 0,322  |
| 14 | O94876 TMCC1_HUMAN | R.NKFGS#ADNIPNLKDSLEE.G        | S382:           | 3 | 3,2201 | 0,183 | -0,265 |
| 14 | Q14694 UBP10_HUMAN | E.TKYS#PPAISPLVSEK.Q           | S365:           | 2 | 3,2192 | 0,347 | -0,575 |
| 14 | P06748 NPM_HUMAN   | K.M*QAS#IEKGGSLPK.V            | S254:           | 2 | 3,215  | 0,369 | -0,254 |
| 14 | Q13153 PAK1_HUMAN  | E.DYNSSNALNVK.A                |                 | 2 | 3,2134 | 0,383 | -1,195 |
| 14 | O15160 RPAC1_HUMAN | E.KVLVYNNTSIVQDE.I             |                 | 2 | 3,213  | 0,392 | -0,978 |
| 14 | Q9Y6I9 TX264_HUMAN | E.TSAATLSPGASSR.G              |                 | 2 | 3,2128 | 0,416 | -0,809 |
| 14 | Q5JRA6 MIA3_HUMAN  | K.LKDVISM*NASEFSE.V            |                 | 2 | 3,2121 | 0,489 | -0,385 |
| 14 | Q8N4C8 MINK1_HUMAN | R.SDSVLPASHGHLPOAGS#LE.R       | S763:           | 3 | 3,2108 | 0,286 | -0,369 |
| 14 | P40818 UBP8_HUMAN  | E.M*APSSAPPST#PPTHK.A          | T692:           | 3 | 3,2076 | 0,216 | 0,228  |
| 14 | P60174 TPIS_HUMAN  | R.KQS#LGELIGTLNAAK.V           | S21:            | 3 | 3,2066 | 0,267 | -0,676 |
| 14 | Q00653 NFKB2_HUMAN | E.YDDFKLNSS#IVEPK.E            | S23:            | 3 | 3,2047 | 0,183 | -0,633 |
| 14 | P49761 CLK3_HUMAN  | R.YRS#PEPDPYLSYR.W             | S157:           | 3 | 3,2025 | 0,234 | -0,531 |
| 14 | O00273 DFFA_HUMAN  | K.ACDILAIK.S                   |                 | 2 | 3,2004 | 0,458 | -1,018 |
| 14 | Q8TF05 PP4R1_HUMAN | E.LDINELPNCK.I                 |                 | 2 | 3,1973 | 0,343 | -0,301 |
| 14 | O00159 MYO1C_HUMAN | R.KALTVIDFTEDE.V               |                 | 2 | 3,1957 | 0,413 | -0,618 |
| 14 | P82979 HCC1_HUMAN  | R.FGLNVSSISR.K                 |                 | 2 | 3,1944 | 0,388 | -0,339 |
| 14 | Q9BTE6 AASD1_HUMAN | R.TNLIFLSGNR.V                 |                 | 2 | 3,1918 | 0,348 | 0,107  |
| 14 | O60684 IMA7_HUMAN  | E.HYFGVEDDDSSLAPQVDE.T         |                 | 2 | 3,1916 | 0,389 | -0,121 |
| 14 | P49588 SYAC_HUMAN  | K.M*HSPQTSAM*LFTVDNE.A         |                 | 2 | 3,1886 | 0,324 | -0,531 |
| 14 | P21796 VDAC1_HUMAN | K.LTFDSSFS#PNTGKK.N            | S104:           | 2 | 3,1882 | 0,261 | -0,758 |
| 14 | Q9UQ35 SRRM2_HUMAN | E.SYFGVSSLQLK.G                |                 | 2 | 3,1877 | 0,467 | -0,298 |
| 14 | Q8TDY2 RBCC1_HUMAN | E.STAGITTTTSPR.T               |                 | 2 | 3,1875 | 0,457 | -0,102 |
| 14 | O43493 TGON2_HUMAN | K.SGAEEQGPIDGPSK.S             |                 | 2 | 3,187  | 0,428 | -0,711 |



|    |                     |                          |       |   |        |       |        |
|----|---------------------|--------------------------|-------|---|--------|-------|--------|
| 14 | P16949 STMN1_HUMAN  | R.SKESVPEFPLS#PPK.K      | S38:  | 2 | 3,1852 | 0,405 | -0,677 |
| 14 | Q8WXV6 Q8WXV6_HUMAN | K.RTSS#EDNLYLAVLR.A      | S21:  | 2 | 3,1828 | 0,392 | -0,568 |
| 14 | Q92581 SL9A6_HUMAN  | R.FM*GNSSEDALDRE.L       |       | 2 | 3,1824 | 0,33  | -1,395 |
| 14 | Q14444 CAPR1_HUMAN  | R.LNQDQLDAVSK.Y          |       | 2 | 3,1824 | 0,439 | -0,694 |
| 14 | Q9NQG5 CT077_HUMAN  | K.LSM*EDSKS#PPPKATEE.K   | S134: | 3 | 3,1816 | 0,287 | 0,298  |
| 14 | Q5VWN6 CJ018_HUMAN  | E.VDSSSASTTLGR.Q         |       | 2 | 3,1805 | 0,425 | 0,207  |
| 14 | Q14974 IMB1_HUMAN   | R.YRDAAVM*AFGCILE.G      |       | 2 | 3,1792 | 0,453 | -0,374 |
| 14 | Q86UE8 TLK2_HUMAN   | R.SS#PQHSLSNPLPR.R       | S111: | 3 | 3,1778 | 0,23  | 0,427  |
| 14 | Q9UBR2 CATZ_HUMAN   | R.VGDYGSLSGR.E           |       | 2 | 3,1758 | 0,448 | -0,302 |
| 14 | Q92547 TOPB1_HUMAN  | K.NLQLALANSSR.N          |       | 2 | 3,1732 | 0,369 | -0,206 |
| 14 | O95777 LSM8_HUMAN   | E.TDSALDLGNIR.A          |       | 2 | 3,1731 | 0,464 | -0,623 |
| 14 | P21333 FLNA_HUMAN   | K.AHEPTYFTVDCAE.A        |       | 2 | 3,1731 | 0,472 | -0,079 |
| 14 | P17066 HSP76_HUMAN  | R.VEILANDQGNR.T          |       | 2 | 3,1727 | 0,281 | -0,695 |
| 14 | P10276 RARA_HUMAN   | E.GLDTLSGQPGGGGR.D       |       | 2 | 3,1715 | 0,483 | -0,767 |
| 14 | P12004 PCNA_HUMAN   | K.CAGNEDIITLR.A          |       | 2 | 3,1709 | 0,42  | -0,773 |
| 14 | Q16531 DDB1_HUMAN   | E.NAFNLFVCQK.D           |       | 2 | 3,1699 | 0,406 | -0,393 |
| 14 | P42704 LPPRC_HUMAN  | K.GFTLNDAANSR.L          |       | 2 | 3,1683 | 0,37  | -0,523 |
| 14 | Q9HBM1 SPC25_HUMAN  | K.TNNFSAFLANVR.K         |       | 2 | 3,1681 | 0,426 | -0,721 |
| 14 | O43493 TGON2_HUMAN  | K.DSPSKS#SAEAQTPEDTPNK.S | S70:  | 3 | 3,1643 | 0,106 | -0,177 |
| 14 | Q9NQ88 CL005_HUMAN  | E.KIIQGGQVDEPLSE.T       |       | 2 | 3,1638 | 0,48  | -0,645 |
| 14 | P22626 ROA2_HUMAN   | K.LFVGGIKEDTEE.H         |       | 2 | 3,1631 | 0,309 | -1,095 |
| 14 | Q6YP21 KAT3_HUMAN   | K.KLSAIPVSAFCNSE.T       |       | 2 | 3,1592 | 0,483 | 0      |
| 14 | O00233 PSMD9_HUMAN  | R.SDVDLYQVR.T            |       | 2 | 3,1592 | 0,376 | -0,111 |
| 14 | Q9NSM8 Q9NSM8_HUMAN | K.NADLNAQTVVK.V          |       | 2 | 3,1582 | 0,338 | -1,04  |
| 14 | Q03252 LMNB2_HUMAN  | R.M*RLES#LSYQLSGLQK.Q    | S296: | 2 | 3,1572 | 0,39  | -1,584 |
| 14 | P22234 PUR6_HUMAN   | K.ACGNFGIPCELR.V         |       | 2 | 3,1571 | 0,384 | -0,525 |
| 14 | Q9BY89 K1671_HUMAN  | E.SLATESPDSSATSTR.K      |       | 2 | 3,1562 | 0,392 | -1,131 |
| 14 | P55072 TERA_HUMAN   | E.M*FAQTLQQSR.G          |       | 2 | 3,156  | 0,3   | -0,498 |
| 14 | P18858 DNL1_HUMAN   | K.TSKAETPTESVSEPE.V      |       | 2 | 3,1557 | 0,482 | -0,23  |
| 14 | Q9BY89 K1671_HUMAN  | R.TFQARPLS#ADLTK.L       | S508: | 2 | 3,1535 | 0,264 | -0,16  |
| 14 | Q8WU79 SMAP2_HUMAN  | R.KVVGSM*PTAGSAGSVPE.N   |       | 2 | 3,1532 | 0,459 | -0,46  |
| 14 | P49593 PPM1F_HUMAN  | D.AQSLAQFFNR.L           |       | 2 | 3,1517 | 0,26  | 0,192  |
| 14 | O60884 DNJA2_HUMAN  | K.NVLCACSQGQGGK.S        |       | 2 | 3,1504 | 0,428 | -0,912 |

|    |                     |                            |        |   |        |       |        |
|----|---------------------|----------------------------|--------|---|--------|-------|--------|
| 14 | P63104 1433Z_HUMAN  | K.SVTEQGAELSNEER.N         |        | 2 | 3,1486 | 0,329 | -1,339 |
| 14 | Q8TBA6 GOGA5_HUMAN  | R.VDQGAATALSR.K            |        | 2 | 3,1479 | 0,395 | -1,008 |
| 14 | Q15149 PLEC1_HUMAN  | E.FADM*LSGNAGGFR.S         |        | 2 | 3,1464 | 0,386 | -0,18  |
| 14 | Q7Z401 MYCPP_HUMAN  | K.LSYQNSSSIVR.L            |        | 2 | 3,1459 | 0,447 | -0,584 |
| 14 | Q15185 TEBP_HUMAN   | K.LTFSCGGSDNFK.H           |        | 2 | 3,1423 | 0,462 | -0,506 |
| 14 | Q8NEF9 SRFB1_HUMAN  | K.AVTIANS#PSKPSEK.D        | S203:  | 2 | 3,1406 | 0,358 | -0,647 |
| 14 | Q05209 PTN12_HUMAN  | R.SCLVEGDAKEE.I            |        | 2 | 3,1401 | 0,368 | -1,282 |
| 14 | Q08945 SSRP1_HUMAN  | K.TGKVDNIQAGELTE.G         |        | 2 | 3,1387 | 0,124 | -0,331 |
| 14 | Q92628 K0232_HUMAN  | E.GIASFS#PSFKPK.S          | S1067: | 2 | 3,1385 | 0,398 | -0,906 |
| 14 | Q99459 CDC5L_HUMAN  | E.NYQALDADFR.K             |        | 2 | 3,138  | 0,401 | -0,402 |
| 14 | Q9P107 GMIP_HUMAN   | R.SLDSPTSSPGAGTR.Q         |        | 2 | 3,1378 | 0,333 | -0,458 |
| 14 | Q5VT52 K0460_HUMAN  | R.GPTSTSIDNIDGT#PVRDER.S   | T723:  | 3 | 3,136  | 0,28  | -0,52  |
| 14 | Q12789 TF3C1_HUMAN  | E.GSSSEDSPPPEGQAPPSHS#PR.G | S1856: | 3 | 3,1346 | 0,252 | -0,175 |
| 14 | Q969M3 YIPF5_HUMAN  | K.QYAGYDYSQQGR.F           |        | 2 | 3,1341 | 0,508 | -0,765 |
| 14 | Q15042 SR140_HUMAN  | R.KNDIGDAM*VFCLNNAE.A      |        | 2 | 3,1335 | 0,477 | -0,2   |
| 14 | Q9GZT3 SLIRP_HUMAN  | K.LPQTS#DDEKKDF.-          | S102:  | 2 | 3,1331 | 0,397 | -1,38  |
| 14 | Q96B23 CR025_HUMAN  | E.GDPSGVSGATVGR.K          |        | 2 | 3,1326 | 0,163 | -0,841 |
| 14 | O95400 CD2B2_HUMAN  | K.LVDPVAGSGGPGSR.F         |        | 2 | 3,1317 | 0,475 | -0,577 |
| 14 | P98170 BIRC4_HUMAN  | R.RIDDTIFQNPM*VQE.A        |        | 2 | 3,1306 | 0,361 | -0,283 |
| 14 | P46937 YAP1_HUMAN   | R.QAS#TDAGTAGALTPQHVR.A    | S109:  | 3 | 3,1305 | 0,368 | -0,393 |
| 14 | Q9UPN3 MACF1_HUMAN  | K.DKNSVFSVLDEE.I           |        | 2 | 3,1304 | 0,41  | -0,265 |
| 14 | P04181 OAT_HUMAN    | K.KTVQGPPPTSDDIFE.R        |        | 2 | 3,1264 | 0,235 | -1,432 |
| 14 | Q9HC35 EMAL4_HUMAN  | E.GSDGTDINALVR.S           |        | 2 | 3,1261 | 0,319 | -0,501 |
| 14 | Q9C0C2 TB182_HUMAN  | R.SYQFGIIGNDR.V            |        | 2 | 3,126  | 0,423 | 0      |
| 14 | P13647 K2C5_HUMAN   | K.YEELQQTAGR.H             |        | 2 | 3,125  | 0,315 | -0,204 |
| 14 | Q15003 CND2_HUMAN   | E.SVS#ALVDKFK.K            | S337:  | 2 | 3,1171 | 0,407 | -0,416 |
| 14 | P49736 MCM2_HUMAN   | R.QINIHNLSAFYDSE.L         |        | 2 | 3,1161 | 0,381 | -0,148 |
| 14 | P11532 DMD_HUMAN    | R.SDSSQPM*LLR.V            |        | 2 | 3,1154 | 0,279 | -0,424 |
| 14 | BOV0T1 BOV0T1_HUMAN | E.HIYCALSGSAADAQAVAD.M     |        | 2 | 3,1141 | 0,46  | -0,268 |
| 14 | Q9UBR2 CATZ_HUMAN   | R.VGDYGSLSGRE.K            |        | 2 | 3,114  | 0,44  | -0,856 |
| 14 | P38432 P80C_HUMAN   | K.LGFSLT#PSKGGK.T          | T303:  | 2 | 3,1136 | 0,298 | -0,703 |
| 14 | A0FGR8 ESYT2_HUMAN  | R.SSSS#LLASPGHISVK.E       | S739:  | 3 | 3,1136 | 0,281 | -0,236 |
| 14 | P35580 MYH10_HUMAN  | R.KLDGETTDLQDQIAE.L        |        | 2 | 3,112  | 0,472 | 0,073  |

|    |                    |                         |        |   |        |       |        |
|----|--------------------|-------------------------|--------|---|--------|-------|--------|
| 14 | P35908 K22E_HUMAN  | K.NVQDAIADAEQR.G        |        | 2 | 3,1114 | 0,351 | -0,642 |
| 14 | A0AVT1 UBA6_HUMAN  | K.SHVFLSGM*GGLGLE.I     |        | 2 | 3,1055 | 0,457 | -0,344 |
| 14 | Q00341 VIGLN_HUMAN | R.CDIIISGR.K            |        | 2 | 3,1037 | 0,281 | -0,816 |
| 14 | Q9HC52 CBX8_HUMAN  | R.IPYPGRS#PQDLASTSR.A   | S110:  | 3 | 3,1019 | 0,314 | -0,401 |
| 14 | Q9NWH9 SLTM_HUMAN  | R.IVQISGNSM*PR.G        |        | 2 | 3,1016 | 0,34  | -0,701 |
| 14 | Q9Y490 TLN1_HUMAN  | E.KM*VGGIAQIIAAQEE.M    |        | 2 | 3,0986 | 0,34  | -0,388 |
| 14 | P39023 RL3_HUMAN   | E.RLEQQVPVNQVFGQDE.M    |        | 2 | 3,097  | 0,388 | -0,388 |
| 14 | Q8WU20 FRS2_HUMAN  | E.NVTPAS#AHKIE.Y        | S403:  | 2 | 3,0963 | 0,418 | -1,088 |
| 14 | Q99733 NP1L4_HUMAN | K.LTDQVM*QNPR.V         |        | 2 | 3,096  | 0,38  | -0,2   |
| 14 | P78347 GTF2I_HUMAN | K.VKTEPTEDSGISLE.M      |        | 2 | 3,0958 | 0,351 | -0,486 |
| 14 | Q13523 PRP4B_HUMAN | R.TKLDDLALLEDE.K        |        | 2 | 3,0958 | 0,402 | -0,492 |
| 14 | Q8NI22 MCFD2_HUMAN | K.M*HDYDGNLLDGLLE.L     |        | 2 | 3,0951 | 0,431 | -0,301 |
| 14 | P34932 HSP74_HUMAN | R.NSFTLKLEDTE.N         |        | 2 | 3,0936 | 0,376 | -0,47  |
| 14 | P15559 NQO1_HUMAN  | K.LKDPANFYQPAE.S        |        | 2 | 3,0919 | 0,38  | -0,613 |
| 14 | Q14974 IMB1_HUMAN  | E.VKNYVLQTLGTE.T        |        | 2 | 3,0916 | 0,366 | -0,089 |
| 14 | O75821 EIF3G_HUMAN | R.VTNLSEDTRE.T          |        | 2 | 3,0871 | 0,233 | -0,524 |
| 14 | Q09161 NCBP1_HUMAN | K.TSDANETEDHLE.S        |        | 2 | 3,0857 | 0,442 | -1,703 |
| 14 | P09525 ANXA4_HUMAN | R.ISQTYQQYGR.S          |        | 2 | 3,0834 | 0,405 | -0,8   |
| 14 | P04075 ALDOA_HUMAN | R.ALANSLACQGK.Y         |        | 2 | 3,0833 | 0,378 | -0,969 |
| 14 | Q8IXS8 F126B_HUMAN | K.HLS#LPAGQVVPK.I       | S430:  | 2 | 3,0828 | 0,424 | -0,276 |
| 14 | Q32MZ4 LRRF1_HUMAN | K.IDGATQSS#PAEPKSEADR.C | S714:  | 3 | 3,0807 | 0,294 | -0,178 |
| 14 | Q9NX58 LYAR_HUMAN  | K.KVLAQYYTVTDE.H        |        | 2 | 3,0803 | 0,425 | -0,683 |
| 14 | Q9HAW4 CLSPN_HUMAN | R.NFVFHTLS#PVK.A        | S1289: | 2 | 3,0793 | 0,392 | -0,178 |
| 14 | Q9Y2W1 TR150_HUMAN | K.SPLQSVVVR.R           |        | 2 | 3,0776 | 0,354 | -1,177 |
| 14 | Q9UJM3 ERRFI_HUMAN | K.KLTVNGVCAST#PPLTPIK.N | T127:  | 3 | 3,077  | 0,184 | -0,093 |
| 14 | Q9H501 ESF1_HUMAN  | R.TLDSGTSEIVKS#PR.I     | S198:  | 2 | 3,077  | 0,314 | -1,166 |
| 14 | Q14444 CAPR1_HUMAN | E.TQFTSGEKEQVDE.W       |        | 2 | 3,0766 | 0,353 | -0,57  |
| 14 | Q96FC9 DDX11_HUMAN | K.SLGSVQLINDR.C         |        | 2 | 3,075  | 0,369 | -0,711 |
| 14 | O75157 T22D2_HUMAN | R.RKS#EPLPQPPLSLIAE.N   | S598:  | 2 | 3,0738 | 0,41  | -0,46  |
| 14 | O14744 ANM5_HUMAN  | K.YSQYQQAIYK.C          |        | 2 | 3,0737 | 0,399 | -0,944 |
| 14 | O43707 ACTN4_HUMAN | R.KDDPVTNLNNAFE.V       |        | 2 | 3,0737 | 0,307 | -0,909 |
| 14 | Q9NUQ8 ABCF3_HUMAN | E.KFSPPIQLDE.V          |        | 2 | 3,0736 | 0,239 | -0,379 |
| 14 | Q9NVI7 ATD3A_HUMAN | E.DQLKQQQLLEE.N         |        | 2 | 3,0734 | 0,246 | -0,739 |

|    |                    |                            |       |   |        |       |        |
|----|--------------------|----------------------------|-------|---|--------|-------|--------|
| 14 | P13987 CD59_HUMAN  | K.AGLQVYNK.C               |       | 2 | 3,0729 | 0,195 | -0,478 |
| 14 | O60216 RAD21_HUMAN | E.NDFGDFGM*DDRE.I          |       | 2 | 3,0728 | 0,5   | -0,596 |
| 14 | P29692 EF1D_HUMAN  | E.LQQAISKLE.A              |       | 2 | 3,0703 | 0,243 | -0,711 |
| 14 | Q8IY81 RRMJ3_HUMAN | E.GLALGAVIAS#SKK.A         | S676: | 2 | 3,0689 | 0,524 | -0,377 |
| 14 | Q99460 PSMD1_HUMAN | E.SVDKIEVLYEDE.G           |       | 2 | 3,0683 | 0,21  | -1,017 |
| 14 | P47756 CAPZB_HUMAN | E.VEANNAFDQYR.D            |       | 2 | 3,067  | 0,399 | -0,736 |
| 14 | Q8TDP1 RNH2C_HUMAN | R.FIGATANFSR.F             |       | 2 | 3,063  | 0,245 | -0,45  |
| 14 | Q9NR48 ASH1L_HUMAN | R.KS#PSAISTGTLVSK.R        | S22:  | 2 | 3,0623 | 0,373 | -0,503 |
| 14 | P28838 AMPL_HUMAN  | K.EKEDDVPOFTSAGE.N         |       | 2 | 3,0621 | 0,52  | -0,943 |
| 14 | O00299 CLIC1_HUMAN | E.SNTAGLDIFAK.F            |       | 2 | 3,0578 | 0,367 | -0,322 |
| 14 | P05787 K2C8_HUMAN  | E.AAIADAEQRGE.L            |       | 2 | 3,0571 | 0,414 | -0,432 |
| 14 | P00533 EGFR_HUMAN  | R.NGLQSCPIKE.D             |       | 2 | 3,0533 | 0,316 | -0,319 |
| 14 | O60361 NDK8_HUMAN  | R.GDFCIQVGR.N              |       | 2 | 3,0526 | 0,344 | -0,116 |
| 14 | Q96HC4 PDLI5_HUMAN | E.VVKVPITS#PAVSK.V         | S111: | 2 | 3,0516 | 0,433 | -0,975 |
| 14 | A6NIH7 U119B_HUMAN | R.SDSFYFVDNK.L             |       | 2 | 3,0503 | 0,412 | -0,3   |
| 14 | P46459 NSF_HUMAN   | E.NDIKPAFGTNQE.D           |       | 2 | 3,0502 | 0,291 | -0,915 |
| 14 | P29317 EPHA2_HUMAN | E.SLDYGTNFQK.R             |       | 2 | 3,0498 | 0,341 | -0,284 |
| 14 | Q8NI08 NCOA7_HUMAN | K.LSKEPDTSSAFE.S           |       | 2 | 3,0495 | 0,318 | -0,785 |
| 14 | O94880 PHF14_HUMAN | R.NRPLDFVSM*EE.L           |       | 2 | 3,049  | 0,272 | 0,25   |
| 14 | O60333 KIF1B_HUMAN | K.CNAVINEDPNAK.L           |       | 2 | 3,0482 | 0,339 | -0,907 |
| 14 | P55265 DSRAD_HUMAN | K.ALHGATNSM*ASDNQPE.G      |       | 2 | 3,0477 | 0,44  | -0,068 |
| 14 | Q9Y4B6 VPRBP_HUMAN | R.KLSSEPLLPLDEE.A          |       | 2 | 3,0449 | 0,233 | -0,581 |
| 14 | Q6P1L5 AL2SC_HUMAN | R.SIDTQTPGGADR.G           |       | 2 | 3,0449 | 0,34  | -0,2   |
| 14 | O60716 CTND1_HUMAN | E.KALSAIADLLTNE.H          |       | 2 | 3,0442 | 0,283 | -0,359 |
| 14 | P51570 GALK1_HUMAN | R.KDGLVSLTTSE.G            |       | 2 | 3,0441 | 0,439 | -0,676 |
| 14 | P11021 GRP78_HUMAN | R.M*VNDAEKFAEE.D           |       | 2 | 3,0439 | 0,285 | -0,188 |
| 14 | Q8N4C8 MINK1_HUMAN | R.SDSVLPASHGHLPOAGS#LE.R   | S763: | 2 | 3,0439 | 0,253 | -0,123 |
| 14 | Q9H063 MAF1_HUMAN  | K.SQGGEEGPLSDK.C           |       | 2 | 3,0431 | 0,413 | -1,19  |
| 14 | P37802 TAGL2_HUMAN | R.TLM*NLGGLAVAR.D          |       | 2 | 3,0429 | 0,339 | 0      |
| 14 | P24534 EF1B_HUMAN  | E.AVS#SPPPADLCHALR.W       | S42:  | 2 | 3,0415 | 0,27  | -0,292 |
| 14 | Q9UDT6 CLIP2_HUMAN | K.QSSGPSSS#PAAAAAPEKPGPK.A | S54:  | 3 | 3,0363 | 0,308 | -0,64  |
| 14 | Q15424 SAFB1_HUMAN | E.LEQPFAQDTSS#VGPDRK.L     | S247: | 3 | 3,0344 | 0,101 | -0,749 |
| 14 | Q9Y2I7 FYV1_HUMAN  | R.SASITNLSLDR.S            |       | 2 | 3,0332 | 0,442 | -0,933 |

|    |                     |                           |       |   |        |       |        |
|----|---------------------|---------------------------|-------|---|--------|-------|--------|
| 14 | Q92597 NDRG1_HUMAN  | R.TASGSSVTSLDGTR.S        |       | 2 | 3,033  | 0,478 | -0,911 |
| 14 | Q96CS3 UBXD8_HUMAN  | E.KLLQFQDLTGIE.S          |       | 2 | 3,0329 | 0,37  | -0,521 |
| 14 | P35998 PRS7_HUMAN   | K.IINADSEDPK.Y            |       | 2 | 3,0308 | 0,318 | -0,111 |
| 14 | A8K0Z3 WASH1_HUMAN  | K.GPGAGEGPGGAFAR.V        |       | 2 | 3,0262 | 0,509 | -1,422 |
| 14 | Q86Y04 Q86Y04_HUMAN | K.LSFCEDQNAQDR.N          |       | 2 | 3,0259 | 0,355 | -0,905 |
| 14 | P17812 PYRG1_HUMAN  | R.KLYGDADYLEE.R           |       | 2 | 3,0232 | 0,377 | -0,556 |
| 14 | P20042 IF2B_HUMAN   | K.NVKFPDEDEILE.K          |       | 2 | 3,0216 | 0,264 | -0,337 |
| 14 | P78527 PRKDC_HUMAN  | R.HLLSSDQM*M*DSILADE.A    |       | 2 | 3,0196 | 0,431 | -1,129 |
| 14 | Q5JPI9 METLA_HUMAN  | R.S#DKGSPGEDGFVPSALGTRE.H | S17:  | 3 | 3,0171 | 0,193 | -0,702 |
| 14 | P46013 KI67_HUMAN   | K.LDQPGNLPGSNR.R          |       | 2 | 3,0169 | 0,422 | -0,77  |
| 14 | O60879 DIAP2_HUMAN  | K.QLIDINKEGDE.T           |       | 2 | 3,0167 | 0,331 | -0,958 |
| 14 | Q01130 SFRS2_HUMAN  | K.VDNLTyrTS#PDTLR.R       | S26:  | 3 | 3,0157 | 0,183 | -0,211 |
| 14 | P12955 PEPD_HUMAN   | E.KYAVDDVQYVDE.I          |       | 2 | 3,0149 | 0,266 | -0,76  |
| 14 | Q58FF7 H90B3_HUMAN  | E.LKIDIIPNPQE.R           |       | 2 | 3,0137 | 0,309 | -0,381 |
| 14 | Q16658 FSCN1_HUMAN  | E.DRLSCFAQTVSPA.E.K       |       | 2 | 3,0118 | 0,316 | -0,772 |
| 14 | Q13242 SFRS9_HUMAN  | R.GSPHYFS#PFRPY.-         | S216: | 2 | 3,0107 | 0,319 | -0,397 |
| 14 | Q8N108 MIER1_HUMAN  | R.YDFFAQQTR.F             |       | 2 | 3,0091 | 0,345 | -0,311 |
| 14 | P50570 DYN2_HUMAN   | K.FTDFDEVRQE.I            |       | 2 | 3,0082 | 0,386 | -0,664 |
| 14 | Q13428 TCOF_HUMAN   | K.TVANLLSGKS#PR.K         | S156: | 2 | 3,008  | 0,353 | -0,461 |
| 14 | O95817 BAG3_HUMAN   | E.KVQGLEQAVDNFE.G         |       | 2 | 3,0074 | 0,154 | -0,083 |
| 14 | Q09666 AHNK_HUMAN   | K.FSM*PGFKGEGPE.V         |       | 2 | 3,0064 | 0,406 | -0,658 |
| 14 | O60506 HNRPO_HUMAN  | E.DGALAVLQQFK.D           |       | 2 | 3,0022 | 0,374 | 0,718  |
| 14 | Q03188 CENPC_HUMAN  | K.SLANDFSTNSTK.S          |       | 2 | 3,0022 | 0,417 | -0,855 |
| 14 | P29966 MARCS_HUMAN  | E.AAAERPGEA AVASS#PSK.A   | S27:  | 2 | 3,001  | 0,303 | -0,145 |
| 14 | Q9NRP2 CP061_HUMAN  | K.FFGYCNDVDRE.L           |       | 2 | 2,9966 | 0,442 | -0,601 |
| 14 | P31948 STIP1_HUMAN  | R.IGNSYFKEE.K             |       | 2 | 2,9961 | 0,332 | -0,112 |
| 14 | O75420 PERQ1_HUMAN  | R.GGDQNULLPTM*SR.S        |       | 2 | 2,9958 | 0,252 | -1,215 |
| 14 | P36543 VATE1_HUMAN  | R.ARDDLITDLLNE.A          |       | 2 | 2,9954 | 0,268 | -0,264 |
| 14 | Q7LGC8 CHST3_HUMAN  | E.LDSAFS QLQSR.L          |       | 2 | 2,9952 | 0,256 | -0,39  |
| 14 | O95793 STAU1_HUMAN  | E.LSVGGQQFNGK.G           |       | 2 | 2,9951 | 0,384 | -0,967 |
| 14 | P05556 ITB1_HUMAN   | E.VNSEDMDAYCR.K           |       | 2 | 2,9941 | 0,477 | -0,628 |
| 14 | Q5W0B1 RN219_HUMAN  | R.FAVAALQSK.V             |       | 2 | 2,9938 | 0,195 | -0,587 |
| 14 | Q53F64 Q53F64_HUMAN | K.KIFVGGLNPEATE.E         |       | 2 | 2,9937 | 0,344 | -0,621 |

|    |                    |                                        |       |   |        |       |        |
|----|--------------------|----------------------------------------|-------|---|--------|-------|--------|
| 14 | P26358 DNMT1_HUMAN | K.GSNLDAPEPYR.I                        |       | 2 | 2,9935 | 0,395 | -0,601 |
| 14 | Q9Y597 KCTD3_HUMAN | D.SFFSLLSGR.I                          |       | 2 | 2,9933 | 0,345 | -0,111 |
| 14 | P62258 1433E_HUMAN | R.IISSIEQKEE.N                         |       | 2 | 2,9909 | 0,302 | -0,934 |
| 14 | P04264 K2C1_HUMAN  | K.AEAESLYQSK.Y                         |       | 2 | 2,9905 | 0,42  | -0,542 |
| 14 | P19838 NFKB1_HUMAN | K.TTSQAHSPLS#PASTR.Q                   | S907: | 3 | 2,9894 | 0,176 | -0,316 |
| 14 | Q13435 SF3B2_HUMAN | E.IGAPIQGNREE.L                        |       | 2 | 2,9892 | 0,364 | -0,721 |
| 14 | Q15691 MARE1_HUMAN | E.NEGENDPVLQR.I                        |       | 2 | 2,9874 | 0,361 | -0,864 |
| 14 | Q15819 UB2V2_HUMAN | E.NM*KLPQPPEGQTYNN.-                   |       | 2 | 2,9864 | 0,303 | -0,908 |
| 14 | Q99459 CDC5L_HUMAN | E.YNVTNNSVALR.T                        |       | 2 | 2,9833 | 0,366 | -0,683 |
| 14 | P31946 1433B_HUMAN | R.VISSIEQKTE.R                         |       | 2 | 2,9828 | 0,228 | -0,646 |
| 14 | Q8N4Q1 MIA40_HUMAN | K.SAFSCFHSTEE.I                        |       | 2 | 2,9825 | 0,383 | -1     |
| 14 | P17152 TMM11_HUMAN | E.RVS#LSATDCYIVHE.I                    | S23:  | 2 | 2,9821 | 0,388 | -0,494 |
| 14 | P57737 CORO7_HUMAN | R.SLQSLGPPSSK.F                        |       | 2 | 2,9819 | 0,243 | -0,874 |
| 14 | Q13347 EIF31_HUMAN | R.TERPVNSAALSPNYD.H                    |       | 2 | 2,9818 | 0,347 | -0,224 |
| 14 | Q96GX5 MASTL_HUMAN | K.CLTSNLLQSR.K                         |       | 2 | 2,9762 | 0,243 | -0,205 |
| 14 | Q9NR46 SHLB2_HUMAN | K.SQTTYAQCYR.H                         |       | 2 | 2,9761 | 0,393 | -0,762 |
| 14 | Q8WVM8 SCFD1_HUMAN | E.YQNLVDYIK.G                          |       | 2 | 2,9757 | 0,272 | -0,844 |
| 14 | Q8IWA0 WDR75_HUMAN | K.VQDTS#NTGLGEDIIHQLSK.S               | S796: | 3 | 2,974  | 0,144 | 0,086  |
| 14 | Q15149 PLEC1_HUMAN | R.QLAEEDLAQQR.A                        |       | 2 | 2,9712 | 0,216 | -0,469 |
| 14 | Q13952 NFYC_HUMAN  | R.NDIAM*AITK.F                         |       | 2 | 2,9694 | 0,348 | -0,061 |
| 14 | Q12888 TP53B_HUMAN | R.QDKPM*DTSVLSEE.G                     |       | 2 | 2,9682 | 0,189 | -0,571 |
| 14 | P05387 RLA2_HUMAN  | K.LASVPAGGAVAVSAAPGSAAPAAGSAPAAAEKKD.E |       | 3 | 2,9679 | 0,315 | -0,606 |
| 14 | P49023 PAXI_HUMAN  | R.CYYCNGPILDK.V                        |       | 2 | 2,9676 | 0,4   | -0,87  |
| 14 | Q9BUA3 YK007_HUMAN | E.GVALLQDVR.A                          |       | 2 | 2,9652 | 0,277 | -0,126 |
| 14 | Q93063 EXT2_HUMAN  | K.HQVFDYPQVLQE.A                       |       | 2 | 2,9651 | 0,322 | -0,487 |
| 14 | O43432 IF4G3_HUMAN | E.ILDSQNLNSR.R                         |       | 2 | 2,9647 | 0,428 | -0,947 |
| 14 | P62495 ERF1_HUMAN  | E.KILYLTPEQE.K                         |       | 2 | 2,9585 | 0,298 | -0,494 |
| 14 | O14908 GIPC1_HUMAN | R.SRGPATVEDLPSAFE.E                    |       | 2 | 2,9573 | 0,377 | -0,31  |
| 14 | Q9ULH1 DDEF1_HUMAN | K.AIYNSGQDHSVQNEE.N                    |       | 2 | 2,9565 | 0,385 | -0,761 |
| 14 | P49916 DNL3_HUMAN  | K.SATNLPQLKE.L                         |       | 2 | 2,9565 | 0,246 | -0,443 |
| 14 | O15344 TRI18_HUMAN | R.NVTLQNIIDR.F                         |       | 2 | 2,9551 | 0,394 | -0,411 |
| 14 | Q13428 TCOF_HUMAN  | R.KSAEPSANTTLVSE.T                     |       | 2 | 2,9546 | 0,406 | -1,191 |
| 14 | Q04721 NOTC2_HUMAN | E.VDVLDVNVNR.G                         |       | 2 | 2,9541 | 0,375 | -0,237 |

|    |                    |                              |       |   |        |       |        |
|----|--------------------|------------------------------|-------|---|--------|-------|--------|
| 14 | P49736 MCM2_HUMAN  | R.GNDPLTSSPGR.S              |       | 2 | 2,9514 | 0,376 | -0,332 |
| 14 | Q9Y2H6 FND3A_HUMAN | K.GQIAGGINTGSAK.I            |       | 2 | 2,9508 | 0,45  | -0,624 |
| 14 | O14617 AP3D1_HUMAN | E.TSKS#PEKDVPM*VE.K          | S829: | 2 | 2,9506 | 0,353 | 0,158  |
| 14 | Q13185 CBX3_HUMAN  | K.KVEEAPEEFVVE.K             |       | 2 | 2,9505 | 0,287 | -0,716 |
| 14 | P04632 CPNS1_HUMAN | K.TDGFGITCR.S                |       | 2 | 2,9505 | 0,402 | -0,534 |
| 14 | Q14257 RCN2_HUMAN  | K.KIDLDSGFLTESE.L            |       | 2 | 2,9458 | 0,397 | -0,389 |
| 14 | Q9UPN4 AZI1_HUMAN  | E.ATGPGGSQAINNLR.R           |       | 2 | 2,9438 | 0,508 | -0,9   |
| 14 | Q9NR00 CH004_HUMAN | R.VSPS#IHGYHFD.T             | S21:  | 2 | 2,9407 | 0,369 | -0,182 |
| 14 | Q14683 SMC1A_HUMAN | K.SGVISGGASDLK.A             |       | 2 | 2,9381 | 0,29  | -0,671 |
| 14 | Q32MZ4 LRRF1_HUMAN | K.IDGATQSSPAEPK.S            |       | 2 | 2,9376 | 0,285 | -0,75  |
| 14 | Q58FF8 H90B2_HUMAN | K.YIDQEELNK.T                |       | 2 | 2,9357 | 0,206 | -0,847 |
| 14 | Q9UNF1 MAGD2_HUMAN | K.KQNADPQAVTM*PATE.T         |       | 2 | 2,9356 | 0,441 | -0,83  |
| 14 | O15320 CTGE5_HUMAN | R.GPGNPLDHQITNE.R            |       | 2 | 2,9356 | 0,242 | -0,526 |
| 14 | Q8TER5 SOLO_HUMAN  | E.TLDSSGDVSPGPR.N            |       | 2 | 2,9346 | 0,261 | -0,853 |
| 14 | P46926 GNPI1_HUMAN | E.NTHILDGNAVDLQAE.C          |       | 2 | 2,934  | 0,383 | -0,985 |
| 14 | Q9NQC7 CYLD_HUMAN  | R.FHS#LPFSLTK.M              | S418: | 3 | 2,9312 | 0,159 | 0,364  |
| 14 | Q9Y4L1 HYOU1_HUMAN | R.LAGLFNEQR.K                |       | 2 | 2,9293 | 0,333 | -0,699 |
| 14 | Q6FI81 CPIN1_HUMAN | K.SACGNCYLGDAFR.C            |       | 2 | 2,929  | 0,25  | -0,246 |
| 14 | P50548 ERF_HUMAN   | R.RVSS#DLQHATAQLSLE.H        | S532: | 2 | 2,9288 | 0,299 | 0,199  |
| 14 | Q9H1B7 EAP1_HUMAN  | R.QSPNSSSAAASVASR.R          |       | 2 | 2,9284 | 0,447 | -0,516 |
| 14 | Q9Y6K9 NEMO_HUMAN  | E.DLKQQLQQAEE.A              |       | 2 | 2,928  | 0,23  | -1,376 |
| 14 | P22314 UBA1_HUMAN  | R.RVS#GPDPKPGSNCSIPAQSVLSE.V | S13:  | 3 | 2,9255 | 0,27  | -0,389 |
| 14 | Q9BTU6 P4K2A_HUMAN | R.VAAAAGSGSPS#PPGSPGHDR.R    | S47:  | 3 | 2,9234 | 0,298 | -0,868 |
| 14 | Q58FF8 H90B2_HUMAN | E.FDGKS#LVSVTKE.G            | S305: | 2 | 2,9192 | 0,187 | -0,351 |
| 14 | Q53LP3 ANR57_HUMAN | R.DLVM*GSS#PQLKR.S           | S213: | 2 | 2,9192 | 0,323 | -0,855 |
| 14 | Q8NE71 ABCF1_HUMAN | K.LSVPTS#DEEDEVPAKPR.G       | S109: | 3 | 2,9191 | 0,275 | -0,268 |
| 14 | Q86V48 LUZP1_HUMAN | R.VGPSSGDAPEPSSR.R           |       | 2 | 2,9167 | 0,425 | -0,363 |
| 14 | Q3YEC7 PARF_HUMAN  | R.LKNDSDLFGLGLE.E            |       | 2 | 2,9145 | 0,365 | -0,258 |
| 14 | Q9UHV7 MED13_HUMAN | R.GAGGPASAQGSVKYE.N          |       | 2 | 2,9132 | 0,319 | -0,973 |
| 14 | P11940 PABP1_HUMAN | R.SKGFVFCVCFSSPEE.A          |       | 2 | 2,9125 | 0,449 | -0,232 |
| 14 | Q9H3P2 NELFA_HUMAN | E.ASRPPEEPSAPS#PTLPAQFK.Q    | S384: | 3 | 2,9119 | 0,269 | -0,836 |
| 14 | P04075 ALDOA_HUMAN | K.VDKGVVPLAGTNGE.T           |       | 2 | 2,9109 | 0,426 | -0,63  |
| 14 | P49419 AL7A1_HUMAN | E.KIQVLGSLVSLE.M             |       | 2 | 2,9107 | 0,294 | -0,379 |

|    |                    |                             |            |   |        |       |        |
|----|--------------------|-----------------------------|------------|---|--------|-------|--------|
| 14 | Q2NKX8 ERC6L_HUMAN | E.AEALS#PEQAAHYLR.Y         | S14:       | 2 | 2,91   | 0,363 | -0,373 |
| 14 | P41252 SYIC_HUMAN  | E.VTDFAGQYVK.D              |            | 2 | 2,91   | 0,408 | -0,433 |
| 14 | Q9H165 BC11A_HUMAN | K.KLLG#PSSLSPFSK.R          | S625:      | 2 | 2,9082 | 0,415 | -0,074 |
| 14 | Q53F19 CQ085_HUMAN | K.SRLDNLPSLQIE.V            |            | 2 | 2,9075 | 0,237 | -0,352 |
| 14 | Q13136 LIPA1_HUMAN | K.RLS#DVTVDKLLSE.S          | S448:      | 2 | 2,9074 | 0,449 | -0,67  |
| 14 | P62312 LSM6_HUMAN  | R.GNNVLYISTQK.R             |            | 2 | 2,9068 | 0,393 | -0,395 |
| 14 | Q13112 CAF1B_HUMAN | R.GSS#PGPRPVEGTPASR.T       | S410:      | 3 | 2,9042 | 0,226 | 0      |
| 14 | P55201 BRPF1_HUMAN | R.GSLTPHPAACDKDQTD#AAEE.S   | S860:      | 3 | 2,9033 | 0,206 | -1,018 |
| 14 | P35658 NU214_HUMAN | R.SAQGSSPVPS#M*VQKSPR.I     | S661:      | 3 | 2,9025 | 0,218 | -0,475 |
| 14 | P39019 RS19_HUMAN  | R.IAGQVAAANK.K              |            | 2 | 2,9018 | 0,334 | -0,259 |
| 14 | Q9NZM1 MYOF_HUMAN  | E.LFDNDQVGKDE.F             |            | 2 | 2,9007 | 0,368 | -0,286 |
| 14 | Q6S8J3 A26CA_HUMAN | K.AGFAGDDAPR.A              |            | 2 | 2,9    | 0,374 | -1,124 |
| 14 | P27694 RFA1_HUMAN  | K.VIDQQNGLYR.C              |            | 2 | 2,8983 | 0,411 | -1,619 |
| 14 | P31948 STIP1_HUMAN | E.IAT#PPPPPPKKE.T           | T198:      | 3 | 2,8975 | 0,293 | -0,379 |
| 14 | O94885 SASH1_HUMAN | E.VEKPDASPTS#LQLR.S         | S104:      | 2 | 2,8959 | 0,295 | -0,527 |
| 14 | Q9Y3R0 GRIP1_HUMAN | R.RQS#IPEEFGSTVVE.L         | S43:       | 2 | 2,8867 | 0,194 | -0,82  |
| 14 | Q8IYB3 SRRM1_HUMAN | K.M*AAADSVQQR.R             |            | 2 | 2,8866 | 0,417 | -0,223 |
| 14 | Q96S82 UBL7_HUMAN  | E.GLS#DDEDDFHPNTR.S         | S230:      | 3 | 2,8849 | 0,341 | -1,077 |
| 14 | O75534 CSDE1_HUMAN | K.NITLDDASAPR.L             |            | 2 | 2,8844 | 0,386 | 0,104  |
| 14 | P51610 HCFC1_HUMAN | D.SYLLQLQK.Y                |            | 2 | 2,8841 | 0,215 | -0,061 |
| 14 | P29966 MARCS_HUMAN | E.AAAERPGEAAVASS#PSKANGQE.N | S27:       | 3 | 2,8803 | 0,095 | -0,336 |
| 14 | P23258 TBG1_HUMAN  | K.KLVQTYSVFPNQDE.M          |            | 2 | 2,8796 | 0,355 | -0,512 |
| 14 | Q9H7D7 WDR26_HUMAN | R.LSQSDEDVIR.L              |            | 2 | 2,8785 | 0,147 | -1,68  |
| 14 | P02765 FETUA_HUMAN | K.CDSSPDSAEDVR.K            |            | 2 | 2,8763 | 0,416 | 0      |
| 14 | Q96JM3 ZN828_HUMAN | R.NVLQFTEEKE.A              |            | 2 | 2,8762 | 0,353 | -0,789 |
| 14 | P31946 1433B_HUMAN | K.DSTLIM*QLLR.D             |            | 2 | 2,8755 | 0,178 | -0,405 |
| 14 | Q15021 CND1_HUMAN  | E.FHLPLS#PEELLK.S           | S13:       | 2 | 2,8748 | 0,34  | -0,325 |
| 14 | P04792 HSPB1_HUMAN | E.SPAAVAPAYS.R.A            |            | 2 | 2,8729 | 0,406 | -1,343 |
| 14 | Q9H299 SH3L3_HUMAN | R.VYSTSVTGSRE.I             |            | 2 | 2,8718 | 0,43  | -0,309 |
| 14 | Q71F56 MD13L_HUMAN | R.KLGYNSGLFEDE.L            |            | 2 | 2,8705 | 0,21  | -0,329 |
| 14 | P13056 NR2C1_HUMAN | R.KDLRS#PLTATPTFVTDSE.S     | S215:      | 3 | 2,8702 | 0,203 | -1,156 |
| 14 | P55209 NP1L1_HUMAN | E.FHFEPNEYFTNE.V            |            | 2 | 2,8688 | 0,321 | -0,543 |
| 14 | Q13428 TCOF_HUMAN  | R.AAS#APAKGTPGKGT#PAPPGK.A  | S304:T316: | 3 | 2,8682 | 0,296 | -0,092 |



|    |                    |                           |            |   |        |       |        |
|----|--------------------|---------------------------|------------|---|--------|-------|--------|
| 14 | Q13740 CD166_HUMAN | R.SSNTYTLTDVR.R           |            | 2 | 2,8682 | 0,314 | -0,582 |
| 14 | Q09666 AHNK_HUMAN  | K.ANVDISAPK.V             |            | 2 | 2,8678 | 0,266 | -0,067 |
| 14 | Q9NYL2 MLTK_HUMAN  | K.YQQITPVNQSR.S           |            | 2 | 2,8666 | 0,352 | 1,28   |
| 14 | Q9UNN5 FAF1_HUMAN  | E.VFGM*ASSALR.K           |            | 2 | 2,8639 | 0,425 | -0,81  |
| 14 | Q86V81 THOC4_HUMAN | E.LDAQLDAYNAR.M           |            | 2 | 2,8629 | 0,264 | -0,586 |
| 14 | Q13596 SNX1_HUMAN  | E.LSLDSTQNNQK.K           |            | 2 | 2,8612 | 0,152 | -0,782 |
| 14 | Q03252 LMNB2_HUMAN | R.M*RLES#LSYQLSGLQK.Q     | S296:      | 3 | 2,8605 | 0,14  | -0,989 |
| 14 | Q9Y4E8 UBP15_HUMAN | K.SPGASNFSTLPK.I          |            | 2 | 2,8604 | 0,368 | -0,101 |
| 14 | Q13490 BIRC2_HUMAN | R.NSFAHLSPTLE.H           |            | 2 | 2,8604 | 0,308 | -0,562 |
| 14 | P20700 LMNB1_HUMAN | E.SLSSQLSNLQKE.S          |            | 2 | 2,8594 | 0,24  | -0,549 |
| 14 | P32004 L1CAM_HUMAN | K.GQLSFNLRDPE.L           |            | 2 | 2,8593 | 0,319 | -0,765 |
| 14 | Q8NDF8 PAPD5_HUMAN | R.NYNQGVVGLHEE.I          |            | 2 | 2,8587 | 0,255 | -0,359 |
| 14 | Q9NUG6 PDRG1_HUMAN | E.LKGFNLNPLNQDE.L         |            | 2 | 2,8553 | 0,357 | -0,487 |
| 14 | P50990 TCPQ_HUMAN  | R.GSTDNLM*DDIER.A         |            | 2 | 2,8542 | 0,363 | -0,088 |
| 14 | Q99633 PRP18_HUMAN | K.AALDKIDQQYLNE.I         |            | 2 | 2,8532 | 0,279 | -0,401 |
| 14 | Q9H165 BC11A_HUMAN | K.KLLLGSPS#SLSPFSK.R      | S627:      | 3 | 2,8522 | 0,261 | 0      |
| 14 | O15347 HMGB3_HUMAN | K.KNPEVPVNFAE.F           |            | 2 | 2,8522 | 0,379 | -0,294 |
| 14 | Q15121 PEA15_HUMAN | K.DIIRQPSEEE.I            |            | 2 | 2,8516 | 0,226 | 0      |
| 14 | P17301 ITA2_HUMAN  | E.KAGTLGEQIFSIE.G         |            | 2 | 2,8512 | 0,226 | -1,139 |
| 14 | Q9NYF8 BCLF1_HUMAN | D.LFDYS#PPLHK.N           | S512:      | 2 | 2,8486 | 0,139 | -0,282 |
| 14 | Q13573 SNW1_HUMAN  | R.GLQTVHINE.N             |            | 2 | 2,8486 | 0,329 | 0,302  |
| 14 | Q9Y6M7 S4A7_HUMAN  | R.KIPTGAEASNVLVGE.V       |            | 2 | 2,8436 | 0,386 | -0,575 |
| 14 | Q9Y2V2 CHSP1_HUMAN | R.ERS#PS#PLRGNVVPSPTR.R   | S30:S32:   | 3 | 2,843  | 0,232 | -0,33  |
| 14 | P67936 TPM4_HUMAN  | E.NVGLHQTLDQTLNE.L        |            | 2 | 2,8421 | 0,177 | -0,386 |
| 14 | P10809 CH60_HUMAN  | K.KISSIQSIVPALE.I         |            | 2 | 2,8421 | 0,261 | -0,352 |
| 14 | P25686 DNJB2_HUMAN | R.SVSTSTTFVQGR.R          |            | 2 | 2,841  | 0,206 | -0,865 |
| 14 | P26196 DDX6_HUMAN  | K.TSDVTSTKGNEFE.D         |            | 2 | 2,84   | 0,483 | -1,035 |
| 14 | Q9Y6I3 EPN1_HUMAN  | R.SPGAFDM*SGVR.G          |            | 2 | 2,8399 | 0,385 | -0,642 |
| 14 | Q15418 KS6A1_HUMAN | R.T#PKDSPGIPPS#AGAHQLFR.G | T359:S369: | 3 | 2,8398 | 0,255 | -0,514 |
| 14 | O95239 KIF4A_HUMAN | K.NKPIVNIDPQTAE.L         |            | 2 | 2,8394 | 0,316 | -0,763 |
| 14 | Q16186 ADRM1_HUMAN | R.SQSAAVTPSSTTSSTR.A      |            | 2 | 2,8387 | 0,378 | -0,156 |
| 14 | Q5VT52 K0460_HUMAN | R.ALLDSSSENCDR.L          |            | 2 | 2,8368 | 0,44  | -1,049 |
| 14 | Q16352 AINX_HUMAN  | E.YQDLLNVK.M              |            | 2 | 2,8358 | 0,184 | -0,921 |

|    |                    |                        |        |   |        |       |        |
|----|--------------------|------------------------|--------|---|--------|-------|--------|
| 14 | Q9NW82 WDR70_HUMAN | K.M*VGKPVNFM*EE.D      |        | 2 | 2,8349 | 0,403 | -1,301 |
| 14 | Q96QR8 PURB_HUMAN  | R.GGGGGPCGFQPASR.G     |        | 2 | 2,8342 | 0,364 | -0,187 |
| 14 | Q15042 RB3GP_HUMAN | R.KAENPQCLLGDFVTE.F    |        | 2 | 2,8338 | 0,338 | -0,425 |
| 14 | Q53H12 AGK_HUMAN   | K.GDFITIGSR.K          |        | 2 | 2,832  | 0,271 | -0,631 |
| 14 | P21333 FLNA_HUMAN  | K.FADQHVPGS#PFSVK.V    | S2128: | 2 | 2,8284 | 0,292 | -0,153 |
| 14 | P50213 IDH3A_HUMAN | R.M*SDGLFLQK.C         |        | 2 | 2,8275 | 0,268 | 0      |
| 14 | Q15056 IF4H_HUMAN  | R.GSNM*DFREPTEEE.R     |        | 2 | 2,8252 | 0,373 | -0,549 |
| 14 | Q04917 1433F_HUMAN | E.DSYKDSTLIM*QLLR.D    |        | 3 | 2,8248 | 0,161 | -0,108 |
| 14 | Q14195 DPYL3_HUMAN | R.NLHQSGFSLSGTQVD.E    |        | 2 | 2,8247 | 0,439 | -0,46  |
| 14 | P53041 PPP5_HUMAN  | R.GVSCQFGPDVTK.A       |        | 2 | 2,8244 | 0,359 | 0      |
| 14 | Q9Y3T9 NOC2L_HUMAN | K.KNSVPVTVAM*VE.R      |        | 2 | 2,8238 | 0,384 | -0,757 |
| 14 | P14384 CBPM_HUMAN  | R.IHIM*PSM*NPDGFE.A    |        | 2 | 2,8231 | 0,424 | -0,642 |
| 14 | O43896 KIF1C_HUMAN | R.CNAIINEDPNAR.L       |        | 2 | 2,8223 | 0,276 | -0,968 |
| 14 | Q13428 TCOF_HUMAN  | K.GSLGSQGAKDEPEEE.L    |        | 2 | 2,8222 | 0,409 | -0,08  |
| 14 | P04264 K2C1_HUMAN  | K.NM*QDM*VEDYR.N       |        | 2 | 2,822  | 0,318 | -0,549 |
| 14 | P49368 TCPG_HUMAN  | R.NLQDAM*QVCR.N        |        | 2 | 2,8215 | 0,456 | -0,488 |
| 14 | Q9H204 MED28_HUMAN | K.KPADIPQGLAYLE.Q      |        | 2 | 2,8198 | 0,314 | -0,65  |
| 14 | P26639 SYTC_HUMAN  | E.LSGALTGLTR.V         |        | 2 | 2,8192 | 0,219 | -0,493 |
| 14 | P68104 EF1A1_HUMAN | R.GNVAGDSKNDPPM*E.A    |        | 2 | 2,8168 | 0,31  | 0      |
| 14 | O95453 PARN_HUMAN  | R.NNSFTAPSTVGK.R       |        | 2 | 2,8166 | 0,436 | -1,197 |
| 14 | Q96AX1 VP33A_HUMAN | K.NFNAVGSVLSK.K        |        | 2 | 2,8154 | 0,313 | 0,322  |
| 14 | P11142 HSP7C_HUMAN | K.DNNLLGKFE.L          |        | 2 | 2,8141 | 0,347 | -0,232 |
| 14 | Q9UHB6 LIMA1_HUMAN | R.ETPHS#PGVEDAPIAK.V   | S490:  | 3 | 2,812  | 0,18  | 0,337  |
| 14 | P46087 NOL1_HUMAN  | K.GPQSLFNAPR.G         |        | 2 | 2,8116 | 0,327 | -0,673 |
| 14 | O94842 TOX4_HUMAN  | R.SGCENPPIVSK.D        |        | 2 | 2,8115 | 0,249 | -0,822 |
| 14 | P63104 1433Z_HUMAN | R.VVSSIEQKTE.G         |        | 2 | 2,8112 | 0,281 | 0,109  |
| 14 | P52948 NUP98_HUMAN | E.NGERFS#FLSKPVDE.N    | S635:  | 2 | 2,8111 | 0,311 | -0,358 |
| 14 | Q9UGV2 NDRG3_HUMAN | E.SCES#PDVLDLRHQTM*E.V | S361:  | 3 | 2,8093 | 0,28  | -0,096 |
| 14 | P18669 PGAM1_HUMAN | R.RYADLTEDQLPSCE.S     |        | 2 | 2,8093 | 0,427 | -0,359 |
| 14 | P55072 TERA_HUMAN  | E.CQANFISIK.G          |        | 2 | 2,8085 | 0,378 | -0,903 |
| 14 | P00558 PGK1_HUMAN  | E.GKVLPGVDALSNI.-      |        | 2 | 2,8082 | 0,404 | -0,285 |
| 14 | P62937 PIIA_HUMAN  | K.SIYGKFEDE.N          |        | 2 | 2,808  | 0,369 | -0,1   |
| 14 | P04264 K2C1_HUMAN  | E.TNVILSM*DNNR.S       |        | 2 | 2,8029 | 0,418 | -0,094 |

|    |                    |                           |            |   |        |       |        |
|----|--------------------|---------------------------|------------|---|--------|-------|--------|
| 14 | P60174 TPIS_HUMAN  | K.IAVAAQNCYK.V            |            | 2 | 2,8014 | 0,405 | -0,643 |
| 14 | Q9UJA5 TRM6_HUMAN  | K.GIKGEEIVQQLIE.N         |            | 2 | 2,8007 | 0,221 | -0,168 |
| 14 | Q7KZ85 SPT6H_HUMAN | K.KLPGYTDAALQE.A          |            | 2 | 2,7993 | 0,211 | -0,374 |
| 14 | P49321 NASP_HUMAN  | K.HLVM*GDIPAAVNAFQE.A     |            | 2 | 2,7959 | 0,356 | -0,212 |
| 14 | Q9UQR0 SCML2_HUMAN | R.QSTKRS#PQQTVPYVPLS#PK.L | S499:S511: | 3 | 2,7955 | 0,184 | -0,762 |
| 14 | P55735 SEC13_HUMAN | R.FASGGCDNLIK.L           |            | 2 | 2,7947 | 0,423 | 0      |
| 14 | P07954 FUMH_HUMAN  | E.VNQDYGLDPK.I            |            | 2 | 2,7938 | 0,317 | -0,743 |
| 14 | Q6P3W7 SCYL2_HUMAN | K.VTNIGNQQIDK.V           |            | 2 | 2,7936 | 0,282 | 0      |
| 14 | Q14141 SEPT6_HUMAN | K.SLDDEVNAFK.Q            |            | 2 | 2,7931 | 0,401 | -0,751 |
| 14 | Q9NTZ6 RBM12_HUMAN | R.LQNFSYDQRE.M            |            | 2 | 2,7931 | 0,234 | -0,845 |
| 14 | Q00839 HNRPU_HUMAN | R.DRLSASSLTM*E.S          |            | 2 | 2,7928 | 0,38  | -0,1   |
| 14 | P43360 MAGA6_HUMAN | K.KLLTQYFVQE.N            |            | 2 | 2,7927 | 0,355 | -0,385 |
| 14 | P0C7M2 RA1L3_HUMAN | K.IFVGGIKEDTE.E           |            | 2 | 2,7926 | 0,274 | -1,01  |
| 14 | P31949 S10AB_HUMAN | K.DGYNYTLK.T              |            | 2 | 2,7903 | 0,412 | -1,38  |
| 14 | Q5THJ4 VP13D_HUMAN | R.M*LLTNTQDNSR.R          |            | 2 | 2,7891 | 0,29  | -1,025 |
| 14 | Q12905 ILF2_HUMAN  | R.VKPAPDETSFSE.A          |            | 2 | 2,789  | 0,378 | -0,373 |
| 14 | P09525 ANXA4_HUMAN | E.GNYLDDALVR.Q            |            | 2 | 2,7885 | 0,238 | -0,322 |
| 14 | O00203 AP3B1_HUMAN | K.M*HVFNPIDSLEPE.G        |            | 2 | 2,7878 | 0,44  | -0,316 |
| 14 | Q9NZM1 MYOF_HUMAN  | R.FKGFPQPILSE.D           |            | 2 | 2,7866 | 0,273 | -0,386 |
| 14 | P27695 APEX1_HUMAN | E.GYSGVGLLSR.Q            |            | 2 | 2,7862 | 0,301 | -0,423 |
| 14 | Q92878 RAD50_HUMAN | R.ARDSLIQSLATQLE.L        |            | 2 | 2,7847 | 0,306 | -0,316 |
| 14 | P56545 CTBP2_HUMAN | R.QGAFLVNAAR.G            |            | 2 | 2,7847 | 0,268 | -0,466 |
| 14 | P07737 PROF1_HUMAN | K.CSVIRDSLLQDGE.F         |            | 2 | 2,784  | 0,317 | -0,491 |
| 14 | Q9Y679 AUP1_HUMAN  | K.GTQSLPTASASK.F          |            | 2 | 2,784  | 0,327 | 0,106  |
| 14 | P31946 1433B_HUMAN | R.YDDM*AAAM*K.A           |            | 2 | 2,7837 | 0,439 | -0,233 |
| 14 | Q9UPN9 TRI33_HUMAN | K.TAQLSPVDQR.K            |            | 2 | 2,7826 | 0,424 | -0,521 |
| 14 | Q16513 PKN2_HUMAN  | R.FQFNLQDFR.C             |            | 2 | 2,7825 | 0,297 | -0,502 |
| 14 | Q9Y2W1 TR150_HUMAN | K.GSFSDTGLGDGK.M          |            | 2 | 2,7816 | 0,512 | -0,855 |
| 14 | Q9BZL4 PP12C_HUMAN | R.SYQM*PVRDEESE.S         |            | 2 | 2,781  | 0,403 | -0,575 |
| 14 | P46087 NOL1_HUMAN  | E.QDAQAPDLQR.V            |            | 2 | 2,7805 | 0,298 | -0,534 |
| 14 | Q9NU22 MDN1_HUMAN  | E.SNFIAQLASQK.H           |            | 2 | 2,7793 | 0,321 | -0,606 |
| 14 | Q07157 ZO1_HUMAN   | E.NQTYPPYS#PQAQPPIHR.I    | S899:      | 3 | 2,7781 | 0,323 | -0,332 |
| 14 | Q9BRP8 WIBG_HUMAN  | K.SKPELPPGLSPE.A          |            | 2 | 2,7772 | 0,304 | -0,878 |

|    |                    |                                          |            |   |        |       |        |
|----|--------------------|------------------------------------------|------------|---|--------|-------|--------|
| 14 | P05387 RLA2_HUMAN  | K.LASVPAGGAVAVSAAPGSAAPAAGSAPAAAEEKKDE.K |            | 3 | 2,7771 | 0,325 | -0,582 |
| 14 | Q14980 NUMA1_HUMAN | E.FASHLQQQLDALNE.L                       |            | 2 | 2,7764 | 0,165 | -0,227 |
| 14 | Q9NRF9 DPOE3_HUMAN | R.KTLNASDVL SAM*EE.M                     |            | 2 | 2,7761 | 0,276 | -0,16  |
| 14 | P13010 KU86_HUMAN  | K.DKPSGD TAAVFEE.G                       |            | 2 | 2,776  | 0,256 | -0,268 |
| 14 | Q9UPN3 MACF1_HUMAN | K.LKGLNDATTAEEAE.A                       |            | 2 | 2,7757 | 0,337 | -0,239 |
| 14 | P47736 RPGP1_HUMAN | R.HIGNDIVAVVFQDE.N                       |            | 2 | 2,7752 | 0,362 | -0,314 |
| 14 | P52907 CAZA1_HUMAN | K.FITHAPPGEFNE.V                         |            | 2 | 2,7742 | 0,29  | -0,808 |
| 14 | P37198 NUP62_HUMAN | R.M*AQDLKDII.E.H                         |            | 2 | 2,7742 | 0,247 | -0,409 |
| 14 | Q15742 NAB2_HUMAN  | R.SFSPKS#PLELGEK.L                       | S162:      | 2 | 2,7722 | 0,332 | -0,407 |
| 14 | Q9UQE7 SMC3_HUMAN  | K.SLDQAINDK.K                            |            | 2 | 2,7718 | 0,204 | 0,122  |
| 14 | P49790 NU153_HUMAN | K.TTLSASGTGFGDK.F                        |            | 2 | 2,7698 | 0,329 | -0,491 |
| 14 | Q96T23 RSF1_HUMAN  | K.TFLDKDAQRLS#PIPE.E                     | S594:      | 2 | 2,7662 | 0,238 | -0,404 |
| 14 | O75152 ZC11A_HUMAN | R.RLS#SAS#TGKPLSVEDDFEK.L                | S758:S761: | 3 | 2,7645 | 0,139 | -1,024 |
| 14 | P49368 TCPG_HUMAN  | R.TLIQNGASTIR.L                          |            | 2 | 2,7641 | 0,381 | -0,915 |
| 14 | Q1KMD3 HNRL2_HUMAN | K.DRYGGQPLFSE.K                          |            | 2 | 2,7636 | 0,339 | -0,385 |
| 14 | P43246 MSH2_HUMAN  | K.M*QSTLISAAR.D                          |            | 2 | 2,7633 | 0,273 | -1,227 |
| 14 | O15320 CTGE5_HUMAN | E.GPLRLS#PLLPGGGGR.G                     | S548:      | 3 | 2,7625 | 0,198 | 0,659  |
| 14 | P17480 UBF1_HUMAN  | K.RPVSAM*FIFSEE.K                        |            | 2 | 2,7622 | 0,204 | -0,342 |
| 14 | Q9C0C7 AMRA1_HUMAN | R.SSQTGTEPGAHTSS#PQPSTSR.G               | S1205:     | 3 | 2,7595 | 0,176 | 0      |
| 14 | Q96I24 FUBP3_HUMAN | R.LLGQIVDR.C                             |            | 2 | 2,7588 | 0,312 | -0,734 |
| 14 | Q6Y7W6 PERQ2_HUMAN | K.VQKEPIPEEQE.M                          |            | 2 | 2,7582 | 0,272 | -0,92  |
| 14 | P40925 MDHC_HUMAN  | K.GEFVTTVQQR.G                           |            | 2 | 2,758  | 0,304 | 0,314  |
| 14 | P62750 RL23A_HUMAN | K.VNTLIRPDGE.K                           |            | 2 | 2,7578 | 0,339 | -0,548 |
| 14 | Q96G28 CC104_HUMAN | K.THTSQAILQPVLAAE.D                      |            | 2 | 2,7564 | 0,335 | -0,464 |
| 14 | P34932 HSP74_HUMAN | K.KLM*SANASDLPLSIE.C                     |            | 2 | 2,7547 | 0,486 | -0,304 |
| 14 | Q9NR12 PDLI7_HUMAN | R.ILAHLTGTE.F                            |            | 2 | 2,7535 | 0,336 | 0,128  |
| 14 | Q14789 G0GB1_HUMAN | E.DSYNQVQSFSK.A                          |            | 2 | 2,7532 | 0,416 | -0,375 |
| 14 | Q92562 SAC3_HUMAN  | E.GS#VSQRS#TPVKM*TDAGDSAK.V              | S771:S776: | 3 | 2,7523 | 0,306 | -0,083 |
| 14 | P31948 STIP1_HUMAN | K.ALDLDSCKE.A                            |            | 2 | 2,7519 | 0,231 | -1,179 |
| 14 | P49815 TSC2_HUMAN  | R.GYTISDSAPSR.R                          |            | 2 | 2,7512 | 0,46  | -0,423 |
| 14 | Q9NXG2 THUM1_HUMAN | E.YGDDM*YGPEK.F                          |            | 2 | 2,7509 | 0,519 | -1,127 |
| 14 | Q9UHB7 AFF4_HUMAN  | K.IDLNLTR.I                              |            | 2 | 2,7507 | 0,23  | -0,064 |
| 14 | P54687 BCAT1_HUMAN | K.LTDIQYGREE.S                           |            | 2 | 2,7505 | 0,323 | -0,1   |

|    |                    |                       |       |   |        |       |        |
|----|--------------------|-----------------------|-------|---|--------|-------|--------|
| 14 | Q15398 DLG7_HUMAN  | K.FNNLIKLEE.S         |       | 2 | 2,7497 | 0,096 | -0,654 |
| 14 | P29692 EF1D_HUMAN  | R.ATAPQQTQHVS#PMR.Q   | S133: | 2 | 2,7497 | 0,355 | -0,649 |
| 14 | Q9NPF4 OSGEP_HUMAN | R.TPLSDSGVTQR.Y       |       | 2 | 2,7489 | 0,397 | -0,525 |
| 14 | Q9NWH9 SLTM_HUMAN  | R.ISSKS#PGHM*VILD.Q   | S553: | 2 | 2,7475 | 0,385 | -0,824 |
| 14 | Q9H501 ESF1_HUMAN  | K.NIVQHTTDSLEE.K      |       | 2 | 2,747  | 0,32  | -0,994 |
| 14 | O14497 ARI1A_HUMAN | E.IGGLTQVNK.N         |       | 2 | 2,7457 | 0,208 | -1,049 |
| 14 | P60709 ACTB_HUMAN  | R.GYSFTTTAERE.I       |       | 2 | 2,7453 | 0,557 | -0,677 |
| 14 | Q969S3 ZN622_HUMAN | E.FADFYDFR.S          |       | 2 | 2,7435 | 0,444 | 0      |
| 14 | Q08211 DHX9_HUMAN  | K.LAQFEPSQR.Q         |       | 2 | 2,7408 | 0,294 | -0,794 |
| 14 | Q9BWD1 THIC_HUMAN  | K.VAVLSQNRTE.N        |       | 2 | 2,7395 | 0,395 | -0,218 |
| 14 | Q00610 CLH1_HUMAN  | R.RPLIDQVVQTALSE.T    |       | 2 | 2,7394 | 0,46  | -0,389 |
| 14 | Q00610 CLH1_HUMAN  | E.KIVLDNSVFSE.H       |       | 2 | 2,7378 | 0,335 | 0,39   |
| 14 | O60841 IF2P_HUMAN  | E.TVAVKPTENNEEE.F     |       | 2 | 2,7368 | 0,382 | -0,334 |
| 14 | Q96QT4 TRPM7_HUMAN | K.HGVVNTLSSSLPQGDLE.S |       | 2 | 2,7368 | 0,471 | -0,835 |
| 14 | Q9NRY5 F1142_HUMAN | R.NATLSQVLR.A         |       | 2 | 2,7367 | 0,248 | -0,971 |
| 14 | P12268 IMDH2_HUMAN | K.NLIDAGVDALR.V       |       | 2 | 2,7363 | 0,301 | -0,738 |
| 14 | O95425 SVIL_HUMAN  | R.DSSFTEVPRS#PK.H     | S245: | 2 | 2,7335 | 0,269 | 0      |
| 14 | Q9Y490 TLN1_HUMAN  | E.FGDAISTASK.A        |       | 2 | 2,7301 | 0,358 | -0,306 |
| 14 | Q86WB0 NIPA_HUMAN  | E.GIAPEEGGVDAK.D      |       | 2 | 2,7273 | 0,379 | -0,427 |
| 14 | P49588 SYAC_HUMAN  | E.KGLVVDM*DGFEED.R    |       | 2 | 2,7262 | 0,351 | -0,493 |
| 14 | Q8NBJ4 GOLM1_HUMAN | E.IQVVNEEPQR.D        |       | 2 | 2,7252 | 0,398 | -0,705 |
| 14 | Q9Y3F4 STRAP_HUMAN | K.AATAAADFTAK.V       |       | 2 | 2,7249 | 0,378 | -0,705 |
| 14 | P63220 RS21_HUMAN  | R.M*GESDDSILR.L       |       | 2 | 2,7234 | 0,368 | -1,178 |
| 14 | Q96NE9 FRMD6_HUMAN | R.GQSTDSLPTICR.K      |       | 2 | 2,7226 | 0,133 | 1,501  |
| 14 | P78527 PRKDC_HUMAN | R.KLAGANPAVITCDE.L    |       | 2 | 2,7213 | 0,323 | -0,92  |
| 14 | Q8N3R9 MPP5_HUMAN  | E.M*AVDCPGDLGTR.M     |       | 2 | 2,7199 | 0,358 | -1,119 |
| 14 | O60216 RAD21_HUMAN | E.NDFGDFGM*DDR.E      |       | 2 | 2,7189 | 0,338 | -1,403 |
| 14 | Q8NC51 PAIRB_HUMAN | E.LTES#PKYIQK.Q       | S234: | 2 | 2,7185 | 0,196 | -0,379 |
| 14 | P40425 PBX2_HUMAN  | R.M*KPALFSVLCE.I      |       | 2 | 2,718  | 0,339 | -0,279 |
| 14 | Q96HP0 DOCK6_HUMAN | R.SSGASSIFDLR.N       |       | 2 | 2,7177 | 0,29  | -0,107 |
| 14 | Q9NR30 DDX21_HUMAN | R.SDAGLES#DTAM*KKGE.T | S13:  | 2 | 2,7173 | 0,246 | -0,299 |
| 14 | Q69YN2 C19L1_HUMAN | R.KDFEPYDFTLDD.-      |       | 2 | 2,7157 | 0,405 | -0,243 |
| 14 | Q9ULT8 HECD1_HUMAN | R.SKDTDALIDAIDTGAFF.V |       | 2 | 2,7154 | 0,342 | -0,274 |

|    |                    |                         |        |   |        |       |        |
|----|--------------------|-------------------------|--------|---|--------|-------|--------|
| 14 | O75592 MYCB2_HUMAN | R.S#LSPNHNTLQTLK.S      | S2749: | 2 | 2,715  | 0,31  | -0,716 |
| 14 | Q9ULH0 ARMS_HUMAN  | R.SSLFQDLK.L            |        | 2 | 2,7144 | 0,295 | -0,235 |
| 14 | Q99590 SFRIP_HUMAN | E.GEIIQTVDR.Q           |        | 2 | 2,7138 | 0,135 | -0,592 |
| 14 | Q9BWU0 NADAP_HUMAN | K.TTSLCAGPSASKNE.Y      |        | 2 | 2,7138 | 0,278 | -0,257 |
| 14 | O00418 EF2K_HUMAN  | K.LLQSAKT#ILR.G         | T348:  | 2 | 2,713  | 0,369 | -0,798 |
| 14 | Q71U36 TBA1A_HUMAN | K.YM*ACCLLYR.G          |        | 2 | 2,7123 | 0,391 | -0,578 |
| 14 | POC0S8 H2A1_HUMAN  | R.AGLQFPVGR.V           |        | 2 | 2,7121 | 0,352 | -0,258 |
| 14 | Q9Y4F1 FARP1_HUMAN | K.VSAGEPGSHPS#PAPR.R    | S427:  | 2 | 2,7112 | 0,3   | -0,64  |
| 14 | Q8TAT6 NPL4_HUMAN  | K.CVHCVPLEPFDE.D        |        | 2 | 2,7106 | 0,427 | -0,081 |
| 14 | Q8TF40 FNIP1_HUMAN | R.SQAVVDQITR.H          |        | 2 | 2,7106 | 0,293 | -0,765 |
| 14 | P37837 TALDO_HUMAN | K.FAADAVKLE.R           |        | 2 | 2,7087 | 0,25  | 0      |
| 14 | Q9Y2D5 AKAP2_HUMAN | E.SDVM*VGPFK.L          |        | 2 | 2,7084 | 0,312 | -0,123 |
| 14 | P51114 FXR1_HUMAN  | R.KVPGVTAIELDE.D        |        | 2 | 2,7082 | 0,325 | -0,384 |
| 14 | O60307 MAST3_HUMAN | R.LHQLPFQPTPDE.L        |        | 2 | 2,7081 | 0,399 | -0,601 |
| 14 | P40227 TCPZ_HUMAN  | K.M*LVSGAGDIK.L         |        | 2 | 2,7056 | 0,114 | 0      |
| 14 | Q96QT6 PHF12_HUMAN | R.RPFELLIAAM*E.R        |        | 2 | 2,7042 | 0,308 | -0,266 |
| 14 | Q9UL18 I2C1_HUMAN  | K.YPHLPCLQVGQE.Q        |        | 2 | 2,7041 | 0,145 | -0,508 |
| 14 | P78371 TCPB_HUMAN  | K.KLGGSLADSYLDE.G       |        | 2 | 2,7033 | 0,345 | -0,714 |
| 14 | P62495 ERF1_HUMAN  | K.GFGGIGGILR.Y          |        | 2 | 2,7027 | 0,3   | -0,515 |
| 14 | Q9C0B5 ZDHC5_HUMAN | K.LSRGDS#LKEPTSIAE.S    | S380:  | 2 | 2,7014 | 0,453 | -0,507 |
| 14 | Q9Y490 TLN1_HUMAN  | E.STM*LEDSVS#PKK.S      | S425:  | 2 | 2,7007 | 0,321 | -0,516 |
| 14 | Q09666 AHNK_HUMAN  | K.FAGGLHFS#GPKVE.G      | S5620: | 2 | 2,7005 | 0,457 | 0,342  |
| 14 | P13639 EF2_HUMAN   | E.SFGFTADLR.S           |        | 2 | 2,6957 | 0,367 | -0,722 |
| 14 | Q4VC31 CCD58_HUMAN | K.NCIAQTSAVVK.N         |        | 2 | 2,6944 | 0,238 | -1,229 |
| 14 | Q12800 TFCP2_HUMAN | R.VQIDTFKENE.N          |        | 2 | 2,6929 | 0,119 | -0,898 |
| 14 | P28066 PSA5_HUMAN  | K.RITS#PLM*EPSSIEK.I    | S56:   | 2 | 2,6916 | 0,139 | -0,869 |
| 14 | Q14681 KCTD2_HUMAN | R.GPPS#PRPAGPTPR.G      | S33:   | 3 | 2,6913 | 0,324 | 0,134  |
| 14 | O60347 TBC12_HUMAN | R.SGGFADFFTR.N          |        | 2 | 2,6898 | 0,388 | -0,331 |
| 14 | Q6RFH5 WDR74_HUMAN | K.SQLNCLLLSGR.D         |        | 2 | 2,6896 | 0,437 | -0,29  |
| 14 | O14744 ANM5_HUMAN  | R.GPLVNASLR.A           |        | 2 | 2,6889 | 0,387 | -0,658 |
| 14 | Q6S8J3 A26CA_HUMAN | E.M*ATAASSSLEK.S        |        | 2 | 2,6881 | 0,407 | -0,204 |
| 14 | Q5T1M5 FKB15_HUMAN | E.SLAAS#PM*AAKPDNPSGK.V | S1065: | 2 | 2,6879 | 0,351 | -0,702 |
| 14 | O00299 CLIC1_HUMAN | R.YLSNAYAREE.F          |        | 2 | 2,6871 | 0,342 | -1,104 |

|    |                    |                            |              |   |        |       |        |
|----|--------------------|----------------------------|--------------|---|--------|-------|--------|
| 14 | P08670 VIME_HUMAN  | R.QDVNASLAR.L              |              | 2 | 2,6867 | 0,428 | -0,672 |
| 14 | O15027 SC16A_HUMAN | R.ANVVGEVRE.T              |              | 2 | 2,6864 | 0,4   | 1,254  |
| 14 | Q6PJF5 RHDF2_HUMAN | E.SPPLSASYFR.G             |              | 2 | 2,6859 | 0,287 | -0,542 |
| 14 | P50454 SERPH_HUMAN | K.AVLSAEQLRDEE.V           |              | 2 | 2,6855 | 0,298 | -0,628 |
| 14 | P61289 PSME3_HUMAN | E.AASYLDQISR.Y             |              | 2 | 2,6854 | 0,339 | -0,543 |
| 14 | Q9NY61 AATF_HUMAN  | E.LLFQYPDTR.Y              |              | 2 | 2,6852 | 0,205 | -0,212 |
| 14 | Q08J23 NSUN2_HUMAN | E.GKPTDPSKLES#PSFTGTGDTE.I | S473:        | 2 | 2,6851 | 0,325 | -0,219 |
| 14 | O75179 ANR17_HUMAN | R.NSPLDCGSASPKN.V          |              | 2 | 2,6831 | 0,325 | -0,634 |
| 14 | Q5VUA4 ZN318_HUMAN | K.DKLC#PLSEPGDSPK.C        | S2189:       | 2 | 2,6828 | 0,405 | -0,214 |
| 14 | P36776 LONM_HUMAN  | K.TKTENPLILIDE.V           |              | 2 | 2,6821 | 0,188 | -0,616 |
| 14 | Q9BPX3 CND3_HUMAN  | E.NCITLQDFNR.A             |              | 2 | 2,6792 | 0,33  | -0,857 |
| 14 | O14907 TX1B3_HUMAN | E.IAGLQIGDK.I              |              | 2 | 2,6781 | 0,266 | 0,067  |
| 14 | Q13813 SPTA2_HUMAN | K.GRELPTAFDYVE.F           |              | 2 | 2,6768 | 0,424 | -0,611 |
| 14 | P12270 TPR_HUMAN   | R.LTIHAPPQE.L              |              | 2 | 2,6765 | 0,251 | 0,243  |
| 14 | P12268 IMDH2_HUMAN | R.LVGISSR.D                |              | 2 | 2,6748 | 0,137 | -0,722 |
| 14 | Q16543 CDC37_HUMAN | K.RLGPGLDPVEVYE.S          |              | 2 | 2,6747 | 0,271 | -0,244 |
| 14 | Q9UQ80 PA2G4_HUMAN | R.LVKPGNQNTQVTE.A          |              | 2 | 2,6745 | 0,316 | -0,769 |
| 14 | O60825 F262_HUMAN  | R.NYS#VGSRPLKPLS#PLR.A     | S483:S493:   | 3 | 2,673  | 0,197 | -0,847 |
| 14 | P55209 NP1L1_HUMAN | E.RLDGLVETPTGYIE.S         |              | 2 | 2,6729 | 0,368 | -0,156 |
| 14 | Q92558 WASF1_HUMAN | E.NDVATILSR.R              |              | 2 | 2,6713 | 0,339 | -0,617 |
| 14 | P35527 K1C9_HUMAN  | R.QGVDADINGLR.Q            |              | 2 | 2,6707 | 0,354 | -0,948 |
| 14 | Q9UNS1 TIM_HUMAN   | R.IPAKLS#PTQLR.R           | S1087:       | 2 | 2,6664 | 0,406 | -0,561 |
| 14 | Q9BWG6 SCNM1_HUMAN | R.RVGDLLASYIPEDE.A         |              | 2 | 2,6661 | 0,397 | -0,619 |
| 14 | Q969Q5 RAB24_HUMAN | E.GCQIYLCGTK.S             |              | 2 | 2,6659 | 0,412 | -0,508 |
| 14 | P25208 NFYB_HUMAN  | E.KGIGGAVTATDGLSEE.L       |              | 2 | 2,6658 | 0,364 | -0,73  |
| 14 | O75116 ROCK2_HUMAN | K.DSDIEQLR.S               |              | 2 | 2,6651 | 0,161 | -0,25  |
| 14 | Q9H4A3 WNK1_HUMAN  | R.DVDDGSGS#PHS#PHQLSSK.S   | S2029:S2032: | 2 | 2,6647 | 0,356 | -0,182 |
| 14 | P34932 HSP74_HUMAN | R.NSFTLKE.D                |              | 2 | 2,6647 | 0,301 | -0,641 |
| 14 | Q08AD1 CA1L1_HUMAN | K.FLQDYDIR.T               |              | 2 | 2,6631 | 0,305 | -0,114 |
| 14 | P23528 COF1_HUMAN  | K.KAVLFCLSE.D              |              | 2 | 2,6614 | 0,369 | -0,229 |
| 14 | P50579 AMPM2_HUMAN | E.NFGTLAFCR.R              |              | 2 | 2,6605 | 0,303 | -0,674 |
| 14 | P39687 AN32A_HUMAN | E.GKLEGLTDEFEE.L           |              | 2 | 2,6602 | 0,221 | -0,714 |
| 14 | P18887 XRCC1_HUMAN | K.HFFLYGEFPGDE.R           |              | 2 | 2,6598 | 0,513 | -0,251 |

|    |                     |                           |            |   |        |       |        |
|----|---------------------|---------------------------|------------|---|--------|-------|--------|
| 14 | Q86WB0 NIPA_HUMAN   | E.GQAFAVGVEK.N            |            | 2 | 2,6595 | 0,31  | -0,91  |
| 14 | Q53H82 LACB2_HUMAN  | K.SINNDTTYCIK.K           |            | 2 | 2,6593 | 0,364 | -0,275 |
| 14 | Q9UQE7 SMC3_HUMAN   | R.GALTGGYYDTR.K           |            | 2 | 2,6575 | 0,154 | -0,728 |
| 14 | P05787 K2C8_HUMAN   | E.SM*YQIKYEE.L            |            | 2 | 2,6567 | 0,34  | -0,91  |
| 14 | Q14493 SLBP_HUMAN   | R.HM*DSQVEDEFDLE.A        |            | 2 | 2,6558 | 0,351 | -0,531 |
| 14 | P54289 CA2D1_HUMAN  | E.SGYTFIAPR.D             |            | 2 | 2,6556 | 0,411 | -0,06  |
| 14 | Q15185 TEBP_HUMAN   | E.DSKDVNVNFE.K            |            | 2 | 2,6543 | 0,3   | -0,523 |
| 14 | P31948 STIP1_HUMAN  | E.TKPEPM*EEDLPE.N         |            | 2 | 2,6528 | 0,12  | -1,194 |
| 14 | Q96S82 UBL7_HUMAN   | E.GLS#DDEDDFHPNTR.S       | S230:      | 2 | 2,6525 | 0,402 | -1,006 |
| 14 | Q9BR77 CCD77_HUMAN  | K.KIQNLLALVGTDAGE.V       |            | 2 | 2,6517 | 0,375 | -0,396 |
| 14 | Q9BTC0 DIDO1_HUMAN  | K.VTVDDLPNR.M             |            | 2 | 2,6508 | 0,342 | -0,593 |
| 14 | P26599 PTBP1_HUMAN  | R.KM*ALIQM*GSVEE.A        |            | 2 | 2,6495 | 0,189 | -0,714 |
| 14 | Q9UHB7 AFF4_HUMAN   | E.KELLS#PLS#EPDDRYPLIVK.I | S703:S706: | 3 | 2,6488 | 0,279 | -0,386 |
| 14 | Q6PJT7 ZC3HE_HUMAN  | K.TTNYSTVPQK.Q            |            | 2 | 2,6488 | 0,365 | -0,428 |
| 14 | Q8IZT6 ASPM_HUMAN   | E.VTPSSTTASVAR.K          |            | 2 | 2,6485 | 0,477 | -0,311 |
| 14 | Q13085 ACACA_HUMAN  | R.HLEPALAFQLE.L           |            | 2 | 2,648  | 0,292 | -0,289 |
| 14 | Q9Y371 SHLB1_HUMAN  | K.GKVPITYLELLN.-          |            | 2 | 2,6476 | 0,318 | -0,09  |
| 14 | B2RA01 B2RA01_HUMAN | K.AQYEDIAQK.S             |            | 2 | 2,6455 | 0,157 | -1,946 |
| 14 | P21980 TGM2_HUMAN   | E.KSVPLCILYE.K            |            | 2 | 2,6451 | 0,168 | -0,2   |
| 14 | P14625 ENPL_HUMAN   | K.IYFM*AGSSR.K            |            | 2 | 2,6434 | 0,442 | -0,815 |
| 14 | Q15435 PP1R7_HUMAN  | E.NLSNLHQLQM*LE.L         |            | 2 | 2,6432 | 0,22  | -0,922 |
| 14 | P35232 PHB_HUMAN    | E.DIAYQLSR.S              |            | 2 | 2,643  | 0,293 | -0,189 |
| 14 | P39687 AN32A_HUMAN  | E.VTNLNDYRE.N             |            | 2 | 2,6398 | 0,257 | -0,326 |
| 14 | Q13428 TCOF_HUMAN   | K.AGPVAVQVK.A             |            | 2 | 2,6367 | 0,129 | 0,07   |
| 14 | Q99961 SH3G1_HUMAN  | E.QSNGGFPCTTAPK.I         |            | 2 | 2,636  | 0,355 | -0,804 |
| 14 | Q8TB65 Q8TB65_HUMAN | R.LNDFASTVR.I             |            | 2 | 2,6355 | 0,396 | -0,06  |
| 14 | Q9P0K7 RAI14_HUMAN  | R.SITSTPLSGKE.S           |            | 2 | 2,6349 | 0,462 | -0,436 |
| 14 | Q2NKX8 ERC6L_HUMAN  | K.VNVTTLQDGK.G            |            | 2 | 2,6329 | 0,335 | -0,34  |
| 14 | Q7Z2Z1 CO042_HUMAN  | E.NKS#PLLSVPFLSSAR.R      | S820:      | 2 | 2,632  | 0,303 | -0,144 |
| 14 | P35658 NU214_HUMAN  | R.QPKS#PGSTPTTPTSSQAPQK.L | S430:      | 3 | 2,6319 | 0,313 | -0,087 |
| 14 | Q9GZT3 SLIRP_HUMAN  | R.SINQPVAFVR.R            |            | 2 | 2,6318 | 0,251 | -0,431 |
| 14 | Q9Y3S2 ZN330_HUMAN  | R.TYASGYAHYEEQEN.-        |            | 2 | 2,6317 | 0,355 | -0,587 |
| 14 | P17980 PRS6A_HUMAN  | E.KAPSIIFIDE.L            |            | 2 | 2,6295 | 0,203 | 0,431  |



|    |                     |                             |            |   |        |       |        |
|----|---------------------|-----------------------------|------------|---|--------|-------|--------|
| 14 | Q9Y3T9 NOC2L_HUMAN  | K.KNSVPVTVAMVE.R            |            | 2 | 2,6295 | 0,405 | -0,575 |
| 14 | P30153 2AAA_HUMAN   | R.NLCSDDTPM*VR.R            |            | 2 | 2,6286 | 0,356 | -0,829 |
| 14 | P05556 ITB1_HUMAN   | K.SAVTTVVNPK.Y              |            | 2 | 2,6278 | 0,285 | -0,06  |
| 14 | Q03014 HHEX_HUMAN   | E.LESLDSSCDQR.Q             |            | 2 | 2,6277 | 0,122 | -1,118 |
| 14 | Q08AE8 SPIR1_HUMAN  | E.NGLSTSQQVPAQR.K           |            | 2 | 2,6267 | 0,323 | -1,056 |
| 14 | Q86TX2 ACOT1_HUMAN  | R.YRADTLGELDLE.R            |            | 2 | 2,6267 | 0,256 | -0,437 |
| 14 | Q9UBB4 ATX10_HUMAN  | E.GDISNVANGFK.S             |            | 2 | 2,6258 | 0,402 | -0,761 |
| 14 | P07900 HS90A_HUMAN  | R.APFDFLENR.K               |            | 2 | 2,624  | 0,284 | 0,44   |
| 14 | A9CQZ4 A9CQZ4_HUMAN | R.QKFCGM*FCPVEGSSE.N        |            | 2 | 2,6237 | 0,448 | -1,372 |
| 14 | O15143 ARC1B_HUMAN  | R.TQIAICPNNHE.V             |            | 2 | 2,6226 | 0,322 | -0,941 |
| 14 | Q8NI08 NCOA7_HUMAN  | R.YYSIDDNQNK.T              |            | 2 | 2,6214 | 0,316 | -0,581 |
| 14 | Q96EV2 RBM33_HUMAN  | K.VKPAS#PVAQPKEE.A          | S775:      | 2 | 2,6191 | 0,465 | -0,585 |
| 14 | Q13416 ORC2_HUMAN   | K.SVSFSLKNDPE.I             |            | 2 | 2,6182 | 0,333 | -0,399 |
| 14 | Q99661 KIF2C_HUMAN  | K.GKEIDFDDVAAINPE.L         |            | 2 | 2,6179 | 0,33  | -0,523 |
| 14 | Q9Y6Y8 S23IP_HUMAN  | R.YDVLYDR.I                 |            | 2 | 2,6176 | 0,308 | -0,441 |
| 14 | P52948 NUP98_HUMAN  | E.RFS#FLSKPVDE.N            | S635:      | 2 | 2,6174 | 0,455 | -0,434 |
| 14 | Q9BVC4 LST8_HUMAN   | R.TVQHQDSQVNALE.V           |            | 2 | 2,6164 | 0,349 | -0,914 |
| 14 | O14744 ANM5_HUMAN   | K.CLLDRVPEEE.K              |            | 2 | 2,6162 | 0,284 | -0,581 |
| 14 | O94842 TOX4_HUMAN   | R.LSTTPS#PTS#SLHEDGVEDFRR.Q | S178:S181: | 3 | 2,6159 | 1     | -0,367 |
| 14 | P15822 ZEP1_HUMAN   | R.SLGSTDSGYFSR.S            |            | 2 | 2,6154 | 0,271 | -0,191 |
| 14 | Q15043 S39AE_HUMAN  | E.GDSLTLQQLK.A              |            | 2 | 2,6153 | 0,179 | 0,111  |
| 14 | P35579 MYH9_HUMAN   | K.SGFEPASLKEE.V             |            | 2 | 2,6146 | 0,199 | -0,818 |
| 14 | Q9NYV4 CD2L7_HUMAN  | K.NSGPQGPRRT#PTM*PQEE.A     | T1244:     | 3 | 2,6145 | 0,245 | -0,37  |
| 14 | O75864 K1986_HUMAN  | R.SPPGSPSTPEQR.I            |            | 2 | 2,6144 | 0,331 | -0,455 |
| 14 | P26885 FKBP2_HUMAN  | R.KLVIPSELGYGE.R            |            | 2 | 2,6141 | 0,459 | -0,374 |
| 14 | A0FGR8 ESYT2_HUMAN  | R.SSSLLAS#PGHISVK.E         | S743:      | 3 | 2,6134 | 0,215 | -0,708 |
| 14 | Q6GMV2 SMYD5_HUMAN  | E.NYLFVCSPK.C               |            | 2 | 2,6133 | 0,302 | -0,284 |
| 14 | Q59G85 Q59G85_HUMAN | K.GGGPVTLQDYR.L             |            | 2 | 2,6132 | 0,25  | -0,734 |
| 14 | Q7Z6B7 SRGP1_HUMAN  | E.SLS#PLHNVALR.S            | S1010:     | 2 | 2,6131 | 0,343 | -0,379 |
| 14 | P27816 MAP4_HUMAN   | R.LATNTSAPDLK.N             |            | 2 | 2,6129 | 0,336 | -1,079 |
| 14 | P05198 IF2A_HUMAN   | K.HAVSDPSILDSLNE.D          |            | 2 | 2,612  | 0,368 | -0,778 |
| 14 | Q9NRL3 STRN4_HUMAN  | K.LQGILADLR.D               |            | 2 | 2,6111 | 0,141 | -0,122 |
| 14 | O00161 SNP23_HUMAN  | E.IDAQNPQIK.R               |            | 2 | 2,6106 | 0,145 | -1,188 |

|    |                    |                             |       |   |        |       |        |
|----|--------------------|-----------------------------|-------|---|--------|-------|--------|
| 14 | Q86V81 THOC4_HUMAN | R.SLGTADVHFE.R              |       | 2 | 2,6099 | 0,298 | -0,227 |
| 14 | Q9ULR0 ISY1_HUMAN  | K.FIAHVPVPSQQE.I            |       | 2 | 2,6098 | 0,334 | -0,812 |
| 14 | Q9P2N6 K1310_HUMAN | K.SSQIGSSQLLK.R             |       | 2 | 2,6098 | 0,344 | -0,213 |
| 14 | P04075 ALDOA_HUMAN | E.ASINLNAINK.C              |       | 2 | 2,6094 | 0,294 | -1,153 |
| 14 | P56537 IF6_HUMAN   | E.AQPSTIATSM*R.D            |       | 2 | 2,609  | 0,491 | -0,207 |
| 14 | O00562 PITM1_HUMAN | K.GIEDGAQAPR.D              |       | 2 | 2,6086 | 0,196 | -0,662 |
| 14 | Q8WXX5 DNJC9_HUMAN | K.VYSVLSDRE.Q               |       | 2 | 2,6083 | 0,41  | -0,8   |
| 14 | Q6ZTN6 AN13D_HUMAN | E.SLQLSTEPR.G               |       | 2 | 2,6081 | 0,314 | -0,71  |
| 14 | Q53ET0 CRTC2_HUMAN | R.RVPLS#PLSLLAGPADAR.R      | S433: | 2 | 2,6078 | 0,093 | -0,202 |
| 14 | Q9NQC7 CYLD_HUMAN  | R.FHS#LPFSLTK.M             | S418: | 2 | 2,6067 | 0,247 | -0,582 |
| 14 | P09960 LKHA4_HUMAN | E.FLAQTLQR.A                |       | 2 | 2,6064 | 0,093 | 0,375  |
| 14 | Q9Y2N3 PO121_HUMAN | E.TATKPKQATSAPS#PAPK.Q      | S674: | 2 | 2,6054 | 0,335 | 0,075  |
| 14 | O75044 FBNP2_HUMAN | R.KQDSSQAIPLVVE.S           |       | 2 | 2,6052 | 0,328 | -0,259 |
| 14 | Q96JQ2 CLMN_HUMAN  | E.GLDFKPS#PPLSK.V           | S713: | 2 | 2,604  | 0,086 | -0,536 |
| 14 | Q8WYA1 BMAL2_HUMAN | E.NQCIAPVVSSR.V             |       | 2 | 2,6019 | 0,189 | -0,991 |
| 14 | Q14257 RCN2_HUMAN  | K.KIDLSDGFLTE.S             |       | 2 | 2,6018 | 0,346 | -0,812 |
| 14 | P51784 UBP11_HUMAN | E.GLYNVLM*YR.L              |       | 2 | 2,6013 | 0,351 | -0,32  |
| 14 | Q9HAW0 BRF2_HUMAN  | E.VGNNSLGLPQGK.R            |       | 2 | 2,6009 | 0,376 | -0,618 |
| 14 | Q14669 TRIPC_HUMAN | K.SSFLASLNPK.T              |       | 2 | 2,5991 | 0,319 | -0,229 |
| 14 | P05556 ITB1_HUMAN  | E.CQSEGIPESPK.C             |       | 2 | 2,5971 | 0,328 | -1,188 |
| 14 | Q9H009 NACA2_HUMAN | K.LVM*SQANVSR.A             |       | 2 | 2,5971 | 0,217 | -0,653 |
| 14 | Q8N5A5 ZGPAT_HUMAN | E.GDGILPLR.T                |       | 2 | 2,5963 | 0,264 | -0,715 |
| 14 | P46776 RL27A_HUMAN | R.NQSFQPTVNLDK.L            |       | 2 | 2,5947 | 0,3   | -0,171 |
| 14 | Q5VT25 MRCKA_HUMAN | R.GYLQALASK.M               |       | 2 | 2,5945 | 0,288 | -0,128 |
| 14 | Q92900 RENT1_HUMAN | R.AYQHGGVGTGLSQY.-          |       | 2 | 2,5942 | 0,281 | -0,707 |
| 14 | Q92934 BAD_HUMAN   | E.GM*GEEPSFR.G              |       | 2 | 2,5939 | 0,343 | -1,304 |
| 14 | Q86UU0 BCL9L_HUMAN | K.ANQISPSNSSLK.N            |       | 2 | 2,5931 | 0,227 | -1,273 |
| 14 | Q9H6A9 PCX3_HUMAN  | R.CSSQHSVFGFNQVSE.L         |       | 2 | 2,5928 | 0,399 | -0,071 |
| 14 | P62280 RS11_HUMAN  | R.VLLGETGKE.K               |       | 2 | 2,5919 | 0,265 | 0      |
| 14 | Q99638 RAD9A_HUMAN | D.GHFVLATLSDTDSHSQDLGS#PE.R | S277: | 3 | 2,5892 | 0,084 | -0,382 |
| 14 | P31948 STIP1_HUMAN | E.FQLALKDCEE.C              |       | 2 | 2,589  | 0,211 | -0,584 |
| 14 | P09525 ANXA4_HUMAN | R.SDTSFM*FQR.V              |       | 2 | 2,5888 | 0,227 | -0,538 |
| 14 | P08648 ITA5_HUMAN  | E.GQQLLYVTR.V               |       | 2 | 2,5882 | 0,366 | -0,792 |

|    |                     |                            |        |   |        |       |        |
|----|---------------------|----------------------------|--------|---|--------|-------|--------|
| 14 | P61956 SUMO2_HUMAN  | K.VAGQDGSVVQFK.I           |        | 2 | 2,5879 | 0,349 | 0      |
| 14 | P52732 KIF11_HUMAN  | K.LDIPTGT#TPQRK.S          | T925:  | 2 | 2,587  | 0,309 | -0,434 |
| 14 | P00338 LDHA_HUMAN   | K.VTLTSEEEAR.L             |        | 2 | 2,5869 | 0,224 | -1,075 |
| 14 | Q12904 MCA1_HUMAN   | R.IGCIITAR.K               |        | 2 | 2,5845 | 0,283 | -0,81  |
| 14 | Q9BZY3 Q9BZY3_HUMAN | R.SQGAQPQVTLR.L            |        | 2 | 2,5841 | 0,193 | -0,558 |
| 14 | O00629 IMA4_HUMAN   | K.IEQLQNHENE.D             |        | 2 | 2,5838 | 0,132 | -0,876 |
| 14 | P04264 K2C1_HUMAN   | R.SLDLDSIIAEVK.A           |        | 2 | 2,5817 | 0,291 | -0,281 |
| 14 | P05023 AT1A1_HUMAN  | E.LKDAFQNAVLE.L            |        | 2 | 2,5814 | 0,223 | -0,279 |
| 14 | P55327 TPD52_HUMAN  | K.VGGTKPAGGDFGE.V          |        | 2 | 2,5812 | 0,283 | -0,717 |
| 14 | P31946 1433B_HUMAN  | D.STLIM*QLLR.D             |        | 2 | 2,5807 | 0,154 | -0,112 |
| 14 | Q5JTD0 TJAP1_HUMAN  | D.CNLAVQLLK.C              |        | 2 | 2,5799 | 0,195 | -0,461 |
| 14 | P13647 K2C5_HUMAN   | R.ISISTSGGSFR.N            |        | 2 | 2,5797 | 0,374 | -0,329 |
| 14 | Q92841 DDX17_HUMAN  | D.M*GFEPQIR.K              |        | 2 | 2,5782 | 0,345 | -0,184 |
| 14 | O75643 U520_HUMAN   | R.KNVQINLNFVVDE.V          |        | 2 | 2,5777 | 0,388 | -0,637 |
| 14 | P05556 ITB1_HUMAN   | K.NVLSLTNKGEVFNE.L         |        | 2 | 2,576  | 0,216 | -0,156 |
| 14 | Q8NFC6 FA44A_HUMAN  | E.HS#TNLDSSPSLSSVTVVPLRE.S | S1275: | 3 | 2,575  | 0,145 | 0      |
| 14 | Q9Y4B5 K0802_HUMAN  | E.TLNGPAGGGAPDAK.L         |        | 2 | 2,5748 | 0,476 | -1,294 |
| 14 | P49721 PSB2_HUMAN   | E.KILLLCVGE.A              |        | 2 | 2,5737 | 0,345 | -0,467 |
| 14 | P22626 ROA2_HUMAN   | K.LTDCVVM*R.D              |        | 2 | 2,5725 | 0,331 | 0,181  |
| 14 | Q5TCU3 Q5TCU3_HUMAN | E.IHQTLDTLLE.L             |        | 2 | 2,5693 | 0,273 | -0,558 |
| 14 | Q70EL1 UBP54_HUMAN  | E.SLNIDSIFSK.D             |        | 2 | 2,5687 | 0,341 | 0      |
| 14 | Q9P260 K1468_HUMAN  | E.ADSTIPKENS#PNSFPR.R      | S453:  | 3 | 2,568  | 0,186 | -0,994 |
| 14 | Q09666 AHNK_HUMAN   | K.ADVDISGPK.I              |        | 2 | 2,568  | 0,124 | 0      |
| 14 | P04626 ERBB2_HUMAN  | E.YVNQPDVRPQPPS#PR.E       | S1151: | 3 | 2,5677 | 0,268 | -0,8   |
| 14 | Q9NPF0 CD320_HUMAN  | R.LACLAGELR.C              |        | 2 | 2,5673 | 0,343 | 0,365  |
| 14 | P21359 NF1_HUMAN    | K.S#FDHLISDTK.A            | S2543: | 2 | 2,5666 | 0,268 | -0,491 |
| 14 | Q5JSH3 WDR44_HUMAN  | K.VGLSTFKE.T               |        | 2 | 2,5664 | 0,244 | 0      |
| 14 | P42285 SK2L2_HUMAN  | K.AQIAIDIK.S               |        | 2 | 2,5635 | 0,198 | 0,769  |
| 14 | Q9UQR1 ZN148_HUMAN  | K.FLQQALDR.T               |        | 2 | 2,5605 | 0,095 | -0,123 |
| 14 | Q8WUA2 PPIL4_HUMAN  | K.QDTKYDLILDE.Q            |        | 2 | 2,5599 | 0,25  | -0,361 |
| 14 | Q99618 CDCA3_HUMAN  | R.SPTLGIART#PM*K.T         | T76:   | 2 | 2,5594 | 0,13  | -0,981 |
| 14 | P60174 TPIS_HUMAN   | E.LIGTLNAAK.V              |        | 2 | 2,5587 | 0,296 | -1,219 |
| 14 | Q9UDI3 Q9UDI3_HUMAN | -.PDYLGADQR.K              |        | 2 | 2,5586 | 0,31  | -0,354 |

|    |                    |                     |       |   |        |       |        |
|----|--------------------|---------------------|-------|---|--------|-------|--------|
| 14 | O43143 DHX15_HUMAN | D.LGEDYPSGK.K       |       | 2 | 2,5584 | 0,38  | -0,568 |
| 14 | Q9UHY1 NRBP_HUMAN  | R.HLSCDLM*PNENIPE.L |       | 2 | 2,5564 | 0,209 | -1,231 |
| 14 | P22307 NLTP_HUMAN  | K.IGGIFAFK.V        |       | 2 | 2,556  | 0,352 | 0,286  |
| 14 | Q12888 TP53B_HUMAN | R.ADDPLRLDQE.L      |       | 2 | 2,556  | 0,204 | -0,833 |
| 14 | Q8WXE1 ATRIP_HUMAN | K.LAAPSVSHVS#PR.K   | S224: | 2 | 2,5558 | 0,331 | -0,844 |
| 14 | O75351 VPS4B_HUMAN | R.SLSNTKPTVNE.H     |       | 2 | 2,5556 | 0,233 | -0,513 |
| 14 | Q7L014 DDX46_HUMAN | E.INDFPQTAR.W       |       | 2 | 2,5542 | 0,339 | 0,115  |
| 14 | P46063 RECQ1_HUMAN | E.M*VSYCQNISK.C     |       | 2 | 2,5541 | 0,1   | -0,685 |
| 14 | Q15910 EZH2_HUMAN  | E.FAAALTAER.I       |       | 2 | 2,553  | 0,114 | -0,193 |
| 14 | Q17R98 ZN827_HUMAN | R.NVGYSTLIGRE.K     |       | 2 | 2,5529 | 0,148 | -0,303 |
| 14 | Q14554 PDIA5_HUMAN | R.NNVLVLYSK.S       |       | 2 | 2,5518 | 0,34  | 0      |
| 14 | P58546 MTPN_HUMAN  | K.TVKGPDGLTAFE.A    |       | 2 | 2,5517 | 0,356 | -0,099 |
| 14 | Q16740 CLPP_HUMAN  | R.DRYM*SPM*EAQE.F   |       | 2 | 2,5511 | 0,355 | -0,439 |
| 14 | Q5VZ89 DEN4C_HUMAN | K.VPSGIFDVNSR.K     |       | 2 | 2,5508 | 0,343 | -0,205 |
| 14 | O15160 RPAC1_HUMAN | K.FSPVATASYR.L      |       | 2 | 2,5502 | 0,385 | 0      |
| 14 | P52209 6PGD_HUMAN  | K.VVGAQSLKE.M       |       | 2 | 2,5483 | 0,088 | 0,131  |
| 14 | O95235 KI20A_HUMAN | E.LSLCDLAGSER.C     |       | 2 | 2,5475 | 0,439 | -0,3   |
| 14 | Q02790 FKBP4_HUMAN | K.VLQLYPNNK.A       |       | 2 | 2,5475 | 0,207 | -0,112 |
| 14 | Q96AY3 FKB10_HUMAN | K.TIGDM*FQNQDR.N    |       | 2 | 2,5474 | 0,332 | -0,91  |
| 14 | Q04837 SSB_HUMAN   | R.VGQDPVLR.Q        |       | 2 | 2,5474 | 0,194 | 0,138  |
| 14 | P19338 NUCL_HUMAN  | K.NDLAVVDVR.I       |       | 2 | 2,5465 | 0,204 | -0,609 |
| 14 | P51858 HDGF_HUMAN  | K.CGDLVFAK.M        |       | 2 | 2,5456 | 0,248 | -0,201 |
| 14 | Q56P03 EAPP_HUMAN  | E.VDVLLHGT#PDQK.R   | T37:  | 3 | 2,5445 | 0,114 | 0,065  |
| 14 | Q92598 HS105_HUMAN | K.IKVNVNELPIE.A     |       | 2 | 2,5444 | 0,276 | -0,389 |
| 14 | P08107 HSP71_HUMAN | K.LLQDFFNDR.D       |       | 2 | 2,5439 | 0,176 | -0,55  |
| 14 | P62258 1433E_HUMAN | R.IISSIEQKE.E       |       | 2 | 2,5439 | 0,162 | -1,049 |
| 14 | Q9NVT9 ARMC1_HUMAN | E.ALASAIASK.V       |       | 2 | 2,5435 | 0,341 | 0      |
| 14 | P31949 S10AB_HUMAN | E.SLIAVFQK.Y        |       | 2 | 2,5433 | 0,281 | -0,337 |
| 14 | Q8TDD1 DDX54_HUMAN | R.VADNAQQQYVR.S     |       | 2 | 2,5428 | 0,341 | -0,661 |
| 14 | Q9NXG2 THUM1_HUMAN | E.YGDDMYGPEK.F      |       | 2 | 2,5422 | 0,378 | -0,104 |
| 14 | P18754 RCC1_HUMAN  | R.SHSTEPGLVLTGQGD.V |       | 2 | 2,5414 | 0,344 | -0,379 |
| 14 | O75083 WDR1_HUMAN  | R.IAVVGEGR.K        |       | 2 | 2,5409 | 0,184 | 0,066  |
| 14 | O15231 ZN185_HUMAN | R.QSSPSGSEQLVR.R    |       | 2 | 2,5404 | 0,256 | -1,435 |

|    |                     |                             |       |   |        |       |        |
|----|---------------------|-----------------------------|-------|---|--------|-------|--------|
| 14 | Q9NR45 SIAS_HUMAN   | K.GSDHSASLEPGELAE.L         |       | 2 | 2,54   | 0,42  | -0,163 |
| 14 | Q9NYF8 BCLF1_HUMAN  | K.TIAPQNAPRDE.S             |       | 2 | 2,5398 | 0,286 | 0,201  |
| 14 | Q6PJ19 Q6PJ19_HUMAN | E.NALDKLFSSE.Q              |       | 2 | 2,5396 | 0,353 | -0,543 |
| 14 | P35527 K1C9_HUMAN   | K.FEM*EQNLR.Q               |       | 2 | 2,5393 | 0,217 | -0,901 |
| 14 | Q14116 IL18_HUMAN   | K.SDIFFQR.S                 |       | 2 | 2,5383 | 0,194 | -0,357 |
| 14 | P40424 PBX1_HUMAN   | R.M*KPALFNVLCE.I            |       | 2 | 2,5379 | 0,206 | -0,365 |
| 14 | Q15149 PLEC1_HUMAN  | E.QSVLDQLRGEAE.A            |       | 2 | 2,5372 | 0,309 | -0,091 |
| 14 | P18621 RL17_HUMAN   | R.YSLDPENPTK.S              |       | 2 | 2,5368 | 0,229 | -0,314 |
| 14 | O00571 DDX3X_HUMAN  | K.HVINFDLPSDIEE.Y           |       | 2 | 2,5362 | 0,377 | -1,357 |
| 14 | P63104 1433Z_HUMAN  | R.YDDM*AACM*K.S             |       | 2 | 2,5337 | 0,408 | -0,107 |
| 14 | O14964 HGS_HUMAN    | E.ARKSPT#PSAPVPLTEPAAQPGE.G | T347: | 3 | 2,5336 | 0,291 | -0,802 |
| 14 | Q6FI81 CPIN1_HUMAN  | K.GLVDKLQALTGNE.G           |       | 2 | 2,5336 | 0,352 | -0,27  |
| 14 | Q8WWK9 CKAP2_HUMAN  | R.NLLFQDCEKE.Q              |       | 2 | 2,5331 | 0,313 | -1,036 |
| 14 | P40925 MDHC_HUMAN   | K.LGVTANDVK.N               |       | 2 | 2,5329 | 0,282 | 0,266  |
| 14 | P19105 MLRM_HUMAN   | E.AFNM*IDQNR.D              |       | 2 | 2,5318 | 0,188 | -0,542 |
| 14 | P62736 ACTA_HUMAN   | K.DSYVGDEAQSK.R             |       | 2 | 2,5314 | 0,33  | 0,102  |
| 14 | P00558 PGK1_HUMAN   | R.VDFNVPM*K.N               |       | 2 | 2,5311 | 0,321 | -0,189 |
| 14 | P09936 UCHL1_HUMAN  | R.M*PFPVNHGASSE.D           |       | 2 | 2,5301 | 0,297 | -0,568 |
| 14 | Q9UPW6 SATB2_HUMAN  | R.SGS#PDVKGPPPVK.V          | S20:  | 3 | 2,53   | 0,121 | 0,34   |
| 14 | P62937 PIIA_HUMAN   | K.KITIADCGQLE.-             |       | 2 | 2,5294 | 0,377 | -1,173 |
| 14 | Q8TDN6 BXDC2_HUMAN  | K.DKLFVINE.V                |       | 2 | 2,5287 | 0,094 | -0,437 |
| 14 | O43504 HBXIP_HUMAN  | E.SDNGNIM*IQK.H             |       | 2 | 2,5281 | 0,204 | -0,537 |
| 14 | Q6PJG2 CN043_HUMAN  | R.AVSTGDCGQVLR.G            |       | 2 | 2,5274 | 0,394 | -1,256 |
| 14 | P30044 PRDX5_HUMAN  | K.THLPGFVEQAE.A             |       | 2 | 2,5273 | 0,338 | -0,099 |
| 14 | Q16890 TPD53_HUMAN  | R.NSPTFKS#FEERVE.T          | S149: | 2 | 2,5272 | 0,394 | -1,035 |
| 14 | Q8WWB7 CA085_HUMAN  | R.LLHTADTCQLE.V             |       | 2 | 2,5264 | 0,305 | -0,656 |
| 14 | Q9NTJ3 SMC4_HUMAN   | E.ANVLATAPDK.K              |       | 2 | 2,5237 | 0,327 | 1,708  |
| 14 | Q15003 CND2_HUMAN   | R.KAPLNIPGTPVLE.D           |       | 2 | 2,5232 | 0,421 | -0,362 |
| 14 | Q9BQA1 MEP50_HUMAN  | R.KET#PPPLVPPAARE.W         | T5:   | 2 | 2,5228 | 0,254 | -0,617 |
| 14 | Q13485 SMAD4_HUMAN  | K.YCQYAFDLK.C               |       | 2 | 2,522  | 0,423 | -0,505 |
| 14 | Q63ZY3 KANK2_HUMAN  | E.IASMLYSR.M                |       | 2 | 2,5219 | 0,249 | -0,324 |
| 14 | P51149 RAB7A_HUMAN  | K.TSLM*NQYVVK.K             |       | 2 | 2,5219 | 0,296 | -0,905 |
| 14 | P63104 1433Z_HUMAN  | R.VVSSIEQK.T                |       | 2 | 2,5217 | 0,134 | -0,137 |

|    |                    |                          |        |   |        |       |        |
|----|--------------------|--------------------------|--------|---|--------|-------|--------|
| 14 | Q14C86 GAPD1_HUMAN | R.FSTLTDDPSPR.L          |        | 2 | 2,5208 | 0,308 | -0,296 |
| 14 | P49411 EFTU_HUMAN  | R.GITINAAHVE.Y           |        | 2 | 2,5191 | 0,262 | -0,714 |
| 14 | P40227 TCPZ_HUMAN  | K.KQDEPIDLFM*IE.I        |        | 2 | 2,5173 | 0,245 | -0,245 |
| 14 | Q9UNZ2 NSF1C_HUMAN | R.SGQQIVGPPR.K           |        | 2 | 2,517  | 0,194 | -0,822 |
| 14 | P49591 SYSC_HUMAN  | K.YAGLSTCFR.Q            |        | 2 | 2,5153 | 0,188 | -0,454 |
| 14 | Q6DN90 IQEC1_HUMAN | R.IGLNLFNK.K             |        | 2 | 2,515  | 0,101 | -0,465 |
| 14 | Q9BRA2 TXD17_HUMAN | K.TIFAYFTGSK.D           |        | 2 | 2,5148 | 0,404 | -0,215 |
| 14 | Q86VQ1 GLCI1_HUMAN | K.YASS#PKPNNSYM*FK.R     | S406:  | 2 | 2,5148 | 0,305 | -0,776 |
| 14 | P49736 MCM2_HUMAN  | E.SFTMASSPAQR.R          |        | 2 | 2,5145 | 0,422 | -0,722 |
| 14 | P30260 CDC27_HUMAN | R.LFTSDSSTTKE.N          |        | 2 | 2,5135 | 0,352 | -0,903 |
| 14 | P13473 LAMP2_HUMAN | R.IPLNDLFR.C             |        | 2 | 2,5125 | 0,202 | -0,185 |
| 14 | P37802 TAGL2_HUMAN | K.NVIGLQM*GTNR.G         |        | 2 | 2,5124 | 0,171 | -1,401 |
| 14 | Q969R5 LMBL2_HUMAN | E.HLDVASPKASS#PELPVSVE.N | S689:  | 3 | 2,5107 | 0,156 | -0,254 |
| 14 | Q5VT06 CE350_HUMAN | E.GLLAQLCK.R             |        | 2 | 2,5102 | 0,164 | 0,135  |
| 14 | Q99832 TCPH_HUMAN  | R.VHTVEDYQAIVDAE.W       |        | 2 | 2,5086 | 0,262 | -0,384 |
| 14 | P07814 SYEP_HUMAN  | R.VAVQGDVVRE.L           |        | 2 | 2,5082 | 0,274 | -0,341 |
| 14 | Q86UE8 TLK2_HUMAN  | R.SS#PQHSLSNPLPR.R       | S111:  | 2 | 2,5078 | 0,413 | -0,081 |
| 14 | P38646 GRP75_HUMAN | E.DKVIAYVD.L             |        | 2 | 2,5071 | 0,101 | -0,066 |
| 14 | Q99570 PI3R4_HUMAN | D.LAALGITGR.Q            |        | 2 | 2,5061 | 0,34  | 0,14   |
| 14 | P18858 DNL1_HUMAN  | E.GEDGDQPT#TPPKPLK.T     | T182:  | 2 | 2,5052 | 0,226 | -0,368 |
| 14 | Q86U90 YRDC_HUMAN  | R.LFRPPS#PAPAAPGAR.L     | S37:   | 3 | 2,504  | 0,221 | -0,346 |
| 14 | P49959 MRE11_HUMAN | R.NM*SIIDAFK.S           |        | 2 | 2,504  | 0,142 | -0,347 |
| 14 | Q96T37 RBM15_HUMAN | R.LQQLALGR.L             |        | 2 | 2,5035 | 0,143 | 0,068  |
| 14 | P07355 ANXA2_HUMAN | K.AYTNFDAERD.A           |        | 2 | 2,5032 | 0,247 | -0,711 |
| 14 | Q96S55 WRIP1_HUMAN | E.SYDAPPTPSGAR.L         |        | 2 | 2,5022 | 0,303 | -1,501 |
| 14 | P62750 RL23A_HUMAN | K.VNTLIRPD.G             |        | 2 | 2,5009 | 0,228 | 0      |
| 14 | Q08945 SSRP1_HUMAN | E.ISFVNFR.G              |        | 2 | 2,4996 | 0,198 | 0,064  |
| 14 | Q9C0C2 TB182_HUMAN | E.AQDLCRAS#PEPPGPSSSR.W  | S672:  | 3 | 2,4994 | 0,088 | 0,345  |
| 14 | Q9NTI5 PDS5B_HUMAN | E.DYTM*SS#PLPGKK.S       | S1191: | 2 | 2,4987 | 0,315 | -1,031 |
| 14 | P62081 RS7_HUMAN   | E.LNITAAKE.I             |        | 2 | 2,4986 | 0,093 | 0,851  |
| 14 | Q8TB72 PUM2_HUMAN  | E.YVLSSSPADK.L           |        | 2 | 2,4954 | 0,214 | -0,572 |
| 14 | P50991 TCPD_HUMAN  | K.M*IQDGKGDVTITND.G      |        | 2 | 2,4953 | 0,305 | -0,481 |
| 14 | Q9NQZ2 SAS10_HUMAN | K.LYYDTDYGSK.S           |        | 2 | 2,495  | 0,304 | -0,896 |

|    |                     |                             |              |   |        |       |        |
|----|---------------------|-----------------------------|--------------|---|--------|-------|--------|
| 14 | Q15036 SNX17_HUMAN  | R.VRY#SQLLGLHE.Q            | Y37:         | 2 | 2,4947 | 0,214 | -0,437 |
| 14 | Q9NUQ3 TXLNG_HUMAN  | E.AGICGLGVK.A               |              | 2 | 2,4946 | 0,081 | 0,627  |
| 14 | P07437 TBB5_HUMAN   | E.LTQQVFDK.N                |              | 2 | 2,4944 | 0,249 | -1,162 |
| 14 | Q01518 CAP1_HUMAN   | E.NKLSDLLAPISE.Q            |              | 2 | 2,4937 | 0,316 | -0,282 |
| 14 | Q15019 SEPT2_HUMAN  | K.ADTLTLKE.R                |              | 2 | 2,4933 | 0,224 | 0,342  |
| 14 | P08107 HSP71_HUMAN  | K.DNNLLGRFE.L               |              | 2 | 2,4924 | 0,315 | -0,34  |
| 14 | Q9H2G2 SLK_HUMAN    | K.LADFGVSAK.N               |              | 2 | 2,4923 | 0,398 | -1,276 |
| 14 | P55072 TERA_HUMAN   | E.VGYDDIGGCR.K              |              | 2 | 2,4921 | 0,306 | -0,658 |
| 14 | Q02952 AKA12_HUMAN  | E.ALICVGSSK.K               |              | 2 | 2,492  | 0,383 | -0,848 |
| 14 | P52701 MSH6_HUMAN   | E.DYSQNVAVR.L               |              | 2 | 2,4908 | 0,348 | -0,58  |
| 14 | P14625 ENPL_HUMAN   | R.SGYLLPDTK.A               |              | 2 | 2,4889 | 0,267 | -0,184 |
| 14 | Q6P444 FA54A_HUMAN  | R.ISLGQLSSSR.A              |              | 2 | 2,4886 | 0,206 | -0,116 |
| 14 | O75643 U520_HUMAN   | R.FYDDAIVSQK.K              |              | 2 | 2,4869 | 0,219 | -0,823 |
| 14 | P27708 PYR1_HUMAN   | R.LSLDLLQR.L                |              | 2 | 2,4861 | 0,221 | -0,114 |
| 14 | Q9NR30 DDX21_HUMAN  | R.SDAGLES#DTAM*KKGE.T       | S13:         | 3 | 2,4854 | 0,271 | -0,112 |
| 14 | Q14697 GANAB_HUMAN  | R.SLLSVNAR.G                |              | 2 | 2,4847 | 0,27  | -0,815 |
| 14 | P06748 NPM_HUMAN    | R.TVSLGAGAKDE.L             |              | 2 | 2,4844 | 0,297 | -1,63  |
| 14 | P25788 PSA3_HUMAN   | R.SLADIAREE.A               |              | 2 | 2,4839 | 0,238 | 0,122  |
| 14 | Q9H0P0 5NT3_HUMAN   | K.IGYLNDRVDE.L              |              | 2 | 2,4835 | 0,12  | -0,204 |
| 14 | Q9HCM1 CL035_HUMAN  | K.NM*ETPSTSNVSGR.V          |              | 2 | 2,4825 | 0,346 | -0,262 |
| 14 | Q13177 PAK2_HUMAN   | E.LKNPNIVNFLD.S             |              | 2 | 2,4822 | 0,141 | -0,474 |
| 14 | P09211 GSTP1_HUMAN  | K.ASCLYGQLPK.F              |              | 2 | 2,4818 | 0,266 | -0,429 |
| 14 | Q14103 HNRPD_HUMAN  | E.SIELPM*DNK.T              |              | 2 | 2,4817 | 0,223 | -1,033 |
| 14 | Q12846 STX4_HUMAN   | K.TQHGVLSSQQFVE.L           |              | 2 | 2,4811 | 0,231 | -0,889 |
| 14 | Q9BSQ5 CCM2_HUMAN   | E.STIDFLDR.A                |              | 2 | 2,4797 | 0,249 | -0,315 |
| 14 | P13639 EF2_HUMAN    | K.SDPVVSURE.T               |              | 2 | 2,4797 | 0,372 | -0,116 |
| 14 | P55197 AF10_HUMAN   | R.GSLSPRS#PVSSLQIR.Y        | S705:        | 3 | 2,4782 | 0,218 | -0,33  |
| 14 | P11172 PYR5_HUMAN   | K.FADIGNTVK.K               |              | 2 | 2,4779 | 0,156 | -1,138 |
| 14 | Q92499 DDX1_HUMAN   | E.QYFIQQGGGPK.K             |              | 2 | 2,4776 | 0,38  | -0,091 |
| 14 | Q9H1U4 MEGF9_HUMAN  | K.VGVIGSICDR.C              |              | 2 | 2,4776 | 0,164 | -0,227 |
| 14 | Q58FG1 HS904_HUMAN  | K.TLVSVTKE.D                |              | 2 | 2,4772 | 0,124 | 0,209  |
| 14 | ##Q7Z5J4 RAI1_HUMAN | K.TGFSLPGTT#KKPDPTAFVS#PD.E | T1205:S1216: | 3 | 2,4771 | 0,139 | 0,229  |
| 14 | Q9NWB7 IFT57_HUMAN  | K.AQTYHLDL*NE.T             |              | 2 | 2,4767 | 0,291 | 0,493  |

|    |                    |                       |       |   |        |       |        |
|----|--------------------|-----------------------|-------|---|--------|-------|--------|
| 14 | Q99873 ANM1_HUMAN  | E.CSSISDYAVK.I        |       | 2 | 2,4761 | 0,273 | -1,296 |
| 14 | Q9BZZ5 API5_HUMAN  | R.LAAQFIPK.F          |       | 2 | 2,4735 | 0,352 | 0,206  |
| 14 | Q12931 TRAP1_HUMAN | R.SPAAECLSEKE.T       |       | 2 | 2,4734 | 0,329 | -0,7   |
| 14 | P20073 ANXA7_HUMAN | E.QAIVDVVANR.S        |       | 2 | 2,4733 | 0,318 | -0,225 |
| 14 | P22626 ROA2_HUMAN  | R.GGGGNFGPGPGSNFR.G   |       | 2 | 2,4722 | 0,393 | -0,443 |
| 14 | P25205 MCM3_HUMAN  | K.IIKPVLQE.S          |       | 2 | 2,4686 | 0,151 | -0,938 |
| 14 | Q9BUJ2 HNRL1_HUMAN | R.DRSSGYPLTIE.G       |       | 2 | 2,4677 | 0,279 | -0,493 |
| 14 | P10809 CH60_HUMAN  | K.LSDGVAVLK.V         |       | 2 | 2,4661 | 0,165 | 1,555  |
| 14 | P62249 RS16_HUMAN  | E.IKDILIQYD.R         |       | 2 | 2,4653 | 0,337 | 0,218  |
| 14 | Q8WU90 ZC3HF_HUMAN | R.SVYIDARDEE.L        |       | 2 | 2,4652 | 0,275 | -0,714 |
| 14 | P46013 KI67_HUMAN  | K.AM*DTPKPAVSDE.K     |       | 2 | 2,4649 | 0,348 | -0,764 |
| 14 | Q3YEC7 PARF_HUMAN  | R.SFLEDTTPAR.D        |       | 2 | 2,4639 | 0,279 | -0,537 |
| 14 | P15880 RS2_HUMAN   | R.GCTATLGNFAK.A       |       | 2 | 2,4621 | 0,247 | -0,535 |
| 14 | Q96MU7 YTDC1_HUMAN | R.LSSS#ASREPYKNQPE.K  | S120: | 2 | 2,4604 | 0,311 | -0,551 |
| 14 | O60716 CTND1_HUMAN | K.NCDGVPALVR.L        |       | 2 | 2,4598 | 0,233 | -0,111 |
| 14 | P05787 K2C8_HUMAN  | E.VDPNIQAVR.T         |       | 2 | 2,4594 | 0,289 | -1,447 |
| 14 | P06454 PTMA_HUMAN  | K.EVVEEAENGR.D        |       | 2 | 2,4591 | 0,341 | -0,323 |
| 14 | Q96EB6 SIRT1_HUMAN | E.AASSPAGEPLR.K       |       | 2 | 2,4588 | 0,422 | -0,578 |
| 14 | Q9Y2I7 FYV1_HUMAN  | K.TYSLAFKQE.L         |       | 2 | 2,4563 | 0,286 | 0,112  |
| 14 | O95602 RPA1_HUMAN  | K.NGDILLNR.Q          |       | 2 | 2,4554 | 0,344 | -0,593 |
| 14 | Q14966 ZN638_HUMAN | E.SAQSM*YSFLK.Q       |       | 2 | 2,4549 | 0,234 | -0,621 |
| 14 | Q4G0X4 KCD21_HUMAN | R.TSHLDLPEDFQE.M      |       | 2 | 2,4529 | 0,188 | -0,682 |
| 14 | P68104 EF1A1_HUMAN | R.GNVAGDSKNDPPME.A    |       | 2 | 2,4522 | 0,307 | -0,512 |
| 14 | Q6NXE6 ARMC6_HUMAN | E.SQGVDSLNIK.T        |       | 2 | 2,4514 | 0,36  | -0,841 |
| 14 | Q9UGV2 NDRG3_HUMAN | E.SCESPDVLDLDR.H      |       | 2 | 2,4509 | 0,142 | -1,347 |
| 14 | O43291 SPIT2_HUMAN | E.EYCTANAVTGPCR.A     |       | 2 | 2,4506 | 0,273 | -0,407 |
| 14 | Q7Z460 CLAP1_HUMAN | K.NSDSIVSLPQSDR.S     |       | 2 | 2,4506 | 0,236 | -0,602 |
| 14 | P46013 KI67_HUMAN  | K.AFM*GTPVQK.L        |       | 2 | 2,45   | 0,215 | -0,736 |
| 14 | Q9Y6X9 MORC2_HUMAN | R.TNIVALLQK.V         |       | 2 | 2,4494 | 0,271 | 0      |
| 14 | O75116 ROCK2_HUMAN | R.CSLLDCDLK.Q         |       | 2 | 2,4491 | 0,284 | -0,651 |
| 14 | Q86UP2 KTN1_HUMAN  | E.IQNGNLHES#DSESVPR.D | S75:  | 3 | 2,4486 | 0,295 | -1,081 |
| 14 | P34932 HSP74_HUMAN | K.VKTSTVDLPIE.N       |       | 2 | 2,4484 | 0,271 | -0,102 |
| 14 | Q8NFH5 NUP53_HUMAN | K.ASTSDYQVISDR.Q      |       | 2 | 2,4469 | 0,153 | -1,182 |



|    |                    |                          |        |   |        |       |        |
|----|--------------------|--------------------------|--------|---|--------|-------|--------|
| 14 | O60610 DIAP1_HUMAN | R.SPDELPSAGGDGGK.S       |        | 2 | 2,4468 | 0,193 | -0,569 |
| 14 | O43765 SGTA_HUMAN  | E.LNPANAVYFCNR.A         |        | 2 | 2,4464 | 0,261 | -1,017 |
| 14 | P51946 CCNH_HUMAN  | E.LALNVITK.K             |        | 2 | 2,4459 | 0,174 | -0,07  |
| 14 | Q02790 FKBP4_HUMAN | K.LYANM*FER.L            |        | 2 | 2,4453 | 0,387 | -0,691 |
| 14 | Q9UPX8 SHAN2_HUMAN | K.APFLGIPR.G             |        | 2 | 2,4447 | 0,367 | -0,35  |
| 14 | Q8IWW6 RHG12_HUMAN | E.LSSSSTEQIR.A           |        | 2 | 2,4445 | 0,14  | -0,11  |
| 14 | Q92618 ZN516_HUMAN | R.LLNGASQADGAR.V         |        | 2 | 2,4439 | 0,29  | -0,936 |
| 14 | Q68DN6 RGPD1_HUMAN | D.ESTTGFNFSFK.S          |        | 2 | 2,4433 | 0,462 | -0,579 |
| 14 | Q9UHV7 MED13_HUMAN | E.GFCS#PKPSEIKD.F        | S890:  | 2 | 2,4411 | 0,211 | -1,942 |
| 14 | Q13428 TCOF_HUMAN  | K.VGDVTPQVK.G            |        | 2 | 2,441  | 0,215 | -0,065 |
| 14 | Q15149 PLEC1_HUMAN | R.LSYTQLLR.R             |        | 2 | 2,4404 | 0,101 | 0,675  |
| 14 | Q01780 EXOSX_HUMAN | K.LAQVQVQK.D             |        | 2 | 2,4401 | 0,197 | 0,067  |
| 14 | Q9Y2U8 MAN1_HUMAN  | R.LAQLAGDHE.C            |        | 2 | 2,4395 | 0,283 | -0,703 |
| 14 | Q16891 IMMT_HUMAN  | K.GM*SVSDLADK.L          |        | 2 | 2,4385 | 0,152 | -1,057 |
| 14 | Q969H8 CS010_HUMAN | K.SYLYFTQFK.A            |        | 2 | 2,4385 | 0,394 | -0,204 |
| 14 | Q14789 GOGB1_HUMAN | K.SLKDQLTDLNSLE.K        |        | 2 | 2,4362 | 0,219 | -0,624 |
| 14 | Q9NZN5 ARHGC_HUMAN | E.QHGISVTGLQS#PDRDLGLE.S | S1176: | 2 | 2,436  | 0,333 | 0,116  |
| 14 | Q9GZN8 CT027_HUMAN | K.LHDSVVM*VTQE.S         |        | 2 | 2,4349 | 0,194 | -1,149 |
| 14 | Q15637 SF01_HUMAN  | R.SITNTTVCTK.C           |        | 2 | 2,4347 | 0,353 | 0      |
| 14 | Q06124 PTN11_HUMAN | K.SNPGDFTLSVR.R          |        | 2 | 2,434  | 0,351 | -1,125 |
| 14 | P62495 ERF1_HUMAN  | E.LSQSDM*FDQR.L          |        | 2 | 2,4335 | 0,225 | -0,883 |
| 14 | Q08211 DHX9_HUMAN  | R.LSM*SQLNEK.E           |        | 2 | 2,4323 | 0,258 | -0,114 |
| 14 | O14745 NHERF_HUMAN | E.AALES#PRPALVR.S        | S280:  | 3 | 2,4315 | 0,29  | 0,067  |
| 14 | Q92620 PRP16_HUMAN | R.VETPSHPGGVSEE.F        |        | 2 | 2,4309 | 0,383 | -1,105 |
| 14 | Q4AC94 C2CD3_HUMAN | K.ISQSTALAR.S            |        | 2 | 2,4303 | 0,288 | -0,322 |
| 14 | Q9Y490 TLN1_HUMAN  | E.VANSTANLVK.T           |        | 2 | 2,4294 | 0,323 | -0,96  |
| 14 | P35908 K22E_HUMAN  | K.IEISELNR.V             |        | 2 | 2,4272 | 0,233 | 0,063  |
| 14 | Q5JSH3 WDR44_HUMAN | K.VGLSTFKETE.N           |        | 2 | 2,4255 | 0,308 | -0,659 |
| 14 | P06737 PYGL_HUMAN  | K.VSQLYM*NPK.A           |        | 2 | 2,4255 | 0,141 | -0,779 |
| 14 | Q5JTD0 TJAP1_HUMAN | R.AFVDRT#PPPAVAQR.T      | T422:  | 2 | 2,4244 | 0,415 | -0,728 |
| 14 | Q9NW82 WDR70_HUMAN | K.M*VGKPVNFM*E.E         |        | 2 | 2,4217 | 0,243 | -0,927 |
| 14 | Q9Y230 RUVB2_HUMAN | R.DYDAM*GSQTK.F          |        | 2 | 2,4217 | 0,345 | -0,323 |
| 14 | P50991 TCPD_HUMAN  | K.KLGGTIDDCELVE.G        |        | 2 | 2,4211 | 0,21  | -0,674 |

|    |                     |                        |       |   |        |       |        |
|----|---------------------|------------------------|-------|---|--------|-------|--------|
| 14 | Q9Y2N3 PO121_HUMAN  | E.TATKPQATSAPS#PAPK.Q  | S674: | 3 | 2,4194 | 0,3   | -0,336 |
| 14 | P05387 RLA2_HUMAN   | E.DVIAQGIGK.L          |       | 2 | 2,4193 | 0,249 | -0,812 |
| 14 | Q58FF7 H90B3_HUMAN  | D.NSTM*GYM*M*AK.K      |       | 2 | 2,4183 | 0,406 | -0,103 |
| 14 | Q9BZ67 FRMD8_HUMAN  | R.IQHLSTIDYVE.D        |       | 2 | 2,4179 | 0,186 | -0,833 |
| 14 | P53680 AP2S1_HUMAN  | R.FILIQNR.A            |       | 2 | 2,4151 | 0,091 | -0,202 |
| 14 | Q9HB19 PKHA2_HUMAN  | K.EKPFM*FNLDDE.N       |       | 2 | 2,4133 | 0,266 | -0,174 |
| 14 | P98179 RBM3_HUMAN   | E.DHFSSFGPISE.V        |       | 2 | 2,413  | 0,421 | -0,499 |
| 14 | Q15149 PLEC1_HUMAN  | R.VPVDVAYQR.G          |       | 2 | 2,4128 | 0,328 | -0,35  |
| 14 | P26651 TTP_HUMAN    | R.QSISFSGLPGR.R        |       | 2 | 2,4113 | 0,219 | -0,197 |
| 14 | P32969 RL9_HUMAN    | R.KFLDGIYVSE.K         |       | 2 | 2,4102 | 0,255 | 0,313  |
| 14 | Q6SPF0 SAMD1_HUMAN  | R.LGALALPR.G           |       | 2 | 2,4099 | 0,127 | 1,053  |
| 14 | Q9H583 HEAT1_HUMAN  | E.KNVLGSALLCIAE.V      |       | 2 | 2,4096 | 0,308 | -0,264 |
| 14 | Q16401 PSMD5_HUMAN  | E.SNLLDDLK.S           |       | 2 | 2,4082 | 0,223 | -0,266 |
| 14 | O15372 EIF3H_HUMAN  | E.GTGSTATSSSSTAGAAGK.G |       | 2 | 2,4076 | 0,247 | -0,407 |
| 14 | Q15084 PDIA6_HUMAN  | K.GESPVVDYDGR.T        |       | 2 | 2,4074 | 0,292 | -0,53  |
| 14 | P21333 FLNA_HUMAN   | K.CSGPGLSPGM*VR.A      |       | 2 | 2,4071 | 0,364 | -0,396 |
| 14 | Q92598 HS105_HUMAN  | K.KLM*SSNSTDLPLNIE.C   |       | 2 | 2,4062 | 0,328 | -1,163 |
| 14 | Q5JTH9 RRP12_HUMAN  | R.VLATQPGPGR.G         |       | 2 | 2,4061 | 0,187 | 0,184  |
| 14 | P53396 ACLY_HUMAN   | E.GGVDVGDVDAK.A        |       | 2 | 2,4047 | 0,124 | -0,591 |
| 14 | Q9P260 K1468_HUMAN  | E.ADSTIPKENS#PNSFPR.R  | S453: | 2 | 2,4041 | 0,335 | -0,398 |
| 14 | O75569 PRKRA_HUMAN  | K.TPIQVLHE.Y           |       | 2 | 2,4041 | 0,275 | -0,651 |
| 14 | Q13435 SF3B2_HUMAN  | K.IDIDYQK.L            |       | 2 | 2,4037 | 0,284 | 0,204  |
| 14 | P61254 RL26_HUMAN   | K.FNPFVTSR.S           |       | 2 | 2,4029 | 0,182 | -0,338 |
| 14 | P42704 LPPRC_HUMAN  | K.IQEENVIPR.E          |       | 2 | 2,4027 | 0,212 | -0,778 |
| 14 | Q15149 PLEC1_HUMAN  | R.SSIAGLLK.A           |       | 2 | 2,402  | 0,137 | -0,135 |
| 14 | Q63HJ5 Q63HJ5_HUMAN | E.GTNLPDVPNK.S         |       | 2 | 2,4008 | 0,222 | -0,231 |
| 14 | Q9BZL6 KPCD2_HUMAN  | R.CAFSIPNNCSGAR.K      |       | 2 | 2,4005 | 0,358 | -0,168 |
| 14 | P13667 PDIA4_HUMAN  | E.KYGIVDYM*IE.Q        |       | 2 | 2,4    | 0,318 | -0,294 |
| 14 | Q15650 TRIP4_HUMAN  | K.LINNCLICGR.I         |       | 2 | 2,4    | 0,268 | 0      |
| 14 | Q8ND24 RN214_HUMAN  | K.QKNS#PLLSVSSQTITKE.N | S47:  | 3 | 2,3996 | 0,215 | -0,471 |
| 14 | Q09666 AHNK_HUMAN   | K.LKGDVDVSLPE.V        |       | 2 | 2,3984 | 0,362 | -0,729 |
| 14 | Q9H0G5 CCD55_HUMAN  | K.CILQTDVK.V           |       | 2 | 2,3983 | 0,213 | 0,562  |
| 14 | Q13428 TCOF_HUMAN   | K.LPEVQQATK.A          |       | 2 | 2,3975 | 0,281 | -0,18  |

|    |                    |                          |              |   |        |       |        |
|----|--------------------|--------------------------|--------------|---|--------|-------|--------|
| 14 | Q86XP3 DDX42_HUMAN | K.TVINYDVAR.D            |              | 2 | 2,3975 | 0,344 | -0,232 |
| 14 | O95155 UBE4B_HUMAN | E.VLM*M*STQTR.D          |              | 2 | 2,3965 | 0,308 | -0,333 |
| 14 | Q01130 SFRS2_HUMAN | K.VDNLTyrTS#PDTLR.R      | S26:         | 2 | 2,3963 | 0,191 | -0,634 |
| 14 | Q9UDY8 MALT1_HUMAN | K.LKAPLVDVYE.L           |              | 2 | 2,3944 | 0,269 | -0,638 |
| 14 | Q9Y2Q9 RT28_HUMAN  | E.NDLYIDFGGK.F           |              | 2 | 2,393  | 0,308 | -0,748 |
| 14 | P42695 CNDD3_HUMAN | K.ARPm*S#LSTIAILNS#VKK.A | S1348:S1357: | 3 | 2,3929 | 0,135 | -0,912 |
| 14 | P53618 COPB_HUMAN  | K.SQGM*ALSLGDK.I         |              | 2 | 2,3911 | 0,295 | -0,217 |
| 14 | Q9C0B0 UNK_HUMAN   | R.SQEQPLLQPK.Q           |              | 2 | 2,3909 | 0,353 | -0,522 |
| 14 | Q13428 TCOF_HUMAN  | K.TVANLLSGK.S            |              | 2 | 2,3902 | 0,267 | -0,878 |
| 14 | Q9UQ35 SRRM2_HUMAN | R.GEFSASPM*LK.S          |              | 2 | 2,3893 | 0,337 | -0,563 |
| 14 | P30085 KCY_HUMAN   | K.FLIDGFPR.N             |              | 2 | 2,389  | 0,258 | -0,126 |
| 14 | Q13310 PABP4_HUMAN | K.GYAFVHFE.T             |              | 2 | 2,3888 | 0,368 | 0,189  |
| 14 | P52272 HNRPM_HUMAN | K.GCGVVKFESPE.V          |              | 2 | 2,388  | 0,382 | 0      |
| 14 | Q9Y4L1 HYOU1_HUMAN | K.LCQGLFFR.V             |              | 2 | 2,3877 | 0,177 | 0,117  |
| 14 | Q8IYB3 SRRM1_HUMAN | E.KT#PELPEPSVK.V         | T220:        | 2 | 2,3872 | 0,231 | -0,187 |
| 14 | P35527 K1C9_HUMAN  | K.TLLDIDNTR.M            |              | 2 | 2,3872 | 0,346 | -0,69  |
| 14 | Q13443 ADAM9_HUMAN | R.HVS#PVT#PPREVPIYANR.F  | S758:T761:   | 3 | 2,3866 | 0,134 | -0,874 |
| 14 | P29401 TKT_HUMAN   | E.DFQVGQAK.V             |              | 2 | 2,3859 | 0,286 | -1,435 |
| 14 | Q15942 ZYX_HUMAN   | K.FSPGAPGGSGSQPNQK.L     |              | 2 | 2,3852 | 0,348 | -0,644 |
| 14 | Q9C0C2 TB182_HUMAN | R.TYGTTTAPRDE.D          |              | 2 | 2,385  | 0,286 | 0,201  |
| 14 | O43681 ARSA1_HUMAN | K.VKGYDNLfAM*E.I         |              | 2 | 2,3845 | 0,263 | -0,562 |
| 14 | P19525 E2AK2_HUMAN | R.FDLPDM*KE.T            |              | 2 | 2,3841 | 0,14  | -1,086 |
| 14 | P46013 KI67_HUMAN  | K.GKSEVPEDLAGFIE.L       |              | 2 | 2,384  | 0,267 | -0,573 |
| 14 | P22307 NLTP_HUMAN  | K.ANLVFKE.I              |              | 2 | 2,3831 | 0,175 | 0,149  |
| 14 | Q9UHB6 LIMA1_HUMAN | R.ASSLSESS#PPKAM*K.K     | S374:        | 2 | 2,3829 | 0,225 | -0,563 |
| 14 | Q9NX55 HYPK_HUMAN  | R.VTDYAEKE.I             |              | 2 | 2,3827 | 0,351 | -0,563 |
| 14 | Q8NEM2 SHCBP_HUMAN | R.DKPGSSLQSFm*PE.G       |              | 2 | 2,3824 | 0,273 | -0,933 |
| 14 | P19338 NUCL_HUMAN  | K.TGISDVFAK.N            |              | 2 | 2,3819 | 0,381 | -0,195 |
| 14 | Q13523 PRP4B_HUMAN | R.TKLDDLALLE.D           |              | 2 | 2,3816 | 0,229 | -0,324 |
| 14 | Q15738 NSDHL_HUMAN | R.FFLGDLCsr.Q            |              | 2 | 2,3801 | 0,304 | -0,328 |
| 14 | Q5JRX3 PREP_HUMAN  | K.GM*DHFlyGLSDE.M        |              | 2 | 2,3798 | 0,25  | -0,61  |
| 14 | Q9UJF2 NGAP_HUMAN  | E.TQSTPQSAPQVR.R         |              | 2 | 2,3797 | 0,398 | -0,282 |
| 14 | O43290 SNUT1_HUMAN | R.QLQLQLR.D              |              | 2 | 2,3783 | 0,125 | -0,634 |

|    |                    |                          |       |   |        |       |        |
|----|--------------------|--------------------------|-------|---|--------|-------|--------|
| 14 | Q05209 PTN12_HUMAN | K.SFDGNTLLNR.G           |       | 2 | 2,3782 | 0,218 | -0,537 |
| 14 | P08670 VIME_HUMAN  | R.TYS#LGSALRPSTSR.S      | S39:  | 3 | 2,3775 | 0,102 | -0,348 |
| 14 | Q56NI9 ESCO2_HUMAN | K.CDSLLHFTE.N            |       | 2 | 2,3769 | 0,33  | -0,326 |
| 14 | Q92547 TOPB1_HUMAN | R.IYLCGFSGR.K            |       | 2 | 2,3769 | 0,462 | -0,682 |
| 14 | Q9UHV9 PFD2_HUMAN  | E.TLTQQQAK.G             |       | 2 | 2,3765 | 0,267 | -0,355 |
| 14 | P11021 GRP78_HUMAN | E.IDVNGILR.V             |       | 2 | 2,3759 | 0,198 | -0,61  |
| 14 | P50213 IDH3A_HUMAN | R.NVTAIQGPGGK.W          |       | 2 | 2,3746 | 0,342 | -0,468 |
| 14 | Q9Y496 KIF3A_HUMAN | K.LHLVDLAGSE.R           |       | 2 | 2,3744 | 0,287 | -0,926 |
| 14 | Q6UUV9 CRTC1_HUMAN | K.SQYLQLGPSR.G           |       | 2 | 2,374  | 0,256 | -0,743 |
| 14 | Q9UKI8 TLK1_HUMAN  | E.GNDLDFYLK.Q            |       | 2 | 2,3733 | 0,239 | -0,112 |
| 14 | Q5T9A4 ATD3B_HUMAN | R.GVEHPLSGVQGE.T         |       | 2 | 2,3731 | 0,31  | -0,706 |
| 14 | O95628 CNOT4_HUMAN | E.SQSLFSDNFR.H           |       | 2 | 2,3729 | 0,396 | -0,203 |
| 14 | P19338 NUCL_HUMAN  | R.SISLYTGEK.G            |       | 2 | 2,3728 | 0,385 | -0,525 |
| 14 | P09471 GNAO_HUMAN  | K.KSPLTICFPE.Y           |       | 2 | 2,3719 | 0,251 | -0,512 |
| 14 | Q86YS7 K0528_HUMAN | K.ALGCHAVVGYS.S          |       | 2 | 2,3718 | 0,182 | -0,676 |
| 14 | Q02790 FKBP4_HUMAN | E.GTGTEM*PM*IGDR.V       |       | 2 | 2,3712 | 0,326 | -1,035 |
| 14 | P15336 ATF2_HUMAN  | E.TPAS#PAHTTPQQTQSTSGR.R | S310: | 3 | 2,371  | 0,14  | 0      |
| 14 | P04844 RPN2_HUMAN  | E.TKDLLLLAAVSE.D         |       | 2 | 2,3697 | 0,228 | -0,421 |
| 14 | Q6QNY0 BL1S3_HUMAN | E.LYLGPSGPTR.G           |       | 2 | 2,3688 | 0,234 | -0,805 |
| 14 | P51451 BLK_HUMAN   | K.IADFLGAR.I             |       | 2 | 2,3688 | 0,234 | 0,283  |
| 14 | P55072 TERA_HUMAN  | R.IHVLPIDDTVE.G          |       | 2 | 2,3688 | 0,345 | 0      |
| 14 | P21333 FLNA_HUMAN  | K.QKDLGDGVYGFY.Y         |       | 2 | 2,3687 | 0,298 | -0,827 |
| 14 | P54652 HSP72_HUMAN | K.LLQDFFNGKE.L           |       | 2 | 2,3679 | 0,334 | -0,907 |
| 14 | Q86WJ1 CHD1L_HUMAN | R.GGQAPGFLLR.L           |       | 2 | 2,3677 | 0,102 | -0,12  |
| 14 | Q5T200 ZC3HD_HUMAN | R.SLS#PSHLTEDR.Q         | S877: | 2 | 2,3677 | 0,364 | -0,831 |
| 14 | Q9BY89 K1671_HUMAN | K.SPFQPGVLGSR.V          |       | 2 | 2,3676 | 0,315 | -0,533 |
| 14 | Q7L7X3 TAOK1_HUMAN | R.ASDPQSPQVSR.H          |       | 2 | 2,3664 | 0,189 | -0,481 |
| 14 | Q9NWU1 OXSM_HUMAN  | K.GATGHLLGAAGAVE.A       |       | 2 | 2,3658 | 0,232 | -0,598 |
| 14 | P04075 ALDOA_HUMAN | R.ALQASALK.A             |       | 2 | 2,3658 | 0,169 | 0,076  |
| 14 | Q8WYA6 CTBL1_HUMAN | E.LLSYQPNR.G             |       | 2 | 2,3648 | 0,344 | -0,369 |
| 14 | Q13442 HAP28_HUMAN | R.M*QSLSLNK.-            |       | 2 | 2,3646 | 0,135 | -0,456 |
| 14 | Q6WKZ4 RFIP1_HUMAN | E.GLSFLGGLR.S            |       | 2 | 2,3639 | 0,222 | -0,729 |
| 14 | Q92879 CELF1_HUMAN | K.M*FVGQVPR.T            |       | 2 | 2,3635 | 0,254 | -0,771 |

|    |                    |                        |            |   |        |       |        |
|----|--------------------|------------------------|------------|---|--------|-------|--------|
| 14 | Q5VWVG9 TAF3_HUMAN | R.ISGPECTTPK.A         |            | 2 | 2,3629 | 0,362 | -0,224 |
| 14 | P09417 DHPR_HUMAN  | K.NRPSSGSLIQVVTTE.G    |            | 2 | 2,3625 | 0,295 | 0,077  |
| 14 | Q02218 ODO1_HUMAN  | R.LNVLANVIR.K          |            | 2 | 2,3622 | 0,19  | -0,241 |
| 14 | Q8TAA5 GRPE2_HUMAN | K.IFGIQSFCK.D          |            | 2 | 2,3612 | 0,334 | -0,222 |
| 14 | Q7L8J4 3BP5L_HUMAN | R.TVAS#DLQKCD5#VEHLR.G | S343:S350: | 3 | 2,3608 | 0,244 | -0,363 |
| 14 | Q9P265 DIP2B_HUMAN | R.TGYLGFVR.R           |            | 2 | 2,3603 | 0,382 | -1,136 |
| 14 | P15121 ALDR_HUMAN  | K.VAIDVGYR.H           |            | 2 | 2,3591 | 0,278 | -0,205 |
| 14 | Q9NSD9 SYFB_HUMAN  | D.LLFQALGR.T           |            | 2 | 2,3583 | 0,211 | -0,133 |
| 14 | Q8N0Z3 CCD52_HUMAN | R.AALNATNAVK.R         |            | 2 | 2,3568 | 0,313 | -0,69  |
| 14 | Q7Z7N9 T179B_HUMAN | E.TDALVGSRLS#HS.-      | S217:      | 2 | 2,3552 | 0,356 | -0,738 |
| 14 | Q8WV92 MITD1_HUMAN | K.TIHLLTSLDE.G         |            | 2 | 2,355  | 0,287 | 0,107  |
| 14 | Q6PL24 TMED8_HUMAN | E.HTGAIDVLSADLE.S      |            | 2 | 2,3542 | 0,219 | -0,273 |
| 14 | P16615 AT2A2_HUMAN | K.AKDIVPGDIVE.I        |            | 2 | 2,3534 | 0,259 | -0,528 |
| 14 | Q8NG31 CASC5_HUMAN | R.CSLGIFLPR.L          |            | 2 | 2,3531 | 0,21  | -0,344 |
| 14 | Q9P2B4 CT2NL_HUMAN | R.NTVTQVLSR.F          |            | 2 | 2,353  | 0,24  | -0,3   |
| 14 | P42167 LAP2B_HUMAN | K.GGPLQALTR.E          |            | 2 | 2,3509 | 0,164 | 0,134  |
| 14 | P30153 2AAA_HUMAN  | K.KLSTIALALGVE.R       |            | 2 | 2,349  | 0,289 | -0,904 |
| 14 | Q06830 PRDX1_HUMAN | E.IIAFSDRAEE.F         |            | 2 | 2,3482 | 0,267 | -0,53  |
| 14 | Q969R5 LMBL2_HUMAN | E.LFGGYDSFR.S          |            | 2 | 2,3472 | 0,267 | -0,23  |
| 14 | P35527 K1C9_HUMAN  | E.YEQLIAK.N            |            | 2 | 2,3469 | 0,136 | -0,705 |
| 14 | Q08752 PPID_HUMAN  | E.GDDGGIFPK.D          |            | 2 | 2,3467 | 0,302 | 0,269  |
| 14 | Q5VZ89 DEN4C_HUMAN | E.VCDASAIVAK.H         |            | 2 | 2,3466 | 0,298 | 1,416  |
| 14 | Q92616 GCN1L_HUMAN | K.KLDAGNQLALIEE.L      |            | 2 | 2,3463 | 0,169 | -0,518 |
| 14 | P62988 UBIQ_HUMAN  | R.TLSDYNIQK.E          |            | 2 | 2,3461 | 0,328 | -0,789 |
| 14 | O14530 TXND9_HUMAN | K.FGTNFTKLE.K          |            | 2 | 2,3458 | 0,329 | -0,231 |
| 14 | P46013 KI67_HUMAN  | K.AM*DTPKPAGGDE.K      |            | 2 | 2,3457 | 0,266 | 0      |
| 14 | Q76FK4 NOL8_HUMAN  | E.SESDPFEVVR.D         |            | 2 | 2,3449 | 0,221 | -0,628 |
| 14 | Q9Y232 CDYL1_HUMAN | K.ILVPKS#PVK.S         | S201:      | 2 | 2,3441 | 0,182 | -0,345 |
| 14 | O43676 NDUB3_HUMAN | K.M*ELPDYR.Q           |            | 2 | 2,3418 | 0,199 | -0,26  |
| 14 | O95340 PAPS2_HUMAN | E.FDFISGTR.M           |            | 2 | 2,3408 | 0,215 | 0,194  |
| 14 | P39880 CUX1_HUMAN  | R.RPSSLQSLFGLPE.A      |            | 2 | 2,3407 | 0,309 | -0,512 |
| 14 | Q09666 AHNK_HUMAN  | K.ADLGVSGPK.V          |            | 2 | 2,3398 | 0,196 | -0,289 |
| 14 | Q8WWM7 ATX2L_HUMAN | E.NSLDPFPPR.I          |            | 2 | 2,3388 | 0,226 | -0,351 |

|    |                    |                      |       |   |        |       |        |
|----|--------------------|----------------------|-------|---|--------|-------|--------|
| 14 | Q674X7 KAZRN_HUMAN | K.NLHNPIVQSLEDLE.D   |       | 2 | 2,3385 | 0,289 | -0,226 |
| 14 | P18206 VINC_HUMAN  | R.DYLIDGSR.G         |       | 2 | 2,3379 | 0,373 | 0,065  |
| 14 | Q96BR5 CA163_HUMAN | K.LGAYVVTGK.G        |       | 2 | 2,3377 | 0,299 | -0,69  |
| 14 | Q86U90 YRDC_HUMAN  | R.LFRPPS#PAPAAPGAR.L | S37:  | 2 | 2,3376 | 0,426 | -0,539 |
| 14 | Q6ZMR3 LDH6A_HUMAN | R.VIGSGCNLDSAR.F     |       | 2 | 2,337  | 0,423 | -0,879 |
| 14 | P49368 TCPG_HUMAN  | R.VEKIPGGIIE.D       |       | 2 | 2,3368 | 0,086 | -0,578 |
| 14 | Q9UPN3 MACF1_HUMAN | R.FVTISGQK.V         |       | 2 | 2,336  | 0,182 | 0,208  |
| 14 | P78527 PRKDC_HUMAN | R.LAAVVSACK.Q        |       | 2 | 2,3357 | 0,298 | -1,593 |
| 14 | Q96E09 F122A_HUMAN | E.SFSLSDNDVEK.S      |       | 2 | 2,3353 | 0,107 | -0,393 |
| 14 | P17987 TCPA_HUMAN  | R.TSASIILR.G         |       | 2 | 2,3352 | 0,239 | -0,213 |
| 14 | O75828 CBR3_HUMAN  | K.LGVTVLSR.I         |       | 2 | 2,3347 | 0,105 | 0,433  |
| 14 | P18621 RL17_HUMAN  | E.LKGLDVDLVE.H       |       | 2 | 2,3341 | 0,096 | -0,75  |
| 14 | Q13347 EIF3I_HUMAN | R.QINDIQLSRD.M       |       | 2 | 2,3328 | 0,19  | 0      |
| 14 | Q92609 TBCD5_HUMAN | D.THLVNIQDVILQE.N    |       | 2 | 2,3322 | 0,13  | -0,24  |
| 14 | O75410 TACC1_HUMAN | E.NTSPLLGDAR.F       |       | 2 | 2,332  | 0,227 | -0,467 |
| 14 | O15027 SC16A_HUMAN | R.FGPGGQLIK.V        |       | 2 | 2,3316 | 0,232 | -1,596 |
| 14 | Q9Y3S1 WNK2_HUMAN  | R.AGSLGPETPSR.V      |       | 2 | 2,3315 | 0,375 | -0,455 |
| 14 | Q8IYB5 SMAP1_HUMAN | K.KAAEPTVDLLGLD.G    |       | 2 | 2,3308 | 0,33  | -0,545 |
| 14 | O60318 MCM3A_HUMAN | E.DAPFQHS#PLGK.A     | S538: | 2 | 2,3305 | 0,251 | -0,764 |
| 14 | P29350 PTN6_HUMAN  | K.NQLLGPDENAK.T      |       | 2 | 2,3296 | 0,19  | -0,407 |
| 14 | Q13428 TCOF_HUMAN  | R.GPASVPSVGK.A       |       | 2 | 2,3295 | 0,423 | -0,475 |
| 14 | P55145 ARMET_HUMAN | E.VCISYLGR.F         |       | 2 | 2,3291 | 0,323 | 0,252  |
| 14 | O43583 DENR_HUMAN  | K.LDADYPLR.V         |       | 2 | 2,3276 | 0,21  | -0,317 |
| 14 | Q07157 ZO1_HUMAN   | R.IDS#PGFKPASQQK.A   | S912: | 2 | 2,3263 | 0,299 | -0,576 |
| 14 | Q09666 AHNK_HUMAN  | E.SDFGINLK.G         |       | 2 | 2,3256 | 0,241 | 0,273  |
| 14 | P49916 DNL3_HUMAN  | K.HVLDALDPNAYE.A     |       | 2 | 2,3251 | 0,22  | 0,27   |
| 14 | Q9BVG9 PTSS2_HUMAN | R.DAGGPRPES#PVPAGR.A | S16:  | 2 | 2,3251 | 0,198 | -0,712 |
| 14 | P46821 MAP1B_HUMAN | E.EGGYSYDISEK.T      |       | 2 | 2,3238 | 0,331 | -1,173 |
| 14 | Q5T7P8 SYT6_HUMAN  | K.LKDPSTLGFL.E.A     |       | 2 | 2,3233 | 0,328 | -0,4   |
| 14 | P13647 K2C5_HUMAN  | K.WTLLQEQT.K.T       |       | 2 | 2,3201 | 0,14  | -1,115 |
| 14 | Q09028 RBBP4_HUMAN | R.LVLGTHTSDE.Q       |       | 2 | 2,32   | 0,384 | 0      |
| 14 | Q13506 NAB1_HUMAN  | R.IKVEDGFPDFQD.S     |       | 2 | 2,3192 | 0,212 | -0,346 |
| 14 | O43301 HS12A_HUMAN | E.TAPTSAYSSPAR.S     |       | 2 | 2,3181 | 0,14  | 0,606  |

|    |                    |                              |        |   |        |       |        |
|----|--------------------|------------------------------|--------|---|--------|-------|--------|
| 14 | P06493 CDC2_HUMAN  | K.TTGQVVAM*K.K               |        | 2 | 2,3165 | 0,308 | -0,128 |
| 14 | Q09666 AHNK_HUMAN  | K.FKAEAPLPS#PKLE.G           | S5110: | 3 | 2,3162 | 0,304 | -0,364 |
| 14 | Q13043 STK4_HUMAN  | E.NQINSFGKS#VPGPLK.N         | S414:  | 3 | 2,3137 | 0,081 | -1,098 |
| 14 | Q13099 IFT88_HUMAN | R.GSAFDPLSQSR.G              |        | 2 | 2,3134 | 0,216 | -1,047 |
| 14 | Q3T8J9 GON4L_HUMAN | E.NAFQGLEPK.L                |        | 2 | 2,3132 | 0,242 | -0,243 |
| 14 | Q9UHR4 BI2L1_HUMAN | R.FCFLVDK.H                  |        | 2 | 2,3129 | 0,213 | -0,46  |
| 14 | Q5JRA6 MIA3_HUMAN  | E.ASGKPSDPGSGTATM*M*NSS#SR.G | S1740: | 2 | 2,3128 | 0,23  | 0,42   |
| 14 | P40925 MDHC_HUMAN  | E.GLPINDFSRE.K               |        | 2 | 2,312  | 0,458 | -0,213 |
| 14 | P16401 H15_HUMAN   | R.NGLSLAALK.K                |        | 2 | 2,312  | 0,223 | 0,413  |
| 14 | P33991 MCM4_HUMAN  | R.IAEPSVCGR.C                |        | 2 | 2,3117 | 0,339 | 0      |
| 14 | P28482 MK01_HUMAN  | K.LKELIFEE.T                 |        | 2 | 2,3115 | 0,137 | -0,478 |
| 14 | Q8N1F7 NUP93_HUMAN | R.LTLSQFQK.Q                 |        | 2 | 2,3109 | 0,236 | 0      |
| 14 | P11021 GRP78_HUMAN | K.ITITNDQNR.L                |        | 2 | 2,3099 | 0,25  | 0      |
| 14 | O75376 NCOR1_HUMAN | D.SLLLLSQR.G                 |        | 2 | 2,3084 | 0,122 | 0,197  |
| 14 | Q96FV9 THOC1_HUMAN | R.DKPVTGEQIE.V               |        | 2 | 2,3079 | 0,287 | -0,765 |
| 14 | Q01813 K6PP_HUMAN  | E.CVQM*TQDVQK.A              |        | 2 | 2,3075 | 0,271 | -0,195 |
| 14 | Q5TC12 ATPF1_HUMAN | E.LQANPFYDR.Y                |        | 2 | 2,3063 | 0,097 | -0,977 |
| 14 | P0C7M2 RA1L3_HUMAN | K.IFVGGIKE.D                 |        | 2 | 2,3062 | 0,184 | -0,495 |
| 14 | O95340 PAPS2_HUMAN | K.AM*DFYDPAH.H               |        | 2 | 2,306  | 0,401 | 0,111  |
| 14 | P04075 ALDOA_HUMAN | K.GILAADESTGS#IAKR.L         | S39:   | 2 | 2,3032 | 0,196 | -0,389 |
| 14 | Q9Y5U5 TNR18_HUMAN | R.LLLGTGTDAR.C               |        | 2 | 2,3029 | 0,14  | -0,72  |
| 14 | P27348 1433T_HUMAN | R.YDDM*ATCM*K.A              |        | 2 | 2,3029 | 0,384 | -0,105 |
| 14 | Q9Y3L3 3BP1_HUMAN  | E.SEVPPRPAS#PK.V             | S544:  | 2 | 2,3024 | 0,158 | -0,686 |
| 14 | O15355 PPM1G_HUMAN | K.QLIVANAGDSR.C              |        | 2 | 2,3023 | 0,338 | -1,066 |
| 14 | O95202 LETM1_HUMAN | K.VNIDDLVK.V                 |        | 2 | 2,3021 | 0,197 | 0,133  |
| 14 | Q9BZ67 FRMD8_HUMAN | R.IQHLSTIDYVED.G             |        | 2 | 2,3021 | 0,242 | -0,937 |
| 14 | P46100 ATRX_HUMAN  | E.IEDAS#PTKCPITTK.L          | S1527: | 2 | 2,301  | 0,221 | -0,149 |
| 14 | Q8NBJ5 GT251_HUMAN | E.VFM*INLR.R                 |        | 2 | 2,301  | 0,226 | -1,543 |
| 14 | Q68CZ2 TENS3_HUMAN | R.LPDTGEGPSR.A               |        | 2 | 2,301  | 0,373 | -0,356 |
| 14 | Q02790 FKBP4_HUMAN | E.GYAKPNEGATIVE.V            |        | 2 | 2,3003 | 0,247 | -0,196 |
| 14 | P58107 EPIPL_HUMAN | R.VPVDVAYR.R                 |        | 2 | 2,2996 | 0,267 | 0,664  |
| 14 | O75122 CLAP2_HUMAN | K.ASSLPGSLQR.S               |        | 2 | 2,2988 | 0,192 | -0,12  |
| 14 | Q8NBS9 TXND5_HUMAN | E.ADKGTVLALTE.N              |        | 2 | 2,2986 | 0,298 | -0,546 |

|    |                     |                   |       |   |        |       |        |
|----|---------------------|-------------------|-------|---|--------|-------|--------|
| 14 | P49821 NDUV1_HUMAN  | R.IFTNLYGR.H      |       | 2 | 2,2981 | 0,182 | -0,682 |
| 14 | Q6P9B9 INT5_HUMAN   | R.CGLLLLR.S       |       | 2 | 2,298  | 0,132 | 0,289  |
| 14 | O60232 SSA27_HUMAN  | R.LM*GDYLLR.G     |       | 2 | 2,2975 | 0,282 | -0,245 |
| 14 | P47756 CAPZB_HUMAN  | K.DYLLCDYNR.D     |       | 2 | 2,2971 | 0,239 | -0,693 |
| 14 | A8MQ02 A8MQ02_HUMAN | R.LFSQGGQDVSNK.V  |       | 2 | 2,2971 | 0,146 | -0,299 |
| 14 | P31327 CPSM_HUMAN   | E.DRSIFSAVLDE.L   |       | 2 | 2,297  | 0,199 | 0,195  |
| 14 | O00268 TAF4_HUMAN   | K.GAAGAVTQSLSR.T  |       | 2 | 2,2957 | 0,101 | -0,327 |
| 14 | O15062 ZBTB5_HUMAN  | R.VGDIHILE.V      |       | 2 | 2,2957 | 0,173 | 0,068  |
| 14 | Q8N1F7 NUP93_HUMAN  | R.GLDIS#HISQRLE.S | S72:  | 2 | 2,2948 | 0,311 | -0,674 |
| 14 | Q6P0N0 CN106_HUMAN  | E.NQVAM*SFYK.H    |       | 2 | 2,2946 | 0,271 | -0,884 |
| 14 | A6ND36 FA83G_HUMAN  | E.VYDPGSEDPR.G    |       | 2 | 2,2943 | 0,39  | -0,323 |
| 14 | Q9BTT0 AN32E_HUMAN  | E.GLNDFKELE.F     |       | 2 | 2,2904 | 0,201 | 0,105  |
| 14 | Q2NKX8 ERC6L_HUMAN  | E.ALS#PEQAAHYLR.Y | S14:  | 2 | 2,2875 | 0,411 | -0,68  |
| 14 | Q9UBB4 ATX10_HUMAN  | R.LIGNLCYK.N      |       | 2 | 2,2865 | 0,24  | -0,933 |
| 14 | P49589 SYCC_HUMAN   | K.ALCDNVDT.R      |       | 2 | 2,2861 | 0,352 | -0,229 |
| 14 | P08107 HSP71_HUMAN  | D.LVLVGGSTR.I     |       | 2 | 2,2858 | 0,241 | 0      |
| 14 | P31689 DNJA1_HUMAN  | E.DLYNGATR.K      |       | 2 | 2,2846 | 0,142 | -0,134 |
| 14 | Q86WP2 GPBP1_HUMAN  | E.NGNASVISQIIR.S  |       | 2 | 2,2825 | 0,228 | 0      |
| 14 | Q13242 SFRS9_HUMAN  | R.GS#PHYFSPFRPY.- | S211: | 3 | 2,2821 | 0,239 | 0,238  |
| 14 | O60812 HNRCL_HUMAN  | D.INLAAEPK.V      |       | 2 | 2,281  | 0,227 | 0,57   |
| 14 | P04264 K2C1_HUMAN   | R.TNAENEFVTIK.K   |       | 2 | 2,2791 | 0,423 | -0,964 |
| 14 | P16070 CD44_HUMAN   | R.FAGVFHVE.K      |       | 2 | 2,2763 | 0,185 | -1,145 |
| 14 | P07942 LAMB1_HUMAN  | K.ISGVIGPYRE.T    |       | 2 | 2,276  | 0,176 | -1,23  |
| 14 | Q13561 DCTN2_HUMAN  | K.YADLPGIAR.N     |       | 2 | 2,2757 | 0,171 | -0,063 |
| 14 | Q9Y580 RBM7_HUMAN   | R.M*NSYPYLADR.H   |       | 2 | 2,2741 | 0,292 | -1,175 |
| 14 | Q92917 GPKOW_HUMAN  | E.AQALPTGPSR.M    |       | 2 | 2,2738 | 0,183 | -1,11  |
| 14 | Q07889 SOS1_HUMAN   | R.SASVSSISLTK.G   |       | 2 | 2,2731 | 0,251 | -0,113 |
| 14 | Q15797 SMAD1_HUMAN  | K.GVHLYYVGGE.V    |       | 2 | 2,2727 | 0,163 | -0,446 |
| 14 | P48506 GSH1_HUMAN   | R.CSILNYLK.L      |       | 2 | 2,2726 | 0,114 | 0,121  |
| 14 | O75431 MTX2_HUMAN   | E.NATLYQQLKGE.Q   |       | 2 | 2,2702 | 0,127 | -0,868 |
| 14 | Q8N9N5 BANP_HUMAN   | E.NVISNAVPGR.R    |       | 2 | 2,2698 | 0,136 | -0,238 |
| 14 | Q9Y2U8 MAN1_HUMAN   | R.GLKAPPAPLAASE.V |       | 2 | 2,2697 | 0,204 | -0,998 |
| 14 | Q969H8 CS010_HUMAN  | E.SDVPLKTEE.F     |       | 2 | 2,2691 | 0,199 | -0,36  |



|    |                      |                       |       |   |        |       |        |
|----|----------------------|-----------------------|-------|---|--------|-------|--------|
| 14 | Q96RP9 EFG1_HUMAN    | K.NKGVQPLLDVLE.Y      |       | 2 | 2,269  | 0,274 | -0,175 |
| 14 | ##Q9NRG1 PRDC1_HUMAN | E.NYDLAY#GVVFLNPIE.F  | Y28:  | 2 | 2,268  | 0,116 | 0,743  |
| 14 | Q99615 DNJC7_HUMAN   | E.ALGIDPNNIK.T        |       | 2 | 2,2677 | 0,2   | -0,809 |
| 14 | Q6ZU65 K2030_HUMAN   | R.VAFISLS#PVRR.R      | S13:  | 3 | 2,2671 | 0,145 | 0,552  |
| 14 | P13010 KU86_HUMAN    | E.ASNQLINHIE.Q        |       | 2 | 2,2666 | 0,291 | -1,071 |
| 14 | Q10567 AP1B1_HUMAN   | E.GQDM*LYQSLK.L       |       | 2 | 2,266  | 0,19  | -0,407 |
| 14 | P13010 KU86_HUMAN    | K.DKPSGDAAVFE.E       |       | 2 | 2,2657 | 0,277 | -0,395 |
| 14 | P63218 GBG5_HUMAN    | K.VVQQLRLE.A          |       | 2 | 2,2652 | 0,244 | 0,124  |
| 14 | Q16555 DPYL2_HUMAN   | K.VFNLYPR.K           |       | 2 | 2,2647 | 0,271 | -0,201 |
| 14 | Q6S8J3 A26CA_HUMAN   | E.KLCYVALDFE.Q        |       | 2 | 2,2634 | 0,171 | -0,097 |
| 14 | P48960 CD97_HUMAN    | R.HLIATQLLSNLE.D      |       | 2 | 2,2631 | 0,223 | 0,09   |
| 14 | Q9NPR2 SEM4B_HUMAN   | R.LGSEIRDSVV.-        |       | 2 | 2,2627 | 0,319 | -0,227 |
| 14 | P13674 P4HA1_HUMAN   | R.FHDIISDAEIE.I       |       | 2 | 2,2623 | 0,177 | 0,379  |
| 14 | P33991 MCM4_HUMAN    | R.LSNKVEAIDVEE.A      |       | 2 | 2,262  | 0,1   | -0,181 |
| 14 | Q13247 SFRS6_HUMAN   | R.ALDKLDGTE.I         |       | 2 | 2,2609 | 0,233 | -0,38  |
| 14 | Q9NWT1 PK1IP_HUMAN   | R.VKDM*FSFEIPE.H      |       | 2 | 2,2607 | 0,194 | -0,27  |
| 14 | Q8TCG1 K1524_HUMAN   | K.ALALAQADR.L         |       | 2 | 2,2601 | 0,135 | -0,46  |
| 14 | Q9H2Y7 ZF106_HUMAN   | E.VGLSAYAK.H          |       | 2 | 2,2592 | 0,314 | -0,528 |
| 14 | P30153 2AAA_HUMAN    | R.YM*VADKFTE.L        |       | 2 | 2,2586 | 0,276 | -0,327 |
| 14 | Q92598 HS105_HUMAN   | K.SLDQDPVVR.A         |       | 2 | 2,2568 | 0,276 | 0      |
| 14 | Q96JG6 CC132_HUMAN   | R.S#PSVSPSKQPVSTSSK.T | S494: | 2 | 2,2559 | 0,175 | -0,58  |
| 14 | Q15742 NAB2_HUMAN    | E.KLS#PLPGGPGAGDPR.I  | S171: | 2 | 2,2544 | 0,298 | -0,814 |
| 14 | Q8WUM0 NU133_HUMAN   | K.AAFLQYCR.K          |       | 2 | 2,2533 | 0,199 | -0,711 |
| 14 | Q9UQ80 PA2G4_HUMAN   | K.VAHSFNCTPIE.G       |       | 2 | 2,2529 | 0,311 | -0,574 |
| 14 | Q9Y5K8 VATD_HUMAN    | K.KDNVAGVTLPVFE.H     |       | 2 | 2,2526 | 0,213 | -0,351 |
| 14 | Q9Y4C8 RBM19_HUMAN   | E.LSDM*DYLK.S         |       | 2 | 2,2521 | 0,142 | -0,792 |
| 14 | Q09028 RBBP4_HUMAN   | E.TILASSGTDR.R        |       | 2 | 2,2516 | 0,206 | -0,179 |
| 14 | O75351 VPS4B_HUMAN   | K.KLQNLQGAIVIE.R      |       | 2 | 2,2515 | 0,194 | -0,42  |
| 14 | P13010 KU86_HUMAN    | E.QGGAHFSVSSLA.E      |       | 2 | 2,2483 | 0,244 | -0,662 |
| 14 | Q14839 CHD4_HUMAN    | E.VM*LQNGETPK.D       |       | 2 | 2,2481 | 0,179 | -1,292 |
| 14 | Q9UNF0 PACN2_HUMAN   | K.ASLM*NDDFEK.I       |       | 2 | 2,248  | 0,208 | -1,337 |
| 14 | Q9UHY7 ENOPH_HUMAN   | E.KTYYSLITSFSE.L      |       | 2 | 2,2464 | 0,267 | -0,424 |
| 14 | P52597 HNRPF_HUMAN   | R.GLPFGCTKEE.I        |       | 2 | 2,246  | 0,287 | -0,322 |

|    |                     |                     |       |   |        |       |        |
|----|---------------------|---------------------|-------|---|--------|-------|--------|
| 14 | P15927 RFA2_HUMAN   | E.GLNFQDLK.N        |       | 2 | 2,245  | 0,273 | -0,13  |
| 14 | Q9UDY2 ZO2_HUMAN    | R.M*GATPTPFK.S      |       | 2 | 2,245  | 0,166 | 0,568  |
| 14 | O15446 RPA34_HUMAN  | R.SALAPNLLTS#GKK.K  | S172: | 2 | 2,2443 | 0,209 | -0,177 |
| 14 | P04083 ANXA1_HUMAN  | R.NALLSLAK.G        |       | 2 | 2,243  | 0,24  | 0,147  |
| 14 | Q9BTE3 CJ119_HUMAN  | R.VSPSTSYTPSR.H     |       | 2 | 2,2415 | 0,279 | -0,619 |
| 14 | P30837 AL1B1_HUMAN  | E.TLDNGKPFQE.S      |       | 2 | 2,2414 | 0,365 | -1,274 |
| 14 | P62158 CALM_HUMAN   | E.FLTM*MAR.K        |       | 2 | 2,2405 | 0,155 | 0,207  |
| 14 | Q13242 SFERS9_HUMAN | R.GS#PHYFSPFRPY.-   | S211: | 2 | 2,2397 | 0,366 | -0,397 |
| 14 | Q12906 ILF3_HUMAN   | D.M*GLPTGAEGR.D     |       | 2 | 2,2395 | 0,245 | -0,182 |
| 14 | O94992 HEX1_HUMAN   | E.LLAQPCHDSE.A      |       | 2 | 2,2386 | 0,089 | -1,356 |
| 14 | O75116 ROCK2_HUMAN  | E.LQM*TLDSK.D       |       | 2 | 2,2378 | 0,156 | 0,064  |
| 14 | Q8N9N8 EIF1A_HUMAN  | K.RGDFLIVDPIEE.G    |       | 2 | 2,2377 | 0,178 | -0,696 |
| 14 | P31943 HNRH1_HUMAN  | R.GLPFGCSKEE.I      |       | 2 | 2,2375 | 0,278 | 1,411  |
| 14 | P07814 SYEP_HUMAN   | K.QLLSLKAE.Y        |       | 2 | 2,237  | 0,183 | -0,744 |
| 14 | Q9BTC0 DIDO1_HUMAN  | R.SGPQSASTAVK.E     |       | 2 | 2,2363 | 0,432 | 0      |
| 14 | Q15233 NONO_HUMAN   | K.GFGFIRLE.T        |       | 2 | 2,2357 | 0,207 | -0,13  |
| 14 | Q9UPN3 MACF1_HUMAN  | K.IQQQJIR.H         |       | 2 | 2,2356 | 0,14  | 0,136  |
| 14 | O95831 AIFM1_HUMAN  | E.IDSDFGGFR.V       |       | 2 | 2,2351 | 0,299 | -0,18  |
| 14 | Q13432 U119A_HUMAN  | K.IRDM*DSGTVLFE.I   |       | 2 | 2,2347 | 0,087 | -0,349 |
| 14 | Q66K74 MAP1S_HUMAN  | E.AGLSLPLR.G        |       | 2 | 2,2344 | 0,139 | 0,59   |
| 14 | A2AJT9 CX023_HUMAN  | R.SIADSRFE.G        |       | 2 | 2,2342 | 0,388 | 0      |
| 14 | O75396 SC22B_HUMAN  | E.FDTFIQK.T         |       | 2 | 2,2338 | 0,134 | 0,407  |
| 14 | P29692 EF1D_HUMAN   | R.ATAPQTQHVS#PM*R.Q | S133: | 2 | 2,2333 | 0,261 | -0,401 |
| 14 | P38117 ETFB_HUMAN   | R.LGPLQVAR.V        |       | 2 | 2,2317 | 0,349 | 0      |
| 14 | P30153 2AAA_HUMAN   | R.YMVADKFTE.L       |       | 2 | 2,2309 | 0,216 | 0,221  |
| 14 | P04637 P53_HUMAN    | E.DSSGNLLGR.N       |       | 2 | 2,2292 | 0,111 | 0      |
| 14 | Q15398 DLG7_HUMAN   | D.AGFFRVES#PVK.L    | S618: | 2 | 2,2291 | 0,189 | -0,648 |
| 14 | P13797 PLST_HUMAN   | K.KLTPFIIQE.N       |       | 2 | 2,2282 | 0,092 | -0,112 |
| 14 | O95359 TACC2_HUMAN  | R.KTLPLTTAPE.A      |       | 2 | 2,2258 | 0,276 | 0      |
| 14 | Q13610 PWP1_HUMAN   | E.TGSPSEDGM*QSAR.T  |       | 2 | 2,2252 | 0,168 | -0,273 |
| 14 | Q7Z2Z2 ETUD1_HUMAN  | K.FEEQGASDLAK.E     |       | 2 | 2,2248 | 0,109 | -0,511 |
| 14 | O15541 R113A_HUMAN  | R.QSFQNPVVK.C       |       | 2 | 2,2247 | 0,222 | -0,956 |
| 14 | Q70CQ4 UBP31_HUMAN  | R.LNSSVVDTQSK.H     |       | 2 | 2,2236 | 0,098 | -0,518 |

|    |                    |                        |       |   |        |       |        |
|----|--------------------|------------------------|-------|---|--------|-------|--------|
| 14 | P40925 MDHC_HUMAN  | E.FVTTVQQR.G           |       | 2 | 2,2232 | 0,288 | -1,184 |
| 14 | Q96KB5 TOPK_HUMAN  | E.GISNFKT#PSKLSE.K     | T9:   | 3 | 2,2215 | 0,197 | -0,061 |
| 14 | P54577 SYYC_HUMAN  | E.NNGVLSFIK.H          |       | 2 | 2,2212 | 0,206 | 0,061  |
| 14 | P28799 GRN_HUMAN   | E.VSCPDGYTCCR.L        |       | 2 | 2,2204 | 0,417 | -0,976 |
| 14 | Q9HC35 EMAL4_HUMAN | R.AS#PSPQPSSQPLQIHR.Q  | S144: | 2 | 2,2187 | 0,311 | -0,337 |
| 14 | P06733 ENOA_HUMAN  | E.VDLFTS#KGLFR.A       | S27:  | 2 | 2,2182 | 0,218 | -0,269 |
| 14 | Q9NYL2 MLTK_HUMAN  | R.QIASNTSLQR.S         |       | 2 | 2,215  | 0,324 | -0,982 |
| 14 | Q9UKV3 ACINU_HUMAN | K.LLDDLFR.K            |       | 2 | 2,2133 | 0,205 | -1,368 |
| 14 | P29401 TKT_HUMAN   | R.IIALDGDTK.N          |       | 2 | 2,2123 | 0,367 | 0,387  |
| 14 | Q01968 OCRL_HUMAN  | E.KSLLQM*VPLDE.G       |       | 2 | 2,2117 | 0,212 | -0,095 |
| 14 | P27448 MARK3_HUMAN | K.SSTVPSSENTASGGM*TR.R |       | 2 | 2,2107 | 0,4   | -0,235 |
| 14 | Q5TGY3 AHDC1_HUMAN | R.QNLFTGYFR.S          |       | 2 | 2,2098 | 0,293 | -0,213 |
| 14 | P04075 ALDOA_HUMAN | R.QLLLTADDR.V          |       | 2 | 2,2094 | 0,184 | -0,817 |
| 14 | P30305 MPIP2_HUMAN | K.SQVGTLLFR.S          |       | 2 | 2,2091 | 0,313 | -0,597 |
| 14 | Q13613 MTMR1_HUMAN | R.GSS#PSHSATSVHTSV.-   | S653: | 2 | 2,2084 | 0,298 | -0,562 |
| 14 | Q00169 PIPNA_HUMAN | E.YRVILPVSVDY.Y        |       | 2 | 2,2072 | 0,222 | -0,567 |
| 14 | P50990 TCPQ_HUMAN  | K.YNIM*LVR.L           |       | 2 | 2,204  | 0,212 | 0,132  |
| 14 | O75064 DEN4B_HUMAN | R.LQQLTPSR.H           |       | 2 | 2,2038 | 0,238 | -0,116 |
| 14 | Q15417 CNN3_HUMAN  | K.GASQAGM*LAPGTR.R     |       | 2 | 2,2036 | 0,416 | -0,198 |
| 14 | P42704 LPPRC_HUMAN | E.FDRLDSSAVLD.T        |       | 2 | 2,203  | 0,287 | -0,493 |
| 14 | P05556 ITB1_HUMAN  | E.VNSEDM*DAYCR.K       |       | 3 | 2,2029 | 0,115 | -0,199 |
| 14 | Q14204 DYHC1_HUMAN | E.LDLVNYQNK.C          |       | 2 | 2,2016 | 0,169 | -0,771 |
| 14 | Q16851 UGPA_HUMAN  | K.IQRPPEDSIQPYE.K      |       | 2 | 2,2012 | 0,203 | -0,388 |
| 14 | Q16881 TRXR1_HUMAN | K.M*NGPEDLPK.S         |       | 2 | 2,2002 | 0,156 | -1,86  |
| 14 | Q9Y2K5 R3HD2_HUMAN | R.ISRPGM*ALGAPE.V      |       | 2 | 2,1992 | 0,201 | -1,105 |
| 14 | P04406 G3P_HUMAN   | K.VIHDFNGIVE.G         |       | 2 | 2,199  | 0,305 | 0,213  |
| 14 | Q9NYW8 RBAK_HUMAN  | K.TFNLNSAFIR.H         |       | 2 | 2,1978 | 0,146 | -0,103 |
| 14 | P21127 CD2L1_HUMAN | K.YLPALQGCR.S          |       | 2 | 2,1974 | 0,36  | -0,34  |
| 14 | P09661 RU2A_HUMAN  | K.GLLQSGQIPGR.E        |       | 2 | 2,1972 | 0,232 | -1,192 |
| 14 | Q96LD4 TRI47_HUMAN | E.DGCGPGPGPPRE.L       |       | 2 | 2,1969 | 0,121 | -0,612 |
| 14 | Q8NFD5 ARI1B_HUMAN | R.CICVSNIVR.S          |       | 2 | 2,1948 | 0,26  | -0,871 |
| 14 | Q92879 CELF1_HUMAN | R.GCAFTFTTR.A          |       | 2 | 2,1946 | 0,09  | -0,526 |
| 14 | Q9H6Y2 WDR55_HUMAN | K.AHGAPINSLLLVDE.N     |       | 2 | 2,1943 | 0,219 | -0,505 |

|    |                     |                       |       |   |        |       |        |
|----|---------------------|-----------------------|-------|---|--------|-------|--------|
| 14 | Q6KC79 NIPBL_HUMAN  | K.LSLDDVQK.L          |       | 2 | 2,193  | 0,179 | 0,133  |
| 14 | Q8N6H7 ARFG2_HUMAN  | R.LGM*GLVSR.S         |       | 2 | 2,1926 | 0,255 | 0      |
| 14 | Q15417 CNN3_HUMAN   | K.GM*SVYGLGR.Q        |       | 2 | 2,1921 | 0,369 | -0,447 |
| 14 | Q53EZ4 CEP55_HUMAN  | K.CYNDLLASAK.K        |       | 2 | 2,1912 | 0,192 | -0,423 |
| 14 | P46940 IQGA1_HUMAN  | K.GGYYYYHNLE.T        |       | 2 | 2,1897 | 0,241 | -0,954 |
| 14 | P13639 EF2_HUMAN    | R.GGGQIIPTAR.R        |       | 2 | 2,1895 | 0,139 | -1,572 |
| 14 | Q5VZ89 DEN4C_HUMAN  | E.DKLFS#PVIAR.N       | S989: | 3 | 2,1852 | 0,108 | 0      |
| 14 | Q58FF8 H90B2_HUMAN  | K.SIYYITGESK.E        |       | 2 | 2,1852 | 0,182 | -0,631 |
| 14 | P23246 SFPQ_HUMAN   | E.AFSQFGPIER.A        |       | 2 | 2,1847 | 0,094 | -0,847 |
| 14 | Q05CZ2 Q05CZ2_HUMAN | K.AVVHAVDGTAE.N       |       | 2 | 2,1843 | 0,325 | -0,342 |
| 14 | Q9Y4W6 AFG32_HUMAN  | R.KNAPCILFIDE.I       |       | 2 | 2,1842 | 0,12  | -1,664 |
| 14 | P49792 RBP2_HUMAN   | E.STTGFNFSFK.S        |       | 2 | 2,1835 | 0,423 | 0,107  |
| 14 | Q7Z2W4 ZCCHV_HUMAN  | R.SCTPSPDQISHRAS#LE.D | S284: | 2 | 2,1831 | 0,373 | -0,589 |
| 14 | Q99615 DNJC7_HUMAN  | K.LDDTYIK.A           |       | 2 | 2,1825 | 0,157 | -0,351 |
| 14 | P04083 ANXA1_HUMAN  | K.TPAQFDADEL.R.A      |       | 2 | 2,1808 | 0,306 | -0,483 |
| 14 | P11586 C1TC_HUMAN   | R.FSDIQR.R            |       | 2 | 2,1774 | 0,17  | -0,347 |
| 14 | Q13601 KRR1_HUMAN   | E.SSFATLFPK.Y         |       | 2 | 2,1773 | 0,16  | -0,183 |
| 14 | Q14676 MDC1_HUMAN   | K.RGAGNGVVPAGVILE.R   |       | 2 | 2,1754 | 0,143 | 0,26   |
| 14 | Q9Y490 TLN1_HUMAN   | K.LKPLPGETM*E.K       |       | 2 | 2,1743 | 0,26  | -0,863 |
| 14 | Q9NW13 RBM28_HUMAN  | R.GFGFVQFK.N          |       | 2 | 2,1731 | 0,166 | -0,197 |
| 14 | P07237 PDIA1_HUMAN  | R.TVIDYNGER.T         |       | 2 | 2,172  | 0,252 | -0,572 |
| 14 | Q5TBA9 FRY_HUMAN    | D.VINLAFK.H           |       | 2 | 2,1716 | 0,106 | 0,53   |
| 14 | P49736 MCM2_HUMAN   | R.SKDAILLADLVD.S      |       | 2 | 2,1712 | 0,083 | -0,383 |
| 14 | Q13613 MTMR1_HUMAN  | R.GSS#PSHSATSVHTSV.-  | S653: | 3 | 2,1702 | 0,262 | 0,12   |
| 14 | Q71U36 TBA1A_HUMAN  | R.AFVHWYVGE.G         |       | 2 | 2,1701 | 0,295 | -0,33  |
| 14 | O95905 SGT1_HUMAN   | D.SFLNYFDK.I          |       | 2 | 2,1698 | 0,239 | -0,354 |
| 14 | O15067 PUR4_HUMAN   | R.IVLVDDR.E           |       | 2 | 2,1687 | 0,199 | 1,029  |
| 14 | Q15404 RSU1_HUMAN   | K.LQILSLRDND.L        |       | 2 | 2,1684 | 0,213 | -0,411 |
| 14 | Q9NZ32 ARP10_HUMAN  | E.M*M*FDVGK.T         |       | 2 | 2,168  | 0,15  | 0,426  |
| 14 | P07954 FUMH_HUMAN   | R.THTQDAVPLTLGQE.F    |       | 2 | 2,1676 | 0,33  | -0,242 |
| 14 | P68431 H31_HUMAN    | E.IAQDFKTD.L          |       | 2 | 2,1663 | 0,244 | -0,195 |
| 14 | Q14203 DCTN1_HUMAN  | E.TVADYQQTIK.K        |       | 2 | 2,1659 | 0,317 | -0,105 |
| 14 | Q63ZY3 KANK2_HUMAN  | E.IASM*LYSR.M         |       | 2 | 2,1655 | 0,204 | -0,637 |

|    |                     |                    |       |   |        |       |        |
|----|---------------------|--------------------|-------|---|--------|-------|--------|
| 14 | Q9Y3L3 3BP1_HUMAN   | R.TESEVPPRPAS#PK.V | S544: | 2 | 2,1653 | 0,204 | -0,662 |
| 14 | Q9ULU4 PKCB1_HUMAN  | E.SM*DFLDK.S       |       | 2 | 2,165  | 0,138 | 0,84   |
| 14 | Q9Y678 COPG_HUMAN   | R.VFNETPINPR.K     |       | 2 | 2,1643 | 0,204 | -0,925 |
| 14 | P31939 PUR9_HUMAN   | R.LDFNLIR.V        |       | 2 | 2,1632 | 0,216 | 0,068  |
| 14 | O75531 BAF_HUMAN    | R.DCFGCLRE.W       |       | 2 | 2,1623 | 0,12  | -0,346 |
| 14 | P39880 CUX1_HUMAN   | K.FALNSLLQR.Q      |       | 2 | 2,1621 | 0,22  | 0      |
| 14 | Q32P28 P3H1_HUMAN   | R.VQADDLVK.M       |       | 2 | 2,1617 | 0,241 | 0,069  |
| 14 | P30042 ES1_HUMAN    | K.NLSTFAVDGK.D     |       | 2 | 2,1615 | 0,102 | -0,58  |
| 14 | P12830 CADH1_HUMAN  | E.INPDTGAISTR.A    |       | 2 | 2,1611 | 0,122 | -0,959 |
| 14 | P78347 GTF2I_HUMAN  | K.M*VDQLFCK.K      |       | 2 | 2,1597 | 0,175 | 0,231  |
| 14 | Q6P0N0 CN106_HUMAN  | E.TDFSTPTR.R       |       | 2 | 2,1588 | 0,316 | -0,358 |
| 14 | Q5VY92 Q5VY92_HUMAN | R.M*QDIPEETESR.D   |       | 2 | 2,1585 | 0,229 | -0,813 |
| 14 | P09874 PARP1_HUMAN  | E.VAYSLLR.G        |       | 2 | 2,1582 | 0,194 | 1,039  |
| 14 | Q9UKX7 NUP50_HUMAN  | K.QLAALNCSVR.D     |       | 2 | 2,158  | 0,237 | 0      |
| 14 | Q9H4H8 FA83D_HUMAN  | E.LTLGNLLR.M       |       | 2 | 2,1565 | 0,16  | -1,084 |
| 14 | P04075 ALDOA_HUMAN  | E.SLFVSNHAY.-      |       | 2 | 2,1556 | 0,265 | 0,235  |
| 14 | Q12830 BPTF_HUMAN   | K.SQQVAAAAHE.A     |       | 2 | 2,1554 | 0,353 | 0,121  |
| 14 | Q15050 RRS1_HUMAN   | R.KFQPLFGDFAAE.K   |       | 2 | 2,1547 | 0,332 | -0,089 |
| 14 | Q8WUA2 PPIL4_HUMAN  | K.YQTDLYERE.R      |       | 2 | 2,1546 | 0,27  | -0,501 |
| 14 | P85037 FOXK1_HUMAN  | R.TPFGPLSSR.S      |       | 2 | 2,1544 | 0,253 | 0,19   |
| 14 | P49720 PSB3_HUMAN   | K.TFKPFICSLD.L     |       | 2 | 2,1541 | 0,107 | -0,199 |
| 14 | Q9BQA1 MEP50_HUMAN  | R.KET#PPPLVPPAAR.E | T5:   | 2 | 2,1527 | 0,103 | -0,336 |
| 14 | Q7Z2W4 ZCCHV_HUMAN  | K.VLAIM*RE.H       |       | 2 | 2,1524 | 0,11  | 0,791  |
| 14 | Q14676 MDC1_HUMAN   | R.DAEEDM*PQR.V     |       | 2 | 2,1507 | 0,193 | -0,11  |
| 14 | P52655 TF2AA_HUMAN  | E.NVVVCQYDK.I      |       | 2 | 2,1506 | 0,199 | -0,868 |
| 14 | Q3T8J9 GON4L_HUMAN  | R.TLFHQPEEE.I      |       | 2 | 2,1487 | 0,28  | -0,864 |
| 14 | P45983 MK08_HUMAN   | K.ILDFGLAR.T       |       | 2 | 2,148  | 0,155 | 0,135  |
| 14 | P60174 TPIS_HUMAN   | E.FVDIINAK.Q       |       | 2 | 2,1476 | 0,188 | -1,326 |
| 14 | Q12888 TP53B_HUMAN  | E.DLFDQSNK.T       |       | 2 | 2,1472 | 0,202 | -0,252 |
| 14 | P49736 MCM2_HUMAN   | R.ISHLPLVEE.L      |       | 2 | 2,1432 | 0,111 | -0,235 |
| 14 | Q8NHZ8 CDC26_HUMAN  | E.LKLDDEEFE.N      |       | 2 | 2,143  | 0,125 | -0,878 |
| 14 | P43307 SSRA_HUMAN   | K.FLVGFTNK.G       |       | 2 | 2,1427 | 0,129 | -0,198 |
| 14 | Q9H9Q2 CSN7B_HUMAN  | E.VDFCIGR.D        |       | 2 | 2,142  | 0,185 | 0,704  |

|    |                    |                          |       |   |        |       |        |
|----|--------------------|--------------------------|-------|---|--------|-------|--------|
| 14 | P08758 ANXA5_HUMAN | K.FITIFGTR.S             |       | 2 | 2,1399 | 0,117 | 0      |
| 14 | Q71U36 TBA1A_HUMAN | K.FDLM*YAK.R             |       | 2 | 2,138  | 0,143 | -1,215 |
| 14 | Q7Z6Z7 HUWE1_HUMAN | K.ADGTATAPPPR.S          |       | 2 | 2,1378 | 0,33  | -0,232 |
| 14 | P55196 AFAD_HUMAN  | R.RQES#RTQDASGPILPASIE.F | S573: | 3 | 2,137  | 0,185 | -0,308 |
| 14 | P31751 AKT2_HUMAN  | R.APGEDPM*DYK.C          |       | 2 | 2,1343 | 0,288 | 0      |
| 14 | Q8IWC1 MA7D3_HUMAN | K.QSPQTSFPYK.I           |       | 2 | 2,1331 | 0,214 | -0,516 |
| 14 | Q9NZ52 GGA3_HUMAN  | R.TLIPS#PPRPK.N          | S159: | 2 | 2,1326 | 0,152 | -0,666 |
| 14 | Q96QZ7 MAGI1_HUMAN | E.VTLLVQR.G              |       | 2 | 2,1322 | 0,161 | 0,221  |
| 14 | P37802 TAGL2_HUMAN | K.IQASTM*AFK.Q           |       | 2 | 2,1305 | 0,143 | -0,783 |
| 14 | Q00839 HNRPU_HUMAN | K.NGQDLGVAFK.I           |       | 2 | 2,1279 | 0,267 | -0,465 |
| 14 | P54652 HSP72_HUMAN | E.LNADLFR.G              |       | 2 | 2,1276 | 0,091 | 0,359  |
| 14 | Q9H6Z4 RANB3_HUMAN | K.FVFGQNM*SER.V          |       | 2 | 2,1276 | 0,345 | -0,595 |
| 14 | Q13823 NOG2_HUMAN  | K.VHILDTESE.T            |       | 2 | 2,1276 | 0,23  | -0,103 |
| 14 | Q6ZRP7 QSOX2_HUMAN | R.AFFSSYLK.S             |       | 2 | 2,1268 | 0,109 | -0,317 |
| 14 | Q04864 REL_HUMAN   | R.SGNTNPLSSFSTR.T        |       | 2 | 2,1265 | 0,125 | 0,268  |
| 14 | P43246 MSH2_HUMAN  | K.NFSTVDIQK.N            |       | 2 | 2,1252 | 0,132 | 0,116  |
| 14 | Q9UQE7 SMC3_HUMAN  | K.VSHIDVITAE.M           |       | 2 | 2,1252 | 0,205 | -0,675 |
| 14 | Q92621 NU205_HUMAN | R.SVSGFLHFD.T            |       | 2 | 2,1252 | 0,208 | -0,302 |
| 14 | Q92905 CSN5_HUMAN  | K.DKLFNQINIS.-           |       | 2 | 2,1237 | 0,16  | -0,716 |
| 14 | Q9H0E9 BRD8_HUMAN  | E.SGTIFGSQIK.D           |       | 2 | 2,1204 | 0,258 | -0,47  |
| 14 | Q03164 HRX_HUMAN   | R.SPTVPSQNPSR.L          |       | 2 | 2,1201 | 0,249 | 0,104  |
| 14 | P52655 TF2AA_HUMAN | K.DGIM*NLNGR.D           |       | 2 | 2,1183 | 0,253 | 0,121  |
| 14 | P60228 EIF3E_HUMAN | R.TTVVAQLK.Q             |       | 2 | 2,1173 | 0,326 | -0,496 |
| 14 | Q8N6T3 ARFG1_HUMAN | R.YVGFNGT#PPPQKKE.D      | T189: | 3 | 2,1172 | 0,122 | -0,111 |
| 14 | Q9Y262 IF3EI_HUMAN | R.YGDFIR.Q               |       | 2 | 2,1166 | 0,337 | -0,199 |
| 14 | Q15118 PDK1_HUMAN  | R.HNDVIPTM*AQGVIE.Y      |       | 2 | 2,1161 | 0,32  | -0,792 |
| 14 | Q0ZGT2 NEXN_HUMAN  | K.NTSVVDSEPV.R           |       | 2 | 2,1157 | 0,258 | -0,101 |
| 14 | Q86X29 LSR_HUMAN   | R.GPALTPIRDEE.W          |       | 2 | 2,1153 | 0,263 | 0      |
| 14 | Q96L73 NSD1_HUMAN  | D.LIDLTPR.Q              |       | 2 | 2,1148 | 0,237 | 0,074  |
| 14 | O60841 IF2P_HUMAN  | E.ATDILVSK.I             |       | 2 | 2,1141 | 0,309 | -0,648 |
| 14 | P06744 G6PI_HUMAN  | R.M*LVDLAK.S             |       | 2 | 2,113  | 0,125 | 0,984  |
| 14 | Q6GYQ0 GRIPE_HUMAN | R.QKT#VDIDDAQILPR.S      | T754: | 2 | 2,1126 | 0,292 | -0,288 |
| 14 | O00170 AIP_HUMAN   | R.NIAVGKDPLE.G           |       | 2 | 2,1117 | 0,151 | -1,04  |

|    |                      |                       |       |   |        |       |        |
|----|----------------------|-----------------------|-------|---|--------|-------|--------|
| 14 | Q9Y2H9 MAST1_HUMAN   | R.SPAVRPRS#R.S        | S159: | 2 | 2,1117 | 0,289 | 1,324  |
| 14 | Q14191 WRN_HUMAN     | E.YLSDIAYK.S          |       | 2 | 2,1111 | 0,274 | -0,063 |
| 14 | O95340 PAPS2_HUMAN   | K.VLTDYYR.S           |       | 2 | 2,1105 | 0,249 | -0,131 |
| 14 | P18583 SON_HUMAN     | D.SAM*LGSKS#PDPYR.L   | S910: | 3 | 2,1099 | 0,099 | 0,061  |
| 14 | Q15020 SART3_HUMAN   | K.VAISNPPQR.K         |       | 2 | 2,109  | 0,211 | 0,124  |
| 14 | P26358 DNMT1_HUMAN   | R.VARPLPAEEPE.R       |       | 2 | 2,1046 | 0,359 | 0,101  |
| 14 | ##Q15054 DPOD3_HUMAN | K.DERVVAVK.H          |       | 2 | 2,1039 | 0,094 | 0,067  |
| 14 | Q9UPZ3 HPS5_HUMAN    | K.FEPLDSACSSR.R       |       | 2 | 2,0996 | 0,263 | -0,192 |
| 14 | P68104 EF1A1_HUMAN   | R.LPLQDVYK.I          |       | 2 | 2,0977 | 0,209 | -0,125 |
| 14 | Q16864 VATF_HUMAN    | R.GM*FTAEDLR.-        |       | 2 | 2,0967 | 0,298 | -0,231 |
| 14 | Q96G74 OTUD5_HUMAN   | E.DFTTYINR.K          |       | 2 | 2,0959 | 0,242 | -0,355 |
| 14 | Q5UIP0 RIF1_HUMAN    | R.DSFLAQT.K           |       | 2 | 2,0954 | 0,314 | -0,067 |
| 14 | P30040 ERP29_HUMAN   | K.QGQDNLSSVKE.T       |       | 2 | 2,0949 | 0,213 | -1,316 |
| 14 | P0C7M2 RA1L3_HUMAN   | R.KLFIGGLSFE.T        |       | 2 | 2,0946 | 0,107 | -0,329 |
| 14 | Q13242 SFRS9_HUMAN   | R.GSPHYFS#PFRPY.-     | S216: | 3 | 2,0888 | 0,31  | 0,238  |
| 14 | P35658 NU214_HUMAN   | R.ITPPAAKPGS#PQAK.S   | S678: | 2 | 2,0876 | 0,312 | -0,592 |
| 14 | Q99798 ACON_HUMAN    | R.LNRPLTSE.K          |       | 2 | 2,0876 | 0,178 | -0,468 |
| 14 | P08758 ANXA5_HUMAN   | E.IDLFNIR.K           |       | 2 | 2,0874 | 0,253 | 0,068  |
| 14 | P08473 NEP_HUMAN     | R.NDPM*LLYNK.M        |       | 2 | 2,0869 | 0,186 | -0,651 |
| 14 | A6NDG6 PGP_HUMAN     | R.FIAGTGCLVR.A        |       | 2 | 2,0857 | 0,159 | -0,892 |
| 14 | Q9H0C8 ILKAP_HUMAN   | R.CLLDTFK.H           |       | 2 | 2,0846 | 0,216 | 0      |
| 14 | Q5W189 Q5W189_HUMAN  | R.SPDGPNVLSKAE.F      |       | 2 | 2,084  | 0,175 | -0,887 |
| 14 | P55265 DSRAD_HUMAN   | R.TM*LLLSR.S          |       | 2 | 2,084  | 0,11  | -0,215 |
| 14 | O15397 IPO8_HUMAN    | E.NKGVLSAFNFGTVPSNN.- |       | 2 | 2,0835 | 0,279 | -0,484 |
| 14 | P11388 TOP2A_HUMAN   | E.ILVNAADNK.Q         |       | 2 | 2,083  | 0,263 | -0,064 |
| 14 | Q12792 TWF1_HUMAN    | E.VQTDVGVDTK.H        |       | 2 | 2,0829 | 0,3   | 0,23   |
| 14 | Q6ZUM4 RHG27_HUMAN   | K.QM*LYTNHFTQE.Q      |       | 2 | 2,0821 | 0,176 | -0,513 |
| 14 | Q96ER3 SAAL1_HUMAN   | K.ILKDILCE.F          |       | 2 | 2,0804 | 0,203 | 0,122  |
| 14 | Q7Z6E9 RBBP6_HUMAN   | R.FLPLNIRNS#PFTR.G    | S873: | 2 | 2,0803 | 0,217 | -0,442 |
| 14 | Q15287 RNPS1_HUMAN   | K.M*IDM*PVER.M        |       | 2 | 2,0793 | 0,281 | 0,119  |
| 14 | B1AND4 B1AND4_HUMAN  | R.SS#TPPLHVHVDE.N     | S6:   | 2 | 2,077  | 0,31  | -0,698 |
| 14 | P54289 CA2D1_HUMAN   | E.QTQYFFDNDK.S        |       | 2 | 2,0769 | 0,117 | -0,438 |
| 14 | Q8WZA9 IRGQ_HUMAN    | R.AAHGVLLQALDE.M      |       | 2 | 2,0767 | 0,223 | -0,296 |

|    |                    |                      |        |   |        |       |        |
|----|--------------------|----------------------|--------|---|--------|-------|--------|
| 14 | O75064 DEN4B_HUMAN | E.ALGVLEPR.G         |        | 2 | 2,0763 | 0,191 | -0,285 |
| 14 | Q6GYQ0 GRIPE_HUMAN | E.NDVINAILK.Q        |        | 2 | 2,0763 | 0,133 | -0,061 |
| 14 | Q8IY81 RRMJ3_HUMAN | D.TFLSDLPR.D         |        | 2 | 2,075  | 0,249 | 0      |
| 14 | A0JNW5 UH1BL_HUMAN | K.SDSVLLTSGK.Y       |        | 2 | 2,0749 | 0,225 | -0,424 |
| 14 | Q9NQW6 ANLN_HUMAN  | K.ATS#PVKSTTSITDAK.S | S295:  | 2 | 2,0739 | 0,261 | -0,846 |
| 14 | O60826 CCD22_HUMAN | K.YLAALHE.N          |        | 2 | 2,0736 | 0,207 | 0,299  |
| 14 | Q8IYB3 SRRM1_HUMAN | E.ATSTSDILK.V        |        | 2 | 2,0733 | 0,304 | -0,782 |
| 14 | Q96IF1 JUB_HUMAN   | R.TSGISM*GYDQR.H     |        | 2 | 2,0731 | 0,155 | -0,396 |
| 14 | Q96I15 SCLY_HUMAN  | R.IGALYIR.G          |        | 2 | 2,0723 | 0,175 | -0,227 |
| 14 | Q99439 CNN2_HUMAN  | K.GLQSGVDIGVK.Y      |        | 2 | 2,0717 | 0,118 | -0,682 |
| 14 | Q96GY3 LIN37_HUMAN | E.NTPLYPICR.A        |        | 2 | 2,0708 | 0,219 | -0,108 |
| 14 | P52209 6PGD_HUMAN  | K.TIFQGIAAK.V        |        | 2 | 2,0707 | 0,237 | -0,643 |
| 14 | P04626 ERBB2_HUMAN | K.TLS#PGKNGVVVD.V    | S1174: | 2 | 2,0688 | 0,251 | -0,754 |
| 14 | Q8N1G1 REXO1_HUMAN | R.GSEPYTPAPK.K       |        | 2 | 2,0688 | 0,409 | 0,233  |
| 14 | Q14692 BMS1_HUMAN  | E.MTDQYM*AVK.G       |        | 2 | 2,0687 | 0,155 | -0,996 |
| 14 | P08069 IGF1R_HUMAN | K.M*YFAFNPK.L        |        | 2 | 2,0677 | 0,188 | -0,236 |
| 14 | P78371 TCPB_HUMAN  | K.LIHFSGVALGE.A      |        | 2 | 2,0665 | 0,125 | -0,427 |
| 14 | Q14204 DYHC1_HUMAN | R.TSFLDDAFR.K        |        | 2 | 2,0654 | 0,324 | -0,228 |
| 14 | O60506 HNRPQ_HUMAN | K.SAFLCGVM*K.T       |        | 2 | 2,0649 | 0,297 | -0,356 |
| 14 | Q12996 CSTF3_HUMAN | E.GNGPVESNAVLTK.A    |        | 2 | 2,0641 | 0,325 | -1,423 |
| 14 | Q8IY81 RRMJ3_HUMAN | R.TSVTDFLR.A         |        | 2 | 2,064  | 0,198 | 0,52   |
| 14 | Q86XP3 DDX42_HUMAN | R.GLDIPSIK.T         |        | 2 | 2,0634 | 0,265 | 0,651  |
| 14 | O75642 IF1AH_HUMAN | E.LVFKEDGQE.Y        |        | 2 | 2,0631 | 0,24  | -0,687 |
| 14 | P18206 VINC_HUMAN  | E.DLVTYTK.N          |        | 2 | 2,0619 | 0,155 | 0,073  |
| 14 | P55884 EIF3B_HUMAN | R.VNLFTDFDK.Y        |        | 2 | 2,0614 | 0,164 | -0,888 |
| 14 | P46821 MAP1B_HUMAN | K.SDISLTPR.E         |        | 2 | 2,061  | 0,179 | -0,309 |
| 14 | Q14978 NOLC1_HUMAN | K.LQANGPVAK.K        |        | 2 | 2,0589 | 0,123 | -0,272 |
| 14 | Q8NCE0 SEN2_HUMAN  | K.QDALILQR.G         |        | 2 | 2,0582 | 0,175 | 0,127  |
| 14 | Q9GZT3 SLIRP_HUMAN | R.CILPFDKE.T         |        | 2 | 2,0573 | 0,166 | -0,358 |
| 14 | Q9UMY1 NOL7_HUMAN  | R.KLLPDTILE.K        |        | 2 | 2,0565 | 0,099 | -0,117 |
| 14 | P23229 ITA6_HUMAN  | R.CYVLSQNL.R.I       |        | 2 | 2,0555 | 0,157 | -0,635 |
| 14 | P19623 SPEE_HUMAN  | R.SKTYGNVLVLD.G      |        | 2 | 2,0555 | 0,224 | -0,303 |
| 14 | O75475 PSIP1_HUMAN | K.AVDITTPK.A         |        | 2 | 2,0554 | 0,169 | -0,217 |



|    |                    |                            |            |   |        |       |        |
|----|--------------------|----------------------------|------------|---|--------|-------|--------|
| 14 | Q9NX58 LYAR_HUMAN  | E.QISAFDNVPR.K             |            | 2 | 2,0545 | 0,247 | -0,425 |
| 14 | Q16555 DPYL2_HUMAN | K.T#SPAQQAPPVR.N           | T521:      | 3 | 2,0525 | 0,19  | 0,269  |
| 14 | Q96JG6 CC132_HUMAN | R.S#PSVSPSKQPVSTSSK.T      | S494:      | 3 | 2,0515 | 0,19  | -0,217 |
| 14 | O00571 DDX3X_HUMAN | K.IGLDFCK.Y                |            | 2 | 2,0509 | 0,192 | -0,143 |
| 14 | Q92576 PHF3_HUMAN  | E.NDFDNS#FTTVLHK.Q         | S1401:     | 2 | 2,0504 | 0,199 | -0,148 |
| 14 | Q15648 MED1_HUMAN  | K.ITIQIPK.G                |            | 2 | 2,0504 | 0,328 | -0,075 |
| 14 | Q9Y4F1 FARP1_HUMAN | K.VSAGEPGSHPS#PAPR.R       | S427:      | 3 | 2,0485 | 0,108 | 0      |
| 14 | Q00610 CLH1_HUMAN  | E.AIDSYIK.A                |            | 2 | 2,0477 | 0,29  | -0,301 |
| 14 | ##P47897 SYQ_HUMAN | R.EVLLQPR.H                |            | 2 | 2,0464 | 0,116 | -0,214 |
| 14 | Q13347 EIF3I_HUMAN | R.FFHAFEEEE.F              |            | 2 | 2,0436 | 0,193 | -0,104 |
| 14 | P07900 HS90A_HUMAN | D.NSTM*GYM*AAK.K           |            | 2 | 2,0433 | 0,335 | -0,331 |
| 14 | P12270 TPR_HUMAN   | E.NANDLLSATK.R             |            | 2 | 2,0428 | 0,205 | -0,699 |
| 14 | P53597 SUCA_HUMAN  | K.IICQGFTGK.Q              |            | 2 | 2,0413 | 0,245 | -1,668 |
| 14 | Q96ED9 HOOK2_HUMAN | K.KLLLLQSQLE.Q             |            | 2 | 2,0407 | 0,253 | -0,515 |
| 14 | P50613 CDK7_HUMAN  | K.LADFLAK.S                |            | 2 | 2,0388 | 0,209 | 0,146  |
| 14 | Q08J23 NSUN2_HUMAN | E.SAASTGQPDNDVTEGQR.A      |            | 2 | 2,0344 | 0,293 | -0,282 |
| 14 | P07602 SAP_HUMAN   | K.LVGYLDR.N                |            | 2 | 2,0335 | 0,355 | -0,292 |
| 14 | Q8IZL8 PELP1_HUMAN | E.ALPSQGEVER.E             |            | 2 | 2,0321 | 0,245 | -1,91  |
| 14 | Q14320 FA50A_HUMAN | K.FSAHYDAVEAE.L            |            | 2 | 2,0303 | 0,12  | 0,197  |
| 14 | P26358 DNMT1_HUMAN | K.LTCFSVYCK.H              |            | 2 | 2,03   | 0,256 | -0,725 |
| 14 | Q6P4E1 CASC4_HUMAN | R.IQTDILK.Q                |            | 2 | 2,0293 | 0,136 | 0,807  |
| 14 | Q9H3N1 TXND1_HUMAN | R.SLGPSLATDKS.-            |            | 2 | 2,0287 | 0,258 | -0,567 |
| 14 | P54132 BLM_HUMAN   | K.SSTAAYQPIKE.G            |            | 2 | 2,0248 | 0,099 | -0,408 |
| 14 | Q99618 CDCA3_HUMAN | R.VADPRS#PSAGILR.T         | S29:       | 3 | 2,0241 | 0,11  | 0,129  |
| 14 | Q9ULW6 NP1L2_HUMAN | K.YDEPILK.L                |            | 2 | 2,0221 | 0,233 | 0,139  |
| 14 | Q9H9B1 EHMT1_HUMAN | R.VNPQDGTNLTTR.I           |            | 2 | 2,0214 | 0,148 | -1,391 |
| 14 | P14866 HNRPL_HUMAN | E.DGSCSYKDFSE.S            |            | 2 | 2,021  | 0,181 | -1,131 |
| 14 | P46087 NOL1_HUMAN  | R.LGSVEAPK.T               |            | 2 | 2,0209 | 0,262 | 0,228  |
| 14 | Q8NBS9 TXND5_HUMAN | R.FVLSQAKDEL.-             |            | 2 | 2,0181 | 0,147 | -0,212 |
| 14 | O43491 E41L2_HUMAN | E.ISPGSGPGEIR.K            |            | 2 | 2,0171 | 0,191 | 0,798  |
| 14 | Q96RL1 UIMC1_HUMAN | E.KLLLEEPTTSHGQSS#QGIVEE.T | S402:      | 3 | 2,0165 | 0,101 | -0,514 |
| 14 | Q13972 RGRF1_HUMAN | K.IT#RGRGLSLS#LEK.E        | T475:S483: | 2 | 2,0131 | 0,083 | -0,691 |
| 14 | Q96T88 UHRF1_HUMAN | D.TIQLLVR.Q                |            | 2 | 2,0094 | 0,209 | -0,362 |

|    |                      |                   |   |        |       |        |
|----|----------------------|-------------------|---|--------|-------|--------|
| 14 | Q9UNI6 DUS12_HUMAN   | R.M*TPSSM*LTTGR.Q | 2 | 2,0089 | 0,163 | -1,106 |
| 14 | Q9BZE9 ASPC1_HUMAN   | R.IALQLDDGSR.L    | 2 | 2,0086 | 0,105 | -1,794 |
| 14 | Q92973 TNPO1_HUMAN   | R.SLSGLILK.N      | 2 | 2,0083 | 0,187 | 0,367  |
| 14 | P54760 EPHB4_HUMAN   | R.GAPCTPPSAPR.S   | 2 | 2,0071 | 0,167 | -0,604 |
| 14 | Q6P3S6 FBX42_HUMAN   | K.IGLSLAPR.R      | 2 | 2,0055 | 0,168 | -0,369 |
| 14 | P61254 RL26_HUMAN    | K.IM*SSPLSKE.L    | 2 | 2,0053 | 0,173 | -0,908 |
| 14 | P78371 TCPB_HUMAN    | K.NIGVDNPAAK.V    | 2 | 2,0047 | 0,144 | -0,061 |
| 14 | P50502 F10A1_HUMAN   | E.INPDSAQPYK.W    | 2 | 2,0023 | 0,369 | -1,4   |
| 14 | P51970 NDUA8_HUMAN   | K.CALDFFR.Q       | 2 | 2,0008 | 0,132 | -0,066 |
| 14 | P31689 DNJA1_HUMAN   | K.NVVHQLSVTLE.D   | 2 | 2,0008 | 0,116 | -0,492 |
| 14 | Q9P275 UBP36_HUMAN   | R.SAKPQDAVVPE.S   | 2 | 2,0006 | 0,321 | -0,749 |
| 14 | O95352 ATG7_HUMAN    | E.M*AFSPDCPK.A    | 2 | 1,9994 | 0,166 | -0,228 |
| 14 | Q8TAT6 NPL4_HUMAN    | K.CQPSAITLNR.Q    | 2 | 1,9985 | 0,177 | 0      |
| 14 | ##Q8IVF5 TIAM2_HUMAN | E.YFLLTCGK.L      | 2 | 1,9983 | 0,164 | 0,061  |
| 14 | Q13416 ORC2_HUMAN    | R.AQLLVNPK.K      | 2 | 1,9975 | 0,25  | -0,138 |
| 14 | P22234 PUR6_HUMAN    | R.DLKEVTPE.G      | 2 | 1,9974 | 0,195 | -0,066 |
| 14 | Q14692 BMS1_HUMAN    | K.AGLSPANCSQSDR.V | 2 | 1,9955 | 0,373 | -0,765 |
| 14 | P23229 ITA6_HUMAN    | K.LRPIITASVE.I    | 2 | 1,9954 | 0,34  | -0,612 |
| 14 | P52292 IMA2_HUMAN    | K.FVSFLGR.T       | 2 | 1,9949 | 0,09  | 0,886  |
| 14 | Q01167 FOXK2_HUMAN   | R.TPLGPLSSR.S     | 2 | 1,9935 | 0,341 | 0,263  |
| 14 | Q9Y6W5 WASF2_HUMAN   | R.SDLSAIR.Q       | 2 | 1,9923 | 0,208 | -0,139 |
| 14 | Q96I59 SYNM_HUMAN    | R.TNVLGSILR.I     | 2 | 1,9917 | 0,174 | -0,125 |
| 14 | Q99956 DUS9_HUMAN    | R.LLLLCDR.S       | 2 | 1,9906 | 0,124 | -0,608 |
| 14 | O75746 CMC1_HUMAN    | K.LTVNDFVR.D      | 2 | 1,9893 | 0,263 | -0,19  |
| 14 | A7MD96 A7MD96_HUMAN  | R.SVSPLRPETE.A    | 2 | 1,9819 | 0,249 | -0,766 |
| 14 | P54652 HSP72_HUMAN   | E.ELNADLFR.G      | 2 | 1,9815 | 0,184 | -0,312 |
| 14 | P19174 PLCG1_HUMAN   | R.NEPNSYAISFR.A   | 2 | 1,9785 | 0,165 | -0,47  |
| 14 | Q86WB0 NIPA_HUMAN    | R.LPLVPES#PRR.M   | 2 | 1,9777 | 0,465 | -0,294 |
| 14 | Q8WWY3 PRP31_HUMAN   | E.TQLDLSGDSVK.T   | 2 | 1,9771 | 0,105 | 0,105  |
| 14 | P49411 EFTU_HUMAN    | K.TTLTAAITK.I     | 2 | 1,9762 | 0,25  | -1,193 |
| 14 | Q9C0B0 UNK_HUMAN     | D.LSALLCR.N       | 2 | 1,9755 | 0,127 | 0,439  |
| 14 | P54725 RD23A_HUMAN   | R.DQPQFQNM*R.Q    | 2 | 1,9755 | 0,247 | 0,31   |
| 14 | Q71U36 TBA1A_HUMAN   | K.FDLMYAK.R       | 2 | 1,9738 | 0,156 | 0,206  |

S321:

|    |                    |                       |        |   |        |       |        |
|----|--------------------|-----------------------|--------|---|--------|-------|--------|
| 14 | P04264 K2C1_HUMAN  | R.DYQELM*NTK.L        |        | 2 | 1,9732 | 0,223 | -0,843 |
| 14 | P28066 PSA5_HUMAN  | E.GVCLAVEK.R          |        | 2 | 1,9705 | 0,144 | 0,139  |
| 14 | Q9UGM6 SYWM_HUMAN  | K.VLQIGSAK.A          |        | 2 | 1,9702 | 0,185 | -0,374 |
| 14 | P40818 UBP8_HUMAN  | E.M*APSSAPPS#TPPTHK.A | S691:  | 2 | 1,9691 | 0,331 | -0,381 |
| 14 | O14944 EREG_HUMAN  | R.VAQVSITK.C          |        | 2 | 1,9686 | 0,187 | -0,072 |
| 14 | P10721 KIT_HUMAN   | R.QATLTISSAR.V        |        | 2 | 1,9655 | 0,136 | 0      |
| 14 | Q7Z406 MYH14_HUMAN | R.GPLTFTTR.T          |        | 2 | 1,9638 | 0,227 | -0,068 |
| 14 | P23588 IF4B_HUMAN  | K.VAPAQPSEEGPGR.K     |        | 2 | 1,9618 | 0,312 | -0,094 |
| 14 | Q58FF7 H90B3_HUMAN | K.EQVANSAFVER.V       |        | 2 | 1,9608 | 0,134 | -0,195 |
| 14 | P17275 JUNB_HUMAN  | E.GFADGFVK.A          |        | 2 | 1,9605 | 0,15  | 0,145  |
| 14 | P04264 K2C1_HUMAN  | K.SISISVAR.G          |        | 2 | 1,9584 | 0,164 | 1,904  |
| 14 | P51858 HDGF_HUMAN  | E.DAEAPGIRDHES#L.-    | S239:  | 2 | 1,958  | 0,291 | -0,901 |
| 14 | P04075 ALDOA_HUMAN | R.VNPCIGGVILFHE.T     |        | 2 | 1,9569 | 0,12  | 0,335  |
| 14 | Q8N5U6 RNF10_HUMAN | R.YLSHLPLTCE.F        |        | 2 | 1,9545 | 0,325 | -1,781 |
| 14 | P06703 S10A6_HUMAN | K.LQDAEIAR.L          |        | 2 | 1,9537 | 0,206 | -0,333 |
| 14 | Q09666 AHNK_HUMAN  | K.GDISISGPK.V         |        | 2 | 1,9502 | 0,185 | 0      |
| 14 | Q15418 KS6A1_HUMAN | D.LKPSNILYVDE.S       |        | 2 | 1,9483 | 0,085 | -0,945 |
| 14 | Q9NR45 SIAS_HUMAN  | E.LNVPPFK.V           |        | 2 | 1,9474 | 0,159 | 0,494  |
| 14 | Q8N6T3 ARFG1_HUMAN | E.TFGSAEPTK.T         |        | 2 | 1,9471 | 0,282 | 0      |
| 14 | Q12791 KCMA1_HUMAN | E.CILASLNIK.S         |        | 2 | 1,947  | 0,246 | 0,236  |
| 14 | P02768 ALBU_HUMAN  | K.YICENQDSISSK.L      |        | 2 | 1,9456 | 0,106 | -0,591 |
| 14 | Q13347 EIF3I_HUMAN | R.IHYFDPQYFE.F        |        | 2 | 1,9455 | 0,2   | -0,449 |
| 14 | Q14241 ELOA1_HUMAN | K.QGLDSFDTGK.G        |        | 2 | 1,9445 | 0,253 | -1,142 |
| 14 | Q07954 LRP1_HUMAN  | R.CLPGFLGDR.C         |        | 2 | 1,9443 | 0,154 | -0,707 |
| 14 | P34931 HS71L_HUMAN | E.ISSM*VLTK.L         |        | 2 | 1,9435 | 0,242 | -0,068 |
| 14 | P35222 CTNB1_HUMAN | R.LVQLLVR.A           |        | 2 | 1,9426 | 0,126 | 0      |
| 14 | Q6ZRS2 SRCAP_HUMAN | R.LRPGSLVPPLE.T       |        | 2 | 1,9403 | 0,142 | -0,621 |
| 14 | Q8N5N7 RM50_HUMAN  | K.FNLLAHLADD.L        |        | 2 | 1,9386 | 0,219 | -0,324 |
| 14 | P11717 MPRI_HUMAN  | K.FISSPM*KE.K         |        | 2 | 1,9371 | 0,081 | -0,575 |
| 14 | Q9Y6M7 S4A7_HUMAN  | K.VDM*NFM*R.K         |        | 2 | 1,9366 | 0,272 | 0,452  |
| 14 | Q9UQ35 SRRM2_HUMAN | R.VSGRTS#PPLLD.R.A    | S2398: | 2 | 1,9338 | 0,095 | -1,151 |
| 14 | Q15393 SF3B3_HUMAN | R.SYYFPVK.N           |        | 2 | 1,9326 | 0,2   | -0,135 |
| 14 | P20700 LMNB1_HUMAN | R.LAVYIDK.V           |        | 2 | 1,932  | 0,223 | 0,371  |

|    |                     |                     |   |        |       |        |
|----|---------------------|---------------------|---|--------|-------|--------|
| 14 | P45974 UBP5_HUMAN   | E.LDISQLR.G         | 2 | 1,9313 | 0,132 | 0,361  |
| 14 | P09543 CN37_HUMAN   | E.DLAAYCR.R         | 2 | 1,9284 | 0,236 | 0,281  |
| 14 | P15121 ALDR_HUMAN   | D.M*TTLLSYNR.N      | 2 | 1,9272 | 0,257 | -0,328 |
| 14 | O43166 SI1L1_HUMAN  | E.SFFDLLK.G         | 2 | 1,9269 | 0,175 | 0,421  |
| 14 | Q00610 CLH1_HUMAN   | R.IAAYLFK.G         | 2 | 1,9268 | 0,237 | 0,222  |
| 14 | P11142 HSP7C_HUMAN  | K.VCNPIITK.L        | 2 | 1,9264 | 0,203 | -0,904 |
| 14 | O15400 STX7_HUMAN   | E.FTSLTNFQK.V       | 2 | 1,9236 | 0,176 | -0,411 |
| 14 | P08238 HS90B_HUMAN  | E.INPDHPIVE.T       | 2 | 1,9207 | 0,213 | -1,18  |
| 14 | A1L390 PKHG3_HUMAN  | E.NM*VEPPLSGR.V     | 2 | 1,9188 | 0,193 | -0,765 |
| 14 | P49959 MRE11_HUMAN  | K.IM*SQSQVSK.G      | 2 | 1,9182 | 0,215 | -0,119 |
| 14 | Q00839 HNRPU_HUMAN  | K.EKPYFPIPEE.Y      | 2 | 1,9164 | 0,253 | -0,586 |
| 14 | Q92805 GOGA1_HUMAN  | R.EDLSSQLLR.R       | 2 | 1,9154 | 0,286 | -0,115 |
| 14 | Q15657 Q15657_HUMAN | R.IM*DQTLK.A        | 2 | 1,9148 | 0,138 | 0,212  |
| 14 | Q9BZL6 KPCD2_HUMAN  | E.M*LFGLVR.Q        | 2 | 1,9093 | 0,28  | 0,358  |
| 14 | A2RUB1 YQ006_HUMAN  | K.HLDGLSQNTYQDLLE.S | 2 | 1,9063 | 0,208 | -0,489 |
| 14 | Q9Y5W9 SNX11_HUMAN  | K.EGTSTLQSVR.R      | 2 | 1,9062 | 0,266 | -1,585 |
| 14 | Q92597 NDRG1_HUMAN  | E.KGETITGLLQE.F     | 2 | 1,9045 | 0,144 | 0      |
| 14 | P11940 PABP1_HUMAN  | K.FGPALSVK.V        | 2 | 1,9016 | 0,118 | 0,074  |
| 14 | Q9NQ92 CQ079_HUMAN  | R.GTQSIPNDSPAR.G    | 2 | 1,9015 | 0,382 | -0,687 |
| 14 | P11766 ADHX_HUMAN   | E.FVTHNLSFDE.I      | 2 | 1,9008 | 0,081 | -0,807 |
| 14 | Q9UPT9 UBP22_HUMAN  | K.ASIKDVLDSE.G      | 2 | 1,9003 | 0,221 | -1,133 |
| 14 | P23396 RS3_HUMAN    | K.FVADGIFK.A        | 2 | 1,8995 | 0,18  | 0,068  |
| 14 | Q96J01 THOC3_HUMAN  | E.DHFIDIAEVE.T      | 2 | 1,8975 | 0,277 | -0,205 |
| 14 | Q8WYP5 AHTF1_HUMAN  | E.FTPQSILR.S        | 2 | 1,8967 | 0,143 | -0,444 |
| 14 | Q9Y4L1 HYOU1_HUMAN  | K.LQDLTLR.D         | 2 | 1,8951 | 0,14  | -0,142 |
| 14 | Q13564 ULA1_HUMAN   | K.LLCSNSAFLR.V      | 2 | 1,8949 | 0,104 | -0,93  |
| 14 | Q13428 TCOF_HUMAN   | K.VVTAAAQAK.Q       | 2 | 1,8918 | 0,276 | 0,497  |
| 14 | Q7Z401 MYCPP_HUMAN  | R.FTM*YTTSSK.D      | 2 | 1,8878 | 0,247 | -0,113 |
| 14 | P52788 SPSY_HUMAN   | E.DSPYQNIK.I        | 2 | 1,8869 | 0,238 | 0      |
| 14 | Q99497 PARK7_HUMAN  | K.VTVAGLAGK.D       | 2 | 1,8841 | 0,166 | -0,748 |
| 14 | Q8WWM7 ATX2L_HUMAN  | R.NVDFNYATK.D       | 2 | 1,8797 | 0,211 | -0,455 |
| 14 | Q06323 PSME1_HUMAN  | E.NLLGSYFPK.K       | 2 | 1,8742 | 0,255 | -0,235 |
| 14 | P09936 UCHL1_HUMAN  | R.FSAVALCK.A        | 2 | 1,8729 | 0,179 | 0,136  |

|    |                     |                      |       |   |        |       |        |
|----|---------------------|----------------------|-------|---|--------|-------|--------|
| 14 | Q9UPN3 MACF1_HUMAN  | K.AFSIDIIR.H         |       | 2 | 1,8704 | 0,083 | -0,065 |
| 14 | P26640 SYVC_HUMAN   | K.ITPAHDQNDYE.V      |       | 2 | 1,8699 | 0,115 | -1,03  |
| 14 | Q9NQ88 CL005_HUMAN  | R.FALTVVR.H          |       | 2 | 1,8648 | 0,129 | -0,227 |
| 14 | Q9NZI8 IF2B1_HUMAN  | K.QQQVDIPLR.L        |       | 2 | 1,8642 | 0,176 | -0,334 |
| 14 | Q96PE2 ARHGH_HUMAN  | R.AHPTLQAPSLE.D      |       | 2 | 1,8642 | 0,176 | -0,21  |
| 14 | P12004 PCNA_HUMAN   | R.YLNFFTK.A          |       | 2 | 1,8626 | 0,16  | -0,262 |
| 14 | Q6IBW4 CNDH2_HUMAN  | E.EQPM*EVSVC.R.S     |       | 2 | 1,8617 | 0,212 | -1,365 |
| 14 | P68371 TBB2C_HUMAN  | R.YLTVAAVFR.G        |       | 2 | 1,8562 | 0,228 | -0,235 |
| 14 | Q96P11 NSUN5_HUMAN  | K.HFLLDPLM*PE.L      |       | 2 | 1,8561 | 0,173 | -0,397 |
| 14 | Q9NW13 RBM28_HUMAN  | R.IVLHPDTE.H         |       | 2 | 1,8558 | 0,083 | 0,132  |
| 14 | Q9P013 CWC15_HUMAN  | R.FVNDTLRSE.F        |       | 2 | 1,8548 | 0,144 | -0,451 |
| 14 | P22102 PUR2_HUMAN   | K.GLAAIKFE.G         |       | 2 | 1,8546 | 0,139 | 0,431  |
| 14 | Q7Z2Z1 CO042_HUMAN  | E.ITS#PTKPILR.S      | S120: | 2 | 1,8517 | 0,13  | -0,809 |
| 14 | Q9H6Y2 WDR55_HUMAN  | R.AVVVDDYR.R         |       | 2 | 1,8517 | 0,284 | 0,13   |
| 14 | Q15418 KS6A1_HUMAN  | R.ICDFGFAK.Q         |       | 2 | 1,8498 | 0,269 | -0,127 |
| 14 | Q00537 PCTK2_HUMAN  | E.VQSPTGVCLR.N       |       | 2 | 1,8477 | 0,199 | -1,201 |
| 14 | O60678 ANM3_HUMAN   | K.QQTPCLFCNR.L       |       | 2 | 1,8458 | 0,332 | -0,645 |
| 14 | Q6P4R8 NFRKB_HUMAN  | R.SPSPAVPLR.V        |       | 2 | 1,8447 | 0,102 | -0,66  |
| 14 | Q7Z2K8 GRIN1_HUMAN  | K.AGTVS#PGKEDPVSSR.R | S452: | 2 | 1,8441 | 0,252 | -1,246 |
| 14 | Q8N3X1 FNBP4_HUMAN  | K.VQTPKVEE.E         |       | 2 | 1,8428 | 0,185 | 0,237  |
| 14 | Q15181 IPYR_HUMAN   | D.FAIDIK.S           |       | 2 | 1,8421 | 0,092 | 0,744  |
| 14 | Q96T37 RBM15_HUMAN  | R.LLLERPS#PIR.D      | S700: | 2 | 1,8419 | 0,236 | -0,67  |
| 14 | P46013 KI67_HUMAN   | K.SVPTTQCLDNSK.K     |       | 2 | 1,8405 | 0,408 | -0,813 |
| 14 | Q9Y4C8 RBM19_HUMAN  | E.LSDMDYLK.S         |       | 2 | 1,8381 | 0,187 | -0,31  |
| 14 | Q9BSQ5 CCM2_HUMAN   | R.GIITDSFGR.H        |       | 2 | 1,8369 | 0,088 | -0,568 |
| 14 | Q2NL66 Q2NL66_HUMAN | R.GPST#PKKPLEQSC.-   | T226: | 2 | 1,8367 | 0,141 | -0,404 |
| 14 | O75153 EIF3X_HUMAN  | R.TCFSLHLD.G         |       | 2 | 1,8349 | 0,225 | 0,061  |
| 14 | Q6S8J3 A26CA_HUMAN  | E.TTFNSIM*K.S        |       | 2 | 1,8343 | 0,259 | 0,764  |
| 14 | Q6NUK1 SCMC1_HUMAN  | E.TLFQALDR.N         |       | 2 | 1,8326 | 0,199 | 0,316  |
| 14 | Q12756 KIF1A_HUMAN  | R.AASVSSLHE.R        |       | 2 | 1,8311 | 0,253 | 0,135  |
| 14 | P31948 STIP1_HUMAN  | R.TLSDPTYR.E         |       | 2 | 1,8304 | 0,13  | -1,03  |
| 14 | P26373 RL13_HUMAN   | R.TIGISVDPR.R        |       | 2 | 1,8302 | 0,175 | -0,127 |
| 14 | Q96R72 OR4K3_HUMAN  | K.M*IADFLR.E         |       | 2 | 1,8299 | 0,139 | 0,207  |

|    |                    |                      |       |   |        |       |        |
|----|--------------------|----------------------|-------|---|--------|-------|--------|
| 14 | Q14980 NUMA1_HUMAN | E.GTPLSITSK.L        |       | 2 | 1,8292 | 0,376 | -1,012 |
| 14 | Q96PK6 RBM14_HUMAN | R.TQPM*TAQAASYR.A    |       | 2 | 1,8265 | 0,342 | -0,364 |
| 14 | Q9Y3C6 PPIL1_HUMAN | R.VCQGIGM*VNR.V      |       | 2 | 1,826  | 0,13  | -0,743 |
| 14 | Q96A19 C102A_HUMAN | R.QQQNAPLFGK.I       |       | 2 | 1,8235 | 0,4   | -0,216 |
| 14 | O15061 DMN_HUMAN   | E.NIVTSILK.Q         |       | 2 | 1,8226 | 0,09  | 0,069  |
| 14 | A6NHR9 SMHD1_HUMAN | R.TVYLFDR.R          |       | 2 | 1,8219 | 0,226 | 0,2    |
| 14 | Q96JM3 ZN828_HUMAN | E.DTLFPSSK.K         |       | 2 | 1,8197 | 0,161 | 0,068  |
| 14 | O75822 EIF3J_HUMAN | E.KSLYYASFLE.V       |       | 2 | 1,8148 | 0,117 | -0,4   |
| 14 | Q6PJT7 ZC3HE_HUMAN | D.LVQPKPAS#PK.F      | S515: | 2 | 1,8121 | 0,279 | -0,484 |
| 14 | Q03154 ACY1_HUMAN  | R.TIHM*TFVPDEE.V     |       | 2 | 1,8102 | 0,086 | -0,64  |
| 14 | P58107 EPIPL_HUMAN | K.GFFDPNTHE.N        |       | 2 | 1,8084 | 0,126 | -0,459 |
| 14 | A8MPT4 GSTT4_HUMAN | E.LNIGSGLFRE.A       |       | 2 | 1,8054 | 0,153 | -0,11  |
| 14 | Q2VPK5 CP084_HUMAN | R.DGPAAGDSGPR.C      |       | 2 | 1,8021 | 0,253 | -0,061 |
| 14 | P06396 GELS_HUMAN  | E.GGETPLFK.Q         |       | 2 | 1,8018 | 0,092 | -0,072 |
| 14 | Q96HS1 PGAM5_HUMAN | R.EPLSLINVR.K        |       | 2 | 1,8013 | 0,342 | 0      |
| 14 | Q96B97 SH3K1_HUMAN | K.GVGFGDIFK.D        |       | 2 | 1,7986 | 0,218 | -0,973 |
| 14 | P12955 PEPD_HUMAN  | E.ASFDGISKFE.V       |       | 2 | 1,7978 | 0,155 | 0      |
| 14 | Q08378 GOGA3_HUMAN | R.GTYGILSK.T         |       | 2 | 1,7952 | 0,286 | 0,654  |
| 14 | P62258 1433E_HUMAN | E.DLVYQAK.L          |       | 2 | 1,7945 | 0,157 | -0,219 |
| 14 | Q9UKV3 ACINU_HUMAN | K.STLADYSAQK.D       |       | 2 | 1,7911 | 0,169 | 0      |
| 14 | Q00536 PCTK1_HUMAN | R.LSLPADIR.L         |       | 2 | 1,7887 | 0,289 | 0      |
| 14 | O15320 CTGE5_HUMAN | E.GPLRLS#PLLPGGGGR.G | S548: | 2 | 1,7878 | 0,25  | -0,399 |
| 14 | Q00796 DHSO_HUMAN  | R.VAIEPGAPR.E        |       | 2 | 1,7876 | 0,21  | -0,335 |
| 14 | Q9NYZ3 GTSE1_HUMAN | R.LVDVS#PDRGSPPSR.V  | S575: | 2 | 1,7875 | 0,341 | -0,625 |
| 14 | Q9NZL9 MAT2B_HUMAN | R.M*LDPSIK.G         |       | 2 | 1,7856 | 0,114 | 0,521  |
| 14 | Q09666 AHNK_HUMAN  | K.FSM*PGFK.A         |       | 2 | 1,784  | 0,116 | 0,662  |
| 14 | Q16643 DREB_HUMAN  | R.M*APTPIPTR.S       |       | 2 | 1,7826 | 0,173 | 0,061  |
| 14 | P35579 MYH9_HUMAN  | D.LPFVVPR.R          |       | 2 | 1,7777 | 0,163 | 0      |
| 14 | Q76176 SSH2_HUMAN  | E.YQGILLASK.Q        |       | 2 | 1,7753 | 0,105 | -0,246 |
| 14 | Q6ZU65 K2030_HUMAN | R.VAFIS#LSPVRR.R     | S11:  | 2 | 1,7709 | 0,241 | -0,645 |
| 14 | Q96RS0 TGS1_HUMAN  | K.LYNLGLK.G          |       | 2 | 1,7702 | 0,126 | -0,594 |
| 14 | Q9BY49 PECR_HUMAN  | E.EVNNLVK.S          |       | 2 | 1,7687 | 0,103 | 0,523  |
| 14 | P84090 ERH_HUMAN   | D.LSCLVYR.A          |       | 2 | 1,7646 | 0,129 | 0,067  |

|    |                      |                    |        |   |        |       |        |
|----|----------------------|--------------------|--------|---|--------|-------|--------|
| 14 | Q96IU4 ABHEB_HUMAN   | K.INAANYASVK.T     |        | 2 | 1,7643 | 0,162 | -0,813 |
| 14 | O14777 NDC80_HUMAN   | K.LDDLYQQK.I       |        | 2 | 1,7611 | 0,251 | 0,119  |
| 14 | P51114 FXR1_HUMAN    | E.DFIQVPR.N        |        | 2 | 1,7602 | 0,155 | 0,07   |
| 14 | P43358 MAGA4_HUMAN   | R.IAYPSLRE.A       |        | 2 | 1,7556 | 0,203 | -0,9   |
| 14 | P06703 S10A6_HUMAN   | R.LM*EDLDR.N       |        | 2 | 1,755  | 0,188 | 0,269  |
| 14 | Q9Y6N7 ROBO1_HUMAN   | E.M*PCPVPPAR.M     |        | 2 | 1,7537 | 0,219 | -0,352 |
| 14 | P49792 RBP2_HUMAN    | E.VM*VPSFCK.S      |        | 2 | 1,7532 | 0,086 | -0,186 |
| 14 | Q15813 TBCE_HUMAN    | R.YQFLCLK.Y        |        | 2 | 1,7525 | 0,141 | -0,063 |
| 14 | O00115 DNS2A_HUMAN   | R.SLQPLYR.S        |        | 2 | 1,7514 | 0,164 | -0,07  |
| 14 | Q14684 RRP1B_HUMAN   | K.FIDPFCK.I        |        | 2 | 1,7502 | 0,141 | 0      |
| 14 | P30622 CLIP1_HUMAN   | R.YFQCEPLK.G       |        | 2 | 1,7496 | 0,141 | -0,112 |
| 14 | P46013 KI67_HUMAN    | K.LDLAGTLPGS#KR.Q  | S1207: | 2 | 1,7459 | 0,178 | -0,187 |
| 14 | A8MUS9 A8MUS9_HUMAN  | E.IPIPFAR.A        |        | 2 | 1,7399 | 0,133 | 1,049  |
| 14 | P05783 K1C18_HUMAN   | E.IDLDSM*R.N       |        | 2 | 1,7391 | 0,245 | -0,352 |
| 14 | Q96HC4 PDLI5_HUMAN   | K.VTSTNNM*AYNK.A   |        | 2 | 1,7371 | 0,295 | -0,194 |
| 14 | P84103 SFRS3_HUMAN   | R.AFGYYGPLR.S      |        | 2 | 1,7365 | 0,112 | -0,234 |
| 14 | Q5UIP0 RIF1_HUMAN    | K.TVGPCLGDSK.N     |        | 2 | 1,7347 | 0,188 | 0      |
| 14 | ##Q96AY4 TTC28_HUMAN | K.VARS#ILQEGTE.S   | S632:  | 2 | 1,7325 | 0,099 | 1,141  |
| 14 | Q6P1N0 C2D1A_HUMAN   | R.TLLEALEQR.M      |        | 2 | 1,7287 | 0,089 | -1,933 |
| 14 | P49327 FAS_HUMAN     | E.FFLAGIGR.L       |        | 2 | 1,7269 | 0,151 | 0,138  |
| 14 | P62158 CALM_HUMAN    | E.FLTMM*AR.K       |        | 2 | 1,7235 | 0,205 | -0,069 |
| 14 | P42224 STAT1_HUMAN   | K.VM*CIEHE.I       |        | 2 | 1,7198 | 0,246 | 0      |
| 14 | ##Q9H492 MLP3A_HUMAN | D.LVPLQKE.G        |        | 2 | 1,7194 | 0,092 | 0      |
| 14 | Q13428 TCOF_HUMAN    | K.TSQVGAASAPAKE.S  |        | 2 | 1,7192 | 0,195 | 0,201  |
| 14 | Q00577 PURA_HUMAN    | R.FFFDVGSNK.Y      |        | 2 | 1,7134 | 0,098 | -0,23  |
| 14 | Q14103 HNRPD_HUMAN   | R.GFCFITFK.E       |        | 2 | 1,7121 | 0,103 | -0,06  |
| 14 | Q8IYB7 DI3L2_HUMAN   | K.LSVCVSEK.G       |        | 2 | 1,7051 | 0,231 | 0      |
| 14 | O00541 PESC_HUMAN    | E.GDYVPPEK.L       |        | 2 | 1,7049 | 0,305 | 0,27   |
| 14 | P11021 GRP78_HUMAN   | R.LTPEEIER.M       |        | 2 | 1,6989 | 0,279 | -0,618 |
| 14 | P61158 ARP3_HUMAN    | K.QYTGINAISK.K     |        | 2 | 1,6956 | 0,247 | -0,446 |
| 14 | Q99618 CDCA3_HUMAN   | R.VADPRSPS#AGILR.T | S31:   | 2 | 1,6924 | 0,175 | 0      |
| 14 | P55060 XPO2_HUMAN    | K.ICAVGITK.L       |        | 2 | 1,6901 | 0,175 | -0,354 |
| 14 | Q9H6Z4 RANB3_HUMAN   | K.FVFGQNMSEK.V     |        | 2 | 1,6895 | 0,087 | -0,803 |

|    |                       |                       |        |   |        |       |        |
|----|-----------------------|-----------------------|--------|---|--------|-------|--------|
| 14 | O15042 SR140_HUMAN    | D.ASGPSDSDM*PSR.T     |        | 2 | 1,689  | 0,19  | -0,2   |
| 14 | P29084 T2EB_HUMAN     | K.ILFFNDK.S           |        | 2 | 1,6802 | 0,131 | -0,612 |
| 14 | Q92733 PRCC_HUMAN     | K.SAALQVTK.Q          |        | 2 | 1,6782 | 0,264 | 0,447  |
| 14 | Q9BR76 COR1B_HUMAN    | R.AIFLADGK.V          |        | 2 | 1,6695 | 0,237 | 0,146  |
| 14 | Q15149 PLEC1_HUMAN    | R.RDDGTGQLLLPLSD.A    |        | 2 | 1,6649 | 0,212 | -0,407 |
| 14 | Q01518 CAP1_HUMAN     | K.VPTISINK.T          |        | 2 | 1,6642 | 0,215 | 0,14   |
| 14 | O95359 TACC2_HUMAN    | E.SAEGVPPASGGGR.V     |        | 2 | 1,659  | 0,115 | -0,983 |
| 14 | Q02880 TOP2B_HUMAN    | E.TEPVVIPR.D          |        | 2 | 1,658  | 0,255 | 0,067  |
| 14 | Q99615 DNJC7_HUMAN    | K.VVFCM*DR.A          |        | 2 | 1,6547 | 0,113 | 1,876  |
| 14 | Q96P70 IPO9_HUMAN     | K.VSSVALCK.L          |        | 2 | 1,6545 | 0,285 | -0,071 |
| 14 | Q9H7D7 WDR26_HUMAN    | R.GYNFEDLTDR.N        |        | 2 | 1,6483 | 0,195 | -0,298 |
| 14 | P06733 ENOA_HUMAN     | E.VDLFTSK.G           |        | 2 | 1,6463 | 0,323 | -0,151 |
| 14 | P62851 RS25_HUMAN     | R.AQVIYTR.N           |        | 2 | 1,6453 | 0,133 | -0,072 |
| 14 | Q96C86 DCPS_HUMAN     | R.TLTFALR.A           |        | 2 | 1,6311 | 0,087 | 0,223  |
| 14 | Q15149 PLEC1_HUMAN    | E.FADM*LSGNAGGFRS#R.S | S4382: | 2 | 1,6283 | 0,434 | -0,145 |
| 14 | O15355 PPM1G_HUMAN    | E.VALYCAK.Y           |        | 2 | 1,6275 | 0,163 | 0      |
| 14 | Q8IY17 PLPL6_HUMAN    | E.TPSAPLLSR.C         |        | 2 | 1,6238 | 0,103 | -0,194 |
| 14 | P06748 NPM_HUMAN      | K.GPSSVEDIK.A         |        | 2 | 1,6193 | 0,107 | -0,72  |
| 14 | O14745 NHERF_HUMAN    | E.AALES#PRPALVR.S     | S280:  | 2 | 1,6154 | 0,282 | -0,718 |
| 14 | P04792 HSPB1_HUMAN    | R.VPFSLLR.G           |        | 2 | 1,6143 | 0,174 | 0      |
| 14 | P14678 RSMB_HUMAN     | R.IFIGTFK.A           |        | 2 | 1,6113 | 0,091 | 0,443  |
| 14 | ##P23458 JAK1_HUMAN   | E.ILNQFSTR.N          |        | 2 | 1,6049 | 0,143 | -1,246 |
| 14 | P49757 NUMB_HUMAN     | R.GFPALSQK.M          |        | 2 | 1,599  | 0,294 | -0,144 |
| 14 | Q9H6Z4 RANB3_HUMAN    | E.AQLPPFPR.E          |        | 2 | 1,5963 | 0,226 | -0,198 |
| 14 | Q07820 MCL1_HUMAN     | K.RPAVLPLLE.L         |        | 2 | 1,5947 | 0,108 | 0,121  |
| 14 | Q9UHB6 LIMA1_HUMAN    | R.ETPHS#PGVEDAPIAK.V  | S490:  | 2 | 1,5945 | 0,282 | -0,15  |
| 14 | Q13363 CTBP1_HUMAN    | R.GAALDVHE.S          |        | 2 | 1,5939 | 0,157 | 0,376  |
| 14 | ##Q695H4 Q695H4_HUMAN | K.DSGSPLDK.F          |        | 2 | 1,5854 | 0,098 | 0,521  |
| 14 | P49321 NASP_HUMAN     | E.AFFFYGK.S           |        | 2 | 1,5852 | 0,202 | 0,277  |
| 14 | P13693 TCTP_HUMAN     | R.DLISHDE.M           |        | 2 | 1,5836 | 0,177 | 0,662  |
| 14 | Q15293 RCN1_HUMAN     | R.YIFDNVAK.V          |        | 2 | 1,5824 | 0,109 | -0,566 |
| 14 | P15924 DESP_HUMAN     | K.ISTISSVR.N          |        | 2 | 1,5769 | 0,201 | 0,424  |
| 14 | Q9H4H8 FA83D_HUMAN    | K.YLGTPHLE.L          |        | 2 | 1,5767 | 0,12  | 0,197  |



|    |                    |                        |       |   |        |       |        |
|----|--------------------|------------------------|-------|---|--------|-------|--------|
| 14 | Q14185 DOCK1_HUMAN | R.IM*PSSLDDR.R         |       | 2 | 1,5749 | 0,082 | 0,116  |
| 14 | Q99848 EBP2_HUMAN  | E.RLDVTLGPVPE.I        |       | 2 | 1,5738 | 0,185 | -0,408 |
| 14 | Q04760 LGUL_HUMAN  | R.GFGHIGIAVPD.V        |       | 2 | 1,5706 | 0,085 | -0,789 |
| 14 | Q68D10 SPT2_HUMAN  | R.LPFPTGYK.R           |       | 2 | 1,5686 | 0,083 | -0,264 |
| 14 | Q08211 DHX9_HUMAN  | R.QLYHLGVVE.A          |       | 2 | 1,5588 | 0,3   | -0,577 |
| 14 | Q9UJM3 ERRFI_HUMAN | E.DSTLSDFK.Y           |       | 2 | 1,5563 | 0,177 | 0      |
| 14 | O60547 GMDS_HUMAN  | E.CFSLGNLDAK.R         |       | 2 | 1,5531 | 0,097 | 0,108  |
| 14 | Q96G28 CC104_HUMAN | K.IPGLEHASIE.G         |       | 2 | 1,546  | 0,083 | -0,458 |
| 14 | Q8TD19 NEK9_HUMAN  | R.LNPAVTCAGK.G         |       | 2 | 1,5458 | 0,174 | -0,828 |
| 14 | Q9Y490 TLN1_HUMAN  | K.GITM*ATAK.A          |       | 2 | 1,545  | 0,284 | 0,528  |
| 14 | P61604 CH10_HUMAN  | K.FLPLFDR.V            |       | 2 | 1,5401 | 0,091 | -0,403 |
| 14 | Q9UM22 EPDR1_HUMAN | E.YILLYK.D             |       | 2 | 1,5322 | 0,123 | 0      |
| 14 | Q13464 ROCK1_HUMAN | D.LDFPALR.K            |       | 2 | 1,5311 | 0,093 | -0,147 |
| 14 | Q9Y4B6 VPRBP_HUMAN | R.KLSSEPLLPLDE.E       |       | 2 | 1,5304 | 0,153 | -0,546 |
| 14 | P04406 G3P_HUMAN   | K.LTGM*AFR.V           |       | 2 | 1,5174 | 0,261 | 0,601  |
| 14 | P08559 ODPA_HUMAN  | R.GDFIPGLR.V           |       | 2 | 1,5114 | 0,299 | -0,139 |
| 14 | Q69YN4 VIR_HUMAN   | E.DQFNGS#PPRPQPR.G     | S173: | 2 | 1,5101 | 0,176 | -0,619 |
| 14 | Q9BUQ8 DDX23_HUMAN | E.DYSITTK.G            |       | 2 | 1,5099 | 0,09  | 0,368  |
| 14 | P48643 TCPE_HUMAN  | R.AVTIFIR.G            |       | 2 | 1,504  | 0,14  | 0,521  |
| 14 | Q9HD15 SRA1_HUMAN  | R.VAAPQDGSPPR.V        |       | 2 | 1,4919 | 0,193 | 0,061  |
| 14 | Q07955 SFRS1_HUMAN | E.DM*TYAVR.K           |       | 2 | 1,4912 | 0,124 | 0,21   |
| 14 | P45974 UBP5_HUMAN  | E.TGYPLAVK.L           |       | 2 | 1,4853 | 0,106 | 0      |
| 14 | Q6NVY1 HIBCH_HUMAN | K.IAPVFFR.E            |       | 2 | 1,4701 | 0,26  | -0,072 |
| 14 | P62995 TRA2B_HUMAN | R.VDFSITK.R            |       | 2 | 1,4641 | 0,175 | 0,452  |
| 14 | Q9P2N6 K1310_HUMAN | K.VTTVTSQK.S           |       | 2 | 1,4621 | 0,124 | 0,065  |
| 14 | P28340 DPOD1_HUMAN | E.DVICTSR.D            |       | 2 | 1,4139 | 0,092 | -0,072 |
| 14 | P11142 HSP7C_HUMAN | R.GTLDPVEK.A           |       | 2 | 1,4087 | 0,175 | -0,213 |
| 14 | Q3KQU3 MA7D1_HUMAN | R.GPTPPAM*GPR.D        |       | 2 | 1,4076 | 0,269 | 0,184  |
| 14 | P02545 LMNA_HUMAN  | R.LSPSPTSQR.S          |       | 2 | 1,3022 | 0,174 | 0,564  |
| 14 | O15231 ZN185_HUMAN | K.LAPYNIR.R            |       | 2 | 1,2726 | 0,138 | 0      |
| 14 | O95382 M3K6_HUMAN  | E.AQAFLLR.T            |       | 2 | 1,2711 | 0,11  | 0,447  |
| 14 | Q6GYQ0 GRIPE_HUMAN | R.DQPGQAPM*R.Q         |       | 2 | 1,2084 | 0,116 | -0,06  |
| 15 | P04049 RAF1_HUMAN  | R.AAHTEDINACTLTTS#PR.L | S642: | 2 | 6,7345 | 0,493 | -0,126 |

|    |                     |                                |              |   |        |       |        |
|----|---------------------|--------------------------------|--------------|---|--------|-------|--------|
| 15 | Q8TEW0 PARD3_HUMAN  | R.ISHSLYSGIEGLDES#PSR.N        | S728:        | 2 | 6,1395 | 0,491 | -0,482 |
| 15 | Q53EZ4 CEP55_HUMAN  | E.KVAASPKS#PTAALNES#LVECPK.C   | S428:S436:   | 3 | 6,1392 | 0,517 | -0,745 |
| 15 | Q8IXJ6 SIRT2_HUMAN  | E.HASIDAQSGAGVNPSTAS#PK.K      | S368:        | 2 | 6,0416 | 0,428 | 1,017  |
| 15 | O95487 SC24B_HUMAN  | R.TPPTANHPVEPVTSVTQPSSELLQK.G  |              | 3 | 5,8083 | 0,406 | -0,136 |
| 15 | P80723 BASP_HUMAN   | K.AQGAASAEEPKEPAANSQDQTVTVKE.- |              | 3 | 5,7046 | 0,458 | -0,443 |
| 15 | Q5JSH3 WDR44_HUMAN  | K.GKELSDQATAS#PIVAR.T          | S96:         | 2 | 5,6353 | 0,409 | 0      |
| 15 | Q8TE77 SSH3_HUMAN   | E.LHGDQTDGQGSQ#PQKQEE.Q        | S87:         | 2 | 5,561  | 0,461 | 0,213  |
| 15 | Q14692 BMS1_HUMAN   | R.VTLFSDSKPLGSEDIDNQLM*M*PK.E  |              | 3 | 5,5444 | 0,302 | -0,207 |
| 15 | Q5JRA6 MIA3_HUMAN   | E.ASGKPSDPGSGTATM*M*NSS#R.G    | S1741:       | 3 | 5,4509 | 0,454 | 0,079  |
| 15 | P49023 PAXI_HUMAN   | R.FIHQQPQSS#PVYGSSAK.T         | S85:         | 3 | 5,4292 | 0,228 | -0,271 |
| 15 | Q15459 SF3A1_HUMAN  | K.ASKPLPPAPAPDEYLVSPITGEK.I    |              | 3 | 5,4088 | 0,481 | -0,154 |
| 15 | Q9ULT8 HECD1_HUMAN  | E.GHDSLSVGS#FEEDSKSE.F         | S2320:       | 2 | 5,2549 | 0,511 | -1,227 |
| 15 | Q9BUR4 WDR79_HUMAN  | K.DCTNGVSLHPSLPLLATASGQR.V     |              | 3 | 5,2449 | 0,559 | -0,718 |
| 15 | Q96GQ7 DDX27_HUMAN  | K.KGQEAGGFEDASQYDE.N           |              | 2 | 5,2285 | 0,539 | -0,715 |
| 15 | Q99598 TSNAX_HUMAN  | E.GKDVNSSS#PVM*LAFK.S          | S33:         | 2 | 5,1749 | 0,459 | -0,582 |
| 15 | P82664 RT10_HUMAN   | K.DLTKPVVTISDEPDILYK.R         |              | 2 | 5,1477 | 0,48  | 0      |
| 15 | Q9UQ35 SRRM2_HUMAN  | K.VKAQT#PPGSLSGSKS#PCPQEK.S    | T1003:S1014: | 3 | 5,1323 | 0,329 | -0,15  |
| 15 | Q9P0U4 CXXC1_HUMAN  | R.KPDINCFM*IGCDNCNE.W          |              | 2 | 5,1094 | 0,488 | -0,244 |
| 15 | Q5VTR2 BRE1A_HUMAN  | R.KALVVPEPEPDS#NQER.K          | S138:        | 2 | 5,0803 | 0,41  | 0,117  |
| 15 | O75717 WDHD1_HUMAN  | R.SHILEDDENS#VDISM*LK.T        | S383:        | 2 | 5,0443 | 0,528 | 0,06   |
| 15 | Q9UHB6 LIMA1_HUMAN  | E.VQQPVHPKPLSPDS#RASS#LSE.S    | S365:S369:   | 3 | 5,0407 | 1     | 0,076  |
| 15 | O75717 WDHD1_HUMAN  | R.SHILEDDENS#VDISM*LK.T        | S383:        | 3 | 5,0219 | 0,3   | 0      |
| 15 | Q8N1G0 ZN687_HUMAN  | E.SCS#PHHPQVLAQQGSGSS#PK.A     | S227:S242:   | 2 | 4,9841 | 0,51  | -1,085 |
| 15 | Q00537 PCTK2_HUMAN  | E.KLQINS#PPFDQPM*SR.R          | S165:        | 3 | 4,9362 | 0,359 | -1,381 |
| 15 | Q8N5P1 ZC3H8_HUMAN  | R.SKDYDVYSDNDICSQE.S           |              | 2 | 4,8433 | 0,535 | 0      |
| 15 | P35527 K1C9_HUMAN   | R.GSGSGSYGGGGSGGGYGGGSGSR.G    |              | 2 | 4,8432 | 0,43  | -0,136 |
| 15 | Q8TEW0 PARD3_HUMAN  | R.ISHSLYSGIEGLDES#PSR.N        | S728:        | 3 | 4,8329 | 0,372 | -0,632 |
| 15 | P62913 RL11_HUMAN   | R.KNNFSDTGNFGFIQE.H            |              | 2 | 4,8196 | 0,494 | -0,137 |
| 15 | Q14694 UBP10_HUMAN  | E.TKYSPPAIS#PLVSEK.Q           | S370:        | 3 | 4,7915 | 0,416 | 0      |
| 15 | Q9H8G2 CI082_HUMAN  | E.KELFLAHS#DLEE.G              | S120:        | 2 | 4,776  | 0,472 | -0,446 |
| 15 | Q53ET0 CRTC2_HUMAN  | R.HGSGPNIILTGDSS#PGFSKE.I      | S624:        | 2 | 4,7391 | 0,513 | -0,117 |
| 15 | Q9NZL4 HPBP1_HUMAN  | E.KLLQTCFSSPADDS#M*DR.-        | S359:        | 3 | 4,724  | 0,404 | -0,089 |
| 15 | Q9NZ23 Q9NZ23_HUMAN | E.DQVSSDIVNNTHGSIFDATLTK.F     |              | 2 | 4,698  | 0,399 | 0,397  |

|    |                    |                                      |            |   |        |       |        |
|----|--------------------|--------------------------------------|------------|---|--------|-------|--------|
| 15 | P48634 BAT2_HUMAN  | E.GKPSLTLPASAPGPEEALTTVTVAPAPR.R     |            | 3 | 4,6709 | 0,332 | 0,067  |
| 15 | Q8WXE0 CSKI2_HUMAN | R.SHS#LSRPGPTEGDAEGE.A               | S800:      | 2 | 4,6353 | 0,553 | 0,743  |
| 15 | O43776 SYNC_HUMAN  | K.ALM*TVGKEPFPTIYVDSQKE.N            |            | 3 | 4,624  | 0,404 | -0,403 |
| 15 | P49023 PAXI_HUMAN  | R.FIHQQPQSSS#PVYGSSAK.T              | S85:       | 2 | 4,6165 | 0,417 | -0,301 |
| 15 | Q8N1G0 ZN687_HUMAN | E.SCS#PHHPQVLAQQGSGSS#PK.A           | S227:S242: | 3 | 4,6149 | 0,281 | -1,464 |
| 15 | O75179 ANR17_HUMAN | E.HYPVSSPSSPS#PPAQPGGVSR.N           | S2047:     | 3 | 4,5998 | 0,247 | 0,337  |
| 15 | Q9BQ52 RNZ2_HUMAN  | K.ADAPVALVVHM*APASVLVDSR.Y           |            | 3 | 4,5791 | 0,402 | -0,257 |
| 15 | P27816 MAP4_HUMAN  | E.EGRPVVSGTGNDDIT#PPNKE.L            | T687:      | 3 | 4,5517 | 0,408 | -0,426 |
| 15 | Q96GQ7 DDX27_HUMAN | R.SADFNPDFVFTEKE.G                   |            | 2 | 4,5328 | 0,459 | -0,445 |
| 15 | Q8TE77 SSH3_HUMAN  | E.LHGDQTDGQGS#PQKQEE.Q               | S87:       | 3 | 4,5227 | 0,32  | -0,159 |
| 15 | P62495 ERF1_HUMAN  | R.YRVDFQGM*EYQGGDDE.F                |            | 2 | 4,5203 | 0,543 | -0,19  |
| 15 | Q13263 TIF1B_HUMAN | E.RLDLDTADS#QPPVFK.V                 | S501:      | 2 | 4,5178 | 0,583 | -0,129 |
| 15 | P11274 BCR_HUMAN   | R.HQDGLPYIDDS#PSSS#PHLSSK.G          | S459:S463: | 3 | 4,5135 | 1     | -0,829 |
| 15 | P42166 LAP2A_HUMAN | E.HSAM*LVSTAAS#PSLIKE.T              | S310:      | 2 | 4,5017 | 0,382 | -1,46  |
| 15 | Q13506 NAB1_HUMAN  | E.HSLSPADLGSPAS#PKESSE.A             | S183:      | 2 | 4,5004 | 0,499 | -0,864 |
| 15 | P05387 RLA2_HUMAN  | K.LASVPAGGAVAVSAAPGSAAPAAGSAPAAAEK.K |            | 3 | 4,4809 | 0,399 | -0,264 |
| 15 | O75179 ANR17_HUMAN | E.HYPVSSPSS#PSPPAQPGGVSR.N           | S2045:     | 3 | 4,4516 | 0,276 | -0,084 |
| 15 | Q8IWI9 MGAP_HUMAN  | E.KQLAEPAS#EPDVLK.I                  | S2882:     | 2 | 4,4487 | 0,346 | -0,456 |
| 15 | P05412 JUN_HUMAN   | R.AKNSDLLTS#PDVGLLK.L                | S63:       | 3 | 4,434  | 0,375 | -0,418 |
| 15 | Q9Y6A5 TACC3_HUMAN | R.HGGVCAPAAVATS#PPGAIPK.E            | S250:      | 2 | 4,428  | 0,403 | 0,063  |
| 15 | O75376 NCOR1_HUMAN | K.HEAPS#SPISGQPCGDDQNASPSK.L         | S157:      | 3 | 4,4246 | 0,416 | -0,598 |
| 15 | P78347 GTF2I_HUMAN | R.KINSSPNVNTTASGVED.L                |            | 2 | 4,4231 | 0,599 | -0,211 |
| 15 | Q3KR37 GRM1B_HUMAN | R.SRS#PTPQNQDGMT*VEK.G               | S30:       | 3 | 4,4026 | 0,341 | -0,276 |
| 15 | P05412 JUN_HUMAN   | R.AKNSDLLTS#PDVGLLK.L                | S63:       | 2 | 4,396  | 0,467 | -0,279 |
| 15 | Q9HCH0 K1602_HUMAN | E.KSPSPGGPQLS#PQLPR.N                | S473:      | 3 | 4,3813 | 0,266 | -0,106 |
| 15 | Q09472 EP300_HUMAN | E.IKEEDQPSTSATQSS#PAPGQSK.K          | S1038:     | 3 | 4,3645 | 0,384 | -0,147 |
| 15 | P46100 ATRX_HUMAN  | E.KCGLGQENS#DNEHLVENE.V              | S634:      | 2 | 4,3391 | 0,526 | 0,794  |
| 15 | Q92619 HMHA1_HUMAN | R.KSS#FNVSDVARPE.A                   | S578:      | 2 | 4,3383 | 0,462 | 0,483  |
| 15 | P52948 NUP98_HUMAN | E.S#AGNKHSNSNS#VDDTIVALNM*R.A        | S673:S683: | 3 | 4,3348 | 0,398 | -0,511 |
| 15 | Q9C0H5 K1688_HUMAN | K.RAELPGSSS#PLLAQPR.K                | S286:      | 2 | 4,3296 | 0,44  | -0,069 |
| 15 | Q8WU79 SMAP2_HUMAN | E.KDLDLLASVPS#PSSSGSR.K              | S219:      | 2 | 4,322  | 0,559 | -0,257 |
| 15 | Q6S8J3 A26CA_HUMAN | E.KSYELPDGQVITIGNE.R                 |            | 2 | 4,3187 | 0,414 | -0,138 |
| 15 | P35527 K1C9_HUMAN  | R.GSGSGSYGGGGSGGGYGGGSGSR.G          |            | 3 | 4,3031 | 0,349 | 0      |

|    |                     |                                  |              |   |        |       |        |
|----|---------------------|----------------------------------|--------------|---|--------|-------|--------|
| 15 | Q32MZ4 LRRF1_HUMAN  | R.NM*PGLSAATLASLGGTSSR.R         |              | 2 | 4,3021 | 0,443 | -0,473 |
| 15 | Q9H1K0 RBNS5_HUMAN  | E.AVAGNPFIQPDSAPNPFSEEDHPQQR.L   |              | 3 | 4,286  | 0,393 | 0,119  |
| 15 | Q9UK76 HN1_HUMAN    | R.RNS#SEASSGDFLDLKG.E            | S87:         | 3 | 4,2746 | 0,405 | 1,354  |
| 15 | Q9UK76 HN1_HUMAN    | R.RNS#SEASSGDFLDLKG.G            | S87:         | 2 | 4,2729 | 0,402 | -0,429 |
| 15 | O60841 IF2P_HUMAN   | K.NKPGPNIES#GNEDDDASF.K          | S214:        | 3 | 4,2602 | 0,469 | 0      |
| 15 | Q9UK76 HN1_HUMAN    | R.RNS#SEASSGDFLDLKG.E            | S87:         | 2 | 4,2574 | 0,483 | -0,193 |
| 15 | Q01813 K6PP_HUMAN   | K.YKASYDVSDSGQLE.H               |              | 2 | 4,2471 | 0,556 | -1,562 |
| 15 | P42166 LAP2A_HUMAN  | E.SRSST#PLPTISSAENTR.Q           | T160:        | 3 | 4,2414 | 0,383 | 0,093  |
| 15 | Q8IU81 I2BP1_HUMAN  | R.AGGAS#PAASSTAQPPTQHR.L         | S453:        | 3 | 4,2379 | 0,386 | 0,195  |
| 15 | P46821 MAP1B_HUMAN  | E.RASVSPM*DEVPDSES#PIEK.V        | S1389:       | 2 | 4,2243 | 0,517 | 0,108  |
| 15 | P52292 IMA2_HUMAN   | R.RNVSSFPDDATSPLQE.N             |              | 2 | 4,2048 | 0,469 | -0,415 |
| 15 | Q9UHR5 S30BP_HUMAN  | E.KGGLVS#DAYGEDDFSR.L            | S43:         | 3 | 4,1983 | 0,34  | -0,102 |
| 15 | P46013 KI67_HUMAN   | E.VSCK#PQPDPVKT#PTSSK.Q          | S1983:T1991: | 3 | 4,1979 | 0,372 | -0,957 |
| 15 | Q13459 MYO9B_HUMAN  | R.VQEKPDS#PGGSTQIQR.Y            | S1290:       | 3 | 4,1922 | 0,487 | 0,101  |
| 15 | Q7Z5L9 I2BP2_HUMAN  | R.AAASLAAVSGTAAASLGSAQPTDLGAHK.R |              | 3 | 4,1892 | 0,493 | -0,147 |
| 15 | O60307 MAST3_HUMAN  | E.RGPSPLLNTIS#LDTM*PK.F          | S782:        | 3 | 4,184  | 0,385 | -0,09  |
| 15 | Q53ET0 CRTC2_HUMAN  | R.HGSGPNIILTGDSS#PGFSKE.I        | S624:        | 3 | 4,1743 | 0,315 | -0,44  |
| 15 | Q01804 OTUD4_HUMAN  | E.NITDDKYATVSS#PSK.S             | S546:        | 2 | 4,1738 | 0,478 | -0,215 |
| 15 | Q05519 SFR11_HUMAN  | K.LNHVAAGLV#PSLK.S               | S207:        | 2 | 4,1605 | 0,487 | -1,478 |
| 15 | Q15648 MED1_HUMAN   | E.KSYQNSPSS#DDGIRPLPE.Y          | S1482:       | 2 | 4,1545 | 0,439 | 0      |
| 15 | Q9UQ35 SRRM2_HUMAN  | E.KM*ALPPQEDATAS#PPR.Q           | S1179:       | 2 | 4,1507 | 0,59  | -0,744 |
| 15 | Q8WUX9 CHMP7_HUMAN  | E.LDILLQDTTKEPLDLPDNP.R          |              | 3 | 4,1383 | 0,367 | -0,159 |
| 15 | Q00613 HSF1_HUMAN   | R.GHTDTEGRPPS#PPPTSTPE.K         | S363:        | 2 | 4,1251 | 0,468 | -0,06  |
| 15 | Q15545 TAF7_HUMAN   | E.NQGLDIS#SPGM*SGHR.Q            | S200:        | 2 | 4,12   | 0,527 | -0,148 |
| 15 | Q9UQ35 SRRM2_HUMAN  | E.KAGM*SSNQSIS#SPVLDAVPRT#PSRE.R | S1403:T1413: | 3 | 4,1189 | 1     | -0,656 |
| 15 | Q96EV2 RBM33_HUMAN  | K.VKPAS#PVAQPKEE.A               | S775:        | 3 | 4,111  | 0,21  | -0,125 |
| 15 | O14672 ADA10_HUMAN  | R.HTQVCINGQCAGSICE.K             |              | 2 | 4,0906 | 0,511 | 0,067  |
| 15 | Q9Y6G9 DC1L1_HUMAN  | R.SVSSNVAVS#PIPAGSKK.I           | S421:        | 2 | 4,0888 | 0,494 | -0,272 |
| 15 | A8K1U6 A8K1U6_HUMAN | E.TGVFVINHFTCRS#.-               | S523:        | 2 | 4,0697 | 0,393 | -0,302 |
| 15 | P49790 NU153_HUMAN  | K.RIPSIVSS#PLNSPLDR.S            | S334:        | 3 | 4,0545 | 0,363 | -0,3   |
| 15 | Q6P4F7 RHGBA_HUMAN  | R.RQS#VGDFVSGALNK.F              | S285:        | 2 | 4,0501 | 0,372 | -0,705 |
| 15 | Q12756 KIF1A_HUMAN  | E.LSLCHVADAGS#PGM*QR.R           | S1337:       | 3 | 4,0388 | 0,402 | -0,204 |
| 15 | Q9C0C2 TB182_HUMAN  | E.AGKEEPPPLT#PPAR.C              | T131:        | 3 | 4,0352 | 0,344 | -0,475 |

|    |                     |                              |              |   |        |       |        |
|----|---------------------|------------------------------|--------------|---|--------|-------|--------|
| 15 | B2RDE1 B2RDE1_HUMAN | R.KIQVLQQADDAEE.R            |              | 2 | 4,0331 | 0,452 | -0,151 |
| 15 | P08621 RU17_HUMAN   | R.GGGGGQDNGLEGLGNDSD         |              | 2 | 4,0176 | 0,548 | -0,294 |
| 15 | Q9H4A3 WNK1_HUMAN   | E.KQSSTPGSLFLS#PPAPAPK.N     | S19:         | 3 | 4,0164 | 0,298 | -0,184 |
| 15 | P35908 K22E_HUMAN   | R.GSSSSGGYSSGSSSYGSGGR.Q     |              | 2 | 4,0149 | 0,615 | -0,21  |
| 15 | O60841 IF2P_HUMAN   | K.NKPGPNIES#GNEDDDASF.K      | S214:        | 2 | 4,0093 | 0,435 | 0      |
| 15 | P08651 NFIC_HUMAN   | E.M*DKS#PFNSPSPQDSR.L        | S333:        | 2 | 4,0011 | 0,495 | -0,841 |
| 15 | Q8NI27 THOC2_HUMAN  | K.GGEKT#PVSGSLKS#PVPR.S      | T1270:S1278: | 3 | 4,0007 | 0,413 | -0,099 |
| 15 | P60842 IF4A1_HUMAN  | R.SRDNGPDGM*EPEGVIE.S        |              | 2 | 3,9989 | 0,359 | -0,284 |
| 15 | Q9Y2W1 TR150_HUMAN  | R.SIFQHIQSAQSQRS#PSE.L       | S622:        | 3 | 3,9912 | 0,269 | 0,637  |
| 15 | P38398 BRCA1_HUMAN  | E.KAVLTSQKS#SEYPISQNPE.G     | S1460:       | 2 | 3,9879 | 0,398 | 0,335  |
| 15 | Q08J23 NSUN2_HUMAN  | E.GKPTDPSKLES#PSFTGTGDE.I    | S473:        | 2 | 3,9805 | 0,434 | 0      |
| 15 | Q15003 CND2_HUMAN   | K.KNDQVFDINAEVDE.S           |              | 2 | 3,9778 | 0,425 | -0,447 |
| 15 | P39748 FEN1_HUMAN   | E.KQLQQAQAAGAEQE.V           |              | 2 | 3,9745 | 0,319 | 0,081  |
| 15 | P55786 PSA_HUMAN    | E.LDALDNSHPIEVSVGHPSEVDE.I   |              | 3 | 3,9724 | 0,407 | -1,241 |
| 15 | Q86Y04 Q86Y04_HUMAN | K.KVDLTLSS#PKSE.N            | S239:        | 2 | 3,9723 | 0,461 | -0,519 |
| 15 | P16949 STMN1_HUMAN  | R.SKESVPEFPLS#PPK.K          | S38:         | 3 | 3,9606 | 0,431 | -0,564 |
| 15 | Q9UQ35 SRRM2_HUMAN  | K.VKAQT#PPGPSLSGSKS#PCPQEK.S | T1003:S1014: | 2 | 3,9574 | 1     | 0,2    |
| 15 | Q9BVC5 ASHWN_HUMAN  | R.KSPSGPVKS#PPLS#PVGTTVPK.L  | S189:S193:   | 3 | 3,9508 | 0,361 | -0,494 |
| 15 | Q00610 CLH1_HUMAN   | R.KFNALFAQGNYSE.A            |              | 2 | 3,9457 | 0,438 | -0,574 |
| 15 | Q66K74 MAP1S_HUMAN  | R.KAVPM*APAPAS#PGSSNDSSAR.S  | S759:        | 3 | 3,9449 | 0,287 | -0,437 |
| 15 | P07355 ANXA2_HUMAN  | E.GDHS#TPPSAYGSVK.A          | S18:         | 3 | 3,9415 | 0,325 | -1,233 |
| 15 | Q14195 DPYL3_HUMAN  | R.NLHQSGFSLSGTQVDE.G         |              | 2 | 3,9378 | 0,406 | -0,497 |
| 15 | Q13506 NAB1_HUMAN   | E.HSLSPADLGSPAS#PKESSE.A     | S183:        | 3 | 3,9344 | 0,324 | -0,741 |
| 15 | Q14498 RBM39_HUMAN  | E.RTDASSASSFLDSDELE.R        |              | 2 | 3,9257 | 0,477 | -0,333 |
| 15 | O95295 S25BP_HUMAN  | R.RVVLVNNILQNAQE.R           |              | 2 | 3,922  | 0,4   | -0,379 |
| 15 | Q8TEU7 RPGF6_HUMAN  | E.KGLIVYCVTS#PK.K            | S1494:       | 2 | 3,9216 | 0,393 | -0,338 |
| 15 | Q6POQ8 MAST2_HUMAN  | R.KLS#NPDIFSSTGK.V           | S74:         | 2 | 3,9162 | 0,412 | -0,248 |
| 15 | Q9UHR5 S30BP_HUMAN  | E.KGGLVS#DAYGEDDFSR.L        | S43:         | 2 | 3,9038 | 0,475 | -0,34  |
| 15 | Q9P0K8 FOXJ2_HUMAN  | R.KCSPGS#PTDPNATLSKDE.A      | S46:         | 2 | 3,8936 | 0,546 | 0,123  |
| 15 | Q07002 PCTK3_HUMAN  | R.RAS#LSDIGFGKLE.T           | S130:        | 2 | 3,8936 | 0,543 | -0,331 |
| 15 | P52948 NUP98_HUMAN  | K.HSNSNS#VDDTIVALNM*R.A      | S683:        | 3 | 3,8894 | 0,2   | -1,301 |
| 15 | O95997 PTTG1_HUMAN  | E.KLFLGPPS#PVK.M             | S165:        | 2 | 3,887  | 0,412 | -0,175 |
| 15 | Q9NQS7 INCE_HUMAN   | E.RVLAPILPDNFST#PTGSR.T      | T292:        | 2 | 3,8768 | 0,397 | -0,121 |

|    |                     |                                |            |   |        |       |        |
|----|---------------------|--------------------------------|------------|---|--------|-------|--------|
| 15 | P09960 LKHA4_HUMAN  | R.RTLTGTAALTVQSQE.D            |            | 2 | 3,8745 | 0,439 | -0,464 |
| 15 | Q9NQS7 INCE_HUMAN   | E.RVLAPILPDNFST#PTGSR.T        | T292:      | 3 | 3,8728 | 0,325 | -0,634 |
| 15 | Q9H0D6 XRN2_HUMAN   | R.RNS#LGGDVLVFGK.H             | S678:      | 2 | 3,8597 | 0,44  | -0,508 |
| 15 | Q63HJ5 Q63HJ5_HUMAN | R.KLANDFPLDLS#PVK.K            | S688:      | 2 | 3,8586 | 0,449 | -0,373 |
| 15 | Q92615 LARP5_HUMAN  | R.TSKEPPSS#PLQPQKE.Q           | S664:      | 2 | 3,8399 | 0,282 | -0,352 |
| 15 | Q9UGV2 NDRG3_HUMAN  | R.THS#TSSSLGSGESPFSS.S         | S331:      | 2 | 3,8391 | 0,522 | -1,082 |
| 15 | Q8NHG8 ZNR2_HUMAN   | R.SRS#LGGAVGVSASGAR.A          | S82:       | 2 | 3,8348 | 0,446 | -0,323 |
| 15 | Q14157 UBP2L_HUMAN  | K.NPSDSAVHS#PFTK.R             | S416:      | 2 | 3,8328 | 0,477 | -0,998 |
| 15 | P78347 GTF2I_HUMAN  | R.KINSSPNVNTTASGVE.D           |            | 2 | 3,8319 | 0,507 | -0,603 |
| 15 | Q96PZ0 PUS7_HUMAN   | K.GQDGLQNDFLSIEDVPRPPDVTSTGK.G |            | 3 | 3,8302 | 0,274 | -0,191 |
| 15 | Q13263 TIF1B_HUMAN  | E.RLDLTLTADS#QPPVFK.V          | S501:      | 3 | 3,8229 | 0,169 | -0,29  |
| 15 | P27816 MAP4_HUMAN   | E.EGRPVSSTGNDITT#PPNK.E        | T687:      | 3 | 3,8155 | 0,212 | -0,272 |
| 15 | Q99700 ATX2_HUMAN   | E.FVSHNPPSEAAT#PPVAR.T         | T659:      | 3 | 3,8129 | 0,377 | -0,296 |
| 15 | Q9HB09 B2L12_HUMAN  | K.LVRLS#SDSFAR.L               | S242:      | 3 | 3,8123 | 0,212 | 0,206  |
| 15 | Q9UNE7 STUB1_HUMAN  | R.VGHFDPVTRS#PLTQE.Q           | S273:      | 2 | 3,8119 | 0,495 | -0,692 |
| 15 | Q14671 PUM1_HUMAN   | R.RDS#LTGSSDLYK.R              | S709:      | 2 | 3,7991 | 0,302 | -0,772 |
| 15 | Q9NZL4 HPBP1_HUMAN  | E.KLLQTCFSSPADDS#M*DR.-        | S359:      | 2 | 3,7965 | 0,424 | 0      |
| 15 | P46063 RECQ1_HUMAN  | K.IKQCLEDSDAGASNE.Y            |            | 2 | 3,7965 | 0,457 | -0,671 |
| 15 | Q96S66 CLCC1_HUMAN  | R.FQTGNKS#PEVLR.A              | S438:      | 2 | 3,7876 | 0,445 | 0,084  |
| 15 | P35908 K22E_HUMAN   | R.GFSSGSAVVSAGSR.R             |            | 2 | 3,7862 | 0,414 | -0,097 |
| 15 | Q9UK32 KS6A6_HUMAN  | K.TPKDS#PGLPAS#ANAHQLFK.G      | S372:S378: | 3 | 3,7852 | 0,085 | -0,086 |
| 15 | O00139 KIF2A_HUMAN  | E.INKS#LLALKE.C                | S484:      | 3 | 3,78   | 0,251 | -0,378 |
| 15 | Q9ULW0 TPX2_HUMAN   | E.IKSSDQPLTVPVS#PK.F           | S738:      | 2 | 3,7774 | 0,406 | -0,801 |
| 15 | Q9UGV2 NDRG3_HUMAN  | R.THSTSS#SLGSGESPFSS.S         | S334:      | 3 | 3,7688 | 0,382 | -0,608 |
| 15 | Q13459 MYO9B_HUMAN  | R.VQEKPDS#PGGSTQIQR.Y          | S1290:     | 2 | 3,767  | 0,416 | -0,27  |
| 15 | P49761 CLK3_HUMAN   | R.YRS#PEPDPYLSYR.W             | S157:      | 2 | 3,7661 | 0,352 | -0,354 |
| 15 | Q14980 NUMA1_HUMAN  | E.KQAQLAQTLLQQE.Q              |            | 2 | 3,7511 | 0,402 | -0,806 |
| 15 | Q16555 DPYL2_HUMAN  | R.NLHQSGFSLGAQIDD.N            |            | 2 | 3,7502 | 0,488 | -0,289 |
| 15 | O60716 CTND1_HUMAN  | R.SQSSHSYDDST#LPLIDR.N         | T869:      | 3 | 3,7424 | 0,227 | -0,366 |
| 15 | Q9NYZ3 GTSE1_HUMAN  | E.SRPLIDLMTNT#PDM*NK.N         | T677:      | 3 | 3,725  | 0,334 | -1,028 |
| 15 | P52948 NUP98_HUMAN  | K.TRS#LVGGLLQSK.F              | S1043:     | 2 | 3,7245 | 0,308 | -0,273 |
| 15 | O95793 STAU1_HUMAN  | R.KVTFEPGSGDE.N                |            | 2 | 3,7118 | 0,475 | -0,279 |
| 15 | P31949 S10AB_HUMAN  | K.KLDTNSDGQLDFSE.F             |            | 2 | 3,7104 | 0,409 | -0,855 |

|    |                     |                               |            |   |        |       |        |
|----|---------------------|-------------------------------|------------|---|--------|-------|--------|
| 15 | Q96DM3 MIC1_HUMAN   | E.KANPVNCFVFFDE.A             |            | 2 | 3,7072 | 0,264 | -0,169 |
| 15 | O60566 BUB1B_HUMAN  | K.KLS#PIIEDSRE.A              | S670:      | 2 | 3,7042 | 0,161 | -0,714 |
| 15 | Q9ULT8 HECD1_HUMAN  | E.GHDSLSVGS#FEEDSKSE.F        | S2320:     | 3 | 3,7031 | 0,267 | -1,258 |
| 15 | P16220 CREB1_HUMAN  | R.KILNDLSS#DAPGVPR.I          | S143:      | 2 | 3,7027 | 0,482 | -0,954 |
| 15 | Q8IZN3 ZDH14_HUMAN  | R.LLAAGS#PLAHSR.T             | S455:      | 2 | 3,698  | 0,521 | -0,575 |
| 15 | P52948 NUP98_HUMAN  | K.TRS#LVGGLLQSK.F             | S1043:     | 3 | 3,6975 | 0,185 | 0,273  |
| 15 | P05387 RLA2_HUMAN   | K.NIEDVIAQGIGK.L              |            | 2 | 3,6956 | 0,479 | -0,291 |
| 15 | Q5VTR2 BRE1A_HUMAN  | R.KALVVPEPEPDSDS#NQER.K       | S138:      | 3 | 3,6915 | 0,33  | -0,525 |
| 15 | P15586 GNS_HUMAN    | R.RPNVLLLLTDDQDE.V            |            | 2 | 3,6822 | 0,499 | -0,3   |
| 15 | Q13428 TCOF_HUMAN   | E.AKPQQAAGM*LS#PK.T           | S1257:     | 3 | 3,6653 | 0,395 | 0      |
| 15 | Q9BTC0 DIDO1_HUMAN  | E.KTAAPS#PSLLYK.S             | S523:      | 2 | 3,6599 | 0,318 | -0,63  |
| 15 | Q8N2Y8 RUSC2_HUMAN  | E.TSRPSPLGSYS#PIR.S           | S781:      | 3 | 3,6491 | 0,297 | 0      |
| 15 | P31943 HNRH1_HUMAN  | E.GRPSGEAFVELESEDE.V          |            | 2 | 3,6482 | 0,384 | -0,557 |
| 15 | O15234 CASC3_HUMAN  | R.GGGSCSGSAGGGGSGSLPSQR.G     |            | 2 | 3,6435 | 0,518 | -0,343 |
| 15 | P06396 GELS_HUMAN   | E.AM*LQVLGPKPALPAGTEDTAK.E    |            | 3 | 3,6365 | 0,321 | -0,172 |
| 15 | Q8WYP5 AHTF1_HUMAN  | K.DRTTSFFLNS#PEKE.H           | S1292:     | 2 | 3,6317 | 0,387 | -0,07  |
| 15 | Q9Y2W1 TR150_HUMAN  | R.SIFQHIQSAQSQRS#PSE.L        | S622:      | 2 | 3,6278 | 0,459 | 0,911  |
| 15 | Q59HD5 Q59HD5_HUMAN | E.ARS#PSVAAM*ASPQLCR.A        | S15:       | 3 | 3,6223 | 0,338 | -0,203 |
| 15 | P14618 KPYM_HUMAN   | E.SFASDPILYRPVAVALDTKGPE.I    |            | 3 | 3,6202 | 0,427 | -0,312 |
| 15 | Q9Y6X4 K0888_HUMAN  | K.AHLGSSDNVATM*SNEE.R         |            | 2 | 3,6153 | 0,472 | -0,436 |
| 15 | O60293 CC131_HUMAN  | R.RIS#TSDILSEK.K              | S352:      | 2 | 3,6114 | 0,501 | -0,184 |
| 15 | Q07866 KLC1_HUMAN   | R.SRES#LNVDVVKYE.S            | S520:      | 2 | 3,6087 | 0,444 | -0,603 |
| 15 | Q13642 FHL1_HUMAN   | K.CFDKFCANTCVE.C              |            | 2 | 3,6078 | 0,504 | -0,393 |
| 15 | A8K2B4 A8K2B4_HUMAN | R.TNT#M*NGSKS#PVISRPK.S       | T502:S508: | 3 | 3,6074 | 0,264 | -0,29  |
| 15 | Q5T5Y3 CAMP1_HUMAN  | K.DSLASNIVNLTPQNQPHTATK.S     |            | 3 | 3,5923 | 0,392 | 0      |
| 15 | P35222 CTNB1_HUMAN  | K.HAVVNLINYQDDAE.L            |            | 2 | 3,5911 | 0,527 | -0,381 |
| 15 | Q86UP2 KTN1_HUMAN   | K.KVEPVPVTKQPT#PPSE.A         | T153:      | 2 | 3,5878 | 0,505 | -0,067 |
| 15 | P60174 TPIS_HUMAN   | K.SNVSDAVAQSTR.I              |            | 2 | 3,5851 | 0,439 | -0,593 |
| 15 | O95684 FR1OP_HUMAN  | E.KGPTTGEGALDLSDVHS#PPKS#PE.G | S156:S160: | 2 | 3,5833 | 0,407 | 0,197  |
| 15 | Q9UJX6 ANC2_HUMAN   | R.LLHQFSFS#PERE.I             | S534:      | 3 | 3,5822 | 0,178 | -0,583 |
| 15 | O00139 KIF2A_HUMAN  | E.INKS#LLALKE.C               | S484:      | 2 | 3,5766 | 0,348 | -1,312 |
| 15 | P42566 EP15_HUMAN   | R.SINKLDS#PDPFK.L             | S796:      | 2 | 3,5754 | 0,353 | -0,254 |
| 15 | O43776 SYNC_HUMAN   | K.ALM*TVGKEFPPTIYVDSQKENE.R   |            | 3 | 3,5731 | 0,35  | -0,073 |

|    |                    |                            |        |   |        |       |        |
|----|--------------------|----------------------------|--------|---|--------|-------|--------|
| 15 | Q9HCN4 GPN1_HUMAN  | K.DSLSPVLHPSDLILTR.G       |        | 2 | 3,5694 | 0,314 | 0      |
| 15 | P12956 KU70_HUMAN  | E.NLEAS#GDYKYSGR.D         | S27:   | 2 | 3,5643 | 0,471 | -0,396 |
| 15 | P19838 NFKB1_HUMAN | K.TTSAHSLPLS#PASTR.Q       | S907:  | 2 | 3,555  | 0,558 | 0,07   |
| 15 | Q12756 KIF1A_HUMAN | E.LSLCHVADAGS#PGM*QR.R     | S1337: | 2 | 3,5491 | 0,494 | -0,476 |
| 15 | P04920 B3A2_HUMAN  | E.RTS#PSSPAPLPHQE.A        | S170:  | 2 | 3,5437 | 0,49  | -1,078 |
| 15 | Q8WYP5 AHTF1_HUMAN | K.DRTTSFFLNS#PEKE.H        | S1292: | 3 | 3,5429 | 0,203 | 0      |
| 15 | O95425 SVIL_HUMAN  | E.M*EKS#FDEQNVPK.R         | S707:  | 2 | 3,5367 | 0,403 | -0,867 |
| 15 | Q9Y2K5 R3HD2_HUMAN | E.VCNQVTSSQSVR.G           |        | 2 | 3,5351 | 0,491 | -0,268 |
| 15 | Q53EZ4 CEP55_HUMAN | E.KVAAS#PKSPTAALNE.S       | S425:  | 2 | 3,5293 | 0,423 | -0,078 |
| 15 | Q09666 AHNK_HUMAN  | K.VKGDLDIAGPNLE.G          |        | 2 | 3,5293 | 0,313 | 0      |
| 15 | P18669 PGAM1_HUMAN | R.SYDVPPPPM*EPDHPFYSNISK.D |        | 2 | 3,5168 | 0,36  | 0,301  |
| 15 | Q9UQ35 SRRM2_HUMAN | E.KAGM*SSNQSIS#PVLDAVPR.T  | S1404: | 3 | 3,5159 | 0,137 | -1,453 |
| 15 | Q9HCD6 TANC2_HUMAN | R.SQS#ASYYPVCHSK.L         | S1722: | 2 | 3,5132 | 0,502 | -0,306 |
| 15 | O75506 HSBP1_HUMAN | E.KNIADLM*TQAGVEE.L        |        | 2 | 3,5121 | 0,401 | -0,874 |
| 15 | O75157 T22D2_HUMAN | R.RKS#EPLPQPPLSLIAE.N      | S598:  | 2 | 3,4968 | 0,432 | -0,132 |
| 15 | P42704 LPPRC_HUMAN | K.GFTLNDAANSR.L            |        | 2 | 3,4891 | 0,424 | -0,419 |
| 15 | Q9UK76 HN1_HUMAN   | R.RNSS#EASSGDFLDLK.G       | S88:   | 3 | 3,4843 | 0,285 | 0,536  |
| 15 | Q96EV8 DTBP1_HUMAN | R.AKDCASAGELVDSE.V         |        | 2 | 3,484  | 0,455 | -0,42  |
| 15 | Q8NI22 MCFD2_HUMAN | K.M*HDYDGNLLDGLE.L         |        | 2 | 3,4831 | 0,453 | -0,376 |
| 15 | Q7Z309 F122B_HUMAN | K.RIDFTPVS#PAPSPTR.G       | S115:  | 3 | 3,4737 | 0,247 | -0,425 |
| 15 | Q9ULJ7 ANR50_HUMAN | E.KYGASSLNGCSPS#PVHTM*E.Q  | S1057: | 3 | 3,4693 | 0,235 | -0,432 |
| 15 | P46821 MAP1B_HUMAN | E.RASVSPM*DEPVPDES#PIEK.V  | S1389: | 3 | 3,4679 | 0,382 | 0,081  |
| 15 | O14545 TRAD1_HUMAN | K.LSNSDSQDIQGR.N           |        | 2 | 3,4651 | 0,397 | -0,462 |
| 15 | Q9H3S7 PTN23_HUMAN | R.SGKDDYINASCVE.G          |        | 2 | 3,4635 | 0,447 | -0,837 |
| 15 | Q14671 PUM1_HUMAN  | E.YVLSS#PGDSCLRK.G         | S229:  | 2 | 3,4628 | 0,346 | -0,222 |
| 15 | P11137 MAP2_HUMAN  | R.RLSNVSSSGSINLE.S         |        | 2 | 3,4619 | 0,428 | -0,774 |
| 15 | Q9UJU6 DBNL_HUMAN  | E.RAM*S#TTSISSPQPGK.L      | S269:  | 2 | 3,4607 | 0,449 | -0,445 |
| 15 | Q86W56 PARG_HUMAN  | E.NVSQLSLDKS#PTEK.S        | S137:  | 2 | 3,4558 | 0,446 | -0,15  |
| 15 | Q6ZRV2 FA83H_HUMAN | R.RLSLGQGDSTEAAATEE.R      |        | 2 | 3,4509 | 0,486 | -0,367 |
| 15 | P04632 CPNS1_HUMAN | R.RLFAQLAGDDM*E.V          |        | 2 | 3,4501 | 0,437 | -0,088 |
| 15 | Q9P246 STIM2_HUMAN | E.TKS#M*IFSPASK.V          | S661:  | 2 | 3,4408 | 0,322 | 0,094  |
| 15 | P82664 RT10_HUMAN  | K.DLTKPVVTISDEPDILYK.R     |        | 3 | 3,4385 | 0,37  | -0,358 |
| 15 | Q9NSK0 KLC4_HUMAN  | R.RTS#QEGPGDSVKFE.G        | S519:  | 2 | 3,4382 | 0,503 | -0,453 |



|    |                     |                            |            |   |        |       |        |
|----|---------------------|----------------------------|------------|---|--------|-------|--------|
| 15 | P55036 PSMD4_HUMAN  | E.KVNVDIINFGEV.V           |            | 2 | 3,4346 | 0,414 | -0,486 |
| 15 | P23443 KS6B1_HUMAN  | E.SIHDGTVTHT#FCGTIE.Y      | T252:      | 2 | 3,429  | 0,516 | -0,132 |
| 15 | Q15427 SF3B4_HUMAN  | E.RNQDATVYVGGGLDE.K        |            | 2 | 3,4289 | 0,357 | 0,159  |
| 15 | Q8N6T3 ARFG1_HUMAN  | R.YVGFNGT#PPPQKK.E         | T189:      | 2 | 3,4268 | 0,475 | -0,161 |
| 15 | Q9Y6W5 WASF2_HUMAN  | R.DVVGNVDVATILSR.R         |            | 2 | 3,4265 | 0,418 | -0,359 |
| 15 | P61160 ARP2_HUMAN   | E.KLCYVGYNIEQE.Q           |            | 2 | 3,4139 | 0,319 | -0,644 |
| 15 | P07355 ANXA2_HUMAN  | E.GDHST#PPSAYGSVK.A        | T19:       | 2 | 3,411  | 0,364 | -0,987 |
| 15 | Q15365 PCBP1_HUMAN  | E.GPPLDAYSIQGQHTISPLDLAK.L |            | 3 | 3,4072 | 0,383 | 0,079  |
| 15 | O43865 SAHH2_HUMAN  | K.KQIQFADDM*QE.F           |            | 2 | 3,4068 | 0,346 | -0,357 |
| 15 | Q9H869 YYAP1_HUMAN  | K.VEHS#PGPPPVDK.Q          | S724:      | 3 | 3,4064 | 0,126 | 0      |
| 15 | P55209 NP1L1_HUMAN  | E.FHFEPNEYFTNE.V           |            | 2 | 3,4031 | 0,34  | -0,62  |
| 15 | P37802 TAGL2_HUMAN  | K.ENPRNFSDNQLQE.G          |            | 2 | 3,4026 | 0,141 | -0,383 |
| 15 | Q7LBC6 JHD2B_HUMAN  | E.SLADSSS#RDSFK.Q          | S553:      | 2 | 3,3966 | 0,34  | -0,898 |
| 15 | Q9H6R7 CB044_HUMAN  | D.SFSHS#PGAVSSLK.V         | S690:      | 2 | 3,3965 | 0,305 | -0,353 |
| 15 | O60716 CTND1_HUMAN  | K.SDFQVNLNNASR.S           |            | 2 | 3,3846 | 0,326 | 0      |
| 15 | Q8IXQ3 CI040_HUMAN  | R.KIDAGTM*AEPSAS#PSK.R     | S69:       | 2 | 3,3837 | 0,466 | -0,362 |
| 15 | O14910 LIN7A_HUMAN  | K.RGDQLLSVNGVSVE.G         |            | 2 | 3,382  | 0,457 | -0,994 |
| 15 | Q14980 NUMA1_HUMAN  | E.SRPSLSLGTITDEE.M         |            | 2 | 3,3805 | 0,414 | -0,973 |
| 15 | P10636 TAU_HUMAN    | R.HLSNVSTGSIDM*VD.S        |            | 2 | 3,3791 | 0,583 | -0,541 |
| 15 | P13645 K1C10_HUMAN  | R.SQYEQLAEQNR.K            |            | 2 | 3,3783 | 0,364 | -0,179 |
| 15 | Q9UPU5 UBP24_HUMAN  | R.HLQQGSESPM*M*IGE.L       |            | 2 | 3,3776 | 0,51  | -0,232 |
| 15 | Q6VY07 PACS1_HUMAN  | R.TNSS#DSERS#PDLGHSTQIPR.K | S529:S534: | 3 | 3,3741 | 1     | -0,156 |
| 15 | Q69YH5 CDCA2_HUMAN  | E.RVASDS#PKPALTLQQGQE.F    | S727:      | 3 | 3,3707 | 0,282 | -0,365 |
| 15 | P12270 TPR_HUMAN    | E.AIHS#PQVAGVPR.F          | S2141:     | 2 | 3,3689 | 0,396 | 0,279  |
| 15 | P50458 LHX2_HUMAN   | E.GHEPHS#PSQTTLTNLF.-      | S396:      | 2 | 3,3624 | 0,43  | -0,264 |
| 15 | O60884 DNJA2_HUMAN  | K.NVLCSACSGQGGK.S          |            | 2 | 3,361  | 0,529 | -0,912 |
| 15 | Q96S94 CCNL2_HUMAN  | K.AKADS#PVNGLPK.G          | S369:      | 2 | 3,36   | 0,267 | -0,573 |
| 15 | O95202 LETM1_HUMAN  | E.SKLTSLAAALDE.N           |            | 2 | 3,3577 | 0,457 | -0,4   |
| 15 | Q9P0K8 FOXJ2_HUMAN  | R.KCSPGSPT#DPNATLSKDE.A    | T48:       | 3 | 3,3557 | 0,218 | -0,277 |
| 15 | Q6NZI2 PTRF_HUMAN   | R.RGS#SPDVHALLE.I          | S365:      | 2 | 3,353  | 0,403 | -0,538 |
| 15 | P13645 K1C10_HUMAN  | R.SLLEGEGSSGGGGR.G         |            | 2 | 3,3427 | 0,404 | -0,966 |
| 15 | Q52LD0 Q52LD0_HUMAN | K.AGGSPAS#YHGSTSPR.V       | S195:      | 2 | 3,3421 | 0,414 | -0,323 |
| 15 | P82673 RT35_HUMAN   | K.SVVSCLKNEEENE.N          |            | 2 | 3,3414 | 0,282 | -0,443 |

|    |                     |                             |        |   |        |       |        |
|----|---------------------|-----------------------------|--------|---|--------|-------|--------|
| 15 | Q0VF46 Q0VF46_HUMAN | K.HS#PIKEEPCGSLSE.T         | S99:   | 2 | 3,3382 | 0,313 | -0,37  |
| 15 | Q9Y490 TLN1_HUMAN   | E.SAGLIQTAR.A               |        | 2 | 3,336  | 0,29  | -0,752 |
| 15 | Q9Y2K2 QSK_HUMAN    | R.RFS#DGAASIQAQAFK.A        | S568:  | 2 | 3,333  | 0,434 | -0,66  |
| 15 | P39880 CUX1_HUMAN   | E.YSQGAS#PQPQHQLK.K         | S1237: | 2 | 3,3324 | 0,322 | -0,518 |
| 15 | P53621 COPA_HUMAN   | E.KNPTDAYQLNYD.M            |        | 2 | 3,3217 | 0,457 | 0,169  |
| 15 | Q7Z417 NUFP2_HUMAN  | K.RTS#PQVLGSILK.S           | S572:  | 3 | 3,3209 | 0,299 | -0,265 |
| 15 | P57740 NU107_HUMAN  | D.ISCILGTGGKS#PR.L          | S86:   | 2 | 3,3182 | 0,28  | -0,513 |
| 15 | Q96SB3 NEB2_HUMAN   | R.RNEDVDPM*AASAEYE.L        |        | 2 | 3,3177 | 0,55  | -0,214 |
| 15 | Q9NSM8 Q9NSM8_HUMAN | K.AQKLPDLS#PVENKE.H         | S652:  | 2 | 3,3156 | 0,508 | -0,148 |
| 15 | Q9UK58 CCNL1_HUMAN  | K.AEEKS#PISINVK.T           | S352:  | 2 | 3,3146 | 0,284 | -0,437 |
| 15 | P08651 NFIC_HUMAN   | E.M*DKS#PFNSPSPQDSPR.L      | S333:  | 3 | 3,3107 | 0,081 | -0,776 |
| 15 | Q15543 TAF13_HUMAN  | R.VKDLLTM*NEE.L             |        | 2 | 3,3105 | 0,243 | 0,202  |
| 15 | P55786 PSA_HUMAN    | E.IHATGFNYQNEDE.K           |        | 2 | 3,3098 | 0,388 | -0,238 |
| 15 | Q8WW1 LMO7_HUMAN    | K.REDS#FESLDSLGSR.S         | S246:  | 2 | 3,3074 | 0,498 | -0,145 |
| 15 | Q9Y4E1 FA21C_HUMAN  | R.KVQSTADIFGDEE.G           |        | 2 | 3,3067 | 0,494 | -1,357 |
| 15 | Q96RL1 UIMC1_HUMAN  | R.RDLNES#PVKSFVSISE.A       | S677:  | 2 | 3,3031 | 0,357 | -0,323 |
| 15 | P67936 TPM4_HUMAN   | R.KIQALQQQADE.A             |        | 2 | 3,3025 | 0,412 | -0,575 |
| 15 | Q6IAA8 CK059_HUMAN  | R.KLLDPSS#PPTK.A            | S27:   | 2 | 3,2984 | 0,388 | -0,443 |
| 15 | Q96T58 MINT_HUMAN   | E.VGKPPQDVTDDS#PPSK.K       | S1222: | 3 | 3,2972 | 0,252 | -0,209 |
| 15 | P29966 MARCS_HUMAN  | E.AAAERPGEAAVASS#PSK.A      | S27:   | 2 | 3,2955 | 0,29  | -0,145 |
| 15 | P04083 ANXA1_HUMAN  | K.GGPGSAVSPYPTFNPSDVAALHK.A |        | 3 | 3,2925 | 0,377 | -0,544 |
| 15 | P00533 EGFR_HUMAN   | K.GSHQISLDNPDYQQD.F         |        | 2 | 3,2873 | 0,368 | -0,426 |
| 15 | Q9NW13 RBM28_HUMAN  | R.KLLSATSGE.K               |        | 2 | 3,2868 | 0,43  | -0,718 |
| 15 | P20810 ICAL_HUMAN   | K.TKPQDM*ISAGGE.S           |        | 2 | 3,2861 | 0,406 | -0,976 |
| 15 | P27816 MAP4_HUMAN   | E.EGRPVSSTGNDITT#PPNKE.L    | T687:  | 2 | 3,286  | 0,344 | 0,227  |
| 15 | O75400 PR40A_HUMAN  | R.RTLLEQLDDDDQ.-            |        | 2 | 3,2857 | 0,313 | -0,363 |
| 15 | O60264 SMCA5_HUMAN  | E.IFDDAS#PGKQKE.I           | S66:   | 2 | 3,2854 | 0,389 | -0,259 |
| 15 | Q13616 CUL1_HUMAN   | K.KYNALVM*SAFNND.A          |        | 2 | 3,2845 | 0,41  | -0,162 |
| 15 | Q7Z333 SETX_HUMAN   | R.KSTLVDNTINLDE.N           |        | 2 | 3,2828 | 0,371 | -0,334 |
| 15 | O00418 EF2K_HUMAN   | K.LLQSAKT#ILR.G             | T348:  | 2 | 3,2768 | 0,394 | -0,299 |
| 15 | Q9NZJ7 MTCH1_HUMAN  | R.RM*DGGSGGLSGDNAPTTE.A     |        | 2 | 3,2757 | 0,399 | -0,408 |
| 15 | Q14974 IMB1_HUMAN   | E.VKNYVLQTLGTE.T            |        | 2 | 3,2725 | 0,377 | -0,358 |
| 15 | Q9Y2W1 TR150_HUMAN  | K.VIGANKNQEEE.K             |        | 2 | 3,2667 | 0,365 | -0,198 |

|    |                     |                                  |            |   |        |       |        |
|----|---------------------|----------------------------------|------------|---|--------|-------|--------|
| 15 | Q16822 PPCKM_HUMAN  | E.HM*LILGITS#PAGK.K              | S290:      | 2 | 3,2608 | 0,408 | -0,425 |
| 15 | P37802 TAGL2_HUMAN  | R.NFSDNQLQEGK.N                  |            | 2 | 3,2605 | 0,349 | -0,095 |
| 15 | Q92615 LARP5_HUMAN  | R.TSKEPPSS#PLQPQKE.Q             | S664:      | 3 | 3,2605 | 0,329 | -0,317 |
| 15 | Q53SC7 Q53SC7_HUMAN | R.SNM*HFTSSSTGGLSSSQSSYS#PSNRE.A | S189:      | 3 | 3,26   | 0,225 | 0      |
| 15 | Q9NX24 NOLA2_HUMAN  | K.IKADPDGPEAQAE.A                |            | 2 | 3,2583 | 0,441 | -0,728 |
| 15 | Q99459 CDC5L_HUMAN  | E.YNVT#NNSVALRTPRT#PASQDR.I      | T344:T355: | 3 | 3,2565 | 0,285 | 0,073  |
| 15 | Q58FF8 H90B2_HUMAN  | E.SKEQVANSAFVE.Q                 |            | 2 | 3,2535 | 0,385 | -0,932 |
| 15 | Q58FG0 HS905_HUMAN  | E.TKDQVANSAFVE.C                 |            | 2 | 3,2521 | 0,377 | -0,373 |
| 15 | Q8IU2 RB6I2_HUMAN   | E.NQHM*QM*TIQALQDE.L             |            | 2 | 3,2506 | 0,353 | 0,142  |
| 15 | P33316 DUT_HUMAN    | K.HFIDVGAGVIDE.D                 |            | 2 | 3,2503 | 0,383 | -0,48  |
| 15 | P62316 SMD2_HUMAN   | K.NNTQVLINCR.N                   |            | 2 | 3,2492 | 0,421 | -0,396 |
| 15 | Q86WV7 Q86WV7_HUMAN | R.NTNVEDVLNAR.K                  |            | 2 | 3,2483 | 0,44  | -1,568 |
| 15 | P25205 MCM3_HUMAN   | E.M*PQVHT#PKTADSQE.T             | T722:      | 2 | 3,2447 | 0,49  | -0,22  |
| 15 | O14910 LIN7A_HUMAN  | K.RGDQLLVNGVSVVEGE.H             |            | 2 | 3,2365 | 0,544 | -0,368 |
| 15 | Q92597 NDRG1_HUMAN  | E.GAHLDT#PNSSGAAGNSAGPK.S        | T375:      | 3 | 3,234  | 0,09  | -0,191 |
| 15 | Q6ZRV2 FA83H_HUMAN  | R.RGS#LTLTISGESPK.A              | S936:      | 2 | 3,233  | 0,397 | 0,48   |
| 15 | P51114 FXR1_HUMAN   | K.INTLKEENTQE.A                  |            | 2 | 3,2316 | 0,293 | -0,278 |
| 15 | P42566 EP15_HUMAN   | E.SEPIHQESPARS#SPE.L             | S562:      | 2 | 3,2232 | 0,32  | -0,282 |
| 15 | Q9ULW0 TPX2_HUMAN   | K.ANLQQAIVTPLKVDNTYYKE.A         |            | 3 | 3,2192 | 0,24  | 0,076  |
| 15 | Q13535 ATR_HUMAN    | E.SLHSSQM*TALPNT#PCQNADVR.K      | T952:      | 3 | 3,2181 | 0,187 | -0,076 |
| 15 | Q14676 MDC1_HUMAN   | R.SLATM*DS#PPHQK.Q               | S1820:     | 2 | 3,2178 | 0,361 | -0,607 |
| 15 | P60900 PSA6_HUMAN   | K.RIADISQVYTQNAE.M               |            | 2 | 3,2155 | 0,38  | -0,835 |
| 15 | Q8N7R7 CCYL1_HUMAN  | R.RS#FSADNFIGIQR.S               | S342:      | 3 | 3,2152 | 0,109 | -0,115 |
| 15 | Q9Y2N3 PO121_HUMAN  | E.TATKPOATSAPS#PAPK.Q            | S674:      | 2 | 3,2128 | 0,444 | -0,224 |
| 15 | O96017 CHK2_HUMAN   | R.KFQDLLSEENE.S                  |            | 2 | 3,2103 | 0,25  | -0,09  |
| 15 | Q15233 NONO_HUMAN   | R.FACHS#ASLTVR.N                 | S147:      | 2 | 3,205  | 0,353 | -0,643 |
| 15 | O14908 GIPC1_HUMAN  | R.SRGPATVEDLPSAFE.E              |            | 2 | 3,204  | 0,33  | -0,077 |
| 15 | Q9UGM6 SYWM_HUMAN   | K.AKELAYTVCQE.V                  |            | 2 | 3,2033 | 0,296 | -0,186 |
| 15 | Q9NRF9 DPOE3_HUMAN  | R.KTLNASDVLSAM*EE.M              |            | 2 | 3,2022 | 0,27  | -0,801 |
| 15 | Q27J81 INF2_HUMAN   | K.SVQANLDQSQR.G                  |            | 2 | 3,195  | 0,314 | -0,979 |
| 15 | P50479 PDLI4_HUMAN  | R.IHIDPEIQDGS#PTTSR.R            | S112:      | 2 | 3,1933 | 0,409 | -0,198 |
| 15 | P07942 LAMB1_HUMAN  | R.KCVCNYLGTVQE.H                 |            | 2 | 3,1926 | 0,293 | 0,995  |
| 15 | Q8IW52 SLIK4_HUMAN  | K.THPSDLGLSVNCCQE.K              |            | 2 | 3,187  | 0,396 | -0,392 |

|    |                     |                                |            |   |        |       |        |
|----|---------------------|--------------------------------|------------|---|--------|-------|--------|
| 15 | P18583 SON_HUMAN    | D.SAM*LGSKS#PDPYR.L            | S910:      | 2 | 3,1862 | 0,402 | -0,405 |
| 15 | Q9HCM1 CL035_HUMAN  | K.SLVNNPKT#PPDGK.S             | T1240:     | 2 | 3,1802 | 0,31  | -1,433 |
| 15 | Q9Y5M8 SRPRB_HUMAN  | K.GGRGDVGSADIQDLE.K            |            | 2 | 3,1799 | 0,266 | -0,082 |
| 15 | Q09666 AHNK_HUMAN   | K.FKAEAPLPS#PKLE.G             | S5110:     | 2 | 3,1762 | 0,471 | -1,7   |
| 15 | Q5VZK9 LR16A_HUMAN  | K.ALEEVPIHIEDPPFSLR.Q          |            | 3 | 3,1744 | 0,237 | -0,444 |
| 15 | Q9H7X3 ZN696_HUMAN  | E.CGKRFLLHS#SNVVR.H            | S249:S250: | 2 | 3,1734 | 0,275 | 1,915  |
| 15 | P49790 NU153_HUMAN  | K.CIACQAAKLS#PR.D              | S687:      | 3 | 3,1687 | 0,248 | 0,566  |
| 15 | Q14980 NUMA1_HUMAN  | E.KQAAS#PLEPKELEE.L            | S271:      | 2 | 3,1667 | 0,491 | -0,592 |
| 15 | P49736 MCM2_HUMAN   | R.GNDPLTSSPGR.S                |            | 2 | 3,1661 | 0,412 | -0,443 |
| 15 | P05556 ITB1_HUMAN   | R.SNGLICGGNGVCK.C              |            | 2 | 3,1629 | 0,326 | 0,457  |
| 15 | Q6VMQ6 MCAF1_HUMAN  | K.TVNDVNSNNNM*SYR.N            |            | 2 | 3,1614 | 0,467 | -0,371 |
| 15 | Q13136 LIPA1_HUMAN  | K.RLS#DTVDKLLSESNE.R           | S448:      | 2 | 3,1577 | 0,467 | -0,205 |
| 15 | Q9Y4X0 AMER1_HUMAN  | K.QKLSSS#PPSGSGGGGASSSSHCSGE.S | S16:       | 3 | 3,1556 | 0,218 | -0,075 |
| 15 | Q07157 ZO1_HUMAN    | K.SHSLAQPEFDSGVE.T             |            | 2 | 3,1551 | 0,51  | -0,991 |
| 15 | Q9Y608 LRRF2_HUMAN  | R.NSASATTPLSGNSSR.R            |            | 2 | 3,1548 | 0,496 | -0,505 |
| 15 | Q13573 SNW1_HUMAN   | K.KM*SNALAIQVDSE.G             |            | 2 | 3,1527 | 0,295 | -0,515 |
| 15 | Q07960 RHG01_HUMAN  | K.SSS#PELVTHLK.W               | S51:       | 3 | 3,1517 | 0,213 | -0,143 |
| 15 | Q9UQ35 SRRM2_HUMAN  | R.VSGRT#SPPLDR.A               | T2397:     | 2 | 3,1513 | 0,287 | -0,974 |
| 15 | O95400 CD2B2_HUMAN  | R.KVTFQGVGDEEDE.D              |            | 2 | 3,148  | 0,363 | -1,596 |
| 15 | Q9NYV4 CD2L7_HUMAN  | K.NSGPQGPRRT#PTM*PQEE.A        | T1244:     | 3 | 3,1454 | 0,226 | -0,092 |
| 15 | Q8TEJ3 SH3R3_HUMAN  | R.KAGS#LDLNFTSPSR.Q            | S797:      | 2 | 3,1421 | 0,458 | -0,31  |
| 15 | Q96D46 NMD3_HUMAN   | E.STDRS#PGHILCCE.C             | S11:       | 2 | 3,1418 | 0,47  | -0,378 |
| 15 | Q71U36 TBA1A_HUMAN  | E.HSDCAF*VDNEAIYD.I            |            | 2 | 3,1398 | 0,461 | -0,271 |
| 15 | P25205 MCM3_HUMAN   | E.M*PQVHT#PKTADS#QETKE.S       | T722:S728: | 3 | 3,1387 | 0,139 | -0,348 |
| 15 | Q7Z309 F122B_HUMAN  | K.RIDFTPVSPAPS#PTR.G           | S119:      | 2 | 3,1375 | 0,397 | -1,347 |
| 15 | P30086 PEBP1_HUMAN  | E.LRAPVAGTCYQAE.W              |            | 2 | 3,1373 | 0,479 | -0,34  |
| 15 | Q9UPN3 MACF1_HUMAN  | K.LKGLNDATTAEEAE.A             |            | 2 | 3,1326 | 0,443 | -0,478 |
| 15 | Q15437 SC23B_HUMAN  | K.HLLQAPLDDAQE.I               |            | 2 | 3,1311 | 0,338 | -0,633 |
| 15 | Q02241 KIF23_HUMAN  | R.RSSTVAPAQPDGAESE.W           |            | 2 | 3,1301 | 0,335 | -0,305 |
| 15 | Q9NZ23 Q9NZ23_HUMAN | E.DQVVSSDIVNNTGHSIFDATLTK.F    |            | 3 | 3,1269 | 0,272 | -0,149 |
| 15 | O43379 WDR62_HUMAN  | R.RGQSS#PPPAPPICLR.R           | S33:       | 3 | 3,1247 | 0,235 | -0,32  |
| 15 | Q14160 LAP4_HUMAN   | R.LRVQS#PEPPAPER.A             | S1475:     | 2 | 3,1233 | 0,281 | -0,784 |
| 15 | Q86UE4 LYRIC_HUMAN  | K.SGKGDSTLQVSSGLNE.N           |            | 2 | 3,1209 | 0,327 | 0,155  |

|    |                    |                               |            |   |        |       |        |
|----|--------------------|-------------------------------|------------|---|--------|-------|--------|
| 15 | Q14980 NUMA1_HUMAN | K.LKAVQAQGGESQQE.A            |            | 2 | 3,1171 | 0,356 | -0,166 |
| 15 | Q9Y2W1 TR150_HUMAN | R.ERS#PALKS#PLQSVVVR.R        | S248:S253: | 3 | 3,1149 | 0,357 | 0      |
| 15 | Q9NUG6 PDRG1_HUMAN | E.LKGFNLNPLNQDE.L             |            | 2 | 3,1132 | 0,3   | -0,487 |
| 15 | Q66K74 MAP1S_HUMAN | R.KAVPM*APAPAS#PGSSNDSSAR.S   | S759:      | 2 | 3,1091 | 0,476 | 0,35   |
| 15 | A1L390 PKHG3_HUMAN | R.HGSATDSLSCQLSPE.V           |            | 2 | 3,109  | 0,39  | -0,307 |
| 15 | Q99638 RAD9A_HUMAN | E.AEPSTVPGT#PPPCK.F           | T355:      | 2 | 3,1071 | 0,171 | -0,411 |
| 15 | P40939 ECHA_HUMAN  | K.M*GLVDQLVEPLGPKPPEER.T      |            | 3 | 3,1067 | 0,377 | -0,32  |
| 15 | Q15424 SAFB1_HUMAN | R.SVVS#FDKVK.E                | S604:      | 2 | 3,1063 | 0,258 | 0,224  |
| 15 | Q01844 EWS_HUMAN   | R.QDHPSSM*GVYGE.S             |            | 2 | 3,103  | 0,319 | -0,084 |
| 15 | Q92785 REQU_HUMAN  | E.GEDKEDS#QPPTVPSQR.S         | S244:      | 2 | 3,098  | 0,269 | -0,132 |
| 15 | P62937 PIIA_HUMAN  | K.KITIADCGQLE.-               |            | 2 | 3,0977 | 0,453 | -0,391 |
| 15 | Q7Z417 NUFP2_HUMAN | K.RTS#PQVLGSILK.S             | S572:      | 2 | 3,0963 | 0,348 | -0,885 |
| 15 | Q6UN15 FIP1_HUMAN  | R.DHS#PTPSVFNS#DEERYR.Y       | S492:S500: | 3 | 3,0933 | 0,403 | 0,5    |
| 15 | Q92562 SAC3_HUMAN  | E.GSVSQRS#T#PVKM*TDAGDSAK.V   | S776:T777: | 3 | 3,0899 | 0,277 | -0,083 |
| 15 | Q9NPQ8 RIC8A_HUMAN | R.GHLTSLQDAM*CE.T             |            | 2 | 3,0894 | 0,305 | -0,177 |
| 15 | Q8IWS0 PHF6_HUMAN  | K.CGFCHVGEEENE.A              |            | 2 | 3,0883 | 0,287 | -0,749 |
| 15 | P08670 VIME_HUMAN  | E.VDALKGTNES#LER.Q            | S339:      | 2 | 3,0872 | 0,171 | -0,646 |
| 15 | Q6P996 PDXD1_HUMAN | E.KVERLS#SGPEQITLE.A          | S736:      | 2 | 3,0863 | 0,528 | -0,138 |
| 15 | Q5QE6 TDIF2_HUMAN  | K.NAVSVHSLNLE.A               |            | 2 | 3,0849 | 0,433 | -0,864 |
| 15 | P35579 MYH9_HUMAN  | E.AKIAQLEEQLDNE.T             |            | 2 | 3,0846 | 0,316 | -0,325 |
| 15 | P31948 STIP1_HUMAN | R.IGNSYFKEE.K                 |            | 2 | 3,0827 | 0,272 | -0,112 |
| 15 | P20700 LMNB1_HUMAN | E.IRDQM*QQQLNDYE.Q            |            | 2 | 3,0788 | 0,348 | -0,288 |
| 15 | Q9Y490 TLN1_HUMAN  | E.KM*VGGIAQIIAAQEE.M          |            | 2 | 3,0744 | 0,248 | -0,465 |
| 15 | Q9NYV4 CD2L7_HUMAN | E.SKGS#PVFLPR.K               | S423:      | 2 | 3,0742 | 0,36  | 0,209  |
| 15 | Q9UQ35 SRRM2_HUMAN | R.VSGRTS#PPLDR.A              | S2398:     | 2 | 3,0717 | 0,277 | -0,177 |
| 15 | Q96QR8 PURB_HUMAN  | R.GGGGGPCGFQPASR.G            |            | 2 | 3,0709 | 0,428 | 0      |
| 15 | P49736 MCM2_HUMAN  | E.SFTM*ASSPAQR.R              |            | 2 | 3,0686 | 0,384 | -0,407 |
| 15 | Q5W0B1 RN219_HUMAN | E.KTELNLS#KGS�TNDQLE.N        | S592:      | 2 | 3,0641 | 0,417 | -0,495 |
| 15 | Q9Y4F1 FARP1_HUMAN | K.IHSIRSLAS#QPTLNSE.V         | S376:      | 3 | 3,0635 | 0,134 | -0,466 |
| 15 | P60981 DEST_HUMAN  | E.CQANGPEDLNR.A               |            | 2 | 3,0629 | 0,313 | -0,575 |
| 15 | Q8N4C8 MINK1_HUMAN | R.NLAAFPASHDPDPAIPAPTATPSAR.G |            | 3 | 3,0616 | 0,244 | 0,147  |
| 15 | P63104 1433Z_HUMAN | K.KGIVDQSQAYQE.A              |            | 2 | 3,0602 | 0,337 | -0,408 |
| 15 | O75947 ATP5H_HUMAN | E.DKYTAQVDAEE.K               |            | 2 | 3,0582 | 0,444 | 0      |

|    |                    |                              |            |   |        |       |        |
|----|--------------------|------------------------------|------------|---|--------|-------|--------|
| 15 | Q6S8J3 A26CA_HUMAN | R.VAPEEHPILLTEAPLNPK.A       |            | 3 | 3,054  | 0,212 | -0,093 |
| 15 | Q01484 ANK2_HUMAN  | R.DSAVM*DDSVVIPSHQVSTLAKE.A  |            | 3 | 3,0538 | 0,381 | -0,234 |
| 15 | Q9UBF2 COPG2_HUMAN | K.HPSAVTACNLDLE.N            |            | 2 | 3,0516 | 0,404 | -0,342 |
| 15 | P45973 CBX5_HUMAN  | K.SNFSNSADDIK.S              |            | 2 | 3,0504 | 0,309 | -0,917 |
| 15 | P39019 RS19_HUMAN  | R.IAGQVAAANK.K               |            | 2 | 3,0498 | 0,338 | 0      |
| 15 | P29966 MARCS_HUMAN | E.AAAERPGEAAVASS#PSK.A       | S27:       | 3 | 3,0496 | 0,117 | 0      |
| 15 | O95149 SPN1_HUMAN  | K.GSSH#PDHPGCLM*EN.-         | S350:      | 2 | 3,0485 | 0,452 | -0,142 |
| 15 | Q86SQ0 PHLB2_HUMAN | K.SHDNVYSLGGLG.G             |            | 2 | 3,0455 | 0,319 | -0,662 |
| 15 | P37802 TAGL2_HUMAN | R.TLM*NLGGLAVAR.D            |            | 2 | 3,0438 | 0,303 | 0,891  |
| 15 | O94880 PHF14_HUMAN | R.NRPLLDVSM*EE.L             |            | 2 | 3,0436 | 0,335 | -0,25  |
| 15 | O43432 IF4G3_HUMAN | E.ILDSQNLNSR.R               |            | 2 | 3,0414 | 0,407 | -0,631 |
| 15 | P84157 MXRA7_HUMAN | E.GFSFKYS#PGK.L              | S144:      | 2 | 3,0399 | 0,419 | -0,102 |
| 15 | O75643 U520_HUMAN  | E.RNALLQLTDSQIAD.V           |            | 2 | 3,0396 | 0,277 | -0,157 |
| 15 | P07237 PDIA1_HUMAN | K.RTGPAATTLPGAAAE.S          |            | 2 | 3,0381 | 0,471 | -0,407 |
| 15 | Q5VUA4 ZN318_HUMAN | E.VILKGS#PEEK.V              | S1420:     | 2 | 3,0376 | 0,365 | -0,414 |
| 15 | P62191 PRS4_HUMAN  | R.IKDYLML*EEE.F              |            | 2 | 3,0368 | 0,093 | -0,751 |
| 15 | Q6KC79 NIPBL_HUMAN | E.KAAM*YDISS#PSKD.S          | S350:      | 2 | 3,0364 | 0,35  | -0,226 |
| 15 | Q9NWW8 CS062_HUMAN | R.AVGAQASVGSR.S              |            | 2 | 3,0354 | 0,178 | -0,365 |
| 15 | Q92576 PHF3_HUMAN  | E.NNLQDNQTSNSSPCR.S          |            | 2 | 3,0347 | 0,525 | -0,07  |
| 15 | Q8N6H7 ARFG2_HUMAN | E.HGPNTDLLGTS#PKASLE.L       | S201:      | 2 | 3,0339 | 0,524 | -0,806 |
| 15 | Q13813 SPTA2_HUMAN | K.KIEDLGAAM*EE.A             |            | 2 | 3,0324 | 0,372 | -0,2   |
| 15 | Q09666 AHNK_HUMAN  | R.LKSEDGVEGDLGE.T            |            | 2 | 3,0308 | 0,363 | -0,453 |
| 15 | Q96C57 CL043_HUMAN | E.SAIHS#PGTVEKE.A            | S179:      | 2 | 3,0276 | 0,26  | -0,823 |
| 15 | P16949 STMN1_HUMAN | R.SKESVPEFPLS#PPK.K          | S38:       | 2 | 3,0249 | 0,445 | -0,677 |
| 15 | Q66GS9 CP135_HUMAN | R.HGLAT#PPLSSTLR.S           | T1121:     | 2 | 3,0228 | 0,348 | -1,45  |
| 15 | O15381 NVL_HUMAN   | R.KGNPDSVSNTPEM*E.Q          |            | 2 | 3,0204 | 0,474 | -0,241 |
| 15 | P18887 XRCC1_HUMAN | K.TKPTQAAGPSS#PQKPPT#PEETK.A | S447:T453: | 3 | 3,0203 | 0,155 | -0,375 |
| 15 | O00116 ADAS_HUMAN  | R.RAASAATAAPTATPAAQE.S       |            | 2 | 3,0193 | 0,505 | -0,074 |
| 15 | Q86SQ0 PHLB2_HUMAN | E.YTKPDSRSL#TGTTVED.V        | S468:      | 2 | 3,0148 | 0,425 | 0,462  |
| 15 | Q86XJ1 GA2L3_HUMAN | R.HGPGLANVCQYDE.W            |            | 2 | 3,0132 | 0,169 | -0,585 |
| 15 | P68104 EF1A1_HUMAN | E.HALLAY#TLGVK.Q             | Y141:      | 2 | 3,0114 | 0,38  | -0,385 |
| 15 | Q9P0V9 SEP10_HUMAN | K.TTCM*SSQGS#DDEQIKRE.N      | S28:       | 3 | 3,0073 | 0,354 | -0,177 |
| 15 | Q8WW12 PCNP_HUMAN  | K.NIGRDT#PTSAGPNSFNK.G       | T139:      | 2 | 3,0059 | 0,097 | -0,329 |

|    |                     |                                |              |   |        |       |        |
|----|---------------------|--------------------------------|--------------|---|--------|-------|--------|
| 15 | P42695 CNDD3_HUMAN  | K.ARPM*S#LSTIALINS#VKK.A       | S1348:S1357: | 3 | 3,0018 | 0,271 | -0,456 |
| 15 | Q15436 SC23A_HUMAN  | R.HLLQAPVDDAQE.I               |              | 2 | 2,9972 | 0,418 | -0,365 |
| 15 | Q9Y6A5 TACC3_HUMAN  | R.HGGVCAPAAVATS#PPGAIPK.E      | S250:        | 3 | 2,997  | 0,213 | 0,094  |
| 15 | P41250 SYG_HUMAN    | K.VDDSSGSIGR.R                 |              | 2 | 2,9968 | 0,425 | -0,123 |
| 15 | Q53F19 CQ085_HUMAN  | K.SRLDNLPSLQIE.V               |              | 2 | 2,9955 | 0,149 | -0,352 |
| 15 | O95831 AIFM1_HUMAN  | R.VLIVSEDPPELYM*RPPLSK.E       |              | 3 | 2,9944 | 0,277 | -0,333 |
| 15 | Q06323 PSME1_HUMAN  | E.DKGPPCGPVNCNE.K              |              | 2 | 2,9919 | 0,326 | -0,507 |
| 15 | O75386 TULP3_HUMAN  | R.CRLS#PSGDSVFHEE.M            | S9:          | 2 | 2,9905 | 0,376 | 0,072  |
| 15 | Q53LP3 ANR57_HUMAN  | R.SVCPGGSSPGSSSGGGR.G          |              | 2 | 2,9866 | 0,5   | 0      |
| 15 | Q14493 SLBP_HUMAN   | R.HM*DSQVEDEFDLE.A             |              | 2 | 2,9838 | 0,427 | -0,379 |
| 15 | Q14669 TRIPC_HUMAN  | R.KPNPLANSNTSGYSE.S            |              | 2 | 2,9838 | 0,438 | -0,541 |
| 15 | P31943 HNRH1_HUMAN  | K.HTGPNS#PDTANDGFVR.L          | S104:        | 2 | 2,9837 | 0,413 | 0,415  |
| 15 | Q76176 SSH2_HUMAN   | E.YTHIVTS#PNHTGPGSE.I          | S1020:       | 2 | 2,9813 | 0,274 | -0,549 |
| 15 | Q9UQB8 BAIP2_HUMAN  | K.LSDSYSNT#LPVRK.S             | T340:        | 2 | 2,9766 | 0,29  | -0,626 |
| 15 | O75167 PHAR2_HUMAN  | R.KLS#LRPTVAE.L                | S560:        | 2 | 2,9741 | 0,265 | -0,204 |
| 15 | Q00537 PCTK2_HUMAN  | E.KLQINS#PPFDQPM*SR.R          | S165:        | 2 | 2,9733 | 0,346 | -1,053 |
| 15 | Q8N7R7 CCYL1_HUMAN  | R.RSFS#ADNFIGIQR.S             | S344:        | 2 | 2,9711 | 0,508 | 0,153  |
| 15 | Q9UQ35 SRRM2_HUMAN  | K.VKAQT#PPGPSLSGSK.S           | T1003:       | 3 | 2,9705 | 0,226 | -0,179 |
| 15 | Q96T23 RSF1_HUMAN   | E.SEKPGS#PEAAETS#PPSNIIDHCEK.L | S612:S619:   | 3 | 2,9703 | 0,189 | 0      |
| 15 | Q9UNE7 STUB1_HUMAN  | R.VGHFDPVTRS#PLTQE.Q           | S273:        | 3 | 2,9697 | 0,178 | -0,415 |
| 15 | Q9NQS7 INCE_HUMAN   | R.HSPIAPSS#PSPQVLAQK.Y         | S312:        | 3 | 2,9696 | 0,336 | -0,201 |
| 15 | Q14914 LTB4D_HUMAN  | K.HFVGYPNTSDFE.L               |              | 2 | 2,9683 | 0,372 | -0,345 |
| 15 | P20645 MPRD_HUMAN   | R.HTLADNFNPVSEE.R              |              | 2 | 2,9675 | 0,279 | -0,497 |
| 15 | P10809 CH60_HUMAN   | R.KPLVIIAEDVDGE.A              |              | 2 | 2,9667 | 0,399 | -0,698 |
| 15 | Q8N1F7 NUP93_HUMAN  | K.NEKNALLSAIEE.S               |              | 2 | 2,9666 | 0,317 | -0,422 |
| 15 | B2CI53 B2CI53_HUMAN | R.S#NM*SPDKPVSVK.I             | S1102:       | 2 | 2,9664 | 0,193 | -0,264 |
| 15 | Q12905 ILF2_HUMAN   | R.VKPAPDETSFSE.A               |              | 2 | 2,9659 | 0,437 | -0,56  |
| 15 | Q68DN6 RGPD1_HUMAN  | K.SALSLSKS#PAK.L               | S1289:       | 2 | 2,9643 | 0,321 | 0      |
| 15 | Q99661 KIF2C_HUMAN  | R.GSSSANPVNSVR.R               |              | 2 | 2,9642 | 0,417 | -0,415 |
| 15 | Q8N1G0 ZN687_HUMAN  | R.KAVVLPGGTATS#PK.M            | S433:        | 2 | 2,9639 | 0,281 | -0,087 |
| 15 | Q92878 RAD50_HUMAN  | R.ARDSLIIQSLATQLE.L            |              | 2 | 2,9566 | 0,356 | -0,079 |
| 15 | P49790 NU153_HUMAN  | K.CIACQAAKLS#PR.D              | S687:        | 2 | 2,9539 | 0,337 | 0,252  |
| 15 | Q96RS0 TGS1_HUMAN   | K.KGDDLLETNNPEPE.K             |              | 2 | 2,952  | 0,23  | -0,621 |

|    |                    |                            |            |   |        |       |        |
|----|--------------------|----------------------------|------------|---|--------|-------|--------|
| 15 | Q09666 AHNK_HUMAN  | R.RVT#AYTVDVTGR.E          | T158:      | 2 | 2,9502 | 0,398 | -1,979 |
| 15 | O94776 MTA2_HUMAN  | E.NSSSNPYLVR.R             |            | 2 | 2,9488 | 0,337 | -0,215 |
| 15 | P20042 IF2B_HUMAN  | K.KIFDIDEAEE.G             |            | 2 | 2,9479 | 0,213 | -0,404 |
| 15 | O95831 AIFM1_HUMAN | R.VLIVSEDPPELPPM*RPPLSKE.L |            | 3 | 2,9462 | 0,315 | 0      |
| 15 | Q8IWU2 LMTK2_HUMAN | E.TFTAGSQGSYR.D            |            | 2 | 2,9444 | 0,435 | -0,312 |
| 15 | Q6P1L5 AL2SC_HUMAN | R.SIDTQTPGGADR.G           |            | 2 | 2,9444 | 0,377 | -0,501 |
| 15 | Q96T23 RSF1_HUMAN  | E.IKLS#DDFDS#PVKGPLCK.S    | S382:S387: | 3 | 2,9407 | 0,151 | -0,176 |
| 15 | Q9UQ35 SRRM2_HUMAN | K.VKAQT#PPGPSLSGSK.S       | T1003:     | 2 | 2,94   | 0,346 | -0,318 |
| 15 | Q96GX5 MASTL_HUMAN | E.KNQDPANILSACLSE.T        |            | 2 | 2,9389 | 0,401 | -0,221 |
| 15 | Q13428 TCOF_HUMAN  | K.TVANLLSGKS#PR.K          | S156:      | 2 | 2,9389 | 0,415 | 0,738  |
| 15 | Q6PI48 SYDM_HUMAN  | R.SQHYDLVLNGNE.I           |            | 2 | 2,9362 | 0,294 | -1,23  |
| 15 | P05023 AT1A1_HUMAN | E.LKDAFQAYLE.L             |            | 2 | 2,9356 | 0,325 | -0,465 |
| 15 | Q14320 FA50A_HUMAN | R.KISSLSFTLEEEEE.G         |            | 2 | 2,934  | 0,305 | -0,446 |
| 15 | Q16649 NFIL3_HUMAN | K.GPIHS#PVELK.H            | S301:      | 2 | 2,9325 | 0,113 | -0,738 |
| 15 | P49756 RBM25_HUMAN | K.LGASNS#PGQPNSVKR.K       | S618:      | 3 | 2,9316 | 0,267 | 0      |
| 15 | Q99700 ATX2_HUMAN  | E.NIKPNETS#PSFSKAE.N       | S771:      | 2 | 2,9314 | 0,311 | 0,212  |
| 15 | Q5JRA6 MIA3_HUMAN  | K.LKDVISM*NASE.F           |            | 2 | 2,929  | 0,419 | -0,2   |
| 15 | Q01484 ANK2_HUMAN  | R.DSAVM*DDSVVIPSHQVSTLAK.E |            | 3 | 2,9273 | 0,306 | -1,074 |
| 15 | P60709 ACTB_HUMAN  | R.GYSFTTTAERE.I            |            | 2 | 2,9232 | 0,512 | -0,387 |
| 15 | P30085 KCY_HUMAN   | R.KNPDSQYGELIE.K           |            | 2 | 2,9227 | 0,28  | -0,35  |
| 15 | Q09666 AHNK_HUMAN  | K.FKAEAPLPS#PK.L           | S5110:     | 2 | 2,9215 | 0,313 | -1,736 |
| 15 | P17812 PYRG1_HUMAN | R.KLYGDADYLEE.R            |            | 2 | 2,9193 | 0,35  | -0,742 |
| 15 | Q2Y0W8 S4A8_HUMAN  | K.HGQTVSPQSVPTTNLE.V       |            | 2 | 2,9183 | 0,536 | -0,216 |
| 15 | Q7Z6Z7 HUWE1_HUMAN | E.KFQDADPLEQDE.L           |            | 2 | 2,9173 | 0,292 | -0,34  |
| 15 | Q14257 RCN2_HUMAN  | E.KANQDSGPGLSLEE.F         |            | 2 | 2,9172 | 0,263 | -0,591 |
| 15 | P12955 PEPD_HUMAN  | E.KYAVDDVQYVDE.I           |            | 2 | 2,9151 | 0,361 | -0,507 |
| 15 | Q92766 RREB1_HUMAN | E.NGGS#PQGIKS#PSKPPGPNR.I  | S36:S42:   | 3 | 2,9144 | 0,311 | -0,27  |
| 15 | Q9UQ35 SRRM2_HUMAN | R.VSGRTS#PPLDR.A           | S2398:     | 3 | 2,9139 | 0,257 | 0,066  |
| 15 | Q96E09 F122A_HUMAN | R.HGLLLPAS#PVR.M           | S76:       | 2 | 2,9131 | 0,435 | -0,689 |
| 15 | Q7Z2W4 ZCCHV_HUMAN | R.KTVFS#PTLPAAR.S          | S378:      | 2 | 2,9126 | 0,293 | -0,535 |
| 15 | Q9UHB6 LIMA1_HUMAN | R.LRS#PPEALVQGR.Y          | S132:      | 2 | 2,9123 | 0,359 | -0,174 |
| 15 | P09543 CN37_HUMAN  | R.AHITLGCAADVE.A           |            | 2 | 2,911  | 0,444 | -0,097 |
| 15 | Q05209 PTN12_HUMAN | E.GNSSDINYQTR.K            |            | 2 | 2,9104 | 0,373 | -0,389 |



|    |                    |                            |        |   |        |       |        |
|----|--------------------|----------------------------|--------|---|--------|-------|--------|
| 15 | Q9UQ35 SRRM2_HUMAN | E.KM*ALPPQEDAT#ASPPR.Q     | T1177: | 3 | 2,9094 | 0,309 | 0,203  |
| 15 | Q8NEF9 SRFB1_HUMAN | E.SVFFHSLS#GSK.S           | S349:  | 2 | 2,9052 | 0,384 | -0,287 |
| 15 | P28290 SSFA2_HUMAN | R.SSALM*GM*CGSR.S          |        | 2 | 2,9043 | 0,331 | -0,308 |
| 15 | Q15459 SF3A1_HUMAN | E.DSAPSKPVVGIIPPPEVR.N     |        | 3 | 2,9034 | 0,159 | -0,996 |
| 15 | Q8N2Y8 RUSC2_HUMAN | E.HTKIS#PPPGPGDPGSPQSE.Y   | S428:  | 3 | 2,9007 | 0,199 | -0,085 |
| 15 | Q06587 RING1_HUMAN | R.LHNQQALSSSIEE.G          |        | 2 | 2,9007 | 0,149 | -0,335 |
| 15 | Q14160 LAP4_HUMAN  | K.RVS#LVGADDLR.K           | S1378: | 2 | 2,9006 | 0,162 | -0,19  |
| 15 | P48634 BAT2_HUMAN  | E.KLIPGPLS#PVAR.G          | S1219: | 2 | 2,9    | 0,213 | -0,459 |
| 15 | P13797 PLST_HUMAN  | K.INNFSADIK.D              |        | 2 | 2,8985 | 0,297 | -0,298 |
| 15 | P02538 K2C6A_HUMAN | R.SGFSSVSVSR.S             |        | 2 | 2,8981 | 0,38  | -0,662 |
| 15 | P62495 ERF1_HUMAN  | R.YVLHCQGTEEE.K            |        | 2 | 2,8966 | 0,377 | -0,179 |
| 15 | P63104 1433Z_HUMAN | E.KFLIPNASQAE.S            |        | 2 | 2,8964 | 0,252 | -0,601 |
| 15 | P17980 PRS6A_HUMAN | R.KM*NVSPDVNYEE.L          |        | 2 | 2,8961 | 0,312 | -0,762 |
| 15 | P49588 SYAC_HUMAN  | E.RLYVTYFGGDE.A            |        | 2 | 2,8951 | 0,342 | -0,185 |
| 15 | O75122 CLAP2_HUMAN | R.NTGNGTQSSM*GS#PLTRPTPR.S | S892:  | 3 | 2,8948 | 0,202 | -0,509 |
| 15 | Q4G0J3 LARP7_HUMAN | E.NM*DTSNTSISK.M           |        | 2 | 2,8919 | 0,313 | -0,201 |
| 15 | Q8TEW0 PARD3_HUMAN | R.RIS#HSLYSGIEGLDE.S       | S715:  | 2 | 2,891  | 0,426 | -0,764 |
| 15 | Q9Y3T9 NOC2L_HUMAN | K.KNSVPVTVAM*VE.R          |        | 2 | 2,8908 | 0,407 | -0,284 |
| 15 | Q7Z309 F122B_HUMAN | R.RSSS#APLIHGLSD.L         | S25:   | 2 | 2,8908 | 0,354 | -0,516 |
| 15 | Q8NI27 THOC2_HUMAN | K.RVPSIDVLCNE.F            |        | 2 | 2,8891 | 0,323 | -0,562 |
| 15 | P30086 PEBP1_HUMAN | K.CDEPILSNR.S              |        | 2 | 2,8858 | 0,298 | -0,332 |
| 15 | Q5SW96 ARH_HUMAN   | R.ALIRS#PSLAK.Q            | S14:   | 2 | 2,8844 | 0,163 | 0,107  |
| 15 | P50579 AMPM2_HUMAN | E.NFGTLAFCR.R              |        | 2 | 2,8827 | 0,305 | -0,674 |
| 15 | Q9BVL2 NUPL1_HUMAN | R.TQKT#PPGLQHE.Y           | T331:  | 3 | 2,8827 | 0,138 | -0,139 |
| 15 | P49327 FAS_HUMAN   | R.HSQDLAFLSM*LND.I         |        | 2 | 2,8812 | 0,258 | -0,324 |
| 15 | Q08AD1 CA1L1_HUMAN | E.KLNSS#LHFLQQE.M          | S901:  | 2 | 2,876  | 0,286 | -0,4   |
| 15 | Q8WWM7 ATX2L_HUMAN | R.QGS#GRESPLASRE.G         | S335:  | 3 | 2,876  | 0,27  | -0,475 |
| 15 | Q92616 GCN1L_HUMAN | R.RALQAAIQQLAE.A           |        | 2 | 2,8736 | 0,305 | -0,93  |
| 15 | P46013 KI67_HUMAN  | E.LFQT#PSHTKE.S            | T1719: | 2 | 2,8727 | 0,368 | -0,385 |
| 15 | P16144 ITB4_HUMAN  | R.RPNGDIVGYLVTC.E.M        |        | 2 | 2,8704 | 0,226 | -0,536 |
| 15 | Q16875 F263_HUMAN  | R.RNS#VTPLASPEPTK.K        | S461:  | 2 | 2,8699 | 0,336 | 0,232  |
| 15 | P46100 ATRX_HUMAN  | K.AHLALEEDLNSE.F           |        | 2 | 2,8673 | 0,338 | -0,182 |
| 15 | P06400 RB_HUMAN    | D.M*YLSPVRS#PK.K           | S612:  | 2 | 2,8649 | 0,312 | -0,383 |

|    |                    |                         |        |   |        |       |        |
|----|--------------------|-------------------------|--------|---|--------|-------|--------|
| 15 | Q8NI08 NCOA7_HUMAN | K.STGHT#PTKPSGSSVSE.K   | T358:  | 2 | 2,8627 | 0,218 | -0,074 |
| 15 | P78371 TCPB_HUMAN  | K.KLGGSLADSYLDE.G       |        | 2 | 2,8619 | 0,322 | -0,357 |
| 15 | O60220 TIM8A_HUMAN | K.SKPVFSESLSD.-         |        | 2 | 2,8613 | 0,394 | 0,306  |
| 15 | Q6AI08 HEAT6_HUMAN | K.KAPAGPSLEE.T          |        | 2 | 2,8608 | 0,315 | -1,527 |
| 15 | Q13428 TCOF_HUMAN  | E.AKPQQAAGM*LS#PK.T     | S1257: | 2 | 2,86   | 0,405 | -0,257 |
| 15 | Q9NZM3 ITSN2_HUMAN | K.HDIITVLEQQE.N         |        | 2 | 2,8596 | 0,225 | 0      |
| 15 | Q15154 PCM1_HUMAN  | R.INFSDLQQR.S           |        | 2 | 2,8585 | 0,32  | -0,22  |
| 15 | Q9UJX6 ANC2_HUMAN  | R.LLHQFSFS#PERE.I       | S534:  | 2 | 2,8565 | 0,328 | -0,855 |
| 15 | P39687 AN32A_HUMAN | E.GKLEGLTDEFEE.L        |        | 2 | 2,8561 | 0,207 | -0,446 |
| 15 | P46060 RAGP1_HUMAN | E.KLDLNGNTLGEE.G        |        | 2 | 2,8544 | 0,274 | -0,281 |
| 15 | O94826 TOM70_HUMAN | R.LRPES#ALAQAQK.C       | S434:  | 2 | 2,8538 | 0,264 | -0,351 |
| 15 | Q9BZD4 NUF2_HUMAN  | K.IVDS#PEKLK.N          | S247:  | 2 | 2,8508 | 0,299 | -0,33  |
| 15 | Q12874 SF3A3_HUMAN | K.LHGLNINYNCE.I         |        | 2 | 2,8485 | 0,313 | -1,721 |
| 15 | Q58FF7 H90B3_HUMAN | R.RVFIM*DSCDE.L         |        | 2 | 2,8475 | 0,295 | 0,758  |
| 15 | Q8IXT5 RB12B_HUMAN | R.FPPEDFRHS#PE.D        | S575:  | 2 | 2,8466 | 0,339 | -0,424 |
| 15 | Q6ZN18 AEBP2_HUMAN | E.GYGTGGGGSSATSGGR.R    |        | 2 | 2,8446 | 0,505 | -0,459 |
| 15 | Q9Y6D9 MD1L1_HUMAN | R.ALQGDYDQSR.T          |        | 2 | 2,8386 | 0,387 | -1,058 |
| 15 | Q86XP3 DDX42_HUMAN | K.IIDPLPIDHSEIDYPPFEK.N |        | 3 | 2,8378 | 0,162 | -0,235 |
| 15 | O75643 U520_HUMAN  | R.KNVQINLFFVDE.V        |        | 2 | 2,8361 | 0,43  | -0,239 |
| 15 | Q96EV2 RBM33_HUMAN | K.VKPAS#PVAQPKEE.A      | S775:  | 2 | 2,8331 | 0,457 | -0,585 |
| 15 | Q12846 STX4_HUMAN  | K.TQHGVLSQQFVE.L        |        | 2 | 2,8319 | 0,322 | -1,511 |
| 15 | P56537 IF6_HUMAN   | R.HGLLVPNNTTDQE.L       |        | 2 | 2,8306 | 0,371 | -0,509 |
| 15 | P06400 RB_HUMAN    | K.LRFDIEGSDEAD.G        |        | 2 | 2,8304 | 0,37  | -0,893 |
| 15 | P38646 GRP75_HUMAN | K.KSQVFSTAADGQTQVE.I    |        | 2 | 2,8276 | 0,268 | -0,288 |
| 15 | Q9BXY0 RBM13_HUMAN | K.RAYVEIEYEQE.T         |        | 2 | 2,8247 | 0,3   | -0,598 |
| 15 | O43707 ACTN4_HUMAN | R.KDDPVTNLNNAFE.V       |        | 2 | 2,8244 | 0,403 | -0,578 |
| 15 | Q01804 OTUD4_HUMAN | K.NNGNSTSLPLSR.K        |        | 2 | 2,823  | 0,399 | -0,484 |
| 15 | Q96L91 EP400_HUMAN | R.LKT#PTKPPCQ.-         | T3153: | 2 | 2,8218 | 0,145 | -0,293 |
| 15 | P27348 1433T_HUMAN | D.KYLIANATNPE.S         |        | 2 | 2,8215 | 0,26  | -0,692 |
| 15 | Q8NCN4 RN169_HUMAN | D.GRVLS#PLIHK.S         | S403:  | 2 | 2,8146 | 0,267 | 0      |
| 15 | Q9UQR0 SCML2_HUMAN | K.RSPQQTVPYVVPLS#PK.L   | S511:  | 2 | 2,8139 | 0,31  | 0,715  |
| 15 | Q7KZ85 SPT6H_HUMAN | K.KLPGYTDAALQE.A        |        | 2 | 2,8135 | 0,248 | -1,028 |
| 15 | P15311 EZRI_HUMAN  | R.AKFYPEDVAEE.L         |        | 2 | 2,8129 | 0,336 | -0,094 |

|    |                    |                            |        |   |        |       |        |
|----|--------------------|----------------------------|--------|---|--------|-------|--------|
| 15 | Q92616 GCN1L_HUMAN | R.RALQAAIQQLAEAQPE.A       |        | 2 | 2,8104 | 0,303 | -0,14  |
| 15 | P42224 STAT1_HUMAN | E.IKSLEDLQDE.Y             |        | 2 | 2,8065 | 0,248 | 0      |
| 15 | Q8WW1 LMO7_HUMAN   | K.REDSFES#LDSLGSR.S        | S249:  | 3 | 2,8063 | 0,206 | 0,109  |
| 15 | Q6GYQ0 GRIPE_HUMAN | K.NGSYQGalHNASEE.A         |        | 2 | 2,8053 | 0,457 | -0,661 |
| 15 | Q5VT06 CE350_HUMAN | E.LKS#PTELM*K.S            | S2460: | 2 | 2,8044 | 0,142 | -0,32  |
| 15 | P62136 PP1A_HUMAN  | R.AHQVVEDGYE.F             |        | 2 | 2,8025 | 0,47  | -0,319 |
| 15 | P42892 ECE1_HUMAN  | K.DNFQDTLQVVTahYR.T        |        | 3 | 2,8012 | 0,206 | 0,101  |
| 15 | Q8IXJ6 SIRT2_HUMAN | E.HASIDAQSGAGVNPSTs#ASPK.K | S366:  | 3 | 2,7975 | 0,176 | 0,593  |
| 15 | P17980 PRS6A_HUMAN | R.KIEFPM*PNEE.A            |        | 2 | 2,7953 | 0,225 | -0,39  |
| 15 | Q8TEQ6 GEMI5_HUMAN | R.VKDLIVSGDE.K             |        | 2 | 2,7936 | 0,214 | 0,227  |
| 15 | Q6ZS17 FA65A_HUMAN | R.RPETPSSGPlDEE.G          |        | 2 | 2,7928 | 0,495 | 0,345  |
| 15 | Q02952 AKA12_HUMAN | E.SDKAITPQAQEE.L           |        | 2 | 2,7897 | 0,336 | -0,371 |
| 15 | P42285 SK2L2_HUMAN | R.VKVQSVETVE.G             |        | 2 | 2,7897 | 0,255 | 0,655  |
| 15 | Q92616 GCN1L_HUMAN | K.KLDAGNQLALIEE.L          |        | 2 | 2,7885 | 0,257 | -0,345 |
| 15 | P62195 PRS8_HUMAN  | E.HAPSIIFM*DE.I            |        | 2 | 2,788  | 0,311 | -0,311 |
| 15 | Q9Y6M7 S4A7_HUMAN  | K.TSSTVNTKFE.K             |        | 2 | 2,7874 | 0,37  | -0,657 |
| 15 | Q92499 DDX1_HUMAN  | E.LKFNGEEEE.F              |        | 2 | 2,7835 | 0,198 | -0,219 |
| 15 | Q96C92 SDCG3_HUMAN | R.HSLGLDHNS#PPSQTGGYGLE.Y  | S147:  | 3 | 2,7799 | 0,296 | -1,108 |
| 15 | Q16740 CLPP_HUMAN  | R.DRYM*SPM*EAQE.F          |        | 2 | 2,7777 | 0,371 | -0,527 |
| 15 | P25686 DNJB2_HUMAN | K.AQHQPGLGGTQE.G           |        | 2 | 2,7776 | 0,391 | -0,365 |
| 15 | Q86UE8 TLK2_HUMAN  | E.FAGGSAPGTSPGR.S          |        | 2 | 2,7767 | 0,277 | -0,315 |
| 15 | P18669 PGAM1_HUMAN | R.RYADLTEDQLPSCE.S         |        | 2 | 2,7767 | 0,445 | -0,216 |
| 15 | Q00839 HNRPU_HUMAN | R.DRLSASSLTM*E.S           |        | 2 | 2,7757 | 0,423 | 0,199  |
| 15 | P35580 MYH10_HUMAN | K.FSKVEDM*AE.L             |        | 2 | 2,7688 | 0,254 | -0,569 |
| 15 | Q14126 DSG2_HUMAN  | K.GSSSAS#IVKGQHE.M         | S703:  | 2 | 2,7681 | 0,302 | -0,625 |
| 15 | Q9UQE7 SMC3_HUMAN  | K.SLDQAINDK.K              |        | 2 | 2,7664 | 0,28  | -0,365 |
| 15 | Q86VP6 CAND1_HUMAN | K.CLDAVVSTR.H              |        | 2 | 2,7663 | 0,329 | 0,358  |
| 15 | P49773 HINT1_HUMAN | K.CAADLGLNK.G              |        | 2 | 2,7617 | 0,381 | -0,698 |
| 15 | P35527 K1C9_HUMAN  | K.STM*QELNSR.L             |        | 2 | 2,7597 | 0,231 | -0,226 |
| 15 | Q1KMD3 HNRL2_HUMAN | K.DRYGGQPLFSE.K            |        | 2 | 2,7584 | 0,377 | -0,288 |
| 15 | P84103 SFRS3_HUMAN | K.VYVGNLGNNGNK.T           |        | 2 | 2,7569 | 0,357 | -0,293 |
| 15 | Q01082 SPTB2_HUMAN | R.RPPS#PEPSTKVSEE.A        | S2102: | 2 | 2,7555 | 0,361 | -0,452 |
| 15 | Q9UQ35 SRRM2_HUMAN | E.SYFGVSSLQLK.G            |        | 2 | 2,7545 | 0,426 | -0,794 |

|    |                     |                            |              |   |        |       |        |
|----|---------------------|----------------------------|--------------|---|--------|-------|--------|
| 15 | Q76I76 SSH2_HUMAN   | K.SLSHS#PGVVKE.R           | S1227:       | 2 | 2,7545 | 0,33  | -1,1   |
| 15 | Q9BW19 KIFC1_HUMAN  | E.NQQLQDQLR.D              |              | 2 | 2,7528 | 0,179 | -0,427 |
| 15 | Q9Y696 CLIC4_HUMAN  | R.YLTNAYSRDE.F             |              | 2 | 2,7515 | 0,298 | -0,495 |
| 15 | O75083 WDR1_HUMAN   | R.KCFSIDNPGYEPE.V          |              | 2 | 2,7509 | 0,337 | -0,392 |
| 15 | O15355 PPM1G_HUMAN  | K.AYTGFSNSER.G             |              | 2 | 2,7495 | 0,461 | -0,2   |
| 15 | Q9C0C2 TB182_HUMAN  | E.AGKEEPPPLT#PPAR.C        | T131:        | 2 | 2,7487 | 0,354 | -0,475 |
| 15 | P63241 IF5A1_HUMAN  | E.IEQKYDCGEE.I             |              | 2 | 2,7482 | 0,291 | -0,48  |
| 15 | Q9H2Y7 ZF106_HUMAN  | R.RATGDGSSPELPSLE.R        |              | 2 | 2,7459 | 0,283 | -0,563 |
| 15 | Q99700 ATX2_HUMAN   | E.NIKPNETS#PSFSKAE.N       | S771:        | 3 | 2,7434 | 0,246 | 0,423  |
| 15 | P22234 PUR6_HUMAN   | R.IATGS#FLKR.N             | S107:        | 2 | 2,7423 | 0,466 | 0      |
| 15 | P13647 K2C5_HUMAN   | K.AQYEEIANR.S              |              | 2 | 2,7419 | 0,401 | -0,335 |
| 15 | Q9NSK0 KLC4_HUMAN   | E.WSGDGSGLQR.S             |              | 2 | 2,7352 | 0,158 | -0,419 |
| 15 | P07477 TRY1_HUMAN   | E.GNEQFINAAK.I             |              | 2 | 2,733  | 0,39  | -0,223 |
| 15 | Q9UHR5 S30BP_HUMAN  | E.KLIQFCAIDE.L             |              | 2 | 2,7326 | 0,111 | -0,197 |
| 15 | P35749 MYH11_HUMAN  | E.M*KTQLELEDE.L            |              | 2 | 2,7326 | 0,125 | -1,06  |
| 15 | P24928 RPB1_HUMAN   | K.RVQFGVLSPDE.L            |              | 2 | 2,731  | 0,246 | -0,391 |
| 15 | Q5T200 ZC3HD_HUMAN  | R.SLS#PSHLTEDR.Q           | S877:        | 2 | 2,7294 | 0,477 | -0,369 |
| 15 | P07814 SYEP_HUMAN   | K.SCQFVAVR.R               |              | 2 | 2,7293 | 0,331 | 0      |
| 15 | P55327 TPD52_HUMAN  | E.DVKNS#PTFK.S             | S131:        | 2 | 2,7275 | 0,214 | -0,328 |
| 15 | Q15046 SYK_HUMAN    | E.VTCINPTFICDHPQIM*SPLAK.W |              | 3 | 2,7272 | 0,324 | -0,447 |
| 15 | Q9NTZ6 RBM12_HUMAN  | R.LQNFSYDQRE.M             |              | 2 | 2,7234 | 0,186 | -0,375 |
| 15 | P46459 NSF_HUMAN    | E.NDIKPAFGTNQE.D           |              | 2 | 2,7227 | 0,404 | -0,457 |
| 15 | Q13428 TCOF_HUMAN   | R.KSAEPSANTTLVSE.T         |              | 2 | 2,7205 | 0,312 | -0,34  |
| 15 | P06576 ATPB_HUMAN   | K.AHGGSYVFAGVGE.R          |              | 2 | 2,7181 | 0,259 | -0,098 |
| 15 | Q6GMS8 Q6GMS8_HUMAN | R.SIAALADDR.M              |              | 2 | 2,717  | 0,315 | 0      |
| 15 | P11532 DMD_HUMAN    | E.AKVNGTTVSS#PSTSLQR.S     | S3613:       | 3 | 2,7162 | 0,172 | -0,202 |
| 15 | Q9Y2N3 PO121_HUMAN  | R.NAITSSYSSTR.G            |              | 2 | 2,7155 | 0,466 | -0,411 |
| 15 | P35658 NU214_HUMAN  | K.SPRIT#PPAAKPGS#PQAK.S    | T670:S678:   | 2 | 2,715  | 0,391 | 0      |
| 15 | Q92922 SMRC1_HUMAN  | R.FDLQNPSR.M               |              | 2 | 2,7119 | 0,099 | -0,062 |
| 15 | Q6XZF7 DNMBP_HUMAN  | E.NTLGVVEEQR.H             |              | 2 | 2,71   | 0,156 | -1,4   |
| 15 | Q6WCQ1 MRIP_HUMAN   | E.VDRS#PGLPM*SDLK.T        | S618:        | 2 | 2,7086 | 0,201 | -0,565 |
| 15 | Q9UHR5 S30BP_HUMAN  | K.RDPQELVASFSE.R           |              | 2 | 2,7076 | 0,289 | -0,443 |
| 15 | O95785 WIZ_HUMAN    | E.ARS#PSDLHIS#PLAK.K       | S1127:S1134: | 3 | 2,7073 | 0,147 | -0,332 |

|    |                    |                                |            |   |        |       |        |
|----|--------------------|--------------------------------|------------|---|--------|-------|--------|
| 15 | Q99759 M3K3_HUMAN  | E.NSLSGSCQSLDR.S               |            | 2 | 2,7072 | 0,451 | -0,461 |
| 15 | P10619 PPGB_HUMAN  | K.CNFYDNKDLE.C                 |            | 2 | 2,7059 | 0,323 | -0,185 |
| 15 | O00299 CLIC1_HUMAN | R.YLSNAYAREE.F                 |            | 2 | 2,7049 | 0,346 | 0,201  |
| 15 | O15347 HMGB3_HUMAN | K.KNPEVPVNFAE.F                |            | 2 | 2,7047 | 0,281 | -0,981 |
| 15 | Q9Y5L4 TIM13_HUMAN | K.CIGKPGGSLDNSE.Q              |            | 2 | 2,7046 | 0,363 | -0,183 |
| 15 | O75116 ROCK2_HUMAN | E.NDVNSLKDQLE.D                |            | 2 | 2,7041 | 0,342 | -0,574 |
| 15 | Q8WXH0 SYNE2_HUMAN | E.KDYSASINLLE.R                |            | 2 | 2,7031 | 0,344 | -0,455 |
| 15 | P11310 ACADM_HUMAN | R.QREPGLGFSFE.F                |            | 2 | 2,7003 | 0,366 | -0,289 |
| 15 | Q8NC51 PAIRB_HUMAN | E.GFGCVVTNR.F                  |            | 2 | 2,7002 | 0,318 | -0,483 |
| 15 | Q5GLZ8 HERC4_HUMAN | R.FSGVDM*NAAR.L                |            | 2 | 2,6977 | 0,326 | -0,788 |
| 15 | Q6NZI2 PTRF_HUMAN  | K.LPAKLS#ISK.S                 | S167:      | 2 | 2,697  | 0,32  | 0,118  |
| 15 | P62937 PIIA_HUMAN  | K.SIYGKFEDE.N                  |            | 2 | 2,6955 | 0,388 | 0,501  |
| 15 | O60716 CTND1_HUMAN | E.KALSAIADLLTNE.H              |            | 2 | 2,6942 | 0,261 | -0,449 |
| 15 | P29317 EPHA2_HUMAN | R.NGVSGLVTSR.S                 |            | 2 | 2,6931 | 0,446 | 0,123  |
| 15 | Q8N1F7 NUP93_HUMAN | E.KDNALLSAIEE.S                |            | 2 | 2,6923 | 0,195 | -0,203 |
| 15 | Q6PJT7 ZC3HE_HUMAN | R.TPRIS#PPIKEE.T               | S409:      | 2 | 2,6917 | 0,244 | -1,157 |
| 15 | P25705 ATPA_HUMAN  | K.RTGAIVDVPVGEE.L              |            | 2 | 2,6915 | 0,302 | -1,546 |
| 15 | P02765 FETUA_HUMAN | K.CDSSPDSAEDVR.K               |            | 2 | 2,6908 | 0,366 | -0,274 |
| 15 | O00193 SMAP_HUMAN  | E.SQYQQSM*DSK.L                |            | 2 | 2,6836 | 0,302 | -0,301 |
| 15 | O14578 CTRO_HUMAN  | R.VASS#PAPPEGPSHPR.E           | S1940:     | 3 | 2,6836 | 0,292 | -0,117 |
| 15 | Q9UJZ1 STML2_HUMAN | E.AEKAEQINQAAGE.A              |            | 2 | 2,683  | 0,279 | -0,539 |
| 15 | Q9ULW0 TPX2_HUMAN  | R.SLRLS#AQKDLE.Q               | S125:      | 2 | 2,6825 | 0,098 | -0,364 |
| 15 | Q8N3F8 MILK1_HUMAN | R.APSAS#PLALHASR.L             | S486:      | 2 | 2,6802 | 0,47  | -0,449 |
| 15 | Q9UHD1 CHRD1_HUMAN | R.KTSDFNFLAQE.G                |            | 2 | 2,6799 | 0,223 | -0,174 |
| 15 | Q8IWB9 TEX2_HUMAN  | K.SPILSSASTLSSAKPFM*SLVK.S     |            | 3 | 2,6794 | 0,103 | 0,524  |
| 15 | Q01433 AMPD2_HUMAN | E.RQIS#QDVKLEPD.I              | S168:      | 2 | 2,679  | 0,406 | -0,485 |
| 15 | Q15365 PCBP1_HUMAN | R.QQSHFAM*M*HGGTGFAGIDSSS#PE.V | S264:      | 3 | 2,6789 | 0,117 | 0,588  |
| 15 | Q96L14 C170L_HUMAN | E.ADFS#IHFNR.V                 | S274:      | 2 | 2,6743 | 0,086 | -0,411 |
| 15 | P39687 AN32A_HUMAN | E.VTNLNDYRE.N                  |            | 2 | 2,6693 | 0,298 | -0,326 |
| 15 | P49792 RBP2_HUMAN  | K.SALSPSKS#PAK.L               | S2280:     | 2 | 2,6666 | 0,314 | -0,317 |
| 15 | Q9UK22 FBX2_HUMAN  | R.KAQVIDLQAE.G                 |            | 2 | 2,6666 | 0,315 | -0,219 |
| 15 | P49591 SYSC_HUMAN  | K.YAGLSTCFR.Q                  |            | 2 | 2,6626 | 0,4   | -0,114 |
| 15 | Q15424 SAFB1_HUMAN | R.S#VVS#FDKVKPR.K              | S601:S604: | 2 | 2,6618 | 0,28  | -0,629 |

|    |                     |                            |        |   |        |       |        |
|----|---------------------|----------------------------|--------|---|--------|-------|--------|
| 15 | P09525 ANXA4_HUMAN  | R.KVLLVLCGGDD.-            |        | 2 | 2,6614 | 0,271 | -0,616 |
| 15 | Q86XL3 ANKL2_HUMAN  | R.LKDGLCLSE.S              |        | 2 | 2,6594 | 0,234 | 0,472  |
| 15 | P08670 VIME_HUMAN   | E.AANYQDTIGR.L             |        | 2 | 2,6579 | 0,198 | -0,22  |
| 15 | Q15181 IPYR_HUMAN   | K.HTGCCGDNDPIDVCE.I        |        | 2 | 2,6566 | 0,416 | -0,419 |
| 15 | Q9NYF8 BCLF1_HUMAN  | E.GEPQEES#PLKSK.S          | S177:  | 2 | 2,6558 | 0,104 | -0,52  |
| 15 | Q07157 ZO1_HUMAN    | R.ISKPGAVS#TPVK.H          | S353:  | 2 | 2,654  | 0,194 | -0,097 |
| 15 | Q14341 Q14341_HUMAN | E.STVSSVQGSR.-             |        | 2 | 2,6539 | 0,318 | -0,121 |
| 15 | Q9BTC0 DIDO1_HUMAN  | K.SILAKPSSS#PDPR.Y         | S1019: | 2 | 2,652  | 0,269 | -0,595 |
| 15 | Q9NX62 IMPA3_HUMAN  | K.M*TSGDVLSNR.K            |        | 2 | 2,6494 | 0,237 | -1,447 |
| 15 | Q14195 DPYL3_HUMAN  | R.NLHQSGFSLSGTQVD.E        |        | 2 | 2,6477 | 0,351 | -1,842 |
| 15 | Q6S8J3 A26CA_HUMAN  | E.KLCYVALDFEQE.M           |        | 2 | 2,6472 | 0,275 | -0,483 |
| 15 | P11586 C1TC_HUMAN   | R.KVVGDVAYDE.A             |        | 2 | 2,6472 | 0,37  | 0,557  |
| 15 | Q9C0C2 TB182_HUMAN  | R.RPSQGGPPARS#PSQDFSFIE.D  | S1552: | 3 | 2,6438 | 0,183 | -0,754 |
| 15 | Q8NCF5 NF2IP_HUMAN  | R.KLS#FFFDGTL.L            | S390:  | 2 | 2,6401 | 0,221 | -0,576 |
| 15 | P49790 NU153_HUMAN  | K.RIPSIVSSPLNS#PLDR.S      | S338:  | 2 | 2,6399 | 0,301 | -0,267 |
| 15 | P19838 NFKB1_HUMAN  | K.TTSQAHSPLS#PASTR.Q       | S907:  | 3 | 2,6374 | 0,239 | 0      |
| 15 | P21333 FLNA_HUMAN   | K.QKDLGDGVYGF.Y            |        | 2 | 2,6369 | 0,443 | -0,368 |
| 15 | P27816 MAP4_HUMAN   | K.KCSLPAEEDSVLE.K          |        | 2 | 2,6337 | 0,251 | -0,413 |
| 15 | Q96K17 BT3L4_HUMAN  | K.KLAVNNIAGIEE.V           |        | 2 | 2,6266 | 0,301 | -0,48  |
| 15 | P63220 RS21_HUMAN   | K.DHASIQM*NVAE.V           |        | 2 | 2,6249 | 0,422 | -1,586 |
| 15 | P23193 TCEA1_HUMAN  | K.NCTYTQVQTR.S             |        | 2 | 2,6238 | 0,373 | -0,288 |
| 15 | Q99798 ACON_HUMAN   | K.TGREDIANLADE.F           |        | 2 | 2,6232 | 0,234 | -0,561 |
| 15 | Q15185 TEBP_HUMAN   | K.LTFSCLLGGSDNFK.H         |        | 2 | 2,6228 | 0,412 | -0,506 |
| 15 | Q8IU81 I2BP1_HUMAN  | K.DPGGGGGPVR.A             |        | 2 | 2,6212 | 0,18  | 0,07   |
| 15 | Q6NZI2 PTRF_HUMAN   | R.RGSS#PDVHALLE.I          | S366:  | 2 | 2,6201 | 0,402 | -1,165 |
| 15 | Q8NC51 PAIRB_HUMAN  | E.LTES#PKYIQK.Q            | S234:  | 2 | 2,619  | 0,178 | -0,569 |
| 15 | Q96I18 LRCH3_HUMAN  | R.VPAEPSSLLSASHNQLSHTDLE.L |        | 3 | 2,619  | 0,376 | -0,434 |
| 15 | P09874 PARP1_HUMAN  | K.RQIQAAAYSILSE.V          |        | 2 | 2,618  | 0,319 | -0,354 |
| 15 | Q9BX68 HINT2_HUMAN  | R.DVAPQAPVHFLVIPK.K        |        | 2 | 2,6146 | 0,311 | -0,374 |
| 15 | O75534 CSDE1_HUMAN  | K.NQNDPLPGR.I              |        | 2 | 2,6142 | 0,206 | -0,784 |
| 15 | O43290 SNUT1_HUMAN  | R.KGAIVFNATSE.F            |        | 2 | 2,6127 | 0,435 | -0,429 |
| 15 | P14625 ENPL_HUMAN   | D.GLNASQIRE.L              |        | 2 | 2,6121 | 0,166 | -0,864 |
| 15 | Q99569 PKP4_HUMAN   | R.VASPSQGVGSSS#PKR.S       | S337:  | 2 | 2,6117 | 0,519 | -0,074 |

|    |                     |                             |              |   |        |       |        |
|----|---------------------|-----------------------------|--------------|---|--------|-------|--------|
| 15 | O00562 PITM1_HUMAN  | K.GIEDGAQAPR.D              |              | 2 | 2,6105 | 0,115 | 0,301  |
| 15 | O60812 HNRCL_HUMAN  | K.QKVDLLENLE.K              |              | 2 | 2,6085 | 0,286 | -0,568 |
| 15 | Q99459 CDC5L_HUMAN  | E.SDFSGVTPQR.Q              |              | 2 | 2,6069 | 0,352 | -0,223 |
| 15 | P30044 PRDX5_HUMAN  | K.THLPGFVEQAE.A             |              | 2 | 2,6067 | 0,347 | 0      |
| 15 | Q969E8 TSR2_HUMAN   | E.M*ASCITQR.K               |              | 2 | 2,6064 | 0,366 | -0,31  |
| 15 | Q4AC94 C2CD3_HUMAN  | K.ISQSTALAR.S               |              | 2 | 2,605  | 0,34  | 0,064  |
| 15 | P31948 STIP1_HUMAN  | R.CM*M*AQYNR.H              |              | 2 | 2,6049 | 0,327 | -0,221 |
| 15 | Q9Y4L1 HYOU1_HUMAN  | E.RVPGPVQQALQSAE.M          |              | 2 | 2,6038 | 0,361 | -0,742 |
| 15 | Q6PFW1 VIP1_HUMAN   | R.TLHS#PPLQLQQR.S           | S1152:       | 2 | 2,6027 | 0,384 | -1,14  |
| 15 | B2R6R8 B2R6R8_HUMAN | R.LKDANDVPIQCE.I            |              | 2 | 2,6014 | 0,331 | -0,435 |
| 15 | Q674X7 KAZRN_HUMAN  | K.NLHNPIVQSLE.D             |              | 2 | 2,6    | 0,189 | -0,386 |
| 15 | P13645 K1C10_HUMAN  | K.VTM*QNLNDR.L              |              | 2 | 2,5999 | 0,225 | -0,331 |
| 15 | Q16643 DREB_HUMAN   | E.GASTLQGEPR.A              |              | 2 | 2,5992 | 0,254 | 0,06   |
| 15 | O15061 DMN_HUMAN    | K.GLQT#PVKDAGGTGR.E         | T598:        | 2 | 2,5982 | 0,419 | -0,408 |
| 15 | Q9UKV3 ACINU_HUMAN  | K.SHCFVYSTVEE.A             |              | 2 | 2,5963 | 0,267 | -0,753 |
| 15 | Q8IX01 SFR14_HUMAN  | R.YHM*DASGEAVSE.T           |              | 2 | 2,5963 | 0,355 | -0,465 |
| 15 | Q6PJ19 Q6PJ19_HUMAN | E.NALDKLFSSE.Q              |              | 2 | 2,5959 | 0,299 | -0,217 |
| 15 | Q9H0H5 RGAP1_HUMAN  | K.SALAFLNR.G                |              | 2 | 2,5928 | 0,289 | -1,094 |
| 15 | Q08211 DHX9_HUMAN   | R.LSM*SQLNEK.E              |              | 2 | 2,5915 | 0,298 | -0,343 |
| 15 | O14578 CTRO_HUMAN   | R.VASS#PAPPEGSHPR.E         | S1940:       | 2 | 2,5915 | 0,391 | -0,623 |
| 15 | Q14493 SLBP_HUMAN   | E.SFTT#PEGPKPR.S            | T62:         | 2 | 2,5894 | 0,342 | -0,659 |
| 15 | P27816 MAP4_HUMAN   | E.VALTEDQVPALKTEAPLAK.D     |              | 3 | 2,5851 | 0,302 | -0,367 |
| 15 | P04264 K2C1_HUMAN   | K.SLNNQFASFIDK.V            |              | 2 | 2,5836 | 0,283 | 0      |
| 15 | P63096 GNAI1_HUMAN  | K.KSPLTICYE.Y               |              | 2 | 2,5834 | 0,392 | -0,606 |
| 15 | P09525 ANXA4_HUMAN  | R.SDTSFM*FQR.V              |              | 2 | 2,5803 | 0,245 | -0,215 |
| 15 | Q86TX2 ACOT1_HUMAN  | R.YRADTLGELDLE.R            |              | 2 | 2,5803 | 0,26  | -0,35  |
| 15 | Q7Z591 AKNA_HUMAN   | R.HSIQLDLGDLEE.L            |              | 2 | 2,5802 | 0,272 | -0,089 |
| 15 | P35269 T2FA_HUMAN   | R.LRLDTGPQSL#GKST#PQPSPGK.T | S433:T437:   | 3 | 2,5787 | 0,249 | -0,379 |
| 15 | P98164 LRP2_HUMAN   | E.SVAAT#PPPS#PSLPAKPKPPSR.R | T4612:S4616: | 3 | 2,578  | 0,336 | -0,082 |
| 15 | P31946 1433B_HUMAN  | K.DSTLIM*QLLR.D             |              | 2 | 2,5702 | 0,166 | -0,506 |
| 15 | Q58FF7 H90B3_HUMAN  | E.YCVQQLKE.F                |              | 2 | 2,5698 | 0,199 | 0,685  |
| 15 | Q7KZF4 SND1_HUMAN   | R.YGDFRADDAD.F              |              | 2 | 2,5685 | 0,384 | -0,383 |
| 15 | Q13442 HAP28_HUMAN  | K.GVEGLIDIENPNR.V           |              | 2 | 2,5646 | 0,285 | -0,342 |

|    |                     |                                 |            |   |        |       |        |
|----|---------------------|---------------------------------|------------|---|--------|-------|--------|
| 15 | Q8IX90 CM003_HUMAN  | E.KSPRS#PQLSDFGLE.R             | S155:      | 2 | 2,5641 | 0,503 | -0,372 |
| 15 | O95684 FR1OP_HUMAN  | E.KGPTTGEGALDLSDVHS#PPKS#PE.G   | S156:S160: | 3 | 2,5617 | 0,102 | -0,443 |
| 15 | P42166 LAP2A_HUMAN  | E.RDSGSFVAFQNIQSE.L             |            | 2 | 2,5569 | 0,39  | -0,143 |
| 15 | Q9Y5U2 TSSC4_HUMAN  | R.GM*SSTFSQR.S                  |            | 2 | 2,5548 | 0,218 | 0,12   |
| 15 | Q92834 RPGR_HUMAN   | K.SLKLS#PVQK.Q                  | S518:      | 2 | 2,5528 | 0,227 | -0,339 |
| 15 | Q12972 PP1R8_HUMAN  | K.RVEGPGSLGLEE.S                |            | 2 | 2,5497 | 0,231 | 0,491  |
| 15 | Q15545 TAF7_HUMAN   | E.NQGLDISS#PGM*SGHR.Q           | S201:      | 3 | 2,5495 | 0,116 | -0,554 |
| 15 | Q8IYB3 SRRM1_HUMAN  | K.M*AAADSVQQR.R                 |            | 2 | 2,5495 | 0,429 | -0,112 |
| 15 | P61978 HNRPK_HUMAN  | R.GGDLM*AYDR.R                  |            | 2 | 2,5473 | 0,154 | 0,06   |
| 15 | Q9NPI6 DCP1A_HUMAN  | R.QRSPLLNPVPE.L                 |            | 2 | 2,5453 | 0,291 | -0,443 |
| 15 | Q9UPU5 UBP24_HUMAN  | E.SNSLCPAGIR.N                  |            | 2 | 2,5451 | 0,294 | -0,681 |
| 15 | Q92542 NICA_HUMAN   | R.RSSIQSTFSINPE.I               |            | 2 | 2,5425 | 0,228 | -0,083 |
| 15 | Q9ULF5 S39AA_HUMAN  | K.NNAIISLR.K                    |            | 2 | 2,5395 | 0,102 | -0,271 |
| 15 | Q92888 ARHG1_HUMAN  | E.TM*KQLEEEEEE.F                |            | 2 | 2,5372 | 0,186 | -0,525 |
| 15 | Q14814 MEF2D_HUMAN  | R.RAS#EELDGLFR.R                | S121:      | 2 | 2,5363 | 0,261 | -0,711 |
| 15 | P34931 HS71L_HUMAN  | K.ILDKCNE.L                     |            | 2 | 2,5325 | 0,157 | -0,068 |
| 15 | Q9UQ84 EXO1_HUMAN   | E.FSLQSSNASK.L                  |            | 2 | 2,5314 | 0,121 | 0,228  |
| 15 | Q02790 FKBP4_HUMAN  | K.TQLAVCQQR.I                   |            | 2 | 2,5285 | 0,361 | -1,658 |
| 15 | Q86UW6 N4BP2_HUMAN  | E.LCAYSCEDR.S                   |            | 2 | 2,5274 | 0,318 | -0,624 |
| 15 | O14497 ARI1A_HUMAN  | R.CVCVSNTIR.S                   |            | 2 | 2,5274 | 0,253 | -0,44  |
| 15 | A1L390 PKHG3_HUMAN  | E.M*DSYYPNR.Y                   |            | 2 | 2,5259 | 0,226 | -0,689 |
| 15 | Q14C86 GAPD1_HUMAN  | E.ALQNISADDLPDSASQAHPQDSAFSYR.D |            | 3 | 2,5251 | 0,328 | -0,492 |
| 15 | Q9ULV4 COR1C_HUMAN  | K.SIKDTICNQDE.R                 |            | 2 | 2,5249 | 0,242 | -0,461 |
| 15 | A9CQZ4 A9CQZ4_HUMAN | R.QKFCGM*FCPVEGSSE.N            |            | 2 | 2,5248 | 0,385 | 0,069  |
| 15 | Q9UGI8 TES_HUMAN    | K.HFCCFDCDSILAGE.I              |            | 2 | 2,5246 | 0,219 | -0,211 |
| 15 | Q00610 CLH1_HUMAN   | E.KIVLDNSVFSE.H                 |            | 2 | 2,5245 | 0,369 | -0,39  |
| 15 | O43513 MED7_HUMAN   | E.KDAALCVLIDE.M                 |            | 2 | 2,5244 | 0,191 | -0,294 |
| 15 | Q13107 UBP4_HUMAN   | E.SLYQAVCDR.I                   |            | 2 | 2,5241 | 0,41  | -0,658 |
| 15 | Q9NP74 PALMD_HUMAN  | K.NSISLKEQEE.S                  |            | 2 | 2,5234 | 0,212 | -0,726 |
| 15 | P04792 HSPB1_HUMAN  | E.SPAVAAPAYSR.A                 |            | 2 | 2,519  | 0,296 | -0,224 |
| 15 | Q9H910 HN1L_HUMAN   | E.SSNLFGS#PEEATPSSRPNR.M        | S30:       | 3 | 2,5171 | 0,209 | -0,346 |
| 15 | P23528 COF1_HUMAN   | K.KAVLFLCSE.D                   |            | 2 | 2,5147 | 0,307 | -0,343 |
| 15 | O15320 CTGE5_HUMAN  | E.SSLKDAS#FEKEATE.A             | S116:      | 2 | 2,5135 | 0,273 | -0,226 |



|    |                    |                        |            |   |        |       |        |
|----|--------------------|------------------------|------------|---|--------|-------|--------|
| 15 | Q9NYF8 BCLF1_HUMAN | E.ALDYFS#DKES#GKQK.F   | S385:S389: | 2 | 2,5102 | 0,317 | -0,206 |
| 15 | P26358 DNMT1_HUMAN | R.KEPVDEDLYPE.H        |            | 2 | 2,5082 | 0,395 | -0,091 |
| 15 | P52272 HNRPM_HUMAN | K.GCGVVKFE.S           |            | 2 | 2,508  | 0,162 | 1,498  |
| 15 | Q9H6K1 CF106_HUMAN | K.GLHGYPYFGQS.-        |            | 2 | 2,5077 | 0,23  | -1,052 |
| 15 | Q5VUA4 ZN318_HUMAN | R.SVRIPS#PNILK.T       | S2101:     | 2 | 2,5073 | 0,17  | -0,561 |
| 15 | Q99959 PKP2_HUMAN  | E.NDFVGGRS#PVPK.T      | S102:      | 2 | 2,507  | 0,324 | -0,271 |
| 15 | Q13546 RIPK1_HUMAN | R.KLGFTQSQIDE.I        |            | 2 | 2,5066 | 0,252 | -1,349 |
| 15 | P49189 AL9A1_HUMAN | E.VNLAVQNAK.A          |            | 2 | 2,506  | 0,225 | -0,191 |
| 15 | P06400 RB_HUMAN    | K.LRFDIEGSDE.A         |            | 2 | 2,504  | 0,289 | 0,103  |
| 15 | P04083 ANXA1_HUMAN | E.KILVALCGGN.-         |            | 2 | 2,5021 | 0,433 | -0,233 |
| 15 | P49761 CLK3_HUMAN  | R.Y#RSPEPDPYLSYR.W     | Y155:      | 3 | 2,5016 | 0,18  | 0      |
| 15 | P52948 NUP98_HUMAN | E.RFS#FLSKPVDE.N       | S635:      | 2 | 2,5002 | 0,352 | -0,434 |
| 15 | P13639 EF2_HUMAN   | E.NDLNFIK.Q            |            | 2 | 2,4993 | 0,126 | -0,353 |
| 15 | P09211 GSTP1_HUMAN | K.LKAFLASPE.Y          |            | 2 | 2,4988 | 0,194 | -1     |
| 15 | O95628 CNOT4_HUMAN | E.SQSLFSDNFR.H         |            | 2 | 2,4979 | 0,233 | -0,102 |
| 15 | O60716 CTND1_HUMAN | K.SLDNNYSTPNER.G       |            | 2 | 2,4959 | 0,383 | -0,606 |
| 15 | Q5VUA4 ZN318_HUMAN | K.AKLDLSE.A            |            | 2 | 2,4941 | 0,202 | -0,121 |
| 15 | Q01082 SPTB2_HUMAN | R.RPPS#PEPSTKVSEE.A    | S2102:     | 3 | 2,4919 | 0,129 | -0,226 |
| 15 | Q96MU7 YTDC1_HUMAN | R.LSSS#ASREPYK.N       | S120:      | 2 | 2,4897 | 0,245 | -0,467 |
| 15 | Q96SB4 SRPK1_HUMAN | E.SES#PVERPLK.E        | S482:      | 2 | 2,4877 | 0,224 | -0,599 |
| 15 | Q7Z2W4 ZCCHV_HUMAN | K.FTYLGSQDR.A          |            | 2 | 2,4857 | 0,308 | 0,112  |
| 15 | O75351 VPS4B_HUMAN | K.LHLGTTQNSLTE.A       |            | 2 | 2,4849 | 0,294 | -0,186 |
| 15 | Q9UQ35 SRRM2_HUMAN | E.LDVKPSAS#PQER.S      | S1552:     | 2 | 2,4834 | 0,298 | -1,301 |
| 15 | Q9NVD7 PARVA_HUMAN | K.SPSVPKS#PTPKS#PPSR.K | S14:S19:   | 3 | 2,4817 | 0,117 | -0,303 |
| 15 | Q93009 UBP7_HUMAN  | K.FDDDVVSR.C           |            | 2 | 2,4809 | 0,085 | 0,576  |
| 15 | Q15742 NAB2_HUMAN  | E.KLS#PLPGGPGAGDPR.I   | S171:      | 2 | 2,4802 | 0,312 | 0,081  |
| 15 | P55884 EIF3B_HUMAN | K.NGDYLCVK.V           |            | 2 | 2,4791 | 0,356 | -0,567 |
| 15 | Q96L93 KI16B_HUMAN | K.IHLVDLAGSE.R         |            | 2 | 2,4767 | 0,195 | 0      |
| 15 | Q9NXH9 TRM1_HUMAN  | R.GDQCCYSHS#PPTPR.V    | S625:      | 2 | 2,4743 | 0,294 | -0,42  |
| 15 | Q5VZK9 LR16A_HUMAN | R.RYGVQVM*GSGLLAE.M    |            | 2 | 2,4743 | 0,249 | -1,386 |
| 15 | P36543 VATE1_HUMAN | R.ARDDLITDLLNE.A       |            | 2 | 2,472  | 0,215 | -0,44  |
| 15 | Q5VTB9 CA164_HUMAN | R.GSGFIM*CSGK.E        |            | 2 | 2,4713 | 0,268 | -0,23  |
| 15 | Q96PE2 ARHG_HUMAN  | R.AHPTLQAPSLE.D        |            | 2 | 2,4701 | 0,212 | -0,419 |

|    |                     |                       |            |   |        |       |        |
|----|---------------------|-----------------------|------------|---|--------|-------|--------|
| 15 | P21333 FLNA_HUMAN   | E.YAVHVCNSE.D         |            | 2 | 2,4697 | 0,313 | -0,512 |
| 15 | P13639 EF2_HUMAN    | E.ICLKDEED.H          |            | 2 | 2,4681 | 0,251 | -0,538 |
| 15 | O15440 MRP5_HUMAN   | R.TRPLECQDALE.T       |            | 2 | 2,4673 | 0,329 | -0,366 |
| 15 | Q96CN4 EVI5L_HUMAN  | R.KLVVVELQDE.L        |            | 2 | 2,4642 | 0,265 | -0,216 |
| 15 | Q9P0K7 RAI14_HUMAN  | K.VAS#LTLHNKE.L       | S358:      | 2 | 2,4637 | 0,215 | -0,102 |
| 15 | P68104 EF1A1_HUMAN  | R.KDGNASGTTLE.A       |            | 2 | 2,4636 | 0,294 | -0,304 |
| 15 | P20042 IF2B_HUMAN   | K.NVKFPDEDE.I         |            | 2 | 2,4629 | 0,298 | -0,223 |
| 15 | Q9H0E9 BRD8_HUMAN   | K.ATDAAYQAR.Q         |            | 2 | 2,4614 | 0,358 | 0,189  |
| 15 | Q6PGP7 TTC37_HUMAN  | K.KLVDLYYQE.K         |            | 2 | 2,4607 | 0,259 | -1,459 |
| 15 | O75153 EIF3X_HUMAN  | E.AKNYFDFDLE.C        |            | 2 | 2,4605 | 0,278 | -0,483 |
| 15 | B2RN45 B2RN45_HUMAN | R.NSQDFDLR.F          |            | 2 | 2,4584 | 0,269 | 0      |
| 15 | Q8NG31 CASC5_HUMAN  | R.RCS#LGIFLPR.L       | S1675:     | 2 | 2,4579 | 0,303 | -0,282 |
| 15 | P54727 RD23B_HUMAN  | E.HFIQM*LNEPVQE.A     |            | 2 | 2,4576 | 0,265 | -1,219 |
| 15 | Q9Y3L3 3BP1_HUMAN   | E.SEVPPRPAS#PK.V      | S544:      | 2 | 2,4557 | 0,091 | -0,392 |
| 15 | P49589 SYCC_HUMAN   | K.ALCDNVDTTR.T        |            | 2 | 2,4556 | 0,412 | -0,229 |
| 15 | O75351 VPS4B_HUMAN  | E.NKPSIIFIDE.I        |            | 2 | 2,4537 | 0,142 | -0,311 |
| 15 | Q9UPN3 MACF1_HUMAN  | K.LKGLNDATTAEE.A      |            | 2 | 2,4536 | 0,112 | -0,183 |
| 15 | Q15468 STIL_HUMAN   | E.NQLSQLSVTR.S        |            | 2 | 2,4529 | 0,084 | -0,426 |
| 15 | Q9ULF5 S39AA_HUMAN  | E.KLLTNLGLGE.R        |            | 2 | 2,4513 | 0,201 | -0,231 |
| 15 | P07195 LDHB_HUMAN   | E.KLIAPVAEEE.A        |            | 2 | 2,4495 | 0,303 | -0,444 |
| 15 | Q96ST3 SIN3A_HUMAN  | K.FRLDNTLGGTSE.V      |            | 2 | 2,4472 | 0,226 | 0      |
| 15 | Q6IMN6 CAPR2_HUMAN  | K.SGEHLNPDQLE.A       |            | 2 | 2,4472 | 0,16  | -0,295 |
| 15 | P38606 VATA_HUMAN   | K.IKSDYAQLLE.D        |            | 2 | 2,4467 | 0,153 | 0      |
| 15 | Q13435 SF3B2_HUMAN  | E.KEDFSDM*VAE.H       |            | 2 | 2,4447 | 0,344 | 0,411  |
| 15 | Q99618 CDCA3_HUMAN  | R.SPTLGIAR.T          |            | 2 | 2,4447 | 0,296 | -0,374 |
| 15 | P61086 UBE2K_HUMAN  | K.NQIKVDLVDE.N        |            | 2 | 2,4436 | 0,248 | -0,728 |
| 15 | Q9UPZ9 ICK_HUMAN    | K.TLIPNAS#S#EAVQLLR.D | S254:S255: | 2 | 2,4422 | 0,12  | -1,171 |
| 15 | O43148 MCES_HUMAN   | R.KIALEDVPE.K         |            | 2 | 2,4373 | 0,282 | 0      |
| 15 | P43121 MUC18_HUMAN  | E.DKDAQFYCE.L         |            | 2 | 2,4351 | 0,309 | -0,519 |
| 15 | Q8N1G4 LRC47_HUMAN  | R.YLHLLDGNE.N         |            | 2 | 2,4341 | 0,189 | -0,795 |
| 15 | Q14318 FKBP8_HUMAN  | K.GKVLAQQGEYSE.A      |            | 2 | 2,4337 | 0,094 | -1,305 |
| 15 | Q15942 ZYX_HUMAN    | R.EKVSSIDLE.I         |            | 2 | 2,4315 | 0,157 | -1,974 |
| 15 | Q9UBE0 SAE1_HUMAN   | D.AVCLTCCSR.D         |            | 2 | 2,4313 | 0,304 | 0      |

|    |                     |                      |        |   |        |       |        |
|----|---------------------|----------------------|--------|---|--------|-------|--------|
| 15 | Q9BYW2 SETD2_HUMAN  | K.FSASIEKE.R         |        | 2 | 2,4302 | 0,265 | -0,134 |
| 15 | Q9NY61 AATF_HUMAN   | E.LLFQYPDTR.Y        |        | 2 | 2,43   | 0,214 | -0,423 |
| 15 | P08670 VIME_HUMAN   | R.FANYIDK.V          |        | 2 | 2,4295 | 0,284 | -0,07  |
| 15 | Q8TAT6 NPL4_HUMAN   | R.NKDTYFLSSEE.C      |        | 2 | 2,4263 | 0,168 | -0,092 |
| 15 | P07355 ANXA2_HUMAN  | R.TNQELQEINR.V       |        | 2 | 2,4241 | 0,139 | -0,49  |
| 15 | Q96RY5 CRML_HUMAN   | R.LAQQREE.G          |        | 2 | 2,423  | 0,105 | -0,309 |
| 15 | Q9UQ35 SRRM2_HUMAN  | R.VSGRT#SPPLDR.A     | T2397: | 3 | 2,4221 | 0,151 | -0,664 |
| 15 | Q16649 NFIL3_HUMAN  | K.LSS#PIDM*TSKR.H    | S353:  | 3 | 2,4208 | 0,138 | 0,275  |
| 15 | O00410 IMB3_HUMAN   | K.FKPDCVNVVE.V       |        | 2 | 2,4202 | 0,187 | -0,493 |
| 15 | Q15084 PDIA6_HUMAN  | K.GESPVDYDGGR.T      |        | 2 | 2,4195 | 0,35  | -0,424 |
| 15 | Q5VUA4 ZN318_HUMAN  | E.LLLHS#PAR.S        | S1896: | 2 | 2,4186 | 0,318 | 0,185  |
| 15 | O95997 PTTG1_HUMAN  | E.KLFQLGPPS#PVK.M    | S165:  | 3 | 2,4185 | 0,201 | 0,066  |
| 15 | Q99729 ROAA_HUMAN   | K.KIFVGGLNPE.S       |        | 2 | 2,4185 | 0,243 | -0,568 |
| 15 | P49593 PPM1F_HUMAN  | R.RQDLPSSLPEPE.T     |        | 2 | 2,417  | 0,276 | -0,624 |
| 15 | Q03701 CEBPZ_HUMAN  | K.KGAIDDLQQGELE.A    |        | 2 | 2,4159 | 0,187 | -0,172 |
| 15 | P18583 SON_HUMAN    | D.SAM*LGSKS#PDPYR.L  | S910:  | 3 | 2,4151 | 0,249 | -0,79  |
| 15 | Q9NXN4 GDAP2_HUMAN  | R.KLILQGQLSE.A       |        | 2 | 2,415  | 0,27  | -0,756 |
| 15 | P08574 CY1_HUMAN    | R.HLVGVICYTEDE.A     |        | 2 | 2,413  | 0,335 | -0,461 |
| 15 | Q9BYG9 Q9BYG9_HUMAN | K.M*QAS#IEKAH.-      | S254:  | 2 | 2,4098 | 0,353 | -0,22  |
| 15 | Q9NXH9 TRM1_HUMAN   | R.GDQCYSYSHS#PPTPR.V | S625:  | 3 | 2,4094 | 0,403 | -0,315 |
| 15 | O00213 APBB1_HUMAN  | E.GKDLLLQLEDE.T      |        | 2 | 2,409  | 0,103 | 0,288  |
| 15 | Q9BY89 K1671_HUMAN  | R.RS#PTVEPSTLPR.E    | S1224: | 2 | 2,4037 | 0,146 | -0,43  |
| 15 | O15014 ZN609_HUMAN  | R.LVEPHS#PSPSSK.F    | S576:  | 3 | 2,4035 | 0,202 | 0,204  |
| 15 | Q9H1V8 S6A17_HUMAN  | K.VPSEAPS#PM*PTHR.S  | S686:  | 3 | 2,403  | 0,322 | 0      |
| 15 | Q14568 HS902_HUMAN  | E.SSAGGSFTVR.T       |        | 2 | 2,4019 | 0,307 | -0,441 |
| 15 | Q6IN84 MRM1_HUMAN   | R.YQVHQGVCM*E.V      |        | 2 | 2,3987 | 0,241 | -0,578 |
| 15 | O75792 RNH2A_HUMAN  | R.KEPCVLGVDE.A       |        | 2 | 2,3985 | 0,286 | -0,532 |
| 15 | Q6GYQ0 GRIPE_HUMAN  | E.SLKEPEPLHS#PDSE.R  | S1478: | 2 | 2,396  | 0,25  | -0,371 |
| 15 | Q15742 NAB2_HUMAN   | R.HILQQTLM*DE.G      |        | 2 | 2,3954 | 0,228 | -0,294 |
| 15 | Q14257 RCN2_HUMAN   | K.KIDLSDGFLTE.S      |        | 2 | 2,3942 | 0,224 | -0,271 |
| 15 | Q8WXI2 CNKR2_HUMAN  | E.VTGSSAVS#PIRK.T    | S756:  | 2 | 2,3941 | 0,096 | -0,666 |
| 15 | Q08378 GOGA3_HUMAN  | K.HLVQALQASLE.K      |        | 2 | 2,3932 | 0,268 | -0,505 |
| 15 | Q96SK2 TM209_HUMAN  | K.FQYQLACR.S         |        | 2 | 2,3931 | 0,321 | -0,449 |

|    |                    |                       |        |   |        |       |        |
|----|--------------------|-----------------------|--------|---|--------|-------|--------|
| 15 | P15151 PVR_HUMAN   | R.M*FGLRVEDE.G        |        | 2 | 2,393  | 0,201 | -1,536 |
| 15 | P08670 VIME_HUMAN  | R.QDVNASLAR.L         |        | 2 | 2,392  | 0,427 | -0,672 |
| 15 | Q86SQ0 PHLB2_HUMAN | E.YTKPDSRSL#TGTTVE.D  | S468:  | 2 | 2,3914 | 0,209 | 0,07   |
| 15 | Q8NCF5 NF2IP_HUMAN | E.VLSRDS#PLK.T        | S369:  | 2 | 2,3909 | 0,217 | -0,103 |
| 15 | O95817 BAG3_HUMAN  | R.SSTPLHS#PSPIR.V     | S289:  | 2 | 2,3908 | 0,308 | 0,09   |
| 15 | P09874 PARP1_HUMAN | E.CSGQLVFK.S          |        | 2 | 2,3905 | 0,346 | -0,325 |
| 15 | Q99829 CPNE1_HUMAN | E.LRDDDFLGGAE.C       |        | 2 | 2,3905 | 0,17  | 0      |
| 15 | Q52LJ0 FA98B_HUMAN | E.SITSAGRDDLE.S       |        | 2 | 2,3876 | 0,291 | -0,21  |
| 15 | Q8TEW8 PAR3L_HUMAN | R.GCNE#FRAAIDK.S      | S780:  | 2 | 2,3876 | 0,231 | -0,169 |
| 15 | Q92917 GPKOW_HUMAN | R.FVDNM*YK.G          |        | 2 | 2,3874 | 0,142 | 0,327  |
| 15 | Q9P013 CWC15_HUMAN | R.FVNDTLRSE.F         |        | 2 | 2,3863 | 0,2   | -0,226 |
| 15 | Q9Y490 TLN1_HUMAN  | E.STM*LEDSVS#PKK.S    | S425:  | 2 | 2,3841 | 0,227 | -0,43  |
| 15 | Q96T37 RBM15_HUMAN | R.DRT#PPLLYR.D        | T568:  | 2 | 2,384  | 0,129 | 0,302  |
| 15 | Q15293 RCN1_HUMAN  | K.LTKEEILE.N          |        | 2 | 2,3838 | 0,144 | 0      |
| 15 | P49069 CAMLG_HUMAN | R.IM*GFHRPGS#GAEEE.S  | S55:   | 2 | 2,3813 | 0,184 | -0,151 |
| 15 | O94833 BPAAE_HUMAN | R.KQNVQDQALLNGLE.L    |        | 2 | 2,3785 | 0,281 | -0,338 |
| 15 | P49790 NU153_HUMAN | K.RIPSIVSS#PLNSPLDR.S | S334:  | 2 | 2,3775 | 0,316 | -0,333 |
| 15 | P07108 ACBP_HUMAN  | K.AYINKVEE.L          |        | 2 | 2,3773 | 0,123 | -0,316 |
| 15 | P63165 SUMO1_HUMAN | K.LKVIGQDSSE.I        |        | 2 | 2,3768 | 0,301 | 1,134  |
| 15 | O14579 COPE_HUMAN  | R.KFGVVLDE.I          |        | 2 | 2,3765 | 0,141 | 0      |
| 15 | Q14204 DYHC1_HUMAN | E.KSLQALNE.V          |        | 2 | 2,3761 | 0,155 | 0,42   |
| 15 | P21796 VDAC1_HUMAN | E.FGGSIYQK.V          |        | 2 | 2,3755 | 0,246 | -0,339 |
| 15 | O95149 SPN1_HUMAN  | K.GSSHS#PDHPGCLM*EN.- | S350:  | 3 | 2,3752 | 0,18  | 0      |
| 15 | Q01081 U2AF1_HUMAN | K.VNCSFYFK.I          |        | 2 | 2,3752 | 0,298 | -0,229 |
| 15 | P62633 CNBP_HUMAN  | E.DACYNCGR.G          |        | 2 | 2,3746 | 0,34  | -0,3   |
| 15 | P13639 EF2_HUMAN   | K.ARPFDGLAE.D         |        | 2 | 2,3727 | 0,247 | -1,364 |
| 15 | P11021 GRP78_HUMAN | K.ITITNDQNR.L         |        | 2 | 2,3719 | 0,268 | -0,454 |
| 15 | Q6P0Q8 MAST2_HUMAN | R.GNLASSLSGK.Q        |        | 2 | 2,3717 | 0,341 | -0,196 |
| 15 | P49023 PAXI_HUMAN  | R.ISASSATRE.L         |        | 2 | 2,3692 | 0,206 | -1,985 |
| 15 | Q8NCC3 LYPA3_HUMAN | R.KFFQDIGFE.D         |        | 2 | 2,3681 | 0,175 | -0,216 |
| 15 | Q9UHY1 NRBP_HUMAN  | R.HLSCDLM*PNENIPE.L   |        | 2 | 2,3674 | 0,322 | -0,217 |
| 15 | Q7L7X3 TAOK1_HUMAN | R.GSSM*GVRNS#PQALR.R  | S965:  | 2 | 2,3668 | 0,193 | -0,392 |
| 15 | Q9ULI4 KI26A_HUMAN | R.LAGHAS#LERYE.G      | S1437: | 2 | 2,3662 | 0,087 | 0      |

|    |                    |                                 |            |   |        |       |        |
|----|--------------------|---------------------------------|------------|---|--------|-------|--------|
| 15 | P49756 RBM25_HUMAN | K.LGASNS#PGQPNSVKR.K            | S618:      | 2 | 2,3659 | 0,332 | -0,153 |
| 15 | O94804 STK10_HUMAN | R.ILRLS#TFEK.R                  | S13:       | 2 | 2,3654 | 0,325 | -0,308 |
| 15 | P39880 CUX1_HUMAN  | E.YSQGAS#PQPQHQLK.K             | S1237:     | 3 | 2,365  | 0,246 | -0,222 |
| 15 | P23588 IF4B_HUMAN  | R.GLNISAVR.L                    |            | 2 | 2,3642 | 0,269 | 0,294  |
| 15 | Q32MZ4 LRRF1_HUMAN | E.VM*GAPDDR.T                   |            | 2 | 2,3603 | 0,293 | 0,348  |
| 15 | P16615 AT2A2_HUMAN | E.VLGHFGVNE.S                   |            | 2 | 2,3588 | 0,169 | 1,13   |
| 15 | Q9Y5W9 SNX11_HUMAN | K.SCCFLPR.S                     |            | 2 | 2,3579 | 0,122 | -0,389 |
| 15 | Q86WP2 GPBP1_HUMAN | K.NGLICDFK.F                    |            | 2 | 2,3577 | 0,158 | 0,694  |
| 15 | P38646 GRP75_HUMAN | E.FKDQLPADE.C                   |            | 2 | 2,3574 | 0,136 | -0,574 |
| 15 | Q9UPU5 UBP24_HUMAN | K.QQHQPSSASSILE.S               |            | 2 | 2,3564 | 0,262 | -0,829 |
| 15 | Q14209 E2F2_HUMAN  | K.KFIYLLSESE.D                  |            | 2 | 2,3552 | 0,197 | -0,695 |
| 15 | P51858 HDGF_HUMAN  | E.VERPLPM*EVEKNS#TPS#EPGSGR.G   | S199:S202: | 3 | 2,3527 | 0,21  | 0,925  |
| 15 | P13010 KU86_HUMAN  | E.QGGAHFSVSSLA.E.G              |            | 2 | 2,352  | 0,225 | -0,189 |
| 15 | Q12874 SF3A3_HUMAN | E.YLQDYTDR.V                    |            | 2 | 2,352  | 0,308 | -0,114 |
| 15 | Q09666 AHNK_HUMAN  | K.FKAEAPLPS#PKLE.G              | S5110:     | 3 | 2,352  | 0,238 | -1,153 |
| 15 | Q15003 CND2_HUMAN  | E.SVSALVDK.F                    |            | 2 | 2,3518 | 0,245 | -0,596 |
| 15 | Q9UGN5 PARP2_HUMAN | E.SLKS#PLKPE.S                  | S226:      | 2 | 2,351  | 0,208 | -0,792 |
| 15 | O75643 U520_HUMAN  | R.CQLPDGFSFR.R                  |            | 2 | 2,3508 | 0,232 | -0,113 |
| 15 | O60343 TBCD4_HUMAN | R.HAS#APSHVQPSDSE.K             | S341:      | 2 | 2,3486 | 0,248 | -0,319 |
| 15 | Q9BQE9 BCL7B_HUMAN | E.SLS#PAHTSDFR.T                | S122:      | 2 | 2,3478 | 0,421 | 0,282  |
| 15 | P26599 PTBP1_HUMAN | R.KM*ALIQM*GSVEE.A              |            | 2 | 2,3462 | 0,237 | -0,089 |
| 15 | O76031 CLPX_HUMAN  | E.KAQQGIVFLDE.V                 |            | 2 | 2,346  | 0,218 | -0,196 |
| 15 | O43504 HBXIP_HUMAN | E.SDNGNIM*IQK.H                 |            | 2 | 2,3445 | 0,22  | -0,43  |
| 15 | Q00613 HSF1_HUMAN  | E.LAPASPM*ASPGGSIDERPLSSSPLVR.V |            | 3 | 2,343  | 0,39  | 0,07   |
| 15 | Q96JM3 ZN828_HUMAN | R.KTSPASLDFPE.S                 |            | 2 | 2,343  | 0,272 | -0,205 |
| 15 | P49327 FAS_HUMAN   | K.AFDTAGNGYCR.S                 |            | 2 | 2,3426 | 0,183 | -1,089 |
| 15 | Q96C24 SYTL4_HUMAN | R.RDS#LDKSGLFPE.W               | S217:      | 2 | 2,3419 | 0,1   | -0,422 |
| 15 | P16144 ITB4_HUMAN  | R.TSGFLCNDR.G                   |            | 2 | 2,3389 | 0,377 | -0,114 |
| 15 | Q6IE81 JADE1_HUMAN | K.LHDSYQLNPDE.Y                 |            | 2 | 2,3384 | 0,173 | 0      |
| 15 | Q13439 GOGA4_HUMAN | E.SLFRS#PIKE.S                  | S78:       | 2 | 2,3382 | 0,231 | -0,105 |
| 15 | Q8N6H7 ARFG2_HUMAN | E.HGPNTDLLGTS#PKASLE.L          | S201:      | 3 | 2,3373 | 0,197 | -0,302 |
| 15 | P34896 GLYC_HUMAN  | E.ALGSCLNNK.Y                   |            | 2 | 2,336  | 0,117 | -0,874 |
| 15 | P09661 RU2A_HUMAN  | E.QAAQYTN AVR.D                 |            | 2 | 2,3349 | 0,404 | -0,326 |

|    |                    |                         |        |   |        |       |        |
|----|--------------------|-------------------------|--------|---|--------|-------|--------|
| 15 | O43379 WDR62_HUMAN | R.RGQSS#PPPAPPICLR.R    | S33:   | 2 | 2,3337 | 0,389 | -0,641 |
| 15 | P48637 GS HB_HUMAN | E.NCLLRPGS#PAR.V        | S415:  | 2 | 2,3334 | 0,385 | -0,277 |
| 15 | Q9UQ35 SRRM2_HUMAN | E.KM*ALPPQEDATAS#PPR.Q  | S1179: | 3 | 2,331  | 0,225 | -0,101 |
| 15 | P35579 MYH9_HUMAN  | K.YKASITALE.A           |        | 2 | 2,3289 | 0,254 | -0,245 |
| 15 | Q9Y2U5 M3K2_HUMAN  | K.LLGQGA FGR.V          |        | 2 | 2,326  | 0,193 | 0,133  |
| 15 | O60271 JIP4_HUMAN  | K.LHQLSGSDQLE.S         |        | 2 | 2,3259 | 0,232 | -0,895 |
| 15 | P49792 RBP2_HUMAN  | K.SALS#PSKSPAK.L        | S2276: | 2 | 2,3252 | 0,217 | -0,529 |
| 15 | Q96S55 WRIP1_HUMAN | R.KTILFIDE.I            |        | 2 | 2,325  | 0,187 | -0,312 |
| 15 | Q9NRA8 4ET_HUMAN   | R.SSCSTPLSQANR.Y        |        | 2 | 2,3241 | 0,3   | -0,653 |
| 15 | Q9Y2W1 TR150_HUMAN | K.SFSITRE.A             |        | 2 | 2,324  | 0,122 | 0      |
| 15 | Q13247 SFRS6_HUMAN | R.ALDKLDGTE.I           |        | 2 | 2,3237 | 0,299 | -0,824 |
| 15 | O43252 PAPS1_HUMAN | E.RDIVPVDASYE.V         |        | 2 | 2,3218 | 0,247 | -1,158 |
| 15 | Q9H501 ESF1_HUMAN  | K.YRQLLQVIQE.K          |        | 2 | 2,3217 | 0,081 | -0,473 |
| 15 | Q14164 IKKE_HUMAN  | K.LTDFGAAR.E            |        | 2 | 2,3215 | 0,293 | -0,072 |
| 15 | Q9NSY1 BMP2K_HUMAN | K.YSDM*SSVYR.D          |        | 2 | 2,321  | 0,39  | -0,217 |
| 15 | O95400 CD2B2_HUMAN | D.ADGNYFLNR.D           |        | 2 | 2,3206 | 0,319 | 0,342  |
| 15 | P17980 PRS6A_HUMAN | E.KAPSIIFIDE.L          |        | 2 | 2,3173 | 0,2   | 0,215  |
| 15 | Q9NTZ6 RBM12_HUMAN | R.LQNFSYDQR.E           |        | 2 | 2,3167 | 0,184 | -0,313 |
| 15 | Q09666 AHNK_HUMAN  | K.LQGSGVSLASK.K         |        | 2 | 2,3154 | 0,228 | -1,165 |
| 15 | Q6R327 RICTR_HUMAN | K.HIEDTGSTPSIGE.N       |        | 2 | 2,3145 | 0,358 | -0,454 |
| 15 | P26006 ITA3_HUMAN  | R.HM*GAVFLLSQE.A        |        | 2 | 2,3145 | 0,154 | -0,293 |
| 15 | Q9BQG0 MBB1A_HUMAN | R.KALVDILSE.V           |        | 2 | 2,3128 | 0,176 | -0,123 |
| 15 | P23528 COF1_HUMAN  | K.KAVLFCLSED.K          |        | 2 | 2,3117 | 0,286 | -0,723 |
| 15 | P17480 UBF1_HUMAN  | K.RPV SAM*FIFSEE.K      |        | 2 | 2,3108 | 0,279 | 0,854  |
| 15 | Q9Y490 TLN1_HUMAN  | R.CV SCLPGQR.D          |        | 2 | 2,3071 | 0,229 | 0      |
| 15 | Q16576 RBBP7_HUMAN | R.VHIPNDDAQFD.A         |        | 2 | 2,3056 | 0,298 | -0,576 |
| 15 | Q07960 RHG01_HUMAN | K.SS#SPELVTHLK.W        | S50:   | 2 | 2,3046 | 0,09  | -1,05  |
| 15 | Q7Z5J4 RAI1_HUMAN  | R.SFLYCNQAR.G           |        | 2 | 2,3039 | 0,38  | -1,474 |
| 15 | P08651 NFIC_HUMAN  | E.GGISS#PVKKTE.M        | S323:  | 2 | 2,3027 | 0,227 | -0,309 |
| 15 | A6NKT7 RGPD3_HUMAN | E.STTGSNFSFK.S          |        | 2 | 2,3018 | 0,543 | -0,113 |
| 15 | O15027 SC16A_HUMAN | K.FANLTPSR.T            |        | 2 | 2,3015 | 0,185 | -0,808 |
| 15 | P63010 AP2B1_HUMAN | K.LHDINAQM*VED.Q        |        | 2 | 2,3014 | 0,396 | -0,281 |
| 15 | Q8WU79 SMAP2_HUMAN | E.KDLDLLASVPS#PSSSGSR.K | S219:  | 3 | 2,3012 | 0,229 | -0,579 |

|    |                    |                  |        |   |        |       |        |
|----|--------------------|------------------|--------|---|--------|-------|--------|
| 15 | P09874 PARP1_HUMAN | K.ASLCISTK.K     |        | 2 | 2,3005 | 0,185 | -0,139 |
| 15 | O14964 HGS_HUMAN   | R.GALSALRE.E     |        | 2 | 2,2997 | 0,142 | 0,747  |
| 15 | Q15417 CNN3_HUMAN  | K.GM*SVYGLGR.Q   |        | 2 | 2,2992 | 0,28  | 0,383  |
| 15 | P29317 EPHA2_HUMAN | E.SGEGCPCEASVR.Y |        | 2 | 2,2982 | 0,234 | -0,653 |
| 15 | Q6S8J3 A26CA_HUMAN | E.KLCYVALDFE.Q   |        | 2 | 2,2948 | 0,245 | -0,194 |
| 15 | Q9BSJ8 ESYT1_HUMAN | K.HLSPYATLTVGD.S |        | 2 | 2,2915 | 0,34  | -0,096 |
| 15 | P16401 H15_HUMAN   | K.KALAAGGYDVE.K  |        | 2 | 2,2913 | 0,313 | -1,115 |
| 15 | Q8IVF2 AHNK2_HUMAN | K.LDLKS#PKAE.V   | S1112: | 2 | 2,288  | 0,402 | -0,903 |
| 15 | Q9BWF3 RBM4_HUMAN  | R.RATAPVPTVGE.G  |        | 2 | 2,2839 | 0,239 | -0,222 |
| 15 | O94864 ST65G_HUMAN | K.NPNAPFQIR.H    |        | 2 | 2,2833 | 0,258 | 0      |
| 15 | Q9NYL2 MLTK_HUMAN  | R.QIASNTSLQR.S   |        | 2 | 2,2829 | 0,234 | -0,546 |
| 15 | Q02790 FKBP4_HUMAN | E.FKGEDLTEEE.D   |        | 2 | 2,2825 | 0,113 | 0,815  |
| 15 | O43617 TPPC3_HUMAN | K.M*GFNIGVR.L    |        | 2 | 2,2817 | 0,191 | 0,268  |
| 15 | Q8NDT2 RB15B_HUMAN | R.NLDADLVR.D     |        | 2 | 2,2814 | 0,153 | -0,999 |
| 15 | Q6P3S6 FBX42_HUMAN | R.SM*DEAPCVNGR.W |        | 2 | 2,2791 | 0,141 | -0,195 |
| 15 | Q9NZM1 MYOF_HUMAN  | R.YGGRDYSLDEFE.A |        | 2 | 2,2786 | 0,275 | -0,336 |
| 15 | Q16851 UGPA_HUMAN  | E.NSLGINVPR.S    |        | 2 | 2,2785 | 0,276 | 0,063  |
| 15 | Q9NQS7 INCE_HUMAN  | K.YSLVAKQE.S     |        | 2 | 2,2771 | 0,195 | -0,065 |
| 15 | O15031 PLXB2_HUMAN | E.TGPLGGGIR.I    |        | 2 | 2,2768 | 0,193 | 0,147  |
| 15 | O75475 PSIP1_HUMAN | K.FSSQQAATK.Q    |        | 2 | 2,2763 | 0,266 | -0,378 |
| 15 | P51114 FXR1_HUMAN  | R.KVPGVTAIE.L    |        | 2 | 2,2755 | 0,255 | 0,067  |
| 15 | P60983 GMFB_HUMAN  | K.RLVVLDEELE.G   |        | 2 | 2,2754 | 0,158 | -0,502 |
| 15 | P11142 HSP7C_HUMAN | R.M*VNHFAIE.F    |        | 2 | 2,2745 | 0,232 | -0,749 |
| 15 | Q9UGI8 TES_HUMAN   | R.TQYSCYCK.L     |        | 2 | 2,273  | 0,324 | -0,865 |
| 15 | Q96CT7 CC124_HUMAN | K.SHLEVPLEE.N    |        | 2 | 2,2697 | 0,18  | -0,811 |
| 15 | P32969 RL9_HUMAN   | R.KFLDGIYVSE.K   |        | 2 | 2,2686 | 0,254 | -0,313 |
| 15 | P35580 MYH10_HUMAN | K.KFDQLLAE.E.K   |        | 2 | 2,268  | 0,114 | -0,67  |
| 15 | Q14008 CKAP5_HUMAN | K.AKVNDFLAE.I    |        | 2 | 2,266  | 0,108 | -0,363 |
| 15 | Q8WUA2 PPIL4_HUMAN | K.NTNQDIYRE.M    |        | 2 | 2,2654 | 0,299 | -1,058 |
| 15 | P60709 ACTB_HUMAN  | R.GYSFTTTAER.E   |        | 2 | 2,265  | 0,446 | -0,323 |
| 15 | P18084 ITB5_HUMAN  | E.M*ASNPLYR.K    |        | 2 | 2,2645 | 0,293 | -0,504 |
| 15 | O15042 SR140_HUMAN | D.ASGPSDSM*PSR.T |        | 2 | 2,2628 | 0,326 | -0,2   |
| 15 | P51858 HDGF_HUMAN  | E.IENNPTVK.A     |        | 2 | 2,2617 | 0,142 | 0      |

|    |                    |                            |              |   |        |       |        |
|----|--------------------|----------------------------|--------------|---|--------|-------|--------|
| 15 | Q9H7P9 PKHG2_HUMAN | E.RGPS#PLHVL.E.G           | S610:        | 2 | 2,2615 | 0,178 | -0,206 |
| 15 | O00429 DNM1L_HUMAN | K.SKPIPIM*PAS#PQK.G        | S616:        | 2 | 2,2595 | 0,235 | -0,573 |
| 15 | P11216 PYGB_HUMAN  | K.KLLPLVSD.E.V             |              | 2 | 2,2588 | 0,135 | -0,361 |
| 15 | Q86YS7 K0528_HUMAN | K.NQTYSFSPK.S              |              | 2 | 2,2586 | 0,309 | -0,211 |
| 15 | P35244 RFA3_HUMAN  | D.SHPFDLGLYNE.A            |              | 2 | 2,2582 | 0,197 | -0,189 |
| 15 | Q6VY07 PACS1_HUMAN | E.SILST#PKPK.L             | T394:        | 2 | 2,2561 | 0,273 | -0,929 |
| 15 | Q15942 ZYX_HUMAN   | E.GCYTDTLEK.C              |              | 2 | 2,2536 | 0,238 | -0,337 |
| 15 | Q9NYJ1 CHCH8_HUMAN | R.SGCAASHFAVQE.C           |              | 2 | 2,2524 | 0,087 | -0,097 |
| 15 | Q58FF8 H90B2_HUMAN | K.SLVSVTKE.G               |              | 2 | 2,2501 | 0,12  | -0,424 |
| 15 | O60583 CCNT2_HUMAN | K.M*KIPIANTE.K             |              | 2 | 2,2497 | 0,166 | -0,354 |
| 15 | Q9Y6I3 EPN1_HUMAN  | K.NIVHNYSEAE.I             |              | 2 | 2,2489 | 0,166 | -1,038 |
| 15 | Q9H8Y8 GORS2_HUMAN | R.IPTRPFEE.G               |              | 2 | 2,2488 | 0,205 | -1,974 |
| 15 | Q92692 PVRL2_HUMAN | R.YHELPTLEE.R              |              | 2 | 2,2445 | 0,193 | -1,402 |
| 15 | Q9UNH7 SNX6_HUMAN  | K.SSLPNFKQNE.F             |              | 2 | 2,2442 | 0,202 | -0,419 |
| 15 | Q8NI27 THOC2_HUMAN | E.GGYFGQIR.N               |              | 2 | 2,2437 | 0,214 | -0,204 |
| 15 | Q9UHD1 CHRD1_HUMAN | K.RPSPDEPM*TNLE.L          |              | 2 | 2,2433 | 0,162 | 0      |
| 15 | O43432 IF4G3_HUMAN | K.ITKPTIDE.K               |              | 2 | 2,2415 | 0,287 | 0,133  |
| 15 | O43719 HTSF1_HUMAN | K.LFDDSDER.G               |              | 2 | 2,2406 | 0,251 | -0,979 |
| 15 | Q8N9N5 BANP_HUMAN  | E.NVISNAVPGR.R             |              | 2 | 2,2405 | 0,261 | -0,356 |
| 15 | Q9UQ35 SRRM2_HUMAN | R.DGSGTPS#RHSLSGSS#PGM*K.D | S1455:S1463: | 3 | 2,2399 | 0,257 | -0,362 |
| 15 | P55072 TERA_HUMAN  | R.GGNIGDGGGAADR.V          |              | 2 | 2,2399 | 0,147 | -0,328 |
| 15 | O60610 DIAP1_HUMAN | R.KAGCAVTSLLEASE.L         |              | 2 | 2,2395 | 0,169 | -1,027 |
| 15 | Q05519 SFR11_HUMAN | E.CS#VEKGTGDSLRE.S         | S456:        | 2 | 2,239  | 0,535 | -0,482 |
| 15 | Q8WUM0 NU133_HUMAN | K.AAFLQYCR.K               |              | 2 | 2,239  | 0,226 | -0,474 |
| 15 | P52732 KIF11_HUMAN | K.LDIPTGT#TPQRK.S          | T925:        | 2 | 2,2385 | 0,17  | -0,867 |
| 15 | Q9Y696 CLIC4_HUMAN | R.NFDIPKE.M                |              | 2 | 2,2366 | 0,098 | 0,071  |
| 15 | Q5T3I0 GPTC4_HUMAN | E.NGITQALR.V               |              | 2 | 2,2351 | 0,12  | 1,607  |
| 15 | Q5T4S7 UBR4_HUMAN  | R.TSPADHGGSVGSE.S          |              | 2 | 2,2348 | 0,351 | -0,203 |
| 15 | Q99497 PARK7_HUMAN | K.M*M*NGGHYTYSE.N          |              | 2 | 2,2334 | 0,353 | -0,554 |
| 15 | Q969H8 CS010_HUMAN | K.SYLYFTQFK.A              |              | 2 | 2,2332 | 0,326 | -0,408 |
| 15 | P63010 AP2B1_HUMAN | K.LHDINAQM*VE.D            |              | 2 | 2,2319 | 0,193 | -0,823 |
| 15 | Q9Y3C1 U384_HUMAN  | R.KPYVLNDLEAE.A            |              | 2 | 2,2308 | 0,116 | -1,607 |
| 15 | Q14978 NOLC1_HUMAN | K.LQANGPVAK.K              |              | 2 | 2,2305 | 0,21  | 0      |



|    |                    |                               |       |   |        |       |        |
|----|--------------------|-------------------------------|-------|---|--------|-------|--------|
| 15 | Q86WB0 NIPA_HUMAN  | R.LPLVPES#PRR.M               | S321: | 3 | 2,23   | 0,141 | 0,441  |
| 15 | P35606 COPB2_HUMAN | K.SFKPDFGAE.S                 |       | 2 | 2,2294 | 0,213 | -0,122 |
| 15 | P13639 EF2_HUMAN   | R.YFDPANGK.F                  |       | 2 | 2,229  | 0,35  | -0,87  |
| 15 | Q9P2B4 CT2NL_HUMAN | R.KVILDLEEE.R                 |       | 2 | 2,2265 | 0,244 | -0,336 |
| 15 | O60739 EIF1B_HUMAN | R.KNICQFLLE.V                 |       | 2 | 2,2262 | 0,115 | -0,419 |
| 15 | P61221 ABCE1_HUMAN | K.GTVGSILDR.K                 |       | 2 | 2,2254 | 0,24  | 0,133  |
| 15 | O95684 FR1OP_HUMAN | K.IGSFLSNR.T                  |       | 2 | 2,2254 | 0,255 | 0,205  |
| 15 | P13639 EF2_HUMAN   | E.SNVLCLSK.S                  |       | 2 | 2,225  | 0,269 | -1,391 |
| 15 | O95297 MPZL1_HUMAN | E.SLS#PVKQAPR.K               | S210: | 2 | 2,2238 | 0,152 | -1,469 |
| 15 | Q9HAW4 CLSPN_HUMAN | K.NASRPM*VIQE.S               |       | 2 | 2,2237 | 0,141 | -0,736 |
| 15 | P11142 HSP7C_HUMAN | D.NNLLGKFE.L                  |       | 2 | 2,2234 | 0,203 | 0,261  |
| 15 | P55265 DSRAD_HUMAN | E.KICDYLFNVSD.S               |       | 2 | 2,2225 | 0,317 | -0,444 |
| 15 | O15014 ZN609_HUMAN | E.NTTPTQPLTPLHVVTQNGAEASSVK.T |       | 3 | 2,2217 | 0,421 | -1,342 |
| 15 | O95235 KI20A_HUMAN | E.STAADLGS#VVRK.N             | S33:  | 2 | 2,2207 | 0,28  | -0,57  |
| 15 | Q8N2Y8 RUSC2_HUMAN | E.TSRPSPLGSYS#PIR.S           | S781: | 2 | 2,2205 | 0,164 | -0,382 |
| 15 | Q8N1G1 REXO1_HUMAN | K.YSLASLDR.G                  |       | 2 | 2,2201 | 0,128 | -0,066 |
| 15 | Q9NYF8 BCLF1_HUMAN | K.TIAPQNAPRDE.S               |       | 2 | 2,2172 | 0,44  | -0,805 |
| 15 | Q16891 IMMT_HUMAN  | E.GKPTPALSEE.A                |       | 2 | 2,2165 | 0,261 | -1,304 |
| 15 | Q9Y3R0 GRIP1_HUMAN | R.GSL#PVTKPR.S                | S847: | 2 | 2,2162 | 0,125 | -1,74  |
| 15 | P22570 ADRO_HUMAN  | K.RGPTGVIATM*TD.S             |       | 2 | 2,2143 | 0,248 | -0,091 |
| 15 | Q9NPR2 SEM4B_HUMAN | R.SCGDCLLAR.D                 |       | 2 | 2,212  | 0,164 | 0,232  |
| 15 | Q9H0K6 PUS7L_HUMAN | E.KADVLSFLDE.K                |       | 2 | 2,2119 | 0,233 | -0,299 |
| 15 | O15355 PPM1G_HUMAN | R.VNGGLNLSR.A                 |       | 2 | 2,2103 | 0,175 | 0,131  |
| 15 | Q9UPT8 ZC3H4_HUMAN | K.KIPSLFE.I                   |       | 2 | 2,2096 | 0,133 | 0,073  |
| 15 | Q12888 TP53B_HUMAN | R.KGVSQGTGPVCE.E              |       | 2 | 2,2086 | 0,335 | -0,773 |
| 15 | P85037 FOXK1_HUMAN | R.TPFGPLSSR.S                 |       | 2 | 2,2026 | 0,325 | 0,444  |
| 15 | P53367 ARFP1_HUMAN | K.HSLPSGLGLSE.T               |       | 2 | 2,2009 | 0,331 | -1,223 |
| 15 | Q63HQ0 CD016_HUMAN | E.SSCDLM*TK.T                 |       | 2 | 2,1995 | 0,315 | -0,127 |
| 15 | Q96RQ1 ERGI2_HUMAN | R.IDHLSFGE.L                  |       | 2 | 2,1979 | 0,132 | -0,199 |
| 15 | Q8N2Y8 RUSC2_HUMAN | E.GPAAM*AGPGS#PPRR.V          | S536: | 2 | 2,1971 | 0,337 | -0,258 |
| 15 | P04264 K2C1_HUMAN  | R.THNLPEYFE.S                 |       | 2 | 2,1963 | 0,317 | -0,318 |
| 15 | O60716 CTND1_HUMAN | R.GSLAS#LDSLRLK.G             | S349: | 2 | 2,1954 | 0,186 | -0,696 |
| 15 | Q96SB3 NEB2_HUMAN  | K.IKPVEVEE.S                  |       | 2 | 2,1945 | 0,123 | 0,065  |

|    |                    |                           |        |   |        |       |        |
|----|--------------------|---------------------------|--------|---|--------|-------|--------|
| 15 | Q96SI9 STRBP_HUMAN | K.HSTIYPSPEELE.A          |        | 2 | 2,1941 | 0,201 | -0,522 |
| 15 | Q01082 SPTB2_HUMAN | R.LFQLNRE.V               |        | 2 | 2,194  | 0,115 | 0      |
| 15 | Q9UKV3 ACINU_HUMAN | R.TSTSSSSVQAR.R           |        | 2 | 2,1915 | 0,384 | -0,329 |
| 15 | Q9UER7 DAXX_HUMAN  | R.KQSEEPFTTVLE.N          |        | 2 | 2,1895 | 0,135 | -0,433 |
| 15 | Q9HCH0 K1602_HUMAN | R.RQLNLGQLLEDTE.S         |        | 2 | 2,1893 | 0,292 | -0,638 |
| 15 | Q07666 KHDR1_HUMAN | R.SGS#M*DPSGAHPSVR.Q      | S20:   | 2 | 2,1876 | 0,231 | -0,33  |
| 15 | Q76FK4 NOL8_HUMAN  | R.VSCHDS#DDDIM*R.N        | S365:  | 2 | 2,1873 | 0,181 | -0,158 |
| 15 | P15822 ZEP1_HUMAN  | K.KPLFLQQPSE.L            |        | 2 | 2,1872 | 0,116 | -1,233 |
| 15 | P48643 TCPE_HUMAN  | E.KLGFAGLVQE.I            |        | 2 | 2,1871 | 0,101 | -0,23  |
| 15 | Q9BTC0 DIDO1_HUMAN | R.SGPQSASTAVK.E           |        | 2 | 2,1865 | 0,359 | -0,236 |
| 15 | Q92621 NU205_HUMAN | E.NRS#VSGFLHFD.T          | S1165: | 3 | 2,1849 | 0,145 | 0,135  |
| 15 | Q8N612 CK056_HUMAN | R.RPTPAEEPGELE.D          |        | 2 | 2,1847 | 0,283 | -0,368 |
| 15 | O14497 ARI1A_HUMAN | E.YEVGDPGQR.T             |        | 2 | 2,1832 | 0,247 | -0,299 |
| 15 | Q9ULL5 PRR12_HUMAN | E.GLGLGCPS#PCKR.L         | S540:  | 2 | 2,1826 | 0,294 | -0,265 |
| 15 | Q00535 CDK5_HUMAN  | K.KLTLVFE.F               |        | 2 | 2,1824 | 0,171 | 0,431  |
| 15 | Q9Y5U2 TSSC4_HUMAN | R.SRDIFDCLE.G             |        | 2 | 2,1808 | 0,267 | -0,317 |
| 15 | P08243 ASNS_HUMAN  | R.GPDAFRFE.N              |        | 2 | 2,1782 | 0,225 | 0,325  |
| 15 | Q76L83 ASXL2_HUMAN | E.SLVTS#PSKPK.S           | S524:  | 2 | 2,1766 | 0,299 | -0,868 |
| 15 | Q9UPT8 ZC3H4_HUMAN | R.QQTSSRPPASVGE.L         |        | 2 | 2,1751 | 0,429 | -0,272 |
| 15 | O95425 SVIL_HUMAN  | E.SSSTFSFSGR.D            |        | 2 | 2,1743 | 0,299 | -0,23  |
| 15 | Q9UQ80 PA2G4_HUMAN | K.VAHSFNCTPIE.G           |        | 2 | 2,1738 | 0,348 | -0,191 |
| 15 | Q66GS9 CP135_HUMAN | E.KDFLQETVDE.K            |        | 2 | 2,1736 | 0,186 | -0,897 |
| 15 | O60271 JIP4_HUMAN  | E.LSDVVSQGGSK.A           |        | 2 | 2,1736 | 0,201 | -0,062 |
| 15 | O75427 LRCH4_HUMAN | E.AAATTSVPGS#PGLPGRR.S    | S25:   | 2 | 2,1717 | 0,322 | -0,291 |
| 15 | P27708 PYR1_HUMAN  | E.LSALVAPAFHAHTSQVLVDK.S  |        | 2 | 2,171  | 0,308 | -0,434 |
| 15 | P35221 CTNA1_HUMAN | E.NEFIDASR.L              |        | 2 | 2,17   | 0,197 | -0,128 |
| 15 | Q9NXN4 GDAP2_HUMAN | R.SPFLYNK.D               |        | 2 | 2,1676 | 0,121 | 0,913  |
| 15 | P04264 K2C1_HUMAN  | R.TLLEGEESR.M             |        | 2 | 2,1665 | 0,225 | -0,354 |
| 15 | P26599 PTBP1_HUMAN | R.KLPIDVTEGE.V            |        | 2 | 2,166  | 0,255 | -1,441 |
| 15 | Q6T4R5 NHS_HUMAN   | K.VGAKPSAYEE.G            |        | 2 | 2,1657 | 0,236 | -0,232 |
| 15 | Q3T8J9 GON4L_HUMAN | R.TLFHQPEEE.I             |        | 2 | 2,1655 | 0,311 | -0,54  |
| 15 | P43490 NAMPT_HUMAN | R.STQAPLIIRPDSGNPLDTVLK.V |        | 3 | 2,1646 | 0,2   | 0,491  |
| 15 | Q6P996 PDXD1_HUMAN | E.GHPGAPS#PQHTDQTE.A      | S757:  | 2 | 2,1634 | 0,286 | -0,298 |

|    |                    |                         |            |   |        |       |        |
|----|--------------------|-------------------------|------------|---|--------|-------|--------|
| 15 | Q9Y2V2 CHSP1_HUMAN | R.ASQGPVYK.G            |            | 2 | 2,1634 | 0,272 | 0,072  |
| 15 | Q3KR37 GRM1B_HUMAN | R.SRSPT#PQNQDGDGM*VEK.G | T32:       | 2 | 2,1634 | 0,145 | 0,492  |
| 15 | Q05655 KPCD_HUMAN  | E.ALNQVTQR.A            |            | 2 | 2,1633 | 0,284 | -0,131 |
| 15 | P16070 CD44_HUMAN  | E.KALSIGFE.T            |            | 2 | 2,1628 | 0,095 | 0,141  |
| 15 | Q5TDH0 DDI2_HUMAN  | R.SLASGLK.D             |            | 2 | 2,1625 | 0,287 | 0,364  |
| 15 | Q14155 ARHG7_HUMAN | K.GFDTTAINK.S           |            | 2 | 2,1588 | 0,207 | -0,189 |
| 15 | P51970 NDUA8_HUMAN | K.CALDFFR.Q             |            | 2 | 2,1561 | 0,122 | 0      |
| 15 | Q00610 CLH1_HUMAN  | E.YQAAVDGAR.K           |            | 2 | 2,1535 | 0,373 | -0,257 |
| 15 | Q9BR61 ACBD6_HUMAN | K.NVDVNVKDEE.G          |            | 2 | 2,1531 | 0,177 | -0,736 |
| 15 | P04264 K2C1_HUMAN  | R.SLVNLGGSK.S           |            | 2 | 2,153  | 0,226 | -0,279 |
| 15 | O75663 TIPRL_HUMAN | R.IQHSGFGIE.F           |            | 2 | 2,1485 | 0,09  | -1,635 |
| 15 | P05556 ITB1_HUMAN  | E.DM*DAYCR.K            |            | 2 | 2,1483 | 0,293 | 0,064  |
| 15 | P14618 KPYM_HUMAN  | K.QKGADFLVTE.V          |            | 2 | 2,1472 | 0,144 | -1,542 |
| 15 | P42167 LAP2B_HUMAN | K.GAAGRPLELS#DFR.M      | S378:      | 2 | 2,1471 | 0,236 | -0,249 |
| 15 | O75822 EIF3J_HUMAN | E.KSLYYASFLE.V          |            | 2 | 2,1453 | 0,308 | -0,4   |
| 15 | Q99569 PKP4_HUMAN  | R.AAS#PYSQRPAS#PTAIRR.I | S273:S281: | 3 | 2,1439 | 0,105 | -0,276 |
| 15 | P11586 C1TC_HUMAN  | R.FSDIQR.R              |            | 2 | 2,1434 | 0,152 | -0,278 |
| 15 | P35908 K22E_HUMAN  | K.IEISELNR.V            |            | 2 | 2,1427 | 0,141 | 0,063  |
| 15 | Q8WXH0 SYNE2_HUMAN | K.VNLKECFE.S            |            | 2 | 2,1422 | 0,167 | 0      |
| 15 | P22314 UBA1_HUMAN  | E.NYDIPSADR.H           |            | 2 | 2,1416 | 0,217 | 0      |
| 15 | P07602 SAP_HUMAN   | K.LVGYLDR.N             |            | 2 | 2,1413 | 0,38  | -0,511 |
| 15 | P98175 RBM10_HUMAN | K.LACLCCR.R             |            | 2 | 2,1411 | 0,102 | 0,404  |
| 15 | Q15057 CENB2_HUMAN | K.FGPGDQVR.A            |            | 2 | 2,1405 | 0,264 | 0      |
| 15 | Q13177 PAK2_HUMAN  | E.LKNPNIVNFLD.S         |            | 2 | 2,1404 | 0,21  | -0,379 |
| 15 | Q86TB9 PATL1_HUMAN | R.RSTS#PIIGSPPVR.A      | S179:      | 2 | 2,1404 | 0,305 | -1,012 |
| 15 | Q92576 PHF3_HUMAN  | K.AKPVGS#PLFK.F         | S283:      | 2 | 2,1375 | 0,164 | -0,109 |
| 15 | O95785 WIZ_HUMAN   | K.GLGHPPS#SPLLK.K       | S982:      | 2 | 2,1339 | 0,1   | -0,38  |
| 15 | Q00536 PCTK1_HUMAN | K.RLS#LPADIR.L          | S119:      | 2 | 2,1303 | 0,182 | -0,435 |
| 15 | Q14152 EIF3A_HUMAN | R.LGDSLSR.K             |            | 2 | 2,1295 | 0,301 | 0,219  |
| 15 | Q15185 TEBP_HUMAN  | E.DSKDVNVNFE.K          |            | 2 | 2,129  | 0,088 | -0,732 |
| 15 | Q9Y3E2 BOLA1_HUMAN | R.LVHAALAE.L            |            | 2 | 2,128  | 0,208 | -0,256 |
| 15 | P26640 SYVC_HUMAN  | K.ITPAHDQNDYE.V         |            | 2 | 2,1267 | 0,123 | -1,03  |
| 15 | P08651 NFIC_HUMAN  | D.LNPASTGLR.R           |            | 2 | 2,1253 | 0,391 | -1,051 |

|    |                     |                        |        |   |        |       |        |
|----|---------------------|------------------------|--------|---|--------|-------|--------|
| 15 | Q02790 FKBP4_HUMAN  | K.LYANM*FER.L          |        | 2 | 2,125  | 0,255 | -0,691 |
| 15 | Q9Y294 ASF1A_HUMAN  | R.NILASNPR.V           |        | 2 | 2,1245 | 0,347 | -0,069 |
| 15 | Q7Z460 CLAP1_HUMAN  | R.IPGSVNAM*R.V         |        | 2 | 2,124  | 0,295 | -0,698 |
| 15 | Q9UNE7 STUB1_HUMAN  | K.AHFFLGQCQLE.M        |        | 2 | 2,1237 | 0,23  | -0,633 |
| 15 | A6PVI3 NCB2L_HUMAN  | K.KTACGFCFVE.C         |        | 2 | 2,1218 | 0,24  | -0,801 |
| 15 | P35580 MYH10_HUMAN  | E.RQLLQANPILE.S        |        | 2 | 2,1208 | 0,174 | -0,565 |
| 15 | P07900 HS90A_HUMAN  | E.M*VS#LKDYCTR.M       | S476:  | 2 | 2,1194 | 0,209 | 0      |
| 15 | Q01105 SET_HUMAN    | E.IDRLNEQASEE.I        |        | 2 | 2,1182 | 0,217 | -0,842 |
| 15 | Q9Y512 SAM50_HUMAN  | R.TKDDIIICE.I          |        | 2 | 2,1182 | 0,169 | 0,22   |
| 15 | P35998 PRS7_HUMAN   | K.KACLIFFDE.I          |        | 2 | 2,1165 | 0,14  | -0,427 |
| 15 | Q01082 SPTB2_HUMAN  | E.S#SPIPSPTSDRK.A      | S2164: | 2 | 2,1163 | 0,189 | -0,541 |
| 15 | O75427 LRCH4_HUMAN  | E.AAATTSVPGS#PGLPGRR.S | S25:   | 3 | 2,116  | 0,164 | -0,218 |
| 15 | A6NDU8 U600_HUMAN   | K.HCNLLGDELLE.C        |        | 2 | 2,114  | 0,242 | -0,372 |
| 15 | P48637 GS HB_HUMAN  | E.KIEPEPFE.N           |        | 2 | 2,1139 | 0,128 | -0,432 |
| 15 | P15336 ATF2_HUMAN   | R.SKIEEPSVVE.T         |        | 2 | 2,1135 | 0,234 | -0,109 |
| 15 | P61221 ABCE1_HUMAN  | K.KSGNYFFLDD.-         |        | 2 | 2,1127 | 0,287 | -0,202 |
| 15 | P07355 ANXA2_HUMAN  | R.RAEDGSVIDYE.L        |        | 2 | 2,1118 | 0,123 | -0,584 |
| 15 | P38159 HNRPG_HUMAN  | R.DGYGGSRDS#YSSSR.S    | S326:  | 3 | 2,1114 | 0,377 | 0      |
| 15 | P62269 RS18_HUMAN   | R.VLNTNIDGR.R          |        | 2 | 2,1101 | 0,163 | 0      |
| 15 | Q02539 H11_HUMAN    | K.KALAAAGYDVE.K        |        | 2 | 2,1091 | 0,291 | 0,11   |
| 15 | P55072 TERA_HUMAN   | K.KM*DLIDLEDE.T        |        | 2 | 2,1084 | 0,094 | -1,973 |
| 15 | Q7Z5K2 WAPL_HUMAN   | K.RPES#PSEISPIK.G      | S221:  | 2 | 2,108  | 0,314 | -0,516 |
| 15 | Q92499 DDX1_HUMAN   | K.NGKDLGLAFE.I         |        | 2 | 2,1063 | 0,245 | -0,229 |
| 15 | Q5TCU3 Q5TCU3_HUMAN | E.IHQTLDTLLE.L         |        | 2 | 2,1047 | 0,188 | -0,838 |
| 15 | Q9UKV3 ACINU_HUMAN  | R.TAQVPS#PPRGK.I       | S1004: | 2 | 2,1047 | 0,208 | -0,601 |
| 15 | P06748 NPM_HUMAN    | K.GPSS#VEDIKAK.M       | S243:  | 3 | 2,1042 | 0,355 | 0,831  |
| 15 | P08648 ITA5_HUMAN   | K.HVADSIGFTVE.L        |        | 2 | 2,1042 | 0,25  | -0,519 |
| 15 | Q5H9R7 SAPS3_HUMAN  | K.CAAPRPPS#SSPEQR.T    | S851:  | 3 | 2,1039 | 0,089 | -0,113 |
| 15 | O75521 PECI_HUMAN   | K.NNAVLLRE.F           |        | 2 | 2,1014 | 0,135 | -1,248 |
| 15 | P13645 K1C10_HUMAN  | R.LAADDFR.L            |        | 2 | 2,1014 | 0,34  | -0,227 |
| 15 | Q92896 GSLG1_HUMAN  | R.QITQNTDYR.L          |        | 2 | 2,1003 | 0,202 | -0,214 |
| 15 | Q10567 AP1B1_HUMAN  | K.LHDINAQLVED.Q        |        | 2 | 2,1    | 0,255 | -0,289 |
| 15 | O00410 IMB3_HUMAN   | R.HAGLM*ALSAIGE.G      |        | 2 | 2,0998 | 0,135 | -0,206 |

|    |                    |                                  |            |   |        |       |        |
|----|--------------------|----------------------------------|------------|---|--------|-------|--------|
| 15 | P10599 THIO_HUMAN  | E.KYSNVIFLE.V                    |            | 2 | 2,0983 | 0,198 | -0,438 |
| 15 | Q92733 PRCC_HUMAN  | K.SAALQVTK.Q                     |            | 2 | 2,0978 | 0,097 | 0,373  |
| 15 | P62937 PIIA_HUMAN  | K.SIYGKFEDE                      |            | 2 | 2,096  | 0,254 | -0,112 |
| 15 | P25788 PSA3_HUMAN  | R.CKDGVVFGVE.K                   |            | 2 | 2,0941 | 0,213 | -0,879 |
| 15 | Q6P2E9 EDC4_HUMAN  | E.GLEPDSM*AS#AASALHLLSPRPRPGPE.L | S771:      | 3 | 2,0924 | 0,281 | 0,066  |
| 15 | Q92609 TBCD5_HUMAN | E.FTGSPPS#SATKKD.S               | S557:      | 2 | 2,0911 | 0,097 | -0,348 |
| 15 | P04264 K2C1_HUMAN  | K.SISISVAR.G                     |            | 2 | 2,0892 | 0,135 | 0,146  |
| 15 | Q6IN85 SMEK1_HUMAN | R.GTGHVSSGYVE.R                  |            | 2 | 2,0868 | 0,256 | -0,558 |
| 15 | Q7L4I2 RSRC2_HUMAN | K.LM*GIKSEDE.A                   |            | 2 | 2,0852 | 0,112 | -0,235 |
| 15 | Q99747 SNAG_HUMAN  | K.YM*DNDYAK.L                    |            | 2 | 2,0833 | 0,281 | 0,236  |
| 15 | Q9GZR7 DDX24_HUMAN | K.NPSSLFSK.E                     |            | 2 | 2,0819 | 0,157 | 0      |
| 15 | Q08378 GOGA3_HUMAN | R.GTYGILSK.T                     |            | 2 | 2,0815 | 0,238 | 0,073  |
| 15 | Q7Z4S6 KI21A_HUMAN | R.ASQQINALR.S                    |            | 2 | 2,0784 | 0,114 | -0,488 |
| 15 | Q14204 DYHC1_HUMAN | R.LKVFYEEE.L                     |            | 2 | 2,0781 | 0,188 | -0,577 |
| 15 | Q15149 PLEC1_HUMAN | K.AFCGFEDPR.T                    |            | 2 | 2,0771 | 0,351 | -0,222 |
| 15 | O94967 WDR47_HUMAN | K.KQFVCINILE.D                   |            | 2 | 2,0765 | 0,14  | -0,193 |
| 15 | Q9UII5 ZN107_HUMAN | K.IHT#AEKSY#K.C                  | T379:Y384: | 3 | 2,0737 | 0,159 | 1,405  |
| 15 | Q15042 RB3GP_HUMAN | K.LFVNAQR.A                      |            | 2 | 2,0729 | 0,084 | -0,288 |
| 15 | Q13428 TCOF_HUMAN  | R.AALAPAKES#PR.K                 | S906:      | 2 | 2,0713 | 0,153 | -0,102 |
| 15 | Q9Y2X0 MED16_HUMAN | R.LHLGACPTTE.C                   |            | 2 | 2,0681 | 0,146 | -0,325 |
| 15 | Q6S8J3 A26CA_HUMAN | E.TTFNSIM*K.S                    |            | 2 | 2,0673 | 0,268 | 0,191  |
| 15 | P42229 STA5A_HUMAN | R.KQQTILDDE.L                    |            | 2 | 2,067  | 0,145 | -0,406 |
| 15 | Q14247 SRC8_HUMAN  | K.VDKSAVGFE.Y                    |            | 2 | 2,0665 | 0,155 | -0,192 |
| 15 | Q9NTI5 PDS5B_HUMAN | K.SFFT#PGKPK.T                   | T1121:     | 2 | 2,0647 | 0,196 | 0      |
| 15 | Q9UQE7 SMC3_HUMAN  | K.KALDQFVNFSE.Q                  |            | 2 | 2,0627 | 0,119 | -0,282 |
| 15 | Q9BST9 RTKN_HUMAN  | R.VCISDLR.I                      |            | 2 | 2,0613 | 0,179 | -0,495 |
| 15 | O43290 SNUT1_HUMAN | R.SILSKYDEE.L                    |            | 2 | 2,0606 | 0,141 | -0,113 |
| 15 | P31946 1433B_HUMAN | D.KYLIPNATQPE.S                  |            | 2 | 2,0594 | 0,253 | 0,287  |
| 15 | Q9Y2W1 TR150_HUMAN | R.ERS#PALKS#PLQSVVVR.R           | S248:S253: | 2 | 2,0571 | 0,224 | -0,633 |
| 15 | P0C7M2 RA1L3_HUMAN | R.KLFIGGLSFE.T                   |            | 2 | 2,0565 | 0,138 | -0,329 |
| 15 | P84090 ERH_HUMAN   | D.LSCLVYR.A                      |            | 2 | 2,0556 | 0,177 | 1,808  |
| 15 | P35269 T2FA_HUMAN  | K.KIYQEEEM*PE.S                  |            | 2 | 2,0538 | 0,245 | -1,116 |
| 15 | Q08752 PPID_HUMAN  | E.GDDGGIFPK.D                    |            | 2 | 2,0509 | 0,173 | 0,337  |

|    |                     |                       |        |   |        |       |        |
|----|---------------------|-----------------------|--------|---|--------|-------|--------|
| 15 | Q9ULU4 PKCB1_HUMAN  | E.SM*DFLDK.S          |        | 2 | 2,0505 | 0,177 | 0,07   |
| 15 | P42892 ECE1_HUMAN   | K.TSSFLDQR.F          |        | 2 | 2,0494 | 0,166 | -0,064 |
| 15 | Q5T069 Q5T069_HUMAN | K.SVPGYKVEEKS#P.-     | S288:  | 2 | 2,0481 | 0,383 | -1,046 |
| 15 | P54652 HSP72_HUMAN  | E.LNADLFR.G           |        | 2 | 2,0472 | 0,178 | 0,287  |
| 15 | P15313 VATB1_HUMAN  | E.IAAQICR.Q           |        | 2 | 2,0468 | 0,092 | -0,513 |
| 15 | Q9BSJ6 FA64A_HUMAN  | R.SLQHQEQLE.D         |        | 2 | 2,0464 | 0,202 | -0,439 |
| 15 | Q16543 CDC37_HUMAN  | K.TFVEKYE.K           |        | 2 | 2,0435 | 0,291 | -0,067 |
| 15 | O14974 MYPT1_HUMAN  | R.YDSLLGR.S           |        | 2 | 2,0426 | 0,142 | 0,814  |
| 15 | Q8IWI9 MGAP_HUMAN   | K.LLTGIKS#PR.S        | S1208: | 2 | 2,0403 | 0,128 | -0,115 |
| 15 | P17275 JUNB_HUMAN   | E.GFADGFVK.A          |        | 2 | 2,039  | 0,205 | 0,508  |
| 15 | P61956 SUMO2_HUMAN  | R.FRFDGQPINE.T        |        | 2 | 2,0388 | 0,085 | -0,299 |
| 15 | Q9P275 UBP36_HUMAN  | K.TFVGEPQR.L          |        | 2 | 2,0369 | 0,251 | -0,457 |
| 15 | Q71RC2 LARP4_HUMAN  | K.EQYVPPRS#PK.-       | S722:  | 2 | 2,0357 | 0,216 | -0,381 |
| 15 | Q8IWB9 TEX2_HUMAN   | R.SFFKVPE.M           |        | 2 | 2,0345 | 0,151 | 0,357  |
| 15 | P28799 GRN_HUMAN    | E.VSCPDGYTCCR.L       |        | 2 | 2,0344 | 0,318 | -1,242 |
| 15 | Q6P2E9 EDC4_HUMAN   | R.GLLPGLLPAPADKLTpk.G |        | 2 | 2,0338 | 0,266 | -0,215 |
| 15 | Q9UQ84 EXO1_HUMAN   | K.FATFLQR.K           |        | 2 | 2,0323 | 0,089 | 0      |
| 15 | P00533 EGFR_HUMAN   | R.TDLHAFE.N           |        | 2 | 2,0316 | 0,202 | 0,513  |
| 15 | P17480 UBF1_HUMAN   | K.YIQDFQRE.K          |        | 2 | 2,0275 | 0,246 | 0,222  |
| 15 | O75582 KS6A5_HUMAN  | E.GFCLQNVDK.A         |        | 2 | 2,0274 | 0,242 | -0,79  |
| 15 | Q8TEX9 IPO4_HUMAN   | E.NAFFDEKE.D          |        | 2 | 2,0274 | 0,154 | -0,061 |
| 15 | Q9Y3D8 KAD6_HUMAN   | E.NNVQILK.W           |        | 2 | 2,0266 | 0,178 | 0,129  |
| 15 | Q9UEY8 ADDG_HUMAN   | K.VNVPEESR.N          |        | 2 | 2,026  | 0,307 | -0,853 |
| 15 | Q96P48 CEND2_HUMAN  | R.YHPLFGNQEE.L        |        | 2 | 2,025  | 0,151 | -0,791 |
| 15 | P52888 THOP1_HUMAN  | R.SCILRPGGSE.D        |        | 2 | 2,0248 | 0,083 | -0,34  |
| 15 | Q8TB72 PUM2_HUMAN   | K.ASPFEEDQNR.D        |        | 2 | 2,0245 | 0,264 | -0,102 |
| 15 | P41567 EIF1_HUMAN   | R.KNICQFLVE.I         |        | 2 | 2,0236 | 0,234 | -0,424 |
| 15 | P21580 TNAP3_HUMAN  | K.VHFLTDPENE.M        |        | 2 | 2,0231 | 0,126 | -0,102 |
| 15 | P49959 MRE11_HUMAN  | E.KNVQLSLLTE.R        |        | 2 | 2,022  | 0,175 | -0,639 |
| 15 | Q96RF0 SNX18_HUMAN  | R.SDLSLGSR.G          |        | 2 | 2,0202 | 0,12  | -0,365 |
| 15 | Q16342 PDCD2_HUMAN  | K.FKTQIALEPE.Q        |        | 2 | 2,0201 | 0,138 | 0      |
| 15 | O75694 NU155_HUMAN  | E.DRM*YDDLSE.L        |        | 2 | 2,0197 | 0,144 | -0,641 |
| 15 | P49327 FAS_HUMAN    | K.YSGTLNLDR.V         |        | 2 | 2,0194 | 0,171 | -0,117 |

|    |                    |                         |        |   |        |       |        |
|----|--------------------|-------------------------|--------|---|--------|-------|--------|
| 15 | Q9UQ35 SRRM2_HUMAN | K.ALPQT#PRPR.S          | T1492: | 2 | 2,0187 | 0,121 | -0,765 |
| 15 | Q10567 AP1B1_HUMAN | K.LHDINAQLVE.D          |        | 2 | 2,0158 | 0,167 | -0,212 |
| 15 | Q8N999 CL029_HUMAN | R.KM*PCVFEVTE.V         |        | 2 | 2,015  | 0,102 | -0,433 |
| 15 | Q9BUQ8 DDX23_HUMAN | K.KLLAILE.Q             |        | 2 | 2,0138 | 0,122 | 0,686  |
| 15 | P33991 MCM4_HUMAN  | R.IAEPSVCGR.C           |        | 2 | 2,0136 | 0,081 | -0,123 |
| 15 | Q9Y608 LRRF2_HUMAN | E.SAGEGPLDVR.L          |        | 2 | 2,0129 | 0,136 | -0,122 |
| 15 | Q5VWQ0 RSBN1_HUMAN | K.FSNFIHEE.H            |        | 2 | 2,0127 | 0,202 | -0,656 |
| 15 | P04049 RAF1_HUMAN  | K.TPVPAQRE.R            |        | 2 | 2,012  | 0,183 | 0      |
| 15 | Q9BZ67 FRMD8_HUMAN | E.GSAGQPGPAER.S         |        | 2 | 2,0105 | 0,157 | 0      |
| 15 | Q9NV70 EXOC1_HUMAN | K.GLDNLYK.K             |        | 2 | 2,0101 | 0,222 | 0,445  |
| 15 | P27824 CALX_HUMAN  | R.KIPNPDFFED.L          |        | 2 | 2,0071 | 0,273 | -0,3   |
| 15 | Q7L311 ARMX2_HUMAN | K.RPFPEIDE.I            |        | 2 | 2,0069 | 0,336 | -0,628 |
| 15 | Q9Y310 CV028_HUMAN | K.KGFVPMN*QVE.G         |        | 2 | 2,0066 | 0,083 | -0,314 |
| 15 | P31946 1433B_HUMAN | D.STLIM*QLLR.D          |        | 2 | 2,0044 | 0,156 | -0,335 |
| 15 | Q29983 MICA_HUMAN  | R.SSQHFYDGE.L           |        | 2 | 2,0037 | 0,19  | -0,495 |
| 15 | P39880 CUX1_HUMAN  | R.RPSSLQSLFGLPE.A       |        | 2 | 2,0003 | 0,168 | -0,426 |
| 15 | Q8WVV9 HNRL_HUMAN  | K.QHSVPSQIFE.L          |        | 2 | 1,9995 | 0,116 | -0,576 |
| 15 | P05556 ITB1_HUMAN  | K.NVLSLTNK.G            |        | 2 | 1,9954 | 0,187 | -0,618 |
| 15 | Q8IZ21 PHAR4_HUMAN | R.RLS#QRPTPEELE.Q       | S590:  | 2 | 1,9941 | 0,112 | -0,397 |
| 15 | P48960 CD97_HUMAN  | R.FFDKVQD.L             |        | 2 | 1,994  | 0,102 | 0,204  |
| 15 | P50991 TCPD_HUMAN  | R.KGGISNILEE.L          |        | 2 | 1,9909 | 0,205 | 0      |
| 15 | Q9NYV4 CD2L7_HUMAN | K.NSGPQGPRRT#PTM*PQEE.A | T1244: | 2 | 1,9907 | 0,096 | -0,062 |
| 15 | Q16891 IMMT_HUMAN  | K.QKGDTPASATAPTE.A      |        | 2 | 1,9906 | 0,116 | -0,089 |
| 15 | Q9C037 TRIM4_HUMAN | K.LHNFLVEEE.D           |        | 2 | 1,99   | 0,119 | 1,62   |
| 15 | O75351 VPS4B_HUMAN | R.SLSNTKPTVNE.H         |        | 2 | 1,9893 | 0,199 | 0      |
| 15 | P13639 EF2_HUMAN   | R.GGGQIIPTAR.R          |        | 2 | 1,9888 | 0,09  | -1,006 |
| 15 | Q12768 STRUM_HUMAN | E.AHVPNFIFDE.F          |        | 2 | 1,9875 | 0,172 | -0,616 |
| 15 | Q13823 NOG2_HUMAN  | K.VHILDTESFE.T          |        | 2 | 1,9834 | 0,268 | -0,103 |
| 15 | Q9Y217 MTMR6_HUMAN | K.TSLCFKE.Q             |        | 2 | 1,9825 | 0,152 | -0,069 |
| 15 | Q96KQ4 ASPP1_HUMAN | E.SLPRPLS#PTK.L         | S671:  | 2 | 1,9821 | 0,17  | -0,622 |
| 15 | Q86TL0 ATG4D_HUMAN | R.AKRPS#SEDFVFL.-       | S467:  | 2 | 1,9811 | 0,233 | -0,331 |
| 15 | Q494U1 PKHN1_HUMAN | D.LTQLHRLS#LE.S         | S488:  | 2 | 1,9809 | 0,366 | -0,284 |
| 15 | P15927 RFA2_HUMAN  | E.GLNFQDLK.N            |        | 2 | 1,9807 | 0,225 | -0,261 |

|    |                     |                   |       |   |        |       |        |
|----|---------------------|-------------------|-------|---|--------|-------|--------|
| 15 | Q96SN8 CK5P2_HUMAN  | R.HVLGLIEDYE.A    |       | 2 | 1,9803 | 0,268 | -0,411 |
| 15 | P25787 PSA2_HUMAN   | E.VKDYLAAlA.-     |       | 2 | 1,9796 | 0,179 | 0,253  |
| 15 | Q9Y4W6 AFG32_HUMAN  | R.KNAPCILFIDE.I   |       | 2 | 1,9791 | 0,089 | -0,462 |
| 15 | P98175 RBM10_HUMAN  | K.LASDDRPS#PPR.G  | S722: | 2 | 1,979  | 0,142 | -0,567 |
| 15 | Q6S8J3 A26CA_HUMAN  | E.TTFNSIMK.S      |       | 2 | 1,977  | 0,128 | 0,453  |
| 15 | Q9UKM9 RALY_HUMAN   | E.AGLPQGEAR.T     |       | 2 | 1,9761 | 0,193 | -0,136 |
| 15 | Q17RV1 Q17RV1_HUMAN | E.FQFGDGSCCK.H    |       | 2 | 1,9739 | 0,103 | 0,467  |
| 15 | Q14192 FHL2_HUMAN   | K.CSLSLVGR.G      |       | 2 | 1,9719 | 0,237 | -0,137 |
| 15 | P30533 AMRP_HUMAN   | E.AEFEEPR.V       |       | 2 | 1,9711 | 0,232 | 0      |
| 15 | Q9Y5K5 UCHL5_HUMAN  | K.HNYLPFIM*E.L    |       | 2 | 1,9697 | 0,101 | -0,31  |
| 15 | Q8NDI1 EHBP1_HUMAN  | K.LGYSYSRD.L      |       | 2 | 1,969  | 0,224 | -0,063 |
| 15 | Q5T5Y3 CAMP1_HUMAN  | R.ALGLTANAR.S     |       | 2 | 1,9668 | 0,125 | -0,138 |
| 15 | Q6PCD5 RFWD3_HUMAN  | K.TLPKQPS#PQK.S   | S266: | 2 | 1,9649 | 0,204 | -0,203 |
| 15 | P00367 DHE3_HUMAN   | K.HGGTIPIVPTAE.F  |       | 2 | 1,9644 | 0,169 | -0,512 |
| 15 | Q9UNN5 FAF1_HUMAN   | R.IRTPSGEFLE.R    |       | 2 | 1,9641 | 0,156 | -0,212 |
| 15 | O94763 RMP_HUMAN    | R.TPADIYR.A       |       | 2 | 1,9639 | 0,103 | 0,219  |
| 15 | P62753 RS6_HUMAN    | R.LSSLRAS#TSKSE.S | S240: | 2 | 1,9633 | 0,155 | -0,453 |
| 15 | P61247 RS3A_HUMAN   | E.RADGYEPPVQE.S   |       | 2 | 1,9613 | 0,146 | -0,194 |
| 15 | P15151 PVR_HUMAN    | E.ATLTCDAR.S      |       | 2 | 1,9589 | 0,408 | 0,067  |
| 15 | Q9H6Y2 WDR55_HUMAN  | R.IRDPEDIVLE.A    |       | 2 | 1,955  | 0,108 | -0,188 |
| 15 | P50613 CDK7_HUMAN   | E.KLDFLGE.G       |       | 2 | 1,9538 | 0,141 | -0,148 |
| 15 | Q9UMS4 PRP19_HUMAN  | K.FIASTGM*DR.S    |       | 2 | 1,9538 | 0,214 | -0,241 |
| 15 | P43034 LIS1_HUMAN   | R.AIADYLR.S       |       | 2 | 1,9536 | 0,131 | 0,445  |
| 15 | O14974 MYPT1_HUMAN  | R.LSSSLDNK.E      |       | 2 | 1,9526 | 0,117 | 0,212  |
| 15 | O00267 SPT5H_HUMAN  | R.HGGFILDEADVD.D  |       | 2 | 1,9499 | 0,316 | -0,568 |
| 15 | P52292 IMA2_HUMAN   | K.FVSFLGR.T       |       | 2 | 1,9498 | 0,154 | 0,222  |
| 15 | Q6P0N0 CN106_HUMAN  | K.LQHTYLCEE.K     |       | 2 | 1,9487 | 0,244 | -0,307 |
| 15 | Q9NWS0 PIHD1_HUMAN  | R.M*QNSDFLRE.L    |       | 2 | 1,948  | 0,154 | -0,211 |
| 15 | Q9UBP9 GULP1_HUMAN  | R.ISFCADDK.T      |       | 2 | 1,9463 | 0,105 | 0,064  |
| 15 | O43709 WBS22_HUMAN  | E.HGGPPELFYDE.T   |       | 2 | 1,9455 | 0,165 | -0,387 |
| 15 | P78527 PRKDC_HUMAN  | E.LFQSSFR.R       |       | 2 | 1,9446 | 0,189 | 0      |
| 15 | Q9UMY1 NOL7_HUMAN   | R.KLLPDTILE.K     |       | 2 | 1,9434 | 0,159 | 0      |
| 15 | P60953 CDC42_HUMAN  | R.LRPLSYPQTD.V    |       | 2 | 1,9432 | 0,302 | -0,718 |



|    |                    |                   |        |   |        |       |        |
|----|--------------------|-------------------|--------|---|--------|-------|--------|
| 15 | Q9UPT9 UBP22_HUMAN | K.ASIKDVLDSE.G    |        | 2 | 1,9411 | 0,279 | 0,227  |
| 15 | P08651 NFIC_HUMAN  | R.SFVGLGPR.D      |        | 2 | 1,9409 | 0,259 | 0,22   |
| 15 | Q9NRY5 F1142_HUMAN | K.THYGLLFE.F      |        | 2 | 1,9393 | 0,206 | 0      |
| 15 | P26639 SYTC_HUMAN  | K.ISGTVNIR.T      |        | 2 | 1,9375 | 0,26  | -0,426 |
| 15 | Q92665 RT31_HUMAN  | E.FAKQLATVNE.Q    |        | 2 | 1,9371 | 0,104 | -0,653 |
| 15 | O14776 TCRG1_HUMAN | R.KLIVAYVDD.L     |        | 2 | 1,9362 | 0,155 | -0,118 |
| 15 | Q96RK0 CIC_HUMAN   | R.VPGQGLNR.G      |        | 2 | 1,9343 | 0,185 | -0,503 |
| 15 | Q8WVV9 HNRL_HUMAN  | R.LNVCVSK.Q       |        | 2 | 1,9333 | 0,3   | 0,893  |
| 15 | Q9BRL6 SFR2B_HUMAN | K.VDNLYR.T        |        | 2 | 1,931  | 0,22  | -0,277 |
| 15 | Q14692 BMS1_HUMAN  | K.AGLSPANCQSDR.V  |        | 2 | 1,9266 | 0,346 | -0,574 |
| 15 | P51970 NDUA8_HUMAN | D.YTQQQLFR.H      |        | 2 | 1,9257 | 0,244 | 0,542  |
| 15 | Q9UGU5 HM2L1_HUMAN | K.ASSVGVLSPQKK.S  | S497:  | 2 | 1,9217 | 0,083 | -0,571 |
| 15 | Q9HB09 B2L12_HUMAN | K.LVRLS#SDSFAR.L  | S242:  | 2 | 1,9189 | 0,389 | -0,183 |
| 15 | Q9UFG5 CS025_HUMAN | R.LQQAGNVLR.Q     |        | 2 | 1,918  | 0,153 | -0,855 |
| 15 | Q9H5V7 IKZF5_HUMAN | R.CHLCPFASAYE.R   |        | 2 | 1,915  | 0,269 | -0,54  |
| 15 | P06737 PYGL_HUMAN  | E.YGIFNQK.I       |        | 2 | 1,9135 | 0,172 | 0,21   |
| 15 | P35568 IRS1_HUMAN  | E.YGSSPCDFR.S     |        | 2 | 1,9108 | 0,337 | 0,448  |
| 15 | P08107 HSP71_HUMAN | R.KFGDPVVQSD.M    |        | 2 | 1,91   | 0,107 | 0,112  |
| 15 | Q96AG4 LRC59_HUMAN | K.AVQADQERE.R     |        | 2 | 1,9092 | 0,122 | -0,117 |
| 15 | Q96PK6 RBM14_HUMAN | R.ASYDDPYK.K      |        | 2 | 1,9041 | 0,107 | -0,254 |
| 15 | Q96HC4 PDLI5_HUMAN | E.GQTFFSK.K       |        | 2 | 1,9031 | 0,152 | 0,449  |
| 15 | Q14789 G0GB1_HUMAN | R.SSSSQTPQLK.V    |        | 2 | 1,9014 | 0,106 | -0,115 |
| 15 | P42345 FRAP_HUMAN  | R.IHGALLILNE.L    |        | 2 | 1,8982 | 0,106 | -0,112 |
| 15 | P38405 GNAL_HUMAN  | K.SKIEDYFPE.Y     |        | 2 | 1,8967 | 0,251 | -0,433 |
| 15 | Q86X29 LSR_HUMAN   | R.SGDLPYDGR.L     |        | 2 | 1,8963 | 0,234 | -0,187 |
| 15 | Q9H6Z4 RANB3_HUMAN | K.FVFGQNM*SER.V   |        | 2 | 1,891  | 0,296 | -0,396 |
| 15 | P31939 PUR9_HUMAN  | K.AFTHTAQYDE.A    |        | 2 | 1,8879 | 0,271 | 0      |
| 15 | Q9Y6C9 MTCH2_HUMAN | R.GNSLFFR.K       |        | 2 | 1,8857 | 0,264 | 0,218  |
| 15 | P57081 WDR4_HUMAN  | K.M*RPGEATLSC.-   |        | 2 | 1,8851 | 0,171 | -0,429 |
| 15 | Q15365 PCBP1_HUMAN | E.TLSQSPQGR.V     |        | 2 | 1,882  | 0,198 | 0      |
| 15 | P21127 CD2L1_HUMAN | K.YLPALQGCR.S     |        | 2 | 1,8803 | 0,091 | 0,113  |
| 15 | P38398 BRCA1_HUMAN | R.SSPS#KCPSLDDR.W | S1499: | 2 | 1,8795 | 0,091 | -0,427 |
| 15 | Q12906 ILF3_HUMAN  | R.IFVNDDR.H       |        | 2 | 1,8784 | 0,166 | -0,069 |

|    |                    |                       |       |   |        |       |        |
|----|--------------------|-----------------------|-------|---|--------|-------|--------|
| 15 | Q15477 SKIV2_HUMAN | E.AVGQPGGPR.G         |       | 2 | 1,8783 | 0,272 | 0,291  |
| 15 | Q15056 IF4H_HUMAN  | K.FKGFCYVE.F          |       | 2 | 1,8781 | 0,184 | -0,116 |
| 15 | P35527 K1C9_HUMAN  | R.M*TLDDFR.I          |       | 2 | 1,878  | 0,319 | -0,467 |
| 15 | Q9Y4H2 IRS2_HUMAN  | E.YGSSPGDLR.A         |       | 2 | 1,8778 | 0,19  | -0,577 |
| 15 | Q9BY89 K1671_HUMAN | K.CISLFRE.D           |       | 2 | 1,8776 | 0,087 | 0,264  |
| 15 | Q92622 K0226_HUMAN | E.SQLSSVLR.R          |       | 2 | 1,8769 | 0,093 | -0,685 |
| 15 | Q9Y2B0 CNPY2_HUMAN | E.LDLQGIR.I           |       | 2 | 1,875  | 0,132 | 0,674  |
| 15 | Q08334 I10R2_HUMAN | E.CDFSSLSK.Y          |       | 2 | 1,8747 | 0,179 | 0,129  |
| 15 | Q9Y6M7 S4A7_HUMAN  | K.VDM*NFM*R.K         |       | 2 | 1,8747 | 0,138 | -0,129 |
| 15 | Q96FW1 OTUB1_HUMAN | R.AFGFSHLE.A          |       | 2 | 1,8746 | 0,082 | 0,134  |
| 15 | Q6UW56 APR3_HUMAN  | K.GDLANTFR.G          |       | 2 | 1,8745 | 0,155 | 0,136  |
| 15 | Q13526 PIN1_HUMAN  | R.GDLGAFSR.G          |       | 2 | 1,8726 | 0,219 | 0,296  |
| 15 | Q6NXE6 ARMC6_HUMAN | E.ADLTCGIR.C          |       | 2 | 1,8719 | 0,112 | -0,676 |
| 15 | Q5M775 SPEC1_HUMAN | K.T#PRSPLSGIPVR.T     | T844: | 2 | 1,8715 | 0,267 | 0,09   |
| 15 | Q9Y446 PKP3_HUMAN  | R.LGPGGLDDR.Y         |       | 2 | 1,8712 | 0,087 | 0,339  |
| 15 | O95071 UBR5_HUMAN  | R.RSGTISTSAAAAAAALE.A |       | 2 | 1,8711 | 0,16  | -0,631 |
| 15 | Q12802 AKP13_HUMAN | E.VPANCSVLR.S         |       | 2 | 1,8703 | 0,331 | -1,201 |
| 15 | Q15056 IF4H_HUMAN  | R.DDFNSGFR.D          |       | 2 | 1,8698 | 0,1   | 0,191  |
| 15 | O14776 TCRG1_HUMAN | K.VYYYNAR.T           |       | 2 | 1,8696 | 0,245 | -0,257 |
| 15 | P12268 IMDH2_HUMAN | R.GM*GSLDAM*DK.H      |       | 2 | 1,8665 | 0,17  | -0,346 |
| 15 | Q99590 SFRIP_HUMAN | E.IIQTVDR.Q           |       | 2 | 1,8662 | 0,126 | 0,578  |
| 15 | Q15398 DLG7_HUMAN  | D.AGFFRVES#PVK.L      | S618: | 2 | 1,8651 | 0,103 | -0,371 |
| 15 | P61160 ARP2_HUMAN  | K.VGGERFEAPE.A        |       | 2 | 1,8646 | 0,15  | -0,336 |
| 15 | Q15003 CND2_HUMAN  | E.YSYFSR.T            |       | 2 | 1,8644 | 0,308 | 0,133  |
| 15 | P46777 RL5_HUMAN   | K.QFSQYIK.N           |       | 2 | 1,8629 | 0,107 | -0,601 |
| 15 | Q13501 SQSTM_HUMAN | R.NM*VHPNVICD.G       |       | 2 | 1,8623 | 0,084 | -0,1   |
| 15 | O43719 HTSF1_HUMAN | K.APEPTDAR.K          |       | 2 | 1,8614 | 0,117 | 0,285  |
| 15 | A0AVT1 UBA6_HUMAN  | R.YYFSHDTD.-          |       | 2 | 1,8607 | 0,329 | 0,233  |
| 15 | Q96EU6 CF153_HUMAN | E.LQSQVGTK.T          |       | 2 | 1,8597 | 0,171 | 0,283  |
| 15 | Q02447 SP3_HUMAN   | K.GIHSSSTVLASVE.A     |       | 2 | 1,8579 | 0,095 | -0,758 |
| 15 | Q96T23 RSF1_HUMAN  | E.CQFDDNLK.F          |       | 2 | 1,8548 | 0,195 | -0,352 |
| 15 | P18615 NELFE_HUMAN | R.KGNTLYVYGE.D        |       | 2 | 1,8548 | 0,183 | 0,533  |
| 15 | Q92499 DDX1_HUMAN  | K.DNTRPGANSPE.M       |       | 2 | 1,8503 | 0,233 | -0,316 |

|    |                    |                     |       |   |        |       |        |
|----|--------------------|---------------------|-------|---|--------|-------|--------|
| 15 | P54886 P5CS_HUMAN  | R.NLNGTLHE.L        |       | 2 | 1,8484 | 0,122 | -0,408 |
| 15 | O15027 SC16A_HUMAN | E.TTVSQNYR.G        |       | 2 | 1,8476 | 0,345 | 0,252  |
| 15 | P60660 MYL6_HUMAN  | E.AFQLFDR.T         |       | 2 | 1,8463 | 0,102 | -0,34  |
| 15 | Q9H1B7 EAP1_HUMAN  | K.FCFPCSR.E         |       | 2 | 1,8453 | 0,163 | -0,626 |
| 15 | P14625 ENPL_HUMAN  | K.IYFM*AGSSR.K      |       | 2 | 1,8427 | 0,141 | -0,582 |
| 15 | P62701 RS4X_HUMAN  | R.LTIAEER.D         |       | 2 | 1,842  | 0,235 | 0,22   |
| 15 | Q8IYS1 P20D2_HUMAN | R.KLGIEFISE.D       |       | 2 | 1,8402 | 0,127 | 0      |
| 15 | P40227 TCPZ_HUMAN  | E.TDTSLIR.G         |       | 2 | 1,8385 | 0,082 | 0,151  |
| 15 | P07910 HNRPC_HUMAN | R.M*YSYPAR.V        |       | 2 | 1,8369 | 0,167 | -0,067 |
| 15 | Q7LBR1 CHM1B_HUMAN | K.NQAVNFLR.M        |       | 2 | 1,8361 | 0,087 | -0,063 |
| 15 | Q92616 GCN1L_HUMAN | R.GM*GFLM*R.H       |       | 2 | 1,835  | 0,186 | 0,145  |
| 15 | P17480 UBF1_HUMAN  | K.RPVSAM*FIFSE.E    |       | 2 | 1,8327 | 0,1   | 0      |
| 15 | P08107 HSP71_HUMAN | K.VQVSYKGE.T        |       | 2 | 1,8326 | 0,165 | -0,536 |
| 15 | Q9Y2H6 FND3A_HUMAN | R.RVVVVPQAPE.F      |       | 2 | 1,8321 | 0,12  | -0,335 |
| 15 | Q5H9R7 SAPS3_HUMAN | E.FTSSLS#TKDSL.R.S  | S731: | 2 | 1,8312 | 0,376 | -0,515 |
| 15 | P35908 K22E_HUMAN  | K.FASFDK.V          |       | 2 | 1,8303 | 0,15  | 0,074  |
| 15 | Q12996 CSTF3_HUMAN | K.KLEENPYDLD.A      |       | 2 | 1,8279 | 0,127 | -0,197 |
| 15 | P09496 CLCA_HUMAN  | R.LCDFNPK.S         |       | 2 | 1,8278 | 0,217 | -0,478 |
| 15 | P38159 HNRPG_HUMAN | R.DSYSSRS#DLYSSGR.D | S332: | 2 | 1,8275 | 0,241 | -0,349 |
| 15 | P08670 VIME_HUMAN  | R.SYVTTSTR.T        |       | 2 | 1,8233 | 0,258 | 0      |
| 15 | P24928 RPB1_HUMAN  | R.KLTM*EQIAE.K      |       | 2 | 1,82   | 0,089 | -0,339 |
| 15 | Q15022 SUZ12_HUMAN | R.RLQLLDGEYE.V      |       | 2 | 1,8145 | 0,128 | -0,79  |
| 15 | Q9UK61 CC063_HUMAN | K.FYIHEEEE.S        |       | 2 | 1,8081 | 0,083 | -0,334 |
| 15 | O75122 CLAP2_HUMAN | R.NGSIPTYM*R.Q      |       | 2 | 1,806  | 0,1   | 0      |
| 15 | P08670 VIME_HUMAN  | R.QVDQLTNDK.A       |       | 2 | 1,8054 | 0,158 | -0,575 |
| 15 | Q9BWT7 CAR10_HUMAN | R.GCGLDFLNR.S       |       | 2 | 1,8023 | 0,179 | -0,348 |
| 15 | Q9H9Q2 CSN7B_HUMAN | E.VDFCIGR.D         |       | 2 | 1,8022 | 0,176 | -0,07  |
| 15 | Q09666 AHNK_HUMAN  | K.FSM*PGFK.A        |       | 2 | 1,8016 | 0,169 | 0,441  |
| 15 | P62258 1433E_HUMAN | E.ILNSPDR.A         |       | 2 | 1,8015 | 0,142 | 0      |
| 15 | Q9NQ92 CQ079_HUMAN | R.GTQSIPNDSPAR.G    |       | 2 | 1,8013 | 0,419 | -0,393 |
| 15 | P42166 LAP2A_HUMAN | E.KSGIQPLCPE.R      |       | 2 | 1,7956 | 0,237 | -0,648 |
| 15 | P60953 CDC42_HUMAN | K.QKPITPETAE.K      |       | 2 | 1,7943 | 0,159 | -0,219 |
| 15 | Q86XL3 ANKL2_HUMAN | K.TAPLFSNDR.L       |       | 2 | 1,7939 | 0,275 | -0,179 |

|    |                     |                  |        |   |        |       |        |
|----|---------------------|------------------|--------|---|--------|-------|--------|
| 15 | Q9P2D0 IBTK_HUMAN   | E.GSYAGVGSPPR.D  |        | 2 | 1,7938 | 0,307 | -0,577 |
| 15 | P78527 PRKDC_HUMAN  | E.SLNHLLYDE.F    |        | 2 | 1,7929 | 0,131 | -0,221 |
| 15 | P05556 ITB1_HUMAN   | K.IRPLGFTEE.V    |        | 2 | 1,7927 | 0,088 | -0,574 |
| 15 | P04075 ALDOA_HUMAN  | R.CVLKIGE.H      |        | 2 | 1,7914 | 0,101 | 0,819  |
| 15 | Q99460 PSMD1_HUMAN  | K.YKQAIGIALE.T   |        | 2 | 1,7878 | 0,163 | -1,213 |
| 15 | P40855 PEX19_HUMAN  | E.SALDDFDK.A     |        | 2 | 1,7876 | 0,249 | 0,268  |
| 15 | O60303 K0556_HUMAN  | E.LSVNLQR.K      |        | 2 | 1,7821 | 0,146 | 0,073  |
| 15 | O15355 PPM1G_HUMAN  | E.VALYCAK.Y      |        | 2 | 1,7803 | 0,218 | 0,296  |
| 15 | O00629 IMA4_HUMAN   | R.NVPHEDEICE.D   |        | 2 | 1,779  | 0,256 | -0,987 |
| 15 | Q9HAW4 CLSPN_HUMAN  | R.SPSPGLFR.A     |        | 2 | 1,7738 | 0,187 | 1,063  |
| 15 | Q92841 DDX17_HUMAN  | E.EANQAINPK.L    |        | 2 | 1,7727 | 0,23  | 0,062  |
| 15 | P49454 CENPF_HUMAN  | E.KAQLQLGLDE.A   |        | 2 | 1,7705 | 0,158 | -0,547 |
| 15 | Q965T2 IWS1_HUMAN   | K.HM*DFLSDFE.M   |        | 2 | 1,7683 | 0,126 | -0,316 |
| 15 | P18887 XRCC1_HUMAN  | K.HFFLYGEFPGDE.R |        | 2 | 1,7673 | 0,094 | -0,586 |
| 15 | P31689 DNJA1_HUMAN  | K.NVICDKCE.G     |        | 2 | 1,7655 | 0,268 | -0,47  |
| 15 | Q9UBT2 SAE2_HUMAN   | E.VVGDAPEK.V     |        | 2 | 1,7645 | 0,242 | 0,599  |
| 15 | Q8IXH7 NELFD_HUMAN  | R.KADSIFTEE.G    |        | 2 | 1,7638 | 0,118 | 0,939  |
| 15 | P53597 SUCA_HUMAN   | K.QGTFHSQQALE.Y  |        | 2 | 1,7564 | 0,158 | -0,098 |
| 15 | O00299 CLIC1_HUMAN  | R.YLSNAYAR.E     |        | 2 | 1,7561 | 0,091 | 0,191  |
| 15 | Q03164 HRX_HUMAN    | R.SPTVPSQNPSR.L  |        | 2 | 1,7515 | 0,15  | -0,104 |
| 15 | Q8IZZ6 Q8IZZ6_HUMAN | K.M*LTVAS#GSVK.A | S12:   | 2 | 1,7492 | 0,088 | -1,344 |
| 15 | P30837 AL1B1_HUMAN  | R.DRVYLASLE.T    |        | 2 | 1,7457 | 0,126 | 1,373  |
| 15 | Q8IWC1 MA7D3_HUMAN  | K.TYFNGDLK.N     |        | 2 | 1,7435 | 0,114 | 0,573  |
| 15 | P78527 PRKDC_HUMAN  | K.RLS#FAVPFRE.M  | S893:  | 2 | 1,7421 | 0,312 | -0,375 |
| 15 | P07355 ANXA2_HUMAN  | D.IAFAYQR.R      |        | 2 | 1,7403 | 0,257 | 0,14   |
| 15 | Q5SW79 CE170_HUMAN  | R.LVPSDKFS#PR.I  | S1198: | 2 | 1,7386 | 0,287 | -0,597 |
| 15 | P51116 FXR2_HUMAN   | E.DSVQVPR.N      |        | 2 | 1,7354 | 0,104 | -0,381 |
| 15 | Q92499 DDX1_HUMAN   | K.LNLSQVR.F      |        | 2 | 1,7321 | 0,086 | 0,294  |
| 15 | Q9GZL7 WDR12_HUMAN  | R.YSPTTSHVGA.-   |        | 2 | 1,7313 | 0,273 | 0,179  |
| 15 | Q9NTK5 OLA1_HUMAN   | K.FNTPQQPK.K     |        | 2 | 1,7277 | 0,203 | -0,445 |
| 15 | Q14978 NOLC1_HUMAN  | R.VADNSFDAK.R    |        | 2 | 1,7228 | 0,125 | -0,883 |
| 15 | Q9UKY7 CDV3_HUMAN   | E.VDYSGLR.V      |        | 2 | 1,7227 | 0,174 | 0,226  |
| 15 | Q9H4L7 SMRCD_HUMAN  | E.SQGLPTM*AR.R   |        | 2 | 1,7116 | 0,224 | -0,687 |

|    |                    |                   |       |   |        |       |        |
|----|--------------------|-------------------|-------|---|--------|-------|--------|
| 15 | Q13442 HAP28_HUMAN | R.KGVEGLIDIE.N    |       | 2 | 1,711  | 0,083 | -0,114 |
| 15 | Q8IY67 RAVR1_HUMAN | E.VHDLLSDYE.L     |       | 2 | 1,707  | 0,107 | -0,224 |
| 15 | P29692 EF1D_HUMAN  | E.QM*NGPVAGASR.Q  |       | 2 | 1,7066 | 0,195 | -0,332 |
| 15 | P78310 CXAR_HUMAN  | K.VAAPNLSR.M      |       | 2 | 1,699  | 0,085 | 0,442  |
| 15 | Q13136 LIPA1_HUMAN | R.VGSGSLDNLGR.F   |       | 2 | 1,6959 | 0,259 | -0,227 |
| 15 | P24666 PPAC_HUMAN  | E.TVYQQCVR.C      |       | 2 | 1,6884 | 0,204 | -0,579 |
| 15 | Q08752 PPID_HUMAN  | K.NIGNTFFK.S      |       | 2 | 1,6771 | 0,146 | -0,583 |
| 15 | P06733 ENOA_HUMAN  | K.YDLDFK.S        |       | 2 | 1,6748 | 0,146 | -0,228 |
| 15 | P14618 KPYM_HUMAN  | E.VENGGSLGSK.K    |       | 2 | 1,6698 | 0,179 | 0,129  |
| 15 | Q02790 FKBP4_HUMAN | K.FSFDLGG.G       |       | 2 | 1,6673 | 0,126 | 0,225  |
| 15 | P09543 CN37_HUMAN  | E.DLAAYCR.R       |       | 2 | 1,6647 | 0,145 | 0,211  |
| 15 | P38919 IF4A3_HUMAN | K.FM*TDPIR.I      |       | 2 | 1,6638 | 0,163 | 0,068  |
| 15 | P07355 ANXA2_HUMAN | K.SALSGHLE.T      |       | 2 | 1,6622 | 0,237 | 0,525  |
| 15 | P55196 AFAD_HUMAN  | K.SAYASGTTAK.I    |       | 2 | 1,6563 | 0,229 | -0,064 |
| 15 | P53396 ACLY_HUMAN  | K.SINNPDM*R.V     |       | 2 | 1,6533 | 0,139 | -0,19  |
| 15 | O94906 PRP6_HUMAN  | R.NTLM*DM*R.L     |       | 2 | 1,6512 | 0,138 | 0,067  |
| 15 | P08651 NFIC_HUMAN  | R.TLPSTSSSGSK.R   |       | 2 | 1,6421 | 0,355 | 0      |
| 15 | Q15185 TEBP_HUMAN  | R.SILCCLR.K       |       | 2 | 1,6341 | 0,174 | -1,72  |
| 15 | Q99439 CNN2_HUMAN  | R.NFDDATM*K.A     |       | 2 | 1,6289 | 0,154 | 0      |
| 15 | Q13885 TBB2A_HUMAN | K.NM*M*AACDPR.H   |       | 2 | 1,6253 | 0,11  | -0,111 |
| 15 | Q01167 FOXK2_HUMAN | R.TPLGPLSSR.S     |       | 2 | 1,6236 | 0,123 | -0,131 |
| 15 | P13639 EF2_HUMAN   | K.SDPVVSYSR.E     |       | 2 | 1,6206 | 0,089 | -1,19  |
| 15 | O60678 ANM3_HUMAN  | K.QQTPCLFCNR.L    |       | 2 | 1,6187 | 0,313 | 0      |
| 15 | Q14683 SMC1A_HUMAN | R.ISSIYAR.E       |       | 2 | 1,6113 | 0,197 | 0,753  |
| 15 | P13639 EF2_HUMAN   | E.SFGFTADLR.S     |       | 2 | 1,6097 | 0,122 | -0,241 |
| 15 | P35222 CTNB1_HUMAN | E.LTSSLFR.T       |       | 2 | 1,6087 | 0,124 | 0      |
| 15 | Q8N556 AFAP1_HUMAN | K.SQAAPGSSPCR.G   |       | 2 | 1,6026 | 0,243 | -0,327 |
| 15 | P78344 IF4G2_HUMAN | K.AFLDNGPK.T      |       | 2 | 1,6021 | 0,151 | 0,354  |
| 15 | Q99426 TBCB_HUMAN  | E.LYGVDDK.F       |       | 2 | 1,6007 | 0,158 | 0,151  |
| 15 | P04843 RPN1_HUMAN  | R.QPDSGISSIR.S    |       | 2 | 1,5966 | 0,405 | -0,691 |
| 15 | Q9BST9 RTKN_HUMAN  | R.SVAPLPPQRS#PR.T | S543: | 2 | 1,5909 | 0,189 | -0,264 |
| 15 | P19338 NUCL_HUMAN  | K.VVVS#PTKK.V     | S67:  | 2 | 1,5863 | 0,129 | -0,13  |
| 15 | Q8N9T8 KRI1_HUMAN  | K.DATFYNR.T       |       | 2 | 1,5829 | 0,139 | 0,069  |

|    |                      |                      |        |   |        |       |        |
|----|----------------------|----------------------|--------|---|--------|-------|--------|
| 15 | O43290 SNUT1_HUMAN   | E.LM*DFER.D          |        | 2 | 1,5798 | 0,118 | 0,59   |
| 15 | Q9UMZ2 SYNG_HUMAN    | K.QDLPTAER.S         |        | 2 | 1,5772 | 0,09  | 0,131  |
| 15 | O75864 K1986_HUMAN   | R.ISVSSPGR.G         |        | 2 | 1,5766 | 0,132 | 0,608  |
| 15 | P39880 CUX1_HUMAN    | E.LSLTGASR.S         |        | 2 | 1,5756 | 0,151 | -1,212 |
| 15 | Q86W56 PARG_HUMAN    | E.QFSNANIDR.S        |        | 2 | 1,5667 | 0,187 | -0,229 |
| 15 | Q7RTX8 HIN1L_HUMAN   | K.SLNPAVYR.N         |        | 2 | 1,5646 | 0,131 | -0,464 |
| 15 | Q8TF42 UBS3B_HUMAN   | K.IRVEPGLFE.W        |        | 2 | 1,5553 | 0,099 | -0,23  |
| 15 | Q13873 BMPR2_HUMAN   | K.VFSFANR.Q          |        | 2 | 1,5553 | 0,241 | 0,798  |
| 15 | Q7KZF4 SND1_HUMAN    | K.YTIENPR.H          |        | 2 | 1,5552 | 0,25  | -0,478 |
| 15 | P30837 AL1B1_HUMAN   | R.KVGNPFELD.T        |        | 2 | 1,5331 | 0,182 | -0,06  |
| 15 | P35527 K1C9_HUMAN    | R.MTLDDFR.I          |        | 2 | 1,5267 | 0,13  | -0,068 |
| 15 | Q9BTV5 FSD1_HUMAN    | R.TASPINSR.G         |        | 2 | 1,5224 | 0,156 | -0,481 |
| 15 | Q9UEW8 STK39_HUMAN   | R.TPDIAQR.A          |        | 2 | 1,5174 | 0,151 | 0,381  |
| 15 | O00541 PESC_HUMAN    | E.GDYVPPEK.L         |        | 2 | 1,5138 | 0,195 | 0,337  |
| 15 | Q96ST2 IWS1_HUMAN    | R.M*NSTGGQT#PRRDLE.K | T725:  | 2 | 1,5112 | 0,174 | -0,368 |
| 15 | P06748 NPM_HUMAN     | K.M*SVQPTVSLGGFE.I   |        | 2 | 1,5092 | 0,108 | -0,357 |
| 15 | P34931 HS71L_HUMAN   | K.ITITNDK.G          |        | 2 | 1,5001 | 0,095 | 0,53   |
| 15 | P38159 HNRPG_HUMAN   | R.GPPPSYGGSSR.Y      |        | 2 | 1,4785 | 0,083 | -0,345 |
| 15 | P49757 NUMB_HUMAN    | R.GFPALSQK.M         |        | 2 | 1,4767 | 0,228 | 0,072  |
| 15 | Q09666 AHNK_HUMAN    | E.SDFGINLK.G         |        | 2 | 1,4758 | 0,115 | 0,068  |
| 15 | P31949 S10AB_HUMAN   | D.GYNYTLK.T          |        | 2 | 1,4582 | 0,208 | 0,193  |
| 15 | Q14677 EPN4_HUMAN    | K.SAFPFSDK.L         |        | 2 | 1,4557 | 0,188 | 0,068  |
| 15 | Q8TCT7 PSL1_HUMAN    | K.ASFLQLR.N          |        | 2 | 1,4428 | 0,088 | 0,219  |
| 15 | Q9NYL9 TMOD3_HUMAN   | K.STTGPFDR.H         |        | 2 | 1,4339 | 0,256 | -0,846 |
| 15 | P04843 RPN1_HUMAN    | R.YDYQRQPD.S         |        | 2 | 1,4306 | 0,281 | 0      |
| 15 | Q5SW79 CE170_HUMAN   | E.FDDSTPGK.V         |        | 2 | 1,4237 | 0,141 | 0      |
| 15 | P02545 LMNA_HUMAN    | R.LSPSPTSQR.S        |        | 2 | 1,4151 | 0,083 | -0,063 |
| 15 | P60903 S10AA_HUMAN   | K.DLDQCR.D           |        | 2 | 1,4075 | 0,153 | 0,605  |
| 15 | Q9Y248 PSF2_HUMAN    | R.VSADSFVR.Q         |        | 2 | 1,383  | 0,136 | 0,554  |
| 15 | Q9H6F5 CCD86_HUMAN   | R.AGLGS#PERPPK.T     | S58:   | 2 | 1,3763 | 0,238 | -0,718 |
| 15 | Q9Y2G3 AT11B_HUMAN   | R.TLCIAYR.K          |        | 2 | 1,3528 | 0,209 | -0,748 |
| 15 | ##O94916 NFAT5_HUMAN | K.KKS#GAIGIRAEVD.A   | S1128: | 2 | 1,3497 | 0,314 | -0,514 |
| 15 | Q9BZ23 PANK2_HUMAN   | R.DRLGS#YSGPTSVSR.Q  | S189:  | 2 | 1,3494 | 0,363 | -1,015 |

|    |                    |                                         |            |   |        |       |        |
|----|--------------------|-----------------------------------------|------------|---|--------|-------|--------|
| 15 | Q13242 SFRS9_HUMAN | R.DSPYQSR.G                             |            | 2 | 1,3328 | 0,165 | 0,215  |
| 15 | Q9ULC8 ZDHC8_HUMAN | R.SFS#PVLGPRPR.E                        | S526:      | 2 | 1,3244 | 0,123 | -0,094 |
| 15 | Q8NDI1 EHBP1_HUMAN | E.SNPFYEPK.S                            |            | 2 | 1,3175 | 0,13  | -0,186 |
| 15 | O60716 CTND1_HUMAN | R.GSLASLDS#LRK.G                        | S352:      | 2 | 1,3077 | 0,184 | -0,199 |
| 15 | Q96JN2 CC136_HUMAN | E.LQEKYKASQK.E                          |            | 2 | 1,3004 | 0,12  | -0,499 |
| 15 | Q99704 DOK1_HUMAN  | D.NPPKLS#ALE.M                          | S136:      | 2 | 1,295  | 0,09  | -1,861 |
| 15 | P33991 MCM4_HUMAN  | R.ATPAQTPR.S                            |            | 2 | 1,2711 | 0,135 | -0,145 |
| 15 | Q9NPR2 SEM4B_HUMAN | R.VRLGS#EIRDSVV.-                       | S825:      | 2 | 1,1956 | 0,325 | -0,433 |
| 15 | O43707 ACTN4_HUMAN | E.TAT#LSDIK.A                           | T445:      | 2 | 1,1901 | 0,086 | -1,97  |
| 15 | Q8ND56 LS14A_HUMAN | R.SS#PQLDPLRK.S                         | S183:      | 2 | 1,0205 | 0,088 | 0      |
| 16 | Q9UER7 DAXX_HUMAN  | R.LQGTSSHSADTPEASLDSGEGPSGM*ASQGCPASR.A |            | 3 | 8,1368 | 0,632 | 0,213  |
| 16 | P15408 FOSL2_HUMAN | R.SGGGSVAVVVKQEPLEEDSPSSSSAGLDK.A       |            | 3 | 6,8795 | 0,491 | 0,064  |
| 16 | Q8TEW0 PARD3_HUMAN | R.RISHS#LYSGIEGLDES#PSR.N               | S717:S728: | 3 | 6,1807 | 0,487 | -0,162 |
| 16 | Q96SU4 OSBL9_HUMAN | R.LIDSSGSASVLTHSSSGNS#LKRPDTE.S         | S329:      | 3 | 5,8165 | 0,6   | -0,129 |
| 16 | Q53EZ4 CEP55_HUMAN | E.KVAASPKS#PTAALNES#LVECPK.C            | S428:S436: | 3 | 5,6601 | 0,448 | 0,223  |
| 16 | Q14C86 GAPD1_HUMAN | E.LPPAAAIGATSLVAAPHSSSS#SPSKDSSRGE.T    | S949:      | 3 | 5,5458 | 1     | 0,121  |
| 16 | P48643 TCPE_HUMAN  | D.SVLVDIKDTEPLIQTAK.T                   |            | 2 | 5,5381 | 0,495 | -0,261 |
| 16 | Q9ULT8 HECD1_HUMAN | E.GHDSLSVGS#FEEDSKSE.F                  | S2320:     | 2 | 5,4108 | 0,539 | -0,581 |
| 16 | Q9P2B4 CT2NL_HUMAN | R.FTSQQGPIKPVSPNSSPFGTDYR.N             |            | 3 | 5,3835 | 0,402 | -0,51  |
| 16 | P19838 NFKB1_HUMAN | E.VIQAASS#PVKTTSQLHSLPLSPASTR.Q         | S893:      | 3 | 5,3227 | 0,419 | 0,067  |
| 16 | Q16531 DDB1_HUMAN  | E.VQDTSGGTALRPSASTQALSSSVSSSK.L         |            | 3 | 5,3124 | 0,529 | -0,203 |
| 16 | Q9H7N4 SFR19_HUMAN | R.AARPPPAASATPTAQPLQPPAPR.A             |            | 3 | 5,2952 | 0,456 | -0,155 |
| 16 | Q9UK76 HN1_HUMAN   | R.RNS#SEASSGDFLDLKG.G                   | S87:       | 2 | 5,2866 | 0,539 | -0,193 |
| 16 | P30405 PIF_HUMAN   | K.GSGDPSSSSSGNPLVYLDVDANGKPLGR.V        |            | 3 | 5,282  | 0,485 | 0      |
| 16 | Q9P2J5 SYLC_HUMAN  | E.DKGTGVVTSVPSDSPDDIAALR.D              |            | 2 | 5,271  | 0,494 | 0,111  |
| 16 | P35606 COPB2_HUMAN | R.STAQQELDGKPAS#PTPVIVASHTANKEE.K       | S859:      | 3 | 5,2114 | 0,472 | 0,245  |
| 16 | P46013 KI67_HUMAN  | K.M*KTPVQYSQQNS#PQK.H                   | S357:      | 3 | 5,1973 | 0,319 | -0,644 |
| 16 | O95336 6PGL_HUMAN  | R.ILEDQEENPLPAALVQPHTGK.L               |            | 3 | 5,1554 | 0,385 | 0,159  |
| 16 | Q6AI12 ANR40_HUMAN | R.DHTSLALVQNGDVSAPSAILR.T               |            | 3 | 5,1206 | 0,428 | -0,085 |
| 16 | Q5T5Y3 CAMP1_HUMAN | R.SIS#KDSLASNIVNLTPQNQPHTATK.S          | S500:      | 3 | 5,113  | 0,436 | -0,064 |
| 16 | P12270 TPR_HUMAN   | E.AM*QSEGPVEHVVPVFGSTSGSVR.S            |            | 3 | 5,0843 | 0,45  | 0,08   |
| 16 | Q15459 SF3A1_HUMAN | K.ASKPLPPAPAPDEYLVSPITGEK.I             |            | 3 | 5,0789 | 0,495 | -0,462 |
| 16 | Q9Y4P1 ATG4B_HUMAN | E.QQPSHLACPDVNLNLSLSDSDVER.L            |            | 3 | 5,0399 | 0,377 | 0      |

|    |                     |                                    |              |   |        |       |        |
|----|---------------------|------------------------------------|--------------|---|--------|-------|--------|
| 16 | Q99592 ZN238_HUMAN  | R.LPSDSAGIPQAGGAEAPHATAAGK.T       |              | 3 | 5,035  | 0,537 | -0,492 |
| 16 | P36507 MP2K2_HUMAN  | R.RKPVLPALTINPTIAEGPS#PTSE.G       | S23:         | 3 | 5,0134 | 0,384 | -0,296 |
| 16 | Q8N1F8 S11IP_HUMAN  | E.TSGGPDLSDSLSSGGVVTQPLLHK.V       |              | 3 | 4,9531 | 0,514 | -0,311 |
| 16 | O60658 PDE8A_HUMAN  | K.DDDPHANDLVGGLM*SDGLR.R           |              | 3 | 4,9497 | 0,281 | -0,273 |
| 16 | Q8N6H7 ARFG2_HUMAN  | K.YKDNPFSLGES#FGSR.W               | S368:        | 3 | 4,9461 | 0,353 | -0,103 |
| 16 | Q99575 POP1_HUMAN   | E.SRVQAYEEPSVAS#SPNGKE.S           | S729:        | 3 | 4,9397 | 0,354 | -0,173 |
| 16 | P40189 IL6RB_HUMAN  | E.DLQLVDHVDGGDGILPR.Q              |              | 2 | 4,9326 | 0,526 | -0,201 |
| 16 | Q5T5Y3 CAMP1_HUMAN  | K.DSLASNIVNLTPQNQPHTATK.S          |              | 3 | 4,9321 | 0,49  | -0,078 |
| 16 | P04406 G3P_HUMAN    | K.RVIISAPSADAPM*FVM*GVNHE.K        |              | 3 | 4,9288 | 0,398 | -0,241 |
| 16 | P06744 G6PI_HUMAN   | E.LDGSAQVTSHDASTNGLINFIK.Q         |              | 3 | 4,9113 | 0,216 | -0,08  |
| 16 | Q9UQ35 SRRM2_HUMAN  | R.SSGHSSSELS#PDAVEK.A              | S1387:       | 2 | 4,9036 | 0,428 | -0,503 |
| 16 | Q9H0D6 XRN2_HUMAN   | R.M*QNNSSPSISPNSTSDGSPSPLGGIKR.K   |              | 3 | 4,9033 | 0,573 | 0      |
| 16 | Q6R327 RICTR_HUMAN  | E.ALASPAKDVLFDTITM*K.A             |              | 3 | 4,8848 | 0,366 | -0,472 |
| 16 | P46100 ATRX_HUMAN   | E.KCGLGQENS#DNEHLVENE.V            | S634:        | 2 | 4,8612 | 0,495 | 0,113  |
| 16 | P28290 SSFA2_HUMAN  | E.VQSTEGEAPHVPATYQLGLTK.S          |              | 2 | 4,8593 | 0,573 | -0,11  |
| 16 | Q05682 CALD1_HUMAN  | E.KGNVFSPTAAGT#PNKE.T              | T730:        | 2 | 4,8485 | 0,5   | 0,273  |
| 16 | Q05209 PTN12_HUMAN  | R.KTVSLTPSPTTQVETPDLVDHDNTS#PLFR.T | S588:        | 3 | 4,8333 | 0,529 | 0,447  |
| 16 | Q15018 K0157_HUMAN  | R.SVFM*PRPQAVGSSNYASTSAGLK.Y       |              | 3 | 4,8323 | 0,422 | 0,154  |
| 16 | P49792 RBP2_HUMAN   | E.DALDDSVSSSVHASPLASS#PVRK.N       | S2251:       | 3 | 4,8154 | 0,414 | 0,954  |
| 16 | Q9UK76 HN1_HUMAN    | R.RNS#SEASSGDFLDLK.G               | S87:         | 2 | 4,8133 | 0,496 | -0,215 |
| 16 | Q9UK76 HN1_HUMAN    | E.EKPVPAAPVPSVPAPVPSR.R            |              | 3 | 4,8116 | 0,38  | -0,089 |
| 16 | B2CI53 B2CI53_HUMAN | E.RNGILASPQS#APGNLDNSK.S           | S263:        | 2 | 4,7854 | 0,477 | -0,121 |
| 16 | Q8ND24 RN214_HUMAN  | R.DTSLDFRPVVPANGVEGVR.V            |              | 3 | 4,7643 | 0,37  | -0,259 |
| 16 | P17980 PRS6A_HUMAN  | K.VIAATNRVDILDPELLR.S              |              | 3 | 4,7552 | 0,293 | -0,198 |
| 16 | Q9BR22 TRI56_HUMAN  | E.RQGGVQPQAGDGAQT#PKEE.K           | T418:        | 3 | 4,7417 | 0,474 | -0,18  |
| 16 | P11388 TOP2A_HUMAN  | E.LKPQKS#VVS#DLEADDVK.G            | S1374:S1377: | 2 | 4,7344 | 0,495 | 0,12   |
| 16 | O43242 PSMD3_HUMAN  | K.AKPPPGGGEQEP PPPPAPQDVEM*KEE.A   |              | 3 | 4,7215 | 0,456 | -0,269 |
| 16 | Q9H6K5 YS027_HUMAN  | R.SPSSTLSGPDLAGHSSSATSTPEELR.G     |              | 3 | 4,7215 | 0,44  | -0,356 |
| 16 | O43776 SYNC_HUMAN   | K.ALM*TVGKEPFPTIYVDSQKE.N          |              | 3 | 4,7048 | 0,409 | -0,322 |
| 16 | Q9ULT8 HECD1_HUMAN  | E.GHDSLSVGS#FEEDSKSE.F             | S2320:       | 3 | 4,6955 | 0,392 | -0,29  |
| 16 | Q16181 SEPT7_HUMAN  | K.NKGQLTKS#PLAQM*EEE.R             | S334:        | 2 | 4,6657 | 0,492 | -0,129 |
| 16 | P36507 MP2K2_HUMAN  | R.RKPVLPALTINPTIAEGPS#PTSE.G       | S23:         | 2 | 4,6623 | 0,45  | 0,297  |
| 16 | P40189 IL6RB_HUMAN  | E.GHSSGIGGSSCM*SSSRPS#ISSSDENE.S   | S740:        | 3 | 4,6605 | 0,431 | 0      |



|    |                    |                                       |            |   |        |       |        |
|----|--------------------|---------------------------------------|------------|---|--------|-------|--------|
| 16 | O15085 ARHGB_HUMAN | E.LDDSDV FHGEPEPEELPGGTGSQQR.V        |            | 3 | 4,6583 | 0,337 | 0      |
| 16 | P78332 RBM6_HUMAN  | E.HESPADFQNSQS#PVQDQDK.S              | S362:      | 3 | 4,6574 | 0,362 | -0,245 |
| 16 | Q53E24 CEP55_HUMAN | E.KVAASPKS#PTAALNE.S                  | S428:      | 2 | 4,6502 | 0,346 | -0,078 |
| 16 | Q99575 POP1_HUMAN  | E.SRVQAYEEPSVASS#PNGKE.S              | S730:      | 2 | 4,6487 | 0,507 | 0      |
| 16 | Q6IBS0 TWF2_HUMAN  | E.TIELVHTEPTDVAQLPSR.V                |            | 3 | 4,6431 | 0,19  | -0,182 |
| 16 | Q9P287 BCCIP_HUMAN | E.LTDLLIQQNHIGSVIK.Q                  |            | 2 | 4,6392 | 0,444 | -0,477 |
| 16 | Q9NRF9 DPOE3_HUMAN | K.RKT#LNASDVLSAM*EE.M                 | T63:       | 2 | 4,6389 | 0,523 | -0,416 |
| 16 | Q05682 CALD1_HUMAN | E.KGNVFSS#PTAAGTPNKE.T                | S724:      | 2 | 4,6143 | 0,545 | -0,342 |
| 16 | Q1KMD3 HNRL2_HUMAN | E.AAAEPDASEKPAEATAGSGGVNGGEEQGLGK.R   |            | 3 | 4,5983 | 0,456 | 0,384  |
| 16 | Q9GZR7 DDX24_HUMAN | E.LTDYQLVSPAKNPSSLFSK.E               |            | 3 | 4,5913 | 0,365 | -0,087 |
| 16 | Q9ULU4 PKCB1_HUMAN | K.TGQAGSLSGSPKPFSPQLSAPITTK.T         |            | 3 | 4,5864 | 0,46  | -0,298 |
| 16 | Q14202 ZMYM3_HUMAN | E.TLGDGINSSQTKPGGSS#PPAHPSLPGDGLTAK.A | S214:      | 3 | 4,5795 | 0,412 | 0,234  |
| 16 | Q6WKZ4 RFIP1_HUMAN | E.GM*LM*GVKPGEDASGPAEDLVR.R           |            | 3 | 4,5621 | 0,408 | -0,423 |
| 16 | Q86TC9 MYPN_HUMAN  | K.TPEPSS#PVKEPPPVLAKPKLD.S            | S644:      | 3 | 4,5593 | 0,311 | -0,159 |
| 16 | Q5T5U3 RHG21_HUMAN | R.FKS#DSGSLGDAKNE.K                   | S1712:     | 2 | 4,5581 | 0,433 | -0,159 |
| 16 | P28715 ERCC5_HUMAN | E.SKFDSSLLS#DDETK.C                   | S563:      | 2 | 4,5562 | 0,509 | 1,473  |
| 16 | O75122 CLAP2_HUMAN | R.SRS#DIDVNAAGAK.A                    | S370:      | 2 | 4,5544 | 0,434 | -0,755 |
| 16 | Q9BVC5 ASHWN_HUMAN | R.KSPSGPVKS#PPLS#PVGTTVPVK.L          | S189:S193: | 3 | 4,5294 | 0,373 | -0,165 |
| 16 | Q9BWH6 RPAP1_HUMAN | R.DKLEPEAPALALPVTQKE.W                |            | 3 | 4,5198 | 0,376 | -0,179 |
| 16 | Q6PGQ7 BORA_HUMAN  | E.ASTHGTHLVVTAM*SVTQNS#SAS#EKE.L      | S411:S414: | 3 | 4,5159 | 0,513 | 0,827  |
| 16 | Q8IYB3 SRRM1_HUMAN | E.ATSTSDILKVPKPEPIPEKPS#PE.K          | S260:      | 3 | 4,5134 | 0,16  | -0,529 |
| 16 | Q9UGV2 NDRG3_HUMAN | R.THSTSS#SLGSGESPFSS.S                | S334:      | 3 | 4,4623 | 0,374 | -0,101 |
| 16 | Q16181 SEPT7_HUMAN | K.NKGQLTKS#PLAQM*E.E                  | S334:      | 2 | 4,4475 | 0,352 | -0,297 |
| 16 | Q5QJE6 TDIF2_HUMAN | E.KQIVGT#PVNSESDTR.Q                  | T232:      | 3 | 4,4327 | 0,4   | -0,401 |
| 16 | P09622 DLDH_HUMAN  | K.IPNIYAIGDVVAGPM*LAHK.A              |            | 3 | 4,4325 | 0,284 | -0,275 |
| 16 | P27816 MAP4_HUMAN  | E.VALTEDQVPALKTEAPLAK.D               |            | 2 | 4,422  | 0,431 | 0      |
| 16 | P49959 MRE11_HUMAN | E.DIVLANHPDIFNPDNPK.V                 |            | 2 | 4,4008 | 0,359 | 0,064  |
| 16 | Q96G74 OTUD5_HUMAN | R.RQAPGVGAVGGGS#PEREE.V               | S165:      | 3 | 4,3938 | 0,39  | -0,1   |
| 16 | Q9UK76 HN1_HUMAN   | R.RNSSEAS#SGDFLDLKE.G                 | S91:       | 3 | 4,3848 | 0,293 | 0,097  |
| 16 | Q5QJE6 TDIF2_HUMAN | E.KQIVGT#PVNSESDTR.Q                  | T232:      | 2 | 4,3795 | 0,528 | -0,2   |
| 16 | Q9Y4P8 WIPI2_HUMAN | E.ILDSASHDCPLVTQTYGAAAGK.G            |            | 3 | 4,3653 | 0,257 | -0,241 |
| 16 | Q99567 NUP88_HUMAN | E.GLKNQS#PTEAEKPASSSLPSSPPPQLLTR.N    | S35:       | 3 | 4,3646 | 0,278 | 0,591  |
| 16 | O14893 GEMI2_HUMAN | K.RKQS#VNISLSGCQPAPE.G                | S81:       | 2 | 4,3499 | 0,503 | -0,063 |

|    |                     |                                   |              |   |        |       |        |
|----|---------------------|-----------------------------------|--------------|---|--------|-------|--------|
| 16 | P48643 TCPE_HUMAN   | K.ISDSVLVDIKDTEPLIQTAK.T          |              | 2 | 4,3482 | 0,421 | 0,223  |
| 16 | Q8WXV6 Q8WXV6_HUMAN | R.KRT#SS#EDNLYLAVLR.A             | T19:S21:     | 3 | 4,3459 | 0,316 | -0,285 |
| 16 | O43504 HBXIP_HUMAN  | E.DTM*KNPSIVGLCTDSQGLNLGCR.G      |              | 3 | 4,3411 | 0,459 | -0,138 |
| 16 | Q12756 KIF1A_HUMAN  | E.SHGSSSASS#PLSAEGRPS#PLEAPNER.Q  | S1430:S1439: | 3 | 4,3118 | 1     | -0,066 |
| 16 | Q9P2R6 RERE_HUMAN   | E.ISRPNS#PSEGECESSDSR.S           | S679:        | 3 | 4,3099 | 0,394 | -0,186 |
| 16 | Q9UIW2 PLXA1_HUMAN  | R.LNTLAHYQVTDGSSVALVPK.Q          |              | 3 | 4,3076 | 0,304 | -0,346 |
| 16 | Q96Q11 TRNT1_HUMAN  | K.ATDSSDPLKPYQDFIISR.E            |              | 3 | 4,3    | 0,466 | -0,253 |
| 16 | Q7LBC6 JHD2B_HUMAN  | R.HSGGFLSSPADFSQE.N               |              | 2 | 4,2917 | 0,39  | -0,39  |
| 16 | P55786 PSA_HUMAN    | E.DEKVTLSPSTLQTGTGTLK.I           |              | 3 | 4,2871 | 0,299 | -0,258 |
| 16 | Q9UGU5 HM2L1_HUMAN  | R.KHS#SDDYYGDISSLE.S              | S79:         | 2 | 4,2858 | 0,539 | 0      |
| 16 | Q9BWF3 RBM4_HUMAN   | K.LHVGNIS#PTCTNKE.L               | S86:         | 2 | 4,2746 | 0,501 | -0,148 |
| 16 | Q0JRZ9 FCHO2_HUMAN  | E.IPRPFSPVTSNTSPPPAAPLAR.A        |              | 3 | 4,269  | 0,334 | -0,077 |
| 16 | Q9UHR5 S30BP_HUMAN  | E.KGGLVSDAYGEDDFS#R.L             | S52:         | 3 | 4,266  | 0,472 | 0,102  |
| 16 | P27708 PYR1_HUMAN   | E.LSALVAPAFHTSQVLVDK.S            |              | 2 | 4,2585 | 0,435 | 0,434  |
| 16 | P35527 K1C9_HUMAN   | R.GSGSGSYGGGGSGGGYGGGSGSR.G       |              | 2 | 4,2474 | 0,386 | -0,34  |
| 16 | P10768 ESTD_HUMAN   | E.HGLVVIAPDTS#PR.G                | S84:         | 2 | 4,2428 | 0,587 | -0,338 |
| 16 | Q01813 K6PP_HUMAN   | R.GRS#FAGNLNTYK.R                 | S386:        | 2 | 4,2293 | 0,499 | -0,347 |
| 16 | P22681 CBL_HUMAN    | E.DDGYDVPKPPVPAVLAR.R             |              | 3 | 4,2256 | 0,37  | -0,303 |
| 16 | P16383 GCF_HUMAN    | R.AQDDYISLDVQHTSSISGM*K.R         |              | 2 | 4,2179 | 0,521 | 0,11   |
| 16 | Q00653 NFKB2_HUMAN  | R.TFAGNTPLHLAAGLGYPTLTR.L         |              | 3 | 4,2137 | 0,454 | -0,337 |
| 16 | Q8IZL8 PELP1_HUMAN  | E.ALLTHLLSDISPPADALK.L            |              | 2 | 4,2008 | 0,355 | -0,13  |
| 16 | Q6Y7W6 PERQ2_HUMAN  | R.VGVEASEETPQTSSSSARPGTPSDHQSQE.A |              | 3 | 4,1947 | 0,449 | 0,368  |
| 16 | O95336 6PGL_HUMAN   | E.DQEENPLPAALVQPHTGK.L            |              | 3 | 4,1888 | 0,425 | -0,47  |
| 16 | Q8WUA4 TF3C2_HUMAN  | R.AHFNAM*FQPSS#PTR.R              | S893:        | 2 | 4,1838 | 0,444 | -0,217 |
| 16 | Q9P2J5 SYLC_HUMAN   | E.DKGTGVVTSVPSDSDPDIAALR.D        |              | 3 | 4,1822 | 0,325 | -0,166 |
| 16 | Q9UKI8 TLK1_HUMAN   | E.SSNHSFGSLGSL#DKE.S              | S105:        | 2 | 4,1705 | 0,51  | -0,352 |
| 16 | Q9Y2X3 NOL5_HUMAN   | E.KLNLSCIHS#PVVNE.L               | S109:        | 2 | 4,1609 | 0,462 | -0,433 |
| 16 | Q9UIW2 PLXA1_HUMAN  | R.SPPELGERPDELGFVM*DNVR.S         |              | 3 | 4,1607 | 0,29  | -0,08  |
| 16 | Q13206 DDX10_HUMAN  | R.SNS#EVEDVGPTSHNR.K              | S831:        | 2 | 4,1602 | 0,48  | -0,572 |
| 16 | O43683 BUB1_HUMAN   | K.VANTSSFHTTPNTSLGM*VQATPSK.V     |              | 3 | 4,1592 | 0,347 | -0,587 |
| 16 | Q9NZT2 OGFR_HUMAN   | E.GAGDAAVASGGAQTLALAGSPAPSGHPK.A  |              | 3 | 4,1545 | 0,419 | 0,146  |
| 16 | Q15003 CND2_HUMAN   | E.THNES#VSALVDK.F                 | S335:        | 2 | 4,1382 | 0,508 | -0,354 |
| 16 | P48739 PIPNB_HUMAN  | R.SQVEPADYKADEDPALFQSVK.T         |              | 3 | 4,1304 | 0,322 | -0,078 |

|    |                     |                                   |              |   |        |       |        |
|----|---------------------|-----------------------------------|--------------|---|--------|-------|--------|
| 16 | P12956 KU70_HUMAN   | E.KIM*AT#PEQVGK.M                 | T455:        | 2 | 4,1251 | 0,217 | -0,376 |
| 16 | P60709 ACTB_HUMAN   | R.VAPEEHPVLLTEAPLNPK.A            |              | 2 | 4,1246 | 0,43  | -0,25  |
| 16 | Q9NPG3 UBN1_HUMAN   | E.HLLES#PEGSPFR.D                 | S323:        | 2 | 4,1234 | 0,547 | -0,238 |
| 16 | Q13506 NAB1_HUMAN   | E.HSLSPADLGSPAS#PK.E              | S183:        | 2 | 4,1212 | 0,429 | -1,422 |
| 16 | P42858 HD_HUMAN     | E.LAASSGVSTPGSAGHDIITEQPR.S       |              | 3 | 4,1119 | 0,472 | -0,081 |
| 16 | O43681 ARSA1_HUMAN  | E.SVLIISTDPAHNISDAFDQK.F          |              | 3 | 4,1089 | 0,265 | -0,421 |
| 16 | Q9Y2W1 TR150_HUMAN  | E.KGSFS#DTGLGDGK.M                | S379:        | 2 | 4,1019 | 0,545 | -0,181 |
| 16 | P11274 BCR_HUMAN    | R.HQDGLPYIDDS#PSSS#PHLSSK.G       | S459:S463:   | 3 | 4,0831 | 1     | -0,075 |
| 16 | P46100 ATRX_HUMAN   | E.KCGLGQENS#DNEHLVE.N             | S634:        | 2 | 4,0811 | 0,386 | 0      |
| 16 | Q9HCD6 TANC2_HUMAN  | E.ARPSQGLPVIQS#PPS#SPPHRD.S       | S1442:S1445: | 3 | 4,0784 | 0,2   | -0,307 |
| 16 | A0MZ66 SHOT1_HUMAN  | K.QAEPVVVLDPVSTHEPQTK.D           |              | 3 | 4,075  | 0,36  | -0,265 |
| 16 | Q7Z5L9 I2BP2_HUMAN  | R.AAASLAAVSGTAAASLGSAQPTDLGAHK.R  |              | 3 | 4,0664 | 0,389 | -0,293 |
| 16 | Q96PZ0 PUS7_HUMAN   | D.FLSISEDVPRPPTVSTGK.G            |              | 2 | 4,066  | 0,467 | -0,179 |
| 16 | Q6NXG5 Q6NXG5_HUMAN | R.SPSTTYLHTPTSEDAAIPSK.S          |              | 3 | 4,0578 | 0,406 | -0,333 |
| 16 | Q86UU0 BCL9L_HUMAN  | K.ANQISPSNSSLKNPQAGVPPFSSLK.G     |              | 3 | 4,0559 | 0,381 | 0,285  |
| 16 | O15061 DMN_HUMAN    | R.HVTLGPGQS#PLSRE.V               | S1181:       | 2 | 4,05   | 0,591 | -0,861 |
| 16 | Q9NYB9 ABI2_HUMAN   | R.TLEPVRPPVVPNDYVPSPTR.N          |              | 3 | 4,0377 | 0,366 | -0,164 |
| 16 | P11586 C1TC_HUMAN   | E.VINAIAPEKDVDGLTSINAGR.L         |              | 3 | 4,0364 | 0,357 | -0,425 |
| 16 | P62750 RL23A_HUMAN  | K.LYDIDVAKVNTLIRPDGE.K            |              | 3 | 4,0321 | 0,427 | -0,54  |
| 16 | P46063 RECQ1_HUMAN  | K.IKQCLEDSDAGASNE.Y               |              | 2 | 4,0197 | 0,463 | -0,671 |
| 16 | P21333 FLNA_HUMAN   | K.DAGEGLLAVQITDPEGKPK.K           |              | 2 | 4,0136 | 0,329 | -0,189 |
| 16 | Q8WXI9 P66B_HUMAN   | R.TTSSAIYM*NLASHIQPGTVNR.V        |              | 3 | 4,0079 | 0,38  | -0,08  |
| 16 | O43399 TPD54_HUMAN  | K.VVGDRENGSDNLPSSAGSGDKPLSDPAPF.- |              | 3 | 4,0023 | 0,402 | -0,317 |
| 16 | Q96HC4 PDLI5_HUMAN  | K.KANNSQEPS#PQLASSVASTR.S         | S313:        | 3 | 3,9907 | 0,501 | -0,17  |
| 16 | Q8N5U6 RNF10_HUMAN  | E.GHGALSIS#PLSR.S                 | S670:        | 2 | 3,9902 | 0,613 | -0,383 |
| 16 | Q8NEM7 FA48A_HUMAN  | K.M*SHSSSGSASLSQVS#PGKE.T         | S437:        | 2 | 3,9807 | 0,495 | -0,249 |
| 16 | P19525 E2AK2_HUMAN  | E.KKAVS#PLLLTTTNSSE.G             | S83:         | 2 | 3,9642 | 0,41  | -0,207 |
| 16 | Q9UGV2 NDRG3_HUMAN  | R.SRT#HS#TSSSLGSGESPFGR.S         | T329:S331:   | 3 | 3,9628 | 1     | -0,258 |
| 16 | Q9UGU0 TCF20_HUMAN  | E.KAGSS#PAQGAQNEPPR.L             | S559:        | 3 | 3,9605 | 0,23  | -1,201 |
| 16 | Q02952 AKA12_HUMAN  | K.LTASEQAHPQEAESAHEPRLS#AEYE.K    | S371:        | 3 | 3,9568 | 0,496 | 0,619  |
| 16 | O60841 IF2P_HUMAN   | K.NKPGPNIES#GNEDDDASF.K           | S214:        | 3 | 3,9558 | 0,419 | 0,087  |
| 16 | Q6B0I6 JHD3D_HUMAN  | E.DGALM*DKPVPLS#PGLQHPVK.A        | S502:        | 3 | 3,9496 | 0,308 | -0,083 |
| 16 | Q6ULP2 AFTIN_HUMAN  | R.KPLSTHSTEYNLDSVPS#PAEE.F        | S226:        | 3 | 3,9384 | 0,366 | -0,231 |

|    |                     |                              |              |   |        |       |        |
|----|---------------------|------------------------------|--------------|---|--------|-------|--------|
| 16 | Q96PK6 RBM14_HUMAN  | R.TQSSASLAASYAAQQHPQAAASYR.G |              | 3 | 3,9325 | 0,442 | 0,074  |
| 16 | Q66GS9 CP135_HUMAN  | R.HGLATPPLSSTLRS#PSHS#PE.H   | S1130:S1134: | 3 | 3,9279 | 0,367 | -0,082 |
| 16 | Q9H0E9 BRD8_HUMAN   | E.IVEADVAIGKGETPLTNVK.T      |              | 3 | 3,9278 | 0,413 | -0,177 |
| 16 | P48643 TCPE_HUMAN   | D.SVLVDIKDTEPLIQTAK.T        |              | 3 | 3,921  | 0,341 | -0,098 |
| 16 | P31943 HNRH1_HUMAN  | R.VTGEADVEFATHEDAVAAM*SK.D   |              | 3 | 3,9199 | 0,533 | 0      |
| 16 | P05387 RLA2_HUMAN   | K.NIEDVIAQGIGK.L             |              | 2 | 3,9117 | 0,413 | -0,291 |
| 16 | Q96T51 RUFY1_HUMAN  | R.NCGHIFCNTCSSNE.L           |              | 2 | 3,9107 | 0,444 | 0      |
| 16 | B2CI53 B2CI53_HUMAN | E.RNGILASPQS#APGNLDNSK.S     | S263:        | 3 | 3,91   | 0,36  | -0,181 |
| 16 | P23193 TCEA1_HUMAN  | K.KEPAITSQNS#PEAREE.S        | S100:        | 3 | 3,9031 | 0,31  | -1,274 |
| 16 | Q9HC44 GPBL1_HUMAN  | R.HNS#SDGFFNNGPLR.T          | S49:         | 2 | 3,897  | 0,568 | -0,297 |
| 16 | Q7Z460 CLAP1_HUMAN  | R.RQS#SGSATNVASTPDNR.G       | S646:        | 2 | 3,8869 | 0,619 | -0,934 |
| 16 | P06744 G6PI_HUMAN   | E.LDGSAQVTSHDASTNGLINFIK.Q   |              | 2 | 3,8839 | 0,46  | 0      |
| 16 | Q9HAF1 CA149_HUMAN  | K.SSVTSAAAVSALAGVQDQLIEKR.E  |              | 3 | 3,8794 | 0,352 | -0,477 |
| 16 | Q8N3V7 SYNPO_HUMAN  | R.AASPAKPSLDLVPNLPK.G        |              | 3 | 3,871  | 0,227 | -0,405 |
| 16 | O75376 NCOR1_HUMAN  | R.SHVSSEPYEPISPPQVPVVE.K     |              | 3 | 3,8709 | 0,196 | -0,158 |
| 16 | P04844 RPN2_HUMAN   | E.VGITNVLDLSTVDKQSIAPK.T     |              | 3 | 3,8695 | 0,35  | -0,174 |
| 16 | Q15596 NCOA2_HUMAN  | E.GHGVSLGSSLAS#PDLK.M        | S554:        | 2 | 3,868  | 0,511 | -0,38  |
| 16 | O14974 MYPT1_HUMAN  | R.RLAS#TSDIEEKE.N            | S507:        | 2 | 3,8604 | 0,321 | -0,921 |
| 16 | Q99497 PARK7_HUMAN  | E.DAKKEGPDVVVLPGGNLGAQNLSE.S |              | 3 | 3,8575 | 0,393 | -0,142 |
| 16 | P35527 K1C9_HUMAN   | R.SGGGGGGGLGSGGSIR.S         |              | 2 | 3,8561 | 0,551 | -0,99  |
| 16 | Q99627 CSN8_HUMAN   | R.KPVAGALDVS#FNK.F           | S175:        | 2 | 3,8558 | 0,296 | -0,428 |
| 16 | P39748 FEN1_HUMAN   | E.KQLQQAQAAGAEQE.V           |              | 2 | 3,8546 | 0,298 | -0,325 |
| 16 | P48643 TCPE_HUMAN   | K.ISDSVLVDIKDTEPLIQTAK.T     |              | 3 | 3,8546 | 0,303 | -0,167 |
| 16 | P60709 ACTB_HUMAN   | R.VAPEEHPVLLTEAPLNPK.A       |              | 3 | 3,8541 | 0,384 | 1,311  |
| 16 | Q9NZN4 EHD2_HUMAN   | E.DADFDGKPM*VLVAGQYSTGK.T    |              | 3 | 3,8526 | 0,385 | -0,865 |
| 16 | Q9NY61 AATF_HUMAN   | E.QLLNPRPSEADPEADPEEATAAR.V  |              | 3 | 3,8493 | 0,363 | 0,369  |
| 16 | P54709 AT1B3_HUMAN  | E.DIPNVAVYPHNGM*IDLK.Y       |              | 2 | 3,8483 | 0,437 | -0,255 |
| 16 | P21333 FLNA_HUMAN   | R.RAPS#VANVGSCHCD.L          | S2152:       | 2 | 3,8473 | 0,557 | -0,673 |
| 16 | P55786 PSA_HUMAN    | E.LDALDNSHPIEVSVGHPSEVDE.I   |              | 3 | 3,8468 | 0,316 | -0,233 |
| 16 | A6NGZ7 U93BL_HUMAN  | R.RPCPYEQAQGGDGPEEQ.-        |              | 2 | 3,8357 | 0,415 | 0      |
| 16 | Q9H8H2 DDX31_HUMAN  | R.LADISLHDPVSISVLDK.S        |              | 3 | 3,8328 | 0,335 | 0      |
| 16 | Q14980 NUMA1_HUMAN  | E.KQAQLAQLTQQQE.Q            |              | 2 | 3,8266 | 0,365 | 0,161  |
| 16 | P46821 MAP1B_HUMAN  | E.KVSPSKS#PSLSPSPS#PLEK.T    | S1256:S1265: | 3 | 3,8241 | 0,151 | -0,166 |

|    |                     |                                  |            |   |        |       |        |
|----|---------------------|----------------------------------|------------|---|--------|-------|--------|
| 16 | Q9H8G2 CI082_HUMAN  | E.KELFLAEHS#DLEE.G               | S120:      | 2 | 3,8129 | 0,211 | -0,298 |
| 16 | P12270 TPR_HUMAN    | E.AM*QSEGPVEHVPVFGSTSGSVR.S      |            | 2 | 3,8078 | 0,5   | 0,429  |
| 16 | P62873 GGB1_HUMAN   | E.TGQQTTTFTGHTGDVM*SLSLAPDTR.L   |            | 3 | 3,7992 | 0,387 | 0,208  |
| 16 | P07355 ANXA2_HUMAN  | E.GDHSTPPSAYGS#VK.A              | S26:       | 2 | 3,7858 | 0,493 | -0,987 |
| 16 | Q9H2Y7 ZF106_HUMAN  | R.NRENS#PSSQSAGLSSINKE.G         | S1279:     | 2 | 3,7856 | 0,524 | 0,234  |
| 16 | Q9NZT2 OGFR_HUMAN   | E.GAGDAAVASGGAQTLALAGSPAPSGHPK.A |            | 2 | 3,7852 | 0,427 | 0,487  |
| 16 | P67936 TPM4_HUMAN   | R.KIQALQQQADE.A                  |            | 2 | 3,785  | 0,372 | -0,192 |
| 16 | A8K123 A8K123_HUMAN | K.TITAEIPGHLDPGFLASDK.T          |            | 2 | 3,7829 | 0,488 | 0,246  |
| 16 | P50479 PDL1_HUMAN   | R.IHIDPEIQDGS#PTTSR.R            | S112:      | 3 | 3,7786 | 0,367 | -0,495 |
| 16 | Q96N67 DOCK7_HUMAN  | E.DYLITHPLAVDSGPLR.D             |            | 3 | 3,7735 | 0,351 | 0      |
| 16 | P52701 MSH6_HUMAN   | R.VHVQFFDDS#PTR.G                | S137:      | 2 | 3,7674 | 0,489 | -0,399 |
| 16 | P04920 B3A2_HUMAN   | E.RTSPSS#PAPLPHQE.A              | S173:      | 2 | 3,7651 | 0,47  | -0,385 |
| 16 | O95433 AHSA1_HUMAN  | E.ISVSLAKDEPDTNLVALM*KEE.G       |            | 3 | 3,756  | 0,136 | -0,079 |
| 16 | P40189 IL6RB_HUMAN  | E.DLQLVDHVDGGDILPR.Q             |            | 3 | 3,7542 | 0,326 | 0      |
| 16 | O96019 ACL6A_HUMAN  | R.STGLILDGATHHTAIPVHD.G          |            | 2 | 3,7486 | 0,472 | -0,365 |
| 16 | Q9Y4L1 HYOU1_HUMAN  | K.VAIVKPGVPM*EIVLNKE.S           |            | 3 | 3,7474 | 0,383 | 0      |
| 16 | Q6NUP7 K1622_HUMAN  | R.SQS#FNNQAFHAK.Y                | S775:      | 2 | 3,7453 | 0,363 | -0,251 |
| 16 | Q9BRS2 RIOK1_HUMAN  | E.DM*AM*NAQQDNILYQTVTGLKK.D      |            | 3 | 3,7264 | 0,286 | 0,076  |
| 16 | Q14C86 GAPD1_HUMAN  | R.LALCSADSVAFVPLTHSTR.N          |            | 3 | 3,7173 | 0,236 | -0,358 |
| 16 | Q9HC44 GPBL1_HUMAN  | R.HNS#SDGFFNNGPLR.T              | S49:       | 3 | 3,7162 | 0,249 | 0      |
| 16 | Q8NEM2 SHCBP_HUMAN  | E.KGLFQDEDS#CSDCSYR.D            | S42:       | 2 | 3,714  | 0,508 | 1,371  |
| 16 | P05023 AT1A1_HUMAN  | K.DM*TSEQLDDILKYHTE.I            |            | 2 | 3,7108 | 0,343 | 0,5    |
| 16 | P31943 HNRH1_HUMAN  | K.HTGPNS#PDTANDGFVR.L            | S104:      | 2 | 3,7051 | 0,5   | -0,691 |
| 16 | Q9NR30 DDX21_HUMAN  | K.LRSDAGLES#DTAM*K.K             | S13:       | 2 | 3,6918 | 0,476 | 0,077  |
| 16 | Q96N67 DOCK7_HUMAN  | E.DYLITHPLAVDSGPLR.D             |            | 2 | 3,6894 | 0,39  | -0,276 |
| 16 | Q9H1K0 RBNS5_HUMAN  | E.SLSTHTS#PSQS#PNSVHGSR.R        | S215:S219: | 3 | 3,6822 | 1     | -0,172 |
| 16 | Q03188 CENPC_HUMAN  | K.IKDTCIQS#PSKE.C                | S73:       | 2 | 3,6674 | 0,465 | -0,082 |
| 16 | Q92610 ZN592_HUMAN  | E.SVSLSHSGSAPDVPVAVSVIVK.N       |            | 3 | 3,6668 | 0,175 | 0      |
| 16 | P49773 HINT1_HUMAN  | K.HISQISVAEDDDE.S                |            | 2 | 3,6641 | 0,476 | -0,251 |
| 16 | P09211 GSTP1_HUMAN  | K.ALPGQLKPFETLLSQNQGGK.T         |            | 3 | 3,6516 | 0,195 | -0,43  |
| 16 | Q6P4F7 RHGBA_HUMAN  | K.HNSNITSS#PLSGDENNM*TKE.T       | S582:      | 3 | 3,6515 | 0,261 | -0,564 |
| 16 | Q9HAV7 GRPE1_HUMAN  | K.QKNSGQNLEEDM*GQSE.Q            |            | 2 | 3,6479 | 0,535 | 0      |
| 16 | O15075 DCLK1_HUMAN  | R.SGKSPS#PSPTS#PGSLRK.Q          | S332:S337: | 3 | 3,6471 | 0,156 | -0,7   |

|    |                    |                                      |              |   |        |       |        |
|----|--------------------|--------------------------------------|--------------|---|--------|-------|--------|
| 16 | Q8WV44 TRI41_HUMAN | R.VDLTLDPDTAHPALM*LS#PDRR.G          | S447:        | 3 | 3,6365 | 0,098 | -0,151 |
| 16 | Q14C86 GAPD1_HUMAN | R.SRS#SDIVSSVR.R                     | S902:        | 2 | 3,6347 | 0,329 | -0,192 |
| 16 | Q6ZRV2 FA83H_HUMAN | R.HGS#DPAFAPGPR.G                    | S523:        | 2 | 3,6291 | 0,552 | -0,852 |
| 16 | Q7Z494 NPHP3_HUMAN | R.HSS#SGDTFSLK.T                     | S1308:       | 2 | 3,6279 | 0,414 | 0,196  |
| 16 | Q13428 TCOF_HUMAN  | K.LDSSPSVSSTLAAKDDPDGKQE.A           |              | 2 | 3,619  | 0,493 | 0,109  |
| 16 | Q6IAA8 CK059_HUMAN | R.KLLLDPSS#PPTK.A                    | S27:         | 2 | 3,6151 | 0,388 | -0,621 |
| 16 | P06576 ATPB_HUMAN  | K.VLDSGAPIKIPVGPETLGR.I              |              | 3 | 3,6141 | 0,246 | -0,381 |
| 16 | O96019 ACL6A_HUMAN | R.STGLILDGATHTTAIPVHD.G              |              | 3 | 3,6133 | 0,486 | -0,365 |
| 16 | Q9UHR5 S30BP_HUMAN | E.KGGLVSDAYGEDDFS#R.L                | S52:         | 2 | 3,6049 | 0,529 | -0,068 |
| 16 | P18669 PGAM1_HUMAN | R.SYDVPPPPM*EPDHPFYSNISK.D           |              | 2 | 3,6028 | 0,386 | 0,301  |
| 16 | O94885 SASH1_HUMAN | E.KLLVDSQGLSGCS#PR.D                 | S721:        | 2 | 3,6002 | 0,321 | -0,216 |
| 16 | Q01813 K6PP_HUMAN  | R.GRS#FAGNLNTYK.R                    | S386:        | 3 | 3,5928 | 0,195 | 0,195  |
| 16 | Q9Y5Z4 HEBP2_HUMAN | E.KVYYTAGYNS#PVK.L                   | S181:        | 2 | 3,5887 | 0,43  | -0,311 |
| 16 | P49321 NASP_HUMAN  | E.AESLDPTVKPVDVGGDEPEEK.V            |              | 3 | 3,5817 | 0,441 | -0,414 |
| 16 | P31942 HNRH3_HUMAN | R.ATGEADVEFVTHEDAVAAM*SK.D           |              | 3 | 3,5796 | 0,412 | -0,083 |
| 16 | O43865 SAHH2_HUMAN | K.KQIQFADDM*QE.F                     |              | 2 | 3,5786 | 0,373 | 0      |
| 16 | P31949 S10AB_HUMAN | K.KLDTNSDGQLDFSE.F                   |              | 2 | 3,572  | 0,368 | -0,156 |
| 16 | Q13619 CUL4A_HUMAN | R.KGS#FSALVGR.T                      | S10:         | 2 | 3,5679 | 0,267 | -0,221 |
| 16 | Q15459 SF3A1_HUMAN | K.ASKPLPPAPAPDEYLVSPITGEK.I          |              | 2 | 3,5664 | 0,409 | -0,205 |
| 16 | O75420 PERQ1_HUMAN | R.ALM*LHSDPSILGYSLHGSSGE.I           |              | 3 | 3,5637 | 0,208 | 0,418  |
| 16 | P53350 PLK1_HUMAN  | R.KKT#LCGTPNYIAPE.V                  | T210:        | 2 | 3,5566 | 0,304 | -0,146 |
| 16 | Q5M775 SPEC1_HUMAN | E.KLIYLEHS#PNSE.G                    | S260:        | 2 | 3,553  | 0,347 | 0,081  |
| 16 | Q9H173 SIL1_HUMAN  | K.RLDINTNTYTSQD.L                    |              | 2 | 3,54   | 0,424 | -0,633 |
| 16 | Q96MH2 HEX12_HUMAN | E.AKTSGAPGS#PQTPPER.H                | S29:         | 3 | 3,5372 | 0,288 | -0,661 |
| 16 | P22307 NLTP_HUMAN  | K.HSVNNPYSQFQDE.Y                    |              | 2 | 3,5248 | 0,425 | -0,078 |
| 16 | Q71RC2 LARP4_HUMAN | K.DGLNQTTIPVSPSTTKPSR.A              |              | 3 | 3,522  | 0,361 | 0,349  |
| 16 | Q9NQ55 SSF1_HUMAN  | K.ARVGGS#DEEASGIPSR.T                | S359:        | 3 | 3,5189 | 0,274 | -0,11  |
| 16 | P29375 JAD1A_HUMAN | K.AAANPDLQGHLPFQQSAFNR.V             |              | 3 | 3,5173 | 0,438 | -0,242 |
| 16 | Q9Y2X7 GIT1_HUMAN  | E.LEDDAIYSVHVPAGLYR.I                |              | 3 | 3,5157 | 0,339 | -0,381 |
| 16 | Q01082 SPTB2_HUMAN | R.TSS#KESS#PIPSPTSDRK.A              | S2161:S2165: | 3 | 3,5133 | 0,299 | -0,838 |
| 16 | O43776 SYNC_HUMAN  | K.ALM*TVGKEPFPTIYVDSQKE.N            |              | 2 | 3,5126 | 0,392 | -0,323 |
| 16 | P46100 ATRX_HUMAN  | K.LHDFLAHSS#EESEE.T                  | S26:         | 2 | 3,5086 | 0,469 | -0,214 |
| 16 | P05387 RLA2_HUMAN  | K.LASVPAGGAVAVSAAPGSAAPAAGSAPAAAEK.K |              | 3 | 3,5072 | 0,176 | 0,33   |

|    |                     |                                |              |   |        |       |        |
|----|---------------------|--------------------------------|--------------|---|--------|-------|--------|
| 16 | Q9UM54 MYO6_HUMAN   | R.VM*LTTAGGTKGT#VIKVLKVE.Q     | T405:        | 3 | 3,4954 | 0,183 | -0,654 |
| 16 | Q16204 CCDC6_HUMAN  | E.KLDQPVSAPPS#PR.D             | S244:        | 2 | 3,491  | 0,522 | -0,332 |
| 16 | Q9NXX6 NSE4A_HUMAN  | R.ALINSVQQNREDILNAGDKLTE.V     |              | 3 | 3,4908 | 0,196 | -0,225 |
| 16 | Q5VV41 ARHGG_HUMAN  | R.HQS#FGAAVLSR.E               | S107:        | 2 | 3,4863 | 0,391 | 0,779  |
| 16 | Q9P1Y5 K1543_HUMAN  | K.RPTS#RAPPS#PSGLM*SPSR.L      | S1070:S1074: | 3 | 3,4841 | 0,304 | -0,56  |
| 16 | Q12888 TP53B_HUMAN  | K.LGKPSAHASQS#FCE.S            | S894:        | 2 | 3,4827 | 0,455 | -0,458 |
| 16 | Q9H089 LSG1_HUMAN   | K.FGHSSFDQAEISHS#E.S           | S281:        | 3 | 3,4816 | 0,263 | -0,104 |
| 16 | Q7L1V2 MON1B_HUMAN  | E.TGSKDKDQPPS#PSPPPQSE.A       | S59:         | 3 | 3,4767 | 0,192 | -0,355 |
| 16 | Q9Y6W5 WASF2_HUMAN  | R.DVVGNDVATILSR.R              |              | 2 | 3,4751 | 0,483 | -0,449 |
| 16 | Q9H6F5 CCD86_HUMAN  | R.AGLGSPERPPTS#PGS#PR.L        | S66:S69:     | 2 | 3,4572 | 0,392 | -0,125 |
| 16 | P50479 PDLI4_HUMAN  | R.IHIDPEIQDGS#PTTSR.R          | S112:        | 2 | 3,4537 | 0,461 | -0,198 |
| 16 | Q15149 PLEC1_HUMAN  | R.VVIVDPETGKEM*SVYEAYR.K       |              | 3 | 3,4536 | 0,294 | 0,083  |
| 16 | Q05524 ENO1B_HUMAN  | E.VILPVPAFNVINGGSHAGNK.L       |              | 2 | 3,4501 | 0,379 | -0,365 |
| 16 | Q9C0C2 TB182_HUMAN  | E.FGKRDS#LGAYASQDANE.Q         | S893:        | 2 | 3,4411 | 0,39  | 0,192  |
| 16 | Q5TCQ9 MAGI3_HUMAN  | R.AEVPARPAPQEPYDVVLQR.K        |              | 3 | 3,4381 | 0,342 | -0,171 |
| 16 | Q59FG6 Q59FG6_HUMAN | E.SPAPEPPTQHSYTYNVSNLDVR.Q     |              | 3 | 3,4349 | 0,227 | 0,148  |
| 16 | Q8IXQ3 CI040_HUMAN  | R.KIDAGTM*AEPSAS#PSK.R         | S69:         | 2 | 3,4322 | 0,445 | -0,145 |
| 16 | Q93074 MED12_HUMAN  | E.DM*EKPDFSLFSPTM*PCEGK.G      |              | 3 | 3,4305 | 0,219 | 0      |
| 16 | P04083 ANXA1_HUMAN  | K.GGPGSAVSPYPTFNPSDVAALHK.A    |              | 3 | 3,4299 | 0,282 | -0,078 |
| 16 | Q8N6H7 ARFG2_HUMAN  | K.YKDNPFSLGES#FGSR.W           | S368:        | 2 | 3,4299 | 0,423 | -0,205 |
| 16 | Q5SYE7 NHSL1_HUMAN  | E.ARPSPSTTLPDSSPS#R.K          | S1193:       | 3 | 3,4298 | 0,103 | -0,599 |
| 16 | P22626 ROA2_HUMAN   | K.LFVGGIKEDTEE.H               |              | 2 | 3,4241 | 0,343 | -0,548 |
| 16 | Q8N6H7 ARFG2_HUMAN  | E.HGPNTDLLGTS#PK.A             | S201:        | 2 | 3,4207 | 0,5   | 0,775  |
| 16 | Q00613 HSF1_HUMAN   | R.GHTDTEGRPPS#PPPTST#PEK.C     | S363:T369:   | 3 | 3,4189 | 0,13  | -0,407 |
| 16 | Q6P996 PDXD1_HUMAN  | E.KVERLS#SGPEQITL.E.A          | S736:        | 2 | 3,415  | 0,398 | -0,276 |
| 16 | P54259 ATN1_HUMAN   | R.GRAS#PGGVSTSSSDGKAE.K        | S34:         | 3 | 3,4141 | 0,284 | -0,211 |
| 16 | Q8TB72 PUM2_HUMAN   | R.RES#LSTSSDLYK.R              | S587:        | 2 | 3,4066 | 0,248 | -0,333 |
| 16 | Q86Y04 Q86Y04_HUMAN | K.KVDLTLLS#PK.S                | S239:        | 2 | 3,4048 | 0,368 | -0,307 |
| 16 | P49756 RBM25_HUMAN  | K.LGASNS#PGQPNSVKR.K           | S618:        | 2 | 3,4042 | 0,395 | -0,613 |
| 16 | Q13426 XRCC4_HUMAN  | K.DDSISSLDVTDIAPSRK.R          |              | 2 | 3,4027 | 0,481 | 0      |
| 16 | P50548 ERF_HUMAN    | R.APPAPPKPEPGEAPGASQCM*PLK.L   |              | 3 | 3,4006 | 0,418 | -0,234 |
| 16 | Q32MZ4 LRRF1_HUMAN  | R.NM*PGLSAATLASLGGTSSR.R       |              | 2 | 3,4004 | 0,529 | -0,068 |
| 16 | O43683 BUB1_HUMAN   | K.TLAPSPKS#PGDFTSAAQLASTPFHK.L | S596:        | 3 | 3,3985 | 0,383 | 0      |

|    |                     |                                |            |   |        |       |        |
|----|---------------------|--------------------------------|------------|---|--------|-------|--------|
| 16 | Q92686 NEUG_HUMAN   | E.NACSKPDDDILDIPLDDPGANAAAAA.K |            | 3 | 3,3983 | 0,317 | -0,069 |
| 16 | Q8TAT6 NPL4_HUMAN   | R.NKDTYFLSSEE.C                |            | 2 | 3,398  | 0,387 | -0,458 |
| 16 | Q5SSJ5 HP1B3_HUMAN  | K.ALPLIVGAQLIHADK.L            |            | 2 | 3,3971 | 0,292 | -0,47  |
| 16 | Q96RL1 UIMC1_HUMAN  | R.SRPLATGPSS#QSHQE.K           | S140:      | 2 | 3,3943 | 0,384 | -0,294 |
| 16 | P60660 MYL6_HUMAN   | K.NKDQGTYYEDYVE.G              |            | 2 | 3,3942 | 0,354 | -0,501 |
| 16 | Q6IBW4 CNDH2_HUMAN  | E.SRS#PQQSAALPR.R              | S284:      | 2 | 3,3882 | 0,413 | -1,24  |
| 16 | Q5VV41 ARHGG_HUMAN  | R.HQS#FGAAVLSRE.A              | S107:      | 2 | 3,3859 | 0,414 | -0,441 |
| 16 | Q96GQ7 DDX27_HUMAN  | R.SADFNPDFVFTEKE.G             |            | 2 | 3,3821 | 0,42  | -0,519 |
| 16 | Q53EN3 Q53EN3_HUMAN | R.RIS#AHQPGPEGQEE.S            | S289:      | 2 | 3,3743 | 0,275 | -1,058 |
| 16 | Q8N5I9 CL045_HUMAN  | K.GKIEVLDS#PASK.K              | S178:      | 2 | 3,3737 | 0,369 | 0,092  |
| 16 | O96017 CHK2_HUMAN   | R.KFQDLLSEENE.S                |            | 2 | 3,3725 | 0,312 | -0,361 |
| 16 | O60563 CCNT1_HUMAN  | E.NLALTGVDHSLPQDGSNAFISQK.Q    |            | 3 | 3,3694 | 0,319 | 0      |
| 16 | Q641Q2 FA21A_HUMAN  | K.DLYIDRPLPYLIGSK.L            |            | 2 | 3,3689 | 0,433 | -0,484 |
| 16 | Q8NI35 INADL_HUMAN  | R.RLFDDEAS#VDEPR.R             | S645:      | 2 | 3,3631 | 0,367 | -0,375 |
| 16 | P49959 MRE11_HUMAN  | E.DIVLANHPDIFNPDPK.V           |            | 3 | 3,3552 | 0,43  | 0      |
| 16 | Q96G74 OTUD5_HUMAN  | R.RQAPGVGAVGGGS#PEREE.V        | S165:      | 2 | 3,3506 | 0,405 | 0      |
| 16 | Q8WYP5 AHTF1_HUMAN  | R.LKETRIS#FVEE.D               | S1241:     | 2 | 3,3495 | 0,283 | -0,341 |
| 16 | O15061 DMN_HUMAN    | R.HVTLGPGQS#PLSRE.V            | S1181:     | 3 | 3,3413 | 0,153 | 0      |
| 16 | Q6NZI2 PTRF_HUMAN   | R.RGS#S#PDVHALLE.I             | S365:S366: | 2 | 3,3412 | 0,241 | -0,423 |
| 16 | Q14669 TRIPC_HUMAN  | R.KPNPLANSNTSGYSE.S            |            | 2 | 3,3391 | 0,558 | -0,309 |
| 16 | Q9H6F5 CCD86_HUMAN  | R.AGLGSPERPPKT#SPGS#PR.L       | T65:S69:   | 3 | 3,3281 | 0,317 | -0,281 |
| 16 | P50548 ERF_HUMAN    | K.VRGEGPGEAGGPLT#PR.R          | T526:      | 3 | 3,3267 | 0,171 | 0      |
| 16 | P27816 MAP4_HUMAN   | E.VALTEDQVPALKTEAPLAK.D        |            | 3 | 3,3191 | 0,365 | -0,183 |
| 16 | Q8IU2 RB6I2_HUMAN   | R.SVGKVEPS#SQSPGRS#PR.L        | S14:S21:   | 2 | 3,3182 | 1     | -0,637 |
| 16 | Q8N3X1 FNBP4_HUMAN  | R.RPILQLS#PPGPR.G              | S18:       | 3 | 3,3147 | 0,189 | 0,259  |
| 16 | Q5VW38 GP107_HUMAN  | R.TKNDGFSSYLDE.D               |            | 2 | 3,3126 | 0,254 | -0,443 |
| 16 | Q8WXI9 P66B_HUMAN   | E.RGRLT#PSPDIIVLSDNE.A         | T120:      | 2 | 3,3102 | 0,43  | -0,187 |
| 16 | Q9HCN4 GPN1_HUMAN   | K.DLSPLVHPSDLILTR.G            |            | 2 | 3,3027 | 0,428 | -0,484 |
| 16 | P27348 1433T_HUMAN  | R.KQTIDNSQGAYQE.A              |            | 2 | 3,3013 | 0,351 | -1,564 |
| 16 | P49792 RBP2_HUMAN   | K.LHDSSGS#QVGTGFK.S            | S1835:     | 2 | 3,3004 | 0,411 | -0,325 |
| 16 | O43776 SYNC_HUMAN   | K.ALM*TVGKEPFPTIYVDSQKENE.R    |            | 3 | 3,2997 | 0,347 | -0,218 |
| 16 | Q5PRF9 SAM4B_HUMAN  | R.HALTS#PSLGGQGR.Q             | S607:      | 2 | 3,2984 | 0,42  | 0      |
| 16 | P26640 SYVC_HUMAN   | R.DPGVITYDLPTPPGEKK.D          |            | 3 | 3,297  | 0,416 | -0,2   |



|    |                    |                                  |                 |   |        |       |        |
|----|--------------------|----------------------------------|-----------------|---|--------|-------|--------|
| 16 | O43597 SPY2_HUMAN  | R.DALTQQVHVLSDLQIR.A             |                 | 3 | 3,2916 | 0,245 | 0,1    |
| 16 | Q63ZY3 KANK2_HUMAN | R.S#SGLST#PVPPSAGHLAHVRE.Q       | S171:T176:      | 3 | 3,2897 | 0,352 | -0,254 |
| 16 | P54259 ATN1_HUMAN  | R.GRAS#PGGVSTSSSDGKAE.K          | S34:            | 2 | 3,2881 | 0,47  | -0,353 |
| 16 | P19338 NUCL_HUMAN  | E.TLKES#FDGSVR.A                 | S591:           | 2 | 3,288  | 0,467 | 0,278  |
| 16 | Q6ZRV2 FA83H_HUMAN | R.RGS#PTTGFIQK.G                 | S892:           | 2 | 3,2744 | 0,332 | -0,61  |
| 16 | Q6KC79 NIPBL_HUMAN | E.KAAM*YDISS#PSKD.S              | S350:           | 2 | 3,2707 | 0,459 | -0,301 |
| 16 | P10809 CH60_HUMAN  | K.ISSIQSIVPALEIANAHR.K           |                 | 3 | 3,2609 | 0,265 | -0,572 |
| 16 | Q9UKV3 ACINU_HUMAN | K.SSQGLKEKS#KS#PS#PPRLTE.D       | S384:S386:S388: | 3 | 3,255  | 0,247 | 0,08   |
| 16 | Q5SW79 CE170_HUMAN | E.KFTIQLQLS#QK.S                 | S122:           | 2 | 3,2544 | 0,282 | -0,173 |
| 16 | Q9H165 BC11A_HUMAN | E.KAVDKPPS#PSPIE.M               | S86:            | 2 | 3,2532 | 0,415 | -0,253 |
| 16 | Q14204 DYHC1_HUMAN | K.VAAPDVVVPTLDTVRHE.A            |                 | 2 | 3,251  | 0,301 | -0,134 |
| 16 | Q9UQ35 SRRM2_HUMAN | R.QDRGEFSAS#PM*LK.S              | S1124:          | 3 | 3,2504 | 0,243 | 0,468  |
| 16 | Q8WUX9 CHMP7_HUMAN | R.HFTNSVNPRI#DAELE.A             | S417:           | 3 | 3,2475 | 0,127 | -0,456 |
| 16 | O43493 TGON2_HUMAN | K.LSPHAFKTES#GEE.T               | S298:           | 2 | 3,2455 | 0,498 | -0,323 |
| 16 | Q13177 PAK2_HUMAN  | R.SVIDPVPAPVGDSDHVDGAAK.S        |                 | 2 | 3,2455 | 0,399 | -0,063 |
| 16 | Q8IZ21 PHAR4_HUMAN | R.GVLLEDPEQGGEDPGKPSDAM*LK.N     |                 | 3 | 3,2415 | 0,381 | 0,381  |
| 16 | P52597 HNRPF_HUMAN | R.VTGEADVEFATHEEAVAAM*SK.D       |                 | 3 | 3,2387 | 0,377 | -0,083 |
| 16 | Q9H3Q1 BORG4_HUMAN | K.LPKS#LSSS#PVKK.A               | S138:S142:      | 2 | 3,2339 | 0,365 | -0,341 |
| 16 | P04075 ALDOA_HUMAN | K.RLQSIGTENEE.N                  |                 | 2 | 3,2288 | 0,485 | -0,177 |
| 16 | Q9NYV4 CD2L7_HUMAN | E.SKGS#PVFLPR.K                  | S423:           | 2 | 3,2284 | 0,276 | -0,313 |
| 16 | P46013 KI67_HUMAN  | E.KNIYAFM*GT#PVQK.L              | T1557:          | 2 | 3,2253 | 0,121 | -0,153 |
| 16 | P19525 E2AK2_HUMAN | E.KKAVS#PLLLTTNSSE.G             | S83:            | 3 | 3,2231 | 0,352 | 0      |
| 16 | Q00613 HSF1_HUMAN  | R.KVTS#VSTLKSE.D                 | S121:           | 2 | 3,2199 | 0,37  | 0,291  |
| 16 | Q58FF8 H90B2_HUMAN | E.SKEQVANSAFVE.Q                 |                 | 2 | 3,2197 | 0,369 | -0,559 |
| 16 | Q8IWC1 MA7D3_HUMAN | E.KFTAILYRT#LE.R                 | T149:           | 2 | 3,2118 | 0,423 | -0,34  |
| 16 | P80723 BASP_HUMAN  | E.TKSDGAPASDS#KPGSS#EAAPSSK.E    | S172:S177:      | 3 | 3,2075 | 1     | -1,261 |
| 16 | Q14671 PUM1_HUMAN  | R.RDS#LTGSSDLYK.R                | S709:           | 2 | 3,2039 | 0,322 | -0,257 |
| 16 | P00558 PGK1_HUMAN  | K.ITLPVDFVTADKFDENAK.T           |                 | 2 | 3,1936 | 0,285 | -0,241 |
| 16 | P36507 MP2K2_HUMAN | R.RKPVLPALTINPTIAEGPS#PTSEGASE.A | S23:            | 3 | 3,1928 | 0,302 | 0,13   |
| 16 | P85037 FOXK1_HUMAN | E.EAPASPLRPLYPQJSPK.I            |                 | 2 | 3,1927 | 0,274 | -0,432 |
| 16 | Q99733 NP1L4_HUMAN | E.RLDNVPHTPS#SYIE.T              | S53:            | 2 | 3,1885 | 0,441 | -0,429 |
| 16 | P20700 LMNB1_HUMAN | E.IRDQM*QQQLNDYE.Q               |                 | 2 | 3,1848 | 0,333 | 0,072  |
| 16 | Q8WUX9 CHMP7_HUMAN | E.LDILLQDTTKEPLDLPDNP.N          |                 | 3 | 3,1845 | 0,13  | -0,238 |

|    |                     |                             |                 |   |        |       |        |
|----|---------------------|-----------------------------|-----------------|---|--------|-------|--------|
| 16 | Q99700 ATX2_HUMAN   | E.NIKPNETS#PSFSKAE.N        | S771:           | 2 | 3,1829 | 0,396 | 0,282  |
| 16 | P07602 SAP_HUMAN    | K.SLPCDICKDVVTAAGDM*LK.D    |                 | 3 | 3,1786 | 0,259 | -0,26  |
| 16 | Q02952 AKA12_HUMAN  | E.SAHEPRLS#AEYE.K           | S371:           | 2 | 3,1764 | 0,316 | -0,332 |
| 16 | Q15149 PLEC1_HUMAN  | R.RYASGSSASLGGPE.S          |                 | 2 | 3,1735 | 0,41  | -0,638 |
| 16 | P37802 TAGL2_HUMAN  | R.TLM*NLGGLAVAR.D           |                 | 2 | 3,1723 | 0,361 | -0,396 |
| 16 | Q08999 RBL2_HUMAN   | E.KIFYYSNS#PSK.R            | S1080:          | 2 | 3,1697 | 0,403 | -0,234 |
| 16 | Q5VUB5 CJ038_HUMAN  | E.HLYPAPSS#PEKE.Q           | S525:           | 2 | 3,1673 | 0,408 | -0,34  |
| 16 | Q9H6S3 ES8L2_HUMAN  | R.QSILPPPQGPAPIPFQHR.G      |                 | 3 | 3,1647 | 0,282 | -0,277 |
| 16 | P49756 RBM25_HUMAN  | K.LGASNS#PGQPNSVKR.K        | S618:           | 3 | 3,1609 | 0,389 | -0,345 |
| 16 | Q9UK76 HN1_HUMAN    | R.RNSS#EASSGDFLDL.K         | S88:            | 3 | 3,1608 | 0,306 | 0      |
| 16 | Q99700 ATX2_HUMAN   | E.NIKPNET#SPSFSK.A          | T770:           | 2 | 3,1594 | 0,414 | 0,08   |
| 16 | Q32MZ4 LRRF1_HUMAN  | K.KAM*VSNAQLDNE.K           |                 | 2 | 3,1572 | 0,381 | -1,461 |
| 16 | Q8NEM2 SHCBP_HUMAN  | E.KGLFQDEDS#CSDCSYR.D       | S42:            | 3 | 3,1545 | 0,463 | 0,894  |
| 16 | Q8ND30 LIPB2_HUMAN  | K.KLSCS#LEDLRSE.S           | S387:           | 2 | 3,1506 | 0,297 | -0,885 |
| 16 | P02794 FRIH_HUMAN   | E.YLFDKHTLGDS#DNES.-        | S179:           | 2 | 3,1448 | 0,506 | -0,737 |
| 16 | A8K727 A8K727_HUMAN | E.DSLFTPRPGECSAPGVLPSSR.I   |                 | 3 | 3,1447 | 0,347 | -0,43  |
| 16 | Q06210 GFPT1_HUMAN  | E.SKGYDFESETDTE.T           |                 | 2 | 3,1438 | 0,419 | -0,647 |
| 16 | Q13620 CUL4B_HUMAN  | E.REDFDSTSSSSST#PPLQPR.D    | T67:            | 3 | 3,1434 | 0,288 | -0,084 |
| 16 | A1L020 MEX3A_HUMAN  | K.LGGGGLRS#PGGGR.D          | S462:           | 3 | 3,1398 | 0,272 | 0,599  |
| 16 | Q15631 TSN_HUMAN    | E.ILTLQGVHQGAGFQDIPK.R      |                 | 3 | 3,1393 | 0,312 | -0,36  |
| 16 | Q96ST3 SIN3A_HUMAN  | R.RLDDQES#PVYAAQQR.R        | S10:            | 2 | 3,1346 | 0,509 | -0,46  |
| 16 | P12955 PEPD_HUMAN   | E.IASVLTSQKPSVLLTLR.G       |                 | 3 | 3,133  | 0,222 | -0,401 |
| 16 | Q9H501 ESF1_HUMAN   | K.FKIDSNIS#PK.K             | S153:           | 2 | 3,1314 | 0,232 | -0,397 |
| 16 | Q5VZK9 LR16A_HUMAN  | E.KRSS#GFISELPSEE.G         | S968:           | 2 | 3,1264 | 0,396 | -0,297 |
| 16 | Q9HCD6 TANC2_HUMAN  | E.ARPSQGLPVIQS#PPSS#PPHR.D  | S1442:S1446:    | 3 | 3,1259 | 0,088 | -0,242 |
| 16 | Q43399 TPD54_HUMAN  | R.NSATFKS#FEDR.V            | S166:           | 2 | 3,119  | 0,369 | -0,441 |
| 16 | Q9UQ35 SRRM2_HUMAN  | K.VKPET#PPRQS#HSGSIS#PYPK.V | T983:S988:S994: | 2 | 3,1188 | 0,279 | 0      |
| 16 | Q5VT52 K0460_HUMAN  | K.TPAPATTTSHNPLANILSKVE.I   |                 | 3 | 3,1176 | 0,143 | -0,085 |
| 16 | Q86V48 LUZP1_HUMAN  | K.LVNTTITPEPEPKQPNSRE.K     |                 | 3 | 3,1156 | 0,229 | -0,163 |
| 16 | Q99873 ANM1_HUMAN   | K.DVAIKEPLVDVDPK.Q          |                 | 3 | 3,1137 | 0,314 | -0,223 |
| 16 | Q9UN36 NDRG2_HUMAN  | R.SRTAS#LTSAAASVDGNR.S      | S332:           | 2 | 3,1122 | 0,489 | 0,292  |
| 16 | Q13428 TCOF_HUMAN   | E.AKPQQAAGM*LS#PK.T         | S1257:          | 2 | 3,1116 | 0,407 | -0,429 |
| 16 | Q6ZU65 K2030_HUMAN  | R.RVAFISLS#PVR.R            | S13:            | 3 | 3,1102 | 0,207 | 0,552  |

|    |                     |                               |              |   |        |       |        |
|----|---------------------|-------------------------------|--------------|---|--------|-------|--------|
| 16 | P04792 HSPB1_HUMAN  | R.VSLDVNHFAPDELTVK.T          |              | 2 | 3,1101 | 0,391 | 0      |
| 16 | P49792 RBP2_HUMAN   | E.DALDDSVSSSSVHASPLAS#SPVRK.N | S2250:       | 2 | 3,1079 | 0,378 | 1,175  |
| 16 | P51858 HDGF_HUMAN   | E.VERPLPM*EVEKNS#TPS#EPGSGR.G | S199:S202:   | 3 | 3,1055 | 0,213 | 0      |
| 16 | Q8NI27 THOC2_HUMAN  | K.RVPSIDVLCNE.F               |              | 2 | 3,1044 | 0,385 | -0,375 |
| 16 | Q9UKK3 PARP4_HUMAN  | K.QLLGLQPISTVSPLHR.V          |              | 3 | 3,1027 | 0,107 | 0,104  |
| 16 | Q8IZL8 PELP1_HUMAN  | E.ALLTHLLSDISPPADALK.L        |              | 3 | 3,1004 | 0,221 | -0,195 |
| 16 | P04792 HSPB1_HUMAN  | R.VSLDVNHFAPDELTVK.T          |              | 3 | 3,1003 | 0,29  | -0,308 |
| 16 | P30414 NKTR_HUMAN   | K.IPDVAPIVSDQKPSVSK.S         |              | 3 | 3,0965 | 0,444 | -0,103 |
| 16 | Q9BRQ6 CHCH6_HUMAN  | R.RDT#FYKEQLE.R               | T153:        | 2 | 3,0926 | 0,352 | -0,606 |
| 16 | Q8NEM7 FA48A_HUMAN  | K.M*SHSSSGSASLSQVS#PGKE.T     | S437:        | 3 | 3,0908 | 0,194 | -0,467 |
| 16 | O95239 KIF4A_HUMAN  | E.VRGQVSESEDS#ITKQIE.S        | S815:        | 2 | 3,0904 | 0,494 | 0,123  |
| 16 | Q59FG6 Q59FG6_HUMAN | K.QESPAPPTQHSYTYNVSNLQDVR.Q   |              | 3 | 3,0886 | 0,286 | 0      |
| 16 | Q00537 PCTK2_HUMAN  | R.RIS#M*EDLNK.R               | S137:        | 2 | 3,0863 | 0,234 | -0,203 |
| 16 | Q05397 FAK1_HUMAN   | K.THLGTGM*ERS#PGAM*E.R        | S29:         | 2 | 3,0852 | 0,293 | -0,724 |
| 16 | Q14152 EIF3A_HUMAN  | E.DAPIGPHLQSM*PSEQIR.N        |              | 3 | 3,0848 | 0,314 | -0,483 |
| 16 | Q7L2J0 MEPCE_HUMAN  | E.GHVVLAS#PLK.T               | S254:        | 2 | 3,0848 | 0,463 | -0,111 |
| 16 | Q86V48 LUZP1_HUMAN  | K.SKNNDLQDNYLSE.Q             |              | 2 | 3,0843 | 0,388 | -0,555 |
| 16 | P27816 MAP4_HUMAN   | R.KPCNSQPSELSSE.T             |              | 2 | 3,0838 | 0,273 | -0,667 |
| 16 | O60684 IMA7_HUMAN   | R.M*KS#YKNNALNPEE.M           | S16:         | 2 | 3,0828 | 0,312 | -0,523 |
| 16 | Q8N1G2 K0082_HUMAN  | R.NTSDSVNLVVPLEVIKGDHE.F      |              | 3 | 3,0826 | 0,172 | -0,334 |
| 16 | Q14934 NFAC4_HUMAN  | R.RTS#SEQAVALPR.S             | S334:        | 2 | 3,0776 | 0,394 | -0,7   |
| 16 | O43166 SI1L1_HUMAN  | R.HSASPVVFTS#ARSS#PKEE.L      | S1439:S1443: | 3 | 3,0757 | 0,218 | -0,088 |
| 16 | Q13620 CUL4B_HUMAN  | E.REDFDST#SSSSSTPPLQPR.D      | T61:         | 2 | 3,0732 | 0,368 | -0,337 |
| 16 | P28715 ERCC5_HUMAN  | E.SKFDSSLLSS#DDETK.C          | S563:        | 3 | 3,0721 | 0,123 | 1,367  |
| 16 | Q8WY36 BBX_HUMAN    | E.LRQKS#PLFQFAE.I             | S243:        | 2 | 3,0693 | 0,362 | -0,237 |
| 16 | P17980 PRS6A_HUMAN  | R.KM*NVSPDVNYEE.L             |              | 2 | 3,0677 | 0,303 | -0,254 |
| 16 | P26358 DNMT1_HUMAN  | E.KLSIFDANE.S                 |              | 2 | 3,0652 | 0,263 | -0,118 |
| 16 | Q13769 THOC5_HUMAN  | R.RPT#LGVQLDDK.R              | T328:        | 2 | 3,0591 | 0,35  | -0,185 |
| 16 | Q96E09 F122A_HUMAN  | R.HGLLLPAS#PVR.M              | S76:         | 2 | 3,0571 | 0,475 | -0,787 |
| 16 | Q09666 AHNK_HUMAN   | K.FKAEAPLPS#PK.L              | S5110:       | 2 | 3,0568 | 0,263 | -0,964 |
| 16 | Q9BXS6 NUSAP_HUMAN  | K.SAHVTVSGGT#PKGE.A           | T314:        | 3 | 3,0519 | 0,172 | 0,325  |
| 16 | Q8IZP0 ABI1_HUMAN   | K.TLEPVKPPTPNDYM*TSPAR.L      |              | 3 | 3,0497 | 0,332 | -0,164 |
| 16 | P40222 TXLNA_HUMAN  | R.RPEGPGAQAPSS#PRVTE.A        | S515:        | 3 | 3,0454 | 0,177 | -0,302 |

|    |                     |                             |                 |   |        |       |        |
|----|---------------------|-----------------------------|-----------------|---|--------|-------|--------|
| 16 | P37802 TAGL2_HUMAN  | K.ENPRNFSDNQLQE.G           |                 | 2 | 3,0443 | 0,13  | -0,153 |
| 16 | P28290 SSFA2_HUMAN  | E.VQSTEGEAPHVPATYQLGLTK.S   |                 | 3 | 3,0431 | 0,314 | -0,329 |
| 16 | P49773 HINT1_HUMAN  | E.DDDESLLGHLM*IVGK.K        |                 | 2 | 3,0409 | 0,338 | -0,294 |
| 16 | P14868 SYDC_HUMAN   | R.VRDLT#IQKADE.V            | T52:            | 2 | 3,0372 | 0,356 | 0      |
| 16 | Q76176 SSH2_HUMAN   | R.LPHSSS#SENIK.S            | S1217:          | 2 | 3,0367 | 0,203 | 0,191  |
| 16 | O95785 WIZ_HUMAN    | K.KTPLALAGS#PTPK.N          | S996:           | 2 | 3,0337 | 0,398 | -0,448 |
| 16 | Q9H307 PININ_HUMAN  | R.RGFS#DSGGGPPAK.Q          | S66:            | 2 | 3,0335 | 0,379 | -0,279 |
| 16 | Q9Y2W1 TR150_HUMAN  | E.KGSFSDT#GLGDGK.M          | T381:           | 3 | 3,0333 | 0,129 | 0      |
| 16 | Q6NZI2 PTRF_HUMAN   | R.RGS#SPDVHALLE.I           | S365:           | 2 | 3,0331 | 0,402 | -0,359 |
| 16 | P61970 NTF2_HUMAN   | K.ADEDPIM*GFHQM*FLLK.N      |                 | 2 | 3,0265 | 0,432 | -0,254 |
| 16 | Q96RK0 CIC_HUMAN    | R.KVFS#PVIR.S               | S496:           | 2 | 3,0222 | 0,108 | 0      |
| 16 | Q7KZJ3 Q7KZJ3_HUMAN | R.SGDLDGM*EPLKGTPLM*QK.I    |                 | 3 | 3,0202 | 0,307 | -0,089 |
| 16 | Q9C0B5 ZDHC5_HUMAN  | K.SFHFDPLSSGS#R.S           | S425:           | 2 | 3,0176 | 0,276 | -0,344 |
| 16 | O14920 IKKB_HUMAN   | K.VRGPVSGS#PDSM*NASR.L      | S672:           | 3 | 3,0172 | 0,371 | -0,214 |
| 16 | P40222 TXLNA_HUMAN  | R.RPEGPGAQAPSS#PR.V         | S515:           | 2 | 3,0162 | 0,399 | -1,805 |
| 16 | P42345 FRAP_HUMAN   | R.TRTDSYSAGQSVE.I           |                 | 2 | 3,0162 | 0,413 | -0,523 |
| 16 | P38159 HNRPG_HUMAN  | R.DGYGGSRSY#SSSR.S          | Y327:           | 3 | 3,0141 | 0,427 | 0,232  |
| 16 | O75400 PR40A_HUMAN  | R.RTLLEQLDDDQ.-             |                 | 2 | 3,0121 | 0,305 | -0,363 |
| 16 | A8K123 A8K123_HUMAN | K.TITAEIPGHLDPGFLASDK.T     |                 | 3 | 3,0105 | 0,326 | -0,277 |
| 16 | Q01105 SET_HUMAN    | E.FEDIKS#GYR.I              | S133:           | 2 | 3,0085 | 0,283 | 0      |
| 16 | Q05209 PTN12_HUMAN  | E.GNSSDINYQTR.K             |                 | 2 | 3,0064 | 0,36  | -0,486 |
| 16 | Q92785 REQU_HUMAN   | E.GEDKEDSQPPT#PVSQR.S       | T248:           | 2 | 3,0058 | 0,414 | -0,132 |
| 16 | Q8WUX9 CHMP7_HUMAN  | R.HFTNSVNPRI#DAELE.A        | S417:           | 2 | 3,0024 | 0,369 | -0,061 |
| 16 | Q5VT52 K0460_HUMAN  | R.DAPTHLPSVDLSNPFTKE.A      |                 | 3 | 2,9968 | 0,216 | -0,279 |
| 16 | P49591 SYSC_HUMAN   | E.LIPFVKPAPIEQEPSK.K        |                 | 2 | 2,9955 | 0,117 | -0,272 |
| 16 | Q7Z5K2 WAPL_HUMAN   | K.RPES#PSEIS#PIKGSVR.T      | S221:S226:      | 3 | 2,994  | 0,367 | 0,193  |
| 16 | Q9NY61 AATF_HUMAN   | E.QLLNPRPSEADPEADPEEATAAR.V |                 | 2 | 2,9939 | 0,349 | 0,493  |
| 16 | Q96NE9 FRMD6_HUMAN  | R.HSLS#LDDIR.L              | S544:           | 2 | 2,9933 | 0,268 | -0,215 |
| 16 | Q92793 CBP_HUMAN    | K.LVQAIPTPDPAALKDR.R        |                 | 3 | 2,9888 | 0,182 | -0,494 |
| 16 | Q9Y618 NCOR2_HUMAN  | K.REGT#PPPPPSR.D            | T1383:          | 3 | 2,9859 | 0,136 | -0,134 |
| 16 | Q9UQ35 SRRM2_HUMAN  | K.VKPET#PPRQSHS#GSIS#PYPK.V | T983:S990:S994: | 3 | 2,9854 | 0,174 | -0,978 |
| 16 | Q12874 SF3A3_HUMAN  | K.LHGLNINYNCE.I             |                 | 2 | 2,9851 | 0,295 | -0,543 |
| 16 | P31943 HNRH1_HUMAN  | K.HTGPNS#PDTANDGFVR.L       | S104:           | 3 | 2,9843 | 0,188 | -0,622 |

|    |                       |                                |                 |   |        |       |        |
|----|-----------------------|--------------------------------|-----------------|---|--------|-------|--------|
| 16 | Q7Z309 F122B_HUMAN    | K.RIDFTPVS#PAPSPTR.G           | S115:           | 2 | 2,9827 | 0,469 | -0,071 |
| 16 | Q8TEW8 PAR3L_HUMAN    | R.GCNES#FRAAIDK.S              | S780:           | 2 | 2,9812 | 0,386 | -0,421 |
| 16 | O60343 TBCD4_HUMAN    | R.GRLGS#VDSFER.S               | S588:           | 3 | 2,9751 | 0,208 | 0,351  |
| 16 | Q58FF7 H90B3_HUMAN    | R.RVFIM*DSCDE.L                |                 | 2 | 2,9742 | 0,435 | -0,095 |
| 16 | O96000 NDUBA_HUMAN    | K.AFDLIVDRPVTLVRE.F            |                 | 3 | 2,9667 | 0,255 | -0,105 |
| 16 | P51858 HDGF_HUMAN     | R.RAGDLLEDS#PK.R               | S165:           | 2 | 2,9635 | 0,303 | -0,191 |
| 16 | Q969J2 ZKSC4_HUMAN    | E.VRAPCS#PARGPE.R              | S44:            | 2 | 2,9628 | 0,534 | -0,177 |
| 16 | P07814 SYEP_HUMAN     | K.ERPTSLNNTTSE.D               |                 | 2 | 2,9625 | 0,368 | -0,355 |
| 16 | Q8IVM0 CCD50_HUMAN    | R.YKDLEQQDCE.I                 |                 | 2 | 2,9596 | 0,293 | -1,011 |
| 16 | P35240 MERL_HUMAN     | K.RLS#M*EIEKE.K                | S518:           | 2 | 2,9589 | 0,242 | -0,595 |
| 16 | Q6P2E9 EDC4_HUMAN     | R.GLLPGLLPAPADKLTTPK.G         |                 | 2 | 2,9574 | 0,518 | -0,502 |
| 16 | Q8IZD4 DCP1B_HUMAN    | R.SRAPTSVT#PVAPGK.G            | T393:           | 2 | 2,955  | 0,186 | -0,337 |
| 16 | P58107 EPIPL_HUMAN    | R.VLADPSDDTKGFFDPNTHE.N        |                 | 3 | 2,953  | 0,178 | -0,261 |
| 16 | Q9NP97 DLRB1_HUMAN    | K.STM*DNPTTQYASLM*HSFILK.A     |                 | 3 | 2,9466 | 0,164 | -0,378 |
| 16 | Q8NG27 PJA1_HUMAN     | R.NLAS#PNCVKPK.I               | S265:           | 2 | 2,945  | 0,35  | 0,373  |
| 16 | Q96SU4 OSBL9_HUMAN    | R.LIDSSGSASVLT#HSSGNSLKRPDTE.S | T322:           | 3 | 2,9446 | 0,15  | -0,129 |
| 16 | Q9NQS7 INCE_HUMAN     | K.ALNVTVDVQSPACTSYQM*TPQGHR.A  |                 | 3 | 2,9385 | 0,21  | -0,273 |
| 16 | Q71U36 TBA1A_HUMAN    | E.HSDCAFV*VDNE.A               |                 | 2 | 2,9382 | 0,366 | -0,546 |
| 16 | Q9NVD7 PARVA_HUMAN    | K.SPSVPKS#PTPKS#PPSR.K         | S14:S19:        | 3 | 2,9379 | 0,272 | -0,101 |
| 16 | Q9NZN5 ARHGC_HUMAN    | K.HLSTPSSVS#PEPQDSAK.L         | S637:           | 3 | 2,9356 | 0,126 | 0      |
| 16 | Q9C0B5 ZDHC5_HUMAN    | K.SFHFDPLSS#GSRSSS#LK.S        | S423:S429:      | 3 | 2,9334 | 1     | -0,366 |
| 16 | Q8TE77 SSH3_HUMAN     | R.RQS#FAVLR.G                  | S37:            | 2 | 2,9331 | 0,178 | -0,115 |
| 16 | Q9Y2W1 TR150_HUMAN    | R.ERS#PALKS#PLQSVVVR.R         | S248:S253:      | 3 | 2,9328 | 0,33  | 0,19   |
| 16 | O75717 WDHD1_HUMAN    | K.KLNAGYSNTATE.W               |                 | 2 | 2,9315 | 0,431 | -0,865 |
| 16 | Q6ZS17 FA65A_HUMAN    | R.RPETPSSGPLDEE.G              |                 | 2 | 2,9302 | 0,469 | -0,431 |
| 16 | P05787 K2C8_HUMAN     | R.KLLEGEES#RLE.S               | S400:           | 2 | 2,9282 | 0,186 | -0,088 |
| 16 | Q9NQ55 SSF1_HUMAN     | K.ARVGGS#DEEASGIPSR.T          | S359:           | 2 | 2,926  | 0,534 | -0,293 |
| 16 | Q01433 AMPD2_HUMAN    | E.RQIS#QDVKLEPD.I              | S168:           | 2 | 2,925  | 0,381 | -0,485 |
| 16 | ##A8MXE2 A8MXE2_HUMAN | R.RTGNGPS#S#FILS#LLFINKGK.C    | S241:S242:S246: | 2 | 2,9219 | 0,104 | -1,634 |
| 16 | Q5T5U3 RHG21_HUMAN    | R.HQSYILAVNDQE.T               |                 | 2 | 2,9182 | 0,338 | -0,258 |
| 16 | Q9C0B5 ZDHC5_HUMAN    | K.SFHFDPLSS#GSR.S              | S423:           | 2 | 2,9072 | 0,21  | -0,344 |
| 16 | Q562F6 SGOL2_HUMAN    | E.IHSPNIQDSS#FDSVRE.G          | S1151:          | 3 | 2,9052 | 0,332 | -0,479 |
| 16 | Q96JM3 ZN828_HUMAN    | E.LRKPGLPLS#PEIRS#PAGSPE.L     | S427:S432:      | 3 | 2,9052 | 0,219 | -0,081 |

|    |                    |                             |              |   |        |       |        |
|----|--------------------|-----------------------------|--------------|---|--------|-------|--------|
| 16 | Q13042 CDC16_HUMAN | R.KTPDSRPS#LEETFE.I         | S595:        | 2 | 2,8993 | 0,382 | 0,853  |
| 16 | Q9NPI6 DCP1A_HUMAN | E.RKAS#SPSPLTIGTPE.S        | S522:        | 2 | 2,8982 | 0,31  | -0,753 |
| 16 | Q8IX90 CM003_HUMAN | E.KSPRS#PQLSDFGLE.R         | S155:        | 2 | 2,898  | 0,43  | -0,223 |
| 16 | Q9H1A4 APC1_HUMAN  | R.FNISSHNQS#PK.R            | S377:        | 2 | 2,8966 | 0,249 | -0,182 |
| 16 | Q9H4L7 SMRCD_HUMAN | R.KAS#ISYFK.N               | S79:         | 2 | 2,8936 | 0,39  | -0,596 |
| 16 | Q96EB6 SIRT1_HUMAN | R.RDGPGLERS#PGEPGGAPE.R     | S47:         | 2 | 2,8934 | 0,169 | -0,19  |
| 16 | P08238 HS90B_HUMAN | E.TALLSSGFSLEDPQTHSNR.I     |              | 3 | 2,8926 | 0,249 | -0,089 |
| 16 | Q16204 CCDC6_HUMAN | K.SGGIVISPFRLLEE.L          |              | 2 | 2,8926 | 0,304 | -0,521 |
| 16 | Q9BX40 LS14B_HUMAN | K.SKSFFDNISSE.L             |              | 2 | 2,89   | 0,264 | -0,387 |
| 16 | Q9H7D0 DOCK5_HUMAN | E.KAPEPDLM*#PTR.K           | S1756:       | 2 | 2,8887 | 0,321 | -0,255 |
| 16 | Q86XJ1 GA2L3_HUMAN | R.HGPGLANVCQYDE.W           |              | 2 | 2,8819 | 0,449 | 0      |
| 16 | Q13428 TCOF_HUMAN  | K.AASVPVKGSLGQGTAPVLPK.T    |              | 3 | 2,8793 | 0,302 | -0,567 |
| 16 | P05787 K2C8_HUMAN  | R.VTQKS#YKVS#TSGPR.A        | S9:S13:      | 3 | 2,8734 | 0,185 | -0,108 |
| 16 | Q66K74 MAP1S_HUMAN | R.KAVPM*APAPAS#PGSSNDSSAR.S | S759:        | 3 | 2,8731 | 0,256 | -0,437 |
| 16 | Q9NPQ8 RIC8A_HUMAN | R.GHLTSLQDAM*CE.T           |              | 2 | 2,8714 | 0,358 | -0,266 |
| 16 | P29401 TKT_HUMAN   | E.AVSSAVVGEPGIVTHLAVNR.V    |              | 3 | 2,8703 | 0,206 | -0,088 |
| 16 | Q9NYB9 ABI2_HUMAN  | R.HTPPTIGGS#LPYR.R          | S368:        | 2 | 2,8698 | 0,371 | -0,331 |
| 16 | Q562F6 SGOL2_HUMAN | E.KDNFFSLT#PK.D             | T845:        | 2 | 2,8659 | 0,334 | -0,382 |
| 16 | Q9GZR2 REXO4_HUMAN | R.RPLLTAPDHCS#DDA.-         | S419:        | 2 | 2,8655 | 0,287 | 0      |
| 16 | P21333 FLNA_HUMAN  | K.DAGEGLLAVQITDPEGKPK.K     |              | 3 | 2,8651 | 0,212 | 0      |
| 16 | O76094 SRP72_HUMAN | R.KISASLQSQSPE.H            |              | 2 | 2,8651 | 0,289 | -1,627 |
| 16 | Q9H3Q1 BORG4_HUMAN | R.RNGAAGPHS#PDPLLDE.Q       | S174:        | 2 | 2,8644 | 0,446 | -0,212 |
| 16 | Q8N3Z6 ZCHC7_HUMAN | E.NAHGLSSSLQSNE.L           |              | 2 | 2,8634 | 0,297 | -0,545 |
| 16 | Q8WXE0 CSK12_HUMAN | R.TPQPAAEPPHPLTYSQLPR.V     |              | 3 | 2,8527 | 0,263 | -0,081 |
| 16 | O15381 NVL_HUMAN   | R.KGNPDSVSNTPEM*E.Q         |              | 2 | 2,8522 | 0,429 | -0,321 |
| 16 | Q6ZRV2 FA83H_HUMAN | R.RGS#PVPPVPER.R            | S914:        | 2 | 2,8513 | 0,424 | -0,384 |
| 16 | P10809 CH60_HUMAN  | R.KPLVIIAEDVDGE.A           |              | 2 | 2,8496 | 0,354 | 0,087  |
| 16 | Q9UK58 CCNL1_HUMAN | E.KS#PISINVK.T              | S352:        | 2 | 2,8472 | 0,282 | 0,801  |
| 16 | Q8N7R7 CCYL1_HUMAN | R.RSFS#ADNFIGIQR.S          | S344:        | 2 | 2,8471 | 0,552 | -0,153 |
| 16 | P46013 KI67_HUMAN  | E.KDINTFLGT#PVQK.L          | T1801:       | 2 | 2,8456 | 0,182 | -1,029 |
| 16 | Q9UQ35 SRRM2_HUMAN | K.GQSQTSPDHRS#DT#SSPEVR.Q   | S1069:T1071: | 3 | 2,8434 | 0,158 | -0,41  |
| 16 | Q00613 HSF1_HUMAN  | R.VKKEPPS#PPQSPR.V          | S303:        | 2 | 2,8368 | 0,241 | -0,639 |
| 16 | Q9NVD7 PARVA_HUMAN | K.SPSVPKS#PTPKS#PPSR.K      | S14:S19:     | 2 | 2,8366 | 0,307 | -0,067 |

|    |                     |                              |        |   |        |       |        |
|----|---------------------|------------------------------|--------|---|--------|-------|--------|
| 16 | Q8WUA4 TF3C2_HUMAN  | R.AHFNAM*FQPSS#PTR.R         | S893:  | 3 | 2,8311 | 0,254 | 0,108  |
| 16 | O75592 MYCB2_HUMAN  | E.NRAPS#PHVVQE.N             | S2882: | 2 | 2,8308 | 0,303 | -0,929 |
| 16 | Q9Y5K6 CD2AP_HUMAN  | R.FNGGHS#PTHSPE.K            | S510:  | 2 | 2,8306 | 0,37  | -0,453 |
| 16 | P07355 ANXA2_HUMAN  | E.KDIISDTSGD.F               |        | 2 | 2,8303 | 0,414 | 0      |
| 16 | Q14157 UBP2L_HUMAN  | R.RYPSSISSS#PQKD.L           | S609:  | 2 | 2,8298 | 0,191 | -0,558 |
| 16 | Q9BWT3 PAPOG_HUMAN  | K.RLS#LDSSCLDSSR.D           | S525:  | 2 | 2,8281 | 0,303 | 0,852  |
| 16 | P55786 PSA_HUMAN    | K.KFCAGGSYVGE.D              |        | 2 | 2,8277 | 0,462 | -0,208 |
| 16 | P05787 K2C8_HUMAN   | R.AFSSRS#YTSGPGSR.I          | S24:   | 3 | 2,8247 | 0,193 | -0,119 |
| 16 | Q8WXI9 P66B_HUMAN   | E.RGRLTPS#PDIIVLSDNE.A       | S122:  | 3 | 2,8242 | 0,262 | -0,373 |
| 16 | Q9UMN6 MLL4_HUMAN   | R.YIHFPVTVVSAPGLAPSATPGAPR.I |        | 3 | 2,8223 | 0,136 | -0,304 |
| 16 | P29083 T2EA_HUMAN   | E.DLYTQNVVINM*DDQEDLHR.A     |        | 3 | 2,8201 | 0,095 | 0,157  |
| 16 | Q6S8J3 A26CA_HUMAN  | E.KLCYVALDFEQE.M             |        | 2 | 2,8187 | 0,329 | -0,161 |
| 16 | Q99700 ATX2_HUMAN   | E.NIKPNETS#PSFSKAE.N         | S771:  | 3 | 2,8178 | 0,209 | 0,635  |
| 16 | P31150 GDIA_HUMAN   | R.KQNDVFGAEQ.-               |        | 2 | 2,814  | 0,335 | -0,193 |
| 16 | Q9BQ39 DDX50_HUMAN  | E.GFNRLS#DEFSK.S             | S82:   | 3 | 2,8123 | 0,364 | 0,331  |
| 16 | Q9Y6N7 ROBO1_HUMAN  | K.TFNS#PNLKDGR.F             | S1055: | 2 | 2,8059 | 0,326 | 0,367  |
| 16 | P08621 RU17_HUMAN   | E.LRGGGGDM*AEPSEAGD.A        |        | 2 | 2,8054 | 0,501 | -0,874 |
| 16 | P08670 VIME_HUMAN   | K.SKFADLSE.A                 |        | 2 | 2,8039 | 0,126 | -0,204 |
| 16 | Q99615 DNJC7_HUMAN  | K.TRYDSGQDLDEE.G             |        | 2 | 2,803  | 0,384 | -0,427 |
| 16 | Q9BXS6 NUSAP_HUMAN  | K.SAHVTVSGGT#PKGE.A          | T314:  | 2 | 2,8015 | 0,351 | 0      |
| 16 | Q02241 KIF23_HUMAN  | R.RSSTVAPAQPDGAE.S           |        | 2 | 2,8009 | 0,46  | -0,352 |
| 16 | Q8TF40 FNIP1_HUMAN  | R.NKS#SLLFKE.S               | S593:  | 2 | 2,7991 | 0,112 | 1,171  |
| 16 | Q5QP82 WDR32_HUMAN  | R.RTT#SSSDLTSSSSSGPR.V       | T348:  | 2 | 2,7948 | 0,411 | -0,258 |
| 16 | P45974 UBP5_HUMAN   | R.KAVYYTGNSGAE.A             |        | 2 | 2,794  | 0,295 | 0,484  |
| 16 | Q14C86 GAPD1_HUMAN  | K.RTSPSDGAM*ANYE.S           |        | 2 | 2,7935 | 0,377 | -0,517 |
| 16 | Q04917 1433F_HUMAN  | E.DSYKDSTLIM*QLLR.D          |        | 2 | 2,7922 | 0,338 | -0,144 |
| 16 | P53992 SC24C_HUMAN  | K.LFLFHTSLPIAEAPGK.L         |        | 3 | 2,792  | 0,296 | -0,21  |
| 16 | Q8TF15 Q8TF15_HUMAN | K.KKPPVS#PPLLLVQDSE.T        | S155:  | 3 | 2,7919 | 0,179 | -0,2   |
| 16 | O15234 CASC3_HUMAN  | R.TPQPVTIKPPPPEVVS.R.G       |        | 3 | 2,7918 | 0,3   | 0      |
| 16 | Q06587 RING1_HUMAN  | R.LHNQQALSSSIEE.G            |        | 2 | 2,79   | 0,164 | -0,754 |
| 16 | Q13838 UAP56_HUMAN  | R.VNIAFNIDM*PEDSDTYLHR.V     |        | 3 | 2,7873 | 0,284 | -0,395 |
| 16 | P14618 KPYM_HUMAN   | E.SFASDPILYRPVAVALDTK.G      |        | 3 | 2,784  | 0,264 | -0,621 |
| 16 | Q06203 PUR1_HUMAN   | R.HGIGLSTSSDSE.M             |        | 2 | 2,7837 | 0,162 | -0,308 |

|    |                    |                            |            |   |        |       |        |
|----|--------------------|----------------------------|------------|---|--------|-------|--------|
| 16 | O00429 DNM1L_HUMAN | K.NKLYTDFDE.I              |            | 2 | 2,7834 | 0,213 | -0,213 |
| 16 | O43166 SI1L1_HUMAN | R.HSAS#PVVFTSAR.S          | S1433:     | 2 | 2,7781 | 0,294 | -0,273 |
| 16 | P05787 K2C8_HUMAN  | E.IEGLKGQRAS#LE.A          | S330:      | 2 | 2,7773 | 0,438 | -0,707 |
| 16 | O14777 NDC80_HUMAN | R.KVS#LFGK.R               | S55:       | 2 | 2,7743 | 0,194 | 0,213  |
| 16 | P06748 NPM_HUMAN   | E.KGGS#LPKVE.A             | S260:      | 2 | 2,7673 | 0,24  | 0,123  |
| 16 | P14678 RSMB_HUMAN  | K.HM*NLILCDCDE.F           |            | 2 | 2,7651 | 0,269 | 0,51   |
| 16 | Q92576 PHF3_HUMAN  | R.RGS#AVATSHFE.V           | S1758:     | 2 | 2,7651 | 0,509 | -0,589 |
| 16 | O43166 SI1L1_HUMAN | R.SKS#ETGDSSIFR.K          | S288:      | 2 | 2,7649 | 0,335 | -1,05  |
| 16 | Q86SQ0 PHLB2_HUMAN | K.IKDINDQM*DE.S            |            | 2 | 2,7629 | 0,23  | -0,888 |
| 16 | Q09666 AHNK_HUMAN  | K.FSM*PGFKGEGPDVDVTLPK.A   |            | 3 | 2,759  | 0,287 | -0,629 |
| 16 | Q9H0B6 KLC2_HUMAN  | K.RAS#SLNFLNK.S            | S581:      | 2 | 2,7583 | 0,231 | -0,298 |
| 16 | Q09666 AHNK_HUMAN  | K.ISM*PGFKGEGPEVDVNLPK.A   |            | 3 | 2,7566 | 0,164 | 0,09   |
| 16 | P46934 NEDD4_HUMAN | K.RPTPQDNLTDAE.N           |            | 2 | 2,7557 | 0,36  | -0,18  |
| 16 | P16930 FAAA_HUMAN  | R.KFLLDGDE.V               |            | 2 | 2,7525 | 0,128 | -0,13  |
| 16 | P56537 IF6_HUMAN   | E.RLSALGNVTTCDN.Y          |            | 2 | 2,7519 | 0,369 | -0,429 |
| 16 | Q96PN7 TREF1_HUMAN | K.LLPPKPSSQGFTNSTVAAPSAR.D |            | 3 | 2,7511 | 0,429 | 0,247  |
| 16 | Q14914 LTB4D_HUMAN | K.HFVGYPTNSDFE.L           |            | 2 | 2,7509 | 0,306 | -0,259 |
| 16 | O14920 IKKB_HUMAN  | K.VRGPVSGS#PDSM*NASR.L     | S672:      | 2 | 2,75   | 0,425 | -0,499 |
| 16 | P16383 GCF_HUMAN   | R.AQDDYISLDVQHTSSISGM*K.R  |            | 3 | 2,7493 | 0,343 | 0,165  |
| 16 | Q76I76 SSH2_HUMAN  | R.LPHSSS#SENIK.S           | S1217:     | 3 | 2,7453 | 0,333 | 0,786  |
| 16 | Q6ZRV2 FA83H_HUMAN | R.KGS#PTPGFSTR.R           | S881:      | 2 | 2,7341 | 0,234 | 0,803  |
| 16 | Q6PGN9 PSRC1_HUMAN | R.RET#FVLK.D               | T116:      | 2 | 2,7335 | 0,255 | 0      |
| 16 | Q8IWW6 RHG12_HUMAN | R.TRS#FGHFPGPE.F           | S176:      | 2 | 2,7326 | 0,247 | -0,279 |
| 16 | P28290 SSFA2_HUMAN | E.SKLDSDFNIS#SHSE.L        | S424:      | 2 | 2,7278 | 0,32  | 0,148  |
| 16 | P04264 K2C1_HUMAN  | R.GSGGGSSGGSIGGR.G         |            | 2 | 2,7218 | 0,33  | -0,335 |
| 16 | Q96AQ6 PBIP1_HUMAN | K.YRAPQGCSGVDE.C           |            | 2 | 2,7215 | 0,202 | -0,729 |
| 16 | Q3KR37 GRM1B_HUMAN | E.TKPDAS#PQLPK.K           | S274:      | 2 | 2,7206 | 0,221 | -0,483 |
| 16 | P63313 TYB10_HUMAN | E.IAS#FDKAK.L              | S12:       | 2 | 2,7187 | 0,297 | -0,064 |
| 16 | Q9UQ35 SRRM2_HUMAN | K.TVART#PLGQR.S            | T1531:     | 2 | 2,7185 | 0,227 | -0,414 |
| 16 | Q9BXY0 RBM13_HUMAN | K.RAYVEIEYEQE.T            |            | 2 | 2,7184 | 0,206 | -0,427 |
| 16 | P12956 KU70_HUMAN  | E.NLEAS#GDYKYSGR.D         | S27:       | 2 | 2,7172 | 0,384 | 0      |
| 16 | P31946 1433B_HUMAN | K.DSTLIM*QLLR.D            |            | 2 | 2,7168 | 0,208 | -0,708 |
| 16 | Q7Z5K2 WAPL_HUMAN  | K.RPES#PS#EISPIKGSVR.T     | S221:S223: | 2 | 2,7156 | 0,283 | -0,257 |



|    |                    |                           |              |   |        |       |        |
|----|--------------------|---------------------------|--------------|---|--------|-------|--------|
| 16 | Q15653 IKBB_HUMAN  | R.LPPTPASKPLPDDPRPV.-     |              | 2 | 2,7136 | 0,366 | -0,272 |
| 16 | Q9NR30 DDX21_HUMAN | K.LRSDAGLESdT#AM*K.K      | T15:         | 3 | 2,7127 | 0,23  | 0,575  |
| 16 | P35580 MYH10_HUMAN | K.FSKVEDM*AE.L            |              | 2 | 2,7124 | 0,28  | -0,455 |
| 16 | P78371 TCPB_HUMAN  | R.VRVDS#TAKVAE.I          | S260:        | 2 | 2,7121 | 0,407 | -0,194 |
| 16 | O60499 STX10_HUMAN | E.M*KDHM*VS#PTAVAFLE.R    | S108:        | 2 | 2,7074 | 0,334 | 0,068  |
| 16 | Q3KQU3 MA7D1_HUMAN | K.SRGPT#PPAM*GPR.D        | T97:         | 3 | 2,7073 | 0,243 | 0,277  |
| 16 | O94854 K0754_HUMAN | E.GPVTPATTVHAPEEPDTAAVR.V |              | 3 | 2,7063 | 0,255 | -0,086 |
| 16 | O75581 LRP6_HUMAN  | E.FGYSSNS#PSTHR.S         | S1508:       | 2 | 2,706  | 0,514 | -0,602 |
| 16 | P68104 EF1A1_HUMAN | E.HALLAY#TLGVK.Q          | Y141:        | 2 | 2,7018 | 0,299 | -0,771 |
| 16 | Q6P2E9 EDC4_HUMAN  | E.KSCQAM*FQQIND.S         |              | 2 | 2,7017 | 0,341 | 0      |
| 16 | Q9BW91 NUDT9_HUMAN | K.ARTS#PYPGSKVE.R         | S68:         | 2 | 2,7007 | 0,343 | -0,356 |
| 16 | Q02241 KIF23_HUMAN | E.KYM*LTHQELAS#DGEIE.T    | S867:        | 2 | 2,7004 | 0,445 | -0,249 |
| 16 | Q14257 RCN2_HUMAN  | E.KANQDSGPGLSLEE.F        |              | 2 | 2,7003 | 0,267 | 0      |
| 16 | Q86TB9 PATL1_HUMAN | R.RSTS#PIIGSPPVR.A        | S179:        | 2 | 2,6992 | 0,243 | -0,422 |
| 16 | Q13428 TCOF_HUMAN  | E.AKPQQAAGM*LS#PKT#GGKE.A | S1257:T1260: | 3 | 2,6959 | 0,183 | -0,185 |
| 16 | P28070 PSB4_HUMAN  | E.KQPVLSQTE.A             |              | 2 | 2,695  | 0,234 | -0,237 |
| 16 | Q14CB8 RHG19_HUMAN | R.SRS#FSGLIK.R            | S422:        | 2 | 2,6935 | 0,215 | -0,681 |
| 16 | O43707 ACTN4_HUMAN | R.KAGTQIENIDE.D           |              | 2 | 2,6923 | 0,186 | -0,301 |
| 16 | O60763 USO1_HUMAN  | K.NNNSNQNFKE.G            |              | 2 | 2,6905 | 0,147 | -0,18  |
| 16 | P07948 LYN_HUMAN   | K.GKDSL#DDGVDLK.T         | S13:         | 2 | 2,6904 | 0,222 | -0,854 |
| 16 | O60264 SMCA5_HUMAN | E.KQNLLS#VGDYR.H          | S137:        | 2 | 2,6897 | 0,267 | -0,622 |
| 16 | Q8NFC6 FA44A_HUMAN | R.KLS#VLGK.D              | S800:        | 2 | 2,6886 | 0,131 | 0,222  |
| 16 | Q15283 RASA2_HUMAN | R.KSQFQVEEEDIE.K          |              | 2 | 2,6852 | 0,216 | -0,247 |
| 16 | Q9Y2W1 TR150_HUMAN | R.ERS#PALKS#PLQSVVVR.R    | S248:S253:   | 2 | 2,6846 | 0,246 | 0,19   |
| 16 | Q92785 REQU_HUMAN  | E.GEDKEDSQPPT#PVSQR.S     | T248:        | 3 | 2,6845 | 0,32  | -0,297 |
| 16 | Q92870 APBB2_HUMAN | R.RTKS#FLNYYADLE.T        | S160:        | 2 | 2,6844 | 0,326 | -0,359 |
| 16 | Q9NP74 PALMD_HUMAN | K.NSISLKEQEE.S            |              | 2 | 2,6842 | 0,22  | 0,104  |
| 16 | Q9NZJ7 MTCH1_HUMAN | R.RM*DGGSGGLSGDNPATTE.A   |              | 2 | 2,6831 | 0,293 | 0,476  |
| 16 | O75531 BAF_HUMAN   | R.DFVAEPM*GEKPVGSLAGIGE.V |              | 2 | 2,6828 | 0,356 | 0      |
| 16 | Q96Q42 ALS2_HUMAN  | K.KSS#SLVDIREEE.T         | S465:        | 2 | 2,6821 | 0,295 | -0,249 |
| 16 | Q6NZI2 PTRF_HUMAN  | R.RGSS#PDVHALLE.I         | S366:        | 2 | 2,6776 | 0,335 | -0,448 |
| 16 | P42695 CNDD3_HUMAN | R.NSSAFSYQR.Q             |              | 2 | 2,6757 | 0,351 | -0,115 |
| 16 | Q08211 DHX9_HUMAN  | E.GDLPTTM*GGPLPHLALK.A    |              | 2 | 2,6754 | 0,369 | -0,133 |

|    |                     |                                |            |   |        |       |        |
|----|---------------------|--------------------------------|------------|---|--------|-------|--------|
| 16 | Q9BUH6 CI142_HUMAN  | E.TAVS#PRKS#PRPAGQLFLPDPDPQR.G | S148:S152: | 3 | 2,6751 | 0,309 | -0,19  |
| 16 | Q9H3S7 PTN23_HUMAN  | R.RGAAAADLLSSSPE.S             |            | 2 | 2,6747 | 0,264 | -0,363 |
| 16 | O95425 SVIL_HUMAN   | R.GTTPVSKPLEDIEARPDM*QLE.S     |            | 3 | 2,6746 | 0,293 | -0,234 |
| 16 | Q92820 GGH_HUMAN    | E.LLLSLAVEPLTANFHK.W           |            | 2 | 2,6713 | 0,243 | -0,069 |
| 16 | Q8TAT6 NPL4_HUMAN   | R.NKDTYFLSSE.E                 |            | 2 | 2,6686 | 0,219 | -0,203 |
| 16 | Q5T5P2 SKT_HUMAN    | R.TRAS#LPVVR.S                 | S169:      | 2 | 2,6678 | 0,288 | 0      |
| 16 | P22626 ROA2_HUMAN   | R.GGNFGFGDSR.G                 |            | 2 | 2,6664 | 0,152 | 0,241  |
| 16 | Q6F5E8 LR16C_HUMAN  | R.LQRS#PVLK.R                  | S1381:     | 2 | 2,6648 | 0,194 | -0,358 |
| 16 | P48643 TCPE_HUMAN   | K.IAILTCPFEPKPK.T              |            | 2 | 2,6639 | 0,348 | -0,454 |
| 16 | Q8ND82 Z280C_HUMAN  | K.GIKSEPHS#PGIPE.I             | S80:       | 2 | 2,6625 | 0,342 | -0,085 |
| 16 | Q8IX01 SFR14_HUMAN  | R.YHM*DASGEAVSE.T              |            | 2 | 2,662  | 0,24  | -0,651 |
| 16 | Q674X7 KAZRN_HUMAN  | K.RHS#LAM*PGETVLNGNQE.W        | S259:      | 3 | 2,6597 | 0,209 | -0,282 |
| 16 | Q13425 SNTB2_HUMAN  | R.GPAGEAGAS#PPVRR.V            | S110:      | 3 | 2,6589 | 0,448 | -0,326 |
| 16 | O75531 BAF_HUMAN    | R.DFVAEPM*GEKPVGSLAGIGE.V      |            | 3 | 2,655  | 0,155 | -0,181 |
| 16 | Q99549 MPP8_HUMAN   | R.KDIQRSL#LNNDIFE.A            | S126:      | 2 | 2,6547 | 0,208 | -0,137 |
| 16 | P78527 PRKDC_HUMAN  | E.KITAQSIEE.L                  |            | 2 | 2,6529 | 0,204 | -0,539 |
| 16 | P08134 RHOC_HUMAN   | E.GRDM*ANRIS#AFGYLE.C          | S152:      | 2 | 2,6491 | 0,303 | -0,136 |
| 16 | Q9C0B5 ZDHC5_HUMAN  | K.SFHFDPLSSGS#RS#SSLK.S        | S425:S427: | 2 | 2,6488 | 1     | -0,122 |
| 16 | P62195 PRS8_HUMAN   | K.ILPNKVDPLVSLM*M*VEK.V        |            | 3 | 2,6478 | 0,138 | -0,093 |
| 16 | P22626 ROA2_HUMAN   | R.GGGGNFGPGGSNFR.G             |            | 2 | 2,6435 | 0,442 | -0,531 |
| 16 | Q9NS68 TNR19_HUMAN  | R.RDS#VQTCGPVR.L               | S241:      | 2 | 2,6402 | 0,373 | -0,18  |
| 16 | Q14204 DYHC1_HUMAN  | E.KSLQALNE.V                   |            | 2 | 2,6383 | 0,178 | 0      |
| 16 | Q8TB72 PUM2_HUMAN   | K.GKAS#PFEEQNR.D               | S136:      | 2 | 2,6355 | 0,4   | -0,335 |
| 16 | Q14974 IMB1_HUMAN   | E.DDIVPHVLPFIKE.H              |            | 3 | 2,6351 | 0,222 | 0      |
| 16 | A8MSX0 A8MSX0_HUMAN | E.LSQPRS#HTS#LKDE.L            | S99:S102:  | 2 | 2,634  | 0,375 | -0,515 |
| 16 | Q9Y608 LRRF2_HUMAN  | R.NSASATPLSGNSSR.R             |            | 2 | 2,6337 | 0,331 | -0,589 |
| 16 | P06400 RB_HUMAN     | K.LRFDIEGSDE.A                 |            | 2 | 2,6328 | 0,244 | -0,207 |
| 16 | Q9H446 RWDD1_HUMAN  | E.KQLFHGT#PVTIE.N              | T144:      | 2 | 2,6324 | 0,33  | -0,505 |
| 16 | Q15424 SAFB1_HUMAN  | R.KFDFDACNE.V                  |            | 2 | 2,6272 | 0,336 | -0,106 |
| 16 | P49023 PAXI_HUMAN   | R.ISASSATRE.L                  |            | 2 | 2,6268 | 0,347 | -0,331 |
| 16 | O94906 PRP6_HUMAN   | R.KLAEVTEEE.W                  |            | 2 | 2,6265 | 0,282 | 0      |
| 16 | P49589 SYCC_HUMAN   | R.LHLYNS#LTR.N                 | S34:       | 2 | 2,6255 | 0,381 | 0,917  |
| 16 | P57737 CORO7_HUMAN  | R.RAPSSAQYLEE.K                |            | 2 | 2,6248 | 0,246 | -0,488 |

|    |                     |                              |              |   |        |       |        |
|----|---------------------|------------------------------|--------------|---|--------|-------|--------|
| 16 | Q9NXR1 NDE1_HUMAN   | R.RPS#STSVPLGDK.G            | S306:        | 2 | 2,6239 | 0,382 | -0,184 |
| 16 | Q86UU1 PHLB1_HUMAN  | K.KPAATSPLS#PM*ANGGR.Y       | S223:        | 2 | 2,6234 | 0,352 | -0,813 |
| 16 | Q8NI35 INADL_HUMAN  | R.RLFDDEAS#VDEPR.R           | S645:        | 3 | 2,6219 | 0,133 | 0,112  |
| 16 | Q7Z309 F122B_HUMAN  | K.RIDFTPV5#PAPS#PTRGFGK.M    | S115:S119:   | 3 | 2,621  | 0,301 | -0,334 |
| 16 | P06703 S10A6_HUMAN  | R.NKDQEVNFQE.Y               |              | 2 | 2,6208 | 0,125 | 0      |
| 16 | Q92878 RAD50_HUMAN  | E.KVFQGTDEQLND.L             |              | 2 | 2,6187 | 0,366 | -0,35  |
| 16 | P27987 IP3KB_HUMAN  | R.RAVLS#PGSVFSPGR.G          | S43:         | 2 | 2,6173 | 0,361 | -0,242 |
| 16 | Q9C0B5 ZDHC5_HUMAN  | K.SFHFDPLSSGS#R.S            | S425:        | 3 | 2,6131 | 0,1   | -0,129 |
| 16 | Q8WXA9 SFR12_HUMAN  | K.IQHNGNCQLNEE.N             |              | 2 | 2,6107 | 0,23  | -0,922 |
| 16 | Q96JM3 ZN828_HUMAN  | R.KPGPPLS#PEIR.S             | S427:        | 2 | 2,6101 | 0,261 | -0,576 |
| 16 | Q14166 TTL12_HUMAN  | R.RPAERSS#PGQTPEEGAQALAE.F   | S16:         | 3 | 2,6059 | 0,277 | -0,324 |
| 16 | Q9UBC2 EP15R_HUMAN  | E.RGS#FGAM*DDPFK.N           | S593:        | 2 | 2,6054 | 0,315 | -0,171 |
| 16 | P13984 T2FB_HUMAN   | K.DLVDITKQPVVYLKE.I          |              | 2 | 2,6046 | 0,198 | 0,208  |
| 16 | O75533 SF3B1_HUMAN  | R.TM*IIS#PERLDPFADGGKTPDPK.M | S129:        | 3 | 2,6022 | 0,096 | -0,369 |
| 16 | Q14160 LAP4_HUMAN   | K.RVS#LVGADDLR.K             | S1378:       | 2 | 2,6018 | 0,107 | -0,476 |
| 16 | P10244 MYBB_HUMAN   | E.LAAATTSKEQEPIGTDLDAVR.T    |              | 3 | 2,5971 | 0,134 | -0,084 |
| 16 | P57081 WDR4_HUMAN   | K.M*RPGEATLSC.-              |              | 2 | 2,5949 | 0,432 | -0,429 |
| 16 | A7KAX9 A7KAX9_HUMAN | E.KVVYAFS#PK.I               | S892:        | 2 | 2,5942 | 0,091 | 0      |
| 16 | Q6UN15 FIP1_HUMAN   | R.ERDHS#PTPSVFNSDEE.R        | S492:        | 2 | 2,5933 | 0,266 | -0,253 |
| 16 | Q9UGU5 HM2L1_HUMAN  | R.KHS#SDDYYYGDISSLE.S        | S79:         | 3 | 2,5931 | 0,193 | 0      |
| 16 | Q9Y6I3 EPN1_HUMAN   | K.NIVHNYSEAE.I               |              | 2 | 2,5926 | 0,314 | -0,415 |
| 16 | P42166 LAP2A_HUMAN  | K.DVYVQLYLQHLTAR.N           |              | 3 | 2,5914 | 0,142 | -0,426 |
| 16 | Q9BX68 HINT2_HUMAN  | R.DVAPQAPVHFLVIPK.K          |              | 2 | 2,5882 | 0,311 | -0,374 |
| 16 | B2RMZ9 B2RMZ9_HUMAN | R.RLNS#S#PRAPVSPK.F          | S416:S417:   | 3 | 2,587  | 0,09  | -0,544 |
| 16 | Q02952 AKA12_HUMAN  | E.LQSHAKS#PPS#PVERE.M        | S1328:S1331: | 3 | 2,5849 | 0,151 | -0,201 |
| 16 | O60361 NDK8_HUMAN   | R.NIIHGS#DSVK.S              | S105:        | 2 | 2,5845 | 0,22  | 1,061  |
| 16 | Q99615 DNJC7_HUMAN  | R.RAQCYM*DTEQYE.E            |              | 2 | 2,5832 | 0,274 | -0,606 |
| 16 | O60502 NCOAT_HUMAN  | E.LKPM*DTDKES#IAE.S          | S505:        | 2 | 2,5809 | 0,322 | -0,698 |
| 16 | Q92542 NICA_HUMAN   | R.RSSIQSTFSINPE.I            |              | 2 | 2,5808 | 0,323 | -0,583 |
| 16 | Q13136 LIPA1_HUMAN  | E.RLAS#LSSHVTE.L             | S275:        | 2 | 2,5804 | 0,395 | -0,572 |
| 16 | Q13442 HAP28_HUMAN  | K.GVEGLIDIENPNR.V            |              | 2 | 2,5801 | 0,373 | 0,684  |
| 16 | O95433 AHSA1_HUMAN  | K.FHM*VDGNVSGE.F             |              | 2 | 2,58   | 0,329 | -0,909 |
| 16 | Q9Y4F5 K0284_HUMAN  | E.HQGLPVPGS#PGGQK.W          | S655:        | 2 | 2,579  | 0,112 | -1,102 |

|    |                    |                           |            |   |        |       |        |
|----|--------------------|---------------------------|------------|---|--------|-------|--------|
| 16 | Q9P2B4 CT2NL_HUMAN | K.THSQAASLTAE.D           |            | 2 | 2,5776 | 0,298 | -0,902 |
| 16 | Q9UKV3 ACINU_HUMAN | R.KIS#VVSATK.G            | S825:      | 2 | 2,5761 | 0,136 | 0,602  |
| 16 | Q15181 IPYR_HUMAN  | K.HTGCCGDNDPIDVCE.I       |            | 2 | 2,5749 | 0,342 | -0,279 |
| 16 | Q6IN85 SMEK1_HUMAN | K.TNLSGRQS#PSFK.L         | S741:      | 2 | 2,5722 | 0,134 | -0,522 |
| 16 | Q9BPX3 CND3_HUMAN  | E.KS#KLNLAQFLNE.D         | S1002:     | 2 | 2,5713 | 0,352 | -0,575 |
| 16 | Q9UKG1 DP13A_HUMAN | K.QRFPLGGDDE.V            |            | 2 | 2,5658 | 0,32  | 0,108  |
| 16 | P62424 RL7A_HUMAN  | R.TNYNDRYDE.I             |            | 2 | 2,5606 | 0,335 | -0,41  |
| 16 | Q9NYF8 BCLF1_HUMAN | R.YSPS#QNS#PIHHIPSR.R     | S287:S290: | 2 | 2,5535 | 0,293 | -0,13  |
| 16 | O60232 SSA27_HUMAN | R.KIYCVACQE.L             |            | 2 | 2,5498 | 0,347 | -0,313 |
| 16 | Q92576 PHF3_HUMAN  | K.AKPVGS#PLFK.F           | S283:      | 2 | 2,5496 | 0,358 | -0,434 |
| 16 | Q9Y4P3 TBL2_HUMAN  | R.FLASCGR.A               |            | 2 | 2,5468 | 0,307 | -0,066 |
| 16 | O95639 CPSF4_HUMAN | K.GHLAFLSGQ.-             |            | 2 | 2,5467 | 0,24  | -0,066 |
| 16 | Q8WUA2 PPIL4_HUMAN | K.SKYQTDLYE.R             |            | 2 | 2,5458 | 0,37  | -0,425 |
| 16 | Q9C0C2 TB182_HUMAN | E.FGKRDS#LGAYASQDANE.Q    | S893:      | 3 | 2,5454 | 0,113 | 0,192  |
| 16 | Q04917 1433F_HUMAN | E.DSYKDSTLIM*QLLR.D       |            | 3 | 2,5441 | 0,083 | -0,108 |
| 16 | Q15029 U5S1_HUMAN  | E.TIVQEEDTQPLTEPIIKPVK.T  |            | 3 | 2,5355 | 0,273 | -0,562 |
| 16 | Q9UFW8 CGBP1_HUMAN | R.RAYLPDGYENE.N           |            | 2 | 2,5344 | 0,225 | -0,092 |
| 16 | Q92499 DDX1_HUMAN  | E.LKFNFGEED.F             |            | 2 | 2,5328 | 0,224 | -0,219 |
| 16 | P59074 CG301_HUMAN | E.TVPLPNVPSIALPSKPAK.K    |            | 2 | 2,5328 | 0,351 | -0,334 |
| 16 | Q8IYB3 SRRM1_HUMAN | R.APQTS#SSPPVRR.G         | S694:      | 3 | 2,5289 | 0,247 | -0,313 |
| 16 | P17066 HSP76_HUMAN | E.ILANDQGNR.T             |            | 2 | 2,5287 | 0,264 | -1,463 |
| 16 | Q9UKL3 C8AP2_HUMAN | K.KLNLTLS#PAK.K           | S567:      | 2 | 2,5286 | 0,382 | -0,628 |
| 16 | Q14980 NUMA1_HUMAN | R.KNSLISSLEEE.V           |            | 2 | 2,5284 | 0,158 | -0,391 |
| 16 | Q8IWS0 PHF6_HUMAN  | K.CGFCHVGEEE.N            |            | 2 | 2,5279 | 0,198 | 0,199  |
| 16 | P36957 ODO2_HUMAN  | E.KAVGDTVAEDE.V           |            | 2 | 2,5218 | 0,236 | -0,323 |
| 16 | Q02543 RL18A_HUMAN | R.AHS#IQIM*K.V            | S123:      | 2 | 2,5218 | 0,295 | -0,238 |
| 16 | P30622 CLIP1_HUMAN | E.SISNLS#EAGS#IKKGERE.L   | S200:S204: | 2 | 2,5216 | 0,273 | -0,124 |
| 16 | P82094 TMF1_HUMAN  | R.KPFSVSST#PTM*SR.S       | T929:      | 2 | 2,5178 | 0,248 | -0,642 |
| 16 | Q9ULU4 PKCB1_HUMAN | R.RIS#LSDM*PR.S           | S425:      | 2 | 2,5157 | 0,373 | -0,313 |
| 16 | P52789 HXK2_HUMAN  | E.TKDISDIEGE.K            |            | 2 | 2,5121 | 0,335 | 0      |
| 16 | Q53ET0 CRTC2_HUMAN | R.HGSGPNIILTGDSS#PGFSKE.I | S624:      | 3 | 2,512  | 0,098 | -0,528 |
| 16 | Q86W92 LIPB1_HUMAN | K.SSS#LGNLKE.T            | S466:      | 2 | 2,5109 | 0,26  | -0,961 |
| 16 | Q9H7N4 SFR19_HUMAN | R.RVFFVVGTEAE.A           |            | 2 | 2,5098 | 0,303 | 0,22   |

|    |                    |                            |              |   |        |       |        |
|----|--------------------|----------------------------|--------------|---|--------|-------|--------|
| 16 | Q96E29 MTER1_HUMAN | K.NHAIFSEDLE.N             |              | 2 | 2,5094 | 0,314 | -0,831 |
| 16 | Q14974 IMB1_HUMAN  | E.DDIVPHVLPFIKE.H          |              | 2 | 2,5093 | 0,334 | -0,401 |
| 16 | P68104 EF1A1_HUMAN | R.KDGNASGTTLLE.A           |              | 2 | 2,5093 | 0,253 | -0,304 |
| 16 | Q15054 DPOD3_HUMAN | K.FKVNLDSE.Q               |              | 2 | 2,5081 | 0,114 | 0,256  |
| 16 | O60343 TBCD4_HUMAN | R.HAS#APSHVQPSDSE.K        | S341:        | 2 | 2,5061 | 0,402 | -0,958 |
| 16 | O95573 ACSL3_HUMAN | K.TKADFFEDE.N              |              | 2 | 2,504  | 0,386 | -0,111 |
| 16 | P55196 AFAD_HUMAN  | E.TTFDLGGDIHSGTALPTSK.S    |              | 3 | 2,5002 | 0,303 | -0,095 |
| 16 | Q9Y2V2 CHSP1_HUMAN | R.ERS#PS#PLRGNVVP#PLPTRR.T | S30:S32:S41: | 3 | 2,4993 | 0,171 | -0,224 |
| 16 | P52701 MSH6_HUMAN  | K.IHNVGS#PLK.S             | S830:        | 2 | 2,4911 | 0,311 | -0,234 |
| 16 | P21796 VDAC1_HUMAN | E.HINLGCDM*DFD.I           |              | 2 | 2,49   | 0,195 | -0,451 |
| 16 | O75351 VPS4B_HUMAN | K.KFTEDFGQEG.-             |              | 2 | 2,4888 | 0,347 | -0,211 |
| 16 | Q00839 HNRPU_HUMAN | E.RLQAALDDEE.A             |              | 2 | 2,4882 | 0,203 | -0,631 |
| 16 | Q9UQ35 SRRM2_HUMAN | E.SYFGVSSLQLK.G            |              | 2 | 2,4878 | 0,337 | -0,496 |
| 16 | Q15057 CENB2_HUMAN | K.KSSPSTGS#LDSGNESE.K      | S384:        | 3 | 2,487  | 0,159 | 0,204  |
| 16 | Q96SB3 NEB2_HUMAN  | E.AGIQALKPPDAPGPDEAPK.G    |              | 3 | 2,486  | 0,082 | -0,293 |
| 16 | P54652 HSP72_HUMAN | K.RTLSSSTQASIE.I           |              | 2 | 2,4858 | 0,312 | -0,477 |
| 16 | Q86V48 LUZP1_HUMAN | E.DRFVPGSSQSE.G            |              | 2 | 2,4856 | 0,152 | -0,505 |
| 16 | P12081 SYHC_HUMAN  | K.LKAQLGPDE.S              |              | 2 | 2,4832 | 0,224 | 0      |
| 16 | P27987 IP3KB_HUMAN | K.SGGGPGPSGSET#PPPPRR.A    | T33:         | 3 | 2,4799 | 0,208 | 0      |
| 16 | Q7L7X3 TAOK1_HUMAN | R.GSSM*GVRNS#PQALR.R       | S965:        | 3 | 2,4786 | 0,158 | -0,705 |
| 16 | Q07866 KLC1_HUMAN  | K.YKDAANLLND.A             |              | 2 | 2,4774 | 0,321 | 0,107  |
| 16 | P12814 ACTN1_HUMAN | R.KAGTQIENIEE.D            |              | 2 | 2,4772 | 0,135 | -0,297 |
| 16 | Q5T5U3 RHG21_HUMAN | R.LRTS#TSDLSRGE.I          | S1860:       | 2 | 2,4765 | 0,376 | -0,696 |
| 16 | Q96RQ1 ERGI2_HUMAN | K.KTLS#LVKE.L              | S11:         | 2 | 2,4741 | 0,172 | -0,061 |
| 16 | Q9HCN4 GPN1_HUMAN  | K.DSLSPVLHPSDLILTR.G       |              | 3 | 2,47   | 0,295 | 1,349  |
| 16 | Q9BWN1 PRR14_HUMAN | E.DVM*AVHM*VPVPSK.Q        |              | 2 | 2,4684 | 0,236 | 0      |
| 16 | P20700 LMNB1_HUMAN | R.LKLSPS#PSSR.V            | S393:        | 2 | 2,4668 | 0,169 | -0,212 |
| 16 | Q9H2G2 SLK_HUMAN   | K.TKDSGSISLQE.T            |              | 2 | 2,4645 | 0,149 | 0,733  |
| 16 | Q96PM5 ZN363_HUMAN | E.SYNTAQAGGR.R             |              | 2 | 2,4637 | 0,421 | -0,357 |
| 16 | Q6P2E9 EDC4_HUMAN  | E.VEPLGLPQAS#PSR.T         | S723:        | 2 | 2,4607 | 0,251 | -0,256 |
| 16 | Q96L73 NSD1_HUMAN  | E.RAAS#PHQVTPQADE.K        | S2471:       | 2 | 2,4584 | 0,425 | -0,231 |
| 16 | Q09666 AHNK_HUMAN  | K.FKAEAPLPS#PK.L           | S5110:       | 3 | 2,4579 | 0,085 | 0,434  |
| 16 | Q9H3P7 GCP60_HUMAN | K.NANKPLLDE.I              |              | 2 | 2,4564 | 0,238 | -0,241 |

|    |                    |                                |              |   |        |       |        |
|----|--------------------|--------------------------------|--------------|---|--------|-------|--------|
| 16 | P17812 PYRG1_HUMAN | K.YIDSADLEPITSQEEPVRVHE.A      |              | 3 | 2,4563 | 0,211 | -0,147 |
| 16 | O43765 SGTA_HUMAN  | R.HGGLSSDAQESLE.V              |              | 2 | 2,4562 | 0,211 | -0,459 |
| 16 | Q13546 RIPK1_HUMAN | R.KLGFTQSQIDE.I                |              | 2 | 2,4559 | 0,291 | -0,289 |
| 16 | P78310 CXAR_HUMAN  | E.RTPQS#PTLPPAK.V              | S332:        | 2 | 2,4557 | 0,149 | -0,622 |
| 16 | P07355 ANXA2_HUMAN | E.GDHSTPPSAY#GSVK.A            | Y24:         | 2 | 2,4546 | 0,388 | -0,165 |
| 16 | P56537 IF6_HUMAN   | R.HGLLVNNTTDQE.L               |              | 2 | 2,4518 | 0,394 | 0,085  |
| 16 | P31689 DNJA1_HUMAN | R.GKNVVHQLS#VTLE.D             | S112:        | 2 | 2,4517 | 0,236 | -0,243 |
| 16 | Q7Z4V5 HDGR2_HUMAN | R.GRGPPSSSDSEPEAE.L            |              | 2 | 2,4474 | 0,372 | -0,65  |
| 16 | Q96KB5 TOPK_HUMAN  | E.GISNFKT#PSK.L                | T9:          | 2 | 2,4465 | 0,132 | -0,316 |
| 16 | Q15742 NAB2_HUMAN  | R.HILQQTLM*DE.G                |              | 2 | 2,438  | 0,181 | -0,196 |
| 16 | Q8NCF5 NF2IP_HUMAN | E.VLSRDS#PLK.T                 | S369:        | 2 | 2,4373 | 0,084 | 0,103  |
| 16 | Q9NZN5 ARHGC_HUMAN | E.STHQQQS#PQNTSHSDGAIS#PFTPE.F | S1457:S1468: | 3 | 2,436  | 0,245 | 0      |
| 16 | Q00536 PCTK1_HUMAN | K.RLS#LPADIR.L                 | S119:        | 2 | 2,4352 | 0,245 | -0,653 |
| 16 | Q5H9R7 SAPS3_HUMAN | K.CAAPRPPSS#SPEQR.T            | S852:        | 3 | 2,4339 | 0,265 | -0,226 |
| 16 | P21333 FLNA_HUMAN  | K.IQQNTFTR.W                   |              | 2 | 2,4338 | 0,218 | -0,666 |
| 16 | Q9H7E2 TDRD3_HUMAN | R.SGKGPSFAE.A                  |              | 2 | 2,4333 | 0,278 | 0,139  |
| 16 | P06576 ATPB_HUMAN  | R.FLSQPFQVAE.V                 |              | 2 | 2,4326 | 0,174 | -0,942 |
| 16 | Q6UB35 C1TM_HUMAN  | R.KITIGQGNT.E.K                |              | 2 | 2,4315 | 0,165 | -0,23  |
| 16 | O14686 MLL2_HUMAN  | R.SGITS#PVEKR.E                | S2365:       | 2 | 2,4315 | 0,203 | -1,163 |
| 16 | Q07889 SOS1_HUMAN  | R.TPDVFSSSLHLQPPPLGK.K         |              | 3 | 2,4285 | 0,097 | -0,453 |
| 16 | Q53F19 CQ085_HUMAN | E.LKM*ISTPS#PK.K               | S415:        | 2 | 2,4284 | 0,23  | -0,917 |
| 16 | Q14683 SMC1A_HUMAN | R.LKYSQSDLE.Q                  |              | 2 | 2,4248 | 0,211 | -0,113 |
| 16 | Q01082 SPTB2_HUMAN | R.RPPS#PEPSTK.V                | S2102:       | 2 | 2,4247 | 0,299 | -0,104 |
| 16 | Q9Y4F4 K0423_HUMAN | K.HTSPLIIS#PK.K                | S836:        | 2 | 2,4227 | 0,204 | -0,208 |
| 16 | Q6S8J3 A26CA_HUMAN | R.VAPEEHPILLTEAPLNPK.A         |              | 3 | 2,4227 | 0,194 | -0,186 |
| 16 | P28066 PSA5_HUMAN  | E.EKLNATNIE.L                  |              | 2 | 2,421  | 0,196 | -0,709 |
| 16 | Q16181 SEPT7_HUMAN | K.NKGQLTKS#PLAQM*E.E           | S334:        | 3 | 2,4168 | 0,218 | -0,111 |
| 16 | Q8IV50 LYSM2_HUMAN | R.APRPSAPS#PPPR.S              | S24:         | 3 | 2,4148 | 0,127 | 0,419  |
| 16 | Q13206 DDX10_HUMAN | R.SNS#EVEDVGPTSHNR.K           | S831:        | 3 | 2,4146 | 0,214 | -0,75  |
| 16 | Q5FBB7 SGOL1_HUMAN | E.GVHLT#PFR.Q                  | T346:        | 2 | 2,4124 | 0,084 | 0,121  |
| 16 | Q8N1F7 NUP93_HUMAN | E.KDNALLSAIEE.S                |              | 2 | 2,4111 | 0,181 | -0,304 |
| 16 | Q5JVS0 HABP4_HUMAN | R.KPANDITSQLE.I                |              | 2 | 2,411  | 0,118 | -0,702 |
| 16 | Q9NP61 ARFG3_HUMAN | K.SLASQATR.K                   |              | 2 | 2,4071 | 0,339 | 0,219  |

|    |                    |                                |        |   |        |       |        |
|----|--------------------|--------------------------------|--------|---|--------|-------|--------|
| 16 | Q9NQG5 CT077_HUMAN | E.NAASGDATVR.Q                 |        | 2 | 2,407  | 0,377 | -0,127 |
| 16 | O15355 PPM1G_HUMAN | E.AGQVGEPIGTGEAGPSCSSASDKLPR.V |        | 3 | 2,4067 | 0,214 | 0,07   |
| 16 | Q9BWU0 NADAP_HUMAN | K.KPALPVS#PAAR.S               | S82:   | 2 | 2,4062 | 0,376 | 0,308  |
| 16 | P08107 HSP71_HUMAN | D.NNLLGRFE.L                   |        | 2 | 2,4035 | 0,217 | -0,127 |
| 16 | Q09666 AHNK_HUMAN  | K.FGFGAKS#PK.A                 | S4986: | 2 | 2,4032 | 0,237 | 0,06   |
| 16 | Q7Z4S6 KI21A_HUMAN | K.KIPEPS#PVTR.R                | S1239: | 2 | 2,4031 | 0,261 | -0,912 |
| 16 | Q03188 CENPC_HUMAN | K.IKDTCIQS#PSKE.C              | S73:   | 3 | 2,4016 | 0,086 | 0,185  |
| 16 | P06748 NPM_HUMAN   | K.GPSSVEDIK.A                  |        | 2 | 2,3995 | 0,329 | -0,196 |
| 16 | Q9BU76 MMTA2_HUMAN | E.SGGPGTSAASAR.R               |        | 2 | 2,3981 | 0,393 | 0      |
| 16 | P46459 NSF_HUMAN   | E.TKNFSGAELE.G                 |        | 2 | 2,3962 | 0,263 | 0,779  |
| 16 | Q9P2B4 CT2NL_HUMAN | R.NLANTANPR.G                  |        | 2 | 2,3959 | 0,301 | 0,565  |
| 16 | Q8NHG8 ZNR2_HUMAN  | R.S#RSLGGAVGSVASGAR.A          | S80:   | 3 | 2,3958 | 0,147 | -0,121 |
| 16 | P38646 GRP75_HUMAN | E.QQIVIQSSGGLSKDDIENM*VK.N     |        | 3 | 2,3934 | 0,115 | -0,397 |
| 16 | O15534 PER1_HUMAN  | K.KDPPSAALSGE.G                |        | 2 | 2,3929 | 0,285 | -0,114 |
| 16 | P50990 TCPQ_HUMAN  | E.KLFVTND.A                    |        | 2 | 2,3905 | 0,253 | 0,219  |
| 16 | Q12906 ILF3_HUMAN  | K.HSSVYPTQEE.L                 |        | 2 | 2,3898 | 0,279 | -0,726 |
| 16 | Q6DN90 IQEC1_HUMAN | K.LQHSTS#ILR.K                 | S89:   | 2 | 2,3898 | 0,283 | -0,215 |
| 16 | P48643 TCPE_HUMAN  | K.IAILTCPFEPKPK.T              |        | 3 | 2,3892 | 0,302 | -0,114 |
| 16 | Q92614 MY18A_HUMAN | R.YSHSYLSDSDTE.A               |        | 2 | 2,3887 | 0,449 | -0,521 |
| 16 | P14618 KPYM_HUMAN  | D.NAYM*EKCDEN                  |        | 2 | 2,3882 | 0,203 | -1,453 |
| 16 | P49773 HINT1_HUMAN | E.DDDESLGHLM*IVGK.K            |        | 3 | 2,3856 | 0,305 | 0      |
| 16 | Q07002 PCTK3_HUMAN | R.RFS#M*EDVSK.R                | S87:   | 2 | 2,3851 | 0,219 | -1,94  |
| 16 | Q7Z6Z7 HUWE1_HUMAN | E.NKGNDTPLALE.S                |        | 2 | 2,3831 | 0,243 | 0,104  |
| 16 | Q8N1W1 RGNEF_HUMAN | R.VKS#LVVQHNE.H                | S325:  | 2 | 2,3828 | 0,214 | -0,594 |
| 16 | Q8N2M8 SFR16_HUMAN | R.KIS#PPSYAR.R                 | S270:  | 2 | 2,3827 | 0,154 | -0,444 |
| 16 | P60174 TPIS_HUMAN  | K.SNVSDAVAQSTR.I               |        | 2 | 2,3803 | 0,239 | -0,296 |
| 16 | P46100 ATRX_HUMAN  | E.KCGLGQENS#DNEHLVENE.V        | S634:  | 3 | 2,3769 | 0,151 | -0,255 |
| 16 | Q8IWS0 PHF6_HUMAN  | K.CGFCHVGEEENE.A               |        | 2 | 2,375  | 0,369 | -0,083 |
| 16 | Q9HB58 SP110_HUMAN | R.RVTQGAAS#PGHGIQE.K           | S380:  | 2 | 2,3744 | 0,363 | -0,461 |
| 16 | Q9BTT0 AN32E_HUMAN | K.IKDLSTVE.A                   |        | 2 | 2,3724 | 0,114 | 0,067  |
| 16 | Q00341 VIGLN_HUMAN | K.NGEKLDLE.L                   |        | 2 | 2,3723 | 0,196 | 0,117  |
| 16 | P67870 CSK2B_HUMAN | D.KFNLTGLNE.Q                  |        | 2 | 2,3718 | 0,24  | -0,236 |
| 16 | Q9Y2H0 DLGP4_HUMAN | E.TSSSS#PAEPAQPGACRR.D         | S787:  | 3 | 2,3678 | 0,129 | -0,995 |

|    |                    |                         |          |   |        |       |        |
|----|--------------------|-------------------------|----------|---|--------|-------|--------|
| 16 | Q9Y4F5 K0284_HUMAN | R.TPARPFGS#VGR.R        | S492:    | 3 | 2,3671 | 0,196 | 0,597  |
| 16 | Q9P287 BCCIP_HUMAN | R.KGTQCVEQIQE.L         |          | 2 | 2,3651 | 0,083 | -0,555 |
| 16 | Q12888 TP53B_HUMAN | R.KGVSTGTPVCEE.D        |          | 2 | 2,3646 | 0,403 | -0,351 |
| 16 | Q12824 SNF5_HUMAN  | R.TFPLCFDDHDPAVIHE.N    |          | 2 | 2,3628 | 0,338 | 0,128  |
| 16 | Q16718 NDUA5_HUMAN | R.KYTEQITNE.K           |          | 2 | 2,3613 | 0,191 | -0,65  |
| 16 | P54278 PMS2_HUMAN  | R.HIANLGVISQN.-         |          | 2 | 2,3607 | 0,181 | 0,314  |
| 16 | P17980 PRS6A_HUMAN | R.KM*NVSPDVNYE.E        |          | 2 | 2,3605 | 0,24  | -0,558 |
| 16 | Q8IWA0 WDR75_HUMAN | K.VQDTSNTGLGEDIIHQLSK.S |          | 3 | 2,3574 | 0,222 | -0,267 |
| 16 | Q7Z5K2 WAPL_HUMAN  | K.RPES#PSEISPIK.G       | S221:    | 2 | 2,3534 | 0,402 | -0,344 |
| 16 | O60716 CTND1_HUMAN | R.VGGS#SVDLHR.F         | S268:    | 2 | 2,3502 | 0,23  | 0      |
| 16 | Q5D1E8 ZC12A_HUMAN | R.RPSPSSQSSLLTE.S       |          | 2 | 2,3429 | 0,32  | -0,331 |
| 16 | Q14568 HS902_HUMAN | E.SSAGGSFTVR.T          |          | 2 | 2,3375 | 0,281 | -0,755 |
| 16 | P19338 NUCL_HUMAN  | K.SKGYAFIE.F            |          | 2 | 2,3374 | 0,227 | -0,733 |
| 16 | Q9Y613 FHOD1_HUMAN | R.SNAINIGLTLPPVHVIK.A   |          | 3 | 2,3358 | 0,127 | -0,582 |
| 16 | Q9H4G0 E41L1_HUMAN | R.RLPSSPASPS#PK.G       | S546:    | 2 | 2,3354 | 0,177 | -0,842 |
| 16 | P39687 AN32A_HUMAN | E.GKLEGLTDE.F           |          | 2 | 2,3342 | 0,19  | -0,317 |
| 16 | Q8N655 CJ012_HUMAN | K.IKPNLSS#SPRSEE.T      | S294:    | 2 | 2,331  | 0,327 | -0,16  |
| 16 | Q8IUD2 RB6I2_HUMAN | R.SVGKVEPS#SQSPGRS#PR.L | S14:S21: | 3 | 2,3293 | 0,301 | -0,478 |
| 16 | Q9HCH0 K1602_HUMAN | R.RQLNLGQLLEDTE.S       |          | 2 | 2,3287 | 0,334 | -0,559 |
| 16 | P05783 K1C18_HUMAN | E.TM*QSLNDR.L           |          | 2 | 2,3277 | 0,351 | -0,249 |
| 16 | P49790 NU153_HUMAN | R.SHLNFSM*LE.S          |          | 2 | 2,3272 | 0,327 | -0,335 |
| 16 | P11388 TOP2A_HUMAN | E.LKPQKS#VVSDLE.A       | S1374:   | 2 | 2,3261 | 0,368 | -0,343 |
| 16 | Q6S8J3 A26CA_HUMAN | E.KSYELPDGQVITIGNE.R    |          | 2 | 2,3251 | 0,358 | -0,138 |
| 16 | Q86UU1 PHLB1_HUMAN | R.RALS#PLPTR.T          | S470:    | 2 | 2,3237 | 0,187 | 0,671  |
| 16 | P08574 CY1_HUMAN   | R.HLVGVICYTEDE.A        |          | 2 | 2,3196 | 0,241 | -0,092 |
| 16 | Q13111 CAF1A_HUMAN | R.GLLSNHTGS#PR.T        | S754:    | 2 | 2,3185 | 0,313 | -0,2   |
| 16 | P43307 SSRA_HUMAN  | E.TLNQINKAS#PR.R        | S268:    | 2 | 2,3182 | 0,225 | -0,369 |
| 16 | P35579 MYH9_HUMAN  | K.KM*EDSVGCLE.T         |          | 2 | 2,3182 | 0,307 | -0,309 |
| 16 | Q13442 HAP28_HUMAN | K.KVTQLDLD.G            |          | 2 | 2,3175 | 0,133 | -0,131 |
| 16 | Q9Y5W9 SNX11_HUMAN | K.SCCFLPR.S             |          | 2 | 2,3169 | 0,268 | 0,13   |
| 16 | Q02952 AKA12_HUMAN | E.ALICVGSSK.K           |          | 2 | 2,3162 | 0,292 | -0,065 |
| 16 | P04731 MT1A_HUMAN  | K.CAQGCICK.G            |          | 2 | 2,3156 | 0,315 | -0,796 |
| 16 | Q03252 LMNB2_HUMAN | E.M*RDVM*QQQLAE.Y       |          | 2 | 2,3127 | 0,227 | -0,707 |



|    |                    |                          |          |   |        |       |        |
|----|--------------------|--------------------------|----------|---|--------|-------|--------|
| 16 | Q9C0B5 ZDHC5_HUMAN | K.KVSGVGGTTYE.I          |          | 2 | 2,312  | 0,271 | -0,444 |
| 16 | O00410 IMB3_HUMAN  | K.FKPDCVNVVEE.V          |          | 2 | 2,3106 | 0,181 | -0,197 |
| 16 | Q969E8 TSR2_HUMAN  | E.M*ASCITQR.K            |          | 2 | 2,31   | 0,146 | -0,248 |
| 16 | Q9H3K6 BOLA2_HUMAN | R.LVNACLAEEELPHIHAFE.Q   |          | 3 | 2,3062 | 0,099 | -0,28  |
| 16 | O15144 ARPC2_HUMAN | E.KYFQFQEE.G             |          | 2 | 2,3028 | 0,115 | -0,545 |
| 16 | P53992 SC24C_HUMAN | K.LFLFHTSLPIAEAPGK.L     |          | 2 | 2,2994 | 0,467 | -0,491 |
| 16 | Q13232 NDK3_HUMAN  | K.NLIHGSDSVE.S           |          | 2 | 2,2993 | 0,219 | 0,114  |
| 16 | P49792 RBP2_HUMAN  | R.LLLDIPLQT#PHKLVDTGR.A  | T2153:   | 3 | 2,297  | 0,156 | -0,347 |
| 16 | P68400 CSK21_HUMAN | R.GKYSEVFE.A             |          | 2 | 2,2969 | 0,312 | -0,254 |
| 16 | Q4J6C6 PPCEL_HUMAN | K.KLNGLADLE.A            |          | 2 | 2,2964 | 0,152 | 0,125  |
| 16 | Q8TD16 BICD2_HUMAN | R.RS#PILLPK.G            | S582:    | 2 | 2,2956 | 0,087 | 0      |
| 16 | Q14126 DSG2_HUMAN  | K.GSSSAS#IVKGQHE.M       | S703:    | 2 | 2,2953 | 0,297 | -0,446 |
| 16 | O75534 CSDE1_HUMAN | K.NQNDPLPGR.I            |          | 2 | 2,2932 | 0,26  | -0,664 |
| 16 | O00443 P3C2A_HUMAN | R.KICSALDGVE.T           |          | 2 | 2,2928 | 0,253 | -0,112 |
| 16 | Q15750 TAB1_HUMAN  | R.IHSDTFASGGE.R          |          | 2 | 2,2914 | 0,2   | -0,544 |
| 16 | P46459 NSF_HUMAN   | R.KLFADAEEL.Q            |          | 2 | 2,2888 | 0,179 | -0,464 |
| 16 | Q7Z2W4 ZCCHV_HUMAN | R.SCTPS#PDQISHR.A        | S275:    | 2 | 2,2868 | 0,236 | -0,666 |
| 16 | Q02790 FKBP4_HUMAN | E.AHLAVNDFE.L            |          | 2 | 2,2867 | 0,187 | -0,24  |
| 16 | Q02790 FKBP4_HUMAN | E.FKGEDLTEEE.D           |          | 2 | 2,2827 | 0,176 | -0,714 |
| 16 | P26358 DNMT1_HUMAN | E.IKNQLCDLE.T            |          | 2 | 2,2825 | 0,184 | -0,215 |
| 16 | O75822 EIF3J_HUMAN | K.KLQEEEDLE.L            |          | 2 | 2,2818 | 0,253 | -0,447 |
| 16 | P43304 GPDM_HUMAN  | R.CKDVLTGQE.F            |          | 2 | 2,2797 | 0,172 | -0,349 |
| 16 | Q09666 AHNK_HUMAN  | K.GKFS#LFK.S             | S5769:   | 2 | 2,2778 | 0,198 | 0,269  |
| 16 | Q15653 IKBB_HUMAN  | R.LPPTPASKPLPDDPRPV.-    |          | 3 | 2,2775 | 0,214 | -0,305 |
| 16 | A6ND36 FA83G_HUMAN | R.RPSVASSVSEE.Y          |          | 2 | 2,2763 | 0,295 | -1,063 |
| 16 | P49755 TMEDA_HUMAN | K.GKFAFTE.D              |          | 2 | 2,2689 | 0,312 | 0,135  |
| 16 | Q8TEW0 PARD3_HUMAN | R.RIS#HSLYSGIE.G         | S715:    | 2 | 2,2679 | 0,235 | -0,364 |
| 16 | P06748 NPM_HUMAN   | K.M*SVQPTVSLGGFE.I       |          | 2 | 2,2632 | 0,341 | -0,178 |
| 16 | P11142 HSP7C_HUMAN | E.TKSFYPEE.V             |          | 2 | 2,2621 | 0,272 | 0,183  |
| 16 | O15344 TRI18_HUMAN | K.ASVSGPNS#PSETRRE.R     | S96:     | 2 | 2,2573 | 0,329 | -1,475 |
| 16 | Q6ZU35 K1211_HUMAN | R.RPPS#PPGPEER.K         | S1017:   | 2 | 2,2545 | 0,281 | -0,282 |
| 16 | Q9UM11 FZR_HUMAN   | R.TLTPAS#SPVSS#PSKHGDR.F | S35:S40: | 3 | 2,2525 | 0,142 | -1,014 |
| 16 | P42229 STA5A_HUMAN | K.HLQINQTFEE.L           |          | 2 | 2,251  | 0,19  | -0,194 |

|    |                      |                              |            |   |        |       |        |
|----|----------------------|------------------------------|------------|---|--------|-------|--------|
| 16 | O95405 ZFYV9_HUMAN   | R.KPFTTLGE.V                 |            | 2 | 2,2499 | 0,123 | 0,068  |
| 16 | P40222 TXLNA_HUMAN   | R.RPEPGGAQAPSS#PRVTE.A       | S515:      | 2 | 2,2454 | 0,19  | -0,202 |
| 16 | Q99623 PHB2_HUMAN    | E.SFTRGS#DSLIIK.G            | S291:      | 2 | 2,2423 | 0,087 | -0,473 |
| 16 | O60841 IF2P_HUMAN    | K.NKPGPNIESGNE.D             |            | 2 | 2,2411 | 0,23  | -0,291 |
| 16 | Q9NPD8 UBE2T_HUMAN   | R.KASQLVGIE.K                |            | 2 | 2,2389 | 0,213 | 0      |
| 16 | Q9UJ41 RABX5_HUMAN   | E.AKAPS#PSINR.Q              | S302:      | 2 | 2,2382 | 0,21  | -0,435 |
| 16 | Q9H9R9 DBND1_HUMAN   | E.RRQPLS#SVSS#LE.V           | S63:S67:   | 2 | 2,2378 | 0,325 | 1,205  |
| 16 | ##Q96G74 OTUD5_HUMAN | E.LGSSAAAT#ASSCTASAK.R       | T134:      | 3 | 2,2375 | 0,09  | 0,903  |
| 16 | P07355 ANXA2_HUMAN   | R.RAEDGSVIDYE.L              |            | 2 | 2,2345 | 0,219 | -0,389 |
| 16 | P38646 GRP75_HUMAN   | R.EQQIIVIQSSGGLSKDDIENM*VK.N |            | 3 | 2,2338 | 0,16  | -1,278 |
| 16 | O43399 TPD54_HUMAN   | R.RLGLSTLGE.L                |            | 2 | 2,2318 | 0,265 | -0,903 |
| 16 | Q969J2 ZKSC4_HUMAN   | E.VRAPCS#PARGPE.R            | S44:       | 3 | 2,2316 | 0,178 | 0,465  |
| 16 | Q9UHB6 LIMA1_HUMAN   | R.LRS#PPEALVQGR.Y            | S132:      | 2 | 2,2313 | 0,159 | -0,609 |
| 16 | Q5QP82 WDR32_HUMAN   | R.RPGAPSL#PAPR.S             | S63:       | 2 | 2,2303 | 0,198 | -0,19  |
| 16 | P33981 TTK_HUMAN     | K.FKNEDLTDE.L                |            | 2 | 2,2281 | 0,108 | -0,659 |
| 16 | Q15942 ZYX_HUMAN     | E.IDSLSSLDDM*TKNDPFK.A       |            | 3 | 2,2251 | 0,119 | -0,712 |
| 16 | P54278 PMS2_HUMAN    | K.RGM*LSSSTSGAID.K           |            | 2 | 2,225  | 0,353 | -0,705 |
| 16 | O60841 IF2P_HUMAN    | K.KIPQLE.S                   |            | 2 | 2,2245 | 0,105 | -0,285 |
| 16 | P09874 PARP1_HUMAN   | E.KTLGDFAAE.Y                |            | 2 | 2,2223 | 0,249 | 0,128  |
| 16 | P50990 TCPQ_HUMAN    | E.GNKNVGLDIE.A               |            | 2 | 2,2218 | 0,257 | -0,691 |
| 16 | P54577 SYYC_HUMAN    | R.KIFTFAE.K                  |            | 2 | 2,2215 | 0,106 | 0,57   |
| 16 | Q15691 MARE1_HUMAN   | K.GKFQDNFE.F                 |            | 2 | 2,2188 | 0,237 | -0,062 |
| 16 | Q14126 DSG2_HUMAN    | E.ATM*KGSS#S#ASIVKGQHE.M     | S700:S701: | 3 | 2,2187 | 0,257 | -0,097 |
| 16 | Q15833 STXB2_HUMAN   | R.REPIPSLE.A                 |            | 2 | 2,2181 | 0,188 | 0,778  |
| 16 | P31946 1433B_HUMAN   | D.STLIM*QLLR.D               |            | 2 | 2,2179 | 0,241 | -0,447 |
| 16 | Q13177 PAK2_HUMAN    | R.SVIDPVPAPVGDSDHVDGAAK.S    |            | 3 | 2,2165 | 0,132 | 0      |
| 16 | Q02224 CENPE_HUMAN   | K.AKDSALQSIE.S               |            | 2 | 2,2138 | 0,247 | 0,115  |
| 16 | Q9Y3Q8 T22D4_HUMAN   | E.AGGSGART#PPLSR.R           | T229:      | 3 | 2,2136 | 0,231 | 0,49   |
| 16 | P46087 NOL1_HUMAN    | K.KGPQS#LFNAPR.G             | S96:       | 2 | 2,2125 | 0,218 | -0,66  |
| 16 | Q86YL5 CH042_HUMAN   | K.GHLTDSPEEAE.-              |            | 2 | 2,2121 | 0,215 | -0,721 |
| 16 | Q9NZN5 ARHGC_HUMAN   | R.KFDSVAFGE.S                |            | 2 | 2,2105 | 0,21  | -0,427 |
| 16 | Q96FS4 SIPA1_HUMAN   | E.FLHSQNSLS#PR.S             | S839:      | 2 | 2,2074 | 0,214 | -0,357 |
| 16 | P23381 SYWC_HUMAN    | R.KLSFDQ.-                   |            | 2 | 2,207  | 0,165 | 0,414  |

|    |                    |                         |        |   |        |       |        |
|----|--------------------|-------------------------|--------|---|--------|-------|--------|
| 16 | Q29983 MICA_HUMAN  | R.SSQHFYYDGE.L          |        | 2 | 2,2066 | 0,188 | -0,594 |
| 16 | Q8TAF3 WDR48_HUMAN | R.THVNPM*DEEENE.V       |        | 2 | 2,2047 | 0,203 | -0,585 |
| 16 | Q6PL18 ATAD2_HUMAN | E.SNLNM*YTR.G           |        | 2 | 2,2034 | 0,226 | -0,301 |
| 16 | Q96L73 NSD1_HUMAN  | E.RAAS#PHQVTPQADE.K     | S2471: | 3 | 2,203  | 0,086 | 0,115  |
| 16 | O43617 TPPC3_HUMAN | R.RIEDNLPAGEE.-         |        | 2 | 2,2012 | 0,209 | -0,687 |
| 16 | P67936 TPM4_HUMAN  | E.KTIDDL EE.K           |        | 2 | 2,1987 | 0,161 | 0,317  |
| 16 | Q9NYF8 BCLF1_HUMAN | R.RIDIS#PSTLR.K         | S658:  | 2 | 2,1959 | 0,259 | -0,296 |
| 16 | Q3V6T2 GRDN_HUMAN  | R.T#ESRQHLSVE.L         | T243:  | 2 | 2,1945 | 0,134 | -1,446 |
| 16 | Q63HQ0 CD016_HUMAN | R.SKT#EEDILR.A          | T228:  | 2 | 2,1929 | 0,119 | -0,104 |
| 16 | Q92597 NDRG1_HUMAN | R.SRTAS#GSSVTSLDGTR.S   | S330:  | 2 | 2,1906 | 0,264 | -0,367 |
| 16 | Q6ZSR9 YJ005_HUMAN | R.HYSPEDEPSPE.A         |        | 2 | 2,1857 | 0,275 | -0,853 |
| 16 | P20700 LMNB1_HUMAN | R.LKLS#PSPSSR.V         | S391:  | 2 | 2,1833 | 0,113 | -0,212 |
| 16 | Q9Y5U2 TSSC4_HUMAN | R.SRDIFDCLE.G           |        | 2 | 2,1783 | 0,265 | 0,106  |
| 16 | Q5T4S7 UBR4_HUMAN  | E.RILGPAESDE.F          |        | 2 | 2,1776 | 0,254 | -1,235 |
| 16 | Q9UK61 CC063_HUMAN | R.KLEDLPE.N             |        | 2 | 2,1767 | 0,175 | 0,217  |
| 16 | P62258 1433E_HUMAN | K.HLIPAANTGE.S          |        | 2 | 2,1756 | 0,268 | 0,239  |
| 16 | P06748 NPM_HUMAN   | K.LLSIS#GKR.S           | S139:  | 2 | 2,1748 | 0,125 | -0,064 |
| 16 | O75962 TRIO_HUMAN  | E.GLSNKVS#VK.L          | S2612: | 2 | 2,173  | 0,388 | -0,422 |
| 16 | O43399 TPD54_HUMAN | R.NSATFKS#FEDR.V        | S166:  | 3 | 2,1695 | 0,303 | 0,265  |
| 16 | O14646 CHD1_HUMAN  | R.ASSSGPRS#PLDQR.S      | S1677: | 2 | 2,1638 | 0,245 | -0,339 |
| 16 | Q6XZF7 DNMBP_HUMAN | R.HFSIM*DFNSE.K         |        | 2 | 2,1636 | 0,242 | -0,294 |
| 16 | P31948 STIP1_HUMAN | R.CM*M*AQYNR.H          |        | 2 | 2,1627 | 0,294 | -0,221 |
| 16 | P20042 IF2B_HUMAN  | K.NVKFPDEDE.I           |        | 2 | 2,1614 | 0,172 | -0,223 |
| 16 | Q7L311 ARMX2_HUMAN | K.RFPFYEIDE.I           |        | 2 | 2,1598 | 0,337 | -0,314 |
| 16 | Q9NZ71 RTEL1_HUMAN | E.AKS#PGPFFSTR.K        | S779:  | 2 | 2,1574 | 0,251 | -0,574 |
| 16 | P23443 KS6B1_HUMAN | E.KFS#FEPK.I            | S427:  | 2 | 2,1564 | 0,186 | -0,443 |
| 16 | P78527 PRKDC_HUMAN | K.RLGLPGDE.V            |        | 2 | 2,1554 | 0,136 | 0,285  |
| 16 | P01112 RASH_HUMAN  | R.KQVVIDGE.T            |        | 2 | 2,152  | 0,164 | 0      |
| 16 | Q8NFD5 ARI1B_HUMAN | R.SHPAM*S#PGTPGPTM*GR.S | S502:  | 3 | 2,1493 | 0,152 | -0,324 |
| 16 | Q71U36 TBA1A_HUMAN | K.EDAANNYAR.G           |        | 2 | 2,1487 | 0,253 | -0,238 |
| 16 | Q13671 RIN1_HUMAN  | R.GSPATS#PHLGR.R        | S337:  | 2 | 2,1472 | 0,371 | -0,316 |
| 16 | Q9NVE5 UBP40_HUMAN | R.NDQQIFK.M             |        | 2 | 2,1459 | 0,19  | 0,068  |
| 16 | Q6ZUT9 RA61L_HUMAN | R.RLS#ITSLTGK.N         | S1076: | 2 | 2,1443 | 0,434 | -0,739 |

|    |                    |                               |            |   |        |       |        |
|----|--------------------|-------------------------------|------------|---|--------|-------|--------|
| 16 | P13667 PDIA4_HUMAN | E.VKDLGLSE.S                  |            | 2 | 2,1399 | 0,227 | 0,213  |
| 16 | Q92625 ANS1A_HUMAN | R.SES#LSNCSIGKK.R             | S647:      | 2 | 2,1394 | 0,221 | -1,141 |
| 16 | P14625 ENPL_HUMAN  | E.KFAFQAE.V                   |            | 2 | 2,1333 | 0,153 | 0,363  |
| 16 | P05023 AT1A1_HUMAN | K.DM*TSEQLDDILKYHTE.I         |            | 3 | 2,1325 | 0,09  | 0,281  |
| 16 | Q13564 ULA1_HUMAN  | K.LQNVYRE.K                   |            | 2 | 2,1322 | 0,199 | 0,066  |
| 16 | Q01581 HMCS1_HUMAN | R.RPTPNDDTLDE.G               |            | 2 | 2,1319 | 0,151 | -0,383 |
| 16 | P06748 NPM_HUMAN   | E.KT#PKT#PKGSSVE.D            | T234:T237: | 2 | 2,1316 | 0,283 | -0,241 |
| 16 | Q7Z3B3 K1267_HUMAN | E.LHSAPLT#PVAR.D              | T1003:     | 2 | 2,1311 | 0,326 | 0,196  |
| 16 | P10070 GLI2_HUMAN  | R.RSS#GISPYFSSR.R             | S496:      | 2 | 2,126  | 0,11  | 1,285  |
| 16 | Q9BW71 HIRP3_HUMAN | K.RPPTPCSDPE.R                |            | 2 | 2,1242 | 0,312 | -0,528 |
| 16 | Q9Y2W1 TR150_HUMAN | K.SSFSITRE.A                  |            | 2 | 2,123  | 0,113 | 0,197  |
| 16 | P21333 FLNA_HUMAN  | K.IKVSGLGE.K                  |            | 2 | 2,1225 | 0,142 | 0,228  |
| 16 | P31946 1433B_HUMAN | E.RNLLS#VAYK.N                | S47:       | 2 | 2,1192 | 0,216 | -0,32  |
| 16 | Q13625 ASPP2_HUMAN | K.RLS#NGKLVVE.I               | S206:      | 2 | 2,1167 | 0,156 | -0,199 |
| 16 | P12268 IMDH2_HUMAN | K.FVPYLIAGIQHSCQDIGAK.S       |            | 3 | 2,1143 | 0,113 | -0,346 |
| 16 | Q14188 TFDP2_HUMAN | R.KFIDSDFSE.S                 |            | 2 | 2,1104 | 0,169 | -0,112 |
| 16 | P30533 AMRP_HUMAN  | R.SINQGLDR.L                  |            | 2 | 2,109  | 0,212 | 0,068  |
| 16 | Q96HC4 PDLI5_HUMAN | K.ARPFGSVSS#PK.V              | S137:      | 2 | 2,1075 | 0,182 | -0,652 |
| 16 | O15014 ZN609_HUMAN | E.NTTPTQPLTPLHVVTQNGAEASSVK.T |            | 3 | 2,1038 | 0,313 | -0,424 |
| 16 | P07108 ACBP_HUMAN  | K.QATVGDINTERPGM*LDFTGK.A     |            | 3 | 2,1027 | 0,131 | 0,084  |
| 16 | Q02952 AKA12_HUMAN | K.KGLSSDLEGE.K                |            | 2 | 2,1022 | 0,226 | -0,236 |
| 16 | P51571 SSRD_HUMAN  | E.VRFFDEE.S                   |            | 2 | 2,1013 | 0,199 | 0      |
| 16 | P09429 HMGB1_HUMAN | K.HPDASVNFSE.F                |            | 2 | 2,1013 | 0,187 | -0,553 |
| 16 | Q99436 PSB7_HUMAN  | K.FRPDM*EEEE.A                |            | 2 | 2,0984 | 0,258 | -0,917 |
| 16 | O00505 IMA3_HUMAN  | E.RDDNPSLQFE.A                |            | 2 | 2,098  | 0,204 | 0,2    |
| 16 | Q07866 KLC1_HUMAN  | K.NLGALYR.R                   |            | 2 | 2,0973 | 0,224 | 0,605  |
| 16 | Q5H9R7 SAPS3_HUMAN | R.YKYPNISCE.L                 |            | 2 | 2,0944 | 0,288 | -0,52  |
| 16 | P08107 HSP71_HUMAN | K.VLDKCQE.V                   |            | 2 | 2,0922 | 0,104 | -0,684 |
| 16 | Q15223 PVRL1_HUMAN | K.RPYFTVDE.A                  |            | 2 | 2,0921 | 0,115 | 0,238  |
| 16 | P16615 AT2A2_HUMAN | R.RIGIFGQDE.D                 |            | 2 | 2,0889 | 0,098 | -0,236 |
| 16 | Q7L014 DDX46_HUMAN | K.GFKFDETE.Q                  |            | 2 | 2,0888 | 0,154 | 0,063  |
| 16 | Q96H79 ZCCHL_HUMAN | K.SHGLFGLNE.N                 |            | 2 | 2,0862 | 0,13  | 0,063  |
| 16 | P61221 ABCE1_HUMAN | K.KSGNYFFLDD.-                |            | 2 | 2,0851 | 0,297 | -0,101 |

|    |                    |                           |            |   |        |       |        |
|----|--------------------|---------------------------|------------|---|--------|-------|--------|
| 16 | P54577 SYYC_HUMAN  | K.KAFCEPGNVE.N            |            | 2 | 2,0841 | 0,28  | -1,06  |
| 16 | P34897 GLYM_HUMAN  | R.RVVDIFIDE.G             |            | 2 | 2,0806 | 0,129 | -0,43  |
| 16 | Q63HQ0 CD016_HUMAN | R.VGGGGGS#KYFR.T          | S29:       | 2 | 2,0768 | 0,126 | 0      |
| 16 | P13804 ETFA_HUMAN  | K.SPDTFVR.T               |            | 2 | 2,0736 | 0,167 | 0,148  |
| 16 | P09960 LKHA4_HUMAN | R.CSVDFTFR.R              |            | 2 | 2,0721 | 0,372 | 0,069  |
| 16 | Q96P48 CEND2_HUMAN | R.YHPLFGNQEE.L            |            | 2 | 2,0719 | 0,127 | -0,099 |
| 16 | Q07002 PCTK3_HUMAN | R.RFS#LSVPR.T             | S12:       | 2 | 2,0709 | 0,199 | 0,117  |
| 16 | P50897 PPT1_HUMAN  | E.GDHLQLSEE.W             |            | 2 | 2,0702 | 0,083 | 0      |
| 16 | Q8NEY8 PPHLN_HUMAN | D.NTFFRES#PVGR.K          | S133:      | 2 | 2,0685 | 0,198 | -0,263 |
| 16 | P61247 RS3A_HUMAN  | E.RADGYEPPVQE.S           |            | 2 | 2,068  | 0,123 | 0      |
| 16 | P25440 BRD2_HUMAN  | R.IRKPS#LLYE.G            | S37:       | 2 | 2,0654 | 0,159 | -0,102 |
| 16 | Q66K74 MAP1S_HUMAN | E.RLSLS#PLR.G             | S657:      | 2 | 2,0565 | 0,239 | -0,597 |
| 16 | Q16236 NF2L2_HUMAN | E.LPVS#PGHR.K             | S433:      | 2 | 2,0544 | 0,169 | 0,323  |
| 16 | Q13642 FHL1_HUMAN  | K.CLHPLANE.T              |            | 2 | 2,0541 | 0,211 | 0,064  |
| 16 | P53999 TCP4_HUMAN  | R.KGISLNPE.Q              |            | 2 | 2,0541 | 0,131 | 0,427  |
| 16 | P35580 MYH10_HUMAN | K.KFDQLLAE.E              |            | 2 | 2,0518 | 0,09  | 0,063  |
| 16 | O75665 OFD1_HUMAN  | R.RLS#STPLPK.A            | S735:      | 2 | 2,0509 | 0,309 | -0,113 |
| 16 | P07951 TPM2_HUMAN  | E.KTIDDLE.D               |            | 2 | 2,0508 | 0,191 | -0,293 |
| 16 | Q9Y4W6 AFG32_HUMAN | K.FKDVAGCEE.A             |            | 2 | 2,0499 | 0,084 | -0,116 |
| 16 | Q63ZY3 KANK2_HUMAN | R.ERVPSVAE.A              |            | 2 | 2,0482 | 0,187 | 1,926  |
| 16 | Q5VV52 ZN691_HUMAN | K.TFNNTSNLR.T             |            | 2 | 2,047  | 0,302 | -0,457 |
| 16 | Q01433 AMPD2_HUMAN | E.RQIS#QDVKLEPD.I         | S168:      | 3 | 2,0453 | 0,262 | 0,121  |
| 16 | P13667 PDIA4_HUMAN | K.KLAPEYE.K               |            | 2 | 2,0441 | 0,127 | -0,287 |
| 16 | Q96RU3 FNBP1_HUMAN | R.TVS#DNS#LSNSRGEKPD.LK.F | S296:S299: | 3 | 2,0383 | 0,316 | -0,507 |
| 16 | Q99618 CDCA3_HUMAN | K.RPSLSENVSE.L            |            | 2 | 2,0367 | 0,24  | -0,201 |
| 16 | Q96EB6 SIRT1_HUMAN | R.RDGPGLERS#PGEPGGAPE.R   | S47:       | 3 | 2,0357 | 0,114 | -0,379 |
| 16 | Q13443 ADAM9_HUMAN | R.HVS#PVTPPR.E            | S758:      | 2 | 2,0336 | 0,272 | -1,596 |
| 16 | Q9UBV2 SE1L1_HUMAN | R.KPALTAIE.G              |            | 2 | 2,0314 | 0,105 | 0,072  |
| 16 | O95479 G6PE_HUMAN  | R.KNFFITTE.N              |            | 2 | 2,0289 | 0,093 | -0,183 |
| 16 | O95758 ROD1_HUMAN  | R.KIPCDVTE.A              |            | 2 | 2,0267 | 0,13  | -0,127 |
| 16 | Q8N3X1 FNBP4_HUMAN | R.RPILQLS#PPGPR.G         | S18:       | 2 | 2,0254 | 0,33  | -0,346 |
| 16 | Q9UQ35 SRRM2_HUMAN | K.VKPET#PPR.Q             | T983:      | 2 | 2,0248 | 0,096 | -0,304 |
| 16 | P46013 KI67_HUMAN  | E.EKDINTFLGT#PVQK.L       | T1801:     | 3 | 2,024  | 0,131 | 0,11   |

|    |                     |                         |        |   |        |       |        |
|----|---------------------|-------------------------|--------|---|--------|-------|--------|
| 16 | Q9BYC8 RM32_HUMAN   | K.HVLCAYCYE.K           |        | 2 | 2,0216 | 0,294 | -0,201 |
| 16 | Q9C0C4 SEM4C_HUMAN  | K.GHAGLLVDGE.L          |        | 2 | 2,0191 | 0,115 | 0,126  |
| 16 | Q9H7N4 SFR19_HUMAN  | E.GLSQSISR.I            |        | 2 | 2,0174 | 0,157 | 0,144  |
| 16 | O14802 RPC1_HUMAN   | K.RPLIFDTNE.F           |        | 2 | 2,0172 | 0,213 | 0,221  |
| 16 | P33991 MCM4_HUMAN   | E.DM*PAGQTPHTVILFAHND.L |        | 3 | 2,0166 | 0,184 | -0,092 |
| 16 | Q86WB0 NIPA_HUMAN   | E.RLPLVPES#PR.R         | S321:  | 2 | 2,0131 | 0,278 | -0,883 |
| 16 | P16615 AT2A2_HUMAN  | E.KM*NVFDTE.L           |        | 2 | 2,0113 | 0,11  | -0,122 |
| 16 | Q9Y3F4 STRAP_HUMAN  | K.EISGHT#SGIKK.A        | T143:  | 2 | 2,008  | 0,127 | 1,282  |
| 16 | Q8N5M4 TTC9C_HUMAN  | R.RYLQLTQSE.L           |        | 2 | 2,0055 | 0,105 | -0,536 |
| 16 | Q9NPJ6 MED4_HUMAN   | R.RPYPTDLE.M            |        | 2 | 2,0017 | 0,262 | 0,185  |
| 16 | O75643 U520_HUMAN   | R.FCNRYPNIE.L           |        | 2 | 2,0012 | 0,26  | -0,201 |
| 16 | O00231 PSD11_HUMAN  | K.FHGILDQGE.G           |        | 2 | 2,0007 | 0,161 | -0,841 |
| 16 | Q8IU2 RB6I2_HUMAN   | R.M*KLM*ADNYE.D         |        | 2 | 1,9946 | 0,195 | -0,638 |
| 16 | O15513 O15513_HUMAN | E.KSIDDLEE.K            |        | 2 | 1,9884 | 0,087 | 0      |
| 16 | P53367 ARFP1_HUMAN  | K.HSLPSGLGLSE.T         |        | 2 | 1,9825 | 0,276 | -0,667 |
| 16 | O60524 SDCG1_HUMAN  | K.KLPSDSGDLE.A          |        | 2 | 1,9768 | 0,139 | -0,23  |
| 16 | Q9UPT6 JIP3_HUMAN   | K.NYADQISR.L            |        | 2 | 1,9755 | 0,13  | -0,063 |
| 16 | P02545 LMNA_HUMAN   | R.LRLS#PSPTSQR.S        | S390:  | 2 | 1,9754 | 0,27  | 0      |
| 16 | O60313 OPA1_HUMAN   | E.EHPAYLASDE.I          |        | 2 | 1,9743 | 0,132 | 0,323  |
| 16 | Q9Y490 TLN1_HUMAN   | R.TLREQGVEE.H           |        | 2 | 1,9726 | 0,17  | -0,46  |
| 16 | Q14C86 GAPD1_HUMAN  | E.GISEGPSNR.S           |        | 2 | 1,9696 | 0,261 | -0,067 |
| 16 | Q9UQ35 SRRM2_HUMAN  | K.RVPS#PTPAPK.E         | S2581: | 2 | 1,9674 | 0,268 | 0      |
| 16 | Q7KZI7 MARK2_HUMAN  | R.ST#FHAGQLR.Q          | T596:  | 2 | 1,9634 | 0,227 | -0,111 |
| 16 | Q15149 PLEC1_HUMAN  | R.SALDQYR.A             |        | 2 | 1,963  | 0,21  | 0,215  |
| 16 | Q9H4A5 GLP3L_HUMAN  | K.KLQDSVLE.R            |        | 2 | 1,9599 | 0,114 | 0,065  |
| 16 | O15381 NVL_HUMAN    | R.KGNPDSVSNTPE.M        |        | 2 | 1,9596 | 0,265 | -1,372 |
| 16 | Q9UQ35 SRRM2_HUMAN  | K.ALPQT#PRPR.S          | T1492: | 2 | 1,9591 | 0,096 | -0,984 |
| 16 | Q92738 US6NL_HUMAN  | R.SVGRPS#PLASGR.R       | S396:  | 2 | 1,9591 | 0,397 | 0      |
| 16 | Q5H9R7 SAPS3_HUMAN  | K.CAAPRPPSS#PEQR.T      | S853:  | 2 | 1,9576 | 0,163 | -0,527 |
| 16 | Q86TLO ATG4D_HUMAN  | R.AKRPS#SEDFVFL.-       | S467:  | 2 | 1,9555 | 0,091 | -0,413 |
| 16 | Q8TE02 DERP6_HUMAN  | E.GFSDINNR.L            |        | 2 | 1,9554 | 0,371 | 0,118  |
| 16 | O43615 TIM44_HUMAN  | E.SDNAFIR.A             |        | 2 | 1,9548 | 0,209 | 0,815  |
| 16 | Q9H6R7 CB044_HUMAN  | E.SLS#PDFCHQNK.G        | S468:  | 2 | 1,9538 | 0,237 | -0,691 |

|    |                     |                        |        |   |        |       |        |
|----|---------------------|------------------------|--------|---|--------|-------|--------|
| 16 | Q8N531 FBXL6_HUMAN  | E.S#TAVVSFLEE.A        | S260:  | 2 | 1,9522 | 0,111 | 0,735  |
| 16 | P30041 PRDX6_HUMAN  | K.LPFIIDDR.N           |        | 2 | 1,9498 | 0,12  | 0,449  |
| 16 | P84157 MXRA7_HUMAN  | E.GFSFKYS#PGK.L        | S144:  | 2 | 1,9497 | 0,2   | -0,102 |
| 16 | B0I1T5 B0I1T5_HUMAN | K.ISSS#PKFDSR.D        | S1339: | 2 | 1,9489 | 0,228 | -0,912 |
| 16 | P16152 CBR1_HUMAN   | K.FRSETITEEE.L         |        | 2 | 1,9481 | 0,139 | 0,492  |
| 16 | O00571 DDX3X_HUMAN  | R.SDYDGIGSR.G          |        | 2 | 1,9432 | 0,14  | 0,063  |
| 16 | P29692 EF1D_HUMAN   | R.ATAPQTQHVS#PM*R.Q    | S133:  | 2 | 1,9415 | 0,165 | -0,401 |
| 16 | P26583 HMGB2_HUMAN  | K.HPDSSVNAE.F          |        | 2 | 1,9384 | 0,157 | -0,221 |
| 16 | Q8TBN0 R3GEF_HUMAN  | E.LHPQLLS#PTK.A        | S179:  | 2 | 1,9372 | 0,115 | -0,301 |
| 16 | Q07866 KLC1_HUMAN   | E.HNSILQSLLE.T         |        | 2 | 1,9368 | 0,136 | -0,634 |
| 16 | Q6ZU65 K2030_HUMAN  | R.RVAFISLS#PVR.R       | S13:   | 2 | 1,9362 | 0,295 | 0,184  |
| 16 | Q15056 IF4H_HUMAN   | K.FKGFYVE.F            |        | 2 | 1,9355 | 0,098 | -0,465 |
| 16 | Q9UEW8 STK39_HUMAN  | R.TPDIAQR.A            |        | 2 | 1,9326 | 0,156 | 0,228  |
| 16 | Q14493 SLBP_HUMAN   | E.SFT#TPEGPKPR.S       | T61:   | 2 | 1,9325 | 0,178 | -0,941 |
| 16 | Q8WUA7 TB22A_HUMAN  | K.RVSTFQEFE.S          |        | 2 | 1,9288 | 0,141 | -0,427 |
| 16 | P08670 VIME_HUMAN   | K.SRLGDLYEE.M          |        | 2 | 1,9256 | 0,3   | -0,705 |
| 16 | Q9HC35 EMAL4_HUMAN  | E.KLSLPQNE.T           |        | 2 | 1,9134 | 0,203 | -0,657 |
| 16 | Q8IYA6 CKP2L_HUMAN  | K.FIT#PVRR.S           | T685:  | 2 | 1,9119 | 0,178 | 0,063  |
| 16 | Q15435 PP1R7_HUMAN  | K.HSSGIVADLSE.Q        |        | 2 | 1,9068 | 0,162 | -0,109 |
| 16 | Q16643 DREB_HUMAN   | R.LSS#PVLHR.L          | S142:  | 2 | 1,9063 | 0,173 | -0,493 |
| 16 | P05023 AT1A1_HUMAN  | R.IAGLCNR.A            |        | 2 | 1,9048 | 0,225 | 0,91   |
| 16 | Q92609 TBCD5_HUMAN  | D.SFFSNISR.S           |        | 2 | 1,9015 | 0,163 | -0,127 |
| 16 | O14617 AP3D1_HUMAN  | R.AVFHEEE.Q            |        | 2 | 1,9001 | 0,194 | 0,142  |
| 16 | P62633 CNBP_HUMAN   | E.DACYNCGR.G           |        | 2 | 1,8887 | 0,186 | -1,081 |
| 16 | Q16630 CPSF6_HUMAN  | R.GDYGPPGRE.M          |        | 2 | 1,8885 | 0,087 | -0,386 |
| 16 | Q02952 AKA12_HUMAN  | E.VHVSTVEE.R           |        | 2 | 1,8877 | 0,101 | 0      |
| 16 | Q16881 TRXR1_HUMAN  | K.IICNTKDNE.R          |        | 2 | 1,8869 | 0,23  | -0,661 |
| 16 | P43243 MATR3_HUMAN  | R.CRDDSFFGE.T          |        | 2 | 1,8854 | 0,188 | -0,538 |
| 16 | Q9Y547 PP25_HUMAN   | R.KIDLCLSE.G           |        | 2 | 1,885  | 0,166 | -0,344 |
| 16 | Q5VT52 K0460_HUMAN  | R.DAPTHLPSVDLSNPFTKE.A |        | 2 | 1,8845 | 0,209 | -0,124 |
| 16 | Q9Y4B5 K0802_HUMAN  | R.VLHS#PPAVR.R         | S1505: | 2 | 1,8812 | 0,103 | -0,347 |
| 16 | P49736 MCM2_HUMAN   | R.KM*ILQQF.-           |        | 2 | 1,8765 | 0,223 | -0,132 |
| 16 | Q8IXH7 NELFD_HUMAN  | R.KADSIFTEE.G          |        | 2 | 1,8688 | 0,173 | 0,469  |

|    |                    |                      |        |   |        |       |        |
|----|--------------------|----------------------|--------|---|--------|-------|--------|
| 16 | P11142 HSP7C_HUMAN | R.RFDDAVVQSD.M       |        | 2 | 1,8686 | 0,196 | -0,635 |
| 16 | O75570 RF1M_HUMAN  | K.EFLCGGK.G          |        | 2 | 1,8674 | 0,081 | 0,15   |
| 16 | P37802 TAGL2_HUMAN | K.NM*ACVQR.T         |        | 2 | 1,8668 | 0,134 | 0,068  |
| 16 | Q9H8N7 ZN395_HUMAN | K.SHLIVTS#PPR.A      | S468:  | 2 | 1,8656 | 0,251 | 0,925  |
| 16 | Q9UQ35 SRRM2_HUMAN | R.CRS#PGM*LEPLGSSR.T | S2132: | 2 | 1,8649 | 0,132 | 0      |
| 16 | Q96HN2 SAHH3_HUMAN | K.GSSDFCVK.N         |        | 2 | 1,8647 | 0,39  | 0,068  |
| 16 | P78347 GTF2I_HUMAN | K.KFAEALGSTE.A       |        | 2 | 1,864  | 0,14  | -0,463 |
| 16 | P08670 VIME_HUMAN  | E.M*LQREEAE.N        |        | 2 | 1,8631 | 0,101 | -1,194 |
| 16 | P08574 CY1_HUMAN   | R.HLVGVCYTE.D        |        | 2 | 1,8628 | 0,177 | -0,113 |
| 16 | P45880 VDAC2_HUMAN | R.NNFAVGYR.T         |        | 2 | 1,8617 | 0,093 | -0,065 |
| 16 | P35527 K1C9_HUMAN  | K.STM*QELNSR.L       |        | 2 | 1,8607 | 0,2   | -0,451 |
| 16 | Q9HCD5 NCOA5_HUMAN | R.M*DDYCR.R          |        | 2 | 1,8593 | 0,229 | 0,209  |
| 16 | Q9UPT8 ZC3H4_HUMAN | K.KIPSLFE.I          |        | 2 | 1,8589 | 0,119 | 0,146  |
| 16 | P30414 NKTR_HUMAN  | K.VRPGSLFDE.V        |        | 2 | 1,8582 | 0,183 | -0,179 |
| 16 | Q86VS8 HOOK3_HUMAN | R.HLQLQTQLE.Q        |        | 2 | 1,858  | 0,151 | 0,44   |
| 16 | Q6IMN6 CAPR2_HUMAN | E.YSGAPYSQR.D        |        | 2 | 1,8559 | 0,258 | -0,949 |
| 16 | Q5T200 ZC3HD_HUMAN | R.DQRPS#PIR.H        | S643:  | 2 | 1,8536 | 0,131 | -0,43  |
| 16 | Q92673 SORL_HUMAN  | R.CDRFEFE.C          |        | 2 | 1,8511 | 0,135 | 0,122  |
| 16 | P49454 CENPF_HUMAN | E.KAQLLQGLDE.A       |        | 2 | 1,8498 | 0,093 | 0      |
| 16 | Q02790 FKBP4_HUMAN | K.FDSSLDR.K          |        | 2 | 1,8412 | 0,216 | 0,145  |
| 16 | Q96ST2 IWS1_HUMAN  | K.HM*DFLSDFE.M       |        | 2 | 1,8347 | 0,104 | -0,316 |
| 16 | P18754 RCC1_HUMAN  | R.RS#PPADAIPK.S      | S11:   | 2 | 1,8325 | 0,117 | -0,862 |
| 16 | Q13029 PRDM2_HUMAN | R.RTAS#PPALPK.I      | S643:  | 2 | 1,8311 | 0,117 | -0,218 |
| 16 | P46013 KI67_HUMAN  | K.SINAFRE.T          |        | 2 | 1,828  | 0,131 | 0,51   |
| 16 | P35221 CTNA1_HUMAN | K.HVNPVQALSE.F       |        | 2 | 1,8279 | 0,162 | 0,223  |
| 16 | Q5UIP0 RIF1_HUMAN  | R.RQTFITL.K          |        | 2 | 1,8258 | 0,126 | -0,424 |
| 16 | P08670 VIME_HUMAN  | E.QHVQIDVD.V         |        | 2 | 1,822  | 0,156 | 0,32   |
| 16 | Q9NWH9 SLTM_HUMAN  | R.GSGS#GFKPFK.G      | S1021: | 2 | 1,8199 | 0,172 | -0,112 |
| 16 | P05549 AP2A_HUMAN  | K.YKVTVAE.V          |        | 2 | 1,8141 | 0,164 | 0,151  |
| 16 | P48634 BAT2_HUMAN  | K.KGNS#PNSEPPTPK.T   | S380:  | 2 | 1,8095 | 0,096 | -0,766 |
| 16 | Q9UQ35 SRRM2_HUMAN | R.SRT#PPSAPSQR.M     | T2409: | 2 | 1,8053 | 0,093 | -0,903 |
| 16 | P51149 RAB7A_HUMAN | E.RFQS#LGVAFYR.G     | S72:   | 2 | 1,8021 | 0,239 | 0,257  |
| 16 | Q13573 SNW1_HUMAN  | R.GREGPVQFE.E        |        | 2 | 1,8005 | 0,151 | 0,239  |



|    |                     |                         |            |   |        |       |        |
|----|---------------------|-------------------------|------------|---|--------|-------|--------|
| 16 | Q8IV50 LYSM2_HUMAN  | R.APRPSAPS#PPPR.S       | S24:       | 2 | 1,8001 | 0,225 | -0,838 |
| 16 | P62314 SMD1_HUMAN   | K.NREPVQLE.T            |            | 2 | 1,7998 | 0,162 | 0,062  |
| 16 | P21333 FLNA_HUMAN   | R.VRVS#GQGLHE.G         | S2053:     | 2 | 1,7979 | 0,332 | -0,84  |
| 16 | P05787 K2C8_HUMAN   | R.ISSSSFSR.V            |            | 2 | 1,792  | 0,144 | 1,331  |
| 16 | Q99666 RGPDS5_HUMAN | K.NLFRFDE.S             |            | 2 | 1,7884 | 0,119 | -0,13  |
| 16 | Q15459 SF3A1_HUMAN  | R.RTDIFGVEE.T           |            | 2 | 1,7811 | 0,128 | 0      |
| 16 | P57071 PRD15_HUMAN  | R.CQLTFGR.G             |            | 2 | 1,7764 | 0,179 | 0,138  |
| 16 | Q9NRY4 GRLF1_HUMAN  | R.FVRPSADE.F            |            | 2 | 1,7745 | 0,15  | 0,331  |
| 16 | O43815 STRN_HUMAN   | K.FYDNNTGK.L            |            | 2 | 1,7704 | 0,169 | 0,064  |
| 16 | Q12756 KIF1A_HUMAN  | E.EM*LQHAFE.G           |            | 2 | 1,7678 | 0,11  | 0      |
| 16 | Q9Y3Q8 T22D4_HUMAN  | E.AGGSGART#PPLSR.R      | T229:      | 2 | 1,7676 | 0,131 | -0,467 |
| 16 | Q9NV56 MRGBP_HUMAN  | K.FSQNIGR.Q             |            | 2 | 1,7672 | 0,132 | -0,297 |
| 16 | Q9BWF3 RBM4_HUMAN   | K.LHGVNINVE.A           |            | 2 | 1,7628 | 0,105 | 0,613  |
| 16 | Q71U36 TBA1A_HUMAN  | E.GEFSEARE.D            |            | 2 | 1,7598 | 0,258 | 0,462  |
| 16 | Q8N680 ZBTB2_HUMAN  | K.HSCQNQNSDVFALDE.G     |            | 2 | 1,7591 | 0,219 | -0,415 |
| 16 | P54652 HSP72_HUMAN  | E.LNADLFR.G             |            | 2 | 1,7555 | 0,105 | 0,647  |
| 16 | P41250 SYG_HUMAN    | E.KGEFTIETE.G           |            | 2 | 1,7535 | 0,111 | 0,232  |
| 16 | Q9NQW6 ANLN_HUMAN   | E.ATFCSQR.D             |            | 2 | 1,749  | 0,295 | -0,07  |
| 16 | P49959 MRE11_HUMAN  | K.TLHTCLE.L             |            | 2 | 1,7485 | 0,18  | 0,907  |
| 16 | Q9HCD6 TANC2_HUMAN  | K.RPFVESNV.-            |            | 2 | 1,7472 | 0,185 | 0,579  |
| 16 | P63241 IF5A1_HUMAN  | K.RNDFQLIGIQD.G         |            | 2 | 1,7456 | 0,092 | -0,37  |
| 16 | Q13247 SFRS6_HUMAN  | R.FFSGYGR.L             |            | 2 | 1,7364 | 0,248 | 0,219  |
| 16 | P33993 MCM7_HUMAN   | K.YGNQLVR.L             |            | 2 | 1,7334 | 0,257 | -0,215 |
| 16 | Q96RP9 EFG1_HUMAN   | E.KGFLDACE.K            |            | 2 | 1,7329 | 0,192 | 0,195  |
| 16 | Q96JH7 VCIP1_HUMAN  | R.S#RESS#PSHGLLK.L      | S994:S998: | 2 | 1,7232 | 0,199 | -0,921 |
| 16 | P05783 K1C18_HUMAN  | R.STFSTNYR.S            |            | 2 | 1,7214 | 0,337 | -0,688 |
| 16 | O15085 ARHGB_HUMAN  | R.LPQSIDR.L             |            | 2 | 1,7164 | 0,144 | 1,251  |
| 16 | Q9Y2W1 TR150_HUMAN  | R.RIDIS#PSTFR.K         | S682:      | 2 | 1,7149 | 0,24  | -0,288 |
| 16 | Q8NFD5 ARI1B_HUMAN  | R.S#HPAM*SPGTPGPTM*GR.S | S497:      | 2 | 1,7147 | 0,362 | -0,721 |
| 16 | P52907 CAZA1_HUMAN  | E.SCDSALR.A             |            | 2 | 1,7145 | 0,191 | -0,377 |
| 16 | Q7Z6E9 RBBP6_HUMAN  | E.IVKPS#PK.R            | S1179:     | 2 | 1,699  | 0,091 | 0,072  |
| 16 | Q9H7N4 SFR19_HUMAN  | R.RVFFVVGTE.A           |            | 2 | 1,6963 | 0,084 | -0,336 |
| 16 | Q86W56 PARG_HUMAN   | E.QFSNANIDR.S           |            | 2 | 1,6905 | 0,313 | -0,344 |

|    |                    |                    |        |   |        |       |        |
|----|--------------------|--------------------|--------|---|--------|-------|--------|
| 16 | Q8WWQ0 PHIP_HUMAN  | E.AGISNTR.L        |        | 2 | 1,6895 | 0,161 | 0,303  |
| 16 | P98175 RBM10_HUMAN | K.LASDDRPS#PPR.G   | S722:  | 2 | 1,6838 | 0,19  | -0,284 |
| 16 | P21980 TGM2_HUMAN  | E.RDLYLENPE.I      |        | 2 | 1,6824 | 0,117 | -0,212 |
| 16 | P04843 RPN1_HUMAN  | R.YDYQRQPD.S       |        | 2 | 1,6812 | 0,132 | -0,337 |
| 16 | Q13769 THOC5_HUMAN | R.RPTLGVQLD.D      |        | 2 | 1,6772 | 0,099 | 0,305  |
| 16 | Q9BRX5 PSF3_HUMAN  | R.RIM*DSSQNAYNE.D  |        | 2 | 1,6696 | 0,092 | -0,76  |
| 16 | Q7Z2W4 ZCCHV_HUMAN | R.FPNCLR.S         |        | 2 | 1,6689 | 0,098 | 0,227  |
| 16 | Q9BW91 NUDT9_HUMAN | K.GYVDDPR.N        |        | 2 | 1,6647 | 0,157 | 0,52   |
| 16 | Q02952 AKA12_HUMAN | K.KGLSSDLE.G       |        | 2 | 1,6639 | 0,23  | 0,216  |
| 16 | P22234 PUR6_HUMAN  | K.KACGNFGIPCE.L    |        | 2 | 1,6595 | 0,137 | -0,487 |
| 16 | Q9NPR2 SEM4B_HUMAN | R.VRLGS#EIRDSVV.-  | S825:  | 2 | 1,6557 | 0,567 | -0,26  |
| 16 | Q8WV41 SNX33_HUMAN | R.FSCFVR.S         |        | 2 | 1,6454 | 0,124 | 0,15   |
| 16 | Q6U841 S4A10_HUMAN | R.S#FADIGKK.Q      | S238:  | 2 | 1,6432 | 0,282 | -0,387 |
| 16 | P07814 SYEP_HUMAN  | E.YKPGNPPAE.I      |        | 2 | 1,6352 | 0,175 | -0,063 |
| 16 | P49792 RBP2_HUMAN  | K.YSPKT#PPR.W      | T799:  | 2 | 1,6339 | 0,126 | -0,238 |
| 16 | Q71RC2 LARP4_HUMAN | E.QYVPPRS#PK.-     | S722:  | 2 | 1,6337 | 0,119 | 0      |
| 16 | P62258 1433E_HUMAN | E.ILNSPDR.A        |        | 2 | 1,6261 | 0,112 | 0,15   |
| 16 | P83881 RL36A_HUMAN | R.KGQVIQF.-        |        | 2 | 1,6137 | 0,193 | -0,223 |
| 16 | Q02952 AKA12_HUMAN | K.VQGS#PLKK.L      | S514:  | 2 | 1,612  | 0,179 | -0,195 |
| 16 | Q9NRR4 RNC_HUMAN   | K.NYTSIKE.K        |        | 2 | 1,6098 | 0,091 | 0      |
| 16 | P04264 K2C1_HUMAN  | R.THNLEPYFE.S      |        | 2 | 1,6081 | 0,118 | -0,53  |
| 16 | Q7KZF4 SND1_HUMAN  | K.YTIENPR.H        |        | 2 | 1,5941 | 0,12  | 0,068  |
| 16 | O43683 BUB1_HUMAN  | D.LHQFFE.F         |        | 2 | 1,5936 | 0,091 | 0,446  |
| 16 | O43166 SI1L1_HUMAN | R.RPS#YTLGM*K.S    | S1632: | 2 | 1,5907 | 0,086 | -0,425 |
| 16 | Q05524 ENO1B_HUMAN | K.YNQLLR.I         |        | 2 | 1,5807 | 0,177 | 0      |
| 16 | P24928 RPB1_HUMAN  | D.GSYVNYR.H        |        | 2 | 1,5745 | 0,193 | 0,284  |
| 16 | Q9UGU0 TCF20_HUMAN | R.QQQFLDR.V        |        | 2 | 1,5678 | 0,129 | 0,196  |
| 16 | P05023 AT1A1_HUMAN | K.YGTDLR.G         |        | 2 | 1,559  | 0,226 | 0,376  |
| 16 | P05787 K2C8_HUMAN  | E.SYINNLR.R        |        | 2 | 1,5512 | 0,082 | 0,208  |
| 16 | Q07352 TISB_HUMAN  | R.RLPIFSRLS#ISDD.- | S334:  | 2 | 1,5487 | 0,297 | -0,305 |
| 16 | Q5VT25 MRCKA_HUMAN | R.RYS#FRVPEEE.R    | S1545: | 2 | 1,5302 | 0,192 | -0,877 |
| 16 | P39023 RL3_HUMAN   | K.YCQVIR.V         |        | 2 | 1,5263 | 0,097 | -0,073 |
| 16 | Q8N2Z9 CENPS_HUMAN | R.FSYQQR.L         |        | 2 | 1,5125 | 0,121 | 0,294  |

|    |                     |                                       |              |   |        |       |        |
|----|---------------------|---------------------------------------|--------------|---|--------|-------|--------|
| 16 | Q96GA7 SDSL_HUMAN   | R.GIGHFCQE.M                          |              | 2 | 1,508  | 0,12  | 0,386  |
| 16 | Q9Y5G4 PCDG9_HUMAN  | E.NLSFTLE.N                           |              | 2 | 1,4725 | 0,088 | 0,592  |
| 16 | O00418 EF2K_HUMAN   | E.GVDGGQSPR.A                         |              | 2 | 1,4693 | 0,101 | 0,419  |
| 16 | Q13416 ORC2_HUMAN   | K.VYSFQNR.K                           |              | 2 | 1,4576 | 0,105 | 0,067  |
| 16 | P04406 G3P_HUMAN    | K.LVINGNPITIFQE.R                     |              | 2 | 1,4538 | 0,278 | -0,251 |
| 16 | Q9UBT3 DKK4_HUMAN   | E.GTTGHPVQE.N                         |              | 2 | 1,411  | 0,175 | 0,329  |
| 16 | P49736 MCM2_HUMAN   | E.SFTM*ASS#PAQRR.R                    | S13:         | 2 | 1,3889 | 0,167 | -0,85  |
| 16 | P34931 HS71L_HUMAN  | E.SYAFNM*K.S                          |              | 2 | 1,2143 | 0,191 | 0,07   |
| 16 | Q8WWI1 LMO7_HUMAN   | E.SLDSLGSR.S                          |              | 2 | 1,2058 | 0,215 | 0,073  |
| 17 | Q05209 PTN12_HUMAN  | K.ISKPQELSSDLNVGDTSQNSCVDCSVTQSNK.V   |              | 3 | 6,8169 | 0,487 | 0,646  |
| 17 | Q6AI12 ANR40_HUMAN  | R.DHTSLALVQNGDVSAPSAILR.T             |              | 2 | 6,7167 | 0,613 | -0,113 |
| 17 | Q92734 TFG_HUMAN    | E.INKNVM*SAFGLTDDQVSGPPSAPAEDR.S      |              | 3 | 6,4226 | 0,509 | 0,194  |
| 17 | A8K6V7 A8K6V7_HUMAN | E.LEEKSTT#PPPAEPVSLPQEPPKPR.V         | T227:        | 3 | 6,3988 | 0,483 | 0,135  |
| 17 | O60499 STX10_HUMAN  | E.ILAGKPAAQKS#PSDLLDASAVSATSR.Y       | S132:        | 3 | 6,2961 | 0,537 | 0,069  |
| 17 | Q9H0D6 XRN2_HUMAN   | E.M*RM*QNNSSPSISPNSTFTSDGSPSPLGGIK.R  |              | 3 | 6,1874 | 0,368 | 0,468  |
| 17 | Q9UQ35 SRRM2_HUMAN  | R.HGGSPQPLATTPLSQEPVNPPEASPTR.D       |              | 3 | 6,0976 | 0,554 | -0,128 |
| 17 | Q96SU4 OSBL9_HUMAN  | R.LIDSSGSASVLTHSSSGNSLK.R             |              | 2 | 5,989  | 0,604 | 0      |
| 17 | Q9C0D2 K1731_HUMAN  | R.LKLS#PNKYQPIQPIQTSKLE.Q             | S654:        | 3 | 5,887  | 0,457 | -0,38  |
| 17 | Q2TAL8 QRIC1_HUMAN  | E.AYNAVHVS#GSPTALAAVKLEDDKE.K         | S343:        | 3 | 5,8517 | 0,509 | 0,071  |
| 17 | Q9P287 BCCIP_HUMAN  | E.LTDLLIQQNHIGSVIK.Q                  |              | 2 | 5,8403 | 0,452 | -0,749 |
| 17 | Q12765 SCRN1_HUMAN  | E.DANSCHSFQSAYLIVDRDE.A               |              | 2 | 5,8185 | 0,575 | 0      |
| 17 | P08238 HS90B_HUMAN  | E.TALLSSGFSLEDPQTHSNR.I               |              | 2 | 5,7695 | 0,539 | 0      |
| 17 | P35527 K1C9_HUMAN   | E.TQITQIEHEVSSSGQEVQSSAK.E            |              | 3 | 5,6961 | 0,481 | 0,154  |
| 17 | A0FGR8 ESYT2_HUMAN  | K.SHM*SGSPGPGGSNTAPSTPVIGGSDKPGM*EE.K |              | 3 | 5,6346 | 0,567 | 0,371  |
| 17 | Q01804 OTUD4_HUMAN  | K.TAAAAADVNGFKPLSGNEQLK.N             |              | 2 | 5,6207 | 0,517 | 0,464  |
| 17 | P12268 IMDH2_HUMAN  | K.DKYPNLQVIGGNVVTAAQAK.N              |              | 2 | 5,5557 | 0,547 | -0,351 |
| 17 | P36507 MP2K2_HUMAN  | R.RKPVLPAALTINPTIAEGPS#PTSE.G         | S23:         | 3 | 5,548  | 0,487 | -0,222 |
| 17 | Q8IWA0 WDR75_HUMAN  | K.VQDTSNTGLGEDIIHQLSK.S               |              | 2 | 5,5388 | 0,509 | 0      |
| 17 | Q2NKX8 ERC6L_HUMAN  | E.IADDLSASHSALQDAQASEAK.L             |              | 3 | 5,5264 | 0,489 | 0,258  |
| 17 | P55196 AFAD_HUMAN   | R.ADHRS#SPNVANQPPS#PGGK.S             | S1155:S1165: | 3 | 5,5194 | 0,348 | -0,176 |
| 17 | P55196 AFAD_HUMAN   | R.ADHRS#PNVANQPPS#PGGK.S              | S1156:S1165: | 3 | 5,5081 | 0,353 | -0,176 |
| 17 | Q9P2J5 SYLC_HUMAN   | E.DKGTGVVTSVPSDPPDIAALR.D             |              | 2 | 5,4914 | 0,519 | 0,111  |
| 17 | Q09666 AHNK_HUMAN   | K.FSVSGLKAEGPDVAVDLPK.G               |              | 3 | 5,4832 | 0,455 | 0,19   |

|    |                     |                                  |   |        |       |        |
|----|---------------------|----------------------------------|---|--------|-------|--------|
| 17 | Q2NKX8 ERC6L_HUMAN  | E.IADDSASHSALQDAQASEAK.L         | 2 | 5,4719 | 0,605 | 0,115  |
| 17 | Q14157 UBP2L_HUMAN  | E.KSPAVATSTAAPPPSSPLPSK.S        | 2 | 5,4655 | 0,55  | 0      |
| 17 | Q9UNY4 TTF2_HUMAN   | E.THSVAPAGGPAAQAAPAAPGLSLGEGR.E  | 3 | 5,4259 | 0,504 | -0,225 |
| 17 | P60709 ACTB_HUMAN   | R.KDLYANTVLSGGTTM*YPGIADR.M      | 3 | 5,3885 | 0,49  | 0,465  |
| 17 | Q96PK6 RBM14_HUMAN  | R.TQSSASLAASYAAQQHPQAAASYR.G     | 2 | 5,3793 | 0,53  | 0,792  |
| 17 | P40189 IL6RB_HUMAN  | E.DLQLVDHVDGGDGILPR.Q            | 2 | 5,3684 | 0,543 | -0,134 |
| 17 | Q6A112 ANR40_HUMAN  | R.DHTSLALVQNGDVSAPSAILR.T        | 3 | 5,3539 | 0,365 | 0,169  |
| 17 | Q06787 FMR1_HUMAN   | E.DLM*GLAIGTHGANIQQAR.K          | 3 | 5,244  | 0,422 | 0,194  |
| 17 | O00330 ODPX_HUMAN   | K.STVPHAYATADCDLGAVLK.V          | 2 | 5,2346 | 0,458 | 0,061  |
| 17 | P35998 PRS7_HUMAN   | K.IINADSEDPKYIINVK.Q             | 2 | 5,2288 | 0,447 | -0,2   |
| 17 | Q13347 EIF3I_HUMAN  | R.TERPVNSAALSPNYDHVVLGGGQE.A     | 2 | 5,2149 | 0,552 | 0,681  |
| 17 | P60709 ACTB_HUMAN   | R.KDLYANTVLSGGTTM*YPGIADR.M      | 2 | 5,1759 | 0,576 | 0,103  |
| 17 | Q9BRQ6 CHCH6_HUMAN  | R.M*KEPSSPPAPTSTFGLQDGNLR.A      | 3 | 5,1482 | 0,438 | -0,362 |
| 17 | Q9Y6D5 BIG2_HUMAN   | E.LEKPIQSKPQSPVIQAAAVS#PK.F      | 3 | 5,134  | 0,465 | 0,076  |
| 17 | Q99459 CDC5L_HUMAN  | R.DKLNINPEDGM*ADYSDPSYVK.Q       | 3 | 5,1138 | 0,324 | 0,077  |
| 17 | Q5ZPR3 CD276_HUMAN  | R.NPVLQQDAHSSVTITPQR.S           | 3 | 5,109  | 0,336 | 0,184  |
| 17 | P07900 HS90A_HUMAN  | E.TALLSSGFSLEDPQTHANR.I          | 2 | 5,1019 | 0,498 | 0,06   |
| 17 | P17980 PRS6A_HUMAN  | K.VIAATNRVDILDPELLR.S            | 3 | 5,0855 | 0,314 | 0,099  |
| 17 | P07954 FUMH_HUMAN   | E.SLM*LVTALNPHIGYDK.A            | 2 | 5,0818 | 0,466 | -0,546 |
| 17 | P12270 TPR_HUMAN    | E.AM*QSEGPVEHVPVFGSTSGSVR.S      | 3 | 5,0522 | 0,374 | 0,161  |
| 17 | Q658Y4 F91A1_HUMAN  | D.LQHLCGYVTM*LNASSQLADR.K        | 3 | 5,0286 | 0,458 | 0,239  |
| 17 | Q03519 TAP2_HUMAN   | E.DDKVM*AAAQAAHADDFIQE.M         | 2 | 5,0171 | 0,516 | 0      |
| 17 | Q13263 TIF1B_HUMAN  | K.IVAERPGTNSTGPAPM*APPR.A        | 3 | 5,0039 | 0,361 | -0,36  |
| 17 | P62937 PIIA_HUMAN   | K.HTGPGILSM*ANAGPNTNGSQFFICTAK.T | 3 | 4,9887 | 0,428 | -0,13  |
| 17 | Q13200 PSMD2_HUMAN  | K.APVQPQQSPAAAPGGTDEKPSGK.E      | 2 | 4,9786 | 0,549 | -0,11  |
| 17 | P08069 IGF1R_HUMAN  | E.GFVIHDGECM*QECPSGFIR.N         | 3 | 4,9684 | 0,409 | 0,162  |
| 17 | Q09666 AHNK_HUMAN   | K.GAKPQGHIGVDASAPQIGGSITGPSVE.V  | 3 | 4,9536 | 0,473 | -0,072 |
| 17 | P61978 HNRPK_HUMAN  | R.LLIHQSLAGGIIGVK.G              | 3 | 4,9513 | 0,524 | 0,241  |
| 17 | P09234 RU1C_HUMAN   | K.FYCDYCDTYLTHDSPSVR.K           | 2 | 4,9444 | 0,479 | 0,212  |
| 17 | P04792 HSPB1_HUMAN  | R.VSLDVNHFAPELTVK.T              | 2 | 4,9305 | 0,473 | -0,274 |
| 17 | Q9NZN5 ARHGC_HUMAN  | R.IAPHIIGAEDDDFGTEHE.Q           | 3 | 4,9213 | 0,397 | -0,186 |
| 17 | A8K630 A8K630_HUMAN | R.LQQQHSEQPPLQSPVTRR.R           | 2 | 4,9101 | 0,535 | 0,112  |
| 17 | P55196 AFAD_HUMAN   | E.TTFDLGGDIHSGTALPTSK.S          | 2 | 4,9029 | 0,549 | -0,382 |

S227:

|    |                    |                                   |        |   |        |       |        |
|----|--------------------|-----------------------------------|--------|---|--------|-------|--------|
| 17 | P27815 PDE4A_HUMAN | R.SPLDSQASPLVLHAGAATSQR.R         |        | 3 | 4,9005 | 0,475 | 0      |
| 17 | Q5TAQ9 WD42A_HUMAN | E.DIYLFNSSHSDGAQYVK.R             |        | 2 | 4,9001 | 0,426 | 0,314  |
| 17 | Q8WXG6 MADD_HUMAN  | E.TLGADSDLSSNAGDGGEGSVHLASSR.G    |        | 3 | 4,8962 | 0,523 | -0,07  |
| 17 | P04406 G3P_HUMAN   | K.RVIISAPSADAPM*FVM*GVNHE.K       |        | 3 | 4,8858 | 0,417 | 0,563  |
| 17 | P46013 KI67_HUMAN  | K.IACRS#PQPDPVGTPTIFKPQSK.R       | S2223: | 3 | 4,8753 | 0,35  | -0,511 |
| 17 | P52907 CAZA1_HUMAN | E.DGNVQLVSHKDVQDSLTVSNE.A         |        | 2 | 4,8683 | 0,547 | 0,962  |
| 17 | Q9P2J5 SYLC_HUMAN  | E.DKGTGVVTSVPSDSPDDIAALR.D        |        | 3 | 4,855  | 0,366 | 0,831  |
| 17 | P07195 LDHB_HUMAN  | E.M*M*DLQHGSFLQTPK.I              |        | 2 | 4,8544 | 0,371 | -0,137 |
| 17 | Q9H0D6 XRN2_HUMAN  | R.M*QNNSSPISPNSTFTSDGSPSPLGGIKR.K |        | 3 | 4,8438 | 0,406 | 0,246  |
| 17 | Q9Y219 JAG2_HUMAN  | R.VIDGCGSDAGPGM*PGTAASGVCGPHGR.C  |        | 3 | 4,8308 | 0,573 | -0,215 |
| 17 | Q8N1G2 K0082_HUMAN | E.LALSLSSTSDDEPPSSVSHGAK.A        |        | 2 | 4,8281 | 0,597 | 0,112  |
| 17 | Q01433 AMPD2_HUMAN | E.SM*NLTAIDLSDVTLDVHADR.N         |        | 3 | 4,8239 | 0,451 | -0,081 |
| 17 | P78332 RBM6_HUMAN  | E.HESPADFQNSQS#PVQDQDK.S          | S362:  | 3 | 4,8176 | 0,353 | -0,654 |
| 17 | Q96Q11 TRNT1_HUMAN | K.ATDSSDPLKPYQDFIIDS.R            |        | 3 | 4,8115 | 0,358 | -0,253 |
| 17 | P27816 MAP4_HUMAN  | E.VALAKDM*ES#PTKLDVTLAK.D         | S280:  | 2 | 4,7883 | 0,527 | 0,115  |
| 17 | P50991 TCPD_HUMAN  | K.M*IQDGKGDVTITNDGATILK.Q         |        | 3 | 4,7873 | 0,378 | 0,261  |
| 17 | Q969S3 ZN622_HUMAN | K.GLVDSVDKDAM*NAAIQQAIA.A         |        | 3 | 4,7809 | 0,412 | 0,339  |
| 17 | P51114 FXR1_HUMAN  | E.DLM*GLAIGHGSNIQQAR.K            |        | 3 | 4,7565 | 0,48  | -0,771 |
| 17 | Q9BWU0 NADAP_HUMAN | E.TLASQDLSGDFKPKALPVS#PAAR.S      | S82:   | 3 | 4,746  | 0,494 | -0,373 |
| 17 | P12268 IMDH2_HUMAN | K.DKYPNLQVIGGNVVTAAQAK.N          |        | 3 | 4,7081 | 0,436 | -0,263 |
| 17 | Q13263 TIF1B_HUMAN | E.GYGFGSGDDPYSSAEPHVSGVK.R        |        | 2 | 4,7059 | 0,538 | 0,221  |
| 17 | P29375 JAD1A_HUMAN | K.AAANPDLQGHLPFQQSAFNR.V          |        | 3 | 4,702  | 0,479 | 0,081  |
| 17 | P04406 G3P_HUMAN   | E.GLM*TTVHAITAT#QKTVDGPGSK.L      | T184:  | 2 | 4,6805 | 0,418 | 0,211  |
| 17 | Q14966 ZN638_HUMAN | K.TSILAVSDVSSSKPSIK.A             |        | 2 | 4,6671 | 0,427 | -0,994 |
| 17 | P49792 RBP2_HUMAN  | E.DALDDSVSSSVHASPLAS#SPVRK.N      | S2250: | 3 | 4,6646 | 0,353 | 0,44   |
| 17 | Q9H3P2 NELFA_HUMAN | E.ASRPPEEPSAPSPTLPAQFK.Q          |        | 2 | 4,6552 | 0,493 | 0      |
| 17 | O14545 TRAD1_HUMAN | E.LYPEELLIDHQTSCNPSR.A            |        | 2 | 4,6525 | 0,489 | 0      |
| 17 | O75351 VPS4B_HUMAN | K.LQNQLQGAIVIPNVK.W               |        | 2 | 4,6499 | 0,41  | -0,254 |
| 17 | O60658 PDE8A_HUMAN | K.DDDPHANDLVGGLM*SDGLR.R          |        | 3 | 4,6485 | 0,295 | 0,091  |
| 17 | Q13200 PSMD2_HUMAN | K.APVQPQQSPAAAPGGTDEKPSGK.E       |        | 3 | 4,6315 | 0,398 | -0,247 |
| 17 | P50991 TCPD_HUMAN  | K.M*IQDGKGDVTITNDGATILK.Q         |        | 2 | 4,6287 | 0,518 | -0,116 |
| 17 | Q96T23 RSF1_HUMAN  | E.M*DNLDNAQTSGIEEPSETKGSM*QK.S    |        | 3 | 4,6263 | 0,41  | -0,208 |
| 17 | Q9Y394 DHRS7_HUMAN | E.KDILVPLDLTDTGSHE.A              |        | 2 | 4,6138 | 0,368 | -0,392 |

|    |                    |                                      |        |   |        |       |        |
|----|--------------------|--------------------------------------|--------|---|--------|-------|--------|
| 17 | P28370 SMCA1_HUMAN | E.LFAHFIQPSAQKS#PTSPLNM*K.L          | S116:  | 3 | 4,6126 | 0,352 | -0,075 |
| 17 | Q9BX68 HINT2_HUMAN | E.DQQLLGHLLLVAK.Q                    |        | 2 | 4,6014 | 0,365 | -0,337 |
| 17 | Q02952 AKA12_HUMAN | E.DFAAHPGEDAVPTGPDCQAK.S             |        | 2 | 4,586  | 0,524 | 0      |
| 17 | Q9UER7 DAXX_HUMAN  | R.VDSPSHGLVTSSLICIPSPAR.L            |        | 2 | 4,5859 | 0,513 | 0,117  |
| 17 | O75381 PEX14_HUMAN | E.STSSSPGKEGH#PEGSTVTYHLLGPQEE.G     | S282:  | 3 | 4,5786 | 1     | -0,614 |
| 17 | P49792 RBP2_HUMAN  | E.DALDDSVSSSSVHAS#PLASSPVRK.N        | S2246: | 3 | 4,5697 | 0,393 | -0,073 |
| 17 | P04406 G3P_HUMAN   | K.RVIISAPSADAPM*FVM*GVNHE.K          |        | 2 | 4,5617 | 0,632 | 0,107  |
| 17 | O95336 6PGL_HUMAN  | E.DQEENPLPAALVQPHTGK.L               |        | 2 | 4,5613 | 0,537 | 0      |
| 17 | P39687 AN32A_HUMAN | K.LLPQTYLDGYDRDDK.E                  |        | 2 | 4,5494 | 0,52  | -0,38  |
| 17 | O75083 WDR1_HUMAN  | E.VVAVHPGGDTVAIGGVDGNVR.L            |        | 3 | 4,5471 | 0,261 | 0,46   |
| 17 | O15014 ZN609_HUMAN | E.YGEEPILHADLGSCNGASVSQK.G           |        | 3 | 4,5446 | 0,35  | 0,235  |
| 17 | Q02952 AKA12_HUMAN | E.DSIAGSGVEHSTPDTEPGKEE.S            |        | 2 | 4,5401 | 0,551 | 0,228  |
| 17 | Q5JRA6 MIA3_HUMAN  | E.ASGKPSPSDPGSGTATM*M*NSSSR.G        |        | 3 | 4,5295 | 0,439 | -0,163 |
| 17 | Q86TC9 MYPN_HUMAN  | K.TPEPS#SPVKEPPVLAKPK.L              | S643:  | 3 | 4,5112 | 0,366 | 0,176  |
| 17 | P08581 MET_HUMAN   | K.TGPVLEHPDCFCQDCSSK.A               |        | 2 | 4,4976 | 0,475 | 0,218  |
| 17 | P29375 JAD1A_HUMAN | K.AAANPDLQGHLPFQQSAFNR.V             |        | 2 | 4,4959 | 0,543 | 0,108  |
| 17 | Q92597 NDRG1_HUMAN | E.AFKYFVQGM*GYM*PSASM*TR.L           |        | 3 | 4,4952 | 0,344 | -0,577 |
| 17 | Q9UER7 DAXX_HUMAN  | E.AAAQPGPSHPLPNAAS#PGAEAPSSSEPHGAR.G | S33:   | 3 | 4,4945 | 0,427 | 0,244  |
| 17 | Q15417 CNN3_HUMAN  | K.M*QTDKPFDTTISLQM*GTNK.G            |        | 3 | 4,4921 | 0,385 | 0,158  |
| 17 | Q92890 UFD1_HUMAN  | E.CDM*NVDFDAPLGYKEPER.Q              |        | 3 | 4,4757 | 0,435 | -0,084 |
| 17 | P30837 AL1B1_HUMAN | R.GFFIKPTVFGGVQDDM*R.I               |        | 3 | 4,4717 | 0,271 | 0      |
| 17 | P04406 G3P_HUMAN   | E.GLM*TTVHAITAT#QKTVDGSPGK.L         | T184:  | 3 | 4,4648 | 0,436 | 0,317  |
| 17 | P30086 PEBP1_HUMAN | E.VDEQPQHPLHVTYAGAAVDE.L             |        | 2 | 4,4611 | 0,54  | 0      |
| 17 | Q92882 OSTF1_HUMAN | K.LAFDM*ATNAACASLLKK.K               |        | 2 | 4,4434 | 0,508 | 0,066  |
| 17 | Q13765 NACA_HUMAN  | K.NILFVITKPDVYK.S                    |        | 2 | 4,4363 | 0,379 | -0,394 |
| 17 | Q92622 K0226_HUMAN | R.GHVSPAEDQTIQAPPVSVSALAR.D          |        | 3 | 4,4361 | 0,363 | 0      |
| 17 | P10809 CH60_HUMAN  | E.GLTLNLEDVQPHDLGK.V                 |        | 2 | 4,4253 | 0,551 | -0,279 |
| 17 | P16435 NCPR_HUMAN  | E.SGDHVAVYPANDSALVNQLGK.I            |        | 3 | 4,4193 | 0,393 | 0,085  |
| 17 | P62195 PRS8_HUMAN  | K.FVVDVDKNIDINDVTPNCR.V              |        | 3 | 4,4168 | 0,29  | -0,164 |
| 17 | O94979 SC31A_HUMAN | K.IALALNKVDGANVALK.D                 |        | 2 | 4,4021 | 0,494 | -0,455 |
| 17 | Q9Y2Z0 SUGT1_HUMAN | R.AYCHILLGNYCVAVADAK.K               |        | 3 | 4,3962 | 0,437 | 0,09   |
| 17 | Q99497 PARK7_HUMAN | E.DAKKEGPDVVVLPGGNLGAQNLSE.S         |        | 3 | 4,3948 | 0,44  | -0,356 |
| 17 | Q8TEU7 RPGF6_HUMAN | E.DTISVASSLHSS#PPASPGSPHK.G          | S1237: | 3 | 4,3802 | 0,46  | 0,155  |

|    |                     |                                        |            |   |        |       |        |
|----|---------------------|----------------------------------------|------------|---|--------|-------|--------|
| 17 | Q6B016 JHD3D_HUMAN  | E.DGALM*DKPVPLS#PGLQHPVK.A             | S502:      | 3 | 4,3759 | 0,259 | -0,75  |
| 17 | Q02952 AKA12_HUMAN  | K.VKEESQLPGTGGPEDVLQPVQR.A             |            | 3 | 4,3682 | 0,251 | 0,155  |
| 17 | Q9H1A4 APC1_HUMAN   | E.LRDS#SKLHDS#LYNE.D                   | S563:S569: | 2 | 4,3676 | 0,407 | -0,598 |
| 17 | Q9UER7 DAXX_HUMAN   | R.VDSPSHGLVTSSLICIPSPAR.L              |            | 3 | 4,3629 | 0,336 | 0,176  |
| 17 | P62158 CALM_HUMAN   | E.AFSLFDKDGDTITTKE.L                   |            | 2 | 4,3569 | 0,546 | 0      |
| 17 | Q06787 FMR1_HUMAN   | E.DLM*GLAIGTHGANIQQAR.K                |            | 2 | 4,3569 | 0,362 | -0,13  |
| 17 | O43294 TGF1_HUMAN   | K.KRPS#LPSS#PSPGLPK.A                  | S137:S141: | 3 | 4,3529 | 0,363 | 0,214  |
| 17 | Q8IWE2 NXP20_HUMAN  | K.SLLSSASATVGHGLTAVKE.K                |            | 2 | 4,3373 | 0,433 | -0,667 |
| 17 | P51991 ROA3_HUMAN   | R.GFAFVTFDDHDTVDK.I                    |            | 2 | 4,3365 | 0,492 | -0,285 |
| 17 | Q09666 AHNK_HUMAN   | K.LPQFGISTPGSDLHVNAK.G                 |            | 3 | 4,3361 | 0,46  | 0,194  |
| 17 | Q9NR50 EI2BG_HUMAN  | K.M*KPDIVCIPDDADM*GTADSLR.Y            |            | 3 | 4,3355 | 0,368 | 0,233  |
| 17 | Q12834 CDC20_HUMAN  | E.SDLHSLQLDAPINAPPAR.W                 |            | 3 | 4,3314 | 0,317 | -0,344 |
| 17 | Q96PK6 RBM14_HUMAN  | R.TQSSASLAASYAAQQHPQAAASYR.G           |            | 3 | 4,328  | 0,502 | 0,148  |
| 17 | P04150 GCR_HUMAN    | K.IKDNGDLVLSPPSNVTLPQVK.T              |            | 3 | 4,3264 | 0,235 | -0,493 |
| 17 | Q96SU4 OSBL9_HUMAN  | R.LIDSSGSASVLTHSSSGNS#LKRPDTE.S        | S329:      | 3 | 4,3204 | 0,533 | -0,259 |
| 17 | Q9UHD1 CHRD1_HUMAN  | R.RKT#SDFNTFLAQE.G                     | T199:      | 2 | 4,318  | 0,433 | -0,224 |
| 17 | P51956 NEK3_HUMAN   | E.TEASDSVDGGHDSVILDPER.L               |            | 2 | 4,3171 | 0,431 | 0,116  |
| 17 | Q1JQ81 Q1JQ81_HUMAN | R.NDPKPLPQQPPAPANQDQNSSQNTR.L          |            | 3 | 4,3125 | 0,289 | 0,133  |
| 17 | Q58WW2 IQWD1_HUMAN  | E.KLS#PKPGTGEPVLSLHYSTE.G              | S467:      | 3 | 4,312  | 0,331 | -0,165 |
| 17 | Q14160 LAP4_HUMAN   | E.VSPGVIANPFAAGIGHR.N                  |            | 2 | 4,3107 | 0,415 | -0,367 |
| 17 | Q5JWJ6 Q5JWJ6_HUMAN | E.DTAIVHPVPIRM*T#PSK.I                 | T380:      | 3 | 4,283  | 0,37  | 0,295  |
| 17 | A8K933 A8K933_HUMAN | E.LCHHS#SSS#TPLAADRE.S                 | S199:S202: | 3 | 4,282  | 0,296 | -0,19  |
| 17 | Q8NBZ7 UXS1_HUMAN   | R.ILITGGAGFVGSHLTDK.L                  |            | 2 | 4,2752 | 0,58  | -0,217 |
| 17 | Q9UGV2 NDRG3_HUMAN  | R.THSTSSSLGS#GESPFSR.S                 | S338:      | 2 | 4,2729 | 0,578 | -0,406 |
| 17 | P49750 YLP1_HUMAN   | K.SQAEPLSGNKEPLADTSSNQK.N              |            | 3 | 4,2709 | 0,446 | -0,236 |
| 17 | Q7L2J0 MEPCE_HUMAN  | R.CAPSAGSPAAAVGRES#PGAAATSSSGPQAQQHR.G | S69:       | 3 | 4,2598 | 0,448 | 0,458  |
| 17 | Q9Y2L5 TRS85_HUMAN  | K.YYVLLHDVSAGDEQRAE.S                  |            | 3 | 4,2579 | 0,279 | 0,372  |
| 17 | O75376 NCOR1_HUMAN  | R.SHVSSEPYEPISPPQVPVVE.K               |            | 3 | 4,2566 | 0,29  | -0,158 |
| 17 | O94804 STK10_HUMAN  | E.KQVAEQGGDLS#PAANR.S                  | S438:      | 2 | 4,2435 | 0,41  | -0,567 |
| 17 | P51991 ROA3_HUMAN   | K.IFVGGIKEDTEEYNLR.D                   |            | 3 | 4,2387 | 0,476 | 0,291  |
| 17 | P51617 IRAK1_HUMAN  | R.KLPSSASTFLSPAFIGSQTTHSGPE.L          |            | 3 | 4,2374 | 0,356 | -0,226 |
| 17 | Q13435 SF3B2_HUMAN  | E.TGKPLYGDVFGTNAAEFQTK.T               |            | 3 | 4,231  | 0,28  | -0,768 |
| 17 | P07195 LDHB_HUMAN   | E.M*M*DLQHGSFLQTPK.I                   |            | 3 | 4,2235 | 0,376 | 0,206  |

|    |                     |                                  |       |   |        |       |        |
|----|---------------------|----------------------------------|-------|---|--------|-------|--------|
| 17 | Q96I18 LRCH3_HUMAN  | E.LYSSRPYGALDSGFNSVDSGDK.R       |       | 3 | 4,2173 | 0,322 | -1,097 |
| 17 | Q8WXI9 P66B_HUMAN   | R.TTSSAIYM*NLASHIQPGTVNR.V       |       | 3 | 4,2113 | 0,405 | -0,321 |
| 17 | Q9BTC0 DIDO1_HUMAN  | K.SFDPSAREPPGSTAGLPQEPK.T        |       | 3 | 4,2063 | 0,447 | -0,169 |
| 17 | P55196 AFAD_HUMAN   | E.TTFDLGGDIHSGTALPTS#TTR.L       | S535: | 3 | 4,2018 | 0,286 | 0,225  |
| 17 | Q96SU4 OSBL9_HUMAN  | R.LIDSSGSASVLTHSS#GNSLKRPTTE.S   | S326: | 3 | 4,1916 | 0,53  | 0,129  |
| 17 | P11586 C1TC_HUMAN   | R.LGIEKTDPTTLTDEEINR.F           |       | 3 | 4,1892 | 0,247 | -0,984 |
| 17 | P00338 LDHA_HUMAN   | K.DQLIYNLLKEEQTPQNK.I            |       | 3 | 4,1786 | 0,247 | -0,088 |
| 17 | O14641 DVL2_HUMAN   | E.RHLAGYESS#STLM*TSELE.S         | S195: | 2 | 4,174  | 0,582 | 0,116  |
| 17 | Q9NZT2 OGFR_HUMAN   | E.GAGDAAVASGGAQTLALAGSPAPSGHPK.A |       | 3 | 4,1725 | 0,464 | 0,073  |
| 17 | Q9ULJ7 ANR50_HUMAN  | R.GLPNGPTHAFSSPESPSTVDVDR.Q      |       | 3 | 4,1643 | 0,312 | 0      |
| 17 | P40189 IL6RB_HUMAN  | E.DLQLVDHVDGGDGILPR.Q            |       | 3 | 4,1631 | 0,308 | -0,201 |
| 17 | P20020 AT2B1_HUMAN  | K.SLDKDPILLSGTHVM*E.G            |       | 2 | 4,1436 | 0,439 | -0,276 |
| 17 | P51587 BRCA2_HUMAN  | E.APLTFANADSGLLHSSVK.R           |       | 3 | 4,1399 | 0,458 | -0,5   |
| 17 | Q9UHB7 AFF4_HUMAN   | E.KELLS#PLSEPDDRYPLIVK.I         | S703: | 3 | 4,1391 | 0,416 | -0,399 |
| 17 | Q9H9P8 L2HDH_HUMAN  | R.GLM*AIDCPHTGIVDYR.Q            |       | 2 | 4,133  | 0,595 | -0,333 |
| 17 | Q15366 PCBP2_HUMAN  | K.GVTIPYRKPSSS#PVIFAGGQDR.Y      | S189: | 3 | 4,1319 | 0,407 | 0,146  |
| 17 | P62158 CALM_HUMAN   | K.EAFSLFDKDGDTITTK.E             |       | 2 | 4,129  | 0,481 | -0,265 |
| 17 | O14641 DVL2_HUMAN   | E.RHLAGYES#SSTLM*TSE.L           | S194: | 2 | 4,1236 | 0,303 | 0,131  |
| 17 | Q8IWC1 MA7D3_HUMAN  | K.IM*PIQHTLSVQSASSTVK.K          |       | 3 | 4,1089 | 0,487 | 0,188  |
| 17 | Q9Y2H0 DLGP4_HUMAN  | R.SLPDCTPHPNISISIDAGPR.Q         |       | 2 | 4,1062 | 0,486 | 0,18   |
| 17 | Q13263 TIF1B_HUMAN  | E.GYGFGSGDDPYSSAEPHVSGVK.R       |       | 3 | 4,1023 | 0,424 | 0,413  |
| 17 | Q01970 PLCB3_HUMAN  | E.VGLEKPSLEPQKS#LGDEGLNR.G       | S537: | 3 | 4,0977 | 0,435 | -0,078 |
| 17 | Q8TED0 UTP15_HUMAN  | K.LNPDLFITGSYDHTVK.M             |       | 2 | 4,091  | 0,447 | -0,134 |
| 17 | P30414 NKTR_HUMAN   | K.IPDVAPIVSDQKPSVSK.S            |       | 2 | 4,085  | 0,509 | -0,206 |
| 17 | Q8WUZ0 BCL7C_HUMAN  | R.LGQERDPGGITAGSTDEPPM*LTK.E     |       | 3 | 4,0842 | 0,326 | 1,073  |
| 17 | Q9UUK3 PARP4_HUMAN  | K.AGLQDASGNLVPLEDVHIK.G          |       | 3 | 4,0832 | 0,21  | 0,093  |
| 17 | Q8N4V1 TMM32_HUMAN  | R.VLFRPSDTANSSNQDALSSNTSLK.L     |       | 3 | 4,0813 | 0,358 | 0,072  |
| 17 | Q9UIW2 PLXA1_HUMAN  | R.LNTLAHYQVTDGSSVALVPK.Q         |       | 3 | 4,0788 | 0,338 | -0,087 |
| 17 | Q9Y5X1 SNX9_HUMAN   | R.ASS#SSM*KIPLNKFPGFAKPGTE.Q     | S198: | 3 | 4,0766 | 0,249 | -0,077 |
| 17 | P32519 ELF1_HUMAN   | R.SSQLVAHPPGTVITSVIK.T           |       | 3 | 4,0639 | 0,286 | 0,1    |
| 17 | A8K7W5 A8K7W5_HUMAN | E.KLNIGTDS#PQK.S                 | S568: | 2 | 4,0586 | 0,362 | -0,311 |
| 17 | P15374 UCHL3_HUMAN  | K.QTISNACGTIGLIHAIANNK.D         |       | 3 | 4,0581 | 0,448 | 0,087  |
| 17 | Q9Y4D8 K0614_HUMAN  | R.IAAVATAQQYDSDTSCHYKVE.L        |       | 3 | 4,0361 | 0,473 | 0,294  |



|    |                    |                              |            |   |        |       |        |
|----|--------------------|------------------------------|------------|---|--------|-------|--------|
| 17 | Q13813 SPTA2_HUMAN | R.LKDLNSQADSLM*TSSAFDTSQVK.D |            | 3 | 4,0331 | 0,26  | -0,219 |
| 17 | Q9UM11 FZR_HUMAN   | K.DATSDNGKDGLAYSALLK.N       |            | 2 | 4,0259 | 0,412 | 0,066  |
| 17 | Q9UNS1 TIM_HUMAN   | K.AGLASPEEEDAVGKEPLK.A       |            | 2 | 4,0251 | 0,484 | 0      |
| 17 | Q96NW4 ANR27_HUMAN | R.RHT#VEDAVVSQGPE.A          | T1023:     | 2 | 4,0143 | 0,5   | -0,38  |
| 17 | Q9BTE1 DCTN5_HUMAN | E.DCVVNAAQIGSYVHVHGK.N       |            | 2 | 4,0128 | 0,512 | -0,47  |
| 17 | O14893 GEMI2_HUMAN | K.RKQS#VNISLSGCQPAPE.G       | S81:       | 2 | 4,0085 | 0,34  | 0,375  |
| 17 | Q9NVS9 PNPO_HUMAN  | K.SSQIGAVVSHQSSVIPDRE.Y      |            | 3 | 4,0058 | 0,166 | 0,092  |
| 17 | Q14C86 GAPD1_HUMAN | R.LALCSADSVAFVPLTHSTR.N      |            | 2 | 3,9942 | 0,445 | -0,119 |
| 17 | P61158 ARP3_HUMAN  | E.DHYFLLTEPPLNTPENRE.Y       |            | 3 | 3,9938 | 0,385 | -0,67  |
| 17 | Q5VYJ4 RUEL1_HUMAN | E.YM*NLVLDDAEIHSK.T          |            | 3 | 3,9934 | 0,353 | 0,408  |
| 17 | P12694 ODBA_HUMAN  | R.IGHHSTS#DDSSAYRS#VDE.V     | S339:S347: | 3 | 3,9752 | 0,442 | -0,172 |
| 17 | P49761 CLK3_HUMAN  | E.ALLHPFFAGLTPEER.S          |            | 2 | 3,9666 | 0,454 | 0      |
| 17 | O94804 STK10_HUMAN | E.KQVAEQGGDLS#PAANR.S        | S438:      | 3 | 3,9604 | 0,313 | -0,531 |
| 17 | Q12986 NFX1_HUMAN  | R.RQDPQVVS#PFSR.G            | S326:      | 3 | 3,9402 | 0,331 | 0,367  |
| 17 | P46459 NSF_HUMAN   | R.TPLVSVLLEGGPPHSGK.T        |            | 3 | 3,9364 | 0,326 | 0      |
| 17 | Q9UJM3 ERRFI_HUMAN | D.LSYVSDQNGGVPDPNPPPPQTHR.R  |            | 3 | 3,9227 | 0,395 | 0,296  |
| 17 | Q6NYC8 PHTNS_HUMAN | E.SRLS#PGESAYQK.L            | S224:      | 2 | 3,9178 | 0,298 | -0,783 |
| 17 | P49815 TSC2_HUMAN  | K.SLSVPAASTAKPPPLPR.S        |            | 2 | 3,9148 | 0,422 | 0,289  |
| 17 | P63244 GBLP_HUMAN  | K.IIVDELKQEVISTSSK.A         |            | 3 | 3,9123 | 0,27  | 0,307  |
| 17 | Q9Y2U5 M3K2_HUMAN  | R.RRGS#DIDNPTLTVM*D.I        | S331:      | 2 | 3,9079 | 0,514 | -0,205 |
| 17 | Q04917 1433F_HUMAN | E.DSYKDSTLIM*QLLR.D          |            | 3 | 3,9015 | 0,227 | 0,431  |
| 17 | Q9BY32 ITPA_HUMAN  | E.DKSAYALCTFALSTGDPSQPVR.L   |            | 3 | 3,9004 | 0,311 | 0,077  |
| 17 | Q9NY61 AATF_HUMAN  | E.QLLNPRPSEADPEADPEEATAAR.V  |            | 3 | 3,8924 | 0,246 | 0      |
| 17 | P51956 NEK3_HUMAN  | E.TEASDSVDGGHDSVILDPER.L     |            | 3 | 3,8886 | 0,266 | -0,174 |
| 17 | Q2M2I8 AAK1_HUMAN  | R.ILSDVTHSAVFGVPASK.S        |            | 2 | 3,8851 | 0,501 | 0,212  |
| 17 | Q09666 AHNK_HUMAN  | E.VTGSDDETGKLQGGVSLASK.K     |            | 3 | 3,8847 | 0,399 | 0,27   |
| 17 | Q7LBC6 JHD2B_HUMAN | E.TTFSGGGGPAPVTTPEPDHVPK.A   |            | 3 | 3,8791 | 0,375 | 0,17   |
| 17 | P27816 MAP4_HUMAN  | E.VALAKDM*ES#PTKLDVTLAK.D    | S280:      | 3 | 3,8662 | 0,479 | 0,086  |
| 17 | O43149 ZZEF1_HUMAN | E.KESPGDLTRS#PE.M            | S240:      | 2 | 3,8627 | 0,372 | -0,175 |
| 17 | P07602 SAP_HUMAN   | K.SLPCDICKDVVTAAGDM*LK.D     |            | 3 | 3,8595 | 0,241 | -0,347 |
| 17 | Q9BPX3 CND3_HUMAN  | E.LLVDLTRPSGLNPQAK.T         |            | 2 | 3,8549 | 0,269 | -0,142 |
| 17 | Q9NVM9 CL011_HUMAN | E.AEIIKDSPDS#PEPPNKKPLVE.M   | S626:      | 2 | 3,8525 | 0,371 | 0,512  |
| 17 | O75116 ROCK2_HUMAN | E.LQM*TLDSKDSIEQLR.S         |            | 3 | 3,85   | 0,405 | 0,383  |

|    |                     |                               |            |   |        |       |        |
|----|---------------------|-------------------------------|------------|---|--------|-------|--------|
| 17 | P60842 IF4A1_HUMAN  | K.LQM*EAPHIIVGTPGR.V          |            | 3 | 3,8471 | 0,38  | 0      |
| 17 | Q5SSJ5 HP1B3_HUMAN  | K.ALPLIVGAQLIHADK.L           |            | 2 | 3,8411 | 0,42  | -0,391 |
| 17 | Q92922 SMRC1_HUMAN  | R.KHS#PS#PPPTPTESR.K          | S328:S330: | 3 | 3,8336 | 0,291 | -0,206 |
| 17 | Q6UN15 FIP1_HUMAN   | E.RDHS#PTPSVFNSDEE.R          | S492:      | 2 | 3,8279 | 0,453 | -0,136 |
| 17 | P12270 TPR_HUMAN    | E.AM*QSEGPVEHVPVFGSTSGSVR.S   |            | 2 | 3,8251 | 0,388 | 0,322  |
| 17 | Q63ZY3 KANK2_HUMAN  | R.VPSVAEAPQLRPAGTAAAK.T       |            | 2 | 3,823  | 0,493 | -0,266 |
| 17 | Q9Y490 TLN1_HUMAN   | E.LLDHVLLTLQKPSPE.L           |            | 2 | 3,8201 | 0,425 | -0,072 |
| 17 | P17812 PYRG1_HUMAN  | E.LEDHPPFFVGVQYHPE.F          |            | 3 | 3,8192 | 0,165 | -1,21  |
| 17 | O43166 SI1L1_HUMAN  | E.DQALAQM*KPYSSSKDS#SPTLASK.V | S1733:     | 3 | 3,8171 | 0,304 | 0,289  |
| 17 | O60506 HNRPQ_HUMAN  | E.GLTDVILYHQDDK.K             |            | 2 | 3,8062 | 0,433 | -0,302 |
| 17 | P18615 NELFE_HUMAN  | K.DPEKGPVPTFQPFQR.S           |            | 3 | 3,8014 | 0,411 | 0,315  |
| 17 | Q6IMN6 CAPR2_HUMAN  | K.HSLTSQSQIS#PK.S             | S566:      | 2 | 3,795  | 0,478 | -0,438 |
| 17 | O00629 IMA4_HUMAN   | D.SGIVPHLVPLLSHQE.V           |            | 3 | 3,7833 | 0,303 | 0,112  |
| 17 | Q9NQ57 INCE_HUMAN   | R.TDSQSVRHS#PIAPSSPSPQVLAQK.Y | S306:      | 3 | 3,7811 | 0,352 | -0,07  |
| 17 | Q8IWZ2 Q8IWZ2_HUMAN | R.GHNSNS#PSLQAGGAEGAGDR.G     | S2598:     | 3 | 3,7761 | 0,147 | -0,268 |
| 17 | Q16537 2A5E_HUMAN   | R.SQGKPIELTPLLLK.D            |            | 2 | 3,7759 | 0,516 | -0,523 |
| 17 | O43390 HNRPR_HUMAN  | E.GLVDVILYHQDDK.K             |            | 2 | 3,775  | 0,454 | -0,227 |
| 17 | Q9H0E9 BRD8_HUMAN   | E.ADVAIGKGETPLTNVK.T          |            | 3 | 3,7733 | 0,297 | 0,212  |
| 17 | P62158 CALM_HUMAN   | E.AFSLFDKGDGTITTKE.L          |            | 3 | 3,773  | 0,381 | -0,099 |
| 17 | A8K6N2 A8K6N2_HUMAN | K.LKPEDITQIQPQQLVLR.L         |            | 3 | 3,7696 | 0,183 | 0,181  |
| 17 | P07237 PDIA1_HUMAN  | K.ILFIFIDSDHTDNQR.I           |            | 2 | 3,7688 | 0,406 | 0,266  |
| 17 | P51114 FXR1_HUMAN   | E.DLM*GLAIGTHGSNIQQAR.K       |            | 2 | 3,759  | 0,409 | 0      |
| 17 | Q9C0C2 TB182_HUMAN  | K.VPGLGKPLTLPPKPE.K           |            | 3 | 3,7572 | 0,302 | 0,119  |
| 17 | Q8NCN4 RN169_HUMAN  | E.LNHFKPIVCS#PCT#PPK.R        | S388:T391: | 3 | 3,7571 | 0,317 | -0,267 |
| 17 | P22626 ROA2_HUMAN   | R.GFGFVTDDHDPVVK.I            |            | 2 | 3,7489 | 0,388 | -0,432 |
| 17 | Q9Y265 RUVB1_HUMAN  | R.GTEDITSPHGIPDLLDR.V         |            | 3 | 3,7432 | 0,194 | -0,188 |
| 17 | P26368 U2AF2_HUMAN  | K.SIEIPRPVDGVEVPGCGK.I        |            | 2 | 3,7377 | 0,45  | 0,383  |
| 17 | Q02818 NUCB1_HUMAN  | K.M*DAEQDPNVQVDHLNLLK.Q       |            | 3 | 3,7362 | 0,323 | 0,262  |
| 17 | Q9NX40 OCAD1_HUMAN  | E.SAPTGITDHIVQGPDPNLEES#PKR.K | S191:      | 3 | 3,7281 | 0,279 | 0,139  |
| 17 | P06748 NPM_HUMAN    | D.M*SPLRPQNYLFGCELK.A         |            | 3 | 3,7271 | 0,299 | 0      |
| 17 | Q9BZL6 KPCD2_HUMAN  | R.RLS#S#TSLASGHSVR.L          | S197:S198: | 2 | 3,7257 | 1     | -0,452 |
| 17 | Q96ST3 SIN3A_HUMAN  | E.RYM*NSDTS#PELRE.H           | S1112:     | 3 | 3,7237 | 0,406 | -0,408 |
| 17 | Q9UBR2 CATZ_HUMAN   | E.CDKFNQCCTCNE.F              |            | 2 | 3,7219 | 0,436 | -0,398 |

|    |                    |                                 |              |   |        |       |        |
|----|--------------------|---------------------------------|--------------|---|--------|-------|--------|
| 17 | Q9C004 SPY4_HUMAN  | R.LLDHM*APPPVADQASPR.A          |              | 3 | 3,7206 | 0,353 | -0,4   |
| 17 | Q9H0E9 BRD8_HUMAN  | E.ADVAIGKGDETPLTNVK.T           |              | 2 | 3,718  | 0,467 | -0,212 |
| 17 | Q8WTT2 NOC3L_HUMAN | R.FAAHLIAGAPSEGSGALKPE.L        |              | 2 | 3,7152 | 0,326 | -0,444 |
| 17 | Q01804 OTUD4_HUMAN | K.TAAAAADVNGFKPLSGNEQLK.N       |              | 3 | 3,7151 | 0,314 | 0,087  |
| 17 | Q5TEJ8 ICB1_HUMAN  | E.VLGPQQAHAQGSVDVLCQR.L         |              | 3 | 3,7131 | 0,177 | 0,243  |
| 17 | P55884 EIF3B_HUMAN | E.LPGSHAEPVPAQGEAPGEQAR.D       |              | 3 | 3,7072 | 0,204 | -0,167 |
| 17 | Q71RC2 LARP4_HUMAN | K.DGLNQTTIPVSPSTTKPSR.A         |              | 3 | 3,6944 | 0,315 | -0,349 |
| 17 | Q9UMZ2 SYNG_HUMAN  | K.TSNSQHGNSAPSLLM*PLPGTK.A      |              | 3 | 3,6942 | 0,215 | -0,255 |
| 17 | Q9C0C2 TB182_HUMAN | R.HNGSLS#PGLER.D                | S1385:       | 2 | 3,694  | 0,582 | -0,278 |
| 17 | Q92619 HMHA1_HUMAN | R.KDGADAVFPGPSLEPPAGSSGVK.A     |              | 3 | 3,694  | 0,172 | 0,335  |
| 17 | O43149 ZZEF1_HUMAN | E.HFQASVSPTAAPPATGDQSPGLGTQPK.L |              | 3 | 3,6894 | 0,289 | -0,132 |
| 17 | O60841 IF2P_HUMAN  | R.APIICVLGHVDTGK.T              |              | 2 | 3,688  | 0,529 | -0,165 |
| 17 | Q9UJY5 GGA1_HUMAN  | E.SRPPAQTSLPASSGLDDDLLGK.T      |              | 3 | 3,6834 | 0,386 | -0,548 |
| 17 | O95347 SMC2_HUMAN  | R.TVTLGGDVFDPHGTLSGGAR.S        |              | 2 | 3,6804 | 0,536 | 0      |
| 17 | P48643 TCPE_HUMAN  | K.IAILTCPFEPKPK.T               |              | 2 | 3,6769 | 0,359 | -0,151 |
| 17 | Q02952 AKA12_HUMAN | E.LQSHAKS#PPS#PVERE.M           | S1328:S1331: | 3 | 3,6758 | 0,257 | -0,1   |
| 17 | Q92945 FUBP2_HUMAN | K.LASQGDSISSQLGPIHPPR.T         |              | 3 | 3,6757 | 0,362 | -0,711 |
| 17 | P52435 RPB11_HUMAN | K.SQLLKDPQVLFAGYK.V             |              | 3 | 3,6645 | 0,126 | -0,107 |
| 17 | Q14676 MDC1_HUMAN  | E.LQPSTSTDRPVTSEPTSQATR.G       |              | 2 | 3,6641 | 0,37  | 0      |
| 17 | O95336 6PGL_HUMAN  | E.DQEENPLPAALVQPHTGK.L          |              | 3 | 3,6636 | 0,271 | -0,188 |
| 17 | Q9H307 PININ_HUMAN | R.RGFS#DSGGGPPAK.Q              | S66:         | 3 | 3,6609 | 0,305 | 0,348  |
| 17 | P28290 SSFA2_HUMAN | E.GEAPHVPATYQLGLTK.S            |              | 3 | 3,6592 | 0,39  | 0,435  |
| 17 | Q5VT52 K0460_HUMAN | K.TPAPATTTSHNPLANILSK.V         |              | 3 | 3,6564 | 0,357 | -0,757 |
| 17 | O94925 GLSK_HUMAN  | K.GSTHPQPGVSPPAAPAAPGPK.D       |              | 3 | 3,6487 | 0,343 | -0,381 |
| 17 | P47756 CAPZB_HUMAN | E.DLLSSVDQPLKIAR.D              |              | 2 | 3,6381 | 0,404 | -0,941 |
| 17 | Q7Z2Z1 CO042_HUMAN | R.HVLQTAVADS#PR.D               | S441:        | 2 | 3,6329 | 0,514 | -0,444 |
| 17 | Q13347 EIF3I_HUMAN | R.TERPVNSAALSPNYDHVVLGGGQE.A    |              | 3 | 3,6329 | 0,118 | 0,292  |
| 17 | P15924 DESP_HUMAN  | R.TM*IQSPSGVILQEADVHAR.Y        |              | 3 | 3,631  | 0,365 | -0,599 |
| 17 | Q6S8J3 A26CA_HUMAN | E.KLCYVALDFEQE.M                |              | 2 | 3,6226 | 0,298 | 0,081  |
| 17 | P27816 MAP4_HUMAN  | K.VGSLDNVGHLPAGGAVKTE.G         |              | 3 | 3,6221 | 0,352 | 0,201  |
| 17 | Q5TG3 AHDC1_HUMAN  | R.VNLRPVVQLIDIM*KD.L            |              | 3 | 3,6087 | 0,216 | 0,103  |
| 17 | Q02952 AKA12_HUMAN | E.DSIAGSGVEHSTPDTEPGKEE.S       |              | 3 | 3,6047 | 0,344 | 0,256  |
| 17 | Q9Y618 NCOR2_HUMAN | E.DRPSSAGSTPFYFNPLIM*R.L        |              | 3 | 3,6003 | 0,156 | -0,086 |

|    |                     |                                  |              |   |        |       |        |
|----|---------------------|----------------------------------|--------------|---|--------|-------|--------|
| 17 | Q05524 ENO1B_HUMAN  | E.VILPVPAFNVIINGGSHAGNK.L        |              | 2 | 3,5992 | 0,521 | -0,244 |
| 17 | Q7Z3K3 POGZ_HUMAN   | K.LSGEHS#ESST#PRPR.S             | S1364:T1368: | 3 | 3,5971 | 0,211 | -0,215 |
| 17 | P08581 MET_HUMAN    | K.TGPVLEHPDCFCQDCSSK.A           |              | 3 | 3,5969 | 0,34  | 0,328  |
| 17 | Q9Y5A7 NUB1_HUMAN   | R.KNFQLEEEEQNE.A                 |              | 2 | 3,5964 | 0,133 | 0      |
| 17 | A8K630 A8K630_HUMAN | R.LQQQHSEQPPLQSPVTTTR.R          |              | 3 | 3,5844 | 0,328 | 1,348  |
| 17 | Q6PKG0 LARP1_HUMAN  | R.FSHLTSLPQQQLPSQQLM*SK.D        |              | 3 | 3,5829 | 0,294 | 0      |
| 17 | O60841 IF2P_HUMAN   | K.LLQAQGVVPSKDSLPK.K             |              | 2 | 3,5822 | 0,463 | 0      |
| 17 | Q9UGV2 NDRG3_HUMAN  | R.SRTHSTS#S#SLGSGESPFSSR.S       | S333:S334:   | 3 | 3,5806 | 1     | -0,258 |
| 17 | Q66K74 MAP1S_HUMAN  | E.LPLAASSIPRPR#PSPESHRS#PAEGSE.R | T638:S646:   | 3 | 3,5794 | 1     | 0,245  |
| 17 | O75116 ROCK2_HUMAN  | E.LQM*TLDSKSDIEQLR.S             |              | 2 | 3,577  | 0,42  | 0,064  |
| 17 | Q92610 ZN592_HUMAN  | E.SVLSHSGSAPDVPVAVSVIVK.N        |              | 3 | 3,5683 | 0,198 | 0      |
| 17 | Q92879 CELF1_HUMAN  | -.M*NGTLDHPDQPDLDIAK.M           |              | 3 | 3,5659 | 0,141 | 0,289  |
| 17 | Q13428 TCOF_HUMAN   | K.LDSSPSVSSTLAAKDDPDGKQE.A       |              | 2 | 3,5632 | 0,379 | -0,109 |
| 17 | Q5VT52 K0460_HUMAN  | E.M*M*DKPTSSSVDTM*SLLSK.I        |              | 3 | 3,5526 | 0,351 | 0,456  |
| 17 | Q15691 MARE1_HUMAN  | K.FFDANYDGKDYDPVAAR.Q            |              | 3 | 3,5503 | 0,238 | 0,186  |
| 17 | Q08EQ4 TMSL1_HUMAN  | E.KNPLPSKET#IEQE.K               | T34:         | 2 | 3,5442 | 0,311 | -0,536 |
| 17 | Q8NFZ8 CADM4_HUMAN  | E.GDTLVLTCAVTGNPRPNQIR.W         |              | 3 | 3,5401 | 0,31  | 0,335  |
| 17 | P24752 THIL_HUMAN   | E.DLIVKDGLTDVYNK.I               |              | 2 | 3,538  | 0,377 | -0,077 |
| 17 | P19525 E2AK2_HUMAN  | E.KKAVS#PLLLTTNSSE.G             | S83:         | 2 | 3,535  | 0,422 | -0,207 |
| 17 | P40222 TXLNA_HUMAN  | R.RPEGPGAQAPSS#PR.V              | S515:        | 2 | 3,5328 | 0,386 | -0,492 |
| 17 | Q9Y2N3 PO121_HUMAN  | E.LCHHSSS#S#TPLAADKE.S           | S443:S444:   | 3 | 3,529  | 1     | -0,963 |
| 17 | Q86V48 LUZP1_HUMAN  | K.LVNTTITPEPEPKQPNSRE.K          |              | 2 | 3,5277 | 0,283 | 0,326  |
| 17 | O43719 HTSF1_HUMAN  | R.TAEPPQEKAPEPTDAR.K             |              | 3 | 3,5266 | 0,224 | -0,784 |
| 17 | O00148 DDX39_HUMAN  | R.AIVDCGFEPSEVQHE.C              |              | 2 | 3,5263 | 0,436 | -0,132 |
| 17 | P49792 RBP2_HUMAN   | D.SVSSSVHASPLASS#PVRK.N          | S2251:       | 3 | 3,5246 | 0,285 | -0,466 |
| 17 | P63313 TYB10_HUMAN  | E.KNTLPT#KETIEQE.K               | T31:         | 2 | 3,522  | 0,333 | -0,303 |
| 17 | P49841 GSK3B_HUMAN  | E.LSSNPPLATILIPPHAR.I            |              | 3 | 3,5192 | 0,352 | -0,102 |
| 17 | P30622 CLIP1_HUMAN  | K.ILKPGSTALKTPT#AVVAPVEK.T       | T27:         | 3 | 3,5152 | 0,121 | -0,582 |
| 17 | Q07820 MCL1_HUMAN   | R.VARPPPIGAEPDVTATPAR.L          |              | 3 | 3,515  | 0,214 | -0,182 |
| 17 | P09936 UCHL1_HUMAN  | K.QTIGNSCGTIGLIHAVANNQDK.L       |              | 3 | 3,5104 | 0,339 | 0,158  |
| 17 | Q9GZY8 CB033_HUMAN  | D.LIQSTPFKPLALKT#PPR.V           | T115:        | 3 | 3,5094 | 0,404 | -0,184 |
| 17 | Q9UN86 G3BP2_HUMAN  | R.YPDSHQLFVGNLPHDIDE.N           |              | 3 | 3,5068 | 0,161 | -0,087 |
| 17 | P08238 HS90B_HUMAN  | E.TALLSSGFSLEDPQTHSNR.I          |              | 3 | 3,5066 | 0,299 | -0,533 |

|    |                    |                              |            |   |        |       |        |
|----|--------------------|------------------------------|------------|---|--------|-------|--------|
| 17 | Q96I24 FUBP3_HUMAN | K.M*VM*IQDGPLPTGADKPLR.I     |            | 3 | 3,5059 | 0,259 | 0,186  |
| 17 | Q99471 PFD5_HUMAN  | E.AKDCNLVNLKS#NE.G           | S56:       | 2 | 3,4963 | 0,407 | 0,308  |
| 17 | Q13428 TCOF_HUMAN  | K.AASVPVKGLGQGTAPVLPKG.T     |            | 3 | 3,4954 | 0,344 | 0,095  |
| 17 | P61978 HNRPK_HUMAN | R.LLIHQSLAGGIIGVK.G          |            | 2 | 3,4951 | 0,531 | -0,402 |
| 17 | Q9H4Z2 ZN335_HUMAN | K.THCVGDSQSSASS#PPATSK.A     | S992:      | 3 | 3,4928 | 0,222 | -0,369 |
| 17 | Q8IVF2 AHNK2_HUMAN | E.GDLHAAVGAPVM*SPLSPGER.V    |            | 3 | 3,4927 | 0,264 | 0,37   |
| 17 | P10809 CH60_HUMAN  | K.VGEVIVTKDDAM*LLK.G         |            | 3 | 3,4914 | 0,399 | 0,444  |
| 17 | Q14155 ARHG7_HUMAN | E.LQTVLSTYLRLPLQTSEK.L       |            | 2 | 3,4908 | 0,428 | 0,247  |
| 17 | Q01082 SPTB2_HUMAN | K.TAASGIPYHSEVPVSLKE.A       |            | 3 | 3,489  | 0,337 | 0,097  |
| 17 | Q12888 TP53B_HUMAN | K.LGKPSAHASQS#FCE.S          | S894:      | 2 | 3,4864 | 0,542 | -0,458 |
| 17 | Q9HCN4 GPN1_HUMAN  | D.AGTAKDS#LSPVLHPSDLILTR.G   | S312:      | 3 | 3,4861 | 0,331 | -0,242 |
| 17 | P19105 MLRM_HUMAN  | E.DLHDM*LASLGKNPTDE.Y        |            | 3 | 3,4822 | 0,374 | 0,31   |
| 17 | P42166 LAP2A_HUMAN | K.DVYVQLYLQHLTAR.N           |            | 2 | 3,4807 | 0,432 | -0,497 |
| 17 | P29692 EF1D_HUMAN  | R.ATAPQTQHVS#PM*RQVEPPAK.K   | S133:      | 2 | 3,4793 | 0,32  | -0,215 |
| 17 | Q9GZT9 EGLN1_HUMAN | R.AAAGGQGSAAVAEAEKPGKEPPAR.S |            | 3 | 3,4787 | 0,43  | -0,329 |
| 17 | Q5PRF9 SAM4B_HUMAN | R.HALTS#PSLGGQGR.Q           | S607:      | 2 | 3,4782 | 0,482 | 0      |
| 17 | Q9Y2A7 NCKP1_HUMAN | R.LGQM*IVDYENPLKK.M          |            | 3 | 3,4771 | 0,208 | 0,22   |
| 17 | Q14152 EIF3A_HUMAN | E.DAPIGPHLQSM*PSEQIR.N       |            | 2 | 3,4768 | 0,447 | 0,322  |
| 17 | Q00987 MDM2_HUMAN  | R.HKS#DSISLSFDE.S            | S186:      | 2 | 3,4713 | 0,28  | 0,507  |
| 17 | P05387 RLA2_HUMAN  | K.NIEDVIAQGIGK.L             |            | 2 | 3,4701 | 0,435 | -0,291 |
| 17 | Q9BZL6 KPCD2_HUMAN | R.RLS#STSLAS#GHSVR.L         | S197:S203: | 2 | 3,4694 | 1     | 0,151  |
| 17 | P41227 ARD1A_HUMAN | E.NKVES#KGNS#PPSSGEACRE.E    | S182:S186: | 3 | 3,4692 | 0,084 | -0,584 |
| 17 | P32322 P5CR1_HUMAN | K.DNVSSPGGATIHALHVLE.S       |            | 2 | 3,4689 | 0,309 | -0,806 |
| 17 | Q9Y5T5 UBP16_HUMAN | E.SFLDLSLPVLDQSGKK.S         |            | 2 | 3,4627 | 0,312 | 0,197  |
| 17 | Q9UKV3 ACINU_HUMAN | E.KSKS#PS#PPRLTE.D           | S386:S388: | 3 | 3,4622 | 0,124 | 0,123  |
| 17 | Q12888 TP53B_HUMAN | E.DSSVVIVDVKEPSPR.V          |            | 2 | 3,4615 | 0,353 | -0,15  |
| 17 | Q86YM7 HOME1_HUMAN | R.AEPTQNALPFSHSSAISK.H       |            | 2 | 3,4611 | 0,423 | 0,194  |
| 17 | P19105 MLRM_HUMAN  | E.DLHDM*LASLGKNPTDE.Y        |            | 2 | 3,4605 | 0,337 | 0,482  |
| 17 | P61289 PSME3_HUMAN | E.LDSFLKEPILNIHD.L           |            | 3 | 3,4594 | 0,359 | 0      |
| 17 | Q9Y490 TLN1_HUMAN  | E.LLDHVLLTLQKPSPE.L          |            | 3 | 3,4591 | 0,132 | 0      |
| 17 | Q2NKX8 ERC6L_HUMAN | E.DLQNSVTQLQLQSLHAAQR.K      |            | 3 | 3,4539 | 0,295 | -0,34  |
| 17 | Q8N8S7 ENAH_HUMAN  | E.DNRPLTGLAAAIAAGAK.L        |            | 3 | 3,4498 | 0,089 | 0      |
| 17 | O15027 SC16A_HUMAN | R.FTGSFDDDDPDPHRDPYGEE.V     |            | 3 | 3,448  | 0,399 | -0,083 |

|    |                     |                                    |            |   |        |       |        |
|----|---------------------|------------------------------------|------------|---|--------|-------|--------|
| 17 | Q5T4S7 UBR4_HUMAN   | E.AAPEKQDDSGTAGGISSTSASVNR.Y       |            | 3 | 3,442  | 0,412 | 0      |
| 17 | P00441 SODC_HUMAN   | E.DSVISLSGDHCIIGR.T                |            | 2 | 3,4416 | 0,534 | -0,15  |
| 17 | P04920 B3A2_HUMAN   | R.KAERTS#PSS#PAPLPHQE.A            | S170:S173: | 3 | 3,432  | 0,297 | 0,092  |
| 17 | O43504 HBXIP_HUMAN  | R.GTLSDEHAGVISVLAQQA.L             |            | 3 | 3,4261 | 0,262 | -0,734 |
| 17 | Q58WW2 IQWD1_HUMAN  | K.LSPKPGTGEPVLSLHYSTE.G            |            | 3 | 3,4252 | 0,227 | -0,273 |
| 17 | Q9UHV7 MED13_HUMAN  | K.TGNLDPLSCISTADLHK.M              |            | 3 | 3,4224 | 0,414 | 0      |
| 17 | Q8IUD2 RB6I2_HUMAN  | R.SVGKVEPS#SQSPGRS#PR.L            | S14:S21:   | 2 | 3,4159 | 1     | -0,064 |
| 17 | O75362 ZN217_HUMAN  | R.RAGAES#PTM*SVDGR.Q               | S407:      | 2 | 3,4127 | 0,399 | 0      |
| 17 | O96000 NDUBA_HUMAN  | K.AFDLIVDRPVTLVRE.F                |            | 3 | 3,4104 | 0,287 | 0,105  |
| 17 | Q12888 TP53B_HUMAN  | E.DSSVVIVDVKEPSR.V                 |            | 3 | 3,4095 | 0,35  | 0,45   |
| 17 | P26006 ITA3_HUMAN   | R.TGAVYLCPLTAHKDDCE.R              |            | 2 | 3,4095 | 0,503 | -0,375 |
| 17 | Q12789 TF3C1_HUMAN  | R.EDPQARPLEGSSSESDPPEGQAPPSHS#PR.G | S1856:     | 3 | 3,4051 | 0,355 | 0,234  |
| 17 | P18583 SON_HUMAN    | K.DIHLDLPSNNNLVSK.D                |            | 2 | 3,4043 | 0,414 | 0      |
| 17 | P56282 DPOE2_HUMAN  | K.TLADIICEYPDIHQSSR.F              |            | 3 | 3,4025 | 0,317 | 0,725  |
| 17 | P49321 NASP_HUMAN   | E.SLDPTVKPVDVGGDEPEEK.V            |            | 3 | 3,3939 | 0,464 | 0,182  |
| 17 | P42166 LAP2A_HUMAN  | R.SHISDQS#PLSSK.R                  | S351:      | 2 | 3,3933 | 0,546 | -0,447 |
| 17 | P38159 HNRPG_HUMAN  | R.GFAFVTFESPADAKDAAR.D             |            | 3 | 3,3919 | 0,417 | 0,289  |
| 17 | Q09666 AHNK_HUMAN   | K.FSM*PSLKGEGPEFDVNLSK.A           |            | 3 | 3,388  | 0,331 | -0,087 |
| 17 | Q14C86 GAPD1_HUMAN  | R.LALCSADSVAFVPLTHSTR.N            |            | 3 | 3,3868 | 0,385 | -0,179 |
| 17 | Q12888 TP53B_HUMAN  | R.QSQQPM*KIPISPKDPVS#PASQK.M       | S1101:     | 3 | 3,3862 | 0,176 | -0,074 |
| 17 | Q8N1G0 ZN687_HUMAN  | R.HGLQLGAQS#PGR.G                  | S1057:     | 2 | 3,3829 | 0,542 | -0,281 |
| 17 | P63241 IF5A1_HUMAN  | E.DICPSTHNM*DVPNIK.R               |            | 2 | 3,3822 | 0,289 | -0,347 |
| 17 | P33176 KINH_HUMAN   | E.DTVVIASKPYAFDR.V                 |            | 2 | 3,3801 | 0,377 | -0,694 |
| 17 | Q02952 AKA12_HUMAN  | K.LTASEQAHPQEPAESAEHPRLS#AE.Y      | S371:      | 3 | 3,3794 | 0,294 | -0,275 |
| 17 | Q9NVU0 RPC5_HUMAN   | R.AAGTDSFNGHPPQGCASTPVARE.L        |            | 3 | 3,3774 | 0,366 | -0,472 |
| 17 | Q53SC7 Q53SC7_HUMAN | K.M*GYTETSLQEHVTSEHAETSTE.V        |            | 3 | 3,3752 | 0,185 | -0,147 |
| 17 | Q15185 TEBP_HUMAN   | E.IDLFHCIDPNDSK.H                  |            | 3 | 3,3732 | 0,149 | 0,697  |
| 17 | Q8N6H7 ARFG2_HUMAN  | E.HGPNTDLLGTS#PK.A                 | S201:      | 2 | 3,3662 | 0,428 | -0,172 |
| 17 | O75351 VPS4B_HUMAN  | K.LQNQLQGAIVIERPNVK.W              |            | 3 | 3,3659 | 0,09  | 0,762  |
| 17 | Q9NVM9 CL011_HUMAN  | E.AEIIKDSPDS#PEPPNKKPLVE.M         | S626:      | 3 | 3,3534 | 0,224 | 0,307  |
| 17 | Q14687 GSE1_HUMAN   | R.CVAEQPPLKLDTSSEKLE.F             |            | 3 | 3,3532 | 0,346 | 0      |
| 17 | P61163 ACTZ_HUMAN   | E.LLFRPDLIGEESGIHE.V               |            | 3 | 3,3518 | 0,226 | -0,468 |
| 17 | P35606 COPB2_HUMAN  | E.LDGKPAS#PTPVIVASHTANKEE.K        | S859:      | 2 | 3,3484 | 0,465 | 0,104  |

|    |                     |                                   |            |   |        |       |        |
|----|---------------------|-----------------------------------|------------|---|--------|-------|--------|
| 17 | A4VCI9 A4VCI9_HUMAN | E.AASTPRDPIDVLDVSNNTTQAQK.R       |            | 3 | 3,3468 | 0,206 | 0,379  |
| 17 | Q9Y2W1 TR150_HUMAN  | E.KGSFS#DTGLGDGK.M                | S379:      | 2 | 3,3462 | 0,416 | -0,181 |
| 17 | Q14974 IMB1_HUMAN   | E.DDIVPHVLPFIKE.H                 |            | 2 | 3,3397 | 0,473 | -0,16  |
| 17 | Q7KZJ3 Q7KZJ3_HUMAN | R.SGDLGDM*EPLKGTPLM*QK.I          |            | 3 | 3,3371 | 0,417 | -0,178 |
| 17 | Q14694 UBP10_HUMAN  | R.DIRPGAAFEPTYIYR.L               |            | 3 | 3,331  | 0,279 | -0,207 |
| 17 | Q9BTE1 DCTN5_HUMAN  | E.DCVVNAAQIGSYVHVVGK.N            |            | 3 | 3,3308 | 0,287 | 0,101  |
| 17 | P18669 PGAM1_HUMAN  | R.RS#YDVPPPPM*EPDHPFYSNISK.D      | S118:      | 3 | 3,3272 | 0,36  | 0,343  |
| 17 | Q3V6T2 GRDN_HUMAN   | E.DTYFISSAGKPTPGTQGK.I            |            | 3 | 3,3245 | 0,463 | 0,099  |
| 17 | Q6S8J3 A26CA_HUMAN  | E.KSYELPDGQVITIGNE.R              |            | 2 | 3,319  | 0,385 | -0,138 |
| 17 | O95685 PPR3D_HUMAN  | K.VFNAGDDPSVPLHVLSR.L             |            | 3 | 3,3187 | 0,406 | 0,401  |
| 17 | A0JLU0 A0JLU0_HUMAN | K.KQEGPATQVDSAVGTLPATSPQSTSVOAK.G |            | 3 | 3,3174 | 0,213 | 0,317  |
| 17 | O14561 ACPM_HUMAN   | K.LM*CPQEIVDYIADKK.D              |            | 3 | 3,3113 | 0,267 | -0,895 |
| 17 | Q96I25 SPF45_HUMAN  | R.SM*GGAAIAPPTSLVEKDKE.L          |            | 3 | 3,3111 | 0,204 | 0      |
| 17 | Q8N1G0 ZN687_HUMAN  | R.HGLQLGAQS#PGR.G                 | S1057:     | 3 | 3,3075 | 0,213 | 0,492  |
| 17 | Q6WKZ4 RFIP1_HUMAN  | E.GM*LM*GVKPGEDASGPAEDLVR.R       |            | 3 | 3,3016 | 0,311 | 0      |
| 17 | Q14527 HLTF_HUMAN   | E.M*EPAEAIETPLPHQK.Q              |            | 3 | 3,3005 | 0,24  | 0,301  |
| 17 | Q96GQ7 DDX27_HUMAN  | R.SADFNPDFVFTEKE.G                |            | 2 | 3,2957 | 0,472 | 0,074  |
| 17 | Q9UQ35 SRRM2_HUMAN  | K.THTTALAGRS#PS#PASGR.R           | S295:S297: | 3 | 3,2946 | 0,289 | -0,2   |
| 17 | Q9H3P2 NELFA_HUMAN  | E.ASRPPEEPSAPSPTLPAQFK.Q          |            | 3 | 3,2922 | 0,248 | -0,521 |
| 17 | P11586 C1TC_HUMAN   | K.TAHLDEEVNKGDILVVATGQPE.M        |            | 3 | 3,2906 | 0,299 | 0,078  |
| 17 | Q92896 GSLG1_HUMAN  | E.LECLQDHLDDLVECR.D               |            | 3 | 3,2898 | 0,269 | -0,091 |
| 17 | Q13428 TCOF_HUMAN   | E.ALAAM*NAAQVKPLGK.S              |            | 2 | 3,2872 | 0,471 | -0,163 |
| 17 | Q9BZL6 KPCD2_HUMAN  | R.RLS#ST#SLASGHSVR.L              | S197:T199: | 3 | 3,2867 | 0,365 | -0,226 |
| 17 | P80303 NUCB2_HUMAN  | K.LDSLQDIGM*DHQALLK.Q             |            | 2 | 3,2857 | 0,375 | 0,067  |
| 17 | Q5VZK9 LR16A_HUMAN  | E.KRSS#GFISELPSEE.G               | S968:      | 2 | 3,2855 | 0,527 | 0,222  |
| 17 | P31785 IL2RG_HUMAN  | D.FFLT#TM*PTDS#LSVSTLPLPE.V       | T43:S49:   | 3 | 3,2842 | 0,092 | -0,154 |
| 17 | P51858 HDGF_HUMAN   | R.RAGDLLEDS#PK.R                  | S165:      | 2 | 3,2779 | 0,262 | -0,095 |
| 17 | Q9H3K6 BOLA2_HUMAN  | R.LVNACLAEEELPHIHAFE.Q            |            | 2 | 3,2771 | 0,304 | 0,186  |
| 17 | Q5T200 ZC3HD_HUMAN  | E.SRS#LS#PSHLTEDR.Q               | S875:S877: | 3 | 3,2752 | 0,221 | 0,778  |
| 17 | P43243 MATR3_HUMAN  | R.GAPSSNIEDFHGLLPK.G              |            | 2 | 3,2741 | 0,341 | -0,754 |
| 17 | Q96MH2 HEX12_HUMAN  | R.HDSGGSPLT#PR.M                  | T46:       | 2 | 3,2728 | 0,506 | -0,093 |
| 17 | Q9Y2X7 GIT1_HUMAN   | E.DDAIYSVHVPAGLYR.I               |            | 2 | 3,2701 | 0,419 | -0,51  |
| 17 | Q6PJF5 RHDF2_HUMAN  | R.GIPHSASPVSPDGVQIPLKE.Y          |            | 3 | 3,2646 | 0,316 | 0,18   |

|    |                     |                              |            |   |        |       |        |
|----|---------------------|------------------------------|------------|---|--------|-------|--------|
| 17 | Q9H7N4 SFR19_HUMAN  | E.GVSSTTPAKDAASAGLGSIGVK.F   |            | 3 | 3,2635 | 0,139 | 0,278  |
| 17 | Q70SY1 CR3L2_HUMAN  | R.APSALSSSPLLTAPHK.L         |            | 3 | 3,2603 | 0,15  | -0,928 |
| 17 | P18583 SON_HUMAN    | K.DIHLDLPSNNNLVSK.D          |            | 3 | 3,2561 | 0,256 | 0,545  |
| 17 | P22059 OSBP1_HUMAN  | R.GATVLPANTPGNVGSGKDQCCSGK.G |            | 2 | 3,256  | 0,369 | 0,411  |
| 17 | P37802 TAGL2_HUMAN  | R.TLM*NLGGLAVAR.D            |            | 2 | 3,2494 | 0,331 | 0,792  |
| 17 | P08174 DAF_HUMAN    | E.HSIYCTVNNDE.G              |            | 2 | 3,2492 | 0,298 | -0,361 |
| 17 | P52565 GDIR1_HUMAN  | E.QLAQIAAENEDEHS#VNYKPPAQK.S | S24:       | 3 | 3,249  | 0,277 | 0,197  |
| 17 | P07237 PDIA1_HUMAN  | E.VAVIGFFKDVESDSAK.Q         |            | 3 | 3,2471 | 0,193 | -0,214 |
| 17 | P10244 MYBB_HUMAN   | K.HAAFVT#PDQK.Y              | T505:      | 2 | 3,2458 | 0,481 | -0,409 |
| 17 | Q5PRF9 SAM4B_HUMAN  | E.HALGDGTDKST#I.-            | T693:      | 2 | 3,2407 | 0,384 | -0,175 |
| 17 | Q8IWZ3 ANKH1_HUMAN  | E.DHFSELPQVDTILFK.D          |            | 2 | 3,23   | 0,359 | 0      |
| 17 | Q09666 AHNK_HUMAN   | K.M*SLPDVLDLKGPK.M           |            | 3 | 3,228  | 0,19  | 0,237  |
| 17 | P49841 GSK3B_HUMAN  | E.LSSNPPLATILIPPHAR.I        |            | 2 | 3,2259 | 0,266 | 0      |
| 17 | Q04917 1433F_HUMAN  | E.DSYKDSTLIM*QLLR.D          |            | 2 | 3,225  | 0,434 | -0,215 |
| 17 | Q9UNN5 FAF1_HUMAN   | E.FGVDDGEVFGM*ASSALRK.S      |            | 3 | 3,2215 | 0,151 | -0,385 |
| 17 | A6NFK4 A6NFK4_HUMAN | E.TGGSVDILPLYGDTSQRPSEGR.L   |            | 3 | 3,2204 | 0,394 | -0,476 |
| 17 | Q6PKG0 LARP1_HUMAN  | R.HSVVAGGGGGE.G              |            | 2 | 3,2194 | 0,391 | 0,263  |
| 17 | Q8IWE2 NXP20_HUMAN  | K.SLLSSASATVGHGLTAVK.E       |            | 2 | 3,2174 | 0,401 | -0,287 |
| 17 | Q8N1G2 K0082_HUMAN  | E.LALSLSSTSDDEPPSSVSHGAK.A   |            | 3 | 3,2118 | 0,302 | 1,172  |
| 17 | Q5XUX1 FBXW9_HUMAN  | K.SGLAFSRPQLSTPAASPSASEPR.A  |            | 3 | 3,2105 | 0,192 | -0,229 |
| 17 | O95819 M4K4_HUMAN   | K.HKS#SSS#FTPFIDPR.L         | S852:S855: | 2 | 3,2095 | 1     | -0,069 |
| 17 | Q14C86 GAPD1_HUMAN  | R.SRS#SDIVSSVR.R             | S902:      | 2 | 3,2085 | 0,359 | -0,479 |
| 17 | Q9H981 ARP8_HUMAN   | R.ATDTLPASIPHVIAR.R          |            | 3 | 3,2034 | 0,113 | 0,117  |
| 17 | Q5T200 ZC3HD_HUMAN  | E.SRS#LS#PSHLTEDR.Q          | S875:S877: | 2 | 3,201  | 0,374 | -0,148 |
| 17 | P42356 PI4KA_HUMAN  | K.RKT#SSVSSISQVSPE.R         | T197:      | 2 | 3,2009 | 0,286 | -0,219 |
| 17 | P61289 PSME3_HUMAN  | E.LDSFLKEPILNIHD.L           |            | 2 | 3,1998 | 0,221 | -0,369 |
| 17 | Q6ZRV2 FA83H_HUMAN  | E.SKGS#PTSAYPER.K            | S870:      | 2 | 3,1932 | 0,544 | -0,359 |
| 17 | Q09666 AHNK_HUMAN   | K.APSLDIKGPEVDVSGPK.L        |            | 3 | 3,1922 | 0,327 | 0      |
| 17 | Q9UBK8 MTRR_HUMAN   | K.DVHDALVQIISKE.V            |            | 2 | 3,1904 | 0,454 | -0,333 |
| 17 | P04406 G3P_HUMAN    | K.LVINGNPITIFQERDPSK.I       |            | 2 | 3,1898 | 0,292 | 0,06   |
| 17 | Q8TB72 PUM2_HUMAN   | K.GKAS#PFEEDQNR.D            | S136:      | 2 | 3,1873 | 0,553 | -0,251 |
| 17 | Q96AE4 FUBP1_HUMAN  | K.M*VM*IQDGPQNTGADKPLR.I     |            | 3 | 3,1872 | 0,389 | -0,274 |
| 17 | P48426 PI42A_HUMAN  | K.LM*DYSLLVGIHDVER.A         |            | 3 | 3,1866 | 0,34  | 0,103  |



|    |                    |                                    |            |   |        |       |        |
|----|--------------------|------------------------------------|------------|---|--------|-------|--------|
| 17 | Q32M88 ATHL1_HUMAN | R.IQM*SPPKLPGSSSEFPGR.T            |            | 3 | 3,1859 | 0,182 | 0,272  |
| 17 | Q8N8A6 DDX51_HUMAN | R.RVNDAEPGS#PEAPQGK.R              | S83:       | 2 | 3,1811 | 0,409 | -0,141 |
| 17 | P10809 CH60_HUMAN  | K.ISSIQSIVPALEIANAHR.K             |            | 3 | 3,1792 | 0,205 | -0,191 |
| 17 | P31949 S10AB_HUMAN | K.KLDTNSDGQLDFSE.F                 |            | 2 | 3,178  | 0,319 | -0,156 |
| 17 | Q15691 MARE1_HUMAN | E.TAVAPSLVAPALNPK.K                |            | 2 | 3,173  | 0,442 | -0,619 |
| 17 | Q01082 SPTB2_HUMAN | K.ILSSDDYGKDLTSVM*R.L              |            | 3 | 3,1691 | 0,468 | 0,302  |
| 17 | O94967 WDR47_HUMAN | E.KNELRDS#TEQFQE.Y                 | S422:      | 2 | 3,1679 | 0,347 | 0,072  |
| 17 | A4D1S0 KLRG2_HUMAN | R.VKPVGAAGGSST#PS#PRPSTR.F         | T141:S143: | 3 | 3,1656 | 0,199 | -0,354 |
| 17 | Q15942 ZYG_HUMAN   | E.LEQLTQQLM*QDM*EHPQR.Q            |            | 3 | 3,1636 | 0,358 | 0,085  |
| 17 | Q9Y394 DHRS7_HUMAN | E.KDILVPLDLTDTGSHE.A               |            | 3 | 3,1626 | 0,226 | -0,294 |
| 17 | Q8NEY1 NAV1_HUMAN  | R.RNS#TIVLR.T                      | S452:      | 2 | 3,162  | 0,283 | 0      |
| 17 | O15446 RPA34_HUMAN | K.QEQINTEPLEDTVLSPTKK.R            |            | 3 | 3,1611 | 0,086 | -0,084 |
| 17 | Q96JM3 ZN828_HUMAN | E.LRKPGPPLS#PEIRS#PAGSPE.L         | S427:S432: | 3 | 3,1571 | 0,289 | -0,163 |
| 17 | Q00613 HSF1_HUMAN  | R.GHTDEGRPPS#PPPTST#PEK.C          | S363:T369: | 3 | 3,1568 | 0,107 | -0,244 |
| 17 | P05023 AT1A1_HUMAN | R.QGAIVAVTGDGVNDSPALKK.A           |            | 3 | 3,1565 | 0,418 | 0,283  |
| 17 | P02538 K2C6A_HUMAN | K.DVDAAYM*NKVELQAK.A               |            | 3 | 3,156  | 0,267 | -0,428 |
| 17 | P54725 RD23A_HUMAN | E.SSTSFPPAPTSGM*SHPPAAREDKS#PSEE.S | S123:      | 3 | 3,1495 | 0,277 | -0,119 |
| 17 | P48643 TCPE_HUMAN  | D.SVLVDIKDTEPLIQTAK.T              |            | 3 | 3,1494 | 0,283 | -0,489 |
| 17 | Q6IBW4 CNDH2_HUMAN | E.SRS#PQQSAALPR.R                  | S284:      | 2 | 3,1479 | 0,358 | -0,885 |
| 17 | Q9H0B6 KLC2_HUMAN  | K.RASS#LNFLNK.S                    | S582:      | 2 | 3,1438 | 0,382 | 0,198  |
| 17 | Q14676 MDC1_HUMAN  | R.AIPGDQHPES#PVHTEPM*GIQGR.G       | S793:      | 2 | 3,1432 | 0,346 | 0,698  |
| 17 | Q8WWN8 CEND3_HUMAN | K.SSTLGQEERPEPPPGPPSK.S            |            | 3 | 3,1402 | 0,266 | 0,088  |
| 17 | O15027 SC16A_HUMAN | E.VSHLQSGSHLANNS#DPE.S             | S118:      | 2 | 3,1393 | 0,203 | -0,521 |
| 17 | Q09666 AHNK_HUMAN  | K.APNISM*PDVDLNLKGP.K              |            | 3 | 3,1382 | 0,399 | 0      |
| 17 | Q15139 KPCD1_HUMAN | E.IAIQHALM*PVIPK.G                 |            | 3 | 3,1354 | 0,435 | 0,19   |
| 17 | P51114 FXR1_HUMAN  | R.RGPNYTSGYGTNSE.L                 |            | 2 | 3,1332 | 0,32  | -0,649 |
| 17 | P08559 ODPA_HUMAN  | R.YHGHS#M*SDPGVS#YR.T              | S293:S300: | 2 | 3,1301 | 0,445 | -0,759 |
| 17 | Q9Y2X7 GIT1_HUMAN  | E.DDAIYSVHVPAAGLYR.I               |            | 3 | 3,1277 | 0,282 | 0,218  |
| 17 | Q8TEU7 RPGF6_HUMAN | R.VSQVLQVPAVNLHPIR.K               |            | 3 | 3,1272 | 0,232 | 0,207  |
| 17 | Q9ULL1 PKHG1_HUMAN | R.LLAAFVSKDDVPDR.L                 |            | 3 | 3,1262 | 0,263 | 0,779  |
| 17 | P12814 ACTN1_HUMAN | K.M*LDAEDIVGTARPDEK.A              |            | 3 | 3,1258 | 0,291 | -0,206 |
| 17 | Q6UB98 ANR12_HUMAN | K.IKDEDHS#PTFE.N                   | S630:      | 2 | 3,1241 | 0,474 | -0,087 |
| 17 | Q14157 UBP2L_HUMAN | E.KSPA VATSTAAPPPSSPLPSK.S         |            | 3 | 3,12   | 0,337 | -0,088 |

|    |                     |                                     |            |   |        |       |        |
|----|---------------------|-------------------------------------|------------|---|--------|-------|--------|
| 17 | Q7Z6Z7 HUWE1_HUMAN  | E.YLLTHPPPIM*GGVVR.D                |            | 3 | 3,1197 | 0,392 | 0,22   |
| 17 | Q9UKK3 PARP4_HUMAN  | K.QLLGLQPISTVSPLHR.V                |            | 3 | 3,1194 | 0,259 | 0,104  |
| 17 | Q9BTE7 DCNL5_HUMAN  | K.RKS#PGVAAVAE.D                    | S9:        | 2 | 3,1152 | 0,341 | -0,592 |
| 17 | Q9H6Z4 RANB3_HUMAN  | E.EKPAIAPPVVFVQK.D                  |            | 3 | 3,1142 | 0,091 | 0,116  |
| 17 | Q6UN15 FIP1_HUMAN   | R.ERDHS#PTPSVFNSDEE.R               | S492:      | 2 | 3,1098 | 0,546 | 0,127  |
| 17 | Q01082 SPTB2_HUMAN  | K.ILSSDDYGKDLTSVM*R.L               |            | 2 | 3,1097 | 0,493 | 0,336  |
| 17 | Q13263 TIF1B_HUMAN  | K.LTEDKADVQSIIGLQR.F                |            | 3 | 3,1055 | 0,146 | 0,307  |
| 17 | O94909 K0819_HUMAN  | K.TSTPLAPLPVQSQSDTKDR.L             |            | 2 | 3,1053 | 0,113 | 0      |
| 17 | P15924 DESP_HUMAN   | R.IEPHTGLLLLSVQK.R                  |            | 3 | 3,103  | 0,108 | 0,118  |
| 17 | Q86Y07 VRK2_HUMAN   | K.ILNPHGIPLGPLDFSTK.G               |            | 3 | 3,1028 | 0,253 | 0      |
| 17 | Q9NS91 RAD18_HUMAN  | K.LSSVCM*GQEDNM*TSVTNHFSQSK.L       |            | 3 | 3,1    | 0,115 | 0,21   |
| 17 | B2RCY5 B2RCY5_HUMAN | K.LPAPHTPATAPVPAR.A                 |            | 3 | 3,0999 | 0,279 | 0,115  |
| 17 | P46013 KI67_HUMAN   | R.RES#VNLGKSE.G                     | S374:      | 2 | 3,0976 | 0,351 | -0,509 |
| 17 | Q8N2M8 SFR16_HUMAN  | E.KKAS#IGYTYE.D                     | S147:      | 2 | 3,0974 | 0,378 | -0,098 |
| 17 | O00161 SNP23_HUMAN  | K.QPGPVTNGQLQPTTGAASGGYIKR.I        |            | 3 | 3,0959 | 0,298 | -0,217 |
| 17 | Q5VTL8 PR38B_HUMAN  | E.GHGSSS#FDRELE.R                   | S290:      | 2 | 3,0909 | 0,531 | -0,61  |
| 17 | Q8WWY3 PRP31_HUMAN  | E.DAYQEDLGFSLGHLGK.S                |            | 2 | 3,0868 | 0,57  | 0,07   |
| 17 | Q13561 DCTN2_HUMAN  | E.KLLGPDAAINLTPDGALAK.R             |            | 3 | 3,0846 | 0,169 | 0,184  |
| 17 | O00571 DDX3X_HUMAN  | R.GKS#SFFSDR.G                      | S82:       | 2 | 3,083  | 0,31  | 0,329  |
| 17 | Q8N3X1 FNBP4_HUMAN  | R.RPILQLS#PPGPR.G                   | S18:       | 3 | 3,0809 | 0,15  | 0,259  |
| 17 | Q86V48 LUZP1_HUMAN  | E.RHTS#TSNIQVGLAE.L                 | S820:      | 2 | 3,0805 | 0,37  | -0,383 |
| 17 | P07954 FUMH_HUMAN   | E.SLM*LVLTALNPHIGYDK.A              |            | 3 | 3,0777 | 0,092 | -1,023 |
| 17 | O14545 TRAD1_HUMAN  | E.LYPEELLIDHQTSCNPSR.A              |            | 3 | 3,0768 | 0,322 | -0,253 |
| 17 | P49792 RBP2_HUMAN   | K.SYKYS#PKT#PPR.W                   | S796:T799: | 3 | 3,0759 | 0,174 | 0,246  |
| 17 | Q8WXW3 PIBF1_HUMAN  | E.DNIFTPKPTLFTK.K                   |            | 2 | 3,07   | 0,273 | -0,481 |
| 17 | Q5T4S7 UBR4_HUMAN   | R.T#SPADHGGSVGSESGSAVDSVAGEHSVSGR.S | T2884:     | 3 | 3,0683 | 0,304 | -0,063 |
| 17 | Q5VY92 Q5VY92_HUMAN | E.GSSRLS#PPHS#PR.D                  | S956:S960: | 3 | 3,0651 | 0,283 | 0,064  |
| 17 | P49792 RBP2_HUMAN   | E.DALDDSVSSSVHASPLAS#SPVRK.N        | S2250:     | 2 | 3,0642 | 0,56  | 0,49   |
| 17 | Q14558 KPRA_HUMAN   | K.IYVM*ATHGILSAEAPR.L               |            | 3 | 3,0611 | 0,241 | -1,153 |
| 17 | P52435 RPB11_HUMAN  | K.SQLLKDPQVLFAGYK.V                 |            | 2 | 3,0579 | 0,349 | -0,286 |
| 17 | Q86V48 LUZP1_HUMAN  | K.LVNTTITPEPEPKQPNSR.E              |            | 3 | 3,0486 | 0,242 | -0,259 |
| 17 | Q15121 PEA15_HUMAN  | K.YKDIIRQPS#EEE.I                   | S116:      | 2 | 3,0433 | 0,368 | -0,308 |
| 17 | Q92667 AKAP1_HUMAN  | K.LPAEPPALLQTHPPCR.R                |            | 3 | 3,0432 | 0,408 | 0,712  |

|    |                     |                           |            |   |        |       |        |
|----|---------------------|---------------------------|------------|---|--------|-------|--------|
| 17 | Q96NE9 FRMD6_HUMAN  | R.HSL#LDDIR.L             | S544:      | 2 | 3,0407 | 0,33  | 0,322  |
| 17 | Q9C0C2 TB182_HUMAN  | R.DSLGAYASQDANEQGDGKR.D   |            | 3 | 3,0398 | 0,305 | 0,247  |
| 17 | Q2M2I8 AAK1_HUMAN   | R.I LSDVTHSAVFGVPASK.S    |            | 3 | 3,0349 | 0,221 | 0,529  |
| 17 | P48426 PI42A_HUMAN  | E.LSHVQIPVM*LM*PDDFK.A    |            | 3 | 3,0323 | 0,321 | -0,481 |
| 17 | Q32P41 TRMT5_HUMAN  | K.VFNLDGKDFLQGPVKEE.L     |            | 3 | 3,0316 | 0,119 | 0,095  |
| 17 | Q9H6S3 ES8L2_HUMAN  | R.QSILPPPQGPAPIPFQHR.G    |            | 3 | 3,0309 | 0,363 | -0,277 |
| 17 | P60903 S10AA_HUMAN  | K.EFPGFLENQKDPLAVDK.I     |            | 2 | 3,0264 | 0,322 | -0,251 |
| 17 | Q96ST3 SIN3A_HUMAN  | E.RYM*NSDT#TSPRE.H        | T1110:     | 2 | 3,0258 | 0,274 | -0,136 |
| 17 | P11717 MPRI_HUMAN   | K.LVSFHDDSDDLLHI.-        |            | 3 | 3,0197 | 0,22  | -0,104 |
| 17 | Q8TE77 SSH3_HUMAN   | R.RQS#FAVLR.G             | S37:       | 2 | 3,0171 | 0,186 | 0,231  |
| 17 | P54709 AT1B3_HUMAN  | K.NEDIPNVAVYPHNGM*IDLK.Y  |            | 3 | 3,0153 | 0,283 | 0      |
| 17 | Q9C004 SPY4_HUMAN   | K.GPAVPELDKHFLLCE.A       |            | 2 | 3,0152 | 0,245 | -0,402 |
| 17 | Q9BZL6 KPCD2_HUMAN  | R.RLS#STS#LASGHSVR.L      | S197:S200: | 3 | 3,0145 | 0,285 | 0      |
| 17 | O00154 BACH_HUMAN   | E.IEVLVDADPVVDSSQKR.Y     |            | 3 | 3,0144 | 0,243 | 0,587  |
| 17 | Q09666 AHNK_HUMAN   | K.FSM*PGFKGEGPEVDVNLPK.A  |            | 3 | 3,0125 | 0,276 | 0,177  |
| 17 | Q9BPX3 CND3_HUMAN   | E.LLVDLTRPSGLNPQAK.T      |            | 3 | 3,0066 | 0,213 | 0,319  |
| 17 | P56537 IF6_HUMAN    | E.GELSDTIPVVHASIAGCR.I    |            | 3 | 3,0054 | 0,308 | -0,486 |
| 17 | Q9ULL5 PRR12_HUMAN  | R.SHGLEPAAPS#PR.L         | S44:       | 2 | 3,0027 | 0,481 | -0,376 |
| 17 | Q13610 PWP1_HUMAN   | E.DFLIKPSDNLIVCGR.A       |            | 2 | 3,0002 | 0,337 | -0,14  |
| 17 | Q6ZRV2 FA83H_HUMAN  | R.KGS#PTPGFSTR.R          | S881:      | 2 | 2,9988 | 0,255 | -0,502 |
| 17 | Q63ZY3 KANK2_HUMAN  | E.TM*CPVPAAATSNVHM*VK.K   |            | 3 | 2,9973 | 0,292 | -0,198 |
| 17 | Q7Z5J4 RAI1_HUMAN   | K.SDDSFQSLHGSLPLDSFSK.F   |            | 3 | 2,9971 | 0,278 | -0,442 |
| 17 | Q3KQU3 MA7D1_HUMAN  | R.SRS#AVTLPR.N            | S313:      | 2 | 2,9965 | 0,342 | 0,229  |
| 17 | Q8IX07 FOG1_HUMAN   | R.LAHGILLGAPLAGPGVEAR.T   |            | 3 | 2,9958 | 0,082 | -0,101 |
| 17 | P04075 ALDOA_HUMAN  | K.IGEHTPSALAIM*ENANVLAR.Y |            | 3 | 2,9947 | 0,186 | 0,086  |
| 17 | Q9NYF8 BCLF1_HUMAN  | K.M*APVPLDDSNRPASLTK.D    |            | 2 | 2,9922 | 0,468 | 0      |
| 17 | Q14966 ZN638_HUMAN  | E.KESPLKNS#PIDE.S         | S1106:     | 2 | 2,9919 | 0,179 | -0,163 |
| 17 | Q9BT25 NYS48_HUMAN  | R.KKS#PDLSEAM*E.M         | S139:      | 2 | 2,9913 | 0,324 | -0,275 |
| 17 | P19525 E2AK2_HUMAN  | E.KKAVS#PLLLTTNSSE.G      | S83:       | 3 | 2,9905 | 0,268 | 0,207  |
| 17 | Q68DN6 RGPD1_HUMAN  | K.HSTPS#PTKYSL#PSK.S      | S772:S779: | 2 | 2,9897 | 1     | -0,343 |
| 17 | A1L4Q4 A1L4Q4_HUMAN | E.KKDPANPS#PVM*PGIATSE.R  | S124:      | 3 | 2,9891 | 0,219 | 0      |
| 17 | Q8N3V7 SYNPO_HUMAN  | R.AASPAKPSLDLVPNLPK.G     |            | 3 | 2,9835 | 0,092 | 0,203  |
| 17 | P02786 TFR1_HUMAN   | R.LAGTESPVREEPGEDFPAAR.R  |            | 3 | 2,9819 | 0,284 | 0,258  |

|    |                     |                               |            |   |        |       |        |
|----|---------------------|-------------------------------|------------|---|--------|-------|--------|
| 17 | Q16531 DDB1_HUMAN   | R.SDPNREDDTLVLSFVGQTR.V       |            | 3 | 2,9775 | 0,144 | -0,081 |
| 17 | Q12888 TP53B_HUMAN  | E.ATSEDSVVIVDVKEPSR.V         |            | 2 | 2,9767 | 0,512 | 0,121  |
| 17 | Q6NXG5 Q6NXG5_HUMAN | R.SPSTTYLHTPTSEDAIIPSK.S      |            | 3 | 2,9728 | 0,453 | 0,083  |
| 17 | Q8IUW5 RELL1_HUMAN  | R.SLM*SVSGAETVNGEVPATPVKR.E   |            | 3 | 2,9704 | 0,382 | -0,163 |
| 17 | P10809 CH60_HUMAN   | K.VGEVIVTKDDAM*LLK.G          |            | 2 | 2,9703 | 0,431 | -0,074 |
| 17 | Q5QP82 WDR32_HUMAN  | R.RPGAPSL#PAPR.S              | S63:       | 3 | 2,9693 | 0,21  | 0,711  |
| 17 | Q14692 BMS1_HUMAN   | E.LVQSLISTHSTIDAK.M           |            | 2 | 2,9688 | 0,392 | -0,076 |
| 17 | O60841 IF2P_HUMAN   | R.APIICVLGHVDTGK.T            |            | 3 | 2,9678 | 0,273 | 0,185  |
| 17 | Q9H3Q1 BORG4_HUMAN  | K.LPKS#LSSS#PVKK.A            | S138:S142: | 2 | 2,967  | 0,458 | -0,426 |
| 17 | Q9NZM1 MYOF_HUMAN   | R.HTIIPAKS#PE.K               | S1915:     | 2 | 2,9648 | 0,443 | -1,664 |
| 17 | Q13873 BMPR2_HUMAN  | E.QDVLAQGVPTAADPGPSKPR.R      |            | 3 | 2,9615 | 0,239 | -0,612 |
| 17 | Q14C86 GAPD1_HUMAN  | E.ITHGAHLQTS#PPSQSE.S         | S816:      | 2 | 2,9603 | 0,341 | -0,345 |
| 17 | P49792 RBP2_HUMAN   | R.LLLDIPLQTPHK.L              |            | 2 | 2,9586 | 0,4   | -0,088 |
| 17 | Q12888 TP53B_HUMAN  | E.GRQDKPM*DTS#VLSEE.G         | S395:      | 2 | 2,9578 | 0,368 | -0,409 |
| 17 | Q8IW52 SLIK4_HUMAN  | E.GLDLLHLGSNQITVIK.G          |            | 3 | 2,9568 | 0,344 | -0,106 |
| 17 | O15084 ANR28_HUMAN  | R.NLINATNAALQTPLHVAAR.N       |            | 3 | 2,9559 | 0,167 | -0,276 |
| 17 | P98171 RHG04_HUMAN  | R.GPGAPAS#PSASHQGLDTPKPH.-    | S930:      | 3 | 2,952  | 0,185 | -0,8   |
| 17 | O75533 SF3B1_HUMAN  | R.KLTATPTPLGGM*TGFFHM*QTE.D   |            | 3 | 2,9519 | 0,352 | -0,511 |
| 17 | P09211 GSTP1_HUMAN  | K.ALPGQLKPFETLLSQNGGK.T       |            | 2 | 2,9505 | 0,408 | 0,459  |
| 17 | Q12765 SCRN1_HUMAN  | E.DANSCHSFQSAYLIVDRDE.A       |            | 3 | 2,9501 | 0,293 | -0,246 |
| 17 | Q5VY92 Q5VY92_HUMAN | E.GSSRLS#PPHS#PR.D            | S956:S960: | 2 | 2,9497 | 0,293 | -0,17  |
| 17 | Q9HAF1 CA149_HUMAN  | K.SSVTSAAAVSALAGVQDQLIEKR.E   |            | 3 | 2,9464 | 0,168 | -0,238 |
| 17 | Q12888 TP53B_HUMAN  | E.GRQDKPM*DTS#VLS#EEGGEPFQK.K | S395:S398: | 3 | 2,9445 | 0,31  | 0      |
| 17 | P16383 GCF_HUMAN    | R.AQDDYISLDVQHTSSISGM*K.R     |            | 2 | 2,9426 | 0,293 | 0,11   |
| 17 | Q12888 TP53B_HUMAN  | R.QSQQPM*KPIS#PVKDPVSPASQK.M  | S1094:     | 3 | 2,9417 | 0,287 | -0,222 |
| 17 | P30414 NKTR_HUMAN   | K.IPDVAPIVSDQKPSVSK.S         |            | 3 | 2,9414 | 0,364 | 0,411  |
| 17 | P11387 TOP1_HUMAN   | E.DDLFDRLNTGILNK.H            |            | 3 | 2,9412 | 0,296 | 0      |
| 17 | Q8IXM2 CQ049_HUMAN  | E.LTM*QLHPVADSSPAGAK.W        |            | 3 | 2,9399 | 0,271 | -0,105 |
| 17 | O60256 KPRB_HUMAN   | K.IFVM*ATHGLSSDAPR.R          |            | 3 | 2,9385 | 0,223 | 0,106  |
| 17 | Q09666 AHNK_HUMAN   | K.IDVDAPDIDIHGPDAK.L          |            | 2 | 2,9358 | 0,309 | -0,216 |
| 17 | P62753 RS6_HUMAN    | R.RLS#S#LRASTSKSE.S           | S235:S236: | 3 | 2,9351 | 0,187 | 0      |
| 17 | O95197 RTN3_HUMAN   | K.IQAEKPVSIPIAVVK.T           |            | 3 | 2,935  | 0,203 | 0,35   |
| 17 | O43823 AKAP8_HUMAN  | E.AAHCLACDM*LIPAQPQLQR.H      |            | 3 | 2,9291 | 0,158 | -0,551 |

|    |                    |                            |            |   |        |       |        |
|----|--------------------|----------------------------|------------|---|--------|-------|--------|
| 17 | Q16352 AINX_HUMAN  | E.VDVTVAKPDLTSALRE.I       |            | 3 | 2,9284 | 0,329 | 0,64   |
| 17 | P06576 ATPB_HUMAN  | R.LVLEVAQHLGESTVR.T        |            | 3 | 2,9259 | 0,252 | -0,222 |
| 17 | Q96QC0 PP1RA_HUMAN | K.ESPHEPDPEPEPIPPK.L       |            | 3 | 2,9212 | 0,182 | 0,654  |
| 17 | Q5VZL5 ZMYM4_HUMAN | E.TLHTHLPQT#PE.T           | T217:      | 2 | 2,9194 | 0,348 | -0,27  |
| 17 | P11387 TOP1_HUMAN  | E.DDLFDRLNTGILNK.H         |            | 2 | 2,9182 | 0,263 | -0,448 |
| 17 | Q8IWA5 CTL2_HUMAN  | R.DGDCPAVLIPSKPLAR.R       |            | 3 | 2,915  | 0,286 | 0      |
| 17 | P28066 PSA5_HUMAN  | E.LATVQPGQNFHM*FTKEE.L     |            | 2 | 2,9114 | 0,445 | -0,857 |
| 17 | Q7Z3B3 K1267_HUMAN | E.YSHGQSPRS#PISPE.L        | S991:      | 2 | 2,9067 | 0,381 | -0,903 |
| 17 | Q15418 KS6A1_HUMAN | R.GFSFVATGLM*EDDGKPR.A     |            | 2 | 2,9066 | 0,438 | -0,463 |
| 17 | Q13610 PWP1_HUMAN  | E.DFLIKPSDNLIVCGR.A        |            | 3 | 2,9048 | 0,143 | 0      |
| 17 | P46821 MAP1B_HUMAN | E.NGPTEVDYSPSDM*QDSSLCHK.I |            | 3 | 2,9023 | 0,386 | -0,475 |
| 17 | O75665 OFD1_HUMAN  | R.SHIAS#PSPCPDR.M          | S762:      | 2 | 2,9023 | 0,305 | -0,435 |
| 17 | Q9BZL6 KPCD2_HUMAN | R.RLS#STS#LASGHSVR.L       | S197:S200: | 2 | 2,9006 | 0,219 | 0      |
| 17 | O75140 DEPD5_HUMAN | R.KSASSCDVSSS#PSLPSR.T     | S503:      | 3 | 2,9005 | 0,2   | -0,1   |
| 17 | Q9P289 MST4_HUMAN  | K.LADFGVAGQLTDTQIKR.N      |            | 3 | 2,8993 | 0,339 | 0,1    |
| 17 | Q5VT52 K0460_HUMAN | E.M*M*DKPTSSSVDTM*SLLSK.I  |            | 2 | 2,8988 | 0,403 | -0,122 |
| 17 | Q96EK6 GNA1_HUMAN  | -.M*KPDETPM*FDPSLLKE.V     |            | 3 | 2,8986 | 0,131 | 0,096  |
| 17 | Q6MZQ0 PTOR2_HUMAN | K.CLLPPSFPPPHR.Q           |            | 3 | 2,8982 | 0,183 | 0,239  |
| 17 | Q9UGV2 NDRG3_HUMAN | E.AFKYFLQGM*GYIPSASM*TR.L  |            | 3 | 2,8979 | 0,132 | -0,582 |
| 17 | P20810 ICAL_HUMAN  | K.GTVPDDAVEALADSLGKK.E     |            | 2 | 2,8929 | 0,525 | -0,273 |
| 17 | P51991 ROA3_HUMAN  | R.GFAFVTFDHDTVDK.I         |            | 3 | 2,8902 | 0,313 | 0,107  |
| 17 | Q8IYL2 U383_HUMAN  | E.RGPGPGQGS#PGGGPGPR.S     | S78:       | 3 | 2,8828 | 0,205 | -0,467 |
| 17 | O75643 U520_HUMAN  | D.LEDLVFTQGSHFM*ANK.R      |            | 3 | 2,8811 | 0,296 | 0,296  |
| 17 | P07108 ACBP_HUMAN  | K.QATVGDINTERPGM*LDFTGK.A  |            | 2 | 2,8808 | 0,441 | 0,225  |
| 17 | Q8NFC6 FA44A_HUMAN | K.DGIAVDHVVGLNTEK.Y        |            | 3 | 2,88   | 0,329 | -0,233 |
| 17 | P04637 P53_HUMAN   | K.RALPNTSSS#PQPK.K         | S315:      | 3 | 2,874  | 0,257 | -0,464 |
| 17 | Q14157 UBP2L_HUMAN | R.RYPSSISS#PQKD.L          | S609:      | 2 | 2,8738 | 0,2   | -1,673 |
| 17 | Q93075 TATD2_HUMAN | R.VVIDPQEKPEEPLGDR.R       |            | 3 | 2,8673 | 0,184 | 0,288  |
| 17 | Q86UR5 RIMS1_HUMAN | R.YRS#DPNLAR.Y             | S357:      | 2 | 2,8659 | 0,27  | -0,208 |
| 17 | Q9BVS4 RIOK2_HUMAN | E.M*QADDELLHPLGDDK.N       |            | 3 | 2,8658 | 0,282 | 0,303  |
| 17 | Q2NL82 TSR1_HUMAN  | R.QGTPLIAFSLPHEQK.M        |            | 3 | 2,863  | 0,413 | -0,308 |
| 17 | Q02952 AKA12_HUMAN | E.SAHEPRLS#AEYE.K          | S371:      | 2 | 2,8625 | 0,351 | 0      |
| 17 | P08651 NFIC_HUMAN  | K.M*PSHCLSAQM*LAPPPGLPR.L  |            | 3 | 2,8543 | 0,23  | 0,334  |

|    |                    |                               |              |   |        |       |        |
|----|--------------------|-------------------------------|--------------|---|--------|-------|--------|
| 17 | P78344 IF4G2_HUMAN | K.SQGLSQLYHNQSQGLLSQLQGQSK.D  |              | 3 | 2,8536 | 0,27  | 0,139  |
| 17 | P46013 KI67_HUMAN  | R.SPQDPVGTPTIFKPQSK.R         |              | 3 | 2,8509 | 0,282 | -0,19  |
| 17 | P61129 ZC3H6_HUMAN | R.TGHGPLPVPGLLPAVQR.A         |              | 2 | 2,8436 | 0,333 | -0,143 |
| 17 | Q6ZRV2 FA83H_HUMAN | R.RLSLGQGDSTE.A               |              | 2 | 2,8433 | 0,457 | -0,315 |
| 17 | Q13428 TCOF_HUMAN  | K.LDSSPSVSSTLAAKD.D           |              | 2 | 2,8419 | 0,472 | -0,248 |
| 17 | Q9UHD8 SEPT9_HUMAN | R.RVQT#PLLR.A                 | T49:         | 2 | 2,8363 | 0,157 | -0,115 |
| 17 | Q14694 UBP10_HUMAN | R.QADFVQTPITGIFGGHIR.S        |              | 3 | 2,8348 | 0,339 | -0,093 |
| 17 | P10809 CH60_HUMAN  | E.GLTLNLEDVQPHDLGK.V          |              | 3 | 2,8344 | 0,336 | 0,209  |
| 17 | P07437 TBB5_HUMAN  | E.VISDEHGIDPTGT#YHGSDSLQLDR.I | T35:         | 3 | 2,8334 | 0,174 | 0      |
| 17 | Q5SW79 CE170_HUMAN | R.LRTS#PALK.T                 | S1260:       | 2 | 2,8317 | 0,217 | -0,568 |
| 17 | P49792 RBP2_HUMAN  | E.KDSLIT#PHVS#R.S             | T2450:S2454: | 2 | 2,8251 | 0,291 | -0,173 |
| 17 | Q15813 TBCE_HUMAN  | E.SNNIFISERPTDVLQTVK.L        |              | 3 | 2,8244 | 0,307 | -0,266 |
| 17 | Q16512 PKN1_HUMAN  | E.KLNLGTSDS#SPQK.S            | S561:        | 3 | 2,8241 | 0,151 | 0      |
| 17 | P26006 ITA3_HUMAN  | R.TGAVYLCPLTAHKDDCE.R         |              | 3 | 2,8235 | 0,317 | -0,281 |
| 17 | Q9UHI6 DDX20_HUMAN | E.KYQES#PGIQM*K.T             | S714:        | 2 | 2,8221 | 0,381 | -0,261 |
| 17 | Q13428 TCOF_HUMAN  | K.SPQVKPASTM*GM*GPLGK.G       |              | 3 | 2,82   | 0,232 | -0,213 |
| 17 | Q02952 AKA12_HUMAN | E.LQSHAKS#PPS#PVERE.M         | S1328:S1331: | 2 | 2,8188 | 0,324 | -0,536 |
| 17 | Q96PU5 NED4L_HUMAN | E.DGASGSATNSNNHLIEPQIR.R      |              | 3 | 2,8169 | 0,362 | 0,176  |
| 17 | O95881 TXD12_HUMAN | E.AAASGLPLM*VIIHK.S           |              | 2 | 2,8162 | 0,387 | -0,509 |
| 17 | P27816 MAP4_HUMAN  | E.DQVPALKTEAPLAK.D            |              | 2 | 2,8114 | 0,277 | 0      |
| 17 | P20020 AT2B1_HUMAN | K.SLDKDLLLSGTHVM*E.G          |              | 3 | 2,8086 | 0,222 | 0,516  |
| 17 | Q9C0C9 UBE2O_HUMAN | R.VQSCPDPAVYGVVQSGDHIGR.T     |              | 3 | 2,8044 | 0,179 | -0,49  |
| 17 | P46087 NOL1_HUMAN  | K.GTDTQTPAVLS#PSKTQATLKPK.D   | S732:        | 3 | 2,8041 | 0,378 | -0,312 |
| 17 | O14641 DVL2_HUMAN  | E.RHLAGYES#SSTLM*TSELE.S      | S194:        | 3 | 2,8008 | 0,278 | 0      |
| 17 | P40222 TXLNA_HUMAN | R.RPEGPGAQAPS#SPR.V           | S514:        | 3 | 2,8003 | 0,281 | 0,922  |
| 17 | Q6P2H3 CCD21_HUMAN | R.RDS#ALQQLR.T                | S623:        | 2 | 2,7994 | 0,107 | -0,209 |
| 17 | Q9Y5T5 UBP16_HUMAN | R.FKGYQQQDSQE.L               |              | 2 | 2,7987 | 0,096 | -0,09  |
| 17 | Q96SB3 NEB2_HUMAN  | E.AGIQALKPPDAPGPDEAPK.G       |              | 3 | 2,7977 | 0,253 | 0,098  |
| 17 | Q02952 AKA12_HUMAN | E.DFAAHPGEDAVPTGPDCQAK.S      |              | 3 | 2,7964 | 0,223 | 0,351  |
| 17 | Q6ZRV2 FA83H_HUMAN | E.S#KGSPTSAYPER.K             | S867:        | 3 | 2,795  | 0,088 | 0,067  |
| 17 | Q8TEW0 PARD3_HUMAN | R.KSKS#M*DLGIAD.E.T           | S852:        | 2 | 2,7886 | 0,376 | -0,176 |
| 17 | P51826 AFF3_HUMAN  | E.KM*LRS#PIS#PLSDASK.H        | S878:S881:   | 3 | 2,7885 | 0,128 | 0,101  |
| 17 | P29590 PML_HUMAN   | R.LARS#S#PEQPRPSTSK.A         | S504:S505:   | 3 | 2,7863 | 0,094 | -0,406 |

|    |                    |                               |                 |   |        |       |        |
|----|--------------------|-------------------------------|-----------------|---|--------|-------|--------|
| 17 | Q68DN6 RGPD1_HUMAN | E.IKHS#TPSPT#KYS#LSPSK.S      | S769:T774:S777: | 3 | 2,7857 | 1     | 0,174  |
| 17 | Q96I25 SPF45_HUMAN | R.SM*GGAAIAPPTSLVEKDK.E       |                 | 3 | 2,7857 | 0,256 | 0      |
| 17 | Q71U36 TBA1A_HUMAN | E.HSDCAFV*VDNE.A              |                 | 2 | 2,7856 | 0,275 | -0,273 |
| 17 | P61129 ZC3H6_HUMAN | E.FAQQQPPVVQDSPNHGSGSDGSSTR.T |                 | 3 | 2,7846 | 0,226 | 0,142  |
| 17 | Q8WTT2 NOC3L_HUMAN | R.FAAHLIAGAPSEGSGALKPE.L      |                 | 3 | 2,7824 | 0,349 | 0,38   |
| 17 | O60841 IF2P_HUMAN  | E.DEIPVLKDELIHE.L             |                 | 2 | 2,7812 | 0,418 | -0,236 |
| 17 | O95819 M4K4_HUMAN  | K.HKS#SSS#FTPFIDPR.L          | S852:S855:      | 3 | 2,7812 | 0,281 | 0,311  |
| 17 | P07355 ANXA2_HUMAN | E.GDHSTPPSAY#GSVK.A           | Y24:            | 2 | 2,7801 | 0,323 | -0,247 |
| 17 | Q5W0B1 RN219_HUMAN | R.KIQSSLSSAS#PSK.A            | S719:           | 2 | 2,7765 | 0,369 | -0,436 |
| 17 | Q9ULL5 PRR12_HUMAN | E.GKDPAGAYRS#PS#PQGTK.A       | S94:S96:        | 3 | 2,7764 | 0,254 | -0,195 |
| 17 | P04920 B3A2_HUMAN  | E.AVAVASGTAGDDGGASGRPLPK.A    |                 | 3 | 2,7746 | 0,356 | -0,91  |
| 17 | Q96PU5 NED4L_HUMAN | E.DGASGSATNSNNHLIEPQIR.R      |                 | 2 | 2,7733 | 0,259 | 0,117  |
| 17 | O15075 DCLK1_HUMAN | R.SGKSPSPS#PTS#PGSLRK.Q       | S334:S337:      | 3 | 2,7697 | 1     | 0,1    |
| 17 | O00221 IKBE_HUMAN  | E.DGDTLVHLAVIHE.A             |                 | 2 | 2,7678 | 0,317 | -0,688 |
| 17 | P11717 MPRI_HUMAN  | K.LVSFHDDSDDLLHI.-            |                 | 2 | 2,7646 | 0,35  | -0,209 |
| 17 | P0C7M2 RA1L3_HUMAN | R.GFAFVTFDDHD.S               |                 | 2 | 2,7637 | 0,37  | -0,192 |
| 17 | Q07666 KHDR1_HUMAN | K.DDEENYLDLFSHK.N             |                 | 2 | 2,7621 | 0,36  | -0,375 |
| 17 | Q15836 VAMP3_HUMAN | R.RLQQTQNVQDE.V               |                 | 2 | 2,761  | 0,349 | -0,449 |
| 17 | Q8N2M8 SFR16_HUMAN | E.KLTRPAAS#PAVGE.K            | S532:           | 2 | 2,7609 | 0,325 | -0,443 |
| 17 | Q9C0C2 TB182_HUMAN | R.GSGGLFSPSTAHVPDGLGQR.D      |                 | 2 | 2,7605 | 0,366 | -0,121 |
| 17 | Q09666 AHNK_HUMAN  | K.IDVDAPDIDIHGPDAL.L          |                 | 3 | 2,7567 | 0,341 | 0,541  |
| 17 | Q9Y5T5 UBP16_HUMAN | E.SFLDLSLPVLDDQSGKK.S         |                 | 3 | 2,7531 | 0,203 | 0      |
| 17 | Q9UBB9 TFP11_HUMAN | R.DYSAPVNFISAGLKK.G           |                 | 2 | 2,7531 | 0,424 | -0,455 |
| 17 | Q9BQQ3 GR65_HUMAN  | E.LTTTAVSTSGPEDICSSSSSHER.G   |                 | 3 | 2,7475 | 0,373 | -0,304 |
| 17 | Q9H1A4 APC1_HUMAN  | E.LRDS#SKLHDS#LYNE.D          | S563:S569:      | 3 | 2,7461 | 0,172 | -0,498 |
| 17 | P04637 P53_HUMAN   | K.RALPNTSSS#PQPK.K            | S315:           | 2 | 2,7441 | 0,222 | -0,464 |
| 17 | P04406 G3P_HUMAN   | E.HQVVSSDFNSD.T               |                 | 2 | 2,7436 | 0,374 | -0,198 |
| 17 | P51948 MAT1_HUMAN  | E.SSDLPVALLLAQHK.D            |                 | 2 | 2,742  | 0,297 | -0,327 |
| 17 | Q8ND56 LS14A_HUMAN | E.QAVQTASAHLPAPAAVGR.R        |                 | 3 | 2,7398 | 0,439 | 0,419  |
| 17 | Q8TEM1 PO210_HUMAN | E.DTDSIGLALFAPHSSR.N          |                 | 3 | 2,7374 | 0,193 | -0,217 |
| 17 | P00558 PGK1_HUMAN  | K.ALESPERPFLAILGGAK.V         |                 | 3 | 2,7374 | 0,252 | -0,31  |
| 17 | Q9P032 HRP20_HUMAN | K.DVYVDSKDPVSSLQVK.A          |                 | 3 | 2,7306 | 0,277 | 0,411  |
| 17 | P62753 RS6_HUMAN   | R.RLS#S#LRASTSKSE.S           | S235:S236:      | 2 | 2,7304 | 0,404 | -0,386 |

|    |                     |                              |            |   |        |       |        |
|----|---------------------|------------------------------|------------|---|--------|-------|--------|
| 17 | P16383 GCF_HUMAN    | R.AQDDYISLDVQHTSSISGM*K.R    |            | 3 | 2,7297 | 0,42  | 0,165  |
| 17 | Q6UWE0 LRSM1_HUMAN  | E.HTQLLQSS#SQKDE.I           | S289:      | 2 | 2,7286 | 0,234 | -0,714 |
| 17 | P49915 GUAA_HUMAN   | E.VVLLTHGDSVDKQVAD.G         |            | 3 | 2,7245 | 0,262 | 0,233  |
| 17 | P31946 1433B_HUMAN  | K.DSTLIM*QLLR.D              |            | 2 | 2,7224 | 0,179 | 0      |
| 17 | P07814 SYEP_HUMAN   | E.APCVLIYPDGHTKE.M           |            | 3 | 2,7218 | 0,13  | -0,427 |
| 17 | P42167 LAP2B_HUMAN  | E.HNQSYSQAGITE.T             |            | 2 | 2,7214 | 0,362 | -0,183 |
| 17 | B2RMZ9 B2RMZ9_HUMAN | R.RLNS#SPRAPVS#PLK.F         | S416:S423: | 2 | 2,7207 | 0,437 | -0,653 |
| 17 | Q12888 TP53B_HUMAN  | K.RHS#TPIGISNYPE.S           | S937:      | 2 | 2,7186 | 0,432 | -0,157 |
| 17 | P29692 EF1D_HUMAN   | K.SLAGSSGPGASSGTSGDHGELVVR.I |            | 3 | 2,7173 | 0,335 | -0,251 |
| 17 | P07900 HS90A_HUMAN  | E.TALLSSGFSLQDPQTHANR.I      |            | 3 | 2,716  | 0,166 | -0,537 |
| 17 | Q16537 2A5E_HUMAN   | R.SQGKPIELTPLLLK.D           |            | 3 | 2,7155 | 0,117 | 0      |
| 17 | Q9NS68 TNR19_HUMAN  | R.RDS#VQTCGPVR.L             | S241:      | 2 | 2,7144 | 0,291 | -0,45  |
| 17 | P30086 PEBP1_HUMAN  | K.LYTLVLTDPDAPSRK.D          |            | 3 | 2,7138 | 0,326 | 0,217  |
| 17 | Q13428 TCOF_HUMAN   | K.LDSSPSVSSTLAAKDDPDGK.Q     |            | 3 | 2,7125 | 0,441 | 0,276  |
| 17 | P42166 LAP2A_HUMAN  | R.SHISDQS#PLSSK.R            | S351:      | 3 | 2,7096 | 0,183 | -0,067 |
| 17 | P15170 ERF3A_HUMAN  | E.ISEAEPGGSLGDGRPPEESAHE.M   |            | 3 | 2,7058 | 0,197 | 0      |
| 17 | Q9Y282 ERGI3_HUMAN  | K.QRLDKDGIPVS#SEAE.R         | S116:      | 3 | 2,7057 | 0,299 | -0,424 |
| 17 | Q14686 NCOA6_HUMAN  | R.RNS#RTEEPTVASE.S           | S2018:     | 2 | 2,7042 | 0,516 | -0,235 |
| 17 | Q08211 DHX9_HUMAN   | E.DCIQM*THFVPPPK.D           |            | 2 | 2,7014 | 0,212 | -0,308 |
| 17 | P49840 GSK3A_HUMAN  | R.DSGKVTTVVATLGQGPERS        |            | 3 | 2,7011 | 0,223 | 0      |
| 17 | Q9BY43 CHM4A_HUMAN  | K.LPSVPSTHLPAGPAPK.V         |            | 3 | 2,7004 | 0,194 | 0,35   |
| 17 | Q9UPU9 SAM4A_HUMAN  | E.HALGDGVDRTST#I.-           | T528:      | 2 | 2,6976 | 0,513 | 0,172  |
| 17 | Q14966 ZN638_HUMAN  | K.TSILAVSDVSSSKPSIK.A        |            | 3 | 2,6957 | 0,348 | -0,213 |
| 17 | A0AVK6 E2F8_HUMAN   | R.KINS#APSS#PIKTNK.A         | S413:S417: | 3 | 2,6957 | 0,301 | 0      |
| 17 | P06703 S10A6_HUMAN  | R.NKDQEVNFQE.Y               |            | 2 | 2,6939 | 0,135 | -0,293 |
| 17 | Q8IVF2 AHNK2_HUMAN  | E.GDLHAAVGAPVM*SPLSPGER.V    |            | 2 | 2,6932 | 0,324 | -0,37  |
| 17 | Q3KQU3 MA7D1_HUMAN  | K.SRGPT#PPAM*GPR.D           | T97:       | 3 | 2,6914 | 0,231 | 0,416  |
| 17 | Q9HBD1 RC3H2_HUMAN  | R.KHSS#TGDLLSLE.L            | S983:      | 2 | 2,6882 | 0,157 | 0,446  |
| 17 | P29692 EF1D_HUMAN   | R.ATAPQTQHVS#PMRQVEPPAK.K    | S133:      | 3 | 2,6866 | 0,214 | -0,487 |
| 17 | Q13459 MYO9B_HUMAN  | R.RTS#FSTSDVSK.L             | S1354:     | 2 | 2,6813 | 0,354 | -0,283 |
| 17 | O15143 ARC1B_HUMAN  | R.FQNLDKKASS#E.G             | S311:      | 2 | 2,6807 | 0,233 | -0,543 |
| 17 | P11137 MAP2_HUMAN   | R.RKS#VPSETVVE.D             | S833:      | 2 | 2,6807 | 0,284 | -0,372 |
| 17 | P35611 ADDA_HUMAN   | E.AHRPPS#PTEAPTE.A           | S669:      | 2 | 2,6804 | 0,339 | -0,166 |



|    |                     |                             |              |   |        |       |        |
|----|---------------------|-----------------------------|--------------|---|--------|-------|--------|
| 17 | P04075 ALDOA_HUMAN  | K.RLQSIGTENEE.N             |              | 2 | 2,6794 | 0,451 | -1,861 |
| 17 | P32519 ELF1_HUMAN   | R.SSQLVAHPPGTVITSVIK.T      |              | 2 | 2,678  | 0,236 | 0,133  |
| 17 | P06733 ENOA_HUMAN   | R.HIADLAGNSE.V              |              | 2 | 2,677  | 0,267 | 0      |
| 17 | Q71F23 CENPU_HUMAN  | K.HCGLSLST#PPGK.E           | T98:         | 2 | 2,6759 | 0,343 | -0,172 |
| 17 | Q9H501 ESF1_HUMAN   | K.FKIDSNIS#PK.K             | S153:        | 2 | 2,6758 | 0,207 | 0      |
| 17 | Q09666 AHNK_HUMAN   | K.FSM*PGFKGEGPEVDM*NLPK.A   |              | 3 | 2,6742 | 0,208 | -0,433 |
| 17 | P27816 MAP4_HUMAN   | K.DM*ESPTKLDVTLAK.D         |              | 2 | 2,6653 | 0,268 | -0,312 |
| 17 | Q96C19 EFHD2_HUMAN  | R.RADLNQIGEPQS#PSR.R        | S74:         | 2 | 2,6639 | 0,366 | 0,135  |
| 17 | Q96QB1 RHG07_HUMAN  | R.SLSSTGSLPSHAPPEAATPR.T    |              | 3 | 2,6618 | 0,242 | 0      |
| 17 | P04792 HSPB1_HUMAN  | R.VSLDVNHFADELTVK.T         |              | 3 | 2,6608 | 0,276 | 0,205  |
| 17 | Q9Y2V2 CHSP1_HUMAN  | R.ERS#PS#PLRGNVPS#PLPTRR.T  | S30:S32:S41: | 3 | 2,6606 | 0,177 | 0,224  |
| 17 | P55072 TERA_HUMAN   | E.M*FAQTLQQSR.G             |              | 2 | 2,6539 | 0,218 | -1,095 |
| 17 | P29374 ARI4A_HUMAN  | R.RTS#LCLKGE.R              | S105:        | 2 | 2,6539 | 0,25  | 0      |
| 17 | O96000 NDUBA_HUMAN  | K.AFDLIVDRPVTLVR.E          |              | 3 | 2,6504 | 0,291 | -0,227 |
| 17 | Q92738 US6NL_HUMAN  | R.HALYPSS#PR.K              | S585:        | 2 | 2,6481 | 0,349 | 0,327  |
| 17 | O43237 DC1L2_HUMAN  | R.RGPLTSGSDEE.N             |              | 2 | 2,645  | 0,337 | -0,213 |
| 17 | Q9NS56 TOPRS_HUMAN  | E.FKM*DNFS#PK.A             | S81:         | 2 | 2,643  | 0,262 | -0,908 |
| 17 | P78549 NTHL1_HUMAN  | R.SRS#LGPAGPR.G             | S22:         | 2 | 2,6396 | 0,372 | -0,215 |
| 17 | O00299 CLIC1_HUMAN  | R.KFLDGNE.L                 |              | 2 | 2,6388 | 0,135 | -0,445 |
| 17 | P38646 GRP75_HUMAN  | E.QQIVIQSSGGLSKDDIENM*VK.N  |              | 3 | 2,6359 | 0,313 | -0,635 |
| 17 | Q99497 PARK7_HUMAN  | R.KGLIAAICAGPTALLAHE.I      |              | 3 | 2,6316 | 0,175 | -0,101 |
| 17 | P46020 KPB1_HUMAN   | E.FGVERS#VRPTDSNVSPAISIHE.I | S972:        | 3 | 2,6292 | 0,23  | -0,148 |
| 17 | Q9Y2S0 RPAC2_HUMAN  | R.KISGLKT#SM*AE.G           | T16:         | 2 | 2,6292 | 0,379 | -0,677 |
| 17 | Q5T200 ZC3HD_HUMAN  | R.FVHGPS#PR.G               | S64:         | 2 | 2,6271 | 0,368 | -0,437 |
| 17 | Q8IU2 RB6I2_HUMAN   | R.SVGKVEPSSQS#PGRS#PR.L     | S17:S21:     | 3 | 2,6258 | 0,283 | 0,096  |
| 17 | Q8WUB8 PHF10_HUMAN  | K.RYS#PDELR.Y               | S182:        | 2 | 2,6255 | 0,084 | -0,219 |
| 17 | P08670 VIME_HUMAN   | K.SKFADLSE.A                |              | 2 | 2,6255 | 0,103 | -0,612 |
| 17 | P52701 MSH6_HUMAN   | K.IHNVGS#PLK.S              | S830:        | 2 | 2,6221 | 0,413 | 0,701  |
| 17 | Q9Y6N7 ROBO1_HUMAN  | E.M*KTFNS#PNLK.D            | S1055:       | 2 | 2,6211 | 0,163 | -0,478 |
| 17 | Q8WX19 P66B_HUMAN   | K.DLANLEVPHELPTK.Q          |              | 3 | 2,6199 | 0,232 | 0,812  |
| 17 | P18887 XRCC1_HUMAN  | R.KLDLNQE.E                 |              | 2 | 2,6199 | 0,108 | 0,142  |
| 17 | Q9Y613 FHOD1_HUMAN  | R.SLAPEPEKLIPASPK.A         |              | 3 | 2,6171 | 0,253 | 0,437  |
| 17 | A8K1N6 A8K1N6_HUMAN | K.KGSLLPTS#PR.L             | S284:        | 2 | 2,6156 | 0,258 | 0,215  |

|    |                     |                              |            |   |        |       |        |
|----|---------------------|------------------------------|------------|---|--------|-------|--------|
| 17 | P50991 TCPD_HUMAN   | K.TIGTKPVAHIDQFTADM*LGSAAE.L |            | 3 | 2,6138 | 0,31  | -0,474 |
| 17 | Q00587 BORG5_HUMAN  | R.RSDS#LLSFR.L               | S192:      | 2 | 2,6133 | 0,119 | 0,315  |
| 17 | Q9UNX4 WDR3_HUMAN   | D.IAYLQEIEDPEEPDPKK.I        |            | 3 | 2,6117 | 0,283 | 0,091  |
| 17 | P12955 PEPD_HUMAN   | R.HSSYTCICGSGE.N             |            | 2 | 2,6096 | 0,399 | -0,449 |
| 17 | Q71U36 TBA1A_HUMAN  | R.IHFPLATYAPVISA EK.A        |            | 3 | 2,6083 | 0,152 | -0,208 |
| 17 | Q13523 PRP4B_HUMAN  | E.DKFKGS#LSE.G               | S507:      | 2 | 2,6044 | 0,318 | 0      |
| 17 | Q15029 U5S1_HUMAN   | E.EDTQPLTEPIIKPVK.T          |            | 2 | 2,6039 | 0,287 | 0,071  |
| 17 | Q0JRZ9 FCHO2_HUMAN  | K.VSIGNITLSPAIS#RHSPVQM*NR.N | S391:      | 3 | 2,6037 | 0,307 | 0      |
| 17 | Q96B01 R51A1_HUMAN  | R.KPLEIRS#PSAE.S             | S294:      | 2 | 2,6035 | 0,331 | -0,28  |
| 17 | P04406 G3P_HUMAN    | K.LVINGNPITIFQERDPSK.I       |            | 3 | 2,6026 | 0,343 | -0,269 |
| 17 | Q5VZ89 DEN4C_HUMAN  | K.RSS#LYGIAK.V               | S948:      | 2 | 2,6004 | 0,212 | 0,34   |
| 17 | P35606 COPB2_HUMAN  | D.GKPAS#PTPVIVASHTANKEE.K    | S859:      | 3 | 2,5993 | 0,16  | 0      |
| 17 | Q86YH2 Z280B_HUMAN  | R.STDSPIII EPLSKPDYR.N       |            | 3 | 2,5953 | 0,152 | 0,568  |
| 17 | Q9P107 GMIP_HUMAN   | K.RYS#DIFR.S                 | S19:       | 2 | 2,5951 | 0,351 | 0      |
| 17 | Q86VP1 TAXB1_HUMAN  | R.DGADGAFYPDEIQRPPVR.V       |            | 3 | 2,5947 | 0,188 | -0,457 |
| 17 | Q8NC44 F134A_HUMAN  | E.LAPPEDLLGRPQALSR.Q         |            | 2 | 2,5907 | 0,238 | -0,141 |
| 17 | P68104 EF1A1_HUMAN  | K.QLVGVNKM*DSTEP PYSQK.R     |            | 3 | 2,5904 | 0,186 | -0,085 |
| 17 | Q14558 KPRA_HUMAN   | K.NATVHPGLELPLM*M*AK.E       |            | 3 | 2,5868 | 0,108 | 0,417  |
| 17 | Q8TDD1 DDX54_HUMAN  | E.M*DLVGLGLHPLFSSR.F         |            | 3 | 2,5867 | 0,216 | 0,11   |
| 17 | P09234 RU1C_HUMAN   | K.FYCDYCDTYLTHDSPSVR.K       |            | 3 | 2,586  | 0,377 | 0,239  |
| 17 | Q96B23 CR025_HUMAN  | E.LRRDS#SESQLASTE.S          | S66:       | 2 | 2,5839 | 0,416 | -0,883 |
| 17 | Q9HCN4 GPN1_HUMAN   | K.DSLSPVLHPSDLILTR.G         |            | 2 | 2,5801 | 0,207 | -0,138 |
| 17 | P24752 THIL_HUMAN   | E.DLIVKDGLTDVYNK.I           |            | 3 | 2,5746 | 0,134 | 0,23   |
| 17 | Q8IWQ3 BR SK2_HUMAN | K.RVDS#PM*LNR.H              | S367:      | 2 | 2,574  | 0,169 | -0,206 |
| 17 | Q14157 UBP2L_HUMAN  | R.RYPSSISS#SPQKD.L           | S608:      | 3 | 2,5735 | 0,154 | 0,418  |
| 17 | P12694 ODBA_HUMAN   | R.IGHHS#TSDSSAYRS#VDE.V      | S337:S347: | 2 | 2,5712 | 1     | -0,345 |
| 17 | Q9Y3T9 NOC2L_HUMAN  | E.AARS#PDKPGGS#PSASR.R       | S49:S56:   | 2 | 2,5678 | 1     | 0,215  |
| 17 | Q8TF46 DI3L1_HUMAN  | K.TLADSLDNANDPHDPIVNR.L      |            | 3 | 2,5667 | 0,13  | 0,44   |
| 17 | Q13428 TCOF_HUMAN   | R.KGAAPT#PPGK.T              | T914:      | 2 | 2,5663 | 0,168 | -0,243 |
| 17 | Q5TAX3 ZCH11_HUMAN  | K.NKQNDICIE.K                |            | 2 | 2,5634 | 0,249 | -0,215 |
| 17 | P25787 PSA2_HUMAN   | E.LEDAIHTAILTLKE.S           |            | 2 | 2,5561 | 0,359 | 0      |
| 17 | O14617 AP3D1_HUMAN  | R.ALDIDLKPLADSEK.L           |            | 3 | 2,5523 | 0,249 | 0,334  |
| 17 | Q01105 SET_HUMAN    | K.RQS#PLPPQK.K               | S7:        | 2 | 2,5493 | 0,261 | -0,216 |

|    |                    |                               |              |   |        |       |        |
|----|--------------------|-------------------------------|--------------|---|--------|-------|--------|
| 17 | O60841 IF2P_HUMAN  | E.DEIPVLKDELIHE.L             |              | 3 | 2,5477 | 0,238 | 0,354  |
| 17 | Q8N1F8 S11IP_HUMAN | E.AQAQRS#PRPTGSDLLPGAPILSLR.F | S610:        | 3 | 2,5471 | 0,104 | 0      |
| 17 | P0C7M2 RA1L3_HUMAN | R.GFAFVTFDHDSVDK.I            |              | 3 | 2,5469 | 0,204 | 0,968  |
| 17 | P06576 ATPB_HUMAN  | R.IM*DPNIVGSEHYDVAR.G         |              | 3 | 2,5447 | 0,116 | 0      |
| 17 | P29692 EF1D_HUMAN  | R.ATAPQTQHVS#PM*RQVEPPAK.K    | S133:        | 3 | 2,5426 | 0,119 | 0,967  |
| 17 | Q8NFH3 NUP43_HUMAN | R.TIDNADSSTLHAVTFLR.T         |              | 3 | 2,5422 | 0,299 | -0,197 |
| 17 | Q8N5I2 ARRD1_HUMAN | E.AAAGGPHFLDPVFLSTK.S         |              | 3 | 2,5416 | 0,274 | 0      |
| 17 | Q8IWE2 NXP20_HUMAN | K.SLLSASATVGHGLTAVKE.K        |              | 3 | 2,54   | 0,323 | -0,5   |
| 17 | O60361 NDK8_HUMAN  | R.VM*LGETNPADSKPGTIR.G        |              | 3 | 2,5397 | 0,304 | -0,102 |
| 17 | Q7Z5K2 WAPL_HUMAN  | K.RPES#PSEIS#PIKGSVR.T        | S221:S226:   | 2 | 2,5394 | 0,36  | -0,321 |
| 17 | Q9UQ35 SRRM2_HUMAN | R.NHS#GSRT#PPVALNSSR.M        | S2100:T2104: | 3 | 2,5355 | 0,188 | -0,398 |
| 17 | P34932 HSP74_HUMAN | E.DQYDHLDAADM*TKVE.K          |              | 2 | 2,5347 | 0,253 | -0,138 |
| 17 | Q13085 ACACA_HUMAN | R.DEPIHILNVAIK.T              |              | 2 | 2,5335 | 0,212 | -0,537 |
| 17 | Q86SQ0 PHLB2_HUMAN | R.KSS#ISSISGR.D               | S415:        | 2 | 2,5326 | 0,14  | -0,221 |
| 17 | P04792 HSPB1_HUMAN | E.SPAVAAPAYSR.A               |              | 2 | 2,5321 | 0,332 | -0,448 |
| 17 | Q86UU1 PHLB1_HUMAN | R.KLS#SGDLR.V                 | S563:        | 2 | 2,5284 | 0,149 | -0,702 |
| 17 | Q9UQ35 SRRM2_HUMAN | R.QSHSES#PSLQSK.S             | S1083:       | 3 | 2,5258 | 0,112 | 0,066  |
| 17 | P51991 ROA3_HUMAN  | R.GFAFVTFDHDTVD.K             |              | 2 | 2,5256 | 0,439 | -0,231 |
| 17 | O60841 IF2P_HUMAN  | K.LLQAQGVFVPSKDPLK.K          |              | 3 | 2,5242 | 0,295 | 0      |
| 17 | Q14671 PUM1_HUMAN  | R.RPGQS#FHVNSE.V              | S197:        | 2 | 2,5193 | 0,333 | -0,638 |
| 17 | Q8N0Z3 CCD52_HUMAN | R.RLS#IM*KE.I                 | S93:         | 2 | 2,5176 | 0,126 | -0,502 |
| 17 | Q8WWY3 PRP31_HUMAN | E.DAYQEDLGFSLGLGK.S           |              | 3 | 2,515  | 0,222 | 0,209  |
| 17 | P13639 EF2_HUMAN   | K.SDPVVSURE.T                 |              | 2 | 2,515  | 0,315 | -0,116 |
| 17 | Q9NYF8 BCLF1_HUMAN | R.RIDIS#PSTLR.K               | S658:        | 2 | 2,5148 | 0,341 | 0,099  |
| 17 | Q9H4L4 SENP3_HUMAN | E.LFQGSDLGM*AEEAERPGEK.A      |              | 3 | 2,5145 | 0,195 | -0,44  |
| 17 | Q7L4I2 RSRC2_HUMAN | R.KLM*GIKS#EDE.A              | S376:        | 2 | 2,514  | 0,291 | -1,273 |
| 17 | Q9H4B7 TBB1_HUMAN  | E.RISVYYNE.A                  |              | 2 | 2,5136 | 0,26  | 0,467  |
| 17 | P29692 EF1D_HUMAN  | R.ATAPQTQHVS#PM*R.Q           | S133:        | 2 | 2,5122 | 0,27  | -0,321 |
| 17 | Q9NPR2 SEM4B_HUMAN | E.KRPLS#IQDSFVE.V             | S804:        | 2 | 2,5115 | 0,167 | -0,326 |
| 17 | Q15691 MARE1_HUMAN | K.GKFQDNFE.F                  |              | 2 | 2,5091 | 0,237 | -0,434 |
| 17 | Q09666 AHNK_HUMAN  | K.FSM*PGFKGEGPDVDVTLPK.A      |              | 3 | 2,5078 | 0,138 | 0,269  |
| 17 | P41212 ETV6_HUMAN  | R.SRS#PITTNHRPS#PDPE.Q        | S184:S193:   | 3 | 2,5046 | 0,262 | -0,375 |
| 17 | Q8IWA0 WDR75_HUMAN | K.VQDTSNTGLGEDIIHQLSKSEE.K    |              | 3 | 2,4984 | 0,231 | 0      |

|    |                    |                                |                 |   |        |       |        |
|----|--------------------|--------------------------------|-----------------|---|--------|-------|--------|
| 17 | A0AVK6 E2F8_HUMAN  | R.KINS#APS#SPIKTNK.A           | S413:S416:      | 2 | 2,4947 | 0,294 | 0,074  |
| 17 | Q9UKV5 AMFR2_HUMAN | E.RVPLDLS#PR.L                 | S542:           | 2 | 2,4939 | 0,274 | 0,108  |
| 17 | Q9Y6N7 ROBO1_HUMAN | E.M*KTFNS#PNLK.D               | S1055:          | 3 | 2,4935 | 0,33  | 0,502  |
| 17 | Q14CB8 RHG19_HUMAN | R.SRS#FSGLIK.R                 | S422:           | 2 | 2,492  | 0,155 | 0,114  |
| 17 | Q01082 SPTB2_HUMAN | R.RPPS#PEPSTK.V                | S2102:          | 2 | 2,4907 | 0,321 | -0,104 |
| 17 | Q9C004 SPY4_HUMAN  | R.LQHPLTILPIDQVK.T             |                 | 2 | 2,489  | 0,258 | -0,227 |
| 17 | Q08378 GOGA3_HUMAN | R.SRRDS#ICSSVSLE.S             | S389:           | 2 | 2,4874 | 0,407 | -0,465 |
| 17 | Q9BX63 FANCJ_HUMAN | R.HFNYPST#PPSER.N              | T113:           | 2 | 2,4856 | 0,366 | -0,242 |
| 17 | P22681 CBL_HUMAN   | K.IKPS#SSANAIYSLAARPLVPK.L     | S667:           | 3 | 2,4848 | 0,242 | -0,543 |
| 17 | Q3KQU3 MA7D1_HUMAN | E.ARS#PGLQKE.A                 | S753:           | 2 | 2,4811 | 0,241 | -0,114 |
| 17 | Q00537 PCTK2_HUMAN | R.RIS#M*EDLNK.R                | S137:           | 2 | 2,4793 | 0,221 | 0,203  |
| 17 | Q9Y2X7 GIT1_HUMAN  | E.FKHDS#FVPCSE.K               | S670:           | 2 | 2,4757 | 0,179 | -0,255 |
| 17 | Q96Q11 TRNT1_HUMAN | K.ATDSSDPLKPYQDFIIDS.R         |                 | 2 | 2,4744 | 0,285 | 0,45   |
| 17 | P17252 KPCA_HUMAN  | E.FVTFSCPGADKGPDTDDPR.S        |                 | 3 | 2,4743 | 0,208 | 0      |
| 17 | Q86TC9 MYPN_HUMAN  | K.TPEPSS#PVKEPPVLAKPK.L        | S644:           | 2 | 2,4739 | 0,429 | 0      |
| 17 | P42166 LAP2A_HUMAN | E.AAASALQIATHHTAFVAK.A         |                 | 3 | 2,4727 | 0,448 | -0,328 |
| 17 | O15234 CASC3_HUMAN | R.TPQPVTIKPPPPEVVS.R           |                 | 3 | 2,4692 | 0,177 | 0,397  |
| 17 | Q9Y624 JAM1_HUMAN  | K.KVIYSQPS#AR.S                | S284:           | 2 | 2,4674 | 0,321 | -0,794 |
| 17 | Q07002 PCTK3_HUMAN | R.RFS#M*EDVSK.R                | S87:            | 2 | 2,4634 | 0,129 | -0,408 |
| 17 | P40222 TXLNA_HUMAN | R.RPEGPGAQAPSS#PR.V            | S515:           | 3 | 2,4607 | 0,162 | 0,184  |
| 17 | P11021 GRP78_HUMAN | R.IINEPTAAAIAYGLDKRE.G         |                 | 3 | 2,4591 | 0,141 | -0,282 |
| 17 | P10809 CH60_HUMAN  | K.LVQDVANNTNEE.A               |                 | 2 | 2,4537 | 0,135 | -0,272 |
| 17 | O00571 DDX3X_HUMAN | R.GKSS#FFSDR.G                 | S83:            | 2 | 2,4511 | 0,149 | -0,549 |
| 17 | Q9P2J5 SYLC_HUMAN  | D.SPDDIAALR.D                  |                 | 2 | 2,4502 | 0,402 | 0      |
| 17 | Q8IYB7 DI3L2_HUMAN | R.DLDDALSCKPLADGNFK.V          |                 | 3 | 2,4491 | 0,304 | -0,292 |
| 17 | P11021 GRP78_HUMAN | R.IINEPTAAAIAYGLDKRE.G         |                 | 2 | 2,4481 | 0,269 | -1,945 |
| 17 | Q9Y2R4 DDX52_HUMAN | R.KYDFDSSE.V                   |                 | 2 | 2,4446 | 0,235 | 0,123  |
| 17 | P27815 PDE4A_HUMAN | R.RES#FLYR.S                   | S145:           | 2 | 2,4408 | 0,248 | 0,116  |
| 17 | P07108 ACBP_HUMAN  | K.QATVGDINTERPGM*LDFTGK.A      |                 | 3 | 2,4397 | 0,3   | 0,422  |
| 17 | Q71U36 TBA1A_HUMAN | E.RLS#VDYGK.K                  | S158:           | 2 | 2,4371 | 0,256 | 0,24   |
| 17 | Q14684 RRP1B_HUMAN | E.QKPLHGVLKT#PT#SSPASS#PLVAK.K | T728:T730:S736: | 3 | 2,4356 | 0,104 | 0      |
| 17 | P17612 KAPCA_HUMAN | E.IRV#INEK.C                   | S339:           | 2 | 2,4331 | 0,415 | -0,117 |
| 17 | Q9H582 ZN644_HUMAN | K.CNVNFRE.K                    |                 | 2 | 2,4313 | 0,264 | 0,195  |

|    |                     |                             |            |   |        |       |        |
|----|---------------------|-----------------------------|------------|---|--------|-------|--------|
| 17 | P49116 NR2C2_HUMAN  | R.SPLIATPTFVADKDGAR.Q       |            | 3 | 2,4281 | 0,143 | 0,624  |
| 17 | Q9C0H5 K1688_HUMAN  | R.SRRPS#GSQHS#PSLQTFAPE.A   | S246:S251: | 3 | 2,4274 | 1     | -0,246 |
| 17 | B2RMZ9 B2RMZ9_HUMAN | R.RLNS#SPRAPVS#PLK.F        | S416:S423: | 3 | 2,4231 | 0,3   | -1,305 |
| 17 | P35527 K1C9_HUMAN   | R.FSSSSGYGGGSSR.V           |            | 2 | 2,423  | 0,395 | -0,494 |
| 17 | O43390 HNRPR_HUMAN  | E.GLVDVILYHQDDK.K           |            | 3 | 2,4228 | 0,264 | 0,34   |
| 17 | Q8ND56 LS14A_HUMAN  | E.QAVQTASAHLPAPAAVGR.R      |            | 2 | 2,4225 | 0,338 | -0,21  |
| 17 | Q9Y282 ERGI3_HUMAN  | K.QRLDKDGIPVS#SEAE.R        | S116:      | 2 | 2,4223 | 0,334 | 0,283  |
| 17 | P10398 ARAF_HUMAN   | R.GGSDGT#PRGS#PSPASVSSGRK.S | T253:S257: | 3 | 2,4211 | 0,134 | -0,522 |
| 17 | Q9Y2F5 K0947_HUMAN  | E.TQDTSQSSLPGTLHCYTGIR.E    |            | 3 | 2,4181 | 0,319 | -0,247 |
| 17 | A6ND36 FA83G_HUMAN  | R.RPSVASSVSEE.Y             |            | 2 | 2,4169 | 0,286 | -0,85  |
| 17 | P61604 CH10_HUMAN   | K.VVLDDKDYFLFR.D            |            | 3 | 2,4159 | 0,352 | 0,06   |
| 17 | Q15653 IKBB_HUMAN   | R.LPPTASKPLPDDPRPV.-        |            | 3 | 2,4125 | 0,167 | 0,204  |
| 17 | O00512 BCL9_HUMAN   | E.RSIS#ADSFQQR.D            | S104:      | 2 | 2,4099 | 0,405 | 0,179  |
| 17 | Q9C0B5 ZDHC5_HUMAN  | E.SFRS#PTFGK.S              | S409:      | 2 | 2,4075 | 0,118 | -0,551 |
| 17 | P31689 DNJA1_HUMAN  | R.HYNGEAYEDDE.H             |            | 2 | 2,4032 | 0,268 | -0,091 |
| 17 | Q8N2M8 SFR16_HUMAN  | R.KIS#PPSYAR.R              | S270:      | 2 | 2,3997 | 0,157 | -0,222 |
| 17 | Q9H2S9 IKZF4_HUMAN  | E.AGEGPEDLADGGPLLYRPR.G     |            | 3 | 2,3985 | 0,196 | 0,646  |
| 17 | P78347 GTF2I_HUMAN  | K.ANELPQPPVPEPANAGKR.K      |            | 3 | 2,3982 | 0,236 | 0,194  |
| 17 | Q9H307 PININ_HUMAN  | R.RGFS#DSGGGPPAK.Q          | S66:       | 2 | 2,396  | 0,296 | -0,558 |
| 17 | Q9GZY8 CB033_HUMAN  | D.LIQSTPFKPLALK.T           |            | 2 | 2,3935 | 0,233 | 0      |
| 17 | Q7Z5K2 WAPL_HUMAN   | K.RPES#PSEIS#PIKGSVR.T      | S221:S226: | 3 | 2,3885 | 0,226 | 0,193  |
| 17 | P05387 RLA2_HUMAN   | E.DVIAQGIGK.L               |            | 2 | 2,3881 | 0,27  | 0,203  |
| 17 | P40222 TXLNA_HUMAN  | R.RPEGPGAQAPS#SPR.V         | S514:      | 2 | 2,3858 | 0,376 | -0,656 |
| 17 | Q96K21 ZFY19_HUMAN  | E.HQTSAYS#PPR.A             | S463:      | 2 | 2,3802 | 0,118 | -1,196 |
| 17 | P20700 LMNB1_HUMAN  | E.LFHQQGT#PR.A              | T575:      | 2 | 2,3776 | 0,247 | -0,314 |
| 17 | Q14C86 GAPD1_HUMAN  | E.ITHGAHLQTS#PPSQSE.S       | S816:      | 3 | 2,3753 | 0,117 | -0,62  |
| 17 | P61604 CH10_HUMAN   | K.VVLDDKDYFLFR.D            |            | 2 | 2,3709 | 0,341 | -0,399 |
| 17 | P08133 ANXA6_HUMAN  | E.DTIIDIITHR.S              |            | 2 | 2,3704 | 0,318 | -0,306 |
| 17 | O14920 IKKB_HUMAN   | K.VRGPVSGS#PDSM*NASR.L      | S672:      | 3 | 2,3629 | 0,186 | -0,427 |
| 17 | Q12906 ILF3_HUMAN   | K.HSSVYPTQEE.L              |            | 2 | 2,3623 | 0,402 | -0,622 |
| 17 | P25440 BRD2_HUMAN   | R.IRKPS#LLYE.G              | S37:       | 2 | 2,3593 | 0,097 | 0,305  |
| 17 | Q6NYC8 PHTNS_HUMAN  | R.DIEAQTQKPEPPESA EK.L      |            | 3 | 2,3573 | 0,133 | 0      |
| 17 | Q01433 AMPD2_HUMAN  | R.QISQDVKLEPDILLR.A         |            | 3 | 2,3571 | 0,143 | -0,104 |

|    |                     |                               |            |   |        |       |        |
|----|---------------------|-------------------------------|------------|---|--------|-------|--------|
| 17 | P62158 CALM_HUMAN   | K.EAFSLFDKDGDTITTK.E          |            | 3 | 2,3553 | 0,219 | 0,099  |
| 17 | P60842 IF4A1_HUMAN  | R.DFTVSAM*HGDM*DQKE.R         |            | 2 | 2,354  | 0,236 | -0,14  |
| 17 | P49773 HINT1_HUMAN  | D.ISPQAPTHFLVIPK.K            |            | 2 | 2,3534 | 0,28  | -0,394 |
| 17 | P27987 IP3KB_HUMAN  | R.ARS#PSPCFR.S                | S174:      | 2 | 2,3525 | 0,085 | -0,097 |
| 17 | P68400 CSK21_HUMAN  | R.GGPNITLADIVKDPVSR.T         |            | 3 | 2,3491 | 0,115 | -0,392 |
| 17 | Q99618 CDCA3_HUMAN  | K.RPSPLENVSE.L                |            | 2 | 2,3485 | 0,339 | -0,703 |
| 17 | O75396 SC22B_HUMAN  | R.RNLGSINTE.L                 |            | 2 | 2,3465 | 0,285 | -0,061 |
| 17 | Q9GZV1 ANKR2_HUMAN  | R.KTS#LDLR.R                  | S99:       | 2 | 2,3452 | 0,258 | 0,067  |
| 17 | P62753 RS6_HUMAN    | R.RLS#S#LRASTSK.S             | S235:S236: | 2 | 2,3397 | 0,441 | -1,518 |
| 17 | Q9C0H5 K1688_HUMAN  | R.RPS#PFLK.R                  | S273:      | 2 | 2,3397 | 0,168 | 0,066  |
| 17 | Q92945 FUBP2_HUMAN  | K.M*ILIQDGSQNTNVDKPLR.I       |            | 3 | 2,3385 | 0,23  | -0,089 |
| 17 | P52756 RBM5_HUMAN   | K.CCLNNFR.K                   |            | 2 | 2,3375 | 0,273 | 0,124  |
| 17 | Q8IX21 CJ006_HUMAN  | K.M*QKPHLPLS#QE.K             | S444:      | 2 | 2,3375 | 0,294 | -0,608 |
| 17 | Q14697 GANAB_HUMAN  | K.LVAIVDPHIKVD.S              |            | 3 | 2,3359 | 0,276 | 0,555  |
| 17 | P23443 KS6B1_HUMAN  | E.KFS#FEPK.I                  | S427:      | 2 | 2,3307 | 0,127 | 0,253  |
| 17 | Q53XS9 Q53XS9_HUMAN | R.KYTQSFGE.N                  |            | 2 | 2,3297 | 0,374 | -1,852 |
| 17 | A9CQZ4 A9CQZ4_HUMAN | K.NLGSQS#PKPR.Q               | S27:       | 2 | 2,3261 | 0,239 | -0,112 |
| 17 | P22626 ROA2_HUMAN   | R.GFGFVTDDHDPVD.K             |            | 2 | 2,3234 | 0,138 | -0,233 |
| 17 | Q6P0N0 CN106_HUMAN  | K.SKKDT#FVLE.S                | T267:      | 2 | 2,3232 | 0,133 | 0,106  |
| 17 | Q9HCN4 GPN1_HUMAN   | K.DSLSPVLHPSDLILTR.G          |            | 3 | 2,3219 | 0,125 | -0,104 |
| 17 | Q8IYL2 U383_HUMAN   | E.RGPGPGQGS#PGGGPGPR.S        | S78:       | 2 | 2,3201 | 0,322 | -0,467 |
| 17 | Q9Y3Y2 CA077_HUMAN  | K.NKQPT#PVNIR.A               | T33:       | 2 | 2,3198 | 0,122 | -1,076 |
| 17 | Q8IU8 MINA_HUMAN    | R.RLS#GFLR.T                  | S309:      | 2 | 2,3183 | 0,187 | -0,131 |
| 17 | Q9UJM3 ERRFI_HUMAN  | E.DSTLSDFKYDVPGR.R            |            | 3 | 2,3156 | 0,124 | 0,229  |
| 17 | Q9BZY3 Q9BZY3_HUMAN | R.TPAS#PHFR.S                 | S583:      | 2 | 2,3151 | 0,346 | -0,492 |
| 17 | Q9H6Z4 RANB3_HUMAN  | E.EKPAIAPPVVFQK.D             |            | 2 | 2,3096 | 0,362 | -0,155 |
| 17 | Q14157 UBP2L_HUMAN  | R.RYPSSISS#SPQK.D             | S608:      | 2 | 2,3085 | 0,375 | -0,689 |
| 17 | Q9NW13 RBM28_HUMAN  | R.KLPSDVNE.G                  |            | 2 | 2,3079 | 0,189 | -0,473 |
| 17 | Q15637 SF01_HUMAN   | R.KDGQM*LPGEDEPLHALVTANTM*E.N |            | 3 | 2,307  | 0,091 | -0,434 |
| 17 | Q8IVF2 AHNK2_HUMAN  | E.GIRPRPQGS#SPVYE.Y           | S55:       | 2 | 2,306  | 0,245 | -0,075 |
| 17 | Q5SRE5 NU188_HUMAN  | R.DGVCVLGLHLAKE.L             |            | 3 | 2,3053 | 0,189 | 0,259  |
| 17 | Q4VXC3 Q4VXC3_HUMAN | R.RQFS#APNLK.A                | S1141:     | 2 | 2,3049 | 0,351 | 0,535  |
| 17 | P34896 GLYC_HUMAN   | K.IVTGGSDNHLILVDLR.S          |            | 3 | 2,3048 | 0,275 | -0,106 |

|    |                     |                         |            |   |        |       |        |
|----|---------------------|-------------------------|------------|---|--------|-------|--------|
| 17 | Q08211 DHX9_HUMAN   | E.DCIQM*THFVPPPK.D      |            | 3 | 2,3043 | 0,201 | 0,115  |
| 17 | P05787 K2C8_HUMAN   | E.SRLEGLTDE.I           |            | 2 | 2,3029 | 0,125 | 0,12   |
| 17 | P80303 NUCB2_HUMAN  | K.LDSLQDIGM*DHQALLK.Q   |            | 3 | 2,3014 | 0,21  | 0,404  |
| 17 | Q96RK0 CIC_HUMAN    | R.KVFS#PVIR.S           | S496:      | 2 | 2,2981 | 0,205 | 0,119  |
| 17 | Q7Z6Z7 HUWE1_HUMAN  | E.RDGG#GNSTIIVSR.S      | S2362:     | 2 | 2,2953 | 0,411 | -0,814 |
| 17 | Q3B820 YB032_HUMAN  | E.HLQNSS#PLPCR.S        | S396:      | 2 | 2,2945 | 0,177 | -0,527 |
| 17 | Q9Y2V2 CHSP1_HUMAN  | R.TRTFS#ATVR.A          | S52:       | 2 | 2,2938 | 0,256 | -0,218 |
| 17 | Q13177 PAK2_HUMAN   | R.HKIIS#IFSGTE.K        | S55:       | 2 | 2,292  | 0,215 | -0,465 |
| 17 | P31946 1433B_HUMAN  | D.STLIM*QLLR.D          |            | 2 | 2,2909 | 0,233 | -0,112 |
| 17 | P49903 SPS1_HUMAN   | R.DKVM*PLIIQGFKDAAEE.A  |            | 3 | 2,2896 | 0,102 | -0,095 |
| 17 | ##Q9UMZ2 SYNG_HUMAN | K.IQEQGS#TSDICSVLFKE.E  | S1102:     | 2 | 2,2826 | 0,089 | 1,087  |
| 17 | Q8TE01 Q8TE01_HUMAN | E.RQDLGGTCVNE.G         |            | 2 | 2,2792 | 0,303 | -0,782 |
| 17 | Q92667 AKAP1_HUMAN  | E.VCKQDS#PFSR.V         | S169:      | 3 | 2,2765 | 0,084 | 0,701  |
| 17 | Q3KQU3 MA7D1_HUMAN  | K.RQS#LPASPR.A          | S442:      | 2 | 2,2729 | 0,284 | -0,112 |
| 17 | P50454 SERPH_HUMAN  | K.RSALQSINE.W           |            | 2 | 2,271  | 0,113 | 0,12   |
| 17 | P28066 PSA5_HUMAN   | E.KLNATNIE.L            |            | 2 | 2,2703 | 0,238 | 0      |
| 17 | Q16352 AINX_HUMAN   | K.SKFANLNE.Q            |            | 2 | 2,2694 | 0,221 | -0,198 |
| 17 | O75410 TACC1_HUMAN  | E.SRSS#PLKLE.F          | S316:      | 2 | 2,2689 | 0,113 | 0,222  |
| 17 | P62258 1433E_HUMAN  | R.IISSIEQKEE.N          |            | 2 | 2,2641 | 0,16  | 0,104  |
| 17 | Q8N655 CJ012_HUMAN  | K.IKPNLSS#PR.S          | S295:      | 2 | 2,2636 | 0,209 | -0,103 |
| 17 | Q9NSD9 SYFB_HUMAN   | K.LGVLHPDVITKFE.L       |            | 3 | 2,2618 | 0,139 | 0,374  |
| 17 | P41212 ETV6_HUMAN   | R.SRS#PITTNHRPS#PDPE.Q  | S184:S193: | 2 | 2,2577 | 0,257 | -0,5   |
| 17 | Q6PGN9 PSRC1_HUMAN  | E.DITVLVTPEKPLR.R       |            | 2 | 2,2568 | 0,252 | -0,082 |
| 17 | Q06830 PRDX1_HUMAN  | K.QGGLGPM*NIPLVSDPKR.T  |            | 3 | 2,2509 | 0,144 | 0,509  |
| 17 | P12268 IMDH2_HUMAN  | E.GGVHSLHS#YE.K         | S508:      | 2 | 2,2504 | 0,365 | -0,105 |
| 17 | Q05209 PTN12_HUMAN  | D.HDNTS#PLFR.T          | S588:      | 2 | 2,2463 | 0,192 | 0,523  |
| 17 | Q07002 PCTK3_HUMAN  | R.RFS#LSVPR.T           | S12:       | 2 | 2,2463 | 0,295 | -0,117 |
| 17 | Q14974 IMB1_HUMAN   | E.DDIVPHVLPFIK.E        |            | 2 | 2,2403 | 0,319 | -0,175 |
| 17 | Q86TI0 TBCD1_HUMAN  | R.KSFS#QPGLR.S          | S237:      | 2 | 2,2364 | 0,11  | -0,111 |
| 17 | P49736 MCM2_HUMAN   | R.RGNDPLTSS#PGR.S       | S27:       | 2 | 2,2357 | 0,191 | -0,639 |
| 17 | Q9Y6W5 WASF2_HUMAN  | R.DVVGN DVATILSR.R      |            | 2 | 2,2354 | 0,164 | -0,539 |
| 17 | Q2PPJ7 AS250_HUMAN  | E.NAPAAGSGHLTVGQQQVLR.S |            | 3 | 2,2312 | 0,149 | 0,27   |
| 17 | Q5VZ89 DEN4C_HUMAN  | E.RSTS#LSALVR.S         | S1089:     | 2 | 2,2299 | 0,32  | 0,209  |

|    |                    |                            |        |   |        |       |        |
|----|--------------------|----------------------------|--------|---|--------|-------|--------|
| 17 | P61599 NAT5_HUMAN  | K.SIIPLPHVVRPEDIE.-        |        | 2 | 2,2297 | 0,181 | -0,356 |
| 17 | Q13642 FHL1_HUMAN  | D.KFCANTCVC.C              |        | 2 | 2,2286 | 0,292 | -0,648 |
| 17 | P25963 IKBA_HUMAN  | E.DGDSFLHLAIHE.E           |        | 3 | 2,2274 | 0,139 | -0,062 |
| 17 | P36578 RL4_HUMAN   | K.NNRQPYAVSE.L             |        | 2 | 2,2248 | 0,193 | -0,518 |
| 17 | P08670 VIME_HUMAN  | R.LRS#SVPGVR.L             | S72:   | 2 | 2,217  | 0,094 | -0,58  |
| 17 | Q9H792 SG269_HUMAN | E.HLEGPVNS#PK.T            | S495:  | 2 | 2,2169 | 0,442 | -0,316 |
| 17 | Q9UJ41 RABX5_HUMAN | E.AKAPS#PSINR.Q            | S302:  | 2 | 2,2113 | 0,186 | -0,109 |
| 17 | Q9Y490 TLN1_HUMAN  | K.QAAASATQTIAAAQHAASP.K    |        | 3 | 2,21   | 0,166 | 0,183  |
| 17 | Q14814 MEF2D_HUMAN | K.VIPAKS#PPPPTHSTQLGAPSR.K | S251:  | 3 | 2,2072 | 0,279 | 0,082  |
| 17 | Q13428 TCOF_HUMAN  | K.LDSSPSVSSTLAAKDDPDGKQE.A |        | 3 | 2,2051 | 0,286 | 1,873  |
| 17 | P35998 PRS7_HUMAN  | K.IINADSEDPKYIINVK.Q       |        | 3 | 2,2036 | 0,244 | 0,3    |
| 17 | O75061 AUXI_HUMAN  | R.RSATST#SASPTLR.V         | T567:  | 2 | 2,2036 | 0,205 | -0,776 |
| 17 | P27816 MAP4_HUMAN  | R.AS#PIKM*DLAPSKDM*GPPKE.N | S358:  | 3 | 2,2    | 0,165 | -0,086 |
| 17 | P20700 LMNB1_HUMAN | R.LKLSPS#PSSR.V            | S393:  | 2 | 2,1982 | 0,22  | -0,318 |
| 17 | Q7Z3B3 K1267_HUMAN | R.RTFPLAHS#PQAE.C          | S1045: | 2 | 2,1972 | 0,292 | 0,596  |
| 17 | P00558 PGK1_HUMAN  | K.SVVLM*SHLGRPDGVPM*PD.K   |        | 2 | 2,1946 | 0,284 | 0,063  |
| 17 | P06748 NPM_HUMAN   | K.M*SVQPTVSLGGFE.I         |        | 2 | 2,1931 | 0,289 | -0,178 |
| 17 | O60716 CTND1_HUMAN | K.GIPVLVGLLDHPK.K          |        | 2 | 2,1902 | 0,288 | -0,449 |
| 17 | Q9H9Y6 RPA2_HUMAN  | R.VLQKLDGGLPFIGAK.L        |        | 3 | 2,1883 | 0,194 | -0,635 |
| 17 | O14920 IKKB_HUMAN  | K.VRGPVSGS#PDSM*NASR.L     | S672:  | 2 | 2,1855 | 0,363 | -0,285 |
| 17 | P63244 GBLP_HUMAN  | K.IIVDELKQEVISTSSK.A       |        | 2 | 2,185  | 0,276 | -1,637 |
| 17 | Q02952 AKA12_HUMAN | E.KEPSKSAESPTS#PVTSE.T     | S286:  | 2 | 2,1763 | 0,262 | -0,133 |
| 17 | Q5T4S7 UBR4_HUMAN  | R.HVTLPSS#PR.S             | S2719: | 2 | 2,1748 | 0,195 | -0,341 |
| 17 | Q12888 TP53B_HUMAN | E.ARSEDPT#TPIR.G           | T1055: | 2 | 2,1744 | 0,418 | -0,687 |
| 17 | P33176 KINH_HUMAN  | K.FQGEDTVVIASKPYAFDR.V     |        | 3 | 2,1656 | 0,301 | 0,358  |
| 17 | Q96PZ2 F111A_HUMAN | E.HYFS#PVSKE.Q             | S26:   | 2 | 2,1633 | 0,248 | 0      |
| 17 | Q13137 CACO2_HUMAN | E.DHVFCHS#L.-              | S445:  | 2 | 2,161  | 0,29  | 0,223  |
| 17 | Q9Y5U2 TSSC4_HUMAN | K.RPLAPSGRS#PVE.G          | S132:  | 2 | 2,1593 | 0,214 | -0,272 |
| 17 | Q8IXM2 CQ049_HUMAN | K.KLNFDQA.-                |        | 2 | 2,1588 | 0,321 | -0,146 |
| 17 | Q9HCP0 KC1G1_HUMAN | K.KIGCGNFGE.L              |        | 2 | 2,158  | 0,136 | -0,062 |
| 17 | P28715 ERCC5_HUMAN | E.KEPDATPPS#PR.T           | S341:  | 2 | 2,1512 | 0,274 | -0,191 |
| 17 | P60174 TPIS_HUMAN  | R.HVFGESDE.L               |        | 2 | 2,1468 | 0,191 | -0,464 |
| 17 | Q2NKX8 ERC6L_HUMAN | R.SLINM*VLDHVEDM*EER.L     |        | 3 | 2,1465 | 0,147 | 0      |



|    |                     |                         |              |   |        |       |        |
|----|---------------------|-------------------------|--------------|---|--------|-------|--------|
| 17 | Q9NY61 AATF_HUMAN   | E.LLFQYPDTR.Y           |              | 2 | 2,1456 | 0,163 | 0,106  |
| 17 | Q2QGD7 ZXDC_HUMAN   | R.RAPAPLGAS#PAR.R       | S34:         | 2 | 2,1447 | 0,246 | -0,392 |
| 17 | P06748 NPM_HUMAN    | K.GPSSVEDIK.A           |              | 2 | 2,142  | 0,317 | -0,327 |
| 17 | O60716 CTND1_HUMAN  | E.RGS#LASLDS#LRK.G      | S346:S352:   | 2 | 2,1399 | 0,162 | -0,083 |
| 17 | Q8IYB3 SRRM1_HUMAN  | R.RYS#PPIQR.R           | S597:        | 2 | 2,1365 | 0,274 | -0,334 |
| 17 | Q13769 THOC5_HUMAN  | R.RRPT#LGVQLD.D         | T328:        | 2 | 2,1303 | 0,27  | 0,198  |
| 17 | Q9H1K0 RBNS5_HUMAN  | R.TRS#LDFRE.I           | S548:        | 2 | 2,1251 | 0,478 | -0,774 |
| 17 | Q63ZY3 KANK2_HUMAN  | R.VPSVAEAPQLRPAGTAAAK.T |              | 3 | 2,1218 | 0,135 | 0,199  |
| 17 | P56537 IF6_HUMAN    | E.LSDTIPVVHASIAGCR.I    |              | 3 | 2,1206 | 0,098 | 0,216  |
| 17 | Q9NZQ3 SPN90_HUMAN  | R.RAAPTT#PPPPVK.R       | T181:        | 2 | 2,12   | 0,112 | -0,093 |
| 17 | Q5RGS4 Q5RGS4_HUMAN | R.RLS#NPCIQR.S          | S308:        | 2 | 2,1125 | 0,123 | -0,199 |
| 17 | Q7Z2W4 ZCCHV_HUMAN  | R.KFTY#LGSQDR.A         | Y299:        | 2 | 2,1117 | 0,098 | 0      |
| 17 | Q13535 ATR_HUMAN    | R.RLS#SSLNPSK.R         | S435:        | 2 | 2,1067 | 0,393 | -0,835 |
| 17 | O75928 PIAS2_HUMAN  | R.KCIFM*SE.T            |              | 2 | 2,1011 | 0,178 | -0,131 |
| 17 | P08670 VIME_HUMAN   | R.RQVQSLTCE.V           |              | 2 | 2,0978 | 0,261 | 0,435  |
| 17 | Q05513 KPCZ_HUMAN   | K.RIDQSEFE.G            |              | 2 | 2,0932 | 0,109 | 0,119  |
| 17 | Q3KQU3 MA7D1_HUMAN  | K.SRGPT#PPAM*GPR.D      | T97:         | 2 | 2,0919 | 0,19  | -0,277 |
| 17 | Q96T37 RBM15_HUMAN  | R.LHSYS#SPSTK.N         | S127:        | 2 | 2,0843 | 0,305 | -0,411 |
| 17 | P84090 ERH_HUMAN    | E.GRTYADYE.S            |              | 2 | 2,0842 | 0,212 | 0,375  |
| 17 | Q14203 DCTN1_HUMAN  | R.KYFTCDE.G             |              | 2 | 2,0836 | 0,33  | 0,127  |
| 17 | P25054 APC_HUMAN    | R.SHS#ES#PSRLPINR.S     | S2533:S2535: | 3 | 2,0836 | 0,341 | 0,112  |
| 17 | Q86V48 LUZP1_HUMAN  | E.RHTST#SNIQVGLAE.L     | T821:        | 3 | 2,0833 | 0,163 | 0      |
| 17 | Q9Y2U5 M3K2_HUMAN   | R.RRGS#DIDNPTLTVM*D.I   | S331:        | 3 | 2,0786 | 0,101 | -0,102 |
| 17 | Q8N2Y8 RUSC2_HUMAN  | E.RM*LS#CPVR.L          | S519:        | 2 | 2,0771 | 0,111 | -0,219 |
| 17 | P35580 MYH10_HUMAN  | K.RQLEEAEEE.A           |              | 2 | 2,0756 | 0,099 | -0,538 |
| 17 | Q9NP64 NO40_HUMAN   | R.RS#FQDYTGQK.I         | S114:        | 2 | 2,0719 | 0,258 | -0,093 |
| 17 | Q9UKV3 ACINU_HUMAN  | E.KSKS#PS#PPRLTE.D      | S386:S388:   | 2 | 2,0683 | 0,178 | -1,395 |
| 17 | P48637 GSHB_HUMAN   | R.RLFVDGQE.I            |              | 2 | 2,0664 | 0,268 | 0,063  |
| 17 | Q9UNS1 TIM_HUMAN    | K.AGLASPEEEDAVGKEPLK.A  |              | 3 | 2,0653 | 0,16  | 0,199  |
| 17 | P78347 GTF2I_HUMAN  | R.RPS#TFGIPR.L          | S784:        | 2 | 2,0614 | 0,114 | 0,11   |
| 17 | P55084 ECHB_HUMAN   | E.GLLSDVVPFKVPGK.D      |              | 2 | 2,0608 | 0,21  | -0,335 |
| 17 | P02545 LMNA_HUMAN   | R.LRLSPS#PTSQR.S        | S392:        | 2 | 2,0592 | 0,25  | -0,277 |
| 17 | Q9BXR0 TGT_HUMAN    | R.FRSPYDGTNE.T          |              | 2 | 2,0568 | 0,203 | 0,112  |

|    |                    |                          |            |   |        |       |        |
|----|--------------------|--------------------------|------------|---|--------|-------|--------|
| 17 | Q14241 ELOA1_HUMAN | K.QGLDSFDTGKGAGDLLPK.V   |            | 3 | 2,0512 | 0,148 | 0,201  |
| 17 | Q01581 HMCS1_HUMAN | R.RPTPNDDTLDE.G          |            | 2 | 2,0494 | 0,203 | -0,288 |
| 17 | Q5T5U3 RHG21_HUMAN | R.LRTS#TSDLR.G           | S1860:     | 2 | 2,0484 | 0,365 | -0,502 |
| 17 | Q12986 NFX1_HUMAN  | R.RQDPQVVS#PFSR.G        | S326:      | 2 | 2,0444 | 0,24  | 0      |
| 17 | Q8TEH3 DEN1A_HUMAN | E.AALQLPGQAKS#LEDLRAPK.D | S592:      | 3 | 2,0413 | 0,181 | 0,175  |
| 17 | P12956 KU70_HUMAN  | R.DTGIFLDLM*HLK.K        |            | 2 | 2,04   | 0,223 | -0,43  |
| 17 | Q86W42 THOC6_HUMAN | R.HLLSAGDGE.V            |            | 2 | 2,0367 | 0,179 | 0,271  |
| 17 | Q13428 TCOF_HUMAN  | E.ALAAM*NAAQVKPLGK.S     |            | 3 | 2,0331 | 0,277 | 0      |
| 17 | Q8IV50 LYSM2_HUMAN | R.APRPSAPS#PPPRS#R.S     | S24:S29:   | 2 | 2,0308 | 0,139 | 0,523  |
| 17 | P78347 GTF2I_HUMAN | R.GREFSFE.A              |            | 2 | 2,0292 | 0,115 | 0,35   |
| 17 | Q8TCU4 ALMS1_HUMAN | R.GTDGQPLLLPYKPSGSTK.M   |            | 3 | 2,0289 | 0,085 | 0      |
| 17 | P07355 ANXA2_HUMAN | R.RAEDGSVIDYE.L          |            | 2 | 2,025  | 0,177 | -0,097 |
| 17 | Q14978 NOLC1_HUMAN | R.VADNS#FDAKR.G          | S643:      | 2 | 2,0222 | 0,363 | -0,406 |
| 17 | Q07666 KHDR1_HUMAN | K.DDEENYLDLFSHK.N        |            | 3 | 2,0194 | 0,163 | 0,225  |
| 17 | Q9H9P8 L2HDH_HUMAN | R.GLM*AIDCPHTGIVDYR.Q    |            | 3 | 2,0179 | 0,17  | 0,299  |
| 17 | O00267 SPT5H_HUMAN | K.VVSISSEHLEPITPK.N      |            | 3 | 2,0132 | 0,156 | -0,421 |
| 17 | P25054 APC_HUMAN   | K.RHS#GSYLVTSV.-         | S2835:     | 2 | 2,0126 | 0,248 | 0,095  |
| 17 | P55209 NP1L1_HUMAN | E.FHFEPNE.Y              |            | 2 | 2,0081 | 0,152 | 0,265  |
| 17 | Q86XN8 MEX3D_HUMAN | E.AAPAPRPPPEPDDAAAALR.L  |            | 3 | 2,0039 | 0,317 | 0,194  |
| 17 | Q5QP82 WDR32_HUMAN | R.RPGAPSL#PAPR.S         | S63:       | 2 | 2,0033 | 0,272 | -0,569 |
| 17 | O75063 FA20B_HUMAN | K.CYYCRE.T               |            | 2 | 2,0024 | 0,246 | 0,192  |
| 17 | Q9H1E3 NUCKS_HUMAN | R.LKATVT#PS#PVKKGK.G     | T179:S181: | 3 | 2,0021 | 0,225 | 0,308  |
| 17 | P49792 RBP2_HUMAN  | K.HSTPS#PTRYS#LSPSK.S    | S781:S786: | 3 | 2,0011 | 0,125 | -0,304 |
| 17 | O75909 CCNK_HUMAN  | K.RAVVVS#PKEE.N          | S340:      | 2 | 1,9979 | 0,296 | -0,817 |
| 17 | P43246 MSH2_HUMAN  | R.HACVEVQDE.I            |            | 2 | 1,9953 | 0,214 | 0,112  |
| 17 | Q2LD37 K1109_HUMAN | E.IRVDAAS#PGPR.V         | S3653:     | 2 | 1,993  | 0,215 | -0,4   |
| 17 | Q14568 HS902_HUMAN | E.SSAGGSFTVR.T           |            | 2 | 1,9929 | 0,162 | -0,378 |
| 17 | Q00587 BORG5_HUMAN | E.VKSS#PVGGGPR.G         | S303:      | 2 | 1,9781 | 0,139 | -0,109 |
| 17 | Q9H269 VPS16_HUMAN | E.FNCNIR.A               |            | 2 | 1,9779 | 0,183 | 0,592  |
| 17 | P26599 PTBP1_HUMAN | E.LKTDSS#PNQAR.A         | S141:      | 2 | 1,9747 | 0,216 | 0      |
| 17 | Q8N4N3 CP044_HUMAN | R.VSRPYKIS#E.S           | S17:       | 2 | 1,9677 | 0,273 | -1,369 |
| 17 | Q9NY33 DPP3_HUMAN  | E.KGAFNFDQE.T            |            | 2 | 1,9619 | 0,117 | 0,231  |
| 17 | P22626 ROA2_HUMAN  | R.GGGGNFGPGGSNFR.G       |            | 2 | 1,9542 | 0,199 | -0,974 |

|    |                     |                        |            |   |        |       |        |
|----|---------------------|------------------------|------------|---|--------|-------|--------|
| 17 | Q14694 UBP10_HUMAN  | R.DIRPGAAFEPTYIYR.L    |            | 2 | 1,9504 | 0,344 | -0,138 |
| 17 | P06748 NPM_HUMAN    | E.KT#PKT#PKGPSSVE.D    | T234:T237: | 2 | 1,9306 | 0,286 | -0,241 |
| 17 | P26583 HMGB2_HUMAN  | K.HPDSSVNFAE.F         |            | 2 | 1,9239 | 0,188 | 0      |
| 17 | P46777 RL5_HUMAN    | K.RFPGYDSE.S           |            | 2 | 1,9212 | 0,087 | 0      |
| 17 | Q9H6F5 CCD86_HUMAN  | R.RLGGLRPES#PE.S       | S18:       | 2 | 1,9212 | 0,283 | -0,378 |
| 17 | Q09666 AHNK_HUMAN   | K.LPQFGISTPGSDLHVNAK.G |            | 2 | 1,9118 | 0,185 | -0,195 |
| 17 | Q9HCD5 NCOA5_HUMAN  | R.M*DDYCR.R            |            | 2 | 1,9085 | 0,21  | 0,488  |
| 17 | Q96JM3 ZN828_HUMAN  | E.LRKPGPLS#PE.I        | S427:      | 2 | 1,9068 | 0,192 | -0,288 |
| 17 | Q9Y2W1 TR150_HUMAN  | R.RIDIS#PSTFR.K        | S682:      | 2 | 1,9051 | 0,321 | 0,192  |
| 17 | Q6PKG0 LARP1_HUMAN  | R.TPRT#PRT#PQLK.D      | T785:T788: | 2 | 1,9021 | 0,273 | -0,252 |
| 17 | Q96ST2 IWS1_HUMAN   | K.LTLLPAVVM*HLK.K      |            | 2 | 1,8972 | 0,166 | 0      |
| 17 | P09429 HMGB1_HUMAN  | K.HPDASVNFSE.F         |            | 2 | 1,8922 | 0,095 | -0,332 |
| 17 | Q9Y6Y8 S23IP_HUMAN  | R.RLEFPSGE.T           |            | 2 | 1,8877 | 0,09  | 0,196  |
| 17 | P83881 RL36A_HUMAN  | E.CVEPNCR.S            |            | 2 | 1,8807 | 0,164 | 0,065  |
| 17 | Q8N1G0 ZN687_HUMAN  | K.TSCGNITR.T           |            | 2 | 1,8794 | 0,297 | 0      |
| 17 | P45974 UBP5_HUMAN   | E.ALLSVLPTIRVPK.A      |            | 2 | 1,8764 | 0,208 | -0,434 |
| 17 | Q96KQ7 EHMT2_HUMAN  | R.KLNSGGGLSEE.L        |            | 2 | 1,8731 | 0,081 | 0      |
| 17 | P50570 DYN2_HUMAN   | K.KFTDFDE.V            |            | 2 | 1,8714 | 0,186 | 0,135  |
| 17 | P37802 TAGL2_HUMAN  | E.KQYDADLE.Q           |            | 2 | 1,8686 | 0,157 | 0,062  |
| 17 | Q9NPR2 SEM4B_HUMAN  | R.VRLGS#EIRD.S         | S825:      | 2 | 1,8643 | 0,096 | -0,325 |
| 17 | Q15029 U5S1_HUMAN   | E.DTQPLTEPIIKPVK.T     |            | 2 | 1,8592 | 0,174 | -0,232 |
| 17 | Q9HCD6 TANC2_HUMAN  | K.RPFVESNV.-           |            | 2 | 1,8565 | 0,285 | -0,129 |
| 17 | Q8WVM8 SCFD1_HUMAN  | K.HILYGCSE.L           |            | 2 | 1,8535 | 0,199 | 0,062  |
| 17 | Q7Z417 NUFP2_HUMAN  | K.RIITYNE.A            |            | 2 | 1,8535 | 0,159 | -0,067 |
| 17 | P49810 PSN2_HUMAN   | E.RTSLM*SAES#PTPR.S    | S25:       | 2 | 1,8493 | 0,156 | -0,878 |
| 17 | ##Q96EK6 GNA1_HUMAN | D.VEKLLS#PDFMPTEDPKM.- | S173:      | 2 | 1,848  | 0,111 | 0,83   |
| 17 | P49588 SYAC_HUMAN   | D.KTCFYAE.Q            |            | 2 | 1,8442 | 0,12  | 0,066  |
| 17 | P17858 K6PL_HUMAN   | R.RTLS#M*DKGF.-        | S775:      | 2 | 1,8331 | 0,252 | 0      |
| 17 | P62314 SMD1_HUMAN   | K.NREPVQLE.T           |            | 2 | 1,8322 | 0,086 | 0,062  |
| 17 | P22626 ROA2_HUMAN   | R.GGSDGYGSGR.G         |            | 2 | 1,8267 | 0,259 | 0,134  |
| 17 | Q9BW71 HIRP3_HUMAN  | K.RPPTPCS#DPER.K       | S87:       | 2 | 1,8225 | 0,252 | -0,526 |
| 17 | O95299 NDUAA_HUMAN  | R.KYSPGYNTE.V          |            | 2 | 1,8188 | 0,252 | -0,23  |
| 17 | Q96S55 WRIP1_HUMAN  | E.SRESYDAPPT#PSGAR.L   | T116:      | 2 | 1,8154 | 0,234 | -0,438 |

|    |                     |                              |            |   |        |       |        |
|----|---------------------|------------------------------|------------|---|--------|-------|--------|
| 17 | P31150 GDIA_HUMAN   | R.KQNDVFG.E.A                |            | 2 | 1,8136 | 0,145 | 0,326  |
| 17 | P05787 K2C8_HUMAN   | R.ISSSSFSR.V                 |            | 2 | 1,8135 | 0,143 | 0,42   |
| 17 | P27816 MAP4_HUMAN   | R.AS#PIKM*DLAPSKDM*GPPKE.N   | S358:      | 2 | 1,8042 | 0,264 | 0      |
| 17 | Q14558 KPRA_HUMAN   | K.NATVHPGLELPLM*M*AK.E       |            | 2 | 1,7958 | 0,262 | 0,07   |
| 17 | Q502X6 Q502X6_HUMAN | E.NIHYLND.G                  |            | 2 | 1,7939 | 0,104 | 0      |
| 17 | P27694 RFA1_HUMAN   | K.GARVS#DFGGR.S              | S384:      | 2 | 1,7886 | 0,307 | -0,443 |
| 17 | P05787 K2C8_HUMAN   | K.SYKVS#TSGPR.A              | S13:       | 2 | 1,7729 | 0,164 | -0,315 |
| 17 | Q9UUK3 PARP4_HUMAN  | K.QLLGLQPISTVSPLHR.V         |            | 2 | 1,7728 | 0,232 | 0,416  |
| 17 | Q14684 RRP1B_HUMAN  | K.KFQDLSE.G                  |            | 2 | 1,7715 | 0,085 | 0,352  |
| 17 | Q66K74 MAP1S_HUMAN  | E.RLSLS#PLR.G                | S657:      | 2 | 1,7568 | 0,157 | -0,298 |
| 17 | Q7Z3D7 Q7Z3D7_HUMAN | R.RPYQDM*E.Y                 |            | 2 | 1,7556 | 0,169 | 0,064  |
| 17 | Q86UU1 PHLB1_HUMAN  | R.RALS#PLPTR.T               | S470:      | 2 | 1,7551 | 0,083 | 0,335  |
| 17 | P40938 RFC3_HUMAN   | K.YRPCS#LGR.L                | S12:       | 2 | 1,7418 | 0,215 | -0,336 |
| 17 | P08670 VIME_HUMAN   | R.SVSSSSYR.R                 |            | 2 | 1,741  | 0,166 | 0,419  |
| 17 | Q9Y230 RUVB2_HUMAN  | R.IRCEEEDVE.M                |            | 2 | 1,7382 | 0,138 | -0,414 |
| 17 | Q9UKV3 ACINU_HUMAN  | E.KS#KSPSPRILT#E.D           | S384:T393: | 2 | 1,729  | 0,175 | -0,246 |
| 17 | P52292 IMA2_HUMAN   | R.RIEVNVE.L                  |            | 2 | 1,7226 | 0,14  | 0,355  |
| 17 | Q9HCF4 ALO17_HUMAN  | K.FCSQCGER.L                 |            | 2 | 1,7213 | 0,277 | -0,234 |
| 17 | Q7Z699 SPRE1_HUMAN  | R.HVSFQDEDE.I                |            | 2 | 1,7147 | 0,101 | -0,11  |
| 17 | Q14847 LASP1_HUMAN  | K.ACFHCE.T                   |            | 2 | 1,7069 | 0,314 | 0,37   |
| 17 | Q15785 TOM34_HUMAN  | R.LKLPISLVPVSAQK.R           |            | 2 | 1,7062 | 0,262 | -0,46  |
| 17 | Q9BWU0 NADAP_HUMAN  | K.KPALPVS#PAAR.S             | S82:       | 2 | 1,7028 | 0,154 | 0,103  |
| 17 | Q9NVR0 KLH11_HUMAN  | R.RVPSSQIEC.-                |            | 2 | 1,6869 | 0,313 | -0,227 |
| 17 | Q12888 TP53B_HUMAN  | R.QSQQPM*KPIS#PVKDPVSPASQK.M | S1094:     | 2 | 1,6791 | 0,086 | 0,493  |
| 17 | P52907 CAZA1_HUMAN  | E.SCDSALR.A                  |            | 2 | 1,6599 | 0,235 | 0,302  |
| 17 | P31943 HNRH1_HUMAN  | K.HTGPNPDTAND.G              |            | 2 | 1,6508 | 0,201 | -0,299 |
| 17 | Q00537 PCTK2_HUMAN  | R.RLS#LTLR.G                 | S9:        | 2 | 1,6191 | 0,437 | -0,26  |
| 17 | P98196 AT11A_HUMAN  | K.TVLRHS#GSLT#R.D            | S738:T742: | 2 | 1,6147 | 0,257 | 0      |
| 17 | A8MVW0 U560A_HUMAN  | E.LRRDS#LTSPED.E.L           | S789:      | 2 | 1,6103 | 0,196 | -0,57  |
| 17 | Q96S55 WRIP1_HUMAN  | K.RPAAAAAGS#ASPR.S           | S151:      | 2 | 1,6052 | 0,156 | -0,366 |
| 17 | P02753 RETBP_HUMAN  | R.FS#GT#WYAMAK.K             | S39:T41:   | 2 | 1,5854 | 0,15  | -0,738 |
| 17 | O75167 PHAR2_HUMAN  | R.RLS#QRPTTEE.L              | S522:      | 2 | 1,5559 | 0,12  | -0,188 |
| 17 | A6NDB9 PALM3_HUMAN  | R.QGHRPLS#QSIVE.A            | S124:      | 2 | 1,533  | 0,168 | -0,426 |

|    |                    |                             |          |   |        |       |        |
|----|--------------------|-----------------------------|----------|---|--------|-------|--------|
| 17 | Q8TAF3 WDR48_HUMAN | K.GFCMSTLRTHK.D             |          | 2 | 1,5242 | 0,097 | -0,912 |
| 17 | Q9UHB6 LIMA1_HUMAN | K.TV5#PPIRK.G               | S609:    | 2 | 1,5191 | 0,094 | -0,624 |
| 17 | Q9H6F5 CCD86_HUMAN | E.TREPGS#PPSVQR.A           | S47:     | 2 | 1,5161 | 0,087 | -0,351 |
| 17 | Q9Y333 LSM2_HUMAN  | K.NCFIRGS#VVR.Y             | S65:     | 2 | 1,5045 | 0,25  | 0,284  |
| 17 | P41229 JAD1C_HUMAN | R.NHSNAQFIE.S               |          | 2 | 1,4906 | 0,118 | 0,115  |
| 17 | Q9C0D0 PHAR1_HUMAN | R.RLS#QRPTAEE.L             | S467:    | 2 | 1,4902 | 0,246 | -0,385 |
| 17 | Q3KQU3 MA7D1_HUMAN | E.AKS#RGPT#PPAM*GPR.D       | S93:T97: | 2 | 1,4319 | 0,127 | -0,687 |
| 17 | P13861 KAP2_HUMAN  | R.RVSVCAE.T                 |          | 2 | 1,4122 | 0,095 | 0,594  |
| 17 | Q9C0C2 TB182_HUMAN | R.RPS#QGPPAR.S              | S1545:   | 2 | 1,4044 | 0,112 | 0,117  |
| 17 | Q13541 4EBP1_HUMAN | K.RAGGEESQFE.M              |          | 2 | 1,3771 | 0,12  | -0,55  |
| 17 | Q15642 CIP4_HUMAN  | R.VLSNRGDS#LSR.H            | S482:    | 2 | 1,2765 | 0,125 | -0,38  |
| 17 | P49821 NDUV1_HUMAN | R.GDWYKTK.E                 |          | 2 | 1,2583 | 0,091 | 0      |
| 17 | P38159 HNRPG_HUMAN | R.SDLYSS#GRDR.V             | S337:    | 2 | 1,1321 | 0,103 | -0,197 |
| 17 | O75494 FUSIP_HUMAN | R.NVYSSSR.Y                 |          | 2 | 1,0721 | 0,088 | 0,525  |
| 17 | Q9H0B6 KLC2_HUMAN  | R.SGS#FGKLR.D               | S545:    | 2 | 1,0167 | 0,186 | -0,196 |
| 18 | Q9UQ35 SRRM2_HUMAN | K.SKDSLQVQSCPGSLCAGVK.S     |          | 2 | 7,0159 | 0,519 | -0,117 |
| 18 | Q15398 DLG7_HUMAN  | E.RM*S#LPLLAGGVADDINTNKKE.G | S725:    | 3 | 6,2257 | 0,509 | -0,156 |
| 18 | P60709 ACTB_HUMAN  | R.KDLYANTVLSGGTTM*YPGIADR.M |          | 3 | 6,1849 | 0,46  | -0,233 |
| 18 | Q7Z5K2 WAPL_HUMAN  | E.FFGFEDHETGGDEGGSGSSNYK.I  |          | 2 | 6,1418 | 0,547 | 0,105  |
| 18 | Q16555 DPYL2_HUMAN | R.NLHQSGFSLGAQIDDNIPR.R     |          | 2 | 5,9812 | 0,608 | 0      |
| 18 | Q15398 DLG7_HUMAN  | E.RM*S#LPLLAGGVADDINTNKK.E  | S725:    | 3 | 5,9799 | 0,485 | -0,166 |
| 18 | O95239 KIF4A_HUMAN | E.KVLYLLSQQSQM*AEK.Q        |          | 3 | 5,9785 | 0,53  | -0,09  |
| 18 | Q13501 SQSTM_HUMAN | R.NM*VHPNVICDGCNGPVVGTR.Y   |          | 3 | 5,8388 | 0,403 | -0,165 |
| 18 | P08238 HS90B_HUMAN | E.TALLSSGFSLEDPQTHSNR.I     |          | 2 | 5,8337 | 0,543 | 0,237  |
| 18 | Q13263 TIF1B_HUMAN | E.TKPVLM*ALAEGPGAEGPR.L     |          | 2 | 5,8011 | 0,472 | -0,404 |
| 18 | P07900 HS90A_HUMAN | E.TALLSSGFSLEDPQTHANR.I     |          | 2 | 5,7222 | 0,538 | 0,06   |
| 18 | Q9UQ35 SRRM2_HUMAN | K.SKDSLQVQSCPGSLCAGVK.S     |          | 3 | 5,6213 | 0,394 | 0,437  |
| 18 | P08651 NFIC_HUMAN  | E.LQGHLAYDLNPASTGLR.R       |          | 2 | 5,6111 | 0,505 | -0,2   |
| 18 | O95239 KIF4A_HUMAN | E.KVLYLLSQQSQM*AEK.Q        |          | 2 | 5,5322 | 0,508 | 0,362  |
| 18 | Q92974 ARHG2_HUMAN | E.M*THFQAEEDGGSGM*ALPTLPR.G |          | 2 | 5,4412 | 0,514 | 0,214  |
| 18 | Q8WU17 RN139_HUMAN | E.RNGVIQHTGAAAEFNDT#D.-     | T663:    | 3 | 5,3861 | 0,386 | 0,327  |
| 18 | Q8IWA0 WDR75_HUMAN | K.VQDTSNTGLGEDIIHQLSK.S     |          | 2 | 5,3815 | 0,568 | 0,356  |
| 18 | Q7Z5K2 WAPL_HUMAN  | E.FFGFEDHETGGDEGGSGSSNYK.I  |          | 3 | 5,3658 | 0,553 | 0,079  |

|    |                     |                                  |       |   |        |       |        |
|----|---------------------|----------------------------------|-------|---|--------|-------|--------|
| 18 | P45974 UBP5_HUMAN   | E.KIFQNAPTDPTQDFSTQVAK.L         |       | 3 | 5,3097 | 0,429 | -0,573 |
| 18 | Q9ULU4 PKCB1_HUMAN  | K.TDKTSTTGSILNLDNR.S             |       | 2 | 5,2796 | 0,584 | -0,132 |
| 18 | O15355 PPM1G_HUMAN  | E.GKEEPGSDSGTTAVVALIR.G          |       | 2 | 5,2294 | 0,558 | -0,065 |
| 18 | Q9ULH7 MKL2_HUMAN   | R.TREQLVDQGIM*PPLKS#PAAFHE.Q     | S66:  | 3 | 5,2243 | 0,356 | -0,071 |
| 18 | Q5TAX3 ZCH11_HUMAN  | E.LSQCNCIDLKSK#PDPDKSTGTDCR.S    | S841: | 3 | 5,2151 | 0,532 | 0,516  |
| 18 | Q6ZNB6 NFXL1_HUMAN  | E.KGSVAVPSGTPGGVATTAAGSR.H       |       | 3 | 5,208  | 0,492 | 0,341  |
| 18 | Q00839 HNRPU_HUMAN  | E.AGGRPAM*EPGNGLDLGGDSAGR.S      |       | 3 | 5,2028 | 0,472 | 0,17   |
| 18 | Q9Y6D5 BIG2_HUMAN   | E.LEKPIQSKPQSPVIQAAAVS#PK.F      | S227: | 3 | 5,1753 | 0,442 | 0,153  |
| 18 | P29590 PML_HUMAN    | E.VFLPNSNHVASGAGEAER.V           |       | 2 | 5,1637 | 0,624 | -0,123 |
| 18 | Q92598 HS105_HUMAN  | E.CLNQRPPENPDTDKNVQQDNSE.A       |       | 3 | 5,1502 | 0,426 | -0,634 |
| 18 | Q658Y4 F91A1_HUMAN  | D.LQHLCGYVTM*LNASSQLADR.K        |       | 3 | 5,1183 | 0,379 | -0,16  |
| 18 | O95684 FR1OP_HUMAN  | E.KGPTTGEGALDLSDVHS#PPKSPE.G     | S156: | 3 | 5,1051 | 0,442 | -0,458 |
| 18 | P30837 AL1B1_HUMAN  | R.KVGNPFELDTQQGPQVDKE.Q          |       | 3 | 5,0836 | 0,34  | -0,086 |
| 18 | Q58FG0 HS905_HUMAN  | K.HSQFIGYPITLFVEK.K              |       | 2 | 5,0603 | 0,54  | 0      |
| 18 | P35606 COPB2_HUMAN  | E.LDGKPAS#PTPVIVASHTANKE.E       | S859: | 3 | 5,0461 | 0,425 | -0,083 |
| 18 | P02533 K1C14_HUMAN  | R.LLEGEDAHLSSSQFSSGSQSSR.D       |       | 3 | 4,9991 | 0,405 | -0,238 |
| 18 | P68400 CSK21_HUMAN  | E.AM*EHYPFYTVVKD.Q               |       | 3 | 4,9924 | 0,367 | 0,226  |
| 18 | P12268 IMDH2_HUMAN  | K.DKYPNLQVIGGNVVTAQAQAK.N        |       | 3 | 4,9893 | 0,419 | -0,438 |
| 18 | P60709 ACTB_HUMAN   | R.KDLYANTVLSGGTTM*YPGIADR.M      |       | 2 | 4,9789 | 0,55  | 0      |
| 18 | A8K6V7 A8K6V7_HUMAN | E.KSTT#PPPAEPVSLPQEPKPR.V        | T227: | 3 | 4,9556 | 0,353 | -0,078 |
| 18 | P05362 ICAM1_HUMAN  | K.REPAVGEPAEVTTTVLVR.R           |       | 2 | 4,9434 | 0,483 | -0,317 |
| 18 | P00441 SODC_HUMAN   | R.HVGD LGNV TADK DGVADVSIE.D     |       | 2 | 4,937  | 0,62  | 0,116  |
| 18 | Q9Y4A5 TRRAP_HUMAN  | R.IKDQQPDSDM*DPNSSGEGVNSVSSSIK.R |       | 3 | 4,9291 | 0,451 | -0,064 |
| 18 | Q92882 OSTF1_HUMAN  | K.KLAFDM*ATNAACASLLK.K           |       | 2 | 4,926  | 0,517 | -0,398 |
| 18 | Q14697 GANAB_HUMAN  | R.VSQGSKDPAEGDGAQPEETPR.D        |       | 3 | 4,9254 | 0,229 | 0      |
| 18 | P12268 IMDH2_HUMAN  | D.KYPNLQVIGGNVVTAQAQAK.N         |       | 2 | 4,9219 | 0,44  | 0,186  |
| 18 | O43852 CALU_HUMAN   | K.VHNDASQFDYDHDAFLGAE.E          |       | 2 | 4,9046 | 0,486 | 0,321  |
| 18 | P08069 IGF1R_HUMAN  | E.GFVIHDGECM*QECPSGFIR.N         |       | 3 | 4,9039 | 0,395 | 0      |
| 18 | O15534 PER1_HUMAN   | R.KEPVVGGTLSPLALANK.A            |       | 2 | 4,8937 | 0,506 | -0,936 |
| 18 | Q9HB71 CYBP_HUMAN   | K.EKPSYDTETDPSEGLM*NVLK.K        |       | 3 | 4,8931 | 0,385 | 0,161  |
| 18 | Q13435 SF3B2_HUMAN  | E.TGKPLYGDVFGTNAAEFQTK.T         |       | 3 | 4,8707 | 0,417 | -0,512 |
| 18 | P49736 MCM2_HUMAN   | R.SKDAILLADLVDSCKPGDE.I          |       | 2 | 4,8706 | 0,492 | -0,119 |
| 18 | P26196 DDX6_HUMAN   | R.GPVKPTGGPGGGGTQTQQQM*NQLK.N    |       | 3 | 4,8436 | 0,313 | -0,154 |

|    |                     |                                       |        |   |        |       |        |
|----|---------------------|---------------------------------------|--------|---|--------|-------|--------|
| 18 | O00512 BCL9_HUMAN   | R.SSTPSHGQTTATEPTPAQKT#PAK.V          | T172:  | 3 | 4,8367 | 0,347 | -0,076 |
| 18 | Q14966 ZN638_HUMAN  | K.TSILAVSDVSSSKPSIK.A                 |        | 2 | 4,8327 | 0,433 | -0,781 |
| 18 | P49792 RBP2_HUMAN   | D.DSVSSSSVHASPLASS#PVRK.N             | S2251: | 3 | 4,8272 | 0,477 | -0,176 |
| 18 | Q6VMQ6 MCAF1_HUMAN  | K.NKQDDDLNCEPLS#PHNITPEPVSK.L         | S113:  | 3 | 4,8122 | 0,444 | 0,324  |
| 18 | P0C7M2 RA1L3_HUMAN  | R.GFAFVTFDDHDSVDK.I                   |        | 2 | 4,7943 | 0,469 | -0,431 |
| 18 | P11021 GRP78_HUMAN  | E.VVATNGDTHLGGEDFDQR.V                |        | 2 | 4,7919 | 0,528 | 0,063  |
| 18 | Q9NYJ8 TAB2_HUMAN   | R.KLS#M*GSDDAAYTQALLVHQK.A            | S524:  | 3 | 4,7831 | 0,278 | -0,725 |
| 18 | P63010 AP2B1_HUMAN  | K.LHDINAQM*VEDQGFLDSL.R.D             |        | 3 | 4,7794 | 0,483 | -0,083 |
| 18 | Q5VT25 MRCKA_HUMAN  | K.RQPM*PSPSEGLSSGGM*DQGS DAPAR.D      |        | 3 | 4,7718 | 0,434 | -0,417 |
| 18 | P00813 ADA_HUMAN    | R.LKNDQANYSLNTDDPLIFK.S               |        | 2 | 4,769  | 0,467 | 0,442  |
| 18 | Q58WW2 IQWD1_HUMAN  | E.KLS#PKPGTGEPVLSLHYSTE.G             | S467:  | 3 | 4,7618 | 0,335 | -0,082 |
| 18 | Q13200 PSMD2_HUMAN  | R.DKAPVQPQQS#PAAAPGGTDEKPSGK.E        | S16:   | 3 | 4,7567 | 0,342 | 0,216  |
| 18 | P62158 CALM_HUMAN   | E.AFSLFDKDGDTITTK.E                   |        | 2 | 4,7515 | 0,545 | -0,64  |
| 18 | A8K6V7 A8K6V7_HUMAN | E.KST#TPPPAEPVSLPQEPKPR.V             | T226:  | 3 | 4,7372 | 0,307 | 0,235  |
| 18 | P49750 YLPM1_HUMAN  | K.SQAEPKSGNKEPLADTSSNQK.N             |        | 3 | 4,7354 | 0,391 | 0      |
| 18 | Q1JQ81 Q1JQ81_HUMAN | R.NDPKPLPQPPAPANQDQNSSQNTR.L          |        | 3 | 4,7347 | 0,431 | -0,267 |
| 18 | P51114 FXR1_HUMAN   | R.KVPGVTAIELDEDTGTFR.I                |        | 3 | 4,7344 | 0,356 | 0      |
| 18 | A0FGR8 ESYT2_HUMAN  | K.SHM*SGSPGPGGSNTAPSTPVIGGSDKPGM*EE.K |        | 3 | 4,7275 | 0,479 | 0,062  |
| 18 | Q14157 UBP2L_HUMAN  | R.LAQM*ISDHNDADFEK.V                  |        | 2 | 4,7271 | 0,503 | -0,065 |
| 18 | Q68CQ4 DEF_HUMAN    | E.SGDNSSLKAS#QDPFLQHVNKE.L            | S186:  | 3 | 4,7108 | 0,354 | 0,154  |
| 18 | P00558 PGK1_HUMAN   | E.SPERPFLAILGGAK.V                    |        | 3 | 4,7069 | 0,424 | 0,126  |
| 18 | Q9NQC1 JADE2_HUMAN  | E.KGVQVPAGAEAIPEPVVR.I                |        | 2 | 4,6973 | 0,392 | -0,403 |
| 18 | Q13263 TIF1B_HUMAN  | E.TKPVLM*ALAEPGAEGPR.L                |        | 3 | 4,6942 | 0,302 | 0,808  |
| 18 | P48507 GSH0_HUMAN   | K.KIVAIGTSDLDKTQLE.Q                  |        | 2 | 4,6921 | 0,503 | -0,141 |
| 18 | Q8WUD4 CCD12_HUMAN  | R.LKGQEDSLASAVDAATEQK.T               |        | 2 | 4,6915 | 0,622 | -0,124 |
| 18 | Q5VSL9 FA40A_HUMAN  | R.AHSNPDFLPVDNCLQSVLQQR.V             |        | 3 | 4,6894 | 0,424 | -0,155 |
| 18 | P35606 COPB2_HUMAN  | E.LDGKPAS#PTPVIVASHTANKEE.K           | S859:  | 3 | 4,6889 | 0,443 | -0,078 |
| 18 | P13645 K1C10_HUMAN  | K.SKELTEIDNNIEQISSYK.S                |        | 3 | 4,6862 | 0,27  | -0,248 |
| 18 | Q92615 LARP5_HUMAN  | E.RTLSADASVNTLPVVVSR.E                |        | 2 | 4,6686 | 0,47  | -0,388 |
| 18 | Q92598 HS105_HUMAN  | E.LNNTCEPVVTQPKPK.I                   |        | 3 | 4,6674 | 0,365 | -1,272 |
| 18 | Q13200 PSMD2_HUMAN  | R.DKAPVQPQQS#PAAAPGGTDEKPSGKE.R       | S16:   | 3 | 4,6527 | 0,259 | 0      |
| 18 | Q9NQW6 ANLN_HUMAN   | K.TPIS#PLKTGVSKPIVK.S                 | S323:  | 3 | 4,6508 | 0,45  | 0      |
| 18 | Q8IZL8 PELP1_HUMAN  | E.RGADTAPTLAPEALPSQGEVER.E            |        | 3 | 4,6443 | 0,399 | -0,081 |

|    |                    |                                     |        |   |        |       |        |
|----|--------------------|-------------------------------------|--------|---|--------|-------|--------|
| 18 | Q13586 STIM1_HUMAN | E.GVHPGSLVEKLPDS#PALAK.K            | S575:  | 3 | 4,6243 | 0,399 | -0,275 |
| 18 | Q6PGN9 PSRC1_HUMAN | R.GLS#HRSDPNAVAPAPQGVR.L            | S47:   | 3 | 4,6222 | 0,305 | -1,184 |
| 18 | Q9C0C2 TB182_HUMAN | R.DSLGAYASQDANEQGQDLGKR.D           |        | 2 | 4,6217 | 0,536 | 0,11   |
| 18 | P04264 K2C1_HUMAN  | R.SLVNLTGGSKSISISVAR.G              |        | 3 | 4,613  | 0,392 | 0,217  |
| 18 | Q92616 GCN1L_HUMAN | R.KM*AAQIIGNM*YSLTDQKD.L            |        | 3 | 4,6041 | 0,389 | -0,444 |
| 18 | P09110 THIK_HUMAN  | K.KDGSSTAGNSSQVSDGAAAILLAR.R        |        | 3 | 4,5868 | 0,434 | -0,399 |
| 18 | P00441 SODC_HUMAN  | E.FGDNTAGCTSAGPHFNPLSR.K            |        | 2 | 4,5829 | 0,451 | -0,232 |
| 18 | Q16206 ENOX2_HUMAN | R.LRPPS#PPPVHYSDE.C                 | S240:  | 3 | 4,5719 | 0,387 | 0,192  |
| 18 | Q13813 SPTA2_HUMAN | R.LM*VHTVATFNSIKE.L                 |        | 3 | 4,5542 | 0,418 | 0,456  |
| 18 | P28066 PSA5_HUMAN  | E.IDAHIGCAM*SGLIADAK.T              |        | 3 | 4,5527 | 0,39  | -0,208 |
| 18 | Q9Y2U5 M3K2_HUMAN  | R.DRSS#PPPGYIPDELHQVAR.N            | S164:  | 3 | 4,5491 | 0,465 | -0,083 |
| 18 | Q15366 PCBP2_HUMAN | K.GVTIPYRPKSSS#PVIFAGGQDR.Y         | S189:  | 3 | 4,5286 | 0,417 | -0,292 |
| 18 | Q8WYL5 SSH1_HUMAN  | E.STRPDS#PALFVDKPTEGERTE.R          | S237:  | 3 | 4,5285 | 0,253 | 0      |
| 18 | P78371 TCPB_HUMAN  | R.SLHDALCVLAQTVKD.S                 |        | 2 | 4,5199 | 0,528 | 0      |
| 18 | Q9BY77 PDIP3_HUMAN | K.CNLHM*NGNVITSDQPILLR.L            |        | 3 | 4,517  | 0,286 | 0,165  |
| 18 | P12268 IMDH2_HUMAN | D.KYPNLQVIGGNVVTAAQAK.N             |        | 3 | 4,5153 | 0,431 | 0,464  |
| 18 | P62158 CALM_HUMAN  | K.EAFSLFDKDGDTITTK.E                |        | 2 | 4,4962 | 0,478 | 0,132  |
| 18 | P17980 PRS6A_HUMAN | E.VDERPTEQYSDIGGLDK.Q               |        | 3 | 4,4775 | 0,37  | 0,19   |
| 18 | Q9Y219 JAG2_HUMAN  | R.VIDGCGSDAGPGM*PGTAASGVCGPHGR.C    |        | 3 | 4,473  | 0,513 | 0,072  |
| 18 | P00558 PGK1_HUMAN  | K.VADKIQLINNM*LDKVNE.M              |        | 2 | 4,4686 | 0,438 | 0,062  |
| 18 | P49815 TSC2_HUMAN  | E.GGRPSVDLSFQPSQPLSK.S              |        | 2 | 4,4639 | 0,379 | -0,385 |
| 18 | P61978 HNRPK_HUMAN | R.LLIHQSLAGGIIGVK.G                 |        | 2 | 4,4529 | 0,473 | -0,562 |
| 18 | Q15942 ZYX_HUMAN   | E.ADDNCGFPLDGHVLCR.K                |        | 2 | 4,4474 | 0,462 | -0,264 |
| 18 | Q12809 KCNH2_HUMAN | R.RLS#LPGQLGALTSQPLHR.H             | S1137: | 3 | 4,4381 | 0,255 | -0,452 |
| 18 | P07195 LDHB_HUMAN  | E.M*M*DLQHGSFLQTPK.I                |        | 3 | 4,4315 | 0,344 | -0,514 |
| 18 | Q58FF7 H90B3_HUMAN | K.HSQFIGYPITLYLEK.E                 |        | 2 | 4,4282 | 0,541 | 0      |
| 18 | Q09160 1A80_HUMAN  | E.DGSHTIQIM*YGCDVGS DGR.F           |        | 3 | 4,4271 | 0,471 | -0,088 |
| 18 | P62158 CALM_HUMAN  | R.VFDKDGNGYISAAELR.H                |        | 2 | 4,4228 | 0,534 | -0,07  |
| 18 | P35606 COPB2_HUMAN | E.LDGKPAS#PTPVIVASHTANK.E           | S859:  | 3 | 4,4211 | 0,481 | 0      |
| 18 | Q07617 SPAG1_HUMAN | R.RAS#AAAAAAGGGATGHPGGGQGAENPAGLK.S | S423:  | 3 | 4,417  | 0,411 | 0,288  |
| 18 | Q9H4Z3 PCIF1_HUMAN | K.AVHNTAVLFLQNDPGFAK.W              |        | 3 | 4,4158 | 0,335 | -0,188 |
| 18 | Q9UHB7 AFF4_HUMAN  | E.KELLS#PLSEPDDRYPLIVK.I            | S703:  | 3 | 4,3927 | 0,376 | -0,239 |
| 18 | Q96BT3 CENPT_HUMAN | R.KTQSSGPGQLQKNS#PGKPAQFLAGEAEE.V   | S288:  | 3 | 4,3889 | 0,286 | 0,71   |



|    |                     |                               |              |   |        |       |        |
|----|---------------------|-------------------------------|--------------|---|--------|-------|--------|
| 18 | P28290 SSFA2_HUMAN  | E.GEAPHVPATYQLGLTK.S          |              | 3 | 4,3865 | 0,39  | 0,326  |
| 18 | Q8WUD4 CCD12_HUMAN  | R.LKGQEDSLASAVDAATEQK.T       |              | 3 | 4,3764 | 0,29  | -0,093 |
| 18 | Q8N8S7 ENAH_HUMAN   | E.DNRPLTGLAAAIAAGAK.L         |              | 3 | 4,3666 | 0,166 | 0,356  |
| 18 | O60506 HNRPO_HUMAN  | E.IYVAGLVVAHSDLDER.A          |              | 2 | 4,366  | 0,498 | 0,074  |
| 18 | P43897 EFTS_HUMAN   | R.RLGQHVVM*APLSVGLDDEPGGAE.T  |              | 3 | 4,3603 | 0,47  | -0,486 |
| 18 | A8MZB9 A8MZB9_HUMAN | K.LFVGGIKEDTEEYNLR.D          |              | 2 | 4,3549 | 0,528 | -0,194 |
| 18 | Q15691 MARE1_HUMAN  | K.FFDANYDGKDYDPVAAR.Q         |              | 3 | 4,3542 | 0,388 | -0,093 |
| 18 | O15355 PPM1G_HUMAN  | R.NKNLPPEEQM*ISALPDIK.V       |              | 2 | 4,3532 | 0,455 | -0,119 |
| 18 | Q8NEN9 PDZD8_HUMAN  | K.RVPTTSLIKPLGAIS#PVLNR.K     | S538:        | 3 | 4,3417 | 0,453 | -0,413 |
| 18 | P30048 PRDX3_HUMAN  | K.NGGLGHM*NIALLSDLTK.Q        |              | 3 | 4,332  | 0,349 | -0,413 |
| 18 | Q8WUA2 PPIL4_HUMAN  | E.TFVDKDFVPYQDIR.I            |              | 2 | 4,3312 | 0,456 | 0      |
| 18 | Q05209 PTN12_HUMAN  | E.NM*ISSIEPEKQDS#PPPKPPR.T    | S332:        | 3 | 4,327  | 0,422 | -0,156 |
| 18 | Q9BYG3 MK67I_HUMAN  | K.KGIDYDFPSLILQK.T            |              | 2 | 4,3262 | 0,366 | -0,224 |
| 18 | Q9P270 SLAI2_HUMAN  | R.LSLQGHPTDLQTSNVKNEE.K       |              | 3 | 4,3252 | 0,362 | -0,26  |
| 18 | P08779 K1C16_HUMAN  | K.TEELNKEVASNELVQSSR.S        |              | 3 | 4,3216 | 0,409 | 0      |
| 18 | P50548 ERF_HUMAN    | R.YLQAHTQSVVNYHLS#PR.A        | S327:        | 3 | 4,3175 | 0,349 | 0,085  |
| 18 | P00813 ADA_HUMAN    | R.LKNDQANYSLNTDDPLIFK.S       |              | 3 | 4,3129 | 0,342 | -0,083 |
| 18 | Q8NFZ5 TNIP2_HUMAN  | R.NVGERS#PDQSEHTDGHTSVQSVIE.K | S186:        | 3 | 4,3071 | 0,408 | 0      |
| 18 | Q6UN15 FIP1_HUMAN   | R.RLPGAIDVIGQTITISR.V         |              | 2 | 4,3065 | 0,44  | -0,202 |
| 18 | P17706 PTN2_HUMAN   | E.LSKEDLSPAFDHS#PNKIM*TE.K    | S304:        | 3 | 4,3058 | 0,381 | 0,233  |
| 18 | Q9NVM9 CL011_HUMAN  | E.AEIIKDSPDS#PEPPNKKPLVE.M    | S626:        | 3 | 4,3027 | 0,204 | 0,154  |
| 18 | Q9NQS7 INCE_HUMAN   | E.RVLAPILPDNFSTPTGSR.T        |              | 2 | 4,3014 | 0,488 | -0,189 |
| 18 | O00154 BACH_HUMAN   | K.TNIVTASVDAINFHDK.I          |              | 2 | 4,3002 | 0,55  | -0,489 |
| 18 | Q5VT52 K0460_HUMAN  | E.M*M*DKPTSSSVDTM*SLLSK.I     |              | 3 | 4,2967 | 0,331 | -0,638 |
| 18 | Q9H0E9 BRD8_HUMAN   | E.ADVAIGKGETPLTNVK.T          |              | 2 | 4,2693 | 0,48  | -0,282 |
| 18 | Q8IY57 YAF2_HUMAN   | K.SPPASSAASADQHSQSGSSDNTER.G  |              | 3 | 4,2677 | 0,367 | 0,52   |
| 18 | Q9BQA1 MEP50_HUMAN  | E.HDDIVSTVSVLSSGTQAVSGSK.D    |              | 3 | 4,2657 | 0,364 | -0,589 |
| 18 | Q86TC9 MYPN_HUMAN   | K.TPEPS#SPVKEPPPVLAKPK.L      | S643:        | 3 | 4,264  | 0,443 | -0,352 |
| 18 | Q9H4A3 WNK1_HUMAN   | E.KQSSTPGSLFLSPPAPAK.N        |              | 3 | 4,2564 | 0,27  | -0,096 |
| 18 | P18206 VINC_HUMAN   | R.ALASQLQDSLKDLK.A            |              | 2 | 4,252  | 0,261 | -0,638 |
| 18 | P55196 AFAD_HUMAN   | R.ADHRSS#PNVANQPPS#PGGK.S     | S1156:S1165: | 3 | 4,2423 | 0,294 | -0,176 |
| 18 | O75064 DEN4B_HUMAN  | E.AGSSQAEPYLERPS#PTRPLQR.Q    | S932:        | 3 | 4,2327 | 0,28  | -0,151 |
| 18 | Q3V6T2 GRDN_HUMAN   | R.DGLHFLPHASSSAQSPCGS#PGM*K.R | S237:        | 3 | 4,2295 | 0,348 | -0,074 |

|    |                     |                             |            |   |        |       |        |
|----|---------------------|-----------------------------|------------|---|--------|-------|--------|
| 18 | O15534 PER1_HUMAN   | R.KEPVVGGTSLPLANK.A         |            | 3 | 4,2194 | 0,328 | -1,188 |
| 18 | Q13263 TIF1B_HUMAN  | K.LTEDKADVQSIIGLQR.F        |            | 2 | 4,218  | 0,453 | -0,137 |
| 18 | Q01196 RUNX1_HUMAN  | R.ASLNHSTAFNPQPQSQM*QDTR.Q  |            | 3 | 4,2126 | 0,217 | -0,154 |
| 18 | Q9H488 OFUT1_HUMAN  | R.FGNQADHFLGSLAFK.L         |            | 2 | 4,2122 | 0,578 | -0,354 |
| 18 | Q9H6F5 CCD86_HUMAN  | E.FESNPEETREPGSPPSVQR.A     |            | 3 | 4,2118 | 0,325 | 0,085  |
| 18 | Q01581 HMCS1_HUMAN  | E.GVGLVHSNIATEHIPS#PAK.K    | S495:      | 3 | 4,2079 | 0,414 | 0,273  |
| 18 | P27635 RL10_HUMAN   | K.AKVDEFPLCGHM*VSDE.Y       |            | 2 | 4,2076 | 0,296 | 0,066  |
| 18 | Q92538 GBF1_HUMAN   | E.CIGSGVKPPAALQATAR.A       |            | 3 | 4,206  | 0,463 | 0,323  |
| 18 | P29401 TKT_HUMAN    | K.SKDDQVTVIGAGVTLHE.A       |            | 2 | 4,2059 | 0,586 | -0,276 |
| 18 | P11021 GRP78_HUMAN  | K.VTHAVVTVPAYFNDAQR.Q       |            | 2 | 4,2013 | 0,463 | -0,129 |
| 18 | P42574 CASP3_HUMAN  | K.IIHGSESM*DSGISLDNSYK.M    |            | 3 | 4,1995 | 0,359 | -0,265 |
| 18 | O94903 PROSC_HUMAN  | K.CAADVKAPLEVAQEH.-         |            | 3 | 4,1932 | 0,415 | -0,112 |
| 18 | Q14596 NBR1_HUMAN   | R.GAEGKPGVEAGQEPAEAGER.L    |            | 3 | 4,1876 | 0,218 | 0      |
| 18 | Q9Y2L5 TRS85_HUMAN  | K.YYVLLHDVSAGDEQR.A         |            | 3 | 4,1809 | 0,344 | 0,104  |
| 18 | A0MZ66 SHOT1_HUMAN  | R.QSHLLQSSIPDQQLK.A         |            | 2 | 4,1809 | 0,45  | 0,063  |
| 18 | Q96P11 NSUN5_HUMAN  | E.VHYILLDPSCSGSGM*PSR.Q     |            | 3 | 4,1788 | 0,382 | -0,826 |
| 18 | Q13263 TIF1B_HUMAN  | E.RLDLDTADSQPPVFK.V         |            | 3 | 4,1754 | 0,23  | 0,202  |
| 18 | Q58FF7 H90B3_HUMAN  | K.VILHLKEDQTEYLEE.R         |            | 2 | 4,1681 | 0,442 | -0,197 |
| 18 | P31150 GDIA_HUMAN   | R.KFLVFVANFDENDPK.T         |            | 3 | 4,1667 | 0,23  | -0,308 |
| 18 | Q9BQQ3 GR65_HUMAN   | E.LTTTAVSTSGPEDICSSSSSHER.G |            | 2 | 4,1664 | 0,562 | 0,405  |
| 18 | Q14674 ESPL1_HUMAN  | E.VCPTESKPEVPQAPR.V         |            | 2 | 4,1643 | 0,344 | 0,072  |
| 18 | P52435 RPB11_HUMAN  | K.SQLLKDPQVLFAGYK.V         |            | 3 | 4,163  | 0,374 | -0,214 |
| 18 | Q14596 NBR1_HUMAN   | E.TVIRS#LTLDAAPDHNPPCR.Q    | S656:      | 3 | 4,1608 | 0,249 | -0,248 |
| 18 | Q9BXF6 RFIP5_HUMAN  | R.SSLCVNGSHIYNNEEPQGPVR.H   |            | 3 | 4,1607 | 0,277 | 0,245  |
| 18 | Q14697 GANAB_HUMAN  | R.VSQGSKDPAEGDGAQPEETPR.D   |            | 2 | 4,1419 | 0,496 | 0      |
| 18 | P17706 PTN2_HUMAN   | E.LSKEDLSPAFDHS#PNKIM*TE.K  | S304:      | 2 | 4,1351 | 0,503 | 0,622  |
| 18 | A8K630 A8K630_HUMAN | R.LQQQHSEQPPLQPSPVTRR.R     |            | 3 | 4,134  | 0,402 | 0,337  |
| 18 | P11021 GRP78_HUMAN  | K.VTHAVVTVPAYFNDAQR.Q       |            | 3 | 4,1297 | 0,246 | -0,097 |
| 18 | Q9H008 LHPP_HUMAN   | E.AHQAVM*IGDDIVGDVGAQR.C    |            | 3 | 4,1254 | 0,237 | 0,09   |
| 18 | P54709 AT1B3_HUMAN  | R.SDPTSYAGYIEDLKK.F         |            | 2 | 4,1196 | 0,427 | -0,289 |
| 18 | Q9UGV2 NDRG3_HUMAN  | R.SRT#HSTSS#SLGSGESPFPSR.S  | T329:S334: | 3 | 4,1193 | 1     | -0,344 |
| 18 | P20020 AT2B1_HUMAN  | K.SLDKDLLLSGTHVM*E.G        |            | 2 | 4,1174 | 0,455 | -0,413 |
| 18 | Q6ZRS2 SRCAP_HUMAN  | E.KYSDLLSQSLNQPLTSSK.A      |            | 3 | 4,1172 | 0,407 | -0,546 |

|    |                    |                                 |        |   |        |       |        |
|----|--------------------|---------------------------------|--------|---|--------|-------|--------|
| 18 | P11216 PYGB_HUMAN  | E.LKQAVDQISSGFFSPK.E            |        | 3 | 4,1109 | 0,253 | -0,209 |
| 18 | Q6UN15 FIP1_HUMAN  | R.RLPGAIDVIGQTITISR.V           |        | 3 | 4,1092 | 0,343 | 0      |
| 18 | Q9HB20 PKHA3_HUMAN | R.TYS#DTSDCSDIPLDPDRPVHCSK.N    | S244:  | 3 | 4,1048 | 0,408 | -0,318 |
| 18 | O43379 WDR62_HUMAN | R.NDAGEKLPVSM*AGVPAR.R          |        | 3 | 4,0994 | 0,429 | -0,212 |
| 18 | Q14155 ARHG7_HUMAN | K.SGTLKS#PPKGFDTTAINK.S         | S257:  | 3 | 4,0984 | 0,301 | 0,283  |
| 18 | Q8NCF5 NF2IP_HUMAN | E.VLSRDS#PLKTLM*SHYEE.A         | S369:  | 3 | 4,0932 | 0,267 | 0      |
| 18 | O95466 FMNL_HUMAN  | E.AGADTPGKGEPPAPKS#PPK.A        | S1031: | 3 | 4,0918 | 0,373 | 0,097  |
| 18 | P35568 IRS1_HUMAN  | E.LAAHSSLLGGPQGPQGM*SAFTR.V     |        | 3 | 4,0906 | 0,389 | -0,258 |
| 18 | Q99973 TEP1_HUMAN  | E.SDASM*DSDASM*DSEPTHLK.T       |        | 3 | 4,0874 | 0,345 | -0,68  |
| 18 | O00571 DDX3X_HUMAN | E.KYDDIPVEATGNNCPPHIE.S         |        | 3 | 4,0867 | 0,214 | -0,253 |
| 18 | P62158 CALM_HUMAN  | E.AFSLFDKDGDTITTK.E.L           |        | 3 | 4,0787 | 0,395 | 0,496  |
| 18 | Q9Y4G8 RPGF2_HUMAN | R.KGYTLAPSGTVDNFSDSGHSE.I       |        | 3 | 4,078  | 0,253 | 0,169  |
| 18 | Q8N163 K1967_HUMAN | K.ALVSHNGSLINVGSLQR.A           |        | 2 | 4,0725 | 0,536 | 0,195  |
| 18 | P25787 PSA2_HUMAN  | E.DAIHTAILTLKE.S                |        | 3 | 4,0673 | 0,216 | 0,69   |
| 18 | Q9HC35 EMAL4_HUMAN | R.ASPSPQPSSQPLQIHR.Q            |        | 2 | 4,0643 | 0,417 | -0,353 |
| 18 | O75886 STAM2_HUMAN | E.FQKDPQFSLISATIK.S             |        | 3 | 4,0641 | 0,101 | -0,425 |
| 18 | P26006 ITA3_HUMAN  | R.TGAVYLCPLTAHKDDCE.R           |        | 2 | 4,0616 | 0,449 | -0,125 |
| 18 | Q9NVS9 PNPO_HUMAN  | K.SSQIGAVVSHQSSVIPDRE.Y         |        | 2 | 4,0572 | 0,556 | 0,245  |
| 18 | O14641 DVL2_HUMAN  | E.RHLAGYESS#STLM*TSE.L          | S195:  | 2 | 4,0517 | 0,505 | -0,131 |
| 18 | O00429 DNM1L_HUMAN | K.GHAVNLLDVPVVAR.K              |        | 2 | 4,0425 | 0,496 | -0,392 |
| 18 | O75351 VPS4B_HUMAN | K.LQNQLQGAIVIERPNVK.W           |        | 2 | 4,042  | 0,393 | 0,127  |
| 18 | P18887 XRCC1_HUMAN | K.TKPTQAAGPSS#PQKPPTPEETK.A     | S447:  | 3 | 4,0408 | 0,317 | -0,078 |
| 18 | Q9C0D2 K1731_HUMAN | R.LKLS#PNKYQPIQPIQTSK.L         | S654:  | 3 | 4,0353 | 0,306 | -0,085 |
| 18 | P62424 RL7A_HUMAN  | R.LKVPPAINQFTQALDR.Q            |        | 3 | 4,0315 | 0,324 | -0,707 |
| 18 | Q15084 PDIA6_HUMAN | K.VKLAAVDATVNQVLASR.Y           |        | 3 | 4,0211 | 0,177 | -0,313 |
| 18 | O95359 TACC2_HUMAN | K.KQALYLM*FDTSQESPVK.S          |        | 3 | 4,0192 | 0,322 | -0,183 |
| 18 | Q99536 VAT1_HUMAN  | E.NGVTHPIDYHTTDYVDE.I           |        | 2 | 4,0175 | 0,53  | 0,062  |
| 18 | O60841 IF2P_HUMAN  | R.APIICVLGHVDTGK.T              |        | 2 | 4,0155 | 0,604 | -0,495 |
| 18 | Q9UPN3 MACF1_HUMAN | R.SSSASQSNHSCTSM*PSSPATPASGTK.V |        | 3 | 4,0152 | 0,476 | 0,207  |
| 18 | Q9HB07 MYG1_HUMAN  | E.KLASCDIVVDVGGEYDPR.R          |        | 3 | 4,0045 | 0,347 | 0      |
| 18 | P35908 K22E_HUMAN  | R.TSQNSELNNM*QDLVEDYKK.K        |        | 3 | 3,9953 | 0,373 | -0,242 |
| 18 | O75534 CSDE1_HUMAN | R.LFFHCSQYNGNLQDLK.V            |        | 3 | 3,9898 | 0,185 | -0,277 |
| 18 | P06748 NPM_HUMAN   | D.M*SPLRPQNYLFGCELK.A           |        | 3 | 3,9813 | 0,329 | 0      |

|    |                    |                                |        |   |        |       |        |
|----|--------------------|--------------------------------|--------|---|--------|-------|--------|
| 18 | O15355 PPM1G_HUMAN | R.NKNLPPEEQM*ISALPDIK.V        |        | 3 | 3,9773 | 0,378 | -0,089 |
| 18 | Q15154 PCM1_HUMAN  | E.YM*AFPKPFESS#SIGAEKPR.N      | S1186: | 3 | 3,9705 | 0,332 | -0,236 |
| 18 | Q92538 GBF1_HUMAN  | E.CTSPADHS#DSASVHDM*DYVNPR.G   | S367:  | 3 | 3,97   | 0,275 | -0,215 |
| 18 | Q9H4A3 WNK1_HUMAN  | R.DVDDGSGSPHS#PHQLSSK.S        | S2032: | 3 | 3,9699 | 0,366 | 0,379  |
| 18 | Q09666 AHNK_HUMAN  | K.APKIS#IPDVDLCLKGPK.V         | S4850: | 3 | 3,9676 | 0,382 | -0,097 |
| 18 | P41091 IF2G_HUMAN  | E.VDDLKGGVAGGSILK.G            |        | 3 | 3,9675 | 0,399 | 0,576  |
| 18 | P13804 ETFA_HUMAN  | E.HANDSLAPITLNTITAATR.L        |        | 3 | 3,9546 | 0,451 | -0,185 |
| 18 | O95684 FR1OP_HUMAN | E.KGPTTGEGALDLSDVHSPPKS#PE.G   | S160:  | 3 | 3,9513 | 0,263 | 0,153  |
| 18 | Q9NZM1 MYOF_HUMAN  | R.DQLRPTQLLNVAR.F              |        | 3 | 3,945  | 0,319 | 0,221  |
| 18 | Q9BUH6 CI142_HUMAN | R.KS#PRPAGPQLFLPDPPQR.G        | S152:  | 3 | 3,942  | 0,349 | -0,417 |
| 18 | Q96T23 RSF1_HUMAN  | E.SEKPGS#PEAAETSPPSNIIDHCEK.L  | S612:  | 3 | 3,9372 | 0,308 | -0,344 |
| 18 | Q96T23 RSF1_HUMAN  | E.IKLS#DDFDSPVKGPLCK.S         | S382:  | 3 | 3,9368 | 0,354 | -0,549 |
| 18 | Q9H078 CLPB_HUMAN  | K.GCTALHYAVLADDYR.T            |        | 2 | 3,9331 | 0,461 | -1,061 |
| 18 | Q15154 PCM1_HUMAN  | E.YM*AFPKPFESS#SIGAEKPR.N      | S1187: | 3 | 3,9322 | 0,376 | -0,079 |
| 18 | Q9H4A3 WNK1_HUMAN  | E.KQSSTPGSLFLSPPAPAPK.N        |        | 2 | 3,9288 | 0,563 | -0,128 |
| 18 | Q7Z5L9 I2BP2_HUMAN | E.GRS#PPGAAASAAKPPPLSAK.D      | S71:   | 3 | 3,9274 | 0,355 | -0,185 |
| 18 | O00499 BIN1_HUMAN  | R.VNHEPEPAGGATPGATLPKS#PSQLR.K | S331:  | 3 | 3,9272 | 0,373 | -1,059 |
| 18 | O94979 SC31A_HUMAN | K.IALALNKVDGANVALK.D           |        | 2 | 3,9196 | 0,496 | -0,606 |
| 18 | Q5JVS0 HABP4_HUMAN | R.KSLPAPVAQRPS#PGGGLQAPGQK.R   | S108:  | 3 | 3,915  | 0,37  | -0,451 |
| 18 | Q9NWH9 SLTM_HUMAN  | E.VSKPLPSEGS#LAEADHTAHEE.M     | S217:  | 3 | 3,9127 | 0,302 | -0,16  |
| 18 | Q9NTI5 PDS5B_HUMAN | K.TTNVLGAVNKPLSSAGK.Q          |        | 2 | 3,9103 | 0,434 | -1,031 |
| 18 | Q04760 LGUL_HUMAN  | R.GFGHIGIAVPDVYSACK.R          |        | 2 | 3,9046 | 0,527 | -0,341 |
| 18 | Q02952 AKA12_HUMAN | K.LTAS#EQAHPQEPAESAEPR.L       | S353:  | 3 | 3,8811 | 0,4   | -0,646 |
| 18 | P18615 NELFE_HUMAN | R.KGNTLYVYGEDM*TPTLLR.G        |        | 3 | 3,8765 | 0,256 | -0,614 |
| 18 | Q7Z6M1 RABEK_HUMAN | R.TFHTSSAAIGNQLYVFGGGER.G      |        | 3 | 3,8699 | 0,25  | 0,413  |
| 18 | Q15418 KS6A1_HUMAN | E.KKAYS#FCGTVE.Y               | S221:  | 2 | 3,8692 | 0,465 | -0,089 |
| 18 | P46013 KI67_HUMAN  | K.IACRS#PQPDPVGTPTIFKQSK.R     | S2223: | 3 | 3,8668 | 0,202 | -1,242 |
| 18 | P78527 PRKDC_HUMAN | R.ATQQQHDFTLTQTADGR.S          |        | 3 | 3,8642 | 0,289 | -0,286 |
| 18 | P19634 SL9A1_HUMAN | K.INNYLTVPAHKLDS#PTM*SR.A      | S693:  | 3 | 3,8606 | 0,192 | 0,162  |
| 18 | P27816 MAP4_HUMAN  | E.EGRPVVSGTGNDITPPNK.E         |        | 2 | 3,8601 | 0,418 | 0,44   |
| 18 | Q9Y618 NCOR2_HUMAN | E.AAKPPEPEKPV#PPPIESK.H        | S215:  | 3 | 3,8485 | 0,379 | 0,088  |
| 18 | O00562 PITM1_HUMAN | E.FGPVRDPLADGVEGLGR.G          |        | 3 | 3,8481 | 0,288 | -0,313 |
| 18 | Q8NCF5 NF2IP_HUMAN | E.VSLS#RDSPLKTLM*SHYEE.A       | S366:  | 3 | 3,8476 | 0,105 | 0,084  |

|    |                     |                                    |            |   |        |       |        |
|----|---------------------|------------------------------------|------------|---|--------|-------|--------|
| 18 | Q6KC79 NIPBL_HUMAN  | K.GSRPPLILQSQSLPCSSPR.D            |            | 3 | 3,8468 | 0,275 | -0,264 |
| 18 | Q9C0C2 TB182_HUMAN  | E.AADSDAHLFQDSTEPR.A               |            | 2 | 3,8451 | 0,54  | -0,069 |
| 18 | P08648 ITA5_HUMAN   | E.FYRPGTDGVSVLVGAPK.A              |            | 3 | 3,8447 | 0,245 | 0,415  |
| 18 | O60784 TOM1_HUMAN   | E.VKYEAPQATDGLAGALDAR.Q            |            | 3 | 3,8444 | 0,377 | 0,47   |
| 18 | Q15648 MED1_HUMAN   | E.ASKLPSTSDDCPAIGTPLR.D            |            | 3 | 3,8437 | 0,436 | 0      |
| 18 | Q6P1J9 CDC73_HUMAN  | R.STIKTDLDDITALK.Q                 |            | 2 | 3,8387 | 0,442 | -0,518 |
| 18 | Q9HCK8 CHD8_HUMAN   | R.M*NYM*QNHQAGAPAPSLSR.C           |            | 3 | 3,8298 | 0,243 | -0,274 |
| 18 | Q04637 IF4G1_HUMAN  | K.ITKPGSIDSNNQLFAPGGR.L            |            | 3 | 3,8265 | 0,262 | 0,186  |
| 18 | P00558 PGK1_HUMAN   | E.SPERPFLAILGGAK.V                 |            | 2 | 3,8222 | 0,376 | -0,335 |
| 18 | Q15648 MED1_HUMAN   | K.FKGNNQADTVDFSIIISVAGK.A          |            | 3 | 3,8203 | 0,375 | -0,26  |
| 18 | P61160 ARP2_HUMAN   | K.HM*VFLGGAVLADIM*K.D              |            | 2 | 3,8148 | 0,532 | -0,523 |
| 18 | Q04917 1433F_HUMAN  | E.DSYKDSTLIMQLLR.D                 |            | 2 | 3,8126 | 0,445 | 0,145  |
| 18 | O43390 HNRPR_HUMAN  | E.GLVDVILYHQPDDK.K                 |            | 2 | 3,812  | 0,424 | -0,454 |
| 18 | P47736 RPGP1_HUMAN  | E.DSVSTTSGGSSPGPS#RSPHPDAGK.L      | S629:      | 3 | 3,8115 | 0,385 | 0      |
| 18 | Q58FF8 H90B2_HUMAN  | E.LISNASDALDKIRYE.S                |            | 2 | 3,8112 | 0,524 | 0      |
| 18 | Q76M58 Q76M58_HUMAN | R.QAHLCVLASNCDEPM*YVK.L            |            | 2 | 3,8068 | 0,459 | 0,34   |
| 18 | P54727 RD23B_HUMAN  | K.QEKPAEKPAETPVAT#SPTATDSTSGDSSR.S | T159:      | 3 | 3,8025 | 0,432 | -0,726 |
| 18 | Q15293 RCN1_HUMAN   | E.LGERPPEDNQSFQYDHE.A              |            | 3 | 3,7853 | 0,305 | 0,089  |
| 18 | Q09666 AHNK_HUMAN   | K.ISM*PDLDLHLKS#PK.A               | S2397:     | 2 | 3,7851 | 0,343 | -0,578 |
| 18 | Q92738 US6NL_HUMAN  | R.GLAHPPSYSNPPVYHGNS#PK.H          | S642:      | 3 | 3,7839 | 0,283 | -0,499 |
| 18 | P08559 ODPA_HUMAN   | R.YHGHS#M*SDPGVS#YR.T              | S293:S300: | 2 | 3,7815 | 0,455 | -0,414 |
| 18 | P18583 SON_HUMAN    | K.DIHLDLPSNNNLVSK.D                |            | 2 | 3,7797 | 0,387 | -0,727 |
| 18 | Q9NVM9 CL011_HUMAN  | E.IIKDSPDS#PEPPNKKPLVE.M           | S626:      | 2 | 3,7794 | 0,298 | 0      |
| 18 | P22059 OSBP1_HUMAN  | R.GATVLPANTPGNVGSGKDQCCSGK.G       |            | 2 | 3,7779 | 0,399 | 0      |
| 18 | P35611 ADDA_HUMAN   | E.DGHRT#STSAVPNLFVPLNTNPK.E        | T480:      | 3 | 3,7742 | 0,24  | 0,374  |
| 18 | P27816 MAP4_HUMAN   | E.VALAKDM*ES#PTKLDVTLAK.D          | S280:      | 3 | 3,7726 | 0,506 | -0,344 |
| 18 | P51812 KS6A3_HUMAN  | E.FTAKT#PKDS#PGIPPSANAHQLFR.G      | T365:S369: | 3 | 3,7673 | 0,321 | 0,139  |
| 18 | Q9BXF6 RFIP5_HUMAN  | R.ALLDLQGHLDAAASR.S                |            | 2 | 3,7667 | 0,466 | -0,082 |
| 18 | Q9C004 SPY4_HUMAN   | R.LLDHM*APPPVADQASPR.A             |            | 3 | 3,7649 | 0,312 | -0,799 |
| 18 | O43660 PLRG1_HUMAN  | R.THDM*FVADNGKPVPLDEE.S            |            | 2 | 3,7643 | 0,547 | -0,361 |
| 18 | Q9Y2W2 WBP11_HUMAN  | K.GATAAPQRKS#EDDSAVPLAK.A          | S600:      | 3 | 3,7638 | 0,274 | -0,262 |
| 18 | P08779 K1C16_HUMAN  | R.LLEGEDAHLSSQQASGQSYSSR.E         |            | 3 | 3,7627 | 0,266 | 0,078  |
| 18 | Q29RF7 PDS5A_HUMAN  | R.IISVT#PVKNIDPVKNKE.I             | T1208:     | 3 | 3,7599 | 0,221 | -0,185 |

|    |                    |                                     |        |   |        |       |        |
|----|--------------------|-------------------------------------|--------|---|--------|-------|--------|
| 18 | Q9NQS7 INCE_HUMAN  | E.RVLAPILPDNFSTPTGSR.T              |        | 3 | 3,7591 | 0,308 | -0,094 |
| 18 | A3KN83 SBNO1_HUMAN | K.KSIDPDSIQSALLASGLGSK.R            |        | 3 | 3,758  | 0,381 | -0,276 |
| 18 | P07195 LDHB_HUMAN  | E.M*M*DLQHGSFLQTPK.I                |        | 2 | 3,7566 | 0,351 | 0,686  |
| 18 | Q14247 SRC8_HUMAN  | R.AKTQTPPVSPAPQTEER.L               |        | 3 | 3,7468 | 0,297 | -0,378 |
| 18 | P23634 AT2B4_HUMAN | K.SLDKDPM*LLSGTHVM*E.G              |        | 3 | 3,746  | 0,279 | -0,709 |
| 18 | Q15185 TEBP_HUMAN  | E.IDLFHCIDPNDSK.H                   |        | 3 | 3,7449 | 0,27  | 0,813  |
| 18 | P35606 COPB2_HUMAN | D.GKPAS#PTPVIVASHTANKEE.K           | S859:  | 3 | 3,7447 | 0,241 | 0,173  |
| 18 | P42892 ECE1_HUMAN  | K.DNFQDTLQVVTAYHR.T                 |        | 2 | 3,7403 | 0,53  | -0,743 |
| 18 | Q9ULU4 PKCB1_HUMAN | K.TDKTSTTGSILNLDLDR.S               |        | 3 | 3,7376 | 0,263 | -0,099 |
| 18 | O15304 SIVA_HUMAN  | E.GCAVVHLPES#PKPGPTGAPR.A           | S70:   | 3 | 3,7375 | 0,5   | -0,174 |
| 18 | Q16643 DREB_HUMAN  | R.VASASAGSCDVPS#PFNHRPGSHLD.S       | S312:  | 3 | 3,7303 | 0,368 | 0,144  |
| 18 | Q8N6N3 CA052_HUMAN | R.SVTRPAFLYNPLNK.Q                  |        | 3 | 3,723  | 0,277 | 0,226  |
| 18 | P51956 NEK3_HUMAN  | E.ASDSVDGGHDSVILDPER.L              |        | 2 | 3,722  | 0,445 | -0,326 |
| 18 | P22626 ROA2_HUMAN  | R.GFGFVTFDDHDPVDK.I                 |        | 2 | 3,7199 | 0,408 | -0,504 |
| 18 | P05362 ICAM1_HUMAN | K.REPAVGEPAEVTTTVLVR.R              |        | 3 | 3,7172 | 0,324 | 0      |
| 18 | O15027 SC16A_HUMAN | R.FTGSFDDDPDHRDPYGEE.V              |        | 3 | 3,7148 | 0,26  | -0,167 |
| 18 | Q14320 FA50A_HUMAN | K.SGPLNFVDVHDDVR.L                  |        | 2 | 3,712  | 0,42  | -0,302 |
| 18 | P51991 ROA3_HUMAN  | K.IFVGGIKEDTEEYNLR.D                |        | 3 | 3,7107 | 0,386 | -0,097 |
| 18 | Q92614 MY18A_HUMAN | E.DLHLQIDDIK.A                      |        | 3 | 3,7098 | 0,312 | -0,357 |
| 18 | P62158 CALM_HUMAN  | E.AFSLFDKDGDTITTKE.L                |        | 2 | 3,7038 | 0,501 | -0,132 |
| 18 | Q00987 MDM2_HUMAN  | R.HKSDS#ISLSFDE.S                   | S188:  | 2 | 3,7019 | 0,337 | -0,253 |
| 18 | Q9BQ52 RNZ2_HUMAN  | E.TM*TVYQIPIHSEQR.R                 |        | 2 | 3,6999 | 0,503 | -0,071 |
| 18 | Q9P258 RCC2_HUMAN  | K.AGGAADVITEPEHTKE.R                |        | 2 | 3,6983 | 0,412 | -0,531 |
| 18 | Q16555 DPYL2_HUMAN | R.NLHQSGFSLGAQIDDNIPR.R             |        | 3 | 3,6969 | 0,385 | 0,084  |
| 18 | Q9NVM9 CL011_HUMAN | E.IIKDSPDS#PEPPNKKPLVE.M            | S626:  | 3 | 3,6951 | 0,266 | -0,587 |
| 18 | O14639 ABLM1_HUMAN | E.SIYSRPGSSIPGS#PGHTIYAK.V          | S367:  | 3 | 3,6951 | 0,238 | 0,406  |
| 18 | Q9UMZ2 SYNG_HUMAN  | K.TSNSQHGNSAPSLLM*PLPGTK.A          |        | 3 | 3,6933 | 0,237 | -0,085 |
| 18 | Q92945 FUBP2_HUMAN | K.IGGDAATTVNNSTPDFGFGGQKR.Q         |        | 3 | 3,6932 | 0,399 | -0,317 |
| 18 | P06493 CDC2_HUMAN  | K.M*ALNHPYFNDLDNQIK.K               |        | 2 | 3,6922 | 0,331 | 0,376  |
| 18 | P35659 DEK_HUMAN   | E.GTPTQPASEKEPEM*PGPR.E             |        | 2 | 3,6872 | 0,472 | -0,127 |
| 18 | P12277 KCRB_HUMAN  | E.VFKDLFDPIIEDR.H                   |        | 3 | 3,6829 | 0,414 | 0,341  |
| 18 | Q5T4S7 UBR4_HUMAN  | R.TSPADHGGSVGSES#GGSAVDVAGEHSVSGR.S | S2897: | 3 | 3,6821 | 0,405 | 0      |
| 18 | Q6VY07 PACS1_HUMAN | K.IYSLSSQPIDHEGIK.S                 |        | 2 | 3,6787 | 0,429 | 0,072  |

|    |                    |                                |        |   |        |       |        |
|----|--------------------|--------------------------------|--------|---|--------|-------|--------|
| 18 | Q6GYQ0 GRIPE_HUMAN | R.RGS#SPGSLEIPKDLDPDILNK.Q     | S860:  | 3 | 3,6743 | 0,374 | 0,33   |
| 18 | P00558 PGK1_HUMAN  | K.VADKIQLINNM*LDKVNE.M         |        | 3 | 3,6678 | 0,28  | 0,464  |
| 18 | P52435 RPB11_HUMAN | K.SQLLKDPQVLFAGYK.V            |        | 2 | 3,6674 | 0,396 | -0,071 |
| 18 | Q9UHB7 AFF4_HUMAN  | E.KELLSPLS#EPDDRYPLIVK.I       | S706:  | 3 | 3,6669 | 0,428 | -0,319 |
| 18 | O00499 BIN1_HUMAN  | R.VNHEPEPAGGATPGATLPK.S        |        | 2 | 3,6668 | 0,464 | -0,53  |
| 18 | Q9NVS9 PNPO_HUMAN  | K.SSQIGAVVSHQSSVIPDRE.Y        |        | 3 | 3,6646 | 0,249 | 0,275  |
| 18 | Q9Y314 NOSIP_HUMAN | E.SAIVSRPLNPFTAK.A             |        | 2 | 3,6642 | 0,418 | -0,244 |
| 18 | P17812 PYRG1_HUMAN | E.DHPFFVGVQYHPE.F              |        | 3 | 3,6627 | 0,161 | 0,233  |
| 18 | Q92499 DDX1_HUMAN  | E.FTM*HDTIGCYLDIDK.G           |        | 3 | 3,6569 | 0,207 | -0,297 |
| 18 | P06730 IF4E_HUMAN  | K.IVIGYQSHADTATK.S             |        | 2 | 3,6555 | 0,612 | -0,568 |
| 18 | O95628 CNOT4_HUMAN | K.LNPNFLQLSTGSVDKNK.N          |        | 2 | 3,6552 | 0,185 | 0,065  |
| 18 | Q13425 SNTB2_HUMAN | E.GAAPQSPSFGSEDSGS#PKHQNSTKD.R | S233:  | 3 | 3,6496 | 0,274 | -0,205 |
| 18 | O60508 PRP17_HUMAN | R.CPLPAADSLM*HLTK.S            |        | 3 | 3,6478 | 0,428 | -0,116 |
| 18 | P29401 TKT_HUMAN   | K.SKDDQVTVIGAGVTLHE.A          |        | 3 | 3,6448 | 0,11  | 1,241  |
| 18 | Q99497 PARK7_HUMAN | K.VTVAGLAGKDPVQCSR.D           |        | 3 | 3,6395 | 0,466 | 1,213  |
| 18 | Q58FF8 H90B2_HUMAN | K.HSQFLGYPTILYLEK.E            |        | 3 | 3,6341 | 0,368 | 0,708  |
| 18 | O75152 ZC11A_HUMAN | R.RLS#SASTGKPLSVEDDFEK.L       | S758:  | 3 | 3,634  | 0,31  | 0      |
| 18 | P27797 CALR_HUMAN  | E.YNIM*FGPDCGPGTKK.V           |        | 2 | 3,6338 | 0,314 | 0,067  |
| 18 | Q969H4 CNKR1_HUMAN | E.LLREPAGLSLVLK.K              |        | 3 | 3,6332 | 0,39  | 0,13   |
| 18 | O95785 WIZ_HUMAN   | K.NPEDKSPQLSLSRPAS#PK.A        | S1017: | 3 | 3,6327 | 0,211 | -0,086 |
| 18 | Q58FG0 HS905_HUMAN | K.HSQFIGYPITLFEK.K             |        | 3 | 3,6299 | 0,316 | -0,103 |
| 18 | P35579 MYH9_HUMAN  | E.LDDLLVDLDHQR.Q               |        | 2 | 3,622  | 0,329 | -0,084 |
| 18 | Q08J23 NSUN2_HUMAN | R.LQQQRPEDAEDGAEGGGK.R         |        | 3 | 3,6218 | 0,451 | 0,182  |
| 18 | Q14247 SRC8_HUMAN  | R.M*DKNASTFEDVTQVSSAYQK.T      |        | 3 | 3,6181 | 0,178 | -0,565 |
| 18 | O43399 TPD54_HUMAN | R.AELTKVEEIVTLR.Q              |        | 3 | 3,6123 | 0,367 | -0,224 |
| 18 | Q2M218 AAK1_HUMAN  | R.RILS#DVTHSAVFGVPASK.S        | S637:  | 3 | 3,6101 | 0,267 | -0,373 |
| 18 | P00558 PGK1_HUMAN  | K.LGDVYVNDAFGTAHR.A            |        | 3 | 3,6097 | 0,478 | 0,224  |
| 18 | Q14677 EPN4_HUMAN  | E.LSDKIGSTIDDTISK.F            |        | 2 | 3,6073 | 0,284 | 0      |
| 18 | P43243 MATR3_HUMAN | R.GPSLNPVLDYDHGSR.S            |        | 2 | 3,6061 | 0,512 | 0      |
| 18 | Q12791 KCMA1_HUMAN | R.HDPLLIPGNDQIDNM*DSNVK.K      |        | 3 | 3,6046 | 0,203 | -1,056 |
| 18 | P11172 PYR5_HUMAN  | E.NVFVAANHNGS#PLSIKEAPKE.L     | S214:  | 3 | 3,604  | 0,292 | -0,318 |
| 18 | O43166 SI1L1_HUMAN | E.NHRPLS#AASNSDQLE.D           | S1708: | 2 | 3,6031 | 0,575 | -0,284 |
| 18 | Q04917 1433F_HUMAN | E.DSYKDSTLIM*QLLR.D            |        | 2 | 3,6014 | 0,459 | -0,503 |

|    |                     |                              |              |   |        |       |        |
|----|---------------------|------------------------------|--------------|---|--------|-------|--------|
| 18 | P41250 SYG_HUMAN    | E.DKAPQVDVDKAVAE.L           |              | 3 | 3,5985 | 0,307 | 0,369  |
| 18 | Q4KMP7 TB10B_HUMAN  | R.RQQPPLGPSSLLSLPGLK.S       |              | 3 | 3,5958 | 0,398 | -0,834 |
| 18 | P04406 G3P_HUMAN    | K.VVKQASEGPLKGILGYTE.H       |              | 2 | 3,5945 | 0,431 | -0,129 |
| 18 | O75643 U520_HUMAN   | E.DLVFTQGSHEFM*ANK.R         |              | 2 | 3,591  | 0,403 | -0,454 |
| 18 | Q9Y5S2 MRCKB_HUMAN  | E.YFNTAPLAHDLTFR.T           |              | 2 | 3,5826 | 0,521 | -0,293 |
| 18 | O75376 NCOR1_HUMAN  | E.DRPSSTGSTQFPYNPLTM*R.M     |              | 3 | 3,5795 | 0,22  | 0      |
| 18 | O75116 ROCK2_HUMAN  | E.LQM*TLDSKSDIEQLR.S         |              | 2 | 3,5768 | 0,502 | 0,192  |
| 18 | Q9Y5S2 MRCKB_HUMAN  | K.HSTPSNSSNPSGPPS#PNS#PHR.S  | S1690:S1693: | 3 | 3,5748 | 0,386 | -0,318 |
| 18 | Q9NUQ6 SPS2L_HUMAN  | R.LLQQLS#LDGNPKPIHGTT.E.R    | S159:        | 3 | 3,5733 | 0,269 | 0,081  |
| 18 | P25205 MCM3_HUMAN   | R.ALKDFVASIDATYAK.Q          |              | 3 | 3,5705 | 0,41  | 0      |
| 18 | Q86TC9 MYPN_HUMAN   | R.ISCSGHELM*VQSLPIR.S        |              | 3 | 3,5702 | 0,327 | 0,32   |
| 18 | P53990 K0174_HUMAN  | E.TDLIDVGFTDDVKK.G           |              | 2 | 3,5699 | 0,451 | -0,234 |
| 18 | Q6BDS2 URFB1_HUMAN  | R.SDDGVFHIGAAAQDKPSAE.V      |              | 3 | 3,5682 | 0,142 | 0,191  |
| 18 | Q9P258 RCC2_HUMAN   | K.AGGAHVITEPEHTKE.R          |              | 3 | 3,568  | 0,332 | -0,114 |
| 18 | P68400 CSK21_HUMAN  | E.AM*EHPYFYTVVK.D            |              | 3 | 3,565  | 0,429 | 0,426  |
| 18 | O75116 ROCK2_HUMAN  | E.LQM*TLDSKSDIEQLR.S         |              | 3 | 3,5613 | 0,359 | 0,288  |
| 18 | P60709 ACTB_HUMAN   | E.EHPVLLTEAPLNPK.A           |              | 2 | 3,561  | 0,498 | -0,705 |
| 18 | P30048 PRDX3_HUMAN  | K.NGGLGHEM*NIALSDLT.K.Q      |              | 2 | 3,561  | 0,479 | -0,414 |
| 18 | Q96RT1 LAP2_HUMAN   | E.TSQS#PNRTEPHSDCSVDLGISK.S  | S832:        | 3 | 3,5579 | 0,388 | -0,07  |
| 18 | Q6ZRS2 SRCAP_HUMAN  | R.LPVSKDEPDTLTLR.S           |              | 3 | 3,5537 | 0,378 | 0,346  |
| 18 | Q04917 1433F_HUMAN  | E.DSYKDSLIM*QLLRD.N          |              | 2 | 3,55   | 0,387 | -0,135 |
| 18 | Q9NPI6 DCP1A_HUMAN  | K.SLQDTLIHLIK.N              |              | 2 | 3,5475 | 0,286 | -0,346 |
| 18 | Q5JT44 Q5JT44_HUMAN | E.GDNLETPS#QSPQLFHDDTHSRIE.Q | S126:        | 3 | 3,545  | 0,306 | 0,203  |
| 18 | P35579 MYH9_HUMAN   | K.VIQYLAVVASSHK.S            |              | 2 | 3,5423 | 0,52  | -0,412 |
| 18 | Q13813 SPTA2_HUMAN  | R.LM*VHTVATFNSIKE.L          |              | 2 | 3,5419 | 0,457 | -0,304 |
| 18 | P27824 CALX_HUMAN   | E.VEDSKPDTTAPPSSPK.V         |              | 2 | 3,5356 | 0,508 | -0,368 |
| 18 | O00499 BIN1_HUMAN   | R.VNHEPEPAGGATPGATLPK.S      |              | 3 | 3,5355 | 0,279 | -0,099 |
| 18 | P23786 CPT2_HUMAN   | R.YLSAQKPLLNDGQFR.K          |              | 2 | 3,5295 | 0,519 | -0,279 |
| 18 | Q15942 ZYX_HUMAN    | E.ADDNGCFPLDGHVLCR.K         |              | 3 | 3,5264 | 0,402 | 0,297  |
| 18 | P08670 VIME_HUMAN   | R.ETNLDLPLVDTHSK.R           |              | 2 | 3,5249 | 0,441 | -0,585 |
| 18 | Q9Y490 TLN1_HUMAN   | R.DDILNGSHPVSFDK.A           |              | 2 | 3,5226 | 0,384 | -0,395 |
| 18 | P42166 LAP2A_HUMAN  | K.GDLPREPLVATNLPGR.G         |              | 3 | 3,5205 | 0,208 | 0,536  |
| 18 | P54707 AT12A_HUMAN  | K.VIM*VTGDHPITAK.A           |              | 2 | 3,5149 | 0,421 | -0,175 |



|    |                    |                                        |          |   |        |       |        |
|----|--------------------|----------------------------------------|----------|---|--------|-------|--------|
| 18 | Q9C0C2 TB182_HUMAN | R.RGAGAEKDTQS#PSTCSE.G                 | S712:    | 2 | 3,5148 | 0,497 | -0,062 |
| 18 | Q8IYB3 SRRM1_HUMAN | K.VPKPEPIPEKPS#PEK.N                   | S260:    | 2 | 3,5141 | 0,207 | 0      |
| 18 | Q04917 1433F_HUMAN | E.DSYKDSTLIMQLLR.D                     |          | 3 | 3,5127 | 0,244 | 0      |
| 18 | Q6GYQ0 GRIPE_HUMAN | R.VRHFS#QSEETGNE.V                     | S773:    | 2 | 3,5105 | 0,43  | 0,076  |
| 18 | Q92882 OSTF1_HUMAN | K.KLAFDM*ATNAACASLLK.K                 |          | 3 | 3,5059 | 0,281 | 0      |
| 18 | Q96T23 RSF1_HUMAN  | K.LSDDFDSPVKGPLCK.S                    |          | 2 | 3,5032 | 0,488 | -0,509 |
| 18 | P55735 SEC13_HUMAN | E.DM*IHDAQM*DYYGTR.L                   |          | 3 | 3,5002 | 0,376 | -0,209 |
| 18 | P08670 VIME_HUMAN  | E.TNLDSLPLVDTHSK.R                     |          | 3 | 3,4946 | 0,439 | 0,475  |
| 18 | P05387 RLA2_HUMAN  | K.LASVPAGGAVAVSAAPGSAAPAAGSAPAAAEEKK.D |          | 3 | 3,4943 | 0,238 | -0,121 |
| 18 | P49815 TSC2_HUMAN  | E.GGRPSVDLSFQPSQPLSK.S                 |          | 3 | 3,4941 | 0,16  | 0,096  |
| 18 | O75794 CD123_HUMAN | K.DFVDLSTGEDAHK.L                      |          | 2 | 3,493  | 0,351 | -0,255 |
| 18 | Q12893 TM115_HUMAN | E.SGAKVDS#PLPSDKAPTPPGK.G              | S320:    | 3 | 3,4898 | 0,349 | 0,27   |
| 18 | Q14C86 GAPD1_HUMAN | R.LSAQAQVAEDILDKYR.N                   |          | 3 | 3,4854 | 0,471 | 0      |
| 18 | Q8NCF5 NF2IP_HUMAN | R.RLVLDPGEAPLVPVYSGK.V                 |          | 3 | 3,4845 | 0,196 | -0,096 |
| 18 | Q7Z406 MYH14_HUMAN | R.DQADFSVLHYAGK.V                      |          | 2 | 3,4841 | 0,452 | -0,084 |
| 18 | Q9H6Z4 RANB3_HUMAN | R.SVLRPAVLQAPQPK.A                     |          | 3 | 3,4833 | 0,253 | 0,061  |
| 18 | P12270 TPR_HUMAN   | E.GPVEHVPVFGSTSGSVR.S                  |          | 3 | 3,4829 | 0,391 | 0,534  |
| 18 | P40763 STAT3_HUMAN | E.SQEHPEADPGSAAPYLK.T                  |          | 2 | 3,4824 | 0,416 | -0,272 |
| 18 | Q6IFS5 HSN2_HUMAN  | E.FPSGQAFVLVGHQLNLR.L                  |          | 3 | 3,4798 | 0,461 | -0,308 |
| 18 | Q3KR37 GRM1B_HUMAN | R.KRS#RS#PTPQNQDGMT*VE.K               | S28:S30: | 3 | 3,478  | 0,335 | -0,082 |
| 18 | Q96HC4 PDLI5_HUMAN | R.ILAQITGTEHLKE.S                      |          | 2 | 3,4759 | 0,394 | -0,924 |
| 18 | O15355 PPM1G_HUMAN | E.GKEEPGSDSGTTAVVALIR.G                |          | 3 | 3,4755 | 0,259 | -0,194 |
| 18 | Q92499 DDX1_HUMAN  | E.HLNCTISQVEPDIKVPVDE.F                |          | 3 | 3,4751 | 0,3   | -0,083 |
| 18 | Q9UMN6 MLL4_HUMAN  | E.VVAHPGPEEQDSLLQR.K                   |          | 3 | 3,4744 | 0,275 | -0,927 |
| 18 | P00441 SODC_HUMAN  | E.FGDNTAGCTSAGPHFNPLSR.K               |          | 3 | 3,4706 | 0,358 | 0,347  |
| 18 | Q09666 AHNK_HUMAN  | K.M*SLPDVDLDLKGPK.M                    |          | 3 | 3,4689 | 0,166 | -0,474 |
| 18 | Q8NI35 INADL_HUMAN | E.NM*STGYHLGS#PTAEHHPEDTEE.Q           | S1782:   | 3 | 3,4679 | 0,286 | 0,144  |
| 18 | Q14160 LAP4_HUMAN  | E.VSPGVIANPFAAGIGHR.N                  |          | 2 | 3,4658 | 0,297 | 0,073  |
| 18 | P16401 H15_HUMAN   | E.TAPAETATPAPVEKS#PAKK.K               | S18:     | 2 | 3,4626 | 0,32  | -0,371 |
| 18 | Q13263 TIF1B_HUMAN | K.LTEDKADVQSIIGLQR.F                   |          | 3 | 3,4625 | 0,153 | 0,102  |
| 18 | P52594 NUPL_HUMAN  | K.SLLGDSAPTLHLNK.G                     |          | 2 | 3,4601 | 0,434 | -0,499 |
| 18 | P19484 TFEB_HUMAN  | K.FAAHISPAQGSPPPAAS#PGVR.A             | S122:    | 3 | 3,459  | 0,288 | -0,158 |
| 18 | P17655 CAN2_HUMAN  | E.ICNLTPDTLTSPTYKK.W                   |          | 3 | 3,4512 | 0,32  | 0      |

|    |                    |                             |            |   |        |       |        |
|----|--------------------|-----------------------------|------------|---|--------|-------|--------|
| 18 | P29084 T2EB_HUMAN  | K.ALGDQILFVNRPK.K           |            | 2 | 3,4505 | 0,241 | -0,538 |
| 18 | P04406 G3P_HUMAN   | E.GLM*TTVHAITATQK.T         |            | 2 | 3,449  | 0,433 | -0,984 |
| 18 | P11388 TOP2A_HUMAN | E.SDDFHM*DFDSAVAPR.A        |            | 3 | 3,447  | 0,27  | 0,53   |
| 18 | O75061 AUXI_HUMAN  | E.DVFHPSGPASTQSTPR.R        |            | 3 | 3,446  | 0,387 | 0,326  |
| 18 | O75821 EIF3G_HUMAN | E.DLNCQEEEDPM*NKLG.G        |            | 2 | 3,4431 | 0,231 | -0,909 |
| 18 | O43149 ZZEF1_HUMAN | E.KESPGDLTRS#PE.M           | S240:      | 2 | 3,4396 | 0,353 | 0,262  |
| 18 | Q8N163 K1967_HUMAN | K.ALVSHNGSLINVGSLLR.A       |            | 3 | 3,4388 | 0,161 | -0,097 |
| 18 | P04150 GCR_HUMAN   | K.SSASTAVSAAPEKEFPK.T       |            | 2 | 3,4383 | 0,413 | -0,067 |
| 18 | P46937 YAP1_HUMAN  | R.QASTDAGTAGALTPQHVR.A      |            | 3 | 3,4363 | 0,388 | -1,13  |
| 18 | Q14160 LAP4_HUMAN  | E.NAVTITLPRPEDDYS#PRER.R    | S835:      | 3 | 3,4349 | 0,42  | 0,079  |
| 18 | Q9UBK8 MTRR_HUMAN  | K.DVHDALVQIISK.E            |            | 2 | 3,4339 | 0,352 | 0,091  |
| 18 | P30084 ECHM_HUMAN  | K.LFYSTFATDDRKE.G           |            | 2 | 3,4295 | 0,46  | -0,766 |
| 18 | P08651 NFIC_HUMAN  | E.LQGHLAYDLNPASTGLR.R       |            | 3 | 3,4286 | 0,124 | 0,501  |
| 18 | O75376 NCOR1_HUMAN | E.AAKPPEPEKPV#PPPVEQK.H     | S224:      | 3 | 3,4283 | 0,294 | 0,608  |
| 18 | Q96RN5 MED15_HUMAN | K.SLLDILTDPK.C              |            | 2 | 3,4202 | 0,314 | -0,539 |
| 18 | Q9UQ35 SRRM2_HUMAN | R.M*SCFSRPSM*SPTPLDR.C      |            | 3 | 3,4201 | 0,258 | 0,192  |
| 18 | P61247 RS3A_HUMAN  | K.ACQSIYPLHDVFR.K           |            | 2 | 3,4189 | 0,414 | 0      |
| 18 | Q9UKV3 ACINU_HUMAN | E.KSKS#PS#PPRLTE.D          | S386:S388: | 3 | 3,4186 | 0,108 | -0,43  |
| 18 | P0C7M2 RA1L3_HUMAN | R.KLFIGGLSFETTDESLR.S       |            | 3 | 3,4159 | 0,174 | -0,287 |
| 18 | Q93008 USP9X_HUMAN | E.LFVGELIDPADDRK.L          |            | 2 | 3,4129 | 0,335 | -0,445 |
| 18 | Q9C0C2 TB182_HUMAN | R.DSLGAYASQDANEQGQDLGKR.D   |            | 3 | 3,4106 | 0,503 | 0,082  |
| 18 | Q99700 ATX2_HUMAN  | E.FVSHNPPSEAAPPPVAR.T       |            | 2 | 3,4084 | 0,484 | -0,206 |
| 18 | Q14185 DOCK1_HUMAN | E.NQDLLGSPTPPPPPHQR.H       |            | 3 | 3,4083 | 0,26  | -0,094 |
| 18 | Q13526 PIN1_HUMAN  | R.GQM*QKPFEDASFALR.T        |            | 3 | 3,4042 | 0,378 | 0,315  |
| 18 | P08670 VIME_HUMAN  | E.TNLDSLPLVDTHSK.R          |            | 2 | 3,4025 | 0,458 | -0,158 |
| 18 | O15427 MOT4_HUMAN  | E.KNGEVVHTPETS#V.-          | S464:      | 2 | 3,3994 | 0,43  | -0,165 |
| 18 | Q9UN86 G3BP2_HUMAN | R.NSSVYHGGVDASGKPEAVYGQND.I |            | 3 | 3,3969 | 0,418 | 0,074  |
| 18 | P12277 KCRB_HUMAN  | E.VFKDLFDPIIEDR.H           |            | 2 | 3,3967 | 0,444 | -0,38  |
| 18 | Q5T5C0 STXB5_HUMAN | R.KLS#LPTDLKPDLDVK.D        | S759:      | 3 | 3,3957 | 0,265 | 0,104  |
| 18 | O43719 HTSF1_HUMAN | R.TAEPPQEKAPEPTDAR.K        |            | 3 | 3,3953 | 0,194 | -0,588 |
| 18 | P25205 MCM3_HUMAN  | R.ALKDFVASIDATYAK.Q         |            | 2 | 3,3942 | 0,545 | -0,227 |
| 18 | Q9H2M9 RBGPR_HUMAN | E.DCLILQTLHLSK.G            |            | 2 | 3,3873 | 0,334 | -0,085 |
| 18 | Q9H7X7 RABL5_HUMAN | K.LVHSNLEDDPEEIRM*E.F       |            | 3 | 3,3851 | 0,258 | -0,283 |

|    |                     |                               |       |   |        |       |        |
|----|---------------------|-------------------------------|-------|---|--------|-------|--------|
| 18 | Q13428 TCOF_HUMAN   | E.ALAAM*NAAQVKPLGK.S          |       | 2 | 3,3848 | 0,468 | -0,407 |
| 18 | Q15942 ZYG_HUMAN    | K.VNPFPRPGDSEPPPAPGAQR.A      |       | 2 | 3,3833 | 0,41  | -0,429 |
| 18 | P40925 MDHC_HUMAN   | K.DVIATDKEDVAFK.D             |       | 2 | 3,3827 | 0,381 | -0,336 |
| 18 | Q02818 NUCB1_HUMAN  | K.FHPDTPDDVPVPAPAGDQKE.V      |       | 3 | 3,3816 | 0,131 | -0,09  |
| 18 | Q15418 KS6A1_HUMAN  | R.GFSFVATGLM*EDDGKPR.A        |       | 2 | 3,372  | 0,361 | -0,993 |
| 18 | P00441 SODC_HUMAN   | E.DSVISLSGDHCIIGR.T           |       | 2 | 3,3714 | 0,561 | -0,225 |
| 18 | Q3MII6 TBC25_HUMAN  | E.DAVDHLATASQGGGGGR.L         |       | 3 | 3,3702 | 0,381 | 0,11   |
| 18 | O94776 MTA2_HUMAN   | R.QKLNPADAPNPVVFVATK.D        |       | 3 | 3,3649 | 0,196 | -0,383 |
| 18 | P62158 CALM_HUMAN   | E.AFSLFDKDGDTITTK.E           |       | 3 | 3,3642 | 0,374 | -0,32  |
| 18 | Q01082 SPTB2_HUMAN  | K.ILSSDDYGKDLTSVM*R.L         |       | 2 | 3,3591 | 0,532 | -0,067 |
| 18 | Q96ST3 SIN3A_HUMAN  | R.LKVEDALSYLDQVK.L            |       | 3 | 3,358  | 0,268 | 0,113  |
| 18 | P11388 TOP2A_HUMAN  | K.YSGPEDDAAISLAFSKK.Q         |       | 2 | 3,3572 | 0,402 | -0,814 |
| 18 | Q8NI08 NCOA7_HUMAN  | R.KSASLDSPVLLVIK.D            |       | 2 | 3,3545 | 0,154 | -0,249 |
| 18 | P31689 DNJA1_HUMAN  | E.ALCGFQKPISTLDNR.T           |       | 3 | 3,3528 | 0,366 | -0,106 |
| 18 | P52594 NUPL_HUMAN   | K.SSSADFGTFNTSQSHQTASAVSK.V   |       | 3 | 3,3511 | 0,275 | 0,078  |
| 18 | Q7L1W4 LRC8D_HUMAN  | E.DHLFDLPLEVKE.A              |       | 2 | 3,3505 | 0,484 | 0,078  |
| 18 | O60271 JIP4_HUMAN   | R.TKLHLQSGS#DQLE.S            | S185: | 2 | 3,3494 | 0,437 | -0,477 |
| 18 | Q53TX8 Q53TX8_HUMAN | E.VLSQSSDSKSEAPDPTQK.A        |       | 3 | 3,3477 | 0,3   | -0,288 |
| 18 | Q5EBL2 ZN628_HUMAN  | E.HQPCPGPDAAPQPQEAPAEAPK.A    |       | 3 | 3,3439 | 0,312 | -0,558 |
| 18 | Q71U36 TBA1A_HUMAN  | E.KAYHEQLS#VAE.I              | S287: | 2 | 3,3428 | 0,421 | -0,27  |
| 18 | Q6IBS0 TWF2_HUMAN   | E.LVHTEPTDVAQLPSR.V           |       | 2 | 3,342  | 0,509 | -0,367 |
| 18 | P40222 TXLNA_HUMAN  | R.RPEGPGAQAPSS#PR.V           | S515: | 2 | 3,3418 | 0,413 | -0,164 |
| 18 | Q9NUJ1 ABHDA_HUMAN  | R.VLSTDVDVILRK.H              |       | 2 | 3,3411 | 0,442 | -0,27  |
| 18 | P80723 BASP_HUMAN   | K.DAAAAKEEAPKAEPE.K           |       | 2 | 3,3387 | 0,415 | -0,32  |
| 18 | Q5T4S7 UBR4_HUMAN   | E.AAPEKPQDDSGTAGGISSTSASVNR.Y |       | 3 | 3,3361 | 0,274 | -0,228 |
| 18 | Q2KHM9 K0753_HUMAN  | K.ISAISEKPLS#PHPIR.I          | S826: | 3 | 3,3346 | 0,454 | -0,318 |
| 18 | Q53F19 CQ085_HUMAN  | R.ALINM*SSLPAQDKIR.S          |       | 2 | 3,3339 | 0,536 | -0,51  |
| 18 | P30043 BLVRB_HUMAN  | R.CLTTDEYDGHSTYPHQYQ.-        |       | 3 | 3,332  | 0,395 | -0,556 |
| 18 | Q9Y3F4 STRAP_HUMAN  | K.CVLPEEDSGELAKPK.I           |       | 3 | 3,3318 | 0,265 | 0,219  |
| 18 | Q9ULH0 ARMS_HUMAN   | R.GIPHSLSGLQDPPIAR.M          |       | 2 | 3,3312 | 0,536 | -0,219 |
| 18 | Q09666 AHNK_HUMAN   | K.ISM*PDVDLHLK.G              |       | 3 | 3,3293 | 0,365 | 0,214  |
| 18 | P47756 CAPZB_HUMAN  | K.DYLLCDYNRDGDSYR.S           |       | 2 | 3,3288 | 0,297 | -0,634 |
| 18 | P26640 SYVC_HUMAN   | E.TM*LGDVAVAVHPK.D            |       | 3 | 3,3247 | 0,255 | 1,148  |

|    |                     |                                 |            |   |        |       |        |
|----|---------------------|---------------------------------|------------|---|--------|-------|--------|
| 18 | Q8N6N3 CA052_HUMAN  | R.SVTRPAFLYNPLNK.Q              |            | 2 | 3,3197 | 0,399 | -0,301 |
| 18 | Q49AR2 CE022_HUMAN  | K.KPGTNLTEEDLVDIVDTR.I          |            | 3 | 3,3182 | 0,159 | 0,091  |
| 18 | Q96PZ0 PUS7_HUMAN   | E.DVPRPPDVTSTGK.G               |            | 2 | 3,3115 | 0,185 | -0,713 |
| 18 | Q9Y3F4 STRAP_HUMAN  | K.CVLPEEDSGELAKPK.I             |            | 2 | 3,3091 | 0,336 | -0,292 |
| 18 | Q9NPI6 DCP1A_HUMAN  | K.LRLT#PQHHDQIQTQPLGK.G         | T401:      | 3 | 3,3046 | 0,294 | -0,356 |
| 18 | Q7Z422 CA144_HUMAN  | R.ILGSAS#PEEEQEKPIILDRPTR.I     | S107:      | 3 | 3,3045 | 0,324 | 0,224  |
| 18 | Q14C86 GAPD1_HUMAN  | R.LSAQAQVAEDILDKYR.N            |            | 2 | 3,3008 | 0,411 | -0,268 |
| 18 | O60841 IF2P_HUMAN   | R.APIICVLGHVDTGK.T              |            | 3 | 3,3004 | 0,46  | 0,803  |
| 18 | Q9Y624 JAM1_HUMAN   | E.DRVTFLLPTGITFK.S              |            | 2 | 3,2997 | 0,319 | -0,245 |
| 18 | P35579 MYH9_HUMAN   | E.LDDLLVDLDHQR.Q                |            | 3 | 3,2995 | 0,148 | 0,126  |
| 18 | P31949 S10AB_HUMAN  | K.KLDTNSDGLDFSE.F               |            | 2 | 3,2958 | 0,372 | -0,156 |
| 18 | A8K6V7 A8K6V7_HUMAN | E.EKSTT#PPPAEPVSLPQEPKPR.V      | T227:      | 3 | 3,2929 | 0,349 | -0,074 |
| 18 | Q9BVJ7 DUS23_HUMAN  | R.LRIPDFCPPAPDQIDR.F            |            | 3 | 3,2927 | 0,241 | -0,67  |
| 18 | Q9HB71 CYBP_HUMAN   | K.EKPSYDTETDPSEGLM*NVLK.K       |            | 2 | 3,2924 | 0,385 | 0,43   |
| 18 | P46937 YAP1_HUMAN   | R.TM*TTNSSDPFLNSGTYSRDE.S       |            | 3 | 3,2916 | 0,307 | 0      |
| 18 | Q09666 AHNK_HUMAN   | K.ISM*PDVDLNLKGP.K.L            |            | 3 | 3,2902 | 0,402 | 0,593  |
| 18 | Q14240 IF4A2_HUMAN  | R.DFTVSALHGDM*DQKE.R            |            | 2 | 3,29   | 0,469 | -0,214 |
| 18 | O94915 FRYL_HUMAN   | E.KLM*NVLSLCGPESGLPK.N          |            | 2 | 3,2894 | 0,229 | -0,197 |
| 18 | Q9H0E9 BRD8_HUMAN   | E.ADVAIGKGDDETPLTNVK.T          |            | 3 | 3,282  | 0,233 | 0,212  |
| 18 | Q01459 DIAC_HUMAN   | K.GDVSLKDIIDPAFR.A              |            | 3 | 3,2814 | 0,262 | 0,118  |
| 18 | Q92599 SEPT8_HUMAN  | E.ALQSQUALHATSQQPLR.K           |            | 3 | 3,2803 | 0,181 | 0,418  |
| 18 | Q99747 SNAG_HUMAN   | K.LGLSLVPPGGGK.K                |            | 3 | 3,2784 | 0,426 | 0,273  |
| 18 | Q9Y2N3 PO121_HUMAN  | E.LCHHSSSS#T#PLAADKE.S          | S444:T445: | 3 | 3,2776 | 0,148 | -0,481 |
| 18 | Q9P287 BCCIP_HUMAN  | D.LLIQQNHIGSVIK.Q               |            | 2 | 3,2769 | 0,414 | -0,25  |
| 18 | O14733 MP2K7_HUMAN  | D.ISPQRPRPTLQLPLANDGGSRS#PSSE.S | S55:       | 3 | 3,2746 | 0,388 | 0      |
| 18 | P21333 FLNA_HUMAN   | K.ATCAPQHGAPGPGPADASK.V         |            | 3 | 3,2721 | 0,42  | -0,204 |
| 18 | P51572 BAP31_HUMAN  | K.LQAAVDGPM*DKKEE.-             |            | 2 | 3,2719 | 0,346 | -0,552 |
| 18 | P26006 ITA3_HUMAN   | R.TGAVYLCPLTAHK.D               |            | 2 | 3,2712 | 0,472 | -0,512 |
| 18 | P29966 MARCS_HUMAN  | E.KGEPAAAAAPEAGASPVEK.E         |            | 3 | 3,2663 | 0,293 | 0      |
| 18 | Q9BUH8 BEGIN_HUMAN  | E.GDDLSQLGHLAEPFCFLR.A          |            | 3 | 3,2633 | 0,237 | -0,302 |
| 18 | Q6ZS17 FA65A_HUMAN  | E.GAVAPVLANGHAPYSR.T            |            | 2 | 3,2627 | 0,491 | -0,386 |
| 18 | Q14651 PLSI_HUMAN   | R.AYFHLLNQIAPK.G                |            | 3 | 3,2601 | 0,316 | 0,258  |
| 18 | Q9Y2L1 RRP44_HUMAN  | K.M*SADNQLQVIFITNDRR.N          |            | 3 | 3,2599 | 0,332 | -0,359 |

|    |                     |                               |        |   |        |       |        |
|----|---------------------|-------------------------------|--------|---|--------|-------|--------|
| 18 | P78347 GTF2I_HUMAN  | K.ANELPQPPVPEPANAGKR.K        |        | 2 | 3,2595 | 0,359 | -0,194 |
| 18 | P15586 GNS_HUMAN    | E.FDIKVPLLR.G                 |        | 3 | 3,2571 | 0,214 | 0,609  |
| 18 | Q01850 CDR2_HUMAN   | R.S#PGKCDQEKPA SFACLKE.L      | S145:  | 3 | 3,2561 | 0,245 | 0,164  |
| 18 | Q7Z6Z7 HUWE1_HUMAN  | R.LLVGNDDVHIIAR.S             |        | 2 | 3,2547 | 0,526 | -0,51  |
| 18 | Q969V6 MKL1_HUMAN   | E.ISADFKEPPSLPGK.E            |        | 3 | 3,2538 | 0,38  | -0,185 |
| 18 | Q99569 PKP4_HUMAN   | R.SGM*TAVPQHLGPSLQR.T         |        | 3 | 3,2536 | 0,465 | 0,324  |
| 18 | O00410 IMB3_HUMAN   | E.KFM*QDASDVM*QLLLK.T         |        | 3 | 3,2531 | 0,26  | -0,203 |
| 18 | P61604 CH10_HUMAN   | K.VVLDKDYFLFR.D               |        | 2 | 3,2516 | 0,445 | -0,399 |
| 18 | Q13873 BMPR2_HUMAN  | R.LVRPGEEDNAAISEVGTIR.Y       |        | 3 | 3,2506 | 0,201 | -0,632 |
| 18 | Q6P1J9 CDC73_HUMAN  | R.STIKTDLDDITALK.Q            |        | 3 | 3,2453 | 0,32  | -0,333 |
| 18 | Q59HC3 Q59HC3_HUMAN | E.GDNM*ETPAS#SPQLSHDDTHSRIE.H | S1113: | 3 | 3,2448 | 0,29  | -1,187 |
| 18 | P29590 PML_HUMAN    | E.VFLPNSNHVASGAGEAER.V        |        | 3 | 3,2435 | 0,22  | 0,277  |
| 18 | Q92598 HS105_HUMAN  | E.LNNTCEPVVTQPKPK.I           |        | 2 | 3,2434 | 0,391 | -0,637 |
| 18 | P55042 RAD_HUMAN    | E.RDLQAALTPGALTAAGTGTQGPR.L   |        | 3 | 3,2414 | 0,158 | -0,232 |
| 18 | Q14677 EPN4_HUMAN   | E.LSDKIGSTIDDTISK.F           |        | 3 | 3,2411 | 0,377 | 0,344  |
| 18 | P40855 PEX19_HUMAN  | K.AKPSAPPSTTTAPDASGPQK.R      |        | 2 | 3,2406 | 0,447 | -0,243 |
| 18 | Q14155 ARHG7_HUMAN  | K.SGTLKS#PPKGFDTTAINK.S       | S257:  | 2 | 3,2402 | 0,276 | -0,314 |
| 18 | Q9UHX1 PUF60_HUMAN  | R.IYVASVHQDLSDDDIK.S          |        | 3 | 3,24   | 0,306 | -0,805 |
| 18 | P11387 TOP1_HUMAN   | E.DDLFDRLNTGILNK.H            |        | 2 | 3,2376 | 0,344 | -0,299 |
| 18 | Q9UQ35 SRRM2_HUMAN  | K.DKFSPFPVQDRPE.S             |        | 2 | 3,235  | 0,34  | -0,391 |
| 18 | P46109 CRKL_HUMAN   | K.IHYLDTTTTLIEPAPR.Y          |        | 3 | 3,2336 | 0,135 | -0,736 |
| 18 | P07237 PDIA1_HUMAN  | K.YQLDKDGVVLFK.K              |        | 2 | 3,2315 | 0,31  | -0,086 |
| 18 | Q99700 ATX2_HUMAN   | E.FVSHNPPSEATPPVAR.T          |        | 3 | 3,2278 | 0,225 | 0,309  |
| 18 | P17812 PYRG1_HUMAN  | E.DHPFFVGVQYHPE.F             |        | 2 | 3,2268 | 0,492 | -0,155 |
| 18 | Q8TAQ2 SMRC2_HUMAN  | E.IEASVEDAPTPEKPR.K           |        | 2 | 3,2249 | 0,373 | -0,074 |
| 18 | Q96EV2 RBM33_HUMAN  | E.DDLLGEDLLSGKK.N             |        | 2 | 3,2242 | 0,34  | -0,435 |
| 18 | Q92616 GCN1L_HUMAN  | K.LYRPPVLDALGR.V              |        | 3 | 3,2241 | 0,268 | 0,499  |
| 18 | Q9Y3Q8 T22D4_HUMAN  | K.AEKPLSASSPQQRPEPE.T         |        | 3 | 3,2213 | 0,115 | -0,358 |
| 18 | A0MZ66 SHOT1_HUMAN  | R.RKVTAEADSSS#PTGILATSE.S     | S494:  | 3 | 3,2202 | 0,27  | 0      |
| 18 | O75874 IDHC_HUMAN   | E.DFAHSSFQM*ALSK.G            |        | 2 | 3,2188 | 0,485 | -0,082 |
| 18 | Q9H4A3 WNK1_HUMAN   | R.DVDDGSGSPHS#PHQLSSK.S       | S2032: | 2 | 3,2187 | 0,335 | 0,063  |
| 18 | Q5T1M5 FKB15_HUMAN  | E.LAAATAQVSHLQLK.M            |        | 2 | 3,2154 | 0,276 | -0,084 |
| 18 | P60709 ACTB_HUMAN   | E.EHPVLLTEAPLNPK.A            |        | 3 | 3,2137 | 0,3   | 0,939  |

|    |                     |                           |            |   |        |       |        |
|----|---------------------|---------------------------|------------|---|--------|-------|--------|
| 18 | Q9ULU4 PKCB1_HUMAN  | K.ILM*SKPVLSSGGTGR.R      |            | 3 | 3,2134 | 0,234 | 0,064  |
| 18 | Q06830 PRDX1_HUMAN  | K.QGGLGPM*NIPLVSDPKR.T    |            | 3 | 3,2126 | 0,278 | 0,204  |
| 18 | Q8TAD8 SNIP1_HUMAN  | R.RPDHS#GGSPS#PPTSEPAR.S  | S49:S54:   | 3 | 3,2124 | 0,219 | -0,092 |
| 18 | O43399 TPD54_HUMAN  | R.AELTKVEEEIVTLR.Q        |            | 2 | 3,2107 | 0,388 | -0,15  |
| 18 | Q92576 PHF3_HUMAN   | E.NDFFNSFTTVLHK.Q         |            | 2 | 3,2091 | 0,405 | -0,155 |
| 18 | P78347 GTF2I_HUMAN  | E.DLQLDKPASGVKE.E         |            | 2 | 3,2085 | 0,204 | -0,436 |
| 18 | P40855 PEX19_HUMAN  | K.AKPSPAPPSTTTAPDASGPQK.R |            | 3 | 3,2075 | 0,362 | -0,091 |
| 18 | P63241 IF5A1_HUMAN  | K.VHLVGIDIFTGK.K          |            | 3 | 3,2071 | 0,294 | 0,493  |
| 18 | Q9UBK8 MTRR_HUMAN   | K.DVHDALVQIISKE.V         |            | 2 | 3,2025 | 0,442 | -0,25  |
| 18 | P62333 PRS10_HUMAN  | E.LLNQM*DGFDLHR.V         |            | 3 | 3,2008 | 0,292 | 0,232  |
| 18 | Q8NEL9 DDHD1_HUMAN  | E.HLPGGDPDDGDVPLALLR.G    |            | 3 | 3,1974 | 0,262 | -0,197 |
| 18 | Q9H8U3 ZFAN3_HUMAN  | R.SCGTDSQS#ENEAS#PVKRPR.L | S124:S129: | 3 | 3,1959 | 0,444 | -0,323 |
| 18 | Q92625 ANS1A_HUMAN  | E.ALYNAISCHSLDSM*ASGR.S   |            | 3 | 3,1956 | 0,212 | 0,279  |
| 18 | P11387 TOP1_HUMAN   | E.DDLFDRLNTGILNK.H        |            | 3 | 3,1894 | 0,292 | -0,112 |
| 18 | O94826 TOM70_HUMAN  | K.CIDLEPDNATTYVHK.G       |            | 2 | 3,1882 | 0,411 | 0      |
| 18 | O60832 DKC1_HUMAN   | E.RKS#LPEEDVAE.I          | S21:       | 2 | 3,187  | 0,433 | -0,812 |
| 18 | P63241 IF5A1_HUMAN  | E.TGDAGASATFPM*QCSALRK.N  |            | 3 | 3,1861 | 0,337 | -0,461 |
| 18 | Q9H8Y5 ANKZ1_HUMAN  | K.DKPLLSALDFEK.Q          |            | 3 | 3,1844 | 0,277 | 0,399  |
| 18 | Q9HB07 MYG1_HUMAN   | K.LASCDIVVDVGGGEYDPRR.H   |            | 3 | 3,1826 | 0,243 | -0,362 |
| 18 | O43847 NRDC_HUMAN   | K.YPDENGFD AFLKK.H        |            | 3 | 3,1814 | 0,327 | 0,592  |
| 18 | P28290 SSFA2_HUMAN  | E.GEAPHVPATYQLGLTK.S      |            | 2 | 3,1789 | 0,318 | -0,145 |
| 18 | Q7Z417 NUFP2_HUMAN  | E.SGALSLEPSHIGDLQK.A      |            | 2 | 3,1735 | 0,388 | -0,295 |
| 18 | Q06830 PRDX1_HUMAN  | K.KQGGLGPM*NIPLVSDPKR.R   |            | 3 | 3,1728 | 0,224 | -0,518 |
| 18 | Q99567 NUP88_HUMAN  | K.LLHSFHSELPVLS DSE.R     |            | 2 | 3,1706 | 0,338 | -0,202 |
| 18 | Q9ULU4 PKCB1_HUMAN  | K.KATSSHFS#ASEE.S         | S460:      | 2 | 3,1644 | 0,359 | -0,717 |
| 18 | Q9H6Z4 RANB3_HUMAN  | E.KPAIAPPVVFQK.D          |            | 3 | 3,1628 | 0,313 | 0,634  |
| 18 | P61221 ABCE1_HUMAN  | K.AIIKPQYVDQIPK.A         |            | 3 | 3,1627 | 0,281 | 0,483  |
| 18 | P49821 NDUV1_HUMAN  | K.YLVVNADEGEPGTCKDRE.I    |            | 3 | 3,1616 | 0,141 | 0,178  |
| 18 | P21333 FLNA_HUMAN   | R.RAPS#VANVGSHCDLSLKIPE.I | S2152:     | 2 | 3,1566 | 0,354 | 0,219  |
| 18 | Q5VWJ9 SNX30_HUMAN  | R.DLFVIVDDPKK.H           |            | 2 | 3,1564 | 0,401 | -0,284 |
| 18 | A4D118 A4D118_HUMAN | R.DEPLHALYDNVEK.L         |            | 2 | 3,1525 | 0,41  | -0,395 |
| 18 | Q8NEJ9 NGDN_HUMAN   | R.LVPVHYDETEAERE.K        |            | 2 | 3,1518 | 0,544 | -0,289 |
| 18 | O94826 TOM70_HUMAN  | K.CIDLEPDNATTYVHK.G       |            | 3 | 3,1501 | 0,361 | 0,412  |

|    |                     |                            |        |   |        |       |        |
|----|---------------------|----------------------------|--------|---|--------|-------|--------|
| 18 | Q03164 HRX_HUMAN    | R.SPGCRPLPSAGSPTTTHE.I     |        | 3 | 3,147  | 0,303 | -0,845 |
| 18 | Q9NZM1 MYOF_HUMAN   | R.CDPYAGKEDIVPQLK.A        |        | 3 | 3,1454 | 0,179 | 0,211  |
| 18 | Q8WUA2 PPIL4_HUMAN  | E.TFVDKDFVPYQDIR.I         |        | 3 | 3,1442 | 0,456 | 1,154  |
| 18 | P62937 PPIA_HUMAN   | R.VSFELFADKVPK.T           |        | 2 | 3,1403 | 0,399 | -0,088 |
| 18 | Q13523 PRP4B_HUMAN  | R.KKS#PIINE.S              | S277:  | 2 | 3,14   | 0,181 | -0,363 |
| 18 | P31946 1433B_HUMAN  | E.SYKDSTLIM*QLLR.D         |        | 2 | 3,1397 | 0,473 | -0,308 |
| 18 | Q6ZRS2 SRCAP_HUMAN  | R.LPVSKDEPDTLTLR.S         |        | 2 | 3,1395 | 0,508 | -0,231 |
| 18 | P24928 RPB1_HUMAN   | R.VQFGVLSPELKR.M           |        | 2 | 3,1312 | 0,295 | -0,738 |
| 18 | Q9C0C2 TB182_HUMAN  | R.RGAGAELKDT#QSPSTCSE.G    | T710:  | 3 | 3,1307 | 0,395 | 0,093  |
| 18 | P18583 SON_HUMAN    | K.DIHLDLPSNNNLVSK.D        |        | 3 | 3,1304 | 0,383 | -0,109 |
| 18 | O94910 LPHN1_HUMAN  | R.GTM*GNHLLTNPVLQPR.G      |        | 3 | 3,1254 | 0,111 | 1,037  |
| 18 | Q4J6C6 PPCEL_HUMAN  | E.ELKLDQPFIDCIR.V          |        | 3 | 3,1225 | 0,262 | -0,111 |
| 18 | Q53HL2 BOREA_HUMAN  | E.VSM*VKPTPGLTPR.F         |        | 3 | 3,1225 | 0,335 | -0,196 |
| 18 | Q8NI27 THOC2_HUMAN  | K.IDTHPS#PSHSSTVKDSLIE.L   | S1302: | 2 | 3,1203 | 0,207 | 0,344  |
| 18 | P27824 CALX_HUMAN   | E.VEDSKPDTTAPPSSPK.V       |        | 3 | 3,1202 | 0,304 | 0      |
| 18 | Q8N8S7 ENAH_HUMAN   | E.DNRPLTGLAAAIAGAK.L       |        | 2 | 3,1183 | 0,348 | -0,317 |
| 18 | Q7Z5K2 WAPL_HUMAN   | K.SSQGASNFDKLM*DGTSQALAK.A |        | 3 | 3,1178 | 0,186 | -1,179 |
| 18 | P78347 GTF2I_HUMAN  | E.DLQLDKPASGVKEE.W         |        | 2 | 3,1165 | 0,332 | -0,08  |
| 18 | Q9UQ35 SRRM2_HUMAN  | K.DKFSFPVQDRPE.S           |        | 3 | 3,1143 | 0,304 | 0,468  |
| 18 | Q9NPI6 DCP1A_HUMAN  | R.DKQS#PSQANGCSDHRPIDILE.M | S142:  | 3 | 3,114  | 0,109 | 0,224  |
| 18 | Q9NSD9 SYFB_HUMAN   | K.LGVLHPDVITKFE.L          |        | 3 | 3,1126 | 0,257 | 0,561  |
| 18 | Q15262 PTPRK_HUMAN  | R.VADLLQHINLM*K.T          |        | 2 | 3,1123 | 0,274 | -0,519 |
| 18 | P52888 THOP1_HUMAN  | R.SCILRPGGSEDASAM*LR.R     |        | 3 | 3,1109 | 0,296 | -0,598 |
| 18 | Q9H488 OFUT1_HUMAN  | R.FGNQADHFLGSLAFK.L        |        | 3 | 3,1086 | 0,34  | -0,425 |
| 18 | P49736 MCM2_HUMAN   | R.RGNDPLTSS#PGR.S          | S27:   | 3 | 3,1014 | 0,178 | -0,41  |
| 18 | Q9UL46 PSME2_HUMAN  | E.KVLSLLALVKPE.V           |        | 3 | 3,099  | 0,153 | 0,349  |
| 18 | P35527 K1C9_HUMAN   | K.TLNDM*RQEYEQLIAK.N       |        | 3 | 3,0982 | 0,432 | 0,196  |
| 18 | P56537 IF6_HUMAN    | E.LSDTIPVVHASIAGCR.I       |        | 3 | 3,098  | 0,234 | -0,216 |
| 18 | Q7Z309 F122B_HUMAN  | E.KM*ELDLEPDTSYGGTLR.R     |        | 3 | 3,0944 | 0,161 | -0,377 |
| 18 | Q8TAQ2 SMRC2_HUMAN  | E.IEASVEDAPTEKPR.K         |        | 3 | 3,0918 | 0,342 | 0,781  |
| 18 | A8K8U3 A8K8U3_HUMAN | K.KADVGFAM*GLAGTDVAKE.A    |        | 3 | 3,0891 | 0,313 | 0,306  |
| 18 | P63241 IF5A1_HUMAN  | E.DICPSTHNM*DVPNIK.R       |        | 2 | 3,0861 | 0,397 | -0,694 |
| 18 | Q9NZV1 CRIM1_HUMAN  | R.TQDSCCPQCTDQPFPRPSLSR.N  |        | 3 | 3,0845 | 0,39  | 0,375  |

|    |                     |                                  |            |   |        |       |        |
|----|---------------------|----------------------------------|------------|---|--------|-------|--------|
| 18 | Q86V48 LUZP1_HUMAN  | E.RHTS#TSNIQVGLAE.L              | S820:      | 2 | 3,0818 | 0,334 | -0,46  |
| 18 | O95382 M3K6_HUMAN   | R.ASAQTLGLDPPFLQPGKR.S           |            | 3 | 3,0818 | 0,371 | -0,508 |
| 18 | Q9UPN4 AZI1_HUMAN   | K.KRPAS#LSTAPSE.K                | S114:      | 2 | 3,0806 | 0,431 | -0,737 |
| 18 | Q969H4 CNKR1_HUMAN  | E.LLREPAGLSLVLK.K                |            | 2 | 3,0784 | 0,278 | -0,433 |
| 18 | Q8N137 CNTRB_HUMAN  | R.DTAYRDLPLPGAGSER.R             |            | 2 | 3,0749 | 0,323 | -0,071 |
| 18 | P04637 P53_HUMAN    | K.RALPNTSSS#PQPK.K               | S315:      | 2 | 3,0709 | 0,303 | -0,077 |
| 18 | Q99733 NP1L4_HUMAN  | K.YAALYQPLFDKR.R                 |            | 2 | 3,0705 | 0,333 | -0,329 |
| 18 | P30414 NKTR_HUMAN   | D.VAPIVSDQKPSVSK.S               |            | 2 | 3,0702 | 0,418 | -0,838 |
| 18 | P50395 GDIB_HUMAN   | K.FLVVYANFDEKDPR.T               |            | 2 | 3,0701 | 0,387 | -0,142 |
| 18 | P52272 HNRPM_HUMAN  | R.M*GPLGLDHM*ASSIER.M            |            | 3 | 3,0699 | 0,305 | 0,333  |
| 18 | Q05209 PTN12_HUMAN  | E.NM*ISSIEPEKQDS#PPPKPPR.T       | S332:      | 2 | 3,0698 | 0,202 | 0,208  |
| 18 | Q8N4B1 F109A_HUMAN  | E.ATFRPGPEPPPPPR.R               |            | 3 | 3,0687 | 0,215 | 0,34   |
| 18 | P04920 B3A2_HUMAN   | R.KAERTS#PSS#PAPLPHQE.A          | S170:S173: | 3 | 3,0676 | 0,232 | -0,276 |
| 18 | O75439 MPPB_HUMAN   | K.DLVDTITTHYK.G                  |            | 2 | 3,0637 | 0,471 | -0,446 |
| 18 | P21333 FLNA_HUMAN   | R.RAPS#VANVGSHCDLSLKIPE.I        | S2152:     | 3 | 3,0634 | 0,292 | 0      |
| 18 | P35232 PHB_HUMAN    | D.DVSLTHTFGKE.F                  |            | 2 | 3,0631 | 0,432 | -0,453 |
| 18 | P30622 CLIP1_HUMAN  | E.LDEPLGKNDGAVAGTR.Y             |            | 3 | 3,0628 | 0,26  | 0      |
| 18 | O75582 KS6A5_HUMAN  | E.GFCLQNVDKAPLAK.R               |            | 2 | 3,0607 | 0,409 | -0,313 |
| 18 | Q9Y6D5 BIG2_HUMAN   | K.DLYVNPNHQTSLGQER.L             |            | 3 | 3,056  | 0,339 | -0,293 |
| 18 | P31689 DNJA1_HUMAN  | R.TIVITSHPGQIVK.H                |            | 2 | 3,0555 | 0,41  | -0,35  |
| 18 | O95049 ZO3_HUMAN    | E.LSQAPPSHIPPPPR.H               |            | 3 | 3,0554 | 0,271 | 0,979  |
| 18 | O14776 TCRG1_HUMAN  | K.LIVAYVDDLDRR.G                 |            | 2 | 3,0531 | 0,103 | -0,421 |
| 18 | Q09666 AHNK_HUMAN   | K.IDVDAPDIDIHGPDAL.L             |            | 3 | 3,0525 | 0,324 | 0      |
| 18 | Q96N67 DOCK7_HUMAN  | K.NLNIVGNISHHTTVPLTE.A           |            | 2 | 3,0467 | 0,341 | -0,311 |
| 18 | Q68E09 Q68E09_HUMAN | R.DSGRPPGDSSGQAVAPSEGANK.H       |            | 3 | 3,0451 | 0,108 | -0,176 |
| 18 | Q9Y399 RT02_HUMAN   | E.SEDSTDFNDKILNEPLK.H            |            | 3 | 3,0449 | 0,272 | -1,117 |
| 18 | P28715 ERCC5_HUMAN  | K.LKTEKEDAT#PPS#PR.T             | T338:S341: | 3 | 3,0421 | 0,308 | -0,1   |
| 18 | Q05397 FAK1_HUMAN   | E.DGSLQGPIGNQHIIYQPVGKPDPAAPPK.K |            | 3 | 3,0405 | 0,269 | 0,263  |
| 18 | P61160 ARP2_HUMAN   | K.HM*VFLGGAVLADIM*K.D            |            | 3 | 3,0404 | 0,33  | 0,448  |
| 18 | P46821 MAP1B_HUMAN  | E.RTTKS#PSDSGYSYE.T              | S1915:     | 2 | 3,0375 | 0,432 | -0,736 |
| 18 | P80723 BASP_HUMAN   | K.SDGAPASDSKPGSSEAAPSSK.E        |            | 3 | 3,0365 | 0,335 | -0,284 |
| 18 | Q99569 PKP4_HUMAN   | R.SGM*TAVPQHLGPSLQR.T            |            | 2 | 3,0349 | 0,398 | -0,216 |
| 18 | Q7L2E3 DHX30_HUMAN  | R.NNEPLTHAM*YNLASLRE.L           |            | 3 | 3,0321 | 0,202 | -0,368 |



|    |                      |                            |       |   |        |       |        |
|----|----------------------|----------------------------|-------|---|--------|-------|--------|
| 18 | O60361 NDK8_HUMAN    | R.VM*LGETNPADSKPGTIR.G     |       | 2 | 3,0312 | 0,487 | -0,068 |
| 18 | Q14692 BMS1_HUMAN    | E.LVQSLISTHSTIDAK.M        |       | 2 | 3,028  | 0,382 | -0,227 |
| 18 | Q6PKG0 LARP1_HUMAN   | K.ILIVTQTPHYM*R.R          |       | 2 | 3,0232 | 0,346 | -0,246 |
| 18 | Q9UKG1 DP13A_HUMAN   | E.DSILHQLFIVR.F            |       | 2 | 3,0212 | 0,339 | -0,455 |
| 18 | Q13428 TCOF_HUMAN    | K.SPQVKPASTM*GM*GPLGK.G    |       | 3 | 3,0211 | 0,258 | 0,213  |
| 18 | Q09666 AHNK_HUMAN    | E.GDM*QVPDLDIKGPV.V        |       | 3 | 3,0193 | 0,303 | 0,598  |
| 18 | Q9UBT2 SAE2_HUMAN    | E.FEVVGDAPKVGPK.Q          |       | 2 | 3,0174 | 0,398 | 0      |
| 18 | Q13043 STK4_HUMAN    | R.ATATQLLQHFPVR.S          |       | 3 | 3,0153 | 0,245 | -0,185 |
| 18 | Q96GQ7 DDX27_HUMAN   | R.SADFNPDFVFTEKE.G         |       | 2 | 3,014  | 0,336 | -0,445 |
| 18 | P80723 BASP_HUMAN    | K.DAAAAKEEAPKAEPE.K        |       | 3 | 3,0126 | 0,251 | 0,24   |
| 18 | Q96ER9 CCD51_HUMAN   | R.GLVHAAGPGQDSGSQAGSPPTR.D |       | 3 | 3,0111 | 0,245 | -0,179 |
| 18 | Q9Y2W2 WBP11_HUMAN   | K.ATATISAKPQITNPK.A        |       | 2 | 3,0064 | 0,404 | -1,504 |
| 18 | Q9UQ35 SRRM2_HUMAN   | R.AAFGSDSYVDGSSFDQRR.A     |       | 3 | 2,9893 | 0,441 | -0,252 |
| 18 | Q9H4A3 WNK1_HUMAN    | K.DRPVS#QPSLVGSKEEPPPAR.S  | S167: | 3 | 2,988  | 0,336 | -0,164 |
| 18 | Q13162 PRDX4_HUMAN   | R.IPLSDLTHQISK.D           |       | 3 | 2,9863 | 0,358 | 0,374  |
| 18 | Q06830 PRDX1_HUMAN   | K.KQGGLGPM*NIPLVSDPK.R     |       | 2 | 2,9852 | 0,479 | -0,276 |
| 18 | P08670 VIME_HUMAN    | D.VDVSKPDLTAALR.D          |       | 2 | 2,9851 | 0,391 | -0,264 |
| 18 | Q7Z4H7 FA29A_HUMAN   | K.SILCQYPASLPDAHK.Q        |       | 3 | 2,984  | 0,332 | -0,215 |
| 18 | P31946 1433B_HUMAN   | E.ESYKDSTLIM*QLLR.D        |       | 2 | 2,9814 | 0,272 | -0,214 |
| 18 | Q6NWW9 PR40B_HUMAN   | E.LQQAELPNRS#PGFGIKKE.K    | S832: | 3 | 2,9811 | 0,271 | -0,087 |
| 18 | Q13428 TCOF_HUMAN    | R.AASAPAKGT#PGKGATPAPPK.A  | T310: | 3 | 2,9745 | 0,308 | -0,096 |
| 18 | Q9BTE3 CJ119_HUMAN   | K.LQHINPLLPACLNKEE.S       |       | 3 | 2,9667 | 0,096 | -0,194 |
| 18 | P48643 TCPE_HUMAN    | K.IAILTCPFEPKPK.T          |       | 2 | 2,9616 | 0,332 | -0,303 |
| 18 | P60842 IF4A1_HUMAN   | R.DFTVSAM*HGDM*DQKE.R      |       | 2 | 2,9615 | 0,434 | -0,56  |
| 18 | O75376 NCOR1_HUMAN   | R.RTS#YEPFHGSPVDHDSLE.S    | S88:  | 3 | 2,9604 | 0,168 | 0,156  |
| 18 | P40189 IL6RB_HUMAN   | E.SSQNTSSTVQYSTVVHSGYR.H   |       | 3 | 2,96   | 0,374 | 0      |
| 18 | Q8NB90 SPAT5_HUMAN   | K.TFQNSLIHLGLNTM*K.S       |       | 3 | 2,9557 | 0,341 | 0,106  |
| 18 | Q09666 AHNK_HUMAN    | K.ISM*PDLNLKGPV.M          |       | 3 | 2,9527 | 0,219 | 0,47   |
| 18 | ##Q8WZ42 TITIN_HUMAN | K.VDTAGAINAKLVL.R.Q        |       | 3 | 2,9522 | 0,129 | -0,508 |
| 18 | P31946 1433B_HUMAN   | K.DSTLIM*QLLR.D            |       | 2 | 2,9504 | 0,174 | -0,303 |
| 18 | P49792 RBP2_HUMAN    | E.EENKSGTGAAGASDTTIKPNPE.N |       | 3 | 2,9485 | 0,334 | -0,738 |
| 18 | Q8IWW6 RHG12_HUMAN   | R.SFGHFPGPEFLDVEK.T        |       | 3 | 2,9474 | 0,121 | 0      |
| 18 | O00154 BACH_HUMAN    | K.TNIVTASVDAINFHDK.I       |       | 3 | 2,9462 | 0,327 | -0,314 |

|    |                    |                             |                 |   |        |       |        |
|----|--------------------|-----------------------------|-----------------|---|--------|-------|--------|
| 18 | P61604 CH10_HUMAN  | K.VVLDDKDYFLFR.D            |                 | 3 | 2,9453 | 0,408 | 0      |
| 18 | P60866 RS20_HUMAN  | R.LIDLHSPSEIVK.Q            |                 | 2 | 2,944  | 0,334 | -0,542 |
| 18 | Q04637 IF4G1_HUMAN | R.FSALQQAVPTSTDNRR.V        |                 | 2 | 2,9429 | 0,238 | 0,763  |
| 18 | Q63HN8 RN213_HUMAN | E.DSGLHIIAACNPYR.K          |                 | 3 | 2,942  | 0,122 | 0,115  |
| 18 | P49903 SPS1_HUMAN  | R.DKVM*PLIIQGFK.D           |                 | 3 | 2,9384 | 0,212 | 0,716  |
| 18 | P27635 RL10_HUMAN  | K.AKVDEFPLCGHM*VSDE.Y       |                 | 3 | 2,9366 | 0,303 | 0,494  |
| 18 | P61247 RS3A_HUMAN  | K.ACQSIYPLHDVFVR.K          |                 | 3 | 2,9365 | 0,214 | 0      |
| 18 | P68104 EF1A1_HUMAN | K.YYVTIIDAPGHR.D            |                 | 3 | 2,936  | 0,319 | 0,195  |
| 18 | Q8IWW6 RHG12_HUMAN | E.LSSFQKPSVVQGTGLIR.D       |                 | 3 | 2,9357 | 0,186 | 0,201  |
| 18 | Q68E01 INT3_HUMAN  | R.VLAHLAPLFDNPK.L           |                 | 3 | 2,9355 | 0,295 | 0,319  |
| 18 | P62333 PRS10_HUMAN | E.LLNQM*DGFDLHR.V           |                 | 2 | 2,9351 | 0,379 | -0,155 |
| 18 | P11388 TOP2A_HUMAN | E.SDDFHM*DFDSAVAPR.A        |                 | 2 | 2,9327 | 0,285 | 0      |
| 18 | Q641Q2 FA21A_HUMAN | K.LQKDNDPVDLDFAGTK.K        |                 | 3 | 2,9267 | 0,133 | -0,103 |
| 18 | Q96JB2 COG3_HUMAN  | E.DHVQNNAEQLGAFAGVK.Q       |                 | 3 | 2,9262 | 0,281 | -0,098 |
| 18 | O14979 HNRDL_HUMAN | R.GFCFITYTDEEPVKK.L         |                 | 3 | 2,9246 | 0,447 | -0,499 |
| 18 | P49790 NU153_HUMAN | K.DSTSQHDDDNISTTSGFSSR.A    |                 | 3 | 2,9233 | 0,19  | 0,17   |
| 18 | O43707 ACTN4_HUMAN | K.M*LDAEDIVNTARPDEK.A       |                 | 2 | 2,922  | 0,331 | 0      |
| 18 | P08397 HEM3_HUMAN  | R.AKDQDILDVGLVLDPE.T        |                 | 3 | 2,9182 | 0,135 | -0,097 |
| 18 | P04406 G3P_HUMAN   | E.GLM*TTVHAITATQK.T         |                 | 3 | 2,918  | 0,408 | 1,721  |
| 18 | O15391 TYY2_HUMAN  | K.KLPPGGLPGIDLSDPK.Q        |                 | 3 | 2,9167 | 0,288 | 0,342  |
| 18 | Q0JRZ9 FCHO2_HUMAN | E.FEEDTASAVEGIKPR.K         |                 | 3 | 2,9145 | 0,257 | 0      |
| 18 | Q13162 PRDX4_HUMAN | R.IPLSDLTHQISK.D            |                 | 2 | 2,9122 | 0,333 | -0,167 |
| 18 | Q15185 TEBP_HUMAN  | D.LFHCIDPNDSK.H             |                 | 3 | 2,9117 | 0,189 | 0,204  |
| 18 | P22681 CBL_HUMAN   | E.IKGTEPIVVDPFDP.R.G        |                 | 3 | 2,9116 | 0,135 | 0,652  |
| 18 | P31937 3HIDH_HUMAN | K.SPILLGSLAQIYR.M           |                 | 3 | 2,9105 | 0,302 | -0,35  |
| 18 | P62158 CALM_HUMAN  | K.EAFSLFDKDGDTITTK.E        |                 | 3 | 2,9093 | 0,271 | 0,595  |
| 18 | P23786 CPT2_HUMAN  | R.YLSAQKPLLNDGQFR.K         |                 | 3 | 2,9076 | 0,37  | 0,105  |
| 18 | Q9C0B5 ZDHC5_HUMAN | R.SPTFGKS#FHFDPLSSGSR.S     | S415:           | 3 | 2,9061 | 0,103 | -0,36  |
| 18 | O75376 NCOR1_HUMAN | E.AAKPPEPEKPVSPPPVEQK.H     | S224:           | 2 | 2,9056 | 0,326 | 0,58   |
| 18 | Q9BST9 RTKN_HUMAN  | K.RLATKLS#SS#LGR.S          | S218:S220:      | 2 | 2,8998 | 0,13  | 0      |
| 18 | Q03164 HRX_HUMAN   | R.VRSPTRS#PSVKT#S#PR.K      | S165:T170:S171: | 3 | 2,8974 | 0,212 | -0,386 |
| 18 | Q8NBS9 TXND5_HUMAN | E.AAAAAADGPPAADGEDGQDPHSK.H |                 | 3 | 2,8973 | 0,262 | 0,259  |
| 18 | Q9HC52 CBX8_HUMAN  | R.KELPDPSQRPLGEPAGLGE.Y     |                 | 3 | 2,8967 | 0,384 | -0,352 |

|    |                    |                              |            |   |        |       |        |
|----|--------------------|------------------------------|------------|---|--------|-------|--------|
| 18 | Q9Y6G9 DC1L1_HUMAN | E.DNFEDIITKPPVR.K            |            | 3 | 2,8945 | 0,47  | 0,711  |
| 18 | Q9H6Z4 RANB3_HUMAN | E.EKPAIAPPVVFQK.D            |            | 2 | 2,8909 | 0,356 | -0,155 |
| 18 | P08670 VIME_HUMAN  | R.DGQVINETSQHDDLE.-          |            | 2 | 2,8906 | 0,376 | 0      |
| 18 | Q02952 AKA12_HUMAN | E.SQVHM*M*AAAVADGTR.A        |            | 3 | 2,89   | 0,229 | -0,116 |
| 18 | Q09666 AHNK_HUMAN  | K.ISM*PDVDFNLKGP.K.I         |            | 3 | 2,8891 | 0,269 | 0,116  |
| 18 | Q8TBX8 PI42C_HUMAN | D.YSLLGLIHDII.R.G            |            | 2 | 2,8888 | 0,334 | -0,173 |
| 18 | Q14157 UBP2L_HUMAN | R.LAQM*ISDHNDADFEK.V         |            | 3 | 2,8881 | 0,192 | 0,292  |
| 18 | P06748 NPM_HUMAN   | D.M*SPLRPQNYLFGCELK.A        |            | 2 | 2,8844 | 0,41  | 0,186  |
| 18 | P06756 ITAV_HUMAN  | E.REQLQPHENGEGNS#ET.-        | S1046:     | 2 | 2,8808 | 0,389 | 0,256  |
| 18 | P42166 LAP2A_HUMAN | D.VYVQLYLQHLTAR.N            |            | 3 | 2,8759 | 0,355 | 0,228  |
| 18 | Q13428 TCOF_HUMAN  | K.SPQVKPASTM*GM*GPLGK.G      |            | 2 | 2,8726 | 0,42  | -0,426 |
| 18 | P04150 GCR_HUMAN   | K.SSASTAVSAAPEKEFPK.T        |            | 3 | 2,8701 | 0,424 | -0,607 |
| 18 | Q8IY37 DHX37_HUMAN | R.ALAKPAVFIPVNR.S            |            | 2 | 2,8637 | 0,471 | -0,612 |
| 18 | P14625 ENPL_HUMAN  | R.FQSSHHPTDITSLDQYVE.R       |            | 2 | 2,8636 | 0,474 | -0,116 |
| 18 | Q13163 MP2K5_HUMAN | R.AGPSQHSSPAVSDSLPSNSLK.K    |            | 3 | 2,8616 | 0,238 | 0,089  |
| 18 | Q12904 MCA1_HUMAN  | K.QQSIAGSADSKPIDVSR.L        |            | 2 | 2,861  | 0,328 | -0,139 |
| 18 | P04083 ANXA1_HUMAN | R.DLAKDITSDTSGDFR.N          |            | 2 | 2,8607 | 0,271 | -0,149 |
| 18 | P46821 MAP1B_HUMAN | E.RASVSPM*DEPVPDESPIEK.V     |            | 3 | 2,8602 | 0,157 | -0,335 |
| 18 | P15924 DESP_HUMAN  | R.IEPHTGLLLLSVQK.R           |            | 3 | 2,8572 | 0,121 | 0,709  |
| 18 | Q2M2I8 AAK1_HUMAN  | R.RILS#DVTHSAVFGVPASK.S      | S637:      | 2 | 2,8561 | 0,46  | -0,311 |
| 18 | Q7Z4H7 FA29A_HUMAN | E.EDILNKS#LDAKEPPSDLTR.-     | S943:      | 3 | 2,8555 | 0,258 | -0,082 |
| 18 | Q9UDT6 CLIP2_HUMAN | K.QSSGPSSSPAAAAAPEKPGPK.A    |            | 3 | 2,8543 | 0,112 | 0,381  |
| 18 | P52948 NUP98_HUMAN | E.IENNS#YHM*HPAGIILTK.V      | S726:      | 3 | 2,8496 | 0,129 | -0,09  |
| 18 | O95295 S25BP_HUMAN | K.VALDLDPYVKK.L              |            | 3 | 2,8465 | 0,245 | 0,58   |
| 18 | O60271 JIP4_HUMAN  | E.RT#KLHQLSGS#DQLE.S         | T177:S185: | 2 | 2,8399 | 0,129 | -0,207 |
| 18 | P62736 ACTA_HUMAN  | R.LDLAGRDLTDYLM*K.I          |            | 3 | 2,8384 | 0,302 | 0,223  |
| 18 | O60508 PRP17_HUMAN | R.CPLPAADSLM*HLTK.S          |            | 2 | 2,8361 | 0,401 | -0,311 |
| 18 | Q00839 HNRPU_HUMAN | E.AGGRPAM*EPGNGSLDLGGDSAGR.S |            | 2 | 2,8351 | 0,427 | 0,452  |
| 18 | Q99426 TBCB_HUMAN  | E.LYGVDDKFYSKLDQE.D          |            | 3 | 2,8332 | 0,136 | -1,206 |
| 18 | Q96RP9 EFG1_HUMAN  | R.DNSHPFVGLAFK.L             |            | 2 | 2,8323 | 0,333 | -0,092 |
| 18 | Q06830 PRDX1_HUMAN | R.GLFIIDDKGILR.Q             |            | 2 | 2,8302 | 0,265 | -1,166 |
| 18 | Q8NHP8 PLBL2_HUMAN | R.YNDFLHDPLSLCK.A            |            | 3 | 2,8285 | 0,274 | 0,113  |
| 18 | Q2PPJ7 AS250_HUMAN | E.NAPAAGSGHLTVGQQQVLR.S      |            | 3 | 2,8262 | 0,388 | -0,18  |

|    |                     |                            |              |   |        |       |        |
|----|---------------------|----------------------------|--------------|---|--------|-------|--------|
| 18 | Q14157 UBP2L_HUMAN  | E.KSPAVATSTAAPPPSSPLPSK.S  |              | 3 | 2,8248 | 0,242 | -0,438 |
| 18 | P05387 RLA2_HUMAN   | K.NIEDVIAQGIGK.L           |              | 2 | 2,8234 | 0,42  | 0,194  |
| 18 | P98171 RHG04_HUMAN  | E.LVHRPEPCTS#PE.A          | S842:        | 2 | 2,8202 | 0,331 | -0,325 |
| 18 | P52597 HNRPF_HUMAN  | R.DLSYCLSGM*YDHR.Y         |              | 2 | 2,8183 | 0,374 | 0,149  |
| 18 | Q9Y3C0 CCD53_HUMAN  | E.SEVSAENILTVAKDPR.Y       |              | 3 | 2,8181 | 0,291 | 0      |
| 18 | B2CI53 B2CI53_HUMAN | R.SNM*SPDKPVSVKIS#FEDEPR.K | S1115:       | 3 | 2,8176 | 0,212 | 0,155  |
| 18 | Q9NVD7 PARVA_HUMAN  | R.DAFDTLFDHAPDK.L          |              | 2 | 2,8164 | 0,419 | -0,082 |
| 18 | Q01813 K6PP_HUMAN   | R.LAIKLPDDQIPK.T           |              | 2 | 2,8134 | 0,278 | -0,181 |
| 18 | Q9UPT9 UBP22_HUMAN  | E.FLIAALDVLHR.H            |              | 2 | 2,8099 | 0,349 | -0,385 |
| 18 | Q15386 UBE3C_HUMAN  | E.DAYDKLSPENEPDLK.K        |              | 3 | 2,8093 | 0,173 | -0,527 |
| 18 | P0C7M2 RA1L3_HUMAN  | R.GFAFVTFDDHD.S            |              | 2 | 2,8073 | 0,385 | -0,864 |
| 18 | P61221 ABCE1_HUMAN  | K.AIIKPQYVDQIPK.A          |              | 2 | 2,807  | 0,304 | -0,645 |
| 18 | Q9UQB8 BAIP2_HUMAN  | K.AIFSHAAGDNSTLLSFKE.G     |              | 3 | 2,8017 | 0,176 | 0      |
| 18 | Q8ND56 LS14A_HUMAN  | E.QAVQTASAHLPAPAAVGR.R     |              | 3 | 2,8013 | 0,328 | -0,419 |
| 18 | P49327 FAS_HUMAN    | E.SIIHSSSLAEPR.V           |              | 2 | 2,7989 | 0,296 | -0,16  |
| 18 | P68104 EF1A1_HUMAN  | K.YYVTIIDAPGHR.D           |              | 2 | 2,7986 | 0,434 | -0,608 |
| 18 | P62805 H4_HUMAN     | K.TVTAM*DVVYALKR.Q         |              | 2 | 2,7972 | 0,273 | -0,411 |
| 18 | Q8IXM2 CQ049_HUMAN  | E.DSGIPLAES#PKKGPK.K       | S96:         | 2 | 2,7968 | 0,4   | -0,359 |
| 18 | A0MZ66 SHOT1_HUMAN  | R.QSHLLQSSIPDQQLK.A        |              | 3 | 2,7968 | 0,106 | 0,094  |
| 18 | P60900 PSA6_HUMAN   | E.AEIDAHLVALAERD.-         |              | 3 | 2,7948 | 0,246 | 0,42   |
| 18 | Q96SN8 CK5P2_HUMAN  | E.LRPGGAHPGTCS#PSRPGS#.-   | S1887:S1893: | 3 | 2,7939 | 0,365 | -0,281 |
| 18 | P43304 GPDM_HUMAN   | E.ISLLPSDIDRYK.K           |              | 3 | 2,7931 | 0,111 | 0,58   |
| 18 | Q9NQ84 GPC5C_HUMAN  | R.AEDM*YSAQSHQAAT#PPKDGK.N | T423:        | 3 | 2,7918 | 0,26  | -0,246 |
| 18 | O75475 PSIP1_HUMAN  | R.DFKPGDLIFAK.M            |              | 3 | 2,7905 | 0,233 | 0,292  |
| 18 | Q13242 SFRS9_HUMAN  | R.GRDS#PYQSR.G             | S204:        | 2 | 2,7903 | 0,139 | -0,106 |
| 18 | A1L0T0 ILVBL_HUMAN  | R.DGHPVVVNILIGR.T          |              | 2 | 2,7884 | 0,449 | -0,351 |
| 18 | Q8IY81 RRMJ3_HUMAN  | R.SRGPKS#DDDGFE.I          | S644:        | 2 | 2,7883 | 0,36  | -0,615 |
| 18 | Q09666 AHNK_HUMAN   | K.SPQISM*SDIDLNLKGP.K.I    |              | 3 | 2,7882 | 0,259 | -1,574 |
| 18 | Q5JSH3 WDR44_HUMAN  | K.APDGQTVAGEVM*GPQRPR.S    |              | 3 | 2,7869 | 0,27  | -0,389 |
| 18 | Q86XP1 DGKH_HUMAN   | R.ASYGHSQTDSVPGPAVAASKE.N  |              | 3 | 2,7843 | 0,248 | -0,267 |
| 18 | Q9NYF8 BCLF1_HUMAN  | R.LLASTLVHS#VKKEQE.F       | S578:        | 3 | 2,7806 | 0,229 | 0,104  |
| 18 | O00193 SMAP_HUMAN   | E.LQAAEHPDEVEDPK.N         |              | 2 | 2,7801 | 0,197 | -0,851 |
| 18 | Q96AE4 FUBP1_HUMAN  | K.M*VM*IQDGPQNTGADKPLR.I   |              | 3 | 2,7795 | 0,238 | -0,091 |

|    |                    |                                   |            |   |        |       |        |
|----|--------------------|-----------------------------------|------------|---|--------|-------|--------|
| 18 | Q9P287 BCCIP_HUMAN | E.LTDLLIQQNHIGSVIK.Q              |            | 3 | 2,7783 | 0,327 | -0,306 |
| 18 | Q9H8Y5 ANKZ1_HUMAN | K.DKPLLSALDFEK.Q                  |            | 2 | 2,7759 | 0,224 | -0,089 |
| 18 | Q2KHR3 QSER1_HUMAN | K.SVSTPLTTLDATSDKK.K              |            | 2 | 2,7729 | 0,468 | -0,22  |
| 18 | P18084 ITB5_HUMAN  | K.LGGLVQPHDQGCHLNE.A              |            | 3 | 2,7715 | 0,088 | 0,206  |
| 18 | Q15527 SURF2_HUMAN | R.CILTGHELPCRLPE.L                |            | 3 | 2,7696 | 0,24  | -0,108 |
| 18 | Q9UQ35 SRRM2_HUMAN | K.THTTALAGRS#PS#PASGR.R           | S295:S297: | 2 | 2,7693 | 0,379 | -0,2   |
| 18 | O75367 H2AY_HUMAN  | E.VAGAAVSAGHGLPAK.F               |            | 3 | 2,7666 | 0,344 | 0,28   |
| 18 | Q8WUM4 PDC6I_HUMAN | R.VPDLKDLDPIGK.A                  |            | 3 | 2,7655 | 0,291 | 0,419  |
| 18 | Q14690 RRP5_HUMAN  | K.VFLHLADIYAK.S                   |            | 3 | 2,7654 | 0,371 | 0,283  |
| 18 | P09234 RU1C_HUMAN  | K.FYCDYCDTYLTHDSPSVR.K            |            | 3 | 2,7645 | 0,444 | -0,08  |
| 18 | Q9BW91 NUDT9_HUMAN | K.LFSQDHLVIYK.G                   |            | 2 | 2,7642 | 0,303 | -0,537 |
| 18 | Q0VDF9 HSP7E_HUMAN | K.FAQVVLQDLDKKE.N                 |            | 3 | 2,7637 | 0,265 | 0,298  |
| 18 | Q9BQQ3 GR65_HUMAN  | E.LTTTAVSTSGPEDICSSSSSHER.G       |            | 3 | 2,7609 | 0,255 | -0,152 |
| 18 | P50990 TCPQ_HUMAN  | E.VGDTQVVVFKHE.K                  |            | 2 | 2,7565 | 0,223 | -0,18  |
| 18 | Q96T23 RSF1_HUMAN  | R.LHRIET#DEEE.S                   | T1295:     | 2 | 2,7563 | 0,257 | -0,271 |
| 18 | Q96T23 RSF1_HUMAN  | K.LSDDFDSPVKGPLCK.S               |            | 3 | 2,7553 | 0,362 | 0,109  |
| 18 | Q9NQX3 GEPH_HUMAN  | E.DSSSSHITAAAIAAK.I               |            | 3 | 2,7544 | 0,318 | 0,512  |
| 18 | Q9H4A3 WNK1_HUMAN  | E.HSSSGAQHASVS#LE.T               | S1677:     | 2 | 2,7527 | 0,285 | 0,165  |
| 18 | O43719 HTSF1_HUMAN | R.TAEPPQEKAPEPTDAR.K              |            | 2 | 2,752  | 0,334 | -0,719 |
| 18 | P14209 CD99_HUMAN  | E.NAEQGEVDM*ES#HRNANAEPVQR.T      | S168:      | 3 | 2,7506 | 0,309 | -0,069 |
| 18 | Q9NRG9 AAAS_HUMAN  | R.VQDGKPVILLFR.T                  |            | 3 | 2,7494 | 0,214 | -0,132 |
| 18 | P11021 GRP78_HUMAN | E.VVATNGDTHLGGEDFDQR.V            |            | 3 | 2,7477 | 0,319 | 0,095  |
| 18 | Q6FI81 CPIN1_HUMAN | R.CASCPYLG M*PAFKPGEK.V           |            | 3 | 2,7472 | 0,192 | 0      |
| 18 | P51991 ROA3_HUMAN  | R.GFAFVTDDHDTVDK.I                |            | 3 | 2,7466 | 0,272 | -0,534 |
| 18 | Q15185 TEBP_HUMAN  | E.IDLFHCIDPNDSK.H                 |            | 2 | 2,7462 | 0,297 | -0,543 |
| 18 | Q07955 SFRS1_HUMAN | R.VKVDGPRS#PS#YGR.S               | S199:S201: | 3 | 2,7458 | 0,136 | 0      |
| 18 | Q08211 DHX9_HUMAN  | E.DCIQM*THFVPPPK.D                |            | 2 | 2,745  | 0,273 | -0,154 |
| 18 | P04406 G3P_HUMAN   | R.VVDLM*AHM*ASKE.-                |            | 2 | 2,7376 | 0,306 | -0,627 |
| 18 | P35527 K1C9_HUMAN  | K.TLNDM*RQEYEQLIAK.N              |            | 2 | 2,7374 | 0,196 | 0      |
| 18 | Q09666 AHNK_HUMAN  | K.ISM*PDLDLHLKS#PK.A              | S2397:     | 3 | 2,7352 | 0,183 | 0,108  |
| 18 | Q5VT52 K0460_HUMAN | K.SAVSTSVPTKPTENISK.A             |            | 2 | 2,7313 | 0,399 | -0,349 |
| 18 | P40222 TXLNA_HUMAN | D.LSAGGQGLTDSGPERRPEPGAQAPSS#PR.V | S515:      | 3 | 2,7296 | 0,179 | 0,61   |
| 18 | Q9UKG1 DP13A_HUMAN | E.DSILHQLFIVR.F                   |            | 3 | 2,7292 | 0,324 | 0,205  |

|    |                    |                             |              |   |        |       |        |
|----|--------------------|-----------------------------|--------------|---|--------|-------|--------|
| 18 | P22626 ROA2_HUMAN  | R.GFGFVTDDHDPVD.K           |              | 2 | 2,7273 | 0,329 | -0,078 |
| 18 | Q9NQW6 ANLN_HUMAN  | K.TPIS#PLKTGVSKPIVK.S       | S323:        | 2 | 2,7272 | 0,355 | -0,14  |
| 18 | P51956 NEK3_HUMAN  | E.ASDSVDGGHDSVILDPER.L      |              | 3 | 2,7269 | 0,092 | 0,196  |
| 18 | P13639 EF2_HUMAN   | E.SGEHIIAGAGELHLE.I         |              | 3 | 2,7242 | 0,15  | -1,074 |
| 18 | O60524 SDCG1_HUMAN | K.KKLPS#DSGDLE.A            | S831:        | 2 | 2,7184 | 0,318 | -0,865 |
| 18 | P25787 PSA2_HUMAN  | E.DAIHTAILTLKE.S            |              | 2 | 2,718  | 0,402 | -0,184 |
| 18 | Q14980 NUMA1_HUMAN | R.KRVS#LEPHQGPQT#PE.S       | S1991:T2000: | 3 | 2,7178 | 0,164 | -0,715 |
| 18 | O60264 SMCA5_HUMAN | E.LFAHFIQPAAQK.T            |              | 2 | 2,7154 | 0,369 | -0,623 |
| 18 | Q9Y2F5 K0947_HUMAN | E.TQDTSQSSLPGLHCYTGIR.E     |              | 3 | 2,7115 | 0,279 | -0,165 |
| 18 | Q13177 PAK2_HUMAN  | E.KERPEIS#PPSDFE.H          | S75:         | 2 | 2,7096 | 0,413 | -0,076 |
| 18 | A0MZ66 SHOT1_HUMAN | K.RQS#HLLLQSSIPDQQLK.A      | S249:        | 3 | 2,7005 | 0,131 | -0,67  |
| 18 | Q9P266 K1462_HUMAN | R.SSDAKPLPASYPAEPR.E        |              | 3 | 2,6986 | 0,297 | -0,108 |
| 18 | Q9BSI4 TINF2_HUMAN | R.ALKENPVLDLPATEQKE.N       |              | 3 | 2,6969 | 0,207 | -0,103 |
| 18 | O43290 SNUT1_HUMAN | E.DESVDDLAQQKPR.S           |              | 2 | 2,6959 | 0,281 | 0      |
| 18 | Q16533 SNPC1_HUMAN | K.ALSLIKDDFFDNK.N           |              | 2 | 2,6953 | 0,286 | 0,596  |
| 18 | Q14839 CHD4_HUMAN  | R.AYHM*VCLDPDM*EKAPE.G      |              | 3 | 2,6947 | 0,161 | -0,283 |
| 18 | Q9P260 K1468_HUMAN | E.DLM*VNHFLPGLR.C           |              | 3 | 2,6918 | 0,253 | 0,192  |
| 18 | P42166 LAP2A_HUMAN | E.LVANNVTLPAGEQRK.D         |              | 2 | 2,6892 | 0,347 | 0      |
| 18 | P15260 INGR1_HUMAN | E.SSSPLSSNQSEPGSIALNSYHSR.N |              | 3 | 2,6847 | 0,325 | 0      |
| 18 | Q8IY37 DHX37_HUMAN | R.ALAKPAVFIPVNR.S           |              | 3 | 2,6844 | 0,18  | 0,196  |
| 18 | P04626 ERBB2_HUMAN | K.GLQSLPTHDPSPQR.Y          |              | 3 | 2,6825 | 0,344 | -0,222 |
| 18 | Q15149 PLEC1_HUMAN | E.AQAATGFLLDPVKGER.L        |              | 3 | 2,6798 | 0,182 | -1,093 |
| 18 | Q969V6 MKL1_HUMAN  | E.ISADFKEPPSLPGK.E          |              | 2 | 2,6793 | 0,365 | -0,164 |
| 18 | O43719 HTSF1_HUMAN | K.RGFEGSCS#QKESEE.G         | S481:        | 2 | 2,6783 | 0,409 | 0      |
| 18 | P21333 FLNA_HUMAN  | R.FVPAEM*GTHTVSVK.Y         |              | 2 | 2,6781 | 0,445 | -0,482 |
| 18 | P07900 HS90A_HUMAN | E.TALLSSGFSLEDPQTHANR.I     |              | 3 | 2,6778 | 0,287 | 0,716  |
| 18 | P15336 ATF2_HUMAN  | K.AALTQQHPPVTNGDTVK.G       |              | 3 | 2,6744 | 0,199 | -0,412 |
| 18 | Q96HC4 PDLI5_HUMAN | R.ILAQITGTEHLKESE.A         |              | 2 | 2,6736 | 0,392 | -0,439 |
| 18 | Q76FK4 NOL8_HUMAN  | E.SESDPFEVVRDDFK.S          |              | 2 | 2,6719 | 0,398 | -0,438 |
| 18 | Q13685 AAMP_HUMAN  | K.DASLVVTTSGDHK.A           |              | 2 | 2,6712 | 0,279 | -0,367 |
| 18 | P48643 TCPE_HUMAN  | K.IAILTCPFEPKPK.T           |              | 3 | 2,6668 | 0,214 | 0,681  |
| 18 | Q8N954 CCD75_HUMAN | E.DKEDLSSNCPGPTSADHD.-      |              | 3 | 2,6651 | 0,109 | -0,941 |
| 18 | O00231 PSD11_HUMAN | R.EASIDILHSIVK.R            |              | 2 | 2,6641 | 0,327 | -0,276 |

|    |                    |                             |              |   |        |       |        |
|----|--------------------|-----------------------------|--------------|---|--------|-------|--------|
| 18 | P36776 LONM_HUMAN  | R.AGVTCIVLPAENKK.D          |              | 3 | 2,6625 | 0,198 | 0,366  |
| 18 | P08133 ANXA6_HUMAN | E.DTIIDIITHR.S              |              | 2 | 2,6597 | 0,308 | -0,917 |
| 18 | Q9NQY0 BIN3_HUMAN  | K.IFGDLSHQLDQPGHSDE.Q       |              | 3 | 2,6572 | 0,152 | -0,579 |
| 18 | Q68E01 INT3_HUMAN  | R.VLAHLAPLFDNPK.L           |              | 2 | 2,657  | 0,275 | -0,255 |
| 18 | P98082 DAB2_HUMAN  | E.ALM*ILDDQTNK.LK.S         |              | 3 | 2,656  | 0,285 | 0,181  |
| 18 | Q08554 DSC1_HUMAN  | K.VTATDLDEPDTLHTR.L         |              | 3 | 2,6549 | 0,158 | 0,326  |
| 18 | O94972 TRI37_HUMAN | R.ALIHGSIGDILPK.T           |              | 2 | 2,6542 | 0,259 | -0,549 |
| 18 | P25490 TYY1_HUMAN  | K.KLPPGGIPGIDLSDPK.Q        |              | 3 | 2,6524 | 0,27  | 0      |
| 18 | Q96P16 P15RS_HUMAN | R.ALQDLENAASGDAAVHQR.I      |              | 3 | 2,6504 | 0,236 | -0,49  |
| 18 | P19105 MLRM_HUMAN  | E.DLHDM*LASLGK.N            |              | 3 | 2,6463 | 0,232 | 0,677  |
| 18 | Q14980 NUMA1_HUMAN | R.KRVS#LEPHQGPGT#PE.S       | S1991:T2000: | 2 | 2,6453 | 0,264 | -0,272 |
| 18 | Q7Z4V5 HDGR2_HUMAN | R.IDDIADGAVKPPPNK.Y         |              | 3 | 2,6442 | 0,23  | 0,472  |
| 18 | Q9UDT6 CLIP2_HUMAN | E.DALRDALDQAQQVEK.L         |              | 3 | 2,643  | 0,134 | -1,506 |
| 18 | Q06830 PRDX1_HUMAN | R.GLFIIDDKGILR.Q            |              | 3 | 2,641  | 0,252 | -0,336 |
| 18 | Q15527 SURF2_HUMAN | K.QGVEYVPAQLVHR.R           |              | 3 | 2,6382 | 0,274 | 0,898  |
| 18 | Q9UBT2 SAE2_HUMAN  | E.FEVVGDAPKVGPK.Q           |              | 3 | 2,636  | 0,329 | 0,683  |
| 18 | O43707 ACTN4_HUMAN | K.DGLAFNALIHR.H             |              | 3 | 2,6357 | 0,441 | 0,745  |
| 18 | Q8WUM4 PDC6_HUMAN  | R.VPDLKDLDPGK.A             |              | 2 | 2,635  | 0,387 | 0,093  |
| 18 | P78344 IF4G2_HUMAN | R.SNQLFNHGGHIM*PPTQSQFGE.M  |              | 3 | 2,6347 | 0,14  | -0,153 |
| 18 | Q9NTZ6 RBM12_HUMAN | K.QNM*GPSGQTHPPPQTLPR.S     |              | 3 | 2,6338 | 0,201 | -0,28  |
| 18 | O43852 CALU_HUMAN  | K.VHNDASQFDYDHDAFLGAE.A     |              | 3 | 2,6321 | 0,221 | 0,241  |
| 18 | Q92614 MY18A_HUMAN | E.DLHLQIDDIK.A              |              | 2 | 2,6302 | 0,339 | -1,524 |
| 18 | Q9NW13 RBM28_HUMAN | K.DTQSVSAIGEEKSHE.S         |              | 2 | 2,6287 | 0,229 | -0,679 |
| 18 | P63241 IF5A1_HUMAN | K.YEDICPSTHNM*DVPNIK.R      |              | 3 | 2,6282 | 0,276 | 0,179  |
| 18 | Q92615 LARP5_HUMAN | R.KNS#FGYR.K                | S498:        | 2 | 2,6253 | 0,202 | -0,833 |
| 18 | Q9BU64 CENPO_HUMAN | R.KGEKLDM*S#LVS.-           | S297:        | 2 | 2,6216 | 0,278 | -0,281 |
| 18 | O96013 PAK4_HUMAN  | R.DKRPLS#GPDVGTQPAGLASGAK.L | S181:        | 2 | 2,6211 | 0,374 | 0,531  |
| 18 | Q09666 AHNK_HUMAN  | E.VTGSDDETGKLQSGVSLASK.K    |              | 3 | 2,6176 | 0,143 | 0,27   |
| 18 | P68036 UB2L3_HUMAN | E.INFPAEYFPKPK.I            |              | 2 | 2,6146 | 0,292 | -0,552 |
| 18 | Q96HC4 PDLI5_HUMAN | R.ILAQITGTEHLKESE.A         |              | 3 | 2,6132 | 0,158 | -0,11  |
| 18 | P46087 NOL1_HUMAN  | R.LGVTNTIISHYDGR.Q          |              | 3 | 2,6131 | 0,362 | 0,592  |
| 18 | Q9H9J4 UBP42_HUMAN | D.M*APAGHPEGDAEPSGER.V      |              | 3 | 2,6117 | 0,278 | -0,402 |
| 18 | P22102 PUR2_HUMAN  | K.AAGFKDPLASGTDGVTGK.L      |              | 3 | 2,6063 | 0,119 | 0,203  |

|    |                     |                            |            |   |        |       |        |
|----|---------------------|----------------------------|------------|---|--------|-------|--------|
| 18 | Q6P4E1 CASC4_HUMAN  | R.NSDLLLLVDTHK.K           |            | 3 | 2,6046 | 0,309 | 0,535  |
| 18 | Q14203 DCTN1_HUMAN  | K.ASLASLPLHVAK.L           |            | 2 | 2,6026 | 0,432 | 0,281  |
| 18 | Q05209 PTN12_HUMAN  | E.NM*ISSIEPEKQD.S          |            | 2 | 2,6023 | 0,244 | -0,52  |
| 18 | Q16555 DPYL2_HUMAN  | K.TVTPASSAKTS#PAKQQAPPVR.N | S522:      | 3 | 2,6004 | 0,154 | 0,083  |
| 18 | Q9UKV3 ACINU_HUMAN  | E.KSKS#PSPRLT#E.D          | S386:T393: | 2 | 2,5997 | 0,324 | -0,903 |
| 18 | P08670 VIME_HUMAN   | D.VDVSKPDLTAALR.D          |            | 3 | 2,5914 | 0,286 | 0,198  |
| 18 | Q12904 MCA1_HUMAN   | K.QQSIAGSADSKPIDVSR.L      |            | 3 | 2,5907 | 0,253 | 0,104  |
| 18 | Q96RP9 EFG1_HUMAN   | R.DNSHPFVGLAFK.L           |            | 3 | 2,5865 | 0,215 | 0,412  |
| 18 | Q92598 HS105_HUMAN  | R.VNTHGIFTISTASM*VEK.V     |            | 2 | 2,5857 | 0,361 | 0,066  |
| 18 | Q96AT1 K1143_HUMAN  | R.NQVSYVRPAEPAFLAR.F       |            | 3 | 2,5852 | 0,206 | 0,805  |
| 18 | Q9BUL5 PHF23_HUMAN  | R.RLGGPPKS#GEP.-           | S400:      | 2 | 2,5852 | 0,429 | -0,312 |
| 18 | Q9Y5S2 MRCKB_HUMAN  | E.YFNTAPLAHDLTFR.T         |            | 3 | 2,581  | 0,251 | -0,329 |
| 18 | A8MSQ1 A8MSQ1_HUMAN | R.LCYHFGCLDPPLK.K          |            | 3 | 2,5798 | 0,227 | -1,694 |
| 18 | Q96T58 MINT_HUMAN   | R.RAS#YDYNQDR.T            | S623:      | 2 | 2,5763 | 0,3   | -0,803 |
| 18 | Q01813 K6PP_HUMAN   | R.LAIKLPDDQIPK.T           |            | 3 | 2,5687 | 0,243 | 0,135  |
| 18 | Q14203 DCTN1_HUMAN  | K.LSHEGPGSELPAALYR.K       |            | 3 | 2,5683 | 0,154 | 0,313  |
| 18 | Q14CX7 CL030_HUMAN  | K.SLLDQLKDVFSK.C           |            | 2 | 2,5675 | 0,363 | -0,438 |
| 18 | Q8TBX8 PI42C_HUMAN  | D.YSLLGIHDIIR.G            |            | 3 | 2,567  | 0,451 | -0,065 |
| 18 | P00558 PGK1_HUMAN   | K.SLLGKDVLFK.D             |            | 2 | 2,5665 | 0,188 | -0,297 |
| 18 | O00303 EIF3F_HUMAN  | R.VIGTLLGTVDKHSVE.V        |            | 2 | 2,563  | 0,245 | -0,233 |
| 18 | P22681 CBL_HUMAN    | E.IKGTEPIVVDPFDPR.G        |            | 2 | 2,5616 | 0,26  | 0,072  |
| 18 | O60506 HNRPO_HUMAN  | E.IYVAGLVAHSDLDER.A        |            | 3 | 2,5603 | 0,427 | 0,221  |
| 18 | P62753 RS6_HUMAN    | R.RLS#S#LRASTSK.S          | S235:S236: | 2 | 2,5556 | 0,407 | -0,536 |
| 18 | P52948 NUP98_HUMAN  | E.NNS#YHM*HPAGIILTK.V      | S726:      | 3 | 2,5523 | 0,226 | -0,204 |
| 18 | Q5SRE5 NU188_HUMAN  | R.DGVCVLGLHLAK.E           |            | 2 | 2,5523 | 0,321 | 0,19   |
| 18 | O15417 TNC18_HUMAN  | E.AGRPGVLQAPPGS#PRPLDRPE.G | S416:      | 3 | 2,552  | 0,244 | 0,163  |
| 18 | Q5TDH0 DDI2_HUMAN   | E.NADPRPPVQFPNLPR.I        |            | 3 | 2,5483 | 0,222 | -0,532 |
| 18 | Q14203 DCTN1_HUMAN  | K.ASLASLPLHVAK.L           |            | 3 | 2,5474 | 0,281 | 0,491  |
| 18 | P49736 MCM2_HUMAN   | R.RGNDPLTS#SPGR.S          | S26:       | 2 | 2,5472 | 0,257 | -0,548 |
| 18 | Q16531 DDB1_HUMAN   | R.SDPNREDDTLVLSFVGQTR.V    |            | 3 | 2,5466 | 0,129 | 0,488  |
| 18 | Q8NFC6 FA44A_HUMAN  | R.DCLADVDTKPAYQNL.R.Q      |            | 3 | 2,5435 | 0,096 | 0,097  |
| 18 | Q6FI81 CPIN1_HUMAN  | K.SSPSVKPAVDPAAAK.L        |            | 2 | 2,5411 | 0,261 | -0,428 |
| 18 | O43172 PRP4_HUMAN   | R.NILSVVGTDAKK.T           |            | 2 | 2,5411 | 0,329 | 0,898  |



|    |                    |                              |              |   |        |       |        |
|----|--------------------|------------------------------|--------------|---|--------|-------|--------|
| 18 | Q8IX01 SFR14_HUMAN | R.DYDVDHPGEADSVLR.G          |              | 3 | 2,541  | 0,25  | 0      |
| 18 | P48634 BAT2_HUMAN  | R.DSQSASGEERPEADGK.K         |              | 3 | 2,5407 | 0,19  | -0,104 |
| 18 | Q5VT52 K0460_HUMAN | R.GPTSTSIDNIDGTPVRDER.S      |              | 2 | 2,5403 | 0,283 | 0,12   |
| 18 | Q9NPJ3 THEM2_HUMAN | E.DIVITAHVLK.Q               |              | 2 | 2,539  | 0,32  | 0,11   |
| 18 | Q14697 GANAB_HUMAN | K.LVAIVDPHIK.V               |              | 2 | 2,539  | 0,198 | 0,221  |
| 18 | Q66K74 MAP1S_HUMAN | E.LPLAASSIPRPT#PS#PESHR.S    | T638:S640:   | 3 | 2,537  | 0,217 | -0,314 |
| 18 | P12814 ACTN1_HUMAN | K.M*LDAEDIVGTARPDEK.A        |              | 3 | 2,5345 | 0,314 | 0,206  |
| 18 | P81274 GPSM2_HUMAN | R.AFGNLGNTHYLLGNFR.D         |              | 3 | 2,5339 | 0,283 | 0,102  |
| 18 | Q8WWM7 ATX2L_HUMAN | R.GPHHLDNS#SPGPGSE.A         | S390:        | 3 | 2,5319 | 0,135 | 0      |
| 18 | Q9ULV4 COR1C_HUMAN | E.ASGGGAFLVPLHK.T            |              | 2 | 2,5298 | 0,41  | -0,357 |
| 18 | Q8WUX9 CHMP7_HUMAN | R.HFTNS#VPNPR.I              | S410:        | 2 | 2,5291 | 0,319 | -0,391 |
| 18 | Q9UK61 CC063_HUMAN | E.LM*VTSDHIVPGDM*AR.E        |              | 3 | 2,5248 | 0,1   | -0,219 |
| 18 | Q9NQR4 NIT2_HUMAN  | R.AVDNQVYVATASPARDDK.A       |              | 3 | 2,5245 | 0,239 | -0,191 |
| 18 | O43379 WDR62_HUMAN | R.AGTGYAS#PDRTHVLAAGK.A      | S1144:       | 3 | 2,5189 | 0,211 | 0      |
| 18 | Q13123 RED_HUMAN   | K.VDDEPM*DVDKGGSTK.E         |              | 3 | 2,5163 | 0,182 | -0,107 |
| 18 | Q9NPI6 DCP1A_HUMAN | K.SQLQDTLIHLIK.N             |              | 3 | 2,5157 | 0,351 | 0      |
| 18 | Q9H4H8 FA83D_HUMAN | R.FLNPDEVHAILR.A             |              | 2 | 2,5135 | 0,363 | -0,257 |
| 18 | Q8WXI9 P66B_HUMAN  | R.SLDPADERDDVLAK.R           |              | 2 | 2,51   | 0,368 | -0,316 |
| 18 | P42166 LAP2A_HUMAN | E.LVANNVTLPAGEQRK.D          |              | 3 | 2,5092 | 0,205 | 0,227  |
| 18 | P04792 HSPB1_HUMAN | E.SPAVAAPAYS.R               |              | 2 | 2,5052 | 0,395 | -0,336 |
| 18 | Q02241 KIF23_HUMAN | K.RRS#STVAPAQPDGAE.S         | S911:        | 2 | 2,5047 | 0,364 | -0,226 |
| 18 | Q9Y490 TLN1_HUMAN  | K.AGFLDLKDFLPKE.Y            |              | 3 | 2,5028 | 0,117 | 0      |
| 18 | Q7Z4S6 KI21A_HUMAN | K.HSDSGTSEASLS#PPS#SPPSRPR.N | S1271:S1274: | 3 | 2,4998 | 0,235 | -0,153 |
| 18 | O75822 EIF3J_HUMAN | K.VLTPEEQLADKLR.L            |              | 2 | 2,4996 | 0,322 | -0,484 |
| 18 | Q96E09 F122A_HUMAN | R.RNS#TTFPSR.H               | S62:         | 2 | 2,4987 | 0,194 | -0,319 |
| 18 | P49756 RBM25_HUMAN | K.LVPLDYGEDDKNATK.G          |              | 2 | 2,4982 | 0,384 | -0,291 |
| 18 | Q09666 AHNK_HUMAN  | K.ISM*PDVDFNLKGP.K           |              | 2 | 2,4974 | 0,356 | 0      |
| 18 | Q8IYX8 CF182_HUMAN | K.IHSPNSQALILALK.T           |              | 2 | 2,4967 | 0,229 | -0,302 |
| 18 | P49736 MCM2_HUMAN  | R.RGNDPLTSS#PGR.S            | S27:         | 2 | 2,4955 | 0,184 | -1,095 |
| 18 | P04406 G3P_HUMAN   | K.VVKQASEGPLKGILGYTE.H       |              | 3 | 2,4951 | 0,234 | 0      |
| 18 | Q8NI08 NCOA7_HUMAN | E.VVSIALYNDISHM*K.I          |              | 2 | 2,4903 | 0,133 | -0,304 |
| 18 | P40222 TXLNA_HUMAN | R.RPEGPGAQAPSS#PR.V          | S515:        | 3 | 2,4901 | 0,239 | 0,307  |
| 18 | O00712 NFIB_HUMAN  | E.IPSQPYHDM*NSGVNLQR.S       |              | 3 | 2,4895 | 0,232 | -0,428 |

|    |                    |                               |          |   |        |       |        |
|----|--------------------|-------------------------------|----------|---|--------|-------|--------|
| 18 | Q96SU4 OSBL9_HUMAN | R.LIDSSGSASVLTHSSSGNSLK.R     |          | 3 | 2,4871 | 0,385 | 0,179  |
| 18 | O43707 ACTN4_HUMAN | K.DGLAFNALIHR.H               |          | 2 | 2,486  | 0,277 | 0      |
| 18 | Q14738 2A5D_HUMAN  | R.RQS#S#SRFNLSK.N             | S88:S89: | 2 | 2,4857 | 0,37  | -0,581 |
| 18 | Q08211 DHX9_HUMAN  | E.DCIQM*THFVPPPK.D            |          | 3 | 2,4832 | 0,217 | 0,231  |
| 18 | Q86VP6 CAND1_HUMAN | K.ADVFHAYLSLLK.Q              |          | 2 | 2,4796 | 0,281 | -0,266 |
| 18 | P05556 ITB1_HUMAN  | K.LPQPVPQDPVSHCK.E            |          | 3 | 2,4638 | 0,121 | 0,343  |
| 18 | P43243 MATR3_HUMAN | R.GPSLNPVLDYDHGSR.S           |          | 3 | 2,4633 | 0,166 | 0,337  |
| 18 | Q9UJC5 SH3L2_HUMAN | E.SNTVFSFLGLKPR.L             |          | 2 | 2,4632 | 0,28  | -0,333 |
| 18 | Q8TAT6 NPL4_HUMAN  | E.DYLNHLEPPVK.H               |          | 2 | 2,4613 | 0,367 | -0,276 |
| 18 | Q9ULV4 COR1C_HUMAN | E.ASGGGAFLVPLHK.T             |          | 3 | 2,4571 | 0,297 | 0,134  |
| 18 | Q9Y3F4 STRAP_HUMAN | R.SIAFHSAVSLDPIK.S            |          | 3 | 2,4539 | 0,151 | 0,246  |
| 18 | Q5SRE5 NU188_HUMAN | R.DGVCVLGLHLAKE.L             |          | 3 | 2,4526 | 0,264 | 0,259  |
| 18 | Q13077 TRAF1_HUMAN | K.CRGEDLQISIS#PGSR.L          | S66:     | 2 | 2,451  | 0,191 | -0,223 |
| 18 | P04637 P53_HUMAN   | K.RALPNNTSSS#PQPK.K           | S315:    | 3 | 2,4485 | 0,225 | 0,116  |
| 18 | Q9H2M9 RBGPR_HUMAN | E.DCLILQTLHLSK.G              |          | 3 | 2,4481 | 0,081 | 0,127  |
| 18 | Q5JRA6 MIA3_HUMAN  | E.ASGKPSPSDPGSGTATM*M*NSSSR.G |          | 2 | 2,4468 | 0,188 | 0      |
| 18 | P63279 UBC9_HUMAN  | K.DHPFGFVAVPTK.N              |          | 2 | 2,4455 | 0,447 | -0,093 |
| 18 | P11388 TOP2A_HUMAN | K.GESDDFHM*DFDSAVAPR.A        |          | 3 | 2,444  | 0,082 | -0,478 |
| 18 | P29692 EF1D_HUMAN  | R.ATAPQTQHVS#PM*RQVEPPAK.K    | S133:    | 3 | 2,4414 | 0,091 | -0,806 |
| 18 | O75787 RENR_HUMAN  | E.LQVLHDISSLLSR.H             |          | 3 | 2,4403 | 0,201 | -0,062 |
| 18 | P33176 KINH_HUMAN  | E.DTVVIASKPYAFDR.V            |          | 2 | 2,4382 | 0,33  | -0,925 |
| 18 | Q04446 GLGB_HUMAN  | E.IDPYLKPYPVDFQR.R            |          | 2 | 2,4359 | 0,294 | -0,141 |
| 18 | P27816 MAP4_HUMAN  | K.M*DLAPSKDM*GPPKE.N          |          | 3 | 2,4337 | 0,306 | -0,354 |
| 18 | P35580 MYH10_HUMAN | K.LDPHLVLDQLR.C               |          | 3 | 2,4315 | 0,119 | 0,485  |
| 18 | P26006 ITA3_HUMAN  | R.TGAVYLCPLTAHKDDCE.R         |          | 3 | 2,4308 | 0,202 | -0,469 |
| 18 | P25787 PSA2_HUMAN  | E.DAIHTAILTK.E                |          | 2 | 2,4272 | 0,312 | -0,204 |
| 18 | O15085 ARHGB_HUMAN | K.SSSQSTFHIPLS#PVEVKPGNVR.N   | S556:    | 3 | 2,4253 | 0,285 | 0,15   |
| 18 | A0FGR8 ESYT2_HUMAN | R.SSSLLASPGHISVK.E            |          | 2 | 2,422  | 0,155 | -0,249 |
| 18 | Q9Y613 FHOD1_HUMAN | E.TLAGAM*PNEAGGHPDAR.Q        |          | 3 | 2,4198 | 0,374 | 0      |
| 18 | Q99755 PI51A_HUMAN | R.AGSSGNSCITYQPSVSGEHK.A      |          | 3 | 2,4196 | 0,158 | 0,885  |
| 18 | O60841 IF2P_HUMAN  | E.IIYHLFDAFTK.Y               |          | 2 | 2,4195 | 0,319 | -0,535 |
| 18 | P47756 CAPZB_HUMAN | K.DYLLCDYNRDGDSYR.S           |          | 3 | 2,4152 | 0,201 | -0,95  |
| 18 | Q9C004 SPY4_HUMAN  | R.LQHPLTILPIDQVK.T            |          | 3 | 2,4138 | 0,209 | 0,226  |

|    |                    |                          |              |   |        |       |        |
|----|--------------------|--------------------------|--------------|---|--------|-------|--------|
| 18 | Q09666 AHNK_HUMAN  | K.VKM*PDVDISVPKIE.G      |              | 2 | 2,4112 | 0,242 | -0,077 |
| 18 | Q99436 PSB7_HUMAN  | K.LDFLRPYTPVFNK.K        |              | 3 | 2,4111 | 0,229 | 0,25   |
| 18 | O75122 CLAP2_HUMAN | R.NTGNGTQSSM*GSPLRTPR.S  |              | 3 | 2,4109 | 0,305 | -1,234 |
| 18 | Q09666 AHNK_HUMAN  | K.ISM*PDVDLHLK.G         |              | 2 | 2,409  | 0,318 | 0,19   |
| 18 | Q7Z417 NUFP2_HUMAN | E.SGALSLEPSHIGDLQK.A     |              | 3 | 2,4082 | 0,266 | 0,111  |
| 18 | Q9BXP5 ARS2_HUMAN  | R.QQM*QDFFLAHKDEE.W      |              | 3 | 2,4079 | 0,174 | -0,103 |
| 18 | P34932 HSP74_HUMAN | E.DQYDHLDAADM*TK.V       |              | 3 | 2,4074 | 0,21  | -0,238 |
| 18 | Q9H4A3 WNK1_HUMAN  | K.DRPVSQPS#LVGSKEEPPAR.S | S170:        | 3 | 2,401  | 0,147 | -0,164 |
| 18 | Q8NEL9 DDHD1_HUMAN | E.HLPGGDPDDGDVPLALLR.G   |              | 2 | 2,4004 | 0,352 | 0,066  |
| 18 | P34059 GALNS_HUMAN | K.LPLIFHLGRDPGE.R        |              | 2 | 2,3973 | 0,485 | -0,417 |
| 18 | Q86V48 LUZP1_HUMAN | R.AIIKPVIVDKD.V          |              | 3 | 2,3966 | 0,216 | 0,528  |
| 18 | P41091 IF2G_HUMAN  | E.VDDLKGGVAGGSILK.G      |              | 2 | 2,3959 | 0,319 | -0,171 |
| 18 | Q14676 MDC1_HUMAN  | E.LQISTSTDQPVTPKPTR.T    |              | 3 | 2,395  | 0,135 | 0      |
| 18 | Q58EX2 SDK2_HUMAN  | R.RLS#VKNS#FCR.K         | S1997:S2001: | 2 | 2,3935 | 0,249 | 0      |
| 18 | Q86VP6 CAND1_HUMAN | K.ADVFHAYLSLLK.Q         |              | 3 | 2,391  | 0,171 | 0,266  |
| 18 | Q04637 IF4G1_HUMAN | E.TPQVAVIVRPDDR.S        |              | 3 | 2,3894 | 0,171 | 0,437  |
| 18 | Q07157 ZO1_HUMAN   | E.TNPASSTSAVNHNVLNVR.L   |              | 3 | 2,3867 | 0,445 | 0,087  |
| 18 | O15357 SHIP2_HUMAN | E.GVPHQLLPPEPPSPAR.A     |              | 3 | 2,3862 | 0,324 | 0,324  |
| 18 | P49327 FAS_HUMAN   | R.GLKPSCTIPLM*K.K        |              | 3 | 2,3841 | 0,121 | 0,558  |
| 18 | O60763 USO1_HUMAN  | E.QLQTAVTQQVSIQQHK.D     |              | 3 | 2,3797 | 0,195 | 0,093  |
| 18 | Q96HC4 PDLI5_HUMAN | R.ASAAPKPEVPVQK.G        |              | 3 | 2,3764 | 0,337 | -0,129 |
| 18 | Q16760 DGKD_HUMAN  | K.ILTSQHSVVISSAK.V       |              | 2 | 2,3709 | 0,209 | -0,462 |
| 18 | Q9UQ35 SRRM2_HUMAN | K.THTTALAGRS#PS#PASGR.R  | S295:S297:   | 3 | 2,3709 | 0,146 | -0,1   |
| 18 | Q9Y490 TLN1_HUMAN  | K.AGFLDLKDFLPE.Y         |              | 2 | 2,3708 | 0,245 | -0,245 |
| 18 | Q13057 COASY_HUMAN | R.M*LGNLLRPPYERPE.L      |              | 3 | 2,3694 | 0,206 | -0,43  |
| 18 | A5A3E0 A26CB_HUMAN | E.LRVAPEEHPVLLTE.A       |              | 2 | 2,3677 | 0,31  | -0,685 |
| 18 | Q14244 MAP7_HUMAN  | K.AAPAQVRPPS#PGNIRPVK.R  | S365:        | 3 | 2,3657 | 0,224 | -0,095 |
| 18 | P17980 PRS6A_HUMAN | E.VDERPTEQYSDIGGLDK.Q    |              | 2 | 2,3608 | 0,219 | -0,254 |
| 18 | Q9UKY7 CDV3_HUMAN  | E.TPEPAM*TSGVYRPPGAR.L   |              | 3 | 2,3607 | 0,114 | -0,507 |
| 18 | Q13043 STK4_HUMAN  | R.ATATQLLQHPFVR.S        |              | 2 | 2,3596 | 0,085 | 0,082  |
| 18 | P43246 MSH2_HUMAN  | R.FFQGM*PEKPTTVR.L       |              | 3 | 2,3588 | 0,108 | 0,553  |
| 18 | Q01082 SPTB2_HUMAN | K.ILSSDDYGKDLTSVM*R.L    |              | 3 | 2,3581 | 0,309 | 0,302  |
| 18 | A0FGR8 ESYT2_HUMAN | K.AQPPEAGPQGLHDLGR.S     |              | 2 | 2,3571 | 0,251 | -0,668 |

|    |                    |                              |              |   |        |       |        |
|----|--------------------|------------------------------|--------------|---|--------|-------|--------|
| 18 | Q9H582 ZN644_HUMAN | E.SSVGGEDLDSYPDFLHK.M        |              | 3 | 2,3541 | 0,218 | -0,098 |
| 18 | P29401 TKT_HUMAN   | R.VLDPFTIKPLDR.K             |              | 2 | 2,3526 | 0,43  | -0,518 |
| 18 | Q9UKG1 DP13A_HUMAN | E.VFQIASNDHDAAINR.Y          |              | 3 | 2,3403 | 0,145 | 0,438  |
| 18 | O94915 FRYL_HUMAN  | E.LVDLKLPTAR.R               |              | 3 | 2,3388 | 0,23  | 0,748  |
| 18 | Q6PJT7 ZC3HE_HUMAN | R.DLVQPDKPASPK.F             |              | 2 | 2,3377 | 0,278 | -0,848 |
| 18 | P07741 APT_HUMAN   | R.DISPVLKDPASFR.A            |              | 2 | 2,3368 | 0,382 | -0,169 |
| 18 | Q8NB90 SPAT5_HUMAN | K.TFQNSLIHLGLNTM*K.S         |              | 2 | 2,3358 | 0,359 | -0,07  |
| 18 | P27816 MAP4_HUMAN  | K.M*DLAPSKDM*GPPKE.N         |              | 2 | 2,3309 | 0,37  | -0,394 |
| 18 | A1L0T0 ILVBL_HUMAN | R.DGHPVVVNILIGR.T            |              | 3 | 2,3291 | 0,166 | 0,197  |
| 18 | Q7Z4S6 KI21A_HUMAN | K.HSDSGTS#EASLSPSS#PPSRPR.N  | S1266:S1275: | 3 | 2,3287 | 0,112 | -0,076 |
| 18 | P29692 EF1D_HUMAN  | R.ATAPQTQHVSPM*R.Q           |              | 2 | 2,3274 | 0,367 | -0,339 |
| 18 | Q9BWT1 CDCA7_HUMAN | R.SSVTLPHIIRPVEE.I           |              | 3 | 2,3236 | 0,215 | 0,232  |
| 18 | Q5T4S7 UBR4_HUMAN  | R.HVTLPSPR.S                 | S2718:       | 2 | 2,3226 | 0,404 | -0,114 |
| 18 | P78347 GTF2I_HUMAN | K.ANELPQPPVPEPANAGKR.K       |              | 3 | 2,3211 | 0,296 | -0,194 |
| 18 | P02649 APOE_HUMAN  | E.KVQAAVGTSAAPVPSDNH.-       |              | 3 | 2,3186 | 0,132 | -0,837 |
| 18 | Q9Y6G9 DC1L1_HUMAN | K.AEDNFEDIITKPPVR.K          |              | 3 | 2,315  | 0,157 | 0      |
| 18 | P62330 ARF6_HUMAN  | K.QDLPDAM*KPHEIQE.K          |              | 3 | 2,3146 | 0,146 | 0,11   |
| 18 | O75362 ZN217_HUMAN | E.DFLQLFNLRPK.S              |              | 2 | 2,3051 | 0,117 | -0,526 |
| 18 | P19525 E2AK2_HUMAN | R.DGIISDIFDKKE.K             |              | 2 | 2,3017 | 0,119 | -1,061 |
| 18 | O60885 BRD4_HUMAN  | R.SEPFS#PSLRPEPPKHPE.S       | S1126:       | 3 | 2,2994 | 0,185 | 0      |
| 18 | Q14568 HS902_HUMAN | E.SSAGGSFTVR.T               |              | 2 | 2,2975 | 0,28  | 0      |
| 18 | O43660 PLRG1_HUMAN | R.THDM*FVADNGKPVPLDEE.S      |              | 3 | 2,294  | 0,126 | 0      |
| 18 | Q96AG4 LRC59_HUMAN | R.LVNLQHLLNNK.L              |              | 3 | 2,2922 | 0,202 | 0,417  |
| 18 | Q6S8J3 A26CA_HUMAN | E.EHPILLTEAPLNPK.A           |              | 2 | 2,2889 | 0,246 | -0,466 |
| 18 | P49593 PPM1F_HUMAN | R.AYFAVFDGGGVDAAR.Y          |              | 3 | 2,2876 | 0,303 | -0,332 |
| 18 | Q14692 BMS1_HUMAN  | E.LVQSLISTHSTIDAK.M          |              | 3 | 2,2835 | 0,202 | 0,34   |
| 18 | Q8NFP9 NBEA_HUMAN  | K.VSDDILGNSDRPGSGVHVE.V      |              | 3 | 2,2819 | 0,262 | 0,281  |
| 18 | Q5T5C0 STXB5_HUMAN | R.KLS#LPTDLKPDLDVK.D         | S759:        | 2 | 2,28   | 0,256 | -0,138 |
| 18 | Q9BVJ6 UT14A_HUMAN | E.AFAGDDVIRDFLK.E            |              | 2 | 2,2797 | 0,265 | -0,083 |
| 18 | Q7Z4S6 KI21A_HUMAN | K.HSDSGTSEASLS#PPSS#PPSRPR.N | S1271:S1275: | 3 | 2,2737 | 0,093 | -1,222 |
| 18 | Q4J6C6 PPCEL_HUMAN | E.ELKLDQPFIDCIR.V            |              | 2 | 2,2705 | 0,306 | -0,222 |
| 18 | O95425 SVIL_HUMAN  | R.ANPPITHLGDEPKE.F           |              | 2 | 2,2695 | 0,166 | -0,241 |
| 18 | Q08378 GOGA3_HUMAN | R.SRRDS#ICSSVSLE.S           | S389:        | 2 | 2,2675 | 0,321 | -0,155 |

|    |                     |                              |                 |   |        |       |        |
|----|---------------------|------------------------------|-----------------|---|--------|-------|--------|
| 18 | Q96ST2 IWS1_HUMAN   | R.GKHM*DFLS#DFE.M            | S527:           | 2 | 2,2666 | 0,298 | -0,343 |
| 18 | Q96AE4 FUBP1_HUMAN  | E.EYKVPDGM*VGFIIGR.G         |                 | 3 | 2,2623 | 0,134 | 0,323  |
| 18 | P18583 SON_HUMAN    | R.AGIEGPLLASDVGRDR.S         |                 | 2 | 2,2603 | 0,15  | -0,375 |
| 18 | P49327 FAS_HUMAN    | E.SIISIIHSSLAEPR.V           |                 | 3 | 2,2599 | 0,333 | 0,3    |
| 18 | Q05639 EF1A2_HUMAN  | K.YYITIIDAPGHR.D             |                 | 3 | 2,2578 | 0,182 | 0,129  |
| 18 | Q8TEH3 DEN1A_HUMAN  | E.AALQPLGQAKS#LEDLRAPK.D     | S592:           | 3 | 2,2538 | 0,141 | -0,351 |
| 18 | P09960 LKHA4_HUMAN  | K.ASM*HPVTAM*LVGK.D          |                 | 2 | 2,2533 | 0,242 | -1,421 |
| 18 | P49327 FAS_HUMAN    | R.GLKPSCTIPLM*K.K            |                 | 2 | 2,2482 | 0,304 | -0,579 |
| 18 | Q07955 SFRS1_HUMAN  | R.VKVDGPRSPS#Y#GRS#R.S       | S201:Y202:S205: | 3 | 2,247  | 0,161 | -0,096 |
| 18 | P60866 RS20_HUMAN   | R.LIDLHSPSEIVK.Q             |                 | 3 | 2,2457 | 0,272 | 0,068  |
| 18 | O60361 NDK8_HUMAN   | R.VM*LGETNPADSKPGTIR.G       |                 | 3 | 2,2452 | 0,116 | 0,102  |
| 18 | Q9Y2W2 WBP11_HUMAN  | K.ATATISAKPQITNPK.A          |                 | 3 | 2,2433 | 0,225 | -1,187 |
| 18 | Q14152 EIF3A_HUMAN  | R.LGDSLSR.K                  |                 | 2 | 2,2429 | 0,27  | 0,584  |
| 18 | P54132 BLM_HUMAN    | K.LIDTIPDDKLL.L              |                 | 3 | 2,2398 | 0,3   | 0,288  |
| 18 | Q8NI08 NCOA7_HUMAN  | K.IM*TSDSRPIVPLEK.S          |                 | 2 | 2,2344 | 0,128 | 0,152  |
| 18 | Q9UQ84 EXO1_HUMAN   | R.RKSDS#PTSLPE.N             | S639:           | 2 | 2,2341 | 0,104 | -0,47  |
| 18 | P31946 1433B_HUMAN  | D.STLIM*QLLR.D               |                 | 2 | 2,233  | 0,167 | -0,335 |
| 18 | Q6S8J3 A26CA_HUMAN  | K.AGFAGDDAPR.A               |                 | 2 | 2,2306 | 0,199 | -0,125 |
| 18 | Q09666 AHNK_HUMAN   | K.ISM*PDVDLHM*K.G            |                 | 3 | 2,228  | 0,12  | 0,555  |
| 18 | A0FGR8 ESYT2_HUMAN  | R.SSSSLLASPGHISVK.E          |                 | 3 | 2,2244 | 0,227 | 0,373  |
| 18 | Q9NQ86 TRI36_HUMAN  | D.RVESRAGFNLLAAE.R           |                 | 2 | 2,2194 | 0,09  | -0,519 |
| 18 | Q86V48 LUZP1_HUMAN  | E.RHTSTS#NIQVGLAE.L          | S822:           | 3 | 2,2132 | 0,109 | -0,23  |
| 18 | Q9BUJ2 HNRL1_HUMAN  | K.AIVICPTDEDLKDR.T           |                 | 2 | 2,2106 | 0,265 | -1,187 |
| 18 | Q8WXH0 SYNE2_HUMAN  | K.IGLKDPTVPAVK.H             |                 | 2 | 2,2099 | 0,176 | -0,197 |
| 18 | P49589 SYCC_HUMAN   | E.DVQAALKPFSVK.L             |                 | 2 | 2,2055 | 0,158 | -0,375 |
| 18 | Q96JI7 SPTCS_HUMAN  | E.LLEEEAPDIPLRR.V            |                 | 3 | 2,2027 | 0,275 | 1,769  |
| 18 | Q14165 K0152_HUMAN  | R.VGRAS#DYGMKLPILR.S         | S80:            | 2 | 2,1958 | 0,09  | -1,945 |
| 18 | Q53XS9 Q53XS9_HUMAN | R.KYTQSFCE.N                 |                 | 2 | 2,1957 | 0,28  | -0,327 |
| 18 | Q70Z53 F10C1_HUMAN  | E.DDLLLQKPFQKE.K             |                 | 3 | 2,1939 | 0,142 | 0      |
| 18 | P50991 TCPD_HUMAN   | E.ILTDM*SRPVELSDRE.T         |                 | 3 | 2,1933 | 0,2   | -0,309 |
| 18 | Q92974 ARHG2_HUMAN  | E.M*THFQAEEDGGSGM*ALPTLPR.G  |                 | 3 | 2,1925 | 0,241 | -0,562 |
| 18 | Q68DX9 Q68DX9_HUMAN | R.IDSPGFKPASQVYR.K           |                 | 2 | 2,1917 | 0,416 | -0,432 |
| 18 | P29692 EF1D_HUMAN   | K.SLAGSSGPGASSGTSGDHGELVVR.I |                 | 3 | 2,1887 | 0,183 | -0,586 |

|    |                     |                             |            |   |        |       |        |
|----|---------------------|-----------------------------|------------|---|--------|-------|--------|
| 18 | P62081 RS7_HUMAN    | E.DLVFPSEIVGKR.I            |            | 2 | 2,1885 | 0,34  | -0,718 |
| 18 | Q13428 TCOF_HUMAN   | E.ALAAM*NAAQVKPLGK.S        |            | 3 | 2,1869 | 0,439 | 1,22   |
| 18 | O75821 EIF3G_HUMAN  | E.DLNCQEEEDPM*NKLLK.G       |            | 3 | 2,1865 | 0,253 | 0,876  |
| 18 | Q9H6F5 CCD86_HUMAN  | R.RLGGLRPES#PE.S            | S18:       | 2 | 2,1853 | 0,401 | -0,567 |
| 18 | Q6IFS5 HSN2_HUMAN   | R.RKS#TSFLE.A               | S61:       | 2 | 2,185  | 0,135 | 0      |
| 18 | Q32MZ4 LRRF1_HUMAN  | K.DNAKIDGATQSSPAEPK.S       |            | 3 | 2,184  | 0,266 | -0,212 |
| 18 | Q96BR5 CA163_HUMAN  | K.SIAACHNVGLLAHDGQVNE.D     |            | 2 | 2,1779 | 0,136 | -0,183 |
| 18 | P40818 UBP8_HUMAN   | E.M*APSSAPPSTPPTHK.A        |            | 2 | 2,1754 | 0,199 | 0      |
| 18 | P40818 UBP8_HUMAN   | E.M*APSSAPPSTPPTHK.A        |            | 3 | 2,1746 | 0,199 | 0,3    |
| 18 | Q13263 TIF1B_HUMAN  | R.KVPRVS#LE.R               | S489:      | 2 | 2,1694 | 0,181 | -0,908 |
| 18 | Q99536 VAT1_HUMAN   | E.NGVTHPIDYHTTDYVDE.I       |            | 3 | 2,1665 | 0,102 | 0      |
| 18 | P00519 ABL1_HUMAN   | R.QVTVAPASGLPHKEE.A         |            | 3 | 2,1594 | 0,407 | 0,351  |
| 18 | Q9Y6M5 ZNT1_HUMAN   | E.IKNM*PNKQPES#SL.-         | S505:      | 2 | 2,1582 | 0,178 | -0,386 |
| 18 | Q9H9P8 L2HDH_HUMAN  | R.GLM*AIDCPHTGIVDYR.Q       |            | 3 | 2,155  | 0,249 | 0,199  |
| 18 | Q9P289 MST4_HUMAN   | K.LADFGVAGQLTDTQIKR.N       |            | 3 | 2,1548 | 0,152 | -0,1   |
| 18 | Q9ULU4 PKCB1_HUMAN  | K.ILM*SKPVLGGTGR.R          |            | 2 | 2,1499 | 0,328 | -0,426 |
| 18 | P29401 TKT_HUMAN    | E.IM*AVLFFHTM*R.Y           |            | 3 | 2,1487 | 0,269 | 0,458  |
| 18 | O95685 PPR3D_HUMAN  | R.ARS#LPS#SPERR.Q           | S74:S77:   | 2 | 2,1416 | 0,153 | 0,172  |
| 18 | P09132 SRP19_HUMAN  | E.DGSLCLVQFPSRK.S           |            | 3 | 2,1405 | 0,149 | 0,425  |
| 18 | Q99501 GA2L1_HUMAN  | R.ARS#PAAPRLS#R.V           | S479:S486: | 2 | 2,1395 | 0,244 | -0,182 |
| 18 | Q9NR12 PDLI7_HUMAN  | R.YLVALGHAYHPEE.F           |            | 2 | 2,1381 | 0,269 | -0,326 |
| 18 | Q66K74 MAP1S_HUMAN  | E.LPLAASSIPRPT#PSPES#HR.S   | T638:S643: | 3 | 2,1352 | 0,244 | 0,628  |
| 18 | P12814 ACTN1_HUMAN  | K.DGLGFCALIHR.H             |            | 3 | 2,134  | 0,332 | 0,799  |
| 18 | P49454 CENPF_HUMAN  | R.SPVDSGTILREPTTK.S         |            | 3 | 2,1316 | 0,213 | 0,343  |
| 18 | Q7Z6Z7 HUWE1_HUMAN  | R.LLVGNDDVHIIAR.S           |            | 3 | 2,1298 | 0,398 | -0,573 |
| 18 | P32322 P5CR1_HUMAN  | K.LDSPAGTALSPSGHTK.L        |            | 3 | 2,1286 | 0,254 | 0,238  |
| 18 | Q9BX67 JAM3_HUMAN   | R.HKS#SFVI.-                | S306:      | 2 | 2,1226 | 0,294 | 0      |
| 18 | Q68DX9 Q68DX9_HUMAN | R.IDSPGFKPASQQVYR.K         |            | 3 | 2,1223 | 0,256 | 0,108  |
| 18 | Q09666 AHNK_HUMAN   | E.VTGS#DDEETGKLQSGVSLASKK.S | S5841:     | 3 | 2,122  | 0,227 | 0,082  |
| 18 | P26640 SYVC_HUMAN   | E.TM*LGDVAVAVHPK.D          |            | 2 | 2,1196 | 0,297 | -0,27  |
| 18 | Q07955 SFRS1_HUMAN  | R.VKVDGPRS#PS#YGR.S         | S199:S201: | 2 | 2,1096 | 0,353 | -0,696 |
| 18 | P50395 GDIB_HUMAN   | K.FLVVYVANFDEKDPR.T         |            | 3 | 2,1083 | 0,247 | -0,214 |
| 18 | P42166 LAP2A_HUMAN  | K.GDLPREPLVATNLPGR.G        |            | 2 | 2,1068 | 0,28  | -0,358 |

|    |                    |                              |              |   |        |       |        |
|----|--------------------|------------------------------|--------------|---|--------|-------|--------|
| 18 | P29966 MARCS_HUMAN | E.AAAERPGEAAVASSPSK.A        |              | 3 | 2,1049 | 0,093 | 0      |
| 18 | Q12872 SFRS8_HUMAN | K.VVDPDHLAALVR.K             |              | 2 | 2,1048 | 0,397 | -0,261 |
| 18 | Q92466 DDB2_HUMAN  | K.RS#RSPLLEPE.A              | S24:         | 2 | 2,1038 | 0,149 | -0,438 |
| 18 | Q8N264 RHG24_HUMAN | K.LDVS#RSPPLM*VK.K           | S413:        | 3 | 2,1028 | 0,147 | -1,145 |
| 18 | Q9NRX4 PHP14_HUMAN | K.IHVYGYSM*AYGPAQHAISTE.K    |              | 3 | 2,1022 | 0,127 | 0,083  |
| 18 | Q8ND56 LS14A_HUMAN | E.QAVQTASAHLPAPAAVGR.R       |              | 2 | 2,0964 | 0,415 | -0,489 |
| 18 | P49585 PCY1A_HUMAN | E.RSPSPS#FR.W                | S333:        | 2 | 2,0937 | 0,177 | -0,12  |
| 18 | Q9Y6Q9 NCOA3_HUMAN | R.YLLDRDDPSDALSKE.L          |              | 3 | 2,0907 | 0,102 | 0,421  |
| 18 | P49321 NASP_HUMAN  | E.VSEKPGQEAPVLPK.D           |              | 2 | 2,0831 | 0,193 | -0,247 |
| 18 | P67870 CSK2B_HUMAN | K.IHPM*AYQLQLQAASNFKS#PVK.T  | S209:        | 3 | 2,0827 | 0,347 | -0,297 |
| 18 | P54707 AT12A_HUMAN | K.VIM*VTGDHPITAK.A           |              | 3 | 2,0756 | 0,214 | 0,458  |
| 18 | Q53EL6 PDCD4_HUMAN | K.RFVS#EGDGGR.L              | S457:        | 2 | 2,0695 | 0,293 | -0,21  |
| 18 | Q53F19 CQ085_HUMAN | R.ALINM*SSLPAQDKIR.S         |              | 3 | 2,0694 | 0,463 | -0,219 |
| 18 | P46013 KI67_HUMAN  | R.ASQPDLVDTPTSSKPQPK.R       |              | 3 | 2,0625 | 0,393 | -1,447 |
| 18 | P53618 COPB_HUMAN  | K.SQGM*ALSLGDKINLSQK.K       |              | 3 | 2,0607 | 0,294 | -0,203 |
| 18 | Q15046 SYK_HUMAN   | E.KQLSQATAAATNHTTDNGVGPPEE.S |              | 3 | 2,0575 | 0,179 | -0,519 |
| 18 | Q86SQ4 GP126_HUMAN | E.HS#FNKSGS#LR.Q             | S1199:S1205: | 3 | 2,0541 | 0,093 | 0,495  |
| 18 | Q6GYQ0 GRIPE_HUMAN | R.VRHFS#QSEETGNE.V           | S773:        | 3 | 2,0499 | 0,142 | 1,029  |
| 18 | Q9BW71 HIRP3_HUMAN | K.GKRPT#PCSDPE.R             | T84:         | 2 | 2,0429 | 0,203 | -0,086 |
| 18 | Q9P2M4 TBC14_HUMAN | E.IGNPEPVPCSAVHVR.R          |              | 3 | 2,0427 | 0,133 | 0,336  |
| 18 | P04083 ANXA1_HUMAN | E.ATIIDILTKR.N               |              | 2 | 2,039  | 0,153 | 0      |
| 18 | P37275 ZEB1_HUMAN  | K.IADSVNLPLDVVKK.W           |              | 3 | 2,039  | 0,23  | -0,061 |
| 18 | P60900 PSA6_HUMAN  | K.LLDSSTVTHLFK.I             |              | 3 | 2,0356 | 0,185 | 0,269  |
| 18 | Q96PE2 ARHG_HUMAN  | E.SRQPPT#PPPR.T              | T170:        | 2 | 2,0305 | 0,318 | -0,704 |
| 18 | P62753 RS6_HUMAN   | R.RLSS#LRAS#TSKSE.S          | S236:S240:   | 2 | 2,027  | 0,38  | -0,386 |
| 18 | Q15185 TEBP_HUMAN  | E.IDLFHCIDPND.S              |              | 2 | 2,0265 | 0,227 | -0,359 |
| 18 | Q5VT52 K0460_HUMAN | R.GPTSTSIDNIDGTPVRDER.S      |              | 3 | 2,0256 | 0,129 | 0,09   |
| 18 | Q5VWJ9 SNX30_HUMAN | R.DLFVIVDDPKK.H              |              | 3 | 2,0254 | 0,081 | 0,284  |
| 18 | P06756 ITAV_HUMAN  | E.REQLQPHENGEGNS#ET.-        | S1046:       | 3 | 2,0224 | 0,155 | 0      |
| 18 | P62937 PIIA_HUMAN  | R.VSFELFADKVPK.T             |              | 3 | 2,0199 | 0,104 | 0,265  |
| 18 | Q86SQ4 GP126_HUMAN | E.HS#FNKSGS#LR.Q             | S1199:S1205: | 2 | 2,0109 | 0,134 | 0      |
| 18 | Q9H2U1 DHX36_HUMAN | R.NRS#YIDRDSE.Y              | S161:        | 2 | 2,0077 | 0,109 | -1,554 |
| 18 | P46087 NOL1_HUMAN  | R.LGVTNTIISHYDGR.Q           |              | 2 | 2,0075 | 0,09  | 0,237  |

|    |                     |                          |            |   |        |       |        |
|----|---------------------|--------------------------|------------|---|--------|-------|--------|
| 18 | Q14258 TRI25_HUMAN  | K.FDTIYQILLKK.K          |            | 2 | 2,0062 | 0,381 | -0,53  |
| 18 | Q16401 PSMD5_HUMAN  | R.LLQAM*EPVHVAR.N        |            | 3 | 2,0055 | 0,16  | 0,331  |
| 18 | Q96K21 ZFY19_HUMAN  | E.HQTSAYS#PPR.A          | S463:      | 2 | 2,004  | 0,131 | -0,698 |
| 18 | P61313 RL15_HUMAN   | E.VILIDPFHK.A            |            | 2 | 1,9944 | 0,254 | -0,113 |
| 18 | O95466 FMNL_HUMAN   | E.AGADTPGKGEPAPKS#PPK.A  | S1031:     | 2 | 1,9711 | 0,32  | -0,389 |
| 18 | O60841 IF2P_HUMAN   | R.APIICVLGHVD.T          |            | 2 | 1,9694 | 0,271 | -0,204 |
| 18 | Q14161 GIT2_HUMAN   | E.NKHDS#YIPCSE.R         | S668:      | 2 | 1,9669 | 0,188 | -1,28  |
| 18 | Q96DR7 SGEF_HUMAN   | E.KFS#SLGR.I             | S355:      | 2 | 1,9582 | 0,085 | 0,139  |
| 18 | O00299 CLIC1_HUMAN  | R.KFLDGNE.L              |            | 2 | 1,9562 | 0,137 | 1,112  |
| 18 | Q8WZ73 RFFL_HUMAN   | K.DLRDYLSLHDISTE.M       |            | 2 | 1,949  | 0,24  | -0,218 |
| 18 | P46777 RL5_HUMAN    | K.KAS#FLR.A              | S286:      | 2 | 1,9437 | 0,096 | 0,228  |
| 18 | Q92615 LARP5_HUMAN  | E.LRKPS#YAE.I            | S649:      | 2 | 1,9374 | 0,277 | -0,351 |
| 18 | P35580 MYH10_HUMAN  | K.LDPHLVLDQLR.C          |            | 2 | 1,9145 | 0,299 | -0,185 |
| 18 | Q9UMZ2 SYNG_HUMAN   | R.SNTLNEKPALPVIR.D       |            | 2 | 1,9024 | 0,141 | -0,157 |
| 18 | O14497 ARI1A_HUMAN  | R.GEDPPPDIFAAADSCK.S     |            | 2 | 1,8996 | 0,427 | -0,074 |
| 18 | Q15527 SURF2_HUMAN  | K.QGVEYVPACLVHR.R        |            | 2 | 1,8513 | 0,371 | -0,319 |
| 18 | O75396 SC22B_HUMAN  | R.RNLGSINTE.L            |            | 2 | 1,8447 | 0,109 | 0,304  |
| 18 | Q08AE8 SPIR1_HUMAN  | R.KLRPVS#PEE.I           | S228:      | 2 | 1,8397 | 0,158 | -0,107 |
| 18 | P25440 BRD2_HUMAN   | R.QLSLDINKLPGEK.L        |            | 2 | 1,8251 | 0,245 | -0,419 |
| 18 | O60716 CTND1_HUMAN  | E.RGSLAS#LDS#LRK.G       | S349:S352: | 2 | 1,8109 | 0,116 | -0,167 |
| 18 | Q53HL2 BOREA_HUMAN  | E.VSM*VKPTPGLTPR.F       |            | 2 | 1,8055 | 0,098 | -0,523 |
| 18 | Q9NZJ5 E2AK3_HUMAN  | R.RM*DPFST#KE.H          | T704:      | 2 | 1,8047 | 0,088 | -1,213 |
| 18 | Q8IYB3 SRRM1_HUMAN  | R.RQS#PSPST#RPIR.R       | S713:T718: | 2 | 1,7822 | 0,241 | -0,237 |
| 18 | Q96D71 REPS1_HUMAN  | K.GTTPLAPPPKVR.R         |            | 2 | 1,7781 | 0,276 | 0,275  |
| 18 | Q9BTV7 CABL2_HUMAN  | K.QRHPS#GGVSVSSE.M       | S215:      | 2 | 1,7761 | 0,301 | -0,087 |
| 18 | P09874 PARP1_HUMAN  | K.M*VDPEKPLGM*IDR.W      |            | 2 | 1,7303 | 0,102 | -0,294 |
| 18 | P50991 TCPD_HUMAN   | E.ILTDM*SRPVELSDRE.T     |            | 2 | 1,7283 | 0,128 | -0,343 |
| 18 | Q12964 Q12964_HUMAN | E.LPTSS#PGR.D            | S75:       | 2 | 1,7097 | 0,405 | 0,273  |
| 18 | Q07666 KHDR1_HUMAN  | E.KDSLDPSTFTHAM*QLLTAE.I |            | 2 | 1,6909 | 0,14  | 0,302  |
| 18 | Q9BX66 SRBS1_HUMAN  | D.HLALS#PR.A             | S1024:     | 2 | 1,6297 | 0,28  | 0,279  |
| 18 | O95741 CPNE6_HUMAN  | E.VLRS#CS#SPVFSR.V       | S65:S67:   | 2 | 1,5949 | 0,102 | -0,628 |
| 18 | Q9UIF9 BAZ2A_HUMAN  | E.HFSFS#PR.M             | S586:      | 2 | 1,5938 | 0,221 | 0,382  |
| 18 | P25054 APC_HUMAN    | K.RHS#GSYLVTSV.-         | S2835:     | 2 | 1,5553 | 0,082 | -0,38  |



|    |                       |                                  |        |   |        |       |        |
|----|-----------------------|----------------------------------|--------|---|--------|-------|--------|
| 18 | Q3KQU3 MA7D1_HUMAN    | K.RQSLPAS#PR.A                   | S446:  | 2 | 1,541  | 0,206 | -0,112 |
| 18 | Q562S5 Q562S5_HUMAN   | D.HTFYNE.L                       |        | 2 | 1,456  | 0,158 | 0,301  |
| 18 | Q14152 EIF3A_HUMAN    | R.RLGDSS#LSR.K                   | S882:  | 2 | 1,4388 | 0,303 | -0,456 |
| 18 | Q9BZE9 ASPC1_HUMAN    | R.RQDFNPCE.Y                     |        | 2 | 1,4179 | 0,157 | 0,114  |
| 18 | P40938 RFC3_HUMAN     | K.YRPCS#LGR.L                    | S12:   | 2 | 1,4086 | 0,351 | -0,112 |
| 18 | ##A5PLK6 A5PLK6_HUMAN | K.CFFPLRCKE.L                    |        | 2 | 1,4074 | 0,183 | 1,456  |
| 18 | O75376 NCOR1_HUMAN    | R.RRPS#LLSE.F                    | S70:   | 2 | 1,2439 | 0,178 | 0,235  |
| 19 | Q9UQ35 SRRM2_HUMAN    | K.SKDSLQVQSCPGSLSLCAGVK.S        |        | 2 | 6,5779 | 0,511 | -0,466 |
| 19 | Q15398 DLG7_HUMAN     | E.RM*S#LPLLAGGVADDINTNKK.E       | S725:  | 3 | 6,5267 | 0,491 | -0,497 |
| 19 | Q5VT25 MRCKA_HUMAN    | K.RQPM*PSPSEGLSSGGM*DQGS DAPAR.D |        | 3 | 6,2909 | 0,533 | -0,069 |
| 19 | Q8WUD4 CCD12_HUMAN    | R.LKGQEDSLASAVDAATEQK.T          |        | 2 | 6,2872 | 0,634 | -0,436 |
| 19 | Q8N122 RPTOR_HUMAN    | K.GVHIHQAGGS#PPASSTSSSLTNDVAK.Q  | S877:  | 3 | 6,2129 | 0,476 | -0,959 |
| 19 | Q9UHB6 LIMA1_HUMAN    | R.SRPFTVAASFQSTSVKS#PK.T         | S604:  | 3 | 6,1882 | 0,483 | -0,435 |
| 19 | Q9UQ35 SRRM2_HUMAN    | K.SKDSLQVQSCPGSLSLCAGVK.S        |        | 3 | 5,8667 | 0,412 | -0,35  |
| 19 | O60716 CTND1_HUMAN    | R.SQSSHSDSTLPLIDR.N              |        | 2 | 5,6783 | 0,526 | -0,064 |
| 19 | Q92615 LARP5_HUMAN    | E.RTLSADASVNTLPVVVSR.E           |        | 2 | 5,6008 | 0,458 | -0,518 |
| 19 | Q6DD87 ZN787_HUMAN    | K.IHAVGAPSVCSGQSYR.A             |        | 3 | 5,3706 | 0,559 | -0,872 |
| 19 | Q8N1G0 ZN687_HUMAN    | E.SCS#PHHPQVLAQQGSGSSPK.A        | S227:  | 3 | 5,3637 | 0,479 | -0,337 |
| 19 | P29966 MARCS_HUMAN    | E.KGEPAAAAAPEAGASPVEK.E          |        | 2 | 5,2312 | 0,482 | -0,279 |
| 19 | P38919 IF4A3_HUMAN    | R.KLDYGQHV VAGT#PGRVFD.M         | T163:  | 3 | 5,1699 | 0,385 | -0,449 |
| 19 | O95400 CD2B2_HUMAN    | E.M*EEGHFDADGNYFLNR.D            |        | 3 | 5,169  | 0,399 | -0,758 |
| 19 | P13645 K1C10_HUMAN    | K.SKELTTEIDNIEQISSYK.S           |        | 3 | 5,0597 | 0,345 | -0,413 |
| 19 | Q6ZRS2 SRCAP_HUMAN    | E.KYSDLLSQLNQPLTSSK.A            |        | 3 | 5,0504 | 0,426 | 0      |
| 19 | Q7Z3C6 ATG9A_HUMAN    | R.HPEPVPEEGS#EDELPPQVHKV.-       | S828:  | 3 | 5,0414 | 0,407 | -0,828 |
| 19 | Q13263 TIF1B_HUMAN    | E.TKPVLM*ALAEGPGAEGPR.L          |        | 2 | 4,9887 | 0,462 | -0,809 |
| 19 | P49790 NU153_HUMAN    | E.IKDSTS#QHDDDNISTTSGFSSR.A      | S174:  | 3 | 4,9713 | 0,467 | -0,074 |
| 19 | Q8WUQ7 CS029_HUMAN    | R.LLTAHELPLDAHVLEPDEDLQR.L       |        | 3 | 4,9575 | 0,402 | -0,362 |
| 19 | P46821 MAP1B_HUMAN    | E.KTATCHSSSS#PPIDAASAEPYGFR.A    | S1819: | 3 | 4,9159 | 0,378 | -0,979 |
| 19 | Q14697 GANAB_HUMAN    | R.VSQGSKDPAEGDGAQPEETPR.D        |        | 3 | 4,9142 | 0,338 | -1,698 |
| 19 | Q5SYE7 NHSL1_HUMAN    | E.NLGHLGGASGTGTLRPKS#QE.L        | S388:  | 3 | 4,9138 | 0,474 | -0,673 |
| 19 | Q9BY44 EIF2A_HUMAN    | E.ARSDKS#PDLAPTAPQSTPR.N         | S506:  | 3 | 4,9095 | 0,339 | -0,421 |
| 19 | Q12756 KIF1A_HUMAN    | E.SHGSSSASS#PLSAEGRPSPLEAPNER.Q  | S1430: | 3 | 4,8967 | 0,46  | -0,681 |
| 19 | O15143 ARC1B_HUMAN    | K.KAS#SEGTAAGGLDSLHK.N           | S310:  | 3 | 4,8931 | 0,415 | -0,597 |

|    |                     |                              |        |   |        |       |        |
|----|---------------------|------------------------------|--------|---|--------|-------|--------|
| 19 | Q9H4L4 SEN3_HUMAN   | R.LKSGGGFGPDPGSGTTVVAR.R     |        | 2 | 4,8842 | 0,512 | -0,328 |
| 19 | P11216 PYGB_HUMAN   | E.LKQAVDQISSGFFSPK.E         |        | 3 | 4,8754 | 0,337 | -0,522 |
| 19 | Q05D20 Q05D20_HUMAN | K.DSRPSQAAGDNQGDVEKE.Q       |        | 2 | 4,8723 | 0,431 | -0,064 |
| 19 | Q00537 PCTK2_HUMAN  | E.KLQINSPPFDQPM*SR.R         |        | 3 | 4,8577 | 0,347 | -0,309 |
| 19 | Q9UKK9 NUDT5_HUMAN  | R.KEQTADGVAVIPVLQR.T         |        | 2 | 4,8539 | 0,498 | -1,486 |
| 19 | Q8N6T3 ARFG1_HUMAN  | E.GKIFDDVSSGVSQLASK.V        |        | 2 | 4,8103 | 0,493 | -0,281 |
| 19 | Q6ZRS2 SRCAP_HUMAN  | E.KYSDLLSQSLNQPLTSSK.A       |        | 2 | 4,8084 | 0,641 | -0,182 |
| 19 | P00558 PGK1_HUMAN   | E.SPERPFLAILGGAK.V           |        | 3 | 4,7842 | 0,428 | 0,377  |
| 19 | Q9Y6Y8 S23IP_HUMAN  | R.RIDYVLQEKPYESFNE.Y         |        | 2 | 4,7842 | 0,481 | -0,185 |
| 19 | Q99638 RAD9A_HUMAN  | D.GHFVLATLSDTDSHSQDLGS#PER.H | S277:  | 3 | 4,7817 | 0,408 | -0,861 |
| 19 | Q00536 PCTK1_HUMAN  | E.KLTLNS#PIFDKPLSR.R         | S138:  | 3 | 4,7109 | 0,417 | -0,202 |
| 19 | Q9H9C1 CN133_HUMAN  | R.TRPGSFQSLSDALSDTPAK.S      |        | 3 | 4,6838 | 0,489 | -0,092 |
| 19 | Q9UQ35 SRRM2_HUMAN  | E.KM*ALPPQEDATAS#PPRQK.D     | S1179: | 3 | 4,6621 | 0,338 | -0,266 |
| 19 | P49790 NU153_HUMAN  | E.KQQEPVTSTSLVFGK.K          |        | 2 | 4,6543 | 0,47  | -1,628 |
| 19 | Q07352 TISB_HUMAN   | E.GYLSSSSSSHSGSDSPTLDNSR.R   |        | 3 | 4,6123 | 0,473 | 0      |
| 19 | Q14596 NBR1_HUMAN   | R.GAEGKPGVEAGQEPAEAGER.L     |        | 3 | 4,6123 | 0,3   | -0,377 |
| 19 | Q9Y2K2 QSK_HUMAN    | R.RAS#DGGANIQLHAQQLLK.R      | S493:  | 3 | 4,5949 | 0,394 | -0,549 |
| 19 | Q92598 HS105_HUMAN  | E.CLNQRPPENPDTDKNVQQDNSE.A   |        | 3 | 4,5894 | 0,313 | -0,423 |
| 19 | O00458 IFRD1_HUMAN  | R.GSSAGGGGSGAAAATAATAGGQHR.N |        | 2 | 4,5807 | 0,651 | -0,949 |
| 19 | Q96RS6 NUDC1_HUMAN  | E.HIATFNALGYVQASK.R          |        | 2 | 4,5651 | 0,517 | -0,527 |
| 19 | Q8NBS9 TXND5_HUMAN  | K.VDCTAHSVCSAQGVR.G          |        | 3 | 4,5622 | 0,318 | 0      |
| 19 | Q86UE8 TLK2_HUMAN   | R.RVEQPLYGLDGSAAKE.A         |        | 2 | 4,561  | 0,515 | -0,704 |
| 19 | Q92616 GCN1L_HUMAN  | R.KM*AAQIIGNM*YSLTDQKD.L     |        | 3 | 4,5519 | 0,431 | -0,622 |
| 19 | Q9NPI6 DCP1A_HUMAN  | K.LRLT#PQHDQIQTQPLGK.G       | T401:  | 3 | 4,5136 | 0,49  | -0,98  |
| 19 | P01112 RASH_HUMAN   | R.VKDSDDVPM*VLVGNK.C         |        | 2 | 4,5043 | 0,417 | -1,271 |
| 19 | Q9BSJ8 ESYT1_HUMAN  | K.HLS#PYATLTVGDSSHK.T        | S820:  | 3 | 4,4968 | 0,382 | -0,612 |
| 19 | Q2NKX8 ERC6L_HUMAN  | E.KQDLS#SIKVVNTTLQDGK.G      | S790:  | 3 | 4,4921 | 0,45  | -0,356 |
| 19 | Q6P2H3 CCD21_HUMAN  | E.KYPTEGISHVT#SPSSDVIQK.G    | T16:   | 3 | 4,4906 | 0,298 | -0,812 |
| 19 | Q7Z2W4 ZCCHV_HUMAN  | E.HGLNPDVVQNIQDICNSK.H       |        | 3 | 4,4878 | 0,388 | 0,268  |
| 19 | P62158 CALM_HUMAN   | R.VFDKDGNGYISAAELR.H         |        | 2 | 4,4735 | 0,539 | -0,695 |
| 19 | Q13263 TIF1B_HUMAN  | E.TKPVLM*ALAEPGAEGPR.L       |        | 3 | 4,4678 | 0,354 | -0,808 |
| 19 | P16591 FER_HUMAN    | E.NDGKEPPPVVNYEEDAR.S        |        | 3 | 4,4543 | 0,379 | 0      |
| 19 | Q15424 SAFB1_HUMAN  | R.KFDFDACNEVPPAPKE.S         |        | 2 | 4,4512 | 0,308 | -0,524 |

|    |                     |                               |       |   |        |       |        |
|----|---------------------|-------------------------------|-------|---|--------|-------|--------|
| 19 | P52732 KIF11_HUMAN  | E.QDLKLDIPTGTT#PQRK.S         | T926: | 3 | 4,4405 | 0,382 | -0,871 |
| 19 | P19623 SPEE_HUMAN   | R.KVLIIGGGDGGVLR.V            |       | 3 | 4,4334 | 0,281 | 0,37   |
| 19 | P51991 ROA3_HUMAN   | R.GFAFVTFDHDTVDK.I            |       | 2 | 4,4189 | 0,334 | -0,071 |
| 19 | Q9ULU4 PKCB1_HUMAN  | K.TDKTSTTGSILNLDLDR.S         |       | 2 | 4,4186 | 0,56  | -0,528 |
| 19 | Q14194 DPYL1_HUMAN  | R.NLHQSNFSLGAQIDDNNPR.R       |       | 3 | 4,4154 | 0,423 | -0,575 |
| 19 | Q3KQU3 MA7D1_HUMAN  | R.RSSQPSPTAVPASDSPPTKQE.V     |       | 3 | 4,4149 | 0,203 | -0,422 |
| 19 | P29401 TKT_HUMAN    | K.SKDDQVTVIGAGVTLHE.A         |       | 2 | 4,4116 | 0,601 | -0,138 |
| 19 | P0C7M2 RA1L3_HUMAN  | R.GFAFVTFDHDSVVK.I            |       | 2 | 4,4113 | 0,434 | 0,215  |
| 19 | Q6S8J3 A26CA_HUMAN  | E.KSYELPDGQVITIGNER.F         |       | 2 | 4,4103 | 0,455 | -0,064 |
| 19 | P30084 ECHM_HUMAN   | K.LFYSTFATDDRKE.G             |       | 2 | 4,405  | 0,357 | -0,153 |
| 19 | Q13151 ROA0_HUMAN   | R.GFGFVYFQNHDAADK.A           |       | 2 | 4,4028 | 0,454 | -0,284 |
| 19 | Q15149 PLEC1_HUMAN  | R.RDDGTGQLLLPLSDAR.K          |       | 2 | 4,3695 | 0,398 | -1,272 |
| 19 | Q5QPG4 Q5QPG4_HUMAN | K.RKLSS#IGIQVDCIQVVPK.E       | S127: | 3 | 4,3566 | 0,44  | 0,345  |
| 19 | Q8NA72 CE037_HUMAN  | R.ISTIHDILHSQGNN#EVRE.T       | S78:  | 3 | 4,3509 | 0,393 | -0,657 |
| 19 | Q01813 K6PP_HUMAN   | K.KFTTDDVICVLGISK.R           |       | 2 | 4,347  | 0,421 | -0,145 |
| 19 | Q9UBB9 TFP11_HUMAN  | R.ARDYSAPVNFISAGLK.K          |       | 3 | 4,347  | 0,192 | -0,214 |
| 19 | Q9UK32 KS6A6_HUMAN  | K.TPKDS#PGLPASANAHQLFK.G      | S372: | 3 | 4,3424 | 0,385 | -0,622 |
| 19 | P05387 RLA2_HUMAN   | E.LNGKNIEDVIAQGIGK.L          |       | 2 | 4,3316 | 0,536 | -1,023 |
| 19 | P54819 KAD2_HUMAN   | E.NFCVCHLATGDM*LR.A           |       | 2 | 4,3272 | 0,533 | -0,285 |
| 19 | Q9NYZ3 GTSE1_HUMAN  | E.SRPLIDLM*TNTTPDM*NK.N       |       | 3 | 4,3262 | 0,335 | -0,292 |
| 19 | Q9NZN5 ARHGC_HUMAN  | R.TDCSSGDASRPSSDNADS#PKSGPK.E | S309: | 3 | 4,3177 | 0,484 | -0,219 |
| 19 | Q92597 NDRG1_HUMAN  | E.GAHLDITPNSSAAGNSAGPK.S      |       | 2 | 4,3135 | 0,519 | -0,399 |
| 19 | O00244 ATOX1_HUMAN  | E.SEHS#M*DTLLATLKK.T          | S47:  | 3 | 4,3025 | 0,331 | -1,424 |
| 19 | Q9UHR5 S30BP_HUMAN  | E.KGGLVSDAYGEDDFSR.L          |       | 2 | 4,2897 | 0,575 | -0,782 |
| 19 | Q5BKZ1 ZN326_HUMAN  | R.SM*DSYLNQSYGM*DNHSGGGGSR.F  |       | 3 | 4,2789 | 0,408 | -0,304 |
| 19 | P78527 PRKDC_HUMAN  | R.ATQQQHDFTLTQTADGR.S         |       | 2 | 4,2772 | 0,582 | -0,636 |
| 19 | P02545 LMNA_HUMAN   | R.IRIDSLSAQLSQLQK.Q           |       | 2 | 4,2556 | 0,365 | -0,215 |
| 19 | Q9H8U3 ZFAN3_HUMAN  | E.CGPCTDTAHVSLIT#PTKR.S       | T112: | 3 | 4,2524 | 0,33  | -0,699 |
| 19 | Q15021 CND1_HUMAN   | R.LAQQVCHAIANISDR.R           |       | 3 | 4,2423 | 0,415 | -0,108 |
| 19 | P40227 TCPZ_HUMAN   | K.VCGSDKGFVVINQK.G            |       | 2 | 4,2398 | 0,441 | -1,025 |
| 19 | P21333 FLNA_HUMAN   | K.AGNM*LLVGVHGPR.T            |       | 3 | 4,215  | 0,528 | -0,063 |
| 19 | Q92615 LARP5_HUMAN  | E.RTLSADASVNTLPVVVSR.E        |       | 3 | 4,2088 | 0,281 | -0,194 |
| 19 | Q95400 CD2B2_HUMAN  | E.M*EEGHFDADGNYFLNR.D         |       | 2 | 4,2077 | 0,506 | -0,253 |

|    |                    |                                  |       |   |        |       |        |
|----|--------------------|----------------------------------|-------|---|--------|-------|--------|
| 19 | Q8IWA0 WDR75_HUMAN | E.KVQDTS#NTGLGEDIIHQLSK.S        | S796: | 3 | 4,2038 | 0,342 | -0,323 |
| 19 | P33992 MCM5_HUMAN  | R.RGDINLLM*LGDPGTAK.S            |       | 3 | 4,2003 | 0,275 | -0,217 |
| 19 | P13861 KAP2_HUMAN  | E.ARAPASVLPAAATPR.Q              |       | 2 | 4,1927 | 0,434 | -1,062 |
| 19 | Q8IY57 YAF2_HUMAN  | K.T#KSPPASSAASADQHSQSGSSSDNTER.G | T134: | 3 | 4,1915 | 0,359 | -0,198 |
| 19 | P17706 PTN2_HUMAN  | E.LSKEDLSPAFDHS#PNK.I            | S304: | 3 | 4,1879 | 0,368 | -0,883 |
| 19 | Q9UKG1 DP13A_HUMAN | E.VFQIASNDHDAAINR.Y              |       | 2 | 4,1852 | 0,481 | -0,438 |
| 19 | P13639 EF2_HUMAN   | K.ARPFPDGLAEDIDKGE.V             |       | 3 | 4,1836 | 0,336 | -0,846 |
| 19 | Q92615 LARP5_HUMAN | E.RSPS#PAHLRDDPKVAE.K            | S601: | 3 | 4,1781 | 0,26  | -0,815 |
| 19 | Q58FF7 H90B3_HUMAN | K.VILHLKEDQTEYLEE.R              |       | 2 | 4,1742 | 0,374 | -0,525 |
| 19 | Q8IY57 YAF2_HUMAN  | K.SPPASSAASADQHSQSGSSSDNTER.G    |       | 3 | 4,1729 | 0,407 | -0,074 |
| 19 | P00558 PGK1_HUMAN  | D.KIQLINNM*LDKVNE.M              |       | 3 | 4,1694 | 0,354 | -0,975 |
| 19 | Q53S33 BOLA3_HUMAN | R.TVQQHQM*VNQALKEE.I             |       | 3 | 4,1522 | 0,241 | -0,508 |
| 19 | P63241 IF5A1_HUMAN | E.DLRLPEGDLGKE.I                 |       | 3 | 4,1351 | 0,416 | 0,136  |
| 19 | P48634 BAT2_HUMAN  | R.FSREEFPTLQAAGDQDK.A            |       | 3 | 4,1261 | 0,251 | -0,566 |
| 19 | P50548 ERF_HUMAN   | R.YLQAHTQSVYNYHLS#PR.A           | S327: | 3 | 4,1189 | 0,375 | -0,424 |
| 19 | P47756 CAPZB_HUMAN | D.LDHGFAGVILIK.K                 |       | 3 | 4,1187 | 0,267 | 0,285  |
| 19 | Q9H078 CLPB_HUMAN  | K.GCTALHYAVLADDYR.T              |       | 2 | 4,1153 | 0,517 | -0,707 |
| 19 | Q567U6 CCD93_HUMAN | E.LSAEES#PEKLGTSQLHR.R           | S305: | 3 | 4,1134 | 0,34  | -1,492 |
| 19 | Q9NWH9 SLTM_HUMAN  | R.AGAGM*ITQHSSNASPINR.I          |       | 3 | 4,1054 | 0,28  | -0,4   |
| 19 | P08133 ANXA6_HUMAN | K.SLHQAIEGDTSQDFLK.A             |       | 2 | 4,0987 | 0,535 | -0,923 |
| 19 | O94909 K0819_HUMAN | E.LSSSSGLGLHGSSNM*K.T            |       | 2 | 4,0946 | 0,554 | -0,366 |
| 19 | P11142 HSP7C_HUMAN | K.SQIHDIIVLVGGSTR.I              |       | 2 | 4,086  | 0,562 | -0,576 |
| 19 | Q8TDD1 DDX54_HUMAN | R.KLGPGRPLPTFPTSECTS#DVEPDTR.E.M | S75:  | 3 | 4,0829 | 0,428 | -0,308 |
| 19 | Q96T23 RSF1_HUMAN  | E.IKLSDDFDS#PVKGPLCK.S           | S387: | 2 | 4,0759 | 0,359 | -0,549 |
| 19 | P35580 MYH10_HUMAN | E.KQVLALQSQLADTK.K               |       | 2 | 4,0743 | 0,555 | -0,395 |
| 19 | P05387 RLA2_HUMAN  | E.LNGKNIEDVIAQGIGK.L             |       | 3 | 4,0686 | 0,429 | -0,877 |
| 19 | Q93052 LPP_HUMAN   | E.GDNQGCYPLDGHILCK.T             |       | 2 | 4,0675 | 0,386 | -0,132 |
| 19 | P16220 CREB1_HUMAN | R.KILNDLSSDAPGVPR.I              |       | 2 | 4,0548 | 0,511 | -0,386 |
| 19 | P08238 HS90B_HUMAN | R.YHTSQSGDEM*TSLSEYVSR.M         |       | 3 | 4,0522 | 0,3   | -0,334 |
| 19 | Q15154 PCM1_HUMAN  | R.KPFNFLPM*QINTNK.S              |       | 3 | 4,0437 | 0,328 | 0      |
| 19 | P27816 MAP4_HUMAN  | E.EGRPVSSTGNDITPPNK.E            |       | 2 | 4,0436 | 0,411 | -0,881 |
| 19 | Q9H165 BC11A_HUMAN | R.SGTGS#GGSTPHISGPGPRPSSKE.G     | S718: | 3 | 4,0425 | 0,396 | -1,046 |
| 19 | Q9BUF5 TBB6_HUMAN  | E.IVHIQAGQCGNQIGTK.F             |       | 3 | 4,0397 | 0,297 | -0,424 |

|    |                     |                                |        |   |        |       |        |
|----|---------------------|--------------------------------|--------|---|--------|-------|--------|
| 19 | Q9NYL2 MLTK_HUMAN   | E.SM*SNDTSLPDKCNS#FLHNK.A      | S275:  | 3 | 4,0324 | 0,431 | -0,639 |
| 19 | Q9UMZ2 SYNG_HUMAN   | K.ISKFDFLVATSQSK.M             |        | 2 | 4,0262 | 0,421 | -0,699 |
| 19 | Q96JB2 COG3_HUMAN   | E.DHVQNNAEQLGAFAGVK.Q          |        | 3 | 4,0221 | 0,36  | -0,587 |
| 19 | P48059 LIMS1_HUMAN  | K.CHAIIDEQPLIFK.N              |        | 2 | 4,016  | 0,393 | -0,847 |
| 19 | P12532 KCRU_HUMAN   | K.RGTGGVDTAATGGVFDISNDR.L      |        | 3 | 4,0079 | 0,269 | -0,252 |
| 19 | P18887 XRCC1_HUMAN  | K.TKPTQAAGPSS#PQKPPTPEETK.A    | S447:  | 3 | 4,0078 | 0,379 | -0,31  |
| 19 | O60716 CTND1_HUMAN  | R.APSRQDVYGPQPQVR.V            |        | 3 | 4,0073 | 0,382 | -0,539 |
| 19 | P68371 TBB2C_HUMAN  | E.HGIDPTGTYHGDSLQLE.R          |        | 2 | 4,007  | 0,514 | 0,936  |
| 19 | Q4ZG52 Q4ZG52_HUMAN | E.GKDGAIEDIITALK.K             |        | 3 | 4,0028 | 0,306 | -0,127 |
| 19 | Q8NFH5 NUP53_HUMAN  | R.SPFLAGGS#PPQPVPAHKDK.S       | S73:   | 3 | 3,9995 | 0,34  | -0,793 |
| 19 | P81605 DCD_HUMAN    | K.LGKDAVEDLESVGK.G             |        | 3 | 3,9942 | 0,379 | 0,877  |
| 19 | Q9P2I0 CPSF2_HUMAN  | R.LKDSLVSLLQFCK.A              |        | 2 | 3,9937 | 0,435 | -0,24  |
| 19 | Q13200 PSMD2_HUMAN  | R.DKAPVQPQQS#PAAAPGGTDEKPSGK.E | S16:   | 3 | 3,9936 | 0,397 | -0,36  |
| 19 | P27816 MAP4_HUMAN   | E.TERAS#PIKM*DLAPSK.D          | S358:  | 3 | 3,9918 | 0,413 | -0,526 |
| 19 | Q96GQ7 DDX27_HUMAN  | R.SADFNPDFVFTEKE.G             |        | 2 | 3,9798 | 0,404 | -1,112 |
| 19 | P08670 VIME_HUMAN   | R.KVESLQEEIAFLK.K              |        | 2 | 3,9784 | 0,238 | -0,557 |
| 19 | Q8TEW0 PARD3_HUMAN  | R.ISHSLYSGIEGLDESPSR.N         |        | 3 | 3,9783 | 0,108 | -0,846 |
| 19 | Q02952 AKA12_HUMAN  | E.SQVHM*M*AAAVADGTR.A          |        | 3 | 3,9741 | 0,289 | 0,812  |
| 19 | Q15424 SAFB1_HUMAN  | R.KFDFDACNEVPPAPK.E            |        | 2 | 3,9719 | 0,527 | -0,492 |
| 19 | P16152 CBR1_HUMAN   | R.FHQLDIDDLQSIR.A              |        | 2 | 3,9546 | 0,467 | -0,534 |
| 19 | A8MRS9 A8MRS9_HUMAN | E.TGQM*ATLTSGGEKPNK.D          |        | 3 | 3,9505 | 0,459 | -0,671 |
| 19 | Q6MZL5 Q6MZL5_HUMAN | E.M*EQLFHDDQGGVTR.W            |        | 2 | 3,947  | 0,426 | -0,962 |
| 19 | O00429 DNM1L_HUMAN  | K.GHAVNLLDVPVVAR.K             |        | 2 | 3,9425 | 0,537 | -0,47  |
| 19 | P21333 FLNA_HUMAN   | R.RAPS#VANVGSCHCDLSLK.I        | S2152: | 3 | 3,9369 | 0,336 | -0,193 |
| 19 | Q15054 DPOD3_HUMAN  | K.SKTYLDGEGCIVTEK.V            |        | 3 | 3,9367 | 0,289 | -0,323 |
| 19 | Q9UHB6 LIMA1_HUMAN  | R.SRPFTVAASFQSTSVK.S           |        | 2 | 3,9308 | 0,287 | -0,356 |
| 19 | Q5VWN6 CJ018_HUMAN  | E.NKVDILDAAVQTK.T              |        | 2 | 3,9249 | 0,439 | -1,466 |
| 19 | Q5JVS0 HABP4_HUMAN  | R.KSLPAPVAQRPS#PGGGLQAPGQK.R   | S108:  | 3 | 3,9213 | 0,354 | -0,3   |
| 19 | Q8N108 MIER1_HUMAN  | K.YNLHPGVTDYM*DR.L             |        | 3 | 3,92   | 0,344 | -0,115 |
| 19 | O75179 ANR17_HUMAN  | E.HYPVSSPSSPPAQPGGVSR.N        |        | 3 | 3,9086 | 0,381 | -0,262 |
| 19 | A8K123 A8K123_HUMAN | E.IPGHLDPGFLASDK.T             |        | 3 | 3,9078 | 0,308 | 0,187  |
| 19 | P54289 CA2D1_HUMAN  | R.IKPVFIEDANFGR.Q              |        | 3 | 3,9053 | 0,297 | 0      |
| 19 | P27694 RFA1_HUMAN   | K.SKDSLVDIIGICK.S              |        | 2 | 3,903  | 0,501 | -0,421 |

|    |                    |                             |        |   |        |       |        |
|----|--------------------|-----------------------------|--------|---|--------|-------|--------|
| 19 | Q00839 HNRPU_HUMAN | E.AGGRPAM*EPGNGLDLGGDSAGR.S |        | 3 | 3,9008 | 0,29  | -1,102 |
| 19 | Q14980 NUMA1_HUMAN | K.KLDVEEPDSANSSFYSTR.S      |        | 3 | 3,8974 | 0,433 | -0,537 |
| 19 | P12004 PCNA_HUMAN  | D.LSHIGDAVVISCAK.D          |        | 2 | 3,8943 | 0,468 | -0,996 |
| 19 | P35637 FUS_HUMAN   | K.LKGEATVSFDDPPSAK.A        |        | 3 | 3,8935 | 0,282 | -0,88  |
| 19 | Q96A49 SYAP1_HUMAN | E.AVRPKT#PPVVIK.S           | T248:  | 3 | 3,892  | 0,281 | 0,198  |
| 19 | Q92945 FUBP2_HUMAN | K.LFIIRGS#PQQIDHAK.Q        | S480:  | 3 | 3,8849 | 0,452 | -0,507 |
| 19 | Q1MSJ5 CSPP1_HUMAN | R.VAASGAQDPEKS#PDRLK.Q      | S424:  | 3 | 3,8757 | 0,434 | -0,791 |
| 19 | Q12802 AKP13_HUMAN | E.KNAVLGLPVALQDK.A          |        | 2 | 3,872  | 0,392 | -0,583 |
| 19 | P18887 XRCC1_HUMAN | E.SANSLRPGALFFSR.I          |        | 3 | 3,8668 | 0,398 | -0,781 |
| 19 | Q01469 FABP5_HUMAN | R.KTQTVCNFTDGALVQHQE.W      |        | 3 | 3,8664 | 0,143 | 0,264  |
| 19 | Q6S8J3 A26CA_HUMAN | E.KSYELPDGQVITIGNER.F       |        | 3 | 3,8658 | 0,299 | -0,095 |
| 19 | O75874 IDHC_HUMAN  | E.LDLHSYDLGIENR.D           |        | 3 | 3,8631 | 0,25  | -0,118 |
| 19 | Q9Y2H0 DLGP4_HUMAN | D.CTPHPNSISIDAGPR.Q         |        | 3 | 3,8618 | 0,358 | -0,226 |
| 19 | O14497 ARI1A_HUMAN | E.RGEDPPPDIFAAADSK.K        |        | 3 | 3,8594 | 0,328 | -0,434 |
| 19 | P11233 RALA_HUMAN  | R.ANVDKVFFDLM*RE.I          |        | 3 | 3,8571 | 0,297 | 0,114  |
| 19 | Q9BZF1 OSBL8_HUMAN | R.ANNLHSGDNFQLNDSEIER.Q     |        | 3 | 3,8558 | 0,223 | -0,589 |
| 19 | P62805 H4_HUMAN    | R.KTVTAM*DVVYALK.R          |        | 2 | 3,8554 | 0,492 | -0,335 |
| 19 | P25205 MCM3_HUMAN  | E.M*PQVHT#PKTADSQETKE.S     | T722:  | 3 | 3,8373 | 0,334 | -0,814 |
| 19 | P09234 RU1C_HUMAN  | D.YCDTYLTHDPSVR.K           |        | 2 | 3,8357 | 0,408 | -1,495 |
| 19 | Q15365 PCBP1_HUMAN | R.CSDAAGYPHATHDLE.G         |        | 2 | 3,8314 | 0,536 | -1,484 |
| 19 | Q15054 DPOD3_HUMAN | K.SKTYLDGEGCIVTEK.V         |        | 2 | 3,8295 | 0,437 | -0,431 |
| 19 | Q9UHB6 LIMA1_HUMAN | E.VQQPVHPKPLS#PDSR.A        | S362:  | 2 | 3,8285 | 0,386 | -0,691 |
| 19 | P43897 EFTS_HUMAN  | E.GSLKDQLALAIGK.L           |        | 3 | 3,8271 | 0,228 | 0,417  |
| 19 | P46937 YAP1_HUMAN  | R.TM*TTNSSDPFLNSGTYHSR.D    |        | 3 | 3,822  | 0,446 | -0,686 |
| 19 | Q7L7X3 TAOK1_HUMAN | E.GDHTVM*S#NSSVIHLKPEEE.N   | S392:  | 3 | 3,8215 | 0,22  | -0,664 |
| 19 | Q5SW79 CE170_HUMAN | R.TPLTS#ADEHVHSKLE.G        | S1059: | 3 | 3,8208 | 0,394 | -0,315 |
| 19 | Q4LE39 ARI4B_HUMAN | K.VHADLVISKPVSKS#PE.R       | S778:  | 3 | 3,8191 | 0,411 | 0,205  |
| 19 | O00267 SPT5H_HUMAN | K.VRDTYLDTQVVGQTGVIR.S      |        | 3 | 3,8159 | 0,249 | -0,453 |
| 19 | P27635 RL10_HUMAN  | K.AKVDEFPLCGHM*VSDE.Y       |        | 2 | 3,8148 | 0,374 | -0,33  |
| 19 | Q3V6T2 GRDN_HUMAN  | R.HLLDQIQTLM*LQNR.T         |        | 3 | 3,8045 | 0,298 | -0,105 |
| 19 | P48426 PI42A_HUMAN | D.YSLLVGIHDVER.A            |        | 2 | 3,8028 | 0,452 | -0,784 |
| 19 | P12956 KU70_HUMAN  | R.SDSFENPVLQQHFR.N          |        | 2 | 3,8028 | 0,381 | -0,644 |
| 19 | Q16555 DPYL2_HUMAN | R.NLHQSGFSLGAQIDDNIPR.R     |        | 3 | 3,7967 | 0,408 | -0,253 |

|    |                    |                                    |        |   |        |       |        |
|----|--------------------|------------------------------------|--------|---|--------|-------|--------|
| 19 | Q8N954 CCD75_HUMAN | E.DKEDLSSNCPGPTSADHD.-             |        | 3 | 3,7954 | 0,394 | -1,317 |
| 19 | P81605 DCD_HUMAN   | K.LGKDAVEDLESVGK.G                 |        | 2 | 3,7838 | 0,424 | 0,084  |
| 19 | P31946 1433B_HUMAN | E.SYKDSTLIM*QLLR.D                 |        | 3 | 3,783  | 0,228 | 0,693  |
| 19 | O15042 SR140_HUMAN | R.SSDVHSSGSSDAHM*DASGPS#DSDM*PSR.T | S37:   | 3 | 3,78   | 0,22  | -0,519 |
| 19 | Q9BQA1 MEP50_HUMAN | -.M*RKET#PPPLVPPAARE.W             | T5:    | 3 | 3,7779 | 0,263 | -0,873 |
| 19 | Q9Y6Y8 S23IP_HUMAN | R.RIDYVLQEKPESFNE.Y                |        | 3 | 3,7759 | 0,304 | -0,185 |
| 19 | P07437 TBB5_HUMAN  | E.HGIDPTGTYHGDSLQLD.R              |        | 2 | 3,7731 | 0,577 | -0,629 |
| 19 | Q15424 SAFB1_HUMAN | R.KFDFDACNEVPPAPK.E                |        | 3 | 3,7719 | 0,311 | -0,211 |
| 19 | Q15084 PDIA6_HUMAN | K.IFQKGESPVYDGGGR.T                |        | 3 | 3,7708 | 0,387 | -0,11  |
| 19 | Q9UQR0 SCML2_HUMAN | R.NPM*YIHTSVSQDFSR.S               |        | 2 | 3,7674 | 0,407 | -0,814 |
| 19 | Q01082 SPTB2_HUMAN | R.LQAAYAGDKADDIQK.R                |        | 2 | 3,761  | 0,428 | -0,911 |
| 19 | Q8N6N3 CA052_HUMAN | R.SVTRPAFLYNPLNK.Q                 |        | 3 | 3,7609 | 0,356 | -0,113 |
| 19 | Q14677 EPN4_HUMAN  | E.LSDKIGSTIDDTISK.F                |        | 2 | 3,7567 | 0,354 | -1,532 |
| 19 | Q9Y3Q8 T22D4_HUMAN | K.AKAEKPLSASS#PQQRPEPE.T           | S190:  | 3 | 3,7559 | 0,352 | -0,157 |
| 19 | Q92598 HS105_HUMAN | E.LNNTCEPVVTQPKPK.I                |        | 2 | 3,7499 | 0,289 | -0,424 |
| 19 | Q9BWD1 THIC_HUMAN  | E.DQDKVAVLSQNRTE.N                 |        | 2 | 3,746  | 0,476 | -0,685 |
| 19 | Q7Z2K8 GRIN1_HUMAN | E.GKVGSLPLEKGS#PVTTTK.A            | S615:  | 3 | 3,746  | 0,363 | -0,487 |
| 19 | Q96EU6 CF153_HUMAN | R.DREEDGGGLEPAAVAR.D               |        | 2 | 3,7445 | 0,41  | -0,669 |
| 19 | Q3MII6 TBC25_HUMAN | E.DAVDHLATASQGGGGGR.L              |        | 2 | 3,7434 | 0,534 | -0,659 |
| 19 | Q8WUD4 CCD12_HUMAN | R.LKGQEDSLASAVDAATEQK.T            |        | 3 | 3,7405 | 0,262 | -0,093 |
| 19 | Q9H4A3 WNK1_HUMAN  | R.DVDDGSGSPHS#PHQLSSK.S            | S2032: | 3 | 3,7386 | 0,356 | 0      |
| 19 | P00558 PGK1_HUMAN  | K.VADKIQLINNM*LDK.V                |        | 2 | 3,7383 | 0,354 | -0,972 |
| 19 | P46821 MAP1B_HUMAN | E.RASVSPM*DEPVDPSESPIEK.V          |        | 3 | 3,7373 | 0,335 | 0,167  |
| 19 | P52565 GDIR1_HUMAN | K.IDKTDYM*VGSYGPR.A                |        | 3 | 3,7285 | 0,22  | -0,565 |
| 19 | Q99615 DNJC7_HUMAN | R.KLDDAIEDCTNAVK.L                 |        | 2 | 3,7282 | 0,466 | -0,383 |
| 19 | P78371 TCPB_HUMAN  | R.SLHDALCVLAQTVKD.S                |        | 2 | 3,7277 | 0,49  | -0,292 |
| 19 | Q9NX24 NOLA2_HUMAN | E.DRNLPYVYIPSK.T                   |        | 3 | 3,7271 | 0,37  | 0      |
| 19 | P12277 KCRB_HUMAN  | K.RGTGGVDTAAVGGVFDVSNADR.L         |        | 3 | 3,727  | 0,407 | -0,949 |
| 19 | P62979 RS27A_HUMAN | K.CCLTYCFNKPEDK.-                  |        | 2 | 3,7259 | 0,438 | -1,055 |
| 19 | P40763 STAT3_HUMAN | E.SQEHPEADPGSAAPYLK.T              |        | 3 | 3,7256 | 0,318 | 0,204  |
| 19 | Q01813 K6PP_HUMAN  | K.NVLGHM*QQGGAPSPFDR.N             |        | 2 | 3,7253 | 0,473 | -0,401 |
| 19 | Q9H6F5 CCD86_HUMAN | E.SNPEETREPGSPSVQR.A               |        | 2 | 3,7251 | 0,321 | -0,457 |
| 19 | P51812 KS6A3_HUMAN | K.T#PKDSPGIPPSANAHQLFR.G           | T365:  | 3 | 3,7229 | 0,302 | -0,433 |

|    |                     |                              |        |   |        |       |        |
|----|---------------------|------------------------------|--------|---|--------|-------|--------|
| 19 | Q8N6N3 CA052_HUMAN  | R.SVTRPAFLYNPLNK.Q           |        | 2 | 3,7226 | 0,38  | -0,602 |
| 19 | Q7L7X3 TAOK1_HUMAN  | E.GDHTVM*SNS#SVIHLKPEEE.N    | S394:  | 3 | 3,7214 | 0,325 | -0,664 |
| 19 | O75427 LRCH4_HUMAN  | R.YDGGLDSGFHSVDSGSK.R        |        | 2 | 3,7213 | 0,416 | -0,989 |
| 19 | Q9UQ35 SRRM2_HUMAN  | K.VKAQTPPGPSLSGSKS#PCPQEK.S  | S1014: | 3 | 3,7206 | 0,374 | -0,62  |
| 19 | P35658 NU214_HUMAN  | R.LNHLVDSLQQLR.L             |        | 3 | 3,7205 | 0,19  | -0,064 |
| 19 | P00558 PGK1_HUMAN   | K.VADKIQLINNM*LDK.V          |        | 3 | 3,7201 | 0,276 | -1,009 |
| 19 | Q96HC4 PDLI5_HUMAN  | R.ILAQITGTEHLKE.S            |        | 2 | 3,7186 | 0,298 | -0,756 |
| 19 | P56537 IF6_HUMAN    | D.YVALVHPDLRE.T              |        | 2 | 3,7141 | 0,477 | -0,855 |
| 19 | Q9Y6X2 PIAS3_HUMAN  | K.HCSVTSAAIPALPGSK.G         |        | 2 | 3,714  | 0,521 | -0,229 |
| 19 | Q4ZG52 Q4ZG52_HUMAN | E.GKDGAIEDIITALK.K           |        | 2 | 3,7066 | 0,338 | -0,422 |
| 19 | Q9ULI4 KI26A_HUMAN  | E.VSVCTADSRDPTPQPR.F         |        | 3 | 3,7065 | 0,378 | -1,024 |
| 19 | P07737 PROF1_HUMAN  | K.TDKTLVLLM*GKE.G            |        | 3 | 3,7058 | 0,291 | 0,201  |
| 19 | P40763 STAT3_HUMAN  | E.SQEHPEADPGSAAPYLK.T        |        | 2 | 3,6972 | 0,428 | -0,204 |
| 19 | P07195 LDHB_HUMAN   | K.IVADKDYSVTANSK.I           |        | 2 | 3,6963 | 0,528 | -0,727 |
| 19 | Q6IBS0 TWf2_HUMAN   | E.LVHTEPTDVAQLPSR.V          |        | 3 | 3,696  | 0,279 | -0,55  |
| 19 | Q9P0K7 RAI14_HUMAN  | K.ISQDADLKT#PTKPK.Q          | T249:  | 2 | 3,6953 | 0,425 | -0,376 |
| 19 | P49591 SYSC_HUMAN   | R.FKDPGLVDQLVK.A             |        | 3 | 3,6948 | 0,224 | -0,336 |
| 19 | P00558 PGK1_HUMAN   | E.SPERPFLAILGGAK.V           |        | 2 | 3,6941 | 0,381 | -0,754 |
| 19 | P46821 MAP1B_HUMAN  | E.SEKPLTQSGGAPPPGGK.Q        |        | 2 | 3,691  | 0,541 | -0,429 |
| 19 | Q01804 OTUD4_HUMAN  | E.NITDDKYATVSSPSK.S          |        | 2 | 3,6904 | 0,545 | -0,3   |
| 19 | P16152 CBR1_HUMAN   | R.FHQLDIDDLQSIR.A            |        | 3 | 3,6894 | 0,22  | 0,114  |
| 19 | Q9H2P0 ADNP_HUMAN   | K.ISNDNPEEHVLK.V             |        | 2 | 3,6785 | 0,374 | -1,574 |
| 19 | P51858 HDGF_HUMAN   | E.VERPLPM*EVEKNST#PSEPGSGR.G | T200:  | 3 | 3,6783 | 0,222 | 0      |
| 19 | Q6PJF5 RHDF2_HUMAN  | R.DSGCCVQNDHSGCIQTQR.K       |        | 3 | 3,6744 | 0,35  | -0,431 |
| 19 | Q99460 PSMD1_HUMAN  | R.LLHVAVSDVNDVDR.R           |        | 2 | 3,6736 | 0,535 | -0,472 |
| 19 | P02144 MYG_HUMAN    | K.HGATVLTALGGILK.K           |        | 2 | 3,6724 | 0,522 | -0,542 |
| 19 | P11021 GRP78_HUMAN  | K.TKPYIQVDIGGGQTK.T          |        | 3 | 3,6699 | 0,287 | -0,228 |
| 19 | Q9H814 RNUXA_HUMAN  | R.AFQNTATACAPVSHYR.A         |        | 2 | 3,6679 | 0,528 | -0,612 |
| 19 | Q86W56 PARG_HUMAN   | K.STQYLNQHQTAAAM*CK.W        |        | 2 | 3,6624 | 0,604 | -0,407 |
| 19 | Q6VY07 PACS1_HUMAN  | R.TNSS#DSERSPLDGHSTQIPR.K    | S529:  | 3 | 3,6595 | 0,396 | -0,566 |
| 19 | Q09666 AHNK_HUMAN   | K.SKGHYEVTGS#DDE.T           | S5841: | 2 | 3,6563 | 0,543 | -0,406 |
| 19 | P18669 PGAM1_HUMAN  | K.NLKPIKPM*QFLGDEE.T         |        | 2 | 3,6538 | 0,335 | -0,137 |
| 19 | Q9Y2X3 NOL5_HUMAN   | E.VKTYDPSGDSTLPTCSK.K        |        | 2 | 3,6537 | 0,47  | -0,329 |



|    |                     |                             |        |   |        |       |        |
|----|---------------------|-----------------------------|--------|---|--------|-------|--------|
| 19 | Q9UHB6 LIMA1_HUMAN  | R.SRPFTVAASFQSTS VKS#PK.T   | S604:  | 2 | 3,6498 | 0,291 | -1,043 |
| 19 | Q96IF1 JUB_HUMAN    | R.GSLLLDGAGAGGAGGSRPCS NR.T |        | 3 | 3,6456 | 0,492 | -0,811 |
| 19 | P78371 TCPB_HUMAN   | R.SLHDALCVLAQTVK.D          |        | 2 | 3,6435 | 0,526 | -0,392 |
| 19 | Q13547 HDAC1_HUMAN  | R.M*THNLLLNYGLYR.K          |        | 3 | 3,643  | 0,385 | 1,014  |
| 19 | P08107 HSP71_HUMAN  | K.AQIHDLVLVGGSTR.I          |        | 2 | 3,6414 | 0,384 | -0,666 |
| 19 | Q15084 PDIA6_HUMAN  | K.IFQKGESPVVDYDGGGR.T       |        | 2 | 3,6409 | 0,482 | -0,366 |
| 19 | O60271 JIP4_HUMAN   | E.LDM*DKDLSGYKGSST#PTK.G    | T365:  | 2 | 3,6404 | 0,332 | -0,419 |
| 19 | Q9H1H9 KI13A_HUMAN  | R.IVNHAVVNEDPNAK.V          |        | 2 | 3,6372 | 0,497 | -0,482 |
| 19 | P46013 KI67_HUMAN   | E.VSCK#PQPDPVKPTSSK.Q       | S1983: | 3 | 3,6325 | 0,226 | -0,362 |
| 19 | O75132 ZBED4_HUMAN  | E.LM*NSTSEDVAASHR.C         |        | 3 | 3,6304 | 0,37  | 0,179  |
| 19 | P08670 VIME_HUMAN   | E.NTLQSFQRQVDNASLAR.L       |        | 3 | 3,629  | 0,28  | -0,095 |
| 19 | Q9ULU4 PKCB1_HUMAN  | K.TDKTSTTGSILNLDLDR.S       |        | 3 | 3,6271 | 0,292 | 0,198  |
| 19 | O95819 M4K4_HUMAN   | K.LVDFGVSAQLDRT#VGRR.N      | T181:  | 3 | 3,6266 | 0,433 | -0,65  |
| 19 | Q6ZRV2 FA83H_HUMAN  | R.DPGGGAGAITVASHSK.A        |        | 3 | 3,6249 | 0,421 | 0,064  |
| 19 | Q9Y2X3 NOL5_HUMAN   | E.VKTYDPSGDSTLPTCSK.K       |        | 3 | 3,6239 | 0,264 | -0,197 |
| 19 | Q99700 ATX2_HUMAN   | E.FVSHNPPSEAAPPPVAR.T       |        | 2 | 3,622  | 0,352 | -0,412 |
| 19 | P13639 EF2_HUMAN    | E.SGEHIIAGAGELHLE.I         |        | 2 | 3,6213 | 0,449 | -0,159 |
| 19 | Q16891 IMMT_HUMAN   | K.LHNM*IVDLDNVVK.K          |        | 2 | 3,6184 | 0,495 | -0,64  |
| 19 | Q96RP9 EFG1_HUMAN   | R.FVLQDGAHHM*VDSNE.I        |        | 2 | 3,6157 | 0,412 | -0,569 |
| 19 | Q13263 TIF1B_HUMAN  | E.DKADVQSIIGLQR.F           |        | 2 | 3,6135 | 0,418 | -0,423 |
| 19 | Q9GZR1 SENPE6_HUMAN | E.KVPIDIIVNCDDSK.H          |        | 2 | 3,6102 | 0,512 | -0,528 |
| 19 | O15320 CTGE5_HUMAN  | E.KDPYALDVPNTAFGR.E         |        | 3 | 3,6093 | 0,321 | -0,879 |
| 19 | P29966 MARCS_HUMAN  | E.AAAERPGEAAVASSPSK.A       |        | 2 | 3,6058 | 0,445 | -0,382 |
| 19 | P23258 TBG1_HUMAN   | K.IHEDIFDIIDRE.A            |        | 2 | 3,6057 | 0,511 | -0,403 |
| 19 | P07237 PDIA1_HUMAN  | K.YQLDKDGVVLFK.K            |        | 2 | 3,6057 | 0,337 | -0,685 |
| 19 | O60841 IF2P_HUMAN   | K.NKPGPNIESGNEDDDASFK.I     |        | 3 | 3,6041 | 0,318 | -0,18  |
| 19 | Q8N567 ZCHC9_HUMAN  | K.AKVDPALGEFFFAK.C          |        | 3 | 3,6033 | 0,352 | 0,184  |
| 19 | Q06830 PRDX1_HUMAN  | K.KQGGLGPM*NIPLVSDPK.R      |        | 3 | 3,5995 | 0,293 | 0,104  |
| 19 | O43432 IF4G3_HUMAN  | E.SAHLAASPVTAAASDQK.Q       |        | 3 | 3,5986 | 0,382 | -1,658 |
| 19 | P05387 RLA2_HUMAN   | D.SVGIEADDDRLNK.V           |        | 2 | 3,5969 | 0,369 | -0,426 |
| 19 | Q04917 1433F_HUMAN  | E.DSYKDSTLIM*QLLR.D         |        | 3 | 3,5968 | 0,341 | -0,108 |
| 19 | Q92615 LARP5_HUMAN  | E.THS#VDRLPSALTATACK.S      | S620:  | 3 | 3,5913 | 0,438 | -0,096 |
| 19 | P35579 MYH9_HUMAN   | K.LKDVLLQVDDER.R            |        | 2 | 3,5863 | 0,488 | -0,761 |

|    |                    |                           |        |   |        |       |        |
|----|--------------------|---------------------------|--------|---|--------|-------|--------|
| 19 | Q92598 HS105_HUMAN | E.LNNTCEPVVTQPKP.K.I      |        | 3 | 3,586  | 0,39  | -1,06  |
| 19 | Q9BPX3 CND3_HUMAN  | E.NAQIDDDVFDKINK.A        |        | 2 | 3,5846 | 0,409 | -0,075 |
| 19 | Q8IWW6 RHG12_HUMAN | R.IHQDSESGDELSSSTEQIR.A   |        | 3 | 3,5836 | 0,381 | -0,332 |
| 19 | P30101 PDIA3_HUMAN | R.FLQDYFDGNLKR.Y          |        | 2 | 3,5825 | 0,388 | -0,402 |
| 19 | Q9UPP1 PHF8_HUMAN  | E.GKLGNGSGAGGILDLLK.A     |        | 3 | 3,5821 | 0,331 | 0,116  |
| 19 | O95785 WIZ_HUMAN   | E.DKSPQLSLSPRPAS#PK.A     | S1017: | 3 | 3,5771 | 0,332 | -1,228 |
| 19 | P11940 PABP1_HUMAN | R.SKGFVFCVCFSSPEEATK.A    |        | 3 | 3,5744 | 0,253 | -0,779 |
| 19 | Q9Y6X2 PIAS3_HUMAN | K.GVLTSGHQPSSVLR.S        |        | 2 | 3,5733 | 0,417 | 0,424  |
| 19 | Q9Y6W5 WASF2_HUMAN | R.DVVGNDVATILSR.R         |        | 2 | 3,5722 | 0,454 | -0,718 |
| 19 | P46013 KI67_HUMAN  | E.VHSQFSTGHANS#PCTIIGK.A  | S713:  | 3 | 3,5697 | 0,336 | -0,491 |
| 19 | O00193 SMAP_HUMAN  | E.LQAAEHPDEVEDPK.N        |        | 2 | 3,5672 | 0,489 | -0,541 |
| 19 | Q13442 HAP28_HUMAN | R.KGVEGLIDIENPNR.V        |        | 2 | 3,5667 | 0,267 | -0,471 |
| 19 | Q9NR30 DDX21_HUMAN | K.LKNGFPHPEPDCNPSEAASEE.S |        | 3 | 3,5622 | 0,368 | -0,787 |
| 19 | P01116 RASK_HUMAN  | R.VKDSEDPVM*VLVGNK.C      |        | 2 | 3,5588 | 0,405 | -1,557 |
| 19 | Q92597 NDRG1_HUMAN | E.GAHLDITPNSGAAGNSAGPK.S  |        | 3 | 3,5528 | 0,406 | -0,199 |
| 19 | Q09666 AHNK_HUMAN  | K.VKGDVDVSLPKVE.G         |        | 3 | 3,5527 | 0,118 | -0,198 |
| 19 | P34931 HS71L_HUMAN | K.ATAGDTHLGGEDFDNR.L      |        | 2 | 3,5521 | 0,498 | -0,364 |
| 19 | Q6PCD5 RFWD3_HUMAN | R.LRAPLDAYFQVSR.T         |        | 3 | 3,5513 | 0,176 | -0,119 |
| 19 | Q6U841 S4A10_HUMAN | R.IPIVRS#FADIGKK.Q        | S238:  | 3 | 3,5498 | 0,136 | -0,36  |
| 19 | Q16881 TRXR1_HUMAN | K.KQLDSTIGIHPVCAE.V       |        | 2 | 3,5472 | 0,521 | -0,585 |
| 19 | Q8NBU5 ATAD1_HUMAN | K.SKDAAFQNVLTHVCLD.-      |        | 2 | 3,5432 | 0,272 | -0,537 |
| 19 | P47756 CAPZB_HUMAN | K.VVGKDYLLCDYNR.D         |        | 2 | 3,5429 | 0,505 | -0,907 |
| 19 | Q15043 S39AE_HUMAN | K.ALLNHLVDVGVGR.G         |        | 2 | 3,5413 | 0,443 | 0      |
| 19 | P29966 MARCS_HUMAN | E.KGEPAAAAAPEAGASPVEK.E   |        | 3 | 3,5389 | 0,387 | -0,104 |
| 19 | Q86UV5 UBP48_HUMAN | E.YTQATIYVHK.V            |        | 3 | 3,5365 | 0,413 | 0,598  |
| 19 | P15586 GNS_HUMAN   | E.FDIKVPLLR.G             |        | 3 | 3,5341 | 0,305 | 0,457  |
| 19 | Q8IVF7 FMNL3_HUMAN | E.GKDGTTIEDIITVLK.S       |        | 3 | 3,5302 | 0,096 | 0      |
| 19 | P30622 CLIP1_HUMAN | E.LDEPLGKNDGAVAGTR.Y      |        | 3 | 3,5267 | 0,348 | 0,113  |
| 19 | Q9H1H9 KI13A_HUMAN | R.IVNHAVVNEDPNAK.V        |        | 3 | 3,5255 | 0,346 | 0,301  |
| 19 | P58546 MTPN_HUMAN  | K.NGDLDEVKDYVAK.G         |        | 2 | 3,5219 | 0,416 | -0,499 |
| 19 | Q9UHB9 SRP68_HUMAN | E.KCSLQAAAAILDANDAHQTE.T  |        | 3 | 3,5207 | 0,273 | -0,801 |
| 19 | O75152 ZC11A_HUMAN | R.RLS#SASTGKPLSVEDDFEK.L  | S758:  | 3 | 3,519  | 0,192 | -0,816 |
| 19 | Q9HCD6 TANC2_HUMAN | E.TSVSQLPGRPKS#PLSK.M     | S1579: | 3 | 3,5152 | 0,271 | -0,415 |

|    |                    |                                 |            |   |        |       |        |
|----|--------------------|---------------------------------|------------|---|--------|-------|--------|
| 19 | Q15043 S39AE_HUMAN | K.ALLNHLVDVGVGR.G               |            | 3 | 3,5145 | 0,337 | 1,302  |
| 19 | P35527 K1C9_HUMAN  | R.HGVQLEIEIQSQLSK.K             |            | 3 | 3,5118 | 0,212 | -0,299 |
| 19 | O95425 SVIL_HUMAN  | K.HAHSSSLQQAASRS#PSFGDPQLS#PE.A | S261:S270: | 3 | 3,51   | 0,287 | -0,461 |
| 19 | P52594 NUPL_HUMAN  | K.SLLGDSAPTLHLNK.G              |            | 2 | 3,5087 | 0,432 | -0,583 |
| 19 | Q9BY44 EIF2A_HUMAN | E.ARSDKS#PDLAPTPAPQSTPR.N       | S506:      | 2 | 3,5082 | 0,262 | -0,225 |
| 19 | Q8NCD3 HJURP_HUMAN | R.ISGKS#PGDPAKPASSPR.E          | S201:      | 3 | 3,5027 | 0,374 | -0,739 |
| 19 | Q9BRS8 LARP6_HUMAN | R.KM*QTADGLPVGVL.R              |            | 2 | 3,4999 | 0,395 | -0,488 |
| 19 | P60709 ACTB_HUMAN  | E.EHPVLLTEAPLNPK.A              |            | 2 | 3,4992 | 0,523 | 0,078  |
| 19 | Q09666 AHNK_HUMAN  | K.ISM*PDVDLHLK.G                |            | 3 | 3,4989 | 0,323 | 0,427  |
| 19 | Q02952 AKA12_HUMAN | E.STAVGQAHS DISKDM*SE.A         |            | 2 | 3,4985 | 0,352 | -1,372 |
| 19 | Q99829 CPNE1_HUMAN | E.AM*EQLDADGGPLHTR.S            |            | 3 | 3,4983 | 0,388 | 0      |
| 19 | P00558 PGK1_HUMAN  | D.KIQLINNM*LDKVNE.M             |            | 2 | 3,4963 | 0,423 | -0,723 |
| 19 | P08670 VIME_HUMAN  | E.TNLDLPLVDTHSK.R               |            | 2 | 3,4963 | 0,456 | -0,792 |
| 19 | P43243 MATR3_HUMAN | R.GPSLNPVLDYDHGSR.S             |            | 2 | 3,4925 | 0,534 | -0,375 |
| 19 | Q9P260 K1468_HUMAN | E.RQSGTPPGM*GAPGVPGAAGVGGAGGR.E |            | 3 | 3,4911 | 0,188 | -0,491 |
| 19 | Q2M218 AAK1_HUMAN  | R.RILS#DVTHSAVFGVPASK.S         | S637:      | 2 | 3,4909 | 0,411 | -0,311 |
| 19 | Q01970 PLCB3_HUMAN | R.RPPGPTTSPASTSLSSPGQR.D        |            | 3 | 3,4883 | 0,329 | -1,016 |
| 19 | Q15942 ZYG_HUMAN   | E.ADDNGCFPLDGHVLCR.K            |            | 3 | 3,4881 | 0,388 | -0,297 |
| 19 | Q99460 PSMD1_HUMAN | R.LLHVAVSDVNDVDR.R              |            | 3 | 3,4872 | 0,266 | 0,118  |
| 19 | O60610 DIAP1_HUMAN | E.LTKDDAM*AAVPAK.V              |            | 3 | 3,4843 | 0,238 | -0,543 |
| 19 | Q14320 FA50A_HUMAN | K.SGPLFNFDVHDDVDR.L             |            | 2 | 3,483  | 0,49  | -0,377 |
| 19 | Q01433 AMPD2_HUMAN | E.RQIS#QDVKLEPDILLR.A           | S168:      | 3 | 3,4822 | 0,339 | 0,365  |
| 19 | P51858 HDGF_HUMAN  | E.VERPLPM*EVEK.N                |            | 3 | 3,4782 | 0,386 | -0,613 |
| 19 | P14625 ENPL_HUMAN  | R.FQSSHPTDITSLDQYVE.R           |            | 2 | 3,4751 | 0,434 | 0      |
| 19 | P49023 PAXI_HUMAN  | R.FIHQQPQSSSPVYGSSAK.T          |            | 3 | 3,4742 | 0,091 | -0,845 |
| 19 | O00148 DDX39_HUMAN | K.LTLHLQLQYYVK.L                |            | 3 | 3,4722 | 0,342 | -1,188 |
| 19 | Q15276 RABE1_HUMAN | R.QNAVLQAAQDDLGHLLR.T           |            | 3 | 3,4699 | 0,48  | -0,314 |
| 19 | Q13885 TBB2A_HUMAN | E.IVHIQAGQCGNQIGAK.F            |            | 2 | 3,4694 | 0,469 | -0,432 |
| 19 | Q9P0K7 RAI14_HUMAN | K.ISQDADLKT#PTKPK.Q             | T249:      | 3 | 3,4667 | 0,267 | -0,338 |
| 19 | P35579 MYH9_HUMAN  | K.LKDVLLQVDDER.R                |            | 3 | 3,4656 | 0,246 | 0      |
| 19 | O15066 KIF3B_HUMAN | R.VNEDPKDALLRE.F                |            | 3 | 3,4647 | 0,4   | -0,065 |
| 19 | P31946 1433B_HUMAN | E.SYKDSTLIM*QLLR.D              |            | 2 | 3,4633 | 0,539 | -0,385 |
| 19 | Q01813 K6PP_HUMAN  | E.GAIDTQNKPIITSEK.I             |            | 2 | 3,4626 | 0,362 | -0,65  |

|    |                     |                            |            |   |        |       |        |
|----|---------------------|----------------------------|------------|---|--------|-------|--------|
| 19 | O15391 TYY2_HUMAN   | K.KLPPGGLPGIDLSDPK.Q       |            | 3 | 3,4623 | 0,33  | 0,114  |
| 19 | Q9H7N4 SFR19_HUMAN  | E.LIQATNQILSHR.K           |            | 2 | 3,4583 | 0,391 | -0,613 |
| 19 | Q9P265 DIP2B_HUMAN  | E.LRNQTPAPSAAQTSAPSK.Y     |            | 3 | 3,4559 | 0,325 | -0,501 |
| 19 | Q9NRY4 GRLF1_HUMAN  | E.EENIYSVPHDSTQGK.I        |            | 2 | 3,4547 | 0,432 | -0,501 |
| 19 | Q6P2H3 CCD21_HUMAN  | E.GISHVTPSSDVIQK.G         |            | 2 | 3,4503 | 0,383 | -0,706 |
| 19 | Q92783 STAM1_HUMAN  | E.FKNDPQLSLISAM*IK.N       |            | 3 | 3,444  | 0,214 | -0,106 |
| 19 | Q70CQ4 UBP31_HUMAN  | R.LPGSKPASVTSAASSR.R       |            | 3 | 3,4422 | 0,329 | -0,603 |
| 19 | Q8IUD2 RB6I2_HUMAN  | K.LM*ADNYEDDHFK.S          |            | 3 | 3,4394 | 0,366 | -0,06  |
| 19 | Q96A65 EXOC4_HUMAN  | K.SKDPGGLLISVIR.T          |            | 2 | 3,4371 | 0,401 | -0,793 |
| 19 | P04406 G3P_HUMAN    | E.GLM*TTVHAITATQK.T        |            | 2 | 3,4362 | 0,44  | -0,738 |
| 19 | P60709 ACTB_HUMAN   | E.EHPVLLTEAPLNPK.A         |            | 3 | 3,4354 | 0,33  | 0,704  |
| 19 | P42166 LAP2A_HUMAN  | E.LVANNVTLPAGEQRK.D        |            | 2 | 3,4348 | 0,453 | -0,606 |
| 19 | Q9BYW2 SETD2_HUMAN  | K.KLDELPIFKSE.F            |            | 2 | 3,4336 | 0,326 | -0,462 |
| 19 | P13639 EF2_HUMAN    | K.ARPFDGLAEDIDKGE.V        |            | 2 | 3,4324 | 0,401 | -0,423 |
| 19 | Q5T5Y3 CAMP1_HUMAN  | K.TRPAS#QPTPFALHHAASCE.V   | S470:      | 3 | 3,4318 | 0,357 | -0,763 |
| 19 | Q00341 VIGLN_HUMAN  | E.DKDQDLITIIGKE.D          |            | 2 | 3,4301 | 0,441 | -0,574 |
| 19 | Q15657 Q15657_HUMAN | K.ALM*AAEDKYSQK.E          |            | 2 | 3,4229 | 0,408 | -0,445 |
| 19 | Q5W0V3 K1600_HUMAN  | E.DTLKGQDSLSTDTGQSR.Q      |            | 2 | 3,422  | 0,406 | -0,472 |
| 19 | P01106 MYC_HUMAN    | E.SGS#PSAGGHSKPPHS#PLVLK.R | S281:S293: | 3 | 3,4219 | 0,311 | -0,523 |
| 19 | Q13526 PIN1_HUMAN   | R.GQM*QKPFEDASFALR.T       |            | 3 | 3,4187 | 0,373 | 0,105  |
| 19 | Q8IUD2 RB6I2_HUMAN  | K.LM*ADNYEDDHFK.S          |            | 2 | 3,4168 | 0,375 | -0,645 |
| 19 | Q00610 CLH1_HUMAN   | E.GCEEPATHNALAK.I          |            | 2 | 3,4154 | 0,408 | -0,611 |
| 19 | Q9NY27 PP4R2_HUMAN  | E.KNVM*VVSCVYPSSEK.N       |            | 3 | 3,4081 | 0,3   | -0,42  |
| 19 | P61970 NTF2_HUMAN   | K.IQHSITAQDHDQPTPD.S       |            | 2 | 3,4063 | 0,394 | -0,217 |
| 19 | O00244 ATOX1_HUMAN  | E.SEHSM*DTLLATLK.K         |            | 2 | 3,4037 | 0,414 | -0,501 |
| 19 | Q9UQR0 SCML2_HUMAN  | R.NPM*YIHTSVSQDFSR.S       |            | 3 | 3,4035 | 0,335 | -0,712 |
| 19 | O14497 ARI1A_HUMAN  | K.NDPFVDCSDKLGR.V          |            | 2 | 3,4024 | 0,317 | -0,301 |
| 19 | P38919 IF4A3_HUMAN  | R.LLKEEDM*TKVE.F           |            | 2 | 3,4006 | 0,305 | -0,993 |
| 19 | P46937 YAP1_HUMAN   | R.QASTDAGTAGALTPQHVR.A     |            | 3 | 3,4004 | 0,45  | -0,822 |
| 19 | Q96IF1 JUB_HUMAN    | R.GAQPGRHS#VTGYGDCAVGAR.Y  | S263:      | 3 | 3,3971 | 0,272 | -0,611 |
| 19 | Q8NEJ9 NGDN_HUMAN   | R.LVPVHYDETEAERE.K         |            | 2 | 3,3971 | 0,494 | -1,085 |
| 19 | Q3ZCQ8 TIM50_HUMAN  | E.HYALEDDPLAAFK.Q          |            | 3 | 3,3962 | 0,236 | 0,061  |
| 19 | O75691 UTP20_HUMAN  | R.LGNVNIIDIIHR.I           |            | 3 | 3,3956 | 0,366 | 1,23   |

|    |                     |                            |       |   |        |       |        |
|----|---------------------|----------------------------|-------|---|--------|-------|--------|
| 19 | P51572 BAP31_HUMAN  | K.LQAAVDGPM*DKKEE.-        |       | 2 | 3,3947 | 0,46  | -0,315 |
| 19 | Q14566 MCM6_HUMAN   | R.ISNLIVLHLR.K             |       | 2 | 3,3933 | 0,288 | -0,207 |
| 19 | Q9P2N5 RBM27_HUMAN  | E.DLLQHFSTANQGPK.F         |       | 2 | 3,3929 | 0,429 | -0,863 |
| 19 | Q04917 1433F_HUMAN  | E.DSYKDSTLIM*QLLR.D        |       | 2 | 3,3929 | 0,468 | 0,144  |
| 19 | O75533 SF3B1_HUMAN  | K.KPGYHAPVALLNDIPQSTE.Q    |       | 2 | 3,3891 | 0,405 | -0,476 |
| 19 | Q58FF8 H90B2_HUMAN  | K.HSQFLGYPTILYLEK.E        |       | 3 | 3,3821 | 0,315 | -0,404 |
| 19 | P00734 THRB_HUMAN   | R.KSPQELLCGASLISDR.W       |       | 3 | 3,3789 | 0,268 | -0,412 |
| 19 | Q9BUF5 TBB6_HUMAN   | E.IVHIQAGQCGNQIGTK.F       |       | 2 | 3,3768 | 0,546 | -0,495 |
| 19 | Q9NYF8 BCLF1_HUMAN  | K.LKDLFDYS#PPLHK.N         | S512: | 2 | 3,3725 | 0,49  | -0,443 |
| 19 | A8K630 A8K630_HUMAN | R.LQQQHSEQPPLQPS#PVTTTRR.G | S22:  | 3 | 3,3709 | 0,279 | -0,912 |
| 19 | Q8IZL8 PELP1_HUMAN  | R.GSPDGSLSQTGKPSAPK.K      |       | 2 | 3,3681 | 0,384 | -0,559 |
| 19 | Q86XP3 DDX42_HUMAN  | K.KIIDPLPIDHSE.I           |       | 2 | 3,368  | 0,396 | -0,414 |
| 19 | Q96HC4 PDLI5_HUMAN  | K.KANNSQEPSPQLASSVASTR.S   |       | 3 | 3,3666 | 0,347 | -1,059 |
| 19 | P52948 NUP98_HUMAN  | E.NNS#YHM*HPAGIILTK.V      | S726: | 3 | 3,3647 | 0,36  | -0,51  |
| 19 | A0JNW5 UH1BL_HUMAN  | E.NLDISKEETPPVR.T          |       | 2 | 3,3641 | 0,446 | -1,547 |
| 19 | Q9P2R3 ANFY1_HUMAN  | R.GSHTDAPDTATGNCLLQR.A     |       | 3 | 3,3637 | 0,315 | -1,051 |
| 19 | P60174 TPIS_HUMAN   | R.KQSLGELIGTLNAAK.V        |       | 2 | 3,3622 | 0,426 | -0,237 |
| 19 | P13639 EF2_HUMAN    | R.FDVHDVTLHAD.A            |       | 3 | 3,3609 | 0,402 | 0,144  |
| 19 | Q15121 PEA15_HUMAN  | R.RPDLLTM*VVDYR.T          |       | 3 | 3,36   | 0,405 | 0,428  |
| 19 | P55036 PSMD4_HUMAN  | R.LQAQQDAVNIVCHSK.T        |       | 3 | 3,3543 | 0,346 | -0,962 |
| 19 | Q14651 PLSI_HUMAN   | R.AYFHLLNQIAPK.G           |       | 3 | 3,3525 | 0,258 | 0,323  |
| 19 | P43490 NAMPT_HUMAN  | E.YGQDLLHTVFK.N            |       | 2 | 3,3522 | 0,355 | -0,185 |
| 19 | P78371 TCPB_HUMAN   | E.DKLIHFSGVALGE.A          |       | 2 | 3,351  | 0,398 | -0,968 |
| 19 | Q13885 TBB2A_HUMAN  | E.IVHIQAGQCGNQIGAK.F       |       | 3 | 3,348  | 0,274 | 0,432  |
| 19 | Q6P1N9 TATD1_HUMAN  | R.CVGGVVHVSFDGTKE.A        |       | 2 | 3,347  | 0,426 | 0,409  |
| 19 | Q6P4E1 CASC4_HUMAN  | R.FFDENESPVDPPQHGSK.L      |       | 3 | 3,3444 | 0,215 | -0,2   |
| 19 | P63241 IF5A1_HUMAN  | K.VHLVGIDIFTGK.K           |       | 3 | 3,3431 | 0,294 | 0      |
| 19 | Q9UBF8 PI4KB_HUMAN  | R.RLS#EQLAHTPTAFK.R        | S511: | 3 | 3,3414 | 0,317 | -0,327 |
| 19 | P51784 UBP11_HUMAN  | K.VGHFASQFLGYQQHDSQE.L     |       | 3 | 3,3407 | 0,158 | -0,616 |
| 19 | P78536 ADA17_HUMAN  | K.SFEDLTDHPVTR.S           |       | 2 | 3,3335 | 0,444 | -0,947 |
| 19 | Q9H814 RNUXA_HUMAN  | R.AFQNTATACAPVSHYR.A       |       | 3 | 3,3289 | 0,513 | 0,306  |
| 19 | Q8N5F7 NKAP_HUMAN   | R.TKAEPSDLIGPEAPK.T        |       | 3 | 3,3283 | 0,181 | -0,435 |
| 19 | P05387 RLA2_HUMAN   | K.NIEDVIAQGIGK.L           |       | 2 | 3,328  | 0,401 | -0,291 |

|    |                     |                            |          |   |        |       |        |
|----|---------------------|----------------------------|----------|---|--------|-------|--------|
| 19 | Q14690 RRP5_HUMAN   | K.VFLHLADIYAK.S            |          | 2 | 3,327  | 0,474 | -0,284 |
| 19 | Q8TAD8 SNIP1_HUMAN  | R.RPDHS#GGSPS#PPTSEPAR.S   | S49:S54: | 3 | 3,3261 | 0,269 | -0,367 |
| 19 | P28290 SSFA2_HUMAN  | E.KEPCAPLTIPSIR.N          |          | 3 | 3,326  | 0,164 | -0,247 |
| 19 | P61586 RHOA_HUMAN   | K.HFCPNVPIILVGNK.K         |          | 2 | 3,3232 | 0,44  | -0,303 |
| 19 | P46063 RECQ1_HUMAN  | K.VKDILQNVFKLE.K           |          | 2 | 3,3229 | 0,264 | -0,337 |
| 19 | Q05209 PTN12_HUMAN  | E.NM*ISSIEPEKQDS#PPPKPPR.T | S332:    | 3 | 3,3214 | 0,172 | -0,468 |
| 19 | O60271 JIP4_HUMAN   | E.LDM*DKDLSGYK.G           |          | 3 | 3,3209 | 0,126 | -0,07  |
| 19 | P49815 TSC2_HUMAN   | E.GGRPSVDLSFQPSQPLSK.S     |          | 3 | 3,3201 | 0,161 | -0,385 |
| 19 | Q8TAQ2 SMRC2_HUMAN  | E.DYEVNDDKNPVSR.R          |          | 2 | 3,3136 | 0,216 | -0,787 |
| 19 | Q8N2M8 SFR16_HUMAN  | K.DPAQLQVHGR.A             |          | 3 | 3,3134 | 0,231 | 0,361  |
| 19 | O15182 CETN3_HUMAN  | K.LFDDDDSGKISLR.N          |          | 2 | 3,3134 | 0,376 | -0,494 |
| 19 | P08133 ANXA6_HUMAN  | E.ADIIGDTSGHFQK.M          |          | 2 | 3,3131 | 0,485 | -0,878 |
| 19 | P35658 NU214_HUMAN  | R.LNHLVDSLQQLR.L           |          | 2 | 3,312  | 0,45  | -0,34  |
| 19 | P06730 IF4E_HUMAN   | K.IVIGYQSHADTATK.S         |          | 2 | 3,3091 | 0,52  | -0,649 |
| 19 | P48643 TCPE_HUMAN   | E.ANHLLLQNNLPAVR.W         |          | 2 | 3,3048 | 0,41  | -0,465 |
| 19 | Q9HAW4 CLSPN_HUMAN  | E.LSLQSGNSTDFTDRK.S        |          | 2 | 3,3014 | 0,358 | -0,069 |
| 19 | Q9BZE4 NOG1_HUMAN   | E.GHNIADYIDPAIM*K.K        |          | 2 | 3,3002 | 0,465 | -0,078 |
| 19 | P55884 EIF3B_HUMAN  | K.ITNDFYPEEDGKTK.G         |          | 2 | 3,3001 | 0,417 | -0,295 |
| 19 | Q6MZL5 Q6MZL5_HUMAN | E.M*EQLFHDDQGGVTR.W        |          | 3 | 3,2966 | 0,24  | -0,222 |
| 19 | Q14974 IMB1_HUMAN   | E.LM*KDPSVVVRD.T           |          | 3 | 3,2945 | 0,126 | -0,502 |
| 19 | Q5W0V3 K1600_HUMAN  | E.DTLKGQDSLSTDTGQSR.Q      |          | 3 | 3,2943 | 0,362 | -0,708 |
| 19 | P30084 ECHM_HUMAN   | K.NNTVGLIQLNRPK.A          |          | 2 | 3,2932 | 0,461 | -0,499 |
| 19 | Q99733 NP1L4_HUMAN  | R.KYAALYQPLFDK.R           |          | 2 | 3,2927 | 0,481 | -0,167 |
| 19 | P01116 RASK_HUMAN   | R.VKDSEDVPM*VLVGNK.C       |          | 3 | 3,2913 | 0,282 | -0,556 |
| 19 | P22626 ROA2_HUMAN   | R.GFGFVTDDHDPVVK.I         |          | 2 | 3,2887 | 0,329 | -0,432 |
| 19 | Q9HAV7 GRPE1_HUMAN  | R.TLRPALVGVVKE.A           |          | 3 | 3,2883 | 0,169 | 0,285  |
| 19 | Q9Y2K6 UBP20_HUMAN  | K.FSEQDSPPPSHPLK.A         |          | 3 | 3,284  | 0,192 | -1,518 |
| 19 | Q6NWWY9 PR40B_HUMAN | E.LQQAELPNRS#PGFGIKK.E     | S832:    | 3 | 3,2826 | 0,295 | -1,118 |
| 19 | Q8TCS8 PNPT1_HUMAN  | E.NILQQDFCHAIK.V           |          | 2 | 3,2819 | 0,283 | -0,246 |
| 19 | Q9P0V9 SEP10_HUMAN  | K.TTCM*SSQGSDEQIKRE.N      |          | 3 | 3,2805 | 0,404 | -0,552 |
| 19 | P33993 MCM7_HUMAN   | R.TQRPADVIFATVR.E          |          | 3 | 3,2796 | 0,152 | -0,931 |
| 19 | Q15942 ZYX_HUMAN    | E.ADDNGCFPLDGHVLCR.K       |          | 2 | 3,2795 | 0,499 | -0,727 |
| 19 | Q6NYC8 PHTNS_HUMAN  | E.AQTQKPEPPESAEL.L         |          | 2 | 3,2757 | 0,346 | -1,347 |

|    |                    |                           |        |   |        |       |        |
|----|--------------------|---------------------------|--------|---|--------|-------|--------|
| 19 | Q8NBS9 TXND5_HUMAN | K.VDCTAHSVCSAQGVR.G       |        | 2 | 3,2745 | 0,395 | -0,346 |
| 19 | P78527 PRKDC_HUMAN | R.ATQQQHDFTLTQTADGR.S     |        | 3 | 3,2739 | 0,421 | -0,477 |
| 19 | P29966 MARCS_HUMAN | E.AAAERPGEA AVASSPSK.A    |        | 3 | 3,2737 | 0,393 | -0,114 |
| 19 | P42566 EP15_HUMAN  | K.IGT#PTRPCPLPPGKR.S      | T777:  | 3 | 3,2734 | 0,379 | -0,53  |
| 19 | Q15365 PCBP1_HUMAN | R.CSDAAGYPHATHDLE.G       |        | 3 | 3,272  | 0,277 | -0,89  |
| 19 | P49792 RBP2_HUMAN  | E.SSINYTFKT#PEKAKE.K      | T2613: | 3 | 3,2697 | 0,405 | -0,803 |
| 19 | P52948 NUP98_HUMAN | E.NNS#YHM*HPAGIILTK.V     | S726:  | 2 | 3,2672 | 0,368 | -0,953 |
| 19 | Q01082 SPTB2_HUMAN | K.AKTALPAQSAATLPAR.T      |        | 3 | 3,2619 | 0,229 | 0,233  |
| 19 | Q14677 EPN4_HUMAN  | K.TIDLGAAAHYTGDK.A        |        | 2 | 3,2606 | 0,445 | -0,681 |
| 19 | Q02952 AKA12_HUMAN | E.SQVHM*M*AAAVADGTR.A     |        | 2 | 3,2592 | 0,371 | -0,542 |
| 19 | P54652 HSP72_HUMAN | K.STAGDTHLGGEDFDNR.M      |        | 2 | 3,2591 | 0,461 | -0,361 |
| 19 | Q15642 CIP4_HUMAN  | E.DFSHLPPEQQR.K           |        | 3 | 3,2571 | 0,254 | 0,203  |
| 19 | Q9BVG4 CX026_HUMAN | K.AVYISVQDKEGK.G          |        | 2 | 3,255  | 0,31  | -0,583 |
| 19 | Q9BV38 WDR18_HUMAN | R.LGLHQQGSEPSYLDRT.E.Q    |        | 3 | 3,2541 | 0,364 | -0,569 |
| 19 | P52565 GDIR1_HUMAN | K.IDKTDYM*VGSYGPR.A       |        | 2 | 3,2533 | 0,501 | -0,679 |
| 19 | P04083 ANXA1_HUMAN | R.KGTDVNVFNTILTTR.S       |        | 2 | 3,2523 | 0,372 | -0,436 |
| 19 | O60264 SMCA5_HUMAN | E.LFAHFIQPAAQK.T          |        | 2 | 3,252  | 0,361 | -0,89  |
| 19 | Q13459 MYO9B_HUMAN | R.VQEKPDSPGGSTQIQR.Y      |        | 2 | 3,2497 | 0,251 | -1,907 |
| 19 | Q9BZE4 NOG1_HUMAN  | E.GHNIADYIDPAIM*K.K       |        | 3 | 3,248  | 0,21  | 0      |
| 19 | P28074 PSB5_HUMAN  | R.DAYSGGAVNLYHVR.E        |        | 2 | 3,2471 | 0,456 | -0,321 |
| 19 | O14730 RIOK3_HUMAN | R.KAASFLKDDGDPPLLYDE.-    |        | 2 | 3,2457 | 0,323 | -0,061 |
| 19 | P07737 PROF1_HUMAN | K.TDKTLVLLM*GKE.G         |        | 2 | 3,2448 | 0,43  | -0,537 |
| 19 | Q8NC44 F134A_HUMAN | E.LAGFSPVVDVKK.T          |        | 2 | 3,2447 | 0,402 | -1,065 |
| 19 | Q9Y230 RUVB2_HUMAN | K.DKVQAGDVITDK.A          |        | 2 | 3,2427 | 0,319 | -0,609 |
| 19 | Q969Q5 RAB24_HUMAN | R.VDFHDVQDYADNIK.A        |        | 3 | 3,2423 | 0,27  | -0,109 |
| 19 | Q15418 KS6A1_HUMAN | R.TPKDS#PGIPPSAGAHQLFR.G  | S363:  | 3 | 3,2404 | 0,306 | -0,623 |
| 19 | Q76FK4 NOL8_HUMAN  | K.LM*DLQSHFGTDDR.F        |        | 2 | 3,2395 | 0,389 | -0,865 |
| 19 | Q96AQ6 PBIP1_HUMAN | R.ALQAPHS#PSKTDGKE.L      | S43:   | 2 | 3,2359 | 0,37  | -0,222 |
| 19 | Q96AQ6 PBIP1_HUMAN | R.ALQAPHS#PSKTDGKE.L      | S43:   | 3 | 3,2338 | 0,325 | 1      |
| 19 | Q92859 NEO1_HUMAN  | R.NSQDITPVDNSM*DSNIHQ.R   |        | 3 | 3,233  | 0,305 | -1,004 |
| 19 | P35606 COPB2_HUMAN | D.GKPAS#PTPVIVASHTANKEE.K | S859:  | 3 | 3,2328 | 0,173 | -0,26  |
| 19 | Q9Y4B5 K0802_HUMAN | R.GRS#PPERPVPGTPKEPSLGE.Q | S297:  | 3 | 3,2304 | 0,192 | -0,084 |
| 19 | P43490 NAMPT_HUMAN | E.YGQDLLHTVFK.N           |        | 3 | 3,2292 | 0,29  | 0,138  |

|    |                     |                                    |        |   |        |       |        |
|----|---------------------|------------------------------------|--------|---|--------|-------|--------|
| 19 | P55011 S12A2_HUMAN  | K.KES#KGPIVPLNVADQK.L              | S994:  | 3 | 3,2289 | 0,258 | -0,101 |
| 19 | Q9NZM1 MYOF_HUMAN   | K.NDVVGTTYLHLSK.I                  |        | 2 | 3,2281 | 0,466 | -0,422 |
| 19 | O75643 U520_HUMAN   | R.M*TQNPNYNLQGISHR.H               |        | 3 | 3,2275 | 0,246 | -0,281 |
| 19 | Q9GZV5 WWTR1_HUMAN  | R.SITNNSSDPFLNGGPYHSR.E            |        | 3 | 3,2273 | 0,445 | -0,532 |
| 19 | Q15149 PLEC1_HUMAN  | R.RDDGTGQLLLPLSDAR.K               |        | 3 | 3,2269 | 0,199 | -0,847 |
| 19 | Q9P0L0 VAPA_HUMAN   | E.M*PNENDKLNDM*EPSK.A              |        | 3 | 3,226  | 0,28  | -0,816 |
| 19 | O15226 NKRF_HUMAN   | K.SGEGIREPISVKE.Q                  |        | 3 | 3,2206 | 0,243 | 0,457  |
| 19 | Q05D20 Q05D20_HUMAN | K.DSRPSQAAGDNQGDEVKE.Q             |        | 3 | 3,2205 | 0,33  | -0,288 |
| 19 | O75446 SAP30_HUMAN  | E.KDTLTYFIYSVK.N                   |        | 2 | 3,2167 | 0,468 | -0,578 |
| 19 | Q9Y6M7 S4A7_HUMAN   | K.ALKYS#PDKPVSVK.I                 | S1188: | 3 | 3,2155 | 0,231 | -0,484 |
| 19 | P46013 KI67_HUMAN   | K.SPQPDPVKTPTSSK.Q                 |        | 3 | 3,2154 | 0,275 | -1,058 |
| 19 | Q9H4L4 SENP3_HUMAN  | R.LKSGGGFGPDPGSGTTVPAR.R           |        | 3 | 3,2124 | 0,341 | -0,295 |
| 19 | Q9NW82 WDR70_HUMAN  | R.VGTHGGTLSSYIVK.N                 |        | 3 | 3,2108 | 0,213 | 0,064  |
| 19 | A0JLU0 A0JLU0_HUMAN | E.AETLAQVKPSGK.T                   |        | 2 | 3,2084 | 0,41  | 0      |
| 19 | Q66K74 MAP1S_HUMAN  | E.LPLAASSIPRPR.T                   |        | 2 | 3,2062 | 0,298 | -0,668 |
| 19 | Q09666 AHNK_HUMAN   | K.VKGDVDVSLPKVE.G                  |        | 2 | 3,2061 | 0,36  | -1,321 |
| 19 | P11021 GRP78_HUMAN  | K.TKPYIQVDIGGGQTK.T                |        | 2 | 3,2055 | 0,447 | -0,836 |
| 19 | Q16891 IMMT_HUMAN   | K.LHNM*IVDLDNVVK.K                 |        | 3 | 3,2054 | 0,13  | -0,36  |
| 19 | Q8IY57 YAF2_HUMAN   | K.SPPASSAASADQHSQSGSSDNTERGM*S#R.S | S163:  | 3 | 3,1997 | 0,35  | -0,306 |
| 19 | Q9P0V9 SEP10_HUMAN  | E.IFHSQSFLATGSNLR.K                |        | 3 | 3,199  | 0,084 | 0      |
| 19 | Q9H2J4 PDCL3_HUMAN  | K.KPIEDVLLSSVR.R                   |        | 3 | 3,1989 | 0,338 | -0,202 |
| 19 | P16885 PLCG2_HUMAN  | K.IKFDDVVQAIKD.H                   |        | 2 | 3,1961 | 0,447 | -0,702 |
| 19 | Q9NSI2 CU070_HUMAN  | R.TKIDPSALVQKLE.L                  |        | 2 | 3,1946 | 0,342 | -0,592 |
| 19 | O94826 TOM70_HUMAN  | E.GRAS#PAPGSGHPEGPGAHL.D.M         | S91:   | 3 | 3,1941 | 0,218 | -0,282 |
| 19 | Q00537 PCTK2_HUMAN  | E.KLQINSPPFDQPM*SR.R               |        | 2 | 3,1919 | 0,406 | -0,138 |
| 19 | O95478 NSA2_HUMAN   | E.KTPQGAVPAYLLDRE.G                |        | 3 | 3,1912 | 0,325 | 0,441  |
| 19 | P05412 JUN_HUMAN    | R.AKNSDLLTSPDVGLLK.L               |        | 3 | 3,1886 | 0,227 | -0,438 |
| 19 | P78371 TCPB_HUMAN   | R.SLHDALCVLAQTVK.D                 |        | 3 | 3,1855 | 0,15  | 0      |
| 19 | Q9NY61 AATF_HUMAN   | R.AGDRNSEDGIVVM*TFSSVK.V           |        | 3 | 3,1844 | 0,279 | -0,721 |
| 19 | O00186 STXB3_HUMAN  | K.SVDCFLHDFASK.S                   |        | 2 | 3,1836 | 0,442 | -0,428 |
| 19 | Q9UHB7 AFF4_HUMAN   | E.KDLLPS#PAGPVPSKDPK.T             | S814:  | 2 | 3,1829 | 0,195 | -1,002 |
| 19 | P13010 KU86_HUMAN   | E.IFQDNHEDGPTAK.K                  |        | 2 | 3,1806 | 0,328 | -0,332 |
| 19 | Q13425 SNTB2_HUMAN  | R.LVHSGSGCRS#PSLGSDLTFATR.T        | S393:  | 3 | 3,1796 | 0,268 | 0,153  |



|    |                    |                          |        |   |        |       |        |
|----|--------------------|--------------------------|--------|---|--------|-------|--------|
| 19 | O94915 FRYL_HUMAN  | D.FHFDISETPIIGNK.Y       |        | 3 | 3,1786 | 0,189 | -0,226 |
| 19 | Q9P246 STIM2_HUMAN | E.KSCS#M*NQLSSGIPVPKPR.H | S680:  | 3 | 3,1783 | 0,358 | -0,703 |
| 19 | P08133 ANXA6_HUMAN | E.DTIIDIITHR.S           |        | 2 | 3,1781 | 0,39  | -0,204 |
| 19 | P35580 MYH10_HUMAN | K.LDPHLVLDQLR.C          |        | 3 | 3,1761 | 0,247 | 0,485  |
| 19 | Q09666 AHNK_HUMAN  | K.FKAEAPLPSKLE.G         |        | 2 | 3,1757 | 0,325 | -0,598 |
| 19 | P48634 BAT2_HUMAN  | K.IQT#PPPKEPPKEE.T       | T878:  | 3 | 3,1728 | 0,166 | -0,862 |
| 19 | P27448 MARK3_HUMAN | R.TPVASTHSISSAATPDR.I    |        | 3 | 3,1684 | 0,126 | -0,431 |
| 19 | P35579 MYH9_HUMAN  | E.LDDLLVLDLHQR.Q         |        | 3 | 3,1682 | 0,195 | 0,063  |
| 19 | Q9H2M9 RBGPR_HUMAN | R.FSDDKDGVLVVK.T         |        | 3 | 3,1662 | 0,314 | -0,139 |
| 19 | Q06587 RING1_HUMAN | R.SLRPDPNFDALISK.I       |        | 3 | 3,1655 | 0,176 | 0,116  |
| 19 | O75494 FUSIP_HUMAN | R.DAEDALHNLDLDR.K        |        | 2 | 3,1653 | 0,368 | -0,961 |
| 19 | O75494 FUSIP_HUMAN | R.YLRPPNTSLFVR.N         |        | 3 | 3,1653 | 0,391 | -0,063 |
| 19 | Q9UHV9 PFD2_HUMAN  | E.HSLVIDTLKEVDE.T        |        | 2 | 3,1623 | 0,375 | -0,326 |
| 19 | P04920 B3A2_HUMAN  | E.RELPPPAPPAGITR.S       |        | 2 | 3,162  | 0,108 | 0      |
| 19 | P63241 IF5A1_HUMAN | K.VHLVGIDIFTGK.K         |        | 2 | 3,1583 | 0,364 | 0,47   |
| 19 | P46063 RECQ1_HUMAN | K.VKDILQNVFKLE.K         |        | 3 | 3,1571 | 0,198 | -0,063 |
| 19 | Q04637 IF4G1_HUMAN | R.FSALQQAVPTTESTDNRR.V   |        | 3 | 3,1542 | 0,278 | 0,381  |
| 19 | Q99471 PFD5_HUMAN  | E.HVLIDVGTGYVVEK.T       |        | 2 | 3,1541 | 0,4   | -0,153 |
| 19 | O60264 SMCA5_HUMAN | E.LFAHFIQPAAQK.T         |        | 3 | 3,153  | 0,202 | 0,2    |
| 19 | Q86UU0 BCL9L_HUMAN | R.ADSILAYHQNVPR.A        |        | 2 | 3,1525 | 0,384 | -0,454 |
| 19 | Q09666 AHNK_HUMAN  | K.ISM*PDVDLHVK.G         |        | 3 | 3,1487 | 0,325 | 0,288  |
| 19 | Q9NSI2 CU070_HUMAN | R.TKIDPSALVQKLE.L        |        | 3 | 3,1487 | 0,104 | -0,063 |
| 19 | Q96I25 SPF45_HUMAN | K.IIVGDATEKDASK.K        |        | 2 | 3,1481 | 0,302 | -0,815 |
| 19 | Q9UKG1 DP13A_HUMAN | R.YCFQITSFDGKK.S         |        | 2 | 3,1475 | 0,237 | -0,163 |
| 19 | O75643 U520_HUMAN  | K.TNLLLQAHLR.M           |        | 2 | 3,1462 | 0,344 | -0,771 |
| 19 | Q9H2G2 SLK_HUMAN   | K.QTLDALNYLHDNK.I        |        | 2 | 3,1451 | 0,337 | -0,395 |
| 19 | P22626 ROA2_HUMAN  | E.YGKIDTIEITDR.Q         |        | 2 | 3,1434 | 0,3   | -0,873 |
| 19 | Q9UMZ2 SYNG_HUMAN  | K.ISKFDFLVATSQSK.M       |        | 3 | 3,1433 | 0,168 | -0,116 |
| 19 | P41250 SYG_HUMAN   | E.DKAPQVDVVKAVAE.L       |        | 2 | 3,1417 | 0,471 | -0,657 |
| 19 | Q96NE9 FRMD6_HUMAN | R.DTGPEDSYSSSAIHR.K      |        | 2 | 3,1414 | 0,534 | -0,978 |
| 19 | Q6IAA8 CK059_HUMAN | K.ALNGAEPNYHSLPSAR.T     |        | 2 | 3,1411 | 0,348 | -1,438 |
| 19 | P49792 RBP2_HUMAN  | E.SSINYTFKT#PEKAKE.K     | T2613: | 2 | 3,1356 | 0,378 | -0,736 |
| 19 | P35580 MYH10_HUMAN | K.ADFCIIHYAGK.V          |        | 2 | 3,1346 | 0,446 | -0,283 |

|    |                     |                              |            |   |        |       |        |
|----|---------------------|------------------------------|------------|---|--------|-------|--------|
| 19 | Q8NI08 NCOA7_HUMAN  | R.KSASLDSPVLLVIK.D           |            | 3 | 3,1346 | 0,298 | -0,062 |
| 19 | Q15154 PCM1_HUMAN   | R.KPFNFLPM*QINTNK.S          |            | 2 | 3,133  | 0,432 | -0,357 |
| 19 | P50990 TCPQ_HUMAN   | E.KLFVTNDAATILRE.L           |            | 2 | 3,1329 | 0,112 | -0,69  |
| 19 | P09543 CN37_HUMAN   | R.ILVLDDTNHERE.R             |            | 2 | 3,1309 | 0,439 | -0,755 |
| 19 | Q99733 INP1L4_HUMAN | K.YAALYQPLFDKR.R             |            | 2 | 3,1291 | 0,312 | -0,657 |
| 19 | Q8IU81 I2BP1_HUMAN  | R.AGGASPAASSTAQPPTQHR.L      |            | 3 | 3,1254 | 0,256 | -0,306 |
| 19 | Q9NUQ6 SPS2L_HUMAN  | K.AKTSPVKS#NTPAAHLE.I        | S199:      | 2 | 3,1244 | 0,386 | -1,269 |
| 19 | Q00688 FKBP3_HUMAN  | K.DHLVTAYNHLFE.T             |            | 2 | 3,1234 | 0,521 | -0,418 |
| 19 | P62805 H4_HUMAN     | R.KTVTAM*DVVYALK.R           |            | 3 | 3,1231 | 0,204 | -0,063 |
| 19 | Q96C90 PP14B_HUMAN  | E.AFISGLLDKIR.G              |            | 2 | 3,1156 | 0,288 | -0,594 |
| 19 | P02545 LMNA_HUMAN   | E.RRLRS#PS#PTSQR.S           | S390:S392: | 3 | 3,115  | 0,157 | -0,822 |
| 19 | Q86W92 LIPB1_HUMAN  | E.DDM*FKDFAAR.S              |            | 3 | 3,1111 | 0,227 | 0,742  |
| 19 | Q9UER7 DAXX_HUMAN   | K.YAM*LQDKSEEGER.K           |            | 3 | 3,1108 | 0,365 | -0,349 |
| 19 | Q07065 CKAP4_HUMAN  | K.DLSGDIHVVK.D               |            | 2 | 3,1087 | 0,341 | -0,451 |
| 19 | P40855 PEX19_HUMAN  | K.AKPS#PAPPSTTTAPDASGPQKR.S  | S35:       | 3 | 3,1042 | 0,264 | -0,163 |
| 19 | P78316 NOP14_HUMAN  | E.LTHYGQSLADIEK.H            |            | 3 | 3,0991 | 0,194 | -0,248 |
| 19 | O60271 JIP4_HUMAN   | E.LDM*DKDLSGYK.G             |            | 2 | 3,0984 | 0,414 | -1,782 |
| 19 | Q5TON5 FBP1L_HUMAN  | E.DFSHLPPEQR.R               |            | 3 | 3,0972 | 0,339 | 0,597  |
| 19 | Q8TAQ2 SMRC2_HUMAN  | E.ASVEDAPTPEKPR.K            |            | 2 | 3,091  | 0,483 | -0,699 |
| 19 | P08133 ANXA6_HUMAN  | R.ILISLATGHREE.G             |            | 2 | 3,0907 | 0,376 | -1,64  |
| 19 | P11047 LAMC1_HUMAN  | E.ANDILNNLKDFDR.R            |            | 2 | 3,0894 | 0,363 | -0,315 |
| 19 | Q09666 AHNK_HUMAN   | K.VKGDVDISLPKLE.G            |            | 2 | 3,0876 | 0,306 | -0,518 |
| 19 | Q96PZ0 PUS7_HUMAN   | E.DVPRPPDVTSTGK.G            |            | 2 | 3,0861 | 0,196 | -1,159 |
| 19 | P61586 RHOA_HUMAN   | K.HFCPNVPIILVGNK.K           |            | 3 | 3,0832 | 0,176 | 0,227  |
| 19 | P10109 ADX_HUMAN    | R.SSS#EDKITVHFINDRGE.T       | S63:       | 3 | 3,0831 | 0,317 | -0,727 |
| 19 | P31946 1433B_HUMAN  | E.SYKDSTLIMQLLR.D            |            | 3 | 3,0824 | 0,2   | -0,233 |
| 19 | Q9ULW0 TPX2_HUMAN   | K.GCTIVKPFNLSQGK.K           |            | 2 | 3,0781 | 0,438 | -1,103 |
| 19 | P11216 PYGB_HUMAN   | E.LKQAVDQISSGFFSPK.E         |            | 2 | 3,0764 | 0,428 | -0,557 |
| 19 | Q9NQS7 INCE_HUMAN   | E.QHVTQLM*STEPLPR.T          |            | 3 | 3,0761 | 0,411 | 0,111  |
| 19 | Q8TEP8 CE192_HUMAN  | K.HGGNVSLDVLVPKGPQGS#PLLSR.A | S1514:     | 3 | 3,0757 | 0,144 | -0,608 |
| 19 | P84077 ARF1_HUMAN   | E.LRDAVLLVFANK.Q             |            | 2 | 3,0739 | 0,252 | -0,628 |
| 19 | Q9UGU0 TCF20_HUMAN  | R.QLSGQSTSSDTTYKGGASEK.A     |            | 3 | 3,0719 | 0,357 | -0,45  |
| 19 | Q9NYF8 BCLF1_HUMAN  | E.TGYVVERPSTTK.D             |            | 2 | 3,0711 | 0,347 | -1,185 |

|    |                     |                         |        |   |        |       |        |
|----|---------------------|-------------------------|--------|---|--------|-------|--------|
| 19 | Q9H078 CLPB_HUMAN   | K.GCTALHYAVLADDYR.T     |        | 3 | 3,0697 | 0,2   | -0,424 |
| 19 | Q53Y95 Q53Y95_HUMAN | E.FEKVPLFM*TR.A         |        | 3 | 3,0688 | 0,172 | 0,356  |
| 19 | Q9NVM9 CL011_HUMAN  | K.LAANSDHLM*QIQK.C      |        | 2 | 3,0681 | 0,193 | -1,643 |
| 19 | Q03164 HRX_HUMAN    | R.KSAFDM*FNFLASK.H      |        | 3 | 3,0671 | 0,188 | -0,541 |
| 19 | O95466 FMNL_HUMAN   | E.AGADTPGKGEPAPKS#PPK.A | S1031: | 3 | 3,0664 | 0,177 | -1,264 |
| 19 | P40189 IL6RB_HUMAN  | K.VTSDHINFDPVYK.V       |        | 2 | 3,0651 | 0,301 | -0,874 |
| 19 | Q9ULH0 ARMS_HUMAN   | E.YLSDALLDKK.D          |        | 2 | 3,0635 | 0,324 | -0,523 |
| 19 | Q9GZR1 SENP6_HUMAN  | E.KVPIDIIVNCDDSK.H      |        | 3 | 3,0617 | 0,196 | -0,679 |
| 19 | P04637 P53_HUMAN    | R.CSDSDGLAPPQHLIR.V     |        | 3 | 3,0553 | 0,317 | -0,22  |
| 19 | O75044 FNBP2_HUMAN  | K.HTPDVVLDLTLEPLK.T     |        | 2 | 3,0533 | 0,411 | -0,232 |
| 19 | Q16181 SEPT7_HUMAN  | E.KVNIIPLIK.A           |        | 2 | 3,0511 | 0,361 | 0      |
| 19 | P27816 MAP4_HUMAN   | E.GRPVVSGTGNDDITPPNK.E  |        | 3 | 3,0472 | 0,325 | -0,909 |
| 19 | Q9UKV3 ACINU_HUMAN  | R.GLLVDRPSETKTEE.Q      |        | 2 | 3,0468 | 0,463 | -0,62  |
| 19 | Q9BUL5 PHF23_HUMAN  | K.LKDSLFDLDGPK.V        |        | 2 | 3,0466 | 0,225 | -0,815 |
| 19 | P20700 LMNB1_HUMAN  | K.DAALATALGDKK.S        |        | 2 | 3,0457 | 0,271 | -1,455 |
| 19 | Q3ZCQ8 TIM50_HUMAN  | E.HYALEDDPLAAFQ.Q       |        | 2 | 3,0451 | 0,578 | -0,328 |
| 19 | P04264 K2C1_HUMAN   | R.TNAENEFVTIKK.D        |        | 2 | 3,045  | 0,485 | -0,613 |
| 19 | Q9HC35 EMAL4_HUMAN  | R.LAISEDHVASVK.K        |        | 2 | 3,0449 | 0,437 | -0,192 |
| 19 | Q86TC9 MYPN_HUMAN   | E.SLLVSHPSVQTK.S        |        | 2 | 3,0424 | 0,376 | -0,282 |
| 19 | Q9H4A3 WNK1_HUMAN   | R.DVDDGSGS#PHSPHQLSSK.S | S2029: | 3 | 3,0371 | 0,374 | -0,569 |
| 19 | Q14558 KPRA_HUMAN   | E.LDM*DDGRHS#PPM*VK.N   | S215:  | 3 | 3,0356 | 0,145 | -1,07  |
| 19 | P68104 EF1A1_HUMAN  | E.HALLAYTLGVK.Q         |        | 2 | 3,0343 | 0,344 | -1,029 |
| 19 | P27816 MAP4_HUMAN   | E.TERAS#PIKM*DLAPSKD.M  | S358:  | 3 | 3,0342 | 0,291 | -0,493 |
| 19 | P49736 MCM2_HUMAN   | K.VRGDINVLLCGDPGTAK.S   |        | 3 | 3,0306 | 0,159 | -0,205 |
| 19 | O00571 DDX3X_HUMAN  | R.KQYPISLVLAPTRE.L      |        | 3 | 3,0287 | 0,105 | -0,226 |
| 19 | Q02952 AKA12_HUMAN  | E.SQVHMM*AAAVADGTR.A    |        | 3 | 3,028  | 0,255 | -0,937 |
| 19 | O75179 ANR17_HUMAN  | K.KQPSVLVTFPKEE.R       |        | 2 | 3,0269 | 0,352 | 0      |
| 19 | P78406 RAE1L_HUMAN  | K.DKQNKPTGFALGSIE.G     |        | 2 | 3,0268 | 0,358 | -0,532 |
| 19 | P60900 PSA6_HUMAN   | E.IDAHLVALAERD.-        |        | 3 | 3,0263 | 0,315 | 0,207  |
| 19 | O95359 TACC2_HUMAN  | K.IGSSLPQDDDAPKK.Q      |        | 3 | 3,0258 | 0,38  | 0,186  |
| 19 | P53985 MOT1_HUMAN   | E.TSIDVAGKPNEVTK.A      |        | 2 | 3,0239 | 0,508 | -0,92  |
| 19 | Q13432 U119A_HUMAN  | R.KQPIGPEDVLGLQR.I      |        | 3 | 3,0234 | 0,252 | 0,472  |
| 19 | Q5VZK9 LR16A_HUMAN  | R.TASRPDDIPDPSPPK.V     |        | 2 | 3,023  | 0,33  | -1,023 |

|    |                     |                         |       |   |        |       |        |
|----|---------------------|-------------------------|-------|---|--------|-------|--------|
| 19 | Q96S38 KS6C1_HUMAN  | E.LKFFPNDDPEAVSSPR.T    |       | 3 | 3,0226 | 0,084 | -0,302 |
| 19 | Q13510 ASAH1_HUMAN  | E.QLKPLTVNLDLDFQR.N     |       | 3 | 3,0225 | 0,284 | 0      |
| 19 | O75781 PALM_HUMAN   | E.VVM*NSQQTPVGT#PKDKR.V | T145: | 3 | 3,0215 | 0,408 | -0,554 |
| 19 | P09234 RU1C_HUMAN   | D.YCDTYLTHDSPSVR.K      |       | 3 | 3,0209 | 0,468 | -1,387 |
| 19 | Q8NFAQ8 TOIP2_HUMAN | R.ADAHLGSSSVALPK.E      |       | 3 | 3,0194 | 0,305 | -0,541 |
| 19 | P31946 1433B_HUMAN  | E.ESYKDSTLIM*QLLR.D     |       | 3 | 3,0137 | 0,113 | -0,214 |
| 19 | Q99798 ACON_HUMAN   | K.DSSGQHVDVSPTSQR.L     |       | 3 | 3,0129 | 0,236 | -0,114 |
| 19 | P50402 EMD_HUMAN    | R.GDADM*YDLPKKE.D       |       | 2 | 3,0125 | 0,395 | -0,873 |
| 19 | Q8N1G2 K0082_HUMAN  | K.IHAFVQDRTLSEPR.Q      |       | 2 | 3,0103 | 0,153 | -1,436 |
| 19 | Q7Z309 F122B_HUMAN  | E.SLSLSDSDFDKPEK.L      |       | 2 | 3,0087 | 0,469 | -0,545 |
| 19 | P49327 FAS_HUMAN    | R.FDASFFGVHPK.Q         |       | 2 | 3,0072 | 0,344 | -0,585 |
| 19 | Q68C22 TENS3_HUMAN  | E.VLHTQGPDVGSLYAK.V     |       | 2 | 3,0053 | 0,466 | -1,77  |
| 19 | Q96T23 RSF1_HUMAN   | E.IKLS#DDFDSPVKGPLCK.S  | S382: | 3 | 3,0048 | 0,18  | 0,366  |
| 19 | Q8WVY7 UBCP1_HUMAN  | K.LDDFLDLNHNK.Y         |       | 3 | 3,0003 | 0,281 | 0,669  |
| 19 | O43264 ZW10_HUMAN   | R.FLKGDTTDLLK.Y         |       | 3 | 3      | 0,089 | -0,585 |
| 19 | Q9NZM5 GSCR2_HUMAN  | K.DVLAHQVPAK.K          |       | 2 | 2,9987 | 0,406 | -0,512 |
| 19 | P22087 FBRL_HUMAN   | E.NM*KPQEQLTLEPYER.D    |       | 3 | 2,9965 | 0,281 | -0,483 |
| 19 | P10636 TAU_HUMAN    | K.IGSLDNITHVPGGGNK.K    |       | 2 | 2,9941 | 0,16  | -0,541 |
| 19 | P18583 SON_HUMAN    | K.ESSGGEKEVPPPK.E       |       | 2 | 2,9934 | 0,322 | -0,509 |
| 19 | O60308 K0562_HUMAN  | R.RPFDLPLQPLAR.S        |       | 3 | 2,9915 | 0,166 | 0,193  |
| 19 | P34897 GLYM_HUMAN   | K.LQDFKSFLKLDSE.T       |       | 3 | 2,9912 | 0,383 | -0,233 |
| 19 | Q09666 AHNK_HUMAN   | E.VGFHGAAPDISVK.G       |       | 2 | 2,9897 | 0,479 | -0,282 |
| 19 | Q8N1I0 DOCK4_HUMAN  | R.M*LFNHIGDGALPR.S      |       | 3 | 2,9893 | 0,369 | 0,251  |
| 19 | P22626 ROA2_HUMAN   | E.VDAAM*AARPHS#IDGR.V   | S85:  | 3 | 2,989  | 0,369 | -0,88  |
| 19 | Q9UBF8 PI4KB_HUMAN  | E.SKEPVFIAAGDIR.R       |       | 2 | 2,9863 | 0,276 | -0,174 |
| 19 | Q8N567 ZCHC9_HUMAN  | K.AKVDPALGEPFAK.C       |       | 2 | 2,9858 | 0,315 | -1,146 |
| 19 | P33993 MCM7_HUMAN   | R.TQRPAADVIFATVRE.L     |       | 2 | 2,9857 | 0,402 | -0,761 |
| 19 | Q14651 PLSI_HUMAN   | R.AYFHLLNQIAPK.G        |       | 2 | 2,9807 | 0,285 | -0,431 |
| 19 | P09429 HMGB1_HUMAN  | K.KHPDAS#VNFSE.F        | S35:  | 2 | 2,9802 | 0,397 | -0,838 |
| 19 | Q9NYF8 BCLF1_HUMAN  | K.LKDLFDYS#PPLHK.N      | S512: | 3 | 2,98   | 0,391 | -0,111 |
| 19 | P78316 NOP14_HUMAN  | E.LTHYGQSLADIEK.H       |       | 2 | 2,978  | 0,423 | -0,744 |
| 19 | P26358 DNMT1_HUMAN  | R.VARPLPAEPPER.A        |       | 3 | 2,9776 | 0,219 | 0,134  |
| 19 | P43243 MATR3_HUMAN  | R.GPSLNPVLDYDHGSR.S     |       | 3 | 2,9775 | 0,209 | 0      |

|    |                    |                              |          |   |        |       |        |
|----|--------------------|------------------------------|----------|---|--------|-------|--------|
| 19 | P42858 HD_HUMAN    | R.NSSM*ALQQAHLK.N            |          | 3 | 2,9765 | 0,373 | 0,063  |
| 19 | Q9H2J4 PDCL3_HUMAN | K.KPIEDVLLSSVR.R             |          | 2 | 2,9762 | 0,429 | -0,99  |
| 19 | Q9UHB6 LIMA1_HUMAN | E.ILERPAQLANAR.E             |          | 2 | 2,9754 | 0,161 | -1,354 |
| 19 | Q9Y266 NUDC_HUMAN  | K.LKPNLNGADLPNYR.W           |          | 2 | 2,9742 | 0,4   | -0,594 |
| 19 | P46821 MAP1B_HUMAN | E.SEKPLTQSGGAPPPGGK.Q        |          | 3 | 2,9724 | 0,314 | 0      |
| 19 | Q8TB72 PUM2_HUMAN  | E.YVLSSSPADKLSR.F            |          | 2 | 2,972  | 0,295 | -0,714 |
| 19 | Q12888 TP53B_HUMAN | E.SSSETPFHFTLPK.E            |          | 2 | 2,9713 | 0,217 | -0,33  |
| 19 | P27635 RL10_HUMAN  | K.AKVDEFPLCGHM*VSDE.Y        |          | 3 | 2,97   | 0,228 | 0      |
| 19 | P22314 UBA1_HUMAN  | R.RVSGPDPKPGSNCSQAQSVLSE.V   |          | 3 | 2,9691 | 0,192 | -0,887 |
| 19 | Q7Z434 MAVS_HUMAN  | E.LGSTHTAGATSSLTPSR.G        |          | 3 | 2,9669 | 0,302 | 0,111  |
| 19 | Q9H6F5 CCD86_HUMAN | E.SNPEETREPGSPSVQR.A         |          | 3 | 2,9657 | 0,351 | -0,294 |
| 19 | Q9Y2W1 TR150_HUMAN | R.ERS#PALKSPLQSVVVR.R        | S248:    | 3 | 2,9643 | 0,498 | 0,099  |
| 19 | P20810 ICAL_HUMAN  | E.SVAGITAIKPGDK.K            |          | 2 | 2,964  | 0,331 | -0,697 |
| 19 | O95684 FR1OP_HUMAN | E.KGPTTGEGALDSLVDHSPPKS#PE.G | S160:    | 3 | 2,9632 | 0,166 | -0,305 |
| 19 | P32322 P5CR1_HUMAN | K.LDSPAGTALSPSGHTK.L         |          | 2 | 2,9632 | 0,397 | -0,713 |
| 19 | Q71U36 TBA1A_HUMAN | E.QLITGKEDAANNYAR.G          |          | 2 | 2,9619 | 0,521 | -0,587 |
| 19 | P48059 LIMS1_HUMAN | K.CHAIDEQPLIFK.N             |          | 3 | 2,9589 | 0,165 | -1,27  |
| 19 | O43847 NRDC_HUMAN  | K.YPDENGFDAFLKK.H            |          | 3 | 2,958  | 0,283 | 0,592  |
| 19 | Q99567 NUP88_HUMAN | K.LLHSFHSELPVLSLSE.R         |          | 2 | 2,9576 | 0,381 | -0,404 |
| 19 | Q09666 AHNK_HUMAN  | K.VKGDVDVSLPKLE.G            |          | 2 | 2,9539 | 0,424 | -0,698 |
| 19 | Q96FF9 CDCA5_HUMAN | R.IVAHAVEVPAVQS#PRRS#PR.I    | S75:S79: | 3 | 2,9534 | 0,415 | 0,082  |
| 19 | Q15149 PLEC1_HUMAN | K.DTHDQLSEPSEVR.S            |          | 2 | 2,9522 | 0,253 | -0,323 |
| 19 | Q13586 STIM1_HUMAN | K.ALLALNHGLDK.A              |          | 2 | 2,952  | 0,401 | -0,419 |
| 19 | Q7Z3D4 LYSM3_HUMAN | R.S#TSRDRLLDIIVLTK.D         | S53:     | 3 | 2,9518 | 0,091 | -0,202 |
| 19 | Q99567 NUP88_HUMAN | K.LLHSFHSELPVLSLSE.R         |          | 3 | 2,9507 | 0,185 | 0      |
| 19 | Q9UMZ2 SYNG_HUMAN  | E.LATFDLSVQGSBK.R            |          | 2 | 2,9505 | 0,461 | -0,609 |
| 19 | Q99717 SMAD5_HUMAN | E.FNPQHSLLVQFR.N             |          | 3 | 2,9499 | 0,246 | -0,861 |
| 19 | Q58FF7 H90B3_HUMAN | K.VILHLKEDQTEYLE.E           |          | 2 | 2,9492 | 0,41  | -0,423 |
| 19 | Q9UK59 DBR1_HUMAN  | E.SGNGEDLTKVPLK.R            |          | 2 | 2,9457 | 0,156 | 0,09   |
| 19 | Q71F56 MD13L_HUMAN | K.M*PAVGTEDRPLGK.D           |          | 3 | 2,944  | 0,239 | -0,066 |
| 19 | O94826 TOM70_HUMAN | K.NREPLM*PSPQFIK.S           |          | 2 | 2,9428 | 0,396 | -0,388 |
| 19 | Q6UB99 ANR11_HUMAN | E.NASQAPARPLSTNLYR.S         |          | 2 | 2,9408 | 0,33  | -1,11  |
| 19 | Q3YEC7 PARF_HUMAN  | R.SFLEDTPARDEK.K             |          | 2 | 2,9405 | 0,305 | 0,323  |

|    |                    |                             |        |   |        |       |        |
|----|--------------------|-----------------------------|--------|---|--------|-------|--------|
| 19 | P42858 HD_HUMAN    | R.NSSM*ALQQAHLK.N           |        | 2 | 2,9402 | 0,365 | -0,502 |
| 19 | P35527 K1C9_HUMAN  | K.TLNDM*RQEYEQLIAK.N        |        | 3 | 2,9401 | 0,349 | -0,392 |
| 19 | Q09666 AHNK_HUMAN  | K.AKGEVDVDVPKLE.G           |        | 2 | 2,9386 | 0,346 | -0,959 |
| 19 | Q4G0P3 HYDIN_HUMAN | R.EHLS#VLSRTFANQR.R         | S379:  | 3 | 2,9386 | 0,081 | 0,947  |
| 19 | Q92538 GBF1_HUMAN  | E.LGACDFEKPEPR.A            |        | 3 | 2,9379 | 0,299 | 0,364  |
| 19 | Q92576 PHF3_HUMAN  | E.NDFFNSFTTVLHK.Q           |        | 2 | 2,9379 | 0,288 | -0,933 |
| 19 | Q13432 U119A_HUMAN | R.KQPIGPEVDLGLQR.I          |        | 2 | 2,9349 | 0,555 | -0,394 |
| 19 | Q8IZL8 PELP1_HUMAN | E.ALVTCAALTHPR.V            |        | 2 | 2,9339 | 0,387 | -0,652 |
| 19 | P31943 HNRH1_HUMAN | R.DLNYCFSGM*SDHR.Y          |        | 2 | 2,9317 | 0,405 | -0,226 |
| 19 | O14545 TRAD1_HUMAN | E.ELLIDHQTSCNPSR.A          |        | 2 | 2,9302 | 0,436 | -0,292 |
| 19 | P11388 TOP2A_HUMAN | E.SDDFHM*DFDSAVAPR.A        |        | 2 | 2,927  | 0,48  | -0,071 |
| 19 | Q9Y6A5 TACC3_HUMAN | K.VTFQT#PLRDPQTHR.I         | T59:   | 3 | 2,9248 | 0,285 | -0,618 |
| 19 | Q9Y6G9 DC1L1_HUMAN | K.SGQKPVLDVHAE.L            |        | 3 | 2,9228 | 0,224 | 0,429  |
| 19 | Q9H582 ZN644_HUMAN | E.SSPVHTSTFLSNTLK.K         |        | 2 | 2,9204 | 0,343 | -0,452 |
| 19 | P68104 EF1A1_HUMAN | K.YYVTIIDAPGHR.D            |        | 2 | 2,9195 | 0,478 | -0,608 |
| 19 | Q96B23 CR025_HUMAN | E.AGHLDPGFLASDK.T           |        | 2 | 2,9183 | 0,449 | -0,367 |
| 19 | Q06210 GFPT1_HUMAN | K.LSTDHIPILYR.T             |        | 3 | 2,9178 | 0,386 | 0,688  |
| 19 | O15259 NPHP1_HUMAN | K.KGEILLVIEK.K              |        | 2 | 2,9149 | 0,087 | -0,748 |
| 19 | A0FGR8 ESYT2_HUMAN | R.SSSLLASPGHISVK.E          |        | 2 | 2,9148 | 0,236 | -0,747 |
| 19 | Q99798 ACON_HUMAN  | K.DSSGQHVDVSPTSQR.L         |        | 2 | 2,9133 | 0,495 | -0,458 |
| 19 | Q9UK76 HN1_HUMAN   | E.EKPVPAAPVPS#PVAPAPVPSRR.N | S131:  | 3 | 2,9115 | 0,095 | -1,034 |
| 19 | A5YKK6 CNOT1_HUMAN | R.CLFHVDFSGDGK.S            |        | 3 | 2,9102 | 0,228 | 0,187  |
| 19 | Q8IVF2 AHNK2_HUMAN | E.GDLSLADKDVTAK.D           |        | 2 | 2,9087 | 0,412 | -0,275 |
| 19 | Q92560 BAP1_HUMAN  | E.AAGSCAQAPSHS#PPNPKP.L     | S327:  | 3 | 2,9016 | 0,374 | -0,582 |
| 19 | O75533 SF3B1_HUMAN | K.KPGYHAPVALLNDIPQSTE.Q     |        | 3 | 2,9007 | 0,409 | -0,357 |
| 19 | P26639 SYTC_HUMAN  | K.MGGEEKPIGAGEEK.Q          |        | 3 | 2,8995 | 0,191 | -0,511 |
| 19 | Q9HB40 RISC_HUMAN  | E.IGPLDSLKPR.K              |        | 2 | 2,8984 | 0,487 | -1,007 |
| 19 | Q9BW91 NUDT9_HUMAN | K.LFSQDHLVIYK.G             |        | 2 | 2,8976 | 0,37  | -0,806 |
| 19 | Q2M2I8 AAK1_HUMAN  | R.RILS#DVTHSAVFGVPASK.S     | S637:  | 3 | 2,8926 | 0,216 | 0      |
| 19 | Q9H4A3 WNK1_HUMAN  | R.DVDDGSGSPHS#PHQLSSK.S     | S2032: | 2 | 2,8905 | 0,463 | -0,443 |
| 19 | Q8TAT6 NPL4_HUMAN  | E.DYLNHLEPPVK.H             |        | 2 | 2,8879 | 0,366 | -0,46  |
| 19 | Q12904 MCA1_HUMAN  | K.QQSIAGSADSKPIDVSR.L       |        | 2 | 2,887  | 0,217 | -0,555 |
| 19 | O15066 KIF3B_HUMAN | R.VNEDPKDALLRE.F            |        | 2 | 2,8861 | 0,409 | -0,785 |

|    |                     |                         |        |   |        |       |        |
|----|---------------------|-------------------------|--------|---|--------|-------|--------|
| 19 | Q12906 ILF3_HUMAN   | E.KAEPQAM*NALM*R.L      |        | 3 | 2,8858 | 0,311 | -0,061 |
| 19 | P02545 LMNA_HUMAN   | R.IRIDLSQLSQLQK.Q       |        | 3 | 2,8849 | 0,23  | -0,43  |
| 19 | Q86TC9 MYPN_HUMAN   | K.YGTVSSIAQLHVR.G       |        | 2 | 2,8842 | 0,435 | -0,682 |
| 19 | Q6FI81 CPIN1_HUMAN  | K.KS#SPSVKPAVDPAAAK.L   | S182:  | 2 | 2,8836 | 0,48  | -0,971 |
| 19 | P31946 1433B_HUMAN  | K.DSTLIM*QLLR.D         |        | 2 | 2,8828 | 0,161 | -0,405 |
| 19 | P30048 PRDX3_HUMAN  | K.NGGLGHM*NIALLSDLTK.Q  |        | 3 | 2,8808 | 0,225 | -0,413 |
| 19 | Q9Y3R0 GRIP1_HUMAN  | K.SASQTKPPDGALAVR.R     |        | 2 | 2,8796 | 0,372 | -1,303 |
| 19 | O43290 SNUT1_HUMAN  | E.DESVDDLAQQKPR.S       |        | 2 | 2,8792 | 0,331 | -0,813 |
| 19 | P68431 H31_HUMAN    | E.DTNLCAIHAK.R          |        | 2 | 2,8771 | 0,28  | 0      |
| 19 | Q99700 ATX2_HUMAN   | E.FVSHNPPSEATPPVAR.T    |        | 3 | 2,8754 | 0,199 | -0,412 |
| 19 | P42704 LPPRC_HUMAN  | E.AVFSALVTGHAR.A        |        | 2 | 2,8751 | 0,443 | -0,496 |
| 19 | Q8WWY3 PRP31_HUMAN  | E.DLGFSLGHLGK.S         |        | 2 | 2,8741 | 0,483 | -0,853 |
| 19 | Q8WXH0 SYNE2_HUMAN  | K.SFLDVLSIKR.D          |        | 2 | 2,8741 | 0,349 | 0,414  |
| 19 | P26358 DNMT1_HUMAN  | R.VGM*ADANS#PPKPLSKPR.T | S127:  | 3 | 2,8717 | 0,146 | -0,885 |
| 19 | Q9NV96 CC50A_HUMAN  | K.SRDDSQNGDSSALLNPSKE.C |        | 3 | 2,8701 | 0,17  | -0,086 |
| 19 | O43172 PRP4_HUMAN   | R.NILSVVGTDALKK.T       |        | 2 | 2,8699 | 0,251 | -0,629 |
| 19 | Q6PL18 ATAD2_HUMAN  | R.NIVQSTEHLHEDNGDVE.V   |        | 2 | 2,8673 | 0,385 | -1,134 |
| 19 | Q7Z3D4 LYSM3_HUMAN  | R.DRLDDIIVLTK.D         |        | 2 | 2,8621 | 0,33  | -0,844 |
| 19 | P38432 P80C_HUMAN   | K.LPTELSKEEPSTK.N       |        | 2 | 2,861  | 0,317 | -0,669 |
| 19 | Q9Y570 PPME1_HUMAN  | R.LPSRPPLPGSGGSQSGAK.M  |        | 3 | 2,8602 | 0,305 | 0,108  |
| 19 | Q13415 ORC1_HUMAN   | R.SQPKLQTLS#PALKAPEK.T  | S287:  | 3 | 2,8591 | 0,277 | -0,36  |
| 19 | Q8N5P1 ZC3H8_HUMAN  | E.NLFSKPPNPALGK.T       |        | 2 | 2,8574 | 0,404 | -0,706 |
| 19 | O75152 ZC11A_HUMAN  | R.RLSSASTGKPPLSVEDDFE.K |        | 3 | 2,8574 | 0,294 | -0,629 |
| 19 | Q14004 CD2L5_HUMAN  | K.TKPPLQVTKVE.N         |        | 3 | 2,8566 | 0,249 | 0,516  |
| 19 | Q14677 EPN4_HUMAN   | K.ASPDQNASTHTPQSSVK.T   |        | 2 | 2,8536 | 0,396 | -0,278 |
| 19 | O94833 BPAAEA_HUMAN | K.GFHSGEDSGLITTAAR.V    |        | 3 | 2,8533 | 0,183 | -0,216 |
| 19 | Q15149 PLEC1_HUMAN  | K.AQLEPVAS#PAKKPK.V     | S1435: | 2 | 2,8517 | 0,256 | -0,474 |
| 19 | P08779 K1C16_HUMAN  | R.ILNEM*RDQYEQM*AEK.N   |        | 3 | 2,8512 | 0,244 | -1,611 |
| 19 | P13797 PLST_HUMAN   | R.HVIPM*NPNTDDLFK.A     |        | 2 | 2,8486 | 0,538 | -0,442 |
| 19 | Q9UHB6 LIMA1_HUMAN  | E.NEEILERPAQLANAR.E     |        | 3 | 2,8473 | 0,265 | -0,637 |
| 19 | Q09666 AHNK_HUMAN   | K.VKGDADVSPKLE.G        |        | 2 | 2,8458 | 0,35  | -0,899 |
| 19 | P49591 SYSC_HUMAN   | R.FKDPGLVDQLVK.A        |        | 2 | 2,8438 | 0,334 | -1,616 |
| 19 | Q8NEL9 DDHD1_HUMAN  | R.TLLQTTGARPPQGGDR.D    |        | 3 | 2,8438 | 0,367 | -0,349 |

|    |                    |                          |       |   |        |       |        |
|----|--------------------|--------------------------|-------|---|--------|-------|--------|
| 19 | Q9P2B4 CT2NL_HUMAN | E.KQPVCTNPLSILK.V        |       | 3 | 2,8402 | 0,187 | -0,122 |
| 19 | P31946 1433B_HUMAN | E.ESYKDSTLIM*QLLR.D      |       | 2 | 2,8387 | 0,198 | -0,356 |
| 19 | P51858 HDGF_HUMAN  | R.AGDLLEDS#PKRPK.E       | S165: | 3 | 2,8385 | 0,139 | -0,304 |
| 19 | Q12792 TWF1_HUMAN  | E.DKQPCYILFR.L           |       | 3 | 2,8367 | 0,229 | 0,273  |
| 19 | Q13428 TCOF_HUMAN  | K.SPQVKPASTM*GM*GPLGK.G  |       | 3 | 2,8366 | 0,155 | -0,213 |
| 19 | Q1ED39 TS118_HUMAN | K.SPLAM*SHASGVKTS#PDPR.Q | S132: | 2 | 2,8348 | 0,273 | -0,82  |
| 19 | P49755 TMEDA_HUMAN | K.ITDSAGHILYSKE.D        |       | 2 | 2,8345 | 0,387 | -1,446 |
| 19 | O43776 SYNC_HUMAN  | E.LYVSDREGSDATGDGTK.E    |       | 3 | 2,8336 | 0,253 | -0,723 |
| 19 | P55884 EIF3B_HUMAN | E.YASPAHAVDAVK.N         |       | 2 | 2,8335 | 0,34  | -0,695 |
| 19 | Q9NYF8 BCLF1_HUMAN | R.LLASTLVHSVK.K          |       | 2 | 2,8325 | 0,291 | -1,776 |
| 19 | Q08379 GOGA2_HUMAN | R.LAHLASAQKEPE.A         |       | 2 | 2,8324 | 0,249 | -1,301 |
| 19 | O14974 MYPT1_HUMAN | E.TSSTSAGDRYDSSLGR.S     |       | 2 | 2,8319 | 0,308 | -0,289 |
| 19 | P22695 QCR2_HUMAN  | E.DFSNLGTTLLR.L          |       | 2 | 2,8312 | 0,266 | 0,622  |
| 19 | Q14789 GGOB1_HUMAN | K.SLKDQLTDLNSLEK.C       |       | 2 | 2,8309 | 0,411 | -0,072 |
| 19 | Q9Y2R4 DDX52_HUMAN | E.VLQGLDFFGNKK.S         |       | 2 | 2,8286 | 0,307 | -0,625 |
| 19 | Q9BVJ6 UT14A_HUMAN | E.KLVLADLLEPVK.T         |       | 2 | 2,8274 | 0,429 | -0,547 |
| 19 | Q8NDF8 PAPD5_HUMAN | R.LLGSHALPAEQR.D         |       | 2 | 2,8262 | 0,389 | -0,755 |
| 19 | P42224 STAT1_HUMAN | R.FHDLLSQLDDQYSR.F       |       | 3 | 2,822  | 0,127 | -0,211 |
| 19 | Q9H8Y8 GORS2_HUMAN | K.DNDTLKDLLK.A           |       | 2 | 2,8216 | 0,205 | -0,831 |
| 19 | P31151 S10A7_HUMAN | K.GTNYLADVFEKK.D         |       | 2 | 2,8206 | 0,412 | -0,617 |
| 19 | Q9Y2W2 WBP11_HUMAN | R.KVGFALDLPPR.R          |       | 3 | 2,8168 | 0,139 | 0,377  |
| 19 | P60660 MYL6_HUMAN  | E.HFLPM*LQTVAK.N         |       | 2 | 2,8166 | 0,264 | -0,188 |
| 19 | Q96DI7 WDR57_HUMAN | K.GPELPLVPVKR.Q          |       | 3 | 2,8157 | 0,247 | 0      |
| 19 | P62906 RL10A_HUMAN | K.KYDAFLASESLIK.Q        |       | 3 | 2,8156 | 0,09  | -0,123 |
| 19 | Q9Y613 FHOD1_HUMAN | E.TLAGAM*PNEAGGHPDAR.Q   |       | 2 | 2,8152 | 0,469 | -0,29  |
| 19 | Q155Q3 DIXC1_HUMAN | E.KADFVIIPAEGIENR.T      |       | 3 | 2,8144 | 0,189 | -0,219 |
| 19 | Q9NQR4 NIT2_HUMAN  | K.IHLFDIDVPGK.I          |       | 2 | 2,814  | 0,415 | -0,292 |
| 19 | P18206 VINC_HUMAN  | K.CDRVDQLTAQLADLAAR.G    |       | 2 | 2,8131 | 0,301 | -0,255 |
| 19 | P47756 CAPZB_HUMAN | K.VVGKDYLLCDYNR.D        |       | 3 | 2,8127 | 0,318 | -0,906 |
| 19 | Q9UBT7 CTNL1_HUMAN | E.LHSTATQLAADLLK.Y       |       | 3 | 2,8104 | 0,1   | -0,123 |
| 19 | P25490 TYY1_HUMAN  | K.KLPPGGIPGIDLSDPK.Q     |       | 3 | 2,81   | 0,186 | -0,684 |
| 19 | P08473 NEP_HUMAN   | E.VVLKDVLEPK.T           |       | 2 | 2,8099 | 0,377 | -1,155 |
| 19 | Q9UQ35 SRRM2_HUMAN | K.DKFSFPVQDRPE.S         |       | 3 | 2,8091 | 0,342 | 0,468  |



|    |                     |                             |            |   |        |       |        |
|----|---------------------|-----------------------------|------------|---|--------|-------|--------|
| 19 | Q9P287 BCCIP_HUMAN  | E.LTDLLIQQNHIGSVIK.Q        |            | 3 | 2,8084 | 0,137 | -0,204 |
| 19 | Q9NY61 AATF_HUMAN   | K.LASASLLDSDKR.Y            |            | 2 | 2,8081 | 0,383 | -0,378 |
| 19 | P16949 STMN1_HUMAN  | E.SVPEFPLS#PPKKK.D          | S38:       | 2 | 2,8063 | 0,334 | -1,591 |
| 19 | Q9NQR4 NIT2_HUMAN   | K.IHLFDIDVPGK.I             |            | 3 | 2,8052 | 0,145 | 0,365  |
| 19 | Q6P1L5 AL2SC_HUMAN  | E.EQLPQDIPDGHR.A            |            | 2 | 2,8034 | 0,279 | -0,321 |
| 19 | Q0VF46 Q0VF46_HUMAN | R.SSVDT#PPRLST#PQKGPSTHPK.E | T133:T139: | 3 | 2,8024 | 0,272 | -0,77  |
| 19 | Q5VZ89 DEN4C_HUMAN  | E.SGM*TTFIHALER.R           |            | 2 | 2,8018 | 0,477 | -0,841 |
| 19 | O75190 DNJB6_HUMAN  | R.HAPHCLS#EEE.G             | S277:      | 2 | 2,799  | 0,262 | -0,284 |
| 19 | Q9HCK1 ZDBF2_HUMAN  | K.LAVNPNKTD*PSNK.G          |            | 3 | 2,7984 | 0,469 | -0,118 |
| 19 | P27824 CALX_HUMAN   | E.DSKPDTTAPPSSPK.V          |            | 2 | 2,7981 | 0,153 | -0,684 |
| 19 | P19634 SL9A1_HUMAN  | K.INNYLTVPAHK.L             |            | 3 | 2,7981 | 0,09  | 0,072  |
| 19 | Q9H4A3 Wnk1_HUMAN   | K.DRPVSQPSLVGSK.E           |            | 2 | 2,7961 | 0,123 | -1,158 |
| 19 | Q9P0L0 VAPA_HUMAN   | E.M*PNENDKLNDM*EPSK.A       |            | 2 | 2,7953 | 0,281 | -0,408 |
| 19 | Q8TB72 PUM2_HUMAN   | R.GLPNGM*DADCKDFNR.T        |            | 2 | 2,7951 | 0,48  | -0,707 |
| 19 | P63279 UBC9_HUMAN   | K.DHPFGFVAVPTK.N            |            | 2 | 2,7939 | 0,465 | 0,371  |
| 19 | Q12851 M4K2_HUMAN   | E.TYDM*FPDTIHSR.G           |            | 3 | 2,7921 | 0,365 | -0,122 |
| 19 | P46013 KI67_HUMAN   | K.AM*DTPKPAVSDEK.N          |            | 3 | 2,792  | 0,247 | 0,325  |
| 19 | Q8NDI1 EHBP1_HUMAN  | E.AFVTIKDS#PPQSTKR.K        | S335:      | 3 | 2,7918 | 0,371 | 0,313  |
| 19 | Q7Z3D4 LYSM3_HUMAN  | R.S#TSRDRLLDIIVLTK.D        | S53:       | 2 | 2,79   | 0,374 | -0,404 |
| 19 | Q08379 GOGA2_HUMAN  | R.LAHLASAQKEPE.A            |            | 3 | 2,7876 | 0,194 | -0,78  |
| 19 | P39880 CUX1_HUMAN   | K.AANLNSIIHRLE.K            |            | 3 | 2,7865 | 0,318 | 0,135  |
| 19 | O60701 UGDH_HUMAN   | K.M*LKPAFIFDGR.R            |            | 2 | 2,7863 | 0,347 | -0,279 |
| 19 | Q9NW64 RBM22_HUMAN  | R.APGPIHYPSQDPQR.M          |            | 3 | 2,7849 | 0,288 | -0,351 |
| 19 | Q58FF8 H90B2_HUMAN  | E.SLTDPSKLDGKE.L            |            | 2 | 2,7836 | 0,412 | -0,797 |
| 19 | Q9BWD1 THIC_HUMAN   | E.DQDKVAVLSQNRTE.N          |            | 3 | 2,783  | 0,232 | -0,114 |
| 19 | P31943 HNRH1_HUMAN  | E.FATHEDAAM*SK.D            |            | 3 | 2,7827 | 0,159 | 0,262  |
| 19 | Q13428 TCOF_HUMAN   | K.SAHTLGPTPSRTETLVEE.T      |            | 2 | 2,7815 | 0,411 | -0,697 |
| 19 | Q13616 CUL1_HUMAN   | E.FQNLLDADKNEDLGR.M         |            | 3 | 2,7807 | 0,238 | 0,105  |
| 19 | Q8IXM2 CQ049_HUMAN  | E.DSGIPLAES#PKKGP.K         | S96:       | 2 | 2,7805 | 0,365 | -0,932 |
| 19 | Q96B36 AKTS1_HUMAN  | E.AEDTQVFGDLPRPR.L          |            | 2 | 2,7804 | 0,373 | -0,229 |
| 19 | P20810 ICAL_HUMAN   | K.LGERDDTIPPEYR.H           |            | 2 | 2,7804 | 0,389 | -0,156 |
| 19 | P51991 ROA3_HUMAN   | E.DSVKPGAHLTVK.K            |            | 3 | 2,7802 | 0,174 | 0,438  |
| 19 | P04083 ANXA1_HUMAN  | R.DLAKDITSDTSGDFR.N         |            | 3 | 2,7793 | 0,244 | -0,111 |

|    |                      |                              |            |   |        |       |        |
|----|----------------------|------------------------------|------------|---|--------|-------|--------|
| 19 | Q9BSC4 NOL10_HUMAN   | K.SLPNILTDDRFK.V             |            | 2 | 2,779  | 0,501 | -0,946 |
| 19 | Q14738 2A5D_HUMAN    | R.RQSS#S#RFNLK.N             | S89:S90:   | 2 | 2,7783 | 0,478 | -0,581 |
| 19 | P00491 PNPH_HUMAN    | R.FGDRFPAM*SDAYDR.T          |            | 3 | 2,7779 | 0,305 | -0,33  |
| 19 | Q9NQS7 INCE_HUMAN    | E.QHVTQLM*STEPLPR.T          |            | 2 | 2,7745 | 0,442 | -0,295 |
| 19 | Q12851 M4K2_HUMAN    | E.TYDM*FPDTIHSR.G            |            | 2 | 2,7725 | 0,312 | -0,814 |
| 19 | Q9UHY8 FEZ2_HUMAN    | R.TLHLLTLNLSEK.G             |            | 2 | 2,7723 | 0,354 | -0,088 |
| 19 | P30153 2AAA_HUMAN    | K.KLSTIALALGVER.T            |            | 2 | 2,7706 | 0,316 | -0,445 |
| 19 | P31939 PUR9_HUMAN    | E.LGIILAHTNLR.L              |            | 3 | 2,7679 | 0,263 | 0,374  |
| 19 | O00458 IFRD1_HUMAN   | R.GSSAGGGGSGAAAATAATAGGQHR.N |            | 3 | 2,7666 | 0,318 | -0,569 |
| 19 | Q6WCQ1 MRIP_HUMAN    | E.KSPDSATVSGYDIM*K.S         |            | 3 | 2,7654 | 0,143 | -0,34  |
| 19 | Q9Y3R0 GRIP1_HUMAN   | K.SASQTKPPDGALAVR.R          |            | 3 | 2,7651 | 0,309 | -0,855 |
| 19 | ##O43491 E41L2_HUMAN | D.LLT#VKCQVT#KTKK.T          | T783:T789: | 3 | 2,7626 | 0,264 | 1,179  |
| 19 | Q05639 EF1A2_HUMAN   | K.YYITIIDAPGHR.D             |            | 2 | 2,7614 | 0,366 | -0,344 |
| 19 | Q9UJC5 SH3L2_HUMAN   | E.SNTVFSFLGLKPR.L            |            | 2 | 2,7588 | 0,354 | -0,499 |
| 19 | Q8IWC1 MA7D3_HUMAN   | E.M*DKQALIPIAK.K             |            | 2 | 2,756  | 0,231 | -0,883 |
| 19 | Q15084 PDIA6_HUMAN   | K.AATALKDVVK.V               |            | 2 | 2,7549 | 0,287 | -0,6   |
| 19 | Q8N884 CF150_HUMAN   | E.FNLFSSNLIDKR.S             |            | 2 | 2,7524 | 0,356 | -0,671 |
| 19 | Q02750 MP2K1_HUMAN   | R.DVKPSNILVNSR.G             |            | 3 | 2,7524 | 0,156 | -0,204 |
| 19 | Q8WWM7 ATX2L_HUMAN   | E.FNPTKPLLSVVK.S             |            | 2 | 2,7518 | 0,123 | -0,988 |
| 19 | Q99973 TEP1_HUMAN    | K.IHSGSVTALHVLPE.L           |            | 2 | 2,7509 | 0,433 | -0,418 |
| 19 | O75164 JHD3A_HUMAN   | R.AQQQTGVLTVHSYAK.G          |            | 3 | 2,7492 | 0,313 | -0,469 |
| 19 | P23284 PIIB_HUMAN    | K.TDS#RDKPLKDVIIAD.C         | S181:      | 3 | 2,7445 | 0,134 | -0,829 |
| 19 | P53985 MOT1_HUMAN    | K.DLHDANTDLIGR.H             |            | 3 | 2,7422 | 0,158 | 0,068  |
| 19 | Q9P2Y5 UVRAG_HUMAN   | K.KGEDLVGS#LNGGHANVHPSQE.Q   | S571:      | 3 | 2,7407 | 0,242 | -0,987 |
| 19 | Q16513 PKN2_HUMAN    | K.SLAYVDNILKK.S              |            | 2 | 2,7405 | 0,43  | -1,737 |
| 19 | Q96B36 AKTS1_HUMAN   | E.DTQVFGDLPRPR.L             |            | 2 | 2,7399 | 0,41  | -0,523 |
| 19 | P55769 NH2L1_HUMAN   | K.AYPLADAHLTK.K              |            | 2 | 2,7396 | 0,216 | -0,407 |
| 19 | Q6S8J3 A26CA_HUMAN   | R.AVFPSIVGRPR.Q              |            | 2 | 2,7394 | 0,299 | -0,305 |
| 19 | P46937 YAP1_HUMAN    | R.QASTDAGTAGALTPQHVR.A       |            | 2 | 2,7388 | 0,343 | -0,891 |
| 19 | P43897 EFTS_HUMAN    | E.GSLKDQLALAIGK.L            |            | 2 | 2,7382 | 0,388 | -0,464 |
| 19 | Q9UQ49 NEUR3_HUMAN   | E.ILSHLQGDCTS#PGRNPSQFK.S    | S417:      | 3 | 2,7375 | 0,234 | -0,315 |
| 19 | Q14789 GOGB1_HUMAN   | K.SLKDQLTDLNSLEK.C           |            | 3 | 2,7328 | 0,12  | 0,216  |
| 19 | Q9UQ35 SRRM2_HUMAN   | E.SYFGVSSLQLK.G              |            | 2 | 2,7324 | 0,324 | -0,199 |

|    |                    |                           |            |   |        |       |        |
|----|--------------------|---------------------------|------------|---|--------|-------|--------|
| 19 | Q14545 TRAD1_HUMAN | E.ELLIDHQTSCNPSR.A        |            | 3 | 2,7322 | 0,314 | -0,438 |
| 19 | Q8IVF2 AHNK2_HUMAN | E.GDLSLADKDVTA.K.D        |            | 3 | 2,7321 | 0,469 | 0,206  |
| 19 | Q9UQ80 PA2G4_HUMAN | K.TIIQNPTDQK.K.D          |            | 2 | 2,7285 | 0,173 | -0,777 |
| 19 | O00268 TAF4_HUMAN  | R.RPLVPAGPAPPAK.L         |            | 3 | 2,7272 | 0,168 | 0,273  |
| 19 | Q09666 AHNK_HUMAN  | K.IKGDVDVSAPKLE.G         |            | 2 | 2,726  | 0,276 | -0,623 |
| 19 | P50440 GATM_HUMAN  | R.NSCAADDKATEPLK.D        |            | 3 | 2,7242 | 0,163 | -0,566 |
| 19 | P08670 VIME_HUMAN  | R.LQDEIQNM*KEEM*AR.H      |            | 2 | 2,724  | 0,402 | -0,345 |
| 19 | Q96PK2 MACF4_HUMAN | E.DTQKLDNFLGEV.R.D        |            | 2 | 2,7231 | 0,341 | -0,954 |
| 19 | P02144 MYG_HUMAN   | K.HGATVLTALGGIL.K.K       |            | 3 | 2,722  | 0,338 | 0      |
| 19 | O43318 M3K7_HUMAN  | R.M*ITTSQPTSEKPTR.S       |            | 2 | 2,721  | 0,389 | -0,481 |
| 19 | P15408 FOSL2_HUMAN | E.FM*LVAHGVPCK.I          |            | 2 | 2,7197 | 0,303 | -0,383 |
| 19 | O00429 DNM1L_HUMAN | K.GHAVNLLDVPVVAR.K        |            | 3 | 2,7184 | 0,108 | 0      |
| 19 | Q9UQ35 SRRM2_HUMAN | K.VKPET#PPRQSHS#GSISYPK.V | T983:S990: | 3 | 2,7179 | 0,129 | -1,011 |
| 19 | Q9UQ35 SRRM2_HUMAN | E.KSATRPS#PS#PER.S        | S351:S353: | 3 | 2,7151 | 0,19  | -0,062 |
| 19 | Q96HC4 PDLI5_HUMAN | R.ILAQTGTEHLK.E           |            | 3 | 2,7145 | 0,254 | 0,207  |
| 19 | P54289 CA2D1_HUMAN | R.IKPVFIEDANFGR.Q         |            | 2 | 2,7141 | 0,263 | -0,162 |
| 19 | Q09666 AHNK_HUMAN  | K.ISM*PDVDLHM*K.G         |            | 3 | 2,7132 | 0,307 | 0,278  |
| 19 | Q71U36 TBA1A_HUMAN | R.NLDIERPTYTNLNR.L        |            | 2 | 2,7105 | 0,168 | -0,923 |
| 19 | Q8N1G1 REXO1_HUMAN | E.KGLSGLTTLFPGQK.R        |            | 2 | 2,7086 | 0,312 | -0,422 |
| 19 | O94826 TOM70_HUMAN | K.NREPLM*PSPQFIK.S        |            | 3 | 2,7085 | 0,176 | 0,116  |
| 19 | P49736 MCM2_HUMAN  | K.VRGDINVLLCGDPGTAK.S     |            | 2 | 2,7079 | 0,312 | -0,478 |
| 19 | P49773 HINT1_HUMAN | E.SLLGHLM*IVGK.K          |            | 2 | 2,7078 | 0,403 | -0,824 |
| 19 | P78347 GTF2I_HUMAN | R.TPTQTNGSNVFPKPR.G       |            | 3 | 2,707  | 0,093 | -0,111 |
| 19 | Q13873 BMPR2_HUMAN | R.GLAYLHTELPR.G           |            | 2 | 2,7054 | 0,404 | 0,096  |
| 19 | Q09666 AHNK_HUMAN  | K.VKGDVDVTLPKVE.G         |            | 2 | 2,7048 | 0,371 | -0,698 |
| 19 | Q99583 MNT_HUMAN   | R.LAHTLPVEEPR.M           |            | 3 | 2,7036 | 0,129 | 0,435  |
| 19 | O95628 CNOT4_HUMAN | K.SNPVPISSSNHSAR.S        |            | 2 | 2,7033 | 0,429 | -0,701 |
| 19 | P07237 PDIA1_HUMAN | K.YQLDKDGVVLFK.K          |            | 3 | 2,7028 | 0,285 | -0,064 |
| 19 | Q29RF7 PDS5A_HUMAN | R.HDVIVTIIITAAK.R         |            | 2 | 2,7021 | 0,458 | -0,667 |
| 19 | O00148 DDX39_HUMAN | K.LTLHGLQQYYVK.L          |            | 2 | 2,702  | 0,429 | -1,334 |
| 19 | Q07866 KLC1_HUMAN  | K.YKDAANLLNDALAIRE.K      |            | 3 | 2,7    | 0,15  | -0,613 |
| 19 | Q7L2J0 MEPCE_HUMAN | K.GRDPVEILIPK.D           |            | 2 | 2,6997 | 0,291 | -0,099 |
| 19 | P30153 2AAA_HUMAN  | K.KLSTIALALGVER.T         |            | 3 | 2,698  | 0,125 | 0,333  |

|    |                    |                            |            |   |        |       |        |
|----|--------------------|----------------------------|------------|---|--------|-------|--------|
| 19 | P18887 XRCC1_HUMAN | E.SANSLRPGALFFSR.I         |            | 2 | 2,6969 | 0,233 | -1,282 |
| 19 | Q15477 SKIV2_HUMAN | E.KDLLTIPPGFK.K            |            | 2 | 2,6967 | 0,269 | -0,298 |
| 19 | P50549 ETV1_HUMAN  | E.SLAFHGLPLK.I             |            | 2 | 2,6949 | 0,325 | -0,113 |
| 19 | P42224 STAT1_HUMAN | R.FHDLLSQLDDQYSR.F         |            | 2 | 2,6946 | 0,435 | -0,421 |
| 19 | Q9UQ35 SRRM2_HUMAN | K.VKPET#PPRQS#HSGSISPYPK.V | T983:S988: | 3 | 2,6944 | 0,09  | -0,233 |
| 19 | O94913 PCF11_HUMAN | R.YEDSDKPFVDSPASR.F        |            | 3 | 2,6929 | 0,358 | -0,214 |
| 19 | P10636 TAU_HUMAN   | K.IGSLDNITHVPGGGNK.K       |            | 3 | 2,6911 | 0,389 | -0,116 |
| 19 | Q9UQ35 SRRM2_HUMAN | E.SSLVFKDTRLRT#PPR.E       | T1208:     | 3 | 2,6896 | 0,089 | -0,97  |
| 19 | P26038 MOES_HUMAN  | R.GM*LREDAVLEYLK.I         |            | 3 | 2,6891 | 0,098 | 0,118  |
| 19 | O15164 TIF1A_HUMAN | R.SDAPDSTGDQPGLHQDNSSNGK.S |            | 3 | 2,6888 | 0,124 | -0,986 |
| 19 | P15408 FOSL2_HUMAN | E.FM*LVAHGVPVCK.I          |            | 3 | 2,6881 | 0,36  | 0,215  |
| 19 | Q09666 AHNK_HUMAN  | E.VGFHGAAPDISVK.G          |            | 3 | 2,6848 | 0,24  | 0,564  |
| 19 | Q02790 FKBP4_HUMAN | K.DKFSFDLGKGE.V            |            | 2 | 2,6846 | 0,282 | -0,687 |
| 19 | P31939 PUR9_HUMAN  | E.LGIILAHTNLR.L            |            | 2 | 2,6834 | 0,265 | -0,1   |
| 19 | Q9Y6X2 PIAS3_HUMAN | K.GVLTSGHQPSSVLR.S         |            | 3 | 2,683  | 0,392 | 0,636  |
| 19 | Q9H008 LHPP_HUMAN  | E.LEKPVLSLKG.G             |            | 2 | 2,6829 | 0,283 | -0,713 |
| 19 | Q8WTT2 NOC3L_HUMAN | R.DLSSSEPVHAK.K            |            | 2 | 2,6788 | 0,353 | -0,521 |
| 19 | Q9UKX7 NUP50_HUMAN | K.KTDPSSLGATSASFNGK.K      |            | 3 | 2,6771 | 0,251 | 0,806  |
| 19 | Q9NRY4 GRLF1_HUMAN | E.NIYSVPHDSTQGGK.I         |            | 2 | 2,6769 | 0,394 | -1,097 |
| 19 | Q99460 PSMD1_HUMAN | E.KVSTAVLSITAK.A           |            | 2 | 2,676  | 0,3   | -1,002 |
| 19 | Q9NW82 WDR70_HUMAN | R.VGTHGGTLSSYIVK.N         |            | 2 | 2,6759 | 0,389 | -0,688 |
| 19 | Q99798 ACON_HUMAN  | E.IGATTSVFPYNHR.M          |            | 3 | 2,6733 | 0,273 | 0,063  |
| 19 | O60879 DIAP2_HUMAN | E.DKFENPDLFAK.L            |            | 2 | 2,6724 | 0,317 | -0,461 |
| 19 | Q00653 NFKB2_HUMAN | E.LGLVTHLVTK.L             |            | 2 | 2,6719 | 0,429 | -0,113 |
| 19 | Q16630 CPSF6_HUMAN | K.GAAPNVVYTYTGKR.I         |            | 2 | 2,6719 | 0,398 | -0,896 |
| 19 | Q6IFS5 HSN2_HUMAN  | K.FHPVFPVPHS#APAVLTHNNE.S  | S249:      | 3 | 2,6715 | 0,215 | -0,918 |
| 19 | O60701 UGDH_HUMAN  | K.M*LKPAFIFDGR.R           |            | 3 | 2,6713 | 0,167 | 0,628  |
| 19 | P55072 TERA_HUMAN  | E.DIGGLEDVKRE.L            |            | 2 | 2,67   | 0,365 | 0,198  |
| 19 | Q8N110 DOCK4_HUMAN | R.ERPCSAIYPTPVEPSQR.M      |            | 3 | 2,6693 | 0,12  | -1,749 |
| 19 | O60524 SDCG1_HUMAN | K.LQTNHVMT*LLR.N           |            | 2 | 2,669  | 0,385 | -1,364 |
| 19 | Q02218 ODO1_HUMAN  | E.DHLAVQSLIR.A             |            | 2 | 2,6681 | 0,21  | 0,106  |
| 19 | O60506 HNRPQ_HUMAN | K.DYAFIHFDER.D             |            | 2 | 2,668  | 0,398 | -0,186 |
| 19 | O00522 KRIT1_HUMAN | E.DAYVAVIRPK.N             |            | 2 | 2,6646 | 0,363 | -0,323 |

|    |                     |                         |              |   |        |       |        |
|----|---------------------|-------------------------|--------------|---|--------|-------|--------|
| 19 | Q9UKF6 CPSF3_HUMAN  | K.VM*GFLADKKPE.Q        |              | 3 | 2,663  | 0,148 | 0,439  |
| 19 | Q09666 AHNK_HUMAN   | K.ISM*PDLDLHLKS#PK.A    | S2397:       | 3 | 2,6627 | 0,198 | -0,108 |
| 19 | P04083 ANXA1_HUMAN  | E.ATIIDILTKR.N          |              | 2 | 2,6621 | 0,365 | 0,427  |
| 19 | Q14697 GANAB_HUMAN  | R.YRVPDVLDVADPPIAR.L    |              | 3 | 2,6605 | 0,218 | -0,218 |
| 19 | Q09666 AHNK_HUMAN   | K.ISM*PDVDLHVK.G        |              | 2 | 2,6602 | 0,3   | -0,288 |
| 19 | P13639 EF2_HUMAN    | R.FDVHDVTLHAD.A         |              | 2 | 2,6601 | 0,499 | -0,769 |
| 19 | Q9H9B1 EHMT1_HUMAN  | E.DDKLQGAASHVPE.G       |              | 2 | 2,6574 | 0,283 | -0,893 |
| 19 | Q06830 PRDX1_HUMAN  | R.LVQAFQFTDKHGE.V       |              | 2 | 2,657  | 0,321 | -0,321 |
| 19 | Q9C0H5 K1688_HUMAN  | R.DYSADGQLLHYR.T        |              | 2 | 2,6557 | 0,454 | -0,085 |
| 19 | P30101 PDIA3_HUMAN  | K.LSKDPNIVIAK.M         |              | 2 | 2,6555 | 0,258 | -0,509 |
| 19 | P18615 NELFE_HUMAN  | E.KGPVPTFQPFQR.S        |              | 2 | 2,6526 | 0,262 | -0,696 |
| 19 | Q01813 K6PP_HUMAN   | K.NVLGHM*QQGGAPSPFDR.N  |              | 3 | 2,6516 | 0,209 | -0,501 |
| 19 | P53985 MOT1_HUMAN   | K.DLHDANTDLIGR.H        |              | 2 | 2,651  | 0,391 | -0,637 |
| 19 | O60524 SDCG1_HUMAN  | K.LQTNHVMT*LLR.N        |              | 3 | 2,6493 | 0,319 | -0,409 |
| 19 | Q14980 NUMA1_HUMAN  | R.KRVS#LEPHQPGT#PE.S    | S1991:T2000: | 3 | 2,6473 | 0,111 | -0,817 |
| 19 | Q6P2E9 EDC4_HUMAN   | E.LGSEGLSAAHGS#QPDLRR.I | S565:        | 3 | 2,6456 | 0,148 | -0,828 |
| 19 | P46060 RAGP1_HUMAN  | K.LNTAEDAQDKVIK.I       |              | 2 | 2,6444 | 0,343 | -0,506 |
| 19 | Q9BRQ0 PYGO2_HUMAN  | E.GGGGPAPPAPPSTGRK.Q    |              | 2 | 2,6436 | 0,367 | -1,138 |
| 19 | P04406 G3P_HUMAN    | R.VVDLM*AHM*ASKE.-      |              | 2 | 2,643  | 0,327 | -1,253 |
| 19 | Q8NFAQ8 TOIP2_HUMAN | R.ADAHLGSSSVALPK.E      |              | 2 | 2,6422 | 0,346 | -1,443 |
| 19 | Q8IWB9 TEX2_HUMAN   | E.SDTVSYKPPDSK.L        |              | 2 | 2,642  | 0,359 | -0,829 |
| 19 | O43172 PRP4_HUMAN   | K.TKAPDDLVAPEVVK.K      |              | 2 | 2,6415 | 0,348 | -0,902 |
| 19 | Q01970 PLCB3_HUMAN  | R.KRPLEQSNS#ALSE.S      | S492:        | 2 | 2,6409 | 0,351 | -0,396 |
| 19 | Q8WYL5 SSH1_HUMAN   | R.LAGLTVSSPLKR.S        |              | 2 | 2,6396 | 0,194 | -1,572 |
| 19 | P46013 KI67_HUMAN   | K.VQVKEEPSAVK.F         |              | 3 | 2,6369 | 0,116 | -0,452 |
| 19 | Q7Z5K2 WAPL_HUMAN   | E.DIVQSVLRPTNCR.T       |              | 2 | 2,6368 | 0,295 | -0,392 |
| 19 | Q9C0C9 UBE2O_HUMAN  | R.LLFSHDLVSGR.Y         |              | 2 | 2,6365 | 0,509 | -0,196 |
| 19 | Q5TON5 FBP1L_HUMAN  | K.HFYVVIPQIYK.Q         |              | 2 | 2,6327 | 0,38  | -0,607 |
| 19 | P08574 CY1_HUMAN    | R.GLLSSLDHTSIR.R        |              | 2 | 2,6322 | 0,458 | 0,376  |
| 19 | Q07157 ZO1_HUMAN    | R.ISKPGAVSTPVK.H        |              | 2 | 2,629  | 0,255 | -1,03  |
| 19 | O94906 PRP6_HUMAN   | E.ADAIYAALDKR.M         |              | 2 | 2,6279 | 0,24  | -0,404 |
| 19 | Q58FF8 H90B2_HUMAN  | K.HSQFLGYPITLYLEK.E     |              | 2 | 2,6273 | 0,328 | -0,067 |
| 19 | Q7L2J0 MEPCE_HUMAN  | R.ESPGAAATSSSGPQAQQHR.G |              | 2 | 2,6258 | 0,411 | -0,85  |

|    |                    |                       |   |        |       |        |
|----|--------------------|-----------------------|---|--------|-------|--------|
| 19 | Q14690 RRP5_HUMAN  | E.DHGYLVDIGVDGTR.A    | 2 | 2,6252 | 0,398 | -0,885 |
| 19 | Q8N1F7 NUP93_HUMAN | K.FTSDTKPIINK.V       | 2 | 2,6251 | 0,33  | -0,869 |
| 19 | O95425 SVIL_HUMAN  | E.VM*KPDDDETFAK.F     | 2 | 2,6181 | 0,394 | -0,691 |
| 19 | P27694 RFA1_HUMAN  | K.SKDSLVDIIGICK.S     | 3 | 2,6175 | 0,145 | 0,316  |
| 19 | Q92616 GCN1L_HUMAN | K.KGVTSILPVLRE.G      | 2 | 2,6172 | 0,284 | -0,279 |
| 19 | Q92613 JADE3_HUMAN | E.DLQCYVKPTK.N        | 2 | 2,6161 | 0,319 | -0,487 |
| 19 | O75179 ANR17_HUMAN | K.KQPSVLVTFPKEE.R     | 3 | 2,6143 | 0,092 | 0,487  |
| 19 | Q8WXI9 P66B_HUMAN  | R.SLDPADERDDVLAK.R    | 2 | 2,613  | 0,368 | -0,711 |
| 19 | Q5VUA4 ZN318_HUMAN | R.LCQSRPYETITPK.T     | 3 | 2,6109 | 0,197 | 0,115  |
| 19 | Q16658 FSCN1_HUMAN | R.FLIVAHDDGR.W        | 2 | 2,6087 | 0,349 | -0,427 |
| 19 | Q9C0C2 TB182_HUMAN | R.VVGKPAQLGTQR.S      | 3 | 2,6079 | 0,28  | -0,073 |
| 19 | O75446 SAP30_HUMAN | E.KDTLTYFIYSVK.N      | 3 | 2,6066 | 0,114 | 0      |
| 19 | P42892 ECE1_HUMAN  | K.DNFQDTLQVVTAHYR.T   | 3 | 2,6022 | 0,213 | -0,405 |
| 19 | Q15181 IPYR_HUMAN  | E.IATKDLNPIK.Q        | 3 | 2,6018 | 0,322 | 0,453  |
| 19 | Q14683 SMC1A_HUMAN | K.M*QDIKLPLSK.G       | 2 | 2,599  | 0,273 | -0,308 |
| 19 | O95425 SVIL_HUMAN  | E.VM*KPDDDETFAK.F     | 3 | 2,5984 | 0,247 | 0,13   |
| 19 | Q9H165 BC11A_HUMAN | R.QLKDPFLSFGDSR.Q     | 3 | 2,598  | 0,132 | 0,182  |
| 19 | P05109 S10A8_HUMAN | K.ALNSIIDVYHK.Y       | 2 | 2,5976 | 0,263 | -0,671 |
| 19 | Q8IYB3 SRRM1_HUMAN | K.VPKPEPIPEPK.E       | 3 | 2,5973 | 0,105 | 0,52   |
| 19 | Q9H0C8 ILKAP_HUMAN | R.CLLDTFKHTDEE.F      | 2 | 2,596  | 0,3   | -0,405 |
| 19 | Q9UKI8 TLK1_HUMAN  | R.YLLLHLLGR.G         | 2 | 2,5905 | 0,366 | -0,222 |
| 19 | Q15185 TEBP_HUMAN  | E.IDLFHCIDPNDSK.H     | 2 | 2,5904 | 0,233 | -0,853 |
| 19 | P13797 PLST_HUMAN  | R.HVIPM*NPNTDDLFK.A   | 3 | 2,5897 | 0,173 | -0,11  |
| 19 | P26639 SYTC_HUMAN  | K.M*GGEEKPIGAGEEK.Q   | 2 | 2,5869 | 0,168 | -0,674 |
| 19 | P51858 HDGF_HUMAN  | K.LVIDEPAKEKNE.K      | 2 | 2,5865 | 0,21  | -1,321 |
| 19 | Q9UGU5 HM2L1_HUMAN | E.TLTLREPDGLK.M       | 2 | 2,5861 | 0,188 | -0,393 |
| 19 | Q99613 EIF3C_HUMAN | E.LVTKPVGGNYGK.Q      | 2 | 2,5859 | 0,273 | -1,187 |
| 19 | Q12904 MCA1_HUMAN  | K.QQSIAGSADSKPIDVSR.L | 3 | 2,5857 | 0,232 | -0,728 |
| 19 | Q09666 AHNK_HUMAN  | K.VKGDVDISLPKVE.G     | 2 | 2,5853 | 0,223 | -0,436 |
| 19 | Q9NRL2 BAZ1A_HUMAN | K.KDAIDPLLFK.Y        | 2 | 2,5847 | 0,396 | -0,421 |
| 19 | P08133 ANXA6_HUMAN | K.GTVRPANDFNPDADAK.A  | 3 | 2,5844 | 0,146 | -0,108 |
| 19 | Q04721 NOTC2_HUMAN | E.LINCQADVNAVDDHGK.S  | 3 | 2,5838 | 0,226 | -0,414 |
| 19 | Q8TF05 PP4R1_HUMAN | K.YFASIHPASTK.I       | 2 | 2,5836 | 0,393 | -0,599 |

|    |                    |                             |              |   |        |       |        |
|----|--------------------|-----------------------------|--------------|---|--------|-------|--------|
| 19 | Q9P2E9 RRBP1_HUMAN | K.ATQKGDPAVILK.R            |              | 3 | 2,5827 | 0,305 | 0,884  |
| 19 | Q13546 RIPK1_HUMAN | E.NILVDNDFHIK.I             |              | 2 | 2,5796 | 0,295 | -0,735 |
| 19 | Q8TD55 PKHO2_HUMAN | E.TTSPGDRVETPVGER.A         |              | 3 | 2,5795 | 0,268 | -0,343 |
| 19 | P55010 IF5_HUMAN   | E.ANKLQDM*LDGFIK.K          |              | 3 | 2,5786 | 0,172 | -0,909 |
| 19 | Q12906 ILF3_HUMAN  | E.DITQSAQHALLR.L            |              | 2 | 2,5775 | 0,27  | -0,59  |
| 19 | P05362 ICAM1_HUMAN | E.AQVHLALGDQR.L             |              | 3 | 2,5774 | 0,323 | -0,227 |
| 19 | Q7L7V1 DHX32_HUMAN | E.GDHFTLISIYK.A             |              | 3 | 2,5761 | 0,121 | 0,353  |
| 19 | Q6NVY1 HIBCH_HUMAN | R.AVLIDKDKQSPK.W            |              | 2 | 2,5752 | 0,413 | -1,005 |
| 19 | P04049 RAF1_HUMAN  | R.AAHTEDINACTLTTSPR.L       |              | 3 | 2,5751 | 0,093 | 0      |
| 19 | Q12906 ILF3_HUMAN  | E.SKFNYSGS#GGR.S            | S812:        | 2 | 2,5729 | 0,546 | -0,689 |
| 19 | Q14690 RRP5_HUMAN  | K.VFLHLADIYAK.S             |              | 3 | 2,5728 | 0,268 | 0,283  |
| 19 | P00441 SODC_HUMAN  | R.HVGD LGNVTADKDG VADVSIE.D |              | 3 | 2,5727 | 0,18  | -0,347 |
| 19 | Q5SYE7 NHSL1_HUMAN | R.ATM*PQVPGGSVKPK.I         |              | 2 | 2,5725 | 0,29  | -0,863 |
| 19 | P11310 ACADM_HUMAN | E.YDKTGEYVPLIR.R            |              | 2 | 2,5722 | 0,233 | -0,472 |
| 19 | Q14687 GSE1_HUMAN  | R.APPPQHNGQQEPPTAR.K        |              | 3 | 2,5705 | 0,198 | -0,424 |
| 19 | O75494 FUSIP_HUMAN | R.YLRPPNTSLFVR.N            |              | 2 | 2,5691 | 0,231 | -0,417 |
| 19 | Q14651 PLSI_HUMAN  | K.HLIPM*NPNDDSLK.S          |              | 3 | 2,5672 | 0,161 | -0,442 |
| 19 | Q8TF01 SFR18_HUMAN | K.ATEDAEGGDGPRLPQR.S        |              | 3 | 2,5659 | 0,468 | -0,219 |
| 19 | Q01130 SFRS2_HUMAN | K.VDNLYRTS#PDTLRR.V         | S26:         | 3 | 2,5657 | 0,181 | -1,066 |
| 19 | Q9P0K7 RAI14_HUMAN | K.SSPSVLIHSLGK.S            |              | 2 | 2,565  | 0,361 | -1,096 |
| 19 | Q06210 GFPT1_HUMAN | K.LSTDHIPILYR.T             |              | 2 | 2,5641 | 0,382 | 0      |
| 19 | Q9Y6Y0 NS1BP_HUMAN | D.GIFCVIFLHGR.N             |              | 2 | 2,5616 | 0,358 | -0,462 |
| 19 | O43264 ZW10_HUMAN  | R.FLKGDTTDLLK.Y             |              | 2 | 2,5613 | 0,255 | -1,463 |
| 19 | P48735 IDHP_HUMAN  | E.HFLNTTDFLDTIK.S           |              | 2 | 2,5612 | 0,334 | -0,312 |
| 19 | Q9UQ35 SRRM2_HUMAN | E.HKELS#NS#PLRE.N           | S1318:S1320: | 2 | 2,5596 | 0,278 | -0,332 |
| 19 | Q9UGU0 TCF20_HUMAN | R.YGPPHETDGHGLAE.A          |              | 3 | 2,5595 | 0,124 | -0,494 |
| 19 | O00231 PSD11_HUMAN | E.ASIDILHSIVK.R             |              | 2 | 2,5586 | 0,214 | -0,204 |
| 19 | Q06203 PUR1_HUMAN  | K.LYVSNLIGHTR.Y             |              | 2 | 2,558  | 0,381 | -0,642 |
| 19 | P51858 HDGF_HUMAN  | R.AGDILLEDSPKRPK.E          | S165:        | 2 | 2,5572 | 0,341 | -0,972 |
| 19 | P28370 SMCA1_HUMAN | E.LFAHQPSAQK.S              |              | 3 | 2,5568 | 0,182 | 0      |
| 19 | Q15691 MARE1_HUMAN | R.M*GVDKIIPVDK.L            |              | 2 | 2,5566 | 0,275 | -1,784 |
| 19 | Q02750 MP2K1_HUMAN | R.DVKPSNILVNSR.G            |              | 2 | 2,5563 | 0,363 | -1,545 |
| 19 | P63279 UBC9_HUMAN  | K.DHPFGFVAVPTK.N            |              | 3 | 2,5556 | 0,152 | 1,738  |

|    |                    |                          |            |   |        |       |        |
|----|--------------------|--------------------------|------------|---|--------|-------|--------|
| 19 | P04406 G3P_HUMAN   | E.GLM*TTVHAITATQK.T      |            | 3 | 2,5531 | 0,431 | -0,86  |
| 19 | P40189 IL6RB_HUMAN | K.VTSDHINFDPVYK.V        |            | 3 | 2,5531 | 0,193 | -0,119 |
| 19 | Q9BSJ8 ESYT1_HUMAN | E.AHSHSYSHSSSS#LS#EEPE.L | S933:S935: | 3 | 2,5524 | 0,188 | -0,518 |
| 19 | P32004 L1CAM_HUMAN | R.TIIQKEPIDLR.V          |            | 2 | 2,5511 | 0,33  | -0,828 |
| 19 | Q12802 AKP13_HUMAN | E.KNAVLGLPVALQDK.A       |            | 3 | 2,5502 | 0,372 | 0,062  |
| 19 | Q9HCS7 SYF1_HUMAN  | R.RPLLLNSVLLR.Q          |            | 2 | 2,5497 | 0,105 | -0,189 |
| 19 | P50548 ERF_HUMAN   | R.ARPPGPPDLGAFR.G        |            | 2 | 2,5483 | 0,352 | -0,452 |
| 19 | P35527 K1C9_HUMAN  | K.TLNDM*RQEYEQLIAK.N     |            | 2 | 2,5482 | 0,219 | -0,718 |
| 19 | Q9Y5B6 GCFC_HUMAN  | E.LGDFTPHDNEPGK.G        |            | 2 | 2,5465 | 0,347 | -0,684 |
| 19 | Q9Y5B6 GCFC_HUMAN  | E.LGDFTPHDNEPGK.G        |            | 3 | 2,5459 | 0,22  | 0,32   |
| 19 | Q8N350 DOS_HUMAN   | R.GAGDDTEPPAAPARPRS#PR.A | S548:      | 3 | 2,5454 | 0,264 | -0,183 |
| 19 | P10809 CH60_HUMAN  | E.IGNIISDAM*KK.V         |            | 2 | 2,5434 | 0,357 | -0,405 |
| 19 | Q13641 TPBG_HUMAN  | E.LASNHFLYLPR.D          |            | 2 | 2,5426 | 0,229 | -0,733 |
| 19 | P48637 GS HB_HUMAN | K.CPDIA TQLAGTKK.V       |            | 3 | 2,5406 | 0,325 | -0,196 |
| 19 | Q02952 AKA12_HUMAN | E.STAVGQAHS DISKDM*SE.A  |            | 3 | 2,5402 | 0,398 | -0,308 |
| 19 | Q14651 PLSI_HUMAN  | K.HLIPM*NPNDDSLFK.S      |            | 2 | 2,5395 | 0,362 | -0,221 |
| 19 | Q9HCK1 ZDBF2_HUMAN | K.LAVNPNK TDM*PSNK.G     |            | 2 | 2,5363 | 0,239 | -0,474 |
| 19 | P05556 ITB1_HUMAN  | E.KTVM*PYISTTPAK.L       |            | 2 | 2,5358 | 0,31  | -0,84  |
| 19 | Q8NFH4 NUP37_HUMAN | E.GHTDFINGLVFDPK.E       |            | 2 | 2,535  | 0,266 | -0,547 |
| 19 | Q12979 ABR_HUMAN   | R.STLVLHDLLK.H           |            | 2 | 2,5336 | 0,453 | -0,107 |
| 19 | Q9Y613 FHOD1_HUMAN | E.TLAGAM*PNEAGGHPDAR.Q   |            | 3 | 2,5326 | 0,348 | 0,435  |
| 19 | Q8NFQ8 TOIP2_HUMAN | E.AEILHSACGLSK.D         |            | 2 | 2,5321 | 0,31  | -0,569 |
| 19 | O75952 CABYR_HUMAN | E.AVGGLSSK PATPK.T       |            | 2 | 2,5303 | 0,376 | -0,603 |
| 19 | Q8ND04 CQ071_HUMAN | E.SSPAPPDSADK LK.E       |            | 2 | 2,5279 | 0,379 | -0,854 |
| 19 | O95239 KIF4A_HUMAN | R.RRT#FS#LTEVR.G         | T799:S801: | 3 | 2,5251 | 0,099 | 0,193  |
| 19 | O95989 NUDT3_HUMAN | K.VLQYHKPVQASYFE.T       |            | 2 | 2,522  | 0,282 | -0,857 |
| 19 | Q9UBT7 CTNL1_HUMAN | E.LHSTATQLAADLLK.Y       |            | 2 | 2,5207 | 0,318 | -0,165 |
| 19 | O14733 MP2K7_HUMAN | R.HM*LGLPSTLFTPR.S       |            | 2 | 2,5194 | 0,423 | -0,328 |
| 19 | Q8WXX5 DNJC9_HUMAN | K.VSLQVHPDRVGE.G         |            | 3 | 2,5173 | 0,162 | 0,342  |
| 19 | P35579 MYH9_HUMAN  | K.VSHLLGINVTD FTR.G      |            | 2 | 2,5163 | 0,353 | -0,233 |
| 19 | Q93052 LPP_HUMAN   | E.GDNQGCYPLDGHILCK.T     |            | 3 | 2,5161 | 0,326 | -0,396 |
| 19 | P16989 DBPA_HUMAN  | E.DV FVHQTAIK.K          |            | 2 | 2,5158 | 0,375 | 0,316  |
| 19 | Q13177 PAK2_HUMAN  | E.LEDKPPAPPVR.M          |            | 3 | 2,5146 | 0,224 | -0,075 |



|    |                    |                        |                 |   |        |       |        |
|----|--------------------|------------------------|-----------------|---|--------|-------|--------|
| 19 | P04075 ALDOA_HUMAN | K.ADDGRPFQVIK.S        |                 | 3 | 2,5146 | 0,102 | 0,204  |
| 19 | Q07955 SFRS1_HUMAN | R.VKVDGPRS#PS#YGRS#R.S | S199:S201:S205: | 3 | 2,5135 | 0,119 | -0,481 |
| 19 | Q9H4H8 FA83D_HUMAN | R.FLNPDEVHAILR.A       |                 | 2 | 2,5079 | 0,29  | -0,514 |
| 19 | P25490 TYY1_HUMAN  | K.KLPPGGIPGIDLSDPK.Q   |                 | 2 | 2,5075 | 0,102 | -0,456 |
| 19 | Q5M775 SPEC1_HUMAN | E.TPSRPLSSTSNNPFK.S    |                 | 3 | 2,5074 | 0,343 | -0,903 |
| 19 | P48426 PI42A_HUMAN | D.YSLLVGIHDVER.A       |                 | 3 | 2,5063 | 0,212 | 0,196  |
| 19 | P55072 TERA_HUMAN  | E.LVQYPVEHPDK.F        |                 | 2 | 2,5038 | 0,283 | -0,737 |
| 19 | O75694 NU155_HUMAN | K.DPQGLGLHFYK.H        |                 | 2 | 2,4982 | 0,416 | -0,766 |
| 19 | P16383 GCF_HUMAN   | R.IPFTLRPQTLR.Q        |                 | 2 | 2,4976 | 0,227 | -0,909 |
| 19 | Q8IWX8 CHERP_HUMAN | R.NVIDKLAQFVAR.N       |                 | 2 | 2,497  | 0,324 | -0,533 |
| 19 | Q9NS73 MBIP1_HUMAN | E.QHILYLQPFLAK.L       |                 | 2 | 2,4959 | 0,09  | -0,498 |
| 19 | Q12874 SF3A3_HUMAN | R.YLDLHDCYLK.Y         |                 | 2 | 2,4954 | 0,286 | -0,455 |
| 19 | P34931 HS71L_HUMAN | K.ATAGDTHLGGEDFDNR.L   |                 | 3 | 2,4945 | 0,408 | 0,218  |
| 19 | Q9BY44 EIF2A_HUMAN | K.GLLHSFDLLK.A         |                 | 2 | 2,4926 | 0,288 | -0,213 |
| 19 | Q9H8Y8 GORS2_HUMAN | E.GSLGCGIGYGYLHR.I     |                 | 2 | 2,492  | 0,263 | -0,162 |
| 19 | P27816 MAP4_HUMAN  | E.EGRPVVSGTGNDITPPNK.E |                 | 3 | 2,4913 | 0,159 | -0,189 |
| 19 | Q14966 ZN638_HUMAN | E.LIDQDDCISHSEPK.D     |                 | 3 | 2,4912 | 0,101 | -0,662 |
| 19 | Q13111 CAF1A_HUMAN | D.ILAVRPPQIK.S         |                 | 2 | 2,4902 | 0,299 | -0,215 |
| 19 | P35579 MYH9_HUMAN  | K.DVLLQVDDERR.N        |                 | 2 | 2,4896 | 0,263 | -0,988 |
| 19 | P04626 ERBB2_HUMAN | E.VQGYVLIAHNQVR.Q      |                 | 3 | 2,4843 | 0,337 | -0,489 |
| 19 | P00558 PGK1_HUMAN  | K.SLLGKDVFLK.D         |                 | 2 | 2,4842 | 0,123 | -0,297 |
| 19 | Q14693 LPIN1_HUMAN | E.LKPPSASVVQTANK.T     |                 | 3 | 2,4809 | 0,108 | 0,127  |
| 19 | Q9UHI6 DDX20_HUMAN | E.GLEKPVEIIR.H         |                 | 2 | 2,4774 | 0,269 | -0,529 |
| 19 | Q9Y4L1 HYOU1_HUMAN | K.LQDLTLRDLEKQE.R      |                 | 3 | 2,4773 | 0,249 | -0,914 |
| 19 | Q99798 ACON_HUMAN  | E.IGATTSVFPYNHR.M      |                 | 2 | 2,4728 | 0,293 | -0,5   |
| 19 | P08133 ANXA6_HUMAN | E.DALSSDTSGHFR.R       |                 | 2 | 2,4726 | 0,341 | -0,755 |
| 19 | Q8WUM4 PDC6I_HUMAN | R.VPDLKDLDPGK.A        |                 | 3 | 2,4715 | 0,178 | 0,209  |
| 19 | P10809 CH60_HUMAN  | E.IGNIISDAM*KK.V       |                 | 3 | 2,4694 | 0,355 | 0,606  |
| 19 | Q96B36 AKTS1_HUMAN | E.AEDTQVFGDLPRPR.L     |                 | 3 | 2,4683 | 0,276 | 0,343  |
| 19 | P31946 1433B_HUMAN | D.STLIM*QLLR.D         |                 | 2 | 2,4663 | 0,146 | -0,335 |
| 19 | O15042 SR140_HUMAN | E.TEAFVEEPSKK.G        |                 | 3 | 2,464  | 0,165 | 0,361  |
| 19 | Q14C86 GAPD1_HUMAN | R.TNM*LM*DLHM*DHE.G    |                 | 3 | 2,4627 | 0,202 | -1,192 |
| 19 | P05023 AT1A1_HUMAN | K.NPNTSEPQHLLVM*K.G    |                 | 3 | 2,4617 | 0,085 | -0,901 |

|    |                      |                                |            |   |        |       |        |
|----|----------------------|--------------------------------|------------|---|--------|-------|--------|
| 19 | O43707 ACTN4_HUMAN   | K.DGLAFNALIHR.H                |            | 2 | 2,4602 | 0,31  | -0,597 |
| 19 | Q04637 IF4G1_HUMAN   | E.TPQVAVIVRPDDR.S              |            | 3 | 2,4586 | 0,181 | 0,062  |
| 19 | P08133 ANXA6_HUMAN   | E.ADIIGDTSGHFQK.M              |            | 3 | 2,4582 | 0,181 | -0,263 |
| 19 | Q9UBT2 SAE2_HUMAN    | E.VVGDAPKVGPK.Q                |            | 2 | 2,4544 | 0,327 | -0,51  |
| 19 | P34059 GALNS_HUMAN   | K.LPLIFHLGR.D                  |            | 2 | 2,452  | 0,196 | -0,572 |
| 19 | O43660 PLRG1_HUMAN   | R.THDM*FVADNGKPVPLDEE.S        |            | 3 | 2,4461 | 0,241 | -0,721 |
| 19 | O95394 AGM1_HUMAN    | R.AFVRPSGTEDVVR.V              |            | 3 | 2,4454 | 0,192 | 0,255  |
| 19 | Q14151 SAFB2_HUMAN   | R.DILSFDKIKE.Q                 |            | 2 | 2,4447 | 0,164 | -0,606 |
| 19 | Q8N108 MIER1_HUMAN   | K.YNLHPGVTDYM*DR.L             |            | 2 | 2,4428 | 0,353 | -0,229 |
| 19 | O95376 ARI2_HUMAN    | R.QM*YHAPTDCATIR.K             |            | 3 | 2,4389 | 0,141 | -0,695 |
| 19 | Q9UQ35 SRRM2_HUMAN   | K.VKPET#PPRQSHSGSIS#PYPK.V     | T983:S994: | 2 | 2,4369 | 0,252 | 0      |
| 19 | Q9NZN5 ARHGC_HUMAN   | E.ST#HQQQHSPQNTSHSDGAISPFTPE.F | T1451:     | 3 | 2,4363 | 0,251 | -0,607 |
| 19 | Q9Y4F1 FARP1_HUMAN   | K.VSAGEPGSHPS#PAPRRS#PAGNK.Q   | S427:S433: | 3 | 2,4361 | 0,133 | -0,316 |
| 19 | Q5VT06 CE350_HUMAN   | E.DLSGHSVSVSSDK.G              |            | 2 | 2,4359 | 0,398 | -1,389 |
| 19 | O95163 ELP1_HUMAN    | K.YCLSILTSHVK.K                |            | 3 | 2,4359 | 0,323 | 0,554  |
| 19 | P48634 BAT2_HUMAN    | R.DSQSASGEERPEADGK.K           |            | 3 | 2,4349 | 0,125 | -0,728 |
| 19 | O60610 DIAP1_HUMAN   | E.GLASLLDILKR.L                |            | 2 | 2,4345 | 0,302 | -0,509 |
| 19 | O75122 CLAP2_HUMAN   | R.NTGNGTQSSM*GSPLTRPTPR.S      |            | 3 | 2,4315 | 0,479 | -0,441 |
| 19 | P35251 RFC1_HUMAN    | E.AHLTPYSLQAIK.A               |            | 2 | 2,4313 | 0,123 | -0,364 |
| 19 | P29401 TKT_HUMAN     | K.ISSDLGHPVPK.Q                |            | 3 | 2,4313 | 0,328 | -0,361 |
| 19 | P36542 ATPG_HUMAN    | R.THSDQFLVAFKE.V               |            | 2 | 2,4302 | 0,199 | -0,429 |
| 19 | P08238 HS90B_HUMAN   | E.TALLSSGFSLEDPQTHSNR.I        |            | 3 | 2,4273 | 0,264 | -0,444 |
| 19 | P0C7M2 RA1L3_HUMAN   | R.GFAFVTFFDDHDSVDK.I           |            | 3 | 2,4263 | 0,199 | -0,538 |
| 19 | Q9H8Y5 ANKZ1_HUMAN   | K.DKPLLSALDFEK.Q               |            | 2 | 2,426  | 0,217 | -0,266 |
| 19 | Q16531 DDB1_HUMAN    | E.VVANLQYDDGSGM*KRE.A          |            | 3 | 2,4252 | 0,251 | -0,509 |
| 19 | P50402 EMD_HUMAN     | R.DSAYQSITHYRPVS#ASR.S         | S171:      | 3 | 2,4246 | 0,369 | -0,091 |
| 19 | P35998 PRS7_HUMAN    | K.YQIHIPLPK.I                  |            | 3 | 2,421  | 0,136 | -0,303 |
| 19 | P43243 MATR3_HUMAN   | E.DAM*AM*VDHCLK.K              |            | 2 | 2,4207 | 0,395 | -0,277 |
| 19 | Q86TI2 DPP9_HUMAN    | E.NSLLYSEIPKK.V                |            | 2 | 2,4182 | 0,31  | -0,378 |
| 19 | O75822 EIF3J_HUMAN   | K.VLTPEEQVLADKLR.L             |            | 2 | 2,417  | 0,151 | -1,452 |
| 19 | Q9Y5K6 CD2AP_HUMAN   | K.YFSLKPEEKDE.K                |            | 2 | 2,4167 | 0,311 | -0,881 |
| 19 | ##Q9HBA0 TRPV4_HUMAN | K.LLLLDY#M*KTVFK.T             | Y526:      | 3 | 2,4158 | 0,114 | -1,852 |
| 19 | O60361 NDK8_HUMAN    | K.DRPFPPGLVK.Y                 |            | 2 | 2,4157 | 0,265 | -0,519 |

|    |                     |                      |        |   |        |       |        |
|----|---------------------|----------------------|--------|---|--------|-------|--------|
| 19 | Q96T23 RSF1_HUMAN   | R.LHRIET#DEEE.S      | T1295: | 2 | 2,4133 | 0,213 | -0,452 |
| 19 | Q3MHD2 LSM12_HUMAN  | E.GQQLFQTIHK.T       |        | 2 | 2,4131 | 0,27  | -0,915 |
| 19 | O60343 TBCD4_HUMAN  | K.AIHQQILLLR.M       |        | 3 | 2,4126 | 0,196 | 0,607  |
| 19 | Q9Y281 COF2_HUMAN   | K.AVLFCLSDDKR.Q      |        | 2 | 2,4111 | 0,449 | -0,276 |
| 19 | P78344 IF4G2_HUMAN  | K.TNPPLIQEKPAK.T     |        | 2 | 2,4099 | 0,107 | -0,913 |
| 19 | Q99733 NP1L4_HUMAN  | K.YAALYQPLFDKR.R     |        | 3 | 2,4093 | 0,211 | -0,123 |
| 19 | O60610 DIAP1_HUMAN  | E.LTKDDAM*AAVPAK.V   |        | 2 | 2,4091 | 0,283 | -0,996 |
| 19 | Q5H9R7 SAPS3_HUMAN  | E.KHIAFT#PE.S        | T631:  | 2 | 2,408  | 0,116 | -0,179 |
| 19 | P40926 MDHM_HUMAN   | R.VNVPVIGGHAGK.T     |        | 2 | 2,4054 | 0,36  | -0,638 |
| 19 | O94909 K0819_HUMAN  | E.GLHLLKPLS#IPK.R    | S524:  | 3 | 2,4027 | 0,172 | 0,131  |
| 19 | O43290 SNUT1_HUMAN  | E.KEPVPQPLPSDDTR.V   |        | 3 | 2,4019 | 0,154 | 0      |
| 19 | Q5R372 Q5R372_HUMAN | E.DDGKGNFSPVPK.D     |        | 3 | 2,4018 | 0,194 | 0,073  |
| 19 | P60903 S10AA_HUMAN  | K.DPLAVDKIM*K.D      |        | 2 | 2,3984 | 0,245 | -0,532 |
| 19 | P38117 ETFB_HUMAN   | R.LKLPVVTTADLR.L     |        | 3 | 2,3982 | 0,103 | 0,494  |
| 19 | Q8NDF8 PAPD5_HUMAN  | R.LLGSHPALPAEQR.D    |        | 3 | 2,3952 | 0,13  | -0,071 |
| 19 | Q96DI7 WDR57_HUMAN  | R.KGPELPLVPVK.R      |        | 2 | 2,3942 | 0,325 | 0,104  |
| 19 | O43395 PRPF3_HUMAN  | E.LKDQTKPTPLILDE.Q   |        | 3 | 2,3909 | 0,093 | -0,227 |
| 19 | P14868 SYDC_HUMAN   | R.YGISSM*IQSQEKPDR.V |        | 2 | 2,389  | 0,229 | -0,834 |
| 19 | Q8IYB3 SRRM1_HUMAN  | K.VPKPEPIPEPK.E      |        | 2 | 2,3889 | 0,193 | -0,595 |
| 19 | P05067 A4_HUMAN     | K.AVIQHFQEKVE.S      |        | 2 | 2,3878 | 0,295 | -0,551 |
| 19 | O00592 PODXL_HUMAN  | E.KKVVS#LNGE.L       | S499:  | 2 | 2,3863 | 0,291 | -0,463 |
| 19 | Q8WUM4 PDC6I_HUMAN  | R.VPDLKDLDPGK.A      |        | 2 | 2,3856 | 0,185 | -0,652 |
| 19 | O43683 BUB1_HUMAN   | K.QALSSHM*YSASLLR.L  |        | 3 | 2,3853 | 0,162 | 0,232  |
| 19 | Q5T3I0 GPTC4_HUMAN  | K.M*ATLTSGGKPNKDLE.S |        | 3 | 2,3824 | 0,182 | -1,5   |
| 19 | Q8N655 CJ012_HUMAN  | E.DVISRPHS#PPEIVSR.E | S381:  | 3 | 2,3817 | 0,338 | -0,827 |
| 19 | P60981 DEST_HUMAN   | K.AVIFCLADKK.C       |        | 2 | 2,38   | 0,22  | -0,292 |
| 19 | Q08AE8 SPIR1_HUMAN  | R.KLRPVS#PEE.I       | S228:  | 2 | 2,3798 | 0,224 | -0,752 |
| 19 | Q9UQ35 SRRM2_HUMAN  | K.DKFSPFPVQD.R       |        | 2 | 2,3793 | 0,309 | -0,31  |
| 19 | Q86X29 LSR_HUMAN    | E.LANFDPSRPGPPSGR.V  |        | 3 | 2,3785 | 0,257 | 0,583  |
| 19 | P05455 LA_HUMAN     | E.DLHILFSNHGE.I      |        | 2 | 2,3771 | 0,308 | -0,476 |
| 19 | Q9UMX5 NENF_HUMAN   | E.DQPHFDIKDEF.-      |        | 2 | 2,3767 | 0,269 | -0,614 |
| 19 | Q16881 TRXR1_HUMAN  | K.KQLDSTIGIHPVCAE.V  |        | 3 | 2,3766 | 0,11  | -0,548 |
| 19 | Q9H582 ZN644_HUMAN  | E.SSPVHTSTFLSNTLK.K  |        | 3 | 2,3757 | 0,312 | -0,113 |

|    |                    |                              |        |   |        |       |        |
|----|--------------------|------------------------------|--------|---|--------|-------|--------|
| 19 | Q9GZR7 DDX24_HUMAN | K.RPLLGLVLTPTRE.L            |        | 2 | 2,375  | 0,196 | -0,5   |
| 19 | Q13563 PKD2_HUMAN  | R.RRGS#ISSGVSYYE.F           | S829:  | 2 | 2,374  | 0,318 | -0,324 |
| 19 | P22102 PUR2_HUMAN  | R.IYSHSLLPVLR.S              |        | 3 | 2,3716 | 0,189 | 0,282  |
| 19 | Q08EQ4 TMSL1_HUMAN | K.NPLPSKETIEQEK.Q            |        | 3 | 2,3708 | 0,276 | -0,363 |
| 19 | O95817 BAG3_HUMAN  | E.QNVTRPAAQPS#FHQAQK.T       | S224:  | 3 | 2,369  | 0,199 | -0,644 |
| 19 | Q09666 AHNK_HUMAN  | K.M*KGDYDVTVPKVE.G           |        | 2 | 2,369  | 0,2   | -1,06  |
| 19 | Q9NY61 AATF_HUMAN  | E.GDFLVVGSIRK.L              |        | 2 | 2,3665 | 0,217 | -0,615 |
| 19 | Q14693 LPIN1_HUMAN | E.VVDHVFPLK.R                |        | 2 | 2,3645 | 0,283 | -0,209 |
| 19 | Q12874 SF3A3_HUMAN | K.ETSSALTHAGAHL.D            |        | 2 | 2,3637 | 0,217 | -0,606 |
| 19 | Q14697 GANAB_HUMAN | K.LVAIVDPHIK.V               |        | 2 | 2,363  | 0,217 | -0,11  |
| 19 | Q04637 IF4G1_HUMAN | E.TPQVAVIVRPDDR.S            |        | 2 | 2,3623 | 0,187 | -0,749 |
| 19 | P49368 TCPG_HUMAN  | E.YFTFITDCKDPK.A             |        | 2 | 2,3604 | 0,346 | -1,033 |
| 19 | O00429 DNM1L_HUMAN | R.RPLILQLVHVSQE.D            |        | 2 | 2,3575 | 0,209 | -0,637 |
| 19 | Q9Y2D9 ZN652_HUMAN | E.VNLNNQTLNVSKGEK.G          |        | 3 | 2,3569 | 0,306 | 0      |
| 19 | Q15021 CND1_HUMAN  | E.M*TEDETPKKT#PILR.A         | T1389: | 3 | 2,3536 | 0,178 | -0,493 |
| 19 | Q9BVV5 TIPIN_HUMAN | E.DFIDRVEYLGSK.K             |        | 2 | 2,3474 | 0,11  | -0,423 |
| 19 | Q99816 TS101_HUMAN | R.ASLISAVSDKLR.W             |        | 3 | 2,3431 | 0,252 | 0,363  |
| 19 | P23588 IF4B_HUMAN  | K.VAPAQPSEEGPGRK.D           |        | 2 | 2,3421 | 0,399 | -0,171 |
| 19 | O00560 SDCB1_HUMAN | K.DSTGHVGFIFK.N              |        | 2 | 2,3409 | 0,334 | -0,303 |
| 19 | Q9NZM1 MYOF_HUMAN  | K.NDVVGTTYLHLSK.I            |        | 3 | 2,3407 | 0,108 | -0,063 |
| 19 | P21333 FLNA_HUMAN  | E.GHTFEPAEFIIDTR.D           |        | 2 | 2,3403 | 0,335 | -0,448 |
| 19 | Q14693 LPIN1_HUMAN | K.AHSTGEQPPQLSLATR.V         |        | 3 | 2,3397 | 0,319 | -1,296 |
| 19 | Q9Y4E8 UBP15_HUMAN | E.DKLYNLLLLL.M               |        | 2 | 2,3396 | 0,278 | -0,58  |
| 19 | Q16181 SEPT7_HUMAN | K.IKDRLPLAVVGSNTIIE.V        |        | 2 | 2,339  | 0,27  | -0,199 |
| 19 | P22059 OSBP1_HUMAN | E.IITM*PENLGHK.R             |        | 2 | 2,3383 | 0,151 | -0,481 |
| 19 | Q9P275 UBP36_HUMAN | R.GSSSSSPEHS#ASSDSTKAPQTPR.S | S618:  | 3 | 2,337  | 0,289 | -0,386 |
| 19 | P54819 KAD2_HUMAN  | E.NFCVCHLATGDM*LR.A          |        | 3 | 2,3368 | 0,171 | 0      |
| 19 | O94909 K0819_HUMAN | E.ERLFPEPLPK.E               |        | 2 | 2,3346 | 0,082 | -0,364 |
| 19 | Q9HC52 CBX8_HUMAN  | R.DM*GAQGGPRLIAR.I           |        | 3 | 2,3298 | 0,208 | -1,139 |
| 19 | O60271 JIP4_HUMAN  | E.LDM*DKDLSGYKGSST#PTK.G     | T365:  | 3 | 2,3292 | 0,307 | -0,269 |
| 19 | Q9Y5L0 TNPO3_HUMAN | K.ETTVGAVTVTHK.Q             |        | 2 | 2,3284 | 0,345 | -0,491 |
| 19 | Q8WXX5 DNJC9_HUMAN | K.VSLQVHPDRVGE.G             |        | 2 | 2,3274 | 0,349 | -1,278 |
| 19 | Q9H7N4 SFR19_HUMAN | E.LIQATNQILSHR.K             |        | 3 | 2,3266 | 0,27  | -0,197 |

|    |                    |                            |       |   |        |       |        |
|----|--------------------|----------------------------|-------|---|--------|-------|--------|
| 19 | Q8IWZ8 SF04_HUMAN  | K.DNPAFAFLHDK.N            |       | 2 | 2,3255 | 0,222 | -1,34  |
| 19 | P46734 MP2K3_HUMAN | K.TM*DAGCKPYM*APER.I       |       | 2 | 2,3241 | 0,464 | -0,662 |
| 19 | O14730 RIOK3_HUMAN | R.KAASFLKDDGDPPLLYDE.-     |       | 3 | 2,3233 | 0,098 | -0,183 |
| 19 | Q8TBZ3 WDR20_HUMAN | E.DFQDLLHFGR.D             |       | 2 | 2,323  | 0,262 | -0,489 |
| 19 | P28290 SSFA2_HUMAN | E.KEPCAPLTIPSIR.N          |       | 2 | 2,3228 | 0,258 | -0,659 |
| 19 | P07237 PDIA1_HUMAN | K.THILLFLPK.S              |       | 2 | 2,3218 | 0,234 | -0,676 |
| 19 | Q8NFH8 REPS2_HUMAN | R.SSAEQM*HPAPYEAR.Q        |       | 3 | 2,321  | 0,252 | -0,46  |
| 19 | O15371 EIF3D_HUMAN | K.YLILKDPNK.Q              |       | 2 | 2,3204 | 0,115 | -0,995 |
| 19 | P22314 UBA1_HUMAN  | E.LKATLPS#PDKLPGFK.M       | S835: | 3 | 2,3179 | 0,21  | -0,324 |
| 19 | O60308 K0562_HUMAN | R.RPFDLPLQPLAR.S           |       | 2 | 2,3168 | 0,193 | -0,171 |
| 19 | Q6PJT7 ZC3HE_HUMAN | R.TGSISSSVSPAKPER.R        |       | 3 | 2,3153 | 0,091 | -0,571 |
| 19 | Q9NZJ0 DTL_HUMAN   | E.DLSKDSLGTK.S             |       | 2 | 2,3152 | 0,257 | 0,631  |
| 19 | P04264 K2C1_HUMAN  | R.TNAENEFVTIKK.D           |       | 3 | 2,3139 | 0,289 | 0,066  |
| 19 | Q96HI0 SEN5_HUMAN  | R.HQPYFPDM*DSSAVVK.G       |       | 3 | 2,313  | 0,145 | -0,421 |
| 19 | Q13439 GOGA4_HUMAN | K.YSLIVAQHVEKE.G           |       | 3 | 2,3125 | 0,346 | 0,258  |
| 19 | P07686 HEXB_HUMAN  | K.YYKVEPLDFGGTQK.Q         |       | 2 | 2,312  | 0,168 | -0,668 |
| 19 | P12956 KU70_HUMAN  | R.SDSFENPVLQQHFR.N         |       | 3 | 2,3112 | 0,364 | -0,107 |
| 19 | Q9NX24 NOLA2_HUMAN | E.DRNLPYVYIPSK.T           |       | 2 | 2,3107 | 0,27  | -0,833 |
| 19 | P46821 MAP1B_HUMAN | E.SETIPTDKTVTYK.H          |       | 2 | 2,31   | 0,348 | -0,411 |
| 19 | Q01130 SFRS2_HUMAN | E.GM*TSLKVDNLTYR.T         |       | 2 | 2,3094 | 0,271 | -0,725 |
| 19 | P49792 RBP2_HUMAN  | K.LKLPPTFFCYK.N            |       | 2 | 2,3063 | 0,207 | 0,086  |
| 19 | Q14974 IMB1_HUMAN  | E.NVHPDVM*LVQPR.V          |       | 2 | 2,3043 | 0,255 | -0,601 |
| 19 | O43707 ACTN4_HUMAN | K.DGLAFNALIHR.H            |       | 3 | 2,3041 | 0,261 | 0,373  |
| 19 | P51858 HDGF_HUMAN  | E.VERPLPM*EVEK.N           |       | 2 | 2,304  | 0,195 | -1,635 |
| 19 | Q9BYW2 SETD2_HUMAN | K.DLDDTCM*LHK.K            |       | 2 | 2,3035 | 0,274 | -0,772 |
| 19 | Q09666 AHNK_HUMAN  | K.ISM*PDVDLHM*K.G          |       | 2 | 2,3013 | 0,202 | -0,463 |
| 19 | P49327 FAS_HUMAN   | E.IAPHALLQAVLK.R           |       | 2 | 2,2999 | 0,378 | -0,67  |
| 19 | P08670 VIME_HUMAN  | R.TYSLGSALRPSTSR.S         |       | 2 | 2,2999 | 0,391 | -0,408 |
| 19 | P48643 TCPE_HUMAN  | E.M*NPALGIDCLHK.G          |       | 3 | 2,2986 | 0,258 | -0,132 |
| 19 | O94826 TOM70_HUMAN | E.GRAS#PAPGSGHPEGPGAHL.D.M | S91:  | 2 | 2,2948 | 0,454 | -0,251 |
| 19 | O00267 SPT5H_HUMAN | E.ASNIDNVVLDEDRSGAR.R      |       | 3 | 2,2938 | 0,106 | -0,1   |
| 19 | Q9Y4E8 UBP15_HUMAN | K.DADGRPKVVAEE.A           |       | 2 | 2,2916 | 0,22  | -0,697 |
| 19 | P27816 MAP4_HUMAN  | E.TERAS#PIKM*DLAPSKD.M     | S358: | 2 | 2,2906 | 0,495 | -0,789 |

|    |                    |                          |       |   |        |       |        |
|----|--------------------|--------------------------|-------|---|--------|-------|--------|
| 19 | Q09666 AHNK_HUMAN  | K.ISM*PDVDLHLK.G         |       | 2 | 2,2849 | 0,228 | -0,57  |
| 19 | Q13685 AAMP_HUMAN  | D.ASLVVTSGDHK.A          |       | 3 | 2,2843 | 0,126 | 0,226  |
| 19 | O15372 EIF3H_HUMAN | E.LLSSLASNHLGK.N         |       | 2 | 2,2794 | 0,245 | -1,377 |
| 19 | Q92547 TOPB1_HUMAN | E.DSPFQKPLHDSE.I         |       | 2 | 2,2793 | 0,228 | -0,349 |
| 19 | Q15843 NEDD8_HUMAN | E.IDIEPTDKVER.I          |       | 2 | 2,2786 | 0,254 | -0,093 |
| 19 | Q7KZF4 SND1_HUMAN  | E.SCHNQNILGTILHPNGNITE.L |       | 3 | 2,2769 | 0,114 | -0,574 |
| 19 | Q9Y6X9 MORC2_HUMAN | E.VTTRPSTEEPVR.R         |       | 3 | 2,2746 | 0,168 | 0,2    |
| 19 | Q6I9Y2 THOC7_HUMAN | K.QFHVLLSTIHE.L          |       | 3 | 2,2723 | 0,17  | 0,138  |
| 19 | P55265 DSRAD_HUMAN | K.LVDQSGPPHEPK.F         |       | 3 | 2,2702 | 0,263 | -0,421 |
| 19 | P50395 GDIB_HUMAN  | E.SASITPLEDLYKR.F        |       | 2 | 2,2654 | 0,322 | -0,572 |
| 19 | Q6PJT7 ZC3HE_HUMAN | R.TGSISSSVSPAKPER.R      |       | 2 | 2,2652 | 0,231 | -0,609 |
| 19 | Q9H3S7 PTN23_HUMAN | E.AGDFHFQPAVK.K          |       | 3 | 2,264  | 0,254 | -0,15  |
| 19 | A6NHR9 SMHD1_HUMAN | R.M*ISKPADSQDVHE.L       |       | 3 | 2,2638 | 0,25  | -0,062 |
| 19 | Q3T8J9 GON4L_HUMAN | E.DFSTHVSIDCS#PHK.T      | S775: | 3 | 2,2635 | 0,131 | -0,963 |
| 19 | Q5SYE7 NHSL1_HUMAN | E.DLFAAIHR.S             |       | 2 | 2,2634 | 0,184 | -0,259 |
| 19 | O94804 STK10_HUMAN | E.NGLAVPVPLRK.S          |       | 2 | 2,2629 | 0,135 | -1,048 |
| 19 | Q9UG63 ABCF2_HUMAN | K.LVDEEPQLTKR.T          |       | 2 | 2,261  | 0,352 | -0,551 |
| 19 | Q9C0C9 UBE2O_HUMAN | R.LLFSHDLVSGR.Y          |       | 3 | 2,2607 | 0,25  | 0,735  |
| 19 | P31151 S10A7_HUMAN | K.GTNYLADVFEKK.D         |       | 3 | 2,2605 | 0,287 | -0,066 |
| 19 | Q9BYG5 PAR6B_HUMAN | R.NLIITVRPANQR.N         |       | 2 | 2,2601 | 0,086 | -0,962 |
| 19 | O43399 TPD54_HUMAN | R.NSATFKS#FEDRVGTIK.S    | S166: | 3 | 2,2599 | 0,286 | -1,362 |
| 19 | Q07666 KHDR1_HUMAN | E.NYLDLFSHK.N            |       | 2 | 2,2589 | 0,201 | -0,537 |
| 19 | Q9NYU2 UGGG1_HUMAN | E.LLRPTFPGVIR.Q          |       | 3 | 2,2579 | 0,225 | 0,648  |
| 19 | Q96AG4 LRC59_HUMAN | R.LVNLQHLDLLNKK.L        |       | 3 | 2,2579 | 0,314 | -0,417 |
| 19 | Q14203 DCTN1_HUMAN | E.DCTM*QLADHIK.F         |       | 3 | 2,2561 | 0,208 | 0,136  |
| 19 | O15042 SR140_HUMAN | E.TEAFVEEPSKK.G          |       | 2 | 2,2551 | 0,227 | -0,386 |
| 19 | Q92890 UFD1_HUMAN  | K.GVEPS#PSPIKPGDIKR.G    | S245: | 2 | 2,2536 | 0,277 | -0,278 |
| 19 | Q9NQS7 INCE_HUMAN  | K.KPEDNHTQCQLVPVVE.I     |       | 2 | 2,2534 | 0,121 | -0,387 |
| 19 | P05109 S10A8_HUMAN | K.ALNSIIDVYHK.Y          |       | 3 | 2,2531 | 0,13  | 0,359  |
| 19 | P29692 EF1D_HUMAN  | R.ATAPQTQHVSMPMR.Q       |       | 3 | 2,2527 | 0,266 | 0,064  |
| 19 | Q9Y617 SERC_HUMAN  | K.FGTINIVHPK.L           |       | 2 | 2,252  | 0,3   | -0,867 |
| 19 | Q9H307 PININ_HUMAN | R.DPNDVRPIQAR.L          |       | 3 | 2,2492 | 0,224 | 0,785  |
| 19 | Q15029 U5S1_HUMAN  | R.VLSGTIHAGQPVK.V        |       | 2 | 2,248  | 0,211 | -1,027 |

|    |                    |                            |          |   |        |       |        |
|----|--------------------|----------------------------|----------|---|--------|-------|--------|
| 19 | Q9UJU6 DBNL_HUMAN  | K.GACASHVSTM*ASFLK.G       |          | 3 | 2,2477 | 0,103 | -0,116 |
| 19 | P41091 IF2G_HUMAN  | E.AGVTLGQPHLSR.Q           |          | 3 | 2,2472 | 0,168 | 0,962  |
| 19 | P27708 PYR1_HUMAN  | R.ASDPGLPAEEPKEK.S         |          | 3 | 2,2467 | 0,157 | 0      |
| 19 | Q6I9Y2 THOC7_HUMAN | K.QFHVLLSTIHE.L            |          | 2 | 2,2458 | 0,453 | -0,461 |
| 19 | Q6U841 S4A10_HUMAN | R.IPIVRS#FADIGKK.Q         | S238:    | 2 | 2,2445 | 0,228 | -0,801 |
| 19 | Q9BX67 JAM3_HUMAN  | R.HKS#SFVI.-               | S306:    | 2 | 2,2429 | 0,3   | -0,068 |
| 19 | Q9UPU9 SAM4A_HUMAN | E.LHQM*ILTPIK.A            |          | 2 | 2,2399 | 0,433 | -0,807 |
| 19 | Q15008 PSMD6_HUMAN | R.FLLSLPEHR.G              |          | 2 | 2,2389 | 0,255 | -0,219 |
| 19 | Q9NZT2 OGFR_HUMAN  | R.SQGDEAGGHGEDRPEPLS#PKE.S | S378:    | 3 | 2,238  | 0,239 | -0,322 |
| 19 | P35580 MYH10_HUMAN | K.LDPHLVLDQLR.C            |          | 2 | 2,2376 | 0,311 | -0,37  |
| 19 | P27824 CALX_HUMAN  | E.VEDSKPDTTAPPSSPK.V       |          | 3 | 2,2374 | 0,251 | 0,221  |
| 19 | P52907 CAZA1_HUMAN | E.DGNVQLVSHK.D             |          | 2 | 2,2362 | 0,282 | -0,445 |
| 19 | Q13573 SNW1_HUMAN  | K.DM*AQSIYRPSK.N           |          | 2 | 2,235  | 0,37  | -0,465 |
| 19 | Q9BPX3 CND3_HUMAN  | E.NAQIDDDVFDKINK.A         |          | 3 | 2,2349 | 0,266 | 0      |
| 19 | O15439 MRP4_HUMAN  | K.SGIDFGSLLKK.D            |          | 2 | 2,2336 | 0,178 | -0,419 |
| 19 | Q9Y223 GLCNE_HUMAN | K.SIDLQEPLQKK.F            |          | 2 | 2,2319 | 0,146 | -0,751 |
| 19 | A2AJT9 CX023_HUMAN | K.HRS#LS#PVPR.N            | S15:S17: | 2 | 2,2315 | 0,37  | -0,303 |
| 19 | Q9BRQ0 PYGO2_HUMAN | E.GGGGPAPPAPPSTGRK.Q       |          | 3 | 2,2311 | 0,248 | -1,097 |
| 19 | Q3V6T2 GRDN_HUMAN  | E.NLEVPDDISTGKR.R          |          | 2 | 2,2307 | 0,233 | -0,76  |
| 19 | P11047 LAMC1_HUMAN | E.ANDILNLLKDFDR.R          |          | 3 | 2,23   | 0,186 | 0,118  |
| 19 | Q13435 SF3B2_HUMAN | K.IDIDYQKLHD.A             |          | 3 | 2,2256 | 0,107 | 0,29   |
| 19 | Q5VT52 K0460_HUMAN | R.GPTSTSIDNIDGTPVRDER.S    |          | 2 | 2,2238 | 0,101 | -0,601 |
| 19 | P28799 GRN_HUMAN   | K.LPAHTVGDVKCDM*E.V        |          | 3 | 2,2227 | 0,183 | 0      |
| 19 | P82664 RT10_HUMAN  | R.FTLLQSVHIYK.K            |          | 3 | 2,2221 | 0,093 | 0,068  |
| 19 | O43237 DC1L2_HUMAN | E.DFIVKPPVR.K              |          | 2 | 2,2178 | 0,223 | 0,228  |
| 19 | Q9HAV7 GRPE1_HUMAN | R.TLRPALVGVVKE.A           |          | 2 | 2,217  | 0,174 | -0,761 |
| 19 | Q96B23 CR025_HUMAN | E.TAVEGDPSGVSGATVGRK.S     |          | 3 | 2,2149 | 0,165 | -0,975 |
| 19 | O94833 BPAEA_HUMAN | K.STSTQGLEHLDLDDVNR.W      |          | 3 | 2,2145 | 0,377 | 0      |
| 19 | Q8IY67 RAVR1_HUMAN | E.GLLGLS#PGPNGHSHLLK.V     | S524:    | 3 | 2,2107 | 0,135 | -0,618 |
| 19 | P13010 KU86_HUMAN  | K.SQLDIIIHSLK.K            |          | 3 | 2,21   | 0,175 | 0,216  |
| 19 | O14776 TCRG1_HUMAN | R.GPPPPPTASEPTRR.S         |          | 2 | 2,2098 | 0,158 | -1,504 |
| 19 | P15531 NDKA_HUMAN  | K.DRPFFAGLVK.Y             |          | 2 | 2,2059 | 0,232 | -0,318 |
| 19 | Q5VT52 K0460_HUMAN | R.GPTSTSIDNIDGTPVRDER.S    |          | 3 | 2,2051 | 0,112 | -0,18  |

|    |                    |                        |            |   |        |       |        |
|----|--------------------|------------------------|------------|---|--------|-------|--------|
| 19 | Q5EBL4 RIPL1_HUMAN | R.IPQPPPIAHPR.T        |            | 3 | 2,2002 | 0,376 | 0,299  |
| 19 | Q9Y2X3 NOL5_HUMAN  | K.TYDPSGDSTLPTCSKK.R   |            | 2 | 2,199  | 0,331 | -0,694 |
| 19 | Q9NZM1 MYOF_HUMAN  | E.M*EDTKPLLASK.L       |            | 3 | 2,1978 | 0,146 | 0,293  |
| 19 | Q7L014 DDX46_HUMAN | K.LLEPVDHGKIE.Y        |            | 2 | 2,1959 | 0,215 | -0,195 |
| 19 | P09874 PARP1_HUMAN | R.VEYAKSGRASCK.K       |            | 3 | 2,1955 | 0,121 | -1,551 |
| 19 | Q9ULU4 PKCB1_HUMAN | K.ILM*SKPVLSSGGTGR.R   |            | 2 | 2,1954 | 0,204 | -0,596 |
| 19 | P13861 KAP2_HUMAN  | R.QSLGHPPPEPGPDR.V     |            | 3 | 2,1918 | 0,317 | -0,37  |
| 19 | Q9UHB7 AFF4_HUMAN  | E.KDLLPS#PAGVPVSKDPK.T | S814:      | 3 | 2,1902 | 0,269 | -0,801 |
| 19 | P24539 AT5F1_HUMAN | R.LDYHISVQNM*M*R.R     |            | 2 | 2,1894 | 0,263 | -1,903 |
| 19 | Q13595 TRA2A_HUMAN | R.RRS#PS#PYYSR.Y       | S260:S262: | 2 | 2,1889 | 0,332 | -0,598 |
| 19 | Q00536 PCTK1_HUMAN | E.KLTLNS#PIFDKPLSR.R   | S138:      | 2 | 2,1874 | 0,24  | -0,405 |
| 19 | A0FGR8 ESYT2_HUMAN | R.SSSSLLASPGHISVK.E    |            | 3 | 2,1873 | 0,237 | -0,124 |
| 19 | O75592 MYCB2_HUMAN | E.TSPITDIDLAKR.T       |            | 2 | 2,1845 | 0,229 | -0,37  |
| 19 | Q6PJT7 ZC3HE_HUMAN | D.LVQPDKPASPK.F        |            | 2 | 2,1798 | 0,218 | -0,517 |
| 19 | Q6FI81 CPIN1_HUMAN | K.SSPSVKPAVDPAAAK.L    |            | 2 | 2,1778 | 0,38  | -0,428 |
| 19 | P62736 ACTA_HUMAN  | D.LAGRDLDYLM*K.I       |            | 3 | 2,1773 | 0,137 | 0,194  |
| 19 | P34059 GALNS_HUMAN | K.LPLIFHLGRDPGE.R      |            | 3 | 2,1755 | 0,198 | -0,062 |
| 19 | P37275 ZEB1_HUMAN  | E.AGPEILSNEHVGAR.A     |            | 3 | 2,175  | 0,182 | 0,189  |
| 19 | P43490 NAMPT_HUMAN | E.EYGQDLLHTVFK.N       |            | 2 | 2,1721 | 0,133 | -0,252 |
| 19 | Q86W56 PARG_HUMAN  | K.STQYLNQHQAAM*CK.W    |            | 3 | 2,1715 | 0,354 | -0,305 |
| 19 | Q9UGU5 HM2L1_HUMAN | E.TLTLREPDGLK.M        |            | 3 | 2,171  | 0,135 | 0,809  |
| 19 | Q06203 PUR1_HUMAN  | K.LYVSNLIGHTR.Y        |            | 3 | 2,1679 | 0,363 | 0,275  |
| 19 | O60216 RAD21_HUMAN | E.LELLPEKEK.E          |            | 2 | 2,165  | 0,111 | -0,555 |
| 19 | Q9NZM1 MYOF_HUMAN  | R.FKGFPPQPILSEDGSR.I   |            | 3 | 2,162  | 0,244 | -0,872 |
| 19 | Q9UPN4 AZI1_HUMAN  | E.LSPTPGGTAHQALK.A     |            | 2 | 2,1614 | 0,252 | -1,328 |
| 19 | Q13151 ROA0_HUMAN  | R.GFGFVYFQNHDAADK.A    |            | 3 | 2,1608 | 0,177 | -0,213 |
| 19 | Q9UDT6 CLIP2_HUMAN | K.FGLFAPIHK.V          |            | 2 | 2,1591 | 0,246 | -0,237 |
| 19 | Q9Y4H2 IRS2_HUMAN  | E.AFLQASQPPDPHR.G      |            | 3 | 2,1583 | 0,212 | -0,375 |
| 19 | Q9BZV1 UBXD1_HUMAN | K.YLDNIHLHPEEE.K       |            | 2 | 2,1531 | 0,102 | -0,404 |
| 19 | Q8NBU5 ATAD1_HUMAN | K.SKDAAFQNVLTHVCLD.-   |            | 3 | 2,153  | 0,105 | 0      |
| 19 | O60678 ANM3_HUMAN  | K.QFAQDFVM*HTDVR.T     |            | 2 | 2,1526 | 0,288 | -0,985 |
| 19 | P12814 ACTN1_HUMAN | K.DGLGFCALIHR.H        |            | 2 | 2,151  | 0,459 | -0,388 |
| 19 | Q15121 PEA15_HUMAN | R.RPDLLTM*VVDYR.T      |            | 2 | 2,1456 | 0,247 | -0,408 |



|    |                    |                      |   |        |       |        |
|----|--------------------|----------------------|---|--------|-------|--------|
| 19 | P49321 NASP_HUMAN  | E.AQLYAAQAHLK.L      | 3 | 2,1449 | 0,22  | 0,377  |
| 19 | P54136 SYRC_HUMAN  | R.LM*DLLGEGLRK.S     | 3 | 2,1385 | 0,158 | 0,145  |
| 19 | P23258 TBG1_HUMAN  | K.IHEDIFDIIDRE.A     | 3 | 2,1291 | 0,156 | -0,06  |
| 19 | Q14978 NOLC1_HUMAN | K.VAGGAAPSKPASAK.K   | 2 | 2,1203 | 0,233 | -0,101 |
| 19 | Q76FK4 NOL8_HUMAN  | E.SESDPFEVVRDDFK.S   | 2 | 2,1164 | 0,181 | -0,292 |
| 19 | Q9ULV4 COR1C_HUMAN | E.GKNADPILISLK.H     | 2 | 2,1135 | 0,121 | -0,769 |
| 19 | Q99426 TBCB_HUMAN  | R.YDEPLGKNDGSVNGK.R  | 3 | 2,1127 | 0,122 | -0,344 |
| 19 | Q6IAA8 CK059_HUMAN | K.ALNGAEPNYHSLPSAR.T | 3 | 2,1114 | 0,162 | -1,293 |
| 19 | Q9BW91 NUDT9_HUMAN | K.LFSQDHLVIYK.G      | 3 | 2,1098 | 0,156 | 0,134  |
| 19 | Q00610 CLH1_HUMAN  | E.FINGPNNAHIQVVGDR.C | 3 | 2,1083 | 0,274 | -0,514 |
| 19 | P51858 HDGF_HUMAN  | K.LVIDEPAKEK.N       | 2 | 2,1039 | 0,206 | -0,641 |
| 19 | Q9Y4F1 FARP1_HUMAN | K.VSAGEPGSHSPAPR.R   | 3 | 2,1037 | 0,117 | -0,569 |
| 19 | Q9NZM1 MYOF_HUMAN  | E.M*EDTKPLLASK.L     | 2 | 2,1004 | 0,141 | -0,781 |
| 19 | Q14244 MAP7_HUMAN  | R.LLTPTHSFLAR.S      | 2 | 2,0998 | 0,306 | -0,777 |
| 19 | P29590 PML_HUMAN   | E.DRPLVFFDLK.I       | 2 | 2,098  | 0,215 | -0,488 |
| 19 | Q8IVF2 AHNK2_HUMAN | K.VDLKGPQIDVK.G      | 2 | 2,0969 | 0,302 | -0,302 |
| 19 | O94915 FRYL_HUMAN  | E.LVDLKLPTAR.R       | 3 | 2,093  | 0,295 | 0,598  |
| 19 | Q03164 HRX_HUMAN   | R.KSAFDM*FNFLASK.H   | 2 | 2,088  | 0,11  | -0,561 |
| 19 | P00338 LDHA_HUMAN  | E.M*M*DLQHGSFLR.T    | 3 | 2,0869 | 0,196 | -0,433 |
| 19 | P35580 MYH10_HUMAN | K.ADFCIIHYAGK.V      | 3 | 2,0845 | 0,352 | 1,059  |
| 19 | O76071 CIAO1_HUMAN | E.CVSVLNSHTQDVK.H    | 3 | 2,0793 | 0,115 | 0,184  |
| 19 | Q0JRZ9 FCHO2_HUMAN | K.TFALPGIHK.E        | 2 | 2,0764 | 0,265 | -0,336 |
| 19 | P10599 THIO_HUMAN  | K.M*IKPFFHSLSE.K     | 2 | 2,0722 | 0,124 | -0,632 |
| 19 | P09936 UCHL1_HUMAN | E.DTLLKDAAK.V        | 2 | 2,0719 | 0,21  | -1,877 |
| 19 | O14974 MYPT1_HUMAN | E.TSSTSAGDRYDSLGR.S  | 3 | 2,0719 | 0,312 | 0,108  |
| 19 | P10606 COX5B_HUMAN | K.KGLDPYNVLAPK.G     | 2 | 2,0688 | 0,179 | -0,928 |
| 19 | Q99729 ROAA_HUMAN  | K.DLKDYFTKFGV.V      | 2 | 2,0676 | 0,335 | -0,537 |
| 19 | P08574 CY1_HUMAN   | R.GLLSSLDHTSIR.R     | 3 | 2,0613 | 0,272 | 1,83   |
| 19 | Q09666 AHNK_HUMAN  | K.ISIPDVGLHLK.G      | 2 | 2,0609 | 0,263 | -0,307 |
| 19 | P38159 HNRPG_HUMAN | R.DYSDHPSGGSYRDSYE.S | 3 | 2,0512 | 0,229 | -0,698 |
| 19 | P19634 SL9A1_HUMAN | R.ILPALSCKDEEE.I     | 2 | 2,0505 | 0,211 | -0,445 |
| 19 | P49792 RBP2_HUMAN  | K.KLPVPLESVKE.M      | 2 | 2,0488 | 0,225 | -0,985 |
| 19 | Q9UKG1 DP13A_HUMAN | E.VFQIASNDHDAAINR.Y  | 3 | 2,045  | 0,188 | -0,547 |

|    |                    |                               |            |   |        |       |        |
|----|--------------------|-------------------------------|------------|---|--------|-------|--------|
| 19 | Q92890 UFD1_HUMAN  | K.GVEPSPS#PIKPGDIKR.G         | S247:      | 3 | 2,0447 | 0,154 | -0,104 |
| 19 | Q9UMZ2 SYNG_HUMAN  | E.GSGLGVEDLKDNTPSGK.S         |            | 3 | 2,0438 | 0,375 | -1,093 |
| 19 | Q9HB40 RISC_HUMAN  | E.IGPLDSDLKPR.K               |            | 3 | 2,0438 | 0,17  | -0,302 |
| 19 | Q12874 SF3A3_HUMAN | R.YLDLHDCYLK.Y                |            | 3 | 2,0344 | 0,371 | 0,205  |
| 19 | Q09666 AHNK_HUMAN  | K.VKGDM*DVSVPKVE.G            |            | 2 | 2,0302 | 0,271 | -0,602 |
| 19 | P02545 LMNA_HUMAN  | E.RRLRS#PS#PTSQR.S            | S390:S392: | 2 | 2,0206 | 0,358 | -1,253 |
| 19 | Q99459 CDC5L_HUMAN | R.SGTPPKVINSTPGR.T            |            | 2 | 2,0201 | 0,314 | -1,372 |
| 19 | Q13428 TCOF_HUMAN  | K.TSQVGAASAPAKES#PRK.G        | S381:      | 3 | 2,0193 | 0,282 | -0,725 |
| 19 | P28066 PSA5_HUMAN  | E.KGPQLFHM*DPSGTFVQCD.A       |            | 3 | 2,0164 | 0,211 | -0,264 |
| 19 | O60885 BRD4_HUMAN  | R.SEPFS#PSLRPEPKHPE.S         | S1126:     | 3 | 2,0143 | 0,375 | -0,546 |
| 19 | O14776 TCRG1_HUMAN | K.LIVAYVDDLDRR.G              |            | 3 | 2,0126 | 0,242 | 0,189  |
| 19 | Q9NTJ3 SMC4_HUMAN  | K.SLVHDLFQKVEE.A              |            | 2 | 2,0098 | 0,132 | -0,507 |
| 19 | O95630 STABP_HUMAN | E.FTITHVLIPK.Q                |            | 2 | 2,0011 | 0,171 | -0,626 |
| 19 | Q9UH65 SWP70_HUMAN | K.VLSHNLCTVLK.V               |            | 3 | 2,0005 | 0,183 | 0,142  |
| 19 | Q13564 ULA1_HUMAN  | E.DLRLDKPFPE.L                |            | 2 | 1,9977 | 0,118 | -0,099 |
| 19 | O15160 RPAC1_HUMAN | E.IDLLM*HCVK.G                |            | 2 | 1,9929 | 0,245 | -0,746 |
| 19 | Q02952 AKA12_HUMAN | K.STPVIVSATTKK.G              |            | 2 | 1,9646 | 0,364 | -1,287 |
| 19 | O43815 STRN_HUMAN  | K.LIISM*VAHLE.A               |            | 2 | 1,9589 | 0,203 | -0,628 |
| 19 | P62333 PRS10_HUMAN | D.TLDPALLRPGR.L               |            | 2 | 1,9546 | 0,199 | -0,303 |
| 19 | Q04721 NOTC2_HUMAN | R.GPGTHM*SEPPHNNM*QVYA.-      |            | 2 | 1,9539 | 0,216 | -0,366 |
| 19 | Q8NCD3 HJURP_HUMAN | K.LNPDPHFQGFQK.L              |            | 2 | 1,9533 | 0,121 | -0,769 |
| 19 | P22626 ROA2_HUMAN  | E.VDAAM*AARPHS#IDGR.V         | S85:       | 2 | 1,9468 | 0,088 | -1,027 |
| 19 | P23588 IF4B_HUMAN  | K.VAPAQPSEEGPGRKDE.N          |            | 2 | 1,9434 | 0,205 | -0,366 |
| 19 | Q5VZK9 LR16A_HUMAN | E.KRSS#GFISE.L                | S968:      | 2 | 1,9389 | 0,16  | -1,007 |
| 19 | P27816 MAP4_HUMAN  | E.TERAS#PIKM*DLAPSK.D         | S358:      | 2 | 1,9234 | 0,157 | -0,351 |
| 19 | Q86W92 LIPB1_HUMAN | E.DDM*FKDFAAR.S               |            | 2 | 1,9212 | 0,256 | -0,297 |
| 19 | Q15185 TEBP_HUMAN  | E.IDLFHCIDPND.S               |            | 2 | 1,9187 | 0,146 | -0,449 |
| 19 | Q5JRA6 MIA3_HUMAN  | E.ASGKPSPSDPGSGTATM*M*NSSSR.G |            | 2 | 1,9141 | 0,19  | -0,218 |
| 19 | P17040 ZSC20_HUMAN | E.KLIDHQGLYLAE.K              |            | 2 | 1,9066 | 0,092 | -0,959 |
| 19 | P10398 ARAF_HUMAN  | E.HFPFPAPANAPLQR.I            |            | 2 | 1,9028 | 0,149 | 0,468  |
| 19 | Q53LP3 ANR57_HUMAN | R.DLVM*GSSPQLKR.S             |            | 2 | 1,8988 | 0,248 | -0,362 |
| 19 | O75351 VPS4B_HUMAN | R.IYIPLPEPHAR.A               |            | 2 | 1,8895 | 0,101 | -0,841 |
| 19 | Q9UGU5 HM2L1_HUMAN | E.LYFLGTDTHK.K                |            | 2 | 1,8841 | 0,127 | -0,919 |

|    |                      |                       |            |   |        |       |        |
|----|----------------------|-----------------------|------------|---|--------|-------|--------|
| 19 | Q07065 CKAP4_HUMAN   | K.GLLDDLNRNDLDR.L     |            | 2 | 1,8675 | 0,16  | -0,604 |
| 19 | Q8TF01 SFR18_HUMAN   | K.ATEDAEGGDGPRLPQR.S  |            | 2 | 1,842  | 0,1   | -0,804 |
| 19 | O43318 M3K7_HUMAN    | R.IAATTAYSKPK.R       |            | 2 | 1,8208 | 0,194 | -0,424 |
| 19 | P62736 ACTA_HUMAN    | D.LAGRDLDYLM*K.I      |            | 2 | 1,8078 | 0,131 | -0,259 |
| 19 | Q8IY81 RRMJ3_HUMAN   | E.GLALGAVIASSKK.A     |            | 2 | 1,7962 | 0,262 | -1,004 |
| 19 | Q86X29 LSR_HUMAN     | E.LANFDPSRPGPPSGR.V   |            | 2 | 1,794  | 0,169 | 0,467  |
| 19 | Q99460 PSMD1_HUMAN   | E.LVEPVAAHGPK.I       |            | 2 | 1,7882 | 0,208 | -0,436 |
| 19 | P27708 PYR1_HUMAN    | R.ASDPGLPAEEPKEK.S    |            | 2 | 1,7801 | 0,113 | -0,499 |
| 19 | P13667 PDIA4_HUMAN   | K.DKDPPIPVAK.I        |            | 2 | 1,7768 | 0,199 | -0,678 |
| 19 | Q9UQ35 SRRM2_HUMAN   | E.KSATRPS#PS#PER.S    | S351:S353: | 2 | 1,7749 | 0,264 | -0,166 |
| 19 | Q00341 VIGLN_HUMAN   | E.VEVFDFLHR.Y         |            | 2 | 1,7571 | 0,151 | -0,549 |
| 19 | Q13242 SFRS9_HUMAN   | R.GSPHYFSPFRPY.-      |            | 2 | 1,7536 | 0,121 | -0,168 |
| 19 | P35520 CBS_HUMAN     | K.ILPDILKK.I          |            | 2 | 1,7523 | 0,101 | 0,13   |
| 19 | ##Q8TF62 AT8B4_HUMAN | D.GIALTVANRY#KK.V     | Y388:      | 2 | 1,7393 | 0,082 | -1,553 |
| 19 | Q9UHV9 PFD2_HUMAN    | R.LM*GEDEKPAAKE.N     |            | 2 | 1,7371 | 0,186 | -0,64  |
| 19 | A3KN83 SBNO1_HUMAN   | K.DLLDKLEK.L          |            | 2 | 1,7247 | 0,137 | -0,438 |
| 19 | P78559 MAP1A_HUMAN   | K.GTVPLPTISGHR.E      |            | 2 | 1,7099 | 0,306 | -0,198 |
| 19 | Q8WZ42 TITIN_HUMAN   | R.KEPPAKVPEVPK.K      |            | 2 | 1,6994 | 0,089 | -0,185 |
| 19 | ##Q14533 KRT81_HUMAN | E.QILAEVNAELDSK.R     |            | 2 | 1,629  | 0,214 | 0,683  |
| 19 | P46013 KI67_HUMAN    | K.AM*DTPKPAVSDEK.N    |            | 2 | 1,6218 | 0,081 | -0,347 |
| 19 | P41252 SYIC_HUMAN    | K.TIPIKYPLKE.I        |            | 2 | 1,6198 | 0,259 | -1,116 |
| 19 | Q8WTU2 SRB4D_HUMAN   | R.GPILLDNVK.C         |            | 2 | 1,6127 | 0,093 | 0,189  |
| 19 | Q9BXP5 ARS2_HUMAN    | R.QQM*QDFFLAHKDEE.W   |            | 2 | 1,6078 | 0,259 | -0,342 |
| 19 | P23229 ITA6_HUMAN    | K.SAHLLEPEHIFDGE.G    |            | 2 | 1,6068 | 0,1   | -0,666 |
| 19 | Q76N32 CEP68_HUMAN   | R.RRLS#FQAE.Y         | S268:      | 2 | 1,599  | 0,192 | -0,224 |
| 19 | Q9H853 TBA4B_HUMAN   | R.QIFHPEQLITGK.E      |            | 2 | 1,5876 | 0,418 | -0,519 |
| 19 | Q8NEL9 DDHD1_HUMAN   | R.TLLQTTGARPGGDR.D    |            | 2 | 1,575  | 0,084 | -0,854 |
| 19 | P04183 KITH_HUMAN    | E.NCPVPGKPGEAVAAR.K   |            | 2 | 1,5737 | 0,123 | -0,561 |
| 19 | Q96D71 REPS1_HUMAN   | K.GTTPLAPPPKPV.R      |            | 2 | 1,5301 | 0,157 | -0,367 |
| 19 | Q7Z478 DHX29_HUMAN   | E.DHPVFNPAM*K.I       |            | 2 | 1,4512 | 0,082 | -0,625 |
| 19 | Q9Y2W1 TR150_HUMAN   | R.ERS#PALKSPLQSVVVR.R | S248:      | 2 | 1,3942 | 0,152 | -0,132 |
| 19 | O75376 NCOR1_HUMAN   | R.RRPS#LLSE.F         | S70:       | 2 | 1,3898 | 0,133 | -0,118 |
| 19 | O43491 E41L2_HUMAN   | E.VRS#PTKAPHLQLIE.G   | S598:      | 2 | 1,13   | 0,168 | -0,292 |

|    |                    |                                     |            |   |        |       |        |
|----|--------------------|-------------------------------------|------------|---|--------|-------|--------|
| 20 | Q5T4S7 UBR4_HUMAN  | R.TSPADHGGSVGSESGGSAVDSVAGEHSVSGR.S |            | 3 | 7,2466 | 0,571 | 0,322  |
| 20 | P40222 TXLNA_HUMAN | K.RVQDLSAGGQGS LTDSGPER.R           |            | 2 | 6,2153 | 0,528 | 0,06   |
| 20 | Q6UB35 C1TM_HUMAN  | K.VLNALKPEKDVDGVT DINLGK.L          |            | 3 | 6,1169 | 0,525 | -0,736 |
| 20 | O95817 BAG3_HUMAN  | E.TTQPKQCGQVAAAAAAQPPASHGPER.S      |            | 3 | 5,9195 | 0,342 | -0,333 |
| 20 | P60709 ACTB_HUMAN  | E.LRVAPEEHPVLLTEAPLNPK.A            |            | 3 | 5,8013 | 0,506 | -0,411 |
| 20 | Q9UBF8 PI4KB_HUMAN | R.SKS#DATASISLSSNLKR.T              | S277:      | 3 | 5,7046 | 0,586 | -0,694 |
| 20 | P52948 NUP98_HUMAN | K.HSNSNSVDDTIVALNM*R.A              |            | 2 | 5,5182 | 0,478 | -0,258 |
| 20 | P11532 DMD_HUMAN   | E.HKGLSPLSPPEM*M*PTS#PQSPR.D        | S3549:     | 3 | 5,466  | 0,44  | -0,295 |
| 20 | Q9C0B5 ZDHC5_HUMAN | K.YRPGYSSSSTAAM*PHSSS#AK.L          | S372:      | 3 | 5,4304 | 0,452 | -0,73  |
| 20 | Q9UHB6 LIMA1_HUMAN | R.SRPFTVAASFQSTSVKS#PK.T            | S604:      | 3 | 5,4156 | 0,485 | -0,348 |
| 20 | Q05655 KPCD_HUMAN  | K.KTGVAGEDM*QDNSGTYGK.I             |            | 3 | 5,4144 | 0,551 | 0      |
| 20 | Q9P260 K1468_HUMAN | R.KNYKSS#PEIQEPIKPLE.K              | S244:      | 3 | 5,3642 | 0,287 | -0,352 |
| 20 | Q9HCD6 TANC2_HUMAN | E.RSSS#QLGSPDVSHLIR.R               | S1740:     | 3 | 5,357  | 0,362 | -0,402 |
| 20 | Q5H9R7 SAPS3_HUMAN | R.IANCIVHSTDKGPN SALVQQLIK.D        |            | 3 | 5,339  | 0,453 | -0,219 |
| 20 | Q8N108 MIER1_HUMAN | K.KPLHADM*DTNGYET#DNLTTDPK.L        | T472:      | 3 | 5,2871 | 0,414 | -0,569 |
| 20 | P42224 STAT1_HUMAN | R.FHDLLSQLDDQYSR.F                  |            | 2 | 5,2589 | 0,493 | -0,421 |
| 20 | O43741 AAKB2_HUMAN | E.HKIM*VGST#DDPSVFLPDSK.L           | T40:       | 3 | 5,2566 | 0,418 | -0,405 |
| 20 | O15143 ARC1B_HUMAN | K.KAS#SEGGAAGAGLDSLHK.N             | S310:      | 3 | 5,2348 | 0,413 | -0,797 |
| 20 | Q92598 HS105_HUMAN | K.NQQITHANNTVSNFK.R                 |            | 2 | 5,2304 | 0,434 | -0,356 |
| 20 | P11532 DMD_HUMAN   | E.HLLIQHYCQSLNQDS#PLSQPR.S          | S3483:     | 3 | 5,179  | 0,433 | -0,28  |
| 20 | P78527 PRKDC_HUMAN | R.AGLLHNILPSQSTDLHHSVGT.E.L         |            | 3 | 5,1664 | 0,478 | -0,315 |
| 20 | P82664 RT10_HUMAN  | K.DLTKPVVTISDEPDILYKR.L             |            | 3 | 5,1663 | 0,536 | -1,163 |
| 20 | P49790 NU153_HUMAN | E.IKDSTS#QHDDDNISTTSGFSSR.A         | S174:      | 3 | 5,1444 | 0,571 | -0,443 |
| 20 | Q8IWW6 RHG12_HUMAN | E.KTSFSQEQSCDSAGEGSR.I              |            | 3 | 5,1409 | 0,477 | -0,788 |
| 20 | P52948 NUP98_HUMAN | E.SAGNKHS#NSNSVDDTIVALNM*R.A        | S679:      | 3 | 5,1113 | 0,396 | 0,151  |
| 20 | P28749 RBL1_HUMAN  | E.SKVK#PVS LTAHSLIGAS#PK.Q          | S749:S762: | 3 | 5,0643 | 0,388 | -0,675 |
| 20 | O60506 HNRPQ_HUMAN | E.DGALAVLQQFKDSL SHVQNK.S           |            | 3 | 5,043  | 0,417 | -0,158 |
| 20 | Q15942 ZYX_HUMAN   | K.QHPVPPPAQNQNQVR.S                 |            | 3 | 5,0155 | 0,399 | -0,214 |
| 20 | Q9BQA1 MEP50_HUMAN | -.M*RKET#PPPLVPPAARE.W              | T5:        | 3 | 4,9566 | 0,29  | -1,941 |
| 20 | Q7Z2W4 ZCCHV_HUMAN | E.HGLNPDVVQNIQDICNSK.H              |            | 3 | 4,9539 | 0,384 | -0,535 |
| 20 | Q9BY44 EIF2A_HUMAN | E.ARSDKS#PDLAPTAPQSTPR.N            | S506:      | 3 | 4,9433 | 0,327 | -0,59  |
| 20 | Q9Y6W5 WASF2_HUMAN | K.RDVVGNDVATILSR.R                  |            | 2 | 4,8975 | 0,406 | -0,564 |
| 20 | Q15042 RB3GP_HUMAN | E.GKKTS#ASDVTNIYPGDAGK.A            | S537:      | 3 | 4,8972 | 0,273 | -0,644 |

|    |                     |                                   |            |   |        |       |        |
|----|---------------------|-----------------------------------|------------|---|--------|-------|--------|
| 20 | B2RDE1 B2RDE1_HUMAN | R.KIQVLQQQADDAEER.A               |            | 2 | 4,8789 | 0,559 | -0,551 |
| 20 | Q9BRD0 BUD13_HUMAN  | R.ARHDS#PDLAPNVTVSLPR.T           | S271:      | 3 | 4,8721 | 0,342 | -0,525 |
| 20 | P04406 G3P_HUMAN    | E.HQVVSDFNSDTHSSTFD.A             |            | 2 | 4,8616 | 0,514 | -0,121 |
| 20 | Q96T58 MINT_HUMAN   | E.VGKPPQDVTDDS#PPSKK.K            | S1222:     | 3 | 4,8494 | 0,33  | -0,585 |
| 20 | Q15942 ZYX_HUMAN    | E.DCGKPLSIEADDNGCFPLDGHVLCR.K     |            | 3 | 4,7885 | 0,482 | 0,257  |
| 20 | P11274 BCR_HUMAN    | R.HQDGLPYIDDS#PSSSPHLSSK.G        | S459:      | 3 | 4,7842 | 0,542 | -0,624 |
| 20 | P07437 TBB5_HUMAN   | E.VISDEHGIDPTGTYHGSDLQLDR.I       |            | 3 | 4,7756 | 0,393 | -0,139 |
| 20 | Q9UPY6 WASF3_HUMAN  | K.REPVGNDVATILSR.R                |            | 2 | 4,7586 | 0,546 | -0,639 |
| 20 | P00533 EGFR_HUMAN   | K.SPSCCHNQCAAGCTGPRE.S            |            | 3 | 4,7555 | 0,454 | -0,254 |
| 20 | Q9HC35 EMAL4_HUMAN  | E.SHSNDQSPQIRAS#PS#PQPSSQPLQIHR.Q | S144:S146: | 3 | 4,7448 | 0,31  | 0,35   |
| 20 | P13807 GYS1_HUMAN   | E.HFTYEPNEADAAQGYR.Y              |            | 3 | 4,734  | 0,398 | -0,489 |
| 20 | O14981 BTAF1_HUMAN  | R.KIANVVINQSANDSK.V               |            | 2 | 4,7002 | 0,408 | -0,305 |
| 20 | Q9UQ35 SRRM2_HUMAN  | E.KM*ALPPQEDATAS#PPRQK.D          | S1179:     | 3 | 4,6813 | 0,466 | -0,266 |
| 20 | P16949 STMN1_HUMAN  | R.SKESVPEFPLS#PPKK.K              | S38:       | 3 | 4,6775 | 0,371 | -0,836 |
| 20 | Q6PID6 TTC33_HUMAN  | K.KSEAPAEVTHFS#PK.S               | S197:      | 2 | 4,675  | 0,493 | 0      |
| 20 | Q9BXB4 OSB11_HUMAN  | R.RPS#QNAISFFNVGHSK.L             | S189:      | 3 | 4,6728 | 0,448 | -0,294 |
| 20 | Q9Y2D5 AKAP2_HUMAN  | R.AVLTVVKDDDHGILDQFSR.S           |            | 3 | 4,6687 | 0,434 | -0,172 |
| 20 | Q9H1E3 NUCKS_HUMAN  | R.LKATVTPS#PVKGK.G                | S181:      | 2 | 4,6499 | 0,373 | -0,521 |
| 20 | Q13200 PSMD2_HUMAN  | R.DKAPVQPQQSPAAAPGGTDEKPSGK.E     |            | 3 | 4,6285 | 0,301 | -0,223 |
| 20 | P04264 K2C1_HUMAN   | K.NKLNDLEDALQQAK.E                |            | 3 | 4,6151 | 0,393 | 0      |
| 20 | Q8NHH9 ATLA2_HUMAN  | R.RRTS#DPSAAVNHVSTTSLGENYE.D      | S24:       | 3 | 4,5496 | 0,379 | -0,138 |
| 20 | Q13442 HAP28_HUMAN  | R.KGVEGLIDIENPNR.V                |            | 2 | 4,5439 | 0,443 | -0,864 |
| 20 | Q9Y6R4 M3K4_HUMAN   | E.IRQPIDNSFDIQR.D                 |            | 3 | 4,5421 | 0,408 | 0,108  |
| 20 | P46100 ATRX_HUMAN   | K.LHDFLAHSSESEETSS#PPR.L          | S34:       | 3 | 4,5388 | 0,405 | -0,862 |
| 20 | Q05655 KPCD_HUMAN   | R.RSDS#ASSEPVGIYQGFEEK.T          | S304:      | 3 | 4,5181 | 0,275 | -0,338 |
| 20 | Q9UQ35 SRRM2_HUMAN  | E.KDVNPGGKEET#PGQRPAVTE.T         | T111:      | 3 | 4,4871 | 0,439 | -0,669 |
| 20 | Q9GZL7 WDR12_HUMAN  | R.GHAGSVDSIAVDGSGTK.F             |            | 2 | 4,4768 | 0,673 | -1,018 |
| 20 | Q99708 RBBP8_HUMAN  | R.SKS#EDSALFTHHSLGSE.V            | S379:      | 3 | 4,4728 | 0,366 | -0,861 |
| 20 | Q9NYF8 BCLF1_HUMAN  | R.SGSGSVGNSSRRYS#PSQNS#PIHHIPSR.R | S285:S290: | 3 | 4,4449 | 1     | 0,251  |
| 20 | Q13442 HAP28_HUMAN  | K.KVTQLDLDPKE.L                   |            | 3 | 4,4351 | 0,294 | -1,157 |
| 20 | Q9C0C2 TB182_HUMAN  | E.HGVGGVSQCPEPLR.H                |            | 2 | 4,3925 | 0,491 | -1,417 |
| 20 | Q02543 RL18A_HUMAN  | E.YRDLTTAGAVTQCYR.D               |            | 2 | 4,3715 | 0,452 | -0,55  |
| 20 | Q13885 TBB2A_HUMAN  | E.IVHIQAGQCGNQIGAK.F              |            | 3 | 4,3653 | 0,378 | -0,864 |

|    |                     |                             |        |   |        |       |        |
|----|---------------------|-----------------------------|--------|---|--------|-------|--------|
| 20 | Q9Y520 Q9Y520_HUMAN | E.SENSCNKEEPPVFTR.Q         |        | 2 | 4,3603 | 0,432 | -0,802 |
| 20 | Q8NFC6 FA44A_HUMAN  | E.GKDKDVTLS#PVKAGPATTTSSE.T | S1531: | 2 | 4,358  | 0,389 | -0,215 |
| 20 | B2RDE1 B2RDE1_HUMAN | R.KIQVLQQQADDAEER.A         |        | 3 | 4,352  | 0,415 | -0,516 |
| 20 | Q15366 PCBP2_HUMAN  | K.GVTIPYRKPSSSPVIFAGGQDR.Y  |        | 3 | 4,3466 | 0,515 | -0,452 |
| 20 | Q8WXI9 P66B_HUMAN   | K.DLANLEVPHELPTKQDGSQV.K    |        | 3 | 4,3328 | 0,46  | -0,814 |
| 20 | Q15427 SF3B4_HUMAN  | E.RNQDATVYVGGGLDEK.V        |        | 2 | 4,3304 | 0,233 | -1,026 |
| 20 | O14545 TRAD1_HUMAN  | R.HQGDLSGGYLDLDTKQE.T       |        | 2 | 4,3288 | 0,588 | -1,973 |
| 20 | Q92900 RENT1_HUMAN  | E.DLEKPGVDEEPQHVLRL.Y       |        | 3 | 4,3269 | 0,372 | -0,556 |
| 20 | Q5VUA4 ZN318_HUMAN  | R.TKS#PKPAESPQSATK.Q        | S1037: | 3 | 4,3209 | 0,299 | 0      |
| 20 | P09382 LEG1_HUMAN   | R.FNAHGDANTIVCNSK.D         |        | 2 | 4,3092 | 0,503 | -0,814 |
| 20 | Q15435 PP1R7_HUMAN  | K.HSSGIVADLSEQSLK.D         |        | 3 | 4,3052 | 0,36  | 0      |
| 20 | P13861 KAP2_HUMAN   | E.ARAPASVLPAAATPR.Q         |        | 2 | 4,3041 | 0,367 | -0,885 |
| 20 | P54920 SNAA_HUMAN   | K.HDAATCFVDAGNAFK.K         |        | 2 | 4,3005 | 0,541 | -0,902 |
| 20 | Q15435 PP1R7_HUMAN  | K.HSSGIVADLSEQSLK.D         |        | 2 | 4,2943 | 0,545 | -0,621 |
| 20 | P36578 RL4_HUMAN    | R.VDKAAAAAALQAK.S           |        | 2 | 4,2943 | 0,475 | -0,376 |
| 20 | Q8IYB3 SRRM1_HUMAN  | E.ATSTSDILKVPKPEPIPEPK.E    |        | 3 | 4,2888 | 0,274 | -0,682 |
| 20 | P46821 MAP1B_HUMAN  | E.RKLGDVSP#PTQIDVQFSGFKE.D  | S1501: | 3 | 4,2845 | 0,321 | -0,151 |
| 20 | Q86TC9 MYPN_HUMAN   | K.HSPNLSFEPNFCQDNPR.S       |        | 3 | 4,2833 | 0,277 | -0,444 |
| 20 | Q9P246 STIM2_HUMAN  | E.KS#CSM*NLSSGIPVPKPR.H     | S678:  | 3 | 4,2738 | 0,235 | -1,142 |
| 20 | Q15057 CENB2_HUMAN  | R.KFVDKYSISLS#PPEQQK.K      | S521:  | 3 | 4,2668 | 0,375 | -0,353 |
| 20 | Q9BRX5 PSF3_HUMAN   | E.KGQASQITASNLVQNYK.K       |        | 3 | 4,2663 | 0,369 | -0,593 |
| 20 | Q8NFC6 FA44A_HUMAN  | E.GKDKDVTLS#PVKAGPATTTSSE.T | S1531: | 3 | 4,2471 | 0,49  | -0,564 |
| 20 | P27987 IP3KB_HUMAN  | E.AHIQAQSSAIQAPRS#PR.L      | S166:  | 3 | 4,2467 | 0,343 | -0,482 |
| 20 | Q8NCD3 HJURP_HUMAN  | R.ISGKS#PGDPAKPASSPR.E      | S201:  | 3 | 4,245  | 0,295 | -0,211 |
| 20 | P48553 TMEM1_HUMAN  | E.RSPSDNSLNTTGIICR.N        |        | 2 | 4,244  | 0,485 | -0,341 |
| 20 | Q9BSJ8 ESYT1_HUMAN  | K.HLS#PYATLTVGDSSH.K        | S820:  | 3 | 4,2344 | 0,287 | -0,816 |
| 20 | O75821 EIF3G_HUMAN  | R.CPYKDTLGPV*QKE.L          |        | 2 | 4,2311 | 0,254 | 0      |
| 20 | Q9UHR5 S30BP_HUMAN  | E.KGGLVSDAYGEDDFSR.L        |        | 3 | 4,1863 | 0,398 | 0,853  |
| 20 | Q92615 LARP5_HUMAN  | E.RSPS#PAHLPPDPKVAE.K       | S601:  | 3 | 4,172  | 0,282 | -1,731 |
| 20 | P18065 IBP2_HUMAN   | E.NHVDSTM*NM*LGGGGSAGR.K    |        | 3 | 4,1611 | 0,164 | 0,102  |
| 20 | Q96A73 K1191_HUMAN  | E.ERQPASAQSTPSTTPHSS#PK.Q   | S183:  | 3 | 4,1524 | 0,404 | -0,084 |
| 20 | Q15054 DPOD3_HUMAN  | K.SKTYLDGEGCIVTEK.V         |        | 3 | 4,145  | 0,257 | -0,108 |
| 20 | P16152 CBR1_HUMAN   | R.FHQLDIDDLQSIK.A           |        | 3 | 4,1347 | 0,234 | 0,572  |

|    |                     |                                |        |   |        |       |        |
|----|---------------------|--------------------------------|--------|---|--------|-------|--------|
| 20 | Q8N108 MIER1_HUMAN  | K.YNLHPGVTDYM*DR.L             |        | 3 | 4,1275 | 0,449 | -0,344 |
| 20 | Q02952 AKA12_HUMAN  | E.SQVHM*M*AAAVADGTR.A          |        | 3 | 4,1271 | 0,413 | 0      |
| 20 | P46459 NSF_HUMAN    | R.GHQLLSADVDIKE.L              |        | 3 | 4,1132 | 0,238 | -0,193 |
| 20 | Q9NYF8 BCLF1_HUMAN  | K.KAEGEPQEE#PLKSK.S            | S177:  | 3 | 4,1105 | 0,308 | -1,369 |
| 20 | P41236 IPP2_HUMAN   | E.M*NILATYHPADKDYGLM*K.I       |        | 2 | 4,1097 | 0,523 | -0,231 |
| 20 | Q96SU4 OSBL9_HUMAN  | R.LIDSSGSASVLTHSSSGNSLKRPTTE.S |        | 3 | 4,1005 | 0,45  | -0,133 |
| 20 | Q99615 DNJC7_HUMAN  | R.KLDDAIEDCTNAVK.L             |        | 2 | 4,0842 | 0,475 | -0,613 |
| 20 | O43823 AKAP8_HUMAN  | R.KQFQLYEEDTK.L                |        | 3 | 4,0833 | 0,183 | -0,12  |
| 20 | B1AKC7 B1AKC7_HUMAN | E.KEIPVEGGQEQTDSTK.G           |        | 3 | 4,0832 | 0,232 | -0,488 |
| 20 | Q4LE39 ARI4B_HUMAN  | K.VHADLVISKPVSKS#PE.R          | S778:  | 3 | 4,0727 | 0,369 | -0,307 |
| 20 | P16220 CREB1_HUMAN  | R.KILNDLSSDAPGVPR.I            |        | 2 | 4,0693 | 0,565 | -0,925 |
| 20 | Q86UE8 TLK2_HUMAN   | R.RVEQPLYGLDGSAAK.E            |        | 2 | 4,0604 | 0,498 | -0,532 |
| 20 | O14545 TRAD1_HUMAN  | E.ADQSHGGPRS#LSDIKGADE.I       | S278:  | 3 | 4,0439 | 0,341 | -0,787 |
| 20 | Q9HAV7 GRPE1_HUMAN  | E.ALFHTPVEGKEPGTVALVSK.V       |        | 3 | 4,033  | 0,376 | -0,791 |
| 20 | P29692 EF1D_HUMAN   | E.HVQSVDIAAFNKI.-              |        | 2 | 4,0279 | 0,596 | -0,508 |
| 20 | Q9Y2W1 TR150_HUMAN  | K.KSPVGKS#PPSTGTYGSSQKEE.S     | S320:  | 3 | 4,0204 | 0,337 | -0,158 |
| 20 | O94925 GLSK_HUMAN   | E.DDKPHNPM*VNAGAIIVTSLIK.Q     |        | 3 | 4,0195 | 0,295 | -0,082 |
| 20 | P54652 HSP72_HUMAN  | R.ARFEELNADLFR.G               |        | 3 | 4,0133 | 0,199 | 0,247  |
| 20 | Q8N8N7 ZADH1_HUMAN  | E.NSHIILCGQISQYNK.D            |        | 3 | 4,0117 | 0,38  | -0,618 |
| 20 | P0C7M2 RA1L3_HUMAN  | K.KIFVGGIKEDTEE.H              |        | 2 | 4,0094 | 0,445 | -1,083 |
| 20 | Q02952 AKA12_HUMAN  | E.LQSHAKS#PPSPVERE.M           | S1328: | 3 | 4,0088 | 0,219 | -0,525 |
| 20 | P04264 K2C1_HUMAN   | K.NKLNDLEDALQQAK.E             |        | 2 | 4,0085 | 0,463 | -0,534 |
| 20 | P35908 K22E_HUMAN   | R.NKLNDLEEALQQAK.E             |        | 2 | 4,0038 | 0,436 | -0,454 |
| 20 | P49773 HINT1_HUMAN  | R.CLAFHDISPQAPTHFLVIPK.K       |        | 3 | 3,9952 | 0,345 | -0,399 |
| 20 | Q9P0V9 SEP10_HUMAN  | E.IFHS#QSFLATGSNLRK.D          | S432:  | 3 | 3,983  | 0,245 | -1,164 |
| 20 | Q15054 DPOD3_HUMAN  | K.SKTYLDGEGCIVTEK.V            |        | 2 | 3,9829 | 0,383 | -0,431 |
| 20 | P27708 PYR1_HUMAN   | R.IHRAS#DPGLPAEPEK.E           | S1859: | 3 | 3,9788 | 0,262 | -0,862 |
| 20 | P05387 RLA2_HUMAN   | D.SVGIEADDDRLNK.V              |        | 2 | 3,9785 | 0,422 | -1,108 |
| 20 | Q9UNZ2 NSF1C_HUMAN  | R.KKS#PNELVDDLFK.G             | S114:  | 3 | 3,978  | 0,245 | -0,113 |
| 20 | Q04917 1433F_HUMAN  | E.DSYKDSTLIM*QLLR.D            |        | 2 | 3,9778 | 0,326 | -0,072 |
| 20 | Q9BQA1 MEP50_HUMAN  | -.M*RKET#PPPLVPPAAR.E          | T5:    | 3 | 3,9664 | 0,115 | -1,979 |
| 20 | Q9NZ63 CI078_HUMAN  | R.VGDTEKPEPERS#PPNR.K          | S261:  | 3 | 3,959  | 0,3   | -0,097 |
| 20 | Q8IZA0 K319L_HUMAN  | R.KNRPIAIVSPQFQE.I             |        | 2 | 3,9544 | 0,419 | -0,566 |

|    |                    |                           |            |   |        |       |        |
|----|--------------------|---------------------------|------------|---|--------|-------|--------|
| 20 | Q92613 JADE3_HUMAN | E.TDQQPHS#PDSSSSVHSIR.N   | S566:      | 3 | 3,945  | 0,386 | -1,073 |
| 20 | Q9NYF8 BCLF1_HUMAN | K.LKDLFDYS#PPLHK.N        | S512:      | 2 | 3,9439 | 0,582 | -0,517 |
| 20 | Q5VWN6 CJ018_HUMAN | E.NKVDILDAAVQTK.T         |            | 2 | 3,9436 | 0,451 | -0,431 |
| 20 | Q9BWU0 NADAP_HUMAN | R.SKAPASSSSNPEEVQKE.G     |            | 2 | 3,9138 | 0,458 | -0,137 |
| 20 | Q9Y217 MTMR6_HUMAN | E.LLHSVHPES#PNLK.T        | S561:      | 2 | 3,9065 | 0,41  | -0,944 |
| 20 | P25788 PSA3_HUMAN  | R.HVGM*AVAGLLADAR.S       |            | 2 | 3,8853 | 0,466 | -0,349 |
| 20 | Q96A49 SYAP1_HUMAN | E.AVRPKT#PPVVIK.S         | T248:      | 3 | 3,8836 | 0,279 | 0      |
| 20 | Q9UKS6 PACN3_HUMAN | E.KGGRS#PDEVTLTSIVPTR.D   | S319:      | 3 | 3,8819 | 0,316 | -0,459 |
| 20 | Q9Y230 RUVB2_HUMAN | D.KVQAGDVITIDK.A          |            | 2 | 3,8686 | 0,419 | -0,284 |
| 20 | P49792 RBP2_HUMAN  | E.SSINYFKT#PEKAKE.K       | T2613:     | 3 | 3,8556 | 0,235 | -0,903 |
| 20 | Q92621 NU205_HUMAN | K.FQDDNVEGDKVS.K          |            | 2 | 3,8322 | 0,354 | -0,494 |
| 20 | Q9BXB4 OSB11_HUMAN | R.RPS#QNAISFFNVGHSK.L     | S189:      | 2 | 3,8259 | 0,357 | 0      |
| 20 | O00170 AIP_HUMAN   | E.GRGELPDFQDGTK.A         |            | 2 | 3,8201 | 0,501 | -0,43  |
| 20 | Q15003 CND2_HUMAN  | E.THNES#VSALVDKFK.K       | S335:      | 3 | 3,8086 | 0,391 | -0,332 |
| 20 | Q15365 PCBP1_HUMAN | R.CSDAAGYPHATHDLE.G       |            | 2 | 3,7988 | 0,558 | -0,742 |
| 20 | Q8NI08 NCOA7_HUMAN | E.YDKLPDADLAR.K           |            | 3 | 3,7839 | 0,284 | -0,072 |
| 20 | Q8TC05 MDM1_HUMAN  | R.THHDLTTPAVGGAVLVS#PSK.M | S543:      | 3 | 3,7814 | 0,314 | -0,531 |
| 20 | Q96I18 LRCH3_HUMAN | R.RIS#HEGS#PVKPVVAIRE.F   | S415:S419: | 3 | 3,7772 | 0,151 | -0,567 |
| 20 | Q8WUA7 TB22A_HUMAN | E.SHTSCPAESASDAAPLQR.S    |            | 2 | 3,777  | 0,487 | -0,777 |
| 20 | O14974 MYPT1_HUMAN | K.KFPPTATKIS#PKEEE.R      | S422:      | 3 | 3,7755 | 0,241 | -0,41  |
| 20 | P22626 ROA2_HUMAN  | K.KLFGVGIKEDTEE.H         |            | 2 | 3,7742 | 0,425 | -0,999 |
| 20 | Q9Y6J0 CABIN_HUMAN | K.FCQVHLGAAAQR.Q          |            | 3 | 3,7698 | 0,364 | -0,471 |
| 20 | Q13416 ORC2_HUMAN  | E.HEEDTNAVIFSQK.I         |            | 2 | 3,7559 | 0,452 | -0,563 |
| 20 | Q02543 RL18A_HUMAN | E.YRDLTTAGAVTQCYR.D       |            | 3 | 3,7554 | 0,212 | -0,618 |
| 20 | Q8WYP5 AHTF1_HUMAN | E.TRIS#FVEEDVHPK.W        | S1241:     | 2 | 3,7552 | 0,344 | -0,596 |
| 20 | O95373 IPO7_HUMAN  | R.KQLQDIATLADQR.R         |            | 2 | 3,7541 | 0,47  | -0,569 |
| 20 | O00273 DFFA_HUMAN  | R.SISASKAS#PPGDLQNPKR.A   | S315:      | 3 | 3,752  | 0,39  | -0,662 |
| 20 | P30050 RL12_HUMAN  | R.HPHDIIDDINSGAVECPAS.-   |            | 3 | 3,7429 | 0,479 | -0,626 |
| 20 | O75410 TACC1_HUMAN | E.TKDSTDISAVLGTK.A        |            | 2 | 3,7411 | 0,423 | -0,425 |
| 20 | Q96HC4 PDLI5_HUMAN | K.KANNSQEPSPQLASSVASTR.S  |            | 3 | 3,7362 | 0,392 | -1,059 |
| 20 | Q9UHV9 PFD2_HUMAN  | E.HSLVIDTLKEVDE.T         |            | 2 | 3,7323 | 0,474 | -0,407 |
| 20 | P35579 MYH9_HUMAN  | K.LKDVLLQVDDER.R          |            | 2 | 3,7314 | 0,406 | -0,676 |
| 20 | O60287 NPA1P_HUMAN | E.THLVTQQPTKS#PGKE.R      | S1143:     | 3 | 3,7106 | 0,496 | -0,528 |



|    |                    |                         |        |   |        |       |        |
|----|--------------------|-------------------------|--------|---|--------|-------|--------|
| 20 | Q9BWU0 NADAP_HUMAN | R.SKAPASSSSNPPEEVQKE.G  |        | 3 | 3,7106 | 0,194 | -0,206 |
| 20 | Q14CX7 CL030_HUMAN | R.LRPIYDYLDNGNKK.M      |        | 2 | 3,7066 | 0,405 | 0      |
| 20 | Q9GZL7 WDR12_HUMAN | R.GHAGSVDSIAVDGSGTK.F   |        | 3 | 3,706  | 0,372 | -0,822 |
| 20 | P00558 PGK1_HUMAN  | R.AHSSM*VGVNLPQK.A      |        | 3 | 3,7058 | 0,194 | -1,255 |
| 20 | Q9NRL3 STRN4_HUMAN | K.LKFGTDLNQGEK.K        |        | 3 | 3,698  | 0,138 | -0,068 |
| 20 | Q02447 SP3_HUMAN   | D.GHLINTGQAM*DSSDNSER.T |        | 3 | 3,6961 | 0,394 | 0      |
| 20 | P25398 RS12_HUMAN  | R.KVVGCSVCVVVK.D        |        | 2 | 3,6955 | 0,407 | -0,395 |
| 20 | Q9UNZ2 NSF1C_HUMAN | R.KKS#PNELVDDLK.G       | S114:  | 2 | 3,69   | 0,488 | -0,454 |
| 20 | Q9UPN3 MACF1_HUMAN | R.KAALLDQALSNA.R.L      |        | 2 | 3,6898 | 0,347 | -0,623 |
| 20 | Q7Z6E9 RBBP6_HUMAN | E.NKTDSLFLVPSR.D        |        | 2 | 3,6859 | 0,314 | -0,532 |
| 20 | Q9Y3A3 MOBL3_HUMAN | R.HTLDGAACLLNSNK.Y      |        | 2 | 3,68   | 0,473 | -0,886 |
| 20 | Q96T58 MINT_HUMAN  | R.HGS#FHEDEDPIGSPR.L    | S1268: | 3 | 3,6772 | 0,338 | -0,312 |
| 20 | Q86W92 LIPB1_HUMAN | K.KM*QDTVLAQGK.D        |        | 2 | 3,6757 | 0,42  | -1,097 |
| 20 | O75533 SF3B1_HUMAN | R.TDRGGDSIGETPTPGASK.R  |        | 3 | 3,6747 | 0,294 | -0,21  |
| 20 | Q6W2J9 BCOR_HUMAN  | E.KFLTDYLNLDLQGR.N      |        | 2 | 3,6662 | 0,435 | -0,231 |
| 20 | Q9Y2S7 PDIP2_HUMAN | K.THTYYQVLIDAR.D        |        | 2 | 3,6657 | 0,514 | 0,082  |
| 20 | Q04917 1433F_HUMAN | E.DSYKDSTLIM*QLLR.D     |        | 3 | 3,6648 | 0,28  | 0      |
| 20 | P13807 GYS1_HUMAN  | E.HFTYEPNEADAAQGYR.Y    |        | 2 | 3,663  | 0,571 | -0,653 |
| 20 | O94925 GLSK_HUMAN  | E.KFDYVM*QFLNK.M        |        | 2 | 3,6625 | 0,349 | -0,758 |
| 20 | O95785 WIZ_HUMAN   | E.ARS#PSDLHISPLAK.K     | S1127: | 3 | 3,6614 | 0,468 | -0,465 |
| 20 | Q9Y2H0 DLGP4_HUMAN | D.CTPHPNSISIDAGPR.Q     |        | 3 | 3,6578 | 0,293 | 0      |
| 20 | Q9UPN3 MACF1_HUMAN | R.KAALLDQALSNA.R.L      |        | 3 | 3,6493 | 0,235 | -0,067 |
| 20 | Q01433 AMPD2_HUMAN | E.RQIS#QDVKLEPDILLR.A   | S168:  | 3 | 3,6476 | 0,371 | -0,091 |
| 20 | P08670 VIME_HUMAN  | E.TNLDS#LPLVDTHSKR.T    | S430:  | 3 | 3,6383 | 0,331 | 0,103  |
| 20 | Q8IXQ3 CIO40_HUMAN | R.KIDAGTM*AEPSAS#PSKR.R | S69:   | 3 | 3,6328 | 0,328 | -0,199 |
| 20 | P49756 RBM25_HUMAN | K.LGASNSPGQPNSVKR.K     |        | 3 | 3,6314 | 0,404 | 0,121  |
| 20 | Q9Y266 NUDC_HUMAN  | K.LKPNLNGADLPNYR.W      |        | 2 | 3,6303 | 0,414 | -0,594 |
| 20 | P42224 STAT1_HUMAN | R.FHDLLSQLDDQYSR.F      |        | 3 | 3,6295 | 0,119 | -0,316 |
| 20 | O95149 SPN1_HUMAN  | K.LKGSSHS#PDHPGCLM*EN.- | S350:  | 3 | 3,6277 | 0,298 | -0,466 |
| 20 | O94763 RMP_HUMAN   | R.KNS#TGSGHSAQELPTIR.T  | S371:  | 3 | 3,6181 | 0,301 | -0,589 |
| 20 | Q9Y4C1 JHD2A_HUMAN | E.VVHDNLVTCGNSAR.I      |        | 2 | 3,6145 | 0,513 | -0,237 |
| 20 | P50995 ANX11_HUMAN | K.SLYHDISGDTSGDYR.K     |        | 2 | 3,6117 | 0,531 | -0,507 |
| 20 | Q9UHB7 AFF4_HUMAN  | R.SS#SPGKQAVSSLNSSHRS.S | S179:  | 3 | 3,6103 | 0,317 | 0,184  |

|    |                     |                          |        |   |        |       |        |
|----|---------------------|--------------------------|--------|---|--------|-------|--------|
| 20 | Q12756 KIF1A_HUMAN  | K.KTPHLVNLNEDPLM*SE.C    |        | 2 | 3,6075 | 0,441 | -0,724 |
| 20 | Q96N67 DOCK7_HUMAN  | R.SAVRPASLNLNR.S         |        | 3 | 3,5976 | 0,301 | 0,211  |
| 20 | P22234 PUR6_HUMAN   | K.KACGNFGIPCELR.V        |        | 2 | 3,5924 | 0,486 | -0,641 |
| 20 | O43303 CE110_HUMAN  | R.RLDLDIDGLQKE.N         |        | 2 | 3,589  | 0,321 | -0,604 |
| 20 | Q92766 RREB1_HUMAN  | E.NGGSPQGIKS#PSKPPGPNR.I | S42:   | 3 | 3,5884 | 0,247 | -1,029 |
| 20 | Q8IYB3 SRRM1_HUMAN  | K.KEKT#PELPEPSVK.V       | T220:  | 3 | 3,5842 | 0,293 | -0,351 |
| 20 | O95400 CD2B2_HUMAN  | E.EGHFDADGNYFLNR.D       |        | 2 | 3,5841 | 0,544 | -0,369 |
| 20 | Q9H2P0 ADNP_HUMAN   | K.ISNDNPEEHVLK.V         |        | 3 | 3,5731 | 0,364 | -0,59  |
| 20 | Q9Y6W5 WASF2_HUMAN  | K.RDVVGNDVATILSR.R       |        | 3 | 3,5668 | 0,293 | 0      |
| 20 | P27708 PYR1_HUMAN   | R.IHRAS#DPGLPAEEPKE.K    | S1859: | 3 | 3,5656 | 0,359 | -1,703 |
| 20 | P11586 C1TC_HUMAN   | R.KVVGDVAYDEAKE.R        |        | 2 | 3,5588 | 0,41  | -0,6   |
| 20 | P27694 RFA1_HUMAN   | K.SKDSLVDIIGICK.S        |        | 2 | 3,5578 | 0,497 | -0,421 |
| 20 | P61247 RS3A_HUMAN   | K.NCLTNFHGM*DLTR.D       |        | 2 | 3,5554 | 0,36  | -0,994 |
| 20 | Q9BY44 EIF2A_HUMAN  | E.ARSDKS#PDLAPTPAQSTPR.N | S506:  | 2 | 3,555  | 0,205 | -0,449 |
| 20 | Q14CX7 CLO30_HUMAN  | R.LRPIYDYLDNGNKK.M       |        | 3 | 3,5467 | 0,165 | 0      |
| 20 | Q14980 NUMA1_HUMAN  | E.RLDFVCSFLQK.N          |        | 2 | 3,5466 | 0,232 | -0,432 |
| 20 | Q9H3M3 Q9H3M3_HUMAN | E.KATDATTATFFK.M         |        | 2 | 3,5456 | 0,512 | -0,843 |
| 20 | P16152 CBR1_HUMAN   | R.FHQLDIDDLQSIR.A        |        | 2 | 3,5432 | 0,424 | -0,229 |
| 20 | Q9UKL0 RCOR1_HUMAN  | E.TNGPSNQKPKVKS#PDNSIK.M | S457:  | 3 | 3,5403 | 0,352 | -0,184 |
| 20 | Q9Y217 MTMR6_HUMAN  | E.LLHSVHPES#PNLK.T       | S561:  | 3 | 3,5372 | 0,244 | -1,179 |
| 20 | P04264 K2C1_HUMAN   | R.LLRDYQELM*NTK.L        |        | 3 | 3,5335 | 0,086 | -1,663 |
| 20 | P35579 MYH9_HUMAN   | R.RGDLPFVVPR.R           |        | 2 | 3,5278 | 0,3   | -1,055 |
| 20 | Q15121 PEA15_HUMAN  | R.RPDLLTM*VVDYR.T        |        | 3 | 3,5192 | 0,229 | 0,306  |
| 20 | Q13206 DDX10_HUMAN  | R.SNSEVEDVGPTSHNR.K      |        | 2 | 3,5121 | 0,51  | -0,375 |
| 20 | Q9UHI6 DDX20_HUMAN  | R.HYTGPGDQTVNPNQNGFVR.N  |        | 3 | 3,5079 | 0,253 | -0,368 |
| 20 | P46459 NSF_HUMAN    | R.GHQLLSADVDIKE.L        |        | 2 | 3,5047 | 0,435 | -1,027 |
| 20 | Q13177 PAK2_HUMAN   | K.DPLSANHSLKPLPSVPEEK.K  |        | 3 | 3,4999 | 0,317 | -0,533 |
| 20 | Q9P246 STIM2_HUMAN  | E.KSCS#M*NQLSSGIPVPKPR.H | S680:  | 3 | 3,4929 | 0,286 | -0,703 |
| 20 | Q9Y580 RBM7_HUMAN   | E.RTM*DNM*TSSAQIIQR.S    |        | 3 | 3,4919 | 0,3   | -0,82  |
| 20 | Q8WUA7 TB22A_HUMAN  | E.SHTSCPAESASDAAPLQR.S   |        | 3 | 3,4912 | 0,298 | -0,679 |
| 20 | P46940 IQGA1_HUMAN  | E.VAQHYQDTLIR.A          |        | 3 | 3,4901 | 0,379 | -0,272 |
| 20 | Q8NI27 THOC2_HUMAN  | E.KTPVSGSLKS#PVPR.S      | S1278: | 3 | 3,4855 | 0,27  | -0,358 |
| 20 | P42704 LPPRC_HUMAN  | K.KGAYDIFLNAKE.Q         |        | 3 | 3,4851 | 0,185 | -0,067 |

|    |                     |                            |            |   |        |       |        |
|----|---------------------|----------------------------|------------|---|--------|-------|--------|
| 20 | Q9H0B6 KLC2_HUMAN   | K.KLQGGTPQEPPNPR.M         |            | 2 | 3,4787 | 0,414 | -0,321 |
| 20 | Q13151 ROA0_HUMAN   | K.KLFGVGLKGDVAE.G          |            | 2 | 3,4784 | 0,438 | -0,824 |
| 20 | O60506 HNRPO_HUMAN  | K.LKDYAFIHFE.R             |            | 2 | 3,4754 | 0,389 | -0,349 |
| 20 | Q9Y6R4 M3K4_HUMAN   | E.IRQPIDNSFDIQSR.D         |            | 2 | 3,4725 | 0,372 | -0,361 |
| 20 | O00161 SNP23_HUMAN  | E.IDAQNPKIKR.I             |            | 2 | 3,4718 | 0,32  | -0,619 |
| 20 | Q9Y266 NUDC_HUMAN   | K.LKPNLNGADLPNYR.W         |            | 3 | 3,4674 | 0,376 | 0,334  |
| 20 | Q9UQ35 SRRM2_HUMAN  | E.SYFGVSSLQK.G             |            | 2 | 3,467  | 0,435 | -0,695 |
| 20 | P59074 CG301_HUMAN  | K.AAHDNM*DKVDE.L           |            | 2 | 3,4629 | 0,467 | -0,41  |
| 20 | P00558 PGK1_HUMAN   | E.DKVSHVSTGGASLE.L         |            | 2 | 3,4504 | 0,253 | -1,183 |
| 20 | P61129 ZC3H6_HUMAN  | R.YQEDEEQTSTQPHR.A         |            | 3 | 3,4497 | 0,451 | 0      |
| 20 | P05362 ICAM1_HUMAN  | E.AQVHLALGDQR.L            |            | 2 | 3,4484 | 0,46  | 0      |
| 20 | O94925 GLSK_HUMAN   | E.KFDYVM*QFLNK.M           |            | 3 | 3,4484 | 0,214 | -0,189 |
| 20 | Q9H7N4 SFR19_HUMAN  | R.LDKSDPRGSP#PAPAS#SPKRE.V | S719:S724: | 3 | 3,4469 | 0,141 | -0,244 |
| 20 | A0JLS5 A0JLS5_HUMAN | R.LDDHALTGASDSR.V          |            | 3 | 3,4467 | 0,245 | -0,606 |
| 20 | Q13442 HAP28_HUMAN  | R.KGVEGLIDIENPNR.V         |            | 3 | 3,4464 | 0,265 | 1,177  |
| 20 | Q13144 EI2BE_HUMAN  | K.M*KGYNPAEVGAAGK.G        |            | 2 | 3,4364 | 0,369 | -0,346 |
| 20 | P18754 RCC1_HUMAN   | R.KKPALVSIPEDVVQAE.A       |            | 2 | 3,4303 | 0,39  | -0,425 |
| 20 | P35269 T2FA_HUMAN   | R.LRLDTGPQSLSGK.S          |            | 2 | 3,4297 | 0,496 | -0,8   |
| 20 | Q13428 TCOF_HUMAN   | R.KTGPAQAQVQVQK.Q          |            | 2 | 3,4277 | 0,455 | -1,555 |
| 20 | P35222 CTNB1_HUMAN  | R.HAIM*RS#PQM*VSAIVR.T     | S191:      | 3 | 3,4275 | 0,374 | -0,202 |
| 20 | Q86VP6 CAND1_HUMAN  | K.CLDVVSTRHE.M             |            | 3 | 3,425  | 0,333 | 0,071  |
| 20 | Q8IU81 I2BP1_HUMAN  | E.ALGHS#PKDPGGGGPVR.A      | S436:      | 3 | 3,4221 | 0,093 | -0,558 |
| 20 | P14866 HNRPL_HUMAN  | R.QRQPPLLDHHPAE.Y          |            | 3 | 3,4212 | 0,278 | -0,188 |
| 20 | P42704 LPPRC_HUMAN  | E.CDRDQM*YNNLLK.L          |            | 3 | 3,4205 | 0,294 | -0,559 |
| 20 | P18887 XRCC1_HUMAN  | E.SANSLRPGALFFSR.I         |            | 3 | 3,42   | 0,357 | -0,54  |
| 20 | P36551 HEM6_HUMAN   | E.ACDQHGPDLYPK.F           |            | 3 | 3,419  | 0,441 | 0,065  |
| 20 | Q9UNN8 EPCR_HUMAN   | R.LHM*LQISYFR.D            |            | 3 | 3,416  | 0,12  | 0,898  |
| 20 | O95400 CD2B2_HUMAN  | E.GHFDADGNYFLNR.D          |            | 2 | 3,4152 | 0,514 | -0,4   |
| 20 | O43823 AKAP8_HUMAN  | R.KQFQLYEEDTK.L            |            | 2 | 3,4152 | 0,429 | -0,4   |
| 20 | P51991 ROA3_HUMAN   | R.GFAFVTFDDHDTVVKIVVQK.Y   |            | 3 | 3,4126 | 0,273 | -0,16  |
| 20 | Q71RC2 LARP4_HUMAN  | E.KDLIEDSSVQK.D            |            | 2 | 3,4119 | 0,331 | -0,87  |
| 20 | Q9NVW2 RNF12_HUMAN  | R.SRS#PLHPM*SEIPR.R        | S230:      | 3 | 3,411  | 0,343 | -1,027 |
| 20 | Q6XZF7 DNMBP_HUMAN  | K.SQYYSTVGGSHPHSE.Q        |            | 2 | 3,408  | 0,541 | -0,597 |

|    |                    |                        |        |   |        |       |        |
|----|--------------------|------------------------|--------|---|--------|-------|--------|
| 20 | Q09666 AHNK_HUMAN  | K.IKGDVDVTGPKVE.G      |        | 2 | 3,4075 | 0,5   | -0,539 |
| 20 | P04264 K2C1_HUMAN  | K.KQISNLQQSISDAEQR.G   |        | 3 | 3,4074 | 0,351 | -0,694 |
| 20 | Q7Z309 F122B_HUMAN | K.CIRPSVLGPLK.R        |        | 3 | 3,4045 | 0,26  | 0,074  |
| 20 | Q7Z4V5 HDGR2_HUMAN | K.FALKVDS#PDVKR.C      | S490:  | 2 | 3,3961 | 0,319 | -0,252 |
| 20 | P32004 L1CAM_HUMAN | K.VKDATQITQGPR.S       |        | 2 | 3,396  | 0,446 | -0,65  |
| 20 | Q8IU2 RB6I2_HUMAN  | R.SVGKVEPSS#QSPGRSPR.L | S15:   | 2 | 3,3943 | 0,388 | -0,133 |
| 20 | P22102 PUR2_HUMAN  | E.NHTALTVVM*ASK.G      |        | 2 | 3,3936 | 0,515 | -0,853 |
| 20 | P62979 RS27A_HUMAN | K.CCLTYCFNKPEDK.-      |        | 3 | 3,3925 | 0,286 | -0,949 |
| 20 | P08865 RSSA_HUMAN  | R.KSDGIYIINLK.R        |        | 2 | 3,3912 | 0,316 | -0,772 |
| 20 | Q9UQ80 PA2G4_HUMAN | E.KTIQNPDTQQK.K        |        | 2 | 3,3875 | 0,305 | -0,259 |
| 20 | P12270 TPR_HUMAN   | R.NQHLVSQQKDPDTEE.Y    |        | 2 | 3,3869 | 0,398 | -0,483 |
| 20 | Q9NQG5 CT077_HUMAN | E.RSVYGGFEFIQQLK.L     |        | 2 | 3,385  | 0,224 | -0,88  |
| 20 | P60174 TPIS_HUMAN  | R.HVFGESDELIGQK.V      |        | 2 | 3,3804 | 0,469 | -0,836 |
| 20 | Q99653 CHP1_HUMAN  | R.TLAHFRPIEDNE.K       |        | 2 | 3,3685 | 0,346 | -0,761 |
| 20 | P36578 RL4_HUMAN   | R.VDKAAAAAALQAK.S      |        | 3 | 3,3659 | 0,204 | 0,211  |
| 20 | P27816 MAP4_HUMAN  | E.TERAS#PIKM*DLAPSK.D  | S358:  | 3 | 3,363  | 0,281 | -1,577 |
| 20 | P21333 FLNA_HUMAN  | R.RAPS#VANVGSCHDSLK.I  | S2152: | 3 | 3,3628 | 0,238 | 0,097  |
| 20 | O00425 IF2B3_HUMAN | K.ITGHFYACQVAQR.K      |        | 3 | 3,3607 | 0,17  | -0,943 |
| 20 | P27816 MAP4_HUMAN  | E.RAS#PIKM*DLAPSK.D    | S358:  | 3 | 3,3595 | 0,388 | 0,113  |
| 20 | P48553 TMEM1_HUMAN | E.RSPSDNSLNTTGIICR.N   |        | 3 | 3,3577 | 0,294 | -0,102 |
| 20 | O75306 NDUS2_HUMAN | K.APGFAHLAGLDK.M       |        | 2 | 3,3577 | 0,41  | -0,612 |
| 20 | Q9Y2W1 TR150_HUMAN | R.SIFQHIQSAQSQR.S      |        | 2 | 3,3577 | 0,36  | -0,239 |
| 20 | Q5VWN6 CJ018_HUMAN | E.NKVDILDAAVQTK.T      |        | 3 | 3,357  | 0,168 | 0,323  |
| 20 | O95359 TACC2_HUMAN | E.KIGSSLPQDDDAPK.K     |        | 2 | 3,3552 | 0,279 | -0,995 |
| 20 | Q15084 PDIA6_HUMAN | K.IFQKGESPVVDYDGGR.T   |        | 3 | 3,3543 | 0,217 | 0,219  |
| 20 | Q12770 SCAP_HUMAN  | R.SRDSPGYDFSLVQR.V     |        | 3 | 3,3506 | 0,189 | -0,307 |
| 20 | Q15043 S39AE_HUMAN | K.ALLNHLVDVGVR.G       |        | 2 | 3,3464 | 0,385 | -0,386 |
| 20 | Q12906 ILF3_HUMAN  | E.KAEPQAM*NALM*R.L     |        | 3 | 3,3437 | 0,4   | 0,061  |
| 20 | P46821 MAP1B_HUMAN | E.KEVPSKEEPS#PVKAE.V   | S614:  | 3 | 3,3381 | 0,195 | -0,211 |
| 20 | Q9UER7 DAXX_HUMAN  | K.YAM*LQDKSEGER.K      |        | 3 | 3,3348 | 0,382 | -0,465 |
| 20 | Q96BK5 PINX1_HUMAN | R.SKTDLDCIFGK.R        |        | 3 | 3,3341 | 0,27  | 0,356  |
| 20 | P52907 CAZA1_HUMAN | K.DHYSNGFCTVYAK.T      |        | 2 | 3,3337 | 0,37  | -0,859 |
| 20 | Q14696 MESD2_HUMAN | K.DIRDYNDADM*AR.L      |        | 3 | 3,3326 | 0,284 | -1,368 |

|    |                    |                              |       |   |        |       |        |
|----|--------------------|------------------------------|-------|---|--------|-------|--------|
| 20 | Q9H267 VP33B_HUMAN | E.HFSNVFGFLSQK.A             |       | 3 | 3,3313 | 0,146 | 0,13   |
| 20 | P37802 TAGL2_HUMAN | E.GKNVIGLQM*GTNR.G           |       | 2 | 3,3299 | 0,421 | -0,782 |
| 20 | Q7KZF4 SND1_HUMAN  | K.IHVFYIDYGNRE.V             |       | 2 | 3,3254 | 0,493 | -0,48  |
| 20 | Q9BRR8 GPTC1_HUMAN | R.SKAEPKQQS#SPLVNKEEE.H      | S714: | 3 | 3,3251 | 0,244 | -0,166 |
| 20 | Q9H1K0 RBNS5_HUMAN | E.SLSTHTSPSQSPNS#VHGSR.R     | S222: | 3 | 3,325  | 0,255 | 0      |
| 20 | P26639 SYTC_HUMAN  | K.M*GGEEKPIGAGEEK.Q          |       | 2 | 3,3239 | 0,313 | -0,337 |
| 20 | O75376 NCOR1_HUMAN | E.KQDSLILLSQR.G              |       | 2 | 3,3145 | 0,289 | -0,469 |
| 20 | Q71RC2 LARP4_HUMAN | E.KDLIEDSSVQK.D              |       | 3 | 3,3135 | 0,191 | 0,362  |
| 20 | Q9H307 PININ_HUMAN | K.KPALQSSVVATSKE.R           |       | 2 | 3,3133 | 0,323 | -0,844 |
| 20 | O43719 HTSF1_HUMAN | K.TLKNDCEENGLAK.E            |       | 3 | 3,3108 | 0,275 | -0,797 |
| 20 | P46063 RECQ1_HUMAN | K.VKDILQNVFK.L               |       | 3 | 3,3045 | 0,169 | 0,532  |
| 20 | Q15643 TRIPB_HUMAN | E.DKVENLVDQLNK.S             |       | 2 | 3,304  | 0,288 | -0,517 |
| 20 | Q7L8L6 FAKD5_HUMAN | E.HVGVSLTDDL*MK.L            |       | 2 | 3,3039 | 0,408 | -0,675 |
| 20 | Q9UHB6 LIMA1_HUMAN | E.VQQPVHPKPLS#PDSR.A         | S362: | 2 | 3,3038 | 0,337 | -0,207 |
| 20 | P08670 VIME_HUMAN  | E.TNLDS#LPLVDTHSKR.T         | S430: | 2 | 3,3028 | 0,344 | -0,344 |
| 20 | Q9Y2X9 ZN281_HUMAN | E.SQKEDPFNIAEPR.V            |       | 3 | 3,3027 | 0,171 | -0,358 |
| 20 | Q96AQ6 PBIP1_HUMAN | R.ALQAPHS#PSKTDGKE.L         | S43:  | 2 | 3,2998 | 0,423 | -0,222 |
| 20 | P48634 BAT2_HUMAN  | K.IQT#PPPKEPPKEE.T           | T878: | 3 | 3,2992 | 0,311 | -0,108 |
| 20 | O15355 PPM1G_HUMAN | E.AGPSCSSASDKLPR.V           |       | 2 | 3,295  | 0,391 | -0,426 |
| 20 | P42704 LPPRC_HUMAN | K.KGAYDIFLNAKE.Q             |       | 2 | 3,2947 | 0,412 | -0,624 |
| 20 | Q12888 TP53B_HUMAN | E.GRQDKPM*DTSVLS#EEGGEPFQK.K | S398: | 3 | 3,2925 | 0,223 | 0,072  |
| 20 | P53667 LIMK1_HUMAN | R.IFRPSDLIHGE.V              |       | 3 | 3,2897 | 0,081 | 0,356  |
| 20 | O75534 CSDE1_HUMAN | R.LKNITLDDASAPR.L            |       | 2 | 3,2897 | 0,377 | -0,69  |
| 20 | Q13813 SPTA2_HUMAN | R.GKDLIGVQNLK.K              |       | 3 | 3,2888 | 0,15  | 0,352  |
| 20 | Q96T23 RSF1_HUMAN  | K.KTFLDKDAQRLS#PIPE.E        | S594: | 2 | 3,276  | 0,248 | -0,252 |
| 20 | Q07157 ZO1_HUMAN   | R.IPEPQKPLKPPEDIVR.S         |       | 3 | 3,2744 | 0,177 | -0,369 |
| 20 | O15226 NKRIF_HUMAN | R.KEDLLDQLKQE.G              |       | 2 | 3,2742 | 0,191 | -0,269 |
| 20 | P28074 PSB5_HUMAN  | R.VSSDNVADLHEK.Y             |       | 2 | 3,2726 | 0,341 | -0,371 |
| 20 | P49792 RBP2_HUMAN  | K.SGSSFVHQASFK.F             |       | 2 | 3,271  | 0,448 | -0,286 |
| 20 | O43390 HNRPR_HUMAN | K.LKDYAFVHFE.D               |       | 2 | 3,266  | 0,321 | -0,577 |
| 20 | P27816 MAP4_HUMAN  | E.RAS#PIKM*DLAPSK.D          | S358: | 3 | 3,2642 | 0,419 | -0,303 |
| 20 | P48643 TCPE_HUMAN  | K.KQQISLATQM*VR.M            |       | 2 | 3,2636 | 0,357 | -0,688 |
| 20 | Q58FF7 H90B3_HUMAN | K.VILHLKEDQTEYLEE.R          |       | 2 | 3,2613 | 0,363 | -0,197 |

|    |                     |                        |       |   |        |       |        |
|----|---------------------|------------------------|-------|---|--------|-------|--------|
| 20 | Q9NYF8 BCLF1_HUMAN  | K.LKDLDYDYS#PPLHK.N    | S512: | 3 | 3,2612 | 0,489 | 1,107  |
| 20 | Q05682 CALD1_HUMAN  | E.KQS#VDKVTSPKTV.-     | S783: | 3 | 3,2535 | 0,223 | -0,611 |
| 20 | Q7RTQ0 Q7RTQ0_HUMAN | E.SGPDGGGEEDGTGSLKR.S  |       | 2 | 3,2532 | 0,5   | -1,64  |
| 20 | A8K2B4 A8K2B4_HUMAN | R.TNTM*NGSKS#PVISRPK.S | S508: | 3 | 3,253  | 0,269 | 0      |
| 20 | P13797 PLST_HUMAN   | K.INNFSADIKDSK.A       |       | 2 | 3,2524 | 0,441 | -0,722 |
| 20 | P34932 HSP74_HUMAN  | E.KM*QVDQEEPHVEE.Q     |       | 2 | 3,2523 | 0,324 | -0,378 |
| 20 | Q9BTT0 AN32E_HUMAN  | E.KCPNLTYLNLSGNK.I     |       | 2 | 3,2518 | 0,468 | -0,376 |
| 20 | P11021 GRP78_HUMAN  | K.TKPYIQVDIGGGQTK.T    |       | 3 | 3,2512 | 0,232 | 0,114  |
| 20 | P50995 ANX11_HUMAN  | K.SLYHDISGDTSGDYR.K    |       | 3 | 3,2502 | 0,385 | -0,434 |
| 20 | P00558 PGK1_HUMAN   | E.SPERPFLAILGGAK.V     |       | 3 | 3,2479 | 0,092 | 0,44   |
| 20 | Q9UK45 LSM7_HUMAN   | E.YM*RDPDDQYKLTE.D     |       | 3 | 3,2472 | 0,244 | -0,433 |
| 20 | P12268 IMDH2_HUMAN  | K.KQLLCGAAIGTHE.D      |       | 2 | 3,2466 | 0,423 | -0,611 |
| 20 | P36551 HEM6_HUMAN   | E.ACDQHGPDLYPK.F       |       | 2 | 3,2464 | 0,357 | -0,435 |
| 20 | O95400 CD2B2_HUMAN  | E.EGHFDADGNYFLNR.D     |       | 3 | 3,2443 | 0,181 | -0,111 |
| 20 | P46013 KI67_HUMAN   | E.KLDLLGNLPGSK.R       |       | 3 | 3,2391 | 0,189 | 0,364  |
| 20 | Q99460 PSMD1_HUMAN  | E.KVSTAVLSITAK.A       |       | 3 | 3,2389 | 0,178 | -0,676 |
| 20 | Q5VY92 Q5VY92_HUMAN | R.GTDRLDLPVTR.S        |       | 2 | 3,2389 | 0,407 | -0,726 |
| 20 | P41227 ARD1A_HUMAN  | R.HVVLGAIENKVE.S       |       | 2 | 3,2372 | 0,461 | -0,466 |
| 20 | Q6PID6 TTC33_HUMAN  | K.KSEAPAEVTHFS#PK.S    | S197: | 3 | 3,2355 | 0,309 | 0,569  |
| 20 | P09497 CLCB_HUMAN   | E.KVAQLCDFNPK.S        |       | 3 | 3,2308 | 0,205 | 0      |
| 20 | POC058 H2A1_HUMAN   | R.NDEELNKLLGK.V        |       | 2 | 3,2308 | 0,37  | -0,479 |
| 20 | P42704 LPPRC_HUMAN  | K.NTKLDDLFLK.R         |       | 3 | 3,2307 | 0,265 | 0,606  |
| 20 | Q8NBF2 NHLC2_HUMAN  | E.KDSLQYQYLQK.V        |       | 2 | 3,2284 | 0,329 | -0,793 |
| 20 | P49756 RBM25_HUMAN  | K.LGASNSPGQPNSVKR.K    |       | 2 | 3,227  | 0,479 | -0,403 |
| 20 | Q15370 ELOB_HUMAN   | R.LYKDDQLDDGK.T        |       | 3 | 3,2268 | 0,234 | -0,064 |
| 20 | P17252 KPCA_HUMAN   | K.GAENFDKFFTR.G        |       | 2 | 3,2252 | 0,23  | 0,092  |
| 20 | Q07955 SFRS1_HUMAN  | R.TKDIEDVFYK.Y         |       | 2 | 3,2252 | 0,313 | -0,388 |
| 20 | P31946 1433B_HUMAN  | E.SYKDSTLIM*QLLR.D     |       | 3 | 3,2218 | 0,172 | -0,115 |
| 20 | Q9UQE7 SMC3_HUMAN   | R.QIAAIHKDLEDTE.A      |       | 2 | 3,2217 | 0,526 | -1,645 |
| 20 | O60271 JIP4_HUMAN   | E.LDM*DKDLSGYK.G       |       | 3 | 3,2205 | 0,191 | 0,351  |
| 20 | Q9GZR1 SENP6_HUMAN  | E.NTQNTSLCSGTVVHGR.R   |       | 3 | 3,2199 | 0,312 | 0,106  |
| 20 | P22570 ADRO_HUMAN   | K.NVINTFTQTAHSGR.C     |       | 2 | 3,2193 | 0,508 | -0,316 |
| 20 | P26639 SYTC_HUMAN   | K.M*GGEEKPIGAGEEK.Q    |       | 3 | 3,2155 | 0,349 | 0      |

|    |                    |                           |            |   |        |       |        |
|----|--------------------|---------------------------|------------|---|--------|-------|--------|
| 20 | Q9BYJ9 YTHD1_HUMAN | K.HTTSIFDDFAHYE.K         |            | 2 | 3,2141 | 0,486 | -0,231 |
| 20 | Q02952 AKA12_HUMAN | E.SQVHM*M*AAAVADGTR.A     |            | 2 | 3,2134 | 0,522 | -0,309 |
| 20 | Q6GYQ0 GRIPE_HUMAN | E.DFAAQVFSPAPYHHLPSDADH.- |            | 3 | 3,2114 | 0,318 | -0,63  |
| 20 | P55011 S12A2_HUMAN | R.TFGHNTM*DAVPR.I         |            | 3 | 3,2112 | 0,138 | 0,201  |
| 20 | Q9Y2W2 WBP11_HUMAN | R.KVGFALDLPPR.R           |            | 2 | 3,2034 | 0,332 | -0,503 |
| 20 | Q9NS87 KIF15_HUMAN | K.AYQLHSRVPVKLS#PE.M      | S677:      | 3 | 3,1957 | 0,402 | -0,508 |
| 20 | Q13283 G3BP1_HUMAN | K.VM*SQNFTNCHTK.I         |            | 2 | 3,1949 | 0,365 | -0,329 |
| 20 | P54920 SNAA_HUMAN  | K.HDAATCFVDAGNAFK.K       |            | 3 | 3,193  | 0,215 | 0,113  |
| 20 | Q13206 DDX10_HUMAN | K.NHDFSAGLIIGGK.D         |            | 2 | 3,1914 | 0,415 | -0,367 |
| 20 | O00425 IF2B3_HUMAN | K.ITGHFYACQVAQR.K         |            | 2 | 3,1891 | 0,385 | -1,18  |
| 20 | Q6NZI2 PTRF_HUMAN  | E.VKLPAKLS#ISKS#LKE.S     | S167:S171: | 2 | 3,1887 | 0,426 | -0,271 |
| 20 | P50548 ERF_HUMAN   | R.RVSSDLQHATAQLSLE.H      |            | 2 | 3,1882 | 0,454 | -0,348 |
| 20 | Q9H6F5 CCD86_HUMAN | R.AGLGSPERPPKTS#PGSPR.L   | S66:       | 3 | 3,1868 | 0,336 | -0,587 |
| 20 | P27708 PYR1_HUMAN  | E.GRLSLDLLQR.L            |            | 2 | 3,184  | 0,299 | -0,379 |
| 20 | P36542 ATPG_HUMAN  | R.THSDQFLVAFKE.V          |            | 3 | 3,1839 | 0,202 | -0,129 |
| 20 | Q7Z6E9 RBBP6_HUMAN | E.NKTDSLFLVPSR.D          |            | 3 | 3,183  | 0,088 | 0      |
| 20 | Q8NG31 CASC5_HUMAN | K.SHTVAIDNQIFK.Q          |            | 2 | 3,1769 | 0,544 | -0,533 |
| 20 | P52888 THOP1_HUMAN | K.KLSLLCIDFNK.N           |            | 2 | 3,1752 | 0,296 | -0,542 |
| 20 | P14625 ENPL_HUMAN  | R.FQSSHPTDITSLDQYVE.R     |            | 2 | 3,1751 | 0,248 | -0,116 |
| 20 | P09497 CLCB_HUMAN  | E.KVAQLCDFNPK.S           |            | 2 | 3,1728 | 0,363 | -0,555 |
| 20 | P50990 TCPQ_HUMAN  | E.KEDGAISTIVLR.G          |            | 2 | 3,172  | 0,249 | -0,281 |
| 20 | Q7Z4V5 HDGR2_HUMAN | K.FALKVDS#PDVKR.C         | S490:      | 3 | 3,172  | 0,468 | 0,44   |
| 20 | Q3MHD2 LSM12_HUMAN | E.GQQLFQTIHK.T            |            | 2 | 3,1705 | 0,373 | -0,712 |
| 20 | Q9H2J4 PDCL3_HUMAN | K.KPIEDVLLSSVR.R          |            | 3 | 3,17   | 0,227 | -0,809 |
| 20 | Q8NI27 THOC2_HUMAN | R.KLTM*VVLSEK.M           |            | 2 | 3,1668 | 0,416 | -0,878 |
| 20 | P10109 ADX_HUMAN   | R.SSS#EDKITVHFINR.D       | S63:       | 2 | 3,1658 | 0,462 | -0,356 |
| 20 | P59074 CG301_HUMAN | K.AAHDNM*DIDKVDE.L        |            | 3 | 3,1654 | 0,153 | 0,246  |
| 20 | P55769 NH2L1_HUMAN | E.DKNVPYVVR.S             |            | 3 | 3,1637 | 0,185 | 0,074  |
| 20 | P33991 MCM4_HUMAN  | R.LAHHLVALYQSEEQAEEL      |            | 3 | 3,1624 | 0,148 | 0      |
| 20 | Q9HCN4 GPN1_HUMAN  | R.KDM*GSVALDAGTAK.D       |            | 2 | 3,16   | 0,372 | -0,707 |
| 20 | Q13330 MTA1_HUMAN  | R.RDISSTLIALADK.H         |            | 2 | 3,1587 | 0,298 | -0,261 |
| 20 | Q9H2P0 ADNP_HUMAN  | K.ISNDNPEEHVLK.V          |            | 2 | 3,1537 | 0,398 | -1,137 |
| 20 | Q9Y6W5 WASF2_HUMAN | R.DVVGNDVATILSR.R         |            | 2 | 3,1532 | 0,434 | -0,18  |

|    |                     |                               |            |   |        |       |        |
|----|---------------------|-------------------------------|------------|---|--------|-------|--------|
| 20 | P50443 S26A2_HUMAN  | E.QHNVSPRDS#AEGNDSYPSGIHLE.L  | S16:       | 3 | 3,1523 | 0,278 | -0,353 |
| 20 | A8MTJ2 A8MTJ2_HUMAN | R.RPS#LPALHFIK.G              | S16:       | 3 | 3,1522 | 0,413 | 0,336  |
| 20 | P23396 RS3_HUMAN    | R.KFVADGIFKAE.L               |            | 2 | 3,1513 | 0,35  | -0,398 |
| 20 | Q8NI27 THOC2_HUMAN  | R.KLTM*VVLSEK.M               |            | 3 | 3,1509 | 0,296 | 0,146  |
| 20 | Q92621 NU205_HUMAN  | K.FQDDNVEGDKVSK.K             |            | 3 | 3,1489 | 0,266 | 0,062  |
| 20 | Q13813 SPTA2_HUMAN  | K.KGDILLNLTNK.D               |            | 2 | 3,1446 | 0,311 | 0      |
| 20 | Q9BZE9 ASPC1_HUMAN  | E.HAISPSAADVLVAR.Y            |            | 2 | 3,1412 | 0,453 | -0,867 |
| 20 | O14965 STK6_HUMAN   | E.LANALSYCHSK.R               |            | 2 | 3,1385 | 0,428 | -0,483 |
| 20 | P37802 TAGL2_HUMAN  | R.TLM*NLGGLAVAR.D             |            | 2 | 3,1382 | 0,338 | -0,594 |
| 20 | Q92558 WASF1_HUMAN  | E.RIENDVATILSR.R              |            | 2 | 3,1349 | 0,331 | -0,616 |
| 20 | Q32MZ4 LRRF1_HUMAN  | E.TGLRDEKPIKTEVPGS#PAGTE.G    | S521:      | 2 | 3,1348 | 0,302 | 0,108  |
| 20 | Q9UJM3 ERRFI_HUMAN  | E.VTSSTYSDEDRPPK.V            |            | 2 | 3,1334 | 0,406 | -0,771 |
| 20 | P21333 FLNA_HUMAN   | R.RAPS#VANVGSCHCDLSLK.I       | S2152:     | 2 | 3,1331 | 0,381 | 0,323  |
| 20 | P05387 RLA2_HUMAN   | K.NIEDVIAQGIGK.L              |            | 2 | 3,1276 | 0,373 | -0,194 |
| 20 | P07355 ANXA2_HUMAN  | E.KDIISDTSGDFR.K              |            | 2 | 3,1261 | 0,361 | -1,622 |
| 20 | Q02539 H11_HUMAN    | K.KALAAAGYDVEK.N              |            | 2 | 3,1257 | 0,287 | -0,592 |
| 20 | P09493 TPM1_HUMAN   | K.KATDAEADVASLNR.R            |            | 3 | 3,1242 | 0,105 | -0,188 |
| 20 | Q12802 AKP13_HUMAN  | E.NYNFLPHSPS#KKDSE.W          | S1733:     | 3 | 3,1238 | 0,355 | -1,39  |
| 20 | Q14684 RRP1B_HUMAN  | E.QKPLHGVLKT#PTSS#PASSPLVAK.K | T728:S732: | 3 | 3,1199 | 0,162 | -0,365 |
| 20 | P04264 K2C1_HUMAN   | R.TNAENEFVIKK.D               |            | 2 | 3,1173 | 0,458 | -0,788 |
| 20 | Q32MZ4 LRRF1_HUMAN  | E.TGLRDEKPIKTEVPGS#PAGTE.G    | S521:      | 3 | 3,1172 | 0,367 | 0,243  |
| 20 | Q15370 ELOB_HUMAN   | R.LYKDDQLLDDGK.T              |            | 2 | 3,1155 | 0,449 | -0,686 |
| 20 | Q9H3N1 TXND1_HUMAN  | K.KDFINFISDKE.W               |            | 2 | 3,1146 | 0,299 | -0,81  |
| 20 | P09661 RU2A_HUMAN   | R.LKGLLQSGQIPGR.E             |            | 2 | 3,114  | 0,268 | -0,803 |
| 20 | P56182 RRP1_HUMAN   | R.SEKPPAGSICR.A               |            | 3 | 3,1126 | 0,31  | 0,761  |
| 20 | O00220 TR10A_HUMAN  | K.EKIQDLLVDSGK.F              |            | 2 | 3,1124 | 0,298 | -0,544 |
| 20 | Q06124 PTN11_HUMAN  | E.SQSHPGDFVLSVR.T             |            | 2 | 3,1117 | 0,468 | -0,256 |
| 20 | O75534 CSDE1_HUMAN  | R.LKNITLDDASAPR.L             |            | 3 | 3,1113 | 0,11  | -0,259 |
| 20 | P18754 RCC1_HUMAN   | R.KKPALVSIPEDVVQAE.A          |            | 3 | 3,1099 | 0,356 | -0,212 |
| 20 | P50548 ERF_HUMAN    | R.ARPPGPPDLGAFR.G             |            | 2 | 3,1095 | 0,295 | -0,813 |
| 20 | Q9UGV2 NDRG3_HUMAN  | E.IERPILQQNDNK.S              |            | 3 | 3,1094 | 0,192 | 0,524  |
| 20 | P27708 PYR1_HUMAN   | R.IHRAS#DPGLPAEEPKE.K         | S1859:     | 2 | 3,0988 | 0,451 | -1,671 |
| 20 | P52701 MSH6_HUMAN   | R.RPDHPDFDASTLYVPE.D          |            | 2 | 3,0972 | 0,429 | -0,131 |



|    |                    |                          |        |   |        |       |        |
|----|--------------------|--------------------------|--------|---|--------|-------|--------|
| 20 | O00148 DDX39_HUMAN | R.RILVATNLFGR.G          |        | 2 | 3,0969 | 0,459 | -0,775 |
| 20 | P46087 NOL1_HUMAN  | K.GISAGAVQTAGKK.G        |        | 2 | 3,0961 | 0,391 | -0,719 |
| 20 | Q8N3X1 FNBP4_HUMAN | R.RPILQLSPPGPR.G         |        | 2 | 3,096  | 0,351 | -0,275 |
| 20 | Q13573 SNW1_HUMAN  | E.IHVAQYPLDM*GR.K        |        | 3 | 3,0959 | 0,313 | 0,065  |
| 20 | Q14157 UBP2L_HUMAN | D.LKNPSDSAVHS#PFTK.R     | S416:  | 3 | 3,0958 | 0,269 | -1,071 |
| 20 | Q9H501 ESF1_HUMAN  | E.NKTDLDNSIGIK.K         |        | 2 | 3,0925 | 0,323 | -0,833 |
| 20 | Q99615 DNJC7_HUMAN | E.KAVQFFVQALR.M          |        | 2 | 3,0906 | 0,379 | -1,027 |
| 20 | Q8N1G0 ZN687_HUMAN | R.HGLQLGAQS#PGRGTTLAR.G  | S1057: | 3 | 3,0904 | 0,406 | -0,481 |
| 20 | Q9Y2W2 WBP11_HUMAN | R.KVGFALDLPPR.R          |        | 3 | 3,0895 | 0,254 | 0,377  |
| 20 | P35269 T2FA_HUMAN  | R.LRLDTGPQSLSGK.S        |        | 3 | 3,0886 | 0,344 | 0,067  |
| 20 | Q4G0N4 CE033_HUMAN | K.NVEHIIDSLRNE.G         |        | 2 | 3,0868 | 0,492 | -0,594 |
| 20 | Q9BXJ9 NARG1_HUMAN | R.RLPLNFLSGEK.F          |        | 2 | 3,0868 | 0,421 | -0,766 |
| 20 | P10809 CH60_HUMAN  | K.DRVTDALNATR.A          |        | 2 | 3,0852 | 0,37  | -0,495 |
| 20 | P52948 NUP98_HUMAN | K.HSNSNSVDDTIVALNM*R.A   |        | 3 | 3,0849 | 0,274 | -0,097 |
| 20 | P23528 COF1_HUMAN  | K.KAVLFCLSEDK.K          |        | 2 | 3,0846 | 0,343 | -0,279 |
| 20 | P13645 K1C10_HUMAN | R.SQYEQLAEQNRK.D         |        | 2 | 3,0839 | 0,356 | -0,653 |
| 20 | Q58FF8 H90B2_HUMAN | K.HSQFLGYPTILYLEK.E      |        | 3 | 3,082  | 0,114 | 0      |
| 20 | Q9Y3R0 GRIP1_HUMAN | E.SGNKLDLVISR.N          |        | 3 | 3,0814 | 0,124 | 0,38   |
| 20 | Q15477 SKIV2_HUMAN | K.FKKDPPLAAVTTAVQE.L     |        | 2 | 3,081  | 0,269 | -0,356 |
| 20 | Q14157 UBP2L_HUMAN | R.RYPSSISS#PQKDLTQAK.N   | S609:  | 3 | 3,0782 | 0,36  | -0,971 |
| 20 | Q9UBF8 PI4KB_HUMAN | R.RLS#EQLAHTPTAFK.R      | S511:  | 2 | 3,0761 | 0,507 | -0,509 |
| 20 | O00429 DNM1L_HUMAN | K.NKLYTDFDEIRQE.I        |        | 2 | 3,076  | 0,363 | -0,876 |
| 20 | P09382 LEG1_HUMAN  | K.DSNNLCLHFNPR.F         |        | 2 | 3,0741 | 0,348 | -0,41  |
| 20 | Q32MZ4 LRRF1_HUMAN | R.NM*PGLSAATLASLGGTSSR.R |        | 2 | 3,0727 | 0,412 | 0,135  |
| 20 | Q9BUL5 PHF23_HUMAN | K.LKDSLFDLDGPK.V         |        | 2 | 3,0697 | 0,301 | -0,634 |
| 20 | Q5QE6 TDIF2_HUMAN  | E.KQIVGTPVNSESDTR.Q      |        | 2 | 3,0693 | 0,373 | -0,07  |
| 20 | P17252 KPCA_HUMAN  | K.GAENFDKFFTR.G          |        | 3 | 3,0678 | 0,269 | 0,343  |
| 20 | O60256 KPRB_HUMAN  | E.SDLVDGRHS#PPM*VR.S     | S227:  | 3 | 3,0661 | 0,165 | -1,651 |
| 20 | P11021 GRP78_HUMAN | K.KVTHAVVTVPAYFND.A      |        | 2 | 3,0653 | 0,429 | -0,22  |
| 20 | P49792 RBP2_HUMAN  | E.SSINYTFKT#PEKAK.E      | T2613: | 3 | 3,0621 | 0,106 | -1,944 |
| 20 | Q6PL18 ATAD2_HUMAN | K.DNFNHLHLNR.N           |        | 2 | 3,0621 | 0,265 | -0,378 |
| 20 | Q86TV6 TTC7B_HUMAN | E.KLPISS#STSNLHVDRE.Q    | S57:   | 3 | 3,0606 | 0,376 | -1,178 |
| 20 | O00273 DFFA_HUMAN  | R.SKACDILAIK.S           |        | 2 | 3,0605 | 0,421 | -0,791 |

|    |                     |                         |        |   |        |       |        |
|----|---------------------|-------------------------|--------|---|--------|-------|--------|
| 20 | Q02952 AKA12_HUMAN  | E.M*KGS#VEEPKPEEPK.R    | S660:  | 2 | 3,0592 | 0,347 | -0,508 |
| 20 | Q56P03 EAPP_HUMAN   | E.DKLSLGTGSSSGNGK.V     |        | 2 | 3,0582 | 0,333 | -0,49  |
| 20 | P46087 NOL1_HUMAN   | K.RIQDIVGILR.D          |        | 2 | 3,0572 | 0,133 | -0,516 |
| 20 | Q9H9A6 LRC40_HUMAN  | K.HLNSILVLDLR.D         |        | 2 | 3,0563 | 0,398 | -0,377 |
| 20 | P62988 UBIQ_HUMAN   | K.IQDKEGIPDQQR.L        |        | 2 | 3,056  | 0,36  | -0,961 |
| 20 | Q96AQ6 PBIP1_HUMAN  | R.ALQAPHS#PSKTDGKE.L    | S43:   | 3 | 3,0557 | 0,256 | -0,222 |
| 20 | Q9ULT8 HECD1_HUMAN  | K.RQFS#ALVPAFDPRPGR.T   | S1774: | 3 | 3,0538 | 0,135 | -0,193 |
| 20 | P02545 LMNA_HUMAN   | R.LKDLEALLNSK.E         |        | 2 | 3,0536 | 0,323 | -0,392 |
| 20 | P27987 IP3KB_HUMAN  | E.AHIQAQSSAIQAPRS#PR.L  | S166:  | 2 | 3,0522 | 0,586 | -0,386 |
| 20 | P02545 LMNA_HUMAN   | R.LKDLEALLNSK.E         |        | 3 | 3,0521 | 0,102 | 0,22   |
| 20 | Q3ZCQ8 TIM50_HUMAN  | K.SNKQNLFLGSLTSR.L      |        | 3 | 3,0509 | 0,209 | 0      |
| 20 | A8K6Q8 A8K6Q8_HUMAN | E.KLDSTDFSTIK.L         |        | 2 | 3,0468 | 0,402 | -0,9   |
| 20 | P08238 HS90B_HUMAN  | E.TALLSSGFSLEDPQTHSNR.I |        | 3 | 3,0461 | 0,386 | -0,266 |
| 20 | Q4G0N4 CE033_HUMAN  | K.NVEHIIDSLRNE.G        |        | 3 | 3,042  | 0,425 | -0,381 |
| 20 | P18583 SON_HUMAN    | K.RLTDLDKAQLE.I         |        | 2 | 3,0412 | 0,253 | -0,776 |
| 20 | Q13428 TCOF_HUMAN   | R.TNVVTM*PTAHPR.I       |        | 2 | 3,0345 | 0,4   | -1,093 |
| 20 | P18858 DNL1_HUMAN   | E.KEGEDGDQPTT#PPKPLK.T  | T183:  | 3 | 3,0322 | 0,257 | -0,668 |
| 20 | P35579 MYH9_HUMAN   | E.KQIATLHAQVAD.M        |        | 2 | 3,0316 | 0,415 | -0,377 |
| 20 | O95400 CD2B2_HUMAN  | K.KLVDPVAGSGGPGSR.F     |        | 2 | 3,0291 | 0,405 | -0,699 |
| 20 | P31946 1433B_HUMAN  | E.SYKDSTLIM*QLLR.D      |        | 2 | 3,026  | 0,418 | -0,231 |
| 20 | P19105 MLRM_HUMAN   | E.KLNGTDPEDVIR.N        |        | 2 | 3,0254 | 0,252 | -0,45  |
| 20 | P41236 IPP2_HUMAN   | R.KLAAAEGLEPK.Y         |        | 2 | 3,0244 | 0,328 | -1,299 |
| 20 | P35658 NU214_HUMAN  | R.LNHLVDSLQQLR.L        |        | 2 | 3,0242 | 0,364 | -0,34  |
| 20 | O75533 SF3B1_HUMAN  | R.GGDSIGETPTPGASKR.K    |        | 2 | 3,0229 | 0,388 | -0,159 |
| 20 | P08133 ANXA6_HUMAN  | E.DALSSDTSGHFR.R        |        | 2 | 3,0224 | 0,485 | -1,132 |
| 20 | Q96T88 UHRF1_HUMAN  | R.KAPS#RDEPCSSTRPALE.E  | S165:  | 3 | 3,0219 | 0,256 | -0,265 |
| 20 | Q9NQ57 INCE_HUMAN   | E.QHVTQLM*STEPLPR.T     |        | 3 | 3,0202 | 0,28  | 0,111  |
| 20 | Q06830 PRDX1_HUMAN  | K.RTIAQDYGVKADE.G       |        | 2 | 3,0193 | 0,424 | -0,541 |
| 20 | O00148 DDX39_HUMAN  | K.GSYVSIHSSGFR.D        |        | 2 | 3,0183 | 0,487 | -0,658 |
| 20 | Q8N6N3 CA052_HUMAN  | K.RLPGPDELFR.S          |        | 2 | 3,0166 | 0,253 | -0,407 |
| 20 | Q9Y5J1 UTP18_HUMAN  | R.LRLEEDKPAVE.R         |        | 3 | 3,0149 | 0,143 | 0,422  |
| 20 | Q8N5I9 CL045_HUMAN  | K.GKIEVLDSPAK.K         |        | 2 | 3,0129 | 0,374 | -0,294 |
| 20 | P50570 DYN2_HUMAN   | K.TLNQQLTNHIRE.S        |        | 2 | 3,0105 | 0,377 | -0,749 |

|    |                     |                           |       |   |        |       |        |
|----|---------------------|---------------------------|-------|---|--------|-------|--------|
| 20 | P39880 CUX1_HUMAN   | K.AANLNSIIHRLE.K          |       | 2 | 3,0088 | 0,254 | -0,452 |
| 20 | Q92619 HMHA1_HUMAN  | K.LYDPGQQYASHVR.Q         |       | 2 | 3,0035 | 0,393 | -0,398 |
| 20 | Q9UPT5 EXOC7_HUMAN  | E.KNLPVFQPGVK.L           |       | 3 | 2,9998 | 0,252 | -0,671 |
| 20 | Q99460 PSMD1_HUMAN  | E.KVSTAVLSITAK.A          |       | 2 | 2,9967 | 0,445 | -1,502 |
| 20 | Q9H773 XTP3A_HUMAN  | R.CRVDLPLAVLSK.M          |       | 3 | 2,9944 | 0,295 | 0,2    |
| 20 | Q0VAX7 Q0VAX7_HUMAN | E.KAVNPFLADVDK.L          |       | 2 | 2,9914 | 0,4   | -1,019 |
| 20 | P30101 PDIA3_HUMAN  | K.KQAGPASVPLRTEEE.F       |       | 2 | 2,9896 | 0,374 | -1,06  |
| 20 | Q8WXV6 Q8WXV6_HUMAN | R.KRTSS#EDNLYLAVLR.A      | S21:  | 3 | 2,9847 | 0,193 | -0,892 |
| 20 | Q9C0H9 SNIP_HUMAN   | R.TEKPSKS#PPPPPPR.R       | S875: | 3 | 2,9828 | 0,298 | -0,688 |
| 20 | Q96GQ7 DDX27_HUMAN  | R.SADFNPDFVFTEKE.G        |       | 2 | 2,9808 | 0,432 | -0,371 |
| 20 | Q14738 2A5D_HUMAN   | R.RKS#ELPQDVYTIK.A        | S573: | 2 | 2,9806 | 0,171 | -1,031 |
| 20 | Q92560 BAP1_HUMAN   | E.AAGSCAQAPSHS#PPNPKP.L   | S327: | 3 | 2,979  | 0,445 | -0,291 |
| 20 | P54652 HSP72_HUMAN  | R.ARFEELNADLFR.G          |       | 2 | 2,9789 | 0,352 | -0,741 |
| 20 | Q12756 KIF1A_HUMAN  | R.SHAVFNIIFTQK.R          |       | 2 | 2,9777 | 0,279 | -0,174 |
| 20 | Q9P2M7 CING_HUMAN   | R.SHSQASLAGPGPVDPSNR.S    |       | 3 | 2,9775 | 0,138 | -1,132 |
| 20 | Q9Y2L9 LRCH1_HUMAN  | E.DSCHRLS#PVKGE.F         | S370: | 3 | 2,9766 | 0,228 | -0,125 |
| 20 | P25705 ATPA_HUMAN   | K.HALIIYDLSK.Q            |       | 2 | 2,9764 | 0,421 | -0,568 |
| 20 | P68104 EF1A1_HUMAN  | E.HALLAYTLGVK.Q           |       | 2 | 2,9757 | 0,335 | -0,514 |
| 20 | O15061 DMN_HUMAN    | R.HVTLGPGQSPLSRE.V        |       | 2 | 2,9739 | 0,51  | -0,908 |
| 20 | Q96B23 CR025_HUMAN  | E.AGHLDPGFLASDK.T         |       | 3 | 2,9725 | 0,13  | 0,413  |
| 20 | O14617 AP3D1_HUMAN  | R.M*FDKNLQDLVR.G          |       | 3 | 2,9717 | 0,271 | -0,066 |
| 20 | Q32P44 EMAL3_HUMAN  | R.KAISSANLLVR.S           |       | 2 | 2,9714 | 0,415 | -0,729 |
| 20 | P08621 RU17_HUMAN   | R.YDERPGPS#PLPHR.D        | S226: | 3 | 2,9701 | 0,196 | -0,685 |
| 20 | P49792 RBP2_HUMAN   | R.FKLQDVADSFK.K           |       | 2 | 2,9693 | 0,375 | -0,47  |
| 20 | Q2T9K0 TMM44_HUMAN  | E.LLGSQVHQDSVR.T          |       | 2 | 2,968  | 0,476 | -0,82  |
| 20 | Q99571 P2RX4_HUMAN  | K.SDASCTAGSAGTHSNGVSTGR.C |       | 3 | 2,9642 | 0,329 | -0,37  |
| 20 | Q86W92 LIPB1_HUMAN  | E.DDM*FKDFAAR.S           |       | 3 | 2,963  | 0,194 | 1,707  |
| 20 | P12270 TPR_HUMAN    | K.LSDKVVASVKE.G           |       | 2 | 2,9623 | 0,324 | -0,727 |
| 20 | Q9UDY2 ZO2_HUMAN    | R.GKLQLVVL.R.D            |       | 2 | 2,9618 | 0,251 | -0,357 |
| 20 | P21333 FLNA_HUMAN   | K.RIANLQTDLSGLR.L         |       | 3 | 2,9617 | 0,249 | 0      |
| 20 | Q8WYP5 AHTF1_HUMAN  | E.NLLDVIKDTR.S            |       | 2 | 2,9606 | 0,329 | -0,308 |
| 20 | P21333 FLNA_HUMAN   | K.FNGTHIPGSPFK.I          |       | 2 | 2,9606 | 0,379 | -0,656 |
| 20 | Q9BYW2 SETD2_HUMAN  | K.KLDELPIFKSE.F           |       | 2 | 2,9581 | 0,323 | -0,462 |

|    |                     |                         |            |   |        |       |        |
|----|---------------------|-------------------------|------------|---|--------|-------|--------|
| 20 | Q99717 SMAD5_HUMAN  | E.FNPQHSLLVQFR.N        |            | 3 | 2,957  | 0,099 | 0      |
| 20 | A5YKK6 CNOT1_HUMAN  | K.SSGKDFHQTQFLIQE.C     |            | 2 | 2,9538 | 0,297 | -0,484 |
| 20 | Q9NTJ3 SMC4_HUMAN   | E.ANVLATAPDKK.K         |            | 2 | 2,953  | 0,317 | -0,108 |
| 20 | Q9Y2B0 CNPY2_HUMAN  | E.YGEQIDPSTHR.K         |            | 2 | 2,9506 | 0,409 | -0,375 |
| 20 | Q9NX46 ARHL2_HUMAN  | E.AHDTVDLTSLVR.H        |            | 2 | 2,9489 | 0,368 | -0,46  |
| 20 | Q9P2D1 CHD7_HUMAN   | E.LKGVEVGADTGSK.S       |            | 3 | 2,9379 | 0,239 | 0      |
| 20 | P04181 OAT_HUMAN    | E.NADKLGIIILR.N         |            | 2 | 2,937  | 0,33  | -0,767 |
| 20 | Q9H6K5 YS027_HUMAN  | R.RPPTPGPDTSVSGPR.L     |            | 3 | 2,9316 | 0,314 | -0,12  |
| 20 | O60610 DIAP1_HUMAN  | R.LGLHQVLQDLR.E         |            | 3 | 2,9307 | 0,296 | -0,071 |
| 20 | Q5T670 Q5T670_HUMAN | R.LQKS#PEKS#PRPPLKE.R   | S150:S154: | 3 | 2,9241 | 0,133 | -0,29  |
| 20 | P06576 ATPB_HUMAN   | E.LSEEDKLTVSR.A         |            | 3 | 2,9228 | 0,214 | -0,358 |
| 20 | Q9C0C2 TB182_HUMAN  | K.KIPSVEDSLGEGSR.D      |            | 2 | 2,9194 | 0,378 | -0,331 |
| 20 | Q9BY32 ITPA_HUMAN   | E.GLHQLLAGFEDK.S        |            | 2 | 2,9189 | 0,444 | -0,551 |
| 20 | P62979 RS27A_HUMAN  | E.CGAGVFM*ASHFDR.H      |            | 2 | 2,9187 | 0,363 | -0,249 |
| 20 | Q5SW79 CE170_HUMAN  | E.DNKTDDEGPDTPSYNR.D    |            | 3 | 2,9164 | 0,247 | -0,107 |
| 20 | Q9BYD6 RM01_HUMAN   | K.KFQILDFTSPK.Q         |            | 2 | 2,9151 | 0,295 | -0,645 |
| 20 | Q8N6N3 CA052_HUMAN  | K.RLPGPDELFR.S          |            | 3 | 2,9144 | 0,183 | 1,143  |
| 20 | Q96BK5 PINX1_HUMAN  | R.SKTDLDCIFGK.R         |            | 2 | 2,9136 | 0,332 | -0,57  |
| 20 | Q9NRR5 UBQL4_HUMAN  | K.DKEEIVICDR.A          |            | 2 | 2,9132 | 0,258 | -0,478 |
| 20 | P62736 ACTA_HUMAN   | K.DSYVGDEAQSQR.G        |            | 2 | 2,9123 | 0,449 | -1,621 |
| 20 | P11586 C1TC_HUMAN   | R.KVVGDVAYDEAKE.R       |            | 3 | 2,9119 | 0,176 | -0,321 |
| 20 | Q5SRE5 NU188_HUMAN  | K.ANKDVASPLKE.L         |            | 2 | 2,9101 | 0,397 | -0,52  |
| 20 | Q9Y4B5 K0802_HUMAN  | R.CDLAAHLGLR.A          |            | 2 | 2,9087 | 0,375 | -0,542 |
| 20 | P00558 PGK1_HUMAN   | R.AHSSM*VGVNLPQK.A      |            | 2 | 2,9079 | 0,491 | -1,146 |
| 20 | P48634 BAT2_HUMAN   | E.NKGNPNVSLVPK.D        |            | 2 | 2,9065 | 0,147 | -0,706 |
| 20 | Q6W2J9 BCOR_HUMAN   | E.KFLTDYLNLDLQGR.N      |            | 3 | 2,9045 | 0,185 | 0      |
| 20 | P42224 STAT1_HUMAN  | E.NNFLQHNIR.K           |            | 2 | 2,9016 | 0,278 | -0,481 |
| 20 | Q99549 MPP8_HUMAN   | E.KLM*PVSAQTPK.G        |            | 2 | 2,9006 | 0,291 | -0,401 |
| 20 | Q9UHD8 SEPT9_HUMAN  | E.VLGHKT#PEPAPR.R       | T142:      | 3 | 2,8997 | 0,157 | 0,397  |
| 20 | P62158 CALM_HUMAN   | R.VFDKDGNGYISAAELR.H    |            | 3 | 2,8964 | 0,151 | -0,417 |
| 20 | Q86TI2 DPP9_HUMAN   | K.APHDFQFVQKTDE.S       |            | 3 | 2,8957 | 0,141 | -0,468 |
| 20 | P35579 MYH9_HUMAN   | D.VLLQVDDERR.N          |            | 2 | 2,8932 | 0,186 | 0      |
| 20 | Q9UKS6 PACN3_HUMAN  | E.KGGRS#PDEVTLTSIVPTR.D | S319:      | 2 | 2,8922 | 0,248 | -0,184 |

|    |                     |                          |            |   |        |       |        |
|----|---------------------|--------------------------|------------|---|--------|-------|--------|
| 20 | P49023 PAXI_HUMAN   | E.QNDKPYCQNCFLK.L        |            | 3 | 2,8922 | 0,167 | -0,32  |
| 20 | P46013 KI67_HUMAN   | R.GQNLLQTQDHAK.A         |            | 2 | 2,8906 | 0,373 | -0,541 |
| 20 | P78312 CD008_HUMAN  | K.RPPS#VGDVFGISKE.D      | S642:      | 3 | 2,8866 | 0,351 | -0,322 |
| 20 | P26583 HMGB2_HUMAN  | K.SEHPGLSIGDTAK.K        |            | 2 | 2,8836 | 0,468 | -0,465 |
| 20 | P46060 RAGP1_HUMAN  | R.SKGAVAIADAIR.G         |            | 2 | 2,8829 | 0,341 | 0,104  |
| 20 | Q9Y6A5 TACC3_HUMAN  | E.STAPT NHLVAGR.A        |            | 2 | 2,8808 | 0,491 | -0,199 |
| 20 | P42704 LPPRC_HUMAN  | E.CDRDQM*YYNLLK.L        |            | 2 | 2,8777 | 0,374 | -0,597 |
| 20 | Q9NY61 AATF_HUMAN   | K.LASASLLDTRK.Y          |            | 2 | 2,8775 | 0,309 | -1,04  |
| 20 | P06748 NPM_HUMAN    | E.KT#PKTPKGPSS#VEDIK.A   | T234:S243: | 2 | 2,8742 | 0,348 | -0,587 |
| 20 | O14802 RPC1_HUMAN   | R.HLIDGDVLFNR.Q          |            | 2 | 2,874  | 0,369 | -0,611 |
| 20 | Q9NXG2 THUM1_HUMAN  | E.VVKS#PKDPSQLNSK.Q      | S270:      | 3 | 2,8706 | 0,177 | -0,455 |
| 20 | P49591 SYSC_HUMAN   | R.FKDPGLVDQLVK.A         |            | 2 | 2,8685 | 0,292 | -0,539 |
| 20 | Q9H0C8 ILKAP_HUMAN  | R.CLLDTFKHTDEE.F         |            | 2 | 2,868  | 0,325 | -0,647 |
| 20 | Q9H8Y5 ANKZ1_HUMAN  | R.LKDKPLLSALDFE.K        |            | 2 | 2,8675 | 0,395 | -0,164 |
| 20 | Q4VCS5 AMOT_HUMAN   | R.HFALDAAATVAAQR.D       |            | 2 | 2,8642 | 0,328 | -0,423 |
| 20 | P07951 TPM2_HUMAN   | R.KLVILEGELER.S          |            | 2 | 2,8638 | 0,244 | -0,563 |
| 20 | Q9H2J4 PDCL3_HUMAN  | K.KPIEDVLLSSVR.R         |            | 2 | 2,8564 | 0,45  | -0,99  |
| 20 | Q5VY92 Q5VY92_HUMAN | R.GTDRLDLPVTTR.S         |            | 3 | 2,8562 | 0,178 | 0      |
| 20 | Q9UIW2 PLXA1_HUMAN  | E.CLFHIPGSPAR.V          |            | 2 | 2,8559 | 0,439 | -0,389 |
| 20 | Q9Y230 RUVB2_HUMAN  | K.GTEVQVDDIKR.V          |            | 2 | 2,8558 | 0,365 | -0,871 |
| 20 | Q9Y3R0 GRIP1_HUMAN  | E.SGNKLDLVISR.N          |            | 2 | 2,8557 | 0,311 | -0,71  |
| 20 | Q9H165 BC11A_HUMAN  | E.KAVDKPPS#PSPIEM*K.K    | S86:       | 3 | 2,8553 | 0,122 | -0,425 |
| 20 | O76003 GLRX3_HUMAN  | R.HASSGSFLPS#ANEHLKE.D   | S124:      | 3 | 2,855  | 0,252 | -0,58  |
| 20 | O94826 TOM70_HUMAN  | E.GRAS#PAPGSGHPEGGAHLD.M | S91:       | 3 | 2,8546 | 0,247 | -0,752 |
| 20 | Q96SB3 NEB2_HUMAN   | R.KIHFSTAPIQVFSTYSNE.D   |            | 3 | 2,8532 | 0,293 | 0,354  |
| 20 | Q9Y5K6 CD2AP_HUMAN  | K.YFSLKPEEKDE.K          |            | 2 | 2,8528 | 0,324 | -0,881 |
| 20 | O15047 SET1A_HUMAN  | E.AEPPKQQQQQR.E          |            | 3 | 2,8527 | 0,176 | -0,463 |
| 20 | Q8N3X1 FNBP4_HUMAN  | R.RPILQLSPPGPR.G         |            | 3 | 2,8512 | 0,258 | 0,343  |
| 20 | Q13136 LIPA1_HUMAN  | K.KM*QM*DGNVSGTQRLD.S    |            | 3 | 2,8467 | 0,278 | -0,214 |
| 20 | A0FGR8 ESYT2_HUMAN  | E.NFTFFIHNPK.R           |            | 2 | 2,8448 | 0,275 | -0,482 |
| 20 | P11586 C1TC_HUMAN   | R.KITIGQAPTEK.G          |            | 2 | 2,8439 | 0,338 | -0,72  |
| 20 | Q9C0C9 UBE2O_HUMAN  | R.LLFSHDLVSGR.Y          |            | 2 | 2,8435 | 0,5   | -0,588 |
| 20 | Q8TEM1 PO210_HUMAN  | K.LHGLQAILVHE.A          |            | 3 | 2,843  | 0,242 | 0,52   |

|    |                    |                         |       |   |        |       |        |
|----|--------------------|-------------------------|-------|---|--------|-------|--------|
| 20 | O43815 STRN_HUMAN  | E.KSVIDTSTIVR.K         |       | 2 | 2,8425 | 0,286 | -0,701 |
| 20 | P13667 PDIA4_HUMAN | K.RFDVSGYPTLK.I         |       | 2 | 2,8396 | 0,293 | -0,666 |
| 20 | P27824 CALX_HUMAN  | K.KTHLYTLILNPDNSFE.I    |       | 3 | 2,8358 | 0,208 | -0,384 |
| 20 | Q9HAN9 NMNA1_HUMAN | E.ASDCDHQQNS#PTLERPGR.K | S117: | 3 | 2,835  | 0,25  | -0,596 |
| 20 | P48643 TCPE_HUMAN  | K.IDDIRKPGESE.-         |       | 2 | 2,8321 | 0,309 | 0,088  |
| 20 | Q9H7N4 SFR19_HUMAN | R.RVFVVGTEAEACRE.G      |       | 3 | 2,8298 | 0,219 | -0,338 |
| 20 | P06753 TPM3_HUMAN  | R.KLVIIEGDLER.T         |       | 2 | 2,8297 | 0,297 | -0,76  |
| 20 | O00244 ATOX1_HUMAN | E.HSM*DTLLATLK.K        |       | 2 | 2,8292 | 0,415 | -0,294 |
| 20 | Q13442 HAP28_HUMAN | K.GVEGLIDIENPNR.V       |       | 2 | 2,8288 | 0,187 | 0,086  |
| 20 | Q99717 SMAD5_HUMAN | E.FNPQHSLLVQFR.N        |       | 2 | 2,8279 | 0,148 | -0,657 |
| 20 | Q8IWL3 HSC20_HUMAN | R.LVHPDFFSQR.S          |       | 3 | 2,8266 | 0,229 | 0,44   |
| 20 | Q13177 PAK2_HUMAN  | K.KNPQAVLDVVK.F         |       | 2 | 2,8257 | 0,323 | -0,498 |
| 20 | Q63HQ0 CD016_HUMAN | E.LSDSGIRHS#DTDQQTR.-   | S295: | 3 | 2,8246 | 0,134 | -0,386 |
| 20 | P18621 RL17_HUMAN  | E.KEQIVKPEEE.V          |       | 2 | 2,8219 | 0,26  | -0,184 |
| 20 | O43303 CE110_HUMAN | R.RLDDLIDGLQKE.N        |       | 3 | 2,8203 | 0,194 | -0,065 |
| 20 | P23258 TBG1_HUMAN  | K.IHEDIFDIIDR.E         |       | 2 | 2,819  | 0,403 | -0,528 |
| 20 | P47756 CAPZB_HUMAN | D.HGFAGVILIK.K          |       | 2 | 2,8187 | 0,345 | -0,809 |
| 20 | O75821 EIF3G_HUMAN | R.CPYKDTLGPM*QKE.L      |       | 3 | 2,8177 | 0,244 | 0      |
| 20 | Q9BZE9 ASPC1_HUMAN | E.HAISPSAADVLVAR.Y      |       | 3 | 2,816  | 0,215 | -0,715 |
| 20 | Q2NKX9 U561_HUMAN  | R.KPDLQVYLPR.H          |       | 3 | 2,8144 | 0,217 | 0,372  |
| 20 | P49591 SYSC_HUMAN  | R.FKDPGLVDQLVK.A        |       | 3 | 2,8114 | 0,148 | -0,067 |
| 20 | Q58FF7 H90B3_HUMAN | K.VILHLKEDQTE.Y         |       | 2 | 2,8109 | 0,4   | 0,368  |
| 20 | Q02218 ODO1_HUMAN  | E.DHLAVQSLIR.A          |       | 2 | 2,8082 | 0,253 | -0,741 |
| 20 | P62875 RPAB5_HUMAN | E.GDALDALGLKR.Y         |       | 2 | 2,8081 | 0,204 | -0,54  |
| 20 | P62979 RS27A_HUMAN | E.CGAGVFM*ASHFDR.H      |       | 3 | 2,8073 | 0,346 | 0,249  |
| 20 | Q06203 PUR1_HUMAN  | K.LYVSNLGIGHTR.Y        |       | 2 | 2,8071 | 0,41  | -0,367 |
| 20 | Q9UNX4 WDR3_HUMAN  | K.SFDLIHSPHGE.L         |       | 2 | 2,8071 | 0,371 | -0,492 |
| 20 | Q9ULW0 TPX2_HUMAN  | K.SVSQVTKS#VDFHFR.T     | S257: | 3 | 2,806  | 0,286 | -0,639 |
| 20 | P49023 PAXI_HUMAN  | R.KDYFDM*FAPK.C         |       | 3 | 2,8052 | 0,117 | 0,859  |
| 20 | Q01130 SFRS2_HUMAN | K.VDNLTYSRTS#PDTLRR.V   | S26:  | 3 | 2,8049 | 0,252 | -0,582 |
| 20 | P80723 BASP_HUMAN  | E.TKSDGAPASDSKPGSSE.A   |       | 3 | 2,8045 | 0,2   | -0,339 |
| 20 | Q9H4H8 FA83D_HUMAN | R.KADLDPEM*PAEGK.A      |       | 3 | 2,804  | 0,082 | 0,194  |
| 20 | P51858 HDGF_HUMAN  | R.AGDLLEDS#PKRPK.E      | S165: | 2 | 2,8036 | 0,265 | -1,053 |

|    |                    |                                   |              |   |        |       |        |
|----|--------------------|-----------------------------------|--------------|---|--------|-------|--------|
| 20 | Q96JG6 CC132_HUMAN | E.QSRS#PSVSPSKQPVSTSSK.T          | S494:        | 3 | 2,8027 | 0,267 | -0,356 |
| 20 | P13797 PLST_HUMAN  | R.HVIPM*NPNTDDLFLK.A              |              | 2 | 2,802  | 0,474 | -0,589 |
| 20 | Q9BQG0 MBB1A_HUMAN | E.SRDPAQPM*#SPGEATQSGARPADR.Y     | S11:         | 3 | 2,8016 | 0,255 | -0,517 |
| 20 | P35269 T2FA_HUMAN  | K.VLNHFHFSIM*QQR.R                |              | 3 | 2,8013 | 0,215 | -0,658 |
| 20 | P08473 NEP_HUMAN   | E.DRNDPM*LLYNK.M                  |              | 3 | 2,8003 | 0,172 | 0,59   |
| 20 | O43865 SAHH2_HUMAN | E.KYSFM*ATVTK.A                   |              | 2 | 2,7998 | 0,339 | -0,307 |
| 20 | P62750 RL23A_HUMAN | K.KLYDIDVAK.V                     |              | 2 | 2,7994 | 0,304 | -0,916 |
| 20 | O94967 WDR47_HUMAN | E.HSVIKPPLGDSPPGS#LSR.S           | S581:        | 3 | 2,7977 | 0,309 | 0      |
| 20 | P07355 ANXA2_HUMAN | R.KLM*VALAK.G                     |              | 2 | 2,7977 | 0,275 | -1,988 |
| 20 | Q96I25 SPF45_HUMAN | R.SM*GGAAIAPPTSLVEKDKELPR.D       |              | 3 | 2,7977 | 0,331 | -0,16  |
| 20 | Q9UQ35 SRRM2_HUMAN | E.KAGM*S#SNQSISSPVLDAVPRTPS#RER.S | S1397:S1415: | 3 | 2,7973 | 1     | -0,124 |
| 20 | O60271 JIP4_HUMAN  | E.LDM*DKDLSGYK.G                  |              | 2 | 2,7968 | 0,309 | -0,75  |
| 20 | Q5M775 SPEC1_HUMAN | E.TPSRPLSSTSNPFK.S                |              | 3 | 2,7932 | 0,279 | -0,482 |
| 20 | Q9UHB6 LIMA1_HUMAN | E.ILERPAQLANAR.E                  |              | 3 | 2,7916 | 0,316 | -1,082 |
| 20 | Q12849 GRSF1_HUMAN | E.DAVAAM*LKDR.S                   |              | 2 | 2,7893 | 0,263 | -0,221 |
| 20 | Q99798 ACON_HUMAN  | K.TGREDIANLADEFK.D                |              | 3 | 2,7887 | 0,134 | 0      |
| 20 | Q08J23 NSUN2_HUMAN | E.GFVIANDVDNKR.C                  |              | 2 | 2,7872 | 0,275 | -0,996 |
| 20 | P11413 G6PD_HUMAN  | R.LSNHISSLFRE.D                   |              | 3 | 2,787  | 0,11  | 0,281  |
| 20 | Q13206 DDX10_HUMAN | R.HNVFGLDLKDE.K                   |              | 2 | 2,7864 | 0,434 | -0,664 |
| 20 | Q9Y2X7 GIT1_HUMAN  | E.HSLLDPAQVQSGR.R                 |              | 2 | 2,7859 | 0,24  | -0,607 |
| 20 | P22626 ROA2_HUMAN  | R.GFGFVTFDDHDPVDKIVLQK.Y          |              | 3 | 2,7859 | 0,365 | -0,241 |
| 20 | P02765 FETUA_HUMAN | K.CDSSPDSAEDVRK.V                 |              | 3 | 2,7839 | 0,28  | -0,374 |
| 20 | Q56P03 EAPP_HUMAN  | E.VDVLLHGT#PDQKR.K                | T37:         | 2 | 2,7827 | 0,343 | -0,626 |
| 20 | Q02790 FKBP4_HUMAN | K.DKFSFDLKGGE.V                   |              | 2 | 2,7824 | 0,356 | -0,294 |
| 20 | P42704 LPPRC_HUMAN | K.NTKLDDLFLK.R                    |              | 2 | 2,781  | 0,315 | -0,606 |
| 20 | P16403 H12_HUMAN   | R.SGVSLAALKK.A                    |              | 2 | 2,7797 | 0,255 | -0,376 |
| 20 | Q9Y2D4 EXC6B_HUMAN | R.CLHIYSVLGAR.E                   |              | 2 | 2,7764 | 0,336 | 0      |
| 20 | Q9H773 XTP3A_HUMAN | R.KYTELPHGAISE.D                  |              | 2 | 2,7729 | 0,367 | -0,726 |
| 20 | Q15185 TEBP_HUMAN  | E.IDLFHCIDPNDSK.H                 |              | 2 | 2,77   | 0,139 | -0,465 |
| 20 | Q01082 SPTB2_HUMAN | E.SEHPDQAQAILSR.L                 |              | 3 | 2,7671 | 0,135 | 0,063  |
| 20 | Q14692 BMS1_HUMAN  | K.LSKPSQVSSGQK.L                  |              | 3 | 2,7665 | 0,164 | 0,66   |
| 20 | Q99569 PKP4_HUMAN  | R.SSYASQHSQLGQDLR.S               |              | 3 | 2,7657 | 0,27  | -0,327 |
| 20 | Q5H9R7 SAPS3_HUMAN | R.IANCIVHSTDK.G                   |              | 2 | 2,7654 | 0,379 | -0,485 |

|    |                    |                        |       |   |        |       |        |
|----|--------------------|------------------------|-------|---|--------|-------|--------|
| 20 | Q8TCS8 PNPT1_HUMAN | R.KVLQSPATTVVR.T       |       | 3 | 2,7654 | 0,226 | 0      |
| 20 | P10809 CH60_HUMAN  | D.RGYISPYFINTSK.G      |       | 3 | 2,7629 | 0,186 | 0,118  |
| 20 | P31949 S10AB_HUMAN | K.KLDTNSDGQLDFSE.F     |       | 2 | 2,7622 | 0,257 | 0,311  |
| 20 | Q13283 G3BP1_HUMAN | K.VM*SQNFTNCHTK.I      |       | 3 | 2,7614 | 0,236 | 0,617  |
| 20 | O60841 IF2P_HUMAN  | K.VEGNTVHIEVK.E        |       | 3 | 2,7547 | 0,209 | -0,149 |
| 20 | Q5VWN6 CJ018_HUMAN | K.SSQNHLPFGDLK.T       |       | 3 | 2,7546 | 0,267 | 0,545  |
| 20 | Q15084 PDIA6_HUMAN | K.AATALKDVK.V          |       | 2 | 2,7539 | 0,26  | -0,961 |
| 20 | P23246 SFPQ_HUMAN  | R.FATHAAALSVR.N        |       | 2 | 2,7538 | 0,431 | -0,32  |
| 20 | P46777 RL5_HUMAN   | K.HIM*GQNVADYM*R.Y     |       | 3 | 2,7527 | 0,095 | -0,187 |
| 20 | Q01082 SPTB2_HUMAN | K.HLLGVEDLLQK.H        |       | 2 | 2,7516 | 0,325 | -0,193 |
| 20 | O43896 KIF1C_HUMAN | R.AHIDKLTGILQE.V       |       | 2 | 2,7511 | 0,409 | -0,821 |
| 20 | Q8IUD2 RB6I2_HUMAN | E.KVSLQGDLEKE.A        |       | 2 | 2,751  | 0,294 | -0,253 |
| 20 | Q9UHB6 LIMA1_HUMAN | E.VQQPVHPKPLS#PDSR.A   | S362: | 3 | 2,7501 | 0,204 | -1,244 |
| 20 | Q9ULH0 ARMS_HUMAN  | E.YLSDALLDKK.D         |       | 2 | 2,7498 | 0,333 | -1,046 |
| 20 | Q6NZY4 ZCHC8_HUMAN | K.YHQVFSHIVSLE.G       |       | 2 | 2,7491 | 0,353 | -0,335 |
| 20 | Q13107 UBP4_HUMAN  | E.NM*VVADVYNHR.F       |       | 3 | 2,7487 | 0,247 | 0,343  |
| 20 | Q9UPT5 EXOC7_HUMAN | E.KNLPVFQPGVK.L        |       | 2 | 2,7483 | 0,368 | -1,193 |
| 20 | Q9H1I8 ASCC2_HUMAN | R.RPFTIPQVLR.T         |       | 2 | 2,7467 | 0,282 | -0,298 |
| 20 | Q9P206 K1522_HUMAN | R.KLQLERPVSPE.T        |       | 2 | 2,7461 | 0,303 | -0,941 |
| 20 | P15170 ERF3A_HUMAN | K.HLIVLINK.M           |       | 2 | 2,7458 | 0,225 | -0,449 |
| 20 | Q9BWF3 RBM4_HUMAN  | K.NYGFVHIEDK.T         |       | 2 | 2,7454 | 0,359 | -0,2   |
| 20 | Q8IVM0 CCD50_HUMAN | E.DHTLAHSLQEQE.I       |       | 2 | 2,7437 | 0,328 | -0,607 |
| 20 | Q9P2N5 RBM27_HUMAN | E.LKTSSAVST#PSKVK.T    | T888: | 3 | 2,7421 | 0,094 | 0,06   |
| 20 | P51946 CCNH_HUMAN  | K.GYEDDDYVSKK.S        |       | 2 | 2,742  | 0,327 | -0,185 |
| 20 | Q03252 LMNB2_HUMAN | K.LSSDQNDKAASAAREE.L   |       | 3 | 2,7412 | 0,219 | -0,216 |
| 20 | Q9H4I2 ZH3_HUMAN   | R.KVS#PIKINLK.N        | S723: | 2 | 2,7412 | 0,247 | -0,8   |
| 20 | Q13442 HAP28_HUMAN | K.KVTQLDLGPK.E         |       | 2 | 2,739  | 0,332 | -0,804 |
| 20 | Q9ULS5 TMCC3_HUMAN | R.HDM*NTLSLPLNIR.R     |       | 2 | 2,736  | 0,167 | -1,347 |
| 20 | Q9H4H8 FA83D_HUMAN | R.KADLDPEM*PAEGK.A     |       | 2 | 2,7327 | 0,343 | -0,344 |
| 20 | Q92560 BAP1_HUMAN  | R.SANPTRPSS#PVTSHISK.V | S521: | 2 | 2,7307 | 0,366 | -0,264 |
| 20 | Q04721 NOTC2_HUMAN | R.REPVGQDAVGLK.N       |       | 3 | 2,7304 | 0,256 | 0,216  |
| 20 | O43390 HNRPR_HUMAN | K.DYAFVHFEDR.G         |       | 2 | 2,7291 | 0,438 | -0,658 |
| 20 | Q9H4H8 FA83D_HUMAN | R.TTDFHNPGYPK.Y        |       | 2 | 2,7288 | 0,33  | -0,478 |



|    |                     |                            |            |   |        |       |        |
|----|---------------------|----------------------------|------------|---|--------|-------|--------|
| 20 | Q14004 CD2L5_HUMAN  | K.TKPPLQVTKVE.N            |            | 3 | 2,7284 | 0,111 | 0,442  |
| 20 | Q14738 2A5D_HUMAN   | R.KSELPQDVYTIK.A           |            | 2 | 2,727  | 0,251 | -0,859 |
| 20 | Q14676 MDC1_HUMAN   | E.KNFGFSLQDALSR.A          |            | 3 | 2,7263 | 0,28  | 0,247  |
| 20 | Q13416 ORC2_HUMAN   | R.VVSAPVGKET#PSKR.M        | T226:      | 2 | 2,7246 | 0,328 | -0,477 |
| 20 | Q9UQ35 SRRM2_HUMAN  | K.VKPET#PPRQSHS#GSISPYPK.V | T983:S990: | 3 | 2,7235 | 0,175 | -1,089 |
| 20 | Q9Y5Q8 TF3C5_HUMAN  | E.LRDTM*SLM*IR.Q           |            | 3 | 2,7229 | 0,2   | -0,072 |
| 20 | Q07666 KHDR1_HUMAN  | R.SGSM*DPSGAHPSVR.Q        |            | 3 | 2,7227 | 0,136 | -0,065 |
| 20 | Q5VW38 GP107_HUMAN  | K.VHLNTFGFFKD.G            |            | 2 | 2,7224 | 0,375 | -0,645 |
| 20 | Q9UQE7 SMC3_HUMAN   | E.LKSLDQAINDK.K            |            | 2 | 2,7213 | 0,216 | -1,862 |
| 20 | Q8IVM0 CCD50_HUMAN  | R.LVQHDLQVAK.Q             |            | 2 | 2,7213 | 0,469 | -0,954 |
| 20 | Q9Y5A9 YTHD2_HUMAN  | K.HTTPSIFDDFSHYE.K         |            | 2 | 2,721  | 0,358 | -0,305 |
| 20 | O00170 AIP_HUMAN    | E.GRGELPDFQDGTK.A          |            | 3 | 2,7203 | 0,172 | 0,129  |
| 20 | P21333 FLNA_HUMAN   | K.VPVHDVTDASK.V            |            | 2 | 2,7196 | 0,374 | -0,836 |
| 20 | P78527 PRKDC_HUMAN  | R.CGAALAGHQLIR.G           |            | 3 | 2,7164 | 0,355 | 0,866  |
| 20 | O95785 WIZ_HUMAN    | E.ARSPSDLHIS#PLAK.K        | S1134:     | 3 | 2,7156 | 0,15  | -0,116 |
| 20 | O96019 ACL6A_HUMAN  | D.SFQAILDHTYK.M            |            | 2 | 2,7154 | 0,137 | 0      |
| 20 | Q12756 KIF1A_HUMAN  | R.RVLDTSVAYVRGEE.N         |            | 3 | 2,7151 | 0,19  | -0,344 |
| 20 | Q59GW8 Q59GW8_HUMAN | K.HTLSFVDVGTGK.V           |            | 3 | 2,7127 | 0,216 | 0,29   |
| 20 | P36578 RL4_HUMAN    | D.IVNFVHTNLR.K             |            | 2 | 2,7114 | 0,289 | -0,603 |
| 20 | Q92878 RAD50_HUMAN  | K.IAQDKLNDIKE.K            |            | 3 | 2,7106 | 0,142 | -0,568 |
| 20 | P46063 RECQ1_HUMAN  | K.VKDILQNVFK.L             |            | 2 | 2,71   | 0,361 | -0,709 |
| 20 | O00220 TR10A_HUMAN  | E.KIQDLLVDSGK.F            |            | 2 | 2,7081 | 0,386 | -1,104 |
| 20 | O60716 CTND1_HUMAN  | R.FHPEPYGLEDDQR.S          |            | 3 | 2,7081 | 0,157 | 0,228  |
| 20 | P21333 FLNA_HUMAN   | K.KNGQHVASSIPVVISQSE.I     |            | 3 | 2,708  | 0,315 | -0,648 |
| 20 | Q12792 TWF1_HUMAN   | E.DKQPCYILFR.L             |            | 3 | 2,7079 | 0,149 | -0,136 |
| 20 | Q05524 ENO1B_HUMAN  | R.IGAEVYHNLK.N             |            | 2 | 2,7073 | 0,25  | -0,853 |
| 20 | Q9UER7 DAXX_HUMAN   | K.YAM*LQDKSEEGEER.K        |            | 2 | 2,707  | 0,41  | -0,466 |
| 20 | Q8TEW0 PARD3_HUMAN  | R.DNARS#SLSASHPM*VGK.W     | S220:      | 3 | 2,7049 | 0,086 | -0,73  |
| 20 | O95425 SVIL_HUMAN   | E.VM*KPDDDETFAK.F          |            | 3 | 2,7031 | 0,245 | 0,453  |
| 20 | Q96JM3 ZN828_HUMAN  | R.KPALFPEPAK.T             |            | 2 | 2,702  | 0,386 | -0,667 |
| 20 | P12814 ACTN1_HUMAN  | E.NIEEDFRDGLK.L            |            | 2 | 2,6997 | 0,218 | -0,639 |
| 20 | O00273 DFFA_HUMAN   | R.LQQTQSLHSLR.S            |            | 2 | 2,6971 | 0,435 | -0,931 |
| 20 | P51452 DUS3_HUMAN   | E.RAADFIDQALAQK.N          |            | 3 | 2,6969 | 0,105 | 0,19   |

|    |                    |                         |       |   |        |       |        |
|----|--------------------|-------------------------|-------|---|--------|-------|--------|
| 20 | Q8IXW5 RPAP2_HUMAN | K.TSDIDNPSHFEK.Q        |       | 2 | 2,6969 | 0,307 | -0,527 |
| 20 | P05388 RLA0_HUMAN  | E.KTSFFQALGITTK.I       |       | 2 | 2,6963 | 0,345 | -0,423 |
| 20 | Q8ND56 LS14A_HUMAN | K.SFFDNISCDNRRER.R      |       | 2 | 2,695  | 0,12  | -0,412 |
| 20 | O43815 STRN_HUMAN  | K.LIHSM*VAHLE.A         |       | 2 | 2,6942 | 0,378 | -0,314 |
| 20 | Q9Y2I7 FYV1_HUMAN  | E.GLPTNSTSDSRPK.S       |       | 2 | 2,6941 | 0,455 | -0,538 |
| 20 | P36542 ATPG_HUMAN  | R.THSDQFLVAFK.E         |       | 2 | 2,6926 | 0,402 | -0,566 |
| 20 | P61604 CH10_HUMAN  | K.GKGGEIQPVSVK.V        |       | 2 | 2,6908 | 0,321 | 0,102  |
| 20 | Q9Y2W2 WBP11_HUMAN | R.RREDEM*LYS#PE.L       | S237: | 2 | 2,6901 | 0,226 | -0,081 |
| 20 | O00170 AIP_HUMAN   | E.VLDHCSSILNK.Y         |       | 3 | 2,6883 | 0,234 | -0,142 |
| 20 | O94885 SASH1_HUMAN | R.SLHVGSNNSDPM*GKE.G    |       | 3 | 2,6865 | 0,096 | -0,23  |
| 20 | P55265 DSRAD_HUMAN | E.M*PSFYSHGLPR.C        |       | 3 | 2,686  | 0,188 | -0,14  |
| 20 | P49792 RBP2_HUMAN  | K.LQDVADSFKK.I          |       | 2 | 2,6842 | 0,217 | -0,742 |
| 20 | P62937 PIIA_HUMAN  | E.LFADKVPK.T            |       | 2 | 2,6835 | 0,086 | -0,465 |
| 20 | Q71U36 TBA1A_HUMAN | E.HGIQPDGQM*PSDK.T      |       | 2 | 2,683  | 0,433 | 0,086  |
| 20 | Q12906 ILF3_HUMAN  | E.DITQSAQHALR.L         |       | 2 | 2,6821 | 0,346 | -1,377 |
| 20 | P42285 SK2L2_HUMAN | R.M*YSHPLHNDPNLE.T      |       | 2 | 2,6819 | 0,426 | -0,308 |
| 20 | Q7Z7E8 UB2Q1_HUMAN | K.GNTLLLQHLK.R          |       | 2 | 2,6799 | 0,414 | -0,644 |
| 20 | Q9NY61 AATF_HUMAN  | E.LLFQYPDTR.Y           |       | 2 | 2,6793 | 0,289 | -0,423 |
| 20 | P78347 GTF2I_HUMAN | E.VTIEDDDYS#PPSKRPK.A   | S319: | 3 | 2,6774 | 0,423 | -0,38  |
| 20 | P18615 NELFE_HUMAN | E.KGPVPTFQPFQR.S        |       | 3 | 2,6756 | 0,178 | -0,13  |
| 20 | Q8WUD4 CCD12_HUMAN | R.RVPQAKPVAVEE.K        |       | 2 | 2,6743 | 0,38  | -0,092 |
| 20 | Q9UBG0 MRC2_HUMAN  | K.AGQLSQGAAEEDHGCR.K    |       | 3 | 2,6726 | 0,383 | -0,217 |
| 20 | P55884 EIF3B_HUMAN | E.YASPAHAVDAVK.N        |       | 2 | 2,6719 | 0,361 | -0,397 |
| 20 | Q9UBF2 COPG2_HUMAN | E.VTVSDHIQK.V           |       | 2 | 2,6718 | 0,311 | -0,119 |
| 20 | P52888 THOP1_HUMAN | K.KLSLLCIDFNK.N         |       | 3 | 2,6717 | 0,103 | 0      |
| 20 | Q96F44 TRI11_HUMAN | R.VRPLQDAAEDLK.A        |       | 2 | 2,6716 | 0,337 | -0,09  |
| 20 | Q6KC79 NIPBL_HUMAN | E.KAAM*YDIIS#SPSKDSTK.L | S349: | 3 | 2,6708 | 0,231 | -0,85  |
| 20 | Q52LJ0 FA98B_HUMAN | E.LQASQILQNK.H          |       | 2 | 2,6704 | 0,197 | -0,864 |
| 20 | P35527 K1C9_HUMAN  | R.IKFEM*EQNLR.Q         |       | 3 | 2,6693 | 0,161 | 0,276  |
| 20 | Q9UPN9 TRI33_HUMAN | K.NYVHFAATQVQNR.I       |       | 3 | 2,6658 | 0,107 | -0,473 |
| 20 | Q92598 HS105_HUMAN | E.CLNQRPPENPDTDK.N      |       | 3 | 2,6651 | 0,301 | -0,434 |
| 20 | P08574 CY1_HUMAN   | R.GLLSSLDHTSIR.R        |       | 2 | 2,665  | 0,396 | -0,282 |
| 20 | P35908 K22E_HUMAN  | K.FASFIDKVR.F           |       | 2 | 2,6646 | 0,259 | -0,451 |

|    |                    |                          |       |   |        |       |        |
|----|--------------------|--------------------------|-------|---|--------|-------|--------|
| 20 | Q96N67 DOCK7_HUMAN | R.SAVRPASLNLNR.S         |       | 2 | 2,664  | 0,311 | -0,752 |
| 20 | P50213 IDH3A_HUMAN | E.HVIVDGVVQSIK.L         |       | 2 | 2,6623 | 0,376 | -0,566 |
| 20 | O94826 TOM70_HUMAN | K.NREPLM*PSPQFIK.S       |       | 2 | 2,6608 | 0,351 | -0,465 |
| 20 | P11142 HSP7C_HUMAN | R.RFDDAVVQSDM*K.H        |       | 2 | 2,6577 | 0,464 | -0,77  |
| 20 | Q9H773 XTP3A_HUMAN | R.CRVDLPLAVLSK.M         |       | 2 | 2,6568 | 0,169 | -0,356 |
| 20 | P38159 HNRPG_HUMAN | R.DYSDHPSGGSYR.D         |       | 2 | 2,6566 | 0,5   | -1,001 |
| 20 | Q9HAU5 RENT2_HUMAN | K.LGLVNDKDSK.D           |       | 2 | 2,656  | 0,365 | -0,336 |
| 20 | Q9NQS7 INCE_HUMAN  | K.TDQADGPREPPQSAR.R      |       | 3 | 2,6548 | 0,18  | -0,113 |
| 20 | P00367 DHE3_HUMAN  | K.LQHGSILGFPK.A          |       | 2 | 2,6509 | 0,408 | -0,306 |
| 20 | Q5T5Y3 CAMP1_HUMAN | K.REQS#PSQHGKDPASLLASE.L | S862: | 3 | 2,65   | 0,177 | -1,296 |
| 20 | P10809 CH60_HUMAN  | D.RGYISPYFINTSK.G        |       | 2 | 2,6484 | 0,227 | -0,158 |
| 20 | Q8WVV9 HNRLL_HUMAN | K.VSVSPVVHVR.G           |       | 2 | 2,6469 | 0,242 | -0,791 |
| 20 | Q15003 CND2_HUMAN  | E.SVSALVDKFK.K           |       | 2 | 2,6459 | 0,411 | -1,004 |
| 20 | Q8TF05 PP4R1_HUMAN | K.YFASIHPASTK.I          |       | 2 | 2,6437 | 0,466 | -0,399 |
| 20 | P16949 STMN1_HUMAN | E.SVPEFPLS#PPKKK.D       | S38:  | 2 | 2,6426 | 0,105 | -0,398 |
| 20 | Q99615 DNJC7_HUMAN | R.KLDDAIEDCTNAVK.L       |       | 3 | 2,6424 | 0,129 | -0,345 |
| 20 | P31949 S10AB_HUMAN | K.YAGKDGNYTSLK.T         |       | 3 | 2,6416 | 0,193 | 0,124  |
| 20 | Q9BPX6 CBAA1_HUMAN | E.HLGLDQYIIK.R           |       | 2 | 2,6402 | 0,343 | -0,508 |
| 20 | P55265 DSRAD_HUMAN | E.M*PSFYSHGLPR.C         |       | 2 | 2,6396 | 0,406 | -0,187 |
| 20 | P18846 ATF1_HUMAN  | K.ILKDLSSDTR.G           |       | 2 | 2,6358 | 0,273 | -0,86  |
| 20 | Q7Z6Z7 HUWE1_HUMAN | K.YICQKPSIQK.A           |       | 2 | 2,6351 | 0,292 | 0,096  |
| 20 | Q9BVV6 K0586_HUMAN | K.FHADAILSFAK.Q          |       | 2 | 2,635  | 0,285 | -0,9   |
| 20 | P50991 TCPD_HUMAN  | R.SIHDALCVIR.C           |       | 2 | 2,634  | 0,294 | -0,412 |
| 20 | Q9Y2D4 EXC6B_HUMAN | R.CLHIYSVLGAR.E          |       | 3 | 2,6316 | 0,081 | 1,135  |
| 20 | P31943 HNRH1_HUMAN | R.LRGLPFGCSKEE.I         |       | 2 | 2,6309 | 0,337 | -0,701 |
| 20 | P62191 PRS4_HUMAN  | R.KIEFPLPEK.T            |       | 2 | 2,6305 | 0,161 | -0,201 |
| 20 | P63151 2ABA_HUMAN  | E.ISVDSLDFNKK.I          |       | 2 | 2,6294 | 0,39  | -0,578 |
| 20 | Q8N668 COMD1_HUMAN | R.HSAQIHTPVAIIE.L        |       | 2 | 2,6288 | 0,206 | -0,603 |
| 20 | Q9Y2X9 ZN281_HUMAN | E.SQKEDPFNIAEPR.V        |       | 2 | 2,6273 | 0,315 | -0,797 |
| 20 | P80723 BASP_HUMAN  | E.AKAEPKPEQE.Q           |       | 2 | 2,6265 | 0,459 | -0,283 |
| 20 | P07919 QCR6_HUMAN  | E.LFDLHAR.D              |       | 2 | 2,6251 | 0,374 | -0,718 |
| 20 | Q6PJT7 ZC3HE_HUMAN | R.VLSGHLM*QTR.D          |       | 2 | 2,6227 | 0,388 | -0,421 |
| 20 | Q08211 DHX9_HUMAN  | E.QDHDLQAILQERE.L        |       | 2 | 2,6222 | 0,347 | -0,306 |

|    |                    |                      |        |   |        |       |        |
|----|--------------------|----------------------|--------|---|--------|-------|--------|
| 20 | O60447 EVI5_HUMAN  | E.TGVGFPLHGK.S       |        | 2 | 2,6217 | 0,398 | -1,505 |
| 20 | Q14008 CKAP5_HUMAN | K.KYSDADIEPFLK.N     |        | 2 | 2,6216 | 0,321 | 0,342  |
| 20 | Q99986 VRK1_HUMAN  | E.NLRDILLQGLK.A      |        | 2 | 2,6178 | 0,214 | -0,285 |
| 20 | Q92878 RAD50_HUMAN | K.IAQDKLNDIKE.K      |        | 2 | 2,6176 | 0,122 | -1,706 |
| 20 | Q15043 S39AE_HUMAN | K.ALLNHLVDVGVR.G     |        | 3 | 2,6175 | 0,153 | 0,289  |
| 20 | O43293 DAPK3_HUMAN | K.GALLGTSGLKR.R      |        | 2 | 2,6139 | 0,163 | 0,114  |
| 20 | Q12849 GRSF1_HUMAN | E.THEDAVAAM*LK.D     |        | 2 | 2,6133 | 0,42  | -0,609 |
| 20 | Q9H267 VP33B_HUMAN | E.HFSNVFGFLSQK.A     |        | 2 | 2,6131 | 0,397 | -0,519 |
| 20 | P0C7M2 RA1L3_HUMAN | K.RGFAFVTDDHD.S      |        | 2 | 2,6128 | 0,343 | -0,428 |
| 20 | P13645 K1C10_HUMAN | R.RVLDELTLTK.A       |        | 2 | 2,6107 | 0,293 | -0,411 |
| 20 | Q08AF3 SLFN5_HUMAN | R.HGVGLDVPPIFR.S     |        | 2 | 2,6104 | 0,427 | -0,56  |
| 20 | P42892 ECE1_HUMAN  | D.TLQVVTAYHR.T       |        | 2 | 2,6074 | 0,403 | -0,411 |
| 20 | Q9Y4W6 AFG32_HUMAN | E.KVGQISFDLPR.Q      |        | 3 | 2,6062 | 0,153 | 0,943  |
| 20 | P07355 ANXA2_HUMAN | E.GDHSTPPSAYGSVK.A   |        | 2 | 2,6058 | 0,394 | -0,174 |
| 20 | P35579 MYH9_HUMAN  | K.LKDVLQVDDER.R      |        | 3 | 2,6055 | 0,191 | -1,774 |
| 20 | P0C7M2 RA1L3_HUMAN | R.GFAFVTDDHD.S       |        | 2 | 2,6055 | 0,297 | -0,48  |
| 20 | P62906 RL10A_HUMAN | K.AGKFPSLLTHNE.N     |        | 2 | 2,6047 | 0,184 | -0,929 |
| 20 | P09936 UCHL1_HUMAN | E.DTLLKDAAK.V        |        | 2 | 2,6046 | 0,227 | -0,626 |
| 20 | Q8NI27 THOC2_HUMAN | K.IDTHPSHSST#VK.D    | T1308: | 3 | 2,6025 | 0,212 | -0,233 |
| 20 | Q9UNN8 EPCR_HUMAN  | R.LHM*LQISYFR.D      |        | 2 | 2,6015 | 0,371 | 0,276  |
| 20 | Q5VT06 CE350_HUMAN | E.M*IRPQSAISSFR.V    |        | 3 | 2,5988 | 0,18  | 0,324  |
| 20 | O95239 KIF4A_HUMAN | R.SSDAFTTQHALR.Q     |        | 2 | 2,5986 | 0,451 | -1,006 |
| 20 | Q13242 SFRS9_HUMAN | R.HGLVPFAFVR.F       |        | 2 | 2,5984 | 0,307 | -0,961 |
| 20 | Q8IXT5 RB12B_HUMAN | R.FPPEDFRHS#PEDFR.R  | S575:  | 3 | 2,5981 | 0,131 | -0,493 |
| 20 | P23258 TBG1_HUMAN  | K.IHEDIFDIIDR.E      |        | 3 | 2,5964 | 0,106 | 0,132  |
| 20 | O15259 NPHP1_HUMAN | K.KGEILLVIEK.K       |        | 2 | 2,5957 | 0,097 | 0,32   |
| 20 | Q8TD16 BICD2_HUMAN | K.LPLDNKTST#PKKE.G   | T319:  | 2 | 2,5957 | 0,277 | -0,079 |
| 20 | Q9UIW2 PLXA1_HUMAN | E.CLFHIPGSPAR.V      |        | 3 | 2,5947 | 0,107 | 0,874  |
| 20 | Q4G0N4 CE033_HUMAN | K.NVEHIIDSLR.N       |        | 2 | 2,5944 | 0,32  | 0,204  |
| 20 | Q96A65 EXOC4_HUMAN | K.SKDPSGLLISVIR.T    |        | 3 | 2,5901 | 0,117 | 0,198  |
| 20 | P78527 PRKDC_HUMAN | K.HDVGAYM*LM*YK.G    |        | 2 | 2,59   | 0,46  | -0,538 |
| 20 | Q7KZ85 SPT6H_HUMAN | R.KKLPGYTDAALQEAQE.I |        | 3 | 2,5878 | 0,315 | -0,415 |
| 20 | Q96SU4 OSBL9_HUMAN | K.HCIVLLQIAK.D       |        | 2 | 2,5862 | 0,405 | -0,408 |

|    |                     |                        |       |   |        |       |        |
|----|---------------------|------------------------|-------|---|--------|-------|--------|
| 20 | P02545 LMNA_HUMAN   | R.TLEGELHDLR.G         |       | 2 | 2,5862 | 0,225 | -0,206 |
| 20 | Q9NRY4 GRLF1_HUMAN  | E.NIYVPHDSTQGK.I       |       | 2 | 2,5845 | 0,398 | -1,013 |
| 20 | Q0VF46 Q0VF46_HUMAN | K.T#PKHSPIKEEPCGSLSE.T | T95:  | 3 | 2,5843 | 0,205 | -0,648 |
| 20 | Q9C0C2 TB182_HUMAN  | E.HGVGGVQCPEPGLR.H     |       | 3 | 2,5831 | 0,198 | -1,534 |
| 20 | Q7L2J0 MEPCE_HUMAN  | K.GRDPVEILIPK.D        |       | 2 | 2,583  | 0,21  | -0,394 |
| 20 | P35579 MYH9_HUMAN   | R.HEM*PPHIYAITD.T      |       | 2 | 2,5827 | 0,377 | -0,678 |
| 20 | P42345 FRAP_HUMAN   | E.DALVAYDKK.M          |       | 2 | 2,5826 | 0,323 | 0,06   |
| 20 | Q8TCS8 PNPT1_HUMAN  | R.KVLQSPATTVVR.T       |       | 2 | 2,5824 | 0,263 | -0,563 |
| 20 | Q9UNZ2 NSF1C_HUMAN  | K.KSPNELVDDLK.G        |       | 2 | 2,5823 | 0,212 | 0      |
| 20 | P23381 SYWC_HUMAN   | K.GIDYDKLIVR.F         |       | 2 | 2,5818 | 0,32  | -0,205 |
| 20 | P40763 STAT3_HUMAN  | E.SHATLVFHNLLGE.I      |       | 2 | 2,5813 | 0,396 | -0,085 |
| 20 | P99999 CYC_HUMAN    | K.TGPNLHGLFGR.K        |       | 2 | 2,5808 | 0,331 | -0,835 |
| 20 | P16989 DBPA_HUMAN   | E.GAQLQGPVHR.N         |       | 2 | 2,5781 | 0,185 | -0,574 |
| 20 | P12270 TPR_HUMAN    | R.QHQM*QLVDSIVR.Q      |       | 3 | 2,5781 | 0,18  | -0,435 |
| 20 | A8K0Z3 WASH1_HUMAN  | E.EKLFDAPLS#ISKR.E     | S217: | 3 | 2,5771 | 0,164 | -0,346 |
| 20 | Q8NEJ9 NGDN_HUMAN   | E.LKEQYSDAPEEIR.D      |       | 3 | 2,5751 | 0,229 | -0,232 |
| 20 | Q5M775 SPEC1_HUMAN  | E.TPSRPLSSTSNPFK.S     |       | 2 | 2,5736 | 0,302 | -1,365 |
| 20 | Q96B23 CR025_HUMAN  | E.AGHLDPGFLASDK.T      |       | 2 | 2,5704 | 0,326 | -0,459 |
| 20 | P06396 GELS_HUMAN   | E.DCFILDHGK.D          |       | 2 | 2,5694 | 0,257 | -0,883 |
| 20 | P43243 MATR3_HUMAN  | D.LANLGDVASDGKK.E      |       | 3 | 2,5692 | 0,382 | 0,284  |
| 20 | Q16891 IMMT_HUMAN   | E.KTIPYSDKLF.E.M       |       | 2 | 2,567  | 0,27  | 0,091  |
| 20 | P31946 1433B_HUMAN  | K.DSTLIM*QLLR.D        |       | 2 | 2,563  | 0,175 | -0,202 |
| 20 | Q9UBF8 PI4KB_HUMAN  | R.RLS#EQLAHTPTAFK.R    | S511: | 3 | 2,5619 | 0,257 | 0,436  |
| 20 | Q8NF99 ZN397_HUMAN  | E.STDIHLQPLK.T         |       | 2 | 2,5606 | 0,417 | -0,53  |
| 20 | Q9UQ35 SRRM2_HUMAN  | E.LDVKPSASPQER.S       |       | 3 | 2,555  | 0,209 | 0,138  |
| 20 | Q04721 NOTC2_HUMAN  | R.REPVGQDAVGLK.N       |       | 2 | 2,5536 | 0,28  | -0,865 |
| 20 | O75665 OFD1_HUMAN   | K.NITSSS#PERHIFGEDR.V  | S686: | 3 | 2,5526 | 0,273 | -0,57  |
| 20 | Q9P2J5 SYLC_HUMAN   | E.HAVFNV DLM*SK.K      |       | 2 | 2,5525 | 0,517 | -0,478 |
| 20 | Q6S8J3 A26CA_HUMAN  | R.AVFPSIVGRPR.Q        |       | 2 | 2,5508 | 0,276 | -0,916 |
| 20 | Q12756 KIF1A_HUMAN  | K.KTPHLVNLNEDPLM*SE.C  |       | 3 | 2,5507 | 0,286 | -0,494 |
| 20 | Q13442 HAP28_HUMAN  | K.KVTQLDL.D.G          |       | 2 | 2,5469 | 0,152 | 0      |
| 20 | Q08357 S20A2_HUMAN  | K.SPISNGTFGFDGHTR.S    |       | 3 | 2,5442 | 0,161 | -0,459 |
| 20 | P14314 GLU2B_HUMAN  | R.GVSLTNHFFYDE.S       |       | 2 | 2,5396 | 0,371 | -1,032 |

|    |                     |                       |       |   |        |       |        |
|----|---------------------|-----------------------|-------|---|--------|-------|--------|
| 20 | Q6DD88 ATLA3_HUMAN  | E.QASSHIGNSTQATVR.D   |       | 3 | 2,5394 | 0,284 | -0,117 |
| 20 | Q15185 TEBP_HUMAN   | E.IDLFHCIDPNDSK.H     |       | 3 | 2,5384 | 0,224 | -0,116 |
| 20 | P13674 P4HA1_HUMAN  | E.GFVGHVPVNAFK.L      |       | 2 | 2,5376 | 0,396 | -0,624 |
| 20 | P08133 ANXA6_HUMAN  | E.DTIIDIITHR.S        |       | 2 | 2,5375 | 0,324 | -0,204 |
| 20 | Q7Z460 CLAP1_HUMAN  | R.SQEDLNEPIKR.D       |       | 2 | 2,5365 | 0,188 | -0,826 |
| 20 | Q9NYF8 BCLF1_HUMAN  | K.M*IASDSHRPE.V       |       | 2 | 2,5356 | 0,382 | 0      |
| 20 | Q9UBE0 SAE1_HUMAN   | K.VSQGVEDGPDTR.A      |       | 2 | 2,5316 | 0,396 | -0,44  |
| 20 | Q09666 AHNK_HUMAN   | R.RVTAYTVDTVGR.E      |       | 3 | 2,5287 | 0,25  | 0,478  |
| 20 | Q9NUW8 TYDP1_HUMAN  | K.FSNTDSVLPKR.Q       |       | 3 | 2,5234 | 0,176 | -0,202 |
| 20 | Q12797 ASPH_HUMAN   | R.LHHDTDDVYQVYEE.Q    |       | 2 | 2,5191 | 0,458 | 0,131  |
| 20 | Q14789 GGOB1_HUMAN  | E.ISIVDIANKR.S        |       | 2 | 2,5182 | 0,248 | -0,54  |
| 20 | Q76N32 CEP68_HUMAN  | R.AHQPPQASDANREPVAE.R |       | 3 | 2,5149 | 0,27  | -0,213 |
| 20 | Q13586 STIM1_HUMAN  | R.LTEPQHGLGSQR.D      |       | 2 | 2,5148 | 0,469 | 0      |
| 20 | Q9Y2G8 DJC16_HUMAN  | K.YFCLFKPQK.T         |       | 3 | 2,5145 | 0,3   | 0,297  |
| 20 | Q13435 SF3B2_HUMAN  | K.M*GKIDIDYQK.L       |       | 2 | 2,5136 | 0,297 | -1,193 |
| 20 | P51858 HDGF_HUMAN   | R.AGDLLEDS#PKRPK.E    | S165: | 3 | 2,5133 | 0,097 | -0,607 |
| 20 | Q15149 PLEC1_HUMAN  | R.LFNAIHR.H           |       | 2 | 2,5111 | 0,278 | -0,868 |
| 20 | Q9Y3T9 NOC2L_HUMAN  | R.GILRPLSTR.H         |       | 2 | 2,5107 | 0,143 | -0,903 |
| 20 | Q01082 SPTB2_HUMAN  | K.KLPEELGRDQNTVE.T    |       | 2 | 2,509  | 0,234 | 0,075  |
| 20 | P07737 PROF1_HUMAN  | D.KTLVLLM*GKE.G       |       | 2 | 2,5083 | 0,341 | -0,531 |
| 20 | O14965 STK6_HUMAN   | E.LANALSYCHSK.R       |       | 3 | 2,5075 | 0,247 | 0,506  |
| 20 | Q71RG4 TMUB2_HUMAN  | E.HLLDIQGLPK.R        |       | 2 | 2,5062 | 0,35  | -0,108 |
| 20 | Q8N6T3 ARFG1_HUMAN  | R.GLVHLSFVR.S         |       | 2 | 2,5056 | 0,29  | -0,337 |
| 20 | Q13435 SF3B2_HUMAN  | K.M*GKIDIDYQK.L       |       | 3 | 2,5041 | 0,149 | 0,447  |
| 20 | O00186 STXB3_HUMAN  | K.ATVFDDCKKE.G        |       | 2 | 2,5034 | 0,385 | 0,101  |
| 20 | P22061 PIMT_HUMAN   | K.VIGIDHIKE.L         |       | 2 | 2,5022 | 0,329 | -0,119 |
| 20 | Q59GW8 Q59GW8_HUMAN | K.HTLSFVDVGTGK.V      |       | 2 | 2,4993 | 0,562 | -0,581 |
| 20 | O94906 PRP6_HUMAN   | K.IQQQFSDLKR.K        |       | 2 | 2,4988 | 0,306 | -0,773 |
| 20 | Q9ULJ3 ZN295_HUMAN  | E.T#PYLLKETNK.G       | T288: | 3 | 2,4936 | 0,083 | -1,066 |
| 20 | P27694 RFA1_HUMAN   | K.SKDSLVDIIGICK.S     |       | 3 | 2,4934 | 0,191 | 0      |
| 20 | Q86TC9 MYPN_HUMAN   | K.CIAPIDKR.L          |       | 2 | 2,4917 | 0,207 | -0,545 |
| 20 | P50549 ETV1_HUMAN   | E.SLAFHGLPLK.I        |       | 2 | 2,4905 | 0,312 | -0,451 |
| 20 | P01100 FOS_HUMAN    | E.ADSFPSCAAAHR.K      |       | 2 | 2,4903 | 0,486 | -0,662 |

|    |                    |                            |       |   |        |       |        |
|----|--------------------|----------------------------|-------|---|--------|-------|--------|
| 20 | P35269 T2FA_HUMAN  | K.VLNHFSIM*QQR.R           |       | 2 | 2,4888 | 0,418 | -0,703 |
| 20 | P35580 MYH10_HUMAN | R.HEM*PPHIYAISE.S          |       | 2 | 2,4858 | 0,364 | -1,017 |
| 20 | O00170 AIP_HUMAN   | E.VLDHCSSILNK.Y            |       | 2 | 2,4854 | 0,261 | -0,569 |
| 20 | Q86VQ1 GLCI1_HUMAN | E.VSKPLDIPDGR.R            |       | 2 | 2,4844 | 0,305 | 0,204  |
| 20 | Q0JRZ9 FCHO2_HUMAN | R.KTFALPGIIK.K             |       | 2 | 2,4819 | 0,34  | -0,449 |
| 20 | Q86YZ3 HORN_HUMAN  | R.GSGSGQSPSSGQHGTGFGR.S    |       | 3 | 2,4807 | 0,373 | 0,105  |
| 20 | Q13823 NOG2_HUMAN  | K.LPM*SLLHDR.I             |       | 2 | 2,4805 | 0,3   | -0,222 |
| 20 | O43264 ZW10_HUMAN  | E.RDSVVLSLLK.Q             |       | 2 | 2,4804 | 0,137 | -0,108 |
| 20 | O96028 NSD2_HUMAN  | K.NLSDACKPLK.K             |       | 2 | 2,4803 | 0,264 | -0,426 |
| 20 | P60709 ACTB_HUMAN  | E.GYALPHAILR.L             |       | 2 | 2,4786 | 0,438 | -0,549 |
| 20 | Q8NG31 CASC5_HUMAN | E.NKIDFNDFIK.R             |       | 2 | 2,4735 | 0,261 | -0,486 |
| 20 | P05114 HMG1_HUMAN  | R.LSAKPPAKVE.A             |       | 2 | 2,4716 | 0,205 | -0,352 |
| 20 | Q92820 GGH_HUMAN   | K.KPIIGILM*QK.C            |       | 2 | 2,4679 | 0,274 | -0,633 |
| 20 | Q9H6F5 CCD86_HUMAN | R.AGLGSPERPPK.T            |       | 2 | 2,4671 | 0,326 | -0,66  |
| 20 | Q13409 DC1I2_HUMAN | E.FLSFFDHSTR.I             |       | 2 | 2,4654 | 0,219 | -0,485 |
| 20 | Q7Z422 CA144_HUMAN | R.KS#KSPPKVPIVQDD.S        | S37:  | 3 | 2,4639 | 0,134 | -1,902 |
| 20 | P45984 MK09_HUMAN  | K.M*LVIDPDKR.I             |       | 2 | 2,4624 | 0,278 | -0,221 |
| 20 | P13645 K1C10_HUMAN | K.IRLENEIQTYR.S            |       | 2 | 2,4608 | 0,185 | -0,34  |
| 20 | Q15121 PEA15_HUMAN | R.RPDLLTM*VVDYR.T          |       | 2 | 2,4594 | 0,383 | -0,49  |
| 20 | Q8NDF8 PAPD5_HUMAN | R.LLGSHALPAEQR.D           |       | 2 | 2,459  | 0,187 | -1,7   |
| 20 | P62805 H4_HUMAN    | R.DAVTYTEHAK.R             |       | 2 | 2,4571 | 0,329 | -0,752 |
| 20 | P04843 RPN1_HUMAN  | R.LAHLGVQVK.G              |       | 2 | 2,4569 | 0,3   | -0,379 |
| 20 | Q96T37 RBM15_HUMAN | R.LLLERPS#PIRDR.R          | S700: | 3 | 2,4562 | 0,251 | -0,71  |
| 20 | Q9BW83 RAYL_HUMAN  | E.NFEAPFHCLAK.Q            |       | 2 | 2,4543 | 0,187 | -0,823 |
| 20 | Q92922 SMRC1_HUMAN | K.EKPVLDLQNFGLR.T          |       | 3 | 2,4543 | 0,205 | 0,646  |
| 20 | Q99439 CNN2_HUMAN  | K.TKGLQSGVDIGVK.Y          |       | 3 | 2,4542 | 0,18  | 0,281  |
| 20 | Q9NNT2 OGFR_HUMAN  | R.SQGDEAGGHGEDRPEPLS#PKE.S | S378: | 3 | 2,4536 | 0,324 | -0,081 |
| 20 | Q14974 IMB1_HUMAN  | K.NSLTSKDPDIK.A            |       | 3 | 2,4535 | 0,178 | 0,45   |
| 20 | Q9C0C2 TB182_HUMAN | K.KIPSVEDSLGEGSR.D         |       | 3 | 2,4532 | 0,086 | -0,124 |
| 20 | O60488 ACSL4_HUMAN | E.FHPDGCLQIIDR.K           |       | 2 | 2,4517 | 0,417 | -0,829 |
| 20 | P42704 LPPRC_HUMAN | K.LDDLFLKR.Y               |       | 2 | 2,4499 | 0,174 | -0,478 |
| 20 | P41252 SYIC_HUMAN  | E.SVDHLTIPSR.C             |       | 2 | 2,4479 | 0,256 | -0,217 |
| 20 | P05120 PAI2_HUMAN  | E.SEITYDKLNK.W             |       | 2 | 2,446  | 0,242 | -0,504 |

|    |                    |                          |       |   |        |       |        |
|----|--------------------|--------------------------|-------|---|--------|-------|--------|
| 20 | Q99613 EIF3C_HUMAN | E.LVTKPVGGNYGK.Q         |       | 2 | 2,445  | 0,203 | -0,396 |
| 20 | P13645 K1C10_HUMAN | R.LASYLDKVR.A            |       | 2 | 2,4432 | 0,088 | -0,229 |
| 20 | Q9Y6D6 BIG1_HUMAN  | K.SVDIHDSIQPR.S          |       | 3 | 2,4405 | 0,327 | -0,577 |
| 20 | Q15003 CND2_HUMAN  | E.SVS#ALVDKFK.K          | S337: | 2 | 2,4401 | 0,106 | 0,104  |
| 20 | Q7Z4V5 HDGR2_HUMAN | K.NTDVVATLKK.I           |       | 2 | 2,44   | 0,215 | -0,56  |
| 20 | P28074 PSB5_HUMAN  | R.VSSDNVADLHEK.Y         |       | 3 | 2,4391 | 0,345 | 0,139  |
| 20 | P31948 STIP1_HUMAN | R.CM*M*AQYNRHDS#PEDVK.R  | S481: | 3 | 2,439  | 0,243 | -0,35  |
| 20 | P46777 RL5_HUMAN   | K.HIM*GQNVADYM*R.Y       |       | 2 | 2,4389 | 0,29  | -0,582 |
| 20 | P00533 EGFR_HUMAN  | R.M*HLPSPTDSNFYR.A       |       | 2 | 2,4372 | 0,27  | -0,617 |
| 20 | P10599 THIO_HUMAN  | K.M*IKPFFHSLSE.K         |       | 2 | 2,4348 | 0,237 | -0,632 |
| 20 | Q9Y295 DRG1_HUMAN  | R.LNSKPPNIGFK.K          |       | 2 | 2,4335 | 0,154 | -0,703 |
| 20 | Q96B01 R51A1_HUMAN | K.M*ALDDKLYQR.D          |       | 3 | 2,4333 | 0,369 | 0,072  |
| 20 | Q14676 MDC1_HUMAN  | E.GKAPQAVPLEK.S          |       | 2 | 2,4327 | 0,179 | -0,75  |
| 20 | O15371 EIF3D_HUMAN | K.YLILKDPNK.Q            |       | 2 | 2,4271 | 0,205 | -0,884 |
| 20 | O43395 PRPF3_HUMAN | K.AADHLKPFLLD.S          |       | 2 | 2,4218 | 0,188 | -0,589 |
| 20 | P42025 ACTY_HUMAN  | K.YCFPNVYGRPK.H          |       | 3 | 2,4194 | 0,334 | 0,196  |
| 20 | P16383 GCF_HUMAN   | R.AQVAGLPHR.V            |       | 2 | 2,4167 | 0,224 | 0,643  |
| 20 | Q9NR45 SIAS_HUMAN  | E.IGQNHQGDLDVAK.R        |       | 3 | 2,4159 | 0,16  | 0,524  |
| 20 | Q13573 SNW1_HUMAN  | E.M*QKDPM*EPPR.F         |       | 3 | 2,4152 | 0,098 | 0,653  |
| 20 | O43865 SAHH2_HUMAN | R.M*KNSCIVCNM*GHSNTE.I   |       | 3 | 2,4151 | 0,113 | -0,191 |
| 20 | Q9NX74 DUS2L_HUMAN | R.LGEESPSLHK.R           |       | 2 | 2,415  | 0,304 | 0      |
| 20 | Q9UBQ0 VPS29_HUMAN | K.TLAGDVHIVR.G           |       | 2 | 2,4149 | 0,423 | -1,806 |
| 20 | Q9UQ35 SRRM2_HUMAN | E.SSLVFKDTLR.T           |       | 2 | 2,4134 | 0,24  | -0,419 |
| 20 | Q8IWB9 TEX2_HUMAN  | E.SDTVSYKPPDSK.L         |       | 2 | 2,4132 | 0,329 | -0,461 |
| 20 | Q9BWG6 SCNM1_HUMAN | R.ALDHYLTR.S             |       | 2 | 2,4093 | 0,253 | -0,554 |
| 20 | O75643 U520_HUMAN  | E.KDTLGLFLRE.G           |       | 2 | 2,4092 | 0,334 | -1,126 |
| 20 | Q9NUQ6 SPS2L_HUMAN | K.KISILEEPSK.A           |       | 2 | 2,4088 | 0,174 | -0,64  |
| 20 | Q9NRL3 STRN4_HUMAN | R.VKLQGILADLR.D          |       | 2 | 2,4087 | 0,152 | -0,796 |
| 20 | Q00266 METK1_HUMAN | E.GHPDKICDQISDAVLD.A     |       | 2 | 2,4078 | 0,266 | -0,342 |
| 20 | Q6S8J3 A26CA_HUMAN | E.KLCYVALDFEQE.M         |       | 2 | 2,4073 | 0,089 | -0,161 |
| 20 | O00193 SMAP_HUMAN  | E.SQYQQSM*DSKLSGR.Y      |       | 3 | 2,407  | 0,345 | -0,112 |
| 20 | P10809 CH60_HUMAN  | R.KNQLKDM*AIATGGAVFGEE.G |       | 3 | 2,4066 | 0,262 | -0,458 |
| 20 | Q9Y3Z3 SAMH1_HUMAN | R.RGGFEFVLLK.N           |       | 2 | 2,4058 | 0,229 | -0,49  |



|    |                    |                                 |            |   |        |       |        |
|----|--------------------|---------------------------------|------------|---|--------|-------|--------|
| 20 | Q9C004 SPY4_HUMAN  | K.VVHCQPLDLK.G                  |            | 2 | 2,4048 | 0,334 | -0,303 |
| 20 | Q9Y4L1 HYOU1_HUMAN | R.YFQHLLGK.Q                    |            | 2 | 2,4044 | 0,35  | -0,121 |
| 20 | Q96A65 EXOC4_HUMAN | K.SKDPSSLISVIR.T                |            | 2 | 2,4039 | 0,196 | -0,617 |
| 20 | Q00610 CLH1_HUMAN  | E.GCEEPATHNALAK.I               |            | 3 | 2,4012 | 0,278 | -1,635 |
| 20 | Q15369 ELOC_HUMAN  | E.KTYGGCEGPDAM*YVK.L            |            | 3 | 2,3999 | 0,088 | -0,757 |
| 20 | P31946 1433B_HUMAN | D.STLIM*QLLR.D                  |            | 2 | 2,3986 | 0,277 | -0,335 |
| 20 | P17987 TCPA_HUMAN  | K.IHPTSVISGYR.L                 |            | 2 | 2,3984 | 0,389 | -0,496 |
| 20 | Q15046 SYK_HUMAN   | R.KILDDICVAK.A                  |            | 2 | 2,3963 | 0,158 | -0,519 |
| 20 | Q5VW38 GP107_HUMAN | K.VHLNTEGFFK.D                  |            | 2 | 2,3948 | 0,355 | -0,403 |
| 20 | Q96CN9 GCC1_HUMAN  | R.SVALASGLPGRR.S                |            | 2 | 2,3936 | 0,178 | -0,721 |
| 20 | P09651 ROA1_HUMAN  | R.SSGPYGGGGQYFAKPR.N            |            | 3 | 2,3911 | 0,277 | -1,011 |
| 20 | Q8NEY8 PPHLN_HUMAN | K.ERPVQSLKT#SRDTS#PSSGSAVSSSK.V | T200:S205: | 3 | 2,3903 | 0,147 | -0,067 |
| 20 | P48643 TCPE_HUMAN  | K.KQQISLATQM*VR.M               |            | 3 | 2,3886 | 0,356 | -0,322 |
| 20 | O75533 SF3B1_HUMAN | R.GGDSIGETPTPGASKR.K            |            | 3 | 2,3884 | 0,373 | 0,06   |
| 20 | Q9C0B5 ZDHC5_HUMAN | K.SFHFDPLSSGSR.S                |            | 3 | 2,3841 | 0,132 | 0,342  |
| 20 | Q07157 ZO1_HUMAN   | R.KFES#PKFNHLLPSE.T             | S1545:     | 2 | 2,38   | 0,213 | -0,131 |
| 20 | P16401 H15_HUMAN   | R.NGLSLAALKK.A                  |            | 2 | 2,3768 | 0,164 | -0,24  |
| 20 | Q9UGV6 HMG1X_HUMAN | K.GEHPGLSIGDVAK.K               |            | 2 | 2,3766 | 0,207 | -0,381 |
| 20 | O15534 PER1_HUMAN  | K.AVLSLHTQKEE.Q                 |            | 2 | 2,3763 | 0,361 | -1,069 |
| 20 | P12270 TPR_HUMAN   | R.NQHLVSQQKDPDTEE.Y             |            | 3 | 2,3739 | 0,104 | -0,414 |
| 20 | P46013 KI67_HUMAN  | R.SSFSDPDEKAQDSK.A              |            | 3 | 2,3736 | 0,181 | -0,225 |
| 20 | Q9HAW4 CLSPN_HUMAN | R.YLADGDLHSDGPGR.M              |            | 2 | 2,373  | 0,282 | -0,414 |
| 20 | P08107 HSP71_HUMAN | R.KFGDPVVQSDM*K.H               |            | 2 | 2,3703 | 0,41  | -0,803 |
| 20 | Q9Y3A2 UTP11_HUMAN | E.LHLLDFQGK.Q                   |            | 2 | 2,3701 | 0,309 | 0,228  |
| 20 | Q15393 SF3B3_HUMAN | E.DHDFQHVE.M                    |            | 2 | 2,3669 | 0,406 | -0,52  |
| 20 | P14625 ENPL_HUMAN  | R.FQSSHPTDITSLD.Q               |            | 2 | 2,3634 | 0,395 | -0,462 |
| 20 | Q04917 1433F_HUMAN | E.DRNLLSVAYK.N                  |            | 2 | 2,3604 | 0,243 | 1,345  |
| 20 | Q9H1B7 EAP1_HUMAN  | R.AHGCFQDGRS#PGPPPPVGVK.T       | S69:       | 3 | 2,3596 | 0,29  | -0,256 |
| 20 | P46379 BAT3_HUMAN  | E.HIAASVSIPSEK.Q                |            | 2 | 2,3582 | 0,367 | -0,689 |
| 20 | O60716 CTND1_HUMAN | R.FHPEPYGLEDDQR.S               |            | 2 | 2,3566 | 0,287 | 0      |
| 20 | P29692 EF1D_HUMAN  | E.HVQSVDAIAFNKI.-               |            | 3 | 2,3565 | 0,198 | 0,127  |
| 20 | Q86WP2 GPBP1_HUMAN | R.HNS#SDGFDSAIGRPNGGNFGR.K      | S49:       | 3 | 2,3535 | 0,378 | -0,408 |
| 20 | Q9C004 SPY4_HUMAN  | K.VVHCQPLDLK.G                  |            | 3 | 2,3522 | 0,155 | 0,605  |

|    |                    |                            |          |   |        |       |        |
|----|--------------------|----------------------------|----------|---|--------|-------|--------|
| 20 | P68104 EF1A1_HUMAN | K.STTTGHLIYK.C             |          | 2 | 2,3501 | 0,444 | 0      |
| 20 | O15027 SC16A_HUMAN | K.SHLVGVKPFE.A             |          | 2 | 2,3496 | 0,203 | -0,658 |
| 20 | P26583 HMGB2_HUMAN | K.SEHPGLSIGDTAK.K          |          | 3 | 2,3491 | 0,115 | 0      |
| 20 | Q15459 SF3A1_HUMAN | E.GKAQEPSAAIPK.V           |          | 2 | 2,3479 | 0,327 | -0,408 |
| 20 | P43243 MATR3_HUMAN | R.GPLPLSSQHR.G             |          | 2 | 2,3472 | 0,196 | -0,894 |
| 20 | Q13573 SNW1_HUMAN  | E.IHVAQYPLDM*GR.K          |          | 2 | 2,3456 | 0,301 | -0,689 |
| 20 | Q13131 AAPK1_HUMAN | E.NVLLDAHM*NAK.I           |          | 2 | 2,3448 | 0,371 | -0,786 |
| 20 | Q8N4C8 MINK1_HUMAN | E.RSDSVLPASHGHLPLQAGS#LE.R | S763:    | 3 | 2,3444 | 0,265 | -0,599 |
| 20 | P53667 LIMK1_HUMAN | R.IFRPSDLIHGE.V            |          | 2 | 2,3424 | 0,131 | -0,95  |
| 20 | P46087 NOL1_HUMAN  | K.KGPQSLFNAPR.G            |          | 2 | 2,3394 | 0,137 | -0,803 |
| 20 | O95453 PARN_HUMAN  | R.NNSFTAPSTVGKR.N          |          | 2 | 2,3387 | 0,392 | -1,062 |
| 20 | Q16181 SEPT7_HUMAN | E.NGEHCDFILR.N             |          | 2 | 2,3338 | 0,491 | -0,806 |
| 20 | Q13564 ULA1_HUMAN  | K.DAAAVGNHVAK.L            |          | 2 | 2,3338 | 0,315 | -0,348 |
| 20 | Q15181 IPYR_HUMAN  | K.DKDFAIIDIK.S             |          | 2 | 2,3335 | 0,173 | -0,518 |
| 20 | P54652 HSP72_HUMAN | K.STAGDTHLGGEDFDNR.M       |          | 3 | 2,3311 | 0,311 | -0,432 |
| 20 | Q9BT09 CNPY3_HUMAN | R.LLDYSLHKE.R              |          | 2 | 2,3303 | 0,171 | -0,655 |
| 20 | Q13428 TCOF_HUMAN  | K.TVANLLSGKS#PRK.S         | S156:    | 2 | 2,3275 | 0,279 | -0,084 |
| 20 | Q99729 ROAA_HUMAN  | K.DLKDYFTK.F               |          | 2 | 2,3262 | 0,091 | -0,711 |
| 20 | P38117 ETFB_HUMAN  | E.KVDLVLLGK.Q              |          | 2 | 2,326  | 0,353 | -0,124 |
| 20 | Q9Y6X9 MORC2_HUMAN | E.VTTRPSTEEPVR.R           |          | 3 | 2,326  | 0,263 | -1,066 |
| 20 | Q9H6F5 CCD86_HUMAN | R.RLGGLRPESPES#LTSVSR.T    | S21:     | 2 | 2,3211 | 0,413 | -0,181 |
| 20 | P47897 SYQ_HUMAN   | E.DGKM*DPVAYR.V            |          | 2 | 2,3204 | 0,353 | -0,313 |
| 20 | Q9Y310 CV028_HUMAN | R.M*LQADPNKVSAR.A          |          | 3 | 2,3182 | 0,182 | 0,204  |
| 20 | O94874 K0776_HUMAN | E.KHVQLVLGQLIDE.N          |          | 2 | 2,316  | 0,153 | -0,572 |
| 20 | Q9Y2B0 CNPY2_HUMAN | E.YGEQIDPSTHR.K            |          | 3 | 2,3137 | 0,166 | 0,281  |
| 20 | O00186 STXB3_HUMAN | K.DKVSLIKDE.-              |          | 2 | 2,3116 | 0,173 | -0,35  |
| 20 | Q8IXK0 PHC2_HUMAN  | E.DHLM*SAM*NIK.L           |          | 2 | 2,3114 | 0,144 | -0,512 |
| 20 | Q13242 SFRS9_HUMAN | R.GSPHYFSPFRPY.-           |          | 3 | 2,3107 | 0,313 | 0,189  |
| 20 | Q08J23 NSUN2_HUMAN | R.CYLLVHQAK.R              |          | 2 | 2,3103 | 0,364 | -0,754 |
| 20 | P62081 RS7_HUMAN   | K.IVKPNGEKPDEFE.S          |          | 3 | 2,3102 | 0,097 | -0,67  |
| 20 | Q99618 CDCA3_HUMAN | K.HAQSDPRS#PT#LGIARTPM*K.T | S68:T70: | 3 | 2,3073 | 0,191 | -0,933 |
| 20 | Q9NVM9 CL011_HUMAN | K.DAHVDFLK.S               |          | 2 | 2,3049 | 0,251 | -1,549 |
| 20 | Q96EP1 CHFR_HUMAN  | E.AYLIQHPDK.S              |          | 2 | 2,3047 | 0,121 | -0,337 |

|    |                    |                       |        |   |        |       |        |
|----|--------------------|-----------------------|--------|---|--------|-------|--------|
| 20 | Q09666 AHNK_HUMAN  | K.LQSGVSLASKK.S       |        | 2 | 2,3042 | 0,286 | 0      |
| 20 | P25705 ATPA_HUMAN  | R.GYLDKLEPSK.I        |        | 2 | 2,304  | 0,303 | -1,273 |
| 20 | Q8WU90 ZC3HF_HUMAN | R.HALPPGFVLK.K        |        | 2 | 2,3036 | 0,301 | -0,339 |
| 20 | Q86W92 LIPB1_HUMAN | R.ALHLVEDLR.G         |        | 2 | 2,3013 | 0,136 | -0,114 |
| 20 | Q13873 BMPR2_HUMAN | K.GSLDERPVAVK.V       |        | 2 | 2,3007 | 0,198 | -1,667 |
| 20 | O75534 CSDE1_HUMAN | R.IKVDFVIPK.E         |        | 2 | 2,3    | 0,139 | -0,346 |
| 20 | Q9BQQ3 GR65_HUMAN  | K.ANVEKPVKLE.V        |        | 2 | 2,2982 | 0,113 | -1,84  |
| 20 | P16435 NCPR_HUMAN  | K.VYVQHLLK.Q          |        | 2 | 2,2982 | 0,317 | -0,427 |
| 20 | Q9UJA5 TRM6_HUMAN  | R.IRDGDFVVLK.R        |        | 2 | 2,2976 | 0,193 | -0,42  |
| 20 | Q8NI27 THOC2_HUMAN | K.IDTHSPS#HSSTVK.D    | S1304: | 2 | 2,2962 | 0,407 | -0,31  |
| 20 | P27816 MAP4_HUMAN  | E.TERAS#PIKM*DLAPSK.D | S358:  | 2 | 2,2956 | 0,327 | -0,561 |
| 20 | Q99832 TCPH_HUMAN  | R.SLHDAIM*IVR.R       |        | 2 | 2,2947 | 0,292 | -0,104 |
| 20 | Q9H412 ZH3_HUMAN   | R.KVS#PIKINLK.N       | S723:  | 3 | 2,2924 | 0,216 | 0,075  |
| 20 | Q96HC4 PDLI5_HUMAN | R.TPM*CAHCNQVIR.G     |        | 3 | 2,2897 | 0,238 | -0,183 |
| 20 | Q96DF8 DGC14_HUMAN | R.FLRDPFSQALSR.C      |        | 3 | 2,2881 | 0,186 | -0,318 |
| 20 | Q8N302 AGGF1_HUMAN | E.DVHLLQNK.N          |        | 2 | 2,2874 | 0,276 | -0,505 |
| 20 | Q16543 CDC37_HUMAN | E.THPNIDTASLFR.W      |        | 2 | 2,2848 | 0,323 | -0,978 |
| 20 | Q9Y5B9 SP16H_HUMAN | R.GDKVDILYNNIK.H      |        | 2 | 2,2837 | 0,285 | -1,052 |
| 20 | P78344 IF4G2_HUMAN | E.KASSLISLLK.Q        |        | 2 | 2,2831 | 0,321 | -0,23  |
| 20 | P09234 RU1C_HUMAN  | D.TYLTHDSPSVR.K       |        | 2 | 2,2814 | 0,312 | -0,861 |
| 20 | P04075 ALDOA_HUMAN | K.ALSDHHIYLE.G        |        | 2 | 2,2814 | 0,309 | -1,018 |
| 20 | Q5SW79 CE170_HUMAN | E.STIHEIPTK.D         |        | 2 | 2,2779 | 0,181 | 0,119  |
| 20 | P41250 SYG_HUMAN   | E.DKAPQVDVVK.A        |        | 2 | 2,2778 | 0,269 | -0,985 |
| 20 | O60879 DIAP2_HUMAN | E.DKFENPDLFAK.L       |        | 2 | 2,2762 | 0,234 | -0,092 |
| 20 | O75643 U520_HUMAN  | K.YVHLFPKLE.L         |        | 2 | 2,2725 | 0,172 | -0,426 |
| 20 | Q9UBE0 SAE1_HUMAN  | K.VSQGVEDGPDTRK.A     |        | 3 | 2,2689 | 0,105 | -0,198 |
| 20 | Q9ULJ7 ANR50_HUMAN | K.GHASVVSLLIDR.G      |        | 2 | 2,2683 | 0,381 | -0,77  |
| 20 | Q08J23 NSUN2_HUMAN | R.LQIDVDGRKE.I        |        | 2 | 2,2682 | 0,114 | -0,832 |
| 20 | O75494 FUSIP_HUMAN | R.DAEDALHNLDR.K       |        | 2 | 2,2659 | 0,147 | -1,827 |
| 20 | Q9UGV6 HMG1X_HUMAN | K.GEHPGLSIGDVAK.K     |        | 3 | 2,2616 | 0,104 | -0,5   |
| 20 | P43897 EFTS_HUMAN  | E.GSLKDQLALAIGK.L     |        | 2 | 2,2599 | 0,131 | -0,093 |
| 20 | P27816 MAP4_HUMAN  | E.RAS#PIKM*DLAPSK.D   | S358:  | 2 | 2,2515 | 0,249 | -0,404 |
| 20 | Q9NP92 RT30_HUMAN  | R.YQIDDKPNNQIR.I      |        | 3 | 2,2495 | 0,29  | -0,182 |

|    |                      |                           |       |   |        |       |        |
|----|----------------------|---------------------------|-------|---|--------|-------|--------|
| 20 | Q8NE71 ABCF1_HUMAN   | K.ADDPYAHLK.K             |       | 2 | 2,2479 | 0,217 | -0,437 |
| 20 | Q14203 DCTN1_HUMAN   | R.QLTAHLQDVNRE.L          |       | 2 | 2,2464 | 0,423 | -0,685 |
| 20 | Q8NI08 NCOA7_HUMAN   | E.YDKLPDADLAR.K           |       | 2 | 2,2455 | 0,109 | -0,764 |
| 20 | Q9UKL0 RCOR1_HUMAN   | E.TNGPSNQKPVKS#PDNSIK.M   | S457: | 2 | 2,242  | 0,3   | -0,184 |
| 20 | O00273 DFFA_HUMAN    | R.LQQTQSLHSLR.S           |       | 3 | 2,2403 | 0,115 | 0,209  |
| 20 | P55011 S12A2_HUMAN   | R.TFGHNTM*DAVPR.I         |       | 2 | 2,2393 | 0,151 | -0,627 |
| 20 | Q96A49 SYAP1_HUMAN   | E.AVRPKT#PPVVIK.S         | T248: | 2 | 2,2384 | 0,108 | -0,793 |
| 20 | Q8WU20 FRS2_HUMAN    | R.TSVHVPLEAR.V            |       | 2 | 2,2377 | 0,17  | -1,54  |
| 20 | Q08945 SSRP1_HUMAN   | K.SDHPGISITLSK.K          |       | 2 | 2,2365 | 0,107 | -0,712 |
| 20 | P63241 IF5A1_HUMAN   | K.VHLVGIDIFTGK.K          |       | 2 | 2,2347 | 0,384 | -0,282 |
| 20 | Q9BW91 NUDT9_HUMAN   | K.LYASHSQFIK.L            |       | 2 | 2,2346 | 0,34  | -0,511 |
| 20 | Q02880 TOP2B_HUMAN   | K.KGDLDTAAVKVE.F          |       | 2 | 2,233  | 0,137 | -0,685 |
| 20 | Q03001 BPA1_HUMAN    | R.TPLERDDLHE.S            |       | 2 | 2,2286 | 0,282 | -0,996 |
| 20 | Q96CN9 GCC1_HUMAN    | K.GEFGVEDDRPAR.G          |       | 2 | 2,2278 | 0,286 | -0,724 |
| 20 | Q08EQ4 TMSL1_HUMAN   | K.TETQEKNPLPSK.E          |       | 3 | 2,2266 | 0,186 | -0,866 |
| 20 | P31948 STIP1_HUMAN   | K.DAIHFYNK.S              |       | 2 | 2,2248 | 0,253 | -1,876 |
| 20 | Q04759 KPCT_HUMAN    | E.FLNEKPRLS#FADR.A        | S676: | 3 | 2,2235 | 0,188 | -0,547 |
| 20 | Q9BQQ3 GR65_HUMAN    | R.IPTQPPSYHK.K            |       | 2 | 2,2232 | 0,316 | -0,209 |
| 20 | ##Q8IZM8 ZN654_HUMAN | K.KEMS#EICTKPETSEK.R      | S199: | 3 | 2,2231 | 0,088 | 0,39   |
| 20 | O00170 AIP_HUMAN     | K.HVVLYPLVAK.S            |       | 2 | 2,2223 | 0,313 | -0,643 |
| 20 | P35579 MYH9_HUMAN    | D.VLLQVDDERR.N            |       | 3 | 2,2212 | 0,213 | 0,588  |
| 20 | Q96NE9 FRMD6_HUMAN   | K.TSTDRHS#LSLDDIR.L       | S542: | 3 | 2,221  | 0,175 | -0,216 |
| 20 | Q99569 PKP4_HUMAN    | R.STDVPNTGVSKPR.V         |       | 2 | 2,2196 | 0,447 | -0,809 |
| 20 | P35222 CTNB1_HUMAN   | E.LDM*AM*EPDRK.A          |       | 3 | 2,2183 | 0,117 | 0,665  |
| 20 | O75531 BAF_HUMAN     | R.DFVAEPM*GEKPVGSLAGIGE.V |       | 2 | 2,2153 | 0,334 | 0,06   |
| 20 | Q16881 TRXR1_HUMAN   | E.NAYGQFIGPHR.I           |       | 3 | 2,212  | 0,364 | 0,508  |
| 20 | Q9Y450 HBS1L_HUMAN   | R.LYSCLDHM*RE.V           |       | 2 | 2,212  | 0,182 | -1,002 |
| 20 | P61604 CH10_HUMAN    | D.DKDYFLFR.D              |       | 2 | 2,2119 | 0,262 | -0,332 |
| 20 | Q8TB03 CX038_HUMAN   | K.LDSQEPGRQT#PDRKA.-      | T314: | 3 | 2,2112 | 0,143 | 0,206  |
| 20 | Q14203 DCTN1_HUMAN   | E.TVADYQQTIKK.Y           |       | 2 | 2,2103 | 0,36  | -0,094 |
| 20 | P14618 KPYM_HUMAN    | K.IISKIENHE.G             |       | 2 | 2,2098 | 0,225 | -0,113 |
| 20 | P49023 PAXI_HUMAN    | R.KDYFDM*FAPK.C           |       | 2 | 2,2088 | 0,284 | -0,382 |
| 20 | P11172 PYR5_HUMAN    | K.FADIGNTVKK.Q            |       | 2 | 2,205  | 0,243 | -1,674 |

|    |                    |                           |       |   |        |       |        |
|----|--------------------|---------------------------|-------|---|--------|-------|--------|
| 20 | P31939 PUR9_HUMAN  | R.TLFGHLHSQK.R            |       | 2 | 2,2029 | 0,238 | -0,533 |
| 20 | P14868 SYDC_HUMAN  | E.KVFSIGPVFR.A            |       | 2 | 2,2001 | 0,281 | -0,318 |
| 20 | P78317 RNF4_HUMAN  | R.DVYVTTHTPR.N            |       | 2 | 2,1992 | 0,377 | -0,821 |
| 20 | Q7Z6E9 RBBP6_HUMAN | K.NVSTKPSNIVK.Y           |       | 2 | 2,1959 | 0,336 | -0,206 |
| 20 | P25786 PSA1_HUMAN  | K.THAVLVALK.R             |       | 2 | 2,1933 | 0,269 | -0,833 |
| 20 | Q02790 FKBP4_HUMAN | K.DKFSFDLGK.G             |       | 2 | 2,1929 | 0,282 | -0,346 |
| 20 | Q66GS9 CP135_HUMAN | R.HGLATPPLSSTLR.S         |       | 2 | 2,1907 | 0,329 | -0,452 |
| 20 | Q15424 SAFB1_HUMAN | R.SVVS#FDKVKPR.K          | S604: | 3 | 2,1907 | 0,092 | 0,622  |
| 20 | Q9H0C8 ILKAP_HUMAN | R.CLLDTFKHTDE.E           |       | 2 | 2,1901 | 0,163 | 0,088  |
| 20 | Q96EV8 DTBP1_HUMAN | R.AKPPSSSSTCTDSATR.D      |       | 3 | 2,1888 | 0,194 | 0,221  |
| 20 | P61978 HNRPK_HUMAN | R.VVLIGGKPR.V             |       | 2 | 2,1888 | 0,207 | -1,273 |
| 20 | O75643 U520_HUMAN  | E.KDTLGLFLR.E             |       | 2 | 2,1884 | 0,194 | -0,23  |
| 20 | Q9H875 PKRI1_HUMAN | K.KEPQTLVIPK.N            |       | 2 | 2,1847 | 0,263 | -0,423 |
| 20 | Q13112 CAF1B_HUMAN | E.IQSETPGDAQGS#PPELKRPR.L | S538: | 3 | 2,1845 | 0,206 | -0,408 |
| 20 | P61978 HNRPK_HUMAN | R.GRPGDRYDGM*VGFSAD.E.T   |       | 3 | 2,1839 | 0,208 | -1,19  |
| 20 | P62191 PRS4_HUMAN  | R.KIEFPLPEK.T             |       | 3 | 2,1838 | 0,116 | 0,376  |
| 20 | Q13433 S39A6_HUMAN | R.QYHLQQLFYR.Y            |       | 2 | 2,1835 | 0,325 | -0,524 |
| 20 | Q96AJ1 CLUA1_HUMAN | E.SISLPTKPNR.R            |       | 2 | 2,1827 | 0,165 | -0,61  |
| 20 | P42566 EP15_HUMAN  | K.KSGLPDLILGK.I           |       | 2 | 2,1802 | 0,261 | 0,214  |
| 20 | P12081 SYHC_HUMAN  | R.TICSSVDKLDK.V           |       | 2 | 2,1786 | 0,3   | -0,771 |
| 20 | Q5H9R7 SAPS3_HUMAN | E.FTSSLSTKDSL.R.S         |       | 2 | 2,1783 | 0,329 | -0,818 |
| 20 | Q15102 PA1B3_HUMAN | R.FVADSKDKEPE.V           |       | 2 | 2,1776 | 0,164 | -0,096 |
| 20 | P33176 KINH_HUMAN  | R.SHSIFLINVK.Q            |       | 2 | 2,1769 | 0,359 | -0,421 |
| 20 | P48739 PIPNB_HUMAN | E.IVHIDIADR.S             |       | 2 | 2,1721 | 0,245 | -1,392 |
| 20 | Q13283 G3BP1_HUMAN | K.FYVHNDIFR.Y             |       | 2 | 2,1716 | 0,234 | -1,108 |
| 20 | Q9H6Z4 RANB3_HUMAN | E.DGNYCPPVKR.E            |       | 2 | 2,1708 | 0,162 | -0,506 |
| 20 | Q7Z6B7 SRGP1_HUMAN | E.SLSPLHNVALR.S           |       | 2 | 2,1667 | 0,109 | -0,606 |
| 20 | Q06203 PUR1_HUMAN  | K.LYVSNLGIGHTR.Y          |       | 3 | 2,1666 | 0,326 | 0,344  |
| 20 | Q96I15 SCLY_HUMAN  | E.SNNLVIHSVVK.H           |       | 2 | 2,1656 | 0,107 | -0,504 |
| 20 | Q9Y4L1 HYOU1_HUMAN | K.QADNPHVALYQAR.F         |       | 3 | 2,1636 | 0,167 | -0,493 |
| 20 | Q96Q11 TRNT1_HUMAN | E.KNLGLFIVK.N             |       | 2 | 2,161  | 0,106 | 0,591  |
| 20 | O94766 B3GA3_HUMAN | E.SSLLSHLVDPK.D           |       | 2 | 2,1553 | 0,264 | -0,408 |
| 20 | Q09666 AHNK_HUMAN  | D.VDLNLKGPK.L             |       | 2 | 2,1548 | 0,125 | -0,62  |

|    |                    |                          |        |   |        |       |        |
|----|--------------------|--------------------------|--------|---|--------|-------|--------|
| 20 | Q58WW2 IQWD1_HUMAN | R.M*LASLNHIR.A           |        | 2 | 2,1545 | 0,269 | 1,139  |
| 20 | Q9C0C2 TB182_HUMAN | R.HNGSLS#PGLEARDPLEARE.L | S1385: | 3 | 2,1531 | 0,117 | -0,344 |
| 20 | Q76FK4 NOL8_HUMAN  | K.LHSLIGLGIK.N           |        | 2 | 2,1526 | 0,292 | -0,232 |
| 20 | P50607 TUB_HUMAN   | E.TAAGGGERPSGQDLR.A      |        | 3 | 2,1506 | 0,28  | 0,186  |
| 20 | Q5JU85 IQEC2_HUMAN | E.DTYGAGDGLKR.G          |        | 2 | 2,1477 | 0,409 | 0,317  |
| 20 | P21333 FLNA_HUMAN  | K.AHVVPDASK.V            |        | 2 | 2,1472 | 0,317 | -0,892 |
| 20 | Q9GZL7 WDR12_HUMAN | K.HVEFDFLIK.G            |        | 2 | 2,1462 | 0,208 | 0,531  |
| 20 | Q9UKV3 ACINU_HUMAN | K.LLDDLFRK.T             |        | 2 | 2,1455 | 0,208 | -0,299 |
| 20 | P17987 TCPA_HUMAN  | K.IHPTSVISGYR.L          |        | 3 | 2,1444 | 0,126 | 0,297  |
| 20 | Q8TF64 GIPC3_HUMAN | E.DFIFAHVR.G             |        | 2 | 2,1443 | 0,211 | -0,121 |
| 20 | Q13433 S39A6_HUMAN | R.QYHLQQLFYR.Y           |        | 3 | 2,1395 | 0,182 | 0,131  |
| 20 | Q15527 SURF2_HUMAN | R.CILTGHELPCR.L          |        | 3 | 2,1388 | 0,185 | 0,405  |
| 20 | O43379 WDR62_HUMAN | R.GHPSFLPQQKE.S          |        | 2 | 2,1374 | 0,145 | -1,924 |
| 20 | Q12797 ASPH_HUMAN  | R.LHHDTDDVYQVYEE.Q       |        | 3 | 2,1352 | 0,098 | 0,294  |
| 20 | Q14152 EIF3A_HUMAN | K.RLEEIPLIK.S            |        | 2 | 2,1325 | 0,125 | -0,329 |
| 20 | P13797 PLST_HUMAN  | K.INNFSADIKDSK.A         |        | 3 | 2,1277 | 0,218 | -0,406 |
| 20 | P50570 DYN2_HUMAN  | K.TLNQQLTNHIRE.S         |        | 3 | 2,1237 | 0,121 | -0,187 |
| 20 | Q92499 DDX1_HUMAN  | E.QYFIQGGGPDKK.G         |        | 2 | 2,1206 | 0,25  | -1,248 |
| 20 | Q9BSG1 ZNF2_HUMAN  | K.TFFDHSSLTR.H           |        | 2 | 2,1169 | 0,213 | -0,403 |
| 20 | P49458 SRP09_HUMAN | E.KLYLADPM*K.A           |        | 2 | 2,1154 | 0,273 | -0,334 |
| 20 | Q13740 CD166_HUMAN | R.SSNTYTLTDVRR.N         |        | 2 | 2,1144 | 0,203 | -0,518 |
| 20 | P13010 KU86_HUMAN  | E.IFQDNHEDGPTAK.K        |        | 3 | 2,1125 | 0,197 | 0,311  |
| 20 | Q96LT9 RBM40_HUMAN | R.HLPAELTAEKE.D          |        | 2 | 2,1118 | 0,163 | -0,714 |
| 20 | Q9UQ35 SRRM2_HUMAN | K.DTLRT#PPRER.S          | T1208: | 3 | 2,111  | 0,169 | -0,069 |
| 20 | P12074 CX6A1_HUMAN | E.FIAYPHLR.I             |        | 2 | 2,1074 | 0,237 | -0,24  |
| 20 | P61769 B2MG_HUMAN  | R.VNHVTLSPK.I            |        | 2 | 2,1068 | 0,48  | -0,217 |
| 20 | P29692 EF1D_HUMAN  | R.ATAPQTQHVSPM*R.Q       |        | 2 | 2,1021 | 0,2   | -0,254 |
| 20 | Q8IZ73 RUSD2_HUMAN | R.HNTVIFILGKE.H          |        | 2 | 2,0999 | 0,203 | -0,48  |
| 20 | Q92922 SMRC1_HUMAN | K.EKPVDLQNFGLR.T         |        | 2 | 2,0983 | 0,393 | 0      |
| 20 | Q15154 PCM1_HUMAN  | R.KPS#ASERLPDEKVE.L      | S384:  | 2 | 2,0924 | 0,253 | -0,586 |
| 20 | Q5VUA4 ZN318_HUMAN | R.VSPAHR#PTVLCQK.V       | S2035: | 3 | 2,0904 | 0,262 | 0,11   |
| 20 | Q96RS0 TGS1_HUMAN  | R.FDDGIKLDRE.G           |        | 3 | 2,0888 | 0,182 | 1,514  |
| 20 | O43166 SI1L1_HUMAN | R.HSASPVVFTSAR.S         |        | 2 | 2,0862 | 0,281 | -0,678 |

|    |                    |                      |          |   |        |       |        |
|----|--------------------|----------------------|----------|---|--------|-------|--------|
| 20 | P09234 RU1C_HUMAN  | D.TYLTHDSPSVR.K      |          | 3 | 2,0841 | 0,23  | 0,717  |
| 20 | Q9UGU5 HM2L1_HUMAN | E.TLTLREPDGLK.M      |          | 2 | 2,0736 | 0,092 | -0,589 |
| 20 | P15531 NDKA_HUMAN  | K.DRPFFAGLVK.Y       |          | 2 | 2,0729 | 0,164 | -1,273 |
| 20 | Q04609 FOLH1_HUMAN | K.SS#NEATNIT#PK.H    | S46:T53: | 3 | 2,0725 | 0,204 | 1,937  |
| 20 | P55010 IF5_HUMAN   | R.VKAEPFIK.W         |          | 2 | 2,072  | 0,095 | -1,702 |
| 20 | O14908 GIPC1_HUMAN | E.DFIFAHVK.G         |          | 2 | 2,0699 | 0,188 | -0,749 |
| 20 | P27816 MAP4_HUMAN  | E.RAS#PIKM*DLAPSKD.M | S358:    | 2 | 2,0681 | 0,474 | -0,676 |
| 20 | Q8TD16 BICD2_HUMAN | K.LPLDNKTS#TPKKE.G   | S318:    | 3 | 2,068  | 0,097 | -0,118 |
| 20 | P55769 NH2L1_HUMAN | E.DKNVPYVVR.S        |          | 2 | 2,0677 | 0,101 | -0,69  |
| 20 | Q9NQ29 LUC7L_HUMAN | K.LHLGFIQIRE.K       |          | 2 | 2,0657 | 0,247 | -0,299 |
| 20 | P43243 MATR3_HUMAN | E.DFHGLLPK.G         |          | 2 | 2,0645 | 0,189 | -0,592 |
| 20 | Q16555 DPYL2_HUMAN | R.KPFPDFVYK.R        |          | 2 | 2,064  | 0,195 | -0,428 |
| 20 | Q9NTJ3 SMC4_HUMAN  | R.DNTSVYHISGK.K      |          | 2 | 2,0635 | 0,352 | -0,2   |
| 20 | Q9NRY4 GRLF1_HUMAN | K.GDLSYLDQGHR.D      |          | 2 | 2,0606 | 0,371 | -0,484 |
| 20 | P35251 RFC1_HUMAN  | E.AHLTPYSLQAIK.A     |          | 2 | 2,0585 | 0,288 | -0,727 |
| 20 | Q9BW91 NUDT9_HUMAN | K.HILQFVAIK.R        |          | 2 | 2,0527 | 0,166 | -0,342 |
| 20 | Q13111 CAF1A_HUMAN | K.QHSSTSPFPTSTPLR.R  |          | 2 | 2,0519 | 0,443 | -0,446 |
| 20 | Q86UU1 PHLB1_HUMAN | R.KLS#SGDLRVPVTR.E   | S563:    | 3 | 2,05   | 0,128 | -0,667 |
| 20 | Q09666 AHNK_HUMAN  | E.M*KVPDVDIK.G       |          | 2 | 2,0491 | 0,157 | -0,575 |
| 20 | O60812 HNRCL_HUMAN | K.QKVDSLLENLEK.I     |          | 2 | 2,048  | 0,154 | -0,603 |
| 20 | O60361 NDK8_HUMAN  | E.TNPADSKPGTIR.G     |          | 2 | 2,0479 | 0,384 | -0,194 |
| 20 | P46087 NOL1_HUMAN  | R.FLPAVSDENSKR.L     |          | 2 | 2,0445 | 0,102 | -0,537 |
| 20 | P04075 ALDOA_HUMAN | K.GGVVGIVDK.G        |          | 2 | 2,0402 | 0,146 | -0,314 |
| 20 | Q8ND56 LS14A_HUMAN | R.RS#PVSTRPLPSASQK.A | S216:    | 2 | 2,0394 | 0,399 | -0,433 |
| 20 | P68104 EF1A1_HUMAN | D.M*RQTVAVGVIA.A     |          | 2 | 2,0341 | 0,224 | -1,102 |
| 20 | Q9C0C9 UBE2O_HUMAN | R.LLFSHDLVSGR.Y      |          | 3 | 2,0337 | 0,342 | 0,367  |
| 20 | Q53F19 CQ085_HUMAN | E.YHEELPALK.Q        |          | 2 | 2,0333 | 0,23  | -0,665 |
| 20 | Q9UIK4 DAPK2_HUMAN | K.IAHFDLKPE.N        |          | 2 | 2,0329 | 0,32  | -1,824 |
| 20 | P26641 EF1G_HUMAN  | K.STFVLDEFKR.K       |          | 2 | 2,0313 | 0,294 | -0,393 |
| 20 | P09382 LEG1_HUMAN  | K.DSNNLCLHFNPR.F     |          | 3 | 2,0305 | 0,259 | -0,062 |
| 20 | Q9H2P0 ADNP_HUMAN  | E.TIHLTEPTK.L        |          | 2 | 2,0303 | 0,161 | -0,626 |
| 20 | P61158 ARP3_HUMAN  | E.AIEKPTYATK.W       |          | 2 | 2,0296 | 0,33  | -0,652 |
| 20 | Q9NW82 WDR70_HUMAN | K.NIALDKTDDSNPRE.A   |          | 3 | 2,0296 | 0,181 | -0,115 |

|    |                    |                       |       |   |        |       |        |
|----|--------------------|-----------------------|-------|---|--------|-------|--------|
| 20 | P46109 CRKL_HUMAN  | K.GLFPFTHVK.I         |       | 2 | 2,029  | 0,285 | -0,467 |
| 20 | Q00839 HNRPU_HUMAN | K.VSELKEELK.K         |       | 2 | 2,0272 | 0,097 | -1,362 |
| 20 | P25398 RS12_HUMAN  | K.TALIHDGLAR.G        |       | 2 | 2,0258 | 0,277 | -0,8   |
| 20 | Q8WTT2 NOC3L_HUMAN | D.LSSSEPVHAK.K        |       | 2 | 2,0246 | 0,211 | 0      |
| 20 | Q9Y2H2 SAC2_HUMAN  | E.ITVAHGSGLGK.G       |       | 2 | 2,0214 | 0,281 | -0,469 |
| 20 | Q99417 MYCBP_HUMAN | E.KSGVLDLTK.V         |       | 2 | 2,0211 | 0,329 | -0,919 |
| 20 | Q6I9Y2 THOC7_HUMAN | R.LLIDGDGAGDDRR.I     |       | 2 | 2,02   | 0,153 | -0,622 |
| 20 | Q9BYW2 SETD2_HUMAN | K.IYYYHVITR.Q         |       | 2 | 2,0187 | 0,107 | -1,292 |
| 20 | Q9H1E3 NUCKS_HUMAN | R.LKATVTPS#PVKGG.K    | S181: | 3 | 2,0172 | 0,182 | -0,39  |
| 20 | P13010 KU86_HUMAN  | K.KVITM*FVQR.Q        |       | 2 | 2,0157 | 0,312 | -0,643 |
| 20 | Q13740 CD166_HUMAN | R.SSNTYTLTDVRR.N      |       | 3 | 2,0153 | 0,198 | -0,453 |
| 20 | Q9Y383 LC7L2_HUMAN | K.LHLGFIEIRE.K        |       | 2 | 2,0131 | 0,235 | -0,398 |
| 20 | Q14696 MESD2_HUMAN | K.DIRDYNDADM*AR.L     |       | 2 | 2,0127 | 0,361 | -1,078 |
| 20 | Q12888 TP53B_HUMAN | E.DDSGSHFSM*LSR.H     |       | 3 | 2,0113 | 0,098 | 0,337  |
| 20 | Q9H993 CF211_HUMAN | K.DRIPQILTK.V         |       | 2 | 2,0102 | 0,138 | -1,238 |
| 20 | Q86SQ0 PHLB2_HUMAN | R.DDLM*DYHR.R         |       | 2 | 2,0094 | 0,123 | 0,339  |
| 20 | O00220 TR10A_HUMAN | K.EKIQDLLVDSGK.F      |       | 3 | 2,0091 | 0,132 | 0,34   |
| 20 | P30443 1A01_HUMAN  | R.GYRQDAYDGKDYIALNE.D |       | 3 | 2,0058 | 0,125 | -0,459 |
| 20 | P42704 LPPRC_HUMAN | E.YKFSPDFLAK.M        |       | 2 | 2,0049 | 0,199 | -0,556 |
| 20 | Q13033 STRN3_HUMAN | K.M*IHSM*VAHLD.A      |       | 2 | 2,0026 | 0,224 | -0,514 |
| 20 | P39023 RL3_HUMAN   | K.AFM*GPLKKD.R        |       | 2 | 2,0025 | 0,248 | 0,298  |
| 20 | Q9C073 F117A_HUMAN | R.ILDIPDGHR.A         |       | 2 | 2,0016 | 0,138 | -0,471 |
| 20 | P52788 SPSY_HUMAN  | R.HSTLDFM*LGAK.A      |       | 2 | 1,9905 | 0,193 | -0,395 |
| 20 | Q96JM3 ZN828_HUMAN | K.HALFPELPK.S         |       | 2 | 1,9891 | 0,303 | -0,464 |
| 20 | P08697 A2AP_HUMAN  | E.IQVAHFPEK.N         |       | 2 | 1,9851 | 0,164 | -0,112 |
| 20 | Q5VZ89 DEN4C_HUMAN | K.LHYPTGEVPPFR.G      |       | 2 | 1,9813 | 0,181 | -0,863 |
| 20 | Q9Y3B3 TMED7_HUMAN | K.SVIDYQTHFR.L        |       | 2 | 1,9785 | 0,231 | -0,675 |
| 20 | Q9UNE7 STUB1_HUMAN | E.QRLNFGDDIPSALR.I    |       | 2 | 1,9778 | 0,124 | 0,381  |
| 20 | P46937 YAP1_HUMAN  | D.SFFKPPPEK.S         |       | 2 | 1,9753 | 0,159 | -0,453 |
| 20 | Q7Z478 DHX29_HUMAN | E.DHPVFNPAM*K.I       |       | 2 | 1,9725 | 0,164 | -0,729 |
| 20 | O15145 ARPC3_HUMAN | K.VFDPQNDKPSK.W       |       | 2 | 1,9708 | 0,229 | -0,096 |
| 20 | P29317 EPA2_HUMAN  | R.YSEPPHGLTR.T        |       | 2 | 1,9707 | 0,455 | -0,105 |
| 20 | P15924 DESP_HUMAN  | R.DVLDGHLRE.K         |       | 2 | 1,9661 | 0,328 | -0,232 |



|    |                    |                    |   |        |       |        |
|----|--------------------|--------------------|---|--------|-------|--------|
| 20 | Q14004 CD2L5_HUMAN | K.TKPPLQVTKVE.N    | 2 | 1,9592 | 0,253 | -0,787 |
| 20 | Q96Q11 TRNT1_HUMAN | E.EKNLGLFIVK.N     | 2 | 1,9588 | 0,306 | -0,21  |
| 20 | P39023 RL3_HUMAN   | K.AFM*GPLKK.D      | 2 | 1,9552 | 0,129 | 0      |
| 20 | Q03468 ERCC6_HUMAN | R.NHLILPERLE.S     | 2 | 1,952  | 0,096 | -0,692 |
| 20 | P60903 S10AA_HUMAN | E.TM*M*FTFHK.F     | 2 | 1,9513 | 0,124 | -0,227 |
| 20 | Q7L8J4 3BP5L_HUMAN | R.GGLPPHPLGPR.R    | 2 | 1,9499 | 0,11  | 0,111  |
| 20 | P50579 AMPM2_HUMAN | K.NFDVGHVPIR.L     | 2 | 1,9461 | 0,149 | -0,634 |
| 20 | Q14151 SAFB2_HUMAN | K.SKGEPVISVK.T     | 2 | 1,9456 | 0,203 | -0,117 |
| 20 | Q14493 SLBP_HUMAN  | E.SFTTPEGPKPR.S    | 2 | 1,9442 | 0,239 | -0,802 |
| 20 | Q9Y2W1 TR150_HUMAN | K.YKDDPVDLRLD.I    | 2 | 1,9437 | 0,21  | -1,357 |
| 20 | Q92616 GCN1L_HUMAN | K.LFCLTLHR.Y       | 2 | 1,9434 | 0,155 | 0,115  |
| 20 | Q9H3S7 PTN23_HUMAN | E.DKAVLQNLK.R      | 2 | 1,9422 | 0,156 | -0,711 |
| 20 | O75446 SAP30_HUMAN | K.SDLKVDSGVH.-     | 2 | 1,9407 | 0,354 | 0,231  |
| 20 | Q14566 MCM6_HUMAN  | R.LTHYDHVLI.E.L    | 2 | 1,9395 | 0,185 | 0      |
| 20 | Q86W92 LIPB1_HUMAN | E.DDM*FKDFAAR.S    | 2 | 1,9393 | 0,164 | -0,198 |
| 20 | Q9UPN3 MACF1_HUMAN | E.DKLSSVFK.D       | 2 | 1,9314 | 0,153 | -0,358 |
| 20 | Q9Y4E5 ZN451_HUMAN | D.LHLLLDQSK.F      | 2 | 1,9307 | 0,113 | -0,572 |
| 20 | Q04446 GLGB_HUMAN  | R.QFHLLTDDDLLR.Y   | 2 | 1,9266 | 0,346 | 0,711  |
| 20 | O95049 ZO3_HUMAN   | E.GKLSLLVLR.D      | 2 | 1,9224 | 0,127 | -0,183 |
| 20 | P46379 BAT3_HUMAN  | E.HM*PVGPDAILR.Y   | 2 | 1,9208 | 0,345 | -0,1   |
| 20 | Q9NQR4 NIT2_HUMAN  | K.IHLFDIDVPGK.I    | 2 | 1,916  | 0,195 | 0,584  |
| 20 | Q14692 BMS1_HUMAN  | K.LSKPSQVSSGQK.L   | 2 | 1,9154 | 0,195 | -0,098 |
| 20 | Q6PJT7 ZC3HE_HUMAN | R.KLPVVSSVVK.V     | 2 | 1,9146 | 0,189 | -0,809 |
| 20 | O15042 SR140_HUMAN | E.AFVEEPSKK.G      | 2 | 1,908  | 0,102 | -0,354 |
| 20 | P11233 RALA_HUMAN  | E.DYEPTKADSYR.K    | 2 | 1,9058 | 0,316 | -0,454 |
| 20 | Q9UHV9 PFD2_HUMAN  | R.LM*GEDEKPAK.E    | 2 | 1,9012 | 0,197 | -0,203 |
| 20 | Q13242 SFRS9_HUMAN | R.GSPHYFSPFRPY.-   | 2 | 1,8988 | 0,314 | -0,335 |
| 20 | Q9NR50 EI2BG_HUMAN | R.DFIGVDSTGKR.L    | 2 | 1,8965 | 0,138 | -0,204 |
| 20 | Q5SW79 CE170_HUMAN | K.SDVPVYLKR.L      | 2 | 1,8869 | 0,286 | 0,453  |
| 20 | Q12906 ILF3_HUMAN  | E.KAEPQAM*NALM*R.L | 2 | 1,8867 | 0,325 | -0,082 |
| 20 | Q6ZMI0 CC128_HUMAN | E.HLTSYICFLR.K     | 2 | 1,8831 | 0,115 | -0,279 |
| 20 | Q9P265 DIP2B_HUMAN | K.M*ALPM*PTKR.R    | 2 | 1,8767 | 0,116 | -0,566 |
| 20 | P48643 TCPE_HUMAN  | K.DFSHPQM*PK.K     | 2 | 1,8744 | 0,149 | -0,664 |

|    |                    |                        |       |   |        |       |        |
|----|--------------------|------------------------|-------|---|--------|-------|--------|
| 20 | Q15181 IPYR_HUMAN  | D.KDFAIDIHK.S          |       | 2 | 1,866  | 0,118 | -0,689 |
| 20 | Q6T4R5 NHS_HUMAN   | E.DLFAVIHR.S           |       | 2 | 1,8646 | 0,22  | 0      |
| 20 | Q8WUX9 CHMP7_HUMAN | K.RQLEPTLKPL.-         |       | 2 | 1,8631 | 0,207 | -0,613 |
| 20 | O60361 NDK8_HUMAN  | K.DRPFPPGLVK.Y         |       | 2 | 1,8619 | 0,202 | -0,311 |
| 20 | P46100 ATRX_HUMAN  | R.HPSLQVLICK.N         |       | 2 | 1,8559 | 0,293 | -0,306 |
| 20 | Q9BQA1 MEP50_HUMAN | -.M*RKET#PPPLVPPAARE.W | T5:   | 2 | 1,8541 | 0,114 | -1,683 |
| 20 | Q92621 NU205_HUMAN | R.DILQDVHDK.I          |       | 2 | 1,8534 | 0,11  | -0,563 |
| 20 | Q9Y490 TLN1_HUMAN  | K.FLPSELRDEH.-         |       | 2 | 1,8488 | 0,262 | -0,393 |
| 20 | O00567 NOL5A_HUMAN | E.HAVGYALLALK.E        |       | 2 | 1,8424 | 0,198 | -0,633 |
| 20 | Q8IU81 I2BP1_HUMAN | E.ALGHS#PKDPGGGGGPVR.A | S436: | 2 | 1,8406 | 0,32  | -0,67  |
| 20 | Q14554 PDIA5_HUMAN | R.FHISEFPTLK.Y         |       | 2 | 1,8386 | 0,096 | -0,4   |
| 20 | P78332 RBM6_HUMAN  | E.GKAPAEDVFK.K         |       | 2 | 1,835  | 0,142 | -0,919 |
| 20 | P08670 VIME_HUMAN  | D.SLPLVDTHSK.R         |       | 2 | 1,8312 | 0,33  | -1,001 |
| 20 | P60903 S10AA_HUMAN | D.YFVVHM*K.Q           |       | 2 | 1,8225 | 0,158 | 0,195  |
| 20 | P55010 IF5_HUMAN   | K.ALNRPTPTK.Y          |       | 2 | 1,822  | 0,179 | -0,485 |
| 20 | Q9Y4L1 HYOU1_HUMAN | K.QADNPHVALYQAR.F      |       | 2 | 1,8194 | 0,194 | -0,494 |
| 20 | Q96B23 CR025_HUMAN | E.GDPSGVSGATVGRK.S     |       | 2 | 1,8074 | 0,24  | -0,474 |
| 20 | P27695 APEX1_HUMAN | K.TSPSGKPATLK.I        |       | 2 | 1,8066 | 0,291 | -0,224 |
| 20 | Q7L7V1 DHX32_HUMAN | E.GDHFTLISYK.A         |       | 2 | 1,8045 | 0,103 | -0,471 |
| 20 | P53396 ACLY_HUMAN  | E.GDYVLFHHE.G          |       | 2 | 1,7957 | 0,176 | -0,218 |
| 20 | Q9H4M9 EHD1_HUMAN  | K.SKLPNTVLGK.I         |       | 2 | 1,7875 | 0,167 | -0,462 |
| 20 | Q9NVS9 PNPO_HUMAN  | E.THLTSLDPVK.Q         |       | 2 | 1,7864 | 0,218 | -1,318 |
| 20 | P38919 IF4A3_HUMAN | R.KGVAINFVK.N          |       | 2 | 1,7713 | 0,089 | -0,125 |
| 20 | Q7Z333 SETX_HUMAN  | E.DHLLAGSCLK.Q         |       | 2 | 1,7676 | 0,216 | -0,986 |
| 20 | P52435 RPB11_HUMAN | E.DHTLGNIHK.S          |       | 2 | 1,7611 | 0,143 | -0,543 |
| 20 | P30153 2AAA_HUMAN  | E.AHFVPLVK.R           |       | 2 | 1,75   | 0,211 | 0,067  |
| 20 | P06744 G6PI_HUMAN  | R.AVLHVALR.N           |       | 2 | 1,7441 | 0,271 | -0,069 |
| 20 | Q9BQA1 MEP50_HUMAN | -.M*RKET#PPPLVPPAAR.E  | T5:   | 2 | 1,7378 | 0,088 | -0,417 |
| 20 | Q06124 PTN11_HUMAN | K.NILPFDHTR.V          |       | 2 | 1,7373 | 0,213 | -0,548 |
| 20 | O43615 TIM44_HUMAN | E.ALGVVLHK.D           |       | 2 | 1,7356 | 0,124 | 0,729  |
| 20 | Q14739 LBR_HUMAN   | E.NDIKPLTSFR.Q         |       | 2 | 1,7276 | 0,184 | -0,41  |
| 20 | P26640 SYVC_HUMAN  | K.NVIHPFLSR.S          |       | 2 | 1,7141 | 0,193 | 0      |
| 20 | P46821 MAP1B_HUMAN | K.HM*DPPPAPVQDR.S      |       | 2 | 1,7115 | 0,147 | -1,33  |

|    |                      |                                    |            |   |        |       |        |
|----|----------------------|------------------------------------|------------|---|--------|-------|--------|
| 20 | Q13595 TRA2A_HUMAN   | R.RRS#PS#PYYSR.Y                   | S260:S262: | 2 | 1,7073 | 0,083 | -0,598 |
| 20 | O43681 ARSA1_HUMAN   | K.LPLLPHEVR.G                      |            | 2 | 1,7015 | 0,361 | -0,795 |
| 20 | P07602 SAP_HUMAN     | E.KGCSFLPDYQK.Q                    |            | 2 | 1,691  | 0,117 | -0,339 |
| 20 | Q9ULT8 HECD1_HUMAN   | R.DLYDDHFK.A                       |            | 2 | 1,6893 | 0,177 | -0,463 |
| 20 | Q9NQ29 LUC7L_HUMAN   | K.LHLGFIQR.E                       |            | 2 | 1,6814 | 0,106 | -0,222 |
| 20 | Q9NPD3 EXOS4_HUMAN   | R.DVHTLLDR.V                       |            | 2 | 1,6745 | 0,278 | 0,315  |
| 20 | P12956 KU70_HUMAN    | K.KQELLEALK.H                      |            | 2 | 1,6682 | 0,164 | -0,624 |
| 20 | ##Q8NA47 CCD63_HUMAN | E.IALNM*TKKE.M                     |            | 2 | 1,6574 | 0,101 | -0,688 |
| 20 | Q9Y262 IF3EI_HUMAN   | K.NFIQYFHK.T                       |            | 2 | 1,6533 | 0,081 | -0,556 |
| 20 | Q96T88 UHRF1_HUMAN   | R.QSLVLPSTK.E                      |            | 2 | 1,6501 | 0,091 | -0,33  |
| 20 | Q8WWK9 CKAP2_HUMAN   | R.HTIVDILTM*K.S                    |            | 2 | 1,6379 | 0,25  | -0,514 |
| 20 | O43491 E41L2_HUMAN   | E.VRS#PTKAPHLQIE.G                 | S598:      | 2 | 1,6372 | 0,518 | -0,365 |
| 20 | P14923 PLAK_HUMAN    | E.ALIHAILR.A                       |            | 2 | 1,6123 | 0,109 | 0,202  |
| 20 | Q96IJ6 GMPPA_HUMAN   | R.HPFLLLGTTANR.T                   |            | 2 | 1,6014 | 0,159 | -0,364 |
| 20 | Q96SB4 SRPK1_HUMAN   | E.SES#PVERPLKENPPNK.M              | S482:      | 2 | 1,6007 | 0,182 | -0,513 |
| 20 | Q9UID3 CK002_HUMAN   | K.FISATDTIRK.M                     |            | 2 | 1,5946 | 0,125 | -0,53  |
| 20 | P07237 PDIA1_HUMAN   | K.THILLFLPK.S                      |            | 2 | 1,5723 | 0,104 | -0,451 |
| 20 | Q09666 AHNK_HUMAN    | E.GDLKGPALDIK.G                    |            | 2 | 1,5581 | 0,09  | -0,217 |
| 20 | P04049 RAF1_HUMAN    | E.LLQHSLPK.I                       |            | 2 | 1,4802 | 0,198 | -0,065 |
| 20 | P33316 DUT_HUMAN     | R.ARPAEVGGM*QLR.F                  |            | 2 | 1,4551 | 0,122 | 0,375  |
| 20 | P05549 AP2A_HUMAN    | R.GLPHQLSGLDPR.R                   |            | 2 | 1,4376 | 0,134 | -0,757 |
| 20 | Q9NYB9 ABI2_HUMAN    | R.HTPPTIGGSLPYR.R                  |            | 2 | 1,4104 | 0,197 | -0,874 |
| 20 | P52888 THOP1_HUMAN   | K.YPHYFPLLK.K                      |            | 2 | 1,3984 | 0,202 | -0,207 |
| 20 | Q15149 PLEC1_HUMAN   | K.LSIYNALKK.D                      |            | 2 | 1,3072 | 0,092 | 0,116  |
| 20 | Q14152 EIF3A_HUMAN   | E.QHQLAVTAYLK.N                    |            | 2 | 1,276  | 0,094 | -0,671 |
| 20 | P50552 VASP_HUMAN    | R.QQPGPSEHIER.R                    |            | 2 | 1,0425 | 0,115 | -0,477 |
| 21 | Q5T4S7 UBR4_HUMAN    | R.TSPADHGGVSGSESGSAVDSVAGEHSVSGR.S |            | 3 | 7,1506 | 0,572 | -0,258 |
| 21 | Q7Z3T8 ZFY16_HUMAN   | K.SLDLKDNDVIQDSSSALHVSSK.D         |            | 3 | 5,8734 | 0,394 | -0,543 |
| 21 | Q969S3 ZN622_HUMAN   | E.KGLGVDSVDKDAM*NAAIQQAIA.A        |            | 3 | 5,3542 | 0,39  | -0,4   |
| 21 | Q9H2J4 PDCL3_HUMAN   | D.LEENPKKPIEDVLLSSVR.R             |            | 3 | 5,1638 | 0,456 | -0,354 |
| 21 | Q9BXF6 RFIP5_HUMAN   | R.HRS#SISGSLPSSGSLQAVSSR.F         | S356:      | 3 | 5,1444 | 0,382 | -0,671 |
| 21 | P50851 LRBA_HUMAN    | R.RRDS#GIGEETATGLGSHVE.V           | S1605:     | 3 | 5,1434 | 0,339 | -0,178 |
| 21 | O43318 M3K7_HUMAN    | R.RRS#IQDLTVTGTEPGQVSSR.S          | S439:      | 3 | 5,0602 | 0,444 | -0,888 |

|    |                     |                                   |        |   |        |       |        |
|----|---------------------|-----------------------------------|--------|---|--------|-------|--------|
| 21 | P80303 NUCB2_HUMAN  | K.AKLSLQDIGM*DHQALLK.Q            |        | 3 | 5,0511 | 0,554 | -0,364 |
| 21 | P26006 ITA3_HUMAN   | R.TGAVYLCPLTAHKDDCER.M            |        | 2 | 5,034  | 0,558 | 0      |
| 21 | Q8TEW0 PARD3_HUMAN  | R.RISHSLYSGIEGLDES#PSR.N          | S728:  | 3 | 4,9988 | 0,517 | -0,251 |
| 21 | Q6PGP7 TTC37_HUMAN  | E.NALGLSDKIPSEDHQVLYR.H           |        | 3 | 4,9224 | 0,407 | -0,424 |
| 21 | Q9HA05 Q9HA05_HUMAN | E.HQLGQASGLGGSQSLIDTHLLQAR.A      |        | 3 | 4,899  | 0,4   | -0,229 |
| 21 | Q96RR4 KKCC2_HUMAN  | E.RSQGGLAAGGSLDM*NGR.C            |        | 3 | 4,887  | 0,513 | -0,33  |
| 21 | O00154 BACH_HUMAN   | R.IM*RPDDANVAGNVHGGTILK.M         |        | 3 | 4,8461 | 0,376 | -0,349 |
| 21 | Q15648 MED1_HUMAN   | E.HHS#GSQGPLLTGDLGKE.K            | S951:  | 3 | 4,8398 | 0,124 | -0,096 |
| 21 | Q9Y552 MRCKB_HUMAN  | K.HSTPSNSSNPSGPPS#PNSPHR.S        | S1690: | 3 | 4,8222 | 0,5   | 0      |
| 21 | Q5QP82 WDR32_HUMAN  | E.VLGESDHGNCITSLQLHPK.G           |        | 3 | 4,8052 | 0,475 | -0,087 |
| 21 | Q8NFC6 FA44A_HUMAN  | E.KNVLLNSLQKEDKS#PE.T             | S2475: | 3 | 4,8028 | 0,229 | -0,476 |
| 21 | Q9H4A3 WNK1_HUMAN   | K.DRPVSQLVGSKEEPPPAR.S            |        | 3 | 4,7499 | 0,475 | -0,767 |
| 21 | Q13428 TCOF_HUMAN   | E.KSLGNILQAKPTS#SPAKGPPQK.A       | S582:  | 3 | 4,7491 | 0,442 | -0,314 |
| 21 | Q6P2H3 CCD21_HUMAN  | E.KYPTEGISHVTSPSSDVIQK.G          |        | 3 | 4,7469 | 0,476 | -0,505 |
| 21 | P49792 RBP2_HUMAN   | E.GLRPSLPTQAHTTQPTPFK.F           |        | 3 | 4,7309 | 0,445 | -0,881 |
| 21 | Q9Y2D5 AKAP2_HUMAN  | R.AVLTVVKDDDHGILDQFSR.S           |        | 3 | 4,7118 | 0,395 | -0,43  |
| 21 | Q02818 NUCB1_HUMAN  | K.AKM*DAEQDPNVQVDHLNLLK.Q         |        | 3 | 4,7073 | 0,413 | -0,399 |
| 21 | P25786 PSA1_HUMAN   | R.KAQPAQPADEPAEKADEPM*EH.-        |        | 3 | 4,7067 | 0,495 | -0,317 |
| 21 | P18669 PGAM1_HUMAN  | R.RSYDVPPPPM*EPDHPFYSNISK.D       |        | 3 | 4,6741 | 0,401 | -0,424 |
| 21 | Q8N1G0 ZN687_HUMAN  | E.SCSPHHPQVLAQQGSGSS#PK.A         | S242:  | 3 | 4,6647 | 0,388 | -0,337 |
| 21 | P05362 ICAM1_HUMAN  | E.LKREPAVGEPAEVTTTVLVR.R          |        | 3 | 4,6253 | 0,442 | -0,845 |
| 21 | Q3MII6 TBC25_HUMAN  | R.RDPLVQLPHPAALISSK.S             |        | 3 | 4,57   | 0,423 | -0,397 |
| 21 | Q63ZY3 KANK2_HUMAN  | R.ERVPSVAEAPQLRPAGTAAAK.T         |        | 3 | 4,5646 | 0,381 | 0,086  |
| 21 | Q8IWW6 RHG12_HUMAN  | E.KTSFSQEQSCDSAGEGSR.I            |        | 3 | 4,5564 | 0,484 | 0      |
| 21 | P08621 RU17_HUMAN   | E.ARGGGGGQDNGLEGLGNDNR.D          |        | 3 | 4,5397 | 0,419 | -0,388 |
| 21 | P55198 AF17_HUMAN   | R.HSSGGGGGAGGGGSM*GGGGSGFISGR.R   |        | 3 | 4,5368 | 0,44  | 0,083  |
| 21 | Q53SC7 Q53SC7_HUMAN | R.RSNM*HFTSSSTGGLSSSQSSYS#PSNRE.A | S189:  | 3 | 4,5183 | 0,475 | -0,615 |
| 21 | Q96ST2 IWS1_HUMAN   | K.GHHVTDSSENDEPLNLNASDSE.S        |        | 3 | 4,4755 | 0,469 | 0      |
| 21 | P49790 NU153_HUMAN  | E.IKDSTSQHDDDNIS#TTSGFSSR.A       | S182:  | 3 | 4,4647 | 0,515 | -0,591 |
| 21 | Q13200 PSMD2_HUMAN  | R.DKAPVQPQQSPAAAPGGTDEKPSGK.E     |        | 3 | 4,4411 | 0,408 | 0,149  |
| 21 | O15015 ZN646_HUMAN  | R.HHQSQSSGTTADKAPS#PLGVAGDAM*E.M  | S991:  | 3 | 4,4271 | 0,446 | -0,068 |
| 21 | P30050 RL12_HUMAN   | R.HPHDIIDDINSGAVECPAS.-           |        | 2 | 4,404  | 0,562 | -0,358 |
| 21 | Q14004 CD2L5_HUMAN  | K.AALLQLLAQHQPQDDPKRE.G           |        | 3 | 4,3545 | 0,47  | -0,674 |

|    |                     |                                |            |   |        |       |        |
|----|---------------------|--------------------------------|------------|---|--------|-------|--------|
| 21 | Q13118 KLF10_HUMAN  | K.SLSDTAKPHIAAPFKEEE.K         |            | 3 | 4,3285 | 0,362 | -0,557 |
| 21 | Q9UNZ2 NSF1C_HUMAN  | R.KKS#PNELVDDLFK.G             | S114:      | 3 | 4,3255 | 0,286 | 0,113  |
| 21 | P41236 IPP2_HUMAN   | E.M*NILATYHPADKDYGLM*K.I       |            | 2 | 4,324  | 0,504 | -0,231 |
| 21 | P36578 RL4_HUMAN    | K.APIRPDIVNFVHTNLR.K           |            | 3 | 4,3084 | 0,352 | -0,589 |
| 21 | Q7Z6Z7 HUWE1_HUMAN  | E.RDGGSGNSTIIVSR.S             |            | 2 | 4,272  | 0,424 | -0,688 |
| 21 | Q8WXV6 Q8WXV6_HUMAN | R.KRTSS#EDNLYLAVLR.A           | S21:       | 3 | 4,2147 | 0,276 | -0,297 |
| 21 | P30153 2AAA_HUMAN   | E.KLTQDQDQDVK.Y                |            | 3 | 4,1902 | 0,271 | 0,851  |
| 21 | Q14738 2A5D_HUMAN   | R.RKS#ELPQDVYTIK.A             | S573:      | 2 | 4,1452 | 0,254 | -1,767 |
| 21 | P22061 PIMT_HUMAN   | K.M*KPLM*GVIYVPLTDKEK.Q        |            | 3 | 4,1414 | 0,235 | 0,183  |
| 21 | Q5VUA4 ZN318_HUMAN  | K.SKS#PEKVSSFSNSSSKE.S         | S1010:     | 3 | 4,1127 | 0,392 | -0,364 |
| 21 | P50748 KNTC1_HUMAN  | K.HKPGSTPEPIAAEVR#PSM*E.S      | S1045:     | 3 | 4,0948 | 0,363 | 0,991  |
| 21 | P48643 TCPE_HUMAN   | K.GVIVDKDFSHPQM*PK.K           |            | 3 | 4,0921 | 0,422 | -0,32  |
| 21 | P25705 ATPA_HUMAN   | E.NAFLSHVVSQHQALLGTIR.A        |            | 3 | 4,0791 | 0,372 | -0,35  |
| 21 | Q86UD0 CI140_HUMAN  | R.RHT#IASGVDCGLLK.Q            | T219:      | 3 | 4,0749 | 0,357 | -0,911 |
| 21 | Q86V48 LUZP1_HUMAN  | K.SKNNDLQDNYLSEQNK.N           |            | 3 | 4,0533 | 0,108 | -0,383 |
| 21 | Q68E01 INT3_HUMAN   | R.VLAHLAPLFDNPKLKE.L           |            | 3 | 4,0495 | 0,353 | -0,191 |
| 21 | P46937 YAP1_HUMAN   | K.SHS#RQAST#DAGTAGALTPQHVR.A   | S105:T110: | 3 | 4,0464 | 1     | 0,076  |
| 21 | O94888 UBXD7_HUMAN  | E.HGQLDGLSSS#PPKK.C            | S270:      | 3 | 4,0122 | 0,276 | -0,956 |
| 21 | Q9Y490 TLN1_HUMAN   | K.KSTVLQQQYNR.V                |            | 3 | 4,005  | 0,16  | -0,268 |
| 21 | Q5VZ89 DEN4C_HUMAN  | E.RRS#SLPLDHGSPAQENPESE.K      | S1041:     | 3 | 3,9967 | 0,492 | -0,4   |
| 21 | O94967 WDR47_HUMAN  | E.HSVIKPPLGDS#PGSLR.S          | S578:      | 3 | 3,9923 | 0,503 | -0,2   |
| 21 | O15085 ARHGB_HUMAN  | R.LHQSASSTSSLSTR.S             |            | 2 | 3,9726 | 0,569 | -0,63  |
| 21 | O00170 AIP_HUMAN    | E.GRGELPDFQDGTK.A              |            | 2 | 3,9544 | 0,459 | -0,258 |
| 21 | Q15021 CND1_HUMAN   | E.KNPRES#TGNM*VTGQTVCK.N       | S585:      | 3 | 3,9513 | 0,29  | 0,435  |
| 21 | O95239 KIF4A_HUMAN  | E.TSRS#SDAFTTQHALR.Q           | S507:      | 3 | 3,9354 | 0,477 | -0,52  |
| 21 | O15231 ZN185_HUMAN  | E.RQSSPSGSEQLVR.R              |            | 2 | 3,9309 | 0,381 | -0,426 |
| 21 | Q08211 DHX9_HUMAN   | E.DCIQM*THFVPPPKDK.K           |            | 3 | 3,9294 | 0,128 | -0,5   |
| 21 | Q14671 PUM1_HUMAN   | R.RDS#LTGSSDLYKR.T             | S709:      | 3 | 3,9223 | 0,433 | -0,58  |
| 21 | O75044 FNBP2_HUMAN  | E.HHTS#DDECEPIEIAK.F           | S724:      | 3 | 3,9213 | 0,268 | 0,473  |
| 21 | P46087 NOL1_HUMAN   | K.KGPQSLFNAPR.G                |            | 3 | 3,9048 | 0,308 | 1,354  |
| 21 | Q9UGV2 NDRG3_HUMAN  | R.SRTHS#TSSSLGSGESPSR.S        | S331:      | 3 | 3,8899 | 0,317 | -0,626 |
| 21 | P04264 K2C1_HUMAN   | K.SKAEAESLYQSK.Y               |            | 2 | 3,887  | 0,451 | -0,819 |
| 21 | Q9NX40 OCAD1_HUMAN  | E.SAPTGITDHIVQGPDPNLEES#PKRK.N | S191:      | 3 | 3,8851 | 0,276 | -0,066 |

|    |                    |                               |                    |   |        |       |        |
|----|--------------------|-------------------------------|--------------------|---|--------|-------|--------|
| 21 | Q9BTC0 DIDO1_HUMAN | E.ARQDVPKPVLTSVM*VPK.S        |                    | 3 | 3,8789 | 0,315 | -0,389 |
| 21 | Q9BVJ6 UT14A_HUMAN | K.KKEQM*IDLQNLTTQS#PSVK.S     | S569:              | 3 | 3,8576 | 0,429 | -0,382 |
| 21 | Q9P260 K1468_HUMAN | R.LRDYFSNPGNFER.Q             |                    | 2 | 3,8475 | 0,376 | -0,302 |
| 21 | Q03188 CENPC_HUMAN | E.KSLANDFSTNSTK.S             |                    | 2 | 3,8472 | 0,388 | -1,9   |
| 21 | P13645 K1C10_HUMAN | K.IRLENEIQTYR.S               |                    | 2 | 3,8438 | 0,382 | -0,51  |
| 21 | P36915 GNL1_HUMAN  | R.RLNQQPSQGLGPR.G             |                    | 3 | 3,8424 | 0,357 | -1,008 |
| 21 | Q05682 CALD1_HUMAN | E.KQSVDKVTS#PTKV.-            | S789:              | 3 | 3,7975 | 0,212 | -0,244 |
| 21 | P49792 RBP2_HUMAN  | E.KDSLITPHVSR#S#TPRES#PCGK.I  | S2456:S2457:S2462: | 3 | 3,7944 | 1     | -0,273 |
| 21 | O94888 UBXD7_HUMAN | E.HGQLDGLSS#PPKK.C            | S270:              | 2 | 3,7938 | 0,403 | -1,514 |
| 21 | Q14738 2A5D_HUMAN  | R.RKS#ELPQDVYTIK.A            | S573:              | 3 | 3,79   | 0,22  | 1,104  |
| 21 | P31943 HNRH1_HUMAN | R.LRGLPFGCSKEE.I              |                    | 3 | 3,7898 | 0,332 | 0,394  |
| 21 | P31948 STIP1_HUMAN | K.DPQALSEHLKNPVIAQK.I         |                    | 3 | 3,784  | 0,47  | -0,194 |
| 21 | P36915 GNL1_HUMAN  | R.RLNQQPSQGLGPR.G             |                    | 2 | 3,7747 | 0,293 | -1,009 |
| 21 | O60318 MCM3A_HUMAN | R.TGASSLLNKSS#PVKKPSLLK.A     | S557:              | 3 | 3,7664 | 0,476 | -0,6   |
| 21 | Q9UHR5 S30BP_HUMAN | E.KGGLVSDAYGEDDFSR.L          |                    | 3 | 3,7596 | 0,349 | -0,32  |
| 21 | O60716 CTND1_HUMAN | K.KSDFQVNLNNASR.S             |                    | 3 | 3,7589 | 0,246 | 0,061  |
| 21 | Q8IYB3 SRRM1_HUMAN | K.VPKPEPIPEPEPS#PEKNSK.K      | S260:              | 2 | 3,7523 | 0,517 | -0,212 |
| 21 | Q02952 AKA12_HUMAN | K.LTASEQAHPQEPAESAEPR.L       |                    | 3 | 3,7516 | 0,431 | -0,084 |
| 21 | Q8N163 K1967_HUMAN | E.DGLLPKPLSSGGEEEEKPR.G       |                    | 3 | 3,7483 | 0,376 | -0,539 |
| 21 | Q9P2K3 RCOR3_HUMAN | E.THPM*DGND#DYDPKKE.A         | S171:              | 3 | 3,7259 | 0,42  | -0,094 |
| 21 | O60716 CTND1_HUMAN | K.KSDFQVNLNNASR.S             |                    | 2 | 3,7171 | 0,434 | -0,49  |
| 21 | Q96DA6 TIM14_HUMAN | R.IM*LLNHPDKGGSPYIAAK.I       |                    | 3 | 3,7162 | 0,404 | -0,66  |
| 21 | Q9BTC0 DIDO1_HUMAN | E.RVEQFLTIAR.R                |                    | 2 | 3,7091 | 0,41  | -0,792 |
| 21 | Q8TF01 SFR18_HUMAN | E.SGPNNHGNFQGDSNFR.M          |                    | 3 | 3,7007 | 0,316 | -0,196 |
| 21 | Q8NG31 CASC5_HUMAN | E.NKIDFNDFIK.R                |                    | 3 | 3,6809 | 0,284 | 0,365  |
| 21 | Q9UQ80 PA2G4_HUMAN | E.KTIQNPDTQQK.K               |                    | 2 | 3,6786 | 0,368 | -0,518 |
| 21 | Q71U36 TBA1A_HUMAN | E.HGIQPDGQMPSDK.T             |                    | 2 | 3,6588 | 0,484 | -0,433 |
| 21 | Q99653 CHP1_HUMAN  | K.SKDVNGPEPLNSR.S             |                    | 2 | 3,6585 | 0,43  | -0,086 |
| 21 | Q05682 CALD1_HUMAN | E.KQSVDKVT#SPTKV.-            | T788:              | 2 | 3,6572 | 0,383 | -0,897 |
| 21 | Q8IWE2 NXP20_HUMAN | E.LHVAAT#PDKLNK.A             | T381:              | 2 | 3,6557 | 0,458 | -1,759 |
| 21 | Q7KZ85 SPT6H_HUMAN | R.KKLPGYTDAALQEAQE.I          |                    | 2 | 3,6509 | 0,444 | -0,138 |
| 21 | Q68DK2 ZFY26_HUMAN | E.ISS#RSPPEKPKQE.S            | S701:              | 3 | 3,6351 | 0,209 | 0,117  |
| 21 | P26599 PTBP1_HUMAN | E.NALVQM*ADGNQAQLAM*SHLNGHK.L |                    | 3 | 3,6329 | 0,317 | -0,221 |

|    |                    |                             |          |   |        |       |        |
|----|--------------------|-----------------------------|----------|---|--------|-------|--------|
| 21 | P11137 MAP2_HUMAN  | K.ARVDHGAEIITQS#PGR.S       | S1782:   | 3 | 3,626  | 0,315 | -0,205 |
| 21 | Q9BSE4 HERP2_HUMAN | E.YHM*VHLVCTSRT#PPSS#PK.S   | T90:S94: | 3 | 3,6193 | 0,186 | -0,402 |
| 21 | P08865 RSSA_HUMAN  | K.RKS#DGIYIINLK.R           | S43:     | 2 | 3,6127 | 0,267 | -0,569 |
| 21 | Q00610 CLH1_HUMAN  | K.NNRPSEGPLQTR.L            |          | 3 | 3,6113 | 0,357 | 0,134  |
| 21 | Q9UBC2 EP15R_HUMAN | E.RGS#FGAM*DDPFKNK.A        | S593:    | 3 | 3,611  | 0,318 | -0,769 |
| 21 | Q04917 1433F_HUMAN | E.DSYKDSTLIM*QLLR.D         |          | 3 | 3,6104 | 0,263 | 0      |
| 21 | Q8IYB3 SRRM1_HUMAN | K.VPKPEPIPEPKEPS#PEKNSK.K   | S260:    | 3 | 3,6005 | 0,198 | -0,634 |
| 21 | Q13263 TIF1B_HUMAN | E.GYGFGSGDDPYSSAEPHVSGVKR.S |          | 3 | 3,5885 | 0,334 | -0,463 |
| 21 | O75116 ROCK2_HUMAN | R.THGSEIINDLQGR.I           |          | 2 | 3,5667 | 0,492 | -0,763 |
| 21 | Q9Y6W5 WASF2_HUMAN | R.DVVGNDVATILSR.R           |          | 2 | 3,5664 | 0,449 | -0,269 |
| 21 | Q32MZ4 LRRF1_HUMAN | R.NM*PGLSAATLASLGGTSSR.R    |          | 2 | 3,565  | 0,469 | -0,405 |
| 21 | Q13442 HAP28_HUMAN | K.GVEGLIDIENPNR.V           |          | 2 | 3,5514 | 0,38  | -0,086 |
| 21 | Q13769 THOC5_HUMAN | R.RPT#LGVQLDDKR.K           | T328:    | 3 | 3,5514 | 0,356 | 0,433  |
| 21 | P18615 NELFE_HUMAN | K.LKDPEKGPVPTFQPFQR.S       |          | 3 | 3,5502 | 0,366 | -0,369 |
| 21 | P30050 RL12_HUMAN  | R.HPHDIIDDINSGAVECPAS.-     |          | 3 | 3,5492 | 0,551 | -0,447 |
| 21 | Q9BV38 WDR18_HUMAN | E.KSVLGGQDQLR.V             |          | 3 | 3,5388 | 0,132 | 0,685  |
| 21 | Q13206 DDX10_HUMAN | R.SNSEVEDVGPTSHNR.K         |          | 2 | 3,5315 | 0,468 | 0,15   |
| 21 | Q96FS4 SIPA1_HUMAN | E.FLHSQNSLSR.S              |          | 3 | 3,5266 | 0,232 | 0,853  |
| 21 | Q86XL3 ANKL2_HUMAN | E.FDKLNLQNIGR.S             |          | 3 | 3,5232 | 0,216 | 0,486  |
| 21 | Q9Y224 CN166_HUMAN | D.KHILGFDTGDAVLNE.A         |          | 2 | 3,5165 | 0,467 | -0,374 |
| 21 | P41236 IPP2_HUMAN  | E.MNILATYHPADKDYGLM*K.I     |          | 3 | 3,5129 | 0,371 | -0,349 |
| 21 | Q9P107 GMIP_HUMAN  | R.GGVRPVTHQLSSLALVASK.L     |          | 3 | 3,51   | 0,34  | -0,286 |
| 21 | P29144 TPP2_HUMAN  | K.KADVIVHYLIPPTK.T          |          | 3 | 3,5052 | 0,22  | -0,469 |
| 21 | Q96BW5 PTER_HUMAN  | E.LLHYQLGPDIDM*PDDNKR.I     |          | 3 | 3,4998 | 0,351 | -0,509 |
| 21 | P12268 IMDH2_HUMAN | R.HGFCGIPITDTGR.M           |          | 2 | 3,4989 | 0,371 | -0,341 |
| 21 | Q13428 TCOF_HUMAN  | R.KAEEDAALQAK.K             |          | 2 | 3,4989 | 0,356 | -0,208 |
| 21 | Q04721 NOTC2_HUMAN | R.REPVGQDAVGLK.N            |          | 3 | 3,4973 | 0,239 | 1,153  |
| 21 | P52597 HNRPF_HUMAN | K.HSGPNSADSANDGFVR.L        |          | 3 | 3,497  | 0,395 | 0      |
| 21 | Q9UFC0 LRWD1_HUMAN | K.RPDDVPLSL#PSKR.A          | S243:    | 2 | 3,4894 | 0,358 | -0,074 |
| 21 | Q9BPX5 ARP5L_HUMAN | R.AFHAALRNS#PVNTK.N         | S64:     | 2 | 3,4824 | 0,222 | -0,304 |
| 21 | Q09666 AHNK_HUMAN  | E.VTQLLNTM*GHHTVGLK.L       |          | 2 | 3,4774 | 0,527 | -0,484 |
| 21 | Q9UQ80 PA2G4_HUMAN | K.VAHSFNCTPIEGM*LSHQLK.Q    |          | 3 | 3,4714 | 0,423 | -0,335 |
| 21 | P52597 HNRPF_HUMAN | K.HSGPNSADSANDGFVR.L        |          | 2 | 3,4633 | 0,508 | -0,075 |

|    |                     |                               |        |   |        |       |        |
|----|---------------------|-------------------------------|--------|---|--------|-------|--------|
| 21 | P17987 TCPA_HUMAN   | K.HGSYEDAVHSGALND.-           |        | 2 | 3,4619 | 0,535 | -0,621 |
| 21 | P50548 ERF_HUMAN    | R.AFLHYPGLVVPQQRPK.C          |        | 3 | 3,4598 | 0,201 | -0,177 |
| 21 | Q9Y520 Q9Y520_HUMAN | E.NSCNKEEVPVTR.Q              |        | 2 | 3,4584 | 0,46  | -1,667 |
| 21 | Q07157 ZO1_HUMAN    | R.IPEPQKPKLPPEDIVR.S          |        | 3 | 3,457  | 0,248 | -0,461 |
| 21 | P22626 ROA2_HUMAN   | K.KLFGVGIKEDTEE.H             |        | 2 | 3,4516 | 0,47  | -0,5   |
| 21 | O95400 CD2B2_HUMAN  | E.GHFDADGNYFLNR.D             |        | 2 | 3,4495 | 0,525 | -0,4   |
| 21 | Q13442 HAP28_HUMAN  | R.KGVEGLIDIENPNR.V            |        | 3 | 3,4459 | 0,151 | -0,118 |
| 21 | P31943 HNRH1_HUMAN  | K.HTGPNSPDTANDGFVR.L          |        | 2 | 3,4438 | 0,515 | -1,086 |
| 21 | O75643 U520_HUMAN   | E.YKANSNLVLQADR.S             |        | 2 | 3,4426 | 0,518 | -0,409 |
| 21 | Q9Y2L9 LRCH1_HUMAN  | E.DSCHRLS#PVKGE.F             | S370:  | 3 | 3,4425 | 0,31  | -0,499 |
| 21 | Q8WUM0 NU133_HUMAN  | R.KDLGHAQM*VVDE.L             |        | 2 | 3,4402 | 0,407 | -0,719 |
| 21 | Q9NYF8 BCLF1_HUMAN  | K.KAEGEPQEES#PLKSK.S          | S177:  | 2 | 3,4361 | 0,404 | 0,632  |
| 21 | P40692 MLH1_HUMAN   | K.STTSLTSSSTSGSSDKVYAHQM*VR.T |        | 3 | 3,4348 | 0,302 | -0,144 |
| 21 | Q14103 HNRPD_HUMAN  | R.GFCFITFKEEVPVK.I            |        | 2 | 3,4341 | 0,422 | 0      |
| 21 | P28066 PSA5_HUMAN   | E.KRITS#PLM*EPSSIEK.I         | S56:   | 3 | 3,4316 | 0,261 | -1,211 |
| 21 | Q71RC2 LARP4_HUMAN  | E.KDLIEDSSVQK.D               |        | 3 | 3,4301 | 0,187 | 0,507  |
| 21 | Q9BZL6 KPCD2_HUMAN  | R.QALM*PVILQDAPSAPGHAPHR.Q    |        | 3 | 3,4296 | 0,329 | -0,247 |
| 21 | Q15185 TEBP_HUMAN   | E.IDLFHCIDPNDSK.H             |        | 3 | 3,4271 | 0,164 | -0,116 |
| 21 | Q06830 PRDX1_HUMAN  | K.RTIAQDYGVLK.A               |        | 3 | 3,427  | 0,177 | -0,072 |
| 21 | Q03164 HRX_HUMAN    | R.RVHTSTPS#DKNLLDNTYNT.E.L    | S2816: | 3 | 3,423  | 0,236 | 0      |
| 21 | P46821 MAP1B_HUMAN  | R.HNLQDFINIK.L                |        | 2 | 3,4192 | 0,488 | -0,098 |
| 21 | Q6UB98 ANR12_HUMAN  | K.DDTSLHLFHISTGKS#PK.H        | S543:  | 3 | 3,414  | 0,188 | -0,373 |
| 21 | P21580 TNAP3_HUMAN  | K.HFAAASGKVS#PTASR.F          | S645:  | 3 | 3,4124 | 0,333 | 0      |
| 21 | Q58FF8 H90B2_HUMAN  | E.KYIDQEELNK.T                |        | 2 | 3,4117 | 0,247 | -0,572 |
| 21 | Q9UNZ2 NSF1C_HUMAN  | R.KKS#PNELVDDLFK.G            | S114:  | 2 | 3,4079 | 0,381 | -0,303 |
| 21 | P27708 PYR1_HUMAN   | E.GRLSLDLLQR.L                |        | 3 | 3,4043 | 0,097 | 0,355  |
| 21 | P32004 L1CAM_HUMAN  | K.VKDATQITQGPR.S              |        | 2 | 3,4039 | 0,473 | -0,65  |
| 21 | Q96RT6 CTGE2_HUMAN  | K.VHAEQVLNDKE.N               |        | 2 | 3,3986 | 0,421 | -0,381 |
| 21 | P35579 MYH9_HUMAN   | K.KLKDVLLQVDDE.R              |        | 2 | 3,3972 | 0,444 | -0,259 |
| 21 | Q99798 ACON_HUMAN   | K.LTIQGLKDFTPGKPLK.C          |        | 3 | 3,3959 | 0,107 | -0,312 |
| 21 | P13646 K1C13_HUMAN  | K.TRLEQEIATYR.S               |        | 2 | 3,3834 | 0,297 | -0,265 |
| 21 | O95239 KIF4A_HUMAN  | R.SKHLVLDLAGSE.R              |        | 2 | 3,3824 | 0,363 | -0,577 |
| 21 | Q29980 MICB_HUMAN   | E.LVSLQVLDQHPVGTGDHR.D        |        | 3 | 3,3818 | 0,341 | -0,371 |



|    |                    |                            |            |   |        |       |        |
|----|--------------------|----------------------------|------------|---|--------|-------|--------|
| 21 | Q9Y490 TLN1_HUMAN  | K.KSTVLQQQYNR.V            |            | 2 | 3,3803 | 0,44  | -1,519 |
| 21 | P35579 MYH9_HUMAN  | R.RGDLPFVVPR.R             |            | 2 | 3,3754 | 0,276 | -0,739 |
| 21 | P06748 NPM_HUMAN   | E.KT#PKT#PKGSSVEDIK.A      | T234:T237: | 3 | 3,3735 | 0,229 | -0,098 |
| 21 | Q9UQE7 SMC3_HUMAN  | E.LKSLDQAINDK.K            |            | 3 | 3,373  | 0,202 | 1,322  |
| 21 | O00418 EF2K_HUMAN  | E.RYS#SSGSPANSFHFKE.A      | S70:       | 3 | 3,3705 | 0,099 | 0      |
| 21 | P08559 ODPA_HUMAN  | R.YHGHS#M*SDPGVSYR.T       | S293:      | 2 | 3,3615 | 0,483 | -0,289 |
| 21 | P35749 MYH11_HUMAN | K.KEEELQAALAR.L            |            | 3 | 3,3598 | 0,245 | 0,291  |
| 21 | Q9Y2U5 M3K2_HUMAN  | K.RLSIIGPTSR.D             |            | 2 | 3,3521 | 0,222 | -1,664 |
| 21 | Q6P0N0 CN106_HUMAN | E.KKAPLHNLTYELPTLNQEQE.N   | T218:      | 3 | 3,3515 | 0,15  | -0,449 |
| 21 | Q6P1N9 TATD1_HUMAN | K.HQDDLQDVIGR.A            |            | 2 | 3,3439 | 0,462 | -0,565 |
| 21 | Q9BSE4 HERP2_HUMAN | E.YHM*VHLVCT#SRTPPSS#PK.S  | T87:S94:   | 3 | 3,3409 | 0,154 | -0,644 |
| 21 | Q58FF7 H90B3_HUMAN | K.VILHLKEDQTEYLEE.R        |            | 2 | 3,3337 | 0,391 | -0,131 |
| 21 | Q5VWG9 TAF3_HUMAN  | E.AREPLSSINTQK.I           |            | 2 | 3,3258 | 0,376 | -0,363 |
| 21 | O75569 PRKRA_HUMAN | K.M*ITAKPGKTIQVLHE.Y       |            | 3 | 3,3233 | 0,184 | 0      |
| 21 | P11021 GRP78_HUMAN | E.SHQDADIEDFK.A            |            | 2 | 3,3216 | 0,451 | -0,281 |
| 21 | P43358 MAGA4_HUMAN | K.SQHCKPEEGVEAQEE.A        |            | 2 | 3,3205 | 0,385 | -0,208 |
| 21 | Q9NSV4 DIAP3_HUMAN | R.LHHPAQGSAAGTPYPSSAS#LR.G | S26:       | 3 | 3,3204 | 0,167 | -0,837 |
| 21 | P28715 ERCC5_HUMAN | K.LKTEKPDATPPS#PR.T        | S341:      | 3 | 3,3201 | 0,437 | -0,105 |
| 21 | O43290 SNUT1_HUMAN | K.KKPDYLPYAEDE.S           |            | 2 | 3,3173 | 0,455 | -0,499 |
| 21 | P13667 PDIA4_HUMAN | K.IANILKDKDPPIPVAK.I       |            | 3 | 3,3121 | 0,281 | -0,422 |
| 21 | P68104 EF1A1_HUMAN | R.RGNVAGDSKNDPPM*E.A       |            | 3 | 3,3089 | 0,421 | 0,114  |
| 21 | P09543 CN37_HUMAN  | K.RLDEDLAAYCR.R            |            | 2 | 3,3072 | 0,314 | -1,324 |
| 21 | Q7KZ85 SPT6H_HUMAN | R.KKLPGYTDAALQE.A          |            | 2 | 3,3047 | 0,342 | -0,681 |
| 21 | Q92558 WASF1_HUMAN | E.RIENDVATILSR.R           |            | 2 | 3,3013 | 0,43  | -0,088 |
| 21 | O95149 SPN1_HUMAN  | K.LKGSSHS#PDHPGCLM*EN.-    | S350:      | 3 | 3,3002 | 0,229 | -0,186 |
| 21 | P32004 L1CAM_HUMAN | K.VKDATQITQGPR.S           |            | 3 | 3,3001 | 0,158 | 0,348  |
| 21 | Q71RC2 LARP4_HUMAN | E.KDLIEDSSVQK.D            |            | 2 | 3,2996 | 0,375 | -0,58  |
| 21 | P13645 K1C10_HUMAN | R.SQYEQLAEQNRK.D           |            | 2 | 3,2967 | 0,402 | -1,307 |
| 21 | O00429 DNM1L_HUMAN | E.KSKPIPIM*PAS#PQK.G       | S616:      | 3 | 3,2956 | 0,322 | 0,226  |
| 21 | Q05D32 CTSL2_HUMAN | E.RDI DNNLITSTPR.A         |            | 2 | 3,2892 | 0,299 | -0,483 |
| 21 | P12270 TPR_HUMAN   | R.NQHLVSQQKDPDTE.E         |            | 2 | 3,2828 | 0,338 | -0,298 |
| 21 | Q9UNL4 ING4_HUMAN  | R.RLDTDLARFE.A             |            | 2 | 3,2826 | 0,27  | -0,395 |
| 21 | Q96JP5 ZFP91_HUMAN | R.SKTGSLQLICK.S            |            | 2 | 3,2802 | 0,486 | -0,296 |

|    |                    |                          |        |   |        |       |        |
|----|--------------------|--------------------------|--------|---|--------|-------|--------|
| 21 | Q00341 VIGLN_HUMAN | R.RCDIIISGR.K            |        | 2 | 3,2781 | 0,237 | -0,71  |
| 21 | Q14671 PUM1_HUMAN  | R.NNRYPNLQLRE.I          |        | 3 | 3,2773 | 0,261 | 0,839  |
| 21 | P41236 IPP2_HUMAN  | E.M*NILATYHPADKDYGLM*K.I |        | 3 | 3,2757 | 0,378 | 0,779  |
| 21 | Q9H4M9 EHD1_HUMAN  | E.GHELPADLPPHLVPPSK.R    |        | 3 | 3,2746 | 0,249 | -0,304 |
| 21 | Q8N6N3 CA052_HUMAN | K.RLPGPDELFR.S           |        | 2 | 3,2695 | 0,343 | -0,508 |
| 21 | Q86U44 MTA70_HUMAN | R.GLLQDDAHPTLVTYADHSK.L  |        | 3 | 3,2682 | 0,16  | -0,527 |
| 21 | P05362 ICAM1_HUMAN | E.AQVHLALGDQR.L          |        | 2 | 3,2653 | 0,404 | -0,404 |
| 21 | P51858 HDGF_HUMAN  | E.YKCGDLVFAK.M           |        | 3 | 3,2641 | 0,128 | 0,837  |
| 21 | O43719 HTSF1_HUMAN | K.TLKNDCEENGLAK.E        |        | 3 | 3,2605 | 0,282 | 0,123  |
| 21 | P41227 ARD1A_HUMAN | K.M*EEDPDDVPHGHITSLAVK.R |        | 3 | 3,2563 | 0,244 | 0      |
| 21 | P0C7M2 RA1L3_HUMAN | K.KIFVGGIKEDTE.E         |        | 2 | 3,2491 | 0,404 | -0,639 |
| 21 | Q8TAT6 NPL4_HUMAN  | K.TGNQHFGYLYGR.Y         |        | 3 | 3,2419 | 0,364 | -0,065 |
| 21 | Q8WYH8 ING5_HUMAN  | R.RLDADLARFE.A           |        | 2 | 3,2412 | 0,299 | -0,405 |
| 21 | O15067 PUR4_HUMAN  | E.RCPACFVGTITGDR.R       |        | 2 | 3,2366 | 0,396 | -0,53  |
| 21 | Q00610 CLH1_HUMAN  | E.LCRPVLQQGR.K           |        | 3 | 3,2281 | 0,162 | 0,298  |
| 21 | Q71F23 CENPU_HUMAN | K.HCGLSLSST#PPGKEAK.R    | T98:   | 3 | 3,2229 | 0,401 | -0,941 |
| 21 | Q8WWK9 CKAP2_HUMAN | K.TKDPTHDVKT#PNTE.T      | T579:  | 3 | 3,2214 | 0,33  | -0,11  |
| 21 | P20248 CCNA2_HUMAN | R.RVAPLKDLPVNDE.H        |        | 2 | 3,2205 | 0,323 | -0,583 |
| 21 | Q13442 HAP28_HUMAN | K.KVTQLDLGPK.E.L         |        | 2 | 3,2177 | 0,45  | -0,545 |
| 21 | O94888 UBXD7_HUMAN | E.HGQLDGLSSSPK.K         |        | 2 | 3,2137 | 0,498 | -0,277 |
| 21 | O94874 K0776_HUMAN | E.KHVQLVLGQLIDE.N        |        | 2 | 3,2093 | 0,411 | -0,164 |
| 21 | Q4G0N4 CE033_HUMAN | K.NVEHIIDSLRNE.G         |        | 2 | 3,2079 | 0,475 | -0,424 |
| 21 | Q13427 PPIG_HUMAN  | D.GHHVVFVGQVISGQE.V      |        | 2 | 3,207  | 0,508 | -0,735 |
| 21 | Q13153 PAK1_HUMAN  | E.HTIHVGFDAVTGE.F        |        | 2 | 3,2052 | 0,285 | -0,97  |
| 21 | Q8WUF5 IASPP_HUMAN | R.KAATDGADTPFGR.S        |        | 2 | 3,1981 | 0,449 | -0,28  |
| 21 | P42166 LAP2A_HUMAN | R.SHISDQSPLSSK.R         |        | 2 | 3,1973 | 0,447 | -0,379 |
| 21 | P46777 RL5_HUMAN   | K.HIMGQNVADYM*R.Y        |        | 2 | 3,1961 | 0,486 | -0,505 |
| 21 | P05387 RLA2_HUMAN  | K.NIEDVIAQGIGK.L         |        | 2 | 3,191  | 0,334 | -0,194 |
| 21 | P42166 LAP2A_HUMAN | R.NRPPLPAGTNSK.G         |        | 2 | 3,1892 | 0,467 | -0,39  |
| 21 | Q9UGV2 NDRG3_HUMAN | R.SRTHS#TSSSLGSGESPF.S   | S331:  | 2 | 3,1872 | 0,413 | 0      |
| 21 | P02545 LMNA_HUMAN  | K.LRDLEDSLARE.R          |        | 2 | 3,1792 | 0,329 | -0,926 |
| 21 | P49792 RBP2_HUMAN  | E.KDSLIT#PHVSR.S         | T2450: | 3 | 3,1755 | 0,324 | 0,137  |
| 21 | O95819 M4K4_HUMAN  | R.RDSPLQSGGQQNSQAGQR.N   |        | 3 | 3,1728 | 0,158 | -0,096 |

|    |                     |                                  |            |   |        |       |        |
|----|---------------------|----------------------------------|------------|---|--------|-------|--------|
| 21 | Q13769 THOC5_HUMAN  | R.RPTLGVQLDDK.R                  |            | 3 | 3,1698 | 0,142 | 0,589  |
| 21 | P48634 BAT2_HUMAN   | E.NKGNDPNVSLVPK.D                |            | 3 | 3,1682 | 0,249 | -0,198 |
| 21 | A8K7W5 A8K7W5_HUMAN | E.KLNIGTDSOSSPQK.S               |            | 2 | 3,1591 | 0,392 | -0,819 |
| 21 | P80303 NUCB2_HUMAN  | K.AKLDLQDIGM*DHQALLK.Q           |            | 2 | 3,1577 | 0,386 | 0,364  |
| 21 | P53602 ERG19_HUMAN  | R.RNS#RDGDPLPSSLSCK.V            | S96:       | 3 | 3,1575 | 0,248 | -0,391 |
| 21 | Q9UHD1 CHRD1_HUMAN  | E.TNSDDACTYHPGVVPVFDALK.G        |            | 3 | 3,1506 | 0,238 | -0,546 |
| 21 | Q9NQZ2 SAS10_HUMAN  | K.KLYYDTDYGSK.S                  |            | 2 | 3,1496 | 0,399 | -0,992 |
| 21 | Q8WUM4 PDC6I_HUMAN  | K.DNDFIYHDR.V                    |            | 2 | 3,1474 | 0,352 | -0,408 |
| 21 | P27708 PYR1_HUMAN   | E.GRLSLDLLQR.L                   |            | 2 | 3,1448 | 0,211 | -0,379 |
| 21 | Q96I25 SPF45_HUMAN  | E.EQDRPRS#PTGPSNSFLANM*GGTVAHK.I | S222:      | 3 | 3,1431 | 0,238 | 0,257  |
| 21 | P37802 TAGL2_HUMAN  | E.GKNVIGLQM*GTNR.G               |            | 3 | 3,1423 | 0,239 | 0,586  |
| 21 | Q96HS1 PGAM5_HUMAN  | R.REPLSLINVR.K                   |            | 2 | 3,1316 | 0,33  | -0,306 |
| 21 | P18621 RL17_HUMAN   | E.KEQIVPKPEEE.V                  |            | 2 | 3,1301 | 0,262 | -0,644 |
| 21 | P48643 TCPE_HUMAN   | K.GVIVDKDFSHPQM*PK.K             |            | 2 | 3,1288 | 0,445 | -0,285 |
| 21 | Q9UPZ3 HPS5_HUMAN   | E.KIGTLHTS#PDLK.V                | S563:      | 2 | 3,1276 | 0,218 | -0,966 |
| 21 | Q01518 CAP1_HUMAN   | K.VPTISINKTDGCHAYLSK.N           |            | 3 | 3,1209 | 0,32  | -0,456 |
| 21 | O15231 ZN185_HUMAN  | E.RQSSPSGSEQLVR.R                |            | 3 | 3,1206 | 0,207 | 0,32   |
| 21 | Q9H1A4 APC1_HUMAN   | R.FNISSHNQSPK.R                  |            | 2 | 3,1148 | 0,263 | -0,581 |
| 21 | P13645 K1C10_HUMAN  | R.LKYENEVALR.Q                   |            | 3 | 3,1058 | 0,238 | 0,222  |
| 21 | Q7Z417 NUFP2_HUMAN  | E.KRT#SPQVLGSILK.S               | T571:      | 2 | 3,099  | 0,33  | -0,405 |
| 21 | Q9UNS2 CSN3_HUMAN   | E.KYVLHM*IEDGE.I                 |            | 2 | 3,0968 | 0,323 | -0,09  |
| 21 | P31949 S10AB_HUMAN  | K.KLDTNSDGLDFSE.F                |            | 2 | 3,0933 | 0,399 | -0,156 |
| 21 | Q13111 CAF1A_HUMAN  | R.GLLSNHTGSPR.T                  |            | 2 | 3,0922 | 0,368 | -0,857 |
| 21 | P05455 LA_HUMAN     | K.IRRS#PSKPLPEVTDE.Y             | S92:       | 3 | 3,0884 | 0,202 | -0,811 |
| 21 | Q96A19 C102A_HUMAN  | R.RQQQNAPLFGK.I                  |            | 2 | 3,0868 | 0,258 | -0,758 |
| 21 | Q9UPV0 CE164_HUMAN  | E.RLS#PPLPHEER.A                 | S472:      | 3 | 3,085  | 0,231 | 0      |
| 21 | Q9BPU6 DPYL5_HUMAN  | R.TPYLGDVAVVVHPGKKE.M            |            | 3 | 3,085  | 0,319 | -0,303 |
| 21 | Q9Y5L4 TIM13_HUMAN  | R.KCIGKPGGSLDNSE.Q               |            | 2 | 3,08   | 0,304 | -0,584 |
| 21 | P08559 ODPA_HUMAN   | R.YHGHSM*S#DPGVS#YRTREE.I        | S295:S300: | 3 | 3,0782 | 0,311 | -0,961 |
| 21 | Q02952 AKA12_HUMAN  | E.KLTASEQAHPQEAES#AHEPRLSAEYE.K  | S364:      | 3 | 3,0781 | 0,13  | -0,712 |
| 21 | Q9H3N1 TXND1_HUMAN  | E.GTNKDFPQNAIR.Q                 |            | 2 | 3,0754 | 0,231 | -0,359 |
| 21 | Q12846 STX4_HUMAN   | R.KTQHGVLSSQQFVE.L               |            | 2 | 3,0747 | 0,323 | -0,65  |
| 21 | Q9H9A6 LRC40_HUMAN  | R.LKHLCNSNLE.T                   |            | 2 | 3,0727 | 0,423 | -0,754 |

|    |                     |                           |        |   |        |       |        |
|----|---------------------|---------------------------|--------|---|--------|-------|--------|
| 21 | O94876 TMCC1_HUMAN  | R.RRSS#VSPHDVQQIQADPEPE.M | S64:   | 3 | 3,0631 | 0,285 | -0,466 |
| 21 | Q9Y4G6 TLN2_HUMAN   | K.KSTILQQQFN.R            |        | 3 | 3,0608 | 0,193 | 0      |
| 21 | Q96JM3 ZN828_HUMAN  | E.LRKPGLPLS#PEIR.S        | S427:  | 3 | 3,0578 | 0,281 | 0,356  |
| 21 | Q86Y91 KI18B_HUMAN  | R.LTLQPKPVVGHFSARE.L      |        | 3 | 3,0552 | 0,412 | -0,308 |
| 21 | O95678 K2C75_HUMAN  | E.VKAQYEDIANR.S           |        | 2 | 3,0532 | 0,41  | -0,653 |
| 21 | P48506 GSH1_HUMAN   | K.SRYDSIDSYLSK.C          |        | 2 | 3,0487 | 0,309 | -0,766 |
| 21 | O94763 RMP_HUMAN    | K.KVDNDYNALRE.R           |        | 2 | 3,0484 | 0,348 | -0,365 |
| 21 | Q5QJE6 TDIF2_HUMAN  | K.KS#PIKASDLTK.F          | S381:  | 3 | 3,0449 | 0,204 | -0,361 |
| 21 | Q9HC35 EMAL4_HUMAN  | R.KPS#HTSAVSIAGKE.T       | S94:   | 2 | 3,0436 | 0,494 | -0,491 |
| 21 | Q13206 DDX10_HUMAN  | R.HNVFGLDLKDE.K           |        | 3 | 3,0408 | 0,299 | 0,426  |
| 21 | Q92581 SL9A6_HUMAN  | R.RFM*GNSSDALDRE.L        |        | 3 | 3,0386 | 0,331 | 0,111  |
| 21 | O15347 HMGB3_HUMAN  | K.KKNPEVPVNF.AE.F         |        | 2 | 3,0382 | 0,381 | -0,889 |
| 21 | Q9UQE7 SMC3_HUMAN   | E.LKSLDQAINDK.K           |        | 2 | 3,0372 | 0,287 | -0,294 |
| 21 | P49792 RBP2_HUMAN   | E.KDSLIT#PHVSR.S          | T2450: | 2 | 3,0348 | 0,295 | -0,915 |
| 21 | Q12797 ASPH_HUMAN   | R.LHHDDDDVTVQVYE.E        |        | 2 | 3,0332 | 0,465 | -0,422 |
| 21 | Q8N6N3 CA052_HUMAN  | K.RLPGPDELFR.S            |        | 3 | 3,0296 | 0,208 | 0,838  |
| 21 | Q96SN8 CK5P2_HUMAN  | E.LRPGGAHPGT#CSPSRPGS.-   | T1885: | 3 | 3,0279 | 0,174 | -0,098 |
| 21 | P20749 BCL3_HUMAN   | K.NCHNDTPLM*VAR.S         |        | 3 | 3,0265 | 0,357 | 0,317  |
| 21 | P62736 ACTA_HUMAN   | R.HQGVMM*VGM*GQK.D        |        | 3 | 3,0255 | 0,236 | -0,532 |
| 21 | Q9ULU4 PKCB1_HUMAN  | E.KADPGAVKDKAS#PEPE.K     | S668:  | 3 | 3,0234 | 0,127 | 0      |
| 21 | Q5QP82 WDR32_HUMAN  | R.RPGAPSLSPAPR.S          |        | 2 | 3,0217 | 0,394 | -0,202 |
| 21 | O95400 CD2B2_HUMAN  | E.GHFDADGNYFLNR.D         |        | 3 | 3,0203 | 0,216 | 1,258  |
| 21 | Q8NCN4 RN169_HUMAN  | R.LPFSSLSLASHKPER.S       |        | 3 | 3,0185 | 0,472 | -0,196 |
| 21 | Q14157 UBP2L_HUMAN  | K.NPSSSAVHS#PFTKR.Q       | S416:  | 2 | 3,0172 | 0,447 | -0,376 |
| 21 | Q3V6T2 GRDN_HUMAN   | R.RTS#IHDFLTK.D           | S1820: | 2 | 3,0163 | 0,426 | -0,282 |
| 21 | Q8N108 MIER1_HUMAN  | E.RYDFFAQQTR.F            |        | 2 | 3,0162 | 0,403 | -0,183 |
| 21 | P50570 DYN2_HUMAN   | K.KFTDFDEVRQE.I           |        | 2 | 3,0141 | 0,236 | -0,69  |
| 21 | Q9Y3I0 CV028_HUMAN  | R.RNLDFQDVLDK.L           |        | 3 | 3,0111 | 0,102 | 0,403  |
| 21 | O60927 PP1RB_HUMAN  | K.CCCIEKPR.A              |        | 2 | 3,0105 | 0,444 | 0,285  |
| 21 | Q9BYT8 NEUL_HUMAN   | K.HYKDGSPADLLE.K          |        | 2 | 3,0038 | 0,467 | -0,465 |
| 21 | P11142 HSP7C_HUMAN  | R.RFDDAVVQSDM*K.H         |        | 2 | 3,0003 | 0,485 | -0,342 |
| 21 | B0AZS1 B0AZS1_HUMAN | E.KFVSEDDRNS#FTLK.L       | S20:   | 2 | 2,9984 | 0,271 | 0,898  |
| 21 | Q9NVR2 INT10_HUMAN  | E.NQHQAQDTSDLM*S#PSKR.S   | S231:  | 3 | 2,9942 | 0,116 | -0,087 |

|    |                     |                        |       |   |        |       |        |
|----|---------------------|------------------------|-------|---|--------|-------|--------|
| 21 | Q8IUD2 RB6I2_HUMAN  | R.SVGKVEPSSQSPGRS#PR.L | S21:  | 3 | 2,994  | 0,359 | 0,1    |
| 21 | Q15185 TEBP_HUMAN   | R.TDRSILCCLR.K         |       | 3 | 2,9914 | 0,253 | 0,565  |
| 21 | Q9UEU0 VTI1B_HUMAN  | K.LIRDFDEKQQE.A        |       | 3 | 2,9908 | 0,142 | -0,064 |
| 21 | Q5T200 ZC3HD_HUMAN  | R.AQDIIGHHQS#EDRE.T    | S943: | 3 | 2,989  | 0,206 | -0,213 |
| 21 | Q15386 UBE3C_HUMAN  | R.VHLLNAHGLDE.A        |       | 2 | 2,989  | 0,397 | -1,102 |
| 21 | P35579 MYH9_HUMAN   | R.NAEQYKDQADK.A        |       | 2 | 2,9848 | 0,319 | -0,093 |
| 21 | Q8NCD3 HJURP_HUMAN  | D.LHVQGNSSGIFR.K       |       | 2 | 2,9843 | 0,3   | -0,371 |
| 21 | P42224 STAT1_HUMAN  | E.HAANDVSFATIR.F       |       | 2 | 2,9831 | 0,489 | 0      |
| 21 | Q7Z2Z1 CO042_HUMAN  | R.HVLQTAVADSPR.D       |       | 2 | 2,9806 | 0,522 | -0,66  |
| 21 | Q04721 NOTC2_HUMAN  | R.REPVGQDAVGLK.N       |       | 2 | 2,9802 | 0,409 | -0,096 |
| 21 | P20749 BCL3_HUMAN   | K.NCHNDTPLM*VAR.S      |       | 2 | 2,9736 | 0,197 | -0,253 |
| 21 | P08559 ODPA_HUMAN   | R.YHGHSM#DPGVSYR.T     | S295: | 3 | 2,9719 | 0,19  | -0,437 |
| 21 | Q9UKA4 AKA11_HUMAN  | K.VKNPCLNVQSQR.S       |       | 2 | 2,9662 | 0,31  | -0,592 |
| 21 | Q8WWK9 CKAP2_HUMAN  | E.DDPQSQHM*TLSQAFHLK.N |       | 3 | 2,9657 | 0,408 | -0,641 |
| 21 | Q43396 TXNL1_HUMAN  | E.SDEHGFNCLR.K         |       | 3 | 2,9639 | 0,289 | 0,406  |
| 21 | P20810 ICAL_HUMAN   | K.SLTPAVPVESKPKPSGK.S  |       | 2 | 2,9612 | 0,496 | -0,664 |
| 21 | Q4G0N4 CE033_HUMAN  | K.NVEHIIDSLRNE.G       |       | 3 | 2,9602 | 0,335 | 0,127  |
| 21 | P62136 PP1A_HUMAN   | E.KLNLDIIGR.L          |       | 2 | 2,9597 | 0,221 | -0,108 |
| 21 | Q8WZA0 LZIC_HUMAN   | K.LKQNLEEQDR.L         |       | 2 | 2,9581 | 0,274 | -0,088 |
| 21 | P08670 VIME_HUMAN   | R.FANYIDKVR.F          |       | 2 | 2,9556 | 0,417 | -0,325 |
| 21 | Q6WCQ1 MRIP_HUMAN   | K.SKS#NPDFLKDR.R       | S992: | 3 | 2,9549 | 0,239 | -1,346 |
| 21 | Q14152 EIF3A_HUMAN  | R.RVPPPALS.R           |       | 2 | 2,9521 | 0,277 | 0,184  |
| 21 | Q02818 NUCB1_HUMAN  | E.KLQAANAEDIK.S        |       | 2 | 2,9483 | 0,359 | -0,711 |
| 21 | P42892 ECE1_HUMAN   | R.HTLGENIADNGGLK.A     |       | 2 | 2,9476 | 0,376 | -0,594 |
| 21 | P26651 TTP_HUMAN    | R.RDPTPVCCPSCR.R       |       | 3 | 2,946  | 0,153 | 0,182  |
| 21 | P05198 IF2A_HUMAN   | K.RPGYGAYDAFK.H        |       | 3 | 2,9448 | 0,344 | -0,147 |
| 21 | Q71U36 TBA1A_HUMAN  | E.HGIQPDGQM*PSDK.T     |       | 2 | 2,9447 | 0,437 | -0,257 |
| 21 | Q96PZ0 PUS7_HUMAN   | K.IRDYSLSGAYR.K        |       | 2 | 2,9421 | 0,356 | -0,656 |
| 21 | P55072 TERA_HUMAN   | E.THGHVGDALAALCSE.A    |       | 2 | 2,9406 | 0,479 | -0,397 |
| 21 | Q12906 ILF3_HUMAN   | E.ATDAIGHLDR.Q         |       | 2 | 2,9401 | 0,34  | -1,37  |
| 21 | P30153 2AAA_HUMAN   | E.KLTQDQDQDVK.Y        |       | 2 | 2,9401 | 0,383 | -0,568 |
| 21 | Q9Y520 Q9Y520_HUMAN | R.DHAISLSEPR.M         |       | 2 | 2,9371 | 0,292 | -0,434 |
| 21 | Q8TB72 PUM2_HUMAN   | R.RES#LSTSSDLYKR.S     | S587: | 3 | 2,9322 | 0,117 | -0,902 |

|    |                     |                            |        |   |        |       |        |
|----|---------------------|----------------------------|--------|---|--------|-------|--------|
| 21 | Q9BTA9 WAC_HUMAN    | R.RGDSQPYQALK.Y            |        | 2 | 2,9313 | 0,342 | -0,676 |
| 21 | Q96I24 FUBP3_HUMAN  | K.RLLGQIVDR.C              |        | 2 | 2,9304 | 0,334 | -0,228 |
| 21 | Q562F6 SGOL2_HUMAN  | E.KDNFFSLT#PKDKE.T         | T845:  | 3 | 2,9272 | 0,146 | 0      |
| 21 | P31327 CPSM_HUMAN   | E.DRQLFSDKLE.I             |        | 2 | 2,9226 | 0,35  | -0,358 |
| 21 | Q9H9J4 UBP42_HUMAN  | R.SEEPCEQPLLHPSGDHAR.D     |        | 3 | 2,9198 | 0,304 | -0,17  |
| 21 | P04264 K2C1_HUMAN   | K.SKAEAESLYQSK.Y           |        | 3 | 2,9164 | 0,242 | -0,477 |
| 21 | P37802 TAGL2_HUMAN  | E.GKNVIGLQM*GTNR.G         |        | 2 | 2,9152 | 0,467 | 0,434  |
| 21 | Q8NI27 THOC2_HUMAN  | E.KTPVSGSLKS#PVPR.S        | S1278: | 3 | 2,9149 | 0,209 | -0,119 |
| 21 | P31943 HNRH1_HUMAN  | R.LRGLPFGCSKEE.I           |        | 2 | 2,9145 | 0,394 | -0,438 |
| 21 | Q02952 AKA12_HUMAN  | E.KQEKEPSKSAES#PTSPVTSE.T  | S283:  | 3 | 2,9111 | 0,129 | -0,329 |
| 21 | Q8TA86 RP9_HUMAN    | R.HDAQQLQLK.H              |        | 2 | 2,9089 | 0,38  | -0,706 |
| 21 | P20700 LMNB1_HUMAN  | E.HDQLLLNYAK.K             |        | 2 | 2,9082 | 0,268 | -0,502 |
| 21 | P05787 K2C8_HUMAN   | E.SRLES#GM*QNM*SIHTK.T     | S404:  | 3 | 2,905  | 0,157 | -0,699 |
| 21 | Q9H832 UBE2Z_HUMAN  | R.GHFDYQSLLM*R.L           |        | 2 | 2,9009 | 0,507 | -0,618 |
| 21 | P11142 HSP7C_HUMAN  | E.KVCNPIITK.L              |        | 2 | 2,8999 | 0,175 | -0,682 |
| 21 | Q92922 SMRC1_HUMAN  | K.ASHHIYPYSSSQDDE.E        |        | 2 | 2,899  | 0,455 | 0,211  |
| 21 | P02545 LMNA_HUMAN   | K.LRDLESLAR.E              |        | 2 | 2,8986 | 0,206 | -0,205 |
| 21 | Q8NHH9 ATLA2_HUMAN  | R.RRTS#DPSAAVNHVSSSTSLGE.N | S24:   | 3 | 2,8925 | 0,306 | 0,569  |
| 21 | O60749 SNX2_HUMAN   | R.RFS#DFLGLHSK.L           | S185:  | 3 | 2,8916 | 0,092 | 0,132  |
| 21 | P46777 RL5_HUMAN    | K.HIM*GQNVADYM*R.Y         |        | 2 | 2,891  | 0,389 | -0,915 |
| 21 | Q13206 DDX10_HUMAN  | R.HNVFGLDLKDE.K            |        | 2 | 2,8896 | 0,376 | -0,569 |
| 21 | P09382 LEG1_HUMAN   | D.SNNLCLHFNPR.F            |        | 2 | 2,8858 | 0,384 | -0,445 |
| 21 | Q14978 NOLC1_HUMAN  | R.KLQANGPVAK.K             |        | 2 | 2,8805 | 0,167 | 0      |
| 21 | Q9UQ35 SRRM2_HUMAN  | E.SYFGVSSLQLK.G            |        | 2 | 2,8795 | 0,352 | -0,298 |
| 21 | Q08999 RBL2_HUMAN   | E.KIFYFSNS#PSKR.L          | S1080: | 3 | 2,8789 | 0,302 | -0,107 |
| 21 | P67870 CSK2B_HUMAN  | E.KYQQGDFGYCPR.V           |        | 3 | 2,878  | 0,13  | -0,06  |
| 21 | Q9Y2W1 TR150_HUMAN  | E.MKS#PREPGYKAE.G          | S698:  | 3 | 2,8772 | 0,288 | 1,117  |
| 21 | P04075 ALDOA_HUMAN  | E.GTLLKPNM*VTPGHACTQK.F    |        | 3 | 2,8769 | 0,116 | -0,279 |
| 21 | Q6NWWY9 PR40B_HUMAN | R.RTLLQQLDDHQ.-            |        | 2 | 2,8728 | 0,283 | -0,357 |
| 21 | P53041 PPP5_HUMAN   | E.LKTQANDYFK.A             |        | 3 | 2,8719 | 0,137 | 1,415  |
| 21 | Q7KZ85 SPT6H_HUMAN  | R.KKLPGYTDAALQEAQE.I       |        | 3 | 2,8699 | 0,156 | 0      |
| 21 | P35222 CTNB1_HUMAN  | R.HAIM*RS#PQM*VSAIVR.T     | S191:  | 3 | 2,8645 | 0,241 | 0,202  |
| 21 | Q8N5U6 RNF10_HUMAN  | E.GHGALSISPLSR.S           |        | 2 | 2,8627 | 0,319 | -1,327 |

|    |                    |                         |        |   |        |       |        |
|----|--------------------|-------------------------|--------|---|--------|-------|--------|
| 21 | Q9H501 ESF1_HUMAN  | E.NKTDLDNSIGIK.K        |        | 2 | 2,8617 | 0,366 | -0,278 |
| 21 | O00170 AIP_HUMAN   | E.GRGELPDFQDGTK.A       |        | 3 | 2,858  | 0,114 | -0,193 |
| 21 | O75688 PPM1B_HUMAN | K.HIYFINGDSR.A          |        | 2 | 2,8571 | 0,38  | -0,353 |
| 21 | Q96HN2 SAHH3_HUMAN | R.HRDGGEALVSPDGTVTE.A   |        | 2 | 2,856  | 0,393 | -0,561 |
| 21 | Q9UGV6 HMG1X_HUMAN | K.IKGEHPGLSIGD.V        |        | 2 | 2,8556 | 0,257 | -0,299 |
| 21 | Q09666 AHNK_HUMAN  | K.M*KGNVDISAPK.I        |        | 2 | 2,8542 | 0,34  | -0,207 |
| 21 | Q7Z2W4 ZCCHV_HUMAN | E.RSCTSPDQISHRAS#LE.D   | S284:  | 3 | 2,8521 | 0,312 | 0      |
| 21 | Q5TZA2 CROCC_HUMAN | E.KSNLAHSLQVAQQAE.L     |        | 3 | 2,8504 | 0,114 | 0,583  |
| 21 | O14686 MLL2_HUMAN  | R.HQPST#PDPFLKPR.C      | T1965: | 3 | 2,8492 | 0,354 | -0,114 |
| 21 | Q13627 DYR1A_HUMAN | R.HSGGHFTAAVQAM*DCE.T   |        | 3 | 2,8484 | 0,321 | -0,527 |
| 21 | P54727 RD23B_HUMAN | K.GKDAFPVAGQK.L         |        | 2 | 2,8462 | 0,138 | -0,546 |
| 21 | Q8N5I9 CL045_HUMAN | K.GKIEVLDS#PASKK.K      | S178:  | 3 | 2,8457 | 0,216 | 0,126  |
| 21 | P05783 K1C18_HUMAN | R.KVIDDTNITR.L          |        | 2 | 2,8455 | 0,251 | -0,415 |
| 21 | P19623 SPEE_HUMAN  | R.SRYQDILVFR.S          |        | 2 | 2,8453 | 0,367 | -0,282 |
| 21 | Q9H9A5 CNOTA_HUMAN | K.SHDGDKFIPAPPSS#PLR.K  | S521:  | 3 | 2,8429 | 0,169 | -0,577 |
| 21 | P62820 RAB1A_HUMAN | K.KVVDYTTAKE.F          |        | 2 | 2,84   | 0,344 | -0,529 |
| 21 | P06748 NPM_HUMAN   | K.DYHFKVDNDENE.H        |        | 2 | 2,8364 | 0,367 | -0,56  |
| 21 | Q92734 TFG_HUMAN   | R.RIPIHNEDITYDE.L       |        | 2 | 2,8346 | 0,477 | -0,529 |
| 21 | Q53H12 AGK_HUMAN   | E.KNAAPILHLSGM*DVTIVK.T |        | 3 | 2,8344 | 0,287 | -0,285 |
| 21 | O00161 SNP23_HUMAN | R.DRIDIANAR.A           |        | 2 | 2,833  | 0,233 | -0,584 |
| 21 | Q96EP5 DAZP1_HUMAN | K.DPNCVGTVLASRPHTLDGR.N |        | 3 | 2,8317 | 0,158 | -0,974 |
| 21 | Q16850 CP51A_HUMAN | K.SGLNIAHFK.Q           |        | 2 | 2,8269 | 0,191 | 0,185  |
| 21 | O00571 DDX3X_HUMAN | E.GYACTSIHGDR.S         |        | 2 | 2,8249 | 0,456 | -0,395 |
| 21 | Q9NYF8 BCLF1_HUMAN | K.LKDLDYDYS#PPLHK.N     | S512:  | 3 | 2,8248 | 0,376 | -0,221 |
| 21 | P60903 S10AA_HUMAN | E.NQKDPLAVDK.I          |        | 2 | 2,8222 | 0,276 | -0,865 |
| 21 | O60264 SMCA5_HUMAN | E.KQNLLSVGDYR.H         |        | 3 | 2,8195 | 0,088 | 0,212  |
| 21 | Q9UNZ2 NSF1C_HUMAN | E.RSGQQIVGPPR.K         |        | 2 | 2,8189 | 0,28  | 0      |
| 21 | P42892 ECE1_HUMAN  | E.LTHAFDDQGR.E          |        | 2 | 2,8187 | 0,379 | 0,21   |
| 21 | P82094 TMF1_HUMAN  | E.RIDSFSVQSLDSR.S       |        | 2 | 2,8177 | 0,307 | -0,889 |
| 21 | Q8NI35 INADL_HUMAN | K.GFRDEPYFKEE.L         |        | 3 | 2,8161 | 0,173 | 0,065  |
| 21 | Q9HAN9 NMNA1_HUMAN | E.ASDCDHQNS#PTLERPGR.K  | S117:  | 3 | 2,8151 | 0,343 | -0,17  |
| 21 | Q9Y2W1 TR150_HUMAN | E.M*KS#PREPGYKAE.G      | S698:  | 3 | 2,8149 | 0,123 | 0,184  |
| 21 | P46777 RL5_HUMAN   | K.HIM*GQNVADYMR.Y       |        | 2 | 2,8049 | 0,355 | 0,084  |

|    |                     |                         |       |   |        |       |        |
|----|---------------------|-------------------------|-------|---|--------|-------|--------|
| 21 | P46087 NOL1_HUMAN   | K.RIQDIVGILR.D          |       | 2 | 2,7993 | 0,193 | -0,516 |
| 21 | Q99497 PARK7_HUMAN  | E.KDGLILTSR.G           |       | 2 | 2,798  | 0,292 | -0,182 |
| 21 | O94833 BPAEA_HUMAN  | K.LRLPGYLSGK.G          |       | 2 | 2,797  | 0,292 | -0,663 |
| 21 | Q9BR61 ACBD6_HUMAN  | E.DKNIFDYCRE.N          |       | 2 | 2,794  | 0,165 | -0,359 |
| 21 | P18583 SON_HUMAN    | K.RLTDLDKAQLE.I         |       | 2 | 2,793  | 0,238 | -0,604 |
| 21 | P56182 RRP1_HUMAN   | R.SEKPPAGSICR.A         |       | 3 | 2,7889 | 0,344 | 0,532  |
| 21 | O15075 DCLK1_HUMAN  | R.SSQHGGSSTSLASTK.V     |       | 3 | 2,7846 | 0,298 | 0,127  |
| 21 | Q9Y2W1 TR150_HUMAN  | R.RIDISPSTFR.K          |       | 2 | 2,7821 | 0,109 | -0,307 |
| 21 | P26006 ITA3_HUMAN   | R.TGAVYLCPLTAHKDDCER.M  |       | 3 | 2,7817 | 0,355 | -0,695 |
| 21 | P05787 K2C8_HUMAN   | E.TRDGKLV\$#ESSDVLPK.-  | S475: | 3 | 2,7807 | 0,09  | -0,808 |
| 21 | P68431 H31_HUMAN    | E.DTNLCAIHAK.R          |       | 2 | 2,7795 | 0,306 | -1,174 |
| 21 | P23528 COF1_HUMAN   | R.KKAVLFCLSE.D          |       | 2 | 2,7787 | 0,173 | 0      |
| 21 | Q9Y520 Q9Y520_HUMAN | E.NSCNKEEPEVFTR.Q       |       | 3 | 2,7784 | 0,171 | -1,477 |
| 21 | P23526 SAHH_HUMAN   | K.SKFDNLYGCRE.S         |       | 2 | 2,7732 | 0,382 | -0,527 |
| 21 | P58546 MTPN_HUMAN   | R.KPLHYAADCGQLE.I       |       | 2 | 2,7711 | 0,435 | -0,812 |
| 21 | P46013 KI67_HUMAN   | K.HGDVITIHDR.S          |       | 2 | 2,7704 | 0,222 | -0,536 |
| 21 | Q9UNF0 PACN2_HUMAN  | K.HLDLSNVAGYK.A         |       | 2 | 2,7699 | 0,374 | -0,602 |
| 21 | Q14671 PUM1_HUMAN   | R.RDS#LTGSSDLYKR.T      | S709: | 2 | 2,7698 | 0,261 | -0,696 |
| 21 | P49821 NDUV1_HUMAN  | E.DRIFTNLYGR.H          |       | 3 | 2,7688 | 0,248 | 0,437  |
| 21 | P08670 VIME_HUMAN   | E.RDNLAEDIM*R.L         |       | 3 | 2,7681 | 0,191 | -0,512 |
| 21 | P19174 PLCG1_HUMAN  | R.GSDASGQLFHGR.A        |       | 2 | 2,7663 | 0,31  | -0,495 |
| 21 | P22626 ROA2_HUMAN   | K.KLFVGGIKE.D           |       | 2 | 2,7644 | 0,119 | -1,108 |
| 21 | P68104 EF1A1_HUMAN  | E.ALDCILPPTRPDKPLR.L    |       | 3 | 2,7626 | 0,415 | -0,652 |
| 21 | P46821 MAP1B_HUMAN  | E.SFLSADDKASGR.G        |       | 2 | 2,7617 | 0,419 | -0,389 |
| 21 | O95870 BAT5_HUMAN   | R.RQLALFLAR.K           |       | 2 | 2,7609 | 0,185 | 0      |
| 21 | Q04917 1433F_HUMAN  | E.DSYKDSTLIM*QLLR.D     |       | 2 | 2,7598 | 0,37  | -0,144 |
| 21 | P07355 ANXA2_HUMAN  | E.KDIISDTSGD.F          |       | 2 | 2,7592 | 0,28  | -0,232 |
| 21 | P05787 K2C8_HUMAN   | E.SGM*QNMSIHTK.T        |       | 3 | 2,7576 | 0,206 | 0,585  |
| 21 | P08238 HS90B_HUMAN  | E.TALLSSGFSLEDPQTHSNR.I |       | 3 | 2,7575 | 0,272 | -0,266 |
| 21 | P09874 PARP1_HUMAN  | K.NTHATTHNAYDLE.V       |       | 2 | 2,7542 | 0,456 | -0,574 |
| 21 | P35749 MYH11_HUMAN  | K.KEEELQAALAR.L         |       | 2 | 2,7531 | 0,33  | -0,485 |
| 21 | P28799 GRN_HUMAN    | R.QHCCPAGYTCNVK.A       |       | 3 | 2,7482 | 0,368 | 0,344  |
| 21 | Q9NYF8 BCLF1_HUMAN  | K.LKDLFDYS#PPLHK.N      | S512: | 2 | 2,7475 | 0,26  | -0,295 |



|    |                     |                           |       |   |        |       |        |
|----|---------------------|---------------------------|-------|---|--------|-------|--------|
| 21 | P30101 PDIA3_HUMAN  | E.NIFGICPHM*TEDNKDLIQGK.D |       | 3 | 2,7446 | 0,151 | -0,546 |
| 21 | P0C0S8 H2A1_HUMAN   | R.HLQLAIRNDEE.L           |       | 2 | 2,741  | 0,249 | -1,641 |
| 21 | Q8N108 MIER1_HUMAN  | E.RYDFFAQQTR.F            |       | 3 | 2,7393 | 0,152 | 0,343  |
| 21 | P15170 ERF3A_HUMAN  | K.HLIVLINK.M              |       | 2 | 2,7372 | 0,253 | -0,385 |
| 21 | Q04637 IF4G1_HUMAN  | R.IRDPNQGGKDITEE.I        |       | 2 | 2,7347 | 0,374 | 0,233  |
| 21 | P28715 ERCC5_HUMAN  | K.M*HGM*SFDVKSS#PCEK.L    | S324: | 3 | 2,734  | 0,115 | -1,087 |
| 21 | Q9C0C2 TB182_HUMAN  | R.RGAGAELKDTQSPSTCSE.G    |       | 3 | 2,734  | 0,298 | -0,966 |
| 21 | Q8IXM3 RM41_HUMAN   | E.KDFKDGTFDPDNLE.K        |       | 2 | 2,7287 | 0,297 | -0,446 |
| 21 | P08559 ODPA_HUMAN   | K.RGDFIPGLR.V             |       | 2 | 2,7281 | 0,166 | -0,71  |
| 21 | P41227 ARD1A_HUMAN  | R.HVVLGAIENK.V            |       | 2 | 2,7256 | 0,431 | -0,565 |
| 21 | P42765 THIM_HUMAN   | E.CDKYALQSQQR.W           |       | 2 | 2,7249 | 0,323 | -0,262 |
| 21 | Q01105 SET_HUMAN    | K.KPRPPPALGPEE.T          |       | 2 | 2,7245 | 0,423 | -0,568 |
| 21 | P17174 AATC_HUMAN   | E.NHNAVFSAGFK.D           |       | 2 | 2,7227 | 0,417 | -0,483 |
| 21 | P51570 GALK1_HUMAN  | R.HSLASSEYPVR.R           |       | 2 | 2,7208 | 0,305 | -0,392 |
| 21 | Q96PK6 RBM14_HUMAN  | R.LPDAHSDYAR.Y            |       | 2 | 2,7208 | 0,339 | -0,746 |
| 21 | Q92563 TICN2_HUMAN  | K.KKPGIFIPSCDE.D          |       | 2 | 2,7204 | 0,361 | -0,263 |
| 21 | Q9BRQ0 PYGO2_HUMAN  | R.RKSNT#QGPAAYSHLTE.F     | T50:  | 3 | 2,7163 | 0,187 | 0      |
| 21 | Q6ZRV2 FA83H_HUMAN  | E.RRGS#LTLTISGESPK.A      | S936: | 3 | 2,7155 | 0,276 | 0,217  |
| 21 | P52756 RBM5_HUMAN   | R.NGDEENPLKR.G            |       | 2 | 2,715  | 0,196 | -0,312 |
| 21 | Q96PK6 RBM14_HUMAN  | R.ASYVAPLTAQPATYR.A       |       | 2 | 2,7144 | 0,378 | -0,834 |
| 21 | P50502 F10A1_HUMAN  | E.AAHDLALACK.L            |       | 2 | 2,7136 | 0,286 | -0,114 |
| 21 | Q8IYB3 SRRM1_HUMAN  | D.ILKVPKPEPIPEPK.E        |       | 3 | 2,709  | 0,158 | 0      |
| 21 | Q8WYP5 AHTF1_HUMAN  | R.SLHSVSEERTDE.M          |       | 3 | 2,7076 | 0,157 | 0,988  |
| 21 | P46777 RL5_HUMAN    | K.HIM*QQNVADYM*R.Y        |       | 3 | 2,7068 | 0,142 | 0,997  |
| 21 | P07814 SYEP_HUMAN   | K.KGDIIQLQR.R             |       | 2 | 2,701  | 0,291 | 0,342  |
| 21 | A4D198 A4D198_HUMAN | R.GFRDDFLGGR.G            |       | 2 | 2,7008 | 0,266 | -0,321 |
| 21 | Q14247 SRC8_HUMAN   | K.YGVQADRVDK.S            |       | 2 | 2,6998 | 0,3   | -0,212 |
| 21 | Q15233 NONO_HUMAN   | R.FACHSASLTVR.N           |       | 2 | 2,6961 | 0,466 | -0,684 |
| 21 | P43243 MATR3_HUMAN  | R.DSFDDRGRPSLNPVLD.Y      |       | 2 | 2,6957 | 0,37  | -0,222 |
| 21 | P08237 K6PF_HUMAN   | R.KNVLGHM*QQGGS#PTPFDR.N  | S667: | 3 | 2,6936 | 0,177 | -0,089 |
| 21 | Q15811 ITSN1_HUMAN  | E.KQILNDQLK.Q             |       | 2 | 2,692  | 0,204 | -0,444 |
| 21 | Q14103 HNRPD_HUMAN  | R.GFCFITFKEEPPVKK.I       |       | 3 | 2,692  | 0,202 | -0,197 |
| 21 | Q9NYF8 BCLF1_HUMAN  | K.M*IASDSHRPE.V           |       | 2 | 2,6919 | 0,319 | 0      |

|    |                    |                            |            |   |        |       |        |
|----|--------------------|----------------------------|------------|---|--------|-------|--------|
| 21 | Q8NFH3 NUP43_HUMAN | R.HHGDVM*DLQFFDQE.R        |            | 2 | 2,6881 | 0,365 | 0,07   |
| 21 | Q13206 DDX10_HUMAN | R.SNS#EVEDVGPTSHNRK.K      | S831:      | 3 | 2,6881 | 0,114 | -0,399 |
| 21 | Q96C19 EFHD2_HUMAN | R.RADLNQGIGEPQS#PSRR.V     | S74:       | 2 | 2,6877 | 0,363 | -1,058 |
| 21 | P11021 GRP78_HUMAN | E.SHQDADIEDFK.A            |            | 3 | 2,6873 | 0,112 | 0,771  |
| 21 | P42224 STAT1_HUMAN | E.NNFLQHNR.K               |            | 2 | 2,6847 | 0,224 | -0,385 |
| 21 | Q9HB71 CYBP_HUMAN  | K.EKPSYDTETDPSEGLM*NVLKK.I |            | 2 | 2,683  | 0,385 | -0,305 |
| 21 | O95149 SPN1_HUMAN  | K.LKGSSHS#PDHPGCLM*EN.-    | S350:      | 2 | 2,6807 | 0,307 | -0,187 |
| 21 | P38405 GNAL_HUMAN  | K.HYCYPHFTCAVDTE.N         |            | 2 | 2,6745 | 0,446 | -0,746 |
| 21 | P25398 RS12_HUMAN  | E.HQINLIKVDD.N             |            | 2 | 2,6744 | 0,324 | -1,123 |
| 21 | P50990 TCPQ_HUMAN  | E.RAVDDGVNTFK.V            |            | 2 | 2,6738 | 0,273 | -0,399 |
| 21 | O14562 UBFD1_HUMAN | K.HDVKFPLDSTGSE.L          |            | 2 | 2,6731 | 0,361 | -0,341 |
| 21 | Q8TAD8 SNIP1_HUMAN | E.RLS#PEVAPPAHR.R          | S35:       | 3 | 2,6721 | 0,134 | 0      |
| 21 | Q9BWU0 NADAP_HUMAN | K.KALQGFFDRE.G             |            | 2 | 2,6712 | 0,378 | -0,504 |
| 21 | Q6ZMS4 YK023_HUMAN | R.IHTGEKPYECNE.C           |            | 2 | 2,6672 | 0,127 | -1,074 |
| 21 | P26583 HMGB2_HUMAN | K.IKSEHPGLSIGD.T           |            | 2 | 2,666  | 0,353 | 0      |
| 21 | P41212 ETV6_HUMAN  | R.SRS#PITTNHRPSPDPE.Q      | S184:      | 3 | 2,664  | 0,262 | -0,293 |
| 21 | Q9Y223 GLCNE_HUMAN | K.SKDYIVALQHPVTTDIK.H      |            | 3 | 2,6633 | 0,312 | -0,095 |
| 21 | Q8NI27 THOC2_HUMAN | E.KTPVSGSLKS#PVPR.S        | S1278:     | 2 | 2,6626 | 0,225 | -0,398 |
| 21 | P55072 TERA_HUMAN  | R.AHVIVM*AATNRPN SIDPALR.R |            | 3 | 2,662  | 0,301 | 0,338  |
| 21 | P05023 AT1A1_HUMAN | R.CSSILLHGK.E              |            | 2 | 2,6618 | 0,403 | -0,421 |
| 21 | P38919 IF4A3_HUMAN | R.KLDYGOHV VAGT#PGR.V      | T163:      | 3 | 2,6617 | 0,149 | -0,545 |
| 21 | Q16875 F263_HUMAN  | R.RNS#VTPLAS#PEPTKKPR.I    | S461:S467: | 3 | 2,6606 | 0,397 | -0,539 |
| 21 | P63241 IF5A1_HUMAN | K.VHLVGIDIFTGK.K           |            | 2 | 2,6598 | 0,326 | -0,282 |
| 21 | P17812 PYRG1_HUMAN | R.RLDLPIER.Q               |            | 2 | 2,6583 | 0,155 | -0,422 |
| 21 | O95819 M4K4_HUMAN  | K.HKS#SSSFTPFIDPR.L        | S852:      | 2 | 2,6577 | 0,311 | -0,217 |
| 21 | Q9P2N5 RBM27_HUMAN | E.LKTSSAVST#PSKVK.T        | T888:      | 3 | 2,6575 | 0,137 | -1,209 |
| 21 | P41091 IF2G_HUMAN  | R.RGVTIKPTVDDD.-           |            | 2 | 2,6529 | 0,399 | -0,649 |
| 21 | Q15149 PLEC1_HUMAN | E.RLSYQLLR.R               |            | 2 | 2,651  | 0,157 | -0,318 |
| 21 | Q9Y4E1 FA21C_HUMAN | K.KQTL SLQAQREE.K          |            | 2 | 2,651  | 0,28  | -0,341 |
| 21 | Q9BXJ9 NARG1_HUMAN | R.RLPLNFLSGEK.F            |            | 2 | 2,6498 | 0,222 | 0,096  |
| 21 | Q96A49 SYAP1_HUMAN | E.GKIDGIIDK.T              |            | 2 | 2,6487 | 0,289 | -0,827 |
| 21 | Q9ULW6 NP1L2_HUMAN | K.KYDEPILK.L               |            | 2 | 2,6487 | 0,102 | -0,061 |
| 21 | Q4G0N4 CE033_HUMAN | K.NVEHIIDSLR.N             |            | 2 | 2,6469 | 0,332 | -0,714 |

|    |                     |                           |        |   |        |       |        |
|----|---------------------|---------------------------|--------|---|--------|-------|--------|
| 21 | P06733 ENOA_HUMAN   | E.HINKT#IAPALVSK.K        | T72:   | 3 | 2,6466 | 0,229 | 0,745  |
| 21 | P48634 BAT2_HUMAN   | E.NKGNDPNVSLVPK.D         |        | 2 | 2,6465 | 0,32  | -0,795 |
| 21 | Q99613 EIF3C_HUMAN  | E.SENLHNADQPLR.V          |        | 2 | 2,646  | 0,346 | -0,525 |
| 21 | Q02790 FKBP4_HUMAN  | K.DKFSFDLGKGE.V           |        | 2 | 2,6456 | 0,326 | -0,491 |
| 21 | P36542 ATPG_HUMAN   | K.HLLIGVSSDR.G            |        | 2 | 2,6451 | 0,324 | -1,112 |
| 21 | Q9BZF9 UACA_HUMAN   | K.SHDAIIDDLNR.K           |        | 2 | 2,6432 | 0,401 | -0,577 |
| 21 | Q5VVJ2 MYSM1_HUMAN  | R.GRADPNLNAVK.I           |        | 2 | 2,6413 | 0,107 | -0,951 |
| 21 | O95482 UB6L1_HUMAN  | R.LRLPQIGSK.N             |        | 2 | 2,6398 | 0,215 | -0,422 |
| 21 | Q8WXH0 SYNE2_HUMAN  | K.VTHDGILAR.Q             |        | 2 | 2,6385 | 0,454 | -0,062 |
| 21 | P09497 CLCB_HUMAN   | E.KVAQLCDFNPK.S           |        | 2 | 2,6339 | 0,291 | -0,555 |
| 21 | Q96EB6 SIRT1_HUMAN  | R.RDGPGLERS#PGEPGGAAPER.E | S47:   | 3 | 2,6333 | 0,142 | 0      |
| 21 | Q12972 PP1R8_HUMAN  | E.GNLDIQRPK.R             |        | 2 | 2,6326 | 0,216 | -0,938 |
| 21 | P48735 IDHP_HUMAN   | R.GKLDGNQDLIR.F           |        | 2 | 2,6322 | 0,14  | -1,291 |
| 21 | Q9Y3I0 CV028_HUMAN  | R.RNLDFQDVLDK.L           |        | 2 | 2,6296 | 0,23  | -0,358 |
| 21 | P31946 1433B_HUMAN  | K.DSTLIM*QLLR.D           |        | 2 | 2,6278 | 0,171 | -0,405 |
| 21 | P16989 DBPA_HUMAN   | E.GAQLQGPVHR.N            |        | 2 | 2,6273 | 0,21  | -0,344 |
| 21 | Q96CT7 CC124_HUMAN  | K.AKSHLEVPLEE.N           |        | 2 | 2,6252 | 0,255 | -0,585 |
| 21 | P78344 IF4G2_HUMAN  | R.KAFLDNGPK.T             |        | 2 | 2,6249 | 0,219 | 0,062  |
| 21 | Q8NG31 CASC5_HUMAN  | E.NKIDFNDFIK.R            |        | 2 | 2,6241 | 0,292 | -0,681 |
| 21 | Q99700 ATX2_HUMAN   | R.STSHTSDFNPNSGSDQR.V     |        | 3 | 2,622  | 0,236 | -0,498 |
| 21 | P46734 MP2K3_HUMAN  | K.KTDIAAFVKE.I            |        | 2 | 2,6218 | 0,284 | -0,544 |
| 21 | P52272 HNRPM_HUMAN  | R.KACQIFVR.N              |        | 2 | 2,6211 | 0,259 | -0,358 |
| 21 | Q9H3N1 TXND1_HUMAN  | E.GTNKDFPQNAIR.Q          |        | 3 | 2,6196 | 0,168 | 0,202  |
| 21 | P05198 IF2A_HUMAN   | K.RPGYGAYDAFK.H           |        | 2 | 2,619  | 0,304 | -0,196 |
| 21 | Q86VI3 IQGA3_HUMAN  | R.HRS#LTAHSLPLAE.K        | S1424: | 2 | 2,6189 | 0,387 | -0,375 |
| 21 | P51858 HDGF_HUMAN   | E.YKCGDLVFAK.M            |        | 2 | 2,6167 | 0,394 | -0,61  |
| 21 | P26368 U2AF2_HUMAN  | K.YCDPDSYHR.R             |        | 3 | 2,6156 | 0,33  | 1,357  |
| 21 | Q8WUD4 CCD12_HUMAN  | R.RVPQAKPVAVEE.K          |        | 2 | 2,6116 | 0,35  | 0      |
| 21 | Q5VZ89 DEN4C_HUMAN  | E.RRSS#LPLDHGSPAQENPE.S   | S1042: | 3 | 2,6108 | 0,205 | -0,795 |
| 21 | Q59HC1 Q59HC1_HUMAN | E.HATDEDILAK.G            |        | 2 | 2,6071 | 0,3   | -0,329 |
| 21 | O94888 UBXD7_HUMAN  | E.HGQLDLGSS#SPPKK.C       | S269:  | 3 | 2,6055 | 0,13  | -0,478 |
| 21 | Q5SW79 CE170_HUMAN  | R.RTLPQLPNEEK.S           |        | 2 | 2,6035 | 0,178 | -0,276 |
| 21 | Q05519 SFR11_HUMAN  | R.SKT#PPKSYSTAR.R         | T325:  | 3 | 2,5996 | 0,264 | 0,196  |

|    |                    |                         |       |   |        |       |        |
|----|--------------------|-------------------------|-------|---|--------|-------|--------|
| 21 | P61769 B2MG_HUMAN  | R.VNHVTLTSLQPK.I        |       | 2 | 2,5988 | 0,492 | -0,76  |
| 21 | Q08211 DHX9_HUMAN  | E.DCIQM*THFVPPPKDK.K    |       | 2 | 2,5967 | 0,286 | -0,6   |
| 21 | Q8NCD3 HJURP_HUMAN | D.LHVQGNSSGIFR.K        |       | 3 | 2,593  | 0,264 | 0,278  |
| 21 | Q7Z4H7 FA29A_HUMAN | R.IKDDLTTIR.H           |       | 2 | 2,5909 | 0,231 | -0,681 |
| 21 | P52732 KIF11_HUMAN | E.KQHNIFLDQM*TIDE.D     |       | 2 | 2,5906 | 0,245 | -0,558 |
| 21 | P08559 ODPA_HUMAN  | R.YHGHS#M*SDPGVSYR.T    | S293: | 3 | 2,5901 | 0,225 | 0,325  |
| 21 | Q6ZRV2 FA83H_HUMAN | R.RGS#PVPPVPERR.S       | S914: | 3 | 2,5888 | 0,237 | 0,256  |
| 21 | O95625 ZBT11_HUMAN | R.QKVDQPLKDQE.N         |       | 3 | 2,5886 | 0,177 | 0,62   |
| 21 | P35527 K1C9_HUMAN  | R.IKFEM*EQNLR.Q         |       | 2 | 2,5878 | 0,131 | 0      |
| 21 | P49796 RGS3_HUMAN  | E.VRLDSTYSQK.A          |       | 2 | 2,5864 | 0,274 | -0,408 |
| 21 | P51858 HDGF_HUMAN  | R.AGDLLDS#PKRPK.E       | S165: | 2 | 2,5863 | 0,259 | -0,162 |
| 21 | P10636 TAU_HUMAN   | E.DHAGTYGLGDR.K         |       | 2 | 2,5789 | 0,419 | -0,42  |
| 21 | Q8WUA2 PPIL4_HUMAN | D.KDFVPYQDIR.I          |       | 3 | 2,5771 | 0,246 | -0,285 |
| 21 | Q13033 STRN3_HUMAN | K.HKIGNEGLAADLTDDPDTE.E |       | 3 | 2,5768 | 0,109 | -0,546 |
| 21 | O15392 BIRC5_HUMAN | K.HSSGCAFLSVK.K         |       | 2 | 2,5748 | 0,494 | -0,205 |
| 21 | Q00839 HNRPU_HUMAN | K.GLKAELM*ER.L          |       | 2 | 2,5747 | 0,269 | -0,344 |
| 21 | Q96C19 EFHD2_HUMAN | R.RADLNQGIGEPQS#PSRR.V  | S74:  | 3 | 2,5746 | 0,24  | -0,933 |
| 21 | Q8N9N5 BANP_HUMAN  | E.NVISNAVPGRR.Q         |       | 2 | 2,5696 | 0,276 | -0,309 |
| 21 | Q10570 CPSF1_HUMAN | R.HGFLILSRE.D           |       | 2 | 2,5654 | 0,321 | -0,114 |
| 21 | Q8IZP0 ABI1_HUMAN  | E.NNYIQATDKR.K          |       | 2 | 2,5639 | 0,329 | 0,698  |
| 21 | Q9C0B5 ZDHC5_HUMAN | K.SFHFDPLSSGSR.S        |       | 3 | 2,5638 | 0,269 | 0,205  |
| 21 | P62750 RL23A_HUMAN | K.KLYDIDVAK.V           |       | 2 | 2,5633 | 0,234 | -0,687 |
| 21 | P68104 EF1A1_HUMAN | K.STTTGHLIYK.C          |       | 2 | 2,5606 | 0,482 | -0,762 |
| 21 | Q9UN86 G3BP2_HUMAN | K.FYVHNDMFR.Y           |       | 2 | 2,5598 | 0,387 | -0,397 |
| 21 | O43237 DC1L2_HUMAN | K.LVHDKELAAEDE.Q        |       | 2 | 2,5597 | 0,324 | -0,535 |
| 21 | Q9H7N4 SFR19_HUMAN | E.S#RSPFLKPDER.A        | S872: | 3 | 2,5578 | 0,195 | 0,842  |
| 21 | Q9NV06 SOF1_HUMAN  | K.HSKPGSVPLVSE.K        |       | 2 | 2,5577 | 0,188 | -1,085 |
| 21 | Q01813 K6PP_HUMAN  | R.GRS#FAGNLNTYKR.L      | S386: | 3 | 2,5566 | 0,103 | 0      |
| 21 | Q9P0L0 VAPA_HUMAN  | E.NDKLNDM*EPSK.A        |       | 3 | 2,5556 | 0,16  | 0,28   |
| 21 | Q13769 THOC5_HUMAN | R.RPTLGVQLDDK.R         |       | 2 | 2,5548 | 0,264 | -0,786 |
| 21 | Q86VP6 CAND1_HUMAN | K.HTVDDGLDIR.K          |       | 2 | 2,5514 | 0,263 | -0,535 |
| 21 | Q4LE39 ARI4B_HUMAN | E.HFGTPVIGK.K           |       | 2 | 2,5511 | 0,317 | -0,51  |
| 21 | P21281 VATB2_HUMAN | R.VFNGSGKPIDR.G         |       | 2 | 2,5505 | 0,201 | -0,205 |

|    |                    |                           |       |   |        |       |        |
|----|--------------------|---------------------------|-------|---|--------|-------|--------|
| 21 | P21333 FLNA_HUMAN  | E.IDQDKYAVR.F             |       | 2 | 2,5485 | 0,247 | -0,22  |
| 21 | P48735 IDHP_HUMAN  | R.GKLDGNQDLIR.F           |       | 3 | 2,5477 | 0,128 | 0,372  |
| 21 | Q93008 USP9X_HUMAN | R.KLIGQLNLK.D             |       | 2 | 2,5477 | 0,141 | -0,475 |
| 21 | Q16181 SEPT7_HUMAN | E.NGEHCDFILR.N            |       | 2 | 2,5446 | 0,458 | -0,358 |
| 21 | Q96EP5 DAZP1_HUMAN | E.DEQSVDQAVNM*HFHDIM*GK.K |       | 3 | 2,5431 | 0,156 | -0,164 |
| 21 | P06744 G6PI_HUMAN  | K.HFVALSTNTTK.V           |       | 2 | 2,5383 | 0,348 | -0,5   |
| 21 | Q58FF7 H90B3_HUMAN | R.RAPFDLFENK.K            |       | 2 | 2,5367 | 0,213 | -0,493 |
| 21 | P27694 RFA1_HUMAN  | E.KCDTEFPNFK.Y            |       | 2 | 2,5365 | 0,129 | -0,759 |
| 21 | O75347 TBCA_HUMAN  | K.M*RAEDGENYDIK.K         |       | 2 | 2,5358 | 0,115 | -1,005 |
| 21 | P55072 TERA_HUMAN  | E.VGYDDIGGCRK.Q           |       | 2 | 2,5346 | 0,29  | -0,295 |
| 21 | Q12797 ASPH_HUMAN  | R.LHHDTDDVTVQVYEE.Q       |       | 2 | 2,5319 | 0,444 | 0,458  |
| 21 | Q10570 CPSF1_HUMAN | R.HGFLILSR.E              |       | 2 | 2,5302 | 0,205 | -0,065 |
| 21 | O15067 PUR4_HUMAN  | E.RCPACFVGTITGDR.R        |       | 3 | 2,5285 | 0,257 | -0,114 |
| 21 | Q14789 GOGB1_HUMAN | E.KNTLLSQISTK.D           |       | 2 | 2,5266 | 0,282 | -0,989 |
| 21 | Q9HCG8 NCM_HUMAN   | R.DRDYFDYSR.S             |       | 3 | 2,5257 | 0,083 | -0,444 |
| 21 | Q6DD88 ATLA3_HUMAN | K.LKDIAGEFKE.Q            |       | 2 | 2,5202 | 0,216 | -1,061 |
| 21 | P04049 RAF1_HUMAN  | E.LLQHSLPK.I              |       | 2 | 2,5199 | 0,238 | -0,717 |
| 21 | Q9NW13 RBM28_HUMAN | K.LKDQNIIVSR.T            |       | 2 | 2,5173 | 0,363 | -0,5   |
| 21 | Q9Y3D5 RT18C_HUMAN | E.DLPISM*ENPYKEPLKK.C     |       | 2 | 2,5166 | 0,305 | -0,509 |
| 21 | Q00341 VIGLN_HUMAN | K.KQLLHLAEE.K             |       | 2 | 2,5125 | 0,208 | -0,564 |
| 21 | P17301 ITA2_HUMAN  | E.NKADNLVNLK.I            |       | 2 | 2,5122 | 0,288 | -0,864 |
| 21 | P16383 GCF_HUMAN   | R.AQVAGLPHR.V             |       | 2 | 2,5115 | 0,256 | -0,193 |
| 21 | P48634 BAT2_HUMAN  | R.GGGTGGPNHPPAPR.G        |       | 2 | 2,5091 | 0,233 | -0,096 |
| 21 | Q9COC9 UBE2O_HUMAN | E.KM*EAVPDVER.K           |       | 2 | 2,5089 | 0,242 | -0,513 |
| 21 | P16949 STMN1_HUMAN | E.FPLS#PPKKK.D            | S38:  | 2 | 2,507  | 0,118 | -0,109 |
| 21 | P54819 KAD2_HUMAN  | E.FNPPKEPM*KDDITGEPLIR.R  |       | 3 | 2,5068 | 0,342 | -0,744 |
| 21 | Q06830 PRDX1_HUMAN | K.RTIAQDYGVLK.A           |       | 2 | 2,5067 | 0,304 | -0,676 |
| 21 | Q96RT1 LAP2_HUMAN  | E.KYM*IGNSVQK.I           |       | 2 | 2,5062 | 0,17  | -0,412 |
| 21 | Q14493 SLBP_HUMAN  | R.KLLINDFGRE.R            |       | 2 | 2,5059 | 0,249 | -0,607 |
| 21 | Q09666 AHNK_HUMAN  | R.RVTAYTVDTVGR.E          |       | 3 | 2,5047 | 0,175 | -0,547 |
| 21 | P49327 FAS_HUMAN   | E.KFCFTPHTEE.G            |       | 2 | 2,5043 | 0,25  | -0,282 |
| 21 | Q8TCS8 PNPT1_HUMAN | K.IKHPTALGLE.V            |       | 2 | 2,5033 | 0,373 | -0,565 |
| 21 | Q96JM3 ZN828_HUMAN | E.LRKPGPPLS#PEIR.S        | S427: | 2 | 2,4974 | 0,25  | -0,158 |

|    |                    |                        |       |   |        |       |        |
|----|--------------------|------------------------|-------|---|--------|-------|--------|
| 21 | P43686 PRS6B_HUMAN | K.RLIFSTITSK.M         |       | 2 | 2,4958 | 0,217 | -0,314 |
| 21 | P11142 HSP7C_HUMAN | R.RFDDAVVQSDMK.H       |       | 2 | 2,495  | 0,312 | -1,384 |
| 21 | Q9BTC0 DIDO1_HUMAN | E.AKVTVDDLPNR.M        |       | 3 | 2,4947 | 0,109 | 0,149  |
| 21 | Q9Y4L1 HYOU1_HUMAN | R.YFQHLLGK.Q           |       | 2 | 2,4936 | 0,328 | -0,667 |
| 21 | Q9GZT3 SLIRP_HUMAN | R.RCILPFDKE.T          |       | 2 | 2,4932 | 0,155 | -1,139 |
| 21 | Q9BRT8 CBWD1_HUMAN | R.NLDKDILK.Q           |       | 2 | 2,4893 | 0,105 | 0,127  |
| 21 | P08133 ANXA6_HUMAN | E.DALSSDTSGHFR.R       |       | 2 | 2,4883 | 0,282 | -0,849 |
| 21 | Q9NQW7 XPP1_HUMAN  | R.AHIKDAVALCE.L        |       | 2 | 2,4867 | 0,236 | -0,398 |
| 21 | Q8N6R0 K0859_HUMAN | R.RLIFLSNR.N           |       | 2 | 2,485  | 0,26  | -0,359 |
| 21 | P35527 K1C9_HUMAN  | R.IKFEM*EQNLR.Q        |       | 3 | 2,4839 | 0,181 | 0      |
| 21 | Q99417 MYCBP_HUMAN | E.KSGVLDLTK.V          |       | 2 | 2,4817 | 0,381 | -0,46  |
| 21 | P07900 HS90A_HUMAN | R.RAPFDLFENR.K         |       | 2 | 2,4814 | 0,164 | -0,289 |
| 21 | P12270 TPR_HUMAN   | R.NQHLSVQQKDPDTE.E     |       | 3 | 2,4811 | 0,214 | -0,893 |
| 21 | Q7Z2W4 ZCCHV_HUMAN | R.KFTYLGSQDR.A         |       | 2 | 2,4766 | 0,252 | -0,201 |
| 21 | Q5QJE6 TDIF2_HUMAN | K.KSPIKAS#DLTK.F       | S386: | 2 | 2,4702 | 0,27  | -1,54  |
| 21 | Q71UI9 H2AV_HUMAN  | R.HLQLAIRGDEE.L        |       | 2 | 2,4694 | 0,154 | -0,286 |
| 21 | Q71UI9 H2AV_HUMAN  | R.HLQLAIRGDEE.L        |       | 3 | 2,4688 | 0,1   | 0,571  |
| 21 | Q9NY61 AATF_HUMAN  | E.LLFQYPDTR.Y          |       | 2 | 2,4603 | 0,141 | -0,423 |
| 21 | P54709 AT1B3_HUMAN | K.KFLKPYTLEE.Q         |       | 2 | 2,4567 | 0,149 | -0,674 |
| 21 | Q8N108 MIER1_HUMAN | E.GLHINGPTGGNK.K       |       | 2 | 2,4532 | 0,311 | -0,733 |
| 21 | P17252 KPCA_HUMAN  | E.NFDKFFTR.G           |       | 2 | 2,453  | 0,265 | -0,34  |
| 21 | Q9Y2W1 TR150_HUMAN | K.YYLHDDREGE.G         |       | 2 | 2,4507 | 0,437 | -0,376 |
| 21 | P31930 QCR1_HUMAN  | E.HQQLDLAQK.H          |       | 2 | 2,4506 | 0,197 | -1,328 |
| 21 | Q99729 ROAA_HUMAN  | R.GFVFITFKEEPPVKK.V    |       | 3 | 2,4441 | 0,111 | -0,305 |
| 21 | Q12830 BPTF_HUMAN  | R.HM*DITEDLTNK.A       |       | 2 | 2,4417 | 0,276 | -0,824 |
| 21 | Q8TAD8 SNIP1_HUMAN | E.RLS#PEVAPPAHR.R      | S35:  | 2 | 2,441  | 0,146 | -0,952 |
| 21 | P04075 ALDOA_HUMAN | E.KVLAAYVK.A           |       | 2 | 2,4397 | 0,223 | -1,436 |
| 21 | Q29980 MICB_HUMAN  | E.LVSLQVLDQHPVGTGDHR.D |       | 2 | 2,4391 | 0,268 | -0,124 |
| 21 | P61962 WDR68_HUMAN | R.VNLVSGHVK.T          |       | 2 | 2,4362 | 0,262 | 0,064  |
| 21 | Q96HE7 ERO1A_HUMAN | E.NSFFAGDKKE.A         |       | 2 | 2,4349 | 0,236 | -0,213 |
| 21 | A2RUB1 YQ006_HUMAN | R.FADHHDLLTE.T         |       | 2 | 2,4321 | 0,235 | -0,204 |
| 21 | Q9UHV9 PFD2_HUMAN  | E.HSLVIDTLK.E          |       | 2 | 2,4315 | 0,306 | 1,784  |
| 21 | O60506 HNRPQ_HUMAN | E.GLTDVILYHQPDCK.K     |       | 3 | 2,4264 | 0,211 | -0,315 |

|    |                     |                        |            |   |        |       |        |
|----|---------------------|------------------------|------------|---|--------|-------|--------|
| 21 | Q86X27 RGPS2_HUMAN  | K.CHS#LGYNFIHK.M       | S343:      | 3 | 2,4257 | 0,089 | 0      |
| 21 | Q69YN2 C19L1_HUMAN  | E.GKFDILFNR.V          |            | 2 | 2,4251 | 0,253 | -0,44  |
| 21 | Q5VY92 Q5VY92_HUMAN | E.GSSRLS#PPHS#PRDFTR.M | S956:S960: | 2 | 2,4251 | 0,293 | -0,312 |
| 21 | P02765 FETUA_HUMAN  | K.CDSSPDSAEDVRK.V      |            | 3 | 2,4223 | 0,24  | -0,062 |
| 21 | P78347 GTF2I_HUMAN  | R.KM*VDQLFCK.K         |            | 2 | 2,422  | 0,411 | -1,236 |
| 21 | Q8TDN6 BXDC2_HUMAN  | R.DRIPGPVCK.G          |            | 2 | 2,4214 | 0,331 | -0,468 |
| 21 | P13639 EF2_HUMAN    | K.KSDPVVSYRE.T         |            | 2 | 2,4204 | 0,208 | -0,827 |
| 21 | Q9BXP5 ARS2_HUMAN   | R.YNDYKLDLFR.R         |            | 2 | 2,4197 | 0,171 | -0,593 |
| 21 | Q16181 SEPT7_HUMAN  | E.HCDFILR.N            |            | 2 | 2,4182 | 0,208 | -0,23  |
| 21 | Q9UQ35 SRRM2_HUMAN  | E.LASRS#PIRQDR.G       | S1112:     | 3 | 2,4158 | 0,206 | 0      |
| 21 | P26368 U2AF2_HUMAN  | K.YCDPDSYHR.R          |            | 2 | 2,4153 | 0,209 | 0      |
| 21 | Q9UKV3 ACINU_HUMAN  | K.HSTPHAAFQPNSEQEE.M   |            | 3 | 2,4147 | 0,13  | 0      |
| 21 | O43166 SI1L1_HUMAN  | R.HSASPVVFTSAR.S       |            | 2 | 2,4084 | 0,41  | -0,388 |
| 21 | P49750 YLPM1_HUMAN  | R.ISRPM*DM*YDR.S       |            | 3 | 2,4083 | 0,24  | 1,042  |
| 21 | Q99471 PFD5_HUMAN   | E.AKDCLNVLNK.S         |            | 2 | 2,4033 | 0,255 | -0,623 |
| 21 | O95831 AIFM1_HUMAN  | E.KCLIATGGTPR.S        |            | 2 | 2,3996 | 0,395 | -0,727 |
| 21 | P37837 TALDO_HUMAN  | R.KFAADAVKLE.R         |            | 2 | 2,3996 | 0,138 | -0,112 |
| 21 | O43719 HTSF1_HUMAN  | R.KLLLFDR.H            |            | 2 | 2,3985 | 0,12  | -0,067 |
| 21 | P14314 GLU2B_HUMAN  | R.GVSLTNHHFYDE.S       |            | 2 | 2,3971 | 0,252 | -0,516 |
| 21 | P55072 TERA_HUMAN   | E.ILQIHTK.N            |            | 2 | 2,3964 | 0,122 | 0,715  |
| 21 | P60660 MYL6_HUMAN   | R.HVLVTLGEK.M          |            | 2 | 2,3961 | 0,312 | -0,551 |
| 21 | Q9UBU9 NXF1_HUMAN   | R.SAQAFTHLK.A          |            | 2 | 2,3936 | 0,086 | -0,365 |
| 21 | Q15149 PLEC1_HUMAN  | K.RQELEAELAK.V         |            | 2 | 2,3914 | 0,144 | -1,028 |
| 21 | P68104 EF1A1_HUMAN  | R.RGNVAGDSKNDPPM*E.A   |            | 2 | 2,3903 | 0,185 | -0,076 |
| 21 | Q13595 TRA2A_HUMAN  | R.IRVDYSITK.R          |            | 2 | 2,3854 | 0,265 | -1,337 |
| 21 | Q9UL54 TAOK2_HUMAN  | R.HSLDQDLLRE.D         |            | 2 | 2,3841 | 0,288 | -0,498 |
| 21 | O95625 ZBT11_HUMAN  | R.QKVDQPLKDQE.N        |            | 2 | 2,3824 | 0,338 | -0,276 |
| 21 | P41091 IF2G_HUMAN   | K.HILILQNK.I           |            | 2 | 2,3809 | 0,191 | -0,561 |
| 21 | Q9Y5Q8 TF3C5_HUMAN  | E.LRDTM*SLM*IR.Q       |            | 3 | 2,3806 | 0,092 | 0,288  |
| 21 | O95429 BAG4_HUMAN   | R.HNFPCSVHQYE.S        |            | 2 | 2,3799 | 0,425 | -0,774 |
| 21 | P48637 GSHB_HUMAN   | E.NCLLRPGSPAR.V        |            | 2 | 2,3795 | 0,335 | -0,197 |
| 21 | Q6WCQ1 MRIP_HUMAN   | K.SKS#NPDFLKKD.R       | S992:      | 2 | 2,3762 | 0,31  | -1,706 |
| 21 | P52209 6PGD_HUMAN   | D.HGFVCAFNR.T          |            | 3 | 2,3753 | 0,153 | 0,227  |

|    |                    |                         |        |   |        |       |        |
|----|--------------------|-------------------------|--------|---|--------|-------|--------|
| 21 | Q13206 DDX10_HUMAN | R.HNVFGLDLKD.E          |        | 2 | 2,3751 | 0,269 | -0,316 |
| 21 | P06733 ENOA_HUMAN  | E.KSCNCLLLK.V           |        | 2 | 2,3742 | 0,225 | -0,537 |
| 21 | Q58FG0 HS905_HUMAN | K.HIYITGETK.D           |        | 2 | 2,3742 | 0,435 | -0,1   |
| 21 | Q9P2K3 RCOR3_HUMAN | E.THPM*DGNSD#DYDPKKE.A  | S171:  | 2 | 2,3697 | 0,164 | 0,188  |
| 21 | Q9Y2K1 ZBTB1_HUMAN | K.YRGDTSQAADDASSTTGSR.K |        | 3 | 2,3692 | 0,149 | -0,282 |
| 21 | Q10567 AP1B1_HUMAN | K.CLKDEDPYVR.K          |        | 3 | 2,3683 | 0,138 | -1,13  |
| 21 | Q14320 FA50A_HUMAN | R.KGNTM*QQFLQK.A        |        | 2 | 2,3655 | 0,146 | -0,911 |
| 21 | P62807 H2B1C_HUMAN | R.KESYSVYVYK.V          |        | 2 | 2,3631 | 0,326 | -1,253 |
| 21 | O75643 U520_HUMAN  | E.YKFSVDVK.E            |        | 2 | 2,3619 | 0,326 | 0,619  |
| 21 | O60841 IF2P_HUMAN  | E.GNTVHIEVK.E           |        | 2 | 2,3566 | 0,325 | -1,04  |
| 21 | P62917 RL8_HUMAN   | R.KVGLIAAR.R            |        | 2 | 2,3555 | 0,314 | 0      |
| 21 | Q9HCG8 NCM_HUMAN   | R.DRDYFDYSR.S           |        | 2 | 2,355  | 0,221 | -0,888 |
| 21 | Q15287 RNPS1_HUMAN | R.NVTKDHIM*E.I          |        | 2 | 2,3549 | 0,318 | 0,111  |
| 21 | P50238 CRIP1_HUMAN | K.TLTSGGHAHE.G          |        | 2 | 2,3546 | 0,32  | -0,107 |
| 21 | P23396 RS3_HUMAN   | R.KFVADGIFK.A           |        | 2 | 2,3521 | 0,102 | -0,357 |
| 21 | O94979 SC31A_HUMAN | K.KIALALNK.V            |        | 2 | 2,3504 | 0,09  | 0      |
| 21 | P11586 C1TC_HUMAN  | K.THLSLSHNPE.Q          |        | 2 | 2,3457 | 0,238 | -0,215 |
| 21 | Q9NZW5 MPP6_HUMAN  | K.RAGEPLGVTFR.V         |        | 3 | 2,3451 | 0,145 | 0,684  |
| 21 | Q9UQ35 SRRM2_HUMAN | R.HSLSGSS#PGM*KDIPR.T   | S1463: | 3 | 2,3418 | 0,186 | -0,549 |
| 21 | Q9BZ95 NSD3_HUMAN  | R.VDTVSEKPREEPVLKE.E    |        | 3 | 2,3404 | 0,102 | -0,887 |
| 21 | P60900 PSA6_HUMAN  | D.SSTVTHLFK.I           |        | 2 | 2,3399 | 0,232 | -1,136 |
| 21 | O15085 ARHGB_HUMAN | R.LHQSASSSTSSLSTR.S     |        | 3 | 2,3363 | 0,183 | -0,236 |
| 21 | Q9H6R4 NOL6_HUMAN  | K.DRIDAFLE.V            |        | 2 | 2,3351 | 0,289 | -0,322 |
| 21 | P07602 SAP_HUMAN   | E.KEILDAFDK.M           |        | 2 | 2,333  | 0,182 | -0,226 |
| 21 | P49915 GUAA_HUMAN  | R.KIIGDTFVK.I           |        | 2 | 2,3296 | 0,135 | -0,239 |
| 21 | Q14103 HNRPD_HUMAN | R.RGFCFITK.E            |        | 2 | 2,3291 | 0,104 | -0,311 |
| 21 | Q9Y262 IF3EI_HUMAN | E.VDFYIDKDM*IHADTK.V    |        | 3 | 2,3267 | 0,173 | -0,377 |
| 21 | Q15149 PLEC1_HUMAN | E.HVAVAQLREE.A          |        | 2 | 2,3246 | 0,323 | -0,953 |
| 21 | O95453 PARN_HUMAN  | K.KFIDQVVEK.I           |        | 2 | 2,3215 | 0,12  | -0,552 |
| 21 | Q6PCB5 RSBNL_HUMAN | K.AKLDHVQFAE.F          |        | 2 | 2,3205 | 0,22  | -0,421 |
| 21 | Q7L9B9 EPPD1_HUMAN | E.HGPFRRS#VEDLVR.M      | S173:  | 3 | 2,3201 | 0,257 | 0,061  |
| 21 | P30048 PRDX3_HUMAN | K.HLSVNDLPVGR.S         |        | 2 | 2,3185 | 0,387 | -0,404 |
| 21 | Q14683 SMC1A_HUMAN | E.DTQFNHYHR.K           |        | 2 | 2,3178 | 0,25  | -0,564 |



|    |                    |                         |       |   |        |       |        |
|----|--------------------|-------------------------|-------|---|--------|-------|--------|
| 21 | Q13151 ROAO_HUMAN  | K.KLFVGGLK.G            |       | 2 | 2,3126 | 0,151 | -0,283 |
| 21 | O14530 TXND9_HUMAN | K.KFGTNFTKLE.K          |       | 2 | 2,3125 | 0,237 | -0,103 |
| 21 | Q9BZL4 PP12C_HUMAN | E.KISLQDLSK.E           |       | 2 | 2,3117 | 0,253 | -0,236 |
| 21 | Q9H9C1 CN133_HUMAN | K.CHDVVIDTYR.D          |       | 3 | 2,3088 | 0,124 | 0,859  |
| 21 | Q6ZRV2 FA83H_HUMAN | R.KGSPTPGFSTR.R         |       | 2 | 2,3064 | 0,273 | -1,182 |
| 21 | Q8N3Z6 ZCHC7_HUMAN | R.CHM*LGHYTDACE.I       |       | 2 | 2,3053 | 0,294 | -0,303 |
| 21 | Q96L14 C170L_HUMAN | R.SGDPRPQAAEPPDHLTITR.R |       | 3 | 2,3031 | 0,203 | -0,267 |
| 21 | P99999 CYC_HUMAN   | E.RADLIAYLK.K           |       | 2 | 2,3018 | 0,216 | -0,344 |
| 21 | Q9Y5U2 TSSC4_HUMAN | K.RPLAPSGRS#PVEGLGR.A   | S132: | 3 | 2,2994 | 0,319 | -0,212 |
| 21 | P49792 RBP2_HUMAN  | K.HVVFGFVKD.G           |       | 2 | 2,2989 | 0,382 | -0,233 |
| 21 | Q9Y266 NUDC_HUMAN  | K.LKPNLNGADLPNYR.W      |       | 3 | 2,2987 | 0,178 | -0,111 |
| 21 | Q12849 GRSF1_HUMAN | E.NGIHFLLNR.D           |       | 2 | 2,2976 | 0,279 | -0,338 |
| 21 | P61604 CH10_HUMAN  | D.DKDYFLFR.D            |       | 2 | 2,2963 | 0,215 | -0,332 |
| 21 | P78527 PRKDC_HUMAN | R.HGDLPIQIK.H           |       | 2 | 2,2938 | 0,337 | -0,322 |
| 21 | Q13206 DDX10_HUMAN | R.HNVFGLDLK.D           |       | 2 | 2,2922 | 0,27  | -0,234 |
| 21 | Q9H993 CF211_HUMAN | D.RIPQILTK.V            |       | 2 | 2,2892 | 0,089 | -0,126 |
| 21 | Q9Y3L3 3BP1_HUMAN  | E.RTESEVPPRPAS#PK.V     | S544: | 3 | 2,2891 | 0,123 | 0,224  |
| 21 | P33993 MCM7_HUMAN  | E.HSDQVPVGNIPR.S        |       | 2 | 2,2883 | 0,135 | 0,278  |
| 21 | Q13263 TIF1B_HUMAN | R.KLLASLVK.R            |       | 2 | 2,2882 | 0,098 | -0,699 |
| 21 | P24752 THIL_HUMAN  | K.RLNVTPLAR.I           |       | 2 | 2,288  | 0,17  | -0,117 |
| 21 | P55072 TERA_HUMAN  | R.KGDIFLVR.G            |       | 2 | 2,2856 | 0,135 | -0,965 |
| 21 | Q00610 CLH1_HUMAN  | E.SDKFICIRE.K           |       | 2 | 2,2829 | 0,245 | 0,104  |
| 21 | P07237 PDIA1_HUMAN | D.KDGVVLFK.K            |       | 2 | 2,2815 | 0,102 | -0,269 |
| 21 | Q9Y5B8 NDK7_HUMAN  | R.TKYDNLHLE.D           |       | 2 | 2,281  | 0,179 | -0,323 |
| 21 | Q9NZ32 ARP10_HUMAN | R.TCFVSDLKR.G           |       | 2 | 2,2794 | 0,104 | -0,108 |
| 21 | Q8NFC6 FA44A_HUMAN | E.KNVLLNSLQK.E          |       | 2 | 2,2777 | 0,107 | 0,316  |
| 21 | P47756 CAPZB_HUMAN | D.HGFAGVILIK.K          |       | 2 | 2,2772 | 0,307 | -0,116 |
| 21 | Q5VUA4 ZN318_HUMAN | K.SDHPVGHISGPE.V        |       | 2 | 2,2765 | 0,417 | -0,594 |
| 21 | P12259 FA5_HUMAN   | R.KYLDSTFTK.R           |       | 2 | 2,2762 | 0,12  | -0,664 |
| 21 | P62899 RL31_HUMAN  | E.YTINIHK.R             |       | 2 | 2,2741 | 0,265 | -0,206 |
| 21 | P14618 KPYM_HUMAN  | K.IISKIENHE.G           |       | 2 | 2,2735 | 0,202 | -0,338 |
| 21 | P68431 H31_HUMAN   | D.TNLCAIHAK.R           |       | 2 | 2,2729 | 0,383 | -1,662 |
| 21 | O95684 FR1OP_HUMAN | K.SSLHLLSHE.T           |       | 2 | 2,2707 | 0,231 | -0,179 |

|    |                     |                          |       |   |        |       |        |
|----|---------------------|--------------------------|-------|---|--------|-------|--------|
| 21 | Q9UET6 RRMJ1_HUMAN  | E.IRPQDCPISR.V           |       | 3 | 2,269  | 0,267 | 0,515  |
| 21 | Q3KQU3 MA7D1_HUMAN  | E.AKESPSAAGPEDK.S        |       | 2 | 2,2682 | 0,157 | -0,284 |
| 21 | Q9UKV3 ACINU_HUMAN  | K.KVTLGDTLTR.R           |       | 2 | 2,2675 | 0,314 | -0,221 |
| 21 | P17252 KPCA_HUMAN   | K.GAENFDKFFTR.G          |       | 2 | 2,2666 | 0,173 | -1,008 |
| 21 | Q00059 TFAM_HUMAN   | E.LYIQHAKEDE.T           |       | 2 | 2,2647 | 0,195 | -1,077 |
| 21 | P31350 RIR2_HUMAN   | R.RIFQEPTPK.T            |       | 2 | 2,2631 | 0,23  | -1,176 |
| 21 | Q9UDI3 Q9UDI3_HUMAN | -.PDYLGADQRK.T           |       | 2 | 2,2602 | 0,297 | -0,315 |
| 21 | Q8N3V7 SYNPO_HUMAN  | K.QAPRPSFSTR.N           |       | 2 | 2,2589 | 0,152 | -0,957 |
| 21 | Q9BPX5 ARP5L_HUMAN  | R.AFHAALRNS#PVNTK.N      | S64:  | 3 | 2,2589 | 0,298 | -0,683 |
| 21 | P17480 UBF1_HUMAN   | R.GKLPES#PKRAEE.I        | S484: | 2 | 2,2571 | 0,393 | -0,515 |
| 21 | Q9BXP5 ARS2_HUMAN   | R.YNDYKLDLFR.R           |       | 3 | 2,2561 | 0,342 | 0,963  |
| 21 | Q8IXB1 DJC10_HUMAN  | E.VLKDEDLR.K             |       | 2 | 2,253  | 0,134 | 1,235  |
| 21 | Q16881 TRXR1_HUMAN  | E.NAYGQFIGPHR.I          |       | 3 | 2,2521 | 0,339 | 1,161  |
| 21 | Q7KZF4 SND1_HUMAN   | D.LKYTIENPR.H            |       | 2 | 2,251  | 0,455 | -0,108 |
| 21 | P14618 KPYM_HUMAN   | R.LNFSHGTHE.Y            |       | 2 | 2,2496 | 0,295 | -0,468 |
| 21 | Q9Y3T9 NOC2L_HUMAN  | R.GILRPLSTR.H            |       | 2 | 2,2477 | 0,215 | -1,566 |
| 21 | P22626 ROA2_HUMAN   | K.LFVGGIKEDTEE.H         |       | 2 | 2,2469 | 0,161 | -1,004 |
| 21 | Q8WXH0 SYNE2_HUMAN  | E.SEEPSSPQSLCHLVAPGHER.S |       | 3 | 2,2457 | 0,258 | -0,66  |
| 21 | Q9BWF3 RBM4_HUMAN   | K.NYGFVHIEDK.T           |       | 2 | 2,2457 | 0,199 | 0,1    |
| 21 | Q9C0B5 ZDHC5_HUMAN  | K.SFHFDPSSGSR.S          |       | 2 | 2,2456 | 0,4   | -0,548 |
| 21 | Q86WB0 NIPA_HUMAN   | E.RLPLVPES#PRR.M         | S321: | 2 | 2,2397 | 0,304 | -0,087 |
| 21 | O95340 PAPS2_HUMAN  | K.KAM*DFYDPAR.H          |       | 2 | 2,2355 | 0,288 | -0,794 |
| 21 | Q99653 CHP1_HUMAN   | K.SKDVNGPEPLNSR.S        |       | 3 | 2,229  | 0,21  | 0,259  |
| 21 | Q8WTT2 NOC3L_HUMAN  | K.KIPILENPK.E            |       | 2 | 2,2231 | 0,18  | -0,824 |
| 21 | Q86TI2 DPP9_HUMAN   | K.TGFCHLYK.V             |       | 2 | 2,2214 | 0,214 | -0,119 |
| 21 | Q13740 CD166_HUMAN  | R.SSNTYTLTDVRR.N         |       | 2 | 2,22   | 0,216 | -0,259 |
| 21 | P07355 ANXA2_HUMAN  | E.KDIISDTSGDFR.K         |       | 3 | 2,2193 | 0,356 | -0,54  |
| 21 | Q9UN86 G3BP2_HUMAN  | K.FYVHNDM*FR.Y           |       | 2 | 2,2191 | 0,285 | -1,274 |
| 21 | Q12874 SF3A3_HUMAN  | R.KHPNEICVPM*SVE.F       |       | 2 | 2,2175 | 0,282 | -0,314 |
| 21 | Q9P2G1 AKIB1_HUMAN  | R.LARPTEDDFR.R           |       | 3 | 2,2169 | 0,089 | 0,15   |
| 21 | O15027 SC16A_HUMAN  | K.SHLVGVKPFE.A           |       | 2 | 2,2167 | 0,193 | -0,877 |
| 21 | P06733 ENOA_HUMAN   | R.SGKYDLDFK.S            |       | 2 | 2,2154 | 0,186 | -0,455 |
| 21 | Q9BTC0 DIDO1_HUMAN  | E.AKVTVDLPLNR.M          |       | 2 | 2,2152 | 0,263 | -0,894 |

|    |                     |                   |       |   |        |       |        |
|----|---------------------|-------------------|-------|---|--------|-------|--------|
| 21 | Q15185 TEBP_HUMAN   | R.TDRSILCCLR.K    |       | 2 | 2,214  | 0,231 | -0,377 |
| 21 | P43686 PRS6B_HUMAN  | E.DYVARPK.I       |       | 2 | 2,2132 | 0,242 | 0      |
| 21 | Q9H4I2 ZH3_HUMAN    | R.KVS#PIKINLK.N   | S723: | 3 | 2,2124 | 0,122 | 0      |
| 21 | P20073 ANXA7_HUMAN  | K.TSYGKDLIK.D     |       | 2 | 2,2075 | 0,377 | -1,904 |
| 21 | Q92917 GPKOW_HUMAN  | E.FDKNTLCLR.Q     |       | 2 | 2,2072 | 0,18  | -0,652 |
| 21 | P00533 EGFR_HUMAN   | E.DHFLSLQR.M      |       | 2 | 2,2069 | 0,253 | -1,201 |
| 21 | O14653 GOSR2_HUMAN  | D.VQHLQTALR.N     |       | 2 | 2,2049 | 0,214 | -0,343 |
| 21 | P06748 NPM_HUMAN    | E.AKFINYVK.N      |       | 2 | 2,199  | 0,14  | -0,186 |
| 21 | Q9HB07 MYG1_HUMAN   | R.IGTHNGTFHCDE.A  |       | 2 | 2,1937 | 0,241 | -0,176 |
| 21 | O95453 PARN_HUMAN   | R.NNSFTAPSTVGKR.N |       | 2 | 2,1928 | 0,369 | -0,354 |
| 21 | Q96BT3 CENPT_HUMAN  | R.RAVDVGAFRLR.D   |       | 2 | 2,1927 | 0,202 | 0,221  |
| 21 | P55209 NP1L1_HUMAN  | E.HDEPILK.H       |       | 2 | 2,1914 | 0,122 | 0,43   |
| 21 | Q9UKD1 GMEB2_HUMAN  | E.LDFYQHDK.V      |       | 2 | 2,1906 | 0,11  | -0,572 |
| 21 | P55010 IF5_HUMAN    | R.VKAEPFIK.W      |       | 2 | 2,1906 | 0,086 | -1,571 |
| 21 | A8MYB5 A8MYB5_HUMAN | E.DFRRS#PTEDFR.Q  | S638: | 2 | 2,1893 | 0,111 | -0,324 |
| 21 | Q6ZV73 FGD6_HUMAN   | R.HSLPATGVLK.K    |       | 2 | 2,1878 | 0,132 | -0,358 |
| 21 | Q96EY4 U534_HUMAN   | R.KICANDAIPK.T    |       | 2 | 2,1842 | 0,207 | -0,54  |
| 21 | Q13136 LIPA1_HUMAN  | R.DRLDTRLRE.T     |       | 2 | 2,1839 | 0,154 | -0,431 |
| 21 | Q8N9N5 BANP_HUMAN   | E.KLDLVTNK.Q      |       | 2 | 2,1813 | 0,148 | -0,066 |
| 21 | Q12996 CSTF3_HUMAN  | E.GINIHLAK.K      |       | 2 | 2,181  | 0,309 | -0,07  |
| 21 | Q8NBZ0 CCD95_HUMAN  | R.DKSFLDR.L       |       | 2 | 2,1795 | 0,193 | -0,061 |
| 21 | P83916 CBX1_HUMAN   | K.GKVEYLLK.W      |       | 2 | 2,1777 | 0,142 | 0,771  |
| 21 | O15042 SR140_HUMAN  | E.NQTPAHVYYR.W    |       | 2 | 2,1745 | 0,279 | -0,586 |
| 21 | P00558 PGK1_HUMAN   | K.VKAEPKIE.A      |       | 2 | 2,1729 | 0,132 | -0,31  |
| 21 | Q8WWI1 LMO7_HUMAN   | K.YNGDIEDIKR.T    |       | 3 | 2,1704 | 0,178 | 0,374  |
| 21 | Q9UQ35 SRRM2_HUMAN  | R.QSHSESPSLQSK.S  |       | 3 | 2,169  | 0,102 | 0,417  |
| 21 | Q01081 U2AF1_HUMAN  | E.KAVIDLNNR.W     |       | 2 | 2,1631 | 0,211 | -1,638 |
| 21 | Q86WR0 CCD25_HUMAN  | K.LSSAHVYLR.L     |       | 2 | 2,1622 | 0,206 | -0,467 |
| 21 | P68104 EF1A1_HUMAN  | R.TIEKFEKE.A      |       | 2 | 2,1613 | 0,095 | -0,715 |
| 21 | Q15047 SETB1_HUMAN  | E.SLVKDFYSK.L     |       | 2 | 2,1611 | 0,218 | 0,673  |
| 21 | Q6ZNP1 Q6ZNP1_HUMAN | R.AHDQLDLK.S      |       | 2 | 2,1588 | 0,134 | -1,043 |
| 21 | Q96ST2 IWS1_HUMAN   | R.GKHM*DFLSDFE.M  |       | 2 | 2,1588 | 0,346 | -0,546 |
| 21 | P53396 ACLY_HUMAN   | K.HLLVHAPE.D      |       | 2 | 2,1574 | 0,195 | -0,133 |

|    |                     |                      |        |   |        |       |        |
|----|---------------------|----------------------|--------|---|--------|-------|--------|
| 21 | P12074 CX6A1_HUMAN  | E.FIAYPHLR.I         |        | 2 | 2,1507 | 0,239 | 0,12   |
| 21 | Q04637 IF4G1_HUMAN  | R.IRDPNQGGKDITEE.I   |        | 3 | 2,1487 | 0,16  | 0,349  |
| 21 | A2BF60 A2BF60_HUMAN | R.RPYDVFFSK.V        |        | 2 | 2,1483 | 0,141 | -0,105 |
| 21 | Q8IWB9 TEX2_HUMAN   | K.LNLHLFK.Q          |        | 2 | 2,1481 | 0,139 | -0,069 |
| 21 | Q05682 CALD1_HUMAN  | E.NTFS#RPGGRASVDTK.E | S511:  | 3 | 2,1448 | 0,125 | -0,984 |
| 21 | P05198 IF2A_HUMAN   | K.SKTVYSILR.H        |        | 2 | 2,1448 | 0,192 | -0,457 |
| 21 | P49411 EFTU_HUMAN   | E.HVVVVVVK.A         |        | 2 | 2,1436 | 0,415 | -1,719 |
| 21 | P12277 KCRB_HUMAN   | R.GFCLPPHCSR.G       |        | 2 | 2,143  | 0,131 | -0,396 |
| 21 | Q3V6T2 GRDN_HUMAN   | R.SVS#GKTPGDFYDRR.T  | S1736: | 2 | 2,1426 | 0,306 | -0,293 |
| 21 | Q8IZP0 ABI1_HUMAN   | E.NNYIQATDKR.K       |        | 3 | 2,1412 | 0,091 | 0,673  |
| 21 | O75643 U520_HUMAN   | E.KDTLGLFLR.E        |        | 2 | 2,1408 | 0,193 | -0,344 |
| 21 | Q9NTZ6 RBM12_HUMAN  | K.HVIDFFK.K          |        | 2 | 2,1388 | 0,174 | -0,067 |
| 21 | P22626 ROA2_HUMAN   | K.KLFVGGIK.E         |        | 2 | 2,1387 | 0,105 | 0,778  |
| 21 | P22102 PUR2_HUMAN   | K.KGLAAIKFE.G        |        | 2 | 2,1373 | 0,213 | -0,312 |
| 21 | Q9NTZ6 RBM12_HUMAN  | E.HAFLTVGSKE.A       |        | 2 | 2,1365 | 0,21  | -0,224 |
| 21 | O14497 ARI1A_HUMAN  | K.RPM*DGTYGPPAK.R    |        | 2 | 2,1357 | 0,285 | -0,467 |
| 21 | P48637 GSHB_HUMAN   | R.HVLSVLSK.T         |        | 2 | 2,1348 | 0,235 | 1,382  |
| 21 | Q14151 SAFB2_HUMAN  | K.SKGEPVISVK.T       |        | 2 | 2,1332 | 0,249 | -1,285 |
| 21 | Q8TAP6 CEP76_HUMAN  | R.RGIDDVM*KE.L       |        | 2 | 2,132  | 0,092 | -0,102 |
| 21 | Q9UGP8 SEC63_HUMAN  | R.HTLLHFLE.D         |        | 2 | 2,1297 | 0,173 | -0,423 |
| 21 | Q9H993 CF211_HUMAN  | K.AHLILFK.G          |        | 2 | 2,1279 | 0,26  | -0,145 |
| 21 | Q27J81 INF2_HUMAN   | E.GLEDAVHSR.G        |        | 2 | 2,1275 | 0,236 | 0,062  |
| 21 | O43865 SAHH2_HUMAN  | E.KYSFM*ATVTK.A      |        | 2 | 2,127  | 0,239 | -1,228 |
| 21 | Q53F19 CQ085_HUMAN  | E.YHEELPALK.Q        |        | 2 | 2,1262 | 0,291 | -0,776 |
| 21 | P23368 MAOM_HUMAN   | E.DFGNHNAFR.F        |        | 2 | 2,1256 | 0,228 | -1,132 |
| 21 | P49790 NU153_HUMAN  | R.ASDKDITVSK.N       |        | 2 | 2,1236 | 0,268 | -0,459 |
| 21 | Q6P4F7 RHGBA_HUMAN  | E.SGSNLHALM*NQR.Q    |        | 2 | 2,1234 | 0,32  | -0,817 |
| 21 | Q6L8Q7 PDE12_HUMAN  | E.AGPGTCTFDHR.H      |        | 2 | 2,1219 | 0,089 | -0,2   |
| 21 | P06748 NPM_HUMAN    | R.SAPGGGSKVPQK.K     |        | 2 | 2,1202 | 0,402 | -0,219 |
| 21 | Q96GA3 LTV1_HUMAN   | K.AVS#FHLVHR.S       | S17:   | 2 | 2,1197 | 0,222 | -0,426 |
| 21 | Q15185 TEBP_HUMAN   | K.LTFSCLGGSDNFK.H    |        | 2 | 2,1191 | 0,277 | -0,338 |
| 21 | Q8WYQ5 DGCR8_HUMAN  | R.ARPFQALPR.E        |        | 2 | 2,1191 | 0,088 | -0,462 |
| 21 | O95831 AIFM1_HUMAN  | K.KVVQLDVR.D         |        | 2 | 2,1147 | 0,1   | -0,51  |

|    |                     |                      |       |   |        |       |        |
|----|---------------------|----------------------|-------|---|--------|-------|--------|
| 21 | Q9C0C9 UBE2O_HUMAN  | R.GSVHFGLVR.L        |       | 2 | 2,1108 | 0,334 | -0,941 |
| 21 | Q8WWI1 LMO7_HUMAN   | E.RGEFLAPPR.H        |       | 2 | 2,1107 | 0,083 | 0      |
| 21 | P42704 LPPRC_HUMAN  | E.NQPIRDVLK.Q        |       | 2 | 2,1073 | 0,193 | -0,225 |
| 21 | P49023 PAXI_HUMAN   | E.HFVCAFCLK.Q        |       | 2 | 2,1058 | 0,435 | -0,413 |
| 21 | Q9BUJ2 HNRL1_HUMAN  | D.TYNCDLHFK.V        |       | 2 | 2,1049 | 0,287 | -0,713 |
| 21 | Q9NYF8 BCLF1_HUMAN  | K.MIASDSHRPE.V       |       | 2 | 2,1027 | 0,224 | 0,213  |
| 21 | P18669 PGAM1_HUMAN  | R.HYGGLTGLNKAE.T     |       | 3 | 2,0989 | 0,101 | 0,363  |
| 21 | P13639 EF2_HUMAN    | E.DHACIPIK.K         |       | 2 | 2,098  | 0,311 | -1,215 |
| 21 | Q92614 MY18A_HUMAN  | R.GFFNLNRSS#KRE.S    | S52:  | 3 | 2,0961 | 0,187 | -0,238 |
| 21 | P08559 ODPA_HUMAN   | E.LKADQLYK.Q         |       | 2 | 2,0942 | 0,121 | 0,187  |
| 21 | P08758 ANXA5_HUMAN  | E.KFITIFGTR.S        |       | 2 | 2,0905 | 0,177 | -0,113 |
| 21 | O95721 SNP29_HUMAN  | R.KLDDTDPVPR.G       |       | 2 | 2,089  | 0,378 | -0,211 |
| 21 | Q8N584 CR017_HUMAN  | R.IHAALASLRE.L       |       | 2 | 2,0881 | 0,272 | -0,903 |
| 21 | Q8WXV6 Q8WXV6_HUMAN | R.KRTSS#EDNLYLAVLR.A | S21:  | 2 | 2,0852 | 0,36  | 0      |
| 21 | Q6ZV89 SH2D5_HUMAN  | R.TLRPLSHAKS#EAE.L   | S331: | 2 | 2,0849 | 0,379 | -0,241 |
| 21 | POC0S8 H2A1_HUMAN   | R.HLQLAIR.N          |       | 2 | 2,0836 | 0,12  | -0,932 |
| 21 | Q7KZ85 SPT6H_HUMAN  | K.HITLYDIR.A         |       | 2 | 2,0823 | 0,308 | -0,118 |
| 21 | Q86W92 LIPB1_HUMAN  | D.KLLTSSLQK.S        |       | 2 | 2,0807 | 0,14  | -0,779 |
| 21 | P49736 MCM2_HUMAN   | K.MYSDLRKE.S         |       | 2 | 2,0792 | 0,095 | 0,234  |
| 21 | Q9UIA9 XPO7_HUMAN   | R.DRFTQNLSAFR.R      |       | 3 | 2,076  | 0,098 | 0,27   |
| 21 | P08133 ANXA6_HUMAN  | E.DTIIDIITHR.S       |       | 2 | 2,0745 | 0,167 | -0,51  |
| 21 | Q14554 PDIA5_HUMAN  | R.TRNNVLVLYSK.S      |       | 2 | 2,0731 | 0,11  | -0,187 |
| 21 | O75533 SF3B1_HUMAN  | E.RLDPFADGGKT#PDPK.M | T142: | 3 | 2,073  | 0,092 | -0,432 |
| 21 | P23526 SAHH_HUMAN   | E.TTTGVHNLKY.M       |       | 2 | 2,0682 | 0,238 | -0,968 |
| 21 | Q01433 AMPD2_HUMAN  | K.HFPLDLRTS#M*DGK.C  | S118: | 3 | 2,0666 | 0,216 | -0,34  |
| 21 | Q9Y2K1 ZBTB1_HUMAN  | E.LKDFNIK.V          |       | 2 | 2,0657 | 0,089 | -0,123 |
| 21 | Q9BRJ2 RM45_HUMAN   | R.IKDYDANFK.I        |       | 2 | 2,0596 | 0,292 | -0,219 |
| 21 | P49585 PCY1A_HUMAN  | E.KSIDLIQK.W         |       | 2 | 2,0592 | 0,101 | 0      |
| 21 | Q16658 FSCN1_HUMAN  | R.YAHSARPADE.I       |       | 2 | 2,0589 | 0,279 | -0,694 |
| 21 | P54577 SYYC_HUMAN   | K.HVLFPLK.S          |       | 2 | 2,0582 | 0,202 | 0,143  |
| 21 | Q9Y5K5 UCHL5_HUMAN  | R.KHNYLPFIM*E.L      |       | 2 | 2,0568 | 0,206 | -0,373 |
| 21 | P43358 MAGA4_HUMAN  | E.LAHFLLR.K          |       | 2 | 2,0566 | 0,186 | -0,351 |
| 21 | Q96QT6 PHF12_HUMAN  | E.LGHVNGLVDK.S       |       | 2 | 2,0542 | 0,225 | 0,232  |

|    |                    |                             |       |   |        |       |        |
|----|--------------------|-----------------------------|-------|---|--------|-------|--------|
| 21 | O15160 RPAC1_HUMAN | R.VRDHYIFSVE.S              |       | 2 | 2,0539 | 0,088 | -0,193 |
| 21 | P38606 VATA_HUMAN  | K.FKDPLKDGE.A               |       | 2 | 2,05   | 0,235 | 0,233  |
| 21 | Q9HCG8 NCM_HUMAN   | K.YTSDKDVPSER.N             |       | 3 | 2,05   | 0,247 | 0,775  |
| 21 | Q7L804 RFIP2_HUMAN | K.KPFLGQQR.L                |       | 2 | 2,0491 | 0,258 | 1,04   |
| 21 | Q9BQ89 F110A_HUMAN | R.GLGV AHLAR.A              |       | 2 | 2,0487 | 0,299 | 0,205  |
| 21 | Q15181 IPYR_HUMAN  | R.YKVPDGKPENE.F             |       | 2 | 2,0476 | 0,302 | -0,287 |
| 21 | P02765 FETUA_HUMAN | K.CDSSPDSAEDVRK.V           |       | 2 | 2,0466 | 0,381 | -0,916 |
| 21 | P06748 NPM_HUMAN   | K.LLSISGKR.S                |       | 2 | 2,0364 | 0,153 | 0,279  |
| 21 | P49750 YLPM1_HUMAN | E.DRFSAPPSR.S               |       | 2 | 2,0348 | 0,119 | 0      |
| 21 | Q96S55 WRIP1_HUMAN | K.RPAAAAAGSASPR.S           |       | 3 | 2,033  | 0,18  | 0,583  |
| 21 | Q9NX63 CHCH3_HUMAN | E.SHPVCADLQAK.I             |       | 2 | 2,0302 | 0,115 | -0,498 |
| 21 | Q8NEY8 PPHLN_HUMAN | K.KPPLDRPGE.G               |       | 2 | 2,0287 | 0,282 | -0,435 |
| 21 | Q96JQ2 CLMN_HUMAN  | R.GGVGTTTASEPAPLAPHEDHQRE.T |       | 3 | 2,0268 | 0,167 | -0,516 |
| 21 | Q7Z7A1 CP110_HUMAN | K.HLQDDNLLK.Q               |       | 2 | 2,0252 | 0,23  | -1,008 |
| 21 | P29692 EF1D_HUMAN  | R.ATAPQQTQHSV#PM*R.Q        | S133: | 2 | 2,0187 | 0,288 | -0,08  |
| 21 | O43379 WDR62_HUMAN | R.GHPSFLPQQKE.S             |       | 2 | 2,0173 | 0,33  | -0,192 |
| 21 | Q9HC38 GLOD4_HUMAN | R.ALHFVFK.V                 |       | 2 | 2,0133 | 0,141 | 0,142  |
| 21 | Q14192 FHL2_HUMAN  | K.KPITGGVTYR.E              |       | 2 | 2,0126 | 0,241 | -0,511 |
| 21 | Q7LBC6 JHD2B_HUMAN | E.NKAPFEAVK.R               |       | 2 | 2,0115 | 0,109 | -1,154 |
| 21 | Q15650 TRIP4_HUMAN | K.KVTIDFAGR.K               |       | 2 | 2,0109 | 0,116 | -0,485 |
| 21 | P17987 TCPA_HUMAN  | K.HGSYEDAVHSGALND.-         |       | 3 | 2,0103 | 0,09  | -0,233 |
| 21 | Q99618 CDCA3_HUMAN | K.HAQSDSDPRS#PTLGIAR.T      | S68:  | 2 | 2,0065 | 0,32  | -0,406 |
| 21 | Q9Y2H6 FND3A_HUMAN | E.CVAFSHQNLK.L              |       | 3 | 2,002  | 0,199 | 1,443  |
| 21 | P27824 CALX_HUMAN  | K.LHFIFR.H                  |       | 2 | 2,0001 | 0,129 | -0,073 |
| 21 | Q07352 TISB_HUMAN  | K.FHQNQLLSSLK.G             |       | 2 | 1,9997 | 0,125 | -0,557 |
| 21 | P09525 ANXA4_HUMAN | R.NHLLHVFE.Y                |       | 2 | 1,9988 | 0,202 | -0,326 |
| 21 | Q8NI51 BORIS_HUMAN | R.YALIQHQK.T                |       | 2 | 1,9967 | 0,108 | -0,061 |
| 21 | P35221 CTNA1_HUMAN | R.KAVLM*IR.T                |       | 2 | 1,9896 | 0,11  | -0,216 |
| 21 | Q9Y2S0 RPAC2_HUMAN | E.DHTLGNSLR.Y               |       | 2 | 1,9875 | 0,289 | -0,12  |
| 21 | Q14152 EIF3A_HUMAN | R.GPPLRSEREE.V              |       | 2 | 1,9821 | 0,195 | -0,313 |
| 21 | Q05524 ENO1B_HUMAN | E.KGVPLYR.H                 |       | 2 | 1,9766 | 0,222 | 0,732  |
| 21 | Q92613 JADE3_HUMAN | D.VLFIRPR.K                 |       | 2 | 1,9757 | 0,227 | 0,135  |
| 21 | Q9Y2W1 TR150_HUMAN | E.M*KS#PREPGYKAE.G          | S698: | 2 | 1,9731 | 0,092 | -0,164 |

|    |                    |                 |   |        |       |        |
|----|--------------------|-----------------|---|--------|-------|--------|
| 21 | O95071 UBR5_HUMAN  | R.GFYTPRPGK.N   | 2 | 1,9707 | 0,135 | -0,358 |
| 21 | P27797 CALR_HUMAN  | K.VHVIFNYK.G    | 2 | 1,9641 | 0,125 | -0,06  |
| 21 | Q562F6 SGOL2_HUMAN | E.KDNFFSLTPK.D  | 2 | 1,9611 | 0,153 | -0,408 |
| 21 | P52292 IMA2_HUMAN  | E.KQPPIDNIIR.A  | 2 | 1,9548 | 0,206 | -1,533 |
| 21 | Q99471 PFD5_HUMAN  | E.DAKDFFK.R     | 2 | 1,954  | 0,194 | -0,14  |
| 21 | Q9P000 COMD9_HUMAN | E.HFAALQSLLK.A  | 2 | 1,9538 | 0,137 | -0,649 |
| 21 | Q9BXP5 ARS2_HUMAN  | K.LIHTLDDR.T    | 2 | 1,952  | 0,308 | -0,434 |
| 21 | P06576 ATPB_HUMAN  | R.FLSQPFQVAE.V  | 2 | 1,948  | 0,128 | -0,314 |
| 21 | Q6PD62 CTR9_HUMAN  | K.KYFLASLDR.A   | 2 | 1,9474 | 0,201 | -0,219 |
| 21 | Q66K74 MAP1S_HUMAN | R.HSATFSSIVK.G  | 2 | 1,9474 | 0,471 | -0,227 |
| 21 | P11388 TOP2A_HUMAN | R.KVLFTCFK.R    | 2 | 1,9467 | 0,149 | -0,234 |
| 21 | P49736 MCM2_HUMAN  | R.FVVGSHVR.H    | 2 | 1,9449 | 0,332 | 0      |
| 21 | Q96PK6 RBM14_HUMAN | R.ASYDDPYKK.A   | 2 | 1,9414 | 0,25  | -0,224 |
| 21 | P46100 ATRX_HUMAN  | R.HPSLQVLICK.N  | 2 | 1,9413 | 0,284 | -0,51  |
| 21 | Q9Y680 FKBP7_HUMAN | K.KGDLLNAHYD.G  | 2 | 1,935  | 0,21  | -0,426 |
| 21 | P49792 RBP2_HUMAN  | K.HVVFGFVK.D    | 2 | 1,9289 | 0,164 | -0,262 |
| 21 | O15371 EIF3D_HUMAN | E.GKYLILK.D     | 2 | 1,9269 | 0,083 | 0,292  |
| 21 | O60942 MCE1_HUMAN  | R.NKPFDDICTSR.K | 2 | 1,9268 | 0,148 | -0,793 |
| 21 | O75534 CSDE1_HUMAN | K.LFFHVKE.V     | 2 | 1,9259 | 0,12  | 0,066  |
| 21 | P78332 RBM6_HUMAN  | E.GKAPAEDVFK.K  | 2 | 1,9234 | 0,306 | -0,804 |
| 21 | P49757 NUMB_HUMAN  | R.HAPIEQLAR.Q   | 2 | 1,9185 | 0,362 | -0,471 |
| 21 | P31946 1433B_HUMAN | E.RNLLSVAYK.N   | 2 | 1,9098 | 0,175 | 0      |
| 21 | Q8WWK9 CKAP2_HUMAN | R.KTLFAYKQE.N   | 2 | 1,909  | 0,157 | -0,973 |
| 21 | P53004 BIEA_HUMAN  | R.YLSFHFK.S     | 2 | 1,9078 | 0,193 | 0,324  |
| 21 | P08670 VIME_HUMAN  | E.RDNLAEDIM*R.L | 2 | 1,9063 | 0,202 | -0,977 |
| 21 | Q29980 MICB_HUMAN  | E.GHLDGQPFLR.Y  | 2 | 1,9057 | 0,182 | 0,749  |
| 21 | Q02790 FKBP4_HUMAN | K.DKFSFDLGK.G   | 2 | 1,904  | 0,182 | -0,231 |
| 21 | P54577 SYYC_HUMAN  | E.SKIDLLDR.K    | 2 | 1,9028 | 0,132 | 0      |
| 21 | Q9HAU4 SMUF2_HUMAN | R.THLHTPPDLPE.G | 2 | 1,8999 | 0,12  | -0,874 |
| 21 | Q16531 DDB1_HUMAN  | E.HASIDLPGIK.G  | 2 | 1,8988 | 0,303 | 0      |
| 21 | P35658 NU214_HUMAN | R.HLLVPERE.T    | 2 | 1,8971 | 0,21  | -0,307 |
| 21 | Q9Y3A2 UTP11_HUMAN | K.HVFFFDTK.K    | 2 | 1,8941 | 0,329 | 0,117  |
| 21 | Q92841 DDX17_HUMAN | E.KNFYVEHPE.V   | 2 | 1,8918 | 0,203 | -1,993 |

|    |                     |                        |       |   |        |       |        |
|----|---------------------|------------------------|-------|---|--------|-------|--------|
| 21 | Q59GW8 Q59GW8_HUMAN | K.HTLSFVDVGTGK.V       |       | 2 | 1,8912 | 0,32  | -0,484 |
| 21 | Q6P6C2 ALKB5_HUMAN  | R.SVLLPTHR.R           |       | 2 | 1,8906 | 0,315 | -0,132 |
| 21 | P57076 CU059_HUMAN  | E.KCVPSGGAVFK.K        |       | 2 | 1,8903 | 0,107 | -0,53  |
| 21 | P35579 MYH9_HUMAN   | D.LPFVVR.R             |       | 2 | 1,8892 | 0,252 | 0,368  |
| 21 | P15927 RFA2_HUMAN   | E.KAPTNIVYK.I          |       | 2 | 1,8891 | 0,183 | -0,236 |
| 21 | Q8IY81 RRMJ3_HUMAN  | E.GDLTYHR.T            |       | 2 | 1,8881 | 0,21  | -0,438 |
| 21 | P31946 1433B_HUMAN  | E.RYDDM*AAAM*K.A       |       | 2 | 1,886  | 0,143 | -0,203 |
| 21 | Q5VT52 K0460_HUMAN  | E.VKVVANAYK.T          |       | 2 | 1,885  | 0,129 | 0,307  |
| 21 | Q96RR4 KKCC2_HUMAN  | E.RSQGGLAAGGSLDM*NGR.C |       | 2 | 1,884  | 0,342 | -0,073 |
| 21 | Q92581 SL9A6_HUMAN  | R.RFM*GNSEDALDRE.L     |       | 2 | 1,8829 | 0,307 | -0,446 |
| 21 | O15231 ZN185_HUMAN  | E.HSYVLSAAK.K          |       | 2 | 1,8789 | 0,254 | -0,063 |
| 21 | Q9Y4M2 Q9Y4M2_HUMAN | E.RCTM*PDEPLVR.A       |       | 2 | 1,8721 | 0,139 | -0,263 |
| 21 | Q9Y3B9 RRP15_HUMAN  | K.KDFISVLR.G           |       | 2 | 1,8637 | 0,126 | -0,187 |
| 21 | O00429 DNM1L_HUMAN  | E.KSKPIPIM*PAS#PQK.G   | S616: | 2 | 1,863  | 0,245 | -0,226 |
| 21 | P40818 UBP8_HUMAN   | K.AKPQIAER.D           |       | 2 | 1,8612 | 0,326 | -0,121 |
| 21 | Q13523 PRP4B_HUMAN  | K.ARS#PTDDKVIE.D       | S257: | 2 | 1,8592 | 0,199 | -1,187 |
| 21 | Q10567 AP1B1_HUMAN  | K.CLKDEDPYVR.K         |       | 2 | 1,8574 | 0,152 | -1,979 |
| 21 | Q9HB09 B2L12_HUMAN  | R.SKLVRLSS#DSFAR.L     | S243: | 2 | 1,8559 | 0,233 | -0,789 |
| 21 | Q9NQS7 INCE_HUMAN   | R.TFLHTVQR.N           |       | 2 | 1,8512 | 0,142 | -0,426 |
| 21 | Q8IUD6 RN135_HUMAN  | K.IRDILHDL EE.I        |       | 2 | 1,8434 | 0,242 | -0,389 |
| 21 | O76094 SRP72_HUMAN  | K.HLPSSDSM*SLK.V       |       | 2 | 1,8402 | 0,238 | -0,301 |
| 21 | O75643 U520_HUMAN   | R.YHVLVNLGK.K          |       | 2 | 1,8396 | 0,248 | -0,468 |
| 21 | P62241 RS8_HUMAN    | E.SHYALPLGR.K          |       | 2 | 1,8393 | 0,206 | -0,241 |
| 21 | Q9Y3B8 ORN_HUMAN    | D.KYM*PQFM*K.H         |       | 2 | 1,8379 | 0,147 | -0,773 |
| 21 | P30622 CLIP1_HUMAN  | K.GIFTRPSK.L           |       | 2 | 1,8373 | 0,25  | 0,135  |
| 21 | P54577 SYYC_HUMAN   | K.HVLFPLKSE.F          |       | 2 | 1,8334 | 0,346 | -0,114 |
| 21 | Q96S55 WRIP1_HUMAN  | R.AKGPSPPGAK.R         |       | 2 | 1,8288 | 0,205 | 0,201  |
| 21 | Q8NB90 SPAT5_HUMAN  | R.STPYKPIDDR.I         |       | 2 | 1,8284 | 0,157 | 0      |
| 21 | P13645 K1C10_HUMAN  | K.SEITELRR.N           |       | 2 | 1,8281 | 0,107 | -0,729 |
| 21 | O75027 ABCB7_HUMAN  | R.TSIFIAHR.L           |       | 2 | 1,8213 | 0,21  | 0      |
| 21 | O14686 MLL2_HUMAN   | E.LKTPDVFK.A           |       | 2 | 1,8197 | 0,145 | -0,064 |
| 21 | P14735 IDE_HUMAN    | E.HM*LFLGTK.K          |       | 2 | 1,8164 | 0,267 | -0,063 |
| 21 | P60903 S10AA_HUMAN  | D.YFVVHM*K.Q           |       | 2 | 1,8145 | 0,17  | 0      |



|    |                      |                       |       |   |        |       |        |
|----|----------------------|-----------------------|-------|---|--------|-------|--------|
| 21 | Q9UUK9 NUDT5_HUMAN   | E.KTTYMDPTGK.T        |       | 2 | 1,8087 | 0,164 | -1,282 |
| 21 | P17844 DDX5_HUMAN    | R.GYSSLLKR.D          |       | 2 | 1,8038 | 0,107 | 0,066  |
| 21 | P49589 SYCC_HUMAN    | R.LHLYNSLTR.N         |       | 2 | 1,8038 | 0,089 | 0,328  |
| 21 | Q9NWB6 ARGL1_HUMAN   | E.RAS#SPPDRIDIFGR.T   | S76:  | 2 | 1,8    | 0,21  | -0,22  |
| 21 | Q8WUA2 PPIL4_HUMAN   | D.KDFVPYQDIR.I        |       | 2 | 1,7996 | 0,175 | -1,333 |
| 21 | Q9NYD6 HXC10_HUMAN   | E.HLESPQLGGK.V        |       | 2 | 1,7985 | 0,236 | -0,687 |
| 21 | P04632 CPNS1_HUMAN   | E.HLYNM*IIR.R         |       | 2 | 1,7968 | 0,195 | -1,247 |
| 21 | Q9Y223 GLCNE_HUMAN   | R.LHTIVRGEDE.A        |       | 2 | 1,7909 | 0,386 | -1,357 |
| 21 | Q9H089 LSG1_HUMAN    | E.NKQFLCIPR.R         |       | 2 | 1,7826 | 0,136 | -0,104 |
| 21 | Q66K74 MAP1S_HUMAN   | R.HDPLPDPLK.V         |       | 2 | 1,7821 | 0,218 | -0,118 |
| 21 | P67936 TPM4_HUMAN    | K.LLSDKLE             |       | 2 | 1,781  | 0,1   | 0,672  |
| 21 | P40189 IL6RB_HUMAN   | R.HQVPSVQVFSR.S       |       | 2 | 1,7809 | 0,17  | 0,57   |
| 21 | O15541 R113A_HUMAN   | R.VTHNPM*IQK.T        |       | 2 | 1,7562 | 0,232 | -0,45  |
| 21 | Q9UL63 MKLN1_HUMAN   | E.IHVLSGLSK.D         |       | 2 | 1,7542 | 0,115 | -0,128 |
| 21 | P13667 PDIA4_HUMAN   | K.IANILKDKDPPIPVAK.I  |       | 2 | 1,7489 | 0,232 | -0,493 |
| 21 | O75152 ZC11A_HUMAN   | R.KFS#AGGDSDPPLKR.S   | S290: | 2 | 1,7483 | 0,114 | -0,628 |
| 21 | Q66GS9 CP135_HUMAN   | R.DRS#PSRLDTFLK.G     | S439: | 2 | 1,7389 | 0,213 | -0,725 |
| 21 | P20700 LMNB1_HUMAN   | R.LKLSPPSSR.V         |       | 2 | 1,7348 | 0,114 | -0,91  |
| 21 | Q15059 BRD3_HUMAN    | R.VVHIIQSR.E          |       | 2 | 1,7333 | 0,347 | -0,064 |
| 21 | Q8WUM0 NU133_HUMAN   | R.M*FPHHSITE.S        |       | 2 | 1,7318 | 0,125 | -0,109 |
| 21 | P13674 P4HA1_HUMAN   | K.KKGVAVDYLPE.R       |       | 2 | 1,7307 | 0,167 | -1,201 |
| 21 | P62988 UBIQ_HUMAN    | E.STLHLVLR.L          |       | 2 | 1,7272 | 0,1   | 0,065  |
| 21 | P26640 SYVC_HUMAN    | K.NVIHPFLSR.S         |       | 2 | 1,7239 | 0,092 | -0,113 |
| 21 | Q9BRQ0 PYGO2_HUMAN   | R.RKS#NTQGPAAYSHLTE.F | S48:  | 2 | 1,7188 | 0,082 | -0,345 |
| 21 | P35579 MYH9_HUMAN    | R.GDLPFVPR.R          |       | 2 | 1,7187 | 0,115 | 0,183  |
| 21 | O43847 NRDC_HUMAN    | E.HM*VFM*GSLK.Y       |       | 2 | 1,717  | 0,229 | -0,789 |
| 21 | Q6UB28 AMP1D_HUMAN   | R.HVLLLAGK.S          |       | 2 | 1,7152 | 0,201 | 0,287  |
| 21 | ##Q29RF7 PDS5A_HUMAN | K.SGFLKALLR.V         |       | 2 | 1,7102 | 0,108 | -0,243 |
| 21 | P07237 PDIA1_HUMAN   | E.DHVLVLR.K           |       | 2 | 1,7047 | 0,13  | 0,143  |
| 21 | Q9Y282 ERGI3_HUMAN   | K.QRLDKDGIPVSSE.A     |       | 2 | 1,7003 | 0,224 | -0,845 |
| 21 | Q14978 NOLC1_HUMAN   | K.GSPRPQAPK.A         |       | 2 | 1,692  | 0,195 | 0      |
| 21 | P12270 TPR_HUMAN     | E.HVPVFGSTSGSVR.S     |       | 2 | 1,6776 | 0,154 | -0,367 |
| 21 | O60506 HNRPQ_HUMAN   | E.KAFSQFGKLE.R        |       | 2 | 1,6757 | 0,129 | 1,056  |

|    |                      |                       |       |   |        |       |        |
|----|----------------------|-----------------------|-------|---|--------|-------|--------|
| 21 | Q9Y6R0 NUMBL_HUMAN   | R.HAPLEQLVR.Q         |       | 2 | 1,6691 | 0,228 | 0,115  |
| 21 | Q9Y2Z2 MT01_HUMAN    | R.TLLLTTHR.V          |       | 2 | 1,6664 | 0,173 | 0      |
| 21 | Q10567 AP1B1_HUMAN   | E.YLCEPLRK.C          |       | 2 | 1,6641 | 0,105 | -0,226 |
| 21 | Q9H9Q2 CSN7B_HUMAN   | K.HLTIVSLASR.M        |       | 2 | 1,6629 | 0,141 | 0      |
| 21 | Q9UKI8 TLK1_HUMAN    | R.LGHFTTVR.H          |       | 2 | 1,6583 | 0,174 | 0,262  |
| 21 | Q9BTC0 DIDO1_HUMAN   | R.AHLFDLNCK.I         |       | 2 | 1,6556 | 0,119 | -0,437 |
| 21 | Q6ICG6 CV009_HUMAN   | R.NNRPAFFS#PSLKR.K    | S304: | 2 | 1,6539 | 0,183 | -0,68  |
| 21 | Q9NZM1 MYOF_HUMAN    | R.LALHILR.T           |       | 2 | 1,646  | 0,132 | 0,219  |
| 21 | Q9NTZ6 RBM12_HUMAN   | R.DFFHGLR.V           |       | 2 | 1,6387 | 0,257 | -0,479 |
| 21 | P11142 HSP7C_HUMAN   | K.LDKSQIHD.I          |       | 2 | 1,6364 | 0,141 | 0,191  |
| 21 | Q96CB8 INT12_HUMAN   | K.ALGFLHSK.S          |       | 2 | 1,6265 | 0,127 | -0,07  |
| 21 | P49916 DNL3_HUMAN    | E.AHTADGISIR.F        |       | 2 | 1,6206 | 0,226 | -0,82  |
| 21 | P49591 SYSC_HUMAN    | R.VHQFEKIE.Q          |       | 2 | 1,6194 | 0,174 | -0,474 |
| 21 | P58546 MTPN_HUMAN    | K.HHITPLLSAVYE.G      |       | 2 | 1,614  | 0,144 | -0,972 |
| 21 | Q9NX58 LYAR_HUMAN    | K.M*KLPEHPE.G         |       | 2 | 1,6071 | 0,142 | 0,49   |
| 21 | Q5VT52 K0460_HUMAN   | E.HFGVLPGPR.D         |       | 2 | 1,5982 | 0,251 | 0,124  |
| 21 | ##Q9HCE6 ARGAL_HUMAN | R.LALIDRK.T           |       | 2 | 1,5911 | 0,088 | 0,883  |
| 21 | Q9UKI8 TLK1_HUMAN    | R.SLLNHTPPS#GRPR.E    | S41:  | 2 | 1,591  | 0,206 | -0,323 |
| 21 | Q9Y6X4 K0888_HUMAN   | E.KLSLLPR.K           |       | 2 | 1,5824 | 0,117 | 1,549  |
| 21 | Q06481 APLP2_HUMAN   | R.HYQHVLAVDPE.K       |       | 2 | 1,58   | 0,153 | -0,56  |
| 21 | O00273 DFFA_HUMAN    | R.TLKPCLLR.R          |       | 2 | 1,5539 | 0,098 | -0,183 |
| 21 | Q96DE5 CJ104_HUMAN   | R.KALFTYPK.G          |       | 2 | 1,5447 | 0,143 | 0,252  |
| 21 | Q96RS6 NUDC1_HUMAN   | E.HSIATLLLR.I         |       | 2 | 1,5444 | 0,245 | -0,715 |
| 21 | Q8WWM7 ATX2L_HUMAN   | E.LAVDAVHR.K          |       | 2 | 1,5316 | 0,091 | -0,138 |
| 21 | P06748 NPM_HUMAN     | K.M*SVQPTVSLGGFE.I    |       | 2 | 1,505  | 0,17  | -0,268 |
| 21 | Q06124 PTN11_HUMAN   | K.NILPFDHTR.V         |       | 2 | 1,4638 | 0,09  | -0,658 |
| 21 | Q9UIG0 BAZ1B_HUMAN   | K.IHPLEKVDEE.A        |       | 2 | 1,4584 | 0,178 | -1,514 |
| 21 | Q5U5Q3 MEX3C_HUMAN   | E.SIEHPLAR.R          |       | 2 | 1,4563 | 0,141 | -0,132 |
| 21 | P07237 PDIA1_HUMAN   | K.VHSFPTLK.F          |       | 2 | 1,3941 | 0,112 | -0,131 |
| 21 | P60903 S10AA_HUMAN   | D.YFVVHMK.Q           |       | 2 | 1,373  | 0,172 | 0,264  |
| 21 | P50548 ERF_HUMAN     | R.LPHDPGVFR.V         |       | 2 | 1,3148 | 0,351 | -0,353 |
| 21 | O15066 KIF3B_HUMAN   | K.LHPITRLE.N          |       | 2 | 1,2565 | 0,096 | 0,125  |
| 22 | O75351 VPS4B_HUMAN   | K.KLQNLQGAIVIERPNVK.W |       | 3 | 7,2164 | 0,43  | -0,268 |

|    |                    |                                   |       |   |        |       |        |
|----|--------------------|-----------------------------------|-------|---|--------|-------|--------|
| 22 | Q03164 HRX_HUMAN   | E.CRPPVVEPDINSTVEHDENR.T          |       | 3 | 6,4302 | 0,508 | -0,232 |
| 22 | P49591 SYSC_HUMAN  | E.KYLIATSEQPIAALHRDE.W            |       | 3 | 6,0946 | 0,478 | -0,356 |
| 22 | Q13813 SPTA2_HUMAN | E.KNQALNTDNYGHDLASVQALQR.K        |       | 3 | 5,8208 | 0,406 | -0,67  |
| 22 | O15042 SR140_HUMAN | R.SSDVHSSGSSDAHM*DASGPSDSDM*PSR.T |       | 3 | 5,7688 | 0,572 | 0,067  |
| 22 | P12277 KCRB_HUMAN  | E.HKTDLNPDNLQGGDDLDPNYVLSSR.V     |       | 3 | 5,73   | 0,442 | 0,131  |
| 22 | P35527 K1C9_HUMAN  | R.HGVQELEIELQSLSKK.A              |       | 3 | 5,5718 | 0,433 | -0,186 |
| 22 | P14625 ENPL_HUMAN  | R.FQSSHPTDITSLDQYVER.M            |       | 3 | 5,5221 | 0,437 | 0      |
| 22 | O75351 VPS4B_HUMAN | K.KLQNQLQGAIVIERPNVK.W            |       | 2 | 5,3139 | 0,421 | -0,119 |
| 22 | O60841 IF2P_HUMAN  | K.LRAPIICVLGHVDTGK.T              |       | 3 | 5,3032 | 0,406 | -0,209 |
| 22 | P23193 TCEA1_HUMAN | K.KKEPAITSQNS#PEAREE.S            | S100: | 3 | 5,2926 | 0,425 | -0,092 |
| 22 | Q13428 TCOF_HUMAN  | E.KSLGNILQAKPT#SSPAKGPPQK.A       | T581: | 3 | 5,2448 | 0,458 | -0,079 |
| 22 | Q8NC51 PAIRB_HUMAN | R.KNPLPPSVGVVDKKEE.T              |       | 3 | 5,1851 | 0,329 | 0,421  |
| 22 | Q96SU4 OSBL9_HUMAN | K.RLIDSSGSASVLTHSSSGNSLK.R        |       | 3 | 5,1608 | 0,426 | -0,664 |
| 22 | Q8TBN0 R3GEF_HUMAN | R.HKS#TSSTLCPAVCPAAGHTLTPDRE.G    | S194: | 3 | 5,1563 | 0,404 | -0,99  |
| 22 | P05362 ICAM1_HUMAN | E.LKREPAVGEPAEVTTTVLVR.R          |       | 3 | 5,1417 | 0,53  | -0,676 |
| 22 | P14625 ENPL_HUMAN  | R.FQSSHPTDITSLDQYVER.M            |       | 2 | 5,1412 | 0,541 | 0,108  |
| 22 | P18754 RCC1_HUMAN  | E.KVVQVSAGDSHTAALTDGGR.V          |       | 3 | 5,0919 | 0,503 | -0,541 |
| 22 | P07900 HS90A_HUMAN | K.HSQFIGYPITLFVEKER.D             |       | 3 | 5,0918 | 0,412 | -0,443 |
| 22 | P08238 HS90B_HUMAN | K.HSQFIGYPITLYLEKER.E             |       | 3 | 5,0915 | 0,519 | -0,437 |
| 22 | P11413 G6PD_HUMAN  | R.LQFHDVAGDIFHQQCK.R              |       | 2 | 5,0842 | 0,525 | 0,126  |
| 22 | P25054 APC_HUMAN   | K.IHSANHM*DDNDGELDTPINYSLK.Y      |       | 3 | 5,0545 | 0,538 | 0      |
| 22 | Q96SU4 OSBL9_HUMAN | K.RLIDSSGSASVLTHSSSGNSLK.R        |       | 2 | 4,9843 | 0,61  | -0,886 |
| 22 | P38432 P80C_HUMAN  | R.NSSEKLPTELSKEEPSTK.N            |       | 3 | 4,9794 | 0,335 | -0,091 |
| 22 | Q8IWE2 NXP20_HUMAN | E.LILHGQEEKPAQDQAK.V              |       | 2 | 4,9639 | 0,483 | -0,315 |
| 22 | P21333 FLNA_HUMAN  | E.KTGAVAVNKPAEFTVDAK.H            |       | 2 | 4,9085 | 0,457 | 1,168  |
| 22 | Q9UK76 HN1_HUMAN   | R.RNS#SEASSGDFLDLKE.G             | S87:  | 2 | 4,837  | 0,565 | -0,322 |
| 22 | P28066 PSA5_HUMAN  | E.KGPQLFHM*DPSGTFVQCDAR.A         |       | 3 | 4,8172 | 0,381 | -1,031 |
| 22 | P63241 IF5A1_HUMAN | K.KYEDICPSTHNM*DVPNIK.R           |       | 3 | 4,756  | 0,32  | 0,168  |
| 22 | P51991 ROA3_HUMAN  | K.RGFAFVTFDDHDTVDK.I              |       | 3 | 4,7279 | 0,339 | -0,587 |
| 22 | Q13206 DDX10_HUMAN | K.RSNS#EVEDVGPTSHNR.K             | S831: | 3 | 4,7066 | 0,255 | -1,374 |
| 22 | Q13283 G3BP1_HUMAN | D.SHQLFIGNLPHEVDKSE.L             |       | 3 | 4,6938 | 0,499 | -0,375 |
| 22 | Q15181 IPYR_HUMAN  | E.KGQYISPFHDIPIYADKD.V            |       | 3 | 4,6871 | 0,392 | -0,608 |
| 22 | P43243 MATR3_HUMAN | K.GYPHLCISICDLPVHSNKE.W           |       | 2 | 4,6863 | 0,529 | -0,115 |

|    |                     |                                |        |   |        |       |        |
|----|---------------------|--------------------------------|--------|---|--------|-------|--------|
| 22 | P36578 RL4_HUMAN    | K.APIRPDIVNFVHTNLR.K           |        | 3 | 4,6836 | 0,33  | -0,589 |
| 22 | P84095 RHOG_HUMAN   | E.VCHHCPDVPILLVGTK.K           |        | 3 | 4,6142 | 0,397 | -0,595 |
| 22 | Q8NI27 THOC2_HUMAN  | K.LYINHTPPPLSKS#KERE.M         | S1335: | 3 | 4,6039 | 0,328 | 0      |
| 22 | O15027 SC16A_HUMAN  | K.DDTHKVDVINFAQNK.A            |        | 3 | 4,5967 | 0,392 | -0,734 |
| 22 | O00170 AIP_HUMAN    | E.VLDHCSSILNKYDDNVK.A          |        | 3 | 4,5734 | 0,355 | -0,272 |
| 22 | Q0VAX7 Q0VAX7_HUMAN | E.KAVNPFADVDKLL.L              |        | 3 | 4,5678 | 0,333 | -0,587 |
| 22 | Q9NYB9 ABI2_HUMAN   | R.KPIDYTILDDIGHGVK.W           |        | 3 | 4,5606 | 0,37  | -0,41  |
| 22 | Q8WXH0 SYNE2_HUMAN  | E.KASLLLCGSDLPLHK.M            |        | 3 | 4,5481 | 0,469 | -0,332 |
| 22 | Q3KRA6 U538_HUMAN   | R.NFKPVVYHGVNLDQTVKE.F         |        | 3 | 4,5465 | 0,287 | -0,438 |
| 22 | P53618 COPB_HUMAN   | E.DALANVSIEKPIHQGPDAAVTGHIR.I  |        | 3 | 4,5271 | 0,496 | 0,841  |
| 22 | Q9Y520 Q9Y520_HUMAN | R.S#VEDVRPHHTDANNQSACFEAPDQK.T | S878:  | 3 | 4,5254 | 0,404 | -0,062 |
| 22 | Q9H6W3 NO66_HUMAN   | R.AKDFIHDSLPPVLTDR.R           |        | 2 | 4,5192 | 0,406 | -0,25  |
| 22 | P30876 RPB2_HUMAN   | R.HAIYDKLDDDGLIAPGVR.V         |        | 3 | 4,4986 | 0,363 | -0,929 |
| 22 | Q9NS91 RAD18_HUMAN  | E.ASHKNDLQDTEIS#PR.Q           | S471:  | 2 | 4,4962 | 0,45  | -0,409 |
| 22 | P07437 TBB5_HUMAN   | E.HGIDPTGTYHGSDLQLDR.I         |        | 2 | 4,4687 | 0,549 | -0,116 |
| 22 | Q13118 KLF10_HUMAN  | K.SLSDTAKPHIAAPFKEE.K          |        | 3 | 4,4513 | 0,409 | -0,557 |
| 22 | Q14914 LTB4D_HUMAN  | K.KHFVGYPTNSDFE.L              |        | 2 | 4,4331 | 0,422 | -0,554 |
| 22 | Q06830 PRDX1_HUMAN  | K.KQGGLGPM*NIPLVSDPKR.T        |        | 3 | 4,4236 | 0,355 | -0,285 |
| 22 | O43395 PRPF3_HUMAN  | K.AADHLKPFLLDDSTLR.F           |        | 3 | 4,4071 | 0,441 | -0,323 |
| 22 | P07437 TBB5_HUMAN   | E.HGIDPTGTYHGSDLQLDR.I         |        | 3 | 4,3999 | 0,516 | -0,087 |
| 22 | P26640 SYVC_HUMAN   | K.RDPGVITYDLPTPPGEKK.D         |        | 3 | 4,3999 | 0,289 | -0,738 |
| 22 | Q16891 IMMT_HUMAN   | K.LHNM*IVDLDNVVK.V             |        | 2 | 4,3968 | 0,462 | -0,443 |
| 22 | P61586 RHOA_HUMAN   | K.HFCPNVPIILVGNKK.D            |        | 3 | 4,3864 | 0,174 | -0,316 |
| 22 | P11413 G6PD_HUMAN   | R.LQFHDVAGDIFHQQCK.R           |        | 3 | 4,3746 | 0,379 | -0,282 |
| 22 | Q9HB71 CYBP_HUMAN   | E.KEKPSYDTETDPSEGLM*NVLK.K     |        | 3 | 4,3708 | 0,431 | -0,534 |
| 22 | P18615 NELFE_HUMAN  | K.LKDPEKGPVPTFPFQR.S           |        | 3 | 4,3637 | 0,504 | -0,277 |
| 22 | Q86VS8 HOOK3_HUMAN  | E.RLNQSDSIEDPNS#PAGRR.H        | S238:  | 3 | 4,3613 | 0,283 | -0,612 |
| 22 | Q03188 CENPC_HUMAN  | R.KIKDTCIQS#PSKE.C             | S73:   | 3 | 4,3604 | 0,184 | -0,113 |
| 22 | Q9NYB0 TE2IP_HUMAN  | E.HKYLLGDAPVS#PSSQK.L          | S203:  | 3 | 4,3543 | 0,22  | 0      |
| 22 | Q9Y230 RUVB2_HUMAN  | K.DKVQAGDVITIDKATGK.I          |        | 3 | 4,3539 | 0,288 | -0,52  |
| 22 | Q6P2H3 CCD21_HUMAN  | E.KYPTEGISHVTSPSSDVIQK.G       |        | 3 | 4,3389 | 0,496 | -0,253 |
| 22 | O14497 ARI1A_HUMAN  | R.SHHAPM*S#PGSSGGGGQPLAR.T     | S363:  | 3 | 4,3368 | 0,472 | -0,461 |
| 22 | P11142 HSP7C_HUMAN  | K.LDKSQIHIDIVLVGGSTR.I         |        | 2 | 4,3207 | 0,507 | -1,195 |

|    |                     |                                  |            |   |        |       |        |
|----|---------------------|----------------------------------|------------|---|--------|-------|--------|
| 22 | Q00536 PCTK1_HUMAN  | E.KLTLNSPIFDKPLSR.R              |            | 3 | 4,3136 | 0,377 | -0,212 |
| 22 | P68104 EF1A1_HUMAN  | K.THINIVVIGHVDSGK.S              |            | 3 | 4,3124 | 0,218 | -0,23  |
| 22 | Q4VXC3 Q4VXC3_HUMAN | E.SLNSHSGHPTADVQTFQAK.R          |            | 3 | 4,3099 | 0,373 | -0,271 |
| 22 | Q9HC35 EMAL4_HUMAN  | E.SHSNDQSPQIRAS#PSPQPSSQPLQIHR.Q | S144:      | 3 | 4,299  | 0,402 | 0,658  |
| 22 | Q13428 TCOF_HUMAN   | E.KSLGNILQAKPTSSPAK.G            |            | 2 | 4,278  | 0,415 | 0,21   |
| 22 | O00170 AIP_HUMAN    | E.VLDHCSSILNKYDDNVK.A            |            | 2 | 4,2602 | 0,513 | 0,181  |
| 22 | Q05682 CALD1_HUMAN  | K.SAKPTKPAASDLPVPAEGVR.N         |            | 2 | 4,2463 | 0,5   | -0,368 |
| 22 | Q7Z4H8 KDEL2_HUMAN  | R.GAIVHYTILNNHVYR.R              |            | 3 | 4,2426 | 0,363 | -1,137 |
| 22 | Q9UHB6 LIMA1_HUMAN  | E.VQQPVHPKPLSPDSR.A              |            | 2 | 4,2406 | 0,45  | -0,434 |
| 22 | P23284 PIIB_HUMAN   | R.DKPLKDVIIADCGKIE.V             |            | 3 | 4,2354 | 0,249 | -0,302 |
| 22 | Q13619 CUL4A_HUMAN  | E.KQLLGEHLTAILQK.G               |            | 3 | 4,2346 | 0,305 | -0,574 |
| 22 | Q15833 STXB2_HUMAN  | R.KGPEDTAQLAHAVLAK.L             |            | 3 | 4,2346 | 0,392 | -0,555 |
| 22 | P26006 ITA3_HUMAN   | R.TGAVYLCPLTAHKDDCER.M           |            | 2 | 4,2106 | 0,495 | -0,579 |
| 22 | Q9UBB9 TFP11_HUMAN  | R.ARDYSAPVNFISAGLKK.G            |            | 3 | 4,1943 | 0,247 | -0,199 |
| 22 | Q69YQ0 CYTSA_HUMAN  | R.HSIGPISTSKPLTALSDK.R           |            | 3 | 4,1783 | 0,574 | -1,132 |
| 22 | Q15942 ZYX_HUMAN    | K.AYHPHCFTCVVCARPLE.G            |            | 3 | 4,1704 | 0,234 | -0,259 |
| 22 | Q32MZ4 LRRF1_HUMAN  | R.NM*PGLSAATLASLGGTSSR.R         |            | 2 | 4,1617 | 0,501 | -0,54  |
| 22 | P05556 ITB1_HUMAN   | R.DKLPQPVQDPVSHCK.E              |            | 3 | 4,1548 | 0,234 | -0,099 |
| 22 | Q14103 HNRPD_HUMAN  | R.GFCFITFKEEPPVKK.I              |            | 2 | 4,1529 | 0,411 | -0,131 |
| 22 | Q15149 PLEC1_HUMAN  | R.GYLNKDTHDQLSEPSEVR.S           |            | 3 | 4,1507 | 0,351 | -0,613 |
| 22 | Q9Y2H0 DLGP4_HUMAN  | E.RSLPDCTPHPNSISIDAGPR.Q         |            | 3 | 4,1413 | 0,526 | -0,167 |
| 22 | Q14241 ELOA1_HUMAN  | R.SLEEDQEPIVSHQKPGK.G            |            | 2 | 4,1212 | 0,353 | -0,318 |
| 22 | Q9BTA9 WAC_HUMAN    | E.DKHSSDASSLLPQNILSQTSR.H        |            | 3 | 4,1034 | 0,294 | -0,4   |
| 22 | O43719 HTSF1_HUMAN  | R.ARHFS#EHPSTS#KM*NAQE.T         | S403:S409: | 3 | 4,1027 | 0,281 | -0,343 |
| 22 | O75955 FLOT1_HUMAN  | K.DIHDDQDYLHSLGK.A               |            | 2 | 4,1009 | 0,565 | -0,516 |
| 22 | Q8NFC6 FA44A_HUMAN  | E.GKDKDVTLS#PVK.A                | S1531:     | 3 | 4,1004 | 0,34  | -0,268 |
| 22 | A0FGR8 ESYT2_HUMAN  | E.KAQPEAGPQGLHDLGR.S             |            | 3 | 4,1004 | 0,524 | -0,723 |
| 22 | P61586 RHOA_HUMAN   | E.VKHFCPNVPIILVGNK.K             |            | 3 | 4,0998 | 0,328 | -0,498 |
| 22 | P48643 TCPE_HUMAN   | K.GVIVDKDFSHPM*PK.K              |            | 3 | 4,0965 | 0,456 | 0      |
| 22 | P43243 MATR3_HUMAN  | K.GYPHLCSDLPVHSNKE.W             |            | 3 | 4,088  | 0,298 | -0,344 |
| 22 | Q9P2B4 CT2NL_HUMAN  | R.HKFQSQADQDQASGLQS#PPSRD.L      | S481:      | 3 | 4,078  | 0,348 | -0,417 |
| 22 | P43243 MATR3_HUMAN  | D.RGPSLNPVLDYDHGSR.S             |            | 3 | 4,0752 | 0,232 | -0,923 |
| 22 | P23284 PIIB_HUMAN   | R.DKPLKDVIIADCGKIE.V             |            | 2 | 4,0702 | 0,488 | -0,471 |

|    |                    |                             |        |   |        |       |        |
|----|--------------------|-----------------------------|--------|---|--------|-------|--------|
| 22 | O94979 SC31A_HUMAN | K.KIALALNKVDGANVALK.D       |        | 3 | 4,0563 | 0,391 | -0,737 |
| 22 | Q9H2U2 IPYR2_HUMAN | K.NVTGHHYISPFHDIPLK.V       |        | 3 | 4,0518 | 0,355 | -0,398 |
| 22 | Q8NI27 THOC2_HUMAN | R.KIDTHPS#PSHSSTVKDSLIE.L   | S1302: | 3 | 4,0436 | 0,368 | -0,081 |
| 22 | Q7Z2K8 GRIN1_HUMAN | R.KVDPVSSDKVDPVFPR.K        |        | 3 | 4,0393 | 0,285 | -0,615 |
| 22 | Q8NBJ4 GOLM1_HUMAN | R.LPQEPGREQVVEDRPPVGGR.G    |        | 3 | 4,0297 | 0,137 | -0,691 |
| 22 | Q16891 IMMT_HUMAN  | K.LHNM*IVDLDNVVKK.V         |        | 3 | 4,0272 | 0,427 | -0,332 |
| 22 | Q9P2B4 CT2NL_HUMAN | R.HKFQSQADQDQQASGLQS#PPSR.D | S481:  | 3 | 4,0267 | 0,403 | -0,29  |
| 22 | Q76176 SSH2_HUMAN  | R.SHS#DSDLSDHHEPICKPGLE.L   | S461:  | 3 | 4,0217 | 0,46  | 0,078  |
| 22 | O76094 SRP72_HUMAN | K.ILQINKDDVTALHCK.V         |        | 2 | 4,0201 | 0,506 | -0,345 |
| 22 | P08238 HS90B_HUMAN | K.HLEINPDHPIVETLR.Q         |        | 3 | 4,0086 | 0,501 | -0,615 |
| 22 | Q16891 IMMT_HUMAN  | K.LSTDDLNSLIAHAHR.R         |        | 2 | 4,006  | 0,413 | -0,22  |
| 22 | Q6PJT7 ZC3HE_HUMAN | R.GLLHPQQLHLLSR.Q           |        | 3 | 4,0019 | 0,449 | -0,363 |
| 22 | Q9NUW8 TYDP1_HUMAN | R.KIS#PVKFSNTDSVLPKPKR.Q    | S61:   | 3 | 4,0011 | 0,318 | -1,049 |
| 22 | O00193 SMAP_HUMAN  | E.LQAAEHPDEVEDPKNK.K        |        | 2 | 3,9939 | 0,449 | -1,676 |
| 22 | O75643 U520_HUMAN  | E.DLVFTQGSFHM*ANKR.C        |        | 2 | 3,9889 | 0,514 | -0,552 |
| 22 | P23193 TCEA1_HUMAN | K.KKEPAITSQNS#PEAR.E        | S100:  | 3 | 3,9812 | 0,282 | -0,316 |
| 22 | Q96HN2 SAHH3_HUMAN | R.HRDGGEALVSPDGTVTE.A       |        | 2 | 3,9713 | 0,526 | -0,14  |
| 22 | Q92599 SEPT8_HUMAN | E.ALQSQALHATSQQPLRK.D       |        | 3 | 3,9712 | 0,434 | -0,195 |
| 22 | P04406 G3P_HUMAN   | D.THSSTFDAGAGIALNDHFVK.L    |        | 3 | 3,9458 | 0,33  | -0,613 |
| 22 | Q9NQY0 BIN3_HUMAN  | K.IFGDLSHQLDQPGHSDEQR.E     |        | 3 | 3,9441 | 0,417 | -0,252 |
| 22 | P22087 FBRL_HUMAN  | R.DHAVVVGVYRPPPK.V          |        | 3 | 3,9318 | 0,459 | -1,133 |
| 22 | P11216 PYGB_HUMAN  | R.INM*AHLCVIGSHAVNGVAR.I    |        | 3 | 3,9087 | 0,346 | -0,809 |
| 22 | Q15418 KS6A1_HUMAN | R.APQAPLHSVQQLHGK.N         |        | 2 | 3,9081 | 0,51  | -0,357 |
| 22 | P35579 MYH9_HUMAN  | K.KVIQYLAYVASSHK.S          |        | 3 | 3,9073 | 0,347 | 0,228  |
| 22 | Q96ST2 IWS1_HUMAN  | K.KLTLLPAVVM*HLK.K          |        | 3 | 3,8999 | 0,356 | -0,124 |
| 22 | Q9UKA4 AKA11_HUMAN | K.SLAKPSTSSVNVLGHK.E        |        | 3 | 3,8863 | 0,393 | -0,45  |
| 22 | Q8NFC6 FA44A_HUMAN | E.GKDKDVTLS#PVK.A           | S1531: | 2 | 3,875  | 0,454 | -0,714 |
| 22 | P08238 HS90B_HUMAN | K.HLEINPDHPIVETLR.Q         |        | 2 | 3,8583 | 0,526 | -0,411 |
| 22 | O14561 ACPM_HUMAN  | E.KLM*CPQEIVDYIADKK.D       |        | 3 | 3,8445 | 0,25  | -0,651 |
| 22 | P61247 RS3A_HUMAN  | E.KACQSIYPLHDVFVR.K         |        | 3 | 3,8402 | 0,421 | -0,499 |
| 22 | Q8NFH3 NUP43_HUMAN | R.HHGDVM*DLQFFDQE.R         |        | 2 | 3,8303 | 0,384 | -0,493 |
| 22 | Q96KN1 FA84B_HUMAN | E.LATHLHPAEPEEGDSNVAR.T     |        | 3 | 3,8261 | 0,354 | 0      |
| 22 | P21333 FLNA_HUMAN  | E.KTGAVVNKPAEFTVDAK.H       |        | 3 | 3,8231 | 0,365 | 1,649  |

|    |                    |                           |        |   |        |       |        |
|----|--------------------|---------------------------|--------|---|--------|-------|--------|
| 22 | Q8WXI9 P66B_HUMAN  | R.KDLANLEVPHELPTK.Q       |        | 3 | 3,823  | 0,382 | -0,322 |
| 22 | P49773 HINT1_HUMAN | K.KHISQISVAEDDDE.S        |        | 2 | 3,8225 | 0,495 | -0,615 |
| 22 | Q3SXY8 AR13B_HUMAN | R.ISGKPILVLANKQDKE.G      |        | 3 | 3,8217 | 0,427 | -0,313 |
| 22 | P63241 IF5A1_HUMAN | K.YEDICPSTHNM*DVPNIKR.N   |        | 3 | 3,819  | 0,34  | 0      |
| 22 | Q13347 EIF3I_HUMAN | K.GHFGPINSVAFHPDGK.S      |        | 3 | 3,8153 | 0,396 | -0,544 |
| 22 | O75794 CD123_HUMAN | R.LPKDFVDLSTGEDAHK.L      |        | 3 | 3,7981 | 0,299 | -0,31  |
| 22 | Q7Z2K8 GRIN1_HUMAN | R.KAEPLASGKGEPVSLGK.A     |        | 3 | 3,7933 | 0,391 | -0,329 |
| 22 | O00154 BACH_HUMAN  | R.IM*RPDDANVAGNVHGGTILK.M |        | 3 | 3,7911 | 0,317 | -0,699 |
| 22 | Q7Z5L9 I2BP2_HUMAN | R.DTLALHQHGHSGPFE.S       |        | 2 | 3,7728 | 0,487 | -1,249 |
| 22 | Q96EE3 SEH1L_HUMAN | K.DLIHDVSFDFHGR.R         |        | 3 | 3,7645 | 0,446 | 0      |
| 22 | Q4LE39 ARI4B_HUMAN | K.VHADLVISKPVSKS#PER.L    | S778:  | 2 | 3,7628 | 0,43  | -0,063 |
| 22 | Q9NVX0 CEP27_HUMAN | E.KDTADVHPFFLAQK.C        |        | 3 | 3,7569 | 0,241 | -0,533 |
| 22 | P35908 K22E_HUMAN  | R.HGGGGGGFGGGGFGSR.S      |        | 2 | 3,7457 | 0,541 | -0,185 |
| 22 | P63241 IF5A1_HUMAN | E.DICPSTHNM*DVPNIKR.N     |        | 2 | 3,7381 | 0,441 | 0      |
| 22 | Q9UGV2 NDRG3_HUMAN | R.SRT#HSTSSSLGSGESPFSSR.S | T329:  | 3 | 3,7337 | 0,313 | -0,179 |
| 22 | O60524 SDCG1_HUMAN | E.LKLQTNHVMT*LLR.N        |        | 2 | 3,7329 | 0,469 | -0,308 |
| 22 | Q14203 DCTN1_HUMAN | E.TLNQLSTHTHVVDITR.T      |        | 3 | 3,7305 | 0,478 | -0,797 |
| 22 | Q9H2J4 PDCL3_HUMAN | E.ENPKKPIEDVLLSSVR.R      |        | 3 | 3,7282 | 0,223 | -0,301 |
| 22 | Q8IWE2 NXP20_HUMAN | E.LILHGQEEKPAQDQAK.V      |        | 3 | 3,6933 | 0,303 | -0,662 |
| 22 | Q13428 TCOF_HUMAN  | E.KSLGNILQAKPTSSPAK.G     |        | 3 | 3,6917 | 0,373 | 0,105  |
| 22 | O75955 FLOT1_HUMAN | K.DIHDDQDYLHSLGK.A        |        | 3 | 3,6916 | 0,376 | -0,442 |
| 22 | Q8IWZ8 SF04_HUMAN  | E.DYKDNPAFAFLHDK.N        |        | 3 | 3,6856 | 0,399 | -0,109 |
| 22 | P63241 IF5A1_HUMAN | K.VHLVGIDIFTGKK.Y         |        | 3 | 3,6773 | 0,295 | 0,064  |
| 22 | Q9NYF8 BCLF1_HUMAN | K.LKDLFDYSPPLHK.N         |        | 3 | 3,6763 | 0,34  | 0      |
| 22 | Q15418 KS6A1_HUMAN | R.APQAPLHSVQQQLHGK.N      |        | 3 | 3,6725 | 0,438 | -0,107 |
| 22 | Q9UM54 MYO6_HUMAN  | K.AGSM*KDPLDDHGDFIR.M     |        | 3 | 3,6666 | 0,329 | -0,384 |
| 22 | Q09666 AHNK_HUMAN  | E.VTQLLNTM*GHHTVGLK.L     |        | 2 | 3,6631 | 0,522 | -0,415 |
| 22 | Q9BTC0 DIDO1_HUMAN | E.ARQDVPKPVLTSVM*VPK.S    |        | 3 | 3,6461 | 0,122 | -0,583 |
| 22 | P49643 PRI2_HUMAN  | K.KEPIQPETPQPKPSVQK.T     |        | 3 | 3,6454 | 0,414 | 0,379  |
| 22 | Q9Y6W5 WASF2_HUMAN | R.DVVGNDVATILSR.R         |        | 2 | 3,6437 | 0,368 | -0,359 |
| 22 | Q9NPR2 SEM4B_HUMAN | E.TRPLNGLGPPSTPLDHR.G     |        | 3 | 3,6357 | 0,342 | -0,901 |
| 22 | Q8NI27 THOC2_HUMAN | R.KIDTHPS#PSHSSTVKDSLIE.L | S1302: | 2 | 3,6309 | 0,409 | 0      |
| 22 | Q92882 OSTF1_HUMAN | K.KLAFDM*ATNAACASLLKK.K   |        | 3 | 3,6299 | 0,451 | -0,279 |

|    |                    |                                 |            |   |        |       |        |
|----|--------------------|---------------------------------|------------|---|--------|-------|--------|
| 22 | P57682 KLF3_HUMAN  | E.GLSHGIQM*EPVDLTVNKR.S         |            | 3 | 3,6261 | 0,309 | -0,728 |
| 22 | Q9NYB0 TE2IP_HUMAN | E.HKYLLGDAPVS#PSSQK.L           | S203:      | 2 | 3,6209 | 0,462 | -0,135 |
| 22 | Q7Z3B3 K1267_HUMAN | E.RFTASGIANLR.C                 |            | 2 | 3,6085 | 0,365 | -0,809 |
| 22 | Q86SQ0 PHLB2_HUMAN | R.HKS#HDNVYSLGGLE.G             | S157:      | 2 | 3,6066 | 0,442 | -0,298 |
| 22 | O14497 ARI1A_HUMAN | R.SHAPM*S#PGSSGGGQPLAR.T        | S363:      | 2 | 3,5867 | 0,364 | -0,184 |
| 22 | Q9UQ35 SRRM2_HUMAN | K.THTTALAGRS#PS#PASGRR.G        | S295:S297: | 3 | 3,5841 | 0,238 | -0,83  |
| 22 | P40937 RFC5_HUMAN  | E.DRLPHLLLYGPPGTGK.T            |            | 2 | 3,5841 | 0,46  | -0,844 |
| 22 | Q9UBU7 DBF4A_HUMAN | E.DDIRQNFTQLPLHK.N              |            | 3 | 3,579  | 0,32  | -0,318 |
| 22 | P08559 ODPA_HUMAN  | R.YHGHS#MSDPGVSYR.T             | S293:      | 3 | 3,5668 | 0,27  | -0,109 |
| 22 | P58107 EPIPL_HUMAN | E.AQIATGGVIDPVHSHR.V            |            | 2 | 3,5667 | 0,429 | -0,074 |
| 22 | P46100 ATRX_HUMAN  | K.KAHLALEEDLNSE.F               |            | 2 | 3,5547 | 0,48  | -0,914 |
| 22 | Q8NI27 THOC2_HUMAN | K.HKS#ESPCESPYNEK.D             | S1399:     | 3 | 3,5412 | 0,116 | -0,489 |
| 22 | Q8NE01 CNNM3_HUMAN | E.KTTTAAGSSSRPGVPVEGS#PGRNPGV.- | S700:      | 3 | 3,5305 | 0,458 | -0,136 |
| 22 | Q5UIP0 RIF1_HUMAN  | E.DHHTSQKVEEPSQCLASGTAISE.L     |            | 3 | 3,52   | 0,39  | -0,656 |
| 22 | Q96KN1 FA84B_HUMAN | E.LATHLHPAEPEGDSNVAR.T          |            | 2 | 3,5162 | 0,48  | 0,358  |
| 22 | Q04917 1433F_HUMAN | E.DSYKDSTLIM*QLLR.D             |            | 3 | 3,51   | 0,099 | -0,215 |
| 22 | Q05682 CALD1_HUMAN | K.TPDGNKS#PAPKPSDLRPGDVSSK.R    | S759:      | 3 | 3,5087 | 0,369 | 0,226  |
| 22 | Q8WXX5 DNJC9_HUMAN | K.VSLQVHPDRVGEKDKE.D            |            | 3 | 3,4889 | 0,278 | 0      |
| 22 | Q9NYL2 MLTK_HUMAN  | E.SM*SNDTSLPKCNSFLHNK.A         |            | 3 | 3,483  | 0,267 | -0,165 |
| 22 | P35713 SOX18_HUMAN | R.TRPDAPGLPYHVALAK.L            |            | 3 | 3,4753 | 0,175 | -0,858 |
| 22 | O94906 PRP6_HUMAN  | D.LNSM*IPTHGGDINDIKK.A          |            | 2 | 3,4681 | 0,274 | -0,849 |
| 22 | Q6UB98 ANR12_HUMAN | K.DDTSLHLFHISTGKS#PK.H          | S543:      | 3 | 3,4455 | 0,355 | -1,118 |
| 22 | P48643 TCPE_HUMAN  | K.GVIVDKDFSHPM*PK.K             |            | 2 | 3,4369 | 0,496 | -0,071 |
| 22 | Q7Z4S6 KI21A_HUMAN | E.KKIPEPS#PVTR.R                | S1239:     | 3 | 3,4266 | 0,23  | 0,275  |
| 22 | P08559 ODPA_HUMAN  | R.YHGHS#M*SDPGVSYR.T            | S293:      | 2 | 3,4181 | 0,48  | -0,506 |
| 22 | P15924 DESP_HUMAN  | R.CRIEPTGLLLSVQK.R              |            | 3 | 3,4147 | 0,186 | -0,589 |
| 22 | Q7Z6Z7 HUWE1_HUMAN | E.RDGGSGNSTIIVSR.S              |            | 2 | 3,4135 | 0,385 | -0,774 |
| 22 | Q8TAD8 SNIP1_HUMAN | R.RPDHSGGS#PSPPTSEPAR.S         | S52:       | 3 | 3,404  | 0,267 | -0,383 |
| 22 | O60313 OPA1_HUMAN  | K.VTLSEGGPHHVALFK.D             |            | 2 | 3,403  | 0,325 | -0,874 |
| 22 | O60524 SDCG1_HUMAN | E.LKLTNHVTM*LLR.N               |            | 3 | 3,3998 | 0,334 | 0      |
| 22 | Q15942 ZYX_HUMAN   | E.KQHPVPPPAQNQNQVRS#PGAPGPLTK.E | S344:      | 3 | 3,3871 | 0,368 | -0,187 |
| 22 | Q9H4A3 WNK1_HUMAN  | R.DVDDGSGSPHSPHQLSSK.S          |            | 2 | 3,3828 | 0,449 | -0,66  |
| 22 | A0JNW5 UH1BL_HUMAN | K.DHNVGS#PPKSPTHASPQHTQTE.K     | S414:      | 3 | 3,3741 | 0,329 | -0,075 |



|    |                    |                                 |            |   |        |       |        |
|----|--------------------|---------------------------------|------------|---|--------|-------|--------|
| 22 | O15027 SC16A_HUMAN | K.DDTHKVDVINFAQNK.A             |            | 2 | 3,3674 | 0,476 | -0,7   |
| 22 | Q9NZT2 OGFR_HUMAN  | R.SQGDEAGGHGEDRPEPLSPKE.S       |            | 3 | 3,3591 | 0,358 | -0,501 |
| 22 | O15027 SC16A_HUMAN | K.SHLVGVKPFADRANVVGE.V          |            | 2 | 3,3579 | 0,476 | -0,121 |
| 22 | Q9Y490 TLN1_HUMAN  | K.KSTVLQQQYNR.V                 |            | 3 | 3,3576 | 0,137 | -0,603 |
| 22 | Q9NS91 RAD18_HUMAN | E.ASHKNDLQDTEIS#PR.Q            | S471:      | 3 | 3,3544 | 0,194 | -0,613 |
| 22 | Q13263 TIF1B_HUMAN | E.GYGFGSGDDPYSSAEPHVSGVKR.S     |            | 3 | 3,3523 | 0,362 | -0,541 |
| 22 | O95466 FMNL_HUMAN  | E.AGADTPGKGEPPAPKS#PPKAR.R      | S1031:     | 3 | 3,3518 | 0,312 | -0,26  |
| 22 | P55809 SCOT_HUMAN  | E.DIHIPQIYVHR.L                 |            | 3 | 3,3504 | 0,347 | 0,329  |
| 22 | Q8NDI1 EHBP1_HUMAN | E.SEHQTPDDHLSPSTASPYCR.R        |            | 3 | 3,3451 | 0,249 | -0,32  |
| 22 | O00505 IMA3_HUMAN  | R.KLLSSDRNPPIDDLIK.S            |            | 3 | 3,3429 | 0,158 | -0,401 |
| 22 | O75531 BAF_HUMAN   | K.HRDFVAEPM*GEKPVGSLAGIGE.V     |            | 3 | 3,3424 | 0,339 | -0,317 |
| 22 | Q9H1B7 EAP1_HUMAN  | E.DTHFVQCPSVPSHK.F              |            | 3 | 3,3398 | 0,154 | -0,558 |
| 22 | O15511 ARPC5_HUMAN | E.KAVQSLDKNGVDLLM*K.Y           |            | 3 | 3,3375 | 0,265 | -0,618 |
| 22 | Q04917 1433F_HUMAN | E.DSYKDSTLIM*QLLR.D             |            | 2 | 3,3359 | 0,383 | 0      |
| 22 | Q9UBW7 ZMYM2_HUMAN | E.NLHYDQGCQTSR.T                |            | 3 | 3,3341 | 0,297 | 0      |
| 22 | Q96ST3 SIN3A_HUMAN | R.KNPSIAVPIVLKR.L               |            | 3 | 3,3301 | 0,254 | -0,127 |
| 22 | P35580 MYH10_HUMAN | E.DLM*SSKDDVGKNVHE.L            |            | 3 | 3,3262 | 0,341 | -0,541 |
| 22 | Q641Q2 FA21A_HUMAN | K.LQKDNDPDVDLDFAGTKK.T          |            | 3 | 3,3186 | 0,32  | -0,576 |
| 22 | Q96T58 MINT_HUMAN  | R.HGSFHEDEDPIGS#PR.L            | S1278:     | 3 | 3,3123 | 0,343 | -0,208 |
| 22 | Q96H55 MYO19_HUMAN | R.RLHPCTSSGPDS#PYPK.G           | S685:      | 3 | 3,3097 | 0,329 | -0,563 |
| 22 | Q9UHB6 LIMA1_HUMAN | R.ADHPPAEVTSHAASGAK.A           |            | 3 | 3,3081 | 0,192 | -0,444 |
| 22 | Q9Y383 LC7L2_HUMAN | E.LDAM*DHLQSFADCDRR.T           |            | 3 | 3,303  | 0,087 | -0,44  |
| 22 | Q05682 CALD1_HUMAN | K.SAKPTKPAASDLPVPAEGVR.N        |            | 3 | 3,286  | 0,161 | -0,551 |
| 22 | P35580 MYH10_HUMAN | R.AGKLDPHLVLDQLR.C              |            | 2 | 3,2811 | 0,466 | -0,62  |
| 22 | Q53RE8 ANR39_HUMAN | R.GHGDICSLLLQHSPALK.A           |            | 3 | 3,276  | 0,172 | -0,099 |
| 22 | Q15042 RB3GP_HUMAN | R.HLLPCVIHA AVLK.V              |            | 3 | 3,2692 | 0,215 | -0,186 |
| 22 | P05362 ICAM1_HUMAN | E.LKREPAVGEPAEVTTTVLVR.R        |            | 2 | 3,2635 | 0,366 | -0,225 |
| 22 | O43719 HTSF1_HUMAN | R.HFSEHPSTS#KM*NAQE.T           | S409:      | 2 | 3,2623 | 0,389 | -1,671 |
| 22 | O15371 EIF3D_HUMAN | K.YLILKDPNKQVIR.V               |            | 3 | 3,2559 | 0,395 | -0,457 |
| 22 | Q9Y6G9 DC1L1_HUMAN | K.AEDNFEDIITKPPVRK.F            |            | 3 | 3,2477 | 0,201 | -0,391 |
| 22 | Q3V6T2 GRDN_HUMAN  | E.RDGLHFLPHASSSAQS#PCGS#PGM*K.R | S233:S237: | 3 | 3,2465 | 0,247 | -0,407 |
| 22 | P18615 NELFE_HUMAN | K.LKDPEKGPVPTFQPFQR.S           |            | 2 | 3,2445 | 0,373 | -0,307 |
| 22 | Q02952 AKA12_HUMAN | E.KQEKEPSKSAESPT#SPVTSE.T       | T285:      | 3 | 3,2409 | 0,233 | -0,247 |

|    |                    |                           |        |   |        |       |        |
|----|--------------------|---------------------------|--------|---|--------|-------|--------|
| 22 | P40937 RFC5_HUMAN  | E.DRLPHLLLYGPPGTGK.T      |        | 3 | 3,2382 | 0,3   | -0,633 |
| 22 | Q99567 NUP88_HUMAN | K.LLHSFHSELPVLSDSER.D     |        | 3 | 3,2358 | 0,093 | -0,558 |
| 22 | Q14241 ELOA1_HUMAN | K.SKQGLDSFDTGKGAGDLLPK.V  |        | 3 | 3,2311 | 0,254 | -0,45  |
| 22 | P20020 AT2B1_HUMAN | K.KSLDKDPLLLSGTHVM*E.G    |        | 3 | 3,2249 | 0,137 | -0,482 |
| 22 | Q8IY81 RRMJ3_HUMAN | K.RDLIDNSFNR.Y            |        | 2 | 3,2103 | 0,329 | -0,781 |
| 22 | Q9NYF8 BCLF1_HUMAN | K.LKDLFDYSPPLHK.N         |        | 2 | 3,2088 | 0,524 | -0,465 |
| 22 | Q9P2R6 RERE_HUMAN  | E.YARPHVM*S#PTNR.N        | S1266: | 3 | 3,2069 | 0,274 | 0,3    |
| 22 | Q14203 DCTN1_HUMAN | E.TLNQLSTHTHVVDITR.T      |        | 2 | 3,2043 | 0,331 | -0,997 |
| 22 | Q96BW9 MMP37_HUMAN | K.VLNIVKPNIAHFRE.L        |        | 3 | 3,2041 | 0,334 | 0,333  |
| 22 | P41236 IPP2_HUMAN  | E.M*NILATYHPADKDYGLM*K.I  |        | 3 | 3,1997 | 0,29  | -0,693 |
| 22 | O00512 BCL9_HUMAN  | K.SQDSQHTPHSM*TPSNATAPR.S |        | 3 | 3,1966 | 0,308 | -0,253 |
| 22 | Q9H7N4 SFR19_HUMAN | E.SRS#PFLKPDER.A          | S874:  | 3 | 3,1947 | 0,267 | 0,065  |
| 22 | Q6UX04 SDC10_HUMAN | K.SSHDLLKDDPHLSSVPVVE.S   |        | 2 | 3,1905 | 0,411 | 0      |
| 22 | P35579 MYH9_HUMAN  | R.RGDLPFVVPR.R            |        | 2 | 3,1895 | 0,301 | -0,528 |
| 22 | Q8N2M8 SFR16_HUMAN | R.RDS#PTYDPYKR.S          | S279:  | 3 | 3,188  | 0,32  | 0,062  |
| 22 | Q2PPJ7 AS250_HUMAN | E.LDGGGPTQDKSHSNSSTLSDR.R |        | 3 | 3,1805 | 0,32  | 0,32   |
| 22 | P31949 S10AB_HUMAN | K.KLDTNSDGQLDFSE.F        |        | 2 | 3,1655 | 0,385 | -0,078 |
| 22 | Q13813 SPTA2_HUMAN | E.GHLASDDYGKDLTNVQNLQK.K  |        | 3 | 3,1513 | 0,18  | -0,33  |
| 22 | O43290 SNUT1_HUMAN | E.GERPHS#FRLE.Q           | S348:  | 3 | 3,1453 | 0,213 | 0,28   |
| 22 | Q96BW5 PTER_HUMAN  | E.LLHYQLGPDIDM*PDDNKR.I   |        | 3 | 3,1406 | 0,292 | -0,424 |
| 22 | Q9H1B7 EAP1_HUMAN  | E.DTHFVQCPSVPSHK.F        |        | 2 | 3,1376 | 0,395 | -0,596 |
| 22 | O95926 SYF2_HUMAN  | R.RRPYNDDADIDYINE.R       |        | 2 | 3,1242 | 0,37  | -0,326 |
| 22 | Q7L2E3 DHX30_HUMAN | K.ALLSHDSGSDHLAFVR.A      |        | 3 | 3,1239 | 0,392 | -0,53  |
| 22 | Q8IWZ8 SF04_HUMAN  | E.DYKDNPAFAFLHDK.N        |        | 2 | 3,1129 | 0,477 | -0,073 |
| 22 | P08559 ODPA_HUMAN  | R.YHGHS#M*SDPGVSYR.T      | S293:  | 3 | 3,1113 | 0,215 | 0,65   |
| 22 | Q13177 PAK2_HUMAN  | R.HKIISIFSGTE.K           |        | 2 | 3,1103 | 0,357 | -0,198 |
| 22 | Q6ZRV2 FA83H_HUMAN | E.RRGSLTLTISGESPK.A       | S936:  | 3 | 3,1088 | 0,279 | -0,109 |
| 22 | Q13615 MTMR3_HUMAN | E.TSLVERPQVGSVVHR.T       |        | 3 | 3,1057 | 0,278 | -0,11  |
| 22 | Q3MII6 TBC25_HUMAN | R.RDPLVQLPHPAALISSK.S     |        | 3 | 3,1038 | 0,401 | -0,397 |
| 22 | Q9Y6M7 S4A7_HUMAN  | K.KHS#DPHLLR              | S242:  | 2 | 3,1037 | 0,369 | -0,528 |
| 22 | P67870 CSK2B_HUMAN | K.RPANQFVPR.L             |        | 2 | 3,0908 | 0,089 | -0,675 |
| 22 | Q7Z6Z7 HUWE1_HUMAN | R.TTSNTLHYIHIEQLDK.I      |        | 3 | 3,0851 | 0,353 | -0,382 |
| 22 | Q9Y2B0 CNPY2_HUMAN | R.TDLCDHALHISHDEL.-       |        | 3 | 3,0843 | 0,391 | -0,824 |

|    |                     |                                |            |   |        |       |        |
|----|---------------------|--------------------------------|------------|---|--------|-------|--------|
| 22 | P49792 RBP2_HUMAN   | E.LKLNSS#NSASPHR.W             | S833:      | 3 | 3,0801 | 0,27  | -0,123 |
| 22 | O43719 HTSF1_HUMAN  | R.HFSEHPSTS#KM*NAQE.T          | S409:      | 3 | 3,0709 | 0,249 | -1,703 |
| 22 | Q8WWK9 CKAP2_HUMAN  | K.TKDPHTHDVKT#PNT#ETR.T        | T579:T582: | 3 | 3,0684 | 0,174 | -1,189 |
| 22 | Q4ZG52 Q4ZG52_HUMAN | E.GKDGAIEDIITALKK.N            |            | 3 | 3,0677 | 0,252 | -0,349 |
| 22 | Q5T5C0 STXB5_HUMAN  | R.KLSLPTDLKPDLDVK.D            |            | 2 | 3,0674 | 0,087 | -0,073 |
| 22 | P63241 IF5A1_HUMAN  | K.VHLVGIDIFTGKK.Y              |            | 2 | 3,0669 | 0,42  | 0      |
| 22 | P04150 GCR_HUMAN    | E.GNSNEDCKPLILPDTKPK.I         |            | 3 | 3,066  | 0,234 | -0,542 |
| 22 | P22314 UBA1_HUMAN   | E.LKATLPSDPKLPGFK.M            |            | 3 | 3,0627 | 0,169 | -0,227 |
| 22 | P54259 ATN1_HUMAN   | E.YARPHVM*S#PGNR.N             | S891:      | 3 | 3,0556 | 0,141 | -0,309 |
| 22 | P05362 ICAM1_HUMAN  | E.AQVHLALGDQR.L                |            | 3 | 3,0505 | 0,315 | 1,816  |
| 22 | P55196 AFAD_HUMAN   | R.RLLEPEAPGLCRPPLPR.D          |            | 3 | 3,0469 | 0,29  | -0,928 |
| 22 | Q92890 UFD1_HUMAN   | K.KGVEPSPSPIKPGDIK.R           |            | 3 | 3,0468 | 0,214 | 0,111  |
| 22 | O94826 TOM70_HUMAN  | R.KTPEGRAS#PAPGSGHPEGPGAHL.D.M | S91:       | 3 | 3,0468 | 0,19  | -0,914 |
| 22 | O15231 ZN185_HUMAN  | E.RQSSPSGSEQLVR.R              |            | 2 | 3,0462 | 0,346 | -0,341 |
| 22 | P20839 IMDH1_HUMAN  | K.QKYPHLQVIGGNVVTAAQAK.N       |            | 3 | 3,0442 | 0,259 | -0,431 |
| 22 | P42224 STAT1_HUMAN  | K.YLYPNIDKDHAFGK.Y             |            | 2 | 3,042  | 0,498 | -0,29  |
| 22 | P48643 TCPE_HUMAN   | K.GVIVDKDFSHPQMPK.K            |            | 2 | 3,0412 | 0,403 | -0,072 |
| 22 | P18583 SON_HUMAN    | R.AGIEGPLLASDVGR.D             |            | 2 | 3,0408 | 0,425 | -0,45  |
| 22 | Q9HCG8 NCM_HUMAN    | R.DRDYFDYSR.S                  |            | 2 | 3,0362 | 0,2   | -0,789 |
| 22 | P08651 NFIC_HUMAN   | R.RTLPSTSSSGSK.R               |            | 2 | 3,0325 | 0,262 | -0,202 |
| 22 | Q8NDI1 EHBP1_HUMAN  | K.HNTNTATPFCNR.Q               |            | 2 | 3,0272 | 0,572 | -0,596 |
| 22 | Q9H2P0 ADNP_HUMAN   | E.KADIPVKS#SPQAAVPHYK.D.V      | S607:      | 3 | 3,0266 | 0,268 | -0,259 |
| 22 | Q02952 AKA12_HUMAN  | K.DKTEKPDVQLLTVK.K             |            | 2 | 3,0208 | 0,389 | -0,711 |
| 22 | Q9Y383 LC7L2_HUMAN  | R.FRDQDLASCDR.D                |            | 2 | 3,0194 | 0,327 | -0,882 |
| 22 | P11021 GRP78_HUMAN  | K.KVTHAVVTVPAYFNDAQR.Q         |            | 3 | 3,0172 | 0,215 | -0,544 |
| 22 | P22626 ROA2_HUMAN   | K.LFVGGIKEDTEE.H               |            | 2 | 3,0132 | 0,233 | -1,643 |
| 22 | Q0VAX7 Q0VAX7_HUMAN | E.KAVNPFLADV DKLK.L            |            | 2 | 3,0117 | 0,367 | -1,175 |
| 22 | Q9HC35 EMAL4_HUMAN  | E.SHSNDQSPQIR.A                |            | 2 | 3,0072 | 0,433 | -0,192 |
| 22 | Q9H165 BC11A_HUMAN  | R.SGTGSGGSTPHISGPGPRPSSKE.G    |            | 3 | 2,9959 | 0,334 | 0,167  |
| 22 | Q6P0N0 CN106_HUMAN  | R.RKTPFNTDLGENS#GIGK.L         | S1104:     | 3 | 2,9958 | 0,136 | -0,956 |
| 22 | P24539 AT5F1_HUMAN  | E.KHVVSQISTQQE.K               |            | 2 | 2,9919 | 0,395 | -0,793 |
| 22 | Q9H488 OFUT1_HUMAN  | R.DLQGRPSSFFGM*DRPPK.L         |            | 3 | 2,9914 | 0,175 | -0,375 |
| 22 | P34932 HSP74_HUMAN  | E.LTSTCSPISKPKK.V              |            | 2 | 2,9909 | 0,36  | -0,442 |

|    |                    |                          |        |   |        |       |        |
|----|--------------------|--------------------------|--------|---|--------|-------|--------|
| 22 | O00571 DDX3X_HUMAN | R.GRSDYDGIGSR.G          |        | 2 | 2,9899 | 0,404 | 0      |
| 22 | P0C7M2 RA1L3_HUMAN | E.DSQRPGAHLTVK.K         |        | 3 | 2,9893 | 0,217 | -0,698 |
| 22 | O60927 PP1RB_HUMAN | K.CCCIEYKPR.A            |        | 3 | 2,9869 | 0,409 | 0,64   |
| 22 | A0AVT1 UBA6_HUMAN  | R.KPDHVPISSEDE.R         |        | 2 | 2,9789 | 0,346 | -0,812 |
| 22 | O15371 EIF3D_HUMAN | K.YLILKDPNKQVIR.V        |        | 2 | 2,9753 | 0,329 | -0,457 |
| 22 | P61764 STXB1_HUMAN | K.SVHSLISDFKDPPTAK.Y     |        | 3 | 2,9682 | 0,362 | -0,315 |
| 22 | P50402 EMD_HUMAN   | R.DSAYQSITHYRPVSASR.S    |        | 3 | 2,9633 | 0,352 | -0,566 |
| 22 | P63241 IF5A1_HUMAN | K.KYEDICPSTHNM*DVPNIK.R  |        | 2 | 2,9573 | 0,436 | 0,785  |
| 22 | P07900 HS90A_HUMAN | K.HLEINPDHSIETLR.Q       |        | 3 | 2,9558 | 0,359 | -0,307 |
| 22 | O00231 PSD11_HUMAN | E.ASIDILHSIVKR.D         |        | 3 | 2,9549 | 0,335 | 0,068  |
| 22 | Q08211 DHX9_HUMAN  | E.DCIQM*THFVPPPKDK.K     |        | 3 | 2,9523 | 0,112 | 0      |
| 22 | Q9Y4E5 ZN451_HUMAN | E.GNKDPSSDLHLLDQSK.F     |        | 3 | 2,9484 | 0,242 | 0      |
| 22 | P23588 IF4B_HUMAN  | E.DCHS#PTSKPPKPDQPLK.V   | S459:  | 3 | 2,944  | 0,196 | -0,818 |
| 22 | P26006 ITA3_HUMAN  | R.TGAVYLCPLTAHKDDCER.M   |        | 3 | 2,9366 | 0,467 | -0,608 |
| 22 | Q14571 ITPR2_HUMAN | K.DVGHNIYILAHQLAR.H      |        | 3 | 2,9284 | 0,264 | -0,319 |
| 22 | Q96S55 WRIP1_HUMAN | K.GSGKRPAAAAAAGSAS#PR.S  | S153:  | 3 | 2,9248 | 0,173 | -0,11  |
| 22 | O15347 HMGB3_HUMAN | K.KKNPEVPVNF AE.F        |        | 2 | 2,917  | 0,226 | -0,356 |
| 22 | Q92834 RPGR_HUMAN  | E.KSLKLS#PVQK.Q          | S518:  | 3 | 2,9147 | 0,186 | 0      |
| 22 | P09622 DLDH_HUMAN  | R.VCHAHTLSE.A            |        | 2 | 2,9137 | 0,398 | -0,318 |
| 22 | O60506 HNRPQ_HUMAN | K.DYAFIHFDERDGAVK.A      |        | 2 | 2,8869 | 0,33  | 0,137  |
| 22 | O00429 DNM1L_HUMAN | K.RLEEPSLR.C             |        | 2 | 2,8863 | 0,192 | -0,122 |
| 22 | Q96ST3 SIN3A_HUMAN | K.QIM*HHFIPDLLFAQR.G     |        | 3 | 2,8812 | 0,146 | -0,389 |
| 22 | Q8NFC6 FA44A_HUMAN | R.SKTQLS#PSIKR.K         | S3019: | 2 | 2,8735 | 0,423 | -0,46  |
| 22 | Q9NQ48 LZTL1_HUMAN | E.KALQDLQLDQGNQKDFIK.A   |        | 3 | 2,8721 | 0,228 | -0,783 |
| 22 | O95766 CG028_HUMAN | R.KTPSVSLTSVHPDLM*K.I    |        | 3 | 2,8646 | 0,261 | -0,312 |
| 22 | P52756 RBM5_HUMAN  | R.NGDEENPLKR.G           |        | 2 | 2,864  | 0,119 | -0,521 |
| 22 | Q06830 PRDX1_HUMAN | K.KQGGGLGPM*NIPLVSDPKR.T |        | 2 | 2,861  | 0,474 | -0,317 |
| 22 | P23284 PIIB_HUMAN  | R.DKPLKDVIIADCGK.I       |        | 3 | 2,8486 | 0,331 | -0,931 |
| 22 | Q9UNS1 TIM_HUMAN   | E.DAVGKEPLKAAPK.K        |        | 2 | 2,8443 | 0,31  | -0,737 |
| 22 | P11586 C1TC_HUMAN  | R.RFSDIQIR.R             |        | 2 | 2,8435 | 0,147 | -0,825 |
| 22 | Q9BZ95 NSD3_HUMAN  | R.VDTVSEKPREEPVLKE.E     |        | 3 | 2,8335 | 0,117 | -0,296 |
| 22 | Q96GQ7 DDX27_HUMAN | R.SADFNPDFVFTEKE.G       |        | 2 | 2,826  | 0,413 | 0      |
| 22 | P08670 VIME_HUMAN  | E.RDNLAEDIM*R.L          |        | 3 | 2,8231 | 0,235 | 0,659  |

|    |                     |                           |        |   |        |       |        |
|----|---------------------|---------------------------|--------|---|--------|-------|--------|
| 22 | P15121 ALDR_HUMAN   | R.HIDCAHVYQNE.N           |        | 2 | 2,8222 | 0,385 | -0,264 |
| 22 | Q13442 HAP28_HUMAN  | K.GVEGLIDIENPNR.V         |        | 2 | 2,8162 | 0,319 | -0,342 |
| 22 | O60885 BRD4_HUMAN   | E.EKHS#PIIR.S             | S1117: | 2 | 2,8143 | 0,25  | -0,416 |
| 22 | O00244 ATOX1_HUMAN  | K.LGGVKYDIDLPNKK.V        |        | 3 | 2,8134 | 0,204 | 0      |
| 22 | P17252 KPCA_HUMAN   | E.NFDKFFTR.G              |        | 2 | 2,8106 | 0,316 | -0,681 |
| 22 | Q9Y2B0 CNPY2_HUMAN  | R.TDLCDHALHISHDEL.-       |        | 2 | 2,8056 | 0,447 | -0,962 |
| 22 | Q00536 PCTK1_HUMAN  | E.KLTLNSPIFDKPLSR.R       |        | 2 | 2,8002 | 0,281 | -0,494 |
| 22 | Q9UNZ2 NSF1C_HUMAN  | R.KKS#PNELVDDLFK.G        | S114:  | 3 | 2,7949 | 0,091 | -0,227 |
| 22 | P13639 EF2_HUMAN    | K.DLEEDHACIPIKK.S         |        | 2 | 2,7928 | 0,145 | -0,311 |
| 22 | O00193 SMAP_HUMAN   | E.LQAAEHPDEVEDPKNK.K      |        | 3 | 2,7879 | 0,249 | -1,508 |
| 22 | Q9BZI7 REN3B_HUMAN  | K.KLDKENLSDE.R            |        | 2 | 2,787  | 0,335 | -0,82  |
| 22 | Q14103 HNRPD_HUMAN  | R.GFCFITFKEEPPVKK.I       |        | 3 | 2,7869 | 0,304 | -0,394 |
| 22 | Q5T5C0 STXB5_HUMAN  | R.KLSLPTDLKPDLDVK.D       |        | 3 | 2,7868 | 0,159 | -0,326 |
| 22 | Q96HS1 PGAM5_HUMAN  | R.HSQYHVDGSLE.K           |        | 2 | 2,7855 | 0,429 | -0,384 |
| 22 | P62081 RS7_HUMAN    | K.VHLDKAQQNNVE.H          |        | 2 | 2,7848 | 0,415 | -0,7   |
| 22 | P23588 IF4B_HUMAN   | K.EEDCHS#PTSKPPKPDQLK.V   | S459:  | 3 | 2,7836 | 0,132 | -1,209 |
| 22 | P84098 RL19_HUMAN   | K.RLASSVLR.C              |        | 2 | 2,7798 | 0,171 | -1,826 |
| 22 | Q09666 AHNK_HUMAN   | K.ISM*PDVDLHLKGPV.V       |        | 3 | 2,7796 | 0,335 | -0,234 |
| 22 | Q9Y490 TLN1_HUMAN   | K.SKDHFGLEGDEE.S          |        | 2 | 2,7685 | 0,402 | -0,627 |
| 22 | A4D198 A4D198_HUMAN | R.GFRDDFLGGR.G            |        | 2 | 2,7664 | 0,281 | -0,856 |
| 22 | P40855 PEX19_HUMAN  | K.AKSPAPPSTTTAPDASGPQKR.S |        | 3 | 2,7598 | 0,332 | -1,692 |
| 22 | Q5T8P6 RBM26_HUMAN  | E.DQVDHNSYVRPPM*PK.K      |        | 3 | 2,7589 | 0,255 | -0,61  |
| 22 | Q8N5S9 KKCC1_HUMAN  | R.DIKPSNLLGDDGHVK.I       |        | 3 | 2,7573 | 0,161 | -0,531 |
| 22 | P26368 U2AF2_HUMAN  | K.YCDPDSYHR.R             |        | 3 | 2,7555 | 0,323 | -0,452 |
| 22 | Q9UBW7 ZMYM2_HUMAN  | E.NLHYDQGCQTSR.T          |        | 2 | 2,7547 | 0,49  | -0,578 |
| 22 | Q7Z6E9 RBBP6_HUMAN  | K.NVSTKPSNIVKYPEKE.S      |        | 3 | 2,7541 | 0,291 | -0,399 |
| 22 | Q8NC51 PAIRB_HUMAN  | R.KNPLPPSVGVVDKKEE.T      |        | 2 | 2,7529 | 0,268 | -0,281 |
| 22 | O43747 AP1G1_HUMAN  | R.SSFREEDNTYR.C           |        | 3 | 2,7521 | 0,26  | 0      |
| 22 | Q14152 EIF3A_HUMAN  | R.RVPPPALS.R              |        | 2 | 2,7515 | 0,253 | -0,799 |
| 22 | Q96T58 MINT_HUMAN   | K.NYCSLRDET#PERK.S        | T1140: | 3 | 2,7515 | 0,105 | -0,523 |
| 22 | Q92600 RCD1_HUMAN   | K.DTTFAQVLKDDTTTKR.W      |        | 3 | 2,7478 | 0,299 | -0,596 |
| 22 | Q9UNS1 TIM_HUMAN    | E.DAVGKEPLKAAPK.K         |        | 3 | 2,7439 | 0,165 | 0,276  |
| 22 | P36578 RL4_HUMAN    | K.APIRPDIVNFVHTNLR.K      |        | 2 | 2,7427 | 0,408 | -0,328 |

|    |                     |                           |       |   |        |       |        |
|----|---------------------|---------------------------|-------|---|--------|-------|--------|
| 22 | Q9H8Y5 ANKZ1_HUMAN  | R.LKDKPLLSALDFEK.Q        |       | 3 | 2,7376 | 0,252 | -0,339 |
| 22 | P04179 SODM_HUMAN   | K.HHAAYVNNLNVTE.E         |       | 2 | 2,7327 | 0,42  | 0      |
| 22 | Q9UMZ2 SYNG_HUMAN   | R.DRSNTLNEKPALPVIR.D      |       | 3 | 2,7309 | 0,271 | -0,201 |
| 22 | Q07157 ZO1_HUMAN    | E.RISKPGAVST#PVK.H        | T354: | 3 | 2,7271 | 0,142 | -0,064 |
| 22 | Q9ULW6 NP1L2_HUMAN  | K.KYDEPILK.L              |       | 2 | 2,7231 | 0,193 | -0,364 |
| 22 | Q13952 NFYC_HUMAN   | K.ATGNSTPCTSSLPTTHPPSHR.A |       | 3 | 2,722  | 0,217 | -0,58  |
| 22 | P54886 P5CS_HUMAN   | R.GKDHVVSDFSE.H           |       | 2 | 2,7214 | 0,303 | 1,4    |
| 22 | P68104 EF1A1_HUMAN  | R.RGNVAGDSKNDPPM*E.A      |       | 3 | 2,7209 | 0,325 | 0,114  |
| 22 | Q9UJM3 ERRFI_HUMAN  | E.DSTLSDFKYDVPGRR.S       |       | 3 | 2,7076 | 0,268 | 0      |
| 22 | P31946 1433B_HUMAN  | K.DSTLIM*QLLR.D           |       | 2 | 2,703  | 0,192 | -0,607 |
| 22 | Q96C19 EFHD2_HUMAN  | R.RADLNQGIGEPQS#PSRR.V    | S74:  | 3 | 2,7016 | 0,319 | -0,466 |
| 22 | P46937 YAP1_HUMAN   | R.KLPDSFFKPEPK.S          |       | 3 | 2,694  | 0,159 | -0,299 |
| 22 | Q96L14 C170L_HUMAN  | R.SGDPRPQAAEPPDHLTITR.R   |       | 3 | 2,6921 | 0,315 | 0,178  |
| 22 | P21333 FLNA_HUMAN   | K.KIQQNTFTR.W             |       | 2 | 2,6907 | 0,314 | -1,718 |
| 22 | P49366 DHYS_HUMAN   | E.KKLEPLSQDE.D            |       | 2 | 2,6883 | 0,284 | -0,925 |
| 22 | Q9BVG9 PTSS2_HUMAN  | R.RDAGGPRPES#PVPAGR.A     | S16:  | 3 | 2,6846 | 0,09  | -0,108 |
| 22 | Q8N6R0 K0859_HUMAN  | R.RLIFLSNR.N              |       | 2 | 2,6797 | 0,264 | -0,838 |
| 22 | O60927 PP1RB_HUMAN  | K.CCCIEYKPR.A             |       | 2 | 2,6785 | 0,472 | -0,095 |
| 22 | P04179 SODM_HUMAN   | K.HHAAYVNNLNVTEE.K        |       | 2 | 2,6784 | 0,464 | -0,53  |
| 22 | Q9BVS4 RIOK2_HUMAN  | E.LLHPLGPDDKNIETK.E       |       | 3 | 2,6776 | 0,325 | 0,541  |
| 22 | P04075 ALDOA_HUMAN  | E.GTLLKPNM*VTPGHACTQK.F   |       | 3 | 2,6771 | 0,155 | -0,279 |
| 22 | P34932 HSP74_HUMAN  | K.NKEDQYDHL.D.A           |       | 2 | 2,6727 | 0,314 | -0,669 |
| 22 | P23193 TCEA1_HUMAN  | K.KKEPAIT#SQNSPEAREE.S    | T96:  | 2 | 2,6715 | 0,317 | -0,061 |
| 22 | Q56NI9 ESCO2_HUMAN  | K.HCFYQNSDKNEE.N          |       | 2 | 2,6714 | 0,459 | -0,233 |
| 22 | A8MSQ1 A8MSQ1_HUMAN | R.LCYHFGCLDPPLKK.S        |       | 3 | 2,6674 | 0,26  | -0,105 |
| 22 | Q9UKI8 TLK1_HUMAN   | E.GRIDLLR.A               |       | 2 | 2,6665 | 0,104 | -1,273 |
| 22 | O43395 PRPF3_HUMAN  | K.AADHLKPFDDSTLR.F        |       | 2 | 2,6639 | 0,364 | -0,359 |
| 22 | P58107 EPIPL_HUMAN  | E.AQIATGGIIPVHSHR.V       |       | 3 | 2,6624 | 0,262 | -0,219 |
| 22 | Q09666 AHNK_HUMAN   | K.ISM*PDVDLHLKGPV.V       |       | 2 | 2,659  | 0,336 | -0,467 |
| 22 | Q92990 GLMN_HUMAN   | E.NNFLKPLHIGLNM*SK.A      |       | 3 | 2,6544 | 0,145 | -0,735 |
| 22 | Q12986 NFX1_HUMAN   | R.RNYSS#PPPCHLSR.Q        | S50:  | 3 | 2,6534 | 0,108 | -0,554 |
| 22 | Q86Y91 KI18B_HUMAN  | R.LTLQPKPVVGHFSAR.E       |       | 3 | 2,6517 | 0,222 | -0,111 |
| 22 | P20645 MPRD_HUMAN   | K.SNGKETVVGR.L            |       | 2 | 2,6506 | 0,249 | -0,233 |

|    |                    |                             |        |   |        |       |        |
|----|--------------------|-----------------------------|--------|---|--------|-------|--------|
| 22 | Q76FK4 NOL8_HUMAN  | K.LM*DLQSHFGTDDRFR.M        |        | 3 | 2,648  | 0,191 | -0,493 |
| 22 | Q9NTZ6 RBM12_HUMAN | K.HVIDFFK.K                 |        | 2 | 2,6404 | 0,128 | -0,202 |
| 22 | P58107 EPIPL_HUMAN | E.AQIATGGVIDPVHSHR.V        |        | 3 | 2,6394 | 0,283 | 1,103  |
| 22 | P62736 ACTA_HUMAN  | R.HQGVM*VGM*GQK.D           |        | 3 | 2,6389 | 0,177 | 0,608  |
| 22 | Q01850 CDR2_HUMAN  | R.RS#PGKCDQEKPA SFACLKE.L   | S145:  | 3 | 2,6386 | 0,121 | -1,074 |
| 22 | Q96I24 FUBP3_HUMAN | K.RLLGQIVDR.C               |        | 2 | 2,6327 | 0,268 | -0,228 |
| 22 | P23588 IF4B_HUMAN  | E.DCHS#PTSKPPKPDQPLK.V      | S459:  | 2 | 2,6281 | 0,39  | -0,606 |
| 22 | P08559 ODPA_HUMAN  | K.RGDFIPGLR.V               |        | 2 | 2,6272 | 0,181 | -0,828 |
| 22 | Q9UK61 CC063_HUMAN | R.SSHS#LDYDKDR.V            | S673:  | 3 | 2,6265 | 0,346 | 0,196  |
| 22 | Q9UER7 DAXX_HUMAN  | R.LSQTPHSQPPRPGTCK.T        |        | 2 | 2,6244 | 0,44  | -1,907 |
| 22 | Q99439 CNN2_HUMAN  | K.NHILPPM*DHOSTISLQM*GTNK.C |        | 3 | 2,6237 | 0,305 | -0,646 |
| 22 | Q68C22 TENS3_HUMAN | R.HPPFSPPEPLSPASQHK.G       |        | 3 | 2,6205 | 0,179 | -0,359 |
| 22 | Q9BVS4 RIOK2_HUMAN | E.LLHPLGPDDKNIETK.E         |        | 2 | 2,6151 | 0,37  | 0      |
| 22 | Q12904 MCA1_HUMAN  | R.KHPDADSLYVE.E             |        | 2 | 2,6134 | 0,345 | -0,575 |
| 22 | Q9ULP9 TBC24_HUMAN | R.HFNLPSKTE.S               |        | 2 | 2,613  | 0,418 | -0,341 |
| 22 | Q9GZR1 SENP6_HUMAN | K.HKDTYSTEAPLGE.G           |        | 2 | 2,6112 | 0,437 | -0,59  |
| 22 | Q14257 RCN2_HUMAN  | E.HDKNGDGFVSLEE.F           |        | 2 | 2,6018 | 0,33  | -1,012 |
| 22 | Q9P031 TAP26_HUMAN | R.KVDHPLSEQVHQPLLEE.Q       |        | 2 | 2,5942 | 0,315 | -0,183 |
| 22 | Q96T23 RSF1_HUMAN  | E.IKLSDDFDSPVKGPLCK.S       |        | 3 | 2,5939 | 0,271 | -0,858 |
| 22 | P52272 HNRPM_HUMAN | R.KACQIFVR.N                |        | 2 | 2,5879 | 0,296 | -0,537 |
| 22 | Q8TDB6 DTX3L_HUMAN | R.HPNVHFVLNQE.S             |        | 2 | 2,5841 | 0,343 | -0,732 |
| 22 | Q9P031 TAP26_HUMAN | R.KVDHPLSEQVHQPLLEE.Q       |        | 3 | 2,5794 | 0,244 | -0,824 |
| 22 | Q86X95 CIR_HUMAN   | R.NSGFALKR.N                |        | 2 | 2,5778 | 0,291 | 0,068  |
| 22 | Q14241 ELOA1_HUMAN | R.SLEEDQEPIVSHQKPGK.G       |        | 3 | 2,5767 | 0,331 | -0,286 |
| 22 | Q8WWK9 CKAP2_HUMAN | K.TKDPTHDVKT#PNTE.T         | T579:  | 3 | 2,5749 | 0,317 | -0,66  |
| 22 | P06748 NPM_HUMAN   | D.YHFKVDNDENE.H             |        | 2 | 2,5738 | 0,315 | -0,519 |
| 22 | Q3V6T2 GRDN_HUMAN  | R.VHASRPAS#LDSGR.T          | S1587: | 2 | 2,5736 | 0,429 | -0,596 |
| 22 | A2A3K4 PTPC1_HUMAN | R.RLS#YSDSDLKR.A            | S392:  | 3 | 2,5732 | 0,167 | 0,258  |
| 22 | O75688 PPM1B_HUMAN | K.HIYFINGDSR.A              |        | 2 | 2,5724 | 0,398 | 0,088  |
| 22 | A0JNW5 UH1BL_HUMAN | D.LSHIPLKDLLFK.S            |        | 3 | 2,5697 | 0,227 | -0,06  |
| 22 | O15085 ARHGB_HUMAN | R.RPSRS#PPSLALRD.V          | S1413: | 3 | 2,5683 | 0,175 | -0,119 |
| 22 | Q9UNZ2 NSF1C_HUMAN | E.RSGQQIVGPPR.K             |        | 2 | 2,5676 | 0,344 | -0,51  |
| 22 | P28799 GRN_HUMAN   | E.KAPAHLSLPDPQALK.R         |        | 3 | 2,5658 | 0,097 | -0,346 |

|    |                    |                                   |            |   |        |       |        |
|----|--------------------|-----------------------------------|------------|---|--------|-------|--------|
| 22 | P48960 CD97_HUMAN  | R.HGIPNNQKDTVCE.D                 |            | 2 | 2,5606 | 0,439 | -0,726 |
| 22 | O94909 K0819_HUMAN | R.RPDS#PTRPTLR.G                  | S789:      | 2 | 2,5598 | 0,32  | -0,709 |
| 22 | P49750 YLPM1_HUMAN | R.DREPYFDR.Q                      |            | 2 | 2,5587 | 0,254 | -0,222 |
| 22 | P07108 ACBP_HUMAN  | K.TKPSDEEM*LFYGHYK.Q              |            | 3 | 2,5585 | 0,166 | -0,093 |
| 22 | O60813 PRA11_HUMAN | K.LVLSHMDVVS#RYVVS#PE.Q           | S205:S209: | 3 | 2,5554 | 0,132 | 0,097  |
| 22 | Q3V6T2 GRDN_HUMAN  | K.SLYDSLKDHEKLE.L                 |            | 3 | 2,5544 | 0,128 | -0,216 |
| 22 | P62333 PRS10_HUMAN | R.KIHIDLNE.Q                      |            | 2 | 2,5537 | 0,319 | -0,791 |
| 22 | Q70SY1 CR3L2_HUMAN | E.HSYSLCEEPR.A                    |            | 2 | 2,5519 | 0,525 | -0,573 |
| 22 | Q6ZRV2 FA83H_HUMAN | E.VRHGS#DPAFAPGPR.G               | S523:      | 3 | 2,5509 | 0,148 | -0,711 |
| 22 | O15357 SHIP2_HUMAN | K.VAITVPAPQLGHHR.H                |            | 3 | 2,5355 | 0,284 | -0,244 |
| 22 | P35579 MYH9_HUMAN  | K.VNKDDIQK.M                      |            | 2 | 2,5319 | 0,219 | -0,191 |
| 22 | POC0S8 H2A1_HUMAN  | R.HLQLAIRNDEE.L                   |            | 2 | 2,5314 | 0,279 | -0,912 |
| 22 | P35580 MYH10_HUMAN | R.KDHNIPGELE.R                    |            | 2 | 2,5284 | 0,182 | -0,212 |
| 22 | Q9UL63 MKLN1_HUMAN | K.IALEHPM*LTDIHDK.L               |            | 2 | 2,5282 | 0,275 | 0,148  |
| 22 | Q9Y2K2 QSK_HUMAN   | R.HHTIQNSDDAYVQLD.N               |            | 2 | 2,5281 | 0,261 | -0,834 |
| 22 | Q8TE77 SSH3_HUMAN  | R.RQSFVLR.G                       |            | 2 | 2,5269 | 0,148 | 0,624  |
| 22 | Q15942 ZYG_HUMAN   | E.KQHPVPPPAQNQNQVRS#PGAPGPLTLKE.V | S344:      | 3 | 2,5227 | 0,237 | -0,776 |
| 22 | O00203 AP3B1_HUMAN | R.DHFQLGTLSTLNIA.A                |            | 3 | 2,5169 | 0,218 | 0,212  |
| 22 | P49773 HINT1_HUMAN | K.KCAADLGLNK.G                    |            | 2 | 2,5133 | 0,261 | -0,784 |
| 22 | Q70E73 RAPH1_HUMAN | K.RPSVDSLVS.K.F                   |            | 2 | 2,5117 | 0,327 | -0,561 |
| 22 | O95302 FKBP9_HUMAN | R.RFVPDECPR.T                     |            | 2 | 2,511  | 0,251 | -0,623 |
| 22 | Q5M775 SPEC1_HUMAN | E.HITAETPSRPLSSTS.NPFK.S          |            | 3 | 2,5    | 0,182 | -0,265 |
| 22 | Q9UNL4 ING4_HUMAN  | R.RLDTDLAR.F                      |            | 2 | 2,4994 | 0,257 | -0,635 |
| 22 | Q9GZP8 IMUP_HUMAN  | D.LGAALEPTSQKPGVGAGHGGDPKLS#PHK.V | S29:       | 3 | 2,4954 | 0,163 | -0,066 |
| 22 | P11142 HSP7C_HUMAN | R.LSKEDIER.M                      |            | 2 | 2,4943 | 0,165 | -1,787 |
| 22 | O14974 MYPT1_HUMAN | R.RRS#YLTPVRDEE.S                 | S668:      | 3 | 2,4884 | 0,119 | -0,228 |
| 22 | Q00341 VIGLN_HUMAN | R.RCDIIIISGR.K                    |            | 2 | 2,4863 | 0,178 | -0,507 |
| 22 | Q14103 HNRPD_HUMAN | K.YHNVGLSKCE.I                    |            | 3 | 2,4846 | 0,178 | 0      |
| 22 | O00571 DDX3X_HUMAN | E.GYACTSIHGDR.S                   |            | 2 | 2,484  | 0,377 | -1,282 |
| 22 | P55072 TERA_HUMAN  | E.DNSVVSLSQPK.M                   |            | 2 | 2,4722 | 0,168 | 0,416  |
| 22 | P23443 KS6B1_HUMAN | E.KFSFEPK.I                       |            | 2 | 2,4692 | 0,199 | 1,658  |
| 22 | Q7L1V2 MON1B_HUMAN | R.KHVFVLS.E.A                     |            | 2 | 2,4673 | 0,163 | -0,509 |
| 22 | Q9NP61 ARFG3_HUMAN | R.RKPDYEPVENTDE.A                 |            | 2 | 2,4672 | 0,417 | -0,69  |



|    |                    |                        |        |   |        |       |        |
|----|--------------------|------------------------|--------|---|--------|-------|--------|
| 22 | Q7Z4S6 KI21A_HUMAN | E.KKIPES#PVTR.R        | S1239: | 2 | 2,4653 | 0,275 | -0,183 |
| 22 | Q9BXS6 NUSAP_HUMAN | E.NNYLNQHVNR.I         |        | 2 | 2,458  | 0,276 | -0,096 |
| 22 | P62136 PP1A_HUMAN  | K.HDLDLICR.A           |        | 2 | 2,4573 | 0,148 | -0,937 |
| 22 | P29692 EF1D_HUMAN  | K.FKYDDAER.R           |        | 2 | 2,4552 | 0,221 | -0,584 |
| 22 | Q7Z2W4 ZCCHV_HUMAN | R.RKTVFS#PTLPAAR.S     | S378:  | 3 | 2,4551 | 0,09  | 0,06   |
| 22 | P31949 S10AB_HUMAN | K.NQKDPGVLDR.M         |        | 2 | 2,4462 | 0,228 | -1,816 |
| 22 | P42892 ECE1_HUMAN  | R.KTSSFLDQR.F          |        | 2 | 2,4456 | 0,247 | -0,338 |
| 22 | Q7Z460 CLAP1_HUMAN | R.NGGIPHYLR.Q          |        | 2 | 2,4362 | 0,248 | 0      |
| 22 | Q52LR7 EPC2_HUMAN  | R.RAGCQYYAPR.L         |        | 2 | 2,4354 | 0,248 | -0,884 |
| 22 | Q6PGP7 TTC37_HUMAN | R.HFIQSLSK.F           |        | 2 | 2,4337 | 0,225 | 0,127  |
| 22 | O00629 IMA4_HUMAN  | R.RNVPHEDICE.D         |        | 2 | 2,4327 | 0,402 | -0,673 |
| 22 | Q6PCB5 RSBNL_HUMAN | R.AHADHIGQGFE.R        |        | 2 | 2,4299 | 0,464 | -0,103 |
| 22 | Q9NY61 AATF_HUMAN  | E.LLFQYPDTR.Y          |        | 2 | 2,4296 | 0,151 | -0,423 |
| 22 | P14618 KPYM_HUMAN  | R.LNFSHGTHE.Y          |        | 2 | 2,4294 | 0,301 | -1,054 |
| 22 | P35579 MYH9_HUMAN  | K.KKM*EDSVGCLE.T       |        | 2 | 2,4234 | 0,346 | -0,837 |
| 22 | Q9GZU8 NIP30_HUMAN | R.LKPDPEPDDKNQEPSSCK.S |        | 3 | 2,4232 | 0,168 | -0,614 |
| 22 | P09525 ANXA4_HUMAN | R.NHLLHVFE.Y           |        | 2 | 2,42   | 0,381 | -0,326 |
| 22 | P69905 HBA_HUMAN   | K.TYFPFDLSHGSAQVK.G    |        | 3 | 2,4172 | 0,09  | -0,898 |
| 22 | O60524 SDCG1_HUMAN | K.KKLPSDSGDLE.A        |        | 2 | 2,4166 | 0,124 | -0,308 |
| 22 | P16435 NCPR_HUMAN  | E.HAQAVDYIK.K          |        | 2 | 2,4137 | 0,399 | -0,117 |
| 22 | P06748 NPM_HUMAN   | E.KTPKT#PKGSSVE.D      | T237:  | 3 | 2,4117 | 0,125 | -0,127 |
| 22 | Q09666 AHNK_HUMAN  | E.VTQLLNTM*GHHTVGLK.L  |        | 3 | 2,4116 | 0,229 | -0,104 |
| 22 | P02545 LMNA_HUMAN  | E.RNSNLVGAHEE.L        |        | 2 | 2,4103 | 0,407 | -1,223 |
| 22 | Q14683 SMC1A_HUMAN | R.HNLLQACK.M           |        | 2 | 2,403  | 0,401 | 0,062  |
| 22 | Q8IY81 RRMJ3_HUMAN | K.RDLIDNSFNR.Y         |        | 3 | 2,4012 | 0,138 | 0,512  |
| 22 | P49591 SYSC_HUMAN  | K.KKEPVGDDDESVE.N      |        | 2 | 2,4002 | 0,457 | -0,512 |
| 22 | Q7Z5Y7 KCD20_HUMAN | R.HVDFQCVR.S           |        | 2 | 2,3972 | 0,31  | -0,69  |
| 22 | P49023 PAXI_HUMAN  | E.HVYSFPNK.Q           |        | 2 | 2,3939 | 0,382 | -0,922 |
| 22 | Q9HD15 SRA1_HUMAN  | R.KQVCDDISR.R          |        | 2 | 2,3871 | 0,204 | -0,98  |
| 22 | P55209 NP1L1_HUMAN | E.HDEPILK.H            |        | 2 | 2,376  | 0,132 | -0,644 |
| 22 | Q6ZRV2 FA83H_HUMAN | R.KGSPTPGFSTR.R        |        | 2 | 2,3683 | 0,312 | -0,645 |
| 22 | P29084 T2EB_HUMAN  | K.ALGDQILFVNRPKK.K     |        | 2 | 2,367  | 0,25  | -0,142 |
| 22 | P25398 RS12_HUMAN  | E.HQINLIK.V            |        | 2 | 2,3668 | 0,106 | -0,916 |

|    |                    |                      |       |   |        |       |        |
|----|--------------------|----------------------|-------|---|--------|-------|--------|
| 22 | Q10713 MPPA_HUMAN  | E.KLAFSTAR.F         |       | 2 | 2,3532 | 0,24  | 0      |
| 22 | P49736 MCM2_HUMAN  | R.RGNDPLTSSPGR.S     |       | 2 | 2,3457 | 0,151 | -0,485 |
| 22 | O75436 VP26A_HUMAN | E.KHYLFYDGE.S        |       | 2 | 2,3413 | 0,343 | -0,521 |
| 22 | Q9Y4C8 RBM19_HUMAN | K.FHHVPLYLE.W        |       | 2 | 2,339  | 0,211 | -0,528 |
| 22 | O95429 BAG4_HUMAN  | R.HNFPCSVHQYE.S      |       | 2 | 2,3376 | 0,355 | -0,344 |
| 22 | P05387 RLA2_HUMAN  | K.NIEDVIAQGIGK.L     |       | 2 | 2,3359 | 0,155 | -0,776 |
| 22 | O15392 BIRC5_HUMAN | K.HSSGCAFLSVK.K      |       | 2 | 2,3317 | 0,22  | -0,409 |
| 22 | Q9UNI6 DUS12_HUMAN | R.SSSILDHRE.G        |       | 2 | 2,3298 | 0,202 | -0,117 |
| 22 | P0C7M2 RA1L3_HUMAN | R.GFAFVTFDDHD.S      |       | 2 | 2,3293 | 0,202 | -0,48  |
| 22 | P08133 ANXA6_HUMAN | E.DTIIDIITHR.S       |       | 2 | 2,3286 | 0,18  | -0,713 |
| 22 | Q9BRQ0 PYGO2_HUMAN | R.RKS#NTQGPAYSHLTE.F | S48:  | 2 | 2,3269 | 0,383 | -0,414 |
| 22 | P46777 RL5_HUMAN   | K.HIM*GQNVADYM*R.Y   |       | 2 | 2,3252 | 0,401 | -0,832 |
| 22 | Q9H7N4 SFR19_HUMAN | E.SRS#PFLKPDER.A     | S874: | 2 | 2,3245 | 0,373 | -1,037 |
| 22 | P11586 C1TC_HUMAN  | K.THLSLHNPE.Q        |       | 2 | 2,3239 | 0,28  | -0,43  |
| 22 | P49761 CLK3_HUMAN  | R.HYRPPEVILE.L       |       | 2 | 2,3231 | 0,294 | -0,292 |
| 22 | Q86V48 LUZP1_HUMAN | R.KGGLDYLK.Q         |       | 2 | 2,3229 | 0,097 | -0,136 |
| 22 | Q96AJ1 CLUA1_HUMAN | R.RLPKPQTAM*E.M      |       | 2 | 2,3206 | 0,264 | -0,308 |
| 22 | Q9H4L7 SMRCD_HUMAN | R.KASISYFK.N         |       | 2 | 2,3045 | 0,232 | -0,646 |
| 22 | Q9C0C9 UBE2O_HUMAN | R.KKS#IPLSIK.N       | S515: | 2 | 2,3033 | 0,097 | -0,112 |
| 22 | O14744 ANM5_HUMAN  | R.EKDRDPEAQFE.M      |       | 2 | 2,2999 | 0,161 | -0,716 |
| 22 | Q05524 ENO1B_HUMAN | E.KGVPLYR.H          |       | 2 | 2,2979 | 0,281 | 0      |
| 22 | Q16181 SEPT7_HUMAN | E.HCDFTILR.N         |       | 2 | 2,295  | 0,282 | -0,689 |
| 22 | Q3V6T2 GRDN_HUMAN  | K.SLYDSLIDHEKLE.L    |       | 2 | 2,2918 | 0,33  | -0,433 |
| 22 | Q9BUQ8 DDX23_HUMAN | R.HQVQLLGR.G         |       | 2 | 2,2908 | 0,391 | 0      |
| 22 | Q12931 TRAP1_HUMAN | R.HKLVSQGALPE.M      |       | 2 | 2,2885 | 0,415 | -0,471 |
| 22 | O43166 SI1L1_HUMAN | R.RPSYTLGM*K.S       |       | 2 | 2,2849 | 0,301 | -0,799 |
| 22 | P26583 HMGB2_HUMAN | K.KHPDSSVNFAE.F      |       | 2 | 2,2841 | 0,289 | -0,595 |
| 22 | P63313 TYB10_HUMAN | E.KNTLPTKE.T         |       | 2 | 2,2821 | 0,221 | -0,786 |
| 22 | O60504 VINEX_HUMAN | R.RDFVYPSSTR.D       |       | 2 | 2,2784 | 0,293 | -0,894 |
| 22 | Q9P031 TAP26_HUMAN | R.KVDHPLSE.Q         |       | 2 | 2,2766 | 0,143 | 0,396  |
| 22 | Q06481 APLP2_HUMAN | R.HYQHVLAVDPE.K      |       | 2 | 2,2728 | 0,26  | -0,56  |
| 22 | Q00987 MDM2_HUMAN  | R.HKSDSISLSFDE.S     |       | 2 | 2,2716 | 0,311 | -0,626 |
| 22 | P30085 KCY_HUMAN   | E.KYGYTHLSAGE.L      |       | 2 | 2,2677 | 0,178 | -0,498 |

|    |                    |                      |        |   |        |       |        |
|----|--------------------|----------------------|--------|---|--------|-------|--------|
| 22 | Q9H2J4 PDCL3_HUMAN | E.ENPKKPIEDVLLSSVR.R |        | 2 | 2,2667 | 0,127 | -0,401 |
| 22 | Q9UQ35 SRRM2_HUMAN | E.NSFGS#PLEFR.N      | S1329: | 2 | 2,2664 | 0,221 | 0      |
| 22 | Q8IU66 H2A2B_HUMAN | R.HLQLAVR.N          |        | 2 | 2,2565 | 0,171 | -0,656 |
| 22 | P52788 SPSY_HUMAN  | K.RLPPIVR.G          |        | 2 | 2,256  | 0,102 | 0,43   |
| 22 | Q9NS91 RAD18_HUMAN | K.HLDSCLSREE.K       |        | 2 | 2,2527 | 0,424 | -0,783 |
| 22 | Q96JM7 LMBL3_HUMAN | R.HLGPHSAANCPYSE.I   |        | 2 | 2,2382 | 0,149 | 0,396  |
| 22 | Q7Z7E8 UB2Q1_HUMAN | K.RIISDLCK.L         |        | 2 | 2,2326 | 0,11  | -0,85  |
| 22 | P04264 K2C1_HUMAN  | R.LRSEIDNVK.K        |        | 2 | 2,2247 | 0,24  | -0,454 |
| 22 | P48643 TCPE_HUMAN  | K.HKLDVTSVE.D        |        | 2 | 2,2217 | 0,163 | -0,119 |
| 22 | P04406 G3P_HUMAN   | E.KYDNSLK.I          |        | 2 | 2,2207 | 0,246 | 0,211  |
| 22 | P22626 ROA2_HUMAN  | K.YHTINGHNAE.V       |        | 2 | 2,2197 | 0,218 | -0,528 |
| 22 | Q99798 ACON_HUMAN  | E.KNTIVTSYNR.N       |        | 2 | 2,2187 | 0,265 | -0,816 |
| 22 | P98164 LRP2_HUMAN  | K.CHNSNICIPR.V       |        | 2 | 2,2168 | 0,165 | -0,96  |
| 22 | P12268 IMDH2_HUMAN | E.GGVHSLHSYE.K       |        | 2 | 2,2143 | 0,366 | -0,337 |
| 22 | Q6WKZ4 RFIP1_HUMAN | E.KDTAAVVSQ.R        |        | 2 | 2,2139 | 0,235 | 0,193  |
| 22 | Q71U36 TBA1A_HUMAN | E.RLS#VDYGKK.S       | S158:  | 2 | 2,2136 | 0,279 | 0,106  |
| 22 | Q6S8J3 A26CA_HUMAN | E.SGPSIVHR.K         |        | 2 | 2,212  | 0,217 | -0,072 |
| 22 | Q14457 BECN1_HUMAN | R.RFIPPAR.M          |        | 2 | 2,2043 | 0,114 | -0,071 |
| 22 | P63241 IF5A1_HUMAN | K.VHLVGIDIFTGK.K     |        | 2 | 2,2027 | 0,277 | -0,188 |
| 22 | P35580 MYH10_HUMAN | K.VIQYLAHVASSHK.G    |        | 2 | 2,2    | 0,178 | -0,588 |
| 22 | P13639 EF2_HUMAN   | K.KSDPVVSQR.E        |        | 2 | 2,1996 | 0,216 | -0,232 |
| 22 | Q8WWK9 CKAP2_HUMAN | K.HCIPLKPSNE.L       |        | 2 | 2,1994 | 0,305 | -0,919 |
| 22 | P23588 IF4B_HUMAN  | E.NKVDGM*NAPK.G      |        | 2 | 2,1978 | 0,174 | -0,336 |
| 22 | Q9Y6M7 S4A7_HUMAN  | K.HSDPHLE.R          |        | 2 | 2,1955 | 0,229 | 0,257  |
| 22 | P43897 EFTS_HUMAN  | K.TNLEDVGRR.L        |        | 2 | 2,1952 | 0,089 | -0,23  |
| 22 | P08670 VIME_HUMAN  | E.RDNLAEDIM*R.L      |        | 2 | 2,1933 | 0,37  | -0,488 |
| 22 | P31946 1433B_HUMAN | D.STLIM*QLLR.D       |        | 2 | 2,1882 | 0,235 | -1,23  |
| 22 | O14497 ARI1A_HUMAN | K.RCVCVSNTIR.S       |        | 2 | 2,1875 | 0,18  | -0,482 |
| 22 | P25398 RS12_HUMAN  | E.HQINLIKVDD.N       |        | 2 | 2,184  | 0,251 | -0,817 |
| 22 | P49792 RBP2_HUMAN  | E.KLFSSQYGK.M        |        | 2 | 2,1796 | 0,238 | 0      |
| 22 | Q66K74 MAP1S_HUMAN | E.RLSLSPRL.G         |        | 2 | 2,1766 | 0,092 | -0,518 |
| 22 | Q96IZ7 RSRC1_HUMAN | R.RKEEDQATLVE.Q      |        | 2 | 2,1705 | 0,359 | -0,185 |
| 22 | Q96ST2 IWS1_HUMAN  | R.GKHM*DFLSDFE.M     |        | 2 | 2,1684 | 0,168 | -0,909 |

|    |                      |                        |            |   |        |       |        |
|----|----------------------|------------------------|------------|---|--------|-------|--------|
| 22 | P49755 TMEDA_HUMAN   | E.KLKPLEVE.L           |            | 2 | 2,1651 | 0,158 | 0,064  |
| 22 | P29692 EF1D_HUMAN    | R.ATAPQQTQHVS#PM*R.Q   | S133:      | 2 | 2,1558 | 0,333 | -0,401 |
| 22 | Q9NWH9 SLTM_HUMAN    | R.FNDFDHRE.R           |            | 2 | 2,1494 | 0,216 | -0,226 |
| 22 | P61956 SUMO2_HUMAN   | E.NNDHINLK.V           |            | 2 | 2,1415 | 0,191 | -1,639 |
| 22 | Q16629 SFRS7_HUMAN   | R.RPFDPNDRCYE.C        |            | 2 | 2,1383 | 0,34  | -0,083 |
| 22 | Q8N8S7 ENAH_HUMAN    | R.KNQIVFDNR.S          |            | 2 | 2,1363 | 0,295 | 0,108  |
| 22 | Q9NX63 CHCH3_HUMAN   | K.KQDAFYKE.Q           |            | 2 | 2,1345 | 0,181 | 0,119  |
| 22 | P07737 PROF1_HUMAN   | E.GVHGGLINK.K          |            | 2 | 2,1334 | 0,1   | 0      |
| 22 | Q96C01 F136A_HUMAN   | K.CVDDHM*HLIPTM*TK.K   |            | 2 | 2,1291 | 0,251 | -0,705 |
| 22 | ##Q8IVW4 CDKL3_HUMAN | K.M*VT#GY#SGEGVK.G     | T576:Y578: | 2 | 2,1278 | 0,112 | 1,591  |
| 22 | Q99613 EIF3C_HUMAN   | E.SHITSYK.Q            |            | 2 | 2,1248 | 0,112 | -0,438 |
| 22 | O15231 ZN185_HUMAN   | E.HSYVLSAAK.K          |            | 2 | 2,1244 | 0,307 | 0,875  |
| 22 | P57076 CU059_HUMAN   | K.KLSDYVGKNE.K         |            | 2 | 2,1228 | 0,236 | -0,317 |
| 22 | Q14258 TRI25_HUMAN   | E.LTPSSGDPGEHDPASTHK.S |            | 2 | 2,1156 | 0,215 | -0,865 |
| 22 | P17844 DDX5_HUMAN    | E.KNFYQEHPD.L          |            | 2 | 2,1065 | 0,27  | 0,725  |
| 22 | Q9BYC5 FUT8_HUMAN    | E.HFQLLAR.R            |            | 2 | 2,106  | 0,194 | -0,069 |
| 22 | Q02790 FKBP4_HUMAN   | D.GTKFDSSLDR.K         |            | 2 | 2,1044 | 0,393 | -0,325 |
| 22 | O00418 EF2K_HUMAN    | K.RGELDDPEPR.E         |            | 2 | 2,091  | 0,275 | -0,721 |
| 22 | ##Q29RF7 PDS5A_HUMAN | K.SGFLKALLR.V          |            | 2 | 2,0904 | 0,117 | -0,789 |
| 22 | A6NHR9 SMHD1_HUMAN   | K.CNDSLRLHS#PKVE.T     | S1974:     | 2 | 2,0792 | 0,123 | -0,481 |
| 22 | Q96EZ8 MCRS1_HUMAN   | R.KKFDELVE.S           |            | 2 | 2,0684 | 0,12  | 1,412  |
| 22 | O60488 ACSL4_HUMAN   | K.HIIYVDNK.A           |            | 2 | 2,0678 | 0,235 | -0,731 |
| 22 | Q9UHQ4 BAP29_HUMAN   | K.SHGKDEECVLE.A        |            | 2 | 2,0653 | 0,213 | -0,187 |
| 22 | ##Q13797 ITA9_HUMAN  | K.KGSAQFIK.I           |            | 2 | 2,0652 | 0,205 | 0,139  |
| 22 | P61289 PSME3_HUMAN   | K.LKVDSFR.E            |            | 2 | 2,0561 | 0,174 | 0,282  |
| 22 | Q5TAQ9 WD42A_HUMAN   | K.FCPHHLVNSE.S         |            | 2 | 2,0559 | 0,22  | -1,181 |
| 22 | O75534 CSDE1_HUMAN   | R.FNISTDRR.D           |            | 2 | 2,0549 | 0,118 | -0,846 |
| 22 | Q05BP1 Q05BP1_HUMAN  | R.KNVLQLR.L            |            | 2 | 2,0525 | 0,108 | 0,28   |
| 22 | P28838 AMPL_HUMAN    | E.YDDLKQK.K            |            | 2 | 2,0476 | 0,12  | -0,134 |
| 22 | Q9UPQ3 CENG2_HUMAN   | E.RVFQDVAQK.I          |            | 2 | 2,0419 | 0,224 | 0,447  |
| 22 | Q15424 SAFB1_HUMAN   | E.GRGLPPPPR.R          |            | 2 | 2,0417 | 0,12  | 0,258  |
| 22 | Q9H0G5 CCD55_HUMAN   | R.AKDKFLDQE.R          |            | 2 | 2,0415 | 0,182 | -0,558 |
| 22 | P46013 KI67_HUMAN    | R.RVS#FGGHLRPE.L       | S507:      | 2 | 2,041  | 0,466 | -0,914 |

|    |                    |                             |       |   |        |       |        |
|----|--------------------|-----------------------------|-------|---|--------|-------|--------|
| 22 | P20042 IF2B_HUMAN  | K.KNVKFPDEDE.I              |       | 2 | 2,0401 | 0,264 | -0,6   |
| 22 | Q15293 RCN1_HUMAN  | K.RYIFDNVAK.V               |       | 2 | 2,0369 | 0,189 | -0,758 |
| 22 | P23368 MAOM_HUMAN  | E.DFGNHNAFR.F               |       | 2 | 2,0362 | 0,199 | -0,566 |
| 22 | Q15691 MARE1_HUMAN | E.HEYIQNFK.I                |       | 2 | 2,0356 | 0,265 | -0,226 |
| 22 | Q12904 MCA1_HUMAN  | R.KHPDADSLYVEE.V            |       | 2 | 2,0301 | 0,198 | -0,261 |
| 22 | Q14203 DCTN1_HUMAN | E.LLHKDQLDE.T               |       | 2 | 2,027  | 0,109 | -0,769 |
| 22 | Q14671 PUM1_HUMAN  | R.RPGQSFHVNSE.V             |       | 2 | 2,0248 | 0,246 | -1,843 |
| 22 | P49757 NUMB_HUMAN  | R.KKDVVYPE.A                |       | 2 | 2,0208 | 0,189 | -0,624 |
| 22 | P13693 TCTP_HUMAN  | K.HILANFK.N                 |       | 2 | 2,0054 | 0,146 | 1,23   |
| 22 | Q01081 U2AF1_HUMAN | E.KAVIDLNNR.W               |       | 2 | 2,004  | 0,213 | -0,117 |
| 22 | P08238 HS90B_HUMAN | R.ADHGEPIGR.G               |       | 2 | 2,0027 | 0,36  | -0,256 |
| 23 | Q70E73 RAPH1_HUMAN | E.SQSNHSNQSDSGVSDTQPAGHVR.S |       | 3 | 6,5428 | 0,501 | -1,681 |
| 23 | Q4LE39 ARI4B_HUMAN | E.NKVHADLVISKPVSKS#PE.R     | S778: | 3 | 5,9601 | 0,401 | -1,353 |
| 23 | Q96I24 FUBP3_HUMAN | K.RPLDDGVGNQLGALVHQR.T      |       | 3 | 5,7819 | 0,308 | -0,47  |
| 23 | Q99460 PSMD1_HUMAN | K.KKEPEPNFQLLDNPAR.V        |       | 3 | 5,7303 | 0,389 | -0,579 |
| 23 | Q15393 SF3B3_HUMAN | K.HIANYISGIQTIGHR.V         |       | 3 | 5,5302 | 0,434 | -0,653 |
| 23 | P49790 NU153_HUMAN | E.IKDSTSQHDDDNISTTSGFSSR.A  |       | 3 | 5,5241 | 0,54  | -0,305 |
| 23 | Q9Y2K2 QSK_HUMAN   | R.RASDGGANIQLHAQQLK.R       |       | 3 | 5,4025 | 0,308 | -0,095 |
| 23 | A0FGR8 ESYT2_HUMAN | E.KAQPEAGPQGLHDLGR.S        |       | 3 | 5,364  | 0,506 | 0,62   |
| 23 | Q9H1K0 RBNS5_HUMAN | E.SLSTHTSPSQSPNSVHGSR.R     |       | 3 | 5,1835 | 0,467 | -0,279 |
| 23 | P14625 ENPL_HUMAN  | R.FQSSHPTDITSLDQYVER.M      |       | 3 | 5,183  | 0,434 | -0,405 |
| 23 | Q16881 TRXR1_HUMAN | K.KLM*HQAALLGQALQDSR.N      |       | 3 | 5,1519 | 0,381 | -0,675 |
| 23 | Q13561 DCTN2_HUMAN | E.HIIVNPNAAYDKFK.D          |       | 3 | 5,1498 | 0,501 | -0,449 |
| 23 | Q9UFC0 LRWD1_HUMAN | K.RPDDVPLSLSPSKR.A          |       | 3 | 5,1243 | 0,408 | -0,817 |
| 23 | Q12756 KIF1A_HUMAN | R.RQDIVLSGHFIKEE.H          |       | 3 | 5,0898 | 0,486 | -0,438 |
| 23 | A0FGR8 ESYT2_HUMAN | E.KAQPEAGPQGLHDLGR.S        |       | 2 | 5,0739 | 0,504 | -0,207 |
| 23 | Q12756 KIF1A_HUMAN | R.RQDIVLSGHFIKEE.E          |       | 3 | 5,0462 | 0,385 | -0,119 |
| 23 | P14625 ENPL_HUMAN  | E.KNLLHVTDGTGVM*TREE.L      |       | 3 | 5,0449 | 0,424 | -0,286 |
| 23 | P35579 MYH9_HUMAN  | K.KVIQYLAYVASSHK.S          |       | 3 | 4,9922 | 0,483 | -0,114 |
| 23 | O14497 ARI1A_HUMAN | E.RGEDPPPDIFAAADSCK.S       |       | 3 | 4,9701 | 0,362 | -0,403 |
| 23 | Q9C0B5 ZDHC5_HUMAN | K.YRPGYSSSSTAAM*PHSSAK.L    |       | 3 | 4,9584 | 0,453 | -0,589 |
| 23 | Q9H4A4 AMPB_HUMAN  | R.RPLHSAQAVDVASASNFR.A      |       | 3 | 4,9515 | 0,372 | -0,475 |
| 23 | Q9H4A4 AMPB_HUMAN  | R.RPLHSAQAVDVASASNFR.A      |       | 2 | 4,934  | 0,513 | -0,57  |

|    |                     |                               |       |   |        |       |        |
|----|---------------------|-------------------------------|-------|---|--------|-------|--------|
| 23 | Q9BXP5 ARS2_HUMAN   | R.RQQM*QDFFLAHKDEE.W          |       | 3 | 4,9307 | 0,299 | -0,85  |
| 23 | Q9NRX4 PHP14_HUMAN  | E.YHADIYDKVSGDM*QK.Q          |       | 2 | 4,9228 | 0,491 | -0,41  |
| 23 | Q8WU90 ZC3HF_HUMAN  | R.HALPPGFVLKK.D               |       | 3 | 4,8499 | 0,452 | 0,682  |
| 23 | P23677 IP3KA_HUMAN  | E.RDCLPAAGSSHLQQPR.R          |       | 3 | 4,8378 | 0,266 | -0,306 |
| 23 | P11717 MPRI_HUMAN   | R.RTTTGDVQVLGLVHTQK.L         |       | 3 | 4,8071 | 0,399 | -0,888 |
| 23 | P46531 NOTC1_HUMAN  | R.REPLGEDSVGLKPLK.N           |       | 3 | 4,7832 | 0,318 | -0,782 |
| 23 | O43395 PRPF3_HUMAN  | K.AADHLKPFLDDSTLR.F           |       | 3 | 4,7645 | 0,44  | -0,323 |
| 23 | Q9P2N5 RBM27_HUMAN  | E.KEDLLQHFSTANQGPK.F          |       | 2 | 4,7618 | 0,44  | -0,808 |
| 23 | Q96EL3 RM53_HUMAN   | R.HDGSEPCVDVLFGDGHR.L         |       | 3 | 4,7398 | 0,368 | -0,386 |
| 23 | P35527 K1C9_HUMAN   | R.HGVQELEIELQSLSK.A           |       | 3 | 4,7359 | 0,346 | -0,279 |
| 23 | P04040 CATA_HUMAN   | K.NAIHTFVQSGSHLAARE.K         |       | 2 | 4,7304 | 0,587 | -0,929 |
| 23 | O94916 NFAT5_HUMAN  | E.KQLTSNTVQQHPSTPK.R          |       | 3 | 4,6649 | 0,401 | -0,612 |
| 23 | Q9BRX5 PSF3_HUMAN   | E.KGQASQITASNLVQNYKK.R        |       | 3 | 4,6615 | 0,345 | -0,37  |
| 23 | P49916 DNL3_HUMAN   | E.KEQITQHIADLSSK.A            |       | 3 | 4,6529 | 0,267 | -0,343 |
| 23 | Q15393 SF3B3_HUMAN  | K.HIANYISGIQTIGHR.V           |       | 2 | 4,6303 | 0,481 | -0,436 |
| 23 | A8K6Q8 A8K6Q8_HUMAN | R.KLSEKLDSTFTSTIK.L           |       | 2 | 4,6234 | 0,392 | -0,471 |
| 23 | P28799 GRN_HUMAN    | E.DHIHCCPAGFTCDTQK.G          |       | 2 | 4,6068 | 0,583 | -0,251 |
| 23 | P23193 TCEA1_HUMAN  | K.KKEPAITSQNS#PEAR.E          | S100: | 3 | 4,5962 | 0,298 | -1,054 |
| 23 | Q96JH7 VCIP1_HUMAN  | K.KNPDDYTPVNIDGAHAQR.V        |       | 3 | 4,5578 | 0,32  | -0,637 |
| 23 | O95671 ASML_HUMAN   | E.HSVFTGVAIVHCSSK.D           |       | 3 | 4,5548 | 0,315 | -0,786 |
| 23 | P14324 FPPS_HUMAN   | E.KQDFVQHFSQIVR.V             |       | 3 | 4,5472 | 0,407 | -0,224 |
| 23 | P11388 TOP2A_HUMAN  | K.KQTTLAFKPIK.K               |       | 3 | 4,5064 | 0,217 | 0,143  |
| 23 | Q15057 CENB2_HUMAN  | R.KFVDKYSISLS#PPEQQKK.F       | S521: | 3 | 4,5031 | 0,35  | -0,332 |
| 23 | Q15642 CIP4_HUMAN   | R.HARPPDPPASAPPDSSNSASQDTK.E  |       | 3 | 4,482  | 0,354 | -0,073 |
| 23 | Q9UPY6 WASF3_HUMAN  | E.AKREPVGNDVATILSR.R          |       | 3 | 4,4773 | 0,382 | 0      |
| 23 | Q4LE39 ARI4B_HUMAN  | K.VHADLVISKVSKS#PER.L         | S778: | 2 | 4,4704 | 0,473 | -0,565 |
| 23 | P16949 STMN1_HUMAN  | R.SKESVPEFPLS#PPKKK.D         | S38:  | 3 | 4,459  | 0,406 | -0,487 |
| 23 | P63279 UBC9_HUMAN   | R.KDHPPGFVAVPTK.N             |       | 3 | 4,4405 | 0,383 | -0,507 |
| 23 | Q15642 CIP4_HUMAN   | R.HARPPDPPASAPPDSSNSASQDTKE.S |       | 3 | 4,4308 | 0,465 | -0,346 |
| 23 | Q86VV8 RTTN_HUMAN   | K.HINAQLNLDSLPGK.A            |       | 3 | 4,4268 | 0,321 | -0,764 |
| 23 | Q5VT52 K0460_HUMAN  | E.KGAPIETLGYHSASNR.R          |       | 2 | 4,4134 | 0,557 | -0,287 |
| 23 | P51991 ROA3_HUMAN   | K.RGFAFVTFDDHDTVDK.I          |       | 3 | 4,4063 | 0,339 | -0,685 |
| 23 | Q8NI36 WDR36_HUMAN  | R.NAHSTAIAGLTFLHR.E           |       | 3 | 4,404  | 0,348 | -0,796 |

|    |                    |                            |      |   |        |       |        |
|----|--------------------|----------------------------|------|---|--------|-------|--------|
| 23 | P50995 ANX11_HUMAN | K.SLYHDISGDTSGDYRK.I       |      | 3 | 4,4017 | 0,472 | -0,202 |
| 23 | P62495 ERF1_HUMAN  | E.KILYLTPQEKDK.S           |      | 3 | 4,3774 | 0,328 | -0,456 |
| 23 | Q9Y383 LC7L2_HUMAN | K.SHLLNCCPHDVLGTR.M        |      | 2 | 4,3713 | 0,637 | -0,719 |
| 23 | P0C7M2 RA1L3_HUMAN | K.RGFVFTFDDHDSVDK.I        |      | 3 | 4,3606 | 0,388 | -0,296 |
| 23 | Q9UK76 HN1_HUMAN   | R.RNS#SEASSGDFLDLKE.G      | S87: | 2 | 4,3542 | 0,423 | -0,129 |
| 23 | P46100 ATRX_HUMAN  | K.KQQASASTDGVDKLSGKE.Q     |      | 3 | 4,3314 | 0,471 | -0,89  |
| 23 | O95359 TACC2_HUMAN | E.KIGSSLPQDDDAPKK.Q        |      | 3 | 4,2976 | 0,379 | 0      |
| 23 | Q8IUH3 RBM45_HUMAN | E.M*HGQCLGPNDTKPIK.V       |      | 3 | 4,285  | 0,287 | 0,214  |
| 23 | Q15181 IPYR_HUMAN  | E.FKDKDFAIK.S              |      | 3 | 4,2815 | 0,34  | -0,315 |
| 23 | Q6PD62 CTR9_HUMAN  | E.ARQCSDLLSQAQYHVAR.A      |      | 3 | 4,2673 | 0,259 | -0,457 |
| 23 | P07437 TBB5_HUMAN  | E.HGIDPTGTYHGSDQLDR.I      |      | 2 | 4,267  | 0,542 | -0,116 |
| 23 | P54886 P5CS_HUMAN  | E.IIHHLADLLTDQRDE.I        |      | 3 | 4,2626 | 0,42  | -0,307 |
| 23 | P46783 RS10_HUMAN  | E.LADKNVPNLHVM*K.A         |      | 3 | 4,2583 | 0,388 | -0,367 |
| 23 | P11021 GRP78_HUMAN | K.KKELEEIVQPIISK.L         |      | 2 | 4,2536 | 0,386 | -0,148 |
| 23 | P28799 GRN_HUMAN   | E.DHIHCCPAGFTCDTQK.G       |      | 3 | 4,25   | 0,409 | 0      |
| 23 | Q6ZRS2 SRCAP_HUMAN | E.TQGANHTPVISAHQTR.S       |      | 3 | 4,2438 | 0,428 | -0,319 |
| 23 | P23528 COF1_HUMAN  | K.KAVLFCLSEDK.N            |      | 3 | 4,2369 | 0,332 | -0,191 |
| 23 | P49790 NU153_HUMAN | E.IKDSTSQHDDDNISTTSGFSSR.A |      | 2 | 4,2269 | 0,437 | 0,305  |
| 23 | P60903 S10AA_HUMAN | E.NQKDLAVDKIM*K.D          |      | 3 | 4,2189 | 0,291 | -0,362 |
| 23 | Q9H6Z4 RANB3_HUMAN | E.KKDPATQQAFVFGQNL.R.D     |      | 3 | 4,2047 | 0,411 | -0,657 |
| 23 | O00170 AIP_HUMAN   | E.VLDHCSSILNKYDDNVK.A      |      | 3 | 4,1949 | 0,366 | -1,087 |
| 23 | P22087 FBRL_HUMAN  | D.HAVVVGVYRPPPK.V          |      | 3 | 4,1915 | 0,464 | 0,193  |
| 23 | O75882 ATRN_HUMAN  | E.ACDIPHCTDNCGFPHR.G       |      | 3 | 4,1672 | 0,452 | -1,215 |
| 23 | Q12904 MCA1_HUMAN  | K.KQQSIAGSADSKPIDVSR.L     |      | 3 | 4,1671 | 0,386 | -0,679 |
| 23 | P12532 KCRU_HUMAN  | R.RLYPPSAEYDPLRK.H         |      | 3 | 4,1576 | 0,3   | -0,215 |
| 23 | Q6WCQ1 MRIP_HUMAN  | K.HVHPTTAPDVTSSLPEEK.N     |      | 3 | 4,1538 | 0,358 | -0,846 |
| 23 | P55209 NP1L1_HUMAN | R.KYAVLYQPLFDKR.F          |      | 3 | 4,1489 | 0,395 | -0,892 |
| 23 | Q8WXI9 P66B_HUMAN  | R.TAGRPGKENINDEPVDM*SAR.R  |      | 3 | 4,1357 | 0,249 | -0,505 |
| 23 | P35579 MYH9_HUMAN  | K.HSQAVEELAEQLEQTKR.V      |      | 3 | 4,132  | 0,344 | -0,825 |
| 23 | P35579 MYH9_HUMAN  | R.HEM*PPHIYAITDTAYR.S      |      | 3 | 4,1189 | 0,451 | -0,853 |
| 23 | Q9BQA1 MEP50_HUMAN | R.AHAAQVTCVAASPHKD.S       |      | 3 | 4,1113 | 0,525 | -0,88  |
| 23 | Q7Z3T8 ZFY16_HUMAN | D.M*GNLVHATNSEEDIKK.L      |      | 3 | 4,1074 | 0,333 | -0,508 |
| 23 | P11142 HSP7C_HUMAN | D.KSQIHDIVLVGGSTR.I        |      | 2 | 4,0993 | 0,544 | -0,758 |

|    |                     |                             |            |   |        |       |        |
|----|---------------------|-----------------------------|------------|---|--------|-------|--------|
| 23 | Q4VXC3 Q4VXC3_HUMAN | E.SLNHSHGHPTADVQTFQAK.R     |            | 3 | 4,0984 | 0,262 | -0,271 |
| 23 | P46013 KI67_HUMAN   | R.NRTPAKVEDAADSATKPE.N      |            | 3 | 4,0918 | 0,509 | 0,385  |
| 23 | Q7Z2K8 GRIN1_HUMAN  | R.KAEPLASGKGEVSLGK.A        |            | 3 | 4,0908 | 0,368 | -0,329 |
| 23 | Q92598 HS105_HUMAN  | K.NQQITHANNTVSNFKR.F        |            | 3 | 4,0896 | 0,364 | -0,489 |
| 23 | P07437 TBB5_HUMAN   | E.HGIDPTGTYHGSDLQLDR.I      |            | 3 | 4,0879 | 0,452 | -0,523 |
| 23 | P04040 CATA_HUMAN   | K.NAIHTFVQSGSHLAAR.E        |            | 3 | 4,0831 | 0,382 | -0,642 |
| 23 | O75531 BAF_HUMAN    | K.HRDFVAEPM*GEKPVGSLAGIGE.V |            | 3 | 4,0765 | 0,348 | -0,475 |
| 23 | O00231 PSD11_HUMAN  | E.LRDDPIISTHLAK.L           |            | 3 | 4,0666 | 0,285 | -0,804 |
| 23 | Q9NZM1 MYOF_HUMAN   | E.DRDHYIPNTLNPVFGR.M        |            | 3 | 4,0565 | 0,159 | -0,382 |
| 23 | Q32MZ4 LRRF1_HUMAN  | R.NM*PGLSAATLASLGGTSSR.R    |            | 2 | 4,0498 | 0,501 | -0,405 |
| 23 | Q8NHQ8 RASF8_HUMAN  | R.HLAPHENPIISLNK.W          |            | 3 | 4,0406 | 0,318 | 1,502  |
| 23 | Q8NE86 C109A_HUMAN  | R.LRDPLQVHLPLR.Q            |            | 3 | 4,0377 | 0,272 | -0,251 |
| 23 | P08133 ANXA6_HUMAN  | E.LKGTVRPANDFNPDADAK.A      |            | 2 | 4,0358 | 0,49  | -0,632 |
| 23 | Q15149 PLEC1_HUMAN  | R.GYLNKTDHDLSEPSEVR.S       |            | 3 | 4,0243 | 0,288 | -0,175 |
| 23 | Q9UFC0 LRWD1_HUMAN  | K.ANS#PEKPPEAGAAHKPR.A      | S212:      | 3 | 3,9987 | 0,404 | -0,299 |
| 23 | Q16181 SEPT7_HUMAN  | R.THM*QDLKDVTNNVHYE.N       |            | 3 | 3,996  | 0,338 | -0,187 |
| 23 | Q9NYF8 BCLF1_HUMAN  | R.YSPSQNS#PIHHIPSRRS#PAK.T  | S290:S300: | 3 | 3,9845 | 0,313 | -0,454 |
| 23 | P63241 IF5A1_HUMAN  | K.VHLVGIDIFTGKK.Y           |            | 3 | 3,9802 | 0,314 | -0,128 |
| 23 | P11142 HSP7C_HUMAN  | K.LDKSQIHDIIVLVGGSTR.I      |            | 3 | 3,974  | 0,392 | -0,896 |
| 23 | Q96SU4 OSBL9_HUMAN  | K.RLIDSSGSASVLTHSSSGNSLK.R  |            | 3 | 3,9713 | 0,206 | -0,249 |
| 23 | Q8IV63 VRK3_HUMAN   | E.HVGSQTFVNPVHVSFQGSK.R     |            | 3 | 3,9672 | 0,372 | -0,627 |
| 23 | Q8IUD2 RB6I2_HUMAN  | R.M*KLM*ADNYEDDHFK.S        |            | 3 | 3,9613 | 0,339 | -0,614 |
| 23 | P04040 CATA_HUMAN   | K.NAIHTFVQSGSHLAARE.K       |            | 3 | 3,9607 | 0,489 | -1,095 |
| 23 | Q14676 MDC1_HUMAN   | E.KEVPPGSAIIHIK.K           |            | 3 | 3,9577 | 0,314 | 0,066  |
| 23 | P35908 K22E_HUMAN   | R.HGGGGGGFGGGGFGSR.S        |            | 2 | 3,9498 | 0,629 | -0,554 |
| 23 | P35580 MYH10_HUMAN  | K.DKADFCIIHYAGK.V           |            | 2 | 3,9494 | 0,475 | -0,714 |
| 23 | Q01433 AMPD2_HUMAN  | R.RYLQQLAEKPLETR.T          |            | 3 | 3,9431 | 0,288 | -0,524 |
| 23 | Q8WXH0 SYNE2_HUMAN  | E.HQTSDEDSVHSPSSASQVK.H     |            | 3 | 3,9425 | 0,254 | -0,451 |
| 23 | Q01813 K6PP_HUMAN   | R.KNVLGHM*QQGGAPSPFDR.N     |            | 3 | 3,9402 | 0,368 | -0,561 |
| 23 | Q9UPY6 WASF3_HUMAN  | E.AKREPVGNDVATILSR.R        |            | 2 | 3,9368 | 0,254 | -0,141 |
| 23 | Q9Y224 CN166_HUMAN  | R.KLTALDYHNPAGFNCKDE.T      |            | 3 | 3,9325 | 0,306 | 0      |
| 23 | P30084 ECHM_HUMAN   | K.KLFYSTFATDDRKE.G          |            | 3 | 3,9305 | 0,339 | -0,531 |
| 23 | Q96A33 CCD47_HUMAN  | K.M*VHFLTHYADKIE.S          |            | 3 | 3,9291 | 0,363 | -0,226 |



|    |                    |                             |       |   |        |       |        |
|----|--------------------|-----------------------------|-------|---|--------|-------|--------|
| 23 | O14545 TRAD1_HUMAN | R.VRHQGDLSGGYLDLDTKQE.T     |       | 3 | 3,9265 | 0,424 | -0,179 |
| 23 | P24928 RPB1_HUMAN  | K.RVQFGVLSPELKR.M           |       | 3 | 3,9241 | 0,166 | -0,334 |
| 23 | P62805 H4_HUMAN    | R.KTVTAM*DVVYALKR.Q         |       | 3 | 3,914  | 0,435 | -0,341 |
| 23 | P43243 MATR3_HUMAN | D.DRGPSLNPVLDYDHGSR.S       |       | 3 | 3,9084 | 0,09  | -0,867 |
| 23 | Q5TGY3 AHDC1_HUMAN | K.SERPSHPLYEPEPEPR.D        |       | 3 | 3,9073 | 0,3   | -0,286 |
| 23 | P21333 FLNA_HUMAN  | K.THEAEIVEGENHTYCIR.F       |       | 3 | 3,8941 | 0,329 | -0,356 |
| 23 | P55809 SCOT_HUMAN  | E.DIHIPQIYVHR.L             |       | 3 | 3,8911 | 0,368 | -0,131 |
| 23 | P51991 ROA3_HUMAN  | K.RGFAFVTFDDHDTVDK.I        |       | 2 | 3,8904 | 0,471 | -0,391 |
| 23 | P30084 ECHM_HUMAN  | R.GKNNTVGLIQLNRPK.A         |       | 3 | 3,8816 | 0,273 | -0,221 |
| 23 | P40227 TCPZ_HUMAN  | R.KVCGSDKGFVVINQK.G         |       | 3 | 3,8787 | 0,221 | -0,408 |
| 23 | Q53T59 H1BP3_HUMAN | R.RLQNAHTGLDLTVPQHQE.V      |       | 3 | 3,8766 | 0,366 | -1,245 |
| 23 | Q92890 UFD1_HUMAN  | K.KGVEPSPS#PIKPGDIKR.G      | S247: | 3 | 3,8763 | 0,451 | -0,194 |
| 23 | P43243 MATR3_HUMAN | D.RGPSLNPVLDYDHGSR.S        |       | 3 | 3,8733 | 0,27  | -0,616 |
| 23 | P26640 SYVC_HUMAN  | E.KRDPGVITYDLTPPGEK.K       |       | 3 | 3,8718 | 0,194 | 0,184  |
| 23 | O00244 ATOX1_HUMAN | E.SEHSM*DTLLATLKK.T         |       | 3 | 3,8684 | 0,185 | -0,575 |
| 23 | P62847 RS24_HUMAN  | R.KQM*VIDVLHPGK.A           |       | 3 | 3,8649 | 0,316 | 0      |
| 23 | Q81WJ2 GCC2_HUMAN  | R.RNTDLPLLDLDM*HTVTR.E      |       | 3 | 3,8634 | 0,343 | -0,712 |
| 23 | Q99733 NP1L4_HUMAN | R.KYAALYQPLFDKR.R           |       | 3 | 3,8615 | 0,361 | -0,227 |
| 23 | O75533 SF3B1_HUMAN | R.TDRGGDSIGETPTPGASKR.K     |       | 3 | 3,8586 | 0,258 | -0,481 |
| 23 | Q9UNZ2 NSF1C_HUMAN | R.LAHGGQVNLDM*EDHRDE.D      |       | 2 | 3,8514 | 0,453 | -0,063 |
| 23 | Q8WXX5 DNJC9_HUMAN | K.VSLQVHPDRVGEKDKE.D        |       | 3 | 3,8465 | 0,323 | 0,207  |
| 23 | P07237 PDIA1_HUMAN | K.YQLDKDGVVLFKK.F           |       | 3 | 3,838  | 0,304 | -0,236 |
| 23 | Q9BW71 HIRP3_HUMAN | R.GRPDLSTLTHSIVR.R          |       | 3 | 3,8362 | 0,175 | -0,236 |
| 23 | Q5UIP0 RIF1_HUMAN  | E.DHHTSQKVEEPSQCLASGTAISE.L |       | 3 | 3,8361 | 0,401 | -0,364 |
| 23 | Q9H8M2 BRD9_HUMAN  | K.KVVDDLDDQITGGDHSR.T       |       | 3 | 3,8341 | 0,267 | -0,392 |
| 23 | Q8IVH2 FOXP4_HUMAN | R.RDS#SSHEETPGSHPLYGHGE.C   | S291: | 3 | 3,8296 | 0,269 | -0,729 |
| 23 | Q13347 EIF3I_HUMAN | K.GHFGPINSVAFHPDGK.S        |       | 3 | 3,8188 | 0,435 | -0,544 |
| 23 | Q02952 AKA12_HUMAN | E.M*KGSVEEPKPEEPK.R         |       | 3 | 3,8104 | 0,284 | -0,457 |
| 23 | Q8IXQ3 CI040_HUMAN | R.KIDAGTM*AEPSASPSKR.R      |       | 3 | 3,8099 | 0,34  | -0,727 |
| 23 | P47756 CAPZB_HUMAN | E.KDETVSDCSPHIANIGR.L       |       | 3 | 3,8079 | 0,44  | -1,734 |
| 23 | Q86YZ3 HORN_HUMAN  | R.GPYESGSGHSSGLGHQESR.S     |       | 3 | 3,8075 | 0,49  | -0,284 |
| 23 | Q9UQ80 PA2G4_HUMAN | E.KTIIQNPTDQKK.D            |       | 2 | 3,7993 | 0,264 | 0,554  |
| 23 | Q13619 CUL4A_HUMAN | E.KQLLGEHLTAILQK.G          |       | 3 | 3,7969 | 0,36  | -0,574 |

|    |                     |                              |              |   |        |       |        |
|----|---------------------|------------------------------|--------------|---|--------|-------|--------|
| 23 | P49916 DNL3_HUMAN   | E.KEQITQHIADLSSK.A           |              | 2 | 3,7955 | 0,491 | -0,534 |
| 23 | Q7L014 DDX46_HUMAN  | R.KLLEPVDHGKIE.Y             |              | 3 | 3,7929 | 0,274 | -0,066 |
| 23 | Q0VF46 Q0VF46_HUMAN | K.TKTPKHS#PIKEEPCGSLSE.T     | S99:         | 3 | 3,7924 | 0,424 | -0,083 |
| 23 | Q5VT52 K0460_HUMAN  | E.KGAPIETLGYHSASNR.R         |              | 3 | 3,7921 | 0,462 | -0,108 |
| 23 | Q9UGV6 HMG1X_HUMAN  | K.IKGEHPGLSIGDVAK.K          |              | 2 | 3,7746 | 0,484 | -0,561 |
| 23 | P16949 STMN1_HUMAN  | R.SKESVPEFPLS#PPKKK.D        | S38:         | 2 | 3,7671 | 0,353 | -0,585 |
| 23 | Q5QP82 WDR32_HUMAN  | E.SDHGNCITSLQLHPK.G          |              | 3 | 3,7635 | 0,356 | -0,321 |
| 23 | Q8N9M1 CS047_HUMAN  | E.TKADTTTGSKPTGVFSR.L        |              | 3 | 3,7633 | 0,363 | -0,417 |
| 23 | Q08945 SSRP1_HUMAN  | K.IKSDHPGISITDLSK.K          |              | 3 | 3,758  | 0,404 | -0,681 |
| 23 | Q09666 AHNK_HUMAN   | E.GDLKGPEVDLKGPK.V           |              | 3 | 3,755  | 0,359 | -0,315 |
| 23 | Q6PJT7 ZC3HE_HUMAN  | R.GLLHPQQLHLLSR.Q            |              | 3 | 3,7485 | 0,4   | -0,423 |
| 23 | Q8WTT2 NOC3L_HUMAN  | K.KPIPLENPKEK.R              |              | 3 | 3,7352 | 0,224 | 0,071  |
| 23 | P49792 RBP2_HUMAN   | E.KDSLITPHVSRSS#T#PRESPCGK.I | S2457:T2458: | 3 | 3,7332 | 1     | -0,211 |
| 23 | P07900 HS90A_HUMAN  | K.HLEINPDHSIETLR.Q           |              | 3 | 3,7277 | 0,435 | -0,409 |
| 23 | Q9Y3F4 STRAP_HUMAN  | E.DKQILSADDKTVR.L            |              | 3 | 3,7167 | 0,406 | -0,43  |
| 23 | P30084 ECHM_HUMAN   | R.GKNNTVGLIQLNRPK.A          |              | 2 | 3,7088 | 0,457 | -0,591 |
| 23 | P08237 K6PF_HUMAN   | R.KNVLGHM*QQGGSPTPFDR.N      |              | 3 | 3,7084 | 0,387 | -0,184 |
| 23 | Q92530 PSMF1_HUMAN  | E.KANVSS#PHREFPPATARE.V      | S153:        | 3 | 3,7064 | 0,261 | -0,529 |
| 23 | P42166 LAP2A_HUMAN  | E.RSHISDQS#PLSSK.R           | S351:        | 3 | 3,704  | 0,323 | 0,361  |
| 23 | P46821 MAP1B_HUMAN  | K.HLDFLKQPLATQKD.L           |              | 3 | 3,7007 | 0,29  | -0,442 |
| 23 | Q9UIG0 BAZ1B_HUMAN  | R.YQDIIHSIHLAR.K             |              | 2 | 3,6969 | 0,52  | -0,416 |
| 23 | P41250 SYG_HUMAN    | K.TSGHVDFADFM*VK.D           |              | 3 | 3,6938 | 0,255 | -0,801 |
| 23 | P09960 LKHA4_HUMAN  | K.DLAAFDKSHDQAVR.T           |              | 2 | 3,6867 | 0,54  | -0,853 |
| 23 | Q02952 AKA12_HUMAN  | E.MKGSVEEPKPEPK.R            |              | 3 | 3,6837 | 0,163 | -0,231 |
| 23 | O75179 ANR17_HUMAN  | R.KSDNHSPAVTTTVSSK.K         |              | 3 | 3,6833 | 0,338 | 0,312  |
| 23 | Q8NC51 PAIRB_HUMAN  | R.KNPLPPSVGVVDKKEE.T         |              | 3 | 3,6787 | 0,254 | 0,421  |
| 23 | P14324 FPPS_HUMAN   | E.KQDFVQHFSQIVR.V            |              | 2 | 3,6678 | 0,432 | -0,673 |
| 23 | P61586 RHOA_HUMAN   | E.VKHFCPNVPIILVGNK.K         |              | 3 | 3,6609 | 0,223 | -0,399 |
| 23 | Q9NP64 NO40_HUMAN   | R.RRS#FQDYTGQK.I             | S114:        | 3 | 3,6573 | 0,251 | 0,312  |
| 23 | Q9UNS1 TIM_HUMAN    | E.EFRDSDDDLGHIM*K.N          |              | 3 | 3,6572 | 0,215 | -0,545 |
| 23 | Q09666 AHNK_HUMAN   | E.GEIKAPDVIKGP.V             |              | 3 | 3,6522 | 0,281 | -0,125 |
| 23 | P49773 HINT1_HUMAN  | K.KHISQISVAEDDDE.S           |              | 2 | 3,6506 | 0,506 | -0,308 |
| 23 | O15067 PUR4_HUMAN   | R.GHLLYVALSPGQHR.L           |              | 3 | 3,6484 | 0,332 | -0,945 |

|    |                    |                             |        |   |        |       |        |
|----|--------------------|-----------------------------|--------|---|--------|-------|--------|
| 23 | P35580 MYH10_HUMAN | K.VIQYLAHVASSHK.G           |        | 2 | 3,6389 | 0,395 | -0,336 |
| 23 | Q96DI7 WDR57_HUMAN | R.KGPELPLVPVKR.Q            |        | 3 | 3,6333 | 0,344 | -0,343 |
| 23 | Q7Z5K2 WAPL_HUMAN  | K.LITSDKVENFHEEHE.K         |        | 3 | 3,6319 | 0,296 | -0,501 |
| 23 | Q9UK76 HN1_HUMAN   | R.RNS#SEASSGDFLDLK.G        | S87:   | 2 | 3,6259 | 0,382 | -0,072 |
| 23 | Q15181 IPYR_HUMAN  | E.FKDKDAIDIK.S              |        | 2 | 3,6178 | 0,214 | -0,504 |
| 23 | O15014 ZN609_HUMAN | K.ALDILQQHASHYK.S           |        | 2 | 3,6111 | 0,45  | -0,4   |
| 23 | Q14839 CHD4_HUMAN  | E.DSSVIHYDDKAIER.L          |        | 3 | 3,6076 | 0,402 | -0,999 |
| 23 | P14625 ENPL_HUMAN  | E.KNLLHVTDTGVM*TREE.L       |        | 2 | 3,6048 | 0,563 | -0,318 |
| 23 | Q9HAS0 NJMU_HUMAN  | R.RLEPPSSSHYCLYSYR.G        |        | 3 | 3,6033 | 0,366 | -0,908 |
| 23 | Q9Y6W5 WASF2_HUMAN | R.DVVGNDVATILSR.R           |        | 2 | 3,6001 | 0,416 | -0,269 |
| 23 | P40227 TCPZ_HUMAN  | R.KVCGSDKGFVVINQK.G         |        | 2 | 3,5956 | 0,423 | -0,544 |
| 23 | Q00688 FKBP3_HUMAN | K.TANKDHLVTAYNHLFE.T        |        | 2 | 3,5899 | 0,453 | -0,195 |
| 23 | Q92688 AN32B_HUMAN | E.KLPNLTHLNLSGNK.L          |        | 3 | 3,5792 | 0,387 | -0,236 |
| 23 | Q9NY61 AATF_HUMAN  | R.KLASASLLDTPDKR.Y          |        | 3 | 3,5777 | 0,273 | -0,064 |
| 23 | P48634 BAT2_HUMAN  | R.RGDKEAPPPVLLTPK.A         |        | 3 | 3,5758 | 0,33  | -0,339 |
| 23 | Q92766 RREB1_HUMAN | R.SKRPAHPILATADGASQLVGM*E.- |        | 3 | 3,5676 | 0,354 | -0,565 |
| 23 | Q7KZI7 MARK2_HUMAN | R.KKTTPTPSTNSVLSTSTNR.S     |        | 3 | 3,5535 | 0,217 | -0,362 |
| 23 | Q9HC44 GPBL1_HUMAN | R.RHNS#SDGFFNNGPLR.T        | S49:   | 3 | 3,551  | 0,239 | -0,509 |
| 23 | Q04864 REL_HUMAN   | K.KEPNLFSDAVVRE.M           |        | 3 | 3,5509 | 0,395 | -0,557 |
| 23 | Q92616 GCN1L_HUMAN | E.KLYRPPVLDALGR.V           |        | 3 | 3,5409 | 0,359 | -0,229 |
| 23 | P12270 TPR_HUMAN   | K.IAHLAGVKDQLTKE.N          |        | 2 | 3,5354 | 0,428 | -0,24  |
| 23 | Q16891 IMMT_HUMAN  | E.GKLHNM*IVDLDNVVK.K        |        | 3 | 3,534  | 0,346 | -0,534 |
| 23 | P06733 ENOA_HUMAN  | R.SGKYDLDFKSPDDPSR.Y        |        | 2 | 3,5333 | 0,556 | -0,735 |
| 23 | P46939 UTRO_HUMAN  | E.HYDPSQS#PQLFHDDTHSRIE.Q   | S3182: | 3 | 3,531  | 0,251 | -0,441 |
| 23 | Q5T4S7 UBR4_HUMAN  | R.KQQGYSTVSHFNIVHYD.C       |        | 3 | 3,5287 | 0,156 | -1,447 |
| 23 | Q5VT06 CE350_HUMAN | E.DLSGHSVSVSSDKGR.S         |        | 3 | 3,5245 | 0,451 | -0,119 |
| 23 | P05387 RLA2_HUMAN  | K.NIEDVIAQGIGK.L            |        | 2 | 3,5215 | 0,403 | 0,291  |
| 23 | Q9UG63 ABCF2_HUMAN | K.SKLVDEEPQLTKR.T           |        | 3 | 3,5198 | 0,265 | -0,593 |
| 23 | Q09666 AHNK_HUMAN  | E.GDLKGPALDIKGP.K           |        | 3 | 3,519  | 0,255 | 0,13   |
| 23 | Q09666 AHNK_HUMAN  | E.M*KVPDVIKGP.V             |        | 3 | 3,516  | 0,256 | 0,204  |
| 23 | Q9H1A4 APC1_HUMAN  | R.AHSPALGVHSFSGVQR.F        |        | 2 | 3,5111 | 0,386 | -0,222 |
| 23 | P48634 BAT2_HUMAN  | R.RGDKEAPPPVLLTPK.A         |        | 2 | 3,5083 | 0,412 | -0,452 |
| 23 | P07686 HEXB_HUMAN  | R.KYYKVEPLDFGGTQK.Q         |        | 3 | 3,5058 | 0,228 | -0,516 |

|    |                     |                              |              |   |        |       |        |
|----|---------------------|------------------------------|--------------|---|--------|-------|--------|
| 23 | O95785 WIZ_HUMAN    | E.ARSPDLHISPLAK.K            |              | 3 | 3,5057 | 0,292 | -0,184 |
| 23 | P38919 IF4A3_HUMAN  | R.KLDYGQHV VAGTPGR.V         |              | 3 | 3,4986 | 0,188 | -0,343 |
| 23 | Q7Z401 MYCPP_HUMAN  | K.STRPNTLDIGKPLR.S           |              | 3 | 3,4976 | 0,22  | -0,659 |
| 23 | Q7L2J0 MEPCE_HUMAN  | K.GFQRPVYLFHK.A              |              | 3 | 3,4921 | 0,263 | 0,197  |
| 23 | P23526 SAHH_HUMAN   | D.KYPVGVHFLPK.K              |              | 3 | 3,4838 | 0,279 | -0,071 |
| 23 | Q99873 ANM1_HUMAN   | K.ANKLDHVVTI.K               |              | 3 | 3,4807 | 0,146 | -0,338 |
| 23 | Q5TON5 FBP1L_HUMAN  | R.RHS#SDINHLVTQGRES#PE.G     | S488:S501:   | 3 | 3,4759 | 0,304 | -0,576 |
| 23 | Q92738 US6NL_HUMAN  | R.RPHGSTLSVSAS#PEK.S         | S680:        | 3 | 3,4705 | 0,369 | -0,336 |
| 23 | P42684 ABL2_HUMAN   | R.AGKPTASDDTSKPFPR.S         |              | 3 | 3,468  | 0,356 | -0,655 |
| 23 | P46821 MAP1B_HUMAN  | E.KEVPSKEEPSVKA.E            |              | 3 | 3,467  | 0,255 | -1,327 |
| 23 | Q8TAD8 SNIP1_HUMAN  | R.HRDGDV VLPAGVVVKQE.R       |              | 3 | 3,4664 | 0,326 | -0,302 |
| 23 | Q04917 1433F_HUMAN  | E.DSYKDSTLIM*QLLR.D          |              | 3 | 3,4639 | 0,118 | -0,215 |
| 23 | P63241 IF5A1_HUMAN  | K.VHLVGIDIFTGKK.Y            |              | 2 | 3,4615 | 0,412 | -0,598 |
| 23 | Q13586 STIM1_HUMAN  | K.KALLALNHGLDK.A             |              | 3 | 3,4605 | 0,36  | 0,212  |
| 23 | Q9BUB5 MKNK1_HUMAN  | E.KLQGG SILAHIQK.Q           |              | 3 | 3,4588 | 0,267 | 0,197  |
| 23 | P35520 CBS_HUMAN    | R.LKNEIPNSHILDQYR.N          |              | 3 | 3,4553 | 0,349 | -0,497 |
| 23 | Q15942 ZYG_HUMAN    | E.KQHPVPPPAQNQNQVR.S         |              | 3 | 3,4501 | 0,224 | -1,194 |
| 23 | Q14697 GANAB_HUMAN  | R.KLVAIVDPHIK.V              |              | 3 | 3,4468 | 0,223 | 0,741  |
| 23 | A8K6Q8 A8K6Q8_HUMAN | R.KLSEKLDSTDFSTIK.L          |              | 3 | 3,4467 | 0,43  | -0,605 |
| 23 | Q5R372 Q5R372_HUMAN | E.VKEDDGKGNFSPVPK.D          |              | 3 | 3,4361 | 0,307 | -0,679 |
| 23 | P23284 PIIB_HUMAN   | R.DKPLKDVIIADCGK.I           |              | 3 | 3,436  | 0,315 | -0,465 |
| 23 | Q66GS9 CP135_HUMAN  | R.HGLATPPLSST#LRSPSHS#PEHR.N | T1127:S1134: | 3 | 3,4216 | 1     | -0,435 |
| 23 | Q04637 IF4G1_HUMAN  | E.DKIHNAENIQPGEQKY.E         |              | 3 | 3,4119 | 0,25  | -0,636 |
| 23 | Q9Y383 LC7L2_HUMAN  | K.SHLLNCCPHDVLSGTR.M         |              | 3 | 3,4113 | 0,347 | -0,49  |
| 23 | P26583 HMGB2_HUMAN  | K.IKSEHPGLSIGDTAK.K          |              | 3 | 3,4109 | 0,309 | 0      |
| 23 | P31943 HNRH1_HUMAN  | R.YGDGGSTFQSTTGHCVHM*R.G     |              | 3 | 3,4096 | 0,281 | -0,519 |
| 23 | P07355 ANXA2_HUMAN  | E.KDIISDTSGDFRK.L            |              | 3 | 3,4096 | 0,429 | 0,494  |
| 23 | Q8TAD8 SNIP1_HUMAN  | R.HRDGDV VLPAGVVVKQE.R       |              | 2 | 3,4072 | 0,481 | -0,738 |
| 23 | Q9BSJ8 ESYT1_HUMAN  | K.HLSPYATLVGDSSH.K           |              | 2 | 3,4039 | 0,562 | -0,214 |
| 23 | P07237 PDIA1_HUMAN  | K.YQLDKDGVVLFKK.F            |              | 2 | 3,4004 | 0,415 | -0,628 |
| 23 | Q9NYF8 BCLF1_HUMAN  | K.DRLLASTLVHSVK.K            |              | 3 | 3,3956 | 0,222 | -1,779 |
| 23 | Q16576 RBBP7_HUMAN  | R.SNTTSKPSHLVDAHTAE.V        |              | 3 | 3,3909 | 0,376 | -0,51  |
| 23 | P18084 ITB5_HUMAN   | R.KPISTHTVDFTFNK.F           |              | 2 | 3,3879 | 0,509 | -0,672 |

|    |                    |                         |        |   |        |       |        |
|----|--------------------|-------------------------|--------|---|--------|-------|--------|
| 23 | Q9UMZ2 SYNG_HUMAN  | E.LATFDLSVQGSHKR.S      |        | 2 | 3,3861 | 0,468 | -0,704 |
| 23 | P35659 DEK_HUMAN   | K.LKKPPTDEELKE.T        |        | 3 | 3,3852 | 0,245 | -0,128 |
| 23 | P61247 RS3A_HUMAN  | E.KACQSIYPLHDFVFR.K     |        | 3 | 3,3835 | 0,358 | -0,599 |
| 23 | P26583 HMGB2_HUMAN | K.IKSEHPGLSIGDTAK.K     |        | 2 | 3,3754 | 0,5   | -0,628 |
| 23 | Q9Y2U8 MAN1_HUMAN  | E.KCSDNDGIVHIAVDK.N     |        | 3 | 3,3736 | 0,271 | -0,109 |
| 23 | P12270 TPR_HUMAN   | K.IAHLAGVKDQLTKE.N      |        | 3 | 3,3699 | 0,432 | -0,12  |
| 23 | P49368 TCPG_HUMAN  | R.GVM*INKDVTHPR.M       |        | 3 | 3,3695 | 0,304 | 0,066  |
| 23 | Q92598 HS105_HUMAN | E.LNNTCEPVVTQPKPK.I     |        | 3 | 3,3664 | 0,205 | -0,848 |
| 23 | P25398 RS12_HUMAN  | R.KVVGCSVVVKDYGKE.S     |        | 3 | 3,3598 | 0,18  | -0,4   |
| 23 | P11142 HSP7C_HUMAN | D.KSQIHDIVLVGGSTR.I     |        | 3 | 3,3461 | 0,237 | -0,568 |
| 23 | Q96T58 MINT_HUMAN  | R.HGSFHEDEDPIGS#PR.L    | S1278: | 3 | 3,34   | 0,411 | -0,104 |
| 23 | Q96ST3 SIN3A_HUMAN | E.DAAALIIHHVK.R         |        | 2 | 3,3368 | 0,416 | -0,513 |
| 23 | P34931 HS71L_HUMAN | E.VKATAGDTHLGGEDFDNR.L  |        | 3 | 3,335  | 0,412 | -0,384 |
| 23 | Q92530 PSMF1_HUMAN | E.KANVS#SPHREFPPATARE.V | S152:  | 3 | 3,3343 | 0,143 | -0,353 |
| 23 | Q15042 RB3GP_HUMAN | R.HLLPCVIHA AVLK.V      |        | 3 | 3,3334 | 0,248 | -0,124 |
| 23 | Q9Y240 CLC11_HUMAN | R.LAGLDAGLHQLHVR.L      |        | 2 | 3,3331 | 0,498 | -0,976 |
| 23 | Q7L014 DDX46_HUMAN | R.KLLEPVDHGKIE.Y        |        | 2 | 3,327  | 0,322 | -1,328 |
| 23 | Q9UIG0 BAZ1B_HUMAN | R.YQDIIHSIHLAR.K        |        | 3 | 3,3211 | 0,301 | -0,25  |
| 23 | Q96RT1 LAP2_HUMAN  | R.DLKPHEQQDINK.D        |        | 3 | 3,3186 | 0,291 | -0,926 |
| 23 | P49368 TCPG_HUMAN  | E.KGISDLAQHYLM*R.A      |        | 3 | 3,3175 | 0,339 | 0      |
| 23 | Q15154 PCM1_HUMAN  | E.NRKPFNFLPM*QINTNK.S   |        | 3 | 3,3167 | 0,161 | -0,555 |
| 23 | P06396 GELS_HUMAN  | E.DCFILDHGKDGK.I        |        | 2 | 3,3145 | 0,414 | -0,521 |
| 23 | P35579 MYH9_HUMAN  | K.KVIQYLAYVASSHK.S      |        | 2 | 3,3133 | 0,453 | -0,683 |
| 23 | P08621 RU17_HUMAN  | R.YDERPGPSPLPHR.D       |        | 3 | 3,3095 | 0,189 | -0,12  |
| 23 | Q8TDJ6 DMXL2_HUMAN | E.VAIVRDPDAGEGTKR.H     |        | 3 | 3,3093 | 0,327 | -0,693 |
| 23 | Q12765 SCRN1_HUMAN | K.TQSPCFGDDDDPAKKEPR.F  |        | 2 | 3,3078 | 0,488 | 0      |
| 23 | Q92545 TM131_HUMAN | E.RLS#PAPLAHPSHPER.A    | S1273: | 3 | 3,3053 | 0,255 | -0,314 |
| 23 | Q9Y411 MYO5A_HUMAN | E.HETIQGVSGVKPTGLR.K    |        | 3 | 3,2991 | 0,358 | -0,436 |
| 23 | Q92667 AKAP1_HUMAN | R.KVQPGYPVPAEKR.S       |        | 3 | 3,294  | 0,245 | -0,35  |
| 23 | Q9NX63 CHCH3_HUMAN | K.CSALATQYM*HCVNHAK.Q   |        | 2 | 3,2933 | 0,426 | 0,128  |
| 23 | P08670 VIME_HUMAN  | E.TNLDLPLVDTHSKR.T      |        | 2 | 3,2927 | 0,491 | -0,144 |
| 23 | Q9Y5B9 SP16H_HUMAN | R.KSNVSYKNPSLM*PK.E     |        | 3 | 3,2923 | 0,346 | 0      |
| 23 | P26583 HMGB2_HUMAN | K.SEHPGLSIGDTAKK.L      |        | 3 | 3,288  | 0,295 | -0,063 |

|    |                    |                           |        |   |        |       |        |
|----|--------------------|---------------------------|--------|---|--------|-------|--------|
| 23 | Q7KZF4 SND1_HUMAN  | E.HLSAGCPHVTLQFADSK.G     |        | 3 | 3,2874 | 0,365 | -1,175 |
| 23 | Q6PK04 CC137_HUMAN | E.KEAKGEEPDIAPVK.F        |        | 3 | 3,2752 | 0,178 | 0,121  |
| 23 | P04406 G3P_HUMAN   | R.LEKPAKYDDIKK.V          |        | 3 | 3,2738 | 0,133 | -0,126 |
| 23 | Q5UIP0 RIF1_HUMAN  | K.SPLHIKDDVLPK.Q          |        | 3 | 3,2722 | 0,207 | -0,269 |
| 23 | Q6R327 RICTR_HUMAN | K.TSHYLTPQSNHLSLSK.S      |        | 3 | 3,2708 | 0,311 | -0,202 |
| 23 | Q13347 EIF3_HUMAN  | K.GHFGPINSVAFHPDGK.S      |        | 2 | 3,2703 | 0,488 | -0,581 |
| 23 | P43034 LIS1_HUMAN  | K.GHTDSVQDISFDHSGK.L      |        | 3 | 3,2694 | 0,244 | -0,529 |
| 23 | O60524 SDCG1_HUMAN | E.LKLQTNHVTM*LLR.N        |        | 3 | 3,269  | 0,366 | -0,347 |
| 23 | Q14344 GNA13_HUMAN | R.DVKDTILHDNLK.Q          |        | 2 | 3,2689 | 0,225 | -0,692 |
| 23 | Q00688 FKBP3_HUMAN | K.TANKDHLVTAYNHLFE.T      |        | 3 | 3,2683 | 0,227 | -0,391 |
| 23 | P47897 SYQ_HUMAN   | R.TDFKEEPEPGFKR.L         |        | 3 | 3,2674 | 0,37  | 0      |
| 23 | Q8N8K9 K1958_HUMAN | R.KRPGVVPSSLHSSSQTM*VDE.C |        | 3 | 3,2555 | 0,361 | -0,24  |
| 23 | P49411 EFTU_HUMAN  | R.DKPHVNVGTIGHVD.H        |        | 3 | 3,2449 | 0,266 | -0,184 |
| 23 | P41250 SYG_HUMAN   | K.TSGHVDFKFAFM*VK.D       |        | 2 | 3,2415 | 0,423 | -0,84  |
| 23 | Q8WUF8 CE021_HUMAN | K.IHVQSSSDSDEPAEKRE.R     |        | 3 | 3,2384 | 0,357 | -0,366 |
| 23 | P0C7M2 RA1L3_HUMAN | K.IFVGGIKEDTEE.H          |        | 2 | 3,2345 | 0,261 | -0,73  |
| 23 | Q9NVA1 UQCC_HUMAN  | E.KNPQSILKPHSPTYNDE.G     |        | 3 | 3,2342 | 0,191 | -0,837 |
| 23 | Q9Y2B0 CNPY2_HUMAN | R.TDLCDHALHISHDEL.-       |        | 3 | 3,2325 | 0,383 | -1,751 |
| 23 | P54577 SYYC_HUMAN  | K.RVHLM*NPM*VPGLTGSK.M    |        | 3 | 3,2302 | 0,128 | -0,31  |
| 23 | Q14152 EIF3A_HUMAN | R.HHNQSTAINLNNPE.S        |        | 2 | 3,2274 | 0,396 | -0,768 |
| 23 | Q9H8Y8 GORS2_HUMAN | R.LNKDNDTLKDLLK.A         |        | 2 | 3,2212 | 0,264 | -0,718 |
| 23 | P27708 PYR1_HUMAN  | R.IHRAS#DPGLPAEEPKEK.S    | S1859: | 3 | 3,2153 | 0,18  | -0,468 |
| 23 | P36969 GPX4_HUMAN  | K.DIDGHM*VNLDKYR.G        |        | 3 | 3,2146 | 0,297 | -0,574 |
| 23 | P29144 TPP2_HUMAN  | R.LKDLPFIVSHR.L           |        | 3 | 3,2105 | 0,132 | 0      |
| 23 | P08238 HS90B_HUMAN | K.HLEINPDHPIVETLR.Q       |        | 3 | 3,2038 | 0,444 | -0,513 |
| 23 | Q09666 AHNK_HUMAN  | E.GDLKGPEADIKGPK.V        |        | 3 | 3,2032 | 0,199 | 0,128  |
| 23 | Q71UI9 H2AV_HUMAN  | K.ATIAGGGVIPHIK.S         |        | 2 | 3,2028 | 0,416 | -0,801 |
| 23 | Q16875 F263_HUMAN  | R.RNS#VTPLASPEPTKKPR.I    | S461:  | 3 | 3,2027 | 0,3   | -0,187 |
| 23 | Q09666 AHNK_HUMAN  | E.IKAPDVDIKPK.V           |        | 3 | 3,2005 | 0,277 | 0,357  |
| 23 | Q99973 TEP1_HUMAN  | R.KIHSGSVTALHVLPE.L       |        | 2 | 3,2001 | 0,317 | -0,845 |
| 23 | Q13523 PRP4B_HUMAN | R.AAGIGKDFKENPNLR.D       |        | 3 | 3,1999 | 0,337 | 0,224  |
| 23 | P54886 P5CS_HUMAN  | E.IIHHLADLLTDQRDE.I       |        | 2 | 3,1967 | 0,453 | -0,273 |
| 23 | P51991 ROA3_HUMAN  | D.DHDTVDKIVVQK.Y          |        | 2 | 3,1959 | 0,498 | -0,349 |

|    |                    |                          |       |   |        |       |        |
|----|--------------------|--------------------------|-------|---|--------|-------|--------|
| 23 | Q9Y5B6 GCFC_HUMAN  | E.LGDFTPHDNEPGKGR.L      |       | 2 | 3,1929 | 0,415 | -0,372 |
| 23 | P50995 ANX11_HUMAN | K.SLYHDISGDTSGDYRK.I     |       | 2 | 3,1902 | 0,409 | -0,471 |
| 23 | Q6PL18 ATAD2_HUMAN | R.KATVYYQAPLEKPR.H       |       | 3 | 3,1898 | 0,268 | -0,55  |
| 23 | Q9H8Y5 ANKZ1_HUMAN | R.LKDKPLLSALDFEK.Q       |       | 2 | 3,1888 | 0,354 | -0,377 |
| 23 | Q9BSE4 HERP2_HUMAN | E.YHM*VHLVCTS#RTPPSSPK.S | S88:  | 3 | 3,1836 | 0,162 | -0,584 |
| 23 | P48444 COPD_HUMAN  | K.GVQLQTHPNVDKK.L        |       | 2 | 3,183  | 0,434 | -0,667 |
| 23 | Q92890 UFD1_HUMAN  | K.KKGVEPSPS#PIKPGDIK.R   | S247: | 3 | 3,1824 | 0,347 | -0,492 |
| 23 | P13674 P4HA1_HUMAN | E.KDLVTSLKDYIK.A         |       | 2 | 3,1813 | 0,342 | -0,514 |
| 23 | O00231 PSD11_HUMAN | E.ASIDILHSIVKR.D         |       | 2 | 3,1799 | 0,323 | -0,993 |
| 23 | Q93009 UBP7_HUMAN  | K.FDKDHDVM*FLK.M         |       | 2 | 3,1774 | 0,27  | -0,48  |
| 23 | Q8IXM2 CQ049_HUMAN | K.RFGDDLNHISCVIKE.R      |       | 3 | 3,1759 | 0,097 | -0,406 |
| 23 | Q96JC1 VPS39_HUMAN | E.KAHLALIDYLTQK.R        |       | 3 | 3,1746 | 0,126 | -0,121 |
| 23 | Q13162 PRDX4_HUMAN | R.VSVADHSLHLSK.A         |       | 2 | 3,17   | 0,423 | -0,094 |
| 23 | Q99747 SNAG_HUMAN  | K.TIAQVLVHLHR.N          |       | 2 | 3,1686 | 0,417 | -0,474 |
| 23 | Q12789 TF3C1_HUMAN | E.RACQSLASR.D            |       | 2 | 3,1674 | 0,154 | -0,233 |
| 23 | P62491 RB11A_HUMAN | E.LRDHADSNIIVIM*LVGNK.S  |       | 3 | 3,1674 | 0,189 | -0,67  |
| 23 | P55795 HNRH2_HUMAN | R.YGDGGSSFQSTTGHCVHM*R.G |       | 3 | 3,166  | 0,298 | -0,261 |
| 23 | P35579 MYH9_HUMAN  | R.RGDLPFVVPR.R           |       | 2 | 3,1654 | 0,248 | -0,633 |
| 23 | Q99798 ACON_HUMAN  | K.IHPVDKLTIQGLK.D        |       | 2 | 3,1606 | 0,383 | -0,584 |
| 23 | O60524 SDCG1_HUMAN | E.LKLQTNHVTM*LLR.N       |       | 2 | 3,1606 | 0,443 | -0,385 |
| 23 | P49792 RBP2_HUMAN  | R.FKLQDVADSFKK.I         |       | 3 | 3,1587 | 0,193 | -0,192 |
| 23 | P35579 MYH9_HUMAN  | E.KQIATLHAQVADM*K.K      |       | 2 | 3,156  | 0,479 | -0,389 |
| 23 | P31949 S10AB_HUMAN | K.KLDTNSDGQLDFSE.F       |       | 2 | 3,1557 | 0,357 | -0,544 |
| 23 | O43432 IF4G3_HUMAN | E.EKPKPDPVLKS#PSPVLR.L   | S230: | 3 | 3,1522 | 0,11  | -0,837 |
| 23 | Q9Y6M7 S4A7_HUMAN  | R.SFADIGKKHS#DPHLLR.R    | S242: | 3 | 3,1495 | 0,276 | -0,781 |
| 23 | Q9BXI6 TB10A_HUMAN | K.DSAPQDLAPQVSAHHR.S     |       | 2 | 3,1492 | 0,309 | -0,776 |
| 23 | Q9UHR5 S30BP_HUMAN | E.KGGLVSDAYGEDDFSR.L     |       | 3 | 3,1489 | 0,201 | -0,426 |
| 23 | Q09666 AHNK_HUMAN  | E.GDM*KVPDVIDIKGPK.V     |       | 3 | 3,1487 | 0,371 | -1,328 |
| 23 | O00244 ATOX1_HUMAN | E.SEHSM*DTLLATLKK.T      |       | 2 | 3,1419 | 0,486 | -0,614 |
| 23 | P51858 HDGF_HUMAN  | E.GKLVIDEPAKEKNE.K       |       | 2 | 3,1372 | 0,421 | -0,466 |
| 23 | Q15024 EXOS7_HUMAN | K.VLHASLQSVLHKEE.S       |       | 3 | 3,1361 | 0,229 | -0,46  |
| 23 | O14744 ANM5_HUMAN  | E.KDPIKYSQYQQAIYK.C      |       | 3 | 3,1356 | 0,095 | -0,098 |
| 23 | O00571 DDX3X_HUMAN | R.GRSDYDGIGSR.G          |       | 2 | 3,1319 | 0,411 | -0,206 |

|    |                     |                         |   |        |       |        |
|----|---------------------|-------------------------|---|--------|-------|--------|
| 23 | O94967 WDR47_HUMAN  | E.HSVIKPPLGDSPGSLSR.S   | 3 | 3,1304 | 0,215 | -0,628 |
| 23 | Q9BRS2 RIOK1_HUMAN  | E.NKINLDKLNVTDSVINK.V   | 3 | 3,1261 | 0,245 | -0,285 |
| 23 | Q99081 HTF4_HUMAN   | R.GFTDSPHYSDHLNDSR.L    | 3 | 3,1252 | 0,311 | -0,891 |
| 23 | P37802 TAGL2_HUMAN  | R.TLM*NLGGLAVAR.D       | 2 | 3,1243 | 0,43  | -0,495 |
| 23 | Q01082 SPTB2_HUMAN  | R.LQAAYAGDKADDIQKR.E    | 2 | 3,1211 | 0,393 | -0,623 |
| 23 | Q53F19 CQ085_HUMAN  | E.YHEELPALKQPR.E        | 2 | 3,1114 | 0,407 | -0,906 |
| 23 | Q14697 GANAB_HUMAN  | R.KLVAIVDPHIK.V         | 2 | 3,1062 | 0,461 | -0,495 |
| 23 | Q53GS9 SNUT2_HUMAN  | R.EAPASVVPFVR.V         | 2 | 3,1032 | 0,391 | -0,52  |
| 23 | Q14517 FAT1_HUMAN   | K.KPLEEKPSQPYSARE.S     | 3 | 3,1026 | 0,258 | -0,52  |
| 23 | P78504 JAG1_HUMAN   | E.ITDKIIDLVSKR.D        | 3 | 3,1002 | 0,094 | -0,065 |
| 23 | O75694 NU155_HUMAN  | K.KDPQGLGLHFYK.H        | 3 | 3,0976 | 0,36  | 0,065  |
| 23 | Q9UGV6 HMG1X_HUMAN  | K.IKGEHPGLSIGDVAK.K     | 3 | 3,0916 | 0,376 | 0      |
| 23 | P38919 IF4A3_HUMAN  | R.KLDYQGQHVVAGTPGR.V    | 2 | 3,0895 | 0,411 | -0,534 |
| 23 | Q12756 KIF1A_HUMAN  | R.RQDIVLSGHFIKE.E       | 2 | 3,0894 | 0,419 | -0,791 |
| 23 | P55786 PSA_HUMAN    | R.M*LHDYIGDKDFK.K       | 2 | 3,0868 | 0,397 | -0,407 |
| 23 | Q6P4E1 CASC4_HUMAN  | R.NSDLLLLVDTHKK.Q       | 2 | 3,081  | 0,294 | -0,489 |
| 23 | Q86X27 RGPS2_HUMAN  | R.HLLDSSVM*EPHAPSR.G    | 3 | 3,0801 | 0,427 | -0,425 |
| 23 | P27144 KAD4_HUMAN   | E.KSLLVPDHSVITR.L       | 3 | 3,0795 | 0,173 | 0,133  |
| 23 | P06733 ENOA_HUMAN   | R.SGKYDLDFKSPDDPSR.Y    | 3 | 3,0766 | 0,133 | -0,601 |
| 23 | Q14839 CHD4_HUMAN   | R.NDKDKPLPPLLAR.V       | 3 | 3,0764 | 0,201 | -0,867 |
| 23 | P53582 AMPM1_HUMAN  | K.LFHTAPNVPHYAK.N       | 3 | 3,0694 | 0,331 | -0,061 |
| 23 | P60174 TPIS_HUMAN   | K.SNVSDAVAQSTR.I        | 2 | 3,0678 | 0,431 | -0,395 |
| 23 | Q32P44 EMAL3_HUMAN  | R.FTHDDSHLVSLGGK.D      | 2 | 3,0648 | 0,445 | -0,968 |
| 23 | Q76FK4 NOL8_HUMAN   | K.LM*DLQSHFGTDDRFR.M    | 3 | 3,0591 | 0,353 | -0,789 |
| 23 | Q9H488 OFUT1_HUMAN  | K.YFKEPLQAYHR.V         | 3 | 3,0549 | 0,274 | -0,935 |
| 23 | P63279 UBC9_HUMAN   | R.KDHPFGFVAVPTK.N       | 2 | 3,0538 | 0,412 | -0,592 |
| 23 | A7E212 A7E212_HUMAN | R.GHNVGSLFHM*ADDLGR.A   | 2 | 3,0535 | 0,382 | -0,14  |
| 23 | Q6I9Y2 THOC7_HUMAN  | R.KQFHVLLSTIHE.L        | 3 | 3,0452 | 0,225 | -0,378 |
| 23 | O15067 PUR4_HUMAN   | R.IVLVDDRECPVRR.N       | 3 | 3,042  | 0,121 | -0,112 |
| 23 | P35908 K22E_HUMAN   | K.TLNNKFASFIDKVR.F      | 3 | 3,041  | 0,265 | -0,221 |
| 23 | Q93009 UBP7_HUMAN   | K.FDKDHDVM*LFLK.M       | 3 | 3,0253 | 0,242 | -0,18  |
| 23 | Q9NY61 AATF_HUMAN   | R.KLASASLLDTPDKR.Y      | 2 | 3,025  | 0,4   | 0,172  |
| 23 | ##P83436 COG7_HUMAN | D.IVEGHELPMVSMQILLNS#.E | 3 | 3,0249 | 0,201 | 0,593  |

S403:



|    |                    |                         |       |   |        |       |        |
|----|--------------------|-------------------------|-------|---|--------|-------|--------|
| 23 | P31946 1433B_HUMAN | K.DSTLIM*QLLR.D         |       | 2 | 3,0176 | 0,188 | -0,405 |
| 23 | P62070 RRAS2_HUMAN | R.VKDRDEFPM*ILIGNK.A    |       | 3 | 3,0153 | 0,16  | -0,306 |
| 23 | O14776 TCRG1_HUMAN | R.KLIVAYVDDLDRR.G       |       | 3 | 3,0141 | 0,205 | -0,232 |
| 23 | P42704 LPPRC_HUMAN | K.NTKLDDLFLKR.Y         |       | 3 | 3,0117 | 0,237 | -0,067 |
| 23 | P32929 CGL_HUMAN   | E.KVIYPGLPSHPQHE.L      |       | 3 | 3,0004 | 0,169 | 0,114  |
| 23 | Q05682 CALD1_HUMAN | K.M*PEDGLSDDKKPFK.C     |       | 2 | 2,9987 | 0,391 | -0,451 |
| 23 | P41252 SYIC_HUMAN  | R.KTIPIKYPLKE.I         |       | 3 | 2,994  | 0,147 | 0,069  |
| 23 | P36776 LONM_HUMAN  | K.RAGVTCIVLPAENKK.D     |       | 3 | 2,9919 | 0,114 | -0,442 |
| 23 | Q8IWE2 NXP20_HUMAN | E.LHVAATPDKLNK.A        |       | 2 | 2,9916 | 0,36  | -0,467 |
| 23 | P08133 ANXA6_HUMAN | E.LKGTVRPANDFNPDADAK.A  |       | 3 | 2,9887 | 0,304 | -0,474 |
| 23 | Q9UHD1 CHRD1_HUMAN | E.HIIQAPKPVEAIK.R       |       | 3 | 2,982  | 0,184 | -0,633 |
| 23 | Q00839 HNRPU_HUMAN | K.LKVSELKEELK.K         |       | 3 | 2,9809 | 0,179 | 0,208  |
| 23 | P15927 RFA2_HUMAN  | E.GHIYSTVDDDFKSTDAE.-   |       | 3 | 2,9764 | 0,293 | -0,359 |
| 23 | P35579 MYH9_HUMAN  | E.KQIATLHAQVADM*K.K     |       | 3 | 2,9747 | 0,128 | 0      |
| 23 | P04040 CATA_HUMAN  | K.NAIHTFVQSGSHLAAR.E    |       | 2 | 2,9714 | 0,502 | -0,286 |
| 23 | Q96ST3 SIN3A_HUMAN | R.KNPSIAVPIVLKR.L       |       | 2 | 2,9698 | 0,376 | -0,85  |
| 23 | Q9Y2B0 CNPY2_HUMAN | R.TDLCDHALHISHDEL.-     |       | 2 | 2,9615 | 0,44  | -1,443 |
| 23 | Q9UQ80 PA2G4_HUMAN | E.KTIIQNPTDQQKK.D       |       | 3 | 2,9543 | 0,323 | 0,712  |
| 23 | Q96PK6 RBM14_HUMAN | R.ASYVAPLTAQPATYR.A     |       | 2 | 2,9511 | 0,417 | -1,896 |
| 23 | Q96HA8 CH032_HUMAN | E.DAFKSDDDIHPQFR.R      |       | 3 | 2,9487 | 0,305 | -0,541 |
| 23 | Q92688 AN32B_HUMAN | E.KLPNLTHLNLSGNK.L      |       | 2 | 2,9485 | 0,489 | -1,418 |
| 23 | P30048 PRDX3_HUMAN | R.KNGGLGHM*NIALLSDLTK.Q |       | 3 | 2,9429 | 0,206 | -0,289 |
| 23 | O14974 MYPT1_HUMAN | R.RRS#YLTPVRDEE.S       | S668: | 3 | 2,9421 | 0,193 | -0,914 |
| 23 | O14686 MLL2_HUMAN  | R.KVPAADKAPYLQK.A       |       | 3 | 2,9369 | 0,228 | -0,128 |
| 23 | Q02952 AKA12_HUMAN | E.M*KGSVEEPKPEPK.R      |       | 2 | 2,9333 | 0,347 | -0,61  |
| 23 | P18615 NELFE_HUMAN | K.LKDPEKGPVPTFQPFQR.S   |       | 3 | 2,9284 | 0,212 | -0,461 |
| 23 | Q12756 KIF1A_HUMAN | R.RQDIVLSGHFIKEE.H      |       | 2 | 2,9275 | 0,329 | -0,73  |
| 23 | Q9UHD8 SEPT9_HUMAN | R.HVDSLSQRS#PK.A        | S85:  | 2 | 2,9249 | 0,409 | -1,28  |
| 23 | Q02952 AKA12_HUMAN | D.KTEKPDTVQLLTVK.K      |       | 3 | 2,9226 | 0,278 | -0,457 |
| 23 | O00170 AIP_HUMAN   | R.GKPM*ELIIGKK.F        |       | 3 | 2,9224 | 0,121 | 0,52   |
| 23 | Q13561 DCTN2_HUMAN | E.HIIVNPNAAYDKFK.D      |       | 2 | 2,9194 | 0,322 | -0,748 |
| 23 | Q7Z460 CLAP1_HUMAN | E.AAVADALKKPVR.R        |       | 2 | 2,9173 | 0,241 | -0,689 |
| 23 | P46937 YAP1_HUMAN  | R.KLPDSFFKPEPK.S        |       | 3 | 2,9133 | 0,272 | -0,12  |

|    |                     |                               |   |        |       |        |
|----|---------------------|-------------------------------|---|--------|-------|--------|
| 23 | P35637 FUS_HUMAN    | K.APKPDGPGGGPGGSHM*GGNYGDDR.R | 3 | 2,9108 | 0,292 | -0,645 |
| 23 | Q5SSJ5 HP1B3_HUMAN  | E.NHPGTNSNYQM*HLLK.K          | 3 | 2,9072 | 0,327 | -0,31  |
| 23 | Q4ZG52 Q4ZG52_HUMAN | E.GKDGAIEDIITALKK.N           | 3 | 2,9046 | 0,254 | -0,233 |
| 23 | P35908 K22E_HUMAN   | R.HGGGGGGFGGGGFGSR.S          | 3 | 2,8968 | 0,232 | 0,069  |
| 23 | O75439 MPPB_HUMAN   | R.KDLVDYITTHYK.G              | 2 | 2,8942 | 0,376 | -0,571 |
| 23 | Q8NCD3 HJURP_HUMAN  | K.TLSVPDKEVPGHGR.N            | 3 | 2,8908 | 0,237 | -0,123 |
| 23 | P02144 MYG_HUMAN    | K.HGATVLTALGGILKK.K           | 3 | 2,8766 | 0,139 | -0,247 |
| 23 | Q13895 BYST_HUMAN   | E.LEAEHGTGDKPAAPR.E           | 3 | 2,8733 | 0,289 | -0,708 |
| 23 | Q8NEB9 PK3C3_HUMAN  | E.NFDDIKNGLEPTKK.D            | 3 | 2,8677 | 0,231 | -1,017 |
| 23 | P25054 APC_HUMAN    | E.SKFCSYGQYPADLAHK.I          | 3 | 2,8642 | 0,224 | -1,563 |
| 23 | P17858 K6PL_HUMAN   | R.TGISHGHTVYVVHDGFE.G         | 3 | 2,8628 | 0,287 | -0,887 |
| 23 | P23284 PIIB_HUMAN   | R.DKPLKDVIIADCGK.I            | 2 | 2,862  | 0,443 | -0,466 |
| 23 | P09429 HMGB1_HUMAN  | K.KHPDASVNFSE.F               | 2 | 2,8605 | 0,334 | -0,396 |
| 23 | Q9BV19 CA050_HUMAN  | R.DANLHHVACNIVK.K             | 3 | 2,8601 | 0,256 | -0,368 |
| 23 | Q53FX3 Q53FX3_HUMAN | R.DLHDQFQHQLK.C               | 2 | 2,8583 | 0,469 | -0,606 |
| 23 | Q32P44 EMAL3_HUMAN  | R.FTHDDSHLVSLGGK.D            | 3 | 2,8556 | 0,297 | -0,786 |
| 23 | P10109 ADX_HUMAN    | R.SSSEDKITVHFINRDGE.T         | 3 | 2,8549 | 0,176 | -0,378 |
| 23 | A7E212 A7E212_HUMAN | R.GHNVGSLFHM*ADDLGR.A         | 3 | 2,8528 | 0,341 | -0,21  |
| 23 | P52565 GDIR1_HUMAN  | E.DEHSVNYKPPAQK.S             | 3 | 2,8474 | 0,121 | 0,06   |
| 23 | P61586 RHOA_HUMAN   | K.HFCPNVPIILVGNKK.D           | 2 | 2,8469 | 0,26  | -0,351 |
| 23 | Q96KP4 CNDP2_HUMAN  | K.DVGAQILLHSHK.K              | 2 | 2,8464 | 0,367 | -0,926 |
| 23 | Q13442 HAP28_HUMAN  | R.KGVEGLIDIENPNR.V            | 3 | 2,8436 | 0,196 | -0,353 |
| 23 | Q9NQ29 LUC7L_HUMAN  | K.SHLLDCCPHDILAGTR.M          | 3 | 2,8434 | 0,389 | -1,177 |
| 23 | Q99081 HTF4_HUMAN   | R.LDRLDDAIHVLR.N              | 3 | 2,8403 | 0,138 | -0,127 |
| 23 | P18084 ITB5_HUMAN   | R.KPISTHTVDFTFNK.F            | 3 | 2,837  | 0,205 | -0,447 |
| 23 | P20020 AT2B1_HUMAN  | R.SSIHNFMT*THPEFR.I           | 3 | 2,8342 | 0,371 | -0,339 |
| 23 | P49792 RBP2_HUMAN   | R.FKLQDVADSFKK.I              | 2 | 2,8324 | 0,333 | -0,684 |
| 23 | P68400 CSK21_HUMAN  | R.DVKPHNVMT*IDHE.H            | 3 | 2,8322 | 0,311 | 0,252  |
| 23 | Q04917 1433F_HUMAN  | E.DSYKDSTLIM*QLLR.D           | 2 | 2,8306 | 0,492 | 0,144  |
| 23 | Q9Y2B0 CNPY2_HUMAN  | R.TDLCDDHALHISHDE.L           | 3 | 2,83   | 0,123 | -0,44  |
| 23 | Q9H8Y5 ANKZ1_HUMAN  | R.LKDKPLLSALDFEK.Q            | 3 | 2,8235 | 0,176 | -0,452 |
| 23 | Q12906 ILF3_HUMAN   | R.IFVNDDRHMV*AK.H             | 2 | 2,8204 | 0,444 | -0,501 |
| 23 | P49736 MCM2_HUMAN   | E.SIENLEDLKGHSVRE.W           | 3 | 2,8187 | 0,272 | -0,53  |

|    |                    |                         |   |        |       |        |
|----|--------------------|-------------------------|---|--------|-------|--------|
| 23 | Q15477 SKIV2_HUMAN | E.KDLLTIPPGFKK.G        | 2 | 2,8154 | 0,203 | -0,989 |
| 23 | Q99417 MYCBP_HUMAN | K.HHLGAATPENPE.I        | 2 | 2,805  | 0,322 | -0,575 |
| 23 | P49368 TCPG_HUMAN  | E.KGISDLAQHYLM*R.A      | 2 | 2,8038 | 0,197 | -0,867 |
| 23 | P60903 S10AA_HUMAN | E.NQKDPLAVDKIM*K.D      | 2 | 2,7998 | 0,441 | -0,724 |
| 23 | Q14152 EIF3A_HUMAN | E.VIKPAHILQEKEE.Q       | 3 | 2,7955 | 0,15  | -0,656 |
| 23 | Q96GC9 TMM49_HUMAN | E.HHNGNFTDPSSVNE.K      | 2 | 2,7953 | 0,289 | -0,392 |
| 23 | Q8IWE2 NXP20_HUMAN | E.LHVAATPDKLNK.A        | 3 | 2,794  | 0,363 | 0,14   |
| 23 | Q08945 SSRP1_HUMAN | K.IKSDHPGISITDLSK.K     | 2 | 2,7932 | 0,375 | -0,53  |
| 23 | Q5VYS8 ZCHC6_HUMAN | R.GHPQQDYLIIDHAK.G      | 3 | 2,7917 | 0,327 | -0,523 |
| 23 | Q99460 PSMD1_HUMAN | K.KKEPEPNFQLLDNPAR.V    | 2 | 2,7874 | 0,236 | -0,193 |
| 23 | Q9H4A3 WNK1_HUMAN  | R.DVDDGSGSPHSPHQLSSK.S  | 3 | 2,7849 | 0,478 | -0,494 |
| 23 | Q5TAQ9 WD42A_HUMAN | E.ASDLSLSLTGDDGGPNR.T   | 2 | 2,7831 | 0,397 | -0,219 |
| 23 | Q0JRZ9 FCHO2_HUMAN | R.KTFALPGIIEK.E         | 3 | 2,782  | 0,359 | 0,451  |
| 23 | P16989 DBPA_HUMAN  | R.GPPRRPAPAVGEAEDKE.N   | 3 | 2,7801 | 0,298 | -0,586 |
| 23 | Q6FI81 CPIN1_HUMAN | K.KSSPSVKPAVDPAAAK.L    | 3 | 2,7785 | 0,23  | -0,471 |
| 23 | P51858 HDGF_HUMAN  | E.GKLVIDEPAKEKNE.K      | 3 | 2,7765 | 0,271 | -0,233 |
| 23 | Q8IYB7 DI3L2_HUMAN | E.VHQAVLNLHGIK.Q        | 2 | 2,7729 | 0,467 | -0,174 |
| 23 | Q01082 SPTB2_HUMAN | R.LQAAYAGDKADDIQKR.E    | 3 | 2,7728 | 0,317 | -0,519 |
| 23 | Q96S55 WRIP1_HUMAN | R.NHQGPLPPVPLHLR.N      | 3 | 2,7695 | 0,245 | -0,116 |
| 23 | O95373 IPO7_HUMAN  | R.KQLQDIATLADQRR.A      | 3 | 2,7661 | 0,164 | -0,442 |
| 23 | Q99700 ATX2_HUMAN  | R.DLIKDKIEPSAK.D        | 2 | 2,7644 | 0,362 | -1,079 |
| 23 | P07355 ANXA2_HUMAN | E.KDIISDTSGDFRK.L       | 2 | 2,7626 | 0,286 | -0,165 |
| 23 | Q99733 NP1L4_HUMAN | R.KYAALYQPLFDKR.R       | 2 | 2,7612 | 0,367 | -0,303 |
| 23 | P15924 DESP_HUMAN  | K.TTIHQLTM*QKEEDTSGYR.A | 3 | 2,7604 | 0,147 | -0,934 |
| 23 | Q14157 UBP2L_HUMAN | D.LKNPSDSAVHSPFTK.R     | 3 | 2,7535 | 0,355 | -0,449 |
| 23 | Q14746 COG2_HUMAN  | E.DFDVDHFVSDCRK.R       | 3 | 2,7521 | 0,256 | -0,335 |
| 23 | O14936 CSKP_HUMAN  | K.LKGAVLAAVSSHK.F       | 3 | 2,748  | 0,205 | 0,071  |
| 23 | P12270 TPR_HUMAN   | K.IAHLAGVKDQLTKENEE.L   | 3 | 2,7454 | 0,281 | -1,158 |
| 23 | Q8IWB9 TEX2_HUMAN  | K.SSGVSGGKPGLLPAHSR.H   | 3 | 2,7437 | 0,234 | -0,91  |
| 23 | O15027 SC16A_HUMAN | K.SHLVGVPFEADR.A        | 2 | 2,7404 | 0,314 | -0,503 |
| 23 | P12532 KCRU_HUMAN  | K.HNNCM*ASHLTPAVYAR.L   | 3 | 2,7376 | 0,135 | -0,295 |
| 23 | Q9UHB6 LIMA1_HUMAN | R.ADHPPAEVTSHAASGAK.A   | 3 | 2,736  | 0,287 | -0,556 |
| 23 | Q8WXX5 DNJC9_HUMAN | K.VSLQVHPDRVGEKDKE.D    | 2 | 2,7349 | 0,435 | -0,138 |

|    |                    |                           |       |   |        |       |        |
|----|--------------------|---------------------------|-------|---|--------|-------|--------|
| 23 | Q8N5A5 ZGPAT_HUMAN | E.GRVEPIHAVVLPR.G         |       | 3 | 2,7284 | 0,309 | 0,38   |
| 23 | O60476 MA1A2_HUMAN | K.NPGVFLIHGPDEHR.H        |       | 3 | 2,7234 | 0,192 | -0,346 |
| 23 | P31939 PUR9_HUMAN  | K.TLHPAVHAGILAR.N         |       | 3 | 2,7225 | 0,444 | -1,079 |
| 23 | Q14839 CHD4_HUMAN  | R.NDKDKPLPPLLAR.V         |       | 2 | 2,7211 | 0,337 | -0,743 |
| 23 | O75531 BAF_HUMAN   | R.DFVAEPM*GEKPVGSLAGIGE.V |       | 2 | 2,7198 | 0,365 | 0,121  |
| 23 | P04792 HSPB1_HUMAN | E.SPAVAAPAYSR.A           |       | 2 | 2,717  | 0,423 | -0,448 |
| 23 | P63313 TYB10_HUMAN | K.NTLPTKETIEQEKR.S        |       | 3 | 2,7129 | 0,348 | 0      |
| 23 | Q9Y5B6 GCFC_HUMAN  | E.LGDFTPHDNEPGKGR.L       |       | 3 | 2,7126 | 0,115 | 1,338  |
| 23 | O94916 NFAT5_HUMAN | E.KQLTSNTVQQHPST#PKR.H    | T135: | 3 | 2,7119 | 0,159 | -1,442 |
| 23 | Q9Y2L1 RRP44_HUMAN | E.KHFYFTNE.H              |       | 2 | 2,7084 | 0,352 | -0,514 |
| 23 | Q9UKG1 DP13A_HUMAN | E.SLRPAAGQSRPPTAR.T       |       | 3 | 2,7045 | 0,106 | 0      |
| 23 | P46821 MAP1B_HUMAN | E.SLKPAAKPLPSK.S          |       | 3 | 2,7007 | 0,209 | 0,148  |
| 23 | P46734 MP2K3_HUMAN | E.LM*EHPFFTLHK.T          |       | 2 | 2,7004 | 0,394 | -0,689 |
| 23 | P52948 NUP98_HUMAN | E.NNSYHM*HPAGIILTK.V      |       | 3 | 2,7002 | 0,316 | -1,282 |
| 23 | Q8NC51 PAIRB_HUMAN | R.KNPLPPSVGVVDKK.E        |       | 3 | 2,7    | 0,305 | -0,866 |
| 23 | Q16891 IMMT_HUMAN  | E.GKLHNM*IVDLDNVVK.K      |       | 2 | 2,6993 | 0,253 | -0,499 |
| 23 | Q99873 ANM1_HUMAN  | K.ANKLDHVVTIHK.G          |       | 2 | 2,6969 | 0,249 | -0,993 |
| 23 | Q9UBF8 PI4KB_HUMAN | R.RLS#EQLAHTPTAFKR.D      | S511: | 3 | 2,6937 | 0,32  | 0,1    |
| 23 | Q15022 SUZ12_HUMAN | R.TPITHILVCRPK.R          |       | 3 | 2,6871 | 0,291 | 0,064  |
| 23 | Q9NZT2 OGFR_HUMAN  | R.FKPSSLPHPLEGSR.K        |       | 2 | 2,6866 | 0,343 | -0,236 |
| 23 | Q09666 AHNK_HUMAN  | K.LKM*PDM*HVNM*PK.I       |       | 3 | 2,6857 | 0,199 | -1,72  |
| 23 | Q92614 MY18A_HUMAN | R.RGFFNLNR.S              |       | 2 | 2,6788 | 0,28  | -0,477 |
| 23 | Q5VUA4 ZN318_HUMAN | R.HTDFLLPHERAS#QDGSQFSR.I | S501: | 3 | 2,6755 | 0,279 | -0,548 |
| 23 | Q53F19 CQ085_HUMAN | E.YHEELPALKQPR.E          |       | 3 | 2,6745 | 0,21  | -0,494 |
| 23 | O15371 EIF3D_HUMAN | E.GKYLILKDPNK.Q           |       | 2 | 2,6705 | 0,254 | -1,136 |
| 23 | O43395 PRPF3_HUMAN | K.AADHLKPFLLDDSTLR.F      |       | 2 | 2,6623 | 0,355 | -0,359 |
| 23 | Q9UJM3 ERRFI_HUMAN | E.DSTLSDFKYDVPGRS.S       |       | 3 | 2,66   | 0,32  | 0,208  |
| 23 | Q96JA3 PKHA8_HUMAN | K.M*KHPIPIHNSLE.R         |       | 3 | 2,6558 | 0,087 | -0,118 |
| 23 | P31150 GDIA_HUMAN  | K.RKQNDVFGAEQ.-           |       | 2 | 2,6556 | 0,258 | 0,086  |
| 23 | P51858 HDGF_HUMAN  | R.RAGDLEDS#PKRPK.E        | S165: | 3 | 2,6534 | 0,099 | -0,66  |
| 23 | P13674 P4HA1_HUMAN | E.KDLVTSCLKDYIK.A         |       | 3 | 2,6481 | 0,18  | -0,643 |
| 23 | Q12765 SCRN1_HUMAN | K.TQSPCFGDDDPKKEPR.F      |       | 3 | 2,6376 | 0,259 | -0,094 |
| 23 | P04181 OAT_HUMAN   | D.NGLLAKPTHGDIIR.F        |       | 3 | 2,6364 | 0,313 | -0,182 |

|    |                    |                         |        |   |        |       |        |
|----|--------------------|-------------------------|--------|---|--------|-------|--------|
| 23 | P50990 TCPQ_HUMAN  | E.VGDTQVVVFKHEKE.D      |        | 3 | 2,6344 | 0,27  | -0,906 |
| 23 | P46821 MAP1B_HUMAN | K.HLDFLKQPLATQK.D       |        | 3 | 2,6327 | 0,128 | 0,119  |
| 23 | Q8WXD9 CSKI1_HUMAN | E.DLTAIGVTKPGHR.K       |        | 3 | 2,629  | 0,355 | 0,268  |
| 23 | Q8WW12 PCNP_HUMAN  | K.SHLGNVHDQDN.-         |        | 2 | 2,6286 | 0,364 | -0,296 |
| 23 | P46783 RS10_HUMAN  | E.LADKNVPNLHVM*K.A      |        | 2 | 2,624  | 0,373 | -0,816 |
| 23 | Q02952 AKA12_HUMAN | D.KTEKPDTVQLLTVK.K      |        | 2 | 2,6184 | 0,221 | -0,458 |
| 23 | Q9Y5K6 CD2AP_HUMAN | E.DSANLKPSELKK.D        |        | 3 | 2,6166 | 0,101 | 0,275  |
| 23 | Q9UNZ2 NSF1C_HUMAN | R.LAHGGQVNLDM*EDHRDE.D  |        | 3 | 2,616  | 0,514 | -0,187 |
| 23 | P22626 ROA2_HUMAN  | K.LTDCVVM*RDPAKR.S      |        | 3 | 2,6158 | 0,2   | -0,11  |
| 23 | Q9UER7 DAXX_HUMAN  | R.LSQTPHSQPPRPGTCK.T    |        | 2 | 2,6151 | 0,32  | -1,976 |
| 23 | P41250 SYG_HUMAN   | D.FDTVNKTPHTATLR.D      |        | 3 | 2,614  | 0,087 | 0,228  |
| 23 | Q9P0K7 RAI14_HUMAN | K.ISQDADLKTPTPK.Q       |        | 3 | 2,6085 | 0,081 | -0,356 |
| 23 | O94901 UN84A_HUMAN | E.HKLDPVFDS#PR.M        | S48:   | 3 | 2,6085 | 0,161 | -0,263 |
| 23 | Q02952 AKA12_HUMAN | E.QAHPQEPESAHEPR.L      |        | 3 | 2,6074 | 0,345 | -1,303 |
| 23 | P08670 VIME_HUMAN  | R.KVESLQEEIAFLKK.L      |        | 3 | 2,59   | 0,156 | -0,22  |
| 23 | Q9UQ35 SRRM2_HUMAN | E.SYFGVSSLQLK.G         |        | 2 | 2,5889 | 0,401 | -0,298 |
| 23 | P82909 RT36_HUMAN  | R.SAGLPSHSSVISQHSK.G    |        | 2 | 2,5878 | 0,46  | -0,527 |
| 23 | P46100 ATRX_HUMAN  | R.NSSDAIDNPKPNKLPK.S    |        | 3 | 2,587  | 0,193 | -0,802 |
| 23 | P29692 EF1D_HUMAN  | R.ATAPQQTQHS#PM*R.Q     | S133:  | 2 | 2,5869 | 0,271 | -0,562 |
| 23 | P78371 TCPB_HUMAN  | K.HGINCFINR.Q           |        | 2 | 2,5843 | 0,446 | -0,755 |
| 23 | P39687 AN32A_HUMAN | K.IKDLSTIEPLKK.L        |        | 3 | 2,5725 | 0,161 | 0      |
| 23 | Q8N1G4 LRC47_HUMAN | E.VRDVRPYIVGAVVR.G      |        | 3 | 2,5672 | 0,085 | -1,487 |
| 23 | Q9H1A4 APC1_HUMAN  | R.AHSPALGVHSFSGVQR.F    |        | 3 | 2,5658 | 0,377 | -0,665 |
| 23 | Q5HYW3 RGAG4_HUMAN | K.VRVPKPIPLGVN.N        |        | 3 | 2,5618 | 0,216 | -1,281 |
| 23 | O15357 SHIP2_HUMAN | K.VAITVPAPQLGHR.H       |        | 3 | 2,5612 | 0,258 | -0,55  |
| 23 | Q00169 PIPNA_HUMAN | K.DYKAEEDPAKFK.S        |        | 3 | 2,5608 | 0,129 | 0,635  |
| 23 | P07900 HS90A_HUMAN | E.TALLSSGFSLEDPQTHANR.I |        | 3 | 2,5599 | 0,102 | 0      |
| 23 | P07910 HNRPC_HUMAN | K.LKGDDLQAIKKE.L        |        | 2 | 2,5574 | 0,331 | -0,719 |
| 23 | O95785 WIZ_HUMAN   | E.ARSPSDLHISPLAK.K      |        | 2 | 2,5495 | 0,164 | -0,572 |
| 23 | Q9NYF8 BCLF1_HUMAN | R.LLASTLVHVSVKK.E       |        | 2 | 2,5463 | 0,191 | -0,094 |
| 23 | Q8N3C0 HELC1_HUMAN | E.DLKDILHAAK.Q          |        | 2 | 2,5425 | 0,305 | -0,76  |
| 23 | P51587 BRCA2_HUMAN | E.HSLHYS#PTSR.Q         | S2095: | 3 | 2,5372 | 0,191 | 1,879  |
| 23 | Q5UIP0 RIF1_HUMAN  | K.SPLHIKDDVLPK.Q        |        | 2 | 2,534  | 0,349 | -1,075 |

|    |                     |                        |        |   |        |       |        |
|----|---------------------|------------------------|--------|---|--------|-------|--------|
| 23 | Q00536 PCTK1_HUMAN  | E.KLTLNSPIFDKPLSR.R    |        | 3 | 2,5264 | 0,116 | -0,635 |
| 23 | P22626 ROA2_HUMAN   | K.RGFGFVTFDDHDPVDK.I   |        | 2 | 2,5255 | 0,277 | 0      |
| 23 | P18754 RCC1_HUMAN   | K.RRS#PPADAIPK.S       | S11:   | 3 | 2,5227 | 0,087 | -0,071 |
| 23 | O14776 TCRG1_HUMAN  | R.KLIVAYVDDLDRR.G      |        | 2 | 2,5209 | 0,163 | -0,155 |
| 23 | P82909 RT36_HUMAN   | R.SAGLPSSHSSVISQHSK.G  |        | 3 | 2,5188 | 0,351 | 0      |
| 23 | A1L390 PKHG3_HUMAN  | R.RRES#LSYIPK.G        | S741:  | 3 | 2,5141 | 0,112 | -0,206 |
| 23 | P35579 MYH9_HUMAN   | K.LKDVLLQVDDE.R        |        | 2 | 2,5086 | 0,199 | -0,284 |
| 23 | Q8IVF2 AHNK2_HUMAN  | E.GDLSLAHEDVAGKDSK.F   |        | 3 | 2,5084 | 0,142 | -0,111 |
| 23 | Q01081 U2AF1_HUMAN  | R.GGFCNFM*HLKPISR.E    |        | 3 | 2,5051 | 0,272 | -0,762 |
| 23 | O00231 PSD11_HUMAN  | E.LRDDPIIISTHLAK.L     |        | 2 | 2,5036 | 0,328 | -0,907 |
| 23 | Q9NX63 CHCH3_HUMAN  | K.CSALATQYM*HCVNHAK.Q  |        | 3 | 2,5035 | 0,295 | 0,096  |
| 23 | P27708 PYR1_HUMAN   | R.IHRAS#DPGLPAEEPKEK.S | S1859: | 2 | 2,503  | 0,297 | -0,187 |
| 23 | P09960 LKHA4_HUMAN  | K.DLAAFDKSHDQAVR.T     |        | 3 | 2,5017 | 0,167 | -0,465 |
| 23 | O14526 FCHO1_HUMAN  | K.FYVHIKAPAR.A         |        | 3 | 2,4965 | 0,157 | 0,563  |
| 23 | P21333 FLNA_HUMAN   | R.DAPQDFHPDRVK.A       |        | 2 | 2,495  | 0,195 | -0,685 |
| 23 | Q13283 G3BP1_HUMAN  | R.HPDSHQLFIGNLPHE.V    |        | 3 | 2,492  | 0,195 | -0,63  |
| 23 | P06748 NPM_HUMAN    | D.YHFKVDNDENE.H        |        | 2 | 2,4915 | 0,31  | -0,779 |
| 23 | Q13442 HAP28_HUMAN  | K.GVEGLIDIENPNR.V      |        | 2 | 2,4901 | 0,294 | -0,086 |
| 23 | P31939 PUR9_HUMAN   | K.TLHPAVHAGILAR.N      |        | 2 | 2,4824 | 0,425 | -1,08  |
| 23 | P08133 ANXA6_HUMAN  | E.DTIIDIITHR.S         |        | 2 | 2,4802 | 0,329 | -0,408 |
| 23 | Q15154 PCM1_HUMAN   | R.LTHLIDHLKEQE.K       |        | 2 | 2,479  | 0,32  | -0,744 |
| 23 | Q96BP3 PPWD1_HUMAN  | K.TDFIITASHDGHVK.F     |        | 3 | 2,4784 | 0,196 | -0,475 |
| 23 | Q71U36 TBA1A_HUMAN  | R.LDHKFDLM*YAK.R       |        | 3 | 2,4776 | 0,16  | -0,393 |
| 23 | P49915 GUAA_HUMAN   | K.VIEPLKDFHKDE.V       |        | 3 | 2,4708 | 0,345 | -0,622 |
| 23 | B0AZS1 B0AZS1_HUMAN | E.KFVSEDDRNSFTLK.L     |        | 3 | 2,4684 | 0,186 | -0,542 |
| 23 | Q9NP74 PALMD_HUMAN  | E.SNVM*QDKDAPSPKPR.L   |        | 3 | 2,4662 | 0,348 | -0,108 |
| 23 | O15144 ARPC2_HUMAN  | K.DSIVHQAGM*LKR.N      |        | 3 | 2,4641 | 0,253 | 0,133  |
| 23 | P04183 KITH_HUMAN   | E.VEVIGGADKYHSVCR.L    |        | 3 | 2,4638 | 0,21  | -0,108 |
| 23 | Q16891 IMMT_HUMAN   | K.LSTDDLNSLIAHAHR.R    |        | 2 | 2,4612 | 0,441 | -0,073 |
| 23 | Q9BQ39 DDX50_HUMAN  | R.RKDLPNGDIDE.Y        |        | 2 | 2,4585 | 0,254 | -0,48  |
| 23 | Q32MZ4 LRRF1_HUMAN  | E.KHGILNSE.I           |        | 2 | 2,4574 | 0,236 | -0,241 |
| 23 | P08559 ODPA_HUMAN   | R.YHGHSM*SDPGVS#YR.T   | S300:  | 2 | 2,4543 | 0,388 | -0,578 |
| 23 | P38432 P80C_HUMAN   | E.KLPTELSKEEPSTK.N     |        | 3 | 2,4514 | 0,265 | -0,346 |

|    |                    |                           |            |   |        |       |        |
|----|--------------------|---------------------------|------------|---|--------|-------|--------|
| 23 | P08670 VIME_HUMAN  | E.TNLDLPLVDTHSKR.T        |            | 3 | 2,45   | 0,3   | 0,108  |
| 23 | O95721 SNP29_HUMAN | R.GAGSAM*STDAYPKNPHLR.A   |            | 3 | 2,4445 | 0,187 | -0,775 |
| 23 | Q14693 LPIN1_HUMAN | E.VVDHVFPLLR.S            |            | 3 | 2,4411 | 0,107 | 0      |
| 23 | Q6P2E9 EDC4_HUMAN  | E.VEPLGLPQAS#PSR.T        | S723:      | 2 | 2,435  | 0,188 | -0,597 |
| 23 | P13987 CD59_HUMAN  | E.HCNFNDVTTR.L            |            | 2 | 2,4331 | 0,441 | -0,29  |
| 23 | O75528 TAD3L_HUMAN | E.LKDCPLQFHDFK.S          |            | 3 | 2,4291 | 0,265 | -0,118 |
| 23 | Q14676 MDC1_HUMAN  | E.KEVPPGSAIIHIK.K         |            | 2 | 2,4279 | 0,219 | -0,527 |
| 23 | Q13428 TCOF_HUMAN  | E.KSLGNILQAKPTSSPAK.G     |            | 3 | 2,4271 | 0,259 | -1,261 |
| 23 | Q9NZT2 OGFR_HUMAN  | R.FKPSSLPHPLEGSR.K        |            | 3 | 2,4269 | 0,216 | -0,236 |
| 23 | P0C7M2 RA1L3_HUMAN | K.RGFAFVTFDDHDSVDK.I      |            | 2 | 2,423  | 0,251 | -0,329 |
| 23 | Q8WXD9 CSKI1_HUMAN | E.DLTAIGVTKPGHR.K         |            | 2 | 2,422  | 0,352 | -0,804 |
| 23 | Q9UIF9 BAZ2A_HUMAN | R.NHSDLTFCE.I             |            | 2 | 2,418  | 0,292 | -0,678 |
| 23 | P34897 GLYM_HUMAN  | D.NHLVLVDLRPK.G           |            | 3 | 2,4105 | 0,155 | 0,28   |
| 23 | Q15334 L2GL1_HUMAN | E.RFSLAR.N                |            | 2 | 2,409  | 0,107 | -0,146 |
| 23 | P62753 RS6_HUMAN   | R.RRLS#S#LRASTSKSE.S      | S235:S236: | 3 | 2,3991 | 0,131 | -0,316 |
| 23 | O15027 SC16A_HUMAN | K.SHLVGVPFEADR.A          |            | 3 | 2,3991 | 0,218 | -0,189 |
| 23 | P11388 TOP2A_HUMAN | K.QTTLAFKPIKK.G           |            | 2 | 2,3955 | 0,47  | -0,861 |
| 23 | Q02952 AKA12_HUMAN | K.GSVEEPKPEPKR.K          |            | 3 | 2,3937 | 0,201 | 0      |
| 23 | Q8WYK0 ACO12_HUMAN | K.LVS#VAFST#FVAKPVGKEK.I  | S105:T110: | 3 | 2,3881 | 0,107 | 1,593  |
| 23 | Q92616 GCN1L_HUMAN | K.ALLDNTKDKNTVVR.A        |            | 3 | 2,3858 | 0,172 | -0,346 |
| 23 | P0C0S8 H2A1_HUMAN  | R.HLQLAIRNDEE.L           |            | 2 | 2,3781 | 0,262 | -0,912 |
| 23 | Q96DI7 WDR57_HUMAN | R.KGPELPLVPVQR.Q          |            | 2 | 2,3769 | 0,394 | -0,824 |
| 23 | Q02878 RL6_HUMAN   | E.KVLATVTKPVGDK.N         |            | 3 | 2,3761 | 0,204 | 0,065  |
| 23 | Q5JRX3 PREP_HUMAN  | K.LTLSM*RPDDKYHE.K        |            | 3 | 2,37   | 0,228 | -0,226 |
| 23 | Q05519 SFR11_HUMAN | E.KKPIETGS#PK.T           | S449:      | 2 | 2,3695 | 0,151 | -0,209 |
| 23 | P40222 TXLNA_HUMAN | K.HKDLQQLVD.A             |            | 2 | 2,3609 | 0,3   | -0,598 |
| 23 | Q14204 DYHC1_HUMAN | K.VDGHKDIQM*PDGIR.R       |            | 2 | 2,3505 | 0,346 | -0,535 |
| 23 | Q86SQ0 PHLB2_HUMAN | R.KSS#ISSISGRDDLDM*DYHR.R | S415:      | 3 | 2,342  | 0,146 | -0,761 |
| 23 | P41252 SYIC_HUMAN  | R.KTIPIKYPLKE.I           |            | 2 | 2,3398 | 0,196 | -0,642 |
| 23 | P53582 AMPM1_HUMAN | K.LFHTAPNVPHYAK.N         |            | 2 | 2,3381 | 0,346 | -0,163 |
| 23 | P48643 TCPE_HUMAN  | K.HKLDVTSVE.D             |            | 2 | 2,3362 | 0,219 | -0,237 |
| 23 | Q9Y6A5 TACC3_HUMAN | K.VTFQTPLRDPQTHR.I        |            | 3 | 2,3336 | 0,316 | -0,539 |
| 23 | O94762 RECQ5_HUMAN | R.KGYGDFSR.Y              |            | 2 | 2,3319 | 0,157 | -0,066 |

|    |                    |                          |            |   |        |       |        |
|----|--------------------|--------------------------|------------|---|--------|-------|--------|
| 23 | Q9Y5U2 TSSC4_HUMAN | R.RAPSSVAHTSM*SDNGGFK.R  |            | 3 | 2,3318 | 0,094 | -0,785 |
| 23 | Q14157 UBP2L_HUMAN | D.LKNPSDSAVHS#PFTKR.Q    | S416:      | 3 | 2,3234 | 0,286 | -0,687 |
| 23 | P26368 U2AF2_HUMAN | E.HGGLIRS#PR.H           | S79:       | 2 | 2,3144 | 0,15  | 0,341  |
| 23 | Q15424 SAFB1_HUMAN | E.KRS#VVS#FDKVK.E        | S601:S604: | 3 | 2,3136 | 0,117 | -0,315 |
| 23 | Q6PJT7 ZC3HE_HUMAN | R.GLLHPQQLHLLSR.Q        |            | 2 | 2,3058 | 0,332 | -0,403 |
| 23 | Q8WTT2 NOC3L_HUMAN | E.LIHLLPIKDK.S           |            | 2 | 2,3049 | 0,217 | -1,128 |
| 23 | O15014 ZN609_HUMAN | K.ALDILQQHASHYK.S        |            | 3 | 2,2993 | 0,179 | -0,24  |
| 23 | Q8NI77 KI18A_HUMAN | K.GVVVHGLTLHQPK.S        |            | 3 | 2,2987 | 0,138 | 0,33   |
| 23 | Q8N4C8 MINK1_HUMAN | R.SRPGRPADFVLLKE.R       |            | 2 | 2,2874 | 0,259 | -0,693 |
| 23 | P60866 RS20_HUMAN  | K.RLIDLHSPSEIVK.Q        |            | 3 | 2,2858 | 0,166 | 0,061  |
| 23 | P0C7M2 RA1L3_HUMAN | E.DSQRPGAHLTVK.K         |            | 2 | 2,2828 | 0,222 | 1,025  |
| 23 | P07900 HS90A_HUMAN | E.LHINLIPNKQDR.T         |            | 3 | 2,2814 | 0,205 | -0,563 |
| 23 | Q9Y3P9 RBGP1_HUMAN | E.HHLGLALNE.V            |            | 2 | 2,2807 | 0,14  | -1,154 |
| 23 | Q12802 AKP13_HUMAN | K.DKGPFFHILSSTSQTNK.G    |            | 3 | 2,2762 | 0,211 | -0,208 |
| 23 | P26583 HMGB2_HUMAN | K.KHPDSSVNFAE.F          |            | 2 | 2,2755 | 0,307 | -0,694 |
| 23 | P04179 SODM_HUMAN  | K.HHAAYVNNLNVTTEE.K      |            | 2 | 2,2753 | 0,389 | -0,53  |
| 23 | P09874 PARP1_HUMAN | K.SKLPKPVQDLIK.M         |            | 3 | 2,2719 | 0,109 | -0,87  |
| 23 | O00231 PSD11_HUMAN | E.ASIDILHSIVKR.D         |            | 3 | 2,2711 | 0,146 | -0,203 |
| 23 | P35580 MYH10_HUMAN | E.DLM*SSKDDVGKNVHE.L     |            | 3 | 2,2684 | 0,142 | -0,325 |
| 23 | Q9Y5J1 UTP18_HUMAN | R.LHHYSDF.-              |            | 2 | 2,2572 | 0,446 | 0,066  |
| 23 | Q96JA3 PKHA8_HUMAN | K.M*KHPIPIHNSLE.R        |            | 2 | 2,2539 | 0,22  | -0,632 |
| 23 | P48444 COPD_HUMAN  | K.GVQLQTHPNVDKK.L        |            | 3 | 2,2524 | 0,143 | -0,562 |
| 23 | Q71U36 TBA1A_HUMAN | R.LDHKFDLM*YAK.R         |            | 2 | 2,2515 | 0,301 | -0,786 |
| 23 | P12268 IMDH2_HUMAN | R.GM*GSLDAM*DKHLSSQNR.Y  |            | 3 | 2,2505 | 0,359 | -0,195 |
| 23 | P43246 MSH2_HUMAN  | R.RFPDLNR.L              |            | 2 | 2,2491 | 0,143 | -0,332 |
| 23 | O14686 MLL2_HUMAN  | R.HQPSTPDPFLKPR.C        |            | 3 | 2,2421 | 0,287 | -0,18  |
| 23 | P0C0S8 H2A1_HUMAN  | R.HLQLAIR.N              |            | 2 | 2,2269 | 0,14  | 0,072  |
| 23 | Q14152 EIF3A_HUMAN | R.HHNQSTAINLNNPE.S       |            | 3 | 2,2264 | 0,104 | -0,46  |
| 23 | Q9HCD5 NCOA5_HUMAN | R.YRDSFDGR.G             |            | 2 | 2,2232 | 0,146 | 0,36   |
| 23 | P12277 KCRB_HUMAN  | R.HGGYKPSDE.H            |            | 2 | 2,2222 | 0,362 | -0,246 |
| 23 | P07108 ACBP_HUMAN  | K.AYINKVEELKK.K          |            | 3 | 2,2212 | 0,263 | 0,068  |
| 23 | Q8N3V7 SYNPO_HUMAN | E.KAPAPQPPSLPDRS#PRPQR.H | S525:      | 3 | 2,2163 | 0,115 | -0,252 |
| 23 | Q9UJM3 ERRFI_HUMAN | E.DSTLSDFKYDVPGRR.S      |            | 2 | 2,2087 | 0,207 | 0,208  |



|    |                    |                           |       |   |        |       |        |
|----|--------------------|---------------------------|-------|---|--------|-------|--------|
| 23 | P47974 TISD_HUMAN  | R.S#FSENGDRSQHLLHLQQQK.G  | S123: | 3 | 2,2077 | 0,221 | -0,297 |
| 23 | Q8N5U6 RNF10_HUMAN | E.DGQHM*FLHPVNV.R.C       |       | 3 | 2,2038 | 0,141 | -0,234 |
| 23 | Q01082 SPTB2_HUMAN | K.TALPAQSAATLPAR.T        |       | 2 | 2,1934 | 0,23  | -0,089 |
| 23 | Q56P03 EAPP_HUMAN  | E.VDVLLHGTPDQKR.K         |       | 2 | 2,1862 | 0,287 | -0,578 |
| 23 | Q99798 ACON_HUMAN  | K.IHPVDKLTIQGLKD.F        |       | 3 | 2,1802 | 0,269 | 0,348  |
| 23 | P20020 AT2B1_HUMAN | R.SSIHNFM*THPEFR.I        |       | 2 | 2,1796 | 0,284 | -0,754 |
| 23 | P42704 LPPRC_HUMAN | K.NTKLDDLFLKR.Y           |       | 2 | 2,1788 | 0,268 | -0,895 |
| 23 | P49915 GUAA_HUMAN  | K.VIEPLKDFHKDE.V          |       | 2 | 2,1748 | 0,157 | -0,415 |
| 23 | P62495 ERF1_HUMAN  | K.SHFTDKE.T               |       | 2 | 2,1654 | 0,102 | 0,424  |
| 23 | Q5T200 ZC3HD_HUMAN | E.RDQRPS#PIR.H            | S643: | 3 | 2,1653 | 0,17  | 0,283  |
| 23 | P22681 CBL_HUMAN   | E.GSQVPERPPKPFPR.R        |       | 3 | 2,1612 | 0,149 | -0,919 |
| 23 | Q9UNX4 WDR3_HUMAN  | K.IKSFDLIHSHPGE.L         |       | 3 | 2,1567 | 0,157 | -0,494 |
| 23 | P02545 LMNA_HUMAN  | R.TLEGELHDLRGQVAK.L       |       | 3 | 2,1529 | 0,099 | 0,11   |
| 23 | P13667 PDIA4_HUMAN | K.FHHTFSTE.I              |       | 2 | 2,1514 | 0,117 | -0,546 |
| 23 | P46087 NOL1_HUMAN  | K.KGQSLFNAPR.G            |       | 3 | 2,1496 | 0,127 | 0,828  |
| 23 | P05362 ICAM1_HUMAN | E.AQVHLALGDQR.L           |       | 3 | 2,1496 | 0,239 | 0,076  |
| 23 | Q9HCD5 NCOA5_HUMAN | R.KDDSYFDR.Y              |       | 2 | 2,1445 | 0,185 | -0,233 |
| 23 | P16615 AT2A2_HUMAN | R.CLALATHDNPLRREE.M       |       | 3 | 2,1435 | 0,108 | -0,408 |
| 23 | Q9UGI8 TES_HUMAN   | K.QLPAHDQDPSKCHE.L        |       | 3 | 2,1428 | 0,082 | -0,66  |
| 23 | Q9H2J4 PDCL3_HUMAN | K.KPIEDVLLSSVRR.S         |       | 2 | 2,1357 | 0,279 | -0,403 |
| 23 | P51991 ROA3_HUMAN  | E.DSVKPGAHLTVK.K          |       | 2 | 2,1303 | 0,201 | 0,585  |
| 23 | Q9GZU8 NIP30_HUMAN | R.LKPDPEPDDKNQEPSSCK.S    |       | 3 | 2,1295 | 0,138 | -0,527 |
| 23 | Q14247 SRC8_HUMAN  | K.HCSQVDSVR.G             |       | 2 | 2,1191 | 0,245 | -0,224 |
| 23 | P31946 1433B_HUMAN | D.STLIM*QLLR.D            |       | 2 | 2,1171 | 0,235 | -0,224 |
| 23 | P28290 SSFA2_HUMAN | E.FTQYTTTHILK.S           |       | 3 | 2,1072 | 0,114 | 0,197  |
| 23 | P47756 CAPZB_HUMAN | E.DLLSSVDQPLK.I           |       | 2 | 2,1038 | 0,131 | -0,201 |
| 23 | O15533 TPSN_HUMAN  | R.HHSDGSVSLSGHLQPPPVTTE.Q |       | 3 | 2,1033 | 0,133 | -0,335 |
| 23 | Q9NYF8 BCLF1_HUMAN | R.RIDIS#PSTLR.K           | S658: | 2 | 2,1008 | 0,343 | -0,394 |
| 23 | P22626 ROA2_HUMAN  | R.GGGGNFGPGGSNFR.G        |       | 2 | 2,0863 | 0,367 | -0,266 |
| 23 | Q86X12 CNDG2_HUMAN | R.VQIHDTRPVKPE.L          |       | 3 | 2,0787 | 0,231 | 0,193  |
| 23 | Q14241 ELOA1_HUMAN | E.KPPSS#GVKK.E            | S296: | 2 | 2,0782 | 0,175 | -1,695 |
| 23 | P78316 NOP14_HUMAN | K.EKPKPDAYDM*M*VRE.L      |       | 3 | 2,0755 | 0,16  | 0      |
| 23 | P04406 G3P_HUMAN   | E.KYDNSLK.I               |       | 2 | 2,0461 | 0,213 | -0,492 |

|    |                    |                         |   |        |       |        |
|----|--------------------|-------------------------|---|--------|-------|--------|
| 23 | P12268 IMDH2_HUMAN | R.GM*GSLDAM*DKHLSSQNR.Y | 2 | 2,0419 | 0,141 | 0,13   |
| 23 | P78316 NOP14_HUMAN | K.EKPKPDAYDM*M*VR.E     | 3 | 2,04   | 0,228 | 0,227  |
| 23 | Q7L2J0 MEPCE_HUMAN | K.GFQRPVYLFHK.A         | 2 | 2,0379 | 0,213 | -0,614 |
| 23 | P35579 MYH9_HUMAN  | K.LKDVLLQVD.D           | 2 | 2,0323 | 0,2   | -0,351 |
| 23 | Q04721 NOTC2_HUMAN | E.VDVLDVNV.R.G          | 2 | 2,0306 | 0,236 | -0,356 |
| 23 | P49821 NDUV1_HUMAN | R.HFRPELEE.R            | 2 | 2,0276 | 0,262 | -0,693 |
| 23 | P61160 ARP2_HUMAN  | E.HIFPALVGRPIIR.S       | 3 | 2,0253 | 0,091 | -0,123 |
| 23 | Q8IYB5 SMAP1_HUMAN | R.EKEPEKPAKPLTAE.K      | 2 | 1,996  | 0,12  | -0,701 |
| 23 | Q16204 CCDC6_HUMAN | K.SGGIVISPF.R.L         | 2 | 1,9878 | 0,17  | -0,118 |
| 23 | O15357 SHIP2_HUMAN | K.VAITVPAPQLGHHR.H      | 2 | 1,9874 | 0,236 | -1,06  |
| 23 | P61956 SUMO2_HUMAN | K.VAGQDGSVVQFK.I        | 2 | 1,9794 | 0,209 | -0,198 |
| 23 | P10599 THIO_HUMAN  | K.M*IKPFFHSLSEK.Y       | 2 | 1,9579 | 0,215 | -0,412 |
| 23 | Q9BXP5 ARS2_HUMAN  | R.RQQM*QDFFLAHKDEE.W    | 2 | 1,9465 | 0,182 | -0,63  |
| 23 | P0C7M2 RA1L3_HUMAN | K.YHTVNGHNCE.V          | 2 | 1,9402 | 0,259 | -0,198 |
| 23 | Q12931 TRAP1_HUMAN | E.DIPLNLSRE.L           | 2 | 1,9309 | 0,188 | -0,462 |
| 23 | O75306 NDUS2_HUMAN | K.IKAPGFAHLAGLDK.M      | 2 | 1,9203 | 0,121 | -0,594 |
| 23 | P11387 TOP1_HUMAN  | E.HINLHPE.L             | 2 | 1,9164 | 0,155 | 1,277  |
| 23 | Q15424 SAFB1_HUMAN | R.RPYDLDR.R             | 2 | 1,9121 | 0,164 | -0,326 |
| 23 | P61201 CSN2_HUMAN  | E.KAHTDFFE.A            | 2 | 1,9063 | 0,146 | -0,307 |
| 23 | Q00796 DHSO_HUMAN  | K.HNAAFQYK.L            | 2 | 1,8923 | 0,45  | 0      |
| 23 | P55809 SCOT_HUMAN  | E.DIHIPQIYVHR.L         | 2 | 1,8687 | 0,333 | -0,439 |
| 23 | Q00169 PIPNA_HUMAN | K.DYKAEEDPAKFK.S        | 2 | 1,8586 | 0,093 | 0,508  |
| 23 | Q9UHB6 LIMA1_HUMAN | E.NLSQHFR.K             | 2 | 1,8552 | 0,248 | -0,068 |
| 23 | O75083 WDR1_HUMAN  | E.HLLKYE.Y              | 2 | 1,8366 | 0,092 | 0,912  |
| 23 | P46087 NOL1_HUMAN  | E.AKPLPGKLPK.G          | 2 | 1,8289 | 0,181 | 0      |
| 23 | P43358 MAGA4_HUMAN | E.HTVYGEPR.K            | 2 | 1,7905 | 0,298 | -0,254 |
| 23 | P52907 CAZA1_HUMAN | E.SHQFQPK.N             | 2 | 1,7823 | 0,197 | 0,49   |
| 23 | Q9UPN3 MACF1_HUMAN | R.HKALEEDIE.N           | 2 | 1,774  | 0,229 | 0      |
| 23 | O60925 PFD1_HUMAN  | K.HAHLTDTE.I            | 2 | 1,7649 | 0,172 | 0,066  |
| 23 | P22626 ROA2_HUMAN  | D.DHDPVDKIVLQK.Y        | 2 | 1,7412 | 0,209 | -0,694 |
| 23 | P78316 NOP14_HUMAN | K.EKPKPDAYDM*M*VRE.L    | 2 | 1,7404 | 0,248 | -0,21  |
| 23 | P04920 B3A2_HUMAN  | E.KDFSFP.R.N            | 2 | 1,7297 | 0,083 | 0      |
| 23 | P06748 NPM_HUMAN   | K.M*SVQPTVSLGGFE.I      | 2 | 1,7081 | 0,255 | -0,535 |

|    |                    |                           |      |   |        |       |        |
|----|--------------------|---------------------------|------|---|--------|-------|--------|
| 23 | Q16881 TRXR1_HUMAN | K.KLM*HQAALLGQALQDSR.N    |      | 2 | 1,7024 | 0,157 | -0,708 |
| 23 | Q9BXP5 ARS2_HUMAN  | E.RFS#PPRHE.L             | S67: | 2 | 1,6963 | 0,195 | 0      |
| 23 | Q05524 ENO1B_HUMAN | E.KGVPLYR.H               |      | 2 | 1,6939 | 0,129 | 0,293  |
| 23 | Q86TI2 DPP9_HUMAN  | E.HHLYVVSYE.A             |      | 2 | 1,6823 | 0,096 | -1,064 |
| 23 | P27824 CALX_HUMAN  | K.LHFIFR.H                |      | 2 | 1,6661 | 0,113 | 0,586  |
| 23 | P52701 MSH6_HUMAN  | R.RPDHPDFD.A              |      | 2 | 1,6552 | 0,101 | -0,061 |
| 23 | O43776 SYNC_HUMAN  | R.DHFFDR.G                |      | 2 | 1,6419 | 0,189 | -0,073 |
| 23 | P78316 NOP14_HUMAN | K.EKPKPDAYDM*M*VR.E       |      | 2 | 1,5507 | 0,318 | -0,076 |
| 23 | Q96PK6 RBM14_HUMAN | R.RLPDAHSD.Y              |      | 2 | 1,5288 | 0,198 | -0,804 |
| 23 | Q15149 PLEC1_HUMAN | E.HSFDGLR.R               |      | 2 | 1,4828 | 0,163 | -0,88  |
| 23 | Q9BWG6 SCNM1_HUMAN | D.HYLTLR.S                |      | 2 | 1,4095 | 0,153 | 0      |
| 23 | Q9BSJ6 FA64A_HUMAN | R.RRS#LQHQEQL.E           | S16: | 2 | 1,154  | 0,24  | 0,487  |
| 24 | Q9H4A4 AMPB_HUMAN  | R.RPLHSAQAVDVASASNFR.A    |      | 3 | 5,3344 | 0,499 | -0,475 |
| 24 | Q15942 ZYX_HUMAN   | E.KQHPVPPPAQNQNQVR.S      |      | 3 | 5,3183 | 0,514 | -0,796 |
| 24 | Q9NZQ3 SPN90_HUMAN | R.RGTHTTVSQVQPPPSK.A      |      | 3 | 5,282  | 0,318 | -0,532 |
| 24 | O14497 ARI1A_HUMAN | R.SHHAPM*SPGSSGGGGQPLAR.T |      | 3 | 5,1878 | 0,546 | -0,769 |
| 24 | O14545 TRAD1_HUMAN | R.VRHQGDLSGGLDDTKQE.T     |      | 3 | 4,9987 | 0,51  | -0,447 |
| 24 | Q9BXP5 ARS2_HUMAN  | R.RQQM*QDFFLAHKDEE.W      |      | 3 | 4,9497 | 0,304 | -0,661 |
| 24 | P11717 MPRI_HUMAN  | E.KGNIQLSYSDDCGHGK.K      |      | 3 | 4,8937 | 0,442 | -0,469 |
| 24 | Q9UGI8 TES_HUMAN   | E.HDVLLSNEEDRK.V          |      | 3 | 4,8349 | 0,418 | 0,063  |
| 24 | Q9H4A4 AMPB_HUMAN  | R.RPLHSAQAVDVASASNFR.A    |      | 2 | 4,7868 | 0,55  | -0,38  |
| 24 | Q14C86 GAPD1_HUMAN | E.HEQATTQDNLDDKLR.K       |      | 3 | 4,723  | 0,431 | -1,025 |
| 24 | O75376 NCOR1_HUMAN | R.HNLDNLLQHK.Q            |      | 3 | 4,7112 | 0,339 | 0,134  |
| 24 | P23193 TCEA1_HUMAN | K.KKEPAITSQNSPEAREE.S     |      | 3 | 4,654  | 0,234 | -0,096 |
| 24 | Q9UK76 HN1_HUMAN   | R.RNS#SEASSGDFLDLKG.E     | S87: | 2 | 4,643  | 0,536 | 0      |
| 24 | Q8WU90 ZC3HF_HUMAN | R.HALPPGFVLKK.D           |      | 3 | 4,6242 | 0,381 | 0,909  |
| 24 | Q9H019 FA54B_HUMAN | E.HKAACSSSEEDDCVLSK.A     |      | 3 | 4,6199 | 0,47  | 0      |
| 24 | Q99460 PSMD1_HUMAN | K.KKEPEPNFQLLDNPAR.V      |      | 3 | 4,6084 | 0,317 | -0,675 |
| 24 | Q9Y5K6 CD2AP_HUMAN | E.TEEKKPEKPLILQSLGPK.T    |      | 3 | 4,5081 | 0,23  | -0,449 |
| 24 | Q9Y6W5 WASF2_HUMAN | E.KRDVVGNDVATILSR.R       |      | 3 | 4,434  | 0,386 | -0,668 |
| 24 | Q8TF68 ZN384_HUMAN | E.KAFTQLSNLQSHR.R         |      | 3 | 4,4126 | 0,377 | -0,538 |
| 24 | P28799 GRN_HUMAN   | E.DHIHCCPAGFTCDTQK.G      |      | 2 | 4,3923 | 0,557 | -0,063 |
| 24 | P23677 IP3KA_HUMAN | E.RDCLPAAGSSHLQQR.R       |      | 3 | 4,3661 | 0,415 | -0,51  |

|    |                     |                              |       |   |        |       |        |
|----|---------------------|------------------------------|-------|---|--------|-------|--------|
| 24 | Q15393 SF3B3_HUMAN  | K.HIANYISGIQTIGHR.V          |       | 3 | 4,3556 | 0,372 | -0,435 |
| 24 | Q96ER3 SAAL1_HUMAN  | K.RTDLTQDDFHLK.I             |       | 3 | 4,3266 | 0,344 | -0,184 |
| 24 | Q9UFC0 LRWD1_HUMAN  | K.RPDDVPLSLSPSKR.A           |       | 3 | 4,3131 | 0,329 | -0,817 |
| 24 | Q99460 PSMD1_HUMAN  | R.RLLHVAVSDVNDVDR.R          |       | 3 | 4,3079 | 0,249 | -0,857 |
| 24 | P15927 RFA2_HUMAN   | E.GHIYSTVDDDHFK.S            |       | 3 | 4,284  | 0,366 | -0,179 |
| 24 | Q9Y230 RUVB2_HUMAN  | R.KGTEVQVDDIKR.V             |       | 3 | 4,2825 | 0,203 | 0,264  |
| 24 | Q05682 CALD1_HUMAN  | K.TPDGNKSPAPKPSDLRPGDVSSK.R  |       | 3 | 4,2803 | 0,231 | -0,545 |
| 24 | Q8WXH0 SYNE2_HUMAN  | E.HQTSDEDSVHSPSSASQVK.H      |       | 3 | 4,246  | 0,405 | -0,542 |
| 24 | B0AZS1 B0AZS1_HUMAN | E.KFVSEDDRNSFTLK.L           |       | 2 | 4,2355 | 0,339 | -0,289 |
| 24 | P28799 GRN_HUMAN    | E.DRQHCCPAGYTCNVK.A          |       | 3 | 4,2113 | 0,357 | -0,196 |
| 24 | P23588 IF4B_HUMAN   | E.TLNKEEDCHSPTS#KPPKPDQPLK.V | S462: | 3 | 4,2102 | 0,411 | -0,268 |
| 24 | Q7KZ17 MARK2_HUMAN  | R.KKTTPTSTNSVLSTSTNR.S       |       | 3 | 4,2051 | 0,389 | -0,543 |
| 24 | Q16891 IMMT_HUMAN   | D.LADKLSTDDLNSLIAHAHR.R      |       | 3 | 4,2004 | 0,366 | -0,525 |
| 24 | Q16513 PKN2_HUMAN   | R.KLHGTAQQLQDSK.T            |       | 3 | 4,1873 | 0,344 | -0,817 |
| 24 | Q15181 IPYR_HUMAN   | E.FKDKDFAIDIK.S              |       | 3 | 4,1801 | 0,297 | 0,063  |
| 24 | Q8N5G2 MACOI_HUMAN  | K.KHNLGINNNILQPVDSK.I        |       | 3 | 4,1661 | 0,348 | -0,544 |
| 24 | Q9C0G0 ZN407_HUMAN  | E.HANKPAES#PTSVLEKPDGR.G     | S952: | 3 | 4,1517 | 0,491 | -0,712 |
| 24 | P63279 UBC9_HUMAN   | R.KDHPFGFVAVPTK.N            |       | 3 | 4,1461 | 0,324 | -0,507 |
| 24 | Q13616 CUL1_HUMAN   | E.THIHNQGLAAIEK.C            |       | 3 | 4,141  | 0,387 | -0,255 |
| 24 | O94888 UBXD7_HUMAN  | E.HGQLDGLSSPPKK.C            |       | 3 | 4,14   | 0,423 | -0,315 |
| 24 | O60841 IF2P_HUMAN   | K.KSPDSDVAATLKK.Q            |       | 3 | 4,1354 | 0,369 | 0,336  |
| 24 | P11021 GRP78_HUMAN  | E.SHQDADIEDFKAK.K            |       | 3 | 4,134  | 0,304 | -0,73  |
| 24 | P07355 ANXA2_HUMAN  | E.KDIISDTSGDFRK.L            |       | 3 | 4,1281 | 0,435 | 0,74   |
| 24 | P14324 FPPS_HUMAN   | E.KQDFVQHFSQIVR.V            |       | 2 | 4,1184 | 0,394 | -0,598 |
| 24 | Q92598 HS105_HUMAN  | K.NQQITHANNNTVSNFKR.F        |       | 3 | 4,113  | 0,401 | -0,586 |
| 24 | Q8WUA4 TF3C2_HUMAN  | K.RPPEDFETPSGERPR.R          |       | 3 | 4,1022 | 0,315 | -0,517 |
| 24 | P09493 TPM1_HUMAN   | E.KKATDAEADVASLNR.R          |       | 2 | 4,0947 | 0,498 | -0,537 |
| 24 | P17028 ZNF24_HUMAN  | K.HFSQGSALILHQR.I            |       | 3 | 4,0933 | 0,284 | -0,49  |
| 24 | Q9Y6W5 WASF2_HUMAN  | E.KRDVVGNDVATILSR.R          |       | 2 | 4,0924 | 0,464 | -0,743 |
| 24 | Q53HC9 TSSC1_HUMAN  | R.YNHSHDQLVLTGSSDSR.V        |       | 3 | 4,0884 | 0,337 | -0,191 |
| 24 | Q03164 HRX_HUMAN    | E.HYQLQHVNQLLASK.T           |       | 3 | 4,0657 | 0,387 | -0,327 |
| 24 | Q9Y490 TLN1_HUMAN   | E.KVSHVLAALQAGNR.G           |       | 3 | 4,0515 | 0,341 | -0,312 |
| 24 | P53582 AMPM1_HUMAN  | E.IDHAVHLACIAR.N             |       | 3 | 4,045  | 0,399 | 0      |

|    |                     |                         |       |   |        |       |        |
|----|---------------------|-------------------------|-------|---|--------|-------|--------|
| 24 | Q12756 KIF1A_HUMAN  | R.RQDIVLSGHFIKE.E       |       | 3 | 4,0396 | 0,389 | -0,474 |
| 24 | Q86YZ3 HORN_HUMAN   | R.GPYESGSGHSSGLGHQESR.S |       | 3 | 4,0363 | 0,373 | -0,474 |
| 24 | P0C7M2 RA1L3_HUMAN  | K.RGFAFVTFDDHDSVDK.I    |       | 3 | 4,0337 | 0,209 | -0,296 |
| 24 | Q9NRN7 ADPPT_HUMAN  | R.HQDVPSQDDSKPTQR.Q     |       | 3 | 4,0295 | 0,454 | -1,158 |
| 24 | Q9UFC0 LRWD1_HUMAN  | K.ANS#PEKPPEAGAAHKPR.A  | S212: | 3 | 4,0023 | 0,323 | -0,299 |
| 24 | Q9BXS9 S26A6_HUMAN  | E.AGHFFDASITKK.H        |       | 3 | 3,9989 | 0,262 | 0,277  |
| 24 | Q13561 DCTN2_HUMAN  | E.HIIVNPNAAYDKFK.D      |       | 3 | 3,9982 | 0,255 | -0,112 |
| 24 | P53621 COPA_HUMAN   | R.GHYNNVSCAVFHPR.Q      |       | 3 | 3,9881 | 0,509 | -0,772 |
| 24 | Q13442 HAP28_HUMAN  | K.RKGVEGLIDIENPNR.V     |       | 3 | 3,9752 | 0,173 | -0,321 |
| 24 | Q09666 AHNK_HUMAN   | K.GKKPDIDITGPK.V        |       | 3 | 3,9603 | 0,341 | 0,36   |
| 24 | Q9P0M9 RM27_HUMAN   | E.GHYVHAGNIIATQR.H      |       | 3 | 3,9564 | 0,397 | -0,238 |
| 24 | P49411 EFTU_HUMAN   | R.GLVM*VKPGSIKPHQKVE.A  |       | 3 | 3,9397 | 0,246 | -0,491 |
| 24 | P40939 ECHA_HUMAN   | K.RKDLNSDM*DSILASLK.L   |       | 3 | 3,9346 | 0,152 | -1,205 |
| 24 | P28799 GRN_HUMAN    | E.DHIHCCPAGFTCDTQK.G    |       | 3 | 3,9312 | 0,346 | -0,188 |
| 24 | Q99543 DNJC2_HUMAN  | K.NQDHYAVLGLGHVR.Y      |       | 3 | 3,9274 | 0,314 | -0,232 |
| 24 | Q96R06 SPAG5_HUMAN  | E.KLDDIVQHIYK.T         |       | 3 | 3,9213 | 0,313 | 0,133  |
| 24 | P14324 FPPS_HUMAN   | E.KQDFVQHFSQIVR.V       |       | 3 | 3,9201 | 0,315 | -0,336 |
| 24 | Q502X6 Q502X6_HUMAN | E.GKQHALCVGVM*K.M       |       | 3 | 3,9168 | 0,242 | 0,136  |
| 24 | P08621 RU17_HUMAN   | K.HHNQPYCGIAPYIRE.F     |       | 3 | 3,9021 | 0,187 | -0,789 |
| 24 | Q9HCN8 SDF2L_HUMAN  | K.NLHTHHFSPPLSNNQE.V    |       | 2 | 3,8906 | 0,356 | 0      |
| 24 | P43034 LIS1_HUMAN   | E.HFVTSLDFHK.T          |       | 3 | 3,8677 | 0,305 | 0,891  |
| 24 | Q9H0B6 KLC2_HUMAN   | E.KQHLLFM*SQIR.K        |       | 3 | 3,8643 | 0,287 | -1,032 |
| 24 | Q6PL18 ATAD2_HUMAN  | K.AKDNFNFLHLNR.N        |       | 3 | 3,8536 | 0,366 | -0,184 |
| 24 | O43390 HNRPR_HUMAN  | K.LKDYAFVHFEDR.G        |       | 2 | 3,8502 | 0,368 | -0,396 |
| 24 | Q9P2E9 RRBP1_HUMAN  | E.KQVLQLQASHR.E         |       | 3 | 3,846  | 0,172 | 0,699  |
| 24 | Q92797 SYMPK_HUMAN  | K.RRPEIIPVTQPR.L        |       | 3 | 3,8449 | 0,265 | -1,056 |
| 24 | P62701 RS4X_HUMAN   | R.HPGSFDVVHVK.D         |       | 3 | 3,8405 | 0,329 | -0,15  |
| 24 | Q8WTT2 NOC3L_HUMAN  | K.KPIPLENPKEK.R         |       | 3 | 3,821  | 0,248 | 0,071  |
| 24 | P31629 ZEP2_HUMAN   | E.KKGQDSEPSLNLLS#PHSK.G | S389: | 3 | 3,8196 | 0,226 | -0,179 |
| 24 | Q92598 HS105_HUMAN  | E.LNNTCEPVVTQPKPK.I     |       | 3 | 3,8174 | 0,397 | -0,742 |
| 24 | Q13263 TIF1B_HUMAN  | E.TKPVLM*ALAEPGAEGPR.L  |       | 3 | 3,8162 | 0,173 | -0,505 |
| 24 | Q14203 DCTN1_HUMAN  | E.HALSQCSVDVYKK.V       |       | 3 | 3,8161 | 0,377 | -0,238 |
| 24 | Q9C0C2 TB182_HUMAN  | E.KKIPSVEDSLGEGSR.D     |       | 3 | 3,814  | 0,351 | -0,228 |

|    |                    |                         |        |   |        |       |        |
|----|--------------------|-------------------------|--------|---|--------|-------|--------|
| 24 | Q8TDH9 MUTED_HUMAN | K.KRDS#LGTAGSAHLIK.D    | S25:   | 3 | 3,8027 | 0,432 | -0,523 |
| 24 | Q8TEP8 CE192_HUMAN | R.YKDKLPDSGDSM*LR.I     |        | 3 | 3,7918 | 0,391 | -0,223 |
| 24 | Q8IUH3 RBM45_HUMAN | E.M*HGQCLGPNDTKPIK.V    |        | 3 | 3,7829 | 0,237 | -0,107 |
| 24 | Q02750 MP2K1_HUMAN | E.HM*DGGSLDQVLKK.A      |        | 3 | 3,7816 | 0,351 | -0,127 |
| 24 | Q14847 LASP1_HUMAN | K.KTQDQJISNIKYHEE.F     |        | 3 | 3,7776 | 0,228 | -0,422 |
| 24 | P06733 ENOA_HUMAN  | K.KLNVTEQEIKD.L         |        | 3 | 3,776  | 0,258 | 0      |
| 24 | P45974 UBP5_HUMAN  | E.HLSHFGIDM*LK.M        |        | 3 | 3,7718 | 0,377 | 0,557  |
| 24 | Q8IWR0 Z3H7A_HUMAN | R.KDHLIGPNDNDFGK.Y      |        | 3 | 3,7711 | 0,23  | -0,233 |
| 24 | Q13045 FLII_HUMAN  | E.HLSVSHNNLTLHGE.L      |        | 3 | 3,7681 | 0,362 | -0,331 |
| 24 | Q00610 CLH1_HUMAN  | E.KHDVVFLITK.Y          |        | 3 | 3,764  | 0,195 | 0,609  |
| 24 | Q7Z3E2 CJ118_HUMAN | E.KTYSESPYDTDCTKK.F     |        | 3 | 3,7624 | 0,418 | -0,1   |
| 24 | P11021 GRP78_HUMAN | E.SHQDADIEDFKAK.K       |        | 2 | 3,76   | 0,517 | -0,487 |
| 24 | Q969Q5 RAB24_HUMAN | R.RVDFHVDVQDYADNIK.A    |        | 3 | 3,7588 | 0,282 | -0,598 |
| 24 | Q8IYB3 SRRM1_HUMAN | E.KKEKT#PELPEPSVK.V     | T220:  | 3 | 3,7585 | 0,232 | 1,082  |
| 24 | P35659 DEK_HUMAN   | K.LKKPPTDEELKE.T        |        | 3 | 3,7454 | 0,233 | -0,256 |
| 24 | Q86WC4 OSTM1_HUMAN | E.HNLQGNASHLLQTK.N      |        | 2 | 3,7401 | 0,555 | -0,782 |
| 24 | Q96DG6 CMBL_HUMAN  | K.TFSGQTHGFVHR.K        |        | 2 | 3,74   | 0,423 | -0,977 |
| 24 | Q9UPY6 WASF3_HUMAN | E.AKREPVGNDVATILSR.R    |        | 3 | 3,7359 | 0,249 | -0,424 |
| 24 | Q7Z5K2 WAPL_HUMAN  | K.RPNFKPDIQEIPK.K       |        | 3 | 3,7298 | 0,175 | 0,347  |
| 24 | Q00341 VIGLN_HUMAN | E.KAFHPFIAGPYNR.L       |        | 3 | 3,7296 | 0,33  | -0,663 |
| 24 | Q9C0C2 TB182_HUMAN | E.KKIPSVEDSLGEGSR.D     |        | 2 | 3,7179 | 0,38  | -0,228 |
| 24 | P35579 MYH9_HUMAN  | R.NAEQYKDQADKASTR.L     |        | 3 | 3,7104 | 0,286 | -1,484 |
| 24 | Q9BXB4 OSB11_HUMAN | R.RPSQNAISFFNVGHSK.L    |        | 3 | 3,6919 | 0,132 | -0,613 |
| 24 | Q53F19 CQ085_HUMAN | E.YHEELPALKQPR.E        |        | 2 | 3,6914 | 0,289 | -0,824 |
| 24 | Q8N2M8 SFR16_HUMAN | K.KDPAQFLQVHGR.A        |        | 3 | 3,6893 | 0,336 | 0      |
| 24 | P23528 COF1_HUMAN  | K.KAVLFCLSEDKK.N        |        | 2 | 3,6864 | 0,321 | 0,255  |
| 24 | Q9HBD1 RC3H2_HUMAN | R.DRFIVTDLSGHR.K        |        | 3 | 3,6825 | 0,343 | 0,129  |
| 24 | P41250 SYG_HUMAN   | R.ATKVPLVAEKPLKEPK.T    |        | 3 | 3,6823 | 0,179 | -0,314 |
| 24 | Q9UBF8 PI4KB_HUMAN | R.RRLS#EQLAHTPTAFK.R    | S511:  | 3 | 3,6816 | 0,348 | -0,797 |
| 24 | P46939 UTRO_HUMAN  | E.HYDPSQS#PQLFHDDTHSR.I | S3182: | 3 | 3,672  | 0,382 | -0,977 |
| 24 | A6ND36 FA83G_HUMAN | E.LPKEEAPQNGTDHR.L      |        | 3 | 3,6699 | 0,32  | -0,115 |
| 24 | O15027 SC16A_HUMAN | E.HRPASALVNPLAR.G       |        | 3 | 3,6689 | 0,269 | -0,848 |
| 24 | Q9H583 HEAT1_HUMAN | E.KIQKEPTAVLKDE.A       |        | 3 | 3,6674 | 0,22  | -0,305 |

|    |                     |                           |       |   |        |       |        |
|----|---------------------|---------------------------|-------|---|--------|-------|--------|
| 24 | Q9NQC3 RTN4_HUMAN   | R.HQAQIDHYLGLANK.N        |       | 3 | 3,6646 | 0,312 | -0,114 |
| 24 | P07195 LDHB_HUMAN   | K.LKDDEVAQLKK.S           |       | 3 | 3,664  | 0,305 | 0,924  |
| 24 | P17987 TCPA_HUMAN   | E.SKDDKHGS#YEDAVHSGALND.- | S544: | 3 | 3,6612 | 0,407 | -0,576 |
| 24 | P78332 RBM6_HUMAN   | E.GKAPAEDVFKKPLPPTVK.K    |       | 3 | 3,657  | 0,394 | -0,666 |
| 24 | Q59GW8 Q59GW8_HUMAN | R.KHTLSFVDVGTGK.V         |       | 3 | 3,6479 | 0,306 | -0,066 |
| 24 | Q12849 GRSF1_HUMAN  | E.THEDAVAAM*LKDR.S        |       | 2 | 3,6242 | 0,501 | -0,745 |
| 24 | Q96JN8 K1787_HUMAN  | R.FHQLHGSSNAVITNGGR.T     |       | 3 | 3,6212 | 0,186 | -0,428 |
| 24 | P15927 RFA2_HUMAN   | E.GHIYSTVDDDFK.S          |       | 2 | 3,618  | 0,512 | -0,239 |
| 24 | Q92794 MYST3_HUMAN  | E.HNSPISSVQSHPSQSVR.S     |       | 3 | 3,6168 | 0,427 | 1,486  |
| 24 | P17980 PRS6A_HUMAN  | E.KLKPGLVGVNKD.S          |       | 3 | 3,615  | 0,284 | -0,463 |
| 24 | P40227 TCPZ_HUMAN   | R.KVCGSDKGFVVINQK.G       |       | 3 | 3,6117 | 0,175 | -0,408 |
| 24 | Q5TAQ9 WD42A_HUMAN  | E.ASDLSLSLTGDDGGPNR.T     |       | 2 | 3,6111 | 0,442 | -0,364 |
| 24 | P42704 LPPRC_HUMAN  | E.KHSLNSSASTTEPDFQKD.I    |       | 3 | 3,6082 | 0,255 | -0,352 |
| 24 | Q4KMP7 TB10B_HUMAN  | R.KADGPPGPHDGGDRPSAE.A    |       | 3 | 3,5999 | 0,335 | -0,831 |
| 24 | Q9UER7 DAXX_HUMAN   | E.KKQTGSGPLGNSYVER.Q      |       | 3 | 3,5972 | 0,335 | -0,425 |
| 24 | O95394 AGM1_HUMAN   | K.GKLNHLGADFK.S           |       | 3 | 3,5887 | 0,318 | -0,063 |
| 24 | Q9NYF8 BCLF1_HUMAN  | R.RIDISPSTRK.H            |       | 3 | 3,5877 | 0,233 | -0,071 |
| 24 | Q53F19 CQ085_HUMAN  | E.YHEELPALKQPR.E          |       | 3 | 3,5838 | 0,292 | -1,05  |
| 24 | P09493 TPM1_HUMAN   | E.KKATDAEADVASLNR.R       |       | 3 | 3,5795 | 0,299 | -0,345 |
| 24 | Q0VG06 FP100_HUMAN  | R.RGLYCLSLDHPGR.S         |       | 3 | 3,5661 | 0,291 | -0,355 |
| 24 | Q13127 REST_HUMAN   | E.KKPSNNVSVIQVTTR.T       |       | 3 | 3,5513 | 0,285 | -0,547 |
| 24 | Q16513 PKN2_HUMAN   | R.KLHGTAQQLQDSK.T         |       | 2 | 3,5506 | 0,343 | -0,467 |
| 24 | P43490 NAMPT_HUMAN  | E.KYDGHLPPIEK.A           |       | 3 | 3,55   | 0,1   | 0,348  |
| 24 | Q9UQR1 ZN148_HUMAN  | R.HVFIHTGEKPFQCSQCD.M     |       | 3 | 3,5303 | 0,408 | 0,263  |
| 24 | O60313 OPA1_HUMAN   | E.HDDIFDKLKE.A            |       | 3 | 3,5231 | 0,242 | 0,29   |
| 24 | P54577 SYYC_HUMAN   | E.KHPDADSLYVEK.I          |       | 3 | 3,5089 | 0,307 | -0,065 |
| 24 | Q9UHR5 S30BP_HUMAN  | E.KGGLVSDAYGEDDFSR.L      |       | 3 | 3,5068 | 0,263 | -0,746 |
| 24 | Q8IUD2 RB6I2_HUMAN  | E.HHLPPVSM*AS#TVPHSLR.Q   | S137: | 3 | 3,5056 | 0,255 | -0,746 |
| 24 | P30086 PEBP1_HUMAN  | E.QDRPLKCEPILSNR.S        |       | 3 | 3,5007 | 0,243 | -0,497 |
| 24 | Q7L014 DDX46_HUMAN  | R.KLLEPVDHGKIE.Y          |       | 3 | 3,4976 | 0,363 | -0,133 |
| 24 | Q9BRK5 CAB45_HUMAN  | E.NQNHHLEPEEVK.Y          |       | 3 | 3,4936 | 0,254 | -0,346 |
| 24 | O75083 WDR1_HUMAN   | E.HTLVTTSHDASVKE.W        |       | 3 | 3,4892 | 0,396 | 0,06   |
| 24 | Q9NZN3 EHD3_HUMAN   | E.HQISPGDFPNLKR.M         |       | 3 | 3,4792 | 0,296 | -0,606 |

|    |                    |                          |        |   |        |       |        |
|----|--------------------|--------------------------|--------|---|--------|-------|--------|
| 24 | Q13442 HAP28_HUMAN | K.RKGV EGLIDIENPNR.V     |        | 2 | 3,4708 | 0,339 | -0,357 |
| 24 | Q6PL18 ATAD2_HUMAN | K.AKDNFNFLHLNR.N         |        | 2 | 3,4688 | 0,383 | -0,082 |
| 24 | Q92545 TM131_HUMAN | E.RLS#PAPLAHPSHPER.A     | S1273: | 3 | 3,4631 | 0,325 | -1,048 |
| 24 | P28799 GRN_HUMAN   | E.DRQHCCPAGYTCNVK.A      |        | 2 | 3,4567 | 0,423 | -0,392 |
| 24 | Q15181 IPYR_HUMAN  | E.FKDKDFAIIDIK.S         |        | 2 | 3,4469 | 0,164 | -0,504 |
| 24 | Q9Y3L3 3BP1_HUMAN  | E.NHGQADHSPS#M*TATHFPR.V | S264:  | 3 | 3,4467 | 0,38  | 0,351  |
| 24 | Q9UQ80 PA2G4_HUMAN | E.KTIQNP TDQKK.D         |        | 2 | 3,4389 | 0,385 | -0,158 |
| 24 | P35579 MYH9_HUMAN  | R.RGDLPFV VPRR.M         |        | 3 | 3,4364 | 0,178 | 0,07   |
| 24 | O60315 ZEB2_HUMAN  | E.KGHLEPTELLM*NR.A       |        | 3 | 3,4345 | 0,182 | 0,118  |
| 24 | O14562 UBFD1_HUMAN | K.TKH DVKFPLDSTGSE.L     |        | 2 | 3,4312 | 0,444 | 0,147  |
| 24 | Q96PK6 RBM14_HUMAN | R.ASYVAPLTAQPATYR.A      |        | 2 | 3,4272 | 0,395 | -0,986 |
| 24 | O60763 USO1_HUMAN  | E.HLIHVLQTD RSDSE.I      |        | 3 | 3,419  | 0,291 | -0,222 |
| 24 | P55786 PSA_HUMAN   | R.M*LHDYIGDKDFK.K        |        | 2 | 3,4147 | 0,437 | -0,57  |
| 24 | P35908 K22E_HUMAN  | R.SKEEA EALYHSK.Y        |        | 2 | 3,413  | 0,458 | -0,526 |
| 24 | Q8N1F7 NUP93_HUMAN | R.KPGVIDKFTSDTKPIINK.V   |        | 3 | 3,4086 | 0,311 | -0,731 |
| 24 | P48643 TCPE_HUMAN  | K.HKLDVTSVEDYK.A         |        | 2 | 3,4055 | 0,365 | -0,51  |
| 24 | Q13573 SNW1_HUMAN  | R.GGKDM*AQSIYRPSK.N      |        | 3 | 3,3956 | 0,406 | 0      |
| 24 | P17480 UBF1_HUMAN  | R.FREDHPDLIQNAK.K        |        | 2 | 3,3952 | 0,443 | -0,848 |
| 24 | O14545 TRAD1_HUMAN | R.VRHQGD LSSGYLDDTKQE.T  |        | 2 | 3,3939 | 0,509 | 0,119  |
| 24 | O43172 PRP4_HUMAN  | R.GHNTNVG AIVFHPK.S      |        | 3 | 3,3937 | 0,278 | 0,184  |
| 24 | Q9Y383 LC7L2_HUMAN | K.SHLLNCCPHDVLSGTR.M     |        | 3 | 3,3875 | 0,377 | -0,882 |
| 24 | P51858 HDGF_HUMAN  | R.RAGD LLED S#PKRPK.E    | S165:  | 3 | 3,3871 | 0,266 | -0,44  |
| 24 | Q8IYB3 SRRM1_HUMAN | E.KKEKT#PELPEPSVK.V      | T220:  | 2 | 3,3857 | 0,252 | -0,433 |
| 24 | Q6PK04 CC137_HUMAN | E.KEAKGEEPDI AVPK.F      |        | 3 | 3,3857 | 0,189 | -0,061 |
| 24 | Q14738 2A5D_HUMAN  | R.RKSELPQDVYTIK.A        |        | 3 | 3,3847 | 0,195 | -0,58  |
| 24 | Q9NQR4 NIT2_HUMAN  | R.KIHLFDIDVPGK.I         |        | 3 | 3,384  | 0,155 | 0      |
| 24 | O15067 PUR4_HUMAN  | E.RCPACFVGTITGDRR.I      |        | 3 | 3,3792 | 0,343 | -0,621 |
| 24 | Q92878 RAD50_HUMAN | E.NYIQDGKDDYKK.Q         |        | 2 | 3,3628 | 0,436 | -0,328 |
| 24 | Q9NYB0 TE2IP_HUMAN | E.HKYLLGDAPVSPSSQK.L     |        | 3 | 3,3576 | 0,233 | -0,741 |
| 24 | Q9Y6W5 WASF2_HUMAN | R.DVVGN DVATILSR.R       |        | 2 | 3,3567 | 0,46  | -0,449 |
| 24 | P12270 TPR_HUMAN   | K.SRQHQM*QLVDSIVR.Q      |        | 3 | 3,353  | 0,245 | -0,534 |
| 24 | O00186 STXB3_HUMAN | K.GKTHS QLLIIDR.G        |        | 3 | 3,3518 | 0,233 | 1,324  |
| 24 | Q9UQ35 SRRM2_HUMAN | K.SKDSL VQSCPGLSLCAGVK.S |        | 3 | 3,3515 | 0,176 | -0,175 |



|    |                    |                           |        |   |        |       |        |
|----|--------------------|---------------------------|--------|---|--------|-------|--------|
| 24 | P35579 MYH9_HUMAN  | R.RGDLPFVVPR.R            |        | 2 | 3,3442 | 0,279 | -0,739 |
| 24 | Q96BN8 F105B_HUMAN | E.DDRHYNIPVR.V            |        | 3 | 3,3421 | 0,202 | -0,498 |
| 24 | P23528 COF1_HUMAN  | K.KAVLFCLSEDKK.N          |        | 3 | 3,34   | 0,245 | 0,445  |
| 24 | Q86WR0 CCD25_HUMAN | R.LHKGENIEDIPK.E          |        | 3 | 3,3369 | 0,215 | 0,328  |
| 24 | Q8IWE2 NXP20_HUMAN | E.LHVAATPDKLNK.A          |        | 2 | 3,3367 | 0,428 | -0,56  |
| 24 | P17844 DDX5_HUMAN  | E.KNFYQEHPDLAR.R          |        | 2 | 3,3317 | 0,232 | -0,723 |
| 24 | Q9P0M9 RM27_HUMAN  | E.GHYVHAGNIIATQR.H        |        | 2 | 3,3304 | 0,512 | -0,556 |
| 24 | Q04446 GLGB_HUMAN  | R.RQFHLTDDDLLR.Y          |        | 2 | 3,3304 | 0,253 | -0,239 |
| 24 | Q9NY61 AATF_HUMAN  | R.KLASASLLDSDKR.Y         |        | 3 | 3,3277 | 0,198 | 0,193  |
| 24 | Q8N9N5 BANP_HUMAN  | E.NHVVTDEDEPALKR.Q        |        | 3 | 3,3256 | 0,437 | -0,338 |
| 24 | P30101 PDIA3_HUMAN | E.KLSKDPNIVIAK.M          |        | 2 | 3,3233 | 0,322 | -0,184 |
| 24 | Q9NWS6 F118A_HUMAN | K.HQADM*LLHGK.V           |        | 3 | 3,3214 | 0,17  | 0      |
| 24 | P21333 FLNA_HUMAN  | R.RRAPSVANVGSCHCDLSLK.I   | S2152: | 3 | 3,3171 | 0,322 | -0,626 |
| 24 | O60841 IF2P_HUMAN  | E.KVEGNTVHIEVK.E          |        | 2 | 3,3109 | 0,242 | -0,902 |
| 24 | Q86UE4 LYRIC_HUMAN | K.NKGDSLHNVQVSFK.S        |        | 3 | 3,3103 | 0,127 | -0,759 |
| 24 | O95400 CD2B2_HUMAN | K.KKLVDPVAGSGGPGSR.F      |        | 3 | 3,3058 | 0,29  | 1,139  |
| 24 | P51991 ROA3_HUMAN  | K.RGFAFVTFDDHDTVDK.I      |        | 3 | 3,3024 | 0,143 | -0,489 |
| 24 | Q9UBU7 DBF4A_HUMAN | R.IHS#KGFHQGGIQVK.N       | S10:   | 3 | 3,3022 | 0,196 | 0      |
| 24 | P08133 ANXA6_HUMAN | R.RILISLATGHREE.G         |        | 3 | 3,3007 | 0,24  | -0,061 |
| 24 | Q8TAD8 SNIP1_HUMAN | R.HRDGDVVLPAVVVK.Q        |        | 2 | 3,2978 | 0,514 | -0,703 |
| 24 | Q9NR45 SIAS_HUMAN  | E.IGQNHQGDLDVAKR.M        |        | 3 | 3,2977 | 0,234 | -0,236 |
| 24 | P35579 MYH9_HUMAN  | K.LKQVEDEKNSFR.E          |        | 2 | 3,292  | 0,37  | -0,899 |
| 24 | Q8WUM4 PDC6I_HUMAN | K.KDNDFIYHDRVDP.L         |        | 2 | 3,2827 | 0,414 | -0,523 |
| 24 | P04080 CYTB_HUMAN  | K.VHVGDEDFVHLR.V          |        | 3 | 3,2746 | 0,204 | -0,193 |
| 24 | Q53EZ4 CEP55_HUMAN | E.KNAYQLTEKDKE.I          |        | 3 | 3,2741 | 0,227 | -0,81  |
| 24 | P46777 RL5_HUMAN   | R.KHIMQNVADYM*R.Y         |        | 3 | 3,2694 | 0,259 | -0,232 |
| 24 | Q07157 ZO1_HUMAN   | R.ISKPGAVS#TPVKHADDHTPK.T | S353:  | 3 | 3,266  | 0,293 | -0,253 |
| 24 | P08133 ANXA6_HUMAN | R.RILISLATGHREE.G         |        | 2 | 3,2607 | 0,442 | -0,49  |
| 24 | P37802 TAGL2_HUMAN | R.TLM*NLGGLAVAR.D         |        | 2 | 3,2576 | 0,359 | -0,495 |
| 24 | Q15019 SEPT2_HUMAN | K.RILDEIEEHNK.I           |        | 3 | 3,2574 | 0,239 | -0,121 |
| 24 | O94888 UBXD7_HUMAN | E.HGQLDGLSSPPKK.C         |        | 2 | 3,2509 | 0,461 | -0,673 |
| 24 | Q9C0J8 WDR33_HUMAN | R.RGGPGPPFPDHRE.F         |        | 3 | 3,2482 | 0,241 | 0,06   |
| 24 | Q9BZF9 UACA_HUMAN  | K.SHDAIIDLNRK.L           |        | 2 | 3,248  | 0,382 | -0,611 |

|    |                    |                               |        |   |        |       |        |
|----|--------------------|-------------------------------|--------|---|--------|-------|--------|
| 24 | P23588 IF4B_HUMAN  | E.DCHSPTS KPPKPDQPLK.V        |        | 3 | 3,2475 | 0,337 | -0,284 |
| 24 | Q9UHD8 SEPT9_HUMAN | R.RLGDSSGPALKR.S              |        | 3 | 3,2452 | 0,406 | 0,291  |
| 24 | P49368 TCPG_HUMAN  | R.GVM*INKDVTHPR.M             |        | 3 | 3,2431 | 0,329 | 0,132  |
| 24 | P46459 NSF_HUMAN   | E.KDFQSGQH VIVR.T             |        | 2 | 3,236  | 0,254 | -0,604 |
| 24 | P35573 GDE_HUMAN   | R.HSPSIHQSVVAVSR.T            |        | 3 | 3,2226 | 0,368 | -0,365 |
| 24 | Q5JRA6 MIA3_HUMAN  | K.KLEDDRNSLQAAK.A             |        | 2 | 3,2226 | 0,379 | -0,41  |
| 24 | Q06210 GFPT1_HUMAN | E.FDVHLGIAHTR.W               |        | 3 | 3,2196 | 0,253 | 0,289  |
| 24 | Q7Z460 CLAP1_HUMAN | E.KFSFRS#QEDLNEPIKR.D         | S1196: | 3 | 3,2172 | 0,313 | -0,706 |
| 24 | P26583 HMGB2_HUMAN | K.IKSEHPGLSIGDTAK.K           |        | 3 | 3,2164 | 0,295 | -0,236 |
| 24 | Q9NZ45 CISD1_HUMAN | K.KFPFCDAHTK.H                |        | 3 | 3,214  | 0,269 | -0,21  |
| 24 | Q05682 CALD1_HUMAN | K.TPDGNKSPAPKPS#DLRPGDVSSKR.N | S765:  | 3 | 3,2125 | 0,196 | -0,778 |
| 24 | Q9NRX4 PHP14_HUMAN | E.YHADIYDKVSGDM*QK.Q          |        | 3 | 3,2085 | 0,276 | -0,41  |
| 24 | P39687 AN32A_HUMAN | E.KCPNLTHLNLSGNK.I            |        | 2 | 3,2048 | 0,436 | -0,841 |
| 24 | P52701 MSH6_HUMAN  | K.IHNVGS#PLKSQNH PDSR.A       | S830:  | 3 | 3,2    | 0,315 | -0,465 |
| 24 | Q7L014 DDX46_HUMAN | R.KLLEPVDHGKIE.Y              |        | 2 | 3,1872 | 0,329 | -0,708 |
| 24 | Q9UHD1 CHRD1_HUMAN | R.HNSEKPEPEVKPE.V             |        | 2 | 3,1845 | 0,434 | -0,902 |
| 24 | Q32MZ4 LRRF1_HUMAN | R.NM*PGLSAATLASLGGTSSR.R      |        | 2 | 3,1826 | 0,407 | -0,27  |
| 24 | P17812 PYRG1_HUMAN | E.HSALAINHKLE.I               |        | 3 | 3,1823 | 0,249 | 0,593  |
| 24 | P47897 SYQ_HUMAN   | R.TDFKEEPEPGFKR.L             |        | 3 | 3,1763 | 0,31  | -0,695 |
| 24 | Q8NFP7 NUD10_HUMAN | K.VLQCHKPVHAE.Y               |        | 3 | 3,1727 | 0,257 | 0,555  |
| 24 | P05362 ICAM1_HUMAN | E.AQVHLALGDQR.L               |        | 3 | 3,1626 | 0,254 | 0      |
| 24 | P38919 IF4A3_HUMAN | R.KLDYQGQHV VAGTPGR.V         |        | 3 | 3,1607 | 0,133 | 0,229  |
| 24 | Q06124 PTN11_HUMAN | R.YKNILPFDHTR.V               |        | 2 | 3,1606 | 0,322 | -0,608 |
| 24 | P06396 GELS_HUMAN  | E.DCFILDHGKDGK.I              |        | 2 | 3,1534 | 0,423 | -0,868 |
| 24 | Q09028 RBBP4_HUMAN | E.LLFIHGGHTAK.I               |        | 2 | 3,1489 | 0,307 | -1,022 |
| 24 | O43172 PRP4_HUMAN  | K.KPHIYGSLEEKE.R              |        | 3 | 3,1469 | 0,343 | -0,574 |
| 24 | Q8NE01 CNNM3_HUMAN | K.RKPASLM*APLK.R              |        | 3 | 3,1442 | 0,224 | 1,117  |
| 24 | Q9H307 PININ_HUMAN | K.TKPHLFYIPGR.M               |        | 3 | 3,1424 | 0,229 | 0,138  |
| 24 | Q96J01 THOC3_HUMAN | K.RPLLA FACDDKDGK.Y           |        | 3 | 3,1418 | 0,31  | -0,342 |
| 24 | Q5T1M5 FKB15_HUMAN | K.KDDVTSSTGPHKE.L             |        | 3 | 3,1416 | 0,252 | 0,065  |
| 24 | Q9NQZ2 SAS10_HUMAN | R.HLLTLKDDAVK.K               |        | 3 | 3,1402 | 0,346 | 0,73   |
| 24 | Q6P3W7 SCYL2_HUMAN | E.KDQIIDSLKR.G                |        | 3 | 3,1348 | 0,265 | 0,451  |
| 24 | Q00839 HNRPU_HUMAN | K.LKVSELKEELK.K               |        | 2 | 3,1337 | 0,231 | -0,649 |

|    |                    |                         |        |   |        |       |        |
|----|--------------------|-------------------------|--------|---|--------|-------|--------|
| 24 | Q99832 TCPH_HUMAN  | E.RSLHDAIM*IVR.R        |        | 3 | 3,1336 | 0,244 | -0,069 |
| 24 | Q9NRL2 BAZ1A_HUMAN | K.KKDAIDPLLFK.Y         |        | 2 | 3,1222 | 0,395 | -0,284 |
| 24 | P00492 HPRT_HUMAN  | E.RVFIPHGLIM*DR.T       |        | 3 | 3,1167 | 0,206 | -0,311 |
| 24 | O43395 PRPF3_HUMAN | K.AADHLKPFLLDDSTLR.F    |        | 3 | 3,1132 | 0,169 | -0,754 |
| 24 | Q9BWH6 RPAP1_HUMAN | R.GGGDANSDRPPLQDHR.D    |        | 3 | 3,1129 | 0,239 | -1,297 |
| 24 | Q02790 FKBP4_HUMAN | R.KDKFSFDLKGGE.V        |        | 3 | 3,1078 | 0,347 | 0      |
| 24 | Q5TCQ9 MAGI3_HUMAN | E.HLDKIPS#PLKNNPK.R     | S1266: | 3 | 3,1064 | 0,252 | -0,544 |
| 24 | Q9BUQ8 DDX23_HUMAN | E.LANHPDAQHKPGTILTK.K   |        | 3 | 3,104  | 0,288 | -0,497 |
| 24 | Q9UK76 HN1_HUMAN   | R.RNS#SEASSGDFLDLK.G    | S87:   | 2 | 3,1027 | 0,387 | 0,072  |
| 24 | Q9NY61 AATF_HUMAN  | R.KLASASLLDSDKR.Y       |        | 2 | 3,0954 | 0,506 | -1,032 |
| 24 | P35579 MYH9_HUMAN  | R.NAEQYKDQADKASTR.L     |        | 2 | 3,0913 | 0,431 | -0,92  |
| 24 | Q08379 GOGA2_HUMAN | R.RLAHLLASAQKEPE.A      |        | 3 | 3,0893 | 0,319 | -0,468 |
| 24 | P07910 HNRPC_HUMAN | K.LKGDDLQAIKKE.L        |        | 3 | 3,0865 | 0,26  | -0,067 |
| 24 | Q13642 FHL1_HUMAN  | K.FDCHYCRDPLQGK.K       |        | 3 | 3,0834 | 0,271 | -0,324 |
| 24 | Q9Y5U2 TSSC4_HUMAN | R.RAPSSVAHTSM*SDNGGFK.R |        | 3 | 3,083  | 0,288 | -0,294 |
| 24 | Q7L1Q6 BZW1_HUMAN  | E.KDINAVAASLRK.V        |        | 3 | 3,0779 | 0,182 | 0,071  |
| 24 | Q9Y219 JAG2_HUMAN  | K.SLHFSGHVAHLE.L        |        | 3 | 3,0775 | 0,269 | -0,206 |
| 24 | P46459 NSF_HUMAN   | E.KDFQSGQHIVIR.T        |        | 3 | 3,0755 | 0,298 | 0,065  |
| 24 | Q9P2I0 CPSF2_HUMAN | R.HLSLCHGLSDLAR.V       |        | 2 | 3,0673 | 0,498 | -0,577 |
| 24 | P49902 5NTC_HUMAN  | R.TSVDFKDTDYKR.H        |        | 3 | 3,0651 | 0,453 | -0,558 |
| 24 | P09429 HMGB1_HUMAN | K.KHPDASVNFSEFSK.K      |        | 3 | 3,0607 | 0,24  | 0,115  |
| 24 | O43296 ZN264_HUMAN | E.GHFRPGIDPQEKs#PGK.M   | S150:  | 3 | 3,0589 | 0,311 | -0,6   |
| 24 | Q8NBS9 TXND5_HUMAN | E.LHVAQGDHFIK.F         |        | 3 | 3,0588 | 0,341 | -0,289 |
| 24 | P42166 LAP2A_HUMAN | R.SHISDQSPLSSKR.K       |        | 3 | 3,0554 | 0,377 | -0,19  |
| 24 | Q16774 KGUA_HUMAN  | E.HSGIFGFSVSHTR.N       |        | 3 | 3,0553 | 0,306 | -0,716 |
| 24 | O75362 ZN217_HUMAN | R.TYHQLVLHSR.V          |        | 3 | 3,0529 | 0,136 | -0,146 |
| 24 | P15170 ERF3A_HUMAN | K.HFTILDAPGHK.S         |        | 3 | 3,0527 | 0,121 | 0,37   |
| 24 | P48426 PI42A_HUMAN | K.IKVDNHLFNKE.N         |        | 3 | 3,0511 | 0,094 | 0,135  |
| 24 | P23919 KTHY_HUMAN  | E.DHSVHLLFSANR.W        |        | 3 | 3,0401 | 0,188 | 0,131  |
| 24 | P43243 MATR3_HUMAN | K.NTHCSSLPHYQK.L        |        | 2 | 3,0352 | 0,488 | 0,663  |
| 24 | P49792 RBP2_HUMAN  | R.FKLQDVADSFKK.I        |        | 3 | 3,0344 | 0,294 | -0,064 |
| 24 | P11142 HSP7C_HUMAN | D.KSQIHDIVLVGGSTR.I     |        | 3 | 3,0339 | 0,168 | -1,022 |
| 24 | A4D1S0 KLRG2_HUMAN | R.HADPAHQLLLR.A         |        | 3 | 3,0333 | 0,316 | 0,072  |

|    |                    |                          |   |        |       |        |
|----|--------------------|--------------------------|---|--------|-------|--------|
| 24 | P07355 ANXA2_HUMAN | E.KDIISDTSGDFRK.L        | 2 | 3,0326 | 0,378 | -1,07  |
| 24 | P25786 PSA1_HUMAN  | K.THAVLVALKR.A           | 2 | 3,0266 | 0,298 | -0,22  |
| 24 | O15027 SC16A_HUMAN | K.SHLVGVKPFADR.A         | 2 | 3,0224 | 0,361 | -0,755 |
| 24 | Q5JRA6 MIA3_HUMAN  | K.KLEDDRNSLQAAK.A        | 3 | 3,0183 | 0,237 | 0,246  |
| 24 | Q9UNZ2 NSF1C_HUMAN | R.KKSPNELVDDLK.G         | 3 | 3,0179 | 0,081 | -0,239 |
| 24 | Q8N2M8 SFR16_HUMAN | K.KDPAQLQVHGR.A          | 2 | 3,0173 | 0,401 | -0,175 |
| 24 | Q71U36 TBA1A_HUMAN | R.LDHKFDLM*YAK.R         | 3 | 3,0136 | 0,252 | 0,327  |
| 24 | Q9NZC9 SMAL1_HUMAN | E.SCKPVSHGVIFK.Q         | 3 | 3,011  | 0,242 | -0,538 |
| 24 | Q9Y639 NPTN_HUMAN  | E.YHCVVYHFVSAPK.A        | 2 | 2,9994 | 0,423 | -0,971 |
| 24 | Q70E73 RAPH1_HUMAN | E.DTKPLVTNQHR.R          | 3 | 2,9932 | 0,144 | -0,07  |
| 24 | Q96P70 IPO9_HUMAN  | K.LLQHGINADDKR.L         | 3 | 2,9914 | 0,203 | 0,663  |
| 24 | P06733 ENOA_HUMAN  | R.SGKYDLDFKSPDDPSR.Y     | 3 | 2,989  | 0,385 | -0,801 |
| 24 | Q96BK5 PINX1_HUMAN | R.SKTDLDCIFGKR.Q         | 3 | 2,9877 | 0,299 | 0,127  |
| 24 | Q9HD20 AT131_HUMAN | E.KAHTLILQPPSEK.G        | 3 | 2,9856 | 0,182 | 0,688  |
| 24 | P35813 PPM1A_HUMAN | E.HLLDHITNNQDFK.G        | 2 | 2,9828 | 0,437 | -0,306 |
| 24 | P84077 ARF1_HUMAN  | E.ITDKLGLHSLR.H          | 2 | 2,9818 | 0,426 | -0,487 |
| 24 | Q15797 SMAD1_HUMAN | R.KGLPHVIYCR.V           | 3 | 2,9816 | 0,197 | 0      |
| 24 | P13639 EF2_HUMAN   | R.NMSVIAHVDHGK.S         | 2 | 2,9756 | 0,415 | -0,093 |
| 24 | Q9BYW2 SETD2_HUMAN | E.KDLDDTCM*LHK.K         | 3 | 2,975  | 0,307 | 0,591  |
| 24 | Q8N108 MIER1_HUMAN | K.KYNLHPGVTDYM*DR.L      | 3 | 2,9726 | 0,26  | -0,424 |
| 24 | Q9BW71 HIRP3_HUMAN | E.AASREDKLDLTK.K         | 3 | 2,9713 | 0,333 | -0,068 |
| 24 | Q15833 STXB2_HUMAN | K.YSTHLHLADDCM*K.H       | 3 | 2,9699 | 0,382 | 0,341  |
| 24 | P49902 5NTC_HUMAN  | R.TSVDFKDTDYKR.H         | 2 | 2,9651 | 0,447 | -0,827 |
| 24 | Q8WUA2 PPIL4_HUMAN | E.KEQDKPPNLVLK.D         | 2 | 2,964  | 0,149 | -0,693 |
| 24 | Q9HAW4 CLSPN_HUMAN | E.RYLADGDLHSDGPGR.M      | 2 | 2,9623 | 0,374 | -0,15  |
| 24 | Q8NE71 ABCF1_HUMAN | E.SKADDPYAHLSK.K         | 3 | 2,9622 | 0,341 | 0,069  |
| 24 | P42704 LPPRC_HUMAN | E.KGDIDHVKQTLE.K         | 2 | 2,962  | 0,505 | -0,441 |
| 24 | P07910 HNRPC_HUMAN | K.LKGDDLQAIKKE.L         | 2 | 2,9593 | 0,252 | -0,809 |
| 24 | Q13283 G3BP1_HUMAN | K.SSS#PAPADIAQTVQE.D     | 2 | 2,9534 | 0,184 | -0,386 |
| 24 | P05387 RLA2_HUMAN  | K.NIEDVIAQGIGK.L         | 2 | 2,9509 | 0,416 | 0,291  |
| 24 | Q92664 TF3A_HUMAN  | K.IHQCQHTNEPLFK.C        | 3 | 2,9468 | 0,364 | -0,111 |
| 24 | Q15942 ZYX_HUMAN   | E.GTSFIVDQANRPHCVDPYHK.Q | 3 | 2,9456 | 0,285 | -0,469 |
| 24 | O00299 CLIC1_HUMAN | K.LHIVQVVKK.Y            | 3 | 2,9423 | 0,298 | 0,523  |

S232:

|    |                    |                       |   |        |       |        |
|----|--------------------|-----------------------|---|--------|-------|--------|
| 24 | Q6PJT7 ZC3HE_HUMAN | K.RKLPVVSSVVK.V       | 3 | 2,9423 | 0,124 | 0,302  |
| 24 | O15067 PUR4_HUMAN  | R.ERCPCFVGTITGDRR.I   | 3 | 2,9421 | 0,203 | -1,351 |
| 24 | Q0JRZ9 FCHO2_HUMAN | E.KNSGFDVLYHNM*K.H    | 3 | 2,942  | 0,301 | -0,466 |
| 24 | P17480 UBF1_HUMAN  | R.FREDHPDLIQNAK.K     | 3 | 2,9405 | 0,246 | -0,693 |
| 24 | P00813 ADA_HUMAN   | E.LHVHLDGSIKPE.T      | 3 | 2,9396 | 0,415 | 0,136  |
| 24 | Q09028 RBBP4_HUMAN | R.SNNTSKPSHSVDAHTAE.V | 3 | 2,936  | 0,157 | -0,205 |
| 24 | O94833 BPAAE_HUMAN | K.HLHQAVSIGQSLK.V     | 2 | 2,9359 | 0,404 | -0,344 |
| 24 | P07814 SYEP_HUMAN  | E.HLITKPVLGKDE.D      | 2 | 2,9339 | 0,289 | -0,813 |
| 24 | P48426 PI42A_HUMAN | K.IKVDNHLFNKE.N       | 2 | 2,9323 | 0,279 | -0,629 |
| 24 | Q9UFC0 LRWD1_HUMAN | K.RPDDVPLSLSPSKR.A    | 2 | 2,9206 | 0,378 | -0,623 |
| 24 | Q96JM3 ZN828_HUMAN | E.TRKPGPSGPSESPK.A    | 3 | 2,92   | 0,331 | 0,064  |
| 24 | P29401 TKT_HUMAN   | R.KISSDLGHPVVK.Q      | 3 | 2,9158 | 0,263 | -0,459 |
| 24 | Q9HC35 EMAL4_HUMAN | K.TADKHKDVIINQE.G     | 2 | 2,9137 | 0,32  | -0,646 |
| 24 | Q9GZV5 WWTR1_HUMAN | E.SFFKEPDSGSHSR.Q     | 2 | 2,9093 | 0,355 | -0,33  |
| 24 | P84077 ARF1_HUMAN  | E.ITDKLGLHSLR.H       | 3 | 2,9091 | 0,334 | -0,219 |
| 24 | O00566 MPP10_HUMAN | R.EKSIVDDKFFK.L       | 2 | 2,9085 | 0,342 | -0,54  |
| 24 | P07910 HNRPC_HUMAN | K.LKGDDLQAIKK.E       | 3 | 2,9056 | 0,123 | 1,116  |
| 24 | P42704 LPPRC_HUMAN | K.NTKLDDLFLKR.Y       | 2 | 2,9049 | 0,418 | -1,343 |
| 24 | P43490 NAMPT_HUMAN | E.KYDGHLPKIEK.A       | 2 | 2,9047 | 0,22  | -0,279 |
| 24 | P33991 MCM4_HUMAN  | E.HQIQVRPFNALK.T      | 2 | 2,9014 | 0,335 | -0,589 |
| 24 | P17029 ZKSC1_HUMAN | K.AFSHSSNLILHQR.I     | 3 | 2,9008 | 0,131 | -1,272 |
| 24 | Q9UQ80 PA2G4_HUMAN | E.KTIIQNPTDQKK.D      | 3 | 2,9008 | 0,255 | 1,186  |
| 24 | P54577 SYYC_HUMAN  | E.SKIDLLDRKE.D        | 3 | 2,9004 | 0,207 | 0,376  |
| 24 | P13639 EF2_HUMAN   | E.SNVLCLSKS#PNKHNR.L  | 3 | 2,8974 | 0,256 | -0,598 |
| 24 | Q15149 PLEC1_HUMAN | R.LRLPLDKEPARE.C      | 3 | 2,8973 | 0,089 | -1,336 |
| 24 | Q9UPN6 RBM16_HUMAN | E.NLVRPGIDHLGR.R      | 2 | 2,8921 | 0,232 | -0,996 |
| 24 | Q00341 VIGLN_HUMAN | R.RCDIIISGR.K         | 2 | 2,8896 | 0,224 | -0,203 |
| 24 | Q9UNW9 NOVA2_HUMAN | R.KRPLETPPEVVCTK.R    | 3 | 2,8867 | 0,141 | -0,442 |
| 24 | Q16576 RBBP7_HUMAN | K.HPAKPDPSGECNPDLR.L  | 3 | 2,8865 | 0,395 | -0,409 |
| 24 | P29350 PTN6_HUMAN  | R.YKNILPFDHSR.V       | 3 | 2,8853 | 0,19  | -0,066 |
| 24 | Q9Y4E5 ZN451_HUMAN | K.HCFLQKPSVAHFGSE.K   | 3 | 2,8786 | 0,16  | -0,629 |
| 24 | Q9HAW4 CLSPN_HUMAN | E.RYLADGDLHSDGPGR.M   | 3 | 2,8758 | 0,298 | -0,112 |
| 24 | P07900 HS90A_HUMAN | E.LHINLIPNKQDR.T      | 2 | 2,8754 | 0,358 | -0,418 |

|    |                    |                          |       |   |        |       |        |
|----|--------------------|--------------------------|-------|---|--------|-------|--------|
| 24 | Q15185 TEBP_HUMAN  | K.LTFSCLOGSDNFK.H        |       | 2 | 2,8746 | 0,427 | -0,506 |
| 24 | Q9UKG1 DP13A_HUMAN | E.SLRPAAGQSRPPTAR.T      |       | 3 | 2,8688 | 0,139 | -0,584 |
| 24 | Q8WUA2 PPIL4_HUMAN | E.KEQDKPPNLVLK.D         |       | 3 | 2,8685 | 0,115 | -0,26  |
| 24 | Q16658 FSCN1_HUMAN | R.YLKGDHAGVLK.A          |       | 3 | 2,8684 | 0,252 | 0,457  |
| 24 | O95394 AGM1_HUMAN  | K.GKLNHLGADLVK.S         |       | 2 | 2,8676 | 0,283 | -0,251 |
| 24 | P49792 RBP2_HUMAN  | E.KDSLITPHVSR.S          |       | 2 | 2,8653 | 0,222 | -0,779 |
| 24 | Q9Y6D6 BIG1_HUMAN  | E.HEGDLDLHTNDVDK.S       |       | 3 | 2,8638 | 0,34  | -0,341 |
| 24 | P46821 MAP1B_HUMAN | E.VKKET#PPKEVK.K         | T704: | 3 | 2,8637 | 0,104 | 0,067  |
| 24 | Q9NUQ6 SPS2L_HUMAN | K.TPEAPAHSEKPR.R         |       | 3 | 2,8618 | 0,414 | 0,485  |
| 24 | P51114 FXR1_HUMAN  | K.RVNILSDM*HLR.S         |       | 3 | 2,8578 | 0,173 | -0,133 |
| 24 | Q6ZU80 CN145_HUMAN | R.KGLQHQVSQISK.Q         |       | 3 | 2,8549 | 0,128 | 0,338  |
| 24 | P49411 EFTU_HUMAN  | R.GLVM*VKPGSIKPHQK.V     |       | 2 | 2,8548 | 0,371 | -0,597 |
| 24 | Q9Y5B6 GCFC_HUMAN  | E.LGDFTPHDNEPGKGR.L      |       | 3 | 2,8545 | 0,225 | -0,112 |
| 24 | Q9NYF8 BCLF1_HUMAN | K.NTPSQHSHSIQHS#PER.S    | S268: | 3 | 2,8503 | 0,354 | -0,381 |
| 24 | O75446 SAP30_HUMAN | R.HLYICDYHK.N            |       | 3 | 2,8485 | 0,082 | 0,512  |
| 24 | P05198 IF2A_HUMAN  | K.YKRPGYGAYDAFK.H        |       | 3 | 2,8443 | 0,317 | -0,595 |
| 24 | P43686 PRS6B_HUMAN | R.KIEFPLPDRR.Q           |       | 3 | 2,8415 | 0,294 | 0,432  |
| 24 | P35580 MYH10_HUMAN | D.KADFCIIHYAGK.V         |       | 3 | 2,8403 | 0,203 | 0      |
| 24 | P41236 IPP2_HUMAN  | E.M*NILATYHPADKDYGLM*K.I |       | 3 | 2,8384 | 0,217 | -0,26  |
| 24 | Q8TAD8 SNIP1_HUMAN | R.HRDGDVVLPAQVVVKQE.R    |       | 3 | 2,8376 | 0,082 | -0,503 |
| 24 | Q13177 PAK2_HUMAN  | E.FLHANQVIHR.D           |       | 3 | 2,8354 | 0,258 | 0,222  |
| 24 | O75528 TAD3L_HUMAN | R.NQNKPFVSPHTK.S         |       | 2 | 2,8338 | 0,334 | -0,349 |
| 24 | Q13442 HAP28_HUMAN | R.KGVEGLIDIENPNR.V       |       | 3 | 2,8277 | 0,218 | -0,118 |
| 24 | Q9BR76 COR1B_HUMAN | E.RKCEIVM*TVPR.K         |       | 3 | 2,8239 | 0,227 | -1,035 |
| 24 | P26358 DNMT1_HUMAN | K.HGHLCPIDTGLIEK.N       |       | 2 | 2,8228 | 0,375 | -0,844 |
| 24 | P49792 RBP2_HUMAN  | E.KDSLITPHVSR.S          |       | 3 | 2,8211 | 0,344 | 0      |
| 24 | P35659 DEK_HUMAN   | K.LKKPPTDEELKE.T         |       | 2 | 2,8179 | 0,3   | -0,684 |
| 24 | P26640 SYVC_HUMAN  | K.GKNVIHPFLSR.S          |       | 3 | 2,8139 | 0,211 | 0,361  |
| 24 | O94833 BPAEA_HUMAN | K.HLHQAVSIGQSLK.V        |       | 3 | 2,8138 | 0,143 | 0,129  |
| 24 | Q9Y230 RUVB2_HUMAN | R.KGTEVQVDDIKR.V         |       | 2 | 2,8062 | 0,121 | 0,088  |
| 24 | Q14839 CHD4_HUMAN  | R.NDKDKPLPPLLAR.V        |       | 3 | 2,8062 | 0,159 | 0,186  |
| 24 | Q03164 HRX_HUMAN   | E.ALSFPHLHLR.G           |       | 2 | 2,8038 | 0,249 | -0,41  |
| 24 | Q9Y5K6 CD2AP_HUMAN | E.NLLHLTANRPK.M          |       | 2 | 2,8025 | 0,312 | -0,669 |

|    |                     |                         |            |   |        |       |        |
|----|---------------------|-------------------------|------------|---|--------|-------|--------|
| 24 | Q8TF72 SHRM3_HUMAN  | E.RSDVLAGPVHVR.S        |            | 3 | 2,797  | 0,141 | -0,21  |
| 24 | Q00839 HNRPU_HUMAN  | K.LKVSELKEELK.K         |            | 3 | 2,7967 | 0,118 | 0      |
| 24 | P07355 ANXA2_HUMAN  | E.KDIISDTSGDFR.K        |            | 2 | 2,7911 | 0,373 | -0,901 |
| 24 | P16383 GCF_HUMAN    | K.RIPFTLRPQTLR.Q        |            | 3 | 2,7909 | 0,111 | -0,122 |
| 24 | P12532 KCRU_HUMAN   | K.HNNCM*ASHLTPAVYAR.L   |            | 3 | 2,7904 | 0,161 | -0,394 |
| 24 | P43243 MATR3_HUMAN  | K.NTHCSSLPHYQK.L        |            | 3 | 2,7867 | 0,234 | -0,559 |
| 24 | Q12849 GRSF1_HUMAN  | E.THEDAVAAM*LKDR.S      |            | 3 | 2,7771 | 0,267 | -0,559 |
| 24 | Q15027 SC16A_HUMAN  | K.SHLVGVKPFADR.A        |            | 3 | 2,7771 | 0,258 | -0,314 |
| 24 | Q86WV7 Q86WV7_HUMAN | R.NTNVEDVLNAR.K         |            | 2 | 2,777  | 0,245 | -0,686 |
| 24 | Q8N707 Q8N707_HUMAN | E.KLQLHES#QKDYSK.G      | S261:      | 3 | 2,7767 | 0,226 | -0,326 |
| 24 | P68104 EF1A1_HUMAN  | K.SGDAIVDM*VPGKPM*CVE.S |            | 2 | 2,774  | 0,286 | 0,064  |
| 24 | Q9NRL2 BAZ1A_HUMAN  | K.KKDAIDPLLFK.Y         |            | 3 | 2,7701 | 0,235 | 0,213  |
| 24 | Q14157 UBP2L_HUMAN  | D.LKNPSDSAVHS#PFTKR.Q   | S416:      | 3 | 2,7683 | 0,3   | -0,589 |
| 24 | Q9H1H9 KI13A_HUMAN  | K.RIVNHAVVNEDPNAK.V     |            | 3 | 2,7669 | 0,122 | -0,764 |
| 24 | Q9Y5Q8 TF3C5_HUMAN  | R.SKRPALFSSSAK.A        |            | 2 | 2,7662 | 0,364 | -1,431 |
| 24 | Q8IU81 I2BP1_HUMAN  | E.GRS#PGPPALKHPATK.D    | S66:       | 3 | 2,7641 | 0,301 | 0      |
| 24 | Q92945 FUBP2_HUMAN  | E.KIAHIM*GPPDRCE.H      |            | 3 | 2,7638 | 0,314 | -0,356 |
| 24 | Q8TEW0 PARD3_HUMAN  | R.LNHPPSEQIDSHSR.L      |            | 3 | 2,7611 | 0,181 | 0,06   |
| 24 | Q92785 REQU_HUMAN   | E.DRDKPYACDICGK.R       |            | 2 | 2,7591 | 0,338 | -0,534 |
| 24 | Q12756 KIF1A_HUMAN  | R.RQDIVLSGHFIKE.E       |            | 2 | 2,759  | 0,387 | -0,87  |
| 24 | P20020 AT2B1_HUMAN  | R.SSIHNFM*THPEFR.I      |            | 2 | 2,7576 | 0,363 | -1,055 |
| 24 | P17980 PRS6A_HUMAN  | E.KLKPGDLVGVNKD.S       |            | 2 | 2,7563 | 0,215 | -0,882 |
| 24 | Q86W42 THOC6_HUMAN  | R.GHTDYIHCLALR.E        |            | 3 | 2,7562 | 0,326 | -0,063 |
| 24 | P46777 RL5_HUMAN    | R.KHIM*GQNVADYM*R.Y     |            | 3 | 2,7557 | 0,307 | 0,573  |
| 24 | Q5T3I0 GPTC4_HUMAN  | R.YNHKPNLLYQK.F         |            | 2 | 2,7551 | 0,329 | -0,403 |
| 24 | O60506 HNRPQ_HUMAN  | E.GLTDVILYHQDDKKK.N     |            | 2 | 2,7525 | 0,411 | -0,13  |
| 24 | P46459 NSF_HUMAN    | R.LQILHIHTAR.M          |            | 2 | 2,7429 | 0,297 | 1,015  |
| 24 | P24752 THIL_HUMAN   | R.IVGHLTHALK.Q          |            | 2 | 2,742  | 0,295 | -0,336 |
| 24 | P63000 RAC1_HUMAN   | R.HHCPNTPIILVGTK.L      |            | 2 | 2,7411 | 0,297 | -0,308 |
| 24 | Q8NBS9 TXND5_HUMAN  | E.LHVAQGDHFIK.F         |            | 2 | 2,7371 | 0,36  | -0,579 |
| 24 | Q6NZI2 PTRF_HUMAN   | R.RGS#S#PDVHALLE.I      | S365:S366: | 2 | 2,7292 | 0,384 | -0,762 |
| 24 | Q8IU81 I2BP1_HUMAN  | E.GRS#PGPPALKHPATKD.L   | S66:       | 3 | 2,7283 | 0,157 | 0,107  |
| 24 | P20020 AT2B1_HUMAN  | R.SSIHNFM*THPEFR.I      |            | 3 | 2,7226 | 0,47  | -0,678 |

|    |                    |                        |   |        |       |        |
|----|--------------------|------------------------|---|--------|-------|--------|
| 24 | Q6PIU2 ADCL1_HUMAN | E.HDVLRDDGIM*YAK.R     | 3 | 2,7143 | 0,199 | -0,708 |
| 24 | Q7L4I2 RSRC2_HUMAN | E.KLNFGNKDQNVK.F       | 3 | 2,711  | 0,25  | 0,13   |
| 24 | Q15018 K0157_HUMAN | E.HGTDFFDKDGVM*K.D     | 3 | 2,7061 | 0,187 | -0,06  |
| 24 | Q7Z6B7 SRGP1_HUMAN | K.KGASLLLYHR.A         | 2 | 2,7034 | 0,108 | -0,737 |
| 24 | P31948 STIP1_HUMAN | K.DFDTALKHYDK.A        | 2 | 2,6998 | 0,395 | -0,721 |
| 24 | P29350 PTN6_HUMAN  | R.YKNILPFDHSR.V        | 2 | 2,6987 | 0,348 | -0,527 |
| 24 | P51991 ROA3_HUMAN  | E.DSVKPGAHLTVK.K       | 3 | 2,6953 | 0,238 | 0,219  |
| 24 | P28290 SSFA2_HUMAN | E.FTQYTTHHILK.S        | 2 | 2,6939 | 0,445 | -0,527 |
| 24 | Q14204 DYHC1_HUMAN | K.VDGHKDIQM*PDGIR.R    | 3 | 2,6929 | 0,174 | 0,687  |
| 24 | P49411 EFTU_HUMAN  | R.GLVM*VKPGSIKPHQK.V   | 3 | 2,6892 | 0,351 | -0,336 |
| 24 | Q86TJ2 TAD2B_HUMAN | E.HYVSM*YIHGNLGK.A     | 3 | 2,6789 | 0,106 | -0,596 |
| 24 | Q16658 FSCN1_HUMAN | R.YLKGDHAGVVK.A        | 2 | 2,6764 | 0,401 | -0,508 |
| 24 | O15371 EIF3D_HUMAN | E.GKYLILKDPNK.Q        | 2 | 2,6756 | 0,281 | -0,379 |
| 24 | Q676U5 A16L1_HUMAN | E.KSDLHSVLAQK.L        | 2 | 2,6661 | 0,207 | -0,896 |
| 24 | P47985 UCRI_HUMAN  | E.LSQLRDPQHDLDR.V      | 2 | 2,6639 | 0,213 | -0,306 |
| 24 | Q06124 PTN11_HUMAN | R.YKNILPFDHTR.V        | 3 | 2,6625 | 0,261 | -0,651 |
| 24 | Q15833 STXB2_HUMAN | K.YSTHLHLADDCM*K.H     | 2 | 2,6606 | 0,392 | -0,607 |
| 24 | O75528 TAD3L_HUMAN | R.NQNKPFVPHTK.S        | 3 | 2,6602 | 0,231 | -0,524 |
| 24 | Q9H3S7 PTN23_HUMAN | E.DKAVLQNLKR.I         | 2 | 2,6597 | 0,162 | -1,235 |
| 24 | P45974 UBP5_HUMAN  | E.HLSHFGIDM*LK.M       | 2 | 2,6558 | 0,363 | 0,279  |
| 24 | Q03154 ACY1_HUMAN  | R.TPVLLHDHDER.L        | 3 | 2,6551 | 0,196 | 0,412  |
| 24 | P04406 G3P_HUMAN   | K.IISNASCTTNCLAPLAK.V  | 2 | 2,6543 | 0,214 | -0,399 |
| 24 | Q9H0B6 KLC2_HUMAN  | E.KQHLLFM*SQIR.K       | 2 | 2,6536 | 0,163 | -0,43  |
| 24 | O00566 MPP10_HUMAN | E.KSIVDDKFFK.L         | 3 | 2,6431 | 0,246 | 0,671  |
| 24 | P10253 LYAG_HUMAN  | R.LHFTIKDPANR.R        | 3 | 2,6426 | 0,148 | -0,07  |
| 24 | P50395 GDIB_HUMAN  | E.TTCDIKNIYKR.M        | 3 | 2,6372 | 0,332 | -0,779 |
| 24 | O60563 CCNT1_HUMAN | K.VHAAADKHNS#VEDSVTK.S | 3 | 2,6323 | 0,201 | -0,291 |
| 24 | P23919 KTHY_HUMAN  | E.DHSVHLLFSANR.W       | 2 | 2,6314 | 0,543 | -0,35  |
| 24 | O95373 IPO7_HUMAN  | R.KQLQDIATLADQRR.A     | 3 | 2,6303 | 0,239 | -0,773 |
| 24 | P05067 A4_HUMAN    | K.THPHFVIPYR.C         | 3 | 2,6286 | 0,31  | -0,577 |
| 24 | P09429 HMGB1_HUMAN | K.KHPDASVNFSE.F        | 2 | 2,6215 | 0,392 | -0,297 |
| 24 | Q9C0C2 TB182_HUMAN | D.AHLRPTSLVQR.R        | 3 | 2,6168 | 0,386 | 0      |
| 24 | P60709 ACTB_HUMAN  | R.GYSFTTTAERE.I        | 2 | 2,6145 | 0,447 | 0,87   |



|    |                    |                       |        |   |        |       |        |
|----|--------------------|-----------------------|--------|---|--------|-------|--------|
| 24 | Q9NVW2 RNF12_HUMAN | R.SHHSISSQTFEHPLVNE.T |        | 3 | 2,6119 | 0,157 | -0,188 |
| 24 | O15027 SC16A_HUMAN | E.HRPASALVNPLAR.G     |        | 2 | 2,6105 | 0,258 | -0,609 |
| 24 | Q8NG31 CASC5_HUMAN | E.NKIDFNDFIKR.L       |        | 3 | 2,6097 | 0,329 | -0,13  |
| 24 | P33991 MCM4_HUMAN  | E.HQIQVRPFNALK.T      |        | 3 | 2,6094 | 0,137 | -0,441 |
| 24 | Q9GZV5 WWTR1_HUMAN | E.SFFKEPDSGSHSR.Q     |        | 3 | 2,6073 | 0,185 | 0,185  |
| 24 | P48444 COPD_HUMAN  | K.GKEVDNFVDKLK.S      |        | 3 | 2,6072 | 0,19  | 0,263  |
| 24 | Q9P035 PTAD1_HUMAN | E.KRPLFLAPDFDR.W      |        | 3 | 2,6069 | 0,168 | -0,062 |
| 24 | P62158 CALM_HUMAN  | R.VFDKDGNGYISAAELR.H  |        | 3 | 2,5994 | 0,091 | -0,73  |
| 24 | Q14151 SAFB2_HUMAN | E.KDIKPIIKDE.K        |        | 2 | 2,5992 | 0,262 | 1,119  |
| 24 | P47756 CAPZB_HUMAN | E.DLLSSVDQPLK.I       |        | 2 | 2,5979 | 0,306 | -0,301 |
| 24 | P05362 ICAM1_HUMAN | E.AQVHLALGDQR.L       |        | 2 | 2,596  | 0,392 | -0,404 |
| 24 | O75376 NCOR1_HUMAN | R.HNLDNLLQQHK.Q       |        | 2 | 2,5945 | 0,42  | -0,897 |
| 24 | P30414 NKTR_HUMAN  | E.TIKDNILKTEK.S       |        | 3 | 2,5912 | 0,184 | 0,702  |
| 24 | P13639 EF2_HUMAN   | R.NM*SVIAHVDHGK.S     |        | 2 | 2,5854 | 0,175 | -0,369 |
| 24 | P63279 UBC9_HUMAN  | R.KDHPPGFVAVPTK.N     |        | 2 | 2,5824 | 0,181 | -0,423 |
| 24 | P62917 RL8_HUMAN   | K.GIVKDIHDPGR.G       |        | 3 | 2,5792 | 0,187 | -1,108 |
| 24 | P53999 TCP4_HUMAN  | K.KQVAPEKPVK.K        |        | 2 | 2,5781 | 0,279 | -0,326 |
| 24 | Q99460 PSMD1_HUMAN | R.RLLHVAVSDVNDVDR.R   |        | 2 | 2,578  | 0,196 | -0,5   |
| 24 | Q9Y639 NPTN_HUMAN  | E.YHCVYHFVSAPK.A      |        | 3 | 2,575  | 0,23  | -0,606 |
| 24 | Q15084 PDIA6_HUMAN | K.KAATALKDVVK.V       |        | 2 | 2,5719 | 0,286 | 0,746  |
| 24 | Q02952 AKA12_HUMAN | E.M*KGS#VEEPKPEPKR.K  | S660:  | 3 | 2,5666 | 0,209 | -0,896 |
| 24 | P0C7M2 RA1L3_HUMAN | E.DSQRPGAHLTVK.K      |        | 2 | 2,5635 | 0,301 | 1,584  |
| 24 | P42694 HELZ_HUMAN  | K.IRT#PEKKPTEPK.Q     | T1296: | 3 | 2,563  | 0,176 | -0,365 |
| 24 | Q15386 UBE3C_HUMAN | R.IRVHLLNAHGLDE.A     |        | 3 | 2,5615 | 0,185 | 0,369  |
| 24 | Q8WTT2 NOC3L_HUMAN | K.KPILENPKEK.R        |        | 2 | 2,5569 | 0,262 | -0,472 |
| 24 | O60506 HNRPQ_HUMAN | E.GLTDVILYHQPDCKK.N   |        | 3 | 2,5509 | 0,141 | -0,391 |
| 24 | P63000 RAC1_HUMAN  | R.HHCPNTPIILVGTK.L    |        | 3 | 2,5486 | 0,119 | -0,346 |
| 24 | Q562F6 SGOL2_HUMAN | E.DNDKDVVHGLK.K       |        | 2 | 2,5485 | 0,317 | -0,787 |
| 24 | P49368 TCPG_HUMAN  | E.KGISDLAQHYLM*R.A    |        | 3 | 2,5471 | 0,275 | -0,236 |
| 24 | P31949 S10AB_HUMAN | K.KLDTNSDGQLDFSE.F    |        | 2 | 2,5459 | 0,247 | -0,233 |
| 24 | Q15942 ZYX_HUMAN   | E.KQHPVPPPAQNQNQVR.S  |        | 2 | 2,5431 | 0,209 | -0,863 |
| 24 | Q7L8J4 3BP5L_HUMAN | R.RGGLPPHPLGPR.R      |        | 3 | 2,542  | 0,204 | -0,583 |
| 24 | Q96P70 IPO9_HUMAN  | K.LLQHGINADDKR.L      |        | 2 | 2,5418 | 0,364 | 0,442  |

|    |                    |                        |            |   |        |       |        |
|----|--------------------|------------------------|------------|---|--------|-------|--------|
| 24 | Q14247 SRC8_HUMAN  | K.YGIDKDKVDK.S         |            | 2 | 2,5403 | 0,352 | -0,31  |
| 24 | O43390 HNRPR_HUMAN | K.LKDYAFVHFEDR.G       |            | 3 | 2,5301 | 0,229 | -0,356 |
| 24 | A4D1S0 KLRG2_HUMAN | R.HADPAHQLLLR.A        |            | 2 | 2,5297 | 0,44  | -0,672 |
| 24 | Q9NR56 MBNL1_HUMAN | K.YFHPPAHLQAK.I        |            | 3 | 2,5292 | 0,156 | 0,279  |
| 24 | Q9UQ35 SRRM2_HUMAN | E.SYFGVSSLQLK.G        |            | 2 | 2,5236 | 0,329 | -0,199 |
| 24 | P15170 ERF3A_HUMAN | K.HFTILDAPGHK.S        |            | 2 | 2,5225 | 0,478 | -0,395 |
| 24 | Q8NDT2 RB15B_HUMAN | R.DRT#PPHLLYSRDR.T     | T205:      | 3 | 2,5133 | 0,211 | -0,703 |
| 24 | Q9UG63 ABCF2_HUMAN | E.HIDIYHLTRE.M         |            | 3 | 2,5111 | 0,186 | 0,352  |
| 24 | Q9H825 METL8_HUMAN | R.M*HCPTVPDEKNHYE.K    |            | 3 | 2,4996 | 0,149 | -0,103 |
| 24 | Q9Y6W5 WASF2_HUMAN | D.VVGNDVATILSR.R       |            | 2 | 2,4925 | 0,371 | -0,785 |
| 24 | P49792 RBP2_HUMAN  | R.FKLQDVADSFKK.I       |            | 2 | 2,4909 | 0,29  | -0,428 |
| 24 | P43686 PRS6B_HUMAN | K.AVAHHTTAAFIR.V       |            | 3 | 2,4896 | 0,24  | 0      |
| 24 | P46777 RL5_HUMAN   | R.KHIM*GQNVADYM*R.Y    |            | 2 | 2,4855 | 0,51  | -0,459 |
| 24 | Q9BVC3 DCC1_HUMAN  | E.DGHSLVIRGDKDE.Q      |            | 2 | 2,4839 | 0,348 | -0,508 |
| 24 | Q0ZGT2 NEXN_HUMAN  | E.NFHEEDDVDRPAR.K      |            | 3 | 2,4753 | 0,207 | -0,538 |
| 24 | Q96T23 RSF1_HUMAN  | R.KKKPDS#PPKVLPE.N     | S738:      | 3 | 2,4674 | 0,157 | -0,328 |
| 24 | P50395 GDIB_HUMAN  | E.TTCDDIKNIYKR.M       |            | 2 | 2,4672 | 0,132 | -0,32  |
| 24 | Q15643 TRIPB_HUMAN | K.LSSAENDRDILRR.E      |            | 3 | 2,4618 | 0,175 | -0,473 |
| 24 | P46939 UTRO_HUMAN  | E.YEQLKDQHLR.R         |            | 3 | 2,4586 | 0,279 | 0,412  |
| 24 | Q86WR0 CCD25_HUMAN | R.LHKGENIEDIPK.E       |            | 2 | 2,4576 | 0,335 | -0,263 |
| 24 | Q92785 REQU_HUMAN  | E.DRDKPYACDICGK.R      |            | 3 | 2,4543 | 0,105 | 0,458  |
| 24 | Q9BXP5 ARS2_HUMAN  | E.RFS#PPRHLS#PPQKR.M   | S67:S74:   | 3 | 2,4523 | 0,206 | -0,643 |
| 24 | P04792 HSPB1_HUMAN | E.SPAAVAPAYSRA         |            | 2 | 2,4484 | 0,394 | -0,56  |
| 24 | Q9Y2W1 TR150_HUMAN | R.ERS#PALKS#PLQSVVVR.R | S248:S253: | 3 | 2,4468 | 0,093 | -0,285 |
| 24 | P43686 PRS6B_HUMAN | K.TVIKKDEQEHE.F        |            | 3 | 2,4457 | 0,101 | 0,067  |
| 24 | P49411 EFTU_HUMAN  | R.GLVM*VKPGSIKPHQKVE.A |            | 2 | 2,4326 | 0,319 | -0,196 |
| 24 | Q6GQQ9 OTU7B_HUMAN | K.LHLLHSYM*NVK.W       |            | 2 | 2,4273 | 0,386 | -0,534 |
| 24 | Q49A26 NP60_HUMAN  | R.GRPPKDEKDLTIPE.S     |            | 2 | 2,4258 | 0,305 | -0,382 |
| 24 | P49736 MCM2_HUMAN  | R.RRGNDPLT#SSPGR.S     | T25:       | 2 | 2,4257 | 0,224 | -0,981 |
| 24 | Q96AQ6 PBIP1_HUMAN | E.RALQAPHS#PSKTDGKE.L  | S43:       | 3 | 2,425  | 0,168 | -0,812 |
| 24 | Q13177 PAK2_HUMAN  | E.FLHANQVIHR.D         |            | 2 | 2,4165 | 0,382 | -0,79  |
| 24 | O00186 STXB3_HUMAN | K.IKATVFDCKKE.G        |            | 3 | 2,4138 | 0,11  | -0,503 |
| 24 | Q9NR56 MBNL1_HUMAN | K.YFHPPAHLQAK.I        |            | 2 | 2,4092 | 0,414 | -0,746 |

|    |                     |                      |        |   |        |       |        |
|----|---------------------|----------------------|--------|---|--------|-------|--------|
| 24 | O15371 EIF3D_HUMAN  | E.GKYLILKDPNK.Q      |        | 3 | 2,4089 | 0,15  | -0,071 |
| 24 | Q96HC4 PDLI5_HUMAN  | E.FYHVPTHSDASK.K     |        | 2 | 2,4088 | 0,311 | -0,703 |
| 24 | Q9UPN3 MACF1_HUMAN  | K.DFKQDVLHR.Q        |        | 2 | 2,407  | 0,272 | -0,527 |
| 24 | Q04637 IF4G1_HUMAN  | R.FSALQQAVPTSTDNRR.V |        | 3 | 2,4054 | 0,268 | -0,476 |
| 24 | Q13442 HAP28_HUMAN  | K.GVEGLIDIENPNR.V    |        | 2 | 2,4012 | 0,353 | -0,513 |
| 24 | Q5T4S7 UBR4_HUMAN   | R.VYHQLM*GHRPQLE.N   |        | 3 | 2,395  | 0,137 | -0,45  |
| 24 | Q99653 CHP1_HUMAN   | R.TLAHFRPIEDNEK.S    |        | 3 | 2,3932 | 0,303 | -0,699 |
| 24 | Q09028 RBBP4_HUMAN  | K.HPSKPDPSGECNPDLR.L |        | 3 | 2,3916 | 0,217 | 0,912  |
| 24 | Q8N4C8 MINK1_HUMAN  | E.RTLDEAPRPPK.K      |        | 2 | 2,3893 | 0,28  | -0,667 |
| 24 | Q9Y6D5 BIG2_HUMAN   | R.LKHSQAQSKPTTPE.K   |        | 3 | 2,3888 | 0,097 | -0,118 |
| 24 | P58546 MTPN_HUMAN   | E.VKDYVAKGEDVNR.T    |        | 3 | 2,3867 | 0,288 | 0,306  |
| 24 | Q9UQ35 SRRM2_HUMAN  | E.NSFGS#PLEFR.N      | S1329: | 2 | 2,3831 | 0,404 | -0,494 |
| 24 | Q9NWM8 FKB14_HUMAN  | E.VLQKPFICHR.K       |        | 3 | 2,3809 | 0,104 | -0,07  |
| 24 | P30101 PDIA3_HUMAN  | R.TADGIVSHLKK.Q      |        | 2 | 2,3773 | 0,41  | -0,626 |
| 24 | B0AZS1 B0AZS1_HUMAN | E.KFVSEDDRNSFTLK.L   |        | 3 | 2,3754 | 0,165 | -0,434 |
| 24 | Q96HC4 PDLI5_HUMAN  | E.FYHVPTHSDASK.K     |        | 3 | 2,3723 | 0,23  | -0,395 |
| 24 | Q9UPN6 RBM16_HUMAN  | E.NLVRPGIDHLGR.R     |        | 3 | 2,3715 | 0,168 | -0,068 |
| 24 | Q9NW13 RBM28_HUMAN  | E.SKVTKPVQIQK.R      |        | 3 | 2,3691 | 0,109 | 0,291  |
| 24 | Q5T3I0 GPTC4_HUMAN  | R.YNHPKPNLLYQK.F     |        | 3 | 2,3648 | 0,22  | -0,604 |
| 24 | O94967 WDR47_HUMAN  | R.LTHDASNIHTSTPR.N   |        | 3 | 2,3646 | 0,291 | -0,236 |
| 24 | Q9UQ35 SRRM2_HUMAN  | K.DKFSPFPVQDRPE.S    |        | 3 | 2,3486 | 0,128 | -0,117 |
| 24 | P62140 PP1B_HUMAN   | K.FLNRHDLDLICR.A     |        | 3 | 2,3465 | 0,13  | -0,582 |
| 24 | Q96JM3 ZN828_HUMAN  | R.KHALFPELPK.S       |        | 2 | 2,3449 | 0,325 | -0,517 |
| 24 | Q02790 FKBP4_HUMAN  | R.KDKFSFDLGKGE.V     |        | 2 | 2,3371 | 0,13  | -0,712 |
| 24 | O60313 OPA1_HUMAN   | E.HDDIFDKLKE.A       |        | 2 | 2,337  | 0,358 | -0,387 |
| 24 | Q5VV67 PPRC1_HUMAN  | R.VHVGSGDHDYCVR.S    |        | 3 | 2,333  | 0,318 | 1,219  |
| 24 | Q9ULV4 COR1C_HUMAN  | K.NILDSKPTANKK.C     |        | 2 | 2,3315 | 0,116 | -0,734 |
| 24 | Q9NY61 AATF_HUMAN   | E.LLFQYPDTR.Y        |        | 2 | 2,3311 | 0,124 | -0,529 |
| 24 | O00299 CLIC1_HUMAN  | K.LHIVQVVCKK.Y       |        | 2 | 2,3273 | 0,308 | -0,299 |
| 24 | P50579 AMPM2_HUMAN  | D.VGHVPIRLPR.T       |        | 2 | 2,3272 | 0,143 | -0,746 |
| 24 | Q5VV42 CDKAL_HUMAN  | R.VFHSYSPYDHK.I      |        | 3 | 2,324  | 0,262 | 0,265  |
| 24 | Q9P035 PTAD1_HUMAN  | E.KRPLFLAPDFDR.W     |        | 2 | 2,3217 | 0,26  | -0,331 |
| 24 | Q00610 CLH1_HUMAN   | E.KHDVVFLITK.Y       |        | 2 | 2,3142 | 0,346 | -0,407 |

|    |                    |                       |        |   |        |       |        |
|----|--------------------|-----------------------|--------|---|--------|-------|--------|
| 24 | Q5SSJ5 HP1B3_HUMAN | E.NHPGTNSNYQM*HLLK.K  |        | 3 | 2,3139 | 0,364 | -1,033 |
| 24 | Q9UPN9 TRI33_HUMAN | R.LKS#DERPVHIK.-      | S1119: | 2 | 2,3117 | 0,348 | -0,609 |
| 24 | Q71U36 TBA1A_HUMAN | R.LDHKFDLM*YAK.R      |        | 2 | 2,3109 | 0,254 | -1,135 |
| 24 | P49590 SYHM_HUMAN  | K.AHQEKPNFIK.T        |        | 2 | 2,3047 | 0,379 | -0,552 |
| 24 | Q9BUQ8 DDX23_HUMAN | E.LANHPDAQHKPGTILTK.K |        | 2 | 2,3007 | 0,358 | -0,199 |
| 24 | P54577 SYYC_HUMAN  | E.KHPDADSLYVEK.I      |        | 2 | 2,2976 | 0,384 | -0,522 |
| 24 | Q9BVC3 DCC1_HUMAN  | E.DGHSLVIRGDKDE.Q     |        | 3 | 2,2957 | 0,203 | -0,063 |
| 24 | Q9Y383 LC7L2_HUMAN | E.VCSAYLGLHDNDRR.L    |        | 2 | 2,2808 | 0,18  | -0,582 |
| 24 | Q15942 ZYG_HUMAN   | E.GGPEAPIPPPPQPR.E    |        | 2 | 2,2801 | 0,307 | -1,038 |
| 24 | Q9UNS1 TIM_HUMAN   | E.FRSDDDLGHIM*K.N     |        | 3 | 2,2761 | 0,088 | -0,472 |
| 24 | P46459 NSF_HUMAN   | R.LQILHIHTAR.M        |        | 3 | 2,2759 | 0,131 | 1,673  |
| 24 | A3KN83 SBNO1_HUMAN | K.KDLLDKLEK.L         |        | 2 | 2,2736 | 0,129 | -0,775 |
| 24 | Q9UPP1 PHF8_HUMAN  | E.KATLIIRPK.F         |        | 2 | 2,2726 | 0,197 | -0,469 |
| 24 | O95140 MFN2_HUMAN  | K.TVNQLAHALHQDK.Q     |        | 2 | 2,2714 | 0,254 | -0,827 |
| 24 | P17980 PRS6A_HUMAN | E.KLKPGDLVGVNK.D      |        | 2 | 2,2673 | 0,11  | -0,577 |
| 24 | O00330 ODPX_HUMAN  | K.VRQDLVKDDIK.V       |        | 2 | 2,2656 | 0,242 | -0,459 |
| 24 | P11216 PYGB_HUMAN  | R.HLDHVAALFPGDVDR.L   |        | 3 | 2,2653 | 0,151 | -0,77  |
| 24 | Q12899 TRI26_HUMAN | E.KILNHLSTLR.R        |        | 2 | 2,2648 | 0,292 | -0,408 |
| 24 | Q7Z7E8 UB2Q1_HUMAN | K.KGNTLLLQHLK.R       |        | 2 | 2,2589 | 0,159 | -1,157 |
| 24 | P13639 EF2_HUMAN   | E.EDHACIPIKK.S        |        | 2 | 2,2504 | 0,307 | -0,403 |
| 24 | P31946 1433B_HUMAN | D.STLIM*QLLR.D        |        | 2 | 2,2493 | 0,137 | -0,224 |
| 24 | O00461 GOLI4_HUMAN | K.AHQDIHTQLQDVK.Q     |        | 3 | 2,2459 | 0,326 | 0      |
| 24 | Q9C0J8 WDR33_HUMAN | K.TGQSLATLHAHK.N      |        | 3 | 2,2385 | 0,18  | 0,579  |
| 24 | Q9NVW2 RNF12_HUMAN | R.SHHSISSQTFEHPLVNE.T |        | 2 | 2,2347 | 0,347 | 0,063  |
| 24 | Q6SZW1 SARM1_HUMAN | E.DCGIHLGVHR.A        |        | 2 | 2,233  | 0,321 | -0,839 |
| 24 | A1L020 MEX3A_HUMAN | R.VHQPGCKPLSTFR.Q     |        | 2 | 2,2278 | 0,335 | -0,16  |
| 24 | P49593 PPM1F_HUMAN | R.YAAVHVHTNAAR.Q      |        | 3 | 2,2268 | 0,411 | 0,209  |
| 24 | P10109 ADX_HUMAN   | E.DKITVHFIR.D         |        | 3 | 2,2244 | 0,242 | 0,221  |
| 24 | Q02952 AKA12_HUMAN | E.QAHPQEPESAHEPR.L    |        | 3 | 2,2222 | 0,128 | -0,76  |
| 24 | Q99549 MPP8_HUMAN  | R.KREEIPLDFK.T        |        | 3 | 2,217  | 0,13  | 1,721  |
| 24 | Q9GZR7 DDX24_HUMAN | K.VQHVHIYQVPR.T       |        | 3 | 2,2108 | 0,296 | 0,066  |
| 24 | Q6PD62 CTR9_HUMAN  | K.VQHLALHAFHNTE.V     |        | 3 | 2,2101 | 0,103 | -0,482 |
| 24 | P31153 METK2_HUMAN | K.HIGYDSSKGFYK.T      |        | 3 | 2,2084 | 0,226 | -0,785 |

|    |                      |                     |   |        |       |        |
|----|----------------------|---------------------|---|--------|-------|--------|
| 24 | O75494 FUSIP_HUMAN   | R.DAEDALHNLDK.W     | 2 | 2,206  | 0,111 | -0,611 |
| 24 | P31946 1433B_HUMAN   | K.DSTLIM*QLLR.D     | 2 | 2,2058 | 0,172 | -0,405 |
| 24 | P04406 G3P_HUMAN     | R.LEKPAKYDDIK.K     | 2 | 2,2047 | 0,292 | 1,479  |
| 24 | Q92878 RAD50_HUMAN   | E.NYIQDGKDDYKK.Q    | 3 | 2,2023 | 0,283 | -0,184 |
| 24 | P21333 FLNA_HUMAN    | R.DAPQDFHPDRVK.A    | 2 | 2,2021 | 0,294 | -1,113 |
| 24 | Q9Y6G9 DC1L1_HUMAN   | E.HFDFIQSHIR.K      | 3 | 2,1976 | 0,114 | 0,422  |
| 24 | Q6GMV2 SMYD5_HUMAN   | E.NYLFVCSCP.K       | 2 | 2,1786 | 0,203 | -0,474 |
| 24 | Q6IFS5 HSN2_HUMAN    | E.AQTHHFQPLLR.T     | 3 | 2,1746 | 0,114 | -0,068 |
| 24 | Q8WU25 Q8WU25_HUMAN  | -.M*RPVDADEAREPR.E  | 3 | 2,1682 | 0,255 | -0,117 |
| 24 | P00338 LDHA_HUMAN    | K.TLHPDLGTDKDK.E    | 2 | 2,1642 | 0,383 | 1,329  |
| 24 | P68431 H31_HUMAN     | E.DTNLCAIHAKR.V     | 3 | 2,1619 | 0,228 | -0,352 |
| 24 | Q8NC51 PAIRB_HUMAN   | R.SFSHYSGLKHE.D     | 3 | 2,1607 | 0,249 | -0,995 |
| 24 | O43290 SNUT1_HUMAN   | E.KDGYKPDVKIE.Y     | 2 | 2,1574 | 0,157 | -0,378 |
| 24 | Q9Y618 NCOR2_HUMAN   | E.DHGAPFAGHLPR.G    | 3 | 2,1573 | 0,26  | 0,502  |
| 24 | P42704 LPPRC_HUMAN   | K.NTKLDDLFLKR.Y     | 3 | 2,1549 | 0,159 | -0,134 |
| 24 | Q09666 AHNK_HUMAN    | K.FKM*PDM*HFK.A     | 3 | 2,1542 | 0,092 | 0,377  |
| 24 | Q04917 1433F_HUMAN   | E.DSYKDSTLIM*QLLR.D | 2 | 2,151  | 0,222 | 0      |
| 24 | Q15005 SPCS2_HUMAN   | K.IDDKPVKIDK.W      | 2 | 2,1415 | 0,197 | -0,313 |
| 24 | ##Q8NHV4 NEDD1_HUMAN | D.YQYIKGR.S         | 2 | 2,1411 | 0,18  | -0,066 |
| 24 | Q05682 CALD1_HUMAN   | E.DGLSDDKPKFK.C     | 2 | 2,1378 | 0,221 | 1,659  |
| 24 | P13639 EF2_HUMAN     | E.DHACIPIKK.S       | 2 | 2,1354 | 0,243 | 0,789  |
| 24 | Q9BZE4 NOG1_HUMAN    | R.LHLAIPTRR.D       | 2 | 2,1324 | 0,266 | -0,68  |
| 24 | P22626 ROA2_HUMAN    | E.SGKPGAHVTVK.K     | 2 | 2,1217 | 0,311 | -0,226 |
| 24 | O15145 ARPC3_HUMAN   | E.KVFDPQNDKPSK.W    | 3 | 2,1207 | 0,204 | -0,391 |
| 24 | P08670 VIME_HUMAN    | D.SLPLVDTHSKR.T     | 2 | 2,1177 | 0,314 | -0,292 |
| 24 | Q96C86 DCPS_HUMAN    | R.DKIIFLHGK.V       | 2 | 2,0773 | 0,22  | -0,683 |
| 24 | Q6P2E9 EDC4_HUMAN    | E.VEPLGLPQASPS#R.T  | 2 | 2,0712 | 0,249 | -0,426 |
| 24 | Q05209 PTN12_HUMAN   | R.YHPKPVLHM*VSSE.Q  | 3 | 2,0674 | 0,2   | 0,713  |
| 24 | Q02790 FKBP4_HUMAN   | D.GTKFDSSLDRK.D     | 2 | 2,0586 | 0,214 | -0,876 |
| 24 | Q92688 AN32B_HUMAN   | E.KLPNLTHLNLSGNK.L  | 3 | 2,0584 | 0,097 | -0,945 |
| 24 | P27348 1433T_HUMAN   | K.KLQLIKDYRE.K      | 3 | 2,0579 | 0,081 | 0,28   |
| 24 | Q13136 LIPA1_HUMAN   | K.GALHTVSHEDIR.D    | 2 | 2,0397 | 0,264 | -1,188 |
| 24 | P07355 ANXA2_HUMAN   | D.IISDTSGDFRK.L     | 2 | 2,0385 | 0,251 | -0,295 |

S725:

|    |                      |                    |        |   |        |       |        |
|----|----------------------|--------------------|--------|---|--------|-------|--------|
| 24 | Q9Y305 ACOT9_HUMAN   | R.KLLHSFLAK.S      |        | 2 | 2,0366 | 0,126 | -0,115 |
| 24 | P07900 HS90A_HUMAN   | E.LHINLIPNKQDR.T   |        | 3 | 2,028  | 0,165 | -0,376 |
| 24 | P46736 BRCC3_HUMAN   | R.IHSLTHLDSVTK.I   |        | 3 | 2,0212 | 0,224 | 0,203  |
| 24 | Q6KC79 NIPBL_HUMAN   | E.DYLHM*VHR.L      |        | 2 | 2,0164 | 0,363 | -0,898 |
| 24 | P05106 ITB3_HUMAN    | E.KSFTIKPVGFK.D    |        | 2 | 2,0135 | 0,225 | -0,39  |
| 24 | Q8IXQ4 K1704_HUMAN   | R.IPFDRDKDLK.V     |        | 2 | 2,0121 | 0,105 | -0,783 |
| 24 | Q9NZI8 IF2B1_HUMAN   | E.HKISYSGQFLVK.S   |        | 3 | 2,0029 | 0,158 | -0,39  |
| 24 | P68400 CSK21_HUMAN   | R.VYTDVNTHRPR.E    |        | 2 | 1,9673 | 0,206 | -0,898 |
| 24 | P54577 SYYC_HUMAN    | E.SKIDLLDRKE.D     |        | 2 | 1,9616 | 0,088 | -1,002 |
| 24 | O14974 MYPT1_HUMAN   | R.LAYVAPTIPR.R     |        | 2 | 1,945  | 0,187 | -0,111 |
| 24 | P60174 TPIS_HUMAN    | R.RHVFGESDE.L      |        | 2 | 1,9386 | 0,24  | -0,567 |
| 24 | O60315 ZEB2_HUMAN    | E.KGHLEPTELLM*NR.A |        | 2 | 1,907  | 0,126 | -0,314 |
| 24 | P04083 ANXA1_HUMAN   | K.DITSDTSGDFR.N    |        | 2 | 1,8902 | 0,163 | -0,704 |
| 24 | P62826 RAN_HUMAN     | K.RHLTGEFE.K       |        | 2 | 1,8783 | 0,201 | -0,185 |
| 24 | P53597 SUCA_HUMAN    | K.IGIM*PGHIHK.K    |        | 2 | 1,8732 | 0,258 | -0,981 |
| 24 | Q9Y5K6 CD2AP_HUMAN   | E.LDKDFPKPK.K      |        | 2 | 1,8694 | 0,211 | -0,673 |
| 24 | Q09666 AHNK_HUMAN    | K.GKKPDIDITGPK.V   |        | 2 | 1,8684 | 0,091 | -0,673 |
| 24 | Q04721 NOTC2_HUMAN   | E.VDVLDVNV.R.G     |        | 2 | 1,8555 | 0,091 | -0,237 |
| 24 | P68104 EF1A1_HUMAN   | K.STTTGHLIYK.C     |        | 2 | 1,8517 | 0,302 | -0,544 |
| 24 | Q15185 TEBP_HUMAN    | R.SILCCLR.K        |        | 2 | 1,8275 | 0,23  | 0,132  |
| 24 | Q9H4A3 WNK1_HUMAN    | R.KGTFTDDLHK.L     |        | 2 | 1,8156 | 0,165 | -0,735 |
| 24 | P51858 HDGF_HUMAN    | R.RAGDLEDS#PKRPK.E | S165:  | 2 | 1,7884 | 0,094 | -0,44  |
| 24 | Q53GS9 SNUT2_HUMAN   | R.EAPASVVPFVR.V    |        | 2 | 1,7533 | 0,139 | -0,312 |
| 24 | P46087 NOL1_HUMAN    | E.AKPLPGKPK.G      |        | 2 | 1,673  | 0,201 | -0,233 |
| 24 | ##Q9NYQ7 CELR3_HUMAN | R.LNANPPADGDT#AR.L | T2855: | 2 | 1,6013 | 0,11  | -0,175 |
| 24 | Q16204 CCDC6_HUMAN   | K.SGGIVISPF.R.L    |        | 2 | 1,5979 | 0,115 | -0,354 |
| 24 | Q15424 SAFB1_HUMAN   | R.YHSDFN.R.Q       |        | 2 | 1,5288 | 0,088 | 0,065  |
| 24 | Q8WU90 ZC3HF_HUMAN   | R.HALPPGFVLKK.D    |        | 2 | 1,4544 | 0,161 | -0,708 |
| 24 | P62826 RAN_HUMAN     | E.VHPLVFHTNR.G     |        | 2 | 1,4153 | 0,121 | -1,2   |
| 24 | Q9P2M7 CING_HUMAN    | R.QHVNDQKQLSLR.V   |        | 2 | 1,2914 | 0,317 | -0,309 |
| 24 | P62701 RS4X_HUMAN    | R.HPGSFDVVHVK.D    |        | 2 | 1,2466 | 0,082 | -0,899 |

**Table S5:** Peptide identification information for trypsin(A) workflow. SCX fraction number, protein reference, peptide sequence, phosphorylation localization, charge state, and SEQUEST scoring metrics (cross correlation, delta correlation, and ppm) are provided. Reverse hits that pass filters are included and used to maintain <1% false positive rate.

| Fraction | Ref                | Sequence                         | ModSite            | Charge | XCorr  | dCn   | PPM    |
|----------|--------------------|----------------------------------|--------------------|--------|--------|-------|--------|
| 1        | P23193 TCEA1_HUMAN | K.KKEPAITSQNS#PEAR.E             | S100:              | 3      | 5,1379 | 0,281 | -0,316 |
| 1        | O95251 MYST2_HUMAN | R.SS#GS#ETEQVDFSDR.E             | S100:S102:         | 2      | 4,7228 | 0,408 | 0,135  |
| 1        | Q86W92 LIPB1_HUMAN | K.DFAARSPS#AS#ITDEDSNV.-         | S1001:S1003:       | 3      | 4,1833 | 0,468 | -0,717 |
| 1        | Q86W92 LIPB1_HUMAN | R.SPS#AS#ITDEDSNV.-              | S1001:S1003:       | 2      | 2,6532 | 0,555 | -0,165 |
| 1        | Q86W92 LIPB1_HUMAN | R.SPASITDEDS#NV.-                | S1009:             | 2      | 2,2823 | 0,362 | -0,087 |
| 1        | P05386 RLA1_HUMAN  | K.KEES#EES#DDDM*GFGLFD.-         | S101:S104:         | 2      | 5,1495 | 0,615 | 0,115  |
| 1        | P05386 RLA1_HUMAN  | K.KEES#EES#DDDMGFGLFD.-          | S101:S104:         | 2      | 4,6082 | 0,612 | 0,81   |
| 1        | P05386 RLA1_HUMAN  | K.KEES#EES#DDDMGFGLFD.-          | S101:S104:         | 3      | 3,0141 | 0,428 | -0,173 |
| 1        | Q00587 BORG5_HUMAN | R.M*AS#PPAPSPAPPAIS#PIIK.N       | S101:S113:         | 3      | 4,218  | 0,268 | 0,272  |
| 1        | Q5T200 ZC3HD_HUMAN | K.GDS#DIS#DEEAAQQSK.K            | S1014:S1017:       | 2      | 3,4736 | 0,6   | -0,281 |
| 1        | O75351 VPS4B_HUMAN | K.EGQPSPADEKGNDS#DGEGESDDPEKKK.L | S102:              | 3      | 2,6344 | 0,182 | -0,063 |
| 1        | Q01804 OTUD4_HUMAN | K.EES#S#EDENEVSNILR.S            | S1023:S1024:       | 2      | 2,6983 | 0,334 | -0,064 |
| 1        | Q9H2Y7 ZF106_HUMAN | R.ATGDGS#S#PELPSLER.K            | S1025:S1026:       | 2      | 2,0459 | 0,249 | 0,073  |
| 1        | O60231 DHX16_HUMAN | R.LLEDS#EES#S#EETVSR.A           | S103:S106:S107:    | 2      | 3,9872 | 0,507 | -0,438 |
| 1        | O60231 DHX16_HUMAN | R.LLEDS#EES#S#EETVSR.A           | S103:S107:         | 2      | 5,2187 | 0,465 | -0,457 |
| 1        | O60231 DHX16_HUMAN | R.LLEDS#EES#S#EETVSR.A           | S103:S107:         | 3      | 2,9829 | 0,206 | -0,098 |
| 1        | A1L390 PKHG3_HUMAN | R.S#PLS#PTETFSWPDVR.E            | S1037:S1040:       | 2      | 4,1848 | 1     | -0,065 |
| 1        | P00533 EGFR_HUMAN  | R.TPLLSLS#ATS#NNS#VACIDR.N       | S1039:S1042:T1046: | 3      | 2,7927 | 1     | -0,075 |
| 1        | O00512 BCL9_HUMAN  | R.SIS#ADS#FDQR.D                 | S104:S107:         | 2      | 2,3456 | 0,42  | 0,19   |
| 1        | P00533 EGFR_HUMAN  | R.TPLLSLSATS#NNS#VACIDR.N        | S1042:S1045:       | 3      | 3,5733 | 0,222 | 0      |
| 1        | Q8NA72 CE037_HUMAN | K.TDESS#PVLS#PR.K                | S105:S109:         | 2      | 2,4806 | 0,201 | -0,181 |
| 1        | P20042 IF2B_HUMAN  | K.IES#DVQEPT#EPEDDLDIMLGNK.K     | S105:T111:         | 3      | 4,0515 | 0,419 | 0,138  |
| 1        | P20042 IF2B_HUMAN  | K.IES#DVQEPT#EPEDDLDIM*LGNK.K    | S105:T111:         | 3      | 3,0615 | 0,311 | 0,069  |
| 1        | Q9UHB7 AFF4_HUMAN  | K.AVGMP#PVS#PK.L                 | S1055:S1058:       | 2      | 2,0045 | 0,313 | -0,198 |
| 1        | Q8N3U4 STAG2_HUMAN | R.NSLLAGDDDTMS#VIS#GIS#SR.G      | S1058:S1061:S1064: | 3      | 5,2816 | 0,467 | 0      |
| 1        | Q86VQ1 GLC11_HUMAN | R.GPSPSS#PT#PPAAAAPAEQAPR.A      | S108:T110:         | 3      | 3,0645 | 0,138 | -0,432 |
| 1        | P48634 BAT2_HUMAN  | R.TAS#ETRS#EGS#EYEEIPK.R         | S1085:S1089:S1092: | 3      | 4,791  | 1     | -0,085 |
| 1        | Q6KC79 NIPBL_HUMAN | K.YAEIS#S#DEDNDS#DEAFESSR.K      | S1089:S1090:S1096: | 3      | 4,9911 | 0,511 | -0,219 |

|   |                    |                                  |                    |   |        |       |        |
|---|--------------------|----------------------------------|--------------------|---|--------|-------|--------|
| 1 | P18754 RCC1_HUMAN  | K.RRS#PPADAIPK.S                 | S11:               | 3 | 3,2965 | 0,211 | 0      |
| 1 | Q9UQ35 SRRM2_HUMAN | R.SS#S#PVTELASR.S                | S1102:S1103:       | 2 | 3,4193 | 0,517 | -0,283 |
| 1 | Q9UQ35 SRRM2_HUMAN | R.SS#S#PVTELASRS#PIR.Q           | S1102:S1103:S1112: | 2 | 2,5571 | 1     | 0      |
| 1 | Q13464 ROCK1_HUMAN | K.LLDLSDSTS#VAS#FPSAETDGNLPESR.I | S1102:S1105:       | 3 | 3,9444 | 1     | 0      |
| 1 | Q92900 RENT1_HUMAN | K.SQIDVALS#QDS#TYQGER.A          | S1107:S1110:       | 2 | 4,9135 | 0,536 | -0,949 |
| 1 | Q92900 RENT1_HUMAN | K.SQIDVALS#QDS#TYQGER.A          | S1107:S1110:       | 3 | 4,3921 | 0,501 | -0,623 |
| 1 | Q5T3F8 TM63B_HUMAN | R.LTS#VSS#SVDFDQR.D              | S111:S114:         | 2 | 4,115  | 1     | 0,305  |
| 1 | Q5T3F8 TM63B_HUMAN | R.LTS#VSS#S#VDFDQR.D             | S111:S114:S115:    | 2 | 3,1158 | 1     | 0      |
| 1 | Q9UQ35 SRRM2_HUMAN | R.GEFS#AS#PM*LK.S                | S1122:S1124:       | 2 | 3,1404 | 0,309 | -0,295 |
| 1 | Q07889 SOS1_HUMAN  | R.SAS#VSS#ISLTK.G                | S1134:S1137:       | 2 | 3,6952 | 0,463 | -0,394 |
| 1 | Q8TDJ6 DMXL2_HUMAN | R.VS#VDS#NLFVYSK.S               | S1140:S1143:       | 2 | 3,8335 | 0,399 | -0,723 |
| 1 | Q7Z309 F122B_HUMAN | R.IDFTPVS#PAPS#PTR.G             | S115:S119:         | 2 | 3,425  | 0,314 | 0,445  |
| 1 | P27816 MAP4_HUMAN  | R.EAQTLDSSQIQETS#I.-             | S1151:             | 2 | 3,6268 | 0,377 | -0,223 |
| 1 | P55196 AFAD_HUMAN  | R.S#SPNVANQPPS#PGGK.S            | S1155:S1165:       | 2 | 2,9537 | 0,486 | -0,688 |
| 1 | Q9BQG0 MBB1A_HUMAN | K.EIPS#AT#QSPISK.K               | S1159:T1161:       | 2 | 2,9073 | 0,422 | -0,172 |
| 1 | P55081 MFAP1_HUMAN | K.IVEPEVVGES#DS#EVEGDWR.M        | S116:S118:         | 3 | 5,2484 | 0,448 | 0,077  |
| 1 | Q3KQU3 MA7D1_HUMAN | R.SSQPS#PTAVPASDS#PPTK.Q         | S116:S125:         | 2 | 2,4417 | 0,209 | -0,383 |
| 1 | Q86SQ4 GP126_HUMAN | K.S#LSSS#SIGS#NSTYLTSK.S         | S1160:S1164:S1168: | 2 | 3,3871 | 1     | -0,311 |
| 1 | Q5T1M5 FKB15_HUMAN | R.S#SLS#GDEEDELFK.G              | S1161:S1164:       | 2 | 4,3554 | 0,462 | 0,151  |
| 1 | Q86SQ4 GP126_HUMAN | K.SLS#S#SSIGS#NSTYLTSK.S         | S1162:S1163:S1168: | 3 | 2,6404 | 1     | 0,28   |
| 1 | Q86SQ4 GP126_HUMAN | K.SLS#SSS#IGSNSTYLTSK.S          | S1162:S1165:       | 2 | 4,2342 | 1     | 0,13   |
| 1 | Q9NTI5 PDS5B_HUMAN | R.METVSNASSSS#NPSS#PGR.I         | S1162:S1166:       | 2 | 3,5692 | 1     | -0,624 |
| 1 | Q86SQ4 GP126_HUMAN | K.SLSSSS#IGS#NSTYLTSK.S          | S1165:S1168:       | 2 | 4,6029 | 1     | -0,195 |
| 1 | Q5QJE6 TDIF2_HUMAN | R.QILIACS#PVSS#VR.K              | S117:S121:         | 2 | 3,5779 | 0,319 | -0,46  |
| 1 | P17301 ITA2_HUMAN  | K.NPDEIDETTELSS#.-               | S1181:             | 2 | 3,1612 | 0,506 | -0,16  |
| 1 | O14737 PDCD5_HUMAN | K.VM*DS#DEDDDY.-                 | S119:              | 2 | 2,5432 | 0,515 | -0,094 |
| 1 | Q9UI30 TR112_HUMAN | R.GIPNM*LLS#EEETES.-             | S119:              | 2 | 2,3982 | 0,283 | -0,371 |
| 1 | P45973 CBX5_HUMAN  | R.TADSS#S#SEDEEEYVVEK.V          | S12:S13:           | 3 | 2,704  | 0,134 | 0,089  |
| 1 | Q13286 CLN3_HUMAN  | R.FS#DS#EGEETVPEPR.L             | S12:S14:           | 2 | 3,5396 | 0,464 | 0      |
| 1 | P41236 IPP2_HUMAN  | R.IQEQUES#S#GEEDSDLSPEER.E       | S121:S122:         | 3 | 3,756  | 0,41  | -0,315 |
| 1 | Q8WXI9 P66B_HUMAN  | R.LTPS#PDIIVLSDNEASS#PR.S        | S122:S135:         | 3 | 4,4262 | 0,448 | -0,084 |
| 1 | Q14160 LAP4_HUMAN  | R.NS#LES#ISS#IDR.E               | S1220:S1223:S1226: | 2 | 2,2296 | 0,174 | -0,251 |
| 1 | Q14160 LAP4_HUMAN  | R.NSLES#IS#SIDR.E                | S1223:S1225:       | 2 | 3,9408 | 0,535 | 0,265  |



|   |                      |                                    |                    |   |        |       |        |
|---|----------------------|------------------------------------|--------------------|---|--------|-------|--------|
| 1 | Q13428 TCOF_HUMAN    | K.LDS#S#PSVSSTLAAK.D               | S1227:S1228:       | 2 | 3,8677 | 1     | -0,881 |
| 1 | Q9NQP4 PFD4_HUMAN    | K.FGS#NINLEADES.-                  | S125:              | 2 | 3,0703 | 0,429 | -0,089 |
| 1 | Q14137 BOP1_HUMAN    | R.IGDEYAEDS#S#DEEDIR.N             | S126:S127:         | 2 | 4,4555 | 0,595 | -0,366 |
| 1 | Q14137 BOP1_HUMAN    | R.IGDEYAEDS#S#DEEDIR.N             | S126:S127:         | 3 | 3,3661 | 0,36  | 0,091  |
| 1 | P46821 MAP1B_HUMAN   | K.SPSSL#SPSPS#PLEK.T               | S1260:S1265:       | 2 | 2,8369 | 0,245 | 0,077  |
| 1 | Q13459 MYO9B_HUMAN   | R.VSPAPAGS#APET#PEDK.S             | S1267:T1271:       | 2 | 3,3467 | 0,498 | -0,351 |
| 1 | Q9UPT8 ZC3H4_HUMAN   | K.TGSGS#PFAGNS#PAR.E               | S1269:S1275:       | 2 | 3,6497 | 0,247 | -0,333 |
| 1 | Q9Y2R5 RT17_HUMAN    | K.NLEELNISS#AQ.-                   | S128:              | 2 | 3,1159 | 0,216 | -0,094 |
| 1 | Q96RR4 KKCC2_HUMAN   | R.CICPSLPYS#PVSS#PQSS#PR.L         | S129:S133:S137:    | 3 | 4,9038 | 1     | -0,155 |
| 1 | Q8WXI9 P66B_HUMAN    | R.LTPSPDIIVLS#DNEASS#PR.S          | S129:S135:         | 3 | 4,6463 | 0,357 | -0,084 |
| 1 | ##P51610 HCFC1_HUMAN | K.TGAGS#AQTT#TIITT#PKGDASTVLK.L    | S1294:T1298:T1303: | 3 | 2,6528 | 0,188 | -1,287 |
| 1 | Q14160 LAP4_HUMAN    | K.MAESPCS#PSGQQPPS#PPS#PDELPANVK.Q | S1298:S1306:S1309: | 3 | 4,3423 | 0,484 | 0,361  |
| 1 | Q14160 LAP4_HUMAN    | K.MAESPCSPSGQQPPS#PPS#PDELPANVK.Q  | S1306:S1309:       | 3 | 4,0538 | 0,324 | 0,123  |
| 1 | Q14160 LAP4_HUMAN    | K.M*AESPCSPSGQQPPS#PPS#PDELPANVK.Q | S1306:S1309:       | 3 | 3,6765 | 0,457 | -0,246 |
| 1 | Q96QT6 PHF12_HUMAN   | R.TTS#PSS#DTDLLDR.S                | S131:S134:         | 2 | 3,6839 | 1     | 0,233  |
| 1 | O60341 LSD1_HUMAN    | R.EM*DESLANLS#EDEYYS#EEER.N        | S131:S137:         | 3 | 5,6794 | 0,471 | 0,14   |
| 1 | O60341 LSD1_HUMAN    | R.EMDESLANLS#EDEYYS#EEER.N         | S131:S137:         | 3 | 4,5357 | 0,461 | -0,141 |
| 1 | Q9UQ35 SRRM2_HUMAN   | K.ELS#NS#PLRENSFGS#PLEFR.N         | S1318:S1320:S1329: | 3 | 4,5378 | 0,414 | 0,151  |
| 1 | P55081 MFAP1_HUMAN   | R.EDS#S#EEEEEEIDDEEIER.R           | S132:S133:         | 3 | 5,0249 | 0,48  | -0,077 |
| 1 | Q9UQ35 SRRM2_HUMAN   | K.ELSNS#PLRENS#FGS#PLEFR.N         | S1320:S1326:S1329: | 3 | 4,5176 | 0,329 | 0      |
| 1 | Q9UQ35 SRRM2_HUMAN   | R.ENS#FGS#PLEFR.N                  | S1326:S1329:       | 2 | 2,5892 | 0,265 | 0,085  |
| 1 | Q15021 CND1_HUMAN    | R.YQPLAS#TAS#DNDFVTPEPR.R          | S1330:S1333:       | 3 | 4,3836 | 0,381 | 0,161  |
| 1 | Q15021 CND1_HUMAN    | R.YQPLASTAS#DNDFVT#PEPR.R          | S1333:T1339:       | 3 | 3,3133 | 0,33  | 0,161  |
| 1 | P46100 ATRX_HUMAN    | K.LTVS#DGES#GEEK.K                 | S1348:S1352:       | 2 | 3,6883 | 0,376 | -0,346 |
| 1 | Q96T23 RSF1_HUMAN    | K.VGS#PLDYS#LVDLPSTNGQS#PGK.A      | S1349:S1354:S1365: | 3 | 4,8342 | 0,347 | 0,148  |
| 1 | Q15388 TOM20_HUMAN   | R.IVS#AQSLAEDDVE.-                 | S135:              | 2 | 3,7385 | 0,499 | -0,084 |
| 1 | O60841 IF2P_HUMAN    | K.VEM*YS#GS#DDDDDFNK.L             | S135:S137:         | 2 | 5,4576 | 0,319 | -0,383 |
| 1 | Q15388 TOM20_HUMAN   | R.IVS#AQSLAEDDVE.-                 | S135:S138:         | 2 | 3,8627 | 0,363 | 0,079  |
| 1 | P11388 TOP2A_HUMAN   | K.TDDEDFVPS#DAS#PPK.T              | S1351:S1354:       | 2 | 2,1576 | 0,195 | -0,137 |
| 1 | Q9NTI5 PDS5B_HUMAN   | R.AES#PESSAIESTQST#PQK.G           | S1358:T1370:       | 3 | 3,8171 | 1     | -0,18  |
| 1 | Q7Z309 F122B_HUMAN   | K.MFVSSSGLPPS#PVPS#PR.R            | S137:S141:         | 2 | 2,3687 | 0,233 | 0,192  |
| 1 | P11388 TOP2A_HUMAN   | K.S#VVS#DLEADDVK.G                 | S1374:S1377:       | 2 | 4,5461 | 0,53  | 0,17   |
| 1 | Q9UQ35 SRRM2_HUMAN   | R.S#S#GHSSSELS#PDAVEK.A            | S1378:S1379:S1387: | 2 | 3,9495 | 1     | -0,394 |

|   |                     |                                      |                    |   |        |       |        |
|---|---------------------|--------------------------------------|--------------------|---|--------|-------|--------|
| 1 | Q15388 TOM20_HUMAN  | R.IVSAQS#LAEDDVE.-                   | S138:              | 2 | 3,0602 | 0,417 | 0,168  |
| 1 | Q43597 SPY2_HUMAN   | R.LLGSS#FSS#GPVADGIIR.V              | S139:S142:         | 2 | 4,9793 | 0,466 | 0,066  |
| 1 | Q9UQ35 SRRM2_HUMAN  | K.AGMS#SNQSISS#PVLDAVPR.T            | S1397:S1404:       | 3 | 3,928  | 0,22  | 0,264  |
| 1 | Q9UQ35 SRRM2_HUMAN  | K.AGM*SS#NQSIS#PVLDAVPR.T            | S1398:S1404:       | 3 | 4,3242 | 0,222 | 0      |
| 1 | Q5TGY3 AHDC1_HUMAN  | K.AYS#PTCSP#LGFK.E                   | S1399:T1405:       | 2 | 2,5292 | 0,302 | -0,384 |
| 1 | Q15583 TGIF1_HUMAN  | K.GIVAAS#GS#ET#EDEDSDIPLDLSSSAGSGK.R | S140:S142:T144:    | 3 | 6,233  | 0,515 | -0,116 |
| 1 | Q5JW51 Q5JW51_HUMAN | R.LLGLLALS#S#DAESAAGGPAGVR.T         | S141:S142:         | 3 | 2,792  | 0,236 | -0,395 |
| 1 | Q9Y2U8 MAN1_HUMAN   | K.VLLGFSS#DES#DVEASPR.D              | S141:S144:         | 3 | 3,7134 | 0,337 | 0,186  |
| 1 | Q03164 HRX_HUMAN    | R.AVFGESGGGGGS#GEDEQFLGFGS#DEEVR.V   | S142:S153:         | 3 | 5,1233 | 0,413 | -0,436 |
| 1 | Q12888 TP53B_HUMAN  | R.ETAVPGLGIEDIS#PNLS#PDDK.S          | S1426:S1430:       | 3 | 3,6147 | 0,365 | 0,604  |
| 1 | Q96E09 F122A_HUMAN  | R.IDFIPVS#PAPS#PTR.G                 | S143:S147:         | 2 | 3,0048 | 0,518 | 0      |
| 1 | Q86UU0 BCL9L_HUMAN  | R.S#VSLDSQM*GYLPAPGGM*ANLPF.-        | S1478:             | 3 | 4,4673 | 0,337 | -0,232 |
| 1 | Q9NZ63 CI078_HUMAN  | R.GDS#ES#EEDEQDSEEV.R.L              | S15:S17:           | 2 | 3,823  | 0,481 | -0,61  |
| 1 | Q99959 PKP2_HUMAN   | R.LEIS#PDSS#PER.A                    | S151:S155:         | 2 | 2,4072 | 0,211 | -0,263 |
| 1 | Q02880 TOP2B_HUMAN  | K.VVEAVNS#DS#DSEFGIPK.K              | S1522:S1524:       | 2 | 5,4012 | 0,528 | -0,062 |
| 1 | Q02880 TOP2B_HUMAN  | K.VVEAVNS#DS#DSEFGIPK.K              | S1522:S1524:       | 3 | 3,7903 | 0,296 | 0,094  |
| 1 | P11388 TOP2A_HUMAN  | K.YLEES#DEDDL.F.-                    | S1525:             | 2 | 2,5494 | 0,216 | 0,587  |
| 1 | Q9UQ35 SRRM2_HUMAN  | R.S#GSS#QELDVKPS#ASPQER.S            | S1539:S1542:S1550: | 2 | 2,9326 | 0,405 | -0,57  |
| 1 | Q969H6 POP5_HUMAN   | R.SCLLEEEEEES#GEEAAEAM*E.-           | S154:              | 3 | 4,9456 | 0,464 | 0,245  |
| 1 | Q9BTE3 CJ119_HUMAN  | R.VS#PSTSYT#PSR.H                    | S154:T160:         | 2 | 2,0536 | 0,184 | -0,273 |
| 1 | Q9UQ35 SRRM2_HUMAN  | R.SGS#S#QELDVKPSAS#PQER.S            | S1541:S1542:S1552: | 3 | 4,2316 | 0,371 | -0,256 |
| 1 | Q69YN4 VIR_HUMAN    | R.SFLS#EPSS#PGR.T                    | S1575:S1579:       | 2 | 3,0129 | 0,321 | -0,369 |
| 1 | P42166 LAP2A_HUMAN  | R.S#ST#PLPTISSAENTR.Q                | S158:T160:         | 2 | 3,5526 | 0,515 | -0,405 |
| 1 | P16949 STMN1_HUMAN  | R.AS#GQAFELILS#PR.S                  | S16:S25:           | 2 | 4,4296 | 0,344 | 0      |
| 1 | Q12873 CHD3_HUMAN   | K.METEADAPS#PAPS#LGER.L              | S1601:S1605:       | 2 | 3,7524 | 0,439 | 0      |
| 1 | Q12873 CHD3_HUMAN   | K.M*ETEADAPS#PAPS#LGER.L             | S1601:S1605:       | 2 | 3,0806 | 0,583 | -0,379 |
| 1 | Q9NVU0 RPC5_HUMAN   | R.EAANEAGDS#S#QDEAEDDVK.Q            | S161:S162:         | 3 | 3,8966 | 0,409 | -0,513 |
| 1 | Q1KMD3 HNRL2_HUMAN  | R.S#GDET#PGSEVPGDK.A                 | S161:T165:         | 2 | 2,7528 | 0,153 | -0,477 |
| 1 | Q02880 TOP2B_HUMAN  | K.YFAES#DEEEDDVDFAM*FN.-             | S1613:             | 3 | 4,3801 | 0,457 | 0      |
| 1 | Q02880 TOP2B_HUMAN  | K.YFAES#DEEEDDVDFAM*FN.-             | S1613:             | 2 | 2,9421 | 0,558 | -0,108 |
| 1 | Q9C0C2 TB182_HUMAN  | R.VPS#S#DEEVVEEPQSR.R                | S1620:S1621:       | 2 | 4,9635 | 0,495 | -0,396 |
| 1 | Q9C0C2 TB182_HUMAN  | R.VPS#S#DEEVVEEPQSR.R                | S1620:S1621:       | 3 | 3,3392 | 0,207 | 0      |
| 1 | O00566 MPP10_HUMAN  | K.S#PVFS#DEDS#DLDFDISKLEQQSK.V       | S163:S167:S171:    | 3 | 5,2575 | 0,59  | -0,128 |

|   |                    |                                      |                    |   |        |       |        |
|---|--------------------|--------------------------------------|--------------------|---|--------|-------|--------|
| 1 | O43598 RCL_HUMAN   | R.YFEADPPGQVAAS#PDPTT.-              | S169:              | 2 | 4,2553 | 0,469 | -0,126 |
| 1 | O43598 RCL_HUMAN   | R.YFEADPPGQVAAS#PDPTT.-              | S169:              | 3 | 3,1534 | 0,308 | -0,188 |
| 1 | O75367 H2AY_HUMAN  | K.AAS#ADS#TTEGTPADGFTVLSTK.S         | S170:S173:         | 3 | 4,4628 | 1     | 0      |
| 1 | Q5SRE5 NU188_HUMAN | R.GAPS#SPATGVLPS#PQGK.S              | S1708:S1717:       | 2 | 2,8925 | 0,361 | -0,071 |
| 1 | Q5SRE5 NU188_HUMAN | R.GAPSS#PATGVLPS#PQGK.S              | S1709:S1717:       | 2 | 3,7254 | 0,401 | -0,143 |
| 1 | Q8NDI1 EHP1_HUMAN  | K.ATDEDMQS#LAS#LMSMK.Q               | S171:S174:         | 2 | 3,3029 | 0,53  | -0,064 |
| 1 | Q8NI08 NCOA7_HUMAN | R.LSSSS#PGATVSPS#SS#DAEYDKLPDADLAR.K | S173:S181:S183:    | 3 | 3,6288 | 1     | 0      |
| 1 | Q15154 PCM1_HUMAN  | K.NVRS#DIS#DQEEDEES#EGCPVSINLSK.A    | S1764:S1767:S1775: | 3 | 5,2769 | 0,506 | 0,115  |
| 1 | Q86TB9 PATL1_HUMAN | R.STS#PIIGS#PPVR.A                   | S179:S184:         | 2 | 2,3273 | 0,279 | -0,178 |
| 1 | P46821 MAP1B_HUMAN | R.ES#SPLYS#PTFS DSTSAVK.E            | S1792:S1797:       | 3 | 3,0631 | 0,351 | 0      |
| 1 | P46821 MAP1B_HUMAN | R.ESS#PLYS#PTFS DSTSAVK.E            | S1793:S1797:       | 2 | 2,7759 | 1     | 0,71   |
| 1 | Q53H80 CF166_HUMAN | R.TLDFDPLLS#PAS#PK.R                 | S18:S21:           | 2 | 4,1772 | 0,465 | 0,147  |
| 1 | Q9P260 K1468_HUMAN | R.AGS#ISTLDS#LDFAR.Y                 | S180:S186:         | 2 | 4,7213 | 0,468 | 0,076  |
| 1 | Q9P260 K1468_HUMAN | R.AGS#IST#LDSLDFAR.Y                 | S180:T183:         | 2 | 3,7568 | 0,419 | 0,151  |
| 1 | Q9P260 K1468_HUMAN | R.AGS#IST#LDS#LDFAR.Y                | S180:T183:S186:    | 2 | 3,9384 | 0,469 | -0,144 |
| 1 | Q9Y248 PSF2_HUMAN  | R.TNLQPLESTQS#QDF.-                  | S182:              | 2 | 2,5189 | 0,36  | 0,072  |
| 1 | Q9NQ3 RTN4_HUMAN   | R.GSS#GS#VDETLFALPAASEPVIR.S         | S182:S184:         | 3 | 4,2694 | 0,407 | 0,077  |
| 1 | Q9BVC5 ASHWN_HUMAN | K.S#PSGPVKS#PPLS#PVGTTTPVK.L         | S182:S189:S193:    | 3 | 4,8499 | 0,33  | -0,168 |
| 1 | Q9Y2F5 K0947_HUMAN | R.SC#SPA VSAVSQLPLS#PK.E             | S1890:S1903:       | 3 | 4,5785 | 0,435 | -0,093 |
| 1 | Q9Y2F5 K0947_HUMAN | R.SCSS#PA VSAVSQLPLS#PK.E            | S1891:S1903:       | 2 | 3,0588 | 1     | 0,062  |
| 1 | P24928 RPB1_HUMAN  | K.YSPTSPTYSPTS#PVYTPTS#PK.Y          | S1899:S1906:       | 3 | 3,0666 | 1     | 0,227  |
| 1 | Q6Y7W6 PERQ2_HUMAN | R.ALS#SGGSITS#PPLS#PALPK.Y           | S19:S26:S30:       | 2 | 4,4491 | 1     | -0,181 |
| 1 | P24928 RPB1_HUMAN  | K.YSPTS#PTY SPTS#PK.Y                | S1913:S1917:S1920: | 2 | 3,7351 | 1     | -0,209 |
| 1 | P24928 RPB1_HUMAN  | K.YSPTS#PTY SPTS#PK.Y                | S1913:S1920:       | 2 | 4,1572 | 1     | -0,365 |
| 1 | Q8NAV1 PR38A_HUMAN | R.VSALEEDM*DDVES#S#EEEEEEDEK.L       | S193:S194:         | 3 | 3,8774 | 0,33  | -1,927 |
| 1 | Q92621 NU205_HUMAN | R.LQDS#FAS#ETNLDFR.S                 | S1939:S1942:       | 2 | 5,2232 | 0,595 | -0,203 |
| 1 | Q9HCK8 CHD8_HUMAN  | R.S#SSAAS#M*AEEEEASVSTAAAQFTK.L      | S1939:S1944:       | 3 | 3,8686 | 1     | 0,219  |
| 1 | Q9GZM8 NDEL1_HUMAN | K.S#APSS#PTLDCEK.M                   | S194:S198:         | 2 | 2,6152 | 0,413 | -0,252 |
| 1 | Q9GZM8 NDEL1_HUMAN | K.S#APSSPT#LDCEK.M                   | S194:T200:         | 2 | 2,7241 | 0,239 | -0,168 |
| 1 | P30622 CLIP1_HUMAN | K.TASES#ISNLS#EAGS#IK.K              | S195:S200:S204:    | 2 | 4,9793 | 1     | 0      |
| 1 | P30622 CLIP1_HUMAN | K.TASES#ISNLSEAGS#IK.K               | S195:S204:         | 2 | 5,5631 | 0,398 | 0,209  |
| 1 | Q8TEA8 DTD1_HUMAN  | R.SAS#S#GAEGDVSSEREP.-               | S196:S197:         | 2 | 4,6289 | 0,576 | -0,354 |
| 1 | Q9BW71 HIRP3_HUMAN | R.EES#EES#EAEPVQR.T                  | S196:S199:         | 3 | 3,5231 | 0,311 | -0,109 |

|   |                     |                                     |                 |   |        |       |        |
|---|---------------------|-------------------------------------|-----------------|---|--------|-------|--------|
| 1 | Q9BW71 HIRP3_HUMAN  | R.EES#EES#EAEPVQR.T                 | S196:S199:      | 2 | 2,5689 | 0,239 | -0,363 |
| 1 | Q9Y2D9 ZN652_HUMAN  | R.AAS#VAAATTS#PTPR.T                | S197:S204:      | 2 | 3,4773 | 0,345 | -0,167 |
| 1 | Q8TEA8 DTD1_HUMAN   | R.SASS#GAEGDVSS#EREP.-              | S197:S205:      | 2 | 3,4008 | 0,421 | -0,424 |
| 1 | P30622 CLIP1_HUMAN  | K.TASESISNLS#EAGS#IK.K              | S200:S204:      | 2 | 5,2055 | 0,521 | 0      |
| 1 | P30622 CLIP1_HUMAN  | K.TASESISNLS#EAGS#IK.K              | S200:S204:      | 3 | 3,2471 | 0,334 | 0,209  |
| 1 | Q8IYH0 Q8IYH0_HUMAN | K.TVDLGIS#DLEDDC.-                  | S201:           | 2 | 3,3284 | 0,484 | 0,239  |
| 1 | P16989 DBPA_HUMAN   | R.NYAGEEEEEGS#GS#S#EGFDPPATDR.Q     | S201:S203:S204: | 3 | 4,3949 | 0,572 | -0,198 |
| 1 | P16989 DBPA_HUMAN   | R.NYAGEEEEEGS#GSS#EGFDPPATDR.Q      | S201:S204:      | 3 | 3,4948 | 0,299 | -0,408 |
| 1 | Q9H0H5 RGAP1_HUMAN  | R.S#IGS#AVDQGNESIVAK.T              | S203:S206:      | 2 | 5,042  | 0,538 | 0      |
| 1 | Q96B36 AKTS1_HUMAN  | R.SS#DEENGPPSS#PDLDR.I              | S203:S212:      | 2 | 5,1915 | 0,456 | -0,262 |
| 1 | Q9H0H5 RGAP1_HUMAN  | R.S#IGSAVDQGNES#IVAK.T              | S203:S214:      | 2 | 4,2087 | 0,555 | 0,844  |
| 1 | Q86WR0 CCD25_HUMAN  | K.VENMSSNQDGNDS#DEFM*.-             | S204:           | 2 | 2,6361 | 0,462 | -0,545 |
| 1 | Q9Y5J1 UTP18_HUMAN  | K.TS#S#DDESEEEDEDDLQR.T             | S205:S206:      | 3 | 4,6343 | 0,284 | -0,256 |
| 1 | Q01130 SFRS2_HUMAN  | R.S#KS#PPKS#PEEEGAVSS.-             | S206:S208:S212: | 2 | 3,167  | 0,414 | -0,592 |
| 1 | O95297 MPZL1_HUMAN  | R.DYTGCSTS#ESLS#PVK.Q               | S206:S210:      | 2 | 3,7403 | 1     | -0,273 |
| 1 | Q04721 NOTC2_HUMAN  | R.LLDEYNVTPS#PPGTVLT#SALSPVICGPNR.S | S2070:T2077:    | 3 | 3,6781 | 1     | -0,113 |
| 1 | Q8NI08 NCOA7_HUMAN  | R.VLS#S#TSEEDEPGVVK.F               | S208:S209:      | 3 | 2,6078 | 0,1   | -0,105 |
| 1 | Q8NI08 NCOA7_HUMAN  | R.VLS#STS#EEDEPGVVK.F               | S208:S211:      | 2 | 4,7327 | 0,451 | -0,211 |
| 1 | Q8NI08 NCOA7_HUMAN  | R.VLS#ST#S#EEDEPGVVK.F              | S208:T210:S211: | 2 | 3,9776 | 0,412 | -0,067 |
| 1 | Q8NI08 NCOA7_HUMAN  | R.VLSS#TS#EEDEPGVVK.F               | S209:S211:      | 2 | 3,0446 | 0,31  | -0,281 |
| 1 | Q09666 AHNK_HUMAN   | R.LPS#GSGAAS#PTGSAVDIR.A            | S210:S216:      | 2 | 4,8503 | 0,545 | -0,271 |
| 1 | Q8TBF4 ZCRB1_HUMAN  | K.STYFS#DEEELS#D.-                  | S210:S216:      | 2 | 3,5903 | 0,497 | 0,154  |
| 1 | Q09666 AHNK_HUMAN   | R.LPS#GSGAAS#PTGS#AVDIR.A           | S210:S216:S220: | 2 | 6,1269 | 1     | -0,259 |
| 1 | Q7Z417 NUFP2_HUMAN  | K.GADNDGS#GS#ESGYTPK.K              | S212:S214:      | 2 | 2,3907 | 0,304 | -0,338 |
| 1 | Q14934 NFAC4_HUMAN  | R.FGLGS#PLPS#PR.A                   | S213:S217:      | 2 | 3,1308 | 0,372 | -0,189 |
| 1 | Q8TBF4 ZCRB1_HUMAN  | K.STYFSDEEELS#D.-                   | S216:           | 2 | 3,036  | 0,406 | -0,081 |
| 1 | Q09666 AHNK_HUMAN   | R.LPSGSGAAS#PT#GSAVDIR.A            | S216:T218:      | 2 | 4,0353 | 1     | -0,271 |
| 1 | Q01082 SPTB2_HUMAN  | K.ESS#PIPS#PTSDR.K                  | S2165:S2169:    | 2 | 2,3426 | 0,402 | -0,426 |
| 1 | Q9UBQ5 EIF3K_HUMAN  | K.IDFDSVSSIMASS#Q.-                 | S217:           | 2 | 3,0299 | 0,474 | 0,467  |
| 1 | Q9UBQ5 EIF3K_HUMAN  | K.IDFDSVSSIM*ASS#Q.-                | S217:           | 2 | 2,8029 | 0,343 | -0,231 |
| 1 | Q02750 MP2K1_HUMAN  | K.LCDFGVSGQLIDS#M*ANS#FVGTR.S       | S218:S222:      | 3 | 4,5469 | 0,475 | 0,143  |
| 1 | Q02750 MP2K1_HUMAN  | K.LCDFGVSGQLIDS#MANS#FVGTR.S        | S218:S222:      | 3 | 2,8089 | 0,321 | -0,072 |
| 1 | Q14694 UBP10_HUMAN  | R.TCNSPQNSTD#VSDIVPDS#PFPGALGSDTR.T | S218:S226:      | 3 | 2,9427 | 0,239 | 0,112  |

|   |                    |                                  |                 |   |        |       |        |
|---|--------------------|----------------------------------|-----------------|---|--------|-------|--------|
| 1 | Q13404 UB2V1_HUMAN | K.LPQPPEGQCYS#N.-                | S220:           | 2 | 2,402  | 0,359 | 0,083  |
| 1 | Q8WYP5 AHTF1_HUMAN | R.LIS#PLAS#PADGVK.S              | S2231:S2235:    | 2 | 4,3235 | 0,46  | 0      |
| 1 | Q9BXY0 RBM13_HUMAN | R.EFVEDGEVDES#DIS#DFEDMDK.L      | S229:S232:      | 3 | 5,4631 | 0,468 | 0,421  |
| 1 | Q9BXY0 RBM13_HUMAN | R.EFVEDGEVDES#DIS#DFEDM*DK.L     | S229:S232:      | 3 | 4,2731 | 0,469 | 0,488  |
| 1 | Q6Y7W6 PERQ2_HUMAN | R.ALSSGGS#ITS#PPLSPALPK.Y        | S23:S26:        | 2 | 2,2354 | 0,214 | -0,189 |
| 1 | Q13085 ACACA_HUMAN | R.FIIGS#VSEDNS#EDEISNLVK.L       | S23:S29:        | 3 | 4,277  | 0,369 | 0,078  |
| 1 | Q6Y7W6 PERQ2_HUMAN | R.ALSSGGS#ITSPPLS#PALPK.Y        | S23:S30:        | 3 | 3,0976 | 1     | -0,094 |
| 1 | Q9BYG3 MK671_HUMAN | K.TVDS#QGPT#PVCT#PTFLER.R        | S230:T234:T238: | 3 | 5,3385 | 0,427 | 0,244  |
| 1 | P04183 KITH_HUMAN  | K.LFAPQQILQCS#PAN.-              | S231:           | 2 | 3,2664 | 0,377 | 0,22   |
| 1 | Q13283 G3BP1_HUMAN | K.SS#S#PAPADIAQTVQEDLR.T         | S231:S232:      | 2 | 3,3511 | 0,34  | 0,477  |
| 1 | P27348 1433T_HUMAN | R.DNLTLTWTSDS#AGEECDAAEGAEN.-    | S232:           | 3 | 2,8745 | 0,285 | -0,072 |
| 1 | O75962 TRIO_HUMAN  | R.AGAAS#PLNS#PLSSAVPSLGK.E       | S2396:S2400:    | 2 | 3,8515 | 0,496 | -0,799 |
| 1 | O75962 TRIO_HUMAN  | R.AGAAS#PLNS#PLSSAVPSLGK.E       | S2396:S2400:    | 3 | 2,8283 | 0,245 | 0,184  |
| 1 | O75420 PERQ1_HUMAN | R.ALSSGGSVAS#PPPS#PAM*PK.Y       | S24:S28:        | 2 | 3,6319 | 0,343 | -0,324 |
| 1 | Q96A57 CT030_HUMAN | R.LSS#T#DDGYIDLQFK.K             | S24:T25:        | 2 | 5,2274 | 0,388 | -0,069 |
| 1 | Q16204 CCDC6_HUMAN | K.LDQPVS#APPS#PR.D               | S240:S244:      | 2 | 3,6312 | 0,458 | -0,171 |
| 1 | Q16204 CCDC6_HUMAN | K.LDQPVS#APPS#PR.D               | S240:S244:      | 3 | 2,6892 | 0,325 | 0      |
| 1 | Q9BZG1 RAB34_HUMAN | R.INS#DDS#NLYLTASK.K             | S241:S244:      | 2 | 4,0647 | 0,487 | -0,143 |
| 1 | O75376 NCOR1_HUMAN | R.EPAPLLSAQYETLS#DSDD.-          | S2436:          | 2 | 3,4364 | 0,604 | 0      |
| 1 | O75376 NCOR1_HUMAN | R.EPAPLLSAQYETLS#DS#DD.-         | S2436:S2438:    | 2 | 3,9117 | 0,638 | 0,231  |
| 1 | O75376 NCOR1_HUMAN | R.EPAPLLSAQYETLS#DS#DD.-         | S2436:S2438:    | 3 | 3,3442 | 0,35  | 0,087  |
| 1 | Q96ST2 IWS1_HUMAN  | R.IS#DS#ESEDPPR.H                | S248:S250:      | 2 | 2,7214 | 0,23  | -0,351 |
| 1 | Q9H0G5 CCD55_HUMAN | K.VEENPDADS#DFDAKS#S#ADDEIEETR.V | S248:S254:S255: | 3 | 5,1625 | 0,505 | -0,303 |
| 1 | P0C1Z6 TFPT_HUMAN  | K.LLPYPTLAS#PASD.-               | S249:           | 2 | 2,656  | 0,315 | -0,086 |
| 1 | P0C1Z6 TFPT_HUMAN  | K.LLPYPTLAS#PAS#D.-              | S249:S252:      | 2 | 3,2155 | 0,462 | 0,081  |
| 1 | Q6ZU65 K2030_HUMAN | R.QAS#DT#EEDDITDNQK.H            | S250:T252:      | 2 | 2,5253 | 0,338 | -0,457 |
| 1 | Q9UFC0 LRWD1_HUMAN | R.ACAS#PSAQVEGS#PVAGSDGSPAVK.L   | S251:S259:      | 3 | 5,8486 | 0,553 | -0,073 |
| 1 | P0C1Z6 TFPT_HUMAN  | K.LLPYPTLASPAS#D.-               | S252:           | 2 | 3,1244 | 0,46  | -0,086 |
| 1 | P05787 K2C8_HUMAN  | R.S#LDMDS#IIAEVK.A               | S253:S258:      | 2 | 4,3985 | 0,463 | 0,165  |
| 1 | P05787 K2C8_HUMAN  | R.S#LDM*DS#IIAEVK.A              | S253:S258:      | 2 | 4,1065 | 0,437 | 0      |
| 1 | P07910 HNRPC_HUMAN | K.M*ES#EGGADDS#AEEGDLLDDDDNEDR.G | S253:S260:      | 3 | 7,0996 | 0,617 | -0,255 |
| 1 | Q9Y2U8 MAN1_HUMAN  | R.ENYS#DS#EEEDDDVASSR.Q          | S259:S261:      | 3 | 3,726  | 0,437 | -0,412 |
| 1 | Q15942 ZYG_HUMAN   | R.GPPASS#PAPAPKFS#PVT#PK.F       | S259:S267:T270: | 3 | 4,401  | 0,429 | 0,176  |

|   |                     |                               |                    |   |        |       |        |
|---|---------------------|-------------------------------|--------------------|---|--------|-------|--------|
| 1 | Q8NFH5 NUP53_HUMAN  | R.CALSS#PSLAFT#PPIK.T         | S259:T265:         | 2 | 2,9574 | 0,426 | 1,186  |
| 1 | B2CI53 B2CI53_HUMAN | R.NGILAS#PQS#APGNLDNSK.S      | S260:S263:         | 2 | 4,0468 | 0,62  | 0,063  |
| 1 | Q8NFH5 NUP53_HUMAN  | R.CALSSPS#LAFT#PPIK.T         | S261:T265:         | 3 | 3,0651 | 0,13  | -0,209 |
| 1 | P07900 HS90A_HUMAN  | K.ESEDKPEIEDVGS#DEEEKKDGDGK.K | S263:              | 3 | 2,9844 | 0,241 | 0      |
| 1 | P61247 RS3A_HUMAN   | R.ADGYEPPVQES#V.-             | S263:              | 2 | 2,2073 | 0,375 | 0,178  |
| 1 | Q8IWB9 TEX2_HUMAN   | K.TAPSS#PLTS#PSDTR.S          | S266:S270:         | 2 | 3,3463 | 1     | -0,309 |
| 1 | Q9UJU6 DBNL_HUMAN   | R.AM*#S#TTS#ISSPQPGK.L        | S269:S272:         | 2 | 2,5585 | 1     | -0,389 |
| 1 | Q9UJU6 DBNL_HUMAN   | R.AMS#TTSISS#PQPGK.L          | S269:S275:         | 2 | 3,5592 | 1     | -0,314 |
| 1 | Q9UQ35 SRRM2_HUMAN  | R.S#LS#YSPVER.R               | S2690:S2692:       | 2 | 2,7623 | 0,371 | -0,407 |
| 1 | Q9UQ35 SRRM2_HUMAN  | R.S#LS#YS#PVER.R              | S2690:S2692:S2694: | 2 | 2,9177 | 0,398 | -0,191 |
| 1 | Q9UQ35 SRRM2_HUMAN  | R.S#LSYS#PVER.R               | S2690:S2694:       | 2 | 2,7288 | 0,378 | -0,102 |
| 1 | Q9UQ35 SRRM2_HUMAN  | R.SLS#YS#PVER.R               | S2692:S2694:       | 2 | 2,5667 | 0,336 | -0,306 |
| 1 | O94806 KPCD3_HUMAN  | K.SVLPTAIPAVLPAAS#PCSS#PK.T   | S27:S31:           | 3 | 3,3592 | 0,365 | 0,165  |
| 1 | Q9HCK8 CHD8_HUMAN   | R.NTS#SDNS#DVEVM*PAQSPR.E     | S270:S274:         | 2 | 3,2954 | 0,405 | -0,347 |
| 1 | Q9Y4U1 MMAC_HUMAN   | R.VS#PPASPGP.-                | S275:              | 2 | 2,1275 | 0,204 | 0,137  |
| 1 | P21127 CD2L1_HUMAN  | R.DLLS#DLQDIS#DSER.K          | S277:S283:         | 2 | 4,8671 | 0,571 | -0,138 |
| 1 | P21127 CD2L1_HUMAN  | R.DLLS#DLQDISDS#ER.K          | S277:S285:         | 3 | 3,6677 | 0,227 | -0,311 |
| 1 | Q16637 SMN_HUMAN    | R.GTGQS#DDS#DIWDDTALIK.A      | S28:S31:           | 3 | 3,6166 | 0,293 | 0,262  |
| 1 | O94888 UBXD7_HUMAN  | R.SES#LIDASEDS#QLEAAIR.A      | S280:S288:         | 3 | 4,997  | 0,51  | -0,087 |
| 1 | Q5C9Z4 NOM1_HUMAN   | K.AQEAEAQS#EDDDEDTEEEQGEK.E   | S280:T287:         | 3 | 4,0922 | 0,352 | -0,198 |
| 1 | Q15942 ZYG_HUMAN    | K.FS#PGAPGGS#GSQPNQK.L        | S281:S288:         | 2 | 3,64   | 0,404 | -0,655 |
| 1 | P15924 DESP_HUMAN   | K.GLPSPYNMSS#APGS#R.S         | S2821:S2825:       | 2 | 2,1816 | 0,158 | -0,073 |
| 1 | P07951 TPM2_HUMAN   | K.AISEELDNDITS#L.-            | S283:              | 2 | 3,9713 | 0,51  | -0,204 |
| 1 | Q02952 AKA12_HUMAN  | K.SAES#PTS#PVTSETGSTFK.K      | S283:S286:         | 2 | 4,7679 | 1     | -0,186 |
| 1 | P98172 EFNB1_HUMAN  | R.AAALSLS#TLAS#PK.G           | S283:S287:         | 2 | 3,0018 | 0,43  | 0,439  |
| 1 | Q02952 AKA12_HUMAN  | K.SAESPTS#PVT#SETGSTFK.K      | S286:T289:         | 2 | 3,6548 | 1     | -0,309 |
| 1 | Q7Z6Z7 HUWE1_HUMAN  | R.AGS#S#TPGDAPPAVAEVQGR.S     | S2887:S2888:       | 2 | 3,7853 | 0,616 | -0,443 |
| 1 | Q7Z6Z7 HUWE1_HUMAN  | R.AGSS#T#PGDAPPAVAEVQGR.S     | S2888:T2889:       | 3 | 4,2754 | 0,287 | -0,095 |
| 1 | Q5T8I3 F102B_HUMAN  | K.ILQSQDFSLDS#S#AEEEGLR.L     | S289:S290:         | 3 | 4,697  | 0,394 | 0      |
| 1 | Q9BW71 HIRP3_HUMAN  | R.LLGDS#DS#EEEQK.E            | S289:S291:         | 2 | 4,3365 | 0,52  | -0,566 |
| 1 | Q13371 PHLP_HUMAN   | R.NSATCHS#EDS#DLEID.-         | S293:S296:         | 2 | 3,148  | 0,205 | -0,395 |
| 1 | Q8WVC0 LEO1_HUMAN   | K.NAIAS#DS#EADSDT#EVPK.D      | S294:S296:T302:    | 2 | 2,2072 | 0,228 | -0,368 |
| 1 | O00499 BIN1_HUMAN   | K.SPS#PPDGS#PAATPEIR.V        | S298:S303:         | 2 | 3,7926 | 0,41  | 0      |

|   |                    |                                      |                 |   |        |       |        |
|---|--------------------|--------------------------------------|-----------------|---|--------|-------|--------|
| 1 | Q76FK4 NOL8_HUMAN  | R.NSIS#DDDT#DS#EDEL.R.M              | S298:T302:S304: | 2 | 4,3128 | 0,496 | -0,188 |
| 1 | Q96CW6 S7A6O_HUMAN | K.EFGYDS#PHDLDS#D.-                  | S302:S308:      | 2 | 3,983  | 0,527 | -0,368 |
| 1 | P05388 RLAO_HUMAN  | K.EES#EESDEDM*GFGLFD.-               | S304:           | 2 | 2,0101 | 0,221 | 0      |
| 1 | P05388 RLAO_HUMAN  | K.VEAKES#EES#DEDMGFGLFD.-            | S304:S307:      | 3 | 4,1217 | 0,514 | 0,076  |
| 1 | P05388 RLAO_HUMAN  | K.VEAKES#EES#DEDM*GFGLFD.-           | S304:S307:      | 3 | 4,094  | 0,482 | 0,675  |
| 1 | P05388 RLAO_HUMAN  | K.EES#EES#DEDM*GFGLFD.-              | S304:S307:      | 2 | 3,3006 | 0,541 | 0      |
| 1 | P05388 RLAO_HUMAN  | K.EES#EES#DEDM*GFGLFD.-              | S304:S307:      | 3 | 2,8228 | 0,27  | 0,182  |
| 1 | Q969H4 CNKR1_HUMAN | R.S#PSLSLAPLS#PR.A                   | S305:S314:      | 2 | 3,5855 | 0,52  | -0,088 |
| 1 | P05388 RLAO_HUMAN  | K.EESEES#DEDMGFGLFD.-                | S307:           | 2 | 3,5211 | 0,528 | 0,064  |
| 1 | Q03188 CENPC_HUMAN | K.LIEDEFIIDES#DQS#FASR.S             | S308:S311:      | 3 | 3,5685 | 0,312 | 0,402  |
| 1 | Q6PD74 P34_HUMAN   | R.DEIEGLS#S#DEEH.-                   | S310:S311:      | 2 | 2,6007 | 0,33  | -0,321 |
| 1 | Q15464 SHB_HUMAN   | K.GIQLYDTPYEPEGQSVSDS#ESTVS#PR.L     | S312:S317:      | 3 | 4,8189 | 1     | 0,235  |
| 1 | P67809 YBOX1_HUMAN | K.AADPPAENSS#APEAEQGGAE.-            | S314:           | 3 | 4,6303 | 0,48  | -0,185 |
| 1 | P67809 YBOX1_HUMAN | K.AADPPAENSS#APEAEQGGAE.-            | S314:           | 2 | 4,3103 | 0,601 | -0,432 |
| 1 | Q14004 CD2L5_HUMAN | R.S#LS#PLGGR.D                       | S315:S317:      | 2 | 2,1152 | 0,228 | -0,064 |
| 1 | Q9BW85 CCD94_HUMAN | K.EANPTLTPGASSLSQLGAYLDS#DDS#NGS#N.- | S316:S319:S322: | 3 | 4,556  | 1     | -0,114 |
| 1 | Q15127 SCAM2_HUMAN | R.AAS#SAAQGAFAQGN.-                  | S319:           | 2 | 3,4447 | 0,552 | 0,097  |
| 1 | Q13546 RIPK1_HUMAN | R.M*QS#LQLDCVAVPSS#R.S               | S320:S331:      | 2 | 4,1282 | 0,505 | -0,261 |
| 1 | Q86WC4 OSTM1_HUMAN | R.LKS#STS#FANIQENS.N.-               | S322:S325:      | 2 | 4,5555 | 0,572 | -0,271 |
| 1 | Q15417 CNN3_HUMAN  | R.DYQYS#DQGIDY.-                     | S323:           | 2 | 2,2451 | 0,263 | -0,084 |
| 1 | Q86WC4 OSTM1_HUMAN | K.SSTS#FANIQENS.N.-                  | S325:           | 2 | 3,8303 | 0,513 | 0      |
| 1 | Q8ND76 CCNY_HUMAN  | R.SAS#ADNLT#LPR.W                    | S326:T331:      | 2 | 3,3022 | 0,327 | -0,468 |
| 1 | Q9H330 CI005_HUMAN | R.GESAPTLSTSPSPSS#PTSPS#PTLGR.R      | S327:S332:      | 3 | 3,2806 | 1     | -0,067 |
| 1 | Q13426 XRCC4_HUMAN | R.NSS#PEDLFDEI.-                     | S328:           | 2 | 2,5592 | 0,229 | -0,181 |
| 1 | Q14676 MDC1_HUMAN  | R.AQPFGFIDS#DT#DAEEER.I              | S329:T331:      | 2 | 4,9564 | 0,595 | 0      |
| 1 | Q14676 MDC1_HUMAN  | R.AQPFGFIDS#DT#DAEEER.I              | S329:T331:      | 3 | 3,9265 | 0,451 | -0,263 |
| 1 | Q92597 NDRG1_HUMAN | R.TAS#GSS#VTSLDGTR.S                 | S330:S333:      | 2 | 3,1843 | 1     | -0,163 |
| 1 | Q92597 NDRG1_HUMAN | R.TASGS#S#VTS#LDGTR.S                | S332:S333:S336: | 2 | 3,1482 | 1     | -0,155 |
| 1 | Q9BVS4 RIOK2_HUMAN | K.EGS#EFS#FSDGEVAEK.A                | S332:S335:      | 2 | 3,794  | 0,354 | 0,206  |
| 1 | Q9BVS4 RIOK2_HUMAN | K.EGS#EFS#FSDGEVAEK.A                | S332:S335:S337: | 2 | 4,9463 | 0,416 | 0      |
| 1 | Q92597 NDRG1_HUMAN | R.TASGS#SVTS#LDGTR.S                 | S332:S336:      | 2 | 2,9253 | 0,111 | -0,326 |
| 1 | Q9BVS4 RIOK2_HUMAN | K.EGS#EFS#FSDGEVAEK.A                | S332:S337:      | 2 | 4,8756 | 0,562 | 0,069  |
| 1 | P40925 MDHC_HUMAN  | K.ESAFELSS#A.-                       | S333:           | 2 | 2,2528 | 0,395 | -0,209 |

|   |                     |                                       |                 |   |        |       |        |
|---|---------------------|---------------------------------------|-----------------|---|--------|-------|--------|
| 1 | Q8WXI9 P66B_HUMAN   | R.VS#SPLPS#PSAM*TDAANSQAAAK.L         | S333:S338:      | 3 | 4,0623 | 1     | -0,241 |
| 1 | Q8WXI9 P66B_HUMAN   | R.VSS#PLPS#PSAMTDAANSQAAAK.L          | S334:S338:      | 3 | 5,7822 | 1     | 0      |
| 1 | P49790 NU153_HUMAN  | R.IPSIVSS#PLNS#PLDR.S                 | S334:S338:      | 2 | 4,9301 | 0,557 | -0,07  |
| 1 | Q8IY81 RRMJ3_HUMAN  | K.ALDISLS#S#GEEDEGEDEEDSTAGTTK.Q      | S335:S336:      | 3 | 4,4397 | 0,338 | -0,135 |
| 1 | Q9UK58 CCNL1_HUMAN  | K.GLNPDGTPALSTLGGFS#PAS#KPS#SPR.E     | S335:S338:S341: | 3 | 4,1421 | 1     | 0,067  |
| 1 | Q96F63 CCD97_HUMAN  | R.YFDEEPEPADAPS#PELDGD.-              | S337:           | 2 | 3,3781 | 0,463 | 0,114  |
| 1 | Q16643 DREB_HUMAN   | R.S#PSDSS#TASTPVAEQIER.A              | S337:S342:      | 2 | 3,7384 | 1     | -0,241 |
| 1 | Q53HF9 Q53HF9_HUMAN | K.DIRS#DVEESDS#S#EEAAAAQEPLQLK.N      | S342:S349:S350: | 3 | 6,8426 | 0,39  | -0,248 |
| 1 | O60716 CTND1_HUMAN  | R.GS#LAS#LDSLR.K                      | S346:S349:      | 2 | 2,8731 | 0,328 | 0      |
| 1 | O60716 CTND1_HUMAN  | R.GS#LAS#LDS#LR.K                     | S346:S349:S352: | 2 | 2,147  | 0,128 | 0,097  |
| 1 | Q13541 4EBP1_HUMAN  | R.VVLGDGVQLPPGDYS#TTPGGTLFSTT#PGGTR.I | S35:T46:        | 3 | 2,9083 | 1     | 0      |
| 1 | P38159 HNRPG_HUMAN  | R.GLPPS#MERGYPPRDS#YSS#SSRGAPR.G      | S352:S363:S366: | 3 | 2,9516 | 0,123 | -1,503 |
| 1 | O15014 ZN609_HUMAN  | R.FCDS#PTS#DLEM.R.N                   | S358:S361:      | 2 | 3,5937 | 0,353 | 0,302  |
| 1 | P30462 1B14_HUMAN   | K.GGSYSQAASSDSAQGS#LTA.-              | S359:           | 2 | 4,4813 | 1     | -0,23  |
| 1 | Q6VN20 RBP10_HUMAN  | K.SQDS#YPGS#PSLS#PR.H                 | S361:S365:S369: | 2 | 3,6719 | 1     | -0,071 |
| 1 | P49585 PCY1A_HUMAN  | K.AAAYDIS#EDEED.-                     | S362:           | 2 | 2,9799 | 0,409 | -0,173 |
| 1 | P49768 PSN1_HUMAN   | R.AAVQELS#S#SILAGEDPEER.G             | S365:S366:      | 2 | 2,1242 | 0,334 | 0,113  |
| 1 | Q9NQ22 SAS10_HUMAN  | K.TSAAACAVTDLS#DDS#DFDEK.A            | S365:S368:      | 3 | 6,8952 | 0,616 | -0,241 |
| 1 | Q6VN20 RBP10_HUMAN  | K.SQDSYPGS#PSLS#PR.H                  | S365:S369:      | 2 | 2,961  | 0,308 | 0      |
| 1 | P05455 LA_HUMAN     | K.TKFAS#DDEHDEHDENGATGPVK.R           | S366:           | 3 | 3,1931 | 0,333 | -0,295 |
| 1 | O43303 CE110_HUMAN  | K.LPS#PEPSMS#PK.M                     | S366:S372:      | 2 | 2,8389 | 0,475 | -0,367 |
| 1 | P16989 DBPA_HUMAN   | K.AGEAPTENPAPPTQQS#SAE.-              | S369:           | 2 | 2,1583 | 0,404 | -0,746 |
| 1 | Q86W92 LIPB1_HUMAN  | K.ALEYSNGIFDCQS#PT#SPFM*GSLR.A        | S37:T39:        | 3 | 4,5182 | 0,525 | 0,399  |
| 1 | Q5T200 ZC3HD_HUMAN  | R.S#AS#PYPSHLS#SPQR.K                 | S370:S372:S380: | 2 | 3,1942 | 1     | -0,398 |
| 1 | A7MCY6 TBKB1_HUMAN  | R.S#PVPPCPS#PQQR.R                    | S372:S379:      | 2 | 2,48   | 0,351 | -0,242 |
| 1 | Q9Y3X0 CCDC9_HUMAN  | K.EGAAS#PAPETPQPTSPET#SPK.E           | S376:T389:      | 3 | 3,8643 | 0,335 | -0,245 |
| 1 | O95817 BAG3_HUMAN   | K.VPPAPVPCPPPS#PGPSAVPS#SPK.S         | S377:S385:      | 3 | 3,6634 | 0,329 | 0      |
| 1 | Q9Y4A0 JERKL_HUMAN  | R.AQGQADES#S#ENEEEEIEIPEK.H           | S378:S379:      | 3 | 3,0374 | 0,367 | 0,486  |
| 1 | Q9HCD5 NCOA5_HUMAN  | R.SS#TDS#LPGPIR.Q                     | S378:S381:      | 2 | 3,2192 | 0,316 | 0,089  |
| 1 | Q76FK4 NOL8_HUMAN   | R.EYDS#GDT#DEIIAM*K.K                 | S378:T381:      | 2 | 3,2371 | 0,344 | -0,346 |
| 1 | P22059 OSBP1_HUMAN  | R.TGS#NIS#GAS#SDISLDEQYK.H            | S379:S382:S385: | 3 | 4,5502 | 1     | 0,662  |
| 1 | Q9UQ80 PA2G4_HUMAN  | K.TAENATS#GETLEENEAGD.-               | S383:           | 2 | 3,3878 | 0,409 | -0,127 |
| 1 | Q4KMP7 TB10B_HUMAN  | R.QQPPLGPS#LLS#LPGLK.S                | S383:S386:      | 3 | 3,5075 | 0,309 | -0,185 |



|   |                     |                                 |                    |   |        |       |        |
|---|---------------------|---------------------------------|--------------------|---|--------|-------|--------|
| 1 | Q4KMP7 TB10B_HUMAN  | R.QQPPLGPSSS#LLS#LPGLK.S        | S383:S386:         | 2 | 2,5004 | 0,343 | -0,123 |
| 1 | Q86SQ0 PHL2_HUMAN   | R.NFS#CGS#VEFDEADLESLR.Q        | S384:S387:         | 3 | 6,3647 | 0,48  | 0,082  |
| 1 | Q9Y3X0 CCDC9_HUMAN  | K.EGAASPAPETPQPTS#PETS#PK.E     | S386:S390:         | 3 | 3,8956 | 1     | -0,163 |
| 1 | Q16659 MK06_HUMAN   | R.ALS#DVT#DEEEVQVDPR.K          | S386:T389:         | 2 | 4,945  | 0,322 | 0      |
| 1 | P55010 IF5_HUMAN    | K.EAEEES#S#GGEEDEDEDENIEVVYSK.A | S389:S390:         | 3 | 4,9456 | 0,454 | 0      |
| 1 | Q8TDD1 DDX54_HUMAN  | R.GS#DS#EDGEFEIQAEDDAR.A        | S39:S41:           | 3 | 4,9327 | 0,51  | 0,344  |
| 1 | Q8TDD1 DDX54_HUMAN  | R.GS#DS#EDGEFEIQAEDDAR.A        | S39:S41:           | 2 | 4,3321 | 0,554 | -0,458 |
| 1 | Q14527 HLTF_HUMAN   | K.TAVQYIES#S#DS#EEIETSELPQK.M   | S397:S398:S400:    | 3 | 4,9234 | 1     | -0,067 |
| 1 | Q14527 HLTF_HUMAN   | K.TAVQYIES#SDS#EEIETSELPQK.M    | S397:S400:         | 3 | 3,8395 | 0,371 | -0,069 |
| 1 | Q96ST2 IWS1_HUMAN   | K.AAVLS#DS#EDEEK.A              | S398:S400:         | 2 | 3,6944 | 0,321 | -0,252 |
| 1 | Q9Y519 T184B_HUMAN  | K.TLLLS#S#DDEF.-                | S402:S403:         | 2 | 2,143  | 0,474 | 0,094  |
| 1 | Q5UIP0 RIF1_HUMAN   | K.GASS#PYGAPGT#PR.M             | S402:T409:         | 2 | 2,3512 | 0,257 | -0,089 |
| 1 | Q15276 RABE1_HUMAN  | R.AQS#TDS#LGTSGSLQSK.A          | S407:S410:         | 2 | 6,0795 | 1     | -0,283 |
| 1 | Q9UKV3 ACINU_HUMAN  | K.ASLVALPEQTAS#EEET#PPPLTK.E    | S410:T414:         | 3 | 2,9948 | 0,101 | 0,567  |
| 1 | Q7L1Q6 BZW1_HUMAN   | K.NAEEES#ESEAEEGD.-             | S411:              | 2 | 2,4196 | 0,4   | -0,228 |
| 1 | Q96ST2 IWS1_HUMAN   | R.VVS#DADDS#DSDAVSDK.S          | S415:S420:         | 2 | 2,2546 | 0,318 | -0,205 |
| 1 | B2RMZ9 B2RMZ9_HUMAN | R.LNS#S#PRAPVS#PLK.F            | S416:S417:S423:    | 2 | 2,9894 | 0,379 | -0,228 |
| 1 | Q13547 HDAC1_HUMAN  | R.IACEEEFS#DS#EEEGEGGR.K        | S421:S423:         | 2 | 2,1699 | 0,382 | -0,223 |
| 1 | P42858 HD_HUMAN     | R.SGS#IVELIAGGGSS#CSPVLSR.K     | S421:S432:         | 3 | 3,3803 | 0,338 | 0      |
| 1 | Q8TEQ0 SNX29_HUMAN  | R.NVEPQS#GDL.-                  | S425:              | 2 | 2,0681 | 0,279 | -0,117 |
| 1 | Q53EZ4 CEP55_HUMAN  | K.VAAS#PKS#PTAALNES#LVECPK.C    | S425:S428:S436:    | 3 | 5,6326 | 0,375 | 0,456  |
| 1 | Q96AP0 ACD_HUMAN    | R.TPSS#PLQSCTPSLS#PR.S          | S425:S435:         | 2 | 4,0433 | 1     | -0,13  |
| 1 | Q8NDI1 EHP1_HUMAN   | K.DLSTS#PKPS#PIPS#PVLGR.K       | S428:S432:S436:    | 3 | 3,0712 | 0,132 | -0,088 |
| 1 | Q13112 CAF1B_HUMAN  | R.TQDPSS#PGT#TPPQAR.Q           | S429:T432:         | 2 | 2,406  | 0,328 | -0,287 |
| 1 | P27987 IP3KB_HUMAN  | R.AVLS#PGSVFS#PGR.G             | S43:S49:           | 2 | 4,2229 | 0,441 | -0,17  |
| 1 | P35658 NU214_HUMAN  | K.SPGS#TPPTPTS#SQAPQK.L         | S433:S440:         | 2 | 3,0478 | 1     | -0,2   |
| 1 | Q9P107 GMIP_HUMAN   | R.SLDS#PTSS#PGAGTR.Q            | S437:S441:         | 2 | 3,5223 | 1     | -0,409 |
| 1 | Q9BVJ6 UT14A_HUMAN  | R.SELS#QDAEPAGS#QETK.D          | S437:S445:         | 2 | 2,7697 | 0,403 | -0,399 |
| 1 | Q15149 PLEC1_HUMAN  | R.SSS#VGS#SSSYPI#PAVSR.T        | S4386:S4389:S4396: | 2 | 3,8051 | 1     | -0,183 |
| 1 | Q15149 PLEC1_HUMAN  | R.SSS#VGS#SSSYPI#PAVSR.T        | S4386:S4396:       | 2 | 3,1309 | 1     | -0,382 |
| 1 | Q71U36 TBA1A_HUMAN  | K.DYEEVGVDS#VEGEGEEEGEEY.-      | S439:              | 3 | 4,3925 | 0,498 | -0,075 |
| 1 | Q9BQE3 TBA1C_HUMAN  | K.DYEEVGADS#ADGEDEGEEY.-        | S439:              | 2 | 2,8985 | 0,471 | -0,339 |
| 1 | O43318 M3K7_HUMAN   | R.S#IQDLTVTGTGEPQVS#SR.S        | S439:S454:         | 2 | 4,0923 | 0,491 | 0,72   |

|   |                     |                                       |                 |   |        |       |        |
|---|---------------------|---------------------------------------|-----------------|---|--------|-------|--------|
| 1 | P30622 CLIP1_HUMAN  | K.ASS#TPS#SETQEETFVDDFR.V             | S44:S47:        | 3 | 4,0796 | 1     | -0,167 |
| 1 | Q8WUM0 NU133_HUMAN  | K.GLPLGSAVS#SPVLFS#PVGR.R             | S44:S50:        | 3 | 4,3769 | 0,482 | -0,091 |
| 1 | Q13541 4EBP1_HUMAN  | R.VVLGDGVQLPPGDYSTTPGGTLFS#TT#PGGTR.I | S44:T46:        | 3 | 3,6821 | 1     | -0,456 |
| 1 | Q9BZ67 FRMD8_HUMAN  | R.QLS#LGQGSYTVVQPGDSLEQG.-            | S446:           | 3 | 4,2133 | 0,262 | -0,082 |
| 1 | Q9Y6X4 K0888_HUMAN  | K.TSLITEEEDS#TS#EVLDEELK.L            | S447:S449:      | 3 | 3,8146 | 0,227 | 0,528  |
| 1 | Q96PU5 NED4L_HUMAN  | R.SLS#S#PTVTLSAPLEGAK.D               | S448:S449:      | 2 | 5,1987 | 1     | 0,201  |
| 1 | Q02790 FKBP4_HUMAN  | K.SNTAGS#QSQVETEA.-                   | S451:           | 2 | 2,609  | 0,415 | -0,328 |
| 1 | O60832 DKC1_HUMAN   | R.ES#ES#ESDETPPAAPQLIK.K              | S451:S453:      | 2 | 2,3066 | 0,261 | 1,403  |
| 1 | Q53ET0 CRTC2_HUMAN  | K.QFS#PTM*S#PTLSSITQGVPLDTSK.L        | S456:S460:      | 3 | 4,5164 | 1     | 0      |
| 1 | Q9NYZ3 GTSE1_HUMAN  | K.FS#IGDS#PDSSTPK.L                   | S457:S461:      | 2 | 2,4156 | 0,309 | -0,326 |
| 1 | Q14157 UBP2L_HUMAN  | K.STSAPQMS#PGSSDNQSSS#PQPAQQK.L       | S467:S477:      | 3 | 4,1709 | 1     | -0,408 |
| 1 | Q14157 UBP2L_HUMAN  | K.STSAPQM*S#PGSSDNQSSS#PQPAQQK.L      | S467:S477:      | 3 | 3,6865 | 1     | -0,338 |
| 1 | Q9BZE4 NOG1_HUMAN   | R.TAAGEYDS#VS#ES#EDEEMLEIR.Q          | S468:S470:S472: | 3 | 4,6001 | 1     | 0,07   |
| 1 | Q96D46 NMD3_HUMAN   | R.DSAIPVES#DT#DDEGAPR.I               | S468:T470:      | 3 | 2,8443 | 0,397 | 0      |
| 1 | Q99543 DNJC2_HUMAN  | R.NAS#AS#FQELEDK.K                    | S47:S49:        | 2 | 2,9567 | 0,356 | -0,081 |
| 1 | Q9H0D6 XRN2_HUMAN   | R.MQNNSS#PSIS#PNTSFTSDGSPSPLGGIK.R    | S471:S475:      | 3 | 3,8478 | 1     | 0,185  |
| 1 | Q9H0D6 XRN2_HUMAN   | R.M*QNNSSPS#ISPNTS#FTSDGSPSPLGGIK.R   | S473:S479:      | 3 | 4,5437 | 1     | -0,184 |
| 1 | P05787 K2C8_HUMAN   | K.LVS#ESS#DVLPK.-                     | S475:S478:      | 2 | 3,3116 | 0,341 | 1,281  |
| 1 | Q96Q42 ALS2_HUMAN   | R.LS#LPGLLSQVS#PR.L                   | S483:S492:      | 2 | 3,9671 | 0,396 | 0      |
| 1 | Q96Q42 ALS2_HUMAN   | R.LS#LPGLLSQVS#PR.L                   | S483:S492:      | 3 | 2,8241 | 0,389 | 0,18   |
| 1 | O60832 DKC1_HUMAN   | K.AGLES#GAEPGDGDS#DTTK.K              | S485:S494:      | 2 | 4,2558 | 0,589 | -0,392 |
| 1 | Q9ULU4 PKCB1_HUMAN  | K.TGQAGS#LSGS#PKPFS#PQLSAPITTK.T      | S486:S490:S495: | 3 | 3,9325 | 1     | -0,136 |
| 1 | Q9NUL3 STAU2_HUMAN  | K.GSS#PT#PPCSPVQPSK.Q                 | S486:T488:      | 2 | 2,0158 | 0,235 | 0      |
| 1 | Q9BQC3 DPH2_HUMAN   | R.GIAIAYEDEGS#G.-                     | S488:           | 2 | 2,3288 | 0,454 | 0      |
| 1 | Q86SQ0 PHLB2_HUMAN  | K.LQLS#DEES#VFEEALM*SPDTR.Y           | S489:S493:      | 3 | 5,5263 | 0,509 | 0      |
| 1 | Q86SQ0 PHLB2_HUMAN  | K.LQLS#DEESVFEEALM*S#PDTR.Y           | S489:S501:      | 3 | 5,9554 | 0,57  | -0,074 |
| 1 | Q8TEV9 SMCR8_HUMAN  | K.SDSQAS#LTVPLS#PQVVR.S               | S492:S498:      | 3 | 3,1986 | 0,251 | -0,47  |
| 1 | Q9C0C2 TB182_HUMAN  | R.LDS#PPPS#PITEASEAAEAAEAGNLAVSSR.E   | S494:S498:      | 3 | 5,1859 | 0,524 | 0,122  |
| 1 | Q9NYZ3 GTSE1_HUMAN  | R.S#SGPAPQSLLS#AR.R                   | S494:S504:      | 2 | 3,9262 | 0,551 | 0,085  |
| 1 | P78362 SRPK2_HUMAN  | R.TVS#ASST#GDLPK.A                    | S494:T498:      | 2 | 3,6714 | 0,374 | -0,092 |
| 1 | Q6P597 KLC3_HUMAN   | R.TLS#ASTQDLS#PH.-                    | S495:S502:      | 2 | 2,2033 | 0,327 | -0,172 |
| 1 | Q9H0D6 XRN2_HUMAN   | K.AEDS#DS#EPEPEDNVR.L                 | S499:S501:      | 2 | 5,0255 | 0,495 | -0,66  |
| 1 | Q6ZML7 Q6ZML7_HUMAN | R.AEELS#PAALS#PSLEPIR.C               | S499:S504:      | 3 | 3,7567 | 0,367 | 0,377  |

|   |                    |                                  |                 |   |        |       |        |
|---|--------------------|----------------------------------|-----------------|---|--------|-------|--------|
| 1 | Q9UQR0 SCML2_HUMAN | R.S#PQQTVPYVVPLS#PK.L            | S499:S511:      | 2 | 2,1528 | 0,185 | 0,136  |
| 1 | O43818 U3IP2_HUMAN | K.MNEEIS#S#DS#EESLAPR.K          | S50:S51:S53:    | 2 | 4,1015 | 0,449 | 0      |
| 1 | Q13610 PWP1_HUMAN  | K.LQEEGGGS#DEEETGS#PSEDGM*QSAR.T | S50:S57:        | 3 | 4,8797 | 0,384 | -0,597 |
| 1 | Q13610 PWP1_HUMAN  | K.LQEEGGGS#DEEETGSPS#EDGMQSAR.T  | S50:S59:        | 3 | 4,1768 | 0,43  | -0,267 |
| 1 | Q9Y2X3 NOL5_HUMAN  | K.EEPLS#EEEEPCTSTAIAS#PEK.K      | S502:S514:      | 3 | 4,5597 | 0,233 | 0,155  |
| 1 | P27816 MAP4_HUMAN  | K.DM*S#PLS#ETEMALGK.D            | S507:S510:      | 2 | 3,4304 | 0,349 | -0,072 |
| 1 | P27816 MAP4_HUMAN  | K.DMS#PLS#ETEM*ALGK.D            | S507:S510:      | 2 | 3,4202 | 0,234 | 0,145  |
| 1 | P27816 MAP4_HUMAN  | K.DMS#PLS#ETEMALGK.D             | S507:S510:      | 2 | 3,1141 | 0,504 | 0,146  |
| 1 | Q2VPK5 CP084_HUMAN | R.DCLIEDS#DDEAGQS.-              | S508:           | 2 | 3,3189 | 0,48  | -0,149 |
| 1 | O43818 U3IP2_HUMAN | K.MNEEISS#DS#EESLAPR.K           | S51:S53:        | 2 | 2,921  | 0,347 | -0,299 |
| 1 | O43818 U3IP2_HUMAN | K.M*NEEISS#DS#EESLAPR.K          | S51:S53:        | 2 | 2,8881 | 0,362 | -0,119 |
| 1 | Q9Y6G9 DC1L1_HUMAN | R.KPVTVS#PTT#PTS#PTEGEAS.-       | S510:T513:S516: | 2 | 2,7561 | 1     | -0,115 |
| 1 | O95365 ZBT7A_HUMAN | R.GGAPDPS#PGATATPGAPAQPS#SPDAR.R | S511:S525:      | 3 | 2,9747 | 0,197 | -0,367 |
| 1 | Q6ZRV2 FA83H_HUMAN | R.LDYVPS#S#ASR.E                 | S513:S514:      | 2 | 2,0816 | 0,311 | 0      |
| 1 | P49790 NU153_HUMAN | K.VQMTS#PSSTGS#PMFK.F            | S516:S522:      | 2 | 4,247  | 1     | 0,14   |
| 1 | P49790 NU153_HUMAN | K.VQMTS#PSSTGS#PM*FK.F           | S516:S522:      | 2 | 3,3487 | 1     | -0,346 |
| 1 | Q7Z3K6 MIER3_HUMAN | K.NFS#S#EIEDLEK.E                | S52:S53:        | 2 | 3,6363 | 0,397 | 0      |
| 1 | Q12888 TP53B_HUMAN | K.LMLSTSEYS#QS#PK.M              | S523:S525:      | 2 | 4,4826 | 1     | -0,374 |
| 1 | Q12888 TP53B_HUMAN | K.LM*LTSTSEYS#QS#PK.M            | S523:S525:      | 2 | 4,167  | 1     | -0,222 |
| 1 | Q86VM9 ZCH18_HUMAN | K.LGVS#VS#PSR.A                  | S532:S534:      | 2 | 2,9377 | 0,314 | -0,115 |
| 1 | Q6XQN6 PNCB_HUMAN  | R.LQALVNSLCAGQS#P.-              | S537:           | 2 | 4,2404 | 0,365 | 0      |
| 1 | Q3KQU3 MA7D1_HUMAN | K.ESAAPAS#PAPS#PAPS#PTPAPPQK.E   | S544:S548:S552: | 3 | 2,9128 | 0,345 | -0,229 |
| 1 | Q3KQU3 MA7D1_HUMAN | K.ESAAPAS#PAPSPAPS#PTPAPPQK.E    | S544:S552:      | 3 | 3,0319 | 0,253 | -0,316 |
| 1 | Q96QG7 MTMR9_HUMAN | R.QLAELETEDGM*QES#P.-            | S548:           | 2 | 2,785  | 0,408 | 0,138  |
| 1 | Q9NQG6 SMC7L_HUMAN | R.AIS#APTS#PTR.L                 | S55:S59:        | 2 | 2,3687 | 0,331 | -0,105 |
| 1 | Q9NQW6 ANLN_HUMAN  | R.EIEM*S#VDDDDINSS#K.V           | S553:S562:      | 2 | 4,009  | 0,44  | -0,391 |
| 1 | Q9P2B4 CT2NL_HUMAN | K.VSS#PLSPLS#PGIK.S              | S557:S563:      | 2 | 2,7873 | 0,376 | -0,592 |
| 1 | Q6PGQ7 BORA_HUMAN  | K.TASPFQCSS#P.-                  | S558:           | 2 | 2,4719 | 0,346 | -0,315 |
| 1 | Q9P2B4 CT2NL_HUMAN | K.VSSPLS#PLS#PGIK.S              | S560:S563:      | 2 | 3,1636 | 0,457 | 0,085  |
| 1 | P38432 P80C_HUMAN  | R.LIIES#PSNTSSTEPSA.-            | S566:           | 2 | 3,3027 | 0,437 | 0,075  |
| 1 | P38432 P80C_HUMAN  | R.LIIESPS#NTSSTEPSA.-            | S568:           | 2 | 2,9518 | 0,439 | -0,15  |
| 1 | Q3MIN7 RGL3_HUMAN  | R.DAPAGS#PPAS#PGPQGPSTK.L        | S569:S573:      | 2 | 3,1882 | 0,337 | -0,52  |
| 1 | Q3MIN7 RGL3_HUMAN  | R.DAPAGS#PPAS#PGPQGPSTK.L        | S569:S573:      | 3 | 2,6047 | 0,373 | -0,389 |

|   |                     |                                    |                 |   |        |       |        |
|---|---------------------|------------------------------------|-----------------|---|--------|-------|--------|
| 1 | Q13442 HAP28_HUMAN  | K.KS#LDS#DES#EDEEDDYQQK.R          | S57:S60:S63:    | 3 | 5,1755 | 0,362 | 0,762  |
| 1 | Q9UJX2 CDC23_HUMAN  | R.NQGETPTTEVPAPFFLPAS#LSANNT#PTR.R | S570:T576:      | 3 | 4,6639 | 1     | 0      |
| 1 | Q01201 RELB_HUMAN   | R.EAAFGGGLLS#PGPEAT.-              | S573:           | 2 | 3,5545 | 0,463 | 0,157  |
| 1 | P17812 PYRG1_HUMAN  | R.SGS#SS#PDSEITELK.F               | S573:S575:      | 2 | 3,9956 | 1     | 0      |
| 1 | P17812 PYRG1_HUMAN  | R.SGSS#S#PDSEITELK.F               | S574:S575:      | 2 | 2,6266 | 0,132 | 0,153  |
| 1 | Q09666 AHNK_HUMAN   | K.AS#LGSLEGEAEAEASS#PK.G           | S5749:S5763:    | 3 | 2,979  | 0,316 | -0,193 |
| 1 | Q09666 AHNK_HUMAN   | K.ASLGS#LEGEAEAEASS#PK.G           | S5752:S5763:    | 2 | 6,1616 | 0,565 | 0,064  |
| 1 | Q13523 PRP4B_HUMAN  | R.S#PS#PDDILER.V                   | S578:S580:      | 2 | 3,0997 | 0,37  | 0,095  |
| 1 | P46013 KI67_HUMAN   | K.AQSLVIS#PPAPS#PR.K               | S579:S584:      | 2 | 4,2873 | 0,427 | 1,158  |
| 1 | Q09666 AHNK_HUMAN   | R.EFS#GPST#PTGTLEFEGGEVSLEGGK.V    | S5790:T5794:    | 3 | 5,1817 | 1     | 0,137  |
| 1 | Q86WB0 NIPA_HUMAN   | K.DTSATSQS#VNGS#PQAEQPSLESTK.E     | S58:S62:        | 3 | 2,6123 | 0,172 | -0,204 |
| 1 | Q9UJX2 CDC23_HUMAN  | R.VS#PLNLSSVTP.-                   | S582:           | 2 | 2,0587 | 0,358 | -0,307 |
| 1 | Q9UJX2 CDC23_HUMAN  | R.RVS#PLNLS#SVT#P.-                | S582:S587:T590: | 2 | 2,3684 | 0,385 | 0,162  |
| 1 | Q9UJX2 CDC23_HUMAN  | R.VS#PLNLSSVT#P.-                  | S582:T590:      | 2 | 2,3312 | 0,364 | 0,096  |
| 1 | P41440 S19A1_HUMAN  | K.LGLQCLPS#DGVQNVNQ.-              | S583:           | 2 | 2,4806 | 0,16  | 0,201  |
| 1 | O60343 TBCD4_HUMAN  | R.LGS#VDS#FER.S                    | S588:S591:      | 2 | 3,855  | 0,326 | 0      |
| 1 | Q5PRF9 SAM4B_HUMAN  | R.M*GLLS#PSGIGGVS#PR.H             | S592:S600:      | 2 | 4,63   | 0,527 | -0,076 |
| 1 | A4LAA3 A4LAA3_HUMAN | K.LTPVS#LSNS#PIK.G                 | S594:S598:      | 2 | 2,522  | 0,263 | 0,086  |
| 1 | P23588 IF4B_HUMAN   | K.YAALS#VDGEDENEGEDYAE.-           | S597:           | 2 | 4,9582 | 0,656 | -0,226 |
| 1 | Q14157 UBP2L_HUMAN  | R.YPSS#ISSS#PQK.D                  | S605:S609:      | 2 | 2,8414 | 0,341 | -0,455 |
| 1 | Q684P5 RPGP2_HUMAN  | K.SETS#S#NPSSPEICPNK.E             | S608:S609:      | 2 | 2,0548 | 1     | -0,322 |
| 1 | Q9H0B6 KLC2_HUMAN   | R.TLS#SSS#M*DLSR.R                 | S608:S611:      | 2 | 2,5413 | 0,108 | -0,538 |
| 1 | P52948 NUP98_HUMAN  | K.NLNNS#NLFS#PVNR.D                | S608:S612:      | 2 | 4,328  | 0,309 | 0,296  |
| 1 | Q9H165 BC11A_HUMAN  | K.LLLGS#PSSLS#PFSK.R               | S625:S630:      | 2 | 3,8128 | 0,42  | 0,077  |
| 1 | Q96JM3 ZN828_HUMAN  | K.DNQES#SDAELS#SSEYIK.T            | S626:S632:      | 3 | 3,3718 | 0,229 | 0,177  |
| 1 | Q6PKG0 LARP1_HUMAN  | K.NTFTAWS#DEES#DYEIDDR.D           | S627:S631:      | 3 | 4,4508 | 0,572 | 0,156  |
| 1 | Q13614 MTMR2_HUMAN  | R.ASS#PAQCVTPVQTVV.-               | S631:           | 2 | 3,5273 | 0,542 | 0      |
| 1 | P08107 HSP71_HUMAN  | K.GGSGS#GPTIEEVD.-                 | S633:           | 2 | 2,6306 | 0,371 | -0,095 |
| 1 | Q9Y6X4 K0888_HUMAN  | K.AVDS#SS#EEIEVEVPVVD.R            | S635:S637:      | 2 | 4,1884 | 0,424 | -0,115 |
| 1 | Q12888 TP53B_HUMAN  | R.SEALS#S#VLDQEEAM*EIK.E           | S639:S640:      | 2 | 5,0306 | 0,563 | -0,119 |
| 1 | Q12888 TP53B_HUMAN  | R.SEALS#S#VLDQEEAMEIK.E            | S639:S640:      | 2 | 4,9751 | 0,497 | 0,239  |
| 1 | Q86X29 LSR_HUMAN    | K.NLALS#RES#LVV.-                  | S643:S646:      | 2 | 2,8231 | 0,396 | -0,269 |
| 1 | A1L390 PKHG3_HUMAN  | R.SSSVLS#LEGS#EK.G                 | S643:S647:      | 2 | 3,8705 | 0,263 | 0,088  |

|   |                    |                                   |                 |   |        |       |        |
|---|--------------------|-----------------------------------|-----------------|---|--------|-------|--------|
| 1 | Q02952 AKA12_HUMAN | K.SATLS#S#TESTASEMQEEM*K.G        | S644:S645:      | 3 | 4,8773 | 1     | -0,494 |
| 1 | Q15154 PCM1_HUMAN  | R.VTNDIS#PES#S#PGVGR.R            | S65:S68:S69:    | 2 | 2,3521 | 0,156 | -0,278 |
| 1 | Q15154 PCM1_HUMAN  | R.VTNDIS#PESS#PGVGR.R             | S65:S69:        | 2 | 3,776  | 0,42  | -0,364 |
| 1 | Q96JM3 ZN828_HUMAN | K.GQES#S#SDQEQVDVESIDFSK.E        | S651:S652:      | 3 | 4,7511 | 0,306 | 0,925  |
| 1 | Q96JM3 ZN828_HUMAN | K.GQESS#S#DQEQVDVESIDFSK.E        | S652:S653:      | 3 | 4,5742 | 0,427 | 0,385  |
| 1 | P49848 TAF6_HUMAN  | K.QEAGDS#PPPAPGT#PK.A             | S653:T660:      | 2 | 2,4565 | 0,361 | -0,152 |
| 1 | Q9H1B7 EAP1_HUMAN  | R.NS#SS#PVS#PASVPGQR.R            | S657:S659:S662: | 2 | 3,3475 | 0,368 | -0,214 |
| 1 | Q9H501 ESF1_HUMAN  | K.ALAEEAS#EEELPS#DVDLNDPYFAEEVK.Q | S657:S663:      | 3 | 5,487  | 0,462 | 0,115  |
| 1 | Q8WVCO LEO1_HUMAN  | K.YVIS#DEEEEDDD.-                 | S658:           | 2 | 3,3492 | 0,461 | -0,159 |
| 1 | Q9H1B7 EAP1_HUMAN  | R.NSSS#PVS#PASVPGQR.R             | S659:S662:      | 2 | 2,9428 | 0,272 | -0,075 |
| 1 | P42166 LAP2A_HUMAN | K.GPPDFS#S#DEEREPT#PVLGSGAAAAGR.S | S66:S67:T74:    | 3 | 6,3788 | 0,604 | -0,326 |
| 1 | P18858 DNL1_HUMAN  | R.VLGS#EGEEDEALS#PAK.G            | S66:S76:        | 3 | 4,5609 | 0,47  | -0,286 |
| 1 | P18858 DNL1_HUMAN  | R.VLGS#EGEEDEALS#PAK.G            | S66:S76:        | 2 | 3,7745 | 0,389 | -0,445 |
| 1 | O15085 ARHGB_HUMAN | R.S#LENPT#PPFT#PK.M               | S663:T668:T672: | 2 | 3,3373 | 0,328 | 0,156  |
| 1 | Q7Z4V5 HDGR2_HUMAN | R.GDS#EALDEES.-                   | S664:           | 2 | 2,0507 | 0,428 | -0,108 |
| 1 | Q9Y3T9 NOC2L_HUMAN | K.DLFDLNS#S#EEDDTEGFSE.R          | S672:S673:      | 3 | 4,7682 | 0,3   | -0,077 |
| 1 | Q8N163 K1967_HUMAN | R.S#VAS#NQS#EMEFSSLQDMPK.E        | S675:S678:S681: | 3 | 4,7406 | 0,402 | 0,155  |
| 1 | Q8N163 K1967_HUMAN | K.LEDSEVRS#VAS#NQS#EMEFSSLQDMPK.E | S675:S678:S681: | 3 | 3,746  | 1     | -0,115 |
| 1 | Q8N163 K1967_HUMAN | R.SVAS#NQS#EMEFSSLQDMPK.E         | S678:S681:      | 3 | 4,4584 | 0,407 | -0,241 |
| 1 | Q9C0B5 ZDHC5_HUMAN | K.SLGSAS#PGPGQPPLSS#PTR.G         | S684:S694:      | 2 | 4,3305 | 0,473 | 0,062  |
| 1 | Q14978 NOLC1_HUMAN | R.GGS#ISVQVNSIKFDS#E.-            | S686:S698:      | 2 | 4,6733 | 0,417 | -0,2   |
| 1 | P49959 MRE11_HUMAN | K.GVDFES#S#EDDDDDPFM*NTSSLR.R     | S688:S689:      | 3 | 4,6632 | 0,477 | 0,138  |
| 1 | P35251 RFC1_HUMAN  | R.IIYDS#DS#ESEETLQVK.N            | S69:S71:        | 2 | 5,3285 | 1     | 0,303  |
| 1 | P35251 RFC1_HUMAN  | R.IIYDS#DS#ESEETLQVK.N            | S69:S71:        | 3 | 5,27   | 0,468 | 0,181  |
| 1 | Q7Z417 NUFP2_HUMAN | R.IITYNEAMDS#PDQ.-                | S692:           | 2 | 3,1597 | 0,351 | 0,155  |
| 1 | Q6PJG2 CN043_HUMAN | R.TNS#AEVT#PPVLSVMGEAT#PVSIEPR.I  | S700:T704:T715: | 3 | 4,2431 | 1     | 0,259  |
| 1 | P25205 MCM3_HUMAN  | K.DGDS#YDPYDFS#DTEEEMPQVHT#PK.T   | S704:S711:T722: | 3 | 2,6087 | 0,308 | -0,241 |
| 1 | Q9NYY8 FAKD2_HUMAN | K.IYSVEALPVAANVQS#TQ.-            | S708:           | 3 | 4,7184 | 0,414 | 0,093  |
| 1 | P25205 MCM3_HUMAN  | K.DGDSYDPYDFS#DT#EEEMPQVHT#PK.T   | S711:T713:T722: | 3 | 2,9748 | 0,335 | -0,241 |
| 1 | O43719 HTSF1_HUMAN | K.LFDEEEDS#S#EK.L                 | S713:S714:      | 2 | 3,2499 | 0,365 | -0,246 |
| 1 | O43719 HTSF1_HUMAN | K.LFDEEEDS#S#EKLFDDS#DER.G        | S713:S714:S721: | 3 | 5,3636 | 0,401 | 0      |
| 1 | Q8N350 DOS_HUMAN   | R.LAEPVVATPALVAAPTS#PDHS#PA.-     | S719:S723:      | 3 | 5,4681 | 0,519 | 0,075  |
| 1 | P82094 TMF1_HUMAN  | K.SNTEPQS#PPIAS#PK.A              | S72:S77:        | 2 | 2,4068 | 0,438 | -0,378 |

|   |                     |                                  |                 |   |        |       |        |
|---|---------------------|----------------------------------|-----------------|---|--------|-------|--------|
| 1 | Q9HAW4 CLSPN_HUMAN  | K.SLS#S#DSTLLLFK.D               | S720:S721:      | 2 | 2,2548 | 0,115 | 0      |
| 1 | P46100 ATRX_HUMAN   | K.QSETVDQNS#DS#DEMLAILK.G        | S729:S731:      | 3 | 4,3137 | 0,372 | 0,16   |
| 1 | P46100 ATRX_HUMAN   | K.QSETVDQNS#DS#DEM*LAILK.G       | S729:S731:      | 3 | 3,4946 | 0,179 | -0,08  |
| 1 | Q14684 RRP1B_HUMAN  | K.TPTSS#PASS#PLVAK.K             | S732:S736:      | 2 | 3,117  | 0,249 | -0,244 |
| 1 | Q9H7N4 SFR19_HUMAN  | R.EVLYDS#EGLS#GEER.G             | S734:S738:      | 2 | 2,2954 | 0,219 | -0,28  |
| 1 | P98175 RBM10_HUMAN  | R.GLVAAYSGES#DS#EEEQER.G         | S735:S737:      | 2 | 5,0399 | 0,618 | -0,231 |
| 1 | Q9UER7 DAXX_HUMAN   | K.TSVATQCDPEEIVLS#DS#D.-         | S737:S739:      | 3 | 4,2348 | 0,4   | -0,082 |
| 1 | P28290 SSFA2_HUMAN  | R.SQS#LPTTLLS#PVR.V              | S739:S746:      | 2 | 3,4604 | 0,405 | 0,078  |
| 1 | P50502 F10A1_HUMAN  | K.ADEPS#S#EES#DLEIDK.E           | S75:S76:S79:    | 2 | 3,2884 | 0,306 | -0,128 |
| 1 | A0FGR8 ESYT2_HUMAN  | K.EPTPS#IAS#DISLPIATQELR.Q       | S755:S758:      | 3 | 4,216  | 0,318 | 0      |
| 1 | A0FGR8 ESYT2_HUMAN  | K.EPTPS#IAS#DIS#LPIATQELR.Q      | S755:S758:S761: | 3 | 3,7863 | 0,192 | -0,154 |
| 1 | Q96JH7 VCIP1_HUMAN  | R.DGPS#SAPAT#PTKAPY#SPTTSK.E     | S756:T761:Y767: | 3 | 3,8122 | 1     | -0,398 |
| 1 | Q96PN7 TREF1_HUMAN  | R.S#NSIDGSNVTVT#PGPGEQTVDVPEPR.I | S756:T767:      | 3 | 3,6569 | 0,269 | -0,067 |
| 1 | A0FGR8 ESYT2_HUMAN  | K.EPTPSIAS#DIS#LPIATQELR.Q       | S758:S761:      | 3 | 5,6196 | 0,466 | 0,239  |
| 1 | P50502 F10A1_HUMAN  | K.ADEPSS#EES#DLEIDK.E            | S76:S79:        | 2 | 4,3381 | 0,488 | -0,201 |
| 1 | Q8TF40 FNIP1_HUMAN  | K.VTFLIGDSM*S#PDS#DTELR.S        | S760:S763:      | 3 | 3,127  | 0,281 | 0,254  |
| 1 | Q9C0C4 SEM4C_HUMAN  | R.CQPGGGPPS#PPPPIPQPLPS#PTR.L    | S760:S772:      | 3 | 4,8155 | 0,339 | 0      |
| 1 | Q9C0C4 SEM4C_HUMAN  | R.CQPGGGPPS#PPPPIPQPLPSPT#R.L    | S760:T774:      | 3 | 3,1378 | 0,187 | -0,292 |
| 1 | Q9UHJ3 SMBT1_HUMAN  | R.TFSS#FS#DDENKPPS#PK.E          | S765:S767:S775: | 3 | 3,0537 | 0,357 | 0      |
| 1 | Q02446 SP4_HUMAN    | R.IVTVAAIS#QDSNPAT#PNVSTNMEEF.-  | S767:T774:      | 3 | 4,2864 | 0,266 | 0,131  |
| 1 | P54259 ATN1_HUMAN   | R.SEEIS#ES#ESEETNAPK.K           | S77:S79:        | 3 | 3,2907 | 0,348 | -0,38  |
| 1 | P54259 ATN1_HUMAN   | R.SEEIS#ES#ESEETNAPK.K           | S77:S79:        | 2 | 2,2071 | 0,381 | -0,57  |
| 1 | Q02446 SP4_HUMAN    | R.IVTVAAISQDS#NPAT#PNVSTNM*EEF.- | S770:T774:      | 3 | 2,9649 | 0,169 | -0,195 |
| 1 | P13861 KAP2_HUMAN   | K.GDS#ES#EEDEDLEVPVPSR.F         | S78:S80:        | 2 | 4,299  | 0,492 | -0,454 |
| 1 | P13861 KAP2_HUMAN   | K.GDS#ES#EEDEDLEVPVPSR.F         | S78:S80:        | 3 | 4,0074 | 0,308 | -0,085 |
| 1 | Q9UGH3 S23A2_HUMAN  | K.SSLAETLDS#TGS#LDPQR.S          | S78:S81:        | 3 | 3,8416 | 0,318 | -0,189 |
| 1 | Q9UQR1 ZN148_HUMAN  | R.AGMTSS#PDATTGQTFG.-            | S784:           | 2 | 3,045  | 0,428 | 0,076  |
| 1 | Q2NL81 Q2NL81_HUMAN | R.GYQS#LSDS#PPGAR.V              | S789:S793:      | 2 | 2,5723 | 0,222 | 0,082  |
| 1 | Q15637 SF01_HUMAN   | R.S#PS#PEPIYNSEGK.R              | S80:S82:        | 2 | 3,4763 | 0,299 | -0,234 |
| 1 | Q9H6F5 CCD86_HUMAN  | R.LQQGAGLES#PQQQPEPGAAS#PQR.Q    | S80:S91:        | 3 | 3,6783 | 0,302 | -0,223 |
| 1 | O60293 CC131_HUMAN  | K.TS#SSSPANS#DVEIDGIGR.I         | S802:S809:      | 2 | 4,5614 | 1     | -0,125 |
| 1 | O60293 CC131_HUMAN  | K.TSSSS#PANS#DVEIDGIGR.I         | S805:S809:      | 3 | 3,7767 | 1     | -0,469 |
| 1 | Q9BTC0 DIDO1_HUMAN  | R.QEAIPDLEDSPPVSDS#EEQQESAR.A    | S805:S811:      | 3 | 5,7802 | 0,546 | -0,13  |

|   |                    |                                       |                 |   |        |       |        |
|---|--------------------|---------------------------------------|-----------------|---|--------|-------|--------|
| 1 | Q86TC9 MYPN_HUMAN  | R.CVS#PIPVS#PTSR.I                    | S813:S818:      | 2 | 3,0662 | 0,405 | -0,418 |
| 1 | Q8IWX8 CHERP_HUMAN | R.S#RS#PT#PPSSAGLGSNSAPPIDSR.L        | S815:S817:T819: | 3 | 4,8484 | 1     | 0      |
| 1 | Q8IWX8 CHERP_HUMAN | R.S#RSPTPPS#S#AGLGSNSAPPIDSR.L        | S815:S822:S823: | 3 | 3,7929 | 1     | -0,142 |
| 1 | P42684 ABL2_HUMAN  | R.TVS#TSS#QPEENVDR.A                  | S817:S820:      | 2 | 4,2051 | 1     | -0,214 |
| 1 | Q9BUW7 CIO16_HUMAN | R.LEFQQQLGEAPSDAS#P.-                 | S82:            | 2 | 2,3521 | 0,304 | -0,407 |
| 1 | P04792 HSPB1_HUMAN | R.QLS#SGVS#EIR.H                      | S82:S86:        | 2 | 2,4331 | 0,203 | -0,296 |
| 1 | O14976 GAK_HUMAN   | R.DES#EVS#DEGGSPISSEGEPR.A            | S826:S829:      | 3 | 5,1933 | 0,479 | -0,156 |
| 1 | Q13263 TIF1B_HUMAN | K.FSAVLVEPPPM*SLPGAGLSSQELS#GGPGDGP.- | S828:           | 3 | 2,698  | 0,187 | 0,3    |
| 1 | P46821 MAP1B_HUMAN | R.SLMS#S#PEDLTK.D                     | S831:S832:      | 2 | 4,3005 | 0,521 | -0,178 |
| 1 | P46821 MAP1B_HUMAN | R.SLM*S#S#PEDLTK.D                    | S831:S832:      | 2 | 3,727  | 0,392 | -0,265 |
| 1 | O15541 R113A_HUMAN | K.AAYGDL#S#EEEEENEPELGVVYK.S          | S84:S85:        | 3 | 5,3986 | 0,448 | 0,196  |
| 1 | Q13428 TCOF_HUMAN  | R.VSDPISTS#ESS#EEEEAEAETAK.A          | S85:S88:        | 3 | 3,0272 | 0,219 | -0,63  |
| 1 | Q9UPP1 PHF8_HUMAN  | K.DAEYIYPS#LES#DDDDPALK.S             | S854:S857:      | 3 | 2,7771 | 0,215 | -0,158 |
| 1 | Q9BXJ9 NARG1_HUMAN | K.ITVNGDS#S#AAEELANEI.-               | S855:S856:      | 2 | 2,4191 | 0,309 | 0,302  |
| 1 | Q9UQ35 SRRM2_HUMAN | R.QGSITS#PQANEQSVT#PQR.R              | S857:T866:      | 2 | 2,6994 | 0,385 | -0,234 |
| 1 | Q8N122 RPTOR_HUMAN | R.VLDTSSLTQS#APAS#PTNK.G              | S859:S863:      | 2 | 4,5778 | 1     | -0,37  |
| 1 | Q8N122 RPTOR_HUMAN | R.VLDTSSLTQS#APAS#PTNK.G              | S859:S863:      | 3 | 3,1985 | 1     | -0,463 |
| 1 | Q9NWQ4 CN118_HUMAN | R.EVAPVTNFS#DS#DDTM*VAK.R             | S86:S88:        | 3 | 3,1108 | 0,209 | -0,435 |
| 1 | Q9H2Y7 ZF106_HUMAN | R.SLS#ESS#VIM*DR.A                    | S861:S864:      | 2 | 2,9059 | 0,455 | -0,174 |
| 1 | Q9Y5B0 CTDP1_HUMAN | K.EVDDILGEGS#DDS#DSEK.R               | S869:S872:      | 2 | 5,0883 | 0,476 | 0,062  |
| 1 | Q9UQ35 SRRM2_HUMAN | R.S#CFESS#PDPELK.S                    | S871:S876:      | 2 | 3,8453 | 0,505 | -0,235 |
| 1 | Q9UQ35 SRRM2_HUMAN | R.SCFES#S#PDPELK.S                    | S875:S876:      | 2 | 4,4965 | 0,439 | -0,235 |
| 1 | P29317 EPHA2_HUMAN | R.VS#IRLPST#SGS#EGVPFR.T              | S892:T898:S901: | 3 | 3,6199 | 0,387 | -0,09  |
| 1 | P29317 EPHA2_HUMAN | R.LPS#TS#GS#EGVPFR.T                  | S897:S899:S901: | 2 | 3,1873 | 0,224 | 0,155  |
| 1 | P29317 EPHA2_HUMAN | R.LPS#TS#GS#EGVPFR.T                  | S897:S901:      | 2 | 2,7969 | 0,388 | -0,408 |
| 1 | Q9H5H4 ZN768_HUMAN | R.S#PGLVPPS#PEFAPR.S                  | S90:S97:        | 2 | 2,8549 | 0,436 | 0,151  |
| 1 | P43358 MAGA4_HUMAN | R.QPNEGSSS#QEEEGPST#SPDAESLFR.E       | S90:T98:        | 3 | 3,5337 | 1     | 0,13   |
| 1 | Q96N67 DOCK7_HUMAN | R.SLSNS#NPDISGTPTS#PDDEV.R.S          | S900:S910:      | 3 | 3,8917 | 0,221 | -0,39  |
| 1 | Q8TCG1 K1524_HUMAN | K.INPETVNLS#I.-                       | S904:           | 2 | 2,706  | 0,143 | 0      |
| 1 | Q9BYX2 TBD2A_HUMAN | R.AVSEGCAS#EDEVGEA.-                  | S909:           | 2 | 2,934  | 0,499 | -0,213 |
| 1 | P18858 DNL1_HUMAN  | K.QSQIQNQGEDS#GS#DPEDTY.-             | S911:S913:      | 3 | 2,7285 | 0,232 | -0,307 |
| 1 | Q5SW79 CE170_HUMAN | R.DNSIS#PES#DVDTASTISLVTGETER.K       | S930:S933:      | 3 | 3,2399 | 1     | -0,066 |
| 1 | Q9UQ35 SRRM2_HUMAN | R.S#VS#PCSNVESR.L                     | S952:S954:      | 2 | 3,3314 | 0,485 | -0,265 |

|   |                     |                                  |                    |   |        |       |        |
|---|---------------------|----------------------------------|--------------------|---|--------|-------|--------|
| 1 | B2R8U0 B2R8U0_HUMAN | K.AAAGPLDM*S#LPST#PDIK.I         | S97:T101:          | 2 | 4,4595 | 0,454 | -0,066 |
| 1 | B2R8U0 B2R8U0_HUMAN | K.AAAGPLDM*S#LPST#PDIK.I         | S97:T101:          | 3 | 2,831  | 0,212 | 0,098  |
| 1 | Q9HC35 EMAL4_HUMAN  | K.ATLLEDQDPS#PSS.-               | S978:              | 2 | 3,197  | 0,509 | -0,078 |
| 1 | Q08999 RBL2_HUMAN   | R.SSSTLPVPQPSS#APPT#PTR.L        | S982:T986:         | 3 | 3,0373 | 0,273 | -0,266 |
| 1 | Q5T200 ZC3HD_HUMAN  | R.GNIETTS#EDGQVFS#PK.K           | S986:S993:         | 2 | 4,3143 | 0,383 | -0,131 |
| 1 | Q5T200 ZC3HD_HUMAN  | R.GNIETTS#EDGQVFS#PK.K           | S986:S993:         | 3 | 2,705  | 0,165 | -0,098 |
| 1 | Q8WWI1 LMO7_HUMAN   | R.LPS#PT#SPFSLSQDQAATSK.A        | S988:T990:         | 3 | 3,6896 | 1     | -0,248 |
| 1 | Q86W92 LIPB1_HUMAN  | R.S#PSASITDEDSNV.-               | S999:              | 2 | 3,0664 | 0,476 | -0,174 |
| 1 | Q86W92 LIPB1_HUMAN  | K.DFAARS#PSAS#ITDEDSNV.-         | S999:S1003:        | 2 | 4,2477 | 0,483 | -0,06  |
| 1 | Q9UQ35 SRRM2_HUMAN  | K.AQT#PPGPSLSGS#KS#PCPQEK.S      | T1003:S1012:S1014: | 3 | 2,9781 | 0,323 | -0,319 |
| 1 | Q15648 MED1_HUMAN   | R.SQT#PPGVAT#PPIPK.I             | T1051:T1057:       | 2 | 3,4033 | 0,365 | 0      |
| 1 | Q9UQ26 RIMS2_HUMAN  | R.TGSVQT#S#PSSTPVAGR.R           | T1147:S1148:       | 2 | 2,0508 | 0,315 | 0,072  |
| 1 | O00488 ZN593_HUMAN  | R.LAVPTEVSTEVPEM*DTST#.-         | T116:              | 2 | 2,7552 | 0,292 | -0,244 |
| 1 | Q9NRY4 GRLF1_HUMAN  | R.T#SFSVGS#DDELGPIR.K            | T1173:S1179:       | 2 | 3,0286 | 0,493 | -0,281 |
| 1 | Q8WXI9 P66B_HUMAN   | R.GRLT#PS#PDIIVLSNEASS#PR.S      | T120:S122:S135:    | 3 | 5,8111 | 0,466 | -0,074 |
| 1 | Q9UJM3 ERRFI_HUMAN  | K.LTVNGVCAST#PPLT#PIK.N          | T127:T131:         | 2 | 2,2689 | 0,396 | 0,19   |
| 1 | Q2KHR3 QSER1_HUMAN  | K.GQDTVAIEGFT#DEEDTES#GGEGQYR.E  | T1341:S1348:       | 3 | 5,3444 | 0,626 | -0,064 |
| 1 | P08069 IGF1R_HUMAN  | R.ALPLQSS#C.-                    | T1366:             | 2 | 2,142  | 0,263 | -0,211 |
| 1 | P06493 CDC2_HUMAN   | K.IGEGT#Y#GVVYK.G                | T14:Y15:           | 2 | 3,7976 | 0,367 | 0      |
| 1 | Q9Y4B5 K0802_HUMAN  | K.EDVT#PPLS#PDDLK.Y              | T1408:S1412:       | 2 | 3,1386 | 0,389 | -0,154 |
| 1 | Q76I76 SSH2_HUMAN   | R.TTNPFYNT#M.-                   | T1422:             | 2 | 2,4604 | 0,513 | 0      |
| 1 | Q9Y266 NUDC_HUMAN   | K.NGSLDSPGKQDT#EEDEEEDEKDKGK.L   | T145:              | 3 | 3,4675 | 0,303 | 0      |
| 1 | P42166 LAP2A_HUMAN  | R.SST#PLPTIS#SSAENTR.Q           | T160:S166:         | 2 | 4,1962 | 1     | -0,27  |
| 1 | P42166 LAP2A_HUMAN  | R.SST#PLPTISS#AENTR.Q            | T160:S168:         | 2 | 3,1341 | 1     | -0,135 |
| 1 | P19105 MLRM_HUMAN   | R.AT#S#NVFAM*FDQSQIQEFK.E        | T18:S19:           | 3 | 5,1398 | 0,552 | 0      |
| 1 | Q7Z6Z7 HUWE1_HUMAN  | R.GSGT#AS#DDEFENLR.I             | T1905:S1907:       | 2 | 3,8284 | 0,462 | 1,325  |
| 1 | Q9Y5J1 UTP18_HUMAN  | K.T#SSDDES#EEDEDDLQR.T           | T204:S210:         | 2 | 3,5484 | 0,469 | -0,342 |
| 1 | O95297 MPZL1_HUMAN  | R.DYTGCS#SES#LSPVK.Q             | T205:S208:         | 2 | 3,2551 | 1     | 0      |
| 1 | O75533 SF3B1_HUMAN  | R.WDQTADQT#PGAT#PK.K             | T207:T211:         | 2 | 3,4095 | 0,46  | 0,218  |
| 1 | Q9BYG3 MK671_HUMAN  | K.TVDSQGPT#PVCT#PTFLER.R         | T234:T238:         | 3 | 4,3776 | 0,449 | 0,169  |
| 1 | Q5T200 ZC3HD_HUMAN  | K.T#SAVSS#PLLDQQR.N              | T237:S242:         | 2 | 2,7548 | 0,331 | -0,391 |
| 1 | P09661 RU2A_HUMAN   | R.SGPT#DDGEEEMEEDTVTNGS.-        | T239:              | 2 | 2,0657 | 0,292 | -0,112 |
| 1 | P85037 FOXK1_HUMAN  | R.SM*VSPVPSPTGT#ISV PNSCPAS#PR.G | T247:S257:         | 3 | 4,0362 | 1     | 0      |



|   |                     |                                        |                 |   |        |       |        |
|---|---------------------|----------------------------------------|-----------------|---|--------|-------|--------|
| 1 | P49736 MCM2_HUMAN   | R.GNDPLT#\$S#PGR.S                     | T25:S26:S27:    | 2 | 2,6081 | 0,328 | 0,182  |
| 1 | P17275 JUNB_HUMAN   | R.DAT#PPVS#PINMEDQER.I                 | T255:S259:      | 2 | 4,3662 | 0,426 | -0,187 |
| 1 | P17275 JUNB_HUMAN   | R.DAT#PPVS#PINMEDQER.I                 | T255:S259:      | 3 | 3,677  | 0,325 | 0      |
| 1 | P17275 JUNB_HUMAN   | R.DAT#PPVS#PINM*EDQER.I                | T255:S259:      | 2 | 2,6141 | 0,431 | -0,309 |
| 1 | Q9UHR4 BI2L1_HUMAN  | K.TPASTPVSGT#PQAS#PMIER.S              | T257:S261:      | 3 | 3,2879 | 0,397 | -0,351 |
| 1 | Q96KB5 TOPK_HUMAN   | K.SVLCSTPT#INIPAS#PFM*QK.L             | T26:S32:        | 3 | 3,5806 | 0,275 | 0      |
| 1 | Q5T200 ZC3HD_HUMAN  | R.T#PS#PPPIPEDIALGK.K                  | T263:S265:      | 2 | 3,3528 | 0,496 | 0,068  |
| 1 | A8K1N6 A8K1N6_HUMAN | K.AT#PPPS#PLSELLK.K                    | T264:S268:      | 2 | 2,1451 | 0,249 | -0,15  |
| 1 | Q8NFH5 NUP53_HUMAN  | K.T#LGTPTQPGS#TPR.I                    | T270:S279:      | 2 | 2,1627 | 0,098 | 0      |
| 1 | Q8NFH5 NUP53_HUMAN  | K.T#LGTPTQPGS#T#PR.I                   | T270:S279:T280: | 2 | 2,8412 | 0,228 | -0,314 |
| 1 | Q96G46 DUS3L_HUMAN  | R.QENCGAQV#PAGPGTST#PPSS#PVR.T         | T273:S277:      | 3 | 3,4533 | 0,301 | -0,213 |
| 1 | Q8NFH5 NUP53_HUMAN  | K.TLGT#PTQPGS#TPR.I                    | T273:S279:      | 2 | 2,9049 | 0,157 | -0,249 |
| 1 | Q99436 PSB7_HUMAN   | K.ITPLEIEVLEETVQTM*DT#S.-              | T276:           | 3 | 2,8961 | 0,144 | 0,082  |
| 1 | Q03164 HRX_HUMAN    | R.NSST#PGLQV#PTVPIQNQK.Y               | T3028:S3036:    | 3 | 5,0359 | 0,37  | -0,078 |
| 1 | Q70CQ2 UBP34_HUMAN  | R.EVLT#PTSTS#DNETR.D                   | T3230:S3235:    | 2 | 2,8938 | 0,284 | 0      |
| 1 | P43897 EFTS_HUMAN   | R.FECGEGEEAAET#E.-                     | T324:           | 2 | 2,8681 | 0,49  | -0,238 |
| 1 | Q9UK58 CCNL1_HUMAN  | K.GLNPDGT#PALSTLGGFS#PASKPSS#PR.E      | T325:S335:S342: | 3 | 4,511  | 1     | -0,266 |
| 1 | Q92597 NDRG1_HUMAN  | R.T#AS#GSSVTS#LDGTR.S                  | T328:S330:      | 2 | 2,1671 | 0,311 | -0,163 |
| 1 | Q92597 NDRG1_HUMAN  | R.T#ASGSSVTS#LDGTR.S                   | T328:S336:      | 2 | 3,1986 | 1     | 0,081  |
| 1 | Q9UN36 NDRG2_HUMAN  | R.T#ASLTS#VDGNR.S                      | T330:S338:      | 2 | 4,1801 | 0,566 | -0,404 |
| 1 | P49585 PCY1A_HUMAN  | K.T#SPPCS#PANLSR.H                     | T342:S347:      | 2 | 2,5746 | 0,339 | -0,084 |
| 1 | Q9UGV2 NDRG3_HUMAN  | R.SVT#S#NQSDGT#QESCE#SPDVLDR.H         | T348:S349:      | 3 | 3,2205 | 1     | 0,142  |
| 1 | Q9BW71 HIRP3_HUMAN  | R.LGST#S#GEES#DLER.E                   | T358:S359:S363: | 2 | 3,5342 | 0,35  | -0,151 |
| 1 | Q9NQZ2 SAS10_HUMAN  | K.TSAAACAVT#DLS#DDS#DFDEK.A            | T362:S365:S368: | 3 | 6,0962 | 0,466 | 0      |
| 1 | Q13541 4EBP1_HUMAN  | R.VVLGDGVQLPPGDYSTT#PGGTLFS#TTPGGTR.I  | T37:S44:        | 3 | 3,4129 | 1     | 0,114  |
| 1 | Q13541 4EBP1_HUMAN  | R.VVLGDGVQLPPGDYSTT#PGGTLFSTT#PGGTR.I  | T37:T46:        | 3 | 5,1677 | 1     | 0,456  |
| 1 | Q13541 4EBP1_HUMAN  | R.VVLGDGVQLPPGDYSTT#PGGTLFSTT#PGGT#R.I | T37:T50:        | 3 | 3,0425 | 1     | -0,114 |
| 1 | P31350 RIR2_HUMAN   | R.MGVM*SSPT#ENSFTLDADF.-               | T379:           | 2 | 2,5855 | 0,416 | 0,418  |
| 1 | O75821 EIF3G_HUMAN  | K.GIPLAT#GDT#PEPELLPGAPLPPK.E          | T38:S42:        | 3 | 5,1091 | 0,318 | 0,139  |
| 1 | Q14247 SRC8_HUMAN   | K.TQT#PPVS#PAPQTEER.L                  | T401:S405:      | 2 | 4,6205 | 0,507 | -0,451 |
| 1 | Q14247 SRC8_HUMAN   | K.TQT#PPVS#PAPQTEER.L                  | T401:S405:      | 3 | 3,2819 | 0,368 | 0,193  |
| 1 | O75821 EIF3G_HUMAN  | K.GIPLATGDT#S#PEPELLPGAPLPPK.E         | T41:S42:        | 3 | 5,4158 | 0,311 | -0,139 |
| 1 | Q9Y606 TRUA_HUMAN   | K.VSPLEGSEGDGDT#D.-                    | T426:           | 2 | 3,1035 | 0,508 | -0,235 |

|   |                     |                                    |                 |   |        |       |        |
|---|---------------------|------------------------------------|-----------------|---|--------|-------|--------|
| 1 | P85037 FOXK1_HUMAN  | R.SGGLQT#PECLS#R.E                 | T436:S441:      | 2 | 2,5073 | 0,217 | -0,25  |
| 1 | Q8WVWY3 PRP31_HUMAN | R.SSGT#ASSVAF#PLQGLEIVNPQAAEK.K    | T448:T455:      | 3 | 4,9918 | 1     | -0,066 |
| 1 | Q969V6 MKL1_HUMAN   | K.FGSTGST#PPVS#PTPSER.S            | T450:S454:      | 2 | 3,3506 | 1     | -0,458 |
| 1 | P17544 ATF7_HUMAN   | R.TDSVIIADQT#PT#PTR.F              | T51:T53:        | 2 | 4,2034 | 0,486 | -0,275 |
| 1 | P05362 ICAM1_HUMAN  | K.GT#PM*KPNTQAT#PP.-               | T521:T530:      | 2 | 2,7377 | 0,282 | -0,241 |
| 1 | Q5W0B1 RN219_HUMAN  | R.T#SSEAS#M*DAAYLDK.I              | T524:S529:      | 2 | 4,28   | 0,552 | 0      |
| 1 | Q9H792 SG269_HUMAN  | K.SAPT#SPTAT#NISSK.T               | T571:T576:      | 2 | 2,5487 | 1     | -0,481 |
| 1 | Q9UJX2 CDC23_HUMAN  | R.VSPLNLSSVT#P.-                   | T590:           | 2 | 2,4492 | 0,344 | -0,204 |
| 1 | B2RP63 B2RP63_HUMAN | R.T#SSISGPLSPAY#TGQVPYNYNQLEGR.F   | T6:Y17:         | 3 | 3,5957 | 1     | 0      |
| 1 | P13051 UNG_HUMAN    | K.APAGQEEPQT#PPSS#PLSAEQLDR.I      | T60:S64:        | 3 | 3,2883 | 0,387 | -0,073 |
| 1 | Q14978 NOLC1_HUMAN  | K.LQT#PNT#FPK.R                    | T607:T610:      | 2 | 2,2791 | 0,193 | 0,101  |
| 1 | Q2M2I8 AAK1_HUMAN   | K.VGSLT#PPSS#PK.T                  | T620:S624:      | 2 | 2,1952 | 0,208 | -0,099 |
| 1 | Q6QNY0 BL1S3_HUMAN  | R.VAGEAAET#DS#EPEPEPEPTAAPR.D      | T63:S65:        | 3 | 3,3713 | 0,3   | -0,948 |
| 1 | P35221 CTNA1_HUMAN  | R.T#SVQT#EDDQLIAGQSAR.A            | T654:T658:      | 2 | 4,4499 | 0,5   | -0,062 |
| 1 | O15085 ARHGB_HUMAN  | R.SLENPT#PPFT#PK.M                 | T668:T672:      | 2 | 3,1733 | 0,238 | -0,164 |
| 1 | Q9UBH6 XPR1_HUMAN   | K.VLIEDT#DDEANT.-                  | T690:           | 2 | 2,0349 | 0,294 | -0,172 |
| 1 | Q6PJG2 CN043_HUMAN  | R.T#NSAEVT#PPVLSVM*GEATPVSIEPR.I   | T698:T704:      | 3 | 3,4152 | 0,174 | 0,531  |
| 1 | P40763 STAT3_HUMAN  | K.FICVT#PTTCSNTIDLPM*S#PR.T        | T714:S727:      | 3 | 4,9038 | 0,405 | 0      |
| 1 | P40763 STAT3_HUMAN  | K.FICVT#PTTCSNTIDLPM#PR.T          | T714:S727:      | 3 | 4,7517 | 0,261 | 0,741  |
| 1 | Q96MH2 HEX12_HUMAN  | R.T#QSPGGCS#AEAVLAR.K              | T74:S81:        | 2 | 2,6652 | 0,228 | -0,66  |
| 1 | Q9UGH3 S23A2_HUMAN  | K.SSLAETLDST#GS#LDPQR.S            | T79:S81:        | 2 | 3,0048 | 0,347 | -0,189 |
| 1 | Q6PKG0 LARP1_HUMAN  | R.T#ASISS#SPS#EGTPTVGSYGCTPQSLPK.F | T845:S850:S853: | 3 | 4,4687 | 1     | -0,062 |
| 1 | Q6PKG0 LARP1_HUMAN  | R.T#ASISSPSEGTPTVGSYGCTPQS#LPK.F   | T845:S868:      | 3 | 4,2405 | 1     | -0,513 |
| 1 | Q76FK4 NOL8_HUMAN   | R.FLET#DS#EEEEQEEVNEK.K            | T888:S890:      | 2 | 4,3581 | 0,51  | -0,577 |
| 1 | Q86VM9 ZCH18_HUMAN  | R.GPT#S#SPCEEEGDEGEEDR.T           | T93:S94:        | 2 | 2,1183 | 0,29  | 0,456  |
| 1 | Q8WWI1 LMO7_HUMAN   | R.TPNNVVST#PAPS#PDASQLASSLSSQK.E   | T956:S960:      | 3 | 3,6576 | 0,185 | -0,6   |
| 1 | P24928 RPB1_HUMAN   | K.YTPTSPSY#SPSSPEYTP#SPK.Y         | Y1846:T1856:    | 3 | 3,4991 | 1     | -0,225 |
| 1 | Q96QD8 S38A2_HUMAN  | R.FSISPEDESSSY#SS#NSDFNYSYPTK.Q    | Y20:S22:        | 3 | 4,0726 | 1     | -0,245 |
| 1 | O60516 4EBP3_HUMAN  | R.DQLPDCY#STTPGGTLYATT#PGGTR.I     | Y20:T32:        | 3 | 2,9425 | 1     | 0,068  |
| 1 | Q13595 TRA2A_HUMAN  | R.SY#T#PEYR.R                      | Y87:T88:        | 2 | 2,0385 | 0,352 | 0      |
| 1 | P35998 PRS7_HUMAN   | R.FDDGAGGDNEVQR.T                  |                 | 2 | 3,4579 | 0,455 | -0,354 |
| 1 | P07355 ANXA2_HUMAN  | R.TNQELQEINR.V                     |                 | 2 | 3,3731 | 0,33  | -0,294 |
| 1 | P08670 VIME_HUMAN   | K.FADLSEAAANR.N                    |                 | 2 | 3,3369 | 0,407 | -0,112 |

|   |                       |                                  |                    |        |        |        |        |
|---|-----------------------|----------------------------------|--------------------|--------|--------|--------|--------|
| 1 | O95678 K2C75_HUMAN    | K.AQYEDIANR.S                    | 2                  | 2,8689 | 0,293  | -0,226 |        |
| 1 | Q6S8J3 A26CA_HUMAN    | K.AGFAGDDAPR.A                   | 2                  | 2,8675 | 0,31   | -0,125 |        |
| 1 | Q10589 BST2_HUMAN     | K.LQDASAEVER.L                   | 2                  | 2,8368 | 0,277  | -0,218 |        |
| 1 | P31946 1433B_HUMAN    | R.YLSEVASGDNK.Q                  | 2                  | 2,6032 | 0,437  | -0,103 |        |
| 1 | P02545 LMNA_HUMAN     | K.LLEGEER.L                      | 2                  | 2,5369 | 0,174  | -0,188 |        |
| 1 | P06748 NPM_HUMAN      | K.GPSSVEDIK.A                    | 2                  | 2,3422 | 0,468  | -0,196 |        |
| 1 | P26038 MOES_HUMAN     | R.ALELEQER.K                     | 2                  | 2,3192 | 0,133  | -0,123 |        |
| 1 | P62857 RS28_HUMAN     | R.VEFM*DDTSR.S                   | 2                  | 2,317  | 0,366  | -0,219 |        |
| 1 | P67936 TPM4_HUMAN     | K.TIDDLEEK.L                     | 2                  | 2,2229 | 0,219  | -0,063 |        |
| 1 | P62753 RS6_HUMAN      | K.LIEVDDER.K                     | 2                  | 2,1844 | 0,217  | -0,062 |        |
| 1 | P06703 S10A6_HUMAN    | K.LQDAEIAR.L                     | 2                  | 2,1467 | 0,218  | -0,133 |        |
| 1 | P06703 S10A6_HUMAN    | R.LM*EDLDR.N                     | 2                  | 2,1237 | 0,157  | -0,202 |        |
| 1 | P04083 ANXA1_HUMAN    | R.SEIDM*NDIK.A                   | 2                  | 2,0289 | 0,308  | -0,113 |        |
| 1 | Q93045 STMN2_HUMAN    | K.ALEENNNFSK.M                   | 2                  | 2,0286 | 0,208  | -0,419 |        |
| 2 | ##Q75MU2 Q75MU2_HUMAN | -.S#NFDDRS#DWGGRSERSSGM*GR.D     | S1:S7:             | 3      | 2,6814 | 0,103  | -0,722 |
| 2 | Q9H6Z4 RANB3_HUMAN    | R.SAGGS#S#PEGGEDS#DREDGNYCPPVK.R | S100:S101:S108:    | 3      | 4,8731 | 0,478  | -0,391 |
| 2 | A6H8Y1 BDP1_HUMAN     | R.ISS#TS#SLVK.S                  | S100:S102:         | 2      | 2,5949 | 0,303  | -0,451 |
| 2 | Q86YP4 P66A_HUMAN     | R.RPPS#PDVIVLS#DNEQPSS#PR.V      | S100:S107:S114:    | 3      | 6,8835 | 0,44   | 0,075  |
| 2 | P54259 ATN1_HUMAN     | K.TEQELPRPQS#PS#DLDS#LDGR.S      | S101:S103:S107:    | 3      | 5,5652 | 0,551  | -0,295 |
| 2 | P05386 RLA1_HUMAN     | K.KEES#EES#DDDM*GFGLFD.-         | S101:S104:         | 2      | 5,2905 | 0,68   | -0,23  |
| 2 | P05386 RLA1_HUMAN     | K.KEES#EES#DDDMGFGLFD.-          | S101:S104:         | 2      | 4,1659 | 0,651  | -0,347 |
| 2 | Q7Z612 Q7Z612_HUMAN   | K.KEES#EES#DDDM*GFGLF.-          | S101:S104:         | 2      | 3,5565 | 0,403  | -0,425 |
| 2 | Q5T200 ZC3HD_HUMAN    | K.S#KGDS#DIS#DEEAAQQSK.K         | S1010:S1014:S1017: | 3      | 4,791  | 0,42   | -0,27  |
| 2 | Q5T200 ZC3HD_HUMAN    | K.S#KGDS#DIS#DEEAAQQSK.K         | S1010:S1014:S1017: | 2      | 4,2132 | 0,6    | -0,6   |
| 2 | Q6PD62 CTR9_HUMAN     | K.AIISS#SDDS#S#DEDKLK.I          | S1016:S1020:S1021: | 2      | 3,3094 | 0,384  | -0,125 |
| 2 | Q7Z333 SETX_HUMAN     | R.GQVIII#DS#DDDDDER.I            | S1017:S1019:       | 2      | 4,2732 | 0,513  | -0,375 |
| 2 | Q6PD62 CTR9_HUMAN     | K.AIISS#SDDS#S#DEDKLK.I          | S1017:S1020:S1021: | 2      | 3,3457 | 1      | -0,313 |
| 2 | O15164 TIF1A_HUMAN    | R.NES#EDNKFS#DDS#DDDFVQPR.K      | S1019:S1025:S1028: | 3      | 3,7664 | 0,31   | -0,07  |
| 2 | P17096 HMGA1_HUMAN    | K.LEKEEEEGISQES#S#EEEQ.-         | S102:S103:         | 3      | 4,3219 | 0,363  | -0,323 |
| 2 | Q9H2Y7 ZF106_HUMAN    | R.ATGDGS#S#PELPSLER.K            | S1025:S1026:       | 2      | 4,0162 | 0,496  | -0,291 |
| 2 | O60231 DHX16_HUMAN    | R.LLEDSEES#SEETVSR.A             | S103:S106:         | 2      | 5,1331 | 0,528  | -0,522 |
| 2 | O43159 HUCE1_HUMAN    | K.QGPPCS#DS#EEEVER.K             | S104:S106:         | 2      | 2,0896 | 0,114  | -0,412 |
| 2 | Q15648 MED1_HUMAN     | R.S#QTPPGVAT#PPIPK.I             | S1049:T1057:       | 2      | 2,1433 | 0,24   | 0      |

|   |                    |                                        |                    |   |        |       |        |
|---|--------------------|----------------------------------------|--------------------|---|--------|-------|--------|
| 2 | P09496 CLCA_HUMAN  | R.LQS#EPESIR.K                         | S105:              | 2 | 2,041  | 0,088 | -0,107 |
| 2 | Q8NA72 CE037_HUMAN | K.TDESS#PVLS#PR.K                      | S105:S109:         | 2 | 2,2528 | 0,325 | -0,181 |
| 2 | P49023 PAXI_HUMAN  | K.TSSVSNPQDSVGS#PCS#R.V                | S106:S109:         | 3 | 3,4756 | 0,335 | -0,38  |
| 2 | P49023 PAXI_HUMAN  | K.TSSVSNPQDSVGS#PCS#R.V                | S106:S109:         | 2 | 3,1889 | 0,503 | -0,507 |
| 2 | P48634 BAT2_HUMAN  | R.TAS#ETRS#EGS#EYEEIPK.R               | S1085:S1089:S1092: | 3 | 4,9137 | 1     | -0,085 |
| 2 | Q9UQ35 SRRM2_HUMAN | R.S#RS#SS#PVTELASR.S                   | S1099:S1101:S1103: | 2 | 3,7843 | 0,35  | -0,075 |
| 2 | Q6ZU65 K2030_HUMAN | R.VAFIS#LS#PVR.R                       | S11:S13:           | 2 | 2,2793 | 0,258 | -0,293 |
| 2 | Q9UH99 UN84B_HUMAN | R.GTGGG#ES#SRAS#GLVGR.K                | S110:S112:S116:    | 3 | 3,0734 | 0,265 | -0,213 |
| 2 | Q9UQ35 SRRM2_HUMAN | R.S#S#SPVTELASRS#PIR.Q                 | S1101:S1102:S1112: | 2 | 2,151  | 0,351 | -0,468 |
| 2 | Q9UQ35 SRRM2_HUMAN | R.SS#S#PVTELASRS#PIR.Q                 | S1102:S1103:S1112: | 2 | 2,3327 | 1     | -0,267 |
| 2 | Q9UK61 CC063_HUMAN | K.GGNLPPVS#PNDS#GAK.I                  | S1103:S1107:       | 2 | 2,7816 | 0,207 | -0,933 |
| 2 | Q9UPT8 ZC3H4_HUMAN | R.AAKPGPAEAPS#PTAS#PSGDAS#PPATAPYDPR.V | S1104:S1108:S1114: | 3 | 2,8495 | 1     | -0,346 |
| 2 | Q92900 RENT1_HUMAN | K.SQIDVALS#QDST#YQGER.A                | S1107:T1111:       | 2 | 3,2078 | 0,365 | -1,068 |
| 2 | Q96ST3 SIN3A_HUMAN | R.YM*NS#DTTS#PELR.E                    | S1108:S1112:       | 2 | 3,2537 | 0,338 | -0,307 |
| 2 | Q9ULJ7 ANR50_HUMAN | R.GLPNGPHTAFSS#PSES#PDST#VDR.Q         | S1109:S1113:T1117: | 3 | 3,2295 | 0,161 | 0,141  |
| 2 | Q86UE8 TLK2_HUMAN  | R.SS#PQHS#LS#NPLPR.R                   | S111:S115:S117:    | 3 | 3,076  | 0,148 | -0,22  |
| 2 | Q3KQU3 MA7D1_HUMAN | R.RS#SQPSPT#AVPASDS#PPTK.Q             | S112:T118:S125:    | 3 | 3,0336 | 1     | -0,425 |
| 2 | Q9UQ35 SRRM2_HUMAN | R.GEFS#AS#PM*LK.S                      | S1122:S1124:       | 2 | 2,9777 | 0,266 | -0,196 |
| 2 | Q5T3F8 TM63B_HUMAN | R.LTSVS#S#SVDFDQR.D                    | S113:S114:         | 2 | 2,9378 | 1     | -0,152 |
| 2 | Q3KQU3 MA7D1_HUMAN | R.RSS#QPS#PTAVPASDS#PPTK.Q             | S113:S116:S125:    | 2 | 3,4611 | 1     | -0,341 |
| 2 | Q96T60 PNKP_HUMAN  | R.TPES#QPDT#PPGTPLVS#QDEKR.D           | S114:T118:S126:    | 3 | 4,2675 | 0,472 | -0,145 |
| 2 | Q7Z309 F122B_HUMAN | R.IDFTPVS#PAPS#PTR.G                   | S115:S119:         | 2 | 2,3655 | 0,307 | -0,148 |
| 2 | Q9NTI5 PDS5B_HUMAN | R.M*ETVSNASS#SSNPSS#PGR.I              | S1160:S1166:       | 2 | 2,7636 | 1     | -0,248 |
| 2 | Q5T1M5 FKB15_HUMAN | R.S#SLS#GDEEDELFK.G                    | S1161:S1164:       | 2 | 2,9706 | 0,418 | -0,151 |
| 2 | Q86SQ4 GP126_HUMAN | K.SLSSSS#IGSNS#TYLTSK.S                | S1165:S1170:       | 2 | 3,3972 | 1     | -0,39  |
| 2 | Q92766 RREB1_HUMAN | R.ANSGGVDLDS#S#GEFASIEK.M              | S1174:S1175:       | 2 | 2,7146 | 0,362 | 0      |
| 2 | P41236 IPP2_HUMAN  | R.IQEQUES#S#GEEDSDLSPEER.E             | S121:S122:         | 3 | 3,9545 | 0,28  | 0      |
| 2 | Q8WYP5 AHTF1_HUMAN | R.S#TPLASPS#PSPGRS#PQR.L               | S1218:S1225:S1231: | 2 | 3,0463 | 1     | -1,119 |
| 2 | Q8WXI9 P66B_HUMAN  | R.GRLTPS#PDIIVLS#DNEASS#PR.S           | S122:S129:S135:    | 3 | 5,2355 | 0,427 | -0,074 |
| 2 | Q8WYP5 AHTF1_HUMAN | R.STPLAS#PS#PSPGRS#PQR.L               | S1223:S1225:S1231: | 3 | 2,7179 | 0,47  | -0,186 |
| 2 | Q14160 LAP4_HUMAN  | R.NSLES#ISS#IDRELS#PEGPGK.E            | S1223:S1226:S1232: | 3 | 2,7346 | 0,256 | -0,388 |
| 2 | Q8N488 RYBP_HUMAN  | K.SDILKDPPS#EANS#IQS#ANATTK.T          | S123:S127:S130:    | 3 | 4,5249 | 0,314 | 1,014  |
| 2 | Q01814 AT2B2_HUMAN | K.SATSSSPGS#PIHSLETS#L.-               | S1234:S1242:       | 2 | 2,5005 | 1     | -0,127 |

|   |                     |                                     |                    |   |        |       |        |
|---|---------------------|-------------------------------------|--------------------|---|--------|-------|--------|
| 2 | A6NFL4 A6NFL4_HUMAN | R.GPSFM*TS#PS#PK.H                  | S1250:S1252:       | 2 | 3,1653 | 0,266 | -0,186 |
| 2 | P46821 MAP1B_HUMAN  | K.VSPSPKSPS#LS#PSPPS#PLEK.T         | S1258:S1260:S1265: | 3 | 3,0014 | 1     | -0,169 |
| 2 | Q14137 BOP1_HUMAN   | R.IGDEYAEDS#S#DEEDIR.N              | S126:S127:         | 2 | 4,0838 | 0,481 | -0,548 |
| 2 | Q14137 BOP1_HUMAN   | R.IGDEYAEDS#S#DEEDIR.N              | S126:S127:         | 3 | 2,7514 | 0,17  | 0,183  |
| 2 | Q9BZ29 DOCK9_HUMAN  | R.GSLISTDS#GNS#LPER.N               | S1261:S1264:       | 2 | 3,3075 | 0,341 | -0,577 |
| 2 | Q13459 MYO9B_HUMAN  | R.VSPAPAGS#APET#PEDK.S              | S1267:T1271:       | 2 | 3,4715 | 0,512 | -0,281 |
| 2 | Q96A00 PP14A_HUMAN  | R.QPS#PSHDGS#LS#PLQDR.A             | S128:S134:S136:    | 3 | 3,146  | 0,249 | 0      |
| 2 | Q5VZK9 LR16A_HUMAN  | R.TAS#RPDDIPDS#PSS#PK.V             | S1280:S1288:S1291: | 2 | 3,0324 | 0,33  | -0,639 |
| 2 | Q96RR4 KKCC2_HUMAN  | R.CICPSLPYS#PVS#S#PQSSPRLPR.R       | S129:S132:S133:    | 3 | 4,2475 | 1     | -0,336 |
| 2 | Q96RR4 KKCC2_HUMAN  | R.CICPSLPYS#PVSSPQS#SPR.L           | S129:S136:         | 3 | 2,663  | 0,333 | -0,08  |
| 2 | Q14160 LAP4_HUMAN   | K.M*AESPCSPSGQQPPS#PPS#PDEL PANVK.Q | S1306:S1309:       | 3 | 3,0156 | 0,086 | -0,184 |
| 2 | Q9UQ35 SRRM2_HUMAN  | K.ELS#NS#PLENSFGS#PLEFR.N           | S1318:S1320:S1329: | 3 | 3,5429 | 0,297 | -0,151 |
| 2 | Q9UQ35 SRRM2_HUMAN  | K.ELS#NSPLENS#FGS#PLEFR.N           | S1318:S1326:S1329: | 3 | 3,581  | 0,345 | -0,076 |
| 2 | Q9UQ35 SRRM2_HUMAN  | K.ELS#NS#PLENS#FGS#PLEFR.N          | S1320:S1326:S1329: | 3 | 4,2608 | 0,37  | -0,151 |
| 2 | Q9UQ35 SRRM2_HUMAN  | R.ENS#FGS#PLEFR.N                   | S1326:S1329:       | 2 | 2,2985 | 0,352 | -0,254 |
| 2 | Q13464 ROCK1_HUMAN  | R.TLS#TRS#TANQS#FR.K                | S1333:S1336:S1341: | 2 | 2,9731 | 1     | -0,428 |
| 2 | A6NNE8 A6NNE8_HUMAN | R.FRLS#QS#P.-                       | S134:S136:         | 2 | 2,5877 | 0,369 | -0,441 |
| 2 | Q09666 AHNK_HUMAN   | R.LKS#EDGVEGDLGETQSR.T              | S135:              | 3 | 3,262  | 0,351 | -0,193 |
| 2 | Q9UKM9 RALY_HUMAN   | R.GRLS#PVPVPR.A                     | S135:              | 2 | 2,4149 | 0,182 | -0,211 |
| 2 | Q06841 IF2P_HUMAN   | K.VEM*YS#GS#DDDDDFNK.L              | S135:S137:         | 2 | 3,5133 | 0,44  | -0,638 |
| 2 | Q9NTI5 PDS5B_HUMAN  | R.AES#PESS#AIESTQST#PQKGR.G         | S1358:S1362:T1370: | 3 | 3,1353 | 1     | -0,55  |
| 2 | Q9NTI5 PDS5B_HUMAN  | R.AES#PESSAIES#T#QSTPQKGR.G         | S1358:S1366:T1367: | 3 | 4,4182 | 1     | -0,55  |
| 2 | Q9NTI5 PDS5B_HUMAN  | R.AES#PESSAIES#TQST#PQKGR.G         | S1358:S1366:T1370: | 3 | 3,0579 | 0,153 | -0,707 |
| 2 | Q99549 MPP8_HUMAN   | R.LSLNNDIFEANS#DS#DQQSETK.E         | S136:S138:         | 3 | 4,1931 | 0,362 | -0,291 |
| 2 | Q99549 MPP8_HUMAN   | R.LSLNNDIFEANS#DSDQQS#ET#KEDTSPK.K  | S136:S142:T144:    | 3 | 2,8666 | 0,306 | -0,225 |
| 2 | Q9UQ35 SRRM2_HUMAN  | R.S#SGHS#SSELS#PDAVEK.A             | S1378:S1382:S1387: | 2 | 2,8827 | 1     | -0,46  |
| 2 | Q9UQ35 SRRM2_HUMAN  | R.SSGHS#S#SELS#PDAVEK.A             | S1382:S1383:S1387: | 2 | 4,3536 | 1     | -0,329 |
| 2 | Q5SYE7 NHSL1_HUMAN  | R.NHS#PS#PPVT#PTGAAPSLASPK.Q        | S1386:S1388:T1392: | 3 | 4,0551 | 0,245 | -0,081 |
| 2 | Q9UQ35 SRRM2_HUMAN  | R.SSGHSSSELS#PDAVEK.A               | S1387:             | 3 | 2,7192 | 0,094 | -0,108 |
| 2 | P50914 RL14_HUMAN   | K.AALLKAS#PK.K                      | S139:              | 2 | 2,3715 | 0,187 | -0,249 |
| 2 | Q9H5H4 ZN768_HUMAN  | R.S#PGYES#ESS#RYESQNTLTK.T          | S139:S144:S147:    | 3 | 2,8664 | 0,127 | -0,301 |
| 2 | Q96RK0 CIC_HUMAN    | R.KNS#TDLDS#APEDPT#SPK.R            | S1397:S1402:T1408: | 2 | 5,254  | 0,233 | -0,299 |
| 2 | Q9UQ35 SRRM2_HUMAN  | K.AGM*SS#NQSIS#PVLDAVPR.T           | S1398:S1404:       | 3 | 4,1215 | 0,177 | -0,087 |

|   |                    |                                |                    |   |        |       |        |
|---|--------------------|--------------------------------|--------------------|---|--------|-------|--------|
| 2 | Q9UQ35 SRRM2_HUMAN | K.AGMSSNQS#IS#SPVLDAVPRT#PSR.E | S1401:S1403:T1413: | 3 | 5,7031 | 1     | -0,423 |
| 2 | Q9UQ35 SRRM2_HUMAN | K.AGM*SSNQS#ISS#PVLDAVPR.T     | S1401:S1404:       | 2 | 2,9029 | 1     | 0      |
| 2 | Q5QJE6 TDIF2_HUMAN | K.ESYTEEIVS#EAES#HVS#GISR.I    | S141:S145:S148:    | 3 | 4,414  | 0,494 | -0,149 |
| 2 | Q13177 PAK2_HUMAN  | K.YLS#FT#PPEK.D                | S141:T143:         | 2 | 2,1704 | 0,324 | -0,098 |
| 2 | Q8NEJ9 NGDN_HUMAN  | K.LSS#EDEEDEAEDDQS#EAS#GKK.S   | S143:S156:S159:    | 3 | 3,2451 | 0,264 | -0,069 |
| 2 | Q8WWQ0 PHIP_HUMAN  | K.SESSTS#AFST#PTR.S            | S1476:T1480:       | 2 | 3,3119 | 1     | 0,804  |
| 2 | Q9UQ35 SRRM2_HUMAN | R.S#RS#PSS#PELNK.C             | S1497:S1499:S1502: | 2 | 2,7247 | 0,437 | -0,235 |
| 2 | Q99959 PKP2_HUMAN  | R.LEIS#PDSS#PER.A              | S151:S155:         | 2 | 2,4021 | 0,298 | -0,176 |
| 2 | Q02880 TOP2B_HUMAN | K.VVEAVNS#DS#DSEFGIPK.K        | S1522:S1524:       | 2 | 5,2581 | 0,48  | -0,062 |
| 2 | Q9UQ35 SRRM2_HUMAN | R.S#GSS#QELDVKPS#ASPQR.S       | S1539:S1542:S1550: | 3 | 3,3627 | 0,229 | -0,171 |
| 2 | Q5VZL5 ZMYM4_HUMAN | K.AKSEDS#DVELS#D.-             | S1542:S1547:       | 2 | 2,5466 | 0,299 | -0,335 |
| 2 | O43166 SI1L1_HUMAN | K.LIDLES#PT#PESQK.S            | S1549:T1551:       | 2 | 2,7753 | 0,338 | -0,075 |
| 2 | P42166 LAP2A_HUMAN | R.EQGTESRS#S#T#PLPTISSAENTR.Q  | S158:S159:T160:    | 3 | 2,9862 | 1     | -0,137 |
| 2 | P42166 LAP2A_HUMAN | R.S#STPLPTISS#AENTR.Q          | S158:S168:         | 2 | 3,3551 | 1     | -0,405 |
| 2 | P42166 LAP2A_HUMAN | R.SS#T#PLPTISSAENTR.Q          | S159:T160:         | 2 | 3,4846 | 0,473 | -0,405 |
| 2 | P16949 STMN1_HUMAN | R.AS#GQAFELILS#PR.S            | S16:S25:           | 2 | 3,6929 | 0,33  | -0,473 |
| 2 | P16949 STMN1_HUMAN | R.AS#GQAFELILS#PR.S            | S16:S25:           | 3 | 3,4133 | 0,333 | 0      |
| 2 | Q12873 CHD3_HUMAN  | K.M*ETEADAPS#PAPS#LGER.L       | S1601:S1605:       | 2 | 4,7998 | 0,573 | -0,568 |
| 2 | Q9NVU0 RPC5_HUMAN  | R.EAANEAGDS#S#QDEAEDDVK.Q      | S161:S162:         | 2 | 3,8167 | 0,586 | -0,456 |
| 2 | Q9C0C2 TB182_HUMAN | R.VPS#S#DEEVVEEPQSR.R          | S1620:S1621:       | 2 | 4,4472 | 0,495 | -0,396 |
| 2 | O00566 MPP10_HUMAN | R.KS#PVFS#DEDS#DLDFDISK.L      | S163:S167:S171:    | 3 | 6,5746 | 0,379 | -0,16  |
| 2 | O43166 SI1L1_HUMAN | K.SLHGFEFS#AS#DSS#LTDIQETR.R   | S1645:S1647:S1650: | 3 | 4,7172 | 0,215 | -0,151 |
| 2 | O43399 TPD54_HUMAN | R.NSATFKS#FEDR.V               | S166:              | 2 | 3,3292 | 0,293 | -0,441 |
| 2 | Q9H4L4 SEN3_HUMAN  | K.NHLS#PQQGGAT#PQVPS#PCCR.F    | S169:T176:S181:    | 3 | 3,4297 | 0,261 | -0,301 |
| 2 | Q5SRE5 NU188_HUMAN | R.GAPS#SPATGVLPS#PQGK.S        | S1708:S1717:       | 2 | 2,7798 | 0,319 | -0,214 |
| 2 | Q86V15 CASZ1_HUMAN | R.TPALAALAALGAPGAPTAASS#P.-    | S1758:             | 3 | 2,838  | 0,211 | -0,356 |
| 2 | Q52LW3 RHG29_HUMAN | K.SFENV#VES#VDSSEK.G           | S176:S179:         | 2 | 2,9648 | 0,318 | -0,323 |
| 2 | Q58FF8 H90B2_HUMAN | K.IEDVGS#DEEDDSGKDK.K          | S177:              | 2 | 2,8121 | 0,423 | -0,403 |
| 2 | Q9H7D0 DOCK5_HUMAN | R.LS#PFHGSSPPQSTPLS#PPPLT#PK.A | S1775:S1789:T1794: | 3 | 4,5174 | 0,217 | -0,14  |
| 2 | Q9H7D0 DOCK5_HUMAN | R.LSPFHGSS#PPQSTPLS#PPPLT#PK.A | S1781:S1789:T1794: | 3 | 3,5225 | 0,205 | -0,07  |
| 2 | P46821 MAP1B_HUMAN | K.SDIS#PLT#PR.E                | S1785:T1788:       | 2 | 2,8465 | 0,398 | -0,106 |
| 2 | Q9BXB4 OSB11_HUMAN | R.SFSLASS#NS#PISQR.R           | S179:S181:         | 2 | 3,0722 | 0,167 | -0,353 |
| 2 | Q86TB9 PATL1_HUMAN | R.STS#PIIGS#PPVR.A             | S179:S184:         | 2 | 2,2109 | 0,195 | 0      |

|   |                    |                                     |                    |   |        |       |        |
|---|--------------------|-------------------------------------|--------------------|---|--------|-------|--------|
| 2 | P50548 ERF_HUMAN   | R.LGRGS#VSDCSDGT#S#ELEEPLGEDPR.A    | S185:T193:S194:    | 3 | 3,2951 | 0,199 | -0,378 |
| 2 | P24928 RPB1_HUMAN  | K.YS#PTSPKY#PTS#PK.Y                | S1861:S1868:S1871: | 2 | 3,3289 | 1     | -0,343 |
| 2 | P24928 RPB1_HUMAN  | K.YSPTSPTY#PT#TPK.Y                 | S1882:T1884:       | 2 | 2,7892 | 1     | -0,434 |
| 2 | Q13242 SFRS9_HUMAN | R.STS#YGYS#R.S                      | S189:S193:         | 2 | 2,5671 | 0,148 | -0,226 |
| 2 | Q9BVC5 ASHWN_HUMAN | K.SPSGPVK#PPLS#PVGTT#TPVK.L         | S189:S193:T197:    | 3 | 5,2438 | 0,474 | -0,168 |
| 2 | Q9H1E3 NUCKS_HUMAN | R.KVVDYSQFQES#DDADEDYGR.D           | S19:               | 3 | 2,6218 | 0,323 | -0,299 |
| 2 | Q9NV56 MRGBP_HUMAN | K.VLTANS#NPSS#PSAAK.R               | S191:S195:         | 2 | 4,012  | 0,373 | -0,532 |
| 2 | P24928 RPB1_HUMAN  | K.YSPTS#PTY#PTSPK.Y                 | S1913:S1917:       | 2 | 5,0604 | 1     | -0,292 |
| 2 | P21291 CSR1_HUMAN  | K.GFGFGQGAGALVHS#E.-                | S192:              | 2 | 2,5625 | 0,395 | 0      |
| 2 | Q16629 SFRS7_HUMAN | R.YFQS#PS#R.S                       | S192:S194:         | 2 | 2,0586 | 0,142 | 0      |
| 2 | Q00587 BORG5_HUMAN | R.SDS#LLS#FR.L                      | S192:S195:         | 2 | 3,0444 | 0,292 | -0,337 |
| 2 | Q9BVC5 ASHWN_HUMAN | K.SPPLS#PVGTT#PVK.L                 | S193:T198:         | 2 | 3,4307 | 0,484 | -0,169 |
| 2 | Q92621 NU205_HUMAN | R.LQDS#FAS#ETNLDFR.S                | S1939:S1942:       | 2 | 3,624  | 0,388 | -0,068 |
| 2 | P30622 CLIP1_HUMAN | K.TASES#ISNLS#EAGSIK.K              | S195:S200:         | 2 | 4,1813 | 1     | 0      |
| 2 | Q8TEA8 DTD1_HUMAN  | R.SASS#GAEGDVSS#EREP.-              | S197:S205:         | 2 | 2,6196 | 0,333 | -0,071 |
| 2 | P42356 PI4KA_HUMAN | R.KTS#SVS#S#ISQVSPER.G              | S198:S201:S202:    | 2 | 2,9722 | 1     | -0,067 |
| 2 | P78369 CLD10_HUMAN | R.YTYNGATS#VM*SS#R.T                | S199:S203:         | 2 | 3,5884 | 0,422 | -0,53  |
| 2 | Q14493 SLBP_HUMAN  | R.CGDAS#PPS#PAR.W                   | S20:S23:           | 2 | 3,8475 | 0,521 | -0,263 |
| 2 | P30622 CLIP1_HUMAN | K.TASESISNLS#EAGS#IK.K              | S200:S204:         | 2 | 5,2115 | 0,508 | -0,139 |
| 2 | P16989 DBPA_HUMAN  | R.NYAGEEEEEES#GSS#EGFDPPATDR.Q      | S201:S204:         | 3 | 3,699  | 0,316 | -0,408 |
| 2 | Q9H165 BC11A_HUMAN | R.IYLES#EHGS#PLT#PR.V               | S201:S205:T208:    | 2 | 3,3158 | 0,133 | 0,332  |
| 2 | P18583 SON_HUMAN   | R.SFS#IS#PVR.L                      | S2011:S2013:       | 2 | 2,6824 | 0,37  | 0      |
| 2 | Q96B36 AKTS1_HUMAN | R.TEARS#S#DEENGPPS#SPDLDR.I         | S202:S203:S211:    | 3 | 4,5385 | 0,402 | -0,153 |
| 2 | Q96B36 AKTS1_HUMAN | R.TEARS#S#DEENGPPSS#PDLDR.I         | S202:S203:S212:    | 3 | 3,933  | 0,311 | -0,381 |
| 2 | Q86WR0 CCD25_HUMAN | K.VENM*SSNQDGNDS#DEFM*.-            | S204:              | 2 | 2,368  | 0,404 | -0,481 |
| 2 | Q01130 SFRS2_HUMAN | R.S#KS#PPKS#PEEEGAVSS.-             | S206:S208:S212:    | 2 | 2,9223 | 0,327 | -0,657 |
| 2 | Q01130 SFRS2_HUMAN | R.S#KS#PPKS#PEEEGAVSS.-             | S206:S208:S212:    | 3 | 2,8819 | 0,374 | -0,296 |
| 2 | Q01130 SFRS2_HUMAN | R.S#KS#PPKSPEEEGAVSS#.-             | S206:S208:S221:    | 2 | 2,3829 | 0,178 | -0,394 |
| 2 | Q8TDW0 LRC8C_HUMAN | R.SNTIQSGPEGS#LVNSQS#LKS#IPEK.F     | S206:S212:S215:    | 3 | 3,6831 | 0,359 | 0,134  |
| 2 | Q9NQS7 INCE_HUMAN  | R.TLSPTPASATAPTS#QGIPTS#DEES#TPKK.S | S208:S214:S218:    | 3 | 3,6896 | 1     | -0,722 |
| 2 | P60174 TPIS_HUMAN  | R.KQS#LGELIGTLNAAK.V                | S21:               | 2 | 3,0308 | 0,427 | -0,226 |
| 2 | Q7RTS5 OTOP3_HUMAN | R.ASRAS#VS#PGR.T                    | S21:S23:           | 2 | 2,1421 | 0,171 | -0,213 |
| 2 | P05787 K2C8_HUMAN  | R.AFS#SRS#YTS#GPGSR.I               | S21:S24:S27:       | 3 | 2,6017 | 0,177 | 0,108  |

|   |                     |                                 |                    |   |        |       |        |
|---|---------------------|---------------------------------|--------------------|---|--------|-------|--------|
| 2 | Q6IQ22 RAB12_HUMAN  | R.AGGGGGLGAGS#PALS#GGQGR.R      | S21:S25:           | 2 | 3,1359 | 0,31  | 0,21   |
| 2 | Q09666 AHNK_HUMAN   | R.LPS#GSGAASPTGSAVDIR.A         | S210:              | 2 | 3,8409 | 0,491 | -0,071 |
| 2 | Q09666 AHNK_HUMAN   | R.LPS#GSGAAS#PTGSAVDIR.A        | S210:S216:         | 2 | 4,0028 | 1     | -0,271 |
| 2 | Q8TBF4 ZCRB1_HUMAN  | K.KSTYFS#DEEELS#D.-             | S210:S216:         | 2 | 3,6911 | 0,281 | -0,285 |
| 2 | Q96B36 AKTS1_HUMAN  | R.SSDEENGPPS#S#PDLDR.I          | S211:S212:         | 2 | 2,4471 | 0,366 | -0,786 |
| 2 | Q9H4L7 SMRCD_HUMAN  | R.KLS#S#SS#EPYEEDEFNDDQSIK.K    | S211:S212:S214:    | 3 | 6,5721 | 1     | -0,409 |
| 2 | Q7Z417 NUFP2_HUMAN  | K.GADNDGS#GS#ESGYTPK.K          | S212:S214:         | 2 | 3,8034 | 0,373 | -0,338 |
| 2 | A8K0M8 A8K0M8_HUMAN | R.AAAS#PPT#PIR.S                | S212:T215:         | 2 | 2,9587 | 0,421 | -0,107 |
| 2 | Q09666 AHNK_HUMAN   | R.LPSGSGAAS#PTGS#AVDIR.A        | S216:S220:         | 2 | 4,2262 | 1     | -0,271 |
| 2 | Q01082 SPTB2_HUMAN  | R.TSS#KESS#PIPS#PTSDR.K         | S2161:S2165:S2169: | 2 | 2,7534 | 1     | -0,509 |
| 2 | Q02750 MP2K1_HUMAN  | K.LCDFGVSGQLIDS#M*ANS#FVGTR.S   | S218:S222:         | 3 | 3,8512 | 0,517 | 0      |
| 2 | P49810 PSN2_HUMAN   | R.TSLM*S#AES#PTPR.S             | S22:S25:           | 2 | 3,1389 | 0,407 | -1,092 |
| 2 | Q9UPW0 FOXJ3_HUMAN  | K.VTLYNTDQDGS#DS#PR.S           | S221:S223:         | 2 | 2,5723 | 0,374 | -0,134 |
| 2 | Q8WYP5 AHTF1_HUMAN  | R.LIS#PLAS#PADGVK.S             | S2231:S2235:       | 2 | 3,6944 | 0,363 | -0,342 |
| 2 | P49761 CLK3_HUMAN   | R.CEERS#PS#FGEDYGPS#R.S         | S224:S226:S235:    | 3 | 3,4743 | 0,324 | 0,08   |
| 2 | Q13283 G3BP1_HUMAN  | K.SSS#PAPADIAQTVQEDLR.T         | S232:              | 3 | 3,8911 | 0,417 | -0,279 |
| 2 | Q13283 G3BP1_HUMAN  | K.SSS#PAPADIAQTVQEDLR.T         | S232:              | 2 | 3,171  | 0,415 | -0,435 |
| 2 | Q13136 LIPA1_HUMAN  | R.S#SDGS#LS#HEEDLAK.V           | S238:S242:S244:    | 2 | 2,2651 | 0,134 | -0,427 |
| 2 | O75420 PERQ1_HUMAN  | R.ALSGGGSVAS#PPPS#PAM*PK.Y      | S24:S28:           | 2 | 4,4918 | 0,44  | -0,777 |
| 2 | Q16204 CCDC6_HUMAN  | K.LDQPVS#APPS#PR.D              | S240:S244:         | 2 | 3,6035 | 0,486 | -0,257 |
| 2 | Q16204 CCDC6_HUMAN  | K.LDQPVS#APPS#PR.D              | S240:S244:         | 3 | 2,681  | 0,302 | -0,578 |
| 2 | Q9UBC2 EP15R_HUMAN  | R.STPSHGS#VS#SLNST#GSLSPK.H     | S244:S246:T251:    | 2 | 2,2351 | 1     | -0,112 |
| 2 | Q8IU60 DCP2_HUMAN   | R.FGDS#S#DS#DNGFSSTGTPAKPTVEK.L | S246:S247:S249:    | 3 | 3,8227 | 0,261 | -0,199 |
| 2 | Q9UBC2 EP15R_HUMAN  | R.STPSHGS#VS#SLNSTGS#LS#PK.H    | S246:S253:S255:    | 3 | 3,1663 | 1     | -0,169 |
| 2 | Q96ST2 IWS1_HUMAN   | R.IS#DS#ESEDPPR.H               | S248:S250:         | 2 | 2,0125 | 0,265 | -0,438 |
| 2 | P16949 STMN1_HUMAN  | R.ASGQAFELILS#PR.S              | S25:               | 2 | 2,9173 | 0,235 | -0,083 |
| 2 | P16949 STMN1_HUMAN  | R.ASGQAFELILS#PR.S              | S25:               | 3 | 2,7942 | 0,152 | -0,062 |
| 2 | P17275 JUNB_HUMAN   | R.S#RDAT#PPVS#PINMEDQER.I       | S251:T255:S259:    | 3 | 4,4362 | 0,349 | 0      |
| 2 | P52701 MSH6_HUMAN   | R.VIS#DSES#DIGGS#DVEFKPDTK.E    | S252:S256:S261:    | 3 | 5,8285 | 0,57  | -0,148 |
| 2 | Q9H426 RIMS4_HUMAN  | R.QASQLS#LES#TVGPCGER.S         | S257:S260:         | 2 | 2,991  | 0,438 | 0,062  |
| 2 | Q8NFH5 NUP53_HUMAN  | R.CALS#SPSLAFT#PPIK.T           | S258:T265:         | 2 | 2,9264 | 0,529 | -0,279 |
| 2 | Q15942 ZYG_HUMAN    | R.GPPASS#PAPAPKFS#PVT#PK.F      | S259:S267:T270:    | 3 | 3,6741 | 0,386 | 0,088  |
| 2 | Q8NFH5 NUP53_HUMAN  | R.CALSS#PSLAFT#PPIK.T           | S259:T265:         | 2 | 3,489  | 0,474 | -0,349 |



|   |                     |                                  |                    |   |        |       |        |
|---|---------------------|----------------------------------|--------------------|---|--------|-------|--------|
| 2 | Q92466 DDB2_HUMAN   | R.SRS#PLELEPEAK.K                | S26:               | 2 | 3,8138 | 0,304 | -0,425 |
| 2 | Q92466 DDB2_HUMAN   | R.SRS#PLELEPEAK.K                | S26:               | 3 | 3,1519 | 0,186 | -0,255 |
| 2 | P49736 MCM2_HUMAN   | R.GNDPLTS#S#PGR.S                | S26:S27:           | 2 | 3,7153 | 0,464 | -0,097 |
| 2 | Q96A19 C102A_HUMAN  | K.GSLLTILGS#PS#PER.M             | S26:S28:           | 2 | 3,4672 | 0,391 | -0,692 |
| 2 | Q6Y7W6 PERQ2_HUMAN  | R.ALSSGGSITS#PPLS#PALPK.Y        | S26:S30:           | 2 | 2,1953 | 0,397 | -0,314 |
| 2 | B2CI53 B2CI53_HUMAN | R.NGILAS#PQS#APGNLDNSK.S         | S260:S263:         | 2 | 3,1553 | 0,497 | -0,314 |
| 2 | Q8NFH5 NUP53_HUMAN  | R.CALSSPS#LAFT#PPIK.T            | S261:T265:         | 2 | 2,313  | 0,382 | -0,279 |
| 2 | Q8TF44 NLF3_HUMAN   | R.HGS#LS#ADDSTPDAS#PGSR.R        | S262:S264:S273:    | 2 | 2,3005 | 0,252 | -0,306 |
| 2 | Q8IWB9 TEX2_HUMAN   | K.TAPSS#PLTS#PSDTR.S             | S266:S270:         | 2 | 3,2719 | 1     | -0,387 |
| 2 | Q9UQ35 SRRM2_HUMAN  | R.DS#RSL#YS#PVER.R               | S2688:S2692:S2694: | 3 | 3,051  | 0,3   | -0,224 |
| 2 | Q9UQ35 SRRM2_HUMAN  | R.DSRS#LS#YS#PVER.R              | S2690:S2692:S2694: | 3 | 3,9425 | 0,214 | -0,112 |
| 2 | Q9UQ35 SRRM2_HUMAN  | R.SLS#YS#PVER.R                  | S2692:S2694:       | 2 | 2,7553 | 0,211 | -0,306 |
| 2 | P49736 MCM2_HUMAN   | R.GNDPLTSS#PGRS#S#R.R            | S27:S31:S32:       | 3 | 2,6386 | 0,321 | -0,438 |
| 2 | Q8WUM0 NU133_HUMAN  | R.GPLAGLPGS#T#PR.T               | S27:T28:           | 2 | 2,5102 | 0,24  | -0,091 |
| 2 | Q8WUM0 NU133_HUMAN  | R.GPLAGLPGS#T#PRT#ASR.K          | S27:T28:T31:       | 2 | 2,552  | 0,403 | -0,067 |
| 2 | Q96G46 DUS3L_HUMAN  | R.QENCGAQVPAGPGTS#TPPSS#PVR.T    | S272:S277:         | 3 | 3,4357 | 0,252 | -0,425 |
| 2 | Q96CW6 S7A6O_HUMAN  | R.GSADYNS#LS#EEER.G              | S273:S275:         | 2 | 3,5306 | 0,574 | -0,604 |
| 2 | Q6KC79 NIPBL_HUMAN  | R.NAASFPLRS#PQPVCSS#PAGSEGT#PK.G | S274:S280:T287:    | 3 | 4,0804 | 0,218 | -0,407 |
| 2 | O94880 PHF14_HUMAN  | K.VLS#RNSADDEELT#NDS#LTLQSK.S    | S277:T287:S290:    | 3 | 3,703  | 0,376 | -0,265 |
| 2 | P15924 DESP_HUMAN   | K.GLPSYNYM*SS#APGS#R.S           | S2821:S2825:       | 2 | 3,3959 | 0,463 | -0,144 |
| 2 | P21127 CD2L1_HUMAN  | R.DLLSDLQDIS#DSER.K              | S283:              | 2 | 2,8955 | 0,328 | -0,362 |
| 2 | Q02952 AKA12_HUMAN  | K.SAES#PTS#PVTSETGSTFK.K         | S283:S286:         | 2 | 4,3553 | 1     | -0,495 |
| 2 | Q02952 AKA12_HUMAN  | K.SAES#PTS#PVTS#ETGSTFKK.F       | S283:S286:S290:    | 3 | 2,8379 | 0,132 | -0,252 |
| 2 | Q02952 AKA12_HUMAN  | K.SAES#PTSPVTS#ETGST#FKK.F       | S283:S290:T295:    | 3 | 3,2069 | 1     | -0,419 |
| 2 | O95817 BAG3_HUMAN   | R.SS#TPLHS#PS#PIR.V              | S284:S289:S291:    | 2 | 3,1676 | 0,328 | -0,482 |
| 2 | O95817 BAG3_HUMAN   | R.SS#TPLHS#PS#PIR.V              | S284:S289:S291:    | 3 | 3,1417 | 0,304 | -0,301 |
| 2 | Q02952 AKA12_HUMAN  | K.SAESPTS#PVT#SETGSTFK.K         | S286:T289:         | 2 | 3,4157 | 1     | -0,186 |
| 2 | Q6WCQ1 MRIP_HUMAN   | K.AEEQQLPPPLS#PPS#PS#TPNHR.R     | S288:S291:S293:    | 3 | 2,8329 | 0,145 | -0,145 |
| 2 | Q6WCQ1 MRIP_HUMAN   | K.AEEQQLPPPLS#PPS#PST#PNHR.R     | S288:S291:T294:    | 3 | 3,6142 | 0,284 | 0,363  |
| 2 | Q96MH2 HEX12_HUMAN  | K.TSGAPGS#PQT#PPER.H             | S29:T32:           | 2 | 2,5744 | 0,374 | -0,475 |
| 2 | Q13371 PHLP_HUMAN   | R.NSATCHS#EDS#DLEID.-            | S293:S296:         | 2 | 2,1234 | 0,186 | -0,395 |
| 2 | Q9UJD0 RIMS3_HUMAN  | R.RLS#QSS#LESATSPSCS.-           | S295:S298:         | 2 | 3,3147 | 1     | -0,131 |
| 2 | Q59F18 Q59F18_HUMAN | R.LQDGTQAALS#PLT#PAR.L           | S295:T298:         | 2 | 3,8941 | 0,548 | 0,257  |

|   |                    |                                   |                 |   |        |       |        |
|---|--------------------|-----------------------------------|-----------------|---|--------|-------|--------|
| 2 | O00499 BIN1_HUMAN  | K.S#SPSPDGS#PAATPEIR.V            | S296:S303:      | 2 | 2,1748 | 0,285 | -0,421 |
| 2 | Q96QR8 PURB_HUMAN  | R.RGGGS#GGGEES#EGEEVDED.-         | S298:S304:      | 2 | 3,3371 | 0,337 | -0,243 |
| 2 | Q13247 SFRS6_HUMAN | R.SQS#RS#NS#PLPVPSK.A             | S299:S301:S303: | 2 | 2,1892 | 0,276 | -0,134 |
| 2 | Q7L4I2 RSRC2_HUMAN | K.EQSEVS#VS#PR.A                  | S30:S32:        | 2 | 2,6802 | 0,347 | -0,382 |
| 2 | P38432 P80C_HUMAN  | K.LGFS#LT#PSK.G                   | S301:T303:      | 2 | 2,6672 | 0,42  | -0,22  |
| 2 | P05388 RLAO_HUMAN  | K.VEAKEES#EES#DEDM*GFGLFD.-       | S304:S307:      | 3 | 2,7554 | 0,229 | -0,15  |
| 2 | P05388 RLAO_HUMAN  | K.VEAKEES#EES#DEDMGFGLFD.-        | S304:S307:      | 3 | 2,7251 | 0,343 | -0,453 |
| 2 | P05388 RLAO_HUMAN  | K.EES#EES#DEDM*GFGLFD.-           | S304:S307:      | 2 | 2,6796 | 0,317 | -0,243 |
| 2 | Q08AE8 SPIR1_HUMAN | R.APTLAELDS#S#ES#EETLHK.S         | S305:S306:S308: | 3 | 3,1318 | 0,234 | -0,079 |
| 2 | Q13769 THOC5_HUMAN | K.ALFKPPEDS#QDDES#DS#DAEEEQTTK.R  | S307:S312:S314: | 3 | 2,6112 | 0,326 | -0,48  |
| 2 | P05787 K2C8_HUMAN  | R.SYTSGPS#RISS#S#FSR.V            | S31:S36:S37:    | 3 | 2,7328 | 1     | -0,091 |
| 2 | P05787 K2C8_HUMAN  | R.SYTSGPS#RISS#S#FSR.V            | S31:S36:S37:    | 2 | 2,635  | 1     | -0,305 |
| 2 | P49585 PCY1A_HUMAN | R.MLQAIS#PKQS#PSS#SPTR.E          | S315:S319:S322: | 3 | 4,499  | 1     | -0,178 |
| 2 | P49585 PCY1A_HUMAN | R.MLQAIS#PKQS#PSS#PTR.E           | S315:S319:S323: | 2 | 2,2074 | 1     | -0,475 |
| 2 | Q9NYV4 CD2L7_HUMAN | R.S#GYSYGRS#PS#PYGR.R             | S316:S323:S325: | 2 | 2,2428 | 0,346 | -0,144 |
| 2 | Q5C9Z4 NOM1_HUMAN  | R.FAEDEEK#ENS#S#EDGDITDK.S        | S317:S320:S321: | 3 | 5,0348 | 0,433 | -0,442 |
| 2 | Q9NYV4 CD2L7_HUMAN | R.SGS#YSYGRS#PS#PYGR.R            | S318:S323:S325: | 3 | 3,5881 | 1     | -0,215 |
| 2 | Q9UKS6 PACN3_HUMAN | K.GGRS#PDEV#LTS#IVPTR.D           | S319:T324:S327: | 2 | 2,6077 | 0,446 | -0,482 |
| 2 | P61073 CXCR4_HUMAN | K.TSAQHALTSV#R.G                  | S321:           | 2 | 2,1699 | 0,304 | -0,365 |
| 2 | Q86WC4 OSTM1_HUMAN | R.LKS#STS#FANIQENS#.-             | S322:S325:      | 2 | 4,5642 | 0,545 | -0,203 |
| 2 | P26651 TTP_HUMAN   | R.LPIFNRI#VS#E.-                  | S323:S325:      | 2 | 2,3683 | 0,188 | -0,425 |
| 2 | Q92597 NDRG1_HUMAN | R.S#RTASGSS#VTS#LDGTR.S           | S326:S333:S336: | 2 | 2,1857 | 1     | 0,067  |
| 2 | Q14676 MDC1_HUMAN  | R.AQPFGFIDS#DT#DAEEER.I           | S329:T331:      | 2 | 3,3578 | 0,492 | -0,468 |
| 2 | P49790 NU153_HUMAN | K.RIPS#IVSS#PLNS#PLDR.S           | S330:S334:S338: | 2 | 2,5128 | 0,377 | -0,123 |
| 2 | Q9NYV4 CD2L7_HUMAN | R.SS#S#PFLSK.R                    | S333:S334:      | 2 | 2,8003 | 0,234 | -0,361 |
| 2 | Q9UGV2 NDRG3_HUMAN | R.THSTS#S#S#LGS#GES#PFSR.S        | S333:S334:S335: | 2 | 4,0231 | 1     | -0,373 |
| 2 | Q9UGV2 NDRG3_HUMAN | R.THSTS#S#S#LGS#GES#PFSR.S        | S333:S334:S341: | 2 | 3,0517 | 1     | -0,311 |
| 2 | P82094 TMF1_HUMAN  | R.IDSFSVQS#LDS#R.S                | S333:S336:      | 2 | 4,022  | 0,474 | -0,322 |
| 2 | Q92597 NDRG1_HUMAN | R.TASGSS#VTS#LDGTR.S              | S333:S336:      | 2 | 2,6105 | 1     | -0,244 |
| 2 | Q9UGV2 NDRG3_HUMAN | R.THSTSS#S#LGS#GES#PFSR.S         | S334:S335:S338: | 2 | 4,0625 | 1     | -0,497 |
| 2 | P49790 NU153_HUMAN | R.IPSIVSS#PLNS#PLDR.S             | S334:S338:      | 2 | 3,3225 | 0,403 | -0,209 |
| 2 | Q86WB0 NIPA_HUMAN  | R.SQDATFS#PGS#EQA EK.S            | S335:S338:      | 2 | 2,0515 | 0,308 | -0,49  |
| 2 | Q9UK58 CCNL1_HUMAN | K.GLNPDGTPALSTLGGFS#PAS#KPSS#PR.E | S335:S338:S342: | 3 | 3,5766 | 1     | -0,133 |

|   |                    |                                     |                 |   |        |       |        |
|---|--------------------|-------------------------------------|-----------------|---|--------|-------|--------|
| 2 | Q86WB0 NIPA_HUMAN  | R.SQDATFS#PGS#EQAEKS#PGPIVSR.T      | S335:S338:S344: | 3 | 4,2498 | 0,354 | 0      |
| 2 | Q9P206 K1522_HUMAN | R.FSS#VSS#PQPR.S                    | S339:S342:      | 2 | 2,4485 | 0,143 | -0,292 |
| 2 | P22626 ROA2_HUMAN  | R.NM*GGPYGGGNYGPGGS#GGS#GGYGGR.S    | S341:S344:      | 3 | 3,208  | 0,307 | -0,309 |
| 2 | O75676 KS6A4_HUMAN | R.LEPVYS#PPGS#PPPDPDR.I             | S343:S347:      | 2 | 2,6057 | 0,186 | -0,063 |
| 2 | Q9GZR1 SEN6_HUMAN  | R.RES#IS#PQPADSACS#SPAPSTGK.V       | S350:S352:S361: | 3 | 5,1897 | 0,481 | -0,667 |
| 2 | Q6ZS17 FA65A_HUMAN | R.FSTYSQS#PPDT#PSLR.E               | S351:T355:      | 2 | 3,48   | 0,391 | -0,199 |
| 2 | Q03164 HRX_HUMAN   | K.ALSSAVQASPTS#PGGSPSS#PSSGQR.S     | S3511:S3518:    | 3 | 3,4125 | 1     | -0,149 |
| 2 | Q9Y2W2 WBP11_HUMAN | R.EVEEFS#EDDEDDES#DDS#EAEKQSQK.Q    | S353:S361:S364: | 3 | 3,1451 | 0,33  | -0,349 |
| 2 | P01892 1A02_HUMAN  | K.GGSYSQAASSDSAQGS#DVS#LTACKV.-     | S356:S359:      | 3 | 3,9723 | 1     | -0,282 |
| 2 | Q96Q15 SMG1_HUMAN  | K.NLATS#ADT#PPSTVPGTGK.S            | S3566:T3569:    | 2 | 2,6404 | 0,233 | -0,26  |
| 2 | P04222 1C03_HUMAN  | K.GGSCSQAASSNSAQGS#DES#LIACKA.-     | S357:S360:      | 3 | 3,3408 | 0,254 | -0,492 |
| 2 | Q9NQ55 SSF1_HUMAN  | R.VGGS#DEEASGIPSR.T                 | S359:           | 2 | 2,7093 | 0,296 | -0,254 |
| 2 | O76021 RL1D1_HUMAN | K.ATNES#EDEIPQLVPIGK.K              | S361:           | 2 | 2,5528 | 0,333 | -0,254 |
| 2 | P78426 NKX61_HUMAN | K.SSSGGGGGLLLHAS#EPSSS#.-           | S361:S367:      | 2 | 2,6964 | 0,405 | 0,123  |
| 2 | P11532 DMD_HUMAN   | K.VNGTTVSS#PSTS#LQR.S               | S3613:S3617:    | 2 | 3,5455 | 1     | -0,504 |
| 2 | P49768 PSN1_HUMAN  | R.AAVQELS#S#SILAGEDPEER.G           | S365:S366:      | 2 | 2,6175 | 0,257 | -0,339 |
| 2 | Q6VN20 RBP10_HUMAN | K.SQDSYPGS#PSLS#PR.H                | S365:S369:      | 2 | 4,0755 | 0,47  | -0,372 |
| 2 | Q7Z4V5 HDGR2_HUMAN | R.GS#GGS#S#GDELREDDEPVK.K           | S366:S369:S370: | 2 | 2,2932 | 0,288 | -0,588 |
| 2 | O43303 CE110_HUMAN | K.LPS#PEPSM*S#PK.M                  | S366:S372:      | 2 | 2,5792 | 0,459 | -0,091 |
| 2 | Q3KQU3 MA7D1_HUMAN | R.SASAS#PLT#PCSVTR.S                | S368:T371:      | 2 | 2,1612 | 0,297 | -0,383 |
| 2 | Q5T200 ZC3HD_HUMAN | R.S#AS#PYPSHSLSS#PQR.K              | S370:S372:S381: | 2 | 3,4081 | 1     | -0,464 |
| 2 | Q9HCD5 NCOA5_HUMAN | R.S#STDS#LPGPIR.Q                   | S377:S381:      | 2 | 2,1034 | 0,335 | -0,089 |
| 2 | Q9UQ35 SRRM2_HUMAN | R.HGGS#PQPLATTPLS#QEPVNPPSEAS#PTR.D | S377:S387:S398: | 3 | 3,6911 | 1     | -0,355 |
| 2 | Q9BVS4 RIOK2_HUMAN | R.SSGDPEQIKEDS#LS#EES#ADAR.S        | S380:S382:S385: | 3 | 3,9175 | 0,318 | -0,147 |
| 2 | Q9H5I1 SUV92_HUMAN | K.GSGDIS#SDS#IDHS#PAK.K             | S381:S384:S388: | 2 | 2,9036 | 0,421 | -0,337 |
| 2 | Q9H5I1 SUV92_HUMAN | K.GSGDISS#DS#IDHS#PAK.K             | S382:S384:S388: | 3 | 3,1445 | 0,404 | -0,303 |
| 2 | Q4KMP7 TB10B_HUMAN | R.QQPPLGPSS#SLLS#LPGLK.S            | S382:S386:      | 3 | 2,7583 | 0,26  | -0,37  |
| 2 | Q9Y3X0 CCDC9_HUMAN | K.EGAASPAPETPQPTS#PETS#PK.E         | S386:S390:      | 3 | 2,7814 | 0,263 | -0,327 |
| 2 | Q7Z6L1 K1358_HUMAN | R.SHSGS#S#SLLS#AGCFFGDEV.R.G        | S388:S389:S394: | 3 | 4,1789 | 1     | -0,075 |
| 2 | P55010 IF5_HUMAN   | K.EAEEES#S#GGEEDEDENIEVVYSK.A       | S389:S390:      | 3 | 2,9915 | 0,314 | -0,128 |
| 2 | Q6T4R5 NHS_HUMAN   | R.VQQEIDS#DES#PVAR.E                | S394:S397:      | 2 | 4,9792 | 0,4   | -0,634 |
| 2 | Q14004 CD2L5_HUMAN | R.S#RS#PYS#PVLR.R                   | S395:S397:S400: | 2 | 2,8902 | 0,422 | -0,087 |
| 2 | Q9NYF8 BCLF1_HUMAN | K.FNDS#EGDDT#EETEDYR.Q              | S397:T402:      | 2 | 2,7762 | 0,545 | -0,234 |

|   |                      |                                |                 |   |        |       |        |
|---|----------------------|--------------------------------|-----------------|---|--------|-------|--------|
| 2 | Q96ST2 IWS1_HUMAN    | K.AAVLS#DS#EDEEK.A             | S398:S400:      | 2 | 4,71   | 0,41  | -0,252 |
| 2 | Q8N5Y2 MS3L1_HUMAN   | R.SS#SPIPLT#PSK.E              | S399:T405:      | 2 | 2,3402 | 0,287 | -0,192 |
| 2 | P49736 MCM2_HUMAN    | R.TDALTS#S#PGR.D               | S40:S41:        | 2 | 2,8417 | 0,314 | -0,524 |
| 2 | Q5UIPO RIF1_HUMAN    | K.GASS#PYGAPGT#PR.M            | S402:T409:      | 2 | 2,9979 | 0,353 | -0,354 |
| 2 | Q9NQ84 GPC5C_HUMAN   | R.ATANSQVM*GS#ANST#LR.A        | S403:T407:      | 2 | 3,0695 | 0,381 | -0,547 |
| 2 | P51114 FXR1_HUMAN    | R.GPNYTSGYGTNSELS#NPS#ETESER.K | S406:S409:      | 3 | 5,0412 | 1     | -0,134 |
| 2 | Q9UKV3 ACINU_HUMAN   | K.ASLVALPEQTAS#EEET#PPPLTK.E   | S410:T414:      | 3 | 2,6234 | 0,355 | -0,284 |
| 2 | B2RMZ9 B2RMZ9_HUMAN  | R.LNS#S#PRAPVS#PLK.F           | S416:S417:S423: | 2 | 2,5781 | 0,197 | -0,228 |
| 2 | Q8N350 DOS_HUMAN     | R.LEAAEAAGGAS#PDS#PPER.G       | S416:S419:      | 2 | 4,7753 | 0,456 | -0,453 |
| 2 | Q14247 SRC8_HUMAN    | R.LPS#S#PVYEDAASF.K.A          | S417:S418:      | 2 | 4,1382 | 0,568 | -0,073 |
| 2 | Q2TB10 ZN800_HUMAN   | K.VEPADSVES#SPPS#IT#HSPQNELK.G | S418:S422:T424: | 3 | 2,8519 | 1     | -0,272 |
| 2 | Q9P210 CPSF2_HUMAN   | K.EADIDS#S#DES#DIEEDIDQPSAHK.T | S419:S420:S423: | 3 | 4,9369 | 0,35  | 0      |
| 2 | Q8NEM2 SHCBP_HUMAN   | K.GLFQDEDS#CS#DCSYR.D          | S42:S44:        | 2 | 4,0025 | 0,521 | -0,244 |
| 2 | Q13547 HDAC1_HUMAN   | R.IACEEFS#DS#EEEGEGGR.K        | S421:S423:      | 3 | 4,2012 | 0,41  | 0      |
| 2 | Q13547 HDAC1_HUMAN   | R.IACEEFS#DS#EEEGEGGR.K        | S421:S423:      | 2 | 2,5073 | 0,374 | -0,223 |
| 2 | Q92769 HDAC2_HUMAN   | R.IACDEEFS#DS#EDEGEGGR.R       | S422:S424:      | 2 | 3,4566 | 0,348 | -0,677 |
| 2 | Q92769 HDAC2_HUMAN   | R.IACDEEFS#DS#EDEGEGGR.R       | S422:S424:      | 3 | 2,9383 | 0,345 | -0,254 |
| 2 | Q96AP0 ACD_HUMAN     | R.TPSS#PLQCTPSLS#PR.S          | S425:S435:      | 2 | 3,0211 | 0,343 | 0      |
| 2 | O60269 GRIN2_HUMAN   | R.APASEDS#LS#VEGR.R            | S427:S429:      | 2 | 3,4023 | 0,39  | -0,66  |
| 2 | Q13112 CAF1B_HUMAN   | R.TQDPSS#PGTT#PPQAR.Q          | S429:T433:      | 2 | 3,2803 | 1     | -0,359 |
| 2 | Q9P270 SLAI2_HUMAN   | R.SGAVQGAGS#LGPGS#PVR.A        | S43:S48:        | 2 | 2,8324 | 0,227 | 0,074  |
| 2 | P35658 NU214_HUMAN   | K.S#PGSTPTT#PTSSQAPQK.L        | S430:T437:      | 2 | 2,8827 | 1     | -0,2   |
| 2 | Q9P107 GMIP_HUMAN    | R.S#LDSPTSS#PGAGTR.Q           | S434:S441:      | 2 | 2,8064 | 0,213 | -0,49  |
| 2 | A2ABF8 A2ABF8_HUMAN  | R.GVSNDS#S#LETER.G             | S435:S436:      | 2 | 2,8123 | 0,151 | -0,314 |
| 2 | A2ABF8 A2ABF8_HUMAN  | R.GVSNDS#S#LET#ER.G            | S436:T439:      | 2 | 2,1342 | 0,182 | -0,471 |
| 2 | Q96ST2 IWS1_HUMAN    | K.TIAS#DS#EEEAGK.E             | S438:S440:      | 2 | 2,09   | 0,176 | -0,262 |
| 2 | P47974 TISD_HUMAN    | R.RLS#DS#PVFDAPSPDPS#LSDR.D    | S438:S440:S452: | 3 | 3,4793 | 0,263 | -0,147 |
| 2 | P47974 TISD_HUMAN    | R.RLS#DSPVFDAPSPDPS#LSDR.D     | S438:S448:S452: | 3 | 3,3715 | 0,114 | 0,22   |
| 2 | Q15149 PLEC1_HUMAN   | R.SSS#VGSSSYPIS#PAVSR.T        | S4386:S4396:    | 2 | 3,2418 | 1     | -0,191 |
| 2 | P23443 KS6B1_HUMAN   | R.FIGS#PRT#PVS#PVK.F           | S441:T444:S447: | 2 | 3,7477 | 0,385 | -0,225 |
| 2 | Q14676 MDC1_HUMAN    | R.S#QTT#T#ERDSDTDVEEEELPVENR.E | S445:T448:T449: | 3 | 2,611  | 1     | 0      |
| 2 | Q8TAP8 CG047_HUMAN   | R.APVPEPGLDLS#LS#PRPDS#PQPR.H  | S45:S47:S52:    | 3 | 4,2754 | 0,409 | -0,285 |
| 2 | ##Q16629 SFRS7_HUMAN | R.SRSRSPS#QFY#R.S              | S45:S47:Y50:    | 2 | 2,1803 | 0,096 | 0,197  |

|   |                    |                                  |                 |   |        |       |        |
|---|--------------------|----------------------------------|-----------------|---|--------|-------|--------|
| 2 | Q9H7L9 SDS3_HUMAN  | R.GRES#DEDT#EDAS#ETDLAK.H        | S45:T49:S53:    | 3 | 4,8983 | 0,408 | 0      |
| 2 | Q96D46 NMD3_HUMAN  | K.NVNIYRDS#AIPVES#DT#DDEGAPR.I   | S462:S468:T470: | 3 | 2,8743 | 0,17  | -0,462 |
| 2 | Q15797 SMAD1_HUMAN | K.VLTQM*GSPHNPISS#VS#.-          | S463:S465:      | 2 | 2,7865 | 0,461 | -0,133 |
| 2 | P30414 NKTR_HUMAN  | R.ILIPS#DIESS#KS#STR.R           | S463:S468:S470: | 2 | 2,0242 | 0,171 | -0,326 |
| 2 | Q14157 UBP2L_HUMAN | K.STSAPQM*S#PGS#SDNQSSSPQPAQQK.L | S467:S470:      | 3 | 2,7394 | 0,312 | -0,338 |
| 2 | Q71U36 TBA1A_HUMAN | K.TIGGGDSS#FNTEFFSETGAGK.H       | S48:            | 2 | 2,3073 | 0,415 | -0,351 |
| 2 | Q9H813 TM206_HUMAN | R.VQGPGLPGLDS#ESAS#S#SIRFSK.A    | S48:S52:S53:    | 3 | 2,9067 | 1     | -0,213 |
| 2 | Q9H813 TM206_HUMAN | R.VQGPGLPGLDS#ESASS#S#IRFSK.A    | S48:S53:S54:    | 3 | 2,8978 | 0,156 | -0,285 |
| 2 | Q9H813 TM206_HUMAN | R.VQGPGLPGLDS#ESASS#SIRFS#K.A    | S48:S53:S58:    | 3 | 3,9828 | 1     | -0,498 |
| 2 | Q9P2B4 CT2NL_HUMAN | K.FQSQADQDQQASGLQS#PPS#R.D       | S481:S484:      | 3 | 6,4295 | 0,511 | -0,313 |
| 2 | Q8NFC6 FA44A_HUMAN | K.YYS#DS#DDELTVQR.R              | S482:S484:      | 2 | 5,3696 | 1     | -0,454 |
| 2 | O75925 PIAS1_HUMAN | R.TCPS#LS#PTSPLNNK.G             | S483:S485:      | 2 | 2,5316 | 0,234 | 0      |
| 2 | O75925 PIAS1_HUMAN | R.TCPSLS#PTS#PLNNK.G             | S485:S488:      | 2 | 3,8046 | 0,252 | -0,218 |
| 2 | Q9NUL3 STAU2_HUMAN | K.GSS#PT#PPCSPVQPSK.Q            | S486:T488:      | 2 | 2,6368 | 0,246 | -0,072 |
| 2 | Q6UN15 FIP1_HUMAN  | R.DHS#PTPS#VFNS#DEER.Y           | S492:S496:S500: | 3 | 4,3883 | 0,383 | -0,374 |
| 2 | Q6UN15 FIP1_HUMAN  | R.DHS#PTPS#VFNS#DEER.Y           | S492:S496:S500: | 2 | 3,8593 | 0,368 | -0,561 |
| 2 | Q6UN15 FIP1_HUMAN  | R.DHS#PT#PSVFNS#DEER.Y           | S492:T494:S500: | 2 | 4,051  | 0,546 | -0,312 |
| 2 | P78362 SRPK2_HUMAN | R.TVSAS#ST#GDLPK.A               | S496:T498:      | 2 | 2,3858 | 0,315 | -0,277 |
| 2 | Q9H0D6 XRN2_HUMAN  | K.AEDS#DS#EPEPEDNVR.L            | S499:S501:      | 2 | 4,8366 | 0,429 | -0,396 |
| 2 | Q6ZRV2 FA83H_HUMAN | R.S#QS#SS#QGDNPLAPGYLPPHYK.E     | S5:S7:S9:       | 3 | 2,8786 | 0,198 | 0,074  |
| 2 | Q6ZRV2 FA83H_HUMAN | R.S#QSS#S#QGDNPLAPGYLPPHYK.E     | S5:S8:S9:       | 3 | 3,9314 | 0,394 | -0,074 |
| 2 | O43818 U3IP2_HUMAN | K.MNEISS#DS#EESLAPR.K            | S51:S53:        | 2 | 2,2868 | 0,469 | -0,239 |
| 2 | Q9Y6G9 DC1L1_HUMAN | R.KPVTVS#PTTPTS#PTEGEAS.-        | S510:S516:      | 2 | 3,3448 | 1     | -0,656 |
| 2 | Q3MIN7 RGL3_HUMAN  | R.VIEPPAASCPS#S#PR.I             | S511:S512:      | 2 | 2,0247 | 0,249 | -0,45  |
| 2 | Q9NZJ0 DTL_HUMAN   | R.TPSS#SPPIT#PPASETK.I           | S511:T516:      | 2 | 2,1013 | 0,15  | -0,625 |
| 2 | Q9NZJ0 DTL_HUMAN   | R.TPSSS#PPIT#PPASETK.I           | S512:T516:      | 2 | 3,117  | 1     | -0,486 |
| 2 | P10636 TAU_HUMAN   | R.SGYSS#PGS#PGTPGSR.S            | S516:S519:      | 2 | 2,5992 | 0,194 | -0,393 |
| 2 | P10636 TAU_HUMAN   | R.SGYSSPGS#PGT#PGSR.S            | S519:T522:      | 2 | 2,2436 | 0,299 | 0,393  |
| 2 | Q12888 TP53B_HUMAN | K.LM*LSTSEYS#QS#PK.M             | S523:S525:      | 2 | 3,5383 | 0,38  | -0,148 |
| 2 | Q86VM9 ZCH18_HUMAN | K.LGVS#VS#PSR.A                  | S532:S534:      | 2 | 2,9494 | 0,347 | -0,23  |
| 2 | Q3KQU3 MA7D1_HUMAN | K.ESAAPAS#PAPSPAPS#PTPAPPQK.E    | S544:S552:      | 3 | 2,8442 | 0,286 | -0,316 |
| 2 | Q9P2B4 CT2NL_HUMAN | K.VSS#PLS#PLSPGIKS#PTIPR.A       | S557:S560:S568: | 3 | 2,971  | 0,368 | -0,421 |
| 2 | Q9P2B4 CT2NL_HUMAN | K.VSSPLS#PLS#PGIKS#PTIPR.A       | S560:S563:S568: | 3 | 4,6573 | 1     | -0,253 |

|   |                    |                                      |                    |   |        |       |        |
|---|--------------------|--------------------------------------|--------------------|---|--------|-------|--------|
| 2 | Q5JSH3 WDR44_HUMAN | K.YNTEGRVS#PSPS#QES#LSSSK.S          | S561:S565:S568:    | 3 | 3,817  | 1     | -0,307 |
| 2 | P28715 ERCC5_HUMAN | K.FDSSLLS#S#DDETK.C                  | S562:S563:         | 2 | 4,1218 | 0,485 | 0,076  |
| 2 | Q9NRF8 PYRG2_HUMAN | K.LSSSDRYs#DAS#DDS#FSEPR.I           | S568:S571:S574:    | 3 | 2,6861 | 1     | -1,472 |
| 2 | Q13442 HAP28_HUMAN | K.S#LDS#DESEDEEDDYQQK.R              | S57:S60:           | 3 | 4,1183 | 0,24  | -0,334 |
| 2 | Q13442 HAP28_HUMAN | K.KS#LDS#DES#EEDDYQQK.R              | S57:S60:S63:       | 3 | 6,0903 | 0,416 | -0,152 |
| 2 | P17812 PYRG1_HUMAN | R.S#GS#SSPDSEIT#ELKFPSINHD.-         | S571:S573:T581:    | 3 | 2,6423 | 1     | -0,147 |
| 2 | P17812 PYRG1_HUMAN | R.DTYSDRS#GSS#S#PDSEITELK.F          | S571:S574:S575:    | 3 | 3,8032 | 1     | 0,152  |
| 2 | P17812 PYRG1_HUMAN | R.SGS#SS#PDS#EITELKFPSINHD.-         | S573:S575:S578:    | 3 | 3,2083 | 0,179 | -0,074 |
| 2 | Q09666 AHNK_HUMAN  | K.GGVTGS#PEAS#ISGSK.G                | S5731:S5735:       | 2 | 3,3568 | 0,38  | -0,245 |
| 2 | P17812 PYRG1_HUMAN | R.SGSS#S#PDSEITELK.F                 | S574:S575:         | 2 | 4,0623 | 1     | -0,229 |
| 2 | P17812 PYRG1_HUMAN | R.SGSS#S#PDS#EITELKFPSINHD.-         | S574:S575:S578:    | 3 | 3,6684 | 0,281 | -0,074 |
| 2 | Q09666 AHNK_HUMAN  | K.SS#KASLGS#LEGEAEAEASS#PK.G         | S5746:S5752:S5763: | 3 | 3,4002 | 1     | 0      |
| 2 | Q86TV6 TTC7B_HUMAN | R.VEQALSEVAS#S#LQSSAPK.Q             | S575:S576:         | 2 | 2,3888 | 0,29  | -0,061 |
| 2 | Q09666 AHNK_HUMAN  | K.ASLGS#LEGEAEAEASSPK.G              | S5752:             | 2 | 3,9118 | 0,46  | -0,471 |
| 2 | Q8IZM8 ZN654_HUMAN | K.KCQTLFGFDS#DDES#A.-                | S576:S580:         | 2 | 3,5486 | 0,268 | -0,325 |
| 2 | P46013 KI67_HUMAN  | K.AQSLVIS#PPAPS#PR.K                 | S579:S584:         | 2 | 2,5024 | 0,329 | -0,077 |
| 2 | Q9UJX2 CDC23_HUMAN | R.RVS#PLNLSSVT#P.-                   | S582:T590:         | 2 | 3,2893 | 0,53  | -0,171 |
| 2 | Q09666 AHNK_HUMAN  | K.FGTFGGLGS#K.S                      | S5830:             | 2 | 2,2971 | 0,45  | 0      |
| 2 | Q15678 PTN14_HUMAN | K.YVSGS#S#PDLVTR.K                   | S593:S594:         | 2 | 2,7798 | 0,162 | -0,085 |
| 2 | Q7Z460 CLAP1_HUMAN | R.SRS#DIDVNAAASAK.S                  | S600:              | 2 | 3,4588 | 0,532 | -0,164 |
| 2 | Q05209 PTN12_HUMAN | R.TPLSFTNPLHS#DDS#DS#DER.N           | S603:S606:S608:    | 3 | 5,76   | 0,513 | -0,154 |
| 2 | Q8IYB3 SRRM1_HUMAN | R.YS#PS#PPPK.R                       | S605:S607:         | 2 | 2,1092 | 0,294 | -0,236 |
| 2 | P52948 NUP98_HUMAN | K.NLNNS#NLFS#PVNR.D                  | S608:S612:         | 2 | 2,9527 | 0,349 | 0      |
| 2 | P52948 NUP98_HUMAN | K.NLNNS#NLFS#PVNR.D                  | S608:S612:         | 3 | 2,6226 | 0,101 | -0,111 |
| 2 | Q684P5 RPGP2_HUMAN | K.SETSS#NPSS#PEICPNK.E               | S609:S613:         | 2 | 2,7118 | 0,372 | -0,515 |
| 2 | P02545 LMNA_HUMAN  | K.ASASGSGAQVGGPISSGSS#ASS#VTVTR.S    | S616:S619:         | 3 | 5,7631 | 1     | -0,072 |
| 2 | O60353 FZD6_HUMAN  | R.EQDCGEPAS#PAASIS#R.L               | S620:S626:         | 2 | 2,4772 | 0,3   | -0,133 |
| 2 | Q9H165 BC11A_HUMAN | K.LLLGS#PSSLS#PFSK.R                 | S625:S630:         | 2 | 2,6979 | 0,315 | -0,23  |
| 2 | Q8WU17 RN139_HUMAN | R.EAAAES#DRELNEDDS#T#DCDDDVQR.E      | S625:S634:T635:    | 3 | 4,7289 | 0,442 | -0,489 |
| 2 | P49848 TAF6_HUMAN  | K.GGPTSHPS#PVPPPASS#PS#PLSGSALCGGK.Q | S626:S634:S636:    | 3 | 4,0746 | 1     | -0,626 |
| 2 | Q08999 RBL2_HUMAN  | R.ADEICAGS#PLT#PR.R                  | S639:T642:         | 2 | 2,814  | 0,416 | -0,147 |
| 2 | P13807 GYS1_HUMAN  | R.YPRPAS#VPPS#PSLS#R.H               | S641:S645:S649:    | 2 | 2,2819 | 0,255 | -0,132 |
| 2 | Q9HAW4 CLSPN_HUMAN | K.VLQDS#DS#ETEDTNASPEK.T             | S65:S67:           | 2 | 3,3761 | 0,493 | -0,345 |

|   |                    |                                   |                 |   |        |       |        |
|---|--------------------|-----------------------------------|-----------------|---|--------|-------|--------|
| 2 | Q15154 PCM1_HUMAN  | R.VTNDIS#PES#SPGVGR.R             | S65:S68:        | 2 | 4,4255 | 0,459 | -0,364 |
| 2 | Q15154 PCM1_HUMAN  | R.VTNDIS#PES#SPGVGR.R             | S65:S68:        | 3 | 3,1647 | 0,271 | -0,109 |
| 2 | Q15154 PCM1_HUMAN  | R.VTNDIS#PESS#PGVGR.R             | S65:S69:        | 3 | 2,8495 | 0,181 | -0,437 |
| 2 | Q96JM3 ZN828_HUMAN | K.GQES#SS#DQEQVDVES#IDFSKENK.M    | S651:S653:S662: | 3 | 4,7919 | 0,391 | -0,259 |
| 2 | P49848 TAF6_HUMAN  | K.QEAGDS#PPPAPGT#PK.A             | S653:T660:      | 2 | 3,5934 | 0,556 | -0,303 |
| 2 | Q9H1B7 EAP1_HUMAN  | R.RNS#SS#PVS#PASVPGQR.R           | S657:S659:S662: | 2 | 4,1465 | 1     | -0,327 |
| 2 | Q9H1B7 EAP1_HUMAN  | R.NSSS#PVS#PASVPGQR.R             | S659:S662:      | 2 | 3,6371 | 1     | -0,449 |
| 2 | P42166 LAP2A_HUMAN | K.GPPDFS#S#DEEREPT#PVLGSGAAAAGR.S | S66:S67:T74:    | 3 | 6,5959 | 0,592 | -0,391 |
| 2 | P18858 DNL1_HUMAN  | R.VLGS#EGEEDEALS#PAK.G            | S66:S76:        | 2 | 4,0608 | 0,549 | -0,191 |
| 2 | Q9NYF8 BCLF1_HUMAN | R.IDISPS#TLR.K                    | S660:           | 2 | 2,0751 | 0,244 | -0,338 |
| 2 | Q9UBH6 XPR1_HUMAN  | K.YNQS#IS#LR.R                    | S666:S668:      | 2 | 2,6498 | 0,229 | 0,107  |
| 2 | Q4V328 GRAP1_HUMAN | R.TQTGDSSS#ISS#FSYR.E             | S666:S669:      | 2 | 3,6291 | 1     | -0,137 |
| 2 | Q969R5 LMBL2_HUMAN | R.EAGELPTS#PLHLLS#PGT#PR.S        | S67:S73:T76:    | 3 | 3,6737 | 0,401 | -0,165 |
| 2 | Q9Y3T9 NOC2L_HUMAN | K.DLFDLNS#S#EEDDTEGFSE.R          | S672:S673:      | 3 | 4,3868 | 0,341 | -0,387 |
| 2 | Q9UEY8 ADDG_HUMAN  | K.IEEVLS#PEGS#PSKS#PSK.K          | S673:S677:S681: | 3 | 2,8975 | 0,205 | -0,273 |
| 2 | Q9UEY8 ADDG_HUMAN  | K.IEEVLS#PEGS#PSKS#PSK.K          | S673:S677:S681: | 2 | 2,5365 | 0,195 | -0,425 |
| 2 | P35251 RFC1_HUMAN  | R.IIYDS#DS#ESEETLQVK.N            | S69:S71:        | 2 | 3,6684 | 0,441 | 0,545  |
| 2 | P35251 RFC1_HUMAN  | R.IIYDS#DS#ESEETLQVK.N            | S69:S71:        | 3 | 2,6211 | 0,165 | -0,091 |
| 2 | Q8IYB3 SRRM1_HUMAN | R.APQTSS#S#PPPVR.R                | S695:S696:      | 2 | 3,8091 | 0,377 | -0,441 |
| 2 | Q6ZRV2 FA83H_HUMAN | R.SQS#S#S#QGDNPLAPGYLPPHYK.E      | S7:S8:S9:       | 3 | 3,5296 | 0,307 | -0,221 |
| 2 | P25205 MCM3_HUMAN  | K.DGDSYDPYDFS#DTEEEM*PQVHT#PK.T   | S711:T722:      | 3 | 4,0567 | 0,363 | -0,061 |
| 2 | O43719 HTSF1_HUMAN | K.LFDEEEDS#S#EK.L                 | S713:S714:      | 2 | 2,9145 | 0,335 | -0,328 |
| 2 | O43719 HTSF1_HUMAN | K.LFDEEEDS#S#EKLFDDS#DER.G        | S713:S714:S721: | 3 | 4,6877 | 0,411 | -0,072 |
| 2 | P82094 TMF1_HUMAN  | K.SNTEPQS#PPIAS#PK.A              | S72:S77:        | 2 | 2,507  | 0,46  | -0,454 |
| 2 | Q9Y2D5 AKAP2_HUMAN | R.TLS#M*IEEEIR.A                  | S720:           | 2 | 2,3367 | 0,336 | -0,463 |
| 2 | Q14684 RRP1B_HUMAN | K.TPTSS#PAS#SPLVAK.K              | S732:S735:      | 2 | 3,2344 | 1     | -0,081 |
| 2 | Q9H7N4 SFR19_HUMAN | R.EVLYDS#EGLS#GEER.G              | S734:S738:      | 2 | 4,5849 | 0,605 | -0,21  |
| 2 | P54259 ATN1_HUMAN  | K.QEPAEEYETPES#PVPPARS#PS#PPPK.V  | S734:S741:S743: | 3 | 3,7944 | 0,334 | -0,557 |
| 2 | P98175 RBM10_HUMAN | R.GLVAAYSGES#DS#EEEQER.G          | S735:S737:      | 2 | 6,2138 | 0,627 | -0,346 |
| 2 | P98175 RBM10_HUMAN | R.GLVAAYSGES#DS#EEEQER.G          | S735:S737:      | 3 | 2,8675 | 0,286 | -0,173 |
| 2 | Q8IYB3 SRRM1_HUMAN | K.AAS#PS#PQSVR.R                  | S738:S740:      | 2 | 2,0049 | 0,197 | -0,21  |
| 2 | Q9UKI8 TLK1_HUMAN  | R.FTGVASGS#T#GSTGSCSVGAK.A        | S74:T75:        | 2 | 5,3431 | 1     | -0,74  |
| 2 | Q13136 LIPA1_HUMAN | K.CETS#PPSS#PR.A                  | S741:S745:      | 2 | 2,8174 | 0,451 | -0,191 |

|   |                     |                                      |                 |   |        |       |        |
|---|---------------------|--------------------------------------|-----------------|---|--------|-------|--------|
| 2 | A0FGR8 ESYT2_HUMAN  | K.EPTPSIAS#DIS#LPIATQELR.Q           | S758:S761:      | 3 | 5,3453 | 0,394 | -0,318 |
| 2 | Q66K74 MAP1S_HUMAN  | K.AVPM*APAPAS#PGS#SNDSSAR.S          | S759:S762:      | 2 | 3,4541 | 0,502 | -0,477 |
| 2 | Q9Y2J4 AMOL2_HUMAN  | R.AAS#LDS#VATSR.V                    | S759:S762:      | 2 | 2,4844 | 0,369 | -0,099 |
| 2 | Q9C0C4 SEM4C_HUMAN  | R.CQPGGGPPS#PPPPIGQPLPSPT#R.L        | S760:T774:      | 3 | 2,9991 | 0,235 | 0,365  |
| 2 | P54259 ATN1_HUMAN   | R.SEEIS#ES#ESEETNAPK.K               | S77:S79:        | 2 | 4,1482 | 0,401 | -0,317 |
| 2 | Q99856 ARI3A_HUMAN  | R.AAAAGLGHPAS#PGGS#EDGPPGS#EEEDAAR.E | S77:S81:S88:    | 3 | 6,7804 | 0,471 | -0,379 |
| 2 | Q15003 CND2_HUMAN   | R.VFDLQFS#TDS#PR.L                   | S78:S81:        | 2 | 3,4458 | 0,485 | -0,31  |
| 2 | Q2NL81 Q2NL81_HUMAN | R.GYQS#LSDS#PPGAR.V                  | S789:S793:      | 2 | 2,8184 | 0,215 | -0,245 |
| 2 | Q9UKI8 TLK1_HUMAN   | R.FTGVASGSTGSGS#CS#VGAK.A            | S80:S82:        | 2 | 3,7997 | 1     | -0,123 |
| 2 | Q9H6F5 CCD86_HUMAN  | R.LQQGAGLES#PQQQPEPGAAS#PQR.Q        | S80:S91:        | 3 | 3,5102 | 0,161 | -0,371 |
| 2 | Q86TC9 MYPN_HUMAN   | R.CVS#PIPV#PTSRI                     | S813:S818:      | 2 | 2,7001 | 0,326 | -0,334 |
| 2 | Q8IWX8 CHERP_HUMAN  | R.S#RS#PTPPS#SAGLGSNSAPPIPDSR.L      | S815:S817:S822: | 3 | 5,5369 | 1     | -0,355 |
| 2 | Q8IWX8 CHERP_HUMAN  | R.S#RS#PTPPS#AGLGSNSAPPIPDSR.L       | S815:S817:S823: | 3 | 5,378  | 1     | -0,995 |
| 2 | Q8IWX8 CHERP_HUMAN  | R.S#RS#PT#PPSSAGLGSNSAPPIPDSR.L      | S815:S817:T819: | 3 | 4,1256 | 1     | -0,355 |
| 2 | Q96GE4 CCD45_HUMAN  | R.LQLASFQYSKS#PS#L.-                 | S818:S820:      | 2 | 2,8086 | 0,447 | -0,635 |
| 2 | P46821 MAP1B_HUMAN  | R.SLM*S#S#PEDLTK.D                   | S831:S832:      | 2 | 2,3426 | 0,393 | -0,265 |
| 2 | P46821 MAP1B_HUMAN  | R.SLMS#S#PEDLTK.D                    | S831:S832:      | 2 | 2,2768 | 0,328 | -0,268 |
| 2 | P48960 CD97_HUMAN   | R.ALAS#ES#GI.-                       | S831:S833:      | 2 | 3,1298 | 0,545 | -0,115 |
| 2 | Q9NQ57 INCE_HUMAN   | K.INPDNYGMDLNS#DDS#T#DDEAHPR.K       | S833:S836:T837: | 3 | 4,1535 | 0,346 | -0,129 |
| 2 | Q13595 TRA2A_HUMAN  | R.S#RS#YT#PEYR.R                     | S84:S86:T88:    | 2 | 2,4871 | 0,439 | -0,349 |
| 2 | Q9UQ35 SRRM2_HUMAN  | K.S#GTTPRQGSITS#PQANEQSVT#PQR.R      | S846:S857:T866: | 3 | 3,9633 | 1     | -0,662 |
| 2 | Q13127 REST_HUMAN   | K.ESVSTEDLS#PPS#PPLPK.E              | S861:S864:      | 2 | 2,1345 | 0,271 | -0,063 |
| 2 | Q9UK76 HN1_HUMAN    | R.RNS#S#EAS#SGDFLDLK.G               | S87:S88:S91:    | 2 | 3,3778 | 0,242 | -0,327 |
| 2 | Q9UQ35 SRRM2_HUMAN  | R.SCFES#S#PDPELK.S                   | S875:S876:      | 2 | 2,4562 | 0,324 | -0,157 |
| 2 | Q9UK76 HN1_HUMAN    | R.RNSS#EASSGDFLDLK.G                 | S88:            | 2 | 3,1203 | 0,163 | -0,572 |
| 2 | P29317 EPHA2_HUMAN  | R.VS#IRLPS#TSGS#EGVPFR.T             | S892:S897:S901: | 3 | 2,8375 | 0,324 | -0,361 |
| 2 | Q96N67 DOCK7_HUMAN  | R.S#RSLNSNPDIS#GTPT#SPDDEV.R.S       | S894:S905:T909: | 3 | 5,223  | 1     | -0,205 |
| 2 | Q96N67 DOCK7_HUMAN  | R.SRS#LSNS#NPDISGTPPTS#PDDEV.R.S     | S896:S900:S910: | 3 | 4,8607 | 1     | -0,137 |
| 2 | P29317 EPHA2_HUMAN  | R.LPS#TSGS#EGVPFR.T                  | S897:S901:      | 2 | 2,0203 | 0,343 | 0      |
| 2 | P51784 UBP11_HUMAN  | R.RLLSPAGSS#GAPASPCS#SPSSEFM*DVN.-   | S900:S909:      | 3 | 3,2219 | 1     | -0,18  |
| 2 | Q9BYX2 TBD2A_HUMAN  | R.RAVS#EGCAS#EDEVGEA.-               | S904:S909:      | 2 | 4,4125 | 0,606 | -0,375 |
| 2 | Q9P107 GMIP_HUMAN   | R.GPS#PAAAS#PEGS#PLRR.T              | S914:S919:S923: | 2 | 2,4935 | 0,418 | -0,409 |
| 2 | P15336 ATF2_HUMAN   | K.M*PLDLS#PLAT#PIIR.S                | S94:T98:        | 2 | 2,5908 | 0,374 | 0      |



|   |                    |                               |                    |   |        |       |        |
|---|--------------------|-------------------------------|--------------------|---|--------|-------|--------|
| 2 | Q9UQ35 SRRM2_HUMAN | R.S#RS#VS#PCSNVESR.L          | S950:S952:S954:    | 2 | 3,4449 | 0,387 | -0,429 |
| 2 | Q9UQ35 SRRM2_HUMAN | R.S#RS#VS#PCSNVESR.L          | S950:S952:S954:    | 3 | 3,0861 | 0,422 | -0,322 |
| 2 | Q9UQ35 SRRM2_HUMAN | R.S#VS#PCSNVESR.L             | S952:S954:         | 2 | 3,4904 | 0,485 | -0,177 |
| 2 | Q13409 DC1I2_HUMAN | K.SVSTPS#EAGS#QDSGDGAVGSR.T   | S97:S101:          | 3 | 2,8472 | 0,255 | -0,433 |
| 2 | Q5T200 ZC3HD_HUMAN | R.GNIETTS#EDGQVFS#PK.K        | S986:S993:         | 2 | 2,206  | 0,231 | -0,131 |
| 2 | O15417 TNC18_HUMAN | K.AVS#PPPS#PRAS#PVAALK.A      | S991:S995:S999:    | 2 | 2,5248 | 0,22  | -0,453 |
| 2 | Q9UQ35 SRRM2_HUMAN | K.AQT#PPGPS#LSGS#KSPCPQEK.S   | T1003:S1008:S1012: | 3 | 3,4217 | 0,295 | -0,399 |
| 2 | Q6P0N0 CN106_HUMAN | K.LVETDFST#PT#PR.R            | T1087:T1089:       | 2 | 2,1634 | 0,324 | -0,24  |
| 2 | Q5T3F8 TM63B_HUMAN | R.LT#SVSS#SVDQDQR.D           | T110:S114:         | 2 | 3,1864 | 1     | -0,076 |
| 2 | Q9UKA4 AKA11_HUMAN | R.NVIPDT#PPST#PLVPSR.A        | T1100:T1104:       | 2 | 2,0477 | 0,118 | 0,066  |
| 2 | Q96T60 PNKP_HUMAN  | R.TPESQPDTP#PPGT#PLVSQDEK.R   | T118:T122:         | 3 | 2,7182 | 0,287 | -0,16  |
| 2 | Q8WXI9 P66B_HUMAN  | R.GRLT#PS#PDIIVLSDNEASS#PR.S  | T120:S122:S135:    | 3 | 5,8578 | 0,472 | 0      |
| 2 | Q8WYP5 AHTF1_HUMAN | R.ST#PLASPS#PS#PGRSPQR.L      | T1219:S1225:S1227: | 3 | 2,7636 | 1     | -0,186 |
| 2 | Q8NEZ4 MLL3_HUMAN  | K.IINQNSVAVLQT#PPDIQS#EHS#R.D | T1219:S1225:S1228: | 3 | 3,4645 | 0,25  | 0      |
| 2 | Q9UPT8 ZC3H4_HUMAN | K.T#GSGSPFAGNS#PAR.E          | T1265:S1275:       | 2 | 2,5833 | 0,279 | 0      |
| 2 | Q14181 DPOA2_HUMAN | R.AIST#PET#PLTK.R             | T127:T130:         | 2 | 2,7554 | 0,483 | -0,37  |
| 2 | Q03252 LMNB2_HUMAN | R.AGGPAT#PLS#PTR.L            | T14:S17:           | 2 | 2,925  | 0,441 | -0,095 |
| 2 | P06493 CDC2_HUMAN  | K.IGEGT#Y#GVVYK.G             | T14:Y15:           | 2 | 3,5366 | 0,363 | 0      |
| 2 | Q63ZY6 NSN5C_HUMAN | R.QLEEPGAGT#PS#PVR.L          | T141:S143:         | 2 | 2,2791 | 0,191 | -0,076 |
| 2 | P42166 LAP2A_HUMAN | R.SST#PLPTISSAENTR.Q          | T160:              | 2 | 3,7172 | 0,361 | -0,353 |
| 2 | Q1KMD3 HNRL2_HUMAN | R.SGDET#PGS#EVPGDK.A          | T165:S168:         | 2 | 2,9371 | 0,34  | -0,08  |
| 2 | Q86TB9 PATL1_HUMAN | R.RST#S#PIIGS#PPVR.A          | T178:S179:S184:    | 2 | 2,7862 | 0,336 | -0,228 |
| 2 | Q9Y446 PKP3_HUMAN  | R.ADYDT#LS#LR.S               | T178:S180:         | 2 | 2,7203 | 0,342 | -0,201 |
| 2 | Q9H1E3 NUCKS_HUMAN | K.ATVT#PS#PVK.G               | T179:S181:         | 2 | 2,0861 | 0,403 | -0,115 |
| 2 | P19105 MLRM_HUMAN  | R.AT#SNVFAM*FDQSQIQEFK.E      | T18:               | 3 | 3,0721 | 0,191 | 0,251  |
| 2 | P19105 MLRM_HUMAN  | R.AT#S#NVFAM*FDQSQIQEFK.E     | T18:S19:           | 3 | 3,5103 | 0,336 | -0,242 |
| 2 | Q9P260 K1468_HUMAN | R.AGSIST#LDS#LDFAR.Y          | T183:S186:         | 2 | 2,6789 | 0,417 | -0,378 |
| 2 | P49792 RBP2_HUMAN  | R.YIASVQGST#PS#PR.Q           | T19:S21:           | 2 | 2,9011 | 0,419 | -0,401 |
| 2 | Q99666 RGPD5_HUMAN | R.YVASVLGLT#PS#PR.Q           | T19:S21:           | 2 | 2,5472 | 0,349 | 0,08   |
| 2 | P02545 LMNA_HUMAN  | R.SGAQASST#PLS#PTR.I          | T19:S22:           | 2 | 4,4088 | 1     | -0,241 |
| 2 | P42356 PI4KA_HUMAN | R.KT#SS#VSS#ISQVSPER.G        | T197:S199:S202:    | 2 | 2,8287 | 1     | -0,333 |
| 2 | P20700 LMNB1_HUMAN | R.AGGPTT#PLS#PTR.L            | T20:S23:           | 2 | 3,3544 | 0,435 | -0,464 |
| 2 | O75533 SF3B1_HUMAN | R.WDQTADQT#PGAT#PK.K          | T207:T211:         | 2 | 4,2778 | 0,421 | -0,582 |

|   |                    |                                |                    |   |        |       |        |
|---|--------------------|--------------------------------|--------------------|---|--------|-------|--------|
| 2 | Q01082 SPTB2_HUMAN | R.T#SSKES#SPIPS#PTSDR.K        | T2159:S2164:S2169: | 2 | 2,6172 | 1     | -0,382 |
| 2 | Q5QE6 TDIF2_HUMAN  | K.QIVGT#PVNS#EDSDTR.Q          | T232:S236:         | 2 | 3,0702 | 0,41  | -0,824 |
| 2 | Q9BYG3 MK671_HUMAN | K.TVDSQGPT#PVCT#PTFLER.R       | T234:T238:         | 3 | 3,4526 | 0,318 | -0,169 |
| 2 | P49736 MCM2_HUMAN  | R.GNDPLT#SS#PGR.S              | T25:S27:           | 2 | 2,1762 | 0,336 | -0,29  |
| 2 | Q9UHR4 BI2L1_HUMAN | K.TPASTPVSGT#PQAS#PM*IER.S     | T257:S261:         | 3 | 3,9475 | 0,423 | 0,087  |
| 2 | Q9UHR4 BI2L1_HUMAN | K.TPASTPVSGT#PQAS#PMIER.S      | T257:S261:         | 3 | 3,5275 | 0,367 | -0,088 |
| 2 | Q8IWB9 TEX2_HUMAN  | R.NTGGDSKT#APSS#PLTS#PSDTR.S   | T262:S266:S270:    | 3 | 4,3413 | 1     | -0,237 |
| 2 | O75475 PSIP1_HUMAN | K.TGVST#SDS#EEEGDDQEGEK.K      | T272:S275:         | 3 | 3,3888 | 1     | -0,081 |
| 2 | Q96G46 DUS3L_HUMAN | R.QENCGAQQVPAGPGTST#PPSS#PVR.T | T273:S277:         | 3 | 4,7443 | 1     | -0,213 |
| 2 | P98172 EFNB1_HUMAN | R.AAALSST#LAS#PK.G             | T284:S287:         | 2 | 2,3231 | 0,266 | -0,263 |
| 2 | Q969H4 CNKR1_HUMAN | K.IPIPET#PPQT#PPQVLDS#PHQR.S   | T289:T293:S300:    | 3 | 4,0385 | 0,463 | 0      |
| 2 | Q9BTV5 FSD1_HUMAN  | R.T#ASPINS#PARGTPS#PK.R        | T311:S317:S324:    | 2 | 2,0255 | 0,121 | -0,536 |
| 2 | Q9GZR1 SEN6_HUMAN  | R.KT#SLSLDNDPIILS#S#DDDDNDNR.T | T323:S335:S336:    | 3 | 6,0169 | 0,308 | -0,392 |
| 2 | Q70CQ2 UBP34_HUMAN | R.EVLT#PTS#TSDNETR.D           | T3230:S3233:       | 2 | 3,355  | 1     | -0,214 |
| 2 | Q70CQ2 UBP34_HUMAN | R.EVLTPT#S#TSDNETR.D           | T3232:S3233:       | 2 | 2,2272 | 0,28  | -0,856 |
| 2 | Q9UKS6 PACN3_HUMAN | R.SPDEVT#LTS#IVPTR.D           | T324:S327:         | 2 | 3,9266 | 0,414 | -0,291 |
| 2 | Q86X27 RGPS2_HUMAN | K.SVAEAGALLPQT#PPS#PR.N        | T326:S329:         | 2 | 2,3327 | 0,386 | -0,066 |
| 2 | O75533 SF3B1_HUMAN | R.GGDSIGET#PT#PGASK.R          | T326:T328:         | 2 | 3,6514 | 0,45  | -0,318 |
| 2 | Q9UJZ1 STML2_HUMAN | K.APVPGT#PDS#LSSGSSR.D         | T327:S330:         | 2 | 3,7576 | 1     | -0,146 |
| 2 | Q92597 NDRG1_HUMAN | R.SRT#AS#GSSVTS#LDGTR.S        | T328:S330:S336:    | 2 | 3,1691 | 1     | -0,268 |
| 2 | Q9UN36 NDRG2_HUMAN | R.SRT#AS#LTS#AS#VDGNR.S        | T330:S332:S338:    | 2 | 4,2817 | 1     | -0,599 |
| 2 | Q9H8V3 ECT2_HUMAN  | K.SVSM*LSLNT#PNS#NR.K          | T342:S345:         | 2 | 4,1192 | 0,511 | -0,072 |
| 2 | P49585 PCY1A_HUMAN | K.T#SPPCS#PANLSR.H             | T342:S347:         | 2 | 2,2104 | 0,264 | -0,422 |
| 2 | Q14247 SRC8_HUMAN  | K.TQT#PPVS#PAPQPTEER.L         | T401:S405:         | 2 | 3,8887 | 0,433 | -0,708 |
| 2 | Q14247 SRC8_HUMAN  | K.TQT#PPVS#PAPQPTEER.L         | T401:S405:         | 3 | 3,1862 | 0,41  | 0,097  |
| 2 | Q9ULJ3 ZN295_HUMAN | R.IKT#EPS#S#PLSDPSDIIR.V       | T431:S434:S435:    | 3 | 3,7946 | 0,367 | 0,087  |
| 2 | P85037 FOXK1_HUMAN | R.SGGLQT#PECLS#R.E             | T436:S441:         | 2 | 3,2819 | 0,328 | -0,167 |
| 2 | Q969V6 MKL1_HUMAN  | K.FGSTGST#PPVS#PTPSER.S        | T450:S454:         | 2 | 2,916  | 1     | -0,524 |
| 2 | Q6NZY4 ZCHC8_HUMAN | R.GT#PPPVFT#PPLPK.G            | T479:T485:         | 3 | 2,8885 | 0,273 | -0,182 |
| 2 | Q9NUL3 STAU2_HUMAN | K.GSSPT#PPCS#PVQPSK.Q          | T488:S492:         | 2 | 2,8843 | 0,317 | -0,434 |
| 2 | P17544 ATF7_HUMAN  | R.TDSVIIADQT#PT#PTR.F          | T51:T53:           | 2 | 4,1301 | 0,443 | -0,344 |
| 2 | P15336 ATF2_HUMAN  | R.NDSVIVADQT#PT#PTR.F          | T51:T53:           | 2 | 3,9038 | 0,437 | -0,688 |
| 2 | Q9Y6G9 DC1L1_HUMAN | R.KPVTVSPTT#PTS#PTEGEAS.-      | T513:S516:         | 2 | 2,8471 | 1     | -0,596 |

|   |                    |                               |                    |   |        |       |        |
|---|--------------------|-------------------------------|--------------------|---|--------|-------|--------|
| 2 | P05362 ICAM1_HUMAN | K.GT#PM*KPNTQAT#PP.-          | T521:T530:         | 2 | 2,4314 | 0,248 | -0,241 |
| 2 | Q13523 PRP4B_HUMAN | R.T#RS#PS#PDDILER.V           | T576:S578:S580:    | 3 | 2,6527 | 0,2   | 0      |
| 2 | Q14978 NOLC1_HUMAN | K.LQT#PNT#FPK.R               | T607:T610:         | 2 | 3,1417 | 0,215 | -0,202 |
| 2 | Q2M2I8 AAK1_HUMAN  | K.VGSLT#PPSS#PK.T             | T620:S624:         | 2 | 2,7734 | 0,215 | -0,397 |
| 2 | Q6QNY0 BL1S3_HUMAN | R.VAGEAAET#DS#EPEPEPEPTAAPR.D | T63:S65:           | 3 | 4,3163 | 0,412 | -0,51  |
| 2 | P35221 CTNA1_HUMAN | R.SRT#S#VQT#EDDQLIAGQSAR.A    | T654:S655:T658:    | 3 | 4,2102 | 0,32  | 0,079  |
| 2 | Q6P996 PDXD1_HUMAN | R.GSDALSET#S#S#VSHIEDLEK.V    | T720:S721:S722:    | 3 | 3,3872 | 1     | -0,734 |
| 2 | Q9Y6X9 MORC2_HUMAN | K.T#ESPIKLS#PAT#PSR.K         | T723:S730:T733:    | 2 | 2,7791 | 0,297 | -0,495 |
| 2 | Q14684 RRP1B_HUMAN | K.T#PTSSPASS#PLVAK.K          | T728:S736:         | 3 | 2,6811 | 0,268 | 0,243  |
| 2 | Q14684 RRP1B_HUMAN | K.T#PTSSPASS#PLVAK.K          | T728:S736:         | 2 | 2,1378 | 0,317 | -0,731 |
| 2 | Q9UGH3 S23A2_HUMAN | K.SSLAETLDST#GS#LDPQR.S       | T79:S81:           | 2 | 2,6793 | 1     | -0,252 |
| 2 | Q76FK4 NOL8_HUMAN  | R.FLET#DS#EEEEQEEVNEK.K       | T888:S890:         | 2 | 3,5005 | 0,406 | -0,346 |
| 2 | P49840 GSK3A_HUMAN | R.GEPNVS#Y#ICS#R.Y            | Y279:S282:         | 2 | 2,2677 | 0,237 | -0,338 |
| 2 | Q9NRF8 PYRG2_HUMAN | K.LSSSDRY#SDAS#DDS#FSEPR.I    | Y567:S571:S574:    | 3 | 3,2246 | 0,203 | -0,542 |
| 2 | Q9BT25 NYS48_HUMAN | R.SFAQVLELSAEASK.E            |                    | 2 | 4,2475 | 0,489 | -0,247 |
| 2 | P05386 RLA1_HUMAN  | K.KEESEESDDDM*GFGLFD.-        |                    | 2 | 3,0992 | 0,486 | -0,434 |
| 2 | P30443 1A01_HUMAN  | R.DGEDQTQDTELVETRPAGDGTQK.W   |                    | 3 | 2,8388 | 0,392 | -0,139 |
| 2 | P17661 DESM_HUMAN  | K.VELQELNDR.F                 |                    | 2 | 2,4528 | 0,243 | -0,328 |
| 2 | Q15388 TOM20_HUMAN | R.IVSAQSLAEDDVE.-             |                    | 2 | 2,4225 | 0,177 | -0,177 |
| 2 | P35268 RL22_HUMAN  | R.YFQINQDEEEEEDED.-           |                    | 2 | 2,0933 | 0,229 | -0,189 |
| 3 | P05386 RLA1_HUMAN  | K.KEES#EES#DDDM*GFGLFD.-      | S101:S104:         | 2 | 4,2888 | 0,582 | -0,689 |
| 3 | P05386 RLA1_HUMAN  | K.KEES#EES#DDDMGFGLFD.-       | S101:S104:         | 2 | 3,6451 | 0,568 | -0,231 |
| 3 | P05386 RLA1_HUMAN  | K.KEES#EES#DDDM*GFGLFD.-      | S101:S104:         | 3 | 2,7018 | 0,328 | -0,086 |
| 3 | P52926 HMGA2_HUMAN | K.KPAQEETEETS#SQES#AEED.-     | S101:S105:         | 3 | 3,621  | 0,229 | -0,32  |
| 3 | P17096 HMGA1_HUMAN | K.KLEKEEEEGISQES#S#EEEEQ.-    | S102:S103:         | 3 | 4,343  | 0,275 | -0,153 |
| 3 | O60231 DHX16_HUMAN | R.LLED#EES#SEETVSR.A          | S103:S106:         | 2 | 2,798  | 0,428 | 0      |
| 3 | P31943 HNRH1_HUMAN | K.HTGPNS#PDTANDGFVR.L         | S104:              | 3 | 2,848  | 0,169 | -0,104 |
| 3 | P20042 IF2B_HUMAN  | K.IES#DVQEPTPEPDDLDM*LGNK.K   | S105:              | 3 | 3,0662 | 0,27  | 0      |
| 3 | O95696 BRD1_HUMAN  | R.VHGEPTS#DLS#DID.-           | S1052:S1055:       | 2 | 2,0876 | 0,309 | -0,158 |
| 3 | P24534 EF1B_HUMAN  | K.DDDDIDLFGS#DDEEESEAK.R      | S106:              | 3 | 3,9061 | 0,325 | 0      |
| 3 | Q96RT1 LAP2_HUMAN  | R.QSS#VSS#TAS#VNLGDPGSTRR.A   | S1079:S1082:S1085: | 3 | 3,5183 | 1     | -0,081 |
| 3 | Q76FK4 NOL8_HUMAN  | R.LQDS#S#S#EEEDVTEETDHR.N     | S1082:S1083:S1084: | 3 | 4,2086 | 0,472 | 0,468  |
| 3 | P21333 FLNA_HUMAN  | K.AFGPGLQGGSGS#PAR.F          | S1084:             | 2 | 3,5326 | 0,391 | 0,242  |

|   |                    |                               |                    |   |        |       |        |
|---|--------------------|-------------------------------|--------------------|---|--------|-------|--------|
| 3 | Q9UQ35 SRRM2_HUMAN | R.SS#S#PVTELASR.S             | S1102:S1103:       | 2 | 2,5999 | 0,236 | 0,189  |
| 3 | Q96T60 PNKP_HUMAN  | R.TPES#QPDT#PPGT#PLVSQDEKR.D  | S114:T118:T122:    | 3 | 3,8917 | 0,316 | -0,363 |
| 3 | Q3KQU3 MA7D1_HUMAN | R.RSSQPS#PT#AVPASDS#PPTK.Q    | S116:T118:S125:    | 3 | 3,1721 | 1     | 0      |
| 3 | Q8WYP5 AHTF1_HUMAN | R.STLRS#TPLAS#PSPS#PGR.S      | S1218:S1223:S1227: | 3 | 3,2807 | 1     | 0,094  |
| 3 | Q8N488 RYBP_HUMAN  | K.SDILKDPPS#EANS#IQS#ANATTK.T | S123:S127:S130:    | 3 | 4,7667 | 0,418 | -0,29  |
| 3 | Q14137 BOP1_HUMAN  | R.IGDEYAEDS#S#DEEDIR.N        | S126:S127:         | 2 | 4,4593 | 0,532 | -0,426 |
| 3 | Q9H1E3 NUCKS_HUMAN | K.DS#GSDEDFLM*EDDDSDYGSSK.K   | S130:              | 3 | 4,6068 | 0,435 | -0,217 |
| 3 | Q09666 AHNK_HUMAN  | R.LKS#EDGVEGDLGETQSR.T        | S135:              | 3 | 3,7968 | 0,442 | -0,193 |
| 3 | Q76L83 ASXL2_HUMAN | R.KVSS#SS#PQSGCPS#PTIPAGK.V   | S137:S139:S146:    | 3 | 3,344  | 1     | -0,083 |
| 3 | Q5SYE7 NHSL1_HUMAN | R.NHS#PS#PPVT#PTGAAPSLASPK.Q  | S1386:S1388:T1392: | 3 | 4,1455 | 0,299 | -0,244 |
| 3 | Q02880 TOP2B_HUMAN | K.VVEAVNS#DS#DS#EFGIPKK.T     | S1522:S1524:S1526: | 3 | 3,8546 | 0,434 | -0,169 |
| 3 | Q02880 TOP2B_HUMAN | K.VVEAVNS#DS#DS#EFGIPKK.T     | S1522:S1524:S1526: | 2 | 2,203  | 0,23  | -0,452 |
| 3 | O43166 SI1L1_HUMAN | K.FHALS#SPQS#PFPST#PTS.R      | S1564:S1568:T1573: | 3 | 4,1365 | 1     | -0,168 |
| 3 | O43166 SI1L1_HUMAN | K.FHALS#PQS#PFPSTPTS#R.R      | S1565:S1568:S1576: | 3 | 3,1636 | 0,114 | -0,251 |
| 3 | Q9H4L4 SEN3_HUMAN  | K.NHLS#PQQGGAT#PQVPS#PCCR.F   | S169:T176:S181:    | 3 | 4,7934 | 0,37  | -0,151 |
| 3 | Q9Y2F5 K0947_HUMAN | R.RAS#PPDPS#PS#PSAASASER.V    | S1692:S1697:S1699: | 3 | 3,0314 | 0,219 | -0,174 |
| 3 | Q86TB9 PATL1_HUMAN | R.RS#TS#PIIGS#PPVR.A          | S177:S179:S184:    | 2 | 2,3155 | 0,246 | -0,152 |
| 3 | Q9NSI6 BRWD1_HUMAN | K.LKAES#IS#EEADS#EPGR.S       | S1786:S1788:S1793: | 2 | 4,7397 | 0,478 | -0,312 |
| 3 | Q9NSI6 BRWD1_HUMAN | K.LKAES#IS#EEADS#EPGR.S       | S1786:S1788:S1793: | 3 | 3,6519 | 0,257 | 0      |
| 3 | O60841 IF2P_HUMAN  | R.SRINS#S#GES#GDESDEFLOSR.K   | S182:S183:S186:    | 3 | 5,5506 | 0,337 | -0,375 |
| 3 | O60841 IF2P_HUMAN  | R.SRINS#SGES#GDES#DEFLOSR.K   | S182:S186:S190:    | 3 | 3,8156 | 0,28  | -0,225 |
| 3 | P46013 KI67_HUMAN  | K.ILCKS#PQS#DPADTPTNT#K.Q     | S1861:S1864:T1873: | 3 | 4,0776 | 0,214 | -0,579 |
| 3 | Q9BVC5 ASHWN_HUMAN | K.SPSGPVKS#PPLS#PVGTT#PVK.L   | S189:S193:T198:    | 3 | 3,8605 | 0,377 | -0,168 |
| 3 | Q9H1E3 NUCKS_HUMAN | R.KVVDYSQFQES#DDADEDYGR.D     | S19:               | 3 | 4,8005 | 0,439 | 0,224  |
| 3 | Q9UNF1 MAGD2_HUMAN | K.HLDGEEDGSS#DQS#QAS#GTTGGR.R | S191:S194:S197:    | 3 | 4,2304 | 0,46  | -0,301 |
| 3 | Q16629 SFRS7_HUMAN | R.YFQS#PS#RS#R.S              | S192:S194:S196:    | 2 | 2,4021 | 0,09  | -0,268 |
| 3 | P18583 SON_HUMAN   | R.RS#FS#IS#PSR.R              | S1948:S1950:S1952: | 2 | 2,4005 | 0,284 | -0,191 |
| 3 | P42356 PI4KA_HUMAN | R.KTS#S#VS#SISQVSPER.G        | S198:S199:S201:    | 2 | 2,4137 | 1     | 0,666  |
| 3 | P42356 PI4KA_HUMAN | R.KTS#S#VSSIS#QVSPER.G        | S198:S199:S204:    | 2 | 2,0571 | 1     | -0,333 |
| 3 | P18583 SON_HUMAN   | R.RS#FS#IS#PVR.L              | S2009:S2011:S2013: | 2 | 2,7667 | 0,251 | -0,095 |
| 3 | P23760 PAX3_HUMAN  | R.ASAPQS#DEGS#DIDS#EPDLPLKR.K | S201:S205:S209:    | 3 | 2,8541 | 0,23  | -0,356 |
| 3 | Q96B36 AKTS1_HUMAN | R.TEARS#SDEENGPPS#S#PDLDR.I   | S202:S211:S212:    | 3 | 4,1133 | 0,353 | -0,381 |
| 3 | O75179 ANR17_HUMAN | K.EHYPVSS#PS#SPS#PPAQPGGVS.R  | S2042:S2044:S2047: | 3 | 4,5171 | 1     | 0      |

|   |                    |                              |                    |   |        |       |        |
|---|--------------------|------------------------------|--------------------|---|--------|-------|--------|
| 3 | Q01130 SFRS2_HUMAN | R.S#KSPPKS#PEEEGAVSS#.-      | S206:S212:S221:    | 2 | 2,028  | 0,117 | -0,394 |
| 3 | Q8TBF4 ZCRB1_HUMAN | K.KSTYFS#DEEELS#D.-          | S210:S216:         | 2 | 4,1249 | 0,363 | -0,214 |
| 3 | Q09666 AHNK_HUMAN  | R.LPSGSGAAS#PTGSAVDIR.A      | S216:              | 2 | 2,4322 | 0,345 | 0,071  |
| 3 | P35659 DEK_HUMAN   | K.CPEILS#DESS#S#DEDEKK.N     | S227:S231:S232:    | 3 | 3,7046 | 0,315 | -0,249 |
| 3 | P35659 DEK_HUMAN   | K.CPEILSDES#S#S#DEDEKK.N     | S230:S231:S232:    | 3 | 3,4558 | 0,413 | 0,249  |
| 3 | Q13283 G3BP1_HUMAN | K.SSS#PAPADIAQTVQEDLR.T      | S232:              | 2 | 4,0643 | 0,393 | -0,621 |
| 3 | Q13283 G3BP1_HUMAN | K.SSS#PAPADIAQTVQEDLR.T      | S232:              | 3 | 3,4529 | 0,304 | -0,186 |
| 3 | P46013 KI67_HUMAN  | K.IACKS#PQPDPVDT#PAS#TK.Q    | S2344:T2352:S2355: | 3 | 5,8341 | 0,334 | -0,17  |
| 3 | P46013 KI67_HUMAN  | K.IACKS#PQPDPVDT#PAST#K.Q    | S2344:T2352:T2356: | 2 | 2,4804 | 0,372 | -0,34  |
| 3 | Q15477 SKIV2_HUMAN | R.ASS#LEDLVLK.E              | S256:              | 2 | 2,4913 | 0,407 | 0      |
| 3 | Q8IWB9 TEX2_HUMAN  | R.NTGGDS#KTAPSS#PLTS#PSDTR.S | S260:S266:S270:    | 3 | 3,9929 | 1     | -0,158 |
| 3 | Q9UQ35 SRRM2_HUMAN | R.DRS#LS#YS#PVER.R           | S2690:S2692:S2694: | 2 | 3,1397 | 0,401 | -0,224 |
| 3 | Q9UQ35 SRRM2_HUMAN | R.S#LS#YS#PVERR.R            | S2690:S2692:S2694: | 2 | 2,1674 | 0,245 | 0,17   |
| 3 | Q9UQ35 SRRM2_HUMAN | R.SLS#YS#PVER.R              | S2692:S2694:       | 2 | 3,0199 | 0,372 | -0,102 |
| 3 | Q14934 NFAC4_HUMAN | R.RYS#SSGT#PSSASPALS#R.R     | S272:T276:S285:    | 2 | 4,1621 | 1     | -0,563 |
| 3 | Q13435 SF3B2_HUMAN | R.S#SLGQSAS#ET#EEDTVSVSKK.E  | S279:S286:T288:    | 3 | 3,374  | 0,317 | -0,158 |
| 3 | Q13435 SF3B2_HUMAN | R.SSLGQS#AS#ET#EEDTVSVSKK.E  | S284:S286:T288:    | 3 | 4,6075 | 0,441 | -0,079 |
| 3 | Q13435 SF3B2_HUMAN | R.SSLGQS#AS#ETEEDT#VSVSKK.E  | S284:S286:T292:    | 3 | 2,9068 | 1     | 0,238  |
| 3 | Q8WVC0 LEO1_HUMAN  | R.KNAIAS#DS#EADS#DTEVPK.D    | S294:S296:S300:    | 2 | 5,1198 | 0,562 | -0,231 |
| 3 | Q8WVC0 LEO1_HUMAN  | R.KNAIAS#DS#EADS#DTEVPK.D    | S294:S296:S300:    | 3 | 3,9825 | 0,238 | -0,086 |
| 3 | O00499 BIN1_HUMAN  | K.GNKS#PS#PPDGS#PAATPEIR.V   | S296:S298:S303:    | 3 | 3,3766 | 0,127 | 0,259  |
| 3 | P35659 DEK_HUMAN   | K.KESES#EDS#S#DDEPLIK.K      | S303:S306:S307:    | 2 | 3,7919 | 0,448 | -0,238 |
| 3 | Q08AE8 SPIR1_HUMAN | R.APTLAELDS#S#ES#EEETLHK.S   | S305:S306:S308:    | 3 | 4,6556 | 0,43  | -0,393 |
| 3 | Q08AE8 SPIR1_HUMAN | R.APTLAELDSS#ES#EEET#LHK.S   | S306:S308:T312:    | 3 | 3,4724 | 0,257 | -0,157 |
| 3 | Q9NQS7 INCE_HUMAN  | R.HS#PIAPSS#PS#PQVLAQK.Y     | S306:S312:S314:    | 3 | 3,7678 | 0,389 | 0,553  |
| 3 | Q5C9Z4 NOM1_HUMAN  | R.FAEDEEKS#ENS#S#EDGDITDK.S  | S317:S320:S321:    | 3 | 4,6973 | 0,381 | -0,147 |
| 3 | P61073 CXCR4_HUMAN | K.TSAQHALTS#VSR.G            | S319:              | 2 | 2,072  | 0,303 | -0,456 |
| 3 | Q9UKS6 PACN3_HUMAN | K.GGRS#PDEVT#LTS#IVPTR.D     | S319:T324:S327:    | 3 | 2,7485 | 0,302 | -1,084 |
| 3 | P36915 GNL1_HUMAN  | R.GLQDGLRSS#S#NS#R.S         | S33:S34:S36:       | 2 | 2,5644 | 0,158 | -0,151 |
| 3 | Q92597 NDRG1_HUMAN | R.SRTAS#GSS#VT#SLDGTR.S      | S330:S333:T335:    | 3 | 3,4527 | 1     | -0,201 |
| 3 | P49790 NU153_HUMAN | K.RIPS#IVSS#PLNS#PLDR.S      | S330:S334:S338:    | 3 | 4,0243 | 0,408 | 0      |
| 3 | Q9NYV4 CD2L7_HUMAN | R.RS#S#S#PFLSK.R             | S332:S333:S334:    | 2 | 2,2564 | 0,164 | 0,098  |
| 3 | Q92597 NDRG1_HUMAN | R.SRTASGS#S#VTS#LDGTR.S      | S332:S333:S336:    | 2 | 2,9595 | 1     | -0,536 |

|   |                     |                                     |                 |   |        |       |        |
|---|---------------------|-------------------------------------|-----------------|---|--------|-------|--------|
| 3 | Q96BD0 SO4A1_HUMAN  | R.RAS#PGT#PLSPGS#LR.S               | S34:T37:S43:    | 2 | 2,0768 | 0,248 | -0,149 |
| 3 | Q9NQ55 SSF1_HUMAN   | R.VGGS#DEEASGIPSR.T                 | S359:           | 2 | 2,1291 | 0,213 | 0,254  |
| 3 | Q5T200 ZC3HD_HUMAN  | R.S#AS#PYPSHSL#SPQR.K               | S370:S372:S380: | 2 | 2,6325 | 1     | -0,331 |
| 3 | Q9UQ35 SRRM2_HUMAN  | R.HGGS#PQPLATTPLSQEPVNPSS#EAS#PTR.D | S377:S395:S398: | 3 | 2,6131 | 0,223 | -0,355 |
| 3 | Q8IYB3 SRRM1_HUMAN  | R.RLS#PS#AS#PPR.R                   | S389:S391:S393: | 2 | 3,1857 | 0,415 | -0,28  |
| 3 | P02545 LMNA_HUMAN   | R.LRLS#PS#PTS#QR.S                  | S390:S392:S395: | 2 | 3,5279 | 0,321 | 0,494  |
| 3 | Q7Z4V5 HDGR2_HUMAN  | R.GRGPPS#S#SDS#EPEAELER.E           | S395:S396:S399: | 3 | 3,4228 | 0,292 | 0,427  |
| 3 | Q14004 CD2L5_HUMAN  | R.S#RS#PYS#PVL.R                    | S395:S397:S400: | 2 | 2,7368 | 0,325 | -0,174 |
| 3 | Q9NYF8 BCLF1_HUMAN  | K.FNDS#EGDDTEETEDYR.Q               | S397:           | 2 | 3,9608 | 0,573 | 0,914  |
| 3 | Q8N1F8 S11IP_HUMAN  | R.RAS#IS#EPS#DTDPEPR.T              | S398:S400:S403: | 2 | 3,4818 | 0,463 | -0,064 |
| 3 | Q8WUM0 NU133_HUMAN  | R.KGLPLGS#AVS#SPVLF#PVGR.R          | S41:S44:S50:    | 3 | 4,372  | 0,406 | -0,166 |
| 3 | Q8WUM0 NU133_HUMAN  | R.KGLPLGS#AVSS#PVLFS#PVGR.R         | S41:S45:S50:    | 3 | 3,5811 | 0,218 | -0,083 |
| 3 | O94763 RMP_HUMAN    | R.SRENS#VCSDT#S#ESSAAEFDDR.R        | S417:T422:S423: | 3 | 4,083  | 1     | -0,353 |
| 3 | Q9P2I0 CPSF2_HUMAN  | K.EADIDS#S#DES#DIEEDIDQPSAHK.T      | S419:S420:S423: | 3 | 2,8965 | 0,133 | 0,263  |
| 3 | P35658 NU214_HUMAN  | R.QPKSPGS#TPT#T#PTSSQAPQK.L         | S433:T436:T437: | 3 | 3,2447 | 1     | -0,404 |
| 3 | P23443 KS6B1_HUMAN  | R.FIGS#PRT#PVS#PVK.F                | S441:T444:S447: | 2 | 2,524  | 0,197 | 1,952  |
| 3 | A8K703 A8K703_HUMAN | K.S#AEDLTDGYSDDVLNAEQQLK.L          | S45:            | 3 | 4,7763 | 0,377 | -0,306 |
| 3 | Q9H7L9 SDS3_HUMAN   | R.GRES#DEDT#EDAS#ETDLAK.H           | S45:T49:S53:    | 3 | 4,3796 | 0,376 | -0,414 |
| 3 | O00418 EF2K_HUMAN   | R.KYES#DEDS#LGS#SGR.V               | S470:S474:S477: | 2 | 2,7449 | 0,399 | -0,552 |
| 3 | P11169 GTR3_HUMAN   | K.DGVM*EM*NS#IEPAK.E                | S485:           | 2 | 2,8878 | 0,161 | -0,08  |
| 3 | O43379 WDR62_HUMAN  | R.TRLS#T#AS#EETVQNR.V               | S49:T50:S52:    | 2 | 3,4175 | 0,529 | -0,333 |
| 3 | Q13191 CBLB_HUMAN   | K.GIVRS#PCGS#PTGS#PK.S              | S521:S525:S529: | 2 | 2,5809 | 0,335 | -0,491 |
| 3 | Q13191 CBLB_HUMAN   | K.GIVRS#PCGS#PT#GSPK.S              | S521:S525:T527: | 3 | 2,8145 | 0,192 | -0,315 |
| 3 | Q9NPI6 DCP1A_HUMAN  | R.KASS#PS#PLTIGT#PESQR.K            | S523:S525:T531: | 3 | 3,1123 | 0,198 | 0,367  |
| 3 | Q3KQU3 MA7D1_HUMAN  | R.ASNEKESAAPAS#PAPS#PAPS#PTPAPPQK.E | S544:S548:S552: | 3 | 5,2045 | 0,554 | -0,438 |
| 3 | P08670 VIME_HUMAN   | R.SLYASS#PGGVYATR.S                 | S56:            | 2 | 2,7763 | 0,354 | -0,243 |
| 3 | Q13442 HAP28_HUMAN  | K.S#LDSDES#EDEEDDYQQK.R             | S57:S63:        | 2 | 2,076  | 0,133 | -0,111 |
| 3 | Q7Z460 CLAP1_HUMAN  | R.SRS#DIDVNAASAK.S                  | S600:           | 3 | 3,7238 | 0,382 | -0,123 |
| 3 | Q15424 SAFB1_HUMAN  | R.SVVS#FDKVK.E                      | S604:           | 2 | 2,3607 | 0,416 | -0,224 |
| 3 | P56211 ARP19_HUMAN  | K.YFDS#GDYNM*AK.A                   | S62:            | 2 | 2,158  | 0,259 | 0      |
| 3 | P13807 GYS1_HUMAN   | R.YRPAS#VPPS#PS#LSR.H               | S641:S645:S647: | 3 | 3,0092 | 0,196 | -0,198 |
| 3 | P13807 GYS1_HUMAN   | R.YRPAS#VPPS#PS#LSR.H               | S641:S645:S647: | 2 | 2,1239 | 0,393 | -0,33  |
| 3 | P13807 GYS1_HUMAN   | R.YRPAS#VPPS#PSLS#R.H               | S641:S645:S649: | 3 | 3,4937 | 0,107 | 0,198  |

|   |                    |                                 |                    |   |        |       |        |
|---|--------------------|---------------------------------|--------------------|---|--------|-------|--------|
| 3 | P13807 GYS1_HUMAN  | R.YRPAS#VPPS#PSLS#R.H           | S641:S645:S649:    | 2 | 2,9149 | 0,365 | 0,857  |
| 3 | Q9HAW4 CLSPN_HUMAN | R.KVLQDS#DS#ETEDTNAS#PEK.T      | S65:S67:S75:       | 3 | 3,277  | 0,21  | -0,392 |
| 3 | O00116 ADAS_HUMAN  | R.RAAS#AAT#AAPT#ATPAAQESGTIPK.K | S65:T68:T72:       | 3 | 3,7542 | 0,224 | -0,443 |
| 3 | Q9H1B7 EAP1_HUMAN  | R.RNS#SS#PVS#PASVPGQR.R         | S657:S659:S662:    | 2 | 4,4593 | 1     | -0,392 |
| 3 | Q9NYF8 BCLF1_HUMAN | R.IDIS#PSTLR.K                  | S658:              | 2 | 2,0094 | 0,153 | -0,226 |
| 3 | Q9H1B7 EAP1_HUMAN  | R.RNSS#S#PVS#PASVPGQR.R         | S658:S659:S662:    | 3 | 2,959  | 0,082 | 0      |
| 3 | Q9H1B7 EAP1_HUMAN  | R.RNSS#S#PVS#PASVPGQR.R         | S658:S659:S662:    | 2 | 2,1576 | 0,242 | -0,196 |
| 3 | Q8IWB9 TEX2_HUMAN  | R.SPQRS#PLQS#AESS#PTAGK.K       | S794:S798:S802:    | 3 | 3,6201 | 0,387 | -0,265 |
| 3 | Q8IWX8 CHERP_HUMAN | R.S#RS#PTPPS#SAGLGSNSAPPIDSR.L  | S815:S817:S822:    | 3 | 4,4084 | 1     | -0,782 |
| 3 | Q8IWX8 CHERP_HUMAN | R.S#RS#PT#PPSSAGLGSNSAPPIDSR.L  | S815:S817:T819:    | 3 | 3,7305 | 1     | -0,284 |
| 3 | P04792 HSPB1_HUMAN | R.QLS#SGVSEIR.H                 | S82:               | 2 | 2,7289 | 0,165 | -0,211 |
| 3 | Q13595 TRA2A_HUMAN | R.S#RS#YT#PEYR.R                | S84:S86:T88:       | 2 | 2,7738 | 0,482 | -0,174 |
| 3 | Q92547 TOPB1_HUMAN | R.KPS#T#PLS#EVIVK.N             | S860:T861:S864:    | 2 | 2,1356 | 0,317 | -0,079 |
| 3 | Q8IYB3 SRRM1_HUMAN | K.KETES#EAEDNLDDLEK.H           | S874:              | 3 | 3,6187 | 0,29  | 0      |
| 3 | Q8WX93 PALLD_HUMAN | R.IAS#DEEIQGTK.D                | S893:              | 2 | 2,5836 | 0,38  | -0,096 |
| 3 | P18858 DNL1_HUMAN  | R.KQSQIQNQGEDS#GS#DPEDTY.-      | S911:S913:         | 3 | 4,3112 | 0,488 | -0,073 |
| 3 | Q9P107 GMIP_HUMAN  | R.GRGPS#PAAAS#PEGS#PLR.R        | S914:S919:S923:    | 3 | 3,9445 | 0,348 | 0      |
| 3 | Q9P107 GMIP_HUMAN  | R.GRGPS#PAAAS#PEGS#PLR.R        | S914:S919:S923:    | 2 | 3,7418 | 0,415 | -0,132 |
| 3 | Q01970 PLCB3_HUMAN | R.RPPGPTTS#PASTS#LSS#PGQR.D     | S926:S931:S934:    | 3 | 3,2757 | 1     | -0,082 |
| 3 | Q9UQ35 SRRM2_HUMAN | R.S#VS#PCSNVESR.L               | S952:S954:         | 2 | 2,4023 | 0,31  | -0,177 |
| 3 | Q9ULD4 BRPF3_HUMAN | R.VLENGEDHGVAGS#PAS#PAS#IEEER.H | S959:S962:S965:    | 3 | 4,7627 | 0,433 | 0,272  |
| 3 | P17301 ITA2_HUMAN  | K.M*TKNPDEIDETT#ELSS#.-         | T1177:S1181:       | 2 | 3,2615 | 0,453 | -0,307 |
| 3 | Q96T60 PNKP_HUMAN  | R.TPESQPDT#PPGT#PLVS#QDEKR.D    | T118:T122:S126:    | 3 | 3,8111 | 0,425 | 0,291  |
| 3 | Q8WXI9 P66B_HUMAN  | R.GRLT#PS#PDIIVLSDNEASS#PR.S    | T120:S122:S135:    | 3 | 3,4722 | 0,125 | -0,074 |
| 3 | Q5VT06 CE350_HUMAN | R.SQKTPT#S#PLS#PSSQK.S          | T1255:S1256:S1259: | 2 | 2,4562 | 1     | -0,337 |
| 3 | P06493 CDC2_HUMAN  | K.IGEGT#Y#GVVYK.G               | T14:Y15:           | 2 | 3,7259 | 0,346 | 0      |
| 3 | Q9BTC0 DIDO1_HUMAN | K.GGDDHDDT#S#DS#DSDGLTLK.E      | T151:S152:S154:    | 3 | 3,208  | 0,294 | 0,501  |
| 3 | Q9BTC0 DIDO1_HUMAN | K.GGDDHDDT#SDS#DS#DGLTLK.E      | T151:S154:S156:    | 2 | 2,4258 | 0,328 | 0      |
| 3 | Q9H7D0 DOCK5_HUMAN | R.LSPFHGSSPPQST#PLS#PPPLT#PK.A  | T1786:S1789:T1794: | 3 | 4,1925 | 0,236 | 0,21   |
| 3 | Q9UHR4 BI2L1_HUMAN | K.TPASTPVSGT#PQAS#PM*IER.S      | T257:S261:         | 3 | 3,4941 | 0,253 | 0      |
| 3 | Q8IWB9 TEX2_HUMAN  | R.NTGGDSKT#APSS#PLT#SPSDTR.S    | T262:S266:T269:    | 3 | 4,4774 | 1     | -0,158 |
| 3 | Q13501 SQSTM_HUMAN | R.SRLT#PVS#PESS#STEEK.S         | T269:S272:S276:    | 3 | 3,3232 | 1     | -0,278 |
| 3 | Q13501 SQSTM_HUMAN | R.SRLT#PVS#PESS#STEEK.S         | T269:S272:S276:    | 2 | 3,2477 | 1     | -0,309 |

|   |                     |                                    |                    |   |        |       |        |
|---|---------------------|------------------------------------|--------------------|---|--------|-------|--------|
| 3 | Q15751 HERC1_HUMAN  | R.RAQT#PPISS#LPTSPS#DEVGR.R        | T2701:S2706:S2712: | 3 | 3,5491 | 1     | -0,235 |
| 3 | Q9UM11 FZR_HUMAN    | R.RTLT#PAS#SPVSS#PSK.H             | T32:S35:S40:       | 2 | 2,5866 | 1     | -0,417 |
| 3 | Q92597 NDRG1_HUMAN  | R.SRT#AS#GS#SVTSLDGTR.S            | T328:S330:S332:    | 2 | 2,8756 | 1     | -0,201 |
| 3 | Q92597 NDRG1_HUMAN  | R.SRT#ASGSS#VTS#LDGTR.S            | T328:S333:S336:    | 2 | 2,3569 | 1     | -0,268 |
| 3 | Q9UQ35 SRRM2_HUMAN  | R.HGGSPQPLAT#TPLS#QEPVNPSEAS#PTR.D | T383:S387:S398:    | 3 | 2,9243 | 1     | -0,355 |
| 3 | Q14247 SRC8_HUMAN   | K.TQT#PPVS#PAPQPTTEER.L            | T401:S405:         | 2 | 3,145  | 0,485 | -0,451 |
| 3 | P17252 KPCA_HUMAN   | R.T#FCGTPDYIAPEIIAYQPYGK.S         | T497:              | 3 | 3,1144 | 0,254 | -0,221 |
| 3 | O60832 DKC1_HUMAN   | K.AGLESGAEPGDGSDTT#K.K             | T497:              | 2 | 2,483  | 0,313 | -0,205 |
| 3 | Q9Y6G9 DC1L1_HUMAN  | R.KPVTVSPTT#PTS#PTEGEAS.-          | T513:S516:         | 2 | 3,0923 | 1     | -0,179 |
| 3 | Q9Y6G9 DC1L1_HUMAN  | R.KPVTVSPTT#PTS#PTEGEAS.-          | T513:T518:         | 3 | 2,6741 | 1     | 0      |
| 3 | Q14978 NOLC1_HUMAN  | K.LQT#PNT#FPK.R                    | T607:T610:         | 2 | 2,7781 | 0,145 | -0,304 |
| 3 | Q9H8G2 CI082_HUMAN  | R.RST#DSS#SVS#GSLQQETK.Y           | T90:S93:S96:       | 2 | 3,4484 | 1     | -0,419 |
| 3 | Q14934 NFAC4_HUMAN  | R.DPGSPGPFYD#VGAPPAESIPQK.T        | Y317:              | 3 | 2,6105 | 0,183 | 0,476  |
| 3 | Q99460 PSMD1_HUMAN  | K.IEEEEQEPEPEPEFYIDD.-             |                    | 3 | 3,8732 | 0,459 | -0,314 |
| 3 | Q93034 CUL5_HUMAN   | R.DESDINTFIYM*A.-                  |                    | 2 | 3,2975 | 0,457 | 0      |
| 3 | Q9UCN2 Q9UCN2_HUMAN | -.PYQYPALTPEQK.K                   |                    | 2 | 3,1915 | 0,329 | 0,085  |
| 3 | Q69YN2 C19L1_HUMAN  | K.DFEPYDFTLDD.-                    |                    | 2 | 2,6848 | 0,413 | -0,266 |
| 3 | Q99627 CSN8_HUMAN   | R.KPVAGALDVSFNK.F                  |                    | 3 | 2,623  | 0,19  | 0,068  |
| 3 | Q9BXP5 ARS2_HUMAN   | R.DLDAPDDVDFF.-                    |                    | 2 | 2,6025 | 0,425 | -0,481 |
| 3 | Q13428 TCOF_HUMAN   | K.VGPATPSAQVGK.W                   |                    | 2 | 2,1543 | 0,319 | -0,439 |
| 3 | Q9UCG5 Q9UCG5_HUMAN | -.DATNVGDEGGFAPNIX.-               |                    | 2 | 2,0928 | 0,159 | -0,23  |
| 3 | P13645 K1C10_HUMAN  | K.YENEVALR.Q                       |                    | 2 | 2,0082 | 0,32  | 0,061  |
| 4 | P05386 RLA1_HUMAN   | K.KEES#EES#DDDM*GFGLFD.-           | S101:S104:         | 2 | 5,5236 | 0,686 | -0,804 |
| 4 | P05386 RLA1_HUMAN   | K.KEES#EES#DDDMGFGLFD.-            | S101:S104:         | 2 | 2,7886 | 0,585 | -0,116 |
| 4 | P17096 HMGA1_HUMAN  | K.KLEKEEEEGISQES#SEEEQ.-           | S102:S103:         | 3 | 3,9001 | 0,374 | -0,153 |
| 4 | P20042 IF2B_HUMAN   | K.IES#DVQEPTPEPDDLDIM*LGNK.K       | S105:              | 3 | 3,4809 | 0,298 | 0      |
| 4 | P24534 EF1B_HUMAN   | K.DDDDIDLFGS#DDEEESEEA.R           | S106:              | 3 | 5,3559 | 0,389 | 0,078  |
| 4 | Q9H1E3 NUCKS_HUMAN  | R.EM*LM*EDVGS#EEEEEEEEDEAPFQEK.D   | S113:              | 3 | 5,3735 | 0,441 | 0,247  |
| 4 | P46821 MAP1B_HUMAN  | R.DVM*SDETNNETES#PSQEFVNITK.Y      | S1154:             | 3 | 3,7372 | 0,231 | -0,58  |
| 4 | Q6IN85 SMEK1_HUMAN  | K.DPSVDITQDLVDES#EEER.F            | S117:              | 2 | 4,4328 | 0,528 | -0,34  |
| 4 | Q5MIZ7 SMEK2_HUMAN  | K.DPSVEVTQDLIDES#EEER.F            | S117:              | 2 | 2,8189 | 0,436 | 0,112  |
| 4 | Q6IN85 SMEK1_HUMAN  | K.DPSVDITQDLVDES#EEER.F            | S117:              | 3 | 2,776  | 0,125 | 0      |
| 4 | Q70E73 RAPH1_HUMAN  | R.LTQAEISEQPTM*ATVVPQVPTS#PK.S     | S1206:             | 3 | 2,8465 | 0,28  | -0,069 |



|   |                    |                                   |                    |   |        |       |        |
|---|--------------------|-----------------------------------|--------------------|---|--------|-------|--------|
| 4 | P49023 PAXI_HUMAN  | K.S#AEPSPTVM*STSLGSNLSELDL.R      | S126:              | 3 | 3,8039 | 0,364 | -0,077 |
| 4 | Q9BY77 PDIP3_HUMAN | R.S#SPAAFINPPIGTVTPALK.L          | S126:              | 2 | 3,3821 | 0,467 | -0,249 |
| 4 | Q9H1E3 NUCKS_HUMAN | K.DS#GSDIEDFLM*EDDDSDYGSSK.K      | S130:              | 3 | 5,9586 | 0,601 | -0,145 |
| 4 | P16989 DBPA_HUMAN  | R.S#VGDGETVEFDVVEGEK.G            | S134:              | 2 | 3,5236 | 0,421 | -0,065 |
| 4 | Q09666 AHNK_HUMAN  | R.LKS#EDGVEGDLGETQSR.T            | S135:              | 3 | 3,831  | 0,365 | -0,193 |
| 4 | Q09666 AHNK_HUMAN  | R.LKS#EDGVEGDLGETQSR.T            | S135:              | 2 | 2,2847 | 0,212 | -0,45  |
| 4 | Q9BXP5 ARS2_HUMAN  | R.LGS#IAEIDLGVPPVPM*K.T           | S136:              | 2 | 3,8667 | 0,524 | -0,266 |
| 4 | P50914 RL14_HUMAN  | K.AALLKAS#PK.K                    | S139:              | 2 | 2,4852 | 0,276 | -0,187 |
| 4 | Q14160 LAP4_HUMAN  | R.LAEAPSPAPTPSPTVEDLGPQTSTS#PGR.L | S1561:             | 3 | 4,4998 | 0,447 | 0,062  |
| 4 | Q96QS1 TSN32_HUMAN | K.S#PFS#RLGSTADLCQGEEAAR.E        | S160:S163:         | 3 | 2,7537 | 0,232 | 0,075  |
| 4 | Q12789 TF3C1_HUMAN | K.DGS#LEDEDEEDDLDEGVGGK.R         | S1611:             | 3 | 6,27   | 0,572 | -0,158 |
| 4 | O43399 TPD54_HUMAN | R.NSATFKS#FEDR.V                  | S166:              | 2 | 3,1649 | 0,386 | -0,177 |
| 4 | Q9H7D0 DOCK5_HUMAN | R.TLSSPS#LQTDGIAATPVPPPPPK.S      | S1805:             | 3 | 5,6243 | 0,39  | -0,149 |
| 4 | Q9NQC3 RTN4_HUMAN  | R.GS#SGSVDELTFALPAASEPVIR.S       | S181:              | 3 | 4,7069 | 0,303 | -0,16  |
| 4 | P18583 SON_HUMAN   | R.RS#FS#IS#PVR.L                  | S2009:S2011:S2013: | 2 | 2,4294 | 0,182 | 0,095  |
| 4 | O75179 ANR17_HUMAN | K.EHYPVS#SPSS#PS#PPAQPGGVS.R      | S2041:S2045:S2047: | 3 | 5,2593 | 1     | -0,074 |
| 4 | O75179 ANR17_HUMAN | K.EHYPVSS#PS#SPS#PPAQPGGVS.R      | S2042:S2044:S2047: | 3 | 3,9103 | 1     | -0,223 |
| 4 | O75179 ANR17_HUMAN | K.EHYPVSSPS#S#PS#PPAQPGGVS.R      | S2044:S2045:S2047: | 3 | 4,5285 | 1     | -0,149 |
| 4 | Q5UIP0 RIF1_HUMAN  | R.VS#FADPIYQAGLADDIDR.R           | S2205:             | 3 | 4,0546 | 0,386 | -0,268 |
| 4 | Q5UIP0 RIF1_HUMAN  | R.VS#FADPIYQAGLADDIDR.R           | S2205:             | 2 | 3,4353 | 0,617 | 0,417  |
| 4 | Q9BST9 RTKN_HUMAN  | R.AS#LDSAGSGSSPILLPTPVVGGPR.Y     | S232:              | 3 | 4,6171 | 0,285 | -0,077 |
| 4 | Q13426 XRCC4_HUMAN | K.DDS#IISLDVTDIAPSR.K             | S256:              | 2 | 3,5707 | 0,525 | -0,259 |
| 4 | Q86T90 K1328_HUMAN | R.DFSDEEQS#VVVYVPGISAEGNVR.S      | S26:               | 3 | 4,1779 | 0,271 | -0,443 |
| 4 | Q9UQ35 SRRM2_HUMAN | R.SLS#YS#PVER.R                   | S2692:S2694:       | 2 | 2,485  | 0,194 | -0,306 |
| 4 | Q9UKF7 PITC1_HUMAN | R.S#APSSAPSTPLSTDAPEFLSVPK.D      | S270:              | 3 | 2,9854 | 0,353 | 0      |
| 4 | Q14938 NFIH_HUMAN  | K.S#IDDSEM*ESPVDVDFYPTGR.S        | S280:              | 3 | 3,418  | 0,427 | -0,076 |
| 4 | Q13435 SF3B2_HUMAN | R.SSLGQS#AS#ET#EEDTVSVSKK.E       | S284:S286:T288:    | 3 | 3,8656 | 0,346 | -0,475 |
| 4 | Q12888 TP53B_HUMAN | K.S#PEPEVLSTQEDLFDQSNK.T          | S294:              | 3 | 6,1667 | 0,49  | -0,326 |
| 4 | Q8WVC0 LEO1_HUMAN  | R.KNAIAS#DS#EADS#DTEVPK.D         | S294:S296:S300:    | 2 | 3,5356 | 0,505 | -0,576 |
| 4 | Q8WVC0 LEO1_HUMAN  | R.KNAIAS#DS#EADS#DTEVPK.D         | S294:S296:S300:    | 3 | 3,0275 | 0,141 | 0,086  |
| 4 | P05388 RLA0_HUMAN  | K.EES#EES#DEDM*GFGLFD.-           | S304:S307:         | 2 | 2,7796 | 0,504 | -0,243 |
| 4 | Q14934 NFAC4_HUMAN | R.DPGS#PGPFYVYGAPPAESIPQK.T       | S311:              | 3 | 2,7341 | 0,209 | -0,159 |
| 4 | Q9UN79 SOX13_HUMAN | R.DLQS#SPPSLPLGFLGEGDAVTK.A       | S316:              | 3 | 5,4063 | 0,508 | -0,476 |

|   |                     |                                     |                 |   |        |       |        |
|---|---------------------|-------------------------------------|-----------------|---|--------|-------|--------|
| 4 | Q9UN79 SOX13_HUMAN  | R.DLQSS#PPSLPLGFLGEGDAVTK.A         | S317:           | 3 | 2,8354 | 0,226 | -0,159 |
| 4 | Q15554 TERF2_HUMAN  | K.DLVLTQALPAS#PALK.N                | S323:           | 2 | 3,643  | 0,462 | -0,356 |
| 4 | P19419 ELK1_HUMAN   | R.DLELPLS#PSLLGGPGPER.T             | S324:           | 2 | 3,1163 | 0,458 | -0,443 |
| 4 | Q9UJM3 ERRFI_HUMAN  | K.S#LPSYLNQVM*PPTQSFAPDPK.Y         | S337:           | 3 | 3,4481 | 0,368 | -0,156 |
| 4 | Q8TAQ2 SMRC2_HUMAN  | K.DM*DEPS#PVPNVVEEVTLPK.T           | S347:           | 3 | 2,8757 | 0,266 | 0,35   |
| 4 | P01892 1A02_HUMAN   | R.KGGSYSQAASSDS#AQGS#DVS#LTACKV.-   | S352:S356:S359: | 3 | 3,1298 | 1     | -0,523 |
| 4 | O60502 NCOAT_HUMAN  | K.LENEGS#DEDIETDVLSPQM*ALK.L        | S364:           | 3 | 3,5026 | 0,237 | -0,136 |
| 4 | Q9H307 PININ_HUMAN  | K.QQDS#QPEEVM*DVLEM*VENVK.H         | S381:           | 3 | 5,3356 | 0,32  | -0,149 |
| 4 | Q8IYB3 SRRM1_HUMAN  | R.RLS#PS#AS#PPR.R                   | S389:S391:S393: | 2 | 3,0699 | 0,382 | -0,373 |
| 4 | Q7Z4V5 HDGR2_HUMAN  | R.GRGPPS#S#SDS#EPEAELER.E           | S395:S396:S399: | 3 | 2,8778 | 0,245 | -0,171 |
| 4 | P51114 FXR1_HUMAN   | R.RGPNYTSGYGTNS#ELS#NPS#ETESER.K    | S403:S406:S409: | 3 | 3,1106 | 1     | 0,185  |
| 4 | Q9BS91 S35A5_HUMAN  | R.LTKPKS#DES#DEDT#F.-               | S416:S419:T423: | 2 | 3,7106 | 0,494 | -0,264 |
| 4 | O75821 EIF3G_HUMAN  | K.GIPLATGDT#PEPELLPGAPLPPPK.E       | S42:            | 3 | 5,1632 | 0,463 | -0,216 |
| 4 | A8K703 A8K703_HUMAN | K.S#AEDLTDGSDVLDVNAEQK.L            | S45:            | 3 | 6,8699 | 0,497 | -0,306 |
| 4 | Q86SQ0 PHL2_HUMAN   | K.LQLS#DEESVFEEALM*SPDTR.Y          | S489:           | 3 | 4,1252 | 0,389 | -0,153 |
| 4 | Q9NV70 EXOC1_HUMAN  | R.SQSS#SLLDM*GNM*SASDLVADR.T        | S490:           | 3 | 5,6798 | 0,527 | -0,531 |
| 4 | Q9BUR4 WDR79_HUMAN  | R.VFPEPTES#GDEGEELGLPLLSTR.H        | S491:           | 3 | 3,421  | 0,349 | -0,43  |
| 4 | Q9NYZ3 GTSE1_HUMAN  | R.RVS#ALPT#PAS#R.R                  | S509:T513:S516: | 2 | 2,8204 | 0,282 | -0,35  |
| 4 | Q9Y4E1 FA21C_HUMAN  | K.GLFS#DEEDEDLFFSSQSASNLK.G         | S539:           | 3 | 4,238  | 0,273 | -0,442 |
| 4 | P62854 RS26_HUMAN   | R.DIS#EASVFDAYVLPK.L                | S54:            | 3 | 3,4819 | 0,426 | -0,105 |
| 4 | P62854 RS26_HUMAN   | R.DIS#EASVFDAYVLPK.L                | S54:            | 2 | 3,2971 | 0,503 | -0,422 |
| 4 | Q3KQU3 MA7D1_HUMAN  | R.ASNEKESAAPAS#PAPS#PAPS#PTPAPPQK.E | S544:S548:S552: | 3 | 5,8829 | 0,477 | -0,188 |
| 4 | Q3KQU3 MA7D1_HUMAN  | R.ASNEKESAAPAS#PAPS#PAPSPT#PAPPQK.E | S544:S548:T554: | 3 | 3,8683 | 0,261 | -0,125 |
| 4 | Q96ST2 IWS1_HUMAN   | R.DGGTFIS#DADDVVSAM*IVK.M           | S554:           | 2 | 3,6129 | 0,498 | -0,24  |
| 4 | P42566 EP15_HUMAN   | R.S#SPELLPSGVTDENEVTTAVTEK.V        | S562:           | 3 | 2,8899 | 0,38  | -0,074 |
| 4 | Q96ER3 SAAL1_HUMAN  | K.SSS#DDEEQLTELDEEM*ENEICR.V        | S57:            | 3 | 2,8419 | 0,387 | -0,199 |
| 4 | O94880 PHF14_HUMAN  | K.DSGEGSCS#DSEENILEEELNEDIK.V       | S59:            | 3 | 3,3796 | 0,315 | -0,198 |
| 4 | Q9NZ53 PDXL2_HUMAN  | R.DPEDS#DVFEEDTHL.-                 | S596:           | 2 | 3,703  | 0,456 | -0,424 |
| 4 | Q7Z460 CLAP1_HUMAN  | R.S#RSIDIVNAAASAK.S                 | S598:           | 3 | 3,4907 | 0,351 | -0,185 |
| 4 | Q7Z417 NUFP2_HUMAN  | K.DYEIESQNPLAS#PTNTLLGSAK.E         | S629:           | 3 | 6,0741 | 0,61  | -0,151 |
| 4 | Q99543 DNJC2_HUMAN  | K.ELSEES#EDEELQLEEFPM*LK.T          | S63:            | 3 | 4,5343 | 0,408 | -0,29  |
| 4 | Q8IY81 RRMJ3_HUMAN  | K.S#DDDGEFIVPIEDPAK.H               | S644:           | 2 | 4,0864 | 0,511 | -0,534 |
| 4 | Q9BWT3 PAPOG_HUMAN  | K.S#VDAIGGESM*PIPTIDTSR.K           | S684:           | 2 | 3,612  | 0,631 | 0,12   |

|   |                     |                                       |                    |   |        |       |        |
|---|---------------------|---------------------------------------|--------------------|---|--------|-------|--------|
| 4 | Q9BZL6 KPCD2_HUMAN  | R.S#VVGTPAYLAPEVLLNQGYNR.S            | S710:              | 3 | 3,9502 | 0,483 | -0,234 |
| 4 | Q9UPQ0 LIMC1_HUMAN  | K.S#PEPEATLTFPFLDK.M                  | S718:              | 2 | 3,1644 | 0,342 | -0,275 |
| 4 | Q86UE8 TLK2_HUMAN   | R.KSVSTSSPAGAAIASTSGASNNS#S#SN.-      | S769:S770:         | 3 | 2,9141 | 0,313 | -0,073 |
| 4 | P53367 ARFP1_HUMAN  | K.EGVIEAGAFQGSAPPPLPSVM*S#PSR.V       | S79:               | 3 | 3,9513 | 0,243 | -0,355 |
| 4 | A3KN83 SBNO1_HUMAN  | K.S#IDPDSIQSALLASGLGSK.R              | S794:              | 2 | 4,5837 | 0,621 | -0,44  |
| 4 | O43156 K0406_HUMAN  | K.DVADGNVS#DFDNEEEEQSVPPK.V           | S828:              | 3 | 2,697  | 0,091 | -0,22  |
| 4 | Q96ST3 SIN3A_HUMAN  | R.GDLS#DVEEEEEEM*DVDEATGAVK.K         | S832:              | 3 | 5,6102 | 0,466 | 0,067  |
| 4 | Q13595 TRA2A_HUMAN  | R.S#RS#YT#PEYR.R                      | S84:S86:T88:       | 2 | 2,5406 | 0,374 | -0,262 |
| 4 | Q9P107 GMIP_HUMAN   | R.GRGPS#PAAAS#PEGS#PLR.R              | S914:S919:S923:    | 3 | 3,7612 | 0,386 | -0,396 |
| 4 | Q9P107 GMIP_HUMAN   | R.GRGPS#PAAAS#PEGS#PLR.R              | S914:S919:S923:    | 2 | 3,6029 | 0,387 | -0,33  |
| 4 | Q9P2D0 IBTK_HUMAN   | R.SDS#SGGYNLSDIQSPSSTGLLK.S           | S992:              | 3 | 4,4897 | 0,247 | -0,228 |
| 4 | Q14690 RRP5_HUMAN   | K.DSET#VDEDEEVDPALTVGTIK.K            | T1012:             | 3 | 5,4149 | 0,496 | -0,234 |
| 4 | O60927 PP1RB_HUMAN  | R.ATLGPTPT#TPPQPPDPSQPPPGPM*QH.-      | T108:              | 3 | 2,6109 | 0,17  | -1,136 |
| 4 | O60927 PP1RB_HUMAN  | R.ATLGPTPT#TPPQPPDPSQPPPGPM*QH.-      | T109:              | 3 | 2,9531 | 0,406 | 0,601  |
| 4 | Q7ZZZ1 CO042_HUMAN  | R.ISHT#PQT#PLYT#PER.L                 | T1127:T1130:T1134: | 3 | 3,1464 | 0,163 | -0,292 |
| 4 | P06493 CDC2_HUMAN   | K.IGEGT#Y#GVVYK.G                     | T14:Y15:           | 2 | 3,3012 | 0,374 | -0,091 |
| 4 | P21675 TAF1_HUMAN   | R.DASVFQDESNM*SVLDIPSAT#PEK.Q         | T1680:             | 3 | 4,6868 | 0,282 | -0,071 |
| 4 | Q9H7D0 DOCK5_HUMAN  | R.T#LSSPSLQTDGIAATPVPPPPPK.S          | T1800:             | 3 | 4,0365 | 0,386 | -0,448 |
| 4 | P49792 RBP2_HUMAN   | R.TDVIQGGDDVADATSEVEVSSTSETT#PK.A     | T2504:             | 3 | 3,3937 | 0,205 | -0,512 |
| 4 | Q8NI35 INADL_HUMAN  | R.DPAGDISVT#PPAPAALPVALPTVASK.G       | T335:              | 3 | 2,9469 | 0,3   | -0,361 |
| 4 | Q14247 SRC8_HUMAN   | K.T#QTPPVS#PAPQPTEER.L                | T399:S405:         | 2 | 2,8963 | 0,44  | -0,322 |
| 4 | Q9NW68 BSDC1_HUMAN  | K.DFDLDM*T#EEEVQM*ALSK.V              | T404:              | 2 | 4,2485 | 0,564 | -0,346 |
| 4 | O75821 EIF3G_HUMAN  | K.GIPLATGDT#SPEPELLPGAPLPPPK.E        | T41:               | 3 | 4,0465 | 0,255 | -0,288 |
| 4 | Q53ET0 CRTC2_HUMAN  | K.QFSPT#M*SPTLSSITQGVPLDTSK.L         | T458:              | 3 | 3,4268 | 0,241 | -0,145 |
| 4 | P17252 KPCA_HUMAN   | R.T#FCGTPDYIAPEIIAYQPYGK.S            | T497:              | 3 | 4,314  | 0,455 | -0,221 |
| 4 | Q9UJX2 CDC23_HUMAN  | R.NQGET#PTTEVPAPFFLPASLSANNTPTR.R     | T556:              | 3 | 2,9658 | 0,332 | -0,12  |
| 4 | Q9UK58 CCNL1_HUMAN  | R.LSPT#PSM*QDGLDLPSETDLR.I            | T67:               | 3 | 5,0729 | 0,354 | 0      |
| 4 | ##P10911 MCF2_HUMAN | K.FSY#SPY#RDSGEGSEVRR.K               | Y174:Y177:         | 3 | 3,0679 | 0,166 | 0,51   |
| 4 | Q14934 NFAC4_HUMAN  | R.DPGSPGPFDY#VGAPPAESIPQK.T           | Y317:              | 3 | 2,7776 | 0,105 | 0,079  |
| 4 | P55072 TERA_HUMAN   | R.FPSGNQGGAGPSQSGGGTGGSVYTEDNDDDLYG.- |                    | 3 | 4,3906 | 0,544 | 0,227  |
| 4 | Q9H0E2 TOLIP_HUMAN  | K.DAAINLLQM*GEEP.-                    |                    | 2 | 3,0148 | 0,303 | 0,162  |
| 4 | Q69YN2 C19L1_HUMAN  | K.DFEPYDFTLDD.-                       |                    | 2 | 2,594  | 0,408 | -0,443 |
| 4 | Q9UCG5 Q9UCG5_HUMAN | -.DATNVGDEGGFAPNIX.-                  |                    | 2 | 2,4838 | 0,324 | -0,614 |

|   |                     |                                  |            |        |        |        |        |
|---|---------------------|----------------------------------|------------|--------|--------|--------|--------|
| 4 | Q9BXP5 ARS2_HUMAN   | R.DLDAPDDVDFF.-                  | 2          | 2,4254 | 0,47   | -0,192 |        |
| 4 | Q96QK1 VPS35_HUMAN  | R.ESPESEGIPIYGLIL.-              | 2          | 2,2829 | 0,453  | 0,224  |        |
| 4 | B2RA01 B2RA01_HUMAN | K.AQYEDIAQK.S                    | 2          | 2,0823 | 0,254  | -0,458 |        |
| 5 | O94768 ST17B_HUMAN  | R.S#ISGLLTTPQIPIK.M              | S10:       | 2      | 3,9067 | 0,439  | -0,37  |
| 5 | Q9UBL3 ASH2L_HUMAN  | K.DTLEGAGDTSEVM*DTQAGS#VDEENGR.Q | S101:      | 3      | 4,0535 | 0,424  | -0,329 |
| 5 | Q00587 BORG5_HUMAN  | R.M*AS#PPASPAPPAPISPIIK.N        | S101:      | 2      | 2,1794 | 0,391  | -0,504 |
| 5 | P05386 RLA1_HUMAN   | K.KEES#EES#DDDM*GFGLFD.-         | S101:S104: | 2      | 3,553  | 0,579  | -0,459 |
| 5 | Q8NB46 ANR52_HUMAN  | K.DAVS#PFSFSLK.N                 | S1028:     | 2      | 2,096  | 0,128  | -0,439 |
| 5 | Q9UQ35 SRRM2_HUMAN  | K.S#STPPGESYFGVSSLQLK.G          | S1041:     | 2      | 4,855  | 0,542  | -0,435 |
| 5 | Q5JTH9 RRP12_HUMAN  | R.ALS#QAAVEEEEEEEEEPAQ GK.G      | S1049:     | 3      | 2,669  | 0,308  | 0,485  |
| 5 | P24534 EF1B_HUMAN   | K.DDDDIDLFGS#DDEEESEAK.R         | S106:      | 3      | 3,7647 | 0,34   | 0,156  |
| 5 | Q6ZS32 Q6ZS32_HUMAN | K.FDDS#DTEQIAEEGDDNLAK.Y         | S107:      | 3      | 5,6469 | 0,386  | 0,334  |
| 5 | Q6DN90 IQEC1_HUMAN  | R.SLS#ESYELSSDLQDK.Q             | S107:      | 2      | 4,7702 | 0,525  | -0,069 |
| 5 | P31629 ZEP2_HUMAN   | R.QASFS#GSPEISQGEVGM*DQSVK.Q     | S1087:     | 3      | 4,7108 | 0,439  | 0      |
| 5 | Q68E09 Q68E09_HUMAN | R.GAS#PPISAIIEFSIPEAPM*R.S       | S11:       | 3      | 3,7772 | 0,355  | -0,476 |
| 5 | Q99547 MPH6_HUMAN   | K.AEEVEDETVELDVS#DEEM*AR.R       | S110:      | 3      | 3,1719 | 0,241  | 0,153  |
| 5 | P50851 LRBA_HUMAN   | K.S#IVEEEEDDDYVELK.V             | S1100:     | 2      | 4,0319 | 0,556  | -0,774 |
| 5 | Q12888 TP53B_HUMAN  | K.M*VIQGPSS#PQGEAM*VTDVLEDQK.E   | S1114:     | 3      | 6,3891 | 0,434  | -0,071 |
| 5 | Q9H1E3 NUCKS_HUMAN  | R.EM*LM*EDVGS#EEEQEEDEAPFQEK.D   | S113:      | 3      | 5,1877 | 0,505  | 0,123  |
| 5 | P08708 RS17_HUMAN   | K.LLDFGS#LSNLQVTQPTVGM*NFK.T     | S113:      | 3      | 4,7435 | 0,344  | -0,146 |
| 5 | Q15185 TEBP_HUMAN   | K.DWEDDS#DEDM*SNFDR.F            | S113:      | 2      | 3,9054 | 0,469  | -0,124 |
| 5 | Q9UNZ2 NSF1C_HUMAN  | K.S#PNELVDDLK.G                  | S114:      | 2      | 3,0351 | 0,394  | -0,45  |
| 5 | P48634 BAT2_HUMAN   | K.EGTLTQVPLAPPPGAPPS#PAPAR.F     | S1147:     | 3      | 3,336  | 0,324  | -0,076 |
| 5 | P46821 MAP1B_HUMAN  | R.DVM*SDETNNETES#PSQEFVNITK.Y    | S1154:     | 3      | 4,7133 | 0,509  | -0,644 |
| 5 | B1AKC7 B1AKC7_HUMAN | R.TVS#VPSEGQFPPEYPEGATK.L        | S116:      | 3      | 3,7547 | 0,165  | -0,333 |
| 5 | Q8WW12 PCNP_HUMAN   | K.TLSVAAAFNEDEDS#EPEEM*PPEAK.M   | S119:      | 3      | 2,6514 | 0,092  | 0      |
| 5 | Q9UH99 UN84B_HUMAN  | R.YS#QGDDDGSSSSGSSVAGSQSTL FK.D  | S12:       | 3      | 4,467  | 0,483  | -0,494 |
| 5 | Q00587 BORG5_HUMAN  | K.NAIS#LPQLNQAAYDSL VVGK.L       | S121:      | 3      | 4,8103 | 0,586  | -0,335 |
| 5 | Q9BZH6 BRWD2_HUMAN  | K.DLLNELES#PKEEPIEE.-            | S1216:     | 2      | 2,9966 | 0,202  | -0,311 |
| 5 | O43379 WDR62_HUMAN  | R.S#ISLGDSEGPVATLAQPLR.R         | S1226:     | 2      | 2,1222 | 0,487  | -0,464 |
| 5 | O43379 WDR62_HUMAN  | R.SIS#LGDSEGPVATLAQPLR.R         | S1228:     | 3      | 4,3698 | 0,322  | -0,435 |
| 5 | Q9UQ35 SRRM2_HUMAN  | K.EQNSALPTSS#QDEELM*EVVEK.S      | S1233:     | 3      | 3,1666 | 0,275  | -0,149 |
| 5 | Q8WXG6 MADD_HUMAN   | R.GTLS#DSEIETNSATSTIFGK.A        | S1239:     | 2      | 2,2019 | 0,398  | -0,457 |

|   |                    |                                       |              |   |        |       |        |
|---|--------------------|---------------------------------------|--------------|---|--------|-------|--------|
| 5 | Q92797 SYMPK_HUMAN | R.S#PQTLAPVGEDAM*K.T                  | S1243:       | 2 | 2,9907 | 0,471 | 0,079  |
| 5 | Q8N8S7 ENAH_HUMAN  | R.QNS#QLPAQVQNGPSQEELEIQR.R           | S125:        | 3 | 5,235  | 0,444 | 0,071  |
| 5 | P46100 ATRX_HUMAN  | K.S#VPVTVDDDDDDNDPENR.I               | S1253:       | 2 | 2,0078 | 0,456 | -0,116 |
| 5 | P49023 PAXI_HUMAN  | K.S#AEPSPTVM*STSLGSNLSELDL.R          | S126:        | 3 | 2,631  | 0,254 | 0      |
| 5 | Q9BY77 PDIP3_HUMAN | R.SS#PAAFINPPIGTVTPALK.L              | S127:        | 2 | 4,4831 | 0,446 | -0,436 |
| 5 | Q8NCF5 NF2IP_HUMAN | R.LVLDPGEAPLVPVYS#GK.V                | S127:        | 2 | 4,1441 | 0,582 | -0,466 |
| 5 | Q6T4R5 NHS_HUMAN   | K.APSAGLEEVAQPESVDVITSQSDS#PTR.A      | S1308:       | 3 | 6,3206 | 0,442 | -0,385 |
| 5 | O60341 LSD1_HUMAN  | R.EM*DESLANLS#EDEYYSEEER.N            | S131:        | 3 | 4,0247 | 0,401 | -0,433 |
| 5 | P33991 MCM4_HUMAN  | K.GLQVDLQS#DGAAAEDIVASEQSLGQK.L       | S131:        | 3 | 3,5276 | 0,46  | -0,405 |
| 5 | Q96PE2 ARHGH_HUMAN | R.SS#M*SLYTAASVIDTASK.Y               | S1331:       | 2 | 4,0464 | 0,567 | -0,2   |
| 5 | Q7Z3K3 POGZ_HUMAN  | R.SFLVASVLPGPDGNINS#PTR.N             | S1338:       | 2 | 2,6197 | 0,322 | -0,46  |
| 5 | P16989 DBPA_HUMAN  | R.S#VGDGETVEFDVVEGEK.G                | S134:        | 2 | 5,1938 | 0,555 | -0,26  |
| 5 | P16989 DBPA_HUMAN  | R.S#VGDGETVEFDVVEGEK.G                | S134:        | 3 | 3,7058 | 0,18  | -0,098 |
| 5 | O60499 STX10_HUMAN | K.SPS#DLLDASAVSATS.R                  | S134:        | 2 | 3,4098 | 0,518 | 0,074  |
| 5 | Q96T23 RSF1_HUMAN  | K.VGS#PLDYSLVLDLPSTNGQSPGK.A          | S1349:       | 3 | 3,9777 | 0,294 | -0,079 |
| 5 | Q09666 AHNK_HUMAN  | R.LKS#EDGVEGDLGETQSR.T                | S135:        | 3 | 3,0587 | 0,217 | -0,193 |
| 5 | P29966 MARCS_HUMAN | K.EAPAEGEAAEPGSPTAAEGEAASAASSTSS#PK.A | S135:        | 3 | 2,8238 | 0,292 | 0,367  |
| 5 | Q8WXI9 P66B_HUMAN  | R.LTPSPDIIVLSDNEASS#PR.S              | S135:        | 3 | 2,6111 | 0,242 | -0,087 |
| 5 | P30622 CLIP1_HUMAN | K.VEM*M*SEAALNGNGDDLNNYDS#DDQEK.Q     | S1353:       | 3 | 5,6935 | 0,452 | 0,245  |
| 5 | Q5VZK9 LR16A_HUMAN | K.S#NDSGEEAEKEFIFV.-                  | S1357:       | 2 | 2,6495 | 0,339 | -0,206 |
| 5 | Q96T23 RSF1_HUMAN  | K.VGSPLDYSLVLDLPSTNGQS#PGK.A          | S1365:       | 3 | 3,7823 | 0,165 | 0,158  |
| 5 | P49023 PAXI_HUMAN  | K.SAEPSTVM*STSLGSNLSELDL.R            | S137:        | 3 | 4,5263 | 0,424 | 0,308  |
| 5 | Q9UGU0 TCF20_HUMAN | R.SASS#NSAEAGGDTVTLDDILSLK.S          | S1370:       | 3 | 4,6871 | 0,339 | -0,078 |
| 5 | P42695 CNDD3_HUMAN | R.S#LGVLPFTLNSGSPEK.T                 | S1372:       | 2 | 2,9053 | 0,451 | -0,141 |
| 5 | Q9UPN3 MACF1_HUMAN | R.M*LS#SSDAITQEFM*DLR.T               | S1376:       | 2 | 4,9568 | 0,627 | -0,312 |
| 5 | Q9UPN3 MACF1_HUMAN | R.M*LS#SSDAITQEFM*DLR.T               | S1378:       | 3 | 2,9014 | 0,289 | 0,094  |
| 5 | P49815 TSC2_HUMAN  | K.S#SSPELQTLQDILGDPGDK.A              | S1385:       | 3 | 4,4167 | 0,418 | -0,253 |
| 5 | P49815 TSC2_HUMAN  | K.SSS#PELQTLQDILGDPGDK.A              | S1388:       | 3 | 2,8259 | 0,352 | -0,084 |
| 5 | P49815 TSC2_HUMAN  | K.SSS#PELQTLQDILGDPGDK.A              | S1388:       | 2 | 2,1225 | 0,327 | -0,225 |
| 5 | O15320 CTGE5_HUMAN | R.SNS#ELEDEILCLEK.E                   | S139:        | 2 | 4,8325 | 0,563 | -0,208 |
| 5 | O15320 CTGE5_HUMAN | R.SNS#ELEDEILCLEK.E                   | S139:        | 3 | 4,1085 | 0,311 | -0,104 |
| 5 | P50914 RL14_HUMAN  | K.AALLKAS#PK.K                        | S139:        | 2 | 2,2985 | 0,18  | -0,187 |
| 5 | P46821 MAP1B_HUMAN | K.VLS#PLRS#PPLIGSESAYESFLSADDK.A      | S1396:S1400: | 3 | 4,453  | 0,363 | -0,623 |

|   |                     |                                     |            |   |        |       |        |
|---|---------------------|-------------------------------------|------------|---|--------|-------|--------|
| 5 | P63167 DYL1_HUMAN   | K.NADM*S#EEM*QQDSVECATQALEK.Y       | S14:       | 3 | 4,3735 | 0,409 | -0,279 |
| 5 | Q12888 TP53B_HUMAN  | R.ETAVPGPLGIEDIS#PNLSPDDK.S         | S1426:     | 3 | 2,6424 | 0,159 | 0,078  |
| 5 | Q9NQ57 INCE_HUMAN   | R.AAAAAAATM*ALAAPSS#PTPESPTM*LTK.K  | S143:      | 3 | 4,2636 | 0,451 | -0,27  |
| 5 | Q12788 TBL3_HUMAN   | K.S#PGLYFLTAGDQGTLR.V               | S143:      | 2 | 3,6752 | 0,626 | -0,412 |
| 5 | Q8NEJ9 NGDN_HUMAN   | K.LSS#EDEEDEAEDDQSEASGK.K           | S143:      | 3 | 3,1197 | 0,296 | -0,154 |
| 5 | Q12888 TP53B_HUMAN  | R.ETAVPGPLGIEDISPNS#PDDK.S          | S1430:     | 3 | 3,6516 | 0,244 | 0,312  |
| 5 | P46821 MAP1B_HUMAN  | K.QGS#PDQVSPVSEM*TSTSLYQDK.Q        | S1438:     | 3 | 3,8267 | 0,311 | 0,516  |
| 5 | Q9H1E3 NUCKS_HUMAN  | K.DSGSDEDFLM*EDDDDS#DYGSSK.K        | S144:      | 3 | 5,3333 | 0,536 | 0      |
| 5 | Q9H4Z3 PCIF1_HUMAN  | K.IEIPVTPTGQSVPS#PSIPGTPTLK.M       | S144:      | 3 | 3,2304 | 0,272 | -0,425 |
| 5 | P31629 ZEP2_HUMAN   | R.M*LS#PASSLELFM*ETK.Q              | S1443:     | 2 | 3,6643 | 0,442 | -0,34  |
| 5 | O75179 ANR17_HUMAN  | K.NAS#ILLEELDLEK.L                  | S1457:     | 2 | 4,499  | 0,416 | -0,389 |
| 5 | Q02880 TOP2B_HUMAN  | K.FDS#NEEDSASVFSFGLK.Q              | S1466:     | 3 | 3,3256 | 0,361 | -0,341 |
| 5 | Q02880 TOP2B_HUMAN  | K.FDS#NEEDSASVFSFGLK.Q              | S1466:     | 2 | 3,3153 | 0,555 | -0,569 |
| 5 | Q9NQ57 INCE_HUMAN   | R.AAAAAAATM*ALAAPSSPTPES#PTM*LTK.K  | S148:      | 3 | 4,8847 | 0,412 | 0,202  |
| 5 | P51608 MECP2_HUMAN  | K.VGDS#LDPNDFDFTVTGR.G              | S149:      | 2 | 2,8869 | 0,56  | -0,36  |
| 5 | P46821 MAP1B_HUMAN  | K.LGDVS#PTQIDVSQFGSFK.E             | S1501:     | 2 | 2,1878 | 0,285 | -0,304 |
| 5 | Q9Y2D5 AKAP2_HUMAN  | R.DALGDSLQVPV#PSSTSSR.C             | S152:      | 3 | 2,6031 | 0,212 | 0,351  |
| 5 | Q16594 TAF9_HUMAN   | R.LSVGS#VTSRPST#PTLGTPTPQTM*SVSTK.V | S152:T159: | 3 | 3,8974 | 1     | -0,183 |
| 5 | O60216 RAD21_HUMAN  | R.EEVGNIS#ILQENDFGDFGM*DDR.E        | S153:      | 3 | 6,4255 | 0,516 | -0,141 |
| 5 | Q5QNZ9 Q5QNZ9_HUMAN | K.DDS#ILCFLEVK.E                    | S1548:     | 2 | 3,3149 | 0,522 | -0,43  |
| 5 | P48380 RFX3_HUMAN   | R.AS#PATIEM*AIETLQK.S               | S155:      | 3 | 4,3355 | 0,397 | 0,215  |
| 5 | Q9P2M7 CING_HUMAN   | K.VAS#PGSTIDTAPLSSVDSLINK.F         | S159:      | 3 | 5,1414 | 0,527 | 0,081  |
| 5 | O75376 NCOR1_HUMAN  | R.QLS#PTPGYPSQYQLYAM*ENTR.Q         | S1592:     | 3 | 4,4201 | 0,437 | -0,432 |
| 5 | Q96FW1 OTUB1_HUMAN  | K.QEPLGS#DSEGVNCLAYDEAIM*AQQDR.I    | S16:       | 3 | 2,6879 | 0,294 | -0,428 |
| 5 | P31948 STIP1_HUMAN  | K.ALS#VGNIDDALQCYSEAIK.L            | S16:       | 2 | 2,5413 | 0,508 | -0,568 |
| 5 | Q92870 APBB2_HUMAN  | K.S#FLNYYADLETSAR.E                 | S160:      | 2 | 3,966  | 0,567 | -0,494 |
| 5 | O95049 ZO3_HUMAN    | R.S#PGGGSEANGLALVSGFK.R             | S164:      | 2 | 5,0151 | 0,411 | -0,212 |
| 5 | P46937 YAP1_HUMAN   | R.QSS#FEIPDDVPLPAGWEM*AK.T          | S164:      | 3 | 2,8552 | 0,152 | -0,395 |
| 5 | Q9Y4I1 MYO5A_HUMAN  | R.TSS#IADEGTYTLDSILR.Q              | S1652:     | 3 | 3,4179 | 0,33  | 0      |
| 5 | Q5JSZ5 K0515_HUMAN  | R.LLS#FSPEEFPTLK.A                  | S166:      | 2 | 3,5779 | 0,389 | -0,692 |
| 5 | O43399 TPD54_HUMAN  | R.NSATFKS#FEDR.V                    | S166:      | 2 | 2,0565 | 0,164 | -0,53  |
| 5 | Q14966 ZN638_HUMAN  | K.DVTVLS#VAEEQDLLK.Q                | S1667:     | 3 | 4,3707 | 0,306 | -0,21  |
| 5 | Q14966 ZN638_HUMAN  | K.DVTVLS#VAEEQDLLK.Q                | S1667:     | 2 | 4,2871 | 0,452 | -0,281 |

|   |                    |                                 |        |   |        |       |        |
|---|--------------------|---------------------------------|--------|---|--------|-------|--------|
| 5 | Q14676 MDC1_HUMAN  | R.LLLAEDS#EEEVDFLSER.R          | S168:  | 3 | 4,3647 | 0,399 | 0,088  |
| 5 | Q14676 MDC1_HUMAN  | R.LLLAEDS#EEEVDFLSER.R          | S168:  | 2 | 2,0965 | 0,378 | -0,706 |
| 5 | Q96125 SPF45_HUMAN | R.S#M*GGAAIAPPTSLVEK.D          | S169:  | 2 | 3,5135 | 0,441 | 0,075  |
| 5 | O00193 SMAP_HUMAN  | R.SAS#PDDDLGSSNWEAADLGNEER.K    | S17:   | 3 | 5,9662 | 0,45  | -0,364 |
| 5 | Q15942 ZYG_HUMAN   | R.VSS#GYVPPVATPFSSK.S           | S170:  | 2 | 3,1495 | 0,398 | 0      |
| 5 | O75616 ERAL_HUMAN  | K.ETQVILLDTPGIIS#PGK.Q          | S173:  | 2 | 4,4228 | 0,516 | -0,262 |
| 5 | Q14653 IRF3_HUMAN  | R.S#PSLDNPTFPNLGPEENPLK.R       | S173:  | 3 | 3,5166 | 0,315 | 0,08   |
| 5 | Q63HQ0 CD016_HUMAN | R.LSS#DATVLTNPTESSCDLM*TK.T     | S175:  | 3 | 2,856  | 0,208 | 0,232  |
| 5 | P49454 CENPF_HUMAN | R.S#LLGIDTEDAIQGR.N             | S1750: | 2 | 3,7534 | 0,509 | -0,156 |
| 5 | O14497 ARI1A_HUMAN | K.VSS#PAPM*EGGEEEEELLGPK.L      | S1755: | 3 | 3,9223 | 0,485 | -0,084 |
| 5 | Q9C0E8 LNP_HUMAN   | R.NLS#PTPASPQGGPPQVPVSPGPPK.D   | S177:  | 3 | 5,0937 | 0,406 | 0,504  |
| 5 | Q9BZD3 GRL1B_HUMAN | R.VS#SQAEDTSSFDNLFIDR.L         | S178:  | 3 | 2,7052 | 0,241 | -0,166 |
| 5 | O15027 SC16A_HUMAN | R.LLPSAPQTLPDGGLAS#PAR.V        | S1786: | 2 | 5,3937 | 0,557 | -0,185 |
| 5 | O15027 SC16A_HUMAN | R.LLPSAPQTLPDGGLAS#PAR.V        | S1786: | 3 | 3,426  | 0,325 | 0,185  |
| 5 | Q9NQT8 KI13B_HUMAN | R.S#ATLSGSATNLASLTAALAK.A       | S1791: | 2 | 4,9436 | 0,687 | -0,253 |
| 5 | Q9NQT8 KI13B_HUMAN | R.S#ATLSGSATNLASLTAALAK.A       | S1791: | 3 | 3,7071 | 0,431 | -0,19  |
| 5 | Q93009 UBP7_HUMAN  | K.AGEQQLS#EPEDM*EM*EAGDTPPR.I   | S18:   | 3 | 4,6081 | 0,537 | 0      |
| 5 | Q96S97 MYADM_HUMAN | R.TTITTTTTSSS#GLGSPM*IVGSPR.A   | S18:   | 3 | 3,3237 | 1     | -0,234 |
| 5 | Q9H7D0 DOCK5_HUMAN | R.TLS#SPSLQTDGIAATPVPPPPPK.S    | S1802: | 3 | 3,3003 | 0,205 | -0,149 |
| 5 | Q6UB99 ANR11_HUMAN | R.QQSVPAAS#SYDSPM*PPSM*EDR.A    | S1820: | 3 | 3,7177 | 0,289 | -0,153 |
| 5 | Q96B36 AKTS1_HUMAN | K.S#LPVSVPVWGFK.E               | S183:  | 2 | 2,3903 | 0,473 | -0,35  |
| 5 | Q9NQC3 RTN4_HUMAN  | R.GSSGS#VDETLFALPAASEPVIR.S     | S184:  | 3 | 5,4552 | 0,352 | -0,16  |
| 5 | Q5UIP0 RIF1_HUMAN  | R.EEICDM*DS#SEAM*SLESQESPENFK.T | S1843: | 3 | 2,7938 | 0,216 | 0      |
| 5 | Q96CX2 KCD12_HUMAN | R.S#PSGGAAGPLLTSPQSLDGSR.R      | S185:  | 3 | 3,3784 | 0,219 | 0,09   |
| 5 | O15417 TNC18_HUMAN | R.ALS#PGLSEGLLLAR.F             | S1857: | 2 | 3,7821 | 0,453 | -0,514 |
| 5 | Q99728 BARD1_HUMAN | K.DASAQQDSYEFVSPS#PPADVSR.A     | S186:  | 3 | 3,6109 | 0,34  | -0,071 |
| 5 | P25054 APC_HUMAN   | R.NDS#LSSLDFDDDDVDLSR.E         | S1861: | 2 | 4,4059 | 0,637 | -0,347 |
| 5 | P46939 UTRO_HUMAN  | R.S#SLLPTDYLVEINK.I             | S1865: | 2 | 3,8567 | 0,455 | -0,219 |
| 5 | P50548 ERF_HUMAN   | R.GSVS#DCSDGTSELEEPLGEDPR.A     | S187:  | 3 | 6,1401 | 0,526 | -0,076 |
| 5 | Q96CX2 KCD12_HUMAN | R.SPS#GGAAGPLLTSPQSLDGSR.R      | S187:  | 2 | 2,5174 | 0,556 | 0,3    |
| 5 | P19105 MLRM_HUMAN  | R.ATS#NVFAMFDQSQIQEFK.E         | S19:   | 3 | 5,5053 | 0,461 | -0,253 |
| 5 | Q9NUE0 ZDH18_HUMAN | K.DCEYQQISPGAAPLAS#PGAR.R       | S19:   | 3 | 3,2567 | 0,102 | -0,081 |
| 5 | O43399 TPD54_HUMAN | K.GLLS#DSM*TDVPVDTGVAAR.T       | S19:   | 2 | 3,2063 | 0,541 | 0,671  |

|   |                    |                                   |        |   |        |       |        |
|---|--------------------|-----------------------------------|--------|---|--------|-------|--------|
| 5 | O43399 TPD54_HUMAN | K.GLLS#DSM*TDVPVDTGVAAR.T         | S19:   | 3 | 3,0836 | 0,108 | 0,274  |
| 5 | Q15365 PCBP1_HUMAN | R.VM*TIPYQPM*PASS#PVICAGGQDR.C    | S190:  | 3 | 3,9359 | 0,333 | 0,071  |
| 5 | Q15365 PCBP1_HUMAN | R.VM*TIPYQMPASS#PVICAGGQDR.C      | S190:  | 3 | 3,799  | 0,294 | -0,64  |
| 5 | Q5JRA6 MIA3_HUMAN  | R.DEPPASQSTSQDCSQALKQS#P.-        | S1906: | 3 | 4,4331 | 0,475 | -0,3   |
| 5 | P24928 RPB1_HUMAN  | K.YSPTSPTYSPVYTPS#PK.Y            | S1906: | 3 | 3,2146 | 0,39  | 0,156  |
| 5 | O94915 FRYL_HUMAN  | K.S#TGQLNLSTSPINSSSYLGYNSNAR.S    | S1914: | 3 | 3,8693 | 0,289 | 0      |
| 5 | Q5TDH0 DDI2_HUMAN  | R.LFS#ADPFDLEAQAK.I               | S194:  | 2 | 4,5389 | 0,532 | -0,299 |
| 5 | Q5TDH0 DDI2_HUMAN  | R.LFS#ADPFDLEAQAK.I               | S194:  | 3 | 3,7198 | 0,221 | -0,112 |
| 5 | O43237 DC1L2_HUMAN | K.DFQDYM*EPEEGCQGS#PQR.R          | S194:  | 3 | 2,7894 | 0,324 | 0,323  |
| 5 | Q9HCK8 CHD8_HUMAN  | R.SS#SAASM*AEEEASAVSTAAQFTK.L     | S1940: | 3 | 4,9592 | 0,42  | -0,226 |
| 5 | Q9HCK8 CHD8_HUMAN  | R.SSS#AASM*AEEEASAVSTAAQFTK.L     | S1941: | 3 | 4,0465 | 0,374 | -0,452 |
| 5 | O95714 HERC2_HUMAN | K.LAELPAAQPSAEDS#DTEDDSEAEQTER.N  | S1942: | 3 | 4,5194 | 0,624 | -0,359 |
| 5 | Q14980 NUMA1_HUMAN | R.AS#M*QPIQIAEGTGITR.Q            | S1969: | 2 | 4,1202 | 0,48  | 0,783  |
| 5 | Q92734 TFG_HUMAN   | K.NVM*SAFGLTDDQVSGPPS#APAEDR.S    | S197:  | 3 | 3,6459 | 0,337 | -0,93  |
| 5 | Q04323 SAKS1_HUMAN | K.YGGSVGSQPPVPEPVPVPS#SPSQEPPTK.R | S199:  | 3 | 2,9674 | 0,326 | -0,365 |
| 5 | Q13459 MYO9B_HUMAN | R.GS#DEENLDSETSASTESLLEER.A       | S1993: | 3 | 4,8669 | 0,487 | -0,221 |
| 5 | Q1L5Z9 LONF2_HUMAN | -.M*S#PEPVPPPPPPQCPGCDR.A         | S2:    | 3 | 3,1395 | 0,269 | -0,165 |
| 5 | P31350 RIR2_HUMAN  | R.VPLAPITDPQQLQLS#PLK.G           | S20:   | 3 | 4,7397 | 0,459 | 0,18   |
| 5 | P31350 RIR2_HUMAN  | R.VPLAPITDPQQLQLS#PLK.G           | S20:   | 2 | 2,7142 | 0,535 | -0,479 |
| 5 | Q04323 SAKS1_HUMAN | K.YGGSVGSQPPVPEPVPVPS#PSQEPPTK.R  | S200:  | 3 | 3,1658 | 0,312 | -0,243 |
| 5 | Q9H8G2 CI082_HUMAN | K.ILEGDNM*DS#DM*EEEADDGSK.M       | S203:  | 3 | 4,0301 | 0,512 | -0,232 |
| 5 | Q9H0H5 RGAP1_HUMAN | R.S#IGSAVDQGNESIVAK.T             | S203:  | 2 | 3,921  | 0,329 | -0,147 |
| 5 | Q9UBT2 SAE2_HUMAN  | K.YLFNQLFGEEADQEV#PDR.A           | S207:  | 3 | 3,6024 | 0,365 | -0,373 |
| 5 | O43399 TPD54_HUMAN | K.GLLSDS#M*TDVPVDTGVAAR.T         | S21:   | 3 | 2,9323 | 0,258 | -0,091 |
| 5 | P60174 TPIS_HUMAN  | K.QS#LGELIGTLNAAK.V               | S21:   | 2 | 2,1386 | 0,247 | -0,653 |
| 5 | Q9UBB9 TFP11_HUMAN | R.TTQSM*QDFPVVDS#EEEEEEFQK.E      | S210:  | 3 | 4,788  | 0,462 | -0,327 |
| 5 | P62258 1433E_HUMAN | K.AAFDDAIAELDTLS#EESYK.D          | S210:  | 2 | 2,0609 | 0,382 | -0,45  |
| 5 | Q5UIP0 RIF1_HUMAN  | K.VEEPSQCLASGTAISELIIEDNNAS#PQK.L | S2144: | 3 | 3,3921 | 0,387 | -0,356 |
| 5 | O75376 NCOR1_HUMAN | R.S#PGSISYLPFFTK.L                | S2184: | 2 | 3,4775 | 0,608 | -0,454 |
| 5 | Q15139 KPCD1_HUMAN | R.TSS#AELSTSAPDEPLLQK.S           | S219:  | 2 | 3,2826 | 0,433 | -0,125 |
| 5 | Q8WU79 SMAP2_HUMAN | K.DLDLLASVPS#PSSSGSR.K            | S219:  | 2 | 2,1276 | 0,36  | -0,483 |
| 5 | O95219 SNX4_HUMAN  | R.QLQPAPLEPLGS#PDAGLGAAVGK.E      | S22:   | 3 | 2,6488 | 0,384 | 0,161  |
| 5 | Q13153 PAK1_HUMAN  | R.DVATSPIS#PTENNTTPDALTR.N        | S223:  | 3 | 3,3687 | 0,192 | -0,077 |



|   |                    |                                  |              |   |        |       |        |
|---|--------------------|----------------------------------|--------------|---|--------|-------|--------|
| 5 | Q9H9A7 RMI1_HUMAN  | R.LIGEPDLVSVIPNNS#NENIPR.V       | S225:        | 3 | 3,2754 | 0,145 | -0,074 |
| 5 | Q13085 ACACA_HUMAN | R.FIIGS#VSEDNSEDEISNLVK.L        | S23:         | 3 | 4,8122 | 0,345 | 0,08   |
| 5 | Q8TEU7 RPGF6_HUMAN | R.LPEGPVDS#EDDEEEDEEIDR.T        | S230:        | 3 | 4,7416 | 0,393 | 0,458  |
| 5 | Q96B97 SH3K1_HUMAN | R.S#IEVENDFLPVEK.T               | S230:        | 2 | 4,5077 | 0,529 | 0,076  |
| 5 | Q96B97 SH3K1_HUMAN | R.S#IEVENDFLPVEK.T               | S230:        | 3 | 4,0074 | 0,428 | 0      |
| 5 | Q13283 G3BP1_HUMAN | K.SSS#PAPADIAQTVQEDLR.T          | S232:        | 2 | 3,9186 | 0,42  | -0,435 |
| 5 | O95613 PCNT_HUMAN  | R.LSPGS#GGPEAQTAGPVTTPASISGR.F   | S2355:       | 3 | 2,8574 | 0,181 | -0,161 |
| 5 | Q9BTK6 PA1_HUMAN   | R.DLFSLSEDPSPAS#PPLR.S           | S237:        | 2 | 4,8943 | 0,612 | -0,241 |
| 5 | Q9BTK6 PA1_HUMAN   | R.DLFSLSEDPSPAS#PPLR.S           | S237:        | 3 | 3,8606 | 0,337 | 0,271  |
| 5 | Q96A57 CT030_HUMAN | R.LSS#TDDGYIDLQFK.K              | S24:         | 2 | 4,5238 | 0,492 | 0      |
| 5 | O15530 PDPK1_HUMAN | R.ANS#FVGTAQYVSPPELLTEK.S        | S241:        | 3 | 5,0925 | 0,419 | -0,086 |
| 5 | O15530 PDPK1_HUMAN | R.ANS#FVGTAQYVSPPELLTEK.S        | S241:        | 2 | 2,7768 | 0,508 | -0,229 |
| 5 | Q8NEB9 PK3C3_HUMAN | K.DGDESS#PILTSFELVK.V            | S244:        | 2 | 3,6954 | 0,508 | -0,47  |
| 5 | Q8IUW5 RELL1_HUMAN | R.S#LM*SVSGAETVNGEVPATPVK.R      | S244:        | 2 | 2,1008 | 0,339 | 0      |
| 5 | P78559 MAP1A_HUMAN | R.GELS#PSFLNPPLPPSIDDR.D         | S2449:       | 3 | 2,6906 | 0,087 | -0,343 |
| 5 | P78559 MAP1A_HUMAN | R.GELS#PSFLNPPLPPSIDDR.D         | S2449:       | 2 | 2,0167 | 0,203 | -0,687 |
| 5 | Q14684 RRP1B_HUMAN | K.VGDGDL#AEEIPENEVSLR.R          | S245:        | 2 | 4,3173 | 0,521 | -0,463 |
| 5 | P11717 MPRI_HUMAN  | K.LVS#FHDDS#DEDLLHI.-            | S2479:S2484: | 3 | 3,5627 | 0,399 | -0,096 |
| 5 | P11717 MPRI_HUMAN  | K.LVS#FHDDS#DEDLLHI.-            | S2479:S2484: | 2 | 2,8678 | 0,35  | -0,319 |
| 5 | O95685 PPR3D_HUMAN | R.SLS#CLSDLDGGVALEPR.A           | S25:         | 2 | 5,2505 | 0,431 | -0,392 |
| 5 | Q8NC51 PAIRB_HUMAN | R.FDQLFDES#DPFEVLK.A             | S25:         | 2 | 4,4421 | 0,417 | -0,301 |
| 5 | O00178 GTPB1_HUMAN | R.SAM*DSPVPASM*FAPEPSS#PGAAR.A   | S25:         | 3 | 3,7082 | 0,329 | -0,231 |
| 5 | O95685 PPR3D_HUMAN | R.SLS#CLSDLDGGVALEPR.A           | S25:         | 3 | 3,5379 | 0,44  | 0      |
| 5 | P49792 RBP2_HUMAN  | R.TDVIQGDDVADATSEVEVSSTS#ETTPK.A | S2501:       | 3 | 2,9457 | 0,222 | -0,064 |
| 5 | Q9UFC0 LRWD1_HUMAN | R.ACAS#PSAQVEGSPVAGSDGSQPAVK.L   | S251:        | 3 | 3,4263 | 0,319 | 0,075  |
| 5 | P07910 HNRPC_HUMAN | K.M*ES#EGGADDAEEGDLDDDDNEDR.G    | S253:        | 3 | 4,639  | 0,471 | -0,196 |
| 5 | O15541 R113A_HUMAN | R.YGVYEDENYEVGS#DDEEIPFK.C       | S253:        | 3 | 4,455  | 0,409 | -0,213 |
| 5 | P05787 K2C8_HUMAN  | R.S#LDMDSIIAEVK.A                | S253:        | 2 | 4,0337 | 0,403 | -0,087 |
| 5 | P05787 K2C8_HUMAN  | R.S#LDM*DSIIAEVK.A               | S253:        | 2 | 3,8261 | 0,403 | 0,172  |
| 5 | O60303 K0556_HUMAN | R.SS#PGPDTLVVLEFNPASK.S          | S253:        | 2 | 3,4148 | 0,568 | -0,441 |
| 5 | Q8N1G0 ZN687_HUMAN | K.ATDIPASAS#PPPVAGVPFFK.Q        | S253:        | 2 | 3,1228 | 0,54  | -0,595 |
| 5 | Q9Y4B5 K0802_HUMAN | R.GAPPGS#PEPPALLAAGACPGGR.S      | S254:        | 3 | 3,3125 | 0,392 | -0,15  |
| 5 | Q96LW4 CC111_HUMAN | R.LGS#AEQSSPDLNFLVVK.N           | S255:        | 2 | 4,1997 | 0,515 | -0,46  |

|   |                    |                                    |        |   |        |       |        |
|---|--------------------|------------------------------------|--------|---|--------|-------|--------|
| 5 | P15924 DESP_HUMAN  | R.SGS#LSLTQFADM*ISLK.N             | S2551: | 2 | 4,0705 | 0,497 | -0,544 |
| 5 | Q9HB58 SP110_HUMAN | R.DNS#PEPNDPEEPQEVSTPSDK.K         | S256:  | 3 | 4,4804 | 0,383 | -0,221 |
| 5 | Q969K3 RNF34_HUMAN | R.ASL#DLSSLDDVEGM*SVR.Q            | S256:  | 2 | 4,1795 | 0,583 | -0,247 |
| 5 | P55036 PSMD4_HUMAN | R.AAAASAAEAGIATTGTEDS#DDALLK.M     | S256:  | 3 | 3,7527 | 0,317 | -0,305 |
| 5 | P85037 FOXK1_HUMAN | R.SM*VSPVPSPTGTISVPNSCPAS#PR.G     | S257:  | 3 | 2,8915 | 0,211 | 0,145  |
| 5 | P07910 HNRPC_HUMAN | K.M*ESEGADD#AEEGDLLDDDDNEDR.G      | S260:  | 3 | 6,5864 | 0,457 | 0,327  |
| 5 | P07910 HNRPC_HUMAN | K.MESEGADD#AEEGDLLDDDDNEDR.G       | S260:  | 3 | 3,7627 | 0,422 | -0,198 |
| 5 | Q8N3V7 SYNPO_HUMAN | K.VAS#EEEEVPLVVYLK.E               | S263:  | 2 | 3,8696 | 0,581 | -0,479 |
| 5 | Q5T200 ZC3HD_HUMAN | R.TPS#PPPIPEDIALGK.K               | S265:  | 2 | 2,9381 | 0,474 | -0,143 |
| 5 | Q92733 PRCC_HUMAN  | K.QITQEEDS#DEEVAPENFFSLPEK.A       | S267:  | 3 | 4,9709 | 0,452 | 0,191  |
| 5 | Q6P1R3 CK061_HUMAN | K.M*EVLSPAS#PGGLSDGNPSLSDPSTPR.G   | S27:   | 3 | 2,9041 | 0,263 | 1,167  |
| 5 | Q8N8N7 ZADH1_HUMAN | K.DVPYPPPLS#PAIEAIQK.E             | S270:  | 2 | 3,1279 | 0,363 | -0,319 |
| 5 | Q66PJ3 AR6P4_HUMAN | R.S#AGEEEDGPVLTDEQK.S              | S271:  | 2 | 5,0246 | 0,509 | -0,137 |
| 5 | P52701 MSH6_HUMAN  | K.EEGS#SDEISSGVGDSESEGLNSPVK.V     | S274:  | 3 | 4,8042 | 0,461 | 1,208  |
| 5 | Q8IX01 SFR14_HUMAN | K.NTPS#PDVTLGTNPGTEDIQFPIQK.I      | S277:  | 3 | 2,91   | 0,158 | -0,483 |
| 5 | O94888 UBXD7_HUMAN | R.S#ESLIDASEDSQLEAAIR.A            | S278:  | 2 | 2,3202 | 0,568 | -0,182 |
| 5 | Q96EZ8 MCRS1_HUMAN | K.GDQVLNFS#DAEDLIDDSK.L            | S282:  | 2 | 3,347  | 0,458 | -0,474 |
| 5 | Q13085 ACACA_HUMAN | R.FIIGSVSEDNS#EDEISNLVK.L          | S29:   | 3 | 3,2264 | 0,242 | -0,563 |
| 5 | Q8TDN4 CABL1_HUMAN | R.S#SLETLEDIEENAPLR.R              | S290:  | 2 | 3,6506 | 0,431 | -0,45  |
| 5 | Q8TDN4 CABL1_HUMAN | R.SS#LETLEDIEENAPLR.R              | S291:  | 2 | 4,2565 | 0,457 | -0,257 |
| 5 | P78312 CD008_HUMAN | R.LILTDSGSAPTFCS#DDEDVAPLSAK.F     | S293:  | 3 | 2,9227 | 0,249 | -0,204 |
| 5 | Q12888 TP53B_HUMAN | K.S#PEPEVLSTQEDLFDQSNK.T           | S294:  | 3 | 4,9155 | 0,32  | 0,082  |
| 5 | P49454 CENPF_HUMAN | R.GS#PLLGPVVPGPSPIPSVTEK.R         | S2996: | 2 | 2,6478 | 0,476 | 0      |
| 5 | Q9UHD8 SEPT9_HUMAN | R.S#FEVEEVETPNSTPPR.R              | S30:   | 2 | 4,9199 | 0,562 | -0,45  |
| 5 | O75379 VAMP4_HUMAN | R.NLLEDDS#DEEEDFFLR.G              | S30:   | 3 | 4,6203 | 0,424 | 0      |
| 5 | Q9UHD8 SEPT9_HUMAN | R.S#FEVEEVETPNSTPPR.R              | S30:   | 3 | 2,8914 | 0,401 | -0,096 |
| 5 | Q5JTD0 TJAP1_HUMAN | R.GS#PEEELPLPAFEK.L                | S300:  | 2 | 4,0396 | 0,438 | -0,226 |
| 5 | Q14789 GOGB1_HUMAN | R.QAS#PETSASPDGSQLVYETELLR.T       | S3010: | 3 | 3,364  | 0,196 | -0,068 |
| 5 | Q99459 CDC5L_HUMAN | K.LVLPAPQIS#DAELQEVVK.V            | S303:  | 2 | 2,3882 | 0,484 | -0,842 |
| 5 | Q05655 KPCD_HUMAN  | R.SDS#ASSEPVGIYQGFEK.K             | S304:  | 2 | 3,1102 | 0,408 | -0,195 |
| 5 | Q01850 CDR2_HUMAN  | R.SS#SETILSSLAGSDIVK.G             | S310:  | 2 | 3,6005 | 0,556 | -0,138 |
| 5 | Q6ZTU2 E400N_HUMAN | R.TPGVLLPGAGGAAGFGM*TSPPPPTS#PSR.T | S310:  | 3 | 2,956  | 0,233 | -0,205 |
| 5 | Q9Y446 PKP3_HUMAN  | R.LSS#GFDDIDLPSAVK.Y               | S314:  | 2 | 4,2603 | 0,468 | 1,262  |

|   |                    |                                   |                 |   |        |       |        |
|---|--------------------|-----------------------------------|-----------------|---|--------|-------|--------|
| 5 | Q8NCF5 NF2IP_HUMAN | R.ILLFGETELS#PTATPR.T             | S314:           | 2 | 2,9149 | 0,354 | -0,189 |
| 5 | Q96JH7 VCIP1_HUMAN | R.S#SGDYSATFLPGLIPAEK.C           | S314:           | 2 | 2,6978 | 0,315 | 0      |
| 5 | P46937 YAP1_HUMAN  | R.SQLPTLEQDGGTQNPVSS#PGM*SQELR.T  | S317:           | 3 | 5,9621 | 0,512 | 0,064  |
| 5 | P78527 PRKDC_HUMAN | K.LTPLPEDNS#M*NVDQDGDPSDR.M       | S3205:          | 3 | 3,7987 | 0,367 | 0,152  |
| 5 | O75674 TM1L1_HUMAN | K.EATNTTSEPSAPSQDLLDLSPS#PR.M     | S323:           | 3 | 3,9446 | 0,406 | -0,282 |
| 5 | Q15554 TERF2_HUMAN | K.DLVLPQTALPAS#PALK.N             | S323:           | 2 | 3,8383 | 0,342 | -0,356 |
| 5 | Q15554 TERF2_HUMAN | K.DLVLPQTALPAS#PALK.N             | S323:           | 3 | 2,8556 | 0,305 | 0      |
| 5 | O95628 CNOT4_HUMAN | R.S#PFEGAVTESQSLFSDNFR.H          | S324:           | 3 | 4,5842 | 0,53  | -0,083 |
| 5 | P19419 ELK1_HUMAN  | R.DLELPLS#PSLLGGPGER.T            | S324:           | 2 | 3,3607 | 0,454 | -0,57  |
| 5 | Q70CQ2 UBP34_HUMAN | R.DSSIIDPGTEQDLPS#PENSSVK.E       | S3255:          | 3 | 3,3151 | 0,275 | 0,84   |
| 5 | P19419 ELK1_HUMAN  | R.DLELPLS#PSLLGGPGER.T            | S326:           | 3 | 4,3294 | 0,357 | -0,475 |
| 5 | Q9Y608 LRRF2_HUMAN | R.GS#GDTSSLIDPDTLSSELR.D          | S328:           | 2 | 3,6599 | 0,515 | -0,481 |
| 5 | Q16828 DUS6_HUMAN  | K.SNIS#PNFNFM*GQLLDFER.T          | S331:           | 3 | 2,9919 | 0,371 | -0,164 |
| 5 | Q641Q2 FA21A_HUMAN | R.TPS#DDEEDNLFAPPK.L              | S333:           | 2 | 3,6377 | 0,479 | -0,278 |
| 5 | Q9NQQ7 S35C2_HUMAN | K.GLGS#SPDLELLLR.S                | S335:           | 2 | 3,6883 | 0,262 | -0,337 |
| 5 | Q9ULJ8 NEB1_HUMAN  | K.SEIPS#PQSQLEDAEANLVGR.E         | S338:           | 3 | 4,4958 | 0,353 | -0,235 |
| 5 | P01892 1A02_HUMAN  | K.GGS#YSQAASSDSAQGSVDVSLTACKV.-   | S343:           | 3 | 4,8421 | 0,582 | 0,801  |
| 5 | Q12923 PTN13_HUMAN | R.YS#DGSIALDIFGPQK.M              | S345:           | 2 | 3,5591 | 0,404 | -0,505 |
| 5 | Q8IXU6 S35F2_HUMAN | R.TAEPAES#SVPPVTSIGIDNLGLK.L      | S345:           | 3 | 2,8721 | 0,223 | 0,154  |
| 5 | Q9UGV2 NDRG3_HUMAN | R.S#VTSNQSDGTQESCEPDVLDLDR.H      | S346:           | 3 | 4,3646 | 0,499 | 0,294  |
| 5 | Q9NWB7 IFT57_HUMAN | R.LLS#EVM*EELEK.V                 | S347:           | 2 | 3,1778 | 0,296 | -0,517 |
| 5 | Q96SI1 KCD15_HUMAN | R.S#PVSPLAAQGIPLPAQLTK.S          | S35:            | 2 | 4,6948 | 0,591 | -0,124 |
| 5 | Q9UN36 NDRG2_HUMAN | R.TLS#QSSESGTLSSGPPGHTM*EVSC.-    | S350:           | 3 | 3,692  | 0,496 | -0,145 |
| 5 | Q13671 RIN1_HUMAN  | R.SM*S#AAFCSLLAPER.Q              | S351:           | 2 | 3,7391 | 0,511 | -0,149 |
| 5 | P18031 PTN1_HUMAN  | K.GS#PLNAAPYGIESM*SQDTEVR.S       | S352:           | 3 | 5,7607 | 0,529 | -0,079 |
| 5 | P01892 1A02_HUMAN  | R.KGGSYSQAASSDS#AQGS#DVS#LTACK.V  | S352:S356:S359: | 3 | 6,6905 | 1     | -0,474 |
| 5 | P01892 1A02_HUMAN  | R.KGGSYSQAASSDS#AQGS#DVS#LTACKV.- | S352:S356:S359: | 3 | 5,5801 | 1     | -0,196 |
| 5 | P46937 YAP1_HUMAN  | R.DESTDSGLS#M*SSYSVPR.T           | S353:           | 2 | 3,0041 | 0,459 | -0,191 |
| 5 | P11532 DMD_HUMAN   | K.GLSPLSPPEM*M*PTSPQS#PR.D        | S3552:          | 3 | 2,7671 | 0,332 | -0,082 |
| 5 | Q16625 OCLN_HUMAN  | K.STPVPEVVQELPLTS#PVDDFR.Q        | S358:           | 3 | 3,7928 | 0,307 | 0,076  |
| 5 | Q9UQ35 SRRM2_HUMAN | R.SS#TGPEPPAPTPLLAER.H            | S358:           | 2 | 3,2048 | 0,413 | -0,068 |
| 5 | P17029 ZKSC1_HUMAN | R.SFS#LSSNFTTPEEVPTGTK.S          | S359:           | 2 | 2,2578 | 0,404 | -0,347 |
| 5 | Q9BQL6 FERM1_HUMAN | K.ADS#LLEDITDIPK.L                | S361:           | 2 | 4,0303 | 0,543 | -0,485 |

|   |                    |                                |                 |   |        |       |        |
|---|--------------------|--------------------------------|-----------------|---|--------|-------|--------|
| 5 | O76021 RL1D1_HUMAN | K.ATNES#EDEIPQLVPIGK.K         | S361:           | 3 | 3,4872 | 0,167 | -0,095 |
| 5 | Q9H5J0 ZBTB3_HUMAN | K.VEAIVIS#DEETDVSDSEQPQGP.A    | S362:           | 3 | 5,2942 | 0,454 | 0,349  |
| 5 | P20810 ICAL_HUMAN  | R.S#ESELIDELSEDFDR.S           | S364:           | 2 | 4,2426 | 0,488 | -0,262 |
| 5 | P20810 ICAL_HUMAN  | R.SES#ELIDELSEDFDR.S           | S366:           | 3 | 4,325  | 0,323 | -0,393 |
| 5 | P20810 ICAL_HUMAN  | R.SES#ELIDELSEDFDR.S           | S366:           | 2 | 3,4904 | 0,546 | -0,393 |
| 5 | Q14160 LAP4_HUMAN  | R.S#LEELLLDANQLR.E             | S37:            | 2 | 4,5527 | 0,345 | -0,23  |
| 5 | Q5VT52 K0460_HUMAN | R.DVEDM*ELS#DVEDDGSK.I         | S374:           | 2 | 5,2559 | 0,587 | -0,26  |
| 5 | Q8NDI1 EHB1_HUMAN  | K.S#TPPPNNLVNPVQELETER.R       | S377:           | 3 | 4,7743 | 0,283 | 0,248  |
| 5 | Q9H8V3 ECT2_HUMAN  | K.ENLLIGS#TSYVEEEM*PQIETR.V    | S38:            | 3 | 5,0499 | 0,342 | -0,433 |
| 5 | Q7Z5K2 WAPL_HUMAN  | R.S#M*DEFTASTPADLGEAGR.L       | S380:           | 2 | 5,4785 | 0,627 | -0,125 |
| 5 | Q9H307 PININ_HUMAN | K.QQDS#QPEEVM*DVLEM*VENVK.H    | S381:           | 3 | 6,4725 | 0,437 | -0,074 |
| 5 | O95817 BAG3_HUMAN  | K.VPPAPVPCPPSPGPGS#AVPSSPK.S   | S381:           | 3 | 3,8146 | 0,491 | 0,557  |
| 5 | Q9BY77 PDIP3_HUMAN | R.VNS#ASSNPPAEVDPDTILK.A       | S383:           | 2 | 2,4436 | 0,51  | -0,115 |
| 5 | O95817 BAG3_HUMAN  | K.VPPAPVPCPPSPGPGSAVPS#SPK.S   | S385:           | 3 | 4,0218 | 0,351 | 0,637  |
| 5 | Q9UK32 KS6A6_HUMAN | K.GFS#FVATSIAEEYK.I            | S389:           | 2 | 3,8497 | 0,492 | -0,3   |
| 5 | P55010 IF5_HUMAN   | K.EAEEES#SGGEEDEDENIEVVYSK.A   | S389:           | 3 | 3,674  | 0,239 | -0,066 |
| 5 | Q8IYB3 SRRM1_HUMAN | R.RLS#PS#AS#PPR.R              | S389:S391:S393: | 2 | 2,8838 | 0,35  | -0,28  |
| 5 | O43741 AAKB2_HUMAN | K.IM*VGS#TDDPSVFLPDSK.L        | S39:            | 2 | 4,7996 | 0,487 | -0,184 |
| 5 | Q9BVS4 RIOK2_HUMAN | R.S#FEM*TEFNQALEEIK.G          | S390:           | 2 | 4,0512 | 0,504 | -0,383 |
| 5 | Q14527 HLTF_HUMAN  | K.TAVQYIES#SDSEIETSELPOK.M     | S397:           | 3 | 4,3479 | 0,389 | -0,071 |
| 5 | Q01167 FOXK2_HUMAN | R.EGS#PAPLEPEPGAAQPK.L         | S398:           | 2 | 3,3583 | 0,432 | -0,278 |
| 5 | P05783 K1C18_HUMAN | R.LLEDGEDFNLDALDSS#NSM*QTIQK.T | S399:           | 3 | 6,6769 | 0,472 | -0,258 |
| 5 | O14686 MLL2_HUMAN  | R.VS#PAAAQLADTLFSK.G           | S4084:          | 2 | 3,5401 | 0,565 | 0,076  |
| 5 | Q5T2T1 MPP7_HUMAN  | R.S#QESDGVVEYIFISK.H           | S409:           | 2 | 3,83   | 0,547 | -0,073 |
| 5 | P46108 CRK_HUMAN   | R.DSS#TSPGDYVLSVENS.R.V        | S41:            | 2 | 3,8116 | 0,575 | -0,246 |
| 5 | O14662 STX16_HUMAN | R.S#IAAELDELADDR.M             | S41:            | 2 | 2,1674 | 0,405 | -0,326 |
| 5 | Q9UKV3 ACINU_HUMAN | K.ASLVALPEQTAS#EEETPPPLLTK.E   | S410:           | 3 | 3,9655 | 0,311 | -0,146 |
| 5 | Q659A1 NARG2_HUMAN | K.S#PSPASTSTVPMN*TDAPTAPK.A    | S416:           | 2 | 2,0897 | 0,34  | -0,113 |
| 5 | O60524 SDCG1_HUMAN | R.NPYLLS#EEEDDDVDGDVNVEK.N     | S417:           | 3 | 3,5903 | 0,308 | 0      |
| 5 | Q8IVF2 AHNK2_HUMAN | K.TDLSIQS#PSADLEVQAGQVDVK.L    | S4185:          | 3 | 4,6475 | 0,359 | -0,147 |
| 5 | O75821 EIF3G_HUMAN | K.GIPLATGDT#PEPELLPGAPLPPPK.E  | S42:            | 3 | 4,6603 | 0,446 | -0,288 |
| 5 | Q9P0V3 SH3B4_HUMAN | K.VPS#PSALLVDNPTPFNAK.E        | S42:            | 2 | 3,2662 | 0,473 | -0,122 |
| 5 | Q9NZJ4 SACS_HUMAN  | R.DSAPSTPTS#PTEFLTPLGR.S       | S4264:          | 2 | 2,647  | 0,464 | -0,356 |

|   |                     |                                     |        |   |        |       |        |
|---|---------------------|-------------------------------------|--------|---|--------|-------|--------|
| 5 | Q9H8Y8 GORS2_HUMAN  | R.VGDS#TPVSEKPVSAAVDANASESP.-       | S432:  | 3 | 2,7431 | 0,234 | 0,076  |
| 5 | Q14247 SRC8_HUMAN   | R.GPVS#GTEPEPVYSM*EAADYR.E          | S438:  | 3 | 2,9818 | 0,236 | 0      |
| 5 | O43318 M3K7_HUMAN   | R.S#IQDLTVTGTEPGQVSSR.S             | S439:  | 2 | 4,6358 | 0,532 | -0,437 |
| 5 | Q8NB49 AT11C_HUMAN  | K.GVTQEVDGLS#QTDGTLTYFDK.V          | S445:  | 3 | 2,8628 | 0,279 | 0,311  |
| 5 | Q96PU5 NED4L_HUMAN  | R.S#LSSPTVTLAPLEGAK.D               | S446:  | 2 | 4,0422 | 0,555 | -0,211 |
| 5 | Q8IZD4 DCP1B_HUMAN  | R.QTLPISGSQTGSSGVIS#PQELLK.K        | S449:  | 3 | 2,6986 | 0,174 | 0,152  |
| 5 | Q9NP61 ARFG3_HUMAN  | R.LS#ASSSISSADLFEEPR.K              | S451:  | 2 | 4,1344 | 0,537 | -0,26  |
| 5 | Q9HBH9 MKNK2_HUMAN  | R.AS#LSSAPVVLVDHA.-                 | S452:  | 2 | 2,0958 | 0,305 | 0,244  |
| 5 | Q53ET0 CRTC2_HUMAN  | K.QFS#PTM*SPTLSSITQGVPLDTSK.L       | S456:  | 3 | 3,9823 | 0,327 | -0,363 |
| 5 | Q14721 KCNB1_HUMAN  | R.S#IEM*M*DIVVEK.N                  | S457:  | 2 | 2,1692 | 0,317 | 0,174  |
| 5 | Q15149 PLEC1_HUMAN  | R.GS#FDATGSGFSM*TFSSSYSSSGYGR.R     | S4642: | 3 | 4,6399 | 0,42  | 0,135  |
| 5 | Q96SI9 STRBP_HUMAN  | K.VLQAM*GYPTGFDADIECM*S#SDEK.S      | S465:  | 3 | 6,3653 | 0,498 | -0,137 |
| 5 | Q9UMZ2 SYNG_HUMAN   | K.S#GSLDDSFSDQELPASSK.T             | S467:  | 2 | 2,1642 | 0,434 | -0,116 |
| 5 | Q6NX51 Q6NX51_HUMAN | R.S#GELQGGPDDNLLEGGGTK.F            | S468:  | 2 | 4,2381 | 0,54  | -0,698 |
| 5 | Q86YR5 GPSM1_HUMAN  | R.APS#SDEECFFDLLTK.F                | S469:  | 2 | 3,9225 | 0,561 | -0,332 |
| 5 | Q9Y217 FYV1_HUMAN   | K.FDDS#DTEQIAEEGDDNLANSASPSK.R      | S475:  | 3 | 4,8573 | 0,515 | 1,003  |
| 5 | Q6P1R3 CK061_HUMAN  | R.GAS#PLPGSAAGSGAAASGGLGLGLGGR.S    | S48:   | 3 | 5,1685 | 0,54  | 0,079  |
| 5 | Q9P107 GMIP_HUMAN   | R.DPDLGDGLENLGS#PFGK.W              | S480:  | 2 | 5,2062 | 0,628 | -0,131 |
| 5 | Q9UMX1 SUFU_HUMAN   | K.VSILPDVVFDS#PLH.-                 | S481:  | 2 | 3,8807 | 0,481 | -0,226 |
| 5 | P11169 GTR3_HUMAN   | K.DGVM*EM*NS#IEPAKETTTNV.-          | S485:  | 3 | 3,9148 | 0,415 | 0,336  |
| 5 | Q86SQ0 PHLB2_HUMAN  | K.LQLS#DEESVFEEALM*SPDTR.Y          | S489:  | 3 | 5,4682 | 0,417 | -0,153 |
| 5 | Q9H7E2 TDRD3_HUMAN  | R.SNS#FIGVPNGEVEM*PLK.G             | S489:  | 2 | 2,5567 | 0,324 | -1,02  |
| 5 | P18615 NELFE_HUMAN  | R.S#LSEQPVM*DTATATEQAK.Q            | S49:   | 2 | 4,5617 | 0,504 | -0,305 |
| 5 | Q9UBI6 GBG12_HUMAN  | R.S#DPLLIQIPTSENPFK.D               | S49:   | 2 | 3,4409 | 0,329 | -0,54  |
| 5 | Q9NWW8 CS062_HUMAN  | R.S#EGEGEAASADDGSLNTSGAGPK.S        | S49:   | 3 | 2,7284 | 0,41  | -0,335 |
| 5 | Q9NWW8 CS062_HUMAN  | R.S#EGEGEAASADDGSLNTSGAGPK.S        | S49:   | 2 | 2,1141 | 0,628 | -0,67  |
| 5 | Q9NV70 EXOC1_HUMAN  | R.SQSS#SLLDM*GNM*SASDLVADR.T        | S490:  | 3 | 4,1254 | 0,421 | 0,607  |
| 5 | O15446 RPA34_HUMAN  | R.M*PETVPQEEM*PGPPLNSESE#GEEAPTGR.D | S490:  | 3 | 3,6518 | 0,387 | 0,553  |
| 5 | Q9BUR4 WDR79_HUMAN  | R.VFPEPTES#GDEGEELGLPLLSTR.H        | S491:  | 3 | 3,524  | 0,421 | -0,502 |
| 5 | O43432 IF4G3_HUMAN  | R.S#PVPAQIAITVPK.T                  | S495:  | 2 | 3,1117 | 0,483 | 0,087  |
| 5 | Q9NRA8 4ET_HUMAN    | R.S#M*GETESGDAFLDLK.K               | S5:    | 2 | 4,9766 | 0,474 | -0,144 |
| 5 | A0MZ66 SHOT1_HUMAN  | K.S#M*PVLGSVSSVTK.T                 | S506:  | 2 | 3,2402 | 0,279 | 0,176  |
| 5 | P27816 MAP4_HUMAN   | K.DM*S#PLSETEM*ALGK.D               | S507:  | 2 | 4,4153 | 0,491 | 0,075  |

|   |                    |                                    |            |   |        |       |        |
|---|--------------------|------------------------------------|------------|---|--------|-------|--------|
| 5 | P18615 NELFE_HUMAN | R.SLS#EQPVM*DTATATEQAK.Q           | S51:       | 2 | 5,5698 | 0,504 | -0,365 |
| 5 | Q9ULT0 TTC7A_HUMAN | R.GS#PSAAFTFPDTHDFGK.L             | S51:       | 2 | 4,5481 | 0,627 | -0,332 |
| 5 | P18615 NELFE_HUMAN | R.SLS#EQPVM*DTATATEQAK.Q           | S51:       | 3 | 4,2468 | 0,52  | 0,183  |
| 5 | Q99549 MPP8_HUMAN  | R.GAEAFGDS#EEDGEDVFEVEK.I          | S51:       | 3 | 4,2044 | 0,322 | 0,082  |
| 5 | P18615 NELFE_HUMAN | R.SLS#EQPVM*DTATATEQAK.Q           | S51:       | 3 | 3,3423 | 0,39  | 0,092  |
| 5 | P27816 MAP4_HUMAN  | K.DM*SPLS#ETEM*ALGK.D              | S510:      | 2 | 2,5814 | 0,42  | 0      |
| 5 | Q8ND30 LIPB2_HUMAN | R.TQS#GNFYTDTLGM*AEFR.R            | S512:      | 2 | 3,3206 | 0,489 | -0,24  |
| 5 | Q14669 TRIPC_HUMAN | R.S#SAVVVDAIPVFLEK.L               | S515:      | 2 | 3,8121 | 0,498 | -0,295 |
| 5 | Q96SD1 DCR1C_HUMAN | R.NDEITDESLENFPSSTVAGGSQS#PK.L     | S518:      | 3 | 3,7318 | 0,443 | 0,136  |
| 5 | P50402 EMD_HUMAN   | R.LSPPS#SSAASSYSFSDLNSTR.G         | S52:       | 3 | 3,3496 | 0,297 | -0,082 |
| 5 | Q8N1G4 LRC47_HUMAN | K.EEGSLS#DTEADAVSGQLPDPTTNPSAGK.D  | S520:      | 3 | 3,6615 | 0,304 | -0,321 |
| 5 | Q95365 ZBT7A_HUMAN | R.GGAPDPSPGATATPGAPAQSS#PDAR.R     | S526:      | 3 | 3,889  | 0,294 | -0,228 |
| 5 | Q13330 MTA1_HUMAN  | R.DISS#TLIALADK.H                  | S53:       | 2 | 3,0325 | 0,417 | -0,184 |
| 5 | Q9BWU0 NADAP_HUMAN | K.ASSQVLSE#PSQDSLDAFM*SEM*K.S      | S530:      | 3 | 5,2133 | 0,461 | 0      |
| 5 | Q96T23 RSF1_HUMAN  | K.AQIEEPDPPM*ETSLDS#SEM*AK.D       | S533:      | 3 | 2,6477 | 0,181 | 0      |
| 5 | Q68E01 INT3_HUMAN  | K.DESCYDNAEAAFS#DDEEDLNSK.G        | S537:      | 3 | 4,4796 | 0,36  | -0,351 |
| 5 | Q8N8S7 ENAH_HUMAN  | K.S#TPLSQPSANGVQTEGLDYDR.L         | S537:      | 3 | 3,2086 | 0,372 | 0,474  |
| 5 | Q641Q2 FA21A_HUMAN | K.GLFS#DEEDEDLFSQSASK.L            | S539:      | 3 | 4,6953 | 0,523 | -0,081 |
| 5 | Q8NHQ9 DDX55_HUMAN | R.EEGS#DIEDEDM*EELLNDTR.L          | S544:      | 3 | 5,0216 | 0,412 | -0,078 |
| 5 | Q9Y4E1 FA21C_HUMAN | K.GLFSDEEDS#EDLFSQSASNLK.G         | S544:      | 3 | 2,6666 | 0,104 | -0,074 |
| 5 | O00255 MEN1_HUMAN  | R.GPEGGSTAQVPAPAAS#PPPEGPVLTQSEK.M | S548:      | 3 | 2,791  | 0,221 | -0,429 |
| 5 | Q9Y3L3 3BP1_HUMAN  | R.S#PPETAAPVEDM*AR.R               | S550:      | 2 | 2,8906 | 0,384 | -0,389 |
| 5 | Q12888 TP53B_HUMAN | R.IDEDGENTQIEDTEPM*S#PVLNSK.F      | S552:      | 3 | 4,8742 | 0,459 | -0,344 |
| 5 | Q96ST2 IWS1_HUMAN  | R.DGGTFIS#DADDVVSAM*IVK.M          | S554:      | 2 | 3,383  | 0,463 | -0,36  |
| 5 | Q8WX92 NELFB_HUMAN | R.KPS#PAQAAETPALELPLSPAPAPL.-      | S557:      | 3 | 2,9211 | 0,322 | -0,554 |
| 5 | P29374 ARI4A_HUMAN | K.CDS#EGEEDM*EPCLTGTK.V            | S561:      | 3 | 5,6709 | 0,458 | -0,226 |
| 5 | P42566 EP15_HUMAN  | R.S#SPELLPSGVTDENEVTTAVTEK.V       | S562:      | 3 | 3,8857 | 0,439 | 0,074  |
| 5 | Q9BXF6 RFIP5_HUMAN | K.TVTS#GSIQPVTPAQAGQM*VDTK.R       | S564:      | 3 | 3,0923 | 0,184 | 0,075  |
| 5 | Q96ER3 SAAL1_HUMAN | K.SSS#DDEEQLTELDEEM*ENEICR.V       | S57:       | 3 | 2,7342 | 0,173 | -0,133 |
| 5 | P17812 PYRG1_HUMAN | R.S#GSSS#PDSEITELKFPSINHD.-        | S571:S575: | 3 | 2,7074 | 1     | -0,152 |
| 5 | Q9UJX2 CDC23_HUMAN | R.NQGETPTTEVPAPFFLPASLS#ANNTPTR.R  | S572:      | 3 | 3,2456 | 0,169 | -0,542 |
| 5 | Q6ZRP7 QSOX2_HUMAN | R.DNLLDTYSADQGDS#SEGGTLAR.G        | S578:      | 3 | 6,2015 | 0,566 | 0,077  |
| 5 | Q8N3V7 SYNPO_HUMAN | R.S#PPSYSVLYPSSDPK.S               | S580:      | 2 | 3,1061 | 0,535 | 0,501  |

|   |                    |                                        |            |   |        |       |        |
|---|--------------------|----------------------------------------|------------|---|--------|-------|--------|
| 5 | Q12888 TP53B_HUMAN | K.FVPAENDSILM*NPAQDGEVQLS#QNDDK.T      | S580:      | 3 | 2,828  | 0,383 | -0,119 |
| 5 | O00116 ADAS_HUMAN  | R.GIS#DPLTVFEQTEAAAR.E                 | S589:      | 2 | 4,9305 | 0,513 | -0,388 |
| 5 | O00116 ADAS_HUMAN  | R.GIS#DPLTVFEQTEAAAR.E                 | S589:      | 3 | 3,9041 | 0,331 | -0,097 |
| 5 | O15085 ARHGB_HUMAN | R.LSTGS#FPEDLLESDDR.S                  | S592:      | 2 | 2,8998 | 0,526 | 0      |
| 5 | O75122 CLAP2_HUMAN | R.VLNTGS#DVEEAVADALK.K                 | S596:      | 2 | 4,5143 | 0,595 | -0,269 |
| 5 | P05783 K1C18_HUMAN | R.GGM*GS#GGLATGIAGGLAGM*GGIQNEK.E      | S60:       | 3 | 6,784  | 0,531 | -0,154 |
| 5 | Q9UQL6 HDAC5_HUMAN | K.DEEGES#GAEEGPDLEPGAGYK.K             | S611:      | 3 | 2,6846 | 0,286 | 0,078  |
| 5 | Q03188 CENPC_HUMAN | R.CS#LSEPLESDEADLAK.K                  | S613:      | 2 | 3,0516 | 0,408 | -0,199 |
| 5 | O15211 RGL2_HUMAN  | R.S#ASCGSPLSGGAEASGGTGYGGEGSGPGASDCR.I | S617:      | 3 | 4,1808 | 0,462 | 1,27   |
| 5 | Q7Z417 NUFP2_HUMAN | K.DYEIESQNPLAS#PTNTLLGSAK.E            | S629:      | 3 | 6,1247 | 0,454 | 0      |
| 5 | Q9Y6X4 K0888_HUMAN | K.AVDSSS#EEIEVEVPVDR.R                 | S637:      | 2 | 3,3555 | 0,443 | -0,359 |
| 5 | Q8N0Z3 CCD52_HUMAN | R.S#PTFSEELPVLGDGQQLR.T                | S640:      | 2 | 3,9748 | 0,537 | -0,357 |
| 5 | Q8TDD1 DDX54_HUMAN | K.EEEEEAGES#VEDIFSEVVGR.K              | S644:      | 3 | 2,7679 | 0,15  | -0,316 |
| 5 | Q9UK58 CCNL1_HUMAN | R.LS#PTPSM*QDGLDLPSETDLR.I             | S65:       | 3 | 3,862  | 0,176 | 0,081  |
| 5 | O00267 SPT5H_HUMAN | R.DVTNFTVGGFAPM*S#PR.I                 | S666:      | 2 | 4,9854 | 0,663 | -0,272 |
| 5 | Q9UER7 DAXX_HUMAN  | K.ICTLPS#PPSPLASLAPVADSSTR.V           | S668:      | 3 | 3,6389 | 0,433 | -0,227 |
| 5 | O94854 K0754_HUMAN | R.DSDS#FLNIFPEK.Q                      | S668:      | 2 | 2,7031 | 0,172 | -0,409 |
| 5 | P20042 IF2B_HUMAN  | K.DAS#DDLDDLNFNQK.K                    | S67:       | 2 | 5,0193 | 0,427 | -0,332 |
| 5 | P20042 IF2B_HUMAN  | K.DAS#DDLDDLNFNQK.K                    | S67:       | 3 | 3,7967 | 0,39  | -0,1   |
| 5 | Q9Y3T9 NOC2L_HUMAN | K.DLFDLNSS#EEDDTEGFSEK.G               | S673:      | 3 | 4,1568 | 0,518 | 0      |
| 5 | Q14126 DSG2_HUMAN  | K.VVPSFLPVDQGG#LVGR.N                  | S680:      | 2 | 3,3015 | 0,27  | -0,27  |
| 5 | Q9Y496 KIF3A_HUMAN | R.S#AKPETVIDSLLQ.-                     | S690:      | 2 | 2,9132 | 0,425 | -0,247 |
| 5 | Q8TEW0 PARD3_HUMAN | K.S#PGSPPGPELPIETALDDR.E               | S692:      | 3 | 2,9118 | 0,342 | -0,09  |
| 5 | Q92974 ARHG2_HUMAN | R.EPALPLEPDSGGNTS#PGVTANGEAR.T         | S695:      | 3 | 4,1177 | 0,514 | 0,654  |
| 5 | Q8TEW0 PARD3_HUMAN | K.SPGS#PPGPELPIETALDDR.E               | S695:      | 2 | 3,7894 | 0,519 | -0,481 |
| 5 | Q9UNK9 ANGE1_HUMAN | R.EEGLS#QVLSTASEGPLIDK.G               | S70:       | 2 | 2,758  | 0,456 | -0,475 |
| 5 | P25205 MCM3_HUMAN  | K.DGDSYDPYDFS#DTEEM*PQVHT#PK.T         | S711:T722: | 3 | 3,3633 | 0,416 | -0,492 |
| 5 | P26358 DNMT1_HUMAN | K.EADDDEEVDDNIPEM*PS#PK.K              | S714:      | 3 | 3,3848 | 0,297 | -0,082 |
| 5 | Q9UPQ0 LIMC1_HUMAN | K.S#PEPEATLTFPFLDK.M                   | S718:      | 2 | 3,1946 | 0,463 | -0,413 |
| 5 | Q9HAW4 CLSPN_HUMAN | K.SLS#SDSTLLLFK.D                      | S720:      | 2 | 2,5945 | 0,246 | -0,263 |
| 5 | P40763 STAT3_HUMAN | K.FICVPTTCSNTIDLPM*S#PR.T              | S727:      | 3 | 4,9149 | 0,391 | 0,38   |
| 5 | P46019 KPB2_HUMAN  | K.S#LNLVDSQPPLLEK.V                    | S729:      | 2 | 2,7019 | 0,309 | -0,224 |
| 5 | Q9UKI8 TLK1_HUMAN  | R.SNS#SGNLHM*AGLTASPTPPSSSIITY.-       | S743:      | 3 | 2,8856 | 0,255 | -0,681 |

|   |                     |                                  |       |   |        |       |        |
|---|---------------------|----------------------------------|-------|---|--------|-------|--------|
| 5 | Q6NV74 CB055_HUMAN  | R.NEVIAIESGPVGYDS#EDELEESR.G     | S75:  | 3 | 5,7232 | 0,574 | -0,629 |
| 5 | A0FGR8 ESYT2_HUMAN  | K.EPTPSIAS#DISLPIATQELR.Q        | S758: | 3 | 3,3279 | 0,245 | -0,247 |
| 5 | O60307 MAST3_HUMAN  | R.GPS#PSLLNTISLDTM*PK.F          | S774: | 2 | 3,3271 | 0,475 | -0,392 |
| 5 | Q00536 PCTK1_HUMAN  | K.M*GS#DGESDQASATSSDEVQSPVR.V    | S78:  | 3 | 2,9464 | 0,149 | -0,3   |
| 5 | P53367 ARFP1_HUMAN  | K.EGVIEAGAFQGGSPAPPLPSVM*S#PSR.V | S79:  | 3 | 3,2297 | 0,144 | -0,284 |
| 5 | Q969R5 LMBL2_HUMAN  | R.S#LDGSGSEPAVCEM*CGIVGTR.E      | S79:  | 3 | 2,6218 | 0,248 | 0,482  |
| 5 | A3KN83 SBNO1_HUMAN  | K.S#IDPDSIQSALLASGLGSK.R         | S794: | 2 | 3,112  | 0,642 | -0,566 |
| 5 | Q7Z460 CLAP1_HUMAN  | R.VLST#TDLEAAVADALK.K            | S797: | 2 | 3,1163 | 0,326 | -0,342 |
| 5 | Q9UMX3 BOK_HUMAN    | R.SS#VFAAEIM*DAFDR.S             | S8:   | 2 | 3,7032 | 0,532 | -0,295 |
| 5 | Q96N64 PWP2A_HUMAN  | R.S#PEAVGPELEAEK.L               | S81:  | 2 | 2,2444 | 0,293 | 0,156  |
| 5 | P04792 HSPB1_HUMAN  | R.QLS#SGVSEIR.H                  | S82:  | 2 | 2,1358 | 0,172 | -0,317 |
| 5 | Q2NKX8 ERC6L_HUMAN  | K.GFGS#VEELCTNSSLGM*EK.S         | S820: | 2 | 2,4398 | 0,569 | 0,12   |
| 5 | P33981 TTK_HUMAN    | K.YVLGQLVGLNS#PNSILK.A           | S821: | 2 | 2,2801 | 0,307 | 0,064  |
| 5 | O14976 GAK_HUMAN    | R.DES#EVSDEGGSPISSEGEPR.A        | S826: | 3 | 3,4945 | 0,14  | -0,322 |
| 5 | Q9Y2H2 SAC2_HUMAN   | K.S#DSSLETM*ENTGVM*DK.V          | S827: | 2 | 3,1382 | 0,54  | -0,394 |
| 5 | Q658Y4 F91A1_HUMAN  | R.SPS#SLLIANLHLQ.-               | S828: | 2 | 4,163  | 0,511 | -0,497 |
| 5 | Q13561 DCTN2_HUMAN  | R.TGYES#GEYEM*LGEGLGVK.E         | S83:  | 2 | 3,2485 | 0,419 | -0,424 |
| 5 | Q99848 EBP2_HUMAN   | R.LDVTLGPVPEIGGS#EAPAPQNK.D      | S83:  | 3 | 2,9751 | 0,281 | -0,161 |
| 5 | Q8NCF5 NF2IP_HUMAN  | R.GAADEVEVEPEPPGPVAS#R.D         | S84:  | 2 | 2,9339 | 0,576 | -0,234 |
| 5 | Q5MIZ7 SMEK2_HUMAN  | K.GSLVGLVDYPDDEEEDEESS#PR.K      | S840: | 3 | 4,783  | 0,396 | -0,198 |
| 5 | Q9HAW4 CLSPN_HUMAN  | K.LSEPSLPIEDSQDLYNAS#PEPK.T      | S846: | 3 | 5,5024 | 0,509 | 0      |
| 5 | Q70EL4 UBP43_HUMAN  | R.STS#QSIVSLLTGAGEDK.S           | S847: | 2 | 5,2784 | 0,556 | -0,426 |
| 5 | Q70EL4 UBP43_HUMAN  | R.STS#QSIVSLLTGAGEDK.S           | S847: | 3 | 3,3741 | 0,32  | 0,183  |
| 5 | Q13428 TCOF_HUMAN   | R.VSDPIST#ESSEEEEEAEATAK.A       | S85:  | 3 | 3,4469 | 0,335 | 0,65   |
| 5 | Q15361 TTF1_HUMAN   | R.DIFYEDDS#EGEDIEK.E             | S872: | 2 | 4,3909 | 0,586 | -0,477 |
| 5 | O60296 TRAK2_HUMAN  | R.NQS#LPVIM*GSFAAPVCTSSPK.M      | S889: | 3 | 3,28   | 0,259 | 0      |
| 5 | Q9C0C2 TB182_HUMAN  | R.DS#LGAYASQDANEQGDGK.R          | S893: | 2 | 2,4425 | 0,585 | 0      |
| 5 | Q53EK9 Q53EK9_HUMAN | R.ADGAPSAAPPDGLLAS#PDLGLLK.L     | S90:  | 3 | 4,3656 | 0,368 | 0      |
| 5 | Q99614 TTC1_HUMAN   | K.SNEDVNSS#ELDEEYLIEK.N          | S90:  | 3 | 3,6997 | 0,188 | 0      |
| 5 | Q9Y4H2 IRS2_HUMAN   | K.S#PGEYINIDFGEPGAR.L            | S915: | 2 | 3,481  | 0,497 | 0      |
| 5 | Q16512 PKN1_HUMAN   | R.TDVSNFDEEFTGEAPTL#PPR.D        | S916: | 3 | 3,0561 | 0,113 | 0,077  |
| 5 | Q6S8J3 A26CA_HUMAN  | K.LCYVALDFEQEM*ATAASS#SSLEK.S    | S933: | 3 | 5,8203 | 0,497 | -0,207 |
| 5 | Q53EZ4 CEP55_HUMAN  | R.YS#TTALLEQLEETTR.E             | S96:  | 2 | 3,4317 | 0,328 | -0,665 |



|   |                     |                                    |        |   |        |       |        |
|---|---------------------|------------------------------------|--------|---|--------|-------|--------|
| 5 | Q9Y2H0 DLGP4_HUMAN  | R.QNSATESADS#IEIYVPEAQTR.L         | S977:  | 3 | 4,4756 | 0,391 | 0,153  |
| 5 | Q14814 MEF2D_HUMAN  | K.GFNGCDS#PEPDGEDSLEQSPLLEDK.Y     | S98:   | 3 | 4,1999 | 0,388 | -0,13  |
| 5 | P13861 KAP2_HUMAN   | R.VS#VCAETYNPDEEEEDTDPR.V          | S99:   | 3 | 3,3266 | 0,207 | 0,15   |
| 5 | Q9P2D0 IBTK_HUMAN   | R.SDS#SGGYNLSDIQSPSSTGLLK.S        | S992:  | 3 | 6,2061 | 0,332 | -0,228 |
| 5 | P52948 NUP98_HUMAN  | K.ASLT#DEEDVDM*ALDQR.F             | T1000: | 3 | 3,9174 | 0,321 | 0      |
| 5 | P52948 NUP98_HUMAN  | K.ASLT#DEEDVDM*ALDQR.F             | T1000: | 2 | 3,1826 | 0,481 | -0,302 |
| 5 | O60749 SNX2_HUMAN   | R.EPILSSEPSAVTPVT#PTTLIAPR.I       | T104:  | 3 | 4,6746 | 0,407 | -0,215 |
| 5 | Q9UQ35 SRRM2_HUMAN  | K.SST#PPGESYFGVSSLQLK.G            | T1043: | 3 | 5,8231 | 0,452 | 0,093  |
| 5 | Q9UQ35 SRRM2_HUMAN  | K.SST#PPGESYFGVSSLQLK.G            | T1043: | 2 | 3,224  | 0,569 | -0,311 |
| 5 | P35251 RFC1_HUMAN   | R.QDPVTYISET#DEEDDFM*CK.K          | T110:  | 3 | 3,6902 | 0,361 | -0,076 |
| 5 | P20042 IF2B_HUMAN   | K.IESDVQEPT#EPEDDLDIM*LGNK.K       | T111:  | 3 | 4,4799 | 0,549 | -0,071 |
| 5 | O95239 KIF4A_HUMAN  | K.T#PPAPSPFDLPELK.H                | T1181: | 2 | 3,2223 | 0,452 | -0,307 |
| 5 | Q5JSH3 WDR44_HUMAN  | K.LTQTSST#EQLNVLETETEVLNK.E        | T163:  | 3 | 5,1441 | 0,285 | -0,358 |
| 5 | Q3V6T2 GRDN_HUMAN   | K.T#GSPGSEVVTLQQFLEESNK.L          | T1673: | 3 | 6,7509 | 0,339 | -0,41  |
| 5 | Q16763 UBE2S_HUMAN  | R.ALASGT#EASSTDPGAPGGPGGAEGPM*AK.K | T175:  | 3 | 5,0675 | 0,582 | -0,433 |
| 5 | P19105 MLRM_HUMAN   | R.AT#SNVFAM*FDQSQIQEFK.E           | T18:   | 3 | 6,2781 | 0,529 | 0,251  |
| 5 | Q9UPU5 UBP24_HUMAN  | R.T#ISAQDTLAYATALLNEK.E            | T1809: | 2 | 5,0282 | 0,629 | -0,731 |
| 5 | Q9UPU5 UBP24_HUMAN  | R.TISAQDT#LAYATALLNEK.E            | T1815: | 3 | 5,1843 | 0,438 | 0      |
| 5 | P50616 TOB1_HUMAN   | R.T#SPINLGLNVNDLLK.Q               | T204:  | 2 | 3,1083 | 0,481 | -0,433 |
| 5 | P53350 PLK1_HUMAN   | K.T#LCGTPNYIAPEVLSK.K              | T210:  | 2 | 3,6897 | 0,343 | -0,331 |
| 5 | Q8NFC6 FA44A_HUMAN  | R.VTTEEFEAPM*PSAVSGDDSQLT#ASR.S    | T2131: | 3 | 3,6956 | 0,211 | 0,74   |
| 5 | Q9UN86 G3BP2_HUMAN  | K.STT#PPPAEPVSLPQEPPK.A            | T227:  | 2 | 3,4384 | 0,4   | 0,5    |
| 5 | Q13153 PAK1_HUMAN   | R.DVATSPISPTENNT#TPPDALTR.N        | T229:  | 3 | 3,9268 | 0,394 | -0,077 |
| 5 | Q96A65 EXOC4_HUMAN  | K.DASVPLIDVTNLPT#PR.K              | T237:  | 2 | 4,351  | 0,536 | -0,341 |
| 5 | P53814 SMTN_HUMAN   | K.TT#SPEPQESPTLPSTEGQVVNK.L        | T244:  | 3 | 3,8509 | 0,332 | 0,152  |
| 5 | P17275 JUNB_HUMAN   | R.DAT#PPVSPINM*EDQER.I             | T255:  | 2 | 3,3722 | 0,417 | -0,193 |
| 5 | A8K1N6 A8K1N6_HUMAN | K.AT#PPPSPLSELLK.K                 | T264:  | 3 | 4,0457 | 0,419 | -0,119 |
| 5 | Q9NYL9 TMOD3_HUMAN  | K.DLDEDELLGNLSET#ELK.Q             | T27:   | 2 | 2,6375 | 0,326 | -0,424 |
| 5 | O43493 TGON2_HUMAN  | K.T#ESGEETDLISPPQEEVK.S            | T296:  | 2 | 2,1272 | 0,234 | -0,472 |
| 5 | Q641Q2 FA21A_HUMAN  | R.T#PSDDEEDNLFAPPK.L               | T331:  | 2 | 2,4584 | 0,229 | 0,07   |
| 5 | Q9H330 CI005_HUMAN  | R.GESAPTLSTSPSPSSPSPTSPSPT#LGR.R   | T334:  | 3 | 3,8902 | 0,393 | -0,137 |
| 5 | Q9UQ35 SRRM2_HUMAN  | R.SST#GPEPPAPTPLLAER.H             | T359:  | 2 | 3,2805 | 0,41  | -0,068 |
| 5 | P55209 NP1L1_HUMAN  | R.QLT#VQM*M*QNPQILAALQER.L         | T39:   | 3 | 3,2052 | 0,25  | 0,079  |

|   |                     |                                      |        |   |        |       |        |
|---|---------------------|--------------------------------------|--------|---|--------|-------|--------|
| 5 | P14618 KPYM_HUMAN   | R.LAPIT#SDPTEATAVGAVEASF.K           | T405:  | 3 | 4,2226 | 0,405 | 0      |
| 5 | O75821 EIF3G_HUMAN  | K.GIPLATGDT#SPEPELLPGAPLPPPK.E       | T41:   | 3 | 5,2058 | 0,407 | -0,072 |
| 5 | Q9UKV3 ACINU_HUMAN  | K.ASLVALPEQTASEEET#PPPLTK.E          | T414:  | 3 | 3,2904 | 0,269 | 0,073  |
| 5 | Q9NPF5 DMAP1_HUMAN  | K.DTIIDVVGAPLT#PNSR.K                | T445:  | 2 | 3,4611 | 0,395 | -0,209 |
| 5 | P27816 MAP4_HUMAN   | R.DM*T#LPPETNVILTK.D                 | T451:  | 2 | 2,5452 | 0,122 | -0,073 |
| 5 | Q9UK59 DBR1_HUMAN   | R.ILPGSM*IVSSDDT#VDSTIDR.E           | T482:  | 3 | 2,6085 | 0,256 | 0,083  |
| 5 | Q9BUR4 WDR79_HUMAN  | R.VFPEPT#ESGDEGEELGLPLLSTR.H         | T489:  | 3 | 4,8615 | 0,439 | -0,43  |
| 5 | O15047 SET1A_HUMAN  | K.FSFLASDT#EEEEENSSM*VLGAR.D         | T510:  | 3 | 4,8361 | 0,506 | -0,575 |
| 5 | P27816 MAP4_HUMAN   | K.DVT#PPPETEVLK.N                    | T521:  | 3 | 4,0586 | 0,436 | 0,113  |
| 5 | P27816 MAP4_HUMAN   | K.DVT#PPPETEVLK.N                    | T521:  | 2 | 3,5042 | 0,501 | -0,075 |
| 5 | Q13263 TIF1B_HUMAN  | R.GAAAAATGQPGTAPAGT#PGAPPLAGM*AIVK.E | T541:  | 3 | 3,885  | 0,418 | -0,343 |
| 5 | Q96ST2 IWS1_HUMAN   | R.DGGT#FISDADDVVSAM*IVK.M            | T551:  | 3 | 3,1208 | 0,218 | 0,09   |
| 5 | Q15418 KS6A1_HUMAN  | R.AENGLLM*T#PCYTANFVAPEVLK.R         | T573:  | 3 | 5,7422 | 0,544 | -0,289 |
| 5 | Q9UJX2 CDC23_HUMAN  | R.NQGETPTTEVPAPFFLPASLSANNT#PTR.R    | T576:  | 3 | 3,4868 | 0,362 | 0,06   |
| 5 | Q09666 AHNK_HUMAN   | R.EFSGPSTPT#GTLEFEGGEVSLEGK.V        | T5796: | 3 | 5,7255 | 0,451 | -0,353 |
| 5 | O15085 ARHGB_HUMAN  | R.LST#GSFPEDLLESDDR.S                | T590:  | 2 | 2,2934 | 0,567 | 0,572  |
| 5 | P55209 NP1L1_HUMAN  | R.LDGLVETPT#GYIESLPR.V               | T64:   | 3 | 4,0182 | 0,386 | 0      |
| 5 | Q02952 AKA12_HUMAN  | K.SAT#LSSTESTASEM*QEEM*K.G           | T642:  | 2 | 2,9147 | 0,527 | -0,226 |
| 5 | Q99607 ELF4_HUMAN   | R.SPT#PAPFSPFNPTSLIK.M               | T643:  | 2 | 3,2693 | 0,51  | -0,195 |
| 5 | Q7Z6Z7 HUWE1_HUMAN  | R.SSDPLGDT#ASNLGSAVDELM*R.H          | T655:  | 3 | 4,7255 | 0,277 | 0      |
| 5 | Q68E09 Q68E09_HUMAN | R.DYSTVSASPT#ALSTLK.Q                | T664:  | 2 | 3,8818 | 0,499 | 0,142  |
| 5 | O00116 ADAS_HUMAN   | R.AASAAT#AAPTATPAAQESGTIPK.K         | T68:   | 3 | 3,2072 | 0,231 | 0,085  |
| 5 | Q9Y5Y0 FLVC1_HUMAN  | R.DSLAAASGVLGGPQT#PLAPEEETQAR.L      | T69:   | 3 | 3,5127 | 0,293 | -0,692 |
| 5 | Q96S44 PRPK_HUMAN   | R.AT#TPADGEEPAPAEALAAAR.E            | T7:    | 3 | 3,8841 | 0,379 | 0,518  |
| 5 | Q96S44 PRPK_HUMAN   | R.AT#TPADGEEPAPAEALAAAR.E            | T7:    | 2 | 2,7065 | 0,564 | 1,037  |
| 5 | Q6GYQ0 GRIPE_HUMAN  | R.SSST#SDILEPFTVER.A                 | T798:  | 2 | 2,0324 | 0,255 | -0,768 |
| 5 | Q70EL4 UBP43_HUMAN  | R.ST#SQSIVSLLGTAGEDEK.S              | T846:  | 3 | 3,4861 | 0,436 | -0,183 |
| 5 | Q9UQ35 SRRM2_HUMAN  | K.SSTPPGESY#FGVSSLQLK.G              | Y1049: | 3 | 3,2646 | 0,173 | 0,093  |
| 5 | Q9H7D0 DOCK5_HUMAN  | K.DSY#YVYTQQELK.E                    | Y1288: | 2 | 2,6218 | 0,398 | -0,226 |
| 5 | Q9BTE3 CJ119_HUMAN  | R.SY#EDDDDM*DLQPNK.Q                 | Y168:  | 2 | 3,3258 | 0,435 | -0,411 |
| 5 | P20020 AT2B1_HUMAN  | K.Y#GDLLPADGILIQGNLKI                | Y220:  | 2 | 3,9333 | 0,425 | -0,489 |
| 5 | O60909 B4GT2_HUMAN  | R.DGIGSVRY#QVLEVSR.Q                 | Y344:  | 2 | 2,0032 | 0,277 | 1,527  |
| 5 | P61978 HNRPK_HUMAN  | R.GSY#GDLGGPIITTQVTIPK.D             | Y380:  | 2 | 4,4198 | 0,412 | -0,428 |

|   |                     |                                       |            |   |        |       |        |
|---|---------------------|---------------------------------------|------------|---|--------|-------|--------|
| 5 | Q8WXH0 SYNE2_HUMAN  | R.GSM*SY#LAAVEEEVEESSVK.S             | Y4111:     | 3 | 6,1332 | 0,493 | -0,256 |
| 5 | Q7Z460 CLAP1_HUMAN  | K.VSSSSGTTFPSSAAALPPGSY#ASLGR.I       | Y634:      | 3 | 3,1968 | 0,309 | -0,072 |
| 5 | P25205 MCM3_HUMAN   | K.DGDSYDPY#DFSDTEEM*PQVHT#PK.T        | Y708:T722: | 3 | 4,2636 | 0,367 | -0,307 |
| 5 | Q6S8J3 A26CA_HUMAN  | K.SY#ELPDGQVITIGNER.F                 | Y940:      | 2 | 3,7419 | 0,502 | -0,13  |
| 5 | O15372 EIF3H_HUMAN  | K.LFM*AQALQEYNN.-                     |            | 2 | 4,1106 | 0,448 | 0,167  |
| 5 | P35268 RL22_HUMAN   | R.YFQINQDEEEEEDED.-                   |            | 2 | 3,9706 | 0,488 | 0      |
| 5 | P67809 YBOX1_HUMAN  | K.AADPPAENSAPAEAEQGGAE.-              |            | 3 | 3,5434 | 0,377 | -0,193 |
| 5 | P55072 TERA_HUMAN   | R.FPSGNQGGAGPSQGGGGTGGSVYTEDNDDDLYG.- |            | 3 | 3,4252 | 0,472 | 0,682  |
| 5 | B2RDE1 B2RDE1_HUMAN | R.M*LDQTLDDLNEM*.-                    |            | 2 | 3,1372 | 0,384 | -0,166 |
| 5 | Q9BTT0 AN32E_HUMAN  | R.DAEDDGEEEDD.-                       |            | 2 | 3,0512 | 0,513 | -0,394 |
| 5 | Q9UQ80 PA2G4_HUMAN  | K.TAENATSGETLEENEAGD.-                |            | 2 | 3,0448 | 0,451 | -0,398 |
| 5 | Q86VP6 CAND1_HUMAN  | K.DSSSTNLESMDTS.-                     |            | 2 | 2,9007 | 0,463 | -0,622 |
| 5 | P54725 RD23A_HUMAN  | K.NENLAANFLLSQNFDD.-                  |            | 3 | 2,8625 | 0,145 | -1,217 |
| 5 | P00558 PGK1_HUMAN   | K.VLPGVDALSNI.-                       |            | 2 | 2,7162 | 0,381 | -0,111 |
| 5 | Q86VP6 CAND1_HUMAN  | K.DSSSTNLESMDTS.-                     |            | 2 | 2,6397 | 0,575 | -0,263 |
| 5 | A8K4V4 A8K4V4_HUMAN | R.EVQDPAPAQVQAQ.-                     |            | 2 | 2,5949 | 0,305 | -0,177 |
| 5 | Q8NC51 PAIRB_HUMAN  | K.SSASAPDVEDDPEAFPALA.-               |            | 2 | 2,5567 | 0,333 | -0,277 |
| 5 | P07355 ANXA2_HUMAN  | K.ALLYLCCGGDD.-                       |            | 2 | 2,534  | 0,496 | 0      |
| 5 | P08758 ANXA5_HUMAN  | K.ALLLLCGEDD.-                        |            | 2 | 2,4922 | 0,462 | 0      |
| 5 | O75436 VP26A_HUMAN  | R.FESPESQASAEQPEM*.-                  |            | 2 | 2,4571 | 0,291 | 0      |
| 5 | Q9HC35 EMAL4_HUMAN  | K.ATLLEDQDPSPPSS.-                    |            | 2 | 2,4477 | 0,329 | 0,082  |
| 5 | O60831 PRAF2_HUMAN  | R.TPM*GLLLEALGQEQEAGS.-               |            | 2 | 2,4135 | 0,359 | -0,197 |
| 5 | P54727 RD23B_HUMAN  | K.NENLAANFLLQQNFDED.-                 |            | 2 | 2,3534 | 0,521 | -0,489 |
| 5 | Q5SW79 CE170_HUMAN  | R.FNPDGEEEDVTVQE.-                    |            | 2 | 2,2414 | 0,244 | -0,076 |
| 5 | Q8N884 CF150_HUMAN  | R.NNEFPVDFEF.-                        |            | 2 | 2,1238 | 0,434 | -0,194 |
| 5 | P16989 DBPA_HUMAN   | K.AGEAPTENPAPPTQQSSAE.-               |            | 2 | 2,0617 | 0,263 | -0,519 |
| 6 | Q9H3Z4 DNJC5_HUMAN  | R.SLS#TSGES#LYHVLGLDK.N               | S10:S15:   | 3 | 2,616  | 0,101 | -0,279 |
| 6 | O95251 MYST2_HUMAN  | R.SS#GSETEQVVDFSDR.E                  | S100:      | 2 | 4,7029 | 0,583 | -0,071 |
| 6 | Q01433 AMPD2_HUMAN  | R.S#LPGPAPCLK.H                       | S100:      | 2 | 2,3638 | 0,306 | 0      |
| 6 | Q9ULJ3 ZN295_HUMAN  | K.IQPLEPDS#PTGLSENPTPATEK.L           | S1003:     | 3 | 4,7815 | 0,555 | 0,076  |
| 6 | Q6ZRV2 FA83H_HUMAN  | R.LS#LGQGDSTEAAATEER.G                | S1003:     | 2 | 3,9717 | 0,644 | 0,14   |
| 6 | O43314 VIP2_HUMAN   | R.S#GEQITSSPVSPK.S                    | S1006:     | 2 | 3,397  | 0,457 | -0,175 |
| 6 | P05386 RLA1_HUMAN   | K.KEES#EESDDDM*GFGLFD.-               | S101:      | 2 | 3,6438 | 0,451 | -0,358 |

|   |                     |                                |            |   |        |       |        |
|---|---------------------|--------------------------------|------------|---|--------|-------|--------|
| 6 | Q9UGU5 HM2L1_HUMAN  | K.S#SPQSTDTAM*DLLK.A           | S101:      | 2 | 2,9269 | 0,442 | -0,23  |
| 6 | P05386 RLA1_HUMAN   | K.KEES#EES#DDDM*GFGLFD.-       | S101:S104: | 2 | 4,8477 | 0,477 | -0,574 |
| 6 | Q8TB72 PUM2_HUMAN   | R.SESGGLGVSM*VEYVLSSS#PADK.L   | S102:      | 3 | 3,5712 | 0,364 | -0,239 |
| 6 | Q8WWI1 LMO7_HUMAN   | K.ATLSSTSGLDLM*SESGEGEIS#PQR.E | S1026:     | 3 | 4,7365 | 0,537 | -0,144 |
| 6 | Q8NB46 ANR52_HUMAN  | K.DAVS#PFSFSLK.N               | S1028:     | 2 | 2,535  | 0,306 | -0,439 |
| 6 | O75122 CLAP2_HUMAN  | R.DYNPNYNSDSIS#PFNK.S          | S1029:     | 2 | 2,9792 | 0,431 | -0,487 |
| 6 | Q9UHW9 S12A6_HUMAN  | R.LTS#IGSDEDEETETYQEK.V        | S1029:     | 2 | 2,5361 | 0,566 | 1,473  |
| 6 | O95155 UBE4B_HUMAN  | R.S#QSM*DIDGVSCEK.S            | S103:      | 2 | 2,7094 | 0,43  | -0,315 |
| 6 | O14980 XPO1_HUMAN   | K.EFAGEDTS#DLFLEER.E           | S1031:     | 2 | 4,9342 | 0,481 | -0,332 |
| 6 | Q8IZL8 PELP1_HUMAN  | R.GADTAPTLAPEALPS#QGEVER.E     | S1033:     | 3 | 3,5193 | 0,194 | 0      |
| 6 | P18754 RCC1_HUMAN   | R.DTS#VEGSEM*VPGK.V            | S104:      | 2 | 2,721  | 0,465 | -0,511 |
| 6 | Q9UQ35 SRRM2_HUMAN  | K.S#STPPGESYFGVSSLQLK.G        | S1041:     | 2 | 3,3085 | 0,446 | -0,497 |
| 6 | O75717 WDHD1_HUMAN  | R.SNILSDNPDFS#DEADIIK.E        | S1041:     | 2 | 3,0361 | 0,336 | -0,353 |
| 6 | Q96KR1 ZFR_HUMAN    | R.DS#DGDVDGFEEAGK.K            | S1054:     | 2 | 3,5401 | 0,466 | -0,087 |
| 6 | Q92539 LPIN2_HUMAN  | K.LPAYLATS#PIPTEDQFFK.D        | S106:      | 2 | 2,9141 | 0,552 | -0,461 |
| 6 | Q5VT52 K0460_HUMAN  | R.VS#SSCLDLPDSTEK.G            | S1068:     | 2 | 3,2237 | 0,551 | -0,349 |
| 6 | Q13428 TCOF_HUMAN   | R.LAS#TNSSVLGADLPSSM*K.E       | S107:      | 2 | 4,2976 | 0,589 | -0,195 |
| 6 | Q96HN2 SAHH3_HUMAN  | R.DGGEALVS#PDGTVTEAPR.T        | S107:      | 2 | 4,108  | 0,547 | 0,33   |
| 6 | B2CI53 B2CI53_HUMAN | K.YSVDPS#IVNISDEM*AK.T         | S1073:     | 3 | 4,6099 | 0,428 | 0,098  |
| 6 | Q96SN8 CK5P2_HUMAN  | K.ENPEDVLS#PTSVATYLSSK.S       | S1074:     | 2 | 3,1819 | 0,442 | -0,461 |
| 6 | Q8NG31 CASC5_HUMAN  | K.DVQS#PGFLNEPLSSK.S           | S1076:     | 2 | 3,3355 | 0,446 | 0      |
| 6 | Q7Z2Z1 CO042_HUMAN  | K.SLLFGAM*SEM*IS#PSEK.G        | S1078:     | 2 | 3,6809 | 0,479 | -0,265 |
| 6 | Q96JM2 ZN462_HUMAN  | R.VS#PVPLSGAAAGTEQK.T          | S1078:     | 2 | 2,8965 | 0,395 | -0,23  |
| 6 | O75152 ZC11A_HUMAN  | K.TVLPTVPES#PEEEVK.A           | S108:      | 2 | 2,4967 | 0,189 | -0,422 |
| 6 | Q9UQE7 SMC3_HUMAN   | R.GS#GSQSSVPSVDQFTGVGIR.V      | S1081:     | 2 | 3,1034 | 0,508 | -0,477 |
| 6 | Q9UQE7 SMC3_HUMAN   | R.GSGSQSS#VPSVDQFTGVGIR.V      | S1086:     | 3 | 2,613  | 0,237 | 0,089  |
| 6 | P31629 ZEP2_HUMAN   | R.QASFS#GSPEISQGEVGM*DQSVK.Q   | S1087:     | 3 | 3,3249 | 0,354 | 0,077  |
| 6 | Q63HJ5 Q63HJ5_HUMAN | R.GSALSQLSFEVGAPM*S#PK.M       | S1090:     | 2 | 4,375  | 0,459 | 0,449  |
| 6 | Q9UNL2 SSRG_HUMAN   | K.QQS#EEDLLLQDFSR.N            | S11:       | 3 | 2,7744 | 0,097 | -0,409 |
| 6 | Q9UNL2 SSRG_HUMAN   | K.QQS#EEDLLLQDFSR.N            | S11:       | 2 | 2,1235 | 0,092 | 0,409  |
| 6 | Q9UH62 ARMX3_HUMAN  | R.AS#PNSDDTVLSPQELQK.V         | S110:      | 2 | 5,3629 | 0,528 | -0,128 |
| 6 | Q5SW79 CE170_HUMAN  | R.LGEAS#DSELADADK.A            | S1112:     | 2 | 5,127  | 0,545 | -0,163 |
| 6 | Q8N573 OXR1_HUMAN   | R.VVS#STSEEEAFTEK.F            | S112:      | 2 | 4,5788 | 0,582 | -0,348 |

|   |                    |                                       |              |   |        |       |        |
|---|--------------------|---------------------------------------|--------------|---|--------|-------|--------|
| 6 | Q3KQU3 MA7D1_HUMAN | R.S#SQPSPTAVPASDSPPTK.Q               | S112:        | 2 | 2,8672 | 0,513 | -0,333 |
| 6 | Q7Z5J4 RAI1_HUMAN  | K.AASSPSNPAALPVASDSSPM*GS#K.T         | S1126:       | 3 | 3,4077 | 0,203 | 0,247  |
| 6 | Q15185 TEBP_HUMAN  | K.DWEDDS#DEDM*SNFDR.F                 | S113:        | 3 | 5,3904 | 0,511 | 0,186  |
| 6 | Q15185 TEBP_HUMAN  | K.DWEDDS#DEDM*SNFDR.F                 | S113:        | 2 | 5,2734 | 0,591 | -0,309 |
| 6 | Q15185 TEBP_HUMAN  | K.DWEDDS#DEDM*SNFDR.F                 | S113:        | 2 | 5,0745 | 0,602 | -0,25  |
| 6 | Q3KQU3 MA7D1_HUMAN | R.SS#QPSPTAVPASDSPPTK.Q               | S113:        | 2 | 2,4409 | 0,417 | -0,399 |
| 6 | Q9P035 PTAD1_HUMAN | R.WLDES#DAEM*ELR.A                    | S114:        | 2 | 5,0748 | 0,504 | -0,153 |
| 6 | Q9UNZ2 NSF1C_HUMAN | K.S#PNELVDDLK.G                       | S114:        | 2 | 3,4516 | 0,394 | -0,45  |
| 6 | Q9UQ35 SRRM2_HUMAN | R.FQSDS#SSYPTVDSNSLLGQSR.L            | S1142:       | 3 | 3,2896 | 0,311 | -0,311 |
| 6 | Q641Q2 FA21A_HUMAN | R.GEADLFDSGDIFSTGTGSQS#VER.T          | S1144:       | 3 | 3,7561 | 0,342 | -0,522 |
| 6 | Q09666 AHNK_HUMAN  | R.EVFSSCSSEVVLS#GDDEEYQR.I            | S115:        | 3 | 2,7547 | 0,145 | 0,292  |
| 6 | Q8TEP8 CE192_HUMAN | K.GEVISS#GSKPLS#PGPCLDIPSILSNK.Q      | S1153:S1159: | 3 | 4,4709 | 0,432 | -0,52  |
| 6 | P11137 MAP2_HUMAN  | K.ETS#PESSLIQDEIAVK.L                 | S1155:       | 2 | 3,3088 | 0,559 | -0,401 |
| 6 | Q32MZ4 LRRF1_HUMAN | R.NM*PGLSAATLASLGGTSS#R.R             | S116:        | 2 | 5,1574 | 0,594 | -0,323 |
| 6 | Q8N3X1 FNBPA_HUMAN | K.ATGGLCLLGGAYADS#DDDDNDVSEK.L        | S116:        | 3 | 5,0443 | 0,481 | -0,071 |
| 6 | Q86SQ4 GP126_HUMAN | K.S#LSSSSIGSNSTYLSK.S                 | S1160:       | 2 | 4,825  | 0,451 | -0,203 |
| 6 | Q5T1M5 FKB15_HUMAN | R.SS#LSGDEEDELK.G                     | S1162:       | 2 | 3,1824 | 0,406 | -0,079 |
| 6 | Q5T1M5 FKB15_HUMAN | R.SSL#GDEEDELK.G                      | S1164:       | 2 | 3,541  | 0,524 | -0,238 |
| 6 | Q92766 RREB1_HUMAN | R.ANS#GGVDLDSSGEFASIEK.M              | S1167:       | 2 | 5,5419 | 0,629 | -0,435 |
| 6 | Q9UPW5 CBPC1_HUMAN | K.VTS#PTTYVLDEDEPR.F                  | S1168:       | 2 | 2,8581 | 0,429 | 0      |
| 6 | Q9NRY4 GRLF1_HUMAN | R.TS#FSVGSDDDELGPIR.K                 | S1174:       | 2 | 2,0184 | 0,21  | -0,221 |
| 6 | Q9Y4F5 K0284_HUMAN | R.AGS#FTGTSDPPEAAPAR.T                | S1179:       | 2 | 3,7953 | 0,498 | -0,378 |
| 6 | Q9UQ35 SRRM2_HUMAN | K.M*ALPPQEDATAS#PPR.Q                 | S1179:       | 3 | 3,4185 | 0,296 | 0      |
| 6 | Q9UQ35 SRRM2_HUMAN | K.M*ALPPQEDATAS#PPR.Q                 | S1179:       | 2 | 3,2155 | 0,472 | -0,073 |
| 6 | Q92785 REQU_HUMAN  | K.EGLISQDGSS#LEALLR.T                 | S118:        | 2 | 3,5309 | 0,435 | -0,345 |
| 6 | P29966 MARCS_HUMAN | K.EAPAEGEAAEPGS#PTAAEGEAASAASSTSSPK.A | S118:        | 3 | 3,1504 | 0,309 | -0,305 |
| 6 | O14497 ARI1A_HUMAN | R.S#NSVGIQDAFNDGSDSTFQK.R             | S1182:       | 3 | 4,3451 | 0,313 | -0,333 |
| 6 | Q15390 MTFR1_HUMAN | R.QIS#LPDLSQEELK.T                    | S119:        | 2 | 3,5308 | 0,458 | -0,608 |
| 6 | Q27J81 INF2_HUMAN  | K.SFS#EDAVTDSGSGTLPR.A                | S1194:       | 2 | 4,0666 | 0,531 | -0,193 |
| 6 | Q14814 MEF2D_HUMAN | R.AS#EELDGLFR.R                       | S121:        | 2 | 2,4303 | 0,385 | -0,201 |
| 6 | Q9C0J8 WDR33_HUMAN | R.S#SSLQGM*DM*ASLPPR.K                | S1217:       | 2 | 2,8597 | 0,332 | -0,072 |
| 6 | Q9C0J8 WDR33_HUMAN | R.SS#SLQGM*DM*ASLPPR.K                | S1218:       | 2 | 3,5369 | 0,434 | -0,144 |
| 6 | Q9C0J8 WDR33_HUMAN | R.SSS#LQGM*DM*ASLPPR.K                | S1219:       | 2 | 3,6189 | 0,386 | 0,072  |

|   |                     |                                    |        |   |        |       |        |
|---|---------------------|------------------------------------|--------|---|--------|-------|--------|
| 6 | Q01814 AT2B2_HUMAN  | K.SATS#SSPGSPIHSLETSL.-            | S1229: | 2 | 2,3855 | 1     | -0,664 |
| 6 | Q92870 APBB2_HUMAN  | K.NLS#PTAVINITSEK.L                | S123:  | 2 | 2,7907 | 0,41  | -0,078 |
| 6 | Q01814 AT2B2_HUMAN  | K.SATSSSPGS#PIHSLETSL.-            | S1234: | 2 | 2,8639 | 1     | -0,597 |
| 6 | Q9UKA4 AKA11_HUMAN  | R.SVS#PTFLNPSDENLK.T               | S1242: | 2 | 3,4194 | 0,408 | 0,071  |
| 6 | Q2NKX8 ERC6L_HUMAN  | K.SADPEVM*LLTLS#LYK.Q              | S1242: | 2 | 3,2577 | 0,444 | -0,481 |
| 6 | Q92797 SYMPK_HUMAN  | R.S#PQTLAPVGEDAM*K.T               | S1243: | 2 | 2,1875 | 0,226 | -0,079 |
| 6 | P20020 AT2B1_HUMAN  | K.SATSSSPGS#PLHSLETSL.-            | S1249: | 2 | 2,6507 | 1     | -0,597 |
| 6 | Q8NEY1 NAV1_HUMAN   | K.SASSYSDIEEIATPDSSAPS#SPK.L       | S1252: | 3 | 3,6788 | 0,194 | -0,152 |
| 6 | Q3T8J9 GON4L_HUMAN  | K.LEPQELS#PLSATVFPK.V              | S1255: | 2 | 2,63   | 0,327 | -0,332 |
| 6 | Q13459 MYO9B_HUMAN  | R.VS#PPAPGSAPETPEDK.S              | S1261: | 2 | 2,4436 | 0,321 | -0,588 |
| 6 | O15534 PER1_HUMAN   | K.ASSS#QDLAM*EEEEGR.S              | S1263: | 2 | 2,2471 | 0,132 | 0,131  |
| 6 | Q07890 SOS2_HUMAN   | R.DISTCPNSPSTPPSTPS#PR.V           | S1267: | 2 | 2,8127 | 0,509 | -0,352 |
| 6 | Q8N350 DOS_HUMAN    | R.VS#FNEAALFEQSR.K                 | S127:  | 2 | 3,2467 | 0,337 | -0,387 |
| 6 | P07355 ANXA2_HUMAN  | K.GLGTDEDS#LIEIICSR.T              | S127:  | 2 | 3,1048 | 0,266 | -0,328 |
| 6 | Q7Z6E9 RBBP6_HUMAN  | K.VTGTEGSSSTLVDTSTSSSTGGS#PVR.K    | S1277: | 3 | 5,1577 | 0,487 | -0,21  |
| 6 | P51523 ZNF84_HUMAN  | K.SNS#EGDLGLILK.H                  | S128:  | 2 | 4,2702 | 0,518 | -0,423 |
| 6 | Q9H7D0 DOCK5_HUMAN  | K.DS#YYVYTQQLK.E                   | S1287: | 2 | 2,1483 | 0,437 | -0,151 |
| 6 | Q6P4R8 NFRKB_HUMAN  | K.AVSTVVVTTAPS#PK.Q                | S1291: | 2 | 3,4536 | 0,516 | -0,255 |
| 6 | Q96RK0 CIC_HUMAN    | R.GEPPTPPS#PAPAPAVAPGGSSSESSGR.A   | S1294: | 3 | 3,6088 | 0,297 | -0,072 |
| 6 | Q09666 AHNK_HUMAN   | K.VDVEVPDVS#LEGPEGK.L              | S1298: | 2 | 3,3785 | 0,357 | -0,558 |
| 6 | P07948 LYN_HUMAN    | K.DSLS#DDGVDLK.T                   | S13:   | 2 | 3,6788 | 0,225 | -0,098 |
| 6 | Q14160 LAP4_HUMAN   | K.M*AESPCSPSGQQPPSPPS#PDEL PANVK.Q | S1309: | 3 | 3,4415 | 0,374 | 0      |
| 6 | Q9BYW2 SETD2_HUMAN  | K.M*EIGDTLSTAEISS#PPK.S            | S131:  | 2 | 5,0287 | 0,602 | -0,388 |
| 6 | O60341 LSD1_HUMAN   | R.EM*DESLANLS#EDEYSEEER.N          | S131:  | 3 | 4,1263 | 0,296 | -0,289 |
| 6 | Q9P0V3 SH3B4_HUMAN  | R.NSTLSDSGM*IDNLPDS#PDEVAK.E       | S131:  | 3 | 3,0753 | 0,129 | -0,152 |
| 6 | P18615 NELFE_HUMAN  | K.S#LYESFVSSDR.L                   | S131:  | 2 | 2,9817 | 0,399 | -0,167 |
| 6 | A2RUU9 A2RUU9_HUMAN | K.TGS#DFSM*FEALR.D                 | S1318: | 2 | 3,2564 | 0,343 | -0,084 |
| 6 | Q9NTI5 PDS5B_HUMAN  | K.S#GPPAPEEEEEER.Q                 | S1319: | 2 | 2,9198 | 0,417 | -0,366 |
| 6 | Q6P158 DHX57_HUMAN  | R.GLS#GEEEDDEPDCCNDER.Y            | S132:  | 3 | 3,9634 | 0,387 | 0,083  |
| 6 | P39880 CUX1_HUMAN   | R.ELFIEIQAGSQGAGASDS#PSAR.S        | S1321: | 3 | 5,9594 | 0,529 | -0,217 |
| 6 | O95295 S25BP_HUMAN  | R.AM*LDSGIYPPGS#PGK.-              | S133:  | 2 | 4,0667 | 0,62  | -0,231 |
| 6 | Q8IY17 PLPL6_HUMAN  | R.DEGGS#PEGASPSTASEM*EEEK.S        | S1330: | 3 | 4,4826 | 0,383 | -0,247 |
| 6 | Q15021 CND1_HUMAN   | R.YQPLASTAS#DNDFVTPEPR.R           | S1333: | 3 | 3,4126 | 0,193 | -0,084 |

|   |                    |                                  |              |   |        |       |        |
|---|--------------------|----------------------------------|--------------|---|--------|-------|--------|
| 6 | Q96PE2 ARHGH_HUMAN | R.SSM*S#LYTAASVIDTASK.Y          | S1333:       | 2 | 2,8492 | 0,424 | -0,334 |
| 6 | Q96T23 RSF1_HUMAN  | R.IES#DEEEDFENVGK.V              | S1335:       | 2 | 5,3468 | 0,622 | -0,284 |
| 6 | Q96T23 RSF1_HUMAN  | R.IES#DEEEDFENVGK.V              | S1335:       | 3 | 4,4995 | 0,439 | 0,106  |
| 6 | P11388 TOP2A_HUMAN | K.FTM*DLDSDEDF#DFDEK.T           | S1337:       | 2 | 3,0106 | 0,511 | -0,454 |
| 6 | Q7Z3K3 POGZ_HUMAN  | R.SFLVASVLPDPGNINS#PTR.N         | S1338:       | 2 | 2,8454 | 0,368 | -0,805 |
| 6 | Q8WXI9 P66B_HUMAN  | R.LTPSPDIIVLSDNEASS#PR.S         | S135:        | 3 | 4,0608 | 0,384 | 0,087  |
| 6 | Q8IWJ2 GCC2_HUMAN  | K.NINS#LQEELLQLK.A               | S135:        | 3 | 3,417  | 0,208 | 0      |
| 6 | Q5VZK9 LR16A_HUMAN | K.S#NDSGEEAEKEFIV.-              | S1357:       | 2 | 3,2756 | 0,509 | -0,685 |
| 6 | Q9NTI5 PDS5B_HUMAN | R.AES#PESSAIESTQSTPQK.G          | S1358:       | 2 | 5,0828 | 0,54  | -0,312 |
| 6 | Q7Z4V5 HDGR2_HUMAN | R.GVM*AVTAVTATAAS#DR.M           | S137:        | 2 | 5,3392 | 0,578 | -0,302 |
| 6 | O75396 SC22B_HUMAN | R.NLGS#INTELQDVQR.I              | S137:        | 2 | 4,837  | 0,494 | -0,366 |
| 6 | P49023 PAXI_HUMAN  | K.SAEPSTVM*STS#LGSNLSELDL.R      | S137:        | 3 | 4,7867 | 0,481 | -0,154 |
| 6 | Q9P0T7 TMEM9_HUMAN | R.S#M*AAAAASLGGPR.A              | S137:        | 2 | 3,3799 | 0,443 | -0,097 |
| 6 | Q7Z5J4 RAI1_HUMAN  | K.GAGGS#PVGVEEGLVNVGTGQK.L       | S1374:       | 2 | 5,5289 | 0,534 | -0,429 |
| 6 | P11388 TOP2A_HUMAN | K.S#VVSDLEADDVK.G                | S1374:       | 2 | 3,6775 | 0,481 | -0,09  |
| 6 | Q7Z5J4 RAI1_HUMAN  | K.GAGGS#PVGVEEGLVNVGTGQK.L       | S1374:       | 3 | 3,628  | 0,303 | -0,275 |
| 6 | Q9UPN3 MACF1_HUMAN | R.M*LS#SSDAITQEFM*DLR.T          | S1376:       | 2 | 4,2245 | 0,578 | -0,499 |
| 6 | P11388 TOP2A_HUMAN | K.SVVS#DLEADDVK.G                | S1377:       | 2 | 3,0318 | 0,452 | -0,27  |
| 6 | Q5VTR2 BRE1A_HUMAN | K.ALVPEPEPDS#NQER.K              | S138:        | 2 | 2,4579 | 0,357 | -0,56  |
| 6 | Q9Y314 NOSIP_HUMAN | K.ALSGTS#PDDVQPGPSVGPSPK.D       | S138:        | 2 | 2,0927 | 0,25  | -0,353 |
| 6 | P42695 CNDD3_HUMAN | R.SLGVLPFTLNSGS#PEK.T            | S1384:       | 2 | 4,119  | 0,514 | -0,566 |
| 6 | P42695 CNDD3_HUMAN | R.SLGVLPFTLNSGS#PEK.T            | S1384:       | 3 | 3,6613 | 0,394 | -0,318 |
| 6 | P46821 MAP1B_HUMAN | R.ASVSPM*DEPVDPSES#PIEK.V        | S1389:       | 2 | 2,5906 | 0,484 | -0,463 |
| 6 | O15320 CTGE5_HUMAN | R.SNS#ELEDEILCLEK.E              | S139:        | 2 | 4,9911 | 0,533 | -0,624 |
| 6 | O15320 CTGE5_HUMAN | R.SNS#ELEDEILCLEK.E              | S139:        | 3 | 4,3032 | 0,271 | -0,52  |
| 6 | O43597 SPY2_HUMAN  | R.LLGSS#FSSGPVADGIIR.V           | S139:        | 2 | 3,8584 | 0,538 | -0,695 |
| 6 | Q02952 AKA12_HUMAN | K.EVSSLEGS#PPPCLGQEEAVCTK.I      | S1395:       | 3 | 6,9648 | 0,553 | 0,075  |
| 6 | P46821 MAP1B_HUMAN | K.VLS#PLRS#PPLIGSESAYESFLSADDK.A | S1396:S1400: | 3 | 4,655  | 0,494 | -0,311 |
| 6 | Q9Y2U8 MAN1_HUMAN  | K.VLLGFS#SDESDVEASPR.D           | S140:        | 2 | 4,9303 | 0,55  | -0,388 |
| 6 | Q8NE71 ABCF1_HUMAN | K.GGNVFAALIQQDS#EEEEEEK.H        | S140:        | 3 | 4,2171 | 0,441 | -0,452 |
| 6 | Q9HCK8 CHD8_HUMAN  | R.VLDNFS#DIVEGVDFDK.D            | S1400:       | 2 | 2,4512 | 0,157 | -0,258 |
| 6 | Q13009 TIAM1_HUMAN | K.TES#LPSSQQYVPPFGGK.R           | S1407:       | 2 | 2,8562 | 0,483 | -0,406 |
| 6 | O43432 IF4G3_HUMAN | K.LDFIESDS#PCSSEALSK.K           | S1409:       | 2 | 4,6873 | 0,489 | -0,435 |

|   |                     |                                  |        |   |        |       |        |
|---|---------------------|----------------------------------|--------|---|--------|-------|--------|
| 6 | Q8NEJ9 NGDN_HUMAN   | K.LSS#EDEEEDEAEDDQSEASGK.K       | S143:  | 3 | 6,5087 | 0,545 | -0,077 |
| 6 | P54578 UBP14_HUMAN  | R.AS#GEM*ASAQYITAALR.D           | S143:  | 2 | 4,2961 | 0,491 | -0,562 |
| 6 | Q5T5U3 RHG21_HUMAN  | K.AQPSSS#EDELNDVFFK.K            | S1432: | 2 | 3,4409 | 0,316 | -0,451 |
| 6 | Q9Y2U8 MAN1_HUMAN   | K.VLLGFSSDES#DVEASPR.D           | S144:  | 2 | 4,7154 | 0,602 | 0,259  |
| 6 | O75179 ANR17_HUMAN  | K.NAS#ILLEELDLEK.L               | S1457: | 2 | 3,615  | 0,358 | -0,389 |
| 6 | Q09028 RBBP4_HUMAN  | K.TPS#SDVLVFDYTK.H               | S146:  | 2 | 3,6011 | 0,469 | 0,079  |
| 6 | Q96E09 F122A_HUMAN  | R.IDFIPVSPAPS#PTR.G              | S147:  | 2 | 2,407  | 0,296 | -0,155 |
| 6 | Q5H9R5 Q5H9R5_HUMAN | R.CS#PLEPDFVPDEK.K               | S149:  | 2 | 3,3975 | 0,507 | -0,076 |
| 6 | Q02880 TOP2B_HUMAN  | K.VVEAVNSDS#DSEFGIPK.K           | S1524: | 2 | 4,6617 | 0,235 | 0,847  |
| 6 | O95218 ZRAB2_HUMAN  | K.ES#EGEEDEDEDLSK.Y              | S153:  | 2 | 3,9875 | 0,478 | -0,536 |
| 6 | Q00536 PCTK1_HUMAN  | R.VS#LSEIGFGK.L                  | S153:  | 2 | 2,4772 | 0,39  | -0,109 |
| 6 | Q9H0H5 RGAP1_HUMAN  | R.LSTIDESGSILS#DISFDK.T          | S154:  | 2 | 3,6778 | 0,551 | -0,426 |
| 6 | Q8IX90 CM003_HUMAN  | R.S#PQLSDFGLER.Y                 | S155:  | 2 | 3,4149 | 0,541 | -0,184 |
| 6 | Q8WYP5 AHTF1_HUMAN  | R.NLS#FNELYPSGTLK.L              | S1550: | 2 | 3,5088 | 0,506 | -0,293 |
| 6 | P23528 COF1_HUMAN   | K.LGGS#AVISLEGKPL.-              | S156:  | 2 | 3,4662 | 0,489 | -0,172 |
| 6 | Q93008 USP9X_HUMAN  | R.NGILAIEGTGSDVDDDM*S#GDEK.Q     | S1593: | 3 | 5,621  | 0,424 | 0,078  |
| 6 | P16949 STMN1_HUMAN  | R.AS#GQAFELILSPR.S               | S16:   | 2 | 2,8669 | 0,141 | -0,332 |
| 6 | Q14839 CHD4_HUMAN   | K.STAPETAIECTQAPAPAS#EDEK.V      | S1602: | 3 | 4,7237 | 0,258 | -0,307 |
| 6 | Q12792 TWF1_HUMAN   | K.YLLSQSS#PAPLTAEEELR.Q          | S161:  | 3 | 5,9417 | 0,507 | -0,17  |
| 6 | Q9UEU0 VTI1B_HUMAN  | R.IATETDQIGS#EIIIEELGEQR.D       | S161:  | 3 | 3,945  | 0,247 | -0,237 |
| 6 | Q8TBC3 SHKB1_HUMAN  | R.S#NTM*PPNLGNAGLLGR.M           | S161:  | 2 | 3,652  | 0,411 | -0,357 |
| 6 | Q1KMD3 HNRL2_HUMAN  | R.S#GDETPGSEVPGDK.A              | S161:  | 2 | 3,3697 | 0,531 | -0,084 |
| 6 | Q12792 TWF1_HUMAN   | K.YLLSQSS#PAPLTAEEELR.Q          | S161:  | 2 | 2,2347 | 0,394 | -0,453 |
| 6 | Q96AY4 TTC28_HUMAN  | R.DVLSLLNLS#PR.H                 | S1633: | 2 | 2,9991 | 0,476 | -0,467 |
| 6 | O95049 ZO3_HUMAN    | R.S#PGGGSEANGLALVSGFK.R          | S164:  | 2 | 4,6748 | 0,481 | -0,282 |
| 6 | Q12802 AKP13_HUMAN  | R.VDSLVSLS#EEDLESDQR.E           | S1647: | 2 | 2,5677 | 0,302 | -0,854 |
| 6 | Q9Y3Q8 T22D4_HUMAN  | R.S#FTGGLGQLVPSK.A               | S165:  | 2 | 3,5049 | 0,121 | -0,166 |
| 6 | Q9C0C2 TB182_HUMAN  | K.VNLFPGLS#PSALK.A               | S1652: | 2 | 3,0102 | 0,46  | -0,257 |
| 6 | Q14676 MDC1_HUMAN   | R.LLLAEDS#EEEVDFLSER.R           | S168:  | 3 | 4,4044 | 0,434 | -0,176 |
| 6 | Q14676 MDC1_HUMAN   | R.LLLAEDS#EEEVDFLSER.R           | S168:  | 2 | 3,5533 | 0,557 | -0,824 |
| 6 | Q5JSZ5 K0515_HUMAN  | R.LLSFS#PEEFPTLK.A               | S168:  | 2 | 2,8454 | 0,256 | -0,307 |
| 6 | Q9BZ23 PANK2_HUMAN  | R.AS#SASVPAVGASAEGTR.R           | S168:  | 2 | 2,237  | 0,238 | -0,076 |
| 6 | Q9ULI4 KI26A_HUMAN  | R.DSEATGSASSAPDSM*SESGAAS#PGAR.T | S1687: | 3 | 3,5045 | 0,523 | -0,369 |



|   |                    |                               |              |   |        |       |        |
|---|--------------------|-------------------------------|--------------|---|--------|-------|--------|
| 6 | O00193 SMAP_HUMAN  | R.SAS#PDDDLGSSNWEAADLGNEER.K  | S17:         | 3 | 6,3751 | 0,585 | -0,291 |
| 6 | Q96S97 MYADM_HUMAN | R.TTITTTTTSS#SGLGSPM*IVGSPR.A | S17:         | 3 | 3,7234 | 0,406 | 0,156  |
| 6 | P05387 RLA2_HUMAN  | R.YVASYLLAALGGNSS#PSAK.D      | S17:         | 3 | 2,8748 | 0,353 | -0,282 |
| 6 | Q96EY5 F125A_HUMAN | R.DM*QGLS#LDAASQPSK.G         | S170:        | 2 | 3,3379 | 0,432 | -0,223 |
| 6 | Q8NFC6 FA44A_HUMAN | R.AGS#ISSEEVDSQGNM*M*R.M      | S1701:       | 2 | 3,5693 | 0,52  | -0,31  |
| 6 | P55196 AFAD_HUMAN  | K.TQVLS#PDSLFTAK.F            | S1704:       | 2 | 2,8058 | 0,353 | -0,328 |
| 6 | Q9HCM1 CL035_HUMAN | R.SFS#ADGFEM*LQNPVK.D         | S1708:       | 2 | 5,2    | 0,422 | 0      |
| 6 | Q15366 PCBP2_HUMAN | K.QICVVM*LETLS#QSPPK.G        | S171:        | 3 | 3,3865 | 0,399 | -0,19  |
| 6 | Q2T9J0 TYS1_HUMAN  | R.DDEV#EDEEADQLR.A            | S171:        | 2 | 2,7799 | 0,239 | -0,141 |
| 6 | P48378 RFX2_HUMAN  | R.SS#PATLEM*AIENLQK.S         | S171:        | 2 | 2,1355 | 0,32  | -0,141 |
| 6 | O60292 SI1L3_HUMAN | R.SSS#EITLSECDAGEPR.G         | S172:        | 2 | 2,984  | 0,504 | -1,373 |
| 6 | Q15365 PCBP1_HUMAN | K.QICLVM*LETLSQS#PQGR.V       | S173:        | 3 | 5,1527 | 0,453 | -0,267 |
| 6 | O75367 H2AY_HUMAN  | K.AASADS#TTEGTPADGFTVLSTK.S   | S173:        | 3 | 3,9705 | 0,357 | -0,414 |
| 6 | Q15365 PCBP1_HUMAN | K.QICLVM*LETLSQS#PQGR.V       | S173:        | 2 | 2,9613 | 0,573 | -0,593 |
| 6 | Q5VUA4 ZN318_HUMAN | R.LGS#PVDNLEDM*DR.D           | S173:        | 2 | 2,5772 | 0,326 | 0      |
| 6 | Q15366 PCBP2_HUMAN | K.QICVVM*LETLSQS#PPK.G        | S173:        | 2 | 2,3067 | 0,355 | -0,76  |
| 6 | Q8N9T8 KRI1_HUMAN  | R.AFVEDS#EDEDGAGEGGSSLLQK.R   | S177:        | 3 | 6,4891 | 0,481 | 0,079  |
| 6 | Q9Y6A5 TACC3_HUMAN | K.VSGS#PEQAVEENLSSYSLDR.R     | S177:        | 3 | 4,5696 | 0,573 | -0,326 |
| 6 | Q58FF8 H90B2_HUMAN | K.IEDVGS#DEEDDSGK.D           | S177:        | 2 | 3,0999 | 0,369 | -0,077 |
| 6 | Q09666 AHNK_HUMAN  | K.DIDISS#PEFK.I               | S177:        | 2 | 2,6195 | 0,407 | -0,198 |
| 6 | Q8WXH0 SYNE2_HUMAN | K.ALS#PSDSLEIFTK.L            | S1772:       | 2 | 3,5351 | 0,414 | -0,328 |
| 6 | Q04721 NOTC2_HUMAN | K.AEDEALLS#EEDDPIDR.R         | S1778:       | 2 | 4,6183 | 0,552 | -0,257 |
| 6 | O15027 SC16A_HUMAN | R.LLPSAPQTLPDGPLAS#PAR.V      | S1786:       | 2 | 4,9275 | 0,531 | -0,37  |
| 6 | O15027 SC16A_HUMAN | R.LLPSAPQTLPDGPLAS#PAR.V      | S1786:       | 3 | 2,8366 | 0,117 | -0,185 |
| 6 | Q96S97 MYADM_HUMAN | R.TTITTTTTSS#SGLGSPM*IVGSPR.A | S18:         | 3 | 4,162  | 1     | -0,078 |
| 6 | Q93009 UBP7_HUMAN  | K.AGEQQLS#EPEDM*EM*EAGDTPPR.I | S18:         | 3 | 2,8594 | 0,301 | -0,332 |
| 6 | Q9P260 K1468_HUMAN | R.AGS#ISTLDSLDFAR.Y           | S180:        | 2 | 4,1506 | 0,478 | -0,239 |
| 6 | Q9NQC3 RTN4_HUMAN  | R.RGS#S#GSVDETLFALPAASEPVIR.S | S181:S182:   | 3 | 4,3839 | 0,392 | -0,291 |
| 6 | Q6UB99 ANR11_HUMAN | R.QQS#VPAASSYDSM*PPSM*EDR.A   | S1815:       | 3 | 3,5692 | 0,287 | -0,382 |
| 6 | Q8TD26 CHD6_HUMAN  | R.NLS#SDQQLIDLLENK.S          | S1839:       | 2 | 4,8304 | 0,549 | -0,337 |
| 6 | Q9ULX3 NOB1_HUMAN  | R.GEDVPS#EEEEEEENGFEEDR.K     | S184:        | 3 | 4,8147 | 0,541 | 0,079  |
| 6 | P16070 CD44_HUMAN  | R.TNPEDIYPSNPTDDDVSSESS#ER.S  | S184:        | 3 | 2,8586 | 0,29  | -0,276 |
| 6 | Q15643 TRIPB_HUMAN | K.S#VPNT#PLRPNQSVVNSSSELFVK.F | S1842:T1846: | 3 | 3,0423 | 0,169 | -0,748 |

|   |                     |                                  |              |   |        |       |        |
|---|---------------------|----------------------------------|--------------|---|--------|-------|--------|
| 6 | P37802 TAGL2_HUMAN  | R.GAS#QAGM*TGyGM*PR.Q            | S185:        | 2 | 3,0059 | 0,433 | -0,571 |
| 6 | Q5UIPO RIF1_HUMAN   | R.EEICDM*DSSEAM*SLESQES#PNENFK.T | S1854:       | 3 | 4,8433 | 0,599 | -0,061 |
| 6 | Q8TDJ6 DMXL2_HUMAN  | R.NLAS#PEGLTATLGLK.T             | S1857:       | 2 | 3,8654 | 0,51  | -0,624 |
| 6 | O15417 TNC18_HUMAN  | R.ALS#PGLSESLGLLAR.F             | S1857:       | 2 | 3,5965 | 0,561 | -0,66  |
| 6 | Q9Y3S1 Wnk2_HUMAN   | K.QAS#LPVSGSVAGDFVK.K            | S1862:       | 2 | 2,2588 | 0,342 | -0,074 |
| 6 | Q8WUF5 IASPP_HUMAN  | R.GS#PLAEGPQAFFPER.G             | S187:        | 2 | 3,1181 | 0,449 | -0,073 |
| 6 | P04792 HSPB1_HUMAN  | K.LATQSNEITIPVTFES#R.A           | S187:        | 2 | 2,893  | 0,431 | -0,43  |
| 6 | P42858 HD_HUMAN     | K.LLSPQM*S#GEEEDSDLAAK.L         | S1876:       | 3 | 4,4501 | 0,425 | 0,091  |
| 6 | P42858 HD_HUMAN     | K.LLSPQM*S#GEEEDSDLAAK.L         | S1876:       | 2 | 3,8254 | 0,633 | 0,726  |
| 6 | O14530 TXND9_HUMAN  | R.LGSSDILNYS#GNLM*EPPFQNQK.K     | S188:        | 3 | 4,7512 | 0,471 | -0,359 |
| 6 | Q13596 SNX1_HUMAN   | R.FS#DFLGLYEK.L                  | S188:        | 2 | 2,3059 | 0,423 | -0,376 |
| 6 | A4QN18 A4QN18_HUMAN | R.NDGLLALS#PDAEEPQLPDGTGR.E      | S1880:       | 3 | 3,6748 | 0,309 | -0,075 |
| 6 | ##Q9C0G6 DYH6_HUMAN | K.NYIEVSAEVIS#SAT#QK.V           | S1891:T1894: | 3 | 2,7625 | 0,128 | -0,867 |
| 6 | P19105 MLRM_HUMAN   | R.ATS#NVFAM*FDQSQIQEFK.E         | S19:         | 3 | 5,2329 | 0,463 | -0,251 |
| 6 | Q13442 HAP28_HUMAN  | R.QYTS#PEEIDAQLQAEK.Q            | S19:         | 3 | 4,9354 | 0,407 | 0      |
| 6 | O43399 TPD54_HUMAN  | K.GLLS#DSM*TDVPVDTGVAAR.T        | S19:         | 3 | 3,1925 | 0,155 | -0,274 |
| 6 | Q01433 AMPD2_HUMAN  | K.TDS#DSDLQLYK.E                 | S190:        | 2 | 4,4241 | 0,415 | -0,179 |
| 6 | Q15365 PCBP1_HUMAN  | R.VM*TIPYQPM*PASS#PVICAGGQDR.C   | S190:        | 3 | 4,2499 | 0,498 | 0      |
| 6 | Q12906 ILF3_HUMAN   | K.VLAGETLS#VNDPPDVLDR.Q          | S190:        | 2 | 3,5399 | 0,361 | -0,123 |
| 6 | Q52LW3 RHG29_HUMAN  | K.GNFS#PLELDNVLLK.N              | S190:        | 2 | 2,8145 | 0,296 | -0,149 |
| 6 | O15027 SC16A_HUMAN  | R.ADSGPTQPPLSLS#PAPETK.R         | S1905:       | 2 | 3,6575 | 0,493 | -0,247 |
| 6 | Q5JRA6 MIA3_HUMAN   | R.DEPPASQSTSQDCSQALKQS#P.-       | S1906:       | 3 | 3,8694 | 0,363 | -0,3   |
| 6 | Q92734 TFG_HUMAN    | K.NVM*SAFGLTDDQVS#GPPSAPAEDR.S   | S193:        | 3 | 4,0046 | 0,492 | -1,145 |
| 6 | O43237 DC1L2_HUMAN  | K.DFQDYM*EPEEGCQGS#PQR.R         | S194:        | 3 | 4,9352 | 0,62  | 0      |
| 6 | Q9H2D6 TARA_HUMAN   | R.QALDYVELSPLTQAS#PQR.A          | S1955:       | 3 | 4,0027 | 0,326 | -0,175 |
| 6 | Q5TBA9 FRY_HUMAN    | K.S#TGQLNM*NPGTTSNGNTATAER.S     | S1955:       | 3 | 2,8706 | 0,172 | -0,415 |
| 6 | Q92734 TFG_HUMAN    | K.NVM*SAFGLTDDQVSGPPS#APAEDR.S   | S197:        | 3 | 5,0323 | 0,443 | -0,215 |
| 6 | O43502 RA51C_HUMAN  | R.DLVSFPLS#PAVR.V                | S20:         | 2 | 2,9026 | 0,255 | -0,353 |
| 6 | P31350 RIR2_HUMAN   | R.VPLAPITDPQQLQLS#PLK.G          | S20:         | 2 | 2,6007 | 0,388 | -0,359 |
| 6 | O75643 U520_HUMAN   | R.NALLQLTDS#QIADVAR.F            | S2002:       | 2 | 4,4566 | 0,475 | -0,405 |
| 6 | O75643 U520_HUMAN   | R.NALLQLTDS#QIADVAR.F            | S2002:       | 3 | 4,1826 | 0,518 | -0,202 |
| 6 | Q9H8G2 CI082_HUMAN  | K.ILEGDNGM*DS#DM*EEEADDGSK.M     | S203:        | 3 | 6,927  | 0,551 | -0,077 |
| 6 | Q9H0H5 RGAP1_HUMAN  | R.S#IGSAVDQGNESIVAK.T            | S203:        | 2 | 4,7538 | 0,51  | -0,147 |

|   |                     |                                   |        |   |        |       |        |
|---|---------------------|-----------------------------------|--------|---|--------|-------|--------|
| 6 | Q9H0H5 RGAP1_HUMAN  | R.S#IGSAVDQGNESIVAK.T             | S203:  | 3 | 4,3043 | 0,344 | -0,111 |
| 6 | Q8NCF5 NF2IP_HUMAN  | K.TEFLDLDNSPLSPPS#PR.T            | S204:  | 2 | 4,1762 | 0,492 | -0,683 |
| 6 | Q8NCF5 NF2IP_HUMAN  | K.TEFLDLDNSPLSPPS#PR.T            | S204:  | 3 | 3,9962 | 0,354 | -0,372 |
| 6 | Q92793 CBP_HUMAN    | R.SIS#PSALQDLLR.T                 | S2063: | 2 | 3,0847 | 0,333 | -0,442 |
| 6 | Q9UBT2 SAE2_HUMAN   | K.YLFNQLFGCEEDADQEV#PDR.A         | S207:  | 3 | 3,932  | 0,206 | -0,448 |
| 6 | P63104 1433Z_HUMAN  | K.TAFDEAIAELDTLS#EESYK.D          | S207:  | 3 | 2,8871 | 0,247 | -0,579 |
| 6 | Q01130 SFRS2_HUMAN  | K.S#PPKSPEEEGAVSS.-               | S208:  | 2 | 3,0793 | 0,42  | -0,33  |
| 6 | Q8WXV6 Q8WXV6_HUMAN | R.TSS#EDNLYLAVLR.A                | S21:   | 2 | 4,0255 | 0,34  | -0,547 |
| 6 | Q53H80 CF166_HUMAN  | R.TLDFDLLSPAS#PK.R                | S21:   | 3 | 3,49   | 0,228 | -0,231 |
| 6 | Q16513 PKN2_HUMAN   | R.S#LPFSENVSAVQK.L                | S21:   | 2 | 3,4496 | 0,381 | -0,164 |
| 6 | Q53H80 CF166_HUMAN  | R.TLDFDLLSPAS#PK.R                | S21:   | 2 | 3,4149 | 0,584 | -0,386 |
| 6 | P60174 TPIS_HUMAN   | K.QS#LGLIGLTLNAAK.V               | S21:   | 2 | 3,2805 | 0,503 | -0,571 |
| 6 | Q09666 AHNK_HUMAN   | R.LPS#GSGAASPTGSAVDIR.A           | S210:  | 2 | 4,8687 | 0,567 | -0,283 |
| 6 | Q9UBB9 TFP11_HUMAN  | R.TTQSM*QDFPVVDS#EEEEEEFQK.E      | S210:  | 3 | 4,8634 | 0,427 | -0,588 |
| 6 | P62258 1433E_HUMAN  | K.AAFDDAIAELDTLS#EESYK.D          | S210:  | 3 | 4,4885 | 0,444 | -0,253 |
| 6 | O75369 FLNB_HUMAN   | R.APS#VATVGSICDLNLK.I             | S2107: | 2 | 4,6641 | 0,577 | -0,141 |
| 6 | Q8NI08 NCOA7_HUMAN  | R.VLSSTS#EEDEPGVVK.F              | S211:  | 2 | 3,4845 | 0,399 | -0,589 |
| 6 | Q6P1J9 CDC73_HUMAN  | R.S#FVDAEVDVTR.D                  | S212:  | 2 | 3,3532 | 0,493 | 0,093  |
| 6 | Q9H4L4 SEN3_HUMAN   | R.GS#PPVPSGPPM*EEDGLR.W           | S212:  | 2 | 3,3415 | 0,495 | -0,268 |
| 6 | Q9H4A3 WKN1_HUMAN   | K.VPPAVIIPPAAPLS#GR.R             | S2121: | 3 | 3,0152 | 0,326 | -0,112 |
| 6 | Q9UQ35 SRRM2_HUMAN  | R.S#PGM*LEPLGSSR.T                | S2132: | 2 | 3,3552 | 0,48  | -0,092 |
| 6 | Q9BZL6 KPCD2_HUMAN  | R.LGTSES#LPCTAEELSR.S             | S214:  | 2 | 4,1436 | 0,45  | -0,467 |
| 6 | P61978 HNRPK_HUMAN  | K.IILDLISES#PIK.G                 | S216:  | 2 | 3,8062 | 0,457 | -0,172 |
| 6 | Q9NUA8 ZBT40_HUMAN  | R.NAETPAETPTTAEACSPS#PAVQTFSEAK.K | S216:  | 3 | 3,3016 | 0,411 | -0,616 |
| 6 | P21333 FLNA_HUMAN   | K.IPEISIQDM*TAQVTS#PSGK.T         | S2180: | 3 | 4,0208 | 0,375 | -0,087 |
| 6 | O75376 NCOR1_HUMAN  | R.S#PGSISYLPFFTK.L                | S2184: | 2 | 3,4097 | 0,512 | -0,454 |
| 6 | Q8WU79 SMAP2_HUMAN  | K.DLDLLASVPS#PSSSGSR.K            | S219:  | 2 | 2,2537 | 0,304 | -0,552 |
| 6 | Q02750 MP2K1_HUMAN  | K.LCDFGVSGQLIDSM*ANS#FVGTR.S      | S222:  | 3 | 4,7732 | 0,495 | -0,222 |
| 6 | O75643 U520_HUMAN   | R.EEAS#DDDM*EGDEAVVR.C            | S225:  | 3 | 5,6368 | 0,406 | -0,196 |
| 6 | O75643 U520_HUMAN   | R.EEAS#DDDM*EGDEAVVR.C            | S225:  | 2 | 4,8091 | 0,514 | -0,328 |
| 6 | Q8NE71 ABCF1_HUMAN  | K.AEQGS#EEEEEGEEEEEGGESK.A        | S228:  | 3 | 4,63   | 0,564 | -0,677 |
| 6 | Q14671 PUM1_HUMAN   | R.SESGGLGVSM*VEYVLSSS#PGDSCLR.K   | S229:  | 3 | 3,4737 | 0,226 | -0,343 |
| 6 | Q9NZM3 ITSN2_HUMAN  | K.AQSLIDLGSSSTSSTASLSGNS#PK.T     | S229:  | 3 | 3,1876 | 1     | -0,297 |

|   |                    |                                    |              |   |        |       |        |
|---|--------------------|------------------------------------|--------------|---|--------|-------|--------|
| 6 | Q9UBC2 EP15R_HUMAN | K.TVFPGAVPVLPAS#PPPK.D             | S229:        | 2 | 2,3335 | 0,408 | -0,278 |
| 6 | Q13085 ACACA_HUMAN | R.FIIGS#VSEDNSEDEISNLVK.L          | S23:         | 3 | 3,4652 | 0,11  | -0,965 |
| 6 | Q96B97 SH3K1_HUMAN | R.S#IEVENDFLPVEK.T                 | S230:        | 2 | 3,2752 | 0,43  | -0,305 |
| 6 | Q8WU90 ZC3HF_HUMAN | K.EDEIS#LEDLIER.E                  | S231:        | 2 | 3,538  | 0,458 | -0,238 |
| 6 | Q14814 MEF2D_HUMAN | R.AS#PGLLPVANGNSLNK.V              | S231:        | 2 | 3,3876 | 0,465 | -0,075 |
| 6 | Q13283 G3BP1_HUMAN | K.SSS#PAPADIAQTVQEDLR.T            | S232:        | 3 | 5,2928 | 0,492 | -0,186 |
| 6 | Q13283 G3BP1_HUMAN | K.SSS#PAPADIAQTVQEDLR.T            | S232:        | 2 | 4,4842 | 0,456 | -0,124 |
| 6 | Q5UIP0 RIF1_HUMAN  | K.TIGDLSTLTAS#EIK.T                | S2339:       | 2 | 3,456  | 0,512 | 0      |
| 6 | Q9BTK6 PA1_HUMAN   | R.DLFLDSEDPSPAS#PPLR.S             | S237:        | 2 | 4,3566 | 0,59  | -0,663 |
| 6 | Q9Y2W2 WBP11_HUMAN | R.DEDM*LYS#PELAQR.G                | S237:        | 2 | 3,908  | 0,427 | 0      |
| 6 | Q9BTK6 PA1_HUMAN   | R.DLFLDSEDPSPAS#PPLR.S             | S237:        | 3 | 3,6893 | 0,289 | -0,633 |
| 6 | Q9BQ52 RNZ2_HUMAN  | R.DSS#LVVAFICK.L                   | S238:        | 2 | 3,8861 | 0,462 | -0,278 |
| 6 | Q9H019 FA54B_HUMAN | K.ASS#FADM*M*GILK.D                | S238:        | 2 | 2,9736 | 0,232 | -0,088 |
| 6 | P41743 KPCI_HUMAN  | K.ASS#SLGLQDFDLLR.V                | S238:        | 2 | 2,5666 | 0,445 | -0,533 |
| 6 | Q86V81 THOC4_HUMAN | K.QQLS#AEELDAQLDAYNAR.M            | S239:        | 2 | 2,8415 | 0,407 | -0,462 |
| 6 | O75962 TRIO_HUMAN  | R.AGAAS#PLNSPLSSAVPSLKG.E          | S2396:       | 2 | 2,9494 | 0,428 | -0,064 |
| 6 | Q96A57 CT030_HUMAN | R.LSS#TDDGYIDLQFK.K                | S24:         | 2 | 4,7077 | 0,514 | -0,435 |
| 6 | Q96A57 CT030_HUMAN | R.LSS#TDDGYIDLQFK.K                | S24:         | 3 | 3,1989 | 0,267 | -0,217 |
| 6 | Q96DQ3 YN003_HUMAN | K.SS#PVCSTAPVETEPK.L               | S240:        | 2 | 2,3938 | 0,233 | -0,512 |
| 6 | Q9BZG1 RAB34_HUMAN | R.INS#DDSNLYLTASK.K                | S241:        | 2 | 4,7215 | 0,549 | -0,527 |
| 6 | Q9BST9 RTKN_HUMAN  | R.ASLDSAGSGSS#PILLPTPVVGGPR.Y      | S242:        | 3 | 3,4884 | 0,23  | 0      |
| 6 | Q8NEB9 PK3C3_HUMAN | K.DGDESS#PILTSFELVK.V              | S244:        | 2 | 2,8335 | 0,421 | -0,269 |
| 6 | P49368 TCPG_HUMAN  | R.IVLLDSS#LEYK.K                   | S244:        | 2 | 2,3588 | 0,241 | 0      |
| 6 | Q14684 RRP1B_HUMAN | K.VGDGDL#AAEIPENEVSLR.R            | S245:        | 3 | 2,6594 | 0,135 | 0      |
| 6 | Q9P0V3 SH3B4_HUMAN | R.SYS#LSELSVLQAK.S                 | S246:        | 2 | 4,8908 | 0,423 | -0,081 |
| 6 | Q9P0V3 SH3B4_HUMAN | R.SYS#LSELSVLQAK.S                 | S246:        | 3 | 4,0663 | 0,347 | 0      |
| 6 | Q8WWI1 LMO7_HUMAN  | R.EDS#FESLDSLGR.S                  | S246:        | 2 | 3,522  | 0,451 | -0,321 |
| 6 | O95197 RTN3_HUMAN  | K.DSPES#PFEVIIDK.A                 | S246:        | 2 | 3,085  | 0,337 | 0,235  |
| 6 | Q9H3N1 TXND1_HUMAN | K.VEEEQEAEEDVS#EEEEASK.E           | S247:        | 3 | 5,7358 | 0,551 | 0,077  |
| 6 | P11717 MPRI_HUMAN  | K.LVS#FHDDS#DEDLLHI.-              | S2479:S2484: | 3 | 4,3635 | 0,401 | -0,191 |
| 6 | Q8NC51 PAIRB_HUMAN | R.FDQLFDES#DPFEVLK.A               | S25:         | 2 | 4,3947 | 0,554 | -0,362 |
| 6 | Q9UFC0 LRWD1_HUMAN | R.ACAS#PSAQVEGSPVAGSDGSQPAVK.L     | S251:        | 3 | 6,3041 | 0,517 | -0,225 |
| 6 | P46937 YAP1_HUMAN  | K.QPPPLAPQS#PQGGVM*GGSNSNQQQQM*R.L | S251:        | 3 | 2,6416 | 0,23  | -0,312 |

|   |                     |                                |        |   |        |       |        |
|---|---------------------|--------------------------------|--------|---|--------|-------|--------|
| 6 | Q9NZJ4 SACS_HUMAN   | R.YAS#NVCFTTLGTEFGQK.E         | S2511: | 2 | 4,3254 | 0,48  | -0,67  |
| 6 | P21359 NF1_HUMAN    | K.GSEGYLEAATYPTVGQTS#PR.A      | S2515: | 3 | 2,9585 | 0,341 | -0,18  |
| 6 | P21359 NF1_HUMAN    | K.GSEGYLEAATYPTVGQTS#PR.A      | S2515: | 2 | 2,7484 | 0,372 | -0,36  |
| 6 | P21359 NF1_HUMAN    | K.S#M*SLDM*GQPSQANTK.K         | S2521: | 2 | 3,3231 | 0,438 | -0,357 |
| 6 | Q9UFC0 LRWD1_HUMAN  | R.ACASPS#AQVEGSPVAGSDGSPAVK.L  | S253:  | 3 | 4,0963 | 0,291 | 0,075  |
| 6 | O15541 R113A_HUMAN  | R.YGVYEDENYEVGS#DDEEIPFK.C     | S253:  | 3 | 3,2831 | 0,103 | -0,355 |
| 6 | Q8N1G0 ZN687_HUMAN  | K.ATDIPASAS#PPPVAGVPFFK.Q      | S253:  | 2 | 2,4654 | 0,456 | -0,595 |
| 6 | P55036 PSMD4_HUMAN  | R.AAAASAAEAGIATTGTEDS#DDALLK.M | S256:  | 3 | 3,4895 | 0,309 | -0,229 |
| 6 | Q15477 SKIV2_HUMAN  | R.ASS#LEDLVLK.E                | S256:  | 2 | 2,8961 | 0,497 | -0,317 |
| 6 | Q9BQI3 E2AK1_HUMAN  | R.AAIELPSLEVLN#DQEEEDR.E       | S258:  | 2 | 3,2351 | 0,507 | -0,35  |
| 6 | Q58FF8 H90B2_HUMAN  | K.S#IYYITGESK.E                | S258:  | 2 | 2,2165 | 0,393 | -0,393 |
| 6 | Q8NFH5 NUP53_HUMAN  | R.CALSS#PSLAFTPPIK.T           | S259:  | 2 | 3,26   | 0,447 | -0,366 |
| 6 | Q6Y7W6 PERQ2_HUMAN  | R.ALSSGGSITS#PPLSPALPK.Y       | S26:   | 2 | 4,0874 | 0,47  | -0,59  |
| 6 | Q6Y7W6 PERQ2_HUMAN  | R.ALSSGGSITS#PPLSPALPK.Y       | S26:   | 3 | 3,3158 | 0,233 | -0,197 |
| 6 | P07910 HNRPC_HUMAN  | K.M*ESEGADDSD#AEEGDLDDDDNEDR.G | S260:  | 3 | 5,5478 | 0,478 | 0,851  |
| 6 | Q86YS7 K0528_HUMAN  | K.LSSPAAFLPACNS#PSK.E          | S260:  | 2 | 2,7388 | 0,361 | -0,212 |
| 6 | Q06210 GFPT1_HUMAN  | R.VDS#TTCLFPVEEK.A             | S261:  | 2 | 4,076  | 0,445 | -0,304 |
| 6 | Q14571 ITPR2_HUMAN  | R.AM*S#LVSNEGDSEQNEIR.S        | S2633: | 2 | 2,2477 | 0,339 | -0,062 |
| 6 | Q5T200 ZC3HD_HUMAN  | R.TPS#PPPIPEDIALGK.K           | S265:  | 2 | 3,4199 | 0,53  | -0,214 |
| 6 | Q96QF0 RAB31_HUMAN  | K.TLVLSSSPTS#PTQEPLPGGK.T      | S266:  | 3 | 3,0696 | 0,427 | 0,176  |
| 6 | Q96QF0 RAB31_HUMAN  | K.TLVLSSSPTS#PTQEPLPGGK.T      | S266:  | 2 | 2,2719 | 0,422 | -0,118 |
| 6 | Q8TF74 WIPF2_HUMAN  | R.QPPGVPNGPSS#PTNESAPELPQR.H   | S267:  | 3 | 3,5835 | 0,199 | -0,075 |
| 6 | Q9UBP0 SPAST_HUMAN  | R.APS#YSGLSM*VSGVK.Q           | S268:  | 2 | 3,8532 | 0,426 | 0      |
| 6 | Q9UJU6 DBNL_HUMAN   | R.AM*S#TTSISSPQPGK.L           | S269:  | 2 | 2,8248 | 0,426 | -0,164 |
| 6 | Q9NTJ3 SMC4_HUMAN   | R.EEGPPPPSPDGAS#SDAEPEPPSGR.T  | S27:   | 3 | 3,4183 | 0,17  | 0,15   |
| 6 | Q5TAI8 Q5TAI8_HUMAN | R.VSS#SGLTDSLFIK.E             | S270:  | 2 | 3,8326 | 0,468 | -0,394 |
| 6 | P46013 KI67_HUMAN   | K.IPCES#PPLEVVDTTASTK.R        | S2708: | 2 | 3,3194 | 0,483 | -0,362 |
| 6 | Q66PJ3 AR6P4_HUMAN  | R.S#AGEEEDGPVLTDEQK.S          | S271:  | 2 | 4,8551 | 0,473 | -0,41  |
| 6 | Q9UNZ2 NSF1C_HUMAN  | K.LGSTAPQVLSTSS#PAQQAENEAK.A   | S272:  | 3 | 4,2439 | 0,436 | -0,229 |
| 6 | Q9Y3T6 R3HC1_HUMAN  | R.FGS#TLQLDLEK.G               | S276:  | 2 | 3,9856 | 0,369 | -0,275 |
| 6 | Q8WWI1 LMO7_HUMAN   | R.EGFES#DTDSEFTFK.M            | S276:  | 2 | 3,8975 | 0,502 | -0,213 |
| 6 | Q7L4E1 FA73B_HUMAN  | R.TLM*LPLTEGS#LR.L             | S276:  | 2 | 2,371  | 0,193 | -0,513 |
| 6 | Q9Y6D5 BIG2_HUMAN   | R.GSS#LSGTDDGAQEVVK.D          | S277:  | 2 | 3,9569 | 0,46  | -0,075 |

|   |                    |                                         |        |   |        |       |        |
|---|--------------------|-----------------------------------------|--------|---|--------|-------|--------|
| 6 | Q6UB99 ANR11_HUMAN | K.VANS#PTM*VNLLLGK.G                    | S277:  | 2 | 3,5857 | 0,311 | -0,314 |
| 6 | Q9Y3Q8 T22D4_HUMAN | K.S#PDPFGAVAAQK.F                       | S279:  | 2 | 3,2707 | 0,503 | -0,192 |
| 6 | Q6ZRS2 SRCAP_HUMAN | R.GAASTLVPGVSETSASPGS#PSVR.S            | S2790: | 3 | 3,557  | 0,386 | 0      |
| 6 | Q6MZQ0 PTOR2_HUMAN | R.FM*S#SPVLSLPR.F                       | S28:   | 2 | 3,4506 | 0,464 | -0,169 |
| 6 | Q96EZ8 MCRS1_HUMAN | K.GDQVLNFS#DAEDLIDDSK.L                 | S282:  | 3 | 4,9455 | 0,398 | -0,266 |
| 6 | Q96EZ8 MCRS1_HUMAN | K.GDQVLNFS#DAEDLIDDSK.L                 | S282:  | 2 | 3,5091 | 0,5   | -0,829 |
| 6 | P21127 CD2L1_HUMAN | R.DLLSDLQDIS#DSER.K                     | S283:  | 2 | 4,8531 | 0,518 | -0,434 |
| 6 | P21127 CD2L1_HUMAN | R.DLLSDLQDIS#DSER.K                     | S283:  | 3 | 4,6628 | 0,383 | 0      |
| 6 | O15446 RPA34_HUMAN | K.QEQINTEPLEDTVLS#PTK.K                 | S285:  | 2 | 2,3015 | 0,322 | -0,46  |
| 6 | Q04724 TLE1_HUMAN  | K.DASSS#PASTASSASSTSLK.S                | S286:  | 2 | 2,7791 | 0,463 | -0,134 |
| 6 | Q04726 TLE3_HUMAN  | K.DAPTS#PASVASSSTPSSK.T                 | S286:  | 2 | 2,6102 | 0,389 | -0,463 |
| 6 | O94888 UBXD7_HUMAN | R.SESLIDASEDS#QLEAAIR.A                 | S288:  | 3 | 3,5721 | 0,3   | -0,363 |
| 6 | O94888 UBXD7_HUMAN | R.SESLIDASEDS#QLEAAIR.A                 | S288:  | 2 | 2,8244 | 0,419 | -0,545 |
| 6 | Q7Z6Z7 HUWE1_HUMAN | R.AGS#STPGDAPPAVAEVQGR.S                | S2887: | 2 | 4,1514 | 0,487 | -0,198 |
| 6 | Q7Z6Z7 HUWE1_HUMAN | R.AGSS#TPGDAPPAVAEVQGR.S                | S2888: | 2 | 3,0711 | 0,619 | 0,727  |
| 6 | Q13085 ACACA_HUMAN | R.FIIGSVSEDNS#EDEISNLVK.L               | S29:   | 3 | 3,5223 | 0,195 | -0,322 |
| 6 | O14745 NHERF_HUMAN | R.SAS#SDTSEELNSQDSPPK.Q                 | S290:  | 2 | 5,2616 | 0,512 | -0,685 |
| 6 | P18206 VINC_HUMAN  | R.DPSAS#PGDAGEQAIR.Q                    | S290:  | 2 | 4,4872 | 0,591 | -0,393 |
| 6 | Q8TDN4 CABL1_HUMAN | R.SS#LETLEDIEENAPLR.R                   | S291:  | 2 | 4,5437 | 0,513 | -0,579 |
| 6 | O14974 MYPT1_HUMAN | K.S#PLIESTANM*DNNQSQK.T                 | S299:  | 3 | 3,3487 | 0,361 | -0,371 |
| 6 | Q9UHD8 SEPT9_HUMAN | R.S#FEVEEVETPNSTPPR.R                   | S30:   | 2 | 5,1971 | 0,608 | -0,9   |
| 6 | Q86VQ1 GLCI1_HUMAN | R.SAAGS#PPAVAAAGSGNGAGGGGGVGCAPAAGAGR.L | S30:   | 3 | 4,5467 | 0,423 | -0,467 |
| 6 | O75379 VAMP4_HUMAN | R.NLLEDDS#DEEEDFFLR.G                   | S30:   | 2 | 4,1137 | 0,561 | -0,827 |
| 6 | Q5JTD0 TJAP1_HUMAN | R.GS#PEEELPLPAFEK.L                     | S300:  | 2 | 4,0307 | 0,48  | -0,451 |
| 6 | Q05655 KPCD_HUMAN  | R.S#DSASSEPVGIYQGF EK.K                 | S302:  | 2 | 4,4393 | 0,497 | -0,454 |
| 6 | P05388 RLAO_HUMAN  | K.VEAKEES#EESDEDM*GFGLFD.-              | S304:  | 3 | 3,5038 | 0,405 | -0,388 |
| 6 | Q5W0Z9 ZDH20_HUMAN | R.LVGM*DPEQAS#VTNQNEYAR.S               | S305:  | 3 | 4,1746 | 0,272 | -0,082 |
| 6 | P05783 K1C18_HUMAN | R.TVQS#LEIDLDSM*R.N                     | S305:  | 2 | 3,7905 | 0,422 | -0,152 |
| 6 | P05783 K1C18_HUMAN | R.TVQS#LEIDLDSM*R.N                     | S305:  | 3 | 3,7043 | 0,31  | 0,114  |
| 6 | Q9H3Q1 BORG4_HUMAN | R.DS#SSLSSCTSGILEER.S                   | S307:  | 2 | 2,9645 | 0,414 | 0,472  |
| 6 | A1L020 MEX3A_HUMAN | K.ILEYNNENDFLAGS#PDAAIDSR.Y             | S308:  | 3 | 4,8891 | 0,325 | -0,292 |
| 6 | Q9BVJ6 UT14A_HUMAN | K.DYLLSES#EDEGDNDGER.K                  | S31:   | 2 | 2,1818 | 0,306 | -0,362 |
| 6 | Q01850 CDR2_HUMAN  | R.SSS#ETILSSLAGSDIVK.G                  | S311:  | 2 | 3,1293 | 0,508 | -0,413 |

|   |                    |                                   |            |   |        |       |        |
|---|--------------------|-----------------------------------|------------|---|--------|-------|--------|
| 6 | Q9Y2D8 ADIP_HUMAN  | R.VDDSTGTVIS#DVEEDAGELSR.E        | S312:      | 3 | 5,1239 | 0,382 | -0,483 |
| 6 | Q9BWU0 NADAP_HUMAN | K.M*LGEDS#DEEEEM*DTSER.K          | S312:      | 3 | 4,6068 | 0,454 | -0,087 |
| 6 | Q15811 ITSN1_HUMAN | R.S#GSGISVISSTSVQDR.L             | S313:      | 2 | 3,6968 | 0,484 | -0,515 |
| 6 | Q9Y446 PKP3_HUMAN  | R.LSS#GFDDIDLPSAVK.Y              | S314:      | 2 | 4,2334 | 0,52  | -0,297 |
| 6 | Q99569 PKP4_HUMAN  | R.VGS#PLTLTDAQTR.V                | S314:      | 2 | 2,8524 | 0,353 | -0,17  |
| 6 | Q9Y6A5 TACC3_HUMAN | R.AM*TLS#PQEEVAAGQM*ASSSR.S       | S317:      | 3 | 4,4202 | 0,385 | 0,169  |
| 6 | P46937 YAP1_HUMAN  | R.SQLEPTLEQDGGTQNPVSS#PGM*SQELR.T | S317:      | 3 | 4,4098 | 0,498 | -0,513 |
| 6 | Q6KC79 NIPBL_HUMAN | R.DVPPDILLDS#PER.K                | S318:      | 2 | 2,0748 | 0,282 | -0,158 |
| 6 | Q9UHW9 S12A6_HUMAN | K.IDDIPGLSDTS#PDLSSR.S            | S32:       | 2 | 3,0549 | 0,509 | -0,261 |
| 6 | Q13043 STK4_HUMAN  | R.EVDQDDEENS#EEDEM*DSGTMVR.A      | S320:      | 3 | 2,7812 | 0,208 | -0,138 |
| 6 | P78527 PRKDC_HUMAN | K.LTPLPEDNS#M*NVDQDGDPSDR.M       | S3205:     | 3 | 4,4727 | 0,466 | 0      |
| 6 | O75674 TM1L1_HUMAN | K.EATNTTSEPSAPSQDLLDLS#PSPR.M     | S321:      | 3 | 3,5165 | 0,407 | -0,212 |
| 6 | O75674 TM1L1_HUMAN | K.EATNTTSEPSAPSQDLLDLS#PR.M       | S323:      | 3 | 3,3857 | 0,376 | -0,141 |
| 6 | Q16204 CCDC6_HUMAN | R.QLS#ESESSEM*DDER.Y              | S323:      | 2 | 2,9297 | 0,442 | -0,33  |
| 6 | P42566 EP15_HUMAN  | K.NIIGSS#PVADFSAIK.E              | S324:      | 2 | 3,9384 | 0,54  | 0,153  |
| 6 | P78410 BT3A2_HUMAN | K.IQYLTRGEES#SSDT#NK.S            | S326:T330: | 3 | 3,04   | 0,13  | -1,564 |
| 6 | O15355 PPM1G_HUMAN | K.EEPPGSDS#GTTAVVALIR.G           | S327:      | 2 | 2,7652 | 0,298 | -0,89  |
| 6 | Q8ND30 LIPB2_HUMAN | R.TLS#INEEEPEGGFSK.W              | S329:      | 2 | 4,6581 | 0,301 | -0,142 |
| 6 | Q14676 MDC1_HUMAN  | R.AQPFQFIDS#DTDAEEER.I            | S329:      | 2 | 4,3343 | 0,407 | -0,426 |
| 6 | Q86WB0 NIPA_HUMAN  | R.S#QDATFSPGSEQAEK.S              | S329:      | 2 | 3,7461 | 0,301 | -0,514 |
| 6 | Q9UHR4 BI2L1_HUMAN | R.S#VSVATGLNM*M*K.K               | S329:      | 2 | 3,112  | 0,532 | -0,181 |
| 6 | Q9H330 CI005_HUMAN | R.GESAPTLSTSPSPSSPSTSPS#PTLGR.R   | S332:      | 3 | 4,0434 | 0,493 | -0,206 |
| 6 | Q641Q2 FA21A_HUMAN | R.TPS#DDEEDNLFAPPK.L              | S333:      | 2 | 4,1935 | 0,473 | -0,209 |
| 6 | Q8WXI9 P66B_HUMAN  | R.VSS#PLPSPSAM*TDAANSQAAAK.L      | S334:      | 3 | 3,2861 | 0,373 | 0      |
| 6 | Q14498 RBM39_HUMAN | R.TDASS#ASSFLDSELER.T             | S334:      | 2 | 2,6827 | 0,546 | -0,639 |
| 6 | Q5VSL9 FA40A_HUMAN | R.AAS#PPASASDLIEQQQK.R            | S335:      | 2 | 5,6821 | 0,54  | -0,134 |
| 6 | Q5VSL9 FA40A_HUMAN | R.AAS#PPASASDLIEQQQK.R            | S335:      | 3 | 4,589  | 0,285 | -0,1   |
| 6 | Q9NQQ7 S35C2_HUMAN | K.GLGS#SPDLELLLR.S                | S335:      | 2 | 4,0118 | 0,404 | -0,589 |
| 6 | Q14680 MELK_HUMAN  | R.LS#SFSCGQASATPFTDIK.S           | S335:      | 2 | 3,5228 | 0,517 | -0,367 |
| 6 | Q16643 DREB_HUMAN  | R.SPS#DSSTASTPVAEQIER.A           | S339:      | 2 | 3,4862 | 0,653 | 0,44   |
| 6 | Q8WXI9 P66B_HUMAN  | R.VSSPLPSPSAM*TDAANSQAAAK.L       | S340:      | 3 | 4,2256 | 0,521 | -0,083 |
| 6 | Q16643 DREB_HUMAN  | R.SPSDSS#TASTPVAEQIER.A           | S342:      | 3 | 3,3784 | 0,3   | 0,471  |
| 6 | P49790 NU153_HUMAN | R.S#GIDITDFQAK.R                  | S343:      | 2 | 3,1822 | 0,433 | -0,191 |

|   |                     |                                  |            |   |        |       |        |
|---|---------------------|----------------------------------|------------|---|--------|-------|--------|
| 6 | Q8N7R7 CCYL1_HUMAN  | R.SFS#ADNFIGIQR.S                | S344:      | 2 | 3,337  | 0,341 | 0,085  |
| 6 | Q15942 ZYX_HUMAN    | R.S#PGAGPPLTK.E                  | S344:      | 2 | 2,2536 | 0,309 | -0,327 |
| 6 | Q9UJZ1 STML2_HUMAN  | R.DVQGTDAS#LDEELDR.V             | S345:      | 2 | 4,7976 | 0,398 | -0,21  |
| 6 | Q9Y6M4 KC1G3_HUMAN  | K.QLPTVGVAVQQDPALSS#NR.E         | S345:      | 3 | 4,0208 | 0,302 | 0      |
| 6 | Q5T1M5 FKB15_HUMAN  | K.SNS#LSEQLAINTSPDAVK.A          | S346:      | 2 | 5,7571 | 0,503 | -0,062 |
| 6 | Q9NWB7 IFT57_HUMAN  | R.LLS#EVM*EELEK.V                | S347:      | 2 | 3,2345 | 0,295 | -0,517 |
| 6 | Q9NZT2 OGFR_HUMAN   | R.S#VEPQDAGPLER.S                | S349:      | 2 | 3,2884 | 0,433 | -0,443 |
| 6 | Q13671 RIN1_HUMAN   | R.SM*S#AAFCSLLAPER.Q             | S351:      | 2 | 3,7739 | 0,563 | -0,298 |
| 6 | Q16799 RTN1_HUMAN   | K.GSIS#EDELITAIK.E               | S352:      | 2 | 3,2009 | 0,439 | -0,168 |
| 6 | Q96K21 ZFY19_HUMAN  | R.LPDS#DDDEDEETAIQR.V            | S354:      | 3 | 3,7324 | 0,356 | -0,095 |
| 6 | Q96K21 ZFY19_HUMAN  | R.LPDS#DDDEDEETAIQR.V            | S354:      | 2 | 2,0721 | 0,622 | -0,506 |
| 6 | P46937 YAP1_HUMAN   | R.DESTDSGLSM*S#SYSVPR.T          | S355:      | 2 | 4,63   | 0,561 | -0,319 |
| 6 | Q14157 UBP2L_HUMAN  | K.GGS#TTGSQFLEQFK.T              | S356:      | 2 | 4,3268 | 0,448 | -0,545 |
| 6 | Q5J8M3 TMM85_HUMAN  | R.GS#GQGDSLVPVGYLDK.Q            | S36:       | 2 | 2,383  | 0,406 | -0,211 |
| 6 | Q9BQL6 FERM1_HUMAN  | K.ADS#LLEDITDIPK.L               | S361:      | 2 | 4,1153 | 0,523 | -0,323 |
| 6 | Q5M775 SPEC1_HUMAN  | K.CSTAGSS#PNVSELSLASLTK.I        | S361:      | 3 | 3,8164 | 0,496 | -0,556 |
| 6 | Q9Y2X7 GIT1_HUMAN   | K.SLS#SPTDNLELSLR.S              | S361:      | 2 | 2,6573 | 0,176 | -0,378 |
| 6 | O76021 RL1D1_HUMAN  | K.ATNES#EDEIPQLVPIGK.K           | S361:      | 2 | 2,6268 | 0,371 | -0,254 |
| 6 | Q9H5J0 ZBTB3_HUMAN  | K.VEAIVIS#DEETDVSEDPQGP.A        | S362:      | 3 | 6,511  | 0,472 | -0,14  |
| 6 | Q9UPN3 MACF1_HUMAN  | R.EVEEELATSGGQS#PTGEQIPQFQQR.Q   | S3634:     | 3 | 5,0144 | 0,401 | -0,453 |
| 6 | P49768 PSN1_HUMAN   | R.AAVQELS#SSILAGEDPEER.G         | S365:      | 3 | 3,1611 | 0,237 | 0      |
| 6 | Q6P3S6 FBX42_HUMAN  | R.APLS#PSLNSRPS#PISATPPALVPETR.E | S365:S373: | 3 | 4,1633 | 1     | -0,65  |
| 6 | P49768 PSN1_HUMAN   | R.AAVQELSSS#ILAGEDPEER.G         | S367:      | 2 | 3,2426 | 0,429 | -0,469 |
| 6 | Q99575 POP1_HUMAN   | K.SAVCIADPLTPS#QEK.S             | S367:      | 2 | 3,2389 | 0,32  | 0,749  |
| 6 | Q14CV6 Q14CV6_HUMAN | R.GAPM*DPNES#PAAPEAALPK.A        | S37:       | 2 | 3,5899 | 0,417 | 1,183  |
| 6 | Q8WWL2 SPIR2_HUMAN  | R.GFGS#LPCILNACSGDAK.S           | S371:      | 2 | 3,669  | 0,445 | -0,529 |
| 6 | Q5VT52 K0460_HUMAN  | R.DVEDM*ELS#DVEDDGSK.I           | S374:      | 2 | 4,5625 | 0,465 | -0,39  |
| 6 | Q5VT52 K0460_HUMAN  | R.DVEDM*ELS#DVEDDGSK.I           | S374:      | 3 | 3,9614 | 0,336 | -0,195 |
| 6 | Q9NXX6 NSE4A_HUMAN  | K.TFEISEPVITPS#QR.Q              | S377:      | 2 | 3,2362 | 0,508 | -0,072 |
| 6 | O95817 BAG3_HUMAN   | K.VPPAPVPCPPPS#PGPSAVPSSPK.S     | S377:      | 3 | 2,832  | 0,171 | 0,08   |
| 6 | P12270 TPR_HUMAN    | K.GAILSEEELAAM*S#PTAAAVAK.I      | S379:      | 2 | 4,9696 | 0,557 | -0,23  |
| 6 | P16949 STMN1_HUMAN  | K.ESVPEFPLS#PPK.K                | S38:       | 2 | 2,5919 | 0,474 | -0,173 |
| 6 | Q12888 TP53B_HUMAN  | R.STPFIVPSS#PTEQEGR.Q            | S380:      | 2 | 2,2806 | 0,395 | -0,337 |



|   |                     |                                |                 |   |        |       |        |
|---|---------------------|--------------------------------|-----------------|---|--------|-------|--------|
| 6 | Q6NYC1 JMJD6_HUMAN  | R.TCS#M*VGNQDTSQDDCVSK.E       | S381:           | 3 | 2,8241 | 0,262 | 0      |
| 6 | Q4KMP7 TB10B_HUMAN  | R.QQPPLGPSS#SLLSLPGLK.S        | S382:           | 3 | 2,909  | 0,283 | -0,289 |
| 6 | P50395 GDIB_HUMAN   | K.FVS#ISDLLVPK.D               | S382:           | 2 | 2,8674 | 0,426 | -0,47  |
| 6 | Q9UKS6 PACN3_HUMAN  | R.ALYDYAGQEADELS#FR.A          | S383:           | 2 | 5,2133 | 0,596 | -0,443 |
| 6 | Q9UKS6 PACN3_HUMAN  | R.ALYDYAGQEADELS#FR.A          | S383:           | 3 | 4,0598 | 0,526 | -0,095 |
| 6 | Q4KMP7 TB10B_HUMAN  | R.QQPPLGPSS#SLLSLPGLK.S        | S383:           | 2 | 2,746  | 0,514 | -0,385 |
| 6 | Q8NC44 F134A_HUMAN  | R.QALDS#EEEEEDVAAK.E           | S385:           | 2 | 3,9877 | 0,528 | -0,28  |
| 6 | Q4KMP7 TB10B_HUMAN  | R.QQPPLGPSS#SLLSLPGLK.S        | S386:           | 2 | 3,7162 | 0,493 | -0,45  |
| 6 | Q92622 K0226_HUMAN  | R.S#SFSEGQTLVTSGAK.K           | S387:           | 2 | 4,4642 | 0,52  | -0,654 |
| 6 | Q7Z2W4 ZCCHV_HUMAN  | R.SS#LGSLQTPEAVTTR.K           | S387:           | 2 | 3,4375 | 0,305 | -0,15  |
| 6 | Q86SQ0 PHLB2_HUMAN  | R.NFSCGS#VEFDEADLES.R.Q        | S387:           | 2 | 3,0753 | 0,487 | -0,679 |
| 6 | Q9UK32 KS6A6_HUMAN  | K.GFS#FVATSIAEYK.I             | S389:           | 2 | 3,653  | 0,444 | -0,449 |
| 6 | Q8IYB3 SRRM1_HUMAN  | R.RLS#PS#AS#PPR.R              | S389:S391:S393: | 2 | 2,9653 | 0,35  | -0,093 |
| 6 | Q8TDD1 DDX54_HUMAN  | R.GS#DSEDFEIQEEDDAR.A          | S39:            | 2 | 3,4754 | 0,524 | -0,357 |
| 6 | Q9Y2D5 AKAP2_HUMAN  | K.S#PGALETPSAAGSQGNTASQGK.E    | S393:           | 3 | 4,9978 | 0,547 | -0,087 |
| 6 | Q9BXF6 RFIP5_HUMAN  | R.SNS#SSEAVLGQEELSAQAK.V       | S395:           | 2 | 6,1668 | 0,569 | -0,424 |
| 6 | Q9BXF6 RFIP5_HUMAN  | R.SNS#SSEAVLGQEELSAQAK.V       | S395:           | 3 | 5,3688 | 0,366 | 0,091  |
| 6 | Q01167 FOXK2_HUMAN  | R.EGS#PAPLEPEPGAAQPK.L         | S398:           | 2 | 3,5358 | 0,524 | -0,278 |
| 6 | Q96HE9 PRR11_HUMAN  | K.LITPPPPPS#PER.V              | S40:            | 2 | 2,0717 | 0,2   | 0      |
| 6 | Q14527 HLTF_HUMAN   | K.TAVQYIESSDS#EEIETSELPQK.M    | S400:           | 3 | 3,845  | 0,421 | -0,357 |
| 6 | Q8N5Y2 MS3L1_HUMAN  | R.SSS#PIPLTPS#KEGSVAVFAGFEGR.R | S400:S407:      | 3 | 3,304  | 1     | -0,147 |
| 6 | A6NKF1 SAC31_HUMAN  | R.TLEEVVM*AEEDDEGTDRPGS#PA.-   | S401:           | 3 | 2,6108 | 0,153 | -0,149 |
| 6 | O14686 MLL2_HUMAN   | R.VS#PAAAQLADTLFSK.G           | S4084:          | 2 | 3,6635 | 0,519 | -0,153 |
| 6 | Q9NTJ3 SMC4_HUMAN   | R.TES#PATAAETASEELDNR.S        | S41:            | 3 | 5,1833 | 0,55  | 0,093  |
| 6 | Q09666 AHNK_HUMAN   | R.DDGVFVQEVTVQNS#PAAR.T        | S41:            | 2 | 5,0467 | 0,502 | -0,446 |
| 6 | Q09666 AHNK_HUMAN   | R.DDGVFVQEVTVQNS#PAAR.T        | S41:            | 3 | 4,7575 | 0,511 | 0      |
| 6 | Q9NTJ3 SMC4_HUMAN   | R.TES#PATAAETASEELDNR.S        | S41:            | 2 | 4,6716 | 0,633 | -0,495 |
| 6 | O14662 STX16_HUMAN  | R.S#IAAELDELADDR.M             | S41:            | 2 | 4,527  | 0,619 | -0,326 |
| 6 | Q5JQ19 Q5JQ19_HUMAN | R.LVTEPVEDEQPSTLS#PK.K         | S414:           | 2 | 4,0211 | 0,344 | -0,313 |
| 6 | O60524 SDCG1_HUMAN  | R.NPYLLS#EEEDDDVDGDVNVEK.N     | S417:           | 3 | 5,7756 | 0,46  | 0,296  |
| 6 | Q14247 SRC8_HUMAN   | R.LPSS#PVYEDAASF.K.A           | S418:           | 2 | 3,4464 | 0,503 | 0      |
| 6 | Q14247 SRC8_HUMAN   | R.LPSS#PVYEDAASF.K.A           | S418:           | 3 | 2,7627 | 0,218 | -0,115 |
| 6 | Q14188 TFDP2_HUMAN  | K.GNISFVAFVPSNTNS#PTK.I        | S42:            | 2 | 3,4639 | 0,348 | -0,436 |

|   |                     |                               |        |   |        |       |        |
|---|---------------------|-------------------------------|--------|---|--------|-------|--------|
| 6 | Q9B XK5 B2L13_HUMAN | R.EES#LVEELSPASEK.K           | S420:  | 2 | 2,9065 | 0,405 | -0,375 |
| 6 | Q15911 ZFH X3_HUMAN | K.TPITSVPLGLAS#SPTK.S         | S425:  | 2 | 2,8299 | 0,258 | -0,28  |
| 6 | Q53EZ4 CEP55_HUMAN  | K.S#PTAALNESLVECPK.C          | S428:  | 2 | 3,6155 | 0,459 | 0,072  |
| 6 | Q9C0C2 TB182_HUMAN  | R.FS#EGVLQSPSQDQEK.L          | S429:  | 2 | 3,5493 | 0,383 | -0,139 |
| 6 | P30622 CLIP1_HUMAN  | K.AS#STPSETQEEFVDDFR.V        | S43:   | 2 | 3,5602 | 0,527 | -0,231 |
| 6 | Q86WR7 CJ047_HUMAN  | R.S#FTLDDESLK.Y               | S43:   | 2 | 2,1799 | 0,285 | 0      |
| 6 | O43242 PSMD3_HUMAN  | K.LQLDS#PEDAEFIVAK.A          | S430:  | 2 | 4,1035 | 0,577 | -0,417 |
| 6 | Q6VY07 PACS1_HUMAN  | K.DTTS#PM*ELAALEK.I           | S430:  | 2 | 2,3966 | 0,212 | 0      |
| 6 | P35658 NU214_HUMAN  | K.S#PGSTPTTPTSSQAPQK.L        | S430:  | 2 | 2,2823 | 0,428 | -0,418 |
| 6 | Q53ET0 CRTC2_HUMAN  | R.VPLS#PLSLLAGPADAR.R         | S433:  | 2 | 3,8315 | 0,489 | -0,442 |
| 6 | Q53ET0 CRTC2_HUMAN  | R.VPLS#PLSLLAGPADAR.R         | S433:  | 3 | 3,1394 | 0,182 | -0,221 |
| 6 | Q15223 PVRL1_HUMAN  | K.AGPLGGS#SYEEEEEEGGGGGER.K   | S434:  | 3 | 3,6198 | 0,279 | -0,22  |
| 6 | Q15149 PLEC1_HUMAN  | R.SSS#VGSSSYPIPAVSR.T         | S4386: | 2 | 3,5683 | 0,433 | -0,465 |
| 6 | Q9BZ29 DOCK9_HUMAN  | R.QM*LATTSPALM*NGSGQS#PSVLK.G | S443:  | 3 | 3,572  | 0,378 | -0,471 |
| 6 | O14974 MYPT1_HUMAN  | K.TGS#YGALAEITASK.E           | S445:  | 2 | 3,856  | 0,526 | -0,084 |
| 6 | Q14247 SRC8_HUMAN   | R.GPVSGTEPEPVYS#M*EAADYR.E    | S447:  | 3 | 3,4824 | 0,355 | 0      |
| 6 | Q96PU5 NED4L_HUMAN  | R.SLS#SPTVTLAPLEGAK.D         | S448:  | 2 | 4,0151 | 0,57  | -0,211 |
| 6 | Q8N655 CJ012_HUMAN  | K.ESSTFTDENPS#ETESEEAAGGIGK.L | S449:  | 3 | 4,6767 | 0,534 | -0,358 |
| 6 | Q9H8N7 ZN395_HUMAN  | R.SLS#FSEPQQPAPAM*K.S         | S449:  | 2 | 4,0771 | 0,579 | 0,214  |
| 6 | Q96PU5 NED4L_HUMAN  | R.SLSS#PTVTLAPLEGAK.D         | S449:  | 2 | 2,9316 | 0,445 | -0,211 |
| 6 | Q8N2F6 ARM10_HUMAN  | K.S#AGALEEGTSEGQLCGR.S        | S45:   | 2 | 4,9031 | 0,616 | -0,339 |
| 6 | O60832 DKC1_HUMAN   | R.ES#ESESDETPPAAPQLIK.K       | S451:  | 2 | 2,7051 | 0,402 | -0,365 |
| 6 | Q9BVJ6 UT14A_HUMAN  | K.DSGS#QEVLSLR.V              | S453:  | 2 | 3,7558 | 0,35  | 0,174  |
| 6 | Q14157 UBP2L_HUMAN  | K.SPAVATSTAAPPPPS#SPLPSK.S    | S453:  | 3 | 2,7344 | 0,249 | 0      |
| 6 | Q5BKX6 S45A4_HUMAN  | R.S#M*SDLYDM*QK.R             | S454:  | 2 | 2,6991 | 0,376 | -0,367 |
| 6 | Q14157 UBP2L_HUMAN  | K.SPAVATSTAAPPPSS#PLPSK.S     | S454:  | 2 | 2,6575 | 0,492 | -0,718 |
| 6 | O14686 MLL2_HUMAN   | K.IPNSYEVLPES#PAR.G           | S4547: | 2 | 3,388  | 0,495 | -0,543 |
| 6 | P19338 NUCL_HUMAN   | R.S#ISLYYTGEK.G               | S458:  | 2 | 2,5359 | 0,33  | -0,098 |
| 6 | P22314 UBA1_HUMAN   | K.NGS#EADIDGLYSR.Q            | S46:   | 2 | 4,4404 | 0,542 | -0,076 |
| 6 | Q96TC7 FA82C_HUMAN  | R.SQS#LPNSLDYTQTS DPGR.H      | S46:   | 3 | 3,9157 | 0,421 | 0,268  |
| 6 | Q96TC7 FA82C_HUMAN  | R.SQS#LPNSLDYTQTS DPGR.H      | S46:   | 2 | 3,8617 | 0,521 | -0,477 |
| 6 | P16949 STMN1_HUMAN  | K.DLS#LEEIQK.K                | S46:   | 2 | 3,0081 | 0,245 | -0,211 |
| 6 | Q6PJG2 CN043_HUMAN  | R.AS#QEANLLTLAQK.A            | S461:  | 2 | 3,0907 | 0,304 | -0,166 |

|   |                    |                                   |            |   |        |       |        |
|---|--------------------|-----------------------------------|------------|---|--------|-------|--------|
| 6 | Q6P597 KLC3_HUMAN  | R.AM*S#LNTLNVDAPR.A               | S466:      | 2 | 4,2186 | 0,545 | -0,977 |
| 6 | Q96D46 NMD3_HUMAN  | R.DSAIPVES#DTDDEGAPR.I            | S468:      | 2 | 3,275  | 0,422 | -0,329 |
| 6 | Q99640 PMYT1_HUMAN | R.DALDLS#DINSEPPR.G               | S469:      | 2 | 3,3063 | 0,43  | 0,075  |
| 6 | O60885 BRD4_HUMAN  | K.M*PDEPEEPVAVVSS#PAVPPPTK.V      | S470:      | 3 | 3,7154 | 0,248 | -0,154 |
| 6 | Q86YR5 GPSM1_HUMAN | R.APSS#DEECFFDLLTK.F              | S470:      | 2 | 3,5    | 0,552 | -0,332 |
| 6 | Q9H3U1 UN45A_HUMAN | R.AS#FITANGVSLK.D                 | S472:      | 2 | 2,0241 | 0,23  | -0,174 |
| 6 | O76080 ZFAN5_HUMAN | R.M*S#PM*GTASGSNSPTSDSASVQR.A     | S48:       | 3 | 4,1854 | 0,399 | -0,323 |
| 6 | Q6P1R3 CK061_HUMAN | R.GAS#PLGPGSAAGSGAAASGGLGLGLGGR.S | S48:       | 3 | 4,1821 | 0,383 | -0,318 |
| 6 | O76080 ZFAN5_HUMAN | R.MS#PM*GTASGSNSPTSDSASVQR.A      | S48:       | 3 | 3,186  | 0,248 | -0,244 |
| 6 | Q9UHV7 MED13_HUMAN | R.VS#VSDDVGM*DADSASQR.L           | S481:      | 2 | 3,9763 | 0,506 | -0,266 |
| 6 | Q8NFC6 FA44A_HUMAN | K.YYS#DSDELVEQR.R                 | S482:      | 2 | 4,9564 | 0,465 | -0,339 |
| 6 | Q8NAF0 ZN579_HUMAN | R.AAALQALQAQAPTS#PPPPPPPLK.A      | S483:      | 3 | 4,1738 | 0,207 | -0,156 |
| 6 | Q8NDF8 PAPD5_HUMAN | R.VGS#QDVSLESSQAVGK.M             | S484:      | 2 | 4,2819 | 0,536 | -0,219 |
| 6 | P34947 GRK5_HUMAN  | K.DVLDIEQFS#TVK.G                 | S484:      | 2 | 4,053  | 0,475 | -0,083 |
| 6 | P11169 GTR3_HUMAN  | K.DGVM*EM*NS#IEPAKETTTNV.-        | S485:      | 3 | 3,1744 | 0,307 | 0,084  |
| 6 | Q9P2B4 CT2NL_HUMAN | R.DLS#PTLIDNSAAK.Q                | S488:      | 2 | 4,1055 | 0,505 | -0,171 |
| 6 | P50402 EMD_HUMAN   | R.LS#PPSSAASSYSFDLNSTR.G          | S49:       | 3 | 3,4334 | 0,307 | -0,49  |
| 6 | Q9NWW8 CS062_HUMAN | R.S#EGEGEAASADDGSLNTSGAGPK.S      | S49:       | 2 | 2,0036 | 0,357 | -0,223 |
| 6 | Q96Q42 ALS2_HUMAN  | R.LSLPGLLSQVS#PR.L                | S492:      | 2 | 2,2363 | 0,264 | -0,59  |
| 6 | Q86UE4 LYRIC_HUMAN | K.TIS#TSDPAEVLVK.N                | S494:      | 2 | 2,7401 | 0,331 | 0,169  |
| 6 | Q8NEN9 PDZD8_HUMAN | R.ELDS#EFEDLASDVR.A               | S496:      | 2 | 4,7199 | 0,514 | -0,573 |
| 6 | Q8NEN9 PDZD8_HUMAN | R.ELDS#EFEDLASDVR.A               | S496:      | 3 | 2,9728 | 0,118 | -0,322 |
| 6 | P47736 RPGP1_HUMAN | R.S#SAIGIENIQEVQEK.R              | S498:      | 2 | 3,6046 | 0,43  | -0,566 |
| 6 | O94833 BPAEA_HUMAN | R.STS#VSSQAAQAASPQVPATTPK.I       | S4986:     | 3 | 3,0963 | 0,31  | -0,239 |
| 6 | P61081 UBC12_HUMAN | K.TCDIS#FSDPDDLNFK.L              | S50:       | 2 | 4,6649 | 0,569 | -0,248 |
| 6 | Q8WUM0 NU133_HUMAN | K.GLPLGSAVSSPVLF#PVGR.R           | S50:       | 2 | 3,6483 | 0,335 | -0,572 |
| 6 | Q12888 TP53B_HUMAN | K.NS#PEDLGLSLTGDSCK.L             | S500:      | 2 | 4,1389 | 0,47  | -0,482 |
| 6 | Q9BZE9 ASPC1_HUMAN | R.AAGS#PSPLPAPDPAPK.S             | S500:      | 2 | 3,6814 | 0,327 | -0,471 |
| 6 | Q13263 TIF1B_HUMAN | R.LDLTLTADS#QPPVFK.V              | S501:      | 2 | 4,2757 | 0,536 | -0,21  |
| 6 | Q86SQ0 PHL2_HUMAN  | K.LQLSDEESVFEEALM*S#PDTR.Y        | S501:      | 3 | 3,7958 | 0,446 | -0,229 |
| 6 | Q9NV70 EXOC1_HUMAN | R.SQSSSLDM*GNM*SAS#DLDVADR.T      | S501:      | 3 | 3,4967 | 0,425 | -0,076 |
| 6 | Q9NU22 MDN1_HUMAN  | R.EDS#DTEEQVPEALER.K              | S5015:     | 2 | 3,4527 | 0,35  | -0,134 |
| 6 | Q13470 TNK1_HUMAN  | R.S#LESVLSLGRPTGGSS#PPEIR.Q       | S502:S519: | 3 | 4,0546 | 0,425 | -0,373 |

|   |                     |                                |        |   |        |       |        |
|---|---------------------|--------------------------------|--------|---|--------|-------|--------|
| 6 | Q6ZML7 Q6ZML7_HUMAN | R.AEELSPAALS#PSLEPIR.C         | S504:  | 2 | 4,2464 | 0,496 | -0,394 |
| 6 | A0MZ66 SHOT1_HUMAN  | K.S#M*PVLGSVSVTK.T             | S506:  | 2 | 2,3863 | 0,445 | -0,088 |
| 6 | P27816 MAP4_HUMAN   | K.DM*S#PLSETEM*ALGK.D          | S507:  | 2 | 4,3877 | 0,495 | -0,602 |
| 6 | Q96G74 OTUD5_HUMAN  | R.ATS#PLVSLYPALECR.A           | S508:  | 2 | 3,049  | 0,357 | 0      |
| 6 | Q99549 MPP8_HUMAN   | R.GAEAFGDS#EEDGEDVFEVEK.I      | S51:   | 3 | 5,4084 | 0,462 | -0,327 |
| 6 | Q9UQR0 SCML2_HUMAN  | R.SPQQTVPYVVPLS#PK.L           | S511:  | 2 | 3,6153 | 0,441 | -0,142 |
| 6 | Q9UQR0 SCML2_HUMAN  | R.SPQQTVPYVVPLS#PK.L           | S511:  | 3 | 3,5256 | 0,356 | -0,213 |
| 6 | Q8ND30 LIPB2_HUMAN  | R.TQS#GNFYTDTLGM*AEFR.R        | S512:  | 2 | 3,8164 | 0,485 | -0,6   |
| 6 | Q14676 MDC1_HUMAN   | R.S#QASTTVDINTQVEK.E           | S513:  | 2 | 4,6642 | 0,544 | -0,502 |
| 6 | Q9NUQ3 TXLNG_HUMAN  | R.SAVQKPPS#TGSAPAIESVD.-       | S517:  | 2 | 2,3354 | 0,426 | -0,191 |
| 6 | Q99550 MPP9_HUMAN   | K.DSS#PGSSSTSLLIK.K            | S518:  | 2 | 3,3525 | 0,444 | -0,251 |
| 6 | O00567 NOL5A_HUMAN  | K.EELM*S#SDLEETAGSTSIPK.R      | S519:  | 3 | 3,6703 | 0,424 | 0,086  |
| 6 | Q9H1B7 EAP1_HUMAN   | R.APS#APPGTGALPPAAPSGR.G       | S519:  | 2 | 3,3821 | 0,482 | 0,139  |
| 6 | O94776 MTA2_HUMAN   | R.DIS#SSLNSLADSNAR.E           | S52:   | 2 | 2,8673 | 0,456 | -0,15  |
| 6 | P12956 KU70_HUMAN   | R.LGS#LVDEFK.E                 | S520:  | 2 | 3,4922 | 0,476 | -0,112 |
| 6 | O00567 NOL5A_HUMAN  | K.EELM*SS#DLEETAGSTSIPK.R      | S520:  | 2 | 3,3928 | 0,489 | -0,46  |
| 6 | Q9Y4W2 LAS1L_HUMAN  | R.ICSIYQSGENSLVQEGSEAS#PIGK.S  | S523:  | 3 | 4,34   | 0,449 | -0,535 |
| 6 | Q5W0B1 RN219_HUMAN  | R.TS#SEASM*DAAYLDK.I           | S525:  | 2 | 2,7682 | 0,247 | -0,231 |
| 6 | O95365 ZBT7A_HUMAN  | R.GGAPDPSPGATATPGAPAQSS#PDAR.R | S526:  | 3 | 4,3593 | 0,398 | 0      |
| 6 | Q96CV9 OPTN_HUMAN   | R.TS#DSDQQAYLVQR.G             | S526:  | 2 | 2,0542 | 0,282 | -0,23  |
| 6 | Q5VUA4 ZN318_HUMAN  | R.S#FPDIEDEEK.F                | S527:  | 2 | 2,3365 | 0,166 | -0,095 |
| 6 | Q8NFH5 NUP53_HUMAN  | R.S#ISGPSVGVM*EM*R.S           | S53:   | 2 | 2,9032 | 0,431 | -0,334 |
| 6 | Q2TB40 Q2TB40_HUMAN | R.TSS#TDEVLSLEEK.D             | S530:  | 2 | 4,0973 | 0,481 | -0,161 |
| 6 | O15320 CTGE5_HUMAN  | R.AFLS#PPTLLEGPLR.L            | S536:  | 2 | 2,7416 | 0,391 | -0,153 |
| 6 | Q68E01 INT3_HUMAN   | K.DESCYDNAEAAFS#DDEEDLNSK.G    | S537:  | 3 | 4,0908 | 0,387 | -0,281 |
| 6 | Q09666 AHNK_HUMAN   | R.IS#APNVDFNLEGPK.V            | S5448: | 3 | 4,5621 | 0,435 | 0      |
| 6 | Q09666 AHNK_HUMAN   | R.IS#APNVDFNLEGPK.V            | S5448: | 2 | 2,3023 | 0,532 | -0,309 |
| 6 | Q9Y3L3 3BP1_HUMAN   | R.S#PPETAAPVEDM*AR.R           | S550:  | 2 | 3,2953 | 0,528 | -0,545 |
| 6 | Q96GX5 MASTL_HUMAN  | R.DYLSSS#FLCSDDDR.A            | S552:  | 2 | 3,5427 | 0,521 | -0,416 |
| 6 | P35222 CTNB1_HUMAN  | R.TS#M*GGTQQQFVEGV.R.M         | S552:  | 2 | 2,641  | 0,336 | 0,567  |
| 6 | Q09666 AHNK_HUMAN   | K.GPAFNM*AS#PESDFGINLK.G       | S5552: | 2 | 5,1041 | 0,388 | -0,429 |
| 6 | Q8IWI9 MGAP_HUMAN   | K.TDQGILVTNQDACALASSVSS#PVK.S  | S56:   | 3 | 5,2467 | 0,524 | -0,288 |
| 6 | P28066 PSA5_HUMAN   | R.ITS#PLM*EPSSIEK.I            | S56:   | 2 | 2,4633 | 0,317 | -0,16  |

|   |                     |                                   |            |   |        |       |        |
|---|---------------------|-----------------------------------|------------|---|--------|-------|--------|
| 6 | Q15059 BRD3_HUMAN   | K.QASASYDS#EEEEGLPM*SYDEK.R       | S563:      | 3 | 5,8346 | 0,524 | -0,283 |
| 6 | Q86SQ0 PHLB2_HUMAN  | K.ASSES#SYLSILPK.T                | S565:      | 2 | 3,82   | 0,444 | -0,25  |
| 6 | O60343 TBCD4_HUMAN  | R.S#LTSSLENIFSR.G                 | S566:      | 2 | 2,7486 | 0,36  | -0,425 |
| 6 | Q9Y4L1 HYOU1_HUMAN  | R.VESVFETLVEDS#AEESTLTK.L         | S567:      | 3 | 4,2113 | 0,314 | -0,302 |
| 6 | Q9Y2K2 QSK_HUMAN    | R.FS#DGAASIQAFA.A                 | S568:      | 2 | 2,8084 | 0,461 | -0,461 |
| 6 | Q9BVJ6 UT14A_HUMAN  | K.EQM*IDLQNLTTQS#PSVK.S           | S569:      | 2 | 4,1143 | 0,521 | -0,57  |
| 6 | Q5FWF4 ZRAB3_HUMAN  | R.DIIDYES#DVEPETK.R               | S569:      | 2 | 3,5704 | 0,442 | -0,563 |
| 6 | Q09666 AHNK_HUMAN   | R.IS#M*SEVDLNVAAPK.V              | S570:      | 2 | 3,5744 | 0,455 | -0,078 |
| 6 | O43663 PRC1_HUMAN   | R.NFS#INSVASTYSEFAK.D             | S571:      | 2 | 4,945  | 0,518 | -0,463 |
| 6 | P17812 PYRG1_HUMAN  | R.S#GSS#SPDSEITELKFPSINH.D.-      | S571:S574: | 3 | 2,867  | 1     | -0,228 |
| 6 | Q09666 AHNK_HUMAN   | K.ASLGS#LEGEAEAEASSPK.G           | S5752:     | 2 | 4,4989 | 0,398 | -0,269 |
| 6 | Q6ZRP7 QSOX2_HUMAN  | R.DNLLDTYSADQGDS#SEGGTLAR.G       | S578:      | 3 | 4,6938 | 0,47  | -0,077 |
| 6 | Q8IY81 RRMJ3_HUMAN  | K.TEIM*S#PLYQDEAPK.G              | S584:      | 2 | 3,2929 | 0,342 | 0,284  |
| 6 | P36915 GNL1_HUMAN   | R.DADEEGEGDEETPTS#APGSSLAGR.N     | S587:      | 3 | 3,2294 | 0,222 | -0,372 |
| 6 | Q9H0B6 KLC2_HUMAN   | K.S#VEEPTQPGGTGLSDSR.T            | S589:      | 2 | 3,5297 | 0,537 | -0,34  |
| 6 | O15085 ARHGB_HUMAN  | R.LSTGS#FPEDLLESDSSR.S            | S592:      | 2 | 2,92   | 0,336 | -0,381 |
| 6 | Q8WWM7 ATX2L_HUMAN  | K.EVDGLLTSEPM*GS#PVSSK.T          | S594:      | 3 | 3,0082 | 0,189 | 0,19   |
| 6 | O75122 CLAP2_HUMAN  | R.VLNTGS#DVEEAVADALK.K            | S596:      | 2 | 6,0249 | 0,565 | -0,741 |
| 6 | O75122 CLAP2_HUMAN  | R.VLNTGS#DVEEAVADALK.K            | S596:      | 3 | 4,7845 | 0,368 | -0,404 |
| 6 | Q71RC2 LARP4_HUMAN  | R.ASTAS#PCNNNINAATAVALQEPR.K      | S597:      | 3 | 3,7588 | 0,217 | 0,299  |
| 6 | Q02952 AKA12_HUMAN  | K.GLAEVQQDGEAEEGATS#DGEK.K        | S598:      | 3 | 3,2355 | 0,223 | -0,166 |
| 6 | Q9BWT3 PAPOG_HUMAN  | K.TVS#PPTVCTIPTVVGR.N             | S599:      | 2 | 2,321  | 0,351 | -0,277 |
| 6 | P05783 K1C18_HUMAN  | R.GGM*GS#GGLATGIAGGLAGM*GGIQNEK.E | S60:       | 3 | 6,1736 | 0,53  | -0,308 |
| 6 | O00505 IMA3_HUMAN   | R.NVPQEESLEDS#DVDADFK.A           | S60:       | 2 | 2,5832 | 0,5   | -0,461 |
| 6 | Q86W92 LIPB1_HUMAN  | R.SQS#TTFNPDDM*SEPEFK.R           | S601:      | 2 | 2,4614 | 0,385 | -0,475 |
| 6 | Q9Y4F5 K0284_HUMAN  | K.M*IDQVFGVLEPELS#R.A             | S601:      | 2 | 2,2376 | 0,392 | -0,255 |
| 6 | O14497 ARI1A_HUMAN  | R.FPPPQELS#QDSFGSQASSAPSM*TSSK.G  | S604:      | 3 | 2,7792 | 0,157 | -0,458 |
| 6 | Q96S38 KS6C1_HUMAN  | R.IDS#KDS#ASELLGLDFGEK.L          | S605:S608: | 3 | 4,3575 | 0,168 | -0,263 |
| 6 | Q96S38 KS6C1_HUMAN  | R.IDS#KDS#ASELLGLDFGEK.L          | S605:S608: | 2 | 2,3577 | 0,43  | -0,351 |
| 6 | Q7Z417 NUFP2_HUMAN  | K.ADTSS#QGALVFLSK.D               | S608:      | 2 | 3,0541 | 0,37  | -0,243 |
| 6 | O14907 TX1B3_HUMAN  | R.VS#EGGPAEIAQLQIGDK.I            | S61:       | 2 | 4,56   | 0,551 | -0,071 |
| 6 | Q9UKN8 TF3C4_HUMAN  | K.ILLVDS#PGM*GNADDEQQEETSSK.Q     | S611:      | 3 | 6,6738 | 0,616 | -0,07  |
| 6 | Q70L73 Q70L73_HUMAN | R.S#SFSSDPDESEGIPLK.R             | S62:       | 2 | 3,3399 | 0,515 | -0,55  |

|   |                     |                                 |          |   |        |       |        |
|---|---------------------|---------------------------------|----------|---|--------|-------|--------|
| 6 | Q5T4S7 UBR4_HUMAN   | K.AAPPPPPPPPLESS#PR.V           | S620:    | 3 | 3,3144 | 0,327 | -0,103 |
| 6 | P52948 NUP98_HUMAN  | R.DSENLAS#PSEYPENGER.F          | S623:    | 2 | 4,323  | 0,474 | -0,124 |
| 6 | P52756 RBM5_HUMAN   | R.GLVAAYSGDS#DNEEELVER.L        | S624:    | 2 | 4,9048 | 0,536 | -0,572 |
| 6 | A6NC44 A6NC44_HUMAN | R.NFS#INSVASTYSEFAR.E           | S625:    | 2 | 3,4772 | 0,544 | -0,261 |
| 6 | Q9H165 BC11A_HUMAN  | K.LLLGS#PSSLSPFSK.R             | S625:    | 2 | 3,2968 | 0,38  | -0,645 |
| 6 | Q96JM3 ZN828_HUMAN  | K.DNQESS#DAELSSSEYIK.T          | S627:    | 2 | 2,92   | 0,374 | -0,431 |
| 6 | Q70L73 Q70L73_HUMAN | R.SS#FSSDPDESEGIPLK.R           | S63:     | 2 | 2,8632 | 0,388 | -0,481 |
| 6 | Q96AE4 FUBP1_HUMAN  | R.QQAAYYAQTS#PQGMPQHPPAPQGQ.-   | S630:    | 3 | 3,7343 | 0,455 | -0,069 |
| 6 | Q99661 KIF2C_HUMAN  | K.EEEELSSQM*#SFNEAM*TQIR.E      | S632:    | 3 | 2,6184 | 0,133 | -0,298 |
| 6 | Q92878 RAD50_HUMAN  | K.LFDVCGS#QDFESDLDR.L           | S635:    | 2 | 5,6491 | 0,503 | -0,492 |
| 6 | P35221 CTNA1_HUMAN  | R.TPEELDDS#DFETEDFDVR.S         | S641:    | 3 | 2,945  | 0,338 | -0,082 |
| 6 | Q02952 AKA12_HUMAN  | K.SATLS#STESTASEM*QEEM*K.G      | S644:    | 3 | 4,3713 | 0,412 | 0,508  |
| 6 | Q02952 AKA12_HUMAN  | K.SATLSS#TESTASEM*QEEM*K.G      | S645:    | 3 | 3,8105 | 0,198 | 0,085  |
| 6 | Q9ULT0 TTC7A_HUMAN  | K.DGS#FGEGMTM*K.K               | S647:    | 2 | 2,6638 | 0,459 | 0      |
| 6 | P46013 KI67_HUMAN   | R.S#GASEANLIVAK.S               | S648:    | 2 | 3,0187 | 0,391 | -0,098 |
| 6 | P33778 H2B1B_HUMAN  | K.AM*GIM*NS#FVNDIFER.I          | S65:     | 2 | 3,1471 | 0,319 | -0,263 |
| 6 | Q96JM3 ZN828_HUMAN  | K.GQES#SSDQEQVDVESIDFSK.E       | S651:    | 3 | 5,078  | 0,223 | -0,399 |
| 6 | Q02952 AKA12_HUMAN  | K.SATLSSTESTAS#EM*QEEM*K.G      | S651:    | 3 | 3,1926 | 0,324 | -0,085 |
| 6 | P35658 NU214_HUMAN  | R.S#AQGSSSPVPSM*VQK.S           | S651:    | 2 | 3,0876 | 0,457 | -0,077 |
| 6 | P35221 CTNA1_HUMAN  | R.TS#VQTEDDQLIAGQSAR.A          | S655:    | 2 | 4,396  | 0,396 | -0,193 |
| 6 | Q9BZ95 NSD3_HUMAN   | R.GLS#DLQVGFQK.Q                | S659:    | 2 | 3,2186 | 0,485 | -0,305 |
| 6 | P18858 DNL1_HUMAN   | R.VLGS#EGEEDEALSPAK.G           | S66:     | 2 | 4,5117 | 0,519 | -0,332 |
| 6 | P42166 LAP2A_HUMAN  | K.GPPDFS#S#DEEREPTVLGSGAAAAGR.S | S66:S67: | 3 | 6,8578 | 0,557 | -0,402 |
| 6 | Q92625 ANS1A_HUMAN  | K.SPS#FASEWDEIEK.I              | S663:    | 2 | 3,8454 | 0,474 | -0,304 |
| 6 | O15085 ARHGB_HUMAN  | R.S#LENPTPPFTPK.M               | S663:    | 2 | 2,7485 | 0,417 | 0      |
| 6 | Q15648 MED1_HUMAN   | K.DNPAQDFSTLYGSS#PLER.Q         | S664:    | 3 | 3,9625 | 0,358 | -0,352 |
| 6 | Q05655 KPCD_HUMAN   | K.NLIDSM*DQSAFAGFS#FVNP.K.F     | S664:    | 3 | 3,8185 | 0,448 | -0,4   |
| 6 | Q15648 MED1_HUMAN   | K.DNPAQDFSTLYGSS#PLER.Q         | S664:    | 2 | 2,3186 | 0,474 | -0,352 |
| 6 | O00267 SPT5H_HUMAN  | R.DVTNFTVGGFAPM*#PR.I           | S666:    | 2 | 3,8902 | 0,603 | -0,545 |
| 6 | Q9UER7 DAXX_HUMAN   | K.ICTLPS#PPSPLASLAPVADSSTR.V    | S668:    | 3 | 4,8218 | 0,456 | -0,681 |
| 6 | O94854 K0754_HUMAN  | R.DSDS#FLNIFPEK.Q               | S668:    | 2 | 2,0178 | 0,084 | -0,245 |
| 6 | Q05209 PTN12_HUMAN  | K.DVDVSEDS#PPPLPER.T            | S673:    | 2 | 3,5244 | 0,465 | 0      |
| 6 | Q6P2E9 EDC4_HUMAN   | K.LQLDGLSTM*SSGSLQAS#PR.G       | S676:    | 3 | 3,6944 | 0,284 | 0,172  |

|   |                     |                                 |            |   |        |       |        |
|---|---------------------|---------------------------------|------------|---|--------|-------|--------|
| 6 | Q8N163 K1967_HUMAN  | R.SVAS#NQSEM*EFSSLQDM*PK.E      | S678:      | 3 | 4,3687 | 0,355 | -0,082 |
| 6 | P37275 ZEB1_HUMAN   | K.NNDQPQSANANEPQDSTVNLQS#PLK.M  | S679:      | 3 | 3,2812 | 0,208 | -0,459 |
| 6 | Q969S2 NEIL2_HUMAN  | R.FDLDEEM*GPPGSS#PTPEPPQK.E     | S68:       | 3 | 3,9136 | 0,351 | 0,078  |
| 6 | Q12905 ILF2_HUMAN   | R.NQDLAPNS#AEQASILSLVTK.I       | S68:       | 3 | 3,2843 | 0,389 | -0,42  |
| 6 | Q14126 DSG2_HUMAN   | K.VVPSFLPVDQGG#LVGR.N           | S680:      | 2 | 3,6223 | 0,269 | -0,54  |
| 6 | Q9H1A4 APC1_HUMAN   | R.NFDFEGSLS#PVIAPK.K            | S688:      | 2 | 5,5253 | 0,486 | -0,359 |
| 6 | P35251 RFC1_HUMAN   | R.IIYDS#DSESEETLQVK.N           | S69:       | 2 | 5,5114 | 0,526 | -0,189 |
| 6 | Q9Y496 KIF3A_HUMAN  | R.S#AKPETVIDSLLQ.-              | S690:      | 2 | 3,4366 | 0,473 | -0,33  |
| 6 | Q9H501 ESF1_HUMAN   | K.DGTS#PEEEIEIER.Q              | S694:      | 2 | 3,6543 | 0,481 | -0,385 |
| 6 | Q92974 ARHG2_HUMAN  | R.EPALPLEPDSGGNTS#PGVTANGEAR.T  | S695:      | 3 | 3,7671 | 0,343 | 0      |
| 6 | Q8TEW0 PARD3_HUMAN  | K.SPGS#PPGPELPIETALDDR.E        | S695:      | 3 | 3,4449 | 0,329 | -0,18  |
| 6 | Q8TEW0 PARD3_HUMAN  | K.SPGS#PPGPELPIETALDDR.E        | S695:      | 2 | 3,2462 | 0,528 | -0,421 |
| 6 | P25787 PSA2_HUMAN   | R.GYS#FSLTTFSPSGK.L             | S7:        | 2 | 4,1719 | 0,549 | -0,235 |
| 6 | Q9UMX3 BOK_HUMAN    | R.S#SVFAAEIM*DAFDR.S            | S7:        | 2 | 3,6642 | 0,512 | -0,442 |
| 6 | Q9ULD5 ZN777_HUMAN  | R.SS#PLSFPSVQEETLR.Q            | S7:        | 2 | 2,0529 | 0,284 | -0,395 |
| 6 | P19634 SL9A1_HUMAN  | R.IGS#DPLAYEPK.E                | S703:      | 2 | 3,6479 | 0,486 | 0,096  |
| 6 | O60271 JIP4_HUMAN   | R.DGGS#VVGASVFK.D               | S705:      | 2 | 3,0468 | 0,536 | -0,268 |
| 6 | P25205 MCM3_HUMAN   | K.DGDSYDPYDFS#DTEEEMPQVHT#PK.T  | S711:T722: | 3 | 4,2914 | 0,454 | -0,494 |
| 6 | P25205 MCM3_HUMAN   | K.DGDSYDPYDFS#DTEEEM*PQVHT#PK.T | S711:T722: | 3 | 3,5718 | 0,37  | -0,492 |
| 6 | P26358 DNMT1_HUMAN  | K.EADDDEEVDNIPEM*PS#PK.K        | S714:      | 3 | 3,2194 | 0,169 | 0      |
| 6 | P40818 UBP8_HUMAN   | R.SYS#SPDITQAIQEEK.R            | S718:      | 2 | 3,9558 | 0,565 | -0,512 |
| 6 | Q9HAW4 CLSPN_HUMAN  | K.SLS#SDSTLLLFK.D               | S720:      | 2 | 3,3919 | 0,384 | -0,526 |
| 6 | Q9Y2D5 AKAP2_HUMAN  | R.TLS#M*IEEEIR.A                | S720:      | 2 | 3,3879 | 0,425 | -0,371 |
| 6 | Q08J23 NSUN2_HUMAN  | K.EGVILTNEASAAS#TGQPDNDVTEGQR.A | S724:      | 3 | 4,1162 | 0,395 | 0      |
| 6 | P40763 STAT3_HUMAN  | K.FICVTPTCSNTIDLPM*S#PR.T       | S727:      | 3 | 3,717  | 0,333 | -0,076 |
| 6 | Q12888 TP53B_HUMAN  | K.ECSEAM*EVETSVISIDS#PQK.L      | S727:      | 3 | 3,5919 | 0,322 | -0,157 |
| 6 | A7KAX9 A7KAX9_HUMAN | R.SSS#DALASAFNGEM*LGNR.C        | S732:      | 2 | 4,0137 | 0,584 | -0,126 |
| 6 | P28290 SSFA2_HUMAN  | R.S#QSLPTLLSPVR.V               | S737:      | 2 | 2,2899 | 0,272 | -0,247 |
| 6 | P28290 SSFA2_HUMAN  | R.SQS#LPTLLSPVR.V               | S739:      | 2 | 3,7221 | 0,371 | -0,082 |
| 6 | Q9Y6X9 MORC2_HUMAN  | R.SVAVS#DEEEVEEAER.R            | S743:      | 2 | 3,7495 | 0,482 | -0,453 |
| 6 | Q8TEW8 PAR3L_HUMAN  | K.SS#SLESLQTAVAEVR.K            | S745:      | 2 | 4,6198 | 0,492 | -0,442 |
| 6 | Q13885 TBB2A_HUMAN  | R.AILVDLEPGTM*DS#VR.S           | S75:       | 2 | 3,1691 | 0,349 | -0,855 |
| 6 | Q9UMZ2 SYNG_HUMAN   | R.QLS#LEGSGLGVEDLK.D            | S752:      | 2 | 3,9362 | 0,491 | -0,375 |

|   |                    |                                   |              |   |        |       |        |
|---|--------------------|-----------------------------------|--------------|---|--------|-------|--------|
| 6 | A0FGR8 ESYT2_HUMAN | K.EPTPSIAS#DISLPIATQELR.Q         | S758:        | 3 | 2,949  | 0,206 | -0,495 |
| 6 | Q66K74 MAP1S_HUMAN | K.AVPM*APAPAS#PGSSNDSSAR.S        | S759:        | 2 | 3,3089 | 0,236 | -0,497 |
| 6 | P34932 HSP74_HUMAN | R.AFS#DPFVEAEK.S                  | S76:         | 2 | 3,5082 | 0,508 | -0,277 |
| 6 | Q00403 TF2B_HUMAN  | R.VGDSQNPLLS#DGD LSTM*IGK.G       | S76:         | 2 | 2,3011 | 0,43  | -0,228 |
| 6 | A0FGR8 ESYT2_HUMAN | K.EPTPSIASDIS#LPIATQELR.Q         | S761:        | 3 | 4,3299 | 0,243 | -0,247 |
| 6 | Q9Y4B5 K0802_HUMAN | R.EGPVGGES#DSEEM*FEK.T            | S767:        | 2 | 3,1843 | 0,336 | -0,268 |
| 6 | Q7Z5K2 WAPL_HUMAN  | K.VEEESTGDPFGFDS#DDESLPVSSK.N     | S77:         | 3 | 3,497  | 0,379 | -0,414 |
| 6 | Q00536 PCTK1_HUMAN | K.M*GS#DGESDQASATSSDEVQSPVR.V     | S78:         | 3 | 3,4553 | 0,251 | -0,075 |
| 6 | P51608 MECP2_HUMAN | K.AETSESGSAPAVPEAS#ASPK.Q         | S78:         | 2 | 2,0696 | 0,503 | -0,546 |
| 6 | Q8IX07 FOG1_HUMAN  | R.S#PGPAADGPIDLSK.K               | S784:        | 2 | 2,3239 | 0,385 | -0,087 |
| 6 | Q6ZRV2 FA83H_HUMAN | R.S#LESCLDLR.D                    | S785:        | 2 | 3,4434 | 0,399 | -0,19  |
| 6 | P19634 SL9A1_HUMAN | K.ETSSPGTDDVFTAPSDS#PSSQR.I       | S785:        | 3 | 3,0724 | 0,112 | -0,075 |
| 6 | P55287 CAD11_HUMAN | K.LADLYGS#KDTFDDDS.-              | S788:        | 2 | 3,1143 | 0,502 | -0,42  |
| 6 | Q5T5Y3 CAMP1_HUMAN | R.S#SPCLSTASQM*SSVSM*ASGSVK.M     | S792:        | 3 | 3,004  | 0,247 | -0,318 |
| 6 | Q6GYQ0 GRIPE_HUMAN | R.SSS#TSDILEPFTVER.A              | S797:        | 2 | 3,5077 | 0,532 | -0,279 |
| 6 | Q641Q2 FA21A_HUMAN | K.TVLS#LFDEEEDK.M                 | S802:        | 2 | 2,9426 | 0,506 | -0,568 |
| 6 | Q8WWI1 LMO7_HUMAN  | R.M*YS#FDDVLEEGK.R                | S805:        | 2 | 3,842  | 0,563 | -0,878 |
| 6 | Q9Y467 SALL2_HUMAN | R.GDSEEAS#GAEEVGTVAAAATAGK.E      | S806:        | 3 | 4,0357 | 0,381 | -0,16  |
| 6 | Q96N64 PWP2A_HUMAN | R.S#PEAVGPELEAEK.L                | S81:         | 2 | 3,4348 | 0,527 | -0,078 |
| 6 | Q8TAP6 CEP76_HUMAN | K.ELNFVTDSEVQELPS#SPK.Q           | S82:         | 3 | 2,6249 | 0,177 | -0,436 |
| 6 | Q9UMN6 MLL4_HUMAN  | K.VAASM*PLS#PGGQM*EEVAGAVK.Q      | S821:        | 3 | 3,7954 | 0,261 | 0      |
| 6 | P33981 TTK_HUMAN   | K.YVLGQLVGLNS#PNSILK.A            | S821:        | 2 | 3,2697 | 0,374 | -0,129 |
| 6 | Q658Y4 F91A1_HUMAN | R.SPSS#LLIANLHLQ.-                | S829:        | 2 | 3,668  | 0,485 | -0,663 |
| 6 | Q14976 GAK_HUMAN   | R.DESEVS#DEGGSPISSEGQEP.R.A       | S829:        | 3 | 3,2761 | 0,244 | -0,081 |
| 6 | Q13561 DCTN2_HUMAN | R.TGYES#GEYEM*LGEGLGVK.E          | S83:         | 2 | 3,7989 | 0,614 | -0,363 |
| 6 | Q8IV63 VRK3_HUMAN  | R.LSLFSDGDSS#ESED TLSSSER.S       | S83:         | 3 | 3,6664 | 0,471 | -0,236 |
| 6 | Q9Y2H2 SAC2_HUMAN  | K.SDSS#LETM*ENTGVM*DK.V           | S830:        | 2 | 2,8774 | 0,379 | -0,197 |
| 6 | Q12888 TP53B_HUMAN | K.SGTAETEPVEQDSS#QPSLPLVR.A       | S831:        | 3 | 2,7534 | 0,215 | -0,38  |
| 6 | Q96K76 UBP47_HUMAN | R.LFVLLPEQS#PVSYSK.R              | S832:        | 2 | 3,0212 | 0,366 | -0,819 |
| 6 | Q76L83 ASXL2_HUMAN | K.APS#PTGPALISGAS#PVHCAADGTVELK.A | S834:S845:   | 3 | 3,7723 | 0,327 | -0,199 |
| 6 | Q9C0C2 TB182_HUMAN | R.S#QEADVQDWEFR.K                 | S836:        | 2 | 4,0806 | 0,563 | 0,23   |
| 6 | Q8NCF5 NF2IP_HUMAN | R.GAADEVEVEPPEPPGPVAS#R.D         | S84:         | 3 | 2,7299 | 0,273 | 0      |
| 6 | Q13595 TRA2A_HUMAN | R.S#RS#YT#PEYR.R                  | S84:S86:T88: | 2 | 2,7484 | 0,407 | -0,087 |



|   |                     |                                |           |   |        |       |        |
|---|---------------------|--------------------------------|-----------|---|--------|-------|--------|
| 6 | Q70EL4 UBP43_HUMAN  | R.S#TSQSIVSLLTGTAGEDEK.S       | S845:     | 2 | 3,7299 | 0,594 | -0,548 |
| 6 | Q9P1Y6 K1542_HUMAN  | R.SEVYDPSDPTGSDSSAPGSS#PER.S   | S846:     | 3 | 3,1099 | 0,347 | -0,913 |
| 6 | Q8TEW0 PARD3_HUMAN  | K.S#M*DLGIADETK.L              | S852:     | 2 | 3,2098 | 0,497 | 0      |
| 6 | Q70EL4 UBP43_HUMAN  | R.STSQSIVS#LLTGTAGEDEK.S       | S852:     | 3 | 2,7714 | 0,106 | -0,274 |
| 6 | Q9Y2K5 R3HD2_HUMAN  | K.S#ASTDLGTADVVLGR.V           | S853:     | 2 | 3,6228 | 0,301 | -0,237 |
| 6 | Q14160 LAP4_HUMAN   | R.LPLLPPE#PGPLR.Q              | S853:     | 2 | 2,6795 | 0,45  | -0,083 |
| 6 | A7MD96 A7MD96_HUMAN | R.S#PTSDVSLDSEDSGAK.S          | S854:     | 2 | 4,8357 | 0,556 | -0,341 |
| 6 | O95819 M4K4_HUMAN   | K.SSS#SFTPFIDPR.L              | S854:     | 2 | 2,6078 | 0,452 | -0,258 |
| 6 | Q9H9J4 UBP42_HUMAN  | R.DSALAEPEGLS#PAPPAR.S         | S856:     | 2 | 4,0731 | 0,369 | -0,4   |
| 6 | Q9Y6Q9 NCOA3_HUMAN  | R.AVS#LDSPVSVGSSPPVK.N         | S857:     | 2 | 4,1432 | 0,545 | -0,358 |
| 6 | O75448 MED24_HUMAN  | R.LLS#SNEDDANILSSPTDR.S        | S862:     | 2 | 3,7108 | 0,399 | -0,843 |
| 6 | O75448 MED24_HUMAN  | R.LLS#SNEDDANILSSPTDR.S        | S862:     | 3 | 3,4169 | 0,261 | -0,361 |
| 6 | Q8N122 RPTOR_HUMAN  | R.VLDTSSLTQSAPAS#PTNK.G        | S863:     | 2 | 2,9839 | 0,548 | 0,579  |
| 6 | Q2NKX8 ERC6L_HUMAN  | K.QEALQEDPLES#FNYVLSK.S        | S864:     | 3 | 4,5056 | 0,449 | -0,334 |
| 6 | Q99570 PI3R4_HUMAN  | K.SM*FGS#LDPPNM*PQALPK.G       | S865:     | 2 | 2,6829 | 0,385 | -0,126 |
| 6 | Q9UK76 HN1_HUMAN    | R.NS#SEASSGDFDLK.G             | S87:      | 2 | 4,8458 | 0,444 | 0,079  |
| 6 | Q8WVB6 CTF18_HUMAN  | R.VENSPQVDGS#PPGLELLGGIGEK.G   | S871:     | 3 | 3,6449 | 0,334 | -0,377 |
| 6 | A7KAX9 A7KAX9_HUMAN | K.LSPFFTLDL#PTEDK.S            | S871:     | 2 | 3,205  | 0,499 | -0,204 |
| 6 | Q96HP0 DOCK6_HUMAN  | K.SIS#SSNPDLAVAPGSVDDEVSR.I    | S882:     | 3 | 3,2067 | 0,096 | -0,08  |
| 6 | Q9H6U6 BCAS3_HUMAN  | R.EGS#IETLSNNSGTSIGSIPR.N      | S886:     | 2 | 3,0198 | 0,379 | -0,119 |
| 6 | P07814 SYEP_HUMAN   | K.EYIPGQPPLSQSSDSS#PTR.N       | S886:     | 2 | 2,5409 | 0,19  | -0,344 |
| 6 | Q96RS0 TGS1_HUMAN   | K.GIGLDESELD#EAELM*R.S         | S89:      | 2 | 6,3801 | 0,568 | -0,56  |
| 6 | Q9UPN4 AZI1_HUMAN   | R.SGS#PRPTEPTDFLM*LFEGS#PSGK.K | S89:S105: | 3 | 4,6886 | 0,397 | -0,49  |
| 6 | P19838 NFKB1_HUMAN  | R.QM*GYTEAIEVIQAASS#PVK.T      | S893:     | 3 | 3,7766 | 0,4   | -0,086 |
| 6 | P19838 NFKB1_HUMAN  | R.QM*GYTEAIEVIQAASS#PVK.T      | S893:     | 2 | 3,5759 | 0,617 | -0,346 |
| 6 | Q9BTE7 DCNL5_HUMAN  | K.S#PGVAAVAEDGGLK.K            | S9:       | 2 | 4,1043 | 0,485 | -0,086 |
| 6 | P43358 MAGA4_HUMAN  | R.QPNEGSSS#QEEEGPSTSPDAESLFR.E | S90:      | 3 | 5,0848 | 0,455 | -0,133 |
| 6 | Q96N67 DOCK7_HUMAN  | R.SLSNS#NPDISGTPSPDDEV.R.S     | S900:     | 3 | 4,5843 | 0,399 | 0,403  |
| 6 | Q9H6F5 CCD86_HUMAN  | R.LQQGAGLESPOGQPEPGAAS#PQR.Q   | S91:      | 3 | 4,7648 | 0,178 | -0,154 |
| 6 | Q13409 DC1I2_HUMAN  | K.S#VSTPSEAGSQDSGDGAVGSR.T     | S92:      | 3 | 3,7495 | 0,303 | -0,27  |
| 6 | Q6ZSR9 YJ005_HUMAN  | K.LGGAVPFAPPEVS#PEQAK.T        | S93:      | 2 | 4,3334 | 0,469 | -0,521 |
| 6 | Q15154 PCM1_HUMAN   | R.YM*SQM*S#VPEQAELEK.L         | S93:      | 2 | 4,2717 | 0,454 | -0,195 |
| 6 | Q9UMZ2 SYNG_HUMAN   | K.ETSGS#SENITM*TSLSK.V         | S935:     | 2 | 4,0332 | 0,475 | 0,892  |

|   |                       |                                         |              |   |        |       |        |
|---|-----------------------|-----------------------------------------|--------------|---|--------|-------|--------|
| 6 | P52701 MSH6_HUMAN     | K.AGFDS#DYDQALADIR.E                    | S935:        | 2 | 4,023  | 0,428 | -0,492 |
| 6 | Q5JUX1 Q5JUX1_HUMAN   | R.GALSSS#LRDLS DAGVCY.-                 | S938:        | 2 | 3,1704 | 0,472 | -0,527 |
| 6 | Q6S8J3 A26CA_HUMAN    | K.S#YELPDGQVITIGNER.F                   | S939:        | 2 | 4,2149 | 0,357 | -0,391 |
| 6 | P15336 ATF2_HUMAN     | K.M*PLDLS#PLATPIIR.S                    | S94:         | 2 | 3,0805 | 0,447 | -0,224 |
| 6 | Q99618 CDCA3_HUMAN    | K.QLS#EVFETEDSK.S                       | S94:         | 2 | 2,4988 | 0,468 | -0,327 |
| 6 | Q7Z3T8 ZFY16_HUMAN    | R.NEIIQSPISQVPS#VEK.L                   | S946:        | 2 | 4,5763 | 0,452 | -0,33  |
| 6 | O15258 RER1_HUMAN     | K.VDPSLM*EDS#DDGPSLPTK.Q                | S95:         | 2 | 3,6585 | 0,523 | -0,488 |
| 6 | Q8IXM2 CQ049_HUMAN    | K.VYEDSGIPLPAES#PK.K                    | S96:         | 2 | 3,3511 | 0,556 | -0,218 |
| 6 | Q9BZV1 UBXD1_HUMAN    | K.ELQAEATVSGS#PEAPGTNNVSEPR.E           | S96:         | 3 | 3,3266 | 0,207 | -0,219 |
| 6 | Q14683 SMC1A_HUMAN    | K.GTM*DDISQEEGSSQGEDSVSGS#QR.I          | S966:        | 3 | 4,056  | 0,418 | -0,354 |
| 6 | Q5VZK9 LR16A_HUMAN    | R.S#SGFISELPSEEGK.K                     | S967:        | 2 | 2,609  | 0,534 | -0,315 |
| 6 | P21333 FLNA_HUMAN     | K.SPFSVAVSPS#LDLSK.I                    | S968:        | 2 | 4,2046 | 0,395 | -0,227 |
| 6 | Q07157 ZO1_HUMAN      | R.LEEPTPAPSTSYS#PQADSLR.T               | S968:        | 3 | 3,6221 | 0,427 | 0      |
| 6 | B2R8U0 B2R8U0_HUMAN   | K.AAAGPLDM*S#LPSTPDIK.I                 | S97:         | 2 | 3,4764 | 0,383 | -0,206 |
| 6 | Q9BRJ6 CG050_HUMAN    | R.S#GAELALDYLCR.W                       | S97:         | 2 | 2,0291 | 0,31  | -0,758 |
| 6 | P43358 MAGA4_HUMAN    | R.QPNEGSSSQEEGPSTS#PDAESLFR.E           | S99:         | 3 | 4,8856 | 0,458 | -0,2   |
| 6 | ##B2RNT9 B2RNT9_HUMAN | K.EMNS#QFEMVLK.Q                        | S998:        | 2 | 2,0056 | 0,09  | -0,595 |
| 6 | Q9UQ35 SRRM2_HUMAN    | K.SST#PPGESYFGVSSLQLK.G                 | T1043:       | 3 | 5,8983 | 0,458 | 0,093  |
| 6 | Q9UQ35 SRRM2_HUMAN    | K.SST#PPGESYFGVSSLQLK.G                 | T1043:       | 2 | 2,4892 | 0,367 | -0,683 |
| 6 | Q15648 MED1_HUMAN     | R.SQT#PPGVATPIPK.I                      | T1051:       | 2 | 3,5935 | 0,379 | -0,166 |
| 6 | P30414 NKTR_HUMAN     | R.LDT#PDINIVLK.Q                        | T1155:       | 2 | 3,6747 | 0,421 | -0,277 |
| 6 | Q9Y6M7 S4A7_HUMAN     | R.M*LQDDDDT#VHLPFEGGS#LLQIPVK.A         | T1167:S1176: | 3 | 5,0232 | 0,419 | -0,386 |
| 6 | Q9NZN5 ARHGC_HUMAN    | R.T#ASQGPQTDSVIQNSENIK.A                | T1286:       | 3 | 4,8097 | 0,35  | 0      |
| 6 | Q15021 CND1_HUMAN     | R.YQPLAST#ASDNDFTPEPR.R                 | T1331:       | 3 | 4,5798 | 0,335 | -0,084 |
| 6 | Q9UIF9 BAZ2A_HUMAN    | R.AGDPGEM*PQSPT#GLGQPK.R                | T1372:       | 2 | 3,6214 | 0,225 | -0,72  |
| 6 | P49006 MRP_HUMAN      | K.EGGGDSSASSPTEEEQEQGEIGACSDEGT#AQEGK.A | T139:        | 3 | 3,2502 | 0,514 | -0,629 |
| 6 | Q9NVR5 CN104_HUMAN    | K.QSM*SLT#PPLIEVLQVTDNK.I               | T141:        | 3 | 3,5358 | 0,309 | -0,58  |
| 6 | Q9ULW0 TPX2_HUMAN     | R.CAT#PVIIDEILPSK.K                     | T147:        | 2 | 3,9702 | 0,456 | -0,447 |
| 6 | Q16594 TAF9_HUMAN     | R.LSVGSVT#SRPST#PTLGTPTPQTM*SVSTK.V     | T154:T159:   | 3 | 5,0556 | 1     | -0,367 |
| 6 | Q9Y2D5 AKAP2_HUMAN    | R.DALGDSLQVPVSPSSTT#SSR.C               | T157:        | 3 | 3,5634 | 0,462 | 0,263  |
| 6 | Q6R327 RICTR_HUMAN    | K.ST#ELLGVK.T                           | T1592:       | 2 | 2,142  | 0,1   | -0,117 |
| 6 | P42166 LAP2A_HUMAN    | R.SST#PLPTISSAENTR.Q                    | T160:        | 2 | 3,2993 | 0,52  | -0,141 |
| 6 | Q9HCD6 TANC2_HUMAN    | K.DCSYGAVTSPST#STLESR.D                 | T171:        | 2 | 3,0954 | 0,495 | -0,319 |

|   |                    |                                  |            |   |        |       |        |
|---|--------------------|----------------------------------|------------|---|--------|-------|--------|
| 6 | Q9P289 MST4_HUMAN  | K.LADFGVAGQLTDT#QIK.R            | T172:      | 2 | 5,2559 | 0,501 | -0,347 |
| 6 | Q13442 HAP28_HUMAN | R.QYT#SPEEIDAQLQAEK.Q            | T18:       | 2 | 2,2104 | 0,29  | -0,19  |
| 6 | Q9H7D0 DOCK5_HUMAN | R.NST#ELAPPLPVR.R                | T1835:     | 2 | 2,2444 | 0,211 | -0,089 |
| 6 | P24928 RPB1_HUMAN  | K.YTPTSPSYSPSSPEYTP#SPK.Y        | T1856:     | 3 | 3,3113 | 1     | 0      |
| 6 | P18858 DNL1_HUMAN  | K.AET#PTESVSEPEVATK.Q            | T195:      | 2 | 3,8166 | 0,618 | -0,348 |
| 6 | O95297 MPZL1_HUMAN | R.DYTGCS#SESLSPVK.Q              | T205:      | 2 | 2,8509 | 0,261 | 0,285  |
| 6 | P23396 RS3_HUMAN   | K.DEILPT#PISEQK.G                | T221:      | 2 | 2,1688 | 0,127 | 0,079  |
| 6 | Q9UN86 G3BP2_HUMAN | K.STT#PPPAEPVSLPQEPPK.A          | T227:      | 2 | 3,35   | 0,39  | -0,25  |
| 6 | Q9UN86 G3BP2_HUMAN | K.STT#PPPAEPVSLPQEPPK.A          | T227:      | 3 | 2,8974 | 0,341 | -0,281 |
| 6 | O43399 TPD54_HUMAN | K.GLLSDSM*T#DVPVDTGVAAR.T        | T23:       | 2 | 3,9413 | 0,365 | -0,366 |
| 6 | Q01082 SPTB2_HUMAN | R.AQT#LPTSVVTITSESSPGK.R         | T2328:     | 2 | 4,4924 | 0,555 | -0,492 |
| 6 | Q01082 SPTB2_HUMAN | R.AQT#LPTSVVTITSESSPGK.R         | T2328:     | 3 | 2,9298 | 0,284 | -0,184 |
| 6 | Q96A65 EXOC4_HUMAN | K.DASVPLIDVTNLPT#PR.K            | T237:      | 2 | 4,9127 | 0,537 | -0,273 |
| 6 | Q8TDY2 RBCC1_HUMAN | R.ST#ELVLS PDM*PR.T              | T238:      | 2 | 2,2192 | 0,273 | 0,169  |
| 6 | P49454 CENPF_HUMAN | R.DFSASYFSGEQEV#PSR.S            | T253:      | 2 | 2,3866 | 0,152 | -0,983 |
| 6 | O94915 FRYL_HUMAN  | R.DET#PTLEASLDNANSR.L            | T2547:     | 2 | 3,0958 | 0,403 | 0,135  |
| 6 | P17275 JUNB_HUMAN  | R.DAT#PPVSPINM*EDQER.I           | T255:      | 2 | 3,383  | 0,394 | -0,451 |
| 6 | Q96KN1 FA84B_HUMAN | R.T#TPPPGRPPAPSS#EEEDGEAVAH.-    | T288:S300: | 3 | 2,7866 | 0,254 | -0,074 |
| 6 | Q9NQS7 INCE_HUMAN  | R.VLAPILPDNFST#PTGSR.T           | T292:      | 2 | 3,0696 | 0,551 | -0,458 |
| 6 | P43351 RAD52_HUMAN | K.DFLAGVT#QELIK.T                | T318:      | 2 | 4,2529 | 0,398 | 0,086  |
| 6 | Q9UK58 CCNL1_HUMAN | K.GLNPDGTPALST#LGGFS#PASKPSSPR.E | T330:S335: | 3 | 2,8252 | 1     | -0,411 |
| 6 | Q641Q2 FA21A_HUMAN | R.T#PSDDEEDNLFAPPK.L             | T331:      | 3 | 3,0877 | 0,201 | 0,104  |
| 6 | Q6NZY4 ZCHC8_HUMAN | K.DGT#DGETEVGEIQNK.S             | T342:      | 2 | 5,2163 | 0,458 | -0,339 |
| 6 | Q9H0H5 RGAP1_HUMAN | R.CPLPCIPTLIGT#PVK.I             | T342:      | 2 | 2,6721 | 0,358 | -0,14  |
| 6 | Q9UGV2 NDRG3_HUMAN | R.SVTSNQSDGT#QESCESPDVLDLDR.H    | T355:      | 3 | 3,6672 | 0,408 | 0,514  |
| 6 | O76021 RL1D1_HUMAN | K.AT#NESEDEIPQLVPIGK.K           | T358:      | 3 | 3,1959 | 0,284 | 0      |
| 6 | Q9UQ35 SRRM2_HUMAN | R.SST#GPEPPAPTPLLAER.H           | T359:      | 2 | 2,8339 | 0,386 | -0,203 |
| 6 | Q9Y3X0 CCDC9_HUMAN | K.EGAASPAPETPQPT#SPETSPK.E       | T385:      | 3 | 2,9181 | 0,276 | -0,339 |
| 6 | Q2M2I8 AAK1_HUMAN  | K.AGQTQPNPILPIQPALT#PR.K         | T389:      | 3 | 4,5168 | 0,419 | -0,34  |
| 6 | Q14247 SRC8_HUMAN  | K.T#QTPPVSPAPQPTTEER.L           | T399:      | 2 | 2,6994 | 0,309 | -0,134 |
| 6 | O43741 AAKB2_HUMAN | K.IM*VGST#DDPSVFLPDSK.L          | T40:       | 2 | 4,1149 | 0,547 | -0,429 |
| 6 | Q14247 SRC8_HUMAN  | K.TQT#PPVSPAPQPTTEER.L           | T401:      | 3 | 2,7216 | 0,179 | 0      |
| 6 | Q9UKV3 ACINU_HUMAN | K.ASLVALPEQTASEEET#PPPLLTKE.E    | T414:      | 3 | 3,7393 | 0,388 | -0,366 |

|   |                    |                                    |            |   |        |       |        |
|---|--------------------|------------------------------------|------------|---|--------|-------|--------|
| 6 | P46108 CRK_HUMAN   | R.DSST#SPGDYVLSVSENSR.V            | T42:       | 2 | 3,7822 | 0,509 | -0,801 |
| 6 | P46108 CRK_HUMAN   | R.DSST#SPGDYVLSVSENSR.V            | T42:       | 3 | 3,2198 | 0,265 | 0,185  |
| 6 | P46109 CRKL_HUMAN  | R.DSST#CPGDYVLSVSENSR.V            | T43:       | 2 | 2,1262 | 0,466 | -0,357 |
| 6 | Q9NTJ3 SMC4_HUMAN  | R.TESPAT#AAETASEELDNR.S            | T44:       | 3 | 2,8667 | 0,279 | 0,093  |
| 6 | O14974 MYPT1_HUMAN | K.T#GSYGALAEITASK.E                | T443:      | 3 | 3,9095 | 0,349 | -0,063 |
| 6 | P35269 T2FA_HUMAN  | K.TT#PNSGDVQVTEDAVR.R              | T446:      | 2 | 4,5642 | 0,581 | -0,138 |
| 6 | Q15233 NONO_HUMAN  | R.FGQAATM*EGIGAIGGT#PPAFNR.A       | T450:      | 3 | 5,1373 | 0,364 | -0,081 |
| 6 | Q03519 TAP2_HUMAN  | R.QPNLPSPGT#LAPTTLQGTVK.F          | T458:      | 3 | 2,7    | 0,279 | -0,174 |
| 6 | Q96D46 NMD3_HUMAN  | R.DSAIPVESDT#DDEGAPR.I             | T470:      | 2 | 2,7121 | 0,452 | -0,395 |
| 6 | Q6NZY4 ZCHC8_HUMAN | R.GT#PPPVFTPLPK.G                  | T479:      | 2 | 2,4213 | 0,416 | -0,256 |
| 6 | Q15910 EZH2_HUMAN  | K.ESSIIAPAPAEDVDT#PPR.K            | T487:      | 3 | 2,9472 | 0,399 | 0,188  |
| 6 | Q15910 EZH2_HUMAN  | K.ESSIIAPAPAEDVDT#PPR.K            | T487:      | 2 | 2,216  | 0,499 | -0,376 |
| 6 | Q15758 AAAT_HUMAN  | R.ST#EPELIQVK.S                    | T494:      | 2 | 2,671  | 0,374 | -0,1   |
| 6 | P78344 IF4G2_HUMAN | R.T#QTPPLGQTPQLGLK.T               | T506:      | 2 | 2,6699 | 0,54  | -0,221 |
| 6 | Q14195 DPYL3_HUMAN | R.GM*YDGPVFDLTTT#PK.G              | T509:      | 2 | 3,0578 | 0,437 | -0,632 |
| 6 | P27816 MAP4_HUMAN  | K.DVT#PPPETEVLK.N                  | T521:      | 3 | 3,811  | 0,444 | 0      |
| 6 | P27816 MAP4_HUMAN  | K.DVT#PPPETEVLK.N                  | T521:      | 2 | 3,3587 | 0,529 | -0,302 |
| 6 | Q9NZI8 IF2B1_HUMAN | R.DQT#PDENDQVIVK.I                 | T528:      | 2 | 3,0765 | 0,142 | -0,077 |
| 6 | P35222 CTNB1_HUMAN | R.TSM*GGT#QQQFVEGVR.M              | T556:      | 3 | 2,8956 | 0,276 | -0,106 |
| 6 | Q12906 ILF3_HUMAN  | K.LFPDT#PLALDANK.K                 | T592:      | 2 | 2,7124 | 0,37  | -0,408 |
| 6 | Q86W92 LIPB1_HUMAN | R.SQST#TFNPDDM*SEPEFK.R            | T602:      | 3 | 3,5744 | 0,39  | 0      |
| 6 | P18206 VINC_HUMAN  | R.M*QEAM*TQEVSDVFSDDTT#PIK.L       | T604:      | 3 | 5,557  | 0,494 | -0,444 |
| 6 | P55209 NP1L1_HUMAN | R.LDGLVET#PTGYIESLPR.V             | T62:       | 2 | 4,2584 | 0,517 | -0,755 |
| 6 | O76094 SRP72_HUMAN | K.TVSSPPT#S#PRPGSAATVSASTSNIIPPR.H | T624:S625: | 3 | 3,6915 | 1     | -0,632 |
| 6 | P55209 NP1L1_HUMAN | R.LDGLVETPT#GYIESLPR.V             | T64:       | 3 | 4,5651 | 0,46  | -0,377 |
| 6 | Q02952 AKA12_HUMAN | K.SATLSSTEST#ASEM*QEEM*K.G         | T649:      | 3 | 5,8813 | 0,432 | -0,339 |
| 6 | P35221 CTNA1_HUMAN | R.T#SVQTEDDQLIAGQSAR.A             | T654:      | 3 | 2,6462 | 0,108 | -0,096 |
| 6 | Q9HD15 SRA1_HUMAN  | R.VPASET#SPGPPPM*GPPPPSSK.A        | T68:       | 3 | 2,6616 | 0,272 | -0,26  |
| 6 | Q9UKV3 ACINU_HUMAN | K.DPSSGQEVAT#PPVPQLQVCEPK.E        | T682:      | 3 | 3,9126 | 0,352 | 0,075  |
| 6 | O14641 DVL2_HUMAN  | R.DLGSVPPELT#ASR.Q                 | T715:      | 2 | 2,647  | 0,443 | -0,429 |
| 6 | Q3MHD2 LSM12_HUMAN | R.TET#PPPLASLNVSK.L                | T75:       | 2 | 3,7011 | 0,497 | -0,239 |
| 6 | Q96S44 PRPK_HUMAN  | R.ATT#PADGEEPAEAEALAAAR.E          | T8:        | 3 | 3,215  | 0,211 | 0      |
| 6 | O95425 SVIL_HUMAN  | R.YQT#QPVTLGEVEQVQSGK.L            | T852:      | 3 | 6,5318 | 0,423 | 0,177  |

|   |                    |                                 |            |   |        |       |        |
|---|--------------------|---------------------------------|------------|---|--------|-------|--------|
| 6 | Q6PD62 CTR9_HUMAN  | K.GGEFDEFVNDT#DDDLPIK.K         | T925:      | 3 | 3,2723 | 0,352 | -0,317 |
| 6 | Q96T88 UHRF1_HUMAN | R.DSELSDT#DSGCCLGQSESDK.S       | T93:       | 3 | 5,3739 | 0,527 | -0,081 |
| 6 | Q9UPN4 AZI1_HUMAN  | R.SGSPRTEPT#DFLM*LFEGS#PSGK.K   | T96:S105:  | 3 | 3,7185 | 0,329 | -0,07  |
| 6 | Q86UE8 TLK2_HUMAN  | K.ISDYFEFAGGSAPGT#SPGR.S        | T98:       | 2 | 3,2934 | 0,552 | -0,306 |
| 6 | Q9BTE3 CJ119_HUMAN | R.SY#EDDDDM*DLQPNK.Q            | Y168:      | 2 | 4,0207 | 0,487 | -0,343 |
| 6 | P29353 SHC1_HUMAN  | R.ELFDDPSY#VNVQNLDK.A           | Y427:      | 2 | 3,7072 | 0,42  | -0,741 |
| 6 | P38432 P8OC_HUMAN  | K.LLELTSSY#SPDVSDYK.E           | Y488:      | 2 | 3,7073 | 0,367 | -0,193 |
| 6 | P25205 MCM3_HUMAN  | K.DGDSYDPY#DFSSTEEEM*PQVHT#PK.T | Y708:T722: | 3 | 2,9188 | 0,2   | -0,492 |
| 6 | P18433 PTPRA_HUMAN | K.VVQEYIDAFSDY#ANFK.-           | Y798:      | 2 | 4,7557 | 0,551 | -0,675 |
| 6 | P18433 PTPRA_HUMAN | K.VVQEYIDAFSDY#ANFK.-           | Y798:      | 3 | 3,9167 | 0,27  | -0,368 |
| 6 | Q6S8J3 A26CA_HUMAN | K.SY#ELPDGQVITIGNER.F           | Y940:      | 3 | 3,2985 | 0,253 | -0,196 |
| 7 | Q68CQ4 DEF_HUMAN   | R.SQS#QLLNTLTK.K                | S10:       | 2 | 3,788  | 0,419 | -0,186 |
| 7 | Q6P1L5 AL2SC_HUMAN | R.NGS#PTPAGSLGGAVATAGGPGSR.L    | S10:       | 2 | 3,0024 | 0,55  | -0,353 |
| 7 | Q01433 AMPD2_HUMAN | R.S#LPGPAPCLK.H                 | S100:      | 2 | 2,3649 | 0,323 | 0      |
| 7 | Q9UKV3 ACINU_HUMAN | R.TAQVPS#PPR.G                  | S1004:     | 2 | 2,1248 | 0,248 | -0,118 |
| 7 | O95155 UBE4B_HUMAN | R.SQSSEGVSSSSPSNSLETQSQSL#R.S   | S101:      | 3 | 6,1678 | 0,45  | -0,452 |
| 7 | P29966 MARCS_HUMAN | K.GEPAAAAAPEAGAS#PVEK.E         | S101:      | 2 | 4,221  | 0,481 | -0,287 |
| 7 | P05386 RLA1_HUMAN  | K.KEES#EESDDDM*GFGLFD.-         | S101:      | 2 | 3,3345 | 0,569 | -0,656 |
| 7 | P05386 RLA1_HUMAN  | K.KEES#EESDDDMGFGLFD.-          | S101:      | 2 | 3,2895 | 0,513 | -0,541 |
| 7 | P05386 RLA1_HUMAN  | K.KEES#EESDDDM*GFGLFD.-         | S101:      | 3 | 2,6383 | 0,375 | 0,179  |
| 7 | P05386 RLA1_HUMAN  | K.KEES#EES#DDDM*GFGLFD.-        | S101:S104: | 2 | 3,9318 | 0,614 | -0,574 |
| 7 | Q8WUF5 IASPP_HUMAN | R.SES#APTLHPYS#PLSPK.G          | S102:S110: | 3 | 2,7472 | 0,132 | -0,391 |
| 7 | Q8WUF5 IASPP_HUMAN | R.SES#APTLHPYSPLS#PK.G          | S102:S113: | 2 | 3,3119 | 0,333 | -0,391 |
| 7 | Q8NG08 HELB_HUMAN  | R.WQLSS#PDGVDTDDDLK.S           | S1021:     | 2 | 4,5724 | 0,52  | -0,062 |
| 7 | Q01804 OTUD4_HUMAN | K.EESS#EDENEVSNILR.S            | S1024:     | 2 | 4,5236 | 0,389 | -0,4   |
| 7 | Q9H2Y7 ZF106_HUMAN | R.ATGDGSS#PELPSLER.K            | S1026:     | 2 | 3,7165 | 0,526 | 0,535  |
| 7 | Q12888 TP53B_HUMAN | K.NGSTAVAESVAS#PQK.T            | S1028:     | 2 | 2,884  | 0,432 | -0,16  |
| 7 | O75122 CLAP2_HUMAN | R.DYNPNYSDSIS#PFNK.S            | S1029:     | 2 | 3,1302 | 0,482 | -0,365 |
| 7 | O60231 DHX16_HUMAN | R.LLEDSEESSEETVSR.A             | S103:      | 2 | 5,0602 | 0,583 | -0,341 |
| 7 | P27708 PYR1_HUMAN  | R.VLGTS#PEAIDSAENR.F            | S1038:     | 2 | 4,5871 | 0,39  | -0,447 |
| 7 | O95239 KIF4A_HUMAN | K.FLEQS#M*DIEDLK.Y              | S1038:     | 2 | 4,5732 | 0,312 | -0,156 |
| 7 | P05386 RLA1_HUMAN  | K.KEESEES#DDDM*GFGLFD.-         | S104:      | 2 | 3,3294 | 0,365 | -0,358 |
| 7 | P21796 VDAC1_HUMAN | K.LTFDSSFS#PNTGK.K              | S104:      | 2 | 3,2999 | 0,477 | -0,082 |

|   |                    |                                   |              |   |        |       |        |
|---|--------------------|-----------------------------------|--------------|---|--------|-------|--------|
| 7 | Q8NG08 HELB_HUMAN  | R.TCGVNDDDES#PSKIFM*VGES#PQVSSR.L | S1048:S1058: | 3 | 3,9008 | 0,32  | -0,315 |
| 7 | O15061 DMN_HUMAN   | R.SPAPGS#PDEEGGAEAPAAGIR.F        | S1049:       | 2 | 5,7176 | 0,614 | -0,424 |
| 7 | O15061 DMN_HUMAN   | R.SPAPGS#PDEEGGAEAPAAGIR.F        | S1049:       | 3 | 3,2582 | 0,214 | 0      |
| 7 | O95155 UBE4B_HUMAN | R.SQS#M*DIRGVSCEK.S               | S105:        | 2 | 3,9474 | 0,566 | -0,393 |
| 7 | Q92667 AKAP1_HUMAN | R.S#ESSGILPNTTDM*R.L              | S105:        | 2 | 2,6291 | 0,29  | -0,076 |
| 7 | Q8NFH5 NUP53_HUMAN | R.SIYDDISSPGLGS#TPLTSR.R          | S105:        | 2 | 2,1578 | 0,494 | 0,179  |
| 7 | O15014 ZN609_HUMAN | K.APS#LTDLVK.S                    | S1055:       | 2 | 2,6719 | 0,353 | -0,119 |
| 7 | Q8N3U4 STAG2_HUMAN | R.NSLLAGDDDDTM*S#VISGISSR.G       | S1058:       | 3 | 3,1426 | 0,239 | -0,084 |
| 7 | Q9UHB7 AFF4_HUMAN  | K.AVGM*PSPVS#PK.L                 | S1058:       | 2 | 2,1947 | 0,261 | -0,523 |
| 7 | Q15434 RBMS2_HUMAN | K.GYGFVDFDS#PSAAQK.A              | S106:        | 2 | 4,8488 | 0,528 | -0,219 |
| 7 | P49023 PAXI_HUMAN  | K.TSSVSNPQDSVGS#PCSR.V            | S106:        | 2 | 4,2735 | 0,371 | -0,132 |
| 7 | Q5TDH0 DDI2_HUMAN  | R.IDFSSIAVPGTSS#PR.Q              | S106:        | 2 | 3,259  | 0,543 | -0,151 |
| 7 | Q6P1L5 AL2SC_HUMAN | R.TS#PTVATQTGASATSTR.G            | S106:        | 2 | 3,1507 | 0,593 | -0,569 |
| 7 | Q8N3U4 STAG2_HUMAN | R.NSLLAGDDDDTM*SVIS#GISSR.G       | S1061:       | 3 | 2,8803 | 0,34  | -0,084 |
| 7 | Q12968 NFAC3_HUMAN | R.QAPLPS#PESLDLGR.S               | S1063:       | 2 | 2,0193 | 0,21  | 0,156  |
| 7 | Q5VZK9 LR16A_HUMAN | K.S#SGFLNLIK.S                    | S1067:       | 2 | 2,2739 | 0,335 | -0,23  |
| 7 | Q8NG31 CASC5_HUMAN | K.DVQS#PGFLNEPLSSK.S              | S1076:       | 2 | 4,7101 | 0,548 | -0,216 |
| 7 | Q6ZUT9 RA61L_HUMAN | R.LS#ITSLTGK.N                    | S1076:       | 2 | 2,0936 | 0,491 | -0,427 |
| 7 | Q96RT1 LAP2_HUMAN  | R.QSS#VSSTASVNLGDPGSTR.R          | S1079:       | 3 | 3,4988 | 0,387 | -0,095 |
| 7 | O75152 ZC11A_HUMAN | K.TVLPTVPES#PEEEVK.A              | S108:        | 2 | 2,7274 | 0,254 | -0,141 |
| 7 | Q5JTH9 RRP12_HUMAN | K.GDSIEEILADS#EDEEDNEEEER.S       | S1080:       | 3 | 5,9725 | 0,527 | 0      |
| 7 | Q08999 RBL2_HUMAN  | K.IFYFNS#PSK.R                    | S1080:       | 2 | 2,8943 | 0,356 | -0,341 |
| 7 | Q7Z3B3 K1267_HUMAN | R.ETEAAPTS#PPIVPLK.S              | S1082:       | 2 | 2,423  | 0,249 | -0,15  |
| 7 | Q9NYV4 CD2L7_HUMAN | K.NSS#PAPPQPAPGK.V                | S1083:       | 2 | 2,4997 | 0,345 | 0      |
| 7 | P21333 FLNA_HUMAN  | K.AFGPGLQGGSAGS#PAR.F             | S1084:       | 2 | 2,7187 | 0,424 | 0      |
| 7 | Q5VZ89 DEN4C_HUMAN | R.STS#LSALVR.S                    | S1089:       | 2 | 2,8412 | 0,205 | -0,06  |
| 7 | Q14151 SAFB2_HUMAN | K.M*EEEGTEDNGLEDDS#R.D            | S109:        | 2 | 6,0682 | 0,669 | -0,698 |
| 7 | O43896 KIF1C_HUMAN | R.S#APDLKESGAAV.-                 | S1092:       | 2 | 2,4079 | 0,226 | -0,299 |
| 7 | P46013 KI67_HUMAN  | K.EEAQS#LEDLAGFK.E                | S1098:       | 2 | 2,3717 | 0,404 | 0,08   |
| 7 | Q76FK4 NOL8_HUMAN  | R.NSS#PGEASLLEK.E                 | S1099:       | 2 | 2,5888 | 0,387 | 0,093  |
| 7 | O96018 APBA3_HUMAN | R.SPS#GPPAM*DLEGPR.D              | S11:         | 2 | 3,4497 | 0,557 | -0,486 |
| 7 | Q9UQ35 SRRM2_HUMAN | R.S#SSPVTELASR.S                  | S1101:       | 2 | 3,4685 | 0,354 | 0,302  |
| 7 | Q6BDS2 URFB1_HUMAN | R.TVSQQS#FDGVSLDSSGPEDR.I         | S1106:       | 3 | 3,0742 | 0,289 | -0,084 |

|   |                    |                                 |            |   |        |       |        |
|---|--------------------|---------------------------------|------------|---|--------|-------|--------|
| 7 | Q92900 RENT1_HUMAN | K.SQIDVALS#QDSTYQGER.A          | S1107:     | 2 | 5,1975 | 0,495 | 0,617  |
| 7 | Q92900 RENT1_HUMAN | K.SQIDVALS#QDSTYQGER.A          | S1107:     | 3 | 4,3729 | 0,471 | 0,37   |
| 7 | Q8WWM7 ATX2L_HUMAN | K.GPPQS#PVFEGVYNNR.M            | S111:      | 3 | 5,4948 | 0,307 | -0,3   |
| 7 | Q8WWM7 ATX2L_HUMAN | K.GPPQS#PVFEGVYNNR.M            | S111:      | 2 | 5,2255 | 0,601 | -1,335 |
| 7 | Q5T3F8 TM63B_HUMAN | R.LTS#VSSSVDFDQR.D              | S111:      | 2 | 3,8362 | 0,427 | 0,481  |
| 7 | Q96AP0 ACD_HUMAN   | R.ELILGSETPSS#PR.A              | S111:      | 2 | 2,9917 | 0,314 | -0,083 |
| 7 | P49792 RBP2_HUMAN  | K.NVSGIS#FTENM*GSSQQK.N         | S1110:     | 2 | 4,7474 | 0,603 | -0,511 |
| 7 | Q5SW79 CE170_HUMAN | R.LGEAS#DSELADADK.A             | S1112:     | 2 | 5,0808 | 0,542 | -0,244 |
| 7 | Q7Z417 NUFP2_HUMAN | K.NLS#SDEATNPISR.V              | S112:      | 2 | 4,0054 | 0,463 | -0,329 |
| 7 | Q9BX95 SGPP1_HUMAN | R.NS#LTGEEGQLAR.V               | S112:      | 2 | 3,4031 | 0,596 | -0,18  |
| 7 | Q8N1F7 NUP93_HUMAN | K.DNALLS#AIEESR.K               | S112:      | 2 | 3,2543 | 0,249 | -0,349 |
| 7 | P55060 XPO2_HUMAN  | K.QLS#DAISIIGR.E                | S112:      | 2 | 2,0815 | 0,37  | -0,097 |
| 7 | Q14997 PSME4_HUMAN | K.NPSINQILLS#PEK.I              | S1121:     | 2 | 3,8067 | 0,345 | -0,239 |
| 7 | Q15185 TEBP_HUMAN  | K.DWEDDS#DEDM*SNFDR.F           | S113:      | 2 | 5,4787 | 0,636 | -0,433 |
| 7 | Q8N573 OXR1_HUMAN  | R.VVSS#TSEEEAFTEK.F             | S113:      | 2 | 4,7319 | 0,611 | -0,279 |
| 7 | Q9HB09 B2L12_HUMAN | R.GEAAGS#PVPT#PPRSPAQEPTDFLSR.L | S113:T117: | 3 | 3,2206 | 0,287 | -0,705 |
| 7 | Q92576 PHF3_HUMAN  | R.M*APPVDDL#PK.K                | S1133:     | 2 | 2,4859 | 0,504 | -0,289 |
| 7 | Q07889 SOS1_HUMAN  | R.SAS#VSSISLTK.G                | S1134:     | 2 | 2,9816 | 0,562 | 0      |
| 7 | Q9P035 PTAD1_HUMAN | R.WLDES#DAEM*ELR.A              | S114:      | 2 | 4,6875 | 0,5   | -0,153 |
| 7 | P78312 CD008_HUMAN | K.LVLAES#PQPK.G                 | S1144:     | 2 | 2,7429 | 0,273 | 0      |
| 7 | P18615 NELFE_HUMAN | R.SIS#ADDDLQESSR.R              | S115:      | 2 | 4,73   | 0,532 | -0,244 |
| 7 | Q09666 AHNK_HUMAN  | R.EVFSSCSSEVVLS#GDDEEYQR.I      | S115:      | 3 | 4,4926 | 0,376 | -0,219 |
| 7 | Q32MZ4 LRRF1_HUMAN | R.NM*PGLSAATLASLGGTS#SR.R       | S115:      | 2 | 4,4588 | 0,565 | -0,453 |
| 7 | Q32MZ4 LRRF1_HUMAN | R.NMPGLSAATLASLGGTS#SR.R        | S115:      | 2 | 3,3941 | 0,331 | -0,587 |
| 7 | P45880 VDAC2_HUMAN | K.LTFDTTFS#PNTGK.K              | S115:      | 2 | 3,1442 | 0,547 | -0,162 |
| 7 | Q9UQ35 SRRM2_HUMAN | R.FQSDSSSYPTVDSNS#LLGQSR.L      | S1152:     | 3 | 4,2689 | 0,529 | 0      |
| 7 | Q76L83 ASXL2_HUMAN | R.FCLSS#PTEALK.M                | S1154:     | 2 | 3,0864 | 0,368 | -0,092 |
| 7 | P15822 ZEP1_HUMAN  | R.AS#PVSFQELNR.T                | S1157:     | 2 | 2,3836 | 0,389 | -0,092 |
| 7 | Q8N3X1 FNBP4_HUMAN | K.ATGGLCLLGGAYADS#DDDDNDVSEK.L  | S116:      | 3 | 6,2284 | 0,472 | -0,213 |
| 7 | Q3KQU3 MA7D1_HUMAN | R.SSQPS#PTAVPASDSPPTK.Q         | S116:      | 2 | 3,6929 | 0,497 | -0,133 |
| 7 | Q32MZ4 LRRF1_HUMAN | R.NM*PGLSAATLASLGGTSS#R.R       | S116:      | 3 | 3,6283 | 0,327 | 0      |
| 7 | P28290 SSFA2_HUMAN | R.ASVALTPTAPS#R.T               | S1161:     | 2 | 2,7817 | 0,334 | -0,293 |
| 7 | Q9BQG0 MBB1A_HUMAN | K.EIPSATQS#PISK.K               | S1163:     | 2 | 2,0784 | 0,258 | -0,274 |

|   |                     |                                   |              |   |        |       |        |
|---|---------------------|-----------------------------------|--------------|---|--------|-------|--------|
| 7 | Q86SQ4 GP126_HUMAN  | K.SLSSSS#IGSNSTYLTSK.S            | S1165:       | 2 | 3,6187 | 0,478 | -0,339 |
| 7 | P55196 AFAD_HUMAN   | R.SSPNVANQPPS#PGGK.S              | S1165:       | 2 | 3,359  | 0,465 | -0,402 |
| 7 | Q9NTI5 PDS5B_HUMAN  | R.M*ETVSNASSSSNPSS#PGR.I          | S1166:       | 2 | 3,654  | 0,475 | -0,194 |
| 7 | Q5QJE6 TDIF2_HUMAN  | R.QILIACS#PVSSVR.K                | S117:        | 2 | 3,1605 | 0,455 | -0,081 |
| 7 | Q8IZ21 PHAR4_HUMAN  | R.SS#SPVQVEEPPVR.L                | S117:        | 2 | 3,054  | 0,377 | -0,24  |
| 7 | A4ZYW4 A4ZYW4_HUMAN | K.DETFGEYS#DNEEK.A                | S1172:       | 2 | 3,7637 | 0,541 | -0,371 |
| 7 | Q9UNS1 TIM_HUMAN    | R.QLLDS#DEEQEEDGR.N               | S1173:       | 3 | 4,3821 | 0,39  | 0      |
| 7 | Q9UNS1 TIM_HUMAN    | R.QLLDS#DEEQEEDGR.N               | S1173:       | 2 | 3,4158 | 0,46  | -0,652 |
| 7 | Q7Z3U7 MON2_HUMAN   | K.SFQEILQIVS#PVR.D                | S1178:       | 2 | 3,4194 | 0,288 | -0,153 |
| 7 | Q9UQ35 SRRM2_HUMAN  | K.M*ALPPQEDATAS#PPR.Q             | S1179:       | 3 | 3,8084 | 0,428 | 0,109  |
| 7 | Q9NRY4 GRLF1_HUMAN  | R.TSFSVGS#DDELGPIR.K              | S1179:       | 2 | 3,4332 | 0,472 | -0,294 |
| 7 | Q9UQ35 SRRM2_HUMAN  | K.M*ALPPQEDATAS#PPR.Q             | S1179:       | 2 | 3,4234 | 0,558 | -0,218 |
| 7 | Q9UQ35 SRRM2_HUMAN  | K.MALPPQEDATAS#PPR.Q              | S1179:       | 2 | 2,6912 | 0,519 | 0,147  |
| 7 | P25490 TYY1_HUMAN   | R.EEVVGGDDS#DGLR.A                | S118:        | 2 | 2,578  | 0,208 | -0,256 |
| 7 | Q9UKK3 PARP4_HUMAN  | R.DENES#PFDPDK.V                  | S1186:       | 2 | 2,6906 | 0,377 | -0,249 |
| 7 | O60749 SNX2_HUMAN   | K.SM*S#APVIFDR.S                  | S119:        | 2 | 3,563  | 0,391 | -0,4   |
| 7 | Q00536 PCTK1_HUMAN  | R.LS#LPADIR.L                     | S119:        | 2 | 2,529  | 0,199 | 0      |
| 7 | Q92508 FA38A_HUMAN  | R.SGS#EEAVTDPGER.E                | S1190:       | 2 | 3,6198 | 0,345 | -0,173 |
| 7 | Q8N1G0 ZN687_HUMAN  | R.SDPDGGDS#PLPASGGPLTCK.V         | S1191:       | 3 | 4,7114 | 0,405 | -0,091 |
| 7 | Q8N1G0 ZN687_HUMAN  | R.SDPDGGDS#PLPASGGPLTCK.V         | S1191:       | 2 | 2,7145 | 0,597 | -0,365 |
| 7 | P20020 AT2B1_HUMAN  | R.IEDS#EPHIPLIDDT#DAEDDAPTK.R     | S1193:T1203: | 3 | 7,8908 | 0,531 | -0,407 |
| 7 | Q9NP87 DPOLM_HUMAN  | R.VGS#PSGDAASSTPPSTR.F            | S12:         | 2 | 3,2793 | 0,381 | -0,443 |
| 7 | O95218 ZRAB2_HUMAN  | R.EES#DGEYDEFGR.K                 | S120:        | 2 | 3,5839 | 0,596 | -0,081 |
| 7 | Q96B01 R51A1_HUMAN  | K.ELPTVTTNVQNS#QDK.S              | S120:        | 2 | 2,9609 | 0,391 | 0,348  |
| 7 | Q9BYV8 CEP41_HUMAN  | K.GNPGEQSPS#PEQFINNAGAGDSSR.S     | S121:        | 3 | 3,3512 | 0,352 | -0,073 |
| 7 | Q14814 MEF2D_HUMAN  | R.AS#EELDGLFR.R                   | S121:        | 2 | 2,7342 | 0,424 | -0,1   |
| 7 | O43933 PEX1_HUMAN   | R.SQS#GEDESM*NQPGPIK.T            | S1211:       | 2 | 4,7605 | 0,477 | -0,271 |
| 7 | P11388 TOP2A_HUMAN  | K.TQM*AEVLPS#PR.G                 | S1213:       | 2 | 3,4246 | 0,521 | -0,092 |
| 7 | Q92508 FA38A_HUMAN  | R.TAS#ELLLDR.R                    | S1215:       | 2 | 3,6042 | 0,475 | -0,111 |
| 7 | Q13017 RHG05_HUMAN  | K.GGIDNPAITS#DQELDDK.K            | S1218:       | 2 | 4,8629 | 0,484 | -0,523 |
| 7 | Q00537 PCTK2_HUMAN  | K.M*GSDGESDQASGTSSDEVQS#PTGVCLR.N | S122:        | 3 | 4,2486 | 0,515 | 0,064  |
| 7 | Q9NYF3 FA53C_HUMAN  | R.SLS#VPVDLSR.W                   | S122:        | 2 | 2,6832 | 0,434 | -0,106 |
| 7 | Q14160 LAP4_HUMAN   | R.NSLES#ISSIDR.E                  | S1223:       | 2 | 3,3396 | 0,42  | -0,188 |



|   |                    |                                  |              |   |        |       |        |
|---|--------------------|----------------------------------|--------------|---|--------|-------|--------|
| 7 | Q13428 TCOF_HUMAN  | K.LDSS#PSVSSTLAAK.D              | S1228:       | 2 | 3,0816 | 0,381 | 0,254  |
| 7 | Q13620 CUL4B_HUMAN | K.M*AEESSS#SSSSSPTAATSQQQLK.N    | S123:        | 3 | 3,7402 | 1     | -0,416 |
| 7 | Q92870 APBB2_HUMAN | K.NLS#PTAVINITSEK.L              | S123:        | 2 | 3,0763 | 0,387 | -0,078 |
| 7 | P49916 DNL3_HUMAN  | K.LTTTGQVTS#PVK.G                | S123:        | 2 | 2,8386 | 0,469 | -0,279 |
| 7 | P61020 RAB5B_HUMAN | R.QAS#PSIVIALAGNK.A              | S123:        | 2 | 2,1944 | 0,286 | -0,337 |
| 7 | Q04637 IF4G1_HUMAN | R.EAALPPVS#PLK.A                 | S1232:       | 2 | 2,4286 | 0,114 | -0,102 |
| 7 | Q01814 AT2B2_HUMAN | K.SATSSSPGS#PIHSLETSL.-          | S1234:       | 2 | 2,1969 | 0,255 | -0,797 |
| 7 | Q9BUL5 PHF23_HUMAN | R.LQAPDS#ATLLEK.M                | S124:        | 2 | 3,4399 | 0,415 | -0,536 |
| 7 | Q01664 TFAP4_HUMAN | R.FIQELSGSS#PK.R                 | S124:        | 2 | 3,3308 | 0,375 | -0,096 |
| 7 | Q13868 EXOS2_HUMAN | R.S#AEDELAM*R.G                  | S124:        | 2 | 3,0093 | 0,446 | 0      |
| 7 | Q9UKA4 AKA11_HUMAN | R.SVS#PTFLNPSDENLK.T             | S1242:       | 2 | 4,1849 | 0,441 | -0,212 |
| 7 | Q01814 AT2B2_HUMAN | K.SATSSSPGSPIHSLETS#L.-          | S1242:       | 2 | 2,8602 | 0,529 | -0,332 |
| 7 | P11388 TOP2A_HUMAN | K.NENTEGS#PQEDGVELEGLK.Q         | S1247:       | 3 | 5,5003 | 0,468 | 0,172  |
| 7 | Q14137 BOP1_HUMAN  | R.IGDEYAEDS#SDEEDIR.N            | S126:        | 2 | 5,6992 | 0,569 | 0,761  |
| 7 | Q9H6Z4 RANB3_HUMAN | R.TSS#LTQFPPSQSEER.S             | S126:        | 2 | 3,3784 | 0,489 | -0,138 |
| 7 | Q9H6Z4 RANB3_HUMAN | R.TSS#LTQFPPSQSEER.S             | S126:        | 3 | 2,6206 | 0,256 | 0,103  |
| 7 | Q8TDM6 DLG5_HUMAN  | R.LGS#SSNLQFK.A                  | S1263:       | 2 | 3,4436 | 0,435 | -0,105 |
| 7 | P46821 MAP1B_HUMAN | K.SPSPSPPPS#PLEK.T               | S1265:       | 2 | 3,5965 | 0,4   | -0,487 |
| 7 | Q13459 MYO9B_HUMAN | R.VSPAPGS#APETPEDK.S             | S1267:       | 2 | 2,9023 | 0,397 | -0,515 |
| 7 | Q6P158 DHX57_HUMAN | R.DLQEQDADAGS#ER.G               | S127:        | 2 | 4,2524 | 0,438 | -0,322 |
| 7 | O75822 EIF3J_HUMAN | K.LQEES#DLELAK.E                 | S127:        | 2 | 3,9548 | 0,399 | -0,36  |
| 7 | P07355 ANXA2_HUMAN | K.GLGTDEDS#LIEIICSR.T            | S127:        | 2 | 3,3613 | 0,151 | -0,46  |
| 7 | P08648 ITA5_HUMAN  | R.LLESSLSS#SEGEEPVEYK.S          | S127:        | 2 | 3,104  | 0,477 | -0,71  |
| 7 | Q5SW79 CE170_HUMAN | R.LQS#AGSAM*PTSSSFK.H            | S1270:       | 2 | 4,4339 | 0,554 | -0,459 |
| 7 | Q6P4R8 NFRKB_HUMAN | K.AVSTVVVTTAPS#PK.Q              | S1291:       | 2 | 3,5815 | 0,457 | -0,34  |
| 7 | O15085 ARHGB_HUMAN | R.NS#GIWESPELDR.N                | S1295:       | 2 | 2,2371 | 0,393 | 0,576  |
| 7 | Q92538 GBF1_HUMAN  | R.ADAPDAGAQS#DSELPSYHQNDVS#LDR.G | S1298:S1311: | 3 | 2,792  | 0,188 | 0,564  |
| 7 | Q92685 ALG3_HUMAN  | R.SGS#AAQAEGLCK.Q                | S13:         | 2 | 3,6476 | 0,557 | -0,388 |
| 7 | Q6ZU65 K2030_HUMAN | R.VAFISL#PVR.R                   | S13:         | 2 | 3,6259 | 0,421 | -0,209 |
| 7 | P07948 LYN_HUMAN   | K.DSLS#DDGVDLK.T                 | S13:         | 2 | 3,2729 | 0,221 | -0,294 |
| 7 | Q5VYV7 CT094_HUMAN | R.DLLAS#QNEDLTER.V               | S130:        | 2 | 3,5834 | 0,469 | -1,001 |
| 7 | Q8NAP3 ZBT38_HUMAN | R.NFSNS#PGPYVFCITEK.G            | S130:        | 2 | 3,5256 | 0,581 | -0,314 |
| 7 | Q07020 RL18_HUMAN  | K.ILTFDQLALDS#PK.G               | S130:        | 2 | 3,4441 | 0,407 | -0,317 |

|   |                     |                               |              |   |        |       |        |
|---|---------------------|-------------------------------|--------------|---|--------|-------|--------|
| 7 | P15374 UCHL3_HUMAN  | K.FLEESVSM*S#PEER.A           | S130:        | 2 | 3,0681 | 0,485 | -0,149 |
| 7 | Q07002 PCTK3_HUMAN  | R.AS#LSDIGFGK.L               | S130:        | 2 | 2,1805 | 0,306 | -0,227 |
| 7 | Q9BQG0 MBB1A_HUMAN  | R.S#PSLLQSGAK.K               | S1308:       | 2 | 2,1287 | 0,464 | 0      |
| 7 | Q9P0V3 SH3B4_HUMAN  | R.NSTLSDSGM*IDNLPDS#PDEVAK.E  | S131:        | 3 | 3,898  | 0,312 | -0,152 |
| 7 | P18615 NELFE_HUMAN  | K.S#LYESFVSSDR.L              | S131:        | 2 | 3,8546 | 0,475 | -0,251 |
| 7 | Q9NXV6 CARF_HUMAN   | R.GIS#SSNEGVVEPSK.K           | S131:        | 2 | 3,6514 | 0,385 | -0,407 |
| 7 | Q5M775 SPEC1_HUMAN  | K.S#VSSPTSNTPTPTK.H           | S131:        | 2 | 3,1667 | 0,439 | -0,233 |
| 7 | Q96QT6 PHF12_HUMAN  | R.TTS#PSSDSDLDR.S             | S131:        | 2 | 3,0908 | 0,447 | 0,246  |
| 7 | Q86UP2 KTN1_HUMAN   | K.AAGDTTVIENS DV S#PETESSEK.E | S1313:       | 3 | 4,2101 | 0,374 | -0,234 |
| 7 | A6H8Y3 A6H8Y3_HUMAN | K.APS#PPPLLTDR.Q              | S132:        | 2 | 2,5337 | 0,282 | -0,098 |
| 7 | Q9H910 HN1L_HUMAN   | R.S#IPAGAEPGEK.G              | S132:        | 2 | 2,3966 | 0,302 | -0,107 |
| 7 | Q2LD37 K1109_HUMAN  | R.LGS#TKS#LTAIFYGDK.Q         | S1320:S1323: | 2 | 2,9604 | 0,393 | 1,704  |
| 7 | Q9UQ35 SRRM2_HUMAN  | K.ELNS#PLRENSFGS#PLEFR.N      | S1320:S1329: | 3 | 4,8512 | 0,462 | -0,156 |
| 7 | P46013 KI67_HUMAN   | K.LDLTENLTGS#K.R              | S1329:       | 2 | 3,9991 | 0,427 | -0,192 |
| 7 | O95295 S25BP_HUMAN  | R.AM*LDSGIYPPGS#PGK.-         | S133:        | 2 | 4,4066 | 0,654 | -0,231 |
| 7 | Q15021 CND1_HUMAN   | R.YQPLASTAS#DNDFVTPEPR.R      | S1333:       | 3 | 3,5274 | 0,211 | -0,167 |
| 7 | Q96T23 RSF1_HUMAN   | R.IES#DEEEDFENVGK.V           | S1335:       | 2 | 4,9747 | 0,593 | 0,497  |
| 7 | Q01433 AMPD2_HUMAN  | R.S#LAESLR.S                  | S134:        | 2 | 2,0024 | 0,288 | 0,062  |
| 7 | Q9HD64 GAGD2_HUMAN  | K.SCISQTPGINLDLGS#GVK.V       | S135:        | 2 | 2,6296 | 0,428 | 1,394  |
| 7 | P11388 TOP2A_HUMAN  | K.TDDEDFVPSDAS#PPK.T          | S1354:       | 2 | 3,7755 | 0,459 | -0,287 |
| 7 | Q9NTI5 PDS5B_HUMAN  | R.AES#PESSAIESTQSTPQK.G       | S1358:       | 2 | 5,9275 | 0,558 | -0,561 |
| 7 | P41229 JAD1C_HUMAN  | K.VQGLLENGDSVTS#PEK.V         | S1359:       | 2 | 4,465  | 0,485 | -0,487 |
| 7 | Q5VUA4 ZN318_HUMAN  | R.S#PGLCSDSLEK.S              | S136:        | 2 | 2,7266 | 0,46  | -0,192 |
| 7 | Q5VZK9 LR16A_HUMAN  | K.SNDS#GEEAEKEFIV.-           | S1360:       | 2 | 3,7931 | 0,503 | -0,548 |
| 7 | O60292 SI1L3_HUMAN  | R.EVS#PAPAVAGQSK.G            | S1364:       | 2 | 2,3427 | 0,378 | -0,277 |
| 7 | O75396 SC22B_HUMAN  | R.NLGS#INTELQDVQR.I           | S137:        | 3 | 5,105  | 0,395 | 0,11   |
| 7 | Q7Z4V5 HDGR2_HUMAN  | R.GVM*AVTAVTATAAS#DR.M        | S137:        | 2 | 5,0894 | 0,635 | 0,377  |
| 7 | O75396 SC22B_HUMAN  | R.NLGS#INTELQDVQR.I           | S137:        | 2 | 4,9881 | 0,488 | -0,439 |
| 7 | Q7Z4V5 HDGR2_HUMAN  | R.GVM*AVTAVTATAAS#DR.M        | S137:        | 3 | 4,8045 | 0,464 | 0,113  |
| 7 | Q8WWA1 TMM40_HUMAN  | R.GS#DPASGEVEASQLR.R          | S137:        | 2 | 2,9576 | 0,577 | -0,308 |
| 7 | Q9P0T7 TMEM9_HUMAN  | R.S#M*AAAAASLGGPR.A           | S137:        | 2 | 2,0326 | 0,284 | -0,291 |
| 7 | Q9UIF9 BAZ2A_HUMAN  | R.AGDPGEM*PQS#PTGLGQPK.R      | S1370:       | 2 | 2,9726 | 0,259 | -0,786 |
| 7 | P11388 TOP2A_HUMAN  | K.SVVS#DLEADDVK.G             | S1377:       | 2 | 4,1266 | 0,512 | -0,36  |

|   |                    |                                  |              |   |        |       |        |
|---|--------------------|----------------------------------|--------------|---|--------|-------|--------|
| 7 | Q13428 TCOF_HUMAN  | K.LGAGEGGEASVS#PEK.T             | S1378:       | 2 | 4,1896 | 0,451 | -0,083 |
| 7 | Q14160 LAP4_HUMAN  | R.VS#LVGADDLR.K                  | S1378:       | 2 | 2,2445 | 0,433 | -0,108 |
| 7 | Q5VTR2 BRE1A_HUMAN | K.ALVVPEPEPDS#NQER.K             | S138:        | 2 | 3,6518 | 0,499 | -0,373 |
| 7 | Q9UEU0 VTI1B_HUMAN | R.AM*LLQGTES#LNR.A               | S138:        | 2 | 3,2488 | 0,305 | 0,512  |
| 7 | Q99439 CNN2_HUMAN  | K.GLQS#GVDIGVK.Y                 | S138:        | 2 | 2,7651 | 0,153 | -0,529 |
| 7 | P42695 CNDD3_HUMAN | R.SLGVLPFTLNSGS#PEK.T            | S1384:       | 2 | 3,4211 | 0,481 | 0      |
| 7 | P30291 WEE1_HUMAN  | K.SPAAPYFLGSSFS#PVR.C            | S139:        | 2 | 4,1116 | 0,419 | -0,484 |
| 7 | P41162 ETV3_HUMAN  | R.SSGVVPQS#APPVPTASSR.F          | S139:        | 2 | 3,4814 | 0,381 | -0,541 |
| 7 | P11388 TOP2A_HUMAN | K.GSVPLS#SS#PPATHFPDETEITNPVVK.K | S1391:S1393: | 3 | 2,6765 | 0,266 | -0,256 |
| 7 | P11388 TOP2A_HUMAN | K.GSVPLS#S#PPATHFPDETEITNPVVK.K  | S1392:S1393: | 3 | 3,546  | 0,399 | -0,383 |
| 7 | Q02952 AKA12_HUMAN | K.EVSSLEGS#PPPCLGQEEAVCTK.I      | S1395:       | 3 | 6,3091 | 0,569 | -0,298 |
| 7 | P51580 TPMT_HUMAN  | R.TSLDIEEYS#DTEVQK.N             | S14:         | 2 | 4,9176 | 0,457 | -0,266 |
| 7 | P42696 RBM34_HUMAN | R.S#VQEGENPDDGVR.G               | S14:         | 2 | 3,8389 | 0,481 | -0,329 |
| 7 | P45973 CBX5_HUMAN  | R.TADSSSS#EDEEEYVVEK.V           | S14:         | 2 | 3,6877 | 0,445 | -0,431 |
| 7 | P13051 UNG_HUMAN   | K.TLYSFFSPS#PAR.K                | S14:         | 2 | 3,4309 | 0,442 | -0,336 |
| 7 | O15085 ARHGB_HUMAN | R.LSS#LSSLGDSAPER.K              | S14:         | 2 | 3,0812 | 0,412 | 0,407  |
| 7 | P25787 PSA2_HUMAN  | R.GYSFSLTTF#PSGK.L               | S14:         | 2 | 2,8777 | 0,34  | -0,313 |
| 7 | Q7Z3C6 ATG9A_HUMAN | R.LEAS#YSDS#PPGEEDLLVHVAEGSK.S   | S14:S18:     | 3 | 3,0621 | 0,413 | -0,408 |
| 7 | Q8NE71 ABCF1_HUMAN | K.GGNVFAALIQQQS#EEEEEEK.H        | S140:        | 3 | 4,0701 | 0,257 | -0,602 |
| 7 | Q9UQ35 SRRM2_HUMAN | K.AGM*SSNQSISS#PVLDAVPRT#PSR.E   | S1404:T1413: | 3 | 5,7441 | 1     | -0,361 |
| 7 | P18858 DNL1_HUMAN  | R.TIQEVLEEQS#EDED.R.E            | S141:        | 2 | 3,2102 | 0,332 | 0,514  |
| 7 | Q13177 PAK2_HUMAN  | K.YLS#FTPPEK.D                   | S141:        | 2 | 2,9584 | 0,268 | -0,105 |
| 7 | Q6IAA8 CK059_HUMAN | R.IAAYAYS#ALSQIR.V               | S141:        | 2 | 2,9583 | 0,417 | -0,081 |
| 7 | P41279 M3K8_HUMAN  | R.NIGS#DFIPR.G                   | S141:        | 2 | 2,4581 | 0,254 | -0,777 |
| 7 | Q13177 PAK2_HUMAN  | K.YLS#FTPPEKDGFPST#PALNAK.G      | S141:T154:   | 3 | 4,8121 | 0,406 | -0,366 |
| 7 | Q92785 REQU_HUMAN  | R.VDDDS#LGEFPVTNSR.A             | S142:        | 2 | 4,5486 | 0,545 | -0,282 |
| 7 | O43597 SPY2_HUMAN  | R.LLGSSFS#GPVADGIIR.V            | S142:        | 2 | 3,9258 | 0,461 | -0,347 |
| 7 | Q13523 PRP4B_HUMAN | K.VQSGM*GLILQGYES#GS#EEEEIEHEK.A | S142:S144:   | 3 | 5,0498 | 0,361 | -0,254 |
| 7 | Q9BYP7 WNK3_HUMAN  | K.QPSS#DSEFSASLAGSGK.S           | S1424:       | 2 | 3,0638 | 0,452 | -0,07  |
| 7 | P46821 MAP1B_HUMAN | R.GAES#PFEEK.S                   | S1427:       | 2 | 3,0505 | 0,258 | -0,341 |
| 7 | Q63ZY6 NSN5C_HUMAN | R.QLEEPGAGTPS#PVR.L              | S143:        | 2 | 2,8263 | 0,362 | -0,402 |
| 7 | Q96N67 DOCK7_HUMAN | R.SPS#GSAFGSQENLR.W              | S1432:       | 2 | 4,0701 | 0,556 | 0,161  |
| 7 | Q15648 MED1_HUMAN  | K.NYGS#PLISGSTPK.H               | S1433:       | 2 | 2,3744 | 0,435 | -0,261 |

|   |                     |                              |              |   |        |       |        |
|---|---------------------|------------------------------|--------------|---|--------|-------|--------|
| 7 | O15061 DMN_HUMAN    | R.TFVLAGSADS#PELGK.L         | S1435:       | 2 | 3,3181 | 0,439 | -0,078 |
| 7 | Q15149 PLEC1_HUMAN  | K.AQLEPVAS#PAK.K             | S1435:       | 2 | 2,4754 | 0,323 | -0,102 |
| 7 | Q9Y2U8 MAN1_HUMAN   | K.VLLGFSSDES#DVEASPR.D       | S144:        | 2 | 5,1342 | 0,526 | -0,517 |
| 7 | Q14160 LAP4_HUMAN   | R.QSPAS#PPPLGGGAPVR.T        | S1448:       | 2 | 2,1649 | 0,202 | -0,311 |
| 7 | P46783 RS10_HUMAN   | K.AEAGAGS#ATEFQFR.G          | S146:        | 2 | 4,402  | 0,471 | -0,16  |
| 7 | Q9UIG0 BAZ1B_HUMAN  | R.LAEDEGDS#EPEAVGQSR.G       | S1468:       | 2 | 4,8171 | 0,469 | -0,653 |
| 7 | Q9UIG0 BAZ1B_HUMAN  | R.LAEDEGDS#EPEAVGQSR.G       | S1468:       | 3 | 3,2552 | 0,403 | -0,294 |
| 7 | P40855 PEX19_HUMAN  | K.NATDLQNSS#MSEEELTK.A       | S147:        | 2 | 5,588  | 0,547 | -0,555 |
| 7 | P40855 PEX19_HUMAN  | K.NATDLQNSS#M*SEEELTK.A      | S147:        | 2 | 5,0185 | 0,584 | -0,673 |
| 7 | P61966 AP1S1_HUMAN  | K.AIEQADLLQEEDES#PR.S        | S147:        | 3 | 4,6618 | 0,493 | -0,095 |
| 7 | Q6ZV89 SH2D5_HUMAN  | R.LGNPYCS#PTLVR.K            | S147:        | 2 | 2,6972 | 0,219 | -0,167 |
| 7 | O75376 NCOR1_HUMAN  | K.AQLS#PGIYDDTSAR.R          | S1472:       | 2 | 3,9956 | 0,462 | -0,31  |
| 7 | Q14160 LAP4_HUMAN   | R.VQS#PEPPAPER.A             | S1475:       | 2 | 2,6678 | 0,249 | -1,138 |
| 7 | Q6P0Q8 MAST2_HUMAN  | R.NQSLGQS#APSLTAGLK.E        | S148:        | 2 | 4,3088 | 0,542 | -0,148 |
| 7 | Q9BUH6 CI142_HUMAN  | R.LAAAEETAVS#PR.K            | S148:        | 2 | 3,5023 | 0,574 | -0,377 |
| 7 | Q9Y4M2 Q9Y4M2_HUMAN | R.QGS#PSQSLVACECEASK.A       | S148:        | 2 | 2,0904 | 0,239 | 0,254  |
| 7 | Q9P2M7 CING_HUMAN   | R.SNS#M*LELAPK.V             | S149:        | 2 | 3,4886 | 0,26  | 0      |
| 7 | P40855 PEX19_HUMAN  | K.NATDLQNSSM*S#EEELTK.A      | S149:        | 3 | 3,3472 | 0,289 | -0,092 |
| 7 | A6NGB9 WIPF3_HUMAN  | K.TISGPIPPAS#PR.L            | S149:        | 2 | 2,4029 | 0,453 | -0,264 |
| 7 | Q00610 CLH1_HUMAN   | R.TSIDAYDNFDNIS#LAQR.L       | S1494:       | 2 | 5,2371 | 0,462 | -0,422 |
| 7 | P04792 HSPB1_HUMAN  | R.GPS#WDPFR.D                | S15:         | 2 | 2,6736 | 0,31  | -0,117 |
| 7 | Q15398 DLG7_HUMAN   | K.DIS#TEM*IR.T               | S15:         | 2 | 2,1617 | 0,259 | -0,345 |
| 7 | P04406 G3P_HUMAN    | K.IISNAS#CTTNCLAPLAK.V       | S151:        | 2 | 2,4887 | 0,324 | -0,382 |
| 7 | Q9H611 PIF1_HUMAN   | R.DFVTIS#PVQPEER.R           | S151:        | 2 | 2,1998 | 0,35  | -0,306 |
| 7 | Q9BWH2 FUND2_HUMAN  | K.S#NQIPTEVR.S               | S151:        | 2 | 2,0433 | 0,234 | 0      |
| 7 | Q8WWI1 LMO7_HUMAN   | R.GES#LDNLDSPR.S             | S1510:       | 2 | 3,8068 | 0,471 | 0      |
| 7 | Q13177 PAK2_HUMAN   | K.DGFPS#GTPALNAK.G           | S152:        | 2 | 2,7282 | 0,363 | 0,18   |
| 7 | Q9H6H4 REEP4_HUMAN  | R.SFS#M*QDLR.S               | S152:        | 2 | 2,5167 | 0,311 | -0,113 |
| 7 | Q12756 KIF1A_HUMAN  | R.TPQPCS#RPAS#PEPELLPEADSK.K | S1528:S1532: | 3 | 4,2966 | 0,425 | 0      |
| 7 | Q9NY61 AATF_HUMAN   | K.TPGFSVQS#ISDFEK.F          | S153:        | 2 | 3,8417 | 0,514 | -0,527 |
| 7 | Q00536 PCTK1_HUMAN  | R.VS#LSEIGFGK.L              | S153:        | 2 | 2,5264 | 0,474 | 0      |
| 7 | O43166 SI1L1_HUMAN  | K.LIDLES#PTPESQK.S           | S1549:       | 2 | 4,013  | 0,385 | 0,397  |
| 7 | Q9NY61 AATF_HUMAN   | K.TPGFSVQSIS#DFEK.F          | S155:        | 2 | 3,808  | 0,5   | -0,075 |

|   |                     |                                       |            |   |        |       |        |
|---|---------------------|---------------------------------------|------------|---|--------|-------|--------|
| 7 | Q8IX90 CM003_HUMAN  | R.S#PQLSDFGLER.Y                      | S155:      | 2 | 2,3133 | 0,218 | -0,184 |
| 7 | Q14669 TRIPC_HUMAN  | R.LLDTNPEINQSDS#QDSR.V                | S1577:     | 2 | 2,5747 | 0,492 | 0,667  |
| 7 | Q5UIP0 RIF1_HUMAN   | K.SNES#VDIQDQEEK.V                    | S1579:     | 2 | 3,3699 | 0,423 | 0,076  |
| 7 | Q69YN4 VIR_HUMAN    | R.SFLSEPS#PGR.T                       | S1579:     | 2 | 2,9141 | 0,486 | -0,392 |
| 7 | O95292 VAPB_HUMAN   | K.SLS#SSLDDTEVK.K                     | S158:      | 2 | 2,9879 | 0,308 | 0      |
| 7 | A4D1S0 KLRG2_HUMAN  | R.FLTVPVPES#PAFSR.H                   | S158:      | 2 | 2,8772 | 0,414 | -0,225 |
| 7 | Q6ZWH8 Q6ZWH8_HUMAN | R.LQEEQDGG#S#DEDRAGPAPPGASDGVDIQDVK.F | S158:S159: | 3 | 3,3054 | 0,193 | 1,077  |
| 7 | O43166 SI1L1_HUMAN  | R.TLS#DESIYNSQR.E                     | S1585:     | 2 | 4,1708 | 0,547 | -0,245 |
| 7 | Q9UKI8 TLK1_HUMAN   | K.ISDYFEYQGGNGSS#PVR.G                | S159:      | 2 | 5,2556 | 0,433 | -0,499 |
| 7 | Q9NY27 PP4R2_HUMAN  | R.M*NGVM*FPGNS#PSYTER.S               | S159:      | 2 | 3,7297 | 0,513 | -0,257 |
| 7 | Q9NY27 PP4R2_HUMAN  | R.M*NGVM*FPGNS#PSYTER.S               | S159:      | 3 | 3,27   | 0,256 | 0      |
| 7 | P62324 BTG1_HUMAN   | R.TS#PSKNYNM*M*TVSG.-                 | S159:      | 2 | 2,6924 | 0,442 | -0,599 |
| 7 | Q32MZ4 LRRF1_HUMAN  | R.EIDCLS#PEAQK.L                      | S16:       | 2 | 2,7561 | 0,307 | -0,98  |
| 7 | Q5T1V6 DDX59_HUMAN  | K.ADSEPE#PLNASYVYK.E                  | S160:      | 2 | 4,7102 | 0,506 | -0,594 |
| 7 | O00161 SNP23_HUMAN  | R.EDEM*EENLTQVGS#ILGNLK.D             | S161:      | 3 | 4,4842 | 0,344 | -0,496 |
| 7 | Q1KMD3 HNRL2_HUMAN  | R.S#GDETPGSEVPGDK.A                   | S161:      | 2 | 3,5016 | 0,546 | 0      |
| 7 | Q9Y6M1 IF2B2_HUMAN  | K.ISYIPDEEVS#SPSPQR.A                 | S161:      | 3 | 3,2247 | 0,309 | 0      |
| 7 | Q6SPF0 SAMD1_HUMAN  | R.AAAAAATAPPS#PGPAQPGPR.A             | S161:      | 2 | 3,1118 | 0,488 | -0,532 |
| 7 | Q12888 TP53B_HUMAN  | K.AADIS#LDNLVEGK.R                    | S1618:     | 2 | 4,0033 | 0,385 | 0,086  |
| 7 | Q9NVU0 RPC5_HUMAN   | R.EAANEAGDSS#QDEAEDDVK.Q              | S162:      | 2 | 3,8603 | 0,554 | -0,118 |
| 7 | P50990 TCPQ_HUMAN   | R.DIDEVSS#LLR.T                       | S162:      | 2 | 2,4613 | 0,155 | -0,099 |
| 7 | Q9C0C2 TB182_HUMAN  | R.VPSS#DEEVVEEPQSR.R                  | S1621:     | 2 | 5,0153 | 0,606 | -0,276 |
| 7 | Q9C0C2 TB182_HUMAN  | R.VPSS#DEEVVEEPQSR.R                  | S1621:     | 3 | 3,1801 | 0,226 | 0,414  |
| 7 | P37802 TAGL2_HUMAN  | R.NFS#DNQLQEGK.N                      | S163:      | 2 | 3,8714 | 0,466 | -0,179 |
| 7 | P29966 MARCS_HUMAN  | K.S#FKLS#GFSFK.K                      | S163:S167: | 2 | 2,4062 | 0,191 | -0,373 |
| 7 | P21333 FLNA_HUMAN   | K.YGGDEIPFS#PYR.V                     | S1630:     | 2 | 2,0935 | 0,343 | -0,494 |
| 7 | Q96AY4 TTC28_HUMAN  | R.DVLSLLNLS#PR.H                      | S1633:     | 2 | 3,3071 | 0,48  | -0,653 |
| 7 | Q9Y6M1 IF2B2_HUMAN  | K.ISYIPDEEVSSPS#PPQR.A                | S164:      | 2 | 2,261  | 0,193 | -0,431 |
| 7 | O95997 PTTG1_HUMAN  | K.LFQLGPPS#PVK.M                      | S165:      | 2 | 2,9215 | 0,364 | 0      |
| 7 | P51858 HDGF_HUMAN   | R.AGDLLDS#PK.R                        | S165:      | 2 | 2,6804 | 0,29  | -0,108 |
| 7 | Q9C0C2 TB182_HUMAN  | K.VNLFPGLS#PSALK.A                    | S1652:     | 2 | 2,9055 | 0,302 | -0,257 |
| 7 | Q8NE71 ABCF1_HUMAN  | K.AVS#EEQQPALK.G                      | S166:      | 2 | 2,597  | 0,202 | -0,381 |
| 7 | Q9C0C2 TB182_HUMAN  | R.S#AEEGELAESK.S                      | S1666:     | 2 | 3,6968 | 0,508 | -0,496 |

|   |                    |                                  |        |   |        |       |        |
|---|--------------------|----------------------------------|--------|---|--------|-------|--------|
| 7 | O75569 PRKRA_HUMAN | R.LES#FM*ETGK.G                  | S167:  | 2 | 2,1315 | 0,144 | -0,322 |
| 7 | Q14676 MDC1_HUMAN  | R.LLLAEDS#EEEVDFLSER.R           | S168:  | 2 | 3,6864 | 0,498 | -0,118 |
| 7 | P30307 MPIP3_HUMAN | K.YLGS#PITTVPK.L                 | S168:  | 2 | 3,1683 | 0,377 | 0,097  |
| 7 | Q9ULI4 KI26A_HUMAN | R.DSEATGSASSAPDSM*SESGAAS#PGAR.T | S1687: | 3 | 3,2473 | 0,373 | -0,517 |
| 7 | Q5UIP0 RIF1_HUMAN  | R.DS#FDNCSLGESSK.I               | S1688: | 2 | 3,2197 | 0,63  | -0,32  |
| 7 | Q9BZ23 PANK2_HUMAN | R.ASS#ASVPAVGASAEGR.R            | S169:  | 2 | 2,2563 | 0,226 | -0,153 |
| 7 | P18583 SON_HUMAN   | K.ESDQTLAALLS#PK.E               | S1697: | 2 | 3,7827 | 0,429 | -0,084 |
| 7 | P18583 SON_HUMAN   | K.ESDQTLAALLS#PK.E               | S1697: | 3 | 3,0105 | 0,386 | 0      |
| 7 | Q9H1H9 KI13A_HUMAN | R.TGS#CSELDACPSK.I               | S1698: | 2 | 2,9114 | 0,39  | -0,164 |
| 7 | P53999 TCP4_HUMAN  | K.ELVSSSSGSDS#DSEVDK.K           | S17:   | 2 | 5,5469 | 0,566 | -0,644 |
| 7 | P05387 RLA2_HUMAN  | R.YVASYLLAALGGNSS#PSAK.D         | S17:   | 2 | 4,2364 | 0,382 | -0,751 |
| 7 | Q8IY67 RAVR1_HUMAN | K.S#GAEEVAGDAAER.R               | S17:   | 2 | 3,7705 | 0,471 | -0,091 |
| 7 | P05387 RLA2_HUMAN  | R.YVASYLLAALGGNSS#PSAK.D         | S17:   | 3 | 3,1484 | 0,188 | -0,375 |
| 7 | Q96EY5 F125A_HUMAN | R.DM*QGLS#LDAASQPSK.G            | S170:  | 2 | 3,5606 | 0,289 | 0,223  |
| 7 | P29966 MARCS_HUMAN | K.LSGFS#FK.K                     | S170:  | 2 | 2,1853 | 0,177 | 0,07   |
| 7 | P55196 AFAD_HUMAN  | K.TQVLS#PDSLFTAK.F               | S1704: | 2 | 2,902  | 0,333 | -0,574 |
| 7 | Q5SRE5 NU188_HUMAN | R.GAPSS#PATGVLPSPQGK.S           | S1709: | 2 | 4,2512 | 0,459 | -0,374 |
| 7 | Q15545 TAF7_HUMAN  | R.LLS#TDAEAVSTR.W                | S171:  | 2 | 3,4074 | 0,401 | -0,273 |
| 7 | Q5SRE5 NU188_HUMAN | R.GAPSSPATGVLPSPQGK.S            | S1717: | 2 | 3,4582 | 0,342 | -0,075 |
| 7 | Q9UQ35 SRRM2_HUMAN | R.S#PSVSSPEPAEK.S                | S1727: | 2 | 2,49   | 0,438 | -0,188 |
| 7 | Q15365 PCBP1_HUMAN | K.QICLVM*LETLSQS#PQGR.V          | S173:  | 3 | 4,7325 | 0,447 | 0,089  |
| 7 | O95817 BAG3_HUMAN  | R.SQS#PAASDCSSSSSASLPSSGR.S      | S173:  | 3 | 4,1925 | 0,544 | -0,16  |
| 7 | Q15365 PCBP1_HUMAN | K.QICLVM*LETLSQS#PQGR.V          | S173:  | 2 | 3,605  | 0,59  | -0,593 |
| 7 | Q96RK0 CIC_HUMAN   | R.TQS#LSALPK.E                   | S173:  | 2 | 2,4438 | 0,276 | -0,119 |
| 7 | P53621 COPA_HUMAN  | K.NLS#PGAVESDVR.G                | S173:  | 2 | 2,188  | 0,321 | 0,092  |
| 7 | Q8TEW0 PAR3_HUMAN  | R.WS#TTAGFLK.Q                   | S174:  | 2 | 2,0229 | 0,211 | -0,336 |
| 7 | Q9BRJ6 CG050_HUMAN | R.ELDEEGS#DPPLPGR.A              | S175:  | 2 | 3,0912 | 0,476 | -0,077 |
| 7 | Q14980 NUMA1_HUMAN | R.TQPDGTSVPGEPAS#PISQR.L         | S1757: | 2 | 2,759  | 0,351 | -0,731 |
| 7 | Q9BXF6 RFIP5_HUMAN | R.NNLSAS#M*FDLSM*K.D             | S176:  | 2 | 4,1659 | 0,473 | 0      |
| 7 | Q9H7D0 DOCK5_HUMAN | K.S#LQLM*DNR.L                   | S1766: | 2 | 2,263  | 0,461 | -0,114 |
| 7 | Q9HCK8 CHD8_HUMAN  | R.VS#PSDTPPLVSR.S                | S1767: | 2 | 2,1899 | 0,487 | 0      |
| 7 | P18583 SON_HUMAN   | R.SAAS#PVVSSM*PER.A              | S1769: | 2 | 2,7265 | 0,344 | 0,173  |
| 7 | Q58FF8 H90B2_HUMAN | K.IEDVGS#DEEDDSGK.D              | S177:  | 2 | 4,7005 | 0,536 | -0,465 |

|   |                     |                                    |              |   |        |       |        |
|---|---------------------|------------------------------------|--------------|---|--------|-------|--------|
| 7 | Q9NYF8 BCLF1_HUMAN  | K.AEGEPQEE#PLK.S                   | S177:        | 2 | 3,1137 | 0,394 | -0,175 |
| 7 | Q09666 AHNK_HUMAN   | K.DIDISS#PEFK.I                    | S177:        | 2 | 2,6708 | 0,277 | 0,099  |
| 7 | Q04721 NOTC2_HUMAN  | K.AEDEALLS#EEDDPIDR.R              | S1778:       | 2 | 4,4897 | 0,542 | -0,515 |
| 7 | Q04721 NOTC2_HUMAN  | K.AEDEALLS#EEDDPIDR.R              | S1778:       | 3 | 3,9594 | 0,272 | 0,193  |
| 7 | Q8WWQ0 PHIP_HUMAN   | R.TAFYNEDDS#EEEQR.Q                | S1783:       | 2 | 5,0303 | 0,569 | -0,404 |
| 7 | Q14980 NUMA1_HUMAN  | R.SQAPLES#SLDS#LGDVFLDSGRK.T       | S1788:S1792: | 3 | 3,619  | 0,343 | -0,442 |
| 7 | Q86TB9 PATL1_HUMAN  | R.STS#PIIGSPPVR.A                  | S179:        | 2 | 2,6681 | 0,189 | -0,189 |
| 7 | P46821 MAP1B_HUMAN  | R.ESSPLYS#PTFSDSTSAVK.E            | S1797:       | 2 | 2,5459 | 0,161 | -0,492 |
| 7 | A8MQ02 A8MQ02_HUMAN | R.LFS#QGQDVSNK.V                   | S1799:       | 2 | 3,3946 | 0,353 | 0,094  |
| 7 | Q2M2I8 AAK1_HUMAN   | R.EQGGSGGLGS#GSSGGGGSTSGLGSGYIGR.V | S18:         | 3 | 4,9326 | 0,468 | 0,668  |
| 7 | O43310 K0427_HUMAN  | R.S#QEIEELER.F                     | S18:         | 2 | 3,7747 | 0,242 | -0,201 |
| 7 | Q9Y383 LC7L2_HUMAN  | R.AM*LDQLM*GTS#R.D                 | S18:         | 2 | 3,5122 | 0,525 | -0,091 |
| 7 | Q00537 PCTK2_HUMAN  | R.AS#LSEIGFGK.M                    | S180:        | 2 | 2,6556 | 0,452 | 0      |
| 7 | Q96N67 DOCK7_HUMAN  | R.S#MSIDDTPR.G                     | S180:        | 2 | 2,4407 | 0,227 | -0,111 |
| 7 | Q9NZI8 IF2B1_HUMAN  | R.QGS#PVAAGAPAK.Q                  | S181:        | 2 | 3,0833 | 0,494 | -0,43  |
| 7 | O00264 PGRC1_HUMAN  | K.EGEEPTVYS#DEEPEK.D               | S181:        | 2 | 2,9572 | 0,411 | -0,537 |
| 7 | Q9NQC3 RTN4_HUMAN   | R.RGS#SGS#VDETLFALPAASEPVIR.S      | S181:S184:   | 3 | 4,2734 | 0,295 | -0,291 |
| 7 | P78559 MAP1A_HUMAN  | R.VPSAPGQES#PIPPDK.L               | S1818:       | 2 | 2,3426 | 0,118 | -0,076 |
| 7 | Q9BVC5 ASHWN_HUMAN  | K.S#PSGPVK#PPLSPVGTTPVK.L          | S182:S189:   | 3 | 3,4693 | 0,186 | 0,262  |
| 7 | Q9HCD6 TANC2_HUMAN  | R.SCDELSPVS#PTQGGYPSEPTR.S         | S1827:       | 3 | 3,4931 | 0,349 | 0      |
| 7 | Q8WUF5 IASPP_HUMAN  | R.AGS#PRGS#PLAEGPQAFFPER.G         | S183:S187:   | 3 | 4,7046 | 0,442 | -0,082 |
| 7 | Q04721 NOTC2_HUMAN  | R.GPDGCTPLM*LAS#LR.G               | S1836:       | 2 | 3,3378 | 0,406 | -0,308 |
| 7 | Q03164 HRX_HUMAN    | K.GPGEPDS#PTPLHPPT#PPILSTDR.S      | S1837:T1845: | 3 | 4,201  | 0,303 | -0,36  |
| 7 | Q8NG31 CASC5_HUMAN  | R.TPS#SCSSSLDSIK.A                 | S1845:       | 2 | 3,3408 | 0,54  | -0,084 |
| 7 | P37802 TAGL2_HUMAN  | R.GAS#QAGM*TYGM*PR.Q               | S185:        | 2 | 3,6624 | 0,562 | -0,326 |
| 7 | P48382 RF5_HUMAN    | K.GSES#PEM*GPEVTPAPR.D             | S185:        | 2 | 3,218  | 0,361 | -0,421 |
| 7 | Q8TDJ6 DMXL2_HUMAN  | R.NLAS#PEGLATLGLK.T                | S1857:       | 2 | 3,6038 | 0,415 | -0,39  |
| 7 | P27708 PYR1_HUMAN   | R.AS#DPGLPAEPEK.E                  | S1859:       | 2 | 2,2784 | 0,268 | 0      |
| 7 | O60841 IF2P_HUMAN   | R.INSSGES#GDESDEFLOSR.K            | S186:        | 2 | 4,2648 | 0,522 | -0,3   |
| 7 | Q9P260 K1468_HUMAN  | R.AGSISTLDS#LDFAR.Y                | S186:        | 2 | 3,873  | 0,477 | 0      |
| 7 | Q9Y3S1 WKN2_HUMAN   | K.QAS#LPVSGSVAGDFVK.K              | S1862:       | 2 | 3,4957 | 0,325 | 0      |
| 7 | Q15032 R3HD1_HUMAN  | K.LEQEILDFIGNNES#PR.K              | S187:        | 2 | 4,9464 | 0,562 | -0,437 |
| 7 | Q9Y2U8 MAN1_HUMAN   | K.APPAPLAASEVTNSNS#AER.R           | S187:        | 3 | 4,3442 | 0,32  | 0      |

|   |                    |                                    |            |   |        |       |        |
|---|--------------------|------------------------------------|------------|---|--------|-------|--------|
| 7 | P13798 ACPH_HUMAN  | K.ALDVSAS#DDEIAR.L                 | S187:      | 2 | 4,1912 | 0,455 | -0,085 |
| 7 | Q15032 R3HD1_HUMAN | K.LEQEILDFIGNNES#PR.K              | S187:      | 3 | 4,1502 | 0,361 | -0,374 |
| 7 | P05549 AP2A_HUMAN  | K.SNS#NAVSAIPINK.D                 | S187:      | 2 | 3,0012 | 0,245 | -0,35  |
| 7 | Q8WYP5 AHTF1_HUMAN | R.SVENQES#VEIINDLK.V               | S1893:     | 2 | 3,2031 | 0,235 | -0,407 |
| 7 | P49116 NR2C2_HUMAN | R.IQIISTDSAVAS#PQR.I               | S19:       | 2 | 5,327  | 0,55  | 0,732  |
| 7 | Q9H1E3 NUCKS_HUMAN | K.VVDYSQFQES#DDADEDYGR.D           | S19:       | 3 | 5,0948 | 0,453 | 0,631  |
| 7 | Q9H4A3 WNK1_HUMAN  | K.QSSTPGSLFLS#PPAPAPK.N            | S19:       | 2 | 3,2774 | 0,419 | -0,524 |
| 7 | P02786 TFR1_HUMAN  | R.SAFSNLFGGEPLS#YTR.F              | S19:       | 2 | 2,6951 | 0,412 | -0,267 |
| 7 | O75955 FLOT1_HUMAN | R.S#PPVM*VAGGR.V                   | S19:       | 2 | 2,6527 | 0,542 | 0,114  |
| 7 | Q14103 HNRPD_HUMAN | K.IFVGGLS#PDTPEEK.I                | S190:      | 2 | 3,6153 | 0,336 | -0,233 |
| 7 | Q01433 AMPD2_HUMAN | K.TDS#DSDLQLYK.E                   | S190:      | 2 | 3,5901 | 0,413 | -0,268 |
| 7 | O15027 SC16A_HUMAN | R.ADSGPTQPPLSL#PAPETK.R            | S1905:     | 2 | 3,3076 | 0,286 | -0,495 |
| 7 | O15381 NVL_HUMAN   | K.DSFFLDLS#CEK.S                   | S191:      | 2 | 3,2337 | 0,375 | -0,423 |
| 7 | P24928 RPB1_HUMAN  | K.YSPTS#PTYSPSPK.Y                 | S1913:     | 2 | 3,6105 | 0,531 | -0,46  |
| 7 | P21291 CSR1_HUMAN  | K.GFGFGQGAGALVHS#E.-               | S192:      | 2 | 4,2172 | 0,528 | -0,161 |
| 7 | Q00587 BORG5_HUMAN | R.SDS#LLSFR.L                      | S192:      | 2 | 2,5925 | 0,302 | -0,243 |
| 7 | P24928 RPB1_HUMAN  | K.YSPTSPTYSPS#PK.Y                 | S1920:     | 2 | 2,5215 | 0,312 | -0,306 |
| 7 | O95772 MENTO_HUMAN | R.LLIVQDAS#ER.A                    | S193:      | 2 | 3,5791 | 0,434 | -0,199 |
| 7 | P46013 KI67_HUMAN  | K.LDLLGNLPGS#K.R                   | S1937:     | 2 | 2,6851 | 0,186 | -0,202 |
| 7 | O43237 DC1L2_HUMAN | K.DFQDYM*EPEEGCQGS#PQR.R           | S194:      | 3 | 3,4667 | 0,284 | 0,323  |
| 7 | Q92621 NU205_HUMAN | R.LQDSFAS#ETNLDFR.S                | S1942:     | 2 | 4,8443 | 0,627 | -0,354 |
| 7 | P30622 CLIP1_HUMAN | K.TASES#ISNLSEAGSIK.K              | S195:      | 2 | 4,8908 | 0,471 | 0,729  |
| 7 | Q9NV56 MRGBP_HUMAN | K.VLTANSNPSS#PSAAK.R               | S195:      | 2 | 4,333  | 0,457 | -0,48  |
| 7 | Q12830 BPTF_HUMAN  | K.VGS#PATVTFQQNK.N                 | S1959:     | 2 | 3,9021 | 0,396 | -0,251 |
| 7 | P46821 MAP1B_HUMAN | K.TTS#PPEVSGYSYEK.T                | S1965:     | 2 | 3,3219 | 0,458 | 0,15   |
| 7 | P55072 TERA_HUMAN  | R.EDEEES#LNEVGYDDIGGCR.K           | S197:      | 3 | 5,3828 | 0,548 | -0,081 |
| 7 | Q8TEA8 DTD1_HUMAN  | R.SASS#GAEGDVSSEREP.-              | S197:      | 2 | 3,235  | 0,553 | -0,074 |
| 7 | Q9NQS7 INCE_HUMAN  | R.TLS#PTPASATAPTSQGIPTSDEES#TPKK.S | S197:S218: | 3 | 3,9177 | 1     | -0,247 |
| 7 | Q9UQN3 CHM2B_HUMAN | K.ATIS#DEEIER.Q                    | S199:      | 2 | 3,5375 | 0,243 | -0,098 |
| 7 | Q99618 CDCA3_HUMAN | K.VLGRS#PLTILQDDNS#PGTLTLR.Q       | S199:S209: | 3 | 3,9867 | 0,417 | -0,217 |
| 7 | O14686 MLL2_HUMAN  | K.ASEPLLS#PPPFGESR.K               | S1999:     | 2 | 4,1685 | 0,444 | -0,293 |
| 7 | O43502 RA51C_HUMAN | R.DLVSFPLS#PAVR.V                  | S20:       | 2 | 2,7908 | 0,378 | -0,53  |
| 7 | Q7Z478 DHX29_HUMAN | K.FQSPQIQATIS#PPLQPK.T             | S200:      | 3 | 3,437  | 0,222 | -0,093 |



|   |                    |                               |            |   |        |       |        |
|---|--------------------|-------------------------------|------------|---|--------|-------|--------|
| 7 | Q7Z478 DHX29_HUMAN | K.FQSPQIQATIS#PPLQPK.T        | S200:      | 2 | 3,1268 | 0,376 | -0,311 |
| 7 | P30622 CLIP1_HUMAN | K.TASESISNLS#EAGSIK.K         | S200:      | 2 | 2,6327 | 0,297 | 0      |
| 7 | O75940 SPF30_HUMAN | R.SIFAS#PESVTGK.V             | S201:      | 2 | 3,4167 | 0,457 | 0      |
| 7 | O75391 SPAG7_HUMAN | R.S#IEEAM*NEIR.A              | S202:      | 2 | 3,2007 | 0,33  | -0,095 |
| 7 | P14618 KPYM_HUMAN  | K.GADFLVTEVENGG#LGSK.K        | S202:      | 2 | 3,1096 | 0,406 | 0,984  |
| 7 | Q9NYB0 TE2IP_HUMAN | K.YLLGDAPVS#PSSQK.L           | S203:      | 2 | 3,9745 | 0,448 | -0,158 |
| 7 | Q9H8G2 CI082_HUMAN | K.ILEGDNMG*DS#DM*EEEADDGSK.M  | S203:      | 3 | 3,8391 | 0,274 | -0,463 |
| 7 | Q9P265 DIP2B_HUMAN | K.GTSGS#LADVFNTR.I            | S203:      | 2 | 2,4975 | 0,312 | -0,661 |
| 7 | Q8NCF5 NF2IP_HUMAN | K.TEFLDLNSPLSPS#PR.T          | S204:      | 2 | 4,119  | 0,466 | -0,559 |
| 7 | P16989 DBPA_HUMAN  | R.NYAGEEEEEEGSGS#EGFDPPATDR.Q | S204:      | 3 | 3,7712 | 0,199 | -0,21  |
| 7 | Q9Y580 RBM7_HUMAN  | R.M*NS#YPYLADR.H              | S204:      | 2 | 2,9494 | 0,222 | -0,092 |
| 7 | O95297 MPZL1_HUMAN | R.DYTGCS#TSESLSPVK.Q          | S204:      | 2 | 2,2249 | 0,18  | -0,214 |
| 7 | Q96JM3 ZN828_HUMAN | K.LAPVPS#PEPQKAPVS#PESVK.A    | S204:S214: | 3 | 2,6674 | 0,307 | -0,158 |
| 7 | Q58FF7 H90B3_HUMAN | K.EIS#DDEAEEEEK.G             | S205:      | 2 | 2,4429 | 0,115 | -0,266 |
| 7 | O95297 MPZL1_HUMAN | R.DYTGCS#ESLSPVK.Q            | S206:      | 2 | 3,894  | 0,433 | -0,143 |
| 7 | Q6ZN18 AEBP2_HUMAN | R.GS#LEM*SSDGEPLSR.M          | S206:      | 2 | 3,4776 | 0,459 | -0,235 |
| 7 | Q7Z698 SPRE2_HUMAN | R.QVS#FPDDDEEIVR.I            | S206:      | 2 | 2,5635 | 0,285 | -0,749 |
| 7 | Q01130 SFRS2_HUMAN | R.S#KS#PPKSPEEEGAVSS.-        | S206:S208: | 2 | 2,1599 | 0,409 | -0,344 |
| 7 | Q92793 CBP_HUMAN   | R.SIS#PSALQDLLR.T             | S2063:     | 2 | 2,477  | 0,131 | -0,442 |
| 7 | P49327 FAS_HUMAN   | R.LGM*LS#PEGTCK.A             | S207:      | 2 | 3,3968 | 0,452 | -0,189 |
| 7 | Q6R327 RICTR_HUMAN | R.NDS#GEENVPLDLTR.E           | S21:       | 2 | 4,4069 | 0,474 | 0      |
| 7 | Q53H80 CF166_HUMAN | R.TLDFDPLLSPAS#PK.R           | S21:       | 2 | 2,9297 | 0,481 | -0,386 |
| 7 | Q99666 RGPD5_HUMAN | R.YVASVLGLTPS#PR.Q            | S21:       | 2 | 2,3975 | 0,28  | -0,254 |
| 7 | Q09666 AHNK_HUMAN  | R.LPS#GSGAASPTGSAVDIR.A       | S210:      | 2 | 4,8491 | 0,545 | -0,425 |
| 7 | O95297 MPZL1_HUMAN | R.DYTGCS#TSESLSPVK.Q          | S210:      | 2 | 4,485  | 0,59  | -0,357 |
| 7 | P04406 G3P_HUMAN   | R.GALQNIIPAS#TGAACK.A         | S210:      | 2 | 2,2375 | 0,149 | 0      |
| 7 | Q5VUA4 ZN318_HUMAN | R.IPS#PNILK.T                 | S2101:     | 2 | 2,5727 | 0,226 | -0,063 |
| 7 | Q8NI08 NCOA7_HUMAN | R.VLSSTS#EEDEPGVVK.F          | S211:      | 2 | 3,8783 | 0,454 | -0,295 |
| 7 | Q16186 ADRM1_HUMAN | R.S#QSAAVTPSSTTSSTR.A         | S211:      | 2 | 2,9369 | 0,34  | -0,37  |
| 7 | Q13242 SFRS9_HUMAN | R.GS#PHYFS#PFRPY.-            | S211:S216: | 3 | 2,9074 | 0,32  | -0,34  |
| 7 | Q13242 SFRS9_HUMAN | R.GS#PHYFS#PFRPY.-            | S211:S216: | 2 | 2,8697 | 0,426 | -0,831 |
| 7 | Q7Z417 NUFP2_HUMAN | K.GADNDGS#GSESGYTPK.K         | S212:      | 2 | 3,0478 | 0,409 | -0,567 |
| 7 | Q53LP3 ANR57_HUMAN | R.DLVM*GSS#PQLK.R             | S213:      | 2 | 3,032  | 0,323 | -0,096 |

|   |                    |                           |            |   |        |       |        |
|---|--------------------|---------------------------|------------|---|--------|-------|--------|
| 7 | Q9BZL6 KPCD2_HUMAN | R.LGTSES#LPCTAEELSR.S     | S214:      | 2 | 3,805  | 0,38  | -0,8   |
| 7 | Q9GZM8 NDEL1_HUMAN | K.M*DSAVQASLS#LPATPVGK.G  | S215:      | 2 | 5,1119 | 0,567 | -0,065 |
| 7 | P55196 AFAD_HUMAN  | R.TIS#NPEVVMK.R           | S215:      | 2 | 3,4258 | 0,315 | -0,204 |
| 7 | P55196 AFAD_HUMAN  | R.TIS#NPEVVM*K.R          | S215:      | 2 | 3,0506 | 0,424 | -0,302 |
| 7 | P61978 HNRPK_HUMAN | K.IILDISES#PIK.G          | S216:      | 2 | 3,7559 | 0,482 | -0,343 |
| 7 | Q9Y490 TLN1_HUMAN  | R.QELAVFCS#PEPPAK.T       | S2162:     | 2 | 3,2164 | 0,472 | -0,074 |
| 7 | P46734 MP2K3_HUMAN | K.M*CDFGISGYLVDS#VAK.T    | S218:      | 2 | 5,0912 | 0,631 | -0,788 |
| 7 | P46734 MP2K3_HUMAN | K.M*CDFGISGYLVDS#VAK.T    | S218:      | 3 | 3,7909 | 0,359 | -0,394 |
| 7 | Q53HL2 BOREA_HUMAN | R.IYNISGNGS#PLADSK.E      | S219:      | 2 | 4,8511 | 0,6   | -0,227 |
| 7 | Q8N4S0 CCD82_HUMAN | R.VVEDEGS#SVEM*EQK.T      | S219:      | 2 | 4,6421 | 0,439 | -0,661 |
| 7 | Q8NE71 ABCF1_HUMAN | K.QQPPEPEWIGDGESTS#PSDK.V | S22:       | 3 | 3,8913 | 0,485 | -0,162 |
| 7 | P02545 LMNA_HUMAN  | R.SGAQASSTPLS#PTR.I       | S22:       | 2 | 3,8211 | 0,482 | 0      |
| 7 | P49006 MRP_HUMAN   | R.GDVTAEEAAGAS#PAK.A      | S22:       | 2 | 3,5363 | 0,305 | -0,252 |
| 7 | Q9UBN7 HDAC6_HUMAN | R.QNPQS#PPQDSSVTSK.R      | S22:       | 2 | 2,0481 | 0,197 | -0,073 |
| 7 | Q9UKX7 NUP50_HUMAN | K.VAAEQS#PSLFGSTK.L       | S221:      | 2 | 3,8058 | 0,44  | -0,228 |
| 7 | Q9NYF8 BCLF1_HUMAN | K.SSATSGLIWPGLSAYDNS#PR.S | S222:      | 3 | 2,7174 | 0,133 | -0,423 |
| 7 | O75962 TRIO_HUMAN  | R.NFLNALTS#PIEYQR.N       | S2223:     | 2 | 2,9048 | 0,495 | -0,419 |
| 7 | Q9UPW0 FOXJ3_HUMAN | K.VTLYNTDQDGS#PR.S        | S223:      | 2 | 2,6564 | 0,118 | -1,606 |
| 7 | Q14315 FLNC_HUMAN  | R.LGS#FGSITR.Q            | S2233:     | 2 | 2,3908 | 0,271 | 0,18   |
| 7 | P11831 SRF_HUMAN   | K.ALIQTCLNSPDS#PPR.S      | S224:      | 2 | 4,8588 | 0,377 | -0,279 |
| 7 | Q13573 SNW1_HUMAN  | R.GPPS#PPAPVM*HS#PSR.K    | S224:S232: | 3 | 2,676  | 0,325 | 0      |
| 7 | O95071 UBR5_HUMAN  | R.DLS#LEVDR.D             | S2241:     | 2 | 2,3705 | 0,143 | -0,119 |
| 7 | O75643 U520_HUMAN  | R.EEAS#DDDMEGDEAVVR.C     | S225:      | 2 | 5,111  | 0,501 | -0,396 |
| 7 | O75643 U520_HUMAN  | R.EEAS#DDDM*EGDEAVVR.C    | S225:      | 2 | 4,6983 | 0,477 | -0,524 |
| 7 | O75643 U520_HUMAN  | R.EEAS#DDDM*EGDEAVVR.C    | S225:      | 3 | 4,6821 | 0,4   | -0,295 |
| 7 | O43482 OIP5_HUMAN  | K.ILSEVTPDQS#KPEN.-       | S225:      | 2 | 3,1029 | 0,275 | -0,373 |
| 7 | Q96H22 CENPN_HUMAN | R.S#LGLDINM*DSR.I         | S226:      | 2 | 3,4918 | 0,516 | -0,185 |
| 7 | Q6ZV73 FGD6_HUMAN  | R.IEFADLS#PSPSSFVK.V      | S226:      | 2 | 3,2021 | 0,413 | -0,352 |
| 7 | Q7L2E3 DHX30_HUMAN | R.GSS#FEM*TDDDSAIR.A      | S226:      | 2 | 2,4945 | 0,348 | -0,15  |
| 7 | P52701 MSH6_HUMAN  | K.SEEDNEIES#EEEVQPK.T     | S227:      | 2 | 4,6733 | 0,362 | -0,495 |
| 7 | Q9BW71 HIRP3_HUMAN | K.ESEQES#EEIILAQK.K       | S227:      | 2 | 3,2056 | 0,18  | -0,353 |
| 7 | O43815 STRN_HUMAN  | K.SELTDS#ASVLDNFK.F       | S227:      | 2 | 2,6884 | 0,405 | -0,532 |
| 7 | P49792 RBP2_HUMAN  | R.FGESTTGFNFS#FK.S        | S2270:     | 2 | 2,4127 | 0,223 | -0,394 |

|   |                     |                              |              |   |        |       |        |
|---|---------------------|------------------------------|--------------|---|--------|-------|--------|
| 7 | Q9UQ35 SRRM2_HUMAN  | R.TPAAAAAM*NLAS#PR.T         | S2272:       | 2 | 3,7319 | 0,498 | -0,085 |
| 7 | Q8NE71 ABCF1_HUMAN  | K.AEQGS#EEEEGEGEEEEEGGESK.A  | S228:        | 3 | 6,7986 | 0,566 | -0,075 |
| 7 | P56749 CLD12_HUMAN  | R.S#RLS#AIEIDIPVVSHTT.-      | S228:S231:   | 3 | 3,5487 | 0,29  | -0,092 |
| 7 | P56749 CLD12_HUMAN  | R.S#RLS#AIEIDIPVVSHTT.-      | S228:S231:   | 2 | 2,9548 | 0,269 | 0,061  |
| 7 | O43815 STRN_HUMAN   | K.SELTDSAS#VLDNFK.F          | S229:        | 2 | 4,0162 | 0,568 | -0,456 |
| 7 | P55010 IF5_HUMAN    | K.VLTLS#DDLER.T              | S229:        | 2 | 3,1785 | 0,369 | -0,098 |
| 7 | Q9Y4E8 UBP15_HUMAN  | K.S#PGASNFSTLPK.I            | S229:        | 2 | 2,251  | 0,305 | -0,095 |
| 7 | Q92619 HMHA1_HUMAN  | R.AGS#PSPQPSGELPR.K          | S23:         | 2 | 2,7757 | 0,334 | -0,251 |
| 7 | P15408 FOSL2_HUMAN  | K.QEPLEEDS#PSSSSAGLDK.A      | S230:        | 2 | 3,6733 | 0,521 | -0,374 |
| 7 | Q9P107 GMIP_HUMAN   | R.S#QGSPEDSAPQASPGPSK.Q      | S231:        | 2 | 3,5124 | 0,41  | -0,54  |
| 7 | Q14814 MEF2D_HUMAN  | R.AS#PGLLPVANGNSLNK.V        | S231:        | 2 | 3,0588 | 0,328 | -0,224 |
| 7 | Q13009 TIAM1_HUMAN  | R.ANS#LGDLYAQK.N             | S231:        | 2 | 2,4131 | 0,374 | -0,291 |
| 7 | O95359 TACC2_HUMAN  | K.LDNTPAS#PPRS#PAEPNDIPIAK.G | S2317:S2321: | 3 | 4,0854 | 0,282 | 0,223  |
| 7 | Q13283 G3BP1_HUMAN  | K.SSS#PAPADIAQTVQEDLR.T      | S232:        | 3 | 5,2015 | 0,435 | 0,093  |
| 7 | Q13283 G3BP1_HUMAN  | K.SSS#PAPADIAQTVQEDLR.T      | S232:        | 2 | 3,8552 | 0,487 | -0,559 |
| 7 | O75970 MPDZ_HUMAN   | R.GSLPQLVSPIVS#R.S           | S234:        | 2 | 2,4053 | 0,34  | 0      |
| 7 | Q9UPX8 SHAN2_HUMAN  | R.QGIAVM*TPTVPGS#PK.A        | S235:        | 2 | 3,3954 | 0,379 | -0,232 |
| 7 | Q9Y2W2 WBP11_HUMAN  | R.DEDM*LYS#PELAQR.G          | S237:        | 2 | 4,0004 | 0,363 | 0,587  |
| 7 | Q9Y446 PKP3_HUMAN   | R.AGGLDWPEATEVS#PSR.T        | S238:        | 2 | 3,6001 | 0,502 | -0,418 |
| 7 | Q86X53 ERIC1_HUMAN  | R.EEDGADAS#EEDLTR.A          | S238:        | 2 | 2,9415 | 0,434 | -0,302 |
| 7 | Q9H019 FA54B_HUMAN  | K.ASS#FADM*M*GILK.D          | S238:        | 2 | 2,5598 | 0,199 | 0,618  |
| 7 | Q9H019 FA54B_HUMAN  | K.ASS#FADM*MGILK.D           | S238:        | 2 | 2,3268 | 0,298 | -0,357 |
| 7 | Q9UQ35 SRRM2_HUMAN  | R.M*APALSGANLTS#PR.V         | S2382:       | 2 | 4,134  | 0,518 | -0,165 |
| 7 | Q86Y04 Q86Y04_HUMAN | K.VDLTLLS#PK.S               | S239:        | 2 | 2,849  | 0,378 | 0,343  |
| 7 | Q96DQ3 YN003_HUMAN  | K.S#SPVCSTAPVETEPK.L         | S239:        | 2 | 2,7141 | 0,406 | -0,439 |
| 7 | Q9UDT6 CLIP2_HUMAN  | R.TS#TGSASSSAVAASSK.E        | S24:         | 2 | 3,3146 | 0,524 | -0,394 |
| 7 | O75420 PERQ1_HUMAN  | R.ALSGGGSVAS#PPPSPAM*PK.Y    | S24:         | 2 | 3,2175 | 0,478 | -0,271 |
| 7 | P54920 SNAA_HUMAN   | K.NS#QSFFSGLFGGSSK.I         | S24:         | 2 | 2,6991 | 0,411 | -0,599 |
| 7 | Q6ZN18 AEBP2_HUMAN  | R.LSPLPPGS#PGSAAR.G          | S24:         | 2 | 2,3737 | 0,33  | 0      |
| 7 | Q12923 PTN13_HUMAN  | K.S#M*GFLSIK.D               | S240:        | 2 | 2,2607 | 0,353 | 0,125  |
| 7 | Q9Y2W1 TR150_HUMAN  | R.ASAVSELS#PR.E              | S243:        | 2 | 2,8287 | 0,318 | -0,222 |
| 7 | P06748 NPM_HUMAN    | K.GPSS#VEDIK.A               | S243:        | 2 | 2,5731 | 0,322 | -0,422 |
| 7 | Q9BZG1 RAB34_HUMAN  | R.INSDDS#NLYLTASK.K          | S244:        | 2 | 5,0618 | 0,51  | -0,376 |

|   |                    |                                   |            |   |        |       |        |
|---|--------------------|-----------------------------------|------------|---|--------|-------|--------|
| 7 | P49368 TCPG_HUMAN  | R.IVLLDSS#LEYK.K                  | S244:      | 2 | 3,3335 | 0,39  | -0,179 |
| 7 | Q16204 CCDC6_HUMAN | K.LDQPVSAPPS#PR.D                 | S244:      | 2 | 2,7364 | 0,384 | -0,272 |
| 7 | Q9UPN3 MACF1_HUMAN | K.AFLAELEQNS#PK.I                 | S2454:     | 2 | 3,8825 | 0,475 | -0,086 |
| 7 | Q8WWI1 LMO7_HUMAN  | R.EDS#FESLDSLGSR.S                | S246:      | 2 | 2,6756 | 0,399 | 0      |
| 7 | P05787 K2C8_HUMAN  | R.ELQSQISDTSVVLS#M*DNSR.S         | S247:      | 3 | 4,7075 | 0,363 | 0,083  |
| 7 | Q96ST2 IWS1_HUMAN  | R.IS#DSESEDPPR.H                  | S248:      | 2 | 2,1823 | 0,263 | -0,372 |
| 7 | Q7Z3B3 K1267_HUMAN | R.LS#PGTDSSSNLGGVK.L              | S249:      | 2 | 2,9434 | 0,434 | -0,651 |
| 7 | Q8NHG8 ZNRF2_HUMAN | R.AYSGSDLPS#SSSGGANGTAGGGGAR.A    | S25:       | 3 | 4,4221 | 0,378 | -0,402 |
| 7 | P16949 STMN1_HUMAN | R.ASGQAFELILS#PR.S                | S25:       | 2 | 4,02   | 0,325 | -0,249 |
| 7 | P16949 STMN1_HUMAN | R.ASGQAFELILS#PR.S                | S25:       | 3 | 3,9709 | 0,233 | -0,311 |
| 7 | Q9Y6A5 TACC3_HUMAN | K.NTENCDFLFS#PPEVTGR.S            | S25:       | 2 | 3,5544 | 0,569 | -0,473 |
| 7 | P46937 YAP1_HUMAN  | K.QPPPLAPQS#PQGGVM*GGSNSNQQQM*R.L | S251:      | 3 | 3,3163 | 0,292 | -0,312 |
| 7 | O95359 TACC2_HUMAN | K.FSS#PTEELDYR.N                  | S2512:     | 2 | 3,2746 | 0,37  | 0,343  |
| 7 | P21359 NF1_HUMAN   | K.GSEGylaatyptvgqts#PR.A          | S2515:     | 3 | 2,785  | 0,204 | 0      |
| 7 | P21359 NF1_HUMAN   | K.GSEGylaatyptvgqts#PR.A          | S2515:     | 2 | 2,2391 | 0,513 | -0,48  |
| 7 | P21359 NF1_HUMAN   | K.SM*S#LDM*GQPSQANTK.K            | S2523:     | 2 | 4,0323 | 0,586 | -0,429 |
| 7 | P78345 RPP38_HUMAN | R.QAS#VTLQPLK.I                   | S253:      | 2 | 2,3445 | 0,315 | -0,209 |
| 7 | Q15477 SKIV2_HUMAN | R.ASS#LEDLVLK.E                   | S256:      | 2 | 3,1471 | 0,552 | -0,317 |
| 7 | P37837 TALDO_HUMAN | K.ALAGCDFLTIS#PK.L                | S256:      | 2 | 2,6762 | 0,331 | 0,166  |
| 7 | P45985 MP2K4_HUMAN | K.LCDFGISGQLVDS#IAK.T             | S257:      | 2 | 3,8758 | 0,522 | -0,406 |
| 7 | P05787 K2C8_HUMAN  | R.SLDM*DS#IIAEVK.A                | S258:      | 2 | 4,4291 | 0,469 | 0,086  |
| 7 | Q8NFH5 NUP53_HUMAN | R.CALS#SPSLAFTPPIK.T              | S258:      | 3 | 3,5502 | 0,272 | 0      |
| 7 | P05787 K2C8_HUMAN  | R.SLDMDS#IIAEVK.A                 | S258:      | 2 | 3,3102 | 0,28  | -0,348 |
| 7 | P05787 K2C8_HUMAN  | R.SLDMDS#IIAEVK.A                 | S258:      | 3 | 2,601  | 0,109 | -0,196 |
| 7 | Q86VR2 F134C_HUMAN | R.AM*DNHS#DS#EEELAFCPLDDSTVAR.E   | S258:S260: | 3 | 4,093  | 0,346 | -0,356 |
| 7 | Q9UFC0 LRWD1_HUMAN | R.ACASPSAQVEGS#PVAGSDGSQPAVK.L    | S259:      | 3 | 4,4703 | 0,384 | -0,15  |
| 7 | Q8NFH5 NUP53_HUMAN | R.CALSS#PSLAFTPPIK.T              | S259:      | 2 | 3,0869 | 0,495 | -0,292 |
| 7 | Q6UN15 FIP1_HUMAN  | K.AEFTS#PPSLFK.T                  | S259:      | 2 | 2,9888 | 0,405 | 0,187  |
| 7 | Q6Y7W6 PERQ2_HUMAN | R.ALSSGGSITS#PPLSPALPK.Y          | S26:       | 2 | 4,1573 | 0,515 | -0,525 |
| 7 | Q6Y7W6 PERQ2_HUMAN | R.ALSSGGSITS#PPLSPALPK.Y          | S26:       | 3 | 3,5656 | 0,419 | -0,197 |
| 7 | Q86YS7 K0528_HUMAN | K.LSSPAAFLPACNS#PSK.E             | S260:      | 2 | 3,0573 | 0,393 | -0,565 |
| 7 | O95297 MPZL1_HUMAN | K.SES#VVYADIR.K                   | S260:      | 2 | 2,3486 | 0,206 | -0,3   |
| 7 | Q9UHR4 BI2L1_HUMAN | K.TPASTPVSGTPQAS#PMIER.S          | S261:      | 3 | 4,0624 | 0,346 | 0,091  |

|   |                     |                               |            |   |        |       |        |
|---|---------------------|-------------------------------|------------|---|--------|-------|--------|
| 7 | Q9UHR4 BI2L1_HUMAN  | K.TPASTPVSQTPQAS#PMIER.S      | S261:      | 2 | 2,1889 | 0,346 | -0,122 |
| 7 | Q6UN15 FIP1_HUMAN   | K.AEFTSPPS#LFK.T              | S262:      | 2 | 2,1718 | 0,354 | -0,187 |
| 7 | B2CI53 B2CI53_HUMAN | R.NGILASPQS#APGNLDNSK.S       | S263:      | 2 | 4,5009 | 0,636 | 0      |
| 7 | B2CI53 B2CI53_HUMAN | R.NGILASPQS#APGNLDNSK.S       | S263:      | 3 | 2,9178 | 0,337 | -0,393 |
| 7 | Q15059 BRD3_HUMAN   | R.SES#PPPLSDPK.Q              | S263:      | 2 | 2,248  | 0,131 | -0,297 |
| 7 | Q14571 ITPR2_HUMAN  | R.AM*S#LVSNEGDSEQNEIR.S       | S2633:     | 2 | 3,7507 | 0,43  | -0,309 |
| 7 | Q6NW34 CC017_HUMAN  | K.LFLINEQS#PR.A               | S265:      | 2 | 3,2616 | 0,263 | -0,188 |
| 7 | Q9UNF1 MAGD2_HUMAN  | K.LQSS#QEPEAPPPR.D            | S265:      | 2 | 2,8496 | 0,31  | -0,724 |
| 7 | Q6KC79 NIPBL_HUMAN  | K.AITSLGGGS#PK.N              | S2658:     | 2 | 3,0069 | 0,342 | -0,207 |
| 7 | Q13435 SF3B2_HUMAN  | R.QEEM*NS#QQEEEEEM*ETDAR.S    | S266:      | 3 | 6,7644 | 0,443 | -0,157 |
| 7 | Q8NFC6 FA44A_HUMAN  | K.STADS#GGEGLETAPK.S          | S266:      | 2 | 4,5692 | 0,499 | -0,651 |
| 7 | Q8TF74 WIPF2_HUMAN  | R.QPPGVPNGPS#SPTNESAPELPQR.H  | S266:      | 3 | 3,1972 | 0,28  | -0,451 |
| 7 | P55036 PSMD4_HUMAN  | K.M*TIS#QQEFGR.T              | S266:      | 2 | 2,6596 | 0,129 | -0,472 |
| 7 | Q92888 ARHG1_HUMAN  | K.GLS#SILDAAR.W               | S266:      | 2 | 2,3599 | 0,189 | -1,127 |
| 7 | Q9NR19 ACSA_HUMAN   | R.AELGM*GDSTSQS#PPIK.R        | S267:      | 2 | 4,2711 | 0,565 | -0,427 |
| 7 | Q8TF74 WIPF2_HUMAN  | R.QPPGVPNGPSS#PTNESAPELPQR.H  | S267:      | 3 | 3,2349 | 0,21  | -0,3   |
| 7 | Q14573 ITPR3_HUMAN  | R.LGFVDVQNCIS#R.-             | S2670:     | 2 | 3,0654 | 0,423 | 0      |
| 7 | Q9UBP0 SPAST_HUMAN  | R.APS#YSGLSM*VSGVK.Q          | S268:      | 2 | 3,9418 | 0,406 | 0,495  |
| 7 | Q9Y6Y0 NS1BP_HUMAN  | K.QIS#SSSTGCLSSPNATVQSPK.H    | S268:      | 3 | 3,5606 | 0,218 | -0,083 |
| 7 | P49454 CENPF_HUMAN  | R.DANS#SFFDNSSS#PHLLDQLK.A    | S268:S276: | 3 | 3,6653 | 0,328 | -0,384 |
| 7 | Q9UJU6 DBNL_HUMAN   | R.AM*S#TTSISSPQPGK.L          | S269:      | 2 | 3,8374 | 0,573 | 0,082  |
| 7 | Q9UJU6 DBNL_HUMAN   | R.AMS#TTSISSPQPGK.L           | S269:      | 2 | 3,6439 | 0,492 | -0,083 |
| 7 | P12956 KU70_HUMAN   | K.TEGDEEAEEEEQEENLEAS#GDYK.Y  | S27:       | 3 | 6,7377 | 0,588 | 0,425  |
| 7 | B2RUZ4 B2RUZ4_HUMAN | R.DGVSLGAVS#STEEASR.C         | S27:       | 2 | 4,7374 | 0,502 | -0,223 |
| 7 | Q5TAQ9 WD42A_HUMAN  | R.TDLANGSLSSPEEM*S#GAEGR.E    | S27:       | 3 | 3,4231 | 0,336 | -0,237 |
| 7 | Q5VSY0 GKAP1_HUMAN  | R.FALLQVDSGSGS#DSEPGK.G       | S27:       | 2 | 3,3806 | 0,385 | -0,716 |
| 7 | Q93100 KPBB_HUMAN   | R.SGS#VVEPLK.S                | S27:       | 2 | 2,8271 | 0,376 | 0,115  |
| 7 | P22234 PUR6_HUMAN   | K.EVYELDS#PGK.V               | S27:       | 2 | 2,5204 | 0,51  | 0      |
| 7 | Q6IAA8 CK059_HUMAN  | K.LLLDPSS#PPTK.A              | S27:       | 2 | 2,4745 | 0,34  | -0,196 |
| 7 | P49736 MCM2_HUMAN   | R.GNDPLTSS#PGR.S              | S27:       | 2 | 2,179  | 0,166 | -0,103 |
| 7 | P46013 KI67_HUMAN   | K.IPCES#PPLEVVDTTASTK.R       | S2708:     | 3 | 2,9927 | 0,123 | -0,09  |
| 7 | P46013 KI67_HUMAN   | K.IPCES#PPLEVVDTTASTK.R       | S2708:     | 2 | 2,8122 | 0,395 | -0,241 |
| 7 | Q8WYQ5 DGCR8_HUMAN  | K.YGGDS#DHPS#DGGETSVQPM*MTK.I | S271:S275: | 3 | 3,8695 | 0,295 | -0,303 |

|   |                    |                               |        |   |        |       |        |
|---|--------------------|-------------------------------|--------|---|--------|-------|--------|
| 7 | P49023 PAXI_HUMAN  | R.ELDELM*AS#LSDFK.I           | S272:  | 2 | 3,5084 | 0,516 | -0,153 |
| 7 | Q13501 SQSTM_HUMAN | R.LTPVS#PESSTEEK.S            | S272:  | 2 | 2,2859 | 0,166 | -0,155 |
| 7 | Q8NEM2 SHCBP_HUMAN | R.SLSLNCNS#DSEQENISM*VEGLK.L  | S273:  | 3 | 4,4226 | 0,352 | -0,217 |
| 7 | Q9HB09 B2L12_HUMAN | R.ACPGPPPPS#PEPLAR.L          | S273:  | 2 | 2,9939 | 0,389 | -0,15  |
| 7 | Q8WWI1 LMO7_HUMAN  | R.EGFES#DTDSEFTFK.M           | S276:  | 2 | 3,7804 | 0,483 | -0,142 |
| 7 | Q7L4E1 FA73B_HUMAN | R.TLM*LPLTEGS#LR.L            | S276:  | 2 | 2,4199 | 0,302 | -0,599 |
| 7 | Q8IZD4 DCP1B_HUMAN | R.SLS#YEEPR.R                 | S276:  | 2 | 2,0042 | 0,13  | 0      |
| 7 | Q9Y3Q8 T22D4_HUMAN | K.S#PDPFGAVAAQK.F             | S279:  | 2 | 3,2129 | 0,398 | 0,289  |
| 7 | Q9Y2K7 JHD1A_HUMAN | R.YEDDGIS#DDEIEGK.R           | S28:   | 2 | 4,5276 | 0,674 | -0,293 |
| 7 | O60293 CC131_HUMAN | K.EEGELEDGEIS#DDDNNNSQIR.S    | S28:   | 3 | 4,5176 | 0,455 | -0,312 |
| 7 | Q9NTJ3 SMC4_HUMAN  | R.EEGPPPPSPDGASS#DAEPEPPSGR.T | S28:   | 3 | 3,2038 | 0,287 | -0,225 |
| 7 | Q8IYL3 CA174_HUMAN | R.LAS#AQEVAGSTSAK.T           | S28:   | 2 | 3,1741 | 0,47  | 0      |
| 7 | Q96A19 C102A_HUMAN | K.GSLLTILGSPS#PER.M           | S28:   | 2 | 2,7941 | 0,305 | -0,486 |
| 7 | Q15018 K0157_HUMAN | R.QM*PSESLDPAFS#PR.M          | S280:  | 2 | 3,3422 | 0,397 | -0,662 |
| 7 | O14757 CHK1_HUMAN  | R.VTS#GGVSESPSGFSK.H          | S280:  | 2 | 2,6586 | 0,467 | -0,324 |
| 7 | Q9UNS1 TIM_HUMAN   | R.FGGS#YIVQGLK.S              | S281:  | 2 | 3,8111 | 0,36  | -0,293 |
| 7 | Q15942 ZYG_HUMAN   | K.FS#PGAPGGSGSQPNQK.L         | S281:  | 2 | 2,7468 | 0,272 | -0,306 |
| 7 | P98172 EFNB1_HUMAN | R.AAALS#LSTLASPK.G            | S281:  | 2 | 2,1737 | 0,263 | -0,186 |
| 7 | Q9Y5Q9 TF3C3_HUMAN | R.ILNLLS#PSDGER.F             | S282:  | 2 | 3,5062 | 0,435 | -0,35  |
| 7 | Q96EZ8 MCRS1_HUMAN | K.GDQVLNFS#DAEDLIDDSK.L       | S282:  | 2 | 3,0774 | 0,439 | -0,71  |
| 7 | Q96EZ8 MCRS1_HUMAN | K.GDQVLNFS#DAEDLIDDSK.L       | S282:  | 3 | 2,7027 | 0,235 | -0,444 |
| 7 | P15924 DESP_HUMAN  | K.GLPSPYNM*SSAPGS#R.S         | S2825: | 2 | 2,7702 | 0,326 | 0,226  |
| 7 | P21127 CD2L1_HUMAN | R.DLLSDLQDIS#DSER.K           | S283:  | 2 | 4,2341 | 0,465 | -0,434 |
| 7 | P21127 CD2L1_HUMAN | R.DLLSDLQDIS#DSER.K           | S283:  | 3 | 3,9791 | 0,406 | -0,108 |
| 7 | Q9Y624 JAM1_HUMAN  | K.VIYSQPS#AR.S                | S284:  | 2 | 2,6793 | 0,464 | 0      |
| 7 | Q96N66 MBOA7_HUMAN | R.AGGGPTLQCPPSS#PEK.A         | S285:  | 2 | 3,3472 | 0,363 | -0,555 |
| 7 | Q6P4F7 RHGBA_HUMAN | R.QS#VGDFVSGALNK.F            | S285:  | 2 | 2,9581 | 0,519 | -0,348 |
| 7 | Q02952 AKA12_HUMAN | K.SAESPTS#PVTSETGSTFK.K       | S286:  | 2 | 4,0977 | 0,579 | -0,516 |
| 7 | Q04726 TLE3_HUMAN  | K.DAPTS#PASVASSSSTPSSK.T      | S286:  | 2 | 3,3517 | 0,466 | -0,596 |
| 7 | Q04724 TLE1_HUMAN  | K.DASSS#PASTASSASSTSLK.S      | S286:  | 2 | 3,3503 | 0,403 | -0,335 |
| 7 | Q9NUI1 DECR2_HUMAN | K.GLPDFAS#FSAK.L              | S287:  | 2 | 2,1542 | 0,389 | -0,1   |
| 7 | O94888 UBXD7_HUMAN | R.SESLIDASEDS#QLEAAIR.A       | S288:  | 2 | 5,458  | 0,55  | -0,424 |
| 7 | Q15424 SAFB1_HUMAN | K.ADS#LLAVVK.R                | S288:  | 2 | 4,0276 | 0,314 | -0,123 |

|   |                    |                               |            |   |        |       |        |
|---|--------------------|-------------------------------|------------|---|--------|-------|--------|
| 7 | O75170 SAPS2_HUMAN | R.VGTEGLVDS#FSQGLER.S         | S289:      | 2 | 3,3106 | 0,499 | -0,275 |
| 7 | Q9NWH9 SLTM_HUMAN  | K.DGQDAIAQS#PEK.E             | S289:      | 2 | 2,2727 | 0,213 | -0,365 |
| 7 | O14745 NHERF_HUMAN | R.SAS#SDTSEELNSQDSPPK.Q       | S290:      | 2 | 4,8476 | 0,472 | -0,685 |
| 7 | P18206 VINC_HUMAN  | R.DPSAS#PGDAGEQAIR.Q          | S290:      | 2 | 4,5344 | 0,555 | -0,393 |
| 7 | Q8NFC6 FA44A_HUMAN | K.TDTGIVTVEQS#PSSSK.L         | S2905:     | 2 | 3,9161 | 0,532 | 0      |
| 7 | P51648 AL3A2_HUMAN | R.ILS#LLEGQK.I                | S293:      | 2 | 2,6352 | 0,149 | -0,339 |
| 7 | Q9Y2D8 ADIP_HUMAN  | K.EM*ISLLS#PQK.K              | S293:      | 2 | 2,3338 | 0,184 | -0,196 |
| 7 | Q99590 SFRIP_HUMAN | K.TEELIES#PKLESS#EGEIIQTVDR.Q | S293:S299: | 3 | 4,2119 | 0,318 | -0,729 |
| 7 | O00499 BIN1_HUMAN  | K.S#SPSPDGSPAATPEIR.V         | S296:      | 2 | 3,6031 | 0,548 | -0,074 |
| 7 | Q9P0K7 RAI14_HUMAN | R.SITS#TPLS#GKESVFFAEPFK.A    | S296:S300: | 3 | 2,6719 | 0,112 | 0,452  |
| 7 | Q8N370 LAT4_HUMAN  | K.LCLS#TVDLEVK.C              | S297:      | 2 | 2,8686 | 0,436 | 0,09   |
| 7 | O14495 LPP3_HUMAN  | K.EILS#PVDIIDR.N              | S297:      | 2 | 2,7434 | 0,516 | -0,362 |
| 7 | O00499 BIN1_HUMAN  | K.SPS#PPDGSPAATPEIR.V         | S298:      | 2 | 3,4207 | 0,457 | 0,515  |
| 7 | Q92890 UFD1_HUMAN  | R.FVAFSGEGQS#LR.K             | S299:      | 2 | 3,776  | 0,529 | 0      |
| 7 | Q4G0J3 LARP7_HUMAN | R.SS#SEDAESLAPR.S             | S299:      | 2 | 3,4561 | 0,399 | -0,092 |
| 7 | Q6P0N0 CN106_HUMAN | K.NGS#LLM*VSDSER.T            | S299:      | 2 | 3,2752 | 0,516 | -0,348 |
| 7 | Q99590 SFRIP_HUMAN | K.LESS#EGEIIQTVDR.Q           | S299:      | 2 | 3,1206 | 0,242 | -0,442 |
| 7 | P09382 LEG1_HUMAN  | K.S#FVLNLGK.D                 | S30:       | 2 | 2,4837 | 0,212 | -0,064 |
| 7 | Q3KR37 GRM1B_HUMAN | R.S#PTPQNQDGDGM*VEK.G         | S30:       | 2 | 2,3869 | 0,416 | -0,21  |
| 7 | Q9Y3I0 CV028_HUMAN | R.IAS#PEGQDYLK.G              | S300:      | 2 | 2,562  | 0,336 | -0,094 |
| 7 | P49023 PAXI_HUMAN  | R.SS#PGGQDEGGFM*AQGK.T        | S303:      | 2 | 3,7581 | 0,533 | -0,37  |
| 7 | Q13247 SFRS6_HUMAN | R.SNS#PLPVPPSK.A              | S303:      | 2 | 3,2267 | 0,357 | -0,203 |
| 7 | P49023 PAXI_HUMAN  | R.SS#PGGQDEGGFMAQGK.T         | S303:      | 2 | 3,1332 | 0,595 | -0,448 |
| 7 | Q03164 HRX_HUMAN   | R.NSSTPGLQVPVS#PTVPIQNQK.Y    | S3036:     | 3 | 3,9193 | 0,374 | 0,081  |
| 7 | Q96QE3 ATAD5_HUMAN | K.SGYIS#ESENSEISQQVR.F        | S306:      | 2 | 5,069  | 0,528 | 0,673  |
| 7 | Q96QE3 ATAD5_HUMAN | K.SGYIS#ESENSEISQQVR.F        | S306:      | 3 | 4,7555 | 0,311 | 0,643  |
| 7 | Q9UQR1 ZN148_HUMAN | K.GLLTSEEDSGFSTS#PK.D         | S306:      | 2 | 4,0218 | 0,53  | -0,136 |
| 7 | P49589 SYCC_HUMAN  | K.ALQEGEGDLSIS#ADR.L          | S307:      | 2 | 4,6288 | 0,438 | -0,446 |
| 7 | Q9Y2I7 FYV1_HUMAN  | R.SAS#ITNLSLDR.S              | S307:      | 2 | 2,7848 | 0,296 | 0      |
| 7 | Q96MU7 YTDC1_HUMAN | R.GIS#PIVFDR.S                | S308:      | 2 | 2,7877 | 0,219 | -0,338 |
| 7 | Q9Y2U8 MAN1_HUMAN  | R.LETS#VQGGGLAM*NDR.A         | S309:      | 2 | 2,803  | 0,274 | -0,359 |
| 7 | Q00341 VIGLN_HUMAN | K.VATLNS#EEESDPPTYK.D         | S31:       | 2 | 3,6697 | 0,422 | -0,59  |
| 7 | Q9NR55 BATF3_HUMAN | R.SVAAPGNQPQPQQQS#PEDDDR.K    | S31:       | 3 | 3,5613 | 0,473 | -0,285 |

|   |                     |                               |        |   |        |       |        |
|---|---------------------|-------------------------------|--------|---|--------|-------|--------|
| 7 | Q9NWQ4 CN118_HUMAN  | K.LGELWEEM*ALS#PR.Q           | S31:   | 2 | 2,6076 | 0,149 | -0,975 |
| 7 | P49454 CENPF_HUMAN  | K.LALS#PLSLGK.E               | S3119: | 2 | 3,2906 | 0,439 | 0,113  |
| 7 | Q9BWU0 NADAP_HUMAN  | K.MLGEDS#DEEEEM*DTSER.K       | S312:  | 3 | 4,3554 | 0,123 | -0,349 |
| 7 | Q9BWU0 NADAP_HUMAN  | K.M*LGEDS#DEEEEM*DTSER.K      | S312:  | 3 | 3,4876 | 0,321 | -0,519 |
| 7 | Q14669 TRIPC_HUMAN  | R.SES#PPAELPSLR.R             | S312:  | 2 | 3,1741 | 0,537 | -0,09  |
| 7 | Q9H8G2 CI082_HUMAN  | K.SVNEILGLAESS#PNEPK.A        | S312:  | 2 | 2,2536 | 0,212 | -0,458 |
| 7 | Q15811 ITSN1_HUMAN  | R.S#GSGISVISSTSVDQR.L         | S313:  | 2 | 4,4184 | 0,518 | 0,441  |
| 7 | Q99569 PKP4_HUMAN   | R.VGS#PLTLTDAQTR.V            | S314:  | 2 | 3,055  | 0,438 | 0,424  |
| 7 | Q9H788 SH24A_HUMAN  | R.TLS#SSAQEDIIR.W             | S315:  | 2 | 4,1422 | 0,513 | 0,349  |
| 7 | P04637 P53_HUMAN    | R.ALPNNTSSS#PQPK.K            | S315:  | 2 | 2,081  | 0,271 | -0,258 |
| 7 | Q9Y6A5 TACC3_HUMAN  | R.AM*TLS#PQEEVAAGQM*ASSSR.S   | S317:  | 3 | 5,6828 | 0,366 | 0,169  |
| 7 | Q9UPQ6 Q9UPQ6_HUMAN | R.SESS#DFEVVVK.R              | S319:  | 2 | 2,7701 | 0,384 | 0,468  |
| 7 | Q9UHW9 S12A6_HUMAN  | K.IDDIPGLSDTS#PDLSSR.S        | S32:   | 2 | 3,1591 | 0,524 | -0,457 |
| 7 | Q96A65 EXOC4_HUMAN  | R.TLS#TSDDVEDR.E              | S32:   | 2 | 2,0943 | 0,461 | -0,278 |
| 7 | Q13043 STK4_HUMAN   | R.EVDQDDEENS#EEDEM*DSGTM*VR.A | S320:  | 3 | 5,0192 | 0,362 | -0,548 |
| 7 | Q13043 STK4_HUMAN   | R.EVDQDDEENS#EEDEMDSGTM*VR.A  | S320:  | 3 | 4,727  | 0,444 | -0,345 |
| 7 | Q13043 STK4_HUMAN   | R.EVDQDDEENS#EEDEM*DSGTMVR.A  | S320:  | 3 | 3,9043 | 0,326 | -0,413 |
| 7 | Q9NWT1 PK11P_HUMAN  | K.ESLPPAAEPS#PVSK.E           | S320:  | 2 | 2,8942 | 0,419 | -0,164 |
| 7 | Q16204 CCDC6_HUMAN  | R.QLS#EESSELEM*DDER.Y         | S323:  | 2 | 3,9839 | 0,578 | -0,264 |
| 7 | Q9BX40 LS14B_HUMAN  | K.SFFDNIS#SELK.T              | S323:  | 2 | 3,529  | 0,473 | -0,179 |
| 7 | P26651 TTP_HUMAN    | R.LPIFNRI#VSE.-               | S323:  | 2 | 3,0917 | 0,279 | -0,27  |
| 7 | Q9BYW2 SETD2_HUMAN  | K.SSQSEGIFLGSES#DEDSVR.T      | S323:  | 2 | 2,9335 | 0,496 | -0,347 |
| 7 | Q9NQW6 ANLN_HUMAN   | K.TPIS#PLK.T                  | S323:  | 2 | 2,3231 | 0,27  | 0,146  |
| 7 | P42566 EP15_HUMAN   | K.NIIGSS#PVADFSAIK.E          | S324:  | 2 | 4,0135 | 0,514 | -0,153 |
| 7 | Q9BX40 LS14B_HUMAN  | K.SFFDNIS#ELK.T               | S324:  | 2 | 2,0404 | 0,237 | -0,446 |
| 7 | Q14678 KANK1_HUMAN  | R.SYS#AGNASQLEQLSR.A          | S325:  | 2 | 3,9088 | 0,557 | -0,289 |
| 7 | Q9BRD0 BUD13_HUMAN  | K.YEYDPDIS#PPR.K              | S325:  | 2 | 3,2418 | 0,511 | 0,085  |
| 7 | P08670 VIME_HUMAN   | R.QVQS#LTCEVDALK.G            | S325:  | 2 | 2,5489 | 0,335 | -0,155 |
| 7 | Q8ND76 CCNY_HUMAN   | R.SAS#ADNLTLPR.W              | S326:  | 2 | 3,1494 | 0,23  | -0,299 |
| 7 | Q13469 NFAC2_HUMAN  | K.TS#PDPSPVSAAPSK.A           | S326:  | 2 | 2,734  | 0,467 | -0,086 |
| 7 | Q99708 RBBP8_HUMAN  | R.VSS#PVFGATSSIK.S            | S327:  | 2 | 2,5773 | 0,221 | 0,179  |
| 7 | P82094 TMF1_HUMAN   | R.IDS#FSVQSLDSR.S             | S328:  | 2 | 3,8765 | 0,439 | -0,34  |
| 7 | O43823 AKAP8_HUMAN  | R.VDSEGDIFS#ENDDAAGDFR.S      | S328:  | 3 | 3,5317 | 0,354 | 0,271  |



|   |                    |                                   |                 |   |        |       |        |
|---|--------------------|-----------------------------------|-----------------|---|--------|-------|--------|
| 7 | Q9UKV3 ACINU_HUMAN | R.S#QEQLVLER.G                    | S328:           | 2 | 3,3913 | 0,202 | -0,306 |
| 7 | Q14676 MDC1_HUMAN  | R.AQPFQFIDS#DTDAEEER.I            | S329:           | 2 | 5,1191 | 0,607 | -0,486 |
| 7 | Q99598 TSNAX_HUMAN | K.DVNSSS#PVM*LAFK.S               | S33:            | 2 | 3,5129 | 0,523 | 0,082  |
| 7 | P05787 K2C8_HUMAN  | R.AS#LEAAIADAEQR.G                | S330:           | 3 | 4,0554 | 0,447 | 0      |
| 7 | P05787 K2C8_HUMAN  | R.AS#LEAAIADAEQR.G                | S330:           | 2 | 3,4659 | 0,474 | -0,086 |
| 7 | Q9UHR4 BI2L1_HUMAN | R.SVS#VATGLNM*M*K.K               | S331:           | 2 | 3,2814 | 0,485 | -0,09  |
| 7 | Q13546 RIPK1_HUMAN | R.M*QSLQLDCVAVPSS#R.S             | S331:           | 2 | 3,2605 | 0,473 | -0,205 |
| 7 | Q9H6S0 YTDC2_HUMAN | R.VDGIPNDSS#DSEM*EDK.T            | S331:           | 2 | 3,052  | 0,391 | -0,399 |
| 7 | P78310 CXAR_HUMAN  | R.TPQS#PTLPPAK.V                  | S332:           | 2 | 2,498  | 0,28  | -0,1   |
| 7 | Q03188 CENPC_HUMAN | R.TIS#PAESTALFQGR.K               | S333:           | 2 | 3,38   | 0,619 | -0,157 |
| 7 | Q03188 CENPC_HUMAN | R.TIS#PAESTALFQGR.K               | S333:           | 3 | 2,9243 | 0,294 | -0,117 |
| 7 | Q15036 SNX17_HUMAN | R.VTSSVPLPSGS#TSSPGR.G            | S333:           | 2 | 2,2668 | 0,255 | 0,288  |
| 7 | P49790 NU153_HUMAN | R.IPSIVSS#PLNSPLDR.S              | S334:           | 2 | 4,2556 | 0,531 | -0,291 |
| 7 | Q07352 TISB_HUMAN  | R.LPIFSRLS#ISDD.-                 | S334:           | 2 | 4,1907 | 0,596 | -0,169 |
| 7 | P49790 NU153_HUMAN | R.IPSIVSS#PLNSPLDR.S              | S334:           | 3 | 3,9609 | 0,276 | -0,109 |
| 7 | Q16181 SEPT7_HUMAN | K.S#PLAQM*EEER.R                  | S334:           | 2 | 3,3703 | 0,449 | -0,285 |
| 7 | Q5VSL9 FA40A_HUMAN | R.AAS#PPASASDLIEQQK.R             | S335:           | 3 | 5,345  | 0,375 | 0,201  |
| 7 | Q5VSL9 FA40A_HUMAN | R.AAS#PPASASDLIEQQK.R             | S335:           | 2 | 4,3026 | 0,487 | -0,201 |
| 7 | Q9Y2L8 ZKSC5_HUMAN | R.DLDAITDIS#PK.Q                  | S335:           | 2 | 2,5346 | 0,37  | -0,577 |
| 7 | Q9UJZ1 STML2_HUMAN | K.APVPGTDPDSLSSGS#SR.D            | S335:           | 2 | 2,1886 | 0,35  | -0,382 |
| 7 | Q9UK58 CCNL1_HUMAN | K.GLNPDGTPALSTLGGFS#PASKPS#SPR.E  | S335:S341:      | 3 | 2,7046 | 1     | -0,616 |
| 7 | Q14498 RBM39_HUMAN | R.TDASSASS#FLDSDELER.T            | S337:           | 2 | 4,6273 | 0,588 | -0,511 |
| 7 | Q9BVS4 RIOK2_HUMAN | K.EGSEFSFS#DGEVAEK.A              | S337:           | 2 | 4,4082 | 0,498 | -0,144 |
| 7 | P49790 NU153_HUMAN | R.IPSIVSSPLNS#PLDR.S              | S338:           | 2 | 4,4277 | 0,569 | -0,364 |
| 7 | P49790 NU153_HUMAN | R.IPSIVSSPLNS#PLDR.S              | S338:           | 3 | 3,8419 | 0,16  | -0,218 |
| 7 | Q8NCN4 RN169_HUMAN | R.CVS#APDLTIEK.R                  | S339:           | 2 | 3,137  | 0,247 | 0,186  |
| 7 | Q14681 EI24_HUMAN  | K.TVYLQSALSSSTS#AEKFPS#PHPS#PAK.L | S339:S345:S349: | 3 | 5,1113 | 1     | -0,743 |
| 7 | Q86VM9 ZCH18_HUMAN | R.DSGS#DQDLDGAGVR.A               | S34:            | 2 | 4,6532 | 0,441 | -0,414 |
| 7 | Q5VVJ2 MYSM1_HUMAN | R.QLPS#PEPCEIQK.N                 | S340:           | 2 | 2,5539 | 0,216 | 0,243  |
| 7 | Q14498 RBM39_HUMAN | R.TDASSASSFLDS#DELER.T            | S341:           | 2 | 4,5495 | 0,533 | -0,256 |
| 7 | A6NJT0 UNC4_HUMAN  | K.ASPFVSVELLSDS#PPR.R             | S341:           | 2 | 3,411  | 0,513 | -0,138 |
| 7 | Q09666 AHNK_HUMAN  | K.M*PFLSISS#PK.V                  | S3412:          | 2 | 3,0878 | 0,279 | -0,203 |
| 7 | Q09666 AHNK_HUMAN  | K.MPFLSISS#PK.V                   | S3412:          | 2 | 2,9157 | 0,323 | -0,308 |

|   |                    |                                |        |   |        |       |        |
|---|--------------------|--------------------------------|--------|---|--------|-------|--------|
| 7 | Q99728 BARD1_HUMAN | R.TSILS#TSGDFVK.Q              | S342:  | 2 | 3,451  | 0,426 | -0,366 |
| 7 | P11940 PABP1_HUMAN | K.GFGFVCFSS#PEEATK.A           | S342:  | 2 | 3,3509 | 0,417 | -0,35  |
| 7 | Q9BVG4 SSBP4_HUMAN | K.SS#PGAVAGLSNAPGTPR.D         | S342:  | 2 | 3,3056 | 0,529 | 0,151  |
| 7 | O60934 NBN_HUMAN   | K.TTTPGPSLS#QGVSVDEK.L         | S343:  | 2 | 3,9315 | 0,491 | -0,547 |
| 7 | Q9NVF7 FBX28_HUMAN | R.EVM*ESAVGNSSSGQNEES#PR.K     | S344:  | 3 | 5,4313 | 0,466 | -0,489 |
| 7 | Q8N7R7 CCYL1_HUMAN | R.SFS#ADNFIGIQR.S              | S344:  | 2 | 4,3809 | 0,455 | 0      |
| 7 | Q15942 ZYG_HUMAN   | R.S#PGAPGPLTK.E                | S344:  | 2 | 2,6374 | 0,348 | -0,109 |
| 7 | O75676 KS6A4_HUMAN | R.LEPVYSPPGS#PPPGDPR.I         | S347:  | 2 | 3,5021 | 0,384 | -0,199 |
| 7 | Q9NZT2 OGFR_HUMAN  | R.S#VEPQDAGPLER.S              | S349:  | 2 | 2,3771 | 0,423 | -0,62  |
| 7 | Q8WV9 HNRLL_HUMAN  | K.TEEGEIDYS#AEENR.R            | S35:   | 2 | 4,9898 | 0,507 | -0,256 |
| 7 | Q01650 LAT1_HUMAN  | K.SADGS#APAGEGEGVTLQR.N        | S35:   | 2 | 4,4768 | 0,532 | -0,274 |
| 7 | O15085 ARHGB_HUMAN | R.QPS#DASETTGLVQR.C            | S35:   | 2 | 2,323  | 0,435 | -0,233 |
| 7 | Q6KC79 NIPBL_HUMAN | K.AAM*YDISS#PSK.D              | S350:  | 2 | 3,5581 | 0,512 | -0,088 |
| 7 | Q5QP82 WDR32_HUMAN | R.TTSS#SDLTSSSSGPR.V           | S350:  | 2 | 2,3643 | 0,264 | -0,913 |
| 7 | Q03164 HRX_HUMAN   | K.ALSSAVQASPTSPGGSPS#SPSSGQR.S | S3517: | 3 | 4,5151 | 0,506 | -0,231 |
| 7 | Q9Y2U8 MAN1_HUMAN  | R.NLEEAAAAEQGGGCDQVDSS#PVPR.Y  | S352:  | 3 | 5,4559 | 0,503 | -0,433 |
| 7 | Q641Q2 FA21A_HUMAN | K.LTDEDFS#PFGSGGLFSGGK.G       | S352:  | 3 | 3,7707 | 0,423 | -0,267 |
| 7 | Q641Q2 FA21A_HUMAN | K.LTDEDFS#PFGSGGLFSGGK.G       | S352:  | 2 | 3,2938 | 0,546 | -0,475 |
| 7 | Q96K21 ZFY19_HUMAN | R.LPDS#DDDEDEETAIQR.V          | S354:  | 2 | 7,2388 | 0,6   | -0,506 |
| 7 | Q9NZL4 HPBP1_HUMAN | K.LLQTCFSS#PADDSM*DR.-         | S354:  | 3 | 3,5436 | 0,356 | -0,283 |
| 7 | Q9NQG7 HPS4_HUMAN  | R.GEVLGLSSS#LGK.E              | S355:  | 2 | 2,7651 | 0,422 | -0,497 |
| 7 | Q14157 UBP2L_HUMAN | K.GGS#TTGSQFLEQFK.T            | S356:  | 2 | 4,1247 | 0,502 | -0,389 |
| 7 | Q96Q15 SMG1_HUMAN  | K.NLATS#ADTPPSTVPGTGK.S        | S3566: | 2 | 3,5135 | 0,52  | 0,476  |
| 7 | P46013 KI67_HUMAN  | K.TPVQYSQQNS#PQK.H             | S357:  | 2 | 3,8824 | 0,473 | -0,427 |
| 7 | Q6UB35 C1TM_HUMAN  | K.LQPLS#PVPSDIEISR.G           | S357:  | 2 | 2,8093 | 0,424 | -0,352 |
| 7 | Q2KHR2 RFXD2_HUMAN | R.SPTTVLFTS#SPIK.T             | S357:  | 2 | 2,4177 | 0,339 | -0,167 |
| 7 | O15014 ZN609_HUMAN | R.FCDS#PTSDLEM*R.N             | S358:  | 2 | 3,9221 | 0,467 | -0,079 |
| 7 | P51991 ROA3_HUMAN  | R.SSGS#PYGGGYGGGGSGGYGSR.R     | S358:  | 2 | 3,9093 | 0,734 | -0,49  |
| 7 | Q9UBU7 DBF4A_HUMAN | K.YSVGSL#PVSASVLK.K            | S359:  | 2 | 3,6039 | 0,479 | -0,233 |
| 7 | Q9NQ55 SSF1_HUMAN  | R.VGGS#DEEASGIPSR.T            | S359:  | 2 | 3,5217 | 0,465 | -0,169 |
| 7 | Q9H3C7 GGNB2_HUMAN | R.LEQLCEEFS#EEER.V             | S360:  | 2 | 4,6455 | 0,489 | -0,137 |
| 7 | Q16566 KCC4_HUMAN  | R.DPS#PIQDGNEDM*K.A            | S360:  | 2 | 3,8775 | 0,353 | -0,237 |
| 7 | Q14157 UBP2L_HUMAN | K.GGSTTGS#QFLEQFK.T            | S360:  | 2 | 3,6477 | 0,385 | -0,623 |

|   |                     |                                    |            |   |        |       |        |
|---|---------------------|------------------------------------|------------|---|--------|-------|--------|
| 7 | Q9UGV2 NDRG3_HUMAN  | R.SVTSNQSDGTQESCES#PDVLDR.H        | S361:      | 3 | 6,5644 | 0,556 | -0,294 |
| 7 | Q9Y2X7 GIT1_HUMAN   | K.SLSS#PTDNLELSLR.S                | S362:      | 2 | 3,4193 | 0,387 | -0,227 |
| 7 | Q99728 BARD1_HUMAN  | K.QTVPENIPLPECSS#PPSCK.R           | S364:      | 3 | 3,131  | 0,235 | -0,159 |
| 7 | P49768 PSN1_HUMAN   | R.AAVQELS#SSILAGEDPEER.G           | S365:      | 3 | 3,2107 | 0,227 | 0,176  |
| 7 | P98174 FGD1_HUMAN   | R.QES#VELTVQK.V                    | S365:      | 2 | 2,7003 | 0,338 | -0,178 |
| 7 | O43303 CE110_HUMAN  | K.LPS#PEPSM*SPK.M                  | S366:      | 2 | 2,4641 | 0,232 | -1,06  |
| 7 | P49768 PSN1_HUMAN   | R.AAVQELSSS#ILAGEDPEER.G           | S367:      | 3 | 3,0858 | 0,246 | 0      |
| 7 | Q8IZT6 ASPM_HUMAN   | K.ILS#PDSFIK.D                     | S367:      | 2 | 2,8216 | 0,345 | -0,111 |
| 7 | A8K040 A8K040_HUMAN | K.NQVVSS#TNGELNTDDPTAGR.S          | S367:      | 2 | 2,7363 | 0,443 | -0,453 |
| 7 | Q9UN79 SOX13_HUMAN  | K.DLISLSS#PAK.E                    | S368:      | 2 | 2,8527 | 0,276 | -0,299 |
| 7 | Q96594 CCNL2_HUMAN  | K.ADS#PVNGLPK.G                    | S369:      | 2 | 2,9393 | 0,328 | 0      |
| 7 | Q14CV6 Q14CV6_HUMAN | R.GAPM*DPNES#PAAPEAALPK.A          | S37:       | 2 | 4,5484 | 0,427 | -0,436 |
| 7 | Q14694 UBP10_HUMAN  | K.YSPPAIS#PLVSEK.Q                 | S370:      | 2 | 2,2264 | 0,413 | -0,166 |
| 7 | O43303 CE110_HUMAN  | K.LPSPEPSM*S#PK.M                  | S372:      | 2 | 2,5988 | 0,377 | -0,386 |
| 7 | P20810 ICAL_HUMAN   | R.SESELIDELS#EDFDR.S               | S373:      | 2 | 3,7271 | 0,506 | -0,524 |
| 7 | Q9UHB6 LIMA1_HUMAN  | R.ASSLSESS#PPK.A                   | S374:      | 2 | 2,84   | 0,299 | -0,313 |
| 7 | Q9UQ35 SRRM2_HUMAN  | R.HGGS#PQPLATTPLSQEPVNPPEAS#PTR.D  | S377:S398: | 3 | 7,3769 | 1     | -0,547 |
| 7 | Q9UKV8 I2C2_HUMAN   | R.SAS#FNTDPYVR.E                   | S379:      | 2 | 3,8539 | 0,504 | -0,274 |
| 7 | Q06587 RING1_HUMAN  | R.TPQEAIM*DGTEIAVS#PR.S            | S38:       | 2 | 5,5416 | 0,503 | -0,064 |
| 7 | Q06587 RING1_HUMAN  | R.TPQEAIM*DGTEIAVS#PR.S            | S38:       | 3 | 4,3489 | 0,338 | 0      |
| 7 | P30050 RL12_HUMAN   | K.IGPLGLS#PK.K                     | S38:       | 2 | 3,0915 | 0,411 | 0,063  |
| 7 | P16949 STMN1_HUMAN  | K.EVPEFPLS#PPK.K                   | S38:       | 2 | 2,5753 | 0,425 | 0      |
| 7 | Q12888 TP53B_HUMAN  | R.STPFIVPSS#PTEQEGR.Q              | S380:      | 2 | 2,7617 | 0,404 | -0,269 |
| 7 | Q7Z417 NUFP2_HUMAN  | K.TIQNSSVSPTSSS#SSSSSTGETQTQSSSR.L | S381:      | 3 | 3,825  | 1     | -0,308 |
| 7 | Q86WB0 NIPA_HUMAN   | R.S#M*GTGDTPLGLEVPSS#PLRK.A        | S381:S395: | 3 | 3,3451 | 0,387 | 0,261  |
| 7 | O94876 TMCC1_HUMAN  | K.FGS#ADNIPNLK.D                   | S382:      | 2 | 4,1498 | 0,315 | -0,486 |
| 7 | Q9UKS6 PACN3_HUMAN  | R.ALYDYAGQEADELS#FR.A              | S383:      | 2 | 5,908  | 0,585 | -0,443 |
| 7 | Q5JU85 IQEC2_HUMAN  | R.M*QFS#FEEYEK.A                   | S383:      | 2 | 3,3838 | 0,254 | 0      |
| 7 | Q8TEW0 PAR3_HUMAN   | R.FS#PDSQYIDNR.S                   | S383:      | 2 | 2,9165 | 0,305 | -0,172 |
| 7 | Q92598 HS105_HUMAN  | R.GCALQCAILS#PAFK.V                | S384:      | 2 | 4,3796 | 0,352 | -0,302 |
| 7 | Q9C0H5 K1688_HUMAN  | R.FLS#LEYSAPAGK.E                  | S384:      | 2 | 2,4055 | 0,198 | 0      |
| 7 | Q8NC44 F134A_HUMAN  | R.QALDS#EEEEEDVAAK.E               | S385:      | 2 | 4,2779 | 0,553 | -0,42  |
| 7 | Q8NC44 F134A_HUMAN  | R.QALDS#EEEEEDVAAK.E               | S385:      | 3 | 3,9356 | 0,28  | 0      |

|   |                     |                               |            |   |        |       |        |
|---|---------------------|-------------------------------|------------|---|--------|-------|--------|
| 7 | Q9NYF8 BCLF1_HUMAN  | R.AEGEWEDQEALDYFS#DK.E        | S385:      | 2 | 3,895  | 0,611 | -0,578 |
| 7 | Q9Y3X0 CCDC9_HUMAN  | K.EGAASPAPETPQPTS#PETS PK.E   | S386:      | 3 | 3,7924 | 0,321 | -0,169 |
| 7 | Q8IY92 BTBDC_HUMAN  | R.GGTSQVGS#PTLLSPA VPSK.Q     | S387:      | 2 | 3,7125 | 0,411 | 0      |
| 7 | Q7Z2W4 ZCCHV_HUMAN  | R.SS#LGSLQTPEAVTTR.K          | S387:      | 2 | 3,2708 | 0,352 | 0      |
| 7 | O43318 M3K7_HUMAN   | R.M*S#ADM*SEIEAR.I            | S389:      | 2 | 3,812  | 0,289 | -0,09  |
| 7 | O43318 M3K7_HUMAN   | R.MS#ADMSEIEAR.I              | S389:      | 2 | 2,2557 | 0,207 | -0,092 |
| 7 | Q9UPU9 SAM4A_HUMAN  | R.GFGQS#NSLPTAGSVGGGM*GR.R    | S389:      | 2 | 2,162  | 0,471 | -0,379 |
| 7 | Q99613 EIF3C_HUMAN  | K.QPLLLS#EDEEDTK.R            | S39:       | 2 | 2,6828 | 0,445 | -0,076 |
| 7 | Q9BPX3 CND3_HUMAN   | R.GDFS#YIGNLM*TK.E            | S390:      | 2 | 3,684  | 0,506 | 0      |
| 7 | Q8TD55 PKHO2_HUMAN  | R.CSS#LGDLLGEGPR.H            | S390:      | 2 | 2,7039 | 0,436 | -0,254 |
| 7 | O43463 SUV91_HUMAN  | R.M*DSNFLAGLPGS#PK.K          | S391:      | 2 | 4,1544 | 0,538 | -0,308 |
| 7 | Q8NEY1 NAV1_HUMAN   | K.SGYM*S#DSDLM*GK.T           | S391:      | 2 | 3,5261 | 0,51  | -0,348 |
| 7 | O43463 SUV91_HUMAN  | R.MDSNFLAGLPGS#PK.K           | S391:      | 2 | 3,3021 | 0,509 | 0,466  |
| 7 | Q14684 RRP1B_HUMAN  | R.VFCVEEEDS#ESSLQK.R          | S392:      | 2 | 4,8455 | 0,583 | -0,327 |
| 7 | Q14684 RRP1B_HUMAN  | R.VFCVEEEDS#ESSLQK.R          | S392:      | 3 | 4,2434 | 0,442 | -0,294 |
| 7 | P98082 DAB2_HUMAN   | K.S#SPNPFVGSPPK.G             | S393:      | 2 | 2,5467 | 0,357 | 0      |
| 7 | P49792 RBP2_HUMAN   | K.SGQSALYDALFSSQS#PK.D        | S394:      | 3 | 3,2447 | 0,363 | -0,098 |
| 7 | P49792 RBP2_HUMAN   | K.SGQSALYDALFSSQS#PK.D        | S394:      | 2 | 3,1885 | 0,562 | -0,392 |
| 7 | Q86WB0 NIPA_HUMAN   | R.SM*GTGDTPGLEVP S#SPLR.K     | S394:      | 3 | 2,7856 | 0,101 | -0,289 |
| 7 | Q8NC51 PAIRB_HUMAN  | R.TDKSSAS#APDVDDPEAFPALA.-    | S394:      | 2 | 2,0994 | 0,477 | -0,447 |
| 7 | Q86WB0 NIPA_HUMAN   | R.SM*GTGDTPGLEVPSS#PLR.K      | S395:      | 2 | 3,5124 | 0,517 | -0,386 |
| 7 | Q9NYF8 BCLF1_HUMAN  | K.FNDS#EGDDTEETEDYR.Q         | S397:      | 2 | 4,4865 | 0,551 | -0,488 |
| 7 | Q96BT3 CENPT_HUMAN  | R.AAS#PESASSTPESLQAR.R        | S397:      | 2 | 3,901  | 0,6   | -0,207 |
| 7 | O60934 NBN_HUMAN    | R.M*LS#QDAPTVK.E              | S397:      | 2 | 3,2329 | 0,33  | -0,206 |
| 7 | Q8N1F8 S11IP_HUMAN  | R.AS#ISEPSDTPPEPR.T           | S398:      | 2 | 3,5489 | 0,415 | 0      |
| 7 | Q8N5Y2 MS3L1_HUMAN  | R.SS#SPIPLT#PSKEGSAVFAGFEGR.R | S399:T405: | 3 | 4,8031 | 1     | -0,221 |
| 7 | Q68DK7 Q68DK7_HUMAN | K.S#PLGGGGGSGASSQAACLK.Q      | S4:        | 2 | 4,7838 | 0,654 | -0,42  |
| 7 | A6NKF1 SAC31_HUMAN  | R.TLEEVVM*AEEDDEGTDRPGS#PA.-  | S401:      | 3 | 3,3183 | 0,485 | -0,223 |
| 7 | P98082 DAB2_HUMAN   | K.SSPNPFVGS#PPK.G             | S401:      | 2 | 2,7948 | 0,364 | 0      |
| 7 | Q5T3J3 CA103_HUMAN  | K.DTLQTVSSS#PVTEISR.E         | S402:      | 2 | 4,6188 | 0,395 | -1,491 |
| 7 | Q8NCN4 RN169_HUMAN  | R.VLS#PLIIK.S                 | S403:      | 2 | 2,9913 | 0,295 | -0,317 |
| 7 | Q9NZT2 OGFR_HUMAN   | R.EQPTEPGPQS#ASEVEK.I         | S403:      | 2 | 2,2554 | 0,25  | -0,71  |
| 7 | Q96BY7 ATG2B_HUMAN  | K.DFGTVPPTS#PAK.S             | S403:      | 2 | 2,2549 | 0,361 | -0,188 |

|   |                      |                             |            |   |        |       |        |
|---|----------------------|-----------------------------|------------|---|--------|-------|--------|
| 7 | Q8IVT5 KSR1_HUMAN    | R.TES#VPSDINNPVDR.A         | S404:      | 2 | 2,7351 | 0,175 | 0,15   |
| 7 | O94885 SASH1_HUMAN   | R.TCS#FGGFDLTNR.S           | S407:      | 2 | 3,4495 | 0,473 | -0,168 |
| 7 | Q9C0H5 K1688_HUMAN   | R.QLVYVEQAGSS#PK.L          | S407:      | 2 | 3,3932 | 0,422 | 0      |
| 7 | Q9NTJ3 SMC4_HUMAN    | R.TES#PATAAETASEELDNR.S     | S41:       | 2 | 5,2671 | 0,561 | -1,299 |
| 7 | Q09666 AHNK_HUMAN    | R.DDGVFVQEVTQNS#PAAR.T      | S41:       | 2 | 5,1225 | 0,472 | -0,446 |
| 7 | Q13439 GOGA4_HUMAN   | R.TSS#FTEQLDEGTPNR.E        | S41:       | 2 | 4,1755 | 0,597 | -0,554 |
| 7 | Q9NTJ3 SMC4_HUMAN    | R.TES#PATAAETASEELDNR.S     | S41:       | 3 | 3,9747 | 0,506 | -0,186 |
| 7 | Q09666 AHNK_HUMAN    | R.DDGVFVQEVTQNS#PAAR.T      | S41:       | 3 | 3,1901 | 0,45  | 0      |
| 7 | Q9Y2V2 CHSP1_HUMAN   | R.GNVVPS#PLPTR.R            | S41:       | 2 | 2,1493 | 0,368 | -0,201 |
| 7 | Q8IY17 PLPL6_HUMAN   | R.CVS#M*PGDISGLQGGPR.S      | S411:      | 2 | 4,6782 | 0,629 | -0,495 |
| 7 | Q9UQR1 ZN148_HUMAN   | K.QPLEQNQTIS#PLSTYEESK.V    | S412:      | 3 | 3,803  | 0,25  | -0,161 |
| 7 | Q8NCD3 HJURP_HUMAN   | K.WLIS#PVK.I                | S412:      | 2 | 2,6666 | 0,21  | -0,066 |
| 7 | O94876 TMCC1_HUMAN   | K.ALGVISNFQSS#PK.Y          | S414:      | 2 | 3,6624 | 0,524 | -0,256 |
| 7 | O14545 TRAD1_HUMAN   | R.LDSQPQETS#PELPR.R         | S415:      | 2 | 3,3428 | 0,333 | 0,218  |
| 7 | Q14247 SRC8_HUMAN    | R.LPSS#PVYEDAASF.K.A        | S418:      | 2 | 3,5242 | 0,462 | 0      |
| 7 | Q2VPK5 CP084_HUMAN   | R.LSQM*QS#PIPLTETR.T        | S419:      | 2 | 3,2209 | 0,441 | -0,216 |
| 7 | ##Q96CW1 AP2M1_HUMAN | R.S#ILVEGK.H                | S419:      | 2 | 2,0845 | 0,159 | 0,148  |
| 7 | Q1ED39 TS118_HUMAN   | R.YSVLNDDYFADV#PLR.A        | S42:       | 2 | 4,2312 | 0,588 | -0,354 |
| 7 | O75643 U520_HUMAN    | R.DEPTGEVLS#LVGK.L          | S42:       | 2 | 3,4667 | 0,449 | -0,171 |
| 7 | Q53GA4 PHLA2_HUMAN   | R.LSLFPAS#PR.A              | S42:       | 2 | 2,5912 | 0,439 | 0      |
| 7 | Q1ED39 TS118_HUMAN   | R.YSVLNDDYFADV#PLRATS#PSK.S | S42:S48:   | 3 | 4,0785 | 0,346 | -0,606 |
| 7 | Q96PE2 ARHGH_HUMAN   | R.SPS#FGAGEGLLR.S           | S420:      | 2 | 2,8761 | 0,454 | -0,288 |
| 7 | Q6W2J9 BCOR_HUMAN    | K.DGSS#PPLLEK.Q             | S423:      | 2 | 2,3461 | 0,354 | -0,109 |
| 7 | P42166 LAP2A_HUMAN   | K.FQETEFLS#PPR.K            | S424:      | 2 | 3,0506 | 0,425 | -0,085 |
| 7 | Q9ULU4 PKCB1_HUMAN   | R.IS#LSDM*PR.S              | S425:      | 2 | 2,1772 | 0,499 | -0,06  |
| 7 | Q53EZ4 CEP55_HUMAN   | K.VAAS#PKS#PTAALNESLVECPK.C | S425:S428: | 3 | 6,0905 | 0,441 | -0,079 |
| 7 | Q9C0B5 ZDHC5_HUMAN   | R.S#SSLKS#AQGTGFELGQLQSIR.S | S427:S432: | 3 | 3,4112 | 0,135 | -0,233 |
| 7 | Q96AD5 PLPL2_HUMAN   | R.NNLS#LGDALAK.W            | S428:      | 2 | 3,3629 | 0,339 | -0,102 |
| 7 | Q8NDI1 EHBP1_HUMAN   | K.DLSTS#PKPSIPS#PVLGR.K     | S428:S436: | 3 | 3,0096 | 0,162 | 0,182  |
| 7 | Q9Y6I3 EPN1_HUMAN    | R.GSLAEAVGS#PPPAATPTPTPTR.K | S429:      | 3 | 4,3506 | 0,379 | 0,406  |
| 7 | Q9C0C2 TB182_HUMAN   | R.FS#EGVLQSPSQDQEK.L        | S429:      | 2 | 3,7376 | 0,269 | -0,347 |
| 7 | Q13112 CAF1B_HUMAN   | R.TQDPSS#PGTTPPQAR.Q        | S429:      | 2 | 2,9898 | 0,314 | -0,452 |
| 7 | Q5T7W0 ZN618_HUMAN   | R.S#PPAVVEEK.W              | S429:      | 2 | 2,2649 | 0,223 | -0,236 |

|   |                    |                                   |            |   |        |       |        |
|---|--------------------|-----------------------------------|------------|---|--------|-------|--------|
| 7 | Q9UHR5 S30BP_HUMAN | K.GGLVS#DAYGEDDFSR.L              | S43:       | 2 | 4,2644 | 0,464 | -0,219 |
| 7 | P27987 IP3KB_HUMAN | R.AVLS#PGSVFSPGR.G                | S43:       | 2 | 3,4014 | 0,397 | -0,27  |
| 7 | Q96R06 SPAG5_HUMAN | R.S#PACSSLTPSLCK.L                | S43:       | 2 | 3,0868 | 0,446 | -0,246 |
| 7 | Q9Y230 RUVB2_HUMAN | R.VYS#LFLDESR.S                   | S431:      | 2 | 3,7677 | 0,374 | -0,652 |
| 7 | O14639 ABLM1_HUMAN | R.TLS#PTPSAEGYQDVR.D              | S431:      | 2 | 3,6915 | 0,497 | -0,143 |
| 7 | Q15061 WDR43_HUMAN | K.S#GGNEVSIEER.L                  | S431:      | 2 | 2,4547 | 0,257 | 0,097  |
| 7 | P42858 HD_HUMAN    | R.SGSIVELIAGGGSS#CSPVLSR.K        | S432:      | 3 | 3,18   | 0,377 | -0,519 |
| 7 | Q9Y4K4 M4K5_HUMAN  | R.QS#SPSCGPVAETSSIGNGDGISK.L      | S433:      | 3 | 3,8558 | 0,254 | 0      |
| 7 | P35658 NU214_HUMAN | K.SPGS#TPTTPTSSQAPQK.L            | S433:      | 2 | 3,0566 | 0,481 | -0,627 |
| 7 | Q9BVJ6 UT14A_HUMAN | R.S#ELSQDAEPAGSQETK.D             | S434:      | 2 | 4,7547 | 0,591 | -0,556 |
| 7 | Q05519 SFR11_HUMAN | R.DYDEEEQGYDS#EK.E                | S434:      | 2 | 4,479  | 0,488 | -0,289 |
| 7 | P42858 HD_HUMAN    | R.SGSIVELIAGGGSSCS#PVLSR.K        | S434:      | 2 | 3,9725 | 0,589 | -0,577 |
| 7 | Q9C0C2 TB182_HUMAN | R.FSEGVLQS#PSQDQEK.L              | S435:      | 2 | 3,338  | 0,332 | 1,318  |
| 7 | Q6WKZ4 RFIP1_HUMAN | R.SS#LLSLM*TGK.K                  | S435:      | 2 | 2,7485 | 0,467 | -0,108 |
| 7 | Q9ULJ3 ZN295_HUMAN | K.TEPSS#PLSDPSDIIR.V              | S435:      | 2 | 2,3633 | 0,188 | -0,504 |
| 7 | Q9UPZ3 HPS5_HUMAN  | R.S#S#ISSHESFILDSGIYR.I           | S436:S437: | 3 | 2,7985 | 0,119 | -0,256 |
| 7 | O94804 STK10_HUMAN | K.QVAEQGGDLS#PAANR.S              | S438:      | 2 | 3,7826 | 0,5   | -0,077 |
| 7 | Q15149 PLEC1_HUMAN | R.SSS#VGSSSYPIPAVSR.T             | S4386:     | 2 | 4,1383 | 0,414 | -0,532 |
| 7 | O00178 GTPB1_HUMAN | R.LHGGFDS#DCS#EDGEALNGEPELDLTSK.L | S44:S47:   | 3 | 3,1948 | 0,262 | -0,12  |
| 7 | O14578 CTRO_HUMAN  | R.SESVVSGLDS#PAK.T                | S440:      | 2 | 3,2459 | 0,45  | 0,18   |
| 7 | Q9H307 PININ_HUMAN | K.S#LS#PGKENVSALDM*EK.E           | S441:S443: | 2 | 4,3717 | 0,412 | -0,584 |
| 7 | Q9BVJ6 UT14A_HUMAN | R.SELSQDAEPAGS#QETK.D             | S445:      | 2 | 3,7025 | 0,354 | -0,208 |
| 7 | Q6VMQ6 MCAF1_HUMAN | K.LAPS#EDELTCFSK.T                | S445:      | 2 | 2,7907 | 0,455 | -0,155 |
| 7 | O14974 MYPT1_HUMAN | K.TGS#YGALAEITASK.E               | S445:      | 2 | 2,0921 | 0,312 | 0      |
| 7 | Q96BD5 PF21A_HUMAN | K.YNAVLGFGALTPTS#PQSSHPS#PENЕК.T  | S447:S455: | 3 | 3,5038 | 1     | 0      |
| 7 | Q99741 CDC6_HUMAN  | K.LEPTNVQTVTCS#PR.V               | S45:       | 2 | 3,5417 | 0,355 | -0,508 |
| 7 | Q9H8Y8 GORS2_HUMAN | R.VGDSTPVSEKPVSAAVDANASES#P.-     | S451:      | 3 | 3,4863 | 0,214 | 0,076  |
| 7 | Q09666 AHNK_HUMAN  | K.SPQIS#M*SDIDLNLK.G              | S4520:     | 2 | 4,158  | 0,468 | -0,515 |
| 7 | Q14157 UBP2L_HUMAN | K.SPAVATSTAAPPPPS#SPLPSK.S        | S453:      | 3 | 3,2929 | 0,284 | 0,09   |
| 7 | Q9NU22 MDN1_HUMAN  | K.AEENTDQAS#PQEDYAGFER.L          | S4538:     | 3 | 4,1044 | 0,375 | -0,082 |
| 7 | Q13098 CSN1_HUMAN  | R.EGS#QGELTPANSQSR.M              | S454:      | 2 | 3,4851 | 0,517 | -0,669 |
| 7 | Q8WTW3 COG1_HUMAN  | K.ELLVSALQELES#STSNSPSNK.H        | S454:      | 3 | 3,2932 | 0,392 | -0,237 |
| 7 | Q14157 UBP2L_HUMAN | K.SPAVATSTAAPPPSS#PLPSK.S         | S454:      | 2 | 3,1613 | 0,46  | -0,718 |

|   |                    |                                 |            |   |        |       |        |
|---|--------------------|---------------------------------|------------|---|--------|-------|--------|
| 7 | Q7KZI7 MARK2_HUMAN | K.VPAS#PLPGLER.K                | S456:      | 2 | 3,4811 | 0,379 | 0,401  |
| 7 | Q07866 KLC1_HUMAN  | K.VDS#PTVTTTLK.N                | S456:      | 2 | 3,4014 | 0,322 | -0,295 |
| 7 | Q9NYZ3 GTSE1_HUMAN | K.FS#IGDSPDSSTPK.L              | S457:      | 2 | 3,1649 | 0,37  | -0,43  |
| 7 | O60658 PDE8A_HUMAN | R.LS#GNEYVLSTK.N                | S457:      | 2 | 2,8052 | 0,494 | -0,095 |
| 7 | P22314 UBA1_HUMAN  | K.NGS#EADIDEGLYSR.Q             | S46:       | 2 | 4,8515 | 0,533 | -0,076 |
| 7 | Q96TC7 FA82C_HUMAN | R.SQS#LPNSLDYTQTSDPGR.H         | S46:       | 3 | 4,301  | 0,466 | 0,626  |
| 7 | Q96TC7 FA82C_HUMAN | R.SQS#LPNSLDYTQTSDPGR.H         | S46:       | 2 | 3,7933 | 0,513 | 0,716  |
| 7 | Q86VM9 ZCH18_HUMAN | R.AS#DLEDEESAAR.G               | S46:       | 2 | 3,7801 | 0,5   | -0,355 |
| 7 | P49116 NR2C2_HUMAN | K.IQIVTAVDASGS#PK.Q             | S46:       | 2 | 3,5222 | 0,496 | 0,416  |
| 7 | Q02446 SP4_HUMAN   | K.TSGSQDSQPS#PLALLAATCSK.I      | S46:       | 3 | 3,2305 | 0,328 | -0,25  |
| 7 | P16949 STMN1_HUMAN | K.DLS#LEEIQK.K                  | S46:       | 2 | 3,1482 | 0,256 | 0      |
| 7 | P19338 NUCL_HUMAN  | R.SIS#LYYTGEK.G                 | S460:      | 2 | 3,1833 | 0,226 | -0,393 |
| 7 | Q3KQU3 MA7D1_HUMAN | R.LSASTASELS#PK.S               | S460:      | 2 | 2,0995 | 0,31  | -0,288 |
| 7 | Q16875 F263_HUMAN  | R.NS#VTPLASPEPTK.K              | S461:      | 2 | 2,9031 | 0,308 | -0,429 |
| 7 | Q8IWC1 MA7D3_HUMAN | K.TSLEASM*EAS#PK.A              | S461:      | 2 | 2,0172 | 0,18  | -0,453 |
| 7 | Q15149 PLEC1_HUMAN | K.GYYS#PYSVSGSGSTAGSR.T         | S4613:     | 2 | 3,8845 | 0,598 | -0,327 |
| 7 | Q15149 PLEC1_HUMAN | K.GYSPYSVSGSGS#TAGSR.T          | S4622:     | 2 | 4,7722 | 0,506 | -0,393 |
| 7 | P30414 NKTR_HUMAN  | R.ILIPS#DIESSK.S                | S463:      | 2 | 2,0807 | 0,234 | -0,19  |
| 7 | Q08378 GOGA3_HUMAN | R.QDS#LSSEVDTLK.Q               | S465:      | 2 | 3,3357 | 0,387 | -0,348 |
| 7 | Q6ZTN6 AN13D_HUMAN | R.GPGS#PPRT#PPAPGPPSFEEQLR.L    | S465:T469: | 3 | 3,8303 | 0,359 | -0,452 |
| 7 | Q9BWU0 NADAP_HUMAN | K.NWEDEDFYDS#DDDTFLDR.T         | S466:      | 3 | 4,566  | 0,4   | -0,077 |
| 7 | Q96EP0 RNF31_HUMAN | R.LS#APLSSCGDPEK.Q              | S466:      | 2 | 2,3404 | 0,421 | -1,666 |
| 7 | O60825 F262_HUMAN  | R.NS#FTPLSSSNTIR.R              | S466:      | 2 | 2,2196 | 0,217 | -0,243 |
| 7 | Q14157 UBP2L_HUMAN | K.STSAPQM*S#PGSSDNQSSSPQPAQQK.L | S467:      | 3 | 4,1568 | 0,478 | 0,139  |
| 7 | Q96D46 NMD3_HUMAN  | R.DSAIPVES#DTDDEGAPR.I          | S468:      | 2 | 3,8094 | 0,453 | 0,263  |
| 7 | Q96D46 NMD3_HUMAN  | R.DSAIPVES#DTDDEGAPR.I          | S468:      | 3 | 2,7816 | 0,351 | 0,197  |
| 7 | Q86SQ0 PHLB2_HUMAN | R.LS#TGTTVEDVQK.I               | S468:      | 2 | 2,199  | 0,295 | -0,449 |
| 7 | Q99543 DNJC2_HUMAN | R.NAS#ASFQELEDK.K               | S47:       | 2 | 3,7824 | 0,634 | 0,43   |
| 7 | P31946 1433B_HUMAN | R.NLLS#VAYK.N                   | S47:       | 2 | 2,7362 | 0,153 | -0,062 |
| 7 | Q8TAP8 CG047_HUMAN | R.APVPEPGLDLSL#PRPDS#PQPR.H     | S47:S52:   | 3 | 4,2167 | 0,302 | -0,294 |
| 7 | Q14157 UBP2L_HUMAN | K.STSAPQMSPGSS#DNQSSSPQPAQQK.L  | S471:      | 3 | 3,3572 | 0,322 | -0,49  |
| 7 | Q8IW41 MAPK5_HUMAN | K.QVIEEQTTSHES#Q.-              | S472:      | 2 | 2,4501 | 0,272 | -0,076 |
| 7 | Q8NCD3 HJURP_HUMAN | R.GGPAS#PGGLQGLETR.R            | S473:      | 2 | 3,8004 | 0,563 | 0,496  |

|   |                    |                                 |            |   |        |       |        |
|---|--------------------|---------------------------------|------------|---|--------|-------|--------|
| 7 | Q13263 TIF1B_HUMAN | R.S#GEGEVSGLMR.K                | S473:      | 2 | 3,6569 | 0,513 | 0,102  |
| 7 | Q13263 TIF1B_HUMAN | R.S#GEGEVSGLM*R.K               | S473:      | 2 | 3,5197 | 0,444 | -0,1   |
| 7 | P05787 K2C8_HUMAN  | K.LVS#ESSDVLPK.-                | S475:      | 2 | 3,5118 | 0,315 | 0,292  |
| 7 | Q86VW2 GEFT_HUMAN  | R.DFLNALQS#PIEYQR.R             | S477:      | 2 | 4,1599 | 0,489 | -0,619 |
| 7 | Q14157 UBP2L_HUMAN | K.STSAPQM*SPGSSDNQSSS#PQPAQK.L  | S477:      | 3 | 3,6764 | 0,438 | -0,139 |
| 7 | P05787 K2C8_HUMAN  | K.LVSESS#DVLPK.-                | S478:      | 2 | 3,3349 | 0,312 | -0,195 |
| 7 | O76080 ZFAN5_HUMAN | R.M*S#PM*GTASGSNSPTSASVQR.A     | S48:       | 3 | 4,3637 | 0,403 | -0,242 |
| 7 | Q12774 ARHG5_HUMAN | R.LESLSETPGPSS#PR.Q             | S48:       | 2 | 3,5021 | 0,53  | -0,318 |
| 7 | P62805 H4_HUMAN    | R.IS#GLIYEETR.G                 | S48:       | 2 | 3,1074 | 0,372 | -0,194 |
| 7 | O95544 NADK_HUMAN  | R.SLS#ASPALGSTK.E               | S48:       | 2 | 2,8563 | 0,369 | 0      |
| 7 | Q02952 AKA12_HUMAN | K.ETCVSGEDPTQGADLS#PDEK.V       | S483:      | 3 | 4,2954 | 0,346 | -0,165 |
| 7 | O75970 MPDZ_HUMAN  | K.DADLS#PVNASIIK.E              | S483:      | 2 | 2,9265 | 0,382 | -0,429 |
| 7 | Q8NFC6 FA44A_HUMAN | K.YYSDS#DDELTVQR.R              | S484:      | 2 | 4,7643 | 0,45  | -0,61  |
| 7 | P34947 GRK5_HUMAN  | K.DVLDIEQFS#TVK.G               | S484:      | 2 | 3,0335 | 0,377 | -0,414 |
| 7 | O60832 DKC1_HUMAN  | K.AGLES#GAEPGDGSDTTK.K          | S485:      | 2 | 3,7692 | 0,468 | -0,478 |
| 7 | Q9NQW6 ANLN_HUMAN  | K.TQS#LPVTEK.V                  | S485:      | 2 | 2,6067 | 0,272 | -0,113 |
| 7 | Q8WXI9 P66B_HUMAN  | R.LQQAALS#PTTAPAVSSVSK.Q        | S486:      | 3 | 3,5695 | 0,421 | -0,177 |
| 7 | Q8WXI9 P66B_HUMAN  | R.LQQAALS#PTTAPAVSSVSK.Q        | S486:      | 2 | 2,0724 | 0,457 | -0,591 |
| 7 | Q9ULU4 PKCB1_HUMAN | K.TGQAGS#LSGSPKPF#PQLSAPITTK.T  | S486:S495: | 3 | 4,4442 | 1     | -0,28  |
| 7 | Q12756 KIF1A_HUMAN | R.EDGGTLGVFS#PK.K               | S487:      | 2 | 2,7891 | 0,246 | -0,19  |
| 7 | Q15052 ARHG6_HUMAN | R.M*S#GFIYQGK.I                 | S488:      | 2 | 3,4757 | 0,27  | -0,217 |
| 7 | Q15052 ARHG6_HUMAN | R.MS#GFIYQGK.I                  | S488:      | 2 | 2,5838 | 0,535 | 0      |
| 7 | Q5JTD0 TJAP1_HUMAN | R.EEEELNLPIS#PEEER.Q            | S491:      | 2 | 4,4021 | 0,505 | -0,193 |
| 7 | Q96Q42 ALS2_HUMAN  | R.LSLPGLLSQVS#PR.L              | S492:      | 2 | 3,923  | 0,412 | -0,59  |
| 7 | A0MZ66 SHOT1_HUMAN | K.VTAEADSSS#PTGILATSESK.S       | S494:      | 2 | 4,3117 | 0,545 | -0,3   |
| 7 | O60832 DKC1_HUMAN  | K.AGLESGAEPGDGDS#DTTK.K         | S494:      | 2 | 3,9237 | 0,571 | -0,546 |
| 7 | P78362 SRPK2_HUMAN | R.TVS#ASSTGDLPK.A               | S494:      | 2 | 3,0664 | 0,402 | -0,294 |
| 7 | P17181 INAR1_HUMAN | K.NLLSTS#EEQIEK.C               | S495:      | 2 | 3,4814 | 0,447 | 0      |
| 7 | Q641Q2 FA21A_HUMAN | K.AVAS#PEATVSQTDENK.A           | S498:      | 2 | 4,8442 | 0,557 | -0,353 |
| 7 | Q8TEV9 SMCR8_HUMAN | K.SDSQASLTVPLS#PQVVR.S          | S498:      | 2 | 4,0672 | 0,472 | 0,131  |
| 7 | Q9H0D6 XRN2_HUMAN  | K.AEDS#DSEPEPEDNVR.L            | S499:      | 2 | 2,942  | 0,48  | -0,276 |
| 7 | Q8N1G1 REXO1_HUMAN | R.S#LDEGASQDAPK.L               | S499:      | 2 | 2,5569 | 0,465 | 0,47   |
| 7 | Q13610 PWP1_HUMAN  | K.LQEEGGGS#DEEETGSPSEDGM*QSAR.T | S50:       | 3 | 5,2493 | 0,477 | -0,478 |



|   |                     |                                |            |   |        |       |        |
|---|---------------------|--------------------------------|------------|---|--------|-------|--------|
| 7 | Q9NX63 CHCH3_HUMAN  | R.YS#GAYGASVSDEELK.R           | S50:       | 2 | 4,3612 | 0,529 | -0,368 |
| 7 | Q13610 PWP1_HUMAN   | K.LQEEGGGS#DEEETGSPSEDGMQSAR.T | S50:       | 3 | 2,6189 | 0,237 | -0,344 |
| 7 | Q12888 TP53B_HUMAN  | K.NS#PEDLGLSLTGDSC.L           | S500:      | 2 | 4,7304 | 0,535 | -0,206 |
| 7 | Q9BZE9 ASPC1_HUMAN  | R.AAGS#PSPLPAPDPAPK.S          | S500:      | 2 | 3,5374 | 0,364 | 0,236  |
| 7 | Q5TON5 FBP1L_HUMAN  | R.ES#PEGSYTDDANQEV.R.G         | S501:      | 2 | 4,0617 | 0,48  | -0,325 |
| 7 | Q13263 TIF1B_HUMAN  | R.LDLTLTADS#QPPVFK.V           | S501:      | 2 | 3,9552 | 0,472 | -0,561 |
| 7 | Q68E01 INT3_HUMAN   | K.FPEFCSSPS#PPVEVK.I           | S502:      | 2 | 3,362  | 0,297 | -0,41  |
| 7 | Q6P597 KLC3_HUMAN   | R.TLSASTQDLS#PH.-              | S502:      | 2 | 2,8341 | 0,54  | -0,183 |
| 7 | Q6ZML7 Q6ZML7_HUMAN | R.AEELSPAALS#PSLEPIR.C         | S504:      | 2 | 4,5398 | 0,469 | -0,131 |
| 7 | Q3MII6 TBC25_HUMAN  | R.QAS#LDGLQQLR.D               | S506:      | 2 | 2,7709 | 0,456 | -0,093 |
| 7 | Q12888 TP53B_HUMAN  | K.NSPEDLGLS#LTGDSC.L           | S507:      | 2 | 4,3097 | 0,6   | -0,275 |
| 7 | Q14974 MYPT1_HUMAN  | R.LAS#TSDIEEK.E                | S507:      | 2 | 3,1326 | 0,491 | -0,208 |
| 7 | P61604 CH10_HUMAN   | K.VLQATVAVGS#GSK.G             | S51:       | 2 | 2,9697 | 0,552 | -0,087 |
| 7 | Q09666 AHNK_HUMAN   | K.ISM*QDVDLSLGS#PK.L           | S511:      | 2 | 4,4106 | 0,428 | -0,077 |
| 7 | Q09666 AHNK_HUMAN   | K.ISMQDVDLSLGS#PK.L            | S511:      | 2 | 3,472  | 0,431 | -0,233 |
| 7 | Q9UQR0 SCML2_HUMAN  | R.SPQQTVPYVPLS#PK.L            | S511:      | 2 | 3,2228 | 0,45  | -0,071 |
| 7 | Q96RR4 KCC2_HUMAN   | R.SLS#APGNLLTK.K               | S511:      | 2 | 2,8852 | 0,374 | 0      |
| 7 | O00567 NOL5A_HUMAN  | K.S#FSKEELM*S#SDLEETAGSTSIPK.R | S511:S519: | 3 | 2,9899 | 0,292 | -0,276 |
| 7 | Q6P4Q7 CNNM4_HUMAN  | K.SEILDES#DM*YTDNR.S           | S512:      | 2 | 4,7742 | 0,567 | -0,547 |
| 7 | Q8IZD4 DCP1B_HUMAN  | K.TPNTQQTPLFQVIS#PQR.I         | S512:      | 3 | 4,2064 | 0,382 | -0,338 |
| 7 | Q6ZV73 FGD6_HUMAN   | K.AAS#EELLEK.S                 | S515:      | 2 | 2,5019 | 0,254 | -0,342 |
| 7 | P49790 NU153_HUMAN  | K.VQM*TS#PSSTGSPM*FK.F         | S516:      | 2 | 3,2535 | 0,399 | -0,36  |
| 7 | P49790 NU153_HUMAN  | K.VQM*TS#PSSTGSPMFK.F          | S516:      | 2 | 3,2469 | 0,458 | 0,363  |
| 7 | P49790 NU153_HUMAN  | K.VQMTS#PSSTGSPM*FK.F          | S516:      | 2 | 2,9575 | 0,367 | -0,073 |
| 7 | Q9NUQ3 TXLNG_HUMAN  | R.SAVQKPPS#TGSAPAIESVD.-       | S517:      | 2 | 3,5291 | 0,506 | -0,445 |
| 7 | Q99567 NUP88_HUMAN  | R.EDVEVAES#PLR.V               | S517:      | 2 | 3,4331 | 0,438 | 0      |
| 7 | Q99550 MPP9_HUMAN   | K.DSS#PGSSSTSLIK.K             | S518:      | 2 | 2,5633 | 0,374 | -0,418 |
| 7 | Q9ULM3 YETS2_HUMAN  | K.QPGQVIGATTPSTGS#PTNK.I       | S519:      | 2 | 2,6473 | 0,589 | -0,381 |
| 7 | O00567 NOL5A_HUMAN  | K.SFSKEELM*S#S#DLEETAGSTSIPK.R | S519:S520: | 3 | 2,6359 | 0,151 | -0,276 |
| 7 | Q9UHR5 S30BP_HUMAN  | K.GGLVSDAYGEDDFS#R.L           | S52:       | 2 | 4,8702 | 0,576 | -0,146 |
| 7 | O94776 MTA2_HUMAN   | R.DIS#SSLNLSADSNAR.E           | S52:       | 2 | 3,8957 | 0,547 | -0,299 |
| 7 | Q9BVJ6 UT14A_HUMAN  | K.LLEAISS#LDGK.N               | S52:       | 2 | 3,8654 | 0,477 | -0,398 |
| 7 | P12956 KU70_HUMAN   | R.LGS#LVDEFK.E                 | S520:      | 2 | 3,1865 | 0,415 | 0      |

|   |                     |                                     |              |   |        |       |        |
|---|---------------------|-------------------------------------|--------------|---|--------|-------|--------|
| 7 | Q13330 MTA1_HUMAN   | R.LPEASQS#PLVLK.Q                   | S522:        | 2 | 4,4469 | 0,344 | 0      |
| 7 | Q92609 TBCD5_HUMAN  | K.SES#M*PVQLNK.G                    | S522:        | 2 | 3,4714 | 0,344 | 0      |
| 7 | P49790 NU153_HUMAN  | K.VQM*TSPSSTGS#PM*FK.F              | S522:        | 2 | 3,2898 | 0,431 | -0,216 |
| 7 | O75164 JHD3A_HUMAN  | R.DSISS#DSETSEPLSCR.A               | S523:        | 2 | 3,2171 | 0,47  | 0,528  |
| 7 | Q9BTC0 DIDO1_HUMAN  | K.TAAPS#PSLLYK.S                    | S523:        | 2 | 2,112  | 0,253 | -0,099 |
| 7 | Q16584 M3K11_HUMAN  | R.NVFEVGP GD S#PTFPR.F              | S524:        | 2 | 4,4425 | 0,472 | -0,215 |
| 7 | Q8IWC1 MA7D3_HUMAN  | K.NCPPS#PLPLISK.Q                   | S524:        | 2 | 3,1428 | 0,397 | -0,087 |
| 7 | Q12888 TP53B_HUMAN  | K.LM*LSTSEYSQS#PK.M                 | S525:        | 2 | 3,6416 | 0,519 | -0,234 |
| 7 | Q9BWT3 PAPOG_HUMAN  | R.LS#LDSSCLDSSR.D                   | S525:        | 2 | 2,8003 | 0,436 | -0,086 |
| 7 | Q9UPN3 MACF1_HUMAN  | R.S#S#SSASQSNHSC TSM*PSSPATPASGTK.V | S5276:S5277: | 3 | 4,1904 | 1     | -0,455 |
| 7 | O43818 U3IP2_HUMAN  | K.M*NEEISSDS#EESLAPR.K              | S53:         | 2 | 3,9388 | 0,572 | -0,432 |
| 7 | Q8ND24 RN214_HUMAN  | K.NSPLLSVS#SQTITK.E                 | S53:         | 2 | 3,3665 | 0,489 | -0,078 |
| 7 | Q9H0W8 CS061_HUMAN  | R.DAS#EETSTSV M*QK.T                | S53:         | 2 | 3,0348 | 0,41  | -0,081 |
| 7 | O43818 U3IP2_HUMAN  | K.M*NEEISSDS#EESLAPR.K              | S53:         | 3 | 2,6612 | 0,245 | -0,278 |
| 7 | Q8N1G2 K0082_HUMAN  | K.ASTTSLSGS#DSETEGK.Q               | S53:         | 2 | 2,4256 | 0,127 | 1,714  |
| 7 | Q2TB40 Q2TB40_HUMAN | R.TSS#TDEVLSLEEK.D                  | S530:        | 2 | 4,2574 | 0,54  | 0,161  |
| 7 | O60504 VINEX_HUMAN  | R.LCDDGPQLPTS#PR.L                  | S530:        | 2 | 3,874  | 0,537 | -0,079 |
| 7 | Q70CQ2 UBP34_HUMAN  | K.DLVFNTE S#LPSVDNR.M               | S530:        | 2 | 3,1925 | 0,371 | -0,273 |
| 7 | Q9UPZ3 HPS5_HUMAN   | R.S#PSPLVSLQAVK.E                   | S532:        | 2 | 3,2831 | 0,425 | -0,28  |
| 7 | P02545 LMNA_HUMAN   | R.TALINS#TGEEVAM*R.K                | S533:        | 2 | 4,2907 | 0,491 | -0,384 |
| 7 | Q9UPZ3 HPS5_HUMAN   | R.SPS#PLVSLQAVK.E                   | S534:        | 2 | 3,7112 | 0,347 | -0,28  |
| 7 | Q86VM9 ZCH18_HUMAN  | K.LGVSVS#PSR.A                      | S534:        | 2 | 3,2489 | 0,379 | 0,062  |
| 7 | Q3KQU3 MA7D1_HUMAN  | R.AS#NEKESAAPAS#PAPSPAPSPTPAPPQK.E  | S534:S544:   | 3 | 4,7896 | 0,492 | -0,322 |
| 7 | P15311 EZRI_HUMAN   | R.QLLTLS#SELSQAR.D                  | S535:        | 2 | 3,3414 | 0,323 | -0,16  |
| 7 | Q8N2Y8 RUSC2_HUMAN  | R.LSEGPAAM*AGPGS#PPR.R              | S536:        | 2 | 3,9925 | 0,448 | -0,614 |
| 7 | Q01970 PLCB3_HUMAN  | K.S#LGDEGLNR.G                      | S537:        | 2 | 2,7242 | 0,379 | -0,234 |
| 7 | Q8WYP5 AHTF1_HUMAN  | R.CLVAGLLS#PR.F                     | S537:        | 2 | 2,3014 | 0,446 | -0,419 |
| 7 | Q13206 DDX10_HUMAN  | R.APS#LTNDEVEEFR.A                  | S539:        | 2 | 3,396  | 0,468 | -0,154 |
| 7 | Q15758 AAAT_HUMAN   | R.GPAGDATVASEKES#VM*.-              | S539:        | 2 | 3,2057 | 0,577 | -0,148 |
| 7 | Q9ULW0 TPX2_HUMAN   | R.TVEICPFS#FDSR.D                   | S539:        | 2 | 3,1785 | 0,435 | -0,555 |
| 7 | Q96EB6 SIRT1_HUMAN  | K.ELAYLSELPPTPLHVSEDSS#S#PER.T      | S539:S540:   | 3 | 3,1984 | 0,182 | -0,39  |
| 7 | Q9NQW6 ANLN_HUMAN   | R.QPLSEASNQQPLS#GGEEK.S             | S54:         | 2 | 4,4353 | 0,382 | -0,308 |
| 7 | Q6SZW1 SARM1_HUMAN  | R.EVS#PGAGTEVQDALER.A               | S54:         | 2 | 3,5243 | 0,443 | -0,14  |

|   |                     |                                   |            |   |        |       |        |
|---|---------------------|-----------------------------------|------------|---|--------|-------|--------|
| 7 | O43306 ADCY6_HUMAN  | R.DAEPSP#PTPAGPPR.C               | S54:       | 2 | 2,564  | 0,334 | -0,332 |
| 7 | Q684P5 RPGP2_HUMAN  | K.TTFS#PPVVAATVK.N                | S544:      | 2 | 2,8138 | 0,375 | -0,175 |
| 7 | Q15022 SUZ12_HUMAN  | K.ASMSEFLES#EDGEVEQQR.T           | S546:      | 3 | 4,6669 | 0,369 | -0,34  |
| 7 | Q15022 SUZ12_HUMAN  | K.ASMSEFLES#EDGEVEQQR.T           | S546:      | 2 | 3,4241 | 0,535 | -0,34  |
| 7 | P52292 IMA2_HUMAN   | R.NVSS#FPDDATSPLQENR.N            | S55:       | 2 | 5,1371 | 0,477 | -0,312 |
| 7 | Q3L8U1 CHD9_HUMAN   | R.VM*S#PENFPTASVEGK.E             | S550:      | 2 | 3,9001 | 0,568 | 0,144  |
| 7 | Q12888 TP53B_HUMAN  | R.IDEDGENTQIEDTEPM*S#PVLNSK.F     | S552:      | 3 | 4,2962 | 0,361 | -0,62  |
| 7 | Q96GX5 MASTL_HUMAN  | R.DYLSSS#FLCSDDDR.A               | S552:      | 2 | 4,2917 | 0,549 | -0,416 |
| 7 | Q9Y5T5 UBP16_HUMAN  | K.NINM*DNDLEVLTS#PTR.N            | S552:      | 3 | 3,979  | 0,345 | -0,272 |
| 7 | Q7Z4H7 FA29A_HUMAN  | R.AVLSDS#PQLSEGK.E                | S552:      | 2 | 3,864  | 0,48  | -0,519 |
| 7 | P35222 CTNB1_HUMAN  | R.TS#MGGTQQQFVEGVR.M              | S552:      | 2 | 2,2159 | 0,354 | 1,002  |
| 7 | Q09666 AHNK_HUMAN   | K.GPAFNM*AS#PESDFGINLK.G          | S5552:     | 2 | 3,1671 | 0,534 | -0,061 |
| 7 | P19532 TFE3_HUMAN   | R.AASDLLSSVS#PAVSK.A              | S556:      | 2 | 3,6516 | 0,502 | 0      |
| 7 | Q9P2B4 CT2NL_HUMAN  | K.VSS#PLSPLSPGIKS#PTIPR.A         | S557:S568: | 3 | 3,0013 | 0,364 | -0,262 |
| 7 | Q9BZL4 PP12C_HUMAN  | R.S#TQGVTLTDLK.E                  | S559:      | 2 | 2,8831 | 0,389 | 0      |
| 7 | Q8WWM7 ATX2L_HUMAN  | K.LQPSSS#PENSLDPFPPR.I            | S559:      | 2 | 2,7128 | 0,368 | -0,501 |
| 7 | Q6IAA8 CK059_HUMAN  | R.TDEQALLS#ILAK.T                 | S56:       | 2 | 4,2486 | 0,479 | -0,914 |
| 7 | Q6IAA8 CK059_HUMAN  | R.TDEQALLS#ILAK.T                 | S56:       | 3 | 3,3182 | 0,233 | -0,685 |
| 7 | A9CQZ4 A9CQZ4_HUMAN | K.TIDFDSL#VGR.G                   | S56:       | 2 | 3,3038 | 0,329 | 0      |
| 7 | P28066 PSA5_HUMAN   | R.ITS#PLM*EPSIEK.I                | S56:       | 2 | 2,8674 | 0,415 | -0,16  |
| 7 | P28066 PSA5_HUMAN   | R.ITS#PLMEPSSIEK.I                | S56:       | 2 | 2,5222 | 0,36  | 0      |
| 7 | Q9Y5S9 RBM8A_HUMAN  | R.EDYDS#VEQDGEDEPGQR.S            | S56:       | 2 | 2,3268 | 0,414 | -0,242 |
| 7 | Q9NQW6 ANLN_HUMAN   | R.EIEM*SVDDDDINS#SK.V             | S561:      | 2 | 3,3165 | 0,442 | -0,817 |
| 7 | Q9NQW6 ANLN_HUMAN   | R.EIEM*SVDDDDINSS#K.V             | S562:      | 2 | 4,2097 | 0,526 | -0,476 |
| 7 | O60504 VINEX_HUMAN  | R.SPADPTDLGGQTS#PR.R              | S563:      | 2 | 4,0577 | 0,487 | -0,464 |
| 7 | Q7L7V1 DHX32_HUMAN  | K.AYQDTLNSSS#EYCVKEK.W            | S563:      | 2 | 2,6165 | 0,498 | -0,118 |
| 7 | Q14C86 GAPD1_HUMAN  | R.FSLCS#DNLEGISEGPSNR.S           | S569:      | 2 | 3,1877 | 0,554 | -0,592 |
| 7 | Q96I24 FUBP3_HUMAN  | R.QQVAFYQGTLGQAQHS#QE.Q.-         | S569:      | 3 | 3,0496 | 0,342 | 0,08   |
| 7 | O60343 TBCD4_HUMAN  | R.SLTS#SLENIFSR.G                 | S569:      | 2 | 3,0365 | 0,391 | -0,425 |
| 7 | O00264 PGRC1_HUMAN  | R.GDQPAASGDS#DDDEPPPLPR.L         | S57:       | 3 | 4,2364 | 0,334 | 0,086  |
| 7 | O00264 PGRC1_HUMAN  | R.GDQPAASGDS#DDDEPPPLPR.L         | S57:       | 2 | 3,6108 | 0,43  | -0,577 |
| 7 | O94964 CT117_HUMAN  | R.TKSVS#S#M*SEFESLLDCSPYLAGGDAR.G | S57:S58:   | 3 | 4,0115 | 1     | -0,92  |
| 7 | Q86XJ1 GA2L3_HUMAN  | K.SALNLNQPVSVSSVS#PVK.A           | S570:      | 2 | 3,1722 | 0,5   | -0,256 |

|   |                    |                                  |            |   |        |       |        |
|---|--------------------|----------------------------------|------------|---|--------|-------|--------|
| 7 | Q52LW3 RHG29_HUMAN | R.TPS#SGTM*SSADDLDER.E           | S572:      | 2 | 4,2868 | 0,565 | -0,76  |
| 7 | P17812 PYRG1_HUMAN | R.SGS#SS#PDSEITELKFPSINHD.-      | S573:S575: | 3 | 3,7161 | 1     | -0,608 |
| 7 | Q8N2Y8 RUSC2_HUMAN | R.VSVGDSSQEFS#PIQEAQQDR.G        | S574:      | 3 | 5,463  | 0,48  | -0,08  |
| 7 | P17812 PYRG1_HUMAN | R.SGSS#S#PDSEITELKFPSINHD.-      | S574:S575: | 3 | 4,076  | 1     | -0,836 |
| 7 | P17812 PYRG1_HUMAN | R.SGSS#PDSEITELK.F               | S575:      | 2 | 3,2297 | 0,361 | -0,161 |
| 7 | Q8IVT2 CS021_HUMAN | R.NALFPEVFS#PTPDENSQNSR.S        | S575:      | 3 | 2,8094 | 0,352 | 0,225  |
| 7 | Q09666 AHNK_HUMAN  | K.ASLGS#LEGEAEAEASSPK.G          | S5752:     | 2 | 4,6216 | 0,545 | -0,269 |
| 7 | Q13330 MTA1_HUMAN  | K.VAPVINNGS#PTILGK.R             | S576:      | 2 | 3,7353 | 0,466 | -0,156 |
| 7 | Q09666 AHNK_HUMAN  | K.ASLGSLEGEAEAEASS#PK.G          | S5763:     | 2 | 4,3302 | 0,646 | -0,067 |
| 7 | Q09666 AHNK_HUMAN  | K.ASLGSLEGEAEAEASS#PK.G          | S5763:     | 3 | 3,7065 | 0,384 | 0      |
| 7 | Q8N3F8 MILK1_HUMAN | R.VEQM*PQAS#PGLAPR.T             | S578:      | 2 | 3,0708 | 0,362 | -1,161 |
| 7 | Q5H9R7 SAPS3_HUMAN | K.FADQDDIGNVS#FDR.V              | S579:      | 2 | 4,7419 | 0,555 | 0      |
| 7 | Q86W92 LIPB1_HUMAN | R.NSPFQIPPPS#PDSK.K              | S579:      | 2 | 2,9773 | 0,16  | 0      |
| 7 | Q13614 MTMR2_HUMAN | K.SASVVSSDSISTSADNFS#PDLR.V      | S58:       | 3 | 4,5592 | 0,495 | 0      |
| 7 | O75526 HNRGT_HUMAN | R.GFAFVTFES#PADAK.A              | S58:       | 2 | 3,798  | 0,462 | -0,311 |
| 7 | P46087 NOL1_HUMAN  | R.LGS#VEAPK.T                    | S58:       | 2 | 3,1444 | 0,358 | -0,485 |
| 7 | Q9H0B6 KLC2_HUMAN  | R.ASS#LNFLNK.S                   | S582:      | 2 | 3,0405 | 0,225 | -0,114 |
| 7 | Q9H0B6 KLC2_HUMAN  | R.ASS#LNFLNKS#VEEPTQPGGTGLSDSR.T | S582:S589: | 3 | 2,9861 | 0,209 | -0,257 |
| 7 | Q16513 PKN2_HUMAN  | R.ASS#LGEIDESSEL.R.V             | S583:      | 2 | 3,5784 | 0,489 | -0,388 |
| 7 | Q8IY81 RRMJ3_HUMAN | K.TEIM*#PLYQDEAPK.G              | S584:      | 2 | 3,8806 | 0,459 | -0,355 |
| 7 | P46013 KI67_HUMAN  | K.AQSLVISPPAPS#PR.K              | S584:      | 2 | 3,8401 | 0,474 | 0,325  |
| 7 | Q9NVU7 SDA1_HUMAN  | K.YIEIDS#DEEPR.G                 | S585:      | 2 | 3,7867 | 0,397 | -0,084 |
| 7 | Q15021 CND1_HUMAN  | R.ES#TGNM*VTGQTVCK.N             | S585:      | 2 | 3,4604 | 0,446 | -0,379 |
| 7 | Q15021 CND1_HUMAN  | R.ES#TGNM*VTGQTVCK.N             | S585:      | 3 | 3,1136 | 0,316 | -0,228 |
| 7 | Q8TB72 PUM2_HUMAN  | R.ES#LSTSSDLYK.R                 | S587:      | 2 | 2,6257 | 0,426 | 0      |
| 7 | Q96LD4 TRI47_HUMAN | R.GGIPAS#PIDPFQSR.L              | S588:      | 2 | 3,2361 | 0,544 | -0,24  |
| 7 | O60343 TBCD4_HUMAN | R.LGS#VDSFER.S                   | S588:      | 2 | 3,1887 | 0,295 | -0,224 |
| 7 | Q52LW3 RHG29_HUMAN | R.EPPS#PSETGPNLGTFK.K            | S589:      | 2 | 3,2186 | 0,398 | 0,067  |
| 7 | Q9UQR0 SCML2_HUMAN | R.SVPGTTSSPLVGDIS#PK.S           | S590:      | 2 | 3,2042 | 0,417 | -0,354 |
| 7 | Q9NYZ3 GTSE1_HUMAN | R.VPQALNFS#PEESDSTFSK.S          | S592:      | 2 | 4,0262 | 0,459 | -0,237 |
| 7 | Q5PRF9 SAM4B_HUMAN | R.M*GLLS#PSGIGGVSPR.H            | S592:      | 2 | 2,7556 | 0,43  | 0      |
| 7 | Q9Y2X7 GIT1_HUMAN  | R.HGS#GADS#DYENTQSGDPLLGLEGK.R   | S592:S596: | 3 | 6,4295 | 1     | -0,07  |
| 7 | Q8WWM7 ATX2L_HUMAN | K.EVDGLLTSEPM*GS#PVSSK.T         | S594:      | 2 | 4,0281 | 0,607 | -0,38  |

|   |                     |                              |            |   |        |       |        |
|---|---------------------|------------------------------|------------|---|--------|-------|--------|
| 7 | Q8WWM7 ATX2L_HUMAN  | K.EVDGLLTSEPM*GS#PVSSK.T     | S594:      | 3 | 2,921  | 0,342 | 0,19   |
| 7 | Q96T23 RSF1_HUMAN   | R.LS#PIPEEVPK.S              | S594:      | 2 | 2,6673 | 0,339 | 0      |
| 7 | A4LAA3 A4LAA3_HUMAN | K.LTPVS#LS#NSPIKGADCQEVQDK.D | S594:S596: | 3 | 4,1791 | 0,322 | -0,138 |
| 7 | Q7RTP8 Q7RTP8_HUMAN | R.ASS#LNVLVGGK.A             | S596:      | 2 | 2,7663 | 0,476 | -0,098 |
| 7 | Q9Y4F5 K0284_HUMAN  | K.M*IDQVFGVLES#PELSR.A       | S597:      | 2 | 4,1017 | 0,497 | -0,7   |
| 7 | Q02952 AKA12_HUMAN  | K.GLAEVQQDGEAEEGATS#DGEK.K   | S598:      | 3 | 3,8038 | 0,345 | -0,083 |
| 7 | A4LAA3 A4LAA3_HUMAN | K.LTPVSLSNS#PIK.G            | S598:      | 2 | 2,4409 | 0,406 | 0,091  |
| 7 | Q8IY81 RRMJ3_HUMAN  | K.GTEASS#GTEAATGLEGEEK.D     | S599:      | 2 | 2,6758 | 0,555 | -0,449 |
| 7 | Q15742 NAB2_HUMAN   | R.APS#PTAEQPPGGGDSAR.R       | S6:        | 2 | 4,6765 | 0,603 | -0,801 |
| 7 | Q96EI5 TCAL4_HUMAN  | K.LYS#ENEGM*ASNQGK.M         | S6:        | 2 | 3,8424 | 0,383 | -0,376 |
| 7 | O00505 IMA3_HUMAN   | R.NVPQEESLEDS#DVDADFK.A      | S60:       | 3 | 5,1167 | 0,464 | 0,259  |
| 7 | Q99543 DNJC2_HUMAN  | K.KELS#EES#EDEELQLEEFPM*LK.T | S60:S63:   | 3 | 3,267  | 0,161 | -0,738 |
| 7 | Q8IYT8 ULK2_HUMAN   | K.TPLPTIIGS#PTK.T            | S600:      | 2 | 2,737  | 0,441 | 0,093  |
| 7 | P51116 FXR2_HUMAN   | R.TDGS#IS#GDRQPVTVADYISR.A   | S601:S603: | 3 | 3,9485 | 0,336 | -0,159 |
| 7 | Q96JM3 ZN828_HUMAN  | K.CDILVQEELLAS#PK.K          | S603:      | 2 | 4,2814 | 0,521 | -0,432 |
| 7 | Q96JM7 LMBL3_HUMAN  | R.LSGEM*PPAS#PSFPR.N         | S608:      | 2 | 3,222  | 0,371 | 0,078  |
| 7 | Q7Z417 NUFP2_HUMAN  | K.ADTSS#QGALVFLSK.D          | S608:      | 2 | 2,5781 | 0,248 | -0,243 |
| 7 | O43847 NRDC_HUMAN   | K.STCS#CPDLQPNGQDLGENSR.V    | S61:       | 3 | 2,881  | 0,244 | 0,316  |
| 7 | Q8N1G1 REXO1_HUMAN  | K.EVDFDS#DPM*EECLR.I         | S610:      | 2 | 4,5631 | 0,424 | 0,531  |
| 7 | Q02952 AKA12_HUMAN  | R.EGVTPWAS#FK.K              | S612:      | 2 | 2,0444 | 0,418 | -0,711 |
| 7 | Q5VT52 K0460_HUMAN  | K.ASIGQS#PGLPSTTFK.L         | S614:      | 2 | 3,0254 | 0,404 | -0,078 |
| 7 | Q9Y4W2 LAS1L_HUMAN  | R.M*EVGPFSTGQES#PTAENAR.L    | S617:      | 3 | 4,4551 | 0,435 | 0      |
| 7 | Q9Y4W2 LAS1L_HUMAN  | R.MEVPFSTGQES#PTAENAR.L      | S617:      | 3 | 3,3229 | 0,39  | -0,263 |
| 7 | P52272 HNRPM_HUMAN  | R.M*GLAM*GGGGAS#FDR.A        | S618:      | 2 | 3,9429 | 0,527 | -0,408 |
| 7 | P49756 RBM25_HUMAN  | K.LGASNS#PGQPNSVK.R          | S618:      | 2 | 3,8055 | 0,325 | -0,17  |
| 7 | P19338 NUCL_HUMAN   | K.GFGVDFNS#EEDAK.A           | S619:      | 2 | 4,7698 | 0,454 | -0,297 |
| 7 | P49959 MRE11_HUMAN  | R.NM*S#IIDAFK.S              | S619:      | 2 | 3,5324 | 0,509 | 0      |
| 7 | P52292 IMA2_HUMAN   | R.NVSSFPDDATS#PLQENR.N       | S62:       | 2 | 5,363  | 0,454 | -0,312 |
| 7 | P52292 IMA2_HUMAN   | R.NVSSFPDDATS#PLQENR.N       | S62:       | 3 | 4,5897 | 0,404 | -0,187 |
| 7 | P56211 ARP19_HUMAN  | K.YFDS#GDYNM*AK.A            | S62:       | 2 | 4,0922 | 0,463 | -0,694 |
| 7 | Q03188 CENPC_HUMAN  | R.CSLSEPLES#DEADLAK.K        | S620:      | 2 | 3,7713 | 0,413 | -0,199 |
| 7 | Q9Y490 TLN1_HUMAN   | K.GLAGAVS#ELLR.S             | S620:      | 2 | 2,7966 | 0,164 | 0,314  |
| 7 | Q06787 FMR1_HUMAN   | K.EKPD#SVDGQQPLVNGVP.-       | S620:      | 2 | 2,687  | 0,413 | -0,328 |

|   |                    |                                       |            |   |        |       |        |
|---|--------------------|---------------------------------------|------------|---|--------|-------|--------|
| 7 | O76094 SRP72_HUMAN | K.TVSS#SPPTS#PRPGSAATVSASTSNIIPPR.H   | S620:S625: | 3 | 2,6564 | 0,218 | -0,442 |
| 7 | Q8N3F8 MILK1_HUMAN | R.SPVSPGSSS#PQLQVK.S                  | S621:      | 2 | 3,5202 | 0,514 | -0,364 |
| 7 | O76094 SRP72_HUMAN | K.TVSS#PPPTS#PRPGSAATVSASTSNIIPPR.H   | S621:S625: | 3 | 2,6046 | 1     | -0,442 |
| 7 | O76094 SRP72_HUMAN | K.TVSS#PPT#SPRPGSAATVSASTSNIIPPR.H    | S621:T624: | 3 | 2,7309 | 1     | -0,569 |
| 7 | P52948 NUP98_HUMAN | R.DSENLAS#PSEYPENGER.F                | S623:      | 2 | 5,3161 | 0,54  | 0,433  |
| 7 | P52948 NUP98_HUMAN | R.DSENLAS#PSEYPENGER.F                | S623:      | 3 | 2,6336 | 0,133 | -0,463 |
| 7 | Q96JM3 ZN828_HUMAN | K.DNQESS#DAELSSSEYIK.T                | S627:      | 2 | 3,0923 | 0,426 | -0,616 |
| 7 | P02545 LMNA_HUMAN  | R.S#VGGSGGGSGFDNLVTR.S                | S628:      | 2 | 3,9571 | 0,494 | 0,148  |
| 7 | Q86WJ1 CHD1L_HUMAN | K.GSVLIPGLVEGS#TK.R                   | S628:      | 2 | 2,149  | 0,107 | -0,509 |
| 7 | Q13442 HAP28_HUMAN | K.SLDSDES#EDEEDDYQQK.R                | S63:       | 2 | 4,8864 | 0,524 | -0,693 |
| 7 | Q9H165 BC11A_HUMAN | K.LLLGSPSSLS#PFSK.R                   | S630:      | 2 | 2,7128 | 0,316 | -0,645 |
| 7 | Q14157 UBP2L_HUMAN | K.NGFSSVQATQLQTTQS#VEGATGSAVK.S       | S634:      | 3 | 4,304  | 0,453 | -0,068 |
| 7 | P49750 YLPM1_HUMAN | R.GPASQFYITPSTLS#PR.Q                 | S634:      | 2 | 3,722  | 0,524 | -0,646 |
| 7 | Q86WJ1 CHD1L_HUMAN | R.VLS#PEELED.R                        | S636:      | 2 | 2,8883 | 0,363 | 0,193  |
| 7 | Q9NW82 WDR70_HUMAN | K.TM*FAQVES#DDEEAK.N                  | S638:      | 2 | 4,6496 | 0,572 | -0,719 |
| 7 | O75420 PERQ1_HUMAN | R.SLS#VPDSGR.L                        | S638:      | 2 | 2,1146 | 0,252 | 0,061  |
| 7 | Q9H3Q1 BORG4_HUMAN | K.AGEPDGES#LDEQPSSSSK.R               | S64:       | 2 | 3,4237 | 0,382 | -0,307 |
| 7 | P35221 CTNA1_HUMAN | R.TPEELDDS#DFETEDFDVRS#R.T            | S641:S652: | 3 | 3,4773 | 0,384 | -0,357 |
| 7 | Q6AI08 HEAT6_HUMAN | K.APAGPSLEETS#PK.G                    | S643:      | 2 | 4,4363 | 0,566 | -0,224 |
| 7 | Q8NI35 INADL_HUMAN | R.LFDDEAS#VDEPR.R                     | S645:      | 2 | 4,0518 | 0,497 | 0,083  |
| 7 | Q7Z460 CLAP1_HUMAN | R.QSS#GSATNVASTPDNR.G                 | S647:      | 2 | 3,2614 | 0,558 | -0,365 |
| 7 | Q9ULT0 TTC7A_HUMAN | K.DGS#FGEGTLM*K.K                     | S647:      | 2 | 2,966  | 0,579 | -0,099 |
| 7 | P46013 KI67_HUMAN  | R.S#GASEANLIVAK.S                     | S648:      | 2 | 3,6455 | 0,453 | -0,098 |
| 7 | P33778 H2B1B_HUMAN | K.AM*GIM*NS#FVNDIFER.I                | S65:       | 2 | 4,4914 | 0,566 | -0,329 |
| 7 | Q15154 PCM1_HUMAN  | R.VTNDIS#PESSPGVGR.R                  | S65:       | 2 | 3,6981 | 0,442 | -0,535 |
| 7 | Q02952 AKA12_HUMAN | K.SATLSTESTAS#EM*QEEM*K.G             | S651:      | 2 | 4,6026 | 0,545 | -0,452 |
| 7 | Q7Z417 NUFP2_HUMAN | R.NDS#WGSFDLR.A                       | S652:      | 2 | 2,9577 | 0,337 | -0,096 |
| 7 | Q96TA1 NIBL1_HUMAN | R.GLLAQGLRPES#PPPAGPLLNGAPAGES#PQPK.A | S652:S668: | 3 | 4,8227 | 0,468 | -0,691 |
| 7 | Q96RL1 UIMC1_HUMAN | R.VPS#PGM*EEAGCSR.E                   | S653:      | 2 | 3,4293 | 0,504 | -0,331 |
| 7 | Q6ZMI0 CC128_HUMAN | R.TS#DSEVPDVESR.E                     | S653:      | 2 | 2,7797 | 0,478 | 0      |
| 7 | P49848 TAF6_HUMAN  | K.QEAGDS#PPPAPGTPK.A                  | S653:      | 2 | 2,2144 | 0,203 | -0,319 |
| 7 | Q4V328 GRAP1_HUMAN | R.SGLEELVLESEM*NS#PSR.T               | S655:      | 3 | 3,2162 | 0,235 | -0,298 |
| 7 | Q4V328 GRAP1_HUMAN | R.SGLEELVLESEM*NS#PSR.T               | S655:      | 2 | 2,9648 | 0,337 | -0,331 |

|   |                     |                                  |            |   |        |       |        |
|---|---------------------|----------------------------------|------------|---|--------|-------|--------|
| 7 | P35658 NU214_HUMAN  | R.SAQGSSS#PVPSM*VQK.S            | S657:      | 2 | 2,8042 | 0,248 | -0,154 |
| 7 | Q66K74 MAP1S_HUMAN  | R.LLSL#PLR.G                     | S657:      | 2 | 2,2329 | 0,157 | 0,07   |
| 7 | Q16825 PTN21_HUMAN  | R.TLS#ASAAEVAPR.A                | S658:      | 2 | 3,3357 | 0,363 | 0      |
| 7 | Q9NYF8 BCLF1_HUMAN  | R.IDIS#PSTLR.K                   | S658:      | 2 | 2,301  | 0,315 | -0,113 |
| 7 | Q9H307 PININ_HUMAN  | R.GFS#DSGGGPPAK.Q                | S66:       | 2 | 2,9439 | 0,25  | -0,316 |
| 7 | P42166 LAP2A_HUMAN  | K.GPPDFS#S#DEEREPTVVLGSGAAAAGR.S | S66:S67:   | 3 | 6,6767 | 0,532 | -0,201 |
| 7 | Q5JR12 PPM1J_HUMAN  | R.AS#FSRPTFLQLS#PGGLR.R          | S66:S76:   | 3 | 3,446  | 0,286 | -0,367 |
| 7 | P42166 LAP2A_HUMAN  | K.GPPDFS#SDEEREPT#PVLGSGAAAAGR.S | S66:T74:   | 3 | 5,7538 | 0,557 | -0,402 |
| 7 | Q15398 DLG7_HUMAN   | R.NEM*GIPQQTTS#PENAGPQNTK.S      | S662:      | 3 | 3,0994 | 0,246 | -0,235 |
| 7 | Q92625 ANS1A_HUMAN  | K.SPS#FASEWDEIEK.I               | S663:      | 2 | 4,0373 | 0,403 | -0,38  |
| 7 | O75153 EIF3X_HUMAN  | K.SEDPPGQEAGS#EEEGSSASGLAK.V     | S664:      | 3 | 5,5627 | 0,522 | -0,398 |
| 7 | Q6P4Q7 CNNM4_HUMAN  | R.SAS#LSYPDR.T                   | S664:      | 2 | 2,6994 | 0,191 | -0,113 |
| 7 | Q5VT52 K0460_HUMAN  | K.LESESTS#PSLEM*K.I              | S665:      | 2 | 3,7594 | 0,507 | -0,398 |
| 7 | Q969R5 LMBL2_HUMAN  | R.EAGELPTS#PLHLLSPGT#PR.S        | S67:T76:   | 3 | 2,747  | 0,191 | -0,086 |
| 7 | Q969R5 LMBL2_HUMAN  | R.EAGELPTS#PLHLLSPGT#PR.S        | S67:T76:   | 2 | 2,1478 | 0,439 | -0,458 |
| 7 | Q05209 PTN12_HUMAN  | K.DVDVSEDS#PPPLPER.T             | S673:      | 2 | 4,8671 | 0,476 | -0,352 |
| 7 | Q05209 PTN12_HUMAN  | K.DVDVSEDS#PPPLPER.T             | S673:      | 3 | 4,4583 | 0,384 | 0      |
| 7 | Q8TC07 TBC15_HUMAN  | R.NDS#PTQIPVSSDVCR.L             | S675:      | 2 | 4,6032 | 0,397 | -0,139 |
| 7 | Q9H0D6 XRN2_HUMAN   | R.NS#LGGDVLVFGK.H                | S678:      | 2 | 2,1801 | 0,423 | -0,38  |
| 7 | P37275 ZEB1_HUMAN   | K.NNDQPQSANANEPQDSTVNLQS#PLK.M   | S679:      | 3 | 3,3169 | 0,25  | 0,459  |
| 7 | P46776 RL27A_HUMAN  | R.NQS#FCPTVNLDK.L                | S68:       | 2 | 3,7116 | 0,434 | 0,812  |
| 7 | Q96D71 REPS1_HUMAN  | K.TGVLAASVLAASQPS#IPR.S          | S684:      | 3 | 3,5587 | 0,373 | -0,22  |
| 7 | Q9H2J7 S6A15_HUMAN  | K.IPSEM*PS#PNFGK.N               | S687:      | 2 | 3,1424 | 0,418 | -0,349 |
| 7 | O00512 BCL9_HUMAN   | R.IPVEGPLS#PSR.G                 | S687:      | 2 | 2,8914 | 0,242 | 0      |
| 7 | Q9H1A4 APC1_HUMAN   | R.NDFEGLS#PVIAPK.K               | S688:      | 2 | 4,5008 | 0,464 | -0,646 |
| 7 | Q9H1A4 APC1_HUMAN   | R.NDFEGLS#PVIAPK.K               | S688:      | 3 | 3,8101 | 0,275 | -0,215 |
| 7 | Q63HJ5 Q63HJ5_HUMAN | K.LANDFPLDLS#PVK.K               | S688:      | 2 | 2,9594 | 0,404 | -0,243 |
| 7 | Q9UER7 DAXX_HUMAN   | R.VDS#PSHGLVTSSLCIPS#PAR.L       | S688:S702: | 3 | 4,6295 | 0,356 | -0,163 |
| 7 | Q68DH5 LMBD2_HUMAN  | R.YLSM*SRS#DIFNDV.-              | S689:      | 2 | 3,2772 | 0,344 | -0,371 |
| 7 | Q8IXQ3 CI040_HUMAN  | K.IDAGTM*AEPAS#PSK.R             | S69:       | 2 | 3,3465 | 0,425 | -0,235 |
| 7 | Q9C0C2 TB182_HUMAN  | R.WLDDLLAS#PPPSGGGAR.R           | S691:      | 2 | 4,4421 | 0,461 | -0,614 |
| 7 | Q13136 LIPA1_HUMAN  | R.SM*SSIPPYPASSLASSS#PPGSGR.S    | S693:      | 3 | 3,8539 | 0,315 | 0,158  |
| 7 | Q9C0B5 ZDHC5_HUMAN  | K.SLGSASPGPGQPPLSS#PTR.G         | S694:      | 2 | 3,0939 | 0,469 | 0,326  |

|   |                    |                                    |            |   |        |       |        |
|---|--------------------|------------------------------------|------------|---|--------|-------|--------|
| 7 | O14974 MYPT1_HUMAN | R.S#TQGVTLTDLQEAEK.T               | S695:      | 2 | 3,9044 | 0,615 | -0,144 |
| 7 | O14497 ARI1A_HUMAN | R.GPS#PSPVGPSPASVAQSR.S            | S696:      | 2 | 3,7128 | 0,457 | -0,294 |
| 7 | Q8IYB3 SRRM1_HUMAN | R.APQTSSS#PPPVR.R                  | S696:      | 2 | 2,8839 | 0,148 | -0,187 |
| 7 | Q14978 NOLC1_HUMAN | R.GGSISVQVNSIKFDS#E.-              | S698:      | 2 | 4,2121 | 0,575 | -0,489 |
| 7 | O75382 TRIM3_HUMAN | R.EDS#PGPEVQPM*DK.Q                | S7:        | 2 | 2,4671 | 0,203 | -0,4   |
| 7 | P10809 CH60_HUMAN  | R.TVIIQSWGS#PK.V                   | S70:       | 2 | 3,0916 | 0,449 | -0,086 |
| 7 | Q9HAP2 MLXIP_HUMAN | R.DCPNSGQASPCASEQSPSPQS#PQNNCSGK.S | S700:      | 3 | 2,6517 | 0,295 | -0,696 |
| 7 | O43719 HTSF1_HUMAN | K.LFEDDDS#NEK.L                    | S702:      | 2 | 2,683  | 0,262 | -0,378 |
| 7 | O43719 HTSF1_HUMAN | K.LFEDDDS#NEKLFDEEDSS#EK.L         | S702:S714: | 3 | 6,4239 | 0,434 | -0,205 |
| 7 | Q9NT99 LRC4B_HUMAN | K.SGS#KENVQETQI.-                  | S704:      | 2 | 3,0479 | 0,226 | -0,349 |
| 7 | Q9C0B5 ZDHC5_HUMAN | K.KVS#GVGGTTYEISV.-                | S704:      | 2 | 2,88   | 0,507 | -0,165 |
| 7 | O60271 JIP4_HUMAN  | R.DGGS#VVGASVFK.D                  | S705:      | 2 | 3,3605 | 0,454 | -0,357 |
| 7 | Q96KQ4 ASPP1_HUMAN | R.S#SITEPEGPGPNIQK.L               | S709:      | 2 | 3,1038 | 0,226 | -0,577 |
| 7 | Q14671 PUM1_HUMAN  | R.DS#LTGSSDLYK.R                   | S709:      | 2 | 2,7061 | 0,273 | -0,096 |
| 7 | Q7Z478 DHX29_HUMAN | K.IYSFNS#TNDSSGPANLDK.S            | S71:       | 2 | 5,3748 | 0,529 | -0,546 |
| 7 | O15231 ZN185_HUMAN | K.STGS#PTQETQAPFIAK.R              | S71:       | 2 | 4,4554 | 0,466 | -0,42  |
| 7 | P31629 ZEP2_HUMAN  | K.LAS#PSEVVQQAQAEK.Q               | S71:       | 2 | 3,4112 | 0,434 | -0,312 |
| 7 | P25205 MCM3_HUMAN  | K.DGDSYDPYDFS#DTEEM*PQVHT#PK.T     | S711:T722: | 3 | 3,739  | 0,46  | -0,676 |
| 7 | Q12873 CHD3_HUMAN  | K.ELQGDGPPSS#PTNDPTVK.Y            | S713:      | 2 | 2,8742 | 0,329 | -0,572 |
| 7 | Q9UHI6 DDX20_HUMAN | K.YQES#PGIQM*K.T                   | S714:      | 2 | 3,3325 | 0,301 | -0,287 |
| 7 | Q32MZ4 LRRF1_HUMAN | K.IDGATQSS#PAEPK.S                 | S714:      | 2 | 2,3908 | 0,172 | -0,265 |
| 7 | Q9Y2D5 AKAP2_HUMAN | R.TLS#M*IEEEIR.A                   | S720:      | 2 | 3,1863 | 0,335 | -0,093 |
| 7 | O94885 SASH1_HUMAN | K.LLVDSQGLSGCS#PR.D                | S721:      | 2 | 3,7299 | 0,458 | 0,622  |
| 7 | Q6ZV73 FGD6_HUMAN  | R.AES#LDDQM*LSR.E                  | S721:      | 2 | 2,0986 | 0,355 | -0,359 |
| 7 | Q12888 TP53B_HUMAN | K.ECSEAM*EVETSVISIDS#PQK.L         | S727:      | 3 | 3,2168 | 0,284 | -0,078 |
| 7 | P05412 JUN_HUMAN   | K.LAS#PELER.L                      | S73:       | 2 | 3,2618 | 0,205 | -0,061 |
| 7 | Q99575 POP1_HUMAN  | R.VQAYEEPSVASS#PNGK.E              | S730:      | 2 | 4,3134 | 0,582 | -0,49  |
| 7 | Q13164 MK07_HUMAN  | K.SQVEDPLPPVFS#GTPK.G              | S730:      | 2 | 2,7278 | 0,303 | 0,137  |
| 7 | O60271 JIP4_HUMAN  | R.SAS#QSS#LDKLDQELK.E              | S730:S733: | 2 | 4,8832 | 0,438 | -0,135 |
| 7 | Q9H1A4 APC1_HUMAN  | R.SLCLS#PSEASQM*K.D                | S731:      | 2 | 2,7678 | 0,45  | 0,318  |
| 7 | P46087 NOL1_HUMAN  | K.GTDTQTPAVLS#PSK.T                | S732:      | 2 | 4,0476 | 0,461 | -0,329 |
| 7 | Q14684 RRP1B_HUMAN | K.TPTSS#PASSPLVAK.K                | S732:      | 2 | 3,4641 | 0,386 | -0,171 |
| 7 | Q96RV3 PCX1_HUMAN  | K.EGEVLDELS#LLGR.A                 | S735:      | 2 | 3,3916 | 0,367 | -0,404 |



|   |                    |                                  |            |   |        |       |        |
|---|--------------------|----------------------------------|------------|---|--------|-------|--------|
| 7 | P98175 RBM10_HUMAN | R.GLVAAYSGES#DSEEEQER.G          | S735:      | 3 | 2,8982 | 0,44  | -0,18  |
| 7 | Q9BQ52 RNZ2_HUMAN  | K.VPLFS#PNFSEK.V                 | S736:      | 2 | 4,1406 | 0,475 | -0,454 |
| 7 | Q9ULW0 TPX2_HUMAN  | K.SSDQPLTPVVS#PK.F               | S738:      | 2 | 2,9888 | 0,35  | 0      |
| 7 | P28290 SSFA2_HUMAN | R.SQS#LPTTLLSPVR.V               | S739:      | 2 | 3,3153 | 0,393 | -0,082 |
| 7 | Q12789 TF3C1_HUMAN | K.TSQPPVPQGEAEEDS#QGK.E          | S739:      | 2 | 3,1251 | 0,466 | -0,311 |
| 7 | P27707 DCK_HUMAN   | R.WCNVQSTQDEFEELTM*S#QK.N        | S74:       | 3 | 5,5566 | 0,465 | 0      |
| 7 | Q96C19 EFHD2_HUMAN | R.ADLNQGIGEPQS#PSR.R             | S74:       | 2 | 2,6671 | 0,414 | -0,222 |
| 7 | Q9Y6X9 MORC2_HUMAN | R.SVAVS#DEEEVEEEAER.R            | S743:      | 2 | 5,2597 | 0,624 | 0,453  |
| 7 | Q9Y6X9 MORC2_HUMAN | R.SVAVS#DEEEVEEEAER.R            | S743:      | 3 | 3,9576 | 0,338 | 0,485  |
| 7 | Q9ULC8 ZDHC8_HUMAN | R.LGPATGPPGPSAS#PTR.H            | S743:      | 2 | 2,1005 | 0,175 | -0,316 |
| 7 | P28290 SSFA2_HUMAN | R.SQSLPTTLLS#PVR.V               | S746:      | 2 | 2,6967 | 0,473 | -0,247 |
| 7 | P12931 SRC_HUMAN   | K.LFGGFNSSDVTVS#PQR.A            | S75:       | 2 | 3,8717 | 0,526 | -0,544 |
| 7 | Q02952 AKA12_HUMAN | K.NGQLSTINGVAEQDELS#LQEGDLNGQK.G | S75:       | 3 | 3,8067 | 0,424 | -0,249 |
| 7 | Q99569 PKP4_HUMAN  | R.LGAES#PSIASTSSTEK.S            | S75:       | 2 | 3,2525 | 0,427 | -0,074 |
| 7 | Q08499 PDE4D_HUMAN | K.DSGS#QVEEDTSCSDSK.T            | S754:      | 2 | 2,7916 | 0,36  | -0,606 |
| 7 | O75152 ZC11A_HUMAN | R.LS#SAS#TGKPLSVEDDFEK.L         | S758:S761: | 3 | 3,2095 | 0,26  | -0,084 |
| 7 | Q66K74 MAP1S_HUMAN | K.AVPMAPAPAS#PGSSNDSSAR.S        | S759:      | 2 | 3,4797 | 0,457 | -0,125 |
| 7 | Q66K74 MAP1S_HUMAN | K.AVPM*APAPAS#PGSSNDSSAR.S       | S759:      | 2 | 3,2498 | 0,396 | -0,745 |
| 7 | Q66K74 MAP1S_HUMAN | K.AVPM*APAPAS#PGSSNDSSAR.S       | S759:      | 3 | 3,2219 | 0,358 | -0,093 |
| 7 | P18858 DNL1_HUMAN  | R.VLGSEGEEDS#PAK.G               | S76:       | 2 | 4,6689 | 0,547 | 0,199  |
| 7 | Q9UJ70 NAGK_HUMAN  | R.SLGLSLS#GGDQEDAGR.I            | S76:       | 2 | 4,4565 | 0,591 | -0,149 |
| 7 | Q96MH2 HEX12_HUMAN | R.TQS#PGGCSAEAVLAR.K             | S76:       | 2 | 3,7747 | 0,296 | -0,539 |
| 7 | Q17R98 ZN827_HUMAN | R.TTTS#PFFSEDTR.Q                | S760:      | 2 | 3,5102 | 0,398 | -0,378 |
| 7 | Q03188 CENPC_HUMAN | R.IDYQGRPS#GGFVIGVLS#PDTISSK.R   | S763:S773: | 3 | 7,1982 | 1     | -0,401 |
| 7 | P26373 RL13_HUMAN  | R.GFS#LEELR.V                    | S77:       | 2 | 2,5272 | 0,327 | -0,237 |
| 7 | Q12888 TP53B_HUMAN | R.VDVS#CEPLEGVEK.C               | S771:      | 2 | 4,0391 | 0,375 | 0,396  |
| 7 | O14497 ARI1A_HUMAN | R.NPQM*PQYSSPQPGSALS#PR.Q        | S772:      | 2 | 4,1906 | 0,511 | -0,342 |
| 7 | O14497 ARI1A_HUMAN | R.NPQM*PQYSSPQPGSALS#PR.Q        | S772:      | 3 | 3,2221 | 0,358 | -0,086 |
| 7 | Q2NKX8 ERC6L_HUMAN | K.M*AS#VVDDLPK.E                 | S774:      | 2 | 3,6405 | 0,393 | -0,095 |
| 7 | Q6PKG0 LARP1_HUMAN | R.SLPTTPVES#PNYR.N               | S774:      | 2 | 2,141  | 0,155 | -0,079 |
| 7 | P17858 K6PL_HUMAN  | R.TLS#M*DKGF.-                   | S775:      | 2 | 2,441  | 0,412 | 0      |
| 7 | Q8N4C8 MINK1_HUMAN | K.LDSS#PVLSPGNK.A                | S778:      | 2 | 2,5771 | 0,381 | -0,189 |
| 7 | P13861 KAP2_HUMAN  | R.VADAKGDS#ES#EEDLEVPVPSR.F      | S78:S80:   | 3 | 3,3106 | 0,093 | 0,069  |

|   |                    |                                   |            |   |        |       |        |
|---|--------------------|-----------------------------------|------------|---|--------|-------|--------|
| 7 | P45974 UBP5_HUMAN  | R.SAADS#ISESVPVGP.K.V             | S783:      | 2 | 3,4521 | 0,546 | -0,16  |
| 7 | Q96QK1 VPS35_HUMAN | R.RES#PESEGPIYEG.LIL.-            | S783:      | 2 | 3,4051 | 0,446 | -0,261 |
| 7 | P42684 ABL2_HUMAN  | R.SNS#TSSM*SSGLPEQDR.M            | S783:      | 2 | 3,3835 | 0,427 | -0,617 |
| 7 | Q9Y6N8 CAD10_HUMAN | K.LAEM*YGGGES#DKDS.-              | S784:      | 2 | 4,0366 | 0,569 | -0,392 |
| 7 | Q9Y6N8 CAD10_HUMAN | K.LAEMYGGGES#DKDS.-               | S784:      | 2 | 2,8984 | 0,302 | -0,476 |
| 7 | P46087 NOL1_HUMAN  | K.GPQPPTVS#PIR.S                  | S786:      | 2 | 3,1012 | 0,331 | -0,099 |
| 7 | P54259 ATN1_HUMAN  | R.SEEISES#ESEETNAPK.K             | S79:       | 2 | 4,7292 | 0,576 | -0,727 |
| 7 | Q86V81 THOC4_HUMAN | K.M*DM*S#LDDI.K.L                 | S8:        | 2 | 3,8091 | 0,354 | -0,283 |
| 7 | Q9UKY7 CDV3_HUMAN  | R.S#LDNFFAK.R                     | S8:        | 2 | 2,8498 | 0,283 | -0,179 |
| 7 | Q9H3Z4 DNJC5_HUMAN | R.S#LSTSGESLY#HVLGLDK.N           | S8:Y17:    | 2 | 2,0978 | 0,329 | -0,621 |
| 7 | P60174 TPIS_HUMAN  | K.VTNGAFTGEIS#PGMIK.D             | S80:       | 2 | 4,3081 | 0,553 | 0,358  |
| 7 | P60174 TPIS_HUMAN  | K.VTNGAFTGEIS#PGM*IK.D            | S80:       | 2 | 4,3069 | 0,583 | -0,213 |
| 7 | P63027 VAMP2_HUMAN | R.ADALQAGASQFETS#AAK.L            | S80:       | 2 | 4,1655 | 0,539 | -0,21  |
| 7 | Q0ZGT2 NEXN_HUMAN  | K.EM*LAS#DDEEDVSSK.V              | S80:       | 2 | 3,7136 | 0,524 | -0,37  |
| 7 | Q15637 SF01_HUMAN  | R.TGDLGIPPNPEDRS#PS#PEPIYNSE.GK.R | S80:S82:   | 3 | 3,7308 | 0,354 | -0,563 |
| 7 | Q641Q2 FA21A_HUMAN | K.TVLS#LFDEEEDK.M                 | S802:      | 2 | 2,5476 | 0,236 | -0,405 |
| 7 | P28290 SSFA2_HUMAN | K.STIFIS#PSSVK.K                  | S803:      | 2 | 3,118  | 0,492 | -0,098 |
| 7 | P06400 RB_HUMAN    | R.IPGGNIYIS#PLKS#PYK.I            | S807:S811: | 2 | 2,9849 | 0,395 | -0,512 |
| 7 | P06400 RB_HUMAN    | R.IPGGNIYIS#PLKS#PYK.I            | S807:S811: | 3 | 2,8461 | 0,164 | -0,288 |
| 7 | Q15003 CND2_HUMAN  | R.VFDLQFSTDS#PR.L                 | S81:       | 2 | 4,2445 | 0,601 | -0,082 |
| 7 | Q5M775 SPEC1_HUMAN | R.TS#PTPPESATTVK.S                | S810:      | 2 | 2,1376 | 0,349 | 0      |
| 7 | O95759 TBCD8_HUMAN | R.ASAPS#PEDSVFADTGK.T             | S811:      | 2 | 3,3308 | 0,483 | 0,515  |
| 7 | P42566 EP15_HUMAN  | K.LNDPFQPFPGNDS#PK.E              | S814:      | 2 | 3,7575 | 0,197 | -0,348 |
| 7 | O15534 PER1_HUMAN  | R.GLDSSSTAPS#ALGER.G              | S815:      | 2 | 3,4873 | 0,477 | -0,08  |
| 7 | Q96QE3 ATAD5_HUMAN | K.AADPVPSFDESS#QDTSEK.S           | S817:      | 2 | 3,8515 | 0,378 | -0,491 |
| 7 | P31629 ZEP2_HUMAN  | R.SES#AELVACTQDK.A                | S819:      | 2 | 4,0567 | 0,437 | -0,723 |
| 7 | Q9GZR7 DDX24_HUMAN | K.AQAVS#EEEEEEEGK.S               | S82:       | 2 | 4,4648 | 0,577 | -0,297 |
| 7 | Q8NHG8 ZNRF2_HUMAN | R.S#LGGAVGSVASGAR.A               | S82:       | 2 | 3,4056 | 0,502 | 0,096  |
| 7 | Q96G25 MED8_HUMAN  | R.NQVIPLVLS#PDR.D                 | S82:       | 2 | 3,1529 | 0,342 | -0,395 |
| 7 | P04792 HSPB1_HUMAN | R.QLS#SGVSEIR.H                   | S82:       | 2 | 2,8061 | 0,221 | -0,739 |
| 7 | P11137 MAP2_HUMAN  | R.LAS#VSADAEVAR.R                 | S821:      | 2 | 3,6313 | 0,537 | -0,096 |
| 7 | Q9NPR2 SEM4B_HUMAN | R.LGS#EIRDSVV.-                   | S825:      | 2 | 2,5695 | 0,434 | -0,106 |
| 7 | Q2NKX8 ERC6L_HUMAN | K.GFGSVEELCTNSS#LGM*EK.S          | S829:      | 2 | 2,2583 | 0,441 | -1,255 |

|   |                     |                                |            |   |        |       |        |
|---|---------------------|--------------------------------|------------|---|--------|-------|--------|
| 7 | P10644 KAPO_HUMAN   | R.EDEIS#PPPPNPVVK.G            | S83:       | 2 | 3,4501 | 0,365 | -1,069 |
| 7 | Q8N8A6 DDX51_HUMAN  | R.VNDAEPGS#PEAPQGK.R           | S83:       | 2 | 3,1488 | 0,364 | -0,542 |
| 7 | Q8NCM9 Q8NCM9_HUMAN | R.SSDITSDLGNVLTS#TPNAK.T       | S83:       | 3 | 3,0813 | 0,444 | -0,091 |
| 7 | Q96FF9 CDCA5_HUMAN  | R.IS#FFLEK.E                   | S83:       | 2 | 2,5161 | 0,101 | 0,127  |
| 7 | O43426 SYNJ1_HUMAN  | R.SAEDLDLLNAS#FQDESK.I         | S830:      | 2 | 4,7325 | 0,489 | -0,622 |
| 7 | Q9Y2H2 SAC2_HUMAN   | K.SDSS#LETM*ENTGVM*DK.V        | S830:      | 2 | 3,2465 | 0,444 | -0,592 |
| 7 | P49327 FAS_HUMAN    | R.GTPLIS#PLIK.W                | S831:      | 2 | 2,4231 | 0,396 | -0,109 |
| 7 | Q9UKV3 ACINU_HUMAN  | K.GVPAGNS#DTEGGQPGR.K          | S838:      | 2 | 2,9907 | 0,427 | -0,232 |
| 7 | P29374 ARI4A_HUMAN  | K.NFSS#ATEDEIDQCVK.E           | S840:      | 2 | 3,2286 | 0,387 | 0      |
| 7 | Q9UQ35 SRRM2_HUMAN  | K.S#GTPPRQGSIT#SPQANEQSVTPQR.R | S846:T856: | 3 | 4,7746 | 1     | -0,682 |
| 7 | Q9UPQ3 CENG2_HUMAN  | R.NNS#SGRVPTII.-               | S849:      | 2 | 2,8749 | 0,238 | -0,197 |
| 7 | Q9NUU7 DD19A_HUMAN  | R.DPNS#PLYSVK.S                | S85:       | 2 | 3,6535 | 0,471 | 0,407  |
| 7 | Q96G28 CC104_HUMAN  | K.EIGINEDQFQEACTS#PLAK.T       | S85:       | 3 | 2,7359 | 0,226 | -0,328 |
| 7 | Q14160 LAP4_HUMAN   | R.LPLLPES#PGPLR.Q              | S853:      | 2 | 2,9939 | 0,327 | -0,25  |
| 7 | O95819 M4K4_HUMAN   | K.SSSS#FTPFIDPR.L              | S855:      | 2 | 2,1377 | 0,253 | -0,258 |
| 7 | Q13045 FLII_HUMAN   | R.NAEAVLQS#PGLSGK.V            | S856:      | 2 | 4,6127 | 0,483 | -0,168 |
| 7 | Q9H9J4 UBP42_HUMAN  | R.DSALAEPEGLS#PAPPAR.S         | S856:      | 2 | 3,7963 | 0,503 | 0,467  |
| 7 | Q9H9J4 UBP42_HUMAN  | R.DSALAEPEGLS#PAPPAR.S         | S856:      | 3 | 3,0092 | 0,402 | 0,5    |
| 7 | P10075 GLI4_HUMAN   | R.S#PGSQAPDEGAGGALR.S          | S86:       | 2 | 3,44   | 0,57  | -0,394 |
| 7 | Q9H2Y7 ZF106_HUMAN  | R.SLS#ESSVIM*DR.A              | S861:      | 2 | 3,0955 | 0,468 | -0,092 |
| 7 | Q7Z2K8 GRIN1_HUMAN  | R.DAGLQVS#LGAAETR.S            | S862:      | 2 | 3,8568 | 0,457 | -0,166 |
| 7 | Q8N122 RPTOR_HUMAN  | R.VLDTSSLTQSAPAS#PTNK.G        | S863:      | 2 | 3,6511 | 0,47  | -0,515 |
| 7 | Q13127 REST_HUMAN   | K.ESVSTEDLSPPS#PPLPK.E         | S864:      | 2 | 2,5244 | 0,242 | -0,59  |
| 7 | P29317 EPHA2_HUMAN  | K.FADIVS#ILDK.L                | S869:      | 2 | 2,7515 | 0,22  | -0,305 |
| 7 | Q9UK76 HN1_HUMAN    | R.NS#SEASSGDFDLK.G             | S87:       | 2 | 4,759  | 0,442 | -0,157 |
| 7 | Q99618 CDCA3_HUMAN  | K.TSSGDPPS#PLVK.Q              | S87:       | 2 | 2,2339 | 0,293 | -0,193 |
| 7 | O75448 MED24_HUMAN  | R.LLSSNEDDANILS#SPTDR.S        | S872:      | 3 | 3,1979 | 0,277 | -0,361 |
| 7 | O95155 UBE4B_HUMAN  | R.SQSSEGVSSSSS#PSNSLETQSLSR.S  | S88:       | 3 | 5,9377 | 1     | -0,258 |
| 7 | P33316 DUT_HUMAN    | K.AGGS#PAPGPETPAISPK.R         | S88:       | 2 | 3,1047 | 0,229 | 0,215  |
| 7 | Q9NZM3 ITSN2_HUMAN  | R.TVS#PGSVS#PIHGQGQVVENLK.A    | S883:S888: | 3 | 2,6847 | 0,393 | 0,08   |
| 7 | P07814 SYEP_HUMAN   | K.EYIPGQPPLSQSSDSS#PTR.N       | S886:      | 2 | 2,1662 | 0,177 | -0,574 |
| 7 | Q96RS0 TGS1_HUMAN   | K.GIGLDESELD#EAELM*R.S         | S89:       | 2 | 5,5656 | 0,669 | -0,374 |
| 7 | Q147X3 MAK3_HUMAN   | R.CPQQPQEQQLNGLIS#PELR.H       | S89:       | 3 | 4,5162 | 0,243 | -0,152 |

|   |                     |                                |            |   |        |       |        |
|---|---------------------|--------------------------------|------------|---|--------|-------|--------|
| 7 | Q8NI08 NCOA7_HUMAN  | R.YYS#IDDNQNK.T                | S89:       | 2 | 2,0124 | 0,212 | 0      |
| 7 | Q9UPN4 AZI1_HUMAN   | R.SGS#PRPTEPTDFLM*LFEGS#PSGK.K | S89:S105:  | 3 | 4,3112 | 0,314 | -0,42  |
| 7 | Q8TEA7 TBCK_HUMAN   | K.IKPTGLLTIPS#PQI.-            | S890:      | 2 | 2,8932 | 0,3   | -0,235 |
| 7 | P29317 EPHA2_HUMAN  | R.VS#IRLPS#TSGSEGVPFR.T        | S892:S897: | 3 | 3,8149 | 0,511 | 0      |
| 7 | P29317 EPHA2_HUMAN  | R.VS#IRLPSTSGS#EGVPFR.T        | S892:S901: | 3 | 2,7347 | 0,255 | -0,094 |
| 7 | P29317 EPHA2_HUMAN  | R.VS#IRLPSTSGS#EGVPFR.T        | S892:S901: | 2 | 2,231  | 0,172 | -0,626 |
| 7 | Q8WX93 PALLD_HUMAN  | R.IAS#DEEIQGTK.D               | S893:      | 2 | 3,5401 | 0,432 | -0,096 |
| 7 | Q2M1P5 KIF7_HUMAN   | R.SGS#NGSVVLEQQQK.I            | S895:      | 2 | 4,1271 | 0,442 | -0,3   |
| 7 | Q86SQ0 PHLB2_HUMAN  | K.EGLYLS#DTLPR.K               | S896:      | 2 | 2,2133 | 0,341 | -0,091 |
| 7 | P29317 EPHA2_HUMAN  | R.LPS#TSGSEGVPFR.T             | S897:      | 2 | 3,2583 | 0,473 | 0      |
| 7 | Q9NYM9 BET1L_HUMAN  | R.AQS#PGAVEEILDR.E             | S9:        | 2 | 3,1712 | 0,53  | -0,083 |
| 7 | Q99590 SFRIP_HUMAN  | K.SSSNDS#VDEETAESDTSPVLEK.E    | S90:       | 3 | 2,9639 | 0,247 | -0,38  |
| 7 | Q96N67 DOCK7_HUMAN  | R.SLSNS#NPDISGTPSPDDEV.R       | S900:      | 3 | 4,2514 | 0,404 | -0,081 |
| 7 | Q14C86 GAPD1_HUMAN  | R.S#SDIVSSVR.R                 | S902:      | 2 | 2,3597 | 0,412 | 0      |
| 7 | Q15811 ITSN1_HUMAN  | R.SAFTPATATGSSPS#PVLGQGEK.V    | S904:      | 3 | 3,5131 | 0,48  | 0,422  |
| 7 | Q8WXI2 CNKR2_HUMAN  | K.LGDS#LQDLYR.A                | S908:      | 2 | 2,8309 | 0,181 | -0,678 |
| 7 | Q05397 FAK1_HUMAN   | K.LQPQEIS#PPPTANLDR.S          | S910:      | 2 | 3,3175 | 0,396 | 0,592  |
| 7 | O14974 MYPT1_HUMAN  | R.SGS#YSYLEER.K                | S910:      | 2 | 3,2893 | 0,504 | -0,096 |
| 7 | Q5VT52 K0460_HUMAN  | R.LSSSPGLFGAFS#VR.G            | S917:      | 2 | 2,5343 | 0,445 | -0,892 |
| 7 | P28290 SSFA2_HUMAN  | R.TPLGAS#LDEQSSSTLK.G          | S92:       | 2 | 4,4494 | 0,438 | -0,498 |
| 7 | O76021 RL1D1_HUMAN  | R.SDS#EDICLFTK.D               | S92:       | 2 | 2,6298 | 0,381 | -0,175 |
| 7 | Q15154 PCM1_HUMAN   | R.YM*SQM*S#VPEQAELEK.L         | S93:       | 2 | 5,7003 | 0,527 | -0,324 |
| 7 | Q15154 PCM1_HUMAN   | R.YM*SQMS#VPEQAELEK.L          | S93:       | 2 | 4,8941 | 0,401 | 0,589  |
| 7 | Q15154 PCM1_HUMAN   | R.YMSQM*S#VPEQAELEK.L          | S93:       | 2 | 4,4789 | 0,447 | -0,523 |
| 7 | Q15154 PCM1_HUMAN   | R.YM*SQM*S#VPEQAELEK.L         | S93:       | 3 | 2,6618 | 0,126 | 0      |
| 7 | Q9UMZ2 SYNG_HUMAN   | K.ETSEFGS#SENITMTSLK.V         | S935:      | 2 | 3      | 0,525 | -0,129 |
| 7 | Q6ZRV2 FA83H_HUMAN  | R.GS#LTLTISGESPK.A             | S936:      | 2 | 3,5229 | 0,322 | -0,267 |
| 7 | P42684 ABL2_HUMAN   | K.VPVLIS#PTLK.H                | S936:      | 2 | 3,2931 | 0,384 | 0      |
| 7 | Q5JUX1 Q5JUX1_HUMAN | R.GALSSS#LRDLS DAGVCY.-        | S938:      | 2 | 2,9359 | 0,299 | -0,659 |
| 7 | Q7Z3T8 ZFY16_HUMAN  | R.NEIIQS#PISQVPSVEK.L          | S939:      | 3 | 4,0113 | 0,226 | -0,297 |
| 7 | Q99618 CDCA3_HUMAN  | K.QLS#EVFETEDSK.S              | S94:       | 2 | 3,5488 | 0,553 | -0,082 |
| 7 | P15336 ATF2_HUMAN   | K.M*PLDLS#PLATPIIR.S           | S94:       | 2 | 2,4374 | 0,317 | -0,075 |
| 7 | Q9H4I2 ZHX3_HUMAN   | R.VPEASSEPFDTSS#PQAGR.Q        | S946:      | 3 | 4,3813 | 0,348 | -0,377 |

|   |                     |                                   |              |   |        |       |        |
|---|---------------------|-----------------------------------|--------------|---|--------|-------|--------|
| 7 | P24534 EF1B_HUMAN   | K.YGPADVEDTTGSGATDS#K.D           | S95:         | 2 | 5,4508 | 0,541 | -0,264 |
| 7 | Q9HB90 RRAGC_HUMAN  | K.M*SPNETLFLES#TNK.I              | S95:         | 2 | 4,9153 | 0,541 | -0,786 |
| 7 | Q00536 PCTK1_HUMAN  | K.M*GSDGESDQASATSSDEVQS#PVR.V     | S95:         | 3 | 4,2503 | 0,356 | -0,451 |
| 7 | O15258 RER1_HUMAN   | K.VDPSLMEDS#DDGPSLPTK.Q           | S95:         | 2 | 3,8519 | 0,448 | -0,554 |
| 7 | Q86VM9 ZCH18_HUMAN  | R.GPTSS#PCEEEGDEGEEDR.T           | S95:         | 2 | 3,0693 | 0,561 | -0,474 |
| 7 | Q13425 SNTB2_HUMAN  | R.GLGPPS#PPAPPR.G                 | S95:         | 2 | 2,4404 | 0,258 | -1,297 |
| 7 | O75122 CLAP2_HUMAN  | R.GVTEAIQNFS#FR.S                 | S952:        | 2 | 2,6132 | 0,337 | -0,505 |
| 7 | Q9UJF2 NGAP_HUMAN   | R.QQTQQVQSPVDSATM*S#PVER.T        | S954:        | 3 | 4,2556 | 0,348 | -0,237 |
| 7 | P49792 RBP2_HUMAN   | R.FESPATGILS#PR.G                 | S955:        | 2 | 3,2466 | 0,439 | -0,18  |
| 7 | Q14683 SMC1A_HUMAN  | K.GTM*DDISQEEGSS#QGEDSVSGSQR.I    | S957:        | 3 | 2,9384 | 0,169 | -0,425 |
| 7 | Q8IXM2 CQ049_HUMAN  | K.VYEDSGIPLAES#PK.K               | S96:         | 3 | 2,992  | 0,202 | 0      |
| 7 | O43847 NRDC_HUMAN   | R.GSL#NAGDPEIVK.S                 | S96:         | 2 | 2,541  | 0,207 | -0,268 |
| 7 | P46379 BAT3_HUMAN   | R.AS#PEPQRENAS#PAPGTTAEEAM*SR.G   | S964:S973:   | 3 | 5,1318 | 0,533 | -0,413 |
| 7 | P21333 FLNA_HUMAN   | K.SPFSVAVSPS#LDLSK.I              | S968:        | 2 | 4,1385 | 0,494 | -0,302 |
| 7 | Q5VZK9 LR16A_HUMAN  | R.SS#GFISELPSEEGK.K               | S968:        | 2 | 3,1138 | 0,514 | -0,158 |
| 7 | Q92804 RBP56_HUMAN  | K.QSSYSQQPYNNQGGQQNM*ESSGS#QGGR.A | S97:         | 3 | 3,9603 | 0,439 | -0,477 |
| 7 | Q9H910 HN1L_HUMAN   | K.TSDIFGS#PVTATSR.L               | S97:         | 2 | 3,6019 | 0,38  | 1,125  |
| 7 | Q13409 DC1I2_HUMAN  | K.SVSTPS#EAGSQDSGDGAVGSR.T        | S97:         | 2 | 3,2046 | 0,446 | -0,06  |
| 7 | P46379 BAT3_HUMAN   | R.ENAS#PAPGTTAEEAM*SR.G           | S973:        | 3 | 4,1584 | 0,533 | -0,101 |
| 7 | P46379 BAT3_HUMAN   | R.ENAS#PAPGTTAEEAMSR.G            | S973:        | 2 | 3,9001 | 0,512 | -0,61  |
| 7 | P46379 BAT3_HUMAN   | R.ENAS#PAPGTTAEEAM*SR.G           | S973:        | 2 | 3,4262 | 0,592 | -0,672 |
| 7 | Q9UK61 CC063_HUMAN  | R.SSDYQFPSS#PFTDTLK.G             | S979:        | 2 | 2,0624 | 0,383 | -0,45  |
| 7 | Q9H7F0 AT133_HUMAN  | R.VLSLETYPVSS#PK.S                | S98:         | 2 | 2,9758 | 0,398 | -0,081 |
| 7 | A8K720 A8K720_HUMAN | K.GLNGCES#PDADDYFEHS#PLSEDR.F     | S98:S108:    | 3 | 5,0075 | 0,281 | -0,33  |
| 7 | Q14669 TRIPC_HUMAN  | R.DDS#LDLSPQGR.L                  | S987:        | 2 | 3,3275 | 0,194 | -0,095 |
| 7 | P43358 MAGA4_HUMAN  | R.QPNEGSSSQEEGPSTS#PDAESLFR.E     | S99:         | 3 | 4,571  | 0,393 | -0,2   |
| 7 | Q5T200 ZC3HD_HUMAN  | R.GNIETTSEDGQVFS#PK.K             | S993:        | 2 | 3,8988 | 0,56  | -0,477 |
| 7 | Q5T200 ZC3HD_HUMAN  | R.GNIETTSEDGQVFS#PK.K             | S993:        | 3 | 3,4348 | 0,47  | 0,307  |
| 7 | Q86V48 LUZP1_HUMAN  | R.TQS#SLTVSEVLTR.R                | S995:        | 2 | 2,9121 | 0,431 | -0,081 |
| 7 | Q9UQ35 SRRM2_HUMAN  | K.AQT#PPGPSLSGSKS#PCPQEK.S        | T1003:S1014: | 3 | 3,1366 | 0,395 | -0,413 |
| 7 | B2R8U0 B2R8U0_HUMAN | K.AAAGPLDM*SLPST#PDIK.I           | T101:        | 2 | 4,0585 | 0,491 | -0,48  |
| 7 | Q15648 MED1_HUMAN   | R.SQT#PPGVATPPIPK.I               | T1051:       | 2 | 3,469  | 0,395 | -0,083 |
| 7 | P46821 MAP1B_HUMAN  | K.AAEAGGAEQYGLTT#PTK.Q            | T1067:       | 3 | 3,4943 | 0,386 | 0,091  |

|   |                     |                                 |                 |   |        |       |        |
|---|---------------------|---------------------------------|-----------------|---|--------|-------|--------|
| 7 | Q6SPF0 SAM D1_HUMAN | R.GAT#PPAPPR.A                  | T107:           | 2 | 2,1893 | 0,364 | -0,129 |
| 7 | P06744 G6PI_HUMAN   | R.SNT#PILVDGK.D                 | T109:           | 2 | 3,2252 | 0,317 | -0,543 |
| 7 | Q02952 AKA12_HUMAN  | K.VVGQTT#PESFEK.A               | T1116:          | 2 | 3,4287 | 0,441 | -0,087 |
| 7 | O95248 MTMR5_HUMAN  | R.LGLGT#LSSSLR.A                | T1137:          | 2 | 3,3773 | 0,605 | 0      |
| 7 | Q9HB09 B2L12_HUMAN  | R.GEAAGSPVPT#PPRS#PAQEPTDFLSR.L | T117:S121:      | 3 | 3,1466 | 0,312 | -0,064 |
| 7 | P38432 P8OC_HUMAN   | R.AFQLEEGEET#EPDCK.Y            | T122:           | 2 | 4,4141 | 0,475 | -1,573 |
| 7 | P07355 ANXA2_HUMAN  | K.GLGT#DEDSLIEIICSR.T           | T123:           | 3 | 2,7604 | 0,268 | -0,394 |
| 7 | Q9H2G2 SLK_HUMAN    | K.FYPIPSLHST#GS.-               | T1233:          | 2 | 2,0572 | 0,153 | 0      |
| 7 | Q9H6Z4 RANB3_HUMAN  | R.T#SSLTQFPPSQSEER.S            | T124:           | 2 | 3,876  | 0,387 | -0,206 |
| 7 | Q13459 MYO9B_HUMAN  | R.VSPPAPGSAPET#PEDK.S           | T1271:          | 2 | 2,4848 | 0,504 | -0,441 |
| 7 | P52926 HMG A2_HUMAN | R.GEGAGQPST#SAQGQPAAPAPQK.R     | T13:            | 3 | 3,9949 | 0,3   | -0,259 |
| 7 | Q15021 CND1_HUMAN   | R.YQPLASTASDNDFVT#PEPR.R        | T1339:          | 3 | 5,0424 | 0,459 | -0,084 |
| 7 | P49792 RBP2_HUMAN   | K.ELVGPPLAETVFT#PKTS#PEN VQDR.F | T1396:S1400:    | 3 | 3,0509 | 0,4   | -0,46  |
| 7 | P06493 CDC2_HUMAN   | K.IGEGT#YGVVYK.G                | T14:            | 2 | 3,6979 | 0,343 | 0      |
| 7 | Q14676 MDC1_HUMAN   | K.LEPSTSTDQPV T#PEPTSQATR.G     | T1425:          | 3 | 3,0688 | 0,262 | -0,315 |
| 7 | Q02952 AKA12_HUMAN  | K.ST#PVIVSATT K.K               | T1484:          | 2 | 2,2228 | 0,311 | -0,103 |
| 7 | P29966 MARCS_HUMAN  | K.AEDGATPSPSNET#PK.K            | T150:           | 2 | 2,3636 | 0,264 | -0,154 |
| 7 | Q7Z6E9 RBBP6_HUMAN  | R.EERDLPKKGT#GDSK.K             | T1526:          | 2 | 2,1769 | 0,138 | -0,074 |
| 7 | P42166 LAP2A_HUMAN  | R.SST#PLPTISSAENTR.Q            | T160:           | 2 | 3,763  | 0,424 | -0,424 |
| 7 | Q9UGU0 TCF20_HUMAN  | R.SLT#PPPSSTESK.A               | T1671:          | 2 | 2,4992 | 0,372 | -0,186 |
| 7 | Q17RS7 GEN_HUMAN    | R.NFT#MNTKDPHVDCY#TMSS#IK.S     | T171:Y182:S186: | 3 | 3,4686 | 0,086 | -0,07  |
| 7 | Q9P289 MST4_HUMAN   | K.LADFGVAGQLTDT#QIK.R           | T172:           | 2 | 4,3196 | 0,508 | -0,486 |
| 7 | Q13188 STK3_HUMAN   | K.LADFGVAGQLTDT#M*AK.R          | T174:           | 2 | 4,8958 | 0,556 | -0,563 |
| 7 | Q9H3P2 NELFA_HUMAN  | K.NALTTLAGPLT#PPVK.H            | T178:           | 2 | 2,9394 | 0,42  | -0,233 |
| 7 | Q9H3P2 NELFA_HUMAN  | K.NALTTLAGPLT#PPVK.H            | T178:           | 3 | 2,665  | 0,265 | 0      |
| 7 | Q9H7D0 DOCK5_HUMAN  | R.NST#ELAPPLPVR.R               | T1835:          | 2 | 2,3115 | 0,295 | 0      |
| 7 | Q8TEM1 PO210_HUMAN  | R.DLAVPAALT#PR.A                | T1844:          | 2 | 2,7426 | 0,392 | 0      |
| 7 | P24928 RPB1_HUMAN   | K.YSPTSPT#YSPTSPK.Y             | T1915:          | 2 | 2,9085 | 0,381 | -0,689 |
| 7 | P18858 DNL1_HUMAN   | K.AET#PTESVSEPEVATK.Q           | T195:           | 2 | 4,5287 | 0,545 | -0,348 |
| 7 | Q13535 ATR_HUMAN    | K.GVELCFPENET#PPEGK.N           | T1989:          | 2 | 3,3244 | 0,41  | -0,194 |
| 7 | POC1Z6 TFPT_HUMAN   | R.AGNALT#PELAPVQIK.V            | T207:           | 2 | 2,1269 | 0,208 | -0,228 |
| 7 | Q99618 CDCA3_HUMAN  | R.SPLTILQDDNSPGTLT#LR.Q         | T214:           | 2 | 3,7409 | 0,558 | -0,785 |
| 7 | Q99816 TS101_HUMAN  | R.DGT#ISED TIR.A                | T220:           | 2 | 2,9278 | 0,29  | 0      |

|   |                     |                                     |              |   |        |       |        |
|---|---------------------|-------------------------------------|--------------|---|--------|-------|--------|
| 7 | Q8IYB3 SRRM1_HUMAN  | K.T#PELPEPSVK.V                     | T220:        | 2 | 2,424  | 0,3   | -0,207 |
| 7 | P23396 RS3_HUMAN    | K.DEILPTT#PISEQK.G                  | T221:        | 2 | 2,776  | 0,39  | -0,079 |
| 7 | O94915 FRYL_HUMAN   | K.TYGGDT#GSPEISFTK.I                | T2270:       | 2 | 3,656  | 0,475 | -0,595 |
| 7 | P49792 RBP2_HUMAN   | K.LNQSGTSVGT#DEESDVTQEEER.D         | T2293:       | 3 | 6,3379 | 0,428 | -0,22  |
| 7 | Q8IWW6 RHG12_HUMAN  | R.ATT#PPNQGRPDS#PVYANLQELK.I        | T231:S240:   | 3 | 3,966  | 0,36  | -0,358 |
| 7 | Q8N0Z3 CCD52_HUMAN  | K.IATQSQIT#PPGTPSSALSSGEQR.A        | T235:        | 3 | 4,2508 | 0,403 | -0,306 |
| 7 | A8K1N6 A8K1N6_HUMAN | K.M*LGQKAT#PPPS#PLSELLK.K           | T264:S268:   | 3 | 2,7176 | 0,347 | -0,417 |
| 7 | A8K1N6 A8K1N6_HUMAN | K.M*LGQKAT#PPPSPLLS#ELLK.K          | T264:S272:   | 3 | 2,6712 | 0,189 | -0,333 |
| 7 | Q8NFH5 NUP53_HUMAN  | R.CALSSPSLAFT#PPIK.T                | T265:        | 2 | 3,0131 | 0,427 | 0,731  |
| 7 | Q02952 AKA12_HUMAN  | K.SAESPT#SPVTSETGSTFK.K             | T285:        | 3 | 3,1537 | 0,312 | -0,097 |
| 7 | Q7Z6Z7 HUWE1_HUMAN  | R.AGSST#PGDAPPAVAEVQGR.S            | T2889:       | 3 | 4,3445 | 0,468 | 0      |
| 7 | Q7Z6Z7 HUWE1_HUMAN  | R.AGSST#PGDAPPAVAEVQGR.S            | T2889:       | 2 | 3,8136 | 0,48  | 1,718  |
| 7 | Q9NQS7 INCE_HUMAN   | R.VLAPILPDNFST#PTGSR.T              | T292:        | 2 | 2,9619 | 0,528 | -0,393 |
| 7 | O14686 MLL2_HUMAN   | K.ASFGATGGPPAHLT#PS#PLSGPGGSSLLEK.F | T2922:S2924: | 3 | 4,9042 | 0,309 | -0,432 |
| 7 | P38432 P8OC_HUMAN   | K.LGFSLT#PSK.G                      | T303:        | 2 | 2,5771 | 0,475 | 0      |
| 7 | P51659 DHB4_HUMAN   | R.AT#STATSGFAGAIGQK.L               | T317:        | 2 | 4,2837 | 0,502 | -0,236 |
| 7 | P43351 RAD52_HUMAN  | K.DFLAGVT#QELIK.T                   | T318:        | 2 | 3,6564 | 0,377 | -0,431 |
| 7 | Q92597 NDRG1_HUMAN  | R.T#ASGSSVTSLDGTR.S                 | T328:        | 2 | 2,5962 | 0,557 | -0,172 |
| 7 | Q8TD19 NEK9_HUMAN   | R.SST#VTEAPIAVVTSR.T                | T333:        | 2 | 4,2788 | 0,431 | -0,458 |
| 7 | Q9H0H5 RGAP1_HUMAN  | R.CPLPCIPTLIGT#PVK.I                | T342:        | 3 | 2,7827 | 0,16  | -0,314 |
| 7 | Q9UGV2 NDRG3_HUMAN  | R.SVT#SNQSDGTQESCEPDVLDR.H          | T348:        | 3 | 3,5366 | 0,497 | -0,441 |
| 7 | Q9HBW0 LPAR2_HUMAN  | R.IM*LPENGHPLM*DST#L.-              | T350:        | 2 | 3,5004 | 0,296 | -0,274 |
| 7 | A8K040 A8K040_HUMAN | K.NQVVSST#NGELNTDDPTAGR.S           | T368:        | 3 | 3,0602 | 0,133 | -0,509 |
| 7 | P04075 ALDOA_HUMAN  | K.GILAADEST#GSIK.R                  | T37:         | 2 | 3,708  | 0,378 | -0,173 |
| 7 | Q09666 AHNK_HUMAN   | K.VDIDT#PDINIEGSEGK.F               | T3716:       | 2 | 5,3326 | 0,527 | -0,274 |
| 7 | Q6NYC1 JMJD6_HUMAN  | R.T#CSM*VNGNDTTSQDDCVSK.E           | T379:        | 3 | 4,4671 | 0,371 | -0,085 |
| 7 | O75955 FLOT1_HUMAN  | K.ITLVSSGSGT#M*GAAK.V               | T387:        | 2 | 2,4679 | 0,31  | -0,248 |
| 7 | O15027 SC16A_HUMAN  | K.QIDSSPVGGET#DETTVSQNYR.G          | T397:        | 3 | 3,9828 | 0,371 | -0,232 |
| 7 | Q9Y6D6 BIG1_HUMAN   | R.LSVSSNDT#QESGNSSGSPGAK.F          | T400:        | 3 | 2,8737 | 0,238 | -0,67  |
| 7 | Q14247 SRC8_HUMAN   | K.TQT#PPVSPAPQPTTEER.L              | T401:        | 2 | 4,1609 | 0,583 | -0,538 |
| 7 | Q14247 SRC8_HUMAN   | K.TQT#PPVSPAPQPTTEER.L              | T401:        | 3 | 3,0899 | 0,366 | 0      |
| 7 | Q9H8Y8 GORS2_HUMAN  | K.ADAASSLTVDVT#PPTAK.A              | T415:        | 2 | 2,0708 | 0,154 | 0      |
| 7 | O60271 JIP4_HUMAN   | R.EVENLILENT#QLLETK.N               | T418:        | 3 | 3,8964 | 0,222 | -0,279 |

|   |                     |                                  |                 |   |        |       |        |
|---|---------------------|----------------------------------|-----------------|---|--------|-------|--------|
| 7 | O60271 JIP4_HUMAN   | R.EVENLILENT#QLLETK.N            | T418:           | 2 | 3,8561 | 0,46  | -0,683 |
| 7 | Q9UHY1 NRBP_HUMAN   | K.TPT#PEPAEVETR.K                | T433:           | 2 | 3,3772 | 0,507 | 0,087  |
| 7 | O95486 SC24A_HUMAN  | R.T#Y#INPFVS#FLDQR.R             | T436:Y437:S443: | 3 | 2,7806 | 0,245 | 1,591  |
| 7 | Q9NTJ3 SMC4_HUMAN   | R.TESPAT#AAETASEELDNR.S          | T44:            | 3 | 3,4037 | 0,489 | 0,186  |
| 7 | P30041 PRDX6_HUMAN  | R.DFT#PVCTTELGR.A                | T44:            | 2 | 2,3239 | 0,288 | 0,083  |
| 7 | Q15233 NONO_HUMAN   | R.FGQAATM*EGIGAIGGT#PPAFNR.A     | T450:           | 3 | 4,7408 | 0,417 | -0,243 |
| 7 | Q9Y5X2 SNX8_HUMAN   | K.LSCLFAGPHSTLT#PPCS#PPEDGLCPH.- | T452:S456:      | 3 | 3,1435 | 0,16  | -0,426 |
| 7 | P12956 KU70_HUMAN   | K.IM*AT#PEQVVGK.M                | T455:           | 2 | 2,3303 | 0,21  | -0,104 |
| 7 | Q9Y230 RUVB2_HUMAN  | K.EYQDAFLFNLKGETM*DT#S.-         | T462:           | 3 | 4,0039 | 0,486 | -0,392 |
| 7 | O15014 ZN609_HUMAN  | R.T#NSM*GSATGPLPGTK.V            | T465:           | 2 | 2,9085 | 0,389 | -0,403 |
| 7 | Q96D46 NMD3_HUMAN   | R.DSAIPVESDT#DDEGAPR.I           | T470:           | 2 | 3,6326 | 0,493 | -0,592 |
| 7 | Q6NZY4 ZCHC8_HUMAN  | R.GT#PPPVFPTPLPK.G               | T479:           | 2 | 2,2503 | 0,343 | -0,256 |
| 7 | Q15758 AAAT_HUMAN   | R.ST#EPELIQVK.S                  | T494:           | 2 | 2,6363 | 0,349 | -0,1   |
| 7 | P78344 IF4G2_HUMAN  | R.TQT#PPLGQTPQLGLK.T             | T508:           | 2 | 3,6807 | 0,599 | 0      |
| 7 | Q14195 DPYL3_HUMAN  | R.GM*YDGPVFDLTTT#PK.G            | T509:           | 2 | 4,207  | 0,486 | -0,281 |
| 7 | Q16555 DPYL2_HUMAN  | R.GLYDGPVCEVSVT#PK.T             | T509:           | 2 | 3,0942 | 0,494 | 0      |
| 7 | P05362 ICAM1_HUMAN  | K.GT#PMKPNTQATPP.-               | T521:           | 2 | 3,0532 | 0,359 | -0,258 |
| 7 | P05362 ICAM1_HUMAN  | K.GT#PM*KPNTQATPP.-              | T521:           | 2 | 2,9105 | 0,348 | -0,17  |
| 7 | Q99567 NUP88_HUMAN  | R.VLAET#PDSFEK.H                 | T525:           | 2 | 3,1438 | 0,294 | -0,093 |
| 7 | Q96CV9 OPTN_HUMAN   | R.T#SDSDQQAYLVQR.G               | T525:           | 2 | 2,8173 | 0,383 | -0,383 |
| 7 | P05362 ICAM1_HUMAN  | K.GTPM*KPNT#QATPP.-              | T527:           | 2 | 2,099  | 0,085 | -0,17  |
| 7 | Q9NZI8 IF2B1_HUMAN  | R.DQT#PDENDQVIVK.I               | T528:           | 2 | 4,5983 | 0,353 | -0,232 |
| 7 | O00425 IF2B3_HUMAN  | R.DQT#PDENDQVVVK.I               | T528:           | 2 | 4,594  | 0,441 | -0,467 |
| 7 | P17544 ATF7_HUMAN   | R.TDSVIIADQTPTR.F                | T53:            | 2 | 3,7423 | 0,349 | -0,432 |
| 7 | P35222 CTNB1_HUMAN  | R.T#SM*GGTQQQFVEGVR.M            | T551:           | 3 | 3,6082 | 0,259 | 0,106  |
| 7 | P35222 CTNB1_HUMAN  | R.T#SM*GGTQQQFVEGVR.M            | T551:           | 2 | 2,7337 | 0,384 | -0,142 |
| 7 | Q53QW1 CB057_HUMAN  | K.T#AT#PRAISTSGDKDK.S            | T56:T58:        | 2 | 2,0325 | 0,083 | -1,143 |
| 7 | Q9NQG6 SMC7L_HUMAN  | R.AISAPT#SPTR.L                  | T58:            | 2 | 2,1211 | 0,275 | 0      |
| 7 | B2RA02 B2RA02_HUMAN | K.HRLEVHT#IS#DT#SSPEAAEK.D       | T58:S60:T62:    | 3 | 3,3593 | 0,306 | 0,468  |
| 7 | Q09666 AHNK_HUMAN   | K.FGT#FGGLGSK.S                  | T5824:          | 2 | 2,8906 | 0,275 | 0,464  |
| 7 | Q12906 ILF3_HUMAN   | K.LFPDT#PLALDANK.K               | T592:           | 2 | 2,727  | 0,29  | -0,408 |
| 7 | Q02952 AKA12_HUMAN  | K.GLAEVQQDGEAEEGAT#SDGEK.K       | T597:           | 3 | 3,5869 | 0,324 | -0,166 |
| 7 | P51116 FXR2_HUMAN   | R.T#DGSIS#GDRQPVTVADYISR.A       | T598:S603:      | 3 | 4,4921 | 0,166 | 0      |



|   |                     |                                  |            |   |        |       |        |
|---|---------------------|----------------------------------|------------|---|--------|-------|--------|
| 7 | P05412 JUN_HUMAN    | K.NSDLLT#SPDVGLLK.L              | T62:       | 2 | 4,2569 | 0,356 | -0,236 |
| 7 | O15439 MRP4_HUMAN   | K.DNEESEQPPVPGT#PTLR.N           | T646:      | 3 | 2,9264 | 0,438 | 0,094  |
| 7 | Q6P0N0 CN106_HUMAN  | K.AYILVT#PLK.S                   | T653:      | 2 | 2,898  | 0,392 | -0,111 |
| 7 | Q14676 MDC1_HUMAN   | R.ENLTDLVVDTDT#LGESTQPQR.E       | T654:      | 3 | 4,3926 | 0,383 | -0,455 |
| 7 | Q8TC07 TBC15_HUMAN  | R.NDSPT#QIPVSSDVCR.L             | T677:      | 3 | 3,3579 | 0,202 | 0,208  |
| 7 | P28370 SMCA1_HUMAN  | K.ESELTDEDIT#TILER.G             | T690:      | 2 | 3,9461 | 0,492 | -0,331 |
| 7 | Q9HAW4 CLSPN_HUMAN  | K.SLSSDST#LLLFK.D                | T724:      | 2 | 3,4326 | 0,287 | -0,526 |
| 7 | Q3MHD2 LSM12_HUMAN  | R.TET#PPPLASLNVSK.L              | T75:       | 2 | 3,6368 | 0,478 | -0,159 |
| 7 | Q14160 LAP4_HUMAN   | R.M*VEPENAVTIT#PLRPEDDYS#PR.E    | T826:S835: | 3 | 4,8632 | 0,43  | -0,338 |
| 7 | P83731 RL24_HUMAN   | R.AIT#GASLADIM*AK.R              | T83:       | 2 | 4,6226 | 0,464 | -0,27  |
| 7 | Q8NCM9 Q8NCM9_HUMAN | R.SSDITSDLGNVLTST#PNAK.T         | T84:       | 2 | 3,5614 | 0,573 | -0,549 |
| 7 | Q562F6 SGOL2_HUMAN  | K.DNFFSLT#PK.D                   | T845:      | 2 | 2,4511 | 0,32  | -0,319 |
| 7 | O95425 SVIL_HUMAN   | R.YQT#QPVTLGEVEQVQSGK.L          | T852:      | 3 | 3,8755 | 0,36  | -0,265 |
| 7 | Q15147 PLCB4_HUMAN  | K.ANVT#PQSS#SELRPTTAAALASGVEAK.K | T886:S890: | 3 | 4,0724 | 1     | -0,466 |
| 7 | Q5T3S6 Q5T3S6_HUMAN | R.SFT#FGAYGGVDK.S                | T9:        | 2 | 2,3677 | 0,288 | 0,092  |
| 7 | Q9H8G2 CI082_HUMAN  | R.ST#DSSSVSGSLQQETK.Y            | T90:       | 2 | 5,064  | 0,593 | -0,284 |
| 7 | Q5VZK9 LR16A_HUMAN  | R.LEDLTCM*M*T#PK.S               | T916:      | 2 | 3,7346 | 0,279 | -0,39  |
| 7 | Q6PD62 CTR9_HUMAN   | K.GGEFDEFVNDT#DDDLPISK.K         | T925:      | 3 | 5,5656 | 0,54  | -0,079 |
| 7 | P24534 EF1B_HUMAN   | K.YGPADVEDTTGSGAT#DSK.D          | T93:       | 2 | 4,2533 | 0,536 | -0,396 |
| 7 | O94804 STK10_HUMAN  | K.LSEEAECNPST#PSK.A              | T952:      | 2 | 3,4756 | 0,48  | -1,343 |
| 7 | Q9HB90 RRAGC_HUMAN  | K.MSPNETLFLEST#NK.I              | T96:       | 2 | 2,9848 | 0,282 | 0,361  |
| 7 | P30044 PRDX5_HUMAN  | K.GVLFGVPGAFT#PGCSK.T            | T97:       | 2 | 3,5322 | 0,522 | -0,219 |
| 7 | Q13428 TCOF_HUMAN   | R.SPAGPAATPAQAQAAST#PR.K         | T983:      | 2 | 4,3177 | 0,515 | -0,467 |
| 7 | P06493 CDC2_HUMAN   | K.IGEGTY#GVVYK.G                 | Y15:       | 2 | 2,4344 | 0,397 | 0,193  |
| 7 | P06493 CDC2_HUMAN   | K.IGEGTYGVVY#K.G                 | Y19:       | 2 | 2,829  | 0,424 | -0,289 |
| 7 | P02786 TFR1_HUMAN   | R.SAFSNLFGGEPLOY#TR.F            | Y20:       | 2 | 3,5188 | 0,464 | -0,535 |
| 7 | O00401 WASL_HUMAN   | K.VIY#DFIEK.T                    | Y256:      | 2 | 2,5497 | 0,259 | -0,11  |
| 7 | P06241 FYN_HUMAN    | R.LIEDNEY#TAR.Q                  | Y420:      | 2 | 2,5154 | 0,323 | -0,281 |
| 7 | Q92736 RYSR2_HUMAN  | R.Y#NILTLMR.M                    | Y4250:     | 2 | 2,0442 | 0,226 | -0,221 |
| 7 | P06400 RB_HUMAN     | R.IPGGNIY#ISPLKS#PYK.I           | Y805:S811: | 3 | 2,7912 | 0,146 | -0,288 |
| 7 | P55735 SEC13_HUMAN  | K.GQGSVSASVTEGQQNEQ.-            |            | 2 | 4,5227 | 0,539 | -0,501 |
| 7 | Q7L1Q6 BZW1_HUMAN   | K.NAESESEAEEGD.-                 |            | 2 | 2,7175 | 0,384 | -0,4   |
| 7 | P62258 1433E_HUMAN  | K.EALQDVEDENQ.-                  |            | 2 | 2,5942 | 0,347 | -0,095 |

|   |                       |                                 |            |   |        |       |        |
|---|-----------------------|---------------------------------|------------|---|--------|-------|--------|
| 7 | P62899 RL31_HUMAN     | K.NLQTVNVNVDEN.-                |            | 2 | 2,3291 | 0,183 | 0      |
| 7 | Q7L2H7 EIF3M_HUMAN    | K.NSLLSLSDT.-                   |            | 2 | 2,1292 | 0,326 | -0,193 |
| 8 | P35240 MERL_HUMAN     | R.M*S#FSSLK.R                   | S10:       | 2 | 2,1405 | 0,092 | 0      |
| 8 | A6H8Y1 BDP1_HUMAN     | R.ISS#TSSLVK.S                  | S100:      | 2 | 2,2793 | 0,274 | -0,122 |
| 8 | ##Q8WYF8 Q8WYF8_HUMAN | R.VPRS#M*NATS#VPGLR.S           | S100:S105: | 2 | 2,3267 | 0,142 | 1,836  |
| 8 | O95239 KIF4A_HUMAN    | K.LTLLQVAS#R.Q                  | S1001:     | 2 | 3,6123 | 0,379 | 0,113  |
| 8 | Q9UKV3 ACINU_HUMAN    | R.TAQVPS#PPR.G                  | S1004:     | 2 | 2,2878 | 0,307 | -0,118 |
| 8 | Q01804 OTUD4_HUMAN    | K.TAADVVS#PGANSVDSR.V           | S1006:     | 2 | 4,2214 | 0,408 | -0,6   |
| 8 | Q9BYK8 PR285_HUMAN    | K.AEPGDEALS#PASR.D              | S1006:     | 2 | 2,0057 | 0,33  | -0,442 |
| 8 | Q9BX95 SGPP1_HUMAN    | R.NGLAAELGPAS#PR.R              | S101:      | 2 | 3,0889 | 0,281 | -0,366 |
| 8 | P05386 RLA1_HUMAN     | K.KEES#EESDDDMGFGLFD.-          | S101:      | 2 | 2,9019 | 0,422 | -0,361 |
| 8 | P01213 PDYN_HUMAN     | K.LSGS#FLK.E                    | S101:      | 2 | 2,1493 | 0,114 | 0,147  |
| 8 | P05386 RLA1_HUMAN     | K.KEES#EES#DDDM*GFGLFD.-        | S101:S104: | 2 | 3,6394 | 0,531 | -0,459 |
| 8 | P54259 ATN1_HUMAN     | K.TEQELPRPQS#PSDLDS#LDGR.S      | S101:S107: | 3 | 4,3929 | 0,302 | -0,686 |
| 8 | Q9H6Z4 RANB3_HUMAN    | R.SAGGSS#PEGGEDS#DREDGNYCPPVK.R | S101:S108: | 3 | 5,2504 | 0,534 | -0,537 |
| 8 | Q9NWH9 SLTM_HUMAN     | R.IVQISGNS#M*PR.G               | S1014:     | 2 | 2,8801 | 0,449 | -0,47  |
| 8 | Q14C86 GAPD1_HUMAN    | R.FSTLTDDPS#PR.L                | S1019:     | 2 | 2,9048 | 0,338 | -0,093 |
| 8 | O75351 VPS4B_HUMAN    | K.GNDS#DGEGESDDPEK.K            | S102:      | 2 | 3,8112 | 0,523 | -0,299 |
| 8 | P52948 NUP98_HUMAN    | K.ADTS#QEICSPR.L                | S1023:     | 2 | 2,4497 | 0,426 | -0,363 |
| 8 | P78332 RBM6_HUMAN     | K.LQSFDS#PER.K                  | S1025:     | 2 | 2,7224 | 0,258 | 0      |
| 8 | Q9H2Y7 ZF106_HUMAN    | R.ATGDGS#SPELPSLER.K            | S1025:     | 2 | 2,104  | 0,236 | -0,229 |
| 8 | Q12888 TP53B_HUMAN    | K.NGSTAVAESVAS#PQK.T            | S1028:     | 2 | 4,1113 | 0,538 | -0,56  |
| 8 | Q52LW3 RHG29_HUMAN    | R.LLLAS#PPNER.N                 | S1029:     | 2 | 2,8391 | 0,322 | -0,103 |
| 8 | Q9BSJ8 ESYT1_HUMAN    | R.TLS#PEFNER.F                  | S1034:     | 2 | 2,5621 | 0,296 | -0,208 |
| 8 | O00512 BCL9_HUMAN     | R.SIS#ADSFQQR.D                 | S104:      | 2 | 3,7292 | 0,389 | -0,809 |
| 8 | Q13409 DC1I2_HUMAN    | K.SVSTPSEAGSQDS#GDGAVGSR.T      | S104:      | 2 | 3,6051 | 0,526 | -0,541 |
| 8 | P05386 RLA1_HUMAN     | K.KEESEES#DDDM*GFGLFD.-         | S104:      | 2 | 3,3466 | 0,348 | -0,477 |
| 8 | P21796 VDAC1_HUMAN    | K.LTFDSSF#PNTGK.K               | S104:      | 2 | 3,1714 | 0,457 | -0,247 |
| 8 | P05386 RLA1_HUMAN     | K.KEESEES#DDDMGFGLFD.-          | S104:      | 2 | 2,7674 | 0,359 | -0,481 |
| 8 | P05386 RLA1_HUMAN     | K.KEESEES#DDDM*GFGLFD.-         | S104:      | 3 | 2,748  | 0,296 | -0,179 |
| 8 | P49006 MRP_HUMAN      | K.LSGLS#FK.R                    | S104:      | 2 | 2,2347 | 0,153 | 0      |
| 8 | Q9P266 K1462_HUMAN    | R.GLS#APDLR.S                   | S1044:     | 2 | 2,2284 | 0,252 | 0      |
| 8 | Q8TEW0 PARD3_HUMAN    | K.IQES#FTSEEER.I                | S1046:     | 2 | 3,4824 | 0,284 | -0,085 |

|   |                    |                                          |              |   |        |       |        |
|---|--------------------|------------------------------------------|--------------|---|--------|-------|--------|
| 8 | O95155 UBE4B_HUMAN | R.SQS#M* <u>DIDGVSCEK.S</u>              | S105:        | 2 | 3,5759 | 0,601 | -0,472 |
| 8 | Q8NG08 HELB_HUMAN  | R.TCGVNDDESPS#KIFM* <u>VGES#PQVSSR.L</u> | S1050:S1058: | 3 | 4,5122 | 0,412 | -0,126 |
| 8 | Q96PY6 NEK1_HUMAN  | R.TCS# <u>LPDLSK.L</u>                   | S1052:       | 2 | 2,7113 | 0,218 | 0,111  |
| 8 | Q9UBW7 ZMYM2_HUMAN | K.AVSGYQS# <u>HDDS#SDNSECSFPPK.Y</u>     | S1056:S1060: | 3 | 3,4288 | 1     | -0,139 |
| 8 | O60231 DHX16_HUMAN | R.LLEDSEES# <u>SEETVSR.A</u>             | S106:        | 2 | 4,3695 | 0,501 | -0,614 |
| 8 | P49023 PAXI_HUMAN  | K.TSSVSNPQDSVGS# <u>PCSR.V</u>           | S106:        | 2 | 4,3124 | 0,55  | -0,727 |
| 8 | Q7Z628 ARHG8_HUMAN | R.VTSLANLIS# <u>PVR.N</u>                | S106:        | 2 | 3,6689 | 0,338 | -0,271 |
| 8 | P49023 PAXI_HUMAN  | K.TSSVSNPQDSVGS# <u>PCSR.V</u>           | S106:        | 3 | 3,6305 | 0,284 | -0,496 |
| 8 | P30876 RPB2_HUMAN  | R.DGAPS# <u>PM*M*PNEAR.L</u>             | S106:        | 2 | 2,9389 | 0,366 | -0,74  |
| 8 | P52948 NUP98_HUMAN | K.FTSGAFLS# <u>PSVSVQECRT#PR.A</u>       | S1060:T1070: | 3 | 3,1585 | 0,272 | -1,38  |
| 8 | O75044 FNBP2_HUMAN | K.TNATSPGVNSSTS# <u>PQSTDK.S</u>         | S1061:       | 2 | 2,9112 | 0,351 | -0,685 |
| 8 | Q9UQE7 SMC3_HUMAN  | K.GDVEGSQS# <u>QDEGEGSGESER.G</u>        | S1067:       | 3 | 5,268  | 0,515 | -0,518 |
| 8 | Q9UQE7 SMC3_HUMAN  | K.GDVEGSQS# <u>QDEGEGSGESER.G</u>        | S1067:       | 2 | 3,5841 | 0,606 | -0,576 |
| 8 | Q9P1Y5 K1543_HUMAN | R.APS# <u>PSGLM*SPSR.L</u>               | S1074:       | 2 | 2,8495 | 0,414 | -0,476 |
| 8 | Q9UMZ2 SYNG_HUMAN  | R.SLS# <u>LGDK.E</u>                     | S1075:       | 2 | 2,1456 | 0,182 | -0,153 |
| 8 | Q9NX40 OCAD1_HUMAN | K.LENS# <u>PLGEALR.S</u>                 | S108:        | 2 | 2,5031 | 0,288 | -0,095 |
| 8 | Q9NYV4 CD2L7_HUMAN | K.NSS# <u>PAPPQPAPGK.V</u>               | S1083:       | 2 | 3,1897 | 0,515 | -0,459 |
| 8 | P21333 FLNA_HUMAN  | K.AFGPGLQGGAGS# <u>PAR.F</u>             | S1084:       | 2 | 4,4797 | 0,532 | -0,485 |
| 8 | P48634 BAT2_HUMAN  | R.TAS# <u>ETRS#EGSEYEIPK.R</u>           | S1085:S1089: | 3 | 3,8914 | 1     | -0,088 |
| 8 | Q5VZ89 DEN4C_HUMAN | R.STS# <u>LSALVR.S</u>                   | S1089:       | 2 | 2,9181 | 0,278 | -0,12  |
| 8 | Q14151 SAFB2_HUMAN | K.M* <u>EEEGTEDNGLEDDS#R.D</u>           | S109:        | 2 | 4,6978 | 0,635 | -0,635 |
| 8 | Q8NA72 CE037_HUMAN | K.TDESSPVLS# <u>PR.K</u>                 | S109:        | 2 | 3,3707 | 0,456 | -0,77  |
| 8 | Q56P03 EAPP_HUMAN  | R.YYDDIYFDS# <u>DS#EDEDRAVQVTK.K</u>     | S109:S111:   | 3 | 3,7687 | 0,327 | -0,452 |
| 8 | Q12830 BPTF_HUMAN  | K.NLSES# <u>PVITK.A</u>                  | S1092:       | 2 | 2,9218 | 0,331 | -0,104 |
| 8 | P57740 NU107_HUMAN | R.SGFGEISS# <u>PVIR.E</u>                | S11:         | 2 | 3,1976 | 0,459 | -0,184 |
| 8 | Q15154 PCM1_HUMAN  | R.INFS# <u>DLDQR.S</u>                   | S110:        | 2 | 3,6118 | 0,415 | -0,103 |
| 8 | Q13425 SNTB2_HUMAN | R.GPAGEAGAS# <u>PPVR.R</u>               | S110:        | 2 | 3,519  | 0,332 | -0,588 |
| 8 | Q09028 RBBP4_HUMAN | K.GEFGGFGS# <u>VSGK.I</u>                | S110:        | 2 | 3,223  | 0,461 | -0,202 |
| 8 | P25786 PSA1_HUMAN  | R.LVS# <u>LIGSK.T</u>                    | S110:        | 2 | 2,5074 | 0,272 | 0      |
| 8 | Q9UQ35 SRRM2_HUMAN | R.SS# <u>SPVTELASRS#PIR.Q</u>            | S1102:S1112: | 2 | 2,9515 | 0,215 | -0,349 |
| 8 | Q9UK61 CC063_HUMAN | K.GGNLPPVS# <u>PNDSGAK.I</u>             | S1103:       | 2 | 2,9822 | 0,309 | -0,655 |
| 8 | Q9UQ35 SRRM2_HUMAN | R.SSS# <u>PVTELASR.S</u>                 | S1103:       | 2 | 2,7168 | 0,327 | -0,503 |
| 8 | Q6ZSZ5 ARHGI_HUMAN | R.SLS# <u>PILPGR.H</u>                   | S1103:       | 2 | 2,5102 | 0,387 | -0,299 |

|   |                    |                              |              |   |        |       |        |
|---|--------------------|------------------------------|--------------|---|--------|-------|--------|
| 8 | Q6P0N0 CN106_HUMAN | K.TPFNTDLGENS#GIGK.L         | S1104:       | 2 | 3,3042 | 0,495 | 1,048  |
| 8 | P11388 TOP2A_HUMAN | K.VPDEEENEES#DNEK.E          | S1106:       | 2 | 3,0204 | 0,363 | -0,35  |
| 8 | Q92900 RENT1_HUMAN | K.SQIDVALS#QDSTYQGER.A       | S1107:       | 2 | 4,7586 | 0,531 | -0,37  |
| 8 | Q8WWM7 ATX2L_HUMAN | K.GPPQS#PVFEGVYNNSR.M        | S111:        | 3 | 5,1455 | 0,375 | -0,1   |
| 8 | Q8WWM7 ATX2L_HUMAN | K.GPPQS#PVFEGVYNNSR.M        | S111:        | 2 | 4,8088 | 0,604 | -0,467 |
| 8 | O95251 MYST2_HUMAN | R.SSGSETEQVVDIFS#DR.E        | S111:        | 2 | 4,2294 | 0,415 | -0,283 |
| 8 | Q96ST3 SIN3A_HUMAN | R.YM*NSDTTS#PELR.E           | S1112:       | 2 | 3,0566 | 0,334 | -0,323 |
| 8 | Q9NVM6 DJC17_HUMAN | R.QAQAES#EEEEESR.S           | S112:        | 2 | 2,4175 | 0,197 | 0      |
| 8 | O95425 SVIL_HUMAN  | K.TPTGEGLLDS#PSK.T           | S1120:       | 2 | 3,4706 | 0,36  | -0,353 |
| 8 | Q14997 PSME4_HUMAN | K.NPSINQILLS#PEK.I           | S1121:       | 2 | 2,889  | 0,308 | -0,398 |
| 8 | Q9UQ35 SRRM2_HUMAN | R.GEFSAS#PM*LK.S             | S1124:       | 2 | 2,0781 | 0,136 | 0,105  |
| 8 | Q92900 RENT1_HUMAN | R.AYQHGGVTGLS#QY.-           | S1127:       | 2 | 3,0677 | 0,517 | -0,585 |
| 8 | O60841 IF2P_HUMAN  | K.QSFDDNDS#EELEDK.D          | S113:        | 2 | 3,8143 | 0,392 | -0,279 |
| 8 | Q15185 TEBP_HUMAN  | K.DWEDDS#DEDM*SNFDR.F        | S113:        | 2 | 3,6816 | 0,51  | -0,186 |
| 8 | Q6NV74 CB055_HUMAN | R.VFS#QENVCDR.I              | S113:        | 2 | 2,916  | 0,377 | -0,091 |
| 8 | Q08170 SFRS4_HUMAN | R.LIVENLSS#R.C               | S113:        | 2 | 2,7555 | 0,255 | 0      |
| 8 | Q92576 PHF3_HUMAN  | R.M*APPVDDL#PK.K             | S1133:       | 2 | 2,4613 | 0,412 | -0,386 |
| 8 | Q14191 WRN_HUMAN   | K.SIM*VQS#PEK.A              | S1133:       | 2 | 2,3671 | 0,314 | -0,219 |
| 8 | Q9C0C2 TB182_HUMAN | R.SYQFGIIGNDRVS#GAGFS#PSSK.M | S1133:S1138: | 3 | 3,842  | 0,323 | -0,15  |
| 8 | Q07889 SOS1_HUMAN  | R.SAS#VSSISLTK.G             | S1134:       | 2 | 3,0202 | 0,52  | 0,105  |
| 8 | Q9Y4F5 K0284_HUMAN | R.LGDAS#DTEAADGER.G          | S1135:       | 2 | 4,1692 | 0,509 | -0,574 |
| 8 | Q5T3F8 TM63B_HUMAN | R.LTSVSS#SVDFDQR.D           | S114:        | 2 | 3,1043 | 0,34  | -0,08  |
| 8 | Q03468 ERCC6_HUMAN | K.TSM*PS#GDESIDEK.L          | S1142:       | 2 | 3,5026 | 0,424 | -0,409 |
| 8 | Q9UPT6 JIP3_HUMAN  | K.LGFS#FVR.I                 | S1143:       | 2 | 3,0254 | 0,208 | -0,067 |
| 8 | P78312 CD008_HUMAN | K.LVLAES#PQPK.G              | S1144:       | 2 | 2,9756 | 0,268 | -0,105 |
| 8 | P18615 NELFE_HUMAN | R.SIS#ADDDLQESSR.R           | S115:        | 2 | 4,6861 | 0,542 | -0,244 |
| 8 | Q9Y3S1 WNK2_HUMAN  | K.ELS#DSCEGAFGGGR.L          | S1150:       | 2 | 2,3629 | 0,166 | -0,401 |
| 8 | Q9UIF9 BAZ2A_HUMAN | K.M*ELAGSNTTASS#PAR.A        | S1157:       | 2 | 4,4587 | 0,354 | -0,384 |
| 8 | Q9Y343 SNX24_HUMAN | K.AESCGS#FDETESEESSK.L       | S116:        | 2 | 4,5012 | 0,593 | -0,249 |
| 8 | Q9NU19 TB22B_HUMAN | R.SQS#TTSDVPANYK.V           | S116:        | 2 | 4,1522 | 0,487 | -0,248 |
| 8 | Q92618 ZN516_HUMAN | R.ASEGLDACAS#PTK.S           | S116:        | 2 | 3,0012 | 0,379 | -0,352 |
| 8 | Q9H4Z3 PCIF1_HUMAN | R.QLS#EEQPSGNGVK.K           | S116:        | 2 | 2,8274 | 0,497 | -0,084 |
| 8 | Q5SW79 CE170_HUMAN | R.LGS#LSARS#DSEATISR.S       | S1160:S1165: | 2 | 3,0261 | 0,484 | -0,27  |

|   |                    |                              |              |   |        |       |        |
|---|--------------------|------------------------------|--------------|---|--------|-------|--------|
| 8 | Q6R327 RICTR_HUMAN | K.TLQLETS#FM*GNK.H           | S1162:       | 2 | 3,5146 | 0,239 | -0,416 |
| 8 | Q9BQG0 MBB1A_HUMAN | K.EIPSATQS#PISK.K            | S1163:       | 2 | 2,8107 | 0,398 | -0,73  |
| 8 | P55196 AFAD_HUMAN  | R.SSPNVANQPPS#PGGK.S         | S1165:       | 2 | 4,1099 | 0,545 | -0,563 |
| 8 | Q9NTI5 PDS5B_HUMAN | R.M*ETVSNASSSSNPSS#PGR.I     | S1166:       | 2 | 5,6267 | 0,482 | -0,903 |
| 8 | Q9NTI5 PDS5B_HUMAN | R.M*ETVSNASSSSNPSS#PGR.I     | S1166:       | 3 | 4,2756 | 0,315 | -0,193 |
| 8 | Q9NTI5 PDS5B_HUMAN | R.METVSNASSSSNPSS#PGR.I      | S1166:       | 2 | 3,9937 | 0,475 | -0,521 |
| 8 | Q86SQ4 GP126_HUMAN | K.SLSSSSIGS#NSTYLTSK.S       | S1168:       | 2 | 4,725  | 0,459 | -0,339 |
| 8 | Q5QJE6 TDIF2_HUMAN | R.QILIACS#PVSSVR.K           | S117:        | 2 | 2,8919 | 0,347 | -0,081 |
| 8 | Q9NRY4 GRLF1_HUMAN | R.TSFSVGS#DDELGPIR.K         | S1179:       | 2 | 3,9694 | 0,514 | -0,221 |
| 8 | P53999 TCP4_HUMAN  | K.EQIS#DIDDAVR.K             | S118:        | 2 | 3,1629 | 0,263 | -0,182 |
| 8 | Q8IZ21 PHAR4_HUMAN | R.SSS#PVQVEEEPVR.L           | S118:        | 2 | 2,9182 | 0,385 | -0,481 |
| 8 | P25490 TTY1_HUMAN  | R.EEVVGGDDS#DGLR.A           | S118:        | 2 | 2,7044 | 0,49  | -0,342 |
| 8 | Q504Q3 PAN2_HUMAN  | K.VPEPEGQTS#PK.N             | S1189:       | 2 | 2,4048 | 0,168 | -1,27  |
| 8 | P28370 SMCA1_HUMAN | K.SPTS#PLNM*K.L              | S119:        | 2 | 2,6775 | 0,419 | -0,228 |
| 8 | Q7Z569 BRAP_HUMAN  | K.ECINAAPDSPS#K.Q            | S119:        | 2 | 2,6045 | 0,318 | -0,446 |
| 8 | Q92508 FA38A_HUMAN | R.SGS#EEAVTDPGER.E           | S1190:       | 2 | 2,9835 | 0,238 | -0,345 |
| 8 | Q5T1M5 FKB15_HUMAN | K.AQPEEEDDEVSM*K.G           | S1195:       | 2 | 2,681  | 0,418 | -0,423 |
| 8 | Q96A19 C102A_HUMAN | R.LAES#PQLSK.G               | S12:         | 2 | 3,0769 | 0,239 | -0,463 |
| 8 | O95218 ZRAB2_HUMAN | R.EES#DGEYDEFGR.K            | S120:        | 2 | 3,2507 | 0,572 | -0,242 |
| 8 | P11388 TOP2A_HUMAN | K.TQM*AEVLPS#PR.G            | S1213:       | 2 | 3,6243 | 0,525 | 0      |
| 8 | P11388 TOP2A_HUMAN | K.TQMAEVLPS#PR.G             | S1213:       | 2 | 3,2664 | 0,362 | -0,466 |
| 8 | Q13416 ORC2_HUMAN  | K.SVS#FSLK.N                 | S122:        | 2 | 2,3288 | 0,141 | 0,144  |
| 8 | Q14160 LAP4_HUMAN  | R.NSLES#ISSIDR.E             | S1223:       | 2 | 4,3643 | 0,393 | -0,375 |
| 8 | Q14160 LAP4_HUMAN  | R.NSLES#IS#SIDRELSPEGPK.E    | S1223:S1225: | 3 | 4,381  | 0,367 | -0,241 |
| 8 | Q13428 TCOF_HUMAN  | K.LDSS#PSVSSTLAAK.D          | S1228:       | 2 | 2,753  | 0,426 | -0,592 |
| 8 | P49916 DNL3_HUMAN  | K.LTTTGQVTS#PVK.G            | S123:        | 2 | 2,4107 | 0,367 | -0,651 |
| 8 | Q15154 PCM1_HUMAN  | K.TGFSVS#VEK.S               | S1230:       | 2 | 2,6406 | 0,106 | -0,118 |
| 8 | Q13099 IFT88_HUMAN | R.GPAS#PLEAK.K               | S124:        | 2 | 2,7337 | 0,44  | 0,064  |
| 8 | Q01664 TFAP4_HUMAN | R.FIQELSGSS#PK.R             | S124:        | 2 | 2,711  | 0,403 | -0,192 |
| 8 | P31749 AKT1_HUMAN  | R.SGS#PSDNS#GAEEM*EVSLAKPK.H | S124:S129:   | 3 | 4,1211 | 0,395 | -0,159 |
| 8 | Q01814 AT2B2_HUMAN | K.SATSSSPGSIHSLETS#L.-       | S1242:       | 2 | 3,6081 | 0,542 | -0,465 |
| 8 | Q8IVL0 NAV3_HUMAN  | K.YPDIAS#PTFR.R              | S1245:       | 2 | 2,9509 | 0,243 | -0,391 |
| 8 | P11388 TOP2A_HUMAN | K.NENTEGS#PQEDGVELEGLK.Q     | S1247:       | 2 | 3,3034 | 0,503 | -0,345 |

|   |                     |                                 |              |   |        |       |        |
|---|---------------------|---------------------------------|--------------|---|--------|-------|--------|
| 8 | Q9H5H4 ZN768_HUMAN  | R.YEPQS#PGYEPR.S                | S125:        | 2 | 2,5253 | 0,463 | -0,348 |
| 8 | A6NFL4 A6NFL4_HUMAN | R.GPSFM*TSPS#PK.H               | S1252:       | 2 | 2,6454 | 0,128 | -0,396 |
| 8 | P20020 AT2B1_HUMAN  | K.SATSSSPGSPLHSLETS#L.-         | S1257:       | 2 | 3,1979 | 0,474 | -0,531 |
| 8 | Q9HCF4 ALO17_HUMAN  | K.EDQEAELLS#EPEEESER.H          | S1258:       | 3 | 3,233  | 0,29  | 0      |
| 8 | P49023 PAXI_HUMAN   | K.QKS#AEPS#PTVM*STSLGSNLSELDL.R | S126:S130:   | 3 | 3,4249 | 1     | -0,135 |
| 8 | Q9H4A3 WKN1_HUMAN   | R.FIVS#PVPESR.L                 | S1261:       | 2 | 2,3017 | 0,131 | -0,302 |
| 8 | P46821 MAP1B_HUMAN  | K.SPSLSPSPPS#PLEK.T             | S1265:       | 2 | 2,3207 | 0,233 | -0,244 |
| 8 | Q9UPT8 ZC3H4_HUMAN  | K.TGS#GSPFAGNS#PAREGEQDAASK.D   | S1267:S1275: | 3 | 2,6149 | 0,234 | -0,44  |
| 8 | Q6P158 DHX57_HUMAN  | R.DLQEQDADAGS#ER.G              | S127:        | 2 | 4,5974 | 0,534 | -0,484 |
| 8 | B0I1T5 B0I1T5_HUMAN | R.SLGGIS#PSEDR.R                | S1274:       | 2 | 3,0879 | 0,369 | -0,102 |
| 8 | Q9UPT8 ZC3H4_HUMAN  | K.TGSGSPFAGNS#PAR.E             | S1275:       | 2 | 3,4801 | 0,48  | -0,264 |
| 8 | Q8N5U6 RNF10_HUMAN  | R.AEFS#PAQFSGPK.K               | S128:        | 2 | 3,0247 | 0,466 | -0,363 |
| 8 | Q14966 ZN638_HUMAN  | K.QSSVTQVTEQS#PK.V              | S128:        | 2 | 2,8467 | 0,504 | -0,651 |
| 8 | O95696 BRD1_HUMAN   | R.IVEYS#PPSAPR.R                | S128:        | 2 | 2,828  | 0,357 | -0,094 |
| 8 | Q96A00 PP14A_HUMAN  | R.QPS#PSHDGSL#PLQDR.A           | S128:S136:   | 3 | 3,6114 | 0,412 | 0      |
| 8 | O75533 SF3B1_HUMAN  | R.TM*IIS#PER.L                  | S129:        | 2 | 2,0725 | 0,235 | -0,585 |
| 8 | Q13425 SNTB2_HUMAN  | K.QEAGGLGIS#IK.G                | S129:        | 2 | 2,0139 | 0,299 | -0,317 |
| 8 | Q9C0C2 TB182_HUMAN  | R.NM*APGAVCS#PGESK.E            | S1297:       | 2 | 4,0037 | 0,395 | -0,732 |
| 8 | Q9UPU5 UBP24_HUMAN  | R.VSDQNS#PVLPK.K                | S1297:       | 2 | 3,2303 | 0,219 | -0,29  |
| 8 | Q9NR30 DDX21_HUMAN  | R.SDAGLES#DTAM*K.K              | S13:         | 2 | 4,1072 | 0,39  | 0      |
| 8 | Q9NR30 DDX21_HUMAN  | R.SDAGLES#DTAMK.K               | S13:         | 2 | 4,095  | 0,522 | -0,374 |
| 8 | P20962 PTMS_HUMAN   | K.SVEAAAELS#AK.D                | S13:         | 2 | 3,8245 | 0,46  | -0,844 |
| 8 | Q92685 ALG3_HUMAN   | R.SGS#AAQAEGLCK.Q               | S13:         | 2 | 3,7718 | 0,594 | -0,194 |
| 8 | Q86VM9 ZCH18_HUMAN  | R.DPHS#PEDEEQPQGLS#DDDILR.D     | S13:S24:     | 3 | 3,9783 | 0,331 | -0,072 |
| 8 | Q6YBN2 Q6YBN2_HUMAN | K.NDGSQS#DTAVGTLGTSGK.K         | S130:        | 2 | 3,8314 | 0,479 | -0,55  |
| 8 | Q9P266 K1462_HUMAN  | R.GQAGLPGGLV#PGSGDR.A           | S1304:       | 2 | 2,7499 | 0,275 | -0,076 |
| 8 | Q29RF7 PDS5A_HUMAN  | R.AAVGQES#PGGLEAGNAK.A          | S1305:       | 2 | 4,8739 | 0,494 | -0,82  |
| 8 | Q9BQG0 MBB1A_HUMAN  | R.LSLVIRS#PSLLQS#GAK.K          | S1308:S1314: | 3 | 3,4228 | 0,368 | -0,4   |
| 8 | Q96F86 EDC3_HUMAN   | K.SQDVAVS#PQQQQCSK.S            | S131:        | 2 | 4,0943 | 0,45  | -0,551 |
| 8 | Q9BQG0 MBB1A_HUMAN  | R.SPS#LLQSGAK.K                 | S1310:       | 2 | 3,2951 | 0,437 | -0,114 |
| 8 | Q9BQG0 MBB1A_HUMAN  | R.LSLVIRSPS#LLQS#GAK.K          | S1310:S1314: | 2 | 3,3156 | 0,244 | -0,667 |
| 8 | Q12756 KIF1A_HUMAN  | R.NLFGSGS#LR.A                  | S1312:       | 2 | 2,4937 | 0,226 | 0      |
| 8 | Q9UQ35 SRRM2_HUMAN  | K.ELS#NS#PLRENSFGSPLEFR.N       | S1318:S1320: | 3 | 4,8638 | 0,29  | 0,235  |

|   |                    |                                |              |   |        |       |        |
|---|--------------------|--------------------------------|--------------|---|--------|-------|--------|
| 8 | Q9UQ35 SRRM2_HUMAN | K.ELS#NSPLRENSFGS#PLEFR.N      | S1318:S1329: | 3 | 3,4101 | 0,238 | 0,469  |
| 8 | Q08AD1 CA1L1_HUMAN | R.SESVEGFLS#PSR.C              | S1319:       | 2 | 2,6103 | 0,405 | -0,444 |
| 8 | O75152 ZC11A_HUMAN | K.LSVQSNPS#PQLR.S              | S132:        | 2 | 2,9964 | 0,395 | -0,781 |
| 8 | P51858 HDGF_HUMAN  | K.GNAEGS#S#DEEGKLVIDEPAK.E     | S132:S133:   | 3 | 4,5832 | 0,369 | 0      |
| 8 | P55081 MFAP1_HUMAN | R.M*EREDS#S#EEEEEEIDDEEIER.R   | S132:S133:   | 3 | 4,3302 | 0,311 | -0,326 |
| 8 | Q9UQ35 SRRM2_HUMAN | K.ELSNS#PLRENSFGS#PLEFR.N      | S1320:S1329: | 3 | 4,4068 | 0,377 | -0,078 |
| 8 | Q9NZN5 ARHGC_HUMAN | R.TGTGDIATCYS#PR.T             | S1327:       | 2 | 3,3775 | 0,319 | -0,825 |
| 8 | Q8N201 INT1_HUMAN  | K.SS#PEQPIGQGR.I               | S1327:       | 2 | 2,6209 | 0,117 | -0,296 |
| 8 | Q9UGU0 TCF20_HUMAN | R.NCPAVTLTS#PAK.T              | S1335:       | 2 | 2,826  | 0,261 | -0,547 |
| 8 | P07814 SYEP_HUMAN  | R.LLS#VNIR.V                   | S1336:       | 2 | 2,3628 | 0,117 | 0      |
| 8 | Q05D32 CTSL2_HUMAN | K.LEDNPSGSGS#PPR.T             | S134:        | 2 | 2,4607 | 0,338 | -0,365 |
| 8 | P18615 NELFE_HUMAN | K.SLYES#FVSSDR.L               | S135:        | 2 | 3,4745 | 0,478 | -0,754 |
| 8 | O60841 IF2P_HUMAN  | K.VEM*YS#GS#DDDDDFNKLPK.K      | S135:S137:   | 3 | 3,0631 | 0,226 | -0,163 |
| 8 | Q13459 MYO9B_HUMAN | R.TS#FSTDVSK.L                 | S1354:       | 2 | 2,574  | 0,426 | -0,429 |
| 8 | Q02446 SP4_HUMAN   | K.ENNVSQPASSSSSSSSNNGSAS#PTK.T | S136:        | 3 | 3,4828 | 0,45  | -0,284 |
| 8 | Q9Y580 RBM7_HUMAN  | R.SFS#SPENFQR.Q                | S136:        | 2 | 2,7824 | 0,258 | -0,095 |
| 8 | Q9P1Y6 K1542_HUMAN | K.AEAPSS#PDVAPAGKEDS#PSASGR.V  | S1360:S1371: | 3 | 3,0074 | 0,34  | -0,547 |
| 8 | Q5T200 ZC3HD_HUMAN | R.LIS#DSVER.D                  | S1364:       | 2 | 2,8141 | 0,238 | -0,489 |
| 8 | Q5T200 ZC3HD_HUMAN | R.LISDS#VER.D                  | S1366:       | 2 | 2,5212 | 0,371 | -0,122 |
| 8 | O60264 SMCA5_HUMAN | K.QNLLS#VGDYR.H                | S137:        | 2 | 2,0455 | 0,22  | -0,196 |
| 8 | P42695 CNDD3_HUMAN | R.SRS#LGVLPFTLNSGS#PEK.T       | S1372:S1384: | 3 | 2,8885 | 0,246 | -0,625 |
| 8 | P11388 TOP2A_HUMAN | K.SVVS#DLEADDVK.G              | S1377:       | 2 | 3,6101 | 0,455 | -0,36  |
| 8 | Q13428 TCOF_HUMAN  | K.LGAGEGGEASVS#PEK.T           | S1378:       | 2 | 3,9298 | 0,468 | -0,665 |
| 8 | P41162 ETV3_HUMAN  | R.SSGVVPQS#APPVPTASSR.F        | S139:        | 2 | 3,7429 | 0,527 | -0,338 |
| 8 | Q7Z6Z7 HUWE1_HUMAN | R.AES#PEEVACR.K                | S1395:       | 2 | 3,7888 | 0,439 | -0,298 |
| 8 | P42696 RBM34_HUMAN | R.S#VQEGENPDDGVRGS#PPEDYR.L    | S14:S28:     | 3 | 3,2075 | 0,417 | -0,223 |
| 8 | Q8TDJ6 DMXL2_HUMAN | R.TIS#VSGS#TAKETVTVGK.D        | S1400:S1404: | 2 | 3,9877 | 1     | -0,602 |
| 8 | Q9UQ35 SRRM2_HUMAN | K.AGMSSNQSIS#SPVLDAVPRT#PSR.E  | S1403:T1413: | 3 | 5,3403 | 0,268 | -0,073 |
| 8 | Q9UQ35 SRRM2_HUMAN | K.AGM*SSNQSIS#SPVLDAVPRT#PSR.E | S1403:T1413: | 3 | 3,3361 | 0,29  | 0      |
| 8 | Q96QT4 TRPM7_HUMAN | K.FFVS#TPSQPSCK.S              | S1404:       | 2 | 2,5097 | 0,385 | -0,167 |
| 8 | Q9UQ35 SRRM2_HUMAN | K.AGM*SSNQSISS#PVLDAVPRT#PSR.E | S1404:T1413: | 3 | 6,9048 | 1     | -0,289 |
| 8 | P27708 PYR1_HUMAN  | R.LS#SFVTK.G                   | S1406:       | 2 | 2,3356 | 0,294 | 0,071  |
| 8 | P18858 DNL1_HUMAN  | R.TIQEVLEEQS#EDED.R            | S141:        | 2 | 4,5847 | 0,521 | -0,578 |

|   |                    |                                   |              |   |        |       |        |
|---|--------------------|-----------------------------------|--------------|---|--------|-------|--------|
| 8 | Q13177 PAK2_HUMAN  | K.YLS#FTPPEK.D                    | S141:        | 2 | 3,05   | 0,247 | -0,42  |
| 8 | Q96CT7 CC124_HUMAN | R.VLEEGS#VEAR.T                   | S141:        | 2 | 3,0059 | 0,334 | 0      |
| 8 | P18858 DNL1_HUMAN  | R.TIQEVLEEQS#EDED.R.E             | S141:        | 3 | 2,9549 | 0,262 | 0,096  |
| 8 | P41279 M3K8_HUMAN  | R.NIGS#DFIPR.G                    | S141:        | 2 | 2,8652 | 0,22  | -0,333 |
| 8 | Q14181 DPOA2_HUMAN | R.S#PHQLLSPSSFS#PSATPSQK.Y        | S141:S152:   | 3 | 4,1128 | 0,31  | 0,082  |
| 8 | Q13177 PAK2_HUMAN  | K.YLS#FT#PPEKDGFPSPALNAK.G        | S141:T143:   | 3 | 4,0409 | 0,178 | 0,44   |
| 8 | Q9BXW9 FACD2_HUMAN | K.SQNSQESTADES#EDDM*SSQASK.S      | S1412:       | 3 | 4,0035 | 0,461 | -0,149 |
| 8 | Q13523 PRP4B_HUMAN | K.VQSGM*GLILQGYES#GS#EEEEGEIHEK.A | S142:S144:   | 3 | 5,7216 | 0,522 | -0,127 |
| 8 | P46821 MAP1B_HUMAN | R.GAES#PFEEK.S                    | S1427:       | 2 | 2,7468 | 0,276 | -0,341 |
| 8 | Q63ZY6 NSN5C_HUMAN | R.QLEEPGAGTPS#PVR.L               | S143:        | 2 | 2,7108 | 0,323 | -0,241 |
| 8 | Q8IY33 MILK2_HUMAN | K.LPS#PAPAR.K                     | S143:        | 2 | 2,4109 | 0,22  | -0,069 |
| 8 | O95602 RPA1_HUMAN  | K.QEEVDYES#EEEEER.E               | S1430:       | 2 | 2,6255 | 0,456 | -0,486 |
| 8 | Q15648 MED1_HUMAN  | K.NYGS#PLISGSTPK.H                | S1433:       | 2 | 2,5576 | 0,314 | -0,261 |
| 8 | Q15149 PLEC1_HUMAN | K.AQLEPVAS#PAK.K                  | S1435:       | 2 | 2,2588 | 0,32  | -0,41  |
| 8 | P46821 MAP1B_HUMAN | K.QGS#PDQVS#PVSEM*STSTLYQDKQEGK.S | S1438:S1443: | 3 | 3,2962 | 0,386 | 0,061  |
| 8 | Q13153 PAK1_HUMAN  | K.YM*S#FTDK.S                     | S144:        | 2 | 2,8489 | 0,28  | -0,124 |
| 8 | O43399 TPD54_HUMAN | K.TSAALS#TVGSAISR.K               | S145:        | 2 | 3,1257 | 0,426 | -0,087 |
| 8 | P29966 MARCS_HUMAN | K.AEDGATPS#PSNETPK.K              | S145:        | 2 | 2,6939 | 0,311 | -0,849 |
| 8 | P21333 FLNA_HUMAN  | K.CSGPGLS#PGM*VR.A                | S1459:       | 2 | 3,0447 | 0,495 | -0,557 |
| 8 | P46783 RS10_HUMAN  | K.AEAGAGS#ATEFQFR.G               | S146:        | 2 | 2,9947 | 0,325 | -0,321 |
| 8 | Q9UIG0 BAZ1B_HUMAN | R.LAEDEGDS#EPEAVGQSR.G            | S1468:       | 2 | 4,5728 | 0,503 | -0,718 |
| 8 | O14514 BAI1_HUMAN  | K.NENVATLSVSS#LER.R               | S1469:       | 2 | 4,604  | 0,565 | -0,229 |
| 8 | P40855 PEX19_HUMAN | K.NATDLQNSS#MSEEELTK.A            | S147:        | 2 | 6,1685 | 0,531 | -0,309 |
| 8 | P40855 PEX19_HUMAN | K.NATDLQNSS#M*SEEELTK.A           | S147:        | 2 | 4,6339 | 0,582 | -0,612 |
| 8 | P18085 ARF4_HUMAN  | K.LGLQS#LR.N                      | S147:        | 2 | 2,9863 | 0,186 | -0,07  |
| 8 | O75376 NCOR1_HUMAN | K.AQLS#PGIYDDTSAR.R               | S1472:       | 2 | 2,9672 | 0,445 | -0,465 |
| 8 | Q14160 LAP4_HUMAN  | R.VQS#PEPPAPER.A                  | S1475:       | 2 | 2,9706 | 0,261 | -0,569 |
| 8 | Q15648 MED1_HUMAN  | K.SYQNS#PSS#DDGIRPLPEYSTEK.H      | S1479:S1482: | 3 | 4,698  | 1     | -0,417 |
| 8 | Q9BUH6 CI142_HUMAN | R.LAAAEETAVS#PR.K                 | S148:        | 2 | 3,8869 | 0,517 | -0,471 |
| 8 | Q6P0Q8 MAST2_HUMAN | R.NQSLGQS#APSLTAGLK.E             | S148:        | 2 | 2,4865 | 0,195 | -0,222 |
| 8 | Q14160 LAP4_HUMAN  | R.ALS#PAELR.A                     | S1486:       | 2 | 2,4763 | 0,256 | 0,13   |
| 8 | O43399 TPD54_HUMAN | K.TSAALSTVGS#AISR.K               | S149:        | 2 | 4,052  | 0,386 | -0,348 |
| 8 | Q02952 AKA12_HUMAN | K.GLSS#DLEGEK.T                   | S1498:       | 2 | 2,9284 | 0,376 | 0,109  |



|   |                    |                                     |                 |   |        |       |        |
|---|--------------------|-------------------------------------|-----------------|---|--------|-------|--------|
| 8 | P04792 HSPB1_HUMAN | R.GPS#WDPFR.D                       | S15:            | 2 | 2,884  | 0,383 | -0,117 |
| 8 | O15085 ARHGB_HUMAN | R.NSHELGPCPEDGSDAPLEDSTADAAAS#PGP.- | S1519:          | 3 | 5,4591 | 0,58  | -0,541 |
| 8 | Q9H6H4 REEP4_HUMAN | R.SFS#MQDLR.S                       | S152:           | 2 | 2,6643 | 0,253 | -0,115 |
| 8 | Q9H6H4 REEP4_HUMAN | R.SFS#M*QDLR.S                      | S152:           | 2 | 2,619  | 0,297 | -0,226 |
| 8 | Q9UGU0 TCF20_HUMAN | K.ENDTVTIS#PK.Q                     | S1522:          | 2 | 2,1273 | 0,153 | -0,206 |
| 8 | Q12756 KIF1A_HUMAN | R.TPQPCS#RPAS#PEPELLPEADSK.K        | S1528:S1532:    | 3 | 4,5018 | 0,422 | -0,356 |
| 8 | Q9HCD6 TANC2_HUMAN | R.FSPPPVGQGQKEYPS#PPPS#PLR.R        | S1530:S1534:    | 3 | 2,7712 | 0,155 | 0      |
| 8 | Q8N4C6 NIN_HUMAN   | R.NEITTLNEEDS#ISNLK.L               | S1538:          | 2 | 2,8262 | 0,327 | -0,064 |
| 8 | Q99959 PKP2_HUMAN  | R.LEISPDS#SPER.A                    | S154:           | 2 | 2,3514 | 0,227 | 0,186  |
| 8 | Q5JTV8 TOIP1_HUMAN | R.DS#HSS#EEDEASSQTDLSQTISK.K        | S154:S157:      | 3 | 5,3316 | 1     | 0      |
| 8 | Q9UQ35 SRRM2_HUMAN | R.SGS#SQELDVKPS#ASPQER.S            | S1541:S1550:    | 3 | 3,1251 | 0,285 | -0,532 |
| 8 | O60292 SI1L3_HUMAN | R.TLS#DESLCSGR.R                    | S1544:          | 2 | 3,5025 | 0,393 | -0,842 |
| 8 | O43166 SI1L1_HUMAN | K.LIDLES#PTPESQK.S                  | S1549:          | 2 | 3,7366 | 0,429 | -0,318 |
| 8 | Q15742 NAB2_HUMAN  | R.S#FSPKS#PLELGEKLS#PLPGGPGAGDPR.I  | S157:S162:S171: | 3 | 2,8505 | 0,236 | -0,562 |
| 8 | Q5UIP0 RIF1_HUMAN  | K.SNES#VDIQDQEEK.V                  | S1579:          | 2 | 4,3429 | 0,401 | -0,305 |
| 8 | Q69YN4 VIR_HUMAN   | R.SFLSEPSS#PGR.T                    | S1579:          | 2 | 3,11   | 0,443 | -0,392 |
| 8 | Q03468 ERCC6_HUMAN | K.IIEQLS#PQAATSR.D                  | S158:           | 2 | 4,0238 | 0,525 | -0,49  |
| 8 | Q641Q2 FA21A_HUMAN | K.AGNS#DS#EEDDANGRVELILEPK.D        | S158:S160:      | 3 | 5,0308 | 0,386 | -0,218 |
| 8 | Q8IVF2 AHNK2_HUMAN | K.VQM*PS#FK.M                       | S1583:          | 2 | 2,093  | 0,248 | -0,131 |
| 8 | Q99871 UC5IP_HUMAN | R.GGDDYS#EDEGDSSVSR.A               | S16:            | 2 | 5,08   | 0,493 | -0,348 |
| 8 | Q32MZ4 LRRF1_HUMAN | R.EIDCLS#PEAQK.L                    | S16:            | 2 | 2,3262 | 0,24  | -0,356 |
| 8 | Q9H5H4 ZN768_HUMAN | K.TQS#PEFEAQSSK.F                   | S160:           | 2 | 3,4641 | 0,477 | -0,344 |
| 8 | P12268 IMDH2_HUMAN | R.LVGISS#R.D                        | S160:           | 2 | 2,8942 | 0,201 | -0,923 |
| 8 | P82979 HCC1_HUMAN  | R.FGLNVSS#SISR.K                    | S162:           | 2 | 2,8318 | 0,263 | -0,105 |
| 8 | O95453 PARN_HUMAN  | R.SQANGAGALSYVS#PNTSK.C             | S163:           | 2 | 5,0384 | 0,651 | -0,666 |
| 8 | O95453 PARN_HUMAN  | R.SQANGAGALSYVS#PNTSK.C             | S163:           | 3 | 4,7878 | 0,404 | -0,1   |
| 8 | P37802 TAGL2_HUMAN | R.NFS#DNQLQEGK.N                    | S163:           | 2 | 3,8929 | 0,453 | -0,269 |
| 8 | P82979 HCC1_HUMAN  | R.FGLNVSS#ISR.K                     | S163:           | 2 | 2,6717 | 0,107 | -0,105 |
| 8 | O75396 SC22B_HUMAN | R.GEALS#ALDSK.A                     | S164:           | 2 | 2,718  | 0,407 | -0,342 |
| 8 | O95049 ZO3_HUMAN   | R.RS#PGGGS#EANGLALVSGFK.R           | S164:S169:      | 2 | 3,6106 | 0,424 | -0,559 |
| 8 | Q00537 PCTK2_HUMAN | K.LQINS#PPFDQPM*SR.R                | S165:           | 2 | 3,2744 | 0,258 | -0,353 |
| 8 | P51858 HDGF_HUMAN  | R.AGDLLEDS#PK.R                     | S165:           | 2 | 2,3461 | 0,267 | -0,434 |
| 8 | Q99613 EIF3C_HUMAN | K.QNPEQS#ADEDAEK.N                  | S166:           | 2 | 2,5921 | 0,338 | -0,475 |

|   |                     |                                |              |   |        |       |        |
|---|---------------------|--------------------------------|--------------|---|--------|-------|--------|
| 8 | Q4ZG52 Q4ZG52_HUMAN | R.VRIS#SSTPVVEDTQS.-           | S167:        | 2 | 3,4559 | 0,458 | -0,507 |
| 8 | Q96P11 NSUN5_HUMAN  | R.ASS#LDDL.R.A                 | S167:        | 2 | 2,2924 | 0,282 | 0      |
| 8 | P32519 ELF1_HUMAN   | K.YADSPGASS#PEQPK.R            | S168:        | 2 | 3,7156 | 0,495 | -0,887 |
| 8 | P42166 LAP2A_HUMAN  | R.SSTPLPTISS#AENTR.Q           | S168:        | 2 | 3,145  | 0,45  | -0,353 |
| 8 | Q8TDN4 CABL1_HUMAN  | R.GFAS#PLGAGR.A                | S168:        | 2 | 2,7093 | 0,285 | -0,12  |
| 8 | P18583 SON_HUMAN    | K.ESDQTLAALLS#PK.E             | S1697:       | 3 | 4,1956 | 0,347 | 0,063  |
| 8 | P18583 SON_HUMAN    | K.ESDQTLAALLS#PK.E             | S1697:       | 2 | 3,7835 | 0,45  | 0,084  |
| 8 | P53999 TCP4_HUMAN   | K.ELVSSSSGSDS#DSEVDK.K         | S17:         | 2 | 5,3647 | 0,5   | -0,773 |
| 8 | Q68D06 SLN13_HUMAN  | K.YNLINEGS#PPSK.I              | S170:        | 2 | 3,0297 | 0,396 | -0,262 |
| 8 | P29966 MARCS_HUMAN  | K.LSGFS#FK.K                   | S170:        | 2 | 2,2804 | 0,214 | -1,409 |
| 8 | P35579 MYH9_HUMAN   | R.DELADEIANSS#GK.G             | S1714:       | 2 | 4,098  | 0,469 | 0,256  |
| 8 | O15446 RPA34_HUMAN  | R.SALAPNLLTS#GK.K              | S172:        | 2 | 2,3396 | 0,359 | -0,195 |
| 8 | O95817 BAG3_HUMAN   | R.SQS#PAASDCSSSSSASLPSSGR.S    | S173:        | 3 | 3,9754 | 0,562 | -0,401 |
| 8 | P53621 COPA_HUMAN   | K.NLS#PGAVESDVR.G              | S173:        | 2 | 3,546  | 0,328 | -0,276 |
| 8 | A8K719 A8K719_HUMAN | R.QQDPS#PGSNLGGGDDLK.L         | S173:        | 2 | 2,8915 | 0,32  | -0,484 |
| 8 | P67809 YBOX1_HUMAN  | K.NEGS#ESAPEGQAQQR.R           | S174:        | 2 | 3,7979 | 0,469 | -0,366 |
| 8 | Q92974 ARHG2_HUMAN  | R.ILSQS#TDSLNM*R.N             | S174:        | 2 | 2,7004 | 0,314 | -0,251 |
| 8 | Q9BRJ6 CG050_HUMAN  | R.ELDEEGS#DPPLPGR.A            | S175:        | 2 | 2,1995 | 0,237 | -0,46  |
| 8 | Q12802 AKP13_HUMAN  | R.TFS#YIK.N                    | S1750:       | 2 | 2,0132 | 0,084 | 0,145  |
| 8 | O14497 ARI1A_HUMAN  | R.FSKVS#S#PAPM*EGGEEEEELLGPK.L | S1754:S1755: | 3 | 5,3299 | 0,518 | -0,07  |
| 8 | Q9H7D0 DOCK5_HUMAN  | K.APEPDLM*S#PTR.K              | S1756:       | 2 | 2,8514 | 0,433 | -0,652 |
| 8 | Q13442 HAP28_HUMAN  | R.M*QS#LSLNK.-                 | S176:        | 2 | 3,212  | 0,182 | 0      |
| 8 | P67809 YBOX1_HUMAN  | K.NEGSES#APEGQAQQR.R           | S176:        | 3 | 2,7707 | 0,17  | -0,329 |
| 8 | Q9H7D0 DOCK5_HUMAN  | K.S#LQLM*DNR.L                 | S1766:       | 2 | 2,4248 | 0,524 | -0,227 |
| 8 | Q96CV9 OPTN_HUMAN   | K.LNSSGSEDS#FVEIR.M            | S177:        | 2 | 4,8112 | 0,341 | -0,143 |
| 8 | Q58FF8 H90B2_HUMAN  | K.IEDVGS#DEEDDSGK.D            | S177:        | 2 | 4,5197 | 0,511 | -0,62  |
| 8 | Q86TB9 PATL1_HUMAN  | R.S#TSPHGGPPV.R.A              | S177:        | 3 | 3,2544 | 0,214 | 0,142  |
| 8 | Q9NYF8 BCLF1_HUMAN  | K.AEGEPQES#PLK.S               | S177:        | 2 | 3,2409 | 0,372 | -0,263 |
| 8 | Q09666 AHNK_HUMAN   | K.DIDISS#PEFK.I                | S177:        | 2 | 2,6595 | 0,364 | -0,297 |
| 8 | Q6PIR0 Q6PIR0_HUMAN | K.TSVSQNVIPSS#AQK.R            | S177:        | 2 | 2,3238 | 0,266 | -0,4   |
| 8 | Q9H7D0 DOCK5_HUMAN  | R.LS#PFHGSSPPQSTPLS#PPPLTPK.A  | S1775:S1789: | 3 | 4,4511 | 1     | -0,362 |
| 8 | Q9NZJ4 SACS_HUMAN   | R.IADLQS#PLFR.G                | S1779:       | 2 | 2,9004 | 0,423 | -0,098 |
| 8 | Q7Z6J9 SEN54_HUMAN  | R.FQPSSVLS#PYER.Q              | S178:        | 2 | 2,7178 | 0,291 | -0,246 |

|   |                     |                                |              |   |        |       |        |
|---|---------------------|--------------------------------|--------------|---|--------|-------|--------|
| 8 | Q13442 HAP28_HUMAN  | R.M*QSL#LNK.-                  | S178:        | 2 | 2,1364 | 0,162 | -0,12  |
| 8 | Q9H7D0 DOCK5_HUMAN  | R.LSPFHGS#SPPQSTPLS#PPPLTPK.A  | S1780:S1789: | 3 | 4,263  | 1     | -0,072 |
| 8 | P18583 SON_HUMAN    | R.ASES#S#SEEKDDYEIVFK.V        | S1782:S1783: | 3 | 5,3347 | 0,423 | -0,172 |
| 8 | Q8WWQ0 PHIP_HUMAN   | R.TAFYNEDDS#EEEQR.Q            | S1783:       | 2 | 5,1459 | 0,589 | -0,673 |
| 8 | Q14980 NUMA1_HUMAN  | R.SQAPLES#SLDSLGDVFLDS#GRK.T   | S1788:S1800: | 3 | 3,7628 | 0,448 | -0,369 |
| 8 | Q86TB9 PATL1_HUMAN  | R.STS#PIIGSPVVR.A              | S179:        | 2 | 2,3921 | 0,174 | -0,284 |
| 8 | A8MQ02 A8MQ02_HUMAN | R.LFS#QGQDVSNK.V               | S1799:       | 2 | 3,1261 | 0,336 | -0,281 |
| 8 | Q9HAS0 NJMU_HUMAN   | K.ELES#SEEGSAEER.R             | S18:         | 2 | 4,4461 | 0,39  | -0,538 |
| 8 | Q9Y383 LC7L2_HUMAN  | R.AM*LDQLM*GTS#R.D             | S18:         | 2 | 3,4829 | 0,52  | -0,64  |
| 8 | O00418 EF2K_HUMAN   | R.LEGVDGGQS#PR.A               | S18:         | 2 | 3,2281 | 0,381 | -0,408 |
| 8 | Q9BV40 VAMP8_HUMAN  | R.NLQS#EVEGVK.N                | S18:         | 2 | 2,3397 | 0,147 | -0,309 |
| 8 | O15231 ZN185_HUMAN  | R.RSS#TSGDTEEEEEVVPFSSDEQK.R   | S18:T23:     | 3 | 4,4967 | 1     | -0,673 |
| 8 | Q96N67 DOCK7_HUMAN  | R.S#M*SIDDTPR.G                | S180:        | 2 | 2,2839 | 0,341 | -0,109 |
| 8 | Q6DN90 IQEC1_HUMAN  | R.MQFS#FEGPEK.V                | S180:        | 2 | 2,2217 | 0,2   | -0,763 |
| 8 | Q92945 FUBP2_HUMAN  | K.VQIS#PDSGGLPER.S             | S181:        | 2 | 3,2245 | 0,431 | -0,085 |
| 8 | Q5T4S7 UBR4_HUMAN   | K.ELASPV#PELR.Q                | S181:        | 2 | 2,3433 | 0,221 | -0,191 |
| 8 | Q9NQC3 RTN4_HUMAN   | R.RGS#S#GSVDETLFALPAASEPVIR.S  | S181:S182:   | 3 | 3,4358 | 0,282 | -0,218 |
| 8 | Q5UIP0 RIF1_HUMAN   | K.EDNDTINDS#LIVSETK.S          | S1810:       | 2 | 3,2205 | 0,355 | -0,977 |
| 8 | Q5VT06 CE350_HUMAN  | K.ATS#PGPTDLETR.S              | S1818:       | 2 | 2,446  | 0,314 | -0,829 |
| 8 | Q96N67 DOCK7_HUMAN  | R.SM*S#IDDTPR.G                | S182:        | 2 | 3,0189 | 0,348 | 0      |
| 8 | Q8TB72 PUM2_HUMAN   | R.QAS#PTEVVER.L                | S182:        | 2 | 2,4217 | 0,43  | -0,306 |
| 8 | P04083 ANXA1_HUMAN  | R.NALLS#LAK.G                  | S182:        | 2 | 2,4044 | 0,171 | 0      |
| 8 | Q9NQW6 ANLN_HUMAN   | K.AAS#PPRPLLSNASAT#PVGR.R      | S182:T194:   | 3 | 4,7327 | 0,359 | -0,362 |
| 8 | Q8WUF5 IASPP_HUMAN  | R.AGS#PRGS#PLAEGPQAFFPER.G     | S183:S187:   | 3 | 5,6195 | 0,543 | -0,164 |
| 8 | Q14573 ITPR3_HUMAN  | R.VAS#FSIPGSSSR.Y              | S1832:       | 2 | 3,2151 | 0,508 | -0,383 |
| 8 | Q03164 HRX_HUMAN    | K.GPGEPS#PTLHPPT#PPILSTDR.S    | S1837:T1845: | 3 | 3,6864 | 0,309 | -0,36  |
| 8 | Q8WVT3 TTC15_HUMAN  | K.SPS#FGGASEASAR.T             | S184:        | 2 | 3,1223 | 0,316 | -0,749 |
| 8 | P50548 ERF_HUMAN    | R.LGRGS#VSDCS#DGTSELEPLGEDPR.A | S185:S190:   | 3 | 4,1731 | 1     | -0,259 |
| 8 | Q9Y2F5 K0947_HUMAN  | R.LDTGS#PEPETR.G               | S1854:       | 2 | 3,7083 | 0,469 | -0,476 |
| 8 | P26651 TTP_HUMAN    | R.QSIS#FSGLPGR.R               | S186:        | 2 | 3,3491 | 0,371 | -0,742 |
| 8 | Q9Y388 RBMX2_HUMAN  | R.EVQAEQPSS#SSPR.R             | S186:        | 2 | 2,9161 | 0,283 | -0,329 |
| 8 | P13798 ACPH_HUMAN   | K.ALDVSA#DDEIAR.L              | S187:        | 2 | 4,0942 | 0,459 | -0,254 |
| 8 | O43572 AKA10_HUMAN  | K.QSSLAEPVS#PSK.K              | S187:        | 2 | 2,0624 | 0,222 | -0,373 |

|   |                    |                                    |              |   |        |       |        |
|---|--------------------|------------------------------------|--------------|---|--------|-------|--------|
| 8 | O95218 ZRAB2_HUMAN | K.YNLDA#EEEDSNK.K                  | S188:        | 2 | 4,9292 | 0,575 | -1,072 |
| 8 | Q96PY5 FMNL2_HUMAN | R.GSNLPSVGN#VSR.S                  | S188:        | 2 | 4,1286 | 0,496 | 0,084  |
| 8 | Q8IYI6 EXOC8_HUMAN | R.QLES#GGFEAR.L                    | S19:         | 2 | 2,8192 | 0,359 | 0      |
| 8 | Q9UNE7 STUB1_HUMAN | R.LGAGGGS#PEKS#PSAQELK.E           | S19:S23:     | 3 | 4,4058 | 0,428 | -0,195 |
| 8 | Q9UNE7 STUB1_HUMAN | R.LGAGGGS#PEKS#PSAQELK.E           | S19:S23:     | 2 | 3,5227 | 0,434 | -0,391 |
| 8 | O60841 IF2P_HUMAN  | R.INSSGESGDES#DEFLQSR.K            | S190:        | 3 | 3,1288 | 0,218 | 0      |
| 8 | Q96PY5 FMNL2_HUMAN | R.GSNLPSVGN#VSR.S                  | S190:        | 2 | 2,7814 | 0,345 | 0,252  |
| 8 | P22059 OSBP1_HUMAN | K.M*LAES#DES#GDEESVSQTDKTELQNTLR.T | S190:S193:   | 3 | 3,6209 | 0,446 | -0,918 |
| 8 | Q7Z6Z7 HUWE1_HUMAN | R.GS#GTASDDEFENLR.I                | S1903:       | 2 | 3,9581 | 0,505 | -0,077 |
| 8 | Q7Z6Z7 HUWE1_HUMAN | R.GSGTAS#DDEFENLR.I                | S1907:       | 3 | 3,4491 | 0,245 | -0,116 |
| 8 | P21291 CSR1_HUMAN  | K.GFGFGQGAGALVHS#E.-               | S192:        | 2 | 4,3676 | 0,568 | -0,403 |
| 8 | Q00587 BORG5_HUMAN | R.SDS#LLSFR.L                      | S192:        | 2 | 3,4016 | 0,365 | -0,182 |
| 8 | B01T6 B01T6_HUMAN  | K.LGFSS#PYEGLNKS#PK.T              | S1926:S1935: | 2 | 2,9579 | 0,112 | -0,389 |
| 8 | O95772 MENTO_HUMAN | R.LLIVQDAS#ER.A                    | S193:        | 2 | 3,4921 | 0,43  | -0,498 |
| 8 | Q9BVC5 ASHWN_HUMAN | K.SPPLS#PVGTTVPK.L                 | S193:        | 2 | 3,0256 | 0,256 | -0,09  |
| 8 | Q5TBA9 FRY_HUMAN   | K.NSDLLTVLS#R.S                    | S1936:       | 2 | 2,0778 | 0,129 | -0,306 |
| 8 | Q14151 SAFB2_HUMAN | K.NTLETS#SLNFK.V                   | S194:        | 2 | 3,2773 | 0,503 | -0,183 |
| 8 | Q03164 HRX_HUMAN   | R.NSAILSDPS#VFS#PLNKSETK.S         | S194:S197:   | 3 | 3,1057 | 0,096 | -0,239 |
| 8 | P35579 MYH9_HUMAN  | K.GAGDGS#DEEVDGK.A                 | S1943:       | 2 | 3,1286 | 0,264 | -0,464 |
| 8 | Q9NV56 MRGBP_HUMAN | K.VLTANSNPSS#PSAAK.R               | S195:        | 2 | 4,1057 | 0,488 | -0,56  |
| 8 | Q00587 BORG5_HUMAN | R.SDSLLS#FR.L                      | S195:        | 2 | 2,8498 | 0,331 | -0,182 |
| 8 | Q8IWB9 TEX2_HUMAN  | K.SLS#TEVEPK.E                     | S196:        | 2 | 2,5038 | 0,26  | 0,228  |
| 8 | Q8TEA8 DTD1_HUMAN  | R.SASS#GAEGDVSSEREP.-              | S197:        | 2 | 3,4241 | 0,521 | -0,445 |
| 8 | P35908 K22E_HUMAN  | K.FAS#FIDK.V                       | S197:        | 2 | 2,8537 | 0,251 | -0,134 |
| 8 | Q8IWI9 MGAP_HUMAN  | K.QNSGAATSEETLND#LEDR.G            | S1985:       | 3 | 3,6289 | 0,326 | -0,346 |
| 8 | Q8IWI9 MGAP_HUMAN  | K.QNSGAATSEETLND#LEDR.G            | S1985:       | 2 | 2,7974 | 0,357 | -0,461 |
| 8 | Q9UQN3 CHM2B_HUMAN | K.ATIS#DEEIER.Q                    | S199:        | 2 | 3,3884 | 0,336 | -0,687 |
| 8 | O14686 MLL2_HUMAN  | K.ASEPLS#PPPFESR.K                 | S1999:       | 2 | 2,7803 | 0,341 | -0,44  |
| 8 | P30622 CLIP1_HUMAN | K.TASESISNLS#EAGSIK.K              | S200:        | 2 | 4,7223 | 0,41  | -0,364 |
| 8 | O75940 SPF30_HUMAN | R.SIFAS#PESVTGK.V                  | S201:        | 2 | 3,1115 | 0,524 | -0,281 |
| 8 | Q9Y3X0 CCDC9_HUMAN | R.S#GPLEESER.D                     | S202:        | 2 | 2,6255 | 0,333 | 0,113  |
| 8 | P16989 DBPA_HUMAN  | R.NYAGEEEEEGSGS#SEGFDPATDR.Q       | S203:        | 3 | 5,6015 | 0,522 | -0,351 |
| 8 | Q9P265 DIP2B_HUMAN | K.GTSGS#LADVFNTR.I                 | S203:        | 2 | 3,4238 | 0,537 | -0,413 |

|   |                    |                                |            |   |        |       |        |
|---|--------------------|--------------------------------|------------|---|--------|-------|--------|
| 8 | Q04726 TLE3_HUMAN  | R.ESSANNSVS#PSESLR.A           | S203:      | 2 | 2,2416 | 0,156 | -0,668 |
| 8 | P12270 TPR_HUMAN   | R.AADSQNSGEGNTGAAESS#FSQEVSR.E | S2034:     | 3 | 5,5253 | 0,434 | -0,285 |
| 8 | Q8TEA8 DTD1_HUMAN  | R.SASSGAEGDVSS#EREP.-          | S205:      | 2 | 3,8064 | 0,485 | -0,593 |
| 8 | Q8NEY8 PPHLN_HUMAN | R.DTS#PSSGSAVSSSK.V            | S205:      | 2 | 3,1062 | 0,467 | -0,266 |
| 8 | Q58FF7 H90B3_HUMAN | K.EIS#DDEAEEEEK.G              | S205:      | 2 | 2,6492 | 0,323 | 0      |
| 8 | P40227 TCPZ_HUMAN  | K.SETDTS#LIR.G                 | S205:      | 2 | 2,1379 | 0,176 | 0      |
| 8 | O75683 SURF6_HUMAN | K.VEVS#EDEPASK.A               | S206:      | 2 | 3,2549 | 0,384 | -0,384 |
| 8 | Q01130 SFRS2_HUMAN | R.S#KS#PPKSPEEEGAVSS.-         | S206:S208: | 2 | 2,5772 | 0,219 | -0,824 |
| 8 | O75179 ANR17_HUMAN | R.NSPLDCGSAS#PNK.V             | S2067:     | 2 | 2,2837 | 0,275 | -0,342 |
| 8 | P49327 FAS_HUMAN   | R.LGM*LS#PEGTCK.A              | S207:      | 2 | 2,6683 | 0,354 | -0,757 |
| 8 | Q9NS23 RAS1_HUMAN  | R.TS#FYLPK.D                   | S207:      | 2 | 2,1298 | 0,081 | -0,13  |
| 8 | Q53EP0 FND3B_HUMAN | R.LNS#PPSSIIK.S                | S208:      | 2 | 2,7853 | 0,285 | -0,206 |
| 8 | P38159 HNRPG_HUMAN | R.DVYLS#PR.D                   | S208:      | 2 | 2,0433 | 0,169 | -1,181 |
| 8 | P38159 HNRPG_HUMAN | R.DVYLS#PRDDGYS#TK.D           | S208:S215: | 2 | 3,9852 | 0,516 | -0,206 |
| 8 | Q14244 MAP7_HUMAN  | R.LSSSATLLNS#PDR.A             | S209:      | 2 | 3,5429 | 0,531 | -0,24  |
| 8 | P49790 NU153_HUMAN | K.NTSLPPLWS#PEAER.S            | S209:      | 2 | 2,0475 | 0,123 | -0,073 |
| 8 | Q6IQ22 RAB12_HUMAN | R.AGGGGGLGAGS#PALSGGQGR.R      | S21:       | 2 | 4,8519 | 0,647 | -0,66  |
| 8 | P49792 RBP2_HUMAN  | R.YIASVQGSTPS#PR.Q             | S21:       | 2 | 3,1617 | 0,389 | 0      |
| 8 | O95671 ASML_HUMAN  | R.VVLASAS#PR.R                 | S21:       | 2 | 2,9307 | 0,439 | 0,062  |
| 8 | P78347 GTF2I_HUMAN | R.SILS#PGGSCGPIK.V             | S210:      | 2 | 2,821  | 0,186 | -0,18  |
| 8 | Q09666 AHNK_HUMAN  | K.TVIRLPS#GSGAAS#PTGSAVDIR.A   | S210:S216: | 3 | 3,5135 | 0,412 | -0,483 |
| 8 | Q5VUA4 ZN318_HUMAN | R.IPS#PNILK.T                  | S2101:     | 2 | 3,0425 | 0,24  | -0,063 |
| 8 | Q05086 UBE3A_HUMAN | K.AACSAAM*EEDSEASS#SR.I        | S211:      | 2 | 3,9701 | 0,624 | -0,317 |
| 8 | Q12849 GRSF1_HUMAN | K.SS#PVVNDGVVR.L               | S211:      | 2 | 2,5859 | 0,298 | -0,606 |
| 8 | Q13242 SFRS9_HUMAN | R.GS#PHYFS#PFRPY.-             | S211:S216: | 2 | 3,1445 | 0,398 | -0,68  |
| 8 | Q7Z417 NUFP2_HUMAN | K.GADNDGS#GSESGYTTPK.K         | S212:      | 2 | 4,5658 | 0,523 | -0,708 |
| 8 | O95639 CPSF4_HUMAN | R.SSSLIQLTSQNSS#PNQQR.T        | S212:      | 3 | 3,3885 | 0,366 | -0,267 |
| 8 | Q9NP61 ARFG3_HUMAN | K.ATLEVSS#IIK.K                | S212:      | 2 | 2,4074 | 0,242 | -0,428 |
| 8 | P02545 LMNA_HUMAN  | K.NIYS#EELR.E                  | S212:      | 2 | 2,2273 | 0,277 | 0      |
| 8 | Q9H4L7 SMRCD_HUMAN | R.KLSS#SS#EPYEEDEFNDDQSIK.K    | S212:S214: | 3 | 5,046  | 1     | -0,421 |
| 8 | Q8TDW0 LRC8C_HUMAN | R.SNTIQSGPEGLVNSQS#LKS#IPEK.F  | S212:S215: | 3 | 3,763  | 0,181 | -0,413 |
| 8 | Q99698 LYST_HUMAN  | K.LTGS#LGCSIDR.L               | S2124:     | 2 | 2,8745 | 0,406 | -0,194 |
| 8 | Q8N565 MREG_HUMAN  | K.ELHYLPFPS#P.-                | S213:      | 2 | 2,8231 | 0,304 | -0,667 |

|   |                    |                                 |            |   |        |       |        |
|---|--------------------|---------------------------------|------------|---|--------|-------|--------|
| 8 | Q01082 SPTB2_HUMAN | K.GEQVSQNGLPAEQGS#PR.M          | S2138:     | 2 | 4,6615 | 0,465 | -0,2   |
| 8 | Q01082 SPTB2_HUMAN | K.GEQVSQNGLPAEQGS#PR.M          | S2138:     | 3 | 3,8374 | 0,357 | -0,199 |
| 8 | Q9H0H5 RGAP1_HUMAN | R.SIGSAVDQGNES#IVAK.T           | S214:      | 2 | 4,28   | 0,422 | -0,295 |
| 8 | Q7Z417 NUFP2_HUMAN | K.GADNDGSGS#ESGYTTPK.K          | S214:      | 3 | 2,8435 | 0,31  | 0      |
| 8 | P08670 VIME_HUMAN  | R.QDVDNAS#LAR.L                 | S214:      | 2 | 2,1347 | 0,164 | -0,104 |
| 8 | A4D1S0 KLRG2_HUMAN | R.ASPAEGSAGSPGS#PTCCR.C         | S215:      | 2 | 3,3113 | 0,504 | -0,467 |
| 8 | Q5JTV8 TOIP1_HUMAN | K.VNFS#EEGET#EEDDQDSSHSSVTTVK.A | S215:T220: | 3 | 3,6029 | 0,27  | 0,565  |
| 8 | Q8N4S0 CCD82_HUMAN | R.VVEDEGS#SVEM*EQK.T            | S219:      | 2 | 4,8201 | 0,509 | -0,294 |
| 8 | Q53HL2 BOREA_HUMAN | R.IYNISGNGS#PLADSK.E            | S219:      | 2 | 4,7452 | 0,594 | -0,378 |
| 8 | Q5UIP0 RIF1_HUMAN  | R.SQEDEISS#PVNK.V               | S2196:     | 2 | 3,1729 | 0,283 | -1,036 |
| 8 | P49006 MRP_HUMAN   | R.GDVTAEEAAGAS#PAK.A            | S22:       | 2 | 4,3084 | 0,581 | -0,42  |
| 8 | P02545 LMNA_HUMAN  | R.SGAQASSTPLS#PTR.I             | S22:       | 2 | 3,633  | 0,459 | -0,339 |
| 8 | Q9UBN7 HDAC6_HUMAN | R.QNPQS#PPQDSSVTSK.R            | S22:       | 2 | 2,6684 | 0,287 | -0,581 |
| 8 | Q969R8 ITFG2_HUMAN | K.DTGS#PPASEGPTDGSR.E           | S220:      | 2 | 2,2897 | 0,432 | -0,682 |
| 8 | Q9UKX7 NUP50_HUMAN | K.VAAETQS#PSLFGSTK.L            | S221:      | 2 | 4,2172 | 0,539 | -0,152 |
| 8 | O15231 ZN185_HUMAN | R.QSS#PSGSEQLVR.R               | S221:      | 2 | 2,3673 | 0,323 | -0,45  |
| 8 | Q9UPW0 FOXJ3_HUMAN | K.VTLYNTDQDGS#PR.S              | S223:      | 2 | 4,5175 | 0,567 | -0,489 |
| 8 | Q9UPW0 FOXJ3_HUMAN | K.VTLYNTDQDGS#PR.S              | S223:      | 3 | 2,8344 | 0,153 | -0,523 |
| 8 | A1L170 YA022_HUMAN | R.ASS#PSLIER.N                  | S223:      | 2 | 2,3856 | 0,249 | -0,117 |
| 8 | P05549 AP2A_HUMAN  | R.LSLLSS#TSK.Y                  | S223:      | 2 | 2,2943 | 0,213 | -0,12  |
| 8 | Q14315 FLNC_HUMAN  | R.LGS#FGSITR.Q                  | S2233:     | 2 | 2,4628 | 0,236 | -0,18  |
| 8 | Q13573 SNW1_HUMAN  | R.GPPS#PPAPVM*HS#PSR.K          | S224:S232: | 2 | 3,1222 | 0,427 | -0,505 |
| 8 | Q13573 SNW1_HUMAN  | R.GPPS#PPAPVM*HS#PSR.K          | S224:S232: | 3 | 3,1193 | 0,247 | 0      |
| 8 | O95071 UBR5_HUMAN  | R.DLS#LEVDR.D                   | S2241:     | 2 | 2,4584 | 0,274 | 0      |
| 8 | O75643 U520_HUMAN  | R.EEAS#DDDM*EGDEAVVR.C          | S225:      | 2 | 4,6528 | 0,469 | -0,458 |
| 8 | P41440 S19A1_HUMAN | R.CETSAS#ELER.M                 | S225:      | 2 | 3,3382 | 0,305 | -0,677 |
| 8 | Q2KHR2 RFXD2_HUMAN | K.LQS#PLPGESA.K                 | S225:      | 2 | 2,7503 | 0,255 | -0,764 |
| 8 | Q9H8W4 PKHF2_HUMAN | R.SDS#YSQSLK.S                  | S226:      | 2 | 2,5221 | 0,383 | -0,111 |
| 8 | P52701 MSH6_HUMAN  | K.SEEDNEIES#EEEVQPK.T           | S227:      | 3 | 5,1133 | 0,383 | 0,093  |
| 8 | P52701 MSH6_HUMAN  | K.SEEDNEIES#EEEVQPK.T           | S227:      | 2 | 4,8405 | 0,45  | -0,557 |
| 8 | Q9BW71 HIRP3_HUMAN | K.ESEQES#EEEEILAQK.K            | S227:      | 2 | 3,2758 | 0,254 | 0      |
| 8 | Q9UQ35 SRRM2_HUMAN | R.TPAAAAAM*NLAS#PR.T            | S2272:     | 2 | 4,4914 | 0,549 | -0,424 |
| 8 | O94915 FRYL_HUMAN  | K.TYGGDTGS#PEISFTK.I            | S2272:     | 2 | 4,154  | 0,491 | -0,521 |

|   |                    |                                   |            |   |        |       |        |
|---|--------------------|-----------------------------------|------------|---|--------|-------|--------|
| 8 | Q9UQ35 SRRM2_HUMAN | R.TPAAAAAMNLAS#PR.T               | S2272:     | 2 | 3,5116 | 0,5   | -0,172 |
| 8 | Q9UQ35 SRRM2_HUMAN | R.TPAAAAAMNLAS#PR.T               | S2272:     | 3 | 3,2057 | 0,247 | 0,064  |
| 8 | Q9UQ35 SRRM2_HUMAN | R.TPAAAAAM*NLAS#PR.T              | S2272:     | 3 | 2,7381 | 0,277 | -0,191 |
| 8 | Q13033 STRN3_HUMAN | K.NLEQILNGGES#PK.Q                | S229:      | 2 | 4,282  | 0,385 | -0,33  |
| 8 | P51608 MECP2_HUMAN | K.M*PFQTS#PGGK.A                  | S229:      | 2 | 2,5735 | 0,129 | -0,106 |
| 8 | Q00653 NFKB2_HUMAN | K.LNSS#IVEPK.E                    | S23:       | 2 | 2,731  | 0,279 | -0,343 |
| 8 | P20700 LMNB1_HUMAN | R.AGGPTTPLS#PTR.L                 | S23:       | 2 | 2,2855 | 0,228 | -0,494 |
| 8 | O75970 MPDZ_HUMAN  | R.GSLPQLVS#PIVSR.S                | S230:      | 2 | 2,7862 | 0,354 | -0,596 |
| 8 | P30305 MPIP2_HUMAN | R.EAFAQRPSS#APDLM*CLS#PDR.K       | S230:S238: | 3 | 3,5379 | 0,218 | -0,226 |
| 8 | Q96IZ0 PAWR_HUMAN  | K.STTS#VSEEDVSSR.Y                | S231:      | 2 | 3,816  | 0,373 | -0,333 |
| 8 | Q9UPU9 SAM4A_HUMAN | K.AYSS#PSTTPEAR.R                 | S231:      | 2 | 2,5789 | 0,378 | -0,272 |
| 8 | Q13283 G3BP1_HUMAN | K.SSS#PAPADIAQTVQEDLR.T           | S232:      | 2 | 4,57   | 0,457 | -0,559 |
| 8 | Q13283 G3BP1_HUMAN | K.SSS#PAPADIAQTVQEDLR.T           | S232:      | 3 | 4,2997 | 0,424 | -0,372 |
| 8 | P08559 ODPA_HUMAN  | R.YGM*GTS#VER.A                   | S232:      | 2 | 3,0728 | 0,332 | -0,557 |
| 8 | Q9BST9 RTKN_HUMAN  | R.VRAS#LDSAGSGSS#SPILLPTPVVGGPR.Y | S232:S241: | 3 | 4,1133 | 1     | -0,473 |
| 8 | Q9BST9 RTKN_HUMAN  | R.VRAS#LDSAGSGSS#PILLPTPVVGGPR.Y  | S232:S242: | 3 | 3,0397 | 0,082 | 0,338  |
| 8 | Q9BV73 CP250_HUMAN | R.AAQAGS#LEISK.A                  | S2322:     | 2 | 3,8386 | 0,449 | -0,423 |
| 8 | Q9GZY8 CB033_HUMAN | R.GILSLIQS#STR.R                  | S233:      | 2 | 2,6222 | 0,35  | -0,389 |
| 8 | P49585 PCY1A_HUMAN | K.ELNVS#FINEK.K                   | S233:      | 2 | 2,1725 | 0,274 | 0,096  |
| 8 | Q9P107 GMIP_HUMAN  | R.SQGS#PEDSAPQASPGPSK.Q           | S234:      | 2 | 4,6699 | 0,53  | -1,013 |
| 8 | Q9UQ35 SRRM2_HUMAN | R.TAAALAPAS#LTSAR.M               | S2365:     | 2 | 3,0085 | 0,363 | -0,353 |
| 8 | Q2Y0W8 S4A8_HUMAN  | R.S#FAEVBGK.K                     | S237:      | 2 | 2,1495 | 0,314 | 0,149  |
| 8 | Q86VS8 HOOK3_HUMAN | R.LNQSDSIEDPNS#PAGR.R             | S238:      | 2 | 4,5004 | 0,57  | -0,754 |
| 8 | Q86X53 ERIC1_HUMAN | R.EEDGADAS#EEDLTR.A               | S238:      | 2 | 3,8334 | 0,384 | -0,528 |
| 8 | Q15773 MLF2_HUMAN  | R.LAIQGPEDS#PSR.Q                 | S238:      | 2 | 2,9825 | 0,336 | -0,542 |
| 8 | Q9UQ35 SRRM2_HUMAN | R.M*APALSGANLTS#PR.V              | S2382:     | 2 | 4,1506 | 0,563 | -0,247 |
| 8 | Q9UQ35 SRRM2_HUMAN | R.MAPALSGANLTS#PR.V               | S2382:     | 2 | 3,0106 | 0,445 | 1,248  |
| 8 | Q9UQ35 SRRM2_HUMAN | R.VPLS#AYER.V                     | S2388:     | 2 | 3,1178 | 0,462 | 0,06   |
| 8 | Q5QJE6 TDIF2_HUMAN | K.QIVGTPVNSEDS#DTR.Q              | S239:      | 2 | 2,7762 | 0,415 | -0,431 |
| 8 | Q13136 LIPA1_HUMAN | R.SS#DGS#LSHEEDLAK.V              | S239:S242: | 2 | 2,928  | 0,364 | -0,373 |
| 8 | Q9UGP4 LIMD1_HUMAN | R.SS#EGSLGGQNSGIGGR.S             | S240:      | 2 | 4,2037 | 0,509 | -0,474 |
| 8 | O60664 M6PBP_HUMAN | R.LGS#LSER.L                      | S241:      | 2 | 2,2419 | 0,143 | 0,145  |
| 8 | Q9UBC2 EP15R_HUMAN | R.STPS#HGSVSSLNSTGSL#PK.H         | S241:S255: | 3 | 4,5076 | 1     | -0,088 |

|   |                    |                                |            |   |        |       |        |
|---|--------------------|--------------------------------|------------|---|--------|-------|--------|
| 8 | Q5T200 ZC3HD_HUMAN | K.TSAVSS#PLLDQQR.N             | S242:      | 2 | 3,5725 | 0,477 | -0,165 |
| 8 | Q9P107 GMIP_HUMAN  | R.SQGSPEDESAPQAS#PGPSK.Q       | S243:      | 2 | 4,0209 | 0,541 | -0,608 |
| 8 | Q9Y2W1 TR150_HUMAN | R.ASAVSELS#PR.E                | S243:      | 2 | 3,186  | 0,295 | -0,556 |
| 8 | Q8TDY2 RBCC1_HUMAN | R.STELVLS#PDM*PR.T             | S243:      | 2 | 3,0198 | 0,343 | -0,508 |
| 8 | Q96C92 SDCG3_HUMAN | R.VSPAS#PAGS#PSADFAVHGESLGDR.H | S243:S247: | 3 | 3,3298 | 0,442 | -0,37  |
| 8 | Q9BZG1 RAB34_HUMAN | R.INSDDS#NLYLTASK.K            | S244:      | 2 | 4,0247 | 0,483 | -0,301 |
| 8 | Q16204 CCDC6_HUMAN | K.LDQPVSAPPS#PR.D              | S244:      | 2 | 3,8643 | 0,435 | -0,635 |
| 8 | O15085 ARHGB_HUMAN | R.NSVLS#DPGLDSPR.T             | S245:      | 2 | 3,3401 | 0,377 | -0,425 |
| 8 | Q5T230 UTF1_HUMAN  | R.GPGS#PPPPPAR.E               | S245:      | 2 | 2,9427 | 0,312 | -0,33  |
| 8 | Q9H0G5 CCD55_HUMAN | K.VEENPDADS#DFDAK.S            | S248:      | 2 | 4,3043 | 0,413 | -0,299 |
| 8 | Q9Y6A5 TACC3_HUMAN | K.NTENCDFLFS#PPEVTGR.S         | S25:       | 3 | 4,0872 | 0,393 | -0,355 |
| 8 | P16949 STMN1_HUMAN | R.ASGQAFELILS#PR.S             | S25:       | 2 | 3,968  | 0,333 | -0,498 |
| 8 | Q9Y6A5 TACC3_HUMAN | K.NTENCDFLFS#PPEVTGR.S         | S25:       | 2 | 3,1866 | 0,62  | 0,71   |
| 8 | P49810 PSN2_HUMAN  | R.TSLM*SAES#PTPR.S             | S25:       | 2 | 2,8495 | 0,326 | -1,155 |
| 8 | P16949 STMN1_HUMAN | R.ASGQAFELILS#PR.S             | S25:       | 3 | 2,8106 | 0,188 | -0,125 |
| 8 | Q8IW19 MGAP_HUMAN  | K.M*GSDEFDIS#PR.I              | S2502:     | 2 | 3,4618 | 0,37  | -0,09  |
| 8 | Q8IUD2 RB612_HUMAN | R.DLNQLFQQDSS#SR.T             | S251:      | 3 | 3,5624 | 0,303 | 0,226  |
| 8 | O15085 ARHGB_HUMAN | R.NSVLSDPGLDS#PR.T             | S251:      | 2 | 2,3438 | 0,361 | 0      |
| 8 | Q9P2M7 CING_HUMAN  | K.QPAQSQNLS#PLSGFSR.S          | S252:      | 2 | 3,8305 | 0,491 | -0,407 |
| 8 | Q8IUD2 RB612_HUMAN | R.DLNQLFQQDSS#SR.T             | S252:      | 2 | 3,6484 | 0,444 | -0,452 |
| 8 | Q96ST2 IWS1_HUMAN  | R.ISDSES#EDPPR.H               | S252:      | 2 | 2,3712 | 0,33  | -0,372 |
| 8 | P52701 MSH6_HUMAN  | R.VIS#DSESDIGGS#DVEFKPDTK.E    | S252:S261: | 3 | 5,8902 | 0,564 | -0,153 |
| 8 | Q3KQU3 MA7D1_HUMAN | R.CSVS#AVNLPK.H                | S254:      | 2 | 2,8188 | 0,151 | -0,106 |
| 8 | P52701 MSH6_HUMAN  | R.VISDS#ESDIGGS#DVEFKPDTK.E    | S254:S261: | 3 | 5,0606 | 0,425 | -0,23  |
| 8 | Q8TDY2 RBCC1_HUMAN | R.TTNESLLTS#FPK.S              | S257:      | 2 | 3,3679 | 0,467 | -0,258 |
| 8 | P49790 NU153_HUMAN | K.TSQLGDS#PFYPGK.T             | S257:      | 2 | 3,0008 | 0,437 | -0,165 |
| 8 | Q13263 TIF1B_HUMAN | K.LLAS#LVK.R                   | S258:      | 2 | 2,2884 | 0,104 | 0,148  |
| 8 | Q15942 ZYG_HUMAN   | R.GPPAS#SPAPAKFS#PVTPK.F       | S258:S267: | 2 | 3,8452 | 0,415 | -1,041 |
| 8 | Q15942 ZYG_HUMAN   | R.GPPASS#PAPAPK.F              | S259:      | 2 | 3,194  | 0,344 | -0,527 |
| 8 | O00443 P3C2A_HUMAN | K.VSNLQVS#PK.S                 | S259:      | 2 | 3,1708 | 0,399 | 0,116  |
| 8 | Q15942 ZYG_HUMAN   | R.GPPASS#PAPAPKFS#PVTPK.F      | S259:S267: | 2 | 4,8167 | 0,369 | -0,796 |
| 8 | Q15942 ZYG_HUMAN   | R.GPPASS#PAPAPKFS#PVTPK.F      | S259:S267: | 3 | 2,9533 | 0,134 | -0,459 |
| 8 | Q15942 ZYG_HUMAN   | R.GPPASS#PAPAPKFS#PVTPK.F      | S259:T270: | 3 | 3,0053 | 0,208 | -0,184 |



|   |                     |                                  |                 |   |        |       |        |
|---|---------------------|----------------------------------|-----------------|---|--------|-------|--------|
| 8 | B2CI53 B2CI53_HUMAN | R.NGILASPQS#APGNLDNSK.S          | S263:           | 2 | 4,4156 | 0,601 | -0,655 |
| 8 | Q15059 BRD3_HUMAN   | R.SES#PPPLSDPK.Q                 | S263:           | 2 | 2,948  | 0,423 | -0,198 |
| 8 | Q9NQS7 INCE_HUMAN   | R.IAQVS#PGPR.D                   | S263:           | 2 | 2,3862 | 0,269 | -0,486 |
| 8 | Q8NEF9 SRFB1_HUMAN  | K.EYFDDS#TEER.F                  | S264:           | 2 | 2,438  | 0,245 | -0,445 |
| 8 | Q6NW34 CC017_HUMAN  | K.LFLINEQS#PR.A                  | S265:           | 2 | 3,1497 | 0,215 | -0,47  |
| 8 | Q12888 TP53B_HUMAN  | R.SEDM*PFS#PK.A                  | S265:           | 2 | 2,6311 | 0,222 | -0,323 |
| 8 | Q6KC79 NIPBL_HUMAN  | K.AITSLGGGS#PK.N                 | S2658:          | 2 | 2,7142 | 0,407 | -0,103 |
| 8 | Q8NFC6 FA44A_HUMAN  | K.STADS#GGEGLETAPK.S             | S266:           | 2 | 4,2788 | 0,542 | -0,569 |
| 8 | Q14573 ITPR3_HUMAN  | R.LGFVDVQNCIS#R.-                | S2670:          | 2 | 3,1432 | 0,458 | -0,328 |
| 8 | Q86XL3 ANKL2_HUMAN  | K.TSLPLS#PVK.T                   | S268:           | 2 | 2,2509 | 0,351 | 0      |
| 8 | Q99848 EBP2_HUMAN   | R.ESYDDVS#SFR.A                  | S269:           | 2 | 2,5904 | 0,427 | -0,19  |
| 8 | Q9UQ35 SRRM2_HUMAN  | R.SLSYS#PVER.R                   | S2694:          | 2 | 2,2031 | 0,296 | 0,218  |
| 8 | P12956 KU70_HUMAN   | K.TEGDEEAEEQEENLEAS#GDYK.Y       | S27:            | 3 | 4,4674 | 0,405 | -0,567 |
| 8 | P49736 MCM2_HUMAN   | R.GNDPLTSS#PGR.S                 | S27:            | 2 | 3,2089 | 0,445 | -0,207 |
| 8 | Q96EB6 SIRT1_HUMAN  | R.EAASS#PAGEPLR.K                | S27:            | 2 | 2,7472 | 0,39  | -0,289 |
| 8 | Q9NQX3 GEPH_HUMAN   | R.DTASLSTTPSES#PR.A              | S270:           | 2 | 2,3045 | 0,336 | -0,559 |
| 8 | Q7Z2W4 ZCCHV_HUMAN  | R.S#CTPS#PDQISHRAS#LEDAPVDDLTR.K | S271:S275:S284: | 3 | 3,7513 | 0,448 | -0,365 |
| 8 | Q13367 AP3B2_HUMAN  | K.AFYGS#EEDEAK.G                 | S272:           | 2 | 2,9433 | 0,418 | -0,276 |
| 8 | Q6ZRS2 SRCAP_HUMAN  | R.TS#ADVEIR.G                    | S2725:          | 2 | 2,086  | 0,128 | 0,126  |
| 8 | Q12802 AKP13_HUMAN  | K.SGSLDELSVS#PK.R                | S2728:          | 2 | 3,5028 | 0,451 | 0,176  |
| 8 | Q99569 PKP4_HUMAN   | R.AAS#PYSQRPAS#PTAIR.R           | S273:S281:      | 2 | 3,2874 | 0,162 | -0,666 |
| 8 | Q15768 EFNB3_HUMAN  | R.GGS#LGLGGGGGM*GPR.E            | S274:           | 2 | 3,3314 | 0,429 | -0,552 |
| 8 | Q6KC79 NIPBL_HUMAN  | R.NAASFPLRS#PQPVCS#PAGESEGTK.G   | S274:S280:      | 3 | 3,6621 | 0,117 | 0      |
| 8 | Q8IVL0 NAV3_HUMAN   | R.SQS#FNSIDK.N                   | S275:           | 2 | 2,2781 | 0,21  | -0,331 |
| 8 | P61956 SUMO2_HUMAN  | K.VAGQDGS#VVQFK.I                | S28:            | 2 | 3,6631 | 0,365 | 0,742  |
| 8 | Q14757 CHK1_HUMAN   | R.VTS#GGVSESPGFSK.H              | S280:           | 2 | 3,6298 | 0,486 | -0,567 |
| 8 | Q96PK6 RBM14_HUMAN  | R.AQPSVS#LGAPYR.G                | S280:           | 2 | 2,336  | 0,083 | -0,092 |
| 8 | Q6U841 S4A10_HUMAN  | R.ENS#TVDFSK.G                   | S280:           | 2 | 2,0527 | 0,151 | -0,22  |
| 8 | Q12857 NFIA_HUMAN   | R.LKS#VEDEM*DS#PGEEPFTGQGR.S     | S280:S287:      | 3 | 4,8071 | 0,319 | -0,415 |
| 8 | P27816 MAP4_HUMAN   | K.DM*ES#PTKLDVT#LAK.D            | S280:T287:      | 2 | 3,7274 | 0,369 | -0,212 |
| 8 | P27816 MAP4_HUMAN   | K.DM*ES#PTKLDVT#LAK.D            | S280:T287:      | 3 | 2,846  | 0,132 | -0,531 |
| 8 | P33981 TTK_HUMAN    | R.VPVNLLNS#PDCDVK.T              | S281:           | 2 | 4,9931 | 0,403 | -0,296 |
| 8 | Q15942 ZYG_HUMAN    | K.FS#PGAPGGSGSQPNQK.L            | S281:           | 2 | 2,6471 | 0,379 | -0,459 |

|   |                      |                                 |              |   |        |       |        |
|---|----------------------|---------------------------------|--------------|---|--------|-------|--------|
| 8 | Q96H22 CENPN_HUMAN   | K.SGLNGS#ILAER.E                | S282:        | 2 | 3,1173 | 0,356 | -0,204 |
| 8 | Q9NXR1 NDE1_HUMAN    | R.NLVYDQS#PNR.T                 | S282:        | 2 | 2,064  | 0,303 | -0,38  |
| 8 | P15924 DESP_HUMAN    | K.GLPSPYNM*S#SAPGSR.S           | S2820:       | 2 | 2,2511 | 0,426 | -0,83  |
| 8 | P15924 DESP_HUMAN    | K.GLPSPYNM*SSAPGS#R.S           | S2825:       | 2 | 2,9473 | 0,457 | -0,453 |
| 8 | Q8TAQ2 SMRC2_HUMAN   | K.TLTDEVNS#PDSDR.R              | S283:        | 2 | 3,5918 | 0,538 | -0,718 |
| 8 | Q9Y624 JAM1_HUMAN    | K.VIYSQPS#AR.S                  | S284:        | 2 | 2,7024 | 0,292 | -0,111 |
| 8 | P61978 HNRPK_HUMAN   | R.DYDDM*S#PR.R                  | S284:        | 2 | 2,5554 | 0,381 | -0,892 |
| 8 | P61978 HNRPK_HUMAN   | R.DYDDMS#PR.R                   | S284:        | 2 | 2,0015 | 0,385 | -0,113 |
| 8 | Q641Q2 FA21A_HUMAN   | R.S#RPTS#FADELAAR.I             | S284:S288:   | 2 | 2,5975 | 0,348 | -0,154 |
| 8 | Q99961 SH3G1_HUMAN   | K.IAASSS#FR.S                   | S288:        | 2 | 2,2447 | 0,3   | 0,133  |
| 8 | Q9H6R4 NOL6_HUMAN    | R.GQSPAGDGS#PEPPTPR.Y           | S289:        | 2 | 3,2617 | 0,293 | -0,374 |
| 8 | Q9NWH9 SLTM_HUMAN    | K.DGQDAIAQS#PEK.E               | S289:        | 2 | 2,9378 | 0,296 | -0,091 |
| 8 | Q7Z3B4 NUP54_HUMAN   | R.TELS#PAQIK.Q                  | S289:        | 2 | 2,6119 | 0,197 | 0      |
| 8 | Q99618 CDCA3_HUMAN   | R.S#PSAGILR.T                   | S29:         | 2 | 2,1281 | 0,155 | -0,069 |
| 8 | Q96MH2 HEX12_HUMAN   | K.TSGAPGS#PQTPPER.H             | S29:         | 2 | 2,1088 | 0,205 | -0,584 |
| 8 | O94880 PHF14_HUMAN   | R.NSADDEELTND#LTLQSK.S          | S290:        | 3 | 3,1109 | 0,216 | -0,17  |
| 8 | P18206 VINC_HUMAN    | R.DPSAS#PGDAGEQAIR.Q            | S290:        | 2 | 3,0988 | 0,425 | -0,629 |
| 8 | O94880 PHF14_HUMAN   | R.NSADDEELTND#LTLQSK.S          | S290:        | 2 | 2,8425 | 0,398 | 0,114  |
| 8 | P05787 K2C8_HUMAN    | K.YEELQS#LAGK.H                 | S291:        | 2 | 3,7552 | 0,183 | -0,501 |
| 8 | ##Q8WZ42 TITIN_HUMAN | K.LLQS#PELK.E                   | S29116:      | 2 | 2,6658 | 0,12  | -0,363 |
| 8 | Q9UDT6 CLIP2_HUMAN   | R.IGFPSTS#PAK.A                 | S294:        | 2 | 2,8703 | 0,193 | -0,225 |
| 8 | Q5TON5 FBP1L_HUMAN   | R.TIS#DGTISASK.Q                | S295:        | 2 | 2,6301 | 0,348 | -0,316 |
| 8 | Q13371 PHLP_HUMAN    | R.NSATCHSEDS#DLEID.-            | S296:        | 2 | 2,9806 | 0,3   | -0,413 |
| 8 | Q9Y624 JAM1_HUMAN    | R.SEGEFKQTSS#FLV.-              | S296:        | 2 | 2,8224 | 0,318 | -0,555 |
| 8 | Q8NFC6 FA44A_HUMAN   | R.SLTVSDDAESS#EPER.K            | S2964:       | 2 | 3,7113 | 0,472 | -0,645 |
| 8 | Q96EQ0 SGTB_HUMAN    | R.SFS#SSAEEHS.-                 | S297:        | 2 | 2,3157 | 0,37  | -0,213 |
| 8 | Q86UE4 LYRIC_HUMAN   | K.LSSQIS#AGEEK.W                | S298:        | 2 | 2,7388 | 0,203 | -0,298 |
| 8 | Q92890 UFD1_HUMAN    | R.FVAFSGEGQS#LR.K               | S299:        | 2 | 3,9615 | 0,561 | -0,266 |
| 8 | P08670 VIME_HUMAN    | K.FADLS#EAANR.N                 | S299:        | 2 | 3,8676 | 0,36  | 0      |
| 8 | P07910 HNRPC_HUMAN   | K.EAEEGEDDRDS#ANGEDDS.-         | S299:        | 3 | 2,615  | 0,488 | -0,362 |
| 8 | P49454 CENPF_HUMAN   | K.QDSRGS#PLLGPVVPGPS#PIPSVTEK.R | S2996:S3007: | 3 | 3,3237 | 0,225 | -0,274 |
| 8 | P53814 SMTN_HUMAN    | R.SLS#VLSPR.Q                   | S301:        | 2 | 2,5368 | 0,24  | -0,195 |
| 8 | Q13247 SFRS6_HUMAN   | R.S#NSPLPVPPSK.A                | S301:        | 2 | 2,1268 | 0,281 | -0,304 |

|   |                     |                                  |              |   |        |       |        |
|---|---------------------|----------------------------------|--------------|---|--------|-------|--------|
| 8 | Q9UQR1 ZN148_HUMAN  | K.GLLTSEEDS#GFSTS#PKDNSLPK.K     | S301:S306:   | 3 | 4,2733 | 1     | -0,652 |
| 8 | O94880 PHF14_HUMAN  | K.SNEDS#LILEK.S                  | S302:        | 2 | 3,2619 | 0,338 | -0,099 |
| 8 | Q86W56 PARG_HUMAN   | K.ESEPE#PM*DVDNSK.N              | S302:        | 2 | 3,0067 | 0,359 | -0,588 |
| 8 | Q96CW6 S7A6O_HUMAN  | K.YPLDVQKEFGYDS#PHDLDS#D.-       | S302:S308:   | 3 | 4,2249 | 0,383 | -0,439 |
| 8 | P49023 PAXI_HUMAN   | R.SS#PGGQDEGGFM*AQGK.T           | S303:        | 2 | 3,6502 | 0,557 | -0,518 |
| 8 | A6NDB9 PALM3_HUMAN  | R.VPEVVQTSS#PR.L                 | S303:        | 2 | 3,3162 | 0,313 | -0,763 |
| 8 | Q13247 SFRS6_HUMAN  | R.SNS#PLPVPPSK.A                 | S303:        | 2 | 3,0588 | 0,365 | -0,304 |
| 8 | P07195 LDHB_HUMAN   | R.GLTS#VINQK.L                   | S303:        | 2 | 2,8225 | 0,217 | -0,117 |
| 8 | Q6P0N0 CN106_HUMAN  | K.NGSLLM*VS#DSER.T               | S304:        | 2 | 3,7539 | 0,496 | -0,174 |
| 8 | Q06265 EXOS9_HUMAN  | K.APIDTS#DVEEK.A                 | S306:        | 2 | 3,6467 | 0,524 | -0,19  |
| 8 | Q9Y2I7 FYV1_HUMAN   | R.SAS#ITNLSLDR.S                 | S307:        | 2 | 3,1357 | 0,416 | -0,097 |
| 8 | Q9BXF6 RFIP5_HUMAN  | R.TYS#DEANQM*R.V                 | S307:        | 2 | 2,8035 | 0,355 | -0,465 |
| 8 | Q15054 DPOD3_HUMAN  | R.VAL#DDETK.E                    | S307:        | 2 | 2,5334 | 0,526 | 0,115  |
| 8 | Q96CW6 S7A6O_HUMAN  | K.EFGYDSPHDLDS#D.-               | S308:        | 2 | 3,2047 | 0,42  | -0,31  |
| 8 | Q96MU7 YTDC1_HUMAN  | R.GIS#PIVFDR.S                   | S308:        | 2 | 3,0749 | 0,324 | -0,788 |
| 8 | Q92522 H1X_HUMAN    | K.AGGSAAALS#PSK.K                | S31:         | 2 | 2,8744 | 0,509 | -0,238 |
| 8 | Q9BW19 KIFC1_HUMAN  | K.APSQLPLS#GSR.L                 | S31:         | 2 | 2,79   | 0,488 | -0,102 |
| 8 | Q7Z6Z7 HUWE1_HUMAN  | R.LFGHSS#TSALS#AILR.S            | S3117:S3122: | 2 | 2,3876 | 0,386 | -0,426 |
| 8 | O75122 CLAP2_HUMAN  | K.SSGS#VASLPQSDR.S               | S313:        | 2 | 2,9922 | 0,394 | -0,445 |
| 8 | Q9Y5K3 PCY1B_HUMAN  | R.M*LQALS#PK.Q                   | S315:        | 2 | 2,8975 | 0,205 | 0      |
| 8 | P04637 P53_HUMAN    | R.ALPNNTSSS#PQPK.K               | S315:        | 2 | 2,1612 | 0,32  | 0,086  |
| 8 | Q8IX90 CM003_HUMAN  | K.TNS#SSNDLEVEDR.T               | S317:        | 2 | 3,9638 | 0,48  | -0,631 |
| 8 | O95243 MBD4_HUMAN   | R.SLS#SGSNFCSEQK.T               | S318:        | 2 | 3,9285 | 0,564 | -0,727 |
| 8 | Q9UPQ6 Q9UPQ6_HUMAN | R.SESS#DFEVVVK.R                 | S319:        | 2 | 3,3111 | 0,401 | 0      |
| 8 | Q4G0F5 VP26B_HUMAN  | R.FEGTTS#LGEVR.T                 | S319:        | 2 | 2,2445 | 0,381 | 0      |
| 8 | O76024 WFS1_HUMAN   | R.LNATAS#LEQER.S                 | S32:         | 2 | 3,3387 | 0,476 | -0,558 |
| 8 | Q13523 PRP4B_HUMAN  | K.SINEENGEVS#EDQSQNK.H           | S32:         | 2 | 2,9165 | 0,367 | -0,43  |
| 8 | Q96A65 EXOC4_HUMAN  | R.TLS#TSDDVEDR.E                 | S32:         | 2 | 2,7187 | 0,145 | -0,278 |
| 8 | Q9NWT1 PK1IP_HUMAN  | K.ESLPPAAEPS#PVSK.E              | S320:        | 2 | 2,0752 | 0,255 | -0,492 |
| 8 | Q9NY61 AATF_HUMAN   | R.YLVDGTKPNAGSEIIS#S#EDDELVEEK.K | S320:S321:   | 3 | 4,129  | 0,217 | -0,486 |
| 8 | Q08211 DHX9_HUMAN   | K.LAQFEPS#QR.Q                   | S321:        | 2 | 3,0563 | 0,307 | -0,528 |
| 8 | Q9BYI3 HYCCI_HUMAN  | R.NAVTSM*S#IR.G                  | S321:        | 2 | 2,8714 | 0,365 | -0,114 |
| 8 | Q86WB0 NIPA_HUMAN   | R.LPLVPES#PR.R                   | S321:        | 2 | 2,691  | 0,331 | -0,336 |

|   |                    |                                    |            |   |        |       |        |
|---|--------------------|------------------------------------|------------|---|--------|-------|--------|
| 8 | Q9UQ35 SRRM2_HUMAN | R.GEGDAPFSEPGTTSTQRPS#S#PETATK.Q   | S322:S323: | 3 | 3,7596 | 1     | -0,589 |
| 8 | P78310 CXAR_HUMAN  | K.TQYNQVPS#EDFER.T                 | S323:      | 2 | 4,0253 | 0,44  | -0,144 |
| 8 | P26651 TTP_HUMAN   | R.LPIFNRI#VSE.-                    | S323:      | 2 | 3,252  | 0,347 | -0,18  |
| 8 | Q9NQW6 ANLN_HUMAN  | K.TPIS#PLK.T                       | S323:      | 2 | 2,624  | 0,347 | -0,803 |
| 8 | Q9Y608 LRRF2_HUMAN | R.NSASATPLSGNS#SR.R                | S323:      | 2 | 2,6239 | 0,414 | -0,479 |
| 8 | Q9BRD0 BUD13_HUMAN | K.YEYDPDIS#PPR.K                   | S325:      | 2 | 4,0056 | 0,517 | -0,341 |
| 8 | P17302 CXA1_HUMAN  | R.M*GQAGS#TISNS#HAQPFDFPDDNQNSK.K  | S325:S330: | 3 | 4,3036 | 0,253 | -0,74  |
| 8 | Q8ND76 CCNY_HUMAN  | R.SAS#ADNLTLPR.W                   | S326:      | 2 | 2,6762 | 0,123 | -0,199 |
| 8 | Q12986 NFX1_HUMAN  | R.QDPQVVS#PFSR.G                   | S326:      | 2 | 2,361  | 0,151 | -0,455 |
| 8 | Q9UKS6 PACN3_HUMAN | R.SPDEVTLTS#IVPTR.D                | S327:      | 2 | 3,7952 | 0,472 | -0,306 |
| 8 | P35568 IRS1_HUMAN  | R.AS#SDGEGTM*SRPASVDGSPVS#PSTNR.T  | S329:S348: | 3 | 5,8125 | 0,497 | -0,537 |
| 8 | P20749 BCL3_HUMAN  | R.APS#PEPAAPR.G                    | S33:       | 2 | 2,8257 | 0,299 | -0,341 |
| 8 | Q92597 NDRG1_HUMAN | R.TAS#GSSVTS#LDGTR.S               | S330:      | 2 | 3,6479 | 0,556 | -0,086 |
| 8 | P78310 CXAR_HUMAN  | R.TPQS#PTLPPAK.V                   | S332:      | 2 | 2,8641 | 0,276 | -0,501 |
| 8 | P40925 MDHC_HUMAN  | K.ELTEEKESAFEL#SA.-                | S332:      | 2 | 2,4266 | 0,339 | -0,45  |
| 8 | P82094 TMF1_HUMAN  | R.IDSFSVQS#LDSR.S                  | S333:      | 2 | 2,7916 | 0,088 | -0,34  |
| 8 | Q8NFB2 T185A_HUMAN | R.VVITQS#PGK.Y                     | S333:      | 2 | 2,4534 | 0,456 | -0,181 |
| 8 | Q07352 TISB_HUMAN  | R.LPIFSRLS#ISDD.-                  | S334:      | 2 | 3,1026 | 0,433 | -0,338 |
| 8 | Q86WB0 NIPA_HUMAN  | R.SQDATFS#PGSEQA EK.S              | S335:      | 2 | 4,2566 | 0,373 | -0,587 |
| 8 | P14859 PO2F1_HUMAN | R.FEALNLS#FK.N                     | S335:      | 2 | 2,2212 | 0,084 | -0,637 |
| 8 | Q86WB0 NIPA_HUMAN  | R.SQDATFS#PGSEQA EK#PGPIVSR.T      | S335:S344: | 3 | 4,5887 | 1     | -0,217 |
| 8 | Q92597 NDRG1_HUMAN | R.TASGSSVTS#LDGTR.S                | S336:      | 2 | 2,9474 | 0,535 | 0      |
| 8 | Q16643 DREB_HUMAN  | R.M*APTPIPTRS#PSDSSTAS#TPVAEQIER.A | S337:S345: | 3 | 4,1371 | 1     | -0,792 |
| 8 | Q9UN36 NDRG2_HUMAN | R.TASLTS#VDGNR.S                   | S338:      | 2 | 2,3602 | 0,368 | -0,427 |
| 8 | Q8NCN4 RN169_HUMAN | R.CVS#APDLTIEK.R                   | S339:      | 2 | 3,155  | 0,248 | 0      |
| 8 | Q2QGD7 ZXDC_HUMAN  | R.APAPLGAS#PAR.R                   | S34:       | 2 | 2,8262 | 0,323 | -0,336 |
| 8 | Q16891 IMMT_HUMAN  | R.YS#TSGSSGLTTGK.I                 | S34:       | 2 | 2,1581 | 0,361 | -0,736 |
| 8 | Q9Y243 AKT3_HUMAN  | K.TDGS#FIGYK.E                     | S34:       | 2 | 2,1445 | 0,283 | 0      |
| 8 | P58340 MLF1_HUMAN  | R.SFS#EPFGR.D                      | S34:       | 2 | 2,091  | 0,134 | -0,364 |
| 8 | Q14498 RBM39_HUMAN | R.TDASSASSFLDS#DELER.T             | S341:      | 2 | 4,0085 | 0,564 | -0,639 |
| 8 | Q9NVF7 FBX28_HUMAN | R.EVM*ESAVGNSSGSGQNEES#PR.K        | S344:      | 3 | 4,3561 | 0,439 | -0,489 |
| 8 | P82094 TMF1_HUMAN  | R.SVSEINS#DDELSGK.G                | S344:      | 2 | 4,0863 | 0,468 | -0,156 |
| 8 | Q9BQ67 GRWD1_HUMAN | K.SGS#PVATFK.Q                     | S344:      | 2 | 3,1299 | 0,456 | 0      |

|   |                     |                              |            |   |        |       |        |
|---|---------------------|------------------------------|------------|---|--------|-------|--------|
| 8 | Q9Y2U5 M3K2_HUMAN   | R.GSDIDNPTLTVM*DIS#PPSR#PR.A | S344:S349: | 3 | 3,5934 | 0,289 | -0,217 |
| 8 | O14681 EI24_HUMAN   | K.FPS#PHPS#PAK.L             | S345:S349: | 2 | 2,6951 | 0,115 | -0,398 |
| 8 | Q8IY17 PLPL6_HUMAN  | R.LFPS#PGLPTRT#SPVR.G        | S345:T352: | 2 | 2,5116 | 0,353 | -0,478 |
| 8 | Q9UIK4 DAPK2_HUMAN  | R.NCES#DTEEDIAR.R            | S349:      | 2 | 4,8294 | 0,487 | -0,482 |
| 8 | Q96G23 LASS2_HUMAN  | R.EETESS#EGEEAAAGGGAK.S      | S349:      | 2 | 3,871  | 0,504 | -0,818 |
| 8 | Q15696 U2AFM_HUMAN  | R.DIYLS#PDR.T                | S349:      | 2 | 2,2941 | 0,326 | 0,23   |
| 8 | O60716 CTND1_HUMAN  | R.GSLAS#LDSL.R               | S349:      | 2 | 2,1758 | 0,224 | -0,555 |
| 8 | Q5QP82 WDR32_HUMAN  | R.TTSS#SDLTTSSSSGPR.V        | S350:      | 2 | 3,7666 | 0,51  | -0,632 |
| 8 | Q9BVS4 RIOK2_HUMAN  | K.AEVYGS#ENESER.N            | S350:      | 2 | 3,3977 | 0,476 | -0,337 |
| 8 | Q59FE8 Q59FE8_HUMAN | R.STPAEDDS#PGDSQVK.S         | S352:      | 2 | 2,8286 | 0,569 | -0,605 |
| 8 | P51991 ROA3_HUMAN   | R.SS#GSPYGGYGGGGSGGYGSR.R    | S356:      | 2 | 4,3612 | 0,695 | -1,042 |
| 8 | Q5SW79 CE170_HUMAN  | K.S#IKS#DVPVYLK.R            | S356:S359: | 2 | 3,7215 | 0,369 | -0,173 |
| 8 | P46013 KI67_HUMAN   | K.TPVQYSQQNS#PQK.H           | S357:      | 2 | 4,1311 | 0,48  | -0,784 |
| 8 | Q8WUF5 IASPP_HUMAN  | R.IPM*PPS#SPQPR.G            | S357:      | 2 | 2,5178 | 0,236 | -0,468 |
| 8 | O15014 ZN609_HUMAN  | R.FCDS#PTSDEM*R.N            | S358:      | 2 | 3,7707 | 0,478 | -0,236 |
| 8 | P35611 ADDA_HUMAN   | R.SPGS#PVGEGTGSPK.W          | S358:      | 2 | 3,2715 | 0,489 | -0,511 |
| 8 | P18825 ADA2C_HUMAN  | R.SVEFFLS#R.R                | S358:      | 2 | 2,2971 | 0,17  | -0,344 |
| 8 | Q9NQ55 SSF1_HUMAN   | R.VGGS#DEEASGIPSR.T          | S359:      | 2 | 3,7992 | 0,557 | -0,423 |
| 8 | P04075 ALDOA_HUMAN  | K.GILAADES#TGSIAK.R          | S36:       | 2 | 4,5679 | 0,551 | -0,259 |
| 8 | Q9NRX1 PNO1_HUMAN   | R.QAEQLS#AAGEGGDAGR.M        | S36:       | 2 | 3,5377 | 0,405 | -0,917 |
| 8 | P11532 DMD_HUMAN    | K.VNGTTVSS#PSTSLQR.S         | S3613:     | 2 | 2,0658 | 0,278 | -0,68  |
| 8 | Q15910 EZH2_HUMAN   | R.LPNNS#SRPS#TPTINVLESK.D    | S362:S366: | 3 | 2,8192 | 0,303 | -0,165 |
| 8 | Q8IY17 PLPL6_HUMAN  | R.M*VS#TSATDEPR.E            | S363:      | 2 | 3,2211 | 0,414 | -0,378 |
| 8 | Q15910 EZH2_HUMAN   | R.LPNNSS#RPST#PTINVLESK.D    | S363:T367: | 3 | 3,5856 | 0,252 | -0,083 |
| 8 | O94806 KPCD3_HUMAN  | R.GLDDTEEPS#PPEDK.M          | S364:      | 2 | 3,7209 | 0,38  | -0,228 |
| 8 | Q15629 TRAM1_HUMAN  | K.GTENGVNGTLTSNVADS#PR.N     | S365:      | 2 | 4,5023 | 0,513 | -0,062 |
| 8 | Q9UKV3 ACINU_HUMAN  | K.TTS#PLEEEER.E              | S365:      | 2 | 3,0083 | 0,331 | -0,384 |
| 8 | Q96T37 RBM15_HUMAN  | R.EVDEIS#PEDDQR.A            | S365:      | 2 | 2,8713 | 0,314 | -0,081 |
| 8 | Q9Y613 FHOD1_HUMAN  | R.S#LEGGGCPAR.A              | S367:      | 2 | 2,6007 | 0,389 | -0,45  |
| 8 | Q8N6H7 ARFG2_HUMAN  | K.DNPFLGES#FGSR.W            | S368:      | 2 | 3,5925 | 0,523 | -0,409 |
| 8 | Q96S94 CCNL2_HUMAN  | K.ADS#PVNGLPK.G              | S369:      | 2 | 3,0372 | 0,394 | 0      |
| 8 | P14618 KPYM_HUMAN   | R.LDIDS#PPITAR.N             | S37:       | 2 | 3,4388 | 0,452 | -0,382 |
| 8 | Q03135 CAV1_HUMAN   | K.AM*ADELS#EK.Q              | S37:       | 2 | 2,4297 | 0,411 | -0,336 |

|   |                      |                                   |            |   |        |       |        |
|---|----------------------|-----------------------------------|------------|---|--------|-------|--------|
| 8 | P55210 CASP7_HUMAN   | R.SSFVPSLFS#K.K                   | S37:       | 2 | 2,2194 | 0,145 | -0,414 |
| 8 | Q03135 CAV1_HUMAN    | K.AMADELS#EK.Q                    | S37:       | 2 | 2,1807 | 0,26  | -0,227 |
| 8 | O60343 TBCD4_HUMAN   | R.FEINLIS#PDTK.S                  | S370:      | 2 | 3,4739 | 0,451 | -0,539 |
| 8 | Q9BW71 HIRP3_HUMAN   | R.EVS#DSEAGGGPQGER.K              | S370:      | 2 | 3,2066 | 0,504 | -0,471 |
| 8 | Q9UHB6 LIMA1_HUMAN   | R.ASSLSESS#PPK.A                  | S374:      | 2 | 2,9854 | 0,218 | -0,626 |
| 8 | Q9UQ35 SRRM2_HUMAN   | R.HGGS#PQPLATTPLSQEPVNPPEAS#PTR.D | S377:S398: | 3 | 7,4279 | 1     | -0,547 |
| 8 | Q9UKV8 I2C2_HUMAN    | R.SAS#FNTDPYVR.E                  | S379:      | 2 | 3,391  | 0,479 | -0,456 |
| 8 | P30050 RL12_HUMAN    | K.IGPLGLS#PK.K                    | S38:       | 2 | 3,0341 | 0,461 | 0,063  |
| 8 | ##Q9HBT7 ZN287_HUMAN | K.LLS#PYK.R                       | S380:      | 2 | 2,018  | 0,109 | -0,076 |
| 8 | P48730 KC1D_HUMAN    | R.GAPVNIS#SSDLTGR.Q               | S382:      | 2 | 3,4446 | 0,511 | -0,336 |
| 8 | Q8TEW0 PAR3_HUMAN    | R.FS#PDSQYIDNR.S                  | S383:      | 2 | 3,6161 | 0,433 | 0      |
| 8 | P28715 ERCC5_HUMAN   | R.NAPAAVDEGSIS#PR.T               | S384:      | 2 | 3,6473 | 0,457 | -0,333 |
| 8 | Q92598 HS105_HUMAN   | R.GCALQCAILS#PAFK.V               | S384:      | 2 | 3,5458 | 0,431 | -1,284 |
| 8 | Q9BSQ5 CCM2_HUMAN    | R.GIITDS#FGR.H                    | S384:      | 2 | 2,6244 | 0,418 | -0,117 |
| 8 | Q9C0B0 UNK_HUMAN     | R.NSSLGSPSNLCGS#PPGSIR.K          | S385:      | 2 | 5,0188 | 0,442 | -0,248 |
| 8 | Q9C0B0 UNK_HUMAN     | R.NSSLGSPSNLCGS#PPGSIR.K          | S385:      | 3 | 4,5666 | 0,389 | -0,372 |
| 8 | Q13330 MTA1_HUMAN    | K.AGVVNGTGAPGQS#PGAGR.A           | S386:      | 2 | 2,9409 | 0,28  | -0,448 |
| 8 | Q01813 K6PP_HUMAN    | R.S#FAGNLNTYK.R                   | S386:      | 2 | 2,7927 | 0,456 | 0      |
| 8 | P04075 ALDOA_HUMAN   | K.GILAADESTGS#IAK.R               | S39:       | 2 | 4,3295 | 0,621 | -0,345 |
| 8 | Q01484 ANK2_HUMAN    | R.VVLKS#DTEQSEDNNE.-              | S3914:     | 2 | 3,9351 | 0,506 | -0,751 |
| 8 | O95067 CCNB2_HUMAN   | K.DLAS#PLIGR.S                    | S392:      | 2 | 2,4231 | 0,309 | 0,06   |
| 8 | Q8N108 MIER1_HUMAN   | R.LLDESES#AASSR.A                 | S393:      | 2 | 3,6073 | 0,386 | 0,091  |
| 8 | Q6T4R5 NHS_HUMAN     | R.VQQEIDS#DESPVAR.E               | S394:      | 2 | 4,9295 | 0,485 | -0,517 |
| 8 | O95239 KIF4A_HUMAN   | K.NQS#LVEENEK.L                   | S394:      | 2 | 3,5232 | 0,377 | -0,673 |
| 8 | Q99501 GA2L1_HUMAN   | R.LTTGTPAS#PR.R                   | S394:      | 2 | 2,4935 | 0,241 | -0,226 |
| 8 | P41970 ELK3_HUMAN    | R.AAS#PVLLSSNSQK.S                | S396:      | 2 | 3,1213 | 0,313 | -0,618 |
| 8 | Q8WXE0 CSK12_HUMAN   | R.VGLSPDS#PAGDRNS#VGSEGSVGSIR.S   | S396:S403: | 3 | 2,6845 | 0,324 | -0,858 |
| 8 | Q96ST2 IWS1_HUMAN    | K.AAVLS#DSEDEEK.A                 | S398:      | 2 | 2,3352 | 0,208 | -0,444 |
| 8 | Q8N5Y2 MS3L1_HUMAN   | R.SSS#PIPLTPSK.E                  | S400:      | 2 | 3,2118 | 0,372 | -0,102 |
| 8 | Q03252 LMNB2_HUMAN   | R.ATSS#SSGSLSATGR.L               | S400:      | 2 | 2,7778 | 0,46  | -0,543 |
| 8 | Q96ST2 IWS1_HUMAN    | K.AAVLSDS#EDEEK.A                 | S400:      | 2 | 2,5998 | 0,419 | -0,533 |
| 8 | Q9BUL5 PHF23_HUMAN   | R.LGGPPKS#GEP.-                   | S400:      | 2 | 2,2359 | 0,334 | -0,12  |
| 8 | P98082 DAB2_HUMAN    | K.SSPNPFVGS#PPK.G                 | S401:      | 2 | 2,2164 | 0,279 | -0,189 |

|   |                    |                                |            |   |        |       |        |
|---|--------------------|--------------------------------|------------|---|--------|-------|--------|
| 8 | Q5JSH3 WDR44_HUMAN | K.EYVSNDAAQ#DDEEK.L            | S403:      | 2 | 4,6438 | 0,54  | -0,686 |
| 8 | Q0JRZ9 FCHO2_HUMAN | R.NLS#NEELTK.S                 | S403:      | 2 | 2,9699 | 0,266 | -0,649 |
| 8 | Q15025 TNIP1_HUMAN | K.YLQDQLS#PLTR.Q               | S403:      | 2 | 2,7692 | 0,315 | -0,604 |
| 8 | Q8NCN4 RN169_HUMAN | R.VLS#PLIIK.S                  | S403:      | 2 | 2,4248 | 0,182 | -0,253 |
| 8 | Q4KMP7 TB10B_HUMAN | R.AAGGAPS#PPPPVR.R             | S403:      | 2 | 2,2911 | 0,3   | -0,486 |
| 8 | Q99569 PKP4_HUMAN  | R.S#AVSPDLHIT#PIYEGR.T         | S403:T412: | 2 | 3,3564 | 0,482 | -0,319 |
| 8 | Q14247 SRC8_HUMAN  | K.TQTPPV#PAPQPTEER.L           | S405:      | 2 | 3,9084 | 0,453 | -0,605 |
| 8 | P15151 PVR_HUMAN   | R.ENS#SSQDPQTEGTR.-            | S406:      | 2 | 2,979  | 0,447 | -0,227 |
| 8 | Q6UWZ7 CCD98_HUMAN | K.GFGEYSRS#PTF.-               | S406:      | 2 | 2,6418 | 0,438 | -0,276 |
| 8 | Q9ULU4 PKCB1_HUMAN | K.LNFDMTAS#PK.I                | S406:      | 2 | 2,5112 | 0,454 | -0,203 |
| 8 | Q99569 PKP4_HUMAN  | R.SAVS#PDLHIT#PIYEGR.T         | S406:T412: | 3 | 3,5598 | 0,372 | -0,191 |
| 8 | O94885 SASH1_HUMAN | R.TCS#FGGFDLTNR.S              | S407:      | 2 | 3,9793 | 0,488 | -0,335 |
| 8 | O75362 ZN217_HUMAN | R.AGAES#PTM*SVDGR.Q            | S407:      | 2 | 3,4076 | 0,462 | -0,178 |
| 8 | O75362 ZN217_HUMAN | R.AGAES#PTMSVDGR.Q             | S407:      | 2 | 3,1607 | 0,494 | -0,09  |
| 8 | Q8IZM8 ZN654_HUMAN | R.SDDTVSNIS#LIDQK.M            | S407:      | 2 | 2,757  | 0,317 | 0      |
| 8 | O43237 DC1L2_HUMAN | R.GGPASVPS#PGTSVK.K            | S407:      | 2 | 2,369  | 0,397 | -0,49  |
| 8 | Q9NV11 FANCI_HUMAN | K.TIETS#PSLSR.M                | S407:      | 2 | 2,2254 | 0,337 | -0,417 |
| 8 | Q8TBE7 TMM22_HUMAN | R.QDYQEILDS#PIK.-              | S409:      | 2 | 3,8125 | 0,355 | -0,239 |
| 8 | Q96KM6 Z512B_HUMAN | K.AAGPAS#PPEEDPER.T            | S409:      | 2 | 2,8142 | 0,331 | -0,812 |
| 8 | Q9Y2V2 CHSP1_HUMAN | R.GNVVPS#PLPTR.R               | S41:       | 2 | 2,1871 | 0,38  | -0,201 |
| 8 | Q8NCD3 HJURP_HUMAN | K.WLIS#PVK.I                   | S412:      | 2 | 2,6175 | 0,275 | -0,595 |
| 8 | Q9Y4P8 WIPI2_HUMAN | K.GTYVPSS#PTR.L                | S413:      | 2 | 2,1045 | 0,263 | 0      |
| 8 | O14545 TRAD1_HUMAN | R.LDSQPQETS#PELPR.R            | S415:      | 2 | 3,1391 | 0,288 | -0,218 |
| 8 | Q53F19 CQ085_HUMAN | K.M*ISTPS#PK.K                 | S415:      | 2 | 2,2205 | 0,177 | 0      |
| 8 | Q659A1 NARG2_HUMAN | K.VSKS#PS#PASTSTVPM*TDAPTAPK.A | S416:S418: | 3 | 4,2219 | 0,21  | -1,365 |
| 8 | P85037 FOXK1_HUMAN | R.S#APAS#PTHPGLM*SPR.S         | S416:S420: | 2 | 2,1246 | 0,493 | -0,435 |
| 8 | P85037 FOXK1_HUMAN | R.S#APASPTHPGLM*S#PR.S         | S416:S428: | 2 | 3,1127 | 0,414 | -0,508 |
| 8 | Q8TEV9 SMCR8_HUMAN | K.VLISVGS#YK.S                 | S417:      | 2 | 2,8158 | 0,377 | 0      |
| 8 | Q8N9B5 JMY_HUMAN   | R.RIES#LQK.E                   | S417:      | 2 | 2,0884 | 0,22  | 0,192  |
| 8 | Q14247 SRC8_HUMAN  | R.LPSS#PVYEDAASF.K.A           | S418:      | 2 | 3,7844 | 0,539 | 0,383  |
| 8 | P06733 ENOA_HUMAN  | R.IEEELGS#K.A                  | S419:      | 2 | 2,7951 | 0,11  | -0,186 |
| 8 | Q92917 GPKOW_HUMAN | R.LADSGDGAGPS#PEEK.D           | S42:       | 2 | 5,3265 | 0,457 | -0,485 |
| 8 | Q86U28 ISCA2_HUMAN | R.EASSS#PEAGEGQIR.L            | S42:       | 2 | 2,9771 | 0,354 | -0,616 |

|   |                     |                                   |            |   |        |       |        |
|---|---------------------|-----------------------------------|------------|---|--------|-------|--------|
| 8 | Q53GA4 PHLA2_HUMAN  | R.LSLFPAS#PR.A                    | S42:       | 2 | 2,9284 | 0,43  | 0      |
| 8 | Q5T230 UTF1_HUMAN   | R.RPAS#PSALGELGLPVS#PGSAQR.T      | S42:S54:   | 3 | 3,7937 | 0,368 | -0,396 |
| 8 | A6NDB9 PALM3_HUMAN  | R.DEAEM*S#PVVER.K                 | S420:      | 2 | 2,8325 | 0,384 | -1,438 |
| 8 | Q9Y6G9 DC1L1_HUMAN  | R.SVSSNVASVS#PIPAGSK.K            | S421:      | 2 | 3,4607 | 0,486 | 0,293  |
| 8 | P42858 HD_HUMAN     | R.SGS#IVELIAGGGSSCS#PVLSRK.Q      | S421:S434: | 3 | 3,3243 | 0,241 | -0,394 |
| 8 | Q08357 S20A2_HUMAN  | K.LVGDTVS#YSK.K                   | S422:      | 2 | 2,8101 | 0,311 | -0,212 |
| 8 | P26045 PTN3_HUMAN   | K.GSLAPQDS#DSEVSQNR.S             | S425:      | 2 | 3,9632 | 0,386 | -0,207 |
| 8 | O75116 ROCK2_HUMAN  | R.ENLLSDFS#PSCR.E                 | S425:      | 2 | 3,641  | 0,386 | -0,166 |
| 8 | Q96AD5 PLPL2_HUMAN  | R.NNLS#LGDALAK.W                  | S428:      | 2 | 3,3089 | 0,38  | 0,102  |
| 8 | Q13112 CAF1B_HUMAN  | R.TQDPSS#PGTTPPQAR.Q              | S429:      | 2 | 3,8215 | 0,516 | -0,829 |
| 8 | Q9UH62 ARMX3_HUMAN  | K.M*AEGGS#GDVDDAGDCSGAR.Y         | S43:       | 2 | 4,1222 | 0,708 | -0,571 |
| 8 | Q86U44 MTA70_HUMAN  | R.NPEAALS#PTFR.S                  | S43:       | 2 | 3,5854 | 0,324 | 0,19   |
| 8 | Q9H2J4 PDCL3_HUMAN  | R.ILQQS#VVK.T                     | S43:       | 2 | 3,2721 | 0,146 | -0,368 |
| 8 | P05787 K2C8_HUMAN   | R.VGS#SNFR.G                      | S43:       | 2 | 2,3802 | 0,185 | 0      |
| 8 | Q9Y3M8 STA13_HUMAN  | R.TGS#ISLGR.E                     | S430:      | 2 | 2,7634 | 0,423 | 0      |
| 8 | Q86UU1 PHLB1_HUMAN  | R.TFS#DGLATR.T                    | S430:      | 2 | 2,055  | 0,128 | -0,116 |
| 8 | Q9HCD6 TANC2_HUMAN  | R.ELPLTQPPSAHSSITSGS#CPGT#PEM*R.R | S430:T434: | 3 | 2,665  | 1     | -0,314 |
| 8 | Q08170 SFRS4_HUMAN  | R.GES#ENAGTNQETR.S                | S431:      | 2 | 2,015  | 0,409 | 0      |
| 8 | P52272 HNRPM_HUMAN  | R.VGS#EIER.M                      | S432:      | 2 | 2,8824 | 0,226 | 0      |
| 8 | O60934 NBN_HUMAN    | R.IPNYQLS#PTK.L                   | S432:      | 2 | 2,43   | 0,319 | -0,393 |
| 8 | Q9UPZ3 HPS5_HUMAN   | K.FEPLDSACSS#R.R                  | S433:      | 2 | 2,4223 | 0,378 | 0      |
| 8 | Q05519 SFR11_HUMAN  | R.DYDEEEQGYDS#EK.E                | S434:      | 2 | 4,7705 | 0,558 | -0,506 |
| 8 | Q92754 AP2C_HUMAN   | K.SYM*NPGDQS#PADSNK.T             | S434:      | 2 | 4,0737 | 0,499 | -0,858 |
| 8 | P07814 SYEP_HUMAN   | R.LNLNNTVLS#K.R                   | S434:      | 2 | 3,7477 | 0,271 | -0,204 |
| 8 | Q9Y6A5 TACC3_HUMAN  | K.SGCSEAQPPE#PETR.L               | S434:      | 2 | 2,719  | 0,286 | -0,57  |
| 8 | Q05209 PTN12_HUMAN  | R.NLS#FEIK.K                      | S435:      | 2 | 2,3218 | 0,115 | -1,179 |
| 8 | O94804 STK10_HUMAN  | K.QVAEQGGDLS#PAANR.S              | S438:      | 2 | 4,8969 | 0,566 | -0,689 |
| 8 | O94804 STK10_HUMAN  | K.QVAEQGGDLS#PAANR.S              | S438:      | 3 | 3,2308 | 0,359 | -0,459 |
| 8 | Q8NEM2 SHCBP_HUMAN  | K.GLFQDEDESCS#DCSYR.D             | S44:       | 2 | 4,0583 | 0,494 | -0,445 |
| 8 | Q8NDX6 ZN740_HUMAN  | R.AGS#PDVLR.C                     | S44:       | 2 | 2,8402 | 0,175 | 0      |
| 8 | P52926 HMG2A2_HUMAN | K.QQEQPTGEP#PK.R                  | S44:       | 2 | 2,1301 | 0,206 | -0,347 |
| 8 | O00178 GTPB1_HUMAN  | R.LHGGFDS#DCS#EDGEALNGEPELDLTSK.L | S44:S47:   | 3 | 5,4558 | 0,418 | -0,24  |
| 8 | O14578 CTRO_HUMAN   | R.SESVVSGLDS#PAK.T                | S440:      | 2 | 2,2836 | 0,267 | -0,45  |



|   |                    |                                 |            |   |        |       |        |
|---|--------------------|---------------------------------|------------|---|--------|-------|--------|
| 8 | P47974 TISD_HUMAN  | R.RLSDS#PVFDAPSPDSD#LSDR.D      | S440:S452: | 3 | 2,7539 | 0,157 | -0,076 |
| 8 | Q5SNT2 TM201_HUMAN | R.TS#PSSLPGR.L                  | S441:      | 2 | 2,0146 | 0,252 | -0,186 |
| 8 | P35269 T2FA_HUMAN  | K.STPQPPS#GKT#TPNSGDVQVTEDAVR.R | S442:T445: | 3 | 3,4264 | 1     | -0,201 |
| 8 | Q86UU1 PHLB1_HUMAN | R.TLQPPE#PR.L                   | S443:      | 2 | 2,1491 | 0,254 | 0      |
| 8 | Q9H307 PININ_HUMAN | K.SLS#PGKENVS#ALDM*EK.E         | S443:S450: | 3 | 3,3319 | 0,18  | -0,292 |
| 8 | Q9H307 PININ_HUMAN | K.SLS#PGKENVS#ALDM*EK.E         | S443:S450: | 2 | 3,2412 | 0,315 | -0,389 |
| 8 | Q9BVJ6 UT14A_HUMAN | R.SELSQDAEPAGS#QETK.D           | S445:      | 2 | 4,9822 | 0,483 | -0,694 |
| 8 | Q7L7X3 TAOK1_HUMAN | R.TAS#LVTR.Q                    | S445:      | 2 | 2,4794 | 0,381 | 0,221  |
| 8 | Q92667 AKAP1_HUMAN | K.SLLS#PTK.D                    | S445:      | 2 | 2,2018 | 0,108 | 0,067  |
| 8 | O43237 DC1L2_HUMAN | K.TGSPGS#PGAGGVQSTAK.K          | S446:      | 2 | 2,3126 | 0,324 | -0,317 |
| 8 | Q13247 SFRS6_HUMAN | K.NGYGFVEFEDS#R.D               | S45:       | 2 | 3,4849 | 0,501 | -0,163 |
| 8 | Q9H8Y8 GORS2_HUMAN | R.VGDSTPVSSEKPVSAAVDANASES#P.-  | S451:      | 3 | 2,6942 | 0,11  | -0,306 |
| 8 | Q96GX5 MASTL_HUMAN | R.NFELVDSS#PCK.K                | S453:      | 2 | 2,2128 | 0,303 | -0,177 |
| 8 | Q7KZI7 MARK2_HUMAN | K.VPAS#PLPGLER.K                | S456:      | 2 | 3,4312 | 0,302 | -0,301 |
| 8 | Q99590 SFRIP_HUMAN | K.VETVS#QPSES#PKDTIDK.T         | S456:S461: | 3 | 3,5303 | 0,277 | -1,268 |
| 8 | Q9ULU4 PKCB1_HUMAN | K.ATSS#HFSASEES#M*DFLDK.S       | S457:S465: | 3 | 3,5539 | 0,306 | -0,423 |
| 8 | Q96NT5 PCFT_HUMAN  | K.ADPHLEFQQFPQS#P.-             | S458:      | 2 | 2,9542 | 0,501 | -0,142 |
| 8 | Q86VM9 ZCH18_HUMAN | R.AS#DLEDEESAAR.G               | S46:       | 2 | 3,8324 | 0,46  | -0,267 |
| 8 | P29966 MARCS_HUMAN | K.VNGDAS#PAAAESGAK.E            | S46:       | 2 | 3,1657 | 0,226 | -0,428 |
| 8 | Q3KQU3 MA7D1_HUMAN | R.LSASTASELS#PK.S               | S460:      | 2 | 3,4339 | 0,532 | -0,48  |
| 8 | Q9NYZ3 GTSE1_HUMAN | K.FSIGDS#PDSSTPK.L              | S461:      | 2 | 3,1385 | 0,336 | -0,172 |
| 8 | Q9BTU6 P4K2A_HUMAN | R.SSS#ESYTQSFQSR.K              | S462:      | 2 | 3,6331 | 0,362 | -0,31  |
| 8 | Q15149 PLEC1_HUMAN | K.GYSPYSVSGSGSTAGS#R.T          | S4626:     | 2 | 5,4673 | 0,592 | -0,524 |
| 8 | Q15149 PLEC1_HUMAN | K.GYSPYSVSGSGSTAGS#R.T          | S4626:     | 3 | 3,9293 | 0,529 | -0,196 |
| 8 | O95835 LATS1_HUMAN | R.SNS#FNNPLGMR.A                | S464:      | 2 | 3,7681 | 0,443 | 0      |
| 8 | Q9P275 UBP36_HUMAN | K.NINGIISS#PLTGK.R              | S464:      | 2 | 2,8318 | 0,414 | -0,336 |
| 8 | P11166 GTR1_HUMAN  | R.TFDEIAS#GFR.Q                 | S465:      | 2 | 2,0075 | 0,348 | -0,399 |
| 8 | Q6ZUM4 RHG27_HUMAN | K.SSQDGDTPAQAS#PPEEK.V          | S466:      | 2 | 4,3417 | 0,538 | -0,401 |
| 8 | O60825 F262_HUMAN  | R.NS#FTPLSSNTIR.R               | S466:      | 2 | 2,6977 | 0,243 | -0,243 |
| 8 | O15047 SET1A_HUMAN | R.S#GS#PAPETTNEVFPFAQHSSLDSR.I  | S468:S470: | 3 | 3,8791 | 0,221 | -0,894 |
| 8 | O75385 ULK1_HUMAN  | R.SGSTS#PLGFAR.A                | S469:      | 2 | 2,912  | 0,442 | -0,105 |
| 8 | Q9UPN4 AZI1_HUMAN  | R.SVS#VVTGSEQK.R                | S47:       | 2 | 3,7635 | 0,486 | -0,305 |
| 8 | Q99543 DNJC2_HUMAN | R.NAS#ASFQELEDK.K               | S47:       | 2 | 3,7368 | 0,52  | -0,258 |

|   |                    |                               |            |   |        |       |        |
|---|--------------------|-------------------------------|------------|---|--------|-------|--------|
| 8 | Q96EB6 SIRT1_HUMAN | R.S#PGEPGGAAPER.E             | S47:       | 2 | 3,1328 | 0,401 | -0,506 |
| 8 | Q96BT3 CENPT_HUMAN | R.ALLETAS#PR.K                | S47:       | 2 | 2,7668 | 0,392 | -0,118 |
| 8 | P31946 1433B_HUMAN | R.NLLS#VAYK.N                 | S47:       | 2 | 2,7444 | 0,247 | -0,247 |
| 8 | Q8N684 CPSF7_HUMAN | R.SS#STEP PPPVR.Q             | S47:       | 2 | 2,2048 | 0,169 | -0,198 |
| 8 | Q14157 UBP2L_HUMAN | K.STSAPQM*SPGSS#DNQSSSPQAQK.L | S471:      | 3 | 4,2179 | 0,412 | -0,487 |
| 8 | Q9NS91 RAD18_HUMAN | K.NDLQDTEIS#PR.Q              | S471:      | 2 | 2,3613 | 0,297 | -0,892 |
| 8 | Q8IW41 MAPK5_HUMAN | K.QVIEEQTTSHES#Q.-            | S472:      | 2 | 4,1637 | 0,383 | -0,459 |
| 8 | Q13433 S39A6_HUMAN | K.YESQLS#TNEEK.V              | S472:      | 2 | 3,5555 | 0,361 | 0      |
| 8 | O60669 MOT2_HUMAN  | K.VSNAQSVTS#ERETNI.-          | S472:      | 2 | 2,7862 | 0,274 | 0      |
| 8 | Q9HCH0 K1602_HUMAN | K.SPSPGGPQLS#PQLPR.N          | S473:      | 3 | 2,9225 | 0,144 | -0,458 |
| 8 | Q8NCD3 HJURP_HUMAN | R.GGPAS#PGGLQGLETR.R          | S473:      | 2 | 2,5035 | 0,44  | 0,496  |
| 8 | Q14157 UBP2L_HUMAN | K.STSAPQM*SPGSSDNQSSS#PQAQK.L | S477:      | 3 | 5,1599 | 0,526 | -0,209 |
| 8 | Q9P270 SLAI2_HUMAN | R.SGAVQGAGSLGPGS#PVR.A        | S48:       | 2 | 3,8248 | 0,418 | -0,619 |
| 8 | Q8N684 CPSF7_HUMAN | R.SSS#TEPPPPVR.Q              | S48:       | 2 | 2,4987 | 0,357 | -0,494 |
| 8 | O60583 CCNT2_HUMAN | K.QGQSQAASSSVTS#PIK.M         | S480:      | 2 | 4,0748 | 0,573 | -0,42  |
| 8 | Q9P2B4 CT2NL_HUMAN | K.FQSQADQDQQASGLQS#PPSR.D     | S481:      | 3 | 5,4343 | 0,419 | -1,055 |
| 8 | Q9NQW6 ANLN_HUMAN  | K.TQS#LPVTEK.V                | S485:      | 2 | 2,5396 | 0,392 | -0,338 |
| 8 | P11169 GTR3_HUMAN  | K.DGVM*EM*NS#IEPAK.E          | S485:      | 2 | 2,4439 | 0,239 | -0,239 |
| 8 | P10809 CH60_HUMAN  | K.NAGVEGS#LIVEK.I             | S488:      | 2 | 3,8252 | 0,455 | -0,471 |
| 8 | Q15052 ARHG6_HUMAN | R.M*S#GFIYQGK.I               | S488:      | 2 | 3,5076 | 0,279 | -0,108 |
| 8 | Q15052 ARHG6_HUMAN | R.MS#GFIYQGK.I                | S488:      | 2 | 2,9927 | 0,5   | -0,329 |
| 8 | Q99543 DNJC2_HUMAN | R.NASAS#FQLEDK.K              | S49:       | 2 | 2,8794 | 0,364 | -0,43  |
| 8 | Q9Y3Q8 T22D4_HUMAN | R.LPNGEPS#PDPGGK.G            | S49:       | 2 | 2,2728 | 0,282 | -0,363 |
| 8 | P52292 IMA2_HUMAN  | K.ASL#LIEK.Y                  | S490:      | 2 | 3,1439 | 0,385 | 0      |
| 8 | Q8IWC1 MA7D3_HUMAN | R.LSS#YTECYK.W                | S490:      | 2 | 2,455  | 0,404 | -0,198 |
| 8 | Q8IXS8 F126B_HUMAN | R.YSTVS#LQEDR.L               | S491:      | 2 | 2,8025 | 0,366 | -0,191 |
| 8 | Q1MSJ5 CSPP1_HUMAN | R.SGLSSALGEM*VS#PR.I          | S492:      | 2 | 4,1592 | 0,458 | -0,492 |
| 8 | Q3YEC7 PARF_HUMAN  | K.GPAPAPQQCS#EPETK.W          | S492:      | 2 | 3,5235 | 0,385 | -0,509 |
| 8 | O60832 DKC1_HUMAN  | K.AGLESGAEPGDGDS#DTTK.K       | S494:      | 2 | 3,6802 | 0,55  | -0,683 |
| 8 | Q641Q2 FA21A_HUMAN | K.AVAS#PEATVSQTDENK.A         | S498:      | 2 | 5,0104 | 0,6   | -0,495 |
| 8 | P23588 IF4B_HUMAN  | R.SQSS#DTEQQSPTSGGGK.V        | S498:      | 2 | 2,9883 | 0,475 | -0,208 |
| 8 | Q9HOD6 XRN2_HUMAN  | K.AEDS#DSEPEPEDNVR.L          | S499:      | 2 | 4,206  | 0,523 | -0,621 |
| 8 | Q8N3X1 FNBP4_HUMAN | K.IDENS#DKEM*EEVES#PEK.I      | S499:S508: | 3 | 5,7185 | 0,306 | -0,335 |

|   |                    |                              |            |   |        |       |        |
|---|--------------------|------------------------------|------------|---|--------|-------|--------|
| 8 | P42679 MATK_HUMAN  | R.SAGAPASVSGQDADGSTS#PR.S    | S501:      | 2 | 4,211  | 0,589 | -0,643 |
| 8 | Q9NPQ8 RIC8A_HUMAN | R.VIQPM*GM*S#PR.G            | S501:      | 2 | 2,3824 | 0,285 | -0,397 |
| 8 | P13639 EF2_HUMAN   | K.FSVS#PVVR.V                | S502:      | 2 | 2,3624 | 0,098 | 0,314  |
| 8 | O60237 MYPT2_HUMAN | K.LNS#TSDIEEKENR.E           | S504:      | 2 | 2,3691 | 0,29  | -0,529 |
| 8 | Q92574 TSC1_HUMAN  | R.GGFDS#PFYR.D               | S505:      | 2 | 3,286  | 0,243 | -0,108 |
| 8 | Q12888 TP53B_HUMAN | K.NSPEDLGLS#LTGDSC.L         | S507:      | 2 | 4,1991 | 0,474 | 0,206  |
| 8 | O14974 MYPT1_HUMAN | R.LAS#TSDIEEK.E              | S507:      | 2 | 3,1087 | 0,416 | -0,312 |
| 8 | Q16584 M3K11_HUMAN | R.ITVQAS#PGLDR.R             | S507:      | 2 | 2,4531 | 0,267 | -0,592 |
| 8 | Q08AM6 VAC14_HUMAN | R.AGLLNNTS#GTK.G             | S509:      | 2 | 3,008  | 0,359 | -0,234 |
| 8 | O14974 MYPT1_HUMAN | R.LASTS#DIEEK.E              | S509:      | 2 | 2,8412 | 0,373 | -0,312 |
| 8 | O14737 PDCD5_HUMAN | R.NSILAQVLDQS#AR.A           | S51:       | 2 | 4,0733 | 0,402 | -0,408 |
| 8 | Q9Y6G9 DC1L1_HUMAN | R.KPVTVS#PTTPTSPTGEAS.-      | S510:      | 2 | 5,1711 | 0,556 | -0,559 |
| 8 | Q6UVJ0 SAS6_HUMAN  | R.SGIS#PNLNVDGR.L            | S510:      | 2 | 2,7042 | 0,431 | -0,78  |
| 8 | Q09666 AHNK_HUMAN  | K.AEAPLPS#PK.L               | S5110:     | 2 | 2,4319 | 0,438 | 0      |
| 8 | Q14684 RRP1B_HUMAN | R.GS#PTGGAQLLK.R             | S513:      | 2 | 2,1685 | 0,402 | 0,11   |
| 8 | Q9Y2U5 M3K2_HUMAN  | R.LQTICLS#GTGM*K.S           | S514:      | 2 | 2,8825 | 0,342 | 0,174  |
| 8 | Q99567 NUP88_HUMAN | R.EDVEVAES#PLR.V             | S517:      | 2 | 2,8104 | 0,406 | -0,369 |
| 8 | P29590 PML_HUMAN   | K.AVS#PPHLDGPPS#PR.S         | S518:S527: | 3 | 3,449  | 0,414 | 0,115  |
| 8 | Q8N2Y8 RUSC2_HUMAN | R.M*LS#CPVR.L                | S519:      | 2 | 2,2616 | 0,18  | 0      |
| 8 | Q16204 CCDC6_HUMAN | K.SGGIVIS#PFR.L              | S52:       | 2 | 3,0934 | 0,356 | -0,329 |
| 8 | Q9UHR5 S30BP_HUMAN | K.GGLVSDAYGEDDFS#R.L         | S52:       | 2 | 2,2317 | 0,232 | -0,073 |
| 8 | Q9BST9 RTKN_HUMAN  | R.TFS#LDAVPPDHS#PR.A         | S520:S529: | 2 | 3,9552 | 0,56  | -0,359 |
| 8 | Q9BST9 RTKN_HUMAN  | R.TFS#LDAVPPDHS#PR.A         | S520:S529: | 3 | 2,6261 | 0,247 | 0      |
| 8 | Q15057 CENB2_HUMAN | K.YSISLS#PPEQK.K             | S521:      | 2 | 2,6619 | 0,365 | -0,167 |
| 8 | Q8NI35 INADL_HUMAN | K.VPDS#PENELK.S              | S522:      | 2 | 3,477  | 0,36  | -0,101 |
| 8 | Q92609 TBCD5_HUMAN | K.SES#M*PVQLNK.G             | S522:      | 2 | 3,3458 | 0,375 | -0,199 |
| 8 | Q9P246 STIM2_HUMAN | R.SIVPSS#PQPQR.A             | S523:      | 2 | 2,1655 | 0,217 | -0,191 |
| 8 | Q9P2B4 CT2NL_HUMAN | R.FTSQQGPIKPV#PNS#SPFGTDYR.N | S523:S526: | 3 | 4,9255 | 1     | -0,411 |
| 8 | Q8IWC1 MA7D3_HUMAN | K.NCPPS#PLPLISK.Q            | S524:      | 2 | 3,377  | 0,408 | -0,174 |
| 8 | P28715 ERCC5_HUMAN | R.ELTPAS#PTCTNSVSK.N         | S526:      | 2 | 2,1806 | 0,211 | -0,365 |
| 8 | Q5VTL8 PR38B_HUMAN | R.SQS#IEQESQEK.Q             | S529:      | 2 | 3,479  | 0,42  | -0,267 |
| 8 | P49790 NU153_HUMAN | K.FSS#PIVK.S                 | S529:      | 2 | 2,4253 | 0,126 | 0,071  |
| 8 | Q8N1G2 K0082_HUMAN | K.ASTTSLGS#DSETEGK.Q         | S53:       | 2 | 3,9138 | 0,509 | -0,522 |

|   |                     |                                 |          |   |        |       |        |
|---|---------------------|---------------------------------|----------|---|--------|-------|--------|
| 8 | Q99733 NP1L4_HUMAN  | R.LDNVPHTPS#S#YIETLPK.A         | S53:S54: | 2 | 2,3971 | 1     | -0,471 |
| 8 | Q9P2R6 RERE_HUMAN   | K.NYAES#DHS#EDEDNDNNSATAEESTK.K | S53:S56: | 3 | 7,51   | 0,615 | -0,499 |
| 8 | O60504 VINEX_HUMAN  | R.LCDDGSQLPTS#PR.L              | S530:    | 2 | 3,6732 | 0,517 | -0,159 |
| 8 | Q96S66 CLCC1_HUMAN  | K.SEAAGSPDQGSTYS#PAR.G          | S532:    | 2 | 3,9664 | 0,503 | -0,624 |
| 8 | Q9BYW2 SETD2_HUMAN  | R.CCS#PPNELGFR.R                | S532:    | 2 | 2,713  | 0,293 | -0,258 |
| 8 | Q9UPN3 MACF1_HUMAN  | R.TSLAGDTSNSSS#PASTGAK.T        | S5334:   | 2 | 4,7737 | 0,61  | -0,47  |
| 8 | Q86VM9 ZCH18_HUMAN  | K.LGVSVS#PSR.A                  | S534:    | 2 | 3,3438 | 0,382 | -0,186 |
| 8 | Q8WYP5 AHTF1_HUMAN  | R.CLVAGLLS#PR.F                 | S537:    | 2 | 2,9785 | 0,452 | -0,105 |
| 8 | Q01970 PLCB3_HUMAN  | K.S#LGDEGLNR.G                  | S537:    | 2 | 2,1898 | 0,27  | -0,352 |
| 8 | Q52LR7 EPC2_HUMAN   | R.LLNLQDS#DSEECTSR.K            | S538:    | 2 | 4,9216 | 0,507 | -0,33  |
| 8 | Q03188 CENPC_HUMAN  | K.SEES#PVVYNSSVR.N              | S538:    | 2 | 4,0604 | 0,49  | -0,722 |
| 8 | Q15758 AAAT_HUMAN   | R.GPAGDATVASEKES#VM*.-          | S539:    | 2 | 4,5955 | 0,539 | -0,519 |
| 8 | Q92609 TBCD5_HUMAN  | K.NISSS#PSVESLPGGR.E            | S539:    | 2 | 3,0551 | 0,212 | -0,545 |
| 8 | Q9NQW6 ANLN_HUMAN   | R.QPLSEASNQQPLS#GGEEK.S         | S54:     | 2 | 3,4912 | 0,514 | -0,308 |
| 8 | Q9NQW6 ANLN_HUMAN   | R.QPLSEASNQQPLS#GGEEK.S         | S54:     | 3 | 3,0188 | 0,348 | -0,462 |
| 8 | O43306 ADCY6_HUMAN  | R.DAEPSP#PTPAGPPR.C             | S54:     | 2 | 2,1747 | 0,274 | -0,997 |
| 8 | Q92609 TBCD5_HUMAN  | K.NISSSPS#VESLPGGR.E            | S541:    | 2 | 3,3168 | 0,365 | -0,234 |
| 8 | Q14721 KCNB1_HUMAN  | K.TQS#QPILNTK.E                 | S541:    | 2 | 2,988  | 0,271 | -0,202 |
| 8 | Q9UKV5 AMFR2_HUMAN  | R.VPLDLS#PR.L                   | S542:    | 2 | 2,473  | 0,348 | -0,312 |
| 8 | Q13144 EI2BE_HUMAN  | R.GGS#PQMDDIK.V                 | S544:    | 2 | 2,8821 | 0,189 | -0,108 |
| 8 | Q13144 EI2BE_HUMAN  | R.GGS#PQM*DDIK.V                | S544:    | 2 | 2,5138 | 0,304 | -0,533 |
| 8 | Q5JTD0 TJAP1_HUMAN  | R.KDS#LTQAQEQGNLLN.-            | S545:    | 2 | 4,8908 | 0,521 | -0,631 |
| 8 | Q86SQ0 PHLB2_HUMAN  | R.NDELLS#DLTR.T                 | S545:    | 2 | 3,9054 | 0,161 | -0,097 |
| 8 | Q9P206 K1522_HUMAN  | K.GLAGPPAS#PGK.A                | S545:    | 2 | 2,7572 | 0,474 | 0,118  |
| 8 | Q15022 SUZ12_HUMAN  | K.ASM*SEFLES#EDGEVEQQR.T        | S546:    | 3 | 4,5771 | 0,436 | -0,169 |
| 8 | Q15022 SUZ12_HUMAN  | K.ASMSEFLES#EDGEVEQQR.T         | S546:    | 2 | 4,1513 | 0,511 | -0,567 |
| 8 | Q9H4G0 E41L1_HUMAN  | R.LPSSPASPS#PK.G                | S546:    | 2 | 2,2101 | 0,251 | -0,213 |
| 8 | Q96FS4 SIPA1_HUMAN  | R.SGS#DAGEARPPTPAS#PR.A         | S55:S67: | 2 | 2,7677 | 0,293 | -0,538 |
| 8 | Q14155 ARHG7_HUMAN  | R.NAFEISGS#M*IER.I              | S551:    | 2 | 3,7475 | 0,336 | -0,337 |
| 8 | Q14692 BMS1_HUMAN   | K.AGLS#PANQSDR.V                | S552:    | 2 | 2,2309 | 0,238 | -1,44  |
| 8 | Q8IVH2 FOXPA4_HUMAN | K.M*TG#PTLVK.N                  | S554:    | 2 | 3,0773 | 0,333 | -0,118 |
| 8 | Q6ZV73 FGD6_HUMAN   | R.GVSSS#FDM*PK.R                | S554:    | 2 | 2,2916 | 0,154 | -0,318 |
| 8 | Q92609 TBCD5_HUMAN  | R.EFTGS#PPSSATK.K               | S554:    | 2 | 2,0352 | 0,169 | -0,473 |

|   |                     |                                   |              |   |        |       |        |
|---|---------------------|-----------------------------------|--------------|---|--------|-------|--------|
| 8 | O95453 PARN_HUMAN   | R.NNS#FTAPSTVGK.R                 | S557:        | 2 | 3,4189 | 0,399 | -0,187 |
| 8 | Q9GZU1 MCLN1_HUMAN  | R.GS#GSACSLCCCGR.D                | S557:        | 2 | 3,2696 | 0,581 | 0,15   |
| 8 | Q9Y5B6 GCFC_HUMAN   | K.M*ADHLEGLS#S#DDEETSTDITNFNLEK.D | S557:S558:   | 3 | 4,1446 | 0,371 | -0,711 |
| 8 | Q9UGU0 TCF20_HUMAN  | K.AGSS#PAQGAQNEPPR.L              | S559:        | 2 | 3,06   | 0,427 | -0,394 |
| 8 | Q9UGU0 TCF20_HUMAN  | K.AGSS#PAQGAQNEPPR.L              | S559:        | 3 | 2,8257 | 0,147 | -0,355 |
| 8 | P08670 VIME_HUMAN   | R.SLYASS#PGGVYATR.S               | S56:         | 2 | 3,6943 | 0,464 | -0,243 |
| 8 | Q6IAA8 CK059_HUMAN  | R.TDEQALLS#ILAK.T                 | S56:         | 3 | 3,516  | 0,295 | -0,249 |
| 8 | A9CQZ4 A9CQZ4_HUMAN | K.TIDFDSL#VGR.G                   | S56:         | 2 | 3,4388 | 0,367 | -0,189 |
| 8 | Q6IAA8 CK059_HUMAN  | R.TDEQALLS#ILAK.T                 | S56:         | 2 | 2,7486 | 0,265 | -0,831 |
| 8 | Q6DEN2 Q6DEN2_HUMAN | K.TLDFDALS#VGQR.G                 | S56:         | 2 | 2,7151 | 0,448 | 0,087  |
| 8 | Q13042 CDC16_HUMAN  | K.NIIS#PPWDFR.E                   | S560:        | 2 | 2,2137 | 0,294 | -0,368 |
| 8 | Q9P2B4 CT2NL_HUMAN  | K.VSSPLS#PLSPGIKS#PTIPR.A         | S560:S568:   | 3 | 4,6931 | 1     | 0,262  |
| 8 | Q9NQW6 ANLN_HUMAN   | R.EIEM*SVDDDDINSS#K.V             | S562:        | 2 | 3,4805 | 0,528 | -0,476 |
| 8 | Q16512 PKN1_HUMAN   | K.LNLGTDSDSS#PQK.S                | S562:        | 2 | 3,2704 | 0,463 | -0,931 |
| 8 | O60504 VINEX_HUMAN  | R.SPADPTDLGGQTS#PR.R              | S563:        | 2 | 4,1709 | 0,483 | -0,464 |
| 8 | P28715 ERCC5_HUMAN  | K.FDSSLSS#DDETK.C                 | S563:        | 2 | 4,0026 | 0,519 | -0,24  |
| 8 | Q9P2B4 CT2NL_HUMAN  | K.VSSPLSPLS#PGIKS#PTIPR.A         | S563:S568:   | 3 | 2,7612 | 0,308 | 0      |
| 8 | Q6PJ19 WDR59_HUMAN  | R.AVS#PTEPTPR.S                   | S564:        | 2 | 3,0759 | 0,339 | -0,215 |
| 8 | Q9C011 MTMRC_HUMAN  | R.QLS#LPLTQSK.S                   | S564:        | 2 | 2,4401 | 0,242 | -0,817 |
| 8 | Q9H2G2 SLK_HUMAN    | K.VDEDS#AEDTQS#NDGKEVVEVGQK.L     | S565:S571:   | 3 | 5,4147 | 0,34  | -0,763 |
| 8 | Q9UKL3 C8AP2_HUMAN  | K.LNLTL#PAK.K                     | S567:        | 2 | 2,4881 | 0,269 | -0,118 |
| 8 | O00264 PGRC1_HUMAN  | R.GDQPAASGDS#DDDEPPPLPR.L         | S57:         | 3 | 4,4142 | 0,348 | -0,259 |
| 8 | Q9BRK4 LZTS2_HUMAN  | R.AAAGVGG#LR.A                    | S570:        | 2 | 2,5755 | 0,374 | -0,26  |
| 8 | Q8IVF2 AHNK2_HUMAN  | K.LGFSS#PTK.K                     | S5707:       | 2 | 2,5705 | 0,372 | -0,365 |
| 8 | P17812 PYRG1_HUMAN  | R.DTYSDRSGS#SS#PDSEITLK.F         | S573:S575:   | 3 | 4,1302 | 1     | -0,392 |
| 8 | P17812 PYRG1_HUMAN  | R.SGSS#S#PDSEITELKFPSINHD.-       | S574:S575:   | 3 | 4,5608 | 1     | 0,304  |
| 8 | P17812 PYRG1_HUMAN  | R.SGSS#SPDS#EITELKFPSINHD.-       | S574:S578:   | 3 | 4,1841 | 1     | 0      |
| 8 | Q12959 DLG1_HUMAN   | R.EQM*M*NSSISSGSGS#LR.T           | S575:        | 2 | 5,398  | 0,597 | -0,547 |
| 8 | P17812 PYRG1_HUMAN  | R.SGSS#PDSEITLK.F                 | S575:        | 2 | 3,4676 | 0,302 | -0,322 |
| 8 | Q13586 STIM1_HUMAN  | K.LPDS#PALAK.K                    | S575:        | 2 | 3,3277 | 0,421 | -0,123 |
| 8 | Q09666 AHNK_HUMAN   | K.ASLGS#LEGEAEAEASS#PKGK.F        | S5752:S5763: | 3 | 3,6493 | 0,384 | 0,088  |
| 8 | Q09666 AHNK_HUMAN   | K.ASLGSLEGEAEAEASS#PK.G           | S5763:       | 2 | 3,9914 | 0,517 | -0,067 |
| 8 | Q9Y4H2 IRS2_HUMAN   | R.TYS#LTPAR.Q                     | S577:        | 2 | 2,3238 | 0,354 | 0,112  |

|   |                      |                               |            |   |        |       |        |
|---|----------------------|-------------------------------|------------|---|--------|-------|--------|
| 8 | Q5H9R7 SAPS3_HUMAN   | K.FADQDDIGNVS#FDR.V           | S579:      | 2 | 5,0718 | 0,579 | -0,581 |
| 8 | P46087 NOL1_HUMAN    | R.LGS#VEAPK.T                 | S58:       | 2 | 2,9669 | 0,287 | 0,069  |
| 8 | Q13177 PAK2_HUMAN    | K.IISIFS#GTEK.G               | S58:       | 2 | 2,729  | 0,18  | -0,312 |
| 8 | P68431 H31_HUMAN     | K.S#TELLIR.K                  | S58:       | 2 | 2,3827 | 0,244 | 0,067  |
| 8 | Q9UMZ2 SYNG_HUMAN    | K.TADSVS#PLEPPTK.D            | S580:      | 2 | 2,6816 | 0,421 | -0,429 |
| 8 | ##Q9UK73 FEM1B_HUMAN | R.AAIIPTS#R.Q                 | S581:      | 2 | 2,148  | 0,242 | -0,179 |
| 8 | Q9H0B6 KLC2_HUMAN    | R.ASS#LNFLNK.S                | S582:      | 2 | 3,2674 | 0,294 | -0,227 |
| 8 | Q9UNN5 FAF1_HUMAN    | R.TPS#GEFLER.R                | S582:      | 2 | 2,9536 | 0,392 | 0      |
| 8 | Q9UJX2 CDC23_HUMAN   | R.RVS#PLNLSSVTP.-             | S582:      | 2 | 2,3764 | 0,451 | -0,09  |
| 8 | Q9P275 UBP36_HUMAN   | R.DVVLSTS#PK.L                | S582:      | 2 | 2,3194 | 0,26  | 0      |
| 8 | Q09666 AHNK_HUMAN    | K.FGTFGGLGS#K.S               | S5830:     | 2 | 2,5954 | 0,375 | -0,348 |
| 8 | Q14152 EIF3A_HUMAN   | R.LES#LNIQR.E                 | S584:      | 2 | 2,7267 | 0,146 | 0      |
| 8 | Q9NVU7 SDA1_HUMAN    | K.YIEIDS#DEEPR.G              | S585:      | 2 | 3,8382 | 0,497 | -0,084 |
| 8 | P51114 FXR1_HUMAN    | K.AINGPTSAS#GDDISK.L          | S587:      | 2 | 2,237  | 0,138 | -0,484 |
| 8 | Q96LD4 TRI47_HUMAN   | R.GGIPAS#PIDPFQSR.L           | S588:      | 2 | 3,4017 | 0,515 | -0,24  |
| 8 | O60343 TBCD4_HUMAN   | R.LGS#VDSFER.S                | S588:      | 2 | 3,1518 | 0,344 | -0,336 |
| 8 | Q9NRY4 GRLF1_HUMAN   | K.NS#LSDPNIDR.I               | S589:      | 2 | 2,2443 | 0,331 | -0,705 |
| 8 | Q8IV63 VRK3_HUMAN    | R.GLNSSFETS#PK.K              | S59:       | 2 | 2,2786 | 0,118 | -0,196 |
| 8 | O60343 TBCD4_HUMAN   | R.LGSVDS#FER.S                | S591:      | 2 | 3,3296 | 0,301 | 0      |
| 8 | Q9BXW9 FACD2_HUMAN   | R.SES#PSLTQER.A               | S592:      | 2 | 3,0983 | 0,42  | -0,503 |
| 8 | Q08J23 NSUN2_HUMAN   | R.NNS#GEEFDCAFR.L             | S593:      | 2 | 3,8969 | 0,477 | -0,08  |
| 8 | Q92841 DDX17_HUMAN   | R.SS#QSSSQQFSGIGR.S           | S593:      | 2 | 2,6487 | 0,358 | -0,159 |
| 8 | A4LAA3 A4LAA3_HUMAN  | K.LTPVS#LSNS#PIKGADCQEVPODK.D | S594:S598: | 3 | 3,9219 | 0,197 | -0,277 |
| 8 | Q8NE71 ABCF1_HUMAN   | K.NQDEES#QEAPELLK.R           | S595:      | 2 | 4,6228 | 0,362 | -0,357 |
| 8 | Q7RTP8 Q7RTP8_HUMAN  | R.ASS#LNVLVGGK.A              | S596:      | 2 | 2,5849 | 0,264 | -0,295 |
| 8 | Q08AD1 CA1L1_HUMAN   | K.LNQSS#PDNVTDTK.G            | S599:      | 2 | 3,6136 | 0,468 | -0,57  |
| 8 | Q15742 NAB2_HUMAN    | R.APS#PTAEQPPGGGDSAR.R        | S6:        | 2 | 4,1164 | 0,589 | -0,656 |
| 8 | Q659C4 LARP2_HUMAN   | K.LNGPGENVS#EDEAQSSNQR.K      | S60:       | 3 | 4,0756 | 0,48  | -0,347 |
| 8 | Q86U90 YRDC_HUMAN    | R.LPGSGAVQAAS#PER.A           | S60:       | 2 | 3,6178 | 0,428 | -0,687 |
| 8 | P51116 FXR2_HUMAN    | R.TDGS#IS#GDRQPVTVADYISR.A    | S601:S603: | 3 | 5,3038 | 0,444 | 0,159  |
| 8 | Q96QE3 ATAD5_HUMAN   | R.ISS#TPTTETIR.G              | S602:      | 2 | 2,2686 | 0,12  | 0,285  |
| 8 | Q05209 PTN12_HUMAN   | R.TPLSFTNPLHS#DDS#DSDER.N     | S603:S606: | 3 | 5,0286 | 0,525 | 0      |
| 8 | Q15424 SAFB1_HUMAN   | R.SVVS#FDK.V                  | S604:      | 2 | 2,2089 | 0,222 | 0,071  |

|   |                    |                                  |            |   |        |       |        |
|---|--------------------|----------------------------------|------------|---|--------|-------|--------|
| 8 | Q14157 UBP2L_HUMAN | R.YPS#SISSS#PQKDLTQAK.N          | S604:S609: | 3 | 2,8098 | 0,28  | -0,183 |
| 8 | Q14157 UBP2L_HUMAN | R.YPSSIS#SSPQK.D                 | S607:      | 2 | 2,8994 | 0,285 | -0,484 |
| 8 | Q14157 UBP2L_HUMAN | R.YPSSISSS#PQK.D                 | S609:      | 2 | 2,9196 | 0,364 | -0,387 |
| 8 | Q9H0B6 KLC2_HUMAN  | R.TLSSS#SMDLSR.R                 | S610:      | 2 | 2,8705 | 0,341 | -0,193 |
| 8 | Q9H0B6 KLC2_HUMAN  | R.TLSSS#SM*DLSR.R                | S610:      | 2 | 2,8256 | 0,384 | -0,286 |
| 8 | O95835 LATS1_HUMAN | K.QITTS#PITVR.K                  | S613:      | 2 | 2,249  | 0,37  | 0,102  |
| 8 | Q8IYB3 SRRM1_HUMAN | R.TAS#PPPPPK.R                   | S616:      | 2 | 3,1429 | 0,384 | -0,251 |
| 8 | Q9UPN6 RBM16_HUMAN | K.ETVQTTQS#PTPVEK.E              | S617:      | 2 | 3,081  | 0,382 | -0,676 |
| 8 | P52272 HNRPM_HUMAN | R.M*GLAM*GGGGAS#FDR.A            | S618:      | 2 | 3,9495 | 0,51  | -0,408 |
| 8 | P49756 RBM25_HUMAN | K.LGASNS#PGQPNSVK.R              | S618:      | 2 | 3,7285 | 0,306 | -0,34  |
| 8 | P52292 IMA2_HUMAN  | R.NVSSFPDDATS#PLQENR.N           | S62:       | 3 | 5,473  | 0,541 | -0,187 |
| 8 | P52292 IMA2_HUMAN  | R.NVSSFPDDATS#PLQENR.N           | S62:       | 2 | 4,9357 | 0,425 | -0,374 |
| 8 | P56211 ARP19_HUMAN | K.YFDS#GDYNM*AK.A                | S62:       | 2 | 3,7858 | 0,44  | -0,347 |
| 8 | P52948 NUP98_HUMAN | R.DSENLAS#PSEYPENGER.F           | S623:      | 2 | 4,8796 | 0,508 | 0,742  |
| 8 | P49848 TAF6_HUMAN  | K.GGPTS#HPSVPASS#PSPLSGSALCGGK.Q | S623:S634: | 3 | 4,8974 | 1     | -0,515 |
| 8 | Q14677 EPN4_HUMAN  | K.QDAFANFANFS#K.-                | S624:      | 2 | 3,4849 | 0,424 | -0,508 |
| 8 | P54259 ATN1_HUMAN  | K.TAS#PPGPPYK.R                  | S627:      | 2 | 2,5155 | 0,432 | -0,586 |
| 8 | Q13442 HAP28_HUMAN | K.SLSDDES#EDEEDDYQK.R            | S63:       | 2 | 5,3681 | 0,496 | -1,04  |
| 8 | Q01105 SET_HUMAN   | R.LNEQAS#EEILK.V                 | S63:       | 2 | 3,9749 | 0,216 | -0,09  |
| 8 | Q8WVC0 LEO1_HUMAN  | K.LTS#DEEGEPSGK.R                | S630:      | 2 | 3,0555 | 0,462 | -0,367 |
| 8 | P02545 LMNA_HUMAN  | R.SVGGG#GGGSGFDNLVTR.S           | S632:      | 2 | 3,1705 | 0,408 | 0      |
| 8 | P02545 LMNA_HUMAN  | R.SVGGSGGGG#FGDNLVTR.S           | S636:      | 2 | 3,9745 | 0,59  | -0,296 |
| 8 | Q86WJ1 CHD1L_HUMAN | R.VLS#PEELED.R.Q                 | S636:      | 2 | 3,2425 | 0,361 | -0,193 |
| 8 | Q9NYL2 MLTK_HUMAN  | R.SSS#PTQYGLTK.N                 | S637:      | 2 | 3,2727 | 0,371 | -0,488 |
| 8 | Q9NW82 WDR70_HUMAN | K.TM*FAQVES#DDEEAK.N             | S638:      | 2 | 4,2565 | 0,474 | -0,36  |
| 8 | O75420 PERQ1_HUMAN | R.SLS#VPDSGR.L                   | S638:      | 2 | 2,1127 | 0,304 | -0,611 |
| 8 | Q9C0C7 AMRA1_HUMAN | R.LELSSAS#PQEER.T                | S639:      | 2 | 3,858  | 0,444 | 0,242  |
| 8 | Q8WVB6 CTF18_HUMAN | R.GDAASS#PAPAASVGSSQGGAR.K       | S64:       | 2 | 3,5687 | 0,477 | -0,519 |
| 8 | Q8WVB6 CTF18_HUMAN | R.GDAASS#PAPAASVGSSQGGAR.K       | S64:       | 3 | 2,7223 | 0,284 | -0,292 |
| 8 | Q6P6C2 ALKB5_HUMAN | K.YQEDS#DPERS#DYEEQLQK.E         | S64:S69:   | 3 | 5,0553 | 0,554 | -0,718 |
| 8 | P54259 ATN1_HUMAN  | R.APS#PGAYK.T                    | S640:      | 2 | 2,5032 | 0,158 | 0      |
| 8 | P35221 CTNA1_HUMAN | R.TPEELDDS#DFETEDFDVRS#R.T       | S641:S652: | 3 | 4,8144 | 0,484 | -0,714 |
| 8 | A1L390 PKHG3_HUMAN | R.SSSVLS#LEGSEK.G                | S643:      | 2 | 3,1888 | 0,328 | -0,187 |

|   |                    |                                  |            |   |        |       |        |
|---|--------------------|----------------------------------|------------|---|--------|-------|--------|
| 8 | Q13029 PRDM2_HUMAN | R.TAS#PPALPK.I                   | S643:      | 2 | 2,0091 | 0,35  | 0      |
| 8 | P49756 RBM25_HUMAN | K.FEEDS#DDVPR.K                  | S644:      | 2 | 2,2897 | 0,261 | -0,087 |
| 8 | Q7Z460 CLAP1_HUMAN | R.QS#SGSATNVASTPDNR.G            | S646:      | 2 | 4,2813 | 0,547 | -0,584 |
| 8 | Q6ZRV2 FA83H_HUMAN | K.VPVPGPS#GGNGPER.E              | S647:      | 2 | 3,2966 | 0,365 | -0,251 |
| 8 | Q92625 ANS1A_HUMAN | R.SES#LSNCSIGK.K                 | S647:      | 2 | 2,7585 | 0,332 | -0,387 |
| 8 | Q15154 PCM1_HUMAN  | R.VTNDIS#PESSPGVGR.R             | S65:       | 2 | 3,5112 | 0,475 | -0,612 |
| 8 | Q5TKA1 LIN9_HUMAN  | R.LFS#DEDDR.Q                    | S65:       | 2 | 2,6304 | 0,112 | -0,227 |
| 8 | Q7Z3C6 ATG9A_HUMAN | R.AEVAS#ALRSFS#PLQPGQAPTGR.A     | S650:S656: | 3 | 3,1206 | 0,118 | -0,076 |
| 8 | Q7Z417 NUFP2_HUMAN | R.NDS#WGSFDLR.A                  | S652:      | 2 | 3,7278 | 0,416 | -0,191 |
| 8 | P02545 LMNA_HUMAN  | R.SYLLGNSS#PR.T                  | S652:      | 2 | 2,7732 | 0,372 | 0,104  |
| 8 | Q96RL1 UIMC1_HUMAN | R.VPS#PGM*EEAGCSR.E              | S653:      | 2 | 4,4688 | 0,486 | -0,58  |
| 8 | P49848 TAF6_HUMAN  | K.QEAGDS#PPPAPGTPK.A             | S653:      | 2 | 3,3374 | 0,309 | -0,638 |
| 8 | Q8TDY2 RBCC1_HUMAN | K.ASVSQTSPOQSASS#PR.M            | S653:      | 2 | 3,2348 | 0,475 | -0,466 |
| 8 | Q4V328 GRAP1_HUMAN | R.SGLEELVLSEM*NS#PSR.T           | S655:      | 2 | 2,7436 | 0,389 | -0,463 |
| 8 | P42684 ABL2_HUMAN  | K.GGFFSS#FM*K.K                  | S655:      | 2 | 2,3217 | 0,216 | -0,332 |
| 8 | P35658 NU214_HUMAN | R.SAQGSSS#PVPSM*VQK.S            | S657:      | 2 | 3,7811 | 0,4   | -0,462 |
| 8 | Q66K74 MAP1S_HUMAN | R.LSL#PLR.G                      | S657:      | 2 | 2,3632 | 0,145 | -0,141 |
| 8 | Q9NYF8 BCLF1_HUMAN | R.IDIS#PSTLR.K                   | S658:      | 2 | 2,5077 | 0,289 | -0,113 |
| 8 | Q9UKF6 CPSF3_HUMAN | R.TVECEEGS#EDDESLR.E             | S659:      | 2 | 3,9916 | 0,408 | -0,598 |
| 8 | Q9H307 PININ_HUMAN | R.GFS#DSGGGPPAK.Q                | S66:       | 2 | 3,2383 | 0,518 | -0,105 |
| 8 | P42166 LAP2A_HUMAN | K.GPPDFS#S#DEEREPTPVLGSGAAAAGR.S | S66:S67:   | 3 | 6,7713 | 0,492 | -0,335 |
| 8 | P42166 LAP2A_HUMAN | K.GPPDFS#SDEEREPT#PVLGSGAAAAGR.S | S66:T74:   | 3 | 5,1461 | 0,485 | -0,67  |
| 8 | Q15398 DLG7_HUMAN  | R.NEM*GIPQQTTS#PENAGPQNTK.S      | S662:      | 3 | 3,1819 | 0,367 | -0,548 |
| 8 | P16615 AT2A2_HUMAN | R.EFDELNPS#AQR.D                 | S663:      | 2 | 2,9503 | 0,308 | -0,088 |
| 8 | Q6P4Q7 CNNM4_HUMAN | R.SAS#LSYPDR.T                   | S664:      | 2 | 2,8366 | 0,227 | 0,113  |
| 8 | P28290 SSFA2_HUMAN | K.SLAS#IEAK.C                    | S668:      | 2 | 2,6572 | 0,157 | 0,068  |
| 8 | P62280 RS11_HUMAN  | K.CPFTGNVS#IR.G                  | S67:       | 2 | 2,6968 | 0,304 | 0      |
| 8 | P42166 LAP2A_HUMAN | K.GPPDFS#SDEEREPT#PVLGSGAAAAGR.S | S67:T74:   | 3 | 5,0658 | 0,497 | -0,469 |
| 8 | Q05209 PTN12_HUMAN | K.DVDVS#EDSPPPLPER.T             | S670:      | 3 | 2,8088 | 0,249 | 0      |
| 8 | P25205 MCM3_HUMAN  | R.SEDES#ETEDEEEK.S               | S672:      | 2 | 3,1432 | 0,546 | -0,224 |
| 8 | P25205 MCM3_HUMAN  | R.SEDES#ET#EDEEEKSQEDQEQK.R      | S672:T674: | 3 | 3,3579 | 0,273 | -0,749 |
| 8 | Q05209 PTN12_HUMAN | K.DVDVSEDS#PPPLPER.T             | S673:      | 2 | 3,1833 | 0,326 | -0,493 |
| 8 | Q9Y5B0 CTDP1_HUMAN | R.LVLS#PDAPDR.A                  | S674:      | 2 | 2,7576 | 0,301 | -0,105 |



|   |                    |                                |            |   |        |       |        |
|---|--------------------|--------------------------------|------------|---|--------|-------|--------|
| 8 | P46087 NOL1_HUMAN  | K.TQASSS#FQDSSQPAGK.A          | S675:      | 2 | 3,6058 | 0,427 | -0,286 |
| 8 | Q96TA1 NIBL1_HUMAN | K.AAPEAS#S#PPASPLQHLLPGK.A     | S678:S679: | 3 | 2,7001 | 0,266 | -0,172 |
| 8 | Q53EU6 PLCH_HUMAN  | K.NSAS#VGIQR.D                 | S68:       | 2 | 2,4722 | 0,196 | -0,325 |
| 8 | O75676 KS6A4_HUMAN | R.S#S#PPLRTPDVLESSGPAVR.S      | S681:S682: | 3 | 2,7192 | 0,131 | -0,172 |
| 8 | Q9Y2W1 TR150_HUMAN | R.IDIS#PSTFR.K                 | S682:      | 2 | 2,5938 | 0,156 | -0,328 |
| 8 | P25098 ARBK1_HUMAN | K.VPLVQRGS#ANGL.-              | S685:      | 2 | 3,0827 | 0,312 | 0,095  |
| 8 | P16070 CD44_HUMAN  | K.LVINS#GNGAVEDR.K             | S686:      | 2 | 4,4139 | 0,544 | -0,257 |
| 8 | Q9H1A4 APC1_HUMAN  | R.NDFEGLS#PVIAPK.K             | S688:      | 2 | 3,6928 | 0,437 | -0,502 |
| 8 | Q14160 LAP4_HUMAN  | R.AEEEEAS#T#EEEDKEGAVVSAPSVK.G | S688:T689: | 3 | 4,7137 | 0,529 | 0,751  |
| 8 | Q68DH5 LMBD2_HUMAN | R.YLSM*SRS#DIFNDV.-            | S689:      | 2 | 2,1653 | 0,249 | 0,074  |
| 8 | Q9NV58 RN19A_HUMAN | R.ISIGS#LFR.R                  | S69:       | 2 | 2,252  | 0,113 | -0,502 |
| 8 | Q8TEW0 PARD3_HUMAN | K.CNELKS#PGS#PPGPELPIETALDDR.E | S692:S695: | 3 | 4,5657 | 0,401 | -0,665 |
| 8 | Q9UHB7 AFF4_HUMAN  | R.M*FS#PM*EEK.E                | S694:      | 2 | 2,9384 | 0,238 | 0      |
| 8 | Q8IYB3 SRRM1_HUMAN | R.APQTSSS#PPPVR.R              | S696:      | 2 | 3,347  | 0,252 | -0,374 |
| 8 | Q14978 NOLC1_HUMAN | R.GGSISVQVNSIKFDS#E.-          | S698:      | 2 | 4,8267 | 0,533 | -0,349 |
| 8 | Q9H6X4 TM134_HUMAN | R.YQNLNEDDGAQAS#PEPDGGVGR.D    | S70:       | 3 | 5,2246 | 0,308 | -0,352 |
| 8 | P52272 HNRPM_HUMAN | K.FES#PEVAER.A                 | S701:      | 2 | 2,8856 | 0,216 | -0,32  |
| 8 | O43719 HTSF1_HUMAN | K.LFEDDDS#NEK.L                | S702:      | 2 | 3,1401 | 0,38  | -0,283 |
| 8 | Q5VWQ8 DAB2P_HUMAN | R.LPS#PTPENK.D                 | S702:      | 2 | 2,948  | 0,29  | -0,115 |
| 8 | O43719 HTSF1_HUMAN | K.LFEDDDS#NEKLFDEEDSS#EK.L     | S702:S714: | 3 | 5,923  | 0,414 | -0,341 |
| 8 | Q9UHB7 AFF4_HUMAN  | K.ELLS#PLS#EPDDRYPLIVK.I       | S703:S706: | 3 | 2,8579 | 0,382 | -0,489 |
| 8 | Q9NT99 LRC4B_HUMAN | K.SGS#KENVQETQI.-              | S704:      | 2 | 2,8097 | 0,127 | -0,349 |
| 8 | Q9H2P0 ADNP_HUMAN  | R.LNQS#PSLAPVK.R               | S709:      | 2 | 3,4981 | 0,26  | -0,099 |
| 8 | Q13439 GOGA4_HUMAN | R.VPS#VESLFR.S                 | S71:       | 2 | 2,6922 | 0,332 | -0,548 |
| 8 | Q9NR30 DDX21_HUMAN | K.AEPSEVDM*NS#PK.S             | S71:       | 2 | 2,3741 | 0,33  | -0,523 |
| 8 | Q13439 GOGA4_HUMAN | R.VPS#VESLFRS#PIK.E            | S71:S78:   | 2 | 2,4613 | 0,28  | -0,603 |
| 8 | O43719 HTSF1_HUMAN | K.LFDEEEDS#S#EKLFDSDER.G       | S713:S714: | 3 | 4,9286 | 0,478 | 0,148  |
| 8 | O43719 HTSF1_HUMAN | K.LFDEEEDS#SEKLFDDSDER.G       | S713:S721: | 3 | 4,5618 | 0,295 | -0,297 |
| 8 | O43719 HTSF1_HUMAN | K.LFDEEEDSS#EK.L               | S714:      | 2 | 3,8592 | 0,336 | -0,52  |
| 8 | Q32MZ4 LRRF1_HUMAN | K.IDGATQSS#PAEPK.S             | S714:      | 2 | 3,1659 | 0,388 | -0,53  |
| 8 | Q9UHI6 DDX20_HUMAN | K.YQES#PGIQM*K.T               | S714:      | 2 | 2,9277 | 0,316 | -0,478 |
| 8 | O43719 HTSF1_HUMAN | K.LFDEEEDSS#EKLFDSDER.G        | S714:S721: | 3 | 5,55   | 0,408 | -0,371 |
| 8 | P51812 KS6A3_HUMAN | R.NQS#PVLEPVGR.S               | S715:      | 2 | 2,9054 | 0,46  | -0,191 |

|   |                    |                                      |                 |   |        |       |        |
|---|--------------------|--------------------------------------|-----------------|---|--------|-------|--------|
| 8 | Q5W0B1 RN219_HUMAN | K.IQSSLSSAS#PSK.A                    | S719:           | 2 | 3,1583 | 0,451 | -0,384 |
| 8 | O43719 HTSF1_HUMAN | K.LFDDS#DER.G                        | S721:           | 2 | 3,2685 | 0,439 | -0,113 |
| 8 | P10636 TAU_HUMAN   | K.SPVVSGDTS#PR.H                     | S721:           | 2 | 2,5932 | 0,382 | -0,516 |
| 8 | Q05682 CALD1_HUMAN | K.GNVFS#SPTAAGTPNKET#AGLK.V          | S723:T735:      | 3 | 3,1671 | 0,322 | -0,332 |
| 8 | Q66K74 MAP1S_HUMAN | R.S#AS#PHDVDLCLVS#PCEFEHR.K          | S729:S731:S741: | 3 | 3,4689 | 0,283 | -0,423 |
| 8 | P05412 JUN_HUMAN   | K.LAS#PELER.L                        | S73:            | 2 | 3,2654 | 0,192 | -0,061 |
| 8 | Q7Z2K8 GRIN1_HUMAN | R.S#PSGAGEGASCSDGPR.G                | S73:            | 2 | 2,582  | 0,372 | -0,233 |
| 8 | Q86SQ0 PHLB2_HUMAN | R.SPS#PLGTSVR.S                      | S73:            | 2 | 2,5709 | 0,305 | -0,226 |
| 8 | Q99575 POP1_HUMAN  | R.VQAYEEPSVASS#PNGK.E                | S730:           | 2 | 4,134  | 0,594 | -0,7   |
| 8 | O60271 JIP4_HUMAN  | R.SAS#QSS#LDKLDQELK.E                | S730:S733:      | 2 | 4,1582 | 0,347 | -0,27  |
| 8 | P46087 NOL1_HUMAN  | K.GTDTQTPAVLS#PSK.T                  | S732:           | 2 | 3,707  | 0,53  | -0,329 |
| 8 | Q14684 RRP1B_HUMAN | K.TPTSS#PASSPLVAK.K                  | S732:           | 2 | 3,5135 | 0,373 | -0,171 |
| 8 | Q15418 KS6A1_HUMAN | R.KLPS#TTL.-                         | S732:           | 2 | 2,4547 | 0,491 | 0,073  |
| 8 | Q32MZ4 LRRF1_HUMAN | R.CTLPEHESPS#QDIS#DACEAESTER.C       | S735:S739:      | 3 | 4,5515 | 0,433 | 0      |
| 8 | Q9BQ52 RNZ2_HUMAN  | K.VPLFS#PNFSEK.V                     | S736:           | 2 | 3,0501 | 0,272 | -0,363 |
| 8 | Q9P2G1 AKIB1_HUMAN | R.GVAPADS#PEAPR.R                    | S737:           | 2 | 2,7643 | 0,484 | -0,391 |
| 8 | Q9ULW0 TPX2_HUMAN  | K.SSDQPLTPVVS#PK.F                   | S738:           | 2 | 2,7309 | 0,424 | -0,34  |
| 8 | A0FGR8 ESYT2_HUMAN | R.SSS#SLLAS#PGHISVK.E                | S738:S743:      | 3 | 2,9772 | 0,292 | -0,337 |
| 8 | A0FGR8 ESYT2_HUMAN | R.SSS#SLLAS#PGHISVK.E                | S738:S743:      | 2 | 2,8506 | 1     | -0,15  |
| 8 | Q96C19 EFHD2_HUMAN | R.ADLNQGIGEQS#PSR.R                  | S74:            | 2 | 4,8136 | 0,49  | -0,518 |
| 8 | Q08J23 NSUN2_HUMAN | R.AGEPNS#PDAEEANS#PDVTAGCDPAGVHPPR.- | S743:S751:      | 3 | 3,4036 | 0,218 | -0,231 |
| 8 | P42566 EP15_HUMAN  | R.SATSSS#VSNVVITK.N                  | S746:           | 2 | 2,9284 | 0,38  | -0,585 |
| 8 | Q96EB6 SIRT1_HUMAN | K.QEVTDM*NYPNSKS#.-                  | S747:           | 2 | 2,7003 | 0,208 | -0,834 |
| 8 | Q9H0X9 OSBL5_HUMAN | R.QTTFLGS#PGPR.H                     | S747:           | 2 | 2,6446 | 0,464 | -0,197 |
| 8 | P12931 SRC_HUMAN   | K.LFGGFNSSDTVTS#PQR.A                | S75:            | 2 | 4,5278 | 0,541 | 0,068  |
| 8 | Q9H910 HN1L_HUMAN  | K.GSGIFDES#TPVQTR.Q                  | S75:            | 2 | 3,4573 | 0,417 | -0,155 |
| 8 | Q969J3 L12R1_HUMAN | K.GLLSGQTS#PTNAK.L                   | S75:            | 2 | 2,1974 | 0,226 | -0,541 |
| 8 | Q5VZ89 DEN4C_HUMAN | K.VPS#GIFDVNSR.K                     | S753:           | 2 | 3,414  | 0,446 | -0,096 |
| 8 | Q08499 PDE4D_HUMAN | K.DSGS#QVEEDTSCSDSK.T                | S754:           | 2 | 3,6542 | 0,383 | -0,741 |
| 8 | Q9P266 K1462_HUMAN | R.SLS#PSSNSAFSR.T                    | S757:           | 2 | 3,2151 | 0,251 | 0      |
| 8 | Q9UJ70 NAGK_HUMAN  | R.SLGLSL#GGDQEDAGR.I                 | S76:            | 2 | 2,4585 | 0,296 | -0,297 |
| 8 | Q8NEY1 NAV1_HUMAN  | K.SIGS#PESTPK.N                      | S760:           | 2 | 2,2039 | 0,298 | -0,338 |
| 8 | Q9UJ3 SMBT1_HUMAN  | R.TFS#FSDDENKPPS#PK.E                | S765:S775:      | 3 | 3,6158 | 0,283 | -0,493 |

|   |                    |                                    |            |   |        |       |        |
|---|--------------------|------------------------------------|------------|---|--------|-------|--------|
| 8 | Q9UHH3 SMBT1_HUMAN | R.TFSFS#DDENKPPS#PK.E              | S767:S775: | 2 | 2,9351 | 0,285 | -0,263 |
| 8 | Q9UHH3 SMBT1_HUMAN | R.TFSFS#DDENKPPS#PK.E              | S767:S775: | 3 | 2,9215 | 0,345 | -0,493 |
| 8 | P82094 TMF1_HUMAN  | K.SNTEPQSPPIAS#PK.A                | S77:       | 2 | 2,8227 | 0,38  | -0,478 |
| 8 | O94854 K0754_HUMAN | K.NLS#GDCQDFR.F                    | S77:       | 2 | 2,404  | 0,253 | -0,378 |
| 8 | Q99856 ARI3A_HUMAN | R.AAAAGLGHPS#PGGSEDGPPGS#EEEDAAR.E | S77:S88:   | 3 | 7,8351 | 0,605 | -0,584 |
| 8 | Q9NRY4 GRLF1_HUMAN | R.NLNLVSS#TASIK.D                  | S770:      | 2 | 3,4354 | 0,412 | -0,276 |
| 8 | Q6PKG0 LARP1_HUMAN | R.SLPTTVPE#PNYR.N                  | S774:      | 2 | 2,2094 | 0,237 | -0,238 |
| 8 | Q15398 DLG7_HUMAN  | K.NTASQNS#ILEEGETK.I               | S777:      | 2 | 4,7657 | 0,422 | -0,359 |
| 8 | Q8N4C8 MINK1_HUMAN | K.LDSS#PVLSPGNK.A                  | S778:      | 2 | 3,4077 | 0,388 | -0,66  |
| 8 | Q9NR30 DDX21_HUMAN | R.SFS#KAFGQ.-                      | S778:      | 2 | 3,0404 | 0,408 | -1,025 |
| 8 | Q9H2G2 SLK_HUMAN   | K.DSGS#ISLQETR.R                   | S779:      | 2 | 4,0966 | 0,474 | -0,479 |
| 8 | Q15003 CND2_HUMAN  | R.VFDLQFS#TDSPR.L                  | S78:       | 2 | 3,5296 | 0,569 | 0      |
| 8 | P13861 KAP2_HUMAN  | R.VADAKGDS#ES#EEDEDLEVPVPSR.F      | S78:S80:   | 3 | 3,7937 | 0,225 | -0,347 |
| 8 | P45974 UBP5_HUMAN  | R.SAADS#ISESVPVGPK.V               | S783:      | 2 | 3,7126 | 0,556 | 0,32   |
| 8 | Q9Y6N8 CAD10_HUMAN | K.LAEM*YGGGES#DKDS.-               | S784:      | 2 | 3,8058 | 0,529 | -0,392 |
| 8 | Q9H4G0 E41L1_HUMAN | R.SLS#PIIGK.D                      | S784:      | 2 | 2,4516 | 0,253 | 0      |
| 8 | P46087 NOL1_HUMAN  | K.GPQPPTVS#PIR.S                   | S786:      | 2 | 2,9585 | 0,402 | -0,099 |
| 8 | P49792 RBP2_HUMAN  | R.YSLS#PSK.S                       | S788:      | 2 | 2,4146 | 0,157 | 0,212  |
| 8 | P06400 RB_HUMAN    | R.S#PYKFPSS#PLR.I                  | S788:S795: | 2 | 2,3708 | 0,225 | -0,339 |
| 8 | P42566 EP15_HUMAN  | R.S#INKLDS#PDPFK.L                 | S790:S796: | 2 | 2,0358 | 0,111 | -0,16  |
| 8 | Q8IYB3 SRRM1_HUMAN | K.SPTSPS#PPR.N                     | S797:      | 2 | 2,9292 | 0,31  | 0      |
| 8 | Q7Z4S6 KI21A_HUMAN | -.M*LGAPDES#S#VR.V                 | S8:S9:     | 2 | 2,4014 | 0,247 | -1,55  |
| 8 | Q15637 SF01_HUMAN  | R.TGDLGIPPNPEDRS#PS#PEPIYNSEGK.R   | S80:S82:   | 3 | 3,6639 | 0,468 | -0,625 |
| 8 | O95819 M4K4_HUMAN  | R.AASSLNLS#NGETESVK.T              | S805:      | 2 | 4,1007 | 0,429 | -0,651 |
| 8 | P06400 RB_HUMAN    | R.IPGGNIYIS#PLKS#PYK.I             | S807:S811: | 2 | 4,1971 | 0,435 | -0,448 |
| 8 | P06400 RB_HUMAN    | R.IPGGNIYIS#PLKS#PYK.I             | S807:S811: | 3 | 3,3964 | 0,377 | -0,384 |
| 8 | O60293 CC131_HUMAN | K.TSSSSPANS#DVEIDGIGR.I            | S809:      | 2 | 3,5461 | 0,529 | -0,261 |
| 8 | Q9UGH3 S23A2_HUMAN | K.SSLAETLDSTGS#LDPQR.S             | S81:       | 2 | 5,4476 | 0,448 | -0,263 |
| 8 | Q15003 CND2_HUMAN  | R.VFDLQFSTDS#PR.L                  | S81:       | 2 | 3,5972 | 0,574 | -0,409 |
| 8 | Q8IXZ2 ZC3H3_HUMAN | R.AATS#PAPGPSDATAR.S               | S810:      | 2 | 3,1961 | 0,466 | -0,421 |
| 8 | Q2NKX8 ERC6L_HUMAN | K.GTGSADS#IATLPK.G                 | S810:      | 2 | 3,0362 | 0,108 | 0,376  |
| 8 | O15534 PER1_HUMAN  | R.GLDSSSTAPS#ALGER.G               | S815:      | 2 | 4,5401 | 0,513 | -0,399 |
| 8 | O95239 KIF4A_HUMAN | R.GQVSESEDS#ITK.Q                  | S815:      | 2 | 2,315  | 0,365 | -0,628 |

|   |                    |                                  |            |   |        |       |        |
|---|--------------------|----------------------------------|------------|---|--------|-------|--------|
| 8 | Q8IWX8 CHERP_HUMAN | R.SRS#PT#PPSSAGLGSNSAPPIPDSR.L   | S817:T819: | 3 | 4,4264 | 1     | -0,22  |
| 8 | Q86TC9 MYPN_HUMAN  | R.CVSPPIVVS#PTRS.I               | S818:      | 2 | 2,3769 | 0,18  | -0,177 |
| 8 | P46100 ATRX_HUMAN  | R.QTQSESSNYDS#ELEK.E             | S819:      | 2 | 4,3203 | 0,449 | -0,401 |
| 8 | Q9GZR7 DDX24_HUMAN | K.AQAVS#EEEEEEEGK.S              | S82:       | 2 | 4,917  | 0,648 | -0,594 |
| 8 | P04792 HSPB1_HUMAN | R.QLS#SGVSEIR.H                  | S82:       | 2 | 2,691  | 0,141 | -0,422 |
| 8 | Q86VM9 ZCH18_HUMAN | K.SQDQDS#EVNELSR.G               | S83:       | 2 | 4,185  | 0,449 | -0,461 |
| 8 | Q8N8A6 DDX51_HUMAN | R.VNDAEPGS#PEAPQGK.R             | S83:       | 2 | 3,4589 | 0,475 | -0,619 |
| 8 | Q9H5H4 ZN768_HUMAN | R.FEPES#PGFESR.S                 | S83:       | 2 | 2,5623 | 0,304 | -0,358 |
| 8 | Q9UHB7 AFF4_HUMAN  | R.TIS#QSSSLK.S                   | S836:      | 2 | 2,2915 | 0,342 | 0      |
| 8 | Q9UKV3 ACINU_HUMAN | K.GVPAGNS#DTEGGQPGR.K            | S838:      | 2 | 3,9538 | 0,454 | -0,773 |
| 8 | Q9UKV3 ACINU_HUMAN | K.GVPAGNS#DTEGGQPGR.K            | S838:      | 3 | 3,1675 | 0,206 | -0,463 |
| 8 | Q9UBW7 ZMYM2_HUMAN | K.M*TGSA PPS#PTPNK.E             | S838:      | 2 | 2,3335 | 0,372 | -0,248 |
| 8 | P40189 IL6RB_HUMAN | K.QVSS#VNEEDFVR.L                | S839:      | 2 | 2,5395 | 0,327 | -0,164 |
| 8 | Q8WXH0 SYNE2_HUMAN | K.NLTDVS#PDLDIR.L                | S841:      | 2 | 3,9826 | 0,512 | -0,085 |
| 8 | O15014 ZN609_HUMAN | K.TNS#PAYSDIS#DAGEDGEGKVDVK.S    | S842:S849: | 3 | 4,1877 | 0,327 | -0,211 |
| 8 | Q9UQ35 SRRM2_HUMAN | K.S#GT PPRQGSITS#PQANEQSVTPQR.R  | S846:S857: | 3 | 4,6383 | 1     | -0,546 |
| 8 | Q6P4F7 RHGBA_HUMAN | R.INS#LLEYSR.Q                   | S847:      | 2 | 4,1392 | 0,243 | -0,415 |
| 8 | Q9NUU7 DD19A_HUMAN | R.DPNS#PLYSVK.S                  | S85:       | 2 | 3,888  | 0,448 | -0,305 |
| 8 | Q12770 SCAP_HUMAN  | K.AGPEEPGDS#PPLR.H               | S851:      | 2 | 3,1488 | 0,236 | -0,174 |
| 8 | Q13045 FLII_HUMAN  | R.NAEAVLQS#PGLSGK.V              | S856:      | 3 | 4,0093 | 0,39  | -0,063 |
| 8 | Q13045 FLII_HUMAN  | R.NAEAVLQS#PGLSGK.V              | S856:      | 2 | 3,0024 | 0,479 | -0,505 |
| 8 | Q14687 GSE1_HUMAN  | R.YSPDEM*NNS#PNFEEK.K            | S857:      | 2 | 4,7107 | 0,471 | -0,386 |
| 8 | Q6GYQ0 GRIPE_HUMAN | R.GSS#PGSLEIPK.D                 | S861:      | 2 | 2,1539 | 0,201 | -0,318 |
| 8 | Q86XL3 ANKL2_HUMAN | K.SAVLCYS#PSDR.Q                 | S866:      | 2 | 3,074  | 0,399 | -0,183 |
| 8 | Q69YQ0 CYTSA_HUMAN | R.TPLS#PSPM*K.T                  | S868:      | 2 | 3,1531 | 0,403 | 0      |
| 8 | Q9Y5B0 CTDP1_HUMAN | K.EDLESM*DKEVDDILGEGS#DDS#DSEK.R | S869:S872: | 3 | 4,1931 | 0,461 | -0,25  |
| 8 | Q9UK76 HN1_HUMAN   | R.NS#SEASSGDFLDLK.G              | S87:       | 2 | 3,7858 | 0,414 | -0,315 |
| 8 | P09493 TPM1_HUMAN  | K.ATDAEADVAS#LNR.R               | S87:       | 2 | 3,2725 | 0,267 | -1,554 |
| 8 | Q99618 CDCA3_HUMAN | K.TSSGDPPS#PLVK.Q                | S87:       | 2 | 3,051  | 0,377 | -0,193 |
| 8 | O95049 ZO3_HUMAN   | R.SSEPVAQDESQS#PR.D              | S870:      | 2 | 3,229  | 0,472 | -0,688 |
| 8 | Q6ZRV2 FA83H_HUMAN | K.GS#PTSAYPER.K                  | S870:      | 2 | 2,3355 | 0,395 | -0,426 |
| 8 | Q9Y4F1 FARP1_HUMAN | K.SSSPAPEFLASS#PPDNK.S           | S872:      | 2 | 4,0581 | 0,477 | -0,337 |
| 8 | Q9C0C2 TB182_HUMAN | R.DS#LGTYSR.D                    | S872:      | 2 | 2,3452 | 0,387 | -0,229 |

|   |                     |                                 |            |   |        |       |        |
|---|---------------------|---------------------------------|------------|---|--------|-------|--------|
| 8 | Q14160 LAP4_HUMAN   | R.GLGFS#IAGGK.G                 | S875:      | 2 | 2,8954 | 0,397 | -0,185 |
| 8 | Q5T200 ZC3HD_HUMAN  | R.S#LS#PSHLTEDR.Q               | S875:S877: | 2 | 2,2181 | 0,304 | -0,783 |
| 8 | Q9UQ35 SRRM2_HUMAN  | R.SCFESS#PDPELK.S               | S876:      | 2 | 3,7267 | 0,543 | -0,083 |
| 8 | Q96HP0 DOCK6_HUMAN  | R.S#KISIS#SSNPDLAVAPGSVDDEVSR.I | S878:S882: | 3 | 4,0458 | 1     | -0,213 |
| 8 | Q9UID6 ZN639_HUMAN  | R.NQNYLVPS#PVLR.I               | S88:       | 2 | 2,6126 | 0,4   | -0,082 |
| 8 | Q14152 EIF3A_HUMAN  | R.LGDS#SLSR.K                   | S881:      | 2 | 2,7819 | 0,162 | -0,067 |
| 8 | P46939 UTRO_HUMAN   | R.GFDS#FLGR.Y                   | S881:      | 2 | 2,3362 | 0,297 | -0,249 |
| 8 | Q9NZM3 ITSN2_HUMAN  | R.TVS#PGSVS#PIHGQGQVVENLK.A     | S883:S888: | 3 | 3,7396 | 0,422 | 0,08   |
| 8 | Q92547 TOPB1_HUMAN  | R.NAVALSAS#PQLK.E               | S888:      | 2 | 2,9865 | 0,325 | -0,286 |
| 8 | Q8TEA7 TBCK_HUMAN   | K.IKPTGLLTIPS#PQI.-             | S890:      | 2 | 3,182  | 0,316 | -0,626 |
| 8 | P29317 EPHA2_HUMAN  | R.VS#IRLPSTSGS#EGVPFR.T         | S892:S901: | 3 | 2,6331 | 0,369 | 0,188  |
| 8 | Q8WX93 PALLD_HUMAN  | R.IAS#DEEIQGTK.D                | S893:      | 2 | 3,6027 | 0,492 | -0,192 |
| 8 | P29317 EPHA2_HUMAN  | R.LPS#TSGSEGVPPFR.T             | S897:      | 2 | 2,8237 | 0,327 | -0,345 |
| 8 | O95562 SFT2B_HUMAN  | K.VLS#GQDTEDR.S                 | S9:        | 2 | 3,3625 | 0,494 | 0,102  |
| 8 | Q6PJF5 RHDF2_HUMAN  | K.SVS#LQEPR.S                   | S90:       | 2 | 2,385  | 0,097 | -0,184 |
| 8 | P29317 EPHA2_HUMAN  | R.LPSTSGS#EGVPFR.T              | S901:      | 2 | 3,2878 | 0,532 | -0,431 |
| 8 | A6ZJA4 A6ZJA4_HUMAN | K.NTETQPTS#PQLGTK.T             | S906:      | 2 | 3,5941 | 0,438 | -0,463 |
| 8 | Q7Z4H7 FA29A_HUMAN  | R.SLS#PLIK.F                    | S908:      | 2 | 2,512  | 0,137 | -0,073 |
| 8 | Q7Z4H7 FA29A_HUMAN  | R.SLS#PLIKFS#PVEQR.L            | S908:S914: | 3 | 2,9499 | 0,306 | -0,104 |
| 8 | Q7KZF4 SND1_HUMAN   | R.ADDADEFGYS#R.-                | S909:      | 2 | 3,1378 | 0,424 | -0,184 |
| 8 | Q13615 MTMR3_HUMAN  | R.TSLGSTLS#LTR.S                | S909:      | 2 | 3,0511 | 0,411 | -0,201 |
| 8 | O14974 MYPT1_HUMAN  | R.SGS#YSYLEER.K                 | S910:      | 2 | 2,82   | 0,513 | -0,192 |
| 8 | O75044 FNBP2_HUMAN  | R.LDS#PQIR.K                    | S916:      | 2 | 2,4718 | 0,21  | -0,201 |
| 8 | Q7Z2Z1 CO042_HUMAN  | R.NLFNQELLS#PSK.R               | S923:      | 2 | 2,8943 | 0,296 | 0      |
| 8 | Q8IVF2 AHNK2_HUMAN  | K.VEM*PS#FK.M                   | S923:      | 2 | 2,0117 | 0,206 | -0,588 |
| 8 | Q13233 M3K1_HUMAN   | K.LSAS#SEDISER.L                | S925:      | 2 | 3,019  | 0,13  | -0,575 |
| 8 | P27816 MAP4_HUMAN   | R.LATNTS#APDLK.N                | S928:      | 2 | 3,2308 | 0,422 | -0,101 |
| 8 | P19021 AMD_HUMAN    | K.GSGGLNLGNFFAS#R.K             | S929:      | 2 | 2,9586 | 0,26  | -0,578 |
| 8 | P05783 K1C18_HUMAN  | R.LAS#YLDR.V                    | S93:       | 2 | 2,2525 | 0,165 | -0,266 |
| 8 | Q9Y2W1 TR150_HUMAN  | K.FSGEEGEIEDDES#GTENR.E         | S939:      | 3 | 4,5586 | 0,537 | -0,968 |
| 8 | Q9HB90 RRAGC_HUMAN  | K.M*SPNETLFLES#TNK.I            | S95:       | 2 | 4,3876 | 0,473 | -0,357 |
| 8 | Q9HB90 RRAGC_HUMAN  | K.MSPNETLFLES#TNK.I             | S95:       | 2 | 4,0464 | 0,442 | -0,722 |
| 8 | O15258 RER1_HUMAN   | K.VDPSLM*EDS#DDGPSLPTK.Q        | S95:       | 2 | 3,6762 | 0,417 | -0,305 |

|   |                    |                                   |              |   |        |       |        |
|---|--------------------|-----------------------------------|--------------|---|--------|-------|--------|
| 8 | Q13185 CBX3_HUMAN  | K.SLS#DSESDDSK.S                  | S95:         | 2 | 3,4646 | 0,465 | -0,488 |
| 8 | Q8WXD5 GEMI6_HUMAN | K.AYS#PEDLEER.K                   | S95:         | 2 | 2,6311 | 0,338 | -0,284 |
| 8 | Q13425 SNTB2_HUMAN | R.GLGPPS#PPAPPRGPAGEAGAS#PPVR.R   | S95:S110:    | 3 | 2,8302 | 0,113 | -0,224 |
| 8 | Q9NRA8 4ET_HUMAN   | R.SSS#PVGLAK.W                    | S951:        | 2 | 2,5144 | 0,233 | -0,066 |
| 8 | O75122 CLAP2_HUMAN | R.GVTEAIQNFS#FR.S                 | S952:        | 2 | 3,6519 | 0,389 | -0,589 |
| 8 | Q96Q05 NIBP_HUMAN  | K.FNFESFPES#PGEK.G                | S953:        | 2 | 2,8812 | 0,411 | -0,459 |
| 8 | P49792 RBP2_HUMAN  | R.FESPATGILS#PR.G                 | S955:        | 2 | 3,3171 | 0,477 | -0,18  |
| 8 | Q5JSH3 WDR44_HUMAN | K.ELSDQATAS#PIVAR.T               | S96:         | 2 | 4,4707 | 0,472 | 0,714  |
| 8 | P78316 NOP14_HUMAN | R.FGEYNSNM*#S#PEEK.M              | S96:         | 2 | 4,0439 | 0,472 | -0,6   |
| 8 | Q96H55 MYO19_HUMAN | R.LIHVTSS#AFTGLG.-                | S964:        | 2 | 2,8319 | 0,352 | -0,441 |
| 8 | Q9ULD9 ZN608_HUMAN | K.ASS#PSDISSK.D                   | S964:        | 2 | 2,4702 | 0,341 | -0,312 |
| 8 | P46379 BAT3_HUMAN  | R.AS#PEPQRENAS#PAPGTTAEEAM*SR.G   | S964:S973:   | 3 | 4,3199 | 0,523 | -0,825 |
| 8 | Q9NUQ3 TXLNG_HUMAN | R.NLVS#PAYCTQESR.E                | S97:         | 2 | 3,8646 | 0,544 | -0,228 |
| 8 | Q9H910 HN1L_HUMAN  | K.TSDIFGS#PVTATSR.L               | S97:         | 2 | 3,637  | 0,458 | -0,402 |
| 8 | Q92804 RBP56_HUMAN | K.QSSYSQQPYNNQGGQQNM*ESSGS#QGGR.A | S97:         | 3 | 2,8333 | 0,332 | 0      |
| 8 | Q9NUQ3 TXLNG_HUMAN | R.NLVS#PAYCT#QESREEIPGGEAR.T      | S97:T102:    | 3 | 2,8164 | 0,277 | -0,767 |
| 8 | P46379 BAT3_HUMAN  | R.ENAS#PAPGTTAEEAM*SR.G           | S973:        | 2 | 3,075  | 0,442 | -0,874 |
| 8 | Q9BXP3 CND3_HUMAN  | R.CQTAEADS#ES#DHEVPEPESEM*K.M     | S973:S975:   | 3 | 5,3691 | 0,478 | -0,478 |
| 8 | Q9BXP3 CND3_HUMAN  | R.CQTAEADS#ES#DHEVPEPESEM.K.M     | S973:S975:   | 3 | 4,7207 | 0,451 | -0,069 |
| 8 | Q9NS56 TOPRS_HUMAN | K.LQQTVPADAS#PDSK.C               | S98:         | 2 | 2,5807 | 0,453 | -0,556 |
| 8 | Q14814 MEF2D_HUMAN | K.GFNGCDS#PEPDGEDSLEQS#PLLEDKYR.R | S98:S110:    | 3 | 4,3953 | 0,44  | -0,342 |
| 8 | Q02078 MEF2A_HUMAN | R.GCDS#PDPDTSYVLT#PHTEEK.Y        | S98:T108:    | 3 | 4,9819 | 0,327 | -0,38  |
| 8 | Q15811 ITSN1_HUMAN | K.STSM*DSGSS#ESPASLK.R            | S984:        | 2 | 4,3    | 0,492 | -0,439 |
| 8 | Q14669 TRIPC_HUMAN | R.DDSLDS#PQGR.L                   | S991:        | 2 | 3,1995 | 0,361 | -0,19  |
| 8 | Q5T200 ZC3HD_HUMAN | R.GNIETTSEDGQVFS#PK.K             | S993:        | 2 | 4,5875 | 0,516 | -0,273 |
| 8 | Q5T200 ZC3HD_HUMAN | R.GNIETTSEDGQVFS#PK.K             | S993:        | 3 | 3,9356 | 0,389 | -0,102 |
| 8 | Q99590 SFRIP_HUMAN | K.SSSNDSVDEETAESDT#SPVLEK.E       | T100:        | 3 | 4,3947 | 0,3   | 0      |
| 8 | Q9UQ35 SRRM2_HUMAN | K.AQT#PPGPSLSGSKS#PCPQEK.S        | T1003:S1014: | 3 | 3,4666 | 0,373 | -0,661 |
| 8 | Q14847 LASP1_HUMAN | K.GFSVVADT#PELQR.I                | T104:        | 2 | 3,3043 | 0,413 | -0,326 |
| 8 | P12272 PTHR_HUMAN  | R.YLT#QET#NKVETYKEQPLK.T          | T105:T108:   | 3 | 2,7581 | 0,106 | -1,928 |
| 8 | Q6SPF0 SAM1_HUMAN  | R.GAT#PPAPPR.A                    | T107:        | 2 | 2,4083 | 0,376 | 0,065  |
| 8 | Q9Y266 NUDC_HUMAN  | K.ELT#DEEAER.L                    | T108:        | 2 | 2,3047 | 0,129 | -0,104 |
| 8 | P48634 BAT2_HUMAN  | R.T#ASETRS#EGSEYEEIPK.R           | T1083:S1089: | 2 | 2,449  | 1     | -0,471 |

|   |                     |                             |              |   |        |       |        |
|---|---------------------|-----------------------------|--------------|---|--------|-------|--------|
| 8 | Q9BQ61 CS043_HUMAN  | K.GGPGST#LSFVGK.R           | T112:        | 2 | 2,2364 | 0,344 | 0,103  |
| 8 | P49792 RBP2_HUMAN   | K.SVFGT#PTLETANK.N          | T1144:       | 2 | 2,8765 | 0,453 | -0,084 |
| 8 | Q8WXI9 P66B_HUMAN   | R.GRLT#PS#PDIIVLSDNEASSPR.S | T120:S122:   | 3 | 4,9515 | 0,444 | -0,307 |
| 8 | Q8WXI9 P66B_HUMAN   | R.GRLT#PSPDIIVLSDNEASS#PR.S | T120:S135:   | 3 | 4,8329 | 0,364 | -0,077 |
| 8 | Q27J81 INF2_HUMAN   | K.SFSEDAVTDSSSGGT#LPR.A     | T1206:       | 2 | 3,2379 | 0,463 | -0,258 |
| 8 | P19338 NUCL_HUMAN   | K.ALVAT#PGK.K               | T121:        | 2 | 2,3547 | 0,119 | 0,073  |
| 8 | P38432 P80C_HUMAN   | R.AFQLEEGEET#EPDCK.Y        | T122:        | 2 | 4,9556 | 0,45  | -0,459 |
| 8 | Q14103 HNRPD_HUMAN  | K.FGEVVDCT#LK.L             | T127:        | 2 | 2,7471 | 0,39  | -0,293 |
| 8 | Q5VZK9 LR16A_HUMAN  | R.T#ASRPDDIPDSPS#SPK.V      | T1278:S1290: | 2 | 3,6102 | 0,322 | -0,533 |
| 8 | P46013 KI67_HUMAN   | K.LDLTENLT#GSK.R            | T1327:       | 2 | 2,8322 | 0,365 | -0,096 |
| 8 | Q13459 MYO9B_HUMAN  | R.ATGAALT#PTEER.R           | T1346:       | 2 | 2,3974 | 0,37  | -0,47  |
| 8 | Q14669 TRIPC_HUMAN  | R.EST#DDESPLGR.A            | T1377:       | 2 | 3,0497 | 0,353 | -0,174 |
| 8 | Q9NQZ2 SAS10_HUMAN  | K.LYYDT#DYGSK.S             | T139:        | 2 | 2,5345 | 0,354 | 0,561  |
| 8 | P06493 CDC2_HUMAN   | K.IGEGT#YGVVYK.G            | T14:         | 2 | 3,9359 | 0,322 | -0,096 |
| 8 | Q96BY6 DOC10_HUMAN  | R.SQT#LPIIR.G               | T1437:       | 2 | 2,0501 | 0,185 | -0,182 |
| 8 | P29966 MARCS_HUMAN  | K.AEDGATPSNET#PK.K          | T150:        | 2 | 3,1295 | 0,442 | -0,617 |
| 8 | Q96AE4 FUBP1_HUMAN  | R.SCM*LTGT#PESVQSAK.R       | T153:        | 2 | 5,2134 | 0,614 | -0,361 |
| 8 | P46013 KI67_HUMAN   | K.NIYAFM*GT#PVQK.L          | T1557:       | 2 | 2,9484 | 0,161 | -0,25  |
| 8 | A8K8Z5 A8K8Z5_HUMAN | R.QGVDDAFYT#LVR.E           | T158:        | 2 | 2,8883 | 0,464 | -0,333 |
| 8 | P42166 LAP2A_HUMAN  | R.SST#PLPTISSAENTR.Q        | T160:        | 2 | 3,1964 | 0,429 | -0,494 |
| 8 | P42166 LAP2A_HUMAN  | R.SSTPLPT#ISSAENTR.Q        | T164:        | 3 | 3,3974 | 0,245 | 0      |
| 8 | P61006 RAB8A_HUMAN  | K.ANINVENAFFT#LAR.D         | T164:        | 2 | 3,2466 | 0,464 | -0,147 |
| 8 | Q1KMD3 HNRL2_HUMAN  | R.SGDET#PGSEVPGDK.A         | T165:        | 2 | 3,4999 | 0,43  | -0,252 |
| 8 | Q9H582 ZN644_HUMAN  | K.VAADLQLST#PQK.A           | T165:        | 2 | 2,7678 | 0,119 | -0,361 |
| 8 | Q9UGU0 TCF20_HUMAN  | R.SLT#PPPSSTESK.A           | T1671:       | 2 | 2,8598 | 0,48  | -0,372 |
| 8 | O75691 UTP20_HUMAN  | K.SLSDNGQPQT#PDPADSGGTSK.E  | T1741:       | 3 | 2,8058 | 0,315 | -0,257 |
| 8 | Q9H3P2 NELFA_HUMAN  | K.NALTTLAGPLT#PPVK.H        | T178:        | 2 | 3,18   | 0,41  | -0,233 |
| 8 | Q9H3P2 NELFA_HUMAN  | K.NALTTLAGPLT#PPVK.H        | T178:        | 3 | 2,7939 | 0,217 | -0,116 |
| 8 | Q9Y4G6 TLN2_HUMAN   | K.LDEGT#PPEPK.G             | T1843:       | 2 | 2,1161 | 0,284 | 0,42   |
| 8 | Q8TEM1 PO210_HUMAN  | R.DLAVPAALT#PR.A            | T1844:       | 2 | 2,4872 | 0,394 | -0,304 |
| 8 | ##O75461 E2F6_HUMAN | R.VGLKT#AVK.N               | T188:        | 2 | 2,2192 | 0,123 | -0,136 |
| 8 | P46013 KI67_HUMAN   | K.DINTFVGT#PVEK.L           | T1923:       | 2 | 2,0481 | 0,285 | -0,087 |
| 8 | O94915 FRYL_HUMAN   | R.SNT#LDIM*DGR.I            | T1959:       | 2 | 2,8907 | 0,398 | -0,1   |

|   |                      |                               |                 |   |        |       |        |
|---|----------------------|-------------------------------|-----------------|---|--------|-------|--------|
| 8 | P80723 BASP_HUMAN    | K.ETPAATEAPSST#PK.A           | T196:           | 2 | 2,3038 | 0,48  | -0,749 |
| 8 | Q13535 ATR_HUMAN     | K.GVELCFPENET#PPEGK.N         | T1989:          | 2 | 3,5816 | 0,426 | -0,259 |
| 8 | P20700 LMNB1_HUMAN   | R.AGGPTT#PLSPTR.L             | T20:            | 2 | 2,413  | 0,09  | -0,296 |
| 8 | O60716 CTND1_HUMAN   | K.NGNGGPGPYVQGAGTAT#LPR.N     | T201:           | 3 | 3,3294 | 0,356 | -0,186 |
| 8 | Q14980 NUMA1_HUMAN   | R.QSM*AFSILNT#PK.K            | T2055:          | 2 | 2,3755 | 0,44  | -0,426 |
| 8 | Q8IWW7 UBR1_HUMAN    | R.M*EISAELPQT#PQR.L           | T21:            | 2 | 3,4906 | 0,197 | -0,459 |
| 8 | ##Q6ZS02 CO051_HUMAN | R.VGGCT#S#NS#VGALQLM.-        | T210:S211:S213: | 2 | 2,506  | 0,19  | -1,126 |
| 8 | O75533 SF3B1_HUMAN   | R.WDQTADQTPGAT#PK.K           | T211:           | 2 | 4,7145 | 0,443 | -0,765 |
| 8 | P04406 G3P_HUMAN     | R.GALQNIIPAST#GAAK.A          | T211:           | 2 | 2,9102 | 0,26  | -0,245 |
| 8 | Q01082 SPTB2_HUMAN   | K.TALPAQSAAT#LPAR.T           | T2187:          | 2 | 2,9235 | 0,435 | 0,169  |
| 8 | P49327 FAS_HUMAN     | K.ADEASELACPT#PK.E            | T2204:          | 2 | 3,3224 | 0,485 | -0,249 |
| 8 | P23396 RS3_HUMAN     | K.DEILPTT#PISEQK.G            | T221:           | 2 | 2,5847 | 0,316 | 0      |
| 8 | Q92841 DDX17_HUMAN   | R.GVEICIAT#PGR.L              | T222:           | 2 | 2,9783 | 0,342 | 0,584  |
| 8 | Q969Z4 TR19L_HUMAN   | R.TEDANEDT#IGVLVR.L           | T223:           | 2 | 3,1917 | 0,35  | -0,53  |
| 8 | Q9Y4E8 UBP15_HUMAN   | R.GPST#PKS#PGASNFSTLPK.I      | T226:S229:      | 3 | 3,5224 | 0,327 | -0,095 |
| 8 | Q8IWW6 RHG12_HUMAN   | R.ATT#PPNQGRPDS#PVYANLQELK.I  | T231:S240:      | 3 | 3,3204 | 0,31  | -0,429 |
| 8 | O95359 TACC2_HUMAN   | K.LDNT#PASPPRS#PAEPNDIPIAK.G  | T2314:S2321:    | 3 | 3,4927 | 0,253 | -0,297 |
| 8 | Q5QJE6 TDIF2_HUMAN   | K.QIVGT#PVNSEDSDTR.Q          | T232:           | 2 | 2,6408 | 0,384 | -0,287 |
| 8 | Q9Y4F1 FARP1_HUMAN   | R.LGAPENSGIST#LER.G           | T24:            | 2 | 2,7812 | 0,376 | -0,32  |
| 8 | Q12802 AKP13_HUMAN   | R.DM*AECSTPLPEDCSPT#HS#PR.V   | T2400:S2402:    | 3 | 4,6228 | 0,469 | -0,52  |
| 8 | P46013 KI67_HUMAN    | K.NINTFVET#PVQK.L             | T2406:          | 2 | 2,9614 | 0,287 | -0,332 |
| 8 | O95835 LATS1_HUMAN   | R.SVT#PPPPPR.G                | T246:           | 2 | 2,4142 | 0,351 | -0,593 |
| 8 | Q13428 TCOF_HUMAN    | K.VGDVT#PQVK.G                | T249:           | 2 | 3,2505 | 0,332 | -0,179 |
| 8 | Q5T200 ZC3HD_HUMAN   | K.GPRT#PS#PPPIPEDIALGK.K      | T263:S265:      | 3 | 5,3406 | 0,537 | -0,61  |
| 8 | A8K1N6 A8K1N6_HUMAN  | K.M*LGQKAT#PPPS#PLSELLK.K     | T264:S268:      | 3 | 4,0853 | 0,308 | -0,666 |
| 8 | A8K1N6 A8K1N6_HUMAN  | K.M*LGQKAT#PPPS#PLS#ELLK.K    | T264:S272:      | 3 | 2,9579 | 0,134 | -0,5   |
| 8 | Q8NFH5 NUP53_HUMAN   | R.CALSSPSLAFT#PPIK.T          | T265:           | 2 | 3,6622 | 0,559 | 0,219  |
| 8 | O94906 PRP6_HUMAN    | R.LSQVSDSVSGQT#VVDPK.G        | T266:           | 2 | 4,2804 | 0,404 | 0,267  |
| 8 | Q15942 ZYX_HUMAN     | K.FT#PVASKFS#PGAPGGSGSQPNQK.L | T274:S281:      | 3 | 3,3101 | 0,274 | 0      |
| 8 | Q9H0G5 CCD55_HUMAN   | K.VIET#PENDFK.H               | T275:           | 2 | 3,1235 | 0,262 | -0,48  |
| 8 | Q2LD37 K1109_HUMAN   | K.VVFENEQDNSSLT#K.T           | T2757:          | 2 | 2,1073 | 0,326 | 0,361  |
| 8 | Q8WUM0 NU133_HUMAN   | R.GPLAGLPGST#PR.T             | T28:            | 2 | 3,4905 | 0,463 | -0,194 |
| 8 | O94967 WDR47_HUMAN   | K.AAYADLLT#PLISK.L            | T285:           | 2 | 4,1679 | 0,493 | -0,503 |



|   |                     |                                 |            |   |        |       |        |
|---|---------------------|---------------------------------|------------|---|--------|-------|--------|
| 8 | Q9Y2S7 PDIP2_HUMAN  | R.IFSLSGT#LETVR.G               | T292:      | 2 | 3,8832 | 0,427 | -0,435 |
| 8 | Q9BRQ0 PYGO2_HUMAN  | R.GGGT#PDANSLAPPGK.A            | T302:      | 2 | 3,3147 | 0,379 | -0,946 |
| 8 | P38432 P80C_HUMAN   | K.LGFSLT#PSK.G                  | T303:      | 2 | 3,0772 | 0,435 | 0,237  |
| 8 | Q8WUF5 IASPP_HUMAN  | K.DNLTSAT#LPR.N                 | T308:      | 2 | 2,8626 | 0,162 | -0,209 |
| 8 | Q9NR30 DDX21_HUMAN  | R.NGIDILVGT#PGR.I               | T315:      | 2 | 3,2755 | 0,387 | -0,567 |
| 8 | O00512 BCL9_HUMAN   | R.AVT#PVSQGSNSSSADPK.A          | T315:      | 3 | 2,8233 | 0,295 | -0,214 |
| 8 | Q9NQW6 ANLN_HUMAN   | K.SCEGQNPPELLPKT#PIS#PLK.T      | T320:S323: | 3 | 2,8708 | 0,133 | -0,484 |
| 8 | Q9UJZ1 STML2_HUMAN  | K.APVPGT#PDSLSSGSSR.D           | T327:      | 2 | 2,4629 | 0,208 | 0,229  |
| 8 | P49915 GUAA_HUMAN   | K.TLNMTT#SPEEK.R                | T331:      | 2 | 2,0178 | 0,274 | -0,733 |
| 8 | Q4G0J3 LARP7_HUMAN  | R.DIEIST#EEEEK.D                | T338:      | 2 | 2,8686 | 0,222 | -0,863 |
| 8 | Q16643 DREB_HUMAN   | R.SPDSSTAST#PVAEQIER.A          | T346:      | 3 | 3,6447 | 0,326 | -0,094 |
| 8 | Q08AE8 SPIR1_HUMAN  | K.FLPISST#PQPER.R               | T350:      | 2 | 2,5033 | 0,178 | -0,252 |
| 8 | P19338 NUCL_HUMAN   | K.ALELT#GLK.V                   | T367:      | 2 | 2,6429 | 0,151 | -0,198 |
| 8 | P28749 RBL1_HUMAN   | R.SFAPST#PLTGR.R                | T369:      | 2 | 2,2536 | 0,353 | 0,302  |
| 8 | Q9ULW0 TPX2_HUMAN   | R.DPQT#PVLQTK.H                 | T369:      | 2 | 2,0146 | 0,295 | -0,202 |
| 8 | Q09666 AHNK_HUMAN   | K.VDIDT#PDINIEGSEGK.F           | T3716:     | 2 | 4,4416 | 0,562 | -0,205 |
| 8 | Q13131 AAPK1_HUMAN  | R.VPFLVAET#PR.A                 | T373:      | 2 | 3,5787 | 0,383 | -0,101 |
| 8 | Q9H8Y8 GORS2_HUMAN  | K.ADAASSLTVDVT#PPPTAK.A         | T415:      | 2 | 3,6481 | 0,44  | -0,212 |
| 8 | Q16514 TAF12_HUMAN  | K.IPGT#PGAGGRS#PENNVLT.K        | T43:S51:   | 3 | 2,732  | 0,184 | -0,081 |
| 8 | Q9UHY1 NRBP_HUMAN   | K.TPT#PEPAEVETR.K               | T433:      | 2 | 3,403  | 0,503 | -0,347 |
| 8 | Q9HAU0 PKHA5_HUMAN  | R.GVISYQT#LPR.N                 | T438:      | 2 | 3,1762 | 0,345 | -0,302 |
| 8 | P18206 VINC_HUMAN   | R.SLGEISALT#SK.L                | T442:      | 2 | 2,8904 | 0,407 | -0,206 |
| 8 | Q86X29 LSR_HUMAN    | R.SVDALDDLT#PPSTAESGSR.S        | T501:      | 2 | 3,5851 | 0,478 | -0,427 |
| 8 | Q99733 NP1L4_HUMAN  | R.LDNVPHT#PSS#YIETLPK.A         | T51:S54:   | 3 | 3,6475 | 0,387 | -0,088 |
| 8 | Q99733 NP1L4_HUMAN  | R.LDNVPHT#PSSY#IETLPK.A         | T51:Y55:   | 3 | 3,5837 | 0,264 | -0,177 |
| 8 | Q9NUY8 TBC23_HUMAN  | K.VISFIENTST#PVDR.M             | T514:      | 2 | 2,1412 | 0,286 | -1,177 |
| 8 | Q9HA05 Q9HA05_HUMAN | R.STT#PTSSPFR.A                 | T519:      | 2 | 2,6043 | 0,129 | -0,21  |
| 8 | Q99567 NUP88_HUMAN  | R.VLAET#PDSFEK.H                | T525:      | 2 | 3,4762 | 0,445 | -0,278 |
| 8 | P15336 ATF2_HUMAN   | R.NDSVIVADQTP#PTR.F             | T53:       | 2 | 3,8628 | 0,539 | -0,504 |
| 8 | Q13428 TCOF_HUMAN   | K.VGPAT#PSAQVGK.W               | T533:      | 2 | 3,2645 | 0,279 | -0,307 |
| 8 | Q9H4L7 SMRCD_HUMAN  | R.ANT#PDS#DITEKTEDSSVPETPDNER.K | T54:S57:   | 3 | 4,8197 | 1     | -0,252 |
| 8 | O96028 NSD2_HUMAN   | R.IQDPTEDAEAEDT#PR.K            | T544:      | 2 | 4,7179 | 0,506 | -0,276 |
| 8 | Q9Y2K7 JHD1A_HUMAN  | R.LT#PVRPAAAS#PIVSGAR.R         | T550:S558: | 2 | 2,9289 | 0,221 | 0      |

|   |                    |                                 |            |   |        |       |        |
|---|--------------------|---------------------------------|------------|---|--------|-------|--------|
| 8 | Q8NCN4 RN169_HUMAN | R.EQFEGLGST#PDAK.L              | T554:      | 2 | 3,619  | 0,575 | -0,167 |
| 8 | Q9Y2L9 LRCH1_HUMAN | R.NLESIDPQFT#IR.R               | T568:      | 2 | 4,0545 | 0,382 | -0,403 |
| 8 | Q9NQG6 SMC7L_HUMAN | R.AISAPT#SPTR.L                 | T58:       | 2 | 2,2897 | 0,265 | 0      |
| 8 | O60271 JIP4_HUMAN  | R.SST#LSQLPGDK.S                | T595:      | 2 | 2,8603 | 0,294 | 0      |
| 8 | Q8WWK9 CKAP2_HUMAN | K.YNVSTT#PYLQSVK.K              | T597:      | 2 | 3,5383 | 0,331 | -0,463 |
| 8 | Q9BY89 K1671_HUMAN | R.GGSSVEAPCPSDVT#PEDDR.S        | T600:      | 2 | 2,9408 | 0,401 | -0,356 |
| 8 | P55265 DSRAD_HUMAN | K.TAESQT#PTPSATSFSGK.S          | T601:      | 2 | 4,0302 | 0,521 | -0,951 |
| 8 | Q2M2I8 AAK1_HUMAN  | K.VQTT#PPPAVQGQK.V              | T606:      | 3 | 4,519  | 0,415 | -0,064 |
| 8 | Q2M2I8 AAK1_HUMAN  | K.VQTT#PPPAVQGQK.V              | T606:      | 2 | 2,764  | 0,42  | -0,171 |
| 8 | Q5QJE6 TDIF2_HUMAN | K.AVIT#PDFEK.N                  | T610:      | 2 | 2,2285 | 0,324 | -0,222 |
| 8 | Q8WWK9 CKAP2_HUMAN | K.FLT#PVR.R                     | T623:      | 2 | 2,2137 | 0,125 | 0,15   |
| 8 | O00192 ARVC_HUMAN  | R.NFDT#LDLPK.R                  | T642:      | 2 | 3,5052 | 0,33  | -0,213 |
| 8 | O15439 MRP4_HUMAN  | K.DNEESEQPPVPGT#PTLR.N          | T646:      | 3 | 2,8756 | 0,25  | -0,188 |
| 8 | Q08999 RBL2_HUMAN  | R.SITSPTT#LYDR.Y                | T665:      | 2 | 2,2006 | 0,292 | -1,098 |
| 8 | O15085 ARHGB_HUMAN | R.SLENPT#PPFTPK.M               | T668:      | 2 | 2,0775 | 0,139 | -0,087 |
| 8 | O15085 ARHGB_HUMAN | R.SLENPTPPFT#PK.M               | T672:      | 2 | 2,0842 | 0,221 | -0,26  |
| 8 | Q14847 LASP1_HUMAN | K.QSFTM*VADT#PENLR.L            | T68:       | 2 | 2,6918 | 0,342 | -0,286 |
| 8 | Q9NYV4 CD2L7_HUMAN | K.AIT#PPQQPYK.K                 | T692:      | 2 | 2,4771 | 0,357 | -0,299 |
| 8 | Q86V15 CASZ1_HUMAN | K.DT#EHEES#SNDDLVDLDFSSK.N      | T715:S720: | 3 | 4,5232 | 0,38  | -0,295 |
| 8 | Q03188 CENPC_HUMAN | K.LVLPST#PNVR.R                 | T734:      | 2 | 2,7872 | 0,305 | 0,095  |
| 8 | P10644 KAP0_HUMAN  | R.T#DSREDEIS#PPPNPVVK.G         | T75:S83:   | 3 | 2,6012 | 0,197 | -0,086 |
| 8 | P21127 CD2L1_HUMAN | R.GT#S#PRPEGGGLGYSQLGDDDLK.E    | T751:S752: | 3 | 4,0014 | 0,319 | -0,227 |
| 8 | O15400 STX7_HUMAN  | K.EFGSLPTT#PSEQR.Q              | T79:       | 2 | 2,8575 | 0,51  | -0,559 |
| 8 | Q14118 DAG1_HUMAN  | K.LTLEDQAT#FIK.K                | T790:      | 2 | 2,2832 | 0,266 | -0,09  |
| 8 | P06400 RB_HUMAN    | K.ISEGLPT#PTKM*T#PR.S           | T821:T826: | 2 | 3,2439 | 0,355 | -0,43  |
| 8 | Q8N201 INT1_HUMAN  | K.LSST#PPLSALGR.L               | T83:       | 2 | 2,9324 | 0,416 | -0,286 |
| 8 | Q562F6 SGOL2_HUMAN | K.DNFFSLT#PK.D                  | T845:      | 2 | 2,4227 | 0,305 | -0,212 |
| 8 | Q05D32 CTSL2_HUMAN | R.DIDNNLITST#PR.A               | T86:       | 2 | 2,4109 | 0,339 | -0,085 |
| 8 | Q96QT6 PHF12_HUMAN | K.TPPT#PPSSIVAK.V               | T880:      | 2 | 2,9192 | 0,435 | -0,478 |
| 8 | Q96CN9 GCC1_HUMAN  | R.CST#HSEDST#GTATSLDTAASLTSTK.G | T89:T95:   | 3 | 4,5107 | 1     | -0,544 |
| 8 | Q6PJG2 CN043_HUMAN | R.NGTLTFGDVT#SDEK.S             | T893:      | 2 | 3,4187 | 0,358 | 0,145  |
| 8 | Q86SQ0 PHLB2_HUMAN | K.EGLYLSDT#LPR.K                | T898:      | 2 | 2,6588 | 0,438 | -0,454 |
| 8 | O94804 STK10_HUMAN | K.LSEEAECNPST#PSK.A             | T952:      | 2 | 3,5511 | 0,496 | -0,707 |

|   |                       |                                 |              |   |        |       |        |
|---|-----------------------|---------------------------------|--------------|---|--------|-------|--------|
| 8 | Q3KQU3 MA7D1_HUMAN    | R.GPT#PPAM*GPR.D                | T97:         | 2 | 2,2689 | 0,287 | -0,566 |
| 8 | Q13428 TCOF_HUMAN     | R.SPAGPAATPAQAQAAST#PR.K        | T983:        | 2 | 3,9152 | 0,56  | -0,6   |
| 8 | P06493 CDC2_HUMAN     | K.IGEGTY#GVVYK.G                | Y15:         | 2 | 2,6923 | 0,395 | -0,386 |
| 8 | P06493 CDC2_HUMAN     | K.IGEGTYGVVY#K.G                | Y19:         | 2 | 2,574  | 0,271 | -0,193 |
| 8 | O00401 WASL_HUMAN     | K.VIY#DFIEK.T                   | Y256:        | 2 | 2,4945 | 0,27  | 0,441  |
| 8 | P05023 AT1A1_HUMAN    | R.GIVVY#TGDR.T                  | Y260:        | 2 | 2,4094 | 0,384 | -0,115 |
| 8 | P49840 GSK3A_HUMAN    | R.GEPNVSY#ICSR.Y                | Y279:        | 2 | 2,6693 | 0,273 | 0      |
| 8 | Q13627 DYR1A_HUMAN    | R.IYQY#IQSR.F                   | Y321:        | 2 | 2,5923 | 0,205 | -0,424 |
| 8 | P51991 ROA3_HUMAN     | R.SSGSPY#GGGYSGGGSGGYGSR.R      | Y360:        | 3 | 2,9857 | 0,286 | -0,551 |
| 8 | Q9HCG8 NCM_HUMAN      | R.SY#DSSM*ESR.N                 | Y62:         | 2 | 2,2406 | 0,383 | -0,422 |
| 8 | ##A8K3S0 A8K3S0_HUMAN | R.Y#AT#AFDQNLN*WDLINAIDSK.L     | Y78:T80:     | 3 | 3,4805 | 0,125 | -1,022 |
| 8 | P60709 ACTB_HUMAN     | K.DLYANTVLSGGTTM*YPGIADR.M      |              | 3 | 5,1152 | 0,503 | -0,164 |
| 9 | P05783 K1C18_HUMAN    | R.STFS#TNYR.S                   | S10:         | 2 | 2,5476 | 0,321 | 0,116  |
| 9 | P23193 TCEA1_HUMAN    | K.EPAITSQNS#PEAR.E              | S100:        | 3 | 3,3919 | 0,25  | -0,185 |
| 9 | P23193 TCEA1_HUMAN    | K.EPAITSQNS#PEAR.E              | S100:        | 2 | 2,7886 | 0,465 | -0,495 |
| 9 | Q86YP4 P66A_HUMAN     | R.RPPS#PDVIVLS#DNEQPSSPR.V      | S100:S107:   | 3 | 3,8668 | 0,323 | 0,156  |
| 9 | Q86YP4 P66A_HUMAN     | R.RPPS#PDVIVLSDNEQPSS#PR.V      | S100:S114:   | 3 | 5,6177 | 0,47  | 0,078  |
| 9 | Q8N1G0 ZN687_HUMAN    | R.SFCS#APSLR.R                  | S1004:       | 2 | 2,0931 | 0,297 | 0      |
| 9 | Q9NYI0 PSD3_HUMAN     | K.S#HSSPSLNPPTS#PITAK.V         | S1009:S1020: | 2 | 5,5438 | 1     | 0,386  |
| 9 | P05386 RLA1_HUMAN     | K.KEES#EES#DDDM*GFGLFD.-        | S101:S104:   | 2 | 3,7624 | 0,615 | -0,459 |
| 9 | P05386 RLA1_HUMAN     | K.KEES#EES#DDDMGFGLFD.-         | S101:S104:   | 2 | 3,2847 | 0,388 | -0,347 |
| 9 | P54259 ATN1_HUMAN     | K.TEQELPRPQS#PSDLDS#LDGR.S      | S101:S107:   | 3 | 4,4929 | 0,48  | -0,305 |
| 9 | Q9H6Z4 RANB3_HUMAN    | R.SAGGSS#PEGGEDS#DREDGNYCPPVK.R | S101:S108:   | 3 | 4,3211 | 0,38  | -0,403 |
| 9 | O95785 WIZ_HUMAN      | K.SPQLS#LSPRPAS#PK.A            | S1010:S1017: | 2 | 2,8966 | 0,338 | 0,375  |
| 9 | O95785 WIZ_HUMAN      | K.SPQLS#LSPRPAS#PK.A            | S1012:S1017: | 3 | 2,9288 | 0,194 | 0      |
| 9 | P05387 RLA2_HUMAN     | K.DEKKEES#EES#DDDM*GFGLFD.-     | S102:S105:   | 3 | 2,6939 | 0,363 | -0,293 |
| 9 | O75351 VPS4B_HUMAN    | K.EGQPSPADEKGNDS#DGEGES#DDPEK.K | S102:S108:   | 3 | 3,9571 | 0,493 | -0,599 |
| 9 | Q13233 M3K1_HUMAN     | R.IPSAS#PQTQR.K                 | S1020:       | 2 | 2,9744 | 0,299 | 0      |
| 9 | Q6PD62 CTR9_HUMAN     | K.AIISSDSDS#S#DEDKLK.I          | S1020:S1021: | 2 | 4,8555 | 0,545 | -0,326 |
| 9 | P37275 ZEB1_HUMAN     | R.ASPSQGDS#DERES#LTR.E          | S1022:S1027: | 2 | 2,6476 | 0,367 | -0,773 |
| 9 | P52948 NUP98_HUMAN    | K.ADTSQEICS#PR.L                | S1028:       | 2 | 2,4296 | 0,344 | -0,272 |
| 9 | Q8IX90 CM003_HUMAN    | K.YGYS#PR.V                     | S103:        | 2 | 2,3136 | 0,379 | 0,148  |
| 9 | Q9H019 FA54B_HUMAN    | R.NAS#VPNLR.G                   | S103:        | 2 | 2,0319 | 0,237 | 0,385  |

|   |                     |                                       |                 |   |        |       |        |
|---|---------------------|---------------------------------------|-----------------|---|--------|-------|--------|
| 9 | Q9BSJ8 ESYT1_HUMAN  | R.TLS#PEFNER.F                        | S1034:          | 2 | 2,4531 | 0,273 | -0,104 |
| 9 | P15822 ZEP1_HUMAN   | K.M*K#SVGDDEELQQNESGTS#PK.S           | S1035:S1050:    | 3 | 5,3997 | 0,389 | -0,777 |
| 9 | P05386 RLA1_HUMAN   | K.KEESEES#DDDM*GFGLFD.-               | S104:           | 2 | 3,0487 | 0,292 | -0,716 |
| 9 | Q96BR3 Q96BR3_HUMAN | R.GSASYS#PPR.K                        | S104:           | 2 | 2,6678 | 0,209 | -0,426 |
| 9 | P49006 MRP_HUMAN    | K.LSGLS#FK.R                          | S104:           | 2 | 2,0833 | 0,106 | 0,147  |
| 9 | O15061 DMN_HUMAN    | R.QRS#PAPGS#PDEEGGAEAPAAGIR.F         | S1044:S1049:    | 3 | 5,2431 | 0,418 | -0,461 |
| 9 | P06756 ITAV_HUMAN   | R.EQLQPHENGEGNS#ET.-                  | S1046:          | 2 | 3,6794 | 0,514 | -0,558 |
| 9 | Q9Y6N7 ROBO1_HUMAN  | K.TFNS#PNLK.D                         | S1055:          | 2 | 2,3734 | 0,095 | -0,244 |
| 9 | P49023 PAXI_HUMAN   | K.TSSVSNPQDSVGS#PCSR.V                | S106:           | 2 | 4,2308 | 0,536 | -0,727 |
| 9 | P52948 NUP98_HUMAN  | K.FTSGAFLS#PSVSVQECRT#PR.A            | S1060:T1070:    | 3 | 4,5614 | 0,435 | -0,077 |
| 9 | Q2NKX8 ERC6L_HUMAN  | K.QFDAS#TPKNDIS#PPGR.F                | S1062:S1069:    | 3 | 2,7707 | 0,203 | -0,194 |
| 9 | Q12789 TF3C1_HUMAN  | K.NSSTDQGS#DEEGSLQK.E                 | S1068:          | 2 | 4,0133 | 0,545 | -0,554 |
| 9 | Q9Y2H2 SAC2_HUMAN   | R.AVS#PFAK.I                          | S1069:          | 2 | 2,128  | 0,319 | 0,076  |
| 9 | Q2NKX8 ERC6L_HUMAN  | K.NDIS#PPGR.F                         | S1069:          | 2 | 2,1249 | 0,245 | 0      |
| 9 | Q96FF9 CDCA5_HUMAN  | K.THS#VPAT#PTSTPVPNPEAESSK.E          | S107:T111:      | 3 | 3,984  | 1     | 0,295  |
| 9 | Q8TEU7 RPGF6_HUMAN  | R.SLS#QGS#TNSNM*LDVQGGAHK.K           | S1070:S1073:    | 3 | 2,9765 | 0,275 | -0,332 |
| 9 | Q9UMZ2 SYNG_HUMAN   | R.SLS#LGDK.E                          | S1075:          | 2 | 2,4135 | 0,189 | -0,076 |
| 9 | P35568 IRS1_HUMAN   | R.VNLS#PNR.N                          | S1078:          | 2 | 2,1401 | 0,261 | 0,069  |
| 9 | P35251 RFC1_HUMAN   | R.QDPVTYIS#ET#DEEDDFM*CKK.A           | S108:T110:      | 3 | 2,795  | 0,434 | -0,209 |
| 9 | Q92974 ARHG2_HUMAN  | K.NNTALQSVS#LR.S                      | S109:           | 2 | 3,4392 | 0,358 | 0,285  |
| 9 | P19484 TFEB_HUMAN   | K.FAAHIS#PAQGS#PKPPPAAS#PGVR.A        | S109:S114:S122: | 3 | 4,0347 | 0,189 | 0      |
| 9 | Q7Z460 CLAP1_HUMAN  | K.NSSNTSVGS#PSNTIGR.T                 | S1091:          | 2 | 3,9289 | 0,486 | -0,515 |
| 9 | Q13425 SNTB2_HUMAN  | R.GPAGEAGAS#PPVR.R                    | S110:           | 2 | 3,7481 | 0,485 | -0,49  |
| 9 | Q9BYG4 PAR6G_HUMAN  | R.GSLGAGS#LCR.R                       | S110:           | 2 | 2,8704 | 0,263 | -0,231 |
| 9 | Q86UE8 TLK2_HUMAN   | R.S#SPQHSL#NPLPR.R                    | S110:S117:      | 2 | 2,2924 | 0,279 | 0,309  |
| 9 | Q9UQ35 SRRM2_HUMAN  | R.SSS#PVTELASRS#PIR.Q                 | S1103:S1112:    | 2 | 2,5138 | 0,232 | 0,07   |
| 9 | Q9UPT8 ZC3H4_HUMAN  | R.AAKPGPAEAPS#PTASPSGDAS#PPATAPYDPR.V | S1104:S1114:    | 3 | 4,1257 | 1     | -0,118 |
| 9 | B2CI53 B2CI53_HUMAN | R.SNM*S#PDKPVS#VK.I                   | S1105:S1111:    | 2 | 3,2525 | 0,329 | -0,583 |
| 9 | B2CI53 B2CI53_HUMAN | R.SNM*S#PDKPVS#VK.I                   | S1105:S1111:    | 3 | 3,0344 | 0,21  | 0      |
| 9 | P11388 TOP2A_HUMAN  | K.VPDEEENEES#DNEK.E                   | S1106:          | 2 | 4,3273 | 0,566 | -0,56  |
| 9 | Q86UE8 TLK2_HUMAN   | R.SS#PQHSL#NPLPR.R                    | S111:S117:      | 3 | 4,2187 | 0,428 | 0,116  |
| 9 | Q96ST3 SIN3A_HUMAN  | R.YM*NSDTTS#PELR.E                    | S1112:          | 2 | 3,5643 | 0,365 | -0,404 |
| 9 | Q9NVM6 DJC17_HUMAN  | R.QAQAES#EEEEESR.S                    | S112:           | 2 | 3,1082 | 0,414 | -0,705 |

|   |                    |                                    |              |   |        |       |        |
|---|--------------------|------------------------------------|--------------|---|--------|-------|--------|
| 9 | Q92900 RENT1_HUMAN | R.AYQHGGVTGLS#QY.-                 | S1127:       | 2 | 3,087  | 0,449 | 0,084  |
| 9 | Q3KQU3 MA7D1_HUMAN | R.RSS#QPS#PTAVPASDSPPTK.Q          | S113:S116:   | 3 | 3,0116 | 0,237 | -0,442 |
| 9 | Q3KQU3 MA7D1_HUMAN | R.RSS#QPS#PTAVPASDSPPTK.Q          | S113:S116:   | 2 | 2,7418 | 0,398 | -0,354 |
| 9 | Q9C0C2 TB182_HUMAN | R.VSGAGFS#PSSK.M                   | S1138:       | 2 | 3,6222 | 0,448 | -0,111 |
| 9 | P30414 NKTR_HUMAN  | R.SS#PAKVEETS#PLGNAR.L             | S1138:S1146: | 2 | 2,9532 | 0,422 | -0,338 |
| 9 | Q9HCK8 CHD8_HUMAN  | K.DDDLVEFS#DLES#EDDERPR.S          | S1141:S1145: | 3 | 3,6771 | 0,291 | -0,15  |
| 9 | P30414 NKTR_HUMAN  | K.VEETS#PLGNAR.L                   | S1146:       | 2 | 2,5561 | 0,213 | -0,682 |
| 9 | Q9NW75 GPTC2_HUMAN | K.DHS#DS#DDQM*LVAK.R               | S115:S117:   | 2 | 4,947  | 0,475 | -0,522 |
| 9 | Q9NW75 GPTC2_HUMAN | K.DHS#DS#DDQM*LVAK.R               | S115:S117:   | 3 | 3,0514 | 0,217 | -0,223 |
| 9 | Q3KQU3 MA7D1_HUMAN | R.SSQPS#PTAVPASDS#PPTKQEVK.K       | S116:S125:   | 3 | 3,467  | 1     | -0,534 |
| 9 | P55196 AFAD_HUMAN  | R.SSPNVANQPPS#PGGK.S               | S1165:       | 2 | 4,1916 | 0,57  | -0,563 |
| 9 | P55196 AFAD_HUMAN  | R.SSPNVANQPPS#PGGK.S               | S1165:       | 3 | 2,9205 | 0,119 | -0,121 |
| 9 | Q8WYH8 ING5_HUMAN  | K.M*EGS#DFESSGGR.G                 | S118:        | 2 | 4,0556 | 0,563 | -0,45  |
| 9 | P17301 ITA2_HUMAN  | K.M*TKNPDEIDETTELS#S.-             | S1180:       | 2 | 4,3382 | 0,605 | 0,32   |
| 9 | Q562F6 SGOL2_HUMAN | K.ENFALECS#PAFQVS#DDEHEK.M         | S1181:S1187: | 3 | 4,0442 | 0,296 | 0,073  |
| 9 | O14737 PDCD5_HUMAN | R.KVM*DS#DEDDDY.-                  | S119:        | 2 | 2,7486 | 0,36  | -0,684 |
| 9 | P28370 SMCA1_HUMAN | K.SPTS#PLNM*K.L                    | S119:        | 2 | 2,3193 | 0,312 | -0,342 |
| 9 | Q15648 MED1_HUMAN  | K.LAS#PM*KPVPGT#PPSSK.A            | S1207:T1215: | 2 | 2,7694 | 0,415 | -0,551 |
| 9 | Q9H9C1 CN133_HUMAN | R.TRPGS#FQS#LSDALSDTPAK.S          | S121:S124:   | 3 | 4,8858 | 0,447 | -0,086 |
| 9 | Q8WYP5 AHTF1_HUMAN | R.STPLAS#PSPSPGRS#PQR.L            | S1223:S1231: | 2 | 2,721  | 1     | -0,389 |
| 9 | Q14160 LAP4_HUMAN  | R.NSLESISS#IDR.E                   | S1226:       | 2 | 2,3218 | 0,386 | -0,094 |
| 9 | Q2KHR3 QSER1_HUMAN | K.NLEHLSSFS#S#DEDDPGYSQDAYK.S      | S1230:S1231: | 3 | 5,2868 | 0,323 | -0,066 |
| 9 | Q9H4L7 SMRCD_HUMAN | K.TFNKDTVIVIS#EPSEDEES#QGLPTM*AR.R | S124:S132:   | 3 | 2,8624 | 0,31  | -0,115 |
| 9 | Q9H5H4 ZN768_HUMAN | R.YEPQS#PGYEPR.S                   | S125:        | 2 | 2,8575 | 0,425 | -0,174 |
| 9 | P55884 EIF3B_HUMAN | R.AQAVS#EDAGGNEGR.A                | S125:        | 2 | 2,3491 | 0,377 | -0,508 |
| 9 | O15400 STX7_HUMAN  | R.AS#SRVS#GSFPEDSSK.E              | S125:S129:   | 2 | 2,9052 | 0,336 | -0,502 |
| 9 | Q9H5H4 ZN768_HUMAN | R.YEPQS#PGYEPRS#PGYEPR.S           | S125:S132:   | 3 | 2,7374 | 0,379 | 0,161  |
| 9 | Q96T23 RSF1_HUMAN  | R.S#TDEYS#EADEEEEEEGKPSR.K         | S1267:S1272: | 3 | 3,0849 | 0,212 | -0,351 |
| 9 | Q6P158 DHX57_HUMAN | R.DLQEQDADAGS#ER.G                 | S127:        | 2 | 4,2949 | 0,452 | -0,564 |
| 9 | Q9UPT8 ZC3H4_HUMAN | K.TGSGSPFAGNS#PAR.E                | S1275:       | 2 | 3,302  | 0,422 | -0,264 |
| 9 | Q9BY89 K1671_HUMAN | R.TSS#PLFNK.A                      | S128:        | 2 | 2,8414 | 0,214 | 0      |
| 9 | Q8WWQ0 PHIP_HUMAN  | K.VLS#DS#EDEEKDADVPGTSTR.K         | S1281:S1283: | 3 | 4,471  | 0,334 | 0,238  |
| 9 | Q96T58 MINT_HUMAN  | R.LLS#VKGS#PK.V                    | S1283:S1287: | 2 | 2,3167 | 0,296 | 0      |

|   |                     |                                 |                 |   |        |       |        |
|---|---------------------|---------------------------------|-----------------|---|--------|-------|--------|
| 9 | Q9P2M7 CING_HUMAN   | R.S#HS#QASLAGPGVDPSNR.S         | S129:S131:      | 3 | 3,318  | 0,329 | -0,094 |
| 9 | Q9BQG0 MBB1A_HUMAN  | K.GVLGKS#PLS#ALAR.K             | S1290:S1293:    | 2 | 2,9198 | 0,387 | -0,085 |
| 9 | Q2LD37 K1109_HUMAN  | K.S#VGQSPLRS#PLK.R              | S1297:S1305:    | 2 | 2,0399 | 0,232 | 0,256  |
| 9 | Q9BQG0 MBB1A_HUMAN  | R.LSLVIRS#PSLLQS#GAK.K          | S1308:S1314:    | 3 | 4,1774 | 0,408 | 0      |
| 9 | Q96F86 EDC3_HUMAN   | K.SQDVAVS#PQQQQCSK.S            | S131:           | 2 | 4,6688 | 0,565 | -0,551 |
| 9 | Q96F86 EDC3_HUMAN   | K.SQDVAVS#PQQQQCSKS#YVDR.H      | S131:S140:      | 3 | 2,8209 | 0,217 | -0,222 |
| 9 | Q9BQG0 MBB1A_HUMAN  | R.LSLVIRSPS#LLQS#GAK.K          | S1310:S1314:    | 2 | 2,4182 | 0,155 | -0,267 |
| 9 | Q12756 KIF1A_HUMAN  | R.NLFGSGS#LR.A                  | S1312:          | 2 | 2,0067 | 0,125 | 0,118  |
| 9 | Q13177 PAK2_HUMAN   | K.FYDS#NTVK.Q                   | S132:           | 2 | 2,0554 | 0,127 | -0,579 |
| 9 | P55081 MFAP1_HUMAN  | R.MEREDS#S#EEEEEEIDDEEIER.R     | S132:S133:      | 3 | 5,7108 | 0,37  | 0,788  |
| 9 | P55081 MFAP1_HUMAN  | R.M*EREDS#S#EEEEEEIDDEEIER.R    | S132:S133:      | 3 | 5,6726 | 0,292 | 0,653  |
| 9 | P51858 HDGF_HUMAN   | K.GNAEGS#S#DEEGKLVIDEPAK.E      | S132:S133:      | 3 | 5,0928 | 0,489 | 0,498  |
| 9 | Q9UQ35 SRRM2_HUMAN  | K.ELNS#PLRENSFGS#PLEFR.N        | S1320:S1329:    | 3 | 3,9004 | 0,391 | -0,313 |
| 9 | Q9UQ35 SRRM2_HUMAN  | R.ENSGS#PLEFR.N                 | S1329:          | 2 | 3,0875 | 0,36  | -0,269 |
| 9 | Q9Y4M2 Q9Y4M2_HUMAN | K.SSFLSS#PER.A                  | S134:           | 2 | 2,3882 | 0,15  | 0      |
| 9 | O60841 IF2P_HUMAN   | K.VEM*YS#GS#DDDDDFNKLPK.K       | S135:S137:      | 3 | 4,2275 | 0,384 | 0      |
| 9 | P11388 TOP2A_HUMAN  | K.TDDEDFVPS#DAS#PPKTK.T         | S1351:S1354:    | 3 | 3,5187 | 0,237 | -0,455 |
| 9 | Q9UGU0 TCF20_HUMAN  | K.ITS#PNIR.R                    | S1361:          | 2 | 2,1731 | 0,092 | -0,069 |
| 9 | Q5T200 ZC3HD_HUMAN  | R.LISDS#VER.D                   | S1366:          | 2 | 2,6867 | 0,285 | -0,183 |
| 9 | Q9Y580 RBM7_HUMAN   | R.SFSS#PENFQR.Q                 | S137:           | 2 | 2,5026 | 0,366 | -0,095 |
| 9 | Q7Z309 F122B_HUMAN  | K.M*FVSSSGLPPS#PVPS#PRR.F       | S137:S141:      | 3 | 3,9296 | 0,37  | 0,353  |
| 9 | P42695 CNDD3_HUMAN  | R.SRS#LGVLPFTLNSGS#PEK.T        | S1372:S1384:    | 3 | 3,6529 | 0,198 | -0,357 |
| 9 | P42695 CNDD3_HUMAN  | R.SRS#LGVLPFTLNSGS#PEK.T        | S1372:S1384:    | 2 | 3,0504 | 0,562 | -0,715 |
| 9 | Q13428 TCOF_HUMAN   | K.LGAGEGGEAS#VS#PEKTSTTSK.G     | S1376:S1378:    | 3 | 3,7601 | 0,384 | -0,935 |
| 9 | Q14669 TRIPC_HUMAN  | R.QFSIQAEDERES#T#DDESNPLGR.A    | S1376:T1377:    | 3 | 3,3927 | 0,212 | -0,136 |
| 9 | P02765 FETUA_HUMAN  | K.CDSSPDS#AEDVR.K               | S138:           | 2 | 3,7603 | 0,485 | -0,172 |
| 9 | Q8IWS0 PHF6_HUMAN   | K.TAHNS#EADLEES#FNEHELEPS#SPK.S | S138:S145:S154: | 3 | 4,0237 | 0,268 | -0,81  |
| 9 | Q8IWS0 PHF6_HUMAN   | K.TAHNS#EADLEES#FNEHELEPSS#PK.S | S138:S145:S155: | 3 | 4,4501 | 0,278 | -0,249 |
| 9 | Q9UQ35 SRRM2_HUMAN  | R.SSGHS#S#SELSPDAVEK.A          | S1382:S1383:    | 2 | 4,2743 | 1     | -0,275 |
| 9 | Q9UQ35 SRRM2_HUMAN  | R.SSGHS#SSELS#PDAVEK.A          | S1382:S1387:    | 2 | 4,1112 | 1     | -0,618 |
| 9 | Q9UQ35 SRRM2_HUMAN  | R.SSGHSS#ELS#PDAVEK.A           | S1384:S1387:    | 3 | 3,3433 | 0,21  | -0,309 |
| 9 | Q9ULT8 HECD1_HUMAN  | R.KGS#S#SSVCSVASSDISLGSTK.T     | S1386:S1387:    | 3 | 3,8813 | 1     | -0,08  |
| 9 | Q5SYE7 NHSL1_HUMAN  | R.NHS#PS#PPVTPTGAAPSLASP.K      | S1386:S1388:    | 3 | 4,7815 | 0,283 | 0,421  |

|   |                     |                                     |              |   |        |       |        |
|---|---------------------|-------------------------------------|--------------|---|--------|-------|--------|
| 9 | Q3V6T2 GRDN_HUMAN   | K.FYDPS#PPR.R                       | S1387:       | 2 | 2,2258 | 0,209 | 0      |
| 9 | Q9Y266 NUDC_HUMAN   | K.NGSLDS#PGKQDT#EEDEEEDEK.D         | S139:T145:   | 3 | 6,2618 | 0,443 | -0,51  |
| 9 | Q7Z6Z7 HUWE1_HUMAN  | R.AES#PEEVACR.K                     | S1395:       | 2 | 3,3354 | 0,461 | -0,397 |
| 9 | Q96RK0 CIC_HUMAN    | R.KNS#TDLDSAPEDPTS#PK.R             | S1397:S1409: | 2 | 5,2673 | 0,283 | -0,56  |
| 9 | A8K630 A8K630_HUMAN | R.LQQQHS#EQPPLQPS#PVVTR.R           | S14:S22:     | 3 | 4,0693 | 0,383 | -0,471 |
| 9 | Q8TDJ6 DMXL2_HUMAN  | R.TIS#VSGS#TAKETVTVGK.D             | S1400:S1404: | 2 | 2,4197 | 1     | -0,134 |
| 9 | Q02880 TOP2B_HUMAN  | K.VKAS#PITNDGEDEFVPS#DGLDK.D        | S1400:S1413: | 3 | 4,0156 | 0,163 | 0,22   |
| 9 | Q9UQ35 SRRM2_HUMAN  | K.AGM*SSNQSISS#PVLDAVPRT#PSR.E      | S1404:T1413: | 3 | 6,8572 | 1     | -0,144 |
| 9 | Q9UQ35 SRRM2_HUMAN  | K.AGMSNQSISS#PVLDAVPRT#PSR.E        | S1404:T1413: | 3 | 5,0811 | 0,186 | -0,291 |
| 9 | Q13523 PRP4B_HUMAN  | K.VQSGM*GLILQGYES#GS#EEEEGEIHEK.A   | S142:S144:   | 3 | 5,5372 | 0,463 | -0,063 |
| 9 | Q8IY33 MILK2_HUMAN  | K.LPS#PAPAR.K                       | S143:        | 2 | 2,2489 | 0,23  | 0,069  |
| 9 | Q96N67 DOCK7_HUMAN  | R.SPSGSAFGS#QENLR.W                 | S1438:       | 2 | 3,7106 | 0,418 | 0,322  |
| 9 | O60884 DNJA2_HUMAN  | K.NVLCS#ACSGQGK.S                   | S144:        | 2 | 3,5482 | 0,581 | -0,602 |
| 9 | Q6VEQ5 WASH2_HUMAN  | R.QDDSSSSAS#PSVQGAPR.E              | S144:        | 2 | 3,0641 | 0,424 | -0,556 |
| 9 | Q07343 PDE4B_HUMAN  | R.SDSYDLS#PK.A                      | S145:        | 2 | 3,0906 | 0,482 | -0,101 |
| 9 | Q5QJE6 TDIF2_HUMAN  | K.ESYTEIIVSEAES#HVS#GISR.I          | S145:S148:   | 3 | 2,786  | 0,367 | -0,232 |
| 9 | Q5TZA2 CROCC_HUMAN  | R.APS#PAPRPVPGS#PAR.D               | S1451:S1460: | 3 | 3,3475 | 0,13  | -0,226 |
| 9 | P21333 FLNA_HUMAN   | K.CSGPGLS#PGM*VR.A                  | S1459:       | 2 | 3,3582 | 0,444 | -0,186 |
| 9 | Q3L8U1 CHD9_HUMAN   | K.DELAELS#EAES#EGDEKPK.L            | S1468:S1472: | 3 | 3,2616 | 0,253 | -0,171 |
| 9 | Q15648 MED1_HUMAN   | K.SYQNSPS#S#DDGIRPLPEYSTEK.H        | S1481:S1482: | 3 | 4,0127 | 1     | -0,07  |
| 9 | P27707 DCK_HUMAN    | R.SCPSFSAS#SEGTR.I                  | S15:         | 2 | 2,4065 | 0,353 | -0,336 |
| 9 | P83369 LSM11_HUMAN  | R.SAGAGS#PARPPS#PR.L                | S15:S21:     | 2 | 2,3124 | 0,292 | -0,582 |
| 9 | Q15751 HERC1_HUMAN  | K.SRS#ESDLSQPES#DEEGYALSGR.Q        | S1512:S1521: | 3 | 4,094  | 1     | 0,715  |
| 9 | Q12923 PTN13_HUMAN  | K.NSSGLGFS#FSR.E                    | S1514:       | 2 | 2,2742 | 0,293 | -0,197 |
| 9 | O15085 ARHGB_HUMAN  | R.NSHELGPCPEDGSDAPLEDSTADAAAS#PGP.- | S1519:       | 3 | 3,4845 | 0,42  | 0,24   |
| 9 | O94913 PCF11_HUMAN  | K.NELQEPCDS#PK.V                    | S1520:       | 2 | 2,402  | 0,148 | -0,437 |
| 9 | O43149 ZZEF1_HUMAN  | R.LLS#FRS#M*EEAR.L                  | S1537:S1540: | 2 | 2,3986 | 0,284 | -0,161 |
| 9 | Q9UQ35 SRRM2_HUMAN  | R.SGSS#QELDVKPSAS#PQER.S            | S1542:S1552: | 3 | 3,4677 | 0,095 | -0,355 |
| 9 | Q02880 TOP2B_HUMAN  | K.ASGS#ENEGDYNPGR.K                 | S1552:       | 2 | 3,1165 | 0,286 | -0,478 |
| 9 | Q4JJA0 Q4JJA0_HUMAN | K.CLES#PVGK.R                       | S156:        | 2 | 2,5969 | 0,396 | 0,126  |
| 9 | P42166 LAP2A_HUMAN  | R.EQGTES#RSS#TPLPTISSAENTR.Q        | S156:S159:   | 3 | 3,8038 | 1     | 0,141  |
| 9 | O95292 VAPB_HUMAN   | K.S#LSSS#LDDTEVKK.V                 | S156:S160:   | 2 | 3,9876 | 0,521 | -0,311 |
| 9 | Q69YN4 VIR_HUMAN    | R.SFLSEPSS#PGR.T                    | S1579:       | 2 | 2,703  | 0,458 | 0,196  |

|   |                    |                               |              |   |        |       |        |
|---|--------------------|-------------------------------|--------------|---|--------|-------|--------|
| 9 | Q15742 NAB2_HUMAN  | R.SFS#PKS#PLELGEK.L           | S159:S162:   | 3 | 3,8097 | 0,399 | 0      |
| 9 | Q15742 NAB2_HUMAN  | R.SFS#PKS#PLELGEK.L           | S159:S162:   | 2 | 3,5913 | 0,333 | -0,155 |
| 9 | Q99871 UC5IP_HUMAN | R.GGDDYS#EDEGDSSVSR.A         | S16:         | 2 | 4,2258 | 0,516 | -0,209 |
| 9 | P28066 PSA5_HUMAN  | R.GVNTFS#PEGR.L               | S16:         | 2 | 2,6132 | 0,505 | -0,32  |
| 9 | Q9Y3C1 U384_HUMAN  | K.FGYS#VNR.K                  | S16:         | 2 | 2,5497 | 0,416 | 0,066  |
| 9 | P16949 STMN1_HUMAN | K.RAS#GQAFELILS#PR.S          | S16:S25:     | 2 | 5,2539 | 0,547 | -0,358 |
| 9 | P16949 STMN1_HUMAN | K.RAS#GQAFELILS#PR.S          | S16:S25:     | 3 | 4,1319 | 0,356 | 0      |
| 9 | Q8N1I0 DOCK4_HUMAN | R.NSAPASVS#PDGTR.V            | S1620:       | 2 | 2,926  | 0,411 | -0,547 |
| 9 | Q7Z6E9 RBBP6_HUMAN | R.LSS#DLTR.E                  | S1626:       | 2 | 2,1867 | 0,19  | 0,14   |
| 9 | P29966 MARCS_HUMAN | K.S#FKLS#GFSFK.K              | S163:S167:   | 2 | 2,4383 | 0,372 | -0,466 |
| 9 | O60841 IF2P_HUMAN  | K.WDGS#EEDEDNSK.K             | S164:        | 2 | 4,324  | 0,625 | -0,573 |
| 9 | O95049 ZO3_HUMAN   | R.RS#PGGGS#EANGLALVSGFK.R     | S164:S169:   | 3 | 3,5384 | 0,15  | -0,186 |
| 9 | P67809 YBOX1_HUMAN | R.NYQQNYQNS#ESGEK.N           | S165:        | 2 | 4,943  | 0,38  | -0,552 |
| 9 | Q9NZN8 CNOT2_HUMAN | R.TNSM*SSSGLGS#PNR.S          | S165:        | 2 | 3,8554 | 0,559 | -0,491 |
| 9 | P51858 HDGF_HUMAN  | R.AGDLLDS#PK.R                | S165:        | 2 | 2,2039 | 0,207 | -0,434 |
| 9 | Q12888 TP53B_HUMAN | K.LITS#EEERS#PAK.R            | S1673:S1678: | 2 | 4,0835 | 0,324 | -0,401 |
| 9 | O75179 ANR17_HUMAN | K.SGPS#PLSSPNGK.L             | S1696:       | 2 | 3      | 0,391 | -0,505 |
| 9 | P18583 SON_HUMAN   | K.ESDQTLAALLS#PK.E            | S1697:       | 2 | 2,9251 | 0,381 | -0,252 |
| 9 | Q68D06 SLN13_HUMAN | K.YNLINEGS#PPSK.I             | S170:        | 2 | 3,6214 | 0,471 | 0,349  |
| 9 | Q9P260 K1468_HUMAN | R.EPSTAS#GGGQLNR.A            | S170:        | 2 | 2,0771 | 0,309 | -0,451 |
| 9 | Q9HCK8 CHD8_HUMAN  | R.CS#TPLLHQYTS#R.T            | S1702:S1712: | 2 | 2,1018 | 0,331 | 0,279  |
| 9 | O75396 SC22B_HUMAN | K.ANNLSS#LSK.K                | S175:        | 2 | 2,1109 | 0,242 | -0,301 |
| 9 | P67809 YBOX1_HUMAN | K.NEGSES#APEGQAQQR.R          | S176:        | 2 | 3,9839 | 0,461 | -0,439 |
| 9 | Q58FF8 H90B2_HUMAN | K.IEDVGS#DEEDDSGK.D           | S177:        | 2 | 4,4002 | 0,537 | -0,697 |
| 9 | Q09666 AHNK_HUMAN  | K.DIDISS#PEFK.I               | S177:        | 2 | 2,5473 | 0,243 | 0      |
| 9 | Q58FF8 H90B2_HUMAN | K.IEDVGS#DEEDDS#GKDK.K        | S177:S183:   | 2 | 5,5055 | 0,49  | -0,514 |
| 9 | Q58FF8 H90B2_HUMAN | K.IEDVGS#DEEDDS#GKDK.K        | S177:S183:   | 3 | 4,0527 | 0,324 | -0,193 |
| 9 | Q13442 HAP28_HUMAN | R.M*QSL#LNK.-                 | S178:        | 2 | 2,4884 | 0,16  | -0,3   |
| 9 | Q5T457 UBR4_HUMAN  | K.TLSDVEDQKELAS#PVS#PELR.Q    | S178:S181:   | 3 | 3,2726 | 0,186 | 0,54   |
| 9 | Q8TB72 PUM2_HUMAN  | R.TPGS#RQAS#PTEVVER.L         | S178:S182:   | 2 | 2,6471 | 0,28  | -0,619 |
| 9 | Q92538 GBF1_HUMAN  | R.AASSSSPGS#PVASSPSR.L        | S1784:       | 2 | 3,3926 | 0,468 | -0,303 |
| 9 | P46821 MAP1B_HUMAN | K.SDIS#PLTPR.E                | S1785:       | 2 | 2,3724 | 0,35  | 0,343  |
| 9 | Q9H7D0 DOCK5_HUMAN | R.LSPFHGSSPPQSTPLS#PPPLT#PK.A | S1789:T1794: | 3 | 5,1622 | 0,363 | -0,072 |



|   |                    |                            |              |   |        |       |        |
|---|--------------------|----------------------------|--------------|---|--------|-------|--------|
| 9 | Q6UB99 ANR11_HUMAN | R.SVS#VDIR.R               | S1793:       | 2 | 2,3537 | 0,192 | 0      |
| 9 | O00418 EF2K_HUMAN  | R.LEGVDGGQS#PR.A           | S18:         | 2 | 3,1706 | 0,474 | -0,408 |
| 9 | Q86UX6 ST32C_HUMAN | R.GSSAAASPGS#PPPGR.A       | S18:         | 2 | 3,0262 | 0,414 | -0,532 |
| 9 | Q53H80 CF166_HUMAN | R.TLDFDPLLS#PAS#PKR.R      | S18:S21:     | 3 | 3,3472 | 0,264 | -0,403 |
| 9 | Q9H6F5 CCD86_HUMAN | R.LGGLRPES#PES#LTSVSR.T    | S18:S21:     | 2 | 3,0114 | 0,463 | -0,063 |
| 9 | Q53H80 CF166_HUMAN | R.TLDFDPLLS#PAS#PKR.R      | S18:S21:     | 2 | 2,7503 | 0,381 | -0,067 |
| 9 | Q9H6F5 CCD86_HUMAN | R.LGGLRPES#PESLTS#VSR.T    | S18:S24:     | 3 | 4,5414 | 0,34  | -0,47  |
| 9 | Q9Y446 PKP3_HUMAN  | R.ADYDTLS#LRS#LR.L         | S180:S183:   | 3 | 3,0153 | 0,33  | 0      |
| 9 | Q9BXB4 OSB11_HUMAN | R.SFSLASSNS#PISQR.R        | S181:        | 2 | 3,265  | 0,434 | 0      |
| 9 | P52594 NUPL_HUMAN  | K.GTPSQS#PVVGR.S           | S181:        | 2 | 2,641  | 0,458 | -0,314 |
| 9 | Q9ULT0 TTC7A_HUMAN | R.LPNS#IASR.F              | S182:        | 2 | 2,0151 | 0,349 | -0,13  |
| 9 | Q9NQW6 ANLN_HUMAN  | K.AAS#PPRPLLSNASAT#PVGR.R  | S182:T194:   | 3 | 4,5766 | 0,366 | 0,271  |
| 9 | O15381 NVL_HUMAN   | K.KDS#FFLDLS#CEK.S         | S185:S191:   | 2 | 3,3099 | 0,407 | -0,222 |
| 9 | Q99661 KIF2C_HUMAN | R.GSSSANPVNS#VR.R          | S187:        | 2 | 3,3854 | 0,363 | -0,194 |
| 9 | Q5T4S7 UBR4_HUMAN  | R.M*NYS#GDQGQTIR.Q         | S1878:       | 2 | 3,3289 | 0,193 | 0      |
| 9 | Q9Y388 RBMX2_HUMAN | R.EVQAEQSSSS#PR.R          | S188:        | 2 | 2,931  | 0,406 | -0,576 |
| 9 | Q13242 SFRS9_HUMAN | R.STS#YGYSR.S              | S189:        | 2 | 2,1399 | 0,218 | -0,122 |
| 9 | Q9BVC5 ASHWN_HUMAN | K.SPSGPVKs#PPLS#PVGTTPVK.L | S189:S193:   | 3 | 4,7981 | 0,244 | 0,175  |
| 9 | Q9BVC5 ASHWN_HUMAN | K.SPSGPVKs#PPLSPVGT#TPVK.L | S189:T197:   | 3 | 4,0864 | 0,263 | 0,962  |
| 9 | Q8IYI6 EXOC8_HUMAN | R.QLES#GGFEAR.L            | S19:         | 2 | 2,7801 | 0,345 | -0,831 |
| 9 | Q6PK04 CC137_HUMAN | R.VQAGPGS#PR.R             | S19:         | 2 | 2,4952 | 0,309 | -0,193 |
| 9 | Q9UNE7 STUB1_HUMAN | R.LGAGGGS#PEKS#PSAQELK.E   | S19:S23:     | 3 | 4,3399 | 0,391 | -0,195 |
| 9 | Q9UNE7 STUB1_HUMAN | R.LGAGGGS#PEKS#PSAQELK.E   | S19:S23:     | 2 | 3,4339 | 0,524 | -0,782 |
| 9 | Q16629 SFRS7_HUMAN | R.YFQS#PSR.S               | S192:        | 2 | 2,6481 | 0,41  | -0,19  |
| 9 | Q6IQ26 RA6I1_HUMAN | R.FNS#YDISR.D              | S193:        | 2 | 2,1011 | 0,144 | -0,113 |
| 9 | Q9H4M7 PKHA4_HUMAN | R.ISES#PEVTR.L             | S194:        | 2 | 2,6584 | 0,338 | -0,111 |
| 9 | Q8IWA0 WDR75_HUMAN | R.FTLS#SSR.N               | S194:        | 2 | 2,0006 | 0,163 | -0,486 |
| 9 | O94915 FRYL_HUMAN  | R.SNS#LRLS#LIGDR.R         | S1941:S1945: | 2 | 2,9881 | 0,408 | -0,491 |
| 9 | Q8WYP5 AHTF1_HUMAN | R.EVS#PSDVR.E              | S1953:       | 2 | 2,1614 | 0,332 | 0,189  |
| 9 | Q9Y657 SPIN1_HUMAN | R.IM*PDSNDS#PPAER.E        | S199:        | 2 | 2,7536 | 0,334 | -0,4   |
| 9 | Q14493 SLBP_HUMAN  | R.CDGAS#PPSPAR.W           | S20:         | 2 | 2,5051 | 0,324 | -0,652 |
| 9 | Q8IWW6 RHG12_HUMAN | K.TSFSQEQSCDS#AGEGSER.I    | S201:        | 2 | 4,0867 | 0,577 | -0,598 |
| 9 | Q96RF0 SNX18_HUMAN | R.SDLS#LGSR.G              | S202:        | 2 | 2,2541 | 0,279 | 0,133  |

|   |                    |                                |                    |   |        |       |        |
|---|--------------------|--------------------------------|--------------------|---|--------|-------|--------|
| 9 | Q9H4A3 W NK1_HUMAN | R.DVDDGSGS#PHS#PHQLS#SK.S      | S2029:S2032:S2037: | 3 | 2,8637 | 0,216 | -0,438 |
| 9 | Q04726 TLE3_HUMAN  | R.ESSANNSVS#PSESLR.A           | S203:              | 2 | 3,8938 | 0,437 | -0,742 |
| 9 | Q9NYB0 TE2IP_HUMAN | K.YLLGDAPVS#PSS#QKLK.R         | S203:S206:         | 2 | 2,6865 | 0,441 | -0,065 |
| 9 | Q8NEJ9 NGDN_HUMAN  | R.ALSSS#VIR.E                  | S204:              | 2 | 2,2751 | 0,311 | 0,2    |
| 9 | Q9Y5J1 UTP18_HUMAN | R.KTS#SDDDES#EEDEDDLQR.T       | S205:S210:         | 3 | 4,2119 | 0,263 | 0,564  |
| 9 | Q9H165 BC11A_HUMAN | R.IYLESEHGS#PLT#PR.V           | S205:T208:         | 2 | 3,3026 | 0,24  | -0,139 |
| 9 | Q01130 SFRS2_HUMAN | R.S#KS#PPKSPEEEGAVSS.-         | S206:S208:         | 2 | 2,5404 | 0,187 | -0,824 |
| 9 | O75179 ANR17_HUMAN | R.NSPLDCGSAS#PNK.V             | S2067:             | 2 | 2,7177 | 0,422 | -0,77  |
| 9 | Q6IQ22 RAB12_HUMAN | R.AGGGGGLGAGS#PALSGGQGR.R      | S21:               | 2 | 5,3622 | 0,604 | -0,44  |
| 9 | Q09666 AHNK_HUMAN  | K.TVIRLPS#GSGAAS#PTGSAVDIR.A   | S210:S216:         | 3 | 5,9994 | 0,408 | 0,081  |
| 9 | Q96T58 MINT_HUMAN  | K.NVDAAVS#PR.G                 | S2101:             | 2 | 2,7795 | 0,462 | -0,181 |
| 9 | Q13242 SFRS9_HUMAN | R.GS#PHYFS#PFRPY.-             | S211:S216:         | 2 | 2,2143 | 0,248 | -0,529 |
| 9 | Q7Z417 NUFP2_HUMAN | K.GADNDGS#GSESGYTTPK.K         | S212:              | 2 | 4,0313 | 0,56  | -0,567 |
| 9 | Q96B36 AKTS1_HUMAN | R.SSDEENGPPSS#PDLDR.I          | S212:              | 2 | 3,9934 | 0,494 | -0,548 |
| 9 | P22626 ROA2_HUMAN  | R.GGNFGFGDS#R.G                | S212:              | 2 | 3,5139 | 0,167 | 0,112  |
| 9 | Q9H4L7 SMRCD_HUMAN | R.KLSS#SS#EPYEEDEFNDDQSIK.K    | S212:S214:         | 3 | 4,5775 | 1     | 0,491  |
| 9 | Q9UQ35 SRRM2_HUMAN | R.MSCFSRPS#M*S#PTPLDR.C        | S2121:S2123:       | 3 | 4,0079 | 0,366 | 0,268  |
| 9 | Q9UQ35 SRRM2_HUMAN | R.MSCFSRPS#M*S#PTPLDR.C        | S2121:S2123:       | 2 | 2,0159 | 0,106 | 0,179  |
| 9 | Q8N565 MREG_HUMAN  | K.ELHYLPFPS#P.-                | S213:              | 2 | 2,8182 | 0,367 | -0,477 |
| 9 | P08670 VIME_HUMAN  | R.QDVDNAS#LAR.L                | S214:              | 2 | 2,8698 | 0,343 | -0,104 |
| 9 | Q9H1E3 NUCKS_HUMAN | K.EEDEEPES#PPEK.K              | S214:              | 2 | 2,5929 | 0,169 | -0,49  |
| 9 | Q9Y6D5 BIG2_HUMAN  | R.ELEKPIQS#KQQS#PVIQAAAVS#PK.F | S214:S218:S227:    | 3 | 3,5567 | 0,457 | 0,818  |
| 9 | O95391 SLU7_HUMAN  | K.LVEQANS#PK.H                 | S215:              | 2 | 2,1724 | 0,133 | -0,343 |
| 9 | P13056 NR2C1_HUMAN | K.DLRS#PLTAT#PTFVTDSESTR.S     | S215:T220:         | 3 | 3,2832 | 0,31  | -0,699 |
| 9 | Q03164 HRX_HUMAN   | R.TPSYS#PTQR.S                 | S2151:             | 2 | 2,8732 | 0,384 | -0,218 |
| 9 | Q01082 SPTB2_HUMAN | R.TSS#KESS#PIPSPTSDR.K         | S2161:S2165:       | 2 | 3,1235 | 1     | -0,598 |
| 9 | Q01082 SPTB2_HUMAN | R.TSS#KESSPIPS#PTSDR.K         | S2161:S2169:       | 2 | 3,3085 | 1     | 0,399  |
| 9 | P21359 NF1_HUMAN   | R.SFS#PGSYER.E                 | S2188:             | 2 | 2,1326 | 0,162 | 0      |
| 9 | Q8N4S0 CCD82_HUMAN | R.VVEDEGS#SVEM*EQKT#PEK.T      | S219:T227:         | 3 | 3,0621 | 0,252 | -0,583 |
| 9 | Q5UIP0 RIF1_HUMAN  | R.SQEDEISS#PVNK.V              | S2196:             | 2 | 3,6051 | 0,451 | -0,604 |
| 9 | P02545 LMNA_HUMAN  | R.SGAQASSTPLS#PTR.I            | S22:               | 2 | 3,3842 | 0,469 | -0,508 |
| 9 | P08670 VIME_HUMAN  | R.M*FGGPGTAS#RPSS#SR.S         | S22:S26:           | 2 | 2,4264 | 0,403 | -0,511 |
| 9 | Q13404 UB2V1_HUMAN | K.ENM*KLPQPEGQCYS#N.-          | S220:              | 2 | 3,228  | 0,405 | -0,614 |

|   |                      |                              |                 |   |        |       |        |
|---|----------------------|------------------------------|-----------------|---|--------|-------|--------|
| 9 | P11831 SRF_HUMAN     | K.ALIQTCLNS#PDS#PPRSDPTDQR.M | S221:S224:      | 3 | 4,0981 | 0,409 | -0,067 |
| 9 | ##Q9UKD1 GMEB2_HUMAN | R.S#RDM*QCKHS#ALVKK.V        | S223:S231:      | 2 | 2,5519 | 0,216 | 0,982  |
| 9 | Q13573 SNW1_HUMAN    | R.GPPS#PPAPVM*HS#PSR.K       | S224:S232:      | 3 | 3,754  | 0,396 | -0,649 |
| 9 | Q13573 SNW1_HUMAN    | R.GPPS#PPAPVM*HS#PSR.K       | S224:S232:      | 2 | 3,595  | 0,46  | -0,578 |
| 9 | P41440 S19A1_HUMAN   | R.CETSAS#ELER.M              | S225:           | 2 | 2,1975 | 0,15  | -0,29  |
| 9 | Q9NYB9 ABI2_HUMAN    | R.NM*APSQQS#PVR.T            | S227:           | 2 | 2,7042 | 0,349 | -0,652 |
| 9 | P49792 RBP2_HUMAN    | K.SALS#PSKS#PAK.L            | S2276:S2280:    | 2 | 2,9688 | 0,151 | -0,495 |
| 9 | Q13033 STRN3_HUMAN   | K.NLEQILNGGES#PK.Q           | S229:           | 2 | 2,4619 | 0,316 | -0,083 |
| 9 | Q14493 SLBP_HUMAN    | R.CDGDASPPS#PAR.W            | S23:            | 2 | 3,2159 | 0,489 | -0,186 |
| 9 | Q13283 G3BP1_HUMAN   | K.S#SSPAPADIAQTVQEDLR.T      | S230:           | 3 | 3,3404 | 0,247 | -0,186 |
| 9 | Q13283 G3BP1_HUMAN   | K.SSS#PAPADIAQTVQEDLR.T      | S232:           | 2 | 3,8707 | 0,348 | -0,559 |
| 9 | O43432 IF4G3_HUMAN   | K.SPS#PVLR.L                 | S232:           | 2 | 2,2556 | 0,156 | -0,146 |
| 9 | O95644 NFAC1_HUMAN   | R.GLGACTLLGS#PRHS#PS#TSPR.A  | S233:S237:S239: | 3 | 2,7505 | 0,21  | 0,16   |
| 9 | Q8NDT2 RB15B_HUMAN   | R.NS#LEGYSR.S                | S235:           | 2 | 2,1514 | 0,347 | -0,606 |
| 9 | P62753 RS6_HUMAN     | R.LSS#LRAS#TSK.S             | S236:S240:      | 2 | 2,8469 | 0,306 | -0,403 |
| 9 | O95425 SVIL_HUMAN    | R.DS#SFTEVPRS#PK.H           | S237:S245:      | 2 | 3,8068 | 0,4   | -0,162 |
| 9 | O60271 JIP4_HUMAN    | K.FQELS#QPR.S                | S238:           | 2 | 2,538  | 0,344 | -0,225 |
| 9 | Q15773 MLF2_HUMAN    | R.LAIQGPEDS#PSRQS#R.R        | S238:S243:      | 2 | 2,3339 | 0,354 | -0,339 |
| 9 | Q13136 LIPA1_HUMAN   | R.S#SDGSL#HEEDLAK.V          | S238:S244:      | 2 | 3,2993 | 0,226 | -0,373 |
| 9 | O95425 SVIL_HUMAN    | R.DSS#FTEVPRS#PK.H           | S238:S245:      | 3 | 2,6367 | 0,316 | 0,121  |
| 9 | Q13136 LIPA1_HUMAN   | R.SS#DGS#LSHEEDLAK.V         | S239:S242:      | 2 | 2,3469 | 0,33  | -0,224 |
| 9 | Q92466 DDB2_HUMAN    | R.S#RS#PLELEPEAK.K           | S24:S26:        | 2 | 3,0722 | 0,429 | 0,08   |
| 9 | Q99729 ROAA_HUMAN    | K.EVYQQQYGS#GGR.G            | S242:           | 2 | 3,6672 | 0,333 | -0,695 |
| 9 | Q9Y2W1 TR150_HUMAN   | R.ASAVSELS#PR.E              | S243:           | 2 | 2,9691 | 0,364 | -0,556 |
| 9 | Q9Y570 PPME1_HUMAN   | K.QCEGITS#PEGSK.S            | S243:           | 2 | 2,1015 | 0,384 | -0,622 |
| 9 | P06400 RB_HUMAN      | K.TAVIPINGS#PRT#PR.R         | S249:T252:      | 2 | 2,5142 | 0,261 | 0,223  |
| 9 | P16949 STMN1_HUMAN   | R.ASGQAFELILS#PR.S           | S25:            | 2 | 3,5368 | 0,308 | -0,166 |
| 9 | Q8TAE6 PP14C_HUMAN   | R.VFFQS#PR.G                 | S25:            | 2 | 2,0172 | 0,278 | -0,254 |
| 9 | Q7L9B9 EEP1_HUMAN    | R.KFS#AACNFS#NILVNQER.L      | S25:S31:        | 3 | 5,4048 | 0,311 | 0,085  |
| 9 | P25788 PSA3_HUMAN    | K.ESLKEEDS#DDDNM*.-          | S250:           | 2 | 3,4634 | 0,515 | -0,697 |
| 9 | P52701 MSH6_HUMAN    | R.VIS#DS#ESDIGGS#DVEFKPDTK.E | S252:S254:      | 3 | 3,9549 | 0,412 | 0,153  |
| 9 | P52701 MSH6_HUMAN    | R.VIS#DS#DIGGS#DVEFKPDTK.E   | S256:S261:      | 3 | 4,631  | 0,349 | -0,23  |
| 9 | Q15942 ZYX_HUMAN     | R.GPPAS#SPAPAPKFS#PVTPK.F    | S258:S267:      | 3 | 2,6088 | 0,14  | 0,459  |

|   |                      |                                 |                 |   |        |       |        |
|---|----------------------|---------------------------------|-----------------|---|--------|-------|--------|
| 9 | Q15942 ZYG_HUMAN     | R.GPPASS#PAPAPK.F               | S259:           | 2 | 3,1722 | 0,257 | -0,527 |
| 9 | O00443 P3C2A_HUMAN   | K.VSNLQVS#PK.S                  | S259:           | 2 | 3,0734 | 0,371 | 0      |
| 9 | Q96A00 PP14A_HUMAN   | R.GPGGS#PGGLQK.R                | S26:            | 2 | 2,8928 | 0,366 | -0,236 |
| 9 | Q8N1G2 K0082_HUMAN   | R.VAELALS#LSST#SDDEPPSSVSHGAK.A | S26:T30:        | 3 | 4,8708 | 1     | 0,208  |
| 9 | Q9NQS7 INCE_HUMAN    | R.IAQVS#PGPR.D                  | S263:           | 2 | 2,7594 | 0,336 | -0,607 |
| 9 | Q12888 TP53B_HUMAN   | R.SEDM*PFS#PK.A                 | S265:           | 2 | 2,4656 | 0,295 | -0,215 |
| 9 | Q15942 ZYG_HUMAN     | R.GPPASSPAPAPKFS#PVT#PK.F       | S267:T270:      | 2 | 4,4656 | 0,474 | 0,612  |
| 9 | Q15942 ZYG_HUMAN     | R.GPPASSPAPAPKFS#PVT#PK.F       | S267:T270:      | 3 | 2,6511 | 0,309 | 0,367  |
| 9 | Q6KC79 NIPBL_HUMAN   | K.NNTAAETEDDES#DGEDR.G          | S2672:          | 2 | 4,7268 | 0,641 | -0,501 |
| 9 | Q9UQ35 SRRM2_HUMAN   | R.SLSYS#PVER.R                  | S2694:          | 2 | 2,2037 | 0,342 | -0,218 |
| 9 | P49736 MCM2_HUMAN    | R.GNDPLTSS#PGR.S                | S27:            | 2 | 3,5029 | 0,486 | -0,31  |
| 9 | Q9UJM3 ERRFI_HUMAN   | R.AS#PNS#DEDKPEVPPR.V           | S273:S276:      | 2 | 2,98   | 0,393 | -0,611 |
| 9 | Q9UJM3 ERRFI_HUMAN   | R.AS#PNS#DEDKPEVPPR.V           | S273:S276:      | 3 | 2,9584 | 0,339 | -0,305 |
| 9 | O00203 AP3B1_HUMAN   | K.NFYES#DDDQK.E                 | S276:           | 2 | 2,8962 | 0,24  | -0,637 |
| 9 | Q3KR37 GRM1B_HUMAN   | R.S#RS#PTPQNQDGDGM*VEK.G        | S28:S30:        | 3 | 3,237  | 0,188 | -0,531 |
| 9 | P16949 STMN1_HUMAN   | R.S#KESVPEFPLS#PPK.K            | S28:S38:        | 2 | 3,0872 | 0,254 | -0,358 |
| 9 | Q12857 NFIA_HUMAN    | R.LKS#VEDEM*DS#PGEEPFTGQGR.S    | S280:S287:      | 3 | 5,0829 | 0,478 | -0,415 |
| 9 | Q9Y266 NUDC_HUMAN    | K.LSDLDS#ETR.S                  | S281:           | 2 | 2,4736 | 0,235 | 0,328  |
| 9 | Q15942 ZYG_HUMAN     | K.FTPVASKFS#PGAPGGSGS#QPNQK.L   | S281:S290:      | 3 | 3,0049 | 0,249 | 0,456  |
| 9 | Q9NXR1 NDE1_HUMAN    | R.NLVYDQS#PNR.T                 | S282:           | 2 | 3,0175 | 0,422 | -0,19  |
| 9 | P18583 SON_HUMAN     | K.SVESTS#PEPSK.I                | S283:           | 2 | 2,7564 | 0,444 | -0,795 |
| 9 | P61978 HNRPK_HUMAN   | R.DYDDM*S#PR.R                  | S284:           | 2 | 2,1041 | 0,234 | -0,446 |
| 9 | Q9Y624 JAM1_HUMAN    | K.VIYSQPS#ARS#EGEFK.Q           | S284:S287:      | 2 | 3,47   | 0,402 | 0,328  |
| 9 | Q641Q2 FA21A_HUMAN   | R.S#RPTS#FADELAAR.I             | S284:S288:      | 2 | 3,0615 | 0,105 | -0,077 |
| 9 | O95817 BAG3_HUMAN    | R.SS#TPLHSPS#PIR.V              | S284:S291:      | 3 | 2,6965 | 0,218 | 0      |
| 9 | Q99961 SH3G1_HUMAN   | K.IAASSS#FR.S                   | S288:           | 2 | 2,5187 | 0,415 | -1,726 |
| 9 | P53671 LIMK2_HUMAN   | R.SNS#ISKS#PGPSS#PKEPLLFSR.D    | S289:S293:S298: | 3 | 2,9263 | 1     | -0,075 |
| 9 | Q16269 Q16269_HUMAN  | R.SCQGACGPS#PPDQK.T             | S29:            | 2 | 3,9961 | 0,319 | -0,467 |
| 9 | ##Q8WZ42 TITIN_HUMAN | K.LLQS#PELK.E                   | S29116:         | 2 | 3,1567 | 0,111 | -0,182 |
| 9 | Q8IVF2 AHNK2_HUMAN   | R.DAHDVS#PTST#DTEAQLTVER.Q      | S294:T298:      | 3 | 4,9963 | 1     | 0,549  |
| 9 | Q86YS7 K0528_HUMAN   | K.NQTSYFS#PSK.S                 | S295:           | 2 | 2,1175 | 0,328 | -0,197 |
| 9 | Q13371 PHLP_HUMAN    | R.NSATCHSEDS#DLEID.-            | S296:           | 2 | 3,7144 | 0,346 | -0,619 |
| 9 | Q96RU3 FNBP1_HUMAN   | R.TVS#DNSLSNSR.G                | S296:           | 2 | 3,0688 | 0,409 | -0,291 |

|   |                     |                                 |            |   |        |       |        |
|---|---------------------|---------------------------------|------------|---|--------|-------|--------|
| 9 | Q15642 CIP4_HUMAN   | R.APS#DSS#LGTPSDGRPELR.G        | S296:S299: | 3 | 3,0601 | 0,35  | -0,366 |
| 9 | Q96M11 HYLS1_HUMAN  | R.KLPFPLS#PS.-                  | S297:      | 2 | 3,1398 | 0,374 | -0,343 |
| 9 | Q07157 ZO1_HUMAN    | R.DDISEIQSLAS#DHS#GR.S          | S297:S300: | 2 | 2,6137 | 0,319 | -0,065 |
| 9 | Q5VWG9 TAF3_HUMAN   | K.TAQSPAM*VGS#PIRS#PK.T         | S297:S301: | 2 | 3,2503 | 0,188 | -0,609 |
| 9 | Q15642 CIP4_HUMAN   | R.APSDS#S#LGTPSDGRPELR.G        | S298:S299: | 2 | 2,0951 | 0,335 | 0,549  |
| 9 | P53667 LIMK1_HUMAN  | R.SCS#IDRSPGAGSLGS#PASQR.K      | S298:S310: | 3 | 3,7345 | 0,286 | -0,936 |
| 9 | P07910 HNRPC_HUMAN  | K.EAEEGEDDRDS#ANGEDDS.-         | S299:      | 2 | 2,3421 | 0,317 | -0,846 |
| 9 | Q7Z3D7 Q7Z3D7_HUMAN | R.GGGESLQEAS#PR.L               | S30:       | 2 | 2,583  | 0,335 | -0,481 |
| 9 | P53814 SMTN_HUMAN   | R.SLSVLS#PR.Q                   | S304:      | 2 | 2,5601 | 0,209 | 0,065  |
| 9 | Q5JTV8 TOIP1_HUMAN  | R.M*QNDS#ILK.S                  | S305:      | 2 | 2,5636 | 0,172 | -0,35  |
| 9 | Q08AE8 SPIR1_HUMAN  | R.APTLAELDS#S#ESEETLHK.S        | S305:S306: | 3 | 5,7778 | 0,467 | 0,244  |
| 9 | Q8WWM7 ATX2L_HUMAN  | R.EIESS#PQYR.L                  | S306:      | 2 | 2,0114 | 0,339 | -0,205 |
| 9 | Q9NQS7 INCE_HUMAN   | R.HS#PIAPSS#PSPQVLAQK.Y         | S306:S312: | 2 | 3,6274 | 0,441 | 0,769  |
| 9 | Q9NQS7 INCE_HUMAN   | R.HS#PIAPSS#PSPQVLAQK.Y         | S306:S312: | 3 | 3,453  | 0,361 | 0,192  |
| 9 | P42167 LAP2B_HUMAN  | K.HAS#PILPIT#EFSDIPR.R          | S306:T312: | 2 | 2,164  | 0,119 | -0,125 |
| 9 | Q13769 THOC5_HUMAN  | K.ALFKPPEDS#QDDESDS#DAEEEQTTK.R | S307:S314: | 3 | 3,9028 | 0,275 | -0,677 |
| 9 | Q96MU7 YTDC1_HUMAN  | R.GIS#PIVFDR.S                  | S308:      | 2 | 2,6717 | 0,213 | -0,225 |
| 9 | Q92522 H1X_HUMAN    | K.AGGSAAALS#PSK.K               | S31:       | 2 | 2,8287 | 0,425 | -0,119 |
| 9 | Q9UGU0 TCF20_HUMAN  | R.LEEFS#PR.Q                    | S31:       | 2 | 2,2771 | 0,291 | -0,764 |
| 9 | P16949 STMN1_HUMAN  | R.SKES#VPEFPLS#PPK.K            | S31:S38:   | 2 | 2,6634 | 0,415 | -0,072 |
| 9 | P53667 LIMK1_HUMAN  | R.SPGAGSLGS#PASQR.K             | S310:      | 2 | 3,7832 | 0,475 | -0,541 |
| 9 | O43293 DAPK3_HUMAN  | K.SHS#S#LPPNNSYADFER.F          | S311:S312: | 2 | 4,2122 | 0,517 | -0,185 |
| 9 | O43293 DAPK3_HUMAN  | K.SHS#S#LPPNNSYADFER.F          | S311:S312: | 3 | 4,1534 | 0,407 | -0,277 |
| 9 | Q9UPQ6 Q9UPQ6_HUMAN | R.EES#ETRSES#SDFEVVPK.R         | S312:S318: | 2 | 2,4905 | 0,125 | -0,231 |
| 9 | Q5JTV8 TOIP1_HUMAN  | K.SELGNQS#PSTSSR.Q              | S315:      | 2 | 3,7874 | 0,511 | -0,512 |
| 9 | P04637 P53_HUMAN    | R.ALPNNTSSS#PQPK.K              | S315:      | 2 | 2,1829 | 0,184 | -0,429 |
| 9 | P37275 ZEB1_HUMAN   | K.TSQCSSPS#LSASPGS#PTRPQIR.Q    | S315:S322: | 3 | 4,043  | 1     | 0,074  |
| 9 | Q9P0K7 RAI14_HUMAN  | K.AEISS#IR.E                    | S318:      | 2 | 2,3179 | 0,271 | 0      |
| 9 | Q7L4I2 RSRC2_HUMAN  | K.EQSEVSVS#PR.A                 | S32:       | 2 | 2,726  | 0,368 | -0,509 |
| 9 | Q9Y608 LRRF2_HUMAN  | R.NSASATTPLS#GNSSR.R            | S320:      | 2 | 3,6232 | 0,511 | -0,797 |
| 9 | Q6ZW76 ANKS3_HUMAN  | R.DVTS#PINER.D                  | S320:      | 2 | 2,0762 | 0,162 | -0,439 |
| 9 | Q9NY61 AATF_HUMAN   | R.YLVDGTKPNAGSEIS#S#EDDELVEEK.K | S320:S321: | 3 | 4,4503 | 0,357 | -0,425 |
| 9 | Q9BYI3 HYCCI_HUMAN  | R.NAVTSM*S#IR.G                 | S321:      | 2 | 2,8041 | 0,388 | -0,227 |

|   |                    |                                    |            |   |        |       |        |
|---|--------------------|------------------------------------|------------|---|--------|-------|--------|
| 9 | Q86YS7 K0528_HUMAN | K.TGM*GS#GS#AGKEGGPFK.A            | S321:S323: | 2 | 3,2968 | 0,464 | -0,668 |
| 9 | Q9NQW6 ANLN_HUMAN  | K.TPIS#PLK.T                       | S323:      | 2 | 2,5279 | 0,298 | 0,219  |
| 9 | Q9Y608 LRRF2_HUMAN | R.NSASATPLSGNSS#R.R                | S324:      | 2 | 3,8731 | 0,575 | -0,479 |
| 9 | P33991 MCM4_HUMAN  | R.IAEPS#VCGR.C                     | S326:      | 2 | 2,3534 | 0,356 | -0,114 |
| 9 | Q9Y608 LRRF2_HUMAN | R.RGS#GDTS#SLIDPDTLSSELR.D         | S328:S332: | 3 | 4,7187 | 0,293 | -0,323 |
| 9 | Q9UIG0 BAZ1B_HUMAN | K.TDNSSLSS#PLNPK.L                 | S330:      | 2 | 3,2553 | 0,348 | -0,339 |
| 9 | Q8N5G2 MACOI_HUMAN | K.NASGVVNS#SPR.S                   | S331:      | 2 | 2,0556 | 0,237 | -0,522 |
| 9 | P40925 MDHC_HUMAN  | K.ELTEEKESAFELFSA.-                | S332:      | 2 | 2,9246 | 0,419 | -0,579 |
| 9 | Q9BW71 HIRP3_HUMAN | R.LSGS#S#EDEEDSGKGEPTAK.G          | S332:S333: | 3 | 4,2966 | 0,481 | -0,615 |
| 9 | Q9UN36 NDRG2_HUMAN | R.TAS#L TSAASVDGNRS#R.S            | S332:S344: | 2 | 2,3809 | 0,404 | -0,209 |
| 9 | Q9UGV2 NDRG3_HUMAN | R.THSTS#S#SLGSGESPF SR.S           | S333:S334: | 3 | 3,656  | 1     | 0,097  |
| 9 | P08651 NFIC_HUMAN  | K.TEM*DKS#PFNSPSPQDS#PR.L          | S333:S343: | 3 | 4,771  | 0,368 | -0,417 |
| 9 | Q9NYV4 CD2L7_HUMAN | R.SSS#PFLSK.R                      | S334:      | 2 | 2,1252 | 0,198 | -0,196 |
| 9 | Q92597 NDRG1_HUMAN | R.TASGSSVTS#LDGTR.S                | S336:      | 2 | 2,9477 | 0,518 | -0,43  |
| 9 | Q4G0J3 LARP7_HUMAN | R.DIEIS#T#EEEEKTGDLK.D             | S337:T338: | 3 | 3,0816 | 0,402 | -0,462 |
| 9 | P08651 NFIC_HUMAN  | K.SPFNSPS#PQDSPR.L                 | S339:      | 2 | 3,2355 | 0,347 | -0,326 |
| 9 | Q96P47 CENG3_HUMAN | R.SNIFTS#R.K                       | S341:      | 2 | 2,1642 | 0,251 | 0,135  |
| 9 | P08651 NFIC_HUMAN  | K.SPFNSPSPQDS#PR.L                 | S343:      | 2 | 3,4042 | 0,335 | -0,163 |
| 9 | P01892 1A02_HUMAN  | R.KGGS#YSQAASSDSAQGS DV S#LTACKV.- | S343:S359: | 3 | 6,3666 | 1     | 1,143  |
| 9 | O14681 EI24_HUMAN  | K.FPS#PHPS#PAK.L                   | S345:S349: | 2 | 3,0741 | 0,141 | -0,1   |
| 9 | Q9BVS4 RIOK2_HUMAN | K.AEVYGS#ENESER.N                  | S350:      | 2 | 3,1501 | 0,448 | -0,337 |
| 9 | Q9UBU7 DBF4A_HUMAN | R.IKYS#VGSL S#PVSASVLK.K           | S354:S359: | 3 | 3,2305 | 0,13  | -0,193 |
| 9 | Q9UBU7 DBF4A_HUMAN | R.IKYS#VGSL S#PVSASVLK.K           | S354:S359: | 2 | 2,8401 | 0,242 | -0,386 |
| 9 | P51991 ROA3_HUMAN  | R.SS#GSPYGGY GSGGGSGGYGSR.R        | S356:      | 2 | 3,2972 | 0,595 | -0,735 |
| 9 | Q13009 TIAM1_HUMAN | R.SNATNSSYS#PTTGR.A                | S358:      | 2 | 3,0274 | 0,436 | -0,481 |
| 9 | O60271 JIP4_HUMAN  | K.DLS#GYKGSST#PTK.G                | S358:T365: | 2 | 2,3914 | 0,278 | -0,569 |
| 9 | P05787 K2C8_HUMAN  | R.ISSS#SFSR.V                      | S36:       | 2 | 2,0768 | 0,102 | -0,128 |
| 9 | P09651 ROA1_HUMAN  | R.NQGGYGGSS#SSSYGSGR.R             | S361:      | 2 | 5,0558 | 0,613 | -0,756 |
| 9 | O14929 HAT1_HUMAN  | R.LIS#PYK.K                        | S361:      | 2 | 2,1952 | 0,107 | 0,152  |
| 9 | P09651 ROA1_HUMAN  | R.NQGGYGGSSS#SSY GSGR.R            | S363:      | 2 | 4,5819 | 0,527 | -0,55  |
| 9 | Q96PM9 Z385A_HUMAN | R.TAHGPILFS#PY.-                   | S364:      | 2 | 2,7752 | 0,393 | -0,475 |
| 9 | Q9NQZ2 SAS10_HUMAN | K.TSAAACAVTDLS#DDS#DFDEKAK.L       | S365:S368: | 3 | 4,2593 | 0,402 | -0,222 |
| 9 | Q8TEW8 PAR3L_HUMAN | R.LGGKPPSSPS#LS#PLM*GFGSNK.N       | S366:S368: | 3 | 4,1464 | 0,246 | 0      |

|   |                    |                                 |            |   |        |       |        |
|---|--------------------|---------------------------------|------------|---|--------|-------|--------|
| 9 | Q7Z4V5 HDGR2_HUMAN | R.GS#GGG#SGDELREDDEPVK.K        | S366:S369: | 2 | 2,636  | 0,241 | -0,551 |
| 9 | P09651 ROA1_HUMAN  | R.NQGGYGGSSSSSYGS#GR.R          | S368:      | 2 | 5,0528 | 0,581 | -0,756 |
| 9 | P09651 ROA1_HUMAN  | R.NQGGYGGSSSSSYGS#GR.R          | S368:      | 3 | 2,7265 | 0,279 | -0,103 |
| 9 | Q02156 KPCE_HUMAN  | K.ALS#FDNR.G                    | S368:      | 2 | 2,1568 | 0,366 | 0,068  |
| 9 | Q96553 TESK2_HUMAN | R.SQS#DIFSR.K                   | S369:      | 2 | 2,6667 | 0,325 | 0,06   |
| 9 | P05787 K2C8_HUMAN  | R.ISSSS#FSR.V                   | S37:       | 2 | 2,1566 | 0,093 | -1,219 |
| 9 | Q03135 CAV1_HUMAN  | K.AM*ADELS#EK.Q                 | S37:       | 2 | 2,0902 | 0,139 | -0,224 |
| 9 | Q9UHB6 LIMA1_HUMAN | R.ASSLESS#PPK.A                 | S374:      | 2 | 2,7422 | 0,218 | -0,313 |
| 9 | Q9Y6X4 K0888_HUMAN | K.LESTARPSES#S#EEFLEEEPEQR.G    | S378:S379: | 3 | 4,5137 | 1     | -0,401 |
| 9 | Q9H6Y2 WDR55_HUMAN | R.EEGEDSM*AQEEKEETGDDS#D.-      | S382:      | 3 | 4,2953 | 0,421 | -0,551 |
| 9 | O95049 ZO3_HUMAN   | R.ESSYDIYRVPSS#QS#M*EDR.G       | S383:S385: | 3 | 3,7289 | 0,327 | 0,079  |
| 9 | Q9BSQ5 CCM2_HUMAN  | R.GIITDS#FGR.H                  | S384:      | 2 | 2,2635 | 0,363 | 0      |
| 9 | Q69YQ0 CYTSA_HUMAN | R.KGS#S#GNASEVSVACLTER.I        | S384:S385: | 2 | 2,2748 | 0,349 | -0,606 |
| 9 | Q86SQ0 PHLB2_HUMAN | R.RNFS#CGS#VEFDEADLESLR.Q       | S384:S387: | 3 | 5,0249 | 0,437 | -0,383 |
| 9 | Q7Z6L1 K1358_HUMAN | R.S#HSGSSSS#LLSAGCFFGDEV.R      | S384:S391: | 3 | 4,1567 | 1     | -0,39  |
| 9 | P42167 LAP2B_HUMAN | R.M*EES#FSSK.Y                  | S385:      | 2 | 2,3872 | 0,233 | -0,234 |
| 9 | P35269 T2FA_HUMAN  | R.GNS#RPGT#PSAEGGSTSSTLR.A      | S385:T389: | 3 | 4,7884 | 0,48  | -0,352 |
| 9 | Q9Y2W3 S45A1_HUMAN | K.YGSFIS#R.D                    | S387:      | 2 | 2,4456 | 0,455 | 0,067  |
| 9 | P24864 CCNE1_HUMAN | K.AM*LSEQNRAS#PLPS#GLLTPPQSGK.K | S387:S391: | 3 | 2,9444 | 0,108 | -0,138 |
| 9 | Q8TDD1 DDX54_HUMAN | R.GAASQARGS#DS#EDGEFEIQAEDDAR.A | S39:S41:   | 3 | 6,7559 | 0,505 | -0,33  |
| 9 | P04637 P53_HUMAN   | K.LM*FKTEGPDS#D.-               | S392:      | 2 | 3,1233 | 0,362 | 0,183  |
| 9 | P38398 BRCA1_HUMAN | R.SDELLGS#DDS#HDGESESNAK.V      | S395:S398: | 3 | 2,9643 | 0,347 | -0,325 |
| 9 | Q8NHV4 NEDD1_HUMAN | K.NQDFSS#FDDTGK.S               | S397:      | 2 | 3,535  | 0,456 | -0,169 |
| 9 | P52272 HNRPM_HUMAN | K.QGGGGGGGS#VPGIER.M            | S397:      | 2 | 3,1906 | 0,461 | -0,358 |
| 9 | Q96ST2 IWS1_HUMAN  | K.AAVLS#DS#EDEEKASAK.K          | S398:S400: | 2 | 5,4301 | 0,535 | -0,472 |
| 9 | Q9BUL5 PHF23_HUMAN | R.LGGPPKS#GEP.-                 | S400:      | 2 | 2,3974 | 0,436 | -0,18  |
| 9 | Q9C0C9 UBE2O_HUMAN | R.IM*SCS#PDTQCSR.D              | S401:      | 2 | 3,2656 | 0,496 | -0,635 |
| 9 | Q8NCN4 RN169_HUMAN | R.VLS#PLIKST#PR.N               | S403:T410: | 3 | 2,8676 | 0,255 | 0      |
| 9 | Q9Y2K6 UBP20_HUMAN | K.LSS#SPPRAS#PVR.M              | S407:S413: | 2 | 3,2217 | 0,416 | -0,604 |
| 9 | Q96M27 PRRC1_HUMAN | K.SLLNV#R.T                     | S408:      | 2 | 2,0056 | 0,259 | -0,281 |
| 9 | P49736 MCM2_HUMAN  | R.TDALTSS#PGR.D                 | S41:       | 2 | 3,0922 | 0,378 | -0,337 |
| 9 | Q53F19 CQ085_HUMAN | K.M*ISTPS#PK.K                  | S415:      | 2 | 2,3111 | 0,274 | -0,127 |
| 9 | Q15036 SNX17_HUMAN | R.SDSQQAVKS#PPLLES#PDATR.E      | S415:S421: | 3 | 3,5657 | 0,333 | 0,16   |

|   |                     |                                 |            |   |        |       |        |
|---|---------------------|---------------------------------|------------|---|--------|-------|--------|
| 9 | Q9HAV4 XPO5_HUMAN   | K.TDS#PSCEYSR.F                 | S416:      | 2 | 2,6418 | 0,407 | -0,095 |
| 9 | B2RMZ9 B2RMZ9_HUMAN | R.LNSS#PRAPVS#PLK.F             | S417:S423: | 2 | 3,1965 | 0,35  | 0,32   |
| 9 | B2RMZ9 B2RMZ9_HUMAN | R.LNSS#PRAPVS#PLK.F             | S417:S423: | 3 | 2,812  | 0,116 | 0,18   |
| 9 | Q9NQC7 CYLD_HUMAN   | R.FHS#LPFS#LTK.M                | S418:S422: | 2 | 2,6413 | 0,272 | -0,274 |
| 9 | Q9P2I0 CPSF2_HUMAN  | K.EADIDS#\$#DESDIEEDIDQPSAHK.T  | S419:S420: | 3 | 2,7587 | 0,209 | 0      |
| 9 | Q9Y5S9 RBM8A_HUMAN  | R.GFGS#EEGSR.A                  | S42:       | 2 | 2,4093 | 0,206 | 0,121  |
| 9 | P85037 FOXK1_HUMAN  | R.SAPAS#PTHPGLM*\$#PR.S         | S420:S428: | 2 | 2,8528 | 0,38  | -0,508 |
| 9 | Q7L7X3 TAOK1_HUMAN  | R.ASDPQS#PPQVSR.H               | S421:      | 2 | 3,3501 | 0,255 | -0,543 |
| 9 | Q2KHR2 RFXD2_HUMAN  | K.NGSVVSLOS#PGSR.S              | S424:      | 2 | 2,7819 | 0,349 | -0,357 |
| 9 | Q53EZ4 CEP55_HUMAN  | K.VAASPKS#PTAALNES#LVECPK.C     | S428:S436: | 3 | 3,9711 | 0,302 | 0      |
| 9 | P05787 K2C8_HUMAN   | R.VGS#SNFR.G                    | S43:       | 2 | 2,4243 | 0,228 | 0      |
| 9 | O95232 CROP_HUMAN   | K.NEVNGTSEDIKSEGDTQS#N.-        | S431:      | 3 | 3,5985 | 0,383 | -0,087 |
| 9 | P35269 T2FA_HUMAN   | R.LDTGPQS#LSGKS#TPQPPSGK.T      | S431:S436: | 3 | 3,1679 | 0,121 | -0,598 |
| 9 | Q9Y4K4 M4K5_HUMAN   | R.RQS#\$#PSCGPVAETSSIGNGDGISK.L | S433:S434: | 3 | 5,494  | 1     | 0,574  |
| 9 | Q9Y6A5 TACC3_HUMAN  | K.SGCSEAQPPE\$#PETR.L           | S434:      | 2 | 3,9018 | 0,467 | -0,428 |
| 9 | Q92754 AP2C_HUMAN   | K.SYM*NGPDQS#PADSNK.T           | S434:      | 2 | 3,1592 | 0,43  | -0,429 |
| 9 | Q9NPQ8 RIC8A_HUMAN  | R.GLM*AGGRPEGQYS#EDED#DTDEYK.E  | S435:T440: | 3 | 6,3923 | 1     | -0,516 |
| 9 | Q14004 CD2L5_HUMAN  | R.HSS#IS#PSTLTLK.S              | S437:S439: | 2 | 3,6682 | 0,456 | -0,256 |
| 9 | O94804 STK10_HUMAN  | K.QVAEQGGDLS#PAANR.S            | S438:      | 2 | 3,7913 | 0,428 | -0,383 |
| 9 | Q96ST2 IWS1_HUMAN   | K.TIAS#DS#EEEAGKELSDK.K         | S438:S440: | 2 | 3,7174 | 0,548 | 0,186  |
| 9 | P47974 TISD_HUMAN   | R.RLS#DSPVFDAPPS#PPDSLSDR.D     | S438:S448: | 3 | 4,0325 | 0,309 | -0,227 |
| 9 | O43318 M3K7_HUMAN   | R.RS#IQDLTVTGTEPGQVS#SR.S       | S439:S454: | 3 | 2,6743 | 0,369 | -0,167 |
| 9 | P05787 K2C8_HUMAN   | R.VGSS#NFR.G                    | S44:       | 2 | 2,3462 | 0,156 | 0      |
| 9 | Q5T230 UTF1_HUMAN   | R.RPASPS#ALGELGLPVS#PGSAQR.T    | S44:S54:   | 3 | 3,3692 | 0,252 | -0,238 |
| 9 | P85037 FOXK1_HUMAN  | R.SGGLQTPECLS#R.E               | S441:      | 2 | 2,2426 | 0,093 | 0,088  |
| 9 | O75362 ZN217_HUMAN  | R.GEGGS#EDGS#EDGLPEGIHLDK.N     | S441:S445: | 3 | 4,1792 | 0,374 | -0,243 |
| 9 | Q92667 AKAP1_HUMAN  | K.TYVSCLKS#LLSS#PTK.D           | S441:S445: | 2 | 2,3752 | 0,189 | -0,397 |
| 9 | O00418 EF2K_HUMAN   | R.ESENSGDSGYPS#EK.R             | S445:      | 2 | 2,6939 | 0,385 | -0,312 |
| 9 | Q9BRS8 LARP6_HUMAN  | R.QAEM*GTQEK\$#PGTS#PLLSR.K     | S447:S451: | 3 | 2,8198 | 0,184 | -0,25  |
| 9 | Q9H0D6 XRN2_HUMAN   | R.NS#PGSQVASNPR.Q               | S448:      | 2 | 2,9966 | 0,331 | -0,754 |
| 9 | Q13492 PICAL_HUMAN  | K.SSGDVHLS#IS#SDVSTFTTR.T       | S450:S452: | 3 | 2,972  | 0,267 | 0      |
| 9 | O43719 HTSF1_HUMAN  | K.TEDGGEFEEGASENNAKES#\$#PEK.E  | S452:S453: | 3 | 4,5048 | 0,388 | -0,492 |
| 9 | P29374 ARI4A_HUMAN  | K.SEPEENIDS#NS#ESEREEIELK.S     | S453:S455: | 3 | 2,9513 | 0,356 | -0,14  |



|   |                    |                                    |                 |   |        |       |        |
|---|--------------------|------------------------------------|-----------------|---|--------|-------|--------|
| 9 | Q14676 MDC1_HUMAN  | R.SQTTTERDS#DT#DVEEEELPVENR.E      | S453:T455:      | 3 | 5,0316 | 1     | 0,258  |
| 9 | P53396 ACLY_HUMAN  | R.TAS#FSES.R.A                     | S455:           | 2 | 2,348  | 0,301 | 0,063  |
| 9 | Q53EL6 PDCD4_HUMAN | R.FVS#EGDGGR.L                     | S457:           | 2 | 2,6245 | 0,233 | -0,061 |
| 9 | Q96NT5 PCFT_HUMAN  | K.ADPHLEFQQFPQS#P.-                | S458:           | 2 | 3,0448 | 0,411 | -0,213 |
| 9 | Q7Z5K2 WAPL_HUMAN  | K.YFGFDDL#ES#EDDEDDDCQVERK.T       | S459:S461:      | 3 | 3,1015 | 0,397 | -0,369 |
| 9 | Q7Z5L9 I2BP2_HUMAN | R.NSNSPPS#PSSM*NQR.R               | S460:           | 2 | 2,5609 | 0,319 | -0,763 |
| 9 | Q9ULU4 PKCB1_HUMAN | K.ATSSHFS#ASEES#M*DFLDK.S          | S460:S465:      | 3 | 4,0937 | 1     | -0,254 |
| 9 | Q9H4G0 E41L1_HUMAN | R.DEDGES#GGQRS#EAEEGEVR.T          | S461:S466:      | 3 | 3,9267 | 0,314 | -0,583 |
| 9 | O15427 MOT4_HUMAN  | K.NGEVVHTPETS#V.-                  | S464:           | 2 | 2,7794 | 0,425 | -0,543 |
| 9 | Q15149 PLEC1_HUMAN | R.RGS#FDATGSGFSM*TFSSSS#YSSSGYGR.R | S4642:S4658:    | 3 | 4,1828 | 1     | -0,248 |
| 9 | P19484 TFEB_HUMAN  | R.RSS#FSM*EEGDVL.-                 | S467:           | 2 | 2,9031 | 0,374 | -0,168 |
| 9 | P23381 SYWC_HUMAN  | R.KLS#FDFQ.-                       | S467:           | 2 | 2,6615 | 0,173 | -0,316 |
| 9 | Q9BTU6 P4K2A_HUMAN | R.VAAAAGSGPS#PPGS#PGHDR.E          | S47:S51:        | 2 | 4,1191 | 0,517 | -0,66  |
| 9 | Q9BTU6 P4K2A_HUMAN | R.VAAAAGSGPS#PPGS#PGHDR.E          | S47:S51:        | 3 | 3,283  | 0,283 | -0,198 |
| 9 | Q9NV70 EXOC1_HUMAN | K.LTGS#TSS#LNKLSVQSSGNR.R          | S470:S473:      | 3 | 4,6571 | 1     | -0,087 |
| 9 | Q9NS91 RAD18_HUMAN | K.NDLQDTEIS#PR.Q                   | S471:           | 2 | 2,7543 | 0,341 | -0,178 |
| 9 | Q13433 S39A6_HUMAN | K.YESQLS#TNEEK.V                   | S472:           | 2 | 2,8701 | 0,344 | -0,52  |
| 9 | Q9NUY8 TBC23_HUMAN | R.SSINSVDGES#PNGSSDR.G             | S474:           | 2 | 4,1686 | 0,581 | -0,682 |
| 9 | Q2TBE0 C19L2_HUMAN | K.STFAGS#PER.E                     | S475:           | 2 | 2,2255 | 0,163 | -0,355 |
| 9 | Q9P2B4 CT2NL_HUMAN | K.FQSQADQDQQASGLQS#PPSR.D          | S481:           | 3 | 4,1767 | 0,193 | -0,406 |
| 9 | Q96L73 NSD1_HUMAN  | K.SLAFDS#EHS#ADEK.E                | S483:S486:      | 2 | 4,1788 | 0,448 | -0,229 |
| 9 | Q96Q42 ALS2_HUMAN  | R.RLS#LPGLLSQVS#PR.L               | S483:S492:      | 3 | 4,1985 | 0,429 | -0,326 |
| 9 | Q96Q42 ALS2_HUMAN  | R.RLS#LPGLLSQVS#PR.L               | S483:S492:      | 2 | 3,4908 | 0,449 | -0,725 |
| 9 | O60832 DKC1_HUMAN  | K.AGLES#GAEPGDGDS#DTTK.K           | S485:S494:      | 3 | 3,9262 | 0,298 | -0,183 |
| 9 | O60832 DKC1_HUMAN  | K.AGLES#GAEPGDGDS#DTTK.K           | S485:S494:      | 2 | 3,3116 | 0,493 | -0,673 |
| 9 | Q03468 ERCC6_HUMAN | R.LKLEDDS#EES#DAEFDEGFK.V          | S486:S489:      | 3 | 2,9331 | 0,209 | -0,077 |
| 9 | Q9H6U6 BCAS3_HUMAN | R.CSPVPGLS#PS#GSPLHGK.L            | S488:S490:      | 3 | 2,738  | 0,297 | 0,091  |
| 9 | P50402 EMD_HUMAN   | R.RLS#PPSSAASSY#SFSDLNSTR.G        | S49:Y59:        | 3 | 2,7257 | 1     | -1,182 |
| 9 | Q6UN15 FIP1_HUMAN  | R.DHS#PTPS#VFNSDEER.Y              | S492:S496:      | 2 | 4,3981 | 0,497 | 0,585  |
| 9 | Q6UN15 FIP1_HUMAN  | R.DHS#PTPS#VFNSDEER.Y              | S492:S496:      | 3 | 3,3268 | 0,294 | 0,195  |
| 9 | Q6UN15 FIP1_HUMAN  | R.DHS#PT#PSVFNSDEER.Y              | S492:T494:      | 2 | 4,4419 | 0,312 | 0,455  |
| 9 | Q14692 BMS1_HUMAN  | R.KLELEEDS#EM*DLPAFADS#DDDLER.S    | S494:S504:      | 3 | 3,2512 | 0,205 | -0,433 |
| 9 | Q14676 MDC1_HUMAN  | K.DQPPFGDS#DDS#VEADKSS#PGIHLER.S   | S495:S498:S505: | 3 | 3,6551 | 0,321 | -0,374 |

|   |                     |                             |            |   |        |       |        |
|---|---------------------|-----------------------------|------------|---|--------|-------|--------|
| 9 | B2R6A5 B2R6A5_HUMAN | K.DTDGGPKKEES#PV.-          | S498:      | 2 | 3,6808 | 0,399 | -0,424 |
| 9 | P23588 IF4B_HUMAN   | R.SQSS#DTEQQSPTSGGGK.V      | S498:      | 2 | 2,2288 | 0,369 | -0,277 |
| 9 | Q9H7N4 SFR19_HUMAN  | R.QRS#PS#PAPAPAPAAAAGPPTR.K | S498:S500: | 3 | 3,6674 | 0,266 | -0,258 |
| 9 | Q9H7N4 SFR19_HUMAN  | R.QRS#PS#PAPAPAPAAAAGPPTR.K | S498:S500: | 2 | 2,51   | 0,223 | -0,459 |
| 9 | Q8N3X1 FNBP4_HUMAN  | K.IDENS#DKEM*EVEES#PEK.I    | S499:S508: | 3 | 4,9283 | 0,362 | -0,251 |
| 9 | Q9UQR0 SCML2_HUMAN  | K.RS#PQQTPVYVVPLS#PK.L      | S499:S511: | 2 | 3,9176 | 0,436 | -0,25  |
| 9 | Q8IY92 BTBDC_HUMAN  | K.ALEIS#PR.S                | S502:      | 2 | 2,4355 | 0,163 | 0,211  |
| 9 | Q05655 KPCD_HUMAN   | K.ENIFGES#R.A               | S503:      | 2 | 2,0322 | 0,278 | 0      |
| 9 | P83436 COG7_HUMAN   | K.YLSDSCS#PR.S              | S506:      | 2 | 2,5045 | 0,429 | -0,314 |
| 9 | Q9Y6G9 DC1L1_HUMAN  | R.KPVTVS#PTTPTSPTEGEAS.-    | S510:      | 2 | 3,7322 | 0,496 | -0,496 |
| 9 | Q6ZRV2 FA83H_HUMAN  | R.LDYVPS#S#ASREVR.H         | S513:S514: | 2 | 2,5906 | 0,268 | 0,298  |
| 9 | Q9Y6G9 DC1L1_HUMAN  | R.KPVTVSPTTPTS#PTEGEAS.-    | S516:      | 2 | 4,7772 | 0,624 | -0,621 |
| 9 | Q07866 KLC1_HUMAN   | R.S#RES#LNVDVVK.Y           | S517:S520: | 2 | 4,0449 | 0,461 | 0,607  |
| 9 | P10636 TAU_HUMAN    | R.SGYSSPGS#PGTPGSR.S        | S519:      | 2 | 2,7041 | 0,453 | -0,414 |
| 9 | Q8N2Y8 RUSC2_HUMAN  | R.M*LS#CPVR.L               | S519:      | 2 | 2,3619 | 0,153 | -0,127 |
| 9 | Q86TV6 TTC7B_HUMAN  | K.SCYNLTNPSDSGRGS#S#LLDR.T  | S527:S528: | 3 | 2,6939 | 0,22  | 0      |
| 9 | P49790 NU153_HUMAN  | K.FSS#PIVK.S                | S529:      | 2 | 2,363  | 0,106 | 0,142  |
| 9 | Q5TC82 RC3H1_HUMAN  | K.IDHLS#SSAPGS#PPDLLESVPK.S | S529:S535: | 3 | 3,393  | 0,395 | -0,317 |
| 9 | Q5TC82 RC3H1_HUMAN  | K.IDHLS#SSAPGS#PPDLLESVPK.S | S531:S535: | 3 | 3,2284 | 0,168 | -0,159 |
| 9 | Q9Y2F5 K0947_HUMAN  | K.SELCSS#PLGK.R             | S533:      | 2 | 2,0731 | 0,184 | -0,105 |
| 9 | Q86VM9 ZCH18_HUMAN  | K.LGVSVS#PSR.A              | S534:      | 2 | 3,0423 | 0,363 | 0      |
| 9 | Q13144 EI2BE_HUMAN  | R.GGS#PQM*DDIK.V            | S544:      | 2 | 2,3733 | 0,322 | -0,533 |
| 9 | Q5JTD0 TJAP1_HUMAN  | R.KDS#LTQAQEQGNLLN.-        | S545:      | 2 | 3,376  | 0,343 | -0,07  |
| 9 | A9Z1X7 A9Z1X7_HUMAN | R.WQS#PVTK.S                | S547:      | 2 | 2,0204 | 0,265 | -0,066 |
| 9 | Q96FS4 SIPA1_HUMAN  | R.SGS#DAGEARPPTPAS#PR.A     | S55:S67:   | 2 | 2,9482 | 0,266 | -0,74  |
| 9 | P27824 CALX_HUMAN   | K.QKS#DAEEDGGTVS#QEEEDR.K   | S554:S564: | 3 | 3,9182 | 0,355 | -0,564 |
| 9 | Q13112 CAF1B_HUMAN  | R.LDENKGGTES#LDP.-          | S556:      | 2 | 3,246  | 0,371 | -0,252 |
| 9 | Q14C86 GAPD1_HUMAN  | K.TLRFS#LCS#DNLEGISEGPSNR.S | S566:S569: | 3 | 4,3739 | 0,38  | 0,073  |
| 9 | Q9HAU0 PKHA5_HUMAN  | R.SEVS#SPIQR.G              | S567:      | 2 | 2,396  | 0,178 | 0,225  |
| 9 | Q86W92 LIPB1_HUMAN  | K.DS#QRNSPFQIPPPS#PDSK.K    | S567:S579: | 3 | 2,7837 | 0,119 | 1,103  |
| 9 | O95251 MYST2_HUMAN  | R.LSQSSQDSS#PVR.N           | S57:       | 2 | 2,7541 | 0,331 | -0,356 |
| 9 | Q86V48 LUZP1_HUMAN  | K.AIGALASS#R.R              | S570:      | 2 | 2,7206 | 0,416 | 0,066  |
| 9 | P17812 PYRG1_HUMAN  | R.DTYSDRS#GSSS#PDSEITELK.F  | S571:S575: | 3 | 3,6384 | 1     | -0,941 |

|   |                    |                                |                 |   |        |       |        |
|---|--------------------|--------------------------------|-----------------|---|--------|-------|--------|
| 9 | Q09666 AHNK_HUMAN  | K.GGVTGS#PEAS#ISGSKGDLK.S      | S5731:S5735:    | 2 | 3,4769 | 0,55  | -0,448 |
| 9 | Q09666 AHNK_HUMAN  | K.GGVTGS#PEAS#ISGSKGDLK.S      | S5731:S5735:    | 3 | 2,8183 | 0,226 | -0,288 |
| 9 | P17812 PYRG1_HUMAN | R.SGSS#S#PDSEITELKFPSINHD.-    | S574:S575:      | 3 | 4,1616 | 0,41  | -0,38  |
| 9 | Q9UGU0 TCF20_HUMAN | R.LNAS#PAAREEATS#PGA.K.D       | S574:S583:      | 2 | 3,8245 | 0,624 | -0,533 |
| 9 | Q8IZM8 ZN654_HUMAN | K.KCQTLFGFDS#DDESA.-           | S576:           | 2 | 3,9074 | 0,43  | -0,339 |
| 9 | Q8TDC3 BRSK1_HUMAN | R.NSFLGS#PR.F                  | S579:           | 2 | 2,146  | 0,311 | 0      |
| 9 | P46013 KI67_HUMAN  | K.AQSLVIS#PPAPS#PRKT#PVASDQR.R | S579:S584:T588: | 3 | 4,3694 | 0,517 | 0,138  |
| 9 | O43847 NRDC_HUMAN  | K.AKS#TCS#CPDLQPNGQDLGENSR.V   | S58:S61:        | 3 | 4,5822 | 0,442 | 0,494  |
| 9 | Q8IV63 VRK3_HUMAN  | R.GLNSSFETS#PK.K               | S59:            | 2 | 2,7697 | 0,469 | -0,294 |
| 9 | Q9H2Y7 ZF106_HUMAN | K.IEFQVHALEDES#DGETS#DTEK.H    | S590:S595:      | 3 | 6,665  | 0,535 | -0,072 |
| 9 | Q9BXW9 FACD2_HUMAN | R.SES#PSLTQER.A                | S592:           | 2 | 2,4368 | 0,399 | -0,402 |
| 9 | Q12830 BPTF_HUMAN  | R.ES#HTPV#IQEEIVGDFK.S         | S598:S603:      | 3 | 4,1522 | 0,413 | -0,264 |
| 9 | Q12830 BPTF_HUMAN  | R.ES#HT#PVSIIQEEIVGDFK.S       | S598:T600:      | 3 | 3,7955 | 0,258 | -0,441 |
| 9 | Q96Q07 BTBD9_HUMAN | R.APSGSSLPSS#PGSNSR.S          | S599:           | 2 | 3,5334 | 0,414 | -0,7   |
| 9 | Q08AD1 CA1L1_HUMAN | K.LNQSS#PDNVTDTK.G             | S599:           | 2 | 3,3364 | 0,462 | -0,488 |
| 9 | P31949 S10AB_HUMAN | K.ISS#PTETER.C                 | S6:             | 2 | 2,7366 | 0,211 | -0,555 |
| 9 | Q7L2J0 MEPCE_HUMAN | R.CAPSAGS#PAAAVGR.E            | S60:            | 2 | 3,48   | 0,475 | -0,542 |
| 9 | O00443 P3C2A_HUMAN | R.GFELSSS#TR.K                 | S60:            | 2 | 2,6764 | 0,412 | 0,115  |
| 9 | Q13442 HAP28_HUMAN | K.KSLDS#DES#EDEEDDYQK.R        | S60:S63:        | 3 | 5,9507 | 0,341 | -0,237 |
| 9 | Q13442 HAP28_HUMAN | K.SLDS#DES#EDEEDDYQK.R         | S60:S63:        | 3 | 4,7197 | 0,541 | -0,545 |
| 9 | P50579 AMPM2_HUMAN | K.GPSAAGEQEPDKES#GAS#VDEVAR.Q  | S60:S63:        | 3 | 4,1536 | 0,465 | -0,898 |
| 9 | Q15424 SAFB1_HUMAN | R.S#VVS#FDKVK.E                | S601:S604:      | 2 | 2,2666 | 0,231 | -0,104 |
| 9 | Q05209 PTN12_HUMAN | R.TPLSFTNPLHS#DDS#DS.DER.N     | S603:S606:      | 3 | 5,4758 | 1     | -0,239 |
| 9 | Q05209 PTN12_HUMAN | R.TPLSFTNPLHS#DDSDS#DER.N      | S603:S608:      | 3 | 4,528  | 0,476 | -0,08  |
| 9 | Q15424 SAFB1_HUMAN | R.SVVS#FDK.V                   | S604:           | 2 | 2,5059 | 0,238 | 0,071  |
| 9 | Q14157 UBP2L_HUMAN | R.YPS#SISS#SPQKDLTQAK.N        | S604:S608:      | 2 | 4,8136 | 1     | 0,611  |
| 9 | Q14157 UBP2L_HUMAN | R.YPSS#ISSS#PQKDLTQAK.N        | S605:S609:      | 3 | 3,488  | 1     | 0,55   |
| 9 | Q8N5V2 NGEF_HUMAN  | K.FVS#FTSR.L                   | S606:           | 2 | 2,2403 | 0,222 | -0,066 |
| 9 | Q05209 PTN12_HUMAN | R.TPLSFTNPLHSDDS#DS#DER.N      | S606:S608:      | 3 | 2,8459 | 0,295 | -0,399 |
| 9 | Q8IW19 MGAP_HUMAN  | K.VVNANQNAS#PNVPGK.R           | S607:           | 2 | 3,586  | 0,507 | -0,614 |
| 9 | Q14157 UBP2L_HUMAN | R.YPSSIS#SSPQK.D               | S607:           | 2 | 3,196  | 0,307 | -0,581 |
| 9 | Q8IW19 MGAP_HUMAN  | K.VVNANQNAS#PNVPGK.R           | S607:           | 3 | 2,6624 | 0,403 | -0,46  |
| 9 | Q9UHB6 LIMA1_HUMAN | K.TVS#PPIR.K                   | S609:           | 2 | 2,0899 | 0,135 | -0,072 |

|   |                     |                                  |            |   |        |       |        |
|---|---------------------|----------------------------------|------------|---|--------|-------|--------|
| 9 | Q9P246 STIM2_HUMAN  | R.KQS#PPLSLEIYQTLS#PR.K          | S609:S621: | 3 | 2,7978 | 0,279 | -0,346 |
| 9 | Q9P246 STIM2_HUMAN  | R.KQS#PPLSLEIYQTLS#PR.K          | S609:S621: | 2 | 2,2085 | 0,409 | -0,346 |
| 9 | Q16831 UPP1_HUMAN   | K.FVCVGGG#PSR.M                  | S61:       | 2 | 2,7717 | 0,465 | -0,426 |
| 9 | A6ND36 FA83G_HUMAN  | R.RPS#VASS#VSEEFVFR.E            | S610:S614: | 2 | 3,2757 | 0,287 | -0,122 |
| 9 | P52948 NUP98_HUMAN  | K.NLNNSNLF#PVNR.D                | S612:      | 2 | 4,5621 | 0,444 | 0      |
| 9 | P52948 NUP98_HUMAN  | K.NLNNSNLF#PVNR.D                | S612:      | 3 | 3,7731 | 0,115 | 0      |
| 9 | O43719 HTSF1_HUMAN  | K.VLDEEGS#ER.E                   | S616:      | 2 | 2,685  | 0,366 | 0      |
| 9 | O43395 PRPF3_HUMAN  | K.GDDDEES#DEEAVK.K               | S619:      | 2 | 3,4144 | 0,3   | -0,563 |
| 9 | Q96E09 F122A_HUMAN  | R.NS#TTFPSR.H                    | S62:       | 2 | 2,546  | 0,294 | -0,308 |
| 9 | P42684 ABL2_HUMAN   | R.GAQASSGS#PALPR.K               | S620:      | 2 | 2,1329 | 0,111 | -0,954 |
| 9 | Q96JM7 LMBL3_HUMAN  | R.TDANES#SSSPEIR.D               | S622:      | 2 | 2,7022 | 0,116 | -0,414 |
| 9 | O43719 HTSF1_HUMAN  | R.EFDEDS#DEKEEEDT#YEK.V          | S624:T633: | 3 | 4,0081 | 0,227 | -0,226 |
| 9 | Q9Y6X4 K0888_HUMAN  | K.AVDS#S#SEEIEVEVPVDRR.N         | S635:S636: | 3 | 4,1127 | 0,509 | -0,241 |
| 9 | O75420 PERQ1_HUMAN  | R.SLS#VPDSGR.L                   | S638:      | 2 | 2,0338 | 0,282 | 0      |
| 9 | Q96MG7 MAGG1_HUMAN  | R.GPGGSQGSQGPS#PQGAR.R           | S64:       | 2 | 2,53   | 0,424 | -0,532 |
| 9 | Q6P6C2 ALKB5_HUMAN  | K.YQEDS#DPERS#DYEEQLQK.E         | S64:S69:   | 3 | 5,7531 | 0,549 | -0,431 |
| 9 | Q8NCD3 HJURP_HUMAN  | K.LPSS#PLGCR.K                   | S642:      | 2 | 2,6751 | 0,165 | -0,114 |
| 9 | Q14978 NOLC1_HUMAN  | R.VADNS#FDAK.R                   | S643:      | 2 | 3,389  | 0,358 | -0,466 |
| 9 | Q96JM3 ZN828_HUMAN  | K.GQES#S#SDQEQVDVESIDFSKENK.M    | S651:S652: | 3 | 4,7314 | 0,327 | -0,267 |
| 9 | Q96JM3 ZN828_HUMAN  | K.GQES#SS#DQEQVDVESIDFSKENK.M    | S651:S653: | 3 | 4,3742 | 0,399 | -0,4   |
| 9 | Q9UID3 CK002_HUMAN  | R.TFSVYS#SSR.Q                   | S652:      | 2 | 2,4766 | 0,4   | 0,11   |
| 9 | Q9ULU4 PKCB1_HUMAN  | K.STS#PAS#EKADPGAVK.D            | S652:S655: | 2 | 2,681  | 0,446 | -0,304 |
| 9 | Q8WWI5 CTL1_HUMAN   | R.ELKPM*ASGAS#SA.-               | S655:      | 2 | 2,8123 | 0,319 | 0      |
| 9 | Q8WVC0 LEO1_HUMAN   | K.KYVIS#DEEEEDDD.-               | S658:      | 2 | 4,154  | 0,491 | -0,879 |
| 9 | Q86YS7 K0528_HUMAN  | R.SQS#ESS#DEVTELDLSHGK.K         | S659:S662: | 3 | 3,6988 | 0,399 | 0,087  |
| 9 | Q96S38 KS6C1_HUMAN  | K.AQDTIS#RGS#DDSVVISFK.D         | S661:S664: | 3 | 4,0504 | 0,39  | 0,084  |
| 9 | Q9H1B7 EAP1_HUMAN   | R.NSSSPVS#PASVPGQR.R             | S662:      | 2 | 2,1465 | 0,235 | 0      |
| 9 | Q9UKJ3 GPTC8_HUMAN  | K.ATGPPSQNSNIGTGRGS#EGDCS#PEDK.N | S663:S668: | 3 | 4,4931 | 0,329 | -0,659 |
| 9 | Q9UBH6 XPR1_HUMAN   | K.YNQS#ISLR.R                    | S666:      | 2 | 2,6549 | 0,317 | 0      |
| 9 | P25205 MCM3_HUMAN   | R.SEDES#ET#EDEEEKSQEDQEQK.R      | S672:T674: | 3 | 4,7147 | 0,45  | -0,613 |
| 9 | Q53TX8 Q53TX8_HUMAN | R.DSPLQGSGQQNSQAGQRNS#T#SSIEPR.L | S673:T674: | 3 | 3,1408 | 0,362 | -0,317 |
| 9 | Q9P2R6 RERE_HUMAN   | K.TQEIS#RPNS#PSEGECESSDR.S       | S675:S679: | 3 | 3,9804 | 0,301 | -0,532 |
| 9 | Q58EX7 PKHG4_HUMAN  | K.AYS#FDR.N                      | S677:      | 2 | 2,2862 | 0,088 | 0,291  |

|   |                    |                                      |                 |   |        |       |        |
|---|--------------------|--------------------------------------|-----------------|---|--------|-------|--------|
| 9 | Q96TA1 NIBL1_HUMAN | K.AAPEASS#PPAS#PLQHLLPGK.A           | S679:S683:      | 2 | 2,083  | 0,341 | -0,573 |
| 9 | Q9NYV4 CD2L7_HUMAN | R.HLLTDLPLPELPGGDL#PPDS#PEPK.A       | S681:S685:      | 3 | 2,9378 | 0,155 | -0,443 |
| 9 | Q8IY81 RRMJ3_HUMAN | R.DLIDNS#FNR.Y                       | S688:           | 2 | 2,4026 | 0,166 | 0,104  |
| 9 | Q9NYL2 MLTK_HUMAN  | R.GSISLNSS#PR.G                      | S691:           | 2 | 2,7922 | 0,399 | -0,333 |
| 9 | Q9H5Y7 SLIK6_HUMAN | R.SPS#FGPK.H                         | S694:           | 2 | 2,3572 | 0,173 | 0,229  |
| 9 | Q8IYB3 SRRM1_HUMAN | R.APQTSSS#PPPVR.R                    | S696:           | 2 | 3,3133 | 0,231 | -0,374 |
| 9 | Q14978 NOLC1_HUMAN | R.GGSISVQVNSIKFDS#E.-                | S698:           | 2 | 4,3944 | 0,567 | -0,279 |
| 9 | Q15003 CND2_HUMAN  | R.S#RVFDLQFSTDS#PR.L                 | S70:S81:        | 2 | 3,51   | 0,366 | -0,134 |
| 9 | Q8N128 CNO24_HUMAN | R.VIHFVSGETM*EEYS#T#DEDEV DGLEK.K    | S70:T71:        | 3 | 4,5531 | 0,487 | -0,362 |
| 9 | Q43719 HTSF1_HUMAN | K.LFEDDDS#NEK.L                      | S702:           | 2 | 2,6277 | 0,298 | -0,567 |
| 9 | P55197 AF10_HUMAN  | R.GSLS#PRS#PVSSLQIR.Y                | S702:S705:      | 2 | 3,1534 | 0,305 | 0      |
| 9 | Q14684 RRP1B_HUMAN | K.SILVS#PTGPSR.V                     | S706:           | 2 | 2,6153 | 0,285 | 0      |
| 9 | Q92974 ARHG2_HUMAN | R.TFNCS#IELCR.A                      | S710:           | 2 | 2,7284 | 0,426 | -0,669 |
| 9 | P25205 MCM3_HUMAN  | K.DGDSYDPYDFS#DT#EEEM*PQVHTPK.T      | S711:T713:      | 3 | 4,8213 | 0,52  | -0,246 |
| 9 | Q9UHI6 DDX20_HUMAN | K.YQES#PGIQM*K.T                     | S714:           | 2 | 3,1265 | 0,302 | -0,478 |
| 9 | Q5W0B1 RN219_HUMAN | K.IQSSLSSAS#PSK.A                    | S719:           | 2 | 2,0055 | 0,374 | -0,576 |
| 9 | Q6X4W1 NELF_HUMAN  | R.RLS#LVSNGCY#EGSLSEEPSIR.K          | S72:Y79:        | 3 | 2,9335 | 0,132 | -0,291 |
| 9 | Q15149 PLEC1_HUMAN | R.SDEGQLS#PATR.G                     | S720:           | 2 | 2,8648 | 0,355 | -0,295 |
| 9 | Q86V15 CASZ1_HUMAN | K.DTEHEES#S#NDDLVDLDFSSK.N           | S720:S721:      | 3 | 4,9461 | 0,448 | -0,147 |
| 9 | P10636 TAU_HUMAN   | K.SPVVSGDTS#PR.H                     | S721:           | 2 | 3,5838 | 0,48  | -0,413 |
| 9 | Q43719 HTSF1_HUMAN | K.LFDDS#DER.G                        | S721:           | 2 | 3,1765 | 0,442 | -0,227 |
| 9 | Q8N122 RPTOR_HUMAN | R.SVSS#YGNIR.A                       | S722:           | 2 | 2,3848 | 0,205 | -0,23  |
| 9 | Q9H7N4 SFR19_HUMAN | R.GPSPAPAS#SPKREVLVDS#EGLS#GEER.G    | S724:S734:S738: | 3 | 4,3613 | 1     | -0,433 |
| 9 | Q05682 CALD1_HUMAN | K.GNVFSS#PTAAGT#PNKETAGLK.V          | S724:T730:      | 3 | 2,7575 | 0,183 | 0,083  |
| 9 | Q66K74 MAP1S_HUMAN | R.S#AS#PHDVLCLVS#PCEFEHR.K           | S729:S731:S741: | 3 | 3,4696 | 0,286 | -0,212 |
| 9 | P05412 JUN_HUMAN   | K.LAS#PELER.L                        | S73:            | 2 | 2,5016 | 0,18  | 0      |
| 9 | Q15418 KS6A1_HUMAN | R.KLPS#TTL.-                         | S732:           | 2 | 2,5904 | 0,417 | -0,944 |
| 9 | A0FGR8 ESYT2_HUMAN | R.S#SSS#LLASPGHISVK.E                | S736:S739:      | 2 | 2,3117 | 0,193 | 0,075  |
| 9 | A0FGR8 ESYT2_HUMAN | R.SSS#S#LLASPGHISVK.E                | S738:S739:      | 3 | 4,5744 | 0,296 | -0,224 |
| 9 | Q08J23 NSUN2_HUMAN | R.AGEPNS#PDAEEANS#PDVTAGCDPAGVHPPR.- | S743:S751:      | 3 | 3,8766 | 0,474 | 0,807  |
| 9 | Q92934 BAD_HUMAN   | R.HSS#YPAGTEDDEGM*GEEPS#PFR.G        | S75:S91:        | 3 | 4,21   | 0,348 | 1,139  |
| 9 | P48634 BAT2_HUMAN  | R.SDS#GGSSSEPFDR.H                   | S761:           | 2 | 2,8242 | 0,38  | -0,433 |
| 9 | P31321 KAP1_HUMAN  | K.SNSQSDS#HDEEV#PTPPNPVVK.A          | S77:S83:        | 3 | 4,9351 | 0,278 | 0,364  |

|   |                     |                                    |                |   |        |       |        |
|---|---------------------|------------------------------------|----------------|---|--------|-------|--------|
| 9 | Q15154 PCM1_HUMAN   | K.IQALQTACPDQLS#AAS#VGNCPYTKK.Y    | S776:S779:     | 3 | 5,1736 | 0,449 | -0,129 |
| 9 | Q8IYL2 U383_HUMAN   | R.GPGPGQGS#PGGGPGPR.S              | S78:           | 2 | 3,4244 | 0,565 | -0,518 |
| 9 | P42677 RS27_HUMAN   | R.LTEGCS#FR.R                      | S78:           | 2 | 2,2324 | 0,225 | -0,465 |
| 9 | P13861 KAP2_HUMAN   | R.VADAKGDS#ES#EEDEDLEVPVPSR.F      | S78:S80:       | 3 | 3,6392 | 0,138 | 0,139  |
| 9 | P04792 HSPB1_HUMAN  | R.ALS#RQLS#SGVSEIR.H               | S78:S82:       | 3 | 4,0237 | 0,304 | 0,11   |
| 9 | P04792 HSPB1_HUMAN  | R.ALS#RQLS#SGVSEIR.H               | S78:S82:       | 2 | 2,9448 | 0,25  | 0      |
| 9 | P49792 RBP2_HUMAN   | R.YSLS#PSK.S                       | S788:          | 2 | 2,1126 | 0,194 | 0      |
| 9 | Q4LE39 ARI4B_HUMAN  | K.DIEVLS#EDT#DYEEDEVTKK.R          | S790:T793:     | 3 | 3,9542 | 0,296 | -0,378 |
| 9 | Q2NL81 Q2NL81_HUMAN | R.GYQSLSDS#PPGAR.V                 | S793:          | 2 | 3,5645 | 0,448 | -0,345 |
| 9 | Q2NL81 Q2NL81_HUMAN | R.GYQSLSDS#PPGAR.V                 | S793:          | 3 | 3,4766 | 0,311 | 0,129  |
| 9 | Q8IYB3 SRRM1_HUMAN  | K.SPTSPSPS#PPRNS#DQEGGGK.K         | S797:S802:     | 3 | 3,2971 | 0,206 | -0,712 |
| 9 | Q7LBC6 JHD2B_HUMAN  | R.FS#LDER.S                        | S798:          | 2 | 2,0114 | 0,209 | -0,072 |
| 9 | Q15637 SF01_HUMAN   | R.TGDLGIPPNPEDRS#PS#PEPIYNSEGK.R   | S80:S82:       | 3 | 3,3808 | 0,198 | 0      |
| 9 | O95239 KIF4A_HUMAN  | R.GQVSESEDS#ITK.Q                  | S815:          | 2 | 2,8675 | 0,36  | -0,449 |
| 9 | Q8IWX8 CHERP_HUMAN  | R.SRS#PT#PPSSAGLGSNSAPPIDSR.L      | S817:T819:     | 3 | 4,0669 | 1     | 0,367  |
| 9 | P04792 HSPB1_HUMAN  | R.QLS#SGVSEIR.H                    | S82:           | 2 | 2,6711 | 0,126 | -0,106 |
| 9 | Q53GS9 SNUT2_HUMAN  | R.EVDEDS#EPER.E                    | S82:           | 2 | 2,3421 | 0,144 | -0,76  |
| 9 | Q96JP5 ZFP91_HUMAN  | R.S#SPSARPPDVPGQQPQAAKS#PS#PVQGK.K | S82:S101:S103: | 3 | 3,7603 | 0,112 | -0,56  |
| 9 | Q9GZR7 DDX24_HUMAN  | K.AQAVS#EEEEEEGKSSS#PK.K           | S82:S94:       | 3 | 2,9439 | 0,228 | -0,497 |
| 9 | Q86VM9 ZCH18_HUMAN  | K.SQDQDS#EVNELSR.G                 | S83:           | 2 | 4,3068 | 0,455 | -0,308 |
| 9 | Q8N8A6 DDX51_HUMAN  | R.VNDAEPGS#PEAPQGK.R               | S83:           | 2 | 3,5784 | 0,522 | -0,232 |
| 9 | P48960 CD97_HUMAN   | R.ALAS#ESGI.-                      | S831:          | 2 | 3,1278 | 0,584 | -0,744 |
| 9 | Q9NQS7 INCE_HUMAN   | K.INPDNYGM*DLNS#DDST#DDEAHPR.K     | S833:T837:     | 3 | 3,1235 | 0,176 | -0,595 |
| 9 | Q3KQU3 MA7D1_HUMAN  | K.KAVVQS#PQVTEVL.-                 | S834:          | 2 | 2,2804 | 0,185 | 0      |
| 9 | Q9NQS7 INCE_HUMAN   | K.INPDNYGM*DLNSDDS#T#DDEAHPR.K     | S836:T837:     | 3 | 3,8158 | 0,289 | 0,794  |
| 9 | Q9UKV3 ACINU_HUMAN  | K.GVPAGNS#DTEGGQPGR.K              | S838:          | 2 | 4,1389 | 0,428 | -0,386 |
| 9 | A8MYB5 A8MYB5_HUMAN | R.CPS#DEDFR.Q                      | S839:          | 2 | 2,7333 | 0,282 | -0,221 |
| 9 | Q9ULH1 DDEF1_HUMAN  | R.TLS#DPPS#PLPHGPPNK.G             | S839:S843:     | 2 | 3,4826 | 0,453 | 0,673  |
| 9 | Q9ULH1 DDEF1_HUMAN  | R.TLS#DPPS#PLPHGPPNK.G             | S839:S843:     | 3 | 2,6154 | 0,232 | 0,101  |
| 9 | Q9H307 PININ_HUMAN  | R.DLEGAVS#R.L                      | S84:           | 2 | 2,5118 | 0,141 | 0      |
| 9 | O60716 CTND1_HUMAN  | K.SDFQVNLNNAS#R.S                  | S857:          | 2 | 4,489  | 0,45  | -0,084 |
| 9 | P05114 HMG1_HUMAN   | K.EDLPAENGETKTEES#PAS#DEAGEK.E     | S86:S89:       | 3 | 4,9299 | 0,45  | -0,611 |
| 9 | Q9Y5B0 CTDP1_HUMAN  | K.EDLESM*DKEVDDILGEGS#DDS#DSEK.R   | S869:S872:     | 3 | 6,2545 | 0,491 | -0,312 |

|   |                     |                                     |                |   |        |       |        |
|---|---------------------|-------------------------------------|----------------|---|--------|-------|--------|
| 9 | Q5T200 ZC3HD_HUMAN  | R.S#LS#PSHLTEDR.Q                   | S875:S877:     | 2 | 2,6094 | 0,585 | 0,174  |
| 9 | Q9UQ35 SRRM2_HUMAN  | R.SCFESS#PDPELK.S                   | S876:          | 2 | 2,1007 | 0,377 | 0,496  |
| 9 | Q9BVI0 PHF20_HUMAN  | R.GSALDDAVNPLHENGDDS#LS#PR.L        | S878:S880:     | 3 | 3,4902 | 0,343 | 0,075  |
| 9 | Q5U5Q3 MEX3C_HUMAN  | R.AAELS#PEER.A                      | S88:           | 2 | 2,2953 | 0,257 | -0,226 |
| 9 | Q14152 EIF3A_HUMAN  | R.LGDSS#LSR.K                       | S882:          | 2 | 2,4773 | 0,16  | -0,2   |
| 9 | Q01831 XPC_HUMAN    | K.SEAAAPHTDAGGGLS#S#DEEEGTSSQAEAR.I | S883:S884:     | 3 | 2,9989 | 0,192 | -0,6   |
| 9 | Q8TEA7 TBCK_HUMAN   | K.IKPTGLLTIPS#PQI.-                 | S890:          | 2 | 2,7376 | 0,23  | -0,392 |
| 9 | Q96N67 DOCK7_HUMAN  | R.SRS#LSNS#NPDISGTPTSPDDEVR.S       | S896:S900:     | 3 | 4,9584 | 0,353 | 0,424  |
| 9 | P29317 EPHA2_HUMAN  | R.VSIRLPS#TSGS#EGVPFR.T             | S897:S901:     | 2 | 3,2757 | 0,415 | -0,376 |
| 9 | P43243 MATR3_HUMAN  | K.SFQQSS#LSR.D                      | S9:            | 2 | 2,4715 | 0,39  | -0,109 |
| 9 | O75151 PHF2_HUMAN   | K.GSSDAPYS#PTAR.V                   | S905:          | 2 | 2,1367 | 0,258 | -0,649 |
| 9 | Q8TF72 SHRM3_HUMAN  | R.DRPGS#PES#PLLDAPFSR.A             | S909:S912:     | 3 | 2,9667 | 0,262 | -0,274 |
| 9 | Q9P1Y6 K1542_HUMAN  | R.GAVAAEGAS#DT#EREEPTESQGLAAR.L     | S915:T917:     | 3 | 2,6669 | 0,147 | -0,412 |
| 9 | Q9GZR1 SEN6_HUMAN   | R.LNYSDES#PEAGK.M                   | S919:          | 2 | 3,8681 | 0,491 | -0,614 |
| 9 | O95425 SVIL_HUMAN   | K.FSSSIENS#PVR.S                    | S920:          | 2 | 3,7159 | 0,423 | -0,568 |
| 9 | Q15651 HMG3_HUMAN   | K.AEEAQKTES#VDNEGE.-                | S93:           | 2 | 2,2523 | 0,334 | -0,356 |
| 9 | O75351 VPS4B_HUMAN  | K.EGQPS#PADEKGNDS#DGEGESDDPEK.K     | S93:S102:      | 3 | 3,444  | 0,333 | -0,266 |
| 9 | Q5VY92 Q5VY92_HUMAN | R.QELGS#PEER.L                      | S932:          | 2 | 2,388  | 0,33  | -0,217 |
| 9 | O60293 CC131_HUMAN  | R.LDSS#PVSSPR.K                     | S949:          | 2 | 2,9453 | 0,449 | -0,542 |
| 9 | Q52LW3 RHG29_HUMAN  | R.ATS#FEESER.K                      | S949:          | 2 | 2,5773 | 0,347 | -0,537 |
| 9 | Q9UQ35 SRRM2_HUMAN  | R.SVS#PCSNVESR.L                    | S954:          | 2 | 3,1968 | 0,527 | -0,187 |
| 9 | Q9UK61 CC063_HUMAN  | R.QRSS#DYQFPSS#PFTDTLK.G            | S972:S979:     | 3 | 3,5894 | 0,168 | -0,323 |
| 9 | Q9BPX3 CND3_HUMAN   | R.CQTAEADS#ES#DHEVPEPESEM*K.M       | S973:S975:     | 3 | 4,6139 | 0,402 | -0,546 |
| 9 | Q9BW71 HIRP3_HUMAN  | R.FRFNS#EESG#EASSPDYFGPPAK.N        | S98:S104:      | 3 | 3,634  | 0,336 | -0,199 |
| 9 | Q14814 MEF2D_HUMAN  | K.KGFNGCDS#PEPDGEDS#LEQSPLLEDK.Y    | S98:S106:      | 3 | 3,9477 | 0,384 | -0,242 |
| 9 | Q86UU0 BCL9L_HUMAN  | K.SPQVLGSSLSVRS#PTGS#PSR.L          | S987:S991:     | 3 | 3,8773 | 1     | 0      |
| 9 | O60245 PCDH7_HUMAN  | R.SVNGGPGS#PDLAR.H                  | S989:          | 2 | 3,3032 | 0,468 | -0,187 |
| 9 | P17096 HMGA1_HUMAN  | K.KLEKEEEEGIS#QES#S#EEEQ.-          | S99:S102:S103: | 3 | 3,8099 | 0,395 | -0,517 |
| 9 | Q86W92 LIP1_HUMAN   | K.EDDM*FKDFAARS#PSAS#ITDEDSNV.-     | S999:S1003:    | 3 | 3,5226 | 0,267 | -0,324 |
| 9 | Q9UQ35 SRRM2_HUMAN  | K.AQT#PPGPSLSGSKS#PCPQEK.S          | T1003:S1014:   | 3 | 3,2207 | 0,439 | -0,579 |
| 9 | Q12888 TP53B_HUMAN  | R.SEDPPTT#PIR.G                     | T1056:         | 2 | 2,4805 | 0,353 | -1,125 |
| 9 | Q14137 BOP1_HUMAN   | K.TTEEQVQAST#PCPR.T                 | T106:          | 2 | 3,4184 | 0,515 | -0,435 |
| 9 | Q5VZL5 ZMYM4_HUMAN  | K.DNLVSSIHT#DDS#LEVER.R             | T107:S110:     | 3 | 4,3149 | 0,448 | 0      |

|   |                    |                                   |                 |   |        |       |        |
|---|--------------------|-----------------------------------|-----------------|---|--------|-------|--------|
| 9 | Q96B54 ZN428_HUMAN | R.SPLGEAPPGT#PPCR.L               | T108:           | 2 | 2,4449 | 0,4   | -0,483 |
| 9 | P48634 BAT2_HUMAN  | R.TASET#RSEGS#EYEEIPK.R           | T1087:S1092:    | 3 | 2,6064 | 0,163 | -0,706 |
| 9 | P46013 KI67_HUMAN  | K.AFM*GT#PVQK.L                   | T1193:          | 2 | 2,3747 | 0,287 | -0,341 |
| 9 | Q8WXI9 P66B_HUMAN  | R.GRLT#PS#PDIIVLSDNEASSPR.S       | T120:S122:      | 3 | 5,3976 | 0,458 | 0,23   |
| 9 | Q8WXI9 P66B_HUMAN  | R.GRLT#PSPDIIIVLS#DNEASSPR.S      | T120:S129:      | 3 | 6,7877 | 0,401 | -0,077 |
| 9 | Q8WXI9 P66B_HUMAN  | R.GRLT#PSPDIIIVLSDNEASS#PR.S      | T120:S135:      | 3 | 4,7721 | 0,336 | 0      |
| 9 | Q7Z6E9 RBBP6_HUMAN | K.VTGTEGSSSTLVDYTSST#GGG#PVRK.S   | T1274:S1277:    | 3 | 5,051  | 1     | 0,778  |
| 9 | Q8NEY8 PPHLN_HUMAN | R.DNT#FFRES#PVGR.K                | T128:S133:      | 2 | 2,304  | 0,305 | 0,231  |
| 9 | Q96T23 RSF1_HUMAN  | R.IET#DEEES#CDNAHGDANQPAR.D       | T1295:S1300:    | 3 | 2,8254 | 0,312 | -0,363 |
| 9 | Q9UBW7 ZMYM2_HUMAN | K.DIYDKDNYELDEDT#D.-              | T1376:          | 2 | 2,4077 | 0,328 | -0,251 |
| 9 | Q03252 LMNB2_HUMAN | R.AGGPAT#PLSPTR.L                 | T14:            | 2 | 2,9294 | 0,342 | -0,81  |
| 9 | O95684 FR1OP_HUMAN | K.GPTT#GEGALDLSDVHS#PPKS#PEGK.T   | T144:S156:S160: | 3 | 3,3465 | 0,268 | -0,14  |
| 9 | Q9NYZ3 GTSE1_HUMAN | K.RET#YYLSDS#PLLGPVGEPR.L         | T146:S152:      | 3 | 5,6048 | 1     | -0,152 |
| 9 | Q7KZ85 SPT6H_HUMAN | R.TRT#PAS#INATPANINLADLTR.A       | T1532:S1535:    | 3 | 5,9699 | 0,56  | -0,154 |
| 9 | Q1KMD3 HNRL2_HUMAN | R.SGDET#PGSEVPGDK.A               | T165:           | 2 | 3,246  | 0,391 | -0,503 |
| 9 | Q1KMD3 HNRL2_HUMAN | R.SGDET#PGS#EVPGDKAAEEQGDDQDSEK.S | T165:S168:      | 3 | 5,2528 | 0,512 | -0,498 |
| 9 | Q2QGD7 ZXDC_HUMAN  | R.APQASGPST#PGYR.C                | T172:           | 2 | 2,4462 | 0,366 | -0,624 |
| 9 | Q5THJ4 VP13D_HUMAN | K.EVQDKDYPLT#PPPS#PTVDEPK.I       | T1761:S1765:    | 3 | 4,7611 | 0,38  | -0,073 |
| 9 | P46821 MAP1B_HUMAN | K.SDISPLT#PR.E                    | T1788:          | 2 | 2,3725 | 0,296 | 0,229  |
| 9 | Q3V6T2 GRDN_HUMAN  | K.DSNPYAT#LPR.A                   | T1801:          | 2 | 2,1683 | 0,337 | 0,101  |
| 9 | Q03188 CENPC_HUMAN | K.RET#YTFENS#VNM*LPSSTEVSVK.T     | T183:S189:      | 3 | 6,7895 | 0,409 | 0,068  |
| 9 | P24928 RPB1_HUMAN  | K.YSPT#S#PKYSPTSPK.Y              | T1863:S1864:    | 2 | 3,8248 | 1     | -0,431 |
| 9 | Q15527 SURF2_HUMAN | K.DLGSTEDGDGT#DDFLT#DKEDEK.A      | T190:T195:      | 3 | 5,4498 | 0,39  | 0,143  |
| 9 | P51858 HDGF_HUMAN  | K.NST#PSEPGSGR.G                  | T200:           | 2 | 2,3355 | 0,343 | -0,418 |
| 9 | P60709 ACTB_HUMAN  | R.GYSFTT#TAER.E                   | T202:           | 2 | 2,6273 | 0,519 | 0,101  |
| 9 | Q96PY5 FMNL2_HUMAN | R.YNT#LPSR.R                      | T202:           | 2 | 2,5642 | 0,301 | 0,066  |
| 9 | Q7L2J0 MEPCE_HUMAN | R.TLNAET#PKSS#PLPAK.G             | T213:S217:      | 2 | 4,6485 | 0,304 | -0,712 |
| 9 | Q16186 ADRM1_HUMAN | R.SQSAAVT#PSSSTTSSTR.A            | T217:           | 2 | 2,3826 | 0,218 | -0,444 |
| 9 | Q9BYG3 MK67I_HUMAN | K.VSGTLDT#PEK.T                   | T223:           | 2 | 2,7088 | 0,35  | -0,325 |
| 9 | Q9Y4E8 UBP15_HUMAN | R.GPST#PKS#PGASNFSTLPK.I          | T226:S229:      | 3 | 3,5627 | 0,365 | 0,379  |
| 9 | O75683 SURF6_HUMAN | K.GNLT#PLTGR.N                    | T229:           | 2 | 2,6885 | 0,316 | -0,121 |
| 9 | P08559 ODPA_HUMAN  | R.YGM*GT#SVER.A                   | T231:           | 2 | 2,2856 | 0,233 | -0,334 |
| 9 | P18858 DNL1_HUMAN  | K.TLSSFFT#PR.K                    | T233:           | 2 | 2,4784 | 0,375 | -0,215 |



|   |                     |                                   |                 |   |        |       |        |
|---|---------------------|-----------------------------------|-----------------|---|--------|-------|--------|
| 9 | P49792 RBP2_HUMAN   | K.DSLIT#PHVS#R.S                  | T2450:S2454:    | 2 | 2,574  | 0,237 | 0,19   |
| 9 | Q96B36 AKTS1_HUMAN  | R.LNT#SDFQK.L                     | T246:           | 2 | 3,2212 | 0,224 | -0,827 |
| 9 | O95835 LATS1_HUMAN  | R.SVT#PPPPPR.G                    | T246:           | 2 | 2,8587 | 0,358 | -0,119 |
| 9 | Q13428 TCOF_HUMAN   | K.VGDVT#PQVK.G                    | T249:           | 2 | 2,766  | 0,312 | -0,417 |
| 9 | Q13435 SF3B2_HUMAN  | R.QEEM*NSQQEEEEEM*ET#DAR.S        | T275:           | 3 | 4,6138 | 0,399 | -0,551 |
| 9 | Q9UHR4 BI2L1_HUMAN  | K.DYDT#LSKCS#PK.M                 | T276:S281:      | 2 | 3,3673 | 0,477 | 0,083  |
| 9 | O95817 BAG3_HUMAN   | R.SST#PLHS#PSPIR.V                | T285:S289:      | 2 | 3,1033 | 0,322 | -0,339 |
| 9 | O95817 BAG3_HUMAN   | R.SST#PLHS#PSPIR.V                | T285:S289:      | 3 | 3,0018 | 0,196 | 0,191  |
| 9 | Q13435 SF3B2_HUMAN  | R.SSLGQSASET#EEDTVS#VSKK.E        | T288:S294:      | 3 | 3,284  | 0,288 | -0,821 |
| 9 | Q13620 CUL4B_HUMAN  | R.SATDGNTSTT#PPTSAK.K             | T31:            | 2 | 3,5639 | 0,532 | -0,604 |
| 9 | Q9NXF1 TEX10_HUMAN  | K.LQNATPT#NFK.T                   | T31:            | 2 | 3,3418 | 0,212 | -0,603 |
| 9 | Q99460 PSMD1_HUMAN  | K.TSSAFVGKT#PEAS#PEPK.D           | T311:S315:      | 2 | 4,4574 | 0,47  | -0,709 |
| 9 | Q99460 PSMD1_HUMAN  | K.TSSAFVGKT#PEAS#PEPK.D           | T311:S315:      | 3 | 3,3429 | 0,343 | -0,29  |
| 9 | P51946 CCNH_HUMAN   | K.HEEEEW#DDDLVESL.-               | T315:           | 2 | 2,3678 | 0,447 | -0,19  |
| 9 | Q9NQW6 ANLN_HUMAN   | K.SCEGQNPPELLPKT#PIS#PLK.T        | T320:S323:      | 3 | 3,965  | 0,357 | -0,161 |
| 9 | A6N922 A6N922_HUMAN | K.NGT#SDVLLCGNS#SDAGTCLEGY#R.C    | T320:S329:Y339: | 3 | 2,6617 | 0,132 | 1,703  |
| 9 | P27987 IP3KB_HUMAN  | K.SGGGPGPSGSET#PPPPR.R            | T33:            | 3 | 3,9305 | 0,433 | -0,227 |
| 9 | P27987 IP3KB_HUMAN  | K.SGGGPGPSGSET#PPPPR.R            | T33:            | 2 | 3,4509 | 0,417 | -0,454 |
| 9 | Q641Q2 FA21A_HUMAN  | R.RT#PS#DDEEDNLFAPPK.L            | T331:S333:      | 2 | 4,3253 | 0,586 | -0,368 |
| 9 | Q9Y608 LRRF2_HUMAN  | R.RGSGDT#SSLIDPDT#LSELR.D         | T331:S340:      | 3 | 5,1288 | 1     | -0,242 |
| 9 | P49585 PCY1A_HUMAN  | R.WPFGKT#SPPCS#PANLSR.H           | T342:S347:      | 3 | 3,8425 | 0,373 | -0,085 |
| 9 | Q5T1M5 FKB15_HUMAN  | R.T#KNSLSEQLAINTS#PDAVK.A         | T342:S356:      | 3 | 3,5251 | 0,13  | -0,162 |
| 9 | Q9H814 RNUXA_HUMAN  | K.SLNFQEDDDT#SR.E                 | T349:           | 2 | 2,6383 | 0,336 | 0      |
| 9 | P28749 RBL1_HUMAN   | R.SFAPST#PLTGR.R                  | T369:           | 2 | 2,8334 | 0,366 | -0,201 |
| 9 | Q16625 OCLN_HUMAN   | R.YSSGGNFET#PSK.R                 | T376:           | 2 | 3,2625 | 0,568 | -0,451 |
| 9 | Q86WB0 NIPA_HUMAN   | R.SM*GTGDT#PGLEVPSS#PLRK.A        | T387:S395:      | 3 | 3,9386 | 0,271 | 0,174  |
| 9 | P36507 MP2K2_HUMAN  | R.LNQPGT#PTR.T                    | T394:           | 2 | 2,6828 | 0,101 | -0,917 |
| 9 | P49674 KC1E_HUMAN   | R.IPASQT#S#VPFDHLGK.-             | T407:S408:      | 2 | 2,393  | 0,338 | -0,139 |
| 9 | Q9ULJ3 ZN295_HUMAN  | R.IKT#EPSS#PLSDPSDIIR.V           | T431:S435:      | 3 | 5,0183 | 0,163 | -0,091 |
| 9 | Q96ST2 IWS1_HUMAN   | K.T#IASDS#EEEAGKELSDK.K           | T435:S440:      | 2 | 4,0104 | 0,505 | -0,62  |
| 9 | P85037 FOXK1_HUMAN  | R.SGGLQT#PECLS#REGS#PIPHDPEFGSK.L | T436:S441:S445: | 3 | 4,2409 | 0,553 | -0,303 |
| 9 | Q14676 MDC1_HUMAN   | R.SQT#TTERSDT#DVEEEELPVENR.E      | T447:T455:      | 3 | 3,3453 | 1     | 0,58   |
| 9 | Q15208 STK38_HUMAN  | R.FEGLT#AR.G                      | T452:           | 2 | 2,3326 | 0,229 | 0,07   |

|   |                    |                                  |            |   |        |       |        |
|---|--------------------|----------------------------------|------------|---|--------|-------|--------|
| 9 | Q13098 CSN1_HUMAN  | R.EGSQGELT#PANSQSR.M             | T459:      | 2 | 3,7937 | 0,508 | -0,372 |
| 9 | O76021 RL1D1_HUMAN | K.FFTT#PSK.S                     | T465:      | 2 | 2,1207 | 0,083 | -0,538 |
| 9 | O76021 RL1D1_HUMAN | K.FFTT#PSKS#VR.K                 | T465:S469: | 2 | 2,5234 | 0,253 | 0,367  |
| 9 | Q13131 AAPK1_HUMAN | R.SIDDEIT#EAKSGT#ATPQR.S         | T473:T479: | 3 | 3,2093 | 0,105 | 0,352  |
| 9 | Q5VT52 K0460_HUMAN | K.NTGVSPASRSPGT#PTS#PSNLTSGLK.T  | T482:S485: | 3 | 3,4138 | 0,157 | -0,206 |
| 9 | Q86X29 LSR_HUMAN   | R.SVDALDDLT#PPSTAESGSRSPS#NGGR.S | T501:S515: | 3 | 4,7928 | 1     | -0,452 |
| 9 | Q99733 NP1L4_HUMAN | R.LDNVPHT#PS#SYIETLPK.A          | T51:S53:   | 3 | 3,0888 | 0,127 | -0,442 |
| 9 | Q99733 NP1L4_HUMAN | R.LDNVPHT#PSS#YIETLPK.A          | T51:S54:   | 3 | 4,0945 | 0,387 | -0,088 |
| 9 | Q16555 DPYL2_HUMAN | K.TVT#PASSAKTS#PAK.Q             | T514:S522: | 2 | 2,1917 | 1     | -0,648 |
| 9 | P37198 NUP62_HUMAN | R.SFRIT#FD.-                     | T520:      | 2 | 2,1965 | 0,252 | -0,063 |
| 9 | P50548 ERF_HUMAN   | R.GEGPGEAGGPLT#PR.R              | T526:      | 2 | 3,341  | 0,398 | -0,621 |
| 9 | P05362 ICAM1_HUMAN | K.GTPM*KPNTQAT#PP.-              | T530:      | 2 | 2,9181 | 0,418 | -0,425 |
| 9 | Q9ULU4 PKCB1_HUMAN | K.ELSESVQQQST#PVPLIS#PKR.Q       | T541:S547: | 3 | 2,9209 | 0,262 | -0,384 |
| 9 | P01106 MYC_HUMAN   | K.FELLPT#PPLS#PSRR.S             | T58:S62:   | 2 | 2,3112 | 0,206 | -0,551 |
| 9 | Q12830 BPTF_HUMAN  | R.ESHT#PVS#IQEEIVGDFK.S          | T600:S603: | 2 | 2,4463 | 0,396 | -0,235 |
| 9 | Q2M2I8 AAK1_HUMAN  | K.VQTT#PPPAVQGQK.V               | T606:      | 2 | 2,6853 | 0,332 | -0,597 |
| 9 | Q8NDX5 PHC3_HUMAN  | R.M*DRT#PPPPTLS#PAAITVGR.G       | T609:S616: | 3 | 6,18   | 0,398 | 0,17   |
| 9 | Q8NDX5 PHC3_HUMAN  | R.MDRT#PPPPTLS#PAAITVGR.G        | T609:S616: | 3 | 2,6153 | 0,27  | 0,514  |
| 9 | Q8IXK0 PHC2_HUMAN  | K.LPQQDHTT#TTDS#EM*EEPYLQESK.E   | T617:S621: | 3 | 5,4543 | 1     | 0,635  |
| 9 | Q8WU17 RN139_HUMAN | R.NGVIQHTGAAAEFNDT#D.-           | T663:      | 3 | 3,5221 | 0,267 | -0,088 |
| 9 | P23246 SFPQ_HUMAN  | R.GM*GPGT#PAGYGR.G               | T687:      | 2 | 2,5175 | 0,273 | -0,301 |
| 9 | Q15418 KS6A1_HUMAN | R.KLPST#TL.-                     | T733:      | 2 | 2,6392 | 0,411 | -0,073 |
| 9 | Q9Y2D5 AKAP2_HUMAN | R.QVLQST#QSPR.T                  | T746:      | 2 | 2,6203 | 0,266 | -0,498 |
| 9 | P46087 NOL1_HUMAN  | K.QNDT#PKGQPPTVS#PIR.S           | T776:S786: | 3 | 3,0262 | 0,281 | 0      |
| 9 | P06400 RB_HUMAN    | K.ISEGLPT#PTKM*T#PR.S            | T821:T826: | 2 | 3,5863 | 0,419 | -0,215 |
| 9 | P06400 RB_HUMAN    | K.ISEGLPT#PTKM*T#PR.S            | T821:T826: | 3 | 2,7561 | 0,154 | -0,215 |
| 9 | O95235 KI20A_HUMAN | R.NLLPRT#PTCQSSTDCS#PYAR.I       | T857:S867: | 3 | 3,6092 | 1     | 0,442  |
| 9 | O95251 MYST2_HUMAN | R.SQQQPTPV#PK.K                  | T88:       | 2 | 2,7604 | 0,377 | -0,284 |
| 9 | Q13595 TRA2A_HUMAN | R.SYT#PEYR.R                     | T88:       | 2 | 2,1294 | 0,279 | -0,245 |
| 9 | Q02241 KIF23_HUMAN | R.GGGQSVQFTDIET#LKQES#PNGSR.K    | T897:S902: | 3 | 3,8424 | 0,133 | -0,282 |
| 9 | O60716 CTND1_HUMAN | K.SLDNNYST#PNER.G                | T906:      | 2 | 3,6454 | 0,42  | -0,328 |
| 9 | Q96PY5 FMNL2_HUMAN | K.GYLDPAVT#R.K                   | T92:       | 2 | 2,3778 | 0,501 | 0      |
| 9 | Q9NZB2 F120A_HUMAN | R.GVIST#PVIR.T                   | T991:      | 2 | 2,285  | 0,221 | -0,239 |

|    |                      |                                      |                    |   |        |       |        |
|----|----------------------|--------------------------------------|--------------------|---|--------|-------|--------|
| 9  | O95297 MPZL1_HUMAN   | K.SESVVY#ADIR.K                      | Y263:              | 2 | 2,5305 | 0,285 | -0,3   |
| 9  | P49840 GSK3A_HUMAN   | R.GEPNVSY#ICSR.Y                     | Y279:              | 2 | 2,0398 | 0,386 | 0,09   |
| 9  | P38159 HNRPG_HUMAN   | R.DSY#SSRS#DLYSSGR.D                 | Y327:S332:         | 2 | 2,5641 | 1     | -0,401 |
| 9  | Q86Z02 HIPK1_HUMAN   | K.AVCSTY#LQSR.Y                      | Y352:              | 2 | 2,2603 | 0,353 | -0,772 |
| 9  | Q9UNS2 CSN3_HUMAN    | K.SM*GSQEDDSGNKPSSY#S.-              | Y422:              | 2 | 2,954  | 0,538 | -0,587 |
| 9  | P54105 ICLN_HUMAN    | R.DYEDGM*EVDTTPTVAGQFEDADVDH.-       |                    | 3 | 5,907  | 0,49  | -0,33  |
| 9  | P09211 GSTP1_HUMAN   | K.DQQEAALVDM*VNDGVEDLR.C             |                    | 3 | 4,8654 | 0,459 | -0,172 |
| 9  | P05387 RLA2_HUMAN    | K.LASVPAGGAVAVSAAPGSAAPAAGSAPAAAEK.K |                    | 3 | 4,5626 | 0,449 | -0,33  |
| 9  | P07737 PROF1_HUMAN   | R.DSLLQDGEFSM*DLR.T                  |                    | 2 | 4,0919 | 0,459 | -0,149 |
| 9  | Q05524 ENO1B_HUMAN   | K.DATNVGDEGGFAPNILENK.E              |                    | 2 | 3,9691 | 0,581 | -0,187 |
| 9  | P09211 GSTP1_HUMAN   | K.DQQEAALVDM*VNDGVEDLR.C             |                    | 2 | 3,244  | 0,547 | -0,114 |
| 9  | P13667 PDIA4_HUMAN   | K.DGDDVIIIIGVFK.G                    |                    | 2 | 3,0282 | 0,281 | -0,473 |
| 9  | Q6S8J3 A26CA_HUMAN   | K.SYELPDGQVITIGNER.F                 |                    | 2 | 3,0264 | 0,379 | 0,136  |
| 9  | Q05524 ENO1B_HUMAN   | K.DATNVGDEGGFAPNILENK.E              |                    | 3 | 2,9397 | 0,126 | -0,28  |
| 9  | P30041 PRDX6_HUMAN   | K.DGDSVM*VLPTIPEEEAK.K               |                    | 2 | 2,8168 | 0,33  | -0,132 |
| 9  | P60709 ACTB_HUMAN    | K.DLYANTVLSGGTTM*YPGIADR.M           |                    | 3 | 2,7424 | 0,209 | 0,164  |
| 10 | Q6ZWJ1 STXB4_HUMAN   | K.NTSTVVS#PSLLEKDPAFQM*ITIAK.E       | S10:               | 3 | 3,6461 | 0,347 | -0,204 |
| 10 | P83369 LSM11_HUMAN   | R.S#AGAGSPARPPS#PR.L                 | S10:S21:           | 2 | 2,3581 | 0,22  | -0,332 |
| 10 | Q86YP4 P66A_HUMAN    | R.RPPS#PDVIVLS#DNEQPSSPR.V           | S100:S107:         | 3 | 4,5715 | 0,358 | 0,234  |
| 10 | O95785 WIZ_HUMAN     | K.NPEDKS#PQLSLS#PRPAS#PK.A           | S1006:S1012:S1017: | 3 | 3,4636 | 0,369 | -0,32  |
| 10 | P05386 RLA1_HUMAN    | K.KEES#EES#DDDM*GFGLFD.-             | S101:S104:         | 2 | 4,6291 | 0,641 | -0,23  |
| 10 | Q15058 KIF14_HUMAN   | R.NKESS#LLVS#ELEDTTEK.T              | S101:S105:         | 2 | 2,6038 | 0,298 | -0,352 |
| 10 | Q5T200 ZC3HD_HUMAN   | K.SKGDS#DIS#DEEAAQQSK.K              | S1014:S1017:       | 2 | 4,8938 | 0,501 | -0,375 |
| 10 | P05387 RLA2_HUMAN    | K.DEKKEES#EES#DDDM*GFGLFD.-          | S102:S105:         | 3 | 3,3014 | 0,374 | -0,22  |
| 10 | O15164 TIF1A_HUMAN   | R.NESEDNKS#DDS#DDDFVQPR.K            | S1025:S1028:       | 3 | 5,2302 | 0,524 | 0,073  |
| 10 | Q8NHM5 JHD1B_HUMAN   | R.VISRPPS#VS#PPK.C                   | S1029:S1031:       | 3 | 2,9492 | 0,253 | -0,18  |
| 10 | Q6P0Q8 MAST2_HUMAN   | R.LLS#GDS#TEKR.T                     | S1032:S1035:       | 2 | 2,3982 | 0,346 | -0,289 |
| 10 | P15822 ZEP1_HUMAN    | K.M*KS#VGDEELQQNESGTS#PK.S           | S1035:S1050:       | 3 | 3,7979 | 0,387 | 0      |
| 10 | P28749 RBL1_HUMAN    | R.VIAIDS#DAES#PAKR.V                 | S1037:S1041:       | 2 | 4,4455 | 0,363 | -0,15  |
| 10 | P25054 APC_HUMAN     | K.YSDEQLNS#GRQS#PSQNER.W             | S1038:S1042:       | 3 | 3,7426 | 0,331 | -0,811 |
| 10 | ##Q9HAH1 ZN556_HUMAN | K.VDTSRPRAS#S#KGVS#GGSVPK.K          | S105:S106:S110:    | 3 | 2,9339 | 0,169 | 0,555  |
| 10 | Q8WVM7 STAG1_HUMAN   | R.NSLVTGGEDDRM*S#VNS#GSSSSK.T        | S1062:S1065:       | 3 | 3,3816 | 1     | -0,153 |
| 10 | Q9UQ35 SRRM2_HUMAN   | K.GQSQTS#PDHRSDTS#S#PEVR.Q           | S1064:S1072:S1073: | 3 | 3,0476 | 1     | -0,158 |

|    |                      |                                     |                    |   |        |       |        |
|----|----------------------|-------------------------------------|--------------------|---|--------|-------|--------|
| 10 | Q2NKX8 ERC6L_HUMAN   | K.NDIS#PPGR.F                       | S1069:             | 2 | 2,1214 | 0,217 | -0,261 |
| 10 | O60841 IF2P_HUMAN    | K.KQS#FDDNDS#EELEDK.D               | S107:S113:         | 2 | 4,7569 | 0,553 | -0,187 |
| 10 | ##Q9C0J8 WDR33_HUMAN | K.S#GS#VVLGKT#PHWDVCKVDAGHGR.L      | S1074:S1076:T1082: | 3 | 3,2389 | 0,095 | -0,474 |
| 10 | Q6ZUT9 RA61L_HUMAN   | R.RLS#ITS#LTGK.N                    | S1076:S1079:       | 2 | 2,0134 | 0,203 | 0      |
| 10 | Q71F23 CENPU_HUMAN   | K.RSS#DTS#GNEASEIESVK.I             | S108:S111:         | 2 | 4,2031 | 0,43  | -0,374 |
| 10 | P35251 RFC1_HUMAN    | R.QDPVTYIS#ET#DEEDDFM*CKK.A         | S108:T110:         | 3 | 2,7757 | 0,169 | 0,418  |
| 10 | P07948 LYN_HUMAN     | K.GKDS#LS#DDGVDLK.T                 | S11:S13:           | 2 | 3,1107 | 0,411 | 0,243  |
| 10 | Q9UQ35 SRRM2_HUMAN   | R.SRS#SS#PVTELASR.S                 | S1101:S1103:       | 2 | 3,7938 | 0,241 | -0,238 |
| 10 | Q9UQ35 SRRM2_HUMAN   | R.SRSS#S#PVTELASR.S                 | S1102:S1103:       | 3 | 3,3032 | 0,206 | 0,119  |
| 10 | Q7Z2Z1 CO042_HUMAN   | K.S#LSFSKTT#PR.R                    | S1113:T1120:       | 2 | 2,3969 | 0,311 | -0,095 |
| 10 | Q13459 MYO9B_HUMAN   | R.SPLEHS#S#PEKEAPS#PEK.T            | S1114:S1115:S1122: | 3 | 2,7054 | 0,211 | -0,175 |
| 10 | Q3KQU3 MA7D1_HUMAN   | R.RSS#QPS#PTAVPASDS#PPTKQEVK.K      | S113:S116:S125:    | 3 | 4,0106 | 0,115 | -0,556 |
| 10 | Q3KQU3 MA7D1_HUMAN   | R.RSS#QPSPTAVPASDSPPT#K.Q           | S113:T128:         | 3 | 3,0317 | 0,105 | 0,265  |
| 10 | Q96T60 PNKP_HUMAN    | R.TPES#QPDT#PPGTPLVSQDEKR.D         | S114:T118:         | 3 | 3,7859 | 0,432 | -0,225 |
| 10 | Q13017 RHG05_HUMAN   | R.THS#DAS#DDEAFTTSK.T               | S1173:S1176:       | 2 | 4,6251 | 0,589 | -0,344 |
| 10 | Q9Y6M7 S4A7_HUMAN    | R.M*LQDDDDTVHLPFEGGS#LLQIPVK.A      | S1176:             | 3 | 3,9509 | 0,319 | -0,132 |
| 10 | Q96MU7 YTDC1_HUMAN   | R.LS#SSAS#REPYK.N                   | S118:S122:         | 2 | 2,2764 | 0,324 | -0,088 |
| 10 | P17301 ITA2_HUMAN    | K.M*TKNPDEIDETTELS#S.-              | S1180:             | 2 | 4,4607 | 0,675 | -0,512 |
| 10 | O14737 PDCD5_HUMAN   | R.KVM*DS#DEDDDY.-                   | S119:              | 2 | 3,1748 | 0,411 | -0,598 |
| 10 | O14737 PDCD5_HUMAN   | R.KVMDS#DEDDDY.-                    | S119:              | 2 | 3,0426 | 0,482 | -0,173 |
| 10 | Q13286 CLN3_HUMAN    | R.RFS#DS#EGEETVPEPR.L               | S12:S14:           | 2 | 4,5835 | 0,526 | -0,322 |
| 10 | Q32MZ4 LRRF1_HUMAN   | R.RGS#GDTS#ISIDTEASIR.E             | S120:S124:         | 3 | 3,2044 | 0,316 | 0,095  |
| 10 | Q32MZ4 LRRF1_HUMAN   | R.RGS#GDT#SISIDTEASIR.E             | S120:T123:         | 2 | 4,3135 | 0,624 | -0,127 |
| 10 | Q9Y5J1 UTP18_HUMAN   | R.VQEHEDS#GDS#EVENEAK.G             | S121:S124:         | 3 | 5,6791 | 0,46  | 0,355  |
| 10 | Q9Y5J1 UTP18_HUMAN   | R.VQEHEDS#GDS#EVENEAK.G             | S121:S124:         | 2 | 2,831  | 0,398 | -0,71  |
| 10 | Q8N488 RYBP_HUMAN    | K.SDILKDPPS#EANS#IQSANATTK.T        | S123:S127:         | 3 | 3,5268 | 1     | -0,075 |
| 10 | Q96T23 RSF1_HUMAN    | R.RLS#S#SESEESYLSK.N                | S1235:S1236:       | 2 | 3,3427 | 0,487 | 0,069  |
| 10 | Q96T23 RSF1_HUMAN    | R.RLS#SS#ESEESYLSK.N                | S1235:S1237:       | 2 | 3,4774 | 0,359 | -0,416 |
| 10 | Q9BQG0 MBB1A_HUMAN   | K.SPAPGAPTRS#PST#PAK.S              | S1241:T1244:       | 2 | 3,6572 | 0,451 | -0,508 |
| 10 | P46013 KI67_HUMAN    | R.VSRS#S#FSSDPDEK.A                 | S127:S128:         | 2 | 2,024  | 0,113 | -0,152 |
| 10 | Q8N488 RYBP_HUMAN    | K.SDILKDPPSEANS#IQS#ANATTK.T        | S127:S130:         | 3 | 5,0427 | 0,407 | 0,523  |
| 10 | Q9P2E9 RRBP1_HUMAN   | K.SHVEDGDIAGAPAS#S#PEAPPAEQDPVQLK.T | S1276:S1277:       | 3 | 3,3919 | 0,284 | 0,476  |
| 10 | Q961F1 JUB_HUMAN     | R.SSFASSAS#DASKPSS#PR.G             | S130:S137:         | 2 | 3,5867 | 1     | -0,255 |

|    |                    |                                   |                 |   |        |       |        |
|----|--------------------|-----------------------------------|-----------------|---|--------|-------|--------|
| 10 | O75494 FUSIP_HUMAN | R.S#RS#FDYNYR.R                   | S131:S133:      | 3 | 2,8676 | 0,121 | 0      |
| 10 | Q9P2M7 CING_HUMAN  | R.SHS#QAS#LAGPGVPDPSNR.S          | S131:S134:      | 3 | 2,9162 | 0,274 | -0,378 |
| 10 | Q99959 PKP2_HUMAN  | R.GTAQYSS#QKS#VEER.S              | S132:S135:      | 2 | 3,0075 | 0,406 | -0,071 |
| 10 | Q02952 AKA12_HUMAN | K.SPSS#PVER.E                     | S1331:          | 2 | 2,2772 | 0,149 | -0,321 |
| 10 | P46100 ATRX_HUMAN  | K.LTVS#DGES#GEEKK.T               | S1348:S1352:    | 2 | 3,3154 | 0,34  | -0,238 |
| 10 | P46100 ATRX_HUMAN  | K.LTVS#DGES#GEEKK.T               | S1348:S1352:    | 3 | 3,197  | 0,386 | -0,119 |
| 10 | O60841 IF2P_HUMAN  | K.VEM*YS#GS#DDDDDFNKLPK.K         | S135:S137:      | 3 | 2,6034 | 0,138 | 0,732  |
| 10 | P11388 TOP2A_HUMAN | K.TDDEDVPS#DAS#PPKTK.T            | S1351:S1354:    | 3 | 3,689  | 0,338 | 0,182  |
| 10 | P11388 TOP2A_HUMAN | K.TDDEDVPS#DAS#PPKTK.T            | S1351:S1354:    | 2 | 3,028  | 0,454 | 0,729  |
| 10 | Q9P1Y6 K1542_HUMAN | K.AEAPS#S#PDVAPAGKEDSPSASGR.V     | S1359:S1360:    | 3 | 3,6688 | 0,345 | -0,312 |
| 10 | Q9UM11 FZR_HUMAN   | K.RS#SPDDGNDVSPYLS#PVSNK.S        | S137:S151:      | 3 | 3,5717 | 0,183 | -0,231 |
| 10 | Q8IWS0 PHF6_HUMAN  | K.TAHNS#EADLEES#FNEHELEPSS#PK.S   | S138:S145:S155: | 3 | 3,8291 | 0,385 | 0,872  |
| 10 | Q9UQ35 SRRM2_HUMAN | R.SSGHS#SS#ELSPDAVEK.A            | S1382:S1384:    | 2 | 4,6966 | 1     | -0,549 |
| 10 | Q9UQ35 SRRM2_HUMAN | R.SSGHS#SSELS#PDAVEK.A            | S1382:S1387:    | 2 | 5,0649 | 1     | -0,343 |
| 10 | Q53T59 H1BP3_HUMAN | K.DAELAGSPELLEFLGTRS#PGAAGLTSR.D  | S139:           | 3 | 3,1112 | 0,363 | -0,196 |
| 10 | O15085 ARHGB_HUMAN | R.LSS#LSS#LGDSAPERK.S             | S14:S17:        | 2 | 2,6351 | 0,278 | 0      |
| 10 | Q9H6Y2 WDR55_HUMAN | R.TCEERPAEDGS#DEEDPDS#M*EAPTR.I   | S14:S21:        | 3 | 3,7923 | 0,224 | -0,442 |
| 10 | Q14181 DPOA2_HUMAN | R.SVSTRS#PHQLLS#PSSFS#PSATPSQK.Y  | S141:S147:S152: | 3 | 5,5722 | 1     | -0,064 |
| 10 | Q13523 PRP4B_HUMAN | K.VQSGM*GLILQGYES#GS#EEEEGEIHEK.A | S142:S144:      | 3 | 4,1128 | 0,355 | 0,19   |
| 10 | Q9HC35 EMAL4_HUMAN | R.AS#PS#PQPSSQPLQIHR.Q            | S144:S146:      | 2 | 2,6838 | 0,444 | -0,194 |
| 10 | P29966 MARCS_HUMAN | K.AEDGATPS#PSNET#PKK.K            | S145:T150:      | 2 | 2,2502 | 0,345 | -0,341 |
| 10 | Q8IZ21 PHAR4_HUMAN | R.LGS#TGSQPNSEAESVPENVPKPPLPPK.R  | S147:           | 3 | 4,1772 | 0,395 | -0,124 |
| 10 | Q9HBM6 TAF9B_HUMAN | R.LS#VGAVSSKPTTPTIATPQTVSVPNK.V   | S147:           | 3 | 5,8602 | 0,399 | 0      |
| 10 | O15234 CASC3_HUMAN | K.STVTGERQS#GDGQEST#EPVENK.V      | S148:T155:      | 3 | 4,328  | 0,454 | -0,44  |
| 10 | Q16594 TAF9_HUMAN  | R.LS#VGSVTSRSTPTLGTPTQTM*SVSTK.V  | S149:           | 3 | 2,9541 | 0,307 | 0,565  |
| 10 | Q9Y6N7 ROBO1_HUMAN | R.ETYDDLPPPPVPPPAIKS#PTAQSK.T     | S1492:          | 3 | 3,2304 | 0,312 | 0      |
| 10 | Q9UQ35 SRRM2_HUMAN | R.S#RS#PSSPELNK.C                 | S1497:S1499:    | 2 | 2,0607 | 0,278 | -0,248 |
| 10 | Q9NZ63 CI078_HUMAN | R.RGDS#ES#EEDEQDSEEV.R            | S15:S17:        | 2 | 2,0488 | 0,45  | -0,453 |
| 10 | Q02880 TOP2B_HUMAN | K.VVEAVNS#DS#DSEFGIPKK.T          | S1522:S1524:    | 3 | 3,9002 | 0,367 | 0,088  |
| 10 | Q5JTV8 TOIP1_HUMAN | R.GLRDS#HS#S#EEDEASSQTDLSTQISK.K  | S154:S156:S157: | 3 | 3,1334 | 0,195 | 0      |
| 10 | Q5UIP0 RIF1_HUMAN  | R.ASQGLSSIENS#ES#DSSEAKEEGSR.K    | S1552:S1554:    | 3 | 6,2063 | 1     | 0,133  |
| 10 | P42166 LAP2A_HUMAN | R.EQGTERRS#ST#PLPTISSAENTR.Q      | S158:T160:      | 3 | 3,8267 | 1     | -0,705 |
| 10 | Q9BW71 HIRP3_HUMAN | R.DLPAQRGEES#S#EEEEK.G            | S159:S160:      | 2 | 3,3975 | 0,369 | -0,306 |

|    |                    |                                    |                    |   |        |       |        |
|----|--------------------|------------------------------------|--------------------|---|--------|-------|--------|
| 10 | Q9BW71 HIRP3_HUMAN | R.GEES#S#EEEEKGYK.G                | S159:S160:         | 2 | 3,0553 | 0,267 | -0,441 |
| 10 | P16949 STMN1_HUMAN | K.RAS#GQAFELILS#PR.S               | S16:S25:           | 2 | 5,2037 | 0,548 | -0,286 |
| 10 | P16949 STMN1_HUMAN | K.RAS#GQAFELILS#PR.S               | S16:S25:           | 3 | 4,262  | 0,351 | 0,215  |
| 10 | O43399 TPD54_HUMAN | R.NS#ATFKS#FEDR.V                  | S161:S166:         | 3 | 3,1589 | 0,457 | -0,188 |
| 10 | O43399 TPD54_HUMAN | R.NS#ATFKS#FEDR.V                  | S161:S166:         | 2 | 3,0149 | 0,421 | -0,25  |
| 10 | Q9C0C2 TB182_HUMAN | R.ASRVPS#S#DEEVVEEPQSR.R           | S1620:S1621:       | 3 | 3,6547 | 0,335 | 0,085  |
| 10 | Q9C0C2 TB182_HUMAN | R.ASRVPS#S#DEEVVEEPQSR.R           | S1620:S1621:       | 2 | 2,562  | 0,313 | -0,226 |
| 10 | O43166 SI1L1_HUMAN | K.SLHGFEFSAS#DSS#LTDIQETR.R        | S1647:S1650:       | 3 | 3,601  | 0,208 | 0,391  |
| 10 | Q8WUA7 TB22A_HUMAN | R.S#QSLPHSATVTLGGTSDPSTLSSSALSER.E | S165:              | 3 | 6,8393 | 0,586 | 0,62   |
| 10 | P29966 MARCS_HUMAN | K.SFKLS#GFS#FK.K                   | S167:S170:         | 2 | 2,3775 | 0,17  | -0,093 |
| 10 | O14646 CHD1_HUMAN  | R.ASS#SGPRS#PLDQR.S                | S1672:S1677:       | 3 | 2,8814 | 0,28  | -0,12  |
| 10 | O14646 CHD1_HUMAN  | R.ASS#GPRS#PLDQR.S                 | S1673:S1677:       | 2 | 2,1513 | 0,1   | -0,322 |
| 10 | Q9BZ23 PANK2_HUMAN | R.RAS#S#ASVPAVGASAEGTR.R           | S168:S169:         | 2 | 4,0523 | 0,505 | -0,266 |
| 10 | Q6NZI2 PTRF_HUMAN  | K.LSIS#KS#LK.E                     | S169:S171:         | 2 | 2,5284 | 0,169 | 0      |
| 10 | Q9H4L4 SEN3_HUMAN  | K.NHLS#PQQGGATPQVPS#PCCR.F         | S169:S181:         | 3 | 5,1299 | 0,371 | -0,078 |
| 10 | Q8IUD2 RB6I2_HUMAN | K.VEPSSQS#PGRS#PR.L                | S17:S21:           | 2 | 2,2912 | 0,126 | -0,474 |
| 10 | Q9NYV6 RRN3_HUMAN  | K.EGDVDVS#DS#DDEDDNLPANFDTCHR.A    | S170:S172:         | 3 | 4,6789 | 0,397 | 0,916  |
| 10 | Q8WVC0 LEO1_HUMAN  | R.AQGS#DEDKLNQNS#DDDEK.M           | S171:S179:         | 3 | 3,3749 | 0,27  | -0,178 |
| 10 | Q5VUA4 ZN318_HUMAN | R.LGS#PVDNLEDM*DRDDLTDSDVFTR.S     | S173:              | 3 | 5,3904 | 0,532 | -0,065 |
| 10 | Q58FF8 H90B2_HUMAN | K.IEDVGS#DEEDDS#GKDK.K             | S177:S183:         | 2 | 4,8916 | 0,484 | -0,514 |
| 10 | Q9NZJ4 SACS_HUMAN  | R.IADLQS#PLFRGPDDDDPAALFEM*AK.S    | S1779:             | 3 | 4,1924 | 0,319 | -0,405 |
| 10 | P46821 MAP1B_HUMAN | K.VQSLEGEKLS#PKS#DIS#PLTPR.E       | S1779:S1782:S1785: | 3 | 3,2117 | 0,205 | 0,073  |
| 10 | P46821 MAP1B_HUMAN | K.VQSLEGEKLS#PKS#DISPLT#PR.E       | S1779:S1782:T1788: | 3 | 5,3818 | 0,541 | 0,073  |
| 10 | Q9Y4B5 K0802_HUMAN | R.GRS#PS#PIGVGSEM*CR.E             | S1803:S1805:       | 2 | 3,8217 | 0,427 | 0,553  |
| 10 | Q9BVC5 ASHWN_HUMAN | R.KS#PSGPVK#PPLS#PVGTT#PVK.L       | S182:S189:S193:    | 3 | 2,7076 | 0,28  | 0,08   |
| 10 | Q9BVC5 ASHWN_HUMAN | R.KS#PSGPVK#PPLSPVGT#PVK.L         | S182:S189:T198:    | 3 | 4,1088 | 0,363 | -0,159 |
| 10 | Q15643 TRIPB_HUMAN | K.S#VPNTPLRPNQSVVNSSFSELFVK.F      | S1842:             | 3 | 3,4398 | 0,253 | -0,256 |
| 10 | Q13111 CAF1A_HUMAN | R.GDSQECS#PRS#CELTSGPR.M           | S185:S188:         | 3 | 3,5825 | 0,215 | -0,241 |
| 10 | P46013 KI67_HUMAN  | K.ILCKS#PQSDPADT#PTNTK.Q           | S1861:T1869:       | 3 | 4,7574 | 0,428 | 0      |
| 10 | P46013 KI67_HUMAN  | K.ILCKS#PQSDPADT#PTNTK.Q           | S1861:T1869:       | 2 | 2,6648 | 0,327 | -0,343 |
| 10 | Q99661 KIF2C_HUMAN | R.GSSANPVNS#VR.R                   | S187:              | 2 | 2,5594 | 0,329 | -0,292 |
| 10 | Q9NQX3 GEPH_HUMAN  | K.EVHDELEDLPS#PPPPLS#PPPTTS#PHK.Q  | S188:S194:S200:    | 3 | 3,5612 | 0,382 | 0      |
| 10 | O00165 HAX1_HUMAN  | R.TREDNDLDS#QVS#QELGPLVLPQPK.S     | S189:S192:         | 3 | 4,2593 | 0,434 | -0,126 |

|    |                     |                                    |                    |   |        |       |        |
|----|---------------------|------------------------------------|--------------------|---|--------|-------|--------|
| 10 | Q9NV56 MRGBP_HUMAN  | R.VTDKVLANS#NPS#SPSAK.R            | S191:S194:         | 2 | 3,1373 | 0,328 | -0,119 |
| 10 | Q52LD0 Q52LD0_HUMAN | K.AGGS#PAS#YHGSTSPR.V              | S192:S195:         | 2 | 2,8205 | 0,418 | -0,153 |
| 10 | Q13242 SFRS9_HUMAN  | R.STSYGYS#R.S                      | S193:              | 2 | 2,0254 | 0,223 | -0,122 |
| 10 | P31350 RIR2_HUMAN   | R.VPLAPITDPQQLQLS#PLKGLSLVDK.E     | S20:               | 3 | 3,1941 | 0,274 | -0,2   |
| 10 | P30622 CLIP1_HUMAN  | K.TASESISNLS#EAGS#IKK.G            | S200:S204:         | 2 | 3,586  | 0,538 | -0,648 |
| 10 | Q14244 MAP7_HUMAN   | K.RLS#SSSATLLNS#PDR.A              | S200:S209:         | 2 | 4,4917 | 1     | 0,484  |
| 10 | Q96B36 AKTS1_HUMAN  | R.TEARS#S#DEENGPPSSPDLDR.I         | S202:S203:         | 3 | 3,048  | 0,098 | -0,079 |
| 10 | Q9H4A3 WNK1_HUMAN   | R.DVDDGS#GS#PHS#PHQLSSK.S          | S2027:S2029:S2032: | 3 | 3,2178 | 0,408 | -0,175 |
| 10 | Q9H4A3 WNK1_HUMAN   | R.DVDDGS#GS#PHS#PHQLSSK.S          | S2027:S2029:S2032: | 2 | 2,1039 | 0,355 | -0,467 |
| 10 | Q9H0H5 RGAP1_HUMAN  | K.TR#IGS#AVDQGNESIVAK.T            | S203:S206:         | 3 | 5,4226 | 0,415 | -0,092 |
| 10 | Q96B36 AKTS1_HUMAN  | R.TEARSS#DEENGPPS#SPDLDR.I         | S203:S211:         | 3 | 4,9379 | 0,445 | 0,631  |
| 10 | O75179 ANR17_HUMAN  | K.EHYPVS#SPS#SPSPPAQPGGVSR.N       | S2041:S2044:       | 3 | 3,0232 | 1     | -0,384 |
| 10 | Q15139 KPCD1_HUMAN  | R.RLS#NVS#LTGVSTIR.T               | S205:S208:         | 2 | 3,8117 | 0,539 | 0,073  |
| 10 | Q15139 KPCD1_HUMAN  | R.RLS#NVS#LTGVSTIR.T               | S205:S208:         | 3 | 2,8621 | 0,234 | -0,11  |
| 10 | Q9Y5J1 UTP18_HUMAN  | R.KTS#SDD#E#EEDDLLQR.T             | S205:S210:         | 3 | 4,6208 | 0,128 | 0,081  |
| 10 | Q9H165 BC11A_HUMAN  | R.IYLESEHGS#PLT#PR.V               | S205:T208:         | 2 | 3,0318 | 0,403 | -0,208 |
| 10 | Q6ZN18 AEBP2_HUMAN  | R.RGS#LEM*S#SDGEPLSR.M             | S206:S210:         | 2 | 3,1084 | 0,414 | 0,136  |
| 10 | P05787 K2C8_HUMAN   | R.AFS#SRYS#TSGPGSR.I               | S21:Y25:           | 2 | 2,7155 | 1     | -0,301 |
| 10 | Q9UQ35 SRRM2_HUMAN  | R.M*SCFSRPS#MS#PTPLDR.C            | S2121:S2123:       | 3 | 3,0518 | 0,282 | 0      |
| 10 | Q9UQ35 SRRM2_HUMAN  | R.MSCFSRPS#M*S#PTPLDR.C            | S2121:S2123:       | 2 | 2,5289 | 0,262 | -0,358 |
| 10 | Q8IVF2 AHNK2_HUMAN  | K.SIEASVDVS#PPKVEADM*SLPSM*QGDLK.T | S2179:             | 3 | 4,6382 | 0,451 | -0,187 |
| 10 | Q9BST9 RTKN_HUMAN   | R.LATKLS#S#SLGR.S                  | S218:S219:         | 2 | 3,226  | 0,423 | 0      |
| 10 | Q5VUA4 ZN318_HUMAN  | K.DKLC#PLS#EPGDPSK.C               | S2189:S2192:       | 2 | 2,7711 | 0,278 | -0,273 |
| 10 | P08670 VIME_HUMAN   | R.M*FGGPGTAS#RPSS#SR.S             | S22:S26:           | 2 | 2,9291 | 0,457 | -0,365 |
| 10 | Q9BW71 HIRP3_HUMAN  | K.SLKES#EQES#EEEILAQK.K            | S223:S227:         | 3 | 4,7619 | 0,261 | 0,171  |
| 10 | Q9BW71 HIRP3_HUMAN  | K.SLKES#EQES#EEEILAQK.K            | S223:S227:         | 2 | 4,0619 | 0,362 | -0,343 |
| 10 | P49792 RBP2_HUMAN   | R.EDALDDSVS#SSSVHAS#PLASS#PVRK.N   | S2239:S2246:S2251: | 3 | 3,5659 | 1     | 0,329  |
| 10 | P49761 CLK3_HUMAN   | R.CEERS#PS#FGEDYYGPSR.S            | S224:S226:         | 3 | 3,2151 | 0,289 | 0,333  |
| 10 | Q13573 SNW1_HUMAN   | R.GPPS#PPAPVM*HS#PSR.K             | S224:S232:         | 3 | 2,6365 | 0,297 | 0      |
| 10 | Q5UIP0 RIF1_HUMAN   | K.GFLS#PGSRS#PK.F                  | S2260:S2265:       | 2 | 2,1148 | 0,28  | 0      |
| 10 | P04183 KITH_HUMAN   | R.KLFAPQQILQCS#PAN.-               | S231:              | 2 | 4,0058 | 0,538 | 0,068  |
| 10 | Q9H7L9 SDS3_HUMAN   | K.RPAS#PS#SPEHLPATPAES#PAQR.F      | S234:S236:S248:    | 3 | 3,9194 | 0,324 | -0,218 |
| 10 | P46013 KI67_HUMAN   | K.IACKS#PQPDPVDTAST#K.Q            | S2344:T2356:       | 3 | 3,1497 | 0,135 | -0,088 |

|    |                    |                                   |                 |   |        |       |        |
|----|--------------------|-----------------------------------|-----------------|---|--------|-------|--------|
| 10 | P62753 RS6_HUMAN   | R.LS#SLRAS#TSKS#ESSQK.-           | S235:S240:S244: | 2 | 3,7215 | 1     | -0,441 |
| 10 | P62753 RS6_HUMAN   | R.LSS#LRAS#TS#KSESSQK.-           | S236:S240:S242: | 3 | 2,6646 | 1     | -0,094 |
| 10 | Q5T200 ZC3HD_HUMAN | R.KTS#AVSS#PLLDQQR.N              | S238:S242:      | 2 | 4,5175 | 0,526 | -0,217 |
| 10 | Q15773 MLF2_HUMAN  | R.LAIQGPEDS#PSRQS#R.R             | S238:S243:      | 2 | 2,4518 | 0,385 | -0,61  |
| 10 | Q6PGQ7 BORA_HUMAN  | K.CRS#PLQTPSSGQFSS#PIQASAK.K      | S239:S252:      | 3 | 5,8729 | 1     | 0,142  |
| 10 | Q6PGN9 PSRC1_HUMAN | K.FLHPS#PPGPPT#PIR.S              | S239:T245:      | 3 | 3,1973 | 0,191 | 0,328  |
| 10 | P25788 PSA3_HUMAN  | K.ESLKEEDES#DDDNM*.-              | S250:           | 2 | 4,2496 | 0,54  | -0,279 |
| 10 | P25788 PSA3_HUMAN  | K.ESLKEEDES#DDDNM.-               | S250:           | 2 | 4,0626 | 0,38  | 0,351  |
| 10 | Q9HC52 CBX8_HUMAN  | R.RQDS#DLVQCGVTSPSS#AEATGK.L      | S256:S268:      | 3 | 3,5219 | 0,341 | 0,298  |
| 10 | Q96PM5 ZN363_HUMAN | R.RIS#LDQQ.-                      | S257:           | 2 | 2,1738 | 0,244 | 0,195  |
| 10 | Q4G0J3 LARP7_HUMAN | R.SRPTS#EGS#DIESTEPQK.Q           | S258:S261:      | 3 | 3,0842 | 0,172 | -0,364 |
| 10 | Q8TF44 NLF3_HUMAN  | R.HGS#LSADDSTPDAS#PGSR.R          | S262:S273:      | 2 | 4,7242 | 1     | -0,255 |
| 10 | Q7KZ85 SPT6H_HUMAN | R.S#IFEM*YEPSELESSHLTDQDNEIR.A    | S267:           | 3 | 3,4444 | 0,437 | -0,062 |
| 10 | P49736 MCM2_HUMAN  | R.GNDPLTSS#PGRSS#R.R              | S27:S32:        | 2 | 2,3108 | 0,233 | -0,153 |
| 10 | O75475 PSIP1_HUMAN | K.TGVTSTS#DS#EEEGDDQEGEKK.R       | S273:S275:      | 3 | 3,8259 | 0,387 | -0,077 |
| 10 | O95817 BAG3_HUMAN  | R.SSVQGASS#REGS#PAR.S             | S275:S279:      | 2 | 3,2475 | 0,304 | -0,373 |
| 10 | P27816 MAP4_HUMAN  | K.DM*ES#PTKLDVTLAK.D              | S280:           | 3 | 2,8407 | 0,196 | 0      |
| 10 | P23588 IF4B_HUMAN  | R.AFGS#GYR.R                      | S283:           | 2 | 2,4605 | 0,373 | 0,073  |
| 10 | Q02952 AKA12_HUMAN | K.SAES#PTS#PVTSETGSTFKK.F         | S283:S286:      | 3 | 2,6431 | 0,318 | 0      |
| 10 | Q02952 AKA12_HUMAN | K.SAES#PT#SPVTSETGSTFKK.F         | S283:T285:      | 3 | 2,6648 | 0,265 | 0,435  |
| 10 | Q13435 SF3B2_HUMAN | R.SSLGQS#AS#ETEEDTVSVSKK.E        | S284:S286:      | 3 | 3,4341 | 0,396 | 0      |
| 10 | Q02952 AKA12_HUMAN | K.SAESPTS#PVTS#ETGSTFKK.F         | S286:S290:      | 3 | 2,9721 | 1     | -0,087 |
| 10 | Q96ST2 IWS1_HUMAN  | R.NQAS#DS#ENEELPKPR.V             | S287:S289:      | 2 | 3,3204 | 0,177 | 1,367  |
| 10 | Q96ST2 IWS1_HUMAN  | R.NQAS#DS#ENEELPKPR.V             | S287:S289:      | 3 | 2,8598 | 0,214 | 0,195  |
| 10 | Q99961 SH3G1_HUMAN | K.IAASSS#FR.S                     | S288:           | 2 | 2,2421 | 0,297 | 0,133  |
| 10 | O95817 BAG3_HUMAN  | R.SSTPLHS#PS#PIR.V                | S289:S291:      | 2 | 2,1521 | 0,115 | -0,17  |
| 10 | Q9BVJ6 UT14A_HUMAN | K.DYLLS#ES#EDEGDNDGERK.H          | S29:S31:        | 3 | 2,6886 | 0,32  | 0      |
| 10 | Q4LE39 ARI4B_HUMAN | K.EKEDNS#S#EEEEIEPFPEER.E         | S295:S296:      | 3 | 3,7014 | 0,155 | 0,42   |
| 10 | O00499 BIN1_HUMAN  | K.GNKS#PS#PPDGSPAATPEIR.V         | S296:S298:      | 3 | 4,0536 | 0,422 | -0,269 |
| 10 | Q15642 CIP4_HUMAN  | R.APS#DSS#LGTSPDGRPELR.G          | S296:S299:      | 2 | 2,3162 | 0,298 | -0,975 |
| 10 | Q96M11 HYLS1_HUMAN | R.KLPFPLS#PS.-                    | S297:           | 2 | 2,7721 | 0,318 | -0,114 |
| 10 | P25440 BRD2_HUMAN  | R.KADTTTPTTAILAPGS#PAS#PPGSLEPK.A | S298:S301:      | 3 | 5,3647 | 0,48  | 0,639  |
| 10 | Q9Y2V2 CHSP1_HUMAN | R.ERS#PS#PLRGNVPS#PLPTR.R         | S30:S32:S41:    | 3 | 2,8612 | 0,314 | 0,477  |



|    |                    |                                       |              |   |        |       |        |
|----|--------------------|---------------------------------------|--------------|---|--------|-------|--------|
| 10 | Q05655 KPCD_HUMAN  | R.RSDS#ASS#EPVGIYQGFEK.K              | S304:S307:   | 2 | 2,5655 | 0,413 | -0,115 |
| 10 | Q05655 KPCD_HUMAN  | R.RSDS#ASSEPVGIY#QGFEK.K              | S304:Y313:   | 2 | 2,2744 | 0,305 | 0      |
| 10 | P49454 CENPF_HUMAN | R.GPTPATPES#FS#KK.S                   | S3048:S3050: | 2 | 2,506  | 0,21  | 0,243  |
| 10 | O43765 SGTA_HUMAN  | R.SRTPS#ASNDQQE.-                     | S305:        | 2 | 4,4187 | 0,461 | -0,483 |
| 10 | Q13769 THOC5_HUMAN | K.ALFKPPEDSQDDES#DS#DAEEEEQTTK.R      | S312:S314:   | 3 | 4,3991 | 0,322 | -0,185 |
| 10 | Q6PEV8 CX039_HUMAN | R.AHS#DSNLS#ASAAER.I                  | S316:S321:   | 2 | 4,7973 | 0,577 | -0,465 |
| 10 | Q2TB10 ZN800_HUMAN | R.DS#ITPDIATKPGQPLFLDSISPK.K          | S317:        | 3 | 4,1426 | 0,283 | 0,29   |
| 10 | Q2M2Z5 CT019_HUMAN | K.RAS#PPVS#PIPVSEYCESENK.W            | S317:S321:   | 3 | 4,297  | 0,34  | 0,076  |
| 10 | Q8N350 DOS_HUMAN   | R.HAS#LDGAS#PYFK.V                    | S319:S324:   | 2 | 3,9757 | 0,528 | -0,084 |
| 10 | Q5C9Z4 NOM1_HUMAN  | R.FAEDEEKSENS#S#EDGDITDK.S            | S320:S321:   | 3 | 4,1756 | 0,45  | -0,152 |
| 10 | Q86YS7 K0528_HUMAN | K.TGM*GS#GS#AGKEGGPFK.A               | S321:S323:   | 2 | 2,1356 | 0,257 | -0,148 |
| 10 | P49023 PAXI_HUMAN  | K.TGSSS#PPGGPPKPGSQLDSM*LGSLSQSDLNK.L | S322:        | 3 | 3,6355 | 0,486 | 0,362  |
| 10 | Q99569 PKP4_HUMAN  | R.VAS#PSQGVGS#SSPKR.S                 | S327:S335:   | 2 | 2,3808 | 0,377 | -0,564 |
| 10 | Q92922 SMRC1_HUMAN | K.HS#PS#PPPPTTESR.K                   | S328:S330:   | 2 | 3,1093 | 0,279 | -0,074 |
| 10 | Q9UN36 NDRG2_HUMAN | R.S#RT#ASLTAASVDGNR.S                 | S328:T330:   | 3 | 2,911  | 1     | -0,104 |
| 10 | O15075 DCLK1_HUMAN | K.S#PSPPTS#PGSLRK.Q                   | S330:S337:   | 2 | 2,4412 | 1     | -0,157 |
| 10 | Q9UGV2 NDRG3_HUMAN | R.THSTS#S#SLGSGESPFGR.S               | S333:S334:   | 2 | 4,4861 | 1     | -0,065 |
| 10 | P08651 NFIC_HUMAN  | K.TEM*DKS#PFNSPS#PQDSPR.L             | S333:S339:   | 3 | 4,9459 | 0,392 | 0,083  |
| 10 | P08651 NFIC_HUMAN  | K.TEMDKS#PFNSPS#PQDSPR.L              | S333:S339:   | 3 | 3,3237 | 0,174 | -0,671 |
| 10 | Q9UGV2 NDRG3_HUMAN | R.THSTS#SSLGSGES#PFGR.S               | S333:S341:   | 2 | 2,1806 | 1     | -0,453 |
| 10 | Q9UGV2 NDRG3_HUMAN | R.THSTSS#S#LGSGESPFGR.S               | S334:S335:   | 2 | 3,778  | 1     | -0,13  |
| 10 | Q2TB10 ZN800_HUMAN | R.DSITPDIATKPGQPLFLDSIS#PK.K          | S336:        | 3 | 3,8008 | 0,405 | 0      |
| 10 | Q6PL18 ATAD2_HUMAN | R.LSS#AGPRS#PYCK.R                    | S337:S342:   | 2 | 3,014  | 0,416 | -0,247 |
| 10 | P08651 NFIC_HUMAN  | K.TEM*DKSPFNPS#PQDS#PR.L              | S339:S343:   | 3 | 3,118  | 0,225 | 0      |
| 10 | Q9BQP7 CT072_HUMAN | K.NQNIQKPEYS#E.-                      | S343:        | 2 | 3,8276 | 0,457 | -0,171 |
| 10 | Q674X7 KAZRN_HUMAN | R.THS#LCNGDS#PGPVQK.N                 | S346:S352:   | 2 | 3,1981 | 0,489 | -0,278 |
| 10 | O60307 MAST3_HUMAN | K.DPLEEM*VPLSHLEEQPPAPES#PESR.A       | S348:        | 3 | 3,7031 | 0,368 | -0,181 |
| 10 | Q9GZR1 SEN6_HUMAN  | R.RES#IS#PQPADSACSSPAPSTGK.V          | S350:S352:   | 3 | 4,8319 | 0,555 | 0      |
| 10 | Q9UK58 CCNL1_HUMAN | K.AEEKS#PIS#INVK.T                    | S352:S355:   | 2 | 3,1119 | 0,24  | -0,083 |
| 10 | P17096 HMGA1_HUMAN | R.KQPPVS#PGTALVGS#QKEPSEVPT#PK.R      | S36:S44:T53: | 3 | 4,7734 | 0,34  | -0,262 |
| 10 | Q9HAH7 FBSH_HUMAN  | K.TPPGALLGAPPPLVPAPRPSS#PPR.G         | S360:        | 3 | 3,8251 | 0,389 | -0,076 |
| 10 | P20749 BCL3_HUMAN  | K.ATRPASTS#QPDPS#PDR.S                | S361:S366:   | 3 | 3,0207 | 0,103 | -0,397 |
| 10 | P09651 ROA1_HUMAN  | R.NQGGYGGSSSS#SYGSGR.R                | S364:        | 2 | 4,0884 | 0,623 | -0,344 |

|    |                    |                                    |                 |   |        |       |        |
|----|--------------------|------------------------------------|-----------------|---|--------|-------|--------|
| 10 | Q6P3S6 FBX42_HUMAN | R.APLS#PSLNSRSPISATPPALVPETR.E     | S365:           | 3 | 5,1333 | 0,446 | 0,067  |
| 10 | P09651 ROA1_HUMAN  | R.NQGGYGGSSSSSYGS#GR.R             | S368:           | 2 | 4,9733 | 0,612 | -0,206 |
| 10 | Q9HCD5 NCOA5_HUMAN | R.LM*RSS#TDS#LPGPISR.Q             | S378:S381:      | 2 | 2,4282 | 0,509 | 0,204  |
| 10 | Q76FK4 NOL8_HUMAN  | R.NDREYDS#GDT#DEIIAM*K.K           | S378:T381:      | 3 | 3,5867 | 0,317 | -0,596 |
| 10 | Q9H5I1 SUV92_HUMAN | K.GSGDIS#SDS#IDHSPAK.K             | S381:S384:      | 2 | 3,7524 | 0,388 | -0,282 |
| 10 | Q9BVS4 RIOK2_HUMAN | R.SSGDPEQIKEDSL#EES#ADAR.S         | S382:S385:      | 3 | 3,2939 | 0,232 | -0,228 |
| 10 | Q9NYV4 CD2L7_HUMAN | R.HSS#IS#PVRLPLNSSLGAELS#R.K       | S383:S385:S400: | 3 | 2,837  | 0,275 | 0      |
| 10 | O75717 WDHD1_HUMAN | R.SHILEDDENS#VDIS#M*LK.T           | S383:S387:      | 2 | 2,2181 | 0,367 | 0,115  |
| 10 | Q9C0H9 SNIP_HUMAN  | R.KDS#GSSSVFAES#PGGK.T             | S385:S394:      | 2 | 5,4811 | 1     | -0,359 |
| 10 | Q7Z6L1 K1358_HUMAN | R.SHSGS#SSSLLS#AGCFFGDEV.R         | S388:S394:      | 3 | 4,184  | 1     | -0,156 |
| 10 | Q7Z422 CA144_HUMAN | K.S#PPKVPIVIQDDSLPAGPPPQIR.I       | S39:            | 3 | 4,7452 | 0,334 | 0,073  |
| 10 | Q9NRH2 SNRK_HUMAN  | K.IDVPQDLEDDLATPLSHATVPQS#PAR.A    | S390:           | 3 | 3,3045 | 0,389 | -0,123 |
| 10 | P02545 LMNA_HUMAN  | R.LRLS#PS#PTSQR.S                  | S390:S392:      | 2 | 2,4744 | 0,297 | -0,261 |
| 10 | P20700 LMNB1_HUMAN | R.LKLS#PS#PSSR.V                   | S391:S393:      | 2 | 2,4947 | 0,252 | -0,297 |
| 10 | Q14684 RRP1B_HUMAN | R.VFCVEEDS#ESS#LQKR.R              | S392:S395:      | 3 | 2,907  | 0,303 | 0,174  |
| 10 | Q9NR46 SHLB2_HUMAN | K.GKVPVTYLELLS#.-                  | S395:           | 2 | 2,8413 | 0,319 | -0,174 |
| 10 | Q9UQ35 SRRM2_HUMAN | R.HGGSPQPLATTPLSQEPVNPSS#EAS#PTR.D | S395:S398:      | 3 | 5,8716 | 0,405 | 0,668  |
| 10 | Q96ST2 IWS1_HUMAN  | K.AAVLS#DS#EDEEKASAK.K             | S398:S400:      | 2 | 4,6662 | 0,494 | -0,404 |
| 10 | Q96ST2 IWS1_HUMAN  | K.AAVLS#DS#EDEEKASAK.K             | S398:S400:      | 3 | 3,0696 | 0,48  | 0      |
| 10 | Q9Y6M7 S4A7_HUMAN  | K.GNGS#GGS#RENTVDFSK.V             | S400:S403:      | 2 | 2,9355 | 0,343 | -0,722 |
| 10 | Q9Y6M7 S4A7_HUMAN  | K.GNGSGGS#RENS#TVDFSK.V            | S403:S407:      | 3 | 3,1147 | 0,29  | -0,394 |
| 10 | Q9BTX1 NDC1_HUMAN  | K.KLNS#PEETAFT#PK.S                | S406:T414:      | 2 | 3,6201 | 0,338 | -0,209 |
| 10 | Q96AJ1 CLUA1_HUMAN | R.KSEPLDES#DNDF.-                  | S409:           | 2 | 2,0489 | 0,349 | -0,083 |
| 10 | Q6ULP2 AFTIN_HUMAN | R.KFTNFQSPNIDPTEENDLDDS#LS#VK.N    | S409:S411:      | 3 | 6,2406 | 0,387 | -0,364 |
| 10 | Q13112 CAF1B_HUMAN | R.GS#SPGPRPVEGT#PASR.T             | S409:T419:      | 3 | 2,7755 | 0,251 | -0,748 |
| 10 | Q8WUM0 NU133_HUMAN | R.KGLPLGS#AVSS#PVLFPVGR.R          | S41:S45:        | 3 | 3,7766 | 0,28  | -0,43  |
| 10 | Q96BY7 ATG2B_HUMAN | K.SYIS#PHSS#PSHT#PTR.H             | S410:S414:T418: | 3 | 3,0101 | 1     | 0      |
| 10 | P57081 WDR4_HUMAN  | K.M*RPGEATLS#C.-                   | S411:           | 2 | 2,1808 | 0,361 | -0,401 |
| 10 | Q9BS91 S35A5_HUMAN | R.LTKPKS#DES#DEDTF.-               | S416:S419:      | 2 | 3,4037 | 0,452 | -0,551 |
| 10 | Q8WUX9 CHMP7_HUMAN | R.IS#DAELEAELEKLSLSEGLVPSSK.S      | S417:           | 3 | 2,8099 | 0,361 | -1,569 |
| 10 | P61158 ARP3_HUMAN  | R.HNPVFGVM*S#.-                    | S418:           | 2 | 2,8915 | 0,45  | -0,113 |
| 10 | P42858 HD_HUMAN    | R.SRSGS#IVELIAGGGSSCS#PVLSR.K      | S421:S434:      | 3 | 3,5585 | 1     | 0,15   |
| 10 | Q9C0C2 TB182_HUMAN | R.RFS#EGVLQS#PSQDQEK.L             | S429:S435:      | 2 | 5,4764 | 0,401 | -0,428 |

|    |                    |                                  |            |   |        |       |        |
|----|--------------------|----------------------------------|------------|---|--------|-------|--------|
| 10 | P35658 NU214_HUMAN | R.QPKS#PGSTPT#TPTSSQAPQK.L       | S430:T436: | 3 | 3,0916 | 0,359 | -0,167 |
| 10 | Q14247 SRC8_HUMAN  | K.AELS#YRGPVSGTEPEPVYSM*EAADYR.E | S432:      | 3 | 5,2717 | 0,487 | -0,062 |
| 10 | Q9ULJ3 ZN295_HUMAN | R.IKTEPS#S#PLSDPSDIIR.V          | S434:S435: | 3 | 3,4931 | 0,167 | 0,182  |
| 10 | Q14004 CD2L5_HUMAN | R.HSS#IS#PSTLTLK.S               | S437:S439: | 2 | 3,276  | 1     | -0,085 |
| 10 | Q15036 SNX17_HUMAN | K.LSSKLS#AVS#LR.G                | S437:S440: | 2 | 3,3377 | 0,136 | 0      |
| 10 | Q15036 SNX17_HUMAN | K.LSSKLS#AVS#LR.G                | S437:S440: | 3 | 3,0708 | 0,225 | 0,208  |
| 10 | Q96ST2 IWS1_HUMAN  | K.TIAS#DS#EEEAGKELSDK.K          | S438:S440: | 2 | 4,662  | 0,588 | -0,248 |
| 10 | Q9BTU6 P4K2A_HUMAN | R.VAAAAGS#GSPSPGS#PGHDR.E        | S44:S51:   | 3 | 2,6552 | 0,257 | -0,792 |
| 10 | Q8WUM0 NU133_HUMAN | R.KGLPLGSAVSS#PVLFS#PVGR.R       | S45:S50:   | 3 | 4,3942 | 0,241 | 0,172  |
| 10 | Q8WUM0 NU133_HUMAN | R.KGLPLGSAVSS#PVLFS#PVGR.R       | S45:S50:   | 2 | 2,7298 | 0,373 | -0,115 |
| 10 | Q9P0V9 SEP10_HUMAN | R.KNS#NFL.-                      | S451:      | 2 | 2,0067 | 0,317 | 0,456  |
| 10 | Q9NR09 BIRC6_HUMAN | K.LEGDSDDLLEDS#DS#EEHSR.S        | S452:S454: | 3 | 3,5364 | 0,352 | -0,476 |
| 10 | Q3KQU3 MA7D1_HUMAN | R.ARLSAS#TASELS#PK.S             | S454:S460: | 3 | 3,2038 | 0,378 | 0,232  |
| 10 | Q9NYZ3 GTSE1_HUMAN | K.IPKFS#IGDS#PDSSTPK.L           | S457:S461: | 2 | 4,7872 | 0,51  | -0,066 |
| 10 | Q7Z5K2 WAPL_HUMAN  | K.IKYFGFDDL#ES#EDDEDDCQVER.K     | S459:S461: | 3 | 3,8078 | 0,334 | -0,356 |
| 10 | Q96JM3 ZN828_HUMAN | R.KTS#PAS#LDFPESQK.S             | S459:S462: | 2 | 3,492  | 0,436 | -0,072 |
| 10 | Q16875 F263_HUMAN  | R.RNS#VTPLAS#PEPTK.K             | S461:S467: | 3 | 3,693  | 0,258 | 0      |
| 10 | Q8IYB3 SRRM1_HUMAN | K.VELS#ES#EEDKGGK.M              | S463:S465: | 2 | 3,757  | 0,49  | -0,467 |
| 10 | Q99543 DNJC2_HUMAN | R.NAS#AS#FQELEDKK.E              | S47:S49:   | 3 | 3,102  | 0,368 | -0,112 |
| 10 | Q9BTU6 P4K2A_HUMAN | R.VAAAAGSGPS#PPGS#PGHDR.E        | S47:S51:   | 2 | 4,5665 | 0,491 | -0,528 |
| 10 | Q9BTU6 P4K2A_HUMAN | R.VAAAAGSGPS#PPGS#PGHDR.E        | S47:S51:   | 3 | 3,7712 | 0,372 | 0,099  |
| 10 | O60716 CTND1_HUMAN | R.VRVS#PQDANPLM*ANGT#LTR.R       | S47:T59:   | 3 | 3,9891 | 0,166 | 0,826  |
| 10 | Q02952 AKA12_HUMAN | K.LKETCVS#GEDPTQGADLS#PDEK.V     | S472:S483: | 3 | 5,3196 | 0,316 | -0,144 |
| 10 | O75151 PHF2_HUMAN  | R.EKEPPS#PIEAT#PPQSLLEK.V        | S474:T479: | 3 | 3,3978 | 0,395 | 0,231  |
| 10 | P05787 K2C8_HUMAN  | R.DGKLV#ESS#DVLPK.-              | S475:S478: | 2 | 3,6656 | 0,38  | 0,597  |
| 10 | Q96Q42 ALS2_HUMAN  | R.RLS#LPGLLSQVS#PR.L             | S483:S492: | 2 | 4,4811 | 0,419 | -0,145 |
| 10 | Q96Q42 ALS2_HUMAN  | R.RLS#LPGLLSQVS#PR.L             | S483:S492: | 3 | 3,7753 | 0,376 | 0      |
| 10 | P43250 GRK6_HUMAN  | K.DVLDIEQFS#TVKGVLEPTDQDFYQK.F   | S484:      | 3 | 2,6856 | 0,156 | -0,586 |
| 10 | Q8N3F8 MILK1_HUMAN | R.APS#AS#PLALHASR.L              | S484:S486: | 3 | 3,8085 | 0,478 | 0,127  |
| 10 | O60832 DKC1_HUMAN  | K.AGLES#GAEPGDGSDTT#KK.K         | S485:T497: | 2 | 2,501  | 0,418 | -0,183 |
| 10 | Q6UN15 FIP1_HUMAN  | R.DHS#PTPSVFNS#DEER.Y            | S492:S500: | 2 | 4,4679 | 0,408 | -0,325 |
| 10 | Q6UN15 FIP1_HUMAN  | R.DHS#PT#PSVFNSDEER.Y            | S492:T494: | 3 | 4,0993 | 0,315 | 0,195  |
| 10 | Q96JG6 CC132_HUMAN | K.FM*EQRS#PSVS#PSK.Q             | S494:S498: | 2 | 2,3732 | 0,147 | -0,35  |

|    |                    |                                    |                 |   |        |       |        |
|----|--------------------|------------------------------------|-----------------|---|--------|-------|--------|
| 10 | Q9H7N4 SFR19_HUMAN | R.QRS#PS#PAPAPAAAAAGPPTR.K         | S498:S500:      | 3 | 3,4287 | 0,23  | 0,43   |
| 10 | Q71F23 CENPU_HUMAN | K.CKPIDVDFDPDNS#DVSS#IGR.L         | S50:S54:        | 3 | 3,6562 | 0,24  | -0,151 |
| 10 | Q8NI08 NCOA7_HUMAN | K.QDIM*PEVDKQS#GS#PESR.V           | S500:S502:      | 3 | 3,7763 | 0,367 | -0,616 |
| 10 | Q9Y6M5 ZNT1_HUMAN  | K.NM*PNKQPESS#L.-                  | S506:           | 2 | 2,3737 | 0,354 | -0,364 |
| 10 | O00567 NOL5A_HUMAN | K.S#FS#KEELM*SSDLEETAGSTSIPK.R     | S511:S513:      | 3 | 3,0581 | 0,319 | -0,069 |
| 10 | O95365 ZBT7A_HUMAN | R.VRGGAPDPS#PGATATPGAPAQPSS#PDAR.R | S511:S526:      | 3 | 4,3074 | 0,258 | -0,4   |
| 10 | O60832 DKC1_HUMAN  | K.AKEVELVS#E.-                     | S513:           | 2 | 2,3897 | 0,203 | -0,225 |
| 10 | Q9Y6G9 DC1L1_HUMAN | R.KPVTVSPTTPTS#PTEGEAS.-           | S516:           | 2 | 3,4246 | 0,514 | -0,434 |
| 10 | Q9Y2V2 CHSP1_HUMAN | R.TFS#ATVR.A                       | S52:            | 2 | 2,052  | 0,168 | -0,212 |
| 10 | P55081 MFAP1_HUMAN | K.RPDYAPM*ES#S#DEEDEFQFIK.K        | S52:S53:        | 3 | 6,9484 | 0,562 | -0,2   |
| 10 | Q9NPI6 DCP1A_HUMAN | R.KAS#SPSPLTIGT#PESQR.K            | S522:T531:      | 3 | 3,8379 | 0,203 | -0,095 |
| 10 | Q5H9R7 SAPS3_HUMAN | R.NTVDLVTTCHIHS#S#S#DDEIDFK.E      | S523:S524:S525: | 3 | 5,5886 | 1     | 0,66   |
| 10 | Q9NPI6 DCP1A_HUMAN | R.KASS#PS#PLTIGTPESQR.K            | S523:S525:      | 2 | 2,7724 | 0,206 | -0,446 |
| 10 | Q9NPI6 DCP1A_HUMAN | R.KASS#PSPLTIGT#PESQR.K            | S523:T531:      | 2 | 4,0905 | 1     | 0,382  |
| 10 | Q96PE2 ARHGH_HUMAN | R.DSPSAGGPVQLEPIPIAPAS#PGRPTLK.D   | S527:           | 3 | 3,6859 | 0,356 | -0,306 |
| 10 | Q71F23 CENPU_HUMAN | K.CKPIDVDFDPDSDVS#S#IGR.L          | S53:S54:        | 3 | 4,1128 | 0,408 | -0,301 |
| 10 | Q8TEH3 DEN1A_HUMAN | R.TLRES#DSAEGDEAES#PEQQVR.K        | S536:S546:      | 3 | 5,1118 | 0,451 | -0,367 |
| 10 | Q14807 KIF22_HUMAN | K.AVVM*PLQLIQEAAS#PNAEIHILK.N      | S543:           | 3 | 2,7248 | 0,321 | -0,405 |
| 10 | Q3KQU3 MA7D1_HUMAN | R.ASNEKESAAPAS#PAPSPAPSPT#PAPPQK.E | S544:T554:      | 3 | 4,2924 | 0,453 | -0,322 |
| 10 | P55196 AFAD_HUMAN  | R.LSDSRVS#SASST#AER.G              | S545:T550:      | 3 | 3,1007 | 0,195 | -0,105 |
| 10 | Q99829 CPNE1_HUMAN | R.NCSS#PEFSK.T                     | S55:            | 2 | 2,6829 | 0,3   | -0,107 |
| 10 | P27824 CALX_HUMAN  | K.QKS#DAEEDGGTVS#QEEEDR.K          | S554:S564:      | 3 | 3,411  | 0,117 | -0,564 |
| 10 | Q9NPH3 IL1AP_HUMAN | R.RSS#S#DEQGLSYSSLK.N              | S556:S557:      | 2 | 4,4137 | 0,452 | -0,271 |
| 10 | Q9NRF8 PYRG2_HUMAN | K.LSSSDRY#DAS#DDSFSEPR.I           | S568:S571:      | 3 | 4,8111 | 1     | -0,401 |
| 10 | Q13442 HAP28_HUMAN | K.KS#LDSDES#EDEEDDYQK.R            | S57:S63:        | 3 | 5,42   | 0,317 | 0,789  |
| 10 | Q9NYZ3 GTSE1_HUMAN | R.LVDVS#PDRGS#PPSR.V               | S575:S580:      | 3 | 2,7115 | 0,103 | 0,111  |
| 10 | Q9NYZ3 GTSE1_HUMAN | R.LVDVS#PDRGS#PPSR.V               | S575:S580:      | 2 | 2,2102 | 0,221 | -0,223 |
| 10 | O15014 ZN609_HUMAN | R.LVEPHS#PS#PSSK.F                 | S576:S578:      | 2 | 2,9841 | 0,39  | 0      |
| 10 | Q13523 PRP4B_HUMAN | R.TR#PS#PDDILER.V                  | S578:S580:      | 2 | 3,7957 | 0,458 | 0      |
| 10 | Q13523 PRP4B_HUMAN | R.TR#PS#PDDILER.V                  | S578:S580:      | 3 | 3,3767 | 0,379 | -0,118 |
| 10 | Q9H1E3 NUCKS_HUMAN | K.NSQEDS#EDS#EDKDKV.T              | S58:S61:        | 2 | 4,0223 | 0,334 | -0,453 |
| 10 | Q9H6F5 CCD86_HUMAN | R.AGLGS#PERPPKTS#PGS#PR.L          | S58:S66:S69:    | 3 | 2,8522 | 0,218 | -0,54  |
| 10 | Q8TF40 FNIP1_HUMAN | R.NKS#S#LLFK.E                     | S593:S594:      | 2 | 3,5109 | 0,215 | 0,111  |

|    |                    |                                      |            |   |        |       |        |
|----|--------------------|--------------------------------------|------------|---|--------|-------|--------|
| 10 | O00562 PITM1_HUMAN | R.RGS#M*NNELLS#PEFGPVR.D             | S593:S600: | 3 | 3,5098 | 0,106 | -0,176 |
| 10 | Q8WWM7 ATX2L_HUMAN | K.EKEVDGLLTSEPM*GSPVS#S#K.T          | S597:S598: | 3 | 3,079  | 0,12  | 0,242  |
| 10 | P43243 MATR3_HUMAN | R.SYS#PDGKES#PSDK.K                  | S598:S604: | 2 | 2,8386 | 0,328 | -0,47  |
| 10 | P19634 SL9A1_HUMAN | K.IPSAVS#TVS#M*QNIHPK.S              | S602:S605: | 2 | 2,9566 | 0,396 | -0,518 |
| 10 | A6ND36 FA83G_HUMAN | R.RPS#VASS#VSEEFVVR.E                | S610:S614: | 2 | 3,2823 | 0,327 | 0,427  |
| 10 | P35612 ADDB_HUMAN  | K.EAETKS#PLVS#PSK.S                  | S613:S617: | 2 | 2,1633 | 0,129 | -0,159 |
| 10 | P49756 RBM25_HUMAN | K.LGAS#NSPGQPNS#VKR.K                | S616:S624: | 2 | 2,3387 | 0,224 | -0,292 |
| 10 | P49756 RBM25_HUMAN | K.LGASNS#PGQPNS#VKR.K                | S618:S624: | 3 | 3,1693 | 0,165 | 0      |
| 10 | Q8NFG4 FLCN_HUMAN  | R.AHS#PAEGASVESSS#PGPK.K             | S62:S73:   | 2 | 4,1731 | 1     | -0,197 |
| 10 | Q9H165 BC11A_HUMAN | K.KLLGS#PSSLS#PFSK.R                 | S625:S630: | 2 | 4,4392 | 0,477 | 0,071  |
| 10 | Q96QE2 MYCT_HUMAN  | K.GSNYHLSNDNDAS#DVE.-                | S626:      | 2 | 4,2246 | 0,562 | -0,502 |
| 10 | P35568 IRS1_HUMAN  | R.KGS#GDYM*PMS#PK.S                  | S629:S636: | 2 | 2,8297 | 0,318 | -0,662 |
| 10 | Q96DY7 MTBP_HUMAN  | K.TFVLTPELS#PGKLQVLPFEK.A            | S639:      | 3 | 2,8362 | 0,333 | -0,394 |
| 10 | P13807 GYS1_HUMAN  | R.YPRPAS#VPPS#PSLSR.H                | S641:S645: | 3 | 3,2705 | 0,177 | -0,31  |
| 10 | P13807 GYS1_HUMAN  | R.YPRPASVPPS#PS#LSR.H                | S645:S647: | 2 | 2,5123 | 0,294 | -0,482 |
| 10 | P13807 GYS1_HUMAN  | R.YPRPASVPPS#PSLS#R.H                | S645:S649: | 2 | 2,5374 | 0,283 | -0,344 |
| 10 | Q92625 ANS1A_HUMAN | R.SES#LSNCS#IGKK.R                   | S647:S652: | 2 | 2,6716 | 0,286 | -0,498 |
| 10 | Q96TA1 NIBL1_HUMAN | R.GLLAQGLRPES#PPPAGPLLNGAPAGESPQPK.A | S652:      | 3 | 6,3578 | 0,467 | 0,945  |
| 10 | Q9H1B7 EAP1_HUMAN  | R.RNS#SS#PVSPASVPGQR.R               | S657:S659: | 2 | 3,4359 | 1     | 0,273  |
| 10 | P35658 NU214_HUMAN | R.SAQGSSS#PVPSM*VQKS#PR.I            | S657:S666: | 3 | 3,285  | 0,333 | -0,274 |
| 10 | Q8WVC0 LEO1_HUMAN  | K.KYVIS#DEEEEDDD.-                   | S658:      | 2 | 4,5793 | 0,525 | -0,586 |
| 10 | Q9NYF8 BCLF1_HUMAN | R.IDIS#PST#LRK.H                     | S658:T661: | 2 | 2,184  | 0,112 | -0,189 |
| 10 | Q14004 CD2L5_HUMAN | R.CLLADLPLPELPGGDDLS#KSPEEK.K        | S662:      | 3 | 3,5068 | 0,405 | -0,594 |
| 10 | Q7Z4V5 HDGR2_HUMAN | R.ARGDS#EALDEES.-                    | S664:      | 2 | 2,4233 | 0,472 | 0      |
| 10 | Q14004 CD2L5_HUMAN | R.CLLADLPLPELPGGDDLSKS#PEEK.K        | S664:      | 3 | 4,0619 | 0,457 | -0,66  |
| 10 | Q9UER7 DAXX_HUMAN  | K.KICTLPS#PPS#PLASLAPVADSSTR.V       | S668:S671: | 3 | 3,4077 | 0,359 | -0,279 |
| 10 | Q9Y3T9 NOC2L_HUMAN | K.QFKDLFDLNS#S#EEDDTEGFSE.G          | S672:S673: | 3 | 5,8493 | 0,499 | -0,595 |
| 10 | P25205 MCM3_HUMAN  | R.SEDES#ET#EDEEEKSQEDQE.QK.R         | S672:T674: | 3 | 4,1565 | 0,468 | -0,408 |
| 10 | Q13107 UBP4_HUMAN  | K.EQLS#ETEGS#GEDEPGNDPSETTQKK.I      | S675:S680: | 3 | 3,6685 | 0,274 | -0,192 |
| 10 | Q9P2R6 RERE_HUMAN  | K.TQEISRPN#PS#EGEGESSDSR.S           | S679:S681: | 3 | 3,7149 | 0,305 | -0,38  |
| 10 | Q8IYB3 SRRM1_HUMAN | R.APQTSSS#PPPVR.R                    | S696:      | 2 | 2,8841 | 0,215 | 0      |
| 10 | Q9NR30 DDX21_HUMAN | K.LRS#DAGLES#DTAM*K.K                | S7:S13:    | 2 | 3,1557 | 0,351 | -0,146 |
| 10 | Q86SQ0 PHLB2_HUMAN | K.RS#PS#PLGTSVR.S                    | S71:S73:   | 2 | 2,4076 | 0,347 | 0,185  |

|    |                    |                                  |                 |   |        |       |        |
|----|--------------------|----------------------------------|-----------------|---|--------|-------|--------|
| 10 | O00418 EF2K_HUMAN  | R.YSS#SGS#PANSFHF.K.E            | S71:S74:        | 3 | 3,5708 | 0,413 | -0,109 |
| 10 | P25205 MCM3_HUMAN  | K.DGDSYDPYDFS#DTEEEM*PQVHTPK.T   | S711:           | 3 | 3,8335 | 0,352 | -0,063 |
| 10 | Q9BWH6 RPAP1_HUMAN | R.DVVM*LDNLPDLPPALVPS#PPKR.A     | S72:            | 3 | 5,4598 | 0,378 | -0,443 |
| 10 | O00418 EF2K_HUMAN  | R.YSSS#GS#PANSFHF.K.E            | S72:S74:        | 2 | 3,0643 | 1     | -0,437 |
| 10 | Q9H2P0 ADNP_HUMAN  | K.LDDDS#DSPSFEEKPEEPVVLALDPK.G   | S736:           | 3 | 4,0904 | 0,285 | -0,366 |
| 10 | P51812 KS6A3_HUMAN | K.KITS#TAL.-                     | S737:           | 2 | 2,3116 | 0,435 | 0,3    |
| 10 | Q9H2P0 ADNP_HUMAN  | K.LDDDS#DSPSFEEKPEEPVVLALDPK.G   | S738:           | 3 | 3,1422 | 0,269 | -0,061 |
| 10 | Q9H2P0 ADNP_HUMAN  | K.LDDDS#DSPSFEEKPEEPVVLALDPK.G   | S740:           | 3 | 3,1389 | 0,142 | -0,305 |
| 10 | O60524 SDCG1_HUMAN | R.DELNEELIQEES#S#EDEGEYEEVRK.D   | S747:S748:      | 3 | 2,6328 | 0,272 | -0,12  |
| 10 | Q86UP2 KTN1_HUMAN  | K.EIQNGNLHES#DS#ESVPR.D          | S75:S77:        | 3 | 2,6283 | 0,201 | -0,972 |
| 10 | Q8IYB3 SRRM1_HUMAN | K.KPPAPPS#PVQSQS#PSTNWSPA VPVK.K | S769:S775:      | 3 | 4,1525 | 0,248 | -0,067 |
| 10 | Q8N5P1 ZC3H8_HUMAN | R.SKDYDVYS#DNDICS#QESEDNFAK.E    | S77:S83:        | 3 | 6,5745 | 1     | -0,19  |
| 10 | Q14669 TRIPC_HUMAN | R.SAS#PDYNRTNS#PSSAK.K           | S77:S85:        | 2 | 2,0808 | 0,178 | -0,265 |
| 10 | Q9Y6X9 MORC2_HUMAN | K.DSNELS#DS#AGEEDSADLKR.A        | S777:S779:      | 3 | 3,7375 | 0,344 | -0,333 |
| 10 | Q5T5C0 STXB5_HUMAN | R.SSS#VTS#IDKESR.E               | S782:S785:      | 2 | 3,0938 | 0,208 | -0,419 |
| 10 | Q8IY92 BTBDC_HUMAN | R.DCRS#PGLLDTT#PIR.G             | S786:T793:      | 3 | 3,3275 | 0,247 | -0,312 |
| 10 | Q15637 SF01_HUMAN  | R.S#PS#PEPIYNSEGKR.L             | S80:S82:        | 2 | 2,5711 | 0,294 | -0,284 |
| 10 | O60447 EVI5_HUMAN  | R.RES#YSTTV.-                    | S805:           | 2 | 2,1802 | 0,546 | 0      |
| 10 | Q12906 ILF3_HUMAN  | K.FNYSGS#GGR.S                   | S812:           | 2 | 2,536  | 0,236 | -0,119 |
| 10 | Q8IWX8 CHERP_HUMAN | R.SRS#PT#PPSSAGLGSNSAPPIDSR.L    | S817:T819:      | 3 | 3,9418 | 1     | -0,073 |
| 10 | Q99650 OSMR_HUMAN  | K.S#LTETELTKPNLYLLPTEK.N         | S826:           | 3 | 4,1537 | 0,3   | -0,15  |
| 10 | Q9NQS7 INCE_HUMAN  | K.INPDNYGM*DLNS#DDST#DDEAHPR.K   | S833:T837:      | 3 | 2,9921 | 0,09  | -0,661 |
| 10 | Q9C0C9 UBE2O_HUMAN | K.NM*TVEQLLTGS#PTS#PTVEPEKPTR.E  | S836:S839:      | 3 | 3,899  | 1     | 0,656  |
| 10 | Q9NQS7 INCE_HUMAN  | K.INPDNYGM*DLNS#DDST#DDEAHPR.K   | S836:T837:      | 3 | 4,6563 | 0,294 | -0,132 |
| 10 | Q96FS4 SIPA1_HUMAN | R.TEFLHSQNS#LS#PR.S              | S837:S839:      | 2 | 3,7613 | 0,402 | 0,655  |
| 10 | Q9UQ35 SRRM2_HUMAN | R.QGSITS#PQANEQSVT#PQRR.S        | S857:T866:      | 3 | 2,8752 | 0,088 | 0,245  |
| 10 | Q9NXG2 THUM1_HUMAN | K.FTDKQDQPS#GS#EGEDDDAEAAALK.K   | S86:S88:        | 3 | 5,9308 | 0,357 | -0,14  |
| 10 | P05114 HMG1_HUMAN  | K.TEES#PAS#DEAGEKEAK.S           | S86:S89:        | 2 | 2,3536 | 0,336 | -0,199 |
| 10 | Q92993 TIP60_HUMAN | K.NGLPGS#RPGS#PER.E              | S86:S90:        | 2 | 2,506  | 0,324 | -0,411 |
| 10 | Q6GYQ0 GRIPE_HUMAN | R.RGS#S#PGSLEIPK.D               | S860:S861:      | 2 | 3,6134 | 0,439 | 0,176  |
| 10 | Q6GYQ0 GRIPE_HUMAN | R.RGS#S#PGS#LEIPKDLPDILNK.Q      | S860:S861:S864: | 3 | 3,3925 | 0,111 | -0,077 |
| 10 | Q8TAP8 CG047_HUMAN | R.LTPPS#PVRSEPPAVPQELEM*PVLK.S   | S87:            | 3 | 3,042  | 0,295 | 0,581  |
| 10 | Q9C0C9 UBE2O_HUMAN | R.LIHGEDS#DS#EGEEEGR.G           | S87:S89:        | 2 | 3,8723 | 0,461 | -0,572 |

|    |                    |                                    |                    |   |        |       |        |
|----|--------------------|------------------------------------|--------------------|---|--------|-------|--------|
| 10 | Q9UK76 HN1_HUMAN   | R.RNS#SEAS#SGDFLDLK.G              | S87:S91:           | 2 | 5,6225 | 0,531 | 0,615  |
| 10 | Q9UK76 HN1_HUMAN   | R.RNS#SEAS#GDFLDLK.G               | S87:S92:           | 2 | 4,9183 | 0,521 | -0,273 |
| 10 | Q9UQ35 SRRM2_HUMAN | R.SCFESS#PDPELK.S                  | S876:              | 2 | 2,5376 | 0,371 | -0,331 |
| 10 | Q9UQ35 SRRM2_HUMAN | R.SCFESS#PDPELKS#R.T               | S876:S883:         | 2 | 2,8267 | 0,394 | -0,203 |
| 10 | P51826 AFF3_HUMAN  | K.M*LRS#PIS#PLSDASK.H              | S878:S881:         | 2 | 2,9323 | 0,314 | 0,073  |
| 10 | P07814 SYEP_HUMAN  | K.TGKEYIPGQPPLSQSS#DSS#PTR.N       | S883:S886:         | 3 | 3,1536 | 1     | 0,22   |
| 10 | O75400 PR40A_HUMAN | K.S#DSPES#DAEREK.D                 | S883:S888:         | 2 | 2,4918 | 0,289 | -0,242 |
| 10 | Q9NYV4 CD2L7_HUMAN | R.LYNSEES#RPYT#NK.V                | S889:T893:         | 2 | 2,3082 | 0,188 | 0      |
| 10 | Q01484 ANK2_HUMAN  | R.SDS#LRS#FSSDR.S                  | S898:S901:         | 2 | 2,14   | 0,205 | -0,086 |
| 10 | P19838 NFKB1_HUMAN | K.TTSAQHS#LPLS#PASTR.Q             | S903:S907:         | 2 | 3,3839 | 0,508 | 0,067  |
| 10 | Q3KQU3 MA7D1_HUMAN | K.S#RGPT#PPAMGPR.D                 | S93:T97:           | 3 | 2,6798 | 0,232 | -0,132 |
| 10 | Q3KQU3 MA7D1_HUMAN | K.S#RGPT#PPAMGPR.D                 | S93:T97:           | 2 | 2,209  | 0,509 | -0,176 |
| 10 | P78317 RNF4_HUMAN  | R.LPQDHADSCVVS#S#DDEELSR.D         | S94:S95:           | 3 | 5,9376 | 0,473 | -0,076 |
| 10 | O43847 NRDC_HUMAN  | R.RGS#LS#NAGDPEIVK.S               | S94:S96:           | 2 | 3,5089 | 0,42  | -0,152 |
| 10 | Q8N3X1 FNBPA_HUMAN | R.ELDEEDNS#S#SSEEDRESTAQK.R        | S963:S964:         | 3 | 2,6603 | 0,107 | -0,431 |
| 10 | P49327 FAS_HUMAN   | R.LFDHPES#PTNPTEPLFLAQAEVYK.E      | S974:              | 3 | 3,6939 | 0,415 | -0,501 |
| 10 | Q14814 MEF2D_HUMAN | K.KGFNGCDS#PEPDGEDSLEQS#PLLEDK.Y   | S98:S110:          | 3 | 5,8343 | 0,411 | -0,121 |
| 10 | P17096 HMGA1_HUMAN | K.KLEKEEEEGIS#QES#S#EEEQ.-         | S99:S102:S103:     | 3 | 4,1242 | 0,42  | -0,222 |
| 10 | P00533 EGFR_HUMAN  | R.M*HLP#PTDS#NFYR.A                | S991:S995:         | 2 | 3,3546 | 0,449 | -0,07  |
| 10 | Q9NWH9 SLTM_HUMAN  | R.AGAGM*ITQHS#SNAS#PINR.I          | S998:S1002:        | 3 | 3,232  | 0,299 | -0,276 |
| 10 | Q9GZT3 SLIRP_HUMAN | K.LPQT#S#DDEKKDF.-                 | T101:S102:         | 3 | 2,7686 | 0,328 | -0,116 |
| 10 | Q2NKX8 ERC6L_HUMAN | K.QFDAST#PKNDIS#PPGR.F             | T1063:S1069:       | 2 | 2,1071 | 0,332 | -0,516 |
| 10 | Q8NE71 ABCF1_HUMAN | K.LSVPT#S#DEEDEVPAPKPR.G           | T108:S109:         | 3 | 3,6736 | 0,155 | 0,258  |
| 10 | P05783 K1C18_HUMAN | R.STFST#NYR.S                      | T11:               | 2 | 2,643  | 0,443 | 0,116  |
| 10 | Q70EL4 UBP43_HUMAN | K.YHT#LS#LGR.K                     | T1110:S1112:       | 2 | 2,1365 | 0,085 | -0,22  |
| 10 | Q9Y6M7 S4A7_HUMAN  | R.M*LQDDDDT#VHLPFEGGSLLQIPVK.A     | T1167:             | 3 | 6,4556 | 0,528 | -0,464 |
| 10 | Q96T60 PNKP_HUMAN  | R.TPESQPDT#PPGTPLVS#QDEKR.D        | T118:S126:         | 3 | 3,5129 | 0,262 | -0,3   |
| 10 | Q9BQG0 MBB1A_HUMAN | K.SPAPGAPT#RSPST#PAKS#PK.L         | T1239:T1244:S1248: | 3 | 2,8599 | 0,241 | -0,265 |
| 10 | Q9UGY1 NOL12_HUMAN | R.LLGLT#PPEGGAGDRS#EEEAS#STEKPTK.A | T124:S134:S139:    | 3 | 2,716  | 0,311 | -0,244 |
| 10 | P11388 TOP2A_HUMAN | K.IKNENT#EGS#PQEDGVELEGLK.Q        | T1244:S1247:       | 3 | 4,0723 | 0,292 | 0      |
| 10 | P11388 TOP2A_HUMAN | K.TDDEDVFPDASPPKT#KT#S#PK.L        | T1358:T1360:S1361: | 3 | 3,4948 | 0,196 | -0,073 |
| 10 | O75976 CBPD_HUMAN  | K.SLLSHEFQDET#DT#EEETLYSSK.H       | T1368:T1370:       | 3 | 5,6221 | 0,494 | 0,999  |
| 10 | Q9UQ35 SRRM2_HUMAN | R.DGSGT#PSRHS#LSGSS#PGMK.D         | T1453:S1458:S1463: | 3 | 2,6411 | 1     | -0,175 |

|    |                     |                                   |                    |   |        |       |        |
|----|---------------------|-----------------------------------|--------------------|---|--------|-------|--------|
| 10 | O15085 ARHGB_HUMAN  | K.SLGGESSGGT#T#PVGSFHTEAAR.W      | T1461:T1462:       | 3 | 4,1041 | 1     | 0,242  |
| 10 | Q9BRD0 BUD13_HUMAN  | R.HDT#PDPS#PLR.G                  | T159:S163:         | 2 | 2,9424 | 0,427 | -0,188 |
| 10 | Q12888 TP53B_HUMAN  | R.SNVSSPAT#PTASS#SSSTTPTRK.I      | T1638:S1643:       | 3 | 3,1188 | 1     | -0,158 |
| 10 | Q5THJ4 VP13D_HUMAN  | K.EVQDKDYPLT#PPPS#PTVDEPK.I       | T1761:S1765:       | 3 | 4,8278 | 0,362 | 0,073  |
| 10 | Q9H1E3 NUCKS_HUMAN  | K.ATVT#PS#PVKKG.G                 | T179:S181:         | 2 | 2,5316 | 0,376 | -0,392 |
| 10 | Q9Y4M2 Q9Y4M2_HUMAN | R.APDKGT#DSPS#PPPLEETSNGGR.M      | T18:S22:           | 3 | 3,9005 | 0,228 | 1,081  |
| 10 | Q9NV56 MRGBP_HUMAN  | K.VLT#ANSNPSS#PSAAKR.R            | T188:S195:         | 2 | 2,8226 | 0,352 | -0,347 |
| 10 | Q8WVC0 LEO1_HUMAN   | K.M*QNT#DDEERQQLS#DDER.Q          | T188:S197:         | 3 | 3,8956 | 0,417 | -0,487 |
| 10 | Q8WVC0 LEO1_HUMAN   | K.MQNT#DDEERQQLS#DDER.Q           | T188:S197:         | 3 | 3,4144 | 0,283 | -0,082 |
| 10 | Q8NCM8 DYHC2_HUMAN  | R.LNT#MS#KFTFTDCT#RFDALIK.D       | T1906:S1908:T1916: | 3 | 2,7543 | 0,117 | 0,76   |
| 10 | Q12802 AKP13_HUMAN  | K.FLSHST#DS#LNK.I                 | T1930:S1932:       | 2 | 2,5553 | 0,261 | -0,346 |
| 10 | Q7Z589 EMSY_HUMAN   | R.RT#NS#SSSPVVVK.E                | T207:S209:         | 2 | 2,7465 | 0,183 | 0,401  |
| 10 | Q7L2J0 MEPCE_HUMAN  | R.TLNAET#PKS#SPLPAK.G             | T213:S216:         | 2 | 3,3107 | 0,303 | -0,427 |
| 10 | Q5T200 ZC3HD_HUMAN  | R.KT#SAVSS#PLLDQQR.N              | T237:S242:         | 3 | 3,6602 | 0,353 | 0      |
| 10 | Q9Y3Y2 CA077_HUMAN  | K.GHLDAELDAYM*AQT#DPETND.-        | T242:              | 3 | 3,9714 | 0,347 | 0,238  |
| 10 | P10398 ARAF_HUMAN   | R.GGSDGT#PRGS#PSPASVSSGR.K        | T253:S257:         | 3 | 2,8096 | 0,184 | -0,185 |
| 10 | Q63ZY6 NSN5C_HUMAN  | K.ASAPERT#PS#PAPK.R               | T258:S260:         | 2 | 2,6703 | 0,272 | -0,332 |
| 10 | Q8IWB9 TEX2_HUMAN   | R.NTGGDSKT#APSS#PLTSPSDTR.S       | T262:S266:         | 3 | 3,7636 | 1     | -0,409 |
| 10 | O95817 BAG3_HUMAN   | R.SST#PLHS#PSPIR.V                | T285:S289:         | 3 | 3,3607 | 0,263 | 0,064  |
| 10 | Q99460 PSMD1_HUMAN  | K.TSSAFVGKT#PEAS#PEPK.D           | T311:S315:         | 2 | 3,5258 | 0,569 | -0,451 |
| 10 | Q92597 NDRG1_HUMAN  | R.SRT#AS#GSSVTSLDGTR.S            | T328:S330:         | 2 | 3,9736 | 1     | -0,56  |
| 10 | Q9UGV2 NDRG3_HUMAN  | R.T#HSTS#SSLGSGESPFGR.S           | T329:S333:         | 3 | 3,4603 | 1     | -0,097 |
| 10 | Q9UN36 NDRG2_HUMAN  | R.SRT#AS#L TSAASVDGNR.S           | T330:S332:         | 2 | 4,6568 | 1     | -0,348 |
| 10 | P46013 KI67_HUMAN   | K.M*KT#PVQYS#QQQNSPQK.H           | T347:S352:         | 2 | 2,2955 | 0,339 | -0,472 |
| 10 | P46013 KI67_HUMAN   | K.M*KT#PVQYS#QQQNS#PQK.H          | T347:S357:         | 3 | 4,7714 | 0,311 | -0,088 |
| 10 | Q9Y2U8 MAN1_HUMAN   | K.KLT#PLPPPPLTDM*DSTLDSSTGSLK.T   | T365:              | 3 | 3,2152 | 0,498 | -0,387 |
| 10 | Q12792 TWF1_HUMAN   | R.LIRGPAETEATT#D.-                | T367:              | 2 | 2,1719 | 0,37  | -0,168 |
| 10 | Q9UQ35 SRRM2_HUMAN  | R.HGGSPQPLATT#PLSQEPVNPPEASPT#R.D | T384:T400:         | 3 | 3,3316 | 1     | -0,061 |
| 10 | P17096 HMG1_HUMAN   | R.KQPPVSPGT#ALVGSQKEPS#EVPT#PK.R  | T39:S49:T53:       | 3 | 3,1706 | 0,137 | -0,131 |
| 10 | P36507 MP2K2_HUMAN  | R.LNQPVT#PTR.T                    | T394:              | 2 | 2,6934 | 0,18  | -0,344 |
| 10 | Q14247 SRC8_HUMAN   | R.AKTQT#PPVS#PAPQTEER.L           | T401:S405:         | 3 | 3,3157 | 0,177 | -0,087 |
| 10 | Q9BTX1 NDC1_HUMAN   | K.KLNSPEET#AFQT#PK.S              | T410:T414:         | 2 | 3,4036 | 0,217 | -0,349 |
| 10 | Q96IG2 FXL20_HUMAN  | K.VHAYFAPVT#PPPS#VGGSR.Q          | T417:S421:         | 3 | 3,7445 | 0,286 | 0      |



|    |                    |                                   |                 |   |        |       |        |
|----|--------------------|-----------------------------------|-----------------|---|--------|-------|--------|
| 10 | P35658 NU214_HUMAN | R.QPKSPGST#PT#TPTSSQAPQK.L        | T434:T436:      | 3 | 3,1446 | 1     | -0,251 |
| 10 | P85037 FOXK1_HUMAN | R.SGGLQT#PECLS#REGS#PIPHDPEFGSK.L | T436:S441:S445: | 3 | 3,2515 | 0,278 | -0,303 |
| 10 | P23443 KS6B1_HUMAN | R.FIGSPRT#PVS#PVK.F               | T444:S447:      | 2 | 2,548  | 0,253 | 0,474  |
| 10 | Q14676 MDC1_HUMAN  | R.SQTT#T#ERDSDTDVEEEELPVENR.E     | T448:T449:      | 3 | 5,6007 | 1     | -0,129 |
| 10 | O76021 RL1D1_HUMAN | K.FFTT#PSKS#VR.K                  | T465:S469:      | 2 | 2,8539 | 0,28  | -0,092 |
| 10 | Q16555 DPYL2_HUMAN | K.TVT#PAS#SAKTS#PAKQQAPPVR.N      | T514:S517:S522: | 3 | 2,9967 | 0,306 | -0,62  |
| 10 | P05362 ICAM1_HUMAN | R.LQQAQKGT#PM*KPNTQAT#PP.-        | T521:T530:      | 3 | 4,931  | 0,465 | 0,165  |
| 10 | P05362 ICAM1_HUMAN | K.GTPM*KPNTQAT#PP.-               | T530:           | 2 | 2,5731 | 0,392 | -0,085 |
| 10 | P13639 EF2_HUMAN   | R.AGET#RFT#DTR.K                  | T54:T57:        | 2 | 2,2589 | 0,166 | -0,279 |
| 10 | Q9Y618 NCOR2_HUMAN | K.TDDT#S#GEDNDEKEAVASK.G          | T553:S554:      | 3 | 4,1023 | 0,38  | -0,353 |
| 10 | Q09666 AHNK_HUMAN  | K.GGVT#GSPEAS#ISGSKGDLK.S         | T5729:S5735:    | 2 | 2,7129 | 0,364 | -0,192 |
| 10 | Q13523 PRP4B_HUMAN | R.T#RS#PSPDDILER.V                | T576:S578:      | 3 | 3,5872 | 0,41  | 0      |
| 10 | P01106 MYC_HUMAN   | K.KFELLPT#PPLS#PSR.R              | T58:S62:        | 2 | 2,2939 | 0,359 | -0,21  |
| 10 | P01106 MYC_HUMAN   | K.KFELLPT#PPLSPS#R.R              | T58:S64:        | 2 | 2,1754 | 0,339 | 0,28   |
| 10 | P13051 UNG_HUMAN   | K.KAPAGQEEPQT#PPSS#PLSAEQLDR.I    | T60:S64:        | 3 | 4,9186 | 0,526 | -0,419 |
| 10 | P19634 SL9A1_HUMAN | K.IPSAVST#VSM*QNIHPK.S            | T603:S605:      | 3 | 3,2973 | 0,34  | 0,097  |
| 10 | Q2M2I8 AAK1_HUMAN  | K.VGSLT#PPSS#PKTQR.A              | T620:S624:      | 3 | 3,2548 | 0,305 | 0,113  |
| 10 | P98174 FGD1_HUMAN  | K.LLNSTNREDED#PPNS#PNVDLGK.R      | T711:S715:      | 3 | 3,9985 | 0,217 | -0,136 |
| 10 | Q5VT52 K0460_HUMAN | R.SGT#PTQDEMM*DKPTSSSVDTM*SLLSK.I | T732:           | 3 | 4,4133 | 0,382 | -0,127 |
| 10 | Q15418 KS6A1_HUMAN | R.KLPST#TL.-                      | T733:           | 2 | 2,0323 | 0,349 | 0,145  |
| 10 | Q9ULL5 PRR12_HUMAN | K.KQETAAVCGET#DEEAGES#GGEGIFR.E   | T740:S747:      | 3 | 5,9709 | 0,517 | 0,46   |
| 10 | Q92547 TOPB1_HUMAN | R.KPST#PLS#EVIVK.N                | T861:S864:      | 2 | 2,0669 | 0,116 | 0,251  |
| 10 | Q8IYB3 SRRM1_HUMAN | K.KET#ES#EAEDNLDDLEK.H            | T872:S874:      | 3 | 5,5038 | 0,497 | 0,632  |
| 10 | Q8IYB3 SRRM1_HUMAN | K.KET#ES#EAEDNLDDLEK.H            | T872:S874:      | 2 | 3,0348 | 0,451 | -0,241 |
| 10 | Q76FK4 NOL8_HUMAN  | R.FLET#DS#EEEQEEVNEKK.T           | T888:S890:      | 3 | 3,9526 | 0,32  | -0,082 |
| 10 | Q13404 UB2V1_HUMAN | K.ENM*KLPQPEGQCY#SN.-             | Y219:           | 2 | 2,8177 | 0,406 | -0,43  |
| 10 | Q8NFC6 FA44A_HUMAN | K.QHY#LSS#EDEDNPNPDVLSR.I         | Y2777:S2780:    | 3 | 3,7932 | 0,413 | 0,22   |
| 10 | P38159 HNRPG_HUMAN | R.DSY#SSRS#DLYSSGR.D              | Y327:S332:      | 2 | 2,6622 | 0,529 | -0,468 |
| 10 | Q96JG6 CC132_HUMAN | K.SAYQEY#DSDS#DVPEELKR.D          | Y557:S561:      | 3 | 3,3725 | 0,411 | 0,639  |
| 10 | O60716 CTND1_HUMAN | R.SQSSHSY#DDST#LPLIDR.N           | Y865:T869:      | 3 | 3,4376 | 0,157 | -0,176 |
| 10 | P35232 PHB_HUMAN   | K.AAELIANSLATAGDGLIELR.K          |                 | 3 | 4,0386 | 0,402 | -0,275 |
| 10 | P35606 COPB2_HUMAN | K.AAESLADPTEYENLFPGLK.E           |                 | 2 | 2,9535 | 0,472 | 0,118  |
| 10 | P62258 1433E_HUMAN | K.AAFDDAIAELDTLSEESYK.D           |                 | 2 | 2,3156 | 0,338 | -0,351 |

|    |                     |                             |   |        |       |        |
|----|---------------------|-----------------------------|---|--------|-------|--------|
| 10 | Q9Y490 TLN1_HUMAN   | K.AQEACGPLEM*DSALSVVQNLEK.D | 3 | 4,0155 | 0,407 | 0,076  |
| 10 | P36957 ODO2_HUMAN   | K.ASAFALQEQPVVNAVIDDTTK.E   | 3 | 3,3889 | 0,263 | 0,083  |
| 10 | P31930 QCR1_HUMAN   | K.AVELLGDIVQNCSEDSQIEK.E    | 3 | 5,3799 | 0,512 | 0,078  |
| 10 | Q53T59 H1BP3_HUMAN  | K.DAELAGSPELLEFLGTR.S       | 2 | 4,3895 | 0,533 | -0,201 |
| 10 | O14744 ANM5_HUMAN   | K.DDGVSIPEYTSFLAPISSSK.L    | 2 | 2,6245 | 0,307 | -0,337 |
| 10 | O60841 IF2P_HUMAN   | K.DDIDLALAAEIEGAGAAK.E      | 2 | 4,8228 | 0,434 | -0,263 |
| 10 | P13667 PDIA4_HUMAN  | K.DFPEYTFIAI DEEDYAGEVK.D   | 3 | 4,7951 | 0,349 | -0,079 |
| 10 | P35579 MYH9_HUMAN   | K.DFSALESQIQDTQELLQEENR.Q   | 3 | 4,4024 | 0,438 | -0,22  |
| 10 | P13667 PDIA4_HUMAN  | K.DGDDVIIIIGVFK.G           | 2 | 2,9776 | 0,23  | -0,473 |
| 10 | P30041 PRDX6_HUMAN  | K.DGDSVM*VLPTIPEEEAK.K      | 2 | 3,3433 | 0,442 | 0      |
| 10 | Q15417 CNN3_HUMAN   | K.DGIILCELINK.L             | 2 | 2,6575 | 0,382 | -0,284 |
| 10 | P21333 FLNA_HUMAN   | K.DGSCGVAYVVQEPGDYEVSVK.F   | 3 | 3,5166 | 0,238 | 0,081  |
| 10 | Q86TX2 ACOT1_HUMAN  | K.DGYADIVDV LNSPLEGPDQK.S   | 3 | 4,6965 | 0,326 | -0,512 |
| 10 | Q86TX2 ACOT1_HUMAN  | K.DGYADIVDV LNSPLEGPDQK.S   | 2 | 3,4732 | 0,551 | -0,569 |
| 10 | Q14152 EIF3A_HUMAN  | K.DIDIEDLEELDPDFIM*AK.Q     | 3 | 3,6701 | 0,321 | -0,514 |
| 10 | Q14152 EIF3A_HUMAN  | K.DIDIEDLEELDPDFIM*AK.Q     | 2 | 3,3547 | 0,534 | -0,343 |
| 10 | Q92882 OSTF1_HUMAN  | K.DIVEM*LFTQPNIELNQQNK.L    | 3 | 3,3366 | 0,279 | 0      |
| 10 | P00338 LDHA_HUMAN   | K.DLADELALVDVIEDK.L         | 2 | 2,6031 | 0,421 | -0,442 |
| 10 | Q6PD62 CTR9_HUMAN   | K.DLITQATLLYTM*ADK.I        | 2 | 3,0279 | 0,49  | -0,641 |
| 10 | P60709 ACTB_HUMAN   | K.DLYANTVLSGGTTM*YPGIADR.M  | 3 | 5,4989 | 0,488 | 0,41   |
| 10 | Q8TAQ2 SMRC2_HUMAN  | K.DM*DEPSPVNPVEEVTLPK.T     | 2 | 2,4687 | 0,494 | 1,152  |
| 10 | P42765 THIM_HUMAN   | K.DM*DLVEVNEAFAPQYLAVR.S    | 3 | 5,0029 | 0,416 | 0,157  |
| 10 | Q92922 SMRC1_HUMAN  | K.DM*EDPTVPNIEEVVLPK.N      | 3 | 2,8972 | 0,206 | 0,18   |
| 10 | Q92922 SMRC1_HUMAN  | K.DM*EDPTVPNIEEVVLPK.N      | 2 | 2,5464 | 0,469 | -0,12  |
| 10 | Q03154 ACY1_HUMAN   | K.DM*NLTLEPEIM*PAATDNR.Y    | 2 | 2,9907 | 0,572 | 0      |
| 10 | Q59GR1 Q59GR1_HUMAN | K.DNGQAPFTITPVFSDFPVR.G     | 3 | 3,3611 | 0,413 | -0,607 |
| 10 | Q59GR1 Q59GR1_HUMAN | K.DNGQAPFTITPVFSDFPVR.G     | 2 | 2,3802 | 0,409 | -0,232 |
| 10 | Q14690 RRP5_HUMAN   | K.DSETVDEDEEVDPALTVGTIK.K   | 3 | 4,44   | 0,501 | 0,162  |
| 10 | P17980 PRS6A_HUMAN  | K.DSYLILETLPTIYDSR.V        | 2 | 2,9884 | 0,415 | -0,51  |
| 10 | Q13085 ACACA_HUMAN  | K.DVDDGLQAAEEVGYPM*IK.A     | 3 | 2,6981 | 0,233 | -0,089 |
| 10 | Q7Z417 NUFP2_HUMAN  | K.DYEIESQNPLASPTNTLLGSAK.E  | 3 | 4,4986 | 0,466 | 0      |
| 10 | P38432 P80C_HUMAN   | K.DYLLPLLAAPQVGEK.I         | 3 | 3,2685 | 0,264 | -0,307 |
| 10 | P38432 P80C_HUMAN   | K.DYLLPLLAAPQVGEK.I         | 2 | 2,3461 | 0,334 | -0,342 |

|    |                     |                                |   |        |       |        |
|----|---------------------|--------------------------------|---|--------|-------|--------|
| 10 | Q13813 SPTA2_HUMAN  | K.EAALTSEEVGADLEQVEVLQK.K      | 3 | 3,2583 | 0,178 | -0,081 |
| 10 | P23528 COF1_HUMAN   | K.EILVGDVGTQVDDPYATFVK.M       | 2 | 2,087  | 0,497 | -0,338 |
| 10 | P31948 STIP1_HUMAN  | K.ELDPTNM*TYITNQAAVYFEK.G      | 3 | 3,1331 | 0,232 | 0      |
| 10 | Q8IXM3 RM41_HUMAN   | K.EM*VPEFVVPDLTGFK.L           | 2 | 2,352  | 0,361 | -0,425 |
| 10 | Q14974 IMB1_HUMAN   | K.ESTLEAIGYICQDIDPEQLQDK.S     | 3 | 4,3802 | 0,499 | -0,214 |
| 10 | P31689 DNJA1_HUMAN  | K.EVEETDEM*DQVELVDFDPNQER.R    | 3 | 4,1919 | 0,413 | 0,887  |
| 10 | P49770 EI2BB_HUMAN  | K.FVAPEEVLPFTEGDILEK.V         | 3 | 3,3154 | 0,318 | -0,36  |
| 10 | P13804 ETFA_HUMAN   | K.GLLPEELTPLILATQK.Q           | 2 | 2,9473 | 0,397 | -0,141 |
| 10 | P09972 ALDOC_HUMAN  | K.GVVPLAGTDGETTTQGLDGLSER.C    | 3 | 2,8409 | 0,311 | 0,402  |
| 10 | P20042 IF2B_HUMAN   | K.IESDVQEPTPEDDLDM*LGNK.K      | 3 | 2,9326 | 0,383 | 0,146  |
| 10 | P29401 TKT_HUMAN    | K.ILATPPQEDAPSVDIANIR.M        | 3 | 3,7688 | 0,347 | 0,181  |
| 10 | P10809 CH60_HUMAN   | K.IM*QSSSEVGYDAM*AGDFVNM*VEK.G | 3 | 5,2544 | 0,374 | 0,072  |
| 10 | P78527 PRKDC_HUMAN  | K.ITAQSIIEELCAVNLYGPDAQVDR.S   | 3 | 4,387  | 0,356 | 0,214  |
| 10 | Q6S8J3 A26CA_HUMAN  | K.LCYVALDFEQEM*ATAASSSSLEK.S   | 3 | 6,8401 | 0,48  | 0      |
| 10 | Q14008 CKAP5_HUMAN  | K.LDDIFEPVLIPEPK.I             | 2 | 3,6852 | 0,401 | -0,15  |
| 10 | Q9Y696 CLIC4_HUMAN  | K.LDEYLN SPLPDEIDENSM*EDIK.F   | 3 | 4,2457 | 0,31  | 0,282  |
| 10 | P60228 EIF3E_HUMAN  | K.LDLSDTNM*VDFAM*DVK.N         | 3 | 4,7819 | 0,365 | -0,086 |
| 10 | Q9Y490 TLN1_HUMAN   | K.LGAASLGAEDPETQVVLINAVK.D     | 3 | 3,4104 | 0,316 | -0,083 |
| 10 | P50991 TCPD_HUMAN   | K.LGGTIDDCELVEGLVLTQK.V        | 3 | 3,8496 | 0,353 | -0,266 |
| 10 | Q86UA3 Q86UA3_HUMAN | K.LLAQLLGTSEEDSM*VGTLYDK.M     | 3 | 3,4635 | 0,242 | -0,239 |
| 10 | Q13561 DCTN2_HUMAN  | K.LLGPDAAINLTPDGALAK.R         | 2 | 3,9712 | 0,516 | -0,262 |
| 10 | P55060 XPO2_HUMAN   | K.LLQTDDEEEAGLLELLK.S          | 3 | 4,5396 | 0,367 | -0,284 |
| 10 | P55060 XPO2_HUMAN   | K.LLQTDDEEEAGLLELLK.S          | 2 | 3,1121 | 0,505 | -0,506 |
| 10 | P12004 PCNA_HUMAN   | K.LM*DLDVEQLGIPEQEYSCVVK.M     | 3 | 4,1287 | 0,092 | 0,221  |
| 10 | P49327 FAS_HUMAN    | K.LPEDPLLSGLLDSPALK.A          | 2 | 4,0873 | 0,541 | -0,343 |
| 10 | P11586 C1TC_HUMAN   | K.LVGPEGFVTEAGFGADIGM*EK.F     | 3 | 3,5502 | 0,433 | -0,163 |
| 10 | P52209 6PGD_HUMAN   | K.LVPLLDTGDIIDGGNSEYR.D        | 3 | 2,9821 | 0,211 | -0,508 |
| 10 | P52209 6PGD_HUMAN   | K.LVPLLDTGDIIDGGNSEYR.D        | 2 | 2,2909 | 0,523 | -0,452 |
| 10 | P62899 RL31_HUMAN   | K.LYTLVTVVPVTTFK.N             | 2 | 2,9321 | 0,364 | -0,074 |
| 10 | P40227 TCPZ_HUMAN   | K.NAIDDGCVVPGAGAVEVAM*AEALIK.H | 3 | 3,9117 | 0,281 | -0,221 |
| 10 | P19623 SPEE_HUMAN   | K.NPSTNFQEPVQPLTQQVAQM*QLK.Y   | 3 | 3,6594 | 0,168 | -0,528 |
| 10 | Q8IX01 SFR14_HUMAN  | K.NTPSPDVTLGTPGTEDIQFPIQK.I    | 3 | 3,5038 | 0,217 | -0,427 |
| 10 | P34931 HS71L_HUMAN  | K.SINPDEAVAYGAAVQAAILM*GDK.S   | 3 | 3,0798 | 0,232 | -0,079 |

|    |                    |                                |   |        |       |        |
|----|--------------------|--------------------------------|---|--------|-------|--------|
| 10 | P11142 HSP7C_HUMAN | K.SINPDEAVAYGAAVQAAILSGDK.S    | 3 | 4,4742 | 0,471 | -0,405 |
| 10 | P22314 UBA1_HUMAN  | K.SLVLASLAEPDFVVTDFAK.F        | 2 | 3,4532 | 0,475 | -0,32  |
| 10 | P22314 UBA1_HUMAN  | K.SLVLASLAEPDFVVTDFAK.F        | 3 | 2,75   | 0,304 | -0,192 |
| 10 | O14983 AT2A1_HUMAN | K.TASEM*VLADDNFSTIVAAVEEGR.A   | 3 | 2,9441 | 0,266 | 0,075  |
| 10 | P40227 TCPZ_HUMAN  | K.VATAQDDITGDGTTSNVLIIGELLK.Q  | 3 | 3,3604 | 0,329 | -0,288 |
| 10 | Q07021 C1QBP_HUMAN | K.VEEQEPELTSTPNFVVEVIK.N       | 3 | 3,6359 | 0,434 | 0,08   |
| 10 | P19338 NUCL_HUMAN  | K.VEGTEPTTAFNLFVGNLNFNK.S      | 3 | 3,3168 | 0,259 | -0,396 |
| 10 | Q9NQW6 ANLN_HUMAN  | K.VINDLFSVDVLEEGELDM*EK.S      | 3 | 4,0787 | 0,434 | -0,414 |
| 10 | Q13547 HDAC1_HUMAN | K.VM*EM*FQPSAVVLQCGSDSLSGDR.L  | 3 | 4,2046 | 0,221 | 0,575  |
| 10 | P60174 TPIS_HUMAN  | K.VPADTEVVCPPTAYIDFAR.Q        | 3 | 3,5013 | 0,234 | -0,417 |
| 10 | P0C0S8 H2A1_HUMAN  | K.VTIAQGGVLPNIQAVLLPK.K        | 3 | 4,8447 | 0,457 | -0,379 |
| 10 | P0C0S8 H2A1_HUMAN  | K.VTIAQGGVLPNIQAVLLPK.K        | 2 | 3,2929 | 0,481 | -0,695 |
| 10 | P04406 G3P_HUMAN   | K.WGDAGAEYVVESTGVFTTM*EK.A     | 3 | 3,8911 | 0,263 | 0      |
| 10 | P13010 KU86_HUMAN  | K.YAPTEAQLNAVDALIDSM*SLAK.K    | 3 | 5,4366 | 0,542 | -0,939 |
| 10 | P20020 AT2B1_HUMAN | K.YGDLLPADGILIQGNDLK.I         | 2 | 3,1649 | 0,407 | -0,701 |
| 10 | P14618 KPYM_HUMAN  | R.AEGSDVANAVLDGADCIM*LSGETAK.G | 3 | 6,3483 | 0,559 | -0,146 |
| 10 | P05388 RLAO_HUMAN  | R.AGAIAPCEVTVPAQNTGLGPEK.T     | 3 | 3,6499 | 0,412 | 0,671  |
| 10 | P06576 ATPB_HUMAN  | R.AIAELGIYPAVDPLDSTSR.I        | 3 | 4,1843 | 0,393 | -0,092 |
| 10 | P06576 ATPB_HUMAN  | R.AIAELGIYPAVDPLDSTSR.I        | 2 | 3,4095 | 0,57  | -0,307 |
| 10 | Q05519 SFR11_HUMAN | R.ALIVVPYAEGVIPDEAK.A          | 2 | 3,0155 | 0,381 | 0      |
| 10 | Q9BQG0 MBB1A_HUMAN | R.AM*FLQPDLDSLVDLSTNNQK.K      | 3 | 3,5953 | 0,385 | -0,159 |
| 10 | Q71U36 TBA1A_HUMAN | R.AVFVDLEPTVIDEVR.T            | 3 | 4,0111 | 0,382 | -0,107 |
| 10 | Q71U36 TBA1A_HUMAN | R.AVFVDLEPTVIDEVR.T            | 2 | 3,9456 | 0,537 | -0,143 |
| 10 | Q86W92 LIPB1_HUMAN | R.DAM*ELPDYVLLTATAK.V          | 3 | 2,8559 | 0,107 | 0      |
| 10 | Q9Y4L1 HYOU1_HUMAN | R.DAVVYPILVEFTR.E              | 2 | 2,7525 | 0,457 | -0,16  |
| 10 | Q9BTU6 P4K2A_HUMAN | R.DCLVLNQGYLSEAGASLVDQK.L      | 3 | 3,8359 | 0,381 | 0,401  |
| 10 | Q9H7D0 DOCK5_HUMAN | R.DDNGNILDPEDETSTIALFK.A       | 2 | 2,1498 | 0,305 | -0,235 |
| 10 | P55263 ADK_HUMAN   | R.DDTIM*ATESEVTAFVLDQDQK.E     | 3 | 5,1186 | 0,417 | -0,225 |
| 10 | Q96ST2 IWS1_HUMAN  | R.DGGTFISDADDVVSAM*IVK.M       | 2 | 4,5238 | 0,528 | -0,374 |
| 10 | Q96ST2 IWS1_HUMAN  | R.DGGTFISDADDVVSAM*IVK.M       | 3 | 3,8737 | 0,358 | -0,281 |
| 10 | P45974 UBP5_HUMAN  | R.DGLGGLPDIVR.D                | 2 | 2,8294 | 0,324 | -0,11  |
| 10 | O00159 MYO1C_HUMAN | R.DGTIDFTPGSELLITK.A           | 2 | 3,3374 | 0,494 | 0      |
| 10 | Q8TAQ2 SMRC2_HUMAN | R.DIGEGNLSTAAAAALAAAVK.A       | 3 | 3,3568 | 0,206 | -0,194 |

|    |                    |                                 |   |        |       |        |
|----|--------------------|---------------------------------|---|--------|-------|--------|
| 10 | P62854 RS26_HUMAN  | R.DISEASVFDAYVLPK.L             | 3 | 4,0099 | 0,536 | -0,221 |
| 10 | P62854 RS26_HUMAN  | R.DISEASVFDAYVLPK.L             | 2 | 3,3844 | 0,461 | -0,369 |
| 10 | O00442 RTC1_HUMAN  | R.DLCDGQLEGAEIGSTEITFTPEK.I     | 3 | 3,3876 | 0,392 | 0,073  |
| 10 | Q9BZE4 NOG1_HUMAN  | R.DLELEM*GDDYILDQK.Y            | 3 | 3,9745 | 0,141 | -0,19  |
| 10 | Q9BZE4 NOG1_HUMAN  | R.DLELEM*GDDYILDQK.Y            | 2 | 3,1424 | 0,266 | -0,317 |
| 10 | O76031 CLPX_HUMAN  | R.DLIEFGM*IPEFVGR.L             | 2 | 2,096  | 0,41  | -0,298 |
| 10 | O14744 ANM5_HUMAN  | R.DLNCVPEIADTLGAVAK.Q           | 2 | 2,4087 | 0,352 | -0,273 |
| 10 | P62736 ACTA_HUMAN  | R.DLTDYLM*K.I                   | 2 | 2,5196 | 0,284 | 0,12   |
| 10 | O43390 HNRPR_HUMAN | R.DLYEDELVPLFEK.A               | 2 | 2,2974 | 0,33  | -0,379 |
| 10 | P62841 RS15_HUMAN  | R.DM*IILPEM*VGSM*VGVYNGK.T      | 3 | 3,6155 | 0,422 | 0,697  |
| 10 | P08708 RS17_HUMAN  | R.DNYVPEVSALDQEIEVDPDK.E        | 3 | 4,1488 | 0,449 | -0,367 |
| 10 | Q5H9R7 SAPS3_HUMAN | R.DQM*LQIQNSTEPDLLATLEK.Q       | 3 | 3,8446 | 0,398 | 0      |
| 10 | Q9H0N0 RAB6C_HUMAN | R.DSAAAVVVDITNVNSFQQTTK.W       | 3 | 6,3743 | 0,544 | -0,077 |
| 10 | O95602 RPA1_HUMAN  | R.DSDGSVVQFLYGEDGLDIPK.T        | 2 | 2,9311 | 0,388 | -0,453 |
| 10 | O95602 RPA1_HUMAN  | R.DSDGSVVQFLYGEDGLDIPK.T        | 3 | 2,7294 | 0,322 | -0,085 |
| 10 | P42166 LAP2A_HUMAN | R.DSGSFVAFQNIQSELM*SSFAK.T      | 3 | 3,8807 | 0,401 | -0,235 |
| 10 | P12956 KU70_HUMAN  | R.DSLIFLVDASK.A                 | 2 | 3,1793 | 0,416 | -0,303 |
| 10 | P07737 PROF1_HUMAN | R.DSLLQDGEFSM*DLR.T             | 2 | 3,6862 | 0,491 | 0      |
| 10 | Q03252 LMNB2_HUMAN | R.DVM*QQQLAEYQELLDVK.L          | 3 | 3,4616 | 0,355 | 0      |
| 10 | P10515 ODP2_HUMAN  | R.DVPLGTPLCIIVEK.E              | 2 | 2,9689 | 0,415 | -0,236 |
| 10 | Q86Y56 HEAT2_HUMAN | R.DVQETLM*PQVLTTLEEDSK.M        | 3 | 4,0532 | 0,341 | -0,501 |
| 10 | P54105 ICLN_HUMAN  | R.DYEDGM*EVDTTPTVAGQFEDADV.DH.- | 3 | 3,9031 | 0,341 | -0,066 |
| 10 | Q9NWX6 THG1_HUMAN  | R.DYFEDQPLLYPPGFDGR.V           | 3 | 2,8201 | 0,181 | -0,27  |
| 10 | P25205 MCM3_HUMAN  | R.DYLDFLDDEEDQGIYQSK.V          | 3 | 4,9926 | 0,439 | -0,167 |
| 10 | O75643 U520_HUMAN  | R.EEEVTGPVIAPLFPQK.R            | 2 | 2,1943 | 0,104 | 0,487  |
| 10 | O00299 CLIC1_HUMAN | R.EEFASTCPDDEEIELAYEQVAK.A      | 3 | 5,1631 | 0,492 | 0      |
| 10 | Q09666 AHNK_HUMAN  | R.EFSGPSTPTGTLEFEGGEVSLEGK.V    | 3 | 4,0006 | 0,26  | -0,218 |
| 10 | P53992 SC24C_HUMAN | R.ETETVFPVIQAGM*EALK.A          | 3 | 2,6655 | 0,281 | -0,092 |
| 10 | P31939 PUR9_HUMAN  | R.EVSDGIIAPGYEEEALTILSK.K       | 3 | 2,9182 | 0,375 | -0,328 |
| 10 | Q8NC51 PAIRB_HUMAN | R.FDQLFDDESDPFEVLK.A            | 2 | 2,74   | 0,262 | -0,314 |
| 10 | P48047 ATPO_HUMAN  | R.GEVPCTVTSASPLEEATLSELK.T      | 3 | 4,1765 | 0,401 | -0,158 |
| 10 | P08238 HS90B_HUMAN | R.GFEVVYM*TEPIDEYCVQLK.E        | 3 | 5,4047 | 0,474 | 0,297  |
| 10 | Q14684 RRP1B_HUMAN | R.GVFEAIVDQSPFVPEETM*EEQK.T     | 3 | 3,4537 | 0,252 | -0,217 |

|    |                    |                                 |              |        |        |        |        |
|----|--------------------|---------------------------------|--------------|--------|--------|--------|--------|
| 10 | P35579 MYH9_HUMAN  | R.IIGLDQVAGM*SETALPGAFK.T       | 2            | 2,9855 | 0,477  | -0,12  |        |
| 10 | P61978 HNRPK_HUMAN | R.IITITGTQDQIQNAQYLLQNSVK.Q     | 3            | 5,227  | 0,47   | -0,283 |        |
| 10 | Q9Y490 TLN1_HUMAN  | R.IPEAPAGPPSDFGLFLSDDDPK.K      | 3            | 4,0292 | 0,284  | -0,32  |        |
| 10 | P06576 ATPB_HUMAN  | R.IPSAVGYQPTLATDM*GTM*QER.I     | 3            | 3,1279 | 0,311  | -0,159 |        |
| 10 | P14618 KPYM_HUMAN  | R.LAPITSDPTEATAVGAVEASFK.C      | 3            | 5,6566 | 0,505  | 0,084  |        |
| 10 | Q99848 EBP2_HUMAN  | R.LDVTLGPVPEIGGSEAPAPQNK.D      | 3            | 2,925  | 0,296  | 0,836  |        |
| 10 | Q9Y4L1 HYOU1_HUMAN | R.LIPEM*DQIFTEVEM*TTLEK.V       | 3            | 3,2543 | 0,268  | 0,159  |        |
| 10 | P05783 K1C18_HUMAN | R.LLEDGEDFNLGDALDSSNSM*QTIQK.T  | 3            | 7,0091 | 0,619  | -0,066 |        |
| 10 | Q8TCS8 PNPT1_HUMAN | R.LLTDILGIEDYNGDM*DFK.I         | 3            | 4,0689 | 0,303  | -0,438 |        |
| 10 | Q8TCS8 PNPT1_HUMAN | R.LLTDILGIEDYNGDM*DFK.I         | 2            | 2,5091 | 0,521  | -0,467 |        |
| 10 | Q9Y679 AUP1_HUMAN  | R.LPPTPLLLFPEEEATNGR.E          | 3            | 3,1173 | 0,23   | -0,459 |        |
| 10 | Q5UIP0 RIF1_HUMAN  | R.LVSDIIDPVALEIPLSK.N           | 2            | 3,6971 | 0,415  | 0      |        |
| 10 | P12956 KU70_HUMAN  | R.NIPPYFVALVPQEEELDDQK.I        | 3            | 3,0567 | 0,3    | -0,312 |        |
| 10 | Q7KZF4 SND1_HUMAN  | R.NLPGLVQEGEPFSEEATLFTK.E       | 3            | 3,2906 | 0,281  | -0,635 |        |
| 10 | P26368 U2AF2_HUMAN | R.SVDETTQAM*AFDGIIFQGQSLK.I     | 3            | 4,2791 | 0,289  | -0,228 |        |
| 10 | P62701 RS4X_HUMAN  | R.TDITYPAGFM*DVISIDK.T          | 2            | 2,6832 | 0,319  | -0,577 |        |
| 10 | Q9Y3E5 PTH2_HUMAN  | R.TQIAPGSQTVLGIGPGPADLIDK.V     | 3            | 2,608  | 0,179  | 0,163  |        |
| 10 | Q6ZSR9 YJ005_HUMAN | R.TTELPAAFPALAPFPSK.S           | 2            | 3,6103 | 0,517  | -0,261 |        |
| 10 | P30520 PURA2_HUMAN | R.VGIGAFPTEQDNEIGELLQTR.G       | 3            | 2,7964 | 0,191  | -0,08  |        |
| 10 | P43490 NAMPT_HUMAN | R.VIQGDGVDINTLQEIVEGM*K.Q       | 3            | 4,5226 | 0,382  | -0,421 |        |
| 10 | Q12906 ILF3_HUMAN  | R.VLECLASGIVM*PDGSGIYDPCEK.E    | 3            | 3,0975 | 0,212  | -0,072 |        |
| 10 | Q15365 PCBP1_HUMAN | R.VM*TIPYQPM*PASSPVICAGGQDR.C   | 3            | 3,544  | 0,284  | 0      |        |
| 10 | O14929 HAT1_HUMAN  | R.YYTEFPTVLDITAEDPSK.S          | 3            | 3,3028 | 0,442  | -0,35  |        |
| 10 | O14929 HAT1_HUMAN  | R.YYTEFPTVLDITAEDPSK.S          | 2            | 2,4179 | 0,25   | -0,467 |        |
| 11 | P05386 RLA1_HUMAN  | K.KEES#EES#DDDM*GFGLFD.-        | S101:S104:   | 2      | 3,4331 | 0,34   | -0,23  |
| 11 | Q9BPX3 CND3_HUMAN  | K.SKLNLAQFLNEDLS#.-             | S1015:       | 2      | 3,2011 | 0,398  | -0,438 |
| 11 | Q9P1Y6 K1542_HUMAN | R.S#AS#PSVGEERPR.R              | S1032:S1034: | 2      | 2,1448 | 0,415  | -0,937 |
| 11 | P52926 HMGA2_HUMAN | K.KPAQEETEETSSQES#AEED.-        | S105:        | 3      | 3,9445 | 0,408  | -0,166 |
| 11 | Q8IXQ4 K1704_HUMAN | K.QDDS#PPRPIIGPALPPGFIK.S       | S105:        | 3      | 3,9223 | 0,159  | 0      |
| 11 | P20042 IF2B_HUMAN  | K.DLKIES#DVQEPTEPEDDLDIM*LGNK.K | S105:        | 3      | 3,2631 | 0,254  | -0,436 |
| 11 | Q6PKG0 LARP1_HUMAN | R.CPSQS#SSRPAAM*ISQPPTPTGQPVR.E | S1058:       | 3      | 3,6116 | 0,239  | -0,259 |
| 11 | P26373 RL13_HUMAN  | R.NKS#TES#LQANVQR.L             | S106:S109:   | 2      | 2,8865 | 0,273  | 0,224  |
| 11 | Q12789 TF3C1_HUMAN | R.KNS#STDQGS#DEEGSLQK.E         | S1062:S1068: | 2      | 4,2907 | 0,479  | -0,496 |

|    |                    |                                     |                    |   |        |       |        |
|----|--------------------|-------------------------------------|--------------------|---|--------|-------|--------|
| 11 | Q9UQ35 SRRM2_HUMAN | K.GQSQTS#PDHRS#DTSS#PEVR.Q          | S1064:S1069:S1073: | 3 | 3,261  | 1     | -0,238 |
| 11 | Q6ZNB6 NFXL1_HUMAN | R.KLVEEQFSS#S#SEEGDEDFEGK.Q         | S107:S108:         | 3 | 3,9999 | 0,473 | -0,361 |
| 11 | Q6ZUT9 RA61L_HUMAN | R.RLS#ITS#LTGK.N                    | S1076:S1079:       | 2 | 2,8713 | 0,305 | -0,099 |
| 11 | Q9UQ35 SRRM2_HUMAN | R.S#RS#SSPVTELASR.S                 | S1099:S1101:       | 3 | 2,864  | 0,205 | 0      |
| 11 | Q8IXM2 CQ049_HUMAN | K.VASGVLS#PPPAAPPPSSSSVPEAGGPPIKK.Q | S110:              | 3 | 2,9219 | 0,26  | 0,128  |
| 11 | Q12888 TP53B_HUMAN | K.M*VIQGPS#SPQGEAM*VTDVLEDQKEGR.S   | S1113:             | 3 | 3,0386 | 0,357 | 0,691  |
| 11 | Q2NKX8 ERC6L_HUMAN | R.LDDS#SEAKGPEDYPEEGVEESSGEASK.Y    | S1117:             | 3 | 4,2999 | 0,545 | -0,313 |
| 11 | Q3KQU3 MA7D1_HUMAN | R.RSS#QPS#PTAVPASDS#PPTKQEVK.K      | S113:S116:S125:    | 3 | 5,2652 | 1     | -1,111 |
| 11 | Q9HB09 B2L12_HUMAN | R.RGEEAAGS#PVPT#PPRS#PAQEEPTDFLSR.L | S113:T117:S121:    | 3 | 3,1917 | 0,353 | -0,118 |
| 11 | O95785 WIZ_HUMAN   | K.KLPPPPGS#PLGHS#PTAS#PPPTAR.K      | S1146:S1151:S1155: | 3 | 2,6985 | 0,226 | 0      |
| 11 | O95785 WIZ_HUMAN   | K.KLPPPPGS#PLGHS#PTAS#PPPTAR.K      | S1146:S1151:T1153: | 3 | 3,7595 | 0,271 | 0,22   |
| 11 | Q7Z309 F122B_HUMAN | K.RIDFTPVS#PAPS#PTR.G               | S115:S119:         | 2 | 4,0197 | 0,524 | 0,677  |
| 11 | Q7Z309 F122B_HUMAN | K.RIDFTPVS#PAPS#PTR.G               | S115:T121:         | 3 | 3,0554 | 0,19  | 0,102  |
| 11 | A7E2V4 K0913_HUMAN | K.HTGM*ASIDSSAPETTS#S#PTLSR.R       | S1155:S1156:       | 3 | 3,963  | 1     | -0,35  |
| 11 | Q55YE7 NHSL1_HUMAN | R.S#PGAPSAGEAEARSPSTTLPDSSPSR.K     | S1167:             | 3 | 3,0377 | 0,365 | -0,328 |
| 11 | P36871 PGM1_HUMAN  | K.AIGGIILTAS#HNPGGPNGDFGIK.F        | S117:              | 3 | 5,2058 | 0,435 | 0,16   |
| 11 | Q6R327 RICTR_HUMAN | K.HIEDTGS#TPS#IGENDLK.F             | S1174:S1177:       | 2 | 2,2842 | 0,185 | 0,247  |
| 11 | Q9Y6M7 S4A7_HUMAN  | R.M*LQDDDDTVHLPFEGGS#LLQIPVK.A      | S1176:             | 3 | 6,2572 | 0,417 | -0,464 |
| 11 | Q9NTI5 PDS5B_HUMAN | R.LDS#SEM*DHSENEDYTM*SSPLPGK.K      | S1176:             | 3 | 4,9699 | 0,508 | -0,205 |
| 11 | Q12888 TP53B_HUMAN | R.TSS#VLGM*SVESAPAVEEEKGEELEQK.E    | S119:              | 3 | 3,6649 | 0,206 | -0,192 |
| 11 | O14737 PDCD5_HUMAN | R.KVM*DS#DEDDDY.-                   | S119:              | 2 | 2,3396 | 0,186 | -0,256 |
| 11 | Q8IX90 CM003_HUMAN | K.NSVHEQEAINS#DPELS#NCENFQK.T       | S119:S124:         | 3 | 3,0229 | 0,112 | -0,321 |
| 11 | P20020 AT2B1_HUMAN | R.IEDS#EPHIPLIDDTAEDDAPTK.R         | S1193:             | 3 | 7,5676 | 0,551 | 0,699  |
| 11 | Q13286 CLN3_HUMAN  | R.RFS#DS#EGEETVPEPR.L               | S12:S14:           | 2 | 3,1498 | 0,36  | -0,322 |
| 11 | Q9Y5J1 UTP18_HUMAN | R.VQEHEDS#GDS#EVENEAK.G             | S121:S124:         | 3 | 5,0859 | 0,379 | -0,355 |
| 11 | Q9Y6M7 S4A7_HUMAN  | K.KYVDAETS#L.-                      | S1213:             | 2 | 2,8821 | 0,342 | -0,221 |
| 11 | Q07889 SOS1_HUMAN  | R.TPDVFSSS#PLHLQPPPLGK.K            | S1229:             | 3 | 3,6794 | 0,355 | -0,087 |
| 11 | Q04637 IF4G1_HUMAN | R.EAALPPVS#PLKAALSEEELEK.K          | S1232:             | 3 | 3,1896 | 0,426 | -0,08  |
| 11 | Q5VZK9 LR16A_HUMAN | R.TASRPDDIPDS#PSS#PK.V              | S1288:S1291:       | 2 | 4,4877 | 0,29  | 0,4    |
| 11 | Q5VZK9 LR16A_HUMAN | R.TASRPDDIPDS#PSS#PK.V              | S1288:S1291:       | 3 | 3,2756 | 0,378 | 0,3    |
| 11 | O60293 CC131_HUMAN | R.KPISDNSFS#S#DEEQSTGPIK.Y          | S1303:S1304:       | 3 | 5,4384 | 0,445 | 0,079  |
| 11 | Q96QT6 PHF12_HUMAN | K.RTTS#PS#SDTLLDR.S                 | S131:S133:         | 2 | 3,1784 | 1     | 0,637  |
| 11 | O75494 FUSIP_HUMAN | R.S#RS#FDYNYR.R                     | S131:S133:         | 3 | 2,8528 | 0,099 | -0,401 |

|    |                     |                                    |                 |   |        |       |        |
|----|---------------------|------------------------------------|-----------------|---|--------|-------|--------|
| 11 | Q96HC4 PDLI5_HUMAN  | K.APRPFGS#VSS#PK.V                 | S134:S137:      | 2 | 2,2482 | 0,101 | -0,088 |
| 11 | Q561V9 Q561V9_HUMAN | K.M*TEEEVEM*LVAGHEDS#NGCINYEELVR.M | S135:           | 3 | 3,1894 | 0,502 | 0      |
| 11 | Q12923 PTN13_HUMAN  | K.TFSS#SPPKPGDIFLEVELAK.N          | S1358:          | 3 | 2,7108 | 0,202 | 0,086  |
| 11 | Q16656 NRF1_HUMAN   | R.VGQQAIVLCIS#PSKPNPVFK.V          | S136:           | 3 | 3,53   | 0,295 | -0,162 |
| 11 | Q13428 TCOF_HUMAN   | K.KLGAGEGGEAS#VS#PEK.T             | S1376:S1378:    | 2 | 3,3545 | 0,406 | 0,437  |
| 11 | Q76L83 ASXL2_HUMAN  | R.KVSSSS#PQSGCPSPT#IPAGK.V         | S139:T148:      | 3 | 3,9881 | 1     | 0,172  |
| 11 | P11388 TOP2A_HUMAN  | K.GSVPLSS#SPPATHFPDETEITNPVVK.K    | S1392:          | 3 | 2,9863 | 0,32  | 0,92   |
| 11 | Q7Z3C6 ATG9A_HUMAN  | R.LEAS#YSDSPPGEEDLLVHVAEGSK.S      | S14:            | 3 | 4,8947 | 0,551 | -0,351 |
| 11 | P46821 MAP1B_HUMAN  | K.VLSPLRS#PPLIGSESAYESFLSADDK.A    | S1400:          | 3 | 3,9367 | 0,519 | 0,064  |
| 11 | Q13177 PAK2_HUMAN   | K.YLS#FTPPEKDGFPSTPALNAK.G         | S141:           | 3 | 4,8167 | 0,417 | 0,076  |
| 11 | O95155 UBE4B_HUMAN  | R.SLS#DKEPSSGPEVSEEQALQLVCK.I      | S143:           | 3 | 5,042  | 0,442 | 0,339  |
| 11 | Q96E09 F122A_HUMAN  | K.RIDFIPVS#PAPS#PTR.G              | S143:S147:      | 2 | 3,3215 | 0,564 | -0,404 |
| 11 | Q96E09 F122A_HUMAN  | K.RIDFIPVS#PAPSPT#R.G              | S143:T149:      | 3 | 3,0393 | 0,349 | -0,101 |
| 11 | Q7Z2Z1 CO042_HUMAN  | K.GLSLS#PQS#PPERR.G                | S1430:S1433:    | 2 | 2,3414 | 0,266 | -0,154 |
| 11 | Q9Y6N7 ROBO1_HUMAN  | R.ETYDDLPPPPVPPAIAKS#PTAQSK.T      | S1492:          | 3 | 2,7502 | 0,38  | 0,268  |
| 11 | Q9UQ35 SRRM2_HUMAN  | R.S#RS#PSSPELNNK.C                 | S1497:S1499:    | 2 | 2,9851 | 0,248 | -0,331 |
| 11 | Q02880 TOP2B_HUMAN  | K.KVVEAVNS#DS#DSEFGIPK.K           | S1522:S1524:    | 3 | 4,0717 | 0,4   | 0,176  |
| 11 | Q02880 TOP2B_HUMAN  | R.KAS#GS#ENEGDYNPGR.K              | S1550:S1552:    | 2 | 4,2295 | 0,474 | -0,491 |
| 11 | Q02880 TOP2B_HUMAN  | R.KAS#GS#ENEGDYNPGR.K              | S1550:S1552:    | 3 | 3,772  | 0,201 | -0,525 |
| 11 | P51531 SMCA2_HUMAN  | K.AKPVVS#DFDS#DEEQDER.E            | S1564:S1568:    | 3 | 3,8462 | 0,336 | -0,344 |
| 11 | Q96ST2 IWS1_HUMAN   | K.HPAS#DS#EIEELQK.S                | S157:S159:      | 2 | 3,1823 | 0,396 | 0,223  |
| 11 | Q14676 MDC1_HUMAN   | R.SSVKTPES#IVPIAPELQPSTSR.N        | S1570:          | 3 | 3,0054 | 0,309 | -0,457 |
| 11 | P42166 LAP2A_HUMAN  | R.EQGTESRS#ST#PLPTISSAENTR.Q       | S158:T160:      | 3 | 3,3742 | 1     | -0,353 |
| 11 | P16949 STMN1_HUMAN  | K.RAS#GQAFELILS#PR.S               | S16:S25:        | 3 | 3,479  | 0,281 | 0,215  |
| 11 | Q8N1I0 DOCK4_HUMAN  | R.VCRNS#APASVS#PDGTR.V             | S1614:S1620:    | 2 | 3,436  | 0,354 | -0,266 |
| 11 | Q96EB6 SIRT1_HUMAN  | R.DNLLFGDEIITNGFHSCES#DEEDR.A      | S162:           | 3 | 2,6816 | 0,258 | -0,443 |
| 11 | O00566 MPP10_HUMAN  | K.SDLRKS#PVFS#DEDS#DLDFDISK.L      | S163:S167:S171: | 3 | 6,7288 | 0,643 | -0,133 |
| 11 | Q8NI08 NCOA7_HUMAN  | K.LFHTTIVPGQVLFVPDANSPS#STLR.L     | S164:           | 3 | 3,4483 | 0,179 | 0      |
| 11 | Q8TBN0 R3GEF_HUMAN  | K.TLVITSTPAS#PNRELHPQLLS#PTK.A     | S168:S179:      | 3 | 4,6725 | 1     | 0,597  |
| 11 | P18583 SON_HUMAN    | K.DTEEPLPVKESDQTLAALLS#PK.E        | S1697:          | 3 | 4,4528 | 0,426 | -0,372 |
| 11 | Q5VUA4 ZN318_HUMAN  | R.LGS#PVDNLEDM*DRDDLTDSDVFTR.S     | S173:           | 3 | 4,3526 | 0,579 | -0,259 |
| 11 | Q96L91 EP400_HUMAN  | R.VAVNALAVGEPGTASKPAS#PIGGPTQEEK.T | S1732:          | 3 | 4,6456 | 0,431 | -0,064 |
| 11 | P27987 IP3KB_HUMAN  | R.ARS#PS#PCPFR.S                   | S174:S176:      | 2 | 2,3758 | 0,306 | -1,188 |



|    |                    |                                      |                    |   |        |       |        |
|----|--------------------|--------------------------------------|--------------------|---|--------|-------|--------|
| 11 | Q6PGN9 PSRC1_HUMAN | K.RES#PTCNLFPASKS#PASS#PLTR.S        | S175:S186:S190:    | 3 | 4,9629 | 1     | -0,069 |
| 11 | Q15024 EXOS7_HUMAN | R.VLEDEEGS#KDIELSDDPYDCIR.L          | S177:              | 3 | 5,7645 | 0,414 | 0,888  |
| 11 | O75475 PSIP1_HUMAN | K.QVETEEAGVTTATASVNLKVS#PK.R         | S177:              | 3 | 2,8582 | 0,125 | 0,649  |
| 11 | Q6PJF5 RHDF2_HUMAN | R.DLELPSQEAPSFQGTES#PKPCK.M          | S177:              | 3 | 2,6692 | 0,177 | -0,145 |
| 11 | P11137 MAP2_HUMAN  | R.VDHGAEIITQS#PGRS#SVAS#PR.R         | S1782:S1786:S1790: | 3 | 3,3302 | 0,32  | -0,152 |
| 11 | P11137 MAP2_HUMAN  | R.VDHGAEIITQS#PGRSS#VAS#PR.R         | S1782:S1787:S1790: | 3 | 3,9931 | 0,353 | -0,228 |
| 11 | Q8NI08 NCOA7_HUMAN | R.LSSSSPGATVS#PSSSDAEYDKLPDADLAR.K   | S179:              | 3 | 4,2385 | 0,344 | -0,244 |
| 11 | Q86TB9 PATL1_HUMAN | R.RSTS#PIIGS#PPVR.A                  | S179:S184:         | 2 | 3,8342 | 0,436 | -0,08  |
| 11 | Q86TB9 PATL1_HUMAN | R.RSTS#PIIGS#PPVR.A                  | S179:S184:         | 3 | 2,9102 | 0,093 | -0,12  |
| 11 | P05783 K1C18_HUMAN | R.SLGS#VQAPSYGARPVSSAASVYAGAGGSGSR.I | S18:               | 3 | 3,7988 | 0,433 | -0,249 |
| 11 | Q5T230 UTF1_HUMAN  | R.RPPPLAPPAPPS#PAS#PDPEPR.T          | S18:S21:           | 3 | 4,8933 | 0,438 | -0,079 |
| 11 | Q9Y4B5 K0802_HUMAN | R.GRS#PS#PIGVGSEM*CR.E               | S1803:S1805:       | 2 | 2,8104 | 0,429 | 0,622  |
| 11 | Q9BVC5 ASHWN_HUMAN | R.KS#PSGPVKS#PPLS#PVGTTTPVK.L        | S182:S189:S193:    | 3 | 3,5173 | 0,364 | 0,08   |
| 11 | Q15527 SURF2_HUMAN | R.KDLGS#TEDGDGT#DDFLT#DKEDEK.A       | S183:T190:T195:    | 3 | 4,9285 | 0,377 | 0,132  |
| 11 | Q03164 HRX_HUMAN   | K.GPGEPDS#PTPLHPPTPILSTDR.S          | S1837:             | 3 | 3,5548 | 0,285 | 0,521  |
| 11 | Q9H7D0 DOCK5_HUMAN | R.KSGIPTSEPGS#Q.-                    | S1869:             | 2 | 2,106  | 0,221 | -0,192 |
| 11 | Q9Y2T7 YBOX2_HUMAN | R.FIPRPPS#VAPPPM*VAEIPSAGTGPGSK.G    | S189:              | 3 | 4,4407 | 0,321 | 0,93   |
| 11 | Q9UNF1 MAGD2_HUMAN | K.HLDGEEDGSS#DQS#QASGTTGGR.R         | S191:S194:         | 3 | 3,5918 | 0,458 | -0,156 |
| 11 | Q00587 BORG5_HUMAN | R.RSDS#LLS#FR.L                      | S192:S195:         | 2 | 2,2761 | 0,34  | 0,197  |
| 11 | Q16629 SFRS7_HUMAN | R.YFQS#PSRS#R.S                      | S192:S196:         | 2 | 2,2992 | 0,244 | -0,095 |
| 11 | Q9BRD0 BUD13_HUMAN | R.HDS#PDPS#PPR.R                     | S197:S201:         | 2 | 3,2722 | 0,4   | -0,386 |
| 11 | Q92614 MY18A_HUMAN | K.NKLEGDS#DVDS#ELEDR.V               | S1970:S1974:       | 2 | 4,059  | 0,424 | -0,185 |
| 11 | Q9Y657 SPIN1_HUMAN | R.IM*PDSNDS#PPAEREPEGEVVDLSLVGK.Q    | S199:              | 3 | 3,6365 | 0,177 | 0,87   |
| 11 | Q6WKZ4 RFIP1_HUMAN | K.DSGSDTASAIIPSTTPSVDS#DDESVMKDK.K   | S202:              | 3 | 6,1669 | 0,518 | 0      |
| 11 | Q9H4A3 WNK1_HUMAN  | R.DVDDGS#GS#PHS#PHQLSSK.S            | S2027:S2029:S2032: | 3 | 3,2063 | 0,219 | -0,438 |
| 11 | P00558 PGK1_HUMAN  | K.ALES#PERPFLAILGGAK.V               | S203:              | 3 | 3,1315 | 0,336 | -0,495 |
| 11 | Q96FC9 DDX11_HUMAN | R.LEQLESGEELVLAYES#DEEKK.V           | S204:              | 3 | 3,7676 | 0,338 | -0,066 |
| 11 | Q92614 MY18A_HUMAN | R.YSHSYLS#DS#DTEAK.L                 | S2041:S2043:       | 2 | 4,0417 | 0,443 | -0,415 |
| 11 | O75179 ANR17_HUMAN | K.EHYPVSS#PSS#PSPPAQPGGVS.R          | S2042:S2045:       | 3 | 3,6646 | 1     | 0,077  |
| 11 | O75179 ANR17_HUMAN | K.EHYPVSSPS#S#PSPPAQPGGVS.R          | S2044:S2045:       | 3 | 3,3017 | 1     | -0,154 |
| 11 | O75179 ANR17_HUMAN | K.EHYPVSSPS#SPS#PPAQPGGVS.R          | S2044:S2047:       | 3 | 4,5348 | 1     | -0,077 |
| 11 | P80723 BASP_HUMAN  | K.AQGPAAS#AEKPKVEAPAANSQTVTVKE.-     | S205:              | 3 | 4,7556 | 0,449 | -0,431 |
| 11 | Q3L8U1 CHD9_HUMAN  | K.SENLKEEPQS#S#EEESM*SSVETR.T        | S2058:S2059:       | 3 | 5,0591 | 0,37  | -0,204 |

|    |                    |                                     |                    |   |        |       |        |
|----|--------------------|-------------------------------------|--------------------|---|--------|-------|--------|
| 11 | Q6ZN18 AEBP2_HUMAN | R.RGS#LEM*SS#DGEPLSR.M              | S206:S211:         | 2 | 3,161  | 0,406 | -0,407 |
| 11 | Q5T200 ZC3HD_HUMAN | R.SKLS#PS#PSLR.K                    | S207:S209:         | 2 | 3,0561 | 0,296 | -1,089 |
| 11 | Q6P1L5 AL2SC_HUMAN | K.TRQPS#SS#PSSIIR.R                 | S208:S210:         | 2 | 2,1904 | 0,089 | -0,232 |
| 11 | Q01130 SFRS2_HUMAN | R.SKS#PPKSPEEEGAVSS#.-              | S208:S221:         | 2 | 2,479  | 0,181 | -0,824 |
| 11 | Q9BYW2 SETD2_HUMAN | R.RSS#LS#PPSAYER.G                  | S2080:S2082:       | 2 | 3,2239 | 0,199 | -0,229 |
| 11 | Q5HYW2 NHSL2_HUMAN | R.SVS#LVKDEPGLLPEGGSALPK.D          | S210:              | 3 | 3,8331 | 0,255 | 0,253  |
| 11 | Q9H4L7 SMRCD_HUMAN | R.KLS#S#SS#EPYEEDEFNDDQSIKK.T       | S211:S212:S214:    | 3 | 4,8881 | 1     | 0,195  |
| 11 | P85037 FOXK1_HUMAN | K.EEAPAS#PLRPLYQIISPLK.I            | S213:              | 3 | 3,2402 | 0,384 | 0,084  |
| 11 | Q8TF68 ZN384_HUMAN | R.M*LESGLPEM*NDPYVLS#PEDDDDHQK.D    | S214:              | 3 | 5,1711 | 0,388 | 0,49   |
| 11 | Q9NQS7 INCE_HUMAN  | R.TLSPTPASATAPTSQGIPTS#DEESTPKK.S   | S214:              | 3 | 3,8292 | 0,346 | -0,381 |
| 11 | Q01082 SPTB2_HUMAN | R.TSS#KES#SPIPS#PTSDRK.A            | S2161:S2164:S2169: | 3 | 3,071  | 1     | -0,179 |
| 11 | Q01082 SPTB2_HUMAN | R.TSS#KESS#PIPS#PTSDRK.A            | S2161:S2165:S2169: | 2 | 2,2643 | 1     | -0,478 |
| 11 | Q01082 SPTB2_HUMAN | R.TSSKES#PIPS#PTSDR.K               | S2165:S2169:       | 2 | 2,5327 | 1     | 0,399  |
| 11 | Q5VVJ2 MYSM1_HUMAN | K.IEKLS#DDEEVDITDEVDELSSQTPQK.N     | S218:              | 3 | 3,9985 | 0,344 | -0,361 |
| 11 | Q9BST9 RTKN_HUMAN  | R.LATKLS#S#SLGR.S                   | S218:S219:         | 2 | 2,966  | 0,396 | -0,377 |
| 11 | Q5VUA4 ZN318_HUMAN | K.DK LCS#PLS#EPGDPSK.C              | S2189:S2192:       | 2 | 3,2327 | 0,428 | -0,068 |
| 11 | Q8N5P1 ZC3H8_HUMAN | K.TATDS#DERIDDEIDTEVEETQEEK.I       | S22:               | 3 | 4,1365 | 0,237 | 0,89   |
| 11 | Q9NTJ3 SMC4_HUMAN  | R.REEGPPPPS#PDGAS#SDAEPEPPSGR.T     | S22:S27:           | 3 | 3,628  | 0,324 | -0,41  |
| 11 | Q7Z5K2 WAPL_HUMAN  | K.RPES#PSEIS#PIK.G                  | S221:S226:         | 3 | 3,9745 | 0,231 | -0,061 |
| 11 | Q7Z5K2 WAPL_HUMAN  | K.RPES#PSEIS#PIK.G                  | S221:S226:         | 2 | 3,4878 | 0,468 | -0,081 |
| 11 | A1L170 YA022_HUMAN | R.RAS#S#PSLIER.N                    | S222:S223:         | 2 | 2,8948 | 0,101 | 0,287  |
| 11 | Q8NEL9 DDHD1_HUMAN | R.DGDHVCSPGTPASS#S#GEDDDedr.A       | S224:S225:         | 3 | 3,5444 | 0,347 | 0,357  |
| 11 | Q9NRS6 SNX15_HUMAN | K.EEGAAPS#PTHVAELATM*EVESAR.L       | S227:              | 3 | 3,4    | 0,298 | -0,517 |
| 11 | P51608 MECP2_HUMAN | K.M*PFQTS#PGGKAEGGGATTSTQVM*VIK.R   | S229:              | 3 | 3,5317 | 0,302 | -0,068 |
| 11 | P31629 ZEP2_HUMAN  | R.GPHALQSSGPPS#TPSS#PR.L            | S2297:S2301:       | 2 | 4,6092 | 1     | 0,445  |
| 11 | P13051 UNG_HUMAN   | R.HAPS#PEPAVQGTGVAGVPEESGDAAAIPAK.K | S23:               | 3 | 3,7441 | 0,171 | 0,063  |
| 11 | Q96S82 UBL7_HUMAN  | R.DM*PGGFLFEGLS#DDEDDFHPNTR.S       | S230:              | 3 | 2,9253 | 0,357 | -0,27  |
| 11 | Q9H7L9 SDS3_HUMAN  | K.RPAS#PS#SPEHLPAT#PAESPAQR.F       | S234:S236:T244:    | 3 | 4,0801 | 0,303 | -0,218 |
| 11 | O95155 UBE4B_HUMAN | R.DENPFASLTATSQPIAAAARS#PDR.N       | S238:              | 3 | 4,1591 | 0,46  | 0,143  |
| 11 | Q9H7N4 SFR19_HUMAN | R.FDIYDPFHPTDEAYS#PPPAPEQK.Y        | S239:              | 3 | 5,4122 | 0,351 | -0,133 |
| 11 | P55884 EIF3B_HUMAN | K.GYIFLEYAS#PAHAVDAVK.N             | S239:              | 3 | 3,0055 | 0,369 | -0,09  |
| 11 | Q13136 LIPA1_HUMAN | K.RSS#DGS#LS#HEEDLAK.V              | S239:S242:S244:    | 2 | 4,4211 | 0,307 | -0,391 |
| 11 | Q03164 HRX_HUMAN   | R.DQHTDSTQSANS#S#PDEDTEVK.T         | S2391:S2392:       | 3 | 4,5282 | 1     | -0,448 |

|    |                      |                                  |                 |   |        |       |        |
|----|----------------------|----------------------------------|-----------------|---|--------|-------|--------|
| 11 | P11717 MPRI_HUMAN    | K.ALS#SLHGDDQDSEDEVLTIPEVK.V     | S2400:          | 3 | 3,2405 | 0,148 | -0,142 |
| 11 | P25788 PSA3_HUMAN    | K.ESLKEEDES#DDDNM*.-             | S250:           | 2 | 4,3759 | 0,488 | -0,348 |
| 11 | P25788 PSA3_HUMAN    | K.ESLKEEDES#DDDNM.-              | S250:           | 2 | 2,4304 | 0,243 | 0,422  |
| 11 | Q70Z53 F10C1_HUMAN   | K.SRLS#S#AEEASK.K                | S251:S252:      | 2 | 2,976  | 0,264 | -0,276 |
| 11 | P17275 JUNB_HUMAN    | R.S#RDATPPVS#PINMEDQER.I         | S251:S259:      | 3 | 3,5239 | 0,358 | 0      |
| 11 | P52701 MSH6_HUMAN    | R.RVIS#DSES#DIGGS#DVEFKPDTK.E    | S252:S256:S261: | 3 | 4,8134 | 0,466 | 0,14   |
| 11 | Q4G0J3 LARP7_HUMAN   | R.SRPTS#EGS#DIESTEPQK.Q          | S258:S261:      | 3 | 3,4082 | 0,348 | 0      |
| 11 | Q4G0J3 LARP7_HUMAN   | R.SRPTS#EGS#DIESTEPQK.Q          | S258:S261:      | 2 | 2,0624 | 0,172 | -0,668 |
| 11 | Q13595 TRA2A_HUMAN   | R.RS#PS#PYYSR.Y                  | S260:S262:      | 2 | 2,6326 | 0,319 | -0,096 |
| 11 | ##P42696 RBM34_HUMAN | K.RQS#VVT#DET#DDLK.R             | S264:T267:T270: | 2 | 2,2013 | 0,255 | 0,591  |
| 11 | Q7L4I2 RSRC2_HUMAN   | K.KEQS#EVSVS#PR.A                | S27:S32:        | 2 | 2,7619 | 0,189 | 0,781  |
| 11 | Q9UBQ7 GRHPR_HUMAN   | K.IAAAGLDVTS#PEPLTNHPLLTK.N      | S272:           | 3 | 4,3047 | 0,478 | 0,144  |
| 11 | O43610 SPY3_HUMAN    | R.KIS#SGS#APFPK.A                | S274:S277:      | 2 | 2,0407 | 0,278 | 0      |
| 11 | Q8WVC0 LEO1_HUMAN    | K.SESARGS#DS#EDEVLR.M            | S277:S279:      | 2 | 3,8585 | 0,414 | -0,543 |
| 11 | P27816 MAP4_HUMAN    | K.DM*ES#PTKLDVTLAK.D             | S280:           | 2 | 3,0215 | 0,231 | -0,297 |
| 11 | Q12872 SFRS8_HUMAN   | K.SGVSS#DNEDDDDEEDGNYLHPSLFASK.K | S283:           | 3 | 3,39   | 0,367 | -0,061 |
| 11 | Q8TAQ2 SMRC2_HUMAN   | K.TLTDEVNS#PDS#DRR.D             | S283:S286:      | 2 | 3,5726 | 0,441 | -0,207 |
| 11 | Q02952 AKA12_HUMAN   | K.SAES#PTS#PVTSETGSTFKK.F        | S283:S286:      | 3 | 3,5156 | 0,31  | -0,087 |
| 11 | Q96ST2 IWS1_HUMAN    | R.NQAS#DS#ENEELPKPR.V            | S287:S289:      | 2 | 5,0135 | 0,39  | 0,391  |
| 11 | Q96ST2 IWS1_HUMAN    | R.NQAS#DS#ENEELPKPR.V            | S287:S289:      | 3 | 2,927  | 0,38  | 0,098  |
| 11 | Q6WCQ1 MRIP_HUMAN    | K.AEEQQLPPPLS#PPS#PST#PNHRR.S    | S288:S291:T294: | 3 | 3,5621 | 0,336 | 0,274  |
| 11 | Q96MH2 HEX12_HUMAN   | K.TSGAPGS#PQT#PPERHDSGSLPLT#PR.M | S29:T32:T46:    | 3 | 3,6232 | 1     | -0,064 |
| 11 | Q99590 SFRIP_HUMAN   | K.TEELIES#PKLESSEGEIQTVD.R       | S293:           | 3 | 4,9663 | 0,424 | -0,273 |
| 11 | Q9Y2V2 CHSP1_HUMAN   | R.ERS#PS#PLRGNVPS#PLPTR.R        | S30:S32:S41:    | 3 | 2,7735 | 0,309 | 0,159  |
| 11 | O43765 SGTA_HUMAN    | R.SQIRS#RT#PSASNDDQQE.-          | S301:T303:      | 2 | 2,714  | 0,583 | -0,587 |
| 11 | Q9NQ57 INCE_HUMAN    | R.TDSQS#VRHSPIAPS#SPS#PQVLAQK.Y  | S302:S311:S314: | 3 | 3,721  | 1     | -0,199 |
| 11 | Q00613 HSF1_HUMAN    | R.VKEEPPS#PPQS#PR.V              | S303:S307:      | 2 | 4,4615 | 0,458 | -0,076 |
| 11 | Q96QR8 PURB_HUMAN    | R.RGGGSGGGEES#EGEEVDED.-         | S304:           | 2 | 4,9879 | 0,574 | -1,137 |
| 11 | O43765 SGTA_HUMAN    | R.SRTPS#ASNDDQQE.-               | S305:           | 2 | 4,2306 | 0,504 | -0,644 |
| 11 | Q00341 VIGLN_HUMAN   | K.VATLNS#EEESDPPTYKDAFPPLPEK.A   | S31:            | 3 | 3,6557 | 0,403 | 0,128  |
| 11 | Q13769 THOC5_HUMAN   | K.ALFKPPEDSQDDES#DS#DAEEEEQTTK.R | S312:S314:      | 3 | 3,7037 | 0,247 | -0,554 |
| 11 | Q9NYV4 CD2L7_HUMAN   | R.SGS#YSGRSPS#PYGR.R             | S318:S325:      | 3 | 2,9629 | 1     | -0,113 |
| 11 | P36915 GNL1_HUMAN    | R.GLQDGLRS#SS#NSR.S              | S32:S34:        | 2 | 2,2677 | 0,272 | 0,079  |

|    |                     |                                      |                 |   |        |       |        |
|----|---------------------|--------------------------------------|-----------------|---|--------|-------|--------|
| 11 | P49023 PAXI_HUMAN   | K.TGSSS#PPGGPPKPGSQLDSM*LGSLQSDLNK.L | S322:           | 3 | 2,8187 | 0,316 | -0,121 |
| 11 | Q9NYV4 CD2L7_HUMAN  | R.SGYSYGRS#PS#PYGR.R                 | S323:S325:      | 2 | 2,3292 | 1     | -0,453 |
| 11 | Q6PJF5 RHDF2_HUMAN  | R.GIPHS#AS#PVSPDQVQIPLKEYGR.A        | S323:S325:S328: | 3 | 5,2457 | 0,435 | 0,761  |
| 11 | Q9UKJ3 GPTC8_HUMAN  | R.GPKPEPPGS#GS#PAPPR.R               | S325:S327:      | 3 | 3,7421 | 0,307 | 0,433  |
| 11 | Q9UJM3 ERRFI_HUMAN  | K.VPPREPLS#PSNS#RTPS#PK.S            | S326:S330:S334: | 3 | 3,2479 | 0,176 | -0,167 |
| 11 | O15033 K0317_HUMAN  | R.RPS#TAVDEEDEDSPSECHT#PEK.V         | S327:S337:T343: | 3 | 3,6441 | 0,245 | -0,465 |
| 11 | P36915 GNL1_HUMAN   | R.GLQDGLRSS#S#NSR.S                  | S33:S34:        | 2 | 2,7453 | 0,398 | -0,238 |
| 11 | Q92597 NDRG1_HUMAN  | R.SRTAS#GSSVTS#LDGTR.S               | S330:S336:      | 2 | 3,6305 | 1     | 0,56   |
| 11 | Q9NYV4 CD2L7_HUMAN  | R.RS#SS#PFLSK.R                      | S332:S334:      | 2 | 2,8858 | 0,306 | 0      |
| 11 | P49790 NU153_HUMAN  | K.RIPSIVS#SPLNS#PLDR.S               | S333:S338:      | 3 | 2,6861 | 0,153 | 0,191  |
| 11 | P49790 NU153_HUMAN  | K.RIPSIVSS#PLNS#PLDR.S               | S334:S338:      | 3 | 5,0436 | 0,467 | 0,096  |
| 11 | P49790 NU153_HUMAN  | K.RIPSIVSS#PLNS#PLDR.S               | S334:S338:      | 2 | 4,7479 | 0,435 | 0,575  |
| 11 | P31689 DNJA1_HUMAN  | K.VNFPENGFLS#PDKLSLLEK.L             | S335:           | 3 | 2,748  | 0,299 | -0,246 |
| 11 | Q9UGV2 NDRG3_HUMAN  | R.THSTSSS#LGS#GESPFGR.S              | S335:S338:      | 2 | 2,9853 | 1     | -0,065 |
| 11 | Q2TB10 ZN800_HUMAN  | R.DSITPDIATKPGQPLFLDSIS#PK.K         | S336:           | 3 | 3,9646 | 0,461 | 0,073  |
| 11 | Q16643 DREB_HUMAN   | R.MAPTPIPTRS#PSDSSTASTPVAEQIER.A     | S337:           | 3 | 4,6649 | 0,57  | 0,189  |
| 11 | Q9H4H8 FA83D_HUMAN  | R.LARLS#S#TPR.K                      | S338:S339:      | 2 | 2,3117 | 0,116 | -0,42  |
| 11 | Q16643 DREB_HUMAN   | R.M*APTPIPTRSPS#DSSTASTPVAEQIER.A    | S339:           | 3 | 5,8305 | 0,494 | -0,376 |
| 11 | O14681 EI24_HUMAN   | K.TVYLQSALSSSTAEEKFPS#PHPS#PAK.L     | S345:S349:      | 3 | 2,9763 | 0,169 | 0      |
| 11 | O60307 MAST3_HUMAN  | K.DPLEEM*VPLSHLEEEQPPAPES#PESR.A     | S348:           | 3 | 4,4486 | 0,309 | -0,662 |
| 11 | Q99567 NUP88_HUMAN  | K.NQS#PTEAEKPASSSLPSSPPPQLLTR.N      | S35:            | 3 | 4,719  | 0,376 | -0,196 |
| 11 | P01892 1A02_HUMAN   | R.KGGSYSQAASS#DSAQGSQSDVS#LTACKV.-   | S350:S359:      | 3 | 5,1673 | 1     | 0,134  |
| 11 | P35611 ADDA_HUMAN   | K.S#RSPGS#PVGEGTGSPPK.W              | S353:S358:      | 2 | 3,903  | 0,401 | -0,486 |
| 11 | P35611 ADDA_HUMAN   | K.SRS#PGS#PVGEGTGSPPK.W              | S355:S358:      | 3 | 3,2905 | 0,33  | -0,833 |
| 11 | Q8N554 ZN276_HUMAN  | R.VKDEF#DLS#EGDVL#EDENDKK.Q          | S357:S360:S366: | 3 | 4,6086 | 0,309 | 0,535  |
| 11 | P17096 HMG1A1_HUMAN | R.KQPPVS#PGTALVGS#QKEPSEVPT#PK.R     | S36:S44:T53:    | 3 | 4,538  | 0,379 | -0,065 |
| 11 | Q7Z4V5 HDGR2_HUMAN  | R.GEAERGS#GGS#S#GDELREDDEPVK.K       | S366:S369:S370: | 3 | 2,9538 | 0,233 | -0,28  |
| 11 | Q99575 POP1_HUMAN   | K.SAVCIADPLTPS#QEKSQTELPDEK.I        | S367:           | 3 | 5,3589 | 0,347 | 1,038  |
| 11 | Q96E09 F122A_HUMAN  | R.SNS#APLIHGLSDTSPVFQAEAPSAR.R       | S37:            | 3 | 4,6661 | 0,461 | 0,139  |
| 11 | Q5VT52 K0460_HUMAN  | R.DVEDM*ELS#DVEDDGSKIIVEDR.K         | S374:           | 3 | 4,3014 | 0,335 | -0,211 |
| 11 | Q01484 ANK2_HUMAN   | K.AM*IVPSS#PSKTPEEVSTPAEEK.L         | S3760:          | 3 | 4,4375 | 0,489 | -0,072 |
| 11 | Q76FK4 NOL8_HUMAN   | R.NDREYDS#GDT#DEIIAM*K.K             | S378:T381:      | 3 | 2,7791 | 0,317 | 0,085  |
| 11 | Q76FK4 NOL8_HUMAN   | R.NDREYDS#GDT#DEIIAM*K.K             | S378:T381:      | 2 | 2,5678 | 0,42  | -0,682 |

|    |                     |                                    |                 |   |        |       |        |
|----|---------------------|------------------------------------|-----------------|---|--------|-------|--------|
| 11 | O94876 TMCC1_HUMAN  | K.FGS#ADNIPNLKDSLEEGQVDDAGK.A      | S382:           | 3 | 5,7581 | 0,5   | 0      |
| 11 | O75717 WDHD1_HUMAN  | R.SHILEDDENS#VDIS#M*LK.T           | S383:S387:      | 2 | 4,4485 | 0,586 | 0,92   |
| 11 | O75717 WDHD1_HUMAN  | R.SHILEDDENS#VDIS#M*LK.T           | S383:S387:      | 3 | 4,1403 | 0,263 | 0,604  |
| 11 | Q8IYB3 SRRM1_HUMAN  | R.RLS#PS#ASPPR.R                   | S389:S391:      | 2 | 2,6828 | 0,272 | -0,199 |
| 11 | Q8IYB3 SRRM1_HUMAN  | R.RLS#PSAS#PPR.R                   | S389:S393:      | 3 | 3,9475 | 0,186 | 0,149  |
| 11 | Q8IYB3 SRRM1_HUMAN  | R.RLS#PSAS#PPR.R                   | S389:S393:      | 2 | 2,0778 | 0,254 | -0,397 |
| 11 | P02545 LMNA_HUMAN   | R.LRLS#PS#PTSQR.S                  | S390:S392:      | 2 | 2,7982 | 0,312 | -0,087 |
| 11 | P20700 LMNB1_HUMAN  | R.LKLS#PS#PSSR.V                   | S391:S393:      | 2 | 2,5363 | 0,135 | -0,495 |
| 11 | P20700 LMNB1_HUMAN  | R.LKLS#PSPS#SR.V                   | S391:S395:      | 2 | 2,6447 | 0,175 | -0,198 |
| 11 | Q8TAD8 SNIP1_HUMAN  | R.KDDEDEEEEEVS#DS.-                | S394:           | 2 | 4,16   | 0,553 | -0,589 |
| 11 | O14980 XPO1_HUMAN   | R.ESPFTSASPLLSGS#QHFDVPPR.R        | S397:           | 3 | 3,3606 | 0,316 | -0,218 |
| 11 | Q14004 CD2L5_HUMAN  | R.SRS#PYS#PVL.R                    | S397:S400:      | 2 | 2,0529 | 0,156 | -0,277 |
| 11 | Q96ST2 IWS1_HUMAN   | K.AAVLS#DS#EDEEKASAK.K             | S398:S400:      | 2 | 2,8244 | 0,25  | -0,337 |
| 11 | Q96ST2 IWS1_HUMAN   | K.AAVLS#DS#EDEEKAS#AKK.S           | S398:S400:S407: | 2 | 2,9848 | 0,271 | -1,028 |
| 11 | O15297 PPM1D_HUMAN  | K.YM*EDVTQIVVEPEPTAEEKPS#PR.R      | S40:            | 3 | 5,7998 | 0,357 | 0,134  |
| 11 | Q14692 BMS1_HUMAN   | R.VTLFSDSKPLGS#EDIDNQLM*M*PK.E     | S403:           | 3 | 6,8167 | 0,537 | 0,87   |
| 11 | Q9Y6M7 S4A7_HUMAN   | K.GNGSGGS#RENS#TVDFSK.V            | S403:S407:      | 2 | 3,6569 | 0,479 | -0,656 |
| 11 | Q9Y6M7 S4A7_HUMAN   | K.GNGSGGS#RENS#TVDFSK.V            | S403:S407:      | 3 | 3,358  | 0,419 | -0,197 |
| 11 | Q7Z5L9 I2BP2_HUMAN  | K.IPM*TPTSSFVSPPPPTAS#PHSNR.T      | S406:           | 3 | 3,6072 | 0,259 | 0      |
| 11 | Q5JRA6 MIA3_HUMAN   | R.DTM*DLESSS#SEEEKEDDDALVPDSK.Q    | S407:           | 3 | 4,0112 | 0,477 | -0,245 |
| 11 | Q15276 RAB1_HUMAN   | R.RAQ#TDS#LGTSGSLQSK.A             | S407:S410:      | 2 | 3,0205 | 1     | -0,065 |
| 11 | Q92870 APBB2_HUMAN  | R.NAPHPDDDDSCS#INS#DPEAK.C         | S409:S412:      | 3 | 3,0378 | 0,287 | -0,703 |
| 11 | P57081 WDR4_HUMAN   | K.M*RPGEATLS#C.-                   | S411:           | 2 | 2,3486 | 0,301 | -0,1   |
| 11 | Q86SQ0 PHL2_HUMAN   | R.KSS#ISS#ISGR.D                   | S415:S418:      | 2 | 2,8321 | 0,437 | -0,103 |
| 11 | B2RMZ9 B2RMZ9_HUMAN | R.RLNS#S#PRAPVS#PLK.F              | S416:S417:S423: | 2 | 2,4914 | 0,301 | 0,139  |
| 11 | P61158 ARP3_HUMAN   | R.HNPVFGVM*S#.-                    | S418:           | 2 | 2,3753 | 0,419 | 0      |
| 11 | Q92769 HDAC2_HUMAN  | R.IACDEEFS#DS#EDEGEGGRR.N          | S422:S424:      | 3 | 3,6231 | 0,378 | 0,158  |
| 11 | Q7KZF4 SND1_HUMAN   | K.VNVTVDYIRPAS#PATETVPAFSER.T      | S426:           | 3 | 5,3543 | 0,462 | 0,542  |
| 11 | Q14807 KIF22_HUMAN  | R.GPEEEIIGSPEPM*AAPASASQKLS#PLQK.L | S427:           | 3 | 4,5493 | 0,457 | -0,431 |
| 11 | Q96JM3 ZN828_HUMAN  | R.KPGPLS#PEIRS#PAGS#PELR.K         | S427:S432:S436: | 3 | 4,1599 | 0,383 | -0,472 |
| 11 | Q5H9R5 Q5H9R5_HUMAN | R.VAS#ETHS#EGS#EYEELPKR.R          | S428:S432:S435: | 3 | 2,6068 | 0,243 | 0      |
| 11 | Q9ULJ3 ZN295_HUMAN  | R.IKTEPS#SPLS#DPSDIIR.V            | S434:S438:      | 3 | 4,2618 | 0,277 | 0,363  |
| 11 | Q13535 ATR_HUMAN    | R.RLS#S#SLNPSK.R                   | S435:S436:      | 2 | 2,0338 | 0,097 | 0,293  |

|    |                    |                                     |                 |   |        |       |        |
|----|--------------------|-------------------------------------|-----------------|---|--------|-------|--------|
| 11 | Q15036 SNX17_HUMAN | K.LSSKLS#AVS#LR.G                   | S437:S440:      | 2 | 2,6618 | 0,181 | -0,092 |
| 11 | Q15569 TESK1_HUMAN | R.CRS#LPSS#PELPR.R                  | S437:S441:      | 3 | 3,1395 | 0,223 | -0,117 |
| 11 | Q8TCN5 ZN507_HUMAN | K.M*M*S#PLKNSSDGLTSLNQSNTLVALPEGR.Q | S441:           | 3 | 3,1446 | 0,226 | 1,622  |
| 11 | Q8WWY3 PRP31_HUMAN | R.S#SGTASSVAFTPLQGLEIVNPQAAEKK.V    | S445:           | 3 | 2,8622 | 0,208 | 0,326  |
| 11 | O43290 SNUT1_HUMAN | R.VS#EVEEEKEPVPQPLPSDDTR.V          | S448:           | 3 | 4,1181 | 0,333 | -0,074 |
| 11 | Q96GE4 CCD45_HUMAN | R.SHS#LS#PSPVNK.H                   | S449:S451:      | 2 | 3,0865 | 0,412 | -0,186 |
| 11 | Q8WUM0 NU133_HUMAN | R.KGLPLGSAVSS#PVLFS#PVGR.R          | S45:S50:        | 3 | 4,203  | 0,304 | 0,086  |
| 11 | Q8WUM0 NU133_HUMAN | R.KGLPLGSAVSS#PVLFS#PVGR.R          | S45:S50:        | 2 | 2,9038 | 0,29  | 0,229  |
| 11 | Q96N67 DOCK7_HUMAN | R.TTS#GDDACNLTSFRPATLTVTNFFK.Q      | S452:           | 3 | 2,7518 | 0,266 | -0,45  |
| 11 | Q3KQU3 MA7D1_HUMAN | R.ARLS#ASTASELS#PK.S                | S452:S460:      | 2 | 2,5012 | 0,171 | -0,155 |
| 11 | Q13098 CSN1_HUMAN  | K.SPPREGS#QGELT#PANSQSR.M           | S454:T459:      | 3 | 4,3254 | 0,124 | -0,424 |
| 11 | P51956 NEK3_HUMAN  | K.GPLSEETEASDSVDGGHDS#VILDPER.L     | S462:           | 3 | 4,6628 | 0,343 | 0,197  |
| 11 | Q99543 DNJC2_HUMAN | R.NAS#AS#FQLEDDK.E                  | S47:S49:        | 2 | 3,1266 | 0,408 | 0,075  |
| 11 | O75151 PHF2_HUMAN  | R.EKEEPPS#PIEAT#PPQSLEK.V           | S474:T479:      | 3 | 3,2996 | 0,368 | 0,308  |
| 11 | Q96PU5 NED4L_HUMAN | K.DTLNPNQS#PQPS#PYNS#PKPQHK.V       | S479:S483:S487: | 3 | 3,8836 | 0,346 | 0,477  |
| 11 | Q9ULU4 PKCB1_HUMAN | K.TGQAGS#LSGSPKPFSPQLSAPITTK.T      | S486:           | 3 | 4,3264 | 0,366 | 0,721  |
| 11 | O43379 WDR62_HUMAN | R.TRLS#T#ASEETVQNR.V                | S49:T50:        | 2 | 4,2157 | 1     | -0,627 |
| 11 | Q9H8M2 BRD9_HUMAN  | R.LSVGEQPDVTHDPYEFLQS#PEPAASAK.T    | S492:           | 3 | 4,3817 | 0,424 | 0,428  |
| 11 | Q6UN15 FIP1_HUMAN  | R.DHS#PTPS#VFNS#DEERYR.Y            | S492:S496:S500: | 3 | 2,6674 | 0,299 | 0,161  |
| 11 | Q9BUK6 MSTO1_HUMAN | R.VAPPYPHFLFSSCPPGM*VLDGS#PK.G      | S495:           | 3 | 3,4893 | 0,317 | 0      |
| 11 | Q09666 AHNK_HUMAN  | K.VEAPS#LDVHM*DSPDINIEGPDVK.I       | S4953:          | 3 | 3,3719 | 0,215 | 1,138  |
| 11 | Q09666 AHNK_HUMAN  | K.VEAPSLDVHM*DS#PDINIEGPDVK.I       | S4960:          | 3 | 2,783  | 0,235 | 0,782  |
| 11 | Q8TCJ2 STT3B_HUMAN | R.ENPPVEDS#\$#DEDDKR.N              | S498:S499:      | 2 | 2,34   | 0,45  | -0,516 |
| 11 | Q9H0D6 XRN2_HUMAN  | R.KAEDS#DS#EPEPEDNVR.L              | S499:S501:      | 2 | 5,2835 | 0,475 | -0,679 |
| 11 | Q9H0D6 XRN2_HUMAN  | R.KAEDS#DS#EPEPEDNVR.L              | S499:S501:      | 3 | 2,9177 | 0,104 | -0,278 |
| 11 | Q6ZRV2 FA83H_HUMAN | R.RS#QS#SS#QGDNPLAPGYLPPHYK.E       | S5:S7:S9:       | 3 | 4,331  | 0,11  | 0,208  |
| 11 | Q9P258 RCC2_HUMAN  | R.CSSSSGGGS#\$#GDEDGLELDGAPGGGKR.A  | S50:S51:        | 3 | 4,4769 | 0,469 | -0,069 |
| 11 | Q13610 PWP1_HUMAN  | K.EKLQEEGGGS#DEEETGS#PSEDGM*QSAR.T  | S50:S57:        | 3 | 6,2153 | 0,42  | -1,214 |
| 11 | O95251 MYST2_HUMAN | R.SSARLS#QSSQDSS#PVR.N              | S50:S57:        | 3 | 3,6494 | 0,215 | -0,494 |
| 11 | Q92797 SYMPK_HUMAN | R.RLSAQGQAIS#VVGSLSSM*SPLEEEAPQAK.R | S501:           | 3 | 3,2189 | 0,493 | -0,358 |
| 11 | O94929 ABLM3_HUMAN | R.RFS#\$#GGEEDDFDR.S                | S503:S504:      | 2 | 3,2219 | 0,112 | -0,582 |
| 11 | O14974 MYPT1_HUMAN | R.RLAS#TS#DIEEK.E                   | S507:S509:      | 2 | 2,0305 | 0,285 | -0,26  |
| 11 | O60832 DKC1_HUMAN  | K.AKEVELVS#E.-                      | S513:           | 2 | 2,7742 | 0,272 | -0,338 |

|    |                     |                                        |                 |   |        |       |        |
|----|---------------------|----------------------------------------|-----------------|---|--------|-------|--------|
| 11 | Q99567 NUP88_HUMAN  | R.EDVEVAES#PLRVLAETPDSFEK.H            | S517:           | 3 | 3,1224 | 0,09  | -0,864 |
| 11 | Q8NEM7 FA48A_HUMAN  | R.KSSVDLNQVSM*LS#PAALS#PASSQR.T        | S519:S524:      | 3 | 5,5756 | 1     | 0,267  |
| 11 | Q8TAP8 CG047_HUMAN  | R.APVPEPGLDLSLSPRPDS#PQPR.H            | S52:            | 3 | 3,3376 | 0,343 | 0,38   |
| 11 | P55081 MFAP1_HUMAN  | K.RPDYAPM*ES#S#DEEDEFQFIK.K            | S52:S53:        | 3 | 5,6226 | 0,514 | -0,334 |
| 11 | O75122 CLAP2_HUMAN  | R.IPRPS#VSGQCS#R.E                     | S523:S529:      | 2 | 2,5464 | 0,298 | -0,325 |
| 11 | O75122 CLAP2_HUMAN  | R.IPRPS#VSGQCS#R.E                     | S525:S529:      | 3 | 2,6334 | 0,318 | -0,122 |
| 11 | Q9NPI6 DCP1A_HUMAN  | R.KASSPS#PLTIGT#PESQR.K                | S525:T531:      | 2 | 2,1789 | 0,262 | -0,191 |
| 11 | Q5VTL8 PR38B_HUMAN  | R.RS#QS#IEQESQEK.Q                     | S527:S529:      | 2 | 3,4338 | 0,251 | -0,455 |
| 11 | P05783 K1C18_HUMAN  | R.STS#FRGGM*GSGGLATGIAGGLAGM*GGIQNEK.E | S53:            | 3 | 6,7443 | 0,571 | 1,054  |
| 11 | P29590 PML_HUMAN    | R.S#PVIGSEVFLPNSNHVASGAGEAER.V         | S530:           | 3 | 3,8181 | 0,431 | 0,937  |
| 11 | Q86VM9 ZCH18_HUMAN  | K.KLGVS#VS#PSR.A                       | S532:S534:      | 2 | 2,8453 | 0,388 | 0      |
| 11 | Q3KQU3 MA7D1_HUMAN  | R.AS#NEKESAAPASPAPSPAPTAPPQK.E         | S534:           | 3 | 5,4581 | 0,384 | -1,192 |
| 11 | Q3KQU3 MA7D1_HUMAN  | R.RAS#NEKESAAPAS#PAPSPAPS#PTPAPPQK.E   | S534:S544:S552: | 3 | 3,6454 | 0,377 | -0,357 |
| 11 | Q16513 PKN2_HUMAN   | R.AIPTVNHSGETFS#PQAPVPTTVPVVDVR.I      | S535:           | 3 | 4,7923 | 0,33  | 0      |
| 11 | Q13144 EI2BE_HUMAN  | R.GGS#PQM*DDIKVFQNEVLGTLQR.G           | S544:           | 3 | 5,657  | 0,431 | -0,289 |
| 11 | O60504 VINEX_HUMAN  | R.HPS#SPSALRS#PADPTDLGGQTS#PR.R        | S544:S551:S563: | 3 | 3,1524 | 1     | -0,069 |
| 11 | Q8N6P7 I22R1_HUMAN  | K.DEAKS#PAPETSDLEQPTELDSLFR.G          | S545:           | 3 | 4,6507 | 0,397 | 0,731  |
| 11 | Q96QG7 MTMR9_HUMAN  | R.RQLAELETEDGM*QES#P.-                 | S548:           | 2 | 4,6522 | 0,532 | -0,127 |
| 11 | Q96JG6 CC132_HUMAN  | K.SAYQEYDS#DS#DVPEELKR.D               | S559:S561:      | 3 | 4,1801 | 0,31  | 0,08   |
| 11 | Q13523 PRP4B_HUMAN  | R.TRS#PS#PDDILER.V                     | S578:S580:      | 2 | 4,1194 | 0,497 | 0      |
| 11 | Q13523 PRP4B_HUMAN  | R.TRS#PS#PDDILER.V                     | S578:S580:      | 3 | 3,4014 | 0,424 | 0,118  |
| 11 | Q9H1E3 NUCKS_HUMAN  | K.NSQEDS#EDS#EDKDVK.T                  | S58:S61:        | 2 | 4,3189 | 0,362 | -0,712 |
| 11 | Q9H6F5 CCD86_HUMAN  | R.AGLGS#PERPPKTS#PGS#PR.L              | S58:S66:S69:    | 3 | 3,1447 | 0,355 | 0,27   |
| 11 | Q765P7 MTSSL_HUMAN  | R.ALSS#AGPIPIRPPIVPVK.T                | S580:           | 2 | 2,2397 | 0,18  | -0,387 |
| 11 | Q53TX8 Q53TX8_HUMAN | R.SHS#FSDPS#PK.F                       | S583:S588:      | 2 | 2,3777 | 0,391 | -0,391 |
| 11 | Q7L1V2 MON1B_HUMAN  | K.DKDQPPS#PS#PPPQSEALSSTSR.L           | S59:S61:        | 3 | 3,909  | 0,271 | -0,222 |
| 11 | Q8TF40 FNIP1_HUMAN  | R.NKS#S#LLFK.E                         | S593:S594:      | 2 | 2,8085 | 0,206 | -0,222 |
| 11 | Q8IYB3 SRRM1_HUMAN  | R.RYS#PS#PPPK.R                        | S605:S607:      | 2 | 2,6252 | 0,278 | -0,205 |
| 11 | O95453 PARN_HUMAN   | K.KELS#PAGS#ISK.N                      | S619:S623:      | 2 | 3,1485 | 0,376 | -0,096 |
| 11 | Q8N137 CNTRB_HUMAN  | R.AQLYLPSTS#PPHEGLDGFAQELSR.S          | S62:            | 3 | 3,0734 | 0,223 | 0,543  |
| 11 | P52756 RBM5_HUMAN   | R.GLVAAYSQGS#DNEEELVERLESEEEK.L        | S624:           | 3 | 3,1812 | 0,279 | -0,369 |
| 11 | Q96JM3 ZN828_HUMAN  | K.KDNQESS#DAELSS#SEYIK.T               | S627:S633:      | 3 | 3,0019 | 0,108 | 0      |
| 11 | P13807 GYS1_HUMAN   | R.YRPASVPPS#PSLS#R.H                   | S645:S649:      | 2 | 2,4729 | 0,279 | 0      |

|    |                     |                                   |                 |   |        |       |        |
|----|---------------------|-----------------------------------|-----------------|---|--------|-------|--------|
| 11 | Q13615 MTMR3_HUMAN  | R.S#LELSSLAGPGEDPLSADSLGKPTR.V    | S647:           | 3 | 3,2706 | 0,306 | -0,284 |
| 11 | Q9H1B7 EAP1_HUMAN   | R.RNS#SS#PVSPASVPGQR.R            | S657:S659:      | 2 | 3,7096 | 1     | 0,478  |
| 11 | Q8WVC0 LEO1_HUMAN   | K.KYVIS#DEEEEDDD.-                | S658:           | 2 | 3,7175 | 0,464 | -0,659 |
| 11 | P42166 LAP2A_HUMAN  | K.GPPDFS#SDEEREPTVVLGSGAAAAGR.S   | S66:            | 3 | 6,1194 | 0,295 | 0,69   |
| 11 | O15164 TIF1A_HUMAN  | R.TVQS#PNSSVSPGLAGPVTM*TSVHPPIR.S | S660:           | 3 | 4,0738 | 0,599 | -0,314 |
| 11 | Q9NQW6 ANLN_HUMAN   | R.AESGDS#LGSEDRDLLYSIDAYR.S       | S661:           | 3 | 4,8476 | 0,505 | -0,364 |
| 11 | Q9UEY8 ADDG_HUMAN   | K.S#PEKIEEVLSPEGS#PSKS#PSK.K      | S664:S677:S681: | 3 | 3,3595 | 0,302 | 0      |
| 11 | P51610 HCFC1_HUMAN  | K.TITLVKS#PISVPGGSALISNLGK.V      | S666:           | 3 | 4,894  | 0,499 | -0,157 |
| 11 | Q9Y3T9 NOC2L_HUMAN  | K.QFKDLFDLNS#S#EEDDTEGFSE.R       | S672:S673:      | 3 | 2,7335 | 0,265 | -0,331 |
| 11 | Q9UEY8 ADDG_HUMAN   | K.SPEKIEEVLS#PEGS#PSK.S           | S673:S677:      | 2 | 2,3567 | 0,207 | -0,618 |
| 11 | Q9UEY8 ADDG_HUMAN   | K.SPEKIEEVLS#PEGS#PSKS#PSK.K      | S673:S677:S681: | 3 | 4,2261 | 0,325 | 0,149  |
| 11 | O43896 KIF1C_HUMAN  | R.LYADS#DS#GDDSDKR.S              | S674:S676:      | 2 | 3,2791 | 0,456 | -0,286 |
| 11 | Q9UQ84 EXO1_HUMAN   | K.LSQCSSKDS#DS#EESDCNIK.L         | S700:S702:      | 3 | 2,9155 | 0,154 | -0,467 |
| 11 | Q86SQ0 PHLB2_HUMAN  | K.RS#PS#PLGTSVR.S                 | S71:S73:        | 2 | 2,0141 | 0,287 | 0,093  |
| 11 | Q8N122 RPTOR_HUMAN  | R.LRS#VSS#YGNIR.A                 | S719:S722:      | 2 | 3,785  | 0,48  | 0,086  |
| 11 | Q9BWH6 RPAP1_HUMAN  | R.DVVM*LDNLPDLPALVPS#PPKR.A       | S72:            | 3 | 4,8326 | 0,316 | -0,369 |
| 11 | P08670 VIME_HUMAN   | R.LRS#S#VPGVR.L                   | S72:S73:        | 2 | 2,7612 | 0,087 | 0,108  |
| 11 | P18206 VINC_HUMAN   | K.M*TGLVDEAIDTKS#LLDASEEAIK.K     | S721:           | 3 | 3,5848 | 0,252 | -0,072 |
| 11 | Q12888 TP53B_HUMAN  | K.KECSEAM*EVETSVIS#IDS#PQK.L      | S724:S727:      | 3 | 3,3577 | 0,33  | 0,432  |
| 11 | P46100 ATRX_HUMAN   | K.SKQSETVDQNS#DS#DEM*LAILK.G      | S729:S731:      | 3 | 3,2301 | 0,294 | 0,146  |
| 11 | Q9H7N4 SFR19_HUMAN  | K.REVLYDS#EGLS#GEER.G             | S734:S738:      | 2 | 4,7463 | 0,58  | -0,257 |
| 11 | Q9H7N4 SFR19_HUMAN  | K.REVLYDS#EGLS#GEER.G             | S734:S738:      | 3 | 3,3622 | 0,152 | 0,096  |
| 11 | Q15596 NCOA2_HUMAN  | K.DLSQESSSTAPGSEVTIKQEPVS#PK.K    | S736:           | 3 | 3,3659 | 0,444 | -0,068 |
| 11 | Q8IYB3 SRRM1_HUMAN  | K.KAAS#PS#PQSVR.R                 | S738:S740:      | 2 | 2,8472 | 0,313 | -0,284 |
| 11 | Q96RK0 CIC_HUMAN    | K.SAAATS#PAPHLVAGPLLGTVGK.A       | S739:           | 3 | 3,2474 | 0,32  | 0,349  |
| 11 | O95685 PPR3D_HUMAN  | R.ARS#LPSS#PER.R                  | S74:S78:        | 2 | 2,796  | 0,374 | -0,678 |
| 11 | Q13427 PPIG_HUMAN   | K.FDHESS#PGT#DEDKSG.-             | S745:T748:      | 2 | 3,4002 | 0,517 | -0,552 |
| 11 | Q13427 PPIG_HUMAN   | K.FDHESS#PGT#DEDKSG.-             | S745:T748:      | 3 | 2,8556 | 0,43  | 0      |
| 11 | Q12830 BPTF_HUMAN   | R.S#PILEEKDIPPLEFPK.S             | S77:            | 2 | 2,4551 | 0,466 | -0,063 |
| 11 | P54259 ATN1_HUMAN   | R.SEEIS#ES#ESEETNAPKK.T           | S77:S79:        | 2 | 2,6283 | 0,309 | -0,238 |
| 11 | Q6NXG5 Q6NXG5_HUMAN | R.S#PSTTYLHTPTSEDAAIKPSK.S        | S775:           | 3 | 2,7361 | 0,162 | 0,321  |
| 11 | Q9Y6X9 MORC2_HUMAN  | K.KDSNELS#DS#AGEEDSADLK.R         | S777:S779:      | 3 | 5,2265 | 0,433 | -0,169 |
| 11 | Q9Y6X9 MORC2_HUMAN  | K.DSNELS#DS#AGEEDSADLK.R.A        | S777:S779:      | 3 | 3,2732 | 0,263 | 0      |



|    |                     |                                   |                    |   |        |       |        |
|----|---------------------|-----------------------------------|--------------------|---|--------|-------|--------|
| 11 | Q14676 MDC1_HUMAN   | R.ESEDSETQPFDTHTLEAYGPCLS#PPR.A   | S780:              | 3 | 5,1646 | 0,441 | 0,311  |
| 11 | P19634 SL9A1_HUMAN  | R.SKETSSPGTDDVFTAPSDSPS#S#QR.I    | S787:S788:         | 3 | 5,4122 | 0,492 | -0,267 |
| 11 | Q4LE39 ARI4B_HUMAN  | R.KDIEVLS#EDT#DYEEDEVTK.K         | S790:T793:         | 3 | 4,5485 | 0,409 | -0,227 |
| 11 | Q14721 KCNB1_HUMAN  | K.NHFESS#PLPTS#PK.F               | S800:S805:         | 2 | 2,6822 | 0,185 | -0,152 |
| 11 | Q641Q2 FA21A_HUMAN  | K.TVLS#LFDEEEDKM*EDQNIQAPQK.E     | S802:              | 3 | 4,027  | 0,364 | -0,376 |
| 11 | Q96G25 MED8_HUMAN   | R.NQVIPLVLS#PDRDEDLM*R.Q          | S82:               | 3 | 2,734  | 0,259 | -0,316 |
| 11 | Q8TAP6 CEP76_HUMAN  | K.ELNFVTDSVEQELPSS#PKQPICFDR.Q    | S83:               | 3 | 4,6378 | 0,475 | -0,303 |
| 11 | Q96ST3 SIN3A_HUMAN  | R.GDLS#DVEEEEEEEM*DVDEATGAVKK.H   | S832:              | 3 | 3,6483 | 0,558 | 1,092  |
| 11 | Q14160 LAP4_HUMAN   | R.M*VEPENAVTITPLRPEDDYS#PR.E      | S835:              | 3 | 3,2741 | 0,299 | 0,209  |
| 11 | Q58WW2 IQWD1_HUMAN  | R.ADRLEGDRS#EGS#GQENENEDEE.-      | S847:S850:         | 3 | 3,3624 | 0,164 | -0,488 |
| 11 | Q6VMQ6 MCAF1_HUMAN  | K.NPVSLSPLNPTKPNNVSPVPS#PSIQR.N   | S852:              | 3 | 3,2891 | 0,192 | 1,067  |
| 11 | Q9UQ35 SRRM2_HUMAN  | R.QGSITSPQANEQS#VT#PQRR.S         | S864:T866:         | 3 | 2,9224 | 0,271 | -0,082 |
| 11 | Q9UPN4 AZI1_HUMAN   | R.S#GSPRPTPTDFLM*LFEGSPSGK.K      | S87:               | 3 | 5,1874 | 0,463 | -0,289 |
| 11 | Q9C0C9 UBE2O_HUMAN  | R.LIHGEDS#DS#EGEEEGR.G            | S87:S89:           | 2 | 4,1007 | 0,399 | -0,445 |
| 11 | Q9C0C9 UBE2O_HUMAN  | R.LIHGEDS#DS#EGEEEGR.G            | S87:S89:           | 3 | 3,326  | 0,44  | 0,095  |
| 11 | Q6P2E9 EDC4_HUMAN   | R.DSQDAS#AEQSDHDEVASLASASGGFGTK.V | S875:              | 3 | 5,2412 | 0,58  | 1,297  |
| 11 | Q9BZL6 KPCD2_HUMAN  | R.DLGGACPPQDHDHDM*QGLAERIS#VL.-   | S876:              | 3 | 2,8794 | 0,351 | 0,782  |
| 11 | P51826 AFF3_HUMAN   | K.M*LRS#PIS#PLSDASK.H             | S878:S881:         | 2 | 2,736  | 0,306 | -0,873 |
| 11 | Q9ULH0 ARMS_HUMAN   | R.RVS#QNS#LGEM*TK.L               | S882:S885:         | 2 | 3,7329 | 0,533 | -0,16  |
| 11 | O75400 PR40A_HUMAN  | K.SDS#PES#DAEREK.D                | S885:S888:         | 2 | 2,4874 | 0,259 | -0,485 |
| 11 | Q9UPN4 AZI1_HUMAN   | R.SGS#PRPTEPTDFLM*LFEGSPSGK.K     | S89:               | 3 | 6,4922 | 0,517 | -0,289 |
| 11 | Q70E73 RAPH1_HUMAN  | K.QQS#FCAKPPPSPLSPVPSVVK.Q        | S897:              | 3 | 3,901  | 0,312 | 0,55   |
| 11 | O75151 PHF2_HUMAN   | R.KGS#DDAPY#SPTAR.V               | S899:Y904:         | 2 | 3,6416 | 0,491 | -0,4   |
| 11 | P78317 RNF4_HUMAN   | R.LPQDHADSCVVS#S#DDEELSR.D        | S94:S95:           | 3 | 3,6389 | 0,269 | -0,076 |
| 11 | P15336 ATF2_HUMAN   | K.KM*PLDLS#PLAT#PIIR.S            | S94:T98:           | 2 | 3,1935 | 0,401 | -0,066 |
| 11 | Q6PD62 CTR9_HUMAN   | R.KGS#GS#EQEGEDEEGGER.K           | S941:S943:         | 3 | 4,1767 | 0,441 | -0,283 |
| 11 | Q96NY9 MUS81_HUMAN  | R.TSGGDHAPDS#PSGENS#PAPQGR.L      | S95:S101:          | 3 | 4,892  | 0,377 | -0,321 |
| 11 | Q9UQ35 SRRM2_HUMAN  | R.SRS#VS#PCSNVESR.L               | S952:S954:         | 2 | 3,7046 | 0,347 | -0,451 |
| 11 | P14618 KPYP_HUMAN   | R.TATES#FASDPILYRPVAVALDTK.G      | S97:               | 3 | 3,6944 | 0,352 | -0,216 |
| 11 | B2R8U0 B2R8U0_HUMAN | K.KAAAGPLDM*S#LPST#PDIK.I         | S97:T101:          | 3 | 3,4461 | 0,26  | -0,092 |
| 11 | O60245 PCDH7_HUMAN  | R.YRS#VNGGPGS#PDLAR.H             | S982:S989:         | 2 | 3,9118 | 0,326 | -0,358 |
| 11 | Q9P2D0 IBTK_HUMAN   | R.KRS#DSS#GGYNLSIIQS#PSSTGLLK.S   | S990:S993:S1004:   | 3 | 5,1485 | 1     | -0,449 |
| 11 | Q9UQ35 SRRM2_HUMAN  | K.VKAQT#PPGPGS#LSGSKS#PCPQEK.S    | T1003:S1008:S1014: | 3 | 3,062  | 0,253 | 0,363  |

|    |                    |                                     |                    |   |        |       |        |
|----|--------------------|-------------------------------------|--------------------|---|--------|-------|--------|
| 11 | P33991 MCM4_HUMAN  | R.VEGT#PRS#GVRGT#PVR.Q              | T102:S105:T110:    | 2 | 2,1858 | 0,24  | -0,472 |
| 11 | Q7Z5J4 RAI1_HUMAN  | R.SLTALSEPRT#PGPPGLTTTPAPPDK.L      | T1068:             | 3 | 3,7846 | 0,371 | -0,284 |
| 11 | P48634 BAT2_HUMAN  | R.GRTASET#RS#EGS#EYEEIPK.R          | T1087:S1089:S1092: | 3 | 2,8755 | 0,157 | -0,387 |
| 11 | Q96FF9 CDCA5_HUMAN | K.THSV PAT#PTST#PVPNPEAESSK.E       | T111:T115:         | 3 | 3,9679 | 1     | 0,147  |
| 11 | Q6R327 RICTR_HUMAN | R.TLT#EPSVDFNHSDDFTPISTVQK.T        | T1135:             | 3 | 3,2329 | 0,424 | 0,069  |
| 11 | Q9Y6M7 S4A7_HUMAN  | R.M*LQDDDDT#VHLPFEGGSLQIPVK.A       | T1167:             | 3 | 4,4179 | 0,356 | -0,464 |
| 11 | Q96T60 PNKP_HUMAN  | R.TPESQPDT#PPGT#PLVSQDEKR.D         | T118:T122:         | 3 | 4,9524 | 0,529 | -0,15  |
| 11 | Q9UJM3 ERRFI_HUMAN | K.KLTVNGVCAST#PPLT#PIK.N            | T127:T131:         | 3 | 4,5611 | 0,223 | 0,089  |
| 11 | Q9BRD0 BUD13_HUMAN | R.HGT#PDPS#PR.K                     | T135:S139:         | 2 | 2,7454 | 0,44  | -0,217 |
| 11 | Q9BTK6 PA1_HUMAN   | R.RPPT#PEAQ#EERS#DEEPEAK.E          | T138:S143:S148:    | 3 | 3,3397 | 0,425 | -0,414 |
| 11 | O75781 PALM_HUMAN  | R.KTEVVM*NSQQT#PVG T#PK.D           | T141:T145:         | 3 | 5,1243 | 0,403 | -0,362 |
| 11 | Q9HBM6 TAF9B_HUMAN | R.LSVGAVSSKPT#TPTIATPQTVSVPNK.V     | T156:              | 3 | 4,0929 | 0,39  | 0,757  |
| 11 | Q9BRD0 BUD13_HUMAN | R.HDT#PDPS#PLR.G                    | T159:S163:         | 2 | 3,1317 | 0,456 | 0,188  |
| 11 | O14686 MLL2_HUMAN  | K.ASPVPSDPEKPGT#PGEGM*LSSDLDR.I     | T1590:             | 3 | 2,831  | 0,268 | -0,208 |
| 11 | Q14676 MDC1_HUMAN  | R.SSVKT#PEPVVPTAPEPHPTTSTDQPVT#PK.L | T1608:T1630:       | 3 | 3,5445 | 0,124 | -0,804 |
| 11 | Q14676 MDC1_HUMAN  | K.TPEPVVPTAPEPHPTTSTDQPVT#PK.L      | T1630:             | 3 | 4,0255 | 0,393 | -0,338 |
| 11 | Q12888 TP53B_HUMAN | R.SNVSSPAT#PT#ASSSSSTPTRK.I         | T1638:T1640:       | 3 | 2,6736 | 0,131 | -0,237 |
| 11 | Q9Y5W3 KLF2_HUMAN  | R.GPGRPPPPPTD#PPLS#PDGPAR.L         | T173:S177:         | 3 | 4,0815 | 0,364 | -0,239 |
| 11 | Q92785 REQU_HUMAN  | R.ILEPDDFLDDLDEDEYEDT#PKR.R         | T176:              | 3 | 3,2675 | 0,339 | -0,509 |
| 11 | O94842 TOX4_HUMAN  | R.LSTT#PS#PTSS#LHEDGVDFRR.Q         | T176:S178:S182:    | 3 | 3,4898 | 1     | -0,071 |
| 11 | O94842 TOX4_HUMAN  | R.LSTT#PSPT#S#SLHEDGVDFRR.Q         | T176:T180:S181:    | 3 | 3,4972 | 1     | 0,356  |
| 11 | Q86TB9 PATL1_HUMAN | R.RST#SPIIGS#PPVR.A                 | T178:S184:         | 2 | 2,5904 | 0,417 | -0,24  |
| 11 | Q9H1E3 NUCKS_HUMAN | R.LKATVT#PS#PVK.G                   | T179:S181:         | 3 | 3,5835 | 0,325 | 0,211  |
| 11 | Q9H1E3 NUCKS_HUMAN | K.ATVT#PS#PVK.G                     | T179:S181:         | 2 | 2,8355 | 0,423 | -0,392 |
| 11 | Q9H1E3 NUCKS_HUMAN | R.LKATVT#PS#PVK.G                   | T179:S181:         | 2 | 2,7093 | 0,389 | 0,094  |
| 11 | O94842 TOX4_HUMAN  | R.LSTT#PSPT#S#SLHEDGVDFRR.Q         | T180:S181:S182:    | 3 | 2,9684 | 1     | -0,142 |
| 11 | Q16539 MK14_HUMAN  | R.HTDDEM*T#GY#VATR.W                | T180:Y182:         | 2 | 2,9725 | 0,489 | -0,657 |
| 11 | Q16539 MK14_HUMAN  | R.HTDDEM*T#GY#VATR.W                | T180:Y182:         | 3 | 2,6217 | 0,365 | -0,328 |
| 11 | Q5VWG9 TAF3_HUMAN  | R.LLST#KGD TLDVLLLEAR.E             | T200:              | 3 | 4,0067 | 0,369 | 0      |
| 11 | Q9H1E3 NUCKS_HUMAN | K.EKT#PS#PKEEDEEPES#PPEK.K          | T202:S204:S214:    | 3 | 3,2733 | 0,145 | 0,076  |
| 11 | P25445 TNR6_HUMAN  | K.ENQGSHEP T#LNPETVAINLSVDLSK.Y     | T214:              | 3 | 4,0439 | 0,32  | -0,246 |
| 11 | Q9UQ35 SRRM2_HUMAN | R.TAVAPSAVN LADPRT#PTAPAVNLAGAR.T   | T2289:             | 3 | 4,44   | 0,33  | 0,887  |
| 11 | Q9NRS6 SNX15_HUMAN | K.EEGAAPSPT#HVAELATM*EVESAR.L       | T229:              | 3 | 3,7208 | 0,276 | -0,148 |

|    |                    |                                        |              |   |        |       |        |
|----|--------------------|----------------------------------------|--------------|---|--------|-------|--------|
| 11 | P31629 ZEP2_HUMAN  | R.GPHALQSSGPPST#PSS#PR.L               | T2298:S2301: | 3 | 4,0909 | 0,356 | 0,381  |
| 11 | P17275 JUNB_HUMAN  | R.SRDAT#PPVS#PINM*EDQER.I              | T255:S259:   | 3 | 5,018  | 0,292 | 0,165  |
| 11 | Q4G0J3 LARP7_HUMAN | R.SRPT#SEGS#DIESTEPQK.Q                | T257:S261:   | 2 | 2,8182 | 0,504 | 0,486  |
| 11 | O75592 MYCB2_HUMAN | R.HEDEQALLDQNSQT#PPPS#PFSVQAFNK.G      | T2645:S2649: | 3 | 3,4067 | 0,384 | -0,345 |
| 11 | Q13501 SQSTM_HUMAN | R.SRLT#PVS#PESSSTEEK.S                 | T269:S272:   | 2 | 4,0033 | 0,351 | -0,515 |
| 11 | Q5T4S7 UBR4_HUMAN  | R.HVT#LPSS#PR.S                        | T2715:S2719: | 2 | 3,1774 | 0,419 | -0,846 |
| 11 | Q7Z2W4 ZCCHV_HUMAN | R.SCT#PS#PDQISHR.A                     | T273:S275:   | 2 | 3,7693 | 0,255 | 0,158  |
| 11 | Q7Z2W4 ZCCHV_HUMAN | R.SCT#PS#PDQISHR.A                     | T273:S275:   | 3 | 2,8509 | 0,39  | -0,118 |
| 11 | P27816 MAP4_HUMAN  | K.DM*ESPT#KLDVTLAK.D                   | T282:        | 3 | 3,7129 | 0,39  | -0,111 |
| 11 | Q96KN1 FA84B_HUMAN | R.T#TPPPGRPPAPSSEEEEDGEAVAH.-          | T288:        | 3 | 3,1194 | 0,462 | -0,228 |
| 11 | Q96D31 CRCM1_HUMAN | R.GDHPLT#PGS#HYA.-                     | T295:S298:   | 2 | 2,8498 | 0,404 | -0,259 |
| 11 | Q2TB10 ZN800_HUMAN | R.DSIT#PDIATKPGQPLFLDSISPK.K           | T319:        | 3 | 3,6393 | 0,257 | -0,073 |
| 11 | Q86X27 RGPS2_HUMAN | R.KSVAAEGALLPQT#PPS#PR.N               | T326:S329:   | 3 | 3,172  | 0,113 | 0,277  |
| 11 | O75533 SF3B1_HUMAN | R.GGDSIGET#PT#PGASKR.K                 | T326:T328:   | 2 | 2,7539 | 0,328 | 0,072  |
| 11 | Q96SI1 KCD15_HUMAN | R.LSLT#RSPVSPALAAQGIPLPAQLTK.S         | T33:         | 3 | 4,6649 | 0,443 | -0,216 |
| 11 | Q16643 DREB_HUMAN  | R.M*APTIPT#RSPSDSSTASTPVAEQIER.A       | T335:        | 3 | 6,0493 | 0,527 | -0,188 |
| 11 | O95602 RPA1_HUMAN  | K.LPEEVATPT#TDEEKDSLIAIDR.S            | T359:        | 3 | 4,4734 | 0,396 | 0,508  |
| 11 | Q16543 CDC37_HUMAN | K.EGEEAGPGDPLLEAVPKT#GDEKDVSV.-        | T370:        | 3 | 3,8917 | 0,334 | -1,414 |
| 11 | Q13043 STK4_HUMAN  | R.DET#M*QPAKPSFLEYFEQK.E               | T387:        | 3 | 3,6368 | 0,297 | 0,4    |
| 11 | Q92922 SMRC1_HUMAN | K.DSENT#PVKGGTVADLDEQDEETVTAGGK.E      | T398:        | 3 | 5,4816 | 0,459 | -0,187 |
| 11 | Q14247 SRC8_HUMAN  | R.AKTQT#PPVS#PAPQPTTEER.L              | T401:S405:   | 3 | 3,5853 | 0,206 | 0,175  |
| 11 | P51114 FXR1_HUMAN  | R.RGPNYTSYGT#NSELSNPS#ETESER.K         | T401:S409:   | 3 | 2,962  | 1     | -0,253 |
| 11 | Q14676 MDC1_HUMAN  | K.SQASM*VINSDT#DDEEEVSAALTLAHLK.E      | T404:        | 3 | 4,1157 | 0,477 | -0,616 |
| 11 | Q92692 PVRL2_HUMAN | K.EQTLQGAEDEDEDLEGGPSYKPPT#PK.A        | T410:        | 3 | 3,2979 | 0,365 | -0,323 |
| 11 | Q96IG2 FXL20_HUMAN | K.VHAYFAPVT#PPPS#VGGSR.Q               | T417:S421:   | 3 | 3,1337 | 0,29  | -0,092 |
| 11 | Q96IG2 FXL20_HUMAN | K.VHAYFAPVT#PPPS#VGGSR.Q               | T417:S421:   | 2 | 2,8393 | 0,404 | 0,061  |
| 11 | Q9UPX8 SHAN2_HUMAN | K.QSNVEDSPEKT#CSIPIPTIIVK.E            | T430:        | 3 | 3,4061 | 0,2   | -0,072 |
| 11 | O43379 WDR62_HUMAN | R.TRLST#AS#EETVQNR.V                   | T50:S52:     | 3 | 3,3929 | 0,19  | 0      |
| 11 | P43007 SATT_HUMAN  | K.SEEET#SPLVTHQNPAGPVASAPELESK.E       | T506:        | 3 | 5,669  | 0,495 | -0,381 |
| 11 | P05783 K1C18_HUMAN | R.ST#SFRGGM*GSGGLATGIAGGLAGM*GGIQNEK.E | T52:         | 3 | 5,7972 | 0,469 | 1,116  |
| 11 | Q96FV9 THOC1_HUMAN | K.ELPPPSEEIKT#GEDEDEEDNDALLK.E         | T542:        | 3 | 2,6491 | 0,22  | -0,38  |
| 11 | P13051 UNG_HUMAN   | K.KAPAGQEEPQT#PPSS#PLSAEQLDR.I         | T60:S64:     | 3 | 4,5748 | 0,485 | -0,419 |
| 11 | Q14978 NOLC1_HUMAN | K.IKLQT#PNT#FPK.R                      | T607:T610:   | 3 | 3,6379 | 0,31  | 0,126  |

|    |                    |                                        |                 |   |        |       |        |
|----|--------------------|----------------------------------------|-----------------|---|--------|-------|--------|
| 11 | Q14978 NOLC1_HUMAN | K.IKLQT#PNT#FPK.R                      | T607:T610:      | 2 | 3,5247 | 0,505 | 0,169  |
| 11 | Q14978 NOLC1_HUMAN | K.LQT#PNT#FPK.R.K                      | T607:T610:      | 2 | 2,7877 | 0,421 | -0,538 |
| 11 | Q96PZ0 PUS7_HUMAN  | K.IPLFNTDVDNLEGKT#PPVFASEGK.Y          | T610:           | 3 | 3,9806 | 0,313 | -0,549 |
| 11 | Q8IYB3 SRRM1_HUMAN | R.RT#AS#PPPPPK.R                       | T614:S616:      | 2 | 2,292  | 0,316 | -0,505 |
| 11 | Q8WVC0 LEO1_HUMAN  | K.KLT#S#DEEGEPSGK.R                    | T629:S630:      | 2 | 4,2308 | 0,582 | -0,079 |
| 11 | P12270 TPR_HUMAN   | K.RPST#SQTVSTPAPVPVIESTEAEAK.A         | T647:           | 3 | 4,663  | 0,401 | 0,725  |
| 11 | P05783 K1C18_HUMAN | R.STSFRGGM*GSGGLAT#GIAGGLAGM*GGIQNEK.E | T65:            | 3 | 3,9592 | 0,386 | -0,496 |
| 11 | Q68EM7 RHG17_HUMAN | R.SPSPTQHT#GQPPGQPSAPSQLSAPR.R         | T682:           | 3 | 4,7556 | 0,275 | 0,477  |
| 11 | P25205 MCM3_HUMAN  | K.DGDSYDPYDFSDTEEM*PQVHT#PK.T          | T722:           | 3 | 3,0602 | 0,279 | -0,063 |
| 11 | Q9ULL5 PRR12_HUMAN | K.KQETAAVCGET#DEEAGES#GGEGIFR.E        | T740:S747:      | 3 | 7,6558 | 0,593 | 0,46   |
| 11 | Q68DN6 RGPD1_HUMAN | K.HST#PS#PTKYLS#PSK.S                  | T770:S772:S779: | 3 | 2,8344 | 1     | -0,197 |
| 11 | O95239 KIF4A_HUMAN | R.RT#FS#LTEVR.G                        | T799:S801:      | 2 | 3,4304 | 0,328 | 0,288  |
| 11 | P22314 UBA1_HUMAN  | R.AAVATFLQSVQVPEFT#PKSGVK.I            | T800:           | 3 | 3,6087 | 0,211 | -0,23  |
| 11 | P05114 HMG1_HUMAN  | K.T#EESPAS#DEAGEKEAK.S                 | T83:S89:        | 2 | 2,4896 | 0,411 | -0,398 |
| 11 | Q8IYB3 SRRM1_HUMAN | K.KET#ES#EAEDNLDLEK.H                  | T872:S874:      | 3 | 4,8382 | 0,396 | 0,181  |
| 11 | Q9BVJ6 UT14A_HUMAN | K.LVLADLLEPVKT#SSSLATVK.K              | T96:            | 3 | 2,8728 | 0,427 | 0,085  |
| 11 | Q9P1Y6 K1542_HUMAN | R.TVTCVTVVEPEAPSPDVLQAAT#HR.V          | T981:           | 3 | 2,6791 | 0,115 | 0,531  |
| 11 | Q9NQ66 PLCB1_HUMAN | K.SEPSSPDHGSST#IEQDLAALDAEM*TQK.L      | T989:           | 3 | 2,7592 | 0,138 | -0,124 |
| 11 | O43166 SI1L1_HUMAN | R.EY#GSTSSIDKQGTSGESFFDLLK.G           | Y206:           | 3 | 2,8614 | 0,25  | -0,426 |
| 11 | Q04726 TLE3_HUMAN  | R.Y#DSDGDKSDDLVDVSNEDPATPR.V           | Y238:           | 3 | 4,7615 | 0,475 | 0,544  |
| 11 | P35580 MYH10_HUMAN | R.IAQLEEELEEEQSNM*ELLNDR.F             |                 | 3 | 6,7354 | 0,475 | 0      |
| 11 | P14618 KPYM_HUMAN  | R.AEGSDVANAVLDGADCIM*LSGETAK.G         |                 | 3 | 6,2028 | 0,552 | 0      |
| 11 | O00629 IMA4_HUMAN  | K.M*AEDEAETIGNLIEECGGLEK.I             |                 | 3 | 5,9734 | 0,474 | -0,236 |
| 11 | Q05524 ENO1B_HUMAN | K.DATNVGDEGGFAPNILENK.E                |                 | 2 | 5,8414 | 0,541 | -0,187 |
| 11 | P63167 DYL1_HUMAN  | K.NADM*SEEM*QQDSVECATQALEK.Y           |                 | 3 | 5,8011 | 0,432 | -0,287 |
| 11 | P35579 MYH9_HUMAN  | K.DFSALSQLQDTQELLQEENR.Q               |                 | 3 | 5,7661 | 0,478 | -0,367 |
| 11 | Q9Y6E2 BZW2_HUMAN  | R.DTLVQGLNEAGDDLEAVAK.F                |                 | 2 | 5,7218 | 0,585 | -0,374 |
| 11 | Q12905 ILF2_HUMAN  | R.NQDLAPNSAEQASILSLVTK.I               |                 | 3 | 5,7091 | 0,524 | 0,174  |
| 11 | P04181 OAT_HUMAN   | R.VAIAALEVLEENLAENADK.L                |                 | 3 | 5,6781 | 0,577 | -0,342 |
| 11 | P35580 MYH10_HUMAN | K.DAASLESQLQDTQELLQEETR.Q              |                 | 3 | 5,5668 | 0,438 | -0,228 |
| 11 | O00299 CLIC1_HUMAN | K.LAALNPESNTAGLDIFAK.F                 |                 | 2 | 5,5644 | 0,505 | -0,132 |
| 11 | Q01130 SFRS2_HUMAN | R.DAEDAM*DAM*DGAVLDGR.E                |                 | 2 | 5,539  | 0,53  | -0,616 |
| 11 | Q86TX2 ACOT1_HUMAN | K.DGYADIVDVLNSPLEGPDQK.S               |                 | 3 | 5,5237 | 0,547 | -0,256 |

|    |                    |                                  |   |        |       |        |
|----|--------------------|----------------------------------|---|--------|-------|--------|
| 11 | P25205 MCM3_HUMAN  | R.DYLDFLDDEEDQGIYQSK.V           | 3 | 5,4227 | 0,519 | -0,083 |
| 11 | Q08211 DHX9_HUMAN  | K.DDDGGEDDDANCNLCGDEYGPETR.L     | 3 | 5,3417 | 0,523 | 0,196  |
| 11 | Q92734 TFG_HUMAN   | K.NVM*SAFGLTDDQVSGPPSAPAEDR.S    | 3 | 5,3385 | 0,511 | 0,369  |
| 11 | P13667 PDIA4_HUMAN | K.DLGLSESGEDVNAAILDESGK.K        | 3 | 5,3345 | 0,465 | 0,173  |
| 11 | Q8TAQ2 SMRC2_HUMAN | R.DIGEGNLSTAAAAALAAAVK.A         | 2 | 5,3175 | 0,623 | -0,259 |
| 11 | P60709 ACTB_HUMAN  | K.DLYANTVLSGGTTM*YPGIADR.M       | 3 | 5,3111 | 0,542 | 0,328  |
| 11 | Q02952 AKA12_HUMAN | K.EVSSLEGSPPPCLGQEEAVCTK.I       | 3 | 5,2029 | 0,553 | -0,539 |
| 11 | P05783 K1C18_HUMAN | R.GGM*GSGGLATGIAGGLAGM*GGIQNEK.E | 3 | 5,201  | 0,514 | 0,08   |
| 11 | Q14974 IMB1_HUMAN  | K.YLEVVLNLTQQASQAQVVK.S          | 3 | 5,1833 | 0,538 | -0,341 |
| 11 | Q71U36 TBA1A_HUMAN | R.AVFVDLEPTVIDEVR.T              | 2 | 5,1827 | 0,497 | -0,573 |
| 11 | P55036 PSMD4_HUMAN | R.AAAASAAEAGIATTGTEDSDDALLK.M    | 3 | 5,1326 | 0,584 | -0,079 |
| 11 | Q9NVI7 ATD3A_HUMAN | K.DALNLAQM*QEQLQLEQQSK.L         | 3 | 5,1018 | 0,487 | 0,628  |
| 11 | Q8IZH2 XRN1_HUMAN  | K.DNLEDETEDDDLFETEFR.Q           | 3 | 5,0981 | 0,334 | 0      |
| 11 | Q15149 PLEC1_HUMAN | R.DPYSGSTISLFQAM*QK.G            | 2 | 5,0943 | 0,449 | -0,341 |
| 11 | P09972 ALDOC_HUMAN | K.GVVPLAGTDGETTTQGLDGLSER.C      | 3 | 5,034  | 0,548 | 0,724  |
| 11 | Q14103 HNRPD_HUMAN | R.EYFGGFGEVESIELPM*DNK.T         | 3 | 4,9943 | 0,407 | -0,084 |
| 11 | P09211 GSTP1_HUMAN | K.DQQEAALVDM*VNDGVEDLR.C         | 3 | 4,9774 | 0,462 | 0,515  |
| 11 | P07355 ANXA2_HUMAN | R.AEDGSVIDYELIDQDAR.D            | 2 | 4,9633 | 0,471 | 0,064  |
| 11 | Q9P015 RM15_HUMAN  | R.DYGVQLVEEGADTFK.V              | 2 | 4,9464 | 0,503 | -1,324 |
| 11 | P25205 MCM3_HUMAN  | R.DSEEPFSSVEIQAALSK.M            | 2 | 4,8788 | 0,5   | 0,598  |
| 11 | P48735 IDHP_HUMAN  | R.DQTDDQVTIDSALATQK.Y            | 2 | 4,8468 | 0,58  | -0,33  |
| 11 | Q02790 FKBP4_HUMAN | R.FEIGEGENLDLPYGLER.A            | 2 | 4,8413 | 0,579 | -0,313 |
| 11 | Q9UL25 RAB21_HUMAN | R.DSNGAILVYDITDEDSFQK.V          | 3 | 4,8244 | 0,393 | -0,086 |
| 11 | P22626 ROA2_HUMAN  | K.LFIGGLSFETTEESLR.N             | 2 | 4,8241 | 0,534 | -0,271 |
| 11 | Q01130 SFRS2_HUMAN | R.DAEDAMDAM*DGAVLDGR.E           | 2 | 4,8159 | 0,54  | 0,138  |
| 11 | P62854 RS26_HUMAN  | R.DISEASVFDAYVLPK.L              | 3 | 4,8045 | 0,531 | -0,111 |
| 11 | Q12906 ILF3_HUMAN  | K.VLAGETLSVNDPPDVLDR.Q           | 2 | 4,7913 | 0,383 | 0,383  |
| 11 | P20020 AT2B1_HUMAN | K.YGDLTPADGILIQGNDLK.I           | 3 | 4,7839 | 0,364 | -0,191 |
| 11 | P42704 LPPRC_HUMAN | K.LLM*SEDYFTQAM*EVK.A            | 2 | 4,7775 | 0,515 | -0,199 |
| 11 | P62263 RS14_HUMAN  | R.DESSPYAAM*LAAQDVAQR.C          | 3 | 4,7293 | 0,362 | 0,377  |
| 11 | P33316 DUT_HUMAN   | R.IFYPEIEVQALDDTER.G             | 3 | 4,7116 | 0,335 | -0,177 |
| 11 | Q9UHX1 PUF60_HUMAN | K.DIDDDLEGEVTEECGK.F             | 2 | 4,6469 | 0,599 | -0,334 |
| 11 | Q95747 OXSR1_HUMAN | R.DTAEGVSQELISAGLVDGR.D          | 2 | 4,6304 | 0,425 | -0,318 |

|    |                     |                               |   |        |       |        |
|----|---------------------|-------------------------------|---|--------|-------|--------|
| 11 | P51991 ROA3_HUMAN   | K.LFIGGLSFETDDSLR.E           | 2 | 4,5959 | 0,539 | -0,207 |
| 11 | A3KN83 SBNO1_HUMAN  | K.SIDPDSIQSALLASGLGSK.R       | 2 | 4,5923 | 0,574 | -0,788 |
| 11 | Q03252 LMNB2_HUMAN  | R.DVM*QQQLAEYQELLDVK.L        | 3 | 4,5788 | 0,337 | 0,177  |
| 11 | P11586 C1TC_HUMAN   | K.YVVVTGITPTPLGEGK.S          | 2 | 4,537  | 0,538 | 0,673  |
| 11 | Q8TAQ2 SMRC2_HUMAN  | R.DIGEGNLSTAAAAALAAAIVK.A     | 3 | 4,5284 | 0,329 | -0,194 |
| 11 | P62829 RL23_HUMAN   | R.ISLGLPVGAVINCADNTGAK.N      | 3 | 4,5145 | 0,388 | 0      |
| 11 | Q00610 CLH1_HUMAN   | K.VGEQAQVVIIDM*NDPSNPIR.R     | 3 | 4,5106 | 0,347 | 0,496  |
| 11 | P62263 RS14_HUMAN   | R.DESSPYAAM*LAAQDVAQR.C       | 2 | 4,5025 | 0,532 | 0,692  |
| 11 | Q02952 AKA12_HUMAN  | R.EVIAEEEPPTVTEPLPENR.E       | 3 | 4,4725 | 0,306 | 0,34   |
| 11 | P06733 ENOA_HUMAN   | R.AAVPSGASTGIYEALELR.D        | 2 | 4,4721 | 0,366 | -0,338 |
| 11 | Q03252 LMNB2_HUMAN  | R.DVM*QQQLAEYQELLDVK.L        | 2 | 4,4699 | 0,577 | -0,236 |
| 11 | Q9Y6E2 BZW2_HUMAN   | R.DTLVQGLNEAGDDLEAVAK.F       | 3 | 4,4461 | 0,467 | -0,187 |
| 11 | P25705 ATPA_HUMAN   | K.GM*SLNLEPDNVGVVVFVFGNDK.L   | 3 | 4,443  | 0,451 | 0,086  |
| 11 | P07195 LDHB_HUMAN   | K.SLADELALVDVLEDK.L           | 2 | 4,4334 | 0,415 | -0,299 |
| 11 | P05787 K2C8_HUMAN   | K.LEAELGNM*QGLVEDFK.N         | 2 | 4,4228 | 0,43  | 1,281  |
| 11 | Q96RI4 Q96RI4_HUMAN | K.TLNDELEIIEGM*KFD.-          | 2 | 4,4136 | 0,581 | -0,411 |
| 11 | P21333 FLNA_HUMAN   | K.DGSCGVAYVVQEPGDYEVSVK.F     | 3 | 4,4057 | 0,248 | 0,81   |
| 11 | P06744 G6PI_HUMAN   | K.TLAQLNPESSLFIIASK.T         | 3 | 4,4023 | 0,406 | -0,2   |
| 11 | P20042 IF2B_HUMAN   | K.DASDDLDDLNFFNQK.K           | 3 | 4,3962 | 0,337 | -0,104 |
| 11 | Q9NVI1 FANCI_HUMAN  | K.DVPLTAEVEFVVEK.A            | 2 | 4,3661 | 0,52  | -0,143 |
| 11 | O15173 PGRC2_HUMAN  | R.DEYDDLSDLNAVQM*ESVR.E       | 3 | 4,3655 | 0,408 | -0,087 |
| 11 | Q14839 CHD4_HUMAN   | R.NQDETETELQGM*NEYLSSFV.V     | 3 | 4,3473 | 0,344 | 0,513  |
| 11 | Q16658 FSCN1_HUMAN  | R.QGM*DLSANQDEETDQETFQLEIDR.D | 3 | 4,3453 | 0,45  | 0,776  |
| 11 | P26368 U2AF2_HUMAN  | K.LFIGGLPNYLNDQVK.E           | 2 | 4,3301 | 0,289 | -0,676 |
| 11 | P51149 RAB7A_HUMAN  | R.DPENFPFVVLGNK.I             | 2 | 4,3221 | 0,472 | -0,248 |
| 11 | P46940 IQGA1_HUMAN  | R.ILAIGLINEALDEGDAQK.T        | 2 | 4,3164 | 0,544 | -0,454 |
| 11 | Q9Y508 ZN313_HUMAN  | R.DCGGAAQLAGPAAEADPLGR.F      | 3 | 4,3148 | 0,479 | 0      |
| 11 | P52565 GDIR1_HUMAN  | R.AEEYEFLTPVEEAPK.G           | 2 | 4,3141 | 0,416 | 0,487  |
| 11 | Q8IUF8 MINA_HUMAN   | R.DDPALATYYGSLFK.L            | 2 | 4,3093 | 0,618 | -0,313 |
| 11 | P27824 CALX_HUMAN   | K.APVPTGEVYFADSFDR.G          | 2 | 4,2939 | 0,539 | -0,138 |
| 11 | O14744 ANM5_HUMAN   | R.DLNCVPEIADTLGAVAK.Q         | 3 | 4,2893 | 0,449 | -0,307 |
| 11 | P11021 GRP78_HUMAN  | R.IINEPTAAAIAVGLDK.R          | 2 | 4,2864 | 0,575 | -0,073 |
| 11 | P09211 GSTP1_HUMAN  | K.DQQEAALVDM*VNDGVEDLR.C      | 2 | 4,2757 | 0,503 | -0,114 |

|    |                     |                             |   |        |       |        |
|----|---------------------|-----------------------------|---|--------|-------|--------|
| 11 | P23381 SYWC_HUMAN   | K.DLTLDQAYSAYAVENAK.D       | 2 | 4,2724 | 0,558 | -0,406 |
| 11 | O60271 JIP4_HUMAN   | R.EVENLILENTQLLETK.N        | 2 | 4,265  | 0,444 | -0,582 |
| 11 | Q9BV86 CI032_HUMAN  | K.DNM*AQEGVILDDVDSSVCR.D    | 3 | 4,2614 | 0,456 | 0,599  |
| 11 | Q9Y490 TLN1_HUMAN   | K.EADESLNFEEQILEAAK.S       | 2 | 4,2602 | 0,401 | -0,252 |
| 11 | P08670 VIME_HUMAN   | R.EM*EENFAVEAANYQDTIGR.L    | 3 | 4,2544 | 0,408 | 0,996  |
| 11 | O00159 MYO1C_HUMAN  | R.DGTIDFTPGSELLITK.A        | 2 | 4,2539 | 0,512 | -0,214 |
| 11 | Q5T6G5 Q5T6G5_HUMAN | K.QAPELSLSSQDLEVGGNQGH.-    | 3 | 4,244  | 0,326 | 0,089  |
| 11 | P78527 PRKDC_HUMAN  | K.LTPLPEDNSM*NVDQDGDPSDR.M  | 3 | 4,2403 | 0,348 | 0      |
| 11 | P07910 HNRPC_HUMAN  | R.M*IAGQVLDINLAAEPK.V       | 2 | 4,2394 | 0,568 | -0,072 |
| 11 | P06576 ATPB_HUMAN   | R.IPSAVGYQPTLATDM*GTM*QER.I | 3 | 4,234  | 0,424 | 0,318  |
| 11 | Q13813 SPTA2_HUMAN  | K.DLNSQADSLM*TSSAFDTSQVK.D  | 3 | 4,2257 | 0,398 | 0,243  |
| 11 | P12004 PCNA_HUMAN   | R.AEDNADTLALVFEAPNQEK.V     | 3 | 4,2088 | 0,195 | 0,176  |
| 11 | Q96ST2 IWS1_HUMAN   | R.DGGTFISDADDVVSAM*IVK.M    | 2 | 4,2076 | 0,545 | -0,312 |
| 11 | P55145 ARMET_HUMAN  | R.DVTFSPATIENELIK.F         | 2 | 4,2022 | 0,466 | -0,437 |
| 11 | Q9UL25 RAB21_HUMAN  | R.DSNGAILVYDITDEDSFQK.V     | 2 | 4,2009 | 0,567 | -0,115 |
| 11 | P08107 HSP71_HUMAN  | R.IINEPTAAAIAYGLDR.T        | 2 | 4,1919 | 0,503 | 0,072  |
| 11 | Q9Y490 TLN1_HUMAN   | K.VVAPTISSPVCQEQLVEAGR.L    | 3 | 4,1888 | 0,408 | 0      |
| 11 | P17980 PRS6A_HUMAN  | R.TM*LELLNQLDGFQPNQVK.V     | 3 | 4,1768 | 0,353 | -0,166 |
| 11 | Q9NQX3 GEPH_HUMAN   | K.DLVQDPSLLGGTISAYK.I       | 2 | 4,1714 | 0,489 | 0,069  |
| 11 | Q96E29 MTER1_HUMAN  | K.DVGIEDNQLGAFITK.N         | 2 | 4,1691 | 0,512 | -0,075 |
| 11 | Q14108 SCRB2_HUMAN  | K.DEVLYVFPSPDFCR.S          | 2 | 4,1681 | 0,508 | -0,222 |
| 11 | P35579 MYH9_HUMAN   | R.IAQLEEELEEEQGNTELINDR.L   | 3 | 4,1663 | 0,409 | 0,074  |
| 11 | P21333 FLNA_HUMAN   | R.EGPYSISVLYGDEEVPR.S       | 2 | 4,1614 | 0,508 | -0,256 |
| 11 | P20042 IF2B_HUMAN   | K.DASDDLDDLNFFNQK.K         | 2 | 4,1584 | 0,446 | -0,417 |
| 11 | P40939 ECHA_HUMAN   | R.DSIFSNLTGQLDYQGFEK.A      | 3 | 4,1199 | 0,488 | -0,266 |
| 11 | Q70CQ2 UBP34_HUMAN  | K.DM*TEFFTLITK.I            | 2 | 4,1037 | 0,445 | 0,33   |
| 11 | P78371 TCPB_HUMAN   | R.DASLM*VTNDGATILK.N        | 2 | 4,0822 | 0,449 | 0      |
| 11 | O43390 HNRPR_HUMAN  | R.DLYEDELVPLFEK.A           | 2 | 4,0814 | 0,459 | -0,455 |
| 11 | P07437 TBB5_HUMAN   | R.ALTVPELTQQVFDK.N          | 3 | 4,069  | 0,496 | 0      |
| 11 | P26640 SYVC_HUMAN   | R.DPGVITYDLPTPPGEK.K        | 2 | 4,0686 | 0,512 | 0,934  |
| 11 | Q12906 ILF3_HUMAN   | K.VLAGETLSVNDPPDVLDLDR.Q    | 3 | 4,0664 | 0,425 | 0,192  |
| 11 | Q8NC51 PAIRB_HUMAN  | R.FDQLFDDESDPFEVLK.A        | 3 | 4,0643 | 0,356 | -0,094 |
| 11 | P06737 PYGL_HUMAN   | K.LITSVADVNNNDPM*VGSK.L     | 3 | 4,0626 | 0,357 | 0,293  |

|    |                    |                              |   |        |       |        |
|----|--------------------|------------------------------|---|--------|-------|--------|
| 11 | O60841 IF2P_HUMAN  | R.DPIVM*GVTVEAGQVK.Q         | 2 | 4,0583 | 0,531 | -0,235 |
| 11 | P31150 GDIA_HUMAN  | K.EVEPALELLEPIDQK.F          | 2 | 4,0568 | 0,418 | -0,142 |
| 11 | O43399 TPD54_HUMAN | K.GLLSDSM*TDVVPVDTGVAAR.T    | 2 | 4,0528 | 0,561 | -0,318 |
| 11 | P12814 ACTN1_HUMAN | K.DDPLTNLNTAFDVAEK.Y         | 2 | 4,0444 | 0,451 | -0,277 |
| 11 | Q8N163 K1967_HUMAN | K.VLLLSSPGLEELYR.C           | 2 | 4,0229 | 0,379 | -0,461 |
| 11 | P31948 STIP1_HUMAN | K.DCEECIQLEPTFIK.G           | 2 | 4,0221 | 0,379 | 0      |
| 11 | Q05524 ENO1B_HUMAN | K.DATNVGDEGGFAPNILENK.E      | 3 | 4,0043 | 0,289 | 0,28   |
| 11 | P07355 ANXA2_HUMAN | R.AEDGSVIDYELIDQDAR.D        | 3 | 3,9938 | 0,279 | -0,192 |
| 11 | O75643 U520_HUMAN  | R.M*DTDLETM*DLDQGGEALAPR.Q   | 3 | 3,9936 | 0,353 | 0,248  |
| 11 | P11177 ODPB_HUMAN  | K.VFLLGEEVAQYDGAYK.V         | 3 | 3,9926 | 0,349 | 0      |
| 11 | P61978 HNRPK_HUMAN | R.GSYGDLGGPIITTQVTIPK.D      | 2 | 3,9849 | 0,591 | -0,191 |
| 11 | P35270 SPRE_HUMAN  | R.DM*LFQVLALEPNVR.V          | 2 | 3,9774 | 0,448 | -0,545 |
| 11 | P04181 OAT_HUMAN   | R.VAIAALEVLEENLAENADK.L      | 2 | 3,9556 | 0,559 | -0,114 |
| 11 | P62988 UBIQ_HUMAN  | K.TITLEVPSDTIENVK.A          | 3 | 3,9432 | 0,299 | 0,205  |
| 11 | P06576 ATPB_HUMAN  | R.AIAELGIYPAVDPLDSTR.I       | 3 | 3,943  | 0,403 | -0,46  |
| 11 | Q71U36 TBA1A_HUMAN | R.AVFVDLEPTVIDEVR.T          | 3 | 3,9281 | 0,46  | -0,215 |
| 11 | P49591 SYSC_HUMAN  | K.EVM*QEVAQLSQFDEELYK.V      | 3 | 3,9214 | 0,15  | -0,332 |
| 11 | P63104 1433Z_HUMAN | K.GIVDQSQQAYQEAFEISK.K       | 2 | 3,9105 | 0,632 | -0,239 |
| 11 | Q08211 DHX9_HUMAN  | K.TTQVPQFILDDEFIQNDR.A       | 3 | 3,9036 | 0,356 | -0,446 |
| 11 | P50990 TCPO_HUMAN  | K.DM*LEAGILDTYLGK.Y          | 2 | 3,8774 | 0,606 | -0,314 |
| 11 | P07339 CATD_HUMAN  | R.DPDAQPGGELM*LGGTDSK.Y      | 2 | 3,8602 | 0,615 | -0,203 |
| 11 | Q7KZ85 SPT6H_HUMAN | K.DLDLDAFAEELER.Q            | 2 | 3,8592 | 0,428 | -0,635 |
| 11 | P50395 GDIB_HUMAN  | R.NPYYGGESASITPLEDLYK.R      | 2 | 3,8585 | 0,557 | -0,461 |
| 11 | P07737 PROF1_HUMAN | R.DSLLQDGEFSM*DLR.T          | 2 | 3,8558 | 0,516 | 0,892  |
| 11 | Q9HAV4 XPO5_HUMAN  | R.VLSDVDAFIAYVGTQK.S         | 3 | 3,8544 | 0,345 | -0,099 |
| 11 | P23246 SFPQ_HUMAN  | R.LFVGNLPADITEDEFK.R         | 2 | 3,8521 | 0,42  | -0,135 |
| 11 | P17301 ITA2_HUMAN  | K.DCGEDGLCISDLVLDVR.Q        | 3 | 3,835  | 0,333 | -0,283 |
| 11 | P42704 LPPRC_HUMAN | K.TVQLTSSSELESTLETLK.A       | 3 | 3,8332 | 0,337 | -0,195 |
| 11 | P78371 TCPB_HUMAN  | K.LGGSLADSYLDEGFLLDK.K       | 2 | 3,8263 | 0,503 | -0,574 |
| 11 | O14818 PSA7_HUMAN  | R.LTVEDPVTVEYITR.Y           | 2 | 3,8149 | 0,523 | 0,597  |
| 11 | P31939 PUR9_HUMAN  | R.DVSELTFPEM*LGGR.V          | 2 | 3,8116 | 0,445 | -0,075 |
| 11 | P07737 PROF1_HUMAN | K.TFVNITPAEVGVLVGK.D         | 2 | 3,7979 | 0,419 | -0,297 |
| 11 | P13010 KU86_HUMAN  | K.DKPSGDAAVFEEGGDVDDLLDM*I.- | 3 | 3,7965 | 0,421 | -0,217 |



|    |                    |                               |   |        |       |        |
|----|--------------------|-------------------------------|---|--------|-------|--------|
| 11 | P09211 GSTP1_HUMAN | K.AFLASPEYVNLPIPINGNK.Q       | 2 | 3,7945 | 0,499 | -0,577 |
| 11 | P52272 HNRPM_HUMAN | K.VGEVTYVELLM*DAEGK.S         | 3 | 3,7912 | 0,255 | -0,207 |
| 11 | Q9HAV4 XPO5_HUMAN  | R.VLSDVDAFIAYVGTQK.S          | 2 | 3,7863 | 0,476 | -0,398 |
| 11 | P05388 RLAO_HUMAN  | R.AGAIAPCEVTVPAQNTGLGPEK.T    | 3 | 3,7732 | 0,456 | 0,839  |
| 11 | Q08J23 NSUN2_HUMAN | K.EGVILTNESAASTGQPDNDVTEGQR.A | 3 | 3,7706 | 0,429 | -0,071 |
| 11 | P62258 1433E_HUMAN | K.AAFDDAIAELDTLSEESYK.D       | 3 | 3,7674 | 0,337 | -0,35  |
| 11 | P55209 NP1L1_HUMAN | R.QLTVQM*M*QNPQILAALQER.L     | 3 | 3,7637 | 0,323 | 0,571  |
| 11 | P53396 ACLY_HUMAN  | R.TIAIIAEGIPEALTR.K           | 2 | 3,7636 | 0,354 | -0,311 |
| 11 | P62701 RS4X_HUMAN  | R.TDITYPAGFM*DVISIDK.T        | 2 | 3,7534 | 0,365 | -0,257 |
| 11 | O60568 PLOD3_HUMAN | R.DVFSGSDTDPDM*AFCK.S         | 2 | 3,7526 | 0,463 | 0      |
| 11 | P55786 PSA_HUMAN   | K.QM*GFPLIYVEAEQVEDDR.L       | 3 | 3,7512 | 0,26  | -0,17  |
| 11 | P20700 LMNB1_HUMAN | R.DQM*QQQLNDYEQLLDVK.L        | 2 | 3,7478 | 0,509 | -0,46  |
| 11 | O14657 TOR1B_HUMAN | K.DLEPVLSVGVFNK.H             | 2 | 3,7434 | 0,491 | -0,159 |
| 11 | Q13838 UAP56_HUMAN | K.FM*QDPM*EIFVDDTK.L          | 2 | 3,7416 | 0,436 | 0,26   |
| 11 | P35749 MYH11_HUMAN | K.QLLQANPILEAFGNAK.T          | 2 | 3,7389 | 0,435 | -0,353 |
| 11 | O43399 TPD54_HUMAN | K.GLLSDSM*TDVPVDTGVAAR.T      | 3 | 3,7371 | 0,284 | -0,191 |
| 11 | P07737 PROF1_HUMAN | K.TFVNITPAEVGVLVGK.D          | 3 | 3,7264 | 0,462 | -0,111 |
| 11 | Q9Y333 LSM2_HUMAN  | R.YVQLPADEVDTQLLQDAAR.K       | 2 | 3,7259 | 0,513 | 0,114  |
| 11 | P33778 H2B1B_HUMAN | K.AM*GIM*NSFVNDIFER.I         | 2 | 3,7154 | 0,565 | -0,206 |
| 11 | P55072 TERA_HUMAN  | R.LDQLIYIPLPEK.S              | 2 | 3,7039 | 0,232 | -0,313 |
| 11 | P13667 PDIA4_HUMAN | K.DLGLSESGEDVNAAILDESGK.K     | 2 | 3,7028 | 0,493 | -0,23  |
| 11 | O75643 U520_HUMAN  | R.LTAIDILTCAADIQR.Q           | 3 | 3,6951 | 0,334 | -0,103 |
| 11 | P17980 PRS6A_HUMAN | K.DSYLILETLPTDYDSR.V          | 2 | 3,6933 | 0,569 | -0,319 |
| 11 | O94906 PRP6_HUMAN  | K.DDEEADAIYAALDK.R            | 2 | 3,6845 | 0,469 | -0,238 |
| 11 | P30101 PDIA3_HUMAN | K.DLLIAYYDVYK.N               | 2 | 3,6822 | 0,476 | -0,151 |
| 11 | O00410 IMB3_HUMAN  | K.FM*QDASDVM*QLLK.T           | 2 | 3,6815 | 0,476 | 0,219  |
| 11 | Q01518 CAP1_HUMAN  | R.VENQENVSNLVIEDTELK.Q        | 3 | 3,6711 | 0,295 | 0,353  |
| 11 | O75643 U520_HUMAN  | R.AALETDENLLLCAPTGAGK.T       | 2 | 3,6697 | 0,498 | 0,063  |
| 11 | P61081 UBC12_HUMAN | K.TCDISFSDPDDLNFK.L           | 2 | 3,6632 | 0,614 | -0,259 |
| 11 | P15311 EZRI_HUMAN  | R.VTTM*DAELEFAIQPNTTGK.Q      | 3 | 3,646  | 0,319 | 0,351  |
| 11 | P06737 PYGL_HUMAN  | K.LITSVADVNNNDPM*VGSK.L       | 2 | 3,6455 | 0,425 | 0,976  |
| 11 | Q5T457 UBR4_HUMAN  | K.DGETSGSQEDQLCTALVNQLNK.F    | 3 | 3,6439 | 0,35  | -0,304 |
| 11 | P62888 RL30_HUMAN  | R.VCTLAIIDPGSDIIR.S           | 2 | 3,6415 | 0,332 | -0,208 |

|    |                     |                               |   |        |       |        |
|----|---------------------|-------------------------------|---|--------|-------|--------|
| 11 | P10809 CH60_HUMAN   | K.LVQDVANNTNEEAGDGTTTATVLR.S  | 3 | 3,637  | 0,402 | -0,071 |
| 11 | Q8NC51 PAIRB_HUMAN  | R.FDQLFDDSDPFEVLK.A           | 2 | 3,6262 | 0,403 | -0,502 |
| 11 | P49589 SYCC_HUMAN   | K.DTLDYSSNTM*ESALQYEK.F       | 2 | 3,6214 | 0,635 | -0,116 |
| 11 | Q70CQ2 UBP34_HUMAN  | K.DASQTTLLDLALAR.H            | 2 | 3,6211 | 0,489 | -0,152 |
| 11 | Q9UBI6 GBG12_HUMAN  | R.SDPLLIGIPTSSENPFK.D         | 2 | 3,6206 | 0,393 | -0,282 |
| 11 | P27348 1433T_HUMAN  | K.TAFDEAIAELDTLNEDSYK.D       | 3 | 3,6188 | 0,393 | -0,597 |
| 11 | Q04637 IF4G1_HUMAN  | K.EFLPEGQDIGAFVAEQK.V         | 2 | 3,6185 | 0,46  | -0,13  |
| 11 | Q6NXR4 CH041_HUMAN  | K.DLGDLEATEFDR.L              | 2 | 3,6131 | 0,448 | -0,49  |
| 11 | Q99459 CDC5L_HUMAN  | K.ESDLPSAILQTSVSEFTK.K        | 2 | 3,6129 | 0,373 | -0,243 |
| 11 | Q13885 TBB2A_HUMAN  | R.AILVDLEPGTM*DSVR.S          | 2 | 3,6072 | 0,53  | 0,748  |
| 11 | P41208 CETN2_HUMAN  | R.EAFDLFDADGTGTIDVK.E         | 2 | 3,6063 | 0,437 | -0,605 |
| 11 | Q6PGP7 TTC37_HUMAN  | K.DDYELIDVLVNNAK.T            | 2 | 3,5944 | 0,444 | -0,452 |
| 11 | P62854 RS26_HUMAN   | R.DISEASVFDAYVLPK.L           | 2 | 3,5929 | 0,546 | -0,443 |
| 11 | P04406 G3P_HUMAN    | K.WGDAGAEEYVVESTGVFTTM*EK.A   | 3 | 3,5786 | 0,329 | -0,16  |
| 11 | Q13561 DCTN2_HUMAN  | K.LLGPDAAINLTPDGALAK.R        | 2 | 3,578  | 0,565 | -0,196 |
| 11 | Q01082 SPTB2_HUMAN  | R.LVSQDNFGFDLPAVEAATK.K       | 2 | 3,5751 | 0,404 | -0,422 |
| 11 | Q8N6H7 ARFG2_HUMAN  | R.SQLDLFDDVGTAFSGPPK.Y        | 3 | 3,5712 | 0,405 | -0,676 |
| 11 | P0C7M2 RA1L3_HUMAN  | K.LFIGGLSFETTDESLR.S          | 2 | 3,5633 | 0,539 | -0,684 |
| 11 | P13667 PDIA4_HUMAN  | K.VEGFPTIYFAPSGDK.K           | 2 | 3,5559 | 0,459 | 0,075  |
| 11 | Q99714 HCD2_HUMAN   | R.LVGQGASAVLLDLPSGGEAQAK.K    | 3 | 3,5508 | 0,327 | 0,333  |
| 11 | A6NHR9 SMHD1_HUMAN  | R.DSTEYFIVFEPR.L              | 2 | 3,5496 | 0,312 | -0,162 |
| 11 | P31946 1433B_HUMAN  | K.TAFDEAIAELDTLNESYK.D        | 3 | 3,5452 | 0,299 | -0,424 |
| 11 | P52272 HNRPM_HUMAN  | K.VGEVTYVELLM*DAEGK.S         | 2 | 3,5369 | 0,53  | -0,345 |
| 11 | Q09161 NCBP1_HUMAN  | K.DVPNPQDDDDDEGFSFNPLK.I      | 3 | 3,5328 | 0,386 | 0      |
| 11 | Q6PD62 CTR9_HUMAN   | K.DLITQATLLYTM*ADK.I          | 2 | 3,5297 | 0,484 | -0,57  |
| 11 | Q0D2N1 Q0D2N1_HUMAN | R.VAAAPDEDLDGDEDDAEDENNIDNR.T | 3 | 3,5294 | 0,172 | -0,129 |
| 11 | P68371 TBB2C_HUMAN  | R.AVLVDLEPGTM*DSVR.S          | 2 | 3,5261 | 0,417 | 0,528  |
| 11 | O14744 ANM5_HUMAN   | R.DLNCVPEIADTLGAVAK.Q         | 2 | 3,521  | 0,413 | -0,41  |
| 11 | P55209 NP1L1_HUMAN  | R.LDGLVETPTGYIESLPR.V         | 2 | 3,5142 | 0,537 | -0,394 |
| 11 | P55072 TERA_HUMAN   | R.LGDVISIQPCPDVK.Y            | 2 | 3,5098 | 0,432 | -0,079 |
| 11 | Q6NZI2 PTRF_HUMAN   | K.IIGAVDQIQLTQAQLEER.Q        | 3 | 3,5096 | 0,297 | -0,181 |
| 11 | Q04917 1433F_HUMAN  | K.QAFDDAIAELDTLNEDSYK.D       | 3 | 3,5092 | 0,275 | -0,339 |
| 11 | Q9Y333 LSM2_HUMAN   | R.YVQLPADEVDTQLLQDAAR.K       | 3 | 3,5079 | 0,303 | 0,085  |

|    |                    |                             |   |        |       |        |
|----|--------------------|-----------------------------|---|--------|-------|--------|
| 11 | Q13564 ULA1_HUMAN  | K.NVNTALNTTQIPSSIEDIFNDDR.C | 3 | 3,5065 | 0,421 | -0,426 |
| 11 | Q14697 GANAB_HUMAN | R.DENSVELTM*AEGPYK.I        | 2 | 3,4994 | 0,575 | 0,072  |
| 11 | P30041 PRDX6_HUMAN | R.ELAILLGM*LDPAEK.D         | 2 | 3,4965 | 0,428 | -0,16  |
| 11 | O43707 ACTN4_HUMAN | R.M*APYQGPDAVPGALDYK.S      | 2 | 3,4963 | 0,502 | 0      |
| 11 | P62316 SMD2_HUMAN  | R.EEEEFNTGPLSVLTQSVK.N      | 3 | 3,4911 | 0,301 | -0,091 |
| 11 | P51398 RT29_HUMAN  | K.ELLFLSNANPSLLER.H         | 2 | 3,4824 | 0,401 | -0,498 |
| 11 | P11177 ODPB_HUMAN  | K.VFLLGEEVAQYDGAYK.V        | 2 | 3,4808 | 0,42  | -0,406 |
| 11 | P40939 ECHA_HUMAN  | K.DLNSDM*DSILASLK.L         | 2 | 3,4793 | 0,361 | 0      |
| 11 | Q8IXH7 NELFD_HUMAN | R.DYIM*EPSIFNTLK.R          | 2 | 3,4701 | 0,389 | 0,077  |
| 11 | P62316 SMD2_HUMAN  | R.EEEEFNTGPLSVLTQSVK.N      | 2 | 3,4655 | 0,609 | -0,304 |
| 11 | P46108 CRK_HUMAN   | R.ALDFFNNGNDEEDLPFK.K       | 2 | 3,4629 | 0,442 | 0      |
| 11 | Q14669 TRIPC_HUMAN | R.SSAVVVDAIPVFLEK.L         | 2 | 3,4601 | 0,484 | 0      |
| 11 | O60841 IF2P_HUMAN  | R.DPIVM*GVTVEAGQVK.Q        | 3 | 3,457  | 0,24  | 0,352  |
| 11 | P19387 RPB3_HUMAN  | R.DNDPNDYVEQDDILIVK.L       | 2 | 3,4556 | 0,461 | -0,365 |
| 11 | P13639 EF2_HUMAN   | R.CELLYEGPPDDEAAM*GIK.S     | 3 | 3,4536 | 0,383 | 0,452  |
| 11 | P62258 1433E_HUMAN | K.AAFDDAIAELDTLSEESYK.D     | 2 | 3,4507 | 0,41  | -0,234 |
| 11 | P78527 PRKDC_HUMAN | K.DVDFM*YVELIQR.C           | 2 | 3,4505 | 0,353 | -0,158 |
| 11 | O75367 H2AY_HUMAN  | K.AASADSTTEGTPADGFTVLSTK.S  | 2 | 3,4339 | 0,526 | 0,115  |
| 11 | Q15149 PLEC1_HUMAN | K.FLEGTSCIAGVFVDATK.E       | 2 | 3,4308 | 0,446 | -0,403 |
| 11 | O00442 RTC1_HUMAN  | R.DLYVNIQPVQEPK.D           | 2 | 3,4302 | 0,365 | 0,633  |
| 11 | Q9NUY8 TBC23_HUMAN | K.DLEEALAGGCDLETLR.N        | 2 | 3,4281 | 0,471 | -0,323 |
| 11 | Q99798 ACON_HUMAN  | K.DINQEVYNFLATAGAK.Y        | 2 | 3,4181 | 0,433 | -0,278 |
| 11 | P30154 2AAB_HUMAN  | K.SEIVPLFTSLASDEQDSVR.L     | 3 | 3,3981 | 0,381 | -0,175 |
| 11 | P61981 1433G_HUMAN | K.TAFDDAIAELDTLNEDSYK.D     | 3 | 3,3973 | 0,425 | -0,515 |
| 11 | Q15233 NONO_HUMAN  | R.LFVGNLPPDITEEEM*R.K       | 2 | 3,3953 | 0,359 | -0,455 |
| 11 | Q92616 GCN1L_HUMAN | R.EEFAIM*QTPAGELYDK.S       | 2 | 3,3756 | 0,533 | 1,379  |
| 11 | O15155 BET1_HUMAN  | K.LLAEM*DSQFDSTTGFLGK.T     | 2 | 3,3707 | 0,592 | 1,482  |
| 11 | P10644 KAP0_HUMAN  | R.LTVADALEPVQFEDGQK.I       | 3 | 3,3684 | 0,353 | -0,098 |
| 11 | P07437 TBB5_HUMAN  | R.ALTVPELTQQVFDK.N          | 2 | 3,3682 | 0,454 | -0,514 |
| 11 | Q9HAV7 GRPE1_HUMAN | K.DLLEVADVLEK.A             | 2 | 3,367  | 0,386 | -0,196 |
| 11 | O15145 ARPC3_HUMAN | K.DTDIVDEAIYFK.A            | 2 | 3,3663 | 0,482 | -0,46  |
| 11 | Q9P2J5 SYLC_HUMAN  | K.M*IDAGDALIYM*EPEK.Q       | 2 | 3,3646 | 0,431 | 0,424  |
| 11 | Q04917 1433F_HUMAN | K.ELETVCNDVLSLLDK.F         | 2 | 3,3639 | 0,426 | -0,419 |

|    |                    |                             |   |        |       |        |
|----|--------------------|-----------------------------|---|--------|-------|--------|
| 11 | P49720 PSB3_HUMAN  | R.FGPYYTEPVIAGLDPK.T        | 2 | 3,3618 | 0,452 | -0,138 |
| 11 | P31943 HNRH1_HUMAN | R.ATENDIYNFFSPLNPVR.V       | 3 | 3,3578 | 0,27  | -0,366 |
| 11 | P45974 UBP5_HUMAN  | K.IFQNAPTDPTQDFSTQVAK.L     | 3 | 3,3573 | 0,224 | 0      |
| 11 | Q9NZL4 HPBP1_HUMAN | R.VLSQPM*PPTAGEAEQAADQQER.E | 3 | 3,3499 | 0,352 | 0      |
| 11 | Q12792 TWF1_HUMAN  | K.DYDSFVLPLEDK.Q            | 2 | 3,3444 | 0,462 | -0,55  |
| 11 | Q99798 ACON_HUMAN  | K.QGLLPLTFADPADYNK.I        | 2 | 3,3418 | 0,332 | -1,038 |
| 11 | P52597 HNRPF_HUMAN | K.ITGEAFVQFASQELA EK.A      | 2 | 3,3413 | 0,52  | -0,327 |
| 11 | Q9BTE3 CJ119_HUMAN | R.DASALLDPM*ECTDTAEEQR.V    | 3 | 3,3334 | 0,465 | 0      |
| 11 | P55072 TERA_HUMAN  | R.LIVDEAINEDNSVVSLSQPK.M    | 3 | 3,3317 | 0,205 | 0,337  |
| 11 | P46778 RL21_HUMAN  | R.TNGKEPELLEPIPYEFM*A.-     | 3 | 3,3299 | 0,336 | -0,175 |
| 11 | O75489 NDU53_HUMAN | K.TYTDELTPIESAVSVFK.A       | 2 | 3,3248 | 0,41  | -0,578 |
| 11 | P14406 CX7A2_HUMAN | K.LFQEDDEIPLYLK.G           | 2 | 3,319  | 0,202 | -0,075 |
| 11 | O15145 ARPC3_HUMAN | K.DTDIVDEAIYFK.A            | 3 | 3,3187 | 0,25  | -0,345 |
| 11 | Q13283 G3BP1_HUMAN | K.LPNFGFVVFDSEPVQK.V        | 3 | 3,3182 | 0,299 | -0,472 |
| 11 | Q15293 RCN1_HUMAN  | K.EIVVLETLEDIDK.N           | 2 | 3,3139 | 0,446 | -0,161 |
| 11 | P25705 ATPA_HUMAN  | R.TGAIVDVPVGEELLGR.V        | 2 | 3,3127 | 0,367 | -0,15  |
| 11 | Q9BV86 CI032_HUMAN | K.DNM*AQEGVILDDVDSSVCR.D    | 2 | 3,3069 | 0,518 | 1,027  |
| 11 | Q01082 SPTB2_HUMAN | R.LVSQDNFGFDLPAVEAATK.K     | 3 | 3,3028 | 0,245 | -0,452 |
| 11 | Q99497 PARK7_HUMAN | K.GAEEM*ETVIPVDVM*R.R       | 2 | 3,297  | 0,442 | -0,214 |
| 11 | P46199 IF2M_HUMAN  | R.DLPSAGEEILEVESEPR.A       | 2 | 3,296  | 0,29  | -0,718 |
| 11 | P11021 GRP78_HUMAN | R.IINEPTAAAIAYGLDK.R        | 3 | 3,2939 | 0,336 | 0      |
| 11 | P13667 PDIA4_HUMAN | K.DGDDVIIIIGVFK.G           | 2 | 3,288  | 0,265 | -0,284 |
| 11 | P04792 HSPB1_HUMAN | K.LATQSNEITIPVTFESR.A       | 2 | 3,2878 | 0,498 | -0,192 |
| 11 | P25705 ATPA_HUMAN  | R.TGAIVDVPVGEELLGR.V        | 3 | 3,2778 | 0,186 | -0,225 |
| 11 | P78527 PRKDC_HUMAN | K.NLDLAVLELM*QSSVDNTK.M     | 2 | 3,2771 | 0,53  | -0,243 |
| 11 | Q9BYT8 NEUL_HUMAN  | K.AELGALPDDFIDSLEK.T        | 2 | 3,2751 | 0,387 | -0,422 |
| 11 | Q6PGP7 TTC37_HUMAN | K.DDYELIDVLVNNAK.T          | 3 | 3,2646 | 0,332 | -0,338 |
| 11 | Q7KZF4 SND1_HUMAN  | K.DTNGENIAESLVAEGLATR.R     | 3 | 3,2603 | 0,285 | -0,187 |
| 11 | P17252 KPCA_HUMAN  | K.DVVIQDDDV ECTM*VEK.R      | 2 | 3,2597 | 0,429 | 0,319  |
| 11 | P61978 HNRPK_HUMAN | K.IILD LISEPIK.G            | 2 | 3,2511 | 0,486 | -0,182 |
| 11 | P30086 PEBP1_HUMAN | K.LYTLVLTDPDAPSR.K          | 2 | 3,2408 | 0,445 | -0,078 |
| 11 | Q09666 AHNK_HUMAN  | K.VDIDVPDVNLEAPEGK.L        | 2 | 3,2387 | 0,46  | 0,713  |
| 11 | O75312 ZPR1_HUMAN  | R.IPELDFEIPAFSQK.G          | 2 | 3,231  | 0,383 | -0,149 |

|    |                    |                             |   |        |       |        |
|----|--------------------|-----------------------------|---|--------|-------|--------|
| 11 | Q71U36 TBA1A_HUMAN | K.VGINYQPPTVVPGGDLAK.V      | 3 | 3,2306 | 0,195 | 0,401  |
| 11 | Q13283 G3BP1_HUMAN | K.LPNFGFVVFDDSEPVQK.V       | 2 | 3,2302 | 0,51  | -0,252 |
| 11 | Q99615 DNJC7_HUMAN | K.LAYELYTEALGIDPNNIK.T      | 3 | 3,229  | 0,202 | -0,269 |
| 11 | Q99798 ACON_HUMAN  | K.DINQEVYNFLATAGAK.Y        | 3 | 3,2209 | 0,317 | -0,417 |
| 11 | P30041 PRDX6_HUMAN | K.DGDSVM*VLPTIPEEEAK.K      | 2 | 3,2176 | 0,362 | 0,793  |
| 11 | P52565 GDIR1_HUMAN | R.AEEYEFLTPVEEAPK.G         | 3 | 3,2097 | 0,21  | 0,313  |
| 11 | P30050 RL12_HUMAN  | R.QAQIEVVPSASALI.K          | 2 | 3,1997 | 0,362 | -0,22  |
| 11 | Q14139 UBE4A_HUMAN | R.IFLITLDNSDPSLK.S          | 2 | 3,1951 | 0,211 | 1,626  |
| 11 | P18084 ITB5_HUMAN  | R.DAPEGGFDAVLQAAVCK.E       | 2 | 3,1904 | 0,41  | -0,279 |
| 11 | P34931 HS71L_HUMAN | K.AFYPEEISSM*VLTK.L         | 2 | 3,1875 | 0,378 | -0,299 |
| 11 | P29401 TKT_HUMAN   | K.ILATPPQEDAPSVDIANIR.M     | 3 | 3,1853 | 0,13  | -0,634 |
| 11 | O75506 HSBP1_HUMAN | K.TVQDLTSVVQTLQQM*QDK.F     | 3 | 3,1825 | 0,256 | -0,25  |
| 11 | P62988 UBIQ_HUMAN  | K.TITLEVEPSDTIENVK.A        | 2 | 3,1773 | 0,493 | 0,546  |
| 11 | P31942 HNRH3_HUMAN | R.ATENDIANFFSPLNPIR.V       | 2 | 3,1628 | 0,385 | -0,445 |
| 11 | P33993 MCM7_HUMAN  | K.LFADAVQELLPQYK.E          | 2 | 3,1598 | 0,278 | -0,448 |
| 11 | Q8IY81 RRMJ3_HUMAN | K.SDDDGFEIVPIEDPAK.H        | 2 | 3,1533 | 0,37  | -0,14  |
| 11 | Q7Z2W4 ZCCHV_HUMAN | K.DQVYPQYVIEYTEDK.A         | 2 | 3,147  | 0,285 | 0,065  |
| 11 | P12956 KU70_HUMAN  | R.DLLAVVFGTEK.D             | 2 | 3,1446 | 0,538 | -0,09  |
| 11 | P08648 ITA5_HUMAN  | R.DLDGNGYPLDIVGSFGVDK.A     | 2 | 3,1244 | 0,481 | -0,185 |
| 11 | O75390 CISY_HUMAN  | K.GLVYETSVLDPDEGIR.F        | 2 | 3,1235 | 0,294 | 0,346  |
| 11 | Q13405 RM49_HUMAN  | K.DVEDFLSPLLK.T             | 2 | 3,1233 | 0,426 | -0,275 |
| 11 | P50990 TCPQ_HUMAN  | K.IAVYSCPFDM*ITETK.G        | 2 | 3,1221 | 0,446 | 0,198  |
| 11 | Q9UHB9 SRP68_HUMAN | K.DLPDVQELITQVR.S           | 2 | 3,1218 | 0,464 | 0      |
| 11 | P40939 ECHA_HUMAN  | R.DSIFSNLTGQLDYQGFEK.A      | 2 | 3,1216 | 0,546 | -0,355 |
| 11 | Q16822 PPCKM_HUMAN | R.LGTPVLQALGDGDFVK.C        | 2 | 3,1202 | 0,366 | -0,15  |
| 11 | O95793 STAU1_HUMAN | R.ELLYGGTSPTAETILK.N        | 2 | 3,1194 | 0,508 | 0      |
| 11 | P25705 ATPA_HUMAN  | K.GM*SLNLEPDNVGVVFGNDK.L    | 2 | 3,1159 | 0,582 | -0,576 |
| 11 | Q9UNF1 MAGD2_HUMAN | R.EAPATQASSTTQLTDTQVLAENK.S | 3 | 3,1098 | 0,165 | -0,148 |
| 11 | Q86XP3 DDX42_HUMAN | K.DIPVLVATDVAAR.G           | 2 | 3,1081 | 0,494 | -0,091 |
| 11 | Q32MZ4 LRRF1_HUMAN | K.DM*LLEEEQLAESR.R          | 2 | 3,0967 | 0,295 | 0,072  |
| 11 | Q71U36 TBA1A_HUMAN | K.VGINYQPPTVVPGGDLAK.V      | 2 | 3,0933 | 0,352 | 0,802  |
| 11 | P62333 PRS10_HUMAN | R.EVIELPLTNPELFQR.V         | 2 | 3,0772 | 0,293 | -0,407 |
| 11 | Q9UNX4 WDR3_HUMAN  | R.DVIGFNM*AGLDYLK.R         | 2 | 3,0733 | 0,319 | -0,233 |

|    |                    |                          |   |        |       |        |
|----|--------------------|--------------------------|---|--------|-------|--------|
| 11 | Q71U36 TBA1A_HUMAN | K.TIGGGDDSFNTFFSETGAGK.H | 2 | 3,0725 | 0,495 | -0,486 |
| 11 | Q86TX2 ACOT1_HUMAN | K.DGYADIVDVLNSPLEGPDQK.S | 2 | 3,0669 | 0,573 | -0,114 |
| 11 | P35270 SPRE_HUMAN  | R.DM*LFQVLALEEPNVR.V     | 3 | 3,0669 | 0,198 | -0,102 |
| 11 | P31943 HNRH1_HUMAN | R.ATENDIYNFFSPLNPVR.V    | 2 | 3,0655 | 0,444 | -0,305 |
| 11 | P00558 PGK1_HUMAN  | K.VLNNM*EIGTSLFDEEGAK.I  | 3 | 3,0646 | 0,213 | 0,369  |
| 11 | P62258 1433E_HUMAN | K.LICCDILDVLDK.H         | 2 | 3,0638 | 0,314 | -0,496 |
| 11 | P10644 KAP0_HUMAN  | R.LTVADALEPVQFEDGQK.I    | 2 | 3,0634 | 0,353 | -0,262 |
| 11 | P15880 RS2_HUMAN   | K.SLEEIYLFSLPIK.E        | 2 | 3,0616 | 0,34  | -0,236 |
| 11 | Q9H0D6 XRN2_HUMAN  | R.ELTM*ASLPFTFDVER.S     | 2 | 3,0528 | 0,517 | -0,757 |
| 11 | O14980 XPO1_HUMAN  | R.EPEVLSTM*AIIVNK.L      | 2 | 3,051  | 0,274 | 0,156  |
| 11 | P25685 DNJB1_HUMAN | K.EGDQTSNNIPADIVFLK.D    | 2 | 3,0481 | 0,393 | -0,311 |
| 11 | P08670 VIME_HUMAN  | R.DNLAEDIM*R.L           | 2 | 3,0464 | 0,191 | 0      |
| 11 | P52597 HNRPF_HUMAN | K.ITGEAFVQFASQELA EK.A   | 3 | 3,0446 | 0,15  | -0,392 |
| 11 | P61981 1433G_HUMAN | K.TAFDDAIAELDTLNEDSYK.D  | 2 | 3,0193 | 0,485 | -0,229 |
| 11 | Q9BZH6 BRWD2_HUMAN | K.DLLNELESPKEPIEE.-      | 2 | 3,0147 | 0,211 | -1,036 |
| 11 | Q08945 SSRP1_HUMAN | K.DEDISLTLNM*NEEEEVEK.R  | 3 | 3,0037 | 0,159 | -0,452 |
| 11 | P31939 PUR9_HUMAN  | K.ALFEVPELLTEAEK.K       | 2 | 3,003  | 0,373 | -0,426 |
| 11 | P33316 DUT_HUMAN   | R.IFYPEIEEVQALDDTER.G    | 2 | 3,0024 | 0,506 | -0,472 |
| 11 | Q9NYY8 FAKD2_HUMAN | K.DIISELLTSDDM*K.N       | 2 | 2,9932 | 0,429 | -0,489 |
| 11 | P06733 ENOA_HUMAN  | R.AAVPSGASTGIYEALELR.D   | 3 | 2,9882 | 0,294 | -0,304 |
| 11 | Q9P2J5 SYLC_HUMAN  | R.VDIGDTIYLVH.-          | 2 | 2,9814 | 0,426 | -0,359 |
| 11 | Q9Y4L1 HYOU1_HUMAN | R.DAVVYPILVEFTR.E        | 3 | 2,9745 | 0,375 | -0,12  |
| 11 | Q9Y490 TLN1_HUMAN  | R.DLDQASLAAVSQQLAPR.E    | 3 | 2,9704 | 0,214 | -0,308 |
| 11 | P35579 MYH9_HUMAN  | K.NLPIYSEEIVEM*YK.G      | 2 | 2,9678 | 0,401 | 0,07   |
| 11 | P17812 PYRG1_HUMAN | K.YIDSADLEPITSQEPPVR.Y   | 2 | 2,9398 | 0,459 | 0,118  |
| 11 | P62820 RAB1A_HUMAN | K.EFADSLGIPFLESAK.N      | 2 | 2,9398 | 0,418 | -0,566 |
| 11 | P27348 1433T_HUMAN | K.TAFDEAIAELDTLNEDSYK.D  | 2 | 2,9306 | 0,578 | -0,683 |
| 11 | P08648 ITA5_HUMAN  | R.DLDGNGYPDLIVGSFGVDK.A  | 3 | 2,93   | 0,328 | -0,369 |
| 11 | Q14204 DYHC1_HUMAN | K.DFPLNDLLSATELDK.I      | 2 | 2,9287 | 0,496 | -0,505 |
| 11 | O43847 NRDC_HUMAN  | K.LQNGLQALLISDLSNM*EGK.T | 3 | 2,9194 | 0,142 | 0      |
| 11 | Q13263 TIF1B_HUMAN | R.LDLDLTADSQPPVFK.V      | 3 | 2,9121 | 0,205 | 0      |
| 11 | Q03154 ACY1_HUMAN  | K.DM*NLTLEPEIM*PAATDNR.Y | 3 | 2,9091 | 0,209 | 0,177  |
| 11 | Q15233 NONO_HUMAN  | R.LFVGNLPPDITEEM*R.K     | 3 | 2,9041 | 0,182 | 0,195  |

|    |                    |                           |   |        |       |        |
|----|--------------------|---------------------------|---|--------|-------|--------|
| 11 | P07437 TBB5_HUMAN  | K.M*AVTFIGNSTAIQELFK.R    | 2 | 2,8971 | 0,487 | -0,323 |
| 11 | Q15021 CND1_HUMAN  | R.DLAYCVSQLPLTER.G        | 2 | 2,8943 | 0,445 | -0,147 |
| 11 | Q13362 2A5G_HUMAN  | K.DSTLTPEVVM*ALLK.Y       | 2 | 2,8886 | 0,371 | -0,318 |
| 11 | Q8NDI1 EHBP1_HUMAN | K.DTSQYVVGELAALENEQK.Q    | 3 | 2,8878 | 0,329 | -0,459 |
| 11 | P42704 LPPRC_HUMAN | K.TVQLTSSELESTLETLK.A     | 2 | 2,8851 | 0,278 | -0,519 |
| 11 | Q15054 DPOD3_HUMAN | K.DSGPLFNTDYDILK.S        | 2 | 2,8668 | 0,144 | -0,076 |
| 11 | Q16352 AINX_HUMAN  | R.DGLAEVQR.L              | 2 | 2,8641 | 0,292 | 0,42   |
| 11 | Q16630 CPSF6_HUMAN | R.DYM*DTLPPTVGDDVGK.G     | 2 | 2,8621 | 0,48  | -0,14  |
| 11 | O43491 E41L2_HUMAN | K.DYFGLLFQESPEQK.N        | 2 | 2,8597 | 0,184 | -0,215 |
| 11 | P54819 KAD2_HUMAN  | K.LVSDEM*VVELIEK.N        | 2 | 2,8531 | 0,332 | 0      |
| 11 | P09211 GSTP1_HUMAN | K.AFLASPEYVNLPIGNGK.Q     | 3 | 2,8517 | 0,219 | -0,192 |
| 11 | Q9Y2X3 NOL5_HUMAN  | K.FQDTAEALAAFTALM*EGK.I   | 3 | 2,8415 | 0,183 | -0,379 |
| 11 | Q92616 GCN1L_HUMAN | K.QLDDEEVSEFALDGLK.Q      | 2 | 2,84   | 0,312 | -0,135 |
| 11 | P20700 LMNB1_HUMAN | R.DQM*QQQLNDYEQLLDVK.L    | 3 | 2,8385 | 0,264 | -0,172 |
| 11 | P55072 TERA_HUMAN  | R.LIVDEAINEDNSVVLSQPK.M   | 2 | 2,8337 | 0,281 | 0      |
| 11 | Q00610 CLH1_HUMAN  | K.LTDQLPLIIVCDR.F         | 2 | 2,833  | 0,358 | -0,078 |
| 11 | P27816 MAP4_HUMAN  | K.DM*QPSM*ESDM*ALVK.D     | 2 | 2,8311 | 0,295 | -0,15  |
| 11 | P45974 UBP5_HUMAN  | K.IVILPDYLEIAR.D          | 2 | 2,8307 | 0,474 | -0,259 |
| 11 | P31942 HNRH3_HUMAN | R.ATENDIANFFSPLNPIR.V     | 3 | 2,818  | 0,154 | -0,191 |
| 11 | P31946 1433B_HUMAN | K.TAFDEAIAELDTLNEESYK.D   | 2 | 2,8056 | 0,503 | -0,339 |
| 11 | P31949 S10AB_HUMAN | K.TEFLSFM*NTELAFTK.N      | 3 | 2,7997 | 0,271 | -0,588 |
| 11 | P49755 TMEDA_HUMAN | R.LEDLSSESIVNDFAYM*K.K    | 2 | 2,7974 | 0,308 | 0,323  |
| 11 | Q8WVM8 SCFD1_HUMAN | K.SLLDIISDPDAGTPEDK.M     | 2 | 2,7909 | 0,425 | -0,205 |
| 11 | Q1KMD3 HNRL2_HUMAN | K.EVEGDDVPESIM*LEM*K.A    | 2 | 2,7874 | 0,506 | -0,658 |
| 11 | P55084 ECHB_HUMAN  | K.DQLLLGPTYATPK.V         | 2 | 2,7695 | 0,285 | 0,43   |
| 11 | O43242 PSMD3_HUMAN | K.LQLDSPEDADEFIVAK.A      | 2 | 2,7693 | 0,394 | -0,364 |
| 11 | P63104 1433Z_HUMAN | K.GIVDQSQQAYQEAFFEISK.K   | 3 | 2,7623 | 0,314 | 0,09   |
| 11 | P61081 UBC12_HUMAN | K.TCDISFSDPDDLNFK.L       | 3 | 2,7621 | 0,297 | -0,679 |
| 11 | P22102 PUR2_HUMAN  | R.FGDPEQCQVILPLLK.S       | 2 | 2,7533 | 0,373 | -0,15  |
| 11 | Q15029 U5S1_HUMAN  | K.FFDDPM*LLELAK.Q         | 2 | 2,7508 | 0,514 | -0,252 |
| 11 | P04792 HSPB1_HUMAN | K.DGVVEITGK.H             | 2 | 2,7462 | 0,421 | -0,066 |
| 11 | Q8TE02 DERP6_HUMAN | R.DSLILPFQFSSEK.Q         | 2 | 2,7455 | 0,338 | -0,242 |
| 11 | Q99961 SH3G1_HUMAN | K.ELGGESNFGDALLDAGESM*K.R | 3 | 2,7372 | 0,082 | 0      |

|    |                     |                           |   |        |       |        |
|----|---------------------|---------------------------|---|--------|-------|--------|
| 11 | Q07812 BAX_HUMAN    | R.M*GGEAPELALDPVPQDASTK.K | 3 | 2,7366 | 0,155 | 0,09   |
| 11 | Q00839 HNRPU_HUMAN  | K.DCEVVM*M*IGLPGAGK.T     | 2 | 2,7351 | 0,443 | -0,152 |
| 11 | P34931 HS71L_HUMAN  | K.AFYPEEISSM*VLTK.L       | 3 | 2,7205 | 0,126 | 0      |
| 11 | P53999 TCP4_HUMAN   | R.DDNM*FQIGK.M            | 2 | 2,7166 | 0,172 | 0,338  |
| 11 | Q99459 CDC5L_HUMAN  | K.ESDLPSAILQTSQVSEFTK.K   | 3 | 2,7158 | 0,365 | 0,091  |
| 11 | P04843 RPN1_HUMAN   | R.ATSFLLALEPELEAR.L       | 2 | 2,7048 | 0,505 | -0,22  |
| 11 | Q96RI4 Q96RI4_HUMAN | K.TLNDELEIIEGM*KFD.-      | 3 | 2,7022 | 0,278 | -0,205 |
| 11 | P13639 EF2_HUMAN    | R.CELLYEGPPDDEAAM*GIK.S   | 2 | 2,7008 | 0,328 | 0,121  |
| 11 | Q53GS9 SNUT2_HUMAN  | R.AYDGTTYLPGIVGLNNIK.A    | 2 | 2,6774 | 0,09  | -0,32  |
| 11 | Q09666 AHNK_HUMAN   | K.VDVEVPDVSLEGPEGK.L      | 2 | 2,67   | 0,289 | 0,658  |
| 11 | B2RWN5 B2RWN5_HUMAN | K.NFGAENPDPFVPLSTAVK.L    | 2 | 2,6483 | 0,341 | 0      |
| 11 | Q15738 NSDHL_HUMAN  | R.DPQLVPILIEAAR.N         | 3 | 2,6451 | 0,217 | -0,191 |
| 11 | P05362 ICAM1_HUMAN  | K.DGTFPLPIGESVTVTR.D      | 2 | 2,6356 | 0,448 | -0,144 |
| 11 | Q8NEB9 PK3C3_HUMAN  | K.DGDESSPILTSFELVK.V      | 2 | 2,6256 | 0,374 | -0,281 |
| 11 | O75643 U520_HUMAN   | R.EEEVTGPVIAPLFPQK.R      | 2 | 2,6256 | 0,234 | 0      |
| 11 | Q14738 2A5D_HUMAN   | K.ESSLTEPVIVGLLK.F        | 2 | 2,6134 | 0,334 | -0,164 |
| 11 | Q7L576 CYFP1_HUMAN  | K.DFVSEAYLITLTK.F         | 2 | 2,6077 | 0,449 | -0,67  |
| 11 | Q7KZ85 SPT6H_HUMAN  | R.LEDDDFDLIEENLGVK.V      | 2 | 2,605  | 0,278 | -0,655 |
| 11 | O95260 ATE1_HUMAN   | K.DPSEEA AVLQYASLVGQK.C   | 3 | 2,6014 | 0,207 | -0,384 |
| 11 | Q9Y4L1 HYOU1_HUMAN  | K.DAVITVPVFFNQAER.R       | 2 | 2,6007 | 0,501 | -0,215 |
| 11 | Q15738 NSDHL_HUMAN  | R.DPQLVPILIEAAR.N         | 2 | 2,6006 | 0,407 | -0,34  |
| 11 | Q16513 PKN2_HUMAN   | R.VLDIPGQDSETVFDIQNDR.N   | 2 | 2,5918 | 0,493 | -0,339 |
| 11 | P08195 4F2_HUMAN    | K.DDVAQTDLLQIDPNFGSK.E    | 2 | 2,5905 | 0,377 | 0,062  |
| 11 | P29401 TKT_HUMAN    | R.SVPTSTVFYPSDGVATEK.A    | 2 | 2,5653 | 0,407 | -0,194 |
| 11 | Q8NDI1 EHBP1_HUMAN  | K.DTSQYVVGELAALENEQK.Q    | 2 | 2,5648 | 0,451 | -0,734 |
| 11 | O15355 PPM1G_HUMAN  | K.NLPPPEEQM*ISALPDIK.V    | 2 | 2,5523 | 0,205 | 0,741  |
| 11 | P11142 HSP7C_HUMAN  | K.TVTNAVVTVPAYFNDSQR.Q    | 2 | 2,5495 | 0,234 | 0,8    |
| 11 | Q53T59 H1BP3_HUMAN  | K.DAELAGSPELLEFLGTR.S     | 2 | 2,5474 | 0,395 | -0,336 |
| 11 | Q08211 DHX9_HUMAN   | K.TTQVPQFILDIFIQNDR.A     | 2 | 2,5405 | 0,563 | -0,357 |
| 11 | Q86VP6 CAND1_HUMAN  | K.LTLIDPETLLPR.L          | 2 | 2,5375 | 0,268 | -0,53  |
| 11 | P06744 G6PI_HUMAN   | K.TLAQLNPESSLFIIASK.T     | 2 | 2,522  | 0,32  | -0,2   |
| 11 | Q9BXP2 S12A9_HUMAN  | R.DDLFGVILAPAK.V          | 2 | 2,5156 | 0,242 | -0,194 |
| 11 | P09211 GSTP1_HUMAN  | K.AFLASPEYVNLPIGNGKQ.-    | 2 | 2,5117 | 0,549 | -0,42  |



|    |                    |                         |   |        |       |        |
|----|--------------------|-------------------------|---|--------|-------|--------|
| 11 | Q15155 NOMO1_HUMAN | R.DGENYVLLDSTLPR.S      | 2 | 2,51   | 0,32  | -0,361 |
| 11 | Q9Y4L1 HYOU1_HUMAN | R.DAVVYPILVEFTR.E       | 2 | 2,4927 | 0,351 | -0,401 |
| 11 | Q9NR30 DDX21_HUMAN | K.LGVCFDVPASVTEIQEK.W   | 2 | 2,473  | 0,253 | -0,122 |
| 11 | Q92615 LARP5_HUMAN | R.GPGLLESPIFNFTADR.L    | 2 | 2,4636 | 0,495 | -0,737 |
| 11 | Q9Y3P9 RBGP1_HUMAN | K.DDLLLLDFEGALK.F       | 2 | 2,4418 | 0,333 | -0,337 |
| 11 | O76031 CLPX_HUMAN  | R.DLIEFGM*IPEFVGR.L     | 2 | 2,4255 | 0,331 | -0,372 |
| 11 | P11388 TOP2A_HUMAN | R.FLEEFITPIVK.V         | 2 | 2,4215 | 0,223 | -0,091 |
| 11 | P62736 ACTA_HUMAN  | R.DLTDYLM*K.I           | 2 | 2,3881 | 0,301 | 0,18   |
| 11 | Q6P587 FAHD1_HUMAN | K.IITLEEGDIILTGTPK.G    | 2 | 2,3853 | 0,236 | -0,071 |
| 11 | Q13200 PSMD2_HUMAN | R.EDVLTLLLPVM*GDSK.S    | 2 | 2,376  | 0,391 | -0,148 |
| 11 | Q9NU22 MDN1_HUMAN  | K.DFADILVQPTLEENK.G     | 2 | 2,3715 | 0,273 | -0,282 |
| 11 | O14925 TIM23_HUMAN | R.YLVQDTDEFILPTGANK.T   | 2 | 2,3699 | 0,234 | 0,571  |
| 11 | P12004 PCNA_HUMAN  | R.AEDNADTLALVFEAPNQEK.V | 2 | 2,3685 | 0,512 | -0,47  |
| 11 | Q9UHY7 ENOPH_HUMAN | K.DILFPYIEENVK.E        | 2 | 2,3677 | 0,274 | -0,247 |
| 11 | P20020 AT2B1_HUMAN | K.YGDLLPADGILIQGNDLK.I  | 2 | 2,3666 | 0,332 | -0,255 |
| 11 | P55060 XPO2_HUMAN  | K.LLTECPPM*M*DTEYTK.L   | 2 | 2,3559 | 0,371 | -0,197 |
| 11 | Q9NT62 ATG3_HUMAN  | K.ALEVAEYLTPVLK.E       | 2 | 2,346  | 0,253 | -0,506 |
| 11 | Q9NYL9 TMOD3_HUMAN | K.DLDEDELLGNLSETLK.Q    | 2 | 2,3361 | 0,343 | -0,505 |
| 11 | Q9BUF5 TBB6_HUMAN  | K.M*ASTFIGNSTAIQELFK.R  | 2 | 2,3171 | 0,411 | -0,456 |
| 11 | Q92499 DDX1_HUMAN  | K.DGFVALSK.A            | 2 | 2,291  | 0,296 | 0      |
| 11 | P62736 ACTA_HUMAN  | K.DSYVGDEAQSK.R         | 2 | 2,2814 | 0,424 | -0,305 |
| 11 | P36578 RL4_HUMAN   | R.IEEVPELPLVVEDK.V      | 2 | 2,2688 | 0,252 | -0,152 |
| 11 | Q9HAV4 XPO5_HUMAN  | R.DPLLLAIIPK.Y          | 2 | 2,2629 | 0,271 | -0,223 |
| 11 | P45974 UBP5_HUMAN  | R.DGLGGLPDIVR.D         | 2 | 2,259  | 0,174 | -0,549 |
| 11 | P14735 IDE_HUMAN   | K.NEFIPTNFEILPLEK.E     | 2 | 2,241  | 0,104 | -0,271 |
| 11 | P60510 PP4C_HUMAN  | K.DFIIEAAPQETR.G        | 2 | 2,1986 | 0,212 | -0,238 |
| 11 | P30040 ERP29_HUMAN | R.DGDFENPVPTGAVK.V      | 2 | 2,1942 | 0,35  | -0,152 |
| 11 | P25205 MCM3_HUMAN  | R.GDINILLIGDPSVAK.S     | 2 | 2,1907 | 0,311 | -0,16  |
| 11 | Q96P16 P15RS_HUMAN | K.DFAPVIVEAFK.H         | 2 | 2,1903 | 0,286 | -0,099 |
| 11 | P19387 RPB3_HUMAN  | R.LGLIPLISDDIVDK.L      | 2 | 2,1895 | 0,272 | -0,404 |
| 11 | Q01518 CAP1_HUMAN  | R.VENQENVSNLVIEDTELK.Q  | 2 | 2,1778 | 0,469 | 0,706  |
| 11 | O00571 DDX3X_HUMAN | K.DLLDLLVEAK.Q          | 2 | 2,1685 | 0,354 | -0,324 |
| 11 | Q92621 NU205_HUMAN | R.DPPM*FIPTPVDR.Y       | 2 | 2,1556 | 0,215 | 0,087  |

|    |                       |                                     |                    |   |        |       |        |
|----|-----------------------|-------------------------------------|--------------------|---|--------|-------|--------|
| 11 | O00299 CLIC1_HUMAN    | K.FLDGNELTLADCNLLPK.L               |                    | 2 | 2,13   | 0,321 | -0,631 |
| 11 | Q9UQE7 SMC3_HUMAN     | R.DTAYPETNDAIPM*ISK.L               |                    | 2 | 2,1266 | 0,346 | -0,205 |
| 11 | P31939 PUR9_HUMAN     | R.M*SSFQDFVALSDVCDVPTAK.I           |                    | 2 | 2,1261 | 0,466 | -0,451 |
| 11 | O43747 AP1G1_HUMAN    | K.ELLYFLDSCEPEFK.A                  |                    | 2 | 2,1235 | 0,231 | -0,136 |
| 11 | Q9Y248 PSF2_HUMAN     | K.ELVTIIPNFSLDK.I                   |                    | 2 | 2,1224 | 0,229 | -0,41  |
| 11 | Q9Y490 TLN1_HUMAN     | R.DLDQASLAAVSQQLAPR.E               |                    | 2 | 2,1069 | 0,144 | -0,137 |
| 11 | P20810 ICAL_HUMAN     | K.DTM*SDQALEALSASLGTR.Q             |                    | 2 | 2,1026 | 0,379 | 0      |
| 11 | P06576 ATPB_HUMAN     | R.AIAELGIYPAVDPLDSTSR.I             |                    | 2 | 2,0962 | 0,25  | -0,368 |
| 11 | Q93008 USP9X_HUMAN    | R.DGLFDTIQR.S                       |                    | 2 | 2,0839 | 0,255 | 0,229  |
| 11 | P0C7M2 RA1L3_HUMAN    | R.DYFEQYGK.I                        |                    | 2 | 2,046  | 0,361 | -0,116 |
| 11 | Q12802 AKP13_HUMAN    | K.DNEVEQEDLAQSLSLVK.D               |                    | 2 | 2,0332 | 0,238 | -0,636 |
| 11 | Q8TCG1 K1524_HUMAN    | K.DGVPGLNIEELIEK.L                  |                    | 2 | 2,0322 | 0,275 | -0,32  |
| 11 | ##Q96IG6 Q96IG6_HUMAN | -.FCPGSPLEVLLMTGPR.S                |                    | 2 | 2,0057 | 0,11  | 1,169  |
| 12 | Q9H3Z4 DNJC5_HUMAN    | R.SLS#TSGESLYHVLGLDK.N              | S10:               | 3 | 3,0438 | 0,365 | 0,194  |
| 12 | Q8TB72 PUM2_HUMAN     | R.SESGGLGVSM*VEYVLS#SSPADKLSR.F     | S100:              | 3 | 2,9934 | 0,352 | -0,397 |
| 12 | Q8TB72 PUM2_HUMAN     | R.SESGGLGVSM*VEYVLS#SPADKLSR.F      | S101:              | 3 | 3,5458 | 0,358 | -0,463 |
| 12 | B0QZ62 B0QZ62_HUMAN   | R.TS#PSDGAM*ANYESTEVM*GDGESAHDSR.D  | S1017:             | 3 | 3,1698 | 0,364 | -0,182 |
| 12 | Q07912 ACK1_HUMAN     | R.KTS#PAPGGPAGEGPLQSLTCLIGEK.D      | S102:              | 3 | 4,5004 | 0,42  | 0      |
| 12 | P35658 NU214_HUMAN    | R.TPS#IQPSLLPHAAPFAK.S              | S1023:             | 3 | 4,1957 | 0,394 | -0,099 |
| 12 | P35658 NU214_HUMAN    | R.TPS#IQPSLLPHAAPFAK.S              | S1023:             | 2 | 3,7536 | 0,485 | 0,46   |
| 12 | B0QZ62 B0QZ62_HUMAN   | R.TSPSDGAM*ANYESTEVM*GDGES#AHDSPR.D | S1037:             | 3 | 4,153  | 0,447 | -0,486 |
| 12 | Q9Y3Q8 T22D4_HUMAN    | R.DLEPHS#FGGLLEGIR.G                | S104:              | 3 | 3,4584 | 0,325 | -0,532 |
| 12 | Q7Z3B3 K1267_HUMAN    | R.TFPLAHS#PQAECEQLDAQER.A           | S1045:             | 3 | 4,5256 | 0,425 | -0,073 |
| 12 | Q6PKG0 LARP1_HUMAN    | R.CPS#QSSSRPAAM*ISQPPTPTGQPV.R      | S1056:             | 3 | 4,6458 | 0,223 | -0,129 |
| 12 | P24534 EF1B_HUMAN     | K.DDDDIDLFGS#DDEESEEAKR.L           | S106:              | 3 | 3,4592 | 0,408 | -0,292 |
| 12 | Q8IXM2 CQ049_HUMAN    | K.VAS#GVLSPPPAAPPSSSSVPEAGGPPIKK.Q  | S106:              | 3 | 3,2763 | 0,401 | -0,32  |
| 12 | Q9UQE7 SMC3_HUMAN     | K.KGDVEGS#QS#QDEGEGSGESER.G         | S1065:S1067:       | 3 | 3,3721 | 0,151 | 0,157  |
| 12 | Q96PN7 TREF1_HUMAN    | K.SSPS#HSTTSGETDPTTIFPCK.E          | S1072:             | 3 | 3,1867 | 0,248 | -0,395 |
| 12 | Q9UHF7 TRPS1_HUMAN    | K.HPNYS#PPGS#PIEK.Y                 | S1081:S1085:       | 2 | 2,7555 | 0,375 | -0,231 |
| 12 | Q9NYV4 CD2L7_HUMAN    | K.ETTSSTSTEPVKNS#SPAPPQAPGK.V       | S1082:             | 3 | 4,1408 | 0,392 | -0,359 |
| 12 | Q2NKX8 ERC6L_HUMAN    | R.S#LINM*VLDHVEDM*EER.L             | S1098:             | 2 | 2,5634 | 0,422 | 0,12   |
| 12 | Q9UQ35 SRRM2_HUMAN    | K.GGRS#RS#S#SPVTELASR.S             | S1099:S1101:S1102: | 2 | 2,2727 | 0,337 | -0,388 |
| 12 | Q9UQ35 SRRM2_HUMAN    | K.GGRS#RS#SS#PVTELASR.S             | S1099:S1101:S1103: | 3 | 3,0202 | 0,245 | 0      |

|    |                    |                                          |                    |   |        |       |        |
|----|--------------------|------------------------------------------|--------------------|---|--------|-------|--------|
| 12 | Q8IXM2 CQ049_HUMAN | K.KVASGVLS#PPPAAPPPSSSSVPEAGGPPIK.K      | S110:              | 3 | 4,1067 | 0,26  | -0,384 |
| 12 | Q8NI27 THOC2_HUMAN | R.NAVASVQNGPGGGPSSSSIGSASKS#DESSTEETDK.S | S1104:             | 3 | 3,1132 | 1     | 0      |
| 12 | Q9UPT8 ZC3H4_HUMAN | R.AAKPGPAEAPS#PTASPSGDASPPATAPYDPR.V     | S1104:             | 3 | 2,7556 | 0,147 | -0,547 |
| 12 | Q12888 TP53B_HUMAN | K.M*VIQGPSS#PQGEAM*VTDVLEDQKEGR.S        | S1114:             | 3 | 3,1124 | 0,252 | -0,314 |
| 12 | Q9P1Y6 K1542_HUMAN | R.GRECS#PTSS#LER.L                       | S1124:S1128:       | 2 | 2,418  | 0,209 | -0,317 |
| 12 | Q14160 LAP4_HUMAN  | R.DPTDEGIFISKVS#PTGAAGR.D                | S1140:             | 3 | 5,9897 | 0,526 | -0,174 |
| 12 | Q68CZ2 TENS3_HUMAN | K.ASEAASPLPDS#PGDKLVIVK.F                | S1154:             | 3 | 2,6166 | 0,301 | -0,265 |
| 12 | P55196 AFAD_HUMAN  | R.ADHRS#S#PNVANQPPS#PGGK.S               | S1155:S1156:S1165: | 3 | 4,1203 | 0,283 | -0,424 |
| 12 | P36871 PGM1_HUMAN  | K.AIGGIILTAS#HNPGGPNDFGIK.F              | S117:              | 3 | 5,28   | 0,423 | -0,24  |
| 12 | Q5SYE7 NHSL1_HUMAN | R.SPGAPSAGEAEARSPSTTLPDSS#PSR.K          | S1191:             | 3 | 4,7402 | 0,354 | -1,116 |
| 12 | Q9P1Y6 K1542_HUMAN | R.LPALGEAHVS#PEVATADK.A                  | S1229:             | 3 | 3,5948 | 0,38  | 0,097  |
| 12 | Q5UIP0 RIF1_HUMAN  | K.FDGSENRPF#PSPLNNISSTVTVK.N             | S1236:             | 3 | 4,4659 | 0,439 | -0,205 |
| 12 | Q92797 SYMPK_HUMAN | R.SPQTLAPVGEDAM*KTPS#PAAEDAR.E           | S1259:             | 3 | 5,0801 | 0,471 | -0,361 |
| 12 | P49023 PAXI_HUMAN  | K.QKS#AEPSPTVM*STSLGSNLSELDL.R           | S126:              | 3 | 4,0511 | 0,41  | -0,417 |
| 12 | O75533 SF3B1_HUMAN | R.TM*IIS#PERLDPFADGGK.T                  | S129:              | 3 | 3,1319 | 0,328 | -0,188 |
| 12 | O75494 FUSIP_HUMAN | R.S#RS#RS#FDYNYR.R                       | S129:S131:S133:    | 2 | 2,3527 | 0,184 | -0,289 |
| 12 | O75533 SF3B1_HUMAN | R.TM*IIS#PERLDPFADGGKT#PDPK.M            | S129:T142:         | 3 | 4,2572 | 0,259 | -0,143 |
| 12 | Q92538 GBF1_HUMAN  | R.ADAPDAGAQS#DSELPSYHQNDVSLDR.G          | S1298:             | 3 | 5,1028 | 0,474 | -0,129 |
| 12 | Q86VM9 ZCH18_HUMAN | R.DPHS#PEDEEQPQGLSDDDLR.D                | S13:               | 3 | 4,5127 | 0,39  | -0,592 |
| 12 | Q05655 KPCD_HUMAN  | K.VLM*SVQYFLEDVDCKQS#M*R.S               | S130:              | 3 | 3,142  | 0,387 | -0,446 |
| 12 | Q7Z2Z1 CO042_HUMAN | K.RPGNSTVTSS#PPVT#PK.K                   | S1303:T1307:       | 3 | 3,9814 | 0,373 | -0,205 |
| 12 | Q99569 PKP4_HUMAN  | R.TEPEQGTLYSPEQTS#LHESEGLGNSR.S          | S132:              | 3 | 3,2295 | 0,478 | -0,304 |
| 12 | Q9UQ35 SRRM2_HUMAN | K.ELSNS#PLRENSFGSPLEFR.N                 | S1320:             | 3 | 3,8985 | 0,362 | 0,243  |
| 12 | Q8NEY8 PPHLN_HUMAN | R.DNTFFRES#PVGR.K                        | S133:              | 2 | 2,056  | 0,233 | 0,649  |
| 12 | Q12756 KIF1A_HUMAN | R.VTGVYELSLCHVADAGS#PGM*QR.R             | S1337:             | 3 | 6,0297 | 0,537 | 0,449  |
| 12 | P49815 TSC2_HUMAN  | R.VVS#SEGGRPSVDLSFQPSQPLSK.S             | S1364:             | 3 | 5,6126 | 0,44  | 0,074  |
| 12 | Q9NWS9 ZN446_HUMAN | K.TEEPLGS#PHPSGTVESPGEGPQDTR.I           | S137:              | 3 | 3,977  | 0,237 | 0,139  |
| 12 | Q15021 CND1_HUMAN  | K.VVFSSDES#SEEDLSAEM*TEDETPKK.T          | S1370:             | 3 | 3,5809 | 0,399 | 0,951  |
| 12 | Q13428 TCOF_HUMAN  | K.KLGAGEGGEAS#VS#PEK.T                   | S1376:S1378:       | 2 | 3,4619 | 0,379 | -0,51  |
| 12 | Q13428 TCOF_HUMAN  | K.KLGAGEGGEAS#VS#PEK.T                   | S1376:S1378:       | 3 | 3,0311 | 0,33  | -0,218 |
| 12 | Q16656 NRF1_HUMAN  | R.VGQQAIVLCISPS#KPNPVFK.V                | S138:              | 3 | 3,3556 | 0,332 | 0,404  |
| 12 | Q9HAZ1 CLK4_HUMAN  | R.S#IEDDEEGHLICQSGDVL.R.A                | S138:              | 3 | 2,8011 | 0,238 | -0,162 |
| 12 | P52701 MSH6_HUMAN  | R.QSTLYSFFPKS#PALSDANK.A                 | S14:               | 3 | 3,0689 | 0,24  | 0,252  |

|    |                    |                                   |                 |   |        |       |        |
|----|--------------------|-----------------------------------|-----------------|---|--------|-------|--------|
| 12 | P49759 CLK1_HUMAN  | R.S#VEDDEEGHLCQSGDVLSAR.Y         | S140:           | 3 | 5,8984 | 0,432 | -0,076 |
| 12 | Q13177 PAK2_HUMAN  | K.YLS#FTPPEKDGFPSTPALNAK.G        | S141:           | 3 | 4,0936 | 0,386 | 0,076  |
| 12 | Q14181 DPOA2_HUMAN | R.S#PHQLLSPSSFSPSATPSQK.Y         | S141:           | 3 | 3,8209 | 0,141 | -0,085 |
| 12 | Q8NHG8 ZNR2_HUMAN  | R.LVIGS#LPAHLS#PHM*FGGFK.C        | S145:S151:      | 3 | 3,4816 | 0,369 | -0,084 |
| 12 | Q02880 TOP2B_HUMAN | K.SQDFGNLFSFSPSYS#QKSEDDSAK.F     | S1454:          | 3 | 3,2182 | 0,28  | -0,343 |
| 12 | Q9BTC0 DIDO1_HUMAN | R.NS#VERPAEPVAGAATPSLVEQQK.M      | S1456:          | 3 | 4,5265 | 0,335 | 0      |
| 12 | Q9HCD6 TANC2_HUMAN | R.DSAYISS#PLGSHQVDFDR.S           | S1458:          | 3 | 2,7336 | 0,366 | 0,334  |
| 12 | P78316 NOP14_HUMAN | K.HNDIVDS#DS#DAEDR.G              | S146:S148:      | 2 | 6,152  | 0,536 | 0      |
| 12 | P78316 NOP14_HUMAN | K.HNDIVDS#DS#DAEDR.G              | S146:S148:      | 3 | 3,0226 | 0,366 | -0,105 |
| 12 | Q9UQ35 SRRM2_HUMAN | R.SRS#PS#SPELNNK.C                | S1499:S1501:    | 2 | 2,4049 | 0,223 | 0,496  |
| 12 | Q9H3Z4 DNJC5_HUMAN | R.SLSTSGES#LYHVLGLDK.N            | S15:            | 2 | 3,6121 | 0,454 | -0,518 |
| 12 | Q12756 KIF1A_HUMAN | R.TPQPCSRPAS#PEPELLPEADSK.K       | S1532:          | 3 | 4,2    | 0,324 | 0,662  |
| 12 | P42166 LAP2A_HUMAN | K.LREQGTES#RSS#T#PLPTISSAENTR.Q   | S156:S159:T160: | 3 | 3,3845 | 0,214 | -0,435 |
| 12 | Q15742 NAB2_HUMAN  | R.S#FSPKSPLELGEKLS#PLPGGPGAGDPR.I | S157:S171:      | 3 | 3,269  | 0,261 | -0,449 |
| 12 | Q641Q2 FA21A_HUMAN | K.AGNS#DSEEDDANGRVELILEPK.D       | S158:           | 3 | 3,4216 | 0,404 | 0      |
| 12 | Q02880 TOP2B_HUMAN | K.KTSFDQDS#DVDIFPSDFPTEPPSLPR.T   | S1581:          | 3 | 3,4258 | 0,42  | -0,182 |
| 12 | P49327 FAS_HUMAN   | R.DIM*LATGKLS#PDAIPGK.W           | S1584:          | 3 | 3,9535 | 0,407 | 0,301  |
| 12 | Q99966 CITE1_HUMAN | K.GGTS#PAKEDANQEM*SSVAYSNLAVK.D   | S16:            | 3 | 3,4528 | 0,304 | -0,621 |
| 12 | Q9UJF2 NGAP_HUMAN  | R.S#ISGTSTSEKPNM*DTANTSPFK.V      | S16:            | 3 | 3,4207 | 0,469 | -0,147 |
| 12 | Q9BVG9 PTSS2_HUMAN | R.DAGGPRPES#PVPAGR.A              | S16:            | 3 | 2,8667 | 0,328 | 0,119  |
| 12 | P38398 BRCA1_HUMAN | K.VAESAQ#PAAAHTDTAGYNAM*EESVSR.E  | S1613:          | 3 | 5,5183 | 0,46  | -0,373 |
| 12 | Q92734 TFG_HUMAN   | K.QSTQVM*AAS#M*SAFDPLKNQDEINK.N   | S164:           | 3 | 4,0424 | 0,319 | 0,199  |
| 12 | P12270 TPR_HUMAN   | R.GIASTDPPTANIKTPVVS#TPSK.V       | S1676:          | 3 | 2,9793 | 0,29  | -0,524 |
| 12 | P46013 KI67_HUMAN  | K.AFM*ES#PKQILDSAASLTGSK.R        | S1679:          | 3 | 5,6852 | 0,455 | 0      |
| 12 | Q01433 AMPD2_HUMAN | R.QIS#QDVKLEPDILLR.A              | S168:           | 3 | 3,5948 | 0,323 | 0,198  |
| 12 | P18583 SON_HUMAN   | K.DTEEPLPVKESDQTLAALLS#PK.E       | S1697:          | 3 | 3,8916 | 0,478 | -0,52  |
| 12 | Q9P2K5 MYEF2_HUMAN | K.AEVPGATGGDS#PHLQPAEPPGEP.R      | S17:            | 3 | 3,3596 | 0,389 | -0,299 |
| 12 | Q15742 NAB2_HUMAN  | K.SPLELGEKLS#PLPGGPGAGDPR.I       | S171:           | 3 | 3,2723 | 0,245 | 0,411  |
| 12 | P35579 MYH9_HUMAN  | R.DELAIDEIANSS#GKGALALEEK.R       | S1714:          | 3 | 4,2886 | 0,503 | 0,408  |
| 12 | Q8IWW6 RHG12_HUMAN | R.S#FGHFPGPEFLDVEK.T              | S176:           | 3 | 4,3748 | 0,309 | -0,307 |
| 12 | Q15024 EXOS7_HUMAN | R.VLEDEEGS#KDIELSDDPYDCIR.L       | S177:           | 3 | 4,1422 | 0,328 | 0      |
| 12 | Q58FF8 H90B2_HUMAN | K.IEDVGS#DEEDDSGK.D               | S177:           | 2 | 3,1708 | 0,366 | -0,387 |
| 12 | P51636 CAV2_HUMAN  | K.ADVQLFM*DDDS#YSHHS#GLEADPEK.F   | S18:S23:        | 3 | 2,8175 | 1     | -0,12  |

|    |                    |                                  |                    |   |        |       |        |
|----|--------------------|----------------------------------|--------------------|---|--------|-------|--------|
| 12 | Q13111 CAF1A_HUMAN | R.RGDS#QECS#PRS#CPELTSGPR.M      | S181:S185:S188:    | 3 | 3,1232 | 0,286 | -0,218 |
| 12 | O60271 JIP4_HUMAN  | K.LHQLS#GS#DQLES#TAHSR.I         | S183:S185:S190:    | 3 | 2,7047 | 0,248 | -0,261 |
| 12 | Q03164 HRX_HUMAN   | K.GPGEPDS#PTPLHPPTPILSTDR.S      | S1837:             | 3 | 3,6206 | 0,342 | 0,223  |
| 12 | Q9Y388 RBMX2_HUMAN | K.ADREVQAEQPSS#S#PR.R            | S187:S188:         | 3 | 2,8739 | 0,13  | 0,192  |
| 12 | Q9UQ35 SRRM2_HUMAN | R.S#RS#RT#PLISR.R                | S1876:S1878:T1880: | 2 | 2,4715 | 0,3   | -0,345 |
| 12 | Q9BVC5 ASHWN_HUMAN | R.KSPSGPVKS#PPLS#PVG#TPVK.L      | S189:S193:T197:    | 3 | 5,0484 | 1     | 0,08   |
| 12 | Q9Y3A4 ZG14_HUMAN  | R.DPEDRIPS#PLGYAAPIK.F           | S19:               | 3 | 4,8369 | 0,4   | -0,27  |
| 12 | Q9UNF1 MAGD2_HUMAN | K.HLDGEEDGS#S#DQSQASGTTGGR.R     | S190:S191:         | 3 | 4,6891 | 0,507 | -0,311 |
| 12 | Q96N77 ZN641_HUMAN | R.VTYTGDGS#EHEGDTPELEAEPPR.M     | S191:              | 3 | 3,8446 | 0,228 | 1,07   |
| 12 | Q9UNF1 MAGD2_HUMAN | K.HLDGEEDGS#DQSQAS#GTTGGR.R      | S191:S197:         | 3 | 3,8836 | 0,399 | 0,233  |
| 12 | O43663 PRC1_HUMAN  | R.QIILCM*EELDHTPDT#FER.D         | S195:              | 3 | 2,783  | 0,266 | -0,452 |
| 12 | P30622 CLIP1_HUMAN | K.TASES#IS#NLSEAGS#IKKGER.E      | S195:S197:S204:    | 3 | 3,6639 | 1     | 0,079  |
| 12 | Q9BZL6 KPCD2_HUMAN | R.RLS#STS#LAS#GHSVR.L            | S197:S200:S203:    | 2 | 4,1853 | 1     | -0,072 |
| 12 | Q9BZL6 KPCD2_HUMAN | R.RLS#STSLAS#GHS#VR.L            | S197:S203:S206:    | 2 | 3,6455 | 1     | -0,647 |
| 12 | Q9BZL6 KPCD2_HUMAN | R.RLS#STSLAS#GHS#VR.L            | S197:S203:S206:    | 3 | 3,0129 | 1     | -0,431 |
| 12 | Q9BZL6 KPCD2_HUMAN | R.RLS#ST#S#LASGHSVR.L            | S197:T199:S200:    | 2 | 3,5293 | 0,456 | 0,503  |
| 12 | Q08752 PPID_HUMAN  | K.DGS#GDSHPDFPEDADIDLK.D         | S198:              | 3 | 4,5399 | 0,231 | 0      |
| 12 | Q08752 PPID_HUMAN  | K.DGS#GDS#HPDFPEDADIDLKDVVK.I    | S198:S201:         | 3 | 4,279  | 0,406 | -0,415 |
| 12 | Q9Y657 SPIN1_HUMAN | R.IM#PDSNDS#PPAEREPGEVVDLSLVGK.Q | S199:              | 3 | 3,3063 | 0,296 | 0      |
| 12 | Q07955 SFRS1_HUMAN | K.VDGRS#PS#YGRS#R.S              | S199:S201:S205:    | 3 | 2,7575 | 0,193 | 0      |
| 12 | Q15003 CND2_HUMAN  | K.DAPSLEVEGHVADGS#ATEM*GTTK.K    | S201:              | 3 | 4,6325 | 0,445 | -0,579 |
| 12 | Q9BRG2 SH23A_HUMAN | K.APAPLGTVADSLRAS#DGQLQAK.A      | S201:              | 3 | 3,3992 | 0,304 | -0,326 |
| 12 | P00558 PGK1_HUMAN  | K.ALES#PERPFLAILGGAK.V           | S203:              | 3 | 4,8029 | 0,422 | 0,198  |
| 12 | P00558 PGK1_HUMAN  | K.ALES#PERPFLAILGGAK.V           | S203:              | 2 | 3,2504 | 0,253 | -0,726 |
| 12 | Q9UQ35 SRRM2_HUMAN | R.S#RS#RT#PLLPR.K                | S2030:S2032:T2034: | 2 | 2,1152 | 0,246 | -0,257 |
| 12 | Q6WKZ4 RFIP1_HUMAN | K.DSGSDTASAIIPSTTPVSDDES#VVKDK.K | S206:              | 3 | 3,927  | 0,329 | -0,183 |
| 12 | Q9UQ35 SRRM2_HUMAN | K.RS#LT#RS#PPAIR.R               | S2067:T2069:S2071: | 2 | 2,4575 | 0,258 | -1,388 |
| 12 | Q5T200 ZC3HD_HUMAN | R.SKLS#PS#PSLR.K                 | S207:S209:         | 2 | 2,6168 | 0,207 | -0,792 |
| 12 | O43166 SI1L1_HUMAN | R.EYGS#TSSIDKQGTSGESFFDLLK.G     | S208:              | 3 | 3,3995 | 0,246 | -0,142 |
| 12 | Q9UQ35 SRRM2_HUMAN | R.NHS#GS#RT#PPVALN SSR.M         | S2100:S2102:T2104: | 2 | 3,0252 | 0,5   | -0,381 |
| 12 | Q9UQ35 SRRM2_HUMAN | R.NHS#GS#RT#PPVALN SSR.M         | S2100:S2102:T2104: | 3 | 3,0066 | 0,23  | 0,191  |
| 12 | Q9H4L7 SMRCD_HUMAN | R.KLS#S#SS#EPYEEDEFNDDQSIKK.T    | S211:S212:S214:    | 3 | 3,7327 | 0,394 | -0,195 |
| 12 | O15027 SC16A_HUMAN | K.VLSSAASLPGSELPSRPEGSQGGELS#R.C | S2113:             | 3 | 2,8839 | 0,224 | 0,581  |

|    |                     |                                     |                    |   |        |       |        |
|----|---------------------|-------------------------------------|--------------------|---|--------|-------|--------|
| 12 | P25445 TNR6_HUMAN   | K.ENQGSHE\$#PTLNPETVAINLSDVDLSK.Y   | S212:              | 3 | 3,0376 | 0,216 | -0,246 |
| 12 | Q96T58 MINT_HUMAN   | R.ESGVVAVS#PEKSES#PQKEDGLSSQLK.S    | S2120:S2126:       | 3 | 2,966  | 0,367 | -0,255 |
| 12 | P11172 PYR5_HUMAN   | R.FIQENVFVAANHNGS#PLSIK.E           | S214:              | 3 | 2,8565 | 0,211 | 0,404  |
| 12 | Q5JTV8 TOIP1_HUMAN  | K.VNFS#EEGETEEDDQDSSHSSVTTVK.A      | S215:              | 3 | 3,5967 | 0,328 | -0,258 |
| 12 | Q01082 SPTB2_HUMAN  | R.TSS#KESS#PIPS#PTSDRK.A            | S2161:S2165:S2169: | 2 | 2,8348 | 1     | -0,537 |
| 12 | Q9NTJ3 SMC4_HUMAN   | R.REEGPPPPS#PDGAS#SDAEPEPPSGR.T     | S22:S27:           | 3 | 5,5467 | 0,434 | -0,821 |
| 12 | Q9NTJ3 SMC4_HUMAN   | R.REEGPPPPS#PDGASS#DAEPEPPSGR.T     | S22:S28:           | 3 | 5,3733 | 0,43  | -0,752 |
| 12 | P11831 SRF_HUMAN    | K.ALIQTCLNSPDS#PPRSDPTTDQR.M        | S224:              | 3 | 4,7166 | 0,526 | 0,622  |
| 12 | P49792 RBP2_HUMAN   | R.EDALDDSVSSSVHASPLASS#PVR.K        | S2251:             | 3 | 4,5401 | 0,391 | 0,44   |
| 12 | B1ALX9 B1ALX9_HUMAN | K.SEGDNYSATLEPAASSLS#PDHK.N         | S226:              | 3 | 2,8253 | 0,279 | 0      |
| 12 | O95671 ASML_HUMAN   | K.HDS#IPAADTFEDLSDVEGGGSEPTQR.D     | S228:              | 3 | 3,4555 | 0,359 | 0,195  |
| 12 | P13051 UNG_HUMAN    | R.HAPS#PEPAVQGTGVAGVPEESGDAAAIPAK.K | S23:               | 3 | 3,4009 | 0,199 | -0,443 |
| 12 | Q96S82 UBL7_HUMAN   | R.DM*PGGFLFEGLS#DDEDDFHPNTR.S       | S230:              | 3 | 3,3758 | 0,416 | -0,338 |
| 12 | Q9BST9 RTKN_HUMAN   | R.VRAS#LDSAGSGSSPILLPTPVVGGPR.Y     | S232:              | 3 | 4,0541 | 0,38  | -0,209 |
| 12 | P21333 FLNA_HUMAN   | K.FNEEHIPDSPFVVPVAS#PSGDAR.R        | S2327:             | 3 | 4,4466 | 0,229 | -0,215 |
| 12 | Q15424 SAFB1_HUMAN  | K.SEPVKEESS#ELEQPFAQDTSSVGPDR.K     | S235:              | 3 | 5,3968 | 0,466 | -0,625 |
| 12 | P62753 RS6_HUMAN    | R.RLS#S#LRAS#TSK.S                  | S235:S236:S240:    | 2 | 2,8948 | 0,489 | -1,772 |
| 12 | O95155 UBE4B_HUMAN  | R.DENPFASLTATSQPIAAAARS#PDR.N       | S238:              | 3 | 3,8264 | 0,305 | 0,713  |
| 12 | P22059 OSBP1_HUMAN  | R.S#LSELESCLKPAESNEK.I              | S238:              | 2 | 2,895  | 0,428 | -0,187 |
| 12 | Q9UQ35 SRRM2_HUMAN  | R.M*APALSGANLTS#PRVPLSAYER.V        | S2382:             | 3 | 2,6734 | 0,346 | 0,305  |
| 12 | Q9Y2U5 M3K2_HUMAN   | R.AQS#YPDNDHQEFSYDNPIFEK.F          | S239:              | 3 | 4,0098 | 0,369 | 0,628  |
| 12 | P55884 EIF3B_HUMAN  | K.GYIFLEYAS#PAHAVDAVK.N             | S239:              | 2 | 3,1787 | 0,475 | -0,481 |
| 12 | Q12802 AKP13_HUMAN  | R.DM*AECSTPLPEDCS#PTHSPR.V          | S2398:             | 3 | 2,8246 | 0,253 | -0,23  |
| 12 | Q04726 TLE3_HUMAN   | R.YDS#DGDKSDLLVVDVSNEDPATPR.V       | S240:              | 3 | 4,8348 | 0,365 | -0,136 |
| 12 | O75179 ANR17_HUMAN  | R.APS#PAPSSVPLGSEKPSNVSQDR.K        | S2401:             | 3 | 2,7512 | 0,198 | -0,077 |
| 12 | P11717 MPRI_HUMAN   | K.ALSSLHGDDQDS#EDEVLTIPVK.V         | S2409:             | 3 | 4,312  | 0,238 | 0,142  |
| 12 | Q9UNX4 WDR3_HUMAN   | K.IKGSS#PGIQDTLEAEDGAFETDEAPEDR.I   | S241:              | 3 | 3,0437 | 0,506 | -0,239 |
| 12 | P35659 DEK_HUMAN    | K.NKEES#S#DDEDKES#EEEEPK.K          | S243:S244:S251:    | 3 | 3,5859 | 0,445 | 0,149  |
| 12 | P42345 FRAP_HUMAN   | K.TGTTVPES#IHS#FIGDGLVKPEALNK.K     | S2478:S2481:       | 3 | 2,7188 | 0,125 | -0,462 |
| 12 | P11717 MPRI_HUMAN   | K.LVSFHDDS#DEDLLHI.-                | S2484:             | 2 | 5,5213 | 0,516 | -0,399 |
| 12 | P25788 PSA3_HUMAN   | K.ESLKEEDS#DDDNM*.-                 | S250:              | 2 | 2,8732 | 0,441 | -0,348 |
| 12 | P49792 RBP2_HUMAN   | K.AVVS#PPKFVFGSESVK.S               | S2510:             | 3 | 3,5799 | 0,422 | 0,208  |
| 12 | P49792 RBP2_HUMAN   | K.AVVS#PPKFVFGSESVK.S               | S2510:             | 2 | 2,9961 | 0,463 | 0,278  |

|    |                    |                                    |                 |   |        |       |        |
|----|--------------------|------------------------------------|-----------------|---|--------|-------|--------|
| 12 | P52701 MSH6_HUMAN  | R.RVIS#DSES#DIGGS#DVEFKPDTK.E      | S252:S256:S261: | 3 | 5,5653 | 0,468 | 0,768  |
| 12 | O15417 TNC18_HUMAN | K.ATGDGLAQEPGPGPLTFEDS#GNPKSPDK.A  | S2538:          | 3 | 3,7027 | 0,239 | -0,518 |
| 12 | O95684 FR1OP_HUMAN | K.AGLCPDEDDM*EGDS#FFDDPIPKPEK.T    | S254:           | 3 | 2,9371 | 0,37  | -0,251 |
| 12 | Q9C0B1 FATSO_HUMAN | R.SAVAVYSYSCEGPEEES#EDDSHLEGR.D    | S256:           | 3 | 5,1708 | 0,53  | -0,307 |
| 12 | O00303 EIF3F_HUMAN | K.TCFS#PNRVIGLSSDLQVGGASAR.I       | S258:           | 3 | 4,2061 | 0,359 | -0,211 |
| 12 | P33981 TTK_HUMAN   | R.FLYGENM*PPQDAEIGYRNS#LR.Q        | S258:           | 3 | 3,1858 | 0,308 | -0,356 |
| 12 | P21359 NF1_HUMAN   | R.KVS#VSESNVLLDEEVLTPK.I           | S2597:          | 3 | 5,0778 | 0,288 | 0,642  |
| 12 | Q15067 ACOX1_HUMAN | R.DSASFNPELLTHILDGS#PEK.T          | S26:            | 3 | 2,8373 | 0,179 | -0,407 |
| 12 | Q15545 TAF7_HUMAN  | K.LNES#DEQHQENEGTNQLVM*GIQK.Q      | S264:           | 3 | 4,8578 | 0,324 | -0,401 |
| 12 | Q8N556 AFAP1_HUMAN | K.EAYSIGSGPVDSECPPPPSS#PVHK.A      | S265:           | 3 | 4,3239 | 0,297 | -0,489 |
| 12 | Q03111 ENL_HUMAN   | K.LESTS#PKGGPPPPPPPPR.A            | S267:           | 3 | 4,4069 | 0,276 | 0,184  |
| 12 | Q15942 ZYG_HUMAN   | R.GPPASSPAPAPKFS#PVTPK.F           | S267:           | 2 | 4,0525 | 0,437 | -0,383 |
| 12 | P49454 CENPF_HUMAN | R.DANSS#FFDNSSSPHLLDQLK.A          | S269:           | 3 | 4,557  | 0,378 | 0,079  |
| 12 | P22234 PUR6_HUMAN  | K.EVYELDS#PGKVLLQSK.D              | S27:            | 2 | 4,1887 | 0,488 | -0,366 |
| 12 | P22234 PUR6_HUMAN  | K.EVYELDS#PGKVLLQSK.D              | S27:            | 3 | 3,1677 | 0,39  | 0,183  |
| 12 | Q99638 RAD9A_HUMAN | K.DSLLDGHFVLATLSDTDS#HSQDLGS#PER.H | S270:S277:      | 3 | 3,6654 | 0,223 | -0,346 |
| 12 | Q13367 AP3B2_HUMAN | K.AFYGS#EEDEAKGAGSEETAAAAAPSR.K    | S272:           | 3 | 4,6017 | 0,475 | -0,828 |
| 12 | Q9NR45 SIAS_HUMAN  | R.ALGS#PTKQLLPCEM*ACNEK.L          | S275:           | 3 | 3,75   | 0,088 | 0,571  |
| 12 | P49454 CENPF_HUMAN | R.DANSSFFDNSSS#PHLLDQLK.A          | S276:           | 3 | 3,9502 | 0,315 | 0,079  |
| 12 | P27816 MAP4_HUMAN  | K.DM*ES#PTKLDVTLAK.D               | S280:           | 2 | 4,2424 | 0,406 | 0,297  |
| 12 | P27816 MAP4_HUMAN  | K.DM*ES#PTKLDVTLAK.D               | S280:           | 3 | 3,7451 | 0,358 | 0,223  |
| 12 | Q6WKZ4 RFIP1_HUMAN | R.TAS#TDLKQLNQVNFTLPK.K            | S280:           | 3 | 2,7445 | 0,193 | -0,174 |
| 12 | Q12872 SFRS8_HUMAN | K.SGVS#SDNEDDDDEEDGNYLHPSLFASK.K   | S282:           | 3 | 4,7415 | 0,562 | 1,211  |
| 12 | Q96EZ8 MCRS1_HUMAN | K.GDQVLNFS#DAEDLIDDSK.L.D          | S282:           | 3 | 2,6949 | 0,157 | -0,318 |
| 12 | Q12872 SFRS8_HUMAN | K.SGVSS#DNEDDDDEEDGNYLHPSLFASK.K   | S283:           | 3 | 4,7462 | 0,537 | 0,727  |
| 12 | Q9HCK8 CHD8_HUMAN  | R.NTSSDNSDVEVM*PAQS#PREDEESSIQK.R  | S283:           | 3 | 2,6944 | 0,248 | -0,119 |
| 12 | Q9NWH9 SLTM_HUMAN  | K.DGQDAIAQS#PEKESK.D               | S289:           | 2 | 2,9912 | 0,292 | -0,363 |
| 12 | P46939 UTRO_HUMAN  | K.ECEEEAINIQSTAPEEEHES#PR.A        | S295:           | 3 | 3,2118 | 0,355 | 0,206  |
| 12 | Q99590 SFRIP_HUMAN | K.TEELIESPKLESS#EGEIIQTVDR.Q       | S299:           | 3 | 4,7938 | 0,408 | 0,341  |
| 12 | P49454 CENPF_HUMAN | K.QDSRGS#PLLGPVVPGPSPIPSVTEK.R     | S2996:          | 3 | 3,0903 | 0,164 | 0,635  |
| 12 | P49023 PAXI_HUMAN  | R.DGGRS#SPGGQDEGGFM*AQGK.T         | S302:           | 3 | 5,5409 | 0,399 | -0,36  |
| 12 | Q00613 HSF1_HUMAN  | R.VKEEPPS#PPQS#PR.V                | S303:S307:      | 2 | 3,766  | 0,404 | -0,379 |
| 12 | Q96QR8 PURB_HUMAN  | R.RGGGSGGGEES#EGEEVDED.-           | S304:           | 2 | 4,2319 | 0,461 | -0,568 |

|    |                     |                                      |                 |   |        |       |        |
|----|---------------------|--------------------------------------|-----------------|---|--------|-------|--------|
| 12 | Q9UQR1 ZN148_HUMAN  | K.GLLTSEEDSGFSTS#PKDNSLPK.K          | S306:           | 3 | 4,4255 | 0,431 | -0,524 |
| 12 | Q13769 THOC5_HUMAN  | K.ALFKPPEDS#QDDES#DS#DAEEEEQTTKR.R   | S307:S312:S314: | 3 | 5,3784 | 0,498 | 0,913  |
| 12 | Q8N3F8 MILK1_HUMAN  | R.KAS#ES#TTPAPPT#PRPR.S              | S309:S311:T318: | 3 | 3,4982 | 0,267 | -0,095 |
| 12 | P05783 K1C18_HUMAN  | R.SLGSVQAPSYGARPVSS#AASVYAGAGGSGSR.I | S31:            | 3 | 4,0627 | 0,475 | -0,499 |
| 12 | Q08AC7 Q08AC7_HUMAN | K.ESES#DQEQEEEIDM*TSEKNPQDEQER.I     | S31:            | 3 | 3,9391 | 0,433 | -0,339 |
| 12 | Q9HCN4 GPN1_HUMAN   | K.DSLS#PVLHPSDLILTR.G                | S314:           | 2 | 2,1641 | 0,457 | -0,132 |
| 12 | B1ALC7 B1ALC7_HUMAN | R.DSHS#PDLQLPTPEVIPSSGSK.L           | S317:           | 3 | 3,5462 | 0,329 | 0,242  |
| 12 | Q86VR2 F134C_HUMAN  | R.QQTPLEGESEDLDGHS#DPEESFAR.D        | S320:           | 3 | 2,6551 | 0,322 | -0,276 |
| 12 | Q9UQ35 SRRM2_HUMAN  | R.GEGDAPFSEPGTTSTQRPS#SPETATK.Q      | S322:           | 3 | 3,4523 | 0,12  | -0,135 |
| 12 | Q86WC4 OSTM1_HUMAN  | K.RLKS#STS#FANIQENSN.-               | S322:S325:      | 2 | 4,0576 | 0,507 | -0,312 |
| 12 | Q9UKJ3 GPTC8_HUMAN  | R.GPKPEPPGS#GS#PAPPR.R               | S325:S327:      | 3 | 4,4791 | 0,475 | 0      |
| 12 | Q9UKJ3 GPTC8_HUMAN  | R.GPKPEPPGS#GS#PAPPR.R               | S325:S327:      | 2 | 3,4504 | 0,537 | -0,506 |
| 12 | Q9UQQ2 SH2B3_HUMAN  | R.GLESTEAEEM*HIPSALPSTSSS#PR.G       | S330:           | 3 | 4,3771 | 0,348 | 0,21   |
| 12 | O15075 DCLK1_HUMAN  | R.SGKS#PS#PSPTS#PGSLRK.Q             | S330:S332:S337: | 3 | 3,2148 | 1     | -0,479 |
| 12 | O15075 DCLK1_HUMAN  | R.SGKS#PS#PSPTSPGS#LRK.Q             | S330:S332:S340: | 2 | 3,1516 | 1     | -0,319 |
| 12 | O15075 DCLK1_HUMAN  | R.SGKS#PSPS#PTSPGS#LRK.Q             | S330:S334:S340: | 2 | 2,5137 | 1     | -0,575 |
| 12 | Q9UGV2 NDRG3_HUMAN  | R.THS#TSSSLGS#GESPFGR.S              | S331:S338:      | 3 | 3,8097 | 1     | -0,291 |
| 12 | P13994 CC130_HUMAN  | R.VPEEAAQDRPM*#S#PGDCPPETTETPK.C     | S332:           | 3 | 5,6982 | 0,48  | 0,581  |
| 12 | P78310 CXAR_HUMAN   | K.TQYNQVPSDEFERTPQS#PTLPPAK.V        | S332:           | 3 | 3,3419 | 0,257 | -0,13  |
| 12 | Q969V6 MKL1_HUMAN   | R.QNS#TSLTGKPGALPANLDDM*K.V          | S333:           | 3 | 4,2946 | 0,435 | 0,568  |
| 12 | Q9UGV2 NDRG3_HUMAN  | R.THSTSSS#LGS#GESPFGR.S              | S335:S338:      | 2 | 4,3603 | 1     | 0,13   |
| 12 | P04083 ANXA1_HUMAN  | K.GGPGS#AVSPYPTFNPSDVAALHK.A         | S34:            | 3 | 3,609  | 0,424 | -0,225 |
| 12 | Q8IZ21 PHAR4_HUMAN  | R.S#PSPPLPTHIPPEPRT#PPFPAK.T         | S342:T358:      | 3 | 4,4799 | 0,424 | 0,35   |
| 12 | Q5JSH3 WDR44_HUMAN  | R.SNS#GRELTDEEILASVM*IK.N            | S344:           | 3 | 2,6642 | 0,258 | -0,084 |
| 12 | Q8IZ21 PHAR4_HUMAN  | R.SPS#PPLPT#HIPPEPRT#PPFPAK.T        | S344:T349:      | 3 | 3,9889 | 0,361 | -0,07  |
| 12 | Q8IZ21 PHAR4_HUMAN  | R.SPS#PPLPTHIPPEPRT#PPFPAK.T         | S344:T358:      | 3 | 3,6292 | 0,396 | -0,489 |
| 12 | O14681 EI24_HUMAN   | K.TVYLQSALSSSTAIEKFPS#PHPS#PAK.L     | S345:S349:      | 3 | 3,1564 | 0,328 | -0,318 |
| 12 | Q8IY18 SMC5_HUMAN   | R.KNS#APQLPLLQSSGPFVEGSIVR.I         | S35:            | 3 | 5,9227 | 0,512 | -0,292 |
| 12 | Q8IY81 RRMJ3_HUMAN  | K.QPS#KEEEEEEEQLNQLAEM*K.A           | S356:           | 3 | 4,1043 | 0,328 | -0,382 |
| 12 | Q9ULW0 TPX2_HUMAN   | K.DDINLLPS#KSSVTK.I                  | S356:           | 2 | 3,0652 | 0,145 | 1,07   |
| 12 | Q9H814 RNUXA_HUMAN  | R.ETFAS#DTNEALASLDESQEGHAEAK.L       | S356:           | 3 | 2,9337 | 0,293 | -0,268 |
| 12 | P01892 1A02_HUMAN   | R.KGGSYSQAASSDSAQGS#DVS#LTACKV.-     | S356:S359:      | 3 | 4,8288 | 1     | 0      |
| 12 | O00559 RCAS1_HUMAN  | R.KLS#GDQITLPTTVDYSSVVK.Q            | S36:            | 3 | 4,6724 | 0,426 | 0,082  |



|    |                    |                                    |                 |   |        |       |        |
|----|--------------------|------------------------------------|-----------------|---|--------|-------|--------|
| 12 | P20810 ICAL_HUMAN  | R.SES#ELIDELSEDFDRSECK.E           | S366:           | 3 | 3,3473 | 0,33  | -0,232 |
| 12 | Q9UJM3 ERRFI_HUMAN | R.QNS#EGSASKVPCILPIIENGK.K         | S369:           | 3 | 4,1101 | 0,447 | 0,315  |
| 12 | P04083 ANXA1_HUMAN | K.GGPGSAVS#PYPTFNPSDDVAALHK.A      | S37:            | 3 | 5,3527 | 0,412 | 0,526  |
| 12 | Q96GX5 MASTL_HUMAN | K.DLELALS#PIHNSSALPTTGR.S          | S370:           | 3 | 2,9124 | 0,267 | 0,337  |
| 12 | Q9UQ35 SRRM2_HUMAN | R.HGGS#PQPLATTPLSQEPVNPPEASPTR.D   | S377:           | 3 | 5,7184 | 0,398 | 0,936  |
| 12 | Q15276 RABE1_HUMAN | R.GSVHS#LDAGLLPSGDPFSK.S           | S377:           | 3 | 3,3554 | 0,107 | -0,617 |
| 12 | Q9H307 PININ_HUMAN | R.ESEKQQDS#QPEEVM*DVLEM*VENVK.H    | S381:           | 3 | 6,2958 | 0,361 | -0,374 |
| 12 | O94876 TMCC1_HUMAN | K.FGS#ADNIPNLKDSLEEGQVDDAGK.A      | S382:           | 3 | 3,7167 | 0,265 | -0,986 |
| 12 | Q9H0E9 BRD8_HUMAN  | R.SGVAEAPVGS#KAPS#IDGKEELDLAEK.M   | S383:S387:      | 3 | 4,5175 | 0,258 | -0,796 |
| 12 | Q8IYB3 SRRM1_HUMAN | R.RLS#PS#ASPPR.R                   | S389:S391:      | 2 | 2,7727 | 0,265 | -0,397 |
| 12 | P02545 LMNA_HUMAN  | R.LRLS#PS#PTSQRS#R.G               | S390:S392:S398: | 2 | 2,6534 | 0,189 | -1,132 |
| 12 | P02545 LMNA_HUMAN  | R.LRLS#PSPTS#QR.S                  | S390:S395:      | 2 | 2,176  | 0,186 | -0,087 |
| 12 | O14980 XPO1_HUMAN  | R.ESPFSTSAS#PLLSGSQHFDVPPR.R       | S391:           | 3 | 3,9092 | 0,397 | -0,218 |
| 12 | O14980 XPO1_HUMAN  | R.ESPFSTSASPLLS#GSQHFDVPPR.R       | S395:           | 3 | 3,1648 | 0,37  | -0,29  |
| 12 | Q8TAD8 SNIP1_HUMAN | R.KDDEDEEEEEVSDES#.-               | S396:           | 2 | 4,3655 | 0,521 | -0,458 |
| 12 | Q68DA7 FMN1_HUMAN  | R.SSQS#PAGETASISSVSASAEGAVNKVPLK.V | S398:           | 3 | 2,9285 | 0,187 | 0,387  |
| 12 | Q96ST2 IWS1_HUMAN  | R.KAAVLS#DS#EDEEK.A                | S398:S400:      | 2 | 5,5758 | 0,49  | -0,386 |
| 12 | P30414 NKTR_HUMAN  | R.WDERS#LS#QR.S                    | S401:S403:      | 2 | 2,497  | 0,197 | -0,091 |
| 12 | P30989 NTR1_HUMAN  | R.KADS#VSS#NHT#LSSNATR.E           | S401:S404:T407: | 2 | 2,4408 | 0,453 | -0,424 |
| 12 | Q9UHK0 NUFP1_HUMAN | K.TEADVLAENQVLDSAPKS#PSQDVK.A      | S403:           | 3 | 4,7827 | 0,515 | -0,068 |
| 12 | Q7Z5L9 I2BP2_HUMAN | K.IPM*TPTSSFVSPPTAS#PHSNR.T        | S406:           | 3 | 4,9032 | 0,288 | 0      |
| 12 | P51114 FXR1_HUMAN  | R.RGPNYTSYGTNSELS#NPS#ETESER.K     | S406:S409:      | 3 | 6,2788 | 1     | -0,443 |
| 12 | Q9BXI6 TB10A_HUMAN | K.AILDAEPGRPALQPS#PSIR.L           | S407:           | 3 | 3,2836 | 0,418 | -0,084 |
| 12 | Q13435 SF3B2_HUMAN | K.GFEEHKDS#DDDS#S#DDEQEK.K         | S408:S412:S413: | 3 | 4,2839 | 0,363 | -0,284 |
| 12 | Q86SQ0 PHL2_HUMAN  | R.KSS#ISS#ISGR.D                   | S415:S418:      | 2 | 2,7745 | 0,248 | 0,103  |
| 12 | Q659A1 NARG2_HUMAN | K.VSKS#PSPASTSTVPMN*TDAPTAPK.A     | S416:           | 3 | 3,3406 | 0,223 | 0,297  |
| 12 | Q9H4Z2 ZN335_HUMAN | R.TPVEAGVSQS#DAENAAPSCPEHDTLPR.R   | S418:           | 3 | 4,9898 | 0,467 | -0,242 |
| 12 | Q96MH2 HEX12_HUMAN | R.HDSGGS#LPLT#PR.M                 | S42:T46:        | 2 | 2,5967 | 0,197 | -0,262 |
| 12 | Q13547 HDAC1_HUMAN | R.IACEEFS#DS#EEEEGEGGRK.N          | S421:S423:      | 3 | 4,6684 | 0,34  | 0,631  |
| 12 | Q92769 HDAC2_HUMAN | R.IACDEEFS#DS#EDEGEGGRR.N          | S422:S424:      | 3 | 3,6628 | 0,413 | 0      |
| 12 | Q96D71 REPS1_HUMAN | R.TGS#DHTNPTS#PLLVKPSDLLEENK.I     | S423:S430:      | 3 | 4,695  | 1     | -0,465 |
| 12 | Q7Z3K3 POGZ_HUMAN  | K.SLDSEPSVPSAAKPPS#PEK.T           | S425:           | 2 | 4,0789 | 0,485 | -0,426 |
| 12 | Q7Z3K3 POGZ_HUMAN  | K.SLDSEPSVPSAAKPPS#PEK.T           | S425:           | 3 | 3,4517 | 0,366 | 0,091  |

|    |                     |                                      |                 |   |        |       |        |
|----|---------------------|--------------------------------------|-----------------|---|--------|-------|--------|
| 12 | Q96JM3 ZN828_HUMAN  | R.KPGPPLS#PEIRS#PAGS#PELR.K          | S427:S432:S436: | 3 | 3,9333 | 0,347 | 0      |
| 12 | O60508 PRP17_HUMAN  | K.S#PSSKPSLAVAVDSAPEVAVK.E           | S43:            | 3 | 3,5192 | 0,244 | 0      |
| 12 | Q9Y3R0 GRIP1_HUMAN  | R.QS#IPEEFKGSTVVELM*K.K              | S43:            | 3 | 3,0063 | 0,196 | 0,181  |
| 12 | Q5F1R6 DJC21_HUMAN  | K.ELEDS#PQENVSVTEIIKPCDDPK.S         | S430:           | 3 | 3,4802 | 0,214 | 0      |
| 12 | Q99567 NUP88_HUMAN  | K.FLGS#DEEDKDSLQELSTEQK.C            | S430:           | 3 | 3,4412 | 0,297 | -0,846 |
| 12 | Q15003 CND2_HUMAN   | R.TM*CPLLSM*KPGEYSYFS#PR.T           | S432:           | 3 | 3,5649 | 0,335 | 0,462  |
| 12 | O95628 CNOT4_HUMAN  | K.ELSVQDQPSLS#PTSLQNSSSHTTTAK.G      | S432:           | 3 | 3,1071 | 0,267 | -0,259 |
| 12 | Q6AW89 Q6AW89_HUMAN | K.DGPHGS#VLEEGLDDYLTR.L              | S435:           | 3 | 3,0665 | 0,23  | -0,089 |
| 12 | Q96B97 SH3K1_HUMAN  | R.GDS#PKIDLAGSSLSGILDK.D             | S436:           | 2 | 3,9493 | 0,518 | -0,062 |
| 12 | Q96B97 SH3K1_HUMAN  | R.GDS#PKIDLAGSSLSGILDK.D             | S436:           | 3 | 3,4696 | 0,268 | 0      |
| 12 | Q14004 CD2L5_HUMAN  | R.SRHS#S#IS#PSTLTLK.S                | S436:S437:S439: | 3 | 3,6667 | 0,158 | -0,104 |
| 12 | Q15149 PLEC1_HUMAN  | R.AGTLSITEFADM*LSGNAGGFRS#R.S        | S4382:          | 3 | 4,5862 | 0,432 | -0,075 |
| 12 | O94887 FARP2_HUMAN  | K.DSSSLTDPQVSYVKS#PAAER.R            | S439:           | 3 | 4,1329 | 0,456 | 0,238  |
| 12 | Q3KQU3 MA7D1_HUMAN  | K.RQS#LPAS#PR.A                      | S442:S446:      | 2 | 2,7562 | 0,226 | -0,312 |
| 12 | Q08945 SSRP1_HUMAN  | K.EGM*NPSYDEYADS#DEDQHDAYLER.M       | S444:           | 3 | 4,2981 | 0,335 | -0,87  |
| 12 | Q08945 SSRP1_HUMAN  | K.EGMNPSYDEYADS#DEDQHDAYLER.M        | S444:           | 3 | 3,6593 | 0,388 | 0,75   |
| 12 | Q8NB49 AT11C_HUMAN  | K.GVTQEVDGLS#QTDGTLTYFDKVDK.N        | S445:           | 3 | 3,7621 | 0,263 | 0,271  |
| 12 | Q8IZD4 DCP1B_HUMAN  | R.QLPISGSQTGSSGVIS#PQELLKK.L         | S449:           | 3 | 3,4617 | 0,357 | 1,155  |
| 12 | A8K703 A8K703_HUMAN | R.SSKS#AEDLTDGSDVLAELQK.L            | S45:            | 3 | 6,6616 | 0,478 | 0,476  |
| 12 | Q9UPN4 AZI1_HUMAN   | R.TQDVLAQDAAGDNLEM*M*APSRGS#AK.S     | S450:           | 3 | 5,8985 | 0,526 | -0,136 |
| 12 | Q86VM9 ZCH18_HUMAN  | R.DSGSDQDLGAGVRAS#DLEDEESAAR.G       | S46:            | 3 | 5,303  | 0,616 | 0,533  |
| 12 | O15014 ZN609_HUMAN  | R.TNS#M*GSATGPLPGTKVEPTVLDR.N        | S467:           | 3 | 3,1396 | 0,132 | 0,075  |
| 12 | Q9NZN4 EHD2_HUMAN   | K.YDEIFYNLAPADGKLS#GSK.A             | S468:           | 3 | 2,9611 | 0,166 | 0      |
| 12 | O15047 SET1A_HUMAN  | R.S#GSPAPETTNEVPFAQHSSLSR.I          | S468:           | 3 | 2,8042 | 0,2   | 0,567  |
| 12 | Q9H6F5 CCD86_HUMAN  | R.ALVEFESNPEETREPGS#PPSVQR.A         | S47:            | 3 | 5,1312 | 0,434 | 0,139  |
| 12 | O00418 EF2K_HUMAN   | R.KYES#DEDS#LGSSGR.V                 | S470:S474:      | 2 | 4,9198 | 0,574 | -0,433 |
| 12 | Q8WXE0 CSK12_HUMAN  | R.S#GEQIFTQDVRPEQLLEGK.D             | S471:           | 3 | 2,99   | 0,239 | 0,081  |
| 12 | Q96PU5 NED4L_HUMAN  | K.DTSLNPQS#PQPS#PYNS#PKPQHK.V        | S479:S483:S487: | 3 | 3,2307 | 0,331 | 0,613  |
| 12 | P22681 CBL_HUMAN    | K.VERPPS#PFSM*APQASLPPVPPR.L         | S483:           | 3 | 3,3571 | 0,362 | -0,298 |
| 12 | Q9NZT2 OGFR_HUMAN   | K.VDEGAGDAAVASGGAQTLALAGS#PAPSGHPK.A | S484:           | 3 | 4,4126 | 0,369 | -0,188 |
| 12 | Q9ULW0 TPX2_HUMAN   | K.VLPITVPKS#PAFALK.N                 | S486:           | 2 | 3,9469 | 0,424 | 0,367  |
| 12 | Q9UKV3 ACINU_HUMAN  | K.AES#PAEKVPEESVLPVQK.S              | S490:           | 3 | 6,0507 | 0,479 | 0,515  |
| 12 | Q9ULU4 PKCB1_HUMAN  | K.TGQAGSLSGS#PKPFPQLSAPITTK.T        | S490:           | 3 | 5,547  | 0,489 | -0,361 |

|    |                    |                                        |              |   |        |       |        |
|----|--------------------|----------------------------------------|--------------|---|--------|-------|--------|
| 12 | Q9UKV3 ACINU_HUMAN | K.AES#PAEKVPEESVLPVQK.S                | S490:        | 2 | 2,7699 | 0,504 | 0,802  |
| 12 | Q09666 AHNK_HUMAN  | K.LSGPS#LKM*PSLEISAPK.V                | S4903:       | 3 | 3,8211 | 0,482 | 0      |
| 12 | Q09666 AHNK_HUMAN  | K.LSGPS#LKM*PSLEISAPK.V                | S4903:       | 2 | 3,4476 | 0,507 | -0,264 |
| 12 | Q8N3E9 PLCD3_HUMAN | R.ALS#DREEEEDDEEEVEAAAQR.R             | S496:        | 3 | 3,9455 | 0,496 | 0,607  |
| 12 | Q96C34 RUND1_HUMAN | R.KLSQS#FALPVTGGTVVTPK.Q               | S499:        | 3 | 2,911  | 0,192 | 0      |
| 12 | Q9H0D6 XRN2_HUMAN  | R.KAEDS#DS#EPEPEDNVR.L                 | S499:S501:   | 2 | 4,9714 | 0,481 | -0,494 |
| 12 | Q9H0D6 XRN2_HUMAN  | R.KAEDS#DS#EPEPEDNVR.L                 | S499:S501:   | 3 | 3,0242 | 0,224 | -0,185 |
| 12 | Q12888 TP53B_HUMAN | K.TSEIEPKNS#PEDLGLSLTGDSCK.L           | S500:        | 3 | 4,6996 | 0,539 | -0,286 |
| 12 | Q8IXJ9 ASXL1_HUMAN | R.ASAS#PDRISLPQETVDQEPK.D              | S503:        | 3 | 4,0522 | 0,274 | 0,078  |
| 12 | O14974 MYPT1_HUMAN | R.RLAS#TS#DIEEK.E                      | S507:S509:   | 2 | 3,5811 | 0,476 | -0,26  |
| 12 | Q9BZL4 PP12C_HUMAN | R.IPEPES#PAKPNVPTASTAPPADSR.D          | S509:        | 3 | 4,6217 | 0,369 | -0,146 |
| 12 | O60832 DKC1_HUMAN  | K.AKEVELVS#E.-                         | S513:        | 2 | 2,9007 | 0,313 | -0,225 |
| 12 | Q9P2B4 CT2NL_HUMAN | R.FTSQQGPIKPVVS#PNSSPFGTDYR.N          | S523:        | 3 | 5,2236 | 0,304 | -0,141 |
| 12 | O75122 CLAP2_HUMAN | R.IPRPSVS#QGCS#R.E                     | S525:S529:   | 2 | 2,5749 | 0,376 | 0,243  |
| 12 | O94979 SC31A_HUMAN | K.DSDQVAQS#DGEESPAEEQLLGEHIK.E         | S527:        | 3 | 4,7825 | 0,444 | -0,128 |
| 12 | P05783 K1C18_HUMAN | R.STS#FRGGM*GSSGLATGIAGGLAGM*GGIQNEK.E | S53:         | 3 | 6,4993 | 0,503 | -0,062 |
| 12 | Q86VM9 ZCH18_HUMAN | K.KLGVSVS#PSR.A                        | S532:S534:   | 2 | 2,1576 | 0,265 | -0,205 |
| 12 | Q01970 PLCB3_HUMAN | K.S#LGDEGLNRGPYVLGPADR.E               | S537:        | 3 | 3,8813 | 0,43  | 0      |
| 12 | Q15154 PCM1_HUMAN  | K.DEETESEYDS#EHENSEPVTNIR.N            | S537:        | 3 | 3,4202 | 0,339 | -0,13  |
| 12 | Q86VI3 IQGA3_HUMAN | R.VLAVSLINEALDKGS#PEK.T                | S539:        | 2 | 4,0955 | 0,526 | -0,373 |
| 12 | Q86VI3 IQGA3_HUMAN | R.VLAVSLINEALDKGS#PEK.T                | S539:        | 3 | 2,6641 | 0,338 | -0,093 |
| 12 | Q9ULH7 MKL2_HUMAN  | R.M*TNNEDSLS#PTSSTLSNLELDAAEKDR.K      | S543:        | 3 | 3,3558 | 0,413 | 0,422  |
| 12 | Q13144 EI2BE_HUMAN | R.GGS#PQM*DDIKVFQNEVLGTLQR.G           | S544:        | 3 | 5,68   | 0,468 | -0,217 |
| 12 | Q9Y5K6 CD2AP_HUMAN | K.DTCYSPKPS#VYLSTPSSASK.A              | S546:        | 3 | 3,4643 | 0,431 | 0,243  |
| 12 | Q9ULU4 PKCB1_HUMAN | K.ELSESQQQSTPVPPLIS#PKR.Q              | S547:        | 3 | 3,1422 | 0,293 | 0,159  |
| 12 | Q969Z0 TBGR4_HUMAN | R.DFVAPHLAQPTGSQSPPPGS#K.R             | S558:        | 3 | 3,1893 | 0,247 | 0,083  |
| 12 | Q14966 ZN638_HUMAN | K.CFRS#VS#PER.M                        | S558:S560:   | 3 | 3,3049 | 0,206 | -0,07  |
| 12 | Q3MIN7 RGL3_HUMAN  | R.SRDAPAGS#PPAS#PGPQGPK.L              | S569:S573:   | 3 | 5,1351 | 0,536 | -0,172 |
| 12 | Q12906 ILF3_HUMAN  | K.GSS#EQAESDNM*DVPPEDDSKEGAGEQK.T      | S57:         | 3 | 3,3126 | 0,33  | -0,25  |
| 12 | Q09666 AHNK_HUMAN  | K.GKGGVTGS#PEAS#ISGSK.G                | S5731:S5735: | 2 | 3,5896 | 0,508 | -0,218 |
| 12 | P17812 PYRG1_HUMAN | R.SGSS#SPDSEITELKFPSINHD.-             | S574:        | 3 | 3,6894 | 0,31  | 0,472  |
| 12 | Q9Y2W1 TR150_HUMAN | R.M*DS#FDEDLARPSGLLAQER.K              | S575:        | 3 | 4,3736 | 0,396 | 0,163  |
| 12 | P17812 PYRG1_HUMAN | R.SGSS#PDSEITELKFPSINHD.-              | S575:        | 3 | 3,2155 | 0,239 | 0,079  |

|    |                     |                                        |              |   |        |       |        |
|----|---------------------|----------------------------------------|--------------|---|--------|-------|--------|
| 12 | Q68EM7 RHG17_HUMAN  | R.AESSSGGGTVSSAGILEQGPSGDGS#PPKPK.D    | S575:        | 3 | 2,7175 | 0,367 | 0,85   |
| 12 | Q9H0B6 KLC2_HUMAN   | R.ASSLNFLNKS#VEEPTQPGGTGLSDSR.T        | S589:        | 3 | 3,8107 | 0,199 | 0,066  |
| 12 | Q00839 HNRPU_HUMAN  | R.LQAALDDEEAGGRPAM*EPGNCS#LDLGGDSAGR.S | S59:         | 3 | 3,1276 | 0,328 | 0,681  |
| 12 | Q8IV36 CQ028_HUMAN  | R.TGS#QEGTSM*EGSRPAAPAEPGLK.T          | S593:        | 3 | 3,5193 | 0,421 | -0,075 |
| 12 | Q6Y7W6 PERQ2_HUMAN  | R.VPFS#PGPAPPPHM*GELDQER.L             | S593:        | 3 | 3,1751 | 0,176 | -0,243 |
| 12 | A4LAA3 A4LAA3_HUMAN | K.LTPVLSLNS#PIKGADCQEVQDK.D            | S598:        | 3 | 2,6198 | 0,197 | 0      |
| 12 | P05783 K1C18_HUMAN  | R.STSFRGGM*GS#GGLATGIAGGLAGM*GGIQNEK.E | S60:         | 3 | 5,7625 | 0,466 | -0,186 |
| 12 | P51116 FXR2_HUMAN   | R.TDGS#ISGDRQPVTVADYISR.A              | S601:        | 3 | 4,6471 | 0,396 | 0      |
| 12 | Q8IYB3 SRRM1_HUMAN  | R.RYS#PS#PPPK.R                        | S605:S607:   | 2 | 2,6009 | 0,252 | -0,513 |
| 12 | Q14157 UBP2L_HUMAN  | R.RYPSS#ISS#PQK.D                      | S605:S609:   | 2 | 2,7264 | 0,377 | -0,408 |
| 12 | Q9UJ41 RABX5_HUMAN  | K.LDAQSLNLSQEDFDRYM*SGQTS#PR.K         | S607:        | 3 | 5,3065 | 0,353 | 0,385  |
| 12 | P82909 RT36_HUMAN   | K.GSKS#PDLLM*YQGPPDTAEIK.T             | S61:         | 3 | 5,2498 | 0,29  | 0,078  |
| 12 | Q8TDZ2 MICA1_HUMAN  | K.SM*AHS#PGPVSQASPGTSSAVLFLSK.L        | S617:        | 3 | 4,5939 | 0,462 | 0,504  |
| 12 | Q15398 DLG7_HUMAN   | R.VES#PVKLFSGLSVSSEGPSQR.L             | S618:        | 3 | 2,8978 | 0,228 | -0,081 |
| 12 | Q92625 ANS1A_HUMAN  | R.S#LSKSDSLLTCSPTEDATM*GSR.S           | S622:        | 3 | 5,984  | 0,436 | -0,215 |
| 12 | Q92625 ANS1A_HUMAN  | R.SLS#KSDSLLTCSPTEDATM*GSR.S           | S624:        | 3 | 5,3197 | 0,499 | -0,072 |
| 12 | Q9HCJ3 RAVR2_HUMAN  | K.TGIASSILDAISQGSSES#QHALEK.C          | S624:        | 3 | 3,2628 | 0,253 | -0,302 |
| 12 | Q8IZ40 RCOR2_HUMAN  | R.VGTNYQAVIPECKPES#PAR.Y               | S63:         | 3 | 3,6559 | 0,093 | 0      |
| 12 | Q9UJA3 MCM8_HUMAN   | R.M*NS#QDSNTSVLEVSEKPLSER.L            | S630:        | 3 | 5,6356 | 0,42  | 0,359  |
| 12 | Q92995 UBP13_HUMAN  | R.GLQPGEELPDIS#PPIVIPDDSKDR.L          | S630:        | 3 | 2,6046 | 0,105 | -0,196 |
| 12 | Q8N9T8 KRI1_HUMAN   | R.QLPALDGSLM*GPES#PPAQEEEEAPVSPHK.K    | S634:        | 3 | 3,7117 | 0,314 | -0,304 |
| 12 | Q8WXH0 SYNE2_HUMAN  | R.LTSCTPGLLEDEKEAS#ENETDM*EDPR.E       | S6361:       | 3 | 4,8103 | 0,414 | -0,434 |
| 12 | Q2M2I8 AAK1_HUMAN   | R.ILS#DVTHSAVFGVPASK.S                 | S637:        | 3 | 4,4156 | 0,35  | 0,202  |
| 12 | Q2M2I8 AAK1_HUMAN   | R.ILS#DVTHSAVFGVPASK.S                 | S637:        | 2 | 3,734  | 0,417 | -0,54  |
| 12 | A8MYB5 A8MYB5_HUMAN | R.RS#PT#EDFR.Q                         | S638:T640:   | 2 | 2,5925 | 0,185 | -0,209 |
| 12 | O95394 AGM1_HUMAN   | K.STIGVM*VTAS#HNPEEDNGVK.L             | S64:         | 3 | 3,5517 | 0,366 | 0      |
| 12 | Q8IY81 RRMJ3_HUMAN  | R.GPKS#DDDGFVPIEDPAK.H                 | S644:        | 2 | 2,9665 | 0,296 | -0,116 |
| 12 | P12270 TPR_HUMAN    | K.RPS#TSQTVSTPAPVPIESTEAEIAK.A         | S646:        | 3 | 5,2553 | 0,317 | -0,264 |
| 12 | P37275 ZEB1_HUMAN   | K.M*QAGQISVQSSEPS#PEPGKVNIPAK.N        | S646:        | 3 | 4,1492 | 0,363 | -0,464 |
| 12 | Q9H1B7 EAP1_HUMAN   | R.RNSS#SPVS#PASVPGQR.R                 | S658:S662:   | 2 | 2,1712 | 0,247 | 0      |
| 12 | P42166 LAP2A_HUMAN  | K.GPPDFS#SDEEREPTVVLGSGAAAAGR.S        | S66:         | 3 | 5,7922 | 0,453 | -0,276 |
| 12 | Q96B23 CR025_HUMAN  | R.RDS#SES#QLASTES#DKPTTGR.V            | S66:S69:S76: | 3 | 3,5094 | 0,198 | -0,229 |
| 12 | Q9NQW6 ANLN_HUMAN   | R.AESGDS#LGSEDRDLLYSIDAYR.S            | S661:        | 3 | 5,1005 | 0,504 | -0,437 |

|    |                    |                                   |                 |   |        |       |        |
|----|--------------------|-----------------------------------|-----------------|---|--------|-------|--------|
| 12 | Q0VG06 FP100_HUMAN | R.APS#PLGPTRDPVATFLETCE.E         | S667:           | 3 | 5,0709 | 0,429 | -0,162 |
| 12 | P78559 MAP1A_HUMAN | K.AELEEM*EEVHPS#DEEEEDATK.A       | S667:           | 3 | 3,6374 | 0,385 | -0,216 |
| 12 | P42166 LAP2A_HUMAN | K.GPPDFSS#DEEREPTVLGSGAAAAGR.S    | S67:            | 3 | 4,6687 | 0,417 | 0,069  |
| 12 | Q9Y2N3 PO121_HUMAN | K.APPTLQAETATKPQATSAPS#PAPK.Q     | S674:           | 3 | 5,2531 | 0,469 | -0,3   |
| 12 | P46100 ATRX_HUMAN  | R.RPTETNPVTS#NS#DEECNETVK.E       | S675:S677:      | 3 | 5,5058 | 0,462 | 0,57   |
| 12 | Q68EM7 RHG17_HUMAN | R.SPS#PPTQHTGQPPGQPSAPSQLSAPR.R   | S676:           | 3 | 4,7813 | 0,414 | 0,136  |
| 12 | Q8IY81 RRMJ3_HUMAN | R.ILDPEGLALGAVIAS#SKK.A           | S676:           | 2 | 3,6015 | 0,491 | -0,655 |
| 12 | Q9H063 MAF1_HUMAN  | K.QFCQEQGPHVLEALSPPQTSGLS#PSR.L   | S68:            | 3 | 4,7302 | 0,423 | 0,5    |
| 12 | Q12959 DLG1_HUMAN  | K.HVTS#NAS#DSESSYR.G              | S684:S687:      | 2 | 3,217  | 1     | -0,287 |
| 12 | Q14160 LAP4_HUMAN  | R.AEEEEAS#TEEEDKEGAVVSAPSVK.G     | S688:           | 3 | 3,6901 | 0,367 | 0      |
| 12 | Q15398 DLG7_HUMAN  | R.S#SIEDAQCPGLPDLIEENHVVNK.T      | S689:           | 3 | 3,4008 | 0,326 | 0,277  |
| 12 | Q8TEW0 PARD3_HUMAN | K.CNELKSPGS#PPGPELPIETALDDR.E     | S695:           | 3 | 4,4648 | 0,263 | -0,411 |
| 12 | P06748 NPM_HUMAN   | K.DELHIVEAEM*NYEGS#PIK.V          | S70:            | 3 | 4,5443 | 0,402 | 0,082  |
| 12 | O43719 HTSF1_HUMAN | K.LFEDDDS#NEKLFDEEEDSSEK.L        | S702:           | 3 | 6,4475 | 0,482 | -0,352 |
| 12 | P25205 MCM3_HUMAN  | K.DGDSYDPYDFS#DTEEEM*PQVHTPK.T    | S711:           | 3 | 3,9789 | 0,421 | -0,189 |
| 12 | P10636 TAU_HUMAN   | K.TDHGAEIVYKS#PVVS#GDTs#PR.H      | S713:S717:S721: | 3 | 5,8311 | 0,546 | 0      |
| 12 | Q6P4Q7 CNNM4_HUMAN | R.M*ENS#PQFPIDGCTTHM*ENLAEK.S     | S728:           | 3 | 4,1371 | 0,171 | -0,138 |
| 12 | Q9Y6Q9 NCOA3_HUMAN | K.DTSSITSCGDGNVVKQEQLS#PK.K       | S728:           | 3 | 2,926  | 0,293 | 0,151  |
| 12 | O43583 DENR_HUMAN  | K.LTVENS#PKQEAGISEGQGTAGEEEEEK.K  | S73:            | 3 | 5,541  | 0,513 | -0,065 |
| 12 | Q32M24 LRRF1_HUMAN | R.CTLPEHESPS#QDISDACEAESTER.C     | S735:           | 3 | 7,5517 | 0,564 | -0,388 |
| 12 | Q96T58 MINT_HUMAN  | R.RPQS#PGAS#PSQAER.L              | S736:S740:      | 3 | 3,1486 | 0,283 | -0,337 |
| 12 | Q96T58 MINT_HUMAN  | R.RPQS#PGAS#PSQAER.L              | S736:S740:      | 2 | 2,7115 | 0,189 | -0,375 |
| 12 | Q8IYB3 SRRM1_HUMAN | K.KAAS#PS#PQSVR.R                 | S738:S740:      | 2 | 2,5637 | 0,186 | -0,379 |
| 12 | O95685 PPR3D_HUMAN | R.ARS#LPS#SPER.R                  | S74:S77:        | 2 | 2,1829 | 0,18  | -0,291 |
| 12 | P21127 CD2L1_HUMAN | R.GTS#PRPPEGGLGYSQLGDDDLK.E       | S752:           | 3 | 5,9492 | 0,41  | 0,235  |
| 12 | Q9UM22 SYNG_HUMAN  | R.QLS#LEGSGLGVEDLKDNTPSGK.S       | S752:           | 3 | 2,8173 | 0,254 | 0,157  |
| 12 | A1L390 PKHG3_HUMAN | R.FNS#LPRPDPEVPPVGSK.R            | S759:           | 3 | 3,7361 | 0,434 | 0,636  |
| 12 | O75152 ZC11A_HUMAN | R.LSS#ASTGKPLSVEDDFEK.L           | S759:           | 3 | 2,9652 | 0,222 | -0,088 |
| 12 | Q2V2M9 FHOD3_HUMAN | R.GSIS#PDAEPNDKVPETAPVQPK.T       | S763:           | 3 | 3,2707 | 0,222 | -0,155 |
| 12 | Q14149 MORC3_HUMAN | K.SES#PDHM*VSQYQQALEEIER.L        | S765:           | 3 | 5,648  | 0,457 | 0,444  |
| 12 | Q8WUA4 TF3C2_HUMAN | K.ADLIPYQDS#PEGPDHSSASSGVPNPPK.A  | S765:           | 3 | 2,7646 | 0,329 | -0,386 |
| 12 | P43243 MATR3_HUMAN | K.DTSENADGQS#DENKDDYTIPDEYR.I     | S766:           | 3 | 4,8104 | 0,533 | -0,064 |
| 12 | Q99856 ARI3A_HUMAN | R.AAAAGLGHPAS#PGGSEDGPPGSEEDAAR.E | S77:            | 3 | 5,1487 | 0,421 | -0,534 |

|    |                     |                                    |                 |   |        |       |        |
|----|---------------------|------------------------------------|-----------------|---|--------|-------|--------|
| 12 | P50219 MNX1_HUMAN   | R.LRAES#PS#PPR.L                   | S77:S79:        | 2 | 2,8821 | 0,268 | -0,192 |
| 12 | Q9UJX5 APC4_HUMAN   | K.IKEEVLS#ESEAEENQQAGAAALAPEIVIK.V | S777:           | 3 | 3,9468 | 0,267 | -0,243 |
| 12 | Q13625 ASPP2_HUMAN  | K.SASVTASSES#PVEIQNPYLHVEPEK.E     | S783:           | 3 | 3,2255 | 0,333 | -0,132 |
| 12 | Q8IYB3 SRRM1_HUMAN  | K.AKSPTPS#PS#PPR.N                 | S795:S797:      | 2 | 2,2006 | 0,185 | -0,883 |
| 12 | P19634 SL9A1_HUMAN  | R.CLS#DPGPHPEPGEPEFFPK.G           | S796:           | 3 | 3,2396 | 0,399 | 0,241  |
| 12 | Q9H3Z4 DNJC5_HUMAN  | R.S#LSTSGESLYHVLGLDK.N             | S8:             | 2 | 3,7239 | 0,494 | -0,647 |
| 12 | O95696 BRD1_HUMAN   | R.SRS#TCGDS#EVEEES#PGKR.L          | S803:S808:S814: | 3 | 4,1614 | 0,162 | -0,407 |
| 12 | Q7Z4H7 FA29A_HUMAN  | K.LEPNS#PM*HGGTLLEDVVGGR.Q         | S805:           | 3 | 2,7158 | 0,082 | 0      |
| 12 | Q96ST3 SIN3A_HUMAN  | R.GDLS#DVEEEEEEM*DVEATGAVKK.H      | S832:           | 3 | 4,3806 | 0,428 | -0,128 |
| 12 | Q8N3V7 SYNPO_HUMAN  | R.AAS#PAKPSLIDLVPNLPK.G            | S833:           | 2 | 3,0857 | 0,392 | -0,518 |
| 12 | Q8TEW0 PAR3_HUMAN   | K.S#M*DLGIADETKLNTVDDQK.A          | S852:           | 3 | 3,5898 | 0,471 | 0,669  |
| 12 | Q9UQ35 SRRM2_HUMAN  | K.SGTPPRQGS#ITSPQANEQSVTPQR.R      | S854:           | 3 | 4,1204 | 0,364 | -0,351 |
| 12 | Q13595 TRA2A_HUMAN  | R.SRS#YT#PEYR.R                    | S86:T88:        | 2 | 3,1667 | 0,337 | -0,463 |
| 12 | Q6GYQ0 GRIPE_HUMAN  | R.GSS#PGSLEIPKDLPDILNK.Q           | S861:           | 2 | 2,1078 | 0,401 | -0,592 |
| 12 | Q9UPN4 AZI1_HUMAN   | R.S#GSPRPTPTDFLM*LFEGS#PSGKK.R     | S87:S105:       | 3 | 3,106  | 0,369 | -0,133 |
| 12 | Q6P2E9 EDC4_HUMAN   | R.DSQDAS#AEQSDHDEVASLASASGGFGTK.V  | S875:           | 3 | 4,3407 | 0,21  | -0,185 |
| 12 | Q86UU0 BCL9L_HUMAN  | K.ANQIS#PSNSLKNPQAGVPPFSSLK.G      | S88:            | 3 | 4,4867 | 0,272 | 0,484  |
| 12 | Q6PL18 ATAD2_HUMAN  | K.DAQNSSDSS#FEKNVEITEQLANGR.H      | S88:            | 3 | 2,836  | 0,322 | 0,404  |
| 12 | Q8NCF5 NF2IP_HUMAN  | R.DNS#NS#DS#EGEDRRPAGPPR.E         | S88:S90:S92:    | 3 | 2,7198 | 0,218 | -0,239 |
| 12 | O14981 BTAF1_HUMAN  | R.TRQEPTS#ESS#M*EDSPTTER.L         | S88:S91:        | 3 | 3,0415 | 0,124 | -0,39  |
| 12 | P46100 ATRX_HUMAN   | R.ETFS#SAEGTVDKDTTIM*ELR.D         | S889:           | 3 | 4,0761 | 0,19  | 0,236  |
| 12 | P29317 EPHA2_HUMAN  | R.VS#IRLPSTSGSEGVPR.T              | S892:           | 3 | 2,9345 | 0,39  | 0,196  |
| 12 | Q7L7X3 TAOK1_HUMAN  | R.AGS#LKDPEIAELFFK.E               | S9:             | 3 | 4,4411 | 0,249 | -0,21  |
| 12 | P49841 GSK3B_HUMAN  | R.TTS#FAESCKPVQQPSAFGSM*K.V        | S9:             | 3 | 4,0926 | 0,372 | -0,153 |
| 12 | Q7L7X3 TAOK1_HUMAN  | R.AGS#LKDPEIAELFFK.E               | S9:             | 2 | 2,9924 | 0,278 | -0,42  |
| 12 | Q12872 SFRS8_HUMAN  | R.GVS#QEKEAQISSAIVSSVQSK.I         | S909:           | 3 | 3,8862 | 0,455 | 0,571  |
| 12 | Q9NXL9 MCM9_HUMAN   | K.SLAQVEEPAIENVKPPGS#PVAK.L        | S915:           | 3 | 3,7736 | 0,253 | -0,235 |
| 12 | Q9P107 GMIP_HUMAN   | R.GRGPSAAAAS#PEGS#PLR.R            | S919:S923:      | 2 | 2,2854 | 0,39  | 0,621  |
| 12 | Q15311 RBP1_HUMAN   | K.RTEGYAAFQEDS#S#GDEAESPSK.M       | S92:S93:        | 3 | 4,8008 | 0,459 | -0,145 |
| 12 | P82094 TMF1_HUMAN   | R.KPFSVS#STPTM*S#R.S               | S927:S933:      | 2 | 2,3683 | 1     | -0,381 |
| 12 | A2RRN1 A2RRN1_HUMAN | R.AQS#PFTHITSDFSNDDEVESEK.W        | S93:            | 3 | 5,2434 | 0,532 | -0,286 |
| 12 | Q69YH5 CDCA2_HUMAN  | R.TICTFDSSGFESM*S#PIKETVSSR.Q      | S937:           | 3 | 4,947  | 0,548 | -0,206 |
| 12 | Q9Y618 NCOR2_HUMAN  | R.LLS#PRPSLLTPTGDPR.A              | S939:           | 3 | 3,1114 | 0,266 | 0,203  |

|    |                    |                                  |                    |   |        |       |        |
|----|--------------------|----------------------------------|--------------------|---|--------|-------|--------|
| 12 | Q9UQ35 SRRM2_HUMAN | R.SRS#VS#PCSNVESR.L              | S952:S954:         | 2 | 4,4319 | 0,346 | -0,451 |
| 12 | Q9UQ35 SRRM2_HUMAN | R.SRS#VS#PCSNVESR.L              | S952:S954:         | 3 | 3,5418 | 0,264 | -0,113 |
| 12 | O75122 CLAP2_HUMAN | R.GVTEAIQNF5FRS#QEDM*NEPLK.R     | S955:              | 3 | 5,1075 | 0,4   | -0,069 |
| 12 | P46379 BAT3_HUMAN  | R.AS#PEPQRENASPAGTTAEEM*SR.G     | S964:              | 3 | 5,8216 | 0,488 | -0,638 |
| 12 | Q14498 RBM39_HUMAN | R.YRS#PYS#GPK.F                  | S97:S100:          | 2 | 2,7882 | 0,446 | -0,201 |
| 12 | Q6WCQ1 MRIP_HUMAN  | K.AATEALGEKSPDS#ATVSGYDIM*K.S    | S979:              | 3 | 3,8824 | 0,333 | 0,15   |
| 12 | Q9NZZ3 CHMP5_HUMAN | R.DNLAQQSFNM*EQANYTIQS#LKDTK.T   | S98:               | 3 | 4,7724 | 0,384 | -0,381 |
| 12 | Q9C0C2 TB182_HUMAN | R.SFGTRPLS#SGFSPEEAQQQDEEFK.K    | S983:              | 3 | 4,8674 | 0,378 | -0,503 |
| 12 | O95382 M3K6_HUMAN  | R.VPEEPAAEPPAS#PEESSGLSLLHQESK.R | S984:              | 3 | 5,5635 | 0,486 | -0,125 |
| 12 | Q96S90 LYSM1_HUMAN | R.DLFNGLDS#EEEKDGEEK.V           | S99:               | 3 | 3,0785 | 0,199 | -0,09  |
| 12 | Q14669 TRIPC_HUMAN | R.DDSLDSLSPQGRS#DVLK.R           | S997:              | 2 | 3,6137 | 0,367 | 0,441  |
| 12 | Q14669 TRIPC_HUMAN | R.DDSLDSLSPQGRS#DVLK.R           | S997:              | 3 | 2,6031 | 0,29  | 0,283  |
| 12 | Q14690 RRP5_HUMAN  | K.DSET#VDEDEEVDPALTVGTIKK.H      | T1012:             | 3 | 3,4607 | 0,413 | -0,296 |
| 12 | Q9UIF8 BAZ2B_HUMAN | R.DTSGGIDLGEEQHPLGT#PTPGR.K      | T1087:             | 3 | 3,4672 | 0,475 | 0,553  |
| 12 | P06744 G6PI_HUMAN  | R.SNT#PILVDGKDV*PEVVK.V          | T109:              | 3 | 4,4257 | 0,499 | 0,267  |
| 12 | P20042 IF2B_HUMAN  | K.IESDVQEPT#EPEDDLDIM*LGK.K      | T111:              | 3 | 4,7027 | 0,538 | -0,27  |
| 12 | P49916 DNL3_HUMAN  | K.LT#TTGQVTSVPKASVFTSTNPR.K      | T116:              | 3 | 2,6856 | 0,179 | 0      |
| 12 | Q7Z2Z1 CO042_HUMAN | K.RPGNSTVT#SSPVT#PK.K            | T1301:T1307:       | 2 | 2,5166 | 1     | -0,547 |
| 12 | Q9P2B7 K1430_HUMAN | K.IVKEGEDDYT#DGEES#S#DDGKK.Y     | T133:S138:S139:    | 3 | 4,6494 | 0,336 | 0      |
| 12 | P30622 CLIP1_HUMAN | R.KVQAEDENGLQTT#PAS#R.A          | T140:S143:         | 3 | 3,2487 | 0,225 | 0,088  |
| 12 | O75781 PALM_HUMAN  | R.KTEVVM*NSQQT#PVGTT#PK.D        | T141:T145:         | 3 | 5,2545 | 0,483 | -0,272 |
| 12 | Q8N9Q2 S12IP_HUMAN | K.HSST#PNS#SEFSR.K               | T146:S149:         | 2 | 3,0044 | 0,33  | -0,408 |
| 12 | Q9NRS6 SNX15_HUMAN | R.DLHILPPPLIPT#PPPDDPR.L         | T148:              | 3 | 2,9514 | 0,264 | -0,168 |
| 12 | P25205 MCM3_HUMAN  | R.RYSDLT#TLVAFSSSVYPTK.D         | T163:              | 3 | 4,1726 | 0,319 | -0,079 |
| 12 | O75616 ERAL_HUMAN  | K.ETQVILLDT#PGIISPGKQK.R         | T168:              | 3 | 2,9026 | 0,178 | -0,173 |
| 12 | Q16539 MK14_HUMAN  | R.HTDDEM*T#GY#VATR.W             | T180:Y182:         | 2 | 4,036  | 0,522 | 0,365  |
| 12 | Q9UKY7 CDV3_HUMAN  | R.KT#PQGPEIYSDTQFSLQSTAK.H       | T182:              | 3 | 6,4009 | 0,414 | -0,211 |
| 12 | Q15527 SURF2_HUMAN | K.DLGSTEDGDGTDFFLT#DKEDK.A       | T195:              | 3 | 2,9227 | 0,188 | 0,737  |
| 12 | P12270 TPR_HUMAN   | R.GLQLT#PGIGGM*QQHFFDDEDR.T      | T2102:             | 3 | 3,1531 | 0,381 | 0,521  |
| 12 | Q01082 SPTB2_HUMAN | R.T#SSKES#SPIPS#PTSDRK.A         | T2159:S2164:S2169: | 3 | 3,0999 | 1     | -0,269 |
| 12 | O60271 JIP4_HUMAN  | K.ERPISLGIFPLPAGDGLLT#PDAQK.G    | T217:              | 3 | 4,4666 | 0,307 | -0,495 |
| 12 | P13056 NR2C1_HUMAN | K.DLRSPLT#ATPTFVTDSESTR.S        | T218:              | 3 | 4,2082 | 0,418 | 0      |
| 12 | Q86UU1 PHLB1_HUMAN | K.KPAAT#SPLS#PM*ANGGR.Y          | T219:S223:         | 2 | 2,9787 | 0,501 | -0,705 |

|    |                     |                                  |                 |   |        |       |        |
|----|---------------------|----------------------------------|-----------------|---|--------|-------|--------|
| 12 | Q8IWW6 RHG12_HUMAN  | R.ATT#PPNQGRPDSPVYANLQELK.I      | T231:           | 3 | 4,2242 | 0,338 | -0,074 |
| 12 | O15085 ARHGB_HUMAN  | R.NSVLSDPGLDSPRT#SPVIM*AR.V      | T254:           | 3 | 3,2153 | 0,295 | 0      |
| 12 | A8K1N6 A8K1N6_HUMAN | K.M*LGQKAT#PPPSPLSELLK.K         | T264:           | 3 | 4,0439 | 0,356 | 0      |
| 12 | Q96CP6 GRM1A_HUMAN  | R.GHVT#PNLS#R.A                  | T277:S281:      | 2 | 2,405  | 0,224 | -0,428 |
| 12 | P27816 MAP4_HUMAN   | K.DM*ESPT#KLDVTLAK.D             | T282:           | 3 | 2,739  | 0,147 | 0,445  |
| 12 | Q96QF0 RAB31_HUMAN  | K.ST#SSAM*SGSHQDLSVIQPIVK.D      | T289:           | 3 | 3,8918 | 0,323 | 0,242  |
| 12 | Q9UQ35 SRRM2_HUMAN  | K.THTT#ALAGRS#PSPAS#GR.R         | T289:S295:S300: | 3 | 3,0531 | 0,412 | -0,192 |
| 12 | Q92625 ANS1A_HUMAN  | K.EVDKT#PPPQPPLISSM*DSISQK.S     | T318:           | 3 | 4,244  | 0,39  | 0,441  |
| 12 | O75533 SF3B1_HUMAN  | R.TDRGGDSIGET#PT#PGASK.R         | T326:T328:      | 2 | 3,2312 | 0,331 | 0,128  |
| 12 | O75533 SF3B1_HUMAN  | R.GGDSIGET#PT#PGAS#KRK.S         | T326:T328:S332: | 2 | 2,9911 | 0,319 | -0,257 |
| 12 | O75533 SF3B1_HUMAN  | R.GGDSIGET#PT#PGAS#KRK.S         | T326:T328:S332: | 3 | 2,946  | 0,196 | -0,482 |
| 12 | Q16643 DREB_HUMAN   | R.M*APTIPT#RSPSDSSTASTPVAEQIER.A | T335:           | 3 | 6,2641 | 0,541 | -0,125 |
| 12 | P80723 BASP_HUMAN   | K.AEGAATEEEGT#PKESEPQAAAEPAEAK.E | T36:            | 3 | 6,0477 | 0,491 | 0,329  |
| 12 | Q5T4S7 UBR4_HUMAN   | R.T#GSTSSKEDDYESDAATIVQK.C       | T360:           | 3 | 6,1661 | 0,541 | 0,554  |
| 12 | Q13043 STK4_HUMAN   | R.DET#M*QPAKPSFLEYFEQK.E         | T387:           | 3 | 4,7287 | 0,444 | -0,32  |
| 12 | P41743 KPCI_HUMAN   | K.EGLRPGDST#FCGTPNYIAPEILR.G     | T403:           | 3 | 4,6005 | 0,403 | -0,193 |
| 12 | Q16630 CPSF6_HUMAN  | R.EM*DTART#PLSEAEFEEIM*NR.N      | T407:           | 3 | 3,3336 | 0,295 | -0,369 |
| 12 | Q2TB10 ZN800_HUMAN  | K.VEPADSVESPPSIT#HSPQNELK.G      | T424:           | 3 | 2,9958 | 0,283 | 0,651  |
| 12 | Q8ND04 CQ071_HUMAN  | K.LYEVAIDGKEEDLGSPT#GELTSK.I     | T471:           | 3 | 4,0544 | 0,391 | 0,867  |
| 12 | Q96FV2 SCRN2_HUMAN  | R.DEVQEVVFPAGT#HTPGSR.L          | T50:            | 3 | 3,1807 | 0,234 | -0,087 |
| 12 | O94964 CT117_HUMAN  | R.T#KSVSSM*SEFESLLDCSPYLAGGDAR.G | T53:            | 3 | 4,2202 | 0,331 | -0,378 |
| 12 | Q86SQ0 PHLB2_HUMAN  | R.NDELLSDLTRT#PPPPSSTFPK.A       | T550:           | 3 | 5,3332 | 0,425 | 0      |
| 12 | Q59FH2 Q59FH2_HUMAN | K.RLEDEQPST#LS#PK.K              | T570:S572:      | 2 | 3,7414 | 0,411 | 0,221  |
| 12 | Q59FH2 Q59FH2_HUMAN | K.RLEDEQPST#LS#PK.K              | T570:S572:      | 3 | 2,6918 | 0,142 | 0      |
| 12 | Q86SQ0 PHLB2_HUMAN  | K.ASSSEYLSILPKT#PEGISEEQR.S      | T574:           | 3 | 3,8982 | 0,348 | 0,495  |
| 12 | Q9H0H5 RGAP1_HUMAN  | K.VSLLGPVT#TPEHQLLK.T            | T579:           | 2 | 3,3438 | 0,395 | 0,269  |
| 12 | P51114 FXR1_HUMAN   | R.TPGEEKINT#LKEENTQEAAVLNGVS.-   | T605:           | 3 | 2,6628 | 0,081 | 0      |
| 12 | Q68EM7 RHG17_HUMAN  | R.SPSPPT#QHTGQPPGQPSAPSQLSAPR.R  | T679:           | 3 | 6,0444 | 0,398 | -0,204 |
| 12 | Q86V15 CASZ1_HUMAN  | K.DT#EHEESSNDDLVDLDFSSK.N        | T715:           | 3 | 4,1603 | 0,367 | 0,609  |
| 12 | Q9Y6X9 MORC2_HUMAN  | K.KT#ES#PIKLSPAT#PSR.K           | T723:S725:T733: | 2 | 2,1492 | 0,132 | -0,198 |
| 12 | Q96RK0 CIC_HUMAN    | K.SAAAT#SPAPHLVAGPLLGTGK.A       | T738:           | 3 | 4,0985 | 0,449 | -0,087 |
| 12 | P42166 LAP2A_HUMAN  | K.GPPDFSSDEEREPT#PVLGSGAAAAGR.S  | T74:            | 3 | 5,3218 | 0,517 | -0,069 |
| 12 | P27816 MAP4_HUMAN   | K.TTTAAAVASTGPSRSPST#LLPK.K      | T828:           | 3 | 3,893  | 0,396 | 0      |



|    |                    |                                  |            |   |        |       |        |
|----|--------------------|----------------------------------|------------|---|--------|-------|--------|
| 12 | Q9BW71 HIRP3_HUMAN | K.RPPT#PCS#DPER.K                | T84:S87:   | 3 | 3,3025 | 0,395 | 0,373  |
| 12 | Q9BW71 HIRP3_HUMAN | K.RPPT#PCS#DPER.K                | T84:S87:   | 2 | 3,1594 | 0,408 | 0,166  |
| 12 | Q9UQ35 SRRM2_HUMAN | K.SGT#PPRQGSITSPQANEQSVTPQR.R    | T848:      | 3 | 4,7247 | 0,481 | -0,281 |
| 12 | Q9P1Y6 K1542_HUMAN | R.GAVAAEGASDT#EREPTESQGLAAR.L    | T917:      | 3 | 3,9959 | 0,447 | -0,142 |
| 12 | P82094 TMF1_HUMAN  | R.KPFSVSST#PTM*S#R.S             | T929:S933: | 3 | 2,8811 | 0,262 | 0      |
| 12 | P46821 MAP1B_HUMAN | K.AET#EEAEPEEDGEEHVCVSASK.H      | T948:      | 3 | 3,3107 | 0,299 | -0,346 |
| 12 | Q7Z6E9 RBBP6_HUMAN | R.DDAT#PVRDEPM*DAESITFK.S        | T984:      | 3 | 3,8162 | 0,323 | -0,328 |
| 12 | Q9Y3A4 ZG14_HUMAN  | R.DPEDRIPSPLGY#AAPIK.F           | Y23:       | 2 | 2,4006 | 0,268 | -0,54  |
| 12 | P78310 CXAR_HUMAN  | R.SY#IGSNHSSLGSM*SPSNM*EGYSK.T   | Y294:      | 3 | 5,0646 | 0,407 | -0,145 |
| 12 | Q6PJG2 CN043_HUMAN | K.AGTFIAPPVY#SNITPYQSHLRS#PVR.L  | Y624:S636: | 3 | 3,1238 | 1     | 0,499  |
| 12 | Q14160 LAP4_HUMAN  | R.M*VEPENAVTITPLRPEDDY#SPR.E     | Y834:      | 3 | 3,6536 | 0,124 | -0,209 |
| 12 | Q96FJ2 DYL2_HUMAN  | K.NADM*SEDM*QQDAVDCATQAM*EK.Y    |            | 3 | 5,8492 | 0,434 | -0,361 |
| 12 | P05783 K1C18_HUMAN | R.GGM*GSGGLATGIAGGLAGM*GGIQNEK.E |            | 3 | 5,8406 | 0,551 | 0      |
| 12 | P78527 PRKDC_HUMAN | R.M*EVQEQEEDISSLIR.S             |            | 2 | 5,6953 | 0,466 | 0,737  |
| 12 | P78527 PRKDC_HUMAN | R.DPESETDNDSQEIFK.L              |            | 2 | 5,6725 | 0,553 | -0,209 |
| 12 | Q05524 ENO1B_HUMAN | K.DATNVGDEGGFAPNILENK.E          |            | 2 | 5,6008 | 0,612 | 0,187  |
| 12 | O00571 DDX3X_HUMAN | R.LEQELFSGGNTGINFEK.Y            |            | 2 | 5,4964 | 0,583 | -0,13  |
| 12 | P05023 AT1A1_HUMAN | K.GVGIIEGNETVEDIAAR.L            |            | 2 | 5,3896 | 0,517 | -0,267 |
| 12 | O14818 PSA7_HUMAN  | K.NYTDEAIETDDLTIK.L              |            | 2 | 5,3776 | 0,5   | -0,28  |
| 12 | P12814 ACTN1_HUMAN | K.VLAVNQENEQLM*EDYEK.L           |            | 3 | 5,3407 | 0,536 | 0,354  |
| 12 | P08238 HS90B_HUMAN | R.NPDDITQEEYGEFYK.S              |            | 2 | 5,3035 | 0,503 | -0,528 |
| 12 | P55072 TERA_HUMAN  | R.EAVCIVLSDDTCSDEK.I             |            | 2 | 5,2292 | 0,468 | 0,663  |
| 12 | P55072 TERA_HUMAN  | R.EDEEESLNEVGYDDIGGCR.K          |            | 3 | 5,1716 | 0,466 | 0,084  |
| 12 | P22314 UBA1_HUMAN  | R.ALPAVQQNNLDEDLIR.K             |            | 2 | 5,1218 | 0,497 | 0,337  |
| 12 | P20042 IF2B_HUMAN  | K.DASDDLDDLNFFNQK.K              |            | 2 | 5,1209 | 0,375 | -0,417 |
| 12 | Q99613 EIF3C_HUMAN | R.TEPTAQQLALQLAEK.L              |            | 2 | 5,1195 | 0,405 | 0      |
| 12 | P07910 HNRPC_HUMAN | K.M*ESEGGADDSAEEDLLDDDDNEDR.G    |            | 3 | 5,0684 | 0,486 | -0,202 |
| 12 | P63167 DYL1_HUMAN  | K.NADM*SEEM*QQDSVECATQALEK.Y     |            | 3 | 5,0071 | 0,432 | 0,072  |
| 12 | P24534 EF1B_HUMAN  | K.SPAGLQVLNDYLADK.S              |            | 2 | 4,9814 | 0,54  | -0,152 |
| 12 | P62820 RAB1A_HUMAN | K.NATNVEQSFM*TM*AAEIK.K          |            | 2 | 4,9759 | 0,5   | -0,509 |
| 12 | P07355 ANXA2_HUMAN | K.GLGTDEDSLIEIICSR.T             |            | 2 | 4,9529 | 0,348 | -0,343 |
| 12 | Q15020 SART3_HUMAN | K.GLAYVEYENESQASQAVM*K.M         |            | 3 | 4,9424 | 0,435 | -0,172 |
| 12 | Q9NQ88 CL005_HUMAN | K.IIQGGQVDEPLSETGFK.Q            |            | 2 | 4,903  | 0,444 | -0,336 |

|    |                    |                                |   |        |       |        |
|----|--------------------|--------------------------------|---|--------|-------|--------|
| 12 | P30086 PEBP1_HUMAN | K.GNDISSGTVLSDYVGSPPK.G        | 2 | 4,8667 | 0,507 | 0      |
| 12 | Q9UII4 HERC5_HUMAN | K.YSTM*ETVEEALQEAINNNR.G       | 3 | 4,8544 | 0,311 | -0,164 |
| 12 | P48735 IDHP_HUMAN  | R.DQTDDQVTIDSALATQK.Y          | 2 | 4,8375 | 0,588 | 0,66   |
| 12 | P42704 LPPRC_HUMAN | K.NNNIDAAIENIENM*LTSENK.V      | 3 | 4,8308 | 0,446 | -0,081 |
| 12 | Q9UBQ7 GRHPR_HUMAN | R.GDVVNQDDLYQALASGK.I          | 3 | 4,8266 | 0,364 | 0,306  |
| 12 | P18583 SON_HUMAN   | R.NEGQLNGETNTPIEGNQAGDAAASAR.S | 3 | 4,8092 | 0,5   | 0,142  |
| 12 | P16989 DBPA_HUMAN  | R.SVGDGETVEFDVVEGEK.G          | 2 | 4,8091 | 0,496 | -0,204 |
| 12 | P43358 MAGA4_HUMAN | R.QPNEGSSSQEEEGPSTSPDAESLFR.E  | 3 | 4,7857 | 0,512 | -0,206 |
| 12 | P08670 VIME_HUMAN  | R.EM*EENFAVEAANYQDTIGR.L       | 3 | 4,7852 | 0,473 | 0,664  |
| 12 | P31943 HNRH1_HUMAN | R.STGEAFVQFASQEIAEK.A          | 2 | 4,7621 | 0,47  | -0,331 |
| 12 | P12956 KU70_HUMAN  | K.TEGDEEAEEEEQENLEASGDYK.Y     | 3 | 4,7535 | 0,474 | -0,293 |
| 12 | Q01082 SPTB2_HUMAN | K.EIEELQSQAQALSQEGK.S          | 2 | 4,7413 | 0,436 | 0,129  |
| 12 | P63104 1433Z_HUMAN | K.GIVDQSQQAYQEAFFEISK.K        | 2 | 4,7404 | 0,636 | -0,179 |
| 12 | P04818 TYSY_HUMAN  | R.DM*ESDYSGGVDQLQR.V           | 2 | 4,7335 | 0,42  | -0,728 |
| 12 | Q05524 ENO1B_HUMAN | K.DATNVGDEGGFAPNILENK.E        | 3 | 4,7088 | 0,439 | 0,373  |
| 12 | Q01082 SPTB2_HUMAN | K.EIEELQSQAQALSQEGK.S          | 3 | 4,7088 | 0,4   | 0,097  |
| 12 | P00813 ADA_HUMAN   | K.NDQANYSLNTDDPLIFK.S          | 2 | 4,7044 | 0,6   | -0,744 |
| 12 | P22314 UBA1_HUMAN  | R.LAGTQPLEVLEAVQR.S            | 3 | 4,6957 | 0,43  | -0,113 |
| 12 | P51452 DUS3_HUMAN  | R.EIGPNDGFLAQLCQLNDR.L         | 3 | 4,6948 | 0,325 | -0,444 |
| 12 | P62820 RAB1A_HUMAN | K.NATNVEQSFM*TM*AAEIK.K        | 3 | 4,6918 | 0,356 | -0,191 |
| 12 | Q96SB8 SMC6_HUMAN  | R.DVDSEISDLENEVENK.T           | 3 | 4,6906 | 0,357 | -0,498 |
| 12 | P11021 GRP78_HUMAN | K.SQIFSTASDNQPTVTIK.V          | 2 | 4,6775 | 0,491 | 0,731  |
| 12 | Q9Y4L1 HYOU1_HUMAN | K.AANSLEAFIFETQDK.L            | 3 | 4,6685 | 0,397 | -0,109 |
| 12 | Q8WUM4 PDC6I_HUMAN | R.SVIEQGGIQTVDQLIK.E           | 2 | 4,6235 | 0,351 | 0,353  |
| 12 | Q01518 CAP1_HUMAN  | R.VENQENVSNLVIEDTELK.Q         | 3 | 4,6233 | 0,401 | -0,353 |
| 12 | P00558 PGK1_HUMAN  | K.VLNNM*EIGTSLFDEEGAK.I        | 2 | 4,6213 | 0,463 | 0      |
| 12 | P35580 MYH10_HUMAN | R.TQLEEELEDELQATEDAK.L         | 2 | 4,62   | 0,582 | -0,56  |
| 12 | Q7KZF4 SND1_HUMAN  | K.DTNGENIAESLVAEGLATR.R        | 2 | 4,61   | 0,534 | -0,249 |
| 12 | Q9UPN3 MACF1_HUMAN | R.DQIIELDQTNQLK.F              | 2 | 4,5772 | 0,506 | -0,076 |
| 12 | Q13283 G3BP1_HUMAN | K.SSSPAPADIAQTVQEDLR.T         | 2 | 4,5631 | 0,516 | 0,388  |
| 12 | P05787 K2C8_HUMAN  | R.ELQSQISDTSVVLSM*DNSR.S       | 3 | 4,5626 | 0,32  | -0,086 |
| 12 | Q71U36 TBA1A_HUMAN | K.TIGGGDDSFNTFFSETGAGK.H       | 3 | 4,5624 | 0,475 | 0,273  |
| 12 | Q9Y224 CN166_HUMAN | K.NAEPLINLDVNNPDFK.A           | 2 | 4,5622 | 0,401 | -0,269 |

|    |                    |                               |   |        |       |        |
|----|--------------------|-------------------------------|---|--------|-------|--------|
| 12 | P09382 LEG1_HUMAN  | R.LNLEAINYM*AADGDFK.I         | 2 | 4,5588 | 0,505 | 0,339  |
| 12 | Q96IZ0 PAWR_HUMAN  | R.DANVSGTLVSSSTLEK.K          | 2 | 4,5463 | 0,512 | 0,683  |
| 12 | Q9Y4L1 HYOU1_HUMAN | K.AANSLEAFIFETQDK.L           | 2 | 4,535  | 0,47  | -0,072 |
| 12 | P35579 MYH9_HUMAN  | R.IAQLEEEELQGNTELINDR.L       | 3 | 4,5319 | 0,417 | 0,518  |
| 12 | Q9H147 TDIF1_HUMAN | R.DNVGEEVDAEQLIQEACR.S        | 3 | 4,5017 | 0,394 | 0      |
| 12 | P42704 LPPRC_HUMAN | R.LIASYCNVGDIEGASK.I          | 2 | 4,484  | 0,596 | 0,647  |
| 12 | P16989 DBPA_HUMAN  | R.SVGDGETVEFDVVEGK.G          | 3 | 4,4766 | 0,399 | 0,102  |
| 12 | Q15691 MARE1_HUMAN | R.NIELICQENEGENDPVLQR.I       | 3 | 4,4584 | 0,417 | -0,161 |
| 12 | Q9Y2Q3 GSTK1_HUMAN | R.NEDITEPQSILAAAEK.A          | 3 | 4,4401 | 0,286 | 0,106  |
| 12 | O43707 ACTN4_HUMAN | R.ETDTDADQVIASFV.V            | 2 | 4,4145 | 0,507 | -0,21  |
| 12 | P14618 KPYM_HUMAN  | K.GADFLVTEVENGSLGSK.K         | 2 | 4,4128 | 0,543 | -0,548 |
| 12 | Q05682 CALD1_HUMAN | K.TTTTNTQVEGDDEAAFLER.L       | 3 | 4,4093 | 0,467 | -0,174 |
| 12 | Q71U36 TBA1A_HUMAN | K.TIGGGDDSFNTFFSETGAGK.H      | 2 | 4,4042 | 0,575 | -0,425 |
| 12 | Q14697 GANAB_HUMAN | K.M*M*DYLQSGETPQTDVR.W        | 2 | 4,4013 | 0,508 | 0      |
| 12 | Q86V81 THOC4_HUMAN | K.QQLSAEELDAQLDAYNAR.M        | 3 | 4,399  | 0,408 | 0,09   |
| 12 | P39687 AN32A_HUMAN | K.SLDLFNCEVTNLNDYR.E          | 2 | 4,3959 | 0,569 | -0,433 |
| 12 | O75718 CRTAP_HUMAN | K.NAAPCAVSYLLFDQNDK.V         | 3 | 4,3748 | 0,477 | -0,095 |
| 12 | Q9UBQ7 GRHPR_HUMAN | R.GDVVNQDDLYQALASGK.I         | 2 | 4,3737 | 0,631 | 0      |
| 12 | Q567U6 CCD93_HUMAN | R.DQLNDQYLELLEK.Q             | 2 | 4,3377 | 0,333 | -0,226 |
| 12 | P46782 RS5_HUMAN   | K.TIAECLADELINAAG.G           | 3 | 4,3158 | 0,24  | -0,224 |
| 12 | P30086 PEBP1_HUMAN | K.GNDISSGTVLSDYVGSPPK.G       | 3 | 4,3123 | 0,493 | 0,188  |
| 12 | Q96SB8 SMC6_HUMAN  | R.DVDSEISDLENEVENK.T          | 2 | 4,2789 | 0,429 | -0,465 |
| 12 | P14868 SYDC_HUMAN  | R.EAGVEM*GDEDDLSTPNEK.L       | 2 | 4,2764 | 0,416 | -0,25  |
| 12 | P21333 FLNA_HUMAN  | R.VQVQDNEGCPVEALVK.D          | 2 | 4,2758 | 0,504 | -0,478 |
| 12 | P08107 HSP71_HUMAN | R.IINEPTAAAIAYGLDR.T          | 2 | 4,2695 | 0,522 | -0,217 |
| 12 | Q8IY81 RRMJ3_HUMAN | K.SDDDGFEIVPIEDPAK.H          | 2 | 4,2664 | 0,469 | -0,279 |
| 12 | Q8WXH0 SYNE2_HUMAN | R.DFQEYLAAVESM*K.A            | 3 | 4,2536 | 0,362 | 0      |
| 12 | Q6NZY4 ZCHC8_HUMAN | K.DGTDGETEVGEIQNK.S           | 2 | 4,2511 | 0,477 | 0      |
| 12 | P27348 1433T_HUMAN | K.QTIDNSQGAYQEAFFDISK.K       | 3 | 4,2166 | 0,452 | 0,272  |
| 12 | O43747 AP1G1_HUMAN | R.NDDDSSEAM*NDILAQVATNTETSK.N | 3 | 4,2089 | 0,381 | 0,495  |
| 12 | P49792 RBP2_HUMAN  | K.DTSFLGSDDIGNIDVR.E          | 2 | 4,2073 | 0,608 | -0,425 |
| 12 | Q9UBW7 ZMYM2_HUMAN | K.DIYDKDNYELDEDTD.-           | 2 | 4,2067 | 0,386 | -0,393 |
| 12 | Q9UHX1 PUF60_HUMAN | K.DIDDDLEGEVTEECGK.F          | 2 | 4,2064 | 0,641 | -0,535 |

|    |                    |                           |   |        |       |        |
|----|--------------------|---------------------------|---|--------|-------|--------|
| 12 | P35579 MYH9_HUMAN  | K.M*QQNIQELEEQLLEEEESAR.Q | 3 | 4,1923 | 0,395 | -0,156 |
| 12 | O60506 HNRPQ_HUMAN | K.EFNEDGALAVLQQFK.D       | 2 | 4,1898 | 0,366 | -0,643 |
| 12 | P12277 KCRB_HUMAN  | R.GTGGVDTAAVGGVDFVSNADR.L | 2 | 4,188  | 0,584 | 0,621  |
| 12 | P30419 NMT1_HUMAN  | K.GFDVFNALDLM*ENK.T       | 2 | 4,1874 | 0,524 | -0,599 |
| 12 | P50991 TCPD_HUMAN  | K.TDM*DNQIVVSDYAQM*DR.V   | 3 | 4,1756 | 0,371 | 0,09   |
| 12 | Q01105 SET_HUMAN   | R.IDFYFDENPYFENK.V        | 2 | 4,1687 | 0,469 | -0,663 |
| 12 | Q9Y2Q3 GSTK1_HUMAN | R.NEDITEPQSILAAAEK.A      | 2 | 4,1604 | 0,402 | -0,071 |
| 12 | Q9NZL4 HPBP1_HUMAN | K.LLQTCFSSPADDSM*DR.-     | 2 | 4,1554 | 0,565 | 1,116  |
| 12 | Q09666 AHNK_HUMAN  | R.DDGVFVQEVTQNSPAAR.T     | 2 | 4,1418 | 0,573 | -0,2   |
| 12 | Q14566 MCM6_HUMAN  | K.EIESEIDSEEELINK.K       | 2 | 4,1177 | 0,409 | 0      |
| 12 | P42126 D3D2_HUMAN  | R.DADVQNFVFSISK.D         | 2 | 4,1126 | 0,491 | 0      |
| 12 | P19338 NUCL_HUMAN  | K.FGYVDFESAEDLEK.A        | 2 | 4,1028 | 0,589 | -0,888 |
| 12 | P51149 RAB7A_HUMAN | R.DPENFPFVVLGNK.I         | 2 | 4,1022 | 0,506 | -0,248 |
| 12 | P12814 ACTN1_HUMAN | R.ETADTDTADQVM*ASF.K.I    | 2 | 4,1021 | 0,548 | 0,21   |
| 12 | Q15287 RNPS1_HUMAN | K.GYAYVEFENPDEAEK.A       | 2 | 4,0957 | 0,515 | -0,277 |
| 12 | Q13765 NACA_HUMAN  | K.IEDLSQQAQLAAAEK.F       | 2 | 4,0881 | 0,525 | 0,151  |
| 12 | P78344 IF4G2_HUMAN | R.LAEDAPNFDGPAAEGQPGQK.Q  | 3 | 4,0836 | 0,22  | 0      |
| 12 | Q5T457 UBR4_HUMAN  | R.DNPEATQQM*NDLIIGK.V     | 2 | 4,0723 | 0,47  | -0,338 |
| 12 | P02545 LMNA_HUMAN  | R.M*QQQLDEYQELLDIK.L      | 2 | 4,0671 | 0,52  | -0,383 |
| 12 | P46782 RS5_HUMAN   | K.TIAECLADELINAAG.G       | 2 | 4,0431 | 0,45  | -0,15  |
| 12 | P78527 PRKDC_HUMAN | K.NILEESLCELVAQ.Q         | 2 | 4,0387 | 0,479 | -0,241 |
| 12 | P60842 IF4A1_HUMAN | K.M*FVLDEADEM*LSR.G       | 2 | 4,0343 | 0,429 | -0,231 |
| 12 | P12236 ADT3_HUMAN  | K.DFLAGGIAAAISK.T         | 2 | 4,0337 | 0,493 | -0,198 |
| 12 | P02649 APOE_HUMAN  | K.VQAAVGTSAAPVPSDNH.-     | 2 | 4,0328 | 0,449 | -0,452 |
| 12 | Q6NXR4 CH041_HUMAN | K.DLGLIEATEFDR.L          | 2 | 4,0225 | 0,543 | -0,408 |
| 12 | P82979 HCC1_HUMAN  | R.FGIVTSSAGTGTTEDTEAK.K   | 2 | 4,0198 | 0,527 | -0,13  |
| 12 | Q99613 EIF3C_HUMAN | R.TEPTAQQLALQLAEK.L       | 3 | 4,0018 | 0,421 | 0,521  |
| 12 | P43490 NAMPT_HUMAN | K.YLLETSGNLDGLEYK.L       | 2 | 3,9997 | 0,503 | 0,711  |
| 12 | P10809 CH60_HUMAN  | R.CIPALDSLTPANEDQK.I      | 2 | 3,9983 | 0,417 | 0      |
| 12 | P10619 PPGB_HUMAN  | K.DLECVTNLQEVAR.I         | 2 | 3,9925 | 0,415 | 0,237  |
| 12 | Q9UJZ1 STML2_HUMAN | R.DVQGTDASLDEELDR.V       | 2 | 3,972  | 0,537 | -0,293 |
| 12 | P78371 TCPB_HUMAN  | R.DASLM*VTNDGATILK.N      | 2 | 3,9707 | 0,524 | 0,156  |
| 12 | P07355 ANXA2_HUMAN | K.GVDEVTIVNILTNR.S        | 2 | 3,9697 | 0,335 | -0,237 |

|    |                     |                           |   |        |       |        |
|----|---------------------|---------------------------|---|--------|-------|--------|
| 12 | P67870 CSK2B_HUMAN  | R.GNEFFCEVDEDYIQDK.F      | 2 | 3,959  | 0,523 | 0,851  |
| 12 | P50395 GDIB_HUMAN   | R.TDDYLDQPCYETINR.I       | 2 | 3,9525 | 0,464 | 0,641  |
| 12 | Q9NX58 LYAR_HUMAN   | R.ELLEQISAFDNVPR.K        | 3 | 3,9503 | 0,313 | 0      |
| 12 | Q02952 AKA12_HUMAN  | K.GLAEVQQDGEAEEGATSDGEK.K | 3 | 3,9492 | 0,365 | -0,345 |
| 12 | P09960 LKHA4_HUMAN  | R.TLTGTAALTVQSQEDNLR.S    | 3 | 3,9306 | 0,419 | 0,095  |
| 12 | Q9BUF5 TBB6_HUMAN   | K.M*ASTFIGNSTAIQELFK.R    | 2 | 3,928  | 0,411 | -0,456 |
| 12 | Q9NR30 DDX21_HUMAN  | K.EGAFSNFPISEETIK.L       | 2 | 3,9265 | 0,364 | 0,219  |
| 12 | Q9Y490 TLN1_HUMAN   | R.LNEAAAGLNQAATELVQASR.G  | 3 | 3,9216 | 0,377 | -0,271 |
| 12 | P52907 CAZA1_HUMAN  | K.DVQDSLTVSNEAQTAKE.E     | 3 | 3,9184 | 0,454 | -0,107 |
| 12 | P33778 H2B1B_HUMAN  | K.AM*GIM*NSFVNDIFER.I     | 2 | 3,9159 | 0,564 | -0,275 |
| 12 | Q01130 SFRS2_HUMAN  | R.DAEDAM*DAM*DGAVLDGR.E   | 2 | 3,9136 | 0,614 | -0,137 |
| 12 | P62995 TRA2B_HUMAN  | R.GFAFVYFENVDDAK.E        | 2 | 3,9105 | 0,483 | -0,075 |
| 12 | P05141 ADT2_HUMAN   | K.DFLAGGVAAAISK.T         | 2 | 3,9087 | 0,526 | 0,1    |
| 12 | Q14157 UBP2L_HUMAN  | R.DGSLASNPYSGDLTK.F       | 2 | 3,9066 | 0,47  | 0,08   |
| 12 | P20042 IF2B_HUMAN   | K.DASDDLDDLNFFNQK.K       | 3 | 3,9035 | 0,363 | -0,104 |
| 12 | O75534 CSDE1_HUMAN  | K.DQFGFINYEVGDSK.K        | 2 | 3,8999 | 0,5   | -1,13  |
| 12 | P07737 PROF1_HUMAN  | R.DSLLQDGEFSM*DLR.T       | 3 | 3,8969 | 0,444 | -0,111 |
| 12 | O00567 NOL5A_HUMAN  | R.IDCFSEVPTSVFGEK.L       | 2 | 3,8854 | 0,386 | -0,142 |
| 12 | Q9HC35 EMAL4_HUMAN  | K.DVIINQEGEYIK.M          | 2 | 3,8827 | 0,422 | 0,515  |
| 12 | O00505 IMA3_HUMAN   | K.DSQVVQVVLGDK.N          | 2 | 3,8766 | 0,326 | -0,261 |
| 12 | P58546 MTPN_HUMAN   | K.GPDGLTAFEATDNQAIK.A     | 3 | 3,8712 | 0,375 | 0,314  |
| 12 | P55265 DSRAD_HUMAN  | K.DSEDM*GVVSLGTGNR.C      | 2 | 3,8711 | 0,57  | 0,517  |
| 12 | P47755 CAZA2_HUMAN  | K.DIQDSLTVSNEVQTAK.E      | 3 | 3,8575 | 0,485 | 0,209  |
| 12 | Q9BPY3 F118B_HUMAN  | K.DCLYEVFDDLESK.M         | 2 | 3,8568 | 0,567 | -0,224 |
| 12 | O60568 PLOD3_HUMAN  | R.DVFSGSDTDPDM*AFCK.S     | 2 | 3,8546 | 0,619 | 0      |
| 12 | P50914 RL14_HUMAN   | K.LVAIVDVIDQNR.A          | 2 | 3,8513 | 0,536 | 0,36   |
| 12 | P35579 MYH9_HUMAN   | R.LTEM*ETLQSQLM*AEK.L     | 2 | 3,8448 | 0,373 | -0,205 |
| 12 | Q9Y3F4 STRAP_HUMAN  | R.FSPDGELYASGEDGTLR.L     | 2 | 3,8359 | 0,584 | -0,321 |
| 12 | Q6S8J3 A26CA_HUMAN  | K.SYELPDGQVITIGNER.F      | 2 | 3,8322 | 0,525 | 0,341  |
| 12 | Q2TAY7 SMU1_HUMAN   | K.DSSQILSASFDQTIR.I       | 2 | 3,8311 | 0,361 | 0,073  |
| 12 | A6NJJ0 A6NJJ0_HUMAN | K.DYGVYLEDGHTL.-          | 2 | 3,8224 | 0,578 | -0,166 |
| 12 | P24534 EF1B_HUMAN   | K.SPAGLQVLNDYLADK.S       | 3 | 3,8191 | 0,384 | -0,228 |
| 12 | P50579 AMPM2_HUMAN  | R.M*EEGEVYAIETFGSTGK.G    | 2 | 3,8148 | 0,621 | -0,72  |

|    |                    |                                |   |        |       |        |
|----|--------------------|--------------------------------|---|--------|-------|--------|
| 12 | Q96HC4 PDLI5_HUMAN | R.QPTVTSVCSETSQELAEGQR.R       | 3 | 3,8148 | 0,237 | 0      |
| 12 | Q09666 AHNK_HUMAN  | K.VDIEGPDVNIEGPEGK.L           | 2 | 3,8135 | 0,518 | -0,073 |
| 12 | O00505 IMA3_HUMAN  | R.NVPQEESELESDVDADFK.A         | 3 | 3,8056 | 0,306 | -0,09  |
| 12 | P52907 CAZA1_HUMAN | K.DVQDSLTVSNEAQTAK.E           | 2 | 3,8032 | 0,556 | -0,143 |
| 12 | Q13243 SFRS5_HUMAN | R.DADDAVYELDGGK.E              | 2 | 3,7956 | 0,501 | 0,279  |
| 12 | Q9NW13 RBM28_HUMAN | R.SEQLEELFSQVGPVK.Q            | 2 | 3,7821 | 0,403 | -0,217 |
| 12 | P10809 CH60_HUMAN  | K.TLNDELEIIEGM*K.F             | 3 | 3,7785 | 0,297 | 0,18   |
| 12 | Q6S8J3 A26CA_HUMAN | K.SYELPDGQVITIGNER.F           | 3 | 3,778  | 0,427 | 0,204  |
| 12 | P07339 CATD_HUMAN  | R.DPDAQPGGELM*LGGTDSK.Y        | 2 | 3,7765 | 0,494 | -0,135 |
| 12 | Q14974 IMB1_HUMAN  | R.ESCLEAYTGIVQGLK.G            | 2 | 3,7725 | 0,499 | -0,219 |
| 12 | P10809 CH60_HUMAN  | K.TLNDELEIIEGM*K.F             | 2 | 3,7711 | 0,473 | -0,321 |
| 12 | P62195 PRS8_HUMAN  | R.TM*LELLNQLDGFATK.N           | 2 | 3,7586 | 0,564 | -0,398 |
| 12 | O60264 SMCA5_HUMAN | K.ESEITDEDIDGILER.G            | 2 | 3,7534 | 0,41  | 0,563  |
| 12 | Q15393 SF3B3_HUMAN | K.NVIDGDLCEQFNSM*EPNK.Q        | 2 | 3,7429 | 0,588 | -0,574 |
| 12 | Q86VI3 IQGA3_HUMAN | R.VLAVSLINEALDK.G              | 2 | 3,7406 | 0,418 | -0,264 |
| 12 | O14929 HAT1_HUMAN  | K.VDENFDCVEADDVEGK.I           | 2 | 3,7399 | 0,543 | 0,199  |
| 12 | Q9UHX1 PUF60_HUMAN | K.DIDDDLEGEVTEECGK.F           | 3 | 3,7381 | 0,402 | -0,1   |
| 12 | P14314 GLU2B_HUMAN | R.VNDGVCDCCDGTDEYNSGVICENTCK.E | 3 | 3,7256 | 0,424 | -0,301 |
| 12 | P42126 D3D2_HUMAN  | R.DADVQNFVFSISK.D              | 3 | 3,7235 | 0,368 | 0,124  |
| 12 | Q9HCD6 TANC2_HUMAN | R.DSGIATLTSYSENVER.T           | 2 | 3,7207 | 0,558 | -0,46  |
| 12 | O15258 RER1_HUMAN  | K.VDPQLM*EDSDDGPSLPTK.Q        | 2 | 3,7187 | 0,495 | -0,064 |
| 12 | P05141 ADT2_HUMAN  | K.DFLAGGVAAAISK.T              | 3 | 3,7152 | 0,313 | 0,225  |
| 12 | Q09666 AHNK_HUMAN  | K.VDIDVPDVLNLEAPEGK.L          | 2 | 3,7152 | 0,394 | 0      |
| 12 | Q9BRT2 CF125_HUMAN | R.DTSFSGLSLEEYK.L              | 2 | 3,7098 | 0,625 | -0,248 |
| 12 | P14625 ENPL_HUMAN  | K.EEASDYLELDTIK.N              | 2 | 3,6986 | 0,483 | 0,08   |
| 12 | O75083 WDR1_HUMAN  | K.YAPSGFYIASGDVSGK.L           | 2 | 3,6929 | 0,643 | -0,452 |
| 12 | Q14498 RBM39_HUMAN | R.TDASSASSFLDSDELER.T          | 2 | 3,6896 | 0,465 | -0,267 |
| 12 | P05023 AT1A1_HUMAN | R.QGAIVAVTGDGVNDSPALK.K        | 2 | 3,6824 | 0,494 | 0,741  |
| 12 | Q15836 VAMP3_HUMAN | R.LQQTQNNQVDEVVDIM*R.V         | 3 | 3,6792 | 0,372 | 0,379  |
| 12 | Q9H9C1 CN133_HUMAN | R.DFVDDDDDDDLER.V              | 2 | 3,673  | 0,509 | 0,539  |
| 12 | Q13642 FHL1_HUMAN  | R.FTAVEDQYYCVDCYK.N            | 2 | 3,659  | 0,551 | -0,249 |
| 12 | Q9NW13 RBM28_HUMAN | R.SEQLEELFSQVGPVK.Q            | 3 | 3,6524 | 0,266 | -0,216 |
| 12 | Q14974 IMB1_HUMAN  | K.LAATNALLNSLEFTK.A            | 2 | 3,6523 | 0,202 | -0,532 |

|    |                     |                           |   |        |       |        |
|----|---------------------|---------------------------|---|--------|-------|--------|
| 12 | O14983 AT2A1_HUMAN  | R.VDQSILTGESVSVIK.H       | 2 | 3,6465 | 0,454 | -0,155 |
| 12 | A6NHR9 SMHD1_HUMAN  | R.DSTEYFIVFEPR.L          | 2 | 3,6428 | 0,274 | -0,162 |
| 12 | P11142 HSP7C_HUMAN  | K.TVTNAVVTVPAYFNDSQR.Q    | 3 | 3,6426 | 0,447 | -0,185 |
| 12 | Q92598 HS105_HUMAN  | K.DISTTLNADEAVAR.G        | 2 | 3,6396 | 0,438 | 0,661  |
| 12 | P38646 GRP75_HUMAN  | K.STNGDFTLGGEDFDQALLR.H   | 2 | 3,6276 | 0,617 | -0,356 |
| 12 | P50454 SERPH_HUMAN  | R.LYGPSSVSFADDFVR.S       | 2 | 3,6231 | 0,471 | -0,294 |
| 12 | P07602 SAP_HUMAN    | K.SDVYCEVCEFLVK.E         | 3 | 3,619  | 0,407 | -0,333 |
| 12 | O43707 ACTN4_HUMAN  | R.M*APYQGPDAVPGALDYK.S    | 2 | 3,619  | 0,476 | -0,54  |
| 12 | Q58FG1 HS904_HUMAN  | R.TLTIVDTGIGM*TK.A        | 2 | 3,6141 | 0,495 | -0,179 |
| 12 | Q14152 EIF3A_HUMAN  | R.LLDM*DGIIVEK.Q          | 2 | 3,6137 | 0,354 | 0,387  |
| 12 | O60216 RAD21_HUMAN  | R.DVIDEPIIEEPSR.L         | 2 | 3,6117 | 0,466 | -0,403 |
| 12 | P13667 PDIA4_HUMAN  | K.YGIVDYM*IEQSGPPSK.E     | 2 | 3,6078 | 0,498 | 1,017  |
| 12 | Q07020 RL18_HUMAN   | K.ILTFDQLALDSPK.G         | 2 | 3,6052 | 0,532 | -0,167 |
| 12 | P29966 MARCS_HUMAN  | K.GEPAAAAPEAGASPVEK.E     | 2 | 3,6044 | 0,482 | 0      |
| 12 | O00148 DDX39_HUMAN  | K.GLAITFVSDENDAK.I        | 2 | 3,5998 | 0,427 | -0,247 |
| 12 | Q86SX6 GLRX5_HUMAN  | R.DYAAYNVLDDPELR.Q        | 2 | 3,5928 | 0,43  | -0,221 |
| 12 | P10515 ODP2_HUMAN   | K.GVETIANDVVSLATK.A       | 2 | 3,5843 | 0,527 | -0,402 |
| 12 | P06737 PYGL_HUMAN   | K.LVIDQIDNGFFSPK.Q        | 2 | 3,582  | 0,41  | -0,077 |
| 12 | Q01518 CAP1_HUMAN   | R.ALLVTASQCQQAENK.L       | 2 | 3,5791 | 0,422 | -0,486 |
| 12 | Q53G79 Q53G79_HUMAN | K.ALEDVFDALGK.S           | 2 | 3,5781 | 0,516 | -0,28  |
| 12 | P08107 HSP71_HUMAN  | R.IINEPTAAAIAYGLDR.T      | 3 | 3,5767 | 0,272 | 0      |
| 12 | P07195 LDHB_HUMAN   | K.SLADELALVDVLEDK.L       | 2 | 3,5747 | 0,509 | -0,299 |
| 12 | Q86W92 LIPB1_HUMAN  | R.DLGQSNSDLDM*PFAK.W      | 2 | 3,5742 | 0,36  | 0      |
| 12 | Q14566 MCM6_HUMAN   | K.EIESEIDSEEELINK.K       | 3 | 3,5712 | 0,3   | -0,309 |
| 12 | P04406 G3P_HUMAN    | K.IISNASCTTNCLAPLAK.V     | 2 | 3,5692 | 0,458 | -0,333 |
| 12 | A5YKK6 CNOT1_HUMAN  | R.DAIAALGLLQK.A           | 2 | 3,5658 | 0,369 | -0,219 |
| 12 | Q9Y262 IF3EI_HUMAN  | K.LAGFLDLTEQEFR.I         | 2 | 3,5611 | 0,47  | -0,317 |
| 12 | P38646 GRP75_HUMAN  | K.STNGDFTLGGEDFDQALLR.H   | 3 | 3,5609 | 0,24  | -0,178 |
| 12 | P07355 ANXA2_HUMAN  | R.AEDGSVIDYELIDQDAR.D     | 3 | 3,5592 | 0,253 | -0,192 |
| 12 | O14972 DSCR3_HUMAN  | R.DATEIQNIQIADGDVCR.G     | 2 | 3,5564 | 0,482 | -0,064 |
| 12 | P46108 CRK_HUMAN    | R.DSSTSPGDYVLSVSENSR.V    | 2 | 3,5542 | 0,487 | 0,128  |
| 12 | Q15365 PCBP1_HUMAN  | R.ESTGAQVQVAGDM*LPNSTER.A | 3 | 3,5524 | 0,389 | 0,261  |
| 12 | P38646 GRP75_HUMAN  | R.AQFEGIVTDLIR.R          | 2 | 3,5504 | 0,459 | -0,358 |

|    |                     |                          |   |        |       |        |
|----|---------------------|--------------------------|---|--------|-------|--------|
| 12 | P06576 ATPB_HUMAN   | K.TVLIM*ELINNVAK.A       | 2 | 3,5499 | 0,43  | -0,083 |
| 12 | P11021 GRP78_HUMAN  | R.IINEPTAAAIAYGLDK.R     | 3 | 3,5495 | 0,322 | 0,11   |
| 12 | P21333 FLNA_HUMAN   | R.EGPYSISVLYGDEEVPR.S    | 2 | 3,5464 | 0,504 | -0,064 |
| 12 | Q9HB66 Q9HB66_HUMAN | K.NDDIPEQDSLGLSNLQK.S    | 2 | 3,5426 | 0,446 | -0,323 |
| 12 | P46109 CRKL_HUMAN   | R.DSSTCPGDYVLSVSENSR.V   | 3 | 3,5412 | 0,432 | 0      |
| 12 | Q9UDY8 MALT1_HUMAN  | R.NDYDDTIPILDALK.V       | 2 | 3,5376 | 0,44  | -0,152 |
| 12 | P62191 PRS4_HUMAN   | R.TM*LELLNQLDGFDSR.G     | 2 | 3,5372 | 0,478 | 0      |
| 12 | Q9BTT0 AN32E_HUMAN  | K.DLSTVEALQNLK.N         | 3 | 3,531  | 0,287 | 0,343  |
| 12 | O76021 RL1D1_HUMAN  | K.ATNESEDEIPQLVPIGK.K    | 2 | 3,5206 | 0,342 | -0,133 |
| 12 | Q9NUQ9 FA49B_HUMAN  | K.DAEGILEDLQSYR.G        | 2 | 3,5136 | 0,455 | -0,323 |
| 12 | Q7KZF4 SND1_HUMAN   | K.DTNGENIAESLVAEGLATR.R  | 3 | 3,5074 | 0,335 | -0,187 |
| 12 | P62258 1433E_HUMAN  | K.LICCDILDVLDK.H         | 2 | 3,5061 | 0,493 | -0,413 |
| 12 | P04083 ANXA1_HUMAN  | K.GVDEATIIDILTK.R        | 2 | 3,4985 | 0,407 | -0,352 |
| 12 | P22314 UBA1_HUMAN   | R.NEEDAAELVALAQAVNAR.A   | 3 | 3,4948 | 0,437 | -0,291 |
| 12 | Q9BV86 CI032_HUMAN  | K.DNM*AQEGVILDDVDSSVCR.D | 3 | 3,4931 | 0,378 | 0,086  |
| 12 | Q01970 PLCB3_HUMAN  | R.DVLEAIAETAFK.T         | 2 | 3,4927 | 0,486 | -0,28  |
| 12 | P07602 SAP_HUMAN    | K.SDVYCEVCEFLVK.E        | 2 | 3,4904 | 0,472 | -0,296 |
| 12 | P35080 PROF2_HUMAN  | R.DSLYVDGDCTM*DIR.T      | 2 | 3,4898 | 0,413 | -0,073 |
| 12 | O00505 IMA3_HUMAN   | K.DSQVVQVVLGGLK.N        | 3 | 3,4862 | 0,219 | -0,196 |
| 12 | O14974 MYPT1_HUMAN  | R.ILVDNLCDM*EM*VNK.V     | 2 | 3,4816 | 0,281 | -1,06  |
| 12 | Q99832 TCPH_HUMAN   | K.LPIGDVATQYFADR.D       | 2 | 3,4774 | 0,478 | 0,234  |
| 12 | Q96CW5 GCP3_HUMAN   | R.DILYVFQGIDGK.N         | 2 | 3,4738 | 0,4   | -0,178 |
| 12 | Q9BT78 CSN4_HUMAN   | R.NAAQVLVGIPILETGQK.Q    | 3 | 3,4736 | 0,274 | 0,223  |
| 12 | P07900 HS90A_HUMAN  | R.GVVDESDLPLNISR.E       | 2 | 3,4622 | 0,277 | 0,403  |
| 12 | Q96EY5 F125A_HUMAN  | R.DM*QGLSLDAASQPSK.G     | 2 | 3,4604 | 0,493 | -0,078 |
| 12 | P39687 AN32A_HUMAN  | K.SLDLFNCEVTNLNDYR.E     | 3 | 3,46   | 0,421 | 0,185  |
| 12 | O95817 BAG3_HUMAN   | K.ELLALDSVDPEGR.A        | 2 | 3,4599 | 0,496 | -0,086 |
| 12 | Q9NVD7 PARVA_HUMAN  | K.DLAEDLYDGQVLQK.L       | 3 | 3,4582 | 0,355 | 0      |
| 12 | P28370 SMCA1_HUMAN  | K.ESELTDEDITTILER.G      | 2 | 3,4573 | 0,435 | -0,138 |
| 12 | P84077 ARF1_HUMAN   | R.DAVLLVFANK.Q           | 2 | 3,4569 | 0,504 | -0,112 |
| 12 | Q8WVM8 SCFD1_HUMAN  | K.SLLDIISDPDAGTPEDK.M    | 2 | 3,4402 | 0,525 | -0,205 |
| 12 | Q9NUQ9 FA49B_HUMAN  | K.DAEGILEDLQSYR.G        | 3 | 3,4374 | 0,446 | -0,182 |
| 12 | P25205 MCM3_HUMAN   | R.SVDVILDDDLVDK.A        | 2 | 3,4341 | 0,548 | -0,084 |



|    |                     |                                |   |        |       |        |
|----|---------------------|--------------------------------|---|--------|-------|--------|
| 12 | P47755 CAZA2_HUMAN  | K.DIQDSLTVSNEVQTAK.E           | 2 | 3,4334 | 0,517 | 0      |
| 12 | P12956 KU70_HUMAN   | R.DSLIFLVDASK.A                | 2 | 3,4307 | 0,396 | -0,202 |
| 12 | P18085 ARF4_HUMAN   | R.DAVLLL FANK.Q                | 2 | 3,4304 | 0,476 | -0,442 |
| 12 | Q14157 UBP2L_HUMAN  | K.STSAPQM*SPGSSDNQSSSPQPAQQK.L | 3 | 3,4245 | 0,489 | -0,215 |
| 12 | Q9BV73 CP250_HUMAN  | R.DQELEALQQEQQAQQQEER.V        | 3 | 3,4185 | 0,327 | 0,844  |
| 12 | Q14103 HNRPD_HUMAN  | K.IFVGGLSPDTPPEEK.I            | 2 | 3,4182 | 0,454 | -0,082 |
| 12 | Q00610 CLH1_HUMAN   | R.TSIDAYDNFDNISLAQR.L          | 2 | 3,4182 | 0,474 | 0,565  |
| 12 | Q14980 NUMA1_HUMAN  | R.DSALETLQGQLEEK.A             | 3 | 3,4172 | 0,33  | 0,117  |
| 12 | P78527 PRKDC_HUMAN  | K.DLLLNTM*SQEEK.A              | 2 | 3,4164 | 0,367 | 0      |
| 12 | P62241 RS8_HUMAN    | R.IIDVVYNASNELVR.T             | 3 | 3,416  | 0,298 | 0,213  |
| 12 | P11940 PABP1_HUMAN  | R.SLGYAYVNFQQPADAER.A          | 3 | 3,4149 | 0,378 | 0      |
| 12 | O43633 CHM2A_HUMAN  | K.AEAAASALADADADLEER.L         | 3 | 3,4139 | 0,382 | -0,102 |
| 12 | P35579 MYH9_HUMAN   | R.LTEM*ETLQSQLM*AEK.L          | 3 | 3,41   | 0,157 | -0,103 |
| 12 | Q09666 AHNK_HUMAN   | K.M*DVNVGDIDIEGPEGK.L          | 2 | 3,4061 | 0,473 | -0,143 |
| 12 | P42704 LPPRC_HUMAN  | K.VIEEQLEPAVEK.I               | 2 | 3,406  | 0,462 | -0,264 |
| 12 | P11142 HSP7C_HUMAN  | K.TVTNAVVTVPAYFNDSQR.Q         | 2 | 3,4044 | 0,421 | 0      |
| 12 | P11169 GTR3_HUMAN   | K.DGVM*EM*NSIEPAK.E            | 2 | 3,4037 | 0,375 | -0,42  |
| 12 | P13667 PDIA4_HUMAN  | K.FAM*EPEEFSDTLR.E             | 2 | 3,3997 | 0,44  | -0,143 |
| 12 | Q92616 GCN1L_HUMAN  | K.QLDDEEVSEFALDGLK.Q           | 2 | 3,3957 | 0,328 | 0      |
| 12 | P84103 SFRS3_HUMAN  | R.NPPGFVFEFEDPR.D              | 2 | 3,3922 | 0,478 | -0,301 |
| 12 | P19404 NDUV2_HUMAN  | K.DIEEIIDELK.A                 | 2 | 3,3891 | 0,209 | -0,401 |
| 12 | P22314 UBA1_HUMAN   | R.LAGTQPLEVLEAVQR.S            | 2 | 3,3859 | 0,461 | -0,225 |
| 12 | Q86U06 RBM23_HUMAN  | R.DLEDFFSAVGK.V                | 2 | 3,3854 | 0,518 | -0,199 |
| 12 | P23396 RS3_HUMAN    | R.FGFPEGSVELYAEK.V             | 2 | 3,3829 | 0,444 | -0,233 |
| 12 | Q01813 K6PP_HUMAN   | R.M*LAIYDGFDFGFAK.G            | 2 | 3,3815 | 0,388 | -0,25  |
| 12 | P51659 DHB4_HUMAN   | R.GALVVVNDLGGDFK.G             | 2 | 3,3803 | 0,276 | -0,261 |
| 12 | O43290 SNUT1_HUMAN  | R.ADDLLPLGDQTQDGFGR.L          | 2 | 3,3757 | 0,595 | -0,242 |
| 12 | Q96NX8 Q96NX8_HUMAN | R.QLLAEQELDELADDR.M            | 2 | 3,3729 | 0,491 | -0,347 |
| 12 | Q14697 GANAB_HUMAN  | R.DENSVELTM*AEGPYK.I           | 2 | 3,3722 | 0,578 | -0,503 |
| 12 | O43172 PRP4_HUMAN   | R.ALGEPITLFGGPAER.R            | 2 | 3,3663 | 0,477 | -0,295 |
| 12 | Q9Y3B7 RM11_HUMAN   | K.DLSSEELAAFQK.E               | 2 | 3,359  | 0,339 | -0,182 |
| 12 | Q99459 CDC5L_HUMAN  | R.EIDDTYIEDAADVDAR.K           | 2 | 3,3589 | 0,425 | -0,067 |
| 12 | Q9NYY8 FAKD2_HUMAN  | K.DIISELLTSDDM*K.N             | 2 | 3,3444 | 0,471 | -0,571 |

|    |                     |                        |   |        |       |        |
|----|---------------------|------------------------|---|--------|-------|--------|
| 12 | P07437 TBB5_HUMAN   | R.ALTVPELTQQVFDK.N     | 2 | 3,3433 | 0,503 | -0,588 |
| 12 | P11021 GRP78_HUMAN  | R.IINEPTAAAIAYGLDK.R   | 2 | 3,332  | 0,305 | 0,441  |
| 12 | Q07020 RL18_HUMAN   | K.TAVVVGTITDDVR.V      | 2 | 3,3243 | 0,439 | 0,453  |
| 12 | Q06210 GFPT1_HUMAN  | R.VDSTTCLFPVEEK.A      | 2 | 3,3223 | 0,49  | -0,24  |
| 12 | Q92598 HS105_HUMAN  | K.DLLNM*YIETEGK.M      | 2 | 3,3217 | 0,565 | 0,338  |
| 12 | Q15149 PLEC1_HUMAN  | R.DDGTGQLLLPLSDAR.K    | 2 | 3,3211 | 0,454 | 0,466  |
| 12 | Q15417 CNN3_HUMAN   | K.DGIILCELINK.L        | 2 | 3,321  | 0,432 | -0,284 |
| 12 | Q96JH7 VCIP1_HUMAN  | R.DM*NQGELFDCALLGDR.A  | 2 | 3,3207 | 0,539 | -0,522 |
| 12 | P04083 ANXA1_HUMAN  | K.GVDEATIIDILTK.R      | 3 | 3,3206 | 0,389 | -0,132 |
| 12 | Q15008 PSMD6_HUMAN  | R.DNNM*APYYEALCK.S     | 2 | 3,3164 | 0,274 | 0,456  |
| 12 | O43837 IDH3B_HUMAN  | R.DM*GGYSTTTDFIK.S     | 2 | 3,3159 | 0,475 | -0,336 |
| 12 | Q9HAV7 GRPE1_HUMAN  | K.DLLEVADVLEK.A        | 2 | 3,3151 | 0,425 | 0      |
| 12 | P38646 GRP75_HUMAN  | R.VINEPTAAALAYGLDK.S   | 2 | 3,3075 | 0,419 | 0,148  |
| 12 | Q86W92 LIPB1_HUMAN  | R.DTEGLIQEINDLR.L      | 2 | 3,3043 | 0,313 | -0,322 |
| 12 | P46459 NSF_HUMAN    | K.DIEAM*DPSILK.G       | 2 | 3,3005 | 0,331 | 0      |
| 12 | P33992 MCM5_HUMAN   | K.LQPFATEADVEEALR.L    | 2 | 3,2955 | 0,451 | -0,144 |
| 12 | Q9NSI2 CU070_HUMAN  | R.DALPELLGLEAGSR.R     | 2 | 3,2919 | 0,406 | -0,339 |
| 12 | P62330 ARF6_HUMAN   | R.DAIIIFANK.Q          | 2 | 3,2801 | 0,359 | -0,655 |
| 12 | P07355 ANXA2_HUMAN  | R.AEDGSVIDYELIDQDAR.D  | 2 | 3,2763 | 0,524 | -0,383 |
| 12 | P55039 DRG2_HUMAN   | R.EDCSPDEFIDVIVGNR.V   | 2 | 3,27   | 0,385 | -0,131 |
| 12 | P10809 CH60_HUMAN   | K.CEFQDAYVLLSEK.K      | 2 | 3,2639 | 0,559 | -0,381 |
| 12 | Q9GZS3 WDR61_HUMAN  | K.ENSETVVTGSLDDLVK.V   | 2 | 3,2616 | 0,438 | -0,143 |
| 12 | O60271 JIP4_HUMAN   | R.ETDYPAGEDLSESGQVDK.A | 2 | 3,2551 | 0,617 | -0,377 |
| 12 | P05783 K1C18_HUMAN  | R.TVQSLEIDLDSM*R.N     | 3 | 3,252  | 0,356 | -0,12  |
| 12 | Q9UNN8 EPCR_HUMAN   | R.EFLEDTCVQYVQK.H      | 2 | 3,2512 | 0,387 | -1,03  |
| 12 | P39687 AN32A_HUMAN  | K.LLPQLTYLDGYDR.D      | 2 | 3,2499 | 0,588 | 0,156  |
| 12 | Q9NXH9 TRM1_HUMAN   | R.DLTCAVITEFAR.I       | 2 | 3,2488 | 0,326 | -0,175 |
| 12 | O43852 CALU_HUMAN   | K.DIVVQETM*EDIDK.N     | 2 | 3,2413 | 0,306 | -0,079 |
| 12 | Q53F64 Q53F64_HUMAN | K.IFVGGLNPEATEEK.I     | 2 | 3,2403 | 0,264 | 0      |
| 12 | P33991 MCM4_HUMAN   | R.ALADDDFLTGTGK.T      | 2 | 3,2388 | 0,36  | -0,179 |
| 12 | Q9NP64 NO40_HUMAN   | K.DLDPNNVIEQEER.R      | 2 | 3,2383 | 0,374 | -0,072 |
| 12 | O14908 GIPC1_HUMAN  | R.DTELAATM*VELGK.D     | 2 | 3,2352 | 0,517 | 0      |
| 12 | P29401 TKT_HUMAN    | K.LDNLVAILDINR.L       | 2 | 3,234  | 0,33  | -0,267 |

|    |                    |                          |   |        |       |        |
|----|--------------------|--------------------------|---|--------|-------|--------|
| 12 | P53396 ACLY_HUMAN  | R.EAYPEEAYIADLDAK.S      | 2 | 3,2273 | 0,374 | 0,359  |
| 12 | Q9UHD8 SEPT9_HUMAN | R.SQEATEAAPSCVGM*ADTPR.D | 2 | 3,2223 | 0,584 | 1,041  |
| 12 | P12277 KCRB_HUMAN  | R.LEQQQAIDDLM*PAQK.-     | 2 | 3,2197 | 0,425 | -0,146 |
| 12 | P40925 MDHC_HUMAN  | K.ELTEEKESAFEFLSSA.-     | 2 | 3,2148 | 0,391 | 0,134  |
| 12 | P63104 1433Z_HUMAN | K.GIVDQSQQAYQEAIFEISK.K  | 3 | 3,2136 | 0,366 | 0,179  |
| 12 | P61011 SRP54_HUMAN | R.DVQELLTQYTK.F          | 2 | 3,2078 | 0,354 | -0,091 |
| 12 | Q6IQ22 RAB12_HUMAN | K.DNFNVDEIFLK.L          | 2 | 3,2076 | 0,479 | -0,18  |
| 12 | P12956 KU70_HUMAN  | R.DIISIAEDEDLR.V         | 3 | 3,1991 | 0,291 | 0,066  |
| 12 | P00505 AATM_HUMAN  | K.TCGFDFTGAVEDISK.I      | 2 | 3,1965 | 0,414 | -0,593 |
| 12 | P27816 MAP4_HUMAN  | K.DGVLTLANNVTPAK.D       | 2 | 3,1892 | 0,472 | -0,345 |
| 12 | P05198 IF2A_HUMAN  | R.ENAEVDGDDDAEEM*EAK.A   | 2 | 3,1869 | 0,314 | -0,065 |
| 12 | O95347 SMC2_HUMAN  | K.DTSATTALELVAGER.L      | 3 | 3,1866 | 0,355 | -0,119 |
| 12 | P09874 PARP1_HUMAN | R.VVSEDFLQDVSASTK.S      | 3 | 3,1846 | 0,28  | 0,338  |
| 12 | P29353 SHC1_HUMAN  | R.ELFDDPSYVNVQNLDK.A     | 2 | 3,1825 | 0,513 | -0,064 |
| 12 | Q14166 TTL12_HUMAN | R.DFAYGETDPLIR.K         | 2 | 3,1806 | 0,481 | 0,175  |
| 12 | P04792 HSPB1_HUMAN | K.LATQSNEITIPVTFESR.A    | 2 | 3,1793 | 0,53  | 0,512  |
| 12 | P05787 K2C8_HUMAN  | R.LEGLTDEINFLR.Q         | 2 | 3,1779 | 0,488 | -0,344 |
| 12 | P27824 CALX_HUMAN  | K.APVPTGEVYFADSFDR.G     | 2 | 3,1771 | 0,56  | -0,344 |
| 12 | Q9H9Y2 RPF1_HUMAN  | R.DFTDLIVINEDR.K         | 2 | 3,1762 | 0,416 | -0,084 |
| 12 | Q14566 MCM6_HUMAN  | K.DFYVAFQDLPTR.H         | 2 | 3,1761 | 0,517 | 0,083  |
| 12 | Q99497 PARK7_HUMAN | R.DVVICPDASLEDAK.K       | 2 | 3,1761 | 0,476 | -0,08  |
| 12 | Q14498 RBM39_HUMAN | R.DLEEFFSTVGK.V          | 2 | 3,1739 | 0,52  | -0,384 |
| 12 | Q9Y3F4 STRAP_HUMAN | K.TVDFTQDSNYLLTGGQDK.L   | 2 | 3,1714 | 0,524 | -0,305 |
| 12 | O60664 M6PBP_HUMAN | K.DTVATQLSEAVDATR.G      | 2 | 3,168  | 0,429 | 0      |
| 12 | P16615 AT2A2_HUMAN | K.VGEATETALTCLVEK.M      | 2 | 3,1653 | 0,469 | 0,301  |
| 12 | P37802 TAGL2_HUMAN | R.DDGLFSGDPNWFPK.K       | 2 | 3,1629 | 0,388 | -0,306 |
| 12 | O76094 SRP72_HUMAN | R.TEEALQLYNQIIK.L        | 2 | 3,1622 | 0,375 | -0,156 |
| 12 | Q13885 TBB2A_HUMAN | R.AILVDLEPGTM*DSVR.S     | 2 | 3,1597 | 0,46  | -0,449 |
| 12 | Q9Y3B4 PM14_HUMAN  | R.GTAYVVYEDIFDAK.N       | 3 | 3,1533 | 0,133 | 0,115  |
| 12 | P62829 RL23_HUMAN  | R.LPAAGVGDM*VM*ATVK.K    | 2 | 3,1501 | 0,471 | -0,082 |
| 12 | Q86W92 LIPB1_HUMAN | R.DTEGLIQEINDLR.L        | 3 | 3,142  | 0,271 | 0,121  |
| 12 | Q92598 HS105_HUMAN | K.VLGTAFDPFLGGK.N        | 2 | 3,1412 | 0,539 | -0,185 |
| 12 | Q9BTC8 MTA3_HUMAN  | R.DISNTLIM*LADK.H        | 2 | 3,1366 | 0,432 | 0      |

|    |                    |                           |   |        |       |        |
|----|--------------------|---------------------------|---|--------|-------|--------|
| 12 | P33991 MCM4_HUMAN  | R.LSEEASQALIEAYVDM*R.K    | 3 | 3,1327 | 0,406 | 0      |
| 12 | Q14152 EIF3A_HUMAN | R.FNVLQYVVPEVK.D          | 2 | 3,1278 | 0,378 | -0,425 |
| 12 | O95352 ATG7_HUMAN  | R.FDNVLPVSLAFDK.C         | 2 | 3,1239 | 0,432 | -0,416 |
| 12 | P07814 SYEP_HUMAN  | R.DQDLEPGAPSM*GAK.S       | 2 | 3,122  | 0,314 | -0,17  |
| 12 | P27816 MAP4_HUMAN  | K.DM*QPSM*ESDM*ALVK.D     | 2 | 3,1139 | 0,418 | 0,15   |
| 12 | Q09666 AHNK_HUMAN  | R.DDGVFVQEVTVQNSPAAR.T    | 3 | 3,1119 | 0,353 | 0,1    |
| 12 | Q99661 KIF2C_HUMAN | R.ITAQENDM*EVELPAAANSR.K  | 3 | 3,1112 | 0,203 | -0,441 |
| 12 | P04406 G3P_HUMAN   | K.LVINGNPITIFQER.D        | 2 | 3,1092 | 0,34  | -0,151 |
| 12 | P62750 RL23A_HUMAN | R.LAPDYDALDVANK.I         | 2 | 3,1089 | 0,532 | 0,174  |
| 12 | Q13185 CBX3_HUMAN  | K.DSDEADLVLAK.E           | 2 | 3,1054 | 0,403 | 0,207  |
| 12 | O00429 DNM1L_HUMAN | K.SLLDDLLTESEDM*AQR.R     | 3 | 3,1019 | 0,176 | -0,377 |
| 12 | O95433 AHSA1_HUMAN | K.DEPDTNLVALM*K.E         | 2 | 3,1012 | 0,295 | -0,09  |
| 12 | P11021 GRP78_HUMAN | K.TFAPEEISAM*VLTK.M       | 2 | 3,0996 | 0,45  | 0      |
| 12 | P62888 RL30_HUMAN  | R.VCTLAIIDPGDSDIIR.S      | 2 | 3,0962 | 0,419 | -0,139 |
| 12 | O00231 PSD11_HUMAN | K.EQSILELGSLAK.T          | 2 | 3,0872 | 0,387 | -0,348 |
| 12 | Q9H4A4 AMPB_HUMAN  | K.EEYNGVIEEFLATGEK.L      | 2 | 3,0814 | 0,503 | -0,601 |
| 12 | P07437 TBB5_HUMAN  | R.ALTVPILTQQVFDK.N        | 3 | 3,0769 | 0,419 | -0,441 |
| 12 | Q16204 CCDC6_HUMAN | R.DISM*EIDSPENM*M*R.H     | 2 | 3,0741 | 0,403 | 0      |
| 12 | Q9UBT2 SAE2_HUMAN  | K.DVEFEVVGDAPEK.V         | 2 | 3,0694 | 0,4   | 0      |
| 12 | Q9NYJ1 CHCH8_HUMAN | K.DDEEEDPLDQLISR.S        | 2 | 3,0687 | 0,293 | -1,312 |
| 12 | P09211 GSTP1_HUMAN | K.DQQEAAALVDM*VNDGVEDLR.C | 3 | 3,0608 | 0,259 | 0,343  |
| 12 | Q9H6T3 RPAP3_HUMAN | K.QDFETVLLLEPGNK.Q        | 2 | 3,0554 | 0,36  | -0,228 |
| 12 | P78527 PRKDC_HUMAN | R.SDPGLLTNTM*DVFVK.E      | 2 | 3,0523 | 0,311 | 0,074  |
| 12 | P08670 VIME_HUMAN  | K.ILLAELEQLK.G            | 2 | 3,0509 | 0,254 | -0,104 |
| 12 | P08670 VIME_HUMAN  | K.VESLQEEIAFLK.K          | 2 | 3,0453 | 0,482 | -0,434 |
| 12 | P49588 SYAC_HUMAN  | K.DIINEEVQFLK.T           | 2 | 3,042  | 0,421 | -0,248 |
| 12 | Q07065 CKAP4_HUMAN | R.LEGLGSSEADQDGLASTVR.S   | 2 | 3,0393 | 0,555 | 0,705  |
| 12 | P12532 KCRU_HUMAN  | R.GTGGVDTAATGGVFDISNLDR.L | 3 | 3,0354 | 0,291 | 0,633  |
| 12 | P52272 HNRPM_HUMAN | R.AFITNIPFDVK.W           | 2 | 3,0352 | 0,392 | -0,193 |
| 12 | Q13330 MTA1_HUMAN  | R.DISSTLIALADK.H          | 2 | 3,035  | 0,39  | -0,391 |
| 12 | O75396 SC22B_HUMAN | R.VADGLPLAASM*QEDEQSGR.D  | 2 | 3,0315 | 0,562 | -0,307 |
| 12 | P10809 CH60_HUMAN  | K.CEFQDAYVLLSEK.K         | 3 | 3,0294 | 0,303 | 0,114  |
| 12 | P11021 GRP78_HUMAN | K.ELEEIVQPIISK.L          | 2 | 3,029  | 0,43  | 0      |

|    |                     |                            |   |        |       |        |
|----|---------------------|----------------------------|---|--------|-------|--------|
| 12 | P49327 FAS_HUMAN    | R.DNLEFFLAGIGR.L           | 2 | 3,028  | 0,325 | -0,541 |
| 12 | P07195 LDHB_HUMAN   | K.LIAPVAEEEEATVPNNK.I      | 2 | 3,0256 | 0,416 | 0,504  |
| 12 | Q9H3S7 PTN23_HUMAN  | R.DLLEEDELLEQK.F           | 2 | 3,0208 | 0,324 | 0,083  |
| 12 | Q7Z3B4 NUP54_HUMAN  | R.LDIISEDISELQK.N          | 2 | 3,0196 | 0,315 | -0,487 |
| 12 | Q9Y262 IF3EI_HUMAN  | R.QLEVYTSGGDPESVAGEYGR.H   | 2 | 3,0167 | 0,613 | -0,115 |
| 12 | Q9GZP4 CA128_HUMAN  | R.DLTGELEYATK.I            | 2 | 3,0072 | 0,383 | 0,295  |
| 12 | P31946 1433B_HUMAN  | K.DSTLIM*QLLR.D            | 2 | 3,002  | 0,24  | -0,303 |
| 12 | Q66K74 MAP1S_HUMAN  | R.GDNLETLVLLNPSDK.S        | 2 | 2,9999 | 0,138 | -0,225 |
| 12 | Q15758 AAAT_HUMAN   | K.EVLDSFLDLAR.N            | 2 | 2,9997 | 0,408 | -0,382 |
| 12 | Q16718 NDUA5_HUMAN  | K.ILDVLEEIPK.N             | 2 | 2,9962 | 0,305 | -0,209 |
| 12 | Q00610 CLH1_HUMAN   | K.LTDQLPLIIVCDR.F          | 2 | 2,9858 | 0,487 | -0,157 |
| 12 | O75718 CRTAP_HUMAN  | K.NAAPCAVSYLLFDQNDK.V      | 2 | 2,9839 | 0,485 | -0,253 |
| 12 | Q9Y230 RUVB2_HUMAN  | R.TQGFLALFSGDTGEIK.S       | 2 | 2,9834 | 0,546 | -0,217 |
| 12 | Q86UP2 KTN1_HUMAN   | K.SVEELLEAELLK.V           | 2 | 2,9828 | 0,322 | -0,267 |
| 12 | A0AVT1 UBA6_HUMAN   | K.GM*ITVTDPLIEK.S          | 2 | 2,9708 | 0,443 | 0,421  |
| 12 | Q8TAA5 GRPE2_HUMAN  | K.DLVEVADILEK.T            | 2 | 2,968  | 0,489 | -0,392 |
| 12 | Q8WXH0 SYNE2_HUMAN  | R.DFQEYLAAVESSM*K.A        | 2 | 2,9675 | 0,391 | -0,448 |
| 12 | P11142 HSP7C_HUMAN  | K.SFYPEEVSSM*VLTK.M        | 2 | 2,9661 | 0,408 | 0,598  |
| 12 | P49755 TMEDA_HUMAN  | R.IPDQLVILDM*K.H           | 2 | 2,9622 | 0,371 | -0,656 |
| 12 | P61081 UBC12_HUMAN  | K.TCDISFSDPDDLNFK.L        | 2 | 2,9571 | 0,538 | -0,388 |
| 12 | P27694 RFA1_HUMAN   | K.DSLVDIIGICK.S            | 2 | 2,944  | 0,484 | -0,198 |
| 12 | Q92620 PRP16_HUMAN  | R.DNSIVIVVGETGSGK.T        | 2 | 2,9436 | 0,482 | 0,248  |
| 12 | Q16543 CDC37_HUMAN  | K.DVQM*LQDAISK.M           | 2 | 2,9422 | 0,362 | 0,097  |
| 12 | Q969V3 NCLN_HUMAN   | R.DPEFVFDQLK.Q             | 2 | 2,9375 | 0,348 | -0,261 |
| 12 | P09525 ANXA4_HUMAN  | K.SETSGSFEDALLAIVK.C       | 2 | 2,9365 | 0,419 | 0      |
| 12 | O75526 HNRGT_HUMAN  | R.GFAFVTFESPADAK.A         | 2 | 2,9322 | 0,433 | -0,246 |
| 12 | P46108 CRK_HUMAN    | R.DSSTSPGDYVLSVSENSR.V     | 3 | 2,9305 | 0,357 | -0,481 |
| 12 | P38919 IF4A3_HUMAN  | K.M*LVLDEADEM*LNK.G        | 2 | 2,9283 | 0,365 | 0,393  |
| 12 | P22314 UBA1_HUMAN   | R.NEEDAAELVALAQAVNAR.A     | 2 | 2,9205 | 0,403 | -0,518 |
| 12 | P60174 TPIS_HUMAN   | K.VTNGAFTGEISPGM*IK.D      | 3 | 2,9199 | 0,37  | 0,335  |
| 12 | P05787 K2C8_HUMAN   | R.SLDM*DSIIAEVK.A          | 2 | 2,9189 | 0,377 | -0,091 |
| 12 | Q86UK7 ZN598_HUMAN  | R.DDDFPSLQAIAR.I           | 2 | 2,9163 | 0,459 | -0,272 |
| 12 | O15513 O15513_HUMAN | K.EENLSM*HQM*LDQTLLELNM*.- | 3 | 2,916  | 0,207 | 0,672  |

|    |                    |                           |   |        |       |        |
|----|--------------------|---------------------------|---|--------|-------|--------|
| 12 | Q92616 GCN1L_HUMAN | R.IIIEDLLEATR.S           | 2 | 2,914  | 0,271 | -0,285 |
| 12 | P46937 YAP1_HUMAN  | R.DESTDSGLSM*SSYSVPR.T    | 2 | 2,913  | 0,349 | 0,133  |
| 12 | Q07955 SFRS1_HUMAN | R.GGPPFAFVEFEDPR.D        | 2 | 2,9123 | 0,386 | -0,468 |
| 12 | P00558 PGK1_HUMAN  | K.YSLEPVAVELK.S           | 2 | 2,9106 | 0,467 | 0,293  |
| 12 | P11586 C1TC_HUMAN  | R.AAQAPSSFQLLYDLK.L       | 2 | 2,9092 | 0,126 | 0,148  |
| 12 | Q9Y490 TLN1_HUMAN  | K.EADESLNFEEQILEAAK.S     | 3 | 2,9084 | 0,201 | -0,094 |
| 12 | P21333 FLNA_HUMAN  | K.DAGEGGLSLAIEGPSK.A      | 2 | 2,9082 | 0,265 | -0,081 |
| 12 | Q9BQG0 MBB1A_HUMAN | R.VLDLVEVLVTK.Q           | 2 | 2,9061 | 0,409 | -0,298 |
| 12 | Q9NQT5 EXOS3_HUMAN | K.DM*EPEM*VCIDSCGR.A      | 2 | 2,8979 | 0,322 | -0,282 |
| 12 | P01116 RASK_HUMAN  | K.DSEDVPM*VLVGNK.C        | 2 | 2,8978 | 0,287 | 0,172  |
| 12 | Q9NVD7 PARVA_HUMAN | K.DLAEDLYDGQVLQK.L        | 2 | 2,895  | 0,274 | -0,152 |
| 12 | Q99832 TCPH_HUMAN  | K.NDSVVAGGGAEM*ELSK.Y     | 2 | 2,8929 | 0,439 | -0,36  |
| 12 | O14965 STK6_HUMAN  | R.VEFTFPDFVTEGAR.D        | 2 | 2,8777 | 0,399 | -0,302 |
| 12 | Q9BQL6 FERM1_HUMAN | K.ADSLLEDITDIPK.L         | 2 | 2,873  | 0,38  | -0,427 |
| 12 | O15355 PPM1G_HUMAN | K.EEPGSDSGTTAVVALIR.G     | 2 | 2,8727 | 0,301 | -0,072 |
| 12 | Q9UQ35 SRRM2_HUMAN | R.SSTGPEPPAPTPLLAER.H     | 2 | 2,8726 | 0,425 | 0,78   |
| 12 | Q15398 DLG7_HUMAN  | K.DFM*FQPLDGLK.T          | 2 | 2,8643 | 0,463 | -0,276 |
| 12 | P30040 ERP29_HUMAN | R.DGDFENVPVYTGAVK.V       | 2 | 2,8637 | 0,434 | -0,152 |
| 12 | Q03701 CEBPZ_HUMAN | K.ELLITDLLPDNR.K          | 2 | 2,8627 | 0,274 | -0,518 |
| 12 | P23396 RS3_HUMAN   | K.DEILPTTPISEQK.G         | 2 | 2,8482 | 0,41  | 0,581  |
| 12 | Q96HC4 PDLI5_HUMAN | K.DFNM*PLTISSLK.D         | 2 | 2,8457 | 0,414 | -0,088 |
| 12 | P55084 ECHB_HUMAN  | K.DQLLLGPTYATPK.V         | 2 | 2,8455 | 0,361 | 0      |
| 12 | Q9BVQ7 SPA5L_HUMAN | K.DLALYENLFK.K            | 2 | 2,844  | 0,395 | -0,299 |
| 12 | Q09666 AHNK_HUMAN  | K.LDADM*PEVAVEGPNGK.W     | 2 | 2,8429 | 0,375 | -0,662 |
| 12 | P49458 SRP09_HUMAN | K.VTDDLVLVYK.T            | 2 | 2,8426 | 0,374 | 0,092  |
| 12 | P07195 LDHB_HUMAN  | K.M*VVESAYEVIK.L          | 2 | 2,8387 | 0,267 | -0,38  |
| 12 | P09211 GSTP1_HUMAN | K.DQQAALVDM*VNDGVEDLR.C   | 2 | 2,8315 | 0,432 | 0,915  |
| 12 | P31948 STIP1_HUMAN | R.LAYINPDLALEEK.N         | 2 | 2,831  | 0,322 | -0,246 |
| 12 | P05023 AT1A1_HUMAN | K.GVGIISEGNETVEDIAAR.L    | 3 | 2,8268 | 0,249 | 0      |
| 12 | Q86Y56 HEAT2_HUMAN | R.AIQDAILEVLK.E           | 2 | 2,8222 | 0,37  | -0,201 |
| 12 | P50750 CDK9_HUMAN  | R.DPYALDLIDK.L            | 2 | 2,8172 | 0,303 | 0      |
| 12 | P42285 SK2L2_HUMAN | R.DVDFEGTDEPIFGK.K        | 2 | 2,8152 | 0,467 | -0,078 |
| 12 | Q02952 AKA12_HUMAN | K.SATLSSTESTASEM*QEEM*K.G | 2 | 2,8092 | 0,469 | -0,587 |

|    |                    |                          |   |        |       |        |
|----|--------------------|--------------------------|---|--------|-------|--------|
| 12 | Q99439 CNN2_HUMAN  | K.DGTILCTLM*NK.L         | 2 | 2,7995 | 0,378 | -0,19  |
| 12 | P53621 COPA_HUMAN  | R.DADSIPLFDVQQK.R        | 2 | 2,7908 | 0,403 | 0,165  |
| 12 | P09874 PARP1_HUMAN | R.VVSEDFLQDVSASTK.S      | 2 | 2,7906 | 0,397 | 0      |
| 12 | O43237 DC1L2_HUMAN | K.DFQDYM*EPEEGCQGSPQR.R  | 3 | 2,7876 | 0,336 | -0,084 |
| 12 | Q13765 NACA_HUMAN  | K.DIELVM*SQANVSR.A       | 2 | 2,7824 | 0,365 | 0,083  |
| 12 | P02786 TFR1_HUMAN  | K.VSASPLLYTLIEK.T        | 2 | 2,7757 | 0,378 | -0,17  |
| 12 | P27816 MAP4_HUMAN  | K.DM*SPLSETEM*ALGK.D     | 2 | 2,7719 | 0,393 | -0,713 |
| 12 | Q6P2Q9 PRP8_HUMAN  | K.DNPNLLFNM*CGFECR.I     | 2 | 2,7713 | 0,481 | 0,705  |
| 12 | P46013 KI67_HUMAN  | R.DIVEELSALK.Q           | 2 | 2,7683 | 0,362 | -0,109 |
| 12 | O75369 FLNB_HUMAN  | R.DAGYGGISLAVEGPSK.V     | 2 | 2,7668 | 0,373 | -0,08  |
| 12 | P78312 CD008_HUMAN | K.DIDLDSVDM*DETER.E      | 2 | 2,7637 | 0,41  | -0,146 |
| 12 | P13639 EF2_HUMAN   | K.EGIPALDNFLDK.L         | 2 | 2,7622 | 0,395 | -0,275 |
| 12 | P53396 ACLY_HUMAN  | K.AFDSGIIPM*EFVNK.M      | 2 | 2,7593 | 0,399 | 0      |
| 12 | P00492 HPRT_HUMAN  | K.NVLIVEDIIDT GK.T       | 2 | 2,7564 | 0,253 | 0,342  |
| 12 | O00273 DFFA_HUMAN  | K.AAFGEEVDAVDTGISR.E     | 2 | 2,7543 | 0,363 | 0,075  |
| 12 | Q13765 NACA_HUMAN  | K.DIELVM*SQANVSR.A       | 3 | 2,754  | 0,413 | 0,124  |
| 12 | P12277 KCRB_HUMAN  | K.DLFDPIIEDR.H           | 2 | 2,7536 | 0,509 | -0,198 |
| 12 | P60510 PP4C_HUMAN  | K.DFIIFEAAPQETR.G        | 2 | 2,749  | 0,287 | 0,079  |
| 12 | P63104 1433Z_HUMAN | R.DICNDVLSLLEK.F         | 2 | 2,749  | 0,198 | -0,344 |
| 12 | P31943 HNRH1_HUMAN | R.STGEAFVQFASQEIAEK.A    | 3 | 2,7401 | 0,198 | 0      |
| 12 | Q9BXP5 ARS2_HUMAN  | K.EVAFFNFLTDAK.R         | 2 | 2,7383 | 0,475 | -0,402 |
| 12 | Q9Y230 RUVB2_HUMAN | R.TQGFLALFSGDTGEIK.S     | 3 | 2,7303 | 0,22  | -0,217 |
| 12 | Q9Y606 TRUA_HUMAN  | K.TIEDDLVSALVR.S         | 2 | 2,7199 | 0,18  | -0,367 |
| 12 | P55209 NP1L1_HUMAN | K.YAVLYQPLFDK.R          | 2 | 2,7166 | 0,372 | 0,09   |
| 12 | P35579 MYH9_HUMAN  | K.SM*EAEM*IQLQEELAAAER.A | 2 | 2,716  | 0,608 | 0      |
| 12 | Q6NYC1 JMJD6_HUMAN | K.FFTDDLQYAGEK.R         | 2 | 2,7156 | 0,291 | 0,077  |
| 12 | P07355 ANXA2_HUMAN | K.GLGTDEDSLIEICSR.T      | 3 | 2,7145 | 0,14  | 0      |
| 12 | Q99832 TCPH_HUMAN  | K.LPIGDVATQYFADR.D       | 3 | 2,7134 | 0,3   | 0,35   |
| 12 | Q6YP21 KAT3_HUMAN  | K.DSTLDAEEIIK.A          | 2 | 2,7133 | 0,388 | 0      |
| 12 | Q9Y490 TLN1_HUMAN  | K.EADESLNFEEQILEAAK.S    | 2 | 2,7131 | 0,347 | -0,378 |
| 12 | Q9UPN3 MACF1_HUMAN | K.ELEEAVTSALQQETEK.S     | 3 | 2,7126 | 0,255 | 0,101  |
| 12 | Q9Y3B4 PM14_HUMAN  | R.GTAYVVYEDIFDAK.N       | 2 | 2,7114 | 0,423 | -0,46  |
| 12 | P31949 S10AB_HUMAN | K.DGYNYTLSK.T            | 2 | 2,706  | 0,487 | -0,23  |

|    |                    |                        |   |        |       |        |
|----|--------------------|------------------------|---|--------|-------|--------|
| 12 | P40926 MDHM_HUMAN  | K.GYLGPEQLPDCLK.G      | 2 | 2,7035 | 0,358 | -0,082 |
| 12 | Q86VP6 CAND1_HUMAN | K.SVILEAFSSPSEEVK.S    | 2 | 2,7017 | 0,229 | 0,451  |
| 12 | Q07021 C1QBP_HUMAN | K.AFVDFLSDEIK.E        | 2 | 2,6977 | 0,406 | -0,19  |
| 12 | Q09666 AHNK_HUMAN  | K.VDVECPDVNIEGPEGK.W   | 2 | 2,6896 | 0,456 | -0,069 |
| 12 | O60830 TI17B_HUMAN | K.DGTPAPGYPSYQQYH.-    | 2 | 2,6882 | 0,242 | -0,508 |
| 12 | P11388 TOP2A_HUMAN | R.FLEEFITPIVK.V        | 2 | 2,6876 | 0,335 | -0,183 |
| 12 | P14618 KPYM_HUMAN  | K.GVNLPGAAVDLPVSEK.D   | 2 | 2,687  | 0,301 | 0,075  |
| 12 | Q96SY0 CO044_HUMAN | R.DYNTLQEALSNM*DDYDK.T | 2 | 2,686  | 0,554 | -0,238 |
| 12 | P20700 LMNB1_HUMAN | R.DQM*QQQLNDYEQLLDVK.L | 3 | 2,6842 | 0,145 | 0      |
| 12 | P12268 IMDH2_HUMAN | R.EDLVVAPAGITLK.E      | 2 | 2,6818 | 0,312 | -0,368 |
| 12 | Q6UB35 C1TM_HUMAN  | K.DVDGVTDINLGK.L       | 2 | 2,6809 | 0,359 | -0,196 |
| 12 | O14980 XPO1_HUMAN  | R.EPEVLSTM*AIIVNK.L    | 2 | 2,6798 | 0,447 | 0,156  |
| 12 | P38646 GRP75_HUMAN | K.NAVITVPAYFNDSQR.Q    | 2 | 2,6778 | 0,23  | -0,072 |
| 12 | Q9UHB9 SRP68_HUMAN | K.DLPDVQELITQVR.S      | 2 | 2,675  | 0,323 | -0,24  |
| 12 | P46940 IQGA1_HUMAN | K.IFYPETTDIYDR.K       | 2 | 2,6727 | 0,372 | 0,159  |
| 12 | P46199 IF2M_HUMAN  | K.DAQVPIILAVNK.C       | 2 | 2,6659 | 0,384 | -0,381 |
| 12 | O94906 PRP6_HUMAN  | K.DDEEADAIYAALDK.R     | 2 | 2,6656 | 0,399 | 0,476  |
| 12 | Q92621 NU205_HUMAN | R.DPPM*FIPTPVDR.Y      | 2 | 2,6629 | 0,388 | 0      |
| 12 | P11021 GRP78_HUMAN | R.ITPSYVAFTPEGER.L     | 2 | 2,6569 | 0,457 | -0,156 |
| 12 | Q9Y265 RUVB1_HUMAN | R.YSVQLLTPANLLAK.I     | 2 | 2,6561 | 0,363 | -0,558 |
| 12 | Q10567 AP1B1_HUMAN | K.DLDYYGTLLK.K         | 2 | 2,6553 | 0,324 | 0      |
| 12 | P40227 TCPZ_HUMAN  | K.GIDPFSLDALSK.E       | 2 | 2,653  | 0,532 | -0,097 |
| 12 | O75717 WDHD1_HUMAN | R.SNILSDNPDFSDEADIIK.E | 2 | 2,6514 | 0,311 | -0,061 |
| 12 | O14744 ANM5_HUMAN  | K.AAILPTSIFLTNK.K      | 2 | 2,6408 | 0,421 | -0,351 |
| 12 | Q15436 SC23A_HUMAN | K.IDM*NLTDLLGELQR.D    | 2 | 2,6364 | 0,238 | -0,37  |
| 12 | P46100 ATRX_HUMAN  | K.SVPVTVDDDDDDNDPENR.I | 2 | 2,632  | 0,393 | -0,121 |
| 12 | P62263 RS14_HUMAN  | R.IEDVTPIPSDSTR.R      | 2 | 2,6288 | 0,397 | 0      |
| 12 | O43809 CPSF5_HUMAN | K.LPGGELNPGEDEVEGLK.R  | 2 | 2,6285 | 0,39  | -0,07  |
| 12 | O00571 DDX3X_HUMAN | K.DLLDLLVEAK.Q         | 2 | 2,6169 | 0,4   | -0,432 |
| 12 | P38606 VATA_HUMAN  | R.DFPELTM*EVDGK.V      | 2 | 2,6117 | 0,425 | -0,262 |
| 12 | P12814 ACTN1_HUMAN | K.VLAVNQENEQLM*EDYEK.L | 2 | 2,6093 | 0,551 | 0,59   |
| 12 | Q8WUM0 NU133_HUMAN | K.DGIQLSEYLPEVK.D      | 2 | 2,6064 | 0,391 | -0,164 |
| 12 | Q9BZG1 RAB34_HUMAN | K.DLSTPAQYALM*EK.D     | 2 | 2,6064 | 0,488 | 0,165  |



|    |                    |                         |   |        |       |        |
|----|--------------------|-------------------------|---|--------|-------|--------|
| 12 | Q6UX04 SDC10_HUMAN | K.DASM*QSDTFEIIDPR.N    | 2 | 2,6    | 0,334 | -0,128 |
| 12 | Q69YH5 CDCA2_HUMAN | K.VIGLQIFNIDTDR.A       | 2 | 2,5992 | 0,461 | -0,081 |
| 12 | O00429 DNM1L_HUMAN | K.DTLQSELVGQLYK.S       | 2 | 2,5978 | 0,459 | -0,327 |
| 12 | P05787 K2C8_HUMAN  | R.TEM*ENEFVLIK.K        | 2 | 2,597  | 0,391 | -0,178 |
| 12 | P42704 LPPRC_HUMAN | K.SVLELIPELNEK.E        | 2 | 2,5885 | 0,247 | -0,088 |
| 12 | P62988 UBIQ_HUMAN  | K.TITLEVEPSDTIENVK.A    | 2 | 2,5776 | 0,45  | -0,136 |
| 12 | P35749 MYH11_HUMAN | R.DLGEELEALK.T          | 2 | 2,5758 | 0,232 | 0,109  |
| 12 | Q9Y490 TLN1_HUMAN  | K.TLAESALQLLYTAK.E      | 2 | 2,5705 | 0,256 | -0,16  |
| 12 | Q5T6V5 CI064_HUMAN | K.DISSITM*FADYR.L       | 2 | 2,5664 | 0,477 | 0,425  |
| 12 | O00505 IMA3_HUMAN  | R.NVPQEESESDVDADFK.A    | 2 | 2,5635 | 0,335 | -0,18  |
| 12 | P27816 MAP4_HUMAN  | K.TDYIPLLDVDEK.T        | 2 | 2,5604 | 0,375 | -0,086 |
| 12 | P55072 TERA_HUMAN  | R.LGDVISIQPCPDVK.Y      | 2 | 2,5552 | 0,272 | 0,079  |
| 12 | Q9BZI7 REN3B_HUMAN | K.M*TSTPETLLEEIEAK.N    | 2 | 2,551  | 0,374 | 0      |
| 12 | O43592 XPOT_HUMAN  | K.DGPVGFADFVYK.H        | 2 | 2,5491 | 0,479 | -0,464 |
| 12 | Q13616 CUL1_HUMAN  | K.DGEDLM*DESVLK.F       | 2 | 2,5448 | 0,295 | 0      |
| 12 | Q9UGR2 Z3H7B_HUMAN | R.DLLFDPLGGVK.R         | 2 | 2,5411 | 0,379 | -0,208 |
| 12 | P28066 PSA5_HUMAN  | R.ITSPLM*EPSSIEK.I      | 2 | 2,5273 | 0,448 | -0,084 |
| 12 | Q15021 CND1_HUMAN  | R.DLAYCVSQLPLTER.G      | 2 | 2,5262 | 0,098 | 0,22   |
| 12 | P14866 HNRPL_HUMAN | R.VFNVFCLYGNVEK.V       | 2 | 2,5241 | 0,436 | -0,461 |
| 12 | P12004 PCNA_HUMAN  | R.AEDNADTLALVFEAPNQEK.V | 2 | 2,5205 | 0,326 | -0,118 |
| 12 | O75390 CISY_HUMAN  | K.DILADLIPK.E           | 2 | 2,5197 | 0,153 | -0,122 |
| 12 | P55072 TERA_HUMAN  | K.DVDLEFLAK.M           | 2 | 2,5143 | 0,306 | 0,116  |
| 12 | Q07955 SFRS1_HUMAN | R.DGYDYDGYR.L           | 2 | 2,5026 | 0,416 | -0,109 |
| 12 | Q13509 TBB3_HUMAN  | K.M*SSTFIGNSTAIQELFK.R  | 2 | 2,4981 | 0,343 | 0,129  |
| 12 | Q29RF7 PDS5A_HUMAN | K.EVQLAQIFEPLSR.S       | 2 | 2,4962 | 0,385 | -0,399 |
| 12 | P21980 TGM2_HUMAN  | K.TVEIPDPVEAGEEVK.V     | 2 | 2,4942 | 0,306 | -0,303 |
| 12 | P62249 RS16_HUMAN  | K.LLEPVLLL GK.E         | 2 | 2,4841 | 0,227 | -0,668 |
| 12 | P49736 MCM2_HUMAN  | R.DTVDPVQDEM*LAR.F      | 2 | 2,4729 | 0,284 | 0,081  |
| 12 | O75694 NU155_HUMAN | R.LLEVYDQLFK.S          | 2 | 2,4658 | 0,317 | -0,385 |
| 12 | Q8N1G4 LRC47_HUMAN | K.DVM*DALILK.M          | 2 | 2,4522 | 0,205 | 0      |
| 12 | P25205 MCM3_HUMAN  | R.GDINILLIGDPSVAK.S     | 2 | 2,4517 | 0,422 | -0,08  |
| 12 | Q15084 PDIA6_HUMAN | K.DVIELTDDSDFK.N        | 2 | 2,4515 | 0,35  | 0,524  |
| 12 | Q9NQE9 HINT3_HUMAN | K.DQVELVENM*VTVGK.T     | 2 | 2,4486 | 0,181 | 0,619  |

|    |                    |                          |   |        |       |        |
|----|--------------------|--------------------------|---|--------|-------|--------|
| 12 | Q29RF7 PDS5A_HUMAN | K.SIEGTADDEEEGVSPDTAIR.S | 2 | 2,4459 | 0,3   | 0,117  |
| 12 | Q9NRL2 BAZ1A_HUMAN | K.DAIDPLLFK.Y            | 2 | 2,4414 | 0,151 | 0,236  |
| 12 | P43246 MSH2_HUMAN  | K.DSLIIDEELGR.G          | 2 | 2,4367 | 0,356 | -0,196 |
| 12 | Q09666 AHNK_HUMAN  | K.VDIDVPDVNIEGPEGK.L     | 2 | 2,4355 | 0,125 | -0,36  |
| 12 | Q7Z4G4 TRM11_HUMAN | R.IDALEFLPFEGK.V         | 2 | 2,434  | 0,48  | -0,354 |
| 12 | Q9BZE4 NOG1_HUMAN  | K.DFIDLTLTK.T            | 2 | 2,4198 | 0,236 | 0,116  |
| 12 | P47897 SYQ_HUMAN   | K.SLDIQVPNFPADETK.G      | 2 | 2,4176 | 0,399 | -0,364 |
| 12 | Q14694 UBP10_HUMAN | K.EGLVPVSEDPVAIK.I       | 2 | 2,4163 | 0,109 | -0,252 |
| 12 | Q9BYT8 NEUL_HUMAN  | K.DGSPiADDLLEK.L         | 2 | 2,414  | 0,284 | -0,096 |
| 12 | Q8IYI6 EXOC8_HUMAN | R.DFEGAVDLLDK.L          | 2 | 2,4039 | 0,336 | 0,1    |
| 12 | Q16864 VATF_HUMAN  | K.DTTINEIEDTFR.Q         | 2 | 2,3977 | 0,398 | 0      |
| 12 | O60610 DIAP1_HUMAN | K.ELGEYFLFDPK.K          | 2 | 2,3938 | 0,28  | -0,27  |
| 12 | Q06203 PUR1_HUMAN  | R.EVLPGEIVEISR.H         | 2 | 2,391  | 0,375 | 0,455  |
| 12 | P60900 PSA6_HUMAN  | K.YGYEIPVDM*LCK.R        | 2 | 2,3895 | 0,276 | -0,162 |
| 12 | Q6UB35 C1TM_HUMAN  | R.DFILPISDVR.A           | 2 | 2,3711 | 0,349 | 0      |
| 12 | P51114 FXR1_HUMAN  | R.EDGM*VPFVFGTK.E        | 2 | 2,3574 | 0,417 | 0,508  |
| 12 | P11940 PABP1_HUMAN | R.SLGYAYVNFQQPADAER.A    | 2 | 2,3548 | 0,498 | 0,19   |
| 12 | Q8IUD2 RB6I2_HUMAN | K.DANIALLELSSSK.K        | 2 | 2,3529 | 0,44  | 0,179  |
| 12 | O60888 CUTA_HUMAN  | K.TQSSLVPALTDVFR.S       | 2 | 2,3394 | 0,386 | 0      |
| 12 | Q01813 K6PP_HUMAN  | K.FTTDDSIQVGLGSK.R       | 2 | 2,3267 | 0,186 | -0,235 |
| 12 | P62805 H4_HUMAN    | K.TVTAM*DVVYALK.R        | 2 | 2,3161 | 0,484 | 0,276  |
| 12 | P27816 MAP4_HUMAN  | K.NVVLPTEVEVAPAK.D       | 2 | 2,3153 | 0,251 | 0,249  |
| 12 | Q9UHD8 SEPT9_HUMAN | K.VPEVPTAPATDAAPK.R      | 2 | 2,3132 | 0,381 | -0,25  |
| 12 | O95747 OXSR1_HUMAN | R.DLVIVAANLQK.I          | 2 | 2,3102 | 0,371 | -0,103 |
| 12 | Q96D46 NMD3_HUMAN  | R.DSAIPVESDTDDEGAPR.I    | 2 | 2,295  | 0,336 | 0,206  |
| 12 | A3KN83 SBNO1_HUMAN | R.QGLIGVGLINVEDR.S       | 2 | 2,2906 | 0,42  | 0      |
| 12 | P30837 AL1B1_HUMAN | K.EEIFGPVQPLFK.F         | 2 | 2,2884 | 0,16  | -0,087 |
| 12 | Q96RP9 EFG1_HUMAN  | K.DGVGAVM*DSM*ELER.Q     | 2 | 2,2844 | 0,162 | -0,158 |
| 12 | Q8WXH0 SYNE2_HUMAN | K.SVLDQDDVDTSM*EESLK.H   | 2 | 2,2763 | 0,19  | -0,886 |
| 12 | P41227 ARD1A_HUMAN | K.DLSEVSETTESTDVK.D      | 2 | 2,2746 | 0,142 | 0,298  |
| 12 | Q562F6 SGOL2_HUMAN | K.DSGNLYDSEIQNVLGVK.H    | 2 | 2,2587 | 0,151 | 0      |
| 12 | P17174 AATC_HUMAN  | K.EPESILQVLSQM*EK.I      | 2 | 2,2567 | 0,431 | -0,37  |
| 12 | P20810 ICAL_HUMAN  | K.GTVPDDAVEALADSLGK.K    | 2 | 2,2543 | 0,397 | -0,221 |

|    |                    |                          |   |        |       |        |
|----|--------------------|--------------------------|---|--------|-------|--------|
| 12 | P00338 LDHA_HUMAN  | K.DQLIYNLLK.E            | 2 | 2,24   | 0,085 | 0      |
| 12 | O43252 PAPS1_HUMAN | R.DIVPVDASYEVK.E         | 2 | 2,238  | 0,299 | 0,091  |
| 12 | P31939 PUR9_HUMAN  | R.DVSELTFPEM*LGGR.V      | 2 | 2,2309 | 0,246 | -0,075 |
| 12 | Q9BQG0 MBB1A_HUMAN | K.ATLQEILPEVLK.A         | 2 | 2,2294 | 0,24  | -0,541 |
| 12 | P07602 SAP_HUMAN   | K.DGGFCEVCK.K            | 2 | 2,203  | 0,35  | -0,228 |
| 12 | Q5UIP0 RIF1_HUMAN  | R.GLEEIPVFDISEK.T        | 2 | 2,2025 | 0,179 | -0,248 |
| 12 | Q15149 PLEC1_HUMAN | R.LLDPEDVDVPQPDEK.S      | 2 | 2,1991 | 0,217 | -0,214 |
| 12 | Q9H4A4 AMPB_HUMAN  | R.VDIIPGFEDR.W           | 2 | 2,1959 | 0,279 | -0,373 |
| 12 | Q9H490 PIGU_HUMAN  | K.DGTEAM*LVLK.-          | 2 | 2,1948 | 0,197 | -0,223 |
| 12 | Q99460 PSMD1_HUMAN | K.EALQLM*ATYLPK.D        | 2 | 2,1761 | 0,101 | 0,788  |
| 12 | Q15084 PDIA6_HUMAN | R.GSTAPVGGGAFPTIVER.E    | 2 | 2,1719 | 0,378 | -0,151 |
| 12 | Q15084 PDIA6_HUMAN | R.TGEAIVDAALSALR.Q       | 2 | 2,167  | 0,206 | 0,088  |
| 12 | P05023 AT1A1_HUMAN | K.NLEAVETLGSTSTICSDK.T   | 2 | 2,1607 | 0,41  | -0,444 |
| 12 | Q05682 CALD1_HUMAN | K.TTTTNTQVEGDDEAAFLER.L  | 2 | 2,1525 | 0,394 | -0,233 |
| 12 | Q96SB4 SRPK1_HUMAN | R.EM*VVQLLDDFK.I         | 2 | 2,149  | 0,24  | -0,18  |
| 12 | P12235 ADT1_HUMAN  | R.YFPTQALNFAFK.D         | 2 | 2,1435 | 0,259 | -0,337 |
| 12 | Q01518 CAP1_HUMAN  | R.VENQENVSNLVIEDTELK.Q   | 2 | 2,1426 | 0,426 | -0,706 |
| 12 | Q13464 ROCK1_HUMAN | K.DVEM*EPVQQAQK.T        | 2 | 2,142  | 0,234 | -0,344 |
| 12 | Q96SQ9 CP2S1_HUMAN | R.DLVDAFLK.M             | 2 | 2,1355 | 0,283 | -0,472 |
| 12 | Q27J81 INF2_HUMAN  | R.ALDELFEAIEQK.Q         | 2 | 2,1346 | 0,192 | -0,347 |
| 12 | P35221 CTNA1_HUMAN | K.QIIVDPLSFSEER.F        | 2 | 2,1334 | 0,297 | -0,478 |
| 12 | Q09666 AHNK_HUMAN  | K.VDIDAPDVSIEGPDAL.L     | 2 | 2,1327 | 0,199 | -0,149 |
| 12 | O00139 KIF2A_HUMAN | K.DLDVITIPSK.D           | 2 | 2,1322 | 0,312 | -0,222 |
| 12 | P62736 ACTA_HUMAN  | R.DLTDYLM*K.I            | 2 | 2,1298 | 0,391 | -0,361 |
| 12 | P25205 MCM3_HUMAN  | K.DAQPSFSAEDIAK.I        | 2 | 2,114  | 0,22  | 0,885  |
| 12 | P55072 TERA_HUMAN  | R.QTNPSAM*EVEEDDPVPEIR.R | 2 | 2,0993 | 0,211 | -0,337 |
| 12 | P62318 SMD3_HUMAN  | R.FLILPDM*LK.N           | 2 | 2,0928 | 0,115 | -0,11  |
| 12 | P27695 APEX1_HUMAN | K.EAAGEGALYEDPPDQK.T     | 2 | 2,0806 | 0,321 | 0,546  |
| 12 | Q9BVJ6 UT14A_HUMAN | K.LVLADLLEPVK.T          | 2 | 2,0663 | 0,247 | -0,302 |
| 12 | P46060 RAGP1_HUMAN | R.DAALAVAEAM*ADK.A       | 2 | 2,0607 | 0,383 | -0,283 |
| 12 | O00429 DNM1L_HUMAN | K.SLLDLLLSEEDM*AQR.R     | 2 | 2,0564 | 0,275 | -0,252 |
| 12 | Q09666 AHNK_HUMAN  | K.IDVTAPDVSIEPEGK.L      | 2 | 2,0554 | 0,19  | -0,072 |
| 12 | Q09666 AHNK_HUMAN  | K.VDVEVPDVSLEGPEGK.L     | 2 | 2,0265 | 0,097 | 0,585  |

|    |                    |                                      |              |   |        |       |        |
|----|--------------------|--------------------------------------|--------------|---|--------|-------|--------|
| 12 | P51648 AL3A2_HUMAN | R.YIAPTVLTDVDPK.T                    |              | 2 | 2,0171 | 0,248 | 0      |
| 12 | Q9Y262 IF3EI_HUMAN | K.GDPQVYEELFSYSCP.K                  |              | 2 | 2,0106 | 0,205 | -0,318 |
| 13 | Q9H9T3 ELP3_HUMAN  | R.KGDLS#PAELM*M*LTIGDVIK.Q           | S10:         | 3 | 4,3161 | 0,34  | -0,427 |
| 13 | Q9H3Z4 DNJC5_HUMAN | R.SLS#TSGESLYHVLGLDK.N               | S10:         | 3 | 2,8277 | 0,217 | -0,485 |
| 13 | Q9H3Z4 DNJC5_HUMAN | R.SLS#TSGESLYHVLGLDK.N               | S10:         | 2 | 2,2087 | 0,426 | -0,776 |
| 13 | P05386 RLA1_HUMAN  | K.KEES#EES#DDDM*GFGLFD.-             | S101:S104:   | 2 | 2,8611 | 0,57  | 0      |
| 13 | P54259 ATN1_HUMAN  | K.TEQELPRPQSPS#DLDSLDR.S             | S103:        | 3 | 3,0452 | 0,272 | -0,473 |
| 13 | Q5THJ4 VP13D_HUMAN | R.AQS#PVSGPNVAHLTDGATLNDR.S          | S1042:       | 3 | 2,9986 | 0,28  | -0,398 |
| 13 | Q9UPN4 AZI1_HUMAN  | R.SGSPRPTEPTDFLM*LFEGS#PSGK.K        | S105:        | 3 | 2,8382 | 0,159 | -0,144 |
| 13 | Q9UBW7 ZMYM2_HUMAN | K.AVSGYQS#HDDSSDNSECSFPFK.Y          | S1056:       | 3 | 4,5641 | 0,323 | -0,216 |
| 13 | P24534 EF1B_HUMAN  | K.DDDDDIDLFGS#DDEEESEAKR.L           | S106:        | 3 | 4,1155 | 0,447 | -0,146 |
| 13 | O15504 NUPL2_HUMAN | K.EGFGLSENPFASLS#PDEQKDEK.K          | S106:        | 3 | 3,3612 | 0,242 | -0,365 |
| 13 | Q09666 AHNK_HUMAN  | K.M*S#LPDVDLGLKPK.M                  | S1068:       | 3 | 3,9614 | 0,236 | 0      |
| 13 | Q09666 AHNK_HUMAN  | K.M*S#LPDVDLGLKPK.M                  | S1068:       | 2 | 2,9707 | 0,302 | -0,301 |
| 13 | P27816 MAP4_HUMAN  | K.VGS#LDNVGHLPAGGAVK.T               | S1073:       | 3 | 3,4521 | 0,299 | 0,219  |
| 13 | Q9NYV4 CD2L7_HUMAN | K.ETTSSTSTEPVKNSS#PAPPQPAPGK.V       | S1083:       | 3 | 4,4269 | 0,305 | -0,719 |
| 13 | P49815 TSC2_HUMAN  | R.SLLGLDSGELQSGPESS#SPGVHVR.Q        | S1096:       | 3 | 4,9265 | 0,52  | -0,426 |
| 13 | Q96RQ1 ERGI2_HUMAN | K.TLS#LVKELDAFPK.V                   | S11:         | 2 | 2,823  | 0,411 | -0,396 |
| 13 | Q8WUF5 IASPP_HUMAN | R.SESAPTLHPYS#PLSPK.G                | S110:        | 2 | 2,8067 | 0,287 | 0      |
| 13 | Q9NZM1 MYOF_HUMAN  | K.LEGALGADTTEDGDEKS#LEK.Q            | S1110:       | 3 | 3,1012 | 0,129 | 0      |
| 13 | Q9UPT8 ZC3H4_HUMAN | R.AAKPGPAEAPSPTASPSGDAS#PPATAPYDPR.V | S1114:       | 3 | 3,3904 | 0,417 | -0,304 |
| 13 | Q6ZSZ5 ARHGI_HUMAN | R.HSPAPPPDPGFAPPS#PPPADSPSEGLSK.A    | S1124:       | 3 | 4,6219 | 0,386 | -0,433 |
| 13 | Q9UHR5 S30BP_HUMAN | R.NM*S#PDEIKIPPEPPGR.C               | S113:        | 3 | 4,1444 | 0,1   | 0      |
| 13 | Q9UHR5 S30BP_HUMAN | R.NM*S#PDEIKIPPEPPGR.C               | S113:        | 2 | 2,5527 | 0,202 | -0,717 |
| 13 | Q86YH2 Z280B_HUMAN | R.STDS#PIIIEPLSKPDYR.N               | S114:        | 3 | 2,9606 | 0,381 | 0,182  |
| 13 | Q9UNS1 TIM_HUMAN   | K.AGLAS#PEEEDAVGKEPLK.A              | S1149:       | 3 | 3,6694 | 0,327 | 0,191  |
| 13 | Q68CZ2 TENS3_HUMAN | K.ASEAAS#PLPDSPGDKLVIVK.F            | S1149:       | 3 | 2,6472 | 0,188 | 1,323  |
| 13 | Q15121 PEA15_HUMAN | K.DIIRQPS#EEEIK.L                    | S116:        | 2 | 2,7529 | 0,286 | 0      |
| 13 | Q9NR48 ASH1L_HUMAN | R.RLS#PPTLLPNS#PSHLSLTK.E            | S1162:S1170: | 3 | 3,6912 | 0,244 | -0,359 |
| 13 | Q9BQG0 MBB1A_HUMAN | R.KS#EDGTPAEDGTPAATGGSQPPSM*GR.K     | S1186:       | 3 | 4,8212 | 0,406 | -0,634 |
| 13 | P20020 AT2B1_HUMAN | R.IEDS#EPIHLIDDT#DAEDDAPTKR.N        | S1193:T1203: | 3 | 5,9426 | 0,477 | -0,385 |
| 13 | Q9UH99 UN84B_HUMAN | R.LTRYS#QGDDDGSSSSGGSSVAGSQSTLFK.D   | S12:         | 3 | 5,4021 | 0,5   | -0,433 |
| 13 | Q15648 MED1_HUMAN  | K.LAS#PM*KPVPPTPPSSK.A               | S1207:       | 3 | 3,7363 | 0,271 | -0,108 |

|    |                     |                                     |              |   |        |       |        |
|----|---------------------|-------------------------------------|--------------|---|--------|-------|--------|
| 13 | Q15648 MED1_HUMAN   | K.LAS#PM*KPVPGTTPSSK.A              | S1207:       | 2 | 2,3006 | 0,128 | 0,361  |
| 13 | P20020 AT2B1_HUMAN  | R.NS#SPPPS#PNKNNNAVDSGIHLTIEM*NK.S  | S1215:S1220: | 3 | 2,7672 | 0,448 | -0,42  |
| 13 | Q13428 TCOF_HUMAN   | K.LDSS#PSVSTLAAKDDPDGK.Q            | S1228:       | 3 | 2,8906 | 0,229 | 0      |
| 13 | Q13428 TCOF_HUMAN   | K.LDSS#PSVSTLAAKDDPDGK.Q            | S1228:       | 2 | 2,1582 | 0,324 | -0,236 |
| 13 | P54725 RD23A_HUMAN  | R.EDKS#PSEESAPTTSPESVSGSVSSGSSGR.E  | S123:        | 3 | 4,2422 | 0,464 | -0,366 |
| 13 | Q9C004 SPY4_HUMAN   | R.LLDHM*APPPVADQAS#PR.A             | S125:        | 3 | 3,517  | 0,34  | 0,383  |
| 13 | Q9UQ35 SRRM2_HUMAN  | K.SEEPAGQILSHLS#SELK.E              | S1257:       | 2 | 2,4154 | 0,442 | -0,192 |
| 13 | Q5QPG4 Q5QPG4_HUMAN | R.KLS#SIGIQVDCIQVPK.E               | S126:        | 3 | 4,7787 | 0,228 | 0,093  |
| 13 | P49023 PAXI_HUMAN   | K.QKS#AEPSTVM*STSLGSNLSELDL.R       | S126:        | 3 | 4,346  | 0,347 | -0,487 |
| 13 | Q5QPG4 Q5QPG4_HUMAN | R.KLS#SIGIQVDCIQVPK.E               | S126:        | 2 | 4,1161 | 0,49  | -0,373 |
| 13 | Q7Z340 ZN551_HUMAN  | K.DILPAAEHQTTS#PVQK.S               | S126:        | 2 | 3,4813 | 0,385 | -0,067 |
| 13 | Q3T8J9 GON4L_HUMAN  | K.VEHS#PGPPLADAECQEGLSENSACR.W      | S1268:       | 3 | 7,9475 | 0,469 | -0,393 |
| 13 | Q9BY77 PDIP3_HUMAN  | K.RSS#PAAFINPPIGTVTPALK.L           | S127:        | 3 | 3,6148 | 0,299 | -0,086 |
| 13 | Q9P2E9 RRBP1_HUMAN  | K.SHVEDGDIAGAPASS#PEAPPAEQDPVQLK.T  | S1277:       | 3 | 4,1864 | 0,391 | -0,428 |
| 13 | Q6PGP3 Q6PGP3_HUMAN | R.TPS#PEPVDKDFYSEFGNK.T             | S1284:       | 3 | 4,2983 | 0,334 | 0,428  |
| 13 | O75533 SF3B1_HUMAN  | R.TM*IIS#PERLDPFADGGKT#PDPK.M       | S129:T142:   | 3 | 4,9507 | 0,501 | -0,857 |
| 13 | Q92538 GBF1_HUMAN   | R.ADAPDAGAQS#DSELPYHQNDVSLDR.G      | S1298:       | 3 | 5,1355 | 0,357 | -0,129 |
| 13 | Q9BQG0 MBB1A_HUMAN  | R.LSLVIRS#PSLLQSGAK.K               | S1308:       | 2 | 3,6392 | 0,289 | -0,14  |
| 13 | Q8WUA4 TF3C2_HUMAN  | K.RPQQPNPPSAPLVPGLLDQS#NPLSTPM*PK.K | S132:        | 3 | 4,5764 | 0,47  | -0,461 |
| 13 | P51858 HDGF_HUMAN   | K.GNAEGS#SDEEGKLVIDEPAK.E           | S132:        | 3 | 3,9373 | 0,37  | 0      |
| 13 | O15357 SHIP2_HUMAN  | R.DAS#DGEDEKPPLPPR.S                | S132:        | 3 | 3,7212 | 0,388 | 0      |
| 13 | O15357 SHIP2_HUMAN  | R.DAS#DGEDEKPPLPPR.S                | S132:        | 2 | 3,1332 | 0,301 | -0,287 |
| 13 | Q9Y2K6 UBP20_HUMAN  | K.AVPIA VADEGES#ESEDDDLKPR.G        | S132:        | 3 | 2,6906 | 0,269 | 0,076  |
| 13 | Q9UQ35 SRRM2_HUMAN  | K.ELSNS#PLRENSFGSPLEFR.N            | S1320:       | 3 | 2,9438 | 0,195 | 0,081  |
| 13 | Q92766 RREB1_HUMAN  | R.QVAGDAPVEQATAETAS#PVHR.E          | S1320:       | 3 | 2,7954 | 0,348 | 0,083  |
| 13 | Q12756 KIF1A_HUMAN  | R.VTGVYELSLCHVADAGS#PGM*QR.R        | S1337:       | 3 | 4,5553 | 0,364 | 1,048  |
| 13 | Q6UB98 ANR12_HUMAN  | R.DLSNVSNIHSSFATS#PTGASNSK.Y        | S1372:       | 3 | 5,3251 | 0,46  | -0,152 |
| 13 | Q96T58 MINT_HUMAN   | R.DLEPGEVPS#DSDEEDGEHK.S            | S1380:       | 2 | 2,1764 | 0,133 | -0,42  |
| 13 | P49736 MCM2_HUMAN   | R.GLLYDS#DEEDEERPAR.K               | S139:        | 3 | 3,2728 | 0,382 | -0,093 |
| 13 | O14686 MLL2_HUMAN   | K.LEGPVS#PDVEPGKEETESK.K            | S1396:       | 3 | 2,807  | 0,291 | 0      |
| 13 | P52701 MSH6_HUMAN   | R.QSTLYSFFPKS#PALSDANK.A            | S14:         | 3 | 3,4251 | 0,319 | 0,168  |
| 13 | Q5QJE6 TDIF2_HUMAN  | K.ESYTEEIVS#EAESHVSGISR.I           | S141:        | 3 | 2,8145 | 0,316 | -0,559 |
| 13 | Q13523 PRP4B_HUMAN  | K.VQSGM*GLILQGYES#GSEEEGEIHEK.A     | S142:        | 3 | 4,8723 | 0,353 | 1,175  |

|    |                    |                                  |            |   |        |       |        |
|----|--------------------|----------------------------------|------------|---|--------|-------|--------|
| 13 | Q86VI3 IQGA3_HUMAN | R.S#LTAHSLPLAEK.Q                | S1424:     | 2 | 3,4723 | 0,457 | -0,167 |
| 13 | P78316 NOP14_HUMAN | K.HNDIVDS#DS#DAEDR.G             | S146:S148: | 2 | 5,7833 | 0,463 | 0,07   |
| 13 | P78316 NOP14_HUMAN | K.HNDIVDS#DS#DAEDR.G             | S146:S148: | 3 | 3,1483 | 0,242 | -0,419 |
| 13 | Q02880 TOP2B_HUMAN | K.SQDFGNLFSFYSYSQKSEDDS#AK.F     | S1461:     | 3 | 3,7196 | 0,328 | -0,206 |
| 13 | P30307 MPIP3_HUMAN | R.DAM*CSSS#ANKENDNGNLVDSEM*K.Y   | S148:      | 3 | 5,1041 | 0,361 | 0,418  |
| 13 | Q9BUA3 YK007_HUMAN | R.AEQPS#PPNSDSGQDAHPDPDANPDAAR.M | S148:      | 3 | 3,283  | 0,336 | 0,645  |
| 13 | Q15648 MED1_HUMAN  | K.SYQNSPSS#DDGIRPLPEYSTEK.H      | S1482:     | 3 | 3,4748 | 0,26  | 0,789  |
| 13 | Q15040 JOS1_HUMAN  | K.SES#LELPQAAPPQIYHEK.Q          | S15:       | 3 | 4,7044 | 0,354 | -0,173 |
| 13 | Q9H3Z4 DNJC5_HUMAN | R.SLSTSGES#LYHVLGLDK.N           | S15:       | 2 | 4,3589 | 0,543 | -0,518 |
| 13 | Q96JG6 CC132_HUMAN | R.QGLKS#PQESLSLGAIESLR.V         | S15:       | 3 | 3,951  | 0,391 | -0,331 |
| 13 | Q9H4L7 SMRCD_HUMAN | R.NDDISELEDLS#ELEDLKDAK.L        | S152:      | 3 | 4,7379 | 0,432 | -0,54  |
| 13 | P08134 RHOC_HUMAN  | R.DM*ANRIS#AFGYLECSAK.T          | S152:      | 3 | 2,6823 | 0,179 | -0,18  |
| 13 | P08134 RHOC_HUMAN  | R.DM*ANRIS#AFGYLECSAK.T          | S152:      | 2 | 2,3057 | 0,236 | -0,481 |
| 13 | Q8NFD5 ARI1B_HUMAN | R.M*S#PSKSPFLPSM*K.M             | S1555:     | 3 | 3,408  | 0,347 | 0,118  |
| 13 | O95684 FR1OP_HUMAN | K.GPTTGEGALDLSDVHS#PPKS#PEGK.T   | S156:S160: | 3 | 6,2451 | 0,51  | 0,072  |
| 13 | Q5JTV8 TOIP1_HUMAN | R.DSHSS#EEDEASSQTDLSTISK.K       | S157:      | 3 | 6,105  | 0,549 | 0      |
| 13 | O75391 SPAG7_HUMAN | R.QEEEAQQGPVVVS#PASDYKDK.Y       | S158:      | 3 | 4,191  | 0,458 | -0,224 |
| 13 | Q02880 TOP2B_HUMAN | K.KTSFDQDS#DVDIFPSDFPTEPPSLPR.T  | S1581:     | 3 | 3,3157 | 0,166 | -0,121 |
| 13 | Q13200 PSMD2_HUMAN | K.APVQPQQS#PAAAPGGTDEKPSGK.E     | S16:       | 3 | 3,2108 | 0,305 | -0,398 |
| 13 | Q1KMD3 HNRL2_HUMAN | R.EEDEPEERS#GDETPGSEVPGDK.A      | S161:      | 3 | 3,6955 | 0,29  | -0,371 |
| 13 | Q9BUL9 RPP25_HUMAN | R.QPGYQPPNPHPGPS#SPPAAPASK.R     | S161:      | 3 | 2,6495 | 0,342 | -0,155 |
| 13 | Q9Y5S2 MRCKB_HUMAN | R.SM*S#DPDQDFDKEPDSSTK.H         | S1659:     | 3 | 4,6599 | 0,388 | -0,163 |
| 13 | Q5VYS8 ZCHC6_HUMAN | K.DLTSLETTS#EM*EAGSPENKK.Q       | S166:      | 3 | 2,6233 | 0,283 | 0,081  |
| 13 | Q01433 AMPD2_HUMAN | R.QIS#QDVKLEPDILLR.A             | S168:      | 3 | 2,9786 | 0,239 | -0,297 |
| 13 | Q14980 NUMA1_HUMAN | K.APVPSTCSSTFPEELS#PPSHQAK.R     | S169:      | 3 | 5,8447 | 0,451 | -0,072 |
| 13 | Q14789 GOGB1_HUMAN | R.LSGLANVVLHELHS#GDDDDTDQNM*R.A  | S17:       | 3 | 5,1902 | 0,452 | -0,635 |
| 13 | P09234 RU1C_HUMAN  | K.FYCDYCDTYLTHDS#PSVR.K          | S17:       | 3 | 3,3084 | 0,3   | 0,461  |
| 13 | Q15742 NAB2_HUMAN  | K.SPLELGEKLS#PLPGGPGAGDPR.I      | S171:      | 3 | 2,8535 | 0,087 | 0,494  |
| 13 | Q96Q89 MPPH1_HUMAN | K.FGDFLQHS#PSILQSK.A             | S1740:     | 3 | 3,5851 | 0,397 | -0,205 |
| 13 | Q9H7D0 DOCK5_HUMAN | K.SQVIAEKAPEPDLM*S#PTR.K         | S1756:     | 3 | 3,8264 | 0,314 | -0,266 |
| 13 | Q7Z589 EMSY_HUMAN  | K.SPRPASPAS#NVVVLPSTVYVK.S       | S176:      | 3 | 4,4898 | 0,335 | -0,153 |
| 13 | P42694 HELZ_HUMAN  | R.RIS#SSSVQPCSEEVSTPQDSLQCK.E    | S1763:     | 3 | 5,3014 | 0,457 | -0,384 |
| 13 | Q58FF8 H90B2_HUMAN | K.IEDVGS#DEEDDSGKDK.K            | S177:      | 2 | 4,3643 | 0,469 | -0,537 |

|    |                     |                                    |                 |   |        |       |        |
|----|---------------------|------------------------------------|-----------------|---|--------|-------|--------|
| 13 | Q5T4S7 UBR4_HUMAN   | K.TLSDVEDQKELAS#PVSPELR.Q          | S178:           | 3 | 4,3577 | 0,388 | -0,08  |
| 13 | P18583 SON_HUMAN    | R.ASESS#SEEKDDYEIVK.V              | S1783:          | 2 | 2,9833 | 0,417 | -0,597 |
| 13 | Q9H7D0 DOCK5_HUMAN  | R.LSPFHGSSPPQSTPLS#PPPLTPK.A       | S1789:          | 3 | 3,166  | 0,141 | -0,149 |
| 13 | Q14980 NUMA1_HUMAN  | R.SQAPLESS#LDSLGDVFLDSGRK.T        | S1789:          | 3 | 2,9932 | 0,293 | -0,305 |
| 13 | Q8N344 MIER2_HUMAN  | R.FLADEDREPGSSAS#SDTEEDSLPANK.C    | S180:           | 3 | 5,5726 | 0,439 | -0,835 |
| 13 | Q5T4S7 UBR4_HUMAN   | K.TLSDVEDQKELASPV#PELR.Q           | S181:           | 3 | 3,9546 | 0,338 | -0,479 |
| 13 | Q9NQW6 ANLN_HUMAN   | K.AAS#PPRPLLSNASATPVGR.R           | S182:           | 3 | 5,1252 | 0,504 | 0,094  |
| 13 | Q9BVG6 SCNM1_HUMAN  | K.ISREPEPAAGQAEESATVSAPAPM*S#PTR.R | S183:           | 3 | 3,1629 | 0,329 | -0,302 |
| 13 | P50548 ERF_HUMAN    | R.LGRGS#VSDCSDGTSELEEPLGEDPR.A     | S185:           | 3 | 4,8669 | 0,388 | -0,4   |
| 13 | Q8IWC1 MA7D3_HUMAN  | R.SAS#TEKLEQGTSALIR.Q              | S185:           | 3 | 3,8062 | 0,297 | -0,103 |
| 13 | Q9H845 ACAD9_HUMAN  | K.LASGEHIAAFCLTEPASGS#DAASIR.S     | S187:           | 3 | 3,096  | 0,102 | -0,28  |
| 13 | Q9BVC5 ASHWN_HUMAN  | K.SPSGPVK#PPLSPVGTTPVK.L           | S189:           | 3 | 4,3747 | 0,329 | 0,273  |
| 13 | Q96E09 F122A_HUMAN  | R.SQS#PINCIRPSVLGPK.R              | S189:           | 3 | 2,7014 | 0,432 | 0,564  |
| 13 | Q9H1E3 NUCKS_HUMAN  | K.VVDYSQFQES#DDADEDYGRDSGPPTK.K    | S19:            | 3 | 5,4847 | 0,523 | -0,549 |
| 13 | A6NJ09 RU2BL_HUMAN  | K.LDVKS#IDDEDVDENEDDVYGNSSGR.K     | S191:           | 3 | 4,9152 | 0,382 | -0,319 |
| 13 | B0I1T6 B0I1T6_HUMAN | K.LGFSSPYEGLNKS#PK.T               | S1935:          | 2 | 3,4339 | 0,43  | -0,135 |
| 13 | O43237 DC1L2_HUMAN  | K.DFQDYM*EPEEGCQGS#PQRR.G          | S194:           | 3 | 3,9982 | 0,367 | -0,377 |
| 13 | P35579 MYH9_HUMAN   | K.GAGDGS#DEEVDGKADGAEAKPAE.-       | S1943:          | 3 | 5,2676 | 0,465 | -0,568 |
| 13 | Q9NW75 GPTC2_HUMAN  | R.DQDM*DS#DRAYQYQEFK.N             | S195:           | 3 | 2,7071 | 0,193 | -0,164 |
| 13 | Q9NYF8 BCLF1_HUMAN  | K.DTFEHDPSSES#IDFNK.S              | S198:           | 3 | 4,2059 | 0,424 | -0,276 |
| 13 | Q07955 SFRS1_HUMAN  | K.VDGPRS#PS#YGRS#R.S               | S199:S201:S205: | 2 | 2,1638 | 0,181 | -0,364 |
| 13 | O96007 MOS2L_HUMAN  | K.LPLS#PPLVEDSAFEPSRK.D            | S20:            | 3 | 2,8138 | 0,437 | 0,444  |
| 13 | Q96B36 AKTS1_HUMAN  | K.RTEARS#S#DEENGPPS#SPDLDR.I       | S202:S203:S211: | 3 | 5,9885 | 0,499 | -0,215 |
| 13 | P00558 PGK1_HUMAN   | K.ALES#PERPFLAILGGAK.V             | S203:           | 3 | 3,5995 | 0,423 | -0,396 |
| 13 | P08670 VIME_HUMAN   | R.EEAENTLQS#FRQDVDNASLAR.L         | S205:           | 3 | 3,2026 | 0,303 | 0,074  |
| 13 | Q9Y6G9 DC1L1_HUMAN  | R.DFQEYVEPGEDFPAS#PQRR.N           | S207:           | 3 | 3,0373 | 0,295 | 0,078  |
| 13 | P38159 HNRPG_HUMAN  | R.DVYLS#PRDDGYSTK.D                | S208:           | 2 | 2,297  | 0,5   | -0,072 |
| 13 | Q96CP2 FWCH2_HUMAN  | K.ASQEPS#PKPGTEVIPAAPR.K           | S21:            | 3 | 3,5667 | 0,265 | 0      |
| 13 | Q6R327 RICTR_HUMAN  | R.NDS#GEENVPLDLTREPSDNL.R.E        | S21:            | 3 | 3,005  | 0,121 | -0,373 |
| 13 | Q53H80 CF166_HUMAN  | R.TLDFDPLLSPAS#PKR.R               | S21:            | 2 | 2,6755 | 0,43  | -0,421 |
| 13 | Q09666 AHNK_HUMAN   | K.TVIRLPS#GSGAASPTGSAVDIR.A        | S210:           | 3 | 5,0538 | 0,382 | 0      |
| 13 | Q13242 SFRS9_HUMAN  | R.GS#PHYFSPFRPY.-                  | S211:           | 2 | 2,0587 | 0,4   | -0,318 |
| 13 | Q96T58 MINT_HUMAN   | R.ESGVVAVS#PEKS#ESPQKEDGLSSQLK.S   | S2120:S2124:    | 3 | 3,2877 | 0,242 | -0,127 |

|    |                     |                                   |        |   |        |       |        |
|----|---------------------|-----------------------------------|--------|---|--------|-------|--------|
| 13 | P12270 TPR_HUMAN    | R.TDGF AEAIHS#PQVAGVPR.F          | S2141: | 3 | 5,4542 | 0,548 | 0,189  |
| 13 | P12270 TPR_HUMAN    | R.TDGF AEAIHS#PQVAGVPR.F          | S2141: | 2 | 4,1607 | 0,384 | -0,568 |
| 13 | Q5JTV8 TOIP1_HUMAN  | K.VNFS#EEGETEEDDQDSSHSSVTTVK.A    | S215:  | 3 | 3,5393 | 0,349 | -0,387 |
| 13 | Q01082 SPTB2_HUMAN  | R.M*AETVDTSEM*VNGATEQRTS#SK.E     | S2160: | 3 | 3,4962 | 0,355 | 1,252  |
| 13 | O75376 NCOR1_HUMAN  | R.NDARS#PGSISYLPFFTK.L            | S2184: | 3 | 3,6132 | 0,298 | -0,266 |
| 13 | Q5UIP0 RIF1_HUMAN   | R.RVS#FADPIYQAGLADDIDR.R          | S2205: | 3 | 3,0938 | 0,301 | -0,083 |
| 13 | O95759 TBCD8_HUMAN  | K.SPLM*HPDALVTAFFQSGSQS#PDSR.M    | S221:  | 3 | 4,443  | 0,409 | -0,276 |
| 13 | Q8WVB6 CTF18_HUMAN  | R.GGGQLDLLGVS#LASLKK.Q            | S222:  | 3 | 3,0244 | 0,304 | -0,316 |
| 13 | Q9Y618 NCOR2_HUMAN  | K.TSVLGGGEDGIEPVS#PPEGM*TEPGHSR.S | S2226: | 3 | 5,2671 | 0,403 | -0,263 |
| 13 | P11831 SRF_HUMAN    | K.ALIQTCLNSPDS#PPRSDPTTDQR.M      | S224:  | 3 | 4,2882 | 0,259 | 0,76   |
| 13 | Q5T2D3 OTUD3_HUMAN  | K.GM*DS#EDDLRDEVEDAVQK.V          | S224:  | 3 | 3,2081 | 0,329 | 0      |
| 13 | Q8WVB6 CTF18_HUMAN  | R.GGGQLDLLGVS#LASLKK.Q            | S225:  | 2 | 3,28   | 0,303 | -0,422 |
| 13 | P54578 UBP14_HUMAN  | K.LEAIEDDSVKETDS#SSASAATPSK.K     | S228:  | 3 | 4,6352 | 0,492 | 0,073  |
| 13 | Q96AG4 LRC59_HUMAN  | R.DKLDGNELDLS#LSDLNEVPVK.E        | S23:   | 3 | 4,9451 | 0,306 | -0,306 |
| 13 | P56749 CLD12_HUMAN  | R.SRLS#AIEIDIPVVSHTT.-            | S231:  | 2 | 4,3831 | 0,519 | -0,7   |
| 13 | Q8TF40 FNIP1_HUMAN  | R.SAS#FFAVHSNPM*DM*PGR.E          | S232:  | 3 | 3,447  | 0,218 | 0,28   |
| 13 | P21333 FLNA_HUMAN   | K.FNEEHIPDSPFVVPVAS#PSGDAR.R      | S2327: | 3 | 4,0826 | 0,248 | -0,575 |
| 13 | Q15424 SAFB1_HUMAN  | K.SEPVKEES#SELEQPFAQDTSSVGPDR.K   | S234:  | 3 | 5,4795 | 0,513 | -0,5   |
| 13 | Q15424 SAFB1_HUMAN  | K.SEPVKEESS#ELEQPFAQDTSSVGPDR.K   | S235:  | 3 | 4,392  | 0,407 | -0,312 |
| 13 | Q6ZML7 Q6ZML7_HUMAN | R.YYS#PCEEHPAETNQNEGSESGTIR.Q     | S238:  | 3 | 4,5541 | 0,453 | -0,323 |
| 13 | Q12802 AKP13_HUMAN  | R.DM*AECSTPLPEDCS#PTHSPR.V        | S2398: | 3 | 4,5712 | 0,485 | -0,154 |
| 13 | Q96A57 CTO30_HUMAN  | R.LSS#TDDGYIDLQFKK.T              | S24:   | 3 | 2,8383 | 0,259 | 0,404  |
| 13 | Q14244 MAP7_HUMAN   | R.S#KSTAALSGEAAASCPPIIM*PYK.A     | S240:  | 3 | 5,305  | 0,491 | -0,309 |
| 13 | P22059 OSBP1_HUMAN  | R.SLS#ELESCLKPAESNEK.I            | S240:  | 2 | 2,7566 | 0,475 | -0,375 |
| 13 | O75179 ANR17_HUMAN  | R.APS#PAPSSVPLGSEKPSNVSQDR.K      | S2401: | 3 | 4,1034 | 0,291 | 0      |
| 13 | P11717 MPRI_HUMAN   | K.ALSSLHGDDQDS#EDEVLTIPVK.V       | S2409: | 3 | 4,9145 | 0,362 | -0,497 |
| 13 | O43815 STRN_HUMAN   | K.FLESAAADFS#DEDEDDVDGREK.S       | S245:  | 3 | 5,2326 | 0,31  | -0,551 |
| 13 | Q15424 SAFB1_HUMAN  | K.SEPVKEESSELEQPFAQDTSS#VGPDR.K   | S247:  | 3 | 4,7587 | 0,435 | -0,5   |
| 13 | Q92890 UFD1_HUMAN   | K.GVEPSPS#PIKPGDIK.R              | S247:  | 2 | 2,4954 | 0,209 | -0,305 |
| 13 | P11717 MPRI_HUMAN   | K.LVSFHDDS#DEDLLHI.-              | S2484: | 2 | 4,9333 | 0,53  | -0,798 |
| 13 | B2RAW2 B2RAW2_HUMAN | R.KLS#PQDPSEDVSSM*DPLK.L          | S249:  | 3 | 4,3948 | 0,406 | 0      |
| 13 | Q53T59 H1BP3_HUMAN  | R.KLS#PQDPSEDVSSVDPLK.L           | S249:  | 3 | 3,8949 | 0,387 | 0,362  |
| 13 | P25788 PSA3_HUMAN   | K.ESLKEEDS#DDDNM*.-               | S250:  | 2 | 2,102  | 0,254 | -0,348 |



|    |                     |                                  |            |   |        |       |        |
|----|---------------------|----------------------------------|------------|---|--------|-------|--------|
| 13 | P49792 RBP2_HUMAN   | K.AVVS#PPKFVFGSESVK.S            | S2510:     | 2 | 2,1922 | 0,389 | -0,763 |
| 13 | P52701 MSH6_HUMAN   | R.VIS#DSESDIGGSDVEFKPDTK.E       | S252:      | 3 | 3,8783 | 0,437 | -0,317 |
| 13 | Q08357 S20A2_HUMAN  | K.EGALSRVS#DES#LSKVQEAESPVK.E    | S256:S259: | 3 | 3,5089 | 0,434 | -0,399 |
| 13 | P04049 RAF1_HUMAN   | R.STS#TPNVHM*VSTTLPVDSR.M        | S259:      | 3 | 3,2706 | 0,143 | 0,172  |
| 13 | P49736 MCM2_HUMAN   | R.RGNDPLTS#S#PGR.S               | S26:S27:   | 2 | 3,5838 | 0,444 | 0,172  |
| 13 | P21359 NF1_HUMAN    | R.KVSVSES#NVLLEEVLTDPK.I         | S2601:     | 3 | 5,6162 | 0,249 | 0      |
| 13 | Q8N556 AFAP1_HUMAN  | K.EAYSGCSGPVDSECPPPPS#SPVHK.A    | S264:      | 3 | 3,7278 | 0,301 | -0,558 |
| 13 | Q5T200 ZC3HD_HUMAN  | R.TPS#PPPIPEDIALGKK.Y            | S265:      | 3 | 3,9872 | 0,463 | -0,1   |
| 13 | Q9UBF8 PI4KB_HUMAN  | R.ELPSLSPAPDTGLS#PSKR.T          | S266:      | 2 | 2,4938 | 0,348 | -0,126 |
| 13 | Q15942 ZYGX_HUMAN   | R.GPPASSPAPAPKFS#PVTPK.F         | S267:      | 2 | 4,6698 | 0,563 | -0,383 |
| 13 | Q03111 ENL_HUMAN    | K.LESTS#PKGGPPPPPPPPR.A          | S267:      | 3 | 4,1618 | 0,26  | -0,092 |
| 13 | Q76FK4 NOL8_HUMAN   | R.TCDSITPSKSS#PVPVSDTQK.L        | S268:      | 3 | 3,5481 | 0,249 | 0,331  |
| 13 | Q96ST2 IWS1_HUMAN   | R.DSGS#DGEDDVNEQHSGSDTGSVER.H    | S27:       | 3 | 3,5392 | 0,463 | -0,429 |
| 13 | Q99504 EYA3_HUMAN   | K.LSSGDPSTSPSLSQTTPS#KDTDDQSR.K  | S271:      | 3 | 2,7743 | 0,115 | -0,396 |
| 13 | Q9H6K1 CF106_HUMAN  | R.LSQNSVNL#PSSHANNLSVVTYSK.G     | S272:      | 3 | 4,0831 | 0,386 | -0,07  |
| 13 | Q13367 AP3B2_HUMAN  | K.AFYGS#EEDEAKGAGSEETAAAAAPSR.K  | S272:      | 3 | 3,2837 | 0,238 | -0,345 |
| 13 | Q8WYQ5 DGCR8_HUMAN  | K.YGGDSHDPS#DGETSVQPM*M*TK.I     | S275:      | 3 | 4,0023 | 0,331 | 0,078  |
| 13 | Q5W189 Q5W189_HUMAN | R.REPES#PPASAPIPLFGADTIGQR.S     | S28:       | 3 | 5,1411 | 0,394 | -0,515 |
| 13 | Q12857 NFIA_HUMAN   | R.LKS#VEDEM*DSPGEEPFTGQGR.S      | S280:      | 3 | 5,3577 | 0,387 | 0,143  |
| 13 | P27816 MAP4_HUMAN   | K.DM*ES#PTKLDVTLAK.D             | S280:      | 2 | 4,2259 | 0,379 | 0,148  |
| 13 | P27816 MAP4_HUMAN   | K.DM*ES#PTKLDVTLAK.D             | S280:      | 3 | 4,0241 | 0,288 | 0      |
| 13 | P21127 CD2L1_HUMAN  | R.DLLSDLQDIS#DSERK.T             | S283:      | 2 | 3,0922 | 0,348 | 0,135  |
| 13 | Q8N3D4 EH1L1_HUMAN  | R.ANEAGGQVGPAPRPPETS#PEM*R.S     | S285:      | 3 | 4,1599 | 0,43  | -0,518 |
| 13 | Q16649 NFIL3_HUMAN  | R.TSETDDGVVGKSS#DGEDEQQVVK.G     | S286:      | 3 | 4,2163 | 0,437 | -0,147 |
| 13 | Q8IVF2 AHNK2_HUMAN  | R.DAHDVS#PTSTDTEAQLTVER.Q        | S294:      | 3 | 5,3359 | 0,398 | 0      |
| 13 | P46939 UTRO_HUMAN   | K.ECEEEAINIQSTAPEEEHES#PR.A      | S295:      | 3 | 3,6052 | 0,231 | -0,206 |
| 13 | P78310 CXAR_HUMAN   | R.SYIGS#NHSSLGSM*SPSNM*EGYSK.T   | S297:      | 3 | 3,6949 | 0,365 | 0      |
| 13 | Q99501 GA2L1_HUMAN  | R.VCTFSPQRVS#PTTSPRPAS#PVPGSER.R | S297:S306: | 3 | 2,6744 | 1     | -0,186 |
| 13 | Q6P4R8 NFRKB_HUMAN  | R.KGS#LAALYDLAVLK.K              | S298:      | 2 | 5,1062 | 0,44  | -0,475 |
| 13 | P25440 BRD2_HUMAN   | R.KADTTTPTTAILAPGS#PASPPGSLEPK.A | S298:      | 3 | 3,7071 | 0,412 | -0,46  |
| 13 | Q92805 GOGA1_HUMAN  | R.SVS#KESVASM*GADSGDDFASDGSSSR.E | S30:       | 3 | 5,7683 | 0,509 | -0,348 |
| 13 | P09382 LEG1_HUMAN   | R.GEVAPDAKS#FVLNLGK.D            | S30:       | 2 | 3,4245 | 0,386 | 0,071  |
| 13 | Q7L4I2 RSRC2_HUMAN  | K.KEQSEVS#VS#PR.A                | S30:S32:   | 3 | 2,9502 | 0,166 | -0,065 |

|    |                    |                                   |                 |   |        |       |        |
|----|--------------------|-----------------------------------|-----------------|---|--------|-------|--------|
| 13 | Q7L4I2 RSRC2_HUMAN | K.KEQSEVS#VS#PR.A                 | S30:S32:        | 2 | 2,4344 | 0,155 | -0,174 |
| 13 | P78310 CXAR_HUMAN  | R.SYIGSNHS#SLGSM*SPSNM*EGYSK.T    | S300:           | 3 | 5,1016 | 0,433 | -0,145 |
| 13 | Q96ST2 IWS1_HUMAN  | R.VS#DSESEGPQKGPASDSETEDASR.H     | S300:           | 3 | 4,383  | 0,533 | -0,288 |
| 13 | Q6WCQ1 MRIP_HUMAN  | R.S#QVIEKFEALDIEK.A               | S300:           | 2 | 2,6747 | 0,295 | 0,565  |
| 13 | P25440 BRD2_HUMAN  | R.KADTTTPTPTAILAPGSPAS#PPGSLEPK.A | S301:           | 3 | 5,1643 | 0,434 | -0,592 |
| 13 | Q15942 ZYX_HUMAN   | K.LGHPEALS#AGTGSPQPPSFTYAQQR.E    | S303:           | 3 | 3,7905 | 0,233 | -0,547 |
| 13 | P42167 LAP2B_HUMAN | K.HAS#PILPITEFSDIPR.R             | S306:           | 2 | 4,3183 | 0,516 | -0,651 |
| 13 | P42167 LAP2B_HUMAN | K.HAS#PILPITEFSDIPR.R             | S306:           | 3 | 3,5562 | 0,364 | -0,098 |
| 13 | Q01518 CAP1_HUMAN  | R.SGPKPFSAPKPQTS#PSPK.R           | S308:           | 3 | 2,7363 | 0,255 | -0,381 |
| 13 | Q7RTV3 ZN367_HUMAN | K.ADQEQQDPLEYLQS#DEEDDEKR.G       | S310:           | 3 | 5,0087 | 0,43  | 0,066  |
| 13 | O94967 WDR47_HUMAN | R.S#LNPALDGLTCLTSHDK.R            | S312:           | 2 | 2,7662 | 0,511 | -0,493 |
| 13 | Q96QC0 PP1RA_HUMAN | K.VLS#PTAAKPSPFEGK.T              | S313:           | 2 | 2,0398 | 0,367 | -0,152 |
| 13 | Q13188 STK3_HUMAN  | R.ELEEEEEENS#DEDELDSHTM*VK.T      | S316:           | 3 | 4,0508 | 0,317 | -0,211 |
| 13 | Q6KC79 NIPBL_HUMAN | R.DVPPDILLDS#PERK.Q               | S318:           | 2 | 3,2907 | 0,434 | -0,364 |
| 13 | Q9UIG0 BAZ1B_HUMAN | R.KPS#KKSKT#DNSSLSSPLNPK.L        | S318:T323:      | 3 | 2,7035 | 0,181 | -0,556 |
| 13 | P35659 DEK_HUMAN   | R.EES#EEEEDEDEEEEEEEKEK.S         | S32:            | 3 | 4,2062 | 0,471 | -0,47  |
| 13 | Q9Y2W1 TR150_HUMAN | K.S#PPSTGTYGSSQKEESAASGGAAYTK.R   | S320:           | 3 | 3,8447 | 0,452 | -0,204 |
| 13 | Q12893 TM115_HUMAN | K.VDS#PLPSDKAPTPPGK.G             | S320:           | 3 | 3,5805 | 0,429 | 0      |
| 13 | Q9UQ35 SRRM2_HUMAN | R.GEGDAPFSEPGTTSTQRPS#SPETATK.Q   | S322:           | 3 | 2,6724 | 0,16  | -0,202 |
| 13 | Q92922 SMRC1_HUMAN | R.KHS#PS#PPPPT#PTESR.K            | S328:S330:T335: | 3 | 4,7363 | 0,465 | -0,296 |
| 13 | Q92922 SMRC1_HUMAN | R.KHS#PS#PPPPT#PTESR.K            | S328:S330:T335: | 2 | 2,5058 | 0,16  | -0,329 |
| 13 | Q92922 SMRC1_HUMAN | R.KHS#PS#PPPPTPT#ESR.K            | S328:S330:T337: | 3 | 3,4165 | 0,268 | -0,394 |
| 13 | Q15459 SF3A1_HUMAN | K.FGESEEVEM*EVES#DEEDDKQEK.A      | S329:           | 3 | 6,186  | 0,373 | -0,944 |
| 13 | Q15459 SF3A1_HUMAN | K.FGESEEVEMEVEVES#DEEDDKQEK.A     | S329:           | 3 | 4,7444 | 0,465 | -0,407 |
| 13 | P19484 TFEB_HUMAN  | R.VHGLPTTS#PSGM*NM*AELAQQVVK.Q    | S332:           | 3 | 3,7258 | 0,258 | -0,292 |
| 13 | Q9H6Z4 RANB3_HUMAN | R.VLS#PPKLNEVSSDANR.E             | S333:           | 3 | 4,4099 | 0,384 | 0,101  |
| 13 | Q9H7F4 T185B_HUMAN | R.VVITQS#PGKYVPPPK.L              | S333:           | 3 | 3,8554 | 0,399 | 0,205  |
| 13 | Q9H6Z4 RANB3_HUMAN | R.VLS#PPKLNEVSSDANR.E             | S333:           | 2 | 3,0768 | 0,502 | -0,405 |
| 13 | Q6AI08 HEAT6_HUMAN | K.IQQGEEEEKES#SGEIEAAPVTGTGR.V    | S336:           | 3 | 3,5699 | 0,33  | -0,405 |
| 13 | Q9HCN4 GPN1_HUMAN  | R.GTLDEEDEEADS#DTDDIDHR.V         | S338:           | 3 | 3,0338 | 0,339 | -0,155 |
| 13 | P08670 VIME_HUMAN  | R.QVQSLTCEVDALKGTNES#LER.Q        | S339:           | 3 | 3,4194 | 0,228 | 0,521  |
| 13 | Q8IZ21 PHAR4_HUMAN | R.S#PSPPLPHIPPEPPR.T              | S342:           | 3 | 3,3476 | 0,295 | 0,203  |
| 13 | Q86WB0 NIPA_HUMAN  | R.SQDATFSPGSEQAEKS#PGPIVSR.T      | S344:           | 3 | 4,0643 | 0,474 | -0,149 |

|    |                     |                                   |                 |   |        |       |        |
|----|---------------------|-----------------------------------|-----------------|---|--------|-------|--------|
| 13 | A7MCY6 TBKB1_HUMAN  | R.HSPAPQCPS#PS#PPAR.A             | S349:S351:      | 3 | 3,2865 | 0,143 | -0,419 |
| 13 | Q8IY17 PLPL6_HUMAN  | R.LFSPGLPTRTS#PVR.G               | S353:           | 2 | 3,1756 | 0,507 | -0,429 |
| 13 | Q9NYB0 TE2IP_HUMAN  | R.DDGSSM*SFYVRPS#PAK.R            | S36:            | 2 | 3,5446 | 0,253 | -0,332 |
| 13 | Q14683 SMC1A_HUMAN  | R.M*EEESQS#QGRDLTLEENQVK.K        | S360:           | 3 | 4,9185 | 0,414 | -0,224 |
| 13 | Q9NY27 PP4R2_HUMAN  | K.DLLHS#EGSENEGVPSSSSDCR.E        | S361:           | 3 | 2,8169 | 0,235 | 0,075  |
| 13 | Q5T4S7 UBR4_HUMAN   | R.TGS#TSSKEDDYESDAATIVQK.C        | S362:           | 3 | 6,2356 | 0,472 | 0,158  |
| 13 | P04083 ANXA1_HUMAN  | K.GGPGSAVS#PYPTFNPSDVAALHK.A      | S37:            | 3 | 3,8217 | 0,206 | 0,676  |
| 13 | O94967 WDR47_HUMAN  | R.SLM*LENTECHSIYEE#PER.D          | S374:           | 3 | 3,612  | 0,364 | -0,302 |
| 13 | Q15418 KS6A1_HUMAN  | R.GFS#FVATGLM*EDDGKPR.A           | S380:           | 3 | 3,1688 | 0,381 | 0,095  |
| 13 | Q15418 KS6A1_HUMAN  | R.GFS#FVATGLM*EDDGKPR.A           | S380:           | 2 | 3,111  | 0,477 | -0,381 |
| 13 | Q9H307 PININ_HUMAN  | R.ESEKQQDS#QPEEVM*DVLEM*VENVK.H   | S381:           | 3 | 6,9034 | 0,425 | -0,437 |
| 13 | Q15326 ZMY11_HUMAN  | K.KEEPEPETEAVSS#QEIPTM*PQPIEK.V   | S381:           | 3 | 3,8218 | 0,255 | 0,183  |
| 13 | Q14966 ZN638_HUMAN  | K.NYQSQADIPIRS#PFGIVK.A           | S383:           | 3 | 2,8544 | 0,314 | 0      |
| 13 | Q13188 STK3_HUMAN   | R.NATS#PQVQRPSFM*DYFDK.Q          | S385:           | 3 | 3,4171 | 0,301 | 0      |
| 13 | Q0JRZ9 FCHO2_HUMAN  | K.VSIGNITLS#PAISRHS#PVQM*NR.N     | S387:S394:      | 3 | 3,0118 | 0,182 | -0,143 |
| 13 | P26358 DNMT1_HUMAN  | K.LSIFDANES#GFESYEALPQHK.L        | S394:           | 3 | 4,3705 | 0,43  | -0,297 |
| 13 | Q6T4R5 NHS_HUMAN    | R.RVQQEIDS#DES#PVAR.E             | S394:S397:      | 3 | 5,3068 | 0,321 | -0,097 |
| 13 | P15260 INGR1_HUMAN  | R.ESSSPLSSNQSEPGSIALNSYHS#R.N     | S399:           | 3 | 4,5043 | 0,42  | -0,07  |
| 13 | Q9BTI9 Q9BTI9_HUMAN | -.YEGS#PIKVTLATLK.M               | S4:             | 3 | 3,2186 | 0,446 | 0,114  |
| 13 | P49736 MCM2_HUMAN   | R.RTDALTS#S#PGR.D                 | S40:S41:        | 2 | 3,0337 | 0,387 | -0,277 |
| 13 | Q8WWQ8 STAB2_HUMAN  | K.AYAWPLS#KLGPF#VLLPT#DK.G        | S400:T406:T411: | 3 | 2,7433 | 0,123 | 0,372  |
| 13 | Q99569 PKP4_HUMAN   | R.S#AVSPDLHITPIYEGR.T             | S403:           | 2 | 3,8248 | 0,511 | 0,399  |
| 13 | Q8WXH0 SYNE2_HUMAN  | R.RGS#M*SYLAAVEEEVEESSVK.S        | S4108:          | 3 | 4,1881 | 0,293 | -0,319 |
| 13 | Q9ULJ3 ZN295_HUMAN  | R.SFS#ASQSTDREGASPVTEVR.I         | S411:           | 3 | 5,3454 | 0,48  | -0,167 |
| 13 | Q8NHV4 NEDD1_HUMAN  | K.SSLGDM*FS#PIRDDAVVVK.G          | S411:           | 3 | 2,6575 | 0,229 | 0,089  |
| 13 | Q9Y5T5 UBP16_HUMAN  | K.TVEDEDQDS#EEEKDNDSEYK.E         | S415:           | 3 | 3,1458 | 0,39  | -0,667 |
| 13 | Q9NUL3 STAU2_HUMAN  | K.GILHLS#PDVYQEM*EASR.H           | S416:           | 3 | 4,8077 | 0,391 | 0,269  |
| 13 | Q659A1 NARG2_HUMAN  | K.VSKS#PSPASTSTVPM*TDAPTAPK.A     | S416:           | 3 | 4,4718 | 0,362 | -0,148 |
| 13 | Q07617 SPAG1_HUMAN  | R.AS#AAAAAGGGATGHPGGGQGAENPAGLK.S | S423:           | 3 | 2,7225 | 0,258 | -0,384 |
| 13 | Q9Y490 TLN1_HUMAN   | K.DHFGLEGDEESTM*LEDVSV#PK.K       | S425:           | 3 | 4,0163 | 0,472 | 0,454  |
| 13 | Q7Z3K3 POGZ_HUMAN   | K.SLDSEPSVPSAAKPPS#PEK.T          | S425:           | 2 | 3,2999 | 0,493 | -0,365 |
| 13 | Q7Z3K3 POGZ_HUMAN   | K.SLDSEPSVPSAAKPPS#PEK.T          | S425:           | 3 | 2,6017 | 0,152 | 0,091  |
| 13 | Q8IZ21 PHAR4_HUMAN  | R.IQQALTS#PLPM*TPILEGSHR.A        | S427:           | 3 | 3,7289 | 0,233 | -0,08  |

|    |                     |                                     |                 |   |        |       |        |
|----|---------------------|-------------------------------------|-----------------|---|--------|-------|--------|
| 13 | Q9C0B5 ZDHC5_HUMAN  | R.SSS#LKSAQGTGFELGQLQSIR.S          | S429:           | 3 | 3,4598 | 0,322 | -0,241 |
| 13 | Q8NAH4 Q8NAH4_HUMAN | R.GAS#SAGEASEKEPLKGGPASC.S.-        | S431:           | 3 | 4,0126 | 0,384 | 0      |
| 13 | O60934 NBN_HUMAN    | R.IPNYQLS#PTKLPSINK.S               | S432:           | 3 | 3,9086 | 0,214 | 0,193  |
| 13 | P18206 VINC_HUMAN   | R.DDILRS#LGEISALTSK.L               | S434:           | 3 | 3,2309 | 0,226 | 0      |
| 13 | Q9NPQ8 RIC8A_HUMAN  | R.GLM*AGGRPEGQYS#EDEDTDDEYK.E       | S435:           | 3 | 4,3361 | 0,204 | -0,464 |
| 13 | O94763 RMP_HUMAN    | R.SIS#CEEATCSDTSESILEEPPQENQKK.L    | S441:           | 3 | 3,5169 | 0,429 | 0      |
| 13 | P85037 FOXK1_HUMAN  | R.SGGLQTPECLS#REGS#PIPHDPEFGSK.L    | S441:S445:      | 3 | 5,1353 | 0,406 | -0,808 |
| 13 | Q8IZ21 PHAR4_HUMAN  | R.AHS#LLFENSDFSSEDSSTLGR.T          | S443:           | 3 | 5,4817 | 0,448 | -0,231 |
| 13 | Q9H307 PININ_HUMAN  | K.SLS#PGKENVSALDM*EK.E              | S443:           | 2 | 3,2957 | 0,304 | -0,406 |
| 13 | Q08945 SSRP1_HUMAN  | K.EGM*NPSYDEYADS#DEDQHDAYLER.M      | S444:           | 3 | 5,6026 | 0,508 | -0,559 |
| 13 | Q15459 SF3A1_HUMAN  | R.EKQS#DDEVYAPGLDISSLK.Q            | S451:           | 3 | 4,2617 | 0,319 | -0,238 |
| 13 | O60832 DKC1_HUMAN   | R.KRES#ES#ES#DETPPAAPQLIK.K         | S451:S453:S455: | 3 | 5,4931 | 0,299 | 0      |
| 13 | P08670 VIME_HUMAN   | R.DGQVINETS#QHHDDLE.-               | S459:           | 3 | 2,9211 | 0,353 | 0,191  |
| 13 | Q14C86 GAPD1_HUMAN  | K.SSSLEM*TPYNTPQLS#PATTPANKK.N      | S466:           | 3 | 4,7687 | 0,424 | -0,275 |
| 13 | O15047 SET1A_HUMAN  | R.SGS#PAPETTNEVPFAQHSSLSR.I         | S470:           | 3 | 2,7894 | 0,352 | 0,638  |
| 13 | O00418 EF2K_HUMAN   | R.KYESDEDS#LGS#SGR.V                | S474:S477:      | 2 | 3,388  | 0,569 | -0,361 |
| 13 | P81274 GPSM2_HUMAN  | R.KIS#ADTIGDEGFFDLSR.F              | S476:           | 3 | 3,4837 | 0,309 | -0,355 |
| 13 | Q1ED39 TS118_HUMAN  | R.ATS#PSKS#VAHGQAPEM*PLVK.K         | S48:S52:        | 3 | 3,1393 | 0,155 | -0,165 |
| 13 | B2R6A5 B2R6A5_HUMAN | K.AAES#PDQKDTDGGPKKEESP.V.-         | S483:           | 3 | 2,8819 | 0,133 | -0,161 |
| 13 | Q5VT52 K0460_HUMAN  | K.NTGVPSPARSPGPTPTS#PSNLTSGLK.T     | S485:           | 3 | 4,1785 | 0,359 | -0,424 |
| 13 | Q9NQW6 ANLN_HUMAN   | K.TQS#LPVTEKV TENQIPAK.N            | S485:           | 3 | 2,9823 | 0,264 | -0,089 |
| 13 | Q09666 AHNK_HUMAN   | K.IS#IPDVLDLKGPK.V                  | S4850:          | 3 | 3,24   | 0,46  | 0,115  |
| 13 | P38432 P80C_HUMAN   | K.LLELTSSYS#PDVSDYKEGR.I            | S489:           | 3 | 4,7441 | 0,388 | 0      |
| 13 | Q9UHB6 LIMA1_HUMAN  | R.ETPHS#PGVEDAPIAK.V                | S490:           | 3 | 2,8215 | 0,273 | 0,112  |
| 13 | Q96C34 RUND1_HUMAN  | R.KLS#QSFALPVTGGTVVTPK.Q            | S497:           | 2 | 3,2904 | 0,508 | -0,425 |
| 13 | Q8N3X1 FNBP4_HUMAN  | K.IDENS#DKEM*EVEESPEK.I             | S499:           | 3 | 3,9032 | 0,185 | -0,174 |
| 13 | Q02535 ID3_HUMAN    | K.ALS#PVRGCYEAVCCLSER.S             | S5:             | 3 | 4,7706 | 0,413 | -0,166 |
| 13 | Q99567 NUP88_HUMAN  | K.NQSPTAEKPASSLPSS#PPPQLLTR.N       | S50:            | 3 | 5,5946 | 0,446 | -0,065 |
| 13 | Q12888 TP53B_HUMAN  | K.TSEIEPKNS#PEDLGLSLTGDSC.L         | S500:           | 3 | 5,0789 | 0,514 | -0,072 |
| 13 | Q13428 TCOF_HUMAN   | K.S#PQVKPASTM*GM*GPLGK.G            | S503:           | 2 | 2,2181 | 0,226 | 0,475  |
| 13 | Q02952 AKA12_HUMAN  | K.VLSKPPEGVVSEVEM*LSS#QER.M         | S505:           | 3 | 3,5089 | 0,264 | -0,382 |
| 13 | Q96S66 CLCC1_HUMAN  | K.ESSTESSQSAKPVSGQDTSNGTEGS#PAAEK.A | S509:           | 3 | 3,0483 | 0,283 | -0,362 |
| 13 | Q09666 AHNK_HUMAN   | K.M*YFPDVEFDIKS#PK.F                | S5099:          | 2 | 4,0427 | 0,517 | -0,269 |

|    |                     |                                    |              |   |        |       |        |
|----|---------------------|------------------------------------|--------------|---|--------|-------|--------|
| 13 | Q09666 AHNK_HUMAN   | K.M*YFPDVEFDIKS#PK.F               | S5099:       | 3 | 3,3926 | 0,286 | 0      |
| 13 | Q16514 TAF12_HUMAN  | K.IPGTPGAGGRLS#PENNVQLTK.K         | S51:         | 3 | 2,8227 | 0,292 | 0,084  |
| 13 | Q9P2N6 K1310_HUMAN  | R.DLAFEVPERGS#RPAS#PAAK.L          | S511:S515:   | 3 | 3,1945 | 0,349 | 0      |
| 13 | P42695 CNDD3_HUMAN  | R.QTS#NRSEPSGEINIDSSGETVGSGER.C    | S517:        | 3 | 4,7272 | 0,303 | -0,264 |
| 13 | Q03164 HRX_HUMAN    | R.SDTPEVHPPLISQS#PENESNDR.R        | S518:        | 3 | 6,4902 | 0,454 | 0,697  |
| 13 | Q9NQW6 ANLN_HUMAN   | K.SS#PLKITLFLEEDK.S                | S518:        | 3 | 2,7383 | 0,179 | -0,108 |
| 13 | ##O14939 PLD2_HUMAN | R.KS#Y#GSNIGLALEVEK.F              | S518:Y519:   | 2 | 2,0079 | 0,151 | 0,069  |
| 13 | Q16204 CCDC6_HUMAN  | K.SGGIVIS#PFRLEELTNR.L             | S52:         | 3 | 3,8138 | 0,45  | -0,465 |
| 13 | Q16204 CCDC6_HUMAN  | K.SGGIVIS#PFRLEELTNR.L             | S52:         | 2 | 2,3078 | 0,459 | -0,682 |
| 13 | O95365 ZBT7A_HUMAN  | R.GGAPDPSPGATATPGAPAQSS#PDARR.N    | S526:        | 3 | 3,8468 | 0,417 | -0,356 |
| 13 | Q86VI3 IQGA3_HUMAN  | R.VLAVSLINEALDKGS#PEK.T            | S539:        | 2 | 4,4998 | 0,436 | -0,373 |
| 13 | Q99733 NP1L4_HUMAN  | R.LDNVPHTPSS#YIETLPK.A             | S54:         | 2 | 3,7951 | 0,359 | -0,306 |
| 13 | Q99733 NP1L4_HUMAN  | R.LDNVPHTPSS#YIETLPK.A             | S54:         | 3 | 2,6341 | 0,157 | -0,276 |
| 13 | Q3KQU3 MA7D1_HUMAN  | R.ASNEKESAAPAS#PAPSPAPSPTAPPQK.E   | S544:        | 3 | 5,0903 | 0,389 | -0,132 |
| 13 | Q9H5J0 ZBTB3_HUMAN  | R.SKPDPEVGPLLVQPLPGS#PTADR.Q       | S549:        | 3 | 5,1706 | 0,376 | -0,292 |
| 13 | Q5W0B1 RN219_HUMAN  | K.ISELDSM*M*SESDNSKS#PCNNGFK.S     | S553:        | 3 | 5,6366 | 0,558 | -0,612 |
| 13 | Q969Z0 TBGR4_HUMAN  | R.DFVAPHLAQTGSQS#PPPGSK.R          | S553:        | 3 | 5,2869 | 0,545 | 0,083  |
| 13 | Q96FV9 THOC1_HUMAN  | K.TGEDEDEEDNDALLKENES#PDVR.R       | S560:        | 3 | 6,0969 | 0,48  | -0,271 |
| 13 | P51116 FXR2_HUMAN   | R.TVM*DGGLES#DGNPM*TENGLDESRRPQR.R | S566:        | 3 | 3,5969 | 0,462 | -0,3   |
| 13 | P00519 ABL1_HUMAN   | K.GQGESDPLDHEPAVS#PLLPR.K          | S569:        | 3 | 3,2187 | 0,166 | 0,083  |
| 13 | Q13442 HAP28_HUMAN  | K.EKKS#LDS#DES#EDEEDDYQQK.R        | S57:S60:S63: | 3 | 3,5347 | 0,273 | 0,344  |
| 13 | P17812 PYRG1_HUMAN  | R.SGSS#SPDSEITELKFPSINHD.-         | S574:        | 3 | 3,9976 | 0,374 | 0,314  |
| 13 | P17812 PYRG1_HUMAN  | R.SGSS#PDSEITELKFPSINHD.-          | S575:        | 3 | 3,3443 | 0,421 | -0,157 |
| 13 | P38159 HNRPG_HUMAN  | R.GFAFVTFES#PADAKDAAR.D            | S58:         | 2 | 3,6866 | 0,576 | 0      |
| 13 | Q6PKG0 LARP1_HUMAN  | R.FS#HLTSLPQQQLPSQQLM*SK.D         | S580:        | 3 | 3,3982 | 0,118 | 0,565  |
| 13 | Q5JSH3 WDR44_HUMAN  | K.SDTDTGVCS#GTDEDPPDDKNAPFR.Q      | S582:        | 3 | 4,2301 | 0,542 | -0,284 |
| 13 | Q71RC2 LARP4_HUMAN  | K.DGLNQTTIPVS#PPSTTKPSR.A          | S583:        | 3 | 3,1473 | 0,316 | -0,084 |
| 13 | Q5VSL9 FA40A_HUMAN  | R.KDS#EGYSESPDLEFEYADTDK.W         | S59:         | 3 | 6,0377 | 0,449 | -0,073 |
| 13 | Q9BRJ6 CG050_HUMAN  | K.GEAVLRPGLDAEPELS#PEEQR.V         | S59:         | 3 | 3,9903 | 0,326 | -0,077 |
| 13 | Q9Y2X7 GIT1_HUMAN   | R.HGS#GADSDYENTQSGDPLLGLEGK.R      | S592:        | 3 | 5,9397 | 0,519 | 0,29   |
| 13 | Q6Y7W6 PERQ2_HUMAN  | R.VPFS#PGPAPPPHM*GELDQER.L         | S593:        | 3 | 3,8347 | 0,238 | 0,243  |
| 13 | O43683 BUB1_HUMAN   | K.S#PGDFTSAAQLASTPFHK.L            | S596:        | 2 | 2,7152 | 0,506 | -0,691 |
| 13 | Q99543 DNJC2_HUMAN  | K.KELS#EESEDEELQLEEFPM*LK.T        | S60:         | 3 | 3,2558 | 0,305 | -0,484 |

|    |                     |                                  |        |   |        |       |        |
|----|---------------------|----------------------------------|--------|---|--------|-------|--------|
| 13 | P51116 FXR2_HUMAN   | R.TDGS#ISGDRQPVTVADYISR.A        | S601:  | 3 | 4,6031 | 0,439 | 0,33   |
| 13 | Q9UQL6 HDAC5_HUMAN  | K.DEEGES#GAEEGPDLEEPGAGYKK.L     | S611:  | 3 | 4,2185 | 0,362 | 0      |
| 13 | Q9P2H5 UBP35_HUMAN  | R.LGS#VM*RPTEDITAR.E             | S612:  | 3 | 3,0058 | 0,32  | 0,223  |
| 13 | Q9Y4B5 K0802_HUMAN  | R.DHAPSIPTS#PFGDSLESSTELR.R      | S613:  | 3 | 4,5236 | 0,568 | -0,604 |
| 13 | P49790 NU153_HUMAN  | K.EGSVLDILKS#PGFASPK.I           | S614:  | 2 | 3,0616 | 0,417 | -0,602 |
| 13 | Q2KHR3 QSER1_HUMAN  | R.SNS#RLEDQVIGVALQASK.K          | S615:  | 2 | 4,5626 | 0,479 | -0,489 |
| 13 | Q2KHR3 QSER1_HUMAN  | R.SNS#RLEDQVIGVALQASK.K          | S615:  | 3 | 3,2223 | 0,234 | -0,458 |
| 13 | Q8IXK0 PHC2_HUMAN   | K.LPQQDHTTTTDS#EM*EOPYLQESK.E    | S621:  | 3 | 5,2186 | 0,385 | -0,392 |
| 13 | Q96PN7 TREF1_HUMAN  | R.DKPASSM*S#DDEM*PVLEIPR.K       | S621:  | 3 | 3,9225 | 0,344 | -0,246 |
| 13 | P49848 TAF6_HUMAN   | K.GGPTSHPSVPASS#PSPLSGSALCGGK.Q  | S634:  | 3 | 5,4034 | 0,449 | -0,331 |
| 13 | Q8WXH0 SYNE2_HUMAN  | R.LTSCTPGLLEDEKEAS#ENETDM*EDPR.E | S6361: | 3 | 3,2216 | 0,296 | -0,434 |
| 13 | Q2M2I8 AAK1_HUMAN   | R.ILS#DVTHSAVFGVPASK.S           | S637:  | 2 | 3,2531 | 0,503 | -0,405 |
| 13 | O14776 TCRG1_HUMAN  | K.DIDS#EKEAAM*EAEIK.A            | S638:  | 2 | 2,4976 | 0,146 | -0,412 |
| 13 | Q58EX7 PKHG4_HUMAN  | K.DPGPPRPPAGATQDEELQGS#PLSR.K    | S64:   | 3 | 5,3799 | 0,452 | -0,287 |
| 13 | Q6P6C2 ALKB5_HUMAN  | K.YQEDS#DPERSDYEEQLQK.E          | S64:   | 3 | 4,853  | 0,523 | -0,148 |
| 13 | O95394 AGM1_HUMAN   | K.STIGVM*VTAS#HNPEEDNGVK.L       | S64:   | 3 | 2,6876 | 0,403 | -0,084 |
| 13 | O43719 HTSF1_HUMAN  | K.VFDDDES#DEKEDYEYADEK.G         | S642:  | 3 | 4,9883 | 0,467 | 0,081  |
| 13 | P04049 RAF1_HUMAN   | R.AAHTEDINACTLTTS#PRLPVF.-       | S642:  | 3 | 2,8994 | 0,216 | -0,382 |
| 13 | P49756 RBM25_HUMAN  | K.LPVDSVFNFKEDEDS#DDVPR.K        | S644:  | 3 | 4,9727 | 0,453 | -0,305 |
| 13 | Q8IY81 RRMJ3_HUMAN  | R.GPKS#DDDGFIVPIEDPAK.H          | S644:  | 2 | 3,6048 | 0,453 | -0,347 |
| 13 | Q6ZRV2 FA83H_HUMAN  | R.VPAAFPTKVPVPGPGS#GGNGPER.E     | S647:  | 3 | 4,8918 | 0,344 | -0,807 |
| 13 | Q7Z6Z7 HUWE1_HUMAN  | R.RSS#DPLGDTASNLSAVDELM*R.H      | S649:  | 3 | 4,8574 | 0,525 | -0,23  |
| 13 | Q86V48 LUZP1_HUMAN  | R.EKPDS#DDDLDIASLVTAK.L          | S659:  | 3 | 4,9885 | 0,379 | 0,182  |
| 13 | Q86V48 LUZP1_HUMAN  | R.EKPDS#DDDLDIASLVTAK.L          | S659:  | 2 | 2,8817 | 0,471 | -0,425 |
| 13 | Q70E73 RAPH1_HUMAN  | R.M*ESM*NRPYTSLVPLS#PQPK.I       | S662:  | 3 | 2,9859 | 0,235 | -0,077 |
| 13 | Q641Q2 FA21A_HUMAN  | K.KTS#LFEEDDEDDLFAIAK.D          | S663:  | 3 | 6,3139 | 0,498 | -0,252 |
| 13 | O75665 OFD1_HUMAN   | K.S#PPSLHLLEAFK.N                | S669:  | 2 | 2,3261 | 0,129 | -0,688 |
| 13 | Q53TX8 Q53TX8_HUMAN | R.DSPLQSGSQNSQAGQRNS#TSSIEPR.L   | S673:  | 3 | 4,1732 | 0,292 | -0,456 |
| 13 | P06748 NPM_HUMAN    | K.DELHIVEAEAM*NYEGS#PIK.V        | S70:   | 3 | 4,8048 | 0,333 | 0      |
| 13 | O43719 HTSF1_HUMAN  | K.LFEDDDS#NEKLFDEEEDSSEK.L       | S702:  | 3 | 5,6129 | 0,424 | -0,422 |
| 13 | Q9BWT3 PAPOG_HUMAN  | R.LPS#KELPDSSSPVANNIR.V          | S708:  | 3 | 3,1864 | 0,214 | 0      |
| 13 | Q7Z5L9 I2BP2_HUMAN  | R.S#PPGAAASAAKPPPLSAK.D          | S71:   | 2 | 3,849  | 0,557 | -0,138 |
| 13 | Q02543 RL18A_HUMAN  | K.SSGEIVYCGQVFEKS#PLR.V          | S71:   | 3 | 2,8844 | 0,192 | 0      |

|    |                     |                                   |                 |   |        |       |        |
|----|---------------------|-----------------------------------|-----------------|---|--------|-------|--------|
| 13 | O43719 HTSF1_HUMAN  | K.LFDEEEDS#SEKLFDDSDER.G          | S713:           | 3 | 5,2442 | 0,476 | 0,537  |
| 13 | O43719 HTSF1_HUMAN  | K.LFDEEEDSSEKLFDDSDER.G           | S721:           | 3 | 4,253  | 0,383 | 0,23   |
| 13 | O15063 K0355_HUMAN  | R.APQAGAHTPLTPQPLAPQQS#PK.Q       | S723:           | 3 | 4,5324 | 0,405 | 0      |
| 13 | Q5TCQ9 MAGI3_HUMAN  | R.SGS#PKLDPSEVYLK.S               | S724:           | 3 | 3,518  | 0,226 | -0,114 |
| 13 | Q92615 LARP5_HUMAN  | K.RLS#REQST#PPKS#PQ.-             | S727:T732:S736: | 2 | 2,9236 | 0,467 | -0,396 |
| 13 | Q6P4Q7 CNNM4_HUMAN  | R.M*ENS#PQFPIDGCTTHM*ENLAEK.S     | S728:           | 3 | 4,1847 | 0,417 | -0,344 |
| 13 | Q66K74 MAP1S_HUMAN  | R.S#AS#PHDVDLCLVSPCFEHR.K         | S729:S731:      | 3 | 4,2671 | 0,228 | -0,218 |
| 13 | O43583 DENR_HUMAN   | K.LTVENS#PKQEAGISEGQGTAGEEEEEK.K  | S73:            | 3 | 5,0711 | 0,407 | -0,589 |
| 13 | Q12906 ILF3_HUMAN   | K.GSSEQAESDNM*DVPPEDDS#KEGAGEQK.T | S73:            | 3 | 3,3372 | 0,326 | 0,062  |
| 13 | Q32MZ4 LRRF1_HUMAN  | R.CTLPEHES#PSQDISDACEAESTER.C     | S733:           | 3 | 6,9029 | 0,547 | -0,323 |
| 13 | O60927 PP1RB_HUMAN  | R.AFGESS#T#ES#DEEEEECGHHCVR.G     | S74:T75:S77:    | 3 | 2,9918 | 1     | -0,491 |
| 13 | Q9UKI8 TLK1_HUMAN   | R.RSNS#SGNLHM*AGLTASPTPPSSSIITY.- | S743:           | 3 | 4,2397 | 0,413 | -0,258 |
| 13 | Q8TDD1 DDX54_HUMAN  | K.LGPGRPLPTFPTSECTS#DVEPDTR.E     | S75:            | 3 | 4,5257 | 0,415 | -0,338 |
| 13 | P50502 F10A1_HUMAN  | K.KVEEDLKADEPS#S#EES#DLEIDK.E     | S75:S76:S79:    | 3 | 5,5729 | 0,431 | -0,333 |
| 13 | Q13435 SF3B2_HUMAN  | K.IEEAM*DGS#ETPQLFTVLPEKR.T       | S755:           | 3 | 5,2727 | 0,456 | -0,294 |
| 13 | Q99856 ARI3A_HUMAN  | R.AAAAGLGHPAS#PGGSEDGPPGSEEDAAR.E | S77:            | 3 | 5,6043 | 0,41  | -0,467 |
| 13 | P07737 PROF1_HUMAN  | K.CSVIRDS#LLQDGEFSM*DLR.T         | S77:            | 3 | 5,435  | 0,38  | -0,626 |
| 13 | Q15651 HMG3_HUMAN   | K.EGTAPS#ENGETKAEQAQKTESVDNEGE.-  | S78:            | 3 | 3,8157 | 0,32  | -0,502 |
| 13 | O75530 O75530_HUMAN | R.NM*S#EREVSTAPAGTDM*PAAK.K       | S78:            | 3 | 3,4932 | 0,293 | -0,336 |
| 13 | O75044 FNB2_HUMAN   | R.S#SPKSEIEVISEPPEEK.V            | S795:           | 2 | 2,8463 | 0,389 | -0,124 |
| 13 | Q8IWA0 WDR75_HUMAN  | K.VQDTS#NTGLGEDIIHQLSK.S          | S796:           | 3 | 5,8639 | 0,517 | -0,171 |
| 13 | O75044 FNB2_HUMAN   | R.SS#PKSEIEVISEPPEEK.V            | S796:           | 2 | 2,4236 | 0,238 | -0,186 |
| 13 | Q9H3Z4 DNJC5_HUMAN  | R.S#LSTSGESLYHVLGLDK.N            | S8:             | 2 | 4,1385 | 0,549 | -0,841 |
| 13 | Q99856 ARI3A_HUMAN  | R.AAAAGLGHPASPGGS#EDGPPGSEEDAAR.E | S81:            | 3 | 4,676  | 0,291 | -0,2   |
| 13 | Q92628 K0232_HUMAN  | K.NFETTQVCNES#PHGDGYSSGVIK.D      | S814:           | 3 | 4,3391 | 0,314 | -0,421 |
| 13 | O94762 RECQ5_HUMAN  | K.YTGEEDGAGGHS#PAPPQTEECLR.E      | S815:           | 3 | 4,1399 | 0,366 | -0,144 |
| 13 | Q5H9R7 SAPS3_HUMAN  | K.LSTS#QDAACKDAECPETAETAK.C       | S825:           | 3 | 5,6294 | 0,492 | -0,22  |
| 13 | P55265 DSRAD_HUMAN  | R.TM*LLLSRS#PEAQPK.T              | S825:           | 3 | 3,5052 | 0,264 | 0,219  |
| 13 | P27816 MAP4_HUMAN   | K.TTTAAAVASTGPSSRSPS#TLLPK.K      | S827:           | 3 | 3,2121 | 0,34  | 0,08   |
| 13 | Q14008 CKAP5_HUMAN  | K.HS#TSGTDEGEDGDEPDDGSNDVVDLLPR.T | S828:           | 3 | 2,69   | 0,204 | -0,122 |
| 13 | Q9NPF0 CD320_HUMAN  | R.DLDCSDGS#DEEECRIEPTQK.G         | S84:            | 3 | 3,8476 | 0,247 | -0,07  |
| 13 | O15014 ZN609_HUMAN  | K.TNS#PAYSDISDAGEDGEGKVDSVK.S     | S842:           | 3 | 4,1862 | 0,378 | -0,29  |
| 13 | Q9NZ71 RTEL1_HUMAN  | R.AGS#PGEEQAHSCTSLLLSEK.R         | S847:           | 3 | 2,9147 | 0,297 | -0,161 |

|    |                     |                                     |                 |   |        |       |        |
|----|---------------------|-------------------------------------|-----------------|---|--------|-------|--------|
| 13 | P16333 NCK1_HUMAN   | R.KPS#VPDSASPADDSFVDPGER.L          | S85:            | 3 | 3,5121 | 0,308 | 0,081  |
| 13 | Q7Z4S6 KI21A_HUMAN  | R.KLSSS#DAPAQDTGSSAAAVETDASR.T      | S855:           | 3 | 5,7017 | 0,455 | 0      |
| 13 | P05114 HMG1_HUMAN   | K.EDLPAENGETKTEES#PASDEAGEK.E       | S86:            | 3 | 4,0933 | 0,49  | -0,42  |
| 13 | Q9UPN4 AZI1_HUMAN   | R.S#GSPRPTEPTDFLM*LFEGS#PSGKK.R     | S87:S105:       | 3 | 3,4944 | 0,384 | -0,334 |
| 13 | Q96HP0 DOCK6_HUMAN  | R.S#KSISSSNPD LAVAPGSVDDEVSR.I      | S878:           | 3 | 3,0833 | 0,169 | -0,293 |
| 13 | Q5SW79 CE170_HUMAN  | R.ERS#ESLDPDSSM*DTTLILK.D           | S879:           | 3 | 3,9139 | 0,338 | 0,41   |
| 13 | Q01831 XPC_HUMAN    | K.SEAAAPHTDAGGGLS#SDEEETSSQAEAAAR.I | S883:           | 3 | 4,0555 | 0,502 | 0,247  |
| 13 | P16333 NCK1_HUMAN   | R.KPSVPDS#ASPADDSFVDPGER.L          | S89:            | 3 | 3,4039 | 0,196 | -0,244 |
| 13 | Q9UPN4 AZI1_HUMAN   | R.SGS#PRPTEPTDFLM*LFEGS#PSGKK.R     | S89:S105:       | 3 | 4,6494 | 0,443 | -0,2   |
| 13 | P29317 EPA2_HUMAN   | R.VS#IRLPSTSGSEGVPR.T               | S892:           | 3 | 6,0564 | 0,525 | 0      |
| 13 | Q9C0C2 TB182_HUMAN  | R.DS#LGAYASQDANEQQDLGKR.D           | S893:           | 3 | 2,7231 | 0,251 | -0,238 |
| 13 | Q060841 IF2P_HUMAN  | K.NKS#EDS#TKDDIDLALAAEIEGAGAAK.E    | S9:S12:         | 3 | 2,6251 | 0,301 | -0,441 |
| 13 | Q02241 KIF23_HUMAN  | R.GGGQSVQFTDIETLKQES#PNGSR.K        | S902:           | 3 | 4,1281 | 0,247 | -0,291 |
| 13 | Q70E73 RAPH1_HUMAN  | K.QQSFCAKPPSPLS#PVPSVVK.Q           | S908:           | 3 | 3,5008 | 0,511 | 0      |
| 13 | Q9NS73 MBIP1_HUMAN  | K.LQS#PIKEENTTAVEEIGR.T             | S91:            | 3 | 4,9203 | 0,496 | 0,349  |
| 13 | Q9P107 GMIP_HUMAN   | R.GRGPS#PAAAS#PEGS#PLRR.T           | S914:S919:S923: | 3 | 3,3041 | 0,285 | 0      |
| 13 | Q76021 RLD1_HUMAN   | R.SDS#EDICLFTKDEPNSTPEK.T           | S92:            | 3 | 4,5183 | 0,528 | 0,535  |
| 13 | Q9ULH7 MKL2_HUMAN   | K.SGEISLPIKEEPS#PISK.M              | S921:           | 2 | 2,6551 | 0,474 | 0,71   |
| 13 | Q9Y6Y8 S23IP_HUMAN  | K.VVES#PDFSKDEDYLK.V                | S926:           | 2 | 2,8107 | 0,453 | -0,32  |
| 13 | Q86SQ0 PHL2_HUMAN   | K.AHLPLGQSNCSGS#VLPPSLAAM*AK.D      | S937:           | 3 | 4,2978 | 0,328 | 0,439  |
| 13 | P05455 LA_HUMAN     | R.SPS#KPLPEVTDEYK.N                 | S94:            | 2 | 2,8535 | 0,108 | -0,365 |
| 13 | Q14687 GSE1_HUMAN   | R.GSSLSESSPVSSPATNHSS#PASTPK.R      | S95:            | 3 | 3,7044 | 0,337 | -0,428 |
| 13 | Q9UQ35 SRRM2_HUMAN  | R.RS#RS#VS#PCSNVESR.L               | S950:S952:S954: | 3 | 2,6848 | 0,335 | -0,295 |
| 13 | Q9UQ35 SRRM2_HUMAN  | R.RS#RS#VS#PCSNVESR.L               | S950:S952:S954: | 2 | 2,4421 | 0,447 | -0,787 |
| 13 | Q5VY92 Q5VY92_HUMAN | R.LQDSSDPDTGSEEGS#SRLSPPHS#PR.D     | S952:S960:      | 3 | 4,7955 | 1     | -0,563 |
| 13 | Q96Q05 NIBP_HUMAN   | R.M*AIQVDFKFNFSFPES#PGEK.G          | S953:           | 3 | 3,4624 | 0,194 | 0      |
| 13 | Q8IXM2 CQ049_HUMAN  | K.VYEDSGIPLAES#PKK.G                | S96:            | 3 | 3,3174 | 0,44  | 0,404  |
| 13 | P46379 BAT3_HUMAN   | R.AS#PEPQRENASPAGTTAEEAM*SR.G       | S964:           | 3 | 5,6905 | 0,504 | 0,355  |
| 13 | Q96N67 DOCK7_HUMAN  | R.M*SS#HTETSFLQTLTGR.L              | S964:           | 2 | 3,6365 | 0,499 | -0,308 |
| 13 | Q9BPX3 CND3_HUMAN   | R.CQTAEADS#ESDHEVPEPESEM*K.M        | S973:           | 3 | 4,4609 | 0,242 | 0,07   |
| 13 | P46379 BAT3_HUMAN   | R.ASPEPQRENAS#PAPAGTTAEEAM*SR.G     | S973:           | 3 | 3,9276 | 0,297 | -0,213 |
| 13 | Q9BPX3 CND3_HUMAN   | R.CQTAEADSES#DHEVPEPESEM*K.M        | S975:           | 3 | 3,4604 | 0,161 | 0,07   |
| 13 | Q6PGN9 PSRC1_HUMAN  | R.LAAQLEQCALQDRES#AGEGLGPR.R        | S98:            | 3 | 4,2425 | 0,309 | -0,287 |



|    |                     |                                    |              |   |        |       |        |
|----|---------------------|------------------------------------|--------------|---|--------|-------|--------|
| 13 | Q9C0C2 TB182_HUMAN  | R.SFGTRPLS#SGFSPEEAQQQDEEFK.K      | S983:        | 3 | 4,485  | 0,328 | -0,252 |
| 13 | Q86W92 LIPB1_HUMAN  | K.EDDM*FKDFAARS#PSASITDEDSNV.-     | S999:        | 3 | 5,1242 | 0,514 | -0,6   |
| 13 | O00267 SPT5H_HUMAN  | K.VVSISSEHLEPIT#PTK.N              | T1034:       | 2 | 3,6004 | 0,402 | -0,134 |
| 13 | P42684 ABL2_HUMAN   | K.AGRPVM*PPPQVPLPT#SSISPAK.M       | T1050:       | 3 | 4,3252 | 0,338 | -0,472 |
| 13 | P46013 KI67_HUMAN   | R.T#PKEEAQSLEDLAGFK.E              | T1091:       | 3 | 3,1908 | 0,237 | 0      |
| 13 | P46013 KI67_HUMAN   | R.T#PKEEAQSLEDLAGFK.E              | T1091:       | 2 | 2,7763 | 0,447 | -0,265 |
| 13 | P35251 RFC1_HUMAN   | R.QDPVTYISET#DEEDDFM*CKK.A         | T110:        | 3 | 3,3267 | 0,268 | -0,287 |
| 13 | O60264 SMCA5_HUMAN  | K.QTELFAHFIQPAAQKT#PTS#PLK.M       | T113:S116:   | 3 | 3,5994 | 0,378 | -0,21  |
| 13 | O60264 SMCA5_HUMAN  | K.QTELFAHFIQPAAQKTPT#S#PLK.M       | T115:S116:   | 3 | 3,6265 | 0,36  | -0,28  |
| 13 | O95239 KIF4A_HUMAN  | K.KT#PPAPSPFDLPELK.H               | T1181:       | 3 | 3,6782 | 0,378 | 0      |
| 13 | O95239 KIF4A_HUMAN  | K.KT#PPAPSPFDLPELK.H               | T1181:       | 2 | 2,929  | 0,433 | -0,355 |
| 13 | Q8WXI9 P66B_HUMAN   | R.GRLT#PSPDIIVLSDNEASSPR.S         | T120:        | 3 | 3,0527 | 0,123 | 0      |
| 13 | P20020 AT2B1_HUMAN  | R.IEDSEPHIPLIDDT#DAEDDAPTK.R       | T1203:       | 3 | 4,5239 | 0,331 | -1,609 |
| 13 | Q29RF7 PDS5A_HUMAN  | R.IISVT#PVKNIDPVK.N                | T1208:       | 2 | 2,903  | 0,162 | 0,304  |
| 13 | Q6IA86 ELP2_HUMAN   | R.RT#SDPALCTLIVSAAADSAVR.L         | T121:        | 3 | 4,9038 | 0,207 | -0,406 |
| 13 | Q9UPT8 ZC3H4_HUMAN  | K.T#GSGSPFAGNS#PAREGEQDAASLKDVFK.G | T1265:S1275: | 3 | 4,8087 | 0,406 | -0,307 |
| 13 | P49759 CLK1_HUMAN   | R.T#RS#VEDDEEGHLCQSGDVLSAR.Y       | T138:S140:   | 3 | 3,23   | 0,33  | -0,067 |
| 13 | Q9UQ35 SRRM2_HUMAN  | K.AGM*SSNQSISSPVLDVAVPRT#PSR.E     | T1413:       | 3 | 4,1241 | 0,411 | -0,373 |
| 13 | P46821 MAP1B_HUMAN  | R.KLGDVSPT#QIDVSQFGSFK.E           | T1503:       | 3 | 3,0844 | 0,238 | -0,172 |
| 13 | Q3V6T2 GRDN_HUMAN   | K.QLVNNKDDT#SFEDISQGVSDDSSTGSR.V   | T1560:       | 3 | 4,4306 | 0,352 | -0,776 |
| 13 | Q3V6T2 GRDN_HUMAN   | K.IKT#GSPGSEVVTLQQFLEESNK.L        | T1673:       | 3 | 6,7526 | 0,453 | -0,296 |
| 13 | Q9NX94 OPA1L_HUMAN  | R.SST#RPPSIADPDPSDLPVDR.A          | T169:        | 3 | 4,5689 | 0,324 | 0,332  |
| 13 | Q9P289 MST4_HUMAN   | K.LADFGVAGQLTDT#QIKR.N             | T172:        | 3 | 2,8497 | 0,293 | 0,096  |
| 13 | Q9NQR1 SETD8_HUMAN  | K.SEAAPPKT#PPSSCDSTNAIAK.Q         | T181:        | 3 | 3,1133 | 0,354 | -0,304 |
| 13 | Q9NQC3 RTN4_HUMAN   | R.RGSSGSVDET#LFALPAASEPVIR.S       | T188:        | 3 | 4,0514 | 0,272 | -0,45  |
| 13 | Q86YP4 P66A_HUMAN   | K.EATAQKPTGSGVSTVTT#PPPLVR.G       | T189:        | 3 | 4,2981 | 0,388 | 0,077  |
| 13 | P21796 VDAC1_HUMAN  | R.DVFT#KGYGFGLIK.L                 | T19:         | 2 | 2,0856 | 0,102 | 0,48   |
| 13 | Q15527 SURF2_HUMAN  | K.DLGSTEDGDGT#DDFLTDKEDEK.A        | T190:        | 3 | 3,9539 | 0,357 | -0,221 |
| 13 | P49792 RBP2_HUMAN   | R.LLLDIPLQT#PHK.L                  | T2153:       | 2 | 2,8496 | 0,364 | -0,166 |
| 13 | O60271 JIP4_HUMAN   | K.ERPISLGIFPLPAGDGLLT#PDAQK.G      | T217:        | 3 | 4,3905 | 0,281 | -0,283 |
| 13 | Q16181 SEPT7_HUMAN  | K.IYEFPET#DDEEENKLVK.K             | T228:        | 3 | 3,1549 | 0,296 | 0,336  |
| 13 | A8K1N6 A8K1N6_HUMAN | K.M*LGQKAT#PPPS#PLSELLKK.G         | T264:S268:   | 3 | 3,1649 | 0,182 | -0,472 |
| 13 | Q9UBU7 DBF4A_HUMAN  | R.IQT#DGDGYGGSITQLQLK.E            | T273:        | 3 | 3,6264 | 0,351 | -0,089 |

|    |                     |                                        |            |   |        |       |        |
|----|---------------------|----------------------------------------|------------|---|--------|-------|--------|
| 13 | O15446 RPA34_HUMAN  | K.QEQINTEPLEDT#VLSPTKK.R               | T282:      | 3 | 2,826  | 0,185 | 0,407  |
| 13 | Q8N6T7 SIRT6_HUMAN  | R.ALPLPRPPT#PK.L                       | T294:      | 2 | 2,1371 | 0,26  | -0,179 |
| 13 | Q8IVF2 AHNK2_HUMAN  | R.DAHDVSP#STDTEAQLTVER.Q               | T296:      | 3 | 3,1841 | 0,098 | -1,543 |
| 13 | Q8N1G2 K0082_HUMAN  | R.VAELALSST#SDDEPPSSVSHGAK.A           | T30:       | 3 | 4,604  | 0,466 | -0,143 |
| 13 | Q8N5P1 ZC3H8_HUMAN  | K.TATDSERIDDEIDT#EVEETQEEK.I           | T32:       | 3 | 6,1945 | 0,458 | -1,463 |
| 13 | P62136 PP1A_HUMAN   | K.YGQFSLNPGGRPIT#PPR.N                 | T320:      | 3 | 3,0119 | 0,403 | -0,092 |
| 13 | Q4G0J3 LARP7_HUMAN  | R.DIEIST#EEEKDTGDLK.D                  | T338:      | 3 | 3,2413 | 0,402 | 0,192  |
| 13 | Q86U44 MTA70_HUMAN  | K.DHT#PSQELALTSVGGDSSADR.L             | T348:      | 3 | 4,5001 | 0,324 | -0,078 |
| 13 | Q5JSH3 WDR44_HUMAN  | R.SNSGRELT#DEEILASVM*IK.N              | T349:      | 3 | 4,2886 | 0,309 | -0,251 |
| 13 | P06400 RB_HUMAN     | K.SNLDEEVNVIPT#PVR.T                   | T373:      | 3 | 3,6128 | 0,348 | -0,183 |
| 13 | P15056 BRAFF1_HUMAN | R.DQGFRRDGGSTTGLSAT#PPASLPGSLTNVK.A    | T401:      | 3 | 3,3989 | 0,35  | -0,308 |
| 13 | Q14247 SRC8_HUMAN   | R.AKTQT#PPVS#PAPQPTTEER.L              | T401:S405: | 3 | 3,0689 | 0,196 | -0,087 |
| 13 | O60934 NBN_HUMAN    | R.IPNYQLSPT#KLPSINK.S                  | T434:      | 2 | 3,7944 | 0,363 | -0,322 |
| 13 | Q9NPF5 DMAP1_HUMAN  | K.DTIIDVVGAPLT#PNSRK.R                 | T445:      | 2 | 3,0227 | 0,474 | -0,26  |
| 13 | P08670 VIME_HUMAN   | R.DGQVINET#SQHHDDLE.-                  | T458:      | 2 | 3,9102 | 0,388 | -0,127 |
| 13 | P30307 MPIP3_HUMAN  | R.DTSFTVCPDVPRT#PVGK.F                 | T48:       | 3 | 3,2436 | 0,393 | -0,094 |
| 13 | Q5VT52 K0460_HUMAN  | K.NTGVPSPARSPGT#PTSPSNLTSGLK.T         | T482:      | 3 | 3,1988 | 0,111 | -0,636 |
| 13 | Q99733 NP1L4_HUMAN  | R.LDNVPHT#PSSYIETLPK.A                 | T51:       | 3 | 3,93   | 0,34  | 0,184  |
| 13 | Q99733 NP1L4_HUMAN  | R.LDNVPHT#PSSYIETLPK.A                 | T51:       | 2 | 2,6164 | 0,368 | 0,429  |
| 13 | Q9HA05 Q9HA05_HUMAN | K.AFGSGIDIKPGT#PPIAGR.S                | T510:      | 3 | 3,3211 | 0,159 | 0,399  |
| 13 | Q86V48 LUZP1_HUMAN  | R.T#FSDTTHGVSVPDPLGR.A                 | T510:      | 2 | 3,0343 | 0,404 | 0      |
| 13 | Q86V48 LUZP1_HUMAN  | R.TFSDT#THGVSVPDPLGR.A                 | T514:      | 3 | 2,8744 | 0,081 | -0,197 |
| 13 | P05783 K1C18_HUMAN  | R.ST#SFRGGM*GSGGLATGIAGGLAGM*GGIQNEK.E | T52:       | 3 | 6,7984 | 0,485 | -0,496 |
| 13 | Q6PKG0 LARP1_HUMAN  | R.AVT#PVPTKTEEVSNLK.T                  | T526:      | 2 | 3,3376 | 0,347 | -0,272 |
| 13 | Q9NYF8 BCLF1_HUMAN  | K.M*APVPLDDSNRPASLT#K.D                | T566:      | 3 | 2,7084 | 0,328 | -0,288 |
| 13 | Q86XJ1 GA2L3_HUMAN  | K.SALNLNQPVSVSSVSPVKAT#QK.S            | T575:      | 3 | 3,6594 | 0,277 | -0,235 |
| 13 | Q96RK0 CIC_HUMAN    | K.AQESGQGSTAGPLRPPPGAGGPAT#PSK.A       | T583:      | 3 | 4,7632 | 0,371 | -0,345 |
| 13 | O43683 BUB1_HUMAN   | K.T#LAPSPK#PGDFTSAAQLASTPFHK.L         | T589:S596: | 3 | 3,9273 | 0,369 | -0,539 |
| 13 | Q86T12 DPP9_HUMAN   | -.M*ATTGT#PTADRGDAAATDDPAAR.F          | T6:        | 3 | 3,3589 | 0,397 | -0,236 |
| 13 | Q8TE76 MORC4_HUMAN  | K.SSSERST#PPYLFPPEYPEASK.N             | T621:      | 3 | 2,8624 | 0,22  | -0,078 |
| 13 | Q9NSM8 Q9NSM8_HUMAN | K.DAQQVEPEGQEKSPAT#VR.S                | T693:      | 3 | 3,2072 | 0,246 | -0,085 |
| 13 | Q13435 SF3B2_HUMAN  | K.IEEAM*DGSET#PQLFTVLPEKR.T            | T757:      | 3 | 5,5741 | 0,503 | -0,221 |
| 13 | P42566 EP15_HUMAN   | K.IGT#PTRPCPLPPGK.R                    | T777:      | 3 | 2,9483 | 0,28  | -0,116 |

|    |                    |                                  |        |   |        |       |        |
|----|--------------------|----------------------------------|--------|---|--------|-------|--------|
| 13 | Q86VM9 ZCH18_HUMAN | K.SSQQPST#PQQAPPGQPQQGTFVAHK.E   | T796:  | 3 | 2,9806 | 0,38  | -1,215 |
| 13 | P13489 RINI_HUMAN  | R.SNELGDVGVHCVLQGLQT#PSCK.I      | T82:   | 3 | 3,368  | 0,158 | -0,221 |
| 13 | Q9C0C9 UBE2O_HUMAN | K.NM*TVEQLLTGSPTSPT#VEPEKPTR.E   | T841:  | 3 | 5,2862 | 0,508 | 0,405  |
| 13 | Q9UQ35 SRRM2_HUMAN | K.SGT#PPRQGSITSPQANEQSVTPQR.R    | T848:  | 3 | 4,7688 | 0,411 | -0,492 |
| 13 | Q9P1Y6 K1542_HUMAN | R.GAVAAEGASDT#EREPTESQGLAAR.L    | T917:  | 3 | 4,469  | 0,353 | -0,354 |
| 13 | P46821 MAP1B_HUMAN | K.AET#EEAEPEEDGEEHVCSASK.H       | T948:  | 3 | 2,709  | 0,276 | 0,346  |
| 13 | Q7Z6E9 RBBP6_HUMAN | K.VTGTEGSSSTLVDY#TSTSSTGGSPVRK.S | Y1268: | 3 | 4,5471 | 1     | -0,534 |
| 13 | Q9NXE4 NSMA3_HUMAN | K.ASIQECILPDSPLY#HNK.V           | Y133:  | 3 | 3,7248 | 0,332 | -0,354 |
| 13 | O60841 IF2P_HUMAN  | K.VEM*Y#SGSDDDDDFNKLPK.K         | Y134:  | 3 | 3,6554 | 0,386 | 0,337  |
| 13 | Q13164 MK07_HUMAN  | R.GLCTSPAEHQYFM*TEY#VATR.W       | Y220:  | 3 | 3,5562 | 0,193 | -0,149 |
| 13 | Q96JH7 VCIP1_HUMAN | R.DGPSSAPATPTKAPY#SPTTSK.E       | Y767:  | 3 | 3,1398 | 0,192 | 0      |
| 13 | Q13523 PRP4B_HUMAN | K.LCDFGSASHVADNDITPY#LVSR.F      | Y849:  | 3 | 5,3128 | 0,44  | 0      |
| 13 | Q13435 SF3B2_HUMAN | R.QEEM*NSQQEEEEEM*ETDAR.S        |        | 3 | 5,7006 | 0,504 | -0,163 |
| 13 | P35580 MYH10_HUMAN | R.TQLEEELEDELQATEDAK.L           |        | 2 | 5,691  | 0,499 | -0,808 |
| 13 | Q9NZT2 OGFR_HUMAN  | R.DADAGDEDEESEPR.A               |        | 2 | 5,4469 | 0,569 | -0,147 |
| 13 | Q02952 AKA12_HUMAN | K.GLAEVQQDGEAEEGATSDGEK.K        |        | 3 | 5,4397 | 0,471 | -0,604 |
| 13 | P08238 HS90B_HUMAN | R.NPDDITQEEYGEFYK.S              |        | 2 | 5,3784 | 0,487 | 0,528  |
| 13 | P67775 PP2AA_HUMAN | K.SPDTNYLFM*GDYVDR.G             |        | 2 | 5,3179 | 0,588 | 0,135  |
| 13 | P07900 HS90A_HUMAN | R.NPDDITNEEYGEFYK.S              |        | 2 | 5,2638 | 0,474 | -0,067 |
| 13 | Q15287 RNPS1_HUMAN | K.GYAYVEFENPDEAEK.A              |        | 2 | 5,2489 | 0,504 | -0,139 |
| 13 | Q14247 SRC8_HUMAN  | K.NASTFEDVTQVSSAYQK.T            |        | 2 | 5,1741 | 0,51  | -0,39  |
| 13 | P50395 GDIB_HUMAN  | R.TDDYLDQPCYETINR.I              |        | 2 | 5,1479 | 0,452 | -0,321 |
| 13 | P21333 FLNA_HUMAN  | R.VANPSGNLTETYVQDR.G             |        | 2 | 5,0623 | 0,553 | -0,207 |
| 13 | P26640 SYVC_HUMAN  | K.VQGSDSDEEVVATTR.I              |        | 2 | 5,0106 | 0,513 | 0,144  |
| 13 | O14929 HAT1_HUMAN  | K.VDENFDCVEADDVEGK.I             |        | 2 | 5,0035 | 0,568 | 0,331  |
| 13 | Q6P3X3 TTC27_HUMAN | K.NLELNDDTILNDIK.L               |        | 2 | 4,983  | 0,33  | -0,524 |
| 13 | Q92552 RT27_HUMAN  | K.ALTSADGASEEQSQNDEDNQGSEK.L     |        | 3 | 4,8868 | 0,491 | -0,364 |
| 13 | Q96A65 EXOC4_HUMAN | R.SGELQGGPDDNLIIEGGGK.F          |        | 2 | 4,8325 | 0,557 | -0,265 |
| 13 | P12956 KU70_HUMAN  | K.NIYVLQELDNPGAK.R               |        | 2 | 4,7953 | 0,377 | -0,31  |
| 13 | P39748 FEN1_HUMAN  | K.QLQQAQAAGAEQEVEK.F             |        | 2 | 4,7822 | 0,539 | -0,353 |
| 13 | Q99613 EIF3C_HUMAN | K.SEQDQAENEGEDSAVLM*ER.L         |        | 3 | 4,7606 | 0,312 | 0      |
| 13 | P24534 EF1B_HUMAN  | K.SPAGLQVLNDYLADK.S              |        | 2 | 4,6883 | 0,544 | -0,532 |
| 13 | P35241 RADI_HUMAN  | K.NQEQLAAELAEFTAK.I              |        | 2 | 4,6785 | 0,575 | -0,293 |

|    |                     |                          |   |        |       |        |
|----|---------------------|--------------------------|---|--------|-------|--------|
| 13 | O14818 PSA7_HUMAN   | K.NYTDEAIETDDDLTIK.L     | 2 | 4,6738 | 0,485 | -0,42  |
| 13 | P52292 IMA2_HUMAN   | R.NVSSFPDDATSPLQENR.N    | 2 | 4,6649 | 0,5   | -0,52  |
| 13 | P05198 IF2A_HUMAN   | R.ENAEVDGDDDAEEM*EAK.A   | 2 | 4,6329 | 0,561 | -0,583 |
| 13 | P04818 TYSY_HUMAN   | R.DM*ESDYSQGQVDQLQR.V    | 2 | 4,5566 | 0,438 | -0,331 |
| 13 | Q9Y2X3 NOL5_HUMAN   | R.YDAFGEDSSSAM*GVENR.A   | 2 | 4,5526 | 0,596 | -0,527 |
| 13 | Q9NZM1 MYOF_HUMAN   | K.LEGALGADTTEDGDEK.S     | 2 | 4,5306 | 0,602 | -0,527 |
| 13 | P78527 PRKDC_HUMAN  | R.DPESETDNDSQEIFK.L      | 2 | 4,4954 | 0,536 | -0,209 |
| 13 | O00231 PSD11_HUMAN  | R.DIQENDEEAVQVK.E        | 3 | 4,4722 | 0,374 | 0,06   |
| 13 | Q92598 HS105_HUMAN  | R.SQFEELCAELLQK.I        | 3 | 4,4332 | 0,348 | -0,344 |
| 13 | Q14697 GANAB_HUMAN  | K.DPAEGDGAQPEETPR.D      | 2 | 4,4251 | 0,559 | -0,622 |
| 13 | P61604 CH10_HUMAN   | K.VLQATVVAVGSGSK.G       | 2 | 4,3805 | 0,596 | -0,093 |
| 13 | A4D186 A4D186_HUMAN | K.IQVLQQADDAEER.A        | 2 | 4,3662 | 0,47  | -0,149 |
| 13 | Q13561 DCTN2_HUMAN  | R.ENLATVEGNFASIDER.M     | 2 | 4,3632 | 0,504 | -0,484 |
| 13 | P50502 F10A1_HUMAN  | K.VAAIEALNDGELQK.A       | 2 | 4,3456 | 0,456 | 0      |
| 13 | Q9NTJ3 SMC4_HUMAN   | R.TESPATAAETASEELDNR.S   | 3 | 4,3107 | 0,456 | 0,097  |
| 13 | Q6S8J3 A26CA_HUMAN  | K.SYELPDGQVITIGNER.F     | 2 | 4,2906 | 0,423 | -0,409 |
| 13 | Q9UMY4 SNX12_HUMAN  | R.GDEGIFEESFIEER.R       | 2 | 4,2901 | 0,527 | -0,368 |
| 13 | Q13765 NACA_HUMAN   | K.IEDLSQQAQLAAAEK.F      | 3 | 4,2784 | 0,424 | 0      |
| 13 | Q53F64 Q53F64_HUMAN | K.IFVGGLNPEATEEK.I       | 2 | 4,2768 | 0,483 | -0,081 |
| 13 | O75694 NU155_HUMAN  | K.CITDTLQELVNQSK.A       | 3 | 4,2538 | 0,264 | -0,222 |
| 13 | P35579 MYH9_HUMAN   | K.LEEEQIILEDQNCK.L       | 2 | 4,2439 | 0,503 | -0,346 |
| 13 | Q02543 RL18A_HUMAN  | K.SSGEIVYCGQVFEK.S       | 2 | 4,241  | 0,457 | -0,304 |
| 13 | Q96GX5 MASTL_HUMAN  | R.DYLSSSFLCSDDDR.A       | 2 | 4,233  | 0,501 | 0      |
| 13 | P55072 TERA_HUMAN   | K.M*TNFGSGADLTEICQR.A    | 2 | 4,2288 | 0,579 | 0,403  |
| 13 | Q9P2E9 RRBP1_HUMAN  | R.DAQDVQASQAEADQQQTR.L   | 2 | 4,1982 | 0,579 | -0,491 |
| 13 | Q16643 DREB_HUMAN   | R.SPSDSSTASTPVAEQIER.A   | 2 | 4,1978 | 0,578 | -0,131 |
| 13 | P15311 EZRI_HUMAN   | K.SQEQLAAELAETAK.I       | 3 | 4,1973 | 0,346 | -0,111 |
| 13 | Q9NTK5 OLA1_HUMAN   | R.NYIVEDGDIIFK.F         | 2 | 4,1739 | 0,352 | -0,155 |
| 13 | Q6NZY4 ZCHC8_HUMAN  | K.DGTDGETEVGEIQQNK.S     | 3 | 4,1722 | 0,213 | -0,106 |
| 13 | P55060 XPO2_HUMAN   | K.NLFEDQNTLTSICEK.V      | 2 | 4,1503 | 0,548 | -0,202 |
| 13 | P04818 TYSY_HUMAN   | R.DM*ESDYSQGQVDQLQR.V    | 3 | 4,1471 | 0,229 | 0,099  |
| 13 | Q14980 NUMA1_HUMAN  | R.DSALETLQGQLEEK.A       | 2 | 4,128  | 0,478 | 0      |
| 13 | P67809 YBOX1_HUMAN  | K.GAEAAANVTGPGGVPVQGSK.Y | 2 | 4,1235 | 0,427 | -0,504 |

|    |                    |                          |   |        |       |        |
|----|--------------------|--------------------------|---|--------|-------|--------|
| 13 | P07237 PDIA1_HUMAN | K.VDATEESDLAQQYGVR.G     | 2 | 4,1182 | 0,555 | -0,274 |
| 13 | Q96AE4 FUBP1_HUMAN | K.IGGDAGTSLNSNDYGYGGQK.R | 2 | 4,11   | 0,517 | 0      |
| 13 | P28331 NDUS1_HUMAN | R.NDGAAILAAVSSIAQK.I     | 2 | 4,0969 | 0,537 | -0,479 |
| 13 | P35579 MYH9_HUMAN  | K.IAQLEEQLDNETK.E        | 2 | 4,0938 | 0,409 | 0,239  |
| 13 | P04083 ANXA1_HUMAN | R.SEDFGVNEDLADSDAR.A     | 2 | 4,0874 | 0,507 | -0,281 |
| 13 | P10809 CH60_HUMAN  | K.CEFQDAYVLLSEK.K        | 2 | 4,076  | 0,605 | -1,295 |
| 13 | Q9P2E9 RRBP1_HUMAN | R.DAQDVQASQAEADQQQTR.L   | 3 | 4,0744 | 0,466 | -0,092 |
| 13 | Q15560 TCEA2_HUMAN | R.SSDEPMTTFVVCNECGNR.W   | 3 | 4,0514 | 0,392 | 0      |
| 13 | Q9NP72 RAB18_HUMAN | K.TCDGVQCAFEELVEK.I      | 2 | 4,0496 | 0,567 | 0,068  |
| 13 | P08729 K2C7_HUMAN  | R.SLDLDGIIAEVK.A         | 2 | 4,0276 | 0,434 | -0,192 |
| 13 | P11142 HSP7C_HUMAN | K.NQVAM*NPTNTVFDAR.R     | 2 | 4,0185 | 0,493 | -0,586 |
| 13 | Q13765 NACA_HUMAN  | K.SPASDTYIVFGEAK.I       | 2 | 4,0166 | 0,611 | 0,082  |
| 13 | Q13813 SPTA2_HUMAN | R.SSLSSAQADFNQLAELDR.Q   | 2 | 4,0164 | 0,493 | -0,063 |
| 13 | P61289 PSME3_HUMAN | R.TVESEAASYLDQISR.Y      | 3 | 4,0126 | 0,385 | 0,11   |
| 13 | O94776 MTA2_HUMAN  | R.DISSLNSLADSNAR.E       | 2 | 4,0036 | 0,461 | -0,157 |
| 13 | P31150 GDIA_HUMAN  | R.TDDYLDQPCLETVNR.I      | 2 | 4,0006 | 0,584 | -0,332 |
| 13 | P11021 GRP78_HUMAN | K.SQIFSTASDNQPTVTIK.V    | 2 | 3,993  | 0,598 | -0,266 |
| 13 | P00505 AATM_HUMAN  | K.TCGFDFGAVEDISK.I       | 2 | 3,9822 | 0,554 | -0,296 |
| 13 | P10809 CH60_HUMAN  | K.CEFQDAYVLLSEK.K        | 3 | 3,9709 | 0,319 | -0,685 |
| 13 | Q08170 SFRS4_HUMAN | R.DADDAVYELNGK.D         | 2 | 3,9694 | 0,487 | -0,279 |
| 13 | O75874 IDHC_HUMAN  | K.ISGGSVVEM*QGDEM*TR.I   | 2 | 3,958  | 0,55  | -0,141 |
| 13 | Q13438 OS9_HUMAN   | R.EM*EEEEDEDEDEDEDER.Q   | 3 | 3,9571 | 0,382 | -0,451 |
| 13 | Q9NQG5 CT077_HUMAN | K.ALQDLENAASGDATVR.Q     | 2 | 3,9549 | 0,507 | -0,075 |
| 13 | O60264 SMCA5_HUMAN | R.TEQEEDPELLTESSK.A      | 2 | 3,9515 | 0,534 | -0,276 |
| 13 | P19338 NUCL_HUMAN  | K.GFGFVDFNSEDAK.A        | 2 | 3,9495 | 0,448 | -0,312 |
| 13 | O00159 MYO1C_HUMAN | R.DQAVM*ISGESGAGK.T      | 2 | 3,947  | 0,559 | 0,179  |
| 13 | P35579 MYH9_HUMAN  | R.IAEFTTNLTEEEK.S        | 2 | 3,9333 | 0,494 | 0,369  |
| 13 | Q9NTJ3 SMC4_HUMAN  | R.TESPATAAETASEELDNR.S   | 2 | 3,9303 | 0,605 | -0,322 |
| 13 | P55072 TERA_HUMAN  | R.EAVCIVLSDDTCSDEK.I     | 2 | 3,8973 | 0,438 | 0      |
| 13 | Q1KMD3 HNRL2_HUMAN | R.DLLVQQASQCLSK.L        | 2 | 3,8925 | 0,497 | 0,409  |
| 13 | P21333 FLNA_HUMAN  | K.VTAQGPGLPSGNIANK.T     | 2 | 3,8883 | 0,57  | -0,517 |
| 13 | P61289 PSME3_HUMAN | R.TVESEAASYLDQISR.Y      | 2 | 3,8819 | 0,38  | -0,439 |
| 13 | O14617 AP3D1_HUMAN | K.CSDSTLLSNLLEEM*K.A     | 2 | 3,8759 | 0,308 | 0      |

|    |                     |                               |   |        |       |        |
|----|---------------------|-------------------------------|---|--------|-------|--------|
| 13 | P46060 RAGP1_HUMAN  | K.SSVLIAQQTDTSDPEK.V          | 2 | 3,8756 | 0,544 | -0,142 |
| 13 | Q6NZY4 ZCHC8_HUMAN  | K.DGTDGETEVGEIQNK.S           | 2 | 3,8634 | 0,411 | -0,355 |
| 13 | O00231 PSD11_HUMAN  | R.DIQENDEEAVQVK.E             | 2 | 3,8587 | 0,437 | -0,161 |
| 13 | Q07812 BAX_HUMAN    | K.TGALLLQGFQDR.A              | 2 | 3,8482 | 0,497 | -0,341 |
| 13 | Q14683 SMC1A_HUMAN  | K.GTM*DDISQEEGSSQGEDSVSGSQR.I | 3 | 3,8462 | 0,377 | 0,292  |
| 13 | P07305 H10_HUMAN    | K.YSDM*IVAAIQAEK.N            | 2 | 3,8461 | 0,43  | -0,671 |
| 13 | Q6NZI2 PTRF_HUMAN   | K.ATEM*VEVGADDDEGGAER.G       | 2 | 3,8375 | 0,593 | -0,261 |
| 13 | P61764 STXB1_HUMAN  | K.DNALLAQLIQDK.L              | 2 | 3,8256 | 0,446 | -0,455 |
| 13 | O43390 HNRPR_HUMAN  | R.NLATTVTEEILEK.S             | 2 | 3,8256 | 0,449 | -0,501 |
| 13 | Q4QZC0 Q4QZC0_HUMAN | R.DGEDQTQDTELVETR.L           | 2 | 3,8151 | 0,463 | -0,07  |
| 13 | O75694 NU155_HUMAN  | K.CITDTLQELVNQSK.A            | 2 | 3,8126 | 0,436 | -0,296 |
| 13 | P30050 RL12_HUMAN   | K.EILGTAQSVGCNVDGR.H          | 2 | 3,8125 | 0,6   | -0,218 |
| 13 | Q16630 CPSF6_HUMAN  | R.TPLSEAEFEEIM*NR.N           | 2 | 3,8043 | 0,559 | -0,145 |
| 13 | Q15149 PLEC1_HUMAN  | R.QTNLENLDQAFSVAER.D          | 2 | 3,8032 | 0,512 | -0,199 |
| 13 | P29317 EPHA2_HUMAN  | R.VLEDDPEATYTTSGGK.I          | 2 | 3,7937 | 0,49  | -0,217 |
| 13 | P35579 MYH9_HUMAN   | R.ELEDATETADAM*NR.E           | 2 | 3,7706 | 0,555 | -0,077 |
| 13 | Q99832 TCPH_HUMAN   | K.LPIGDVATQYFADR.D            | 2 | 3,7617 | 0,527 | -0,545 |
| 13 | Q12931 TRAP1_HUMAN  | R.GVVDESDIPLNLSR.E            | 2 | 3,7476 | 0,328 | 0,322  |
| 13 | Q8IXH7 NELFD_HUMAN  | R.TSLATILDGGEENLEK.N          | 2 | 3,7319 | 0,361 | -0,072 |
| 13 | P05387 RLA2_HUMAN   | K.NIEDVIAQGIGK.L              | 2 | 3,7307 | 0,498 | 0      |
| 13 | P38646 GRP75_HUMAN  | R.AQFEGIVTDLIR.R              | 2 | 3,7264 | 0,474 | -0,448 |
| 13 | Q12840 KIF5A_HUMAN  | K.ISFLENNLEQLTK.V             | 2 | 3,7183 | 0,47  | -0,236 |
| 13 | P19105 MLRM_HUMAN   | R.FTDEEVDELYR.E               | 2 | 3,7183 | 0,457 | -0,776 |
| 13 | P14625 ENPL_HUMAN   | K.EESDDEAAVEEEEEK.K           | 2 | 3,7142 | 0,522 | -0,196 |
| 13 | O76031 CLPX_HUMAN   | R.DVGEGVQQLLK.L               | 2 | 3,7009 | 0,431 | 0      |
| 13 | A4D186 A4D186_HUMAN | K.IQVLQQADDAEER.A             | 3 | 3,6979 | 0,407 | 0,111  |
| 13 | P47897 SYQ_HUMAN    | R.EAATQAQQLGSTIDK.A           | 2 | 3,6972 | 0,507 | 0      |
| 13 | P42704 LPPRC_HUMAN  | K.M*LNGLED SIGLSK.M           | 2 | 3,6929 | 0,471 | 0      |
| 13 | P51149 RAB7A_HUMAN  | K.EAINVEQAFQTIAR.N            | 2 | 3,6897 | 0,445 | 0      |
| 13 | P49589 SYCC_HUMAN   | K.ALQEGEGDLSISADR.L           | 2 | 3,6864 | 0,51  | -0,469 |
| 13 | Q14194 DPYL1_HUMAN  | K.M*DENQFVAVTSTNAAK.I         | 2 | 3,6816 | 0,425 | -0,77  |
| 13 | Q13618 CUL3_HUMAN   | R.SPEYLSLFIDDK.L              | 2 | 3,6745 | 0,47  | -0,428 |
| 13 | Q8IY81 RRMJ3_HUMAN  | K.GTEASSGTEAATGLEGEEK.D       | 2 | 3,671  | 0,56  | -0,401 |

|    |                    |                          |   |        |       |        |
|----|--------------------|--------------------------|---|--------|-------|--------|
| 13 | P63244 GBLP_HUMAN  | K.DVLSVAFSSDNR.Q         | 2 | 3,6689 | 0,561 | 0,279  |
| 13 | O60506 HNRPQ_HUMAN | R.NLANTVTEEILEK.A        | 2 | 3,6676 | 0,46  | -0,579 |
| 13 | P49748 ACADV_HUMAN | R.VPSENVLGEVGSFK.V       | 2 | 3,6647 | 0,458 | -0,241 |
| 13 | P46060 RAGP1_HUMAN | R.DAALAVAEAM*ADK.A       | 2 | 3,6632 | 0,516 | -1,133 |
| 13 | Q99832 TCPH_HUMAN  | R.QLCDNAGFDATNILNK.L     | 3 | 3,6569 | 0,452 | 0,51   |
| 13 | Q15393 SF3B3_HUMAN | R.LPPNTNDEVEDPTGNK.A     | 2 | 3,6504 | 0,54  | -0,263 |
| 13 | P16989 DBPA_HUMAN  | K.GAEANVTGPDGVPVEGSR.Y   | 2 | 3,6494 | 0,514 | 0,068  |
| 13 | Q71U36 TBA1A_HUMAN | K.TIGGGDDSFNTFFSETGAGK.H | 2 | 3,6483 | 0,667 | -0,668 |
| 13 | Q2TAY7 SMU1_HUMAN  | R.DTEM*LATGAQDGK.I       | 2 | 3,6463 | 0,474 | -0,361 |
| 13 | Q01518 CAP1_HUMAN  | R.ALLVTASQCQQAENK.L      | 2 | 3,6451 | 0,456 | -0,208 |
| 13 | Q02952 AKA12_HUMAN | K.SAESPTSPVTSETGSTFK.K   | 2 | 3,6443 | 0,475 | -0,808 |
| 13 | P07737 PROF1_HUMAN | R.DSLLQDGEFSM*DLR.T      | 2 | 3,6437 | 0,488 | -0,297 |
| 13 | P08670 VIME_HUMAN  | K.FADLSEAANR.N           | 2 | 3,6392 | 0,378 | -0,223 |
| 13 | P35579 MYH9_HUMAN  | R.DELADEIANSSGK.G        | 2 | 3,6392 | 0,527 | 0,271  |
| 13 | P08107 HSP71_HUMAN | K.NQVALNPQNTVFDK.R       | 2 | 3,6383 | 0,164 | 0      |
| 13 | Q99714 HCD2_HUMAN  | R.LVAGEM*GQNEPDQGGQR.G   | 2 | 3,6373 | 0,371 | -0,542 |
| 13 | O75306 NDUS2_HUMAN | R.LDELELLTNNR.I          | 2 | 3,634  | 0,316 | -0,418 |
| 13 | P02786 TFR1_HUMAN  | K.DSAQNSVIIVDK.N         | 2 | 3,633  | 0,467 | 0,095  |
| 13 | Q9Y295 DRG1_HUMAN  | K.IIENELEGFGIR.L         | 2 | 3,6214 | 0,372 | -0,088 |
| 13 | Q08211 DHX9_HUMAN  | K.QPAIISQLDPVNER.M       | 2 | 3,621  | 0,526 | 0,541  |
| 13 | Q9BTV5 FSD1_HUMAN  | K.NEEIQSFIYSLK.Q         | 2 | 3,614  | 0,465 | -0,581 |
| 13 | Q15172 2A5A_HUMAN  | K.DATSNEQQELFCQK.L       | 2 | 3,6047 | 0,435 | -0,072 |
| 13 | P08238 HS90B_HUMAN | K.CLELFSELAEDK.E         | 2 | 3,5993 | 0,47  | -0,42  |
| 13 | Q8N1F7 NUP93_HUMAN | K.DNALLSAIEESR.K         | 2 | 3,5944 | 0,537 | -0,093 |
| 13 | Q9UFC0 LRWD1_HUMAN | K.DASSTYSQVENLNR.E       | 2 | 3,5937 | 0,426 | -0,154 |
| 13 | P36542 ATPG_HUMAN  | R.IYGLGSLALYEK.A         | 2 | 3,5866 | 0,524 | -0,46  |
| 13 | P04181 OAT_HUMAN   | K.TVQGPPTSDDIFER.E       | 2 | 3,581  | 0,516 | -0,312 |
| 13 | P30041 PRDX6_HUMAN | K.DINAYNCEEPTK.L         | 2 | 3,5777 | 0,525 | -0,385 |
| 13 | P30520 PURA2_HUMAN | R.M*CDLVSDFDGFSER.F      | 2 | 3,5756 | 0,47  | -0,144 |
| 13 | Q92841 DDX17_HUMAN | R.ELAQQVQQVADDYGK.C      | 2 | 3,5717 | 0,465 | -0,216 |
| 13 | P60174 TPIS_HUMAN  | K.QSLGELIGTLNAAK.V       | 2 | 3,5699 | 0,397 | -0,259 |
| 13 | P21333 FLNA_HUMAN  | R.GAGTGGLGLAVEGPSEAK.M   | 2 | 3,5694 | 0,634 | 0,544  |
| 13 | P10809 CH60_HUMAN  | K.TLNDELEIIEGM*K.F       | 3 | 3,5658 | 0,358 | 0,12   |

|    |                     |                           |   |        |       |        |
|----|---------------------|---------------------------|---|--------|-------|--------|
| 13 | P42704 LPPRC_HUMAN  | K.NNNIDAAIENIENM*LTSENK.V | 3 | 3,5649 | 0,339 | -0,243 |
| 13 | P14868 SYDC_HUMAN   | R.EAGVEM*GDEDDLSTPNEK.L   | 2 | 3,5611 | 0,493 | 0,125  |
| 13 | P55060 XPO2_HUMAN   | R.AADEEAFEDNSEEYIR.R      | 2 | 3,5598 | 0,505 | -0,452 |
| 13 | Q8WUM4 PDC6I_HUMAN  | R.LLDEEEATDNDLR.A         | 2 | 3,5427 | 0,437 | -0,478 |
| 13 | Q15149 PLEC1_HUMAN  | R.LEDLLQDAQDEK.E          | 2 | 3,5407 | 0,326 | -0,344 |
| 13 | Q13347 EIF3I_HUMAN  | R.DPSQIDNNEPYM*K.I        | 2 | 3,538  | 0,409 | -0,156 |
| 13 | Q00610 CLH1_HUMAN   | R.GQFSTDELVAEVEK.R        | 2 | 3,5365 | 0,498 | 0      |
| 13 | P61011 SRP54_HUMAN  | K.SAIDLEEM*ASGLNK.R       | 2 | 3,5353 | 0,463 | -0,245 |
| 13 | Q09666 AHNK_HUMAN   | K.VDINAPDVEVQGK.V         | 2 | 3,5283 | 0,49  | -0,529 |
| 13 | P04083 ANXA1_HUMAN  | K.GTDVNVFNTILTTR.S        | 2 | 3,5276 | 0,513 | -0,472 |
| 13 | P09960 LKHA4_HUMAN  | K.SAYEFSETESM*LK.I        | 2 | 3,5186 | 0,447 | 0,476  |
| 13 | P05387 RLA2_HUMAN   | K.ILDSVGIEADDDR.L         | 2 | 3,5152 | 0,589 | 0      |
| 13 | P61011 SRP54_HUMAN  | R.DM*YEQFQNM*K.M          | 2 | 3,515  | 0,335 | -0,413 |
| 13 | O15371 EIF3D_HUMAN  | K.LGDDIDLIVR.C            | 2 | 3,5044 | 0,388 | -0,108 |
| 13 | A0JLS5 A0JLS5_HUMAN | K.DVTEAEQAEQAR.Q          | 2 | 3,4893 | 0,322 | -0,083 |
| 13 | P49736 MCM2_HUMAN   | R.ESLVVNYEDLAAR.E         | 2 | 3,4885 | 0,356 | -0,082 |
| 13 | P52597 HNRPF_HUMAN  | R.QSGEAFVELGSEDDVK.M      | 2 | 3,4878 | 0,529 | -0,285 |
| 13 | Q99832 TCPH_HUMAN   | K.NDSVVAGGGAIEM*ELSK.Y    | 2 | 3,4867 | 0,432 | 0,432  |
| 13 | P78527 PRKDC_HUMAN  | K.NLLTVTSSDEM*M*K.S       | 2 | 3,4846 | 0,439 | -0,163 |
| 13 | P46063 RECQ1_HUMAN  | R.ISSM*VVM*ENVGQK.L       | 2 | 3,481  | 0,505 | -0,54  |
| 13 | Q13185 CBX3_HUMAN   | K.DSDEADLVLAK.E           | 2 | 3,4664 | 0,482 | -0,104 |
| 13 | P05783 K1C18_HUMAN  | R.TVQSLEIDLDSM*R.N        | 2 | 3,4638 | 0,497 | -0,08  |
| 13 | O60306 AQR_HUMAN    | K.DADVEDEDTEEAK.T         | 2 | 3,4616 | 0,511 | -0,583 |
| 13 | Q9UPN3 MACF1_HUMAN  | K.NSVFVLDEEIAK.A          | 2 | 3,4615 | 0,516 | -0,336 |
| 13 | P13929 ENOB_HUMAN   | K.VNQIGSVTESIQACK.L       | 2 | 3,4612 | 0,46  | 0      |
| 13 | P07737 PROF1_HUMAN  | R.SSFYVNGLTGGQK.C         | 2 | 3,46   | 0,535 | 0,415  |
| 13 | P61764 STXB1_HUMAN  | R.VEQDLAM*GTDAEGEK.I      | 2 | 3,4585 | 0,444 | 0,455  |
| 13 | Q9Y3Y2 CA077_HUMAN  | K.EQLDNQLDAYM*SK.T        | 2 | 3,4543 | 0,43  | -0,466 |
| 13 | Q92542 NICA_HUMAN   | R.NQVEDLLATLEK.S          | 2 | 3,4542 | 0,434 | -0,533 |
| 13 | Q5TCU3 Q5TCU3_HUMAN | K.TIDDLEETLASAK.E         | 2 | 3,454  | 0,413 | -0,174 |
| 13 | P11142 HSP7C_HUMAN  | K.DAGTIAGLNVLR.I          | 2 | 3,4531 | 0,324 | 0      |
| 13 | Q9Y3C6 PPIL1_HUMAN  | K.DFM*IQQGDPTGTGR.G       | 2 | 3,4511 | 0,491 | -0,582 |
| 13 | O76021 RL1D1_HUMAN  | R.EINDCIGGTVLNISK.S       | 2 | 3,4506 | 0,415 | 0,822  |



|    |                    |                             |   |        |       |        |
|----|--------------------|-----------------------------|---|--------|-------|--------|
| 13 | P42224 STAT1_HUMAN | K.SLEDLQDEYDFK.C            | 2 | 3,4498 | 0,531 | 0,244  |
| 13 | P09622 DLDH_HUMAN  | K.NLGLLEELGIELDPR.G         | 2 | 3,4497 | 0,49  | 0      |
| 13 | P37802 TAGL2_HUMAN | K.QM*EQISQFLQAAER.Y         | 2 | 3,4496 | 0,493 | -0,432 |
| 13 | P05787 K2C8_HUMAN  | R.SLDM*DSIIAEVK.A           | 2 | 3,4474 | 0,47  | 0,091  |
| 13 | Q9UPN3 MACF1_HUMAN | R.DTDSLQSQIEDVR.L           | 2 | 3,4455 | 0,449 | 0,162  |
| 13 | P11586 C1TC_HUMAN  | R.DDSNLYINVK.L              | 2 | 3,4447 | 0,434 | 0,103  |
| 13 | P22314 UBA1_HUMAN  | K.DNPGVVTCLDEAR.H           | 2 | 3,4408 | 0,525 | 0,169  |
| 13 | P04406 G3P_HUMAN   | R.VPTANVSVVTLTCR.L          | 2 | 3,4405 | 0,514 | 0,478  |
| 13 | P14625 ENPL_HUMAN  | K.GVVDSDDLPLNVSER.E         | 2 | 3,4391 | 0,387 | 0,575  |
| 13 | P27635 RL10_HUMAN  | K.FNADEFEDM*VAEK.R          | 2 | 3,4371 | 0,389 | -0,625 |
| 13 | P61978 HNRPK_HUMAN | R.TDYNASVSVPDSSGPER.I       | 2 | 3,4361 | 0,536 | -0,343 |
| 13 | Q9UL46 PSME2_HUMAN | K.IEDGNDFGVAIQEK.V          | 2 | 3,436  | 0,291 | -0,079 |
| 13 | Q9H0S4 DDX47_HUMAN | R.IILNM*DFETEVDK.I          | 2 | 3,4321 | 0,426 | 0,083  |
| 13 | P52907 CAZA1_HUMAN | K.DVQDSLTVSNEAQTAK.E        | 2 | 3,4311 | 0,515 | -0,215 |
| 13 | P37802 TAGL2_HUMAN | K.QM*EQISQFLQAAER.Y         | 3 | 3,431  | 0,405 | 0      |
| 13 | P12956 KU70_HUMAN  | R.DSLIFLVDASK.A             | 2 | 3,4309 | 0,474 | -0,202 |
| 13 | O60832 DKC1_HUMAN  | K.AGLESGAEPGDGSDTTK.K       | 2 | 3,4252 | 0,368 | -0,715 |
| 13 | Q9Y3A6 TMED5_HUMAN | K.LEDILESINSIK.S            | 2 | 3,422  | 0,401 | -0,355 |
| 13 | P21291 CSR1_HUMAN  | K.GFGFGQGAGALVHSE.-         | 2 | 3,4216 | 0,421 | 0,34   |
| 13 | P61106 RAB14_HUMAN | K.TGENVEDAFLEAAK.K          | 2 | 3,4136 | 0,448 | -0,163 |
| 13 | Q15393 SF3B3_HUMAN | R.LPPNTNDEVEDPTGNK.A        | 3 | 3,4121 | 0,245 | 0,099  |
| 13 | P07237 PDIA1_HUMAN | K.VDATEESDLAQYGVGR.G        | 3 | 3,4055 | 0,242 | 0,103  |
| 13 | Q9HC35 EMAL4_HUMAN | R.VQQEIDEITVLK.A            | 2 | 3,4049 | 0,441 | -0,085 |
| 13 | Q7L014 DDX46_HUMAN | R.VTYVVLDEADR.M             | 2 | 3,4035 | 0,534 | -0,191 |
| 13 | P50502 F10A1_HUMAN | K.LDYDEDASAM*LK.E           | 2 | 3,4031 | 0,391 | -0,088 |
| 13 | P04844 RPN2_HUMAN  | K.TGQEVVFAEPDNK.N           | 2 | 3,4028 | 0,343 | -0,239 |
| 13 | P13667 PDIA4_HUMAN | K.GESDPAYQQYQDAANNLR.E      | 2 | 3,4021 | 0,591 | -0,239 |
| 13 | Q6UB35 C1TM_HUMAN  | K.DVDGVTDINLGK.L            | 2 | 3,3976 | 0,56  | 0      |
| 13 | Q9UPZ3 HPS5_HUMAN  | K.DFSGVSDTDNSSM*K.L         | 2 | 3,3963 | 0,451 | 1,053  |
| 13 | P84077 ARF1_HUMAN  | R.DAVLLVFANK.Q              | 2 | 3,3899 | 0,521 | -0,224 |
| 13 | Q9NWW8 CS062_HUMAN | R.SEGEGEAASADDGSLNTSGAGPK.S | 2 | 3,3894 | 0,632 | -0,579 |
| 13 | Q9UNL2 SSRG_HUMAN  | K.QQSEEDLLLQDFSR.N          | 3 | 3,3883 | 0,189 | -0,321 |
| 13 | Q6S8J3 A26CA_HUMAN | K.SYELPDGQVITIGNER.F        | 3 | 3,3869 | 0,471 | 0,102  |

|    |                    |                            |   |        |       |        |
|----|--------------------|----------------------------|---|--------|-------|--------|
| 13 | O94909 K0819_HUMAN | R.DSLVALLEEQR.L            | 2 | 3,3866 | 0,448 | -0,288 |
| 13 | Q9UQE7 SMC3_HUMAN  | K.DLQDELAGNSEQR.K          | 2 | 3,386  | 0,372 | -0,331 |
| 13 | Q92598 HS105_HUMAN | K.VEDVSAVEIVGGATR.I        | 2 | 3,3779 | 0,393 | -0,244 |
| 13 | Q12904 MCA1_HUMAN  | K.GAEADQIIEYLK.Q           | 2 | 3,3702 | 0,273 | -0,09  |
| 13 | Q9BRP8 WIBG_HUMAN  | R.AAPTAASDQPDSAATTEK.A     | 2 | 3,3671 | 0,61  | -0,423 |
| 13 | P50991 TCPD_HUMAN  | K.VIDPATATSVDLR.D          | 2 | 3,367  | 0,567 | -0,27  |
| 13 | Q9HCN4 GPN1_HUMAN  | K.DM*GSVALDAGTAK.D         | 2 | 3,3666 | 0,442 | 0      |
| 13 | O75874 IDHC_HUMAN  | R.SDYLNTEFFEM*DK.L         | 2 | 3,3658 | 0,428 | -0,24  |
| 13 | Q92841 DDX17_HUMAN | K.APILIATDVASR.G           | 2 | 3,3652 | 0,096 | 0,099  |
| 13 | Q9NTJ3 SMC4_HUMAN  | R.DTLVADNLDQATR.V          | 2 | 3,3644 | 0,363 | -0,256 |
| 13 | P82650 RT22_HUMAN  | K.DQAAEGINLIK.V            | 2 | 3,3612 | 0,42  | -0,416 |
| 13 | P06576 ATPB_HUMAN  | R.IM*NVIGEPIDER.G          | 2 | 3,3585 | 0,438 | 0      |
| 13 | Q8IUD2 RB6I2_HUMAN | R.DLNQLFQQDSSSR.T          | 2 | 3,358  | 0,417 | -0,079 |
| 13 | P52926 HMGA2_HUMAN | R.GEGAGQPSTSAQGQPAAPAPQK.R | 3 | 3,3522 | 0,401 | -0,09  |
| 13 | P09525 ANXA4_HUMAN | K.GAGTDEGLIEILASR.T        | 2 | 3,35   | 0,497 | 0,514  |
| 13 | Q86WQ0 NR2CA_HUMAN | K.VTFEDATDFFR.V            | 2 | 3,3494 | 0,416 | -0,521 |
| 13 | P62857 RS28_HUMAN  | R.EGDVLTLLSER.E            | 2 | 3,3493 | 0,484 | -0,448 |
| 13 | Q9Y490 TLN1_HUMAN  | K.NGNLPEFGDAISTASK.A       | 2 | 3,3468 | 0,482 | -0,376 |
| 13 | Q99832 TCPH_HUMAN  | R.QLCDNAGFDATNILNK.L       | 2 | 3,3463 | 0,411 | 1,02   |
| 13 | Q99613 EIF3C_HUMAN | K.SEQDQAENEGEDSAVLM*ER.L   | 2 | 3,3451 | 0,588 | -0,453 |
| 13 | Q06124 PTN11_HUMAN | K.IQNTGDYYDLYGGEK.F        | 2 | 3,3441 | 0,506 | -0,633 |
| 13 | O14929 HAT1_HUMAN  | R.LLVTD*SDAEQYR.S          | 2 | 3,3427 | 0,53  | -0,235 |
| 13 | P04818 TYSY_HUMAN  | R.DFLDSLGFSTR.E            | 2 | 3,3424 | 0,456 | -0,388 |
| 13 | P31943 HNRH1_HUMAN | R.STGEAFVQFASQEIIEK.A      | 2 | 3,3422 | 0,433 | -0,596 |
| 13 | P35241 RADI_HUMAN  | K.NQEQLAAELAEFTAK.I        | 3 | 3,3377 | 0,392 | 0,11   |
| 13 | P05388 RLAO_HUMAN  | K.IIQLDDYPK.C              | 2 | 3,3284 | 0,315 | -0,2   |
| 13 | Q14254 FLOT2_HUMAN | K.VDEIVVLSGDNSK.V          | 2 | 3,3281 | 0,12  | 0      |
| 13 | Q9NUQ9 FA49B_HUMAN | K.DAEGILEDLQSYR.G          | 2 | 3,3262 | 0,416 | -0,647 |
| 13 | Q14980 NUMA1_HUMAN | K.DQLQEQLQALK.E            | 2 | 3,322  | 0,303 | 0,186  |
| 13 | P40763 STAT3_HUMAN | R.GLSIEQLTTLAEK.L          | 2 | 3,3202 | 0,476 | 0,087  |
| 13 | P20810 ICAL_HUMAN  | R.SESELIDELSEDFDR.S        | 2 | 3,318  | 0,536 | -0,479 |
| 13 | Q9H2U2 IPYR2_HUMAN | K.LIAINANDPEASK.F          | 2 | 3,3127 | 0,404 | 0,45   |
| 13 | Q16543 CDC37_HUMAN | K.DVQM*LQDAISK.M           | 2 | 3,309  | 0,471 | 0,29   |

|    |                    |                     |   |        |       |        |
|----|--------------------|---------------------|---|--------|-------|--------|
| 13 | P23381 SYWC_HUMAN  | R.DM*NQVLDAYENK.K   | 2 | 3,3087 | 0,448 | 0      |
| 13 | Q9C0D5 TANC1_HUMAN | K.DSGIATITSSSEDDR.S | 2 | 3,3075 | 0,468 | 0,754  |
| 13 | P49458 SRP09_HUMAN | K.VTDDLVLVYK.T      | 2 | 3,3061 | 0,527 | -0,368 |
| 13 | P13489 RINI_HUMAN  | K.ELSLAGNELGDEGAR.L | 2 | 3,3033 | 0,495 | 0      |
| 13 | O94925 GLSK_HUMAN  | K.DGPGETDAFGNSEGK.E | 2 | 3,3027 | 0,577 | -0,165 |
| 13 | O60493 SNX3_HUMAN  | R.GDDGIFDDNFIEER.K  | 2 | 3,2987 | 0,459 | -0,446 |
| 13 | Q8TDP1 RNH2C_HUMAN | R.DSGTDDQEEPLER.D   | 2 | 3,2983 | 0,366 | -0,075 |
| 13 | Q10713 MPPA_HUMAN  | R.DTTM*YAVSADSK.G   | 2 | 3,2961 | 0,549 | 0,094  |
| 13 | P18754 RCC1_HUMAN  | R.DTSVEGSEM*VPGK.V  | 2 | 3,29   | 0,51  | -0,18  |
| 13 | Q14157 UBP2L_HUMAN | R.DGSLASNPYSGDLTK.F | 2 | 3,2859 | 0,507 | -0,24  |
| 13 | Q14980 NUMA1_HUMAN | R.DSALETLQGQLEEK.A  | 3 | 3,2832 | 0,303 | 0      |
| 13 | P42704 LPPRC_HUMAN | K.VIEEQLEPAVEK.I    | 2 | 3,2752 | 0,439 | -0,264 |
| 13 | Q6UX04 SDC10_HUMAN | R.EDQTLALLNQFK.S    | 2 | 3,2747 | 0,34  | -0,43  |
| 13 | Q58FF7 H90B3_HUMAN | R.DNSTM*GYM*M*AK.K  | 2 | 3,2741 | 0,452 | -0,659 |
| 13 | Q9P265 DIP2B_HUMAN | R.DLGQIEENDLVR.K    | 2 | 3,2715 | 0,428 | -0,087 |
| 13 | Q6IQ22 RAB12_HUMAN | K.DNFNVDIFLK.L      | 2 | 3,2688 | 0,437 | -0,451 |
| 13 | Q14789 GOGB1_HUMAN | K.DQLIQEAAAENNK.L   | 2 | 3,2688 | 0,248 | -0,169 |
| 13 | P31150 GDIA_HUMAN  | R.FQLLEGPPESM*GR.G  | 2 | 3,2643 | 0,334 | 0,33   |
| 13 | P08729 K2C7_HUMAN  | K.VDALNDEINFLR.T    | 2 | 3,2616 | 0,451 | -0,602 |
| 13 | P35579 MYH9_HUMAN  | K.DM*FQETM*EAM*R.I  | 2 | 3,2566 | 0,356 | 0      |
| 13 | Q8WU90 ZC3HF_HUMAN | K.EDEISLEDLIER.E    | 2 | 3,2557 | 0,413 | -0,418 |
| 13 | P62750 RL23A_HUMAN | R.LAPDYDALDVANK.I   | 2 | 3,2516 | 0,558 | -0,087 |
| 13 | O95363 SYFM_HUMAN  | K.DGESLQLFEQSSR.S   | 2 | 3,2494 | 0,389 | 0      |
| 13 | P61011 SRP54_HUMAN | R.DVQELLTQYTK.F     | 2 | 3,2481 | 0,396 | -0,091 |
| 13 | Q13885 TBB2A_HUMAN | K.EVDEQM*LNQNK.N    | 2 | 3,245  | 0,161 | 0,083  |
| 13 | Q6AI08 HEAT6_HUMAN | K.SEDTIDFLEFK.Y     | 2 | 3,2419 | 0,347 | -0,091 |
| 13 | P55884 EIF3B_HUMAN | R.DQYSVIFESGDR.T    | 2 | 3,2411 | 0,577 | 0      |
| 13 | Q96RN5 MED15_HUMAN | K.SLLDILTDPK.R      | 2 | 3,24   | 0,454 | -0,406 |
| 13 | Q93009 UBP7_HUMAN  | K.DDPENDNSELPTAK.E  | 2 | 3,2392 | 0,239 | -0,158 |
| 13 | Q15750 TAB1_HUMAN  | R.SFLESIDDALAEK.A   | 2 | 3,237  | 0,385 | -0,339 |
| 13 | P62424 RL7A_HUMAN  | R.AGVNTVTTLVENK.K   | 2 | 3,2351 | 0,463 | -0,272 |
| 13 | P07900 HS90A_HUMAN | R.YYTSASGDEM*VSLK.D | 2 | 3,2346 | 0,479 | -0,078 |
| 13 | P07814 SYEP_HUMAN  | K.INEAVECLLSLK.A    | 2 | 3,2335 | 0,497 | -0,439 |

|    |                    |                        |   |        |       |        |
|----|--------------------|------------------------|---|--------|-------|--------|
| 13 | P17844 DDX5_HUMAN  | R.ELAQQVQQVAAEYCR.A    | 3 | 3,2297 | 0,228 | -0,204 |
| 13 | P40855 PEX19_HUMAN | K.NATDLQNSSM*SEEELTK.A | 2 | 3,2218 | 0,542 | -0,191 |
| 13 | P18206 VINC_HUMAN  | K.M*TGLVDEAIDTK.S      | 2 | 3,2216 | 0,446 | 0,093  |
| 13 | P37802 TAGL2_HUMAN | R.NFSDNQLQEGK.N        | 2 | 3,2213 | 0,459 | -0,095 |
| 13 | P18206 VINC_HUMAN  | R.DPSASPGDAGEQAIR.Q    | 2 | 3,2167 | 0,477 | 0      |
| 13 | Q9UNL2 SSRG_HUMAN  | K.QQSEEDLLLQDFSR.N     | 2 | 3,2148 | 0,473 | -0,5   |
| 13 | P09874 PARP1_HUMAN | R.VVSEDFLQDVSASTK.S    | 2 | 3,2147 | 0,457 | -0,3   |
| 13 | P12814 ACTN1_HUMAN | K.CQLEINFNTLQTK.L      | 2 | 3,2134 | 0,382 | -0,379 |
| 13 | Q9UKN8 TF3C4_HUMAN | R.GLCNFLM*SDEEYDDR.T   | 2 | 3,2094 | 0,571 | -1,233 |
| 13 | Q8N884 CF150_HUMAN | R.DDISTAAGM*VK.G       | 2 | 3,2085 | 0,484 | -0,109 |
| 13 | Q99541 ADFP_HUMAN  | K.DSVASTITGVM*DK.T     | 2 | 3,2007 | 0,509 | -0,182 |
| 13 | Q99536 VAT1_HUMAN  | R.CLVLTGFGGYDK.V       | 2 | 3,198  | 0,399 | 0      |
| 13 | Q04917 1433F_HUMAN | K.AVTELNEPLSNEDR.N     | 2 | 3,1977 | 0,475 | -0,384 |
| 13 | Q9UBW7 ZMYM2_HUMAN | K.DIYDKDNYELDEDTD.-    | 2 | 3,1969 | 0,404 | -0,524 |
| 13 | Q13509 TBB3_HUMAN  | K.EVDEQM*LAIQSK.N      | 2 | 3,193  | 0,362 | 0      |
| 13 | P62826 RAN_HUMAN   | R.VCENIPIVLCGNK.V      | 2 | 3,193  | 0,398 | -0,322 |
| 13 | P61758 PFD3_HUMAN  | R.DQFTTTEVNM*AR.V      | 2 | 3,1872 | 0,343 | -0,085 |
| 13 | Q14166 TTL12_HUMAN | R.AFALNDLDDYEK.H       | 2 | 3,1811 | 0,259 | -0,086 |
| 13 | Q9GZP4 CA128_HUMAN | R.DLTGELEYATK.I        | 2 | 3,168  | 0,437 | -0,197 |
| 13 | P07355 ANXA2_HUMAN | R.TNQELQEINR.V         | 2 | 3,1604 | 0,363 | -0,098 |
| 13 | P52701 MSH6_HUMAN  | K.AGFSDSDYDQALADIR.E   | 2 | 3,1585 | 0,425 | -0,147 |
| 13 | P78318 IGBP1_HUMAN | R.NEDLEEIASTDLK.Y      | 2 | 3,1571 | 0,446 | 0,33   |
| 13 | P13667 PDIA4_HUMAN | K.VSQGQLVVM*QPEK.F     | 2 | 3,157  | 0,381 | -0,502 |
| 13 | P07384 CAN1_HUMAN  | R.LDETDPPDDYGDR.E      | 2 | 3,1539 | 0,482 | 0      |
| 13 | O75116 ROCK2_HUMAN | K.DATIASLEETNR.T       | 2 | 3,1519 | 0,281 | -0,185 |
| 13 | Q96GQ7 DDX27_HUMAN | R.SADFNPDFVFTEK.E      | 2 | 3,1486 | 0,362 | -0,402 |
| 13 | P35637 FUS_HUMAN   | K.GEATVSFDDPPSAK.A     | 2 | 3,1481 | 0,374 | -0,172 |
| 13 | P16070 CD44_HUMAN  | K.ESSETPDQFM*TADETR.N  | 2 | 3,1472 | 0,5   | -0,59  |
| 13 | P78371 TCPB_HUMAN  | R.QDLM*NIAGTTLSSK.L    | 2 | 3,1466 | 0,337 | -0,571 |
| 13 | Q9BWJ5 SF3B5_HUMAN | K.M*LQPCGPPADKPEEN.-   | 2 | 3,1452 | 0,328 | 0      |
| 13 | P05388 RLAO_HUMAN  | K.TSFFQALGITTK.I       | 2 | 3,1423 | 0,43  | -0,65  |
| 13 | P02545 LMNA_HUMAN  | R.TALINSTGEEVAM*R.K    | 2 | 3,1411 | 0,482 | -0,324 |
| 13 | Q96GA3 LTV1_HUMAN  | R.DPLAADESAPQR.V       | 2 | 3,1363 | 0,526 | 0,384  |

|    |                     |                        |   |        |       |        |
|----|---------------------|------------------------|---|--------|-------|--------|
| 13 | P04406 G3P_HUMAN    | R.GALQNIIPASTGAAK.A    | 2 | 3,1354 | 0,377 | 0,346  |
| 13 | P62937 PPIA_HUMAN   | K.KITIADCGQLE.-        | 2 | 3,1295 | 0,338 | 0,098  |
| 13 | P23284 PPIB_HUMAN   | K.DTNGSQFFITTVK.T      | 2 | 3,1294 | 0,478 | 0,251  |
| 13 | O15144 ARPC2_HUMAN  | R.DDETM*YVESK.K        | 2 | 3,1293 | 0,326 | 0,099  |
| 13 | P00441 SODC_HUMAN   | K.GDGPVQGIINFEQK.E     | 2 | 3,1261 | 0,512 | -0,244 |
| 13 | Q9NZZ3 CHMP5_HUMAN  | K.NKDGVLVDEFGLPQIPAS.- | 2 | 3,1259 | 0,319 | -0,642 |
| 13 | Q08209 PP2BA_HUMAN  | R.DAM*PSDANLNSINK.A    | 2 | 3,1201 | 0,421 | -0,567 |
| 13 | O94763 RMP_HUMAN    | K.TSDIFEADIANDVK.S     | 2 | 3,1189 | 0,404 | 0,555  |
| 13 | B2R9R2 B2R9R2_HUMAN | K.DSM*PDESSQTSLQK.E    | 2 | 3,1188 | 0,35  | -0,233 |
| 13 | Q13813 SPTA2_HUMAN  | K.DVTGAEALLER.H        | 2 | 3,1115 | 0,329 | -0,104 |
| 13 | P54920 SNAA_HUMAN   | K.YEELFPAFSDSR.E       | 2 | 3,1114 | 0,496 | -0,418 |
| 13 | Q15042 RB3GP_HUMAN  | R.DYIEEEVIDEK.G        | 2 | 3,111  | 0,263 | -0,265 |
| 13 | Q9H4A4 AMPB_HUMAN   | K.TYQLVYFLDK.I         | 2 | 3,1087 | 0,435 | -0,378 |
| 13 | P02545 LMNA_HUMAN   | R.TALINSTGEEVAM*R.K    | 3 | 3,1082 | 0,26  | -0,182 |
| 13 | Q8WXX5 DNJC9_HUMAN  | K.ISLEDIQAFEK.T        | 2 | 3,1024 | 0,381 | -0,189 |
| 13 | Q8IXT5 RB12B_HUMAN  | K.DSSVELFLSK.A         | 2 | 3,1018 | 0,506 | -0,302 |
| 13 | Q13765 NACA_HUMAN   | K.SPASDTYIVFGEAK.I     | 3 | 3,0941 | 0,228 | 0      |
| 13 | P11586 C1TC_HUMAN   | K.TDTESELDLISR.L       | 2 | 3,0937 | 0,459 | 0      |
| 13 | Q14980 NUMA1_HUMAN  | K.VLEGSELELAK.M        | 2 | 3,0867 | 0,337 | 0,103  |
| 13 | P09874 PARP1_HUMAN  | K.AM*VEYEIDLQK.M       | 2 | 3,0864 | 0,453 | 0      |
| 13 | Q07157 ZO1_HUMAN    | R.DGNIQEGDVVLK.I       | 2 | 3,0863 | 0,412 | 0      |
| 13 | Q9NVV4 PAPD1_HUMAN  | R.DEQPSGSVETGFEDK.I    | 2 | 3,0855 | 0,406 | -0,225 |
| 13 | P41208 CETN2_HUMAN  | R.DGDGEVSEQEFLR.I      | 2 | 3,0854 | 0,338 | -0,33  |
| 13 | O00571 DDX3X_HUMAN  | R.VGNLGLATSFNER.N      | 2 | 3,0844 | 0,4   | -0,4   |
| 13 | P21333 FLNA_HUMAN   | R.IANLQTDLSGLR.L       | 2 | 3,0787 | 0,444 | 0,086  |
| 13 | Q15019 SEPT2_HUMAN  | K.TIISYIDEQFER.Y       | 2 | 3,0736 | 0,407 | -0,403 |
| 13 | Q9BW27 NUP85_HUMAN  | K.DAAFATLVSDR.F        | 2 | 3,0727 | 0,386 | -0,209 |
| 13 | Q15459 SF3A1_HUMAN  | K.VM*QQQQTTQQQLPQK.V   | 3 | 3,0725 | 0,434 | -0,28  |
| 13 | Q9NW13 RBM28_HUMAN  | K.AEVEQVELPDGK.K       | 2 | 3,0704 | 0,359 | -0,371 |
| 13 | Q12888 TP53B_HUMAN  | K.NSPEDLGLSLTGDSC.L    | 2 | 3,0696 | 0,554 | 1,081  |
| 13 | P39656 OST48_HUMAN  | R.ELGSECGIEFDEEK.T     | 2 | 3,0686 | 0,467 | -0,074 |
| 13 | P07814 SYEP_HUMAN   | R.DQDLEPGAPSM*GAK.S    | 2 | 3,0633 | 0,382 | 0,17   |
| 13 | P52888 THOP1_HUMAN  | K.TSQTVATFLDELAQK.L    | 2 | 3,0632 | 0,496 | -0,517 |

|    |                    |                      |   |        |       |        |
|----|--------------------|----------------------|---|--------|-------|--------|
| 13 | Q9H307 PININ_HUMAN | R.DLIQDQNM*DEK.G     | 2 | 3,063  | 0,296 | 0,179  |
| 13 | P33176 KINH_HUMAN  | K.EYELLSDELNQK.S     | 2 | 3,0608 | 0,351 | 0,412  |
| 13 | Q99439 CNN2_HUMAN  | K.DGTILCTLM*NK.L     | 2 | 3,0582 | 0,371 | 0,19   |
| 13 | P11586 C1TC_HUMAN  | K.DVDGLTSINAGR.L     | 2 | 3,0571 | 0,452 | -0,301 |
| 13 | Q13017 RHG05_HUMAN | K.DGLAQELANEIR.T     | 2 | 3,057  | 0,374 | -1,01  |
| 13 | Q9BV44 THUM3_HUMAN | R.DFGGAVQDYFK.W      | 2 | 3,0554 | 0,472 | 0      |
| 13 | P78527 PRKDC_HUMAN | R.YPEETLSLM*TK.E     | 2 | 3,052  | 0,404 | -0,184 |
| 13 | Q06830 PRDX1_HUMAN | R.LVQAFQFTDK.H       | 2 | 3,0506 | 0,435 | 0,306  |
| 13 | P08670 VIME_HUMAN  | K.ILLAELEQLK.G       | 2 | 3,0495 | 0,271 | -0,417 |
| 13 | Q04637 IF4G1_HUMAN | K.DITEEIM*SGAR.T     | 2 | 3,0489 | 0,48  | 0,197  |
| 13 | P31946 1433B_HUMAN | R.YLSEVASGDNK.Q      | 2 | 3,0482 | 0,37  | -0,206 |
| 13 | Q9UNZ2 NSF1C_HUMAN | K.SPNELVDDLK.G       | 2 | 3,0455 | 0,305 | -0,573 |
| 13 | P05783 K1C18_HUMAN | R.QAQEYEALLNIK.V     | 3 | 3,0447 | 0,209 | 0,129  |
| 13 | Q02952 AKA12_HUMAN | K.SDEVDEQVACQEVK.V   | 2 | 3,0428 | 0,42  | -0,149 |
| 13 | P50991 TCPD_HUMAN  | K.GDVTITNDGATILK.Q   | 2 | 3,0423 | 0,309 | -0,258 |
| 13 | P50395 GDIB_HUMAN  | K.DLGTESQIFISR.T     | 2 | 3,042  | 0,431 | 0,268  |
| 13 | Q9Y265 RUVB1_HUMAN | K.TALALAIQELGSK.V    | 2 | 3,0405 | 0,471 | -0,264 |
| 13 | P29317 EPHA2_HUMAN | K.FADIVSILDK.L       | 2 | 3,0379 | 0,322 | -0,109 |
| 13 | P43487 RANG_HUMAN  | K.TLEEDDEELFK.M      | 2 | 3,0348 | 0,38  | -0,088 |
| 13 | Q8TCG1 K1524_HUMAN | K.DLQITCDLNLK.Q      | 2 | 3,0344 | 0,35  | -0,093 |
| 13 | Q71U36 TBA1A_HUMAN | K.DVNAAIATIK.T       | 2 | 3,0284 | 0,347 | -0,3   |
| 13 | P14618 KPYM_HUMAN  | R.GDLGIEIPA EK.V     | 2 | 3,0263 | 0,442 | -0,107 |
| 13 | Q99436 PSB7_HUMAN  | K.DGIVLGADTR.A       | 2 | 3,023  | 0,378 | 0,06   |
| 13 | P60981 DEST_HUMAN  | R.YALYDASFETK.E      | 2 | 3,0217 | 0,509 | -0,093 |
| 13 | P35579 MYH9_HUMAN  | K.TDLLLEPYNK.Y       | 2 | 3,0212 | 0,228 | 0,303  |
| 13 | P84077 ARF1_HUMAN  | K.QDLPNAM*NAAEITDK.L | 2 | 3,0178 | 0,449 | -0,222 |
| 13 | P54652 HSP72_HUMAN | R.FEELNADLFR.G       | 2 | 3,0172 | 0,354 | -0,195 |
| 13 | Q9UKL0 RCOR1_HUMAN | R.DFQAISDVIGNK.S     | 2 | 3,0163 | 0,528 | 0      |
| 13 | P61158 ARP3_HUMAN  | K.DYEEIGPSICR.H      | 2 | 3,0132 | 0,374 | 0      |
| 13 | P23528 COF1_HUMAN  | R.YALYDATYETK.E      | 2 | 3,0132 | 0,548 | 0,274  |
| 13 | Q01105 SET_HUMAN   | R.VEVTEFEDIK.S       | 2 | 3,0115 | 0,361 | -0,606 |
| 13 | P46379 BAT3_HUMAN  | R.DLEAPEVQESYR.Q     | 2 | 3,0082 | 0,363 | 0      |
| 13 | P52907 CAZA1_HUMAN | K.EASDPQPEEADGGLK.S  | 2 | 3,0014 | 0,521 | -0,395 |

|    |                    |                        |   |        |       |        |
|----|--------------------|------------------------|---|--------|-------|--------|
| 13 | Q15046 SYK_HUMAN   | K.EICNAYTELNDPM*R.Q    | 2 | 3,0004 | 0,362 | -0,21  |
| 13 | Q58FF7 H90B3_HUMAN | R.DNSTM*GYMM*AK.K      | 2 | 2,9966 | 0,496 | -0,381 |
| 13 | P68371 TBB2C_HUMAN | R.IM*NTFSVVPSPK.V      | 2 | 2,9961 | 0,389 | -0,091 |
| 13 | Q14152 EIF3A_HUMAN | R.LLDM*DGIIVEK.Q       | 2 | 2,9894 | 0,363 | 0,193  |
| 13 | Q9BS26 TXND4_HUMAN | R.DLAEITTLDR.S         | 2 | 2,9874 | 0,53  | -0,106 |
| 13 | P11586 C1TC_HUMAN  | R.GDLNDCFIPCTPK.G      | 2 | 2,9872 | 0,35  | 0      |
| 13 | P30041 PRDX6_HUMAN | K.LPFPIIDDR.N          | 2 | 2,9857 | 0,347 | 0      |
| 13 | Q96HC4 PDLI5_HUMAN | K.NTM*AYIGFVEEK.G      | 2 | 2,9839 | 0,515 | -0,172 |
| 13 | O95793 STAU1_HUMAN | R.NAAENM*LEILGFK.V     | 2 | 2,9837 | 0,41  | -0,583 |
| 13 | P11586 C1TC_HUMAN  | K.TDPTTLTDEEINR.F      | 2 | 2,9821 | 0,422 | -0,324 |
| 13 | Q9Y4L1 HYOU1_HUMAN | K.AEAGPEGVAPAPEGEK.K   | 2 | 2,9766 | 0,376 | -0,162 |
| 13 | Q69YH5 CDCA2_HUMAN | K.DLSDAIEQTFQR.R       | 2 | 2,9722 | 0,377 | -0,429 |
| 13 | Q7Z2W4 ZCCHV_HUMAN | R.ASLEDAPVDDLTR.K      | 2 | 2,9631 | 0,447 | -0,174 |
| 13 | P10809 CH60_HUMAN  | K.TLNDELEIIEGM*K.F     | 2 | 2,9619 | 0,453 | -0,16  |
| 13 | Q86V81 THOC4_HUMAN | K.M*DM*SLDDIIL.L       | 2 | 2,9606 | 0,334 | -0,201 |
| 13 | P09493 TPM1_HUMAN  | R.IQLVEEELDR.A         | 2 | 2,9497 | 0,355 | -0,098 |
| 13 | O00592 PODXL_HUMAN | K.DDLDEEEDTHL.-        | 2 | 2,9491 | 0,386 | -0,183 |
| 13 | Q16864 VATF_HUMAN  | K.DTTINEIEDTFR.Q       | 2 | 2,9487 | 0,469 | -0,503 |
| 13 | P12270 TPR_HUMAN   | K.LDELQASDVSVK.Y       | 2 | 2,9462 | 0,426 | 0,561  |
| 13 | P40926 MDHM_HUMAN  | R.FVFSLVDAM*NGK.E      | 2 | 2,9443 | 0,415 | -0,454 |
| 13 | Q9Y5U2 TSSC4_HUMAN | R.DIFDCLEGAAR.R        | 2 | 2,939  | 0,376 | -0,385 |
| 13 | P36776 LONM_HUMAN  | R.QLEVEPEEPEAENK.H     | 2 | 2,9361 | 0,322 | -0,149 |
| 13 | P24534 EF1B_HUMAN  | K.SPAGLQVLNDYLADK.S    | 3 | 2,9354 | 0,183 | -0,342 |
| 13 | P61978 HNRPK_HUMAN | R.NTDEM*VELR.I         | 2 | 2,9328 | 0,228 | -0,109 |
| 13 | P04406 G3P_HUMAN   | R.VPTANVSVVDLTCR.L     | 3 | 2,9322 | 0,22  | 0,358  |
| 13 | P06733 ENOA_HUMAN  | K.LM*IEM*DG TENK.S     | 2 | 2,9319 | 0,259 | -0,093 |
| 13 | P13798 ACPH_HUMAN  | R.SALYYVDLIGGK.C       | 2 | 2,9302 | 0,38  | -0,657 |
| 13 | Q9Y606 TRUA_HUMAN  | K.TIEDDLVSALVR.S       | 2 | 2,92   | 0,444 | -0,367 |
| 13 | Q8IYT4 KATL2_HUMAN | K.GLLLYGPPGTGK.T       | 2 | 2,9128 | 0,421 | 0,104  |
| 13 | P07355 ANXA2_HUMAN | K.DIISDTSGDFR.K        | 2 | 2,9102 | 0,444 | -0,1   |
| 13 | Q02539 H11_HUMAN   | K.ALAAAGYDVEK.N        | 2 | 2,9067 | 0,436 | -0,22  |
| 13 | Q99536 VAT1_HUMAN  | R.EVAEAAATGEDASSPPPK.T | 2 | 2,9063 | 0,476 | -0,221 |
| 13 | Q9NZM1 MYOF_HUMAN  | R.DYSLDEFEANK.I        | 2 | 2,9054 | 0,517 | 0,367  |

|    |                    |                               |   |        |       |        |
|----|--------------------|-------------------------------|---|--------|-------|--------|
| 13 | O15355 PPM1G_HUMAN | K.SGGGTGEEPGSQGLNGEAGPEDSTR.E | 3 | 2,9    | 0,21  | -0,234 |
| 13 | O95831 AIFM1_HUMAN | K.TGGLEIDSDFGGFR.V            | 2 | 2,8987 | 0,203 | -0,249 |
| 13 | O43707 ACTN4_HUMAN | R.DYETATLSDIK.A               | 2 | 2,8987 | 0,449 | -0,291 |
| 13 | P13797 PLST_HUMAN  | R.DGETLEELM*K.L               | 2 | 2,8986 | 0,454 | 0      |
| 13 | P56192 SYMC_HUMAN  | K.ITQDIFQQLK.R                | 2 | 2,8971 | 0,37  | -0,362 |
| 13 | Q12840 KIF5A_HUMAN | K.LYLVDLAGSEK.V               | 2 | 2,8968 | 0,333 | -0,505 |
| 13 | Q9BZZ5 API5_HUMAN  | K.DAYQVILDGVK.G               | 2 | 2,8954 | 0,287 | -0,2   |
| 13 | O76094 SRP72_HUMAN | R.TEEALQLYNQIIL.L             | 2 | 2,8942 | 0,392 | -0,156 |
| 13 | O95373 IPO7_HUMAN  | K.EYNEFAEVFLK.A               | 2 | 2,893  | 0,358 | -0,351 |
| 13 | O15144 ARPC2_HUMAN | R.DDETMIVESK.K                | 2 | 2,8916 | 0,362 | 0      |
| 13 | Q96S82 UBL7_HUMAN  | R.DM*GIQDDELSLR.A             | 2 | 2,8901 | 0,333 | -0,087 |
| 13 | P07737 PROF1_HUMAN | K.STGGAPTFNVTVK.T             | 2 | 2,8884 | 0,362 | 0,088  |
| 13 | P34932 HSP74_HUMAN | K.ELSTTLNADEAVTR.G            | 2 | 2,8822 | 0,401 | 0      |
| 13 | O75533 SF3B1_HUMAN | R.QLVDTTVELANK.V              | 2 | 2,8808 | 0,371 | 0,55   |
| 13 | Q9NSD9 SYFB_HUMAN  | R.DLLFQALGR.T                 | 2 | 2,8798 | 0,33  | -0,236 |
| 13 | P13010 KU86_HUMAN  | K.TDTLEDLFPTTK.I              | 2 | 2,8765 | 0,483 | -0,265 |
| 13 | Q9NY33 DPP3_HUMAN  | R.GEFEGFVAVVNK.A              | 2 | 2,8743 | 0,364 | -0,094 |
| 13 | O00410 IMB3_HUMAN  | K.SLVEIADTVPK.Y               | 2 | 2,874  | 0,381 | -0,625 |
| 13 | P40925 MDHC_HUMAN  | K.ELTEEKESAFELSSA.-           | 2 | 2,8736 | 0,391 | -0,47  |
| 13 | P07951 TPM2_HUMAN  | K.LVILEGELER.S                | 2 | 2,8724 | 0,394 | -0,208 |
| 13 | P07954 FUMH_HUMAN  | R.AIEM*LGGELGSK.I             | 2 | 2,8711 | 0,319 | -0,1   |
| 13 | P34932 HSP74_HUMAN | K.FLEM*CNDLLAR.V              | 2 | 2,8701 | 0,254 | -0,611 |
| 13 | P67812 SC11A_HUMAN | -.M*LSLDFLDDVR.R              | 2 | 2,8648 | 0,432 | -0,273 |
| 13 | O96019 ACL6A_HUMAN | R.DDGSTLM*EIDGDK.G            | 2 | 2,8637 | 0,414 | -0,173 |
| 13 | P31689 DNJA1_HUMAN | K.QISQAYEVLSDAK.K             | 2 | 2,8624 | 0,512 | 0,084  |
| 13 | Q13907 IDI1_HUMAN  | R.AFSVFLFNTENK.L              | 2 | 2,8603 | 0,461 | -0,344 |
| 13 | P50995 ANX11_HUMAN | K.GFGTDEQAIIDCLGSR.S          | 2 | 2,8572 | 0,344 | -0,21  |
| 13 | Q7KZF4 SND1_HUMAN  | R.EVEVEVESM*DK.A              | 2 | 2,8533 | 0,422 | -0,093 |
| 13 | O94903 PROSC_HUMAN | R.TFGENYVQELLEK.A             | 2 | 2,8526 | 0,406 | -0,466 |
| 13 | P04843 RPN1_HUMAN  | R.SEDLLDYGPFR.D               | 2 | 2,851  | 0,432 | -0,093 |
| 13 | P0C7M2 RA1L3_HUMAN | K.IEVIEIM*TDR.G               | 2 | 2,8507 | 0,304 | -0,198 |
| 13 | O00151 PDLI1_HUMAN | K.DFEQPLAISR.V                | 2 | 2,8491 | 0,247 | 0,104  |
| 13 | O95678 K2C75_HUMAN | K.AQYEDIANR.S                 | 2 | 2,8472 | 0,305 | -0,113 |



|    |                    |                     |   |        |       |        |
|----|--------------------|---------------------|---|--------|-------|--------|
| 13 | P23381 SYWC_HUMAN  | K.DIIACGFDINK.T     | 2 | 2,8468 | 0,314 | 0,289  |
| 13 | Q14669 TRIPC_HUMAN | R.DDSLDLSPQGR.L     | 2 | 2,843  | 0,37  | 0,101  |
| 13 | P54136 SYRC_HUMAN  | R.LM*DLLGEGLK.R     | 2 | 2,843  | 0,341 | -0,221 |
| 13 | P45974 UBP5_HUMAN  | R.DGLGGLPDIVR.D     | 2 | 2,8422 | 0,28  | -0,11  |
| 13 | O76021 RL1D1_HUMAN | K.DDVAPESGDTTVK.K   | 2 | 2,8399 | 0,382 | -0,457 |
| 13 | Q00341 VIGLN_HUMAN | K.DQGLSIM*VSGK.L    | 2 | 2,8391 | 0,432 | -0,212 |
| 13 | P54136 SYRC_HUMAN  | R.LNDYIFSFDK.M      | 2 | 2,8375 | 0,405 | -0,387 |
| 13 | P61160 ARP2_HUMAN  | K.LCYVGYNIEQEQK.L   | 2 | 2,8362 | 0,325 | 0,223  |
| 13 | O14980 XPO1_HUMAN  | R.VDTILEFSQNM*NTK.Y | 2 | 2,8351 | 0,261 | 0,221  |
| 13 | Q9ULK4 MED23_HUMAN | R.DM*VCNM*LGLNK.Q   | 2 | 2,8327 | 0,338 | -1,471 |
| 13 | P31946 1433B_HUMAN | K.YLIPNATQPESK.V    | 2 | 2,8305 | 0,398 | -0,359 |
| 13 | Q92688 AN32B_HUMAN | R.IFGGLDM*LAEK.L    | 2 | 2,8297 | 0,27  | 0,302  |
| 13 | O00299 CLIC1_HUMAN | K.GVTFNVTTVDTK.R    | 2 | 2,8253 | 0,52  | 0      |
| 13 | Q9UQ80 PA2G4_HUMAN | R.ITSGPFEPDLYK.S    | 2 | 2,8237 | 0,382 | 0      |
| 13 | P00338 LDHA_HUMAN  | K.QVVESAYEVIK.L     | 2 | 2,8229 | 0,425 | 0      |
| 13 | O00767 ACOD_HUMAN  | K.GSTLDLSDLEAEK.L   | 2 | 2,8141 | 0,454 | 0      |
| 13 | Q9Y4X5 ARI1_HUMAN  | R.DISQDSLQDIK.Q     | 2 | 2,8138 | 0,39  | -0,097 |
| 13 | Q9NPJ3 THEM2_HUMAN | K.TLAFTSVDLTNK.A    | 2 | 2,8097 | 0,571 | 0      |
| 13 | P30041 PRDX6_HUMAN | K.DINAYNCEEPTEK.L   | 3 | 2,8094 | 0,395 | -0,116 |
| 13 | P49588 SYAC_HUMAN  | R.AVFDETYPPDVR.V    | 2 | 2,8073 | 0,419 | -0,173 |
| 13 | P51858 HDGF_HUMAN  | R.IDEM*PEAAVK.S     | 2 | 2,807  | 0,281 | -0,109 |
| 13 | P48634 BAT2_HUMAN  | R.EEFPTLQAAGDQDK.A  | 2 | 2,8054 | 0,118 | 0,079  |
| 13 | Q9H0S4 DDX47_HUMAN | R.DIIGLAETGSGK.T    | 2 | 2,8003 | 0,454 | -0,21  |
| 13 | Q14974 IMB1_HUMAN  | R.SSAYESLM*EIVK.N   | 2 | 2,7948 | 0,346 | -0,355 |
| 13 | Q96HS1 PGAM5_HUMAN | R.TLGDTGFM*PPDK.I   | 2 | 2,7875 | 0,456 | -0,283 |
| 13 | P22626 ROA2_HUMAN  | K.IDTIEITDR.Q       | 2 | 2,7852 | 0,271 | -0,205 |
| 13 | Q04837 SSB_HUMAN   | R.SGDSEVYQLGDVSQK.T | 2 | 2,7819 | 0,396 | 0      |
| 13 | Q9HC35 EMAL4_HUMAN | K.DVIINQEGEYIK.M    | 2 | 2,7816 | 0,384 | 0,086  |
| 13 | P40926 MDHM_HUMAN  | K.GYLGPEQLPDCLK.G   | 2 | 2,7743 | 0,368 | 0,246  |
| 13 | P09493 TPM1_HUMAN  | K.QLEDELVSLQK.K     | 2 | 2,7734 | 0,284 | 0,094  |
| 13 | P62937 PPIA_HUMAN  | R.VSFELFADK.V       | 2 | 2,7714 | 0,39  | -0,116 |
| 13 | P61201 CSN2_HUMAN  | K.SINSILDYISTSK.Q   | 2 | 2,7711 | 0,449 | -0,423 |
| 13 | Q9NZT2 OGFR_HUMAN  | R.DADAGDEDEESEPR.A  | 3 | 2,7669 | 0,261 | 0,11   |

|    |                     |                         |   |        |       |        |
|----|---------------------|-------------------------|---|--------|-------|--------|
| 13 | Q5JWF2 GNAS1_HUMAN  | R.YTTPEDATPEPGEDPR.V    | 2 | 2,7651 | 0,385 | -0,619 |
| 13 | P09525 ANXA4_HUMAN  | R.DEGNYLDDALVR.Q        | 2 | 2,7591 | 0,406 | 0,265  |
| 13 | P53992 SC24C_HUMAN  | K.SDVLQPGAEVTTDDR.A     | 2 | 2,7584 | 0,443 | -0,304 |
| 13 | P08195 4F2_HUMAN    | K.GQSEDPGSLLSLFR.R      | 2 | 2,756  | 0,405 | -0,729 |
| 13 | Q96PU5 NED4L_HUMAN  | R.LLFEVFDENR.L          | 2 | 2,755  | 0,496 | -0,571 |
| 13 | P10809 CH60_HUMAN   | R.GYISPYFINTSK.G        | 2 | 2,7531 | 0,494 | 0,176  |
| 13 | O95163 ELP1_HUMAN   | R.SVGDNSSDLSNVAVIDGNR.V | 2 | 2,7435 | 0,528 | -0,127 |
| 13 | O75179 ANR17_HUMAN  | K.NASILLEELDLEK.L       | 2 | 2,743  | 0,299 | -0,656 |
| 13 | Q16222 UAP1_HUMAN   | R.ALAAQNIVEDM*EQR.G     | 2 | 2,7425 | 0,195 | -0,761 |
| 13 | P62241 RS8_HUMAN    | K.NCIVLIDSTPYR.Q        | 2 | 2,7385 | 0,435 | 0,252  |
| 13 | P20042 IF2B_HUMAN   | R.DYTYEELLNR.V          | 2 | 2,738  | 0,375 | 0,185  |
| 13 | P25685 DNJB1_HUMAN  | R.DGSDVIYPAR.I          | 2 | 2,737  | 0,271 | -0,112 |
| 13 | P31949 S10AB_HUMAN  | R.CIESLIAVFQK.Y         | 2 | 2,7353 | 0,379 | -0,466 |
| 13 | Q08211 DHX9_HUMAN   | R.DVVQAYPEVR.I          | 2 | 2,7351 | 0,411 | -0,104 |
| 13 | P46100 ATRX_HUMAN   | K.SVPVTVDDDDDDNDPENR.I  | 2 | 2,7252 | 0,503 | -0,423 |
| 13 | P60660 MYL6_HUMAN   | K.DQGTYEDYVEGLR.V       | 2 | 2,7251 | 0,42  | 0,158  |
| 13 | P12955 PEPD_HUMAN   | R.TVEEIEACM*AGCDK.A     | 2 | 2,7221 | 0,333 | -0,449 |
| 13 | P41227 ARD1A_HUMAN  | R.DLTQM*ADELR.R         | 2 | 2,7157 | 0,243 | 0,808  |
| 13 | P17987 TCPA_HUMAN   | R.ICDDELILIK.N          | 2 | 2,7146 | 0,344 | 0      |
| 13 | Q9Y4E8 UBP15_HUMAN  | R.QDTFSGTGFFPLDR.E      | 2 | 2,7141 | 0,428 | -0,384 |
| 13 | O75940 SPF30_HUMAN  | K.DLQEVIELTK.D          | 2 | 2,714  | 0,413 | 0,205  |
| 13 | Q5VZK9 LR16A_HUMAN  | K.SNDSGEEAEKEFIFV.-     | 2 | 2,7088 | 0,359 | -0,933 |
| 13 | P49327 FAS_HUMAN    | R.SEGVVAVLLTK.K         | 2 | 2,705  | 0,455 | 0      |
| 13 | O75306 NDUS2_HUMAN  | R.LDELEELLTNNR.I        | 3 | 2,7041 | 0,216 | 0,063  |
| 13 | Q07065 CKAP4_HUMAN  | R.DFTSLENTVEER.L        | 2 | 2,702  | 0,296 | 0,169  |
| 13 | Q6P1S1 Q6P1S1_HUMAN | R.EALDVLGAVLK.A         | 2 | 2,7004 | 0,41  | -0,216 |
| 13 | Q7L2H7 EIF3M_HUMAN  | R.LLYEALVDCK.K          | 2 | 2,697  | 0,38  | 0,199  |
| 13 | Q92598 HS105_HUMAN  | K.DISTTLNADEAVAR.G      | 2 | 2,6954 | 0,31  | 0,083  |
| 13 | Q9BZG1 RAB34_HUMAN  | K.DALQVAQEM*K.A         | 2 | 2,6891 | 0,357 | 0      |
| 13 | P11388 TOP2A_HUMAN  | K.IFDEILVNAADNK.Q       | 3 | 2,6804 | 0,198 | -0,25  |
| 13 | Q9UCN2 Q9UCN2_HUMAN | -.PYQYPALTPEQK.K        | 2 | 2,6792 | 0,361 | -0,085 |
| 13 | Q09666 AHNK_HUMAN   | K.VDTNAPDLSLEGPEGK.L    | 2 | 2,677  | 0,241 | -0,372 |
| 13 | P09493 TPM1_HUMAN   | K.LVIIESDLER.A          | 2 | 2,6743 | 0,394 | 0,206  |

|    |                    |                      |   |        |       |        |
|----|--------------------|----------------------|---|--------|-------|--------|
| 13 | P67775 PP2AA_HUMAN | R.CGNQAAIM*ELDDTLK.Y | 2 | 2,6727 | 0,372 | 0      |
| 13 | P52272 HNRPM_HUMAN | R.AFITNIPFDVK.W      | 2 | 2,6705 | 0,416 | -0,289 |
| 13 | Q9UNH7 SNX6_HUMAN  | K.NLVELAELELK.H      | 2 | 2,6664 | 0,359 | -0,192 |
| 13 | P78527 PRKDC_HUMAN | K.NILEESLCELVAK.Q    | 2 | 2,664  | 0,478 | -0,241 |
| 13 | P29401 TKT_HUMAN   | K.LDNLVAILDINR.L     | 2 | 2,6624 | 0,427 | -0,535 |
| 13 | Q9UIV1 CNOT7_HUMAN | K.GGLQEVAEQLELER.I   | 2 | 2,66   | 0,319 | 0,311  |
| 13 | Q05524 ENO1B_HUMAN | R.YISPDQLADLYK.G     | 2 | 2,6587 | 0,418 | -0,086 |
| 13 | Q96R06 SPAG5_HUMAN | K.LASTIADNQEQDLEK.T  | 2 | 2,6579 | 0,208 | 0      |
| 13 | P49354 FNNTA_HUMAN | K.ALELCEILAK.E       | 2 | 2,6574 | 0,354 | -0,21  |
| 13 | Q9Y3F4 STRAP_HUMAN | K.EFLVAGGEDFK.L      | 2 | 2,6535 | 0,349 | -0,805 |
| 13 | O43615 TIM44_HUMAN | K.VTDLLGGLFSK.T      | 2 | 2,6528 | 0,242 | -0,318 |
| 13 | P62263 RS14_HUMAN  | R.IEDVTPIPSDSTR.R    | 2 | 2,6523 | 0,384 | 0      |
| 13 | P05787 K2C8_HUMAN  | R.SLDMDSIIAEVK.A     | 2 | 2,6493 | 0,357 | -0,462 |
| 13 | P11216 PYGB_HUMAN  | K.DFYELEPEK.F        | 2 | 2,6484 | 0,308 | 0      |
| 13 | P50502 F10A1_HUMAN | K.AIDLFTDAIK.L       | 2 | 2,6469 | 0,281 | -0,22  |
| 13 | P23284 PPIB_HUMAN  | R.IGDEDVGR.V         | 2 | 2,6451 | 0,295 | 0,142  |
| 13 | Q7L5D6 CGO20_HUMAN | R.DPM*YNEYLDR.I      | 2 | 2,6396 | 0,334 | 0,183  |
| 13 | Q99755 PI51A_HUMAN | K.LEVAESEFTH.-       | 2 | 2,638  | 0,295 | -0,105 |
| 13 | P16615 AT2A2_HUMAN | R.IGIFGQDEDVTSK.A    | 2 | 2,6379 | 0,398 | 0,52   |
| 13 | Q16795 NDUA9_HUMAN | K.NFD FEDVFVK.I      | 2 | 2,637  | 0,336 | -0,581 |
| 13 | Q8WWC4 CB047_HUMAN | K.FDLLEELVAK.E       | 2 | 2,6337 | 0,434 | -0,311 |
| 13 | P08107 HSP71_HUMAN | K.FGDPVVQSDM*K.H     | 2 | 2,6317 | 0,33  | 0,098  |
| 13 | O76003 GLRX3_HUMAN | K.GELVGGLDIVK.E      | 2 | 2,6253 | 0,386 | 0,444  |
| 13 | Q01813 K6PP_HUMAN  | R.NVIFQPVAELK.K      | 2 | 2,6248 | 0,228 | 0,194  |
| 13 | Q14683 SMC1A_HUMAN | R.DLTLEENQVK.K       | 2 | 2,6232 | 0,365 | 0,308  |
| 13 | P01111 RASN_HUMAN  | R.TGEGFLCVFAINNSK.S  | 2 | 2,6206 | 0,32  | -0,295 |
| 13 | Q8N1G4 LRC47_HUMAN | R.ELLLTGPLEER.V      | 2 | 2,6178 | 0,33  | -0,184 |
| 13 | Q15404 RSU1_HUMAN  | R.DNDLISLPK.E        | 2 | 2,6172 | 0,245 | 0      |
| 13 | Q13347 EIF3I_HUMAN | R.DM*TM*FVTASK.D     | 2 | 2,6129 | 0,445 | -0,105 |
| 13 | P18206 VINC_HUMAN  | R.DPSASPGDAGEQAIR.Q  | 3 | 2,6109 | 0,122 | 0      |
| 13 | Q00653 NFKB2_HUMAN | R.DSGEEAAEPSAPSR.T   | 2 | 2,6107 | 0,311 | -0,087 |
| 13 | P31946 1433B_HUMAN | K.DSTLIM*QLLR.D      | 2 | 2,6106 | 0,243 | -0,202 |
| 13 | P61225 RAP2B_HUMAN | K.ASVDELFAEIVR.Q     | 2 | 2,6065 | 0,233 | -0,543 |

|    |                    |                     |   |        |       |        |
|----|--------------------|---------------------|---|--------|-------|--------|
| 13 | Q07021 C1QBP_HUMAN | K.AFVDFLSDEIK.E     | 2 | 2,6059 | 0,343 | -0,665 |
| 13 | Q9ULX6 AKP8L_HUMAN | K.QTADFLQEYVTNK.T   | 2 | 2,6004 | 0,353 | 0,705  |
| 13 | P07311 ACYP1_HUMAN | K.LDYSDFQIVK.-      | 2 | 2,5973 | 0,429 | -0,099 |
| 13 | Q9Y230 RUVB2_HUMAN | K.EYQDAFLFNLK.G     | 2 | 2,5962 | 0,4   | -0,402 |
| 13 | P07237 PDIA1_HUMAN | R.LITTLEEM*TK.Y     | 2 | 2,5913 | 0,377 | -0,1   |
| 13 | P62753 RS6_HUMAN   | K.LIEVDDER.K        | 2 | 2,5891 | 0,253 | -0,123 |
| 13 | Q13618 CUL3_HUMAN  | R.DM*SISNTTM*DEFR.Q | 2 | 2,5891 | 0,435 | -0,155 |
| 13 | Q08211 DHX9_HUMAN  | K.YPSPFFVFG EK.I    | 2 | 2,5878 | 0,167 | -0,555 |
| 13 | Q58FF7 H90B3_HUMAN | R.DNSTM*GYM*MAK.K   | 2 | 2,5851 | 0,343 | -0,476 |
| 13 | O00410 IMB3_HUMAN  | K.EGFVEYTEQVVK.L    | 2 | 2,5849 | 0,331 | 0,171  |
| 13 | A6NHR9 SMHD1_HUMAN | K.GSNEEDTDTPLFIGK.V | 2 | 2,5849 | 0,303 | 1,128  |
| 13 | O00170 AIP_HUMAN   | R.EGEIAQFLCDIK.H    | 2 | 2,5837 | 0,497 | -0,343 |
| 13 | Q86Y56 HEAT2_HUMAN | R.AIQDAILEVLK.E     | 2 | 2,5832 | 0,287 | -0,302 |
| 13 | P52701 MSH6_HUMAN  | R.LANLPEEVIQK.G     | 2 | 2,583  | 0,359 | -0,292 |
| 13 | Q8WXX5 DNJC9_HUMAN | K.ELGLDEGVDSLK.A    | 2 | 2,5827 | 0,529 | 0,096  |
| 13 | P05783 K1C18_HUMAN | R.QAQEYEALLNIK.V    | 2 | 2,5811 | 0,46  | -0,258 |
| 13 | Q08EQ4 TMSL1_HUMAN | K.ETIEQEKQAGES.-    | 2 | 2,5777 | 0,392 | -0,271 |
| 13 | Q9BZE4 NOG1_HUMAN  | K.DFIDLTLK.T        | 2 | 2,5747 | 0,377 | 0      |
| 13 | Q92841 DDX17_HUMAN | R.DM*VGIAQTGSGK.T   | 2 | 2,5733 | 0,454 | -0,31  |
| 13 | Q99536 VAT1_HUMAN  | K.VLLVPGPEKEN.-     | 2 | 2,5728 | 0,268 | -0,102 |
| 13 | P30626 SORCN_HUMAN | R.DM*SGTM*GFNEFK.E  | 2 | 2,5728 | 0,315 | 0      |
| 13 | P55072 TERA_HUMAN  | K.DVDLEFLAK.M       | 2 | 2,5707 | 0,298 | 0      |
| 13 | Q04637 IF4G1_HUMAN | K.EAVGDLLDAFK.E     | 2 | 2,5699 | 0,293 | -0,311 |
| 13 | P35268 RL22_HUMAN  | K.ITVTSEVPFSK.R     | 2 | 2,5607 | 0,208 | -0,202 |
| 13 | P52701 MSH6_HUMAN  | R.VEQTETPEM*M*EAR.C | 2 | 2,5588 | 0,296 | -0,308 |
| 13 | P20700 LMNB1_HUMAN | R.IQELEDLLAK.E      | 2 | 2,5581 | 0,234 | 0      |
| 13 | P42704 LPPRC_HUMAN | K.AGYPPQYVSEILEK.V  | 2 | 2,5573 | 0,34  | -0,244 |
| 13 | P38646 GRP75_HUMAN | R.TTPSVVAFTADGER.L  | 2 | 2,5573 | 0,545 | -0,084 |
| 13 | Q9Y3I0 CV028_HUMAN | K.LVM*EEAPESYK.N    | 2 | 2,556  | 0,455 | 0      |
| 13 | Q07020 RL18_HUMAN  | K.TAVVVGTITDDVR.V   | 2 | 2,5544 | 0,357 | 0      |
| 13 | Q8N163 K1967_HUMAN | R.DDGEEEFAGAK.L     | 2 | 2,5508 | 0,529 | -0,313 |
| 13 | P34931 HS71L_HUMAN | R.TTPSYVAFTDTER.L   | 2 | 2,5479 | 0,53  | 0,082  |
| 13 | P46013 KI67_HUMAN  | R.DIVEELSALK.Q      | 2 | 2,5453 | 0,329 | -0,109 |

|    |                    |                       |   |        |       |        |
|----|--------------------|-----------------------|---|--------|-------|--------|
| 13 | Q7L9L4 MOL1A_HUMAN | R.ELAPLQELIEK.L       | 2 | 2,542  | 0,406 | -0,285 |
| 13 | Q01844 EWS_HUMAN   | K.GDATVSYEDPPTAK.A    | 2 | 2,5413 | 0,217 | 0,084  |
| 13 | P54578 UBP14_HUMAN | K.ENQLQLSCFINQEVK.Y   | 2 | 2,5407 | 0,425 | 0      |
| 13 | Q9Y3A5 SBDS_HUMAN  | K.DVEEGDEKFE.-        | 2 | 2,5391 | 0,376 | -0,102 |
| 13 | P62736 ACTA_HUMAN  | K.DSYVGDEAQSK.R       | 2 | 2,536  | 0,274 | -0,407 |
| 13 | P62491 RB11A_HUMAN | R.DDEYDYLFK.V         | 2 | 2,5346 | 0,462 | 0      |
| 13 | P43243 MATR3_HUMAN | K.LCSLFYTNEEVAK.N     | 2 | 2,534  | 0,307 | 0,155  |
| 13 | Q16718 NDUA5_HUMAN | K.ILDVLEEIPK.N        | 2 | 2,5329 | 0,169 | -0,209 |
| 13 | P38646 GRP75_HUMAN | K.NAVITVPAYFNDSQR.Q   | 2 | 2,5254 | 0,233 | -0,144 |
| 13 | P61923 COPZ1_HUMAN | K.AILILDNDGDR.L       | 2 | 2,5252 | 0,215 | 0,201  |
| 13 | P05787 K2C8_HUMAN  | R.TEM*ENEFVLIK.K      | 2 | 2,5251 | 0,373 | -0,267 |
| 13 | P11021 GRP78_HUMAN | K.SDIDEIVLVGGSTR.I    | 2 | 2,5229 | 0,424 | -0,084 |
| 13 | Q9Y266 NUDC_HUMAN  | K.LSDLSETR.S          | 2 | 2,5218 | 0,406 | 0,353  |
| 13 | Q06830 PRDX1_HUMAN | R.GLFIIDDK.G          | 2 | 2,5195 | 0,278 | 0      |
| 13 | Q09666 AHNK_HUMAN  | K.DIDISSPEFK.I        | 2 | 2,5157 | 0,22  | 0,106  |
| 13 | Q13813 SPTA2_HUMAN | K.DLIGVQNLLK.K        | 2 | 2,5155 | 0,255 | -0,219 |
| 13 | O60641 AP180_HUMAN | R.NTLFNLSNFLDK.S      | 2 | 2,5141 | 0,305 | -0,257 |
| 13 | P62805 H4_HUMAN    | K.TVTAM*DVVYALK.R     | 2 | 2,5099 | 0,521 | -0,092 |
| 13 | P28066 PSA5_HUMAN  | K.EELEEVIKDI.-        | 2 | 2,5066 | 0,377 | -0,401 |
| 13 | P22314 UBA1_HUMAN  | R.DEFEGFLFK.Q         | 2 | 2,5008 | 0,228 | -0,062 |
| 13 | P02545 LMNA_HUMAN  | K.LLEGEER.L           | 2 | 2,4982 | 0,289 | -0,125 |
| 13 | Q58FF7 H90B3_HUMAN | R.DNSTMGYM*M*AK.K     | 2 | 2,4928 | 0,489 | -0,286 |
| 13 | Q06210 GFPT1_HUMAN | K.GYDFESETDTETIAK.L   | 2 | 2,4916 | 0,302 | -0,286 |
| 13 | Q9Y2Z4 SYYM_HUMAN  | K.IELPELFDR.G         | 2 | 2,4905 | 0,159 | -0,216 |
| 13 | Q00610 CLH1_HUMAN  | R.VVGAM*QLYSVDR.K     | 2 | 2,4905 | 0,438 | 0,09   |
| 13 | P52272 HNRPM_HUMAN | R.M*GPAM*GPALGAGIER.M | 2 | 2,4875 | 0,286 | -0,167 |
| 13 | P39656 OST48_HUMAN | K.TADDPSSLIK.Y        | 2 | 2,4859 | 0,288 | -0,316 |
| 13 | P21333 FLNA_HUMAN  | R.AYGPGIEPTGNM*VK.K   | 2 | 2,4788 | 0,348 | -0,084 |
| 13 | P15170 ERF3A_HUMAN | K.DM*GTVVLGK.L        | 2 | 2,4743 | 0,248 | 0,13   |
| 13 | P34932 HSP74_HUMAN | R.AFSDPFVEAEK.S       | 2 | 2,4716 | 0,397 | -0,098 |
| 13 | P78527 PRKDC_HUMAN | R.AQEPESGLSEETQVK.C   | 2 | 2,4711 | 0,361 | -0,299 |
| 13 | P08670 VIME_HUMAN  | R.DNLAEDIM*R.L        | 2 | 2,4694 | 0,27  | 0,112  |
| 13 | Q9H444 CHM4B_HUMAN | R.EALENANTNTEVLK.N    | 2 | 2,4688 | 0,249 | 0,395  |

|    |                      |                      |   |        |       |        |
|----|----------------------|----------------------|---|--------|-------|--------|
| 13 | Q14192 FHL2_HUMAN    | R.DDILCPDCGKDI.-     | 2 | 2,4658 | 0,356 | -0,086 |
| 13 | P30041 PRDX6_HUMAN   | R.DFTPVCTTELGR.A     | 2 | 2,4643 | 0,414 | 0,087  |
| 13 | O14979 HNRDL_HUMAN   | R.FGEVVDCTIK.T       | 2 | 2,4613 | 0,332 | 0,209  |
| 13 | Q16181 SEPT7_HUMAN   | K.IYEFPETDDEEENK.L   | 2 | 2,461  | 0,363 | 0,208  |
| 13 | Q10567 AP1B1_HUMAN   | R.CVSTLLDLIQT.K.V    | 2 | 2,45   | 0,291 | -0,351 |
| 13 | Q9HAV4 XPO5_HUMAN    | R.DIQQTLTQNM*ER.I    | 2 | 2,4441 | 0,276 | -0,572 |
| 13 | P06733 ENOA_HUMAN    | R.GNPTVEVDLFTSK.G    | 2 | 2,4352 | 0,367 | 0      |
| 13 | P20700 LMNB1_HUMAN   | K.DAALATALGDK.K      | 2 | 2,4294 | 0,369 | 0      |
| 13 | P34932 HSP74_HUMAN   | R.EM*LNLYIENEGK.M    | 2 | 2,4281 | 0,368 | -0,249 |
| 13 | ##Q13114 TRAF3_HUMAN | K.EVSENQLLSVK.K      | 2 | 2,4264 | 0,132 | -0,098 |
| 13 | Q96QU8 XPO6_HUMAN    | R.DLSSLLQAVGR.L      | 2 | 2,4258 | 0,333 | -0,316 |
| 13 | P27348 1433T_HUMAN   | R.SICTTVLELLDK.Y     | 2 | 2,4228 | 0,249 | -0,175 |
| 13 | P18583 SON_HUMAN     | K.DTEEPLPVK.E        | 2 | 2,4226 | 0,22  | 0      |
| 13 | Q13619 CUL4A_HUMAN   | K.DVFEAFYK.K         | 2 | 2,4224 | 0,29  | -0,12  |
| 13 | P30876 RPB2_HUMAN    | R.DGAPSPM*M*PNEAR.L  | 2 | 2,4217 | 0,289 | -0,261 |
| 13 | Q13523 PRP4B_HUMAN   | K.DLLADLIGCQR.L      | 2 | 2,4182 | 0,381 | -0,958 |
| 13 | P11021 GRP78_HUMAN   | R.ITPSYVAFTPEGER.L   | 2 | 2,4163 | 0,352 | 0,311  |
| 13 | Q6P1J9 CDC73_HUMAN   | K.TDLDDDITALK.Q      | 2 | 2,4091 | 0,316 | -0,3   |
| 13 | Q15257 PTPA_HUMAN    | K.LVALLNTLDR.W       | 2 | 2,4005 | 0,189 | -0,108 |
| 13 | P06748 NPM_HUMAN     | K.GPSSVEDIK.A        | 2 | 2,3994 | 0,311 | 0,196  |
| 13 | Q92783 STAM1_HUMAN   | R.DFASEVSNVLNK.G     | 2 | 2,3988 | 0,322 | -0,184 |
| 13 | O43765 SGTA_HUMAN    | K.ALELDPDNETYK.S     | 2 | 2,3957 | 0,096 | 0      |
| 13 | Q15758 AAAT_HUMAN    | K.EVLDSFLDLAR.N      | 2 | 2,394  | 0,368 | -0,573 |
| 13 | Q71U36 TBA1A_HUMAN   | K.EIIDLVLDR.I        | 2 | 2,3914 | 0,383 | -0,112 |
| 13 | P22234 PUR6_HUMAN    | K.EVYELLDSPGK.V      | 2 | 2,39   | 0,462 | -0,098 |
| 13 | O75165 DNJCD_HUMAN   | R.ENGLEVLQEAFSR.C    | 2 | 2,3888 | 0,316 | -0,654 |
| 13 | P11177 ODPB_HUMAN    | K.ILEDNSIPQVK.D      | 2 | 2,3881 | 0,255 | 0,291  |
| 13 | O75821 EIF3G_HUMAN   | K.EDLNCQEEEDPM*NK.L  | 2 | 2,3848 | 0,247 | -0,345 |
| 13 | Q9H488 OFUT1_HUMAN   | R.VISLEDFM*EK.L      | 2 | 2,3841 | 0,195 | 0,199  |
| 13 | Q7KZF4 SND1_HUMAN    | R.EADGSETPEPFAAEAK.F | 2 | 2,3822 | 0,324 | 0,592  |
| 13 | Q12929 EPS8_HUMAN    | K.DDILEILDDR.K       | 2 | 2,3797 | 0,324 | 0,401  |
| 13 | Q9UPN3 MACF1_HUMAN   | K.FLDVLELAEK.F       | 2 | 2,3777 | 0,162 | -0,207 |
| 13 | P80723 BASP_HUMAN    | K.ETPAATEAPSSTPK.A   | 2 | 2,3732 | 0,408 | -0,704 |

|    |                     |                       |   |        |       |        |
|----|---------------------|-----------------------|---|--------|-------|--------|
| 13 | Q9UQE7 SMC3_HUMAN   | R.DQTIVDPFSSK.H       | 2 | 2,3723 | 0,352 | 0,197  |
| 13 | O43148 MCES_HUMAN   | K.SVLIGEFLEK.V        | 2 | 2,3604 | 0,314 | -0,215 |
| 13 | Q09161 NCBP1_HUMAN  | K.DGVLEEQIER.L        | 2 | 2,3584 | 0,117 | 0      |
| 13 | P17661 DESM_HUMAN   | K.LLEGEESR.I          | 2 | 2,3574 | 0,339 | 0,131  |
| 13 | P42704 LPPRC_HUMAN  | K.NVQGIIEILK.G        | 2 | 2,3565 | 0,314 | -0,649 |
| 13 | Q9UHA4 MK111_HUMAN  | K.ELAPLFEELR.Q        | 2 | 2,3544 | 0,386 | -0,301 |
| 13 | Q09161 NCBP1_HUMAN  | K.ATNDEIFSILK.D       | 2 | 2,3542 | 0,348 | -0,098 |
| 13 | P62736 ACTA_HUMAN   | R.DLTDYLMK.I          | 2 | 2,3525 | 0,361 | 0,061  |
| 13 | Q9BVC6 TM109_HUMAN  | R.EAPVDVLTQIGR.S      | 2 | 2,35   | 0,299 | -0,188 |
| 13 | P46783 RS10_HUMAN   | R.IAIYELLFK.E         | 2 | 2,3447 | 0,388 | -0,22  |
| 13 | P38117 ETFB_HUMAN   | K.LSVISVEDPPQR.T      | 2 | 2,3444 | 0,279 | 0,091  |
| 13 | Q9H3U1 UN45A_HUMAN  | R.DNALTLLIK.A         | 2 | 2,3444 | 0,141 | -0,609 |
| 13 | Q13190 STX5_HUMAN   | K.DVAIDM*M*DSR.T      | 2 | 2,3411 | 0,28  | 0,412  |
| 13 | O75347 TBCA_HUMAN   | R.LVLDSVKLEA.-        | 2 | 2,3403 | 0,412 | -0,112 |
| 13 | O95433 AHSA1_HUMAN  | K.ETFLTSPEELYR.V      | 2 | 2,3396 | 0,391 | -0,082 |
| 13 | P49915 GUAA_HUMAN   | R.ELGLPEELVSR.H       | 2 | 2,3383 | 0,236 | -0,098 |
| 13 | Q9BRK5 CAB45_HUMAN  | K.DLGGFDEDAEPR.R      | 2 | 2,3346 | 0,28  | -0,092 |
| 13 | Q92688 AN32B_HUMAN  | K.DISTLEPLK.K         | 2 | 2,3318 | 0,322 | 0,12   |
| 13 | Q13242 SFRS9_HUMAN  | K.DLEDLFYK.Y          | 2 | 2,3277 | 0,253 | 0,117  |
| 13 | Q9NR31 SAR1A_HUMAN  | K.LVFLGLDNAGK.T       | 2 | 2,3267 | 0,142 | -0,106 |
| 13 | Q13564 ULA1_HUMAN   | K.NENGAPEDeenFEEAIK.N | 2 | 2,3229 | 0,408 | -0,189 |
| 13 | P14618 KPYM_HUMAN   | R.LDIDSPITAR.N        | 2 | 2,3213 | 0,161 | 0,204  |
| 13 | P48643 TCPE_HUMAN   | R.DVDFELIK.V          | 2 | 2,3187 | 0,228 | 0      |
| 13 | Q8IX01 SFR14_HUMAN  | R.VDNEFLNM*LLDK.G     | 2 | 2,318  | 0,21  | -0,333 |
| 13 | Q53G79 Q53G79_HUMAN | K.ALEDVFDALGK.S       | 2 | 2,3162 | 0,353 | -0,56  |
| 13 | Q16513 PKN2_HUMAN   | R.DEVDSLm*CEK.R       | 2 | 2,3158 | 0,164 | -0,393 |
| 13 | O00566 MPP10_HUMAN  | K.LSLAEIYEQEIYK.L     | 2 | 2,3153 | 0,13  | -0,687 |
| 13 | P23284 PPIB_HUMAN   | K.DFM*IQGGDFTR.G      | 2 | 2,3148 | 0,253 | -0,187 |
| 13 | Q15286 RAB35_HUMAN  | K.LLIIGDSGVGK.S       | 2 | 2,3096 | 0,387 | -0,114 |
| 13 | P07814 SYEP_HUMAN   | K.FVELPGAEM*GK.V      | 2 | 2,3056 | 0,134 | -0,307 |
| 13 | Q8NHM5 JHD1B_HUMAN  | R.DSLTEINLSDCNK.V     | 2 | 2,3033 | 0,372 | -0,081 |
| 13 | B2R6A5 B2R6A5_HUMAN | K.DTDGGPKKEESP.V.-    | 2 | 2,2974 | 0,367 | 0,09   |
| 13 | P43246 MSH2_HUMAN   | K.DSLIIDEELGR.G       | 2 | 2,2968 | 0,13  | -0,392 |

|    |                    |                     |   |        |       |        |
|----|--------------------|---------------------|---|--------|-------|--------|
| 13 | P25789 PSA4_HUMAN  | K.LLDEVFFSEK.I      | 2 | 2,2927 | 0,226 | -0,099 |
| 13 | Q13618 CUL3_HUMAN  | K.GLTEQEVETILDK.A   | 2 | 2,2875 | 0,289 | 0      |
| 13 | P21980 TGM2_HUMAN  | R.DLYLENPEIK.I      | 2 | 2,2868 | 0,143 | -0,791 |
| 13 | Q00535 CDK5_HUMAN  | R.DLLQNLLK.C        | 2 | 2,2839 | 0,105 | -0,255 |
| 13 | P08670 VIME_HUMAN  | R.QDVDNASLAR.L      | 2 | 2,2834 | 0,345 | -0,224 |
| 13 | P11940 PABP1_HUMAN | R.ALDTM*NFDVIK.G    | 2 | 2,2762 | 0,453 | 0,19   |
| 13 | Q96KP4 CNDP2_HUMAN | K.QLGGSVELVDIGK.Q   | 2 | 2,2734 | 0,328 | 0,093  |
| 13 | P06737 PYGL_HUMAN  | K.EYYEALPELK.L      | 2 | 2,2723 | 0,313 | -0,194 |
| 13 | P06703 S10A6_HUMAN | K.LQDAEIAR.L        | 2 | 2,2703 | 0,203 | -0,067 |
| 13 | P06753 TPM3_HUMAN  | K.LVIIEGDLER.T      | 2 | 2,2661 | 0,301 | 0,211  |
| 13 | P48506 GSH1_HUMAN  | R.DPLTLFEEK.I       | 2 | 2,2661 | 0,268 | -0,335 |
| 13 | Q12906 ILF3_HUMAN  | K.VLQDM*GLPTGAEGR.D | 2 | 2,2649 | 0,129 | 0,084  |
| 13 | Q9UHX1 PUF60_HUMAN | K.QGEEEDAIEIVK.I    | 2 | 2,2615 | 0,403 | -0,09  |
| 13 | Q06210 GFPT1_HUMAN | K.EVLSM*DDEIQK.L    | 2 | 2,2602 | 0,312 | -0,092 |
| 13 | P13639 EF2_HUMAN   | K.EGIPALDNFLDK.L    | 2 | 2,2533 | 0,34  | -0,275 |
| 13 | Q9H4A4 AMPB_HUMAN  | R.VDIIPGFDFDR.W     | 2 | 2,25   | 0,263 | -0,56  |
| 13 | P62273 RS29_HUMAN  | K.DIGFIKLD.-        | 2 | 2,2481 | 0,221 | -1,325 |
| 13 | Q9BUQ8 DDX23_HUMAN | K.AQPLSLEELLAK.K    | 2 | 2,2467 | 0,245 | -0,744 |
| 13 | P16401 H15_HUMAN   | K.ATGPPVSELITK.A    | 2 | 2,2447 | 0,453 | -0,101 |
| 13 | O00186 STXB3_HUMAN | K.DIM*EDAIDNR.L     | 2 | 2,2443 | 0,348 | 0,303  |
| 13 | P46060 RAGP1_HUMAN | K.EIEDFDSLEALR.L    | 2 | 2,2389 | 0,356 | 0,255  |
| 13 | P19525 E2AK2_HUMAN | R.DGIISDIFDK.K      | 2 | 2,2358 | 0,222 | -0,217 |
| 13 | P28331 NDUS1_HUMAN | K.DFYM*TDSISR.A     | 2 | 2,2307 | 0,214 | -0,098 |
| 13 | P00338 LDHA_HUMAN  | K.DQLIYNLLK.E       | 2 | 2,2287 | 0,126 | -0,327 |
| 13 | P05198 IF2A_HUMAN  | K.VVTDTDETELAR.Q    | 2 | 2,2284 | 0,376 | -0,271 |
| 13 | O60942 MCE1_HUMAN  | K.EM*LFEFIDR.C      | 2 | 2,2235 | 0,338 | 0,1    |
| 13 | P07237 PDIA1_HUMAN | R.ILEFFGLK.K        | 2 | 2,2154 | 0,266 | -0,252 |
| 13 | Q14008 CKAP5_HUMAN | K.EGLDEVAGIINDAK.F  | 2 | 2,2115 | 0,366 | 0,084  |
| 13 | Q15843 NEDD8_HUMAN | K.EIEIDIEPTDK.V     | 2 | 2,2102 | 0,149 | -0,187 |
| 13 | Q9Y490 TLN1_HUMAN  | R.AAM*EPIVISAQ.T    | 2 | 2,2067 | 0,278 | 0,106  |
| 13 | Q9Y2Q3 GSTK1_HUMAN | K.DFLSVM*LEK.G      | 2 | 2,2066 | 0,261 | -0,111 |
| 13 | P14735 IDE_HUMAN   | R.ESLDDLTNLVVK.L    | 2 | 2,2043 | 0,374 | -0,544 |
| 13 | Q9NQ50 RM40_HUMAN  | R.DPNLFPFEK.E       | 2 | 2,2009 | 0,297 | -0,11  |



|    |                     |                        |   |        |       |        |
|----|---------------------|------------------------|---|--------|-------|--------|
| 13 | Q07955 SFRS1_HUMAN  | R.DGTGVVEFVR.K         | 2 | 2,2005 | 0,261 | 0,113  |
| 13 | O00159 MYO1C_HUMAN  | K.TLFATEDALEVR.R       | 2 | 2,1995 | 0,115 | -0,179 |
| 13 | P25205 MCM3_HUMAN   | K.DAQPSFSAEDIAK.I      | 2 | 2,1991 | 0,32  | -0,177 |
| 13 | O15513 O15513_HUMAN | K.SIDDLEEK.V           | 2 | 2,1989 | 0,283 | -0,064 |
| 13 | O75746 CMC1_HUMAN   | R.DLGIFGLYK.G          | 2 | 2,1973 | 0,258 | -0,119 |
| 13 | Q9UJS0 CMC2_HUMAN   | R.DLGFFGIYK.G          | 2 | 2,1958 | 0,34  | -0,345 |
| 13 | Q92973 TNPO1_HUMAN  | K.YSDIDIILLK.G         | 2 | 2,1944 | 0,256 | 0,205  |
| 13 | P18077 RL35A_HUMAN  | R.DETEFYLGK.R          | 2 | 2,1937 | 0,443 | -0,221 |
| 13 | P16949 STMN1_HUMAN  | K.DLSLEEIQK.K          | 2 | 2,19   | 0,234 | -0,454 |
| 13 | P14625 ENPL_HUMAN   | K.EEASDYLELDTIK.N      | 2 | 2,1896 | 0,34  | 0      |
| 13 | O15144 ARPC2_HUMAN  | R.IIETLALK.F           | 2 | 2,1736 | 0,178 | 0      |
| 13 | P23396 RS3_HUMAN    | K.GGKPEPPAM*PQPVPPTA.- | 2 | 2,1726 | 0,251 | -0,614 |
| 13 | P42285 SK2L2_HUMAN  | K.DCEAYALQM*TK.L       | 2 | 2,1723 | 0,33  | -0,181 |
| 13 | Q6P2Q9 PRP8_HUMAN   | K.DLILADYGK.K          | 2 | 2,1681 | 0,231 | 0,061  |
| 13 | Q9BYJ9 YTHD1_HUMAN  | R.DTQEVPLEK.A          | 2 | 2,1676 | 0,299 | 0      |
| 13 | P04792 HSPB1_HUMAN  | K.DGVVEITGK.H          | 2 | 2,1663 | 0,265 | -0,066 |
| 13 | Q96HE7 ERO1A_HUMAN  | R.LGAVDESLSEETQK.A     | 2 | 2,1646 | 0,331 | -0,162 |
| 13 | P31939 PUR9_HUMAN   | R.SGVAYIAAPSGSAADK.V   | 2 | 2,1631 | 0,245 | 0,083  |
| 13 | P46379 BAT3_HUMAN   | R.ENASPAPGTTAEEAM*SR.G | 2 | 2,1609 | 0,228 | -0,281 |
| 13 | P52815 RM12_HUMAN   | K.LVESLPQEIK.A         | 2 | 2,1603 | 0,177 | 0,317  |
| 13 | O43592 XPOT_HUMAN   | K.QM*NPFIEDILNR.I      | 2 | 2,1592 | 0,168 | -0,243 |
| 13 | P62993 GRB2_HUMAN   | R.ESESAPGDFSLSVK.F     | 2 | 2,1591 | 0,314 | 0,588  |
| 13 | P25786 PSA1_HUMAN   | R.ETLPAEQDLTTK.N       | 2 | 2,1582 | 0,379 | -0,091 |
| 13 | P67936 TPM4_HUMAN   | K.TIDDLEEK.L           | 2 | 2,1581 | 0,195 | 0      |
| 13 | P13639 EF2_HUMAN    | K.GEGQLGPAER.A         | 2 | 2,1563 | 0,205 | -0,241 |
| 13 | O75962 TRIO_HUMAN   | R.DFFLGELEK.C          | 2 | 2,154  | 0,164 | -0,111 |
| 13 | O14818 PSA7_HUMAN   | R.DIVVLGVEK.K          | 2 | 2,142  | 0,24  | 0,063  |
| 13 | P20340 RAB6A_HUMAN  | R.VAAALPGM*ESTQDR.S    | 2 | 2,1363 | 0,209 | 0      |
| 13 | P26640 SYVC_HUMAN   | K.DVSGPM*PDSYSR.Y      | 2 | 2,1355 | 0,304 | -0,086 |
| 13 | P23919 KTHY_HUMAN   | R.GALIVLEGVDR.A        | 2 | 2,1326 | 0,149 | -0,107 |
| 13 | P09960 LKHA4_HUMAN  | R.DGETPDPEPDR.K        | 2 | 2,1271 | 0,327 | -0,186 |
| 13 | Q8IXB1 DJC10_HUMAN  | K.NSILFLNSLDAK.E       | 2 | 2,1265 | 0,21  | -0,457 |
| 13 | P54727 RD23B_HUMAN  | K.IDIDPEETVK.A         | 2 | 2,1237 | 0,194 | 0      |

|    |                    |                            |            |   |        |       |        |
|----|--------------------|----------------------------|------------|---|--------|-------|--------|
| 13 | P30048 PRDX3_HUMAN | K.DLSLDDFK.G               |            | 2 | 2,1183 | 0,396 | 0,064  |
| 13 | Q13043 STK4_HUMAN  | R.DLINEAM*DVK.L            |            | 2 | 2,1176 | 0,236 | 0      |
| 13 | Q15631 TSN_HUMAN   | R.EAVTEILGIEPDR.E          |            | 2 | 2,1168 | 0,247 | 0      |
| 13 | P78316 NOP14_HUMAN | K.ELIEELIAK.S              |            | 2 | 2,1152 | 0,286 | 0      |
| 13 | O75390 CISY_HUMAN  | K.DILADLIPK.E              |            | 2 | 2,1027 | 0,083 | -0,244 |
| 13 | Q6S8J3 A26CA_HUMAN | K.AGFAGDDAPR.A             |            | 2 | 2,0998 | 0,212 | -0,062 |
| 13 | P48643 TCPE_HUMAN  | K.DTEPLIQTAK.T             |            | 2 | 2,0986 | 0,138 | 0      |
| 13 | P62736 ACTA_HUMAN  | R.DLTDYLM*K.I              |            | 2 | 2,096  | 0,383 | -1,022 |
| 13 | P53611 PGTB2_HUMAN | K.SDAPDTLLLEK.H            |            | 2 | 2,0924 | 0,188 | 0      |
| 13 | Q96DC8 ECHD3_HUMAN | R.DGQEGITAFQK.R            |            | 2 | 2,0872 | 0,296 | -0,093 |
| 13 | P11021 GRP78_HUMAN | K.NQLTSNPENTVFDK.R         |            | 2 | 2,0836 | 0,239 | -0,073 |
| 13 | P11216 PYGB_HUMAN  | R.VLYPNDNFFEGK.E           |            | 2 | 2,0833 | 0,241 | -0,169 |
| 13 | P28838 AMPL_HUMAN  | R.QLM*ETPANEM*TPTR.F       |            | 2 | 2,0787 | 0,131 | -0,443 |
| 13 | Q9Y3T9 NOC2L_HUMAN | K.DTFLGPVLK.Q              |            | 2 | 2,071  | 0,215 | -0,185 |
| 13 | Q8NE71 ABCF1_HUMAN | K.STLLLLLTGK.L             |            | 2 | 2,0703 | 0,432 | -0,115 |
| 13 | P11388 TOP2A_HUMAN | K.IFDEILVNAADNK.Q          |            | 2 | 2,0676 | 0,196 | -0,25  |
| 13 | Q14258 TRI25_HUMAN | R.DEFEFLEK.A               |            | 2 | 2,0589 | 0,316 | -0,115 |
| 13 | Q9H501 ESF1_HUMAN  | K.DGTSPEEEIEIER.Q          |            | 2 | 2,0516 | 0,105 | -1,947 |
| 13 | Q9H0A0 NAT10_HUMAN | K.DVVM*EPTM*K.T            |            | 2 | 2,045  | 0,24  | -0,338 |
| 13 | Q6PKG0 LARP1_HUMAN | R.DFVEAPPPK.V              |            | 2 | 2,0387 | 0,323 | -0,061 |
| 13 | P13645 K1C10_HUMAN | R.LAADDFR.L                |            | 2 | 2,033  | 0,336 | 0,151  |
| 13 | P61088 UBE2N_HUMAN | R.LLAEPVPGIK.A             |            | 2 | 2,0325 | 0,211 | -0,118 |
| 13 | Q14204 DYHC1_HUMAN | R.VQVALEELQDLK.G           |            | 2 | 2,0294 | 0,265 | -0,264 |
| 13 | P11940 PABP1_HUMAN | K.NLDDGIDDER.L             |            | 2 | 2,015  | 0,317 | -0,105 |
| 13 | Q9GZZ1 NAT13_HUMAN | K.DVLEVGELAK.L             |            | 2 | 2,0128 | 0,386 | 0,114  |
| 13 | Q9BUL5 PHF23_HUMAN | K.DSLFDLDGPK.V             |            | 2 | 2,011  | 0,277 | -0,11  |
| 13 | Q13523 PRP4B_HUMAN | K.LCDFGSASHVADNDITPYLVSR.F |            | 3 | 4,2471 | 0,327 | -0,375 |
| 14 | P46939 UTRO_HUMAN  | K.YGEHEAS#PDNGQNEFSDIK.S   | S10:       | 3 | 3,6989 | 0,323 | -0,157 |
| 14 | Q9H3Z4 DNJC5_HUMAN | R.SLS#TSGESLYHVLGLDK.N     | S10:       | 2 | 2,3753 | 0,432 | -0,518 |
| 14 | Q86YP4 P66A_HUMAN  | R.RPPS#PDVIVLSDNEQPSSPR.V  | S100:      | 3 | 4,2182 | 0,344 | -0,403 |
| 14 | Q96SB3 NEB2_HUMAN  | R.ASS#LNENVDSALLK.L        | S100:      | 3 | 2,6907 | 0,408 | 0,218  |
| 14 | P05386 RLA1_HUMAN  | K.KES#EES#DDDM*GFGLFD.-    | S101:S104: | 2 | 3,8755 | 0,589 | -0,459 |
| 14 | O95785 WIZ_HUMAN   | K.SPQLSLSPRPAS#PK.A        | S1017:     | 2 | 3,7781 | 0,366 | 0,158  |

|    |                     |                                   |              |   |        |       |        |
|----|---------------------|-----------------------------------|--------------|---|--------|-------|--------|
| 14 | O95785 WIZ_HUMAN    | K.SPQLSLSPRPAS#PK.A               | S1017:       | 3 | 2,9317 | 0,298 | 0      |
| 14 | Q8NDI1 EHBP1_HUMAN  | K.TQLQS#FSQYIENRPEM*K.R           | S1019:       | 3 | 3,4359 | 0,303 | -0,667 |
| 14 | O75351 VPS4B_HUMAN  | K.EGQPSPADEKGNDS#DGEGESDDPEK.K    | S102:        | 3 | 4,2571 | 0,39  | -0,206 |
| 14 | P17096 HMGA1_HUMAN  | K.KLEKEEEEGLSQES#S#EEEEQ.-        | S102:S103:   | 3 | 4,5506 | 0,232 | -0,076 |
| 14 | A7MCZ2 A7MCZ2_HUMAN | R.S#TSVASHILNGSSHFYS.-            | S1033:       | 2 | 3,3541 | 0,339 | 0      |
| 14 | Q6R327 RICTR_HUMAN  | R.HNS#ESESVSSM*FILEDDR.F          | S1035:       | 3 | 3,4636 | 0,366 | 0      |
| 14 | Q5THJ4 VP13D_HUMAN  | K.NLSFDIPTGSLRDS#R.A              | S1038:       | 2 | 2,3969 | 0,366 | -1,11  |
| 14 | O60293 CC131_HUMAN  | R.S#FLESNYFTKPNLK.H               | S1046:       | 2 | 2,5418 | 0,274 | -0,828 |
| 14 | P24534 EF1B_HUMAN   | K.DDDDIDLFGS#DDEESEEAKR.L         | S106:        | 3 | 3,1555 | 0,347 | -0,365 |
| 14 | Q9UBW7 ZMYM2_HUMAN  | K.AVSGYQSHDDS#SDNSECSFPFK.Y       | S1060:       | 3 | 3,8756 | 0,381 | -0,288 |
| 14 | A0JLU0 A0JLU0_HUMAN | K.KQEGPATQVDSAVGTLPATSPQSTSVQAK.G | S1073:       | 3 | 4,3139 | 0,27  | 0,556  |
| 14 | Q9H6Z4 RANB3_HUMAN  | R.SAGGSSPEGGEDS#DREDGNYCPPVK.R    | S108:        | 3 | 3,0309 | 0,126 | -0,415 |
| 14 | P55196 AFAD_HUMAN   | K.QGAIYHGLATLLNQPS#PM*M*QR.I      | S1090:       | 3 | 4,4368 | 0,195 | -0,45  |
| 14 | Q12888 TP53B_HUMAN  | R.QSQQPM*KPIS#PVKDPVS#PASQK.M     | S1094:S1101: | 3 | 2,8298 | 0,118 | 0,43   |
| 14 | P42677 RS27_HUMAN   | K.DLLHPS#PEEEK.R                  | S11:         | 2 | 2,9503 | 0,308 | 0,178  |
| 14 | P48634 BAT2_HUMAN   | R.GS#ETGSETHES#DLAPSDKEAPTPK.E    | S1106:S1115: | 3 | 3,1757 | 0,233 | -0,417 |
| 14 | Q14997 PSME4_HUMAN  | K.NPSINQILLS#PEKIK.E              | S1121:       | 3 | 4,4785 | 0,481 | 0      |
| 14 | Q14997 PSME4_HUMAN  | K.NPSINQILLS#PEKIK.E              | S1121:       | 2 | 2,89   | 0,284 | -0,344 |
| 14 | O15417 TNC18_HUMAN  | R.LALS#PEDKPIRLS#PSK.I            | S1127:S1136: | 2 | 3,2478 | 0,376 | -0,192 |
| 14 | O15417 TNC18_HUMAN  | R.LALS#PEDKPIRLS#PSK.I            | S1127:S1136: | 3 | 2,9686 | 0,374 | 0      |
| 14 | Q8WUF5 IASPP_HUMAN  | R.SESAPTLHPYSPLS#PK.G             | S113:        | 2 | 3,7342 | 0,389 | 0      |
| 14 | Q6ZV89 SH2D5_HUMAN  | R.DQLSQNVHALVS#FR.R               | S113:        | 2 | 3,5155 | 0,483 | -0,144 |
| 14 | Q9NTI5 PDS5B_HUMAN  | K.TTNVLGAVNKPSS#AGK.Q             | S1140:       | 2 | 3,9854 | 0,313 | 0,281  |
| 14 | Q8TAP9 TTDN1_HUMAN  | R.SPAGSQQQFGYSPGQQQTHPQGS#PR.T    | S115:        | 3 | 5,0575 | 0,447 | 0,535  |
| 14 | Q6T4R5 NHS_HUMAN    | K.QKEENNTDLPYLEESTLTTAALS#PSK.I   | S1155:       | 3 | 2,793  | 0,253 | -0,804 |
| 14 | Q15121 PEA15_HUMAN  | K.DIIRQPS#EEEEIK.L                | S116:        | 2 | 3,0474 | 0,321 | -0,592 |
| 14 | P28370 SMCA1_HUMAN  | K.QTELFHFQPSAQKS#PTS#PLNM*K.L     | S116:S119:   | 3 | 2,971  | 0,193 | -0,509 |
| 14 | Q92621 NU205_HUMAN  | R.S#VSGFLHFDATK.V                 | S1165:       | 2 | 2,5234 | 0,429 | 0,082  |
| 14 | P00533 EGFR_HUMAN   | K.GSHQIS#LDNPDYQQDFFPK.E          | S1166:       | 3 | 4,471  | 0,448 | 0,237  |
| 14 | O43314 VIP2_HUMAN   | K.TAEISSTALRSS#PIM*R.K            | S1172:       | 2 | 2,5482 | 0,464 | 0,336  |
| 14 | Q7Z6E9 RBBP6_HUMAN  | K.LEVTEIVKPS#PK.R                 | S1179:       | 2 | 3,7599 | 0,276 | -0,172 |
| 14 | Q9UQ35 SRRM2_HUMAN  | K.M*ALPPQEDATAS#PPRQK.D           | S1179:       | 2 | 2,4662 | 0,373 | -0,379 |
| 14 | O14497 ARI1A_HUMAN  | R.SNS#VGIQDAFNDGSDSTFQKR.N        | S1184:       | 3 | 2,7738 | 0,307 | -0,311 |

|    |                    |                                    |              |   |        |       |        |
|----|--------------------|------------------------------------|--------------|---|--------|-------|--------|
| 14 | P20020 AT2B1_HUMAN | R.IEDS#EPHIPLIDDT#DAEDDAPTKR.N     | S1193:T1203: | 3 | 7,2741 | 0,492 | -0,449 |
| 14 | Q15776 ZN192_HUMAN | R.KPSAPS#PPDQTPEEDLVIVK.V          | S12:         | 3 | 3,4299 | 0,276 | 0,329  |
| 14 | O95218 ZRAB2_HUMAN | R.ENVEYIEREES#DGEYDEFGR.K          | S120:        | 3 | 5,2751 | 0,48  | 0,216  |
| 14 | O96017 CHK2_HUMAN  | R.DKS#CEYCFDEPLLK.R                | S120:        | 2 | 3,1731 | 0,193 | -0,194 |
| 14 | P51610 HCFC1_HUMAN | R.EPGRS#PAFVQLAPLSSK.V             | S1205:       | 3 | 2,6198 | 0,126 | 0      |
| 14 | Q9H9C1 CN133_HUMAN | R.TRPGS#FQSLSDALSOTPAK.S           | S121:        | 3 | 4,6179 | 0,436 | 0      |
| 14 | Q9Y2D5 AKAP2_HUMAN | R.QAPPHIELSNSS#PDPM*AEAER.T        | S121:        | 3 | 3,6874 | 0,281 | 0,54   |
| 14 | Q13017 RHG05_HUMAN | K.GGIDNPAITS#DQELDDKK.M            | S1218:       | 2 | 2,1858 | 0,444 | 0,55   |
| 14 | O95155 UBE4B_HUMAN | K.SM*SQVDVDS#GIENM*EVDENDRR.E      | S124:        | 3 | 2,9674 | 0,212 | 0,139  |
| 14 | Q9Y657 SPIN1_HUMAN | R.IS#DAHLADTM*IGK.A                | S124:        | 3 | 2,7201 | 0,264 | 0,125  |
| 14 | Q9C004 SPY4_HUMAN  | R.LLDHM*APPPVADQAS#PR.A            | S125:        | 2 | 4,9393 | 0,301 | -0,128 |
| 14 | Q9C004 SPY4_HUMAN  | R.LLDHM*APPPVADQAS#PR.A            | S125:        | 3 | 4,7137 | 0,358 | 0,191  |
| 14 | Q93074 MED12_HUMAN | K.GSGFTVTGGTEELPEEEGGGS#GGRR.Q     | S1260:       | 3 | 3,7202 | 0,365 | 0,357  |
| 14 | Q9UPT8 ZC3H4_HUMAN | K.TGSGS#PFAGNS#PAREGEQDAASLKDVFK.G | S1269:S1275: | 3 | 3,7495 | 0,368 | -0,552 |
| 14 | Q15906 VPS72_HUMAN | K.ALLPLELQDDGS#DSRK.S              | S127:        | 2 | 3,1062 | 0,439 | -0,531 |
| 14 | Q9P2E9 RRBP1_HUMAN | K.SHVEDGDIAGAPASS#PEAPPAEQDPVQLK.T | S1277:       | 3 | 3,3498 | 0,358 | 0,489  |
| 14 | Q6R327 RICTR_HUMAN | K.SNS#VSLVPPGSSHTLPR.R             | S1284:       | 3 | 3,0906 | 0,269 | 0      |
| 14 | Q9NXE4 NSMA3_HUMAN | K.ASIQECILPDS#PLYHMK.V             | S130:        | 3 | 3,0876 | 0,198 | -0,443 |
| 14 | Q6R327 RICTR_HUMAN | R.AQS#LKAPSIATIK.S                 | S1302:       | 3 | 3,9262 | 0,356 | 0,195  |
| 14 | Q6R327 RICTR_HUMAN | R.AQS#LKAPSIATIK.S                 | S1302:       | 2 | 3,2216 | 0,394 | 0,347  |
| 14 | O15357 SHIP2_HUMAN | R.DAS#DGEDEKPPLPPR.S               | S132:        | 3 | 3,7083 | 0,432 | 0,107  |
| 14 | O15357 SHIP2_HUMAN | R.DAS#DGEDEKPPLPPR.S               | S132:        | 2 | 2,7962 | 0,293 | 0,43   |
| 14 | P51858 HDGF_HUMAN  | K.GNAEGS#SDEEGKLVIDEPAK.E          | S132:        | 2 | 2,709  | 0,376 | 0,689  |
| 14 | P51858 HDGF_HUMAN  | K.GNAEGSS#DEEGKLVIDEPAK.E          | S133:        | 3 | 4,4759 | 0,448 | 0,344  |
| 14 | Q01105 SET_HUMAN   | R.VEVTEFEDIKS#GYR.I                | S133:        | 2 | 3,8389 | 0,55  | 0,279  |
| 14 | P29692 EF1D_HUMAN  | R.ATAPQTQHVS#PM*R.Q                | S133:        | 2 | 2,5775 | 0,233 | -0,562 |
| 14 | P42695 CNDD3_HUMAN | K.ARPM*S#LSTIAILNSVK.K             | S1348:       | 3 | 3,6008 | 0,277 | -0,204 |
| 14 | Q9BXS6 NUSAP_HUMAN | K.VPS#PPDEHQEAENAVSSGNR.D          | S135:        | 3 | 3,4334 | 0,315 | -0,333 |
| 14 | P11388 TOP2A_HUMAN | K.TDDEDFVPSDAS#PPKTK.T             | S1354:       | 2 | 3,6892 | 0,446 | 0,316  |
| 14 | Q14498 RBM39_HUMAN | K.S#PVREPIDNLTPEER.D               | S136:        | 3 | 2,8608 | 0,14  | 0,2    |
| 14 | Q9HAZ1 CLK4_HUMAN  | R.S#RS#IEDDEEGHLICQSGDVL.R.A       | S136:S138:   | 3 | 2,7032 | 0,482 | -0,284 |
| 14 | Q9P1Y6 K1542_HUMAN | K.AEAPSS#PDVAPAGKEDSPASGR.V        | S1360:       | 3 | 2,7597 | 0,291 | -0,404 |
| 14 | O15320 CTGE5_HUMAN | K.LNRS#NSELEDEILCLEK.E             | S137:        | 3 | 5,919  | 0,444 | -0,342 |

|    |                    |                                |            |   |        |       |        |
|----|--------------------|--------------------------------|------------|---|--------|-------|--------|
| 14 | Q86W56 PARG_HUMAN  | K.LENVSQSLDKS#PTEK.S           | S137:      | 2 | 4,7092 | 0,383 | -0,523 |
| 14 | Q96GY3 LIN37_HUMAN | R.ERECSPS#SPLPLPEDEEGSEVTNSK.S | S137:      | 3 | 3,5735 | 0,289 | 0,682  |
| 14 | Q86W56 PARG_HUMAN  | K.LENVSQSLDKS#PTEK.S           | S137:      | 3 | 3,5304 | 0,297 | 0,294  |
| 14 | O60841 IF2P_HUMAN  | K.VEM*YSGS#DDDDDFNKLPK.K       | S137:      | 3 | 3,2806 | 0,251 | 0,421  |
| 14 | Q8WVD3 RN138_HUMAN | R.SETS#TSDNTETYQENTSSSGHPTFK.C | S137:      | 3 | 2,7796 | 0,149 | 0,845  |
| 14 | P42695 CNDD3_HUMAN | R.SRS#LGVLPTLNLSGSPEK.T        | S1372:     | 3 | 5,1935 | 0,546 | -0,093 |
| 14 | P42695 CNDD3_HUMAN | R.SRS#LGVLPTLNLSGSPEK.T        | S1372:     | 2 | 2,5728 | 0,184 | -0,372 |
| 14 | Q9UPN3 MACF1_HUMAN | R.RM*LS#SSDAITQEFM*DLR.T       | S1376:     | 3 | 4,7348 | 0,342 | 0      |
| 14 | Q14669 TRIPC_HUMAN | R.QFSIQAEERES#TDDSNPLGR.A      | S1376:     | 3 | 3,6893 | 0,318 | 0      |
| 14 | Q13428 TCOF_HUMAN  | K.LGAGEGGEASVS#PEKTSTTSK.G     | S1378:     | 3 | 3,69   | 0,41  | 0,618  |
| 14 | Q8IWS0 PHF6_HUMAN  | K.TAHNS#EADLEESFNEHELEPS#SPK.S | S138:S154: | 3 | 5,3205 | 0,477 | -0,512 |
| 14 | P49736 MCM2_HUMAN  | R.GLLYDS#DEEDEERPAR.K          | S139:      | 2 | 3,3534 | 0,363 | 0,433  |
| 14 | P49736 MCM2_HUMAN  | R.GLLYDS#DEEDEERPAR.K          | S139:      | 3 | 2,7211 | 0,111 | 0,093  |
| 14 | O14686 MLL2_HUMAN  | K.LEGPVS#PDVEPGKEETESK.K       | S1396:     | 3 | 4,4441 | 0,455 | 0,327  |
| 14 | Q14676 MDC1_HUMAN  | R.S#SGKTPETLVPTAPK.L           | S1399:     | 2 | 2,9937 | 0,258 | 0,306  |
| 14 | Q9H6Y2 WDR55_HUMAN | R.TCEERPAEDGS#DEEDPDSM*EAPTR.I | S14:       | 3 | 6,2661 | 0,485 | 0,454  |
| 14 | Q13428 TCOF_HUMAN  | K.GS#LGSQGAKDEPEEELQK.G        | S1407:     | 2 | 3,9896 | 0,304 | 0,308  |
| 14 | Q6P0Q8 MAST2_HUMAN | R.VQS#AEKLAALAAASEK.K          | S1407:     | 2 | 3,7305 | 0,535 | 0,293  |
| 14 | O43432 IF4G3_HUMAN | K.LDFIESDS#PCSSEALSCK.E        | S1409:     | 3 | 2,9018 | 0,176 | 0      |
| 14 | Q13428 TCOF_HUMAN  | K.GSLGS#QGAKDEPEEELQK.G        | S1410:     | 3 | 2,8205 | 0,163 | 0,461  |
| 14 | Q5VUA4 ZN318_HUMAN | K.AFGGEEVILKGS#PEEK.V          | S1420:     | 2 | 4,1188 | 0,367 | 0,483  |
| 14 | Q8NEJ9 NGDN_HUMAN  | K.LSS#EDEEEDEAEDDQSEASGKK.S    | S143:      | 3 | 4,0749 | 0,475 | -0,876 |
| 14 | P46940 IQGA1_HUMAN | K.S#VKEDSNLTLQEK.K             | S1443:     | 2 | 3,3307 | 0,458 | 0,388  |
| 14 | P11388 TOP2A_HUMAN | R.DPALNS#GVSQKPDPAK.T          | S1449:     | 3 | 2,9272 | 0,261 | -0,644 |
| 14 | P16144 ITB4_HUMAN  | R.M*DFAFPGSTNS#LHR.M           | S1457:     | 3 | 3,0504 | 0,365 | -0,109 |
| 14 | P16144 ITB4_HUMAN  | R.M*DFAFPGSTNS#LHR.M           | S1457:     | 2 | 2,4836 | 0,292 | 0,582  |
| 14 | P39880 CUX1_HUMAN  | R.RPSSLQS#LFLPEAAGAR.D         | S1458:     | 3 | 4,0163 | 0,394 | -0,378 |
| 14 | Q8TF76 HASP_HUMAN  | R.DSGRLS#PDLVCGQPR.D           | S147:      | 3 | 4,2434 | 0,355 | 0,1    |
| 14 | Q8TF76 HASP_HUMAN  | R.DSGRLS#PDLVCGQPR.D           | S147:      | 2 | 3,8453 | 0,478 | 0,401  |
| 14 | O15234 CASC3_HUMAN | K.STVTGERQS#GDGQESTEPVENK.V    | S148:      | 3 | 5,2594 | 0,506 | 0      |
| 14 | O15085 ARHGB_HUMAN | R.WTDGSL#PPAKEPLASDSR.N        | S1480:     | 3 | 3,3118 | 0,386 | 0,175  |
| 14 | Q9Y3C6 PPIL1_HUMAN | R.VGM*VETNS#QDRPVDDVK.I        | S149:      | 3 | 3,4795 | 0,302 | -0,369 |
| 14 | Q9Y3C6 PPIL1_HUMAN | R.VGM*VETNS#QDRPVDDVK.I        | S149:      | 2 | 3,4343 | 0,336 | -0,553 |

|    |                     |                                     |              |   |        |       |        |
|----|---------------------|-------------------------------------|--------------|---|--------|-------|--------|
| 14 | Q14135 VGLL4_HUMAN  | K.NSLDASRPAGLS#PTLTPGER.Q           | S149:        | 3 | 3,1553 | 0,083 | 0,086  |
| 14 | Q6UB98 ANR12_HUMAN  | R.DNS#PDSTPNHPSQTTPAQK.K            | S149:        | 3 | 2,6554 | 0,09  | -0,435 |
| 14 | P46821 MAP1B_HUMAN  | R.KLGDVSP#PTQIDVSQFGSFK.E           | S1501:       | 3 | 6,0835 | 0,437 | -0,172 |
| 14 | P11388 TOP2A_HUMAN  | K.GESDDFHM*DFDS#AVAPR.A             | S1504:       | 2 | 2,7383 | 0,428 | -0,123 |
| 14 | Q14674 ESPL1_HUMAN  | K.M*SFEILRGS#DGEDSASGGK.T           | S1508:       | 3 | 3,5071 | 0,401 | 0,179  |
| 14 | P49792 RBP2_HUMAN   | R.KQS#LPATSIPTPASFK.F               | S1509:       | 2 | 3,9196 | 0,496 | -0,557 |
| 14 | P40425 PBX2_HUMAN   | K.GGGSAAAAAAAAASGGGVS#PDNSIEHSDYR.S | S151:        | 3 | 4,5094 | 0,457 | -0,266 |
| 14 | Q15751 HERC1_HUMAN  | K.SRS#ESDLSQPESDEEGYALSGR.Q         | S1512:       | 3 | 4,4273 | 0,47  | 0,517  |
| 14 | Q9ULH0 ARMS_HUMAN   | K.LPSDEDES#GTEESDNTPLLKDDK.D        | S1526:       | 3 | 5,3447 | 0,482 | 0,42   |
| 14 | Q12756 KIF1A_HUMAN  | R.TPQPCS#RPAS#PEPELLPEADSKK.L       | S1528:S1532: | 3 | 3,8837 | 0,274 | 0,815  |
| 14 | O95218 ZRB2_HUMAN   | K.EVEDKES#EGEEDEDEDLSK.Y            | S153:        | 3 | 5,3715 | 0,332 | 0      |
| 14 | Q9UQ35 SRRM2_HUMAN  | R.S#GSSQELDVKPSASPQER.S             | S1539:       | 2 | 2,524  | 0,431 | -0,616 |
| 14 | O00512 BCL9_HUMAN   | R.SS#TPSHGQTTATEPTPAQKT#PAK.V       | S154:T172:   | 3 | 4,1934 | 1     | -0,663 |
| 14 | Q9UQ35 SRRM2_HUMAN  | R.SGS#SQELDVKPSASPQER.S             | S1541:       | 3 | 3,7876 | 0,278 | -0,461 |
| 14 | Q5QNZ9 Q5QNZ9_HUMAN | K.CDTKDDS#ILCFLEVK.E                | S1548:       | 3 | 3,844  | 0,23  | -0,571 |
| 14 | Q5QNZ9 Q5QNZ9_HUMAN | K.CDTKDDS#ILCFLEVK.E                | S1548:       | 2 | 2,7722 | 0,429 | -0,444 |
| 14 | Q5UIP0 RIF1_HUMAN   | R.ASQGLLSSIENSES#DSSEAKEEGSR.K      | S1554:       | 3 | 6,2793 | 0,557 | 0,205  |
| 14 | Q8NFD5 ARI1B_HUMAN  | R.M*S#PSKSPFLPSM*K.M                | S1555:       | 3 | 3,5058 | 0,192 | 0,118  |
| 14 | Q8TF44 NLF3_HUMAN   | K.AQTSYGFAM*LAES#PHTR.R             | S156:        | 2 | 3,4813 | 0,476 | -0,249 |
| 14 | Q8TF44 NLF3_HUMAN   | K.AQTSYGFAM*LAES#PHTR.R             | S156:        | 3 | 3,2124 | 0,511 | 0,186  |
| 14 | O76064 RNF8_HUMAN   | R.KFS#LDELAPGAEGPSNLK.S             | S157:        | 2 | 4,5545 | 0,588 | -0,607 |
| 14 | O76064 RNF8_HUMAN   | R.KFS#LDELAPGAEGPSNLK.S             | S157:        | 3 | 3,5779 | 0,287 | -0,182 |
| 14 | Q14839 CHD4_HUMAN   | K.IEENS#LKEEESIEGEK.E               | S1570:       | 2 | 2,3311 | 0,35  | 1,13   |
| 14 | Q96JC9 EAF1_HUMAN   | K.TS#PLKDNPS#PEPQLDDIKR.E           | S158:S165:   | 3 | 3,3264 | 0,508 | 0,158  |
| 14 | Q15742 NAB2_HUMAN   | R.SFS#PKSPLELGEK.L                  | S159:        | 3 | 3,9497 | 0,363 | 0,061  |
| 14 | Q15154 PCM1_HUMAN   | K.DASTS#PPNRETIGSAQCK.E             | S159:        | 3 | 3,0609 | 0,338 | -0,458 |
| 14 | Q15742 NAB2_HUMAN   | R.SFS#PKSPLELGEK.L                  | S159:        | 2 | 2,3754 | 0,315 | 0,163  |
| 14 | Q9ULH0 ARMS_HUMAN   | R.SS#ESSPNHS#LHNEVADDSQLEK.A        | S1591:S1598: | 3 | 3,2511 | 0,251 | 0,214  |
| 14 | Q13200 PSMD2_HUMAN  | K.APVQPQQS#PAAAPGGTDEKPSGK.E        | S16:         | 3 | 3,7452 | 0,36  | -0,318 |
| 14 | Q9BVG9 PTSS2_HUMAN  | R.DAGGPRPES#PVPAGR.A                | S16:         | 2 | 2,3562 | 0,243 | -0,316 |
| 14 | Q02241 KIF23_HUMAN  | K.SNDRNS#M*DIQCEVDALLER.Q           | S160:        | 3 | 5,7886 | 0,331 | -0,465 |
| 14 | O00161 SNP23_HUMAN  | R.ITNDAREDEM*EENLTQVGS#ILGNLK.D     | S161:        | 3 | 5,1099 | 0,408 | -0,507 |
| 14 | Q1KMD3 HNRL2_HUMAN  | R.EEDEPEERS#GDETPGSEVPGDK.A         | S161:        | 3 | 3,3339 | 0,283 | 0,297  |

|    |                    |                                  |                    |   |        |       |        |
|----|--------------------|----------------------------------|--------------------|---|--------|-------|--------|
| 14 | Q5UIP0 RIF1_HUMAN  | K.ATSEEDVSIKS#PICEK.Q            | S1616:             | 2 | 3,3432 | 0,449 | 0,586  |
| 14 | P29692 EF1D_HUMAN  | K.KPATPAEDDEDDIDLFGS#DNEEEDK.E   | S162:              | 3 | 6,9215 | 0,512 | -0,367 |
| 14 | Q9H0F6 SHRPN_HUMAN | R.S#PGNLTEREELAGSLAR.A           | S165:              | 3 | 3,6571 | 0,513 | 0,292  |
| 14 | Q02952 AKA12_HUMAN | K.S#VPEDDGHALLAER.I              | S1674:             | 2 | 3,517  | 0,507 | 0,461  |
| 14 | Q9Y5S2 MRCKB_HUMAN | K.HSTPSNSSNPS#GPPS#PNS#PHR.S     | S1686:S1690:S1693: | 3 | 2,7571 | 0,154 | -0,154 |
| 14 | O00193 SMAP_HUMAN  | R.SAS#PDDDLGSSNWEAADLGNEERK.Q    | S17:               | 3 | 3,6843 | 0,298 | -0,138 |
| 14 | P39687 AN32A_HUMAN | R.TPS#DVKELVLDNSR.S              | S17:               | 2 | 2,2203 | 0,185 | -0,148 |
| 14 | Q9HCK8 CHD8_HUMAN  | R.TAS#PLPLRPDAPVEK.S             | S1716:             | 2 | 3,316  | 0,326 | 0,219  |
| 14 | P04920 B3A2_HUMAN  | R.TSPS#SPAPLPHQEATPR.A           | S172:              | 2 | 3,6001 | 0,374 | -0,395 |
| 14 | Q96Q89 MPPH1_HUMAN | K.FGDFLQHS#PSILQSK.A             | S1740:             | 3 | 3,5952 | 0,409 | -0,308 |
| 14 | Q96Q89 MPPH1_HUMAN | K.FGDFLQHS#PSILQSK.A             | S1740:             | 2 | 3,5867 | 0,401 | -0,274 |
| 14 | O75962 TRIO_HUMAN  | K.SADAGSQKDS#DDSAATPQDETVEER.G   | S1759:             | 3 | 2,6009 | 0,089 | 0,748  |
| 14 | Q58FF8 H90B2_HUMAN | K.IEDVGS#DEEDDSGKDK.K            | S177:              | 2 | 4,4629 | 0,398 | -0,873 |
| 14 | Q58FF8 H90B2_HUMAN | K.IEDVGS#DEEDDSGKDK.K            | S177:              | 3 | 4,2424 | 0,441 | -0,376 |
| 14 | P25786 PSA1_HUMAN  | R.HM*S#EFM*ECNLNELVK.H           | S177:              | 3 | 3,1312 | 0,24  | -0,092 |
| 14 | P80723 BASP_HUMAN  | K.SDGAPASDSKPGSS#EAAPSSK.E       | S177:              | 3 | 2,9868 | 0,252 | -0,273 |
| 14 | P18583 SON_HUMAN   | R.ASES#SSEKDDYEIFVK.V            | S1782:             | 2 | 3,8463 | 0,498 | -0,358 |
| 14 | P18583 SON_HUMAN   | R.ASES#SSEKDDYEIFVK.V            | S1782:             | 3 | 2,8154 | 0,261 | -0,179 |
| 14 | Q96EE3 SEH1L_HUMAN | R.AHS#PM*IAVGSDDSSPNAM*AK.V      | S179:              | 3 | 5,4477 | 0,487 | -0,262 |
| 14 | Q9H6F5 CCD86_HUMAN | R.LGGLRPES#PESLTSVSR.T           | S18:               | 3 | 4,6686 | 0,429 | -0,196 |
| 14 | O75569 PRKRA_HUMAN | R.AEAPPLEREDS#GTFSLGK.M          | S18:               | 2 | 4,1486 | 0,579 | -0,492 |
| 14 | O15231 ZN185_HUMAN | R.RSS#TSGDTEEEEEVVPFSSDEQK.R     | S18:               | 3 | 3,2378 | 0,254 | -0,314 |
| 14 | O00264 PGRC1_HUMAN | K.LLKEGEEPTVYS#DEECPK.D          | S181:              | 3 | 5,5196 | 0,417 | -0,084 |
| 14 | O00264 PGRC1_HUMAN | K.EGEEPTVYS#DEECPKDESAR.K        | S181:              | 3 | 3,5623 | 0,4   | -0,616 |
| 14 | Q9NVZ3 NECP2_HUMAN | R.VRPAS#TGGLSLLPPPGGK.T          | S181:              | 2 | 2,5226 | 0,144 | -0,649 |
| 14 | P46821 MAP1B_HUMAN | K.TATCHS#SSSPIDAASAEPYGF.R.A     | S1816:             | 3 | 4,0242 | 0,441 | -0,221 |
| 14 | Q9NYB9 ABI2_HUMAN  | R.TTPPTQKPPS#PPM*SGK.G           | S183:              | 2 | 2,4751 | 0,492 | -0,559 |
| 14 | Q8IZP0 ABI1_HUMAN  | R.TNPPTQKPPS#PPM*SGR.G           | S183:              | 2 | 2,1509 | 0,249 | -0,546 |
| 14 | Q8IZP0 ABI1_HUMAN  | R.TNPPTQKPPS#PPM*SGRGT#LGR.N     | S183:T191:         | 3 | 2,6913 | 0,155 | -0,544 |
| 14 | Q1KMD3 HNRL2_HUMAN | R.SGDETPGSEVPGDKAAEEQGDDQDS#EK.S | S185:              | 3 | 4,5832 | 0,437 | -0,512 |
| 14 | Q8IWC1 MA7D3_HUMAN | R.SAS#TEKLEQGTSALIR.Q            | S185:              | 2 | 2,8767 | 0,454 | -0,482 |
| 14 | Q5VUA4 ZN318_HUMAN | K.VVIKLS#PQACSFTK.A              | S1856:             | 2 | 3,3672 | 0,344 | 0,662  |
| 14 | Q0VDF9 HSP7E_HUMAN | R.LIHEPSAALLAYGIGQDS#PTGK.S      | S186:              | 3 | 4,3805 | 0,432 | -0,552 |

|    |                    |                                    |                 |   |        |       |        |
|----|--------------------|------------------------------------|-----------------|---|--------|-------|--------|
| 14 | P49792 RBP2_HUMAN  | K.FGHVDQENSPS#FM*FQGSSNTEFK.S      | S1871:          | 3 | 5,821  | 0,25  | -0,337 |
| 14 | Q5VUA4 ZN318_HUMAN | K.ISAPELLLHS#PAR.S                 | S1896:          | 2 | 3,2699 | 0,351 | -0,411 |
| 14 | Q9UNE7 STUB1_HUMAN | R.LGAGGGS#PEKSPSAQELK.E            | S19:            | 3 | 4,6877 | 0,383 | 0      |
| 14 | Q9UNE7 STUB1_HUMAN | R.LGAGGGS#PEKSPSAQELK.E            | S19:            | 2 | 2,9406 | 0,507 | -0,68  |
| 14 | Q01433 AMPD2_HUMAN | K.TDS#DSDLQLYKEQGEGQGDR.S          | S190:           | 3 | 4,7234 | 0,52  | 0,315  |
| 14 | Q01433 AMPD2_HUMAN | K.QDFLKTDS#DSDLQLYK.E              | S190:           | 3 | 3,6121 | 0,259 | -0,092 |
| 14 | Q9UKY7 CDV3_HUMAN  | R.KTPQGPPEIYS#DTQFPSLQSTAK.H       | S191:           | 3 | 4,1001 | 0,332 | 0      |
| 14 | P84157 MXRA7_HUMAN | K.DNKETFGEM*S#DGDVQEQLR.L          | S191:           | 3 | 3,11   | 0,175 | 0      |
| 14 | O43237 DC1L2_HUMAN | K.FVKDFQDYM*EPEEGCQGS#PQR.R        | S194:           | 3 | 5,2356 | 0,43  | 0,831  |
| 14 | Q5TDH0 DDI2_HUMAN  | R.IRLFS#ADPFLEAQAK.I               | S194:           | 3 | 3,9624 | 0,349 | -0,385 |
| 14 | A0JLT2 MED19_HUMAN | R.TQDPVPPETPS#DSDHK.K              | S194:           | 2 | 3,4973 | 0,44  | 0,6    |
| 14 | O43237 DC1L2_HUMAN | K.DFQDYM*EPEEGCQGS#PQRR.G          | S194:           | 3 | 3,2373 | 0,267 | 0      |
| 14 | A0JLT2 MED19_HUMAN | R.TQDPVPPETPS#DSDHK.K              | S194:           | 3 | 2,893  | 0,258 | 0,3    |
| 14 | P35579 MYH9_HUMAN  | K.GAGDGS#DEEVDGKADGAEAKPAE.-       | S1943:          | 3 | 5,3499 | 0,415 | 0,325  |
| 14 | Q6PID6 TTC33_HUMAN | K.SEAPAEVTHFS#PK.S                 | S197:           | 2 | 4,3194 | 0,509 | 0,33   |
| 14 | Q9NYF8 BCLF1_HUMAN | K.DTFEHDPSSES#IDFNK.S              | S198:           | 3 | 4,2723 | 0,433 | -0,092 |
| 14 | Q9NYF8 BCLF1_HUMAN | K.DTFEHDPSSES#IDFNK.S              | S198:           | 2 | 2,8096 | 0,187 | 0,552  |
| 14 | Q04323 SAKS1_HUMAN | K.KYGGSVGSQPPVPEPGVPVS#SPSQEPPTK.R | S199:           | 3 | 3,4773 | 0,228 | 0,934  |
| 14 | Q07955 SFRS1_HUMAN | K.VDGRS#PS#YGRS#R.S                | S199:S201:S205: | 3 | 2,8777 | 0,149 | 0      |
| 14 | O96007 MOS2L_HUMAN | K.LPLS#PPLVEDSAFESRK.D             | S20:            | 3 | 3,4713 | 0,235 | -0,444 |
| 14 | P51636 CAV2_HUMAN  | K.ADVQLFM*DDDSYS#HHS#GLEADPEK.F    | S20:S23:        | 3 | 3,1702 | 0,382 | -0,361 |
| 14 | Q8NEZ4 MLL3_HUMAN  | K.ERS#PQQNIVSCVSVSTQTASDDQAGK.L    | S200:           | 3 | 5,5461 | 0,521 | 0,701  |
| 14 | Q15717 ELAV1_HUMAN | K.NVALLSQLYHS#PAR.R                | S202:           | 2 | 4,8324 | 0,44  | -0,444 |
| 14 | Q15717 ELAV1_HUMAN | K.NVALLSQLYHS#PAR.R                | S202:           | 3 | 2,8423 | 0,386 | -0,333 |
| 14 | Q9H4A3 WNK1_HUMAN  | R.DVDDGSGS#PHS#PHQLSSK.S           | S2029:S2032:    | 3 | 3,4424 | 1     | 0,091  |
| 14 | Q04206 TF65_HUMAN  | R.VNRNS#GSLGDEIFLLCDK.V            | S203:           | 3 | 5,7678 | 0,423 | -0,47  |
| 14 | Q9NY61 AATF_HUMAN  | R.AGDRNS#EDDGVVM*TFSSVK.V          | S203:           | 3 | 5,0074 | 0,403 | 0,173  |
| 14 | Q9NY61 AATF_HUMAN  | R.AGDRNS#EDDGVVM*TFSSVK.V          | S203:           | 3 | 2,9146 | 0,19  | -0,087 |
| 14 | Q9NY61 AATF_HUMAN  | R.AGDRNS#EDDGVVM*TFSSVK.V          | S203:           | 2 | 2,1482 | 0,388 | 0,463  |
| 14 | Q96EV2 RBM33_HUMAN | K.DIKEES#DEEEEDDEESGR.L            | S205:           | 3 | 5,9393 | 0,418 | -0,494 |
| 14 | P43243 MATR3_HUMAN | R.GPSLNPVLDYDHGS#R.S               | S206:           | 2 | 3,7495 | 0,484 | 0,286  |
| 14 | P43243 MATR3_HUMAN | R.GPSLNPVLDYDHGS#RS#QESGYDR.M      | S206:S208:      | 3 | 3,9759 | 1     | -0,382 |
| 14 | Q5VV41 ARHGG_HUMAN | K.GS#FKDDPQLYQEIQER.G              | S208:           | 3 | 4,5824 | 0,371 | -0,18  |



|    |                     |                                   |              |   |        |       |        |
|----|---------------------|-----------------------------------|--------------|---|--------|-------|--------|
| 14 | P38159 HNRPG_HUMAN  | R.DVYLS#PRDDGYSTK.D               | S208:        | 2 | 2,5934 | 0,45  | 0,504  |
| 14 | Q8IWI9 MGAP_HUMAN   | K.GFDNPEENS#SEFPVTFKEESK.F        | S2088:       | 3 | 3,9544 | 0,432 | -0,513 |
| 14 | P60174 TPIS_HUMAN   | R.KQS#LGELIGTLNAAK.V              | S21:         | 2 | 4,9228 | 0,583 | -0,376 |
| 14 | P60174 TPIS_HUMAN   | R.KQS#LGELIGTLNAAK.V              | S21:         | 3 | 3,4028 | 0,385 | 0      |
| 14 | A2RUQ8 A2RUQ8_HUMAN | R.M*IS#TGSELNEDYPKENDSSSNK.A      | S210:        | 3 | 3,5769 | 0,326 | 0,551  |
| 14 | Q99698 LYST_HUMAN   | R.S#RSLPAFPTSSLLTQSQK.L           | S2103:       | 3 | 4,5618 | 0,352 | -0,09  |
| 14 | Q99698 LYST_HUMAN   | R.SRS#LPAFPTSSLLTQSQK.L           | S2105:       | 2 | 2,1182 | 0,488 | 0,18   |
| 14 | Q13242 SFRS9_HUMAN  | R.GS#PHYFSPFRPY.-                 | S211:        | 3 | 2,8866 | 0,195 | -0,238 |
| 14 | Q13242 SFRS9_HUMAN  | R.GS#PHYFSPFRPY.-                 | S211:        | 2 | 2,4998 | 0,459 | -0,318 |
| 14 | P08670 VIME_HUMAN   | R.EEAENTLQSFQRQVDNAS#LAR.L        | S214:        | 3 | 4,0867 | 0,37  | -0,148 |
| 14 | P12270 TPR_HUMAN    | R.TDGFAEAIHS#PQVAGVPR.F           | S2141:       | 2 | 4,7573 | 0,451 | 0,442  |
| 14 | P21333 FLNA_HUMAN   | R.APS#VANVGSHCDLSLK.I             | S2152:       | 2 | 3,9632 | 0,496 | -0,141 |
| 14 | P21333 FLNA_HUMAN   | R.APS#VANVGSHCDLSLK.I             | S2152:       | 3 | 3,4148 | 0,281 | 0,105  |
| 14 | Q9UHF7 TRPS1_HUMAN  | K.SKTDLLVNDNPDPAPLS#PELQDFK.C     | S216:        | 3 | 4,2972 | 0,282 | -0,536 |
| 14 | P61978 HNRPK_HUMAN  | K.IILDILISES#PIKGR.A              | S216:        | 2 | 4,002  | 0,596 | -0,672 |
| 14 | Q15019 SEPT2_HUMAN  | K.IYHLPDAES#DEDEDFK.E             | S218:        | 3 | 4,5349 | 0,294 | 0,183  |
| 14 | Q9Y6D5 BIG2_HUMAN   | R.ELEKPIQSKPQS#PVIQAAAVS#PK.F     | S218:S227:   | 3 | 4,0475 | 0,495 | 0,421  |
| 14 | O75376 NCOR1_HUMAN  | R.NDARS#PGSISYLPFFTK.L            | S2184:       | 3 | 4,1475 | 0,418 | -0,62  |
| 14 | O75376 NCOR1_HUMAN  | R.NDARS#PGSISYLPFFTK.L            | S2184:       | 2 | 2,3005 | 0,446 | -0,708 |
| 14 | Q8WU79 SMAP2_HUMAN  | K.DLDLLASVPS#PSSSGSRK.V           | S219:        | 2 | 2,7397 | 0,382 | -0,386 |
| 14 | Q14566 MCM6_HUMAN   | R.IQETQAELPRGS#IPR.S              | S219:        | 3 | 2,7391 | 0,102 | 0      |
| 14 | A8K630 A8K630_HUMAN | R.LQQQHSEQPPLQPS#PVTTR.R          | S22:         | 3 | 4,0713 | 0,291 | 0,488  |
| 14 | Q5TEC3 ZN697_HUMAN  | K.GM*GS#DFESEDREGDPEER.E          | S22:         | 3 | 2,7727 | 0,387 | -0,406 |
| 14 | Q9BUB5 MKNK1_HUMAN  | R.DLKPENILCES#PEKVS#PVK.I         | S221:S226:   | 3 | 2,9206 | 0,185 | -0,312 |
| 14 | Q15428 SF3A2_HUMAN  | K.M*EKPPAPPS#LPAGPPGVK.R          | S222:        | 3 | 3,3672 | 0,302 | 0,196  |
| 14 | Q9Y5K6 CD2AP_HUMAN  | R.GIGFGDIFKEGS#VK.L               | S224:        | 2 | 3,5472 | 0,495 | -0,636 |
| 14 | P49792 RBP2_HUMAN   | R.EDALDDSVSSS#SVHASPLASS#PVRK.N   | S2241:S2251: | 3 | 3,0884 | 0,122 | -0,271 |
| 14 | Q8WVB6 CTF18_HUMAN  | R.GGGQLDLLGVSLAS#LKK.Q            | S225:        | 2 | 2,9138 | 0,367 | -0,633 |
| 14 | O95359 TACC2_HUMAN  | R.KTLPLTTAPEAGEVTPSDSGGQEDS#PAK.G | S2256:       | 3 | 2,9442 | 0,146 | 0,831  |
| 14 | Q9Y618 NCOR2_HUMAN  | R.M*GS#KSPGNTSQPPAFFSK.L          | S2259:       | 3 | 2,7406 | 0,183 | -0,186 |
| 14 | Q96A57 CTO30_HUMAN  | R.LS#STDDGYIDLQFKK.T              | S23:         | 2 | 4,1612 | 0,429 | -0,539 |
| 14 | Q14978 NOLC1_HUMAN  | K.AASSSSSSSSSSDSS#EEEKAAATPK.K    | S230:        | 3 | 4,6866 | 1     | -0,482 |
| 14 | Q96L14 C170L_HUMAN  | K.S#SPVNNHHS#PGQTPTLGQPEAR.A      | S230:S238:   | 3 | 2,6978 | 0,249 | -0,296 |

|    |                     |                                 |        |   |        |       |        |
|----|---------------------|---------------------------------|--------|---|--------|-------|--------|
| 14 | P56749 CLD12_HUMAN  | R.SRLS#AIEIDIPVVSHTT.-          | S231:  | 2 | 2,9046 | 0,417 | -0,382 |
| 14 | Q9Y6M7 S4A7_HUMAN   | R.IPLVRS#FADIGK.K               | S233:  | 2 | 2,5256 | 0,116 | 0,087  |
| 14 | Q8IYB3 SRRM1_HUMAN  | K.VKEPS#VQEATSTSDILK.V          | S234:  | 2 | 4,7401 | 0,498 | 0,191  |
| 14 | Q8NC51 PAIRB_HUMAN  | K.DELTES#PKYIQK.Q               | S234:  | 2 | 3,5414 | 0,373 | -0,159 |
| 14 | Q8IYB3 SRRM1_HUMAN  | K.VKEPS#VQEATSTSDILK.V          | S234:  | 3 | 3,4201 | 0,249 | 0,191  |
| 14 | P46013 KI67_HUMAN   | K.IACKS#PQPDPVDTASTK.Q          | S2344: | 3 | 3,3903 | 0,161 | -0,643 |
| 14 | P46013 KI67_HUMAN   | K.IACKS#PQPDPVDTASTK.Q          | S2344: | 2 | 2,4182 | 0,408 | -0,429 |
| 14 | Q96A57 CT030_HUMAN  | R.LSS#TDDGYIDLQFKK.T            | S24:   | 3 | 3,644  | 0,333 | -0,202 |
| 14 | Q5VT06 CE350_HUMAN  | R.LLELKS#PTELM*K.S              | S2460: | 2 | 4,2137 | 0,309 | -0,407 |
| 14 | P46013 KI67_HUMAN   | K.ITEVSCKS#PQPESFK.T            | S2466: | 3 | 3,7633 | 0,24  | 0,201  |
| 14 | Q15424 SAFB1_HUMAN  | K.SEPVKEESSELEQPFADTSS#VGPDR.K  | S247:  | 3 | 5,693  | 0,472 | -0,437 |
| 14 | Q92890 UFD1_HUMAN   | K.GVEPSPS#PIKPGDIK.R            | S247:  | 2 | 3,5133 | 0,391 | -0,152 |
| 14 | P11717 MPRI_HUMAN   | K.LVSFHDDS#DEDLLHI.-            | S2484: | 2 | 2,9413 | 0,417 | -0,798 |
| 14 | B2RAW2 B2RAW2_HUMAN | R.KLS#PQDPSEDVSSM*DPLK.L        | S249:  | 3 | 3,7813 | 0,198 | -0,088 |
| 14 | Q7L2Z9 CENPQ_HUMAN  | K.DLDILHNSS#QM*K.S              | S249:  | 2 | 3,2337 | 0,333 | -0,082 |
| 14 | Q53T59 H1BP3_HUMAN  | R.KLS#PQDPSEDVSSVDPLK.L         | S249:  | 3 | 3,0599 | 0,191 | 0,181  |
| 14 | B2RAW2 B2RAW2_HUMAN | R.KLS#PQDPSEDVSSM*DPLK.L        | S249:  | 2 | 2,0164 | 0,318 | 0,708  |
| 14 | Q9NYL9 TMOD3_HUMAN  | K.YKDLDEDELLGNLS#ETELK.Q        | S25:   | 3 | 4,3836 | 0,225 | 0,079  |
| 14 | Q7L9B9 EEPDP1_HUMAN | R.KFS#AACNFSNILVNQER.L          | S25:   | 3 | 4,1637 | 0,218 | -0,44  |
| 14 | Q5VSY0 GKAP1_HUMAN  | R.FALLQVDSGS#GSDSEPGK.G         | S25:   | 3 | 3,3105 | 0,332 | -0,178 |
| 14 | Q9HA47 UCK1_HUMAN   | R.TFS#EPGDHPGM*LTSGK.R          | S253:  | 2 | 2,6566 | 0,476 | 0,208  |
| 14 | Q86X53 ERIC1_HUMAN  | R.QEEGADAS#EEDPTPAGEEDVKDAR.E   | S254:  | 3 | 3,5917 | 0,298 | -0,279 |
| 14 | Q9HB58 SP110_HUMAN  | R.DNS#PEPNDPEEPQEVSTPSDKK.G     | S256:  | 3 | 4,6671 | 0,22  | -0,562 |
| 14 | Q969K3 RNF34_HUMAN  | R.VRASLS#DLSSLDDVEGM*SVR.Q      | S256:  | 3 | 4,641  | 0,487 | -0,246 |
| 14 | Q9UKL0 RCOR1_HUMAN  | R.EREES#EDELEEANGNPNIDIEVDQNK.E | S257:  | 3 | 6,7639 | 0,415 | -0,236 |
| 14 | O95433 AHS1_HUMAN   | K.FHM*VDGNVS#GEFTDLVPEK.H       | S258:  | 3 | 3,5534 | 0,299 | -0,33  |
| 14 | P46013 KI67_HUMAN   | K.IPCKS#PPPELTDATSTK.R          | S2588: | 3 | 4,332  | 0,295 | 0,181  |
| 14 | Q8N3P4 VPS8_HUMAN   | K.TSEELNKS#FNLEASLK.F           | S26:   | 3 | 4,1484 | 0,326 | -0,261 |
| 14 | P07355 ANXA2_HUMAN  | K.LSLEGDHSTPPSAYGS#VK.A         | S26:   | 2 | 3,3987 | 0,528 | 0,444  |
| 14 | P07355 ANXA2_HUMAN  | K.LSLEGDHSTPPSAYGS#VK.A         | S26:   | 3 | 2,7711 | 0,278 | 0,285  |
| 14 | P52701 MSH6_HUMAN   | R.VISDESIDIIGGS#DVEFKPDTK.E     | S261:  | 3 | 3,2893 | 0,358 | 0,159  |
| 14 | A8K199 A8K199_HUMAN | R.CPQDQS#PDRVGT*EPVSK.N         | S265:  | 3 | 3,5155 | 0,372 | -0,081 |
| 14 | Q76FK4 NOL8_HUMAN   | R.TCDSITPSKSS#PVPVSDTQK.L       | S268:  | 3 | 3,9632 | 0,296 | -0,083 |

|    |                    |                                |                 |   |        |       |        |
|----|--------------------|--------------------------------|-----------------|---|--------|-------|--------|
| 14 | Q7Z3B3 K1267_HUMAN | K.KS#PLSSILFSALDSDTR.I         | S268:           | 3 | 3,4687 | 0,34  | -0,286 |
| 14 | P12956 KU70_HUMAN  | K.TEGDEEAEQEEENLEAS#GDYKYSGR.D | S27:            | 3 | 2,7118 | 0,486 | 0,421  |
| 14 | P46013 KI67_HUMAN  | K.IPCES#PPLEVVDTTASTKR.H       | S2708:          | 3 | 4,5683 | 0,397 | 0,252  |
| 14 | P31943 HNRH1_HUMAN | R.DLNYCFSGM*S#DHR.Y            | S272:           | 2 | 3,3436 | 0,431 | -0,072 |
| 14 | Q9BRL6 SFR2B_HUMAN | K.RPPKS#PEEEGQM*S#S.-          | S273:S281:      | 2 | 2,7849 | 0,403 | -0,492 |
| 14 | O75410 TACC1_HUMAN | K.ASYHFSPEELDENTS#PLLGDAR.F    | S276:           | 3 | 5,4553 | 0,516 | -0,289 |
| 14 | O00203 AP3B1_HUMAN | K.EGDELEDNGKNFYES#DDDQK.E      | S276:           | 3 | 4,1464 | 0,319 | 0,678  |
| 14 | Q9UKS6 PACN3_HUMAN | R.DLHQGIEAAS#DEEDLR.W          | S276:           | 2 | 4,0693 | 0,466 | 0,65   |
| 14 | P63244 GBLP_HUMAN  | K.IIVDELKQEVIS#TSSK.A          | S276:           | 2 | 3,5541 | 0,588 | -0,457 |
| 14 | Q9UKS6 PACN3_HUMAN | R.DLHQGIEAAS#DEEDLR.W          | S276:           | 3 | 3,5214 | 0,435 | 0,487  |
| 14 | Q8N556 AFAP1_HUMAN | K.LS#SERPSSDGEVGVVENGITTCNGK.E | S277:           | 3 | 5,2097 | 0,417 | 0,071  |
| 14 | P42696 RBM34_HUMAN | R.SVQEGENPDDGVRGS#PPEDYR.L     | S28:            | 3 | 2,9462 | 0,14  | 0,461  |
| 14 | P27816 MAP4_HUMAN  | K.DM*ES#PTKLDVTLAK.D           | S280:           | 2 | 3,6829 | 0,452 | 0,148  |
| 14 | P27816 MAP4_HUMAN  | K.DM*ES#PTKLDVTLAK.D           | S280:           | 3 | 3,5634 | 0,263 | 0,556  |
| 14 | P21127 CD2L1_HUMAN | R.DLLSDLQDIS#DSERK.T           | S283:           | 2 | 3,9804 | 0,448 | -0,471 |
| 14 | O15446 RPA34_HUMAN | K.TVKQEIQINTEPLEDTVLS#PTK.K    | S285:           | 3 | 4,8615 | 0,346 | -0,224 |
| 14 | Q96QF0 RAB3I_HUMAN | R.NKS#TSS#AM*SGSHQDLSVIQPIVK.D | S288:S291:      | 3 | 4,1849 | 1     | 0,212  |
| 14 | Q9NWH9 SLTM_HUMAN  | K.DGQDAIAQS#PEKESK.D           | S289:           | 2 | 4,0677 | 0,455 | -0,363 |
| 14 | O95714 HERC2_HUMAN | R.IRAEEEDLAAVPFLAS#DNEEEDEK.G  | S2928:          | 3 | 4,8109 | 0,448 | -0,25  |
| 14 | Q6ZSR9 YJ005_HUMAN | R.HYS#PEDEPSPEAQPIAAYK.I       | S294:           | 3 | 4,8459 | 0,431 | 0      |
| 14 | Q9NQW6 ANLN_HUMAN  | K.ATS#PVKSTTSITDAK.S           | S295:           | 3 | 4,0033 | 0,45  | -0,115 |
| 14 | Q9UQ35 SRRM2_HUMAN | K.THTTALAGRS#PS#PAS#GR.R       | S295:S297:S300: | 3 | 2,6439 | 0,287 | -0,096 |
| 14 | Q9UQ35 SRRM2_HUMAN | K.THTTALAGRS#PS#PAS#GR.R       | S295:S297:S300: | 2 | 2,2239 | 0,193 | -0,384 |
| 14 | Q9Y3S2 ZN330_HUMAN | R.KSDTESS#DLFTNLNLGR.T         | S296:           | 3 | 3,5682 | 0,306 | -0,262 |
| 14 | Q15642 CIP4_HUMAN  | R.APS#DSSLGTPSDGRPELR.G        | S296:           | 3 | 2,8997 | 0,24  | 0,095  |
| 14 | Q6P4R8 NFRKB_HUMAN | R.KGS#LAALYDLAVLK.K            | S298:           | 2 | 4,7344 | 0,46  | -0,554 |
| 14 | P07910 HNRPC_HUMAN | K.DDEKEAEEGEDDRDS#ANGEDDS.-    | S299:           | 3 | 4,0593 | 0,49  | -0,365 |
| 14 | Q05655 KPCD_HUMAN  | K.LLAEALNQVTQRAS#R.R           | S299:           | 3 | 2,9112 | 0,406 | -0,105 |
| 14 | Q96HY6 CT116_HUMAN | R.AAS#AGQEPLHNEELAGAGR.V       | S30:            | 3 | 3,3785 | 0,538 | 0,187  |
| 14 | P09382 LEG1_HUMAN  | R.GEVAPDAKS#FVLNLGK.D          | S30:            | 2 | 3,1513 | 0,314 | -0,354 |
| 14 | P78310 CXAR_HUMAN  | R.SYIGSNHS#SLGSM*SPSNM*EGYSK.T | S300:           | 3 | 4,6507 | 0,364 | 0,289  |
| 14 | Q6ZRS2 SRCAP_HUMAN | K.NPPS#PRPSQLPVLDLDR.D         | S3016:          | 3 | 3,4308 | 0,297 | 0,313  |
| 14 | Q6ZRS2 SRCAP_HUMAN | K.NPPS#PRPSQLPVLDLDR.D         | S3016:          | 2 | 2,0464 | 0,165 | 0,07   |

|    |                     |                                |                 |   |        |       |        |
|----|---------------------|--------------------------------|-----------------|---|--------|-------|--------|
| 14 | P52594 NUPL_HUMAN   | K.SSSADFGTFNTS#QSHQTASAVSK.V   | S302:           | 3 | 3,0001 | 0,189 | 0,528  |
| 14 | P49023 PAXI_HUMAN   | R.DGGRSS#PGGQDEGGFM*AQ GK.T    | S303:           | 3 | 5,4218 | 0,476 | 0      |
| 14 | Q99459 CDC5L_HUMAN  | R.SKLVLPAPQIS#DAELQEVVK.V      | S303:           | 3 | 3,2925 | 0,145 | -0,815 |
| 14 | P78310 CXAR_HUMAN   | R.SYIGSNHSSLGSM*S#PSNM*EGYSK.T | S306:           | 3 | 4,4726 | 0,378 | 0      |
| 14 | P42167 LAP2B_HUMAN  | K.HAS#PILPITEFSDIPR.R          | S306:           | 2 | 4,395  | 0,516 | -0,651 |
| 14 | P42167 LAP2B_HUMAN  | K.HAS#PILPITEFSDIPR.R          | S306:           | 3 | 3,7348 | 0,376 | -0,684 |
| 14 | Q08AE8 SPIR1_HUMAN  | R.APTLAELDSS#ESEETLHK.S        | S306:           | 3 | 3,5929 | 0,279 | 0,253  |
| 14 | Q15054 DPOD3_HUMAN  | R.VAL#DDETKETENM*R.K           | S307:           | 2 | 2,9742 | 0,552 | -0,732 |
| 14 | Q96CW6 S7A6O_HUMAN  | K.YPLDVQKEFGYDSPHDLS#D.-       | S308:           | 3 | 4,5897 | 0,408 | -0,227 |
| 14 | Q9NR55 BATF3_HUMAN  | R.SVAAPGNQPQPQQQS#PEDDDRK.V    | S31:            | 3 | 3,0998 | 0,443 | -0,543 |
| 14 | Q7RTV3 ZN367_HUMAN  | K.ADQEQQDPLEYLQS#DEEDDEKR.G    | S310:           | 3 | 5,3787 | 0,543 | -0,464 |
| 14 | O15143 ARC1B_HUMAN  | K.AS#SEGTAAGAGLDSLHK.N         | S310:           | 2 | 2,2446 | 0,413 | -0,071 |
| 14 | Q9Y2D8 ADIP_HUMAN   | R.ERVDDSTGTVIS#DVEEDAGELSR.E   | S312:           | 3 | 4,2269 | 0,357 | -0,429 |
| 14 | Q9BWU0 NADAP_HUMAN  | K.M*LGEDS#DEEEEM*DTSERK.I      | S312:           | 3 | 4,1186 | 0,495 | 0,245  |
| 14 | Q96ST2 IWS1_HUMAN   | R.VSDSESEGPQKGPAS#DSETEDASR.H  | S313:           | 3 | 5,3316 | 0,5   | -0,431 |
| 14 | Q96QC0 PP1RA_HUMAN  | K.VLS#PTAAKPSPFEGK.T           | S313:           | 2 | 2,4354 | 0,294 | 0      |
| 14 | Q13769 THOC5_HUMAN  | K.ALFKPPEDSQDDES#DAEEEQTTK.R   | S314:           | 3 | 4,446  | 0,392 | 0,443  |
| 14 | Q9ULL5 PRR12_HUMAN  | R.SRPALS#PLGDIDFCPPNPGPDGPR.R  | S314:           | 3 | 3,8304 | 0,328 | -0,49  |
| 14 | Q13188 STK3_HUMAN   | R.ELEEEENS#DEDELDSHTM*VK.T     | S316:           | 3 | 3,011  | 0,276 | 0,703  |
| 14 | Q5W0Z9 ZDH20_HUMAN  | R.SSGS#NQPFPIKPLESEK.N         | S318:           | 2 | 2,0327 | 0,349 | 0,324  |
| 14 | Q9NWT1 PK1IP_HUMAN  | K.VADM*KESLPPAAEPS#PVSK.E      | S320:           | 3 | 2,637  | 0,133 | 0      |
| 14 | P30305 MPIP2_HUMAN  | R.SPS#M*PCSVIRPILK.R           | S323:           | 3 | 2,9191 | 0,231 | -0,218 |
| 14 | B2RMQ4 B2RMQ4_HUMAN | R.SIASEVVARPAS#LSNDK.L         | S327:           | 2 | 3,4265 | 0,476 | 0,334  |
| 14 | B2RMQ4 B2RMQ4_HUMAN | R.SIASEVVARPAS#LSNDK.L         | S327:           | 3 | 2,922  | 0,248 | -0,1   |
| 14 | Q9Y608 LRRF2_HUMAN  | R.RGS#GDTSSLIDPDTLSLELR.D      | S328:           | 3 | 4,8678 | 0,372 | -0,669 |
| 14 | Q92922 SMRC1_HUMAN  | R.KHS#PS#PPPPT#PTESR.K         | S328:S330:T335: | 2 | 3,2947 | 0,309 | -0,395 |
| 14 | Q92922 SMRC1_HUMAN  | R.KHS#PS#PPPPT#PTESR.K         | S328:S330:T335: | 3 | 3,1344 | 0,293 | -0,296 |
| 14 | Q92922 SMRC1_HUMAN  | R.KHS#PS#PPPPT#ESR.K           | S328:S330:T337: | 3 | 4,7955 | 0,327 | -0,394 |
| 14 | Q15459 SF3A1_HUMAN  | K.FGESEEVEM*EVES#DEEDDKQEK.A   | S329:           | 3 | 6,4032 | 0,471 | 0,27   |
| 14 | Q15459 SF3A1_HUMAN  | K.FGESEEVEMEVES#DEEDDKQEK.A    | S329:           | 3 | 5,92   | 0,48  | -0,271 |
| 14 | Q9Y2U5 M3K2_HUMAN   | R.RGS#DIDNPTLTVM*DISPPSR.S     | S331:           | 3 | 3,9036 | 0,288 | -0,242 |
| 14 | Q9Y2U5 M3K2_HUMAN   | R.RGS#DIDNPTLTVM*DISPPSR#PR.A  | S331:S349:      | 3 | 4,6599 | 0,434 | 0,272  |
| 14 | P19484 TFEB_HUMAN   | R.VHGLPTTS#PSGM*NM*AELAQQVVK.Q | S332:           | 3 | 4,9354 | 0,456 | 0,949  |

|    |                    |                                  |                 |   |        |       |        |
|----|--------------------|----------------------------------|-----------------|---|--------|-------|--------|
| 14 | Q9NYV4 CD2L7_HUMAN | R.RRS#S#S#PFLSK.R                | S332:S333:S334: | 2 | 3,3683 | 0,304 | 0,174  |
| 14 | Q9H6Z4 RANB3_HUMAN | R.VLS#PPKLNEVSSDANR.E            | S333:           | 3 | 3,9928 | 0,209 | 0,203  |
| 14 | Q9H6Z4 RANB3_HUMAN | R.VLS#PPKLNEVSSDANR.E            | S333:           | 2 | 2,6843 | 0,58  | 0,338  |
| 14 | Q86V59 PNML1_HUMAN | R.AEAESPGGASES#DQDGGHESPPK.K     | S335:           | 3 | 2,9316 | 0,154 | -0,237 |
| 14 | Q09666 AHNK_HUMAN  | K.FNFSGS#KVQTPEVDVK.G            | S3362:          | 3 | 4,2294 | 0,26  | 0      |
| 14 | Q09666 AHNK_HUMAN  | K.FNFSGS#KVQTPEVDVK.G            | S3362:          | 2 | 4,1252 | 0,458 | -0,459 |
| 14 | Q4G0J3 LARP7_HUMAN | R.DIEIS#T#EEEKDTGDLKDSSLLK.T     | S337:T338:      | 3 | 4,2056 | 0,394 | -0,348 |
| 14 | Q9HCN4 GPN1_HUMAN  | R.GTLDEEDEEADS#DTDDIDHR.V        | S338:           | 3 | 4,9059 | 0,496 | 0,699  |
| 14 | O43823 AKAP8_HUMAN | R.S#GDEEFKGEDELCDSSGR.Q          | S339:           | 3 | 4,4782 | 0,443 | -0,091 |
| 14 | Q09666 AHNK_HUMAN  | K.VSM*PDVELNLKS#PK.V             | S3426:          | 2 | 4,2744 | 0,503 | -0,369 |
| 14 | Q09666 AHNK_HUMAN  | K.VSM*PDVELNLKS#PK.V             | S3426:          | 3 | 3,1999 | 0,367 | 0      |
| 14 | Q86WB0 NIPA_HUMAN  | R.SQDATFSPGSEQAEKS#PGPIVSR.T     | S344:           | 3 | 4,0854 | 0,417 | 0,745  |
| 14 | P01892 1A02_HUMAN  | R.KGGSYS#QAASSDSAQGSVDVSLTACKV.- | S345:           | 3 | 5,0767 | 0,346 | 0,416  |
| 14 | Q9NYF8 BCLF1_HUMAN | R.FTDEES#RVFLLDR.G               | S345:           | 3 | 2,8575 | 0,201 | -0,429 |
| 14 | Q9HCI7 MSL2_HUMAN  | R.SRS#ES#DSEKVQPLPISTIIR.G       | S345:S347:      | 3 | 3,5346 | 0,294 | -0,381 |
| 14 | Q63HN8 RN213_HUMAN | R.DFATPSLHTSDQS#PGK.H            | S346:           | 2 | 4,6552 | 0,416 | 0,345  |
| 14 | P35568 IRS1_HUMAN  | R.ASSDGEGTM*SRPASVDGSPVS#PSTNR.T | S348:           | 3 | 6,9318 | 0,461 | -0,484 |
| 14 | Q9Y6D5 BIG2_HUMAN  | R.QSLSS#ADNLESDAQGHQVAAR.F       | S349:           | 3 | 2,6439 | 0,188 | 0,485  |
| 14 | P40855 PEX19_HUMAN | K.AKPS#PAPPSTTTAPDASGPQK.R       | S35:            | 3 | 3,878  | 0,36  | 0,088  |
| 14 | Q6KC79 NIPBL_HUMAN | K.AAM*YDIISS#PSKDSTK.L           | S350:           | 2 | 3,8426 | 0,538 | 0,202  |
| 14 | Q9BX66 SRBS1_HUMAN | R.VGEQDSAPTQEKPTS#PGK.A          | S350:           | 3 | 3,5279 | 0,231 | -0,094 |
| 14 | Q5SW79 CE170_HUMAN | R.TEEDSKS#IKS#DVPVYLK.R          | S356:S359:      | 3 | 4,3894 | 0,337 | -0,087 |
| 14 | P27816 MAP4_HUMAN  | R.AS#PIKM*DLAPSK.D               | S358:           | 2 | 2,0884 | 0,366 | -0,36  |
| 14 | Q9UBU7 DBF4A_HUMAN | K.YSVGSL#PVSASVLKK.T             | S359:           | 2 | 3,7747 | 0,377 | -0,143 |
| 14 | P23588 IF4B_HUMAN  | R.AAS#IFGGAKPVDTAAR.E            | S359:           | 2 | 3,0813 | 0,394 | -0,227 |
| 14 | P23588 IF4B_HUMAN  | R.AAS#IFGGAKPVDTAAR.E            | S359:           | 3 | 2,9494 | 0,436 | 0,227  |
| 14 | O76021 RL1D1_HUMAN | K.ATNES#EDEIPQLVPIGKK.T          | S361:           | 3 | 4,4316 | 0,366 | -0,089 |
| 14 | O76021 RL1D1_HUMAN | K.ATNES#EDEIPQLVPIGKK.T          | S361:           | 2 | 2,1356 | 0,33  | -0,119 |
| 14 | Q7L8J4 3BP5L_HUMAN | R.GLSDHVS#LDGQELGTR.S            | S362:           | 2 | 3,9698 | 0,522 | -0,415 |
| 14 | Q7L8J4 3BP5L_HUMAN | R.GLSDHVS#LDGQELGTR.S            | S362:           | 3 | 3,1505 | 0,267 | -0,104 |
| 14 | P48634 BAT2_HUMAN  | R.DSQS#ASGEERPPEADGK.K           | S363:           | 2 | 2,9034 | 0,448 | -0,597 |
| 14 | P48634 BAT2_HUMAN  | R.DSQS#ASGEERPPEADGK.K           | S363:           | 3 | 2,8269 | 0,253 | -0,099 |
| 14 | Q9NY27 PP4R2_HUMAN | K.DLLHSEGS#ENEGPVSSSSSDCR.E      | S364:           | 3 | 4,4158 | 0,414 | 0,753  |

|    |                     |                                   |                 |   |        |       |        |
|----|---------------------|-----------------------------------|-----------------|---|--------|-------|--------|
| 14 | Q14795 UN13B_HUMAN  | K.DHFLGPQESFPEENASS#PFTQAR.A      | S367:           | 3 | 4,3896 | 0,272 | -0,479 |
| 14 | Q15K36 Q15K36_HUMAN | R.LTHFPTVSGS#PASLADSM*QQK.L       | S368:           | 3 | 3,2047 | 0,17  | -0,08  |
| 14 | Q9UN79 SOX13_HUMAN  | K.DLISLDSS#PAKER.L                | S368:           | 2 | 3,0864 | 0,381 | 0,081  |
| 14 | Q86U90 YRDC_HUMAN   | R.LFRPPS#PAPAAPGAR.L              | S37:            | 3 | 2,8649 | 0,261 | 0,231  |
| 14 | P20810 ICAL_HUMAN   | R.SESELIDELS#EDFDRSECK.E          | S373:           | 3 | 2,6942 | 0,217 | -0,541 |
| 14 | Q01167 FOXK2_HUMAN  | R.SAPAS#PNHAGVLSAHSSGAQT#PESLSR.E | S373:T389:      | 3 | 3,4119 | 1     | 0,593  |
| 14 | Q9Y5P4 C43BP_HUMAN  | R.SSS#M*SSIDLVSASDDVHR.F          | S377:           | 2 | 3,4152 | 0,427 | 0,552  |
| 14 | Q92698 RAD54_HUMAN  | R.KSS#SETQIQECFLSPFR.K            | S38:            | 2 | 3,4276 | 0,612 | -0,23  |
| 14 | Q92698 RAD54_HUMAN  | R.KSS#SETQIQECFLSPFR.K            | S38:            | 3 | 3,1764 | 0,219 | -0,517 |
| 14 | Q9C0B5 ZDHC5_HUMAN  | R.GDS#LKEPTSIAESSR.H              | S380:           | 3 | 4,0613 | 0,424 | 0,331  |
| 14 | Q9BVS4 RIOK2_HUMAN  | R.SSGDPEQIKEDS#LSEESADAR.S        | S380:           | 3 | 3,8274 | 0,265 | 0,079  |
| 14 | Q9C0B5 ZDHC5_HUMAN  | R.GDS#LKEPTSIAESSR.H              | S380:           | 2 | 3,0487 | 0,491 | 0,368  |
| 14 | Q15326 ZMY11_HUMAN  | K.KEEPEPETEAVSSS#QEIPTM*PQPIEK.V  | S381:           | 3 | 4,1448 | 0,349 | 0,609  |
| 14 | Q8TBP0 TBC16_HUMAN  | K.LPS#SETHPEESM*YK.R              | S383:           | 2 | 3,0315 | 0,432 | -0,423 |
| 14 | Q14966 ZN638_HUMAN  | K.NYQSQADIPRS#PFGIVK.A            | S383:           | 3 | 2,8656 | 0,258 | 0,173  |
| 14 | Q9NYV4 CD2L7_HUMAN  | R.HSS#IS#PVRLPLNSSLGAELSR.K       | S383:S385:      | 3 | 4,5896 | 0,519 | -0,307 |
| 14 | Q96T23 RSF1_HUMAN   | K.LSDDFDS#PVKGPLCK.S              | S387:           | 2 | 3,9098 | 0,532 | -0,347 |
| 14 | Q9H0E9 BRD8_HUMAN   | K.APS#IDGKEELDLAEK.M              | S387:           | 2 | 3,634  | 0,577 | 0,072  |
| 14 | Q9H0E9 BRD8_HUMAN   | K.APS#IDGKEELDLAEK.M              | S387:           | 3 | 3,2884 | 0,485 | 0,216  |
| 14 | Q96T23 RSF1_HUMAN   | K.LSDDFDS#PVKGPLCK.S              | S387:           | 3 | 3,2564 | 0,438 | 0      |
| 14 | Q0JRZ9 FCHO2_HUMAN  | K.VSIGNITLS#PAISRHS#PVQM*NR.N     | S387:S394:      | 3 | 4,1925 | 0,349 | -0,573 |
| 14 | Q8WYA6 CTBL1_HUMAN  | R.TIFPLFM*KS#PR.K                 | S389:           | 2 | 2,8793 | 0,334 | -0,511 |
| 14 | Q8IYB3 SRRM1_HUMAN  | R.RLS#PS#AS#PPRR.R                | S389:S391:S393: | 3 | 2,6933 | 0,316 | -0,187 |
| 14 | Q9Y2D5 AKAP2_HUMAN  | K.GQKS#PGALETPSAAGSQGNTASQGK.E    | S393:           | 3 | 5,7871 | 0,554 | -0,152 |
| 14 | Q86WB0 NIPA_HUMAN   | R.SM*GTGDTPGLEVPS#PLRK.A          | S395:           | 3 | 4,3033 | 0,424 | 0,09   |
| 14 | Q86WB0 NIPA_HUMAN   | R.SM*GTGDTPGLEVPS#PLRK.A          | S395:           | 2 | 2,5169 | 0,431 | 0,422  |
| 14 | Q9UQ35 SRRM2_HUMAN  | R.HGGSPQPLATTPLSQEPVNPPEAS#PTR.D  | S398:           | 3 | 6,9501 | 0,58  | -0,686 |
| 14 | P05783 K1C18_HUMAN  | R.RLLEDGEDFNLDALDSS#NSM*QTIQK.T   | S399:           | 3 | 6,3325 | 0,366 | -0,55  |
| 14 | O43303 CE110_HUMAN  | R.TSSACHILINNPINACELS#PK.G        | S400:           | 3 | 4,012  | 0,321 | -0,151 |
| 14 | Q8WUQ7 CS029_HUMAN  | K.LKQEQGVES#EPLFPILK.Q            | S408:           | 3 | 3,5558 | 0,128 | -0,27  |
| 14 | Q9C0B5 ZDHC5_HUMAN  | R.SEPSLEPESFRS#PTFGK.S            | S409:           | 2 | 3,0166 | 0,566 | -0,494 |
| 14 | Q8WUM0 NU133_HUMAN  | R.KGLPLGS#AVSSPVLFSPVGR.R         | S41:            | 3 | 3,4989 | 0,24  | 0,089  |
| 14 | Q6ULP2 AFTIN_HUMAN  | R.KFTNFQSPNIDPTEENDLDDSL#VK.N     | S411:           | 3 | 5,7585 | 0,396 | -0,499 |

|    |                    |                                    |            |   |        |       |        |
|----|--------------------|------------------------------------|------------|---|--------|-------|--------|
| 14 | Q9UQR1 ZN148_HUMAN | R.SLKQPLEQNQTIS#PLSTYEESK.V        | S412:      | 3 | 5,3008 | 0,4   | -0,141 |
| 14 | Q9Y5T5 UBP16_HUMAN | K.TVEDEDQDS#EEEKDNDSEYIK.E         | S415:      | 3 | 2,8163 | 0,221 | -0,371 |
| 14 | O14737 PDCD5_HUMAN | R.EAEM*RNS#ILAQVLDQSAR.A           | S42:       | 3 | 3,7863 | 0,278 | -0,086 |
| 14 | Q92917 GPKOW_HUMAN | R.LADSGDGAGPS#PEEKDFLK.T           | S42:       | 3 | 2,8966 | 0,388 | 0,273  |
| 14 | Q9NTZ6 RBM12_HUMAN | R.S#PHEAGFCVYLK.G                  | S424:      | 3 | 2,6964 | 0,157 | 0,061  |
| 14 | Q9NTZ6 RBM12_HUMAN | R.S#PHEAGFCVYLK.G                  | S424:      | 2 | 2,2317 | 0,239 | 0      |
| 14 | O00220 TR10A_HUMAN | R.NAS#IHTLLDALER.M                 | S424:      | 2 | 2,0369 | 0,225 | -0,398 |
| 14 | Q9Y490 TLN1_HUMAN  | K.DHFGLEGDEESTM*LEDSVS#PK.K        | S425:      | 3 | 4,9566 | 0,411 | -0,227 |
| 14 | Q9BTC8 MTA3_HUMAN  | K.M*PTQSEEEKLS#PSPTTEDPR.V         | S428:      | 3 | 3,9002 | 0,282 | -0,233 |
| 14 | Q9UBF8 PI4KB_HUMAN | R.S#VENLPECGITHEQR.A               | S428:      | 2 | 3,4969 | 0,483 | 0,528  |
| 14 | Q9BRQ6 CHCH6_HUMAN | R.M*KEPSS#PPPAPTSSTFGLQDGNLR.A     | S43:       | 3 | 5,0595 | 0,314 | 0,35   |
| 14 | Q9Y5Q9 TF3C3_HUMAN | K.GKLS#AEENPDDSEVPSSSGINSTK.S      | S43:       | 3 | 4,4399 | 0,298 | -0,507 |
| 14 | Q14191 WRN_HUMAN   | K.HLSPNDNENDTSYVIES#DEDLEM*EM*LK.S | S440:      | 3 | 4,0539 | 0,448 | -0,335 |
| 14 | Q8NI08 NCOA7_HUMAN | K.DTLKECLS#LDPEER.K                | S441:      | 3 | 4,4009 | 0,343 | 0      |
| 14 | Q8WUX9 CHMP7_HUMAN | K.LSLSEGGLVPSSKS#PK.R              | S441:      | 2 | 4,2712 | 0,478 | 0,146  |
| 14 | Q8NI08 NCOA7_HUMAN | K.DTLKECLS#LDPEER.K                | S441:      | 2 | 3,2823 | 0,373 | -0,41  |
| 14 | P85037 FOXK1_HUMAN | R.SGGLQTPECLS#REGS#PIPHDPEFGSK.L   | S441:S445: | 3 | 5,123  | 0,423 | -0,373 |
| 14 | Q99567 NUP88_HUMAN | K.FLGSDEEDKDSLQELS#TEQK.C          | S442:      | 3 | 3,9543 | 0,307 | 0,077  |
| 14 | Q9H307 PININ_HUMAN | K.SLS#PGKENVSALDMEK.E              | S443:      | 3 | 4,1868 | 0,344 | 0,205  |
| 14 | Q9H307 PININ_HUMAN | K.SLS#PGKENVSALDM*EK.E             | S443:      | 2 | 2,7185 | 0,278 | 0,406  |
| 14 | Q9ULU4 PKCB1_HUMAN | R.SPM*STNSSVHTGS#DVEQDAEK.K        | S444:      | 3 | 3,2927 | 0,262 | -0,238 |
| 14 | Q8NB49 AT11C_HUMAN | K.YKGVQTQEV DGLS#QTDGTLTYFDK.V     | S445:      | 3 | 5,9081 | 0,42  | -0,553 |
| 14 | Q8NHM5 JHD1B_HUMAN | R.APKPPTDGSTS#PTSTPSEDQEALGK.K     | S445:      | 3 | 4,6451 | 0,471 | 0,639  |
| 14 | Q96PU5 NED4L_HUMAN | R.SLS#SPTVTL SAPLEGAKDS#PVRR.A     | S448:S464: | 3 | 3,2096 | 0,229 | -0,145 |
| 14 | Q9NS69 TOM22_HUMAN | K.GDAEKPEEELEEDDDEELDETL#ER.L      | S45:       | 3 | 4,6736 | 0,549 | -0,183 |
| 14 | Q8WUM0 NU133_HUMAN | R.KGLPLGSAVSS#PVLFPVGR.R           | S45:       | 3 | 3,5396 | 0,193 | -0,447 |
| 14 | Q96CP6 GRM1A_HUMAN | K.GS#DSSSEKGGVPGTPSTQSLGSR.N       | S45:       | 3 | 3,3063 | 0,211 | 0,567  |
| 14 | P40818 UBP8_HUMAN  | R.STKPVVFS#PTLM*LTDEEK.A           | S452:      | 3 | 3,1766 | 0,276 | -0,345 |
| 14 | Q09666 AHNK_HUMAN  | K.SPQIS#M*SDIDLNLKGP.K.I           | S4520:     | 3 | 3,5265 | 0,413 | 0,094  |
| 14 | Q14676 MDC1_HUMAN  | R.SQTTTERDS#DTDVEEEELPVENR.E       | S453:      | 3 | 5,5888 | 0,456 | 0,398  |
| 14 | Q13098 CSN1_HUMAN  | K.SPPREGS#QGELTPANSQSR.M           | S454:      | 3 | 3,4315 | 0,186 | 0      |
| 14 | P53396 ACLY_HUMAN  | R.TAS#FESRADEVAPAK.K               | S455:      | 3 | 2,6433 | 0,128 | 0,21   |
| 14 | Q9H4M9 EHD1_HUMAN  | K.DKPTYDEIFYTLS#PVNGK.I            | S456:      | 3 | 4,8616 | 0,359 | -0,169 |

|    |                    |                                   |              |   |        |       |        |
|----|--------------------|-----------------------------------|--------------|---|--------|-------|--------|
| 14 | Q9NZN3 EHD3_HUMAN  | R.DKPM*YDEIFYTLS#PVDGK.I          | S456:        | 3 | 3,4069 | 0,317 | -0,413 |
| 14 | Q9H223 EHD4_HUMAN  | K.DKPVYDELFTLS#PINGK.I            | S459:        | 3 | 3,5884 | 0,239 | -0,336 |
| 14 | O60784 TOM1_HUMAN  | K.AADRLPNLSS#PSAEGPPGPPSGPAPR.K   | S462:        | 3 | 5,8788 | 0,523 | -0,213 |
| 14 | Q9ULU4 PKCB1_HUMAN | K.ATSSHFSAS#EESM*DFLDK.S          | S462:        | 3 | 4,3953 | 0,326 | -0,263 |
| 14 | Q15643 TRIPB_HUMAN | R.DIS#LDELHDLR.L                  | S464:        | 2 | 3,1301 | 0,431 | 0      |
| 14 | Q15149 PLEC1_HUMAN | R.RGS#FDATGSGFSM*TFSSSSYSSSGYGR.R | S4642:       | 3 | 3,9548 | 0,549 | -0,255 |
| 14 | Q8TE76 MORC4_HUMAN | R.RCS#VPPEQELTDEDLCLSK.A          | S465:        | 3 | 4,6616 | 0,246 | -0,153 |
| 14 | Q14C86 GAPD1_HUMAN | K.SSSLEM*TPYNTPQLS#PATTPANKK.N    | S466:        | 3 | 4,5541 | 0,421 | 0,482  |
| 14 | Q96EB6 SIRT1_HUMAN | R.DGPGLERS#PGEPGGAAPER.E          | S47:         | 3 | 3,717  | 0,316 | -0,095 |
| 14 | Q9UPQ0 LIMC1_HUMAN | R.SHS#TEPNLSSFLNDPNPM*K.Y         | S471:        | 3 | 3,7777 | 0,307 | -0,331 |
| 14 | O75151 PHF2_HUMAN  | R.EKEEPPS#PIEATPPQSLEK.V          | S474:        | 3 | 2,9341 | 0,118 | -0,08  |
| 14 | P05787 K2C8_HUMAN  | R.DGKLV#ESSDVLPK.-                | S475:        | 2 | 4,2179 | 0,403 | 0,236  |
| 14 | Q9Y4E1 FA21C_HUMAN | R.KVQS#TADIFGDEEGDLFK.E           | S478:        | 3 | 4,6375 | 0,38  | 0,088  |
| 14 | Q99816 TS101_HUMAN | K.DLKPVLDSYVFNDS#SR.E             | S48:         | 3 | 3,3736 | 0,307 | -0,184 |
| 14 | O60825 F262_HUMAN  | R.NYS#VGSRLKPLS#PLR.A             | S483:S493:   | 3 | 3,1391 | 0,258 | 0,282  |
| 14 | P47736 RPGP1_HUMAN | K.AAGISLIVPGKS#PTR.K              | S484:        | 3 | 2,7784 | 0,203 | 0,355  |
| 14 | P11169 GTR3_HUMAN  | R.SGKDGVM*EM*NS#IEPAKETTTNV.-     | S485:        | 3 | 3,9709 | 0,194 | 0,224  |
| 14 | P38432 P80C_HUMAN  | K.LLELTSS#YSPDVSDYKEGR.I          | S487:        | 3 | 3,5311 | 0,26  | -0,082 |
| 14 | P38432 P80C_HUMAN  | K.LLELTSSYS#PDVSDYKEGR.I          | S489:        | 3 | 3,9842 | 0,375 | -0,327 |
| 14 | P50402 EMD_HUMAN   | R.RLS#PPSSAASSYSFSDLNSTR.G        | S49:         | 3 | 3,5158 | 0,195 | 0,153  |
| 14 | Q8TAD8 SNIP1_HUMAN | R.RPDHS#GGS#PS#PPTSEPAR.S         | S49:S52:S54: | 3 | 3,6377 | 0,199 | -0,177 |
| 14 | Q8IWJ2 GCC2_HUMAN  | K.INS#LTEEKDDFINK.L               | S490:        | 2 | 4,4646 | 0,454 | 1,118  |
| 14 | Q9UHB6 LIMA1_HUMAN | R.ETPHS#PGVEDAPIAK.V              | S490:        | 3 | 3,3796 | 0,262 | 0,225  |
| 14 | Q9UHB6 LIMA1_HUMAN | R.ETPHS#PGVEDAPIAK.V              | S490:        | 2 | 2,2285 | 0,367 | -0,45  |
| 14 | Q86X29 LSR_HUMAN   | R.ARS#VDALDDLTPPSTAESGSR.S        | S493:        | 3 | 3,1472 | 0,086 | 0      |
| 14 | Q9UER7 DAXX_HUMAN  | K.DGDKS#PM*SSLQISNEK.N            | S495:        | 3 | 4,8588 | 0,398 | 0      |
| 14 | O43432 IF4G3_HUMAN | R.RS#PVPAQIAITVPK.T               | S495:        | 3 | 4,1172 | 0,233 | -0,235 |
| 14 | Q9UER7 DAXX_HUMAN  | K.DGDKS#PM*SSLQISNEK.N            | S495:        | 2 | 3,6961 | 0,304 | -0,666 |
| 14 | O43432 IF4G3_HUMAN | R.RS#PVPAQIAITVPK.T               | S495:        | 2 | 3,4418 | 0,341 | 0      |
| 14 | Q14676 MDC1_HUMAN  | K.DQPPFGDS#DDS#VEADKSSPGIHLER.S   | S495:S498:   | 3 | 3,1394 | 0,284 | 0,448  |
| 14 | Q8N3X1 FNBP4_HUMAN | K.IDENS#DKEM*EVEESPEK.I           | S499:        | 3 | 5,7812 | 0,362 | 0,522  |
| 14 | Q8N3X1 FNBP4_HUMAN | K.IDENS#DKEM*EVEES#PEKIK.V        | S499:S508:   | 3 | 4,0473 | 0,284 | -0,226 |
| 14 | Q8WUM0 NU133_HUMAN | R.KGLPLGSAVSSPVLF#PVGR.R          | S50:         | 3 | 4,9036 | 0,416 | -0,447 |



|    |                    |                                      |            |   |        |       |        |
|----|--------------------|--------------------------------------|------------|---|--------|-------|--------|
| 14 | Q03164 HRX_HUMAN   | R.S#DTPEVHPPLISQS#PENESNDRR.S        | S504:S518: | 3 | 3,7965 | 0,406 | -0,064 |
| 14 | Q9BY44 EIF2A_HUMAN | R.SDKS#PDLAPTAPQSTPR.N               | S506:      | 3 | 3,7162 | 0,204 | -0,282 |
| 14 | Q9BY44 EIF2A_HUMAN | R.SDKS#PDLAPTAPQSTPR.N               | S506:      | 2 | 3,5271 | 0,426 | -0,753 |
| 14 | Q8N108 MIER1_HUMAN | R.VNS#NGKES#PGSSEFFQEAVSHGK.F        | S507:S512: | 3 | 3,3139 | 0,344 | -0,283 |
| 14 | Q96S66 CLCC1_HUMAN | K.ESSTESSQSAKPVSGQDTSNGNTEGS#PAAEK.A | S509:      | 3 | 3,5054 | 0,351 | -0,483 |
| 14 | Q9ULT0 TTC7A_HUMAN | R.RGS#PSAAFTFPDITDFGK.L              | S51:       | 3 | 3,9141 | 0,402 | 0      |
| 14 | Q9NYF8 BCLF1_HUMAN | K.DLFDYS#PPLHK.N                     | S512:      | 2 | 3,7918 | 0,522 | -0,173 |
| 14 | Q6PJT7 ZC3HE_HUMAN | R.DLVQDPKPAS#PK.F                    | S515:      | 2 | 2,6922 | 0,319 | -0,887 |
| 14 | O60934 NBN_HUMAN   | K.EQHLSSENEPVDNTS#DNNLFTDITDLK.S     | S518:      | 3 | 4,6753 | 0,365 | -0,31  |
| 14 | Q9NQW6 ANLN_HUMAN  | K.GFTECEM*TKSS#PLK.I                 | S518:      | 2 | 3,6649 | 0,403 | -0,357 |
| 14 | Q14721 KCNB1_HUMAN | R.SSS#SPQHNLNVQLEDM*YNK.M            | S519:      | 3 | 4,026  | 0,209 | 1,352  |
| 14 | Q99661 KIF2C_HUMAN | R.M*EGAEINKS#LLALK.E                 | S519:      | 3 | 3,9041 | 0,46  | 0,113  |
| 14 | O00567 NOL5A_HUMAN | K.SFSKEELMS#SDLEETAGSTSIPK.R         | S519:      | 3 | 3,9002 | 0,368 | -0,358 |
| 14 | Q9BST9 RTKN_HUMAN  | R.TFS#LDAVPPDHSR.A                   | S520:      | 2 | 3,2564 | 0,37  | -0,301 |
| 14 | Q5H9R7 SAPS3_HUMAN | R.NTVDLVTTCHIHSS#SDDEIDFK.E          | S523:S524: | 3 | 4,9349 | 1     | -0,272 |
| 14 | Q5H9R7 SAPS3_HUMAN | R.NTVDLVTTCHIHSS#SDDEIDFK.E          | S524:S525: | 3 | 5,2352 | 1     | -0,272 |
| 14 | Q9UPN3 MACF1_HUMAN | R.S#SSSASQSNHSCSTM*PSSPATPASGTK.V    | S5276:     | 3 | 3,9293 | 0,335 | -0,401 |
| 14 | Q9BST9 RTKN_HUMAN  | R.TFSLDAVPPDHS#PR.A                  | S529:      | 2 | 3,6349 | 0,381 | 0,452  |
| 14 | Q9BST9 RTKN_HUMAN  | R.TFSLDAVPPDHS#PR.A                  | S529:      | 3 | 2,9572 | 0,442 | 0,226  |
| 14 | Q7Z3D4 LYSM3_HUMAN | R.S#TS#RDRLDDIIVLTK.D                | S53:S55:   | 2 | 2,9431 | 0,192 | 0,451  |
| 14 | Q6P4Q7 CNNM4_HUMAN | R.DFS#AFKDADNELK.V                   | S533:      | 2 | 3,039  | 0,202 | -0,309 |
| 14 | Q9BTA9 WAC_HUMAN   | R.SPSPGPNHTSNS#SNASNATVVPQNSSAR.S    | S534:      | 3 | 3,7019 | 0,347 | 0,257  |
| 14 | Q5TC82 RC3H1_HUMAN | K.IDHLSSSAPGS#PPDLLESVPK.S           | S535:      | 3 | 2,8237 | 0,138 | 0,329  |
| 14 | Q16555 DPYL2_HUMAN | R.NLHQSS#GFLSLSGAQIDDNIPR.R          | S537:      | 3 | 5,6919 | 0,406 | -0,651 |
| 14 | Q9UBT7 CTNL1_HUMAN | K.YGYLS#LPKPM*K.N                    | S538:      | 2 | 2,4613 | 0,266 | -0,175 |
| 14 | P40855 PEX19_HUMAN | R.S#PGDTAKDALFASQEK.F                | S54:       | 2 | 3,331  | 0,445 | -0,21  |
| 14 | P40855 PEX19_HUMAN | R.S#PGDTAKDALFASQEK.F                | S54:       | 3 | 3,2806 | 0,203 | -0,105 |
| 14 | Q9UQC2 GAB2_HUMAN  | R.NNTVIDELPFKS#PITK.S                | S543:      | 3 | 2,9453 | 0,322 | -0,193 |
| 14 | Q9UQC2 GAB2_HUMAN  | R.NNTVIDELPFKS#PITK.S                | S543:      | 2 | 2,9429 | 0,328 | 0,386  |
| 14 | Q09666 AHNK_HUMAN  | K.GPRIS#APNVDFNLEGPK.V               | S5448:     | 3 | 4,4639 | 0,382 | -0,193 |
| 14 | Q09666 AHNK_HUMAN  | K.GPRIS#APNVDFNLEGPK.V               | S5448:     | 2 | 3,1447 | 0,548 | -0,452 |
| 14 | P54278 PMS2_HUMAN  | K.APETDDSFSS#DVDCHSNQEDTGCK.F        | S547:      | 3 | 4,0318 | 0,462 | -0,408 |
| 14 | Q9H5J0 ZBTB3_HUMAN | R.SKPDPEVGPLLVGQPLPGS#PTADR.Q        | S549:      | 3 | 4,4514 | 0,372 | -0,73  |

|    |                    |                                    |            |   |        |       |        |
|----|--------------------|------------------------------------|------------|---|--------|-------|--------|
| 14 | Q3L8U1 CHD9_HUMAN  | R.VM*S#PENFPTASVEGKEEK.K           | S550:      | 3 | 3,7164 | 0,284 | 0,088  |
| 14 | Q9NWH9 SLTM_HUMAN  | K.S#PGHM*VILDQTK.G                 | S553:      | 2 | 3,7654 | 0,506 | -0,257 |
| 14 | Q86VP6 CAND1_HUMAN | K.VIRPLDQPSS#FDATPYIK.D            | S558:      | 3 | 3,2747 | 0,25  | -0,43  |
| 14 | Q96FV9 THOC1_HUMAN | K.TGEDEDEEDNDALLKENES#PDVR.R       | S560:      | 3 | 6,9361 | 0,567 | 0,475  |
| 14 | Q15059 BRD3_HUMAN  | K.QASASYDS#EEEEGLPM*SYDEKR.Q       | S563:      | 3 | 3,078  | 0,185 | 0,6    |
| 14 | P51116 FXR2_HUMAN  | R.TVM*DGGLES#DGNPM*TENGLDES RPQR.R | S566:      | 3 | 4,3611 | 0,41  | 0,841  |
| 14 | Q7KZI7 MARK2_HUMAN | R.VPVASPS#AHNISSGGAPDR.T           | S571:      | 2 | 2,4681 | 0,401 | -0,922 |
| 14 | Q92610 ZN592_HUMAN | K.VLHSSNPVPLYAPNLS#PPADSR.I        | S573:      | 3 | 4,1593 | 0,379 | -0,076 |
| 14 | Q96J84 KIRR1_HUMAN | K.AIYSS#FKDDVDLK.Q                 | S574:      | 2 | 3,5776 | 0,308 | -0,309 |
| 14 | P17812 PYRG1_HUMAN | R.SGSSS#PDSEITELKFPSINHD.-         | S575:      | 3 | 3,1011 | 0,278 | -0,314 |
| 14 | Q09666 AHNK_HUMAN  | K.ASLGSLEGEAEAEASS#PKGK.F          | S5763:     | 2 | 3,4299 | 0,499 | -0,427 |
| 14 | Q8NG31 CASC5_HUMAN | R.IQQLS#NPLSISLTDRK.T              | S578:      | 3 | 2,709  | 0,211 | -0,554 |
| 14 | O00178 GTPB1_HUMAN | K.LLQTTNNS#PM*NSKPQIK.M            | S580:      | 3 | 2,9879 | 0,332 | -0,342 |
| 14 | Q5JSH3 WDR44_HUMAN | K.SDTDTGVCS#GTDED PDDKNAPFR.Q      | S582:      | 3 | 5,0929 | 0,495 | 0,568  |
| 14 | Q92560 BAP1_HUMAN  | K.GS#SPSIRPIQSGSSPVEK.E            | S582:      | 3 | 2,6601 | 0,27  | 0,253  |
| 14 | Q13428 TCOF_HUMAN  | K.SLGNILQAKPTSS#PAK.G              | S583:      | 2 | 3,6021 | 0,388 | 0,361  |
| 14 | Q71RC2 LARP4_HUMAN | K.DGLNQTTIPVS#PPSTTKPSR.A          | S583:      | 3 | 3,4088 | 0,329 | 0      |
| 14 | Q7L1V2 MON1B_HUMAN | K.DKDQPPS#PSPPPQSEALSSTR.L         | S59:       | 3 | 3,9825 | 0,423 | 0,536  |
| 14 | Q86VM9 ZCH18_HUMAN | R.GPS#QEEEDNHS#DEEDRASEPK.S        | S59:S67:   | 3 | 3,06   | 0,321 | -0,216 |
| 14 | Q9Y2X7 GIT1_HUMAN  | R.HGS#GADSDYENTQSGDLLGLEGK.R       | S592:      | 3 | 5,2836 | 0,501 | -0,145 |
| 14 | Q96T23 RSF1_HUMAN  | K.DAQRSL#PIPEEVPK.S                | S594:      | 3 | 4,0489 | 0,348 | 0,331  |
| 14 | Q06124 PTN11_HUMAN | R.VYENVGLM*QQQS#FR.-               | S595:      | 2 | 3,7702 | 0,402 | 0,508  |
| 14 | Q12830 BPTF_HUMAN  | R.ES#HTPVSIQEEIVGDFK.S             | S598:      | 3 | 4,1606 | 0,253 | 0      |
| 14 | P19634 SL9A1_HUMAN | K.IPS#AVSTVSM*QNIHPK.S             | S599:      | 3 | 3,9528 | 0,408 | 0,101  |
| 14 | P08473 NEP_HUMAN   | K.SES#QM*DITDINTPKPK.K             | S6:        | 3 | 4,0465 | 0,475 | -0,385 |
| 14 | Q86W92 LIPB1_HUMAN | R.SQS#TTFNPDDM*SEPEFKR.G           | S601:      | 3 | 3,5849 | 0,443 | 0,414  |
| 14 | O94880 PHF14_HUMAN | R.KAELM*GISTDIFVDNSDTSSS#VDGR.R    | S603:      | 3 | 5,0837 | 0,444 | -0,516 |
| 14 | Q05209 PTN12_HUMAN | R.TPLSFTNPLHSDDS#DSDER.N           | S606:      | 3 | 5,3215 | 0,553 | -0,248 |
| 14 | Q14157 UBP2L_HUMAN | R.YPSSIS#SSPQKDLTQAK.N             | S607:      | 3 | 3,5978 | 0,413 | 0,382  |
| 14 | Q96T23 RSF1_HUMAN  | K.STLESEKPGS#PEAAETS#PPSNIIDHCEK.L | S612:S619: | 3 | 4,0977 | 1     | 0,462  |
| 14 | Q14151 SAFB2_HUMAN | R.DILS#FDKIK.E                     | S613:      | 2 | 3,0889 | 0,312 | -0,316 |
| 14 | Q7Z2K8 GRIN1_HUMAN | K.VGSLPLEKGS#PVTTTK.A              | S615:      | 2 | 3,7467 | 0,476 | -0,072 |
| 14 | Q9P2E9 RRBP1_HUMAN | R.NTDVAQS#PEAPKQEAPAK.K            | S615:      | 2 | 2,2608 | 0,309 | -0,56  |

|    |                    |                                   |            |   |        |       |        |
|----|--------------------|-----------------------------------|------------|---|--------|-------|--------|
| 14 | Q9UPN6 RBM16_HUMAN | K.SSEPVKETVQTTQS#PTPVEK.E         | S617:      | 3 | 3,9118 | 0,388 | -0,325 |
| 14 | Q12906 ILF3_HUMAN  | K.GSSEQAES#DNM*DVPPEDDSKEGAGEQK.T | S62:       | 3 | 3,1158 | 0,266 | -0,562 |
| 14 | Q12906 ILF3_HUMAN  | K.GSSEQAES#DNM*DVPPEDDSKEGAGEQK.T | S62:       | 3 | 3,1158 | 0,363 | -0,437 |
| 14 | Q8TE76 MORC4_HUMAN | K.SSSERS#TPPYLFPEYPEASK.N         | S620:      | 3 | 4,0784 | 0,346 | -0,467 |
| 14 | O75122 CLAP2_HUMAN | R.YESYGM*HS#DDDANSDASSACSER.S     | S621:      | 3 | 3,5352 | 0,29  | 0,76   |
| 14 | O43719 HTSF1_HUMAN | R.EFDEDS#DEKEEEEEDTYEK.V          | S624:      | 3 | 3,4687 | 0,22  | 0,156  |
| 14 | Q96RL1 UIMC1_HUMAN | R.LLS#FLEQSEHK.T                  | S627:      | 2 | 2,9674 | 0,193 | -0,692 |
| 14 | Q6P6C2 ALKB5_HUMAN | K.YQEDS#DPERSDYEEQQLQK.E          | S64:       | 3 | 5,0252 | 0,463 | 0,445  |
| 14 | Q3YEC7 PARF_HUMAN  | K.NSDSLFGLGLEEAGPKES#S#EEGKEGK.T  | S640:S641: | 3 | 4,2416 | 0,23  | -0,444 |
| 14 | O43719 HTSF1_HUMAN | K.VFDDDES#DEKEDEEYADEK.G          | S642:      | 3 | 4,5764 | 0,479 | 0,483  |
| 14 | Q8TDD1 DDX54_HUMAN | K.QPEKEEEEEAGES#VEDIFSEVVGR.K     | S644:      | 3 | 3,3543 | 0,248 | -0,523 |
| 14 | Q96DT7 ZBT10_HUMAN | R.NVNANLLAEAGTS#QDGGDAGTSHDFK.Y   | S647:      | 3 | 4,0075 | 0,433 | -0,274 |
| 14 | Q7Z6Z7 HUWE1_HUMAN | R.RS#SDPLGDTASNLSAVDELM*R.H       | S648:      | 3 | 4,596  | 0,342 | -0,613 |
| 14 | Q00536 PCTK1_HUMAN | R.GPLSS#APEIVHEDLK.M              | S65:       | 2 | 2,8136 | 0,406 | 0      |
| 14 | Q86T82 UBP37_HUMAN | K.SSLALCLDS#DSEDELKR.S            | S650:      | 2 | 3,5362 | 0,597 | -0,302 |
| 14 | Q9ULW0 TPX2_HUMAN  | K.KSVAEGLS#GSLVQEPFQLATEK.R       | S652:      | 3 | 6,0599 | 0,335 | -0,687 |
| 14 | P12270 TPR_HUMAN   | K.RPSTSQTVS#TPAPVPVIESTEAEIAK.A   | S652:      | 3 | 5,6759 | 0,45  | -0,264 |
| 14 | Q8NEY1 NAV1_HUMAN  | R.KTSLDVS#NSAEPGFLAPGAR.S         | S652:      | 3 | 4,3063 | 0,342 | -0,349 |
| 14 | Q96RL1 UIMC1_HUMAN | K.SSETGAFRVPS#PGM*EEAGCSR.E       | S653:      | 3 | 4,2866 | 0,373 | 0,238  |
| 14 | O75151 PHF2_HUMAN  | K.ALRPPTS#PGVFGALQNFK.E           | S655:      | 3 | 3,6161 | 0,256 | -0,647 |
| 14 | Q86YS7 K0528_HUMAN | R.SQS#ESSDEVTELDLSHGK.K           | S659:      | 2 | 4,4745 | 0,566 | 0,421  |
| 14 | Q86V48 LUZP1_HUMAN | R.EKPDS#DDDLDIASLVTAK.L           | S659:      | 3 | 4,3007 | 0,324 | 0      |
| 14 | Q86YS7 K0528_HUMAN | R.SQS#ESSDEVTELDLSHGK.K           | S659:      | 3 | 3,4289 | 0,433 | -0,18  |
| 14 | Q86V48 LUZP1_HUMAN | R.EKPDS#DDDLDIASLVTAK.L           | S659:      | 2 | 3,2001 | 0,434 | -0,546 |
| 14 | Q9UER7 DAXX_HUMAN  | K.KICTLPSPPS#PLASLAPVADSSTR.V     | S671:      | 3 | 5,3502 | 0,452 | -0,503 |
| 14 | Q9UHB7 AFF4_HUMAN  | K.YPES#NRTPVKPS#VEEEDSFFR.Q       | S671:S680: | 3 | 3,8206 | 0,164 | -0,398 |
| 14 | P25205 MCM3_HUMAN  | R.SEDES#ETEDEEEKSQEDQEQK.R        | S672:      | 3 | 5,7586 | 0,518 | -0,631 |
| 14 | Q9C0C2 TB182_HUMAN | R.TEAQDLCRAS#PEPPGPESSR.W         | S672:      | 3 | 4,5213 | 0,377 | 0,156  |
| 14 | O43719 HTSF1_HUMAN | K.LFEES#DDKEDEDADGK.E             | S676:      | 3 | 2,9402 | 0,274 | 0,571  |
| 14 | O43719 HTSF1_HUMAN | K.LFEES#DDKEDEDADGK.E             | S676:      | 2 | 2,4076 | 0,33  | 0,508  |
| 14 | Q9P275 UBP36_HUMAN | K.SPVLSTTTTEPASTM*S#PPPAKK.L      | S682:      | 3 | 2,9884 | 0,284 | -0,235 |
| 14 | Q7Z460 CLAP1_HUMAN | R.SSS#PGKLLGSGYGGLTGGSSR.G        | S688:      | 2 | 3,3365 | 0,551 | 0,548  |
| 14 | Q9H6R7 CB044_HUMAN | R.DSFHS#PGAVSSLK.V                | S690:      | 3 | 4,0668 | 0,41  | 0,183  |

|    |                     |                               |                 |   |        |       |        |
|----|---------------------|-------------------------------|-----------------|---|--------|-------|--------|
| 14 | Q9H6R7 CB044_HUMAN  | R.DSFSS#PGAVSSLK.V            | S690:           | 2 | 4,0219 | 0,448 | 0,081  |
| 14 | Q9Y6X9 MORC2_HUMAN  | K.TASRPAPLVQQLS#PSLLPNSK.S    | S696:           | 3 | 3,3865 | 0,359 | -0,16  |
| 14 | P06748 NPM_HUMAN    | K.DELHIVEAEAM*NYEGS#PIK.V     | S70:            | 3 | 4,8009 | 0,383 | -0,49  |
| 14 | O43493 TGON2_HUMAN  | K.DSPSKS#SAEAQTPEDTPNK.S      | S70:            | 3 | 3,5612 | 0,225 | -0,088 |
| 14 | O43719 HTSF1_HUMAN  | K.EVEDADEKLFEDDS#NEK.L        | S702:           | 3 | 3,2407 | 0,169 | 0,414  |
| 14 | O75151 PHF2_HUMAN   | R.DLS#FLLDKK.A                | S705:           | 2 | 2,4497 | 0,361 | -0,316 |
| 14 | Q96T88 UHRF1_HUMAN  | K.DRPAS#GSPFQLFLSK.V          | S707:           | 2 | 2,4471 | 0,315 | -0,705 |
| 14 | Q96T88 UHRF1_HUMAN  | K.DRPASGS#PFQLFLSK.V          | S709:           | 2 | 2,9944 | 0,457 | -0,776 |
| 14 | Q02543 RL18A_HUMAN  | K.SSGEIVYCGQVFEKS#PLR.V       | S71:            | 3 | 2,9675 | 0,47  | -0,171 |
| 14 | Q13459 MYO9B_HUMAN  | K.AAGM*SS#PGAQSHPEELPR.G      | S717:           | 3 | 2,9696 | 0,298 | -0,191 |
| 14 | P18206 VINC_HUMAN   | K.S#LLDASEEAIKK.D             | S721:           | 2 | 3,4432 | 0,436 | -0,088 |
| 14 | Q5TCQ9 MAGI3_HUMAN  | R.S#GSPKLDPSEVYLK.S           | S722:           | 2 | 4,0254 | 0,398 | -0,458 |
| 14 | Q5TCQ9 MAGI3_HUMAN  | R.S#GSPKLDPSEVYLK.S           | S722:           | 3 | 2,8787 | 0,176 | 0,114  |
| 14 | Q92614 MY18A_HUMAN  | R.STS#FRQGPEESGLGDGTGPK.L     | S728:           | 3 | 3,5264 | 0,334 | -0,351 |
| 14 | Q66K74 MAP1S_HUMAN  | R.S#ASPHDVLCLVS#PCEFEHR.K     | S729:S741:      | 3 | 4,1354 | 0,344 | 0,218  |
| 14 | Q8NFH5 NUP53_HUMAN  | R.SPLLAGGS#PPQPVPVPAHK.D      | S73:            | 3 | 4,84   | 0,475 | 0,3    |
| 14 | Q8NFH5 NUP53_HUMAN  | R.SPLLAGGS#PPQPVPVPAHK.D      | S73:            | 2 | 3,7295 | 0,461 | 0,4    |
| 14 | O60271 JIP4_HUMAN   | R.SAS#QSS#LDKLDQELKEQQK.E     | S730:S733:      | 3 | 3,5296 | 0,261 | -0,394 |
| 14 | Q66K74 MAP1S_HUMAN  | R.SAS#PHDVLCLVS#PCEFEHR.K     | S731:S741:      | 3 | 4,0368 | 0,425 | 0      |
| 14 | O60271 JIP4_HUMAN   | R.SASQSS#LDKLDQELK.E          | S733:           | 2 | 3,7952 | 0,331 | 0,565  |
| 14 | A0FGR8 ESYT2_HUMAN  | R.SS#SLLASPGHISVK.E           | S737:           | 2 | 3,2471 | 0,442 | 0,236  |
| 14 | A0FGR8 ESYT2_HUMAN  | R.SSS#SLLASPGHISVK.E          | S738:           | 3 | 2,8863 | 0,265 | 0,118  |
| 14 | Q32MZ4 LRRF1_HUMAN  | R.CTLPEHESPSQDIS#DACEAESTER.C | S739:           | 3 | 5,0804 | 0,453 | 0,323  |
| 14 | Q92934 BAD_HUMAN    | R.HS#SYPAGTEDDEGM*GEEPSPFR.G  | S74:            | 3 | 4,1273 | 0,212 | 0,22   |
| 14 | Q13427 PPIG_HUMAN   | K.KFDHES#S#PGT#DEDKSG.-       | S744:S745:T748: | 2 | 4,6127 | 0,529 | -0,556 |
| 14 | Q13427 PPIG_HUMAN   | K.KFDHES#S#PGT#DEDKSG.-       | S744:S745:T748: | 3 | 3,5675 | 0,481 | -0,185 |
| 14 | Q9BYW2 SETD2_HUMAN  | K.SES#PFRETEPLVS#PHQDK.L      | S744:S754:      | 3 | 3,5657 | 0,246 | 0,082  |
| 14 | Q96EV2 RBM33_HUMAN  | R.CSATPSAQVKPIVSAS#PPSR.A     | S751:           | 3 | 4,8785 | 0,575 | 0,345  |
| 14 | Q8IWB9 TEX2_HUMAN   | R.SSSKGS#VEEIM*SQPK.Q         | S751:           | 3 | 3,1077 | 0,17  | 0,216  |
| 14 | Q96EV2 RBM33_HUMAN  | R.CSATPSAQVKPIVSAS#PPSR.A     | S751:           | 2 | 2,7968 | 0,292 | 0,23   |
| 14 | B2RTR6 B2RTR6_HUMAN | R.SRNS#LPNQVAFPEGEEQDAVSGGK.F | S752:           | 3 | 4,1188 | 0,312 | -0,141 |
| 14 | P51826 AFF3_HUMAN   | R.NELLS#PLKDSDEIR.S           | S755:           | 2 | 4,029  | 0,416 | -0,357 |
| 14 | P51826 AFF3_HUMAN   | R.NELLS#PLKDSDEIR.S           | S755:           | 3 | 2,7505 | 0,285 | -0,107 |

|    |                     |                                   |            |   |        |       |        |
|----|---------------------|-----------------------------------|------------|---|--------|-------|--------|
| 14 | O75152 ZC11A_HUMAN  | R.RLS#SASTGKPLS#VEDDFEK.L         | S758:S768: | 3 | 3,0665 | 0,294 | 0,315  |
| 14 | P28749 RBL1_HUMAN   | K.SPVSLTAHSLIGAS#PK.Q             | S762:      | 3 | 4,3773 | 0,404 | -0,111 |
| 14 | P28749 RBL1_HUMAN   | K.SPVSLTAHSLIGAS#PK.Q             | S762:      | 2 | 3,9089 | 0,529 | -0,074 |
| 14 | Q68CZ2 TENS3_HUMAN  | R.KLS#LGQYDNDAGGQLPFSK.C          | S776:      | 2 | 2,3153 | 0,394 | -0,807 |
| 14 | Q9Y520 Q9Y520_HUMAN | R.DQM*EGS#PNSSESEFEHIAR.S         | S779:      | 3 | 2,6748 | 0,339 | -0,086 |
| 14 | P09874 PARP1_HUMAN  | R.GGS#DDSSKDPIDVNYEK.L            | S782:      | 2 | 4,2041 | 0,554 | 0,512  |
| 14 | Q8IY92 BTBDC_HUMAN  | R.DCRS#PGLDTPPIR.G                | S786:      | 2 | 3,2593 | 0,364 | 0,508  |
| 14 | O60343 TBCD4_HUMAN  | R.VASPM*NKS#PSAM*QQQDGLDR.N       | S787:      | 3 | 4,7684 | 0,395 | -0,483 |
| 14 | Q8IWA0 WDR75_HUMAN  | K.VQDTS#NTGLGEDIIHQLSK.S          | S796:      | 3 | 4,614  | 0,394 | -0,171 |
| 14 | O00479 HMGN4_HUMAN  | R.DASTLQS#QKAEGTGDAK.-            | S80:       | 2 | 3,4457 | 0,565 | -0,683 |
| 14 | Q0ZGT2 NEXN_HUMAN   | K.EM*LAS#DDEEDVSSKVEK.A           | S80:       | 2 | 3,0498 | 0,489 | -0,608 |
| 14 | Q93075 TATD2_HUMAN  | R.NNS#SSSFSPHFLGPGVGAASK.G        | S80:       | 3 | 2,9978 | 0,251 | -0,167 |
| 14 | Q15637 SF01_HUMAN   | R.TGDLGIPPNPEDRS#PS#PEPIYNSEGKR.L | S80:S82:   | 3 | 3,4216 | 0,318 | -0,237 |
| 14 | P23193 TCEA1_HUMAN  | K.LLDGPS#TEKDLDEK.K               | S81:       | 2 | 3,0728 | 0,272 | 0,521  |
| 14 | Q9UHB7 AFF4_HUMAN   | K.DLLPS#PAGPVPSKDPK.T             | S814:      | 2 | 2,523  | 0,158 | 0,359  |
| 14 | Q9H7F0 AT133_HUMAN  | K.LVHDS#LEDLQM*TR.Y               | S817:      | 2 | 4,2158 | 0,361 | 0,443  |
| 14 | Q9BQ39 DDX50_HUMAN  | K.LNGDTEEGFNRLS#DEFSK.S           | S82:       | 3 | 2,9138 | 0,273 | 0      |
| 14 | P55265 DSRAD_HUMAN  | R.TM*LLLSRS#PEAQPK.T              | S825:      | 2 | 3,9281 | 0,383 | 0      |
| 14 | Q14008 CKAP5_HUMAN  | K.HS#TSGTDEGEDGDEPDDGSNDVVDLLPR.T | S828:      | 3 | 4,51   | 0,386 | 0,669  |
| 14 | Q6NWX9 PR40B_HUMAN  | R.ELQQAELPNRS#PGFGIK.K            | S832:      | 2 | 2,6372 | 0,444 | -0,311 |
| 14 | Q9NQS7 INCE_HUMAN   | K.INPDNYGM*DLNS#DDSTDDEAHPR.K     | S833:      | 3 | 2,63   | 0,331 | 0,613  |
| 14 | P22314 UBA1_HUMAN   | K.ATLPS#PDKLPGFK.M                | S835:      | 2 | 2,4899 | 0,264 | -0,336 |
| 14 | Q9C0C9 UBE2O_HUMAN  | K.NM*TVEQLLTGSPTS#PTVEPEKPTR.E    | S839:      | 3 | 4,6543 | 0,363 | -0,473 |
| 14 | Q9ULH1 DDEF1_HUMAN  | R.TLS#DPPSPLPHGPPNK.G             | S839:      | 2 | 2,2506 | 0,347 | 0,422  |
| 14 | Q9UQ35 SRRM2_HUMAN  | K.S#GTPPRQGSITSPQANEQSVT#PQRR.S   | S846:T866: | 3 | 3,0388 | 0,269 | -0,387 |
| 14 | P16333 NCK1_HUMAN   | R.KPS#VPDSASPADDVDPGER.L          | S85:       | 3 | 3,6233 | 0,37  | 0,081  |
| 14 | P98171 RHG04_HUMAN  | R.CLVPAS#PEQHVEVDK.A              | S860:      | 2 | 2,9458 | 0,413 | 0,614  |
| 14 | Q6GYQ0 GRIPE_HUMAN  | R.RGS#S#PGSLEIPKDLPDILNK.Q        | S860:S861: | 3 | 4,6651 | 0,36  | -0,558 |
| 14 | Q02241 KIF23_HUMAN  | K.YM*LTHQELAS#DGEIETK.L           | S867:      | 3 | 4,2993 | 0,287 | 0      |
| 14 | Q07021 C1QBP_HUMAN  | K.AFVDFLS#DEIKEER.K               | S87:       | 2 | 3,0547 | 0,344 | -0,412 |
| 14 | Q9NZ71 RTEL1_HUMAN  | R.LVS#HPEEPVAGAQTDR.A             | S882:      | 3 | 3,853  | 0,291 | -0,102 |
| 14 | Q9UQE7 SMC3_HUMAN   | R.SEDLDNS#IDKTEAGIK.E             | S886:      | 2 | 3,7061 | 0,554 | 0,067  |
| 14 | P52948 NUP98_HUMAN  | K.YGLQDS#DEEEEEHPSK.T             | S888:      | 3 | 5,3759 | 0,6   | -0,278 |

|    |                    |                                  |            |   |        |       |        |
|----|--------------------|----------------------------------|------------|---|--------|-------|--------|
| 14 | P52948 NUP98_HUMAN | K.YGLQDS#DEEEEEHPSK.T            | S888:      | 2 | 4,2979 | 0,468 | -0,309 |
| 14 | P29317 EPHA2_HUMAN | K.TLADFDPVRS#IR.L                | S892:      | 2 | 2,5825 | 0,318 | -0,332 |
| 14 | Q9C0C2 TB182_HUMAN | R.DS#LGAYASQDANEQGQDLGKR.D       | S893:      | 3 | 2,7843 | 0,186 | 0,238  |
| 14 | Q96N67 DOCK7_HUMAN | R.SRS#LSNSNPDISGTPSPDDEV.R.S     | S896:      | 3 | 3,728  | 0,37  | 0,291  |
| 14 | P29317 EPHA2_HUMAN | R.VSIRLPS#TSGSEGVPR.T            | S897:      | 2 | 2,9588 | 0,512 | -0,653 |
| 14 | Q9BTE7 DCNL5_HUMAN | K.S#PGVAAVAEDGGLKK.C             | S9:        | 2 | 3,3723 | 0,468 | 0,236  |
| 14 | Q02241 KIF23_HUMAN | R.GGGQSVQFTDIETLKQES#PNGSR.K     | S902:      | 3 | 4,214  | 0,15  | 0,727  |
| 14 | Q12872 SFRS8_HUMAN | R.S#RGVS#QEKEAQISSAIVSSVQSK.I    | S905:S909: | 3 | 5,0213 | 0,604 | -0,143 |
| 14 | P05455 LA_HUMAN    | R.S#PSKPLPEVTDEYK.N              | S92:       | 2 | 3,1296 | 0,48  | 0,511  |
| 14 | Q9H2P0 ADNP_HUMAN  | K.VIPEDASES#EEKLDQK.E            | S923:      | 2 | 3,765  | 0,424 | -0,515 |
| 14 | Q99570 PI3R4_HUMAN | K.KPVIPVLS#STILPSTYQIR.I         | S925:      | 3 | 3,1414 | 0,101 | -0,334 |
| 14 | Q9Y6Y8 S23IP_HUMAN | K.VVES#PDFSKDEYLGK.V             | S926:      | 3 | 2,9585 | 0,327 | 0      |
| 14 | Q86TC9 MYPN_HUMAN  | R.TPVDES#DDEIQHDEIPTGK.C         | S928:      | 3 | 3,673  | 0,233 | 0,083  |
| 14 | Q15651 HMG3_HUMAN  | K.EGTAPSENGETKAEAAQKTES#VDNEGE.- | S93:       | 3 | 4,5222 | 0,383 | -0,502 |
| 14 | Q96K76 UBP47_HUMAN | R.ELEQHIQTS#DPENFQSEER.S         | S933:      | 3 | 3,3615 | 0,276 | 0,076  |
| 14 | Q86SQ0 PHL2_HUMAN  | K.AHLPLGQSNS#CGSVLPPSLAAM*AK.D   | S934:      | 3 | 4,6933 | 0,336 | -0,439 |
| 14 | Q86SQ0 PHL2_HUMAN  | K.AHLPLGQSNSCGS#VLPPSLAAM*AK.D   | S937:      | 3 | 4,36   | 0,437 | -0,512 |
| 14 | Q93009 UBP7_HUMAN  | K.IIGVHQEDELLECLS#PATSR.T        | S963:      | 3 | 4,3503 | 0,35  | 0,312  |
| 14 | Q96N67 DOCK7_HUMAN | R.M*SS#HTETSFLQTLTGR.L           | S964:      | 3 | 3,1161 | 0,354 | -0,092 |
| 14 | Q96N67 DOCK7_HUMAN | R.M*SS#HTETSFLQTLTGR.L           | S964:      | 2 | 3,0914 | 0,555 | -0,617 |
| 14 | Q6ZU35 K1211_HUMAN | K.M*PLAQKPALAPKPTS#QTPPAS#PLSK.L | S969:S975: | 3 | 5,2784 | 1     | 0,536  |
| 14 | Q9UK61 CC063_HUMAN | R.QRS#SDYQFPSSPFTDTLK.G          | S971:      | 3 | 2,9978 | 0,184 | -0,251 |
| 14 | P46379 BAT3_HUMAN  | R.ASPEPQRENAS#PAPGTTAEEAM*SR.G   | S973:      | 3 | 4,6997 | 0,406 | 0,425  |
| 14 | Q14814 MEF2D_HUMAN | K.KGFNGCDS#PEPDGEDSLEQSPLLEDK.Y  | S98:       | 3 | 5,3629 | 0,455 | -0,373 |
| 14 | Q8IXT5 RB12B_HUMAN | R.GRPGS#GTSGVDSLSNFIESVK.E       | S98:       | 3 | 3,7109 | 0,18  | -0,252 |
| 14 | Q96H12 CI030_HUMAN | R.SVS#PLLSTHVLGK.E               | S98:       | 3 | 3,0662 | 0,338 | 0,193  |
| 14 | Q14669 TRIPC_HUMAN | R.DDS#LDLSPQGRSL#DVLKR.K         | S987:S997: | 3 | 2,6141 | 0,15  | -0,337 |
| 14 | P13861 KAP2_HUMAN  | R.RVS#VCAETYNPDEEEEDTDP.R.V      | S99:       | 3 | 5,0707 | 0,382 | 0,282  |
| 14 | Q96SB3 NEB2_HUMAN  | R.AS#SLNENVDSALLK.L              | S99:       | 2 | 3,2224 | 0,44  | 0,509  |
| 14 | P17096 HMGA1_HUMAN | K.KLEKEEEEGIS#QES#SEEEQ.-        | S99:S102:  | 3 | 3,7205 | 0,234 | -0,305 |
| 14 | P17096 HMGA1_HUMAN | K.KLEKEEEEGIS#QESS#EEEQ.-        | S99:S103:  | 3 | 4,0237 | 0,246 | 0,305  |
| 14 | Q14974 IMB1_HUMAN  | K.T#VSPDRLELEAAQK.F              | T10:       | 2 | 2,4686 | 0,282 | 0,298  |
| 14 | Q9UKK3 PARP4_HUMAN | K.NYDPYKPLDIT#PPPDQK.A           | T101:      | 3 | 3,5994 | 0,173 | -0,879 |

|    |                       |                                  |                 |   |        |       |        |
|----|-----------------------|----------------------------------|-----------------|---|--------|-------|--------|
| 14 | O75044 FNBP2_HUMAN    | R.SAST#AGDIACAFRPVK.S            | T1014:          | 2 | 2,8821 | 0,342 | -0,352 |
| 14 | Q8NE71 ABCF1_HUMAN    | K.LSVPT#SDEEDEVPAKPR.G           | T108:           | 3 | 3,6852 | 0,394 | -0,089 |
| 14 | P48634 BAT2_HUMAN     | R.T#ASETREGSEYEEIPK.R            | T1083:          | 2 | 3,0409 | 0,308 | 1,653  |
| 14 | O75822 EIF3J_HUMAN    | K.VLT#PEEQVLADKLR.L              | T109:           | 2 | 2,2745 | 0,248 | -0,536 |
| 14 | Q96HC4 PDLI5_HUMAN    | K.EVVKPVPIIT#SPAVSK.V            | T110:           | 2 | 2,5319 | 0,452 | 0,15   |
| 14 | O60264 SMCA5_HUMAN    | K.QTELFAHFIQPAAQKT#PTS#PLK.M     | T113:S116:      | 3 | 3,4748 | 0,322 | -0,35  |
| 14 | O15047 SET1A_HUMAN    | R.RKT#VS#FSAIEVVPAPPPATPPQAK.F   | T1167:S1169:    | 3 | 4,344  | 0,257 | -0,255 |
| 14 | Q3KQU3 MA7D1_HUMAN    | R.SSQPSPT#AVPASDSPPTKQEVK.K      | T118:           | 3 | 2,7895 | 0,262 | -0,237 |
| 14 | P28370 SMCA1_HUMAN    | K.QTELFAHFIQPSAQKSPT#S#PLNM*K.L  | T118:S119:      | 3 | 2,7933 | 0,178 | -0,318 |
| 14 | Q96T23 RSF1_HUMAN     | R.IET#DEEESCDNAHGDNQPAR.D        | T1295:          | 3 | 4,3595 | 0,439 | -0,75  |
| 14 | Q8NI08 NCOA7_HUMAN    | K.FNIT#PNKLVLENK.L               | T134:           | 2 | 4,5153 | 0,284 | -0,455 |
| 14 | Q8NI08 NCOA7_HUMAN    | K.FNIT#PNKLVLENK.L               | T134:           | 3 | 4,248  | 0,297 | -0,341 |
| 14 | O75976 CBPD_HUMAN     | K.SLLSHEFQDET#DTEEETLYSSK.H      | T1368:          | 3 | 3,6086 | 0,401 | -0,411 |
| 14 | Q14669 TRIPC_HUMAN    | R.QFSIQAEDEREST#DDESNPLGR.A      | T1377:          | 3 | 3,8047 | 0,112 | -0,351 |
| 14 | Q9UQ35 SRRM2_HUMAN    | K.AGM*SSNQSISSVLDVAVPRT#PS#RER.S | T1413:S1415:    | 3 | 5,1073 | 0,457 | 0,584  |
| 14 | Q9ULW0 TPX2_HUMAN     | R.CAT#PVIIDEILPSKK.M             | T147:           | 3 | 4,7183 | 0,5   | -0,415 |
| 14 | Q9ULW0 TPX2_HUMAN     | R.CAT#PVIIDEILPSKK.M             | T147:           | 2 | 2,444  | 0,422 | -0,622 |
| 14 | P42166 LAP2A_HUMAN    | R.EQGT#ESRSSTPLPTISSAENTR.Q      | T154:           | 3 | 3,5999 | 0,32  | 0,218  |
| 14 | O00512 BCL9_HUMAN     | R.SST#PSHGQTTATEPTPAQK.T         | T155:           | 3 | 4,1567 | 0,307 | -0,182 |
| 14 | Q15154 PCM1_HUMAN     | K.DAST#SPPNRETIGSAQCK.E          | T158:           | 2 | 2,7011 | 0,339 | -0,61  |
| 14 | Q96G03 PGM2_HUMAN     | K.LCAGIM*IT#ASHNPK.Q             | T163:           | 2 | 3,775  | 0,502 | 0,303  |
| 14 | Q14839 CHD4_HUMAN     | K.SAIDLT#PIVVEDKEEK.K            | T1653:          | 2 | 3,7307 | 0,37  | 0,392  |
| 14 | P04920 B3A2_HUMAN     | R.T#SPSSPAPLPHQEATPR.A           | T169:           | 2 | 3,2748 | 0,4   | -0,329 |
| 14 | Q9P289 MST4_HUMAN     | K.LADFGVAGQLTDT#QIKR.N           | T172:           | 3 | 3,3685 | 0,414 | 0      |
| 14 | P52594 NUPL_HUMAN     | K.SLLGDSAPTLHLNKGTP#PSQS#PVVGR.S | T177:S181:      | 3 | 4,5874 | 0,373 | -0,544 |
| 14 | Q96A73 K1191_HUMAN    | R.QPASAQSTPSTT#PHSSPK.Q          | T179:           | 3 | 3,0018 | 0,458 | -0,097 |
| 14 | P00338 LDHA_HUMAN     | K.DQLIYNLLKEEQT#PQNK.I           | T18:            | 3 | 4,1087 | 0,409 | -0,425 |
| 14 | ##Q95HB8 Q95HB8_HUMAN | K.IT#HAVNDS#HNY#HRQLRK.L         | T182:S188:Y191: | 3 | 2,7281 | 0,113 | -1,65  |
| 14 | P18858 DNL1_HUMAN     | K.EGEDGDQPTT#PPKPLK.T            | T183:           | 2 | 2,3909 | 0,216 | -0,409 |
| 14 | P28482 MK01_HUMAN     | R.VADPDHDHTGFLT#EY#VATR.W        | T185:Y187:      | 3 | 3,9408 | 0,294 | 0,159  |
| 14 | Q96EK9 KTI12_HUMAN    | K.ELEREESGAAESPALVT#PDSEK.S      | T189:           | 3 | 3,912  | 0,088 | 0,075  |
| 14 | Q9H4Z3 PCIF1_HUMAN    | R.EEASLLSHSPGT#SNQSQPCS#PKPIR.L  | T22:S30:        | 3 | 5,0525 | 1     | 0,766  |
| 14 | Q9H1I8 ASCC2_HUMAN    | R.GRLT#PSDM*PLLELK.D             | T233:           | 3 | 2,6311 | 0,13  | 0,11   |

|    |                     |                                 |            |   |        |       |        |
|----|---------------------|---------------------------------|------------|---|--------|-------|--------|
| 14 | Q96T58 MINT_HUMAN   | K.IPSTENSSQEISVEERT#PTK.A       | T2421:     | 3 | 4,0163 | 0,435 | 0,475  |
| 14 | A8K1N6 A8K1N6_HUMAN | K.M*LGQKAT#PPPS#PLLSSELLK.G     | T264:S268: | 3 | 3,7936 | 0,417 | -0,394 |
| 14 | Q5T4S7 UBR4_HUMAN   | R.SNT#PM*GDKDDDDDDDADEK.M       | T2724:     | 3 | 4,9323 | 0,434 | -0,167 |
| 14 | Q8NG27 PJA1_HUMAN   | K.IFFDT#DDDDDM*PHSTSR.W         | T277:      | 2 | 2,7538 | 0,528 | -0,694 |
| 14 | Q9BRD0 BUD13_HUMAN  | R.HDSPDLAPNVT#YSLPR.T           | T279:      | 3 | 2,7926 | 0,09  | -0,196 |
| 14 | Q9NQW6 ANLN_HUMAN   | K.AT#SPVKSTTSITDAK.S            | T294:      | 2 | 3,1606 | 0,419 | -0,615 |
| 14 | Q8N6T7 SIRT6_HUMAN  | R.ALPLPRPPT#PK.L                | T294:      | 2 | 2,2521 | 0,17  | -0,447 |
| 14 | P31350 RIR2_HUMAN   | K.GLSLVDKENT#PPALSGTR.V         | T33:       | 3 | 3,3598 | 0,334 | -0,095 |
| 14 | Q9H0H5 RGAP1_HUMAN  | R.DRCPLPCIPTLIGT#PVK.I          | T342:      | 3 | 4,8322 | 0,367 | -0,453 |
| 14 | Q9H0H5 RGAP1_HUMAN  | R.DRCPLPCIPTLIGT#PVK.I          | T342:      | 2 | 2,8125 | 0,307 | -0,605 |
| 14 | Q9BXS6 NUSAP_HUMAN  | K.LTTEATQT#PVS#NKKPVFDLK.A      | T349:S352: | 3 | 4,1086 | 0,362 | 0,385  |
| 14 | Q01484 ANK2_HUMAN   | R.KT#SLVIVESADNPETCER.L         | T3811:     | 3 | 3,1973 | 0,268 | 0      |
| 14 | P17096 HMG1A1_HUMAN | R.KQPPVSPGT#ALVGSQKEPSEVPT#PK.R | T39:T53:   | 3 | 3,7723 | 0,282 | 0,538  |
| 14 | Q09666 AHNK_HUMAN   | K.VDIDT#PDIDIHGPEGK.L           | T4100:     | 2 | 3,8754 | 0,473 | -0,203 |
| 14 | Q09666 AHNK_HUMAN   | K.VDIDT#PDIDIHGPEGK.L           | T4100:     | 3 | 3,179  | 0,296 | 0      |
| 14 | O75044 FNBP2_HUMAN  | K.ST#VSETFM*SKPSIAK.R           | T425:      | 2 | 2,6488 | 0,272 | 0,5    |
| 14 | P08670 VIME_HUMAN   | R.ET#NLDSLPLVDTHSK.R            | T426:      | 2 | 2,1377 | 0,144 | -0,279 |
| 14 | Q5H9R5 Q5H9R5_HUMAN | R.VASET#HSEGSEYEELPK.R          | T430:      | 3 | 3,0035 | 0,268 | 0,186  |
| 14 | O60934 NBN_HUMAN    | R.IPNYQLSPT#KLPSINK.S           | T434:      | 2 | 3,4852 | 0,37  | -0,193 |
| 14 | Q99549 MPP8_HUMAN   | R.NAFDLFKLT#PEEK.N              | T454:      | 2 | 2,6823 | 0,349 | -0,748 |
| 14 | P08670 VIME_HUMAN   | R.DGQVINET#SQHHDDLE.-           | T458:      | 2 | 4,0708 | 0,424 | -0,064 |
| 14 | Q14202 ZMYM3_HUMAN  | K.T#GSPGPELLFHEGQQK.R           | T462:      | 2 | 3,438  | 0,446 | -0,406 |
| 14 | P53985 MOT1_HUMAN   | K.EEET#SIDVAGKPNEVTK.A          | T466:      | 2 | 2,3048 | 0,359 | 0,634  |
| 14 | Q15003 CND2_HUMAN   | R.KAPLNIPGT#PVLEDFPQNDDEK.E     | T49:       | 3 | 4,7173 | 0,384 | -0,436 |
| 14 | Q03164 HRX_HUMAN    | R.SDT#PEVHPPLPISQS#PENESNDRR.S  | T506:S518: | 3 | 3,7043 | 0,537 | -0,512 |
| 14 | Q9HA05 Q9HA05_HUMAN | K.AFGSGIDIKPGT#PPIAGR.S         | T510:      | 3 | 3,4641 | 0,46  | 0,1    |
| 14 | Q16555 DPYL2_HUMAN  | K.TVT#PASSAKTS#PAKQQAPPVR.N     | T514:S522: | 3 | 4,3877 | 1     | 0,16   |
| 14 | Q8N3X1 FNBP4_HUMAN  | K.VQTT#PKVEEQDLK.F              | T517:      | 2 | 3,6918 | 0,452 | -0,708 |
| 14 | Q9BST9 RTKN_HUMAN   | R.T#FSLDAVPPDHSPR.A             | T518:      | 2 | 3,5128 | 0,456 | -0,075 |
| 14 | Q6PKG0 LARP1_HUMAN  | R.AVT#PVPTKTEEVSNLK.T           | T526:      | 3 | 3,2922 | 0,446 | 0,204  |
| 14 | Q6PKG0 LARP1_HUMAN  | R.AVT#PVPTKTEEVSNLK.T           | T526:      | 2 | 2,737  | 0,422 | 0,272  |
| 14 | P34932 HSP74_HUMAN  | K.M*QVDQEEPHVEEQQT#PAENK.A      | T538:      | 3 | 3,7991 | 0,344 | -0,067 |
| 14 | Q9Y3L3 3BP1_HUMAN   | K.VT#RSPPETAAPVEDM*AR.R         | T548:      | 3 | 3,6335 | 0,199 | -0,095 |



|    |                     |                                   |        |   |        |       |        |
|----|---------------------|-----------------------------------|--------|---|--------|-------|--------|
| 14 | Q9UBU7 DBF4A_HUMAN  | K.APFHT#PPEEPNECDFK.N             | T553:  | 3 | 3,6542 | 0,321 | 0,275  |
| 14 | Q9NV70 EXOC1_HUMAN  | K.LQQHQSM*PGTM*AEAEDLDGGT#LSR.Q   | T559:  | 3 | 3,3593 | 0,162 | -0,068 |
| 14 | Q9Y3Z3 SAMH1_HUMAN  | R.NFTKPDGDVIAPLIT#PQK.K           | T592:  | 3 | 3,7892 | 0,288 | -0,931 |
| 14 | Q12906 ILF3_HUMAN   | K.LFPDT#PLALDANKK.K               | T592:  | 2 | 3,3762 | 0,424 | -0,226 |
| 14 | Q96RN5 MED15_HUMAN  | K.LKNDM*AVPT#PPPPVPPTK.Q          | T603:  | 3 | 3,8477 | 0,367 | 0,35   |
| 14 | B1ALK7 B1ALK7_HUMAN | K.IIVEET#KSNGQTVIEEK.S            | T636:  | 3 | 3,169  | 0,337 | -0,092 |
| 14 | O75151 PHF2_HUMAN   | K.ALRPPT#SPGVFGALQNFK.E           | T654:  | 2 | 3,099  | 0,365 | -0,493 |
| 14 | P25205 MCM3_HUMAN   | R.SEDESET#EDEEEKSQEDQEQK.R        | T674:  | 3 | 6,2967 | 0,46  | -0,631 |
| 14 | O00116 ADAS_HUMAN   | R.RAASAAT#AAPTATPAAQESGTIPK.K     | T68:   | 3 | 5,23   | 0,345 | 0,316  |
| 14 | Q14160 LAP4_HUMAN   | K.GST#PYKGDDEGIFISR.V             | T749:  | 3 | 2,9911 | 0,167 | -0,1   |
| 14 | Q6ZNB6 NFXL1_HUMAN  | R.HSPAGSQALQTT#AAELM*SQK.K        | T75:   | 3 | 3,2907 | 0,159 | -0,245 |
| 14 | Q9NRA8 4ET_HUMAN    | K.ASEENLLSSSVPSADRDSSPT#TNSK.L    | T754:  | 3 | 3,1635 | 0,267 | 0,4    |
| 14 | Q13435 SF3B2_HUMAN  | K.KIEEAM*DGSET#PQLFTVLPEK.R       | T757:  | 3 | 3,7784 | 0,357 | 0,223  |
| 14 | O60293 CC131_HUMAN  | K.ENDPLRT#PEALPEEK.K              | T766:  | 3 | 3,4826 | 0,369 | -0,302 |
| 14 | Q14008 CKAP5_HUMAN  | K.HSTSGT#DEGEDGDEPDDGSNDVVDLLPR.T | T832:  | 3 | 4,0192 | 0,411 | 0,426  |
| 14 | Q92547 TOPB1_HUMAN  | K.DALAALET#PGRPSQQK.R             | T848:  | 3 | 2,9361 | 0,145 | 0,104  |
| 14 | Q12888 TP53B_HUMAN  | R.ADDPLRLDQELQPQT#QEK.T           | T855:  | 3 | 3,9616 | 0,118 | -0,235 |
| 14 | Q6PD62 CTR9_HUMAN   | K.GGEFDEFVNDT#DDDLPISKK.K         | T925:  | 3 | 4,3881 | 0,398 | -0,676 |
| 14 | Q9Y3P9 RBGP1_HUMAN  | K.EVLDEDT#DEEKETLK.N              | T996:  | 2 | 3,571  | 0,316 | 0,521  |
| 14 | Q92870 APBB2_HUMAN  | R.TKSFLNY#YADLETSAR.E             | Y164:  | 3 | 4,1437 | 0,369 | -0,28  |
| 14 | P07355 ANXA2_HUMAN  | K.LSLEGDHSTPPSAY#GSVK.A           | Y24:   | 2 | 2,3889 | 0,499 | 0,507  |
| 14 | Q9HCC9 ZFY28_HUMAN  | K.AKDPDAELACSM*QY#DDQELEQLSR.M    | Y337:  | 3 | 3,7502 | 0,483 | -0,566 |
| 14 | P01892 1A02_HUMAN   | R.KGGSY#SQAASSDSAQGSVSLTACKV.-    | Y344:  | 3 | 6,2705 | 0,354 | 0,416  |
| 14 | Q8WXH0 SYNE2_HUMAN  | R.RGSM*SY#LAAVEEEVEESSVK.S        | Y4111: | 3 | 4,1529 | 0,234 | -0,558 |
| 14 | Q05519 SFR11_HUMAN  | R.DYDEEEQGY#DSEKEK.K              | Y432:  | 3 | 2,7954 | 0,414 | 0      |
| 14 | Q9Y2X7 GIT1_HUMAN   | R.HGSGADSDY#ENTQSGDLLGLEGK.R      | Y598:  | 3 | 5,5639 | 0,457 | -0,145 |
| 14 | Q8ND76 CCNY_HUMAN   | R.KY#SSCSTIFLDDSTVSPNLK.Y         | Y98:   | 3 | 3,6482 | 0,248 | -0,148 |
| 14 | P62633 CNBP_HUMAN   | K.DCDLQEDACYNCGR.G                |        | 2 | 5,4511 | 0,544 | 0,344  |
| 14 | P04083 ANXA1_HUMAN  | R.SEDFGVNEIDLADSDAR.A             |        | 2 | 5,4363 | 0,453 | 0,07   |
| 14 | Q8N1F7 NUP93_HUMAN  | K.LNQVCFDDDGTSPPQDR.L             |        | 2 | 5,0308 | 0,585 | 0,5    |
| 14 | P06744 G6PI_HUMAN   | R.FAAYFQQGDM*ESNGK.Y              |        | 2 | 4,8259 | 0,507 | 0,357  |
| 14 | Q8NE71 ABCF1_HUMAN  | R.LQGQLEQGDDTAAER.L               |        | 2 | 4,6474 | 0,554 | -0,748 |
| 14 | P67936 TPM4_HUMAN   | K.IQALQQQADEAEDR.A                |        | 3 | 4,5479 | 0,346 | 0,113  |

|    |                     |                           |   |        |       |        |
|----|---------------------|---------------------------|---|--------|-------|--------|
| 14 | A4D186 A4D186_HUMAN | K.IQVLQQQADDAEER.A        | 2 | 4,495  | 0,451 | 0,371  |
| 14 | Q70UQ0 IKIP_HUMAN   | K.LETNEFQQLQSK.I          | 2 | 4,4799 | 0,311 | 0,083  |
| 14 | Q9Y3Y2 CA077_HUMAN  | K.GHLDAELDAYM*AQTDPETND.- | 3 | 4,4429 | 0,514 | -0,082 |
| 14 | P05787 K2C8_HUMAN   | R.ASLEAAIADAEQR.G         | 3 | 4,4267 | 0,441 | -0,884 |
| 14 | Q9NZT2 OGFR_HUMAN   | R.DADAGDEDEESEEP.R.A      | 2 | 4,3792 | 0,577 | -0,513 |
| 14 | P05455 LA_HUMAN     | K.IIEDQQESLNK.W           | 2 | 4,3299 | 0,37  | -0,648 |
| 14 | P21796 VDAC1_HUMAN  | K.SENGLLEFTSSGSANTETTK.V  | 2 | 4,3164 | 0,548 | 0,062  |
| 14 | O14737 PDCD5_HUMAN  | R.NSILAQVLDQSAR.A         | 2 | 4,312  | 0,551 | -0,086 |
| 14 | Q06323 PSME1_HUMAN  | R.IEDGNNFGVAVQEK.V        | 2 | 4,3    | 0,441 | 0,401  |
| 14 | Q04837 SSB_HUMAN    | R.SGDSEVYQLGDVSQK.T       | 2 | 4,2094 | 0,481 | 0,454  |
| 14 | Q9Y2Z0 SUGT1_HUMAN  | K.NYAAALETFTGQK.L         | 2 | 4,1978 | 0,57  | -0,237 |
| 14 | Q9Y282 ERGI3_HUMAN  | K.NEGCQVYGFLEVNK.V        | 2 | 4,1608 | 0,499 | -0,147 |
| 14 | Q04917 1433F_HUMAN  | K.AVTELNEPLSNEDR.N        | 2 | 4,1538 | 0,407 | 0,538  |
| 14 | Q86UP2 KTN1_HUMAN   | K.TQLLDVQDENK.L           | 2 | 4,0875 | 0,442 | -0,171 |
| 14 | P19338 NUCL_HUMAN   | K.GFGFVDFNSEDAK.A         | 2 | 4,0759 | 0,313 | -0,547 |
| 14 | P27348 1433T_HUMAN  | K.AVTEQGAELSNEER.N        | 2 | 4,0757 | 0,498 | -0,159 |
| 14 | P61981 1433G_HUMAN  | K.NVTELNEPLSNEER.N        | 2 | 4,0722 | 0,504 | 0,297  |
| 14 | P05783 K1C18_HUMAN  | R.QAQEYEALLNIK.V          | 3 | 4,054  | 0,214 | -0,064 |
| 14 | Q99460 PSMD1_HUMAN  | R.SGM*YTVAM*AYCGSGNNK.A   | 2 | 4,0165 | 0,571 | 0,662  |
| 14 | P23246 SFPQ_HUMAN   | R.M*GGGGAM*NM*GDPYGGGQK.F | 2 | 4,0008 | 0,508 | -0,603 |
| 14 | Q15427 SF3B4_HUMAN  | R.NQDATVYVGGGLDEK.V       | 2 | 3,9848 | 0,594 | 0,485  |
| 14 | P05387 RLA2_HUMAN   | K.NIEDVIAQGIGK.L          | 2 | 3,9745 | 0,569 | -0,388 |
| 14 | P35579 MYH9_HUMAN   | R.ELEDATETADAM*NR.E       | 2 | 3,9665 | 0,601 | -0,848 |
| 14 | P05387 RLA2_HUMAN   | K.NIEDVIAQGIGK.L          | 3 | 3,9535 | 0,28  | 0,218  |
| 14 | Q99714 HCD2_HUMAN   | R.LVAGEM*GQNEPDQGGQR.G    | 2 | 3,9412 | 0,484 | -0,813 |
| 14 | Q9Y4W6 AFG32_HUMAN  | R.NLETLQQELGIEGENR.V      | 2 | 3,9411 | 0,459 | -0,331 |
| 14 | P27635 RL10_HUMAN   | K.FNADEFEDM*VAEK.R        | 2 | 3,9376 | 0,446 | 0,313  |
| 14 | Q8NE71 ABC1_HUMAN   | K.NQDEESQEAPPELLK.R       | 2 | 3,9364 | 0,312 | 0,524  |
| 14 | P35580 MYH10_HUMAN  | R.ELDDATEANEGLSR.E        | 2 | 3,9354 | 0,477 | 0,642  |
| 14 | P29966 MARCS_HUMAN  | K.EAGEGGEAEAPAAEGGK.D     | 2 | 3,9312 | 0,508 | -0,478 |
| 14 | O14908 GIPC1_HUMAN  | R.NPDELAEALDER.L          | 2 | 3,9268 | 0,483 | -0,178 |
| 14 | O43719 HTSF1_HUMAN  | K.TEDGGFEFEEGASENNAK.E    | 2 | 3,925  | 0,306 | -0,274 |
| 14 | P67936 TPM4_HUMAN   | K.IQALQQQADEAEDR.A        | 2 | 3,9205 | 0,547 | -0,076 |

|    |                     |                        |   |        |       |        |
|----|---------------------|------------------------|---|--------|-------|--------|
| 14 | Q02952 AKA12_HUMAN  | K.SDEVDEQVACQEVK.V     | 2 | 3,9156 | 0,402 | 0,447  |
| 14 | Q14247 SRC8_HUMAN   | R.VDQSAVGFYQ GK.T      | 2 | 3,9052 | 0,497 | 0,256  |
| 14 | A4D186 A4D186_HUMAN | K.IQVLQQQADDAEER.A     | 3 | 3,8906 | 0,337 | 0      |
| 14 | Q13509 TBB3_HUMAN   | K.EVDEQM*LAIQSK.N      | 2 | 3,8621 | 0,295 | 0,173  |
| 14 | P29692 EF1D_HUMAN   | R.GVVQELQQAISK.L       | 3 | 3,845  | 0,229 | 0,141  |
| 14 | Q99714 HCD2_HUMAN   | R.LVAGEM*GQNEPDQGGQR.G | 3 | 3,8343 | 0,382 | 0      |
| 14 | P02786 TFR1_HUMAN   | K.LAVDEEENADNNTK.A     | 2 | 3,8319 | 0,466 | 0,234  |
| 14 | P05023 AT1A1_HUMAN  | R.SPFTNENPLETR.N       | 2 | 3,8151 | 0,482 | -0,161 |
| 14 | P50416 CPT1A_HUMAN  | R.ILDNTSEPQPGEAR.L     | 2 | 3,8105 | 0,273 | -0,879 |
| 14 | O75396 SC22B_HUMAN  | R.NLGSINTELQDVQR.I     | 2 | 3,8071 | 0,49  | -0,308 |
| 14 | P04075 ALDOA_HUMAN  | K.GILAADESTGSIK.R      | 2 | 3,8016 | 0,589 | 0      |
| 14 | P18754 RCC1_HUMAN   | K.SGQVYFSGCNDEGALGR.D  | 2 | 3,8011 | 0,454 | -0,806 |
| 14 | Q02790 FKBP4_HUMAN  | K.LQAFSAAIESCNK.A      | 2 | 3,7876 | 0,532 | 0,424  |
| 14 | O60506 HNRPQ_HUMAN  | R.NLANTVTEEILEK.A      | 2 | 3,7733 | 0,499 | -0,579 |
| 14 | P12814 ACTN1_HUMAN  | K.AGTQIENIEEDFR.D      | 2 | 3,7526 | 0,433 | -0,401 |
| 14 | P07737 PROF1_HUMAN  | R.SSFYVNGLTLGGQK.C     | 2 | 3,7441 | 0,452 | -0,166 |
| 14 | P11021 GRP78_HUMAN  | K.NQLTSNPENTVFDK.R     | 2 | 3,725  | 0,469 | 0,364  |
| 14 | Q8N1F7 NUP93_HUMAN  | K.DNALLSAIEESR.K       | 2 | 3,7179 | 0,512 | -0,463 |
| 14 | O00232 PSD12_HUMAN  | K.M*EVDYSATVDQR.L      | 2 | 3,7172 | 0,474 | 0,683  |
| 14 | Q8IUD2 RB612_HUMAN  | R.DLNQLFQQDSSSR.T      | 2 | 3,7073 | 0,499 | -0,238 |
| 14 | O94906 PRP6_HUMAN   | K.LEEANGNTQM*VEK.I     | 2 | 3,7005 | 0,488 | -0,412 |
| 14 | Q9UKF6 CPSF3_HUMAN  | R.TVECEESEDESRL.E      | 2 | 3,6998 | 0,35  | -0,556 |
| 14 | Q8NCA5 FA98A_HUMAN  | K.AQEGGGSEVFQELK.G     | 2 | 3,6899 | 0,331 | 0      |
| 14 | Q9BT73 PSMG3_HUMAN  | K.NLVAFVSQEAGNR.A      | 2 | 3,6813 | 0,432 | -0,174 |
| 14 | A0JLS5 A0JLS5_HUMAN | K.DVTEAEQAEQAR.Q       | 2 | 3,6808 | 0,249 | -0,331 |
| 14 | Q00839 HNRPU_HUMAN  | K.YNILGTNTIM*DK.M      | 2 | 3,6799 | 0,408 | -0,262 |
| 14 | P48307 TFPI2_HUMAN  | R.LQVSVDDQCEGSTEK.Y    | 2 | 3,6744 | 0,547 | 0,36   |
| 14 | O43464 HTRA2_HUMAN  | R.SQYNFIADVVEK.T       | 2 | 3,6574 | 0,503 | -0,086 |
| 14 | P08195 4F2_HUMAN    | K.VAEDEAEAAAAAK.F      | 2 | 3,6492 | 0,536 | 0,196  |
| 14 | P62306 RUXF_HUMAN   | R.GVEEEEEDGEM*RE.-     | 2 | 3,6384 | 0,493 | -0,707 |
| 14 | Q13885 TBB2A_HUMAN  | K.EVDEQM*LNVQNK.N      | 2 | 3,6382 | 0,312 | -0,584 |
| 14 | Q9H4A3 WNK1_HUMAN   | R.SQQQDDIELETK.A       | 2 | 3,6362 | 0,429 | 0,625  |
| 14 | P12270 TPR_HUMAN    | R.LEQDLQQM*QAK.V       | 2 | 3,6348 | 0,4   | -0,905 |

|    |                    |                           |   |        |       |        |
|----|--------------------|---------------------------|---|--------|-------|--------|
| 14 | Q15435 PP1R7_HUMAN | R.GAGQQSQEM*M*EVDR.R      | 2 | 3,6329 | 0,419 | -0,424 |
| 14 | O14737 PDCD5_HUMAN | R.NSILAQVLDQSAR.A         | 3 | 3,6317 | 0,305 | 0,065  |
| 14 | Q99623 PHB2_HUMAN  | K.IVQAEGEAEAAK.M          | 2 | 3,6272 | 0,576 | -0,201 |
| 14 | P09661 RU2A_HUMAN  | K.NAIANASTLAEVER.L        | 2 | 3,6235 | 0,572 | 0,084  |
| 14 | Q14165 K0152_HUMAN | R.SNPEDQILYQTER.Y         | 2 | 3,6214 | 0,407 | 0,306  |
| 14 | Q00341 VIGLN_HUMAN | K.DM*NQFGEQAK.I           | 2 | 3,6203 | 0,549 | -0,089 |
| 14 | Q14980 NUMA1_HUMAN | R.AALM*ESQGQQEER.G        | 2 | 3,6135 | 0,31  | -0,151 |
| 14 | P51648 AL3A2_HUMAN | K.NVDEAINFINER.E          | 2 | 3,6116 | 0,481 | -0,425 |
| 14 | Q13409 DC1I2_HUMAN | K.SVSTPSEAGSQDSGDGAVGSR.T | 2 | 3,6042 | 0,536 | 0,375  |
| 14 | Q9H0S4 DDX47_HUMAN | R.EDAGDNDTTEGAIGVR.N      | 2 | 3,6021 | 0,404 | -0,448 |
| 14 | P24534 EF1B_HUMAN  | K.LQIQCVVEDDK.V           | 2 | 3,5973 | 0,393 | 0,634  |
| 14 | Q05524 ENO1B_HUMAN | K.VNQIGSVTESLQACK.L       | 2 | 3,5921 | 0,453 | 0,523  |
| 14 | P05787 K2C8_HUMAN  | R.ASLEAAIADAEQR.G         | 2 | 3,57   | 0,396 | -0,635 |
| 14 | P35606 COPB2_HUMAN | K.DNNQFASASLDR.T          | 2 | 3,5692 | 0,521 | 0,091  |
| 14 | Q9Y3F4 STRAP_HUMAN | K.YDYNSGEELESYK.G         | 2 | 3,5522 | 0,547 | 0,229  |
| 14 | Q14444 CAPR1_HUMAN | K.YQEVTTNLEFAK.E          | 2 | 3,5467 | 0,466 | 0,168  |
| 14 | Q9Y5M8 SRPRB_HUMAN | R.GDVGSADIQDLEK.W         | 2 | 3,544  | 0,456 | -0,272 |
| 14 | Q6P158 DHX57_HUMAN | R.DLQEQDADAGSER.G         | 2 | 3,5355 | 0,54  | -0,511 |
| 14 | Q9Y240 CLC11_HUMAN | R.DAVQALQEAQGR.A          | 2 | 3,534  | 0,384 | 0      |
| 14 | P05387 RLA2_HUMAN  | K.ILDSVGIEADDDR.L         | 2 | 3,5234 | 0,403 | 0,258  |
| 14 | P11586 C1TC_HUMAN  | K.TDTESELDLISR.L          | 2 | 3,5206 | 0,491 | 0,265  |
| 14 | P21333 FLNA_HUMAN  | R.IANLQTDLSGGLR.L         | 2 | 3,5154 | 0,413 | -0,517 |
| 14 | Q13885 TBB2A_HUMAN | K.EVDEQM*LNQNK.N          | 3 | 3,5006 | 0,129 | -0,063 |
| 14 | P04083 ANXA1_HUMAN | K.TPAQFDADEL.R.A          | 2 | 3,4847 | 0,457 | 0,29   |
| 14 | Q9NTJ3 SMC4_HUMAN  | K.NTNAEEESLPEIQK.E        | 2 | 3,4821 | 0,434 | 0,395  |
| 14 | Q14677 EPN4_HUMAN  | K.ELVEFAQDDDR.L           | 2 | 3,4775 | 0,379 | 0      |
| 14 | P07355 ANXA2_HUMAN | K.SLYYYIQDTK.G            | 2 | 3,4713 | 0,442 | -0,172 |
| 14 | P78371 TCPB_HUMAN  | R.GATQQILDEAER.S          | 2 | 3,4638 | 0,522 | -0,183 |
| 14 | P23526 SAHH_HUMAN  | K.VPAINVNDVTK.S           | 2 | 3,4585 | 0,584 | -0,194 |
| 14 | P07910 HNRPC_HUMAN | K.GFAFVQYVNER.N           | 2 | 3,4581 | 0,472 | 0,092  |
| 14 | P80303 NUCB2_HUMAN | K.NEEDDM*VEM*EEER.L       | 2 | 3,4551 | 0,491 | 0,145  |
| 14 | P29692 EF1D_HUMAN  | R.GVVQELQQAISK.L          | 2 | 3,4531 | 0,457 | -0,375 |
| 14 | P05386 RLA1_HUMAN  | K.KEESEESDDDM*GFLFD.-     | 2 | 3,4433 | 0,567 | -0,31  |

|    |                    |                                   |   |        |       |        |
|----|--------------------|-----------------------------------|---|--------|-------|--------|
| 14 | Q9P2J5 SYLC_HUMAN  | K.TGFFEFQAAK.D                    | 2 | 3,4385 | 0,382 | 0      |
| 14 | P49411 EFTU_HUMAN  | R.AEAGDNLGALVR.G                  | 2 | 3,436  | 0,209 | 0,206  |
| 14 | Q13616 CUL1_HUMAN  | K.ESFESQFLADTER.F                 | 2 | 3,4334 | 0,566 | 0,391  |
| 14 | P55060 XPO2_HUMAN  | K.SQICDNAALYAQK.Y                 | 2 | 3,4318 | 0,437 | 0,494  |
| 14 | Q92804 RBP56_HUMAN | K.QSSYSQQPYNNQGGQQQNM*ESSGSQGGR.A | 3 | 3,4301 | 0,491 | -0,734 |
| 14 | P52701 MSH6_HUMAN  | R.ENEQSLLEYLEK.Q                  | 2 | 3,4263 | 0,367 | -0,49  |
| 14 | P04792 HSPB1_HUMAN | R.LFDQAFGLPR.L                    | 2 | 3,4235 | 0,489 | -0,314 |
| 14 | Q9Y3I0 CV028_HUMAN | R.SYNDELQFLEK.I                   | 2 | 3,418  | 0,312 | -0,176 |
| 14 | Q86UP2 KTN1_HUMAN  | R.DAVSNTTNQLESK.Q                 | 2 | 3,417  | 0,43  | 0,26   |
| 14 | Q96KP4 CNDP2_HUMAN | R.M*M*EVAADV.K                    | 2 | 3,4124 | 0,356 | -0,111 |
| 14 | Q06323 PSME1_HUMAN | K.TENLLGSYFPK.K                   | 2 | 3,4009 | 0,403 | -0,385 |
| 14 | Q70UQ0 IKIP_HUMAN  | K.NIGDLLSSSIDR.T                  | 2 | 3,3973 | 0,533 | -0,189 |
| 14 | P07355 ANXA2_HUMAN | K.TPAQYDASELK.A                   | 2 | 3,393  | 0,473 | 0,1    |
| 14 | O75821 EIF3G_HUMAN | K.EDLNCQEEEDPM*NK.L               | 2 | 3,3869 | 0,258 | -0,483 |
| 14 | P11388 TOP2A_HUMAN | K.ELILFSNSDNER.S                  | 2 | 3,3859 | 0,363 | -0,34  |
| 14 | P11586 C1TC_HUMAN  | R.DDSNLYINVK.L                    | 2 | 3,3854 | 0,425 | -1,343 |
| 14 | P56192 SYMC_HUMAN  | K.NNSELLNNLGNFINR.A               | 2 | 3,3801 | 0,471 | -0,282 |
| 14 | P19105 MLRM_HUMAN  | R.FTDEEVDELYR.E                   | 2 | 3,3764 | 0,446 | -0,431 |
| 14 | P61019 RAB2A_HUMAN | K.TASNVEEAFINTAK.E                | 2 | 3,3693 | 0,424 | -0,163 |
| 14 | Q9Y223 GLCNE_HUMAN | R.M*IEQDDFDINTR.L                 | 2 | 3,3674 | 0,361 | 0,242  |
| 14 | O00139 KIF2A_HUMAN | K.FSLIDLAGNER.G                   | 2 | 3,3578 | 0,465 | -0,296 |
| 14 | P14314 GLU2B_HUMAN | K.SLEDQVEM*LR.T                   | 2 | 3,345  | 0,381 | -0,197 |
| 14 | Q9NZM1 MYOF_HUMAN  | K.LIDEVIEDTR.Y                    | 2 | 3,341  | 0,391 | -0,101 |
| 14 | P09874 PARP1_HUMAN | K.TLGDFAAEYAK.S                   | 2 | 3,3276 | 0,504 | -0,412 |
| 14 | P39687 AN32A_HUMAN | R.VSGGLEVLAEK.C                   | 2 | 3,321  | 0,418 | 0      |
| 14 | Q9BQA1 MEP50_HUMAN | K.DSVFLSCSEDNR.I                  | 2 | 3,3188 | 0,418 | 0,342  |
| 14 | O76021 RL1D1_HUMAN | R.SDSEDICLFTK.D                   | 2 | 3,3174 | 0,583 | -0,278 |
| 14 | Q9UQ80 PA2G4_HUMAN | K.SEM*EVQDAELK.A                  | 2 | 3,3161 | 0,451 | -0,188 |
| 14 | P62269 RS18_HUMAN  | K.YSQVLANGLDNK.L                  | 2 | 3,3161 | 0,492 | 0      |
| 14 | Q3SYE8 HMG4L_HUMAN | K.STNPGISIGDVAK.K                 | 2 | 3,3147 | 0,517 | 0,097  |
| 14 | Q9BPX5 ARP5L_HUMAN | K.SSEIEQAVQSLDR.N                 | 2 | 3,3062 | 0,509 | -0,25  |
| 14 | P05023 AT1A1_HUMAN | K.VDNSSLTGESEPQTR.S               | 2 | 3,3062 | 0,379 | -0,452 |
| 14 | O75396 SC22B_HUMAN | R.NLGSINTELQDVQR.I                | 3 | 3,3033 | 0,151 | 0,115  |

|    |                    |                         |   |        |       |        |
|----|--------------------|-------------------------|---|--------|-------|--------|
| 14 | P35579 MYH9_HUMAN  | K.IAQLLEEQLDNETK.E      | 2 | 3,3011 | 0,355 | 0,319  |
| 14 | Q92841 DDX17_HUMAN | R.DM*VGIAQTGSGK.T       | 2 | 3,2966 | 0,47  | -0,207 |
| 14 | P11586 C1TC_HUMAN  | K.DVDGLTSINAGR.L        | 2 | 3,294  | 0,364 | 0,1    |
| 14 | P62805 H4_HUMAN    | R.ISGLIYEETR.G          | 2 | 3,2936 | 0,366 | -0,207 |
| 14 | P78318 IGBP1_HUMAN | R.NEDLEEIASTDLK.Y       | 2 | 3,2842 | 0,445 | -0,33  |
| 14 | Q03252 LMNB2_HUMAN | K.ALYESELADAR.R         | 2 | 3,2837 | 0,501 | 0,099  |
| 14 | P78527 PRKDC_HUMAN | R.SQGCSEQVLTVLK.T       | 2 | 3,2802 | 0,509 | 0      |
| 14 | Q9NP72 RAB18_HUMAN | R.NDIVNM*LVGNK.I        | 2 | 3,2801 | 0,365 | 0,099  |
| 14 | O60506 HNRPQ_HUMAN | R.NLANTVTEEILEK.A       | 3 | 3,2736 | 0,324 | -0,248 |
| 14 | Q9H0D6 XRN2_HUMAN  | R.NSLGGDVLVFGK.H        | 2 | 3,2712 | 0,437 | -0,101 |
| 14 | Q13547 HDAC1_HUMAN | R.DGIDDESYEAIKFPVM*SK.V | 3 | 3,2683 | 0,315 | -0,355 |
| 14 | P78527 PRKDC_HUMAN | R.LGLPGDEVDNK.V         | 2 | 3,2682 | 0,462 | -0,633 |
| 14 | P62241 RS8_HUMAN   | K.ISSLLEEQFQQGK.L       | 2 | 3,2649 | 0,451 | 0      |
| 14 | P78527 PRKDC_HUMAN | K.NLSSNEAISLEEIR.I      | 2 | 3,2615 | 0,367 | -0,62  |
| 14 | Q96A72 MGN2_HUMAN  | K.IGSLIDVNQSK.D         | 2 | 3,2596 | 0,412 | 0      |
| 14 | P04843 RPN1_HUMAN  | R.SEDLLDYGPFR.D         | 2 | 3,2512 | 0,419 | -0,186 |
| 14 | Q9BVJ6 UT14A_HUMAN | K.DSGSQEVLSELR.V        | 2 | 3,2495 | 0,466 | 0      |
| 14 | P55884 EIF3B_HUMAN | K.M*AQELYM*EQK.N        | 2 | 3,2484 | 0,278 | 0,094  |
| 14 | Q9NVP1 DDX18_HUMAN | K.NLQCLVIDEADR.I        | 2 | 3,248  | 0,263 | -0,084 |
| 14 | P17812 PYRG1_HUMAN | K.LYGDADYLEER.H         | 2 | 3,2431 | 0,533 | 0,363  |
| 14 | Q92541 RTF1_HUMAN  | K.FNDQDIEEIVK.E         | 2 | 3,2403 | 0,343 | -0,09  |
| 14 | P06493 CDC2_HUMAN  | K.NLDENGLDLSK.M         | 2 | 3,2385 | 0,455 | -0,092 |
| 14 | P07237 PDIA1_HUMAN | K.M*DSTANEVEAVK.V       | 2 | 3,2384 | 0,525 | -0,745 |
| 14 | P62851 RS25_HUMAN  | K.LNNLVLFDK.A           | 2 | 3,2377 | 0,379 | -0,113 |
| 14 | P30049 ATPD_HUMAN  | K.AQAELVGTAEATR.A       | 2 | 3,2373 | 0,506 | 0,17   |
| 14 | Q9BVJ7 DUS23_HUMAN | R.GLAAGDAIAEIR.R        | 2 | 3,234  | 0,318 | 0,527  |
| 14 | P27348 1433T_HUMAN | K.YLIANATNPESK.V        | 2 | 3,233  | 0,403 | 0,092  |
| 14 | P42345 FRAP_HUMAN  | R.DASAVSLSESK.S         | 2 | 3,2319 | 0,516 | -0,112 |
| 14 | P12270 TPR_HUMAN   | R.NLDVQLLDTK.R          | 2 | 3,2277 | 0,485 | -0,105 |
| 14 | Q32MZ4 LRRF1_HUMAN | K.IDGATQSSPAEPK.S       | 2 | 3,221  | 0,37  | -0,188 |
| 14 | Q14011 CIRBP_HUMAN | R.DSYDSYATHNE.-         | 2 | 3,221  | 0,51  | -0,094 |
| 14 | Q99832 TCPH_HUMAN  | R.CQVFEEQTIGGER.Y       | 2 | 3,2192 | 0,36  | 0,236  |
| 14 | Q13573 SNW1_HUMAN  | K.M*SNALAIQVDSEGK.I     | 2 | 3,2161 | 0,442 | -0,33  |

|    |                    |                     |   |        |       |        |
|----|--------------------|---------------------|---|--------|-------|--------|
| 14 | Q15084 PDIA6_HUMAN | K.GSFSEQGINEFLR.E   | 2 | 3,2144 | 0,427 | -0,082 |
| 14 | Q9UNZ2 NSF1C_HUMAN | K.SPNELVDDLK.G      | 2 | 3,2112 | 0,313 | -0,669 |
| 14 | P04843 RPN1_HUMAN  | K.NIEIDSPYEISR.A    | 2 | 3,2076 | 0,259 | 0,085  |
| 14 | P10599 THIO_HUMAN  | K.TAFQEALDAAGDK.L   | 2 | 3,2023 | 0,429 | -0,183 |
| 14 | Q9BX40 LS14B_HUMAN | K.SFFDNISSELK.T     | 2 | 3,1958 | 0,459 | -0,379 |
| 14 | P48444 COPD_HUMAN  | K.NSNILEDLETLR.L    | 2 | 3,1944 | 0,435 | -0,603 |
| 14 | Q92598 HS105_HUMAN | R.AGGIETIANEFSDR.C  | 2 | 3,1941 | 0,513 | -0,66  |
| 14 | Q9NQP4 PFD4_HUMAN  | K.NLQEEIDALESR.V    | 2 | 3,1934 | 0,426 | -0,344 |
| 14 | O00571 DDX3X_HUMAN | R.DLM*ACAQTGSGK.T   | 2 | 3,1848 | 0,444 | -0,194 |
| 14 | Q15393 SF3B3_HUMAN | K.DYIVVGS DSGR.I    | 2 | 3,1838 | 0,44  | 0,209  |
| 14 | Q9UBQ0 VPS29_HUMAN | R.GDFDENLNYPEQK.V   | 2 | 3,1836 | 0,323 | 0,389  |
| 14 | P36957 ODO2_HUMAN  | K.TPAFAESVTEGDVR.W  | 2 | 3,1773 | 0,446 | 0,083  |
| 14 | P31947 1433S_HUMAN | R.YLAEVATGDDK.K     | 2 | 3,1728 | 0,464 | 0,103  |
| 14 | Q9NSE4 SYIM_HUMAN  | K.SGDLYVLAADK.V     | 2 | 3,1707 | 0,388 | -0,212 |
| 14 | Q13813 SPTA2_HUMAN | K.DLTNVQNLQK.K      | 2 | 3,1688 | 0,379 | 0      |
| 14 | Q09666 AHNK_HUMAN  | K.VDINAPD VDVR.G    | 2 | 3,1688 | 0,331 | -0,302 |
| 14 | Q9H307 PININ_HUMAN | R.DLIQDQNM*DEK.G    | 2 | 3,1684 | 0,336 | -0,358 |
| 14 | P30101 PDIA3_HUMAN | R.FLQDYFDGNLK.R     | 2 | 3,1677 | 0,222 | -0,269 |
| 14 | P09493 TPM1_HUMAN  | R.IQLVEEELDR.A      | 2 | 3,1677 | 0,363 | -0,196 |
| 14 | Q7Z4Q2 HEAT3_HUMAN | K.SQAEIINALLK.I     | 2 | 3,1665 | 0,411 | -0,203 |
| 14 | P54136 SYRC_HUMAN  | R.LNDYIFSFDK.M      | 2 | 3,1631 | 0,47  | -0,387 |
| 14 | O00159 MYO1C_HUMAN | R.DQAVM*ISGESGAGK.T | 2 | 3,1614 | 0,384 | -0,179 |
| 14 | P23528 COF1_HUMAN  | R.YALYDATYETK.E     | 2 | 3,1572 | 0,577 | 0,274  |
| 14 | O95373 IPO7_HUMAN  | R.ETENDDLTNVIQK.M   | 2 | 3,1569 | 0,381 | 0,241  |
| 14 | P10809 CH60_HUMAN  | K.VGLQVVAVK.A       | 2 | 3,1561 | 0,306 | -0,067 |
| 14 | O75306 NDUS2_HUMAN | R.LDELEELLTNNR.I    | 2 | 3,1518 | 0,292 | -0,669 |
| 14 | P25705 ATPA_HUMAN  | R.VVDALGNAIDGK.G    | 2 | 3,1493 | 0,445 | -0,104 |
| 14 | Q9Y6G9 DC1L1_HUMAN | K.NVLLLGEDGAGK.T    | 2 | 3,1442 | 0,484 | -0,103 |
| 14 | Q10567 AP1B1_HUMAN | R.DCPLNAEAASSK.L    | 2 | 3,1409 | 0,492 | -0,097 |
| 14 | P26640 SYVC_HUMAN  | K.VPLEVQEADK.L      | 2 | 3,139  | 0,361 | 0,367  |
| 14 | P51570 GALK1_HUMAN | R.EVQLEEEAAR.D      | 2 | 3,1389 | 0,413 | 0      |
| 14 | O95757 HS74L_HUMAN | K.NAVEEYVYDFR.D     | 2 | 3,134  | 0,406 | -0,521 |
| 14 | Q05397 FAK1_HUMAN  | K.NLLDVIDQAR.L      | 2 | 3,134  | 0,41  | -0,316 |

|    |                    |                     |   |        |       |        |
|----|--------------------|---------------------|---|--------|-------|--------|
| 14 | P28838 AMPL_HUMAN  | K.LFEASIEGDR.V      | 2 | 3,126  | 0,421 | 0,099  |
| 14 | Q01082 SPTB2_HUMAN | R.DQNTVETLQR.M      | 2 | 3,119  | 0,307 | -0,203 |
| 14 | Q15404 RSU1_HUMAN  | R.DNDLISLPK.E       | 2 | 3,1188 | 0,282 | 0      |
| 14 | P25685 DNJB1_HUMAN | R.VSLEEIYSGCTK.K    | 2 | 3,118  | 0,534 | 0      |
| 14 | Q00653 NFKB2_HUMAN | R.GGDEVYLLCDK.V     | 2 | 3,1159 | 0,467 | -0,096 |
| 14 | P06454 PTMA_HUMAN  | R.AAEDDEDDVDTK.K    | 2 | 3,113  | 0,551 | -0,085 |
| 14 | Q15149 PLEC1_HUMAN | R.SQVEEELFSVR.V     | 2 | 3,113  | 0,473 | -0,184 |
| 14 | P49327 FAS_HUMAN   | K.VGDPQELNGITR.A    | 2 | 3,104  | 0,496 | -0,188 |
| 14 | O14579 COPE_HUMAN  | R.DSIVAELDR.E       | 2 | 3,1031 | 0,352 | -0,12  |
| 14 | P21333 FLNA_HUMAN  | R.ANLPQSFQVDTSK.A   | 2 | 3,098  | 0,549 | -0,17  |
| 14 | P49327 FAS_HUMAN   | R.DPSQQELPR.L       | 2 | 3,0971 | 0,274 | 0      |
| 14 | P35250 RFC2_HUMAN  | K.DAM*LELNASNDR.G   | 2 | 3,0963 | 0,411 | -0,447 |
| 14 | Q14669 TRIPC_HUMAN | R.DDSLDSLSPQGR.L    | 2 | 3,0931 | 0,354 | 0,71   |
| 14 | P31942 HNRH3_HUMAN | R.DGM*DNQGGYGSVGR.M | 2 | 3,0896 | 0,3   | -1,11  |
| 14 | P34931 HS71L_HUMAN | K.NALESYAFNM*K.S    | 2 | 3,081  | 0,53  | 0,187  |
| 14 | Q12931 TRAP1_HUMAN | R.ELISNASDALEK.L    | 2 | 3,0801 | 0,426 | 0,378  |
| 14 | P35268 RL22_HUMAN  | K.AGNLGGGVVTIER.S   | 2 | 3,0762 | 0,314 | -0,098 |
| 14 | O43399 TPD54_HUMAN | R.LGLSTLGELK.Q      | 2 | 3,0735 | 0,462 | 0,118  |
| 14 | Q99829 CPNE1_HUMAN | R.FGIYDIDNK.T       | 2 | 3,0718 | 0,41  | 0,112  |
| 14 | Q02952 AKA12_HUMAN | K.TEGTQEADQYADEK.T  | 2 | 3,0669 | 0,44  | 0,231  |
| 14 | P05783 K1C18_HUMAN | R.QAQEYEALLNIK.V    | 2 | 3,0668 | 0,416 | -0,516 |
| 14 | Q06830 PRDX1_HUMAN | R.LVQAFQFTDK.H      | 2 | 3,0663 | 0,453 | -0,306 |
| 14 | Q9NQP4 PFD4_HUMAN  | K.NLQEEIDALESR.V    | 3 | 3,0658 | 0,215 | -0,065 |
| 14 | O75347 TBCA_HUMAN  | R.LEAAYLDLQR.I      | 2 | 3,0639 | 0,401 | -0,102 |
| 14 | P17066 HSP76_HUMAN | R.VEILANDQGNR.T     | 2 | 3,0615 | 0,29  | -0,893 |
| 14 | Q9Y230 RUVB2_HUMAN | R.GLGLDDALEPR.Q     | 2 | 3,0579 | 0,335 | 0,106  |
| 14 | Q9Y2L1 RRP44_HUMAN | K.SLTANPELIDR.L     | 2 | 3,0525 | 0,38  | -0,496 |
| 14 | Q92878 RAD50_HUMAN | R.GQDIEYIEIR.S      | 2 | 3,0479 | 0,198 | -0,296 |
| 14 | P34932 HSP74_HUMAN | R.AGGIETIANEYSDR.C  | 2 | 3,0468 | 0,485 | 0      |
| 14 | Q9H3U1 UN45A_HUMAN | K.EVQDLFEAQGNDR.L   | 2 | 3,0455 | 0,439 | -0,241 |
| 14 | P13639 EF2_HUMAN   | R.ETVSEESNVLCLSK.S  | 2 | 3,0388 | 0,33  | -0,994 |
| 14 | Q02809 PLOD1_HUMAN | R.SEDYVDIVQGR.R     | 2 | 3,0369 | 0,449 | 0,952  |
| 14 | P51858 HDGF_HUMAN  | R.IDEM*PEAAVK.S     | 2 | 3,0361 | 0,336 | -0,654 |



|    |                    |                     |   |        |       |        |
|----|--------------------|---------------------|---|--------|-------|--------|
| 14 | Q03252 LMNB2_HUMAN | K.LELEQTYQAK.L      | 2 | 3,0283 | 0,273 | 0,2    |
| 14 | P35637 FUS_HUMAN   | K.GEATVSFDDPPSAK.A  | 2 | 3,0268 | 0,501 | 0      |
| 14 | Q05682 CALD1_HUMAN | R.YEIEETETVTK.S     | 2 | 3,0225 | 0,483 | 0,091  |
| 14 | Q9H2G2 SLK_HUMAN   | R.DLQLQCEANVR.E     | 2 | 3,0193 | 0,382 | 0,272  |
| 14 | P37802 TAGL2_HUMAN | K.QM*EQISQFLQAAER.Y | 3 | 3,0184 | 0,234 | -0,108 |
| 14 | P43487 RANG_HUMAN  | K.TLEEEDEELFK.M     | 2 | 3,0182 | 0,452 | -0,177 |
| 14 | P17844 DDX5_HUMAN  | R.LIDFLECGK.T       | 2 | 3,0165 | 0,337 | -0,334 |
| 14 | Q13310 PABP4_HUMAN | K.NFGEEVDDSLK.E     | 2 | 3,0158 | 0,458 | 0,618  |
| 14 | P62424 RL7A_HUMAN  | K.NFGIGQDIQPK.R     | 2 | 3,0137 | 0,355 | 0      |
| 14 | P53621 COPA_HUMAN  | K.DADSQNPDAPEGK.R   | 2 | 3,013  | 0,385 | -0,363 |
| 14 | Q9HD33 RM47_HUMAN  | K.GLEEFFDDPK.N      | 2 | 3,0008 | 0,476 | 0,204  |
| 14 | P34931 HS71L_HUMAN | R.TTPSYVAFTDTER.L   | 2 | 2,995  | 0,484 | -0,082 |
| 14 | Q5H9R7 SAPS3_HUMAN | K.FADQDDIGNVSFDR.V  | 2 | 2,9948 | 0,324 | -0,153 |
| 14 | P50990 TCPQ_HUMAN  | K.FAEAFEAIPIR.A     | 2 | 2,9941 | 0,353 | 0      |
| 14 | P27708 PYR1_HUMAN  | R.LSLDDLLQR.L       | 2 | 2,993  | 0,299 | -0,227 |
| 14 | P38646 GRP75_HUMAN | K.VQQTQVQDLFGR.A    | 2 | 2,9919 | 0,209 | 0,095  |
| 14 | O15212 PFD6_HUMAN  | R.ETLAQLQQEFQR.A    | 2 | 2,9893 | 0,354 | -0,9   |
| 14 | P42704 LPPRC_HUMAN | K.GAYDIFLNAK.E      | 2 | 2,9863 | 0,447 | -0,11  |
| 14 | Q15149 PLEC1_HUMAN | R.DSQDAGGFGPEDR.L   | 2 | 2,9861 | 0,346 | -0,452 |
| 14 | P35659 DEK_HUMAN   | K.NVGQFSGFPFEK.G    | 2 | 2,9849 | 0,394 | -0,36  |
| 14 | Q02539 H11_HUMAN   | K.ALAAAGYDVEK.N     | 2 | 2,9816 | 0,537 | 0,11   |
| 14 | P62701 RS4X_HUMAN  | R.LSNIFVIGK.G       | 2 | 2,9811 | 0,416 | -0,308 |
| 14 | P60900 PSA6_HUMAN  | K.DCAVIVTQK.K       | 2 | 2,9777 | 0,307 | -0,118 |
| 14 | Q71UI9 H2AV_HUMAN  | R.GDEELDSLK.A       | 2 | 2,9776 | 0,364 | 0      |
| 14 | P78310 CXAR_HUMAN  | R.CYVDGSEEIGSDFK.I  | 2 | 2,9763 | 0,358 | -0,304 |
| 14 | P54652 HSP72_HUMAN | K.LLQDFFNGK.E       | 2 | 2,9741 | 0,406 | -0,226 |
| 14 | Q9UQE7 SMC3_HUMAN  | K.DLQDELAGNSEQR.K   | 2 | 2,9717 | 0,304 | 0,248  |
| 14 | P07951 TPM2_HUMAN  | K.QLEEEQALQK.K      | 2 | 2,9714 | 0,256 | 0      |
| 14 | Q01105 SET_HUMAN   | R.VEVTEFEDIK.S      | 2 | 2,9704 | 0,39  | -0,303 |
| 14 | Q9Y2R0 CCD56_HUMAN | R.FLDELEDEAK.A      | 2 | 2,9701 | 0,308 | -0,101 |
| 14 | P13667 PDIA4_HUMAN | K.VDATAETDLAK.R     | 2 | 2,9699 | 0,264 | 0,108  |
| 14 | Q8NE71 ABCF1_HUMAN | K.NLDFGIDM*DSR.I    | 2 | 2,963  | 0,439 | -0,376 |
| 14 | Q92598 HS105_HUMAN | K.NAVEEYVYEF.R      | 2 | 2,9612 | 0,414 | -0,172 |

|    |                     |                     |   |        |       |        |
|----|---------------------|---------------------|---|--------|-------|--------|
| 14 | O15144 ARPC2_HUMAN  | R.DDETM*YVESK.K     | 2 | 2,9559 | 0,305 | -0,198 |
| 14 | P32969 RL9_HUMAN    | K.FLDGIYVSEK.G      | 2 | 2,9541 | 0,426 | -0,208 |
| 14 | P63104 1433Z_HUMAN  | R.YLAEVAAGDDK.K     | 2 | 2,9497 | 0,49  | 0,106  |
| 14 | P11413 G6PD_HUMAN   | R.GGYFDEFGIIR.D     | 2 | 2,949  | 0,27  | -0,287 |
| 14 | Q9UMS4 PRP19_HUMAN  | K.TLQLDNNFEVK.S     | 2 | 2,9489 | 0,262 | -0,185 |
| 14 | P35580 MYH10_HUMAN  | R.EDQSILCTGESGAGK.T | 2 | 2,9416 | 0,437 | -0,55  |
| 14 | Q09666 AHNK_HUMAN   | K.AEGPEVDVNLPK.A    | 2 | 2,9405 | 0,363 | -0,192 |
| 14 | P11586 C1TC_HUMAN   | K.VVGDVAYDEAK.E     | 2 | 2,9381 | 0,486 | -0,419 |
| 14 | Q6NVV1 R13AX_HUMAN  | K.YQAVTATLEEK.R     | 2 | 2,9336 | 0,391 | 0,195  |
| 14 | P19338 NUCL_HUMAN   | K.EVFEDAAEIR.L      | 2 | 2,9308 | 0,28  | 0,103  |
| 14 | P07437 TBB5_HUMAN   | R.ISVYYNEATGGK.Y    | 2 | 2,93   | 0,508 | 0,094  |
| 14 | P62269 RS18_HUMAN   | R.AGELTEDEVER.V     | 2 | 2,929  | 0,421 | 0      |
| 14 | P61923 COPZ1_HUMAN  | K.AILILDNDGDR.L     | 2 | 2,928  | 0,417 | 0      |
| 14 | P41252 SYIC_HUMAN   | K.QLSSEELEQFQK.T    | 2 | 2,9276 | 0,406 | -0,333 |
| 14 | Q99873 ANM1_HUMAN   | R.ATLYVTAIEDR.Q     | 2 | 2,9254 | 0,41  | 0,292  |
| 14 | Q8N4N8 KIF2B_HUMAN  | K.FSLVDLAGNER.G     | 2 | 2,9242 | 0,341 | 0      |
| 14 | Q15185 TEBP_HUMAN   | K.LTFSCLGSDNFK.H    | 2 | 2,9222 | 0,49  | 0      |
| 14 | P48643 TCPE_HUMAN   | K.LDVTSVEDYK.A      | 2 | 2,9165 | 0,398 | -0,104 |
| 14 | B2RCB9 B2RCB9_HUMAN | K.GIIDLIEER.A       | 2 | 2,9154 | 0,274 | -0,231 |
| 14 | P35232 PHB_HUMAN    | R.FDAGELITQR.E      | 2 | 2,9129 | 0,337 | -0,318 |
| 14 | P54652 HSP72_HUMAN  | R.FEELNADLFR.G      | 2 | 2,9127 | 0,38  | -0,389 |
| 14 | P54920 SNAA_HUMAN   | K.NSQSFFSGLFGGSSK.I | 2 | 2,9087 | 0,454 | -0,63  |
| 14 | P10809 CH60_HUMAN   | K.NAGVEGSLIVEK.I    | 2 | 2,9086 | 0,411 | 0      |
| 14 | Q58FF7 H90B3_HUMAN  | R.DNSTM*GYM*M*AK.K  | 2 | 2,9072 | 0,504 | -0,47  |
| 14 | P61254 RL26_HUMAN   | K.DDEVQVVR.G        | 2 | 2,8988 | 0,296 | -0,508 |
| 14 | Q9UPN3 MACF1_HUMAN  | R.ENLEQAFEVAER.L    | 2 | 2,8961 | 0,331 | -0,765 |
| 14 | Q00610 CLH1_HUMAN   | R.NNLAGEEELFAR.K    | 2 | 2,8937 | 0,337 | -0,093 |
| 14 | P16401 H15_HUMAN    | K.ALAAGGYDVEK.N     | 2 | 2,8901 | 0,304 | 0,223  |
| 14 | O95232 CROP_HUMAN   | R.YLQSLLAEVER.R     | 2 | 2,8893 | 0,296 | -0,185 |
| 14 | O95202 LETM1_HUMAN  | K.VAEVEGEQVDNK.A    | 2 | 2,8875 | 0,288 | -0,185 |
| 14 | P20962 PTMS_HUMAN   | K.SVEAAAELSAK.D     | 2 | 2,8814 | 0,476 | 0,113  |
| 14 | P24752 THIL_HUMAN   | K.DGLTDVYNK.I       | 2 | 2,8804 | 0,459 | 0,119  |
| 14 | P25705 ATPA_HUMAN   | K.TGTAEM*SSILEER.I  | 2 | 2,8797 | 0,476 | 0,339  |

|    |                    |                     |   |        |       |        |
|----|--------------------|---------------------|---|--------|-------|--------|
| 14 | Q13200 PSMD2_HUMAN | R.LNILDTLISK.F      | 2 | 2,8766 | 0,266 | -0,42  |
| 14 | P08758 ANXA5_HUMAN | R.GTVTDFPGFDER.A    | 2 | 2,8747 | 0,368 | -0,273 |
| 14 | Q9UJ41 RABX5_HUMAN | K.NLDLLSQLNER.Q     | 2 | 2,8737 | 0,252 | -0,186 |
| 14 | P46459 NSF_HUMAN   | K.SQLSCVVVDDIER.L   | 2 | 2,8725 | 0,483 | -0,722 |
| 14 | P23396 RS3_HUMAN   | R.ELAEDGYSGVEVR.V   | 2 | 2,8693 | 0,476 | 0,171  |
| 14 | O75306 NDUS2_HUMAN | R.LDELEELLTNNR.I    | 3 | 2,8651 | 0,278 | -0,063 |
| 14 | P62736 ACTA_HUMAN  | K.DSYVGDEAQSK.R     | 2 | 2,8648 | 0,481 | -0,407 |
| 14 | P49327 FAS_HUMAN   | R.AALQEELQLCK.G     | 2 | 2,8579 | 0,409 | -0,094 |
| 14 | P14618 KPYM_HUMAN  | R.GDLGIEIPA EK.V    | 2 | 2,8578 | 0,412 | -0,107 |
| 14 | P62937 PPIA_HUMAN  | K.FEDENFILK.H       | 2 | 2,8567 | 0,102 | -0,106 |
| 14 | Q9Y265 RUVB1_HUMAN | K.GLGLDESLAK.Q      | 2 | 2,8547 | 0,502 | 0,115  |
| 14 | P30041 PRDX6_HUMAN | K.DINAYNCEEPTEK.L   | 2 | 2,8529 | 0,424 | -0,308 |
| 14 | P30041 PRDX6_HUMAN | K.LPFPIDDR.N        | 2 | 2,849  | 0,322 | -0,337 |
| 14 | P22102 PUR2_HUMAN  | R.ENLISALEEAK.K     | 2 | 2,8435 | 0,449 | -0,501 |
| 14 | P23246 SFPQ_HUMAN  | K.YGEPGEVFINK.G     | 2 | 2,841  | 0,475 | 0,389  |
| 14 | P40227 TCPZ_HUMAN  | K.ALQFLEEVK.V       | 2 | 2,8361 | 0,384 | -0,113 |
| 14 | Q14671 PUM1_HUMAN  | K.DQYANYVVQK.M      | 2 | 2,8315 | 0,427 | 0,199  |
| 14 | Q14568 HS902_HUMAN | R.ELISNSSDALDK.I    | 2 | 2,8293 | 0,44  | 0,094  |
| 14 | Q04837 SSB_HUMAN   | R.SGDSEVYQLGDVSQK.T | 3 | 2,8202 | 0,109 | 0,227  |
| 14 | P49411 EFTU_HUMAN  | K.YEEIDNAPEER.A     | 2 | 2,8201 | 0,471 | -0,358 |
| 14 | P34897 GLYM_HUMAN  | R.AALEALGSCLNNK.Y   | 2 | 2,82   | 0,416 | 0,09   |
| 14 | Q14566 MCM6_HUMAN  | K.ESEDFIVEQYK.H     | 2 | 2,8198 | 0,406 | -0,176 |
| 14 | Q8NE71 ABCF1_HUMAN | K.AVSEEQQPALK.G     | 2 | 2,8167 | 0,343 | -0,102 |
| 14 | O43813 LANC1_HUMAN | K.SLAEGYFDAAGR.L    | 2 | 2,8088 | 0,434 | -0,291 |
| 14 | P51991 ROA3_HUMAN  | K.IETIEVM*EDR.Q     | 2 | 2,8079 | 0,419 | 0      |
| 14 | P50990 TCPQ_HUMAN  | R.GSTDNLM*DDIER.A   | 2 | 2,8075 | 0,383 | 0,177  |
| 14 | Q14974 IMB1_HUMAN  | R.SSAYESLM*EIVK.N   | 2 | 2,801  | 0,331 | -0,444 |
| 14 | Q15149 PLEC1_HUMAN | R.DVAEVDTVR.R       | 2 | 2,7988 | 0,314 | -0,061 |
| 14 | O43852 CALU_HUMAN  | K.DGDLIATK.E        | 2 | 2,7983 | 0,322 | 0,22   |
| 14 | Q13442 HAP28_HUMAN | K.GVEGLIDIENPNR.V   | 2 | 2,7945 | 0,311 | -0,342 |
| 14 | P05388 RLAO_HUMAN  | K.TSFFQALGITTK.I    | 2 | 2,7942 | 0,59  | -0,557 |
| 14 | P13073 COX41_HUMAN | K.SEDFSLPAYM*DR.R   | 2 | 2,7937 | 0,267 | 0,084  |
| 14 | O00186 STXB3_HUMAN | K.DIM*EDAIDNR.L     | 2 | 2,7925 | 0,353 | -0,202 |

|    |                    |                     |   |        |       |        |
|----|--------------------|---------------------|---|--------|-------|--------|
| 14 | P54619 AAKG1_HUMAN | K.FDVINLAAEK.T      | 2 | 2,791  | 0,379 | 0,218  |
| 14 | Q99613 EIF3C_HUMAN | K.CLEEFELLGK.A      | 2 | 2,7881 | 0,348 | -0,394 |
| 14 | Q07955 SFRS1_HUMAN | R.EAGDVCYADVYR.D    | 2 | 2,7839 | 0,376 | -0,086 |
| 14 | P41091 IF2G_HUMAN  | R.QDLTTLDVTK.L      | 2 | 2,7818 | 0,427 | 0      |
| 14 | P60660 MYL6_HUMAN  | R.ALGQNPTNAEVLK.V   | 2 | 2,7812 | 0,235 | 0,18   |
| 14 | P02545 LMNA_HUMAN  | R.VAVEEVDEEGK.F     | 2 | 2,7789 | 0,474 | 0      |
| 14 | P35659 DEK_HUMAN   | K.SICEVLDLER.S      | 2 | 2,7777 | 0,364 | -0,297 |
| 14 | P14618 KPYM_HUMAN  | K.ITLDNAYM*EK.C     | 2 | 2,7675 | 0,28  | 0,101  |
| 14 | P23284 PPIB_HUMAN  | K.VLEGM*EVVR.K      | 2 | 2,7673 | 0,419 | 0      |
| 14 | P42704 LPPRC_HUMAN | R.LDSSAVLDTGK.Y     | 2 | 2,7666 | 0,421 | 0      |
| 14 | P22061 PIMT_HUMAN  | K.ELVDDSINNV.R      | 2 | 2,7651 | 0,373 | 0,287  |
| 14 | Q14203 DCTN1_HUMAN | R.DLETSCSDIR.Q      | 2 | 2,7617 | 0,296 | 0,102  |
| 14 | P51003 PAPOA_HUMAN | R.SDFFTSFYDK.L      | 2 | 2,7585 | 0,438 | -0,388 |
| 14 | P05787 K2C8_HUMAN  | K.DVDEAYM*NK.V      | 2 | 2,7524 | 0,44  | -0,111 |
| 14 | Q9BWT3 PAPOG_HUMAN | R.SDFFQSFFEK.L      | 2 | 2,7515 | 0,386 | -0,571 |
| 14 | Q00653 NFKB2_HUMAN | R.DSGEEAAEPSAPSR.T  | 2 | 2,7474 | 0,365 | -0,261 |
| 14 | Q96HC4 PDLI5_HUMAN | K.GALYCELCYEK.F     | 2 | 2,7448 | 0,284 | -0,347 |
| 14 | P29374 ARI4A_HUMAN | R.DNFLQQLYK.F       | 2 | 2,7392 | 0,35  | -0,313 |
| 14 | Q14192 FHL2_HUMAN  | K.DNQNFVCPCYEK.Q    | 2 | 2,7382 | 0,129 | 0,078  |
| 14 | P45880 VDAC2_HUMAN | K.LTLSALVDGK.S      | 2 | 2,7369 | 0,409 | -0,06  |
| 14 | Q09160 1A80_HUMAN  | R.AYLEGECVDGLR.R    | 2 | 2,7354 | 0,318 | 0,883  |
| 14 | Q13098 CSN1_HUMAN  | R.DSQTQAILTK.L      | 2 | 2,7349 | 0,297 | 0      |
| 14 | P07951 TPM2_HUMAN  | K.M*ELQEM*QLK.E     | 2 | 2,7284 | 0,234 | -0,206 |
| 14 | P05787 K2C8_HUMAN  | K.LVSESSDVLPK.-     | 2 | 2,7279 | 0,425 | 0,104  |
| 14 | Q15084 PDIA6_HUMAN | R.NSYLEVLLK.L       | 2 | 2,7268 | 0,453 | -0,226 |
| 14 | P62937 PPIA_HUMAN  | R.VSFELFADK.V       | 2 | 2,7238 | 0,436 | -0,693 |
| 14 | P42704 LPPRC_HUMAN | K.GDVENIEVVQK.M     | 2 | 2,7223 | 0,234 | 0,198  |
| 14 | P10809 CH60_HUMAN  | K.VGEVIVTK.D        | 2 | 2,7223 | 0,283 | -0,072 |
| 14 | Q13123 RED_HUMAN   | K.GLDFALLQK.V       | 2 | 2,7213 | 0,167 | -0,061 |
| 14 | Q58FF7 H90B3_HUMAN | R.APFDLFENK.K       | 2 | 2,7195 | 0,373 | -0,226 |
| 14 | P40925 MDHC_HUMAN  | K.ELTEEKESAFELSSA.- | 2 | 2,7165 | 0,517 | -0,336 |
| 14 | Q96HS1 PGAM5_HUMAN | R.AIETTDIISR.H      | 2 | 2,711  | 0,387 | 0,327  |
| 14 | P11142 HSP7C_HUMAN | K.NSLESYAFNM*K.A    | 2 | 2,708  | 0,338 | 0,185  |

|    |                     |                       |   |        |       |        |
|----|---------------------|-----------------------|---|--------|-------|--------|
| 14 | Q8WW12 PCNP_HUMAN   | R.DTPTSAGPNSFNK.G     | 2 | 2,704  | 0,275 | -0,639 |
| 14 | P30566 PUR8_HUMAN   | R.NALDLLPK.L          | 2 | 2,7024 | 0,383 | -0,245 |
| 14 | P33991 MCM4_HUMAN   | K.DM*FEEALR.A         | 2 | 2,7021 | 0,323 | 0      |
| 14 | Q99436 PSB7_HUMAN   | K.DGIVLGADTR.A        | 2 | 2,694  | 0,273 | 0,24   |
| 14 | O00170 AIP_HUMAN    | R.GELPDFQDGTK.A       | 2 | 2,6936 | 0,41  | 0,101  |
| 14 | Q9Y388 RBMX2_HUMAN  | K.DSEEIDDVTR.Q        | 2 | 2,6909 | 0,332 | -0,103 |
| 14 | Q13618 CUL3_HUMAN   | R.FLLESFNDR.L         | 2 | 2,6892 | 0,287 | -0,486 |
| 14 | P23396 RS3_HUMAN    | K.GGKPEPPAM*PQPVPTA.- | 2 | 2,6862 | 0,264 | -0,384 |
| 14 | P17844 DDX5_HUMAN   | R.LM*EEIM*SEK.E       | 2 | 2,682  | 0,319 | -0,107 |
| 14 | Q86VP6 CAND1_HUMAN  | K.TLEDPDLNVR.R        | 2 | 2,681  | 0,297 | -0,104 |
| 14 | P52815 RM12_HUMAN   | K.NYIQGINLVQAK.K      | 2 | 2,6809 | 0,32  | -0,269 |
| 14 | Q92841 DDX17_HUMAN  | R.LIDFLESGK.T         | 2 | 2,6808 | 0,408 | 0,06   |
| 14 | A8K6Q8 A8K6Q8_HUMAN | K.LDSTDFTSTIK.L       | 2 | 2,6804 | 0,388 | 0,199  |
| 14 | P51665 PSD7_HUMAN   | K.NDIANELM*K.R        | 2 | 2,6758 | 0,348 | 0      |
| 14 | P14625 ENPL_HUMAN   | R.LSLNIDPAK.V         | 2 | 2,6756 | 0,301 | -0,112 |
| 14 | P08670 VIME_HUMAN   | R.DNLAEDIMR.L         | 2 | 2,6745 | 0,4   | 0,113  |
| 14 | P51991 ROA3_HUMAN   | K.IETIEVMEDR.Q        | 2 | 2,6743 | 0,348 | -0,198 |
| 14 | P46776 RL27A_HUMAN  | R.NQSFCTVNLDK.L       | 2 | 2,6738 | 0,345 | 0,171  |
| 14 | P14174 MIF_HUMAN    | K.LLCGLLAER.L         | 2 | 2,6691 | 0,318 | 0      |
| 14 | O95831 AIFM1_HUMAN  | K.AALSASEGEEVPQDK.A   | 2 | 2,6674 | 0,208 | -0,159 |
| 14 | P08133 ANXA6_HUMAN  | K.DAISGIGTDEK.C       | 2 | 2,6652 | 0,204 | 0,221  |
| 14 | O60701 UGDH_HUMAN   | R.VLIGGDETPEGQR.A     | 2 | 2,6643 | 0,388 | -0,712 |
| 14 | Q93008 USP9X_HUMAN  | R.DGLFDTIQR.S         | 2 | 2,6632 | 0,309 | -0,115 |
| 14 | P47897 SYQ_HUMAN    | R.DVLNDTAPR.A         | 2 | 2,662  | 0,314 | -0,061 |
| 14 | P53396 ACLY_HUMAN   | K.VDATADYICK.V        | 2 | 2,6605 | 0,3   | 0      |
| 14 | Q14157 UBP2L_HUMAN  | K.GGSTTGSQFLEQFK.T    | 2 | 2,6604 | 0,167 | -0,082 |
| 14 | P07384 CAN1_HUMAN   | R.LDETDPPDDYGDR.E     | 2 | 2,6589 | 0,402 | -0,32  |
| 14 | O00571 DDX3X_HUMAN  | K.YLVLEADR.M          | 2 | 2,6526 | 0,253 | 0,112  |
| 14 | P62851 RS25_HUMAN   | R.AALQELLSK.G         | 2 | 2,649  | 0,254 | 0      |
| 14 | Q9BTX1 NDC1_HUMAN   | R.LQQFLEFKE.-         | 2 | 2,6483 | 0,352 | -0,413 |
| 14 | P29966 MARCS_HUMAN  | K.AEDGATPSPSNETPK.K   | 2 | 2,647  | 0,373 | -0,406 |
| 14 | Q00535 CDK5_HUMAN   | R.DLLQNLK.C           | 2 | 2,6463 | 0,111 | -0,255 |
| 14 | P78527 PRKDC_HUMAN  | R.NELEIPGQYDGR.G      | 2 | 2,6384 | 0,158 | 0,439  |

|    |                    |                      |   |        |       |        |
|----|--------------------|----------------------|---|--------|-------|--------|
| 14 | Q9Y2Q3 GSTK1_HUMAN | K.AGM*SAEQAQGLLEK.I  | 2 | 2,6363 | 0,18  | 0,337  |
| 14 | Q96FW1 OTUB1_HUMAN | K.EYAEDDNIYQQK.I     | 2 | 2,6363 | 0,398 | 0,402  |
| 14 | P45974 UBP5_HUMAN  | K.TM*TELEIDM*NQR.I   | 2 | 2,6329 | 0,374 | 0,242  |
| 14 | P61956 SUMO2_HUMAN | K.VAGQDGSVVQFK.I     | 2 | 2,6329 | 0,43  | 0,395  |
| 14 | Q9P2J5 SYLC_HUMAN  | R.FDDPLLGPR.R        | 2 | 2,6321 | 0,29  | -0,118 |
| 14 | P13639 EF2_HUMAN   | R.VFSGLVSTGLK.V      | 2 | 2,6317 | 0,418 | 0      |
| 14 | Q9UPN3 MACF1_HUMAN | R.DSVLFSVADR.L       | 2 | 2,6306 | 0,448 | 0,11   |
| 14 | O75844 FACE1_HUMAN | K.DIQEDSGM*EPR.N     | 2 | 2,6298 | 0,412 | 0      |
| 14 | P18031 PTN1_HUMAN  | K.LTLISEDIK.S        | 2 | 2,6248 | 0,303 | 0,236  |
| 14 | Q9Y448 T4AF1_HUMAN | R.DNCLAILESK.G       | 2 | 2,6226 | 0,271 | 0,21   |
| 14 | Q9BXJ9 NARG1_HUMAN | R.LPLNFLSGEK.F       | 2 | 2,6209 | 0,255 | -0,327 |
| 14 | P21796 VDAC1_HUMAN | K.LTLSALLDGK.N       | 2 | 2,6167 | 0,348 | -0,355 |
| 14 | P07237 PDIA1_HUMAN | K.NFEDVAFDEK.K       | 2 | 2,6152 | 0,286 | -0,101 |
| 14 | P30519 HMOX2_HUMAN | R.M*ADLSELLK.E       | 2 | 2,6126 | 0,245 | 0      |
| 14 | Q15008 PSMD6_HUMAN | R.LDEELEDK.N         | 2 | 2,6105 | 0,219 | 0,205  |
| 14 | P21333 FLNA_HUMAN  | K.SPFEVYVDK.S        | 2 | 2,6039 | 0,347 | -0,225 |
| 14 | O15321 TM9S1_HUMAN | K.SLSLGEVLDGDR.M     | 2 | 2,602  | 0,259 | -0,097 |
| 14 | A3KN83 SBNO1_HUMAN | R.EFSDFIQAVR.R       | 2 | 2,6017 | 0,116 | -0,364 |
| 14 | P26639 SYTC_HUMAN  | R.IYGISFPDPK.M       | 2 | 2,6009 | 0,516 | -0,215 |
| 14 | Q14204 DYHC1_HUMAN | K.SLLQALNEVK.G       | 2 | 2,5945 | 0,381 | -0,766 |
| 14 | Q9Y277 VDAC3_HUMAN | K.LTLSALIDGK.N       | 2 | 2,5919 | 0,3   | 0      |
| 14 | P61978 HNRPK_HUMAN | K.IDEPLEGSEDR.I      | 2 | 2,5918 | 0,394 | 0,291  |
| 14 | P30043 BLVRB_HUMAN | R.NDLSPTTVM*SEGAR.N  | 2 | 2,5912 | 0,29  | -0,245 |
| 14 | P47756 CAPZB_HUMAN | K.DYLLCDYNR.D        | 2 | 2,5906 | 0,338 | 0      |
| 14 | P25205 MCM3_HUMAN  | R.GVVCIDFDK.M        | 2 | 2,5903 | 0,333 | 0,206  |
| 14 | Q9Y496 KIF3A_HUMAN | R.SAKPETVIDSLLQ.-    | 2 | 2,5849 | 0,318 | -0,087 |
| 14 | P23396 RS3_HUMAN   | K.AELNEFLTR.E        | 2 | 2,584  | 0,33  | 0,223  |
| 14 | P52209 6PGD_HUMAN  | K.AGQAVDDFIEK.L      | 2 | 2,5839 | 0,362 | -0,409 |
| 14 | Q9NVI1 FANCI_HUMAN | K.SELEDFELDK.S       | 2 | 2,5822 | 0,307 | -0,398 |
| 14 | P12956 KU70_HUMAN  | R.ILELDQFK.G         | 2 | 2,5764 | 0,122 | 0      |
| 14 | P05787 K2C8_HUMAN  | R.LQAEIEGLK.G        | 2 | 2,5737 | 0,269 | 0,061  |
| 14 | P02545 LMNA_HUMAN  | K.EAALSTALSEK.R      | 2 | 2,5729 | 0,457 | 0,327  |
| 14 | Q6S8J3 A26CA_HUMAN | K.SYELPDGQVITIGNER.F | 2 | 2,5722 | 0,354 | -0,477 |

|    |                     |                   |   |        |       |        |
|----|---------------------|-------------------|---|--------|-------|--------|
| 14 | P12081 SYHC_HUMAN   | K.ASAELIEEEVAK.L  | 2 | 2,5721 | 0,251 | 0,379  |
| 14 | P52701 MSH6_HUMAN   | K.FFIGQFSDDR.H    | 2 | 2,5681 | 0,319 | 0      |
| 14 | P55786 PSA_HUMAN    | K.LSVEGFAVDK.M    | 2 | 2,5659 | 0,395 | 0      |
| 14 | P08134 RHOC_HUMAN   | R.ISAFGYLECSAK.T  | 2 | 2,5632 | 0,239 | 0,091  |
| 14 | O95793 STAU1_HUMAN  | K.NAAIAVLEELK.K   | 2 | 2,5573 | 0,374 | -0,208 |
| 14 | P61421 VA0D1_HUMAN  | K.LLFEGAGSNPGDK.T | 2 | 2,5548 | 0,201 | -0,467 |
| 14 | P40939 ECHA_HUMAN   | K.DATLTALDR.G     | 2 | 2,5542 | 0,256 | 0      |
| 14 | Q07955 SFERS1_HUMAN | R.DAEDAVYGR.D     | 2 | 2,5493 | 0,434 | -0,368 |
| 14 | O75152 ZC11A_HUMAN  | K.TLEEILLER.A     | 2 | 2,5435 | 0,243 | -0,328 |
| 14 | Q93050 VPP1_HUMAN   | R.NFLELTELK.F     | 2 | 2,5435 | 0,113 | -0,331 |
| 14 | P18206 VINC_HUMAN   | R.ALASQLQDSLK.D   | 2 | 2,5429 | 0,302 | -0,416 |
| 14 | Q14683 SMC1A_HUMAN  | K.NM*DAIIVDSEK.T  | 2 | 2,5426 | 0,198 | 0,39   |
| 14 | Q9UNM6 PSD13_HUMAN  | K.LNIGDLQVTK.E    | 2 | 2,5423 | 0,366 | -0,443 |
| 14 | Q96CX2 KCD12_HUMAN  | K.FNFLEQAFDK.L    | 2 | 2,5387 | 0,095 | -0,485 |
| 14 | Q8TC07 TBC15_HUMAN  | K.IDVEDILCK.A     | 2 | 2,5371 | 0,306 | -0,442 |
| 14 | P23528 COF1_HUMAN   | K.AVLFLSEDK.K     | 2 | 2,5344 | 0,426 | -0,413 |
| 14 | P60981 DEST_HUMAN   | R.YALYDASFETK.E   | 2 | 2,5279 | 0,435 | 0,187  |
| 14 | Q04864 REL_HUMAN    | R.DGYEAEFGQER.R   | 2 | 2,5277 | 0,443 | 0,25   |
| 14 | Q9H3N1 TXND1_HUMAN  | K.DFINFISDK.E     | 2 | 2,5267 | 0,307 | -0,333 |
| 14 | P42704 LPPRC_HUMAN  | K.NVQGIIEILK.G    | 2 | 2,5257 | 0,229 | -0,217 |
| 14 | Q03252 LMNB2_HUMAN  | R.QVLEGEIAYK.F    | 2 | 2,5254 | 0,248 | 0,286  |
| 14 | P37837 TALDO_HUMAN  | K.SYEPLEDPGVK.S   | 2 | 2,5252 | 0,422 | -0,593 |
| 14 | Q15904 VAS1_HUMAN   | R.NVLLFLQDK.L     | 2 | 2,5188 | 0,289 | -0,224 |
| 14 | P12268 IMDH2_HUMAN  | K.NLIDAGVDALR.V   | 2 | 2,5182 | 0,238 | -0,527 |
| 14 | Q14204 DYHC1_HUMAN  | R.SIPLDEGEDEAQR.R | 2 | 2,5159 | 0,345 | -0,418 |
| 14 | P31946 1433B_HUMAN  | K.YLIPNATQPESK.V  | 2 | 2,5141 | 0,266 | 0      |
| 14 | Q96P70 IPO9_HUMAN   | R.ELGENLDQILR.A   | 2 | 2,5135 | 0,39  | -0,375 |
| 14 | Q6P158 DHX57_HUMAN  | R.TAFEEVEEDLR.L   | 2 | 2,5131 | 0,41  | -0,547 |
| 14 | P34932 HSP74_HUMAN  | R.AFSDPFVEAEK.S   | 2 | 2,5092 | 0,335 | -0,098 |
| 14 | P17568 NDUB7_HUMAN  | R.DSFPNFLACK.Q    | 2 | 2,5088 | 0,445 | -0,305 |
| 14 | P31947 1433S_HUMAN  | R.YEDM*AAF*M*K.G  | 2 | 2,5066 | 0,202 | -0,214 |
| 14 | P62191 PRS4_HUMAN   | K.DDLGADIK.A      | 2 | 2,5026 | 0,17  | 0      |
| 14 | P17987 TCPA_HUMAN   | R.EQLAIAEFAR.S    | 2 | 2,498  | 0,353 | 0,106  |

|    |                    |                     |   |        |       |        |
|----|--------------------|---------------------|---|--------|-------|--------|
| 14 | P07900 HS90A_HUMAN | R.DNSTM*GYM*AAK.K   | 2 | 2,4969 | 0,472 | -0,5   |
| 14 | P20618 PSB1_HUMAN  | K.DVFISAAER.D       | 2 | 2,4967 | 0,424 | 0,363  |
| 14 | P60228 EIF3E_HUMAN | R.M*LFDYLADK.H      | 2 | 2,4957 | 0,309 | -0,323 |
| 14 | Q9UBC2 EP15R_HUMAN | K.SGLSDIILGK.I      | 2 | 2,4944 | 0,398 | -0,73  |
| 14 | Q13011 ECH1_HUMAN  | R.YQETFNVIER.C      | 2 | 2,4898 | 0,322 | -0,094 |
| 14 | P21980 TGM2_HUMAN  | R.DCLTESNLIK.V      | 2 | 2,4876 | 0,155 | -0,307 |
| 14 | O00571 DDX3X_HUMAN | R.IVEQDTM*PPK.G     | 2 | 2,4863 | 0,249 | -0,208 |
| 14 | Q15149 PLEC1_HUMAN | R.QYDIDDIAIK.N      | 2 | 2,4857 | 0,452 | -0,106 |
| 14 | P02545 LMNA_HUMAN  | K.DLEALLNSK.E       | 2 | 2,4834 | 0,359 | 0,061  |
| 14 | P13693 TCTP_HUMAN  | K.DGLEM*EKC.-       | 2 | 2,4802 | 0,419 | -0,245 |
| 14 | Q00610 CLH1_HUMAN  | K.DAM*QYASESK.D     | 2 | 2,4798 | 0,363 | -0,426 |
| 14 | P46940 IQGA1_HUMAN | K.VDFTEEEINNM*K.T   | 2 | 2,4795 | 0,296 | 0,739  |
| 14 | P25685 DNJB1_HUMAN | R.DGSDVIYPAR.I      | 2 | 2,4792 | 0,263 | 0,112  |
| 14 | P46063 RECQ1_HUMAN | K.DILQNVFK.L        | 2 | 2,4767 | 0,299 | -0,187 |
| 14 | O14980 XPO1_HUMAN  | K.DLLGLCEQK.R       | 2 | 2,4753 | 0,357 | 0,34   |
| 14 | P15531 NDKA_HUMAN  | K.FM*QASEDLLK.E     | 2 | 2,4751 | 0,353 | 0,204  |
| 14 | Q08211 DHX9_HUMAN  | R.LGGIGQFLAK.A      | 2 | 2,4716 | 0,444 | -0,425 |
| 14 | P08133 ANXA6_HUMAN | R.SEIDLLNIR.R       | 2 | 2,4691 | 0,234 | 0,114  |
| 14 | P52907 CAZA1_HUMAN | K.EASDPQPEEADGGLK.S | 2 | 2,4688 | 0,475 | -0,316 |
| 14 | P19338 NUCL_HUMAN  | K.GLSEDTEETLK.E     | 2 | 2,4677 | 0,47  | -0,092 |
| 14 | Q9Y570 PPME1_HUMAN | K.LLLLAGVDR.L       | 2 | 2,4661 | 0,276 | -0,063 |
| 14 | Q9Y580 RBM7_HUMAN  | R.DDFFYEDR.N        | 2 | 2,4638 | 0,427 | -0,11  |
| 14 | P55884 EIF3B_HUMAN | R.VNLFTDFDK.Y       | 2 | 2,4635 | 0,419 | -0,444 |
| 14 | P08559 ODPA_HUMAN  | K.LPCIFICENNR.Y     | 2 | 2,4601 | 0,397 | -0,17  |
| 14 | P15170 ERF3A_HUMAN | K.DM*GTVVLGK.L      | 2 | 2,4596 | 0,255 | 0      |
| 14 | P08670 VIME_HUMAN  | R.DNLAEDIM*R.L      | 2 | 2,4593 | 0,283 | -0,335 |
| 14 | Q969H8 CS010_HUMAN | R.GAEIEYAM*AYSK.A   | 2 | 2,4593 | 0,155 | 0,181  |
| 14 | Q86UP2 KTN1_HUMAN  | K.SVLAETEGILQK.L    | 2 | 2,4579 | 0,254 | -0,189 |
| 14 | P23284 PPIB_HUMAN  | K.DFM*IQGGDFTR.G    | 2 | 2,4557 | 0,232 | 0,281  |
| 14 | P21333 FLNA_HUMAN  | R.EATTEFSVDAR.A     | 2 | 2,4534 | 0,357 | -1,891 |
| 14 | Q8NBJ5 GT251_HUMAN | K.SLVFEDDLR.F       | 2 | 2,4531 | 0,232 | -0,669 |
| 14 | Q9BRA2 TXD17_HUMAN | K.TIFAYFTGSK.D      | 2 | 2,4493 | 0,51  | -0,322 |
| 14 | P28066 PSA5_HUMAN  | K.EELEEVIKDI.-      | 2 | 2,4462 | 0,327 | -0,602 |



|    |                    |                     |   |        |       |        |
|----|--------------------|---------------------|---|--------|-------|--------|
| 14 | Q96I99 SUCB2_HUMAN | R.ETYLAILM*DR.S     | 2 | 2,4446 | 0,178 | -0,098 |
| 14 | P30101 PDIA3_HUMAN | R.DGEEAGAYDGPR.T    | 2 | 2,4399 | 0,444 | -0,099 |
| 14 | Q15149 PLEC1_HUMAN | R.LAEVEAALEK.Q      | 2 | 2,4374 | 0,243 | -0,682 |
| 14 | O60271 JIP4_HUMAN  | K.DVAGLDTEGSK.Q     | 2 | 2,4371 | 0,431 | 0      |
| 14 | Q92696 PGTA_HUMAN  | R.DSTTDEQLFR.C      | 2 | 2,4362 | 0,375 | 0      |
| 14 | Q9BVK6 TMED9_HUMAN | R.QLVEQVEQIQK.E     | 2 | 2,4332 | 0,276 | -0,091 |
| 14 | P06576 ATPB_HUMAN  | K.IGLFGGAGVGK.T     | 2 | 2,4328 | 0,32  | -0,063 |
| 14 | Q9Y230 RUVB2_HUMAN | R.VYSLFLDESR.S      | 2 | 2,4287 | 0,324 | -0,298 |
| 14 | Q12929 EPS8_HUMAN  | R.NYEPLKTQPK.K      | 2 | 2,4272 | 0,092 | 0      |
| 14 | P49588 SYAC_HUMAN  | R.IVAVTGAEAQK.A     | 2 | 2,4253 | 0,405 | -0,337 |
| 14 | Q9UNK0 STX8_HUMAN  | R.QNLLDDLVTRE       | 2 | 2,4235 | 0,248 | -0,206 |
| 14 | Q96I25 SPF45_HUMAN | K.SDSNPLTEILK.C     | 2 | 2,4227 | 0,312 | -0,301 |
| 14 | P14625 ENPL_HUMAN  | R.SGYLLPDTK.A       | 2 | 2,4211 | 0,164 | 0      |
| 14 | P22234 PUR6_HUMAN  | K.EVTPEGLQM*VK.K    | 2 | 2,4201 | 0,407 | 0,098  |
| 14 | Q92945 FUBP2_HUMAN | K.VQISPDSGGLPER.S   | 2 | 2,4196 | 0,296 | 0,09   |
| 14 | Q9BV38 WDR18_HUMAN | R.DLDFDFSTR.F       | 2 | 2,419  | 0,367 | -0,061 |
| 14 | Q16658 FSCN1_HUMAN | K.YLTAEAFGFK.V      | 2 | 2,4093 | 0,335 | -0,106 |
| 14 | Q9Y6Y8 S23IP_HUMAN | R.SIIECVDDFR.V      | 2 | 2,4093 | 0,332 | -0,292 |
| 14 | O15397 IPO8_HUMAN  | R.DNIVEGIIR.S       | 2 | 2,4091 | 0,329 | -0,119 |
| 14 | Q8WVM7 STAG1_HUMAN | K.DGIEFAFK.Y        | 2 | 2,4086 | 0,328 | 0,132  |
| 14 | Q06830 PRDX1_HUMAN | R.GLFIIDDK.G        | 2 | 2,4071 | 0,293 | -0,927 |
| 14 | Q9NVT9 ARMC1_HUMAN | R.DLAADPLNR.R       | 2 | 2,4044 | 0,376 | 0,062  |
| 14 | Q58FF7 H90B3_HUMAN | K.EDQTEYLEER.R      | 2 | 2,4012 | 0,418 | 0,465  |
| 14 | Q96C19 EFHD2_HUMAN | R.ADLNQGIGEPQSPSR.R | 2 | 2,4012 | 0,395 | 0,544  |
| 14 | P16403 H12_HUMAN   | K.ASGPPVSELITK.A    | 2 | 2,3942 | 0,349 | 0,305  |
| 14 | Q15149 PLEC1_HUMAN | K.AELELELGR.I       | 2 | 2,3893 | 0,316 | -0,237 |
| 14 | P15880 RS2_HUMAN   | R.GTGIVSAPVPK.K     | 2 | 2,3879 | 0,191 | -0,357 |
| 14 | P00558 PGK1_HUMAN  | K.ALM*DEVVK.A       | 2 | 2,3866 | 0,234 | -0,331 |
| 14 | P42704 LPPRC_HUMAN | K.LDDLFLK.R         | 2 | 2,3849 | 0,206 | 0,141  |
| 14 | P61019 RAB2A_HUMAN | K.SCLLLQFTDK.R      | 2 | 2,3835 | 0,327 | 0,199  |
| 14 | P14314 GLU2B_HUMAN | K.ETM*VTSTTEPSR.C   | 2 | 2,3829 | 0,418 | -0,45  |
| 14 | Q7KZF4 SND1_HUMAN  | R.EVEVEVESM*DK.A    | 2 | 2,3791 | 0,41  | -0,279 |
| 14 | Q14978 NOLC1_HUMAN | R.DNQLSEVANK.F      | 2 | 2,3763 | 0,216 | -0,327 |

|    |                    |                      |   |        |       |        |
|----|--------------------|----------------------|---|--------|-------|--------|
| 14 | Q16352 AINX_HUMAN  | R.DGLAEEVQR.L        | 2 | 2,3739 | 0,204 | 0,12   |
| 14 | P14868 SYDC_HUMAN  | R.EIM*DAAEDYAK.E     | 2 | 2,3733 | 0,167 | -0,192 |
| 14 | P14625 ENPL_HUMAN  | K.LIINSLYK.N         | 2 | 2,3711 | 0,087 | -0,063 |
| 14 | P09960 LKHA4_HUMAN | K.EDDLNSFNATDLK.D    | 2 | 2,3667 | 0,081 | 0      |
| 14 | Q96RP9 EFG1_HUMAN  | K.GIVDLIEER.A        | 2 | 2,3658 | 0,216 | -1,285 |
| 14 | P10515 ODP2_HUMAN  | K.DIDSFVPSK.V        | 2 | 2,3638 | 0,343 | 0,121  |
| 14 | P53999 TCP4_HUMAN  | K.EQISDIDDAVR.K      | 2 | 2,3621 | 0,422 | 0,097  |
| 14 | P12956 KU70_HUMAN  | R.LGSLVDEFK.E        | 2 | 2,3605 | 0,334 | 0      |
| 14 | P10809 CH60_HUMAN  | K.DDAM*LLK.G         | 2 | 2,3586 | 0,179 | -0,148 |
| 14 | Q969H8 CS010_HUMAN | K.SYLYFTQFK.A        | 2 | 2,3582 | 0,319 | -0,306 |
| 14 | P61978 HNRPK_HUMAN | R.TDYNASVSPDSSGPER.I | 2 | 2,3558 | 0,418 | 0,274  |
| 14 | Q0IIM8 TBC8B_HUMAN | R.VDITDLIR.E         | 2 | 2,3553 | 0,237 | 0,065  |
| 14 | P55010 IF5_HUMAN   | K.VLTLSDDLER.T       | 2 | 2,3516 | 0,157 | 0,841  |
| 14 | Q14839 CHD4_HUMAN  | R.ENEFSFEDNAIR.G     | 2 | 2,3479 | 0,29  | -0,498 |
| 14 | P62861 RS30_HUMAN  | R.FVNVVPTFGK.K       | 2 | 2,3452 | 0,353 | -0,33  |
| 14 | Q96GQ7 DDX27_HUMAN | K.SVFDEELTNTSK.K     | 2 | 2,3447 | 0,219 | 1,336  |
| 14 | P13489 RINI_HUMAN  | R.DLCGIVASK.A        | 2 | 2,3414 | 0,333 | 0,127  |
| 14 | P35237 SPB6_HUMAN  | R.NLGM*TDAFELGK.A    | 2 | 2,3363 | 0,272 | 0      |
| 14 | Q96QK1 VPS35_HUMAN | K.NIIIALIDR.L        | 2 | 2,3344 | 0,299 | -0,352 |
| 14 | P18085 ARF4_HUMAN  | R.IQEVADQLQK.M       | 2 | 2,3255 | 0,257 | 0      |
| 14 | O14979 HNRDL_HUMAN | R.FGEVVDCTIK.T       | 2 | 2,3213 | 0,418 | -0,209 |
| 14 | Q99541 ADFP_HUMAN  | K.DAVTTTVTGAK.D      | 2 | 2,3173 | 0,399 | -0,344 |
| 14 | O14979 HNRDL_HUMAN | R.GFGFVLFK.D         | 2 | 2,3128 | 0,386 | -0,133 |
| 14 | P05787 K2C8_HUMAN  | R.AEAESM*YQIK.Y      | 2 | 2,3104 | 0,26  | -0,206 |
| 14 | O75494 FUSIP_HUMAN | R.QIEIQFAQGDR.K      | 2 | 2,3093 | 0,281 | 0      |
| 14 | Q16401 PSMD5_HUMAN | R.LEAPLEELR.A        | 2 | 2,3027 | 0,376 | 0,228  |
| 14 | Q06830 PRDX1_HUMAN | K.ATAVM*PDGQFK.D     | 2 | 2,3022 | 0,263 | -0,207 |
| 14 | Q15029 U5S1_HUMAN  | R.EGPLCDELIR.N       | 2 | 2,3001 | 0,283 | 0,102  |
| 14 | Q9Y230 RUVB2_HUMAN | K.VQAGDVITDK.A       | 2 | 2,296  | 0,295 | 0      |
| 14 | O95373 IPO7_HUMAN  | K.QLQDIATLADQR.R     | 2 | 2,2825 | 0,189 | -0,089 |
| 14 | P61353 RL27_HUMAN  | R.YSVDIPLDK.T        | 2 | 2,2789 | 0,401 | 0      |
| 14 | Q9Y570 PPME1_HUMAN | K.DLTIGQM*QGK.F      | 2 | 2,2774 | 0,389 | -0,22  |
| 14 | Q07955 SFRS1_HUMAN | R.DGTGVVEFVR.K       | 2 | 2,2749 | 0,283 | 0      |

|    |                    |                     |   |        |       |        |
|----|--------------------|---------------------|---|--------|-------|--------|
| 14 | P46781 RS9_HUMAN   | K.LDYILGLK.I        | 2 | 2,2717 | 0,286 | 0,13   |
| 14 | Q58FF7 H90B3_HUMAN | K.IDIIPNPQER.T      | 2 | 2,2674 | 0,169 | 0,102  |
| 14 | P17844 DDX5_HUMAN  | K.LLQLVEDR.G        | 2 | 2,265  | 0,238 | 0,186  |
| 14 | Q13610 PWP1_HUMAN  | R.EPLEDGDPEDDR.T    | 2 | 2,2629 | 0,518 | -0,264 |
| 14 | O00299 CLIC1_HUMAN | K.GVTFNVTTVDTK.R    | 2 | 2,2618 | 0,438 | 0,095  |
| 14 | Q92973 TNPO1_HUMAN | R.QSSFALLGLTK.A     | 2 | 2,2574 | 0,438 | -0,286 |
| 14 | P16949 STMN1_HUMAN | K.DLSLEEIQK.K       | 2 | 2,2565 | 0,159 | 0,227  |
| 14 | Q9Y2X3 NOL5_HUMAN  | K.TYDPSGDSTLPTCSK.K | 2 | 2,2547 | 0,418 | 0,225  |
| 14 | P08865 RSSA_HUMAN  | R.YVDIAIPCNNK.G     | 2 | 2,2486 | 0,296 | 0      |
| 14 | Q99961 SH3G1_HUMAN | K.DSLDIEVK.Q        | 2 | 2,2471 | 0,114 | 0,066  |
| 14 | P08107 HSP71_HUMAN | R.FEELCSDLFR.S      | 2 | 2,2468 | 0,392 | -0,371 |
| 14 | Q9HAU5 RENT2_HUMAN | R.NFYENLIDLK.A      | 2 | 2,2436 | 0,245 | -0,288 |
| 14 | P49207 RL34_HUMAN  | R.AFLIEEQK.I        | 2 | 2,2379 | 0,228 | 0,187  |
| 14 | P58107 EPIPL_HUMAN | R.VLADPSDDTK.G      | 2 | 2,2359 | 0,386 | -0,115 |
| 14 | P61081 UBC12_HUMAN | K.DINELNLPK.T       | 2 | 2,2346 | 0,276 | 0      |
| 14 | Q9BUQ8 DDX23_HUMAN | K.EDSAVFYELK.Q      | 2 | 2,2319 | 0,261 | 0,102  |
| 14 | P12956 KU70_HUMAN  | K.IM*ATPEQVGK.M     | 2 | 2,224  | 0,283 | 0      |
| 14 | Q9Y6N5 SQRD_HUMAN  | K.YADALQEIIQER.N    | 2 | 2,2228 | 0,204 | -0,084 |
| 14 | P05388 RLA0_HUMAN  | K.CFIVGADNVGSK.Q    | 2 | 2,2185 | 0,289 | -0,578 |
| 14 | Q92541 RTF1_HUMAN  | K.SASDLSLDFK.V      | 2 | 2,2171 | 0,315 | -0,403 |
| 14 | O75821 EIF3G_HUMAN | K.ELAEQLGLSTGEK.E   | 2 | 2,2162 | 0,346 | 0,355  |
| 14 | P17174 AATC_HUMAN  | R.LALGDDSPALK.E     | 2 | 2,2128 | 0,312 | 0,333  |
| 14 | P26641 EF1G_HUMAN  | K.STFVLDEFK.R       | 2 | 2,211  | 0,344 | -0,225 |
| 14 | Q8NBJ4 GOLM1_HUMAN | R.DTINLLDQR.E       | 2 | 2,211  | 0,281 | 0      |
| 14 | Q6FI81 CPIN1_HUMAN | K.VLLSDSNLHDA.-     | 2 | 2,2096 | 0,334 | 0,618  |
| 14 | Q02790 FKBP4_HUMAN | R.EGTGTEM*PM*IGDR.V | 2 | 2,2084 | 0,263 | -0,171 |
| 14 | P62937 PIIA_HUMAN  | K.EGM*NIVEAM*ER.F   | 2 | 2,2072 | 0,484 | -0,279 |
| 14 | P78527 PRKDC_HUMAN | K.GLSSLLCNFTK.S     | 2 | 2,1893 | 0,34  | -0,098 |
| 14 | P30101 PDIA3_HUMAN | R.LAPEYEAATR.L      | 2 | 2,1866 | 0,253 | -0,102 |
| 14 | Q6NUQ4 U535_HUMAN  | K.DLASYLNYK.L       | 2 | 2,1854 | 0,349 | -0,449 |
| 14 | P52701 MSH6_HUMAN  | R.TLLEEEYFR.E       | 2 | 2,1834 | 0,396 | -0,508 |
| 14 | Q9NYU2 UGGG1_HUMAN | K.DLSQNFPTK.A       | 2 | 2,1827 | 0,09  | 0,116  |
| 14 | P52701 MSH6_HUMAN  | R.FPDLTVELNR.W      | 2 | 2,1768 | 0,227 | -0,101 |

|    |                     |                    |   |        |       |        |
|----|---------------------|--------------------|---|--------|-------|--------|
| 14 | P19338 NUCL_HUMAN   | K.ALELTGLK.V       | 2 | 2,1765 | 0,321 | 0      |
| 14 | Q13243 SFRS5_HUMAN  | R.GFGFVEFEDPR.D    | 2 | 2,1746 | 0,233 | -0,563 |
| 14 | Q99729 ROAA_HUMAN   | R.GFGFILFK.D       | 2 | 2,1724 | 0,136 | -0,197 |
| 14 | P62913 RL11_HUMAN   | K.YDGIILPGK.-      | 2 | 2,1711 | 0,469 | 0,063  |
| 14 | P36871 PGM1_HUMAN   | R.YDYEEVEAEGANK.M  | 2 | 2,1669 | 0,25  | 0,241  |
| 14 | O75822 EIF3J_HUMAN  | R.DDFTEFGK.L       | 2 | 2,1643 | 0,303 | 0      |
| 14 | Q8NI36 WDR36_HUMAN  | K.NLLNLDVIK.K      | 2 | 2,1633 | 0,311 | -0,117 |
| 14 | P30048 PRDX3_HUMAN  | K.DLSLDDFK.G       | 2 | 2,1604 | 0,359 | -0,64  |
| 14 | P15924 DESP_HUMAN   | R.DLIDFDDR.Q       | 2 | 2,1592 | 0,224 | -0,06  |
| 14 | P62826 RAN_HUMAN    | K.LVLVGDGGTGK.T    | 2 | 2,1549 | 0,198 | 0,06   |
| 14 | P36551 HEM6_HUMAN   | K.EAEILEVLR.H      | 2 | 2,1536 | 0,154 | -0,228 |
| 14 | Q15149 PLEC1_HUMAN  | R.QEQALLEEIER.H    | 2 | 2,1512 | 0,288 | -0,449 |
| 14 | Q9NSE4 SYIM_HUMAN   | R.QQPDTELEIQK.C    | 2 | 2,1463 | 0,12  | 0,251  |
| 14 | P08107 HSP71_HUMAN  | K.FGDPVVQSDM*K.H   | 2 | 2,1434 | 0,43  | 0,295  |
| 14 | P22626 ROA2_HUMAN   | R.DYFEEYGK.I       | 2 | 2,1349 | 0,487 | -0,116 |
| 14 | O95373 IPO7_HUMAN   | K.SDQNLQTALELTR.R  | 2 | 2,1345 | 0,323 | -0,328 |
| 14 | Q9UQE7 SMC3_HUMAN   | R.DSILSEM*K.M      | 2 | 2,1331 | 0,1   | -0,065 |
| 14 | P46779 RL28_HUMAN   | K.TVGVEPAADGK.G    | 2 | 2,1299 | 0,334 | 0      |
| 14 | P60842 IF4A1_HUMAN  | K.EELTLEGIR.Q      | 2 | 2,1284 | 0,115 | 0,115  |
| 14 | Q71U36 TBA1A_HUMAN  | K.EIIDLVLR.I       | 2 | 2,1216 | 0,348 | -0,225 |
| 14 | P61978 HNRPK_HUMAN  | K.DLAGSIIGK.G      | 2 | 2,1213 | 0,093 | -0,209 |
| 14 | P22314 UBA1_HUMAN   | R.DEFEGLFK.Q       | 2 | 2,1207 | 0,198 | -0,619 |
| 14 | P04083 ANXA1_HUMAN  | K.DITSDTSGDFR.N    | 2 | 2,1154 | 0,381 | -0,302 |
| 14 | Q9UHB9 SRP68_HUMAN  | R.ALLQQQPEDDSK.R   | 2 | 2,1148 | 0,215 | -0,267 |
| 14 | B2R6A5 B2R6A5_HUMAN | K.DTDGGPKKEESPV.-  | 2 | 2,114  | 0,205 | 0      |
| 14 | P62316 SMD2_HUMAN   | K.SEM*TPEELQK.R    | 2 | 2,1132 | 0,221 | 0,303  |
| 14 | P61009 SPCS3_HUMAN  | K.YFFDDGNGLK.G     | 2 | 2,11   | 0,142 | -0,277 |
| 14 | P80723 BASP_HUMAN   | K.ETPAATEAPSSTPK.A | 2 | 2,1094 | 0,423 | -0,176 |
| 14 | Q9BYJ9 YTHD1_HUMAN  | R.DTQEVPLEK.A      | 2 | 2,1081 | 0,294 | -0,115 |
| 14 | P09884 DPOLA_HUMAN  | R.DTIVENIQK.R      | 2 | 2,1077 | 0,13  | -0,575 |
| 14 | Q96D46 NMD3_HUMAN   | K.DNVVCLSPK.L      | 2 | 2,1046 | 0,331 | -0,236 |
| 14 | P07737 PROF1_HUMAN  | K.TLVLLM*GK.E      | 2 | 2,0968 | 0,319 | 0      |
| 14 | P20042 IF2B_HUMAN   | K.DLEADEEDTR.K     | 2 | 2,0875 | 0,186 | -0,102 |

|    |                     |                          |        |   |        |       |        |
|----|---------------------|--------------------------|--------|---|--------|-------|--------|
| 14 | P09960 LKHA4_HUMAN  | R.DGETPDPEDPSR.K         |        | 2 | 2,0859 | 0,361 | -0,278 |
| 14 | O14979 HNRDL_HUMAN  | K.DLTEYLSR.F             |        | 2 | 2,0847 | 0,261 | 0      |
| 14 | Q14165 K0152_HUMAN  | K.DLDIFDR.V              |        | 2 | 2,082  | 0,216 | -1,024 |
| 14 | P21796 VDAC1_HUMAN  | K.YQIDPDACFSAK.V         |        | 2 | 2,0818 | 0,293 | 0,172  |
| 14 | O95721 SNP29_HUMAN  | R.DLPDGPDAPADR.Q         |        | 2 | 2,0776 | 0,142 | -1,182 |
| 14 | P49736 MCM2_HUMAN   | R.GVCLIDEFDK.M           |        | 2 | 2,0775 | 0,304 | -0,204 |
| 14 | Q15149 PLEC1_HUMAN  | R.LTAEDLFEAR.I           |        | 2 | 2,075  | 0,368 | -0,209 |
| 14 | Q16795 NDUA9_HUMAN  | K.NDFEDVFK.I             |        | 2 | 2,0698 | 0,33  | -0,484 |
| 14 | Q13247 SFRS6_HUMAN  | R.LLEVDLK.N              |        | 2 | 2,0653 | 0,189 | 0,147  |
| 14 | P21283 VATC1_HUMAN  | K.IDCNLLEFK.-            |        | 2 | 2,0651 | 0,247 | -0,424 |
| 14 | Q14157 UBP2L_HUMAN  | R.IDLAVLLGK.T            |        | 2 | 2,0625 | 0,35  | -0,259 |
| 14 | P05198 IF2A_HUMAN   | K.VVTDTDETELAR.Q         |        | 2 | 2,0576 | 0,422 | 0,09   |
| 14 | P53621 COPA_HUMAN   | R.QELILNSEDK.S           |        | 2 | 2,0569 | 0,313 | 0,096  |
| 14 | P31483 TIA1_HUMAN   | K.GYGFVSFFNK.W           |        | 2 | 2,0562 | 0,286 | -0,942 |
| 14 | P10606 COX5B_HUMAN  | R.EDPNLVPSISNK.R         |        | 2 | 2,0504 | 0,218 | -0,093 |
| 14 | P25786 PSA1_HUMAN   | K.AQPAQPADEPAEK.A        |        | 2 | 2,0466 | 0,349 | -0,632 |
| 14 | P08238 HS90B_HUMAN  | R.ALLFIPR.R              |        | 2 | 2,0429 | 0,26  | -0,294 |
| 14 | P18031 PTN1_HUMAN   | K.EM*IFEDTNLK.L          |        | 2 | 2,0419 | 0,296 | -0,389 |
| 14 | A9CQZ4 A9CQZ4_HUMAN | K.TIDFDSLVSGR.G          |        | 2 | 2,0413 | 0,238 | 0,302  |
| 14 | P40926 MDHM_HUMAN   | K.EGVVECSFVK.S           |        | 2 | 2,0411 | 0,188 | 0,106  |
| 14 | Q6UB35 C1TM_HUMAN   | K.AVIELLEK.S             |        | 2 | 2,0374 | 0,186 | 0,133  |
| 14 | P09874 PARP1_HUMAN  | K.QQVPSGESAILDR.V        |        | 2 | 2,0358 | 0,246 | 0,174  |
| 14 | Q92499 DDX1_HUMAN   | K.DGFVALSK.A             |        | 2 | 2,0345 | 0,289 | 0,146  |
| 14 | Q9NVP1 DDX18_HUMAN  | K.EPLYVGVDDDK.A          |        | 2 | 2,0334 | 0,393 | 0,195  |
| 14 | P00813 ADA_HUMAN    | K.STLDTDYQM*TK.R         |        | 2 | 2,0254 | 0,212 | -0,37  |
| 14 | Q9UIC8 LCMT1_HUMAN  | R.DLSELEEK.L             |        | 2 | 2,0205 | 0,237 | -0,063 |
| 14 | Q9P289 MST4_HUMAN   | K.TSYLTELIDR.F           |        | 2 | 2,0174 | 0,294 | -0,403 |
| 14 | P61289 PSME3_HUMAN  | K.SNQQQLVDIIEK.V         |        | 2 | 2,0088 | 0,32  | 0      |
| 14 | Q9NRW7 VPS45_HUMAN  | K.EYELFEFR.R             |        | 2 | 2,0029 | 0,226 | -0,323 |
| 15 | Q15058 KIF14_HUMAN  | R.NKES#SLLVSELEDTTEK.T   | S100:  | 3 | 4,4331 | 0,354 | -0,091 |
| 15 | Q92794 MYST3_HUMAN  | R.SSS#PPILTKPTLK.R       | S1001: | 2 | 2,3892 | 0,258 | 0,084  |
| 15 | Q9NWH9 SLTM_HUMAN   | R.AGAGM*ITQHSSNAS#PINR.I | S1002: | 3 | 3,6188 | 0,368 | -0,288 |
| 15 | Q9NWH9 SLTM_HUMAN   | R.AGAGM*ITQHSSNAS#PINR.I | S1002: | 2 | 2,2953 | 0,283 | -0,448 |

|    |                     |                                    |              |   |        |       |        |
|----|---------------------|------------------------------------|--------------|---|--------|-------|--------|
| 15 | Q15058 KIF14_HUMAN  | R.NKESS#LLVSELEDTTEK.T             | S101:        | 2 | 4,0906 | 0,472 | -0,305 |
| 15 | O75044 FNBP2_HUMAN  | R.S#ASTAGDIACAFRPVK.S              | S1011:       | 2 | 2,9509 | 0,261 | -0,211 |
| 15 | O95785 WIZ_HUMAN    | K.NPEDKSPQLSLS#PRPAS#PK.A          | S1012:S1017: | 3 | 4,3474 | 0,437 | 0      |
| 15 | P46821 MAP1B_HUMAN  | K.GEAEQS#EEEEADEEDKAEDAR.E         | S1016:       | 3 | 3,8821 | 0,327 | 0,316  |
| 15 | O95785 WIZ_HUMAN    | K.SPQLSLSRPAS#PK.A                 | S1017:       | 2 | 3,3963 | 0,357 | 0,158  |
| 15 | Q9UGU5 HM2L1_HUMAN  | K.KSS#PQSTDTAM*DLLK.A              | S102:        | 2 | 4,3629 | 0,559 | 0,497  |
| 15 | O75351 VPS4B_HUMAN  | K.EGQPSPADEKGNDS#DGEGESDDPEK.K     | S102:        | 3 | 4,015  | 0,448 | -0,48  |
| 15 | Q9GZT3 SLIRP_HUMAN  | K.LPQTS#DDEKKDF.-                  | S102:        | 2 | 2,5805 | 0,281 | 0,244  |
| 15 | Q96H12 CI030_HUMAN  | R.SVSPILLS#THVLGK.E                | S102:        | 2 | 2,4722 | 0,311 | 0,86   |
| 15 | Q5H9F3 BCRL1_HUMAN  | R.GS#STERPQLGSQVDLGR.V             | S1033:       | 3 | 4,237  | 0,445 | 0,098  |
| 15 | P15822 ZEP1_HUMAN   | K.M*KS#VGDDEELQQNESGTSPK.S         | S1035:       | 3 | 4,1606 | 0,361 | 1,045  |
| 15 | Q5THJ4 VP13D_HUMAN  | K.NLSFDIPTGSLRDS#R.A               | S1038:       | 2 | 2,4631 | 0,15  | -0,347 |
| 15 | P05386 RLA1_HUMAN   | K.KEESEES#DDDM*GFGLFD.-            | S104:        | 2 | 3,8473 | 0,35  | -0,537 |
| 15 | P21796 VDAC1_HUMAN  | K.LTFDSSFS#PNTGKK.N                | S104:        | 2 | 3,5461 | 0,363 | -0,379 |
| 15 | P28749 RBL1_HUMAN   | R.VIAIDSAES#PAKR.V                 | S1041:       | 2 | 3,8187 | 0,327 | 0      |
| 15 | Q9P2D0 IBTK_HUMAN   | R.DLQS#PDFTTGFHSDK.I               | S1045:       | 2 | 4,44   | 0,445 | -0,137 |
| 15 | P05387 RLA2_HUMAN   | K.DEKKEESEES#DDDM*GFGLFD.-         | S105:        | 3 | 2,9951 | 0,41  | 0      |
| 15 | Q8NHQ8 RASF8_HUMAN  | R.TLYRQS#LPPLAK.L                  | S105:        | 2 | 2,4911 | 0,221 | -0,25  |
| 15 | Q96KR1 ZFR_HUMAN    | R.DS#DGVVDGFEAEGKK.D               | S1054:       | 2 | 2,1503 | 0,378 | 0,318  |
| 15 | P24534 EF1B_HUMAN   | K.DDDIDLFGS#DDEEESEEAKR.L          | S106:        | 3 | 3,3441 | 0,4   | -0,292 |
| 15 | Q5VZL5 ZMYM4_HUMAN  | K.KTLS#QGESQT#SEHELFLDTK.I         | S1064:T1070: | 3 | 3,0808 | 0,357 | -0,375 |
| 15 | Q9UKY7 CDV3_HUMAN   | R.VQAM*QISS#EKEEDDNEK.R            | S107:        | 3 | 2,9097 | 0,248 | 0      |
| 15 | A0JLU0 A0JLU0_HUMAN | K.KQEGPATQVDSAVGTLPATS#PQSTSVQAK.G | S1073:       | 3 | 4,7774 | 0,47  | 0,864  |
| 15 | Q96JM2 ZN462_HUMAN  | R.NNS#RVSPVPLSGAAAGTEQK.T          | S1075:       | 3 | 4,322  | 0,392 | 0,177  |
| 15 | Q8NG31 CASC5_HUMAN  | K.NIKDVQS#PGFLNEPLSSK.S            | S1076:       | 3 | 4,1541 | 0,478 | 0,178  |
| 15 | Q08999 RBL2_HUMAN   | K.IFYFNS#PSKR.L                    | S1080:       | 2 | 2,7691 | 0,315 | -0,077 |
| 15 | A1L390 PKHG3_HUMAN  | R.SHS#VPENM*VEPPLSGR.V             | S1081:       | 3 | 3,9473 | 0,199 | 0,1    |
| 15 | A1L390 PKHG3_HUMAN  | R.SHS#VPENM*VEPPLSGR.V             | S1081:       | 2 | 3,7544 | 0,624 | 0,4    |
| 15 | O60271 JIP4_HUMAN   | K.FIEFEDS#QEQQEK.D                 | S109:        | 2 | 3,6374 | 0,29  | 0,351  |
| 15 | P46937 YAP1_HUMAN   | R.QAS#TDAGTAGALTPQHVR.A            | S109:        | 3 | 3,6234 | 0,403 | 0,393  |
| 15 | Q8NE71 ABCF1_HUMAN  | K.LSVPTS#DEEDEVPAKPR.G             | S109:        | 3 | 2,9996 | 0,321 | -0,268 |
| 15 | Q5VZK9 LR16A_HUMAN  | K.SERPPTILM*TEEPS#SPK.G            | S1093:       | 3 | 4,5324 | 0,404 | -0,367 |
| 15 | Q9HC52 CBX8_HUMAN   | R.IPYPGRS#PQDLASTSR.A              | S110:        | 3 | 2,9139 | 0,291 | 0,2    |

|    |                    |                                  |              |   |        |       |        |
|----|--------------------|----------------------------------|--------------|---|--------|-------|--------|
| 15 | Q92574 TSC1_HUMAN  | R.NKS#ESQCDEEDGM*TSSLSESLK.T     | S1100:       | 3 | 4,4952 | 0,426 | 0,301  |
| 15 | Q96AJ9 VTI1A_HUMAN | R.IAYSDEVRNELLGDDGNSS#ENQR.A     | S111:        | 3 | 5,2668 | 0,485 | -0,138 |
| 15 | Q96HC4 PDLI5_HUMAN | K.EVVKPVPIITS#PAVSK.V            | S111:        | 2 | 2,68   | 0,474 | 0,449  |
| 15 | Q3KQU3 MA7D1_HUMAN | R.RS#SQPSPTAVPASDSPPTK.Q         | S112:        | 3 | 3,3463 | 0,227 | 0,092  |
| 15 | Q9NVI1 FANCI_HUMAN | K.LKGQVSQETLSEEASS#QATLPNQPVK.A  | S1121:       | 3 | 3,2967 | 0,236 | 0,676  |
| 15 | Q3KQU3 MA7D1_HUMAN | R.RSS#QPSPTAVPASDSPPTK.Q         | S113:        | 2 | 4,8625 | 0,294 | 0,368  |
| 15 | O60841 IF2P_HUMAN  | K.QSFDDNDS#EELEDKDSK.S           | S113:        | 3 | 2,6479 | 0,159 | 0,264  |
| 15 | Q92576 PHF3_HUMAN  | R.M*APPVDDL#PKK.V                | S1133:       | 2 | 2,0295 | 0,113 | -0,088 |
| 15 | O95785 WIZ_HUMAN   | R.SPSDLHIS#PLAK.K                | S1134:       | 3 | 2,9417 | 0,183 | -0,068 |
| 15 | Q5THJ4 VP13D_HUMAN | K.EKDDL#PQPLM*TDFER.S            | S1138:       | 3 | 2,828  | 0,156 | 0,091  |
| 15 | Q5THJ4 VP13D_HUMAN | K.EKDDL#PQPLM*TDFER.S            | S1138:       | 2 | 2,7453 | 0,473 | 0,665  |
| 15 | P31323 KAP3_HUMAN  | R.RAS#VCAEAYNPDEEEDDAESR.I       | S114:        | 3 | 5,8348 | 0,354 | 0,367  |
| 15 | Q08AD1 CA1L1_HUMAN | K.YDGES#DKEQFDDQK.V              | S1148:       | 3 | 3,9818 | 0,352 | 0      |
| 15 | Q08AD1 CA1L1_HUMAN | K.YDGES#DKEQFDDQK.V              | S1148:       | 2 | 3,8667 | 0,385 | 0,321  |
| 15 | Q9Y4H2 IRS2_HUMAN  | R.HSS#ETFSTTTVTVPV#PSFAHNP.K     | S1149:S1162: | 3 | 5,7568 | 1     | -0,811 |
| 15 | P45880 VDAC2_HUMAN | K.LTFDITFS#PNTGKK.S              | S115:        | 2 | 3,8549 | 0,489 | -0,373 |
| 15 | Q7Z401 MYCPP_HUMAN | R.M*NS#SFSVKPFEK.T               | S1151:       | 2 | 3,2142 | 0,4   | 0,489  |
| 15 | Q12830 BPTF_HUMAN  | R.VLDDVSIRS#PETK.C               | S1161:       | 2 | 3,9204 | 0,386 | 0,238  |
| 15 | Q5UIP0 RIF1_HUMAN  | K.SSLSNNECGSLDKTS#PEM*SNSNNDER.K | S1162:       | 3 | 6,8725 | 0,51  | 0,555  |
| 15 | Q5SW79 CE170_HUMAN | R.LGSL#ARSDEATISR.S              | S1162:       | 2 | 2,2199 | 0,256 | 0,282  |
| 15 | Q5SW79 CE170_HUMAN | R.LGSLARS#DSEATISR.S             | S1165:       | 3 | 3,5782 | 0,434 | 0,106  |
| 15 | Q8WYP5 AHTF1_HUMAN | R.SLPSSQLKGS#PQAISR.A            | S1169:       | 2 | 3,609  | 0,207 | 0,335  |
| 15 | Q9NW75 GPTC2_HUMAN | K.DHSDS#DDQM*LVAK.R              | S117:        | 2 | 2,2952 | 0,181 | -0,47  |
| 15 | Q92934 BAD_HUMAN   | R.M*S#DEFVDSFKK.G                | S118:        | 3 | 4,2659 | 0,374 | 0,064  |
| 15 | Q92934 BAD_HUMAN   | R.M*S#DEFVDSFKK.G                | S118:        | 2 | 2,9454 | 0,483 | -0,171 |
| 15 | Q7Z460 CLAP1_HUMAN | K.FSFRS#QEDLNEPIK.R              | S1196:       | 3 | 3,751  | 0,322 | -0,307 |
| 15 | Q7Z460 CLAP1_HUMAN | K.FSFRS#QEDLNEPIK.R              | S1196:       | 2 | 2,4172 | 0,139 | 0,068  |
| 15 | O95218 ZRAB2_HUMAN | R.ENVEYIEREES#DGEYDEFGR.K        | S120:        | 3 | 5,2559 | 0,546 | -0,288 |
| 15 | Q8WUF5 IASPP_HUMAN | K.GRPSS#PRT#PLYLQPDAYGSLDR.A     | S120:T123:   | 3 | 5,222  | 0,442 | -0,211 |
| 15 | Q5JPE7 NOMO2_HUMAN | R.LQGVGALGQAASDNS#GPEDAKR.Q      | S1205:       | 3 | 3,3744 | 0,421 | 0,412  |
| 15 | Q9H9C1 CN133_HUMAN | R.TRPGS#FQSLSDALS DTPAK.S        | S121:        | 3 | 4,7652 | 0,46  | 0,089  |
| 15 | Q9NR30 DDX21_HUMAN | K.NEEPS#EEEIDAPKPK.K             | S121:        | 2 | 4,0745 | 0,392 | 0      |
| 15 | Q9NR30 DDX21_HUMAN | K.NEEPS#EEEIDAPKPK.K             | S121:        | 3 | 3,286  | 0,363 | -0,102 |

|    |                    |                                   |              |   |        |       |        |
|----|--------------------|-----------------------------------|--------------|---|--------|-------|--------|
| 15 | Q9ULW0 TPX2_HUMAN  | R.S#LRLS#AQKDLEQK.E               | S121:S125:   | 2 | 3,4148 | 0,52  | 0,364  |
| 15 | Q13017 RHG05_HUMAN | K.GGIDNPAITS#DQELDDKK.M           | S1218:       | 2 | 4,7418 | 0,535 | 0,611  |
| 15 | Q5VZL5 ZMYM4_HUMAN | R.VTQHES#DNENEIQIQNK.L            | S122:        | 3 | 5,259  | 0,368 | 0,174  |
| 15 | P12268 IMDH2_HUMAN | K.KYEQGFITDPVVLS#PK.D             | S122:        | 2 | 2,932  | 0,538 | -0,321 |
| 15 | Q14160 LAP4_HUMAN  | R.NSLES#ISS#IDRELSPEGPGKEK.E      | S1223:S1226: | 3 | 5,1585 | 0,308 | -0,145 |
| 15 | Q9UBS9 CA009_HUMAN | K.SGS#LPSLHDIK.G                  | S1226:       | 3 | 2,8771 | 0,17  | 0      |
| 15 | Q8WYP5 AHTF1_HUMAN | R.STPLASPSPPGRS#PQR.L             | S1231:       | 2 | 2,4878 | 0,212 | 0,135  |
| 15 | O95155 UBE4B_HUMAN | K.SM*SQVDVDS#GIENM*EVDENDRR.E     | S124:        | 3 | 3,4851 | 0,452 | 0,694  |
| 15 | Q9BQG0 MBB1A_HUMAN | K.SPAPGAPTRS#PSTPAK.S             | S1241:       | 2 | 2,6674 | 0,471 | -0,076 |
| 15 | Q8WYP5 AHTF1_HUMAN | R.IS#FVEEDVHPK.W                  | S1241:       | 2 | 2,5333 | 0,448 | -0,088 |
| 15 | P11388 TOP2A_HUMAN | K.IKNENTEGS#PQEDGVELEGLK.Q        | S1247:       | 3 | 5,8837 | 0,489 | 0,387  |
| 15 | Q9C004 SPY4_HUMAN  | R.LLDHM*APPPVADQAS#PR.A           | S125:        | 2 | 4,0892 | 0,323 | 0,575  |
| 15 | Q9C004 SPY4_HUMAN  | R.LLDHM*APPPVADQAS#PR.A           | S125:        | 3 | 3,4179 | 0,321 | 0,096  |
| 15 | Q92797 SYMPK_HUMAN | K.TPS#PAAEDAREPEAK.G              | S1259:       | 3 | 2,8872 | 0,151 | -0,333 |
| 15 | Q92797 SYMPK_HUMAN | K.TPS#PAAEDAREPEAK.G              | S1259:       | 2 | 2,4441 | 0,457 | -0,592 |
| 15 | Q8N488 RYBP_HUMAN  | K.SDILKDPPEANS#IQSANATTK.T        | S127:        | 3 | 4,8978 | 0,462 | 0,696  |
| 15 | Q96T23 RSF1_HUMAN  | R.STDEYS#EADEEEEEEGKPSR.K         | S1272:       | 3 | 3,6506 | 0,396 | -0,435 |
| 15 | Q7Z6E9 RBBP6_HUMAN | R.KVTGTEGSSSTLVDYTTSTSTGGS#PVR.K  | S1277:       | 3 | 3,6242 | 0,365 | 0,534  |
| 15 | Q02446 SP4_HUMAN   | K.ENNVSQPASSSSSSSS#NNGSASPTKTK.S  | S130:        | 3 | 3,1543 | 0,133 | -0,326 |
| 15 | Q9BQG0 MBB1A_HUMAN | K.ARLS#LVIRS#PSLLQSGAK.K          | S1303:S1308: | 3 | 4,1933 | 0,509 | -0,267 |
| 15 | Q9BQG0 MBB1A_HUMAN | R.LSLVIRS#PSLLQS#GAKK.K           | S1308:S1314: | 3 | 4,513  | 0,469 | -0,093 |
| 15 | Q9Y5P4 C43BP_HUMAN | R.HGS#M*VSLVSGASGYSATSTS#SFKK.G   | S132:S149:   | 3 | 4,0036 | 0,504 | 0,717  |
| 15 | P46013 KI67_HUMAN  | K.LDLTENLTGS#KR.R                 | S1329:       | 2 | 2,1678 | 0,427 | 0,342  |
| 15 | P54725 RD23A_HUMAN | R.EDKSPSEESAPTT#PESVSGSVSSGSSGR.E | S133:        | 3 | 4,7312 | 1     | -0,488 |
| 15 | Q9BQI0 IBA2_HUMAN  | K.ANES#SPKPVGPPPER.D              | S133:        | 3 | 4,2794 | 0,186 | 0,111  |
| 15 | Q9BQI0 IBA2_HUMAN  | K.ANES#SPKPVGPPPER.D              | S133:        | 2 | 2,7615 | 0,357 | -0,297 |
| 15 | P29692 EF1D_HUMAN  | R.ATAPQTQHVS#PM*R.Q               | S133:        | 2 | 2,3711 | 0,334 | -1,846 |
| 15 | Q8NEY8 PPHLN_HUMAN | R.DNTFFRES#PVGR.K                 | S133:        | 2 | 2,2221 | 0,267 | -0,081 |
| 15 | Q9P2M7 CING_HUMAN  | R.SHSQAS#LAGPGVPDPSNR.S           | S134:        | 3 | 3,2985 | 0,34  | -0,099 |
| 15 | Q09666 AHNK_HUMAN  | R.LKS#EDGVEGDLGETQSR.T            | S135:        | 3 | 5,6632 | 0,476 | 0,289  |
| 15 | Q09666 AHNK_HUMAN  | R.LKS#EDGVEGDLGETQSR.T            | S135:        | 2 | 3,7174 | 0,624 | 0,385  |
| 15 | Q9ULH0 ARMS_HUMAN  | R.RTPSLSS#LNSQDSSIEISK.L          | S1362:       | 3 | 3,1847 | 0,336 | 0      |
| 15 | Q13428 TCOF_HUMAN  | K.LGAGEGGEASVS#PEKTSTTSK.G        | S1378:       | 3 | 3,6002 | 0,371 | 0,353  |



|    |                    |                                   |                    |   |        |       |        |
|----|--------------------|-----------------------------------|--------------------|---|--------|-------|--------|
| 15 | P49736 MCM2_HUMAN  | R.GLLYDS#DEEDEERPAR.K             | S139:              | 2 | 3,3253 | 0,383 | 0,433  |
| 15 | P49736 MCM2_HUMAN  | R.GLLYDS#DEEDEERPAR.K             | S139:              | 3 | 3,262  | 0,496 | 0,556  |
| 15 | Q9H6Y2 WDR55_HUMAN | R.TCEERPAEDGS#DEEDPDSM*EAPTR.I    | S14:               | 3 | 6,0336 | 0,387 | 0,519  |
| 15 | Q9Y3C5 RNF11_HUMAN | K.SPTSDDIS#LLHESQSDR.A            | S14:               | 2 | 5,1964 | 0,521 | 0,682  |
| 15 | Q9GZR2 REXO4_HUMAN | R.APS#SPVAKPGPVK.T                | S14:               | 2 | 2,5532 | 0,315 | -0,278 |
| 15 | Q9UQ35 SRRM2_HUMAN | K.AGM*SSNQSISS#PVLDVAVPRT#PSRER.S | S1404:T1413:       | 3 | 4,3753 | 1     | -0,649 |
| 15 | Q14181 DPOA2_HUMAN | R.SVSTRS#PHQLLSPSSFS#PSATPSQK.Y   | S141:S152:         | 3 | 5,4924 | 1     | -0,066 |
| 15 | Q8IVF2 AHNK2_HUMAN | K.LQM*PS#FKVPK.V                  | S1418:             | 2 | 3,3114 | 0,15  | -0,096 |
| 15 | Q8NEJ9 NGDN_HUMAN  | K.LSS#EDEEEDEAEDDQSEASGKK.S       | S143:              | 3 | 4,6923 | 0,463 | -0,73  |
| 15 | P46940 IQGA1_HUMAN | K.S#VKEDSNLTLQEK.K                | S1443:             | 2 | 3,1049 | 0,4   | -0,777 |
| 15 | O94916 NFAT5_HUMAN | R.HTVLYIS#PPPEDLLDNSR.M           | S145:              | 3 | 3,4677 | 0,281 | -0,511 |
| 15 | O94916 NFAT5_HUMAN | R.HTVLYIS#PPPEDLLDNSR.M           | S145:              | 2 | 2,5893 | 0,378 | -0,455 |
| 15 | Q8IWS0 PHF6_HUMAN  | K.TAHNSEADLEES#FNEHELEPSS#PK.S    | S145:S155:         | 3 | 4,3769 | 0,335 | -0,256 |
| 15 | P39880 CUX1_HUMAN  | R.RPS#SLQSLFGLPEAAGAR.D           | S1454:             | 3 | 3,1554 | 0,221 | 0      |
| 15 | P39880 CUX1_HUMAN  | R.RPSSLQS#LFLGLPEAAGAR.D          | S1458:             | 3 | 3,3751 | 0,215 | -0,189 |
| 15 | P11388 TOP2A_HUMAN | K.RKPS#T#SDDSDS#NFEK.I            | S1469:T1470:S1476: | 2 | 2,797  | 1     | -0,5   |
| 15 | Q14181 DPOA2_HUMAN | R.SPHQLLS#PSSFSPSATPSQK.Y         | S147:              | 3 | 2,6625 | 0,126 | 0,169  |
| 15 | O15234 CASC3_HUMAN | K.STVTGERQS#GDGQESTEPVENK.V       | S148:              | 3 | 6,0175 | 0,496 | -0,227 |
| 15 | P11388 TOP2A_HUMAN | K.S#KGESDDFHM*DFDS#AVAPR.A        | S1491:S1504:       | 3 | 3,0681 | 0,397 | 0,48   |
| 15 | Q9GZR2 REXO4_HUMAN | R.APSS#PVAKPGPVK.T                | S15:               | 3 | 2,9576 | 0,458 | 0,139  |
| 15 | O75369 FLNB_HUMAN  | K.YADEEIPRS#PFK.V                 | S1505:             | 2 | 2,9439 | 0,409 | 0,239  |
| 15 | Q14674 ESPL1_HUMAN | K.M*SFEILRGS#DGEDSASGGK.T         | S1508:             | 3 | 3,28   | 0,37  | -0,269 |
| 15 | P49792 RBP2_HUMAN  | R.KQS#LPATSIPTPASFK.F             | S1509:             | 2 | 3,7938 | 0,43  | 0,07   |
| 15 | O95218 ZRAB2_HUMAN | K.EVEDKES#EGEEDEDEDLSK.Y          | S153:              | 3 | 5,0339 | 0,286 | -0,302 |
| 15 | Q96RS0 TGS1_HUMAN  | R.KEYEEDDILAS#DDPSSIEQYENTR.T     | S154:              | 3 | 5,5811 | 0,479 | -0,563 |
| 15 | Q9UQ35 SRRM2_HUMAN | R.SGS#SQELDVKPSASPQER.S           | S1541:             | 2 | 3,8446 | 0,41  | -0,492 |
| 15 | Q9UQ35 SRRM2_HUMAN | R.SGS#SQELDVKPSASPQER.S           | S1541:             | 3 | 2,6929 | 0,161 | -0,369 |
| 15 | Q9Y6G5 COMDA_HUMAN | K.LKS#PQAVLQLGVNNEDESK.S          | S155:              | 3 | 4,7551 | 0,168 | -0,453 |
| 15 | O94916 NFAT5_HUMAN | R.HTVLYISPPPEDLLDNS#R.M           | S155:              | 3 | 4,0019 | 0,289 | 0      |
| 15 | Q8IX90 CM003_HUMAN | K.SPRS#PQLSDFGLER.Y               | S155:              | 3 | 3,9375 | 0,362 | 0,219  |
| 15 | Q9UQ35 SRRM2_HUMAN | R.SGSSQELDVKPSAS#PQER.S           | S1552:             | 2 | 3,1088 | 0,534 | 0,123  |
| 15 | Q9UQ35 SRRM2_HUMAN | R.SGSSQELDVKPSAS#PQER.S           | S1552:             | 3 | 2,8696 | 0,312 | -0,185 |
| 15 | Q5UIP0 RIF1_HUMAN  | R.ASQGLLSSIENSES#DSSEAKEEGSR.K    | S1554:             | 3 | 4,6886 | 0,435 | 0,273  |

|    |                     |                                |              |   |        |       |        |
|----|---------------------|--------------------------------|--------------|---|--------|-------|--------|
| 15 | O95292 VAPB_HUMAN   | K.S#LSSSLDDTEVKK.V             | S156:        | 2 | 2,6755 | 0,46  | 0,082  |
| 15 | Q15393 SF3B3_HUMAN  | R.LTISS#PLEAHK.A               | S156:        | 2 | 2,2528 | 0,221 | -0,669 |
| 15 | Q5JTV8 TOIP1_HUMAN  | R.DSHS#S#EEDEASSQTDLSTISKK.T   | S156:S157:   | 3 | 6,5664 | 1     | 0,206  |
| 15 | Q92733 PRCC_HUMAN   | K.IAAPELHKGDS#DS#EEDEPTK.K     | S157:S159:   | 3 | 3,0208 | 0,305 | 0,314  |
| 15 | Q14839 CHD4_HUMAN   | K.IEENS#LKEEESIEGK.E           | S1570:       | 3 | 3,2673 | 0,413 | 0      |
| 15 | Q14839 CHD4_HUMAN   | K.IEENS#LKEEES#IEGEKEVK.S      | S1570:S1576: | 3 | 2,9953 | 0,197 | 0,461  |
| 15 | O95292 VAPB_HUMAN   | K.SLS#SSLDDTEVKK.V             | S158:        | 2 | 3,7954 | 0,563 | 0      |
| 15 | Q96JC9 EAF1_HUMAN   | K.TS#PLKDNPS#PEPQLDDIKR.E      | S158:S165:   | 3 | 4,0442 | 0,425 | 0,238  |
| 15 | Q7Z401 MYCPP_HUMAN  | R.SIS#TSGPLDKEDTGR.Q           | S1589:       | 2 | 2,0987 | 0,319 | -0,668 |
| 15 | Q15742 NAB2_HUMAN   | R.SFS#PKSPLELGEK.L             | S159:        | 3 | 3,2832 | 0,358 | 0,366  |
| 15 | Q15742 NAB2_HUMAN   | R.SFS#PKSPLELGEK.L             | S159:        | 2 | 2,5868 | 0,149 | -0,326 |
| 15 | Q9ULH0 ARMS_HUMAN   | R.SS#ESS#PNHSLHNEVADDSQLEK.A   | S1591:S1594: | 3 | 4,3909 | 1     | 0,427  |
| 15 | Q13200 PSMD2_HUMAN  | K.APVQPQQS#PAAAPGGTDEKPSGK.E   | S16:         | 3 | 4,0432 | 0,412 | -0,557 |
| 15 | Q7Z4C7 Q7Z4C7_HUMAN | K.AEIKEM*LAS#DDEEDVSSK.V       | S16:         | 3 | 3,9615 | 0,538 | 0,175  |
| 15 | P16949 STMN1_HUMAN  | K.RAS#GQAFELILSPR.S            | S16:         | 2 | 3,6894 | 0,603 | -0,45  |
| 15 | P16949 STMN1_HUMAN  | K.RAS#GQAFELILSPR.S            | S16:         | 3 | 3,6565 | 0,319 | 0      |
| 15 | Q9BVG9 PTSS2_HUMAN  | R.DAGGPRPES#PVPAGR.A           | S16:         | 3 | 3,6083 | 0,332 | 0,119  |
| 15 | Q9BVG9 PTSS2_HUMAN  | R.DAGGPRPES#PVPAGR.A           | S16:         | 2 | 2,6922 | 0,221 | -0,474 |
| 15 | Q92870 APBB2_HUMAN  | R.TKS#FLNYADLETSAR.E           | S160:        | 2 | 5,3326 | 0,632 | -0,249 |
| 15 | Q02241 KIF23_HUMAN  | K.SNDRNS#M*DIQCEVDALLER.Q      | S160:        | 3 | 4,891  | 0,398 | -0,387 |
| 15 | Q6ZVM7 TM1L2_HUMAN  | R.KGVEFPM*ADLDALS#PIHT#PQR.S   | S160:T164:   | 3 | 4,4086 | 0,44  | -0,806 |
| 15 | Q5UIP0 RIF1_HUMAN   | K.ATSEEDVSIKS#PICEK.Q          | S1616:       | 2 | 4,1796 | 0,458 | 0,717  |
| 15 | Q12888 TP53B_HUMAN  | K.AADIS#LDNLVEGKR.K            | S1618:       | 3 | 3,0692 | 0,356 | -0,116 |
| 15 | Q12888 TP53B_HUMAN  | K.AADIS#LDNLVEGKR.K            | S1618:       | 2 | 2,5834 | 0,374 | -0,232 |
| 15 | P29692 EF1D_HUMAN   | K.KPATPAEDDEDDIDLFGS#DNEEEDK.E | S162:        | 3 | 7,3219 | 0,534 | 0,735  |
| 15 | Q15742 NAB2_HUMAN   | R.SFSPKS#PLELGEK.L             | S162:        | 2 | 4,4042 | 0,366 | -0,407 |
| 15 | O00566 MPP10_HUMAN  | K.SDLRKS#PVFS#DEDSDLDFDISK.L   | S163:S167:   | 3 | 4,9929 | 0,487 | -0,342 |
| 15 | O00566 MPP10_HUMAN  | K.SDLRKS#PVFSDEDS#DLDFDISK.L   | S163:S171:   | 3 | 6,5103 | 0,485 | -0,205 |
| 15 | O95049 ZO3_HUMAN    | R.RS#PGGGSEANGLALVSGFK.R       | S164:        | 2 | 3,9148 | 0,538 | -0,712 |
| 15 | Q96G03 PGM2_HUMAN   | K.LCAGIM*ITAS#HNPQ.Q           | S165:        | 3 | 2,9809 | 0,374 | 0      |
| 15 | Q9HCK8 CHD8_HUMAN   | R.M*NYM*QNHQAGAPAPSL#R.C       | S1699:       | 3 | 3,3915 | 0,306 | 0,351  |
| 15 | P39687 AN32A_HUMAN  | R.TPS#DVKELVLDNSR.S            | S17:         | 3 | 3,8202 | 0,346 | 0      |
| 15 | Q7L4I2 RSRC2_HUMAN  | R.DGLAPEKTS#PDR.D              | S17:         | 2 | 2,8199 | 0,26  | -0,357 |

|    |                     |                                |                 |   |        |       |        |
|----|---------------------|--------------------------------|-----------------|---|--------|-------|--------|
| 15 | P39687 AN32A_HUMAN  | R.TPS#DVKELVLDNSR.S            | S17:            | 2 | 2,1926 | 0,163 | -0,517 |
| 15 | Q6NZI2 PTRF_HUMAN   | K.S#LKESEALPEK.E               | S171:           | 2 | 2,1064 | 0,14  | -0,186 |
| 15 | O95208 EPN2_HUMAN   | R.GS#SQPNLSTSHSEQEYGK.A        | S172:           | 2 | 2,1152 | 0,273 | -0,484 |
| 15 | O15446 RPA34_HUMAN  | R.SALAPNLLTS#GKK.K             | S172:           | 2 | 2,0564 | 0,091 | 0,354  |
| 15 | Q6P597 KLC3_HUMAN   | R.RDS#LASLFPSEEEER.K           | S173:           | 2 | 4,284  | 0,511 | -0,331 |
| 15 | Q9HCD6 TANC2_HUMAN  | R.SSS#QLGSPDVSHLIR.R           | S1740:          | 2 | 3,0633 | 0,37  | 0,22   |
| 15 | Q6PCE3 PGM2L_HUMAN  | K.AVAGVM*ITAS#HNR.K            | S175:           | 2 | 3,4911 | 0,505 | -0,086 |
| 15 | B1AM35 B1AM35_HUMAN | K.LEEPELNRQS#PNPR.R            | S175:           | 2 | 2,8436 | 0,247 | 0,526  |
| 15 | P80723 BASP_HUMAN   | K.SDGAPASDSKPGS#SEAAPSSK.E     | S176:           | 2 | 3,5328 | 0,522 | -0,667 |
| 15 | Q58FF8 H90B2_HUMAN  | K.IEDVGS#DEEDDSGKDK.K          | S177:           | 2 | 4,7144 | 0,545 | -0,873 |
| 15 | Q58FF8 H90B2_HUMAN  | K.IEDVGS#DEEDDSGKDK.K          | S177:           | 3 | 3,3511 | 0,299 | -0,302 |
| 15 | Q9NYF8 BCLF1_HUMAN  | K.AEGEPQES#PLKSK.S             | S177:           | 2 | 3,302  | 0,444 | -0,227 |
| 15 | P46821 MAP1B_HUMAN  | K.VQSLEGEKLS#PK.S              | S1779:          | 2 | 3,3936 | 0,335 | -0,262 |
| 15 | P48634 BAT2_HUMAN   | K.KYS#SLNFLDITYK.G             | S18:            | 2 | 3,5834 | 0,522 | -0,235 |
| 15 | Q9UMD9 COHA1_HUMAN  | R.NSS#NT#LPIPKKGTVET#K.I       | S180:T182:T193: | 3 | 3,1625 | 0,11  | 1,425  |
| 15 | P49790 NU153_HUMAN  | K.DSTSQHDDDNIS#TTSGFSSR.A      | S182:           | 3 | 3,1487 | 0,29  | 0,245  |
| 15 | Q96A73 K1191_HUMAN  | R.QPASAQSTPSTPHS#SPK.Q         | S182:           | 3 | 3,1328 | 0,414 | -0,581 |
| 15 | Q9BVC5 ASHWN_HUMAN  | R.KS#PSGPVKS#PPLSPVGTTPVK.L    | S182:S189:      | 3 | 4,6951 | 0,252 | 0,082  |
| 15 | Q9NQC3 RTN4_HUMAN   | K.RRGSS#GSVDET#LFALPAASEPVIR.S | S182:T188:      | 3 | 3,3303 | 0,393 | -0,547 |
| 15 | Q58FF8 H90B2_HUMAN  | K.IEDVGSDEEDDS#GKDK.K          | S183:           | 2 | 4,8063 | 0,519 | -0,604 |
| 15 | Q8IZP0 ABI1_HUMAN   | R.TNPPTQKPPS#PPM*SGR.G         | S183:           | 2 | 2,1231 | 0,376 | -0,205 |
| 15 | Q9NQC3 RTN4_HUMAN   | K.RRGSSGS#VDET#LFALPAASEPVIR.S | S184:T188:      | 3 | 2,7421 | 0,158 | -0,479 |
| 15 | Q13596 SNX1_HUMAN   | R.RFS#DFLGLYEK.L               | S188:           | 2 | 3,4729 | 0,363 | -0,335 |
| 15 | Q13596 SNX1_HUMAN   | R.RFS#DFLGLYEK.L               | S188:           | 3 | 3,4126 | 0,247 | -0,126 |
| 15 | Q9H1E3 NUCKS_HUMAN  | R.KVVDYSQFQES#DDADEDYGR.D      | S19:            | 3 | 5,5649 | 0,432 | 0,524  |
| 15 | Q9NUE0 ZDH18_HUMAN  | -.M*KDCEYQQISPGAAPLAS#PGAR.R   | S19:            | 3 | 4,0043 | 0,268 | 0,648  |
| 15 | P35251 RFC1_HUMAN   | R.KELS#QNTDESGLNDEAIAK.Q       | S190:           | 3 | 4,2137 | 0,319 | 0,085  |
| 15 | P46821 MAP1B_HUMAN  | R.TTKS#PSDSGYSYETIGK.T         | S1915:          | 2 | 4,3932 | 0,618 | 0,064  |
| 15 | O00165 HAX1_HUMAN   | R.TREDNDLDSQVS#QEGLGPVLQPQPK.S | S192:           | 3 | 3,9173 | 0,337 | -0,517 |
| 15 | Q9NW97 TMM51_HUMAN  | R.ADVEASPGNPPDRQNS#K.L         | S192:           | 2 | 2,6515 | 0,245 | -0,066 |
| 15 | O43237 DC1L2_HUMAN  | K.FVKDFQDYM*EPEEGCQGS#PQR.R    | S194:           | 3 | 5,6507 | 0,592 | 0,415  |
| 15 | P35580 MYH10_HUMAN  | R.QLHLEGASLELS#DDDTESK.T       | S1956:          | 3 | 5,8295 | 0,513 | 0,76   |
| 15 | A4PB67 A4PB67_HUMAN | R.KGEM*PVSGLAVGSTLPS#PR.E      | S1957:          | 3 | 2,952  | 0,24  | -0,37  |

|    |                     |                                    |                    |   |        |       |        |
|----|---------------------|------------------------------------|--------------------|---|--------|-------|--------|
| 15 | Q14980 NUMA1_HUMAN  | R.RAS#M*QPIQIAEGTGITTR.Q           | S1969:             | 3 | 3,9223 | 0,466 | -0,271 |
| 15 | Q6PID6 TTC33_HUMAN  | K.SEAPAEVTHFS#PK.S                 | S197:              | 2 | 4,1854 | 0,54  | 0,33   |
| 15 | P55072 TERA_HUMAN   | R.EDEEES#LNEVGYYDDIGGCRK.Q         | S197:              | 3 | 3,6096 | 0,296 | -0,076 |
| 15 | O00767 ACOD_HUMAN   | K.EKGS#TLDLSDLEAEK.L               | S198:              | 2 | 2,7381 | 0,431 | -0,498 |
| 15 | P04792 HSPB1_HUMAN  | R.AQLGGPEAAKS#DETAAK.-             | S199:              | 2 | 4,8753 | 0,532 | -0,708 |
| 15 | B0AZS1 B0AZS1_HUMAN | K.FVSEDDRNS#FTLK.L                 | S20:               | 2 | 2,8494 | 0,225 | 0,298  |
| 15 | Q9HC35 EMAL4_HUMAN  | K.IPS#TPKLIPK.V                    | S200:              | 2 | 2,4525 | 0,18  | 0,104  |
| 15 | P18583 SON_HUMAN    | R.RRS#FS#IS#PVR.L                  | S2009:S2011:S2013: | 3 | 3,5529 | 0,324 | 0,19   |
| 15 | P18583 SON_HUMAN    | R.RRS#FS#IS#PVR.L                  | S2009:S2011:S2013: | 2 | 2,933  | 0,315 | -0,676 |
| 15 | Q6WKZ4 RFIP1_HUMAN  | K.NKDSGSDTASAIIPSTTPSVDS#DDESVVK.D | S202:              | 3 | 4,9737 | 0,367 | 0,792  |
| 15 | Q15717 ELAV1_HUMAN  | K.NVALLSQLYHS#PAR.R                | S202:              | 2 | 4,2004 | 0,377 | -0,148 |
| 15 | Q05682 CALD1_HUMAN  | K.RGS#IGENQVEVM*VEEK.T             | S202:              | 3 | 4,0863 | 0,24  | 0      |
| 15 | Q9H4A3 WNK1_HUMAN   | R.DVDDGSGS#PHS#PHQLSSK.S           | S2029:S2032:       | 3 | 3,3867 | 0,5   | -0,364 |
| 15 | Q9H4A3 WNK1_HUMAN   | R.DVDDGSGS#PHS#PHQLSSK.S           | S2029:S2032:       | 2 | 3,3689 | 0,423 | -0,729 |
| 15 | Q9H4A3 WNK1_HUMAN   | R.DVDDGSGS#PHSPHQLS#SK.S           | S2029:S2037:       | 3 | 3,1739 | 0,212 | -0,637 |
| 15 | Q9NY61 AATF_HUMAN   | R.AGDRNS#EDDGVVM*TFSSVK.V          | S203:              | 3 | 5,0785 | 0,406 | -0,26  |
| 15 | Q9NY61 AATF_HUMAN   | R.AGDRNS#EDDGVVM*TFSSVK.V          | S203:              | 2 | 3,3757 | 0,557 | -0,694 |
| 15 | Q8NCF5 NF2IP_HUMAN  | K.KTEFLDLDNSPLSPPS#PR.T            | S204:              | 3 | 4,3731 | 0,401 | -0,437 |
| 15 | Q96EV2 RBM33_HUMAN  | K.DIKEES#DEEEEDDEESGR.L            | S205:              | 3 | 5,9977 | 0,475 | -0,165 |
| 15 | P60174 TPIS_HUMAN   | R.KQS#LGELIGTLNAAK.V               | S21:               | 2 | 4,894  | 0,564 | 0,15   |
| 15 | P60174 TPIS_HUMAN   | R.KQS#LGELIGTLNAAK.V               | S21:               | 3 | 3,7482 | 0,348 | 0,676  |
| 15 | Q13242 SFRS9_HUMAN  | R.GS#PHYFSPFRPY.-                  | S211:              | 2 | 2,6261 | 0,457 | -0,477 |
| 15 | Q9H4L7 SMRCD_HUMAN  | R.KLS#S#SSEPYEEDEFNDDQSIKK.T       | S211:S212:         | 3 | 5,6772 | 1     | 0,201  |
| 15 | Q86SQ0 PHL2_HUMAN   | R.KM*S#IQDSLALQPK.L                | S212:              | 3 | 3,1327 | 0,241 | 0,235  |
| 15 | Q9UQ35 SRRM2_HUMAN  | R.M*SCFSRPSM*S#PTPLDR.C            | S2123:             | 3 | 3,7927 | 0,368 | 0,462  |
| 15 | P21333 FLNA_HUMAN   | K.FADQHVPGS#PFSVK.V                | S2128:             | 2 | 2,8384 | 0,406 | -0,153 |
| 15 | Q53LP3 ANR57_HUMAN  | R.DLVM*GSS#PQLKR.S                 | S213:              | 2 | 3,276  | 0,312 | 0      |
| 15 | Q7L2J0 MEPCE_HUMAN  | R.TLNAETPKS#SPLPAK.G               | S216:              | 3 | 2,7755 | 0,088 | 0,112  |
| 15 | Q8ND56 LS14A_HUMAN  | R.S#PVSTRPLPSASQK.A                | S216:              | 2 | 2,497  | 0,391 | -0,556 |
| 15 | Q7L2J0 MEPCE_HUMAN  | R.TLNAETPKSS#PLPAK.G               | S217:              | 2 | 3,5917 | 0,407 | 0,149  |
| 15 | Q15019 SEPT2_HUMAN  | K.IYHLPDAES#DEDEDFK.E              | S218:              | 2 | 4,9742 | 0,508 | -0,061 |
| 15 | Q15019 SEPT2_HUMAN  | K.IYHLPDAES#DEDEDFK.E              | S218:              | 3 | 3,2934 | 0,198 | 0,274  |
| 15 | O75376 NCOR1_HUMAN  | R.NDARSPGS#ISYLPFFTK.L             | S2187:             | 3 | 2,7385 | 0,278 | -0,354 |

|    |                     |                                  |              |   |        |       |        |
|----|---------------------|----------------------------------|--------------|---|--------|-------|--------|
| 15 | Q5VUA4 ZN318_HUMAN  | K.DKLCS#PLSEPGDPSK.C             | S2189:       | 2 | 2,6327 | 0,305 | 0,285  |
| 15 | A8K630 A8K630_HUMAN | R.LQQQHSEQPPLQPS#PVTTTR.R        | S22:         | 3 | 3,4004 | 0,339 | -0,488 |
| 15 | Q9UKX7 NUP50_HUMAN  | R.NSESESNKVAETQS#PSLFGSTK.L      | S221:        | 3 | 5,7812 | 0,486 | 0,443  |
| 15 | O95425 SVIL_HUMAN   | R.QAHDLS#PAAESSSTFSFSGR.D        | S221:        | 3 | 4,8044 | 0,418 | 0,169  |
| 15 | Q8TDY2 RBC1_HUMAN   | R.LDS#LPEHEDSEK.A                | S222:        | 2 | 2,441  | 0,4   | -0,33  |
| 15 | Q96SK2 TM209_HUMAN  | R.YRSS#PTVYNS#PTDKEDYM*TDLR.T    | S222:S228:   | 3 | 3,2708 | 1     | 0,39   |
| 15 | P46013 KI67_HUMAN   | K.IACRS#PQDPVGT#PTIFKPQSK.R      | S2223:T2231: | 3 | 5,0163 | 0,444 | -0,142 |
| 15 | Q9Y5K6 CD2AP_HUMAN  | R.GIGFGDIFKEGS#VK.L              | S224:        | 2 | 3,5725 | 0,43  | -0,477 |
| 15 | Q8WXE1 ATRIP_HUMAN  | K.LAAPSVSHVS#PR.K                | S224:        | 2 | 2,3444 | 0,249 | 0,094  |
| 15 | Q14978 NOLC1_HUMAN  | K.AASSSSSSSSSS#SSDDSEEEKAAATPK.K | S225:        | 3 | 2,8754 | 0,397 | 0,551  |
| 15 | Q2NL66 Q2NL66_HUMAN | R.GPS#TPKKPLEQSC.-               | S225:        | 3 | 2,6103 | 0,335 | -0,061 |
| 15 | P08670 VIME_HUMAN   | R.KVES#LQEEIAFLK.K               | S226:        | 2 | 4,3034 | 0,43  | -1,285 |
| 15 | P08670 VIME_HUMAN   | R.KVES#LQEEIAFLK.K               | S226:        | 3 | 3,9632 | 0,333 | -0,113 |
| 15 | Q13033 STRN3_HUMAN  | K.NLEQILNGGES#PKQK.G             | S229:        | 2 | 3,6382 | 0,287 | -0,563 |
| 15 | Q9Y4E8 UBP15_HUMAN  | R.GPSTPKS#PGASNFSTLPK.I          | S229:        | 3 | 3,5094 | 0,425 | -0,888 |
| 15 | Q9Y4E8 UBP15_HUMAN  | R.GPSTPKS#PGASNFSTLPK.I          | S229:        | 2 | 3,4685 | 0,398 | -1,119 |
| 15 | Q9UBD5 ORC3_HUMAN   | R.KIS#LPIEDYFNK.G                | S23:         | 2 | 3,6735 | 0,388 | -0,552 |
| 15 | Q9UNE7 STUB1_HUMAN  | R.LGAGGGSPEKS#PSAQELK.E          | S23:         | 2 | 3,5528 | 0,44  | -0,272 |
| 15 | Q9UBD5 ORC3_HUMAN   | R.KIS#LPIEDYFNK.G                | S23:         | 3 | 3,5503 | 0,195 | -0,118 |
| 15 | Q9UNE7 STUB1_HUMAN  | R.LGAGGGSPEKS#PSAQELK.E          | S23:         | 3 | 3,1292 | 0,256 | -0,714 |
| 15 | Q7Z417 NUFP2_HUMAN  | R.NS#AKGCENLNIVQDK.I             | S230:        | 3 | 4,6845 | 0,204 | 0      |
| 15 | Q96L14 C170L_HUMAN  | K.S#SPVNNHHS#PGQTPTLGQPEAR.A     | S230:S238:   | 3 | 2,8515 | 0,289 | 0,074  |
| 15 | Q8WU90 ZC3HF_HUMAN  | K.EEKEDEIS#LEDLIER.E             | S231:        | 3 | 3,0088 | 0,123 | -0,19  |
| 15 | Q8WU90 ZC3HF_HUMAN  | K.EEKEDEIS#LEDLIER.E             | S231:        | 2 | 2,5342 | 0,362 | -0,633 |
| 15 | Q6WKZ4 RFIP1_HUMAN  | K.TPLSQS#M*SVLPTSKPEK.V          | S234:        | 3 | 3,2129 | 0,391 | 0,285  |
| 15 | Q9H7L9 SDS3_HUMAN   | K.RPAS#PS#SPEHLPATPAESPAQR.F     | S234:S236:   | 3 | 4,5629 | 0,335 | 0,225  |
| 15 | Q12802 AKP13_HUMAN  | R.DEDEGIPS#ENEEKK.M              | S2345:       | 3 | 2,9393 | 0,087 | 0      |
| 15 | Q6U841 S4A10_HUMAN  | R.IPIVRS#FADIGK.K                | S238:        | 2 | 2,9556 | 0,277 | -0,524 |
| 15 | O95671 ASML_HUMAN   | K.HDSIPAADTFEDLS#DVEGGGSEPTQR.D  | S239:        | 3 | 3,1322 | 0,304 | 0      |
| 15 | P51003 PAPOA_HUMAN  | K.HYGITS#PISLAAPK.E              | S24:         | 2 | 3,906  | 0,428 | 0,159  |
| 15 | Q13136 LIPA1_HUMAN  | R.SSDGS#LSHEEDLAK.V              | S242:        | 2 | 2,8442 | 0,265 | -0,392 |
| 15 | Q9UPN3 MACF1_HUMAN  | K.SM*DAM*SS#PTKTETVK.A           | S2429:       | 2 | 2,3674 | 0,296 | -0,566 |
| 15 | O95425 SVIL_HUMAN   | R.DSSFTEVPRS#PK.H                | S245:        | 2 | 3,4834 | 0,353 | 0      |

|    |                     |                              |            |   |        |       |        |
|----|---------------------|------------------------------|------------|---|--------|-------|--------|
| 15 | P49792 RBP2_HUMAN   | K.DSLITPHVS#R.S              | S2454:     | 2 | 2,0213 | 0,327 | -0,405 |
| 15 | P46013 KI67_HUMAN   | K.ITEVSCKS#PQPESFK.T         | S2466:     | 3 | 3,2191 | 0,144 | -1,007 |
| 15 | Q96L73 NSD1_HUMAN   | R.AAS#PHQVTPQADEK.M          | S2471:     | 3 | 3,1692 | 0,258 | 0      |
| 15 | Q96L73 NSD1_HUMAN   | R.AAS#PHQVTPQADEK.M          | S2471:     | 2 | 2,2881 | 0,106 | 0,235  |
| 15 | Q9NYL9 TMOD3_HUMAN  | K.YKDLDEDELLGNSL#ETELK.Q     | S25:       | 3 | 5,5732 | 0,397 | 0,476  |
| 15 | Q7L9B9 EEPDP1_HUMAN | R.KFS#AACNFSNILVNQER.L       | S25:       | 3 | 5,0558 | 0,329 | 0,88   |
| 15 | Q9H4L5 OSBL3_HUMAN  | R.TYS#APAINAIQGGSFES#PKKEK.R | S251:S265: | 3 | 2,7932 | 0,119 | 0,221  |
| 15 | Q9Y2W1 TR150_HUMAN  | R.SPALKS#PLQSVVVR.R          | S253:      | 3 | 4,0734 | 0,522 | 0,234  |
| 15 | Q9Y2W1 TR150_HUMAN  | R.SPALKS#PLQSVVVR.R          | S253:      | 2 | 3,2179 | 0,356 | -0,078 |
| 15 | Q99808 S29A1_HUMAN  | K.LDLIS#KGEEPR.A             | S254:      | 3 | 2,9039 | 0,246 | 0,137  |
| 15 | Q99808 S29A1_HUMAN  | K.LDLIS#KGEEPR.A             | S254:      | 2 | 2,5406 | 0,432 | -0,091 |
| 15 | P06748 NPM_HUMAN    | K.M*QAS#IEKGGG#LPKVEAK.F     | S254:S260: | 3 | 2,623  | 0,111 | 0,375  |
| 15 | P21359 NF1_HUMAN    | K.S#FDHLISDTK.A              | S2543:     | 2 | 2,9829 | 0,488 | -0,196 |
| 15 | Q9HC52 CBX8_HUMAN   | R.RQDS#DLVQCQGVTPSSAEATGK.L  | S256:      | 3 | 4,9625 | 0,456 | 0,154  |
| 15 | Q96H79 ZCCHL_HUMAN  | K.M*LENTDNSS#PSTEHSQGLEK.Q   | S257:      | 3 | 3,2366 | 0,296 | -0,477 |
| 15 | Q9UPY5 XCT_HUMAN    | R.LPS#LGNKEPPGQEK.V          | S26:       | 3 | 2,853  | 0,193 | 0,116  |
| 15 | Q01130 SFRS2_HUMAN  | K.VDNLYRTS#PDTLR.R           | S26:       | 3 | 2,7465 | 0,321 | -0,845 |
| 15 | Q01130 SFRS2_HUMAN  | K.VDNLYRTS#PDTLR.R           | S26:       | 2 | 2,3791 | 0,111 | -1,339 |
| 15 | Q9BRL6 SFR2B_HUMAN  | K.VDNLYRTS#PDSL.R            | S26:       | 2 | 2,0414 | 0,118 | 0,711  |
| 15 | P21359 NF1_HUMAN    | R.KVSVSES#NVLLDEEVLTDPK.I    | S2601:     | 3 | 3,6548 | 0,25  | 0,642  |
| 15 | Q03188 CENPC_HUMAN  | K.KS#FSTLFLETVK.R            | S261:      | 2 | 3,2896 | 0,464 | -0,577 |
| 15 | P07900 HS90A_HUMAN  | K.ESEDKPEIEDVGS#DEEEK.K      | S263:      | 3 | 4,0108 | 0,333 | 0,644  |
| 15 | P06733 ENOA_HUMAN   | K.YDLDFKS#PDDPSR.Y           | S263:      | 2 | 3,5466 | 0,399 | -0,448 |
| 15 | P06733 ENOA_HUMAN   | K.YDLDFKS#PDDPSR.Y           | S263:      | 3 | 3,1742 | 0,431 | -0,112 |
| 15 | Q03188 CENPC_HUMAN  | K.KSFS#TLFLETVK.R            | S263:      | 3 | 2,9255 | 0,145 | -0,124 |
| 15 | Q03188 CENPC_HUMAN  | K.KSFS#TLFLETVK.R            | S263:      | 2 | 2,7434 | 0,317 | -0,247 |
| 15 | P49792 RBP2_HUMAN   | K.NRPDYVS#EEEEDEDFETAVK.K    | S2668:     | 3 | 6,0416 | 0,546 | -0,352 |
| 15 | P25054 APC_HUMAN    | R.S#GRSPTGNTPPVIDSVSEK.A     | S2671:     | 2 | 4,4151 | 0,532 | 0,972  |
| 15 | P24928 RPB1_HUMAN   | R.VQFGVLS#PDELKR.M           | S27:       | 2 | 3,8868 | 0,405 | -0,467 |
| 15 | P29966 MARCS_HUMAN  | K.GEAAAERPGEAAVASS#PSK.A     | S27:       | 2 | 3,2568 | 0,489 | -1,047 |
| 15 | P29966 MARCS_HUMAN  | K.GEAAAERPGEAAVASS#PSK.A     | S27:       | 3 | 2,8124 | 0,192 | -0,883 |
| 15 | Q9UJM3 ERRFI_HUMAN  | R.AS#PNSDEDKPEVPPR.V         | S273:      | 3 | 2,6047 | 0,351 | -0,106 |
| 15 | Q9UJM3 ERRFI_HUMAN  | R.AS#PNSDEDKPEVPPR.V         | S273:      | 2 | 2,213  | 0,404 | 0,355  |

|    |                     |                               |            |   |        |       |        |
|----|---------------------|-------------------------------|------------|---|--------|-------|--------|
| 15 | Q6ZNJ1 NBEL2_HUMAN  | R.RIS#QVSSGETEYNPTAR.-        | S2739:     | 3 | 4,6079 | 0,359 | 0,174  |
| 15 | Q3KR37 GRM1B_HUMAN  | K.SSIETKPDAS#PQLPK.K          | S274:      | 2 | 3,6613 | 0,504 | 0,145  |
| 15 | Q3KR37 GRM1B_HUMAN  | K.SSIETKPDAS#PQLPK.K          | S274:      | 3 | 2,9195 | 0,282 | 0      |
| 15 | Q13885 TBB2A_HUMAN  | R.LHFFM*PGFAPLTS#R.G          | S275:      | 3 | 3,3989 | 0,338 | -0,533 |
| 15 | Q9UBF8 PI4KB_HUMAN  | R.S#KSDATASISLSSNLK.R         | S275:      | 2 | 2,3428 | 0,399 | 0,217  |
| 15 | O75410 TACC1_HUMAN  | K.ASYHFSPEELDENTS#PLLGDAR.F   | S276:      | 3 | 5,0335 | 0,483 | -0,289 |
| 15 | O00203 AP3B1_HUMAN  | K.EGDELEDNGKNFYES#DDDQK.E     | S276:      | 3 | 3,8531 | 0,34  | 0      |
| 15 | Q9UJM3 ERRFI_HUMAN  | R.ASPNS#DEDKPEVPPR.V          | S276:      | 2 | 2,3993 | 0,321 | -0,426 |
| 15 | Q9UBF8 PI4KB_HUMAN  | R.SKS#DATASISLSSNLK.R         | S277:      | 2 | 5,4641 | 0,624 | 0,289  |
| 15 | P42696 RBM34_HUMAN  | R.SVQEGENPDDGVRGS#PPEDYR.L    | S28:       | 3 | 3,6101 | 0,306 | -0,384 |
| 15 | P27816 MAP4_HUMAN   | K.DM*ES#PTKLDVTLAK.D          | S280:      | 2 | 4,8247 | 0,496 | 0,297  |
| 15 | P27816 MAP4_HUMAN   | K.DM*ES#PTKLDVTLAK.D          | S280:      | 3 | 3,7139 | 0,394 | 0      |
| 15 | Q8NDD1 CA131_HUMAN  | K.NGTLILS#PVDIKK.I            | S280:      | 2 | 2,6519 | 0,24  | 0,083  |
| 15 | Q8IXT5 RB12B_HUMAN  | R.S#PLGFYVHLK.N               | S280:      | 2 | 2,2396 | 0,542 | -0,295 |
| 15 | Q9UHR4 BI2L1_HUMAN  | K.DYDTLSKCS#PK.M              | S281:      | 2 | 3,1512 | 0,345 | -0,35  |
| 15 | O43572 AKA10_HUMAN  | R.NSPAS#PLKELSGK.L            | S281:      | 2 | 2,987  | 0,39  | 0,347  |
| 15 | P46013 KI67_HUMAN   | K.IPKCS#SPELEDTATSSK.R        | S2827:     | 3 | 3,0238 | 0,154 | -0,474 |
| 15 | O75592 MYCB2_HUMAN  | R.SKS#DSYTLDPDTLR.K           | S2833:     | 2 | 4,0646 | 0,566 | 0,436  |
| 15 | O75592 MYCB2_HUMAN  | R.SKSDS#YTLDPDTLR.K           | S2835:     | 3 | 3,5586 | 0,195 | -0,109 |
| 15 | Q13435 SF3B2_HUMAN  | R.SSLGQS#ASETEEDTVSVSKK.E     | S284:      | 3 | 3,4614 | 0,409 | 0,255  |
| 15 | Q9Y624 JAM1_HUMAN   | K.KVIYSQPS#ARS#EGEFKQTSSFLV.- | S284:S287: | 3 | 3,6486 | 0,24  | -0,799 |
| 15 | Q13435 SF3B2_HUMAN  | R.SSLGQSAS#ETEEDTVSVSKK.E     | S286:      | 3 | 2,8011 | 0,384 | 0,426  |
| 15 | Q96T88 UHRF1_HUMAN  | K.IERPGECS#PM*VDNPM*R.R       | S287:      | 3 | 3,2123 | 0,229 | -0,096 |
| 15 | Q9NWH9 SLTM_HUMAN   | K.DGQDAIAQS#PEKESK.D          | S289:      | 2 | 4,188  | 0,458 | -0,58  |
| 15 | Q8TF01 SFR18_HUMAN  | R.SKFD#DEEEDTENVEAASSGK.V     | S290:      | 3 | 5,5241 | 0,491 | 0,368  |
| 15 | Q5VWC0 Q5VWC0_HUMAN | R.TAS#NPKVENEDEPVR.L          | S294:      | 3 | 3,0435 | 0,256 | -0,311 |
| 15 | Q4LE39 ARI4B_HUMAN  | K.EKEDNS#SEEEEEIEPFPEER.E     | S295:      | 3 | 4,1678 | 0,23  | -0,651 |
| 15 | Q9BSI4 TINF2_HUMAN  | R.NLGS#PTQVISPESK.E           | S295:      | 2 | 4,0575 | 0,342 | 0,293  |
| 15 | Q9NQW6 ANLN_HUMAN   | K.ATS#PVKSTTSITDAK.S          | S295:      | 3 | 3,2013 | 0,441 | 0,115  |
| 15 | Q9NQW6 ANLN_HUMAN   | K.ATS#PVKSTTSITDAK.S          | S295:      | 2 | 3,1828 | 0,462 | 0,077  |
| 15 | O14757 CHK1_HUMAN   | K.HIQS#NLDFSPVNSASSEENVK.Y    | S296:      | 3 | 5,3784 | 0,377 | 0,23   |
| 15 | O00499 BIN1_HUMAN   | K.GNKS#PSPPDGSPAATPEIR.V      | S296:      | 2 | 4,972  | 0,548 | 0,436  |
| 15 | Q03252 LMNB2_HUMAN  | R.M*RLES#LSYQLSGLQK.Q         | S296:      | 2 | 3,857  | 0,449 | -0,528 |

|    |                     |                                |            |   |        |       |        |
|----|---------------------|--------------------------------|------------|---|--------|-------|--------|
| 15 | O00499 BIN1_HUMAN   | K.GNKS#PSPPDGSPAATPEIR.V       | S296:      | 3 | 3,5488 | 0,352 | 0      |
| 15 | Q03252 LMNB2_HUMAN  | R.M*RLES#LSYQLSGLQK.Q          | S296:      | 3 | 3,1687 | 0,17  | -0,198 |
| 15 | O75379 VAMP4_HUMAN  | R.RNLLEDDS#DEEEDFFLR.G         | S30:       | 3 | 4,5547 | 0,391 | -0,329 |
| 15 | Q9NYV4 CD2L7_HUMAN  | K.DGSGGASGTLQPSSGGGSS#NSRER.H  | S30:       | 3 | 3,1507 | 0,33  | 0,24   |
| 15 | O43815 STRN_HUMAN   | K.EALKEFDLVTSEEGDNES#R.S       | S301:      | 3 | 5,3086 | 0,377 | -0,229 |
| 15 | P02545 LMNA_HUMAN   | R.IRIDS#LSAQLSQLQK.Q           | S301:      | 2 | 4,0123 | 0,593 | -0,548 |
| 15 | P49023 PAXI_HUMAN   | R.DGGRSS#PGGQDEGGFM*AQ GK.T    | S303:      | 3 | 4,9655 | 0,465 | -0,09  |
| 15 | Q9H4L5 OSBL3_HUMAN  | R.LHS#SNPNLSTLDFGEEK.N         | S303:      | 3 | 3,5666 | 0,288 | -0,186 |
| 15 | P02545 LMNA_HUMAN   | R.IRIDSLS#AQLSQLQK.Q           | S303:      | 3 | 2,9549 | 0,305 | -0,308 |
| 15 | Q8WVM8 SCFD1_HUMAN  | R.VNLEESSGVENS#PAGARPK.R       | S303:      | 2 | 2,5971 | 0,451 | 0,241  |
| 15 | Q9H4L5 OSBL3_HUMAN  | R.LHSS#NPNLSTLDFGEEK.N         | S304:      | 2 | 5,2372 | 0,554 | -0,558 |
| 15 | P78310 CXAR_HUMAN   | R.SYIGSNHSSLGS#M*SPSNM*EGYSK.T | S304:      | 3 | 4,4275 | 0,35  | -0,072 |
| 15 | Q05655 KPCD_HUMAN   | R.RSDS#ASSEPVGIYQGFEK.K        | S304:      | 2 | 4,1255 | 0,508 | 0,599  |
| 15 | P17706 PTN2_HUMAN   | K.EDLSPAFDHS#PNK.I             | S304:      | 2 | 3,1762 | 0,3   | 0,318  |
| 15 | Q13428 TCOF_HUMAN   | R.AAS#APAKGTPGKGAT#PAPPGK.A    | S304:T316: | 3 | 3,0119 | 0,254 | -0,275 |
| 15 | P46013 KI67_HUMAN   | R.GKS#SEPVVIM*K.R              | S3041:     | 2 | 2,9733 | 0,264 | -0,192 |
| 15 | Q9UBW7 ZMYM2_HUMAN  | R.NQKQPGVDSLS#PVASLPK.Q        | S305:      | 3 | 3,6988 | 0,256 | -0,094 |
| 15 | Q05655 KPCD_HUMAN   | R.RSDSAS#SEPVGIYQGFEK.K        | S306:      | 3 | 4,8228 | 0,289 | 0,449  |
| 15 | P78310 CXAR_HUMAN   | R.SYIGSNHSSLGSM*S#PSNM*EGYSK.T | S306:      | 3 | 4,3678 | 0,404 | 0,289  |
| 15 | Q6KC79 NIPBL_HUMAN  | K.GSRPPLILQSQSLPCSS#PR.D       | S306:      | 3 | 4,2755 | 0,46  | 0,339  |
| 15 | P42167 LAP2B_HUMAN  | K.HAS#PILPITEFSDIPR.R          | S306:      | 3 | 3,1215 | 0,231 | -0,391 |
| 15 | P12956 KU70_HUMAN   | R.TFNST#TGGLLLPSDTKR.S         | S306:      | 2 | 2,7819 | 0,383 | 0,711  |
| 15 | Q9NQS7 INCE_HUMAN   | R.TDSQSVRHS#PIAPSS#PSPQVLAQK.Y | S306:S312: | 3 | 5,0359 | 1     | 0,41   |
| 15 | Q15054 DPOD3_HUMAN  | R.VALST#DDETKETENM*R.K         | S307:      | 2 | 3,2395 | 0,612 | -0,067 |
| 15 | Q5QP69 Q5QP69_HUMAN | K.NKPPPPPASASPSAVPNGPQS#PK.Q   | S310:      | 3 | 4,2691 | 0,11  | -0,229 |
| 15 | Q9Y2D8 ADIP_HUMAN   | R.ERVDSTGTVIS#DVEEDAGELSR.E    | S312:      | 3 | 5,407  | 0,5   | -0,572 |
| 15 | Q9BWU0 NADAP_HUMAN  | K.M*LGEDS#DEEEEM*DTSERK.I      | S312:      | 3 | 3,3066 | 0,479 | 0,082  |
| 15 | Q7Z6Z7 HUWE1_HUMAN  | R.LFGHSSTSALS#AILR.S           | S3122:     | 2 | 3,5598 | 0,29  | -0,446 |
| 15 | O00273 DFFA_HUMAN   | R.SISASKAS#PPGDLQNP.K          | S315:      | 2 | 5,2563 | 0,501 | -0,275 |
| 15 | P05787 K2C8_HUMAN   | R.NIS#RLQAEIEGLK.G             | S315:      | 2 | 2,8032 | 0,323 | -0,157 |
| 15 | Q96A65 EXOC4_HUMAN  | R.TLS#TSDDVEDRENEK.G           | S32:       | 2 | 3,1644 | 0,376 | 0,201  |
| 15 | Q9Y2Z0 SUGT1_HUMAN  | R.LFQQIYSDGS#DEVKR.A           | S321:      | 2 | 2,6948 | 0,18  | -0,262 |
| 15 | Q9H2K8 TAOK3_HUMAN  | R.NGPLNES#QEDEEDSEHGTS LNR.E   | S324:      | 3 | 4,0367 | 0,485 | -0,577 |



|    |                     |                                    |            |   |        |       |        |
|----|---------------------|------------------------------------|------------|---|--------|-------|--------|
| 15 | Q6PJF5 RHDF2_HUMAN  | R.GIPHSAS#PVS#PDGVQIPLKEYGR.A      | S325:S328: | 3 | 5,2871 | 0,317 | 0,285  |
| 15 | O75362 ZN217_HUMAN  | K.ESGQEGSTDNDDS#SSEKELGETNK.G      | S327:      | 3 | 3,9947 | 0,384 | -0,419 |
| 15 | Q9Y608 LRRF2_HUMAN  | R.RGS#GDTSSLIDPDTLSSELR.D          | S328:      | 3 | 4,5566 | 0,412 | -0,167 |
| 15 | Q15459 SF3A1_HUMAN  | K.FGESEEVEM*EVES#DEEDDKQEK.A       | S329:      | 3 | 5,4743 | 0,482 | 0,472  |
| 15 | Q9Y2U5 M3K2_HUMAN   | R.RGS#DIDNPTLTVM*DISPPSR#PR.A      | S331:S349: | 3 | 5,0241 | 0,393 | 0,409  |
| 15 | Q641Q2 FA21A_HUMAN  | R.RTPS#DDEEDNLFAPPK.L              | S333:      | 2 | 4,1755 | 0,347 | -0,064 |
| 15 | P08651 NFIC_HUMAN   | K.TEM*DKS#PFNSPSPQDSR.L            | S333:      | 3 | 3,4672 | 0,23  | -0,259 |
| 15 | Q641Q2 FA21A_HUMAN  | R.RTPS#DDEEDNLFAPPK.L              | S333:      | 3 | 2,8937 | 0,232 | 0      |
| 15 | Q16181 SEPT7_HUMAN  | K.GQLTKS#PLAQM*EEER.R              | S334:      | 3 | 3,8903 | 0,47  | -0,101 |
| 15 | Q9UK58 CCNL1_HUMAN  | K.AKGLNPDGTPALSTLGGFS#PASKPSS#PR.E | S335:S342: | 3 | 3,6295 | 1     | -0,191 |
| 15 | Q9HCN4 GPN1_HUMAN   | R.GTLDEEDEEADS#DTDDIDHR.V          | S338:      | 3 | 4,4434 | 0,451 | 0,466  |
| 15 | P08651 NFIC_HUMAN   | K.TEM*DKSPFNPS#PQDSR.L             | S339:      | 3 | 3,6136 | 0,252 | 0,173  |
| 15 | Q96B23 CR025_HUMAN  | K.ASEQETAKEEDGS#VELESQVQK.D        | S34:       | 3 | 3,3765 | 0,223 | 0,439  |
| 15 | O75909 CCNK_HUMAN   | R.AVVVS#PKEENK.A                   | S340:      | 2 | 3,1291 | 0,174 | -0,381 |
| 15 | Q8IVF2 AHNK2_HUMAN  | K.VDLKS#PQVDIK.G                   | S3408:     | 2 | 2,3701 | 0,12  | 0,185  |
| 15 | P49759 CLK1_HUMAN   | K.VVDFGSATYDDEHHSTLVS#T#R.H        | S341:T342: | 3 | 2,8488 | 0,386 | -0,44  |
| 15 | Q9C0B5 ZDHC5_HUMAN  | R.THLGLATNEDSSLLAKDS#PPT#PTM*YK.Y  | S345:T348: | 3 | 4,2314 | 1     | -0,309 |
| 15 | Q5T1M5 FKB15_HUMAN  | R.TKSNS#LSEQLAINTSPDAVK.A          | S346:      | 3 | 2,8012 | 0,082 | -0,251 |
| 15 | P30622 CLIP1_HUMAN  | R.KIS#GTTALQEALK.E                 | S348:      | 2 | 3,7029 | 0,391 | 0,169  |
| 15 | Q9BU64 CENPO_HUMAN  | R.QQS#EELQSVQAQEGALGTK.I           | S35:       | 2 | 3,266  | 0,586 | 0,925  |
| 15 | Q4G0J3 LARP7_HUMAN  | K.DTGDLKDSS#LLK.T                  | S351:      | 2 | 2,3162 | 0,185 | 0      |
| 15 | Q5SW79 CE170_HUMAN  | R.TEEDS#KSIKS#DVPVYLK.R            | S354:S359: | 3 | 3,4467 | 0,328 | -0,087 |
| 15 | Q5SW79 CE170_HUMAN  | R.TEEDSKS#IKS#DVPVYLK.R            | S356:S359: | 3 | 3,0215 | 0,314 | 0,349  |
| 15 | Q92922 SMRC1_HUMAN  | R.S#QKEEDEQEDLTK.D                 | S357:      | 2 | 3,859  | 0,479 | -0,588 |
| 15 | Q92922 SMRC1_HUMAN  | R.S#QKEEDEQEDLTK.D                 | S357:      | 3 | 2,8537 | 0,137 | -0,551 |
| 15 | Q9H2U1 DHX36_HUMAN  | K.DLLNFRS#DLK.V                    | S358:      | 2 | 2,201  | 0,101 | 0,188  |
| 15 | O60271 JIP4_HUMAN   | K.DLS#GYKGSST#PTKGIENK.A           | S358:T365: | 3 | 3,576  | 0,331 | -0,627 |
| 15 | Q5SW79 CE170_HUMAN  | K.SIKS#DVPVYLK.R                   | S359:      | 2 | 3,1823 | 0,434 | 0      |
| 15 | P16403 H12_HUMAN    | R.KAS#GPPVSELITK.A                 | S36:       | 2 | 4,261  | 0,446 | 0,087  |
| 15 | P17096 HMGGA1_HUMAN | R.KQPPVS#PGTALVGSQKEPSEVPT#PK.R    | S36:T53:   | 3 | 5,2813 | 0,46  | 0,269  |
| 15 | O76021 RL1D1_HUMAN  | K.ATNES#EDEIPQLVPIGKK.T            | S361:      | 3 | 4,0551 | 0,26  | 0      |
| 15 | Q7L8J4 3BP5L_HUMAN  | R.GLSDHVS#LDGQELGTR.S              | S362:      | 2 | 3,7658 | 0,522 | 0      |
| 15 | Q7L8J4 3BP5L_HUMAN  | R.GLSDHVS#LDGQELGTR.S              | S362:      | 3 | 3,1062 | 0,216 | 0,207  |

|    |                    |                                |                 |   |        |       |        |
|----|--------------------|--------------------------------|-----------------|---|--------|-------|--------|
| 15 | P48634 BAT2_HUMAN  | R.DSQS#ASGEERPPEADGK.K         | S363:           | 2 | 3,6893 | 0,52  | 0,199  |
| 15 | P48634 BAT2_HUMAN  | R.DSQS#ASGEERPPEADGK.K         | S363:           | 3 | 3,5121 | 0,459 | 0      |
| 15 | Q9UN79 SOX13_HUMAN | K.DLISLDSS#PAKER.L             | S368:           | 2 | 3,1143 | 0,137 | -0,162 |
| 15 | Q15435 PP1R7_HUMAN | K.HSS#GIVADLSEQSLK.D           | S37:            | 2 | 4,6665 | 0,493 | -0,222 |
| 15 | Q86U90 YRDC_HUMAN  | R.LFRPPS#PAPAAPGAR.L           | S37:            | 2 | 3,1708 | 0,45  | -0,539 |
| 15 | Q86U90 YRDC_HUMAN  | R.LFRPPS#PAPAAPGAR.L           | S37:            | 3 | 2,9011 | 0,336 | -0,115 |
| 15 | Q7Z4V5 HDGR2_HUMAN | R.GSGGSS#GDELREDDEPVK.K        | S370:           | 2 | 2,6886 | 0,334 | 0,191  |
| 15 | O94763 RMP_HUMAN   | K.NS#TGSGHSAQELPTIR.T          | S371:           | 2 | 2,5545 | 0,385 | 0,703  |
| 15 | P20700 LMNB1_HUMAN | K.LALDM*EIS#AYRK.L             | S375:           | 2 | 2,4318 | 0,237 | -0,081 |
| 15 | Q96ST2 IWS1_HUMAN  | K.M*DS#DEDEKEGEEK.V            | S377:           | 2 | 4,005  | 0,333 | -0,691 |
| 15 | Q01484 ANK2_HUMAN  | R.GGS#PIIQEPEEPSEHREESS#PR.K   | S3790:S3807:    | 3 | 2,9272 | 0,122 | 0,281  |
| 15 | P16949 STMN1_HUMAN | R.SKESVPEFPLS#PPK.K            | S38:            | 2 | 3,6841 | 0,429 | 0,075  |
| 15 | P16949 STMN1_HUMAN | R.SKESVPEFPLS#PPK.K            | S38:            | 3 | 3,5494 | 0,278 | 0,226  |
| 15 | Q9C0B5 ZDHC5_HUMAN | R.GDS#LKEPTSIAESSR.H           | S380:           | 3 | 4,1687 | 0,402 | 0      |
| 15 | Q9C0B5 ZDHC5_HUMAN | R.GDS#LKEPTSIAESSR.H           | S380:           | 2 | 3,2269 | 0,578 | 0,221  |
| 15 | Q13428 TCOF_HUMAN  | K.TSQVGAASAPAKES#PR.K          | S381:           | 2 | 3,9253 | 0,54  | -0,373 |
| 15 | Q71RC2 LARP4_HUMAN | R.SS#GGSEHSTEGSVSLGDGQLNR.Y    | S382:           | 3 | 4,4198 | 0,439 | 0,735  |
| 15 | O75717 WDHD1_HUMAN | R.SHILEDDENS#VDISM*LK.T        | S383:           | 3 | 4,175  | 0,326 | -0,269 |
| 15 | O75717 WDHD1_HUMAN | R.SHILEDDENS#VDISM*LK.T        | S383:           | 2 | 3,4452 | 0,573 | -0,717 |
| 15 | Q9NYV4 CD2L7_HUMAN | R.HSS#IS#PVRLPLNSSLGAELSR.K    | S383:S385:      | 3 | 4,5624 | 0,466 | 0,384  |
| 15 | Q8IYU2 HACE1_HUMAN | K.RDS#TEITSILLK.Q              | S385:           | 2 | 3,9409 | 0,382 | -0,335 |
| 15 | O60658 PDE8A_HUMAN | R.IHS#M*TIEAPITK.V             | S386:           | 2 | 3,9249 | 0,513 | -0,255 |
| 15 | Q5JSZ5 K0515_HUMAN | K.LKFS#DDEEEEEVVK.D            | S388:           | 2 | 5,0062 | 0,537 | 0,481  |
| 15 | Q5JSZ5 K0515_HUMAN | K.LKFS#DDEEEEEVVK.D            | S388:           | 3 | 2,9254 | 0,267 | 0,103  |
| 15 | Q8WYA6 CTBL1_HUMAN | R.TIFPLFM*KS#PR.K              | S389:           | 2 | 2,499  | 0,234 | -0,426 |
| 15 | Q8IYB3 SRRM1_HUMAN | R.RLS#PS#AS#PPRR.R             | S389:S391:S393: | 2 | 2,193  | 0,377 | -0,667 |
| 15 | P04075 ALDOA_HUMAN | K.GILAADESTGS#IAKR.L           | S39:            | 2 | 2,995  | 0,482 | 0      |
| 15 | Q99613 EIF3C_HUMAN | K.QPLLLS#EDEEDTKR.V            | S39:            | 2 | 2,1868 | 0,387 | 0,139  |
| 15 | Q6PJT7 ZC3HE_HUMAN | R.TRYS#QEELLAEVVQGQSR.T        | S390:           | 2 | 3,9594 | 0,622 | -0,116 |
| 15 | Q6PJT7 ZC3HE_HUMAN | R.TRYS#QEELLAEVVQGQSR.T        | S390:           | 3 | 3,5154 | 0,28  | -0,26  |
| 15 | Q9Y2D5 AKAP2_HUMAN | K.GQKS#PGALETPSAAGSQGNTASQGK.E | S393:           | 3 | 5,8611 | 0,538 | 0,456  |
| 15 | Q12888 TP53B_HUMAN | R.QDKPM*DTSVLS#EEGGEPFQK.K     | S398:           | 3 | 3,3133 | 0,269 | 0,079  |
| 15 | P60228 EIF3E_HUMAN | K.LGHVVM*GNNAVS#PYQQVIEK.T     | S399:           | 3 | 2,8639 | 0,141 | -0,241 |

|    |                    |                                  |            |   |        |       |        |
|----|--------------------|----------------------------------|------------|---|--------|-------|--------|
| 15 | Q96ST2 IWS1_HUMAN  | K.AAVLSDS#EDEEKASAK.K            | S400:      | 2 | 4,8117 | 0,508 | -0,635 |
| 15 | Q86Y91 KI18B_HUMAN | K.KLQVYEGGGQPPPQDLPGS#PK.S       | S404:      | 3 | 2,68   | 0,17  | 0      |
| 15 | Q86VQ1 GLC11_HUMAN | K.YASS#PKPNNSYM*FK.R             | S406:      | 3 | 3,1074 | 0,258 | 0,211  |
| 15 | Q8WUQ7 CS029_HUMAN | K.LKQEQGVES#EPLFPILK.Q           | S408:      | 3 | 3,1962 | 0,203 | -0,27  |
| 15 | Q6ULP2 AFTIN_HUMAN | R.KFTNFQSPNIDPTEENDLDDS#LSVK.N   | S409:      | 3 | 3,9118 | 0,395 | -0,125 |
| 15 | P05787 K2C8_HUMAN  | R.LESGM*QNM*S#IHTK.T             | S410:      | 2 | 3,4732 | 0,378 | -0,461 |
| 15 | Q13112 CAF1B_HUMAN | R.GSS#PGPRPVEGTPASR.T            | S410:      | 3 | 2,9624 | 0,404 | -0,448 |
| 15 | Q8WUX9 CHMP7_HUMAN | R.HFTNS#VPNPRIS#DAELEAELEK.L     | S410:S417: | 3 | 3,5057 | 0,273 | -0,344 |
| 15 | Q8WXH0 SYNE2_HUMAN | R.RGSM*S#YLAAVEEEVEESSVK.S       | S4110:     | 3 | 3,4996 | 0,194 | -0,319 |
| 15 | Q9UQR1 ZN148_HUMAN | R.SLKQPLEQNQTIS#PLSTYEESK.V      | S412:      | 3 | 5,4412 | 0,425 | -0,281 |
| 15 | Q9UBU7 DBF4A_HUMAN | K.KLLFIS#EPIPHPS#NELR.G          | S413:S420: | 3 | 3,1341 | 0,137 | -0,596 |
| 15 | Q9P0K7 RAI14_HUMAN | K.SSPSVLIHS#LGK.S                | S419:      | 2 | 3,7911 | 0,471 | 0,093  |
| 15 | Q8NHZ8 CDC26_HUMAN | K.QKEDVEVVGGS#DGEGAIGLSSDPK.S    | S42:       | 3 | 4,9153 | 0,495 | -0,373 |
| 15 | O14974 MYPT1_HUMAN | K.FPTTATKIS#PK.E                 | S422:      | 2 | 3,0414 | 0,26  | 0      |
| 15 | O94967 WDR47_HUMAN | K.NELRDS#TEQFQEYYR.Q             | S422:      | 2 | 2,6154 | 0,42  | -0,474 |
| 15 | Q2TB10 ZN800_HUMAN | K.VKVEPADSVESPPS#ITHS#PQNELK.G   | S422:S426: | 3 | 5,8227 | 0,363 | 0,323  |
| 15 | Q86X29 LSR_HUMAN   | K.ELANFDPSRPGPPS#GR.V            | S424:      | 3 | 3,1509 | 0,225 | 0      |
| 15 | Q9NTZ6 RBM12_HUMAN | R.S#PHEAGFCVYLK.G                | S424:      | 3 | 3,1148 | 0,252 | 0,184  |
| 15 | Q9UBF8 PI4KB_HUMAN | R.S#VENLPECGITHEQR.A             | S428:      | 2 | 3,5758 | 0,468 | 0,594  |
| 15 | Q9Y5Q9 TF3C3_HUMAN | K.GKLS#AEENPDDSEVPSSSGINSTK.S    | S43:       | 3 | 4,0629 | 0,349 | 0,289  |
| 15 | P08670 VIME_HUMAN  | R.ETNLDS#LPLVDTHSK.R             | S430:      | 2 | 2,7676 | 0,356 | -0,279 |
| 15 | Q9Y4K4 M4K5_HUMAN  | R.RQS#SPSCGPVAETSSIGNGDGISK.L    | S433:      | 3 | 4,0107 | 0,337 | 0,666  |
| 15 | Q53ET0 CRTC2_HUMAN | R.RVPLS#PLSLLAGPADAR.R           | S433:      | 2 | 3,1619 | 0,233 | -0,538 |
| 15 | Q8TBZ3 WDR20_HUMAN | R.SNS#LPHSAVSNAGSK.S             | S434:      | 3 | 3,203  | 0,411 | -0,357 |
| 15 | Q8IYB1 CC059_HUMAN | R.RGSTTS#IPSPQSDGGDPNQDDR.L      | S436:      | 3 | 3,732  | 0,402 | -0,52  |
| 15 | O43318 M3K7_HUMAN  | R.RS#IQDLTVTGTEPGQVSSR.S         | S439:      | 3 | 4,6319 | 0,461 | 0,26   |
| 15 | Q8NI08 NCOA7_HUMAN | K.DTLKECLS#LDPEER.K              | S441:      | 3 | 3,7264 | 0,332 | 0,205  |
| 15 | Q8NI08 NCOA7_HUMAN | K.DTLKECLS#LDPEER.K              | S441:      | 2 | 3,4019 | 0,326 | -0,273 |
| 15 | Q9H0E3 SP130_HUMAN | K.VVPQQITHTS#PR.I                | S442:      | 2 | 2,139  | 0,165 | 0      |
| 15 | P35269 T2FA_HUMAN  | K.STPQPPS#GKTT#PNSGDVQVTEDAVRR.Y | S442:T446: | 3 | 2,6361 | 0,335 | 0,508  |
| 15 | O14974 MYPT1_HUMAN | R.KTGS#YGALAEITASK.E             | S445:      | 2 | 4,7402 | 0,542 | -0,387 |
| 15 | O14974 MYPT1_HUMAN | R.KTGS#YGALAEITASK.E             | S445:      | 3 | 4,005  | 0,343 | 0      |
| 15 | Q12767 K0195_HUMAN | K.VEPPHSS#HEDLTDGLS#TR.S         | S445:S454: | 3 | 2,604  | 0,195 | -0,171 |

|    |                     |                                 |            |   |        |       |        |
|----|---------------------|---------------------------------|------------|---|--------|-------|--------|
| 15 | Q8WUM0 NU133_HUMAN  | R.KGLPLGSAVSS#PVLFSVGR.R        | S45:       | 3 | 4,6205 | 0,497 | -0,357 |
| 15 | P36404 ARL2_HUMAN   | K.KFNGEDIDTIS#PTLGFNIK.T        | S45:       | 3 | 4,3522 | 0,378 | -0,167 |
| 15 | O94804 STK10_HUMAN  | K.ASQS#RPNSSALETLGGEK.L         | S450:      | 3 | 4,3018 | 0,448 | 0,191  |
| 15 | O94909 K0819_HUMAN  | K.DRLGS#PLAVDEALR.R             | S450:      | 2 | 2,6727 | 0,403 | -0,536 |
| 15 | Q7Z2K8 GRIN1_HUMAN  | K.AGTVS#PGKEDPVSSR.R            | S452:      | 2 | 2,4432 | 0,421 | 0,156  |
| 15 | P51116 FXR2_HUMAN   | R.TGGPAYGPSSDVSTAS#ETESEKR.E    | S453:      | 3 | 2,9778 | 0,318 | -0,306 |
| 15 | O94804 STK10_HUMAN  | K.ASQSRPNS#SALETLGGEK.L         | S454:      | 2 | 2,8386 | 0,358 | 0,383  |
| 15 | P53396 ACLY_HUMAN   | R.TAS#FSESRADVAPAK.K            | S455:      | 2 | 3,0019 | 0,453 | 0,14   |
| 15 | O94804 STK10_HUMAN  | K.ASQSRPNSS#ALETLGGEK.L         | S455:      | 3 | 2,8724 | 0,165 | 0,191  |
| 15 | Q99590 SFRIP_HUMAN  | K.VETVS#QPSES#PKDTIDKTK.K       | S456:S461: | 3 | 3,6031 | 0,246 | 0      |
| 15 | Q9NYZ3 GTSE1_HUMAN  | K.IPKFS#IGDSPDSSTPK.L           | S457:      | 2 | 4,0704 | 0,561 | -0,486 |
| 15 | Q9NYZ3 GTSE1_HUMAN  | K.IPKFS#IGDSPDSSTPK.L           | S457:      | 3 | 3,7891 | 0,295 | -0,208 |
| 15 | Q6P1L5 AL2SC_HUMAN  | K.YATS#PKPNNSYM*FK.R            | S457:      | 3 | 3,0776 | 0,342 | 0,105  |
| 15 | Q9Y5J1 UTP18_HUMAN  | K.AGAGPGGPPQKPAPSS#QR.K         | S46:       | 3 | 3,1065 | 0,401 | -0,526 |
| 15 | Q6PJG2 CN043_HUMAN  | R.RAS#QEANLLTLAQK.A             | S461:      | 2 | 4,3336 | 0,498 | -0,677 |
| 15 | Q08AD1 CA1L1_HUMAN  | R.SIS#NEGLTLNNSHVSK.H           | S464:      | 3 | 3,6761 | 0,48  | 0,206  |
| 15 | Q08AD1 CA1L1_HUMAN  | R.SIS#NEGLTLNNSHVSK.H           | S464:      | 2 | 3,3856 | 0,464 | 0,411  |
| 15 | Q6GQQ9 OTU7B_HUMAN  | R.STPESGDS#DKESVGSSTSNEGGR.R    | S467:      | 3 | 4,0561 | 0,475 | 0,225  |
| 15 | Q9H6R7 CB044_HUMAN  | K.LIESLS#PDFCHQNK.G             | S468:      | 2 | 3,8856 | 0,42  | -0,345 |
| 15 | Q99543 DNJC2_HUMAN  | R.NAS#ASFQLEDKK.E               | S47:       | 2 | 3,0281 | 0,302 | 0,315  |
| 15 | P34897 GLYM_HUMAN   | K.LQDFKS#FLLK.D                 | S470:      | 2 | 3,3155 | 0,104 | -0,278 |
| 15 | P05787 K2C8_HUMAN   | R.DGKLVES#ESSDVLPK.-            | S475:      | 2 | 4,3719 | 0,434 | 0      |
| 15 | Q13415 ORC1_HUMAN   | R.S#RSLAAQEPASVLEEAR.L          | S476:      | 3 | 3,4548 | 0,304 | -0,386 |
| 15 | O43719 HTSF1_HUMAN  | R.GFEGSCS#QKESEEGNPVR.G         | S481:      | 3 | 3,043  | 0,329 | -0,617 |
| 15 | Q96PU5 NED4L_HUMAN  | K.DTLNPNQSPQPS#PYNS#PKPQHK.V    | S483:S487: | 3 | 5,192  | 1     | 0,211  |
| 15 | O60825 F262_HUMAN   | R.NYS#VGSRLKPLS#PLR.A           | S483:S493: | 3 | 2,8642 | 0,41  | 0,47   |
| 15 | P11169 GTR3_HUMAN   | R.SGKDGVM*EM*NS#IEPAKETTTNV.-   | S485:      | 3 | 3,8966 | 0,279 | 0,373  |
| 15 | Q99755 PI51A_HUMAN  | R.AGSSGNCSITYQPSVS#GEHK.A       | S488:      | 3 | 3,4573 | 0,325 | -0,511 |
| 15 | P50402 EMD_HUMAN    | R.RLS#PPSSSAASSYSFSDLNSTR.G     | S49:       | 3 | 4,6989 | 0,375 | -0,076 |
| 15 | P17096 HMG1A1_HUMAN | R.KQPPVSPGTALVGSQKEPS#EVPT#PK.R | S49:T53:   | 3 | 5,522  | 0,421 | 0,538  |
| 15 | Q9UHB6 LIMA1_HUMAN  | R.ETPHS#PGVEDAPIAK.V            | S490:      | 3 | 3,1243 | 0,315 | 0      |
| 15 | Q6UN15 FIP1_HUMAN   | R.DHS#PTPSVFNDSDEER.Y           | S492:      | 2 | 4,6882 | 0,421 | 0,136  |
| 15 | Q6UN15 FIP1_HUMAN   | R.DHS#PTPSVFNDSDEER.Y           | S492:      | 3 | 3,8637 | 0,273 | 0,204  |

|    |                    |                                   |              |   |        |       |        |
|----|--------------------|-----------------------------------|--------------|---|--------|-------|--------|
| 15 | Q15758 AAAT_HUMAN  | R.TESRS#TEPELIQVK.S               | S493:        | 2 | 3,6821 | 0,221 | -0,288 |
| 15 | Q6VY07 PACS1_HUMAN | K.TDLQGS#ASPSKVEGVHT#PR.Q         | S493:T504:   | 3 | 3,6232 | 0,285 | -0,172 |
| 15 | P81408 COTE1_HUMAN | R.SHS#DPGITTSSDTADFR.D            | S494:        | 2 | 5,0949 | 0,591 | 0,912  |
| 15 | O60832 DKC1_HUMAN  | K.AGLESGAEPGDGDS#DTTKK.K          | S494:        | 2 | 2,0889 | 0,284 | -0,446 |
| 15 | Q9UER7 DAXX_HUMAN  | K.DGDKS#PM*SSLQISNEK.N            | S495:        | 3 | 5,0159 | 0,391 | 0      |
| 15 | O43432 IF4G3_HUMAN | R.RS#PVPAQIAITVPK.T               | S495:        | 3 | 4,1057 | 0,193 | 0,235  |
| 15 | Q9UER7 DAXX_HUMAN  | K.DGDKS#PM*SSLQISNEK.N            | S495:        | 2 | 3,4426 | 0,233 | -0,333 |
| 15 | O75152 ZC11A_HUMAN | R.VQQSSESSTSS#PSQHEATPGAR.R       | S495:        | 3 | 2,9165 | 0,302 | -0,939 |
| 15 | Q96JG6 CC132_HUMAN | K.FM*EQSRSPS#VS#PSKQPVSTSSK.T     | S496:S498:   | 3 | 3,432  | 0,135 | -0,215 |
| 15 | P47736 RPGP1_HUMAN | R.RSS#AIGIENIQEVQEK.R             | S499:        | 3 | 3,4544 | 0,388 | -0,292 |
| 15 | Q8N3X1 FNBP4_HUMAN | K.IDENS#DKEM*EVEES#PEKIK.V        | S499:S508:   | 3 | 3,5679 | 0,251 | 0,151  |
| 15 | Q13610 PWP1_HUMAN  | K.EKLQEEGGGS#DEEETGSPSEDGM*QSAR.T | S50:         | 3 | 5,4699 | 0,43  | -0,935 |
| 15 | Q8WUM0 NU133_HUMAN | R.KGLPLGSAVSSPVLFS#PVGR.R         | S50:         | 3 | 5,456  | 0,434 | -0,357 |
| 15 | Q9NX63 CHCH3_HUMAN | K.SQRYG#GAYGASVSDEELK.R           | S50:         | 2 | 4,439  | 0,55  | 0,722  |
| 15 | Q8NI08 NCOA7_HUMAN | K.QDIM*PEVDKQSGS#PESR.V           | S502:        | 3 | 2,9605 | 0,224 | 0,366  |
| 15 | Q14160 LAP4_HUMAN  | R.SEACPCQPDGSGS#PLPAEEKR.L        | S504:        | 3 | 2,9132 | 0,239 | -0,302 |
| 15 | Q9NUY8 TBC23_HUMAN | R.EKVIS#FIENTSTPVDR.M             | S507:        | 2 | 2,0112 | 0,4   | -0,255 |
| 15 | Q8N108 MIER1_HUMAN | R.VNS#NGKESPGS#SEFFQEAVSHGK.F     | S507:S515:   | 3 | 4,2408 | 0,401 | -0,283 |
| 15 | Q9ULT0 TTC7A_HUMAN | R.RGS#PSAAFTFPDTDDFGK.L           | S51:         | 2 | 4,7879 | 0,592 | 0,061  |
| 15 | Q9ULT0 TTC7A_HUMAN | R.RGS#PSAAFTFPDTDDFGK.L           | S51:         | 3 | 3,2755 | 0,469 | -0,275 |
| 15 | Q8N5D0 WDTC1_HUMAN | R.KDS#ISEDEM*VLR.E                | S511:        | 3 | 4,8023 | 0,388 | 0,06   |
| 15 | Q8N5D0 WDTC1_HUMAN | R.KDS#ISEDEM*VLR.E                | S511:        | 2 | 3,5884 | 0,466 | 0,241  |
| 15 | Q9NYF8 BCLF1_HUMAN | K.DLFDYS#PPLHK.N                  | S512:        | 2 | 3,6716 | 0,517 | -0,259 |
| 15 | Q8IVF2 AHNK2_HUMAN | R.KPDAEVLTVES#PEEEAM*TK.Y         | S5175:       | 3 | 5,4656 | 0,393 | 0,25   |
| 15 | Q96SD1 DCR1C_HUMAN | K.RNDEITDESLENFSPSTVAGGSQS#PK.L   | S518:        | 3 | 4,9279 | 0,489 | 0      |
| 15 | Q9NQW6 ANLN_HUMAN  | K.GFTECEM*TKSS#PLK.I              | S518:        | 2 | 3,7944 | 0,449 | 0,071  |
| 15 | Q12905 ILF2_HUMAN  | R.VKPAPDETS#FSEALLK.R             | S52:         | 2 | 4,3312 | 0,583 | -0,471 |
| 15 | Q12905 ILF2_HUMAN  | R.VKPAPDETS#FSEALLK.R             | S52:         | 3 | 4,1276 | 0,437 | -0,404 |
| 15 | Q8TAD8 SNIP1_HUMAN | R.RPDHSGGS#PS#PPT#SEPAR.S         | S52:S54:T57: | 3 | 4,3071 | 0,295 | -0,177 |
| 15 | O00567 NOL5A_HUMAN | K.SFSKEELM*SS#DLEETAGSTSIPK.R     | S520:        | 3 | 3,2864 | 0,352 | 0,712  |
| 15 | Q9BST9 RTKN_HUMAN  | R.TFS#LDAVPPDHSPR.A               | S520:        | 2 | 3,0865 | 0,371 | 0      |
| 15 | Q9BST9 RTKN_HUMAN  | R.TFS#LDAVPPDHSPR.A               | S520:        | 3 | 2,7991 | 0,237 | 0      |
| 15 | Q8NEM7 FA48A_HUMAN | R.KSSVDLNQVSM*LSPAALS#PASSSQR.T   | S524:        | 3 | 4,4475 | 0,349 | -0,344 |

|    |                    |                                     |            |   |        |       |        |
|----|--------------------|-------------------------------------|------------|---|--------|-------|--------|
| 15 | O95365 ZBT7A_HUMAN | R.VRGGAPDPSPGATATPGAPAQPS#SPDAR.R   | S525:      | 3 | 5,4114 | 0,273 | 0,412  |
| 15 | Q9NPI6 DCP1A_HUMAN | R.KASSPS#PLTIGTPESQR.K              | S525:      | 3 | 2,9279 | 0,306 | 0,299  |
| 15 | O43719 HTSF1_HUMAN | K.ESEDDLKES#EEEVGPTK.E              | S529:      | 3 | 3,4783 | 0,35  | 0,173  |
| 15 | Q3KQU3 MA7D1_HUMAN | R.RAS#NEKESAAPAS#PAPSPAPSPTPAPPQK.E | S534:S544: | 3 | 5,2654 | 0,419 | 0,366  |
| 15 | Q8TEH3 DEN1A_HUMAN | R.TLRES#DSAEGDEAESPEQQVR.K          | S536:      | 3 | 5,6951 | 0,246 | -0,531 |
| 15 | Q15042 RB3GP_HUMAN | K.KTS#ASDVTNIYPGDAGK.A              | S537:      | 2 | 4,2528 | 0,52  | 0,812  |
| 15 | Q16555 DPYL2_HUMAN | R.NLHQS#GFSLSGAQIDDNIPR.R           | S537:      | 3 | 3,7237 | 0,28  | -0,081 |
| 15 | P50402 EMD_HUMAN   | R.RLSPSSS#AASSYSFSDLNSTR.G          | S54:       | 3 | 3,7132 | 0,374 | -0,153 |
| 15 | Q8NHQ9 DDX55_HUMAN | K.REEGS#DIEDEDM*EELLNDTR.L          | S544:      | 3 | 4,1217 | 0,324 | 0,661  |
| 15 | Q9Y3L3 3BP1_HUMAN  | R.TESEVPPRPAS#PK.V                  | S544:      | 2 | 2,989  | 0,478 | -0,91  |
| 15 | Q8WYA6 CTBL1_HUMAN | K.EYAENIGDGRS#PEFR.E                | S545:      | 2 | 2,3161 | 0,285 | 0,939  |
| 15 | Q96SN8 CK5P2_HUMAN | K.KQS#SDYEELIQVLK.K                 | S547:      | 2 | 4,0891 | 0,472 | -0,624 |
| 15 | Q9H1B7 EAP1_HUMAN  | R.KAS#PEPPDSAEGALK.L                | S547:      | 2 | 4,0449 | 0,499 | 0,077  |
| 15 | Q9H1B7 EAP1_HUMAN  | R.KAS#PEPPDSAEGALK.L                | S547:      | 3 | 3,3128 | 0,343 | 0,116  |
| 15 | Q96SN8 CK5P2_HUMAN | K.KQSS#DYEELIQVLK.K                 | S548:      | 3 | 4,7042 | 0,313 | -0,312 |
| 15 | Q8N0Z3 CCD52_HUMAN | K.SNLKFS#PLQDVLR.R                  | S548:      | 2 | 3,6511 | 0,447 | -0,306 |
| 15 | Q8N0Z3 CCD52_HUMAN | K.SNLKFS#PLQDVLR.R                  | S548:      | 3 | 3,6191 | 0,318 | 0      |
| 15 | Q96FS4 SIPA1_HUMAN | R.SGS#DAGEARPPTPASPR.A              | S55:       | 3 | 2,6942 | 0,088 | 0,106  |
| 15 | Q96ST2 IWS1_HUMAN  | R.NRDGGTFIS#DADDVVSAM*IVK.M         | S554:      | 3 | 3,525  | 0,27  | -0,397 |
| 15 | Q96JG6 CC132_HUMAN | K.SAYQEYDS#DSDVPEELKR.D             | S559:      | 3 | 3,0277 | 0,268 | 0,414  |
| 15 | Q14807 KIF22_HUMAN | R.KLES#LDALEPEEK.A                  | S562:      | 2 | 4,5069 | 0,375 | -0,077 |
| 15 | O00264 PGRC1_HUMAN | K.IVRGDQPAASGDS#DDDEPPPLPR.L        | S57:       | 3 | 7,3321 | 0,536 | 0,221  |
| 15 | P17040 ZSC20_HUMAN | R.HEDEDQIS#EQDIFEGPLGALSK.C         | S571:      | 3 | 3,2632 | 0,305 | -0,361 |
| 15 | Q14738 2A5D_HUMAN  | R.KS#ELPQDVYTIK.A                   | S573:      | 3 | 3,3245 | 0,264 | 0,122  |
| 15 | Q14738 2A5D_HUMAN  | R.KS#ELPQDVYTIK.A                   | S573:      | 2 | 2,9268 | 0,426 | -0,163 |
| 15 | Q09666 AHNK_HUMAN  | K.GGVTGS#PEASISGSKGDLK.S            | S5731:     | 2 | 3,7224 | 0,41  | 0,334  |
| 15 | Q09666 AHNK_HUMAN  | K.GGVTGS#PEASISGSKGDLK.S            | S5731:     | 3 | 3,4416 | 0,398 | -0,1   |
| 15 | Q09666 AHNK_HUMAN  | K.ASLGSLEGEAEAS#SPKGGK.F            | S5762:     | 3 | 2,7523 | 0,275 | -0,092 |
| 15 | Q86UU1 PHLB1_HUMAN | R.KNS#ITEIS#DNEDDLLEYHR.R           | S578:S583: | 3 | 3,7283 | 0,273 | 0,373  |
| 15 | O00178 GTPB1_HUMAN | K.LLQTTNNS#PM*NSKPQQIK.M            | S580:      | 3 | 4,1769 | 0,416 | -0,342 |
| 15 | Q13428 TCOF_HUMAN  | K.SLGNILQAKPTSS#PAK.G               | S583:      | 2 | 3,6871 | 0,481 | 0,072  |
| 15 | P27824 CALX_HUMAN  | K.AEEDILNRS#PR.N                    | S583:      | 2 | 2,1235 | 0,255 | -0,081 |
| 15 | Q7L1V2 MON1B_HUMAN | K.DKDQPPS#PSPPPQSEALSSTR.L          | S59:       | 3 | 3,3483 | 0,337 | 0,383  |

|    |                     |                                |            |   |        |       |        |
|----|---------------------|--------------------------------|------------|---|--------|-------|--------|
| 15 | Q9Y2X7 GIT1_HUMAN   | R.HGS#GADS#DYENTQSGDLLGLEGKR.F | S592:S596: | 3 | 5,8016 | 1     | 0,464  |
| 15 | Q8WWM7 ATX2L_HUMAN  | K.EKEVDGLLTSEPM*GS#PVSSK.T     | S594:      | 3 | 3,3082 | 0,262 | 0,335  |
| 15 | Q9Y2X7 GIT1_HUMAN   | R.HGSGADS#DYENTQSGDLLGLEGK.R   | S596:      | 3 | 4,828  | 0,433 | -0,434 |
| 15 | Q9NZ53 PDXL2_HUMAN  | K.RDPEDS#DVFEEDTHL.-           | S596:      | 2 | 4,2515 | 0,444 | 0,518  |
| 15 | Q9NZ53 PDXL2_HUMAN  | K.RDPEDS#DVFEEDTHL.-           | S596:      | 3 | 4,0559 | 0,306 | 0,194  |
| 15 | Q6NZY4 ZCHC8_HUMAN  | K.SEAGHASS#PDSEVTSLCQK.E       | S598:      | 3 | 5,1721 | 0,453 | 0,088  |
| 15 | Q8N568 DCLK2_HUMAN  | R.S#IELEHFEER.D                | S6:        | 2 | 2,6866 | 0,472 | 0,267  |
| 15 | Q9UID6 ZN639_HUMAN  | K.YFDNKDDDS#DTETSNDLPK.F       | S60:       | 3 | 3,0585 | 0,13  | 0,318  |
| 15 | Q9Y3X0 CCDC9_HUMAN  | R.S#VEKENVAVESEK.N             | S60:       | 2 | 2,9919 | 0,504 | -0,399 |
| 15 | Q86W92 LIPB1_HUMAN  | R.SQS#TTFNPDDM*SEPEFKR.G       | S601:      | 3 | 2,6771 | 0,151 | 0,331  |
| 15 | Q14157 UBP2L_HUMAN  | R.YPSSIS#SSPQKDLTQAK.N         | S607:      | 3 | 3,0887 | 0,348 | -0,573 |
| 15 | Q9Y4B5 K0802_HUMAN  | R.DHAPS#IPT#SPFGDSLESSTELRR.H  | S609:T612: | 3 | 3,1055 | 0,401 | -0,55  |
| 15 | Q7L1V2 MON1B_HUMAN  | K.DKDQPPSPS#PPPQSEALSSTSR.L    | S61:       | 3 | 4,3887 | 0,405 | 0,153  |
| 15 | Q9P2E9 RRBP1_HUMAN  | R.NTDVAQS#PEAPKQEAPAK.K        | S615:      | 2 | 4,5132 | 0,509 | -0,311 |
| 15 | Q9P2E9 RRBP1_HUMAN  | R.NTDVAQS#PEAPKQEAPAK.K        | S615:      | 3 | 3,6346 | 0,443 | -0,093 |
| 15 | Q9UPN6 RBM16_HUMAN  | K.SSEPVKETVQTTQS#PTPVEK.E      | S617:      | 3 | 4,2166 | 0,368 | 0,325  |
| 15 | Q13586 STIM1_HUMAN  | R.SHS#PSSDPDTPSPVGDSR.A        | S618:      | 2 | 4,0275 | 0,567 | 0,122  |
| 15 | Q6WCQ1 MRIP_HUMAN   | R.M*EVDRS#PGLPM*SDLK.T         | S618:      | 2 | 3,1421 | 0,359 | 0,546  |
| 15 | B1ALK7 B1ALK7_HUMAN | R.KES#APQVLLPEEEK.I            | S619:      | 2 | 4,4931 | 0,371 | 0,364  |
| 15 | P01106 MYC_HUMAN    | K.KFELLPTPLS#PSR.R             | S62:       | 2 | 3,1684 | 0,427 | -0,514 |
| 15 | Q9H165 BC11A_HUMAN  | K.KLLGGS#PSSLSPFSK.R           | S625:      | 2 | 3,3575 | 0,415 | -0,372 |
| 15 | Q9H165 BC11A_HUMAN  | K.KLLGGS#SLSLSPFSK.R           | S627:      | 3 | 3,7317 | 0,247 | 0      |
| 15 | P31943 HNRH1_HUMAN  | R.EGRPSGEAFVELES#EDEVK.L       | S63:       | 3 | 4,6142 | 0,216 | -0,335 |
| 15 | Q01105 SET_HUMAN    | R.LNEQAS#EEILKVEQK.Y           | S63:       | 3 | 3,4079 | 0,252 | -0,1   |
| 15 | P27816 MAP4_HUMAN   | K.KCS#LPAEEDSVLEK.L            | S636:      | 2 | 4,2506 | 0,423 | 0,217  |
| 15 | P13051 UNG_HUMAN    | K.KAPAGQEEPPTPSS#PLSAEQLDR.I   | S64:       | 3 | 3,2435 | 0,275 | 0,288  |
| 15 | Q13177 PAK2_HUMAN   | K.IISIFSGTEKGS#K.K             | S64:       | 2 | 3,0346 | 0,302 | 0,084  |
| 15 | P28749 RBL1_HUMAN   | R.DM*QPLS#PISVHER.Y            | S640:      | 3 | 2,9517 | 0,316 | 0      |
| 15 | Q9BZF1 OSBL8_HUMAN  | K.DLHQPSLS#PASPHS#QGFER.G      | S65:S71:   | 3 | 3,7413 | 0,303 | 0,407  |
| 15 | Q86V48 LUZP1_HUMAN  | R.EKPDS#DDDLDIASLVTA.L         | S659:      | 3 | 3,6113 | 0,285 | -0,091 |
| 15 | Q68CZ2 TENS3_HUMAN  | R.GVGSPPHPPDTPQPS#PSK.A        | S660:      | 2 | 3,2741 | 0,263 | -0,395 |
| 15 | O94854 K0754_HUMAN  | R.RDS#DSFLNIFPEK.Q             | S666:      | 3 | 4,5699 | 0,275 | 0,111  |
| 15 | O94854 K0754_HUMAN  | R.RDS#DSFLNIFPEK.Q             | S666:      | 2 | 4,2232 | 0,453 | -0,518 |

|    |                    |                                    |            |   |        |       |        |
|----|--------------------|------------------------------------|------------|---|--------|-------|--------|
| 15 | Q9P275 UBP36_HUMAN | K.LKS#PVLNNTTTEPASTM*S#PPPAKK.L    | S667:S682: | 3 | 3,5102 | 0,279 | 0,482  |
| 15 | P78364 PHC1_HUMAN  | K.ASPVAES#PKVM*DEK.S               | S669:      | 2 | 4,1872 | 0,37  | -0,385 |
| 15 | P20042 IF2B_HUMAN  | K.KDAS#DDLDDLNFNQK.K               | S67:       | 2 | 6,2575 | 0,558 | -0,621 |
| 15 | Q9C0C2 TB182_HUMAN | R.TEAQDLCRAS#PEPPGPESSSR.W         | S672:      | 3 | 4,3467 | 0,331 | 0,311  |
| 15 | P35658 NU214_HUMAN | R.ITPPAAKPGS#PQAK.S                | S678:      | 2 | 2,4208 | 0,319 | -0,507 |
| 15 | Q8WWM7 ATX2L_HUMAN | K.EFNPTKPLLSVNKS#TSTPT#SPGPR.T     | S678:T683: | 3 | 4,456  | 0,359 | -0,27  |
| 15 | Q96D71 REPS1_HUMAN | R.HAASYSSDS#ENQGSYSGVIPPPGR.G      | S68:       | 3 | 2,9551 | 0,201 | 0,624  |
| 15 | Q9H6R7 CB044_HUMAN | R.SDVFRDS#FSHS#PGAVSSLK.V          | S686:S690: | 3 | 2,768  | 0,329 | 0,419  |
| 15 | Q8IXQ3 CI040_HUMAN | K.IDAGTM*AEPSAS#PSKR.R             | S69:       | 3 | 3,0699 | 0,303 | -0,747 |
| 15 | Q9H6R7 CB044_HUMAN | R.DSFHS#PGAVSSLK.V                 | S690:      | 2 | 4,1832 | 0,425 | 0,326  |
| 15 | Q9H6R7 CB044_HUMAN | R.DSFHS#PGAVSSLK.V                 | S690:      | 3 | 3,5434 | 0,331 | -0,061 |
| 15 | O60303 K0556_HUMAN | R.KDS#LSQLEEYLR.L                  | S691:      | 2 | 4,2361 | 0,355 | -0,391 |
| 15 | O60303 K0556_HUMAN | R.KDSLS#QLEEYLR.L                  | S693:      | 3 | 3,6147 | 0,232 | -0,234 |
| 15 | O14974 MYPT1_HUMAN | R.RS#TQGVTLTDLQEAEK.T              | S695:      | 3 | 3,7961 | 0,405 | 0      |
| 15 | P06748 NPM_HUMAN   | K.DELHIVEAEAM*NYEGS#PIK.V          | S70:       | 3 | 4,4924 | 0,285 | -0,327 |
| 15 | O43493 TGON2_HUMAN | K.DSPSKS#SAEAQTPEDTPNK.S           | S70:       | 3 | 3,7022 | 0,355 | 0,442  |
| 15 | Q8N128 CN024_HUMAN | R.VIHFVSGETM*EEYS#T#DEDEV DGLEKK.D | S70:T71:   | 3 | 3,4304 | 1     | -0,231 |
| 15 | Q96T37 RBM15_HUMAN | R.LLLERPS#PIR.D                    | S700:      | 2 | 2,2395 | 0,187 | -0,479 |
| 15 | O43719 HTSF1_HUMAN | K.EVEDADEKLFEDDDS#NEK.L            | S702:      | 3 | 4,1909 | 0,3   | 0,332  |
| 15 | O15534 PER1_HUMAN  | R.KEPVVGGTLS#PLALANK.A             | S704:      | 2 | 4,6595 | 0,495 | 0,138  |
| 15 | Q96T88 UHRF1_HUMAN | K.DRPASGS#PFQLFLSK.V               | S709:      | 3 | 3,0723 | 0,439 | -0,317 |
| 15 | Q15004 PAF_HUMAN   | K.GIGEFFRLS#PK.D                   | S72:       | 2 | 2,932  | 0,116 | -0,642 |
| 15 | P18206 VINC_HUMAN  | K.S#LLDASEEAIKK.D                  | S721:      | 2 | 3,2602 | 0,405 | 0,176  |
| 15 | Q4AC94 C2CD3_HUMAN | K.LSGNTHYTPLCAPTS#PNK.A            | S728:      | 3 | 3,7877 | 0,21  | -0,628 |
| 15 | Q9NZM1 MYOF_HUMAN  | R.SLS#QIHEAAVR.M                   | S731:      | 2 | 2,7341 | 0,465 | 0,095  |
| 15 | P46087 NOL1_HUMAN  | R.QNAPPKGTDTQTPAVLS#PSK.T          | S732:      | 3 | 3,0266 | 0,377 | -1,469 |
| 15 | O60271 JIP4_HUMAN  | R.SASQSS#LDKLDQELK.E               | S733:      | 2 | 4,4372 | 0,406 | -0,423 |
| 15 | A0FGR8 ESYT2_HUMAN | R.SSS#SLLASPGHISVK.E               | S738:      | 2 | 4,0328 | 0,439 | -0,236 |
| 15 | A0FGR8 ESYT2_HUMAN | R.SSS#SLLASPGHISVK.E               | S738:      | 3 | 3,446  | 0,235 | 0,354  |
| 15 | A0FGR8 ESYT2_HUMAN | R.SSSS#LLASPGHISVK.E               | S739:      | 3 | 2,8381 | 0,214 | 0,354  |
| 15 | Q9Y4B5 K0802_HUMAN | R.APAPAAPRS#PNLAGK.A               | S74:       | 2 | 2,7368 | 0,466 | -0,57  |
| 15 | A0FGR8 ESYT2_HUMAN | R.SSSSLLAS#PGHISVK.E               | S743:      | 2 | 3,8963 | 0,438 | 0,472  |
| 15 | A0FGR8 ESYT2_HUMAN | R.SSSSLLAS#PGHISVK.E               | S743:      | 3 | 3,0499 | 0,314 | 0,118  |



|    |                     |                                 |            |   |        |       |        |
|----|---------------------|---------------------------------|------------|---|--------|-------|--------|
| 15 | Q8N4C8 MINK1_HUMAN  | R.S#DSVLPASHGHL PQAGS#LER.N     | S747:S763: | 3 | 3,9816 | 0,276 | -0,247 |
| 15 | Q8IWB9 TEX2_HUMAN   | R.SSS#KGSVEEIM*SQPK.Q           | S748:      | 2 | 2,745  | 0,215 | 0,361  |
| 15 | P28749 RBL1_HUMAN   | K.VKS#PVSLTAHSLIGAS#PK.Q        | S749:S762: | 2 | 6,494  | 0,544 | 0,125  |
| 15 | P28749 RBL1_HUMAN   | K.VKS#PVSLTAHSLIGAS#PK.Q        | S749:S762: | 3 | 5,681  | 0,49  | 0,094  |
| 15 | Q8N4C8 MINK1_HUMAN  | R.SDS#VLPASHGHL PQAGS#LER.N     | S749:S763: | 3 | 3,4807 | 0,213 | -0,082 |
| 15 | Q96FF9 CDCA5_HUMAN  | R.IVAHAVEVPAVQS#PR.R            | S75:       | 2 | 4,3892 | 0,368 | 0,443  |
| 15 | Q96FF9 CDCA5_HUMAN  | R.IVAHAVEVPAVQS#PR.R            | S75:       | 3 | 3,1414 | 0,132 | 0,221  |
| 15 | Q56NI9 ESCO2_HUMAN  | K.TTEINRLPSANQGS#PFK.S          | S75:       | 2 | 2,551  | 0,324 | -0,063 |
| 15 | Q86UP2 KTN1_HUMAN   | K.EIQNGNLHES#DSESVPR.D          | S75:       | 2 | 2,3427 | 0,268 | 0,429  |
| 15 | Q8IWB9 TEX2_HUMAN   | R.SSSKGS#VEEIM*SQPK.Q           | S751:      | 3 | 4,535  | 0,367 | 0,216  |
| 15 | Q13435 SF3B2_HUMAN  | K.KIEEAM*DGS#ETPQLFTVLPEK.R     | S755:      | 3 | 3,4836 | 0,157 | -0,447 |
| 15 | O75152 ZC11A_HUMAN  | R.RLS#S#ASTGKPLSVEDDFEK.L       | S758:S759: | 3 | 3,8638 | 0,403 | 0      |
| 15 | Q5VT52 K0460_HUMAN  | K.IIS#PGSSTPSSTRS#PPPGRDESYPR.E | S758:S769: | 3 | 2,9184 | 0,087 | 0,656  |
| 15 | Q53EL6 PDCD4_HUMAN  | R.DSGRGDS#VSDSGSDALR.S          | S76:       | 2 | 3,4347 | 0,513 | -0,069 |
| 15 | Q8N5P1 ZC3H8_HUMAN  | R.SKDYDVYS#DNDCIQSEEDNFAK.E     | S77:       | 3 | 7,0234 | 0,493 | -0,521 |
| 15 | O94913 PCF11_HUMAN  | K.M*IFEGPNKLS#PR.I              | S777:      | 2 | 3,0277 | 0,301 | 0      |
| 15 | Q9Y520 Q9Y520_HUMAN | R.DQM*EGS#PNSESFEHIAR.S         | S779:      | 3 | 3,4797 | 0,298 | 0      |
| 15 | Q96N96 SPT13_HUMAN  | R.FRPFTFSQS#TPIGLDR.V           | S78:       | 3 | 4,0859 | 0,312 | -0,282 |
| 15 | Q9BUT9 CP014_HUMAN  | R.RAPS#TSPS#FEGTQETYVAHEENVR.F  | S78:S82:   | 3 | 4,5088 | 1     | 0,682  |
| 15 | P19634 SL9A1_HUMAN  | R.SKETSSPGTDDVFTPAPSDS#PSSQR.I  | S785:      | 3 | 4,2665 | 0,343 | 0,894  |
| 15 | P46087 NOL1_HUMAN   | K.QNDTPKGPQPPTVS#PIR.S          | S786:      | 3 | 2,6086 | 0,253 | 0,383  |
| 15 | O75400 PR40A_HUMAN  | R.FVKEPAFEDITLES#ER.K           | S787:      | 2 | 4,0961 | 0,407 | -0,123 |
| 15 | Q96GQ7 DDX27_HUMAN  | K.NRS#ADFNPDFVFTEK.E            | S79:       | 2 | 4,5953 | 0,526 | -0,392 |
| 15 | Q96GQ7 DDX27_HUMAN  | K.NRS#ADFNPDFVFTEK.E            | S79:       | 3 | 3,4965 | 0,082 | -0,294 |
| 15 | Q8IWA0 WDR75_HUMAN  | K.VQDTS#NTGLGEDIIHQLSK.S        | S796:      | 3 | 3,2105 | 0,144 | -0,343 |
| 15 | Q8IWA0 WDR75_HUMAN  | K.VQDTS#NTGLGEDIIHQLSK.S        | S796:      | 2 | 2,6241 | 0,49  | -0,343 |
| 15 | Q9UMX3 BOK_HUMAN    | R.RSS#VFAAEIM*DAFDR.S           | S8:        | 2 | 4,4037 | 0,509 | -0,809 |
| 15 | Q9UMX3 BOK_HUMAN    | R.RSS#VFAAEIM*DAFDR.S           | S8:        | 3 | 4,1654 | 0,42  | -0,303 |
| 15 | Q9H3Z4 DNJC5_HUMAN  | R.S#LSTSGESLYHVLGLDK.N          | S8:        | 2 | 2,8332 | 0,491 | -0,582 |
| 15 | Q9H3Z4 DNJC5_HUMAN  | R.QRS#LS#TSGESLYHVLGLDK.N       | S8:S10:    | 3 | 2,7083 | 0,142 | -0,407 |
| 15 | Q8ND82 Z280C_HUMAN  | K.SEPHS#PGIPEIFR.T              | S80:       | 3 | 3,3063 | 0,321 | 0,118  |
| 15 | Q8ND82 Z280C_HUMAN  | K.SEPHS#PGIPEIFR.T              | S80:       | 2 | 2,9423 | 0,444 | -0,237 |
| 15 | Q0ZGT2 NEXN_HUMAN   | K.EM*LAS#DDEEDVSSKVEK.A         | S80:       | 2 | 2,7192 | 0,486 | 0,79   |

|    |                     |                                   |            |   |        |       |        |
|----|---------------------|-----------------------------------|------------|---|--------|-------|--------|
| 15 | Q15637 SF01_HUMAN   | R.TGDLGIPPNEPDRS#PS#PEIYNSEGKR.L  | S80:S82:   | 3 | 2,8793 | 0,319 | -0,237 |
| 15 | O15014 ZN609_HUMAN  | K.AEADKIYSFTDNAPS#PSIGGSSR.L      | S804:      | 3 | 4,7904 | 0,415 | -0,448 |
| 15 | Q9H2G2 SLK_HUMAN    | K.IVTSDSDS#KTEELR.F               | S818:      | 2 | 3,4272 | 0,265 | 0,233  |
| 15 | P15559 NQO1_HUMAN   | K.EGHLS#PDIVAEQK.K                | S82:       | 2 | 2,475  | 0,449 | 0      |
| 15 | P31321 KAP1_HUMAN   | K.SNSQSDSHDEEVS#PTPPNPVVK.A       | S83:       | 3 | 3,4067 | 0,207 | -0,075 |
| 15 | P10644 KAP0_HUMAN   | R.TDSREDEIS#PPPPNPVVK.G           | S83:       | 3 | 2,9445 | 0,231 | 0,356  |
| 15 | O60524 SDCG1_HUMAN  | K.KLPS#DSGDLEALEGK.D              | S831:      | 2 | 4,0105 | 0,432 | 0,223  |
| 15 | O60524 SDCG1_HUMAN  | K.KLPS#DSGDLEALEGK.D              | S831:      | 3 | 3,7552 | 0,244 | 0,112  |
| 15 | Q6UB99 ANR11_HUMAN  | K.NQFLENEDTKFSL#DDQR.D            | S835:      | 3 | 3,5312 | 0,364 | 0,242  |
| 15 | A8MYB5 A8MYB5_HUMAN | R.SPQEEDFRCP#DEDFR.Q              | S839:      | 3 | 3,3597 | 0,205 | 0,175  |
| 15 | Q8WUF5 IASPP_HUMAN  | R.YSSSIPEPFGSRGS#PR.K             | S84:       | 3 | 2,8606 | 0,398 | -0,097 |
| 15 | Q14008 CKAP5_HUMAN  | K.HSTSGTDEGEDGDEPDDGS#NDVVDLLPR.T | S845:      | 3 | 3,4164 | 0,33  | -0,182 |
| 15 | Q86YS7 K0528_HUMAN  | K.AM*TVEKAS#PVG DGNFR.N           | S852:      | 2 | 3,8265 | 0,522 | 0,206  |
| 15 | Q9Y6V0 PCLO_HUMAN   | R.RFS#LNLGSITDAPK.S               | S852:      | 2 | 2,4157 | 0,194 | 0,382  |
| 15 | P46013 KI67_HUMAN   | K.M*TSLETKTS#DTETEPSK.T           | S859:      | 2 | 3,8274 | 0,527 | -0,739 |
| 15 | P46013 KI67_HUMAN   | K.M*TSLETKTS#DTETEPSK.T           | S859:      | 3 | 2,907  | 0,357 | -0,277 |
| 15 | Q6GYQ0 GRIPE_HUMAN  | R.RGS#S#PGSLEIPKLDLPDILNK.Q       | S860:S861: | 3 | 4,2273 | 0,446 | -0,398 |
| 15 | Q9UPN9 TRI33_HUMAN  | K.QSGLSSLVNGKS#PIR.S              | S862:      | 3 | 3,4678 | 0,389 | 0,113  |
| 15 | Q02241 KIF23_HUMAN  | K.YM*LTHQELAS#DGEIETK.L           | S867:      | 3 | 5,4026 | 0,359 | 0,266  |
| 15 | Q8TEW0 PARD3_HUMAN  | K.AGS#PSRDVGPSLGLK.K              | S873:      | 3 | 3,0361 | 0,261 | 0,18   |
| 15 | Q8TEW0 PARD3_HUMAN  | K.AGS#PSRDVGPSLGLK.K              | S873:      | 2 | 2,4399 | 0,434 | 0,08   |
| 15 | P52948 NUP98_HUMAN  | K.YGLQDS#DEEEEEHPSK.T             | S888:      | 3 | 5,6917 | 0,525 | 0      |
| 15 | P52948 NUP98_HUMAN  | K.YGLQDS#DEEEEEHPSK.T             | S888:      | 2 | 5,0822 | 0,527 | 0,186  |
| 15 | P29317 EPHA2_HUMAN  | K.TLADFDRVS#IR.L                  | S892:      | 2 | 2,7103 | 0,232 | -0,415 |
| 15 | Q96N67 DOCK7_HUMAN  | R.SRS#LSNSNPDISGTPSPDDEV.R.S      | S896:      | 3 | 5,018  | 0,415 | 0,146  |
| 15 | Q9BTE7 DCNL5_HUMAN  | R.KS#PGVAAVAEDGGLK.K              | S9:        | 2 | 4,3276 | 0,462 | -0,157 |
| 15 | Q9NYM9 BET1L_HUMAN  | R.AQS#PGAVEEILDRENK.R             | S9:        | 2 | 3,5818 | 0,503 | -0,066 |
| 15 | Q4KMQ2 TM16F_HUMAN  | R.M*IEAVDNNLRPKS#E.-              | S909:      | 2 | 3,4219 | 0,455 | 0,285  |
| 15 | Q5M775 SPEC1_HUMAN  | R.KSPS#LES#LSRPPSLGFGDTR.L        | S914:S917: | 3 | 3,1978 | 0,283 | -0,479 |
| 15 | P07737 PROF1_HUMAN  | R.TKS#TGGAPTFNVTVK.T              | S92:       | 2 | 3,3553 | 0,387 | -0,072 |
| 15 | P07737 PROF1_HUMAN  | R.TKS#TGGAPTFNVTVK.T              | S92:       | 3 | 2,6128 | 0,137 | -0,217 |
| 15 | Q08174 PCDH1_HUMAN  | R.IHLPLNYPPGS#PDLGR.H             | S928:      | 3 | 3,0199 | 0,213 | 1,603  |
| 15 | Q13523 PRP4B_HUMAN  | K.EVIDASDKEGM*S#PAK.R             | S93:       | 2 | 3,2891 | 0,316 | -0,729 |

|    |                    |                                |              |   |        |       |        |
|----|--------------------|--------------------------------|--------------|---|--------|-------|--------|
| 15 | Q1MSJ5 CSPP1_HUMAN | R.LLHM*DS#DDEIPIR.K            | S931:        | 2 | 3,485  | 0,331 | -0,148 |
| 15 | Q1MSJ5 CSPP1_HUMAN | R.LLHM*DS#DDEIPIR.K            | S931:        | 3 | 3,4107 | 0,244 | 0,111  |
| 15 | P18583 SON_HUMAN   | R.CVS#VQTDPTDEIPTKK.S          | S94:         | 3 | 3,5125 | 0,242 | 0,289  |
| 15 | P15336 ATF2_HUMAN  | K.KM*PLDLS#PLATPIIR.S          | S94:         | 2 | 2,5886 | 0,309 | -0,485 |
| 15 | Q7Z6E9 RBBP6_HUMAN | R.KGEES#EGFLNPELLETSR.K        | S945:        | 3 | 2,6394 | 0,262 | 0,259  |
| 15 | Q8TF40 FNIP1_HUMAN | R.NESSDSALGDS#ESED TGHD M*TR.Q | S946:        | 3 | 4,5405 | 0,52  | -0,526 |
| 15 | O75122 CLAP2_HUMAN | R.GVTEAIQNFS#FRS#QEDM*NEPLKR.D | S952:S955:   | 3 | 4,463  | 0,323 | 0,764  |
| 15 | Q8NG31 CASC5_HUMAN | K.TVS#PDEITRPM*DK.T            | S956:        | 2 | 2,8556 | 0,464 | 0,507  |
| 15 | Q9Y618 NCOR2_HUMAN | R.ANAS#PQKPLDLK.Q              | S956:        | 3 | 2,6045 | 0,142 | 0,067  |
| 15 | Q8IXM2 CQO49_HUMAN | R.KVYEDSGIPLPAES#PK.K          | S96:         | 2 | 4,2036 | 0,465 | -0,607 |
| 15 | Q9BZV1 UBXD1_HUMAN | R.KELQAEATVSGS#PEAPGTNNVSEPR.E | S96:         | 3 | 3,7519 | 0,235 | 0,695  |
| 15 | Q9HCM7 AUT2L_HUMAN | R.DYS#PSRNPPEVEAR.-            | S961:        | 3 | 3,4372 | 0,204 | -0,108 |
| 15 | Q6P1M3 L2GL2_HUMAN | R.NSGTQS#DGEEKQPLVM*ER.A       | S965:        | 3 | 2,7441 | 0,142 | -1,187 |
| 15 | Q5VZ89 DEN4C_HUMAN | K.TPDESKLFS#PVIAR.N            | S989:        | 3 | 4,5372 | 0,414 | -0,104 |
| 15 | P05114 HMG1_HUMAN  | K.TEESPASDEAGEKEAKS#D.-        | S99:         | 3 | 3,2916 | 0,265 | -0,56  |
| 15 | P05114 HMG1_HUMAN  | K.TEESPASDEAGEKEAKS#D.-        | S99:         | 2 | 2,862  | 0,482 | -0,56  |
| 15 | Q9P2D0 IBTK_HUMAN  | R.KRS#DS#SGGYNLSIIQSPSSTGLLK.S | S990:S992:   | 3 | 4,5161 | 0,299 | -0,528 |
| 15 | Q96T60 PNKP_HUMAN  | R.TPESQPDT#PPGTPLVSQDEKR.D     | T118:        | 3 | 4,606  | 0,377 | 0,465  |
| 15 | Q15393 SF3B3_HUMAN | K.NVSEELDRT#PPEVSK.K           | T1200:       | 3 | 2,8665 | 0,297 | 0,103  |
| 15 | Q13017 RHG05_HUMAN | K.GGIDNPAIT#SDQELDDKK.M        | T1217:       | 3 | 2,6321 | 0,23  | 0,458  |
| 15 | P38432 P80C_HUMAN  | R.AFQLEEGEET#EPDCKYSK.K        | T122:        | 3 | 4,5056 | 0,427 | 0,163  |
| 15 | Q14004 CD2L5_HUMAN | R.ILELT#PEPDRPR.I              | T1246:       | 2 | 3,0467 | 0,312 | 0      |
| 15 | Q96T23 RSF1_HUMAN  | R.IET#DEEESCDNAHG DANQP AR.D   | T1295:       | 3 | 3,8172 | 0,208 | -0,525 |
| 15 | O75533 SF3B1_HUMAN | R.LDPFADGGKT#PDPK.M            | T142:        | 2 | 2,9282 | 0,278 | 0,317  |
| 15 | O15085 ARHGB_HUMAN | K.SLGGESSGTT#PVGSFHTEAAR.W     | T1462:       | 3 | 2,6207 | 0,186 | 0,084  |
| 15 | P29966 MARCS_HUMAN | K.AEDGATPSPSNET#PKK.K          | T150:        | 2 | 2,773  | 0,222 | -0,928 |
| 15 | Q9NRL2 BAZ1A_HUMAN | K.LGLHVTPSNVDQVST#PPAAK.K      | T1547:       | 3 | 2,6513 | 0,169 | 0      |
| 15 | Q9P206 K1522_HUMAN | R.ST#VLGLPQH VQK.E             | T162:        | 2 | 2,2538 | 0,319 | 0,264  |
| 15 | P11137 MAP2_HUMAN  | K.VAIIRT#PPKS#PATPK.Q          | T1649:S1653: | 3 | 3,1793 | 0,397 | -0,105 |
| 15 | P63000 RAC1_HUMAN  | R.GLKT#VFDEAIR.A               | T167:        | 2 | 3,2072 | 0,362 | -0,643 |
| 15 | P09661 RU2A_HUMAN  | R.SKT#FNPGAGLPTDK.K            | T180:        | 2 | 2,6569 | 0,274 | 0,081  |
| 15 | O94842 TOX4_HUMAN  | R.LSTTPSPT#SSLHEDGVEDFRR.Q     | T180:S182:   | 3 | 2,9524 | 0,407 | 0,734  |
| 15 | P28482 MKO1_HUMAN  | R.VADPDHDHTGFLT#EYVATR.W       | T185:        | 3 | 4,7701 | 0,426 | -0,247 |

|    |                     |                                   |            |   |        |       |        |
|----|---------------------|-----------------------------------|------------|---|--------|-------|--------|
| 15 | P28482 MK01_HUMAN   | R.VADPDHDHTGFLT#EY#VATR.W         | T185:Y187: | 3 | 4,5989 | 0,474 | 0,953  |
| 15 | P46821 MAP1B_HUMAN  | K.TT#RTPEEGGYSYDISEK.T            | T1947:     | 3 | 4,6061 | 0,496 | 0      |
| 15 | P18858 DNL1_HUMAN   | K.TSKAETPT#ESVSEPEVATK.Q          | T197:      | 3 | 4,7542 | 0,395 | -0,353 |
| 15 | P27361 MK03_HUMAN   | R.IADPEHDHTGFLT#EYVATR.W          | T202:      | 3 | 4,7385 | 0,449 | -0,325 |
| 15 | P27361 MK03_HUMAN   | R.IADPEHDHTGFLT#EY#VATR.W         | T202:Y204: | 3 | 4,6654 | 0,544 | 0      |
| 15 | O15173 PGRC2_HUMAN  | R.LLKPGEEPSEY#DEEDTK.D            | T211:      | 3 | 4,6512 | 0,489 | 0      |
| 15 | Q5JSH3 WDR44_HUMAN  | R.HLT#PEPDIIVASTK.K               | T219:      | 2 | 3,2714 | 0,416 | 0,902  |
| 15 | Q8IYB3 SRRM1_HUMAN  | K.EKT#PELPEPSVK.V                 | T220:      | 2 | 2,0148 | 0,086 | 0,255  |
| 15 | Q2NL66 Q2NL66_HUMAN | R.GPST#PKKPLEQSC.-                | T226:      | 2 | 3,0463 | 0,385 | -0,404 |
| 15 | Q9Y3Q8 T22D4_HUMAN  | R.VEAEAGGSGART#PPLSR.R            | T229:      | 3 | 2,6352 | 0,142 | -0,316 |
| 15 | Q08EQ4 TMSL1_HUMAN  | K.TET#QEKNPLPSK.E                 | T23:       | 3 | 3,5215 | 0,18  | 0,189  |
| 15 | P63313 TYB10_HUMAN  | K.TET#QEKNLPTK.E                  | T23:       | 2 | 3,4476 | 0,397 | -0,332 |
| 15 | Q00610 CLH1_HUMAN   | K.LHIIEVGT#PPTGNQPFVK.K           | T235:      | 3 | 3,8792 | 0,344 | -0,09  |
| 15 | Q9BRL6 SFR2B_HUMAN  | K.VDNLTYRT#SPDSL.R                | T25:       | 3 | 2,8367 | 0,251 | 0,213  |
| 15 | Q9UNX4 WDR3_HUMAN   | K.IKGSSPGIQDTLEAEDGAFET#DEAPEDR.I | T257:      | 3 | 3,3988 | 0,396 | 0,958  |
| 15 | Q5T200 ZC3HD_HUMAN  | K.KGPRT#PS#PPPIPIEDIALGK.K        | T263:S265: | 3 | 5,0647 | 0,386 | 0      |
| 15 | Q5T200 ZC3HD_HUMAN  | K.GPRT#PS#PPPIPIEDIALGKK.Y        | T263:S265: | 3 | 4,861  | 0,504 | 0      |
| 15 | Q03188 CENPC_HUMAN  | K.KSFST#LFLETVK.R                 | T264:      | 3 | 2,6375 | 0,14  | -0,124 |
| 15 | Q9BXB4 OSB11_HUMAN  | K.VSESEGLKQATAVT#PNK.N            | T27:       | 3 | 5,0117 | 0,524 | -0,452 |
| 15 | O94906 PRP6_HUMAN   | K.GYLT#DLNS#M*IPTHGGDINDIKK.A     | T275:S279: | 3 | 4,94   | 0,393 | -0,71  |
| 15 | Q8NG27 PJA1_HUMAN   | K.IFFDT#DDDDDM*PHSTSR.W           | T277:      | 3 | 2,6138 | 0,239 | -0,347 |
| 15 | Q9UBF8 PI4KB_HUMAN  | R.SKSDAT#ASISLSSNLK.R             | T280:      | 3 | 3,5488 | 0,299 | 0,217  |
| 15 | P45974 UBP5_HUMAN   | K.TDKTM*T#ELEIDM*NQR.I            | T294:      | 3 | 3,3166 | 0,139 | -0,567 |
| 15 | Q8NFH5 NUP53_HUMAN  | K.ASTSDYQVISDRQT#PK.K             | T308:      | 2 | 3,166  | 0,343 | 0,065  |
| 15 | Q9NQ84 GPC5C_HUMAN  | R.GVGYET#ILKEQK.G                 | T326:      | 2 | 2,7981 | 0,208 | -0,169 |
| 15 | Q96G23 LASS2_HUMAN  | K.LVEDERSDREET#ESS#EGEEAAAGGGAK.S | T346:S349: | 3 | 3,9663 | 0,324 | -0,616 |
| 15 | P22059 OSBP1_HUMAN  | K.RT#GSNISGASSDISLDEQYK.H         | T377:      | 3 | 4,034  | 0,33  | 0,249  |
| 15 | Q86X10 K1219_HUMAN  | R.LSM*PQSAAVSTT#PPHNR.R           | T379:      | 3 | 2,7764 | 0,333 | -0,484 |
| 15 | Q99459 CDC5L_HUMAN  | K.GGLNTPLHESDFSGVT#PQR.Q          | T396:      | 3 | 4,5931 | 0,413 | -0,262 |
| 15 | Q14247 SRC8_HUMAN   | R.AKTQT#PPVSPAPQPTTEER.L          | T401:      | 3 | 4,2772 | 0,428 | 0      |
| 15 | Q14247 SRC8_HUMAN   | R.AKTQT#PPVSPAPQPTTEER.L          | T401:      | 2 | 3,8779 | 0,476 | 0,242  |
| 15 | Q9BRZ2 TRI56_HUMAN  | R.QGGVQPQAGDGAQT#PKEEK.A          | T418:      | 3 | 3,1942 | 0,118 | -0,365 |
| 15 | Q9UHD8 SEPT9_HUMAN  | R.SFEVEEETPNST#PPRR.V             | T42:       | 3 | 2,632  | 0,249 | 0,089  |

|    |                    |                                   |            |   |        |       |        |
|----|--------------------|-----------------------------------|------------|---|--------|-------|--------|
| 15 | O94967 WDR47_HUMAN | K.NELRDST#EQFQEYYR.Q              | T423:      | 3 | 4,2728 | 0,336 | -0,178 |
| 15 | Q8I221 PHAR4_HUMAN | R.T#RSLPITIEM*LK.V                | T462:      | 2 | 2,2493 | 0,169 | 0      |
| 15 | Q9H5P4 PDZD7_HUMAN | R.SKT#LM*NLFFK.G                  | T466:      | 2 | 2,9665 | 0,347 | -0,184 |
| 15 | Q15910 EZH2_HUMAN  | R.VKESSIAPAPAEDVDT#PPR.K          | T487:      | 3 | 5,3375 | 0,432 | 0,168  |
| 15 | O60832 DKC1_HUMAN  | K.AGLESGAEPGDGSDTT#KK.K           | T497:      | 3 | 3,2952 | 0,314 | 0,096  |
| 15 | Q9BQA1 MEP50_HUMAN | R.KET#PPPLVPPAAR.E                | T5:        | 2 | 2,7105 | 0,318 | 0,336  |
| 15 | Q05209 PTN12_HUMAN | K.VSVT#PPEESQNSDTPRPDR.L          | T509:      | 3 | 3,2048 | 0,294 | -0,08  |
| 15 | Q8N3X1 FNBP4_HUMAN | K.VQTT#PKVEEQDLK.F                | T517:      | 2 | 3,3996 | 0,382 | -0,566 |
| 15 | Q9BST9 RTKN_HUMAN  | R.T#FSLDAVPPDHSPR.A               | T518:      | 2 | 3,3904 | 0,452 | 0,075  |
| 15 | Q9Y3L3 3BP1_HUMAN  | K.VT#RSPPETAAPVEDM*AR.R           | T548:      | 3 | 4,072  | 0,222 | 0      |
| 15 | Q9UJ14 GGT7_HUMAN  | R.KDEDAFLGDPDT#DPDSFLK.S          | T56:       | 3 | 4,0505 | 0,28  | -0,083 |
| 15 | Q9Y2L9 LRCH1_HUMAN | R.NLESIDPQFT#IRR.K                | T568:      | 3 | 2,6801 | 0,223 | -0,219 |
| 15 | Q9Y2L9 LRCH1_HUMAN | R.NLESIDPQFT#IRR.K                | T568:      | 2 | 2,4556 | 0,329 | 0,146  |
| 15 | Q7Z4H7 FA29A_HUMAN | R.NQIPRT#PENLITEIR.S              | T584:      | 2 | 3,6626 | 0,188 | -0,391 |
| 15 | Q7Z4H7 FA29A_HUMAN | R.NQIPRT#PENLITEIR.S              | T584:      | 3 | 2,9825 | 0,121 | -0,098 |
| 15 | P13051 UNG_HUMAN   | K.KAPAGQEEPQT#PPSSPLSAEQLDR.I     | T60:       | 3 | 5,4689 | 0,451 | 0,576  |
| 15 | P55265 DSRAD_HUMAN | K.ESEKTAESQT#PTPSATSFSGK.S        | T601:      | 3 | 3,9594 | 0,344 | -0,229 |
| 15 | Q53GT1 KLH22_HUMAN | R.SLLEPPRGT#PDR.S                 | T605:      | 2 | 2,3836 | 0,175 | -0,398 |
| 15 | Q8N128 CN024_HUMAN | R.VIHFVSGET#M*EEYS#TDEDEVDGLEKK.D | T65:S70:   | 3 | 2,9375 | 1     | -0,116 |
| 15 | Q9P275 UBP36_HUMAN | K.LKSPVLSNTTTEPAST#M*SPPPAK.K     | T680:      | 3 | 4      | 0,287 | 0,597  |
| 15 | P19634 SL9A1_HUMAN | K.INNYLTVPAHKLDSPT#M*S#R.A        | T695:S697: | 3 | 3,7637 | 0,239 | -0,235 |
| 15 | Q5VT52 K0460_HUMAN | R.GPTSTSIDNIDGT#PVRDR.S           | T723:      | 3 | 3,5819 | 0,479 | 0,26   |
| 15 | P21127 CD2L1_HUMAN | K.RGT#S#PRPPEGGLGYSQLGDDDLK.E     | T751:S752: | 3 | 4,961  | 0,463 | 0,213  |
| 15 | Q6GYQ0 GRIPE_HUMAN | R.QKT#VDIDDAQILPR.S               | T754:      | 2 | 2,3452 | 0,228 | 0      |
| 15 | O15169 AXN1_HUMAN  | R.RSDLDLGYEPEGSASPT#PPYLK.W       | T79:       | 3 | 4,2834 | 0,344 | -0,148 |
| 15 | O75449 KTNA1_HUMAN | K.TLESFKLDST#PLK.A                | T81:       | 2 | 3,4189 | 0,438 | -0,704 |
| 15 | Q13574 DGKZ_HUMAN  | R.LQQEPDGAGAKSPT#CQK.L            | T896:      | 3 | 2,6755 | 0,231 | 0,097  |
| 15 | Q6PD62 CTR9_HUMAN  | K.GGEFDEFVNDT#DDDLPISSK.K         | T925:      | 3 | 5,6827 | 0,474 | -0,451 |
| 15 | Q9HBD1 RC3H2_HUMAN | K.HSST#GDLLSLELQQA.K              | T984:      | 3 | 2,646  | 0,283 | -0,911 |
| 15 | Q92870 APBB2_HUMAN | R.TKSFLNY#YADLETSAR.E             | Y164:      | 3 | 4,882  | 0,504 | -0,093 |
| 15 | P51636 CAV2_HUMAN  | K.ADVQLFM*DDDSY#S#HHSGLYADPEK.F   | Y19:S20:   | 3 | 3,1324 | 0,426 | -0,06  |
| 15 | Q13242 SFRS9_HUMAN | R.GSPHY#FSPFRPY.-                 | Y214:      | 3 | 2,6923 | 0,257 | 0,357  |
| 15 | P07355 ANXA2_HUMAN | K.LSLEGDHSTPPSAY#GSVK.A           | Y24:       | 2 | 3,4246 | 0,563 | 0,951  |

|    |                    |                                     |          |   |        |       |        |
|----|--------------------|-------------------------------------|----------|---|--------|-------|--------|
| 15 | Q86VQ1 GLC1_HUMAN  | K.Y#ASSPKPNNSYM*FK.R                | Y403:    | 2 | 2,1246 | 0,209 | 0,564  |
| 15 | Q9NX63 CHCH3_HUMAN | K.SQRY#SGAYGASVSDEELK.R             | Y49:     | 3 | 3,6441 | 0,137 | 0,541  |
| 15 | P98175 RBM10_HUMAN | K.HDY#DDSSEEQSAEDSYEASPGSETQR.R     | Y57:     | 3 | 2,8912 | 0,334 | 0,732  |
| 15 | Q14978 NOLC1_HUMAN | R.GSY#RGGSSISVQVNSIK.F              | Y682:    | 3 | 3,8399 | 0,256 | 0,634  |
| 15 | Q8N128 CN024_HUMAN | R.VIHFVSGETM*EEY#\$#TDEDEV DGLEKK.D | Y69:S70: | 3 | 2,6633 | 1     | -0,231 |
| 15 | Q8WY36 BBX_HUMAN   | K.FNSLPQY#SPVTFDRK.C                | Y703:    | 3 | 3,3867 | 0,331 | 0,097  |
| 15 | Q9C0C2 TB182_HUMAN | K.RDSL GAY#ASQDANEQQDLGK.R          | Y897:    | 3 | 5,0906 | 0,43  | -0,794 |
| 15 | Q9HCM7 AUT2L_HUMAN | R.DY#SPSRNPPEVEAR.-                 | Y960:    | 2 | 2,2655 | 0,191 | -0,288 |
| 15 | O75531 BAF_HUMAN   | R.DFVAEPM*GEKPVGSLAGIGEVLGK.K       |          | 3 | 5,5953 | 0,592 | -0,606 |
| 15 | P00338 LDHA_HUMAN  | K.DQLIYNLLKEEQTPQNK.I               |          | 3 | 4,8917 | 0,271 | 0      |
| 15 | P05386 RLA1_HUMAN  | K.KEESEESDDDM*GFGLFD.-              |          | 2 | 4,8632 | 0,547 | -0,931 |
| 15 | Q86V48 LUZP1_HUMAN | K.NNDLQDNYLSEQNK.N                  |          | 2 | 4,4409 | 0,403 | 0,216  |
| 15 | P02786 TFR1_HUMAN  | K.LAVDEEENADNNTK.A                  |          | 2 | 4,1584 | 0,563 | 0,234  |
| 15 | P27348 1433T_HUMAN | K.AVTEQGAELSNEER.N                  |          | 2 | 4,0332 | 0,505 | -0,239 |
| 15 | Q9BPX5 ARP5L_HUMAN | K.SSEIEQAVQSLDR.N                   |          | 2 | 4,0183 | 0,413 | -0,417 |
| 15 | P68104 EF1A1_HUMAN | R.VETGVLKPGM*VVTFAPVNVTTVEVK.S      |          | 3 | 3,9323 | 0,247 | -0,289 |
| 15 | Q02952 AKA12_HUMAN | K.TEGTQEADQYADEK.T                  |          | 2 | 3,9307 | 0,564 | 0,231  |
| 15 | P28074 PSB5_HUMAN  | R.GPGLYYVDSEGNR.I                   |          | 2 | 3,9159 | 0,572 | 0,171  |
| 15 | Q9NQP4 PFD4_HUMAN  | K.NLQEEIDALESR.V                    |          | 2 | 3,9007 | 0,476 | 0,086  |
| 15 | P17066 HSP76_HUMAN | R.VEILANDQGNR.T                     |          | 3 | 3,8961 | 0,287 | -0,074 |
| 15 | P62306 RUXF_HUMAN  | R.GVEEEEEDGEM*RE.-                  |          | 2 | 3,8837 | 0,468 | -0,785 |
| 15 | Q9HAV7 GRPE1_HUMAN | K.NSGQNLEEDM*GQSEQK.A               |          | 2 | 3,8264 | 0,44  | 0,472  |
| 15 | P31942 HNRH3_HUMAN | R.DGM*DNQGGYGSVGR.M                 |          | 2 | 3,7708 | 0,489 | -0,342 |
| 15 | Q16181 SEPT7_HUMAN | K.FEDYLNAESR.V                      |          | 2 | 3,7023 | 0,417 | -0,098 |
| 15 | O15143 ARC1B_HUMAN | K.NSVSQISVLGGK.A                    |          | 2 | 3,6824 | 0,497 | 0,096  |
| 15 | O95202 LETM1_HUMAN | K.VAEVEGEQVDNK.A                    |          | 2 | 3,6775 | 0,375 | -0,093 |
| 15 | P21333 FLNA_HUMAN  | R.AGQSAAGAAPGGGV DTR.D              |          | 2 | 3,6758 | 0,411 | 0      |
| 15 | Q14444 CAPR1_HUMAN | R.LNQDQLDAVSK.Y                     |          | 2 | 3,6608 | 0,401 | -0,198 |
| 15 | P22314 UBA1_HUMAN  | K.NGSEADIDGLYSR.Q                   |          | 2 | 3,6313 | 0,541 | 0,16   |
| 15 | P35749 MYH11_HUMAN | R.NTDQASM*PDNTAAQK.V                |          | 2 | 3,6118 | 0,489 | -0,379 |
| 15 | P07355 ANXA2_HUMAN | K.TPAQYDASELK.A                     |          | 2 | 3,5971 | 0,453 | 0,2    |
| 15 | P63244 GBLP_HUMAN  | K.DVLSVAFSSDNR.Q                    |          | 2 | 3,5938 | 0,497 | -0,093 |
| 15 | Q9UJY5 GGA1_HUMAN  | R.VNAIEEVNNVK.L                     |          | 2 | 3,5931 | 0,422 | 0,273  |

|    |                    |                                    |   |        |       |        |
|----|--------------------|------------------------------------|---|--------|-------|--------|
| 15 | P05387 RLA2_HUMAN  | K.NIEDVIAQGIGK.L                   | 2 | 3,5593 | 0,507 | -0,194 |
| 15 | P09493 TPM1_HUMAN  | K.ATDAEADVASLNR.R                  | 2 | 3,5311 | 0,444 | 0,366  |
| 15 | Q9Y237 PIN4_HUMAN  | R.FNEVAAQYSEDK.A                   | 2 | 3,5295 | 0,419 | 0      |
| 15 | P62269 RS18_HUMAN  | K.YSQVLANGLDNK.L                   | 2 | 3,5289 | 0,414 | 0,277  |
| 15 | P06454 PTMA_HUMAN  | R.AAEDDEDVDTK.K                    | 2 | 3,5249 | 0,571 | -1,188 |
| 15 | P04083 ANXA1_HUMAN | K.TPAQFDAELR.A                     | 2 | 3,5206 | 0,506 | 0,097  |
| 15 | Q9Y2B0 CNPY2_HUMAN | R.NGESSELDLQGR.I                   | 2 | 3,5102 | 0,489 | -0,602 |
| 15 | Q9Y371 SHLB1_HUMAN | K.GKVPITYLELLN.-                   | 2 | 3,4864 | 0,473 | -0,449 |
| 15 | P06733 ENOA_HUMAN  | K.DATNVGDEGGFAPNILENKEGLELLK.T     | 3 | 3,4768 | 0,458 | -0,6   |
| 15 | P12268 IMDH2_HUMAN | K.VAQGVSGAVQDK.G                   | 2 | 3,4666 | 0,345 | -0,526 |
| 15 | Q9Y3E0 GOT1B_HUMAN | R.SFVDKVGESNNM*V.-                 | 2 | 3,4584 | 0,511 | 0,085  |
| 15 | P63208 SKP1_HUMAN  | K.NDFTEEEEAQVR.K                   | 2 | 3,4491 | 0,439 | 0,083  |
| 15 | P35606 COPB2_HUMAN | K.DNNQFASASLDR.T                   | 2 | 3,4263 | 0,494 | 0,274  |
| 15 | P16152 CBR1_HUMAN  | K.SPEEGAETPVYLALLPPDAEGPHGQFVSEK.R | 3 | 3,4169 | 0,194 | -0,116 |
| 15 | P37268 FDFI_HUMAN  | R.DYLEDQQGGR.E                     | 2 | 3,4122 | 0,366 | -0,62  |
| 15 | P56192 SYMC_HUMAN  | K.LENDQIESLR.Q                     | 2 | 3,3907 | 0,322 | 0,201  |
| 15 | O95347 SMC2_HUMAN  | R.SLEDALAEAQR.V                    | 2 | 3,3511 | 0,289 | -0,203 |
| 15 | P68104 EF1A1_HUMAN | K.SGDAAIVDM*VPGKPM*CVESFSDYPPLGR.F | 3 | 3,3434 | 0,337 | -0,363 |
| 15 | P43243 MATR3_HUMAN | K.SQAFIEM*ETR.E                    | 2 | 3,337  | 0,409 | 0,199  |
| 15 | Q00839 HNRPU_HUMAN | R.GYFEYIEENK.Y                     | 2 | 3,3268 | 0,438 | -0,567 |
| 15 | P17066 HSP76_HUMAN | R.VEILANDQGNR.T                    | 2 | 3,3183 | 0,322 | -0,596 |
| 15 | P04075 ALDOA_HUMAN | R.LQSIGTENTEENR.R                  | 2 | 3,3131 | 0,467 | -0,082 |
| 15 | P61221 ABCE1_HUMAN | R.NVEDLSGGELQR.F                   | 2 | 3,3082 | 0,401 | -0,371 |
| 15 | Q14011 CIRBP_HUMAN | R.DSYDSYATHNE.-                    | 2 | 3,3073 | 0,569 | 0,187  |
| 15 | Q96T88 UHRF1_HUMAN | R.NDASEVVLAGER.L                   | 2 | 3,3045 | 0,41  | -0,194 |
| 15 | Q00688 FKBP3_HUMAN | K.SEETLDEGPPK.Y                    | 2 | 3,2744 | 0,501 | 0      |
| 15 | P31946 1433B_HUMAN | R.YLSEVASGDNK.Q                    | 2 | 3,2442 | 0,48  | -0,516 |
| 15 | Q15046 SYK_HUMAN   | R.GDIIGVQGNPGK.T                   | 2 | 3,2315 | 0,366 | -0,106 |
| 15 | Q53F19 CQ085_HUMAN | R.APGAEEDDSELQR.A                  | 2 | 3,2294 | 0,502 | 0      |
| 15 | Q9UNZ2 NSF1C_HUMAN | K.SGFSLDNGELR.S                    | 2 | 3,2275 | 0,456 | -0,306 |
| 15 | P07900 HS90A_HUMAN | R.APFDLFENR.K                      | 2 | 3,2195 | 0,464 | -0,44  |
| 15 | P05787 K2C8_HUMAN  | R.AEAESM*YQIK.Y                    | 2 | 3,2133 | 0,223 | -0,72  |
| 15 | Q00610 CLH1_HUMAN  | R.NNLAGEELFAR.K                    | 2 | 3,2012 | 0,454 | 0      |

|    |                    |                        |   |        |       |        |
|----|--------------------|------------------------|---|--------|-------|--------|
| 15 | O14737 PDCD5_HUMAN | R.NSILAQVLDQSAR.A      | 2 | 3,1978 | 0,489 | -0,086 |
| 15 | Q02809 PLOD1_HUMAN | R.SEDYVDIVQGR.R        | 2 | 3,1945 | 0,425 | 0,095  |
| 15 | Q15149 PLEC1_HUMAN | R.DSQDAGGFGPEDR.L      | 2 | 3,1784 | 0,354 | -0,09  |
| 15 | P33993 MCM7_HUMAN  | K.SEDDESGAGELTR.E      | 2 | 3,1782 | 0,428 | 0      |
| 15 | P63220 RS21_HUMAN  | R.M*GESDDSILR.L        | 2 | 3,1617 | 0,473 | 0,107  |
| 15 | P30101 PDIA3_HUMAN | R.DGEEAGAYDGPR.T       | 2 | 3,1608 | 0,449 | 0      |
| 15 | O00233 PSMD9_HUMAN | K.ANYDVLESQK.G         | 2 | 3,1574 | 0,403 | 0,105  |
| 15 | P04843 RPN1_HUMAN  | K.GEDEEENLEVR.E        | 2 | 3,1556 | 0,418 | -0,17  |
| 15 | P05783 K1C18_HUMAN | R.AQIFANTVDNAR.I       | 2 | 3,1517 | 0,448 | 0,185  |
| 15 | Q1KMD3 HNRL2_HUMAN | R.SGDETPGSEVPGDK.A     | 2 | 3,1468 | 0,366 | -0,532 |
| 15 | P33176 KINH_HUMAN  | R.DQDNM*QAELNR.L       | 2 | 3,1396 | 0,344 | 0      |
| 15 | P19105 MLRM_HUMAN  | K.EAFNM*IDQNR.D        | 2 | 3,1346 | 0,419 | 0,195  |
| 15 | P50990 TCPQ_HUMAN  | K.TAEELM*NFSK.G        | 2 | 3,1302 | 0,474 | 0,103  |
| 15 | P10599 THIO_HUMAN  | K.TAFQEALDAAGDK.L      | 2 | 3,1253 | 0,445 | -0,274 |
| 15 | P31946 1433B_HUMAN | R.YDDM*AAAM*K.A        | 2 | 3,1209 | 0,415 | -0,349 |
| 15 | P02545 LMNA_HUMAN  | R.LADALQELR.A          | 2 | 3,112  | 0,323 | 0      |
| 15 | P35998 PRS7_HUMAN  | R.FDDGAGGDNEVQR.T      | 2 | 3,1094 | 0,514 | -0,354 |
| 15 | Q92769 HDAC2_HUMAN | R.DGIDDESYGQIFKPIISK.V | 3 | 3,1085 | 0,261 | -0,542 |
| 15 | Q01518 CAP1_HUMAN  | K.NSLDCEIVSAK.S        | 2 | 3,0895 | 0,45  | 0,197  |
| 15 | Q12907 LMAN2_HUMAN | K.DNVDDPTGNFR.S        | 2 | 3,085  | 0,443 | 0,098  |
| 15 | Q99829 CPNE1_HUMAN | R.FGIYDIDNK.T          | 2 | 3,0666 | 0,404 | 0,112  |
| 15 | P35232 PHB_HUMAN   | R.FDAGELITQR.E         | 2 | 3,0615 | 0,396 | -0,424 |
| 15 | P49411 EFTU_HUMAN  | K.YEEIDNAPEER.A        | 2 | 3,0591 | 0,429 | -0,268 |
| 15 | O14929 HAT1_HUMAN  | R.FPEDLENDIR.T         | 2 | 3,0423 | 0,259 | 0,098  |
| 15 | Q9NVP1 DDX18_HUMAN | K.ISDIQSQLEK.L         | 2 | 3,0189 | 0,118 | 0      |
| 15 | P14625 ENPL_HUMAN  | R.SGYLLPDTK.A          | 2 | 3,0025 | 0,456 | 0,184  |
| 15 | P02545 LMNA_HUMAN  | R.ITESEEVVSR.E         | 2 | 3,0024 | 0,507 | 0      |
| 15 | P07355 ANXA2_HUMAN | R.DALNIETAIK.T         | 2 | 2,9956 | 0,37  | -0,112 |
| 15 | O00429 DNM1L_HUMAN | K.SSVLESVLGR.D         | 2 | 2,994  | 0,213 | 0,117  |
| 15 | P35579 MYH9_HUMAN  | R.QLEEAEEEEAQR.A       | 2 | 2,9904 | 0,389 | -0,733 |
| 15 | P61978 HNRPK_HUMAN | K.IDEPLEGSEDR.I        | 2 | 2,9827 | 0,373 | 0,291  |
| 15 | P49915 GUAA_HUMAN  | R.SGNIVAGIANESK.K      | 2 | 2,9811 | 0,307 | 0,194  |
| 15 | P46776 RL27A_HUMAN | R.NQSFCTVNLDK.L        | 2 | 2,9775 | 0,381 | 0,257  |



|    |                     |                        |   |        |       |        |
|----|---------------------|------------------------|---|--------|-------|--------|
| 15 | Q9Y230 RUVB2_HUMAN  | R.DYDAM*GSQTK.F        | 2 | 2,9747 | 0,375 | -0,539 |
| 15 | P62424 RL7A_HUMAN   | K.NFGIGQDIQPK.R        | 2 | 2,9738 | 0,471 | -0,1   |
| 15 | Q58FF8 H90B2_HUMAN  | K.YIDQEELNK.T          | 2 | 2,9699 | 0,269 | -0,318 |
| 15 | O75494 FUSIP_HUMAN  | R.QIEIQFAQGDR.K        | 2 | 2,9575 | 0,404 | -0,28  |
| 15 | Q99832 TCPH_HUMAN   | R.GGAEQFM*EETER.S      | 2 | 2,9533 | 0,35  | 0      |
| 15 | P11216 PYGB_HUMAN   | R.VEDVEALDR.K          | 2 | 2,9531 | 0,265 | 0      |
| 15 | P63151 2ABA_HUMAN   | K.NAAQFLLSTNDK.T       | 2 | 2,9515 | 0,42  | -0,092 |
| 15 | O00299 CLIC1_HUMAN  | K.NSNPALNDNLEK.G       | 2 | 2,9513 | 0,502 | -0,459 |
| 15 | P62736 ACTA_HUMAN   | K.DSYVGDEAQSK.R        | 2 | 2,9494 | 0,489 | -0,509 |
| 15 | Q99426 TBCB_HUMAN   | R.LGEYEDVSR.V          | 2 | 2,9465 | 0,41  | -0,114 |
| 15 | Q6ZMR3 LDH6A_HUMAN  | R.VIGSGCNLDSAR.F       | 2 | 2,9457 | 0,53  | -0,684 |
| 15 | Q13618 CUL3_HUMAN   | K.NNSGLSFEELYR.N       | 2 | 2,9342 | 0,478 | -0,256 |
| 15 | Q14978 NOLC1_HUMAN  | R.DNQLSEVANK.F         | 2 | 2,929  | 0,254 | -0,437 |
| 15 | Q03252 LMNB2_HUMAN  | K.M*AQALEELR.S         | 2 | 2,9256 | 0,341 | 0,227  |
| 15 | P19338 NUCL_HUMAN   | K.NDLAVVDVR.I          | 2 | 2,8999 | 0,364 | -0,427 |
| 15 | P02545 LMNA_HUMAN   | K.AAYEAELGDAR.K        | 2 | 2,8978 | 0,469 | 0      |
| 15 | P34931 HS71L_HUMAN  | K.NALESYAFNM*K.S       | 2 | 2,8886 | 0,471 | -0,281 |
| 15 | P40763 STAT3_HUMAN  | K.SQGDM*QDLNGNNQSVTR.Q | 2 | 2,8881 | 0,319 | -0,649 |
| 15 | P13667 PDIA4_HUMAN  | K.M*DATANDVPSDR.Y      | 2 | 2,885  | 0,509 | -0,187 |
| 15 | P78527 PRKDC_HUMAN  | R.LQETLSAADR.C         | 2 | 2,885  | 0,402 | 0      |
| 15 | P05787 K2C8_HUMAN   | R.ASLEAAIADAEQR.G      | 3 | 2,8794 | 0,293 | 0      |
| 15 | P84098 RL19_HUMAN   | K.LLADQAEAR.R          | 2 | 2,8766 | 0,265 | 0,062  |
| 15 | P0C0S8 H2A1_HUMAN   | R.AGLQFPVGR.V          | 2 | 2,8684 | 0,346 | -0,065 |
| 15 | P17661 DESM_HUMAN   | K.VELQELNDR.F          | 2 | 2,8676 | 0,292 | -0,437 |
| 15 | Q6ZR64 Q6ZR64_HUMAN | K.EELEEQRTEE.-         | 2 | 2,8652 | 0,359 | -0,515 |
| 15 | P09525 ANXA4_HUMAN  | R.QDAQDLYEAGEK.K       | 2 | 2,8624 | 0,381 | 0      |
| 15 | O00161 SNP23_HUMAN  | R.IEEGLDQINK.D         | 2 | 2,8618 | 0,085 | -0,421 |
| 15 | Q96RS6 NUDC1_HUMAN  | R.DSAQCAAI AER.L       | 2 | 2,8554 | 0,286 | 0,307  |
| 15 | P54920 SNAA_HUMAN   | K.NSQSFFSGLFGGSSK.I    | 2 | 2,8496 | 0,415 | -0,63  |
| 15 | P16401 H15_HUMAN    | K.ALAAGGYDVEK.N        | 2 | 2,8386 | 0,365 | -0,223 |
| 15 | Q6S8J3 A26CA_HUMAN  | K.SYELPDGQVITIGNER.F   | 2 | 2,8305 | 0,437 | -0,341 |
| 15 | Q58FF7 H90B3_HUMAN  | R.APFDLFENK.K          | 2 | 2,8288 | 0,365 | -0,451 |
| 15 | Q12765 SCRN1_HUMAN  | R.AIESDQEQGR.K         | 2 | 2,8217 | 0,417 | -0,588 |

|    |                    |                             |   |        |       |        |
|----|--------------------|-----------------------------|---|--------|-------|--------|
| 15 | P00338 LDHA_HUMAN  | K.VTLTSEEEAR.L              | 2 | 2,8194 | 0,413 | -0,967 |
| 15 | P10644 KAP0_HUMAN  | R.SENEEFVEVGR.L             | 2 | 2,8175 | 0,256 | -0,471 |
| 15 | P46459 NSF_HUMAN   | K.NFSGAELEGLVR.A            | 2 | 2,8171 | 0,322 | 0,094  |
| 15 | Q92526 TCPW_HUMAN  | K.TEVNSGFFYK.T              | 2 | 2,813  | 0,345 | -0,307 |
| 15 | P40925 MDHC_HUMAN  | K.ELTEEKESAFEFLLSA.-        | 2 | 2,8003 | 0,396 | -0,47  |
| 15 | P78527 PRKDC_HUMAN | R.LACDVDQVTR.Q              | 2 | 2,797  | 0,365 | -0,104 |
| 15 | P83916 CBX1_HUMAN  | K.NSDEADLVPAK.E             | 2 | 2,7969 | 0,382 | -0,211 |
| 15 | P61604 CH10_HUMAN  | K.GGEIQPVSVK.V              | 2 | 2,7954 | 0,18  | 0,06   |
| 15 | Q9BVP2 GNL3_HUMAN  | K.SGFNLEEEK.N               | 2 | 2,7934 | 0,251 | -0,105 |
| 15 | Q2TB10 ZN800_HUMAN | R.DSITPDIATKPGQPLFLDSISPK.K | 3 | 2,7882 | 0,203 | -0,3   |
| 15 | P62937 PPIA_HUMAN  | R.VSFELFADK.V               | 2 | 2,7807 | 0,446 | 0      |
| 15 | P84077 ARF1_HUMAN  | R.M*LAEDEL.R.D              | 2 | 2,7785 | 0,23  | -0,307 |
| 15 | P27824 CALX_HUMAN  | K.AEEDEILNR.S               | 2 | 2,7726 | 0,323 | 0      |
| 15 | Q13310 PABP4_HUMAN | K.NLDDTIDDEK.L              | 2 | 2,7597 | 0,431 | -0,207 |
| 15 | P62851 RS25_HUMAN  | R.AALQELLSK.G               | 2 | 2,7589 | 0,239 | 0      |
| 15 | P62805 H4_HUMAN    | K.VFLENVIR.D                | 2 | 2,7488 | 0,177 | -0,37  |
| 15 | P61254 RL26_HUMAN  | K.DDEVQVVR.G                | 2 | 2,7395 | 0,293 | -0,254 |
| 15 | P68104 EF1A1_HUMAN | R.LPLQDVYK.I                | 2 | 2,7373 | 0,257 | 0,125  |
| 15 | P50991 TCPD_HUMAN  | K.LVIEEAER.S                | 2 | 2,7371 | 0,273 | 0,191  |
| 15 | Q05193 DYN1_HUMAN  | K.SSVLENFVGR.D              | 2 | 2,7264 | 0,352 | 0,11   |
| 15 | O75369 FLNB_HUMAN  | K.SPFEVSVDK.A               | 2 | 2,7225 | 0,237 | 0,061  |
| 15 | O75643 U520_HUMAN  | R.NIEM*TQEDVR.L             | 2 | 2,7141 | 0,243 | -0,293 |
| 15 | P11940 PABP1_HUMAN | K.GFGFVSFER.H               | 2 | 2,7119 | 0,412 | 0,117  |
| 15 | P05787 K2C8_HUMAN  | R.LQAEIEGLK.G               | 2 | 2,7089 | 0,303 | -0,122 |
| 15 | P33778 H2B1B_HUMAN | K.AM*GIM*NSFVNDIFER.I       | 2 | 2,7081 | 0,423 | -0,137 |
| 15 | P21333 FLNA_HUMAN  | K.GTVEPQLER.G               | 2 | 2,7035 | 0,397 | -0,222 |
| 15 | P18754 RCC1_HUMAN  | R.LGLGEGAEK.S               | 2 | 2,6987 | 0,278 | -0,304 |
| 15 | P10809 CH60_HUMAN  | K.LSDGVAVLK.V               | 2 | 2,6946 | 0,34  | 0,135  |
| 15 | P08670 VIME_HUMAN  | K.LQEEM*LQR.E               | 2 | 2,6936 | 0,199 | 0,115  |
| 15 | P30049 ATPD_HUMAN  | R.IEANEALVK.A               | 2 | 2,6866 | 0,231 | 0,124  |
| 15 | Q02790 FKBP4_HUMAN | K.ALELDSNNEK.G              | 2 | 2,6859 | 0,279 | 0      |
| 15 | Q9NYU2 UGGG1_HUMAN | R.IEYQFFEDR.H               | 2 | 2,6856 | 0,375 | -0,098 |
| 15 | P39019 RS19_HUMAN  | K.DVNQQEFVR.A               | 2 | 2,6765 | 0,337 | -0,107 |

|    |                    |                                     |   |        |       |        |
|----|--------------------|-------------------------------------|---|--------|-------|--------|
| 15 | P06733 ENOA_HUMAN  | R.GNPTVEVDLFTSK.G                   | 2 | 2,675  | 0,525 | -0,52  |
| 15 | P21333 FLNA_HUMAN  | R.EATTEFSVDAR.A                     | 2 | 2,6743 | 0,435 | 0,299  |
| 15 | Q01813 K6PP_HUMAN  | K.LPDDQIPK.T                        | 2 | 2,674  | 0,276 | -0,198 |
| 15 | P60709 ACTB_HUMAN  | R.GYSFTTTAER.E                      | 2 | 2,6718 | 0,488 | 0,108  |
| 15 | P62753 RS6_HUMAN   | K.LIEVDDER.K                        | 2 | 2,6713 | 0,261 | -0,123 |
| 15 | P23396 RS3_HUMAN   | K.AELNEFLTR.E                       | 2 | 2,6698 | 0,332 | 0,223  |
| 15 | P16403 H12_HUMAN   | R.SGVSLAALK.K                       | 2 | 2,6681 | 0,284 | 0      |
| 15 | P35232 PHB_HUMAN   | K.AAIIAEGDSK.A                      | 2 | 2,6612 | 0,516 | 0,345  |
| 15 | P10809 CH60_HUMAN  | K.NAGVEGSLIVEK.I                    | 2 | 2,6514 | 0,369 | 0,301  |
| 15 | P05787 K2C8_HUMAN  | R.SLDM*DSIIAEVK.A                   | 2 | 2,651  | 0,426 | -0,183 |
| 15 | Q15149 PLEC1_HUMAN | R.QLAEEDLAQQR.A                     | 2 | 2,6431 | 0,344 | -0,188 |
| 15 | O60812 HNRCL_HUMAN | K.SDVEAIFSK.Y                       | 2 | 2,6412 | 0,377 | 0      |
| 15 | O43159 HUCE1_HUMAN | R.DFLEEANR.V                        | 2 | 2,6401 | 0,193 | 0,123  |
| 15 | P05362 ICAM1_HUMAN | K.ASVSVTAEDEGTQR.L                  | 2 | 2,6393 | 0,423 | 0,084  |
| 15 | Q15121 PEA15_HUMAN | K.ISEEDELDTK.L                      | 2 | 2,6363 | 0,392 | -0,103 |
| 15 | P48426 PI42A_HUMAN | K.DNDFINEGQK.I                      | 2 | 2,6317 | 0,378 | 0,103  |
| 15 | Q58FF8 H90B2_HUMAN | K.SIYYITGESK.E                      | 2 | 2,6277 | 0,395 | -0,21  |
| 15 | P55265 DSRAD_HUMAN | R.DGSAFEDGLR.H                      | 2 | 2,625  | 0,329 | 0,229  |
| 15 | P09622 DLDH_HUMAN  | K.ADGGTQVIDTK.N                     | 2 | 2,6219 | 0,448 | 0      |
| 15 | Q5GLZ8 HERC4_HUMAN | K.FGQLGLNDENDR.Y                    | 2 | 2,618  | 0,353 | -0,531 |
| 15 | P63208 SKP1_HUMAN  | K.TM*LEDLGM*DDEGDDDPVPLPNVNAAILKK.V | 3 | 2,6087 | 0,463 | 0,58   |
| 15 | Q8TBX8 PI42C_HUMAN | K.DM*DFLNK.N                        | 2 | 2,6074 | 0,201 | 0      |
| 15 | P07237 PDIA1_HUMAN | K.NFEDVAFDEK.K                      | 2 | 2,6006 | 0,328 | -0,201 |
| 15 | P50990 TCPQ_HUMAN  | R.AVDDGVNTFK.V                      | 2 | 2,5943 | 0,466 | -0,458 |
| 15 | Q9NPJ6 MED4_HUMAN  | R.DSDIQQQK.Q                        | 2 | 2,5933 | 0,191 | -0,454 |
| 15 | Q58FF7 H90B3_HUMAN | K.EQVANSFAFVER.V                    | 2 | 2,5901 | 0,372 | 0,195  |
| 15 | Q9NZM1 MYOF_HUMAN  | K.DFETIGQNK.L                       | 2 | 2,5794 | 0,191 | 0,116  |
| 15 | Q8WXX5 DNJC9_HUMAN | K.GSEEEELADIK.Q                     | 2 | 2,5765 | 0,271 | 0,112  |
| 15 | P40925 MDHC_HUMAN  | K.LGVTANDVK.N                       | 2 | 2,5757 | 0,34  | -0,599 |
| 15 | P54577 SYYC_HUMAN  | K.NSEPEEVIPSR.L                     | 2 | 2,5737 | 0,409 | -0,388 |
| 15 | P07951 TPM2_HUMAN  | K.CGDLEELK.I                        | 2 | 2,5735 | 0,283 | -0,335 |
| 15 | P62316 SMD2_HUMAN  | K.SEM*TPEELQK.R                     | 2 | 2,5719 | 0,437 | -0,606 |
| 15 | P50995 ANX11_HUMAN | R.SETDLLDIR.S                       | 2 | 2,5693 | 0,253 | 0,345  |

|    |                    |                    |   |        |       |        |
|----|--------------------|--------------------|---|--------|-------|--------|
| 15 | P05556 ITB1_HUMAN  | R.DNTNEIYSGK.F     | 2 | 2,5628 | 0,493 | 0,107  |
| 15 | P29373 RABP2_HUMAN | R.SENFEELLK.V      | 2 | 2,5618 | 0,393 | -0,11  |
| 15 | O43818 U3IP2_HUMAN | R.AFEEDQVAGR.L     | 2 | 2,5541 | 0,379 | -0,217 |
| 15 | P27708 PYR1_HUMAN  | R.SILEQLAEK.N      | 2 | 2,5434 | 0,204 | 0,118  |
| 15 | P19338 NUCL_HUMAN  | R.SISLYYTGEK.G     | 2 | 2,5402 | 0,427 | 0      |
| 15 | P47897 SYQ_HUMAN   | R.DVLNDTAPR.A      | 2 | 2,5391 | 0,307 | 0,183  |
| 15 | P09525 ANXA4_HUMAN | K.GLGTDDNTLIR.V    | 2 | 2,5379 | 0,335 | 0,104  |
| 15 | Q08945 SSRP1_HUMAN | R.SFDFEIETK.Q      | 2 | 2,5378 | 0,398 | 0      |
| 15 | P78371 TCPB_HUMAN  | R.GATQQILDEAER.S   | 2 | 2,5338 | 0,256 | 0,183  |
| 15 | P54652 HSP72_HUMAN | K.LLQDFFNGK.E      | 2 | 2,5317 | 0,378 | -0,113 |
| 15 | P55145 ARMET_HUMAN | K.DSQICELK.Y       | 2 | 2,5312 | 0,311 | 0      |
| 15 | P20962 PTMS_HUMAN  | K.SVEAAAELSAK.D    | 2 | 2,5312 | 0,4   | 0,113  |
| 15 | O14983 AT2A1_HUMAN | R.VIM*ITGDNK.G     | 2 | 2,5294 | 0,317 | 0,121  |
| 15 | P30153 2AAA_HUMAN  | K.LTQDQDQDVK.Y     | 2 | 2,529  | 0,324 | -0,315 |
| 15 | P62873 GBB1_HUMAN  | R.LLVASQDGK.L      | 2 | 2,5264 | 0,469 | -0,659 |
| 15 | P08670 VIME_HUMAN  | R.LQDEIQNM*K.E     | 2 | 2,5221 | 0,23  | -0,645 |
| 15 | Q9Y3I0 CV028_HUMAN | R.NLDFQDVLDK.L     | 2 | 2,5186 | 0,366 | -0,101 |
| 15 | P00558 PGK1_HUMAN  | K.ALM*DEVVK.A      | 2 | 2,5056 | 0,264 | 0,132  |
| 15 | Q08257 QOR_HUMAN   | K.ILGTAGTEEGQK.I   | 2 | 2,4999 | 0,228 | -0,203 |
| 15 | Q07955 SFRS1_HUMAN | R.DGYDYDGYR.L      | 2 | 2,4999 | 0,365 | 0,109  |
| 15 | Q13618 CUL3_HUMAN  | R.FLLESFNDR.L      | 2 | 2,498  | 0,312 | -0,194 |
| 15 | P51572 BAP31_HUMAN | K.LDVGNAEVK.L      | 2 | 2,4957 | 0,312 | 0      |
| 15 | P55072 TERA_HUMAN  | K.DVDLEFLAK.M      | 2 | 2,4953 | 0,264 | 0,232  |
| 15 | Q13435 SF3B2_HUMAN | R.AAVLLEQER.Q      | 2 | 2,4937 | 0,102 | 0,119  |
| 15 | P33993 MCM7_HUMAN  | K.SQLLSYIDR.L      | 2 | 2,4868 | 0,405 | -0,111 |
| 15 | P61978 HNRPK_HUMAN | R.NTDEM*VELR.I     | 2 | 2,4855 | 0,324 | -0,543 |
| 15 | P46781 RS9_HUMAN   | R.IGVLDEGK.M       | 2 | 2,4805 | 0,389 | 0      |
| 15 | Q9UQ80 PA2G4_HUMAN | K.SDQDYILK.E       | 2 | 2,4802 | 0,23  | 0,248  |
| 15 | P06744 G6PI_HUMAN  | K.NLVTEDVM*R.M     | 2 | 2,4801 | 0,352 | 0,112  |
| 15 | Q7Z7H8 RM10_HUMAN  | R.EIAAVFQDNR.M     | 2 | 2,4779 | 0,327 | 0,525  |
| 15 | P05783 K1C18_HUMAN | K.VIDDTNITR.L      | 2 | 2,4759 | 0,386 | 0      |
| 15 | P17987 TCPA_HUMAN  | R.GANDFM*CDEM*ER.S | 2 | 2,4756 | 0,317 | 0,324  |
| 15 | P19338 NUCL_HUMAN  | K.TGISDVFAK.N      | 2 | 2,4703 | 0,388 | -0,065 |

|    |                    |                  |   |        |       |        |
|----|--------------------|------------------|---|--------|-------|--------|
| 15 | P22314 UBA1_HUMAN  | R.DEFEGLFK.Q     | 2 | 2,4701 | 0,161 | 0,124  |
| 15 | Q15149 PLEC1_HUMAN | K.NLLDEELQR.L    | 2 | 2,4668 | 0,159 | 0      |
| 15 | Q9NTJ5 SAC1_HUMAN  | K.LEEQDEFEK.I    | 2 | 2,4656 | 0,12  | -0,209 |
| 15 | P55010 IF5_HUMAN   | K.SDNKDDDDIDAI.- | 2 | 2,4579 | 0,326 | 0,084  |
| 15 | Q06830 PRDX1_HUMAN | R.GLFIIDDK.G     | 2 | 2,4559 | 0,294 | -0,066 |
| 15 | P61604 CH10_HUMAN  | K.GGIM*LPEK.S    | 2 | 2,4536 | 0,198 | 0      |
| 15 | P62241 RS8_HUMAN   | R.ADGYVLEGK.E    | 2 | 2,4536 | 0,434 | -0,064 |
| 15 | Q9Y265 RUVB1_HUMAN | K.GLGLDESLAK.Q   | 2 | 2,4526 | 0,452 | 0      |
| 15 | P13639 EF2_HUMAN   | K.GVQYLNEIK.D    | 2 | 2,4522 | 0,15  | 0,229  |
| 15 | Q9UNQ2 DIMT1_HUMAN | R.SM*DIDDFIR.L   | 2 | 2,4507 | 0,261 | 0,108  |
| 15 | P37837 TALDO_HUMAN | R.M*ESALDQLK.Q   | 2 | 2,4475 | 0,242 | 0,116  |
| 15 | P08670 VIME_HUMAN  | R.QDVDNASLAR.L   | 2 | 2,4468 | 0,319 | -0,336 |
| 15 | Q14152 EIF3A_HUMAN | R.ANEFLEVVK.K    | 2 | 2,4452 | 0,302 | 0      |
| 15 | Q7KZF4 SND1_HUMAN  | K.GDVGLGLVK.E    | 2 | 2,4418 | 0,294 | 0,071  |
| 15 | Q58FF8 H90B2_HUMAN | R.YESLTDPSK.L    | 2 | 2,4401 | 0,482 | -0,235 |
| 15 | Q9H4B7 TBB1_HUMAN  | R.FPGQLNADLR.K   | 2 | 2,4369 | 0,111 | -0,431 |
| 15 | P07814 SYEP_HUMAN  | K.LTVAENEAETK.L  | 2 | 2,4357 | 0,178 | 0,304  |
| 15 | P62136 PP1A_HUMAN  | K.NVQLTENEIR.G   | 2 | 2,4316 | 0,255 | 0,201  |
| 15 | Q15366 PCBP2_HUMAN | K.IANPVEGSTDR.Q  | 2 | 2,4302 | 0,47  | -0,842 |
| 15 | P05556 ITB1_HUMAN  | R.IGFGSFVEK.T    | 2 | 2,4296 | 0,331 | 0,496  |
| 15 | Q71U36 TBA1A_HUMAN | K.FDLM*YAK.R     | 2 | 2,4221 | 0,275 | 0,067  |
| 15 | P25685 DNJB1_HUMAN | R.NPFDTFFGQR.N   | 2 | 2,4138 | 0,1   | -0,298 |
| 15 | P61221 ABCE1_HUMAN | R.GSELQNYFTK.I   | 2 | 2,4118 | 0,368 | -0,206 |
| 15 | O94979 SC31A_HUMAN | K.TTFEDLIQR.C    | 2 | 2,409  | 0,222 | -0,326 |
| 15 | Q02790 FKBP4_HUMAN | K.VLQLYPNNK.A    | 2 | 2,4082 | 0,297 | 0      |
| 15 | P49720 PSB3_HUMAN  | R.LNLYELK.E      | 2 | 2,4048 | 0,119 | 0      |
| 15 | P49257 LMAN1_HUMAN | R.DIDNLVQR.N     | 2 | 2,4037 | 0,206 | 0,188  |
| 15 | P62244 RS15A_HUMAN | R.M*NVLADALK.S   | 2 | 2,4036 | 0,179 | -0,062 |
| 15 | Q71U36 TBA1A_HUMAN | K.DVNAAIATIK.T   | 2 | 2,4013 | 0,286 | -0,18  |
| 15 | Q00839 HNRPU_HUMAN | K.NGQDLGVAFK.I   | 2 | 2,4009 | 0,354 | 0,116  |
| 15 | O95831 AIFM1_HUMAN | K.LNDGSQITYEK.C  | 2 | 2,4003 | 0,206 | -0,577 |
| 15 | P19338 NUCL_HUMAN  | K.ALELTGLK.V     | 2 | 2,3946 | 0,292 | -0,072 |
| 15 | Q07020 RL18_HUMAN  | R.TNSTFNQVVLK.R  | 2 | 2,3935 | 0,286 | -0,098 |

|    |                     |                   |   |        |       |        |
|----|---------------------|-------------------|---|--------|-------|--------|
| 15 | P04083 ANXA1_HUMAN  | R.SEIDM*NDIK.A    | 2 | 2,3921 | 0,39  | 0,226  |
| 15 | P62857 RS28_HUMAN   | R.VEFM*DDTSR.S    | 2 | 2,3909 | 0,459 | 0      |
| 15 | P22061 PIMT_HUMAN   | K.ELVDDSIINNVR.K  | 2 | 2,3885 | 0,374 | 0,096  |
| 15 | P05787 K2C8_HUMAN   | R.ASLEAAIADAEQR.G | 2 | 2,3843 | 0,367 | 0,272  |
| 15 | Q9Y490 TLN1_HUMAN   | K.NLGTALAE LR.T   | 2 | 2,3762 | 0,321 | -0,115 |
| 15 | O43390 HNRPR_HUMAN  | K.ENILEEFSK.V     | 2 | 2,3741 | 0,19  | -0,22  |
| 15 | P17987 TCPA_HUMAN   | K.SSLGPVGLDK.M    | 2 | 2,3715 | 0,296 | 0      |
| 15 | Q9H7L9 SDS3_HUMAN   | K.ENLIAELEEK.K    | 2 | 2,3621 | 0,105 | -0,308 |
| 15 | Q9HB71 CYBP_HUMAN   | R.SFDLLVK.N       | 2 | 2,36   | 0,156 | 0      |
| 15 | Q9UMS4 PRP19_HUMAN  | K.SSEQILATLK.G    | 2 | 2,3598 | 0,253 | -0,336 |
| 15 | P60174 TPIS_HUMAN   | K.IAVAAQNCYK.V    | 2 | 2,3597 | 0,23  | 0      |
| 15 | Q13310 PABP4_HUMAN  | K.GFGFVSYEK.H     | 2 | 2,3587 | 0,398 | -0,472 |
| 15 | O14981 BTAF1_HUMAN  | R.NTIDINNF DGK.S  | 2 | 2,3581 | 0,168 | 0,39   |
| 15 | P50990 TCPQ_HUMAN   | R.GSTDNLM*DDIER.A | 2 | 2,3526 | 0,352 | -0,088 |
| 15 | Q86TP1 PRUNE_HUMAN  | R.NDIFDSLQK.V     | 2 | 2,3525 | 0,211 | 0      |
| 15 | Q92598 HS105_HUMAN  | K.SLDQDPVVR.A     | 2 | 2,341  | 0,231 | 0,119  |
| 15 | P68431 H31_HUMAN    | K.STELLIR.K       | 2 | 2,3404 | 0,275 | 0,147  |
| 15 | P78332 RBM6_HUMAN   | R.DLQDQDYR.T      | 2 | 2,3399 | 0,222 | 0,348  |
| 15 | P17987 TCPA_HUMAN   | R.DCLINAAK.T      | 2 | 2,3303 | 0,184 | 0,067  |
| 15 | Q9Y496 KIF3A_HUMAN  | R.SAKPETVIDSLLQ.- | 2 | 2,3275 | 0,249 | -0,784 |
| 15 | Q8TDN6 BXDC2_HUMAN  | R.NEIDAEPK.R      | 2 | 2,3248 | 0,267 | -0,113 |
| 15 | P62701 RS4X_HUMAN   | K.YALTGDEVK.K     | 2 | 2,3238 | 0,123 | -0,796 |
| 15 | O75534 CSDE1_HUMAN  | K.NITLDDASAPR.L   | 2 | 2,3208 | 0,208 | 0,208  |
| 15 | Q15185 TEBP_HUMAN   | K.DVNVNFEK.S      | 2 | 2,3088 | 0,301 | 0,253  |
| 15 | B1AK87 B1AK87_HUMAN | K.NDLVEALK.R      | 2 | 2,2971 | 0,123 | -0,541 |
| 15 | O75694 NU155_HUMAN  | K.GLQEFLDR.N      | 2 | 2,2965 | 0,16  | 0,873  |
| 15 | Q9UQ80 PA2G4_HUMAN  | R.AFFSEVER.R      | 2 | 2,2963 | 0,402 | -0,124 |
| 15 | P26196 DDX6_HUMAN   | K.GNEFEDYCLK.R    | 2 | 2,2948 | 0,43  | -0,67  |
| 15 | O60264 SMCA5_HUMAN  | R.DDIENIAR.E      | 2 | 2,2938 | 0,211 | -0,129 |
| 15 | Q71U36 TBA1A_HUMAN  | K.EIIDLVLDR.I     | 2 | 2,2931 | 0,378 | -0,225 |
| 15 | O75083 WDR1_HUMAN   | R.DYSGQGVVK.L     | 2 | 2,2859 | 0,359 | -0,192 |
| 15 | P83731 RL24_HUMAN   | K.VFQFLNAK.C      | 2 | 2,2843 | 0,325 | 0,252  |
| 15 | Q86VP6 CAND1_HUMAN  | R.IGEYLEK.I       | 2 | 2,2812 | 0,292 | 0      |

|    |                    |                  |   |        |       |        |
|----|--------------------|------------------|---|--------|-------|--------|
| 15 | P08670 VIME_HUMAN  | R.DNLAEDIM*R.L   | 2 | 2,2762 | 0,281 | 0      |
| 15 | P46781 RS9_HUMAN   | R.LFEGNALLR.R    | 2 | 2,2568 | 0,236 | 0,118  |
| 15 | O60749 SNX2_HUMAN  | R.DFEQISK.T      | 2 | 2,2562 | 0,124 | 0,141  |
| 15 | P34932 HSP74_HUMAN | K.LFEELGK.Q      | 2 | 2,2559 | 0,314 | 0,292  |
| 15 | Q99439 CNN2_HUMAN  | K.GLQSGVDIGVK.Y  | 2 | 2,2526 | 0,328 | 0,455  |
| 15 | Q14019 COTL1_HUMAN | K.ELEEDFIK.S     | 2 | 2,244  | 0,143 | -0,298 |
| 15 | Q02978 M2OM_HUMAN  | K.NGLDVLFK.V     | 2 | 2,2433 | 0,18  | 0      |
| 15 | P13639 EF2_HUMAN   | K.STLTDSLVC.A    | 2 | 2,2375 | 0,38  | 0      |
| 15 | P30626 SORCN_HUMAN | R.SGTVDPQELQK.A  | 2 | 2,2327 | 0,189 | -0,102 |
| 15 | Q9Y3I0 CV028_HUMAN | K.LM*FEELR.N     | 2 | 2,2319 | 0,198 | -0,192 |
| 15 | P30153 2AAA_HUMAN  | K.VLELDNVK.S     | 2 | 2,2315 | 0,147 | 0,197  |
| 15 | P26368 U2AF2_HUMAN | K.NFAFLEFR.S     | 2 | 2,2313 | 0,188 | -0,467 |
| 15 | Q9Y5B9 SP16H_HUMAN | K.ELAAQLNEEAK.R  | 2 | 2,2221 | 0,365 | -0,1   |
| 15 | P49207 RL34_HUMAN  | R.AFLIEEQK.I     | 2 | 2,2176 | 0,136 | -0,062 |
| 15 | P11047 LAMC1_HUMAN | K.DVDQQLM*DR.L   | 2 | 2,2169 | 0,257 | 0,217  |
| 15 | Q9UBT2 SAE2_HUMAN  | K.DQQVLDVK.S     | 2 | 2,2155 | 0,272 | 0,194  |
| 15 | Q9NP79 VTA1_HUMAN  | K.M*FLYADNEDR.A  | 2 | 2,2116 | 0,343 | 0,095  |
| 15 | Q05524 ENO1B_HUMAN | R.YISPDQLADLYK.G | 2 | 2,203  | 0,104 | -0,086 |
| 15 | Q15233 NONO_HUMAN  | R.AVVIVDDR.G     | 2 | 2,198  | 0,295 | -0,138 |
| 15 | Q14683 SMC1A_HUMAN | R.TALFEEISR.S    | 2 | 2,1977 | 0,219 | 0      |
| 15 | P39023 RL3_HUMAN   | K.IGQGGLIK.D     | 2 | 2,1972 | 0,231 | -0,068 |
| 15 | P55884 EIF3B_HUMAN | R.VNLFTDFDK.Y    | 2 | 2,1928 | 0,288 | 0,111  |
| 15 | Q9Y3U8 RL36_HUMAN  | R.EVCGFAPYER.R   | 2 | 2,1902 | 0,31  | -0,596 |
| 15 | P12081 SYHC_HUMAN  | K.QALEGLGLK.L    | 2 | 2,1862 | 0,313 | -0,117 |
| 15 | P04075 ALDOA_HUMAN | R.QLLLTADDR.V    | 2 | 2,1811 | 0,252 | -0,233 |
| 15 | P43246 MSH2_HUMAN  | K.NNSFVNEIISR.I  | 2 | 2,1802 | 0,342 | -0,283 |
| 15 | P11940 PABP1_HUMAN | K.SGVGNIFIK.N    | 2 | 2,177  | 0,241 | -0,13  |
| 15 | P46781 RS9_HUMAN   | K.IEDFLER.R      | 2 | 2,1764 | 0,337 | 0,198  |
| 15 | O00148 DDX39_HUMAN | K.M*LEQLDM*R.R   | 2 | 2,1758 | 0,132 | -0,114 |
| 15 | Q16352 AINX_HUMAN  | R.DGLAEEVQR.L    | 2 | 2,1725 | 0,093 | -0,06  |
| 15 | P35579 MYH9_HUMAN  | R.EM*EAELEDER.K  | 2 | 2,1678 | 0,34  | 0,385  |
| 15 | Q32MZ4 LRRF1_HUMAN | K.DSLAEVEEK.Y    | 2 | 2,1671 | 0,243 | -0,12  |
| 15 | P29401 TKT_HUMAN   | R.IIALDGDTK.N    | 2 | 2,1571 | 0,308 | 0      |

|    |                     |                   |   |        |       |        |
|----|---------------------|-------------------|---|--------|-------|--------|
| 15 | P02545 LMNA_HUMAN   | R.DLEDSLAR.E      | 2 | 2,156  | 0,208 | 0,199  |
| 15 | Q6BCY4 NB5R2_HUMAN  | R.KELEEIAR.T      | 2 | 2,1533 | 0,167 | 0,062  |
| 15 | P62937 PPIA_HUMAN   | K.EGM*NIVEAM*ER.F | 2 | 2,1529 | 0,334 | -0,093 |
| 15 | P42704 LPPRC_HUMAN  | K.LVELTQK.L       | 2 | 2,1515 | 0,187 | -0,22  |
| 15 | Q9UPN3 MACF1_HUMAN  | K.DLQDDIQNR.A     | 2 | 2,1505 | 0,282 | 0      |
| 15 | P60174 TPIS_HUMAN   | K.VVFEQTK.V       | 2 | 2,1505 | 0,265 | 0,143  |
| 15 | Q12906 ILF3_HUMAN   | K.NPVM*ELNEK.R    | 2 | 2,1492 | 0,188 | 0,112  |
| 15 | P00558 PGK1_HUMAN   | K.DCVGPEVEK.A     | 2 | 2,1402 | 0,107 | -0,236 |
| 15 | Q15149 PLEC1_HUMAN  | R.SELELTGK.L      | 2 | 2,1341 | 0,37  | -0,246 |
| 15 | P38159 HNRPG_HUMAN  | K.ALEAVFGK.Y      | 2 | 2,1291 | 0,218 | 0,146  |
| 15 | P23246 SFPO_HUMAN   | K.AELDDTPM*R.G    | 2 | 2,1232 | 0,317 | -0,459 |
| 15 | P61221 ABCE1_HUMAN  | K.ILEDDLK.A       | 2 | 2,1066 | 0,083 | 0,072  |
| 15 | Q9UQ80 PA2G4_HUMAN  | K.EGEFVAQFK.F     | 2 | 2,104  | 0,314 | 0      |
| 15 | P09211 GSTP1_HUMAN  | K.ASCLYGQLPK.F    | 2 | 2,1019 | 0,111 | -0,322 |
| 15 | P55769 NH2L1_HUMAN  | K.QQIQSIQQSIER.L  | 2 | 2,1003 | 0,259 | 0,251  |
| 15 | P78527 PRKDC_HUMAN  | R.GIFTSEIGTK.Q    | 2 | 2,0927 | 0,325 | 0      |
| 15 | P18621 RL17_HUMAN   | R.YSLDPENPTK.S    | 2 | 2,0842 | 0,284 | -0,105 |
| 15 | P13473 LAMP2_HUMAN  | R.IPLNDFR.C       | 2 | 2,0787 | 0,164 | 0      |
| 15 | P31946 1433B_HUMAN  | R.NLLSVAYK.N      | 2 | 2,0781 | 0,178 | -0,269 |
| 15 | P19338 NUCL_HUMAN   | K.GIAYIEFK.T      | 2 | 2,0762 | 0,265 | 0,13   |
| 15 | P39656 OST48_HUMAN  | R.GFELTFK.T       | 2 | 2,0733 | 0,257 | 0      |
| 15 | P07602 SAP_HUMAN    | K.EILDAFDK.M      | 2 | 2,0687 | 0,162 | -0,321 |
| 15 | Q8IWS0 PHF6_HUMAN   | R.AEFGDFDIK.T     | 2 | 2,0686 | 0,389 | 0      |
| 15 | P51398 RT29_HUMAN   | R.DLLQSSYNK.Q     | 2 | 2,0677 | 0,154 | 0,228  |
| 15 | P28288 ABCD3_HUMAN  | R.DLNFEVR.S       | 2 | 2,0659 | 0,243 | 0,068  |
| 15 | P07437 TBB5_HUMAN   | R.ISVYYNEATGGK.Y  | 2 | 2,0563 | 0,204 | -0,375 |
| 15 | Q9BUQ8 DDX23_HUMAN  | R.LIDVLENR.Y      | 2 | 2,0506 | 0,154 | 0,126  |
| 15 | P40222 TXLNA_HUMAN  | R.DVSEELSR.Q      | 2 | 2,0455 | 0,296 | -0,196 |
| 15 | P26373 RL13_HUMAN   | R.GFSLEELR.V      | 2 | 2,0428 | 0,368 | -0,128 |
| 15 | P10809 CH60_HUMAN   | K.DDAM*LLK.G      | 2 | 2,0407 | 0,202 | 0,074  |
| 15 | P27482 CALL3_HUMAN  | K.EAFSLFDK.D      | 2 | 2,0371 | 0,307 | 0,064  |
| 15 | A8K2X8 A8K2X8_HUMAN | R.TSLGPDGLDK.M    | 2 | 2,0366 | 0,401 | 0,061  |
| 15 | P07355 ANXA2_HUMAN  | R.DLYDAGVK.R      | 2 | 2,0365 | 0,28  | 0,069  |



|    |                     |                           |              |   |        |       |        |
|----|---------------------|---------------------------|--------------|---|--------|-------|--------|
| 15 | P52701 MSH6_HUMAN   | K.FFIGQFSDDR.H            |              | 2 | 2,0358 | 0,212 | -0,594 |
| 15 | P40855 PEX19_HUMAN  | K.DALFASQEK.F             |              | 2 | 2,028  | 0,353 | 0,121  |
| 15 | O14530 TXND9_HUMAN  | R.DFFQEVK.E               |              | 2 | 2,0245 | 0,18  | 0,134  |
| 15 | P08559 ODPA_HUMAN   | R.EILAELTGR.K             |              | 2 | 2,0189 | 0,336 | 0      |
| 15 | P53396 ACLY_HUMAN   | K.LLVGVDEK.L              |              | 2 | 2,0169 | 0,143 | 0,349  |
| 15 | Q16850 CP51A_HUMAN  | K.DLNLLDR.C               |              | 2 | 2,007  | 0,132 | 0,213  |
| 15 | Q93034 CUL5_HUMAN   | R.RDESDINTFIYM*A.-        |              | 2 | 2,0069 | 0,303 | -0,46  |
| 15 | Q03252 LMNB2_HUMAN  | R.ELEEAM*AGER.D           |              | 2 | 2,0044 | 0,292 | 0      |
| 16 | Q9NWH9 SLTM_HUMAN   | R.AGAGM*ITQHSSNAS#PINR.I  | S1002:       | 3 | 3,0376 | 0,244 | -0,767 |
| 16 | Q9NWH9 SLTM_HUMAN   | R.AGAGM*ITQHSSNAS#PINR.I  | S1002:       | 2 | 2,5953 | 0,337 | -0,639 |
| 16 | Q6ZRV2 FA83H_HUMAN  | R.RLS#LGQGDSTEAAATEER.G   | S1003:       | 3 | 4,643  | 0,414 | 0,193  |
| 16 | Q6ZRV2 FA83H_HUMAN  | R.RLS#LGQGDSTEAAATEER.G   | S1003:       | 2 | 2,6537 | 0,556 | 0,321  |
| 16 | Q9UKV3 ACINU_HUMAN  | R.TAQVPS#PPRGK.I          | S1004:       | 2 | 2,3356 | 0,204 | -0,2   |
| 16 | P05386 RLA1_HUMAN   | K.KEES#EES#DDDM*GFGLFD.-  | S101:S104:   | 2 | 2,4478 | 0,389 | -0,115 |
| 16 | O95785 WIZ_HUMAN    | K.NPEDKSPQLSLS#PRPAS#PK.A | S1012:S1017: | 3 | 3,1838 | 0,312 | -0,663 |
| 16 | Q9BTC0 DIDO1_HUMAN  | K.SILAKPSSS#PDPR.Y        | S1019:       | 2 | 2,3268 | 0,138 | -0,34  |
| 16 | Q9GZT3 SLIRP_HUMAN  | K.LPQTS#DDEKKDF.-         | S102:        | 2 | 2,5205 | 0,251 | -0,162 |
| 16 | P17096 HMGA1_HUMAN  | K.KLEKEEEEGISQES#S#EEEQ.- | S102:S103:   | 3 | 3,9576 | 0,257 | -0,153 |
| 16 | Q7Z2Z1 CO042_HUMAN  | R.THS#ASFYSVSQPK.S        | S1026:       | 3 | 2,7074 | 0,204 | -0,181 |
| 16 | Q9BTT0 AN32E_HUMAN  | K.IKDLS#TVEALQNLK.N       | S104:        | 3 | 4,5676 | 0,312 | 0      |
| 16 | P21796 VDAC1_HUMAN  | K.LTFDSSFS#PNTGKK.N       | S104:        | 2 | 3,4106 | 0,392 | -0,227 |
| 16 | P05386 RLA1_HUMAN   | K.KEESEES#DDDM*GFGLFD.-   | S104:        | 2 | 2,8783 | 0,39  | -0,179 |
| 16 | P52948 NUP98_HUMAN  | K.TRS#LVGGLLQSK.F         | S1043:       | 2 | 3,612  | 0,365 | -0,091 |
| 16 | P41252 SYIC_HUMAN   | K.APLKYPVVS#PSDK.V        | S1051:       | 3 | 3,7659 | 0,356 | -0,371 |
| 16 | P41252 SYIC_HUMAN   | K.APLKYPVSPS#DK.V         | S1053:       | 2 | 3,1369 | 0,169 | -0,247 |
| 16 | Q96KR1 ZFR_HUMAN    | R.RDS#DGVDGFEAEGK.K       | S1054:       | 3 | 3,0958 | 0,169 | 0      |
| 16 | O75494 FUSIP_HUMAN  | R.NVYS#SSRYDDYDR.Y        | S106:        | 2 | 2,4781 | 0,217 | 0,213  |
| 16 | Q12888 TP53B_HUMAN  | R.GNLLHFPS#QGEEK.E        | S1068:       | 2 | 2,751  | 0,384 | -0,488 |
| 16 | A9CQZ4 A9CQZ4_HUMAN | R.AS#GKEALQININDQSDR.L    | S107:        | 2 | 2,0228 | 0,407 | 0,067  |
| 16 | P46379 BAT3_HUMAN   | K.AAGARPLTS#PESLSR.D      | S1081:       | 2 | 2,9206 | 0,421 | -0,077 |
| 16 | P48634 BAT2_HUMAN   | R.TAS#ET#RSEGSEYEEIPKR.R  | S1085:T1087: | 3 | 2,9273 | 0,192 | 0,082  |
| 16 | P46013 KI67_HUMAN   | R.TPKEEQS#LEDLAGFK.E      | S1098:       | 2 | 3,1719 | 0,415 | -0,463 |
| 16 | Q5VT52 K0460_HUMAN  | R.RM*S#GEPIQTVESIR.V      | S1099:       | 3 | 3,6026 | 0,394 | 0,215  |

|    |                      |                               |                 |   |        |       |        |
|----|----------------------|-------------------------------|-----------------|---|--------|-------|--------|
| 16 | Q5VT52 K0460_HUMAN   | R.RM*#S#GEPIQTVESIR.V         | S1099:          | 2 | 2,8647 | 0,338 | 0,431  |
| 16 | Q9UH62 ARMX3_HUMAN   | K.RAS#PNSDDTVLSPQELQK.V       | S110:           | 3 | 4,4196 | 0,256 | -0,177 |
| 16 | Q8IX90 CM003_HUMAN   | K.KNS#VHEQEAINS#DPELNCENFQK.T | S110:S119:      | 3 | 5,1691 | 0,446 | 0,738  |
| 16 | B2CI53 B2CI53_HUMAN  | R.S#NMSPDKPVSVK.I             | S1102:          | 2 | 3,5707 | 0,298 | -0,089 |
| 16 | Q9UQ35 SRRM2_HUMAN   | R.SSS#PVTELASRS#PIRQDR.G      | S1103:S1112:    | 3 | 2,6177 | 0,15  | 0,256  |
| 16 | B2CI53 B2CI53_HUMAN  | R.SNM*#SPDKPVSVK.I            | S1105:          | 3 | 3,491  | 0,329 | -0,066 |
| 16 | B2CI53 B2CI53_HUMAN  | R.SNM*#SPDKPVSVK.I            | S1105:          | 2 | 3,4599 | 0,349 | -0,529 |
| 16 | P11388 TOP2A_HUMAN   | K.EAQQKVPDEEENEES#DNEK.E      | S1106:          | 3 | 4,5242 | 0,3   | -1,258 |
| 16 | Q8IWU2 LMTK2_HUMAN   | R.DSAYFS#DNDSEPEKR.S          | S1107:          | 2 | 3,1888 | 0,435 | 0,332  |
| 16 | Q99873 ANM1_HUMAN    | R.KVIGIECSS#ISDYAVK.I         | S111:           | 2 | 4,51   | 0,45  | -0,066 |
| 16 | Q13459 MYO9B_HUMAN   | R.SPLEHSS#PEKEAPS#PEK.T       | S1115:S1122:    | 3 | 2,7379 | 0,224 | -0,091 |
| 16 | O43379 WDR62_HUMAN   | R.ATQCLVKS#PEVK.L             | S1123:          | 2 | 2,9437 | 0,237 | -0,085 |
| 16 | O43379 WDR62_HUMAN   | R.ATQCLVKS#PEVK.L             | S1123:          | 3 | 2,7221 | 0,339 | 0      |
| 16 | O60841 IF2P_HUMAN    | K.QSFDDNDS#EELEDKDSK.S        | S113:           | 3 | 2,8841 | 0,23  | 0      |
| 16 | O60841 IF2P_HUMAN    | K.QSFDDNDS#EELEDKDSK.S        | S113:           | 2 | 2,3524 | 0,377 | 0,469  |
| 16 | Q3KQU3 MA7D1_HUMAN   | R.RSS#QPSPTAVPASDS#PPTKQEVK.K | S113:S125:      | 3 | 5,6295 | 1     | 0      |
| 16 | Q3KQU3 MA7D1_HUMAN   | R.RSS#QPSPT#AVPASDSPPTKQEVK.K | S113:T118:      | 3 | 4,5896 | 1     | -0,716 |
| 16 | Q12982 BNIP2_HUMAN   | R.KGS#ITEYTAEEK.E             | S114:           | 2 | 4,8365 | 0,566 | -0,162 |
| 16 | Q8N4C6 NIN_HUMAN     | R.HVLS#DLEDEVR.D              | S1145:          | 2 | 4,5846 | 0,585 | 0,324  |
| 16 | Q8WTT2 NOC3L_HUMAN   | R.DLS#SSEPVHAK.K              | S115:           | 2 | 2,3564 | 0,257 | 0,195  |
| 16 | A7E2V4 K0913_HUMAN   | K.HTGM*#ASIDSSAPETTS#PTLSR.R  | S1156:          | 3 | 4,4105 | 0,386 | 0,145  |
| 16 | O75145 LIPA3_HUMAN   | R.SAAAGALGS#PGLPLRK.L         | S1164:          | 3 | 3,3181 | 0,431 | 0      |
| 16 | Q12846 STX4_HUMAN    | K.AIEPQKKEADENYNS#VNTR.M      | S117:           | 3 | 4,387  | 0,361 | 0,08   |
| 16 | O60238 BNI3L_HUMAN   | R.DHS#S#QS#EEEVVEGEKEVEALKK.S | S117:S118:S120: | 3 | 4,1202 | 0,314 | 0,268  |
| 16 | Q9NRY4 GRLF1_HUMAN   | R.TSFSVGS#DDELGPIRK.K         | S1179:          | 2 | 2,9471 | 0,296 | 0,068  |
| 16 | Q6P1X5 TAF2_HUMAN    | K.DKEPFTFSS#PASGR.S           | S1185:          | 2 | 3,251  | 0,43  | 0,076  |
| 16 | Q8IX90 CM003_HUMAN   | K.NSVHEQEAINS#DPELNCENFQK.T   | S119:           | 3 | 5,2179 | 0,42  | 0,463  |
| 16 | P55884 EIF3B_HUMAN   | R.SDS#RAQAVSEADAGGNEGR.A      | S119:           | 3 | 4,9661 | 0,465 | -0,291 |
| 16 | Q13286 CLN3_HUMAN    | R.RFS#DSEGEETVPEPR.L          | S12:            | 2 | 3,8243 | 0,484 | -0,538 |
| 16 | O95218 ZRAB2_HUMAN   | R.ENVEYIEREES#DGEYDEFGR.K     | S120:           | 3 | 5,7465 | 0,502 | -0,216 |
| 16 | P15531 NDKA_HUMAN    | R.NIIHGS#DSVESAEK.E           | S120:           | 2 | 4,4021 | 0,566 | 0,156  |
| 16 | Q32MZ4 LRRF1_HUMAN   | R.RGS#GDTSISIDTEASIR.E        | S120:           | 2 | 3,624  | 0,532 | 0,926  |
| 16 | ##Q02543 RL18A_HUMAN | R.LPSKEFVQGCYVIEGSS#K.K       | S120:           | 2 | 2,0818 | 0,154 | 0,579  |

|    |                     |                                       |              |   |        |       |        |
|----|---------------------|---------------------------------------|--------------|---|--------|-------|--------|
| 16 | O43933 PEX1_HUMAN   | R.YRS#QSGEDES* <sup>m</sup> NQPGPIK.T | S1209:       | 3 | 3,6213 | 0,267 | -0,259 |
| 16 | Q9NR30 DDX21_HUMAN  | K.NEEPS#EEEIDAPKPK.K                  | S121:        | 2 | 4,1509 | 0,408 | -0,136 |
| 16 | Q14814 MEF2D_HUMAN  | R.RAS#EELDGLFR.R                      | S121:        | 3 | 3,3153 | 0,208 | 0,2    |
| 16 | Q9NR30 DDX21_HUMAN  | K.NEEPS#EEEIDAPKPK.K                  | S121:        | 3 | 3,1438 | 0,322 | -0,204 |
| 16 | Q14814 MEF2D_HUMAN  | R.RAS#EELDGLFR.R                      | S121:        | 2 | 2,8344 | 0,387 | -0,178 |
| 16 | Q7Z4S6 KI21A_HUMAN  | R.EKELS#PPPGLPSK.I                    | S1212:       | 2 | 2,8677 | 0,368 | -0,084 |
| 16 | Q92508 FA38A_HUMAN  | R.TAS#ELLLDRR.L                       | S1215:       | 2 | 2,2025 | 0,185 | 0,097  |
| 16 | P12268 IMDH2_HUMAN  | K.KYEQGFITDPVLS#PK.D                  | S122:        | 3 | 3,7012 | 0,359 | -0,289 |
| 16 | B2RP66 B2RP66_HUMAN | R.VLM* <sup>m</sup> KS#PS#PALHPPQK.Y  | S1221:S1223: | 3 | 3,4066 | 0,371 | -0,506 |
| 16 | Q02952 AKA12_HUMAN  | K.ERPPAPS#SFVFQEETK.E                 | S1225:       | 3 | 3,7363 | 0,424 | 0      |
| 16 | Q13111 CAF1A_HUMAN  | K.LNSEAS#PSREAINQQR.E                 | S123:        | 3 | 2,8736 | 0,386 | -0,506 |
| 16 | Q9Y5J1 UTP18_HUMAN  | R.VQEHEDESGDS#EVENEAK.G               | S124:        | 3 | 4,3733 | 0,463 | -0,185 |
| 16 | Q8N163 K1967_HUMAN  | K.VQTLNQPLLKS#PAPPLLHVAALGQK.Q        | S124:        | 3 | 3,978  | 0,428 | -0,523 |
| 16 | Q32MZ4 LRRF1_HUMAN  | R.RGSGDTS#ISIDTEASIR.E                | S124:        | 3 | 2,7956 | 0,297 | 0,297  |
| 16 | Q9BQG0 MBB1A_HUMAN  | K.SPAPGAPTRS#PSTPAK.S                 | S1241:       | 2 | 2,7444 | 0,442 | -0,914 |
| 16 | P11388 TOP2A_HUMAN  | K.IKNENTEGS#PQEDGVELEGLK.Q            | S1247:       | 3 | 5,0369 | 0,493 | 0,773  |
| 16 | Q9BW71 HIRP3_HUMAN  | K.NGVAAEVS#PAKEENPR.R                 | S125:        | 2 | 4,5731 | 0,423 | 0,07   |
| 16 | Q9H6Z4 RANB3_HUMAN  | R.ERTS#SLTQFPPSQSEER.S                | S125:        | 3 | 3,2035 | 0,104 | 0,267  |
| 16 | Q15149 PLEC1_HUMAN  | R.TPHVQAVQGPLGS#PPK.R                 | S125:        | 3 | 2,656  | 0,225 | -0,108 |
| 16 | Q7KZ85 SPT6H_HUMAN  | K.KM* <sup>m</sup> S#DDEDDDEEEYGK.E   | S125:        | 2 | 2,6162 | 0,363 | -0,449 |
| 16 | Q92797 SYMPK_HUMAN  | K.TPS#PAAEDAREPEAK.G                  | S1259:       | 3 | 3,1286 | 0,234 | -0,111 |
| 16 | Q92797 SYMPK_HUMAN  | K.TPS#PAAEDAREPEAK.G                  | S1259:       | 2 | 3,0717 | 0,5   | 0,518  |
| 16 | Q9UGU0 TCF20_HUMAN  | R.VRS#FISPIPSK.R                      | S1259:       | 2 | 2,7998 | 0,293 | 0,186  |
| 16 | Q32MZ4 LRRF1_HUMAN  | R.RGSGDTSIS#IDTEASIR.E                | S126:        | 3 | 4,2096 | 0,451 | 1,19   |
| 16 | Q9H6Z4 RANB3_HUMAN  | R.ERTSS#LTQFPPSQSEER.S                | S126:        | 3 | 2,8707 | 0,086 | 0,089  |
| 16 | P42345 FRAP_HUMAN   | K.LHVS#TINLQK.A                       | S1261:       | 2 | 3,2853 | 0,298 | 0,198  |
| 16 | Q8N350 DOS_HUMAN    | R.RVS#FNEAALFEQSR.K                   | S127:        | 3 | 3,9522 | 0,312 | -0,316 |
| 16 | Q8N350 DOS_HUMAN    | R.RVS#FNEAALFEQSR.K                   | S127:        | 2 | 3,4681 | 0,486 | -0,563 |
| 16 | Q8NI27 THOC2_HUMAN  | K.TPVSGSLKS#PVPR.S                    | S1278:       | 3 | 3,795  | 0,354 | 0,065  |
| 16 | Q8NI27 THOC2_HUMAN  | K.TPVSGSLKS#PVPR.S                    | S1278:       | 2 | 3,0385 | 0,305 | 0      |
| 16 | Q9NTI5 PDS5B_HUMAN  | R.LKEDILENEDEQNS#PPK.K                | S1283:       | 3 | 5,8075 | 0,406 | 0,528  |
| 16 | Q13459 MYO9B_HUMAN  | R.VQEKPDS#PGGSTQIQR.Y                 | S1290:       | 3 | 3,6336 | 0,28  | 0,81   |
| 16 | Q5VZK9 LR16A_HUMAN  | R.TASRPDDIPDSS#PK.V                   | S1291:       | 2 | 4,1399 | 0,508 | -0,209 |

|    |                    |                              |              |   |        |       |        |
|----|--------------------|------------------------------|--------------|---|--------|-------|--------|
| 16 | O94804 STK10_HUMAN | R.ILRSL#TFEK.R               | S13:         | 2 | 2,6063 | 0,517 | -0,206 |
| 16 | Q05682 CALD1_HUMAN | R.QKEFDPTITDASLS#LPSR.R      | S131:        | 3 | 4,2322 | 0,473 | 0,351  |
| 16 | P55327 TPD52_HUMAN | K.LEDVKNS#PTFK.S             | S131:        | 2 | 3,5061 | 0,317 | -0,18  |
| 16 | P51858 HDGF_HUMAN  | K.KGNAEGS#S#DEEGKLVIDEPAK.E  | S132:S133:   | 3 | 5,8476 | 0,552 | 0,549  |
| 16 | P51858 HDGF_HUMAN  | K.GNAEGS#S#DEEGKLVIDEPAKEK.N | S132:S133:   | 3 | 4,2125 | 0,318 | 0,074  |
| 16 | Q7Z6E9 RBBP6_HUMAN | K.WDKDDFES#EEEDVK.S          | S1328:       | 2 | 2,8355 | 0,369 | 0,527  |
| 16 | P38398 BRCA1_HUMAN | R.HQS#ESQGVGLSDKELVS#DDEER.G | S1328:S1342: | 3 | 4,7046 | 0,39  | -0,211 |
| 16 | Q8NEY8 PPHLN_HUMAN | R.DNTFFRES#PVGR.K            | S133:        | 2 | 2,1579 | 0,153 | 0,243  |
| 16 | O14686 MLL2_HUMAN  | R.NLTM*S#PLHK.R              | S1331:       | 2 | 2,4297 | 0,319 | -0,107 |
| 16 | Q9P2M7 CING_HUMAN  | R.SHSQAS#LAGPGVPDPSNR.S      | S134:        | 3 | 4,0946 | 0,346 | -0,099 |
| 16 | Q9NQG5 CT077_HUMAN | K.LSM*EDSKS#PPPK.A           | S134:        | 3 | 3,2137 | 0,308 | -0,518 |
| 16 | Q9NQG5 CT077_HUMAN | K.LSM*EDSKS#PPPK.A           | S134:        | 2 | 2,7356 | 0,256 | -0,605 |
| 16 | Q03468 ERCC6_HUMAN | R.NSNFSVQHPSSTS#PTEK.C       | S1348:       | 2 | 3,744  | 0,504 | -0,507 |
| 16 | P42695 CNDD3_HUMAN | K.ARPM*S#LSTIAILNS#VKK.A     | S1348:S1357: | 3 | 2,7916 | 0,084 | 0,456  |
| 16 | Q09666 AHNK_HUMAN  | R.LKS#EDGVEGDLGETQSR.T       | S135:        | 3 | 5,9215 | 0,497 | 0,096  |
| 16 | Q09666 AHNK_HUMAN  | R.LKS#EDGVEGDLGETQSR.T       | S135:        | 2 | 4,3429 | 0,617 | -0,193 |
| 16 | P55327 TPD52_HUMAN | K.S#FEEKVENLK.S              | S136:        | 2 | 2,2516 | 0,193 | 0,094  |
| 16 | P25054 APC_HUMAN   | K.AVEFSSGAKS#PSK.S           | S1360:       | 2 | 3,795  | 0,415 | -0,177 |
| 16 | Q9UPN3 MACF1_HUMAN | K.AFVESQKS#PGK.R             | S1367:       | 2 | 3,2112 | 0,313 | -0,44  |
| 16 | Q961F1 JUB_HUMAN   | R.SSFASSASDASKPSS#PR.G       | S137:        | 2 | 5,135  | 0,482 | 0,199  |
| 16 | Q8WWA1 TMM40_HUMAN | R.RGS#DPASGEVEASQLR.R        | S137:        | 2 | 4,0079 | 0,542 | 0,14   |
| 16 | Q86YP4 P66A_HUMAN  | K.ETSTEALM*KSS#PEER.E        | S137:        | 2 | 2,2547 | 0,211 | 0,273  |
| 16 | Q8TDY2 RBCC1_HUMAN | R.DKDLIES#LSEDR.A            | S1370:       | 2 | 3,4131 | 0,301 | 0,569  |
| 16 | Q7L2Z9 CENPQ_HUMAN | K.KM*EDLTNVS#SLLNM*ER.A      | S138:        | 3 | 3,9438 | 0,443 | -0,276 |
| 16 | Q5VTR2 BRE1A_HUMAN | R.KALVVPEPEPDSDS#NQER.K      | S138:        | 3 | 3,4419 | 0,335 | -0,35  |
| 16 | Q76L83 ASXL2_HUMAN | R.KVSSS#SPQSGCPSPTIPAGK.V    | S138:        | 3 | 3,062  | 0,175 | -0,267 |
| 16 | Q9UQ35 SRRM2_HUMAN | R.SSGHS#SSELSPDAVEK.A        | S1382:       | 2 | 4,8291 | 0,54  | -0,072 |
| 16 | Q9C0C2 TB182_HUMAN | R.HNGS#LS#PGLEARDPLEAR.E     | S1383:S1385: | 3 | 2,7272 | 0,249 | -0,264 |
| 16 | P50914 RL14_HUMAN  | K.AALLKAS#PK.K               | S139:        | 2 | 3,3022 | 0,421 | -1,059 |
| 16 | P49736 MCM2_HUMAN  | R.GLLYDS#DEEDEERPAR.K        | S139:        | 2 | 2,671  | 0,285 | -0,495 |
| 16 | Q5SW96 ARH_HUMAN   | R.ALIRS#PSLAK.Q              | S14:         | 2 | 2,6407 | 0,297 | -0,43  |
| 16 | Q8NE71 ABCF1_HUMAN | K.TKGGNVFAALIQQDS#EEEEEEK.H  | S140:        | 3 | 5,9567 | 0,387 | -0,688 |
| 16 | Q8WWA1 TMM40_HUMAN | R.RGSDPAS#GEVEASQLR.R        | S141:        | 3 | 3,6097 | 0,285 | -0,421 |

|    |                     |                                 |              |   |        |       |        |
|----|---------------------|---------------------------------|--------------|---|--------|-------|--------|
| 16 | P49815 TSC2_HUMAN   | K.ADVGRSL#PEVK.A                | S1411:       | 2 | 2,3145 | 0,146 | 0,195  |
| 16 | Q75161 NPHP4_HUMAN  | R.IFSNQPDS#PISASQDKR.L          | S142:        | 3 | 3,3057 | 0,29  | -0,65  |
| 16 | Q8TES7 FEBF1_HUMAN  | R.RFS#SELEDPLR.G                | S142:        | 2 | 3,0683 | 0,316 | 0,158  |
| 16 | P29966 MARCS_HUMAN  | K.AEDGATPS#PSNETPKK.K           | S145:        | 2 | 2,6362 | 0,283 | -0,643 |
| 16 | Q8IWS0 PHF6_HUMAN   | K.TAHNSEADLEES#FNEHELEPS#SPK.S  | S145:S154:   | 3 | 4,3517 | 0,432 | -0,512 |
| 16 | Q8IWS0 PHF6_HUMAN   | K.TAHNSEADLEES#FNEHELEPSS#PK.S  | S145:S155:   | 3 | 4,5508 | 0,462 | -0,64  |
| 16 | Q5JRC6 Q5JRC6_HUMAN | K.TAHNSEAADLEES#FNEHELEPS#SPK.S | S146:S155:   | 3 | 5,0081 | 0,514 | -0,562 |
| 16 | P62753 RS6_HUMAN    | K.LFNLS#KEDDVR.Q                | S148:        | 2 | 3,2671 | 0,342 | 0,517  |
| 16 | Q8IY57 YAF2_HUMAN   | K.SPPASSAASADQHS#QSGSSSDNTER.G  | S149:        | 3 | 3,2358 | 0,363 | -0,432 |
| 16 | Q9Y2H6 FND3A_HUMAN  | K.CPS#PINEHGLIK.G               | S149:        | 3 | 2,8397 | 0,197 | 1,994  |
| 16 | P11388 TOP2A_HUMAN  | K.SKGES#DDFHM*DFDS#AVAPR.A      | S1495:S1504: | 3 | 2,8366 | 0,221 | 0,96   |
| 16 | Q14690 RRP5_HUMAN   | K.KAGLSEEDDS#LVDVYYR.E          | S1498:       | 2 | 3,6013 | 0,471 | 0,419  |
| 16 | Q14690 RRP5_HUMAN   | K.KAGLSEEDDS#LVDVYYR.E          | S1498:       | 3 | 3,2024 | 0,133 | 0,359  |
| 16 | P38398 BRCA1_HUMAN  | R.SSPS#KCPSLDDR.W               | S1499:       | 2 | 2,0995 | 0,233 | -0,256 |
| 16 | Q9GZR2 REXO4_HUMAN  | R.APSS#PVAKPGPVK.T              | S15:         | 2 | 2,821  | 0,427 | -0,278 |
| 16 | Q99607 ELF4_HUMAN   | R.AGDT#DQEGHSLEEK.A             | S151:        | 2 | 3,9326 | 0,4   | -0,87  |
| 16 | P18583 SON_HUMAN    | K.SHDDGNIDLES#DSFLK.F           | S152:        | 2 | 5,4688 | 0,62  | -0,196 |
| 16 | Q02880 TOP2B_HUMAN  | K.KVVEAVNS#DSDSEFGIPK.K         | S1522:       | 2 | 3,9985 | 0,434 | -0,305 |
| 16 | Q9UGU0 TCF20_HUMAN  | K.AEEKENDTVTIS#PK.Q             | S1522:       | 3 | 3,0459 | 0,22  | -0,111 |
| 16 | Q5SRE5 NU188_HUMAN  | R.VQRPPS#AASAAPSSSK.Q           | S1523:       | 3 | 3,5968 | 0,344 | -0,451 |
| 16 | Q00536 PCTK1_HUMAN  | R.RVS#LSEIGFGK.L                | S153:        | 2 | 3,8525 | 0,547 | 0,192  |
| 16 | Q00536 PCTK1_HUMAN  | R.RVS#LSEIGFGK.L                | S153:        | 3 | 3,5018 | 0,319 | 0      |
| 16 | Q9Y5B6 GCFC_HUMAN   | K.IKTELNS#SAESEQLDK.T           | S154:        | 3 | 3,4693 | 0,199 | -0,929 |
| 16 | Q8IX90 CM003_HUMAN  | K.SPRS#PQLSDFGLER.Y             | S155:        | 3 | 4,801  | 0,306 | -0,329 |
| 16 | Q8IX90 CM003_HUMAN  | K.SPRS#PQLSDFGLER.Y             | S155:        | 2 | 2,8619 | 0,245 | 0,219  |
| 16 | Q9UQ35 SRRM2_HUMAN  | R.SGSSQELDVKPSAS#PQER.S         | S1552:       | 2 | 4,1649 | 0,479 | 0,554  |
| 16 | Q9UQ35 SRRM2_HUMAN  | R.SGSSQELDVKPSAS#PQER.S         | S1552:       | 3 | 4,1442 | 0,278 | -0,185 |
| 16 | Q13428 TCOF_HUMAN   | K.TVANLLSGKS#PR.K               | S156:        | 2 | 3,047  | 0,328 | -0,461 |
| 16 | P49761 CLK3_HUMAN   | R.YRS#PEPDPYLSYR.W              | S157:        | 3 | 3,4651 | 0,201 | 0      |
| 16 | P10398 ARAF_HUMAN   | R.QQFYHS#VQDLGGSR.Q             | S157:        | 3 | 2,6897 | 0,202 | -0,102 |
| 16 | Q92733 PRCC_HUMAN   | K.IAAPLHKGDS#DS#EEDEPTK.K       | S157:S159:   | 3 | 3,9968 | 0,314 | 0,157  |
| 16 | Q8N5F7 NKAP_HUMAN   | K.NPEPDS#DEHT#PVEDEEPPK.S       | S157:T161:   | 3 | 3,5136 | 0,344 | 0,078  |
| 16 | Q95292 VAPB_HUMAN   | K.SLS#SSLDDTEVKK.V              | S158:        | 2 | 3,7571 | 0,522 | -0,328 |

|    |                     |                               |            |   |        |       |        |
|----|---------------------|-------------------------------|------------|---|--------|-------|--------|
| 16 | P41162 ETV3_HUMAN   | R.FHFPPLDTHS#PT#NDVQPGR.F     | S159:T161: | 3 | 3,0708 | 0,276 | -0,394 |
| 16 | O15513 O15513_HUMAN | K.LEKS#IDDLEEK.V              | S16:       | 2 | 4,5441 | 0,253 | -0,436 |
| 16 | O15513 O15513_HUMAN | K.LEKS#IDDLEEK.V              | S16:       | 3 | 3,7157 | 0,257 | -0,261 |
| 16 | P05023 AT1A1_HUMAN  | K.YEPAAVS#EQGDKK.G            | S16:       | 2 | 2,6531 | 0,105 | -0,162 |
| 16 | O43399 TPD54_HUMAN  | K.LGDM*RNS#ATFKS#FEDR.V       | S161:S166: | 3 | 2,8817 | 0,203 | -0,268 |
| 16 | Q15742 NAB2_HUMAN   | R.SFSPKS#PLELGEK.L            | S162:      | 2 | 3,6188 | 0,406 | -0,488 |
| 16 | Q14011 CIRBP_HUMAN  | R.SSGGSYRDS#YDSYATHNE.-       | S163:      | 3 | 3,4052 | 0,204 | -0,352 |
| 16 | Q9NQT8 KI13B_HUMAN  | R.ERPDLEAPAGS#PFR.V           | S1644:     | 2 | 2,0542 | 0,212 | 0,213  |
| 16 | P05198 IF2A_HUMAN   | K.HAVSDPSILDS#LDLNEDER.E      | S165:      | 3 | 5,8029 | 0,468 | -0,083 |
| 16 | P15924 DESP_HUMAN   | R.RAS#S#KGGGGYTCQSGSGWDEFTK.H | S165:S166: | 3 | 4,6217 | 0,468 | -0,567 |
| 16 | O43166 SI1L1_HUMAN  | K.SLHGFEFSASDSS#LTDIQETR.R    | S1650:     | 3 | 4,3218 | 0,376 | -0,081 |
| 16 | Q99759 M3K3_HUMAN   | R.HLS#VSSQNPRSS#PPPGYVPER.Q   | S166:S176: | 3 | 4,52   | 1     | 0,146  |
| 16 | Q8IY57 YAF2_HUMAN   | R.SSS#PRGEASSLNGESH.-         | S167:      | 2 | 3,9854 | 0,443 | 0,073  |
| 16 | Q8IY57 YAF2_HUMAN   | R.SSS#PRGEASSLNGESH.-         | S167:      | 3 | 3,6205 | 0,251 | 0,109  |
| 16 | P29966 MARCS_HUMAN  | K.SFKLS#GFSFK.K               | S167:      | 2 | 3,1646 | 0,404 | -0,497 |
| 16 | Q6NZI2 PTRF_HUMAN   | K.LPAKLS#ISK.S                | S167:      | 2 | 3,1229 | 0,376 | -0,118 |
| 16 | Q9H4A3 WNK1_HUMAN   | K.DRPVS#QPSLVGSK.E            | S167:      | 2 | 2,7675 | 0,244 | -0,168 |
| 16 | Q5T5U3 RHG21_HUMAN  | R.RNSEGS#ELSCTEGSLTSSLDSR.R   | S1671:     | 3 | 5,3918 | 0,518 | 0,224  |
| 16 | Q12888 TP53B_HUMAN  | K.LITSEEERS#PAK.R             | S1678:     | 2 | 3,6428 | 0,298 | -0,254 |
| 16 | Q9BZ23 PANK2_HUMAN  | R.RAS#SASVPAVGASAEGTR.R       | S168:      | 2 | 2,0944 | 0,406 | 0,209  |
| 16 | P16157 ANK1_HUMAN   | R.ITHS#PTVSQVTER.S            | S1686:     | 2 | 2,7936 | 0,31  | -0,079 |
| 16 | Q9BZ23 PANK2_HUMAN  | R.RASS#ASVPAVGASAEGTR.R       | S169:      | 3 | 2,8254 | 0,316 | 0,209  |
| 16 | O00566 MPP10_HUMAN  | R.KSPVFSDEDS#DLDFDISK.L       | S171:      | 3 | 4,4408 | 0,324 | -0,345 |
| 16 | O00566 MPP10_HUMAN  | R.KSPVFSDEDS#DLDFDISK.L       | S171:      | 2 | 3,5118 | 0,468 | -0,23  |
| 16 | Q9UGI6 KCNN3_HUMAN  | R.RDS#NPFTEIAM*SSCK.Y         | S172:      | 2 | 4,4575 | 0,42  | 0,464  |
| 16 | Q3V6T2 GRDN_HUMAN   | R.SVS#GKTPGDFYDR.R            | S1736:     | 3 | 3,572  | 0,489 | 0,061  |
| 16 | Q3V6T2 GRDN_HUMAN   | R.SVS#GKTPGDFYDR.R            | S1736:     | 2 | 2,7293 | 0,353 | 0,162  |
| 16 | Q9P2D3 HTR5B_HUMAN  | K.VSDS#PSHIATK.T              | S1737:     | 3 | 2,6395 | 0,176 | -0,075 |
| 16 | Q5VV41 ARHGG_HUMAN  | K.GLGKPGGQGDALQLS#PK.L        | S174:      | 2 | 3,5846 | 0,428 | 0      |
| 16 | Q6PCE3 PGM2L_HUMAN  | K.AVAGVM*ITAS#HNR.K           | S175:      | 2 | 3,7916 | 0,547 | -0,171 |
| 16 | O95793 STAU1_HUMAN  | R.LEVNGRES#EEENLNK.S          | S176:      | 2 | 4,314  | 0,28  | -0,464 |
| 16 | Q58FF8 H90B2_HUMAN  | K.IEDVGS#DEEDDSGKDK.K         | S177:      | 3 | 4,5782 | 0,498 | -0,846 |
| 16 | Q58FF8 H90B2_HUMAN  | K.IEDVGS#DEEDDSGKDK.K         | S177:      | 3 | 3,5721 | 0,409 | 0,503  |

|    |                    |                                |            |   |        |       |        |
|----|--------------------|--------------------------------|------------|---|--------|-------|--------|
| 16 | Q9NYF8 BCLF1_HUMAN | K.AEGEPQEE#PLKSK.S             | S177:      | 2 | 3,186  | 0,521 | 0,076  |
| 16 | Q09666 AHNK_HUMAN  | R.EGAKDIDISS#PEFK.I            | S177:      | 2 | 2,505  | 0,486 | 1,737  |
| 16 | Q04721 NOTC2_HUMAN | K.VKAEDALLS#EEDDPIDR.R         | S1778:     | 3 | 4,9735 | 0,352 | -0,775 |
| 16 | P46821 MAP1B_HUMAN | K.VQSLEGEKLS#PK.S              | S1779:     | 2 | 3,7533 | 0,39  | -0,262 |
| 16 | Q8N5I9 CL045_HUMAN | K.IEVLDS#PASKK.K               | S178:      | 2 | 3,4104 | 0,235 | -0,193 |
| 16 | Q8ND56 LS14A_HUMAN | K.TQLS#QGRS#SPQLDPLRK.S        | S178:S182: | 3 | 3,2393 | 0,112 | 0,353  |
| 16 | Q9H501 ESF1_HUMAN  | K.NIVQHTTDS#SLEEK.Q            | S179:      | 2 | 3,8989 | 0,353 | 0,218  |
| 16 | Q5T230 UTF1_HUMAN  | R.RPPPLAPPAPS#PASPDPEPR.T      | S18:       | 3 | 5,6292 | 0,338 | -0,741 |
| 16 | Q9UPW6 SATB2_HUMAN | R.S#GSPDVKGPPPVK.V             | S18:       | 2 | 3,2506 | 0,402 | -0,091 |
| 16 | Q9H1E3 NUCKS_HUMAN | K.ATVTPS#PVKKG.G               | S181:      | 2 | 2,0999 | 0,218 | -0,314 |
| 16 | Q9NQC3 RTN4_HUMAN  | K.RRGS#S#GSVDETLFALPAASEPVIR.S | S181:S182: | 3 | 4,0092 | 0,338 | -0,41  |
| 16 | Q9NQC3 RTN4_HUMAN  | K.RRGS#SGS#VDETLFALPAASEPVIR.S | S181:S184: | 3 | 3,3646 | 0,364 | -0,41  |
| 16 | Q14676 MDC1_HUMAN  | R.SLATM*DS#PPHQK.Q             | S1820:     | 2 | 3,7642 | 0,339 | -0,78  |
| 16 | Q5VWG9 TAF3_HUMAN  | K.RPLDS#PEAEELPAM*K.R          | S183:      | 2 | 4,4289 | 0,499 | 0,412  |
| 16 | O60749 SNX2_HUMAN  | R.FS#DFLGLHSK.L                | S185:      | 3 | 2,9728 | 0,36  | 0,074  |
| 16 | Q99728 BARD1_HUMAN | K.KDASAQQDSYEFVSPS#PPADVSR.A   | S186:      | 3 | 3,8492 | 0,083 | 1,02   |
| 16 | P62070 RRAS2_HUMAN | K.FQEQCPS#PEPTRK.E             | S186:      | 3 | 3,2057 | 0,159 | 0,192  |
| 16 | P62070 RRAS2_HUMAN | K.FQEQCPS#PEPTRK.E             | S186:      | 2 | 2,4061 | 0,396 | 0,447  |
| 16 | Q9UPN3 MACF1_HUMAN | R.QGS#FSEDVISHK.G              | S1860:     | 3 | 2,7951 | 0,316 | -0,323 |
| 16 | P17098 ZNF8_HUMAN  | R.LRENCVLSSS#PNPFPEISR.G       | S187:      | 3 | 5,0314 | 0,388 | -0,561 |
| 16 | O95218 ZRAB2_HUMAN | K.YNLDS#EEEDSNKK.K             | S188:      | 2 | 4,4468 | 0,263 | 0,213  |
| 16 | Q9H4L4 SEN3_HUMAN  | R.FDS#PRGPPPR.L                | S188:      | 3 | 3,5973 | 0,316 | 0,14   |
| 16 | Q13596 SNX1_HUMAN  | R.RFS#DFLGLYEK.L               | S188:      | 3 | 3,4548 | 0,293 | 0      |
| 16 | Q13596 SNX1_HUMAN  | R.RFS#DFLGLYEK.L               | S188:      | 2 | 3,4428 | 0,492 | -0,335 |
| 16 | Q2M3G4 SHRM1_HUMAN | R.SAS#LSHPGGEGERPAR.S          | S188:      | 3 | 3,0896 | 0,386 | -0,239 |
| 16 | Q2M3G4 SHRM1_HUMAN | R.SAS#LSHPGGEGERPAR.S          | S188:      | 2 | 2,2453 | 0,362 | -0,239 |
| 16 | Q9H1E3 NUCKS_HUMAN | R.KVVDYSQFQES#DDADEDYGR.D      | S19:       | 3 | 6,2363 | 0,515 | 0,598  |
| 16 | P15408 FOSL2_HUMAN | R.GSSGS#PAHAESYSSGGGQK.F       | S19:       | 3 | 4,7935 | 0,461 | -0,454 |
| 16 | Q03252 LMNB2_HUMAN | R.CQS#LQEELDFRK.S              | S194:      | 3 | 4,2527 | 0,334 | -0,224 |
| 16 | O94915 FRYL_HUMAN  | R.SNSRLS#LIGDR.R               | S1945:     | 3 | 3,8    | 0,252 | -0,13  |
| 16 | Q9NV56 MRGBP_HUMAN | R.VTDKVLANSNPSS#PSAAK.R        | S195:      | 2 | 5,3282 | 0,47  | -0,496 |
| 16 | Q9NV56 MRGBP_HUMAN | K.VLTANSNPSS#PSAAKR.R          | S195:      | 2 | 3,9612 | 0,433 | 0,29   |
| 16 | P35580 MYH10_HUMAN | R.QLHLEGASLELS#DDDTESK.T       | S1956:     | 3 | 4,6657 | 0,462 | 0,507  |

|    |                     |                                |                 |   |        |       |        |
|----|---------------------|--------------------------------|-----------------|---|--------|-------|--------|
| 16 | Q9BVG4 CX026_HUMAN  | K.GADS#GEEKEEGINR.E            | S197:           | 3 | 3,732  | 0,305 | -0,116 |
| 16 | P35908 K22E_HUMAN   | K.FAS#FIDKVR.F                 | S197:           | 2 | 2,5266 | 0,409 | -0,105 |
| 16 | Q9UP83 COG5_HUMAN   | R.LQGQLQGGS#REITK.A            | S197:           | 2 | 2,4425 | 0,247 | -0,612 |
| 16 | Q9Y5X1 SNX9_HUMAN   | R.AS#SSSM*KIPLNK.F             | S197:           | 2 | 2,0111 | 0,185 | -0,269 |
| 16 | Q92614 MY18A_HUMAN  | K.NKLEGDS#DVDS#ELEDRVDGVK.S    | S1970:S1974:    | 3 | 4,47   | 0,371 | 0,295  |
| 16 | Q8NCF5 NF2IP_HUMAN  | K.KKTEFLDLDNS#PLS#PPS#PR.T     | S198:S201:S204: | 3 | 3,1529 | 0,236 | -0,461 |
| 16 | B0AZS1 B0AZS1_HUMAN | K.FVSEDDRNS#FTLK.L             | S20:            | 2 | 3,5057 | 0,453 | -0,447 |
| 16 | Q07666 KHDR1_HUMAN  | R.SGS#MDPSGAHPSVR.Q            | S20:            | 2 | 2,415  | 0,384 | 0      |
| 16 | Q9ULX3 NOB1_HUMAN   | R.KDDS#DDGGGWITPSNIK.Q         | S201:           | 2 | 4,1961 | 0,422 | -0,305 |
| 16 | Q9H4A3 WNK1_HUMAN   | K.EKPELSEPHLNGPS#S#DPEAAFLSR.D | S2011:S2012:    | 3 | 3,2041 | 0,435 | 0,449  |
| 16 | Q9H4A3 WNK1_HUMAN   | R.DVDDGS#GS#PHSPHQLSSK.S       | S2027:S2029:    | 3 | 3,1374 | 0,231 | -0,091 |
| 16 | O43633 CHM2A_HUMAN  | K.KAEAAAS#ALADADADLEER.L       | S203:           | 3 | 3,7046 | 0,418 | -0,092 |
| 16 | Q8NCF5 NF2IP_HUMAN  | K.KTEFLDLDNSPLSPS#PR.T         | S204:           | 3 | 4,3955 | 0,373 | -0,35  |
| 16 | Q13242 SFRS9_HUMAN  | R.GRDS#PYQSRGS#PHY#FSPFRPY.-   | S204:S211:Y214: | 3 | 3,3719 | 1     | -0,401 |
| 16 | Q14980 NUMA1_HUMAN  | R.RQS#M*AFSILNTPK.K            | S2047:          | 3 | 4,3547 | 0,241 | 0,115  |
| 16 | Q14980 NUMA1_HUMAN  | R.RQS#M*AFSILNTPK.K            | S2047:          | 2 | 3,5602 | 0,497 | -0,23  |
| 16 | Q9Y4A5 TRRAP_HUMAN  | R.GLS#VDSAQEVKR.F              | S2051:          | 2 | 2,0615 | 0,475 | -0,267 |
| 16 | Q6ZN18 AEBP2_HUMAN  | R.RGS#LEM*SSDGEPLSR.M          | S206:           | 2 | 2,8734 | 0,579 | 0      |
| 16 | Q6ZN18 AEBP2_HUMAN  | R.RGS#LEM*SSDGEPLSR.M          | S206:           | 3 | 2,7584 | 0,252 | 0,107  |
| 16 | Q05519 SFR11_HUMAN  | K.LNHVAAGLV#PSLK.S             | S207:           | 2 | 4,4239 | 0,535 | 0,246  |
| 16 | Q05519 SFR11_HUMAN  | K.LNHVAAGLV#PSLK.S             | S207:           | 3 | 3,7967 | 0,371 | 0,062  |
| 16 | Q01130 SFRS2_HUMAN  | R.SKS#PPKSPEEEGAVSS.-          | S208:           | 2 | 2,9504 | 0,279 | -0,144 |
| 16 | Q03164 HRX_HUMAN    | R.TIAHS#PTSFTESSK.E            | S2098:          | 2 | 4,0953 | 0,524 | 0      |
| 16 | P60174 TPIS_HUMAN   | R.KQS#LGELIGTLNAAK.V           | S21:            | 2 | 4,9778 | 0,584 | -0,376 |
| 16 | P60174 TPIS_HUMAN   | R.KQS#LGELIGTLNAAK.V           | S21:            | 3 | 3,6151 | 0,367 | -0,225 |
| 16 | Q53H80 CF166_HUMAN  | K.RTLDFDPLLSPAS#PK.R           | S21:            | 3 | 2,6145 | 0,304 | -0,316 |
| 16 | Q53H80 CF166_HUMAN  | K.RTLDFDPLLSPAS#PK.R           | S21:            | 2 | 2,5499 | 0,365 | -0,421 |
| 16 | Q13242 SFRS9_HUMAN  | R.GS#PHYFSPFRPY.-              | S211:           | 3 | 2,932  | 0,26  | -0,238 |
| 16 | Q13242 SFRS9_HUMAN  | R.GS#PHYFSPFRPY.-              | S211:           | 2 | 2,1065 | 0,279 | -0,159 |
| 16 | Q9H4L7 SMRCD_HUMAN  | R.KLS#SSS#EPYEEDEFNDDQSIKK.T   | S211:S214:      | 3 | 6,6538 | 0,564 | -1,338 |
| 16 | Q9UQ35 SRRM2_HUMAN  | R.M*SCFSRPSM*S#PTPLDR.C        | S2123:          | 3 | 3,0191 | 0,332 | 0,092  |
| 16 | O60841 IF2P_HUMAN   | K.NKPGNIES#GNEDDDASF.K.I       | S214:           | 3 | 4,351  | 0,5   | -0,346 |
| 16 | Q9Y6Q9 NCOA3_HUMAN  | K.TPHDILEDINAS#PEMR.Q          | S214:           | 3 | 3,3532 | 0,302 | -0,191 |



|    |                    |                                |            |   |        |       |        |
|----|--------------------|--------------------------------|------------|---|--------|-------|--------|
| 16 | O60841 IF2P_HUMAN  | K.NKPGPNIES#GNEDDDASFK.I       | S214:      | 2 | 2,9726 | 0,417 | -0,693 |
| 16 | Q8NEJ9 NGDN_HUMAN  | R.ELKEQYS#DAPEEIR.D            | S214:      | 2 | 2,871  | 0,343 | 0,273  |
| 16 | Q9H1E3 NUCKS_HUMAN | K.TPSPKEEDEEPES#PPEK.K         | S214:      | 3 | 2,7922 | 0,233 | -0,456 |
| 16 | Q9Y6Q9 NCOA3_HUMAN | K.TPHDILEDINAS#PEM*R.Q         | S214:      | 2 | 2,3532 | 0,474 | 0,315  |
| 16 | Q9H1E3 NUCKS_HUMAN | K.EEDEEPES#PPEKK.T             | S214:      | 2 | 2,3288 | 0,128 | -0,601 |
| 16 | P38159 HNRPG_HUMAN | R.DDGYS#TKDSYSSR.D             | S215:      | 2 | 2,9582 | 0,484 | 0,078  |
| 16 | Q13242 SFRS9_HUMAN | R.GSPHYFS#PFRPY.-              | S216:      | 2 | 3,1593 | 0,379 | 0,238  |
| 16 | Q9H9L7 CA108_HUMAN | K.RPM*EFEAALLSPGS#PK.R         | S22:       | 2 | 4,2617 | 0,531 | -0,468 |
| 16 | Q9H9L7 CA108_HUMAN | K.RPM*EFEAALLSPGS#PK.R         | S22:       | 3 | 3,4678 | 0,24  | -0,701 |
| 16 | Q9H9L7 CA108_HUMAN | K.RPMEFEAALLSPGS#PK.R          | S22:       | 3 | 3,0803 | 0,238 | -0,202 |
| 16 | Q6ZS17 FA65A_HUMAN | R.SQS#FAGVLGSHER.G             | S22:       | 2 | 3,0665 | 0,432 | 0      |
| 16 | Q9UKX7 NUP50_HUMAN | R.NSESESNKVAETQS#PSLFGSTK.L    | S221:      | 3 | 4,9663 | 0,441 | -0,074 |
| 16 | Q9BV73 CP250_HUMAN | R.LHS#PGATSTAELGSR.G           | S2229:     | 2 | 3,6037 | 0,503 | -0,312 |
| 16 | P49761 CLK3_HUMAN  | R.CEERS#PSFGEDYGPSR.S          | S224:      | 3 | 4,5696 | 0,457 | -0,086 |
| 16 | Q6NYC8 PHTNS_HUMAN | K.EVESRLS#PGESAYQK.L           | S224:      | 2 | 2,9366 | 0,452 | -0,624 |
| 16 | Q13573 SNW1_HUMAN  | R.GPPS#PPAPVM*HS#PSRK.M        | S224:S232: | 3 | 2,9685 | 0,212 | -0,402 |
| 16 | Q13573 SNW1_HUMAN  | R.GPPS#PPAPVM*HS#PSRK.M        | S224:S232: | 2 | 2,5294 | 0,264 | 0,201  |
| 16 | Q13573 SNW1_HUMAN  | R.GPPS#PPAPVMHSPS#RK.M         | S224:S234: | 3 | 2,6299 | 0,353 | -0,508 |
| 16 | P25054 APC_HUMAN   | K.TPASKS#PSEGQTATTSPR.G        | S2260:     | 3 | 3,2166 | 0,194 | -0,874 |
| 16 | Q9BW71 HIRP3_HUMAN | K.SLKESEQES#EEEILAQK.K         | S227:      | 3 | 4,4301 | 0,226 | -0,356 |
| 16 | Q9BW71 HIRP3_HUMAN | K.ESEQES#EEEILAQKK.E           | S227:      | 2 | 2,6922 | 0,136 | 0,263  |
| 16 | Q8N1G0 ZN687_HUMAN | K.QESCS#PHHPQVLAQQGSGSS#PK.A   | S227:S242: | 3 | 2,7377 | 0,094 | -0,511 |
| 16 | Q13033 STRN3_HUMAN | K.NLEQILNGGES#PKQK.G           | S229:      | 2 | 3,44   | 0,329 | -0,633 |
| 16 | Q9BWT3 PAPOG_HUMAN | K.HYGITS#PISLASPK.E            | S23:       | 2 | 2,5543 | 0,435 | 0,236  |
| 16 | P50990 TCPQ_HUMAN  | K.HFS#GLEEAVYR.N               | S23:       | 2 | 2,1179 | 0,308 | -0,703 |
| 16 | Q96A57 CT030_HUMAN | K.YSRLS#ST#DDGYIDLQFKK.T       | S23:T25:   | 3 | 5,5548 | 1     | -0,239 |
| 16 | Q7Z417 NUFP2_HUMAN | R.NS#AKGCENLNIVQDK.I           | S230:      | 3 | 3,5696 | 0,238 | -0,207 |
| 16 | Q7Z417 NUFP2_HUMAN | R.NS#AKGCENLNIVQDK.I           | S230:      | 2 | 2,9173 | 0,495 | -0,62  |
| 16 | P07900 HS90A_HUMAN | R.DKEVS#DDEAEK.E               | S231:      | 2 | 3,5084 | 0,352 | -0,579 |
| 16 | O15231 ZN185_HUMAN | R.RES#CGS#SVLTDFEGKDVATK.V     | S233:S236: | 3 | 4,5427 | 0,322 | 0,234  |
| 16 | Q3V6T2 GRDN_HUMAN  | R.DGLHFLPHASSSAQS#PCGS#PGM*K.R | S233:S237: | 3 | 3,1167 | 0,288 | -0,216 |
| 16 | Q9H7L9 SDS3_HUMAN  | K.RPAS#PS#SPEHLPATPAESPAQR.F   | S234:S236: | 3 | 4,673  | 0,435 | -0,075 |
| 16 | P62753 RS6_HUMAN   | R.LS#SLRAST#SKSESSQK.-         | S235:T241: | 2 | 2,2204 | 1     | -0,723 |

|    |                     |                                 |                    |   |        |       |        |
|----|---------------------|---------------------------------|--------------------|---|--------|-------|--------|
| 16 | P61247 RS3A_HUMAN   | K.LM*ELHGEGS#SSGK.A             | S236:              | 2 | 3,5175 | 0,471 | -0,427 |
| 16 | Q7Z699 SPRE1_HUMAN  | R.HVS#FQDEDEIVR.I               | S238:              | 2 | 3,4684 | 0,326 | 0,864  |
| 16 | O95671 ASML_HUMAN   | K.HDSIPAADTFEDLS#DVEGGGSEPTQR.D | S239:              | 3 | 6,7621 | 0,455 | -0,26  |
| 16 | Q13136 LIPA1_HUMAN  | R.SS#DGSLSHEEDLAK.V             | S239:              | 2 | 2,6333 | 0,221 | -0,392 |
| 16 | Q9UQ35 SRRM2_HUMAN  | R.VSGRTS#PPLDR.A                | S2398:             | 2 | 3,5411 | 0,253 | -0,354 |
| 16 | Q9UQ35 SRRM2_HUMAN  | R.VSGRTS#PPLDR.A                | S2398:             | 3 | 2,9549 | 0,403 | -1,593 |
| 16 | P51003 PAPOA_HUMAN  | K.HYGITS#PISLAAPK.E             | S24:               | 2 | 4,4394 | 0,47  | 0,159  |
| 16 | Q86WB0 NIPA_HUMAN   | K.NWGAVVRS#PEGTPQK.I            | S24:               | 2 | 2,892  | 0,249 | 0,286  |
| 16 | Q86TN4 TRPT1_HUMAN  | R.KPLSLAGDEETECQSS#PK.H         | S240:              | 3 | 4,6658 | 0,382 | -0,178 |
| 16 | Q8IYB3 SRRM1_HUMAN  | K.VKEPSVQEATS#TSDILK.V          | S240:              | 3 | 3,4289 | 0,315 | 0,096  |
| 16 | Q8IYB3 SRRM1_HUMAN  | K.VKEPSVQEATSTS#DILK.V          | S242:              | 2 | 4,0859 | 0,456 | -0,255 |
| 16 | Q8TC05 MDM1_HUMAN   | K.GLS#PVKEPK.L                  | S242:              | 2 | 2,347  | 0,376 | -0,825 |
| 16 | Q9HB09 B2L12_HUMAN  | K.LVRLS#SDSFAR.L                | S242:              | 2 | 2,2942 | 0,377 | 0,183  |
| 16 | Q6P2G2 Q6P2G2_HUMAN | K.GDSGESSGEGQPQDHS#PGPR.T       | S244:              | 3 | 3,5421 | 0,23  | -0,424 |
| 16 | Q9HB20 PKHA3_HUMAN  | R.TYS#DSTS#CSDIPLDPDRPVHCSK.N   | S244:S248:         | 3 | 3,4408 | 1     | 0,743  |
| 16 | P49792 RBP2_HUMAN   | K.DSLITPHVSRSS#T#PRES#PCGK.I    | S2457:T2458:S2462: | 3 | 3,7494 | 1     | 0,072  |
| 16 | Q9P0V3 SH3B4_HUMAN  | K.RSYS#LSELSVLQAK.S             | S246:              | 3 | 3,5408 | 0,207 | -0,22  |
| 16 | Q9H3N1 TXND1_HUMAN  | K.KVEEQEAEEDVS#EEEEASK.E        | S247:              | 3 | 4,7121 | 0,455 | 0,363  |
| 16 | Q9BZD4 NUF2_HUMAN   | K.IVDS#PEKLN.N                  | S247:              | 2 | 3,0722 | 0,226 | -0,33  |
| 16 | Q9UNF1 MAGD2_HUMAN  | R.ALLSLRS#PK.A                  | S247:              | 2 | 2,6907 | 0,267 | 0      |
| 16 | Q9Y2W1 TR150_HUMAN  | R.ERS#PALKS#PLQSVVVR.R          | S248:S253:         | 3 | 3,2886 | 0,504 | 0      |
| 16 | P30305 MPIP2_HUMAN  | R.KM*EVEELS#PLALGR.F            | S249:              | 2 | 3,9172 | 0,55  | 0,293  |
| 16 | Q9NYL9 TMOD3_HUMAN  | K.YKDLDEDELLGNLS#ETELK.Q        | S25:               | 3 | 4,1063 | 0,271 | -0,318 |
| 16 | Q9Y6A5 TACC3_HUMAN  | R.HGGVCAPAAVATS#PPGAIPK.E       | S250:              | 3 | 3,6464 | 0,272 | -0,566 |
| 16 | Q9Y6A5 TACC3_HUMAN  | R.HGGVCAPAAVATS#PPGAIPK.E       | S250:              | 2 | 2,9894 | 0,356 | -0,944 |
| 16 | P42167 LAP2B_HUMAN  | K.GGPLQALTRES#TR.G              | S250:              | 3 | 2,9139 | 0,257 | 0,062  |
| 16 | Q86X53 ERIC1_HUMAN  | R.ARQEEGADAS#EEDPTPAGEEDVK.D    | S254:              | 3 | 5,7701 | 0,359 | -0,437 |
| 16 | P06748 NPM_HUMAN    | K.M*QAS#IEKGGSLPK.V             | S254:              | 2 | 3,3011 | 0,375 | -0,592 |
| 16 | P21359 NF1_HUMAN    | K.S#FDHLISDTK.A                 | S2543:             | 2 | 2,2098 | 0,487 | -0,393 |
| 16 | Q9UBC2 EP15R_HUMAN  | R.STPSHGVSSSLNSTGSL#PK.H        | S255:              | 2 | 5,2742 | 0,489 | 0,364  |
| 16 | Q9UBC2 EP15R_HUMAN  | R.STPSHGVSSSLNSTGSL#PK.H        | S255:              | 3 | 3,0039 | 0,106 | 0,182  |
| 16 | O95359 TACC2_HUMAN  | K.KQALYLM*FDTSQES#PVK.S         | S2557:             | 3 | 4,4403 | 0,348 | 0,264  |
| 16 | P29966 MARCS_HUMAN  | K.GEAAAERPGEAAVAS#SPSK.A        | S26:               | 3 | 4,7336 | 0,301 | -1,275 |

|    |                    |                                       |              |   |        |       |        |
|----|--------------------|---------------------------------------|--------------|---|--------|-------|--------|
| 16 | Q92466 DDB2_HUMAN  | R.SRS#PLELEPEAK.K                     | S26:         | 2 | 3,694  | 0,271 | 0      |
| 16 | Q92466 DDB2_HUMAN  | R.SRS#PLELEPEAK.K                     | S26:         | 3 | 3,622  | 0,293 | -0,064 |
| 16 | P29966 MARCS_HUMAN | K.GEAAAERPGEAAVAS#SPSK.A              | S26:         | 2 | 2,8184 | 0,322 | -0,131 |
| 16 | P07900 HS90A_HUMAN | K.ESEDKPEIEDVGS#DEEEEK.K              | S263:        | 3 | 4,4228 | 0,422 | -0,161 |
| 16 | Q15208 STK38_HUMAN | R.NLNHSLPSDFTFQNMNS#K.R               | S264:        | 3 | 3,6626 | 0,27  | -0,252 |
| 16 | Q15208 STK38_HUMAN | R.NLNHSLPSDFTFQNM*NS#K.R              | S264:        | 3 | 3,4296 | 0,28  | 0,251  |
| 16 | Q9Y2H1 ST38L_HUMAN | R.NLTHNPPSDFSFQNM*NS#K.R              | S265:        | 3 | 5,0363 | 0,392 | 0,673  |
| 16 | Q9NTJ3 SMC4_HUMAN  | R.REEGPPPPSPDGAS#SDAEPEPPSGR.T        | S27:         | 3 | 4,6215 | 0,418 | -0,282 |
| 16 | P22234 PUR6_HUMAN  | K.TKEVYELLD#PGK.V                     | S27:         | 2 | 3,9797 | 0,505 | -0,47  |
| 16 | Q9C0D5 TANC1_HUMAN | R.RADNCS#PVAEEETTGAESTLPK.A           | S270:        | 3 | 3,6414 | 0,115 | -0,217 |
| 16 | P38432 P8OC_HUMAN  | R.NSS#EKLPTLSK.E                      | S272:        | 2 | 2,192  | 0,369 | -0,345 |
| 16 | Q12802 AKP13_HUMAN | K.SGSLDSELSVS#PKR.N                   | S2728:       | 2 | 2,8586 | 0,405 | 0      |
| 16 | Q6ZNJ1 NBEL2_HUMAN | R.RIS#QVSSGETEYNPTEAR.-               | S2739:       | 3 | 5,1271 | 0,288 | -0,783 |
| 16 | Q9UBF8 PI4KB_HUMAN | R.SKS#DATASISLSSNLK.R                 | S277:        | 2 | 5,0067 | 0,562 | -0,795 |
| 16 | Q8N556 AFAP1_HUMAN | K.KLS#SERPS#SDGEGVVENGITTCNGK.E       | S277:S282:   | 3 | 6,9842 | 0,58  | 0,197  |
| 16 | Q8IXT5 RB12B_HUMAN | R.S#RS#PLGFYVHLK.N                    | S278:S280:   | 3 | 2,9245 | 0,227 | -0,117 |
| 16 | Q9NTJ3 SMC4_HUMAN  | R.REEGPPPPSPDGASS#DAEPEPPSGR.T        | S28:         | 3 | 5,3182 | 0,442 | 0,141  |
| 16 | Q9Y2K7 JHD1A_HUMAN | R.YEDDGIS#DDEIEGKR.T                  | S28:         | 2 | 3,9033 | 0,606 | -0,469 |
| 16 | Q9Y2K7 JHD1A_HUMAN | R.YEDDGIS#DDEIEGKR.T                  | S28:         | 3 | 3,2703 | 0,477 | -0,402 |
| 16 | Q9UHR4 BI2L1_HUMAN | K.DYDTLSKCS#PK.M                      | S281:        | 2 | 3,2561 | 0,378 | -0,088 |
| 16 | Q9P289 MST4_HUMAN  | K.KTS#YLTELIDR.F                      | S282:        | 2 | 3,3316 | 0,314 | -0,43  |
| 16 | P46013 KI67_HUMAN  | K.IPKCS#SPELEDTATSSK.R                | S2827:       | 3 | 2,8038 | 0,267 | -0,095 |
| 16 | O94909 K0819_HUMAN | R.VSEDEEKLPAS#PK.H                    | S283:        | 3 | 3,3822 | 0,374 | -0,182 |
| 16 | Q6P4F7 RHGBA_HUMAN | R.RQS#VGDFVSGALNK.F                   | S285:        | 2 | 4,128  | 0,528 | 0      |
| 16 | Q6P4F7 RHGBA_HUMAN | R.RQS#VGDFVSGALNK.F                   | S285:        | 3 | 3,3862 | 0,389 | 0,117  |
| 16 | Q96T88 UHRF1_HUMAN | K.IERPGECS#PM*VDNPM*R.R               | S287:        | 2 | 3,1712 | 0,324 | 0,579  |
| 16 | Q96T88 UHRF1_HUMAN | K.IERPGECS#PM*VDNPM*R.R               | S287:        | 3 | 2,6221 | 0,346 | -0,096 |
| 16 | Q641Q2 FA21A_HUMAN | R.SRPTS#FADELAAR.I                    | S288:        | 2 | 3,4451 | 0,332 | -0,325 |
| 16 | O75170 SAPS2_HUMAN | R.RVGTEGLVDS#FSQGLER.S                | S289:        | 3 | 3,1559 | 0,274 | -0,284 |
| 16 | O95817 BAG3_HUMAN  | R.SSTPLHS#PSPIR.V                     | S289:        | 2 | 2,8955 | 0,397 | -0,269 |
| 16 | Q5T4S7 UBR4_HUMAN  | R.TSPADHGGVSGS#ES#GGSAVDSVAGEHSVSGR.S | S2895:S2897: | 3 | 4,0647 | 1     | 0,793  |
| 16 | Q8TF01 SFR18_HUMAN | R.SKFD#DEEEEDTENVEAASSGK.V            | S290:        | 3 | 4,8346 | 0,508 | 0,074  |
| 16 | O75152 ZC11A_HUMAN | R.KFS#AGGDSDPPLK.R                    | S290:        | 2 | 2,817  | 0,158 | -0,087 |

|    |                     |                                   |            |   |        |       |        |
|----|---------------------|-----------------------------------|------------|---|--------|-------|--------|
| 16 | Q13233 M3K1_HUMAN   | R.RAPS#PDGFSPYSPEETNR.R           | S292:      | 3 | 4,3936 | 0,139 | -0,263 |
| 16 | Q96125 SPF45_HUMAN  | K.KSDS#NPLTEILK.C                 | S293:      | 2 | 3,4468 | 0,284 | -0,771 |
| 16 | Q96124 FUBP3_HUMAN  | R.IQFKPDDGIS#PER.A                | S296:      | 3 | 3,7203 | 0,35  | -0,578 |
| 16 | Q96124 FUBP3_HUMAN  | R.IQFKPDDGIS#PER.A                | S296:      | 2 | 3,5889 | 0,458 | -0,694 |
| 16 | O14495 LPP3_HUMAN   | R.KEILS#PVDIIDR.N                 | S297:      | 2 | 3,3225 | 0,278 | 0,165  |
| 16 | P07910 HNRPC_HUMAN  | K.DDEKEAEEGEDDRDS#ANGEDDS.-       | S299:      | 3 | 2,795  | 0,114 | -0,73  |
| 16 | Q3KR37 GRM1B_HUMAN  | R.SRS#PTPQNQDGDGM*VEK.G           | S30:       | 3 | 4,3795 | 0,377 | -0,461 |
| 16 | O75379 VAMP4_HUMAN  | R.RNLEEDDS#DEEEDFFLR.G            | S30:       | 3 | 3,8596 | 0,373 | -0,494 |
| 16 | Q8NDI1 EHBP1_HUMAN  | R.KTEDS#FYNNNSYNPFK.E             | S302:      | 2 | 3,2427 | 0,435 | 0,379  |
| 16 | Q8NDI1 EHBP1_HUMAN  | R.KTEDS#FYNNNSYNPFK.E             | S302:      | 3 | 3,2176 | 0,232 | 0      |
| 16 | Q8WVM8 SCFD1_HUMAN  | R.VNLEESSGVENS#PAGARPK.R          | S303:      | 3 | 3,1178 | 0,195 | -0,272 |
| 16 | Q9UBW7 ZMYM2_HUMAN  | R.NQKQPGVDSLS#PVASLPK.Q           | S305:      | 3 | 4,3417 | 0,319 | 0,094  |
| 16 | Q9UBW7 ZMYM2_HUMAN  | R.NQKQPGVDSLS#PVASLPK.Q           | S305:      | 2 | 2,7632 | 0,215 | -0,251 |
| 16 | P35659 DEK_HUMAN    | K.ESESEDSS#DDEPLIKK.L             | S307:      | 2 | 2,5474 | 0,382 | 0,065  |
| 16 | P46013 KI67_HUMAN   | K.SGGSGHAVAEPAS#PEQELDQNK.G       | S308:      | 3 | 4,8786 | 0,357 | -0,56  |
| 16 | P55199 ELL_HUMAN    | R.KLCQPQSTGSLGDPAAASS#PPGER.G     | S309:      | 3 | 4,4345 | 0,35  | 0,144  |
| 16 | P62873 GBB1_HUMAN   | R.KACADATLS#QJITNNIDPVGR.I        | S31:       | 3 | 3,3081 | 0,19  | -0,411 |
| 16 | O43293 DAPK3_HUMAN  | K.SHS#SLPPNNSYADFER.F             | S311:      | 3 | 3,8943 | 0,385 | -0,192 |
| 16 | Q9UQ35 SRRM2_HUMAN  | R.RGEGDAPFS#EPGTTSTQRPS#SPETATK.Q | S311:S322: | 3 | 3,6957 | 1     | -0,682 |
| 16 | Q9BWU0 NADAP_HUMAN  | K.KM*LGEDS#DEEEEM*DTSER.K         | S312:      | 3 | 5,9517 | 0,467 | 0      |
| 16 | Q9BWU0 NADAP_HUMAN  | K.KMLGEDS#DEEEEM*DTSER.K          | S312:      | 3 | 5,2893 | 0,391 | -0,493 |
| 16 | Q9NQS7 INCE_HUMAN   | R.HSPIAPSS#PSPQVLAQK.Y            | S312:      | 2 | 4,7117 | 0,553 | 0,535  |
| 16 | O43293 DAPK3_HUMAN  | K.SHSS#LPPNNSYADFER.F             | S312:      | 2 | 3,437  | 0,328 | -0,963 |
| 16 | Q9HCE3 ZN532_HUMAN  | R.AADKS#PESQNLIDGTK.K             | S314:      | 2 | 4,1485 | 0,499 | -0,348 |
| 16 | Q9NQS7 INCE_HUMAN   | R.HSPIAPSSPS#PQVLAQK.Y            | S314:      | 3 | 3,6144 | 0,392 | 0,301  |
| 16 | P33993 MCM7_HUMAN   | K.SEDDES#GAGELTREELR.Q            | S314:      | 3 | 2,6032 | 0,157 | -0,371 |
| 16 | Q6MZP7 Q6MZP7_HUMAN | K.IAISPLKS#PNK.A                  | S314:      | 2 | 2,5537 | 0,145 | -0,196 |
| 16 | O00273 DFFA_HUMAN   | R.SISASKAS#PPGDLQNP.K.R           | S315:      | 2 | 4,2845 | 0,414 | -0,275 |
| 16 | P11940 PABP1_HUMAN  | R.KEFS#PPFGTITSAK.V               | S315:      | 2 | 3,2231 | 0,321 | 0,163  |
| 16 | P49454 CENPF_HUMAN  | K.VAQRS#PVDSGTILR.E               | S3150:     | 2 | 2,2427 | 0,237 | -0,773 |
| 16 | Q9BX40 LS14B_HUMAN  | K.SKS#FFDNISSELK.T                | S317:      | 2 | 4,5543 | 0,427 | -0,463 |
| 16 | P41229 JAD1C_HUMAN  | R.NHS#NAQFIESYVCR.M               | S317:      | 2 | 3,2414 | 0,353 | 0,27   |
| 16 | Q9BX40 LS14B_HUMAN  | K.SKS#FFDNISSELK.T                | S317:      | 3 | 3,2028 | 0,221 | 0      |

|    |                    |                               |              |   |        |       |        |
|----|--------------------|-------------------------------|--------------|---|--------|-------|--------|
| 16 | Q8N350 DOS_HUMAN   | R.HAS#LDGASPYFK.V             | S319:        | 2 | 3,9576 | 0,485 | -0,267 |
| 16 | Q96A65 EXOC4_HUMAN | R.TLS#TSDDEDRENEK.G           | S32:         | 2 | 2,9404 | 0,508 | 0,067  |
| 16 | Q9Y2W1 TR150_HUMAN | K.SPVGKS#PPSTGSTYGSSQK.E      | S320:        | 3 | 4,0805 | 0,465 | 0      |
| 16 | Q70CQ2 UBP34_HUMAN | R.RVS#S#DEEHTVDSCISDM*K.T     | S3207:S3208: | 3 | 4,1922 | 0,354 | 0,161  |
| 16 | O43684 BUB3_HUMAN  | R.QVTD AETPKKS#PCT.-          | S325:        | 2 | 2,2933 | 0,221 | -0,669 |
| 16 | Q6PJF5 RHDF2_HUMAN | R.GIPHSAS#PVS#PDGVQIPLKEYGR.A | S325:S328:   | 3 | 4,4285 | 0,411 | 0,499  |
| 16 | P38159 HNRPG_HUMAN | R.DGYGGRS#YSSS#RSDLYSSGR.D    | S326:S330:   | 3 | 3,2608 | 1     | -0,073 |
| 16 | Q12851 M4K2_HUMAN  | R.TPS#EIQFHQVK.F              | S327:        | 3 | 2,9642 | 0,21  | 0,262  |
| 16 | Q12851 M4K2_HUMAN  | R.TPS#EIQFHQVK.F              | S327:        | 2 | 2,3523 | 0,109 | 0,35   |
| 16 | Q15459 SF3A1_HUMAN | K.FGESEEVEMEVEVES#DEEDDKQEK.A | S329:        | 3 | 5,3639 | 0,419 | -0,407 |
| 16 | Q15459 SF3A1_HUMAN | K.FGESEEVEM*EVES#DEEDDKQEK.A  | S329:        | 3 | 4,5355 | 0,441 | 0,337  |
| 16 | P38159 HNRPG_HUMAN | R.DSYSS#SRSDLYSSGR.D          | S329:        | 3 | 4,0988 | 0,405 | -0,105 |
| 16 | Q86W50 MET10_HUMAN | K.ELSLKAS#PLR.S               | S329:        | 2 | 2,2785 | 0,253 | -0,204 |
| 16 | P78527 PRKDC_HUMAN | R.SRS#QGCSEQVLTVLK.T          | S3290:       | 3 | 5,1499 | 0,405 | -0,516 |
| 16 | P78527 PRKDC_HUMAN | R.SRS#QGCSEQVLTVLK.T          | S3290:       | 2 | 4,6938 | 0,525 | -0,62  |
| 16 | O95674 CDS2_HUMAN  | K.ESESEAKVDGETAS#DSESR.A      | S33:         | 3 | 4,1992 | 0,401 | -0,699 |
| 16 | Q99598 TSNAX_HUMAN | R.EGKDVNSSS#PVM*LAFK.S        | S33:         | 3 | 2,6469 | 0,118 | 0,203  |
| 16 | P05787 K2C8_HUMAN  | K.GQRAS#LEAAIADAEQR.G         | S330:        | 2 | 4,2603 | 0,48  | -0,484 |
| 16 | P05787 K2C8_HUMAN  | K.GQRAS#LEAAIADAEQR.G         | S330:        | 3 | 3,5312 | 0,276 | 0      |
| 16 | P38159 HNRPG_HUMAN | R.DSYSSRS#DLYSSGR.D           | S332:        | 2 | 2,4367 | 0,24  | -0,698 |
| 16 | P49790 NU153_HUMAN | K.RIPSIVSS#PLNSPLDR.S         | S334:        | 2 | 3,7994 | 0,522 | -0,4   |
| 16 | Q2TB10 ZN800_HUMAN | R.DSITPDIATKPGQPLFLDS#ISPKK.S | S334:        | 3 | 3,5748 | 0,378 | -0,415 |
| 16 | P49790 NU153_HUMAN | K.RIPSIVSS#PLNSPLDR.S         | S334:        | 3 | 3,3008 | 0,304 | -0,1   |
| 16 | Q9P1Y5 K1543_HUMAN | K.DLPDGHAAS#PR.G              | S334:        | 2 | 2,3802 | 0,385 | -0,301 |
| 16 | Q2TB10 ZN800_HUMAN | R.DSITPDIATKPGQPLFLDSIS#PKK.S | S336:        | 3 | 3,8819 | 0,27  | -0,484 |
| 16 | Q99569 PKP4_HUMAN  | R.VASPSQGQVGSSS#PKR.S         | S337:        | 2 | 3,1237 | 0,405 | -0,739 |
| 16 | P49790 NU153_HUMAN | K.RIPSIVSSPLNS#PLDR.S         | S338:        | 2 | 3,3006 | 0,387 | -0,267 |
| 16 | Q86X53 ERIC1_HUMAN | K.AHS#ILNFLK.S                | S339:        | 2 | 3,1438 | 0,418 | 0      |
| 16 | O75909 CCNK_HUMAN  | R.AVVVS#PKEENK.A              | S340:        | 2 | 3,3531 | 0,235 | -0,572 |
| 16 | Q09666 AHNK_HUMAN  | K.FKM*PFLSIS#SPK.V            | S3411:       | 2 | 2,5624 | 0,183 | 0,165  |
| 16 | Q09666 AHNK_HUMAN  | K.FKM*PFLSIS#PK.V             | S3412:       | 3 | 3,109  | 0,275 | 0,062  |
| 16 | Q09666 AHNK_HUMAN  | K.FKM*PFLSIS#PK.V             | S3412:       | 2 | 3,0834 | 0,17  | 0,248  |
| 16 | Q09666 AHNK_HUMAN  | K.FKMPFLSIS#PK.V              | S3412:       | 2 | 2,1501 | 0,206 | -0,501 |

|    |                    |                                 |            |   |        |       |        |
|----|--------------------|---------------------------------|------------|---|--------|-------|--------|
| 16 | P11940 PABP1_HUMAN | R.SKGFVFCVCFSS#PEEATK.A         | S342:      | 3 | 3,7439 | 0,344 | 0,187  |
| 16 | Q12968 NFAC3_HUMAN | R.KTS#EDQAAILPGK.L              | S344:      | 2 | 2,9746 | 0,366 | -0,339 |
| 16 | O14681 EI24_HUMAN  | K.FPS#PHPSPAK.L                 | S345:      | 2 | 2,483  | 0,105 | -0,107 |
| 16 | Q9H307 PININ_HUMAN | K.EIAIVHS#DAEK.E                | S347:      | 2 | 2,7159 | 0,417 | -0,189 |
| 16 | P30622 CLIP1_HUMAN | R.KIS#GTTALQEALK.E              | S348:      | 2 | 4,249  | 0,463 | -0,085 |
| 16 | P30622 CLIP1_HUMAN | R.KIS#GTTALQEALK.E              | S348:      | 3 | 3,0885 | 0,245 | 0,063  |
| 16 | P29401 TKT_HUMAN   | K.NSTFS#EIFKK.E                 | S348:      | 2 | 2,5158 | 0,337 | -0,191 |
| 16 | Q13428 TCOF_HUMAN  | K.AGKPEEDSESSSESSDS#EEETPAAK.A  | S349:      | 3 | 6,3333 | 0,493 | -0,524 |
| 16 | O60716 CTND1_HUMAN | R.GSLAS#LDSLRLK.G               | S349:      | 3 | 2,6922 | 0,294 | 0,075  |
| 16 | O60716 CTND1_HUMAN | R.GSLAS#LDSLRLK.G               | S349:      | 2 | 2,064  | 0,262 | 0      |
| 16 | P01892 1A02_HUMAN  | R.KGGSYSQAASSDS#AQGSDVSLTACKV.- | S352:      | 3 | 5,4174 | 0,355 | 0,346  |
| 16 | Q9UK58 CCNL1_HUMAN | K.AEEKS#PISINVK.T               | S352:      | 2 | 4,24   | 0,333 | -0,7   |
| 16 | Q9UK58 CCNL1_HUMAN | K.AEEKS#PISINVK.T               | S352:      | 3 | 3,2951 | 0,338 | -0,918 |
| 16 | P19338 NUCL_HUMAN  | R.KFGYVDFES#AEDLEK.A            | S356:      | 2 | 5,4825 | 0,388 | -0,263 |
| 16 | P19338 NUCL_HUMAN  | R.KFGYVDFES#AEDLEK.A            | S356:      | 3 | 4,1881 | 0,343 | -0,296 |
| 16 | P01892 1A02_HUMAN  | R.KGGSYSQAASSDSAQGSVSLTACKV.-   | S359:      | 3 | 5,1343 | 0,401 | 0,069  |
| 16 | Q5SW79 CE170_HUMAN | K.SIKS#DVPVYLK.R                | S359:      | 2 | 3,749  | 0,441 | 0      |
| 16 | P26045 PTN3_HUMAN  | R.SLS#VEHLETK.S                 | S359:      | 2 | 2,5504 | 0,227 | -0,698 |
| 16 | P16403 H12_HUMAN   | R.KAS#GPPVSELITK.A              | S36:       | 2 | 4,5105 | 0,52  | 0,087  |
| 16 | P16403 H12_HUMAN   | R.KAS#GPPVSELITK.A              | S36:       | 3 | 4,3137 | 0,368 | 0,13   |
| 16 | O60610 DIAP1_HUMAN | R.SPDELPSAGDGGKS#K.K            | S36:       | 2 | 2,8385 | 0,16  | 0      |
| 16 | Q7Z5L9 I2BP2_HUMAN | R.KPS#PEPEGEVGPPK.I             | S360:      | 2 | 4,2685 | 0,527 | -0,24  |
| 16 | Q7Z5L9 I2BP2_HUMAN | R.KPS#PEPEGEVGPPK.I             | S360:      | 3 | 3,8772 | 0,385 | 0,06   |
| 16 | Q7Z6E9 RBBP6_HUMAN | R.NLQPLM*RS#PISR.Q              | S360:      | 2 | 2,3539 | 0,235 | -0,405 |
| 16 | Q13905 RPGF1_HUMAN | K.LSKS#DEQLSSLDLDR.D            | S360:      | 2 | 2,2907 | 0,125 | -0,47  |
| 16 | Q9NZT2 OGFR_HUMAN  | R.S#QGDEAGGHGEDRPEPLS#PK.E      | S361:S378: | 3 | 3,1279 | 0,358 | -0,165 |
| 16 | Q9NYL2 MLTK_HUMAN  | R.KGDSSAEM*S#VYASLFK.E          | S362:      | 2 | 5,9635 | 0,577 | -0,403 |
| 16 | Q9NYL2 MLTK_HUMAN  | R.KGDSSAEM*S#VYASLFK.E          | S362:      | 3 | 3,6827 | 0,284 | 0      |
| 16 | Q15418 KS6A1_HUMAN | R.TPKDS#PGIPPS#AGAHQLFR.G       | S363:S369: | 3 | 2,881  | 0,218 | -0,257 |
| 16 | Q9NRX5 SERC1_HUMAN | R.SDGS#LEDGDDVHR.A              | S364:      | 2 | 3,2835 | 0,484 | -0,165 |
| 16 | Q9NRX5 SERC1_HUMAN | R.SDGS#LEDGDDVHR.A              | S364:      | 3 | 3,2802 | 0,427 | -0,062 |
| 16 | Q8IXJ6 SIRT2_HUMAN | R.EHASIDAQSGAGVNPSTAS#PK.K      | S368:      | 3 | 2,7918 | 0,099 | 0,16   |
| 16 | Q13428 TCOF_HUMAN  | K.ASGKTS#QVGAASAPAKES#PR.K      | S369:S381: | 3 | 3,6858 | 0,173 | -0,444 |

|    |                     |                              |            |   |        |       |        |
|----|---------------------|------------------------------|------------|---|--------|-------|--------|
| 16 | Q9NYM9 BET1L_HUMAN  | R.LKS#LALDIDR.D              | S37:       | 3 | 3,416  | 0,205 | 0,075  |
| 16 | Q9NYM9 BET1L_HUMAN  | R.LKS#LALDIDR.D              | S37:       | 2 | 2,6297 | 0,338 | -0,199 |
| 16 | O75122 CLAP2_HUMAN  | R.SRS#DIDVNAAGAK.A           | S370:      | 2 | 4,7507 | 0,518 | 0      |
| 16 | O75717 WDHD1_HUMAN  | R.QRS#HILEDDENS#VDISM*LK.T   | S374:S383: | 3 | 2,9886 | 0,287 | -0,456 |
| 16 | Q96ST2 IWS1_HUMAN   | K.M*DS#DEDEKEGEEK.V          | S377:      | 2 | 4,3291 | 0,4   | -0,484 |
| 16 | Q8TBC4 UBA3_HUMAN   | R.KENCPACSQLPQNIQFS#PSAK.L   | S377:      | 3 | 3,4564 | 0,193 | -0,295 |
| 16 | Q96ST2 IWS1_HUMAN   | K.M*DS#DEDEKEGEEK.V          | S377:      | 3 | 3,3748 | 0,485 | -0,311 |
| 16 | P42167 LAP2B_HUMAN  | K.GAAGRPLELS#DFR.M           | S378:      | 3 | 2,6568 | 0,401 | 0,062  |
| 16 | P12270 TPR_HUMAN    | R.KGAILSEEELAAM*S#PTAAAVAK.I | S379:      | 3 | 4,7588 | 0,382 | -0,325 |
| 16 | P16949 STMN1_HUMAN  | R.SKESVPEFPLS#PPK.K          | S38:       | 3 | 3,9957 | 0,366 | 0,113  |
| 16 | P16949 STMN1_HUMAN  | R.SKESVPEFPLS#PPK.K          | S38:       | 2 | 3,4582 | 0,427 | -0,376 |
| 16 | Q13428 TCOF_HUMAN   | K.TSQVGAASAPAKES#PR.K        | S381:      | 2 | 3,9209 | 0,545 | -1,491 |
| 16 | P49736 MCM2_HUMAN   | R.IQES#PGKVAAGR.L            | S381:      | 2 | 3,0287 | 0,33  | 0,094  |
| 16 | Q13428 TCOF_HUMAN   | K.TSQVGAASAPAKES#PR.K        | S381:      | 3 | 2,8241 | 0,311 | -0,223 |
| 16 | Q5QJE6 TDIF2_HUMAN  | K.S#PIKASDLTK.F              | S381:      | 2 | 2,2756 | 0,347 | 0,107  |
| 16 | Q8TEW0 PAR3_HUMAN   | K.NNYSSRFS#PDSQYIDNR.S       | S383:      | 3 | 5,3438 | 0,531 | -0,476 |
| 16 | O75717 WDHD1_HUMAN  | R.SHILEDDENS#VDISMLK.T       | S383:      | 2 | 4,6894 | 0,586 | -0,362 |
| 16 | O75717 WDHD1_HUMAN  | R.SHILEDDENS#VDISMLK.T       | S383:      | 3 | 4,4723 | 0,248 | -0,452 |
| 16 | O75717 WDHD1_HUMAN  | R.SHILEDDENS#VDISM*LK.T      | S383:      | 3 | 2,7089 | 0,14  | -0,09  |
| 16 | Q69YQ0 CYTSA_HUMAN  | R.KGS#SGNASEVSVACLTER.I      | S384:      | 3 | 3,7879 | 0,406 | 0,095  |
| 16 | Q9C0H9 SNIP_HUMAN   | R.KDS#GSSSVFAESPGGK.T        | S385:      | 2 | 5,6052 | 0,562 | 0,527  |
| 16 | Q9Y6K9 NEMO_HUMAN   | R.RS#PPEEPPDFCCPK.C          | S387:      | 2 | 3,0273 | 0,318 | -0,408 |
| 16 | Q15464 SHB_HUMAN    | K.HGS#PEFCGILGER.V           | S388:      | 2 | 4,6272 | 0,519 | -0,396 |
| 16 | P04075 ALDOA_HUMAN  | K.GILAADESTGS#IAKR.L         | S39:       | 2 | 3,5288 | 0,495 | -0,156 |
| 16 | Q99613 EIF3C_HUMAN  | K.QPLLLS#EDEEDTKR.V          | S39:       | 2 | 2,0028 | 0,345 | -0,348 |
| 16 | Q8NCF5 NF2IP_HUMAN  | R.KLS#FFFDGTK.L              | S390:      | 2 | 3,0976 | 0,333 | -0,673 |
| 16 | Q9UHV7 MED13_HUMAN  | R.KYS#ASSGGLCEEATAAK.V       | S395:      | 2 | 5,3975 | 0,564 | 0,202  |
| 16 | O43194 GPR39_HUMAN  | R.FVQRPLLFAS#R.R             | S396:      | 3 | 3,4559 | 0,297 | -0,259 |
| 16 | Q8N1F8 S11IP_HUMAN  | R.RAS#ISEPSDTPPEPR.T         | S398:      | 2 | 3,8831 | 0,508 | -0,562 |
| 16 | Q68DK7 Q68DK7_HUMAN | R.KS#PLGGGGGSGASSQAACKL.Q    | S4:        | 2 | 4,9268 | 0,59  | -0,587 |
| 16 | Q9UJY4 GGA2_HUMAN   | K.RNPSSS#TLPGGGVQNPSADR.N    | S402:      | 3 | 4,5571 | 0,454 | -0,44  |
| 16 | Q3YEC7 PARF_HUMAN   | R.LDRS#FLEDTPAR.D            | S402:      | 3 | 3,256  | 0,275 | 0      |
| 16 | Q3YEC7 PARF_HUMAN   | R.LDRS#FLEDTPAR.D            | S402:      | 2 | 2,7069 | 0,379 | -0,457 |

|    |                     |                                |            |   |        |       |        |
|----|---------------------|--------------------------------|------------|---|--------|-------|--------|
| 16 | Q9NVE7 PANK4_HUMAN  | R.ARS#GTFDLLEM*DR.L            | S404:      | 3 | 3,1243 | 0,229 | 0,455  |
| 16 | Q9BTX1 NDC1_HUMAN   | K.KLNS#PEETAFAQTPK.S           | S406:      | 3 | 4,7283 | 0,353 | -0,219 |
| 16 | Q9BTX1 NDC1_HUMAN   | K.KLNS#PEETAFAQTPK.S           | S406:      | 2 | 3,6035 | 0,39  | -0,438 |
| 16 | Q92870 APBB2_HUMAN  | R.NAPHPDDDDSCS#INSDPK.C        | S409:      | 3 | 4,2685 | 0,479 | 0,242  |
| 16 | Q15036 SNX17_HUMAN  | R.RSDS#QQAVKS#PPLLESPDATR.E    | S409:S415: | 3 | 5,5332 | 0,455 | -0,075 |
| 16 | Q9H4L5 OSBL3_HUMAN  | R.IHAESLLDS#PAVAK.S            | S410:      | 2 | 4,8661 | 0,568 | 0,371  |
| 16 | Q9H4L5 OSBL3_HUMAN  | R.IHAESLLDS#PAVAK.S            | S410:      | 3 | 3,3248 | 0,359 | -0,223 |
| 16 | P13807 GYS1_HUMAN   | R.KLYESLLVGS#LPDM*NK.M         | S412:      | 3 | 4,7225 | 0,297 | -0,384 |
| 16 | P49407 ARRB1_HUMAN  | K.DDKEEEEDGTGS#PQLNNR.-        | S412:      | 3 | 4,1397 | 0,552 | -0,087 |
| 16 | Q14157 UBP2L_HUMAN  | K.NPSDSAVHS#PFTK.R             | S416:      | 2 | 3,7417 | 0,528 | 0,083  |
| 16 | Q9NQC7 CYLD_HUMAN   | R.FHS#LPFSLTK.M                | S418:      | 2 | 2,8895 | 0,29  | -0,194 |
| 16 | Q2TB10 ZN800_HUMAN  | K.VKVEPADSVES#PPSIT#HSPQNELK.G | S419:T424: | 3 | 3,2134 | 0,106 | 0,774  |
| 16 | O95671 ASML_HUMAN   | K.KAEDLFQDAYYS#PETR.L          | S421:      | 3 | 4,0318 | 0,251 | 0,427  |
| 16 | O14974 MYPT1_HUMAN  | K.FPTTATKIS#PK.E               | S422:      | 2 | 2,9375 | 0,082 | -0,576 |
| 16 | O14974 MYPT1_HUMAN  | K.FPTTATKIS#PK.E               | S422:      | 3 | 2,7743 | 0,182 | 0      |
| 16 | Q13547 HDAC1_HUMAN  | R.IACEEEFSDS#EEEGEGGRK.N       | S423:      | 3 | 3,6355 | 0,324 | -0,082 |
| 16 | Q96S38 KS6C1_HUMAN  | K.FLNRS#PEESFDIK.E             | S423:      | 3 | 2,9021 | 0,142 | 0,11   |
| 16 | Q96S38 KS6C1_HUMAN  | K.FLNRS#PEES#FDIKEVK.K         | S423:S427: | 3 | 3,2159 | 0,243 | -0,61  |
| 16 | Q8NEZ4 MLL3_HUMAN   | K.NSENKESIPSLPQS#PM*R.E        | S4267:     | 3 | 3,1151 | 0,19  | -0,182 |
| 16 | O76021 RL1D1_HUMAN  | K.AAETPGKS#PEK.K               | S427:      | 2 | 3,2616 | 0,424 | -0,432 |
| 16 | Q9Y4F1 FARP1_HUMAN  | K.VSAGEPGSHPS#PAPR.R           | S427:      | 2 | 2,5067 | 0,366 | -1,119 |
| 16 | Q96JM3 ZN828_HUMAN  | R.KPGPPLS#PEIRS#PAGSPELR.K     | S427:S432: | 3 | 3,5633 | 0,341 | 0,489  |
| 16 | Q5H9R5 Q5H9R5_HUMAN | R.VAS#ETHS#EGSEYEELPKR.R       | S428:S432: | 3 | 3,7547 | 0,381 | -0,331 |
| 16 | Q86WR7 CJ047_HUMAN  | R.SRS#FTLDDESLK.Y              | S43:       | 2 | 4,456  | 0,437 | 0,165  |
| 16 | P08865 RSSA_HUMAN   | R.KS#DGIYIINLK.R               | S43:       | 2 | 3,9631 | 0,367 | -0,272 |
| 16 | Q8N2F6 ARM10_HUMAN  | R.SS#KSAGALEEGTSEGQLCGR.S      | S43:       | 3 | 3,0713 | 0,485 | -0,435 |
| 16 | Q9Y4B5 K0802_HUMAN  | R.APS#PARPFLK.D                | S43:       | 2 | 2,054  | 0,219 | -0,629 |
| 16 | Q8IXS8 F126B_HUMAN  | K.HLS#LPAGQVVPK.I              | S430:      | 2 | 2,9237 | 0,427 | -0,276 |
| 16 | Q8TBZ3 WDR20_HUMAN  | R.S#NSLPHSAVSNAGSK.S           | S432:      | 2 | 2,796  | 0,521 | 0      |
| 16 | Q9Y6J0 CABIN_HUMAN  | R.KLDPEEEDDS#FNNEYVQSEAK.L     | S433:      | 3 | 5,7682 | 0,416 | -0,998 |
| 16 | Q8TBZ3 WDR20_HUMAN  | R.SNS#LPHSAVSNAGSK.S           | S434:      | 3 | 3,4075 | 0,251 | 0      |
| 16 | Q14004 CD2L5_HUMAN  | R.HSS#ISPSTLTLK.S              | S437:      | 2 | 3,6923 | 0,367 | -0,632 |
| 16 | A6NIE6 RN3L1_HUMAN  | R.ALENDFFNS#PPRK.T             | S44:       | 3 | 2,931  | 0,412 | -0,113 |



|    |                    |                                 |                 |   |        |       |        |
|----|--------------------|---------------------------------|-----------------|---|--------|-------|--------|
| 16 | A6NIE6 RN3L1_HUMAN | R.ALENDFFNS#PPRK.T              | S44:            | 2 | 2,2362 | 0,271 | -0,604 |
| 16 | Q96RL1 UIMC1_HUMAN | R.RLEDAFIVIS#DS#DGEEPKEENGLQK.T | S44:S46:        | 3 | 3,5782 | 0,41  | -0,184 |
| 16 | Q9H6S0 YTDC2_HUMAN | R.KSS#ADTEFSDECTTAER.V          | S443:           | 3 | 5,0967 | 0,527 | -0,454 |
| 16 | O14974 MYPT1_HUMAN | R.KTGS#YGALAEITASK.E            | S445:           | 3 | 4,1339 | 0,386 | 0,116  |
| 16 | O14974 MYPT1_HUMAN | R.KTGS#YGALAEITASK.E            | S445:           | 2 | 4,1004 | 0,498 | -0,696 |
| 16 | P18887 XRCC1_HUMAN | K.TKPTQAAGPSS#PQKPPT#PEETK.A    | S447:T453:      | 3 | 4,0715 | 0,281 | 0,225  |
| 16 | O94804 STK10_HUMAN | K.ASQSRPNS#SALETLGGEK.L         | S454:           | 3 | 4,3962 | 0,305 | -0,096 |
| 16 | Q13098 CSN1_HUMAN  | K.SPPREGS#QGELTPANSQSR.M        | S454:           | 3 | 3,9237 | 0,136 | -0,88  |
| 16 | O94804 STK10_HUMAN | K.ASQSRPNS#SALETLGGEK.L         | S454:           | 2 | 2,8187 | 0,539 | 0,191  |
| 16 | Q07866 KLC1_HUMAN  | K.ACKVDS#PTVTITLK.N             | S456:           | 2 | 4,1031 | 0,428 | -0,381 |
| 16 | Q07866 KLC1_HUMAN  | K.ACKVDS#PTVTITLK.N             | S456:           | 3 | 4,0138 | 0,461 | -0,685 |
| 16 | P48634 BAT2_HUMAN  | R.KQS#SSEISLAVER.A              | S456:           | 2 | 3,488  | 0,292 | 0      |
| 16 | O75151 PHF2_HUMAN  | K.AVRPEVNTVAS#SDEVCDGDR.E       | S458:           | 3 | 6,0764 | 0,486 | -0,162 |
| 16 | Q96JM3 ZN828_HUMAN | R.KTS#PASLDFPESQK.S             | S459:           | 2 | 4,1516 | 0,411 | 0,227  |
| 16 | Q16875 F263_HUMAN  | R.RNS#VTPLASPEPTK.K             | S461:           | 2 | 3,2187 | 0,452 | -0,309 |
| 16 | Q8TBZ3 WDR20_HUMAN | K.FATLS#LHDR.K                  | S465:           | 2 | 2,6128 | 0,277 | -0,214 |
| 16 | Q9BWU0 NADAP_HUMAN | K.AKNWEDEDFYDS#DDDTFLDR.T       | S466:           | 3 | 5,0877 | 0,475 | -0,639 |
| 16 | Q96EP0 RNF31_HUMAN | R.RLS#APLPSSCGDPEK.Q            | S466:           | 2 | 3,4172 | 0,464 | -0,144 |
| 16 | Q99543 DNJC2_HUMAN | R.NAS#ASFQLEDKK.E               | S47:            | 2 | 4,1434 | 0,489 | 0,394  |
| 16 | Q99543 DNJC2_HUMAN | R.NAS#ASFQLEDKK.E               | S47:            | 3 | 2,8992 | 0,37  | 0,118  |
| 16 | P35368 ADA1B_HUMAN | R.HDS#GPLFTFK.L                 | S470:           | 2 | 3,6969 | 0,476 | -0,099 |
| 16 | Q8N3F8 MILK1_HUMAN | K.SLHPWYGITPTSS#PK.T            | S471:           | 3 | 2,8894 | 0,106 | -0,418 |
| 16 | Q8N3F8 MILK1_HUMAN | K.SLHPWYGITPTSS#PK.T            | S471:           | 2 | 2,8684 | 0,238 | -0,279 |
| 16 | O14578 CTRO_HUMAN  | R.RVS#EVEAVLSQK.E               | S480:           | 3 | 3,8623 | 0,429 | -0,064 |
| 16 | O14578 CTRO_HUMAN  | R.RVS#EVEAVLSQK.E               | S480:           | 2 | 3,7397 | 0,418 | -0,257 |
| 16 | Q9H6T3 RPAP3_HUMAN | K.KNSS#QDDLFPSTDP.A             | S481:           | 2 | 3,4465 | 0,5   | 1,034  |
| 16 | O43719 HTSF1_HUMAN | R.GFEGSCS#QKESSEGNPVR.G         | S481:           | 3 | 2,9054 | 0,364 | -0,528 |
| 16 | Q02952 AKA12_HUMAN | K.LKETCVSGEDPTQGADLS#PDEK.V     | S483:           | 3 | 5,7235 | 0,428 | 0,298  |
| 16 | Q96D71 REPS1_HUMAN | R.SHS#GTS#PDNTAPPPPPRPQPSHS#R.S | S485:S488:S506: | 3 | 3,1252 | 1     | 0,386  |
| 16 | Q99543 DNJC2_HUMAN | R.NASAS#FQLEDKK.E               | S49:            | 2 | 3,8298 | 0,406 | 0,158  |
| 16 | O95400 CD2B2_HUMAN | K.HSLDS#DEEEDDDGGSSK.Y          | S49:            | 3 | 3,7673 | 0,348 | -0,181 |
| 16 | P17096 HMGA1_HUMAN | R.KQPPVSPGTALVGSQKEPS#EVPT#PK.R | S49:T53:        | 3 | 3,6241 | 0,314 | -0,74  |
| 16 | Q7Z4V5 HDGR2_HUMAN | K.FALKVDS#PDVK.R                | S490:           | 2 | 3,6027 | 0,4   | 0,282  |

|    |                    |                                   |            |   |        |       |        |
|----|--------------------|-----------------------------------|------------|---|--------|-------|--------|
| 16 | Q7Z4V5 HDGR2_HUMAN | K.FALKVDS#PDVK.R                  | S490:      | 3 | 2,682  | 0,3   | 0,422  |
| 16 | Q96JG6 CC132_HUMAN | K.FM*EQS#RSPSVS#PSKQPVSTSSK.T     | S492:S498: | 3 | 3,9994 | 0,148 | 0,286  |
| 16 | Q6UN15 FIP1_HUMAN  | R.DHS#PTPSVFNS#DEERYR.Y           | S492:S500: | 3 | 2,9532 | 0,369 | 0,25   |
| 16 | Q8N1F8 S11IP_HUMAN | R.GPQES#PQKM*SEEV.R.A             | S493:      | 3 | 2,9316 | 0,172 | -0,646 |
| 16 | O60832 DKC1_HUMAN  | K.AGLESQAEPGDGDS#DTTKK.K          | S494:      | 2 | 3,2394 | 0,368 | 0,446  |
| 16 | Q96JG6 CC132_HUMAN | K.FM*EQSRS#PSVSPSK.Q              | S494:      | 2 | 2,806  | 0,325 | 0,293  |
| 16 | P23588 IF4B_HUMAN  | R.SSNPPARS#QSSDTEQQSPTS GGGK.V    | S495:      | 3 | 3,4566 | 0,256 | -0,518 |
| 16 | Q8NCD3 HJURP_HUMAN | K.AKS#LSEAFENLGK.R                | S496:      | 2 | 3,7089 | 0,496 | -0,414 |
| 16 | Q96RU3 FNBP1_HUMAN | R.RQS#GLYDSQNPPTVNNCAQDR.E        | S497:      | 3 | 4,3369 | 0,376 | 0,146  |
| 16 | P56817 BACE1_HUMAN | R.QQHDDFADDIS#LLK.-               | S498:      | 3 | 4,1456 | 0,323 | -0,212 |
| 16 | P56817 BACE1_HUMAN | R.QQHDDFADDIS#LLK.-               | S498:      | 2 | 2,653  | 0,339 | -0,212 |
| 16 | Q8TCJ2 STT3B_HUMAN | R.ENPPVEDS#SDEDDKR.N              | S498:      | 2 | 2,4904 | 0,394 | -0,741 |
| 16 | Q8TCJ2 STT3B_HUMAN | R.ENPPVEDS#S#DEDDKRNQGNLYDK.A     | S498:S499: | 3 | 3,3158 | 0,19  | 0,13   |
| 16 | P47736 RPGP1_HUMAN | R.RSS#AIGIENIQEVQEK.R             | S499:      | 2 | 4,9567 | 0,555 | -0,389 |
| 16 | Q9UQR0 SCML2_HUMAN | R.QSTKRS#PQQTVPYVVPLS#PK.L        | S499:S511: | 3 | 3,0964 | 0,151 | -0,152 |
| 16 | Q9P258 RCC2_HUMAN  | R.CSSSSGGGS#SGDEDGLELDGAPGGGKR.A  | S50:       | 3 | 6,5358 | 0,556 | -0,497 |
| 16 | Q13610 PWP1_HUMAN  | K.EKLQEEGGGS#DEEETGSPSEDGM*QSAR.T | S50:       | 3 | 6,3974 | 0,39  | 0,436  |
| 16 | Q13610 PWP1_HUMAN  | K.EKLQEEGGGS#DEEETGSPSEDGMQSAR.T  | S50:       | 3 | 4,7516 | 0,479 | 0,188  |
| 16 | Q9NX63 CHCH3_HUMAN | K.SQRYIS#GAYGASVSDEELK.R          | S50:       | 2 | 4,3413 | 0,537 | 0,662  |
| 16 | O15155 BET1_HUMAN  | K.SLS#IEIGHEVK.T                  | S50:       | 2 | 2,96   | 0,338 | -0,283 |
| 16 | Q68E01 INT3_HUMAN  | R.EKFPEFCSSPS#PPVEVK.I            | S502:      | 3 | 4,0725 | 0,415 | 0,358  |
| 16 | Q9Y5H9 PCDA2_HUMAN | R.ALSS#YVSVHAES#GK.V              | S506:S514: | 2 | 2,0641 | 0,119 | -0,689 |
| 16 | Q7Z4H7 FA29A_HUMAN | K.KIPEFEVENS#PLSDVAK.N            | S507:      | 3 | 4,3667 | 0,259 | -0,277 |
| 16 | Q7Z4H7 FA29A_HUMAN | K.KIPEFEVENS#PLSDVAK.N            | S507:      | 2 | 4,3065 | 0,573 | -0,308 |
| 16 | O14974 MYPT1_HUMAN | R.LAS#TSDIEEKENR.D                | S507:      | 3 | 3,014  | 0,363 | -0,349 |
| 16 | O14974 MYPT1_HUMAN | R.LAS#TSDIEEKENR.D                | S507:      | 2 | 2,8202 | 0,528 | -0,31  |
| 16 | Q07960 RHG01_HUMAN | K.SSS#PELVTHLK.W                  | S51:       | 3 | 3,59   | 0,177 | -0,429 |
| 16 | Q8N5D0 WDTC1_HUMAN | R.KDS#ISEDEM*VLR.E                | S511:      | 3 | 4,5671 | 0,316 | -0,12  |
| 16 | Q8N5D0 WDTC1_HUMAN | R.KDS#ISEDEM*VLR.E                | S511:      | 2 | 3,7001 | 0,444 | 0      |
| 16 | O43491 E41L2_HUMAN | K.FLTGSG#KFR.Y                    | S513:      | 2 | 2,6086 | 0,245 | -0,106 |
| 16 | Q15742 NAB2_HUMAN  | R.SS#VKVEAEASRQ.-                 | S515:      | 3 | 3,8845 | 0,363 | -0,667 |
| 16 | Q15742 NAB2_HUMAN  | R.SS#VKVEAEASR.Q                  | S515:      | 3 | 3,7516 | 0,386 | 0,294  |
| 16 | Q9H2V7 SPNS1_HUMAN | R.GRS#TRVPVASVLI.-                | S518:      | 2 | 2,4991 | 0,409 | -0,17  |

|    |                    |                               |            |   |        |       |        |
|----|--------------------|-------------------------------|------------|---|--------|-------|--------|
| 16 | P30086 PEBP1_HUMAN | K.NRPTS#ISWDGLDSGK.L          | S52:       | 2 | 3,7607 | 0,569 | -0,784 |
| 16 | O00567 NOL5A_HUMAN | K.SFSKEELM*SS#DLEETAGSTSIPK.R | S520:      | 3 | 3,3132 | 0,443 | -0,285 |
| 16 | Q15057 CENB2_HUMAN | K.YSISLS#PPEQKK.F             | S521:      | 2 | 3,4419 | 0,351 | 0,385  |
| 16 | Q8NI35 INADL_HUMAN | K.LEKVPDS#PENELK.S            | S522:      | 3 | 4,2505 | 0,357 | -0,116 |
| 16 | Q8NI35 INADL_HUMAN | K.LEKVPDS#PENELK.S            | S522:      | 2 | 3,005  | 0,241 | 0      |
| 16 | Q9NPI6 DCP1A_HUMAN | R.KASS#PSPLTIGTPESQR.K        | S523:      | 2 | 3,5299 | 0,507 | 0,066  |
| 16 | Q14004 CD2L5_HUMAN | K.IEHAPS#PSSGGTLK.N           | S525:      | 2 | 2,2818 | 0,289 | 0      |
| 16 | Q9BY44 EIF2A_HUMAN | R.NTVSQS#ISGDPEIDKK.I         | S526:      | 3 | 2,9454 | 0,337 | -0,203 |
| 16 | Q6VY07 PACS1_HUMAN | R.TNS#S#DSERSPDLGHSTQIPR.K    | S528:S529: | 3 | 4,5596 | 1     | -0,546 |
| 16 | Q6VY07 PACS1_HUMAN | R.TNSS#DSERS#PDLGHSTQIPR.K    | S529:S534: | 3 | 4,0055 | 1     | -0,234 |
| 16 | Q9UJX6 ANC2_HUMAN  | R.LLHQFSFS#PER.E              | S534:      | 3 | 4,2573 | 0,279 | 0      |
| 16 | Q9UJX6 ANC2_HUMAN  | R.LLHQFSFS#PER.E              | S534:      | 2 | 2,8746 | 0,423 | 0,254  |
| 16 | A8MT19 RHN2L_HUMAN | K.KLS#FLSWGTLK.N              | S536:      | 2 | 2,0476 | 0,141 | -0,269 |
| 16 | O75151 PHF2_HUMAN  | K.SRES#AS#PTIPNLDLLEAHTK.E    | S537:S539: | 3 | 3,7187 | 0,275 | -0,235 |
| 16 | Q14789 GOGB1_HUMAN | K.RSS#SAEESGQDVLENTFSQK.H     | S538:      | 3 | 5,4603 | 0,391 | 0,401  |
| 16 | Q9BST9 RTKN_HUMAN  | R.SVAPLPPQRS#PR.T             | S543:      | 2 | 2,247  | 0,111 | -0,264 |
| 16 | Q9H992 MARH7_HUMAN | K.IKESLLEDSD#EEEEGLDLCR.I     | S544:      | 3 | 6,2755 | 0,442 | 0,624  |
| 16 | P17987 TCPA_HUMAN  | K.HGS#YEDAVHSGALND.-          | S544:      | 2 | 4,5538 | 0,528 | -0,369 |
| 16 | Q8WYA6 CTBL1_HUMAN | K.EYAENIGDGRS#PEFR.E          | S545:      | 2 | 2,3388 | 0,294 | 0,268  |
| 16 | Q9H1B7 EAP1_HUMAN  | R.KAS#PEPPDSAEGALK.L          | S547:      | 3 | 4,2969 | 0,417 | -0,348 |
| 16 | Q9H1B7 EAP1_HUMAN  | R.KAS#PEPPDSAEGALK.L          | S547:      | 2 | 4,0693 | 0,516 | -0,077 |
| 16 | P35222 CTNB1_HUMAN | R.RTS#M*GGTQQQFVEGVR.M        | S552:      | 2 | 4,3535 | 0,617 | -0,845 |
| 16 | P35222 CTNB1_HUMAN | R.RTS#MGGTQQQFVEGVR.M         | S552:      | 2 | 3,2792 | 0,409 | 0,656  |
| 16 | P27824 CALX_HUMAN  | K.QKS#DAEEDGGTVSQEEEDR.K      | S554:      | 3 | 3,5934 | 0,312 | 0,167  |
| 16 | O60318 MCM3A_HUMAN | R.TGASSLLNKSS#PVK.K           | S557:      | 2 | 3,4537 | 0,295 | 0,581  |
| 16 | Q99471 PFD5_HUMAN  | K.DCLNVLNKS#NEGK.E            | S56:       | 2 | 4,0845 | 0,493 | 0,233  |
| 16 | P28066 PSA5_HUMAN  | K.RITS#PLM*EPSSIEK.I          | S56:       | 2 | 3,7057 | 0,36  | 0,362  |
| 16 | Q9NWZ5 UCKL1_HUMAN | R.LLPPVGTGRS#PR.K             | S56:       | 2 | 2,2108 | 0,282 | -0,55  |
| 16 | Q14807 KIF22_HUMAN | R.KLES#LDALEPEEK.A            | S562:      | 2 | 3,8396 | 0,319 | -0,386 |
| 16 | Q09666 AHNK_HUMAN  | K.FAGGLHFS#GPK.V              | S5620:     | 2 | 2,0528 | 0,328 | -0,306 |
| 16 | O60504 VINEX_HUMAN | R.SPADPTDLGGQTS#PRR.T         | S563:      | 2 | 2,1474 | 0,085 | -0,422 |
| 16 | P19338 NUCL_HUMAN  | R.LELQGRGS#PNAR.S             | S563:      | 2 | 2,1455 | 0,217 | -0,662 |
| 16 | O43422 P52K_HUMAN  | R.AHQGNLES#QLTSESYYK.E        | S566:      | 3 | 2,8828 | 0,164 | -0,18  |

|    |                    |                                |            |   |        |       |        |
|----|--------------------|--------------------------------|------------|---|--------|-------|--------|
| 16 | Q8WUF5 IASPP_HUMAN | R.HGGPGPGGPEPELS#PITEGSEAR.A   | S567:      | 3 | 6,6353 | 0,4   | 0,317  |
| 16 | Q9Y2K2 QSK_HUMAN   | R.RFS#DGAASIQAFK.A             | S568:      | 2 | 3,231  | 0,567 | -0,33  |
| 16 | Q9Y2K2 QSK_HUMAN   | R.RFS#DGAASIQAFK.A             | S568:      | 3 | 2,8082 | 0,199 | 0,619  |
| 16 | Q5T230 UTF1_HUMAN  | R.RPASPSALGELGLPVSPGS#AQR.T    | S57:       | 3 | 3,4059 | 0,112 | 0,164  |
| 16 | Q9Y2X7 GIT1_HUMAN  | R.KGVSASAVPFTPSS#PLLSCSQEGSR.H | S571:      | 3 | 2,7124 | 0,106 | 0,557  |
| 16 | Q7Z417 NUFP2_HUMAN | K.RTS#PQVLGSILK.S              | S572:      | 2 | 3,3779 | 0,32  | -0,619 |
| 16 | Q86UU1 PHLB1_HUMAN | R.KNS#ITEIS#DNEDDLLEYHR.R      | S578:S583: | 3 | 3,397  | 0,352 | 0,523  |
| 16 | Q14684 RRP1B_HUMAN | K.KAGPGS#LELCGLPSQK.T          | S579:      | 3 | 3,0958 | 0,279 | -0,106 |
| 16 | Q86TV6 TTC7B_HUMAN | K.LPISS#TSNLHVDR.E             | S58:       | 3 | 2,8619 | 0,229 | 0      |
| 16 | P68431 H31_HUMAN   | R.YQKS#TELLIR.K                | S58:       | 2 | 2,6487 | 0,149 | 0,458  |
| 16 | Q3KR37 GRM1B_HUMAN | R.VPHLEEVMS#SPVTT#PTDEDVGHR.I  | S581:T585: | 3 | 4,2932 | 0,471 | -0,838 |
| 16 | Q09666 AHNK_HUMAN  | K.FGTFGGLGS#KSK.G              | S5830:     | 2 | 2,4165 | 0,402 | 0      |
| 16 | O14639 ABLM1_HUMAN | R.SS#GREEDDEELLR.R             | S587:      | 3 | 3,6763 | 0,111 | -0,34  |
| 16 | Q9NZ53 PDXL2_HUMAN | K.RDPEDS#DVFEEDTHL.-           | S596:      | 2 | 4,763  | 0,522 | 0,518  |
| 16 | Q9NZ53 PDXL2_HUMAN | K.RDPEDS#DVFEEDTHL.-           | S596:      | 3 | 3,2697 | 0,243 | 0,194  |
| 16 | Q6NZY4 ZCHC8_HUMAN | K.SEAGHASS#PDSEVTSLCQK.E       | S598:      | 2 | 2,4988 | 0,442 | 0,354  |
| 16 | P0C7M2 RA1L3_HUMAN | K.SES#PKEPEQLR.K               | S6:        | 3 | 3,4689 | 0,192 | -0,133 |
| 16 | P0C7M2 RA1L3_HUMAN | K.SES#PKEPEQLR.K               | S6:        | 2 | 2,908  | 0,337 | -0,53  |
| 16 | O00629 IMA4_HUMAN  | R.NVPHEDECDS#DIDGDYR.V         | S60:       | 3 | 4,8023 | 0,363 | 0      |
| 16 | Q7Z460 CLAP1_HUMAN | R.SRS#DIDVNAAASAK.S            | S600:      | 2 | 5,2568 | 0,541 | -0,329 |
| 16 | Q15424 SAFB1_HUMAN | R.SVVS#FDKVK.E                 | S604:      | 2 | 2,7782 | 0,238 | -0,336 |
| 16 | Q14157 UBP2L_HUMAN | R.RYPSSIS#SS#PQKDLTQAK.N       | S607:S609: | 3 | 2,9073 | 0,261 | 0,34   |
| 16 | P50395 GDIB_HUMAN  | R.FKIPGS#PPESM*GR.G            | S61:       | 2 | 2,681  | 0,284 | -0,733 |
| 16 | Q86TM6 SYVN1_HUMAN | R.LQKLES#PVAH.-                | S613:      | 2 | 3,3668 | 0,434 | -0,305 |
| 16 | O00429 DNM1L_HUMAN | K.SKPIPIM*PAS#PQK.G            | S616:      | 2 | 3,0684 | 0,447 | -0,082 |
| 16 | O00429 DNM1L_HUMAN | K.SKPIPIMPAS#PQK.G             | S616:      | 2 | 3,0345 | 0,305 | 0,166  |
| 16 | O60244 MED14_HUMAN | R.KLS#DDPCPVESK.K              | S617:      | 2 | 4,0792 | 0,519 | -0,252 |
| 16 | Q07157 ZO1_HUMAN   | K.S#REDLSAQPVQTK.F             | S617:      | 3 | 3,4848 | 0,223 | 0,238  |
| 16 | Q07157 ZO1_HUMAN   | K.S#REDLSAQPVQTK.F             | S617:      | 2 | 2,6703 | 0,378 | 0,238  |
| 16 | Q13586 STIM1_HUMAN | R.SHS#PSSPDPDTPSPVGDSR.A       | S618:      | 2 | 4,3373 | 0,646 | -0,609 |
| 16 | P01106 MYC_HUMAN   | K.KFELLPTPLS#PSR.R             | S62:       | 2 | 4,0275 | 0,417 | -0,514 |
| 16 | Q9UPR5 NAC2_HUMAN  | K.RGIS#ALLLNQGDGDR.K           | S622:      | 3 | 2,7285 | 0,151 | 0      |
| 16 | Q99700 ATX2_HUMAN  | R.M*SSEGPprm*S#PK.A            | S623:      | 2 | 2,3767 | 0,24  | -0,431 |

|    |                     |                                |            |   |        |       |        |
|----|---------------------|--------------------------------|------------|---|--------|-------|--------|
| 16 | O75132 ZBED4_HUMAN  | K.TEVSETARPSS#PDTR.V           | S624:      | 3 | 3,1297 | 0,436 | -0,32  |
| 16 | Q9H165 BC11A_HUMAN  | K.KLLGSPSSLPFSK.R              | S625:      | 2 | 2,7754 | 0,22  | -0,52  |
| 16 | P31943 HNRH1_HUMAN  | R.EGRPSGEAFVELES#EDEVK.L       | S63:       | 3 | 4,9817 | 0,33  | 0,084  |
| 16 | P05412 JUN_HUMAN    | R.AKNSDLLTS#PDVGLLK.L          | S63:       | 3 | 3,3669 | 0,212 | -0,104 |
| 16 | P23763 VAMP1_HUMAN  | R.DQKLS#ELDDR.A                | S63:       | 2 | 3,1474 | 0,339 | -0,282 |
| 16 | P05412 JUN_HUMAN    | R.AKNSDLLTS#PDVGLLK.L          | S63:       | 2 | 3,0567 | 0,404 | -0,279 |
| 16 | O60238 BNI3L_HUMAN  | K.NGGLEHVPSS#SS#IHNGDM*EK.I    | S63:S65:   | 3 | 3,5216 | 0,296 | 0,081  |
| 16 | Q9H165 BC11A_HUMAN  | K.KLLGSPSSLPFSK.R              | S630:      | 2 | 4,6355 | 0,472 | -0,52  |
| 16 | Q9H165 BC11A_HUMAN  | K.KLLGSPSSLPFSK.R              | S630:      | 3 | 3,2911 | 0,372 | 0      |
| 16 | P42684 ABL2_HUMAN   | R.DKS#PSSLLEDAK.E              | S631:      | 2 | 3,3346 | 0,224 | -0,534 |
| 16 | O15085 ARHGB_HUMAN  | R.SRS#DVDM*DAAAATR.L           | S635:      | 2 | 5,2875 | 0,642 | -0,144 |
| 16 | O15085 ARHGB_HUMAN  | R.SRS#DVDM*DAAAATR.L           | S635:      | 2 | 5,0339 | 0,532 | 0,364  |
| 16 | O15085 ARHGB_HUMAN  | R.SRS#DVDM*DAAAATR.L           | S635:      | 3 | 3,3735 | 0,276 | 0,216  |
| 16 | P27816 MAP4_HUMAN   | K.KCS#LPAEEDSVLEK.L            | S636:      | 2 | 4,3465 | 0,481 | -1,014 |
| 16 | Q3YEC7 PARF_HUMAN   | R.LKNSDLFGLGLEEAGPKES#S#EEGK.E | S640:S641: | 3 | 3,3121 | 0,301 | -0,586 |
| 16 | Q9HCE9 TM16H_HUMAN  | R.RPGPSPEALLEEGS#PTM*VEK.G     | S641:      | 3 | 3,868  | 0,272 | -0,247 |
| 16 | Q6AI08 HEAT6_HUMAN  | K.KAPAGPSLEETS#PK.G            | S643:      | 2 | 3,421  | 0,508 | 0,138  |
| 16 | P52569 CTR2_HUMAN   | R.NLSS#PFIFHEK.T               | S647:      | 2 | 2,909  | 0,255 | -0,349 |
| 16 | Q13541 4EBP1_HUMAN  | K.FLMECRNS#PVTK.T              | S65:       | 2 | 2,9753 | 0,319 | -0,547 |
| 16 | O43155 FLRT2_HUMAN  | R.YCNSS#VPDLEHCHT.-            | S651:      | 3 | 2,8055 | 0,219 | 0      |
| 16 | Q9NSM8 Q9NSM8_HUMAN | K.AQKLPDLS#PVENK.E             | S652:      | 2 | 3,7145 | 0,338 | -0,321 |
| 16 | Q9NSM8 Q9NSM8_HUMAN | K.AQKLPDLS#PVENK.E             | S652:      | 3 | 3,2437 | 0,27  | -0,06  |
| 16 | Q13613 MTMR1_HUMAN  | R.GSS#PSHSATSVHTSV.-           | S653:      | 2 | 2,5318 | 0,433 | 0,08   |
| 16 | P35221 CTNA1_HUMAN  | R.SRTS#VQTEDDQLIAGQSAR.A       | S655:      | 3 | 4,9041 | 0,318 | 0,256  |
| 16 | Q05682 CALD1_HUMAN  | R.AEFLNKS#VQK.S                | S656:      | 2 | 2,4834 | 0,24  | -0,49  |
| 16 | Q92541 RTF1_HUMAN   | R.S#LNLEDYKK.R                 | S657:      | 2 | 2,3972 | 0,442 | -0,308 |
| 16 | Q68CZ2 TENS3_HUMAN  | R.GVGSGPHPPDTQQPS#PSK.A        | S660:      | 2 | 2,8701 | 0,302 | 0,132  |
| 16 | Q9UJF2 NGAP_HUMAN   | K.LKS#PSQDNTDSYFR.G            | S663:      | 3 | 3,2459 | 0,232 | -0,526 |
| 16 | Q16659 MK06_HUMAN   | R.GHEEGFLNNS#GEFLFNK.Q         | S665:      | 2 | 4,5618 | 0,483 | -0,483 |
| 16 | Q16659 MK06_HUMAN   | R.GHEEGFLNNS#GEFLFNK.Q         | S665:      | 3 | 4,3164 | 0,273 | -0,362 |
| 16 | Q96AC1 FERM2_HUMAN  | R.AKDQNES#LDEEM*FYK.L          | S666:      | 3 | 3,2586 | 0,243 | 0,377  |
| 16 | O94854 K0754_HUMAN  | R.RDS#DSFLNIFPEK.Q             | S666:      | 3 | 2,959  | 0,249 | -0,111 |
| 16 | Q96AC1 FERM2_HUMAN  | R.AKDQNES#LDEEMFYK.L           | S666:      | 3 | 2,9289 | 0,264 | 0      |

|    |                     |                               |            |   |        |       |        |
|----|---------------------|-------------------------------|------------|---|--------|-------|--------|
| 16 | O94854 K0754_HUMAN  | R.RDS#DSFLNIFPEK.Q            | S666:      | 2 | 2,677  | 0,192 | -0,518 |
| 16 | P08237 K6PF_HUMAN   | K.NVLGHM*QQGS#PTPFDR.N        | S667:      | 3 | 3,7331 | 0,354 | 0      |
| 16 | Q9C0D0 PHAR1_HUMAN  | R.SKS#DTPYLAEAR.I             | S67:       | 2 | 3,7553 | 0,443 | -0,172 |
| 16 | Q96F54 SIPA1_HUMAN  | R.SGSDAGEARPTPAS#PR.A         | S67:       | 3 | 3,3818 | 0,333 | -0,106 |
| 16 | Q9UEY8 ADDG_HUMAN   | K.SPEKIEEVLS#PEGSPSKS#PSK.K   | S673:S681: | 3 | 3,7325 | 0,242 | -0,386 |
| 16 | Q9UEY8 ADDG_HUMAN   | K.SPEKIEEVLSPEGS#PSKS#PSK.K   | S677:S681: | 3 | 5,3163 | 1     | -0,463 |
| 16 | Q9H0D6 XRN2_HUMAN   | R.RNS#LGGDVLVFGK.H            | S678:      | 2 | 4,1251 | 0,387 | 0,254  |
| 16 | Q9P2R6 RERE_HUMAN   | K.TQEISRPNS#PSEGESESSDR.S     | S679:      | 3 | 5,3536 | 0,53  | 0,079  |
| 16 | Q9HCM7 AUT2L_HUMAN  | R.RPLEAGS#PGQDLEPACDGR.K      | S68:       | 3 | 4,3941 | 0,269 | -0,42  |
| 16 | O15231 ZN185_HUMAN  | K.KS#TGSPTQETQAPPIAK.R        | S68:       | 3 | 3,3472 | 0,368 | -0,196 |
| 16 | O94868 FCSD2_HUMAN  | R.SSLYFPRS#PSANEK.S           | S681:      | 2 | 4,1395 | 0,414 | 0,293  |
| 16 | P49790 NU153_HUMAN  | K.CIACQAAKLS#PR.D             | S687:      | 2 | 3,243  | 0,291 | 0,587  |
| 16 | P49790 NU153_HUMAN  | K.CIACQAAKLS#PR.D             | S687:      | 3 | 2,8365 | 0,297 | -0,063 |
| 16 | Q63HJ5 Q63HJ5_HUMAN | R.KLANDFPLDLS#PVK.K           | S688:      | 2 | 4,5565 | 0,38  | -0,745 |
| 16 | Q63HJ5 Q63HJ5_HUMAN | R.KLANDFPLDLS#PVK.K           | S688:      | 3 | 3,3033 | 0,181 | -0,223 |
| 16 | O60303 K0556_HUMAN  | R.KDS#LSQLEEYLR.L             | S691:      | 2 | 4,0919 | 0,416 | -0,469 |
| 16 | O60303 K0556_HUMAN  | R.KDSLS#QLEEYLR.L             | S693:      | 3 | 3,9412 | 0,214 | -0,234 |
| 16 | Q9UKJ3 GPTC8_HUMAN  | R.KPS#VSEEVQATPNK.A           | S694:      | 2 | 4,6863 | 0,582 | -0,306 |
| 16 | Q86YV5 SG223_HUMAN  | K.SAS#FAFEFPKDR.S             | S696:      | 2 | 2,9374 | 0,256 | -0,082 |
| 16 | Q9UMX3 BOK_HUMAN    | R.RS#SVFAAEIM*DAFDR.S         | S7:        | 3 | 3,9541 | 0,386 | -0,505 |
| 16 | O75382 TRIM3_HUMAN  | K.REDS#PGPEVQPM*DK.Q          | S7:        | 3 | 3,3844 | 0,175 | 0      |
| 16 | P06748 NPM_HUMAN    | K.DELHIVEAEAM*NYEGS#PIK.V     | S70:       | 3 | 3,0867 | 0,154 | -0,327 |
| 16 | P52272 HNRPM_HUMAN  | K.GCGVVKFES#PEVAER.A          | S701:      | 2 | 3,6229 | 0,27  | -0,63  |
| 16 | O43150 DDEF2_HUMAN  | R.LLHEDLDES#DDDM*DEK.L        | S701:      | 3 | 3,544  | 0,138 | -0,272 |
| 16 | O15534 PER1_HUMAN   | R.KEPVVGGTSL#PLALANK.A        | S704:      | 3 | 5,7957 | 0,425 | 0      |
| 16 | O95425 SVIL_HUMAN   | R.EM*EKS#FDEQNVPK.R           | S707:      | 2 | 2,7303 | 0,304 | 0,437  |
| 16 | Q14671 PUM1_HUMAN   | R.RDS#LTGSSDLYK.R             | S709:      | 2 | 4,1448 | 0,494 | -0,515 |
| 16 | Q9UK76 HN1_HUMAN    | K.SS#GGREDLESSGLQR.R          | S71:       | 3 | 3,9645 | 0,259 | -0,331 |
| 16 | Q96KQ4 ASPP1_HUMAN  | K.RSS#ITEPEGPGGPNIQK.L        | S710:      | 3 | 3,2816 | 0,278 | -0,198 |
| 16 | P10636 TAU_HUMAN    | K.TDHGAEIVYKS#PVVSGDTS#PR.H   | S713:S721: | 3 | 6,3327 | 0,456 | -0,539 |
| 16 | Q96RT1 LAP2_HUMAN   | K.IRQEDENFNLLQNGDILNSS#TEEK.F | S715:      | 3 | 5,9818 | 0,427 | -0,554 |
| 16 | Q9H869 YYAP1_HUMAN  | K.VEHS#PGPPPVDK.Q             | S724:      | 3 | 3,5665 | 0,148 | -0,341 |
| 16 | Q12888 TP53B_HUMAN  | K.KECSEAM*EVETSVISIDS#PQK.L   | S727:      | 3 | 4,1267 | 0,432 | -0,149 |

|    |                    |                                    |                 |   |        |       |        |
|----|--------------------|------------------------------------|-----------------|---|--------|-------|--------|
| 16 | P46100 ATRX_HUMAN  | K.SKQSETVDQNS#DSDEM*LAILK.G        | S729:           | 3 | 5,4418 | 0,392 | -0,376 |
| 16 | Q66K74 MAP1S_HUMAN | R.S#AS#PHDVDLCLVS#PCEFEHRK.A       | S729:S731:S741: | 3 | 3,4481 | 0,115 | -0,134 |
| 16 | Q03188 CENPC_HUMAN | K.DTCIQS#PSKECQK.S                 | S73:            | 2 | 2,7808 | 0,234 | -1,028 |
| 16 | Q9UMY4 SNX12_HUMAN | R.RYS#DFEWLK.N                     | S73:            | 2 | 2,5224 | 0,24  | -0,645 |
| 16 | Q9NZM1 MYOF_HUMAN  | R.SLS#QIHEAAVR.M                   | S731:           | 2 | 3,0337 | 0,515 | -0,095 |
| 16 | Q13625 ASPP2_HUMAN | K.RS#SITEPEGPNGPNIQK.L             | S736:           | 3 | 3,4337 | 0,184 | 0,192  |
| 16 | Q13625 ASPP2_HUMAN | K.RSS#ITEPEGPNGPNIQK.L             | S737:           | 2 | 2,315  | 0,255 | 0,449  |
| 16 | Q6P0Q8 MAST2_HUMAN | R.KLS#NPDIFSSTGK.V                 | S74:            | 2 | 4,3095 | 0,509 | 0,331  |
| 16 | Q96C19 EFHD2_HUMAN | R.ADLNQGIGEPQS#PSRR.V              | S74:            | 3 | 3,8106 | 0,378 | -0,304 |
| 16 | Q96T37 RBM15_HUMAN | R.TTAPTEGKS#PLK.K                  | S741:           | 2 | 2,4972 | 0,42  | -0,745 |
| 16 | Q9ULL5 PRR12_HUMAN | K.KQETAAVCGETDEEAGES#GGEGIFR.E     | S747:           | 3 | 6,2793 | 0,512 | 0,338  |
| 16 | P28749 RBL1_HUMAN  | K.VKS#PVSLTAHSLIGAS#PK.Q           | S749:S762:      | 3 | 4,578  | 0,363 | -0,094 |
| 16 | Q9H063 MAF1_HUMAN  | R.LSKS#QGEEEEGPLSDK.C              | S75:            | 2 | 3,6647 | 0,514 | -0,421 |
| 16 | Q86UP2 KTN1_HUMAN  | K.EIQNGNLHES#DSES#VPRDFK.L         | S75:S79:        | 3 | 2,7056 | 0,27  | 0,446  |
| 16 | Q53EL6 PDCD4_HUMAN | R.DSGRGDS#VSDSGSDALR.S             | S76:            | 3 | 3,6572 | 0,301 | -0,208 |
| 16 | Q53EL6 PDCD4_HUMAN | R.DSGRGDS#VSDSGSDALR.S             | S76:            | 2 | 3,5891 | 0,475 | -0,139 |
| 16 | Q8NG31 CASC5_HUMAN | K.SLS#NPTPDYCHDK.M                 | S767:           | 2 | 2,6572 | 0,544 | -0,68  |
| 16 | Q8IYB3 SRRM1_HUMAN | K.KPPAPPS#PVQSQS#PSTNWSPA VPVKK.A  | S769:S775:      | 3 | 3,7239 | 1     | 0,765  |
| 16 | P54259 ATN1_HUMAN  | R.SEEIS#ESESEETNAPKK.T             | S77:            | 3 | 3,2754 | 0,381 | 0      |
| 16 | Q8WW12 PCNP_HUMAN  | K.FGFAIGS#QTTKK.A                  | S77:            | 2 | 3,1249 | 0,089 | -0,179 |
| 16 | Q8IYB3 SRRM1_HUMAN | K.KPPAPPS#PVQS#QS#PSTNWSPA VPVKK.A | S773:S775:      | 3 | 2,8935 | 0,24  | 0,191  |
| 16 | Q96N96 SPT13_HUMAN | R.FRPFTFSQS#TPIGLDR.V              | S78:            | 3 | 3,2996 | 0,185 | -0,563 |
| 16 | Q99700 ATX2_HUMAN  | K.GIS#PVVSEHR.K                    | S783:           | 2 | 2,2311 | 0,255 | -0,315 |
| 16 | P19634 SL9A1_HUMAN | R.SKETSSPGTDDVFTPAPSDS#PSSQR.I     | S785:           | 3 | 5,4229 | 0,445 | 0,344  |
| 16 | P42566 EP15_HUMAN  | R.SINKLDS#PDPFK.L                  | S796:           | 2 | 3,9146 | 0,432 | -0,339 |
| 16 | Q9UMX3 BOK_HUMAN   | R.RSS#VFAAEIM*DAFDR.S              | S8:             | 3 | 3,2835 | 0,297 | -0,404 |
| 16 | Q13085 ACACA_HUMAN | R.SSM*S#GLHLVK.Q                   | S80:            | 2 | 3,5328 | 0,337 | -0,423 |
| 16 | Q9H410 DSN1_HUMAN  | K.SLHLS#PQEQSASYQDR.R              | S81:            | 2 | 3,1274 | 0,391 | -0,634 |
| 16 | Q9H410 DSN1_HUMAN  | K.SLHLS#PQEQSASYQDR.R              | S81:            | 3 | 3,0328 | 0,084 | -0,475 |
| 16 | P35869 AHR_HUMAN   | R.AKS#FFDVALK.S                    | S81:            | 2 | 2,4828 | 0,129 | 0,101  |
| 16 | P04792 HSPB1_HUMAN | R.ALSRQLS#SGVSEIR.H                | S82:            | 3 | 3,5056 | 0,354 | 0,116  |
| 16 | Q2PPJ7 AS250_HUMAN | R.RSS#S#PAELDLKDDLQQTQGK.C         | S820:S821:      | 3 | 4,2165 | 0,361 | -0,231 |
| 16 | Q9NPR2 SEM4B_HUMAN | R.VRLGS#EIRDSVV.-                  | S825:           | 2 | 2,3121 | 0,526 | -0,173 |

|    |                     |                               |            |   |        |       |        |
|----|---------------------|-------------------------------|------------|---|--------|-------|--------|
| 16 | Q12770 SCAP_HUMAN   | R.RDSGVGS#GLEAQESWER.L        | S826:      | 3 | 3,2862 | 0,311 | 0,188  |
| 16 | Q96FS4 SIPA1_HUMAN  | R.TEFLHSQNSLS#PR.S            | S839:      | 2 | 3,9003 | 0,482 | -0,076 |
| 16 | Q96FS4 SIPA1_HUMAN  | R.TEFLHSQNSLS#PR.S            | S839:      | 3 | 2,9144 | 0,297 | -0,115 |
| 16 | A8MYB5 A8MYB5_HUMAN | R.SPQEEDFRCPS#DEDFR.Q         | S839:      | 3 | 2,8588 | 0,185 | -0,524 |
| 16 | O60296 TRAK2_HUMAN  | R.QHASDALS#PVLAEETFR.Y        | S84:       | 2 | 3,3856 | 0,499 | -0,375 |
| 16 | O60296 TRAK2_HUMAN  | R.QHASDALS#PVLAEETFR.Y        | S84:       | 3 | 3,2788 | 0,465 | -0,094 |
| 16 | Q8IVF2 AHNK2_HUMAN  | K.FKM*PS#FGVSAPGK.S           | S842:      | 3 | 2,6308 | 0,249 | -0,063 |
| 16 | P49023 PAXI_HUMAN   | R.FIHQQPQSSS#PVGSSAK.T        | S85:       | 3 | 5,1579 | 0,406 | -0,09  |
| 16 | P49023 PAXI_HUMAN   | R.FIHQQPQSSS#PVGSSAK.T        | S85:       | 2 | 2,7058 | 0,429 | 0,481  |
| 16 | Q9NXG2 THUM1_HUMAN  | K.FTDKDDQPS#GS#EGEDDDAEALKK.E | S86:S88:   | 3 | 5,0538 | 0,545 | 0,067  |
| 16 | Q9UPN9 TRI33_HUMAN  | K.QSGLSSLVNGKS#PIR.S          | S862:      | 3 | 3,3745 | 0,401 | -0,113 |
| 16 | Q9UKV3 ACINU_HUMAN  | K.KPS#ISITTESLK.S             | S863:      | 2 | 2,8435 | 0,415 | 0,088  |
| 16 | Q68CZ2 TENS3_HUMAN  | R.HPPFS#PPEPPLSS#PASQHK.G     | S866:S874: | 3 | 3,0665 | 0,341 | -0,25  |
| 16 | Q9UK76 HN1_HUMAN    | R.RNS#SEASSGDFLDLK.G          | S87:       | 2 | 4,7237 | 0,488 | 0,215  |
| 16 | Q96RT1 LAP2_HUMAN   | K.SHS#ITNM*EIGGLK.I           | S872:      | 2 | 3,3147 | 0,588 | -0,576 |
| 16 | Q8IYB3 SRRM1_HUMAN  | K.KETES#EAEDNLDDLEK.H         | S874:      | 3 | 5,2084 | 0,435 | 0,47   |
| 16 | Q8IYB3 SRRM1_HUMAN  | K.KETES#EAEDNLDDLEK.H         | S874:      | 2 | 4,6555 | 0,513 | 1,004  |
| 16 | Q9H7N4 SFR19_HUMAN  | R.S#PFLKPDER.A                | S874:      | 2 | 2,0104 | 0,106 | -0,417 |
| 16 | Q5T200 ZC3HD_HUMAN  | R.SLS#PSHLTEDR.Q              | S877:      | 2 | 3,1705 | 0,481 | -0,185 |
| 16 | Q9UK76 HN1_HUMAN    | R.RNSS#EASSGDFLDLK.G          | S88:       | 3 | 3,7696 | 0,36  | 0,107  |
| 16 | P38159 HNRPG_HUMAN  | K.VEQATKPS#FESGR.R            | S88:       | 2 | 3,4956 | 0,547 | -0,08  |
| 16 | Q6ZRV2 FA83H_HUMAN  | R.RGS#PTTGFIQKGS#PTSAYPER.R   | S892:S903: | 3 | 3,74   | 1     | 0,362  |
| 16 | P19838 NFKB1_HUMAN  | K.TTSAHSLPLS#PASTR.Q          | S907:      | 2 | 3,53   | 0,566 | -0,563 |
| 16 | Q07157 ZO1_HUMAN    | R.IDS#PGFKPASQK.A             | S912:      | 3 | 2,7016 | 0,232 | -0,308 |
| 16 | Q7Z2Z1 CO042_HUMAN  | R.NLNFQELLS#PSKR.S            | S923:      | 2 | 2,0619 | 0,325 | 0,675  |
| 16 | Q9Y5U2 TSSC4_HUMAN  | R.S#RDIFDCLEGAAR.R            | S93:       | 3 | 3,0024 | 0,125 | 0      |
| 16 | Q6ZRV2 FA83H_HUMAN  | R.RGS#LTLTISGESPK.A           | S936:      | 2 | 3,6627 | 0,542 | 0,08   |
| 16 | Q6ZRV2 FA83H_HUMAN  | R.RGS#LTLTISGESPK.A           | S936:      | 3 | 3,5886 | 0,387 | -0,06  |
| 16 | Q01831 XPC_HUMAN    | K.VIKDEALS#DGDDL.R.D          | S94:       | 2 | 3,9527 | 0,58  | -0,45  |
| 16 | O43847 NRDC_HUMAN   | R.RGS#LSNAGDPEIVK.S           | S94:       | 2 | 3,7786 | 0,42  | -0,721 |
| 16 | Q01831 XPC_HUMAN    | K.VIKDEALS#DGDDL.R.D          | S94:       | 3 | 3,2217 | 0,343 | -0,337 |
| 16 | O43847 NRDC_HUMAN   | R.RGS#LSNAGDPEIVK.S           | S94:       | 3 | 2,8083 | 0,268 | -0,961 |
| 16 | P35658 NU214_HUMAN  | K.VPAKLS#PM*K.Q               | S940:      | 2 | 3,0051 | 0,529 | -0,229 |



|    |                     |                                |              |   |        |       |        |
|----|---------------------|--------------------------------|--------------|---|--------|-------|--------|
| 16 | Q96NY9 MUS81_HUMAN  | R.TSGGDHAPDS#PSGENSPAPQGR.L    | S95:         | 3 | 5,4911 | 0,422 | -0,249 |
| 16 | A7KAX9 A7KAX9_HUMAN | R.DATNRS#PTQIVK.M              | S952:        | 2 | 2,8546 | 0,147 | -0,26  |
| 16 | Q8IXM2 CQ049_HUMAN  | R.KVYEDSGIPLPAES#PK.K          | S96:         | 2 | 4,3847 | 0,472 | -0,607 |
| 16 | Q15154 PCM1_HUMAN   | K.NNCPFS#ADENYRPLAK.T          | S960:        | 3 | 3,6537 | 0,16  | -0,185 |
| 16 | Q15154 PCM1_HUMAN   | K.NNCPFS#ADENYRPLAK.T          | S960:        | 2 | 3,3834 | 0,495 | -0,556 |
| 16 | Q5T1M5 FKB15_HUMAN  | R.RPSQEQSAS#ASSGQPQAPLNR.E     | S962:        | 3 | 3,6767 | 0,359 | -0,402 |
| 16 | Q5VZK9 LR16A_HUMAN  | K.RS#SGFISELPSEEGK.K           | S967:        | 3 | 3,6026 | 0,228 | -0,107 |
| 16 | Q5VZK9 LR16A_HUMAN  | K.RSS#GFISELPSEEGK.K           | S968:        | 2 | 4,0996 | 0,486 | -0,573 |
| 16 | Q15032 R3HD1_HUMAN  | K.KAAS#TDLGAGETVVGK.V          | S973:        | 2 | 3,61   | 0,53  | -0,077 |
| 16 | O95785 WIZ_HUMAN    | K.GLGHPPS#SPLLK.K              | S982:        | 2 | 2,135  | 0,146 | 0      |
| 16 | P05114 HMGN1_HUMAN  | K.TEESPASDEAGEKEAKS#D.-        | S99:         | 2 | 4,0026 | 0,573 | -0,747 |
| 16 | Q9P2D0 IBTK_HUMAN   | R.KRS#DSS#GGYNLSIIQSPSSTGLLK.S | S990:S993:   | 3 | 3,5237 | 1     | -0,528 |
| 16 | Q6ZRV2 FA83H_HUMAN  | R.RM*EDEGGFPVPQENGQPES#PR.R    | S998:        | 3 | 3,8392 | 0,283 | 0,224  |
| 16 | Q9UQ35 SRRM2_HUMAN  | K.VKAQT#PPGPSLSGSK.S           | T1003:       | 3 | 3,6877 | 0,33  | -0,06  |
| 16 | Q9UQ35 SRRM2_HUMAN  | K.VKAQT#PPGPSLSGSKS#PCPQEK.S   | T1003:S1014: | 3 | 4,7971 | 0,293 | -0,225 |
| 16 | P52948 NUP98_HUMAN  | K.T#RSLVGLLQSK.F               | T1041:       | 3 | 4,0647 | 0,23  | 0,205  |
| 16 | Q9BYG5 PAR6B_HUMAN  | K.KEEADYSAFGTDT#LIK.K          | T108:        | 2 | 3,9325 | 0,446 | -0,588 |
| 16 | P19338 NUCL_HUMAN   | K.GAT#PGKALVAT#PGKK.G          | T113:T121:   | 3 | 4,7435 | 0,414 | -0,118 |
| 16 | Q13416 ORC2_HUMAN   | K.LASELAKT#PQK.S               | T116:        | 2 | 2,6771 | 0,21  | -0,096 |
| 16 | Q5VZL5 ZMYM4_HUMAN  | R.VT#QHESDNENEIQIQNK.L         | T118:        | 3 | 3,3093 | 0,144 | -0,261 |
| 16 | Q15393 SF3B3_HUMAN  | K.NVSEELDRT#PPEVSK.K           | T1200:       | 2 | 2,6619 | 0,178 | -1,165 |
| 16 | Q9H6Z4 RANB3_HUMAN  | R.ERT#SSLTQFPQSSEER.S          | T124:        | 3 | 3,37   | 0,243 | 0      |
| 16 | O75367 H2AY_HUMAN   | K.GKLEAIT#PPPAK.K              | T129:        | 2 | 3,0991 | 0,454 | -0,086 |
| 16 | P62241 RS8_HUMAN    | K.GAKLT#PEEEIILNK.K            | T130:        | 3 | 4,5359 | 0,293 | 0,111  |
| 16 | P62241 RS8_HUMAN    | K.GAKLT#PEEEIILNK.K            | T130:        | 2 | 4,1799 | 0,515 | 0,517  |
| 16 | P46013 KI67_HUMAN   | K.LDLTENLT#GSKR.R              | T1327:       | 2 | 2,0427 | 0,309 | 0,428  |
| 16 | O75976 CBPD_HUMAN   | K.SLLSHEFQDET#DT#EEETLYSSKH.-  | T1368:T1370: | 3 | 4,2119 | 1     | 0,698  |
| 16 | Q96MW1 CCD43_HUMAN  | R.KAALLAQYADVT#DEEDEADEK.D     | T139:        | 3 | 6,8275 | 0,57  | 0,381  |
| 16 | Q8WW12 PCNP_HUMAN   | K.NIGRDT#PTSAGPNSFNK.G         | T139:        | 2 | 4,1967 | 0,602 | 0,066  |
| 16 | Q8WW12 PCNP_HUMAN   | K.NIGRDT#PTSAGPNSFNK.G         | T139:        | 3 | 3,5747 | 0,44  | -0,296 |
| 16 | P25054 APC_HUMAN    | R.SKT#PPPPPQTAQTK.R            | T1438:       | 3 | 4,4107 | 0,394 | 0,117  |
| 16 | P29966 MARCS_HUMAN  | K.AEDGATPSPSNET#PKK.K          | T150:        | 2 | 2,6735 | 0,304 | -0,643 |
| 16 | P16157 ANK1_HUMAN   | R.ITHSPT#VSQVTER.S             | T1688:       | 3 | 3,8802 | 0,291 | 0,357  |

|    |                     |                              |                 |   |        |       |        |
|----|---------------------|------------------------------|-----------------|---|--------|-------|--------|
| 16 | O95456 PSMG1_HUMAN  | R.AGT#EDEEEEEGR.R.E          | T18:            | 2 | 2,4201 | 0,394 | -0,782 |
| 16 | A8MQ02 A8MQ02_HUMAN | R.KLT#ELENELNTK.-            | T1815:          | 2 | 2,7754 | 0,452 | -0,081 |
| 16 | P28482 MK01_HUMAN   | R.VADPDHDHTGFLT#EY#VATR.W    | T185:Y187:      | 3 | 5,2931 | 0,462 | -0,159 |
| 16 | Q8N6T3 ARFG1_HUMAN  | R.YVGFNGT#PPPQKK.E           | T189:           | 2 | 4,4042 | 0,523 | 0,081  |
| 16 | P27361 MK03_HUMAN   | R.IADPEHDHTGFLT#EY#VATR.W    | T202:Y204:      | 3 | 4,8484 | 0,424 | -0,157 |
| 16 | P38159 HNRPG_HUMAN  | R.DDGYST#KDSYSSR.D           | T216:           | 3 | 2,6549 | 0,265 | 0      |
| 16 | Q9BV73 CP250_HUMAN  | R.LHSPGAT#STAELGSR.G         | T2233:          | 3 | 3,1536 | 0,379 | 0,117  |
| 16 | Q71U36 TBA1A_HUMAN  | R.NLDIERPTYT#NLNR.L          | T225:           | 2 | 2,08   | 0,318 | -0,068 |
| 16 | Q2NL66 Q2NL66_HUMAN | R.GPST#PKKPLEQSC.-           | T226:           | 2 | 3,3745 | 0,554 | -1,132 |
| 16 | P63313 TYB10_HUMAN  | K.TET#QEKNLPTK.E             | T23:            | 3 | 3,7348 | 0,26  | 0      |
| 16 | P63313 TYB10_HUMAN  | K.TET#QEKNLPTK.E             | T23:            | 2 | 3,4845 | 0,362 | -0,249 |
| 16 | P17275 JUNB_HUMAN   | R.SRDAT#PPVSPINM*EDQER.I     | T255:           | 3 | 4,5306 | 0,386 | -0,428 |
| 16 | Q5T200 ZC3HD_HUMAN  | K.KGPRT#PS#PPPIPEDIALGK.K    | T263:S265:      | 3 | 4,8468 | 0,386 | 0,164  |
| 16 | Q13501 SQSTM_HUMAN  | R.SRLT#PVSPESSTEEL.S         | T269:           | 2 | 3,2498 | 0,147 | 0      |
| 16 | Q9UBF8 PI4KB_HUMAN  | R.SKSDAT#ASISLSSNLK.R        | T280:           | 3 | 3,9858 | 0,291 | -0,433 |
| 16 | Q02952 AKA12_HUMAN  | K.SAESPT#SPVTSETGSTFKK.F     | T285:           | 3 | 2,8868 | 0,204 | -0,543 |
| 16 | Q641Q2 FA21A_HUMAN  | R.SRPT#SFADELAAR.I           | T287:           | 3 | 3,4783 | 0,256 | 0      |
| 16 | Q14457 BECN1_HUMAN  | R.CSQPLKLDTSFK.I             | T29:            | 3 | 2,6451 | 0,411 | -0,304 |
| 16 | Q14677 EPN4_HUMAN   | K.ASPDQNASTHT#PQSSVK.T       | T308:           | 2 | 2,8887 | 0,348 | -0,465 |
| 16 | Q13428 TCOF_HUMAN   | R.AASAPAKGT#PGKGAT#PAPPK.A   | T310:T316:      | 3 | 3,2783 | 0,336 | -0,643 |
| 16 | O00418 EF2K_HUMAN   | K.LLQSAKT#ILR.G              | T348:           | 3 | 3,6501 | 0,269 | 0,374  |
| 16 | O00418 EF2K_HUMAN   | K.LLQSAKT#ILR.G              | T348:           | 2 | 2,9985 | 0,392 | -0,2   |
| 16 | O00418 EF2K_HUMAN   | K.LLQSAKT#ILRGT#EEK.C        | T348:T353:      | 2 | 3,6345 | 0,491 | -0,462 |
| 16 | Q08AE8 SPIR1_HUMAN  | K.FLPISST#PQPERR.Q           | T350:           | 2 | 2,5624 | 0,216 | -0,759 |
| 16 | Q9UQB8 BAIP2_HUMAN  | K.NSYATTENKT#LPR.S           | T360:           | 2 | 2,9191 | 0,302 | -0,465 |
| 16 | O60271 JIP4_HUMAN   | K.DLSGYKGSST#PTK.G           | T365:           | 2 | 2,3995 | 0,316 | -0,172 |
| 16 | Q9UK32 KS6A6_HUMAN  | K.T#PKDSPGLPAS#ANAHQLFK.G    | T368:S378:      | 3 | 3,7713 | 0,255 | 0      |
| 16 | P51116 FXR2_HUMAN   | K.AGYST#DESSSSSLHATR.T       | T411:           | 3 | 2,7052 | 0,252 | -0,199 |
| 16 | Q16181 SEPT7_HUMAN  | R.ILEQQNSSRT#LEK.N           | T426:           | 2 | 3,5081 | 0,267 | 0,15   |
| 16 | Q99459 CDC5L_HUMAN  | R.SGTT#PKPVINS#TPGRT#PLRDK.L | T430:S437:T442: | 3 | 2,6332 | 0,086 | -0,149 |
| 16 | Q9UHY1 NRBP_HUMAN   | K.TPT#PEPAEVETRK.V           | T433:           | 3 | 3,3557 | 0,251 | -0,477 |
| 16 | O14974 MYPT1_HUMAN  | R.KT#GSYGALAEITASK.E         | T443:           | 3 | 3,1664 | 0,278 | -0,116 |
| 16 | Q96JM3 ZN828_HUMAN  | R.KT#SPASLDFPESQK.S          | T458:           | 3 | 2,9137 | 0,144 | -0,227 |

|    |                    |                                   |            |   |        |       |        |
|----|--------------------|-----------------------------------|------------|---|--------|-------|--------|
| 16 | Q16875 F263_HUMAN  | R.RNSVT#PLASPEPTK.K               | T463:      | 3 | 2,9755 | 0,284 | 0      |
| 16 | O15427 MOT4_HUMAN  | K.AEPEKNGEVVHTPET#SV.-            | T463:      | 2 | 2,0162 | 0,292 | 0,449  |
| 16 | Q8N3X1 FNBP4_HUMAN | K.T#GRDTPENGETAIGAENSEK.I         | T475:      | 3 | 5,2471 | 0,378 | -0,509 |
| 16 | Q9H4G0 E41L1_HUMAN | R.SEAEEGEVVRT#PTK.I               | T475:      | 2 | 2,505  | 0,14  | -0,726 |
| 16 | P30086 PEBP1_HUMAN | K.NRPT#SISWDGLDSGK.L              | T51:       | 3 | 2,9464 | 0,254 | -0,32  |
| 16 | P28066 PSA5_HUMAN  | K.RIT#SPLM*EPSSIEK.I              | T55:       | 3 | 2,7807 | 0,108 | 0,217  |
| 16 | Q9UHI6 DDX20_HUMAN | K.NSVQT#PVENSTNSQHQVK.E           | T552:      | 3 | 2,7856 | 0,207 | -0,088 |
| 16 | P35222 CTNB1_HUMAN | R.RTSM*GGT#QQQFVEGVR.M            | T556:      | 3 | 4,2259 | 0,385 | -0,292 |
| 16 | Q9UPZ3 HPS5_HUMAN  | K.IGTLHT#SPDLK.V                  | T562:      | 2 | 2,3269 | 0,216 | -0,387 |
| 16 | Q15021 CND1_HUMAN  | K.NPREST#GNM*VTGQTVCK.N           | T586:      | 3 | 3,4071 | 0,207 | -0,278 |
| 16 | O15061 DMN_HUMAN   | K.GLQT#PVKDAGGGTGR.E              | T598:      | 2 | 2,3962 | 0,454 | -0,327 |
| 16 | O75362 ZN217_HUMAN | R.TKADVT#PPPDGSTTHNLEVS#PK.E      | T648:S662: | 3 | 5,607  | 1     | -0,224 |
| 16 | Q8N128 CN024_HUMAN | R.VIHFVSGET#M*EEYS#TDEDEVDGLEKK.D | T65:S70:   | 3 | 2,6553 | 1     | 0,231  |
| 16 | O14974 MYPT1_HUMAN | R.RST#QGVTLTDLQEAEK.T             | T696:      | 3 | 5,147  | 0,446 | 0,197  |
| 16 | O15534 PER1_HUMAN  | R.KEPVVGGT#LSPLALANK.A            | T702:      | 2 | 3,3729 | 0,515 | 0,757  |
| 16 | P68431 H31_HUMAN   | R.EIAQDFKT#DLR.F                  | T81:       | 2 | 2,1293 | 0,342 | 0      |
| 16 | P49006 MRP_HUMAN   | K.GEVPPKET#PK.K                   | T85:       | 2 | 2,5054 | 0,289 | -0,315 |
| 16 | Q92547 TOPB1_HUMAN | R.KPST#PLSEVIVK.N                 | T861:      | 2 | 2,6655 | 0,357 | 0,177  |
| 16 | Q9UQ35 SRRM2_HUMAN | R.QGSITSPQANEQSVT#PQRR.S          | T866:      | 3 | 3,5234 | 0,439 | -0,085 |
| 16 | Q9NYV4 CD2L7_HUMAN | R.LYNSEESRPT#NK.V                 | T893:      | 2 | 2,9956 | 0,228 | 0,145  |
| 16 | Q5T4S7 UBR4_HUMAN  | R.ATT#PLYHGFK.E                   | T905:      | 2 | 2,294  | 0,256 | -0,402 |
| 16 | Q6PD62 CTR9_HUMAN  | K.KGGFDEFVNDT#DDDLPISK.K          | T925:      | 3 | 4,4782 | 0,4   | 0,376  |
| 16 | P52732 KIF11_HUMAN | K.LDIPTGT#TPQRK.S                 | T925:      | 2 | 2,3262 | 0,301 | -0,347 |
| 16 | Q9UIG0 BAZ1B_HUMAN | K.DHT#VSGDEDYCPR.S                | T945:      | 3 | 3,8108 | 0,215 | -0,224 |
| 16 | Q86V48 LUZP1_HUMAN | R.RT#QSSLTVSEVLTR.R               | T993:      | 3 | 3,1022 | 0,33  | 0,331  |
| 16 | O60841 IF2P_HUMAN  | K.VEM*Y#SGS#DDDDDFNKLPKK.A        | Y134:S137: | 3 | 3,1049 | 0,138 | 0      |
| 16 | P68104 EF1A1_HUMAN | R.EHALLAY#TLGVK.Q                 | Y141:      | 3 | 2,8041 | 0,175 | 0,131  |
| 16 | P68104 EF1A1_HUMAN | R.EHALLAY#TLGVK.Q                 | Y141:      | 2 | 2,6376 | 0,353 | -0,35  |
| 16 | O95248 MTMR5_HUMAN | R.RSTSTLY#SQFQTAESNR.S            | Y1751:     | 3 | 4,8896 | 0,312 | -0,084 |
| 16 | Q9NX63 CHCH3_HUMAN | K.SQRY#SGAYGASVSDEELK.R           | Y49:       | 3 | 3,8251 | 0,144 | 0,541  |
| 16 | P40818 UBP8_HUMAN  | K.RSY#SSPDITQAIQEEK.R             | Y717:      | 3 | 2,9886 | 0,142 | -0,266 |
| 16 | Q8N5P1 ZC3H8_HUMAN | R.SKDYDVY#SDNDICSQESEDNFAK.E      | Y76:       | 3 | 3,6124 | 0,374 | -0,261 |
| 16 | P37198 NUP62_HUMAN | K.DIIHLNTSGAPADTSDPLQIQCK.I       |            | 3 | 4,6859 | 0,452 | -0,418 |

|    |                    |                                   |   |        |       |        |
|----|--------------------|-----------------------------------|---|--------|-------|--------|
| 16 | P61163 ACTZ_HUMAN  | K.DQLQTFSEEHPVLLTEAPLNPR.K        | 3 | 4,5551 | 0,53  | -0,505 |
| 16 | O75531 BAF_HUMAN   | R.DFVAEPM*GEKPVGSLAGIGEVLGK.K     | 3 | 4,4984 | 0,557 | -0,53  |
| 16 | P49327 FAS_HUMAN   | R.CVLLSNLSSTSHVPEVDPGSAELQK.V     | 3 | 4,4916 | 0,229 | -0,137 |
| 16 | P68104 EF1A1_HUMAN | R.VETGVLPKPGM*VVTFAPVNVVTEVK.S    | 3 | 4,4723 | 0,364 | 0,289  |
| 16 | Q9UPN3 MACF1_HUMAN | K.DTQDIVHDLESPGIDPSIIK.Q          | 3 | 4,4032 | 0,345 | -0,501 |
| 16 | P07814 SYEP_HUMAN  | K.NQGGGLSSSGAGEGQGPK.K            | 2 | 4,2943 | 0,352 | -0,692 |
| 16 | P08621 RU17_HUMAN  | R.GGGGGQDNGLEGLGNSDR.D            | 2 | 4,2837 | 0,592 | -0,221 |
| 16 | Q9UIG0 BAZ1B_HUMAN | R.DEAEDYDVITHPM*DFQTVQNK.C        | 3 | 4,1686 | 0,433 | -0,684 |
| 16 | P82664 RT10_HUMAN  | K.DLTKPVVTISDEPDILYK.R            | 3 | 4,0796 | 0,404 | 0,089  |
| 16 | Q9HB71 CYBP_HUMAN  | K.AELLDNEKPAAVVAPITTYVK.I         | 3 | 4,0792 | 0,311 | 0,457  |
| 16 | P30041 PRDX6_HUMAN | K.DINAYNCEEPTEKLPFIIDDR.N         | 3 | 3,9479 | 0,404 | -0,414 |
| 16 | P48147 PPCE_HUMAN  | K.LPEADDIQYPSM*LLLTADHDDR.V       | 3 | 3,9115 | 0,396 | -0,791 |
| 16 | P08670 VIME_HUMAN  | K.FADLSEAANR.N                    | 2 | 3,7586 | 0,376 | -0,781 |
| 16 | Q8IWS0 PHF6_HUMAN  | R.GKVEIDQQQLTQQQLNGN.-            | 2 | 3,7289 | 0,463 | 0,658  |
| 16 | P11940 PABP1_HUMAN | K.NLDDGIDDER.L                    | 2 | 3,7079 | 0,39  | -0,21  |
| 16 | P60174 TPIS_HUMAN  | K.SNVSDAVAQSTR.I                  | 2 | 3,6448 | 0,524 | -0,099 |
| 16 | P02765 FETUA_HUMAN | K.CDSSPDSAEDVR.K                  | 2 | 3,6083 | 0,431 | -0,456 |
| 16 | Q9BT25 NYS48_HUMAN | R.SFAQVLELSAEASK.E                | 2 | 3,5618 | 0,52  | -0,577 |
| 16 | P27816 MAP4_HUMAN  | K.DM*AQLPETEIAPAKDVAPSTVK.E       | 3 | 3,556  | 0,496 | 0,55   |
| 16 | P42765 THIM_HUMAN  | K.DGTVTAGNASGVADGAGAVIIASEDAVKK.H | 3 | 3,5286 | 0,423 | -0,623 |
| 16 | P35998 PRS7_HUMAN  | R.FDDGAGGDNEVQR.T                 | 2 | 3,5035 | 0,432 | -0,354 |
| 16 | P05556 ITB1_HUMAN  | K.FCECDNFNCDR.S                   | 2 | 3,4877 | 0,445 | 0,318  |
| 16 | Q9UBS4 DJB11_HUMAN | R.DGM*EYPPFIGEGEPHVDGEPGDLR.F     | 3 | 3,4329 | 0,463 | -0,506 |
| 16 | Q07157 ZO1_HUMAN   | K.GGPAEGQLQENDR.V                 | 2 | 3,4045 | 0,528 | -0,356 |
| 16 | P07355 ANXA2_HUMAN | R.TNQELQEINR.V                    | 2 | 3,3687 | 0,364 | -0,294 |
| 16 | P14618 KPYM_HUMAN  | R.TATESFASDPILYRPVAVALDTK.G       | 3 | 3,3158 | 0,294 | -0,445 |
| 16 | P61088 UBE2N_HUMAN | K.TNEAQAIETAR.A                   | 2 | 3,2965 | 0,369 | 0,101  |
| 16 | P01889 1B07_HUMAN  | R.DGEDQTQDTELVETRPAGDR.T          | 3 | 3,2846 | 0,395 | -0,41  |
| 16 | O00299 CLIC1_HUMAN | K.NSNPALNDNLEK.G                  | 2 | 3,2772 | 0,501 | -0,367 |
| 16 | P08758 ANXA5_HUMAN | K.KALLLLCGEDD.-                   | 2 | 3,263  | 0,508 | -0,196 |
| 16 | P39023 RL3_HUMAN   | K.NNASTDYDLSDK.S                  | 2 | 3,1843 | 0,487 | -0,091 |
| 16 | P61081 UBC12_HUMAN | K.EAAEVLQNNR.R                    | 2 | 3,1657 | 0,371 | -0,107 |
| 16 | Q15398 DLG7_HUMAN  | K.ISQSELFDNK.S                    | 2 | 3,1653 | 0,398 | 0,413  |

|    |                    |                                |   |        |       |        |
|----|--------------------|--------------------------------|---|--------|-------|--------|
| 16 | Q58FF8 H90B2_HUMAN | K.YIDQEELNK.T                  | 2 | 3,1595 | 0,27  | -0,424 |
| 16 | P06733 ENOA_HUMAN  | K.DATNVGDEGGFAPNILENKEGLELLK.T | 3 | 3,1262 | 0,393 | -0,667 |
| 16 | Q86XA9 HTR5A_HUMAN | K.DVEGDSVPKPLPPALSVISSASK.L    | 3 | 3,125  | 0,347 | -0,399 |
| 16 | P08621 RU17_HUMAN  | R.GGGGGQDNGLEGLGNDSD.R         | 3 | 3,0656 | 0,23  | -0,22  |
| 16 | P13639 EF2_HUMAN   | K.GEGQLGPAER.A                 | 2 | 3,001  | 0,236 | 0,12   |
| 16 | P22314 UBA1_HUMAN  | R.AENYDIPSADR.H                | 2 | 2,9943 | 0,438 | 0      |
| 16 | P42704 LPPRC_HUMAN | K.M*EEANIQPNR.V                | 2 | 2,9812 | 0,364 | 0,1    |
| 16 | P62937 PPIA_HUMAN  | K.KITIADCGQLE.-                | 2 | 2,9721 | 0,303 | -0,587 |
| 16 | Q00610 CLH1_HUMAN  | K.IYIDSNNNPER.F                | 2 | 2,9684 | 0,38  | -0,823 |
| 16 | Q13620 CUL4B_HUMAN | R.DKENPNQYNYIA.-               | 2 | 2,9594 | 0,422 | 0,166  |
| 16 | Q6S8J3 A26CA_HUMAN | K.AGFAGDDAPR.A                 | 2 | 2,9267 | 0,373 | -0,999 |
| 16 | P31946 1433B_HUMAN | R.YLSEVASGDNK.Q                | 2 | 2,9073 | 0,464 | -0,309 |
| 16 | Q08J23 NSUN2_HUMAN | R.NNSGEEFDCAFR.L               | 2 | 2,8807 | 0,315 | 0,253  |
| 16 | P14625 ENPL_HUMAN  | K.FAFQAEVNR.M                  | 2 | 2,879  | 0,382 | 0,113  |
| 16 | P30086 PEBP1_HUMAN | K.CDEPILSNR.S                  | 2 | 2,8721 | 0,296 | -0,663 |
| 16 | P14927 QCR7_HUMAN  | R.LPENLYNDR.M                  | 2 | 2,8534 | 0,33  | -0,538 |
| 16 | P17661 DESM_HUMAN  | K.VELQELNDR.F                  | 2 | 2,8523 | 0,311 | -0,547 |
| 16 | O95678 K2C75_HUMAN | K.AQYEDIANR.S                  | 2 | 2,8427 | 0,357 | -0,678 |
| 16 | P05787 K2C8_HUMAN  | K.WSLLQQQK.T                   | 2 | 2,8303 | 0,14  | 0,355  |
| 16 | P37802 TAGL2_HUMAN | R.NFSDNQLQEGK.N                | 2 | 2,8017 | 0,387 | -0,477 |
| 16 | P54577 SYYC_HUMAN  | K.NSVEVALNK.L                  | 2 | 2,79   | 0,451 | 0,376  |
| 16 | P00338 LDHA_HUMAN  | K.VTLTSEEEAR.L                 | 2 | 2,7725 | 0,369 | -0,215 |
| 16 | P13639 EF2_HUMAN   | K.EGALCEENM*R.G                | 2 | 2,759  | 0,34  | 0      |
| 16 | P61978 HNRPK_HUMAN | R.GGDLM*AYDR.R                 | 2 | 2,7582 | 0,317 | 0      |
| 16 | Q9H583 HEAT1_HUMAN | K.EGEEEQAINR.Q                 | 2 | 2,737  | 0,214 | -0,312 |
| 16 | P36873 PP1G_HUMAN  | K.NVQLQENEIR.G                 | 2 | 2,7254 | 0,247 | 0,196  |
| 16 | Q15149 PLEC1_HUMAN | R.NLVDNITGQR.L                 | 2 | 2,7242 | 0,428 | 0,108  |
| 16 | P61978 HNRPK_HUMAN | K.GSDFDCELR.L                  | 2 | 2,7155 | 0,337 | -0,333 |
| 16 | P60709 ACTB_HUMAN  | R.GYSFTTTAER.E                 | 2 | 2,7106 | 0,527 | -0,431 |
| 16 | P00367 DHE3_HUMAN  | K.M*VEGFFDR.G                  | 2 | 2,7046 | 0,298 | -0,18  |
| 16 | P35221 CTNA1_HUMAN | R.SDALNSAIDK.M                 | 2 | 2,6979 | 0,321 | -0,236 |
| 16 | P13639 EF2_HUMAN   | K.EGALCEENMR.G                 | 2 | 2,6826 | 0,351 | 0,101  |
| 16 | Q13620 CUL4B_HUMAN | K.GLNNLLDENR.I                 | 2 | 2,6749 | 0,372 | -0,211 |

|    |                     |                                 |   |        |       |        |
|----|---------------------|---------------------------------|---|--------|-------|--------|
| 16 | P43246 MSH2_HUMAN   | K.NNSFVNEIISR.I                 | 2 | 2,6704 | 0,476 | -0,377 |
| 16 | Q96Q11 TRNT1_HUMAN  | R.DLLNGVKPQDIDFATTATPTQM*K.E    | 3 | 2,6478 | 0,239 | -0,436 |
| 16 | P80723 BASP_HUMAN   | K.AQGPAASAEKPKVEAPAANSQTVTVKE.- | 3 | 2,646  | 0,446 | 0,127  |
| 16 | Q99729 ROAA_HUMAN   | K.EVYQQQQYGSGR.G                | 2 | 2,645  | 0,448 | -0,081 |
| 16 | P22234 PUR6_HUMAN   | K.NFEWVAER.V                    | 2 | 2,6349 | 0,268 | -0,116 |
| 16 | P02545 LMNA_HUMAN   | R.SLETENAGLR.L                  | 2 | 2,6312 | 0,399 | -0,56  |
| 16 | Q15393 SF3B3_HUMAN  | K.NFGDQPDIR.C                   | 2 | 2,6301 | 0,34  | -0,23  |
| 16 | O00148 DDX39_HUMAN  | K.ILNDVQDR.F                    | 2 | 2,6239 | 0,288 | 0,125  |
| 16 | P62269 RS18_HUMAN   | R.VLNTNIDGR.R                   | 2 | 2,6228 | 0,411 | -0,061 |
| 16 | Q9UQ80 PA2G4_HUMAN  | K.SDQDYILK.E                    | 2 | 2,5929 | 0,21  | -0,497 |
| 16 | Q8WVJ2 NUDC2_HUMAN  | K.GGPDFSLEK.-                   | 2 | 2,5913 | 0,2   | 0,229  |
| 16 | P54578 UBP14_HUMAN  | K.CTESEEEVTK.G                  | 2 | 2,5898 | 0,316 | -0,546 |
| 16 | P08670 VIME_HUMAN   | R.FANYIDK.V                     | 2 | 2,5845 | 0,253 | 0      |
| 16 | Q15366 PCBP2_HUMAN  | K.IANPVEGSTDR.Q                 | 2 | 2,581  | 0,523 | -0,421 |
| 16 | P16949 STMN1_HUMAN  | K.ESKDADEAD.-                   | 2 | 2,5763 | 0,447 | -0,467 |
| 16 | Q15084 PDIA6_HUMAN  | K.GESPDVDYDGGR.T                | 2 | 2,5339 | 0,336 | -0,318 |
| 16 | Q06210 GFPT1_HUMAN  | R.GYDVFPR.N                     | 2 | 2,5286 | 0,404 | 0,126  |
| 16 | O76094 SRP72_HUMAN  | K.DQNVFDSK.K                    | 2 | 2,5257 | 0,221 | 0      |
| 16 | P14618 KPYM_HUMAN   | K.GSGTAEVELK.K                  | 2 | 2,5253 | 0,404 | 0,123  |
| 16 | P84103 SFRS3_HUMAN  | K.VYVGNLGNNGNK.T                | 2 | 2,5217 | 0,355 | -0,098 |
| 16 | P49773 HINT1_HUMAN  | K.CAADLGLNK.G                   | 2 | 2,5193 | 0,408 | -0,19  |
| 16 | P09382 LEG1_HUMAN   | K.DGGAWGTEQR.E                  | 2 | 2,5055 | 0,179 | 0      |
| 16 | Q15056 IF4H_HUMAN   | R.EEVVQKEQE.-                   | 2 | 2,5008 | 0,126 | -0,437 |
| 16 | Q99623 PHB2_HUMAN   | R.LGLDYER.V                     | 2 | 2,494  | 0,34  | -0,123 |
| 16 | Q9BUL8 PDC10_HUMAN  | K.IPDEINDR.V                    | 2 | 2,4914 | 0,205 | -0,126 |
| 16 | P10809 CH60_HUMAN   | R.VTDALNATR.A                   | 2 | 2,488  | 0,371 | 0      |
| 16 | P17812 PYRG1_HUMAN  | K.FVGQDVEGER.M                  | 2 | 2,4826 | 0,254 | -0,215 |
| 16 | P18206 VINC_HUMAN   | R.TNLLQVCER.I                   | 2 | 2,4777 | 0,221 | -0,323 |
| 16 | P05387 RLA2_HUMAN   | K.NIEDVIAQGIGK.L                | 2 | 2,4651 | 0,436 | -0,582 |
| 16 | A9CQZ4 A9CQZ4_HUMAN | K.EALQNINDQSDR.L                | 2 | 2,461  | 0,288 | -0,348 |
| 16 | P06703 S10A6_HUMAN  | K.LQDAEIAR.L                    | 2 | 2,4544 | 0,233 | -0,266 |
| 16 | Q16891 IMMT_HUMAN   | K.SEFEQNLSEK.L                  | 2 | 2,4472 | 0,189 | 0      |
| 16 | O95433 AHS1_HUMAN   | K.NGETELCM*EGR.G                | 2 | 2,4371 | 0,416 | -0,093 |

|    |                    |                        |   |        |       |        |
|----|--------------------|------------------------|---|--------|-------|--------|
| 16 | P50395 GDIB_HUMAN  | R.TFEGIDPK.K           | 2 | 2,4256 | 0,207 | 0,135  |
| 16 | Q8N1F7 NUP93_HUMAN | R.NLQEIQQAGER.L        | 2 | 2,4112 | 0,177 | 0,664  |
| 16 | P04632 CPNS1_HUMAN | K.TDGFGITDCR.S         | 2 | 2,4023 | 0,452 | -0,214 |
| 16 | P08670 VIME_HUMAN  | K.LQEEM*LQR.E          | 2 | 2,3999 | 0,127 | -0,115 |
| 16 | P31948 STIP1_HUMAN | K.ALDLDSCK.E           | 2 | 2,396  | 0,348 | -0,242 |
| 16 | Q8N1F7 NUP93_HUMAN | R.AFDIER.L             | 2 | 2,3943 | 0,256 | 0,141  |
| 16 | P09525 ANXA4_HUMAN | R.KVLLVLCGGDD.-        | 2 | 2,394  | 0,179 | -0,205 |
| 16 | Q15942 ZYG_HUMAN   | R.QNVAVNELCGR.C        | 2 | 2,39   | 0,432 | -0,484 |
| 16 | P07355 ANXA2_HUMAN | K.AYTNFDAER.D          | 2 | 2,3857 | 0,338 | -0,112 |
| 16 | Q9Y266 NUDC_HUMAN  | K.ELTDEEAER.L          | 2 | 2,3747 | 0,265 | 0,223  |
| 16 | Q9NX63 CHCH3_HUMAN | R.LSENVDR.M            | 2 | 2,3551 | 0,249 | 0      |
| 16 | Q9UNH7 SNX6_HUMAN  | R.SLVDYENANK.A         | 2 | 2,3521 | 0,378 | 0,106  |
| 16 | P61254 RL26_HUMAN  | K.FNPFVTSR.S           | 2 | 2,348  | 0,362 | -0,901 |
| 16 | P38646 GRP75_HUMAN | R.YDDPEVQK.D           | 2 | 2,3265 | 0,338 | -0,061 |
| 16 | P02545 LMNA_HUMAN  | K.EDLQELNDR.L          | 2 | 2,323  | 0,223 | 0      |
| 16 | P14618 KPYP_HUMAN  | R.VNFAM*NVGK.A         | 2 | 2,3209 | 0,279 | 0      |
| 16 | P83881 RL36A_HUMAN | R.LECPEPNCR.S          | 2 | 2,3185 | 0,256 | -0,415 |
| 16 | P11021 GRP78_HUMAN | K.ITITNDQNR.L          | 2 | 2,3168 | 0,23  | -0,34  |
| 16 | P17661 DESM_HUMAN  | K.LLEGEESR.I           | 2 | 2,313  | 0,3   | -0,131 |
| 16 | P04083 ANXA1_HUMAN | R.SEIDM*NDIK.A         | 2 | 2,2952 | 0,354 | -0,226 |
| 16 | P63096 GNAI1_HUMAN | K.LFDSICNNK.W          | 2 | 2,2865 | 0,094 | -0,11  |
| 16 | P46777 RL5_HUMAN   | R.FPGYDESK.E           | 2 | 2,2765 | 0,207 | 0      |
| 16 | P06733 ENOA_HUMAN  | R.IEEELGSK.A           | 2 | 2,276  | 0,085 | -0,674 |
| 16 | Q01082 SPTB2_HUMAN | K.SLLDACESR.R          | 2 | 2,2748 | 0,343 | -0,232 |
| 16 | P82664 RT10_HUMAN  | K.DLTKPVVTISDEPDILYK.R | 2 | 2,2735 | 0,392 | 0,537  |
| 16 | P46781 RS9_HUMAN   | K.IEDFLER.R            | 2 | 2,2698 | 0,37  | 0,132  |
| 16 | P19105 MLRM_HUMAN  | K.EAFNM*IDQNR.D        | 2 | 2,2686 | 0,444 | 0,195  |
| 16 | P10599 THIO_HUMAN  | K.EKLEATINELV.-        | 2 | 2,2667 | 0,267 | -0,097 |
| 16 | P08670 VIME_HUMAN  | R.QDVDNASLAR.L         | 2 | 2,2666 | 0,346 | -0,448 |
| 16 | O15294 OGT1_HUMAN  | R.SDLGNLLK.A           | 2 | 2,2559 | 0,172 | -0,142 |
| 16 | Q9UQ80 PA2G4_HUMAN | R.AFFSEVER.R           | 2 | 2,2548 | 0,278 | 0,062  |
| 16 | P26038 MOES_HUMAN  | R.ALELEQER.K           | 2 | 2,2432 | 0,199 | 0,062  |
| 16 | P26373 RL13_HUMAN  | K.EAAEQDVEK.K          | 2 | 2,2373 | 0,218 | -0,239 |

|    |                     |                          |            |   |        |       |        |
|----|---------------------|--------------------------|------------|---|--------|-------|--------|
| 16 | Q06830 PRDX1_HUMAN  | K.ADEGISFR.G             |            | 2 | 2,2355 | 0,362 | 0,068  |
| 16 | P07900 HS90A_HUMAN  | R.APFDLFENR.K            |            | 2 | 2,2348 | 0,366 | -0,33  |
| 16 | Q03252 LMNB2_HUMAN  | R.ALELENDL.L             |            | 2 | 2,2244 | 0,202 | -0,191 |
| 16 | P61978 HNRPK_HUMAN  | R.NTDEM*VELR.I           |            | 2 | 2,2198 | 0,205 | -0,217 |
| 16 | Q02790 FKBP4_HUMAN  | K.FSFDLGG.G              |            | 2 | 2,2155 | 0,208 | 0,15   |
| 16 | P13797 PLST_HUMAN   | K.INNFSAIDK.D            |            | 2 | 2,2153 | 0,313 | -0,239 |
| 16 | P07900 HS90A_HUMAN  | K.FYEQFSK.N              |            | 2 | 2,2143 | 0,22  | 0,064  |
| 16 | P05783 K1C18_HUMAN  | K.ETM*QSLNDR.L           |            | 2 | 2,1942 | 0,378 | -0,22  |
| 16 | Q13045 FLII_HUMAN   | R.GVDLSGNDFK.G           |            | 2 | 2,1939 | 0,21  | -0,116 |
| 16 | Q00325 MPCP_HUMAN   | R.TVEALYK.F              |            | 2 | 2,1895 | 0,19  | 0,074  |
| 16 | P07195 LDHB_HUMAN   | R.GLTSVINQK.L            |            | 2 | 2,1653 | 0,364 | -0,064 |
| 16 | P27824 CALX_HUMAN   | K.AEEDILNR.S             |            | 2 | 2,1534 | 0,231 | -0,112 |
| 16 | P34931 HS71L_HUMAN  | K.DNNLLGR.F              |            | 2 | 2,1398 | 0,096 | -1,217 |
| 16 | P08754 GNAI3_HUMAN  | K.IDFGAAR.A              |            | 2 | 2,1282 | 0,279 | 0,139  |
| 16 | P02545 LMNA_HUMAN   | K.NIYSEELR.E             |            | 2 | 2,1102 | 0,255 | -0,477 |
| 16 | P48637 GSHB_HUMAN   | R.TFEDISEK.G             |            | 2 | 2,1084 | 0,188 | 0      |
| 16 | P05141 ADT2_HUMAN   | R.GLGDCLVK.I             |            | 2 | 2,1073 | 0,234 | -0,071 |
| 16 | P08107 HSP71_HUMAN  | K.SAVEDEGLK.G            |            | 2 | 2,0992 | 0,435 | -0,129 |
| 16 | O00571 DDX3X_HUMAN  | R.GLDISNVK.H             |            | 2 | 2,091  | 0,246 | 0      |
| 16 | Q9BXJ9 NARG1_HUMAN  | K.NFNETFLK.R             |            | 2 | 2,0886 | 0,2   | -0,12  |
| 16 | P60842 IF4A1_HUMAN  | R.QFYINVER.E             |            | 2 | 2,0818 | 0,185 | -0,228 |
| 16 | Q6NVY1 HIBCH_HUMAN  | K.SLGSSDLKF.-            |            | 2 | 2,0801 | 0,399 | 0,32   |
| 16 | P62195 PRS8_HUMAN   | R.VSGSELVQK.F            |            | 2 | 2,0723 | 0,199 | -0,129 |
| 16 | Q99598 TSNAX_HUMAN  | K.SFQQELDAR.H            |            | 2 | 2,0496 | 0,309 | -0,446 |
| 16 | P60842 IF4A1_HUMAN  | R.ELAQQIQK.V             |            | 2 | 2,0393 | 0,172 | 0      |
| 16 | Q04760 LGUL_HUMAN   | K.CDFPIM*K.F             |            | 2 | 2,032  | 0,122 | 0,132  |
| 16 | P04843 RPN1_HUMAN   | K.IDHILDAL.-             |            | 2 | 2,0223 | 0,344 | 0,067  |
| 16 | B1AK87 B1AK87_HUMAN | R.SVQTFADK.S             |            | 2 | 2,0208 | 0,299 | 0      |
| 16 | P39687 AN32A_HUMAN  | K.ELVLDNSR.S             |            | 2 | 2,0113 | 0,261 | 0      |
| 17 | Q9H582 ZN644_HUMAN  | R.HVVS#PEQIATSDK.M       | S1000:     | 2 | 3,5987 | 0,467 | 0,246  |
| 17 | Q9UKV3 ACINU_HUMAN  | R.TAQVPS#PPRGK.I         | S1004:     | 3 | 2,7095 | 0,245 | 0,525  |
| 17 | Q9UKV3 ACINU_HUMAN  | R.TAQVPS#PPRGK.I         | S1004:     | 2 | 2,4819 | 0,28  | -0,2   |
| 17 | P05386 RLA1_HUMAN   | K.KEES#EES#DDDM*GFGLFD.- | S101:S104: | 2 | 4,251  | 0,564 | -0,344 |



|    |                    |                                  |              |   |        |       |        |
|----|--------------------|----------------------------------|--------------|---|--------|-------|--------|
| 17 | Q52LW3 RHG29_HUMAN | K.IRPVS#LPVDR.L                  | S1019:       | 2 | 2,2644 | 0,264 | -0,495 |
| 17 | Q15013 MD2BP_HUMAN | R.KPS#PQAEEM*LK.K                | S102:        | 2 | 3,5029 | 0,359 | -0,27  |
| 17 | Q15013 MD2BP_HUMAN | R.KPS#PQAEEM*LK.K                | S102:        | 3 | 3,193  | 0,235 | 0      |
| 17 | O75122 CLAP2_HUMAN | R.SRDYNPNYSDSIS#PFNK.S           | S1029:       | 3 | 4,8785 | 0,449 | 0,489  |
| 17 | Q8IWW6 RHG12_HUMAN | R.S#TENVNKLPELSSFGKPSVVQGTGLIR.D | S103:        | 3 | 2,7057 | 0,129 | -0,182 |
| 17 | Q70E73 RAPH1_HUMAN | R.NS#SIKS#SSGAEHPEPK.R           | S1031:S1035: | 2 | 3,1823 | 0,258 | -0,538 |
| 17 | Q70E73 RAPH1_HUMAN | R.NSS#IKSSS#GAEHPEPK.R           | S1032:S1037: | 3 | 3,1437 | 0,141 | -0,403 |
| 17 | P31943 HNRH1_HUMAN | K.HTGPNS#PDTANDGFVR.L            | S104:        | 3 | 3,7721 | 0,267 | 0,104  |
| 17 | P31943 HNRH1_HUMAN | K.HTGPNS#PDTANDGFVR.L            | S104:        | 2 | 3,6054 | 0,492 | -0,415 |
| 17 | P09496 CLCA_HUMAN  | R.LQS#EPESIRK.W                  | S105:        | 2 | 2,1609 | 0,243 | -0,481 |
| 17 | Q96KR1 ZFR_HUMAN   | R.RDS#DGVDGFEAEGK.K              | S1054:       | 2 | 5,0329 | 0,509 | -0,312 |
| 17 | Q96KR1 ZFR_HUMAN   | R.RDS#DGVDGFEAEGK.K              | S1054:       | 3 | 4,1598 | 0,403 | 0      |
| 17 | Q8NDI1 EHBP1_HUMAN | R.KPS#EDEVLNK.G                  | S1058:       | 2 | 4,1185 | 0,376 | -0,689 |
| 17 | P78527 PRKDC_HUMAN | K.SPVNTKS#LFK.R                  | S1058:       | 3 | 2,6588 | 0,143 | 0,228  |
| 17 | P24534 EF1B_HUMAN  | K.DDDIDLFGS#DDEEESEEAKR.L        | S106:        | 3 | 3,9158 | 0,455 | -0,219 |
| 17 | Q12789 TF3C1_HUMAN | R.KNS#STDQGSDEEGSLQK.E           | S1062:       | 2 | 4,2309 | 0,576 | 0      |
| 17 | Q5VZK9 LR16A_HUMAN | R.KSS#GFLNLIK.S                  | S1068:       | 2 | 3,5101 | 0,261 | -0,206 |
| 17 | P22234 PUR6_HUMAN  | R.IATGS#FLKR.N                   | S107:        | 2 | 2,5092 | 0,398 | -0,114 |
| 17 | O60841 IF2P_HUMAN  | K.KQS#FDDNDS#EELEDKDSK.S         | S107:S113:   | 3 | 4,8268 | 0,456 | -0,08  |
| 17 | Q6ZUT9 RA61L_HUMAN | R.RLS#ITSLTGK.N                  | S1076:       | 2 | 2,8906 | 0,263 | -0,422 |
| 17 | P30414 NKTR_HUMAN  | K.HDTVTVSS#DLDQFTK.D             | S1077:       | 2 | 5,2918 | 0,5   | -0,275 |
| 17 | Q9NX40 OCAD1_HUMAN | K.KLENS#PLGEALR.S                | S108:        | 2 | 4,1509 | 0,399 | 0,087  |
| 17 | Q9BYG5 PAR6B_HUMAN | R.HGAGS#GCLGTM*EVK.S             | S11:         | 2 | 3,36   | 0,413 | -0,569 |
| 17 | P18754 RCC1_HUMAN  | R.RS#PPADAIPK.S                  | S11:         | 2 | 2,6454 | 0,313 | -0,539 |
| 17 | Q14966 ZN638_HUMAN | K.IDLPEVQIEHDPELEKES#PGLK.N      | S1100:       | 3 | 3,6465 | 0,212 | -0,07  |
| 17 | Q8IZT6 ASPM_HUMAN  | K.RDS#GSFEQYSENIK.L              | S1103:       | 2 | 4,7207 | 0,502 | -0,491 |
| 17 | Q6P0N0 CN106_HUMAN | R.KTPFNTDLGENS#GIGK.L            | S1104:       | 2 | 3,1557 | 0,37  | -0,278 |
| 17 | P50479 PDLI4_HUMAN | R.IHIDPEIQDGS#PTTSR.R            | S112:        | 3 | 5,0361 | 0,507 | -0,099 |
| 17 | Q9BX95 SGPP1_HUMAN | R.RNS#LTGEEGQLAR.V               | S112:        | 3 | 4,3461 | 0,312 | 0,061  |
| 17 | P50479 PDLI4_HUMAN | R.IHIDPEIQDGS#PTTSR.R            | S112:        | 2 | 3,7426 | 0,563 | -0,529 |
| 17 | Q9BX95 SGPP1_HUMAN | R.RNS#LTGEEGQLAR.V               | S112:        | 2 | 3,6054 | 0,503 | -0,242 |
| 17 | Q52LW3 RHG29_HUMAN | R.RSS#DSYPLAPVR.A                | S1144:       | 2 | 2,736  | 0,219 | -0,171 |
| 17 | Q8N4C6 NIN_HUMAN   | R.HVLS#DLEDDEVR.D                | S1145:       | 2 | 4,5062 | 0,612 | 0,405  |

|    |                     |                                   |              |   |        |       |        |
|----|---------------------|-----------------------------------|--------------|---|--------|-------|--------|
| 17 | Q8N4C6 NIN_HUMAN    | R.HVLS#DLEDDEV.R                  | S1145:       | 3 | 3,1611 | 0,093 | 0,303  |
| 17 | P62906 RL10A_HUMAN  | K.KYDAFLASES#LIK.Q                | S115:        | 2 | 2,9898 | 0,465 | -0,546 |
| 17 | Q5T8A7 K0649_HUMAN  | R.RSS#GSEESILDLR.Y                | S1161:       | 2 | 3,3069 | 0,445 | -0,399 |
| 17 | Q96FH0 U402_HUMAN   | R.DHM*NASAQGHSPPEPPSS#A.-         | S118:        | 3 | 3,8817 | 0,27  | -0,327 |
| 17 | Q92934 BAD_HUMAN    | R.RM*S#DEFVDSFK.K                 | S118:        | 2 | 3,4654 | 0,485 | -0,251 |
| 17 | Q92934 BAD_HUMAN    | R.RM*S#DEFVDSFK.K                 | S118:        | 3 | 2,9748 | 0,215 | -0,126 |
| 17 | Q6P1X5 TAF2_HUMAN   | K.DKEPFTFSS#PASGR.S               | S1185:       | 3 | 3,1697 | 0,235 | -0,228 |
| 17 | Q04637 IF4G1_HUMAN  | R.SFS#KEVEER.S                    | S1188:       | 2 | 2,3398 | 0,166 | -0,512 |
| 17 | Q00536 PCTK1_HUMAN  | K.RLS#LPADIR.L                    | S119:        | 2 | 2,6235 | 0,288 | 0,218  |
| 17 | Q96MU7 YTDC1_HUMAN  | R.LSS#SASREPYK.N                  | S119:        | 2 | 2,4348 | 0,335 | -0,374 |
| 17 | P61254 RL26_HUMAN   | K.FNPFVTSDRS#K.N                  | S12:         | 2 | 2,5928 | 0,296 | -0,177 |
| 17 | O95218 ZRAB2_HUMAN  | R.ENVEYIEREES#DGEYDEFGR.K         | S120:        | 3 | 5,6459 | 0,441 | -0,431 |
| 17 | P15531 NDKA_HUMAN   | R.NIIHGS#DSVESAEK.E               | S120:        | 2 | 4,039  | 0,471 | 0,156  |
| 17 | P42858 HD_HUMAN     | K.EKEPGEQASVPLS#PK.K              | S1201:       | 2 | 2,9888 | 0,436 | 0,218  |
| 17 | P42858 HD_HUMAN     | K.EKEPGEQASVPLS#PK.K              | S1201:       | 3 | 2,8851 | 0,349 | 0,218  |
| 17 | Q5SW79 CE170_HUMAN  | R.ANS#ISRLS#DSKVK.S               | S1205:S1210: | 3 | 2,7192 | 0,293 | 0,117  |
| 17 | Q8IWI9 MGAP_HUMAN   | K.LLTGIKS#PR.S                    | S1208:       | 2 | 2,528  | 0,233 | 0      |
| 17 | Q14814 MEF2D_HUMAN  | R.RAS#EELDGLFR.R                  | S121:        | 3 | 3,8155 | 0,332 | -0,2   |
| 17 | Q9H7D7 WDR26_HUMAN  | K.RLS#QSDDEVIR.L                  | S121:        | 2 | 3,6027 | 0,465 | -0,349 |
| 17 | Q14814 MEF2D_HUMAN  | R.RAS#EELDGLFR.R                  | S121:        | 2 | 2,5796 | 0,339 | -0,444 |
| 17 | P11388 TOP2A_HUMAN  | K.KTQM*AEVLP#PR.G                 | S1213:       | 2 | 2,087  | 0,184 | -1,008 |
| 17 | Q02543 RL18A_HUMAN  | R.AHS#IQIM*K.V                    | S123:        | 2 | 2,7572 | 0,257 | 0,477  |
| 17 | Q96T23 RSF1_HUMAN   | R.RLS#SSESEESYLSK.N               | S1235:       | 2 | 3,2945 | 0,502 | 0      |
| 17 | Q9BQG0 MBB1A_HUMAN  | K.SPAPGAPTRS#PS#TPAKSPK.L         | S1241:S1243: | 3 | 2,6793 | 0,141 | -0,275 |
| 17 | P42345 FRAP_HUMAN   | K.LHVS#TINLQK.A                   | S1261:       | 2 | 3,3054 | 0,379 | 0,198  |
| 17 | O95155 UBE4B_HUMAN  | R.HLLNS#PTDPFNR.Q                 | S1265:       | 2 | 3,3378 | 0,273 | 0,573  |
| 17 | Q3ZTR8 Q3ZTR8_HUMAN | K.GHTNAGDAIEVVS#LQR.E             | S127:        | 3 | 2,9536 | 0,255 | -0,192 |
| 17 | Q7Z6E9 RBBP6_HUMAN  | R.KVTGTEGSSSTLVDTSTSS#TGGS#PVRK.S | S1273:S1277: | 3 | 4,1617 | 0,325 | -0,248 |
| 17 | Q5T3I0 GPTC4_HUMAN  | K.M*ATLTSGGKPNKDLES#CS#DDDNQGSK.S | S128:S130:   | 3 | 2,9661 | 0,438 | -0,299 |
| 17 | Q9NTI5 PDS5B_HUMAN  | R.LKEDILENEDEQNS#PPK.K            | S1283:       | 3 | 5,6617 | 0,436 | 0,176  |
| 17 | Q96T58 MINT_HUMAN   | R.LLSVKGS#PK.V                    | S1287:       | 2 | 2,7473 | 0,3   | -1,088 |
| 17 | O15400 STX7_HUMAN   | R.ASSRVS#GSFPEDSSK.E              | S129:        | 2 | 2,9649 | 0,521 | -0,301 |
| 17 | Q92844 TANK_HUMAN   | R.SLGS#PLLHER.G                   | S129:        | 2 | 2,296  | 0,496 | -0,205 |

|    |                    |                              |              |   |        |       |        |
|----|--------------------|------------------------------|--------------|---|--------|-------|--------|
| 17 | Q9UPU5 UBP24_HUMAN | R.VSDQNS#PVLPPK.S            | S1297:       | 3 | 2,9686 | 0,231 | 0,131  |
| 17 | Q9UPU5 UBP24_HUMAN | R.VSDQNS#PVLPPK.S            | S1297:       | 2 | 2,6737 | 0,208 | -0,438 |
| 17 | Q07002 PCTK3_HUMAN | R.RAS#LSDIGFGK.L             | S130:        | 2 | 3,6402 | 0,546 | -0,198 |
| 17 | Q9UHB6 LIMA1_HUMAN | R.LRS#PPEALVQGR.Y            | S132:        | 3 | 4,4324 | 0,168 | 0,065  |
| 17 | Q9UHB6 LIMA1_HUMAN | R.LRS#PPEALVQGR.Y            | S132:        | 2 | 2,7558 | 0,393 | -0,348 |
| 17 | P51858 HDGF_HUMAN  | K.KGNAEGS#S#DEEGKLVIDEPAK.E  | S132:S133:   | 3 | 5,134  | 0,516 | -0,314 |
| 17 | P51858 HDGF_HUMAN  | K.GNAEGS#S#DEEGKLVIDEPAKEK.N | S132:S133:   | 3 | 3,2945 | 0,241 | -0,743 |
| 17 | Q7Z6E9 RBBP6_HUMAN | K.WDKDDFES#EEEDVK.S          | S1328:       | 2 | 4,0703 | 0,446 | -0,066 |
| 17 | P38398 BRCA1_HUMAN | R.HQS#ESQGVGLSDKELVS#DDEER.G | S1328:S1342: | 3 | 4,6168 | 0,436 | 0,141  |
| 17 | Q9H7D0 DOCK5_HUMAN | K.RAS#FYENIIK.A              | S1347:       | 2 | 3,6863 | 0,405 | -0,647 |
| 17 | Q99959 PKP2_HUMAN  | R.GTAQYSSQKS#VEER.S          | S135:        | 2 | 2,6726 | 0,273 | -0,148 |
| 17 | Q9UKM9 RALY_HUMAN  | R.GRLS#PVPVPR.A              | S135:        | 2 | 2,6251 | 0,311 | -0,211 |
| 17 | O60841 IF2P_HUMAN  | K.VEM*YS#GS#DDDDDFNKLPKK.A   | S135:S137:   | 3 | 3,7869 | 0,311 | -0,308 |
| 17 | Q96HC4 PDLI5_HUMAN | K.APRPFGSVS#SPK.V            | S136:        | 2 | 2,5754 | 0,238 | -0,186 |
| 17 | P55327 TPD52_HUMAN | K.NSPTFKS#FEEK.V             | S136:        | 2 | 2,4796 | 0,299 | 0,175  |
| 17 | Q5VUA4 ZN318_HUMAN | R.RS#PGLCSDSLEK.S            | S136:        | 2 | 2,191  | 0,172 | -0,512 |
| 17 | P52701 MSH6_HUMAN  | R.VHVQFFDDS#PTR.G            | S137:        | 2 | 4,4234 | 0,593 | -0,479 |
| 17 | P52701 MSH6_HUMAN  | R.VHVQFFDDS#PTR.G            | S137:        | 3 | 4,4114 | 0,335 | 0      |
| 17 | Q8WWA1 TMM40_HUMAN | R.RGS#DPASGEVEASQLR.R        | S137:        | 2 | 3,9166 | 0,59  | 0,21   |
| 17 | Q8WWA1 TMM40_HUMAN | R.RGS#DPASGEVEASQLR.R        | S137:        | 3 | 3,7865 | 0,298 | 0,316  |
| 17 | Q96HC4 PDLI5_HUMAN | K.APRPFGSVSS#PK.V            | S137:        | 2 | 2,6369 | 0,231 | -0,093 |
| 17 | P11388 TOP2A_HUMAN | K.ELKPQKS#VVS#DLEADDVK.G     | S1374:S1377: | 3 | 3,554  | 0,31  | 0,254  |
| 17 | Q13428 TCOF_HUMAN  | K.KLGAGEGGEASVS#PEK.T        | S1378:       | 2 | 4,3381 | 0,452 | -0,535 |
| 17 | Q14160 LAP4_HUMAN  | K.RVS#LVGADDLR.K             | S1378:       | 2 | 2,8488 | 0,196 | -0,571 |
| 17 | P02765 FETUA_HUMAN | K.CDSSPDS#AEDVRK.V           | S138:        | 2 | 3,4088 | 0,409 | -0,395 |
| 17 | P02765 FETUA_HUMAN | K.CDSSPDS#AEDVRK.V           | S138:        | 3 | 3,0653 | 0,241 | 0,237  |
| 17 | Q5VTR2 BRE1A_HUMAN | R.KALVVPEPEPDS#NQER.K        | S138:        | 3 | 3,0491 | 0,285 | -0,263 |
| 17 | Q6P0Q8 MAST2_HUMAN | K.LHLS#PPLGR.Q               | S1381:       | 2 | 2,3015 | 0,241 | -0,228 |
| 17 | Q96N67 DOCK7_HUMAN | R.M*NS#LTFKK.S               | S1383:       | 2 | 2,6171 | 0,161 | -0,115 |
| 17 | P50914 RL14_HUMAN  | K.AALLKAS#PK.K               | S139:        | 2 | 2,9398 | 0,402 | -1,994 |
| 17 | Q9NVD7 PARVA_HUMAN | K.SPSVPKS#PTPKS#PPSR.K       | S14:S19:     | 3 | 3,0932 | 0,299 | 0      |
| 17 | Q9NVD7 PARVA_HUMAN | K.SPSVPKS#PTPKS#PPSR.K       | S14:S19:     | 2 | 2,5425 | 0,341 | -0,405 |
| 17 | Q06587 RING1_HUMAN | R.LHNQQALSSS#IEEGLR.M        | S140:        | 3 | 3,2638 | 0,149 | 0      |

|    |                    |                              |            |   |        |       |        |
|----|--------------------|------------------------------|------------|---|--------|-------|--------|
| 17 | Q9NRL2 BAZ1A_HUMAN | K.RQS#PEPSPVTLGR.R           | S1413:     | 2 | 2,5226 | 0,473 | -0,081 |
| 17 | Q8N9T8 KRI1_HUMAN  | K.YVDEENS#DGETSNHR.L         | S142:      | 2 | 3,0703 | 0,536 | -0,4   |
| 17 | P30622 CLIP1_HUMAN | R.KVQAEDEANGLQTPAS#R.A       | S143:      | 2 | 4,5446 | 0,527 | -0,55  |
| 17 | O95602 RPA1_HUMAN  | K.EKQEEEVDYES#EEEEER.E       | S1430:     | 3 | 4,8739 | 0,435 | -0,242 |
| 17 | P49792 RBP2_HUMAN  | K.SGSSFVHQAS#FK.F            | S1456:     | 2 | 3,0946 | 0,348 | 0,09   |
| 17 | P46783 RS10_HUMAN  | K.KAEAGAGS#ATEFQFR.G         | S146:      | 2 | 5,0526 | 0,525 | -0,222 |
| 17 | O60307 MAST3_HUMAN | R.SSENVLDEEGRS#PR.L          | S146:      | 2 | 2,7112 | 0,308 | -0,641 |
| 17 | Q14160 LAP4_HUMAN  | R.LRVQS#PEPPAPER.A           | S1475:     | 2 | 3,5846 | 0,397 | -1,098 |
| 17 | Q14160 LAP4_HUMAN  | R.LRVQS#PEPPAPER.A           | S1475:     | 3 | 2,768  | 0,125 | -0,705 |
| 17 | Q09666 AHNK_HUMAN  | R.LKSEdGVEGDLGETQS#R.T       | S148:      | 3 | 2,9789 | 0,161 | -0,289 |
| 17 | Q9UPT6 JIP3_HUMAN  | K.NYADQIS#RLEER.E            | S148:      | 2 | 2,4074 | 0,264 | -0,233 |
| 17 | Q02952 AKA12_HUMAN | K.KGLS#SDLEGEK.T             | S1497:     | 2 | 2,486  | 0,277 | -0,491 |
| 17 | Q8TEP8 CE192_HUMAN | K.HGGNVS#LDVLPVK.G           | S1502:     | 2 | 3,8388 | 0,492 | 0,086  |
| 17 | Q14160 LAP4_HUMAN  | R.M*KS#LEQDALR.A             | S1508:     | 2 | 2,6461 | 0,269 | -0,19  |
| 17 | P18583 SON_HUMAN   | K.SHDDGNIDLES#DSFLK.F        | S152:      | 2 | 5,4173 | 0,58  | -0,391 |
| 17 | P18583 SON_HUMAN   | K.SHDDGNIDLES#DSFLK.F        | S152:      | 3 | 4,6732 | 0,252 | 0,098  |
| 17 | Q8IWY8 ZSC29_HUMAN | R.ARS#PDLGPQEQM*NPK.E        | S152:      | 3 | 2,7836 | 0,3   | 0,104  |
| 17 | Q00536 PCTK1_HUMAN | R.RVS#LSEIGFGK.L             | S153:      | 3 | 3,6505 | 0,361 | 0,144  |
| 17 | Q8NFC6 FA44A_HUMAN | K.DKDVTLS#PVK.A              | S1531:     | 2 | 3,4478 | 0,3   | -0,723 |
| 17 | P18583 SON_HUMAN   | K.SHDDGNIDLES#DSFLK.F        | S154:      | 2 | 5,031  | 0,616 | 0      |
| 17 | P18583 SON_HUMAN   | K.SHDDGNIDLES#DSFLK.F        | S154:      | 3 | 3,5392 | 0,323 | 0,293  |
| 17 | Q92733 PRCC_HUMAN  | K.IAAPELHKGDS#DS#EEDEPTK.K   | S157:S159: | 3 | 3,8856 | 0,455 | -0,079 |
| 17 | O75376 NCOR1_HUMAN | K.HEAPSS#PISGQPCGDDQNASPSK.L | S158:      | 3 | 3,6947 | 0,41  | -0,374 |
| 17 | P05023 AT1A1_HUMAN | R.DKYEPAAVS#EQGDK.K          | S16:       | 3 | 3,6624 | 0,298 | -0,113 |
| 17 | P05023 AT1A1_HUMAN | R.DKYEPAAVS#EQGDK.K          | S16:       | 2 | 3,2557 | 0,47  | -0,679 |
| 17 | Q96QF0 RAB3I_HUMAN | R.LRS#PSVLEVR.E              | S163:      | 3 | 3,0206 | 0,231 | 0,296  |
| 17 | O60841 IF2P_HUMAN  | K.WDGS#EEDEDNSKK.I           | S164:      | 2 | 3,9735 | 0,596 | -0,603 |
| 17 | O60841 IF2P_HUMAN  | K.WDGS#EEDEDNSKK.I           | S164:      | 3 | 2,8796 | 0,341 | -0,226 |
| 17 | Q13523 PRP4B_HUMAN | R.S#SST#KKGKLELVDNK.I        | S164:T167: | 2 | 2,6772 | 0,207 | -0,513 |
| 17 | P50613 CDK7_HUMAN  | K.SFGS#PNRAYT#HQVVTR.W       | S164:T170: | 3 | 3,7593 | 0,326 | -0,924 |
| 17 | Q9NQT8 KI13B_HUMAN | R.ERPDLEAPAGS#PFR.V          | S1644:     | 3 | 2,6243 | 0,182 | -0,106 |
| 17 | Q9NW68 BSDC1_HUMAN | K.KGEISELLVGS#PSIR.A         | S166:      | 2 | 4,0963 | 0,451 | -0,586 |
| 17 | O43399 TPD54_HUMAN | R.NSATFKS#FEDR.V             | S166:      | 2 | 3,7197 | 0,401 | -0,441 |

|    |                     |                                 |              |   |        |       |        |
|----|---------------------|---------------------------------|--------------|---|--------|-------|--------|
| 17 | P29966 MARCS_HUMAN  | K.SFKLS#GFSFK.K                 | S167:        | 2 | 3,1985 | 0,465 | -0,596 |
| 17 | Q6NZI2 PTRF_HUMAN   | K.LPAKLS#ISK.S                  | S167:        | 2 | 3,0406 | 0,35  | -0,118 |
| 17 | Q12888 TP53B_HUMAN  | K.LITS#EEERS#PAKR.G             | S1673:S1678: | 3 | 3,475  | 0,261 | -0,327 |
| 17 | Q5UIPO RIF1_HUMAN   | K.RDS#FDNCSLGESSK.I             | S1688:       | 2 | 4,2558 | 0,456 | 0,145  |
| 17 | Q02952 AKA12_HUMAN  | R.IEKS#LVEPK.E                  | S1691:       | 2 | 2,6212 | 0,213 | -0,109 |
| 17 | P09493 TPM1_HUMAN   | R.KLVIIES#DLER.A                | S174:        | 3 | 4,2537 | 0,302 | -0,066 |
| 17 | P09493 TPM1_HUMAN   | R.KLVIIES#DLER.A                | S174:        | 2 | 3,8762 | 0,18  | 0,175  |
| 17 | Q99627 CSN8_HUMAN   | R.KPVAGALDVS#FNK.F              | S175:        | 3 | 4,0238 | 0,202 | 0,192  |
| 17 | Q99627 CSN8_HUMAN   | R.KPVAGALDVS#FNK.F              | S175:        | 2 | 3,9764 | 0,518 | -0,171 |
| 17 | Q9NYF8 BCLF1_HUMAN  | K.KAEGEPQEES#PLK.S              | S177:        | 2 | 4,409  | 0,436 | -0,561 |
| 17 | Q58FF8 H90B2_HUMAN  | K.IEDVGS#DEEDDSGKDK.K           | S177:        | 2 | 4,3609 | 0,501 | -0,537 |
| 17 | Q58FF8 H90B2_HUMAN  | K.IEDVGS#DEEDDSGKDK.K           | S177:        | 3 | 3,6209 | 0,368 | -0,47  |
| 17 | Q86TB9 PATL1_HUMAN  | R.RS#TSPPIIGSPPVR.A             | S177:        | 2 | 3,0309 | 0,387 | -0,253 |
| 17 | Q9NYF8 BCLF1_HUMAN  | K.KAEGEPQEES#PLK.S              | S177:        | 3 | 2,7233 | 0,219 | 0,24   |
| 17 | Q58FF8 H90B2_HUMAN  | K.IEDVGS#DEEDDSGKDK.K           | S177:        | 3 | 2,6543 | 0,179 | -0,201 |
| 17 | Q09666 AHNK_HUMAN   | R.EGAKDIDISS#PEFK.I             | S177:        | 2 | 2,2919 | 0,271 | -0,227 |
| 17 | Q58FF8 H90B2_HUMAN  | K.IEDVGS#DEEDDS#GKDKK.K         | S177:S183:   | 3 | 3,9621 | 0,397 | -0,09  |
| 17 | P51153 RAB13_HUMAN  | R.S#GNGNKPPSTDLK.T              | S178:        | 2 | 3,0411 | 0,102 | -0,262 |
| 17 | P51636 CAV2_HUMAN   | K.ADVQLFM*DDDS#YSHHSGLEYADPEK.F | S18:         | 3 | 4,8058 | 0,47  | -0,185 |
| 17 | O00221 IKBE_HUMAN   | R.KGPDEAEESQYDS#GIESLR.S        | S18:         | 3 | 4,0113 | 0,219 | -0,334 |
| 17 | O60336 MABP1_HUMAN  | K.NLLRS#PSIK.L                  | S18:         | 2 | 2,1002 | 0,144 | -0,22  |
| 17 | Q00537 PCTK2_HUMAN  | R.RAS#LSEIGFGK.M                | S180:        | 2 | 3,5279 | 0,548 | -0,294 |
| 17 | Q00537 PCTK2_HUMAN  | R.RAS#LSEIGFGK.M                | S180:        | 3 | 3,2514 | 0,251 | 0,294  |
| 17 | Q9H1E3 NUCKS_HUMAN  | R.LKATVTPS#PVK.G                | S181:        | 2 | 2,7266 | 0,306 | -0,2   |
| 17 | O60271 JIP4_HUMAN   | K.LHQLS#GSDQLESTAHS#R.I         | S183:S194:   | 3 | 3,4978 | 0,436 | -0,451 |
| 17 | Q9NPD8 UBE2T_HUMAN  | R.KAS#QLVGIEK.K                 | S184:        | 2 | 2,9056 | 0,319 | 1,376  |
| 17 | P49750 YLPM1_HUMAN  | K.KDAEEEEES#ELGYIPK.S           | S1840:       | 2 | 3,8915 | 0,543 | -0,269 |
| 17 | O95218 ZRAB2_HUMAN  | K.YNLDAS#EEEDSNKK.K             | S188:        | 2 | 4,4045 | 0,575 | -0,496 |
| 17 | Q53SC7 Q53SC7_HUMAN | R.SNM*HFTSSSTGGLSSSQSSYS#PSNR.E | S189:        | 3 | 2,9044 | 0,312 | -0,34  |
| 17 | Q9BVC5 ASHWN_HUMAN  | R.KSPSGPVKS#PPLSPVGT#TPVK.L     | S189:T197:   | 3 | 4,1106 | 1     | 0      |
| 17 | Q9BVC5 ASHWN_HUMAN  | R.KSPSGPVKS#PPLSPVGT#PVK.L      | S189:T198:   | 3 | 5,338  | 1     | -0,165 |
| 17 | Q9H1E3 NUCKS_HUMAN  | R.KVVDYSQFQES#DDADEDYGR.D       | S19:         | 3 | 6,0818 | 0,399 | 0,524  |
| 17 | O94915 FRYL_HUMAN   | R.SNSRLS#LIGDR.R                | S1945:       | 3 | 3,3014 | 0,407 | 0      |

|    |                     |                             |              |   |        |       |        |
|----|---------------------|-----------------------------|--------------|---|--------|-------|--------|
| 17 | P30622 CLIP1_HUMAN  | K.TASES#ISNLSEAGS#IKKGER.E  | S195:S204:   | 3 | 2,9891 | 0,229 | -0,165 |
| 17 | P35580 MYH10_HUMAN  | R.QLHLEGASLELS#DDDTESK.T    | S1956:       | 3 | 4,6008 | 0,281 | 0,084  |
| 17 | O94915 FRYL_HUMAN   | R.RS#NTLDIM*DGR.I           | S1957:       | 2 | 2,0494 | 0,274 | -0,533 |
| 17 | Q9BVG4 CX026_HUMAN  | K.GADS#GEEKEEGINR.E         | S197:        | 3 | 3,3299 | 0,212 | -0,233 |
| 17 | P35908 K22E_HUMAN   | K.FAS#FIDKVR.F              | S197:        | 2 | 2,5935 | 0,283 | -0,525 |
| 17 | Q92614 MY18A_HUMAN  | K.NKLEGDS#DVDS#ELEDSELEDR.V | S1970:       | 2 | 4,2504 | 0,522 | -0,77  |
| 17 | Q92614 MY18A_HUMAN  | K.NKLEGDS#DVDS#ELEDSELEDR.V | S1970:S1974: | 3 | 4,1919 | 0,448 | 0,221  |
| 17 | P30622 CLIP1_HUMAN  | K.TASESISNLS#EAGS#IKKGER.E  | S200:S204:   | 3 | 3,0412 | 0,218 | 0,247  |
| 17 | Q09666 AHNK_HUMAN   | R.HELTEISNVVETQS#GK.T       | S201:        | 3 | 3,6454 | 0,396 | -0,186 |
| 17 | Q52LD0 Q52LD0_HUMAN | K.AGGSPASYHGSTS#PR.V        | S201:        | 2 | 2,6215 | 0,317 | -0,323 |
| 17 | Q8NCD3 HJURP_HUMAN  | R.ISGKS#PGDPAKPAS#SPR.E     | S201:S210:   | 2 | 3,4009 | 0,394 | -0,404 |
| 17 | Q8NCD3 HJURP_HUMAN  | R.ISGKS#PGDPAKPAS#SPR.E     | S201:S210:   | 3 | 3,3339 | 0,197 | -0,101 |
| 17 | Q92614 MY18A_HUMAN  | R.YSHSYLS#DSDTEAK.L         | S2041:       | 2 | 4,4364 | 0,458 | 0,29   |
| 17 | Q14980 NUMA1_HUMAN  | R.RQS#M*AFSILNT#PKK.L       | S2047:T2055: | 3 | 3,0925 | 0,263 | 0,305  |
| 17 | Q6ZN18 AEBP2_HUMAN  | R.RGS#LEM*SSDGEPLSR.M       | S206:        | 2 | 3,2653 | 0,512 | 0,071  |
| 17 | Q9UKV3 ACINU_HUMAN  | K.S#SSISEEKGDS#DDEKPR.K     | S206:S216:   | 3 | 4,0304 | 0,366 | -0,271 |
| 17 | Q05519 SFR11_HUMAN  | K.LNHVAAGLVSP#PSLK.S        | S207:        | 2 | 3,4957 | 0,517 | -0,328 |
| 17 | Q05519 SFR11_HUMAN  | K.LNHVAAGLVSP#LKS#DTSSK.E   | S209:S212:   | 3 | 3,7382 | 1     | 0,758  |
| 17 | Q6R327 RICTR_HUMAN  | R.GRND#GEENVPLDLTR.E        | S21:         | 2 | 4,3546 | 0,385 | -0,461 |
| 17 | P60174 TPIS_HUMAN   | R.KQS#LGELIGTLNAAK.V        | S21:         | 2 | 3,9261 | 0,516 | -0,601 |
| 17 | Q6ZN18 AEBP2_HUMAN  | R.RGSLEM*S#SDGEPLSR.M       | S210:        | 3 | 3,2909 | 0,245 | 0,32   |
| 17 | Q13242 SFRS9_HUMAN  | R.GS#PHYFSPFRPY.-           | S211:        | 2 | 2,5963 | 0,546 | -0,477 |
| 17 | Q9UQ35 SRRM2_HUMAN  | R.CRS#PGM*LEPLGSSR.T        | S2132:       | 3 | 3,2169 | 0,174 | -0,223 |
| 17 | O60841 IF2P_HUMAN   | K.NKPGPNIES#GNEDDDASFK.I    | S214:        | 3 | 4,8883 | 0,596 | 0,692  |
| 17 | Q9Y6Q9 NCOA3_HUMAN  | K.TPHDILEDINAS#PEM*R.Q      | S214:        | 3 | 4,1939 | 0,357 | 0,095  |
| 17 | Q9H792 SG269_HUMAN  | K.HVILSGS#TEVISNEGGR.F      | S214:        | 2 | 3,6807 | 0,529 | -0,133 |
| 17 | O60841 IF2P_HUMAN   | K.NKPGPNIES#GNEDDDASFK.I    | S214:        | 2 | 3,0329 | 0,442 | -0,577 |
| 17 | Q9H1E3 NUCKS_HUMAN  | K.EEDEEPES#PPEKK.T          | S214:        | 2 | 2,8844 | 0,202 | -0,451 |
| 17 | Q9H1E3 NUCKS_HUMAN  | K.TPSPKEEDEEPES#PPEK.K      | S214:        | 3 | 2,7609 | 0,171 | -0,365 |
| 17 | Q9H1E3 NUCKS_HUMAN  | K.TPSPKEEDEEPES#PPEK.K      | S214:        | 2 | 2,0151 | 0,319 | -0,609 |
| 17 | Q9H6K1 CF106_HUMAN  | R.KVEGNFNPAS#PQK.N          | S215:        | 2 | 3,8805 | 0,544 | 0,297  |
| 17 | Q9H6K1 CF106_HUMAN  | R.KVEGNFNPAS#PQK.N          | S215:        | 3 | 3,0186 | 0,21  | 0,223  |
| 17 | Q01082 SPTB2_HUMAN  | R.TSS#KESS#PIPSPTSDRK.A     | S2161:S2165: | 3 | 3,082  | 1     | -0,745 |

|    |                     |                                    |              |   |        |       |        |
|----|---------------------|------------------------------------|--------------|---|--------|-------|--------|
| 17 | Q01082 SPTB2_HUMAN  | R.TSS#KESSPIPS#PTSDRK.A            | S2161:S2169: | 3 | 3,0805 | 0,175 | -0,559 |
| 17 | Q01082 SPTB2_HUMAN  | R.TSSKES#SPIPS#PTSDRK.A            | S2164:S2169: | 2 | 2,9161 | 1     | -0,311 |
| 17 | O95297 MPZL1_HUMAN  | R.KS#PSDTEGLVK.S                   | S219:        | 2 | 3,098  | 0,397 | -0,787 |
| 17 | Q6ZS17 FA65A_HUMAN  | R.SQS#FAGVLGSHER.G                 | S22:         | 3 | 4,1348 | 0,406 | 0,063  |
| 17 | Q6ZS17 FA65A_HUMAN  | R.SQS#FAGVLGSHER.G                 | S22:         | 2 | 3,5278 | 0,446 | -0,419 |
| 17 | Q7Z5K2 WAPL_HUMAN   | K.RPES#PSEISPIK.G                  | S221:        | 3 | 2,8275 | 0,203 | 0,386  |
| 17 | Q13573 SNW1_HUMAN   | R.GPPS#PPAPVM*HS#PSRK.M            | S224:S232:   | 3 | 2,6483 | 0,19  | -0,302 |
| 17 | Q5JSZ5 K0515_HUMAN  | R.HIISATSLSTS#PTELGSR.N            | S226:        | 2 | 5,6956 | 0,706 | -0,504 |
| 17 | P08238 HS90B_HUMAN  | R.EKEIS#DDEAEEEEK.G                | S226:        | 2 | 4,6124 | 0,532 | -0,823 |
| 17 | P08238 HS90B_HUMAN  | R.EKEIS#DDEAEEEEK.G                | S226:        | 3 | 2,6356 | 0,269 | -0,112 |
| 17 | Q9BW71 HIRP3_HUMAN  | K.SLKESEQES#EEEILAQK.K             | S227:        | 3 | 3,7937 | 0,105 | -0,623 |
| 17 | P49792 RBP2_HUMAN   | K.SALS#PSKSPAK.L                   | S2276:       | 2 | 2,5883 | 0,222 | -0,635 |
| 17 | Q8NE71 ABCF1_HUMAN  | K.KAEQGS#EEEGEGEEEEEGGESK.A        | S228:        | 3 | 7,982  | 0,513 | -0,643 |
| 17 | Q08AE8 SPIR1_HUMAN  | K.LRPVS#PEEIR.R                    | S228:        | 2 | 2,2632 | 0,316 | -0,287 |
| 17 | P51636 CAV2_HUMAN   | K.ADVQLFM*DDDSYSHHS#GLEADPEK.F     | S23:         | 3 | 5,085  | 0,436 | 0,432  |
| 17 | O60716 CTND1_HUMAN  | R.HYEDGYPGGSNDYGS#LSR.V            | S230:        | 3 | 5,8292 | 0,392 | -0,267 |
| 17 | O60716 CTND1_HUMAN  | R.HYEDGYPGGSNDYGS#LSR.V            | S230:        | 2 | 2,7492 | 0,566 | -0,475 |
| 17 | P07900 HS90A_HUMAN  | R.DKEVS#DDEAEEK.E                  | S231:        | 2 | 4,0115 | 0,304 | -0,579 |
| 17 | Q96KQ7 EHMT2_HUMAN  | R.KLNS#GGGLSEELGSAR.R              | S232:        | 2 | 4,5766 | 0,569 | -0,442 |
| 17 | O14908 GIPC1_HUMAN  | R.SAGGRPGS#GPQLGTGR.G              | S232:        | 2 | 2,5746 | 0,401 | -0,318 |
| 17 | O15231 ZN185_HUMAN  | R.RES#CGSSVLTDFEGK.D               | S233:        | 2 | 4,0874 | 0,606 | -0,488 |
| 17 | Q96FF7 YS003_HUMAN  | R.ARS#PPQPLGELK.R                  | S233:        | 3 | 3,3466 | 0,289 | -0,067 |
| 17 | Q96FF7 YS003_HUMAN  | R.ARS#PPQPLGELK.R                  | S233:        | 2 | 2,7458 | 0,297 | 0      |
| 17 | P62753 RS6_HUMAN    | R.LS#SLRAS#TSKSESSQK.-             | S235:S240:   | 2 | 2,6862 | 1     | -0,92  |
| 17 | P61247 RS3A_HUMAN   | K.LM*ELHGEKS#SSGK.A                | S236:        | 2 | 2,8388 | 0,386 | -0,171 |
| 17 | P09496 CLCA_HUMAN   | R.M*RS#VLISLK.Q                    | S236:        | 2 | 2,5645 | 0,255 | -0,107 |
| 17 | Q9Y2W2 WBP11_HUMAN  | R.RDEDM*LYS#PELAQR.G               | S237:        | 2 | 4,1256 | 0,483 | -0,47  |
| 17 | Q9Y2W2 WBP11_HUMAN  | R.RDEDM*LYS#PELAQR.G               | S237:        | 3 | 3,9462 | 0,41  | -0,101 |
| 17 | Q6U841 S4A10_HUMAN  | R.S#FADIGKK.Q                      | S238:        | 2 | 2,0702 | 0,21  | -0,645 |
| 17 | Q86Y04 Q86Y04_HUMAN | K.KVDLTLLS#PK.S                    | S239:        | 2 | 4,2781 | 0,395 | 0,102  |
| 17 | Q8WUB8 PHF10_HUMAN  | K.NKGTSDSSSGNVS#EGESPPDSQEDSFQGR.Q | S239:        | 3 | 3,0758 | 0,368 | 0,657  |
| 17 | Q13136 LIPA1_HUMAN  | K.RSS#DGS#LSHEEDLAK.V              | S239:S242:   | 2 | 4,3997 | 0,361 | -0,477 |
| 17 | Q9UQ35 SRRM2_HUMAN  | R.VSGRTS#PPLDR.A                   | S2398:       | 2 | 2,8913 | 0,267 | 0      |

|    |                    |                              |            |   |        |       |        |
|----|--------------------|------------------------------|------------|---|--------|-------|--------|
| 17 | Q9UQ35 SRRM2_HUMAN | R.VSGRTS#PPLDR.A             | S2398:     | 3 | 2,7206 | 0,286 | -0,398 |
| 17 | P18887 XRCC1_HUMAN | R.AIGSTSKPQES#PK.G           | S241:      | 2 | 2,3187 | 0,363 | -0,26  |
| 17 | Q9HB09 B2L12_HUMAN | K.LVRLS#SDSFAR.L             | S242:      | 3 | 4,3445 | 0,438 | 0,069  |
| 17 | Q5T200 ZC3HD_HUMAN | R.KTSAVSS#PLLDQQR.N          | S242:      | 2 | 4,17   | 0,474 | -0,303 |
| 17 | Q8TC05 MDM1_HUMAN  | K.GLS#PVKEPK.L               | S242:      | 2 | 2,3742 | 0,307 | 0,118  |
| 17 | Q9HB09 B2L12_HUMAN | K.LVRLS#SDSFAR.L             | S242:      | 2 | 2,1719 | 0,408 | -0,092 |
| 17 | Q9UFC0 LRWD1_HUMAN | K.RPDDVPLSLS#PSK.R           | S243:      | 2 | 3,4974 | 0,462 | 0,409  |
| 17 | Q56NI9 ESCO2_HUMAN | K.SKSEVIEDS#DVETVSEK.K       | S244:      | 2 | 5,5648 | 0,596 | -0,187 |
| 17 | Q8WWI1 LMO7_HUMAN  | K.REDS#FESLDSLGR.S           | S246:      | 2 | 3,1565 | 0,337 | 0,073  |
| 17 | Q9H3N1 TXND1_HUMAN | K.KVEEEQEAEEDVS#EEEEAESK.E   | S247:      | 3 | 5,4501 | 0,481 | -0,073 |
| 17 | Q9UNF1 MAGD2_HUMAN | R.ALLSLRS#PK.A               | S247:      | 2 | 3,1038 | 0,336 | 0      |
| 17 | Q9BZD4 NUF2_HUMAN  | K.IVDS#PEKLN.N               | S247:      | 2 | 2,5553 | 0,203 | -0,11  |
| 17 | P30305 MPIP2_HUMAN | R.KM*EVEELS#PLALGR.F         | S249:      | 3 | 3,3256 | 0,219 | 0,877  |
| 17 | P16949 STMN1_HUMAN | K.RASGQAFELILS#PR.S          | S25:       | 3 | 3,1064 | 0,179 | -0,225 |
| 17 | P08670 VIME_HUMAN  | R.M*FGGPGTASRPS#SSR.S        | S25:       | 3 | 2,7481 | 0,33  | 0      |
| 17 | P46100 ATRX_HUMAN  | K.LHDFLAHS#SEESEETSS#PPR.L   | S25:S34:   | 3 | 5,0471 | 1     | -0,152 |
| 17 | P52701 MSH6_HUMAN  | R.RVIS#DSESDIGGS#DVEFKPDTK.E | S252:S261: | 3 | 5,6073 | 0,557 | -0,144 |
| 17 | P06733 ENOA_HUMAN  | R.S#GKYDLDFK.S               | S254:      | 2 | 2,4606 | 0,253 | 0      |
| 17 | P52701 MSH6_HUMAN  | R.RVISDS#ESDIGGS#DVEFKPDTK.E | S254:S261: | 3 | 6,1724 | 0,585 | -0,432 |
| 17 | Q4G0J3 LARP7_HUMAN | R.SRPTS#EGSDIESTEPQK.Q       | S258:      | 3 | 3,5329 | 0,288 | -0,854 |
| 17 | Q9UQ35 SRRM2_HUMAN | K.RVPS#PTPAPK.E              | S2581:     | 2 | 2,1549 | 0,109 | -0,54  |
| 17 | Q92466 DDB2_HUMAN  | R.SRS#PLELEPEAK.K            | S26:       | 2 | 3,9694 | 0,343 | -0,17  |
| 17 | Q92466 DDB2_HUMAN  | R.SRS#PLELEPEAK.K            | S26:       | 3 | 3,4443 | 0,272 | -0,7   |
| 17 | Q8TC05 MDM1_HUMAN  | R.NLETVS#PERK.S              | S263:      | 2 | 2,5937 | 0,354 | -0,389 |
| 17 | Q8NG27 PJA1_HUMAN  | R.NLAS#PNCVKPK.I             | S265:      | 2 | 2,7513 | 0,217 | -0,84  |
| 17 | O60716 CTND1_HUMAN | R.VGGS#SVDLHR.F              | S268:      | 2 | 2,7503 | 0,211 | -0,992 |
| 17 | O60716 CTND1_HUMAN | R.VGGSS#VDLHR.F              | S269:      | 2 | 2,6266 | 0,089 | -0,11  |
| 17 | P22234 PUR6_HUMAN  | K.TKEVYELLDS#PGK.V           | S27:       | 2 | 5,0016 | 0,558 | -0,548 |
| 17 | Q6IAA8 CK059_HUMAN | R.KLLDPSS#PPTK.A             | S27:       | 2 | 3,8883 | 0,307 | -0,177 |
| 17 | Q9H3N1 TXND1_HUMAN | R.QRS#LGPLATDKS.-            | S270:      | 3 | 2,9852 | 0,286 | 0,127  |
| 17 | Q5BKZ1 ZN326_HUMAN | K.ISLSKS#PTK.T               | S270:      | 2 | 2,7412 | 0,256 | 0      |
| 17 | Q9NY61 AATF_HUMAN  | K.DKGGPEFSS#ALK.N            | S273:      | 2 | 2,6756 | 0,121 | -0,185 |
| 17 | P23246 SFPQ_HUMAN  | R.SEEKIS#DSEGFK.A            | S273:      | 2 | 2,6265 | 0,432 | -0,255 |



|    |                     |                                |            |   |        |       |        |
|----|---------------------|--------------------------------|------------|---|--------|-------|--------|
| 17 | P05787 K2C8_HUMAN   | R.S#RAEAESM*YQIK.Y             | S274:      | 3 | 2,6855 | 0,124 | 0,242  |
| 17 | Q9NYV4 CD2L7_HUMAN  | R.RQS#VS#PPYKEPSAYQSSTR.S      | S274:S276: | 3 | 3,6783 | 0,289 | 0      |
| 17 | P57060 RWD2B_HUMAN  | R.KFS#IFEK.V                   | S275:      | 2 | 2,1504 | 0,091 | -0,33  |
| 17 | O00203 AP3B1_HUMAN  | K.NFYES#DDDQKEK.T              | S276:      | 2 | 3,6068 | 0,324 | -0,764 |
| 17 | O75691 UTP20_HUMAN  | K.SHS#LKDLAM*VE.-              | S2777:     | 2 | 2,3569 | 0,258 | -0,276 |
| 17 | Q8IXT5 RB12B_HUMAN  | R.S#RS#PLGFYVHLK.N             | S278:S280: | 3 | 3,5276 | 0,233 | -0,585 |
| 17 | Q8IXT5 RB12B_HUMAN  | R.S#RS#PLGFYVHLK.N             | S278:S280: | 2 | 3,0367 | 0,498 | -0,468 |
| 17 | Q03164 HRX_HUMAN    | R.AGKLS#PLK.S                  | S279:      | 2 | 2,8465 | 0,17  | 0      |
| 17 | Q9NTJ3 SMC4_HUMAN   | R.REEGPPPPSPDGASS#DAEPEPPSGR.T | S28:       | 3 | 5,3514 | 0,476 | 0,141  |
| 17 | Q9Y2K7 JHD1A_HUMAN  | R.RYEDDGIS#DDEIEGK.R           | S28:       | 2 | 4,3084 | 0,642 | -0,402 |
| 17 | Q8TAQ2 SMRC2_HUMAN  | K.TLTDEVNS#PDSRRR.D            | S283:      | 2 | 2,9079 | 0,366 | -0,579 |
| 17 | Q92576 PHF3_HUMAN   | K.AKPVGS#PLFK.F                | S283:      | 2 | 2,1024 | 0,217 | -0,109 |
| 17 | Q6P4F7 RHGBA_HUMAN  | R.RQS#VGDFVSGALNK.F            | S285:      | 2 | 4,1623 | 0,454 | -0,157 |
| 17 | Q641Q2 FA21A_HUMAN  | R.SRPTS#FADELAAR.I             | S288:      | 3 | 3,7348 | 0,228 | 0,183  |
| 17 | O43166 SI1L1_HUMAN  | R.SKS#ETGDSSIFR.K              | S288:      | 2 | 3,5114 | 0,438 | -0,175 |
| 17 | Q641Q2 FA21A_HUMAN  | R.SRPTS#FADELAAR.I             | S288:      | 2 | 3,3632 | 0,409 | 0,406  |
| 17 | Q5T069 Q5T069_HUMAN | K.SVPGYKVEEK#P.-               | S288:      | 2 | 2,0962 | 0,298 | -0,349 |
| 17 | O95817 BAG3_HUMAN   | R.SSTPLHS#PSPIR.V              | S289:      | 2 | 2,6239 | 0,085 | -0,09  |
| 17 | Q9BWT3 PAPOG_HUMAN  | K.HYGITSPISLAS#PK.E            | S29:       | 2 | 3,2844 | 0,404 | -0,472 |
| 17 | O75152 ZC11A_HUMAN  | R.KFS#AGGSDPPLK.R              | S290:      | 3 | 3,287  | 0,198 | 0,131  |
| 17 | O95831 AIFM1_HUMAN  | K.IGDFRS#LEK.I                 | S292:      | 2 | 2,0614 | 0,201 | -0,107 |
| 17 | P36578 RL4_HUMAN    | R.ILKS#PEIQR.A                 | S295:      | 2 | 2,8045 | 0,123 | -0,21  |
| 17 | Q9NYF3 FA53C_HUMAN  | R.LRPS#LDFDK.M                 | S299:      | 2 | 2,4579 | 0,321 | -0,521 |
| 17 | Q96N67 DOCK7_HUMAN  | R.KQISGQYSGS#PQLLK.N           | S30:       | 2 | 5,6519 | 0,499 | -0,214 |
| 17 | Q3KR37 GRM1B_HUMAN  | R.SRS#PTPQNQDGDGM*VEK.G        | S30:       | 3 | 4,3496 | 0,406 | -0,461 |
| 17 | Q3KR37 GRM1B_HUMAN  | R.SRS#PTPQNQDGDGM*VEK.G        | S30:       | 2 | 2,4736 | 0,445 | -0,43  |
| 17 | Q9Y2V2 CHSP1_HUMAN  | R.ERS#PSPLRGNVPS#PLPTR.R       | S30:S41:   | 3 | 3,5156 | 0,324 | -0,165 |
| 17 | O14757 CHK1_HUMAN   | K.HIQSNLDFS#PVNSASSEENVK.Y     | S301:      | 3 | 4,3102 | 0,312 | -0,154 |
| 17 | Q6ICG6 CV009_HUMAN  | R.NNRPAFFS#PSLK.R              | S304:      | 3 | 2,9516 | 0,147 | -0,063 |
| 17 | Q6ICG6 CV009_HUMAN  | R.NNRPAFFS#PSLK.R              | S304:      | 2 | 2,1812 | 0,186 | -0,167 |
| 17 | Q9Y2K1 ZBTB1_HUMAN  | R.KSS#TVESEIASEEK.S            | S305:      | 2 | 4,1265 | 0,504 | 0      |
| 17 | Q9Y2K1 ZBTB1_HUMAN  | R.KSS#TVESEIASEEK.S            | S305:      | 3 | 3,2648 | 0,15  | 0      |
| 17 | Q06265 EXOS9_HUMAN  | K.M*EKAPIDTS#DVEEK.A           | S306:      | 2 | 3,9161 | 0,394 | 0,145  |

|    |                    |                                   |            |   |        |       |        |
|----|--------------------|-----------------------------------|------------|---|--------|-------|--------|
| 17 | P08107 HSP71_HUMAN | R.ARFEELCS#DLFR.S                 | S307:      | 3 | 2,8599 | 0,173 | -0,451 |
| 17 | Q7L9B9 EEP1_HUMAN  | R.KFSAACNFS#NILVNQER.L            | S31:       | 3 | 3,4031 | 0,204 | -0,352 |
| 17 | Q92522 H1X_HUMAN   | K.AGGSAAALS#PSKK.R                | S31:       | 2 | 2,7879 | 0,36  | -0,423 |
| 17 | Q14669 TRIPC_HUMAN | K.RSES#PPAELPSLR.R                | S312:      | 3 | 3,4899 | 0,21  | 0,06   |
| 17 | Q8IX01 SFR14_HUMAN | R.KM*S#FDIIDK.S                   | S315:      | 2 | 3,919  | 0,304 | 0,205  |
| 17 | Q8N350 DOS_HUMAN   | R.HAS#LDGASPYFK.V                 | S319:      | 2 | 3,7878 | 0,524 | 0,267  |
| 17 | Q9BRD0 BUD13_HUMAN | K.NSKYEYDPDIS#PPR.K               | S325:      | 3 | 4,102  | 0,452 | 0,312  |
| 17 | Q9BRD0 BUD13_HUMAN | K.NSKYEYDPDIS#PPR.K               | S325:      | 2 | 3,5466 | 0,559 | -0,416 |
| 17 | Q9UKJ3 GPTC8_HUMAN | R.GPKPEPPGS#GSPAPPR.R             | S325:      | 2 | 3,4138 | 0,489 | -0,455 |
| 17 | Q9UJM3 ERRFI_HUMAN | K.VPPREPLS#PSNSR.T                | S326:      | 2 | 2,0443 | 0,291 | -0,402 |
| 17 | Q9UKJ3 GPTC8_HUMAN | R.GPKPEPPGS#PAPPR.R               | S327:      | 3 | 4,3036 | 0,391 | -0,114 |
| 17 | O75122 CLAP2_HUMAN | R.SSSSS#QESLNRPFSSK.W             | S327:      | 2 | 3,3505 | 0,333 | -0,067 |
| 17 | Q9UKJ3 GPTC8_HUMAN | R.GPKPEPPGS#PAPPR.R               | S327:      | 2 | 3,1689 | 0,375 | -0,304 |
| 17 | Q15459 SF3A1_HUMAN | K.FGESEEVEM*EVES#DEEDDKQEK.A      | S329:      | 3 | 5,8404 | 0,562 | -0,337 |
| 17 | Q9UGV2 NDRG3_HUMAN | R.THS#TSSSLGSGESPFSSR.S           | S331:      | 2 | 3,5836 | 0,521 | -0,609 |
| 17 | Q9P2M7 CING_HUMAN  | R.KVS#LVLEK.M                     | S332:      | 2 | 3,3765 | 0,365 | -0,122 |
| 17 | P49790 NU153_HUMAN | K.RIPSIVS#SPLNSPLDR.S             | S333:      | 3 | 3,4239 | 0,322 | -0,4   |
| 17 | Q9UGV2 NDRG3_HUMAN | R.THSTS#SSLGSGESPFSSR.S           | S333:      | 3 | 3,3166 | 0,269 | -0,304 |
| 17 | Q8NEM0 MCPH1_HUMAN | K.YRLS#PTLSSTK.G                  | S333:      | 2 | 3,1586 | 0,398 | -0,366 |
| 17 | Q15642 CIP4_HUMAN  | K.NKPRPPPLS#PLGGPVPS#ALPNGPPSPR.S | S335:S343: | 3 | 3,1936 | 0,304 | -0,064 |
| 17 | Q2TB10 ZN800_HUMAN | R.DSITPDIATKPGQPLFLDSIS#PKK.S     | S336:      | 3 | 3,1196 | 0,355 | -0,553 |
| 17 | Q9NVH2 INT7_HUMAN  | K.HYFSIVPGNVSS#SPR.S              | S337:      | 2 | 3,1542 | 0,392 | 0,283  |
| 17 | Q13671 RIN1_HUMAN  | R.GSPATS#PHLGR.R                  | S337:      | 2 | 2,273  | 0,362 | -0,21  |
| 17 | P49790 NU153_HUMAN | K.RIPSIVSSPLNS#PLDR.S             | S338:      | 2 | 4,2081 | 0,468 | -0,8   |
| 17 | P49790 NU153_HUMAN | K.RIPSIVSSPLNS#PLDR.S             | S338:      | 3 | 3,327  | 0,336 | -0,1   |
| 17 | Q86X53 ERIC1_HUMAN | K.AHS#ILNFLK.S                    | S339:      | 2 | 2,3123 | 0,385 | 0      |
| 17 | Q09666 AHNK_HUMAN  | K.FKM*PFLSISS#PK.V                | S3412:     | 3 | 3,204  | 0,143 | -0,062 |
| 17 | Q9HC62 SEN2_HUMAN  | R.KVS#IIETK.E                     | S344:      | 2 | 2,6303 | 0,35  | -0,122 |
| 17 | Q8WVV9 HNRLH_HUMAN | R.LKTEEGEIDYS#AEEGENR.R           | S35:       | 3 | 4,2961 | 0,364 | -0,511 |
| 17 | P01892 1A02_HUMAN  | R.KGGSYSQAASSDS#AQGSDVSLTACK.V    | S352:      | 3 | 5,6638 | 0,496 | -0,36  |
| 17 | P01892 1A02_HUMAN  | R.KGGSYSQAASSDS#AQGSDVSLTACKV.-   | S352:      | 3 | 4,1903 | 0,482 | -0,485 |
| 17 | Q9UK58 CCNL1_HUMAN | K.AEEKS#PISINVK.T                 | S352:      | 3 | 2,9768 | 0,228 | -0,066 |
| 17 | Q9UK58 CCNL1_HUMAN | K.AEEKS#PISINVK.T                 | S352:      | 2 | 2,6432 | 0,214 | 0,087  |

|    |                    |                                   |            |   |        |       |        |
|----|--------------------|-----------------------------------|------------|---|--------|-------|--------|
| 17 | P01892 1A02_HUMAN  | R.KGGSYSQAASSDSAQGS DV S#LTACK.V  | S359:      | 3 | 5,4366 | 0,454 | 0,432  |
| 17 | P01892 1A02_HUMAN  | R.KGGSYSQAASSDSAQGS DV S#LTACKV.- | S359:      | 3 | 5,2742 | 0,353 | -0,485 |
| 17 | Q9NQ55 SSF1_HUMAN  | K.ARVGGS#DEEASGIPSR.T             | S359:      | 3 | 3,5326 | 0,425 | -0,11  |
| 17 | Q9NQ55 SSF1_HUMAN  | K.ARVGGS#DEEASGIPSR.T             | S359:      | 2 | 2,9857 | 0,507 | -0,293 |
| 17 | P17096 HMGA1_HUMAN | R.KQPPVS#PGTALVGSQK.E             | S36:       | 2 | 4,0294 | 0,554 | 0,292  |
| 17 | Q96RY7 IF140_HUMAN | R.KVPDFLGS#PGAEGK.D               | S360:      | 2 | 2,7627 | 0,445 | 0,412  |
| 17 | Q96RY7 IF140_HUMAN | R.KVPDFLGS#PGAEGK.D               | S360:      | 3 | 2,6872 | 0,193 | -0,062 |
| 17 | P35613 BASI_HUMAN  | R.KPEDVLDDDDAGS#APLK.S            | S362:      | 2 | 5,4664 | 0,577 | -0,065 |
| 17 | Q15910 EZH2_HUMAN  | R.GRLPNNSS#RPS#TPTINVLESK.D       | S363:S366: | 3 | 3,3327 | 0,382 | -0,226 |
| 17 | Q15910 EZH2_HUMAN  | R.GRLPNNSS#RPST#PTINVLESK.D       | S363:T367: | 3 | 3,4258 | 0,275 | -0,226 |
| 17 | Q9NRX5 SERC1_HUMAN | R.SDGS#LEDGDDVHR.A                | S364:      | 3 | 3,6073 | 0,446 | 0,062  |
| 17 | Q6P0N0 CN106_HUMAN | R.NISKLS#PPR.I                    | S365:      | 2 | 2,3104 | 0,322 | -0,112 |
| 17 | P20749 BCL3_HUMAN  | K.ATRPASTSQPDPS#PDR.S             | S366:      | 3 | 3,144  | 0,162 | -0,311 |
| 17 | P20749 BCL3_HUMAN  | K.ATRPASTSQPDPS#PDR.S             | S366:      | 2 | 2,0085 | 0,272 | -0,415 |
| 17 | Q6T4R5 NHS_HUMAN   | R.CSLVHSQS#VLQR.R                 | S367:      | 3 | 3,7323 | 0,425 | 0      |
| 17 | Q8N6H7 ARFG2_HUMAN | K.YKDNPFSLGES#FGSR.W              | S368:      | 3 | 4,2811 | 0,381 | -0,308 |
| 17 | Q8N6H7 ARFG2_HUMAN | K.YKDNPFSLGES#FGSR.W              | S368:      | 2 | 4,0734 | 0,533 | -0,616 |
| 17 | Q9NYB9 ABI2_HUMAN  | R.HTPPTIGGS#LPYR.R                | S368:      | 3 | 3,6168 | 0,295 | 0,434  |
| 17 | Q9NYB9 ABI2_HUMAN  | R.HTPPTIGGS#LPYR.R                | S368:      | 2 | 2,1328 | 0,104 | -0,083 |
| 17 | Q96S94 CCNL2_HUMAN | K.AKADS#PVNGLPK.G                 | S369:      | 2 | 3,4966 | 0,483 | -0,478 |
| 17 | Q96S94 CCNL2_HUMAN | K.AKADS#PVNGLPK.G                 | S369:      | 3 | 3,0385 | 0,134 | 0,215  |
| 17 | Q13428 TCOF_HUMAN  | K.ASGKTS#QVGAASAPAKES#PR.K        | S369:S381: | 3 | 2,9072 | 0,111 | -0,444 |
| 17 | P62807 H2B1C_HUMAN | R.KES#YSVYVYK.V                   | S37:       | 2 | 4,0447 | 0,431 | -0,272 |
| 17 | O75122 CLAP2_HUMAN | R.SRS#DIDVNAAAGAK.A               | S370:      | 2 | 5,1235 | 0,514 | -0,503 |
| 17 | O75122 CLAP2_HUMAN | R.SRS#DIDVNAAAGAK.A               | S370:      | 3 | 4,3675 | 0,406 | 0,063  |
| 17 | P42167 LAP2B_HUMAN | K.GAAGRPLELS#DFR.M                | S378:      | 3 | 2,6495 | 0,383 | -0,062 |
| 17 | P42167 LAP2B_HUMAN | K.GAAGRPLELS#DFR.M                | S378:      | 2 | 2,073  | 0,29  | -0,083 |
| 17 | P16949 STMN1_HUMAN | R.SKESVPEFPLS#PPK.K               | S38:       | 3 | 3,3505 | 0,338 | 0,338  |
| 17 | P16949 STMN1_HUMAN | R.SKESVPEFPLS#PPK.K               | S38:       | 2 | 3,2941 | 0,477 | -0,451 |
| 17 | Q8WU90 ZC3HF_HUMAN | R.AENGRS#DLEEDNER.E               | S381:      | 2 | 3,5879 | 0,478 | -0,662 |
| 17 | Q8WU90 ZC3HF_HUMAN | R.AENGRS#DLEEDNER.E               | S381:      | 3 | 3,4337 | 0,168 | -0,099 |
| 17 | Q96N16 JKIP1_HUMAN | R.HTS#LNDLSLTR.D                  | S382:      | 2 | 3,449  | 0,379 | -0,091 |
| 17 | Q6ULP2 AFTIN_HUMAN | K.TSDDEVGS#PKEESR.K               | S382:      | 2 | 3,0645 | 0,404 | -0,302 |

|    |                     |                                |            |   |        |       |        |
|----|---------------------|--------------------------------|------------|---|--------|-------|--------|
| 17 | O75717 WDHD1_HUMAN  | R.SHILEDDENS#VDISM*LK.T        | S383:      | 3 | 3,3698 | 0,155 | 0      |
| 17 | Q8IU81 I2BP1_HUMAN  | R.KAS#PEPEGEAAGK.M             | S384:      | 2 | 3,8618 | 0,468 | -0,452 |
| 17 | Q01813 K6PP_HUMAN   | R.GRS#FAGNLNTYK.R              | S386:      | 3 | 4,5909 | 0,322 | 0,065  |
| 17 | Q01813 K6PP_HUMAN   | R.GRS#FAGNLNTYK.R              | S386:      | 2 | 4,1304 | 0,478 | -0,173 |
| 17 | Q15464 SHB_HUMAN    | K.HGS#PEFCGILGER.V             | S388:      | 2 | 3,9587 | 0,521 | -0,317 |
| 17 | Q15464 SHB_HUMAN    | K.HGS#PEFCGILGER.V             | S388:      | 3 | 2,7212 | 0,303 | 0,238  |
| 17 | O43318 M3K7_HUMAN   | K.RM*S#ADM*SEIEAR.I            | S389:      | 2 | 3,8543 | 0,479 | -0,971 |
| 17 | O43318 M3K7_HUMAN   | K.RM*S#ADM*SEIEAR.I            | S389:      | 3 | 2,6189 | 0,155 | -0,182 |
| 17 | O60504 VINEX_HUMAN  | R.LKFDFAQS#PK.E                | S395:      | 2 | 3,1719 | 0,462 | -0,264 |
| 17 | P40425 PBX2_HUMAN   | R.HSM*GPGGYGDNLGGGQM*YS#PR.E   | S395:      | 3 | 2,7256 | 0,098 | -0,65  |
| 17 | Q9NYF8 BCLF1_HUMAN  | K.QKFNDSEGGDTEETEDYR.Q         | S397:      | 3 | 5,0445 | 0,452 | 0,162  |
| 17 | Q8N1F8 S11IP_HUMAN  | R.RAS#ISEPSDTPPEPR.T           | S398:      | 2 | 4,0057 | 0,538 | -0,281 |
| 17 | Q3YEC7 PARF_HUMAN   | R.LDRS#FLEDTT#PARDEK.K         | S402:T408: | 3 | 2,8428 | 0,18  | -0,267 |
| 17 | Q15361 TTF1_HUMAN   | R.ARVS#GDDFSVPSK.N             | S403:      | 3 | 2,9008 | 0,197 | 0,19   |
| 17 | Q9Y6M7 S4A7_HUMAN   | K.SGEIKGNSSGGS#RENST#VDFSK.V   | S403:T408: | 3 | 2,9218 | 0,296 | -0,308 |
| 17 | Q8IVT5 KSR1_HUMAN   | R.RTES#VPSDINNPVDR.A           | S404:      | 2 | 3,3889 | 0,154 | 0,343  |
| 17 | Q8NDI1 EHBP1_HUMAN  | R.KAPAPPVLS#PK.T               | S408:      | 2 | 2,9861 | 0,414 | -0,103 |
| 17 | P51114 FXR1_HUMAN   | R.RGPNYTSGYGTNSELSNPS#ETESER.K | S409:      | 3 | 5,4724 | 0,382 | -0,26  |
| 17 | B2RA80 B2RA80_HUMAN | R.KQDYQEILDS#PIK.-             | S409:      | 2 | 4,4563 | 0,472 | 0,147  |
| 17 | Q9BRS8 LARP6_HUMAN  | R.LNCSTS#PEIFRK.C              | S409:      | 2 | 3,401  | 0,361 | -0,08  |
| 17 | Q86WR7 CJ047_HUMAN  | R.S#RSFTLDDESLK.Y              | S41:       | 3 | 3,2699 | 0,19  | 0,062  |
| 17 | Q12756 KIF1A_HUMAN  | R.AAS#VSSLHER.I                | S416:      | 2 | 2,4673 | 0,345 | -0,537 |
| 17 | Q96S38 KS6C1_HUMAN  | K.FLNRS#PEES#FDIKEVK.K         | S423:S427: | 3 | 2,7737 | 0,193 | -0,087 |
| 17 | Q9C0B5 ZDHC5_HUMAN  | K.SFHFDPLSS#GSR#SSLK.S         | S423:S427: | 2 | 2,5788 | 0,321 | 0,916  |
| 17 | Q9C0B5 ZDHC5_HUMAN  | K.SFHFDPLSS#R.S                | S425:      | 2 | 2,7604 | 0,414 | 0,172  |
| 17 | Q96JM3 ZN828_HUMAN  | R.KPGPPLS#PEIR.S               | S427:      | 3 | 3,701  | 0,312 | 0,144  |
| 17 | Q8TB61 S35B2_HUMAN  | K.KAVPVES#PVQKV.-              | S427:      | 2 | 2,3014 | 0,186 | -0,09  |
| 17 | Q96JM3 ZN828_HUMAN  | R.KPGPPLS#PEIR.S               | S427:      | 2 | 2,0703 | 0,396 | -0,384 |
| 17 | Q86WR7 CJ047_HUMAN  | R.SRS#FTLDDESLK.Y              | S43:       | 2 | 4,3032 | 0,442 | -0,248 |
| 17 | Q92609 TBCD5_HUMAN  | R.RTS#STLDSEGTFNYSYR.K         | S43:       | 2 | 3,3234 | 0,486 | -0,193 |
| 17 | O95232 CROP_HUMAN   | K.ESDTKNEVNGTSEDIKSEGDTQS#N.-  | S431:      | 3 | 5,817  | 0,481 | -0,412 |
| 17 | Q96JM3 ZN828_HUMAN  | R.KPGPPLSPEIRS#PAGS#PELR.K     | S432:S436: | 3 | 3,7275 | 0,372 | -0,163 |
| 17 | Q8N1G0 ZN687_HUMAN  | R.KAVVLPGGTATS#PK.M            | S433:      | 2 | 3,6346 | 0,433 | -0,174 |

|    |                    |                              |            |   |        |       |        |
|----|--------------------|------------------------------|------------|---|--------|-------|--------|
| 17 | P35269 T2FA_HUMAN  | R.LRLDTGPQSL#GK.S            | S433:      | 3 | 3,3958 | 0,382 | -0,126 |
| 17 | P35269 T2FA_HUMAN  | R.LRLDTGPQSL#GK.S            | S433:      | 2 | 2,2796 | 0,33  | -0,252 |
| 17 | P26599 PTBP1_HUMAN | K.DYGNS#PLHR.F               | S433:      | 2 | 2,0636 | 0,201 | -0,107 |
| 17 | P35269 T2FA_HUMAN  | R.LRLDTGPQSL#GKST#PQPPSGK.T  | S433:T437: | 3 | 2,7849 | 0,315 | -0,683 |
| 17 | Q6WKZ4 RFIP1_HUMAN | R.RSS#LLSLM*TGK.K            | S435:      | 2 | 2,8099 | 0,346 | -0,568 |
| 17 | Q99501 GA2L1_HUMAN | R.ARS#QS#REEQAVLLVR.R        | S436:S438: | 3 | 3,1004 | 0,281 | -0,096 |
| 17 | P18887 XRCC1_HUMAN | K.TKPTQAAGPSS#PQKPPT#PEETK.A | S447:T453: | 3 | 4,4695 | 0,266 | -0,45  |
| 17 | Q6IQ55 TTBK2_HUMAN | R.SIHS#FELEK.R               | S448:      | 2 | 2,4681 | 0,187 | 0      |
| 17 | Q9NP56 PDE7B_HUMAN | R.RGS#YPFIDFR.L              | S45:       | 2 | 2,2669 | 0,404 | -0,274 |
| 17 | P48634 BAT2_HUMAN  | R.KQS#SSEISLAVER.A           | S456:      | 2 | 2,5973 | 0,293 | -0,967 |
| 17 | O60658 PDE8A_HUMAN | R.RLS#GNEYVLSTK.N            | S457:      | 2 | 3,3075 | 0,406 | -0,084 |
| 17 | P11274 BCR_HUMAN   | R.HQDGLPYIDDS#PSS#SPHLSSK.G  | S459:S462: | 3 | 5,4287 | 1     | -0,452 |
| 17 | O95544 NADK_HUMAN  | K.SRS#LSASPALGSTK.E          | S46:       | 2 | 3,1324 | 0,36  | -0,169 |
| 17 | O95544 NADK_HUMAN  | K.SRS#LSASPALGSTK.E          | S46:       | 3 | 2,6291 | 0,119 | 0,127  |
| 17 | Q9UPZ3 HPS5_HUMAN  | R.RGS#QS#DEDSCSLHSQTLSEDER.F | S461:S463: | 3 | 4,2534 | 1     | 0,136  |
| 17 | O60825 F262_HUMAN  | R.RNS#FTPLSSNTIR.R           | S466:      | 2 | 3,0197 | 0,482 | -0,073 |
| 17 | Q86TL0 ATG4D_HUMAN | R.AKRPS#SEDFVFL.-            | S467:      | 2 | 3,1124 | 0,452 | -0,744 |
| 17 | O76021 RL1D1_HUMAN | K.FFTTPSKS#VR.K              | S469:      | 2 | 2,261  | 0,121 | 0      |
| 17 | Q9BTU6 P4K2A_HUMAN | R.VAAAAGSGPS#PPGS#PGHDRER.Q  | S47:S51:   | 3 | 3,7074 | 0,467 | -0,343 |
| 17 | Q13263 TIF1B_HUMAN | R.SRS#GEGEVSGLM*R.K          | S473:      | 2 | 3,2092 | 0,355 | -0,668 |
| 17 | Q8TDR0 MIPT3_HUMAN | K.RQDS#M*EALQM*DR.S          | S476:      | 3 | 3,8437 | 0,1   | -0,23  |
| 17 | P62805 H4_HUMAN    | K.RIS#GLIYEETR.G             | S48:       | 2 | 2,5412 | 0,456 | 0,086  |
| 17 | Q9H6U6 BCAS3_HUMAN | K.QGGRC#PVPGLSS#PSGSPLHGK.L  | S480:S488: | 3 | 2,97   | 0,241 | -0,152 |
| 17 | P53396 ACLY_HUMAN  | K.AKPAM*PQDSVPS#PR.S         | S481:      | 3 | 3,196  | 0,377 | -0,116 |
| 17 | P53396 ACLY_HUMAN  | K.AKPAM*PQDSVPS#PR.S         | S481:      | 2 | 3,1176 | 0,436 | -0,696 |
| 17 | P11169 GTR3_HUMAN  | R.SGKDGVM*EM*NS#IEPAK.E      | S485:      | 2 | 2,1143 | 0,239 | -0,406 |
| 17 | Q9BVI0 PHF20_HUMAN | K.SLEPEES#PGKR.H             | S488:      | 2 | 2,2835 | 0,331 | -0,466 |
| 17 | O43379 WDR62_HUMAN | R.TRLS#TASEETVQNR.V          | S49:       | 2 | 2,849  | 0,607 | -0,365 |
| 17 | Q6UN15 FIP1_HUMAN  | R.DHS#PTPSVFN#DEERYR.Y       | S492:S500: | 3 | 3,0508 | 0,342 | 0,583  |
| 17 | Q6UN15 FIP1_HUMAN  | R.DHS#PT#PSVFN#DEERYR.Y      | S492:T494: | 3 | 2,649  | 0,358 | -0,25  |
| 17 | O60832 DKC1_HUMAN  | K.AKAGLESGAEPGDGDS#DTTK.K    | S494:      | 3 | 3,6126 | 0,459 | -0,645 |
| 17 | Q8IVF2 AHNK2_HUMAN | K.IKLPS#FR.W                 | S496:      | 2 | 2,3683 | 0,16  | 0      |
| 17 | Q9H0D6 XRN2_HUMAN  | R.KAEDS#DSEPEPEDNVR.L        | S499:      | 2 | 4,8987 | 0,374 | -0,515 |

|    |                    |                                |            |   |        |       |        |
|----|--------------------|--------------------------------|------------|---|--------|-------|--------|
| 17 | Q96AT1 K1143_HUMAN | R.IQPQPPDEGDHS#DKEDEQPQVVVLK.K | S50:       | 3 | 2,8291 | 0,433 | -0,121 |
| 17 | Q14160 LAP4_HUMAN  | R.RSEACPCQPDGSGS#PLPAEEEEK.R   | S504:      | 3 | 4,7515 | 0,382 | -0,755 |
| 17 | O14974 MYPT1_HUMAN | R.LAS#TSDIEEKENR.D             | S507:      | 3 | 3,2014 | 0,248 | -0,931 |
| 17 | O14974 MYPT1_HUMAN | R.LAS#TSDIEEKENR.D             | S507:      | 2 | 3,1685 | 0,422 | -0,931 |
| 17 | Q07960 RHG01_HUMAN | K.SSS#PELVTHLK.W               | S51:       | 3 | 3,7019 | 0,276 | -0,215 |
| 17 | Q07960 RHG01_HUMAN | K.SSS#PELVTHLK.W               | S51:       | 2 | 2,6008 | 0,18  | -0,573 |
| 17 | Q09666 AHNK_HUMAN  | K.FKAEAPLPS#PK.L               | S5110:     | 2 | 3,2259 | 0,313 | -0,482 |
| 17 | Q15742 NAB2_HUMAN  | R.SS#VKVEAEASRQ.-              | S515:      | 3 | 3,8876 | 0,317 | -0,067 |
| 17 | Q15742 NAB2_HUMAN  | R.SS#VKVEAEASR.Q               | S515:      | 3 | 3,7549 | 0,42  | 0,147  |
| 17 | Q6ZV73 FGD6_HUMAN  | K.KAAS#ELLEK.S                 | S515:      | 2 | 3,1269 | 0,361 | -0,204 |
| 17 | Q07866 KLC1_HUMAN  | R.S#RESLNVDVVK.Y               | S517:      | 2 | 2,3911 | 0,225 | -0,276 |
| 17 | Q92834 RPGR_HUMAN  | K.SLKLS#PVQK.Q                 | S518:      | 2 | 2,7977 | 0,248 | -0,113 |
| 17 | Q86UU1 PHLB1_HUMAN | R.TRS#PS#PTLGESLAPHK.G         | S518:S520: | 2 | 4,4574 | 1     | -0,332 |
| 17 | Q86UU1 PHLB1_HUMAN | R.TRS#PS#PTLGESLAPHK.G         | S518:S520: | 3 | 4,3546 | 0,394 | 0,1    |
| 17 | P30086 PEBP1_HUMAN | K.NRPTS#ISWDGLDSGK.L           | S52:       | 2 | 4,4733 | 0,613 | -0,214 |
| 17 | O43572 AKA10_HUMAN | K.ASISVHS#PQK.S                | S52:       | 2 | 2,5349 | 0,286 | -0,323 |
| 17 | P55081 MFAP1_HUMAN | K.RPDYAPM*ES#S#DEEDEEFQFIKK.A  | S52:S53:   | 3 | 5,6347 | 0,474 | -0,192 |
| 17 | Q07866 KLC1_HUMAN  | R.SRES#LNVDVVK.Y               | S520:      | 3 | 3,4415 | 0,105 | 0,069  |
| 17 | O00567 NOL5A_HUMAN | K.SFSKEELM*SS#DLEETAGSTSIPK.R  | S520:      | 3 | 3,1659 | 0,302 | -0,356 |
| 17 | P12956 KU70_HUMAN  | K.RLGS#LVDEFK.E                | S520:      | 2 | 2,6097 | 0,2   | -0,196 |
| 17 | Q02952 AKA12_HUMAN | K.LFTS#TGLKK.L                 | S522:      | 2 | 2,3057 | 0,145 | 0      |
| 17 | Q9BWT3 PAPOG_HUMAN | K.RLS#LDSSCLDSSR.D             | S525:      | 3 | 3,4467 | 0,263 | -0,116 |
| 17 | Q9BWT3 PAPOG_HUMAN | K.RLS#LDSSCLDSSR.D             | S525:      | 2 | 2,8159 | 0,514 | -0,542 |
| 17 | Q5VUA4 ZN318_HUMAN | R.RS#FPDIEDEEK.F               | S527:      | 2 | 3,2771 | 0,294 | -0,169 |
| 17 | Q9UHI6 DDX20_HUMAN | K.ATS#PKELGCDR.Q               | S532:      | 3 | 4,0346 | 0,409 | 0,139  |
| 17 | Q8N2M8 SFR16_HUMAN | K.LTRPAAS#PAVGEK.L             | S532:      | 3 | 3,2391 | 0,349 | -0,066 |
| 17 | Q8N2M8 SFR16_HUMAN | K.LTRPAAS#PAVGEK.L             | S532:      | 2 | 3,1892 | 0,388 | -0,532 |
| 17 | Q09666 AHNK_HUMAN  | K.VHAPGLNLS#GVGGK.M            | S5332:     | 3 | 3,4368 | 0,246 | 0,132  |
| 17 | Q09666 AHNK_HUMAN  | K.VHAPGLNLS#GVGGK.M            | S5332:     | 2 | 2,9996 | 0,573 | -0,088 |
| 17 | Q9UJX6 ANC2_HUMAN  | R.LLHQFSFS#PER.E               | S534:      | 3 | 4,5723 | 0,297 | 0      |
| 17 | Q9UJX6 ANC2_HUMAN  | R.LLHQFSFS#PER.E               | S534:      | 2 | 3,0211 | 0,459 | 0,339  |
| 17 | Q02040 SF17A_HUMAN | R.VVPEDGS#PEKR.C               | S537:      | 2 | 2,8607 | 0,413 | -0,472 |
| 17 | P17987 TCPA_HUMAN  | K.HGS#YEDAVHSGALND.-           | S544:      | 2 | 4,7366 | 0,623 | -0,369 |

|    |                     |                                  |                 |   |        |       |        |
|----|---------------------|----------------------------------|-----------------|---|--------|-------|--------|
| 17 | O60504 VINEX_HUMAN  | R.HPS#S#PSALRSPADPTDLGGQT#SPRR.T | S544:S545:T562: | 3 | 3,4402 | 1     | 0,388  |
| 17 | P35222 CTNB1_HUMAN  | R.RTS#M*GGTQQQFVEGVR.M           | S552:           | 3 | 3,8062 | 0,237 | 0,195  |
| 17 | Q9NPH3 IL1AP_HUMAN  | R.RSS#SDEQGLSYSSLK.N             | S556:           | 2 | 3,9019 | 0,326 | -0,425 |
| 17 | Q9Y5S9 RBM8A_HUMAN  | R.M*REDYDS#VEQDGDPEGPQR.S        | S56:            | 3 | 5,3534 | 0,347 | -0,552 |
| 17 | Q14149 MORC3_HUMAN  | R.RLS#SQFENSVMYK.G               | S560:           | 2 | 3,4402 | 0,433 | -0,476 |
| 17 | Q14149 MORC3_HUMAN  | R.RLSS#QFENSVMYK.G               | S561:           | 3 | 3,1616 | 0,359 | -0,119 |
| 17 | P51957 NEK4_HUMAN   | R.RDLFAFQES#PPR.F                | S563:           | 3 | 2,7356 | 0,094 | -0,119 |
| 17 | P19338 NUCL_HUMAN   | R.LELQGRGS#PNAR.S                | S563:           | 2 | 2,17   | 0,259 | -0,579 |
| 17 | P23193 TCEA1_HUMAN  | R.KQS#TDEEVTSLAK.S               | S57:            | 2 | 2,9313 | 0,251 | -0,483 |
| 17 | P29317 EPAH2_HUMAN  | R.ARQS#PEDVYFSK.S                | S570:           | 2 | 3,5895 | 0,413 | -0,405 |
| 17 | P26640 SYVC_HUMAN   | K.NVIHPFLS#R.S                   | S570:           | 2 | 2,1362 | 0,221 | 0      |
| 17 | Q9H6U6 BCAS3_HUMAN  | K.VKPPPQIS#PSK.S                 | S570:           | 2 | 2,0523 | 0,141 | -0,388 |
| 17 | Q8IVF2 AHNK2_HUMAN  | K.LGFSSS#PTKK.S                  | S5707:          | 2 | 2,3634 | 0,223 | -0,108 |
| 17 | Q7Z417 NUFP2_HUMAN  | K.RTS#PQVLGSILK.S                | S572:           | 2 | 3,2361 | 0,402 | -0,265 |
| 17 | Q7Z417 NUFP2_HUMAN  | K.RTS#PQVLGSILK.S                | S572:           | 3 | 2,7894 | 0,086 | 0,133  |
| 17 | P17812 PYRG1_HUMAN  | R.SGSSS#PDSEITELKFPSINHD.-       | S575:           | 3 | 3,0919 | 0,293 | -0,157 |
| 17 | P57059 SN1L1_HUMAN  | R.RAS#DTSLTQGLK.A                | S575:           | 2 | 2,7115 | 0,43  | -0,45  |
| 17 | Q9H1E3 NUCKS_HUMAN  | K.NSQEDS#EDSEDKDVK.T             | S58:            | 2 | 4,4559 | 0,414 | -0,541 |
| 17 | Q9H1E3 NUCKS_HUMAN  | K.NSQEDS#EDSEDKDVK.T             | S58:            | 3 | 3,0371 | 0,137 | -0,304 |
| 17 | Q8TD16 BICD2_HUMAN  | R.RS#PILLPK.G                    | S582:           | 2 | 3,3492 | 0,171 | -0,122 |
| 17 | Q09666 AHNK_HUMAN   | K.LKFGTFGGLGS#K.S                | S5830:          | 3 | 3,0661 | 0,365 | 0,354  |
| 17 | Q8TB72 PUM2_HUMAN   | R.RES#LSTSSDLYK.R                | S587:           | 2 | 3,2294 | 0,21  | -0,749 |
| 17 | P52756 RBM5_HUMAN   | R.YDDYRDYDS#PER.E                | S59:            | 2 | 2,3694 | 0,297 | 0,292  |
| 17 | Q16825 PTN21_HUMAN  | R.HLYISSS#NPDLITR.R              | S590:           | 2 | 4,3478 | 0,566 | -0,36  |
| 17 | Q8NE71 ABCF1_HUMAN  | R.KNQDEES#QEAPELLK.R             | S595:           | 2 | 4,4521 | 0,349 | -0,066 |
| 17 | Q7RTP8 Q7RTP8_HUMAN | K.RAS#SLNVLNVGGK.A               | S595:           | 2 | 2,8794 | 0,345 | -0,35  |
| 17 | Q12873 CHD3_HUMAN   | R.KNDM*DEPPPLDYGS#GEDDGK.S       | S597:           | 3 | 4,7173 | 0,48  | 0      |
| 17 | P43243 MATR3_HUMAN  | R.SYS#PDGKESPSDK.K               | S598:           | 2 | 3,2533 | 0,291 | -0,413 |
| 17 | P43243 MATR3_HUMAN  | R.SYS#PDGKESPSDK.K               | S598:           | 3 | 2,8526 | 0,389 | 0      |
| 17 | Q9UHB6 LIMA1_HUMAN  | R.SRPFTVAASFQS#TSVKS#PK.T        | S599:S604:      | 3 | 3,8681 | 0,354 | 1,926  |
| 17 | P0C7M2 RA1L3_HUMAN  | K.SES#PKEPEQLR.K                 | S6:             | 3 | 3,4247 | 0,346 | -1,06  |
| 17 | P0C7M2 RA1L3_HUMAN  | K.SES#PKEPEQLR.K                 | S6:             | 2 | 2,4345 | 0,38  | -0,796 |
| 17 | Q70L73 Q70L73_HUMAN | R.RVS#RS#SFSSDPDESEGIPLK.R       | S60:S62:        | 3 | 4,1178 | 1     | 0,622  |

|    |                    |                                   |            |   |        |       |        |
|----|--------------------|-----------------------------------|------------|---|--------|-------|--------|
| 17 | Q7Z460 CLAP1_HUMAN | R.SRS#DIDVNAAASAK.S               | S600:      | 2 | 5,2575 | 0,53  | -0,575 |
| 17 | Q7Z460 CLAP1_HUMAN | R.SRS#DIDVNAAASAK.S               | S600:      | 3 | 4,0468 | 0,353 | -0,493 |
| 17 | Q9UHB6 LIMA1_HUMAN | R.SRPFTVAASFQSTS#VK.S             | S601:      | 2 | 3,1854 | 0,422 | 0,544  |
| 17 | Q15424 SAFB1_HUMAN | R.S#VVS#FDKVKKEPR.K               | S601:S604: | 2 | 2,7561 | 0,296 | -0,315 |
| 17 | Q12872 SFRS8_HUMAN | R.VKLDDDS#DDDEESK.E               | S604:      | 2 | 5,1414 | 0,539 | -0,65  |
| 17 | Q15424 SAFB1_HUMAN | R.SVVS#FDKVK.E                    | S604:      | 2 | 2,9914 | 0,225 | -0,672 |
| 17 | Q6ZV73 FGD6_HUMAN  | R.AKS#LSAM*DVEK.C                 | S605:      | 2 | 3,3224 | 0,461 | -0,67  |
| 17 | Q8IZT6 ASPM_HUMAN  | R.IHFS#PSEPK.T                    | S605:      | 2 | 2,197  | 0,313 | -0,326 |
| 17 | P51798 CLCN7_HUMAN | R.VGHM*SS#VELDDELLDPDM*DPPHPFPK.E | S61:       | 3 | 3,4432 | 0,266 | -0,242 |
| 17 | P50395 GDIB_HUMAN  | R.FKIPGS#PPESM*GR.G               | S61:       | 2 | 2,9364 | 0,28  | -0,244 |
| 17 | A6ND36 FA83G_HUMAN | R.RPS#VASSVSEEFV.R                | S610:      | 3 | 3,2008 | 0,201 | 0,19   |
| 17 | O00429 DNM1L_HUMAN | K.SKPIPIM*PAS#PQK.G               | S616:      | 2 | 2,7924 | 0,419 | -0,409 |
| 17 | P49756 RBM25_HUMAN | K.LGAS#NSPGQPNSVKR.K              | S616:      | 2 | 2,2173 | 0,346 | -0,46  |
| 17 | P49756 RBM25_HUMAN | K.LGASNS#PGQPNSVKR.K              | S618:      | 3 | 3,3143 | 0,309 | -0,115 |
| 17 | Q99700 ATX2_HUMAN  | R.M*SSEGPPRM*S#PK.A               | S623:      | 2 | 2,9633 | 0,354 | -0,431 |
| 17 | Q96JM3 ZN828_HUMAN | K.KDNQESS#DAELSSSEYIK.T           | S627:      | 3 | 3,7392 | 0,216 | -0,173 |
| 17 | P35568 IRS1_HUMAN  | R.KGS#GDYM*PM*SPK.S               | S629:      | 2 | 3,1546 | 0,398 | -0,26  |
| 17 | Q13442 HAP28_HUMAN | K.KSLDSDES#EDEEDDYQQK.R           | S63:       | 3 | 4,3922 | 0,315 | -0,408 |
| 17 | P23763 VAMP1_HUMAN | R.DQKLS#ELDDR.A                   | S63:       | 2 | 2,8417 | 0,197 | -0,282 |
| 17 | Q8WVC0 LEO1_HUMAN  | K.KLTS#DEEGEPSGK.R                | S630:      | 2 | 4,2355 | 0,389 | -0,502 |
| 17 | O15085 ARHGB_HUMAN | R.SRS#DVDM*DAAAEATR.L             | S635:      | 3 | 3,8806 | 0,387 | -0,216 |
| 17 | Q93074 MED12_HUMAN | R.GDLAFGAPGPRPPS#PFDDPADDPEHK.E   | S637:      | 3 | 3,8655 | 0,402 | -0,592 |
| 17 | Q9NZN5 ARHGC_HUMAN | K.HLSTPSSVS#PEPQDSA.L             | S637:      | 2 | 3,832  | 0,558 | -0,264 |
| 17 | Q6P6C2 ALKB5_HUMAN | R.KYQEDS#DPERS#DYEEQLQK.E         | S64:S69:   | 3 | 4,0035 | 0,426 | 0,41   |
| 17 | Q6AI08 HEAT6_HUMAN | K.KAPAGPSLEETS#PK.G               | S643:      | 2 | 3,7802 | 0,519 | -0,622 |
| 17 | Q92625 ANS1A_HUMAN | R.SES#LSNCSIGKK.R                 | S647:      | 2 | 2,8873 | 0,341 | -0,614 |
| 17 | Q92625 ANS1A_HUMAN | R.SES#LSNCSIGKK.R                 | S647:      | 3 | 2,809  | 0,34  | 0      |
| 17 | Q9NYL2 MLTK_HUMAN  | K.NFS#SLHLNSR.D                   | S648:      | 2 | 2,2349 | 0,097 | 0      |
| 17 | P26374 RAE2_HUMAN  | K.NLES#PEKHLQN.-                  | S649:      | 2 | 2,1922 | 0,254 | -0,351 |
| 17 | O43683 BUB1_HUMAN  | R.DGKFS#PIQEKS#PK.Q               | S655:S661: | 3 | 3,3198 | 0,289 | 0      |
| 17 | Q05682 CALD1_HUMAN | R.AEFLNKS#VQK.S                   | S656:      | 2 | 2,3515 | 0,178 | -0,196 |
| 17 | Q6NZY4 ZCHC8_HUMAN | K.IHS#PIPDM*SK.F                  | S658:      | 2 | 2,4501 | 0,34  | -0,4   |
| 17 | Q86YS7 K0528_HUMAN | R.SQS#ESS#DEVTELDLSHGKK.D         | S659:S662: | 3 | 2,6643 | 0,098 | 0      |



|    |                    |                               |            |   |        |       |        |
|----|--------------------|-------------------------------|------------|---|--------|-------|--------|
| 17 | Q9ULH7 MKL2_HUMAN  | R.EQLVDQGIM*PPLKS#PAAFHEQIK.S | S66:       | 3 | 3,7697 | 0,481 | -0,411 |
| 17 | Q96B23 CR025_HUMAN | R.RDS#SES#QLASTESDKPTTGR.V    | S66:S69:   | 3 | 4,3194 | 0,416 | -0,554 |
| 17 | Q9H6F5 CCD86_HUMAN | R.AGLGSPERPPKTS#PGS#PR.L      | S66:S69:   | 3 | 2,6594 | 0,223 | -0,469 |
| 17 | O43683 BUB1_HUMAN  | K.FSPIQEKS#PK.Q               | S661:      | 2 | 2,8604 | 0,368 | -0,492 |
| 17 | Q92615 LARP5_HUMAN | R.TSKEPPSS#PLQPQK.E           | S664:      | 3 | 2,7904 | 0,383 | -0,228 |
| 17 | Q16659 MK06_HUMAN  | R.GHEEGFLNNS#GEFLFNK.Q        | S665:      | 2 | 4,1185 | 0,418 | -0,604 |
| 17 | Q96AC1 FERM2_HUMAN | R.AKDQNES#LDEEM*FYK.L         | S666:      | 3 | 3,6843 | 0,306 | -0,471 |
| 17 | Q9C0D0 PHAR1_HUMAN | R.SKS#DTPYLAEAR.I             | S67:       | 2 | 3,8967 | 0,441 | -0,86  |
| 17 | Q6UB98 ANR12_HUMAN | R.KLPFTIS#PSR.N               | S67:       | 2 | 2,1218 | 0,285 | -0,199 |
| 17 | O60566 BUB1B_HUMAN | K.KLS#PIIEDSR.E               | S670:      | 3 | 3,0424 | 0,147 | 0,369  |
| 17 | O60566 BUB1B_HUMAN | K.KLS#PIIEDSR.E               | S670:      | 2 | 2,8996 | 0,354 | -0,296 |
| 17 | Q9BPX3 CND3_HUMAN  | K.TLHCEGTEINS#DDEQESK.E       | S674:      | 3 | 4,5219 | 0,206 | -0,59  |
| 17 | P46100 ATRX_HUMAN  | R.RPTETNPVTSNS#DEECNETVK.E    | S677:      | 3 | 6,7866 | 0,544 | -0,515 |
| 17 | Q9Y2W1 TR150_HUMAN | R.IDIS#PSTFRK.H               | S682:      | 2 | 2,7035 | 0,456 | -0,196 |
| 17 | P49790 NU153_HUMAN | K.CIACQAAKLS#PR.D             | S687:      | 3 | 2,7684 | 0,259 | 0,189  |
| 17 | Q9Y2K7 JHD1A_HUMAN | R.KM*EES#DEEAVQAK.V           | S692:      | 2 | 4,2202 | 0,542 | -0,46  |
| 17 | Q9Y2K7 JHD1A_HUMAN | R.KM*EES#DEEAVQAK.V           | S692:      | 3 | 3,2163 | 0,172 | 0      |
| 17 | Q96T83 SL9A7_HUMAN | R.TKS#SSEEVLER.D              | S693:      | 2 | 2,7448 | 0,4   | -0,816 |
| 17 | Q9UKJ3 GPTC8_HUMAN | R.KPS#VSEEVQATPNK.A           | S694:      | 2 | 4,727  | 0,573 | -0,765 |
| 17 | P38398 BRCA1_HUMAN | R.HDS#DTFPELK.L               | S694:      | 2 | 3,7558 | 0,451 | 0,192  |
| 17 | Q9UKJ3 GPTC8_HUMAN | R.KPSVS#EEVQATPNK.A           | S696:      | 3 | 3,3499 | 0,312 | -0,574 |
| 17 | O75382 TRIM3_HUMAN | K.REDS#PGPEVQPM*DK.Q          | S7:        | 2 | 3,5875 | 0,445 | -0,363 |
| 17 | O75382 TRIM3_HUMAN | K.REDS#PGPEVQPM*DK.Q          | S7:        | 3 | 3,3773 | 0,213 | -0,326 |
| 17 | P06748 NPM_HUMAN   | K.DELHIVEAEAM*NYEGS#PIK.V     | S70:       | 3 | 4,6295 | 0,437 | -0,327 |
| 17 | O60890 OPHN1_HUMAN | K.TPS#FHIK.R                  | S703:      | 2 | 2,3346 | 0,158 | -0,134 |
| 17 | Q9P2D6 F135A_HUMAN | K.SKS#IEITFEK.E               | S707:      | 2 | 3,0597 | 0,301 | 0,773  |
| 17 | Q9BWT3 PAPOG_HUMAN | K.RLPS#KELPDSSS#PVPANNIR.V    | S708:S716: | 3 | 3,7974 | 0,178 | -0,157 |
| 17 | Q14671 PUM1_HUMAN  | R.RDS#LTGSSDLYK.R             | S709:      | 2 | 3,6248 | 0,41  | -0,429 |
| 17 | P10636 TAU_HUMAN   | K.TDHGAEIVYKS#PVVS#GDTSPR.H   | S713:S717: | 3 | 5,1678 | 1     | -0,462 |
| 17 | Q9NZJ5 E2AK3_HUMAN | K.EHIEIIAPS#PQR.S             | S714:      | 2 | 3,6537 | 0,527 | -0,415 |
| 17 | Q8TEW0 PARD3_HUMAN | R.RISHS#LYSGIEGLDES#PSR.N     | S717:S728: | 3 | 5,1959 | 0,458 | 0,081  |
| 17 | Q8N1F7 NUP93_HUMAN | R.GLDIS#HISQR.L               | S72:       | 2 | 2,9204 | 0,333 | -0,506 |
| 17 | Q71RC2 LARP4_HUMAN | K.EQYVPPRS#PK.-               | S722:      | 2 | 2,2282 | 0,263 | -0,381 |

|    |                    |                                |            |   |        |       |        |
|----|--------------------|--------------------------------|------------|---|--------|-------|--------|
| 17 | Q9Y6X9 MORC2_HUMAN | K.KTES#PIKLSPATPS#R.K          | S725:S735: | 3 | 4,248  | 0,346 | -0,103 |
| 17 | Q9Y6X9 MORC2_HUMAN | K.KTES#PIKLSPATPS#R.K          | S725:S735: | 2 | 2,5179 | 0,204 | -0,207 |
| 17 | P35611 ADDA_HUMAN  | R.TPS#FLKK.S                   | S726:      | 2 | 2,1681 | 0,154 | 0,068  |
| 17 | Q9UMY4 SNX12_HUMAN | R.RYS#DFEWLK.N                 | S73:       | 2 | 3,2857 | 0,25  | -0,737 |
| 17 | Q8NA72 CE037_HUMAN | R.ISTIHDILHS#QGNNS#EVR.E       | S73:S78:   | 3 | 3,58   | 0,135 | -0,168 |
| 17 | Q7Z3C6 ATG9A_HUMAN | R.RES#DESGESAPDEGGEGAR.A       | S735:      | 2 | 2,7546 | 0,43  | -0,606 |
| 17 | P26038 MOES_HUMAN  | R.KES#PLLFK.F                  | S74:       | 2 | 2,9805 | 0,159 | -0,117 |
| 17 | A1L390 PKHG3_HUMAN | R.RES#LSYIPK.G                 | S741:      | 2 | 2,1918 | 0,213 | -0,104 |
| 17 | Q13427 PPIG_HUMAN  | K.FDHES#SPGTDEDKSG.-           | S744:      | 3 | 2,8597 | 0,213 | -0,65  |
| 17 | O15042 SR140_HUMAN | K.SLDDDLDGVPLDATEDS#KKNEPIFK.V | S747:      | 3 | 3,8163 | 0,446 | -0,322 |
| 17 | Q9BY89 K1671_HUMAN | R.VHSEAIS#PAPEEK.A             | S749:      | 3 | 2,645  | 0,244 | 0,248  |
| 17 | P09874 PARP1_HUMAN | R.HPDVEVDGFS#ELR.W             | S75:       | 2 | 3,0817 | 0,436 | -0,154 |
| 17 | P50502 F10A1_HUMAN | K.KVEEDLKADEPS#S#EESDLEIDK.E   | S75:S76:   | 3 | 5,8703 | 0,429 | 0,481  |
| 17 | Q66K74 MAP1S_HUMAN | R.KAVPM*APAPAS#PGSSNDSSAR.S    | S759:      | 3 | 3,4465 | 0,27  | -0,524 |
| 17 | Q96E09 F122A_HUMAN | R.HGLLLPA#PVR.M                | S76:       | 2 | 2,9638 | 0,304 | -0,098 |
| 17 | Q6P0N0 CN106_HUMAN | K.KIENQVAM*S#FYK.H             | S761:      | 3 | 3,1177 | 0,285 | -0,235 |
| 17 | Q9Y4B5 K0802_HUMAN | K.REGPVGES#DSEEM*FEK.T         | S767:      | 2 | 3,3989 | 0,416 | -0,062 |
| 17 | O75170 SAPS2_HUMAN | R.CSS#PVDTECSHAEGSR.S          | S771:      | 3 | 3,2905 | 0,394 | -0,492 |
| 17 | Q96EV2 RBM33_HUMAN | K.VKPAS#PVAQPK.E               | S775:      | 2 | 3,2703 | 0,405 | -0,305 |
| 17 | Q6NUP7 K1622_HUMAN | R.SQS#FNNQAFHAK.Y              | S775:      | 2 | 3,2291 | 0,512 | -0,585 |
| 17 | P15822 ZEP1_HUMAN  | R.RGS#IDS#PKSYIFK.D            | S778:S781: | 3 | 2,8824 | 0,311 | 0      |
| 17 | Q7LBC6 JHD2B_HUMAN | R.HSGGFLSS#PADFSQENK.A         | S779:      | 2 | 3,422  | 0,577 | -0,194 |
| 17 | Q96FT9 CN179_HUMAN | R.KAS#EEIEDFR.L                | S78:       | 2 | 3,1636 | 0,464 | -0,374 |
| 17 | Q8TDD1 DDX54_HUMAN | K.IDDRDS#DEEGASDR.R            | S782:      | 3 | 4,8142 | 0,35  | -0,11  |
| 17 | Q8TDD1 DDX54_HUMAN | K.IDDRDS#DEEGASDR.R            | S782:      | 2 | 3,2926 | 0,447 | -0,441 |
| 17 | Q5T5C0 STXB5_HUMAN | R.SSSVTS#IDKESR.E              | S785:      | 2 | 2,4604 | 0,155 | -0,975 |
| 17 | P55212 CASP6_HUMAN | R.RFS#DLGFEVK.C                | S79:       | 2 | 2,7569 | 0,297 | 0      |
| 17 | Q9NQW6 ANLN_HUMAN  | K.NKAS#PQSEFM*PSK.G            | S792:      | 2 | 3,8847 | 0,459 | -0,71  |
| 17 | Q9NQW6 ANLN_HUMAN  | K.NKAS#PQSEFM*PSK.G            | S792:      | 3 | 2,8377 | 0,226 | -0,118 |
| 17 | P06400 RB_HUMAN    | R.SPYKFPSS#PLR.I               | S795:      | 2 | 2,8807 | 0,343 | -0,449 |
| 17 | Q13085 ACACA_HUMAN | R.SSM*S#GLHLVK.Q               | S80:       | 2 | 2,6994 | 0,151 | 0,106  |
| 17 | Q9UL03 INT6_HUMAN  | R.S#HEEVNTELK.A                | S804:      | 2 | 2,5811 | 0,475 | -0,578 |
| 17 | O15534 PER1_HUMAN  | R.LRGLDS#SSTAPSALGER.G         | S809:      | 2 | 2,5884 | 0,407 | -0,611 |

|    |                     |                                 |            |   |        |       |        |
|----|---------------------|---------------------------------|------------|---|--------|-------|--------|
| 17 | Q13563 PKD2_HUMAN   | R.SLDDS#EEDDDDEDSGHSSR.R        | S812:      | 3 | 5,1228 | 0,381 | -0,529 |
| 17 | Q9P1Y6 K1542_HUMAN  | R.KENPS#PLFSIK.K                | S814:      | 2 | 3,9517 | 0,325 | -0,182 |
| 17 | Q8TB72 PUM2_HUMAN   | R.SGQGFHGNSEVNAILS#PR.S         | S82:       | 2 | 4,3845 | 0,37  | 0,438  |
| 17 | Q8TB72 PUM2_HUMAN   | R.SGQGFHGNSEVNAILS#PR.S         | S82:       | 3 | 4,0135 | 0,316 | 0,188  |
| 17 | Q8NHG8 ZNR2_HUMAN   | R.SRS#LGGAVGSVASGAR.A           | S82:       | 2 | 3,9797 | 0,485 | 0,081  |
| 17 | Q8NHG8 ZNR2_HUMAN   | R.SRS#LGGAVGSVASGAR.A           | S82:       | 3 | 3,6191 | 0,334 | 0,06   |
| 17 | Q9UKV3 ACINU_HUMAN  | R.KIS#VVSATK.G                  | S825:      | 2 | 3,0396 | 0,285 | -0,783 |
| 17 | Q13206 DDX10_HUMAN  | R.SNS#EVEDVGPTSHNR.K            | S831:      | 2 | 4,5665 | 0,506 | -1,143 |
| 17 | Q13206 DDX10_HUMAN  | R.SNS#EVEDVGPTSHNR.K            | S831:      | 3 | 3,0252 | 0,239 | -1,071 |
| 17 | P49023 PAXI_HUMAN   | R.FIHQQPQSSS#PVYGSSAK.T         | S85:       | 3 | 5,0857 | 0,49  | -0,18  |
| 17 | P49023 PAXI_HUMAN   | R.FIHQQPQSSS#PVYGSSAK.T         | S85:       | 2 | 2,7222 | 0,539 | -0,541 |
| 17 | Q5H9R7 SAPS3_HUMAN  | K.CAAPRPPSS#SPEQR.T             | S852:      | 2 | 2,4146 | 0,141 | -0,226 |
| 17 | Q9NXG2 THUM1_HUMAN  | K.FTDKDDQPS#GS#EGEDDDAEAAALKK.E | S86:S88:   | 3 | 5,7632 | 0,527 | -0,401 |
| 17 | Q6GYQ0 GRIPE_HUMAN  | R.RGS#SPGSLEIPK.D               | S860:      | 2 | 3,3317 | 0,413 | -0,28  |
| 17 | P29374 ARI4A_HUMAN  | K.ILGQSS#PEKK.I                 | S864:      | 2 | 2,6996 | 0,238 | -0,523 |
| 17 | Q68CZ2 TENS3_HUMAN  | R.HPPFS#PPEPLSS#PASQHK.G        | S866:S874: | 3 | 3,3385 | 0,286 | -0,167 |
| 17 | Q9UK76 HN1_HUMAN    | R.RNS#SEASSGDFLDL.K             | S87:       | 2 | 5,4547 | 0,527 | -0,858 |
| 17 | Q9UK76 HN1_HUMAN    | R.RNS#SEASSGDFLDL.K             | S87:       | 3 | 4,215  | 0,467 | 0,214  |
| 17 | Q6ZU35 K1211_HUMAN  | R.HSS#TGDSADAGPPAAGSAR.G        | S874:      | 2 | 3,7798 | 0,356 | -0,34  |
| 17 | Q8IYB3 SRRM1_HUMAN  | K.KETES#EAEDNLDDLEK.H           | S874:      | 2 | 3,6235 | 0,468 | -0,125 |
| 17 | Q5T200 ZC3HD_HUMAN  | R.SLS#PSHLTEDR.Q                | S877:      | 2 | 2,0118 | 0,267 | 0      |
| 17 | Q6ZU35 K1211_HUMAN  | R.HSSTGDS#ADAGPPAAGSAR.G        | S878:      | 3 | 3,3561 | 0,37  | 0      |
| 17 | Q96T88 UHRF1_HUMAN  | K.ERDS#ELSDTDSGCCLGQSESDK.S     | S88:       | 3 | 5,9267 | 0,511 | -0,573 |
| 17 | Q9UK76 HN1_HUMAN    | R.RNSS#EASSGDFLDL.K             | S88:       | 3 | 4,0336 | 0,354 | 0      |
| 17 | P38159 HNRPG_HUMAN  | K.VEQATKPS#FESGR.R              | S88:       | 2 | 2,8832 | 0,483 | -0,644 |
| 17 | Q2VIN3 Q2VIN3_HUMAN | K.VEQATKPS#FER.G                | S88:       | 2 | 2,6974 | 0,332 | -0,445 |
| 17 | P06400 RB_HUMAN     | K.LRFDIEGS#DEADGSK.H            | S882:      | 3 | 4,0192 | 0,157 | -0,213 |
| 17 | Q8WUA4 TF3C2_HUMAN  | R.AHFNAM*FQPSS#PTR.R            | S893:      | 2 | 4,7929 | 0,341 | -0,145 |
| 17 | Q8WUA4 TF3C2_HUMAN  | R.AHFNAM*FQPSS#PTR.R            | S893:      | 3 | 2,963  | 0,214 | 0,108  |
| 17 | Q5T4W4 Q5T4W4_HUMAN | R.VHISGS#VDGLDK.A               | S9:        | 2 | 2,8707 | 0,404 | -0,373 |
| 17 | Q13428 TCOF_HUMAN   | R.AALAPAKES#PR.K                | S906:      | 2 | 2,5812 | 0,417 | -0,512 |
| 17 | Q8WWQ0 PHIP_HUMAN   | K.VNEEKDGPIS#PK.K               | S911:      | 2 | 4,0696 | 0,45  | -0,35  |
| 17 | Q8WWQ0 PHIP_HUMAN   | K.VNEEKDGPIS#PK.K               | S911:      | 3 | 2,9879 | 0,402 | 0,263  |

|    |                    |                                 |              |   |        |       |        |
|----|--------------------|---------------------------------|--------------|---|--------|-------|--------|
| 17 | Q6ZRV2 FA83H_HUMAN | R.RGS#PVPPVPER.R                | S914:        | 2 | 2,7806 | 0,38  | -0,384 |
| 17 | Q6ZRV2 FA83H_HUMAN | R.RSS#PVPPVPER.R                | S925:        | 2 | 2,4786 | 0,218 | -0,375 |
| 17 | Q8N4C8 MINK1_HUMAN | K.GQS#PPSKDGSQDYQSR.G           | S927:        | 3 | 2,9679 | 0,337 | 0      |
| 17 | Q9Y4E6 WDR7_HUMAN  | K.ARGS#PPTSSNIVQGQIK.Q          | S935:        | 2 | 3,0641 | 0,39  | 0,67   |
| 17 | O43847 NRDC_HUMAN  | R.RGS#LSNAGDPEIVK.S             | S94:         | 3 | 4,0394 | 0,306 | -0,12  |
| 17 | O43847 NRDC_HUMAN  | R.RGS#LSNAGDPEIVK.S             | S94:         | 2 | 3,3632 | 0,369 | -0,401 |
| 17 | Q14669 TRIPC_HUMAN | K.HLAESSELLTS#PPK.A             | S942:        | 2 | 4,2217 | 0,53  | -0,23  |
| 17 | Q14669 TRIPC_HUMAN | K.HLAESSELLTS#PPK.A             | S942:        | 3 | 2,7485 | 0,132 | 0,23   |
| 17 | Q9Y2F5 K0947_HUMAN | R.KLDFNSPGGSS#PVENSDCSTNSR.L    | S944:        | 3 | 4,7639 | 0,422 | 0,289  |
| 17 | Q9P275 UBP36_HUMAN | R.HSCSPM*GDGDPEAM*EES#PR.K      | S952:        | 3 | 4,4522 | 0,394 | -0,665 |
| 17 | Q15648 MED1_HUMAN  | K.ALAPADLM*EHHSGS#QGPLLTGDLGK.E | S953:        | 3 | 5,0395 | 0,42  | -0,877 |
| 17 | Q5SW79 CE170_HUMAN | R.KS#FTSLYK.D                   | S958:        | 2 | 2,3139 | 0,345 | -0,232 |
| 17 | Q8TER5 SOLO_HUMAN  | R.IQQHLGEEAS#PR.G               | S961:        | 3 | 2,8879 | 0,34  | 0,063  |
| 17 | Q6PD62 CTR9_HUMAN  | K.GEEGS#DDDETENGPCK.K           | S970:        | 2 | 3,5243 | 0,458 | -0,648 |
| 17 | P46020 KPB1_HUMAN  | R.S#VRPTDSNVSPAISIHEIGAVGATK.T  | S972:        | 3 | 5,4067 | 0,498 | 0,141  |
| 17 | Q9HBD1 RC3H2_HUMAN | R.KHS#ST#GDLLSLELQQAK.S         | S982:T984:   | 3 | 3,1618 | 0,213 | 0      |
| 17 | Q9NS91 RAD18_HUMAN | R.NHLLQFALES#PAK.S              | S99:         | 2 | 4,8783 | 0,515 | -0,315 |
| 17 | O14579 COPE_HUMAN  | R.RDS#IVAELDR.E                 | S99:         | 3 | 3,2067 | 0,245 | 0,292  |
| 17 | O14579 COPE_HUMAN  | R.RDS#IVAELDR.E                 | S99:         | 2 | 3,1909 | 0,256 | 0,389  |
| 17 | Q9NS91 RAD18_HUMAN | R.NHLLQFALES#PAK.S              | S99:         | 3 | 3,1579 | 0,319 | -0,118 |
| 17 | Q14739 LBR_HUMAN   | R.SAS#ASHQADIK.E                | S99:         | 2 | 2,3601 | 0,17  | -0,408 |
| 17 | Q8N488 RYBP_HUMAN  | K.DKEIS#PSVTK.K                 | S99:         | 2 | 2,2559 | 0,176 | -0,309 |
| 17 | Q9P2D0 IBTK_HUMAN  | R.KRS#DSSGGYNLSDIQS#PSSTGLLK.S  | S990:S1004:  | 3 | 5,4982 | 1     | -0,528 |
| 17 | O14974 MYPT1_HUMAN | R.RIS#EM*EEELK.M                | S995:        | 2 | 2,8217 | 0,336 | -0,179 |
| 17 | O95785 WIZ_HUMAN   | K.KTPLALAGS#PTPK.N              | S996:        | 2 | 2,1479 | 0,292 | -0,359 |
| 17 | Q9UQ35 SRRM2_HUMAN | K.VKAQT#PPGPSLSGSK.S            | T1003:       | 2 | 3,1505 | 0,465 | -0,636 |
| 17 | Q9UQ35 SRRM2_HUMAN | K.VKAQT#PPGPSLSGSK.S            | T1003:       | 3 | 2,8871 | 0,298 | -0,179 |
| 17 | Q9UQ35 SRRM2_HUMAN | K.GQSQT#SPDHRSDT#SSPEVR.Q       | T1063:T1071: | 3 | 3,0006 | 1     | -0,82  |
| 17 | Q9NTI5 PDS5B_HUMAN | K.SFFT#PGKPK.T                  | T1121:       | 2 | 2,6234 | 0,277 | -0,224 |
| 17 | Q9Y4B4 ARIP4_HUMAN | R.KLAT#PPAAQESSR.R              | T1260:       | 3 | 4,4818 | 0,426 | 0      |
| 17 | Q9Y4B4 ARIP4_HUMAN | R.KLAT#PPAAQESSR.R              | T1260:       | 2 | 2,0341 | 0,146 | -0,255 |
| 17 | Q8NI27 THOC2_HUMAN | K.GGEKT#PVSGSLKS#PVPR.S         | T1270:S1278: | 3 | 4,145  | 0,395 | -0,493 |
| 17 | O75367 H2AY_HUMAN  | K.GKLEAIT#PPPAK.K               | T129:        | 2 | 3,2047 | 0,474 | 0,172  |

|    |                    |                                |                 |   |        |       |        |
|----|--------------------|--------------------------------|-----------------|---|--------|-------|--------|
| 17 | Q9H9C1 CN133_HUMAN | R.TRPGSFQSLSDALSDT#PAK.S       | T132:           | 3 | 4,6163 | 0,523 | 0      |
| 17 | Q9NR31 SAR1A_HUMAN | K.IDRT#DAISEEK.L               | T139:           | 3 | 3,4003 | 0,242 | 0      |
| 17 | Q9NR31 SAR1A_HUMAN | K.IDRT#DAISEEK.L               | T139:           | 2 | 2,8431 | 0,153 | -0,629 |
| 17 | Q9UQ35 SRRM2_HUMAN | K.ALPQT#PRPR.S                 | T1492:          | 2 | 2,1765 | 0,108 | -0,219 |
| 17 | O43166 SI1L1_HUMAN | K.KLIDLESPT#PESQK.S            | T1551:          | 2 | 4,7796 | 0,455 | 0,66   |
| 17 | Q5THJ4 VP13D_HUMAN | K.QKEVQDKDYPLT#PPPS#PTVDEPK.I  | T1761:S1765:    | 3 | 2,8577 | 0,099 | -0,132 |
| 17 | Q86TB9 PATL1_HUMAN | R.RST#SPIIGSPPVR.A             | T178:           | 3 | 3,0288 | 0,241 | -0,126 |
| 17 | Q15527 SURF2_HUMAN | R.KDLGSTEDGDGT#DDFLT#DKEDEK.A  | T190:T195:      | 3 | 4,954  | 0,4   | -0,612 |
| 17 | Q9H1E3 NUCKS_HUMAN | K.EKT#PS#PKEEDEEPES#PPEKK.T    | T202:S204:S214: | 3 | 3,3822 | 0,301 | -0,287 |
| 17 | Q9H1E3 NUCKS_HUMAN | K.EKT#PSPKEEDEEPES#PPEK.K      | T202:S214:      | 3 | 2,6653 | 0,095 | -0,234 |
| 17 | O75494 FUSIP_HUMAN | R.NVADDT#RSEDLR.R              | T21:            | 2 | 2,6809 | 0,187 | -0,498 |
| 17 | Q63HQ0 CD016_HUMAN | R.SKT#EEDILR.A                 | T228:           | 2 | 2,1306 | 0,342 | -0,104 |
| 17 | P49792 RBP2_HUMAN  | K.TAQEKDSLIT#PHVS#R.S          | T2450:S2454:    | 2 | 3,1209 | 0,341 | 0,53   |
| 17 | Q9H0G5 CCD55_HUMAN | R.EKVIET#PENDFK.H              | T275:           | 2 | 3,3853 | 0,427 | -0,319 |
| 17 | Q6T4R5 NHS_HUMAN   | K.NPIHNIPST#LDK.Q              | T311:           | 2 | 2,4999 | 0,341 | -0,683 |
| 17 | Q13769 THOC5_HUMAN | R.RPT#LGVQLDDK.R               | T328:           | 2 | 3,7093 | 0,453 | -0,185 |
| 17 | Q92597 NDRG1_HUMAN | R.SRT#ASGSSVTSLDGTR.S          | T328:           | 3 | 3,3035 | 0,368 | 0,11   |
| 17 | P33981 TTK_HUMAN   | K.FKNEDLT#DELSLNK.I            | T33:            | 3 | 5,0331 | 0,308 | 0      |
| 17 | Q641Q2 FA21A_HUMAN | K.ERRT#PS#DDEEDNLFAPPK.L       | T331:S333:      | 3 | 3,7783 | 0,388 | -0,322 |
| 17 | Q9UQB8 BAIP2_HUMAN | K.LSDSYSNT#LPVRK.S             | T340:           | 3 | 3,3421 | 0,42  | 0,117  |
| 17 | Q9UQB8 BAIP2_HUMAN | K.LSDSYSNT#LPVRK.S             | T340:           | 2 | 2,4875 | 0,092 | 0,235  |
| 17 | Q8NI08 NCOA7_HUMAN | K.STGHT#PTKPS#GSSVSEK.L        | T358:S363:      | 3 | 2,9809 | 1     | -0,198 |
| 17 | Q9ULW0 TPX2_HUMAN  | K.ICRDPQT#PVLQTK.H             | T369:           | 3 | 3,2076 | 0,342 | -0,335 |
| 17 | Q15424 SAFB1_HUMAN | K.ESST#SEGADQKM*S#SPEDDSDTKR.L | T374:S383:      | 3 | 3,188  | 1     | -0,412 |
| 17 | Q00610 CLH1_HUMAN  | K.GILRT#PDTIR.R                | T394:           | 2 | 2,4226 | 0,126 | 0,1    |
| 17 | Q15149 PLEC1_HUMAN | R.KQIT#M*EELVR.S               | T4030:          | 2 | 2,1772 | 0,275 | -0,545 |
| 17 | Q9BTX1 NDC1_HUMAN  | K.KLNSPEETAFAQT#PK.S           | T414:           | 2 | 5,0044 | 0,388 | 0,219  |
| 17 | Q9H7P9 PKHG2_HUMAN | K.SKPVLEPLT#PPLGS#PRPR.D       | T445:S450:      | 3 | 3,6238 | 0,302 | -0,174 |
| 17 | Q96JM3 ZN828_HUMAN | R.KT#SPASLDFPESQKS#SR.G        | T458:S471:      | 2 | 2,3937 | 0,525 | -0,603 |
| 17 | P11362 FGFR1_HUMAN | K.SDAT#EKDLS#DLISEM*EMMK.M     | T521:S526:      | 3 | 2,6575 | 0,174 | -0,935 |
| 17 | O60504 VINEX_HUMAN | R.LRLCDDGPQLPT#SPR.L           | T529:           | 2 | 2,8385 | 0,379 | -0,406 |
| 17 | Q9BZL4 PP12C_HUMAN | R.RST#QGVTLTDLK.E              | T560:           | 2 | 4,719  | 0,441 | -0,174 |
| 17 | O76094 SRP72_HUMAN | K.NYDPKVT#PDPER.W              | T571:           | 2 | 2,8446 | 0,304 | -0,485 |

|    |                    |                                |                 |   |        |       |        |
|----|--------------------|--------------------------------|-----------------|---|--------|-------|--------|
| 17 | O76094 SRP72_HUMAN | K.NYDPKVT#PDPER.W              | T571:           | 3 | 2,7411 | 0,127 | 0,121  |
| 17 | Q9Y485 DMXL1_HUMAN | R.ST#SM*LISSGHNK.S             | T573:           | 2 | 2,5086 | 0,13  | -0,629 |
| 17 | P01106 MYC_HUMAN   | K.KFELLPT#PPLS#PSRR.S          | T58:S62:        | 3 | 3,3405 | 0,236 | -0,289 |
| 17 | P01106 MYC_HUMAN   | K.KFELLPT#PPLS#PSRR.S          | T58:S62:        | 2 | 2,8203 | 0,361 | -0,579 |
| 17 | P01106 MYC_HUMAN   | K.KFELLPT#PPLSPS#RR.S          | T58:S64:        | 2 | 2,0706 | 0,197 | -0,193 |
| 17 | Q12888 TP53B_HUMAN | K.TKGDDT#DTRDDIS#ILATGCK.G     | T591:S598:      | 3 | 3,2766 | 0,203 | -0,391 |
| 17 | O15439 MRP4_HUMAN  | K.KDNEESEQPPVPGTPT#LR.N        | T648:           | 3 | 3,0586 | 0,163 | 0      |
| 17 | Q6P0N0 CN106_HUMAN | K.KAYILVT#PLK.S                | T653:           | 2 | 3,6644 | 0,424 | -0,199 |
| 17 | P19338 NUCL_HUMAN  | K.VVVVST#KK.V                  | T69:            | 2 | 2,2001 | 0,3   | -0,65  |
| 17 | Q12834 CDC20_HUMAN | K.VQTT#PSKPGGDR.Y              | T70:            | 3 | 2,6544 | 0,14  | 0,069  |
| 17 | Q9Y6X9 MORC2_HUMAN | K.KT#ESPIKLS#PATPSR.K          | T723:S730:      | 3 | 3,3938 | 0,198 | -0,31  |
| 17 | Q9Y6X9 MORC2_HUMAN | K.KT#ESPIKLS#PATPSR.K          | T723:S730:      | 2 | 2,8964 | 0,378 | -0,344 |
| 17 | Q13625 ASPP2_HUMAN | K.RSSIT#EPEGPNGPNIQK.L         | T739:           | 3 | 4,1136 | 0,344 | -0,48  |
| 17 | Q13443 ADAM9_HUMAN | R.HVSPVT#PPREVPYI#ANR.F        | T761:Y769:      | 3 | 2,8746 | 0,216 | 0,437  |
| 17 | Q68DN6 RGPD1_HUMAN | R.NADSEIKHST#PS#PTKYSLS#PSK.S  | T770:S772:S779: | 3 | 4,744  | 1     | -0,21  |
| 17 | P18084 ITB5_HUMAN  | R.KPIST#HT#VDFTFNK.F           | T780:T782:      | 3 | 3,2543 | 0,255 | 0      |
| 17 | Q9HCG8 NCM_HUMAN   | K.YT#SDKDVPSER.N               | T785:           | 3 | 3,0973 | 0,151 | -0,133 |
| 17 | P49006 MRP_HUMAN   | K.GEVPPKET#PK.K                | T85:            | 2 | 2,116  | 0,183 | -0,63  |
| 17 | O60716 CTND1_HUMAN | R.SQSSHSDST#LPLIDR.N           | T869:           | 2 | 2,6686 | 0,418 | 0,671  |
| 17 | Q8IYB3 SRRM1_HUMAN | K.KET#ESEAEEDNLDLEK.H          | T872:           | 3 | 3,579  | 0,303 | 0,376  |
| 17 | Q9BWF3 RBM4_HUMAN  | K.LHVGNISPT#CTNK.E             | T88:            | 2 | 3,9384 | 0,45  | -0,481 |
| 17 | Q9NYV4 CD2L7_HUMAN | R.LYNSEESRPYT#NK.V             | T893:           | 2 | 2,1484 | 0,343 | -1,016 |
| 17 | Q6PD62 CTR9_HUMAN  | K.KGGDEFVNDT#DDDLPISK.K        | T925:           | 3 | 3,0841 | 0,265 | -0,451 |
| 17 | Q9BPX3 CND3_HUMAN  | R.RCQT#AEADSES#DHEVPEPESEM*K.M | T968:S975:      | 3 | 2,8993 | 0,384 | -0,258 |
| 17 | Q9UQ35 SRRM2_HUMAN | K.VKPET#PPRQSHS#GSIS#PYPK.V    | T983:S990:S994: | 3 | 2,9028 | 0,111 | 0      |
| 17 | Q9UQ35 SRRM2_HUMAN | K.VKPET#PPRQSHSGS#IS#PYPK.V    | T983:S992:S994: | 3 | 2,6186 | 0,171 | 0      |
| 17 | O60841 IF2P_HUMAN  | K.VEM*Y#S#GSDDDDFNKLPKK.A      | Y134:S135:      | 3 | 2,935  | 0,147 | -0,538 |
| 17 | Q01081 U2AF1_HUMAN | K.DKVNCSFY#FK.I                | Y21:            | 2 | 2,3709 | 0,182 | -0,44  |
| 17 | P35232 PHB_HUMAN   | R.KLEAAEDIAY#QLSR.S            | Y249:           | 2 | 3,8165 | 0,485 | -0,289 |
| 17 | O14974 MYPT1_HUMAN | R.KTGSY#GALAEITASK.E           | Y446:           | 2 | 2,0491 | 0,31  | 0,232  |
| 17 | Q15154 PCM1_HUMAN  | R.KDEETEESY#DS#EHENSEPVTNIR.N  | Y535:S537:      | 3 | 3,3924 | 1     | 0,544  |
| 17 | Q15003 CND2_HUMAN  | K.DAPSLEEVEGHVADGSATEM*GTTK.K  |                 | 3 | 6,0257 | 0,542 | 0,299  |
| 17 | P42166 LAP2A_HUMAN | K.GPPDFSSDEEREPTVVLGSGAAAAGR.S |                 | 3 | 5,8741 | 0,566 | -0,356 |

|    |                    |                                   |   |        |       |        |
|----|--------------------|-----------------------------------|---|--------|-------|--------|
| 17 | Q9Y2W2 WBP11_HUMAN | R.DM*EKLDDEM*EFNPVQQPQLNEK.V      | 3 | 5,0757 | 0,318 | 0,917  |
| 17 | P51858 HDGF_HUMAN  | R.GPPQEEEEEEDEEEEATKEDAEAPGIR.D   | 3 | 5,0257 | 0,549 | -0,18  |
| 17 | Q13435 SF3B2_HUMAN | K.IEEAM*DGSETPQLFTVLPEKR.T        | 3 | 4,7757 | 0,421 | -0,988 |
| 17 | P09972 ALDOC_HUMAN | K.VDKGVVPLAGTDGETTTQGLDGLSER.C    | 3 | 4,664  | 0,559 | 0,35   |
| 17 | P06576 ATPB_HUMAN  | K.VLDSGAPIKIPVGPETLGR.I           | 3 | 4,5995 | 0,371 | -0,286 |
| 17 | Q9Y3A4 ZG14_HUMAN  | R.DPEDRIPSPLGYAAIPIK.F            | 3 | 4,4592 | 0,446 | -0,281 |
| 17 | P09651 ROA1_HUMAN  | R.NQGGYGGSSSSSYGSGR.R             | 2 | 4,4122 | 0,586 | -0,432 |
| 17 | Q13043 STK4_HUMAN  | R.DETM*QPAKPSFLEYFEQK.E           | 3 | 4,3465 | 0,373 | -0,664 |
| 17 | P08195 4F2_HUMAN   | K.ADLLLSTQPGREEGSPELELER.L        | 3 | 4,3431 | 0,498 | -0,317 |
| 17 | O95372 LYPA2_HUMAN | K.DLAILQCHGELDPM*VPVR.F           | 3 | 4,135  | 0,235 | -0,44  |
| 17 | P25788 PSA3_HUMAN  | K.ESLKEEDESDDDNM*.-               | 2 | 4,1303 | 0,517 | -0,511 |
| 17 | O75153 EIF3X_HUMAN | R.DRAEPM*ATEPAPAGAPGDLGSQPPAAK.D  | 3 | 4,1219 | 0,45  | 0,466  |
| 17 | O75153 EIF3X_HUMAN | K.DCM*EHAVLPVDGATLAEVM*R.Q        | 3 | 4,1116 | 0,322 | -0,163 |
| 17 | Q9Y696 CLIC4_HUMAN | R.DEFTNTCPDKEVEIAYSVDVAK.R        | 3 | 4,0945 | 0,333 | 0,581  |
| 17 | Q9NZZ3 CHMP5_HUMAN | R.DNLAQQSFNM*EQANYTIQSLKDTK.T     | 3 | 4,0505 | 0,307 | -0,261 |
| 17 | Q8IY81 RRMJ3_HUMAN | K.ASEIM*VDDEELAQHPATTEDIR.V       | 3 | 4,0196 | 0,358 | -0,147 |
| 17 | P61158 ARP3_HUMAN  | R.AEPEDHYFLLTEPPLNTPENR.E         | 3 | 3,9462 | 0,181 | -0,516 |
| 17 | P35580 MYH10_HUMAN | K.VEDM*AELTCLNEASVLHNLK.D         | 3 | 3,8812 | 0,428 | 0      |
| 17 | P06748 NPM_HUMAN   | K.DELHIVEAEAM*NYEGSPIK.V          | 3 | 3,8757 | 0,296 | -0,593 |
| 17 | Q9HCN8 SDF2L_HUMAN | K.AM*EGIFIKPSVEPSAGHDEL.-         | 3 | 3,8082 | 0,432 | 0,085  |
| 17 | P04083 ANXA1_HUMAN | K.GGPGSAVSPYPTFNPSDVAALHK.A       | 3 | 3,7721 | 0,47  | 0      |
| 17 | P60709 ACTB_HUMAN  | R.VAPEEHPVLLTEAPLNPK.A            | 3 | 3,7046 | 0,4   | -0,094 |
| 17 | P37198 NUP62_HUMAN | K.DIIHLNTSGAPADTSDPLQQICK.I       | 3 | 3,7027 | 0,303 | -0,418 |
| 17 | P80723 BASP_HUMAN  | K.AQGPAASAEKPKVEAPAANSQDQTVTVKE.- | 3 | 3,6696 | 0,377 | 0,38   |
| 17 | P06396 GELS_HUMAN  | R.DPDQTDGLGLSYLSSHIANVER.V        | 3 | 3,6385 | 0,342 | -0,46  |
| 17 | O60506 HNRPQ_HUMAN | K.DLEGENIEIVFAKPPDQK.R            | 3 | 3,6002 | 0,365 | -0,09  |
| 17 | O75400 PR40A_HUMAN | R.RTLLEQLDDDDQ.-                  | 2 | 3,5552 | 0,447 | -0,272 |
| 17 | Q2TAA2 IAH1_HUMAN  | R.DVAEAKPELSLLGDGDH.-             | 2 | 3,5464 | 0,489 | 0,276  |
| 17 | P07355 ANXA2_HUMAN | R.TNQELQEINR.V                    | 2 | 3,4718 | 0,344 | -0,392 |
| 17 | P08670 VIME_HUMAN  | R.DGQVINETSQHDDLE.-               | 2 | 3,46   | 0,298 | -0,731 |
| 17 | P39748 FEN1_HUMAN  | K.EAHQLFLEPEVLDPEVELK.W           | 3 | 3,3614 | 0,283 | -0,394 |
| 17 | Q13409 DC1I2_HUMAN | K.EDEEEDDDVVAPKPIEPPEEK.T         | 3 | 3,3552 | 0,312 | -0,36  |
| 17 | P13639 EF2_HUMAN   | K.GEGQLGPAER.A                    | 2 | 3,3386 | 0,355 | 0      |

|    |                     |                                    |   |        |       |        |
|----|---------------------|------------------------------------|---|--------|-------|--------|
| 17 | P30443 1A01_HUMAN   | R.DGEDQTQDTELVETRPAGDGTFFQK.W      | 3 | 3,3331 | 0,437 | -0,416 |
| 17 | Q15459 SF3A1_HUMAN  | K.ASKPLPPAPAPDEYLVSPITGEK.I        | 3 | 3,3287 | 0,381 | 0,154  |
| 17 | Q92598 HS105_HUMAN  | K.LM*SSNSTDLPLNIECFM*NDKDVSGK.M    | 3 | 3,2829 | 0,472 | -0,257 |
| 17 | Q0D2N1 Q0D2N1_HUMAN | K.DM*VTELFDPVQGEVQHR.V             | 3 | 3,2505 | 0,395 | -0,601 |
| 17 | P55884 EIF3B_HUMAN  | R.M*TLDTLSIYETPSM*GLLDKK.S         | 3 | 3,2352 | 0,359 | 1,919  |
| 17 | Q9BX68 HINT2_HUMAN  | R.DVAPQAPVHFLVIPK.K                | 2 | 3,2193 | 0,257 | -0,374 |
| 17 | P37802 TAGL2_HUMAN  | R.NFSDNQLQEGK.N                    | 2 | 3,2066 | 0,412 | -0,572 |
| 17 | O76094 SRP72_HUMAN  | K.AIELLQEFSDQHPENAAEIK.L           | 3 | 3,1941 | 0,322 | -0,401 |
| 17 | P62851 RS25_HUMAN   | R.DKLNLLVLFDK.A                    | 2 | 3,1885 | 0,327 | -0,185 |
| 17 | P62937 PPIA_HUMAN   | K.KITIADCGQL.-                     | 2 | 3,1635 | 0,411 | -0,587 |
| 17 | P30041 PRDX6_HUMAN  | K.DGDSVM*VLPTIPEEEAKK.L            | 3 | 3,1552 | 0,229 | 0,371  |
| 17 | Q99460 PSMD1_HUMAN  | K.DTSEDIEELVEPVAAHGPK.I            | 2 | 3,0909 | 0,457 | -0,18  |
| 17 | P49840 GSK3A_HUMAN  | R.DIKPQNLLVDPDTAVLK.L              | 3 | 3,0607 | 0,086 | -0,195 |
| 17 | Q01780 EXOSX_HUMAN  | K.DPEPPEKEFTPYDYSQSDFK.A           | 3 | 3,0539 | 0,246 | 0,756  |
| 17 | P49841 GSK3B_HUMAN  | R.DIKPQNLLLDPTAVLK.L               | 3 | 3,0336 | 0,145 | -0,483 |
| 17 | Q9BT25 NYS48_HUMAN  | R.SFAQVLELSAEASK.E                 | 2 | 2,9793 | 0,448 | -0,742 |
| 17 | Q02952 AKA12_HUMAN  | K.EDEKGGDDVDDPENQNSALADTDASGGTLK.E | 3 | 2,974  | 0,168 | -0,304 |
| 17 | P21333 FLNA_HUMAN   | K.DAGEGLLAVQITDPEGKPK.K            | 3 | 2,9262 | 0,134 | 0,189  |
| 17 | O43252 PAPS1_HUMAN  | K.GFTGIDSEYEKPEAPELVLK.T           | 3 | 2,9055 | 0,288 | -0,576 |
| 17 | O60220 TIM8A_HUMAN  | K.SKPVFSESLSD.-                    | 2 | 2,8389 | 0,48  | 0,204  |
| 17 | P22626 ROA2_HUMAN   | R.GGNFGFGDSR.G                     | 2 | 2,789  | 0,174 | -0,06  |
| 17 | P43897 EFTS_HUMAN   | R.LGQHVVGM*APLSVGSLLDEPGGEAETK.M   | 3 | 2,7407 | 0,243 | 0,743  |
| 17 | Q53GS9 SNUT2_HUMAN  | K.NNFFVEK.N                        | 2 | 2,73   | 0,119 | -0,136 |
| 17 | P23381 SYWC_HUMAN   | R.KLSFDFQ.-                        | 2 | 2,7092 | 0,298 | 0,069  |
| 17 | Q13547 HDAC1_HUMAN  | R.DGIDDESIEAIFKPVVM*SK.V           | 3 | 2,6728 | 0,405 | 0      |
| 17 | Q12765 SCRN1_HUMAN  | R.DEVQEVVYFSAADHEPESK.V            | 3 | 2,6678 | 0,084 | 0,084  |
| 17 | Q92769 HDAC2_HUMAN  | R.DGIDDESYGQIFKPIISK.V             | 3 | 2,6599 | 0,302 | -0,452 |
| 17 | O75369 FLNB_HUMAN   | K.FNDEHIPESPYLVPIAPSDDAR.R         | 3 | 2,6592 | 0,099 | -0,213 |
| 17 | P55884 EIF3B_HUMAN  | K.DRPQEADGIDSIVVDNVPQVGPDR.L       | 3 | 2,6588 | 0,1   | -0,34  |
| 17 | P49327 FAS_HUMAN    | R.DGLENQTPEFFQDVCKPK.Y             | 3 | 2,6102 | 0,211 | -0,242 |
| 17 | P08670 VIME_HUMAN   | R.FANYIDK.V                        | 2 | 2,5383 | 0,263 | 0,14   |
| 17 | Q9BR76 COR1B_HUMAN  | K.NDQCYEDIR.V                      | 2 | 2,4439 | 0,3   | -0,101 |
| 17 | Q04917 1433F_HUMAN  | K.NCNDFAQYESK.V                    | 2 | 2,3854 | 0,152 | -0,374 |



|    |                     |                              |              |        |        |        |        |
|----|---------------------|------------------------------|--------------|--------|--------|--------|--------|
| 17 | Q92769 HDAC2_HUMAN  | R.DGIDDESYGQIFKPIISK.V       | 2            | 2,3218 | 0,363  | -0,723 |        |
| 17 | P61221 ABCE1_HUMAN  | K.KSGNYFFLDD.-               | 2            | 2,3104 | 0,471  | -0,202 |        |
| 17 | Q14247 SRC8_HUMAN   | K.FGVEQDR.M                  | 2            | 2,3084 | 0,229  | -0,358 |        |
| 17 | Q9UBV8 PEF1_HUMAN   | K.NLFQQYDR.D                 | 2            | 2,2988 | 0,306  | -0,225 |        |
| 17 | O60506 HNRPQ_HUMAN  | K.DLEGENIEIVFAKPPDQK.R       | 2            | 2,2931 | 0,389  | -0,418 |        |
| 17 | P06748 NPM_HUMAN    | K.DELHIVEAEAM*NYEGSPIK.V     | 2            | 2,2924 | 0,43   | -0,452 |        |
| 17 | P05783 K1C18_HUMAN  | K.ETM*QSLNDR.L               | 2            | 2,2905 | 0,389  | -0,44  |        |
| 17 | P26038 MOES_HUMAN   | K.QRIDEFESM*.-               | 2            | 2,2754 | 0,397  | -0,208 |        |
| 17 | Q9NZM1 MYOF_HUMAN   | R.DIVIEM*EDTKPLLASK.L        | 2            | 2,2262 | 0,302  | 0,47   |        |
| 17 | P21333 FLNA_HUMAN   | R.NDNDTFTVK.Y                | 2            | 2,2232 | 0,52   | -0,347 |        |
| 17 | Q9UBM7 DHCR7_HUMAN  | K.SLDGVTNDR.T                | 2            | 2,1611 | 0,214  | -0,062 |        |
| 17 | B2RDE1 B2RDE1_HUMAN | K.CLSAAEEK.Y                 | 2            | 2,1562 | 0,196  | -0,202 |        |
| 17 | P13645 K1C10_HUMAN  | R.LAADDFR.L                  | 2            | 2,0958 | 0,348  | 0,227  |        |
| 17 | P04406 G3P_HUMAN    | K.VGVNGFGR.I                 | 2            | 2,084  | 0,315  | 0      |        |
| 17 | P02545 LMNA_HUMAN   | K.NIYSEELR.E                 | 2            | 2,0785 | 0,242  | -0,238 |        |
| 17 | P30041 PRDX6_HUMAN  | K.DGDSVM*VLPTIPEEEAKK.L      | 2            | 2,0732 | 0,156  | 0,433  |        |
| 17 | P15311 EZRI_HUMAN   | K.QRIDEFEAL.-                | 2            | 2,0678 | 0,324  | 0      |        |
| 17 | P27695 APEX1_HUMAN  | K.NAGFTPQER.Q                | 2            | 2,0673 | 0,23   | 0,419  |        |
| 17 | P17174 AATC_HUMAN   | K.NFGLYNER.V                 | 2            | 2,0652 | 0,22   | 0,12   |        |
| 17 | P55072 TERA_HUMAN   | R.GGNIGDGGGAADR.V            | 2            | 2,0638 | 0,101  | -0,546 |        |
| 17 | P07237 PDIA1_HUMAN  | R.NNFEGEVTK.E                | 2            | 2,0165 | 0,172  | 0      |        |
| 18 | Q13619 CUL4A_HUMAN  | R.KGS#FSALVGR.T              | S10:         | 2      | 2,6068 | 0,337  | 0,221  |
| 18 | P23193 TCEA1_HUMAN  | K.KEPAITSQNS#PEAR.E          | S100:        | 3      | 3,3436 | 0,225  | -0,455 |
| 18 | O00571 DDX3X_HUMAN  | R.GRS#DYDGIGSR.G             | S102:        | 2      | 2,4488 | 0,216  | -0,483 |
| 18 | P05387 RLA2_HUMAN   | K.KDEKKEES#EES#DDDM*GFGLFD.- | S102:S105:   | 3      | 2,6492 | 0,247  | -0,488 |
| 18 | A8MSX0 A8MSX0_HUMAN | R.SHTS#LKDELSDV#QGGSK.A      | S102:S111:   | 3      | 5,0666 | 1      | -0,27  |
| 18 | Q01804 OTUD4_HUMAN  | R.VQRPKEES#S#EDENEVSNILR.S   | S1023:S1024: | 3      | 3,7731 | 0,402  | -0,218 |
| 18 | Q9ULH1 DDEF1_HUMAN  | K.SHPLDLS#PNVQSR.D           | S1027:       | 2      | 3,1114 | 0,597  | -0,239 |
| 18 | Q12888 TP53B_HUMAN  | R.KNGSTAVAESVAS#PQK.T        | S1028:       | 2      | 4,9947 | 0,43   | -0,59  |
| 18 | Q12888 TP53B_HUMAN  | R.KNGSTAVAESVAS#PQK.T        | S1028:       | 3      | 3,6253 | 0,39   | -0,111 |
| 18 | Q9Y6W5 WASF2_HUMAN  | K.AFRSS#TIQDQK.L             | S103:        | 2      | 2,9485 | 0,244  | 0,179  |
| 18 | P31943 HNRH1_HUMAN  | K.HTGPNS#PDTANDGFVR.L        | S104:        | 2      | 3,5975 | 0,537  | -0,138 |
| 18 | P31943 HNRH1_HUMAN  | K.HTGPNS#PDTANDGFVR.L        | S104:        | 3      | 3,588  | 0,344  | 0,104  |

|    |                     |                                      |              |   |        |       |        |
|----|---------------------|--------------------------------------|--------------|---|--------|-------|--------|
| 18 | P52597 HNRPF_HUMAN  | K.HSGPNS#ADSANDGFVR.L                | S104:        | 2 | 3,3242 | 0,418 | -0,713 |
| 18 | P05386 RLA1_HUMAN   | K.KEESEES#DDDM*GFGLFD.-              | S104:        | 2 | 2,5791 | 0,394 | -0,239 |
| 18 | Q68E09 Q68E09_HUMAN | R.RPS#ILPEGSSDSR.G                   | S1044:       | 3 | 3,3089 | 0,285 | 0,062  |
| 18 | Q70E73 RAPH1_HUMAN  | K.RPS#VDSLVS.K.F                     | S1048:       | 2 | 2,0627 | 0,135 | -0,209 |
| 18 | Q8IXQ4 K1704_HUMAN  | K.KQDDS#PPRPIIGPALPPGFIK.S           | S105:        | 3 | 3,9656 | 0,525 | -0,394 |
| 18 | O60361 NDK8_HUMAN   | R.NIIHGS#DSVK.S                      | S105:        | 2 | 2,8155 | 0,36  | 0,637  |
| 18 | Q8NDI1 EHBP1_HUMAN  | R.KPS#EDEVLNK.G                      | S1058:       | 2 | 3,9597 | 0,5   | -0,492 |
| 18 | Q8NDI1 EHBP1_HUMAN  | R.KPS#EDEVLNK.G                      | S1058:       | 3 | 2,8429 | 0,09  | 0,295  |
| 18 | P26373 RL13_HUMAN   | R.NKS#TESLQANVQR.L                   | S106:        | 2 | 4,0482 | 0,527 | -0,471 |
| 18 | Q70E73 RAPH1_HUMAN  | K.FTPPAES#GSPSKETLPPPAAPPKPGK.L      | S1062:       | 3 | 3,0889 | 0,244 | -0,275 |
| 18 | Q70E73 RAPH1_HUMAN  | K.FTPPAESGS#PSKETLPPPAAPPKPGK.L      | S1064:       | 3 | 3,3491 | 0,309 | -0,275 |
| 18 | Q9UQE7 SMC3_HUMAN   | K.KGDVEGSQS#QDEGEGSGESER.G           | S1067:       | 3 | 5,9331 | 0,549 | -0,081 |
| 18 | Q5VV41 ARHGG_HUMAN  | R.HQS#FGAAVLSR.E                     | S107:        | 2 | 2,9542 | 0,45  | 0      |
| 18 | O60361 NDK8_HUMAN   | R.NIIHGS#VSK.S                       | S107:        | 2 | 2,7582 | 0,191 | -0,424 |
| 18 | O60841 IF2P_HUMAN   | K.KQS#FDDNDS#EELEDKDSK.S             | S107:S113:   | 3 | 5,1764 | 0,519 | -0,4   |
| 18 | Q9P1Y5 K1543_HUMAN  | K.RPTS#RAPS#PSGLM*SPSR.L             | S1070:S1074: | 3 | 3,6217 | 0,308 | -0,467 |
| 18 | Q6ZUT9 RA61L_HUMAN  | R.RLS#ITSLTGK.N                      | S1076:       | 2 | 2,3805 | 0,513 | 0      |
| 18 | Q92794 MYST3_HUMAN  | R.RLS#SQDVLR.C                       | S1089:       | 2 | 2,6237 | 0,355 | -0,317 |
| 18 | P48634 BAT2_HUMAN   | R.TASETRS#EGS#EYEEIPKR.R             | S1089:S1092: | 3 | 3,4119 | 0,44  | -0,246 |
| 18 | A7E2V4 K0913_HUMAN  | K.NVPESPHS#PCEGLPSEAAALTPRPEGK.V     | S1092:       | 3 | 4,9014 | 0,455 | -0,313 |
| 18 | Q12772 SRBP2_HUMAN  | R.HLPLSFLSS#PGQR.A                   | S1098:       | 2 | 2,2003 | 0,252 | -0,402 |
| 18 | Q9BQF6 SEN7_HUMAN   | R.RPS#SSEIITEGK.R                    | S11:         | 2 | 3,2168 | 0,44  | -0,529 |
| 18 | P18754 RCC1_HUMAN   | R.RS#PPADAIPK.S                      | S11:         | 2 | 2,9091 | 0,15  | -0,539 |
| 18 | Q96RQ1 ERGI2_HUMAN  | K.KTSL#LVK.E                         | S11:         | 2 | 2,3319 | 0,143 | 0,14   |
| 18 | Q8IXM2 CQ049_HUMAN  | K.KVASGVLS#PPPAAPPSSSSVPEAGGPPPIKQ.Q | S110:        | 3 | 4,4343 | 0,225 | 0,735  |
| 18 | Q00536 PCTK1_HUMAN  | R.KIS#TEDINK.R                       | S110:        | 2 | 3,8623 | 0,354 | -0,325 |
| 18 | Q14966 ZN638_HUMAN  | K.IDLPEVQIEHDPELEKES#PGLK.N          | S1100:       | 3 | 3,6866 | 0,258 | -0,211 |
| 18 | Q6P0N0 CN106_HUMAN  | R.KTPFNTDLGENS#GIGK.L                | S1104:       | 2 | 4,0744 | 0,446 | -0,208 |
| 18 | P11388 TOP2A_HUMAN  | K.VPDEEENEES#DNEKETEK.S              | S1106:       | 3 | 2,8534 | 0,272 | -0,82  |
| 18 | Q70EL4 UBP43_HUMAN  | K.YHTLS#LGR.K                        | S1112:       | 2 | 2,0699 | 0,242 | 0      |
| 18 | O95490 LPHN2_HUMAN  | R.HSYCCGGLPTES#PHS#SVK.A             | S1112:S1115: | 3 | 3,8539 | 0,311 | 0      |
| 18 | Q9BX95 SGPP1_HUMAN  | R.RNS#LTGEEGQLAR.V                   | S112:        | 2 | 2,8865 | 0,486 | -0,565 |
| 18 | Q9UQ35 SRRM2_HUMAN  | R.QDRGEFSAS#PM*LK.S                  | S1124:       | 3 | 2,9605 | 0,089 | -0,117 |

|    |                    |                                   |              |   |        |       |        |
|----|--------------------|-----------------------------------|--------------|---|--------|-------|--------|
| 18 | O60841 IF2P_HUMAN  | K.KQSFDDNDS#ELEDK.D               | S113:        | 2 | 5,708  | 0,546 | 0,325  |
| 18 | Q9UPN4 AZI1_HUMAN  | K.RPAS#LSTAPSEK.G                 | S114:        | 2 | 3,4017 | 0,447 | -0,922 |
| 18 | Q9BYE7 PCGF6_HUMAN | R.LEGGRQDS#EDEEER.L               | S115:        | 2 | 2,7906 | 0,448 | -0,565 |
| 18 | Q5SW79 CE170_HUMAN | R.TRLGS#LS#ARSDSEATISR.S          | S1160:S1162: | 3 | 2,677  | 0,365 | 0      |
| 18 | Q86VM9 ZCH18_HUMAN | R.TSDLRDEASS#VTR.E                | S118:        | 3 | 4,0549 | 0,401 | 0,241  |
| 18 | Q86UU0 BCL9L_HUMAN | R.DRSVS#VDSGEQR.E                 | S118:        | 2 | 2,384  | 0,278 | -0,517 |
| 18 | O15061 DMN_HUMAN   | R.HVTLPGQS#PLSR.E                 | S1181:       | 2 | 3,2225 | 0,412 | -0,342 |
| 18 | Q04637 IF4G1_HUMAN | R.S#FSKEVEERS#R.E                 | S1186:S1195: | 2 | 2,537  | 0,409 | -0,322 |
| 18 | Q04637 IF4G1_HUMAN | R.SFS#KEVEER.S                    | S1188:       | 2 | 2,4488 | 0,09  | -0,205 |
| 18 | P28370 SMCA1_HUMAN | K.QTELFQHQPSAQKSPTS#PLNM*K.L      | S119:        | 3 | 4,7128 | 0,464 | -0,523 |
| 18 | Q00536 PCTK1_HUMAN | K.RLS#LPADIR.L                    | S119:        | 2 | 2,3841 | 0,245 | 0      |
| 18 | P20020 AT2B1_HUMAN | R.IEDS#EPHIPLIDTDAEDDAPTKR.N      | S1193:       | 3 | 5,3106 | 0,509 | -0,594 |
| 18 | Q29RF7 PDS5A_HUMAN | R.SREQSSEAETGVS#ENEENPVR.I        | S1195:       | 3 | 4,7355 | 0,358 | -0,515 |
| 18 | Q6ZV73 FGD6_HUMAN  | R.ITFCPSRS#LDEADSENKEEVSPGSK.A    | S1197:       | 3 | 5,2342 | 0,428 | -0,369 |
| 18 | Q9NZN5 ARHGC_HUMAN | R.DLGLESTLISSKPQSHLS#TSGK.S       | S1198:       | 3 | 3,2862 | 0,334 | -0,448 |
| 18 | O95218 ZRAB2_HUMAN | R.ENVEYIEREES#DGEYDEFGR.K         | S120:        | 3 | 5,3537 | 0,496 | -0,359 |
| 18 | Q9H7D7 WDR26_HUMAN | K.RLS#QSDDEDVIR.L                 | S121:        | 2 | 3,2852 | 0,535 | -0,611 |
| 18 | Q9H7D7 WDR26_HUMAN | K.RLS#QSDDEDVIR.L                 | S121:        | 3 | 3,0547 | 0,204 | 0,131  |
| 18 | P11388 TOP2A_HUMAN | K.KTQM*AEVLPSPR.G                 | S1213:       | 2 | 2,6197 | 0,23  | -0,84  |
| 18 | Q5VZK9 LR16A_HUMAN | R.KIFPGLS#PVR.I                   | S122:        | 2 | 3,2677 | 0,356 | -0,102 |
| 18 | Q7Z4S6 KI21A_HUMAN | K.KIPEPS#PVTR.R                   | S1239:       | 2 | 2,6155 | 0,191 | -0,507 |
| 18 | Q92797 SYMPK_HUMAN | K.ETAAGGLTLKEERS#PQTLAPVGEDAM*K.T | S1243:       | 3 | 4,1517 | 0,409 | -0,506 |
| 18 | P11388 TOP2A_HUMAN | K.IKNENTEGS#PQEDGVELEGLK.Q        | S1247:       | 3 | 4,7366 | 0,387 | -0,464 |
| 18 | Q9BQG0 MBB1A_HUMAN | K.NQKPSQVNGAPGS#PTEPAGQK.Q        | S1267:       | 3 | 4,4382 | 0,349 | -0,253 |
| 18 | Q96T58 MINT_HUMAN  | R.HGS#FHEDEDPIGS#PR.L             | S1268:S1278: | 2 | 4,6855 | 0,561 | -0,663 |
| 18 | Q96T58 MINT_HUMAN  | R.HGS#FHEDEDPIGS#PR.L             | S1268:S1278: | 3 | 3,8055 | 0,372 | 0      |
| 18 | Q9H2Y7 ZF106_HUMAN | R.NRENS#PSSQSAGLSSINK.E           | S1279:       | 2 | 4,0042 | 0,526 | -0,499 |
| 18 | Q9H2Y7 ZF106_HUMAN | R.NRENS#PSSQSAGLSSINK.E           | S1279:       | 3 | 3,5156 | 0,427 | -0,187 |
| 18 | O75533 SF3B1_HUMAN | R.TM*IIS#PERLDPFADGGKTPDPK.M      | S129:        | 3 | 3,6425 | 0,369 | -0,664 |
| 18 | Q9BQG0 MBB1A_HUMAN | K.KGVLGKS#PLS#ALAR.K              | S1290:S1293: | 3 | 4,079  | 0,386 | -0,117 |
| 18 | Q9BQG0 MBB1A_HUMAN | K.KGVLGKS#PLS#ALAR.K              | S1290:S1293: | 2 | 3,3809 | 0,35  | 0,313  |
| 18 | Q8WYP5 AHTF1_HUMAN | R.TTSFFLNS#PEKEHQEM*DEGSQSLEK.L   | S1292:       | 3 | 4,6887 | 0,494 | -0,489 |
| 18 | P10586 PTPRF_HUMAN | K.DEQSIGLKDS#LLAHSSDPVEM*R.R      | S1295:       | 3 | 3,557  | 0,424 | -0,798 |

|    |                    |                                   |              |   |        |       |        |
|----|--------------------|-----------------------------------|--------------|---|--------|-------|--------|
| 18 | Q9NR30 DDX21_HUMAN | K.LRSDAGLES#DTAM*K.K              | S13:         | 2 | 4,3348 | 0,527 | -0,537 |
| 18 | Q9BRQ6 CHCH6_HUMAN | R.RVS#FGVDEEER.V                  | S13:         | 2 | 3,4244 | 0,496 | 0,087  |
| 18 | Q9BRQ6 CHCH6_HUMAN | R.RVS#FGVDEEER.V                  | S13:         | 3 | 2,9622 | 0,223 | 0,13   |
| 18 | P05787 K2C8_HUMAN  | K.SYKVS#TSGPR.A                   | S13:         | 2 | 2,5565 | 0,33  | -0,525 |
| 18 | P35240 MERL_HUMAN  | R.M*SFSS#LKR.K                    | S13:         | 2 | 2,0493 | 0,362 | 0      |
| 18 | Q07002 PCTK3_HUMAN | R.RAS#LSDIGFGK.L                  | S130:        | 2 | 3,7176 | 0,522 | -0,198 |
| 18 | Q8N4S0 CCD82_HUMAN | K.HLS#QEDNDLNK.Q                  | S131:        | 2 | 4,309  | 0,464 | -0,701 |
| 18 | Q9BSJ6 FA64A_HUMAN | K.GSGS#PTHLSLQK.S                 | S131:        | 2 | 2,3293 | 0,305 | 0,193  |
| 18 | O60499 STX10_HUMAN | R.EILAGKPAAQKS#PSDLLDASAVSATS.R.Y | S132:        | 3 | 5,445  | 0,394 | -0,662 |
| 18 | Q5VYS8 ZCHC6_HUMAN | R.KDS#FQENEDGYR.W                 | S132:        | 2 | 4,3179 | 0,507 | -0,389 |
| 18 | P51858 HDGF_HUMAN  | K.KGNAEGS#S#DEEGKLVIDEPAK.E       | S132:S133:   | 3 | 4,8567 | 0,424 | -0,235 |
| 18 | P51858 HDGF_HUMAN  | K.GNAEGS#S#DEEGKLVIDEPAKEK.N      | S132:S133:   | 3 | 3,5692 | 0,324 | -0,669 |
| 18 | Q92545 TM131_HUMAN | K.DFDHHDSPAELVFTEQPPS#PLPK.S      | S1326:       | 3 | 3,8797 | 0,176 | -0,546 |
| 18 | Q9UGY1 NOL12_HUMAN | R.LLGLTPPEGGAGDRS#EEEASSTEKPTK.A  | S134:        | 3 | 2,6038 | 0,155 | -0,258 |
| 18 | Q96HP0 DOCK6_HUMAN | R.ERS#PFGNPENVR.W                 | S1343:       | 3 | 2,6849 | 0,329 | -0,185 |
| 18 | Q13428 TCOF_HUMAN  | R.KLS#GDQPAART#PR.S               | S1350:T1358: | 3 | 2,7636 | 0,206 | -0,117 |
| 18 | Q13459 MYO9B_HUMAN | R.RTS#FSTSDVSK.L                  | S1354:       | 2 | 3,2486 | 0,382 | -0,848 |
| 18 | Q8TB72 PUM2_HUMAN  | K.GKAS#PFEEQNR.D                  | S136:        | 3 | 3,9483 | 0,278 | -0,125 |
| 18 | Q8TB72 PUM2_HUMAN  | K.GKAS#PFEEQNR.D                  | S136:        | 2 | 3,4744 | 0,596 | -0,251 |
| 18 | Q5VUA4 ZN318_HUMAN | R.RS#PGLCSDSLEK.S                 | S136:        | 2 | 2,7016 | 0,2   | -0,427 |
| 18 | P52701 MSH6_HUMAN  | R.VHVQFFDSDS#PTR.G                | S137:        | 2 | 4,1537 | 0,575 | -0,479 |
| 18 | Q96HC4 PDLI5_HUMAN | K.APRPFGSVSS#PK.V                 | S137:        | 3 | 3,9108 | 0,323 | 0,279  |
| 18 | P52701 MSH6_HUMAN  | R.VHVQFFDSDS#PTR.G                | S137:        | 3 | 3,8356 | 0,29  | -0,359 |
| 18 | Q96HC4 PDLI5_HUMAN | K.APRPFGSVSS#PK.V                 | S137:        | 2 | 2,4708 | 0,233 | 0      |
| 18 | Q13428 TCOF_HUMAN  | K.KLGAGEGGEASVS#PEK.T             | S1378:       | 2 | 4,573  | 0,487 | -0,917 |
| 18 | Q13428 TCOF_HUMAN  | K.KLGAGEGGEASVS#PEK.T             | S1378:       | 3 | 3,8307 | 0,217 | -0,458 |
| 18 | Q69YN4 VIR_HUMAN   | R.VISHDRDS#PPPPPPPPPPQPQPSLK.R    | S138:        | 3 | 6,1776 | 0,186 | 0,321  |
| 18 | O94901 UN84A_HUMAN | R.RPPVLDES#WIR.E                  | S138:        | 3 | 2,7951 | 0,235 | 1,01   |
| 18 | Q8NC56 LEMD2_HUMAN | R.ASVRGS#S#EEDEDARTPDR.A          | S138:S139:   | 3 | 3,4284 | 0,407 | -0,514 |
| 18 | Q6F5E8 LR16C_HUMAN | R.LQRS#PVLK.R                     | S1381:       | 2 | 2,3971 | 0,082 | -0,239 |
| 18 | Q9C0C2 TB182_HUMAN | R.HNGSLS#PGLLEAR.D                | S1385:       | 2 | 2,9777 | 0,428 | 0,741  |
| 18 | Q9UQ35 SRRM2_HUMAN | R.SSGHSSSELS#PDAVEK.A             | S1387:       | 2 | 5,5371 | 0,433 | -0,719 |
| 18 | Q9UQ35 SRRM2_HUMAN | R.SSGHSSSELS#PDAVEK.A             | S1387:       | 3 | 3,52   | 0,199 | -0,431 |

|    |                    |                                |                    |   |        |       |        |
|----|--------------------|--------------------------------|--------------------|---|--------|-------|--------|
| 18 | Q9NVD7 PARVA_HUMAN | K.SPSVPKS#PTPKS#PPSR.K         | S14:S19:           | 3 | 2,8691 | 0,243 | -0,404 |
| 18 | P27708 PYR1_HUMAN  | R.RLS#SFVTK.G                  | S1406:             | 2 | 2,3949 | 0,317 | -0,24  |
| 18 | P18858 DNL1_HUMAN  | K.RTIQEVLEEQS#EDED.R           | S141:              | 3 | 5,5383 | 0,354 | 0,178  |
| 18 | Q8N9T8 KRI1_HUMAN  | K.YVDEENS#DGETSNHR.L           | S142:              | 2 | 4,0469 | 0,59  | -0,599 |
| 18 | O95602 RPA1_HUMAN  | K.EKQEEEVLDYES#EEEEER.E        | S1430:             | 3 | 5,5912 | 0,459 | -0,161 |
| 18 | Q9Y6J0 CABIN_HUMAN | R.GKNEES#LESTEGFR.A            | S1439:             | 3 | 2,9839 | 0,326 | -0,33  |
| 18 | O60269 GRIN2_HUMAN | R.KASLSCS#ALGSS#PVHR.A         | S144:S149:         | 3 | 4,5407 | 0,38  | -0,302 |
| 18 | P84077 ARF1_HUMAN  | K.LGLHS#LR.H                   | S147:              | 2 | 2,3967 | 0,092 | -0,07  |
| 18 | Q02952 AKA12_HUMAN | K.KGLSS#DLEGEK.T               | S1498:             | 2 | 3,2603 | 0,392 | -0,294 |
| 18 | Q9BSQ5 CCM2_HUMAN  | K.KPGIVS#PFK.R                 | S15:               | 2 | 2,3323 | 0,207 | 0,116  |
| 18 | Q14160 LAP4_HUMAN  | R.M*KS#LEQDALR.A               | S1508:             | 3 | 3,4449 | 0,16  | 0,355  |
| 18 | Q14160 LAP4_HUMAN  | R.M*KS#LEQDALR.A               | S1508:             | 2 | 2,6182 | 0,326 | -0,474 |
| 18 | Q8WWI1 LMO7_HUMAN  | R.RGES#LDNLDSPR.S              | S1510:             | 3 | 3,2682 | 0,315 | 0      |
| 18 | Q8WWI1 LMO7_HUMAN  | R.RGES#LDNLDSPR.S              | S1510:             | 2 | 2,455  | 0,369 | -0,763 |
| 18 | Q9Y6D5 BIG2_HUMAN  | K.HLDVDLDRQS#LSS#IDKNPS#ER.G   | S1511:S1514:S1520: | 3 | 3,5915 | 0,306 | -0,343 |
| 18 | Q9H501 ESF1_HUMAN  | K.FKIDSNIS#PK.K                | S153:              | 2 | 3,2064 | 0,3   | -0,199 |
| 18 | Q9H501 ESF1_HUMAN  | K.FKIDSNIS#PK.K                | S153:              | 3 | 3,1678 | 0,213 | 0,298  |
| 18 | Q9UQ35 SRRM2_HUMAN | R.SRSGSS#QELDVKPSAS#PQER.S     | S1542:S1552:       | 3 | 3,6378 | 0,373 | -0,397 |
| 18 | Q96125 SPF45_HUMAN | R.RPDPDS#DEDEDYER.E            | S155:              | 3 | 5,8592 | 0,45  | -0,403 |
| 18 | Q96125 SPF45_HUMAN | R.RPDPDS#DEDEDYER.E            | S155:              | 2 | 4,5527 | 0,427 | -0,94  |
| 18 | Q8WUI4 HDAC7_HUMAN | R.KTVS#EPNLK.L                 | S155:              | 2 | 2,3618 | 0,3   | -0,445 |
| 18 | Q02880 TOP2B_HUMAN | R.KAS#GSENEGDYNPGR.K           | S1550:             | 2 | 4,4348 | 0,528 | -0,367 |
| 18 | O95684 FR1OP_HUMAN | K.GPTTGEGALDLSDVHS#PPKSPEGK.T  | S156:              | 3 | 4,8862 | 0,41  | -0,596 |
| 18 | P35251 RFC1_HUMAN  | K.NKPLS#PIK.L                  | S156:              | 2 | 2,1445 | 0,171 | -0,25  |
| 18 | Q92733 PRCC_HUMAN  | K.IAAPELHKGDS#DS#EEDEPTK.K     | S157:S159:         | 3 | 3,6908 | 0,382 | 0,472  |
| 18 | P42166 LAP2A_HUMAN | K.LREQGTESRSS#T#PLPTISSAENTR.Q | S159:T160:         | 3 | 3,0325 | 1     | -0,319 |
| 18 | Q9P0K8 FOXJ2_HUMAN | R.HPPDDDL#QDSPEQEASKS#PR.G     | S161:S172:         | 3 | 3,8754 | 0,462 | 0,22   |
| 18 | O60841 IF2P_HUMAN  | K.WDGS#EEDEDNSKK.I             | S164:              | 2 | 4,0011 | 0,5   | -0,528 |
| 18 | Q9P0K8 FOXJ2_HUMAN | R.HPPDDDL#QDSPEQEASKS#PR.G     | S164:S172:         | 3 | 4,1413 | 0,471 | -0,513 |
| 18 | P51858 HDGF_HUMAN  | R.RAGDLLEDS#PK.R               | S165:              | 2 | 3,1391 | 0,253 | -0,095 |
| 18 | O43399 TPD54_HUMAN | R.NSATFKS#FEDR.V               | S166:              | 2 | 3,2035 | 0,417 | -0,795 |
| 18 | O43399 TPD54_HUMAN | R.NSATFKS#FEDR.V               | S166:              | 3 | 3,027  | 0,369 | -1,323 |
| 18 | O95482 UB6L1_HUMAN | R.LRLPQIGS#K.N                 | S166:              | 2 | 2,3234 | 0,247 | -0,112 |

|    |                     |                                 |              |   |        |       |        |
|----|---------------------|---------------------------------|--------------|---|--------|-------|--------|
| 18 | Q9C0D5 TANC1_HUMAN  | R.HPASLTSSGS#SGSPSSSIK.M        | S1665:       | 2 | 3,6033 | 1     | -0,329 |
| 18 | Q9C0C2 TB182_HUMAN  | R.NRS#AEEGELAESK.S              | S1666:       | 3 | 4,6889 | 0,312 | -0,61  |
| 18 | Q6NZI2 PTRF_HUMAN   | K.VM*IYQDEVKLPKLS#ISK.S         | S167:        | 3 | 3,3093 | 0,322 | -0,509 |
| 18 | P29966 MARCS_HUMAN  | K.SFKLS#GFS#FKK.N               | S167:S170:   | 2 | 2,3969 | 0,202 | -0,595 |
| 18 | Q12888 TP53B_HUMAN  | K.LITS#EERS#PAKR.G              | S1673:S1678: | 3 | 3,3054 | 0,329 | 0,218  |
| 18 | Q5UIP0 RIF1_HUMAN   | K.RDS#FDNCSLGESSK.I             | S1688:       | 2 | 4,3225 | 0,551 | 0,218  |
| 18 | Q96I25 SPF45_HUMAN  | R.S#M*GGAAIAPPTSLVEKDKEKELPR.D  | S169:        | 3 | 3,6525 | 0,284 | 0,697  |
| 18 | Q8IUD2 RB6I2_HUMAN  | R.SVGKVEPSSQS#PGR.S             | S17:         | 3 | 2,7847 | 0,187 | 0,061  |
| 18 | P53621 COPA_HUMAN   | K.KNLS#PGAVESDVR.G              | S173:        | 3 | 2,6615 | 0,194 | 0,063  |
| 18 | P53621 COPA_HUMAN   | K.KNLS#PGAVESDVR.G              | S173:        | 2 | 2,3548 | 0,222 | -0,504 |
| 18 | P16383 GCF_HUMAN    | K.RES#EDDPES#EPDDHEK.R          | S174:S180:   | 3 | 3,4127 | 0,334 | -0,353 |
| 18 | Q9NYF8 BCLF1_HUMAN  | K.KAEGEPQEES#PLK.S              | S177:        | 2 | 4,1263 | 0,421 | -1,042 |
| 18 | Q9HB21 PKHA1_HUMAN  | R.SQS#HLPYFTKPPQDSAVIK.A        | S177:        | 3 | 4,0595 | 0,323 | -0,631 |
| 18 | Q58FF8 H90B2_HUMAN  | K.IEDVGS#DEEDDSGKDK.K           | S177:        | 3 | 3,0988 | 0,325 | -0,302 |
| 18 | Q9NYF8 BCLF1_HUMAN  | K.KAEGEPQEES#PLK.S              | S177:        | 3 | 3,0657 | 0,208 | -0,481 |
| 18 | Q58FF8 H90B2_HUMAN  | K.IEDVGS#DEEDDS#GKDKK.K         | S177:S183:   | 3 | 4,4621 | 0,424 | -0,271 |
| 18 | Q8N519 CL045_HUMAN  | K.GKIEVLDS#PASK.K               | S178:        | 2 | 4,0977 | 0,515 | -0,369 |
| 18 | Q8N519 CL045_HUMAN  | K.GKIEVLDS#PASK.K               | S178:        | 3 | 3,2797 | 0,204 | 0,345  |
| 18 | Q14676 MDC1_HUMAN   | R.S#RFTPELQPK.A                 | S1797:       | 2 | 2,2263 | 0,307 | 0      |
| 18 | A8MQ02 A8MQ02_HUMAN | R.QRLFS#QGQDVSNK.V              | S1799:       | 3 | 3,0817 | 0,372 | 0,115  |
| 18 | P51636 CAV2_HUMAN   | K.ADVQLFM*DDDS#YSHHSGLEYADPEK.F | S18:         | 3 | 5,1773 | 0,537 | 0,679  |
| 18 | Q8N3X1 FNBP4_HUMAN  | R.RPILQLS#PPGPR.G               | S18:         | 3 | 3,1891 | 0,23  | -0,518 |
| 18 | O60336 MABP1_HUMAN  | K.NLLRS#PSIK.L                  | S18:         | 2 | 2,5862 | 0,275 | -0,33  |
| 18 | Q8N3X1 FNBP4_HUMAN  | R.RPILQLS#PPGPR.G               | S18:         | 2 | 2,0327 | 0,411 | -0,519 |
| 18 | Q00537 PCTK2_HUMAN  | R.RAS#LSEIGFGK.M                | S180:        | 2 | 3,4171 | 0,588 | 0      |
| 18 | POC1Z6 TFPT_HUMAN   | R.RTPAPPEPGS#PAPGEGPSGR.K       | S180:        | 3 | 2,976  | 0,139 | -0,459 |
| 18 | Q9NYF8 BCLF1_HUMAN  | K.S#QEEPKDTFEHDPSESIDEFNK.S     | S183:        | 3 | 2,982  | 0,239 | -0,068 |
| 18 | Q8TEM1 PO210_HUMAN  | R.AS#PGHSPHYFAASSPTSPNALPPAR.K  | S1848:       | 3 | 3,0404 | 0,192 | 0      |
| 18 | Q9Y2F5 K0947_HUMAN  | R.LRLDTGS#PEPETR.G              | S1854:       | 3 | 2,7154 | 0,202 | -0,59  |
| 18 | Q15785 TOM34_HUMAN  | K.NRVPS#AGDVEK.A                | S186:        | 2 | 2,8161 | 0,355 | -0,487 |
| 18 | Q9Y388 RBMX2_HUMAN  | K.ADREVQAEQPSSSS#PR.R           | S188:        | 3 | 3,823  | 0,167 | -0,201 |
| 18 | Q9Y388 RBMX2_HUMAN  | K.ADREVQAEQPSSSS#PR.R           | S188:        | 2 | 2,9215 | 0,403 | -0,535 |
| 18 | P43243 MATR3_HUMAN  | R.DS#FDDRGPSSLNPVLDYDHGSR.S     | S188:        | 3 | 2,6408 | 0,207 | -0,45  |

|    |                    |                                 |                 |   |        |       |        |
|----|--------------------|---------------------------------|-----------------|---|--------|-------|--------|
| 18 | Q16659 MK06_HUMAN  | K.GHLS#EGLVTK.W                 | S189:           | 2 | 3,6637 | 0,536 | 0      |
| 18 | Q9BVC5 ASHWN_HUMAN | R.KSPSGPVKS#PPLS#PVGTTPVK.L     | S189:S193:      | 3 | 6,0351 | 1     | -0,165 |
| 18 | Q9BVC5 ASHWN_HUMAN | R.KSPSGPVKS#PPLS#PVGTT#PVKLK.R  | S189:S193:T198: | 3 | 4,4661 | 1     | 0,144  |
| 18 | Q9H1E3 NUCKS_HUMAN | R.KVVDYSQFQES#DDADEDYGR.D       | S19:            | 3 | 6,0585 | 0,513 | 0,299  |
| 18 | Q9UNF1 MAGD2_HUMAN | K.HLDGEEDGSS#DQSQASGTTGGR.R     | S191:           | 3 | 5,5455 | 0,538 | -0,322 |
| 18 | Q96C19 EFHD2_HUMAN | K.GAKS#FFEAK.V                  | S192:           | 2 | 2,8149 | 0,234 | 0      |
| 18 | P35579 MYH9_HUMAN  | R.KGAGDGS#DEEVDGK.A             | S1943:          | 2 | 4,5398 | 0,461 | -0,338 |
| 18 | P35580 MYH10_HUMAN | R.QLHLEGASLELS#DDDDTESK.T       | S1956:          | 3 | 4,548  | 0,436 | 0,507  |
| 18 | Q5VZL5 ZMYM4_HUMAN | R.LKSS#FFDK.A                   | S197:           | 2 | 2,3442 | 0,185 | -0,116 |
| 18 | Q9BZL6 KPCD2_HUMAN | R.RLS#STSLASGHS#VR.L            | S197:S206:      | 3 | 4,3904 | 0,42  | 0      |
| 18 | Q08752 PPID_HUMAN  | K.DGS#GDSHPDFPEDADIDLKDVVK.I    | S198:           | 3 | 5,9087 | 0,552 | -0,499 |
| 18 | Q5T200 ZC3HD_HUMAN | K.KEVS#PEVVR.S                  | S198:           | 2 | 3,4157 | 0,277 | -0,109 |
| 18 | Q32P44 EMAL3_HUMAN | R.GGKDPLSS#PGGPGSR.R            | S198:           | 2 | 3,2721 | 0,381 | -0,674 |
| 18 | Q92785 REQU_HUMAN  | K.KLDAS#ILED.R.D                | S200:           | 2 | 4,3687 | 0,476 | -0,197 |
| 18 | P30622 CLIP1_HUMAN | K.TASESISNLS#EAGS#IKKGER.E      | S200:S204:      | 3 | 3,3062 | 0,342 | -0,165 |
| 18 | Q15003 CND2_HUMAN  | K.DAPSLEEVEGHVADGS#ATEM*GTTKK.A | S201:           | 3 | 3,8504 | 0,284 | -0,482 |
| 18 | Q8NEF9 SRFB1_HUMAN | K.AVTIANS#PSKPSEKDSVVSLESQK.T   | S203:           | 3 | 4,4208 | 0,437 | -0,213 |
| 18 | O95049 ZO3_HUMAN   | R.RDS#EEFGVK.L                  | S203:           | 2 | 3,0429 | 0,416 | -0,745 |
| 18 | Q01130 SFRS2_HUMAN | K.SRS#RS#KS#PPKSPEEEGAVSS.-     | S204:S206:S208: | 3 | 2,8872 | 0,124 | -0,312 |
| 18 | Q7Z589 EMSY_HUMAN  | R.RTNS#SSSSPVVLK.E              | S209:           | 2 | 2,6812 | 0,231 | -0,338 |
| 18 | P60174 TPIS_HUMAN  | R.KQS#LGELIGTLNAAK.V            | S21:            | 2 | 4,1746 | 0,518 | -0,601 |
| 18 | P60174 TPIS_HUMAN  | R.KQS#LGELIGTLNAAK.V            | S21:            | 3 | 3,6575 | 0,353 | -0,225 |
| 18 | P14866 HNRPL_HUMAN | R.YYGGGS#EGGRAPK.R              | S21:            | 2 | 2,4025 | 0,241 | -0,354 |
| 18 | Q9UQ35 SRRM2_HUMAN | R.NHS#GSRT#PPVALNSSR.M          | S2100:T2104:    | 3 | 2,8412 | 0,273 | -0,398 |
| 18 | Q01082 SPTB2_HUMAN | R.RPPS#PEPSTK.V                 | S2102:          | 2 | 2,9241 | 0,394 | -0,208 |
| 18 | Q96T58 MINT_HUMAN  | R.ESGVVAVSPEKS#ESPQKEDGLSSQLK.S | S2124:          | 3 | 3,1687 | 0,408 | -0,262 |
| 18 | Q9UQ35 SRRM2_HUMAN | R.CRS#PGM*LEPLGSSR.T            | S2132:          | 3 | 3,5397 | 0,115 | 0      |
| 18 | O60841 IF2P_HUMAN  | K.NKPGPNIES#GNEDDDASFK.I        | S214:           | 3 | 3,8875 | 0,405 | -0,433 |
| 18 | O60841 IF2P_HUMAN  | K.NKPGPNIES#GNEDDDASFK.I        | S214:           | 2 | 3,1976 | 0,513 | -0,346 |
| 18 | Q9H6K1 CF106_HUMAN | R.KVEGNFNPFAS#PQK.N             | S215:           | 2 | 4,3915 | 0,448 | -0,52  |
| 18 | Q9H6K1 CF106_HUMAN | R.KVEGNFNPFAS#PQK.N             | S215:           | 3 | 2,809  | 0,101 | 0      |
| 18 | Q9P2B7 K1430_HUMAN | K.HVSGITLLS#PK.H                | S218:           | 2 | 3,4275 | 0,528 | -0,099 |
| 18 | P49116 NR2C2_HUMAN | K.DLRS#PLIATPTFVADKDGAR.Q       | S219:           | 3 | 3,9785 | 0,401 | -0,411 |

|    |                     |                                      |                 |   |        |       |        |
|----|---------------------|--------------------------------------|-----------------|---|--------|-------|--------|
| 18 | Q9UBN7 HDAC6_HUMAN  | R.SRQNPQS#PPQDSSVTSK.R               | S22:            | 3 | 3,6194 | 0,355 | -0,666 |
| 18 | Q86V48 LUZP1_HUMAN  | R.FKLQS#LSR.R                        | S22:            | 2 | 2,5967 | 0,102 | -0,346 |
| 18 | Q7Z5K2 WAPL_HUMAN   | K.RPES#PS#EISPIKGSVR.T               | S221:S223:      | 2 | 2,8853 | 0,331 | -0,643 |
| 18 | Q7Z5K2 WAPL_HUMAN   | K.RPES#PSEIS#PIKGSVR.T               | S221:S226:      | 3 | 3,2695 | 0,416 | -0,193 |
| 18 | P49792 RBP2_HUMAN   | R.EDALDDSVSSSSVHASPLASS#PVRK.N       | S2251:          | 3 | 4,1139 | 0,325 | 0,349  |
| 18 | Q9NY27 PP4R2_HUMAN  | K.NHSDSSTSESEVSSVS#PLK.N             | S226:           | 3 | 4,6759 | 0,377 | -0,267 |
| 18 | P08238 HS90B_HUMAN  | R.EKEIS#DDEAEEEEK.G                  | S226:           | 2 | 4,5807 | 0,536 | -0,374 |
| 18 | Q9Y6D5 BIG2_HUMAN   | R.ELEKPIQSKPQSPVIAAAVS#PK.F          | S227:           | 3 | 5,0727 | 0,346 | -0,145 |
| 18 | Q9BW71 HIRP3_HUMAN  | K.SLKESEQES#EEEILAQK.K               | S227:           | 3 | 2,8408 | 0,233 | -0,267 |
| 18 | Q8NE71 ABCF1_HUMAN  | K.KAEQGS#EEEEGEGEEEEEGGESK.A         | S228:           | 3 | 2,9727 | 0,255 | -0,643 |
| 18 | P13051 UNG_HUMAN    | R.HAPS#PEPAVQGTGVAGVPEESGDAAAIPAKK.A | S23:            | 3 | 3,0677 | 0,378 | -0,364 |
| 18 | O60716 CTND1_HUMAN  | R.HYEDGYPGSDNYGS#LSR.V               | S230:           | 3 | 5,0707 | 0,428 | 0,267  |
| 18 | P07910 HNRPC_HUMAN  | K.NDKS#EEEQSSSSVK.K                  | S233:           | 2 | 2,5145 | 0,141 | -0,448 |
| 18 | P62753 RS6_HUMAN    | R.RLS#S#LRAS#TSKSESSQK.-             | S235:S236:S240: | 3 | 3,496  | 0,46  | -1,049 |
| 18 | P62753 RS6_HUMAN    | R.RLS#S#LRASTS#KSESSQK.-             | S235:S236:S242: | 3 | 3,8006 | 1     | -0,437 |
| 18 | Q13136 LIPA1_HUMAN  | K.RSS#DGS#LSHEEDLAK.V                | S239:S242:      | 2 | 4,5307 | 0,447 | -0,681 |
| 18 | Q13136 LIPA1_HUMAN  | K.RSS#DGSLS#HEEDLAK.V                | S239:S244:      | 2 | 2,9201 | 0,323 | 0,477  |
| 18 | Q9UQ35 SRRM2_HUMAN  | R.VSGRTS#PPLDR.A                     | S2398:          | 3 | 2,8305 | 0,421 | 0,133  |
| 18 | Q9BZL6 KPCD2_HUMAN  | R.RPPSSSSSS#S#ASSYTGRPIELDK.M        | S241:S242:      | 3 | 3,6757 | 1     | -0,358 |
| 18 | Q5T200 ZC3HD_HUMAN  | R.KTSAVSS#PLLDQQR.N                  | S242:           | 2 | 3,8674 | 0,47  | -0,682 |
| 18 | Q5T200 ZC3HD_HUMAN  | R.KTSAVSS#PLLDQQR.N                  | S242:           | 3 | 3,1514 | 0,111 | -0,114 |
| 18 | Q9UDY2 ZO2_HUMAN    | R.GRS#IDQDYER.A                      | S244:           | 2 | 3,1224 | 0,218 | -0,648 |
| 18 | P16949 STMN1_HUMAN  | K.RASGQAFELILS#PR.S                  | S25:            | 3 | 3,601  | 0,235 | -0,113 |
| 18 | P16949 STMN1_HUMAN  | K.RASGQAFELILS#PR.S                  | S25:            | 2 | 2,0764 | 0,119 | -0,375 |
| 18 | P10398 ARAF_HUMAN   | R.GGS#DGTGPRGS#PSPASVSSGRK.S         | S250:S257:      | 3 | 3,1228 | 0,261 | -0,435 |
| 18 | Q13263 TIF1B_HUMAN  | R.KLLAS#LVK.R                        | S258:           | 2 | 3,2771 | 0,142 | 0,064  |
| 18 | Q4G0J3 LARP7_HUMAN  | R.SRPTS#EGS#DIESTEPQKQCSK.K          | S258:S261:      | 3 | 3,1258 | 0,329 | -0,583 |
| 18 | Q9UQ35 SRRM2_HUMAN  | K.RVPS#PTPAPK.E                      | S2581:          | 2 | 2,1732 | 0,164 | -0,324 |
| 18 | Q92466 DDB2_HUMAN   | R.SRS#PLELEPEAK.K                    | S26:            | 3 | 3,1532 | 0,178 | 0      |
| 18 | Q4G0J3 LARP7_HUMAN  | R.SRPTSEGS#DIESTEPQK.Q               | S261:           | 3 | 3,8339 | 0,203 | -0,569 |
| 18 | P42167 LAP2B_HUMAN  | R.VETS#EHFR.I                        | S265:           | 2 | 2,0369 | 0,24  | -0,112 |
| 18 | A9CQZ4 A9CQZ4_HUMAN | K.NLGSGS#PKPR.Q                      | S27:            | 2 | 2,9926 | 0,294 | -0,223 |
| 18 | Q9BRD0 BUD13_HUMAN  | R.ARHDS#PDLAPNVYTS#LPR.T             | S271:S281:      | 3 | 4,0606 | 0,301 | -0,337 |



|    |                     |                                    |              |   |        |       |        |
|----|---------------------|------------------------------------|--------------|---|--------|-------|--------|
| 18 | Q13501 SQSTM_HUMAN  | R.SRLTPVS#PESSSTEEK.S              | S272:        | 2 | 3,4776 | 0,409 | -0,336 |
| 18 | Q6ZRS2 SRCAP_HUMAN  | R.RTS#ADVEIR.G                     | S2725:       | 2 | 2,968  | 0,157 | -0,325 |
| 18 | Q9NYF3 FA53C_HUMAN  | R.SRS#QPCDLAR.K                    | S273:        | 2 | 2,8487 | 0,365 | -0,617 |
| 18 | Q8IXT5 RB12B_HUMAN  | R.S#RS#PLGFYVHLK.N                 | S278:S280:   | 3 | 2,6456 | 0,153 | -0,234 |
| 18 | Q9Y2K7 JHD1A_HUMAN  | R.RYEDDGIS#DDEIEGK.R               | S28:         | 2 | 4,1745 | 0,579 | 0,335  |
| 18 | Q9HCG8 NCM_HUMAN    | R.NSS#PEDRYEEQERS#PR.D             | S28:S39:     | 3 | 2,8788 | 0,382 | -0,855 |
| 18 | P27816 MAP4_HUMAN   | K.TEVALAKDM*ES#PTKLDVTLAK.D        | S280:        | 3 | 4,92   | 0,507 | -0,078 |
| 18 | Q9UJU6 DBNL_HUMAN   | K.LRS#PFLQK.Q                      | S283:        | 2 | 3,0174 | 0,211 | -1,027 |
| 18 | A8K1N6 A8K1N6_HUMAN | K.KGSLLPTS#PR.L                    | S284:        | 2 | 2,5897 | 0,245 | -0,322 |
| 18 | Q9Y624 JAM1_HUMAN   | K.KVIYSQPS#ARS#EGEFK.Q             | S284:S287:   | 2 | 2,4879 | 0,247 | -0,553 |
| 18 | Q641Q2 FA21A_HUMAN  | K.RS#RPT#SFADELAAR.I               | S284:T287:   | 2 | 2,3346 | 0,356 | -0,351 |
| 18 | B2RDU1 B2RDU1_HUMAN | R.DTSS#DKDLDDALDKLSDSLGQR.Q        | S285:        | 3 | 3,6689 | 0,267 | -0,444 |
| 18 | Q9NYF8 BCLF1_HUMAN  | R.YS#PSQNS#PIHHIPSR.R              | S285:S290:   | 2 | 2,5116 | 0,39  | -0,325 |
| 18 | O75410 TACC1_HUMAN  | R.FQKS#PPDLK.E                     | S287:        | 2 | 2,6358 | 0,245 | -0,107 |
| 18 | O43166 SI1L1_HUMAN  | R.SKS#ETGDSSIFR.K                  | S288:        | 2 | 3,9257 | 0,486 | -0,35  |
| 18 | P55040 GEM_HUMAN    | K.SKS#CHDLSVL.-                    | S289:        | 2 | 2,6794 | 0,394 | -0,1   |
| 18 | A1X283 SPD2B_HUMAN  | K.NSGEPLPPKPGPGS#PSHPGALDLDGVS.R.Q | S291:        | 3 | 4,6767 | 0,436 | -0,26  |
| 18 | Q96EQ0 SGTB_HUMAN   | R.SRS#FSSSAEEHS.-                  | S295:        | 2 | 3,1044 | 0,279 | -0,526 |
| 18 | P36578 RL4_HUMAN    | R.ILKS#PEIQR.A                     | S295:        | 2 | 2,437  | 0,105 | -0,734 |
| 18 | Q9C0B5 ZDH5_HUMAN   | K.S#KGSLEITESQSADAEP PPPPKPDL.SR.Y | S296:        | 3 | 3,1749 | 0,307 | 0,691  |
| 18 | Q96EQ0 SGTB_HUMAN   | R.SRSFS#SSAAEEHS.-                 | S297:        | 3 | 2,7029 | 0,19  | -0,066 |
| 18 | Q9Y2V2 CHSP1_HUMAN  | R.ERS#PS#PLRGNVPS#PLPTRR.T         | S30:S32:S41: | 3 | 3,1263 | 0,422 | -0,224 |
| 18 | P35659 DEK_HUMAN    | K.KES#ESED\$#SDDEPLIKK.L           | S301:S306:   | 3 | 3,3468 | 0,135 | -0,611 |
| 18 | Q8NFC6 FA44A_HUMAN  | K.TQLS#PSIKR.K                     | S3019:       | 2 | 2,2365 | 0,319 | 0,11   |
| 18 | Q00613 HSF1_HUMAN   | R.VKKEPPS#PPQSPR.V                 | S303:        | 2 | 3,0302 | 0,282 | -0,479 |
| 18 | Q6ICG6 CV009_HUMAN  | R.NNRPAFFS#PSLK.R                  | S304:        | 3 | 4,2951 | 0,402 | -0,063 |
| 18 | Q6ICG6 CV009_HUMAN  | R.NNRPAFFS#PSLK.R                  | S304:        | 2 | 2,616  | 0,137 | -0,167 |
| 18 | Q7Z7G8 VP13B_HUMAN  | K.LVHNLTS#PK.W                     | S3052:       | 2 | 2,4557 | 0,383 | -0,448 |
| 18 | P35659 DEK_HUMAN    | K.KESEEDS#SDDEPLIK.K               | S306:        | 2 | 4,6215 | 0,492 | -0,323 |
| 18 | Q6ICG6 CV009_HUMAN  | R.NNRPAFFS#LK.R                    | S306:        | 3 | 2,9039 | 0,371 | -0,063 |
| 18 | Q9NXR1 NDE1_HUMAN   | R.RPS#STSVPLGDK.G                  | S306:        | 2 | 2,7803 | 0,471 | -0,829 |
| 18 | Q6ICG6 CV009_HUMAN  | R.NNRPAFFS#LK.R                    | S306:        | 2 | 2,1925 | 0,18  | -0,418 |
| 18 | Q01518 CAP1_HUMAN   | R.SGPKPFSAPKPQTS#PS#PK.R           | S308:S310:   | 2 | 4,0023 | 0,427 | 0,122  |

|    |                     |                                  |            |   |        |       |        |
|----|---------------------|----------------------------------|------------|---|--------|-------|--------|
| 18 | P35251 RFC1_HUMAN   | K.SSADKIGEVS#PK.A                | S312:      | 2 | 3,6775 | 0,409 | -0,352 |
| 18 | Q7Z6Z7 HUWE1_HUMAN  | R.SPAFTSRLS#GNR.G                | S3135:     | 3 | 2,7182 | 0,339 | 0,2    |
| 18 | B1ALC7 B1ALC7_HUMAN | K.AGTPIRDSHS#PDLQLPTPEVIPSSGSK.L | S317:      | 3 | 3,4078 | 0,215 | 0,383  |
| 18 | Q2TB10 ZN800_HUMAN  | R.RDS#ITPDIATKPGQPLFLDSISPK.K    | S317:      | 3 | 3,0512 | 0,484 | -0,547 |
| 18 | Q6VY07 PACS1_HUMAN  | R.KLTS#TSAITR.Q                  | S320:      | 2 | 3,0714 | 0,132 | -0,105 |
| 18 | Q6PJT7 ZC3HE_HUMAN  | K.FNHDGEEEEEDDDYGS#R.T           | S323:      | 3 | 3,8246 | 0,372 | -0,517 |
| 18 | Q9BRD0 BUD13_HUMAN  | K.NSKYEYDPDIS#PPR.K              | S325:      | 2 | 4,0297 | 0,528 | -0,139 |
| 18 | Q9BRD0 BUD13_HUMAN  | K.NSKYEYDPDIS#PPR.K              | S325:      | 3 | 2,7857 | 0,353 | 0,208  |
| 18 | Q9UKV3 ACINU_HUMAN  | K.TRS#QEQEVLER.G                 | S328:      | 2 | 2,7406 | 0,342 | -0,168 |
| 18 | Q92922 SMRC1_HUMAN  | R.KHS#PS#PPPPTPTESR.K            | S328:S330: | 3 | 4,4878 | 0,353 | -0,206 |
| 18 | Q92922 SMRC1_HUMAN  | R.KHS#PS#PPPPTPTESR.K            | S328:S330: | 2 | 2,8875 | 0,525 | -0,55  |
| 18 | Q15459 SF3A1_HUMAN  | K.FGESEEVEM*EVES#DEEDDKQEK.A     | S329:      | 3 | 5,5381 | 0,494 | -0,337 |
| 18 | O15075 DCLK1_HUMAN  | R.SGKS#PSPSPTS#PGSLRK.Q          | S330:S337: | 3 | 2,9849 | 0,15  | -0,4   |
| 18 | Q9UGV2 NDRG3_HUMAN  | R.THS#TSSSLGSGESPF SR.S          | S331:      | 3 | 2,738  | 0,205 | -0,101 |
| 18 | O15075 DCLK1_HUMAN  | R.SGKS#PSPSPTS#PGSLRK.Q          | S332:S337: | 3 | 3,3235 | 0,284 | -0,3   |
| 18 | Q9H1B7 EAP1_HUMAN   | K.RPGS#VSTSDQER.E                | S334:      | 2 | 2,0569 | 0,166 | -0,523 |
| 18 | Q6AI08 HEAT6_HUMAN  | K.KIQQGEEEKES#S#GEIEAAPVTGTGR.V  | S336:S337: | 3 | 3,6246 | 0,405 | -0,439 |
| 18 | Q4G0J3 LARP7_HUMAN  | R.DIEIS#TEEEKDTGDLKDSLLK.T       | S337:      | 3 | 3,5716 | 0,274 | 0,144  |
| 18 | Q9NQV6 PRD10_HUMAN  | R.LEITSENGES#DDGTQDLLHFPTK.E     | S338:      | 3 | 5,3449 | 0,429 | -0,731 |
| 18 | Q9UGV2 NDRG3_HUMAN  | R.THSTSSSLGS#GESPF SR.S          | S338:      | 2 | 4,2103 | 0,558 | -0,203 |
| 18 | P49589 SYCC_HUMAN   | R.LHLYNS#LTR.N                   | S34:       | 2 | 2,2135 | 0,23  | -0,714 |
| 18 | Q96G23 LASS2_HUMAN  | K.LVEDERS#DR.E                   | S341:      | 2 | 2,2623 | 0,248 | -0,509 |
| 18 | Q96S94 CCNL2_HUMAN  | K.GSKPS#PLSVK.N                  | S348:      | 2 | 2,1069 | 0,281 | -0,339 |
| 18 | Q8IZQ1 WDFY3_HUMAN  | R.LKISS#PVR.V                    | S3501:     | 2 | 2,5628 | 0,201 | 0      |
| 18 | Q9UK58 CCNL1_HUMAN  | K.AEEKS#PISINVK.T                | S352:      | 3 | 2,8452 | 0,278 | 0,131  |
| 18 | Q9UK58 CCNL1_HUMAN  | R.EVKAEES#PIS#INVK.T             | S352:S355: | 3 | 2,9963 | 0,174 | 0,1    |
| 18 | Q9UK58 CCNL1_HUMAN  | R.EVKAEES#PIS#INVK.T             | S352:S355: | 2 | 2,8458 | 0,413 | 0,4    |
| 18 | P46013 KI67_HUMAN   | K.M*KTPVQYSQQQNS#PQK.H           | S357:      | 2 | 4,1367 | 0,497 | -0,184 |
| 18 | P46013 KI67_HUMAN   | K.M*KTPVQYSQQQNS#PQK.H           | S357:      | 3 | 3,6032 | 0,356 | -0,552 |
| 18 | P26045 PTN3_HUMAN   | R.RS#LS#VEHLETK.S                | S357:S359: | 2 | 2,8185 | 0,522 | -0,502 |
| 18 | P35611 ADDA_HUMAN   | K.SRSPGS#PVGEGTGSPPK.W           | S358:      | 2 | 3,9344 | 0,424 | -0,073 |
| 18 | Q9P1Y5 K1543_HUMAN  | R.HPLLSS#GGPQSPLR.G              | S363:      | 2 | 3,2877 | 0,503 | -0,32  |
| 18 | Q00613 HSF1_HUMAN   | R.GHTDTEGRPPS#PPPTST#PEK.C       | S363:T369: | 3 | 3,4784 | 0,146 | -0,57  |

|    |                    |                                 |            |   |        |       |        |
|----|--------------------|---------------------------------|------------|---|--------|-------|--------|
| 18 | Q6P0N0 CN106_HUMAN | R.NISKLS#PPR.I                  | S365:      | 2 | 2,7294 | 0,437 | 0      |
| 18 | P20749 BCL3_HUMAN  | K.ATRPASTSQPDPS#PDR.S           | S366:      | 3 | 2,6671 | 0,096 | -0,311 |
| 18 | Q9NYB9 ABI2_HUMAN  | R.HTPPTIGGS#LPYR.R              | S368:      | 3 | 4,4633 | 0,379 | 0,248  |
| 18 | Q9P1Y5 K1543_HUMAN | R.HPLLSSGGPQS#PLR.G             | S368:      | 3 | 3,9958 | 0,38  | 0,12   |
| 18 | O95714 HERC2_HUMAN | K.DAPHSEGDM*HLLSGPLS#PNESFLR.Y  | S368:      | 3 | 3,9672 | 0,201 | -0,271 |
| 18 | Q9NYB9 ABI2_HUMAN  | R.HTPPTIGGS#LPYR.R              | S368:      | 2 | 2,5056 | 0,288 | 0,248  |
| 18 | Q8WU90 ZC3HF_HUMAN | R.FSTYTSDKDENKLS#EAS#GGR.A      | S368:S371: | 3 | 3,9253 | 0,373 | 0,467  |
| 18 | Q2PPJ7 AS250_HUMAN | R.RLS#NSS#LCSIEEHR.M            | S373:S376: | 3 | 3,2275 | 0,404 | 0      |
| 18 | Q9H1A4 APC1_HUMAN  | R.FNISSHNQS#PK.R                | S377:      | 2 | 3,6501 | 0,463 | -0,82  |
| 18 | Q76FK4 NOL8_HUMAN  | R.NDREYDS#GDT#DEIIAM*KK.N       | S378:T381: | 3 | 3,2594 | 0,46  | -0,482 |
| 18 | Q9Y2W1 TR150_HUMAN | K.EKGSFS#DTGLGDGK.M             | S379:      | 2 | 3,0694 | 0,52  | 0,083  |
| 18 | P16949 STMN1_HUMAN | R.SKESVPEFPLS#PPK.K             | S38:       | 3 | 4,1709 | 0,413 | 0      |
| 18 | P16949 STMN1_HUMAN | R.SKESVPEFPLS#PPK.K             | S38:       | 2 | 2,7604 | 0,479 | 0,301  |
| 18 | P48634 BAT2_HUMAN  | K.KGNS#PNSEPPTPK.T              | S380:      | 2 | 2,9612 | 0,339 | -0,085 |
| 18 | O75717 WDHD1_HUMAN | R.SHILEDDENS#VDISM*LK.T         | S383:      | 3 | 4,0184 | 0,261 | -0,448 |
| 18 | O75717 WDHD1_HUMAN | R.SHILEDDENS#VDISM*LK.T         | S383:      | 2 | 3,996  | 0,473 | -0,658 |
| 18 | Q8IU81 I2BP1_HUMAN | R.KAS#PEPEGEAAGK.M              | S384:      | 2 | 4,0214 | 0,378 | -0,271 |
| 18 | Q9NP74 PALMD_HUMAN | K.SEHQNS#SPTCQEEDVDR.Y          | S384:      | 3 | 2,6749 | 0,157 | -0,329 |
| 18 | Q9UKV3 ACINU_HUMAN | K.S#KSPS#PPRLTEDR.K             | S384:S388: | 2 | 2,4257 | 0,286 | -0,225 |
| 18 | Q9UKV3 ACINU_HUMAN | K.S#KSPSPRLT#EDR.K              | S384:T393: | 2 | 2,1838 | 0,164 | -0,674 |
| 18 | Q01813 K6PP_HUMAN  | R.GRS#FAGNLNTYK.R               | S386:      | 3 | 4,6072 | 0,281 | -0,26  |
| 18 | Q01813 K6PP_HUMAN  | R.GRS#FAGNLNTYK.R               | S386:      | 2 | 4,3919 | 0,516 | -0,173 |
| 18 | Q9H0E9 BRD8_HUMAN  | R.SGVAEAPVGSKAPS#IDGKEELDLAEK.M | S387:      | 3 | 4,396  | 0,104 | -0,137 |
| 18 | Q7Z422 CA144_HUMAN | K.SKS#PPKVPIVQDDSLPAGPPPQIR.I   | S39:       | 3 | 5,6199 | 0,43  | -0,606 |
| 18 | P02545 LMNA_HUMAN  | R.LRLS#PSPTSQR.S                | S390:      | 2 | 2,0677 | 0,388 | 0      |
| 18 | P20700 LMNB1_HUMAN | R.LKLS#PSPSSR.V                 | S391:      | 2 | 2,6849 | 0,156 | -0,741 |
| 18 | Q9Y5A9 YTHD2_HUMAN | K.LRS#INNYNPK.D                 | S394:      | 2 | 2,8792 | 0,309 | -0,564 |
| 18 | O60504 VINEX_HUMAN | R.LKFDFQAQS#PK.E                | S395:      | 3 | 3,0795 | 0,107 | -0,066 |
| 18 | Q7Z4V5 HDGR2_HUMAN | R.GRGPSSS#DSEPEAELER.E          | S397:      | 3 | 3,1691 | 0,206 | -0,462 |
| 18 | Q96ST2 IWS1_HUMAN  | R.KAAVLS#DS#EDEEKASAK.K         | S398:S400: | 2 | 3,5655 | 0,503 | -0,693 |
| 18 | Q96ST2 IWS1_HUMAN  | K.AAVLS#DS#EDEEKASAKK.S         | S398:S400: | 3 | 3,2405 | 0,428 | -0,755 |
| 18 | Q12852 M3K12_HUMAN | K.IKS#EGTCLHRLEELVMR.R          | S399:      | 3 | 2,8526 | 0,111 | 1,284  |
| 18 | Q7Z4V5 HDGR2_HUMAN | R.GRGPSSSDS#EPEAELER.E          | S399:      | 3 | 2,6846 | 0,191 | -0,462 |

|    |                     |                               |            |   |        |       |        |
|----|---------------------|-------------------------------|------------|---|--------|-------|--------|
| 18 | Q96ST8 CC123_HUMAN  | R.TPPPRS#PNPS#PERPR.S         | S40:S44:   | 3 | 2,9204 | 0,362 | -0,397 |
| 18 | Q9Y6M7 S4A7_HUMAN   | K.GNGS#GGSRENSTVDFSK.V        | S400:      | 2 | 2,5967 | 0,12  | -0,617 |
| 18 | P30989 NTR1_HUMAN   | R.KADS#VSSNHT#LSSNATR.E       | S401:T407: | 2 | 2,4051 | 1     | -0,504 |
| 18 | Q9Y2U8 MAN1_HUMAN   | K.TNNHIGGGAFSVDS#PR.I         | S402:      | 2 | 3,9505 | 0,391 | 0      |
| 18 | Q9Y2U8 MAN1_HUMAN   | K.TNNHIGGGAFSVDS#PR.I         | S402:      | 3 | 2,7798 | 0,106 | 0,107  |
| 18 | Q5JSH3 WDR44_HUMAN  | R.TKEYVSNDAAQSDDEEK.L         | S403:      | 3 | 5,3083 | 0,481 | -0,728 |
| 18 | Q5JSH3 WDR44_HUMAN  | R.TKEYVSNDAAQSDDEEK.L         | S403:      | 2 | 2,3922 | 0,395 | -0,425 |
| 18 | Q6UWZ7 CCD98_HUMAN  | K.M*KGFGEYSRS#PTF.-           | S406:      | 2 | 3,3686 | 0,487 | -0,381 |
| 18 | Q6UWZ7 CCD98_HUMAN  | K.M*KGFGEYSRS#PTF.-           | S406:      | 3 | 3,2999 | 0,313 | 0,114  |
| 18 | P51114 FXR1_HUMAN   | R.RGPNYTSYGTNSELSNPS#ETESER.K | S409:      | 3 | 5,1484 | 0,367 | 0,586  |
| 18 | B2RA80 B2RA80_HUMAN | R.KQDYQEILDS#PIK.-            | S409:      | 2 | 4,4108 | 0,446 | -0,368 |
| 18 | Q8TBE7 TMM22_HUMAN  | R.RQDYQEILDS#PIK.-            | S409:      | 2 | 4,2417 | 0,44  | -0,797 |
| 18 | Q8TBE7 TMM22_HUMAN  | R.RQDYQEILDS#PIK.-            | S409:      | 3 | 3,2991 | 0,125 | -0,326 |
| 18 | B2RA80 B2RA80_HUMAN | R.KQDYQEILDS#PIK.-            | S409:      | 3 | 3,2795 | 0,294 | -0,11  |
| 18 | Q8WWM7 ATX2L_HUMAN  | R.GINGGPRM*S#PK.A             | S409:      | 2 | 2,1419 | 0,123 | -0,47  |
| 18 | Q12756 KIF1A_HUMAN  | R.AAS#VSSLHER.I               | S416:      | 2 | 2,7436 | 0,381 | -0,429 |
| 18 | Q9GZR2 REXO4_HUMAN  | R.RPLLAPDHCS#DDA.-            | S419:      | 3 | 2,7362 | 0,227 | 0      |
| 18 | Q14CB8 RHG19_HUMAN  | R.SRS#FSGLIK.R                | S422:      | 2 | 2,7575 | 0,225 | -0,34  |
| 18 | P16591 FER_HUMAN    | R.LSKFES#IR.H                 | S423:      | 2 | 2,1522 | 0,23  | -0,23  |
| 18 | Q9C0B5 ZDHC5_HUMAN  | K.SFHFDPLSSGS#R.S             | S425:      | 2 | 3,1807 | 0,426 | -0,517 |
| 18 | Q9C0B5 ZDHC5_HUMAN  | K.SFHFDPLSSGS#R.S             | S425:      | 3 | 3,154  | 0,31  | -0,645 |
| 18 | Q9ULU4 PKCB1_HUMAN  | R.RIS#LSDM*PR.S               | S425:      | 2 | 2,3508 | 0,321 | -0,104 |
| 18 | Q8TB61 S35B2_HUMAN  | K.KAVPVES#PVQKV.-             | S427:      | 2 | 3,1602 | 0,358 | 0,09   |
| 18 | Q96JM3 ZN828_HUMAN  | R.KPGPPLS#PEIR.S              | S427:      | 3 | 3,1367 | 0,439 | 0,072  |
| 18 | Q96JM3 ZN828_HUMAN  | R.KPGPPLS#PEIR.S              | S427:      | 2 | 2,9633 | 0,42  | -0,096 |
| 18 | Q9Y3R0 GRIP1_HUMAN  | R.RQS#IPEEFK.G                | S43:       | 2 | 2,7544 | 0,378 | -0,101 |
| 18 | P62750 RL23A_HUMAN  | K.IRTS#PTFR.R                 | S43:       | 2 | 2,2992 | 0,136 | 0,461  |
| 18 | Q96D71 REPS1_HUMAN  | R.TGSDHTNPTS#PLLVKPSDLLEENK.I | S430:      | 3 | 4,8013 | 0,333 | -0,274 |
| 18 | Q08170 SFRS4_HUMAN  | R.EGRGES#ENAGTNQETR.S         | S431:      | 3 | 2,965  | 0,218 | -0,403 |
| 18 | Q15061 WDR43_HUMAN  | R.KS#GGNEVSIEER.L             | S431:      | 2 | 2,726  | 0,206 | -0,617 |
| 18 | Q08170 SFRS4_HUMAN  | R.EGRGES#ENAGTNQETR.S         | S431:      | 2 | 2,0086 | 0,423 | -0,403 |
| 18 | Q92804 RBP56_HUMAN  | R.SGGGYGGDRSS#GGGYSGDR.S      | S433:      | 3 | 3,1266 | 0,517 | -0,2   |
| 18 | P35269 T2FA_HUMAN   | R.LRLDTGPQSLG#GK.S            | S433:      | 3 | 2,996  | 0,304 | -0,189 |

|    |                    |                                  |                 |   |        |       |        |
|----|--------------------|----------------------------------|-----------------|---|--------|-------|--------|
| 18 | Q92804 RBP56_HUMAN | R.SGGGYGGDRSS#GGGYSGDR.S         | S433:           | 2 | 2,7311 | 0,431 | -0,534 |
| 18 | Q13535 ATR_HUMAN   | R.RLS#SSLNPSK.R                  | S435:           | 2 | 2,7341 | 0,218 | -1,148 |
| 18 | Q9UQ35 SRRM2_HUMAN | R.HAS#SSPES#PKPAPAPGS#HR.E       | S435:S440:S449: | 3 | 3,4997 | 0,311 | -0,428 |
| 18 | O43318 M3K7_HUMAN  | R.RRS#IQDLTVTGTEPGQVSS#R.S       | S439:S455:      | 3 | 4,1572 | 1     | 0      |
| 18 | P52926 HMGA2_HUMAN | R.KQQQEPTGEP#PK.R                | S44:            | 2 | 2,3333 | 0,35  | -0,636 |
| 18 | Q15435 PP1R7_HUMAN | K.HSSGIVADLS#EQS#LKDGEER.G       | S44:S47:        | 3 | 4,6122 | 0,339 | -0,395 |
| 18 | Q7Z2Z1 CO042_HUMAN | R.HVLQTAVADS#PR.D                | S441:           | 2 | 3,4273 | 0,484 | -0,178 |
| 18 | Q9BVJ6 UT14A_HUMAN | K.RSELSQDAEPAGS#QETK.D           | S445:           | 2 | 2,822  | 0,455 | -0,574 |
| 18 | P08238 HS90B_HUMAN | K.LGIHEDS#TNR.R                  | S445:           | 2 | 2,2585 | 0,389 | -0,3   |
| 18 | Q96JM3 ZN828_HUMAN | R.KPSGS#PDLWKL#PDQR.K            | S445:S452:      | 3 | 3,3664 | 0,246 | -0,186 |
| 18 | Q8WWM7 ATX2L_HUMAN | R.M*YPPRS#PK.S                   | S449:           | 2 | 2,0865 | 0,229 | -0,228 |
| 18 | Q96BH1 RNF25_HUMAN | R.RES#LGLESK.D                   | S450:           | 2 | 2,4886 | 0,205 | -0,333 |
| 18 | O60832 DKC1_HUMAN  | R.KRES#ES#ESDETPPAAPQLIK.K       | S451:S453:      | 3 | 4,1607 | 0,311 | 0,386  |
| 18 | Q9BUN5 CC28B_HUMAN | R.VPVPTSHSGSLALGLPHLPS#PK.Q      | S46:            | 3 | 3,7017 | 0,127 | -0,483 |
| 18 | Q9ULU4 PKCB1_HUMAN | K.KATSSHFS#ASEES#M*DFLDK.S       | S460:S465:      | 3 | 4,8203 | 0,361 | 0,399  |
| 18 | A1L020 MEX3A_HUMAN | K.LGGGGLRS#PGGGR.D               | S462:           | 3 | 3,2759 | 0,321 | 0,225  |
| 18 | Q9H8N7 ZN395_HUMAN | K.SHLIVTS#PPR.A                  | S468:           | 2 | 2,9861 | 0,47  | -0,308 |
| 18 | Q13263 TIF1B_HUMAN | R.SRS#GEGEVSGLM*R.K              | S473:           | 3 | 3,3636 | 0,198 | -0,501 |
| 18 | Q13263 TIF1B_HUMAN | R.SRS#GEGEVSGLM*R.K              | S473:           | 2 | 3,3312 | 0,222 | -0,919 |
| 18 | Q9NU22 MDN1_HUMAN  | K.M*HDGELEEQEEDDEKS#DS#EGGDLDK.H | S4752:S4754:    | 3 | 5,2392 | 0,566 | 0,365  |
| 18 | Q8NCD3 HJURP_HUMAN | R.RLS#LPSSK.A                    | S486:           | 2 | 2,4198 | 0,328 | -0,315 |
| 18 | Q07960 RHG01_HUMAN | K.SDDSKS#SS#PELVTHLK.W           | S49:S51:        | 2 | 3,5039 | 1     | 0,581  |
| 18 | Q9Y3T9 NOC2L_HUMAN | R.EAARS#PDKPGGS#PSASR.R          | S49:S56:        | 2 | 2,2146 | 0,113 | -0,333 |
| 18 | Q96ST2 IWS1_HUMAN  | R.HS#ENET#SDREDGLPK.G            | S49:T53:        | 2 | 2,7245 | 0,395 | -0,326 |
| 18 | Q9Y2W1 TR150_HUMAN | R.KTEELEES#FPER.S                | S494:           | 3 | 3,7979 | 0,277 | -0,107 |
| 18 | Q96RK0 CIC_HUMAN   | R.KVFS#PVIR.S                    | S496:           | 2 | 3,037  | 0,095 | -0,119 |
| 18 | Q09666 AHNK_HUMAN  | K.FGFGAKS#PK.A                   | S4986:          | 2 | 3,0036 | 0,304 | -0,838 |
| 18 | Q8NC56 LEMD2_HUMAN | R.WTKPSSFS#DSER.-                | S499:           | 3 | 3,3322 | 0,387 | 0      |
| 18 | Q8NC56 LEMD2_HUMAN | R.WTKPSSFS#DSER.-                | S499:           | 2 | 2,6835 | 0,294 | -0,324 |
| 18 | O15155 BET1_HUMAN  | K.SLS#IEIGHEVK.T                 | S50:            | 2 | 2,5557 | 0,302 | 0,378  |
| 18 | Q07960 RHG01_HUMAN | K.SDDSKS#S#PELVTHLK.W            | S50:S51:        | 3 | 3,8216 | 0,43  | 0,194  |
| 18 | Q5T5Y3 CAMP1_HUMAN | R.SIS#KDSLASNIVNLTPQNQPHPTATK.S  | S500:           | 3 | 5,8116 | 0,544 | -0,515 |
| 18 | Q9H0D6 XRN2_HUMAN  | R.KAEDSDS#EPEPEDNVR.L            | S501:           | 2 | 4,6355 | 0,42  | -0,708 |

|    |                     |                               |            |   |        |       |        |
|----|---------------------|-------------------------------|------------|---|--------|-------|--------|
| 18 | Q9Y2X3 NOL5_HUMAN   | K.HIKEEPLS#EEEPCTSTAIAS#PEK.K | S502:S514: | 3 | 5,7357 | 0,456 | -0,4   |
| 18 | O14974 MYPT1_HUMAN  | R.RLAS#TSDIEEK.E              | S507:      | 2 | 3,0763 | 0,397 | -0,918 |
| 18 | Q09666 AHNK_HUMAN   | K.FKAEAPLPS#PK.L              | S5110:     | 2 | 3,2526 | 0,361 | -0,193 |
| 18 | Q14149 MORC3_HUMAN  | R.HLS#EGTNSYATR.L             | S514:      | 2 | 2,8663 | 0,349 | 0      |
| 18 | P40222 TXLNA_HUMAN  | R.RPEGPGAQAPSS#PR.V           | S515:      | 2 | 3,3793 | 0,416 | -0,328 |
| 18 | P40222 TXLNA_HUMAN  | R.RPEGPGAQAPSS#PR.V           | S515:      | 3 | 2,8129 | 0,219 | -0,062 |
| 18 | P35240 MERL_HUMAN   | K.RLS#M*EIEK.E                | S518:      | 2 | 2,7759 | 0,167 | -0,664 |
| 18 | Q86UU1 PHLB1_HUMAN  | R.TRS#PS#PTLGESLAPHK.G        | S518:S520: | 3 | 3,4548 | 0,4   | -0,199 |
| 18 | O00567 NOL5A_HUMAN  | K.SFSKEELM*S#SDLEETAGSTSIPK.R | S519:      | 3 | 3,6857 | 0,433 | -0,356 |
| 18 | P55081 MFAP1_HUMAN  | K.RPDYAPM*ES#S#DEEDEFQFIKK.A  | S52:S53:   | 3 | 5,6219 | 0,552 | -0,192 |
| 18 | Q07866 KLC1_HUMAN   | R.SRES#LNVDVVK.Y              | S520:      | 3 | 3,8458 | 0,122 | 0,138  |
| 18 | Q07866 KLC1_HUMAN   | R.SRES#LNVDVVK.Y              | S520:      | 2 | 3,8439 | 0,29  | -0,092 |
| 18 | Q9C0E2 XPO4_HUMAN   | R.HQQQLLAS#PGSSTVDNK.M        | S521:      | 3 | 3,511  | 0,286 | -0,29  |
| 18 | Q9C0E2 XPO4_HUMAN   | R.HQQQLLAS#PGSSTVDNK.M        | S521:      | 2 | 3,2306 | 0,428 | -0,71  |
| 18 | Q02952 AKA12_HUMAN  | K.KLFTS#TGLK.K                | S522:      | 2 | 2,7787 | 0,285 | 0      |
| 18 | O95235 KI20A_HUMAN  | K.EHSLQVS#PSLEK.G             | S532:      | 2 | 2,6679 | 0,404 | -0,34  |
| 18 | Q07352 TISB_HUMAN   | R.HS#VTLPSSK.F                | S54:       | 2 | 2,9016 | 0,357 | -0,471 |
| 18 | Q8N2Y8 RUSC2_HUMAN  | R.RVTS#FAELAK.G               | S543:      | 2 | 3,1198 | 0,343 | -0,508 |
| 18 | Q96NE9 FRMD6_HUMAN  | R.HSLS#LDDIR.L                | S544:      | 2 | 3,1099 | 0,37  | 0      |
| 18 | O94909 K0819_HUMAN  | R.LGLPKPEGEPLSLPTPRS#PSDR.E   | S546:      | 3 | 3,413  | 0,388 | 0,377  |
| 18 | Q9H1B7 EAP1_HUMAN   | R.KAS#PEPPDSAEGALK.L          | S547:      | 2 | 3,3403 | 0,457 | -0,309 |
| 18 | Q14694 UBP10_HUMAN  | K.KLLS#PSNEK.L                | S547:      | 2 | 2,7936 | 0,225 | -0,334 |
| 18 | O14777 NDC80_HUMAN  | R.KVS#LFGK.R                  | S55:       | 2 | 2,8543 | 0,186 | 0,142  |
| 18 | Q9Y6M7 S4A7_HUMAN   | R.KIPVFHNGS#T#PTLGETPK.E      | S556:T557: | 3 | 2,6648 | 0,156 | -0,263 |
| 18 | Q9Y6M7 S4A7_HUMAN   | R.KIPVFHNGS#TPT#LGETPK.E      | S556:T559: | 3 | 3,815  | 0,265 | 0,088  |
| 18 | Q9Y6A5 TACC3_HUMAN  | R.KQS#LYLK.F                  | S558:      | 2 | 3,0611 | 0,2   | 0,127  |
| 18 | Q9Y4H2 IRS2_HUMAN   | R.RVS#GDAAQDLDR.G             | S560:      | 2 | 3,3568 | 0,411 | -0,97  |
| 18 | P51957 NEK4_HUMAN   | R.RDLFAFQES#PPR.F             | S563:      | 3 | 2,894  | 0,275 | -0,119 |
| 18 | P27824 CALX_HUMAN   | K.QKSDAEEDGGTVS#QEEEDR.K      | S564:      | 3 | 4,7714 | 0,298 | -0,919 |
| 18 | Q7Z417 NUFP2_HUMAN  | K.RTS#PQVLGSILK.S             | S572:      | 2 | 3,249  | 0,282 | 0,265  |
| 18 | Q59FH2 Q59FH2_HUMAN | K.RLEDEQPSTLS#PK.K            | S572:      | 2 | 3,204  | 0,404 | -0,541 |
| 18 | P22455 FGFR4_HUMAN  | R.RPPGPDLS#PDGPR.S            | S573:      | 3 | 2,8967 | 0,33  | 0      |
| 18 | P22455 FGFR4_HUMAN  | R.RPPGPDLS#PDGPR.S            | S573:      | 2 | 2,8759 | 0,537 | -0,677 |

|    |                     |                                   |            |   |        |       |        |
|----|---------------------|-----------------------------------|------------|---|--------|-------|--------|
| 18 | Q09666 AHNK_HUMAN   | K.GKGGVTGS#PEASISGSK.G            | S5731:     | 2 | 5,2121 | 0,587 | -1,068 |
| 18 | Q09666 AHNK_HUMAN   | K.GKGGVTGS#PEASISGSK.G            | S5731:     | 3 | 3,8696 | 0,374 | -0,458 |
| 18 | Q13586 STIM1_HUMAN  | R.LIEGVHPGSLVEKLPDS#PALAK.K       | S575:      | 3 | 5,9584 | 0,475 | -0,389 |
| 18 | Q9H0B6 KLC2_HUMAN   | K.RASS#LNFLNK.S                   | S582:      | 2 | 3,1708 | 0,212 | -0,496 |
| 18 | Q9UNN5 FAF1_HUMAN   | R.IRTPS#GEFLER.R                  | S582:      | 2 | 2,2898 | 0,267 | 0      |
| 18 | Q53TX8 Q53TX8_HUMAN | R.SHS#FSDPSPK.F                   | S583:      | 2 | 2,2783 | 0,3   | -0,209 |
| 18 | Q09666 AHNK_HUMAN   | K.GHYEVTGS#DDETGK.L               | S5841:     | 2 | 4,7367 | 0,61  | -0,465 |
| 18 | Q09666 AHNK_HUMAN   | K.GHYEVTGS#DDETGK.L               | S5841:     | 3 | 3,7191 | 0,381 | 0,116  |
| 18 | Q9NVU7 SDA1_HUMAN   | R.KYIEIDS#DEEPR.G                 | S585:      | 2 | 4,9988 | 0,577 | -0,388 |
| 18 | Q9NVU7 SDA1_HUMAN   | R.KYIEIDS#DEEPR.G                 | S585:      | 3 | 3,6733 | 0,409 | 0,232  |
| 18 | Q8TB72 PUM2_HUMAN   | R.RES#LSTSSDLYK.R                 | S587:      | 2 | 2,9468 | 0,276 | -0,083 |
| 18 | O60343 TBCD4_HUMAN  | R.GRLGS#VDSFER.S                  | S588:      | 3 | 3,1315 | 0,225 | 0      |
| 18 | O60343 TBCD4_HUMAN  | R.GRLGS#VDSFER.S                  | S588:      | 2 | 2,5478 | 0,33  | -0,187 |
| 18 | Q9NRY4 GRLF1_HUMAN  | R.NQKNS#LSDPNIDR.I                | S589:      | 2 | 4,1961 | 0,408 | -0,849 |
| 18 | Q9NRY4 GRLF1_HUMAN  | R.NQKNS#LSDPNIDR.I                | S589:      | 3 | 3,1088 | 0,249 | -0,347 |
| 18 | Q92667 AKAP1_HUMAN  | K.KTES#FQNAQAGSNPK.K              | S592:      | 3 | 3,2416 | 0,239 | -0,325 |
| 18 | Q8TF40 FNIP1_HUMAN  | R.NKS#SLLFK.E                     | S593:      | 2 | 2,8656 | 0,171 | 0      |
| 18 | Q9P2R6 RERE_HUMAN   | K.KQPAS#PDGRT#SPINEDIR.S          | S594:T599: | 3 | 3,6697 | 0,4   | 0,085  |
| 18 | Q7RTP8 Q7RTP8_HUMAN | K.RAS#SLNVLNVGGK.A                | S595:      | 3 | 3,0003 | 0,341 | 0      |
| 18 | O43683 BUB1_HUMAN   | K.TLAPSPKS#PGDFTSAAQLASTPFHK.L    | S596:      | 3 | 4,7105 | 0,478 | -0,486 |
| 18 | Q7RTP8 Q7RTP8_HUMAN | K.RASS#LNVLNVGGK.A                | S596:      | 2 | 3,3089 | 0,393 | 0,175  |
| 18 | Q8WUA4 TF3C2_HUMAN  | R.IRLS#DGSLK.L                    | S597:      | 2 | 2,0922 | 0,195 | -0,228 |
| 18 | P43243 MATR3_HUMAN  | R.SYS#PDGKES#PSDKK.S              | S598:S604: | 3 | 2,8786 | 0,362 | -0,109 |
| 18 | P0C7M2 RA1L3_HUMAN  | K.SES#PKEPEQLR.K                  | S6:        | 3 | 3,226  | 0,343 | 0,133  |
| 18 | P0C7M2 RA1L3_HUMAN  | K.SES#PKEPEQLR.K                  | S6:        | 2 | 2,1936 | 0,357 | -0,619 |
| 18 | Q8NG31 CASC5_HUMAN  | R.RVS#FADTIK.V                    | S60:       | 2 | 2,2595 | 0,466 | -0,109 |
| 18 | Q13442 HAP28_HUMAN  | K.KSLDS#DES#EDEEDDYQQKR.K         | S60:S63:   | 3 | 4,6978 | 0,459 | -0,369 |
| 18 | O60885 BRD4_HUMAN   | K.SKPPPTYES#EEEDK.C               | S601:      | 2 | 3,4731 | 0,435 | -0,711 |
| 18 | Q15424 SAFB1_HUMAN  | R.SVVS#FDKVK.E                    | S604:      | 2 | 2,7512 | 0,201 | -0,112 |
| 18 | Q8IZT6 ASPM_HUMAN   | R.IHFS#PSEPK.T                    | S605:      | 2 | 2,2328 | 0,26  | -0,217 |
| 18 | Q5PRF9 SAM4B_HUMAN  | R.HALTS#PSLGGQGR.Q                | S607:      | 2 | 3,2962 | 0,551 | -0,359 |
| 18 | Q96T23 RSF1_HUMAN   | K.STLESEKPGS#PEAAETSPPSNIIDHCEK.L | S612:      | 3 | 3,4442 | 0,312 | -0,355 |
| 18 | Q53ET0 CRT2_HUMAN   | R.HGSGPNIIITGDSS#PGFSK.E          | S624:      | 2 | 5,0961 | 0,61  | -0,688 |

|    |                    |                                |                 |   |        |       |        |
|----|--------------------|--------------------------------|-----------------|---|--------|-------|--------|
| 18 | O95466 FMNL_HUMAN  | R.RDS#ELGPGVK.A                | S624:           | 2 | 2,8806 | 0,422 | -0,322 |
| 18 | Q02952 AKA12_HUMAN | R.RPS#ES#DKEDELDK.V            | S627:S629:      | 2 | 3,3631 | 0,404 | -1,143 |
| 18 | Q5QP82 WDR32_HUMAN | R.RPGAPSL#PAPR.S               | S63:            | 3 | 2,9212 | 0,249 | 0,213  |
| 18 | Q8WVC0 LEO1_HUMAN  | K.KLTS#DEEGEPSGK.R             | S630:           | 2 | 3,7901 | 0,441 | -0,419 |
| 18 | Q8WVC0 LEO1_HUMAN  | K.KLTS#DEEGEPSGK.R             | S630:           | 3 | 3,1826 | 0,232 | 0      |
| 18 | Q9NZN5 ARHGC_HUMAN | K.HLSTPSSVS#PEPQDSAK.L         | S637:           | 2 | 5,0561 | 0,523 | -0,595 |
| 18 | O43719 HTSF1_HUMAN | K.VFDDES#DEKEDEEYADEKGLEAADK.K | S642:           | 3 | 5,8845 | 0,444 | -0,371 |
| 18 | Q14978 NOLC1_HUMAN | R.VADNS#FDAKR.G                | S643:           | 2 | 3,5456 | 0,397 | -0,304 |
| 18 | Q8NI35 INADL_HUMAN | R.RLFDDEAS#VDEPR.R             | S645:           | 3 | 3,9033 | 0,248 | 0      |
| 18 | Q8NI35 INADL_HUMAN | R.RLFDDEAS#VDEPR.R             | S645:           | 2 | 3,3712 | 0,354 | -0,375 |
| 18 | Q7Z460 CLAP1_HUMAN | R.RQS#SGSATNVASTPDNR.G         | S646:           | 2 | 4,1212 | 0,547 | -0,534 |
| 18 | Q76L83 ASXL2_HUMAN | R.ARFVPSITS#PNR.T              | S648:           | 3 | 3,745  | 0,18  | 0      |
| 18 | Q9BWT3 PAPOG_HUMAN | R.SHS#PSIDGTPK.R               | S648:           | 2 | 2,9462 | 0,464 | -0,101 |
| 18 | Q96S55 WRIP1_HUMAN | R.AKGPS#PPGAK.R                | S65:            | 2 | 2,3274 | 0,433 | -0,308 |
| 18 | P42684 ABL2_HUMAN  | R.KGGFFSS#FM*K.K               | S655:           | 2 | 2,6874 | 0,383 | -0,099 |
| 18 | Q92541 RTF1_HUMAN  | R.RS#LNLEDYK.K                 | S657:           | 3 | 3,3446 | 0,141 | 0,45   |
| 18 | Q9NYF8 BCLF1_HUMAN | R.RIDIS#PSTLR.K                | S658:           | 2 | 2,1141 | 0,214 | -0,197 |
| 18 | Q86YS7 K0528_HUMAN | R.SQS#ESS#DEVTELDLSHGKK.D      | S659:S662:      | 3 | 3,5881 | 0,361 | 0      |
| 18 | Q9ULH7 MKL2_HUMAN  | R.EQLVDQGIM*PPLKS#PAAFHEQIK.S  | S66:            | 3 | 3,5466 | 0,403 | 0,342  |
| 18 | Q9H307 PININ_HUMAN | R.RGFS#DSGGGPPAK.Q             | S66:            | 2 | 2,1563 | 0,49  | -0,558 |
| 18 | Q13586 STIM1_HUMAN | K.KAVAEEDNGS#IGEETDSSPGR.K     | S660:           | 3 | 4,3665 | 0,432 | -0,657 |
| 18 | P51957 NEK4_HUMAN  | R.RLS#SDCSVTQER.K              | S661:           | 2 | 2,8704 | 0,325 | 0      |
| 18 | P19338 NUCL_HUMAN  | K.KVVVS#PTK.K                  | S67:            | 2 | 2,3014 | 0,211 | -0,195 |
| 18 | Q9UEY8 ADDG_HUMAN  | K.SPEKIEEVLS#PEGS#PSKS#PSKK.K  | S673:S677:S681: | 3 | 4,1349 | 1     | -0,213 |
| 18 | Q9BPX3 CND3_HUMAN  | K.TLHCEGTEINS#DDEQESK.E        | S674:           | 3 | 5,0194 | 0,355 | -0,505 |
| 18 | O43719 HTSF1_HUMAN | K.LFEES#DDKEDEDADGKEVEDADEK.L  | S676:           | 3 | 6,4547 | 0,384 | -0,193 |
| 18 | P46100 ATRX_HUMAN  | R.RPTETNPVTSNS#DEECNETVK.E     | S677:           | 3 | 5,8674 | 0,375 | -0,589 |
| 18 | Q6P3W7 SCYL2_HUMAN | K.RAS#LTLEEK.Q                 | S677:           | 2 | 2,5855 | 0,185 | 0      |
| 18 | Q9Y2W1 TR150_HUMAN | R.RIDIS#PSTFR.K                | S682:           | 2 | 2,7066 | 0,379 | -0,384 |
| 18 | Q9Y2K7 JHD1A_HUMAN | R.KM*EES#DEEAVQAK.V            | S692:           | 2 | 4,6605 | 0,534 | -0,537 |
| 18 | Q14155 ARHG7_HUMAN | R.KPS#DEEFASR.K                | S694:           | 3 | 3,2066 | 0,23  | -0,073 |
| 18 | Q14155 ARHG7_HUMAN | R.KPS#DEEFASR.K                | S694:           | 2 | 2,8418 | 0,403 | 0      |
| 18 | Q9UPZ3 HPS5_HUMAN  | K.RDS#LGNEESVDK.T              | S695:           | 2 | 3,9984 | 0,42  | -0,085 |



|    |                     |                                |            |   |        |       |        |
|----|---------------------|--------------------------------|------------|---|--------|-------|--------|
| 18 | Q96T83 SL9A7_HUMAN  | R.TKSSS#EEVLER.D               | S695:      | 3 | 3,6552 | 0,216 | 0      |
| 18 | Q6UXH1 CREL2_HUMAN  | K.TLSKYES#SEIR.L               | S70:       | 2 | 3,5621 | 0,38  | -0,175 |
| 18 | P06748 NPM_HUMAN    | K.DELHIVEAEAM*NYEGS#PIK.V      | S70:       | 3 | 3,2426 | 0,313 | -0,735 |
| 18 | O60890 OPHN1_HUMAN  | K.TPS#FHIK.R                   | S703:      | 2 | 2,3562 | 0,087 | 0      |
| 18 | O75151 PHF2_HUMAN   | K.RDLS#FLLDK.K                 | S705:      | 2 | 2,9351 | 0,351 | -0,514 |
| 18 | Q9NR30 DDX21_HUMAN  | K.KAEPSEVDM*NS#PK.S            | S71:       | 2 | 3,8548 | 0,427 | -0,559 |
| 18 | Q9NR30 DDX21_HUMAN  | K.KAEPSEVDM*NS#PK.S            | S71:       | 3 | 3,5214 | 0,327 | -0,18  |
| 18 | O00571 DDX3X_HUMAN  | K.DKDAYSS#FGSR.S               | S71:       | 2 | 3,3066 | 0,381 | -0,465 |
| 18 | Q8TEW0 PARD3_HUMAN  | R.RISHS#LYSGIEGLDES#PSR.N      | S717:S728: | 3 | 4,4524 | 0,248 | 0      |
| 18 | Q9UPQ0 LIMC1_HUMAN  | K.VVKPKS#PEPEATLTFPFLDK.M      | S718:      | 3 | 3,0633 | 0,128 | -0,63  |
| 18 | Q96RV3 PCX1_HUMAN   | R.LM*APESIKPLTTS#KSDLEAK.E     | S719:      | 3 | 4,4569 | 0,485 | -0,406 |
| 18 | P18206 VINC_HUMAN   | K.M*TGLVDEAIDTKS#LLDASEEAIKK.D | S721:      | 3 | 3,1493 | 0,227 | -0,479 |
| 18 | P35611 ADDA_HUMAN   | R.TPS#FLKK.S                   | S726:      | 2 | 2,2375 | 0,129 | -1,016 |
| 18 | Q9Y6X9 MORC2_HUMAN  | R.KRS#VAVS#DEEEVEEEAER.R       | S739:S743: | 3 | 5,2588 | 0,469 | -0,244 |
| 18 | Q96C19 EFHD2_HUMAN  | R.RADLNQGIGEPQS#PSR.R          | S74:       | 2 | 2,9075 | 0,395 | -0,608 |
| 18 | O60927 PP1RB_HUMAN  | R.AFGESS#TES#DEEEEGCGHHCVR.G   | S74:S77:   | 3 | 2,9221 | 0,294 | -0,505 |
| 18 | A1L390 PKHG3_HUMAN  | R.RES#LSYIPK.G                 | S741:      | 2 | 2,3351 | 0,223 | -0,104 |
| 18 | Q03164 HRX_HUMAN    | R.KVFS#PIR.S                   | S742:      | 2 | 2,5272 | 0,165 | 0,066  |
| 18 | Q9NWH9 SLTM_HUMAN   | K.KLS#LDTDAR.F                 | S748:      | 2 | 2,9386 | 0,254 | -0,111 |
| 18 | Q96S55 WRIP1_HUMAN  | R.RLS#ESSALK.Q                 | S75:       | 2 | 2,604  | 0,409 | -0,684 |
| 18 | P50502 F10A1_HUMAN  | K.KVEEDLKADEPS#S#EESDLEIDK.E   | S75:S76:   | 3 | 7,7167 | 0,401 | 0,549  |
| 18 | Q9NXE4 NSMA3_HUMAN  | R.HLLS#PVGR.R                  | S753:      | 2 | 2,2106 | 0,297 | 0,064  |
| 18 | Q13443 ADAM9_HUMAN  | R.HVS#PVTPPR.E                 | S758:      | 2 | 2,4295 | 0,367 | -0,228 |
| 18 | Q6P0N0 CN106_HUMAN  | K.KIENQVAM*S#FYK.H             | S761:      | 2 | 3,5225 | 0,42  | 0,157  |
| 18 | Q68DN6 RGPD1_HUMAN  | R.NADSEIKHS#T#PSPTK.Y          | S769:T770: | 3 | 2,9371 | 0,317 | -0,103 |
| 18 | Q15061 WDR43_HUMAN  | R.LQAKES#PQR.K                 | S77:       | 2 | 2,5088 | 0,238 | -0,537 |
| 18 | Q68DN6 RGPD1_HUMAN  | K.HSTPS#PTKYSLS#PSK.S          | S772:S779: | 2 | 4,1293 | 1     | -0,275 |
| 18 | Q9Y6X9 MORC2_HUMAN  | K.KDS#NELSDS#AGEEDSADLKR.A     | S773:S779: | 3 | 3,1565 | 0,404 | -0,079 |
| 18 | Q9H2G2 SLK_HUMAN    | K.TKDSGS#ISLQETR.R             | S779:      | 2 | 4,3584 | 0,568 | -0,406 |
| 18 | Q96FT9 CN179_HUMAN  | R.KAS#EEIEDFR.L                | S78:       | 2 | 3,3731 | 0,431 | -0,094 |
| 18 | Q5HYE4 Q5HYE4_HUMAN | R.HIEALLGS#PCGK.G              | S79:       | 2 | 3,554  | 0,398 | 0,09   |
| 18 | Q96FF9 CDCA5_HUMAN  | R.RS#PRIS#FFLEK.E              | S79:S83:   | 3 | 2,9122 | 0,311 | 0      |
| 18 | Q4LE39 ARI4B_HUMAN  | R.KDIEVLS#EDT#DYEEDEVTKK.R     | S790:T793: | 3 | 3,7957 | 0,308 | -0,575 |

|    |                     |                                   |          |   |        |       |        |
|----|---------------------|-----------------------------------|----------|---|--------|-------|--------|
| 18 | Q8IY18 SMC5_HUMAN   | K.NKLESDYM*AAS#SQLR.L             | S792:    | 2 | 4,789  | 0,469 | 1,754  |
| 18 | Q9NQW6 ANLN_HUMAN   | K.NKAS#PQSEFM*PSK.G               | S792:    | 3 | 3,1832 | 0,18  | -0,118 |
| 18 | Q9UK76 HN1_HUMAN    | K.SSGGRELESS#GLQR.R               | S80:     | 3 | 3,8729 | 0,297 | 0,11   |
| 18 | Q14103 HNRPD_HUMAN  | K.IDASKNEEDEGHS#NSS#PR.H          | S80:S83: | 3 | 3,2455 | 0,206 | -0,343 |
| 18 | O95239 KIF4A_HUMAN  | R.RTF#LTEVR.G                     | S801:    | 2 | 2,1076 | 0,229 | -0,308 |
| 18 | Q14721 KCNB1_HUMAN  | K.NHFESSPLPTS#PK.F                | S805:    | 2 | 3,5672 | 0,517 | -0,401 |
| 18 | P55081 MFAP1_HUMAN  | K.AKEQEAPEEQEEDSS#SDPR.L          | S81:     | 3 | 4,1099 | 0,418 | -0,309 |
| 18 | Q9GZR7 DDX24_HUMAN  | R.KAQAVS#EEEEEEGK.S               | S82:     | 2 | 4,1704 | 0,5   | -0,689 |
| 18 | O00571 DDX3X_HUMAN  | R.GKS#SFFSDR.G                    | S82:     | 2 | 3,3006 | 0,252 | -0,659 |
| 18 | Q9BWU0 NADAP_HUMAN  | K.KPALPVS#PAAR.S                  | S82:     | 2 | 2,4525 | 0,403 | 0,206  |
| 18 | Q9GZR7 DDX24_HUMAN  | R.KAQAVS#EEEEEEGKSS#PK.K          | S82:S94: | 3 | 5,1555 | 0,398 | -0,861 |
| 18 | Q9UKV3 ACINU_HUMAN  | R.KIS#VVSATK.G                    | S825:    | 2 | 2,7752 | 0,163 | -0,301 |
| 18 | B2RTT4 B2RTT4_HUMAN | R.KIS#VVSTK.G                     | S825:    | 2 | 2,5973 | 0,338 | 0      |
| 18 | Q8N8A6 DDX51_HUMAN  | R.RVNDAEPPGS#PEAPQGK.R            | S83:     | 2 | 3,6476 | 0,528 | -0,493 |
| 18 | P04406 G3P_HUMAN    | K.LVINGNPITIFQERDPS#KIK.W         | S83:     | 3 | 2,6962 | 0,145 | -0,542 |
| 18 | Q69YQ0 CYTSA_HUMAN  | R.RSS#TSSEPTPTVK.T                | S832:    | 2 | 3,0512 | 0,372 | -0,335 |
| 18 | Q14160 LAP4_HUMAN   | R.M*VEPENAVTITPLRPEDDYS#PRER.R    | S835:    | 3 | 2,7089 | 0,369 | -0,629 |
| 18 | P40189 IL6RB_HUMAN  | R.SKQVSS#VNEEDFVR.L               | S839:    | 3 | 2,8713 | 0,134 | 0,107  |
| 18 | P49023 PAXI_HUMAN   | R.FIHQQPQSSS#PVYGSSAK.T           | S85:     | 3 | 3,1568 | 0,2   | -0,812 |
| 18 | P16333 NCK1_HUMAN   | K.RKPS#VPDSAS#PADDSFVDPGER.L      | S85:S91: | 3 | 3,0453 | 0,257 | 0,221  |
| 18 | P16333 NCK1_HUMAN   | K.RKPS#VPDSASPADDS#FVDPGER.L      | S85:S96: | 3 | 4,346  | 0,328 | -0,368 |
| 18 | Q9UMZ2 SYNG_HUMAN   | K.HVM*S#DSSLDLPTVSGQHPPAADIEDLK.Y | S852:    | 3 | 4,1576 | 0,48  | -0,433 |
| 18 | Q5H9R7 SAPS3_HUMAN  | K.CAAPRPPSSS#PEQR.T               | S853:    | 2 | 2,0566 | 0,166 | -0,226 |
| 18 | Q00653 NFKB2_HUMAN  | R.DKLPS#TAEVKEDSAYGSQSVEQEAEL     | S858:    | 3 | 4,9205 | 0,553 | -0,315 |
| 18 | P35606 COPB2_HUMAN  | R.STAQQELDGKAS#PTPVIVASHTANK.E    | S859:    | 3 | 3,9805 | 0,32  | -0,268 |
| 18 | Q9C0H9 SNIP_HUMAN   | R.RGS#DELTVPY.Y                   | S859:    | 2 | 3,1821 | 0,506 | -0,303 |
| 18 | Q9C0H9 SNIP_HUMAN   | R.RGS#DELTVPY.Y                   | S859:    | 3 | 2,7037 | 0,229 | 0,453  |
| 18 | Q9BWF3 RBM4_HUMAN   | K.LHVGNIS#PTCTNK.E                | S86:     | 2 | 4,3665 | 0,5   | -0,401 |
| 18 | Q9NXG2 THUM1_HUMAN  | K.FTDKDDQPS#GS#EGEDDDAEAAALKK.E   | S86:S88: | 3 | 2,9236 | 0,225 | -0,401 |
| 18 | Q9UMN6 MLL4_HUMAN   | R.ERPSGPES#PVQGPR.I               | S861:    | 3 | 3,1671 | 0,217 | -0,233 |
| 18 | Q9UK76 HN1_HUMAN    | R.RNS#SEASSGDFLDLK.G              | S87:     | 2 | 4,9067 | 0,478 | -0,501 |
| 18 | P50402 EMD_HUMAN    | K.KEDALLYQS#K.G                   | S87:     | 3 | 3,3636 | 0,202 | 0,143  |
| 18 | P50402 EMD_HUMAN    | K.KEDALLYQS#K.G                   | S87:     | 2 | 3,331  | 0,384 | -0,67  |

|    |                    |                                |              |   |        |       |        |
|----|--------------------|--------------------------------|--------------|---|--------|-------|--------|
| 18 | Q07002 PCTK3_HUMAN | R.RFS#M*EDVSK.R                | S87:         | 2 | 2,5625 | 0,455 | -0,613 |
| 18 | Q13523 PRP4B_HUMAN | R.KEVIDAS#DKEGM*S#PAK.R        | S87:S93:     | 2 | 4,5423 | 0,54  | -0,649 |
| 18 | Q8IYB3 SRRM1_HUMAN | K.KETES#EAEDNLDDLEK.H          | S874:        | 3 | 3,8783 | 0,408 | 0,376  |
| 18 | Q9UK76 HN1_HUMAN   | R.RNSS#EASSGDFLDLKG            | S88:         | 3 | 4,0098 | 0,368 | -0,214 |
| 18 | Q93008 USP9X_HUMAN | K.HLS#FVVR.F                   | S880:        | 2 | 2,7913 | 0,129 | 0      |
| 18 | Q6DN90 IQEC1_HUMAN | K.LQHSTS#ILR.K                 | S89:         | 2 | 2,4556 | 0,356 | 0,215  |
| 18 | Q8WUA4 TF3C2_HUMAN | R.AHFNAM*FQPSS#PTR.R           | S893:        | 2 | 4,5468 | 0,503 | -0,94  |
| 18 | Q8WUA4 TF3C2_HUMAN | R.AHFNAM*FQPSS#PTR.R           | S893:        | 3 | 3,4653 | 0,398 | -0,759 |
| 18 | O75665 OFD1_HUMAN  | R.RQS#NLQEVLER.E               | S899:        | 2 | 3,5157 | 0,427 | 0,084  |
| 18 | O75665 OFD1_HUMAN  | R.RQS#NLQEVLER.E               | S899:        | 3 | 2,8715 | 0,126 | 0,126  |
| 18 | Q9UL54 TAOK2_HUMAN | R.AGS#LKDPDVAELFFKDDPEK.L      | S9:          | 3 | 3,8886 | 0,365 | -0,477 |
| 18 | Q01484 ANK2_HUMAN  | R.SDSLRS#FSSDR.S               | S901:        | 2 | 2,3265 | 0,233 | -0,548 |
| 18 | Q14C86 GAPD1_HUMAN | R.SRS#SDIVSSVR.R               | S902:        | 2 | 2,8183 | 0,411 | 0,192  |
| 18 | Q14C86 GAPD1_HUMAN | R.SRS#SDIVSSVR.R               | S902:        | 3 | 2,7157 | 0,17  | 0,215  |
| 18 | Q86V48 LUZP1_HUMAN | K.SHSAPS#EVGFSDAR.H            | S908:        | 2 | 3,6196 | 0,511 | -0,959 |
| 18 | Q9GZR1 SEN6_HUMAN  | K.IRLNYSDES#PEAGK.M            | S919:        | 3 | 3,7456 | 0,269 | 0      |
| 18 | Q9GZR1 SEN6_HUMAN  | K.IRLNYSDES#PEAGK.M            | S919:        | 2 | 3,1382 | 0,406 | -0,809 |
| 18 | P45973 CBX5_HUMAN  | R.KS#NFSNSADDIK.S              | S92:         | 2 | 2,6278 | 0,255 | -0,347 |
| 18 | P57682 KLF3_HUMAN  | R.RAS#PGLSM*PS#SSPPIKK.Y       | S92:S99:     | 3 | 3,3102 | 0,207 | -0,191 |
| 18 | Q9Y2W1 TR150_HUMAN | K.WAHDKFS#GEEGEIEDDES#GTENR.E  | S928:S939:   | 3 | 7,2702 | 0,554 | -0,131 |
| 18 | Q6P0Q8 MAST2_HUMAN | R.RCS#GLLDAPR.F                | S931:        | 2 | 2,4877 | 0,285 | -0,299 |
| 18 | A0JNW5 UH1BL_HUMAN | R.SM*S#VDLSHIPLKDPDLLFK.S      | S935:        | 3 | 2,773  | 0,276 | -0,771 |
| 18 | Q5VZ89 DEN4C_HUMAN | K.RSS#LYGIAK.V                 | S948:        | 2 | 3,3203 | 0,31  | -1,021 |
| 18 | Q96PE3 INP4A_HUMAN | R.KYAFNS#LQLK.A                | S955:        | 2 | 2,7863 | 0,293 | -0,189 |
| 18 | P28749 RBL1_HUMAN  | K.YDLANQDHM*M*DAPPLS#PFPHIK.Q  | S964:        | 3 | 3,0922 | 0,147 | -0,276 |
| 18 | Q86UU1 PHLB1_HUMAN | R.SKM*DGEATS#PLPR.T            | S971:        | 3 | 3,6687 | 0,368 | -0,246 |
| 18 | Q9BPX3 CND3_HUMAN  | R.RCQTAEADS#ES#DHEVPEPESEM*K.M | S973:S975:   | 3 | 3,1836 | 0,373 | -0,709 |
| 18 | P26358 DNMT1_HUMAN | R.KYS#DYIK.G                   | S977:        | 2 | 2,2457 | 0,17  | -0,367 |
| 18 | Q6WQC1 MRIP_HUMAN  | K.SKS#NPDFLK.K                 | S992:        | 2 | 3,0355 | 0,306 | 0      |
| 18 | Q14669 TRIPC_HUMAN | R.DDSLSPQGRS#DVLKR.K           | S997:        | 3 | 2,7684 | 0,229 | -0,262 |
| 18 | P31943 HNRH1_HUMAN | K.HT#GPNSPDTANDGFVR.L          | T100:        | 3 | 2,6738 | 0,136 | 0,207  |
| 18 | Q9UQ35 SRRM2_HUMAN | K.VKAQT#PPGPSLSGSKS#PCPQEK.S   | T1003:S1014: | 3 | 3,7939 | 0,314 | -0,225 |
| 18 | P26373 RL13_HUMAN  | R.NKST#ESLQANVQR.L             | T107:        | 3 | 3,6938 | 0,303 | -0,235 |

|    |                     |                                    |                 |   |        |       |        |
|----|---------------------|------------------------------------|-----------------|---|--------|-------|--------|
| 18 | Q8NE71 ABCF1_HUMAN  | K.KLSVPT#S#DEEDEVPAKPR.G           | T108:S109:      | 3 | 5,0568 | 0,371 | -0,081 |
| 18 | Q9BX95 SGPP1_HUMAN  | R.RNSLT#GEEGQLAR.V                 | T114:           | 3 | 4,9538 | 0,384 | -0,242 |
| 18 | Q7L576 CYFP1_HUMAN  | K.SGDGEGT#PVEHVR.C                 | T1234:          | 2 | 3,0849 | 0,347 | -0,602 |
| 18 | Q02952 AKA12_HUMAN  | K.M*EDT#LEHTDKEVSVETVSILSK.T       | T1242:          | 3 | 4,9133 | 0,384 | -0,495 |
| 18 | Q9NYV4 CD2L7_HUMAN  | R.RT#PTM*PQEEAAACPPHILPPEK.R       | T1244:          | 3 | 4,1135 | 0,256 | -0,285 |
| 18 | Q7L9B9 EEPDP1_HUMAN | R.DLLAEQQPHHLATAVPLT#PR.V          | T134:           | 3 | 5,0341 | 0,445 | -0,72  |
| 18 | Q9UQ35 SRRM2_HUMAN  | K.TVART#PLGQR.S                    | T1531:          | 2 | 2,4129 | 0,283 | -0,31  |
| 18 | Q13838 UAP56_HUMAN  | K.NCPHIVVGT#PGR.I                  | T172:           | 3 | 3,6824 | 0,4   | 0,132  |
| 18 | Q13838 UAP56_HUMAN  | K.NCPHIVVGT#PGR.I                  | T172:           | 2 | 2,8751 | 0,384 | 0,088  |
| 18 | Q9H1E3 NUCKS_HUMAN  | R.LKATVT#PS#PVKKGK.G               | T179:S181:      | 2 | 3,5461 | 0,477 | -0,657 |
| 18 | Q9H1E3 NUCKS_HUMAN  | R.LKATVT#PS#PVKKGK.G               | T179:S181:      | 3 | 2,8561 | 0,295 | -0,431 |
| 18 | Q16539 MK14_HUMAN   | R.HTDDEM*T#GYVATR.W                | T180:           | 2 | 4,1328 | 0,466 | -0,613 |
| 18 | A0JLT2 MED19_HUMAN  | R.TQDPVPPET#PSDS#DHKK.K            | T192:S196:      | 3 | 2,6719 | 0,094 | -0,539 |
| 18 | O94915 FRYL_HUMAN   | R.RSNT#LDIM*DGR.I                  | T1959:          | 2 | 3,1402 | 0,385 | -0,444 |
| 18 | Q9H1E3 NUCKS_HUMAN  | K.EKT#PS#PKEEDEEPES#PPEKK.T        | T202:S204:S214: | 3 | 4,1546 | 0,234 | -0,646 |
| 18 | Q15003 CND2_HUMAN   | K.DAPSLLEEVEGHVADGSAT#EM*GTTKK.A   | T203:           | 3 | 4,526  | 0,35  | -0,276 |
| 18 | Q96LA8 ANM6_HUMAN   | R.KLESGGGEGEGGT#EEEDGAER.E         | T21:            | 3 | 5,4871 | 0,435 | 0,082  |
| 18 | Q9Y320 TXD14_HUMAN  | R.YKVST#SPLTK.Q                    | T210:           | 2 | 2,6857 | 0,321 | -0,405 |
| 18 | Q12923 PTN13_HUMAN  | R.SST#SDVLDIQKPLSHQTFLNK.G         | T216:           | 3 | 3,1276 | 0,216 | -0,217 |
| 18 | Q9BYG3 MK671_HUMAN  | K.KVSGTLDT#PEKTVDSQGPTPVCTPTFLER.R | T223:           | 3 | 3,502  | 0,305 | 0,904  |
| 18 | Q63HQ0 CD016_HUMAN  | R.SKT#EEDILR.A                     | T228:           | 2 | 3,2696 | 0,423 | 0,104  |
| 18 | O14908 GIPC1_HUMAN  | R.SAGGRPGSGPQLGT#GRGT#LR.L         | T238:T242:      | 3 | 2,9541 | 0,202 | -0,358 |
| 18 | A8K1N6 A8K1N6_HUMAN | K.M*LGQKAT#PPPSPLSELLKK.G          | T264:           | 3 | 4,6531 | 0,438 | -0,245 |
| 18 | O94906 PRP6_HUMAN   | K.GYLT#DLNSM*IPTHGGDINDIKK.A       | T275:           | 3 | 3,1471 | 0,23  | -0,586 |
| 18 | O43166 SI1L1_HUMAN  | R.SKSET#GDSSIFR.K                  | T290:           | 3 | 3,3917 | 0,166 | 0,066  |
| 18 | Q7Z2W4 ZCCHV_HUMAN  | R.KFT#YLSQDR.A                     | T298:           | 2 | 2,6771 | 0,344 | 0,094  |
| 18 | Q3B726 RPA43_HUMAN  | K.HSEEAFT#PPLKCS#PK.R              | T322:S328:      | 3 | 3,5311 | 0,461 | 0,181  |
| 18 | Q9UGV2 NDRG3_HUMAN  | R.SRT#HS#TSSSLGSGESPF SR.S         | T329:S331:      | 3 | 5,4077 | 1     | 0      |
| 18 | Q9Y3Y2 CA077_HUMAN  | K.NKQPT#PVNIR.A                    | T33:            | 2 | 2,251  | 0,083 | -0,783 |
| 18 | Q641Q2 FA21A_HUMAN  | K.ERRT#PS#DDEEDNLFAPPK.L           | T331:S333:      | 3 | 3,5526 | 0,199 | -0,241 |
| 18 | Q4G0J3 LARP7_HUMAN  | R.DIEIST#EEEKDTGDLKDSLLK.T         | T338:           | 3 | 5,788  | 0,389 | -0,431 |
| 18 | Q7L9L4 MOL1A_HUMAN  | K.HAEAT#LGSGNLR.M                  | T35:            | 2 | 2,7007 | 0,552 | -0,28  |
| 18 | O76021 RL1D1_HUMAN  | K.FFT#TPSKS#VRK.A                  | T464:S469:      | 2 | 2,6812 | 0,331 | 0,335  |

|    |                    |                                    |                 |   |        |       |        |
|----|--------------------|------------------------------------|-----------------|---|--------|-------|--------|
| 18 | Q05209 PTN12_HUMAN | K.VSVTPPEESQNSDT#PPRPDRPLDEK.G     | T519:           | 3 | 2,7848 | 0,167 | -0,307 |
| 18 | Q02952 AKA12_HUMAN | K.KLFT#STGLK.K                     | T521:           | 2 | 3,2648 | 0,257 | -0,113 |
| 18 | Q7KZI7 MARK2_HUMAN | R.LLKT#IGK.G                       | T58:            | 2 | 2,321  | 0,097 | 0,143  |
| 18 | P01106 MYC_HUMAN   | K.KFELLPT#PPLS#PSRR.S              | T58:S62:        | 3 | 3,2442 | 0,217 | -0,482 |
| 18 | Q66K74 MAP1S_HUMAN | K.ALELPLAASSIPRPT#PS#PESHR.S       | T638:S640:      | 3 | 4,1278 | 1     | -0,485 |
| 18 | Q66K74 MAP1S_HUMAN | K.ALELPLAASSIPRPT#PSPES#HR.S       | T638:S643:      | 3 | 3,3916 | 1     | -0,554 |
| 18 | Q9H6F5 CCD86_HUMAN | R.AGLGSPERPPKT#SPGS#PR.L           | T65:S69:        | 3 | 3,4453 | 0,382 | -0,656 |
| 18 | Q9H6F5 CCD86_HUMAN | R.AGLGSPERPPKT#SPGS#PR.L           | T65:S69:        | 2 | 3,4424 | 0,333 | -0,563 |
| 18 | Q9NWH9 SLTM_HUMAN  | K.QAIEEEGGDPDNIELTVSTDT#PNKKPTK.G  | T74:            | 3 | 2,7394 | 0,194 | 0,118  |
| 18 | Q13427 PPIG_HUMAN  | K.FDHESPGT#DEDKSG.-                | T748:           | 3 | 3,5014 | 0,392 | -0,108 |
| 18 | Q68DN6 RGPD1_HUMAN | R.NADSEIKHST#PS#PTK.Y              | T770:S772:      | 2 | 2,5674 | 0,322 | -0,344 |
| 18 | P49792 RBP2_HUMAN  | R.NADSEIKHST#PS#PTR.Y              | T779:S781:      | 3 | 3,3192 | 0,166 | -0,203 |
| 18 | P49792 RBP2_HUMAN  | R.NADSEIKHST#PS#PTR.Y              | T779:S781:      | 2 | 2,4691 | 0,277 | -0,271 |
| 18 | Q6PKG0 LARP1_HUMAN | R.TPRT#PQLK.D                      | T788:           | 2 | 2,6679 | 0,184 | 0      |
| 18 | O95239 KIF4A_HUMAN | R.RT#FSLTEVR.G                     | T799:           | 2 | 2,4132 | 0,421 | -0,205 |
| 18 | Q9BW71 HIRP3_HUMAN | K.RPPT#PCSDPER.K                   | T84:            | 3 | 3,3594 | 0,384 | 0      |
| 18 | Q76I76 SSH2_HUMAN  | R.RAT#LEFEER.L                     | T870:           | 2 | 3,5032 | 0,223 | -0,793 |
| 18 | Q8IX03 WWC1_HUMAN  | K.VDKETNTET#PAPS#PTVVRPK.D         | T895:S899:      | 3 | 4,3852 | 0,323 | -0,079 |
| 18 | Q96PY5 FMNL2_HUMAN | K.LKGYLDPAVT#R.K                   | T92:            | 3 | 3,4286 | 0,091 | 0,209  |
| 18 | Q96PY5 FMNL2_HUMAN | K.LKGYLDPAVT#R.K                   | T92:            | 2 | 2,1875 | 0,256 | -0,558 |
| 18 | P82094 TMF1_HUMAN  | R.KPFSVSSTPT#M*SR.S                | T931:           | 2 | 2,7948 | 0,33  | -0,481 |
| 18 | Q3KQU3 MA7D1_HUMAN | K.SRGPT#PPAM*GPR.D                 | T97:            | 3 | 2,769  | 0,194 | 0,069  |
| 18 | Q3KQU3 MA7D1_HUMAN | K.SRGPT#PPAM*GPR.D                 | T97:            | 2 | 2,5243 | 0,183 | -0,462 |
| 18 | Q9UQ35 SRRM2_HUMAN | K.VKPET#PPRQSHS#GSIS#PYPK.V        | T983:S990:S994: | 3 | 3,0811 | 1     | -0,376 |
| 18 | Q9NX40 OCAD1_HUMAN | K.NRESY#EVSLTQK.T                  | Y210:           | 3 | 3,7131 | 0,385 | 0,06   |
| 18 | O60841 IF2P_HUMAN  | K.EM*SSDSEY#DS#DDDRTKEER.A         | Y593:S595:      | 3 | 2,7449 | 0,322 | -0,37  |
| 18 | P43243 MATR3_HUMAN | R.SY#SPDGKES#PSDKK.S               | Y597:S604:      | 2 | 3,0956 | 0,302 | -0,507 |
| 18 | Q9NZM3 ITSN2_HUMAN | K.REEPEALY#AAVNK.K                 | Y967:           | 3 | 3,4293 | 0,253 | 0,117  |
| 18 | Q02952 AKA12_HUMAN | K.EDEKGGDDVDDPENQNSALADTDASGGLTK.E |                 | 3 | 6,0326 | 0,55  | -0,487 |
| 18 | Q8WU90 ZC3HF_HUMAN | R.EVFEPPELVNDDDEEADDTR.Y           |                 | 3 | 5,6576 | 0,473 | -0,36  |
| 18 | P09972 ALDOC_HUMAN | K.VDKGVVPLAGTDGETTTQGLDGLSER.C     |                 | 3 | 5,5982 | 0,508 | -0,56  |
| 18 | P78527 PRKDC_HUMAN | R.DPTVHDDVLEEM*DELNR.H             |                 | 3 | 5,4585 | 0,272 | -0,17  |
| 18 | O75909 CCNK_HUMAN  | K.DLAHTPSQLEGLDPATEAR.Y            |                 | 3 | 5,1636 | 0,461 | -0,453 |

|    |                    |                                  |   |        |       |        |
|----|--------------------|----------------------------------|---|--------|-------|--------|
| 18 | O95336 6PGL_HUMAN  | R.ILEDQEENPLPAALVQPHTGK.L        | 3 | 5,1193 | 0,482 | 0,159  |
| 18 | Q9Y490 TLN1_HUMAN  | K.DHFGLEGDEESTM*LEDSVSPK.K       | 3 | 5,0786 | 0,552 | -0,469 |
| 18 | P46060 RAGP1_HUMAN | R.DAALAVAEAM*ADKAELEK.L          | 2 | 4,9878 | 0,468 | -0,328 |
| 18 | P63027 VAMP2_HUMAN | K.LSELDDRADALQAGASQFETSAK.L      | 3 | 4,8962 | 0,457 | -0,367 |
| 18 | P00338 LDHA_HUMAN  | K.DQLIYNLLKEEQTPQNK.I            | 3 | 4,8693 | 0,312 | 0      |
| 18 | P17980 PRS6A_HUMAN | K.AM*EVDERPTEQYSDIGGLDK.Q        | 3 | 4,8424 | 0,534 | -0,081 |
| 18 | P31323 KAP3_HUMAN  | K.DGEHVIDQGDDGDNFYVIDR.G         | 3 | 4,7763 | 0,561 | 0,241  |
| 18 | Q15642 CIP4_HUMAN  | R.DQAHFYFSQM*PQIFDK.L            | 3 | 4,7416 | 0,421 | -0,635 |
| 18 | Q9NVA2 SEP11_HUMAN | K.DTDPDSKPFSLQETYEAK.R           | 3 | 4,5904 | 0,334 | 0      |
| 18 | P60709 ACTB_HUMAN  | R.VAPEEHPVLLTEAPLNPK.A           | 2 | 4,5196 | 0,497 | -1,124 |
| 18 | P42166 LAP2A_HUMAN | K.GPPDFSSDEEREPTVVLGSGAAAAGR.S   | 3 | 4,4986 | 0,534 | -0,356 |
| 18 | P32004 L1CAM_HUMAN | R.DLQELGSDSKYFIEDGR.L            | 3 | 4,4981 | 0,376 | -0,366 |
| 18 | P08195 4F2_HUMAN   | K.ADLLLSTQPGREEGSPLELER.L        | 3 | 4,4083 | 0,434 | -0,317 |
| 18 | P50990 TCPQ_HUMAN  | K.TAEELM*NFSKGEENLM*DAQVK.A      | 3 | 4,2692 | 0,42  | -0,303 |
| 18 | P80723 BASP_HUMAN  | K.AEPPKAPEQEQAAPGPAAGGEAPK.A     | 3 | 4,1651 | 0,337 | -0,876 |
| 18 | Q08211 DHX9_HUMAN  | K.DKDDDDGGEDDDANCNLICGDEYGPETR.L | 3 | 4,1022 | 0,545 | -0,361 |
| 18 | Q15418 KS6A1_HUMAN | R.DLKPSNILYVDESGNPECLR.I         | 3 | 4,0919 | 0,242 | -0,394 |
| 18 | Q99873 ANM1_HUMAN  | K.DVAIKEPLVDVDPK.Q               | 3 | 4,0878 | 0,436 | -0,112 |
| 18 | O94925 GLSK_HUMAN  | K.DGPGETDAFGNSEGKELVASGENK.I     | 3 | 4,0803 | 0,492 | 0,532  |
| 18 | P49720 PSB3_HUMAN  | R.DAVSGM*GVIVHIEK.D              | 2 | 4,0502 | 0,489 | 0,308  |
| 18 | Q07812 BAX_HUMAN   | R.M*GGEAPELALDPVPQDASTKK.L       | 3 | 4,0192 | 0,406 | -0,084 |
| 18 | O94880 PHF14_HUMAN | R.KAELM*GISTDIFPVDNSDTSSSVDGR.R  | 3 | 4,0091 | 0,321 | -0,133 |
| 18 | Q9Y295 DRG1_HUMAN  | K.DKGGINLTATCPQSELDVETVK.S       | 3 | 4,009  | 0,43  | -0,546 |
| 18 | P53396 ACLY_HUMAN  | R.DEPSVAAM*VYPFTGDHK.Q           | 2 | 3,9912 | 0,45  | -0,519 |
| 18 | P21333 FLNA_HUMAN  | R.SAGQGEVLVYVEDPAGHQEEAK.V       | 3 | 3,9803 | 0,339 | -0,475 |
| 18 | P46777 RL5_HUMAN   | R.IEGDM*IVCAAYAHLPK.Y            | 3 | 3,9626 | 0,432 | -0,189 |
| 18 | Q15691 MARE1_HUMAN | R.QGQETAVAPSLVAPALNPK.K          | 3 | 3,9599 | 0,232 | -0,181 |
| 18 | P51812 KS6A3_HUMAN | R.DLKPSNILYVDESGNPESIR.I         | 3 | 3,9586 | 0,286 | -0,407 |
| 18 | P60709 ACTB_HUMAN  | R.VAPEEHPVLLTEAPLNPK.A           | 3 | 3,9301 | 0,374 | 0,468  |
| 18 | Q6DD88 ATLA3_HUMAN | R.GADDAM*ESSKPGPVQVVLVQK.D       | 3 | 3,9241 | 0,191 | 0,169  |
| 18 | P06748 NPM_HUMAN   | K.DELHIVEAEAM*NYEGSPIK.V         | 3 | 3,9081 | 0,272 | -0,423 |
| 18 | P35580 MYH10_HUMAN | K.VEDM*AELTCLNEASVLHNLK.D        | 3 | 3,9045 | 0,432 | -0,477 |
| 18 | P35606 COPB2_HUMAN | K.GVNCIDYYSGGDKPYLISGADDR.L      | 3 | 3,8864 | 0,378 | 0,65   |

|    |                    |                                 |   |        |       |        |
|----|--------------------|---------------------------------|---|--------|-------|--------|
| 18 | P28482 MK01_HUMAN  | R.DLKPSNLLLNTTCDLK.I            | 3 | 3,8804 | 0,183 | -0,397 |
| 18 | Q9Y490 TLN1_HUMAN  | R.M*VAAATNNLCEAANA AVQGHASQEK.L | 3 | 3,8777 | 0,471 | -0,64  |
| 18 | P10809 CH60_HUMAN  | K.VGEVIVTKDDAM*LLK.G            | 2 | 3,868  | 0,37  | -0,296 |
| 18 | P51858 HDGF_HUMAN  | K.EAATLEVERPLPM*EVEK.N          | 2 | 3,8427 | 0,364 | 0,81   |
| 18 | Q9Y2W1 TR150_HUMAN | R.M*DSFEDLARPSGLLAQER.K         | 3 | 3,8344 | 0,389 | -1,013 |
| 18 | Q14697 GANAB_HUMAN | R.VVIIGAGKPAAVVLQTK.G           | 3 | 3,8323 | 0,392 | -0,44  |
| 18 | Q9BRJ6 CG050_HUMAN | K.GEAVLRPGLDAEPELSPEEQR.V       | 3 | 3,8013 | 0,335 | -0,239 |
| 18 | Q14690 RRP5_HUMAN  | R.IEEALM*DPGRQPESADDFDR.L       | 3 | 3,7935 | 0,304 | -0,238 |
| 18 | P14324 FPPS_HUMAN  | R.VLTEDEM*GHPEIGDAIAR.L         | 2 | 3,7924 | 0,512 | -0,186 |
| 18 | Q86UP2 KTN1_HUMAN  | R.EVIDLLKPDQVEGIQK.S            | 2 | 3,7884 | 0,315 | -0,268 |
| 18 | Q9Y490 TLN1_HUMAN  | K.LLAALLEDEGGSGRPLLQAAK.G       | 3 | 3,7757 | 0,441 | -0,69  |
| 18 | Q2TAA2 IAH1_HUMAN  | R.DVAEAKPELSLLGDGDH.-           | 2 | 3,747  | 0,52  | -0,276 |
| 18 | P13693 TCTP_HUMAN  | R.DLISHDEM*FSDIYK.I             | 3 | 3,7453 | 0,369 | 0      |
| 18 | P30041 PRDX6_HUMAN | R.ELAILLGM*LDPAEKDEK.G          | 2 | 3,7278 | 0,375 | -0,578 |
| 18 | P14868 SYDC_HUMAN  | R.LPLQLDDAVRPEAEGEEEGR.A        | 3 | 3,7201 | 0,403 | -0,082 |
| 18 | Q9BT25 NYS48_HUMAN | R.SFAQVLELSAEASK.E              | 2 | 3,7131 | 0,402 | -0,742 |
| 18 | Q8IU8 MINA_HUMAN   | K.DHIVLTVLPDQDQSDAQEK.M         | 3 | 3,6825 | 0,375 | -0,401 |
| 18 | Q9ULX6 AKP8L_HUMAN | R.DQDLTQEIAM*EHFVK.K            | 2 | 3,6783 | 0,393 | 0,804  |
| 18 | P12004 PCNA_HUMAN  | R.DLSHIGDAVVISCAK.D             | 2 | 3,6659 | 0,51  | -0,539 |
| 18 | O14965 STK6_HUMAN  | R.DIKPENLLGSGAGELK.I            | 3 | 3,5494 | 0,349 | -0,216 |
| 18 | Q86UP2 KTN1_HUMAN  | K.LQTLVSEQPNKDVVEQM*EK.C        | 3 | 3,5455 | 0,231 | -0,164 |
| 18 | Q13823 NOG2_HUMAN  | R.DLVTEDTGVRNEAQEEIYK.K         | 3 | 3,5307 | 0,372 | -0,331 |
| 18 | Q8TD26 CHD6_HUMAN  | R.DDHLSLPDVTCEFISK.V            | 3 | 3,5209 | 0,201 | -0,552 |
| 18 | Q99873 ANM1_HUMAN  | K.DVAIKEPLVDVDPK.Q              | 2 | 3,5186 | 0,191 | -0,373 |
| 18 | Q02818 NUCB1_HUMAN | K.M*DAEQDPNVQVDHLNLLK.Q         | 3 | 3,5163 | 0,191 | -0,087 |
| 18 | Q13151 ROA0_HUMAN  | K.GDVAEGDLIEHFSQFGTVEK.A        | 3 | 3,5162 | 0,474 | -0,672 |
| 18 | P54577 SYYC_HUMAN  | R.QVEPLDPPAGSAPGEHVFK.G         | 3 | 3,5157 | 0,311 | -0,088 |
| 18 | O75369 FLNB_HUMAN  | K.DLDIIDNYDYSHTVK.Y             | 2 | 3,5042 | 0,358 | -0,067 |
| 18 | P21333 FLNA_HUMAN  | K.DAGEGLLAVQITDPEGKPK.K         | 3 | 3,4997 | 0,49  | 0      |
| 18 | Q08752 PPID_HUMAN  | K.DGSGDShPDFPEDADIDLK.D         | 3 | 3,4996 | 0,383 | -0,36  |
| 18 | P11387 TOP1_HUMAN  | K.NLQLFM*ENKQPEDDLFDR.L         | 3 | 3,4976 | 0,209 | -0,726 |
| 18 | Q9NTK5 OLA1_HUMAN  | R.AFEDDDITHVEGSVDPIR.D          | 3 | 3,4967 | 0,37  | 0,272  |
| 18 | P49840 GSK3A_HUMAN | R.DIKQNLLVDPDTAVLK.L            | 3 | 3,4769 | 0,216 | -0,097 |

|    |                    |                                |   |        |       |        |
|----|--------------------|--------------------------------|---|--------|-------|--------|
| 18 | P54578 UBP14_HUMAN | K.LEAIEDDSVKETDSSSASAATPSK.K   | 3 | 3,4527 | 0,319 | -0,825 |
| 18 | Q7L2H7 EIF3M_HUMAN | K.DFIDSLGLLHEQNM*AK.M          | 2 | 3,4319 | 0,298 | -0,661 |
| 18 | Q8WXH0 SYNE2_HUMAN | K.DAERGGDTSCENLLDAFSIK.L       | 3 | 3,4112 | 0,285 | -0,487 |
| 18 | Q9NY12 NOLA1_HUMAN | K.CTTDENKVPYFNAPVYLENK.E       | 3 | 3,4092 | 0,262 | -0,305 |
| 18 | Q13435 SF3B2_HUMAN | K.IEEAM*DGSETPQLFTVLPEKR.T     | 3 | 3,3869 | 0,293 | -0,304 |
| 18 | O75534 CSDE1_HUMAN | K.DVEGSTSPQIGDKVEFSISDK.Q      | 3 | 3,3841 | 0,4   | -0,082 |
| 18 | P51858 HDFG_HUMAN  | R.GPPQEEEEEEDEEEATKEDAEAPGIR.D | 3 | 3,3721 | 0,542 | 0,301  |
| 18 | P00558 PGK1_HUMAN  | K.ALESPERPFLAILGGAK.V          | 3 | 3,3711 | 0,333 | -0,62  |
| 18 | Q6PL24 TMED8_HUMAN | R.DVQAGSHDYPGEGIYLLK.F         | 3 | 3,3619 | 0,261 | -0,28  |
| 18 | Q9BXJ9 NARG1_HUMAN | K.DDDDEEIGGPKEELIPEK.L         | 3 | 3,3518 | 0,477 | -0,18  |
| 18 | Q02952 AKA12_HUMAN | R.TEETATEM*LTSELQTAHVVIK.A     | 3 | 3,3497 | 0,355 | -0,462 |
| 18 | Q99459 CDC5L_HUMAN | R.DKLNINPEDGM*ADYSDPSYVK.Q     | 3 | 3,3416 | 0,087 | -1,916 |
| 18 | Q9NV06 SOF1_HUMAN  | K.M*DGPGYGDEEEPLHTILGK.T       | 3 | 3,3384 | 0,34  | -0,353 |
| 18 | P23634 AT2B4_HUMAN | K.DAEGLEIDHAEM*ELR.R           | 2 | 3,3338 | 0,292 | -0,263 |
| 18 | O00534 LHR2A_HUMAN | R.DVPRPILLGASAPLK.I            | 3 | 3,3287 | 0,193 | -0,118 |
| 18 | Q00610 CLH1_HUMAN  | R.LAELEEFINGPNNAHIQVQVDR.C     | 3 | 3,3163 | 0,378 | -0,371 |
| 18 | P26196 DDX6_HUMAN  | K.SIEEQLGTEIKPIPSNIDK.S        | 3 | 3,3096 | 0,226 | -0,607 |
| 18 | P50991 TCPD_HUMAN  | R.DALSDLALHFLNK.M              | 2 | 3,3012 | 0,42  | -0,502 |
| 18 | Q15149 PLEC1_HUMAN | R.LEDLLQDAQDEKEQLNEYK.G        | 3 | 3,3    | 0,171 | -0,552 |
| 18 | O43390 HNRPR_HUMAN | K.VTEGLVDVILYHQPDCK.K          | 3 | 3,2913 | 0,367 | -0,283 |
| 18 | P16152 CBR1_HUMAN  | R.DVCTELLPLIKPQGR.V            | 2 | 3,2859 | 0,46  | -0,561 |
| 18 | P20810 ICAL_HUMAN  | K.DLDDALDKLSDSLGQR.Q           | 3 | 3,2836 | 0,245 | -0,415 |
| 18 | P04792 HSPB1_HUMAN | R.VSLDVNHFAPELTVK.T            | 2 | 3,2829 | 0,489 | -0,547 |
| 18 | O95433 AHS1_HUMAN  | K.DEPDTNLVALM*KEEGVK.L         | 2 | 3,2819 | 0,283 | -0,449 |
| 18 | P31942 HNRH3_HUMAN | R.ATGEADVEFVTHEDAVAAM*SK.D     | 3 | 3,2741 | 0,393 | 0,083  |
| 18 | Q7KZ85 SPT6H_HUMAN | R.VAPYRPDQQVEEDDDFM*DENQGK.G   | 3 | 3,272  | 0,175 | -0,133 |
| 18 | P10809 CH60_HUMAN  | K.VGEVIVTKDDAM*LLK.G           | 3 | 3,267  | 0,422 | 0      |
| 18 | P21333 FLNA_HUMAN  | K.DAGEGLLAVQITDPEGKPK.K        | 2 | 3,255  | 0,392 | -0,881 |
| 18 | P37802 TAGL2_HUMAN | R.NFSDNQLQEGK.N                | 2 | 3,2257 | 0,439 | 0,381  |
| 18 | P55884 EIF3B_HUMAN | K.DRPQEADGIDSIVVDNVPQVGPDR.L   | 3 | 3,2248 | 0,167 | -0,816 |
| 18 | P62280 RS11_HUMAN  | R.DVQIGDIVTVGECRPLSK.T         | 2 | 3,222  | 0,404 | -0,491 |
| 18 | P00367 DHE3_HUMAN  | K.IIAEGANGPTTPEADKIFLER.N      | 3 | 3,2167 | 0,364 | -0,082 |
| 18 | Q9Y4L1 HYOU1_HUMAN | K.VAIVKPGVPM*EIVLNK.E          | 3 | 3,1995 | 0,314 | -0,212 |



|    |                    |                                |   |        |       |        |
|----|--------------------|--------------------------------|---|--------|-------|--------|
| 18 | P35658 NU214_HUMAN | K.QGSLINSLKPSGPTPASGQLSSGDK.A  | 3 | 3,1949 | 0,309 | -0,151 |
| 18 | O14965 STK6_HUMAN  | R.DIKPENLLLGSAGELK.I           | 2 | 3,1871 | 0,326 | -0,431 |
| 18 | Q5T4S7 UBR4_HUMAN  | K.TLSDVEDQKELASPVSPELR.Q       | 3 | 3,185  | 0,308 | -0,083 |
| 18 | O75400 PR40A_HUMAN | R.RTLLEQLDDDDQ.-               | 2 | 3,155  | 0,371 | 0,181  |
| 18 | P13797 PLST_HUMAN  | K.EGICALGGTSELSSEGTQHSYSEEEK.Y | 3 | 3,1539 | 0,32  | -0,131 |
| 18 | O14744 ANM5_HUMAN  | R.DDIENAPTTHTTEYSGEEK.T        | 3 | 3,149  | 0,379 | 0,241  |
| 18 | P24534 EF1B_HUMAN  | K.DDDDIDLFGSDDEEESSEAKR.L      | 3 | 3,1325 | 0,434 | -0,226 |
| 18 | O96017 CHK2_HUMAN  | R.DLKPENVLLSSQEEDCLIK.I        | 3 | 3,1277 | 0,144 | -0,574 |
| 18 | P50613 CDK7_HUMAN  | R.DLKPNLLLLDENGVLK.L           | 3 | 3,1275 | 0,141 | -0,306 |
| 18 | Q5VT52 K0460_HUMAN | R.DAPTHLPSVDLSNPFTK.E          | 3 | 3,1227 | 0,235 | -0,497 |
| 18 | Q5TDH0 DDI2_HUMAN  | R.DM*LLANPHELSLLK.E            | 3 | 3,1226 | 0,155 | -0,227 |
| 18 | O14795 UN13B_HUMAN | R.DGQAGFGEQEKPLEVTGQAEK.E      | 3 | 3,1198 | 0,41  | -0,165 |
| 18 | P00558 PGK1_HUMAN  | K.DVLFLKDCVGPEVEK.A            | 2 | 3,1112 | 0,432 | -0,14  |
| 18 | P13010 KU86_HUMAN  | K.DQVTAQEIFQDNHEDGPTAK.K       | 3 | 3,0948 | 0,353 | 0      |
| 18 | Q8N766 K0090_HUMAN | K.DKESGM*SSLYVFNPIFGK.W        | 3 | 3,0901 | 0,269 | -0,629 |
| 18 | P54578 UBP14_HUMAN | K.FDDDKVSIVTPEDILR.L           | 3 | 3,0862 | 0,165 | -0,295 |
| 18 | P20042 IF2B_HUMAN  | K.DASDDLDDLNFFNQKK.K           | 2 | 3,086  | 0,397 | -0,583 |
| 18 | Q96P20 PUS7_HUMAN  | R.IEDYGLKPVPGDLVLK.G           | 3 | 3,0763 | 0,134 | -0,208 |
| 18 | Q99460 PSMD1_HUMAN | K.DTSEDIEELVEPVAAHGPK.I        | 2 | 3,072  | 0,472 | -0,479 |
| 18 | Q86UP2 KTN1_HUMAN  | R.EVIDLLKPDQVEGIQK.S           | 3 | 3,0718 | 0,303 | -0,1   |
| 18 | Q8IYB7 DI3L2_HUMAN | R.DLDDALSCKPLADGNFK.V          | 3 | 3,0534 | 0,293 | -0,292 |
| 18 | Q8IZ07 AN13A_HUMAN | R.DYHNTSM*ALEGVPELLQK.I        | 3 | 3,0306 | 0,142 | -0,533 |
| 18 | P31150 GDIA_HUMAN  | R.KQNDVFGAEQ.-                 | 2 | 3,0282 | 0,463 | -0,772 |
| 18 | Q15428 SF3A2_HUMAN | R.QLALETIDINKDPYFM*K.N         | 3 | 3,0206 | 0,207 | -0,089 |
| 18 | P18669 PGAM1_HUMAN | R.YADLTEDQLPSCESLKDTIAR.A      | 3 | 3,0006 | 0,431 | -0,302 |
| 18 | Q2TAA2 IAH1_HUMAN  | R.DVAEAKPELSLLGDGDH.-          | 3 | 2,9789 | 0,342 | 0,518  |
| 18 | Q9H3K6 BOLA2_HUMAN | R.DLEAEHVEVEDTTLNR.C           | 2 | 2,9772 | 0,57  | -0,196 |
| 18 | P27816 MAP4_HUMAN  | K.DM*ELPTEKEVALVK.D            | 3 | 2,9663 | 0,126 | -0,113 |
| 18 | Q15149 PLEC1_HUMAN | R.DALDGPAAEAPEHSFDGLR.R        | 3 | 2,9623 | 0,186 | -0,785 |
| 18 | P20810 ICAL_HUMAN  | K.DLDDALDKLSDSLGQR.Q           | 2 | 2,9577 | 0,44  | -0,485 |
| 18 | P49591 SYSC_HUMAN  | R.EIGNLLHPSVPISNDEDVDNK.V      | 3 | 2,9477 | 0,3   | 0,238  |
| 18 | P55084 ECHB_HUMAN  | K.AQDEGLSDVVVFPKVPKG.D         | 3 | 2,9262 | 0,27  | -0,289 |
| 18 | Q06830 PRDX1_HUMAN | K.ATAVM*PDGQFKDISLSDYK.G       | 3 | 2,9238 | 0,369 | -0,348 |

|    |                     |                             |   |        |       |        |
|----|---------------------|-----------------------------|---|--------|-------|--------|
| 18 | Q9UGP8 SEC63_HUMAN  | K.DATSRPTDNILIPQLIR.E       | 3 | 2,923  | 0,123 | -0,476 |
| 18 | Q6P2Q9 PRP8_HUMAN   | R.EELGLIEQAYDNPHEALSR.I     | 3 | 2,9166 | 0,353 | -0,503 |
| 18 | Q15181 IPYR_HUMAN   | K.VIAINVDDPDAANYNDINDVKR.L  | 3 | 2,9163 | 0,362 | -1,198 |
| 18 | P31943 HNRH1_HUMAN  | R.VTGEADVEFATHEDAVAAM*SK.D  | 3 | 2,8983 | 0,276 | 0,5    |
| 18 | P23634 AT2B4_HUMAN  | K.DAEGLEIDHAEM*ELR.R        | 3 | 2,8794 | 0,288 | -0,394 |
| 18 | Q8TAT6 NPL4_HUMAN   | R.DECLLPCKDAPELGYAK.E       | 3 | 2,8143 | 0,302 | -0,462 |
| 18 | O75369 FLNB_HUMAN   | R.DAGEGLLAVQITDQEGKPK.R     | 3 | 2,8142 | 0,247 | 0,279  |
| 18 | A0JLS5 A0JLS5_HUMAN | K.DVTEAEQAEEQARQEEQVVR.Q    | 3 | 2,8137 | 0,242 | -0,312 |
| 18 | P62937 PPIA_HUMAN   | K.KITIADCGQLE.-             | 2 | 2,8096 | 0,451 | -0,098 |
| 18 | P32004 L1CAM_HUMAN  | R.DLQELGDSDKYFIEDGR.L       | 2 | 2,8091 | 0,367 | -0,061 |
| 18 | Q92621 NU205_HUMAN  | R.DDM*IHQPLLTEK.Q           | 3 | 2,8072 | 0,267 | 0,117  |
| 18 | P13984 T2FB_HUMAN   | K.DLVDITKQPVVYLK.E          | 2 | 2,7662 | 0,262 | -0,449 |
| 18 | P26640 SYVC_HUMAN   | R.AASGYPVKVPLEVQEAEAK.L     | 3 | 2,7616 | 0,128 | -0,174 |
| 18 | P30041 PRDX6_HUMAN  | K.DGDSVM*VLPTIPEEEAKK.L     | 2 | 2,7593 | 0,278 | -0,185 |
| 18 | P12004 PCNA_HUMAN   | R.DLSHIGDAVVISCAK.D         | 3 | 2,7541 | 0,188 | -0,346 |
| 18 | P49454 CENPF_HUMAN  | R.DANSSFFDNSSPHLLDQLK.A     | 3 | 2,7481 | 0,243 | -0,576 |
| 18 | Q9P2J5 SYLC_HUMAN   | K.EDKGTGVVTSVPSDSPDDIAALR.D | 3 | 2,7405 | 0,138 | 0,079  |
| 18 | P50991 TCPD_HUMAN   | K.GIEILTDM*SRPVELSDR.E      | 3 | 2,7265 | 0,332 | -0,282 |
| 18 | P13984 T2FB_HUMAN   | K.DLVDITKQPVVYLK.E          | 3 | 2,7219 | 0,164 | -0,673 |
| 18 | O60884 DNJA2_HUMAN  | K.LYDILGVPPGASENELKK.A      | 3 | 2,6954 | 0,26  | -0,282 |
| 18 | P62269 RS18_HUMAN   | K.DGKYSQVLANGLDNK.L         | 3 | 2,6888 | 0,184 | 0,338  |
| 18 | P00558 PGK1_HUMAN   | K.ALESPERFLAILGGAK.V        | 2 | 2,6803 | 0,326 | -0,483 |
| 18 | O94906 PRP6_HUMAN   | K.DDEEADAIYAALDKR.M         | 3 | 2,6741 | 0,365 | -0,432 |
| 18 | Q9Y6M5 ZNT1_HUMAN   | K.DAEKTPAVSISCLELSNLEK.K    | 3 | 2,6634 | 0,115 | -0,552 |
| 18 | P10809 CH60_HUMAN   | K.ISSIQSIVPALEIANAHR.K      | 3 | 2,6633 | 0,237 | -0,572 |
| 18 | Q9Y2Z0 SUGT1_HUMAN  | K.LELLHPIPEQSTFK.V          | 3 | 2,6608 | 0,202 | -0,311 |
| 18 | P22626 ROA2_HUMAN   | R.GGNFGFGDSR.G              | 2 | 2,6503 | 0,158 | 0,12   |
| 18 | P04406 G3P_HUMAN    | K.LVINGNPITIFQERDPSK.I      | 2 | 2,6484 | 0,393 | -0,418 |
| 18 | O43390 HNRPR_HUMAN  | K.VTEGLVDVILYHQPDCK.K       | 2 | 2,6311 | 0,366 | -0,251 |
| 18 | P08670 VIME_HUMAN   | K.FADLSEANR.N               | 2 | 2,6231 | 0,336 | 0,112  |
| 18 | Q9NY61 AATF_HUMAN   | K.LLSFM*APIDHTTM*NDDAR.T    | 3 | 2,6217 | 0,212 | -0,44  |
| 18 | Q96AG4 LRC59_HUMAN  | R.DKLDGNELDLSLSDLNEVPVK.E   | 3 | 2,615  | 0,243 | -0,554 |
| 18 | P21333 FLNA_HUMAN   | K.FNEEHIPDSPFVVPVSPSGDAR.R  | 3 | 2,6107 | 0,097 | -0,445 |

|    |                    |                                |              |   |        |       |        |
|----|--------------------|--------------------------------|--------------|---|--------|-------|--------|
| 18 | Q9UL26 RB22A_HUMAN | K.DYADSIHAIFVETSAK.N           |              | 3 | 2,61   | 0,402 | -0,414 |
| 18 | Q99460 PSMD1_HUMAN | K.DTSEDIEELVEPVAAHGPK.I        |              | 3 | 2,6094 | 0,258 | -0,27  |
| 18 | O94760 DDAH1_HUMAN | K.DYAVSTVPVADGLHLK.S           |              | 3 | 2,6017 | 0,357 | -0,109 |
| 18 | Q6S8J3 A26CA_HUMAN | K.AGFAGDDAPR.A                 |              | 2 | 2,5793 | 0,357 | 0,062  |
| 18 | Q92621 NU205_HUMAN | R.DDM*IHQLPLLTEK.Q             |              | 2 | 2,5164 | 0,33  | 0      |
| 18 | P46777 RL5_HUMAN   | R.IEGDM*IVCAAYAHLPK.Y          |              | 2 | 2,4417 | 0,31  | -0,505 |
| 18 | P60709 ACTB_HUMAN  | R.GYSFTTTAER.E                 |              | 2 | 2,4408 | 0,511 | -0,215 |
| 18 | P60903 S10AA_HUMAN | K.EFPGFLENQKDPLAVDK.I          |              | 2 | 2,3969 | 0,382 | -0,501 |
| 18 | P23381 SYWC_HUMAN  | R.KLSFDQ.-                     |              | 2 | 2,3857 | 0,227 | -0,069 |
| 18 | O75369 FLNB_HUMAN  | R.DAGEGLLAVQITDQEGPK.R         |              | 2 | 2,2957 | 0,449 | -0,248 |
| 18 | P00558 PGK1_HUMAN  | K.ITLPVDFVTADKFDENAK.T         |              | 2 | 2,2389 | 0,347 | -0,663 |
| 18 | P35658 NU214_HUMAN | K.DSDPVM*AGIGEEIAHFQK.E        |              | 2 | 2,2103 | 0,519 | -0,623 |
| 18 | P62736 ACTA_HUMAN  | R.DLTDYLM*K.I                  |              | 2 | 2,1552 | 0,124 | 0      |
| 18 | Q8IYB7 DI3L2_HUMAN | R.DLDDALSCKPLADGNFK.V          |              | 2 | 2,1433 | 0,259 | 1,234  |
| 18 | P55036 PSMD4_HUMAN | R.IIAFVGSPVEDNEKDLVK.L         |              | 2 | 2,0939 | 0,26  | -0,371 |
| 18 | Q6NYC1 JMJD6_HUMAN | R.DDSPLYIFDSSYGEHPK.R          |              | 2 | 2,0769 | 0,193 | -0,372 |
| 18 | O15516 CLOCK_HUMAN | R.DDSSIFDGLVEEDDKDK.A          |              | 2 | 2,0046 | 0,127 | -0,633 |
| 18 | P46976 GLYG_HUMAN  | R.KLDTYLQ.-                    |              | 2 | 2,0021 | 0,134 | 0,069  |
| 19 | P15407 FOSL1_HUMAN | R.RPCEQS#PEEEER.R              | S101:        | 2 | 3,6046 | 0,403 | 0,281  |
| 19 | P49006 MRP_HUMAN   | K.KPFKLS#GLS#FK.R              | S101:S104:   | 2 | 3,7445 | 0,506 | -0,346 |
| 19 | Q96PY5 FMNL2_HUMAN | K.LLEQEALM*EQQDPKS#PSHK.S      | S1017:       | 3 | 3,4987 | 0,147 | 0,159  |
| 19 | P17096 HMGA1_HUMAN | K.KLEKEEEEGISQES#S#EEEEQ.-     | S102:S103:   | 3 | 3,1485 | 0,199 | -0,611 |
| 19 | P05387 RLA2_HUMAN  | K.KDEKKEES#EES#DDDM*GFGLFD.-   | S102:S105:   | 3 | 3,1747 | 0,228 | -0,209 |
| 19 | Q9UPP1 PHF8_HUMAN  | R.RPS#VGSQSNQAGQGK.R           | S1021:       | 3 | 2,7299 | 0,165 | -0,116 |
| 19 | Q01804 OTUD4_HUMAN | R.VQRPKEES#S#EDENEVSNILR.S     | S1023:S1024: | 3 | 5,472  | 0,424 | 0,581  |
| 19 | Q5VWN6 CJ018_HUMAN | K.TGTLQDLIQHGS#PINNECHPSLER.K  | S1025:       | 3 | 5,3866 | 0,401 | -0,196 |
| 19 | P78332 RBM6_HUMAN  | R.EKLQSFDS#PER.K               | S1025:       | 2 | 2,872  | 0,276 | -0,259 |
| 19 | P17096 HMGA1_HUMAN | K.KLEKEEEEGISQESS#EEEEQ.-      | S103:        | 3 | 4,1877 | 0,323 | -0,869 |
| 19 | O95466 FMNL_HUMAN  | K.EAAAQEAGADTPGKGEPPAPKS#PPK.A | S1031:       | 3 | 4,8615 | 0,33  | -0,59  |
| 19 | O15164 TIF1A_HUMAN | R.LKS#IEER.Q                   | S1042:       | 2 | 2,2918 | 0,174 | -0,192 |
| 19 | Q8IXQ4 K1704_HUMAN | K.KQDDS#PPRPIIGPALPPGFIK.S     | S105:        | 3 | 4,802  | 0,366 | -0,551 |
| 19 | Q8N1G0 ZN687_HUMAN | R.HGLQLGAQS#PGR.G              | S1057:       | 3 | 3,8748 | 0,353 | -0,07  |
| 19 | Q8N1G0 ZN687_HUMAN | R.HGLQLGAQS#PGR.G              | S1057:       | 2 | 3,2814 | 0,557 | -0,188 |

|    |                     |                                      |              |   |        |       |        |
|----|---------------------|--------------------------------------|--------------|---|--------|-------|--------|
| 19 | Q08999 RBL2_HUMAN   | R.IQLSQNHVPVYIS#PHKNETM*LS#PR.E      | S1059:S1068: | 3 | 4,0158 | 0,456 | 1,086  |
| 19 | Q9BST9 RTKN_HUMAN   | R.RPS#DSGPPAERS#PCR.G                | S106:S115:   | 2 | 3,3001 | 0,392 | -0,467 |
| 19 | Q7Z422 CA144_HUMAN  | R.ILGSAS#PEEEQEKPILDRPTR.I           | S107:        | 3 | 3,6932 | 0,262 | 0,524  |
| 19 | O75808 CAN15_HUMAN  | K.GTHS#PPLTPEVAGLHGPRPL.-            | S1070:       | 3 | 3,1464 | 0,284 | -0,087 |
| 19 | O43741 AAKB2_HUMAN  | K.S#HNDFVAILDLPEGEHQYK.F             | S108:        | 3 | 4,7445 | 0,35  | -0,399 |
| 19 | Q8WYQ5 DGCR8_HUMAN  | R.KFS#PDLK.L                         | S109:        | 2 | 2,7973 | 0,127 | -0,533 |
| 19 | Q8IXM2 CQ049_HUMAN  | K.KVASGVLS#PPPAAPPPSSSSVPEAGGPPIKK.Q | S110:        | 3 | 4,9999 | 0,353 | -0,245 |
| 19 | Q99661 KIF2C_HUMAN  | R.SRS#TRM*S#TVSELR.I                 | S111:S115:   | 3 | 3,8123 | 0,464 | -0,108 |
| 19 | Q9NVM6 DJC17_HUMAN  | R.ERQAQAES#EEEEESR.S                 | S112:        | 3 | 4,9837 | 0,382 | -0,454 |
| 19 | Q9P1Y6 K1542_HUMAN  | R.GRECS#PTSSLER.L                    | S1124:       | 2 | 2,3796 | 0,328 | -0,753 |
| 19 | P46379 BAT3_HUMAN   | R.APPQTHLPSGASSGTGSASATHGGGS#PPGTR.G | S113:        | 3 | 3,1453 | 0,34  | -0,575 |
| 19 | Q4VXC3 Q4VXC3_HUMAN | R.RQFS#APNLK.A                       | S1141:       | 2 | 2,2096 | 0,258 | -0,321 |
| 19 | O60244 MED14_HUMAN  | R.M*PGM*SPANPSLHSPVPDASHS#PR.A       | S1144:       | 3 | 4,6535 | 0,396 | -0,737 |
| 19 | Q08AD1 CA1L1_HUMAN  | K.ADVPEKYDGES#DKEQFDDDDQK.V          | S1148:       | 3 | 2,8937 | 0,118 | -0,208 |
| 19 | O15027 SC16A_HUMAN  | R.FTGS#FDDDDPDPHRDPYGEVDR.R          | S1149:       | 3 | 3,9755 | 0,406 | -0,415 |
| 19 | Q9NW75 GPTC2_HUMAN  | K.KDHS#DS#DDQM*LVAK.R                | S115:S117:   | 3 | 3,9966 | 0,313 | -1,14  |
| 19 | P55196 AFAD_HUMAN   | R.ADHRS#SPNVANQPPS#PGGK.S            | S1155:S1165: | 3 | 5,3601 | 0,321 | -0,617 |
| 19 | P55196 AFAD_HUMAN   | R.ADHRSS#PNVANQPPS#PGGK.S            | S1156:S1165: | 3 | 4,2684 | 0,306 | -0,617 |
| 19 | Q9NTI5 PDS5B_HUMAN  | R.LDS#SEM*DHSENEYTM*SSPLPGKK.S       | S1176:       | 3 | 4,3006 | 0,297 | -0,456 |
| 19 | Q641Q2 FA21A_HUMAN  | K.SPM*FPALGEAS#SDDDLFQSAKPKPAK.K     | S1179:       | 3 | 4,2706 | 0,444 | -0,453 |
| 19 | P18669 PGAM1_HUMAN  | R.RS#YDVPPPPM*EPDHPFYSNISK.D         | S118:        | 3 | 3,3531 | 0,198 | 0,137  |
| 19 | Q02790 FKBP4_HUMAN  | K.VGEVCHITCKPEYAYGSAGS#PPK.I         | S118:        | 3 | 3,1769 | 0,13  | -0,141 |
| 19 | Q9NTI5 PDS5B_HUMAN  | R.LDSSEM*DHS#ENEDYTM*SSPLPGKK.S      | S1182:       | 3 | 6,145  | 0,351 | -0,456 |
| 19 | Q04637 IF4G1_HUMAN  | R.S#FSKEVEERS#R.E                    | S1186:S1195: | 2 | 2,0052 | 0,286 | -0,242 |
| 19 | Q9UQ35 SRRM2_HUMAN  | K.DKFS#PPFVQDRPESLVEFK.D             | S1188:       | 3 | 3,0836 | 0,232 | -0,556 |
| 19 | Q9UQ35 SRRM2_HUMAN  | K.DKFSPPFVQDRPES#SLVEFK.D            | S1198:       | 3 | 3,6312 | 0,305 | -0,159 |
| 19 | O95218 ZRAB2_HUMAN  | R.ENVEYIEREES#DGEYDEFGR.K            | S120:        | 3 | 5,1397 | 0,416 | 0,719  |
| 19 | P15408 FOSL2_HUMAN  | R.RDEQLS#PEEEEK.R                    | S120:        | 2 | 4,177  | 0,319 | -0,622 |
| 19 | Q9NZQ3 SPN90_HUMAN  | R.GPSASSVAVM*TSSTS#DHHLDAAAAAR.Q     | S122:        | 3 | 4,2358 | 0,488 | -0,871 |
| 19 | P46013 KI67_HUMAN   | R.RVS#RSS#FSSDPDEK.A                 | S125:S128:   | 2 | 2,3877 | 0,091 | -0,486 |
| 19 | Q02952 AKA12_HUMAN  | K.M*EDTLEHTDKEVSVETVS#ILSK.T         | S1256:       | 3 | 3,022  | 0,323 | -0,141 |
| 19 | Q13428 TCOF_HUMAN   | K.DDPDGKQEAQPQAAGM*LS#PK.T           | S1257:       | 3 | 2,7281 | 0,202 | -1,031 |
| 19 | Q5T8P6 RBM26_HUMAN  | R.LNHS#PPQSSSR.Y                     | S127:        | 3 | 3,2539 | 0,318 | 0,425  |

|    |                     |                                  |                    |   |        |       |        |
|----|---------------------|----------------------------------|--------------------|---|--------|-------|--------|
| 19 | P05787 K2C8_HUMAN   | K.SYKVS#TSGPR.A                  | S13:               | 2 | 2,0926 | 0,312 | -0,63  |
| 19 | Q5JSC5 Q5JSC5_HUMAN | R.LHS#GS#PPRAPPPEALHSGEAGR.A     | S13:S15:           | 3 | 4,133  | 0,411 | -0,353 |
| 19 | P53999 TCP4_HUMAN   | K.SKELVSSSS#GSDS#DSEVDKK.L       | S13:S17:           | 3 | 3,5893 | 1     | -0,237 |
| 19 | P15822 ZEP1_HUMAN   | K.SSESVS#PKKPLFLQPSELR.R         | S130:              | 3 | 2,8193 | 0,103 | 0,692  |
| 19 | O75494 FUSIP_HUMAN  | R.SRS#FDYNYR.R                   | S133:              | 3 | 3,3083 | 0,195 | 0,213  |
| 19 | O75494 FUSIP_HUMAN  | R.SRS#FDYNYR.R                   | S133:              | 2 | 2,7484 | 0,35  | -0,095 |
| 19 | P29692 EF1D_HUMAN   | R.ATAPQTQHVS#PM*RQVEPPAK.K       | S133:              | 3 | 2,7003 | 0,211 | -0,403 |
| 19 | Q13428 TCOF_HUMAN   | R.KLS#GDQPAART#PR.S              | S1350:T1358:       | 3 | 2,972  | 0,316 | -0,235 |
| 19 | Q13428 TCOF_HUMAN   | R.KLS#GDQPAART#PR.S              | S1350:T1358:       | 2 | 2,2679 | 0,171 | -0,549 |
| 19 | Q13459 MYO9B_HUMAN  | R.RTS#FSTSDVSK.L                 | S1354:             | 2 | 3,301  | 0,263 | -0,565 |
| 19 | Q9HCM1 CLO35_HUMAN  | K.HSSLGQSLS#PEK.I                | S1358:             | 2 | 3,8018 | 0,455 | -0,633 |
| 19 | O43294 TGFI1_HUMAN  | K.KRPS#LPSS#PSPGLPK.A            | S137:S141:         | 3 | 4,3363 | 0,429 | -0,107 |
| 19 | Q8IWS0 PHF6_HUMAN   | K.TAHNS#EADLEESFNEHELEPSSPK.S    | S138:              | 3 | 4,1329 | 0,475 | 0,593  |
| 19 | Q9C0C2 TB182_HUMAN  | R.HNGSLS#PGLEAR.D                | S1385:             | 2 | 4,0158 | 0,614 | -0,278 |
| 19 | P27708 PYR1_HUMAN   | R.RLS#SFVTK.G                    | S1406:             | 2 | 2,3282 | 0,275 | -0,12  |
| 19 | P18858 DNL1_HUMAN   | K.RTIQEVLEEQS#EDED.R             | S141:              | 3 | 3,4282 | 0,297 | 0,267  |
| 19 | Q92974 ARHG2_HUMAN  | R.GRSS#LSLAK.S                   | S143:              | 2 | 2,3968 | 0,221 | -0,733 |
| 19 | P27815 PDE4A_HUMAN  | R.RES#FLYR.S                     | S145:              | 2 | 2,3044 | 0,21  | -0,116 |
| 19 | P78316 NOP14_HUMAN  | K.HNDIVDS#DSDAEDR.G              | S146:              | 2 | 5,5172 | 0,495 | -0,146 |
| 19 | P52594 NUPL_HUMAN   | K.VVASVHASISGSS#ASSTSSTPEVKPLK.S | S147:              | 3 | 3,6993 | 0,226 | -0,34  |
| 19 | O95785 WIZ_HUMAN    | R.DSDKRPS#LGLAPGGLAVVGR.S        | S1480:             | 3 | 3,8501 | 0,347 | 0,089  |
| 19 | P46821 MAP1B_HUMAN  | R.KLGDVS#PTQIDVSQLGSKEDTK.M      | S1501:             | 3 | 5,6739 | 0,448 | -0,562 |
| 19 | Q9Y6D5 BIG2_HUMAN   | K.HLDVDLDRQS#LS#SIDKNPS#ER.G     | S1511:S1513:S1520: | 3 | 4,2966 | 0,395 | 1,168  |
| 19 | Q7L2J0 MEPCE_HUMAN  | R.RNS#CNVGGGGGFK.H               | S152:              | 2 | 3,6185 | 0,443 | -0,675 |
| 19 | Q9BUH6 CI142_HUMAN  | R.KS#PRPAGPQLFLPDPDPQR.G         | S152:              | 3 | 3,0984 | 0,193 | -0,417 |
| 19 | Q9H501 ESF1_HUMAN   | K.FKIDSNIS#PK.K                  | S153:              | 2 | 3,1476 | 0,311 | -0,099 |
| 19 | Q9H501 ESF1_HUMAN   | K.FKIDSNIS#PK.K                  | S153:              | 3 | 2,8107 | 0,254 | 0,074  |
| 19 | Q96125 SPF45_HUMAN  | R.RPDPDS#DEDEDYER.E              | S155:              | 3 | 5,1863 | 0,345 | -0,704 |
| 19 | Q96125 SPF45_HUMAN  | R.RPDPDS#DEDEDYER.E              | S155:              | 2 | 4,2131 | 0,473 | -1,342 |
| 19 | Q02880 TOP2B_HUMAN  | R.KAS#GSENEGDPGR.K               | S1550:             | 2 | 3,052  | 0,506 | -0,367 |
| 19 | Q96JC9 EAF1_HUMAN   | K.TS#PLKDNPSPEQLDDIKR.E          | S158:              | 3 | 3,6536 | 0,367 | 0,328  |
| 19 | O95684 FR1OP_HUMAN  | K.GPTTGEGALDLSVDHSPPKS#PEGK.T    | S160:              | 3 | 4,4133 | 0,153 | -0,67  |
| 19 | Q1KMD3 HNRL2_HUMAN  | K.REEDEPEERS#GDETPGS#EVPDGD.K    | S161:S168:         | 3 | 5,1222 | 0,369 | -0,677 |

|    |                    |                                 |                 |   |        |       |        |
|----|--------------------|---------------------------------|-----------------|---|--------|-------|--------|
| 19 | Q03164 HRX_HUMAN   | R.VRS#PTRSPSVKT#\$#PR.K         | S161:T170:S171: | 3 | 2,75   | 1     | -0,483 |
| 19 | P51608 MECP2_HUMAN | K.VGDTSLDPNDFDFTVTGRGS#PSRR.E   | S164:           | 3 | 3,0607 | 0,31  | 0,342  |
| 19 | P51858 HDGF_HUMAN  | R.RAGDLLEDS#PK.R                | S165:           | 2 | 3,5771 | 0,363 | -0,191 |
| 19 | O43399 TPD54_HUMAN | R.NSATFKS#FEDR.V                | S166:           | 2 | 2,9812 | 0,297 | 0,088  |
| 19 | Q99759 M3K3_HUMAN  | R.HLS#VSSQNPRG.S                | S166:           | 2 | 2,7236 | 0,36  | -0,87  |
| 19 | Q6NZI2 PTRF_HUMAN  | K.VM*IYQDEVKLPKLS#ISK.S         | S167:           | 3 | 3,7203 | 0,328 | -0,17  |
| 19 | P20020 AT2B1_HUMAN | K.NS#LKEANHDGDFGITLAELR.A       | S17:            | 3 | 4,0141 | 0,478 | -0,241 |
| 19 | O75379 VAMP4_HUMAN | R.HLNDDDVTS#VK.S                | S17:            | 2 | 3,9106 | 0,468 | -0,707 |
| 19 | Q8IUD2 RB6I2_HUMAN | R.SVGKVEPSSQS#PGRS#PR.L         | S17:S21:        | 2 | 3,557  | 0,421 | -1,083 |
| 19 | P35579 MYH9_HUMAN  | R.DELADEIANSS#GKGALALEEK.R      | S1714:          | 3 | 6,2778 | 0,454 | -0,153 |
| 19 | P16383 GCF_HUMAN   | K.RES#EDDPES#EPDDHEK.R          | S174:S180:      | 3 | 3,7588 | 0,442 | -0,441 |
| 19 | P16383 GCF_HUMAN   | K.RES#EDDPES#EPDDHEK.R          | S174:S180:      | 2 | 3,0513 | 0,367 | -0,706 |
| 19 | Q58FF8 H90B2_HUMAN | K.IEDVGS#DEEDDSGKDK.K           | S177:           | 2 | 3,8732 | 0,529 | -0,604 |
| 19 | Q9HB21 PKHA1_HUMAN | R.SQS#HLPYFTKPPQDSAVIK.A        | S177:           | 3 | 3,8381 | 0,284 | 0,394  |
| 19 | Q8WWQ0 PHIP_HUMAN  | R.RTAFYNEDDS#EEEQR.Q            | S1783:          | 3 | 4,5619 | 0,496 | -0,093 |
| 19 | Q8WWQ0 PHIP_HUMAN  | R.RTAFYNEDDS#EEEQR.Q            | S1783:          | 2 | 3,6105 | 0,435 | -0,248 |
| 19 | O00264 PGRC1_HUMAN | K.LLKEGEEPTVYS#DEEEKDESAR.K     | S181:           | 3 | 4,6683 | 0,558 | -0,938 |
| 19 | Q8WUB8 PHF10_HUMAN | K.RYS#PDELR.Y                   | S182:           | 2 | 3,111  | 0,145 | -0,109 |
| 19 | P49790 NU153_HUMAN | K.EIKDSTSQHDDDNIS#TTS#GFSSR.A   | S182:S185:      | 3 | 2,7261 | 0,269 | 0,409  |
| 19 | Q9NYF8 BCLF1_HUMAN | K.S#QECPKDTFEHDPSSEIDFNK.S      | S183:           | 3 | 3,2626 | 0,27  | -0,272 |
| 19 | Q8TEM1 PO210_HUMAN | R.AS#PGHSPHYFAASPTSPNALPPAR.K   | S1848:          | 3 | 5,3647 | 0,44  | 0,564  |
| 19 | Q13111 CAF1A_HUMAN | R.RGDSQECS#PRS#CELTSGPR.M       | S185:S188:      | 3 | 2,9494 | 0,507 | -1,051 |
| 19 | Q15785 TOM34_HUMAN | K.NRVPS#AGDVEK.A                | S186:           | 2 | 2,7184 | 0,44  | -0,39  |
| 19 | Q5T5U3 RHG21_HUMAN | R.LRTS#TSDLSR.G                 | S1860:          | 2 | 2,3754 | 0,347 | 0      |
| 19 | Q15366 PCBP2_HUMAN | K.GVTIPYRKPSS#SSPVIFAGGQDR.Y    | S187:           | 3 | 4,1983 | 0,356 | 0,292  |
| 19 | P43243 MATR3_HUMAN | R.DS#FDDRGPNSLPVLDYDHGSR.S      | S188:           | 3 | 3,2815 | 0,294 | -0,15  |
| 19 | Q15366 PCBP2_HUMAN | K.GVTIPYRKPSSS#PVIFAGGQDR.Y     | S189:           | 3 | 3,9962 | 0,477 | 0,51   |
| 19 | Q9H1E3 NUCKS_HUMAN | R.KVVQDYSQFQES#DDADEDYGR.D      | S19:            | 3 | 6,1418 | 0,518 | -0,299 |
| 19 | Q9P260 K1468_HUMAN | R.AGSISTLDSLDFARYS#DDGNRETDEK.V | S193:           | 3 | 4,8792 | 0,432 | 0,435  |
| 19 | P35579 MYH9_HUMAN  | R.KGAGDGS#DEEVDGK.A             | S1943:          | 2 | 4,5145 | 0,51  | -0,423 |
| 19 | Q8WYP5 AHTF1_HUMAN | R.GREVS#PSDVR.E                 | S1953:          | 2 | 2,4435 | 0,199 | -0,516 |
| 19 | Q9BZL6 KPCD2_HUMAN | R.RLS#STS#LASGHSVR.L            | S197:S200:      | 3 | 2,87   | 0,209 | 0,226  |
| 19 | Q9BZL6 KPCD2_HUMAN | R.RLS#STSLAS#GHSVR.L            | S197:S203:      | 3 | 2,8894 | 0,327 | 0      |

|    |                     |                                      |                 |   |        |       |        |
|----|---------------------|--------------------------------------|-----------------|---|--------|-------|--------|
| 19 | Q9BZL6 KPCD2_HUMAN  | R.RLS#ST#SLASGHSVR.L                 | S197:T199:      | 2 | 3,0503 | 1     | -0,226 |
| 19 | Q5T200 ZC3HD_HUMAN  | K.KEYS#PEVVR.S                       | S198:           | 2 | 2,9266 | 0,271 | 0      |
| 19 | Q9BRL6 SFR2B_HUMAN  | R.YGGSHYSSSGYSNS#R.Y                 | S198:           | 2 | 2,2951 | 0,37  | -0,361 |
| 19 | Q07955 SFRS1_HUMAN  | R.VKVDGPRS#PS#YGR.S                  | S199:S201:      | 3 | 2,9763 | 0,321 | -0,116 |
| 19 | Q07955 SFRS1_HUMAN  | R.VKVDGPRS#PS#YGR.S                  | S199:S201:      | 2 | 2,2468 | 0,225 | -0,077 |
| 19 | Q9Y3X0 CCDC9_HUMAN  | R.RS#GPLEESER.D                      | S202:           | 2 | 2,288  | 0,38  | 0,098  |
| 19 | Q8NEF9 SRFB1_HUMAN  | K.AVTIANS#PSKPSEKDSVVSLESQK.T        | S203:           | 3 | 4,2506 | 0,442 | -0,213 |
| 19 | Q00653 NFKB2_HUMAN  | R.ASDGS#FSLPLKPVISQPIHDSK.S          | S204:           | 3 | 3,7072 | 0,275 | -0,609 |
| 19 | Q8WYP5 AHTF1_HUMAN  | R.SLHS#VSEER.T                       | S2072:          | 2 | 2,2685 | 0,23  | -0,326 |
| 19 | P43243 MATR3_HUMAN  | R.GPSLNPVLDYDHGSR#QESGYDR.M          | S208:           | 3 | 3,6305 | 0,386 | 0,197  |
| 19 | P60174 TPIS_HUMAN   | R.KQS#LGELIGTLNAAK.V                 | S21:            | 3 | 2,6948 | 0,278 | -0,113 |
| 19 | Q8WXV6 Q8WXV6_HUMAN | R.TSS#EDNLYLAVLR.A                   | S21:            | 2 | 2,5586 | 0,421 | -0,625 |
| 19 | Q9UQ35 SRRM2_HUMAN  | R.NHS#GSRT#PPVALNSSR.M               | S2100:T2104:    | 2 | 2,6883 | 0,432 | -0,663 |
| 19 | Q8TF01 SFR18_HUMAN  | R.QRS#PIALPVKQEPQIDAVK.R             | S211:           | 3 | 3,4553 | 0,435 | 0      |
| 19 | Q13242 SFRS9_HUMAN  | R.GS#PHYFSPFRPY.-                    | S211:           | 3 | 2,619  | 0,151 | 0      |
| 19 | Q03164 HRX_HUMAN    | R.IRTPSYS#PTQR.S                     | S2151:          | 3 | 2,7668 | 0,309 | 0,198  |
| 19 | P49116 NR2C2_HUMAN  | K.DLRS#PLIATPTFVADKDGAR.Q            | S219:           | 3 | 5,265  | 0,393 | 0,165  |
| 19 | P78549 NTHL1_HUMAN  | R.SRS#LGPAGPR.G                      | S22:            | 2 | 2,98   | 0,338 | -0,323 |
| 19 | Q9Y2I8 WDR37_HUMAN  | K.SHS#LSIR.R                         | S22:            | 2 | 2,0991 | 0,118 | -0,208 |
| 19 | Q8N350 DOS_HUMAN    | K.IVTIHECDSGEASSATTPHPATS#PK.A       | S220:           | 3 | 6,9358 | 0,552 | -0,205 |
| 19 | P46821 MAP1B_HUMAN  | K.HM*DPPPAPVQDRS#PS#PR.H             | S2209:S2211:    | 3 | 2,9284 | 0,223 | -0,444 |
| 19 | P46013 KI67_HUMAN   | K.IACRS#PQPDPVGTPTIFKQSK.R           | S2223:          | 3 | 4,4748 | 0,367 | -0,438 |
| 19 | P49792 RBP2_HUMAN   | R.EDALDDSVSSSVHASPLAS#SPVRK.N        | S2250:          | 3 | 4,7935 | 0,515 | 0,07   |
| 19 | Q08495 DEMA_HUMAN   | R.RGAEEEEEEDDS#GEEM*K.A              | S226:           | 3 | 4,676  | 0,428 | -0,238 |
| 19 | Q9Y6D5 BIG2_HUMAN   | R.ELEKPIQSKQSPVIAAAVS#PK.F           | S227:           | 3 | 4,5373 | 0,505 | 0,072  |
| 19 | P13051 UNG_HUMAN    | R.HAPS#PEPAVQGTGVAGVPEESGDAAAIPAKK.A | S23:            | 3 | 2,9688 | 0,203 | 0,485  |
| 19 | P35659 DEK_HUMAN    | R.TKCEILSDESS#S#DEDEKK.N             | S231:S232:      | 3 | 4,137  | 0,347 | -0,078 |
| 19 | Q13283 G3BP1_HUMAN  | K.SSS#PAPADIAQTVQEDLR.T              | S232:           | 2 | 3,7417 | 0,351 | -0,497 |
| 19 | P07910 HNRPC_HUMAN  | K.NDKS#EEEQSS#SS#VKKDETNVK.M         | S233:S239:S241: | 3 | 2,7192 | 0,14  | -0,561 |
| 19 | P62753 RS6_HUMAN    | R.RLS#S#LRASTSK.S                    | S235:S236:      | 2 | 2,5368 | 0,47  | -1,25  |
| 19 | P62753 RS6_HUMAN    | R.RLS#S#LRAST#SKSESSQK.-             | S235:S236:T241: | 3 | 2,9968 | 1     | -0,525 |
| 19 | Q96ST2 IWS1_HUMAN   | R.HQAS#DS#ENEELPKPR.I                | S235:S237:      | 2 | 4,7141 | 0,52  | -0,257 |
| 19 | Q96ST2 IWS1_HUMAN   | R.HQAS#DS#ENEELPKPR.I                | S235:S237:      | 3 | 3,7158 | 0,472 | -0,193 |

|    |                     |                                   |              |   |        |       |        |
|----|---------------------|-----------------------------------|--------------|---|--------|-------|--------|
| 19 | Q01082 SPTB2_HUMAN  | K.RFS#LFGK.K                      | S2358:       | 2 | 2,1228 | 0,223 | -0,065 |
| 19 | Q8IV50 LYSM2_HUMAN  | R.APRPSAPS#PPPRS#R.S              | S24:S29:     | 2 | 2,2876 | 0,314 | -0,598 |
| 19 | Q8IY37 DHX37_HUMAN  | R.ALAKPAVFIPVNR#PEM*QEER.L        | S242:        | 3 | 2,868  | 0,267 | 0,443  |
| 19 | Q9HB58 SP110_HUMAN  | R.DKEDPQEM*PHS#PLGSM*PEIR.D       | S244:        | 3 | 4,1523 | 0,455 | 0,38   |
| 19 | Q9UDY2 ZO2_HUMAN    | R.GRS#IDQDYER.A                   | S244:        | 2 | 3,4097 | 0,393 | 0,925  |
| 19 | P42345 FRAP_HUMAN   | R.TRTDS#YSAGQSVEILDGVELGEPAHK.K   | S2448:       | 3 | 5,8274 | 0,456 | -0,773 |
| 19 | Q9H3N1 TXND1_HUMAN  | K.KVEEQEADEEDVS#EEEAESK.E         | S247:        | 3 | 5,0164 | 0,47  | -0,363 |
| 19 | P16949 STMN1_HUMAN  | R.ASGQAFELILS#PR.S                | S25:         | 2 | 3,2068 | 0,27  | -0,498 |
| 19 | Q5QJE6 TDIF2_HUMAN  | R.S#LSEINKPNFYNNDFDDDFSHR.S       | S251:        | 3 | 3,7664 | 0,424 | -0,133 |
| 19 | Q70Z53 F10C1_HUMAN  | K.SRLS#SAEEASK.K                  | S251:        | 2 | 2,8785 | 0,495 | -0,588 |
| 19 | P85299 PTOR1_HUMAN  | R.SKS#YNTPLLNPVQEHEAEGAAAGGTSIR.R | S254:        | 3 | 3,8093 | 0,46  | 0,553  |
| 19 | Q4G0J3 LARP7_HUMAN  | R.SRPTS#EGS#DIESTEPQKQCSK.K       | S258:S261:   | 3 | 2,8482 | 0,197 | -0,801 |
| 19 | Q96A00 PP14A_HUMAN  | R.ARGPGGS#PGGLQK.R                | S26:         | 2 | 2,5705 | 0,273 | -0,387 |
| 19 | Q9Y2V2 CHSP1_HUMAN  | R.S#RERSPS#PLRGNVVP#PLPTR.R       | S26:S32:S41: | 3 | 2,6507 | 0,373 | 0      |
| 19 | P15880 RS2_HUMAN    | K.ETVFTKS#PYQEFTDHLVK.T           | S264:        | 3 | 4,4623 | 0,462 | -0,325 |
| 19 | A9CQZ4 A9CQZ4_HUMAN | K.NLGS#PKPR.Q                     | S27:         | 2 | 2,8918 | 0,329 | -0,223 |
| 19 | Q5T4S7 UBR4_HUMAN   | R.HVTLPS#PR.S                     | S2719:       | 2 | 2,6945 | 0,453 | -0,795 |
| 19 | Q6ZRS2 SRCAP_HUMAN  | R.RTS#ADVEIR.G                    | S2725:       | 2 | 3,5748 | 0,252 | -0,866 |
| 19 | Q8TF44 NLF3_HUMAN   | R.HGSLADDSTPDAS#PGSR.R            | S273:        | 2 | 5,0027 | 0,657 | -0,598 |
| 19 | Q9C0H5 K1688_HUMAN  | R.RPS#PFLK.R                      | S273:        | 2 | 2,3169 | 0,207 | -0,066 |
| 19 | O75475 PSIP1_HUMAN  | K.TGVTSTS#DS#EEEGDDQEGEKKR.K      | S273:S275:   | 3 | 4,4767 | 1     | -0,719 |
| 19 | Q8NFC6 FA44A_HUMAN  | R.KQHYS#S#EDEPDDNPVLDLDR.I        | S2779:S2780: | 3 | 4,8862 | 0,401 | -0,489 |
| 19 | Q9P2T1 GMPR2_HUMAN  | K.SRS#EVDLTR.S                    | S28:         | 2 | 3,2758 | 0,24  | -1,708 |
| 19 | Q9H410 DSN1_HUMAN   | K.THDHQLLESS#LS#PVEVFAK.T         | S28:S30:     | 3 | 4,0501 | 0,327 | -0,168 |
| 19 | Q96JM3 ZN828_HUMAN  | R.KPS#PSESPEPWKPPAVSPEPR.R        | S282:        | 3 | 4,6074 | 0,42  | -0,435 |
| 19 | A8K1N6 A8K1N6_HUMAN | K.KGSLPTS#PR.L                    | S284:        | 2 | 3,0538 | 0,345 | -0,215 |
| 19 | Q9Y624 JAM1_HUMAN   | K.KVIYSQPS#AR.S                   | S284:        | 2 | 2,6623 | 0,381 | -1,191 |
| 19 | Q92674 CENPI_HUMAN  | R.NRGPS#PEPLK.L                   | S284:        | 2 | 2,1688 | 0,175 | -0,519 |
| 19 | Q96QF0 RAB3I_HUMAN  | R.NKS#TSSAM*SGSHQDLSVIQPIVK.D     | S288:        | 3 | 5,0321 | 0,477 | -0,219 |
| 19 | Q96C24 SYTL4_HUMAN  | K.SVIDLRPEDVVHESGS#LGDR.S         | S289:        | 3 | 3,179  | 0,148 | -0,567 |
| 19 | Q8N655 CJ012_HUMAN  | K.IKPNLS#SSPR.S                   | S293:        | 2 | 2,181  | 0,177 | -0,31  |
| 19 | P08559 ODPA_HUMAN   | R.YHGHS#M*SDPGVS#YR.T             | S293:S300:   | 2 | 3,7747 | 0,393 | -1,173 |
| 19 | P08559 ODPA_HUMAN   | R.YHGHS#M*SDPGVS#YR.T             | S293:S300:   | 3 | 2,9761 | 0,234 | -1,034 |



|    |                     |                                     |            |   |        |       |        |
|----|---------------------|-------------------------------------|------------|---|--------|-------|--------|
| 19 | Q9UQ35 SRRM2_HUMAN  | K.THTTALAGRS#PS#PASGR.R             | S295:S297: | 2 | 3,452  | 1     | -1,069 |
| 19 | Q9UQ35 SRRM2_HUMAN  | K.THTTALAGRS#PS#PASGR.R             | S295:S297: | 3 | 3,058  | 0,363 | -0,801 |
| 19 | B2RDU1 B2RDU1_HUMAN | R.DTSSDKLDDALDKLS#DSLGR.Q           | S297:      | 3 | 3,1596 | 0,338 | 0,074  |
| 19 | O43493 TGON2_HUMAN  | K.LSPHAFKTES#GEETDLISPPQEEVK.S      | S298:      | 3 | 3,6936 | 0,091 | 0,771  |
| 19 | P25440 BRD2_HUMAN   | K.RKADTTTTPTTAILAPGS#PAS#PPGSLEPK.A | S298:S301: | 3 | 3,9633 | 0,365 | -0,364 |
| 19 | Q9H4Z3 PCIF1_HUMAN  | R.EEASLLSHSPGTSNQSQPCS#PKPIR.L      | S30:       | 3 | 5,5152 | 0,445 | -0,394 |
| 19 | Q9NQS7 INCE_HUMAN   | R.TDSQSVRHS#PIAPSSPSPQVLAQK.Y       | S306:      | 3 | 4,1403 | 0,443 | -0,211 |
| 19 | Q9NWW5 CLN6_HUMAN   | R.HGS#VSADEAAR.T                    | S31:       | 2 | 3,8501 | 0,547 | -0,414 |
| 19 | Q5H9R7 SAPS3_HUMAN  | R.LGS#FHLLLEPPKK.S                  | S315:      | 3 | 4,76   | 0,309 | 0      |
| 19 | P04637 P53_HUMAN    | K.RALPNTSSS#PQPK.K                  | S315:      | 2 | 2,8451 | 0,188 | -0,851 |
| 19 | Q2TB10 ZN800_HUMAN  | R.RDS#ITPDIATKPGQLFLDSIS#PKK.S      | S317:S336: | 3 | 2,8438 | 0,27  | -0,381 |
| 19 | O76024 WFS1_HUMAN   | R.SRLNATAS#LEQER.S                  | S32:       | 3 | 3,9847 | 0,369 | 0      |
| 19 | Q7L4I2 RSRC2_HUMAN  | K.KEQSEVSVS#PR.A                    | S32:       | 3 | 3,1573 | 0,261 | 0,138  |
| 19 | Q7L4I2 RSRC2_HUMAN  | K.KEQSEVSVS#PR.A                    | S32:       | 2 | 3,1235 | 0,465 | -0,552 |
| 19 | P49792 RBP2_HUMAN   | K.KIESFGS#PK.G                      | S3207:     | 2 | 2,484  | 0,208 | -0,341 |
| 19 | Q8TAQ2 SMRC2_HUMAN  | K.KGPS#TPYTK.S                      | S321:      | 2 | 2,1057 | 0,241 | -0,346 |
| 19 | Q9NQW6 ANLN_HUMAN   | K.TPIS#PLKTGVSKPIVK.S               | S323:      | 3 | 4,7548 | 0,446 | 0      |
| 19 | P23511 NFYA_HUMAN   | K.EKDS#PHM*QDPNQADEEAM*TQIIR.V      | S326:      | 3 | 3,2456 | 0,207 | -0,524 |
| 19 | B2RMQ4 B2RMQ4_HUMAN | R.SIASEVVARPAS#LSNDKLM*EK.S         | S327:      | 3 | 3,6685 | 0,248 | -0,156 |
| 19 | Q92922 SMRC1_HUMAN  | R.KHS#PS#PPPPTPTESR.K               | S328:S330: | 3 | 5,131  | 0,45  | 0      |
| 19 | Q92922 SMRC1_HUMAN  | R.KHS#PS#PPPPTPTESR.K               | S328:S330: | 2 | 4,1654 | 0,547 | -0,756 |
| 19 | Q15459 SF3A1_HUMAN  | K.FGESEEVEM*EVES#DEEDDKQEK.A        | S329:      | 3 | 6,3747 | 0,493 | -0,337 |
| 19 | Q8TED9 AF1L1_HUMAN  | R.EVSKPVGGAEGVEVPRS#PVLLCK.L        | S329:      | 3 | 3,0827 | 0,257 | 0,809  |
| 19 | O00499 BIN1_HUMAN   | R.VNHEPEPAGGATPGATLPKS#PSQLR.K      | S331:      | 3 | 4,0893 | 0,437 | -0,141 |
| 19 | Q9Y2U5 M3K2_HUMAN   | R.RRGS#DIDNPTLTVM*DIS#PPSR.S        | S331:S344: | 3 | 4,7708 | 0,438 | -0,219 |
| 19 | Q9NXR1 NDE1_HUMAN   | R.LEFGKPPSHM*SS#SPLPSAQGVVK.M       | S332:      | 3 | 3,7635 | 0,264 | -0,591 |
| 19 | P08651 NFIC_HUMAN   | K.KTEM*DKS#PFNSPS#PQDSPR.L          | S333:S339: | 3 | 3,7105 | 0,136 | -0,394 |
| 19 | Q9H1B7 EAP1_HUMAN   | K.RPGS#VSSTDQER.E                   | S334:      | 2 | 2,46   | 0,241 | -0,611 |
| 19 | P49759 CLK1_HUMAN   | K.VVDFGSATYDDEHHSTLVS#TR.H          | S341:      | 3 | 4,6434 | 0,492 | -0,379 |
| 19 | O95365 ZBT7A_HUMAN  | R.AGAAAGDSDEES#RADDKGVM*DYYLK.Y     | S341:      | 3 | 4,4868 | 0,457 | -0,67  |
| 19 | Q9Y383 LC7L2_HUMAN  | R.FRQDLAS#CDR.D                     | S347:      | 3 | 3,4023 | 0,216 | -0,938 |
| 19 | Q9BX40 LS14B_HUMAN  | R.KLNTETFGVS#GR.F                   | S349:      | 3 | 3,6069 | 0,343 | -0,066 |
| 19 | Q9UMX1 SUFU_HUMAN   | R.APSRKDSLES#DSS#TAIIPHELIR.T       | S349:S352: | 3 | 3,3013 | 1     | -0,273 |

|    |                    |                                  |                 |   |        |       |        |
|----|--------------------|----------------------------------|-----------------|---|--------|-------|--------|
| 19 | Q4G0J3 LARP7_HUMAN | R.DIEISTEEKDTGDLKDSS#LLK.T       | S351:           | 3 | 5,1758 | 0,495 | -0,216 |
| 19 | P42166 LAP2A_HUMAN | R.SHISDQS#PLSSK.R                | S351:           | 2 | 3,6088 | 0,523 | -0,625 |
| 19 | Q16576 RBBP7_HUMAN | K.IGEEQS#AEDAEDGPPELLFIHGGHTAK.I | S354:           | 3 | 4,2844 | 0,279 | -0,875 |
| 19 | Q09028 RBBP4_HUMAN | K.IGEEQS#PEDAEDGPPELLFIHGGHTAK.I | S355:           | 3 | 4,7525 | 0,504 | -0,558 |
| 19 | Q96N21 CQ056_HUMAN | R.HFEASCGQLS#PAR.G               | S356:           | 2 | 4,0433 | 0,466 | -0,475 |
| 19 | P17096 HMG1_HUMAN  | R.KQPPVS#PGTALVGSQKEPSEVPTPK.R   | S36:            | 3 | 4,0364 | 0,419 | 0,347  |
| 19 | Q9NQ29 LUC7L_HUMAN | R.RS#EEKEAGEI.-                  | S363:           | 2 | 2,431  | 0,507 | -0,596 |
| 19 | Q00613 HSF1_HUMAN  | R.GHTDTEGRPPS#PPPTST#PEK.C       | S363:T369:      | 3 | 4,4146 | 0,212 | -0,488 |
| 19 | P17302 CXA1_HUMAN  | K.LAAGHELQPLAIVDQRPS#R.A         | S365:           | 3 | 3,1741 | 0,355 | 0,082  |
| 19 | P05455 LA_HUMAN    | K.FAS#DDEHDEHDENGATGPVK.R        | S366:           | 3 | 2,9334 | 0,318 | -0,65  |
| 19 | O14639 ABLM1_HUMAN | R.TSSEIYSRPGSSIPGS#PGHTIYAK.V    | S367:           | 3 | 4,2653 | 0,419 | -0,482 |
| 19 | Q01167 FOXK2_HUMAN | R.SAPAS#PNHAGVLSAHS#GAQTPELSR.E  | S373:           | 3 | 5,0879 | 0,578 | -0,814 |
| 19 | P46013 KI67_HUMAN  | R.RES#VNLGK.S                    | S374:           | 2 | 2,8159 | 0,236 | 0      |
| 19 | Q9Y383 LC7L2_HUMAN | R.SEDRRS#S#EEREAGEI.-            | S383:S384:      | 3 | 3,6016 | 0,202 | -0,096 |
| 19 | Q9Y383 LC7L2_HUMAN | R.RSS#EEREAGEI.-                 | S384:           | 2 | 2,6542 | 0,393 | -0,818 |
| 19 | Q9UKV3 ACINU_HUMAN | K.EKS#KS#PS#PPRLTEDR.K           | S384:S386:S388: | 2 | 2,4819 | 0,331 | -0,868 |
| 19 | Q9UKV3 ACINU_HUMAN | K.S#KSPSPRLT#EDR.K               | S384:T393:      | 2 | 2,2556 | 0,284 | -0,674 |
| 19 | Q08378 GOGA3_HUMAN | K.DVLQAAAAEHQDQGQEVNGEVRS#R.R    | S385:           | 3 | 3,642  | 0,266 | -0,272 |
| 19 | Q8TDD1 DDX54_HUMAN | R.RGAASQARGS#DS#EDGEFEIQAEDDAR.A | S39:S41:        | 3 | 5,3741 | 0,362 | 0,5    |
| 19 | Q8N0S6 CENPL_HUMAN | R.KQSS#FILT#PPRR.K               | S39:T43:        | 3 | 2,8205 | 0,187 | 0      |
| 19 | P02545 LMNA_HUMAN  | R.LRLS#PSPT#SQRSR.G              | S390:T394:      | 2 | 2,2246 | 0,305 | -0,223 |
| 19 | O43660 PLRG1_HUMAN | R.HYTFASGS#PDNIK.Q               | S391:           | 2 | 3,3237 | 0,47  | -0,08  |
| 19 | Q9Y5A9 YTHD2_HUMAN | K.LRS#INNYNPK.D                  | S394:           | 3 | 4,0293 | 0,277 | 0,07   |
| 19 | Q9Y5A9 YTHD2_HUMAN | K.LRS#INNYNPK.D                  | S394:           | 2 | 2,9228 | 0,346 | -0,564 |
| 19 | Q3KQU3 MA7D1_HUMAN | R.KPNAGGS#PAPVR.R                | S399:           | 2 | 2,9232 | 0,255 | -0,297 |
| 19 | Q9NRA0 SPHK2_HUMAN | R.AKS#ELTLTPDPAPPM*AHS#PLHR.S    | S399:S414:      | 3 | 4,2002 | 0,376 | 1,295  |
| 19 | Q9UKV3 ACINU_HUMAN | R.KKAS#LVALPEQTASEEETPPPLTK.E    | S400:           | 3 | 3,2346 | 0,172 | -0,265 |
| 19 | P29590 PML_HUMAN   | K.KAS#PEAASTPRDPIDVDLPEEAER.V    | S403:           | 3 | 4,0765 | 0,405 | 0,205  |
| 19 | Q9Y2W1 TR150_HUMAN | K.TDSEKPFGRS#QS#PK.R             | S406:S408:      | 2 | 2,7686 | 0,223 | -0,566 |
| 19 | P49736 MCM2_HUMAN  | R.RTDALTSS#PGR.D                 | S41:            | 2 | 2,6677 | 0,151 | -1,082 |
| 19 | Q9Y2X7 GIT1_HUMAN  | R.ARS#M*DSSDLSDGAVTLQEYLELKK.A   | S410:           | 3 | 5,6426 | 0,423 | -0,532 |
| 19 | Q9H981 ARP8_HUMAN  | R.S#QGDPEDPHDEHYLLATQSK.Q        | S412:           | 3 | 2,6535 | 0,307 | -0,078 |
| 19 | Q86SQ0 PHLB2_HUMAN | R.KSS#ISSISGR.D                  | S415:           | 2 | 3,0038 | 0,323 | -0,554 |

|    |                    |                                     |            |   |        |       |        |
|----|--------------------|-------------------------------------|------------|---|--------|-------|--------|
| 19 | P55198 AF17_HUMAN  | R.ARAPS#PGDYK.S                     | S423:      | 2 | 2,2348 | 0,173 | 0,214  |
| 19 | Q9Y490 TLN1_HUMAN  | K.DHFGLEGDEESTM*LEDSVS#PKK.S        | S425:      | 3 | 3,7263 | 0,423 | 0      |
| 19 | Q2TB10 ZN800_HUMAN | K.VKVEPADSVESSPPSITHS#PQNELK.G      | S426:      | 3 | 4,8981 | 0,381 | 0,531  |
| 19 | P62750 RL23A_HUMAN | K.IRTS#PTFR.R                       | S43:       | 2 | 2,286  | 0,169 | -0,692 |
| 19 | Q96D71 REPS1_HUMAN | R.TGSDHTNPTS#PLLVKPSDLLEENK.I       | S430:      | 3 | 5,7095 | 0,347 | -0,753 |
| 19 | Q92804 RBP56_HUMAN | R.SGGGYGGDRS#SGGGYSGDR.S            | S432:      | 2 | 2,6317 | 0,366 | -1,268 |
| 19 | Q96I34 PP16A_HUMAN | R.SVS#YQLSPLDSTTPHTLVHDK.A          | S433:      | 3 | 3,6432 | 0,321 | 0,38   |
| 19 | Q13535 ATR_HUMAN   | R.RLS#SSLNPSK.R                     | S435:      | 2 | 3,2155 | 0,195 | -0,313 |
| 19 | P55199 ELL_HUMAN   | R.LGLPLLTCAQPS#RPHGSPSR.S           | S437:      | 3 | 2,8662 | 0,339 | 0      |
| 19 | O94887 FARP2_HUMAN | K.DSSSSLTDPQVSVYK#PAAERR.S          | S439:      | 3 | 4,785  | 0,568 | -0,149 |
| 19 | P17096 HMGA1_HUMAN | R.KQPPVSPGTALVGS#QKEPSEVPTPK.R      | S44:       | 3 | 3,6866 | 0,383 | 0,416  |
| 19 | P52926 HMGA2_HUMAN | R.KQQQEPTGEP#PK.R                   | S44:       | 2 | 3,6263 | 0,336 | -0,716 |
| 19 | P55199 ELL_HUMAN   | R.LGLPLLTCAQPSRPHGS#PSR.S           | S442:      | 3 | 2,9198 | 0,359 | -0,156 |
| 19 | Q9BVJ6 UT14A_HUMAN | K.RSELSQDAEPAGS#QETK.D              | S445:      | 2 | 3,2988 | 0,531 | -0,51  |
| 19 | O43290 SNUT1_HUMAN | R.RVS#EVEEEKEPVPQPLPSDDTR.V         | S448:      | 3 | 4,4643 | 0,361 | -0,14  |
| 19 | P49321 NASP_HUMAN  | K.VAQGATEKS#PEDKVQIAANEETQER.E      | S451:      | 3 | 5,0058 | 0,412 | -0,261 |
| 19 | Q14684 RRP1B_HUMAN | R.VAEPGAEATSSTGEES#GSEHPPAVPM*HNK.R | S458:      | 3 | 3,3479 | 0,477 | -0,488 |
| 19 | Q12830 BPTF_HUMAN  | K.NREEFEDQS#LEK.D                   | S462:      | 2 | 3,285  | 0,245 | -0,761 |
| 19 | Q12830 BPTF_HUMAN  | K.NREEFEDQS#LEK.D                   | S462:      | 3 | 3,2245 | 0,295 | -0,114 |
| 19 | Q96K21 ZFY19_HUMAN | K.EHQTSAYS#PPR.A                    | S463:      | 2 | 2,4501 | 0,369 | -0,361 |
| 19 | Q8IYB3 SRRM1_HUMAN | R.KVELS#ES#EEDKGGK.M                | S463:S465: | 2 | 3,8491 | 0,43  | -0,576 |
| 19 | Q13433 S39A6_HUMAN | K.YESQLS#TNEEKVDTDDRTEGYLR.A        | S472:      | 3 | 3,8208 | 0,345 | -0,453 |
| 19 | O00418 EF2K_HUMAN  | R.KYESDEDS#LGSSGR.V                 | S474:      | 2 | 4,4509 | 0,621 | -0,455 |
| 19 | O00418 EF2K_HUMAN  | R.KYESDEDS#LGSSGR.V                 | S474:      | 3 | 2,8586 | 0,198 | -1,136 |
| 19 | Q13625 ASPP2_HUMAN | R.KNQS#SEDILR.D                     | S480:      | 2 | 3,2394 | 0,363 | -0,48  |
| 19 | Q13625 ASPP2_HUMAN | R.KNQS#SEDILR.D                     | S480:      | 3 | 2,9507 | 0,174 | -0,072 |
| 19 | Q13428 TCOF_HUMAN  | R.SSSEESDS#DREALAAM*NAAQVKPLGK.S    | S484:      | 3 | 5,0704 | 0,487 | -0,197 |
| 19 | P17480 UBF1_HUMAN  | R.GKLPES#PK.R                       | S484:      | 2 | 2,4038 | 0,302 | 0,391  |
| 19 | Q6NUM9 RETST_HUMAN | K.RGS#DYETFK.N                      | S484:      | 2 | 2,381  | 0,462 | -0,206 |
| 19 | Q7KZI7 MARK2_HUMAN | R.SRNS#PLLER.A                      | S486:      | 2 | 3,4606 | 0,28  | -0,318 |
| 19 | Q8NCD3 HJURP_HUMAN | R.RLS#LPSSK.A                       | S486:      | 2 | 2,3906 | 0,297 | 0      |
| 19 | O94913 PCF11_HUMAN | K.S#RSPIHS#PK.R                     | S487:S494: | 3 | 2,6135 | 0,129 | 0,143  |
| 19 | Q9BXP5 ARS2_HUMAN  | R.LRECELS#PGVNR.D                   | S493:      | 2 | 2,5094 | 0,385 | -0,162 |

|    |                     |                                |            |   |        |       |        |
|----|---------------------|--------------------------------|------------|---|--------|-------|--------|
| 19 | Q6ZSP1 Q6ZSP1_HUMAN | R.S#LSGTVVSEREEAPVSSHFDSSNVR.K | S501:      | 3 | 4,5129 | 0,449 | -0,322 |
| 19 | Q8IY92 BTBDC_HUMAN  | K.KALEIS#PR.S                  | S502:      | 2 | 2,3542 | 0,241 | -1,043 |
| 19 | Q9Y2X3 NOL5_HUMAN   | K.HIKEEPLS#EEEPCTSTAIAS#PEK.K  | S502:S514: | 3 | 5,0458 | 0,397 | -0,334 |
| 19 | Q96JM3 ZN828_HUMAN  | R.KPGPSGPSES#PK.A              | S507:      | 2 | 2,9495 | 0,409 | -0,489 |
| 19 | B2RDE1 B2RDE1_HUMAN | R.AREQAEAEVAS#LNR.R            | S51:       | 3 | 3,2009 | 0,148 | -0,225 |
| 19 | Q9H4G0 E41L1_HUMAN  | K.HQAS#INELK.R                 | S510:      | 2 | 3,0277 | 0,426 | -0,327 |
| 19 | Q9BPZ7 SIN1_HUMAN   | R.RTS#FSFQK.E                  | S510:      | 2 | 2,4436 | 0,223 | 0      |
| 19 | Q9Y5K6 CD2AP_HUMAN  | R.FNGGHS#PTHS#PEK.I            | S510:S514: | 3 | 2,9103 | 0,204 | -0,118 |
| 19 | P40222 TXLNA_HUMAN  | R.RPEGPGAQAPSS#PR.V            | S515:      | 2 | 3,8006 | 0,44  | -0,821 |
| 19 | P40222 TXLNA_HUMAN  | R.RPEGPGAQAPSS#PR.V            | S515:      | 3 | 2,8701 | 0,135 | 0      |
| 19 | Q9BTC8 MTA3_HUMAN   | R.HAELS#GSPLK.S                | S517:      | 2 | 2,9629 | 0,47  | -0,654 |
| 19 | O00567 NOL5A_HUMAN  | K.KSFSKEELM*SS#DLEETAGSTSIPK.R | S519:S520: | 3 | 4,5296 | 0,379 | -0,395 |
| 19 | O00567 NOL5A_HUMAN  | K.SFSKEELM*SS#DLEETAGSTSIPK.R  | S520:      | 3 | 2,7195 | 0,184 | 0,356  |
| 19 | Q5H9R7 SAPS3_HUMAN  | R.NTVDLVTTCHIHSS#SSDDEIDFK.E   | S523:      | 3 | 4,9521 | 0,493 | -0,07  |
| 19 | Q5H9R7 SAPS3_HUMAN  | R.NTVDLVTTCHIHSS#SDDEIDFK.E    | S524:      | 3 | 3,9817 | 0,204 | -0,42  |
| 19 | Q9NYJ8 TAB2_HUMAN   | R.KLS#M*GSDDAAYTQALLVHQK.A     | S524:      | 3 | 3,6236 | 0,35  | 0,081  |
| 19 | O75122 CLAP2_HUMAN  | R.IPRPSVQGC#R.E                | S529:      | 3 | 4,1326 | 0,395 | 0,064  |
| 19 | Q09019 DMWD_HUMAN   | R.YHS#LGNISR.G                 | S530:      | 2 | 2,5128 | 0,296 | -0,108 |
| 19 | Q9BPU6 DPYL5_HUMAN  | R.DLHESS#FSLSGSQIDDHVPK.R      | S532:      | 3 | 4,5947 | 0,486 | -0,964 |
| 19 | Q86VM9 ZCH18_HUMAN  | K.KLGVSVS#PSR.A                | S534:      | 2 | 3,0612 | 0,316 | -0,44  |
| 19 | O94909 K0819_HUMAN  | R.LGLPKPEGEPLSLPTPRS#PSDR.E    | S546:      | 3 | 3,5107 | 0,323 | -0,302 |
| 19 | Q14694 UBP10_HUMAN  | K.KLLS#PSNEK.L                 | S547:      | 2 | 3,4404 | 0,239 | -0,223 |
| 19 | P17987 TCPA_HUMAN   | K.HGSYEDAVHS#GALND.-           | S551:      | 2 | 4,7234 | 0,589 | 0,222  |
| 19 | Q86UU1 PHLB1_HUMAN  | R.KLSS#GDLR.V                  | S564:      | 2 | 2,3945 | 0,271 | -1,149 |
| 19 | Q6IMN6 CAPR2_HUMAN  | K.HSLTSQSQIS#PK.S              | S566:      | 2 | 4,0343 | 0,492 | -0,526 |
| 19 | Q8WYL5 SSH1_HUMAN   | K.KLEFGS#PK.G                  | S576:      | 2 | 2,5483 | 0,217 | 0,062  |
| 19 | Q9H410 DSN1_HUMAN   | R.IHLGSS#PK.K                  | S58:       | 2 | 2,3523 | 0,267 | -0,133 |
| 19 | Q9Y5K6 CD2AP_HUMAN  | K.KNS#LDEL.R.A                 | S582:      | 2 | 3,2711 | 0,232 | 0      |
| 19 | Q13428 TCOF_HUMAN   | K.SLGNILQAKPTSS#PAKGPPQK.A     | S583:      | 3 | 4,5627 | 0,39  | -0,166 |
| 19 | Q09666 AHNK_HUMAN   | K.GHYEVTGS#DDETGK.L            | S5841:     | 2 | 4,4864 | 0,611 | -0,62  |
| 19 | Q09666 AHNK_HUMAN   | K.GHYEVTGS#DDETGK.L            | S5841:     | 3 | 4,1721 | 0,456 | -0,232 |
| 19 | Q92738 US6NL_HUMAN  | R.HALYPPS#PR.K                 | S585:      | 2 | 2,7023 | 0,487 | 0      |
| 19 | Q6PJZ5 Q6PJZ5_HUMAN | R.RTS#VPSPEQNTIATPATLHILQK.S   | S587:      | 3 | 6,0632 | 0,473 | -0,283 |

|    |                     |                                 |            |   |        |       |        |
|----|---------------------|---------------------------------|------------|---|--------|-------|--------|
| 19 | Q8IXT5 RB12B_HUMAN  | R.RPS#EEDFR.R                   | S591:      | 2 | 2,2097 | 0,135 | -0,328 |
| 19 | Q96T23 RSF1_HUMAN   | K.TFLDKDAQRLS#PIPEEVPK.S        | S594:      | 3 | 5,5935 | 0,341 | 0,081  |
| 19 | Q8IYB3 SRRM1_HUMAN  | R.RYS#PPIQR.R                   | S597:      | 2 | 2,6059 | 0,318 | -0,445 |
| 19 | Q13442 HAP28_HUMAN  | K.KSLDS#DES#EDEEDDYQQKR.K       | S60:S63:   | 3 | 4,0951 | 0,488 | -0,296 |
| 19 | Q96RT1 LAP2_HUMAN   | K.HIVNHDDVFESEELS#S#DEEM*K.M    | S602:S603: | 3 | 4,2947 | 0,38  | -0,196 |
| 19 | O00203 AP3B1_HUMAN  | K.IFLAQKPAPLLES#PFKDR.D         | S609:      | 3 | 5,7856 | 0,512 | -0,425 |
| 19 | Q14157 UBP2L_HUMAN  | R.RYPSSISS#PQK.D                | S609:      | 2 | 2,9694 | 0,299 | -0,861 |
| 19 | B1ALK7 B1ALK7_HUMAN | R.KES#APQVLLPEEEKIIVEETK.S      | S619:      | 3 | 4,4433 | 0,422 | -0,22  |
| 19 | Q86U16 Q86U16_HUMAN | R.AVVVS#PKEENKAAEPPPK.I         | S62:       | 3 | 4,9074 | 0,341 | -0,885 |
| 19 | P27448 MARK3_HUMAN  | R.SRGS#TNLFSK.L                 | S624:      | 2 | 3,063  | 0,37  | -0,207 |
| 19 | Q14978 NOLC1_HUMAN  | R.VREEEIEVDS#R.V                | S637:      | 3 | 2,9267 | 0,125 | 0,254  |
| 19 | Q5T200 ZC3HD_HUMAN  | R.FVHGPS#PR.G                   | S64:       | 2 | 2,5509 | 0,333 | -0,187 |
| 19 | Q3YEC7 PARF_HUMAN   | K.NSDSLFGLGLEEAGPKES#SEEGKEGK.T | S640:      | 3 | 4,1225 | 0,433 | 0,065  |
| 19 | O43719 HTSF1_HUMAN  | K.VFDDES#DEKEDEEYADEKGLEAADK.K  | S642:      | 3 | 6,0553 | 0,468 | -0,619 |
| 19 | Q86TC9 MYPN_HUMAN   | K.TPEPSS#PVKEPPVLAKPK.L         | S644:      | 3 | 5,0216 | 0,348 | -0,352 |
| 19 | Q16531 DDB1_HUMAN   | R.SLS#TTNVFACSDRPTVIYSSNHK.L    | S645:      | 3 | 3,666  | 0,384 | -0,275 |
| 19 | Q13615 MTMR3_HUMAN  | R.RS#LELSSLAGPGEDPLSADSLGKPTR.V | S647:      | 3 | 4,5867 | 0,418 | -0,268 |
| 19 | O43491 E41L2_HUMAN  | K.HQAS#ISELK.R                  | S647:      | 2 | 3,1289 | 0,328 | 0      |
| 19 | P62988 UBIQ_HUMAN   | R.TLSDYNIQKES#TLHLVLR.L         | S65:       | 3 | 2,7858 | 0,137 | -0,745 |
| 19 | Q9H307 PININ_HUMAN  | R.RGFS#DSGGGPPAK.Q              | S66:       | 2 | 2,8855 | 0,385 | -0,558 |
| 19 | O75665 OFD1_HUMAN   | K.NSAKS#PLAAKS#PPSLHLLEAFK.N    | S663:S669: | 3 | 3,8983 | 0,255 | -0,668 |
| 19 | Q96KM6 Z512B_HUMAN  | R.SEHTAPPPEEPTDKS#PEAEDPLGVER.T | S665:      | 3 | 3,1898 | 0,193 | -0,443 |
| 19 | Q9P275 UBP36_HUMAN  | K.LKS#PVLSNTTTEPASTM*SPPPAKK.L  | S667:      | 3 | 3,9001 | 0,527 | -0,497 |
| 19 | O75665 OFD1_HUMAN   | K.SPLAAKS#PPSLHLLEAFK.N         | S669:      | 3 | 4,2686 | 0,504 | -0,645 |
| 19 | P19338 NUCL_HUMAN   | K.KVVVS#PTK.K                   | S67:       | 2 | 2,8449 | 0,269 | 0      |
| 19 | Q96T37 RBM15_HUMAN  | R.HCAPS#PDRS#PELSSSR.D          | S670:S674: | 3 | 3,0007 | 0,162 | -0,282 |
| 19 | Q08945 SSRP1_HUMAN  | K.SKEFVSSDESS#SGENK.S           | S672:      | 2 | 5,0708 | 0,566 | -0,679 |
| 19 | O43719 HTSF1_HUMAN  | K.AEEGDADEKLFEEES#DDKEDEDADGK.E | S676:      | 3 | 6,2775 | 0,519 | -0,319 |
| 19 | O43719 HTSF1_HUMAN  | K.LFEES#DDKEDEDADGKEVEDADEK.L   | S676:      | 3 | 5,5594 | 0,456 | 0,129  |
| 19 | P48681 NEST_HUMAN   | K.ENQEPLRS#PEVGDEEALRPLTK.E     | S680:      | 3 | 3,7104 | 0,502 | 0      |
| 19 | Q9Y2W1 TR150_HUMAN  | R.RIDISPS#TFR.K                 | S684:      | 2 | 2,3207 | 0,379 | 0,192  |
| 19 | Q68CP9 ARID2_HUMAN  | R.IPQNPS#PHTHQQQNAPVTVIQSK.A    | S689:      | 3 | 3,371  | 0,349 | -0,626 |
| 19 | Q6P0N0 CN106_HUMAN  | K.AVTDFVIPECQKS#PISK.S          | S690:      | 3 | 3,1679 | 0,302 | 0      |

|    |                    |                                         |            |   |        |       |        |
|----|--------------------|-----------------------------------------|------------|---|--------|-------|--------|
| 19 | A0FGR8 ESYT2_HUMAN | K.SHM*S#GSPGPGGSNTAPSTPVIGGSDKPGM*EEK.A | S691:      | 3 | 3,8638 | 0,429 | -0,462 |
| 19 | Q6NZY4 ZCHC8_HUMAN | R.SLLKNS#PR.N                           | S695:      | 2 | 2,237  | 0,286 | -0,123 |
| 19 | P16070 CD44_HUMAN  | K.LVINGSGAVEDRKPS#GLNGEASK.S            | S697:      | 3 | 4,036  | 0,347 | -0,294 |
| 19 | Q01105 SET_HUMAN   | K.RQS#PLPPQK.K                          | S7:        | 2 | 2,4738 | 0,307 | -0,324 |
| 19 | Q9Y6X9 MORC2_HUMAN | K.TASRPAPLVQQLSPSLLPNSKS#PR.E           | S705:      | 3 | 6,1091 | 0,441 | -0,279 |
| 19 | Q8N9B5 JMY_HUMAN   | R.KGAAS#PVLQEDHCDLPSVLQVEEK.T           | S713:      | 3 | 5,0263 | 0,409 | -0,52  |
| 19 | Q9UPQ0 LIMC1_HUMAN | K.VVKPKS#PEPEATLTFPFLDK.M               | S718:      | 3 | 4,7714 | 0,365 | -0,63  |
| 19 | Q15149 PLEC1_HUMAN | R.ARSDEGQLS#PATR.G                      | S720:      | 3 | 2,9277 | 0,149 | -0,062 |
| 19 | Q15149 PLEC1_HUMAN | R.ARSDEGQLS#PATR.G                      | S720:      | 2 | 2,4812 | 0,241 | -0,665 |
| 19 | O43583 DENR_HUMAN  | K.LTVENS#PKQEAGISEGQGTAGEEEEEK.K        | S73:       | 3 | 6,222  | 0,396 | -0,25  |
| 19 | Q66K74 MAP1S_HUMAN | R.SAS#PHDVDLCLVSPCFEHR.K                | S731:      | 3 | 3,9896 | 0,214 | -0,15  |
| 19 | P46087 NOL1_HUMAN  | K.GTDTQTPAVLS#PSKTQATLKP.K.D            | S732:      | 3 | 2,9945 | 0,404 | 0,078  |
| 19 | Q9Y6X9 MORC2_HUMAN | R.KRS#VAVS#DEEEVEEEAER.R                | S739:S743: | 3 | 5,8672 | 0,508 | -0,081 |
| 19 | Q96C19 EFHD2_HUMAN | R.RADLNQGIGEPQS#PSR.R                   | S74:       | 2 | 3,0631 | 0,427 | -0,135 |
| 19 | Q9BXP5 ARS2_HUMAN  | R.HELNS#PPQK.R                          | S74:       | 2 | 2,709  | 0,35  | -0,24  |
| 19 | Q96S55 WRIP1_HUMAN | R.RLS#ESSALK.Q                          | S75:       | 2 | 2,3713 | 0,144 | -0,342 |
| 19 | P48634 BAT2_HUMAN  | R.ERSDS#GGSSSEPFDR.H                    | S761:      | 2 | 3,271  | 0,547 | -0,649 |
| 19 | Q68DN6 RGPD1_HUMAN | K.HSTPS#PTKYSLS#PSK.S                   | S772:S779: | 2 | 4,2918 | 1     | -0,412 |
| 19 | Q9Y6X9 MORC2_HUMAN | K.KDSNELS#DS#AGEEDSADLKR.A              | S777:S779: | 3 | 3,5431 | 0,44  | -0,315 |
| 19 | Q9H4L7 SMRCD_HUMAN | R.KAS#ISYFK.N                           | S79:       | 2 | 2,6922 | 0,158 | 0,596  |
| 19 | O75362 ZN217_HUMAN | K.GKQS#PPGPGKAPLTSIGDSSTLAPSNLK.S       | S795:      | 3 | 4,6914 | 0,494 | -0,066 |
| 19 | P49792 RBP2_HUMAN  | K.SYKYS#PKT#PPR.W                       | S796:T799: | 3 | 3,2148 | 0,303 | 0,185  |
| 19 | P49792 RBP2_HUMAN  | K.SYKYS#PKT#PPR.W                       | S796:T799: | 2 | 2,3341 | 0,201 | 0,082  |
| 19 | Q9UK76 HN1_HUMAN   | K.SSGGREDLESS#GLQR.R                    | S80:       | 3 | 2,6344 | 0,09  | -0,662 |
| 19 | Q9UK76 HN1_HUMAN   | K.SSGGREDLESS#GLQR.R                    | S80:       | 2 | 2,4247 | 0,459 | -0,883 |
| 19 | Q9Y5K6 CD2AP_HUMAN | R.HGNVAS#LVQR.I                         | S80:       | 2 | 2,094  | 0,251 | -0,736 |
| 19 | O95696 BRD1_HUMAN  | R.SRS#TCGDSEVEEES#PGKR.L                | S803:S814: | 3 | 4,5455 | 0,359 | -0,759 |
| 19 | Q53GS9 SNUT2_HUMAN | R.EREVEDS#EPER.E                        | S82:       | 3 | 4,4746 | 0,239 | -0,466 |
| 19 | Q53GS9 SNUT2_HUMAN | R.EREVEDS#EPER.E                        | S82:       | 2 | 2,6192 | 0,396 | -0,544 |
| 19 | Q14103 HNRPD_HUMAN | K.IDASKNEEDEGHNS#\$#PR.H                | S82:S83:   | 3 | 2,799  | 0,287 | -0,515 |
| 19 | Q01082 SPTB2_HUMAN | R.GRLS#GIEER.Y                          | S825:      | 2 | 2,0397 | 0,128 | -1,001 |
| 19 | Q8N8A6 DDX51_HUMAN | R.RVNDAEPPGS#PEAPQGK.R                  | S83:       | 2 | 3,9238 | 0,49  | -0,564 |
| 19 | P04406 G3P_HUMAN   | K.LVINGNPITIFQERDPS#KIK.W               | S83:       | 3 | 3,391  | 0,339 | -0,465 |

|    |                     |                                  |            |   |        |       |        |
|----|---------------------|----------------------------------|------------|---|--------|-------|--------|
| 19 | O00571 DDX3X_HUMAN  | R.GKSS#FFSDR.G                   | S83:       | 2 | 3,0578 | 0,246 | 0      |
| 19 | Q8N8A6 DDX51_HUMAN  | R.RVNDAEPGS#PEAPQGK.R            | S83:       | 3 | 2,8847 | 0,362 | -0,211 |
| 19 | Q8N3R9 MPP5_HUMAN   | K.KQELDLNSS#M*R.L                | S84:       | 2 | 3,2392 | 0,368 | -0,861 |
| 19 | O95819 M4K4_HUMAN   | K.HKS#S#SSFTPFIDPR.L             | S852:S853: | 2 | 3,3202 | 1     | 0      |
| 19 | Q00653 NFKB2_HUMAN  | R.DKLPs#TAEVKEDSAYGSQSVEQEAek.L  | S858:      | 3 | 6,9453 | 0,592 | -0,504 |
| 19 | P35606 COPB2_HUMAN  | R.STAQQELDGKpAS#PTPVIVASHTANK.E  | S859:      | 3 | 5,8189 | 0,486 | -0,134 |
| 19 | Q9UPU5 UBP24_HUMAN  | R.IILNSHS#PAGSAAISQQDFHPK.C      | S862:      | 3 | 5,9165 | 0,452 | -0,229 |
| 19 | Q9BW71 HIRP3_HUMAN  | K.RPPTPCS#DPER.K                 | S87:       | 3 | 3,1484 | 0,394 | -0,066 |
| 19 | Q2NKX8 ERC6L_HUMAN  | K.S#TKADIGPNLDQLKDDEILR.H        | S872:      | 3 | 3,3724 | 0,472 | -0,236 |
| 19 | Q9C0C2 TB182_HUMAN  | R.DAELQDQEFgKRDS#LGTySSR.D       | S872:      | 3 | 2,8473 | 0,289 | 0,442  |
| 19 | Q9C0C2 TB182_HUMAN  | K.RDS#LGTySSR.D                  | S872:      | 2 | 2,7002 | 0,287 | -0,2   |
| 19 | B2RTT4 B2RTT4_HUMAN | K.EAVVDLHADDS#RISEDETER.N        | S882:      | 3 | 2,8879 | 0,241 | -0,309 |
| 19 | Q9NR30 DDX21_HUMAN  | K.KEEPSQNDIS#PK.T                | S89:       | 2 | 3,9882 | 0,373 | -0,672 |
| 19 | Q9Y2H2 SAC2_HUMAN   | R.SQS#LSSTDSsvHAPSEITVAHGSGLGK.G | S907:      | 3 | 5,798  | 0,617 | -0,269 |
| 19 | Q9Y2W1 TR150_HUMAN  | K.WAHDKFS#GEEGEIEDDES#GTENR.E    | S928:S939: | 3 | 6,8666 | 0,588 | 0,654  |
| 19 | P98171 RHG04_HUMAN  | R.GPGAPAS#PSASHPQGLDTPKPH.-      | S930:      | 3 | 4,186  | 0,323 | -0,64  |
| 19 | O94827 PKHG5_HUMAN  | K.S#KSEASLLQLLAGAGTHGTPSAPSR.S   | S932:      | 3 | 4,2991 | 0,444 | -0,509 |
| 19 | Q01831 XPC_HUMAN    | K.VIKDEALS#DGDDLRFPSDLK.K        | S94:       | 3 | 3,5455 | 0,368 | 0,377  |
| 19 | Q01831 XPC_HUMAN    | K.DEALS#DGDDLRFPSDLKK.A          | S94:       | 3 | 3,371  | 0,275 | 0,083  |
| 19 | P78317 RNF4_HUMAN   | R.RLPQDHADSCVVS#S#DDEELSR.D      | S94:S95:   | 3 | 5,2567 | 0,43  | 1,421  |
| 19 | Q5VZ89 DEN4C_HUMAN  | K.RSS#LYGIAK.V                   | S948:      | 2 | 3,2693 | 0,305 | -0,227 |
| 19 | Q9UPU7 TBD2B_HUMAN  | R.ERDTSPDKGELVS#DEEEDT.-         | S957:      | 3 | 2,8685 | 0,383 | -0,246 |
| 19 | Q9Y4G8 RPGF2_HUMAN  | R.RSS#FLNAK.K                    | S960:      | 2 | 2,6182 | 0,172 | -0,243 |
| 19 | Q14498 RBM39_HUMAN  | R.YRS#PYSGPK.F                   | S97:       | 2 | 2,9346 | 0,304 | -0,645 |
| 19 | Q9UBB9 TFP11_HUMAN  | K.GAAEEAELEDs#DDEEKpVKQDDFPK.D   | S98:       | 3 | 5,8922 | 0,399 | -0,51  |
| 19 | Q9H2P0 ADNP_HUMAN   | R.NVHS#EDFENR.I                  | S98:       | 2 | 3,2765 | 0,476 | 0      |
| 19 | P46020 KPB1_HUMAN   | R.SVRPTDSNVSPAIS#IHEIGAVGATK.T   | S985:      | 3 | 6,0564 | 0,358 | 0,92   |
| 19 | Q14669 TRIPC_HUMAN  | R.DDSLdLSPQGRLS#DVLKR.K          | S997:      | 3 | 3,3449 | 0,324 | -0,175 |
| 19 | Q8NE71 ABCf1_HUMAN  | K.KLSVPT#S#DEEDEVpAPKPR.G        | T108:S109: | 3 | 5,6238 | 0,444 | -0,568 |
| 19 | Q9BX63 FANCJ_HUMAN  | R.HFNYPST#PPSER.N                | T113:      | 2 | 2,7149 | 0,418 | 0,484  |
| 19 | P20020 AT2B1_HUMAN  | R.IEDSEPHIPLIDDT#DAEDDAPTKR.N    | T1203:     | 3 | 7,0074 | 0,4   | -0,198 |
| 19 | Q9NYV4 CD2L7_HUMAN  | R.RT#PTM*PQEEAAACPPHILPPEK.R     | T1244:     | 3 | 2,9686 | 0,247 | -0,428 |
| 19 | Q5SW79 CE170_HUMAN  | R.LRT#SPALK.T                    | T1259:     | 2 | 2,8235 | 0,15  | -0,063 |

|    |                    |                                 |                 |   |        |       |        |
|----|--------------------|---------------------------------|-----------------|---|--------|-------|--------|
| 19 | Q8NFA0 UBP32_HUMAN | R.DPALCQHKPLT#PQGDELSEPR.I      | T1326:          | 3 | 2,8793 | 0,301 | -0,074 |
| 19 | Q9UQ35 SRRM2_HUMAN | K.AGM*SSNQSISSPVLDVPRTP#PSRER.S | T1413:          | 3 | 4,1475 | 0,361 | 0,2    |
| 19 | Q8N9Q2 S12IP_HUMAN | K.HSST#PNSSEFSR.K               | T146:           | 2 | 3,282  | 0,412 | -0,517 |
| 19 | Q96L73 NSD1_HUMAN  | R.TAT#SPKETVEEGVEHDPGM*PASK.K   | T1509:          | 3 | 3,9214 | 0,146 | -0,073 |
| 19 | Q8WTV1 THAP3_HUMAN | R.T#PNKQPSDHSYALLDLDLTK.K       | T170:           | 3 | 2,7482 | 0,296 | 0      |
| 19 | Q9H1E3 NUCKS_HUMAN | R.LKATVT#PS#PVKKG.G             | T179:S181:      | 3 | 2,8531 | 0,176 | -0,062 |
| 19 | O94915 FRYL_HUMAN  | R.RSNT#LDIM*DGR.I               | T1959:          | 2 | 2,2746 | 0,333 | -1,243 |
| 19 | P27361 MK03_HUMAN  | R.IADPEHDHTGFLT#EYVATR.W        | T202:           | 3 | 3,8845 | 0,47  | -0,162 |
| 19 | Q9H1E3 NUCKS_HUMAN | K.EKT#PS#PKEEDEEPES#PPEKK.T     | T202:S204:S214: | 3 | 3,4196 | 0,275 | -0,43  |
| 19 | Q9BYG3 MK671_HUMAN | K.KVSGTLDT#PEK.T                | T223:           | 2 | 3,3753 | 0,263 | -0,778 |
| 19 | Q8IWB9 TEX2_HUMAN  | K.SLST#DTSRQESDTVSYKPPDSK.L     | T223:           | 3 | 3,008  | 0,352 | 0,729  |
| 19 | P49736 MCM2_HUMAN  | R.RGNDPLT#SSPGR.S               | T25:            | 2 | 2,1092 | 0,246 | -0,548 |
| 19 | Q9NZM5 GSCR2_HUMAN | K.SDADSGFLGLRPT#SVDPALRR.R      | T28:            | 3 | 3,3424 | 0,203 | -0,317 |
| 19 | Q01518 CAP1_HUMAN  | R.SGPKPFSAPKPQT#SPS#PK.R        | T307:S310:      | 2 | 2,9343 | 0,343 | -0,611 |
| 19 | P49915 GUAA_HUMAN  | K.VINAAHSFYNGTTTLPISDEDRT#PR.K  | T318:           | 3 | 4,7085 | 0,452 | -0,192 |
| 19 | P46013 KI67_HUMAN  | K.GRDVESVQT#PSK.A               | T328:           | 3 | 3,382  | 0,119 | -0,066 |
| 19 | P46013 KI67_HUMAN  | K.GRDVESVQT#PSK.A               | T328:           | 2 | 3,2561 | 0,388 | -0,706 |
| 19 | Q7L9L4 MOL1A_HUMAN | K.HAEAT#LGSGNLR.M               | T35:            | 2 | 3,1707 | 0,529 | -0,187 |
| 19 | O14639 ABLM1_HUMAN | R.T#SSESIYSRPGSSIPGSPGHTIYAK.V  | T351:           | 3 | 3,0175 | 0,18  | -0,344 |
| 19 | Q86YR5 GPSM1_HUMAN | R.LT#SPAASEKPDLAGYEAQGARPK.R    | T363:           | 3 | 3,196  | 0,328 | -0,075 |
| 19 | Q92692 PVRL2_HUMAN | R.KEQTLQGAEEDELEGGPPSYKPPT#PK.A | T410:           | 3 | 4,5359 | 0,303 | -0,185 |
| 19 | Q1ED39 TS118_HUMAN | R.AT#SPSKSVAHGQAPEM*PLVK.K      | T47:            | 3 | 2,9131 | 0,114 | -0,343 |
| 19 | Q9Y3Z3 SAMH1_HUMAN | R.NFTKPQDGDVIAPLIT#PQKK.E       | T592:           | 3 | 4,3831 | 0,306 | 0,479  |
| 19 | Q66K74 MAP1S_HUMAN | K.ALELPLAASSIPRPRTP#PS#PESHR.S  | T638:S640:      | 3 | 3,5195 | 1     | -0,346 |
| 19 | Q66K74 MAP1S_HUMAN | K.ALELPLAASSIPRPRTP#PSPES#HR.S  | T638:S643:      | 3 | 3,4126 | 1     | 0,208  |
| 19 | Q9BW71 HIRP3_HUMAN | K.RPPT#PCSDPER.K                | T84:            | 2 | 2,4864 | 0,12  | -0,701 |
| 19 | Q9ULV3 CIZ1_HUMAN  | R.NALTALFTSSGRPPSQPNT#QDKTPSK.V | T872:           | 3 | 3,1263 | 0,349 | -0,518 |
| 19 | Q13428 TCOF_HUMAN  | R.KGAAPT#PPGK.T                 | T914:           | 2 | 2,1919 | 0,225 | -0,304 |
| 19 | P08559 ODPA_HUMAN  | R.Y#HGHSMSDPGVS#YR.T            | Y289:S300:      | 3 | 3,8877 | 0,345 | 0      |
| 19 | Q76FK4 NOL8_HUMAN  | R.NDREY#DSGDT#DEIIAM*KK.N       | Y376:T381:      | 3 | 3,8268 | 0,36  | 0,241  |
| 19 | Q9UJM3 ERRFI_HUMAN | R.KHLSY#VVSP.-                  | Y458:           | 2 | 2,1976 | 0,354 | -0,11  |
| 19 | Q96PU5 NED4L_HUMAN | K.DTLSNPQSPQPSPY#NSPKPQHK.V     | Y485:           | 3 | 5,0078 | 0,546 | -0,29  |
| 19 | P18669 PGAM1_HUMAN | R.HY#GGTLGLNK.A                 | Y92:            | 2 | 2,913  | 0,216 | -0,321 |



|    |                    |                                   |   |        |       |        |
|----|--------------------|-----------------------------------|---|--------|-------|--------|
| 19 | Q08211 DHX9_HUMAN  | K.DKDDGGEDDDANCNLICGDEYGPETR.L    | 3 | 6,0232 | 0,518 | -0,3   |
| 19 | P60709 ACTB_HUMAN  | R.KDLYANTVLSGGTTM*YPGIADR.M       | 3 | 5,9818 | 0,579 | 0      |
| 19 | P48506 GSH1_HUMAN  | K.DKNTSPFIETFTEDDEASR.A           | 3 | 5,8272 | 0,474 | -0,239 |
| 19 | P20042 IF2B_HUMAN  | K.FPDEDEILEKDEALEDEDNK.K          | 3 | 5,451  | 0,454 | -0,229 |
| 19 | Q9H3K6 BOLA2_HUMAN | R.DLEAEHVEVEDTTLNR.C              | 2 | 5,2315 | 0,578 | -0,457 |
| 19 | Q9P0M6 H2AW_HUMAN  | K.DSDKEGTSNSTSEDGPGDGFILSSK.S     | 3 | 5,2089 | 0,435 | 1,043  |
| 19 | P54725 RD23A_HUMAN | R.EDKSPSEESAPTTSPESVSGSVSSGSSGR.E | 3 | 5,199  | 0,558 | -0,877 |
| 19 | P12268 IMDH2_HUMAN | K.DKYPNLQVIGGNVVTAAQAK.N          | 3 | 5,1902 | 0,466 | -0,088 |
| 19 | P28066 PSA5_HUMAN  | K.GPQLFHM*DPSGTFVQCDAR.A          | 3 | 5,1676 | 0,475 | 0,42   |
| 19 | P07355 ANXA2_HUMAN | K.LSLEGDHSTPPSAYGSVK.A            | 2 | 5,1119 | 0,566 | -0,661 |
| 19 | P00338 LDHA_HUMAN  | K.DQLIYNLLKEEQTPQNK.I             | 3 | 5,1111 | 0,327 | 0,441  |
| 19 | Q13813 SPTA2_HUMAN | R.DLAALGDKVNSLGETAER.L            | 2 | 5,0824 | 0,562 | -0,394 |
| 19 | Q9NY12 NOLA1_HUMAN | K.CTTDENKVPYFNAPVYLENK.E          | 3 | 5,0411 | 0,403 | 0,076  |
| 19 | Q09666 AHNK_HUMAN  | K.IKGDVPSVGLGEPDVLQGPPEAK.I       | 3 | 4,9482 | 0,323 | -0,079 |
| 19 | Q9Y5B9 SP16H_HUMAN | K.NEDEEEEEEEKDEAEDLLGR.G          | 3 | 4,9305 | 0,487 | -0,152 |
| 19 | Q9UNZ2 NSF1C_HUMAN | R.DLIHQDEDEEEEEEGQR.F             | 3 | 4,9081 | 0,326 | -0,438 |
| 19 | P62158 CALM_HUMAN  | K.EAFSLFDKDGDTITTK.E              | 2 | 4,8701 | 0,541 | -0,463 |
| 19 | P52907 CAZA1_HUMAN | K.FITHAPPGEFNEVFNDVR.L            | 3 | 4,8521 | 0,285 | -0,438 |
| 19 | P84157 MXRA7_HUMAN | K.DNKETFGEM*SDGDVQEQLR.L          | 3 | 4,8429 | 0,273 | -0,248 |
| 19 | P13861 KAP2_HUMAN  | K.ADEHVIDQGDDGDNFYVIER.G          | 3 | 4,7699 | 0,535 | -0,317 |
| 19 | Q9UJZ1 STML2_HUMAN | R.DVQGTASLDEELDRVK.M              | 2 | 4,7326 | 0,508 | 0,452  |
| 19 | P13639 EF2_HUMAN   | K.YRCELLYEGPPDDEAAM*GIK.S         | 3 | 4,6656 | 0,312 | 0      |
| 19 | P13489 RINI_HUMAN  | K.DSPCQLEALKLESCGVTSDNCR.D        | 3 | 4,6174 | 0,53  | 0,36   |
| 19 | P50579 AMPM2_HUMAN | K.GPSAAGEQEPDKESGASVDEVAR.Q       | 3 | 4,6    | 0,404 | -0,32  |
| 19 | Q9UJN8 MCD2L_HUMAN | R.DDDKNNDGYIDYAEFAK.S             | 2 | 4,5849 | 0,543 | -0,612 |
| 19 | Q9UJN8 MCD2L_HUMAN | R.DDDKNNDGYIDYAEFAK.S             | 3 | 4,5835 | 0,39  | 0,275  |
| 19 | P0C7M2 RA1L3_HUMAN | R.GFAFVTFDDHDSVDK.I               | 2 | 4,5746 | 0,491 | -0,574 |
| 19 | P10586 PTPRF_HUMAN | R.DHPPIPITDLADNIER.L              | 3 | 4,5692 | 0,403 | -0,201 |
| 19 | P51991 ROA3_HUMAN  | R.GFAFVTFDDHDTVVK.I               | 2 | 4,5412 | 0,509 | -0,498 |
| 19 | P62937 PPIA_HUMAN  | K.HTGPGILSM*ANAGPNTNGSQFFICTAK.T  | 3 | 4,5158 | 0,429 | 0,456  |
| 19 | O94906 PRP6_HUMAN  | K.DDEEADAIYAALDKR.M               | 2 | 4,4929 | 0,466 | -0,36  |
| 19 | P50991 TCPD_HUMAN  | K.M*IQDGKGDVTITNDGATILK.Q         | 3 | 4,489  | 0,261 | -0,087 |
| 19 | P12004 PCNA_HUMAN  | R.DLSHIGDAVVISCAK.D               | 2 | 4,3971 | 0,584 | -0,308 |

|    |                    |                                 |   |        |       |        |
|----|--------------------|---------------------------------|---|--------|-------|--------|
| 19 | Q9UJS0 CMC2_HUMAN  | K.DVEVTKEEFVLAQK.F              | 3 | 4,3963 | 0,44  | 0,107  |
| 19 | P22626 ROA2_HUMAN  | R.GFGFVTFDDHDPVDK.I             | 2 | 4,3743 | 0,484 | -0,647 |
| 19 | O60763 USO1_HUMAN  | R.DSEQVAELKQELATLK.S            | 2 | 4,3612 | 0,456 | -0,677 |
| 19 | O43395 PRPF3_HUMAN | K.DQTKPTPLILDEQGR.T             | 3 | 4,361  | 0,317 | 0,107  |
| 19 | O14561 ACPM_HUMAN  | K.LM*CPQEIVDYIADKK.D            | 3 | 4,3454 | 0,403 | -0,298 |
| 19 | P34932 HSP74_HUMAN | K.M*QVDQEEPHVEEQQQTPAENK.A      | 3 | 4,3424 | 0,429 | 0,277  |
| 19 | P08133 ANXA6_HUMAN | R.DLEADIIGDTSGHFQK.M            | 2 | 4,3355 | 0,562 | -0,489 |
| 19 | P15559 NQO1_HUMAN  | K.LKDPANFQYPAESVLAYK.E          | 3 | 4,3337 | 0,321 | -0,534 |
| 19 | P19338 NUCL_HUMAN  | K.VTQDELKEVFEDAAEIR.L           | 3 | 4,3321 | 0,397 | -0,459 |
| 19 | P00558 PGK1_HUMAN  | K.ALESPERPFLAILGGAK.V           | 3 | 4,3246 | 0,451 | -0,517 |
| 19 | P05783 K1C18_HUMAN | R.RLLEDGEDFNLGDALDSSNSM*QTIQK.T | 3 | 4,32   | 0,397 | -0,503 |
| 19 | Q92499 DDX1_HUMAN  | K.IDCDNLEQYFIQGGGPDKK.G         | 3 | 4,3164 | 0,376 | -0,472 |
| 19 | P67809 YBOX1_HUMAN | R.EDGNEEDKENQGDETQGGQPPQR.R     | 3 | 4,3111 | 0,442 | -0,278 |
| 19 | O14965 STK6_HUMAN  | R.DIKPENLLLGSAGELK.I            | 2 | 4,3038 | 0,432 | -0,647 |
| 19 | P49736 MCM2_HUMAN  | R.FGAQQDTIEVPEKDLVDK.A          | 3 | 4,2698 | 0,409 | 0,36   |
| 19 | Q07666 KHDR1_HUMAN | K.DDEENYLDLFSHK.N               | 2 | 4,2688 | 0,427 | -0,526 |
| 19 | Q9Y295 DRG1_HUMAN  | K.DHTLEDEDVIQIVK.K              | 2 | 4,2655 | 0,517 | -0,443 |
| 19 | P31939 PUR9_HUMAN  | K.NGNYCVLQM*DQSYKPDENEVR.T      | 3 | 4,2607 | 0,481 | 0,568  |
| 19 | O14965 STK6_HUMAN  | R.DIKPENLLLGSAGELK.I            | 3 | 4,2592 | 0,294 | -0,108 |
| 19 | O60763 USO1_HUMAN  | R.DSEQVAELKQELATLK.S            | 3 | 4,2518 | 0,415 | -0,406 |
| 19 | Q9NYL9 TMOD3_HUMAN | K.YKDLDEDELLGNLSETLK.Q          | 3 | 4,2199 | 0,317 | -0,411 |
| 19 | P11387 TOP1_HUMAN  | K.NLQLFM*ENKQPEDDLFDR.L         | 3 | 4,1694 | 0,233 | -0,161 |
| 19 | O95766 CG028_HUMAN | K.DGKPVIEYQEEELLDK.V            | 3 | 4,1643 | 0,486 | 0,192  |
| 19 | P11766 ADHX_HUMAN  | K.VDEFVTHNLSFDEINK.A            | 3 | 4,1605 | 0,291 | -0,576 |
| 19 | P55145 ARMET_HUMAN | K.DRDVTFSPATIENELIK.F           | 3 | 4,1576 | 0,275 | -0,563 |
| 19 | P08865 RSSA_HUMAN  | R.DPEEIEKEEQAAA EK.A            | 3 | 4,1488 | 0,437 | 0      |
| 19 | P00505 AATM_HUMAN  | K.NLDKEYLPIGGLAEFCK.A           | 2 | 4,1375 | 0,553 | -0,806 |
| 19 | P20042 IF2B_HUMAN  | K.DASDDLDDLNFFNQKK.K            | 2 | 4,1121 | 0,377 | -0,712 |
| 19 | Q15691 MARE1_HUMAN | R.KNPGVGNGDDEAAELM*QQVNVLK.L    | 3 | 4,1107 | 0,313 | -0,375 |
| 19 | Q5TC12 ATPF1_HUMAN | K.DKTLSSIFNIEM*VK.E             | 3 | 4,1033 | 0,308 | -0,111 |
| 19 | Q09666 AHNK_HUMAN  | K.VESDLKGPEVDIEGPEGK.L          | 3 | 4,0898 | 0,275 | 0,193  |
| 19 | Q9H0A0 NAT10_HUMAN | K.TLSDDLDEAAKEFQEK.H            | 2 | 4,088  | 0,48  | -0,796 |
| 19 | P26641 EF1G_HUMAN  | K.KAAAPAPEEEM*DECEQALAAEPK.A    | 3 | 4,077  | 0,274 | -0,146 |

|    |                    |                                  |   |        |       |        |
|----|--------------------|----------------------------------|---|--------|-------|--------|
| 19 | Q9Y265 RUVB1_HUMAN | R.GTEDITSPHGIPLDLLDR.V           | 3 | 4,0729 | 0,168 | -0,375 |
| 19 | P05787 K2C8_HUMAN  | K.DVDEAYM*NKVELESR.L             | 3 | 4,0487 | 0,462 | 0,202  |
| 19 | Q99832 TCPH_HUMAN  | R.AIKNDSVVAGGGAIEM*ELSK.Y        | 3 | 4,0382 | 0,325 | 0,456  |
| 19 | P11021 GRP78_HUMAN | R.IINEPTAAAIAYGLDKR.E            | 2 | 4,0327 | 0,48  | 0,739  |
| 19 | P13693 TCTP_HUMAN  | R.DLISHDEM*FSDIYK.I              | 2 | 4,0142 | 0,481 | -0,353 |
| 19 | P08238 HS90B_HUMAN | K.CLELFSELAEDKENYK.K             | 2 | 3,9933 | 0,509 | -0,491 |
| 19 | Q9NVD7 PARVA_HUMAN | R.DAFDTLFDHAPDK.L                | 2 | 3,9887 | 0,441 | -0,572 |
| 19 | Q96FK6 WDR89_HUMAN | K.DSLGAYSETHSDDVTQVR.F           | 2 | 3,981  | 0,577 | -0,555 |
| 19 | O60763 USO1_HUMAN  | K.DNQHQGSYSEGAQM*NGIQPEEIGR.L    | 3 | 3,9791 | 0,357 | -0,206 |
| 19 | O43395 PRPF3_HUMAN | K.DQTKPTLILDEQGR.T               | 2 | 3,9593 | 0,385 | 0      |
| 19 | P00492 HPRT_HUMAN  | R.SVGYPDFVGFPEIPDK.F             | 3 | 3,9461 | 0,264 | -0,102 |
| 19 | Q9P287 BCCIP_HUMAN | K.FLNDTTKPVGLLSER.F              | 3 | 3,9452 | 0,336 | 0,101  |
| 19 | Q14669 TRIPC_HUMAN | R.LVDNFQHEENLLQQVASK.D           | 3 | 3,9384 | 0,217 | -0,26  |
| 19 | Q00341 VIGLN_HUMAN | R.DKFPEVIINFDPQAK.S              | 3 | 3,9366 | 0,15  | -0,394 |
| 19 | Q71U36 TBA1A_HUMAN | R.IHFPLATYAPVISA EK.A            | 2 | 3,9032 | 0,565 | -0,417 |
| 19 | P14927 QCR7_HUMAN  | R.DDTIYEDEDVKEAIR.R              | 2 | 3,8976 | 0,493 | -0,472 |
| 19 | O75419 CC45L_HUMAN | K.DGSGTDHFIQALDSLSR.S            | 3 | 3,8839 | 0,244 | -0,603 |
| 19 | Q01780 EXOSX_HUMAN | R.DDTHYLLIYDK.M                  | 2 | 3,875  | 0,513 | -0,391 |
| 19 | P32004 L1CAM_HUMAN | R.DLQELGSDSKYFIEDGR.L            | 3 | 3,8679 | 0,357 | -0,457 |
| 19 | P05387 RLA2_HUMAN  | K.ILDSVGIEADDDRLNK.V             | 2 | 3,8555 | 0,349 | -0,413 |
| 19 | P04075 ALDOA_HUMAN | K.IGEHTPSALAIM*ENANVLAR.Y        | 3 | 3,8462 | 0,247 | -0,517 |
| 19 | Q14254 FLOT2_HUMAN | K.DVYDKVDYLSSLGK.T               | 2 | 3,8462 | 0,539 | 0,381  |
| 19 | P04792 HSPB1_HUMAN | R.VSLDVNHFAPDELTVK.T             | 2 | 3,8354 | 0,516 | -0,684 |
| 19 | P31350 RIR2_HUMAN  | R.DEGLHCDFACL M*FK.H             | 3 | 3,8325 | 0,342 | -0,416 |
| 19 | P50991 TCPD_HUMAN  | R.DALSDLALHFLNK.M                | 2 | 3,8255 | 0,492 | -0,67  |
| 19 | Q14008 CKAP5_HUMAN | K.HSTSGTDEGEDGDEPDDGSNDVVDLLPR.T | 3 | 3,8201 | 0,3   | 0,375  |
| 19 | Q02952 AKA12_HUMAN | K.VKEESQLPGTGGPEDVLQPVQR.A       | 3 | 3,8117 | 0,347 | 0,155  |
| 19 | P27348 1433T_HUMAN | K.QTIDNSQGAYQEAFDISKK.E          | 3 | 3,8098 | 0,418 | -0,085 |
| 19 | P11216 PYGB_HUMAN  | K.IGEEFLTDLSQLKK.L               | 2 | 3,8041 | 0,35  | -0,452 |
| 19 | Q9BT25 NYS48_HUMAN | R.SFAQVLELSAEASK.E               | 2 | 3,8    | 0,524 | -0,824 |
| 19 | P22234 PUR6_HUMAN  | R.DLKEVTPEGLQM*VK.K              | 3 | 3,7931 | 0,249 | 0,228  |
| 19 | P37802 TAGL2_HUMAN | R.DDGLFSGDPNWFPPK.S              | 2 | 3,7754 | 0,396 | -0,496 |
| 19 | O00165 HAX1_HUMAN  | R.TREDNDLDSQVSEQGLGPVLQPQPK.S    | 3 | 3,7457 | 0,299 | 0,532  |

|    |                    |                              |   |        |       |        |
|----|--------------------|------------------------------|---|--------|-------|--------|
| 19 | P52948 NUP98_HUMAN | K.SHLFDGLDDDEPSLANGAFM*PK.K  | 3 | 3,7444 | 0,278 | -0,153 |
| 19 | P13797 PLST_HUMAN  | R.VYALPEDLVEVKPK.M           | 2 | 3,7371 | 0,469 | -0,229 |
| 19 | Q12789 TF3C1_HUMAN | R.DILHATFEESLDK.T            | 3 | 3,7326 | 0,411 | -0,12  |
| 19 | P53618 COPB_HUMAN  | K.EAGELKPEEEITVGPVQK.L       | 2 | 3,7157 | 0,315 | -0,187 |
| 19 | P48643 TCPE_HUMAN  | R.DVDFELIKVEGK.V             | 2 | 3,7105 | 0,518 | 0      |
| 19 | P50395 GDIB_HUMAN  | K.EIRPALELLEPIEQK.F          | 3 | 3,7059 | 0,287 | -0,411 |
| 19 | Q14204 DYHC1_HUMAN | K.EDLDKVEPAVIEAQNNAVK.S      | 2 | 3,6856 | 0,379 | -0,248 |
| 19 | Q01780 EXOSX_HUMAN | R.DDTHYLLIYDK.M              | 3 | 3,6847 | 0,397 | 0,117  |
| 19 | P20810 ICAL_HUMAN  | K.DLDDALDKLSDSLGQR.Q         | 2 | 3,6812 | 0,472 | -0,624 |
| 19 | P14625 ENPL_HUMAN  | R.VFITDDFHDM*M*PK.Y          | 2 | 3,6674 | 0,346 | -0,3   |
| 19 | O75369 FLNB_HUMAN  | K.DLDIIDNYDYSHTVK.Y          | 2 | 3,6644 | 0,375 | -0,135 |
| 19 | P35606 COPB2_HUMAN | K.DM*GSCEIYPQTIQHNPNGR.F     | 3 | 3,6551 | 0,493 | -0,246 |
| 19 | P47897 SYQ_HUMAN   | R.DRPM*EESLLFEAM*R.K         | 3 | 3,6506 | 0,305 | -0,294 |
| 19 | Q9Y2L1 RRP44_HUMAN | K.DKPNPQLIYDDEIPSLK.I        | 2 | 3,6496 | 0,395 | -0,615 |
| 19 | Q07866 KLC1_HUMAN  | K.DHPAVAATLNNLAVLYGK.R       | 3 | 3,6471 | 0,424 | -0,392 |
| 19 | P62333 PRS10_HUMAN | R.DHQPCIIFM*DEIDAIGGR.R      | 3 | 3,6454 | 0,362 | -0,435 |
| 19 | Q96T23 RSF1_HUMAN  | K.DADSSISVLEIHSQK.A          | 2 | 3,6234 | 0,375 | -0,15  |
| 19 | P10809 CH60_HUMAN  | K.VGEVIVTKDDAM*LLK.G         | 3 | 3,6137 | 0,387 | 0,222  |
| 19 | Q13813 SPTA2_HUMAN | K.SADESGQALLAAGHYASDEV.R     | 3 | 3,6045 | 0,351 | -0,682 |
| 19 | P08758 ANXA5_HUMAN | R.DLLDDLKSELTGK.F            | 2 | 3,5879 | 0,402 | -0,675 |
| 19 | P19525 E2AK2_HUMAN | R.DLKPSNIFLVDTK.Q            | 3 | 3,5867 | 0,372 | -0,123 |
| 19 | Q9BQA1 MEP50_HUMAN | K.YEHDDIVSTVSVLSSGTQAVSGSK.D | 3 | 3,5835 | 0,38  | -0,148 |
| 19 | Q8N766 K0090_HUMAN | K.DKESGM*SSLYVFNPIFGK.W      | 3 | 3,5762 | 0,252 | -0,449 |
| 19 | Q9Y223 GLCNE_HUMAN | K.DEAVGALHLIQAAL.L           | 2 | 3,5726 | 0,43  | -0,34  |
| 19 | P13667 PDIA4_HUMAN | R.YKVEGFPTIYFAPSGDK.K        | 3 | 3,5636 | 0,314 | -0,286 |
| 19 | Q9UBB9 TFP11_HUMAN | R.DM*VVNLFHELEK.M            | 2 | 3,5462 | 0,415 | -1,065 |
| 19 | Q9HB71 CYBP_HUMAN  | K.EKPSYDTETDPSEGLM*NVLK.K    | 3 | 3,5412 | 0,427 | 0,242  |
| 19 | O95766 CG028_HUMAN | K.DGKPVIEYQEEELDK.V          | 2 | 3,5385 | 0,467 | -0,384 |
| 19 | P49642 PRI1_HUMAN  | R.ELDAISTNEEEKEENEAESDVK.H   | 3 | 3,5371 | 0,388 | -0,584 |
| 19 | Q86UL3 PLCF_HUMAN  | K.DPTSLEEEIKEIR.R            | 2 | 3,5264 | 0,287 | 0,078  |
| 19 | Q9H4A4 AMPB_HUMAN  | R.VKIEPGVDPDDTYNETPYEK.G     | 3 | 3,5173 | 0,271 | 0,079  |
| 19 | P54652 HSP72_HUMAN | R.IINEPTAAAIAAYGLDKK.G       | 2 | 3,5114 | 0,41  | -0,409 |
| 19 | O15111 IKKA_HUMAN  | R.DLKPENIVLQDVGGK.I          | 3 | 3,5013 | 0,337 | 0      |

|    |                    |                                  |   |        |       |        |
|----|--------------------|----------------------------------|---|--------|-------|--------|
| 19 | Q9Y490 TLN1_HUMAN  | K.DHFGLEGDEESTM*LEDSVSPK.K       | 3 | 3,4866 | 0,299 | -0,156 |
| 19 | P09211 GSTP1_HUMAN | K.ALPGQLKPFETLLSQNQGGK.T         | 3 | 3,4858 | 0,27  | -0,688 |
| 19 | P08238 HS90B_HUMAN | K.CLELFSELAEDKENYK.K             | 3 | 3,4835 | 0,466 | -0,46  |
| 19 | Q9H3K6 BOLA2_HUMAN | R.DLEAEHVEVEDTTLNR.C             | 3 | 3,482  | 0,412 | 0,196  |
| 19 | P32969 RL9_HUMAN   | R.DFNHINVELSLLGK.K               | 3 | 3,4771 | 0,369 | -0,229 |
| 19 | P43686 PRS6B_HUMAN | K.M*NLSEEVDLEDYVARPDK.I          | 3 | 3,4729 | 0,326 | 0,257  |
| 19 | Q8WYA6 CTBL1_HUMAN | R.DGEEEEEEEEPLDESSVKK.M          | 3 | 3,4691 | 0,438 | -0,083 |
| 19 | P18859 ATP5J_HUMAN | K.FEDPKFEVIEKPQA.-               | 3 | 3,4609 | 0,266 | 0,218  |
| 19 | P26599 PTBP1_HUMAN | K.NNQFQALLQYADPVSAQHAK.L         | 3 | 3,459  | 0,385 | -0,408 |
| 19 | Q13620 CUL4B_HUMAN | K.DIEDGDKFICNDDFK.H              | 2 | 3,4496 | 0,329 | 0,466  |
| 19 | Q99816 TS101_HUMAN | R.LDQEVAEVDKNIELLK.K             | 3 | 3,4134 | 0,195 | -0,099 |
| 19 | Q9H9Y2 RPF1_HUMAN  | R.DFTDLIVINEDRK.T                | 2 | 3,4132 | 0,46  | -0,541 |
| 19 | P62736 ACTA_HUMAN  | K.YPIEHGIITNWDDM*EK.I            | 2 | 3,407  | 0,302 | 0      |
| 19 | P46821 MAP1B_HUMAN | K.DFEELKAEVDVTK.D                | 3 | 3,4043 | 0,441 | -0,221 |
| 19 | P09936 UCHL1_HUMAN | K.QTIGNSCGTIGLIHAVANNQDK.L       | 3 | 3,3972 | 0,523 | 0,079  |
| 19 | Q6NZI2 PTRF_HUMAN  | K.VM*IYQDEVKLPK.L                | 3 | 3,3933 | 0,345 | 0      |
| 19 | P13639 EF2_HUMAN   | K.DLEEDHACIPIK.K                 | 2 | 3,393  | 0,328 | 0,169  |
| 19 | P08670 VIME_HUMAN  | R.DGQVINETSQHDDLE.-              | 2 | 3,3881 | 0,472 | -0,664 |
| 19 | Q9H0S4 DDX47_HUMAN | K.KLPGFPTQDDEVMM*MLTER.V         | 3 | 3,3868 | 0,152 | -0,342 |
| 19 | Q13243 SFRS5_HUMAN | R.DADDAVYELDGKELCSER.V           | 3 | 3,362  | 0,449 | -0,175 |
| 19 | Q7KZI7 MARK2_HUMAN | R.DLKAENLLLDADM*NIK.I            | 3 | 3,3614 | 0,273 | -0,3   |
| 19 | P00367 DHE3_HUMAN  | R.DSNYHLLM*SVQESLER.K            | 3 | 3,3592 | 0,284 | 0,283  |
| 19 | P00558 PGK1_HUMAN  | K.ALESPERFLAILGGAK.V             | 2 | 3,3537 | 0,359 | -0,414 |
| 19 | P14866 HNRPL_HUMAN | K.SDALETGLFLNHYQM*K.N            | 2 | 3,3501 | 0,449 | -0,518 |
| 19 | Q86UL3 PLCF_HUMAN  | K.DPTSLEEEIKEIR.R                | 3 | 3,3498 | 0,334 | 0      |
| 19 | Q9UBE0 SAE1_HUMAN  | R.DPPHNNFFFDGM*K.G               | 3 | 3,3426 | 0,36  | -0,106 |
| 19 | P12956 KU70_HUMAN  | R.DTGIFLDLM*HLK.K                | 2 | 3,3403 | 0,444 | -0,688 |
| 19 | P13010 KU86_HUMAN  | K.DEKTDLTLEDLFPTTK.I             | 2 | 3,3112 | 0,373 | -0,348 |
| 19 | P00505 AATM_HUMAN  | K.NLDKEYLPIGGLAEFCK.A            | 3 | 3,3091 | 0,326 | -0,558 |
| 19 | Q14978 NOLC1_HUMAN | K.AAESSSDSSDSDSSEDDEAPSKPAGTTK.N | 3 | 3,2911 | 0,394 | 0,663  |
| 19 | O00487 PSDE_HUMAN  | K.AVEEEDKM*TPEQLAIK.N            | 2 | 3,2856 | 0,428 | -0,462 |
| 19 | Q8ND56 LS14A_HUMAN | K.DDFEFESANAQFNKEEIDR.E          | 3 | 3,2847 | 0,37  | -0,168 |
| 19 | O60664 M6PBP_HUMAN | R.GLDKLEENLPILQQPTEK.V           | 3 | 3,2716 | 0,2   | -0,354 |

|    |                    |                            |   |        |       |        |
|----|--------------------|----------------------------|---|--------|-------|--------|
| 19 | P54578 UBP14_HUMAN | K.FDDDKVSIVTPEDILR.L       | 3 | 3,2631 | 0,224 | -0,196 |
| 19 | Q9Y2A7 NCKP1_HUMAN | R.LGQM*IVDYENPLKK.M        | 3 | 3,26   | 0,414 | -0,11  |
| 19 | Q9Y2Z4 SYYM_HUMAN  | R.LGLEALAAHQQLFTDGR.S      | 3 | 3,2528 | 0,291 | -0,281 |
| 19 | Q6ZXV5 TMTC3_HUMAN | R.DKISSSSFIEPIFPTSK.I      | 3 | 3,2509 | 0,274 | -0,194 |
| 19 | P27816 MAP4_HUMAN  | K.DM*ESPTKLDVTLAK.D        | 3 | 3,2434 | 0,288 | 0,234  |
| 19 | Q9Y217 MTMR6_HUMAN | R.DCHDIYNSLLQLSK.Q         | 3 | 3,2413 | 0,117 | -0,429 |
| 19 | O43290 SNUT1_HUMAN | R.DLQGLTVEHAIDSFR.E        | 2 | 3,2237 | 0,53  | -0,574 |
| 19 | P38117 ETFB_HUMAN  | K.IEVIKPGDLGVDLTSK.L       | 3 | 3,2235 | 0,385 | -0,109 |
| 19 | Q16531 DDB1_HUMAN  | R.IGRPSETGIIGIIDPECR.M     | 3 | 3,2228 | 0,23  | 0      |
| 19 | P13667 PDIA4_HUMAN | K.GESDPAYQQYQDAANNLREDYK.F | 3 | 3,2221 | 0,305 | -0,426 |
| 19 | P10809 CH60_HUMAN  | K.VGEVIVTKDDAM*LLK.G       | 2 | 3,2189 | 0,434 | -0,074 |
| 19 | P27361 MK03_HUMAN  | R.DLKPSNLLINTTCDLK.I       | 3 | 3,2157 | 0,164 | 0      |
| 19 | Q8TCD5 NT5C_HUMAN  | R.DKTVVLGDLIDDK.D          | 3 | 3,2049 | 0,177 | 0      |
| 19 | P35579 MYH9_HUMAN  | K.NM*DPLNDNIATLLHQSSDK.F   | 3 | 3,2038 | 0,236 | -0,342 |
| 19 | Q96A33 CCD47_HUMAN | K.IM*QEEGQPLKLPDTK.R       | 3 | 3,2015 | 0,253 | 0,105  |
| 19 | P14866 HNRPL_HUMAN | K.SDALETGLFLNHYQM*K.N      | 3 | 3,1985 | 0,4   | -0,389 |
| 19 | Q99497 PARK7_HUMAN | R.DVVICPDASLEDAKK.E        | 2 | 3,1977 | 0,317 | -0,441 |
| 19 | Q99733 NP1L4_HUMAN | R.LDNVPHTPSSYIETLPK.A      | 3 | 3,1913 | 0,298 | 0,191  |
| 19 | Q8NFC6 FA44A_HUMAN | K.DGIAVDHVVLNTEK.Y         | 3 | 3,1913 | 0,276 | 0,233  |
| 19 | P08670 VIME_HUMAN  | R.EEAENTLQSFQDQVDNASLAR.L  | 3 | 3,1872 | 0,363 | -0,535 |
| 19 | P05787 K2C8_HUMAN  | K.DVDEAYM*NKVELESR.L       | 2 | 3,1801 | 0,419 | -0,471 |
| 19 | P62736 ACTA_HUMAN  | K.DSYVGDEAQSKR.G           | 2 | 3,1789 | 0,388 | -0,72  |
| 19 | Q71U36 TBA1A_HUMAN | R.IHFPLATYAPVISA EK.A      | 3 | 3,1739 | 0,454 | -0,104 |
| 19 | P19338 NUCL_HUMAN  | K.GLSEDTEETLKESFDGSRV.A    | 3 | 3,1669 | 0,496 | 0,083  |
| 19 | P08133 ANXA6_HUMAN | R.DLM*TDLKSEISGLAR.L       | 3 | 3,158  | 0,213 | -0,411 |
| 19 | P11766 ADHX_HUMAN  | K.VDEFVTHNLSFDEINK.A       | 2 | 3,1575 | 0,494 | -0,64  |
| 19 | P30837 AL1B1_HUMAN | R.IAKEEIFGPVQPLFK.F        | 3 | 3,1552 | 0,279 | -0,107 |
| 19 | Q14571 ITPR2_HUMAN | K.EDKEAFAIVSVPLSEVR.D      | 3 | 3,1511 | 0,203 | -0,194 |
| 19 | Q14669 TRIPC_HUMAN | R.QFSIQAEDERESTDDESNPLGR.A | 3 | 3,1492 | 0,234 | 0,145  |
| 19 | P13693 TCTP_HUMAN  | R.DLISHDEM*FSDIYK.I        | 3 | 3,1468 | 0,333 | 0,106  |
| 19 | P18583 SON_HUMAN   | K.DIHLDLPSNNNLVSK.D        | 2 | 3,1435 | 0,423 | -0,363 |
| 19 | Q9BUJ2 HNRL1_HUMAN | K.QGAPTSFLPPEASQLKPDR.Q    | 3 | 3,141  | 0,341 | -0,09  |
| 19 | P01889 1B07_HUMAN  | R.DGEDQTQDTELVETRPAGDR.T   | 3 | 3,1357 | 0,312 | 0,246  |

|    |                    |                               |   |        |       |        |
|----|--------------------|-------------------------------|---|--------|-------|--------|
| 19 | P19525 E2AK2_HUMAN | R.DLKPSNIFLVDTK.Q             | 2 | 3,1118 | 0,363 | -0,328 |
| 19 | Q15293 RCN1_HUMAN  | K.IVDRIDNDGDGFVTEELK.T        | 3 | 3,1056 | 0,26  | 0,257  |
| 19 | P20042 IF2B_HUMAN  | K.EVEPEPTEDKDLEADEEDTR.K      | 3 | 3,1034 | 0,263 | -0,234 |
| 19 | Q15843 NEDD8_HUMAN | K.EIEIDIEPTDKVER.I            | 2 | 3,0852 | 0,273 | 0,579  |
| 19 | Q92621 NU205_HUMAN | R.DDM*IHQLPLLTEK.Q            | 3 | 3,0851 | 0,376 | 0      |
| 19 | P21333 FLNA_HUMAN  | K.TGVAVNKPAEFTVDAK.H          | 3 | 3,0807 | 0,356 | -0,333 |
| 19 | Q96GD4 AURKB_HUMAN | R.DIKPENLLLGLK.G              | 3 | 3,0806 | 0,298 | 0      |
| 19 | O14656 TOR1A_HUMAN | K.DIEHALSVSVFNNK.N            | 3 | 3,0804 | 0,205 | -0,116 |
| 19 | Q09666 AHNK_HUMAN  | K.APSLDIKGPEVDVSGPK.L         | 3 | 3,0535 | 0,412 | -0,107 |
| 19 | Q9Y2L1 RRP44_HUMAN | K.DKPNPQLIYDDEIPSLK.I         | 3 | 3,0515 | 0,405 | -0,092 |
| 19 | Q99986 VRK1_HUMAN  | K.DDGKLDLSVVENGGLK.A          | 2 | 3,0468 | 0,407 | -0,221 |
| 19 | Q8NI08 NCOA7_HUMAN | K.DM*DNQIFGAYATHPFK.F         | 3 | 3,0364 | 0,174 | -0,293 |
| 19 | P12004 PCNA_HUMAN  | R.DLSHIGDAVVISCAK.D           | 3 | 3,0361 | 0,243 | -0,231 |
| 19 | Q07021 C1QBP_HUMAN | K.AFVDFLSDEIKEER.K            | 2 | 3,0352 | 0,247 | -0,575 |
| 19 | Q15435 PP1R7_HUMAN | R.ELYLSHNGIEVIEGLENNK.L       | 3 | 3,0334 | 0,141 | 0,08   |
| 19 | P31946 1433B_HUMAN | K.QTTVSNSQQAYQEAFEISKK.E      | 3 | 3,026  | 0,294 | -0,16  |
| 19 | P22234 PUR6_HUMAN  | R.DLKEVTEPEGLQM*VK.K          | 2 | 3,0047 | 0,217 | -0,381 |
| 19 | Q9HAV7 GRPE1_HUMAN | K.NSGQNLEEDM*GQSEQKADPPATEK.T | 3 | 3,0013 | 0,12  | -0,908 |
| 19 | Q9BUQ8 DDX23_HUMAN | K.DSSLPPHILEVIDK.C            | 2 | 2,9966 | 0,448 | -0,234 |
| 19 | Q16539 MK14_HUMAN  | R.DLKPSNLAVNEDCELK.I          | 3 | 2,9537 | 0,083 | 0,297  |
| 19 | P20810 ICAL_HUMAN  | K.DLDDALDKLSDSLGQR.Q          | 3 | 2,9484 | 0,231 | -0,312 |
| 19 | Q99816 TS101_HUMAN | K.DLKPVLDSYVFNDGSSR.E         | 3 | 2,9477 | 0,246 | -0,191 |
| 19 | Q16531 DDB1_HUMAN  | R.SDPNRETDDLVLVSVGQTR.V       | 3 | 2,9443 | 0,154 | -0,325 |
| 19 | P49427 UB2R1_HUMAN | R.DGVKVPTTLAEYCVK.T           | 3 | 2,9337 | 0,163 | -0,109 |
| 19 | Q9UL26 RB22A_HUMAN | K.DYADSIHAIFVETSAK.N          | 2 | 2,9256 | 0,519 | -0,483 |
| 19 | Q92667 AKAP1_HUMAN | R.DDSTKLELALTGGGEAK.S         | 3 | 2,9252 | 0,237 | -0,111 |
| 19 | P38646 GRP75_HUMAN | R.VEAVNM*AEGIIHDTETK.M        | 2 | 2,923  | 0,407 | 0,782  |
| 19 | Q96ER3 SAAL1_HUMAN | K.VGEVVDKLFDLDEK.L            | 2 | 2,9162 | 0,329 | -0,304 |
| 19 | Q13308 PTK7_HUMAN  | K.DRPSFSEIASALGDSTVDSKP.-     | 3 | 2,9126 | 0,28  | -0,923 |
| 19 | P06744 G6PI_HUMAN  | R.SNTPILVDGKDVM*PEVVK.V       | 2 | 2,9016 | 0,417 | 0,742  |
| 19 | P18583 SON_HUMAN   | K.DIHLDLPSNNNLVSK.D           | 3 | 2,8931 | 0,321 | 0,218  |
| 19 | P13010 KU86_HUMAN  | K.DEKTDLTLEDLFPTTK.I          | 3 | 2,8904 | 0,222 | 0      |
| 19 | Q13085 ACACA_HUMAN | R.DEPIHILNVAIK.T              | 2 | 2,8901 | 0,167 | -0,179 |

|    |                     |                         |   |        |       |        |
|----|---------------------|-------------------------|---|--------|-------|--------|
| 19 | B2RDE1 B2RDE1_HUMAN | R.M*LDQTLNEM*.-         | 2 | 2,8792 | 0,45  | -0,748 |
| 19 | O43615 TIM44_HUMAN  | K.VFEPNEEALGVVLHK.D     | 3 | 2,8544 | 0,226 | 0      |
| 19 | O43583 DENR_HUMAN   | K.WPEVDDDSIEDLGEVKK.-   | 2 | 2,8544 | 0,316 | -0,556 |
| 19 | Q9UPN3 MACF1_HUMAN  | K.DCDVQGLEHDM*EEINAR.W  | 3 | 2,8526 | 0,287 | 0,268  |
| 19 | Q9NW15 TM16K_HUMAN  | K.DGGAQLLFRPLLNK.Y      | 3 | 2,8447 | 0,191 | 0      |
| 19 | Q06323 PSME1_HUMAN  | K.APLDIPVPDPVKEK.E      | 3 | 2,8443 | 0,465 | 0,12   |
| 19 | Q00610 CLH1_HUMAN   | R.LASTLVHLGEYQAAVDGAR.K | 3 | 2,8405 | 0,222 | 0      |
| 19 | P27361 MK03_HUMAN   | R.DLKPSNLLINTTCDLK.I    | 2 | 2,8293 | 0,37  | -0,529 |
| 19 | Q9UBB9 TFP11_HUMAN  | R.DM*VVNLFHELEK.M       | 3 | 2,8187 | 0,153 | -0,061 |
| 19 | P24941 CDK2_HUMAN   | R.DLKPQNLLINTEGAIK.L    | 2 | 2,817  | 0,446 | -0,621 |
| 19 | Q05048 CSTF1_HUMAN  | R.TQAVFNHTEDYVLLPDER.T  | 3 | 2,8103 | 0,181 | 0      |
| 19 | Q9UBS4 DJB11_HUMAN  | K.FQDLGAAEVLSDSEKR.K    | 3 | 2,8076 | 0,316 | -0,095 |
| 19 | P50395 GDIB_HUMAN   | K.EIRPALELLEPIEQK.F     | 2 | 2,7908 | 0,128 | -0,618 |
| 19 | Q9Y3E5 PTH2_HUMAN   | K.APDEETLIALLAHAK.M     | 3 | 2,7899 | 0,318 | -0,574 |
| 19 | P54578 UBP14_HUMAN  | K.EKFEGVELNTDEPPM*VFK.A | 3 | 2,7879 | 0,195 | 0,258  |
| 19 | Q9P032 HRP20_HUMAN  | K.DVYVDSKDPVSSLQVK.A    | 3 | 2,7832 | 0,317 | -0,103 |
| 19 | O96000 NDUBA_HUMAN  | R.DYKVDQEIINIM*QDR.L    | 2 | 2,7819 | 0,371 | -0,45  |
| 19 | O75643 U520_HUMAN   | R.LDLVHTAALM*LDK.N      | 3 | 2,7763 | 0,359 | -0,314 |
| 19 | Q15154 PCM1_HUMAN   | K.SDEEDFVKVEDLPLK.L     | 3 | 2,7667 | 0,348 | -0,311 |
| 19 | P07237 PDIA1_HUMAN  | R.NNFEGEVTKENLLDFIK.H   | 3 | 2,7652 | 0,226 | -0,364 |
| 19 | P17844 DDX5_HUMAN   | K.FVINYDYPNSSEDIHR.I    | 3 | 2,7652 | 0,13  | 0,086  |
| 19 | P18887 XRCC1_HUMAN  | R.DSTHLICAFANTPK.Y      | 3 | 2,7629 | 0,197 | -0,116 |
| 19 | Q8IXI2 MIRO1_HUMAN  | R.DCALSPDELKDLFK.V      | 2 | 2,7525 | 0,401 | -0,443 |
| 19 | O00487 PSDE_HUMAN   | K.AVEEEDKM*TPEQLAIK.N   | 3 | 2,7338 | 0,338 | -0,099 |
| 19 | P48729 KC1A_HUMAN   | R.DIKPDNFLM*GIGR.H      | 3 | 2,7241 | 0,162 | -0,184 |
| 19 | P48730 KC1D_HUMAN   | R.DVKPDNFLM*GLGK.K      | 3 | 2,7218 | 0,204 | 0,189  |
| 19 | P13010 KU86_HUMAN   | K.DQVTAQEIQDNHEDGPTAK.K | 3 | 2,7057 | 0,415 | 0      |
| 19 | P07900 HS90A_HUMAN  | K.CLELFTELAEDKENYK.K    | 3 | 2,7007 | 0,266 | -0,548 |
| 19 | P10586 PTPRF_HUMAN  | R.DHPPIPITDLADNIER.L    | 2 | 2,6932 | 0,415 | -0,537 |
| 19 | Q13620 CUL4B_HUMAN  | K.DM*ELSKDIM*IQFK.Q     | 3 | 2,69   | 0,272 | -0,112 |
| 19 | P07195 LDHB_HUMAN   | K.GEM*M*DLQHGSFLQTPK.I  | 2 | 2,6886 | 0,242 | 0,435  |
| 19 | P31350 RIR2_HUMAN   | R.DEGLHCDFACLM*FK.H     | 2 | 2,6876 | 0,316 | -0,347 |
| 19 | Q29RF7 PDS5A_HUMAN  | K.IFAQYLVPHNLETEER.M    | 3 | 2,6838 | 0,146 | -0,467 |



|    |                     |                              |   |        |       |        |
|----|---------------------|------------------------------|---|--------|-------|--------|
| 19 | P0C7M2 RA1L3_HUMAN  | R.GFAFVTFDDHDSVDK.I          | 3 | 2,6805 | 0,31  | -0,646 |
| 19 | Q9NVK5 FGOP2_HUMAN  | R.DHDDAAESLIEQTTALNK.R       | 3 | 2,6758 | 0,173 | 0,186  |
| 19 | Q9H993 CF211_HUMAN  | R.TIEDLDENQLKDEFFK.L         | 3 | 2,6734 | 0,304 | 0      |
| 19 | P13693 TCTP_HUMAN   | R.DLISHDEMFSDIYK.I           | 3 | 2,6663 | 0,289 | -0,107 |
| 19 | Q9Y3Q8 T22D4_HUMAN  | R.DLEPHSFGGLLEGIR.G          | 3 | 2,6605 | 0,201 | -0,335 |
| 19 | P46821 MAP1B_HUMAN  | K.DIKPQLELIEDEEK.L           | 3 | 2,6542 | 0,248 | 0,646  |
| 19 | O94906 PRP6_HUMAN   | K.DDEEADAIYAALDKR.M          | 3 | 2,6538 | 0,357 | 0,108  |
| 19 | P04040 CATA_HUMAN   | R.DPILFPSFIHSQK.R            | 3 | 2,6502 | 0,342 | -0,538 |
| 19 | O14617 AP3D1_HUMAN  | R.ALDIDLKPLADSEK.L           | 3 | 2,6431 | 0,36  | 0      |
| 19 | P06576 ATPB_HUMAN   | R.LVLEVAQHLGESTVR.T          | 3 | 2,6405 | 0,242 | 0,111  |
| 19 | Q13435 SF3B2_HUMAN  | R.GIEKPPFELPDFIK.R           | 3 | 2,6389 | 0,281 | -0,449 |
| 19 | P60842 IF4A1_HUMAN  | K.LQM*EAPHIIVGTPGR.V         | 3 | 2,6383 | 0,247 | 0,112  |
| 19 | Q9UDG1 Q9UDG1_HUMAN | -.FGYVDFESAEDLEKK.G          | 3 | 2,6259 | 0,163 | -0,206 |
| 19 | P62424 RL7A_HUMAN   | K.TCTTVAFTQVNSEDKGALAK.L     | 3 | 2,616  | 0,297 | 0,427  |
| 19 | Q6ZXV5 TMTC3_HUMAN  | R.DKISSSFIPIFPTSK.I          | 2 | 2,6156 | 0,399 | -0,972 |
| 19 | Q9Y4R8 TELO2_HUMAN  | R.DSRDELLASM*M*AGVK.C        | 3 | 2,6131 | 0,248 | -0,221 |
| 19 | P29692 EF1D_HUMAN   | K.SLAGSSGPGASSGTSGDHGELVVR.I | 3 | 2,6113 | 0,188 | -0,084 |
| 19 | P60903 S10AA_HUMAN  | K.EFPGFLENQKDPLAVDK.I        | 2 | 2,5484 | 0,469 | -0,627 |
| 19 | Q9Y230 RUVB2_HUMAN  | R.GTSYQSPHGIPIDLLDR.L        | 2 | 2,5397 | 0,459 | -0,653 |
| 19 | P39687 AN32A_HUMAN  | K.LLPQTYLDGYDRDDK.E          | 2 | 2,4955 | 0,36  | -0,57  |
| 19 | Q9H4M9 EHD1_HUMAN   | K.DKPTYDEIFYTLSPVNGK.I       | 2 | 2,4679 | 0,47  | -0,468 |
| 19 | Q01082 SPTB2_HUMAN  | K.LLDPEDISVDHPDEK.S          | 2 | 2,4637 | 0,132 | -0,213 |
| 19 | Q9UMS4 PRP19_HUMAN  | K.TVPEELVKPEELSK.Y           | 2 | 2,3964 | 0,151 | -0,076 |
| 19 | P26640 SYVC_HUMAN   | K.GFVPSPTSQPGGHESLVDR.W      | 2 | 2,3903 | 0,474 | -0,992 |
| 19 | P49321 NASP_HUMAN   | K.EIEELKELLPEIR.E            | 2 | 2,3887 | 0,244 | -0,606 |
| 19 | P10599 THIO_HUMAN   | K.LEATINELV.-                | 2 | 2,3541 | 0,472 | -0,061 |
| 19 | P48507 GSHO_HUMAN   | R.EFPDVLECTVSHAVEK.I         | 2 | 2,3193 | 0,436 | -0,525 |
| 19 | Q9H0D6 XRN2_HUMAN   | K.NLTVILSDASAPGEGEHK.I       | 2 | 2,2878 | 0,135 | 1,062  |
| 19 | Q9UJ6 SHPK_HUMAN    | R.DTHLTITPTVLGER.H           | 2 | 2,2118 | 0,319 | -0,157 |
| 19 | P07814 SYEP_HUMAN   | K.EAPCVLIYPDGHTK.E           | 2 | 2,2041 | 0,207 | -1,353 |
| 19 | P61599 NAT5_HUMAN   | K.SIIPHPVVRPEDIE.-           | 2 | 2,1722 | 0,364 | 0,428  |
| 19 | P08758 ANXA5_HUMAN  | K.ALLLLCGEDD.-               | 2 | 2,1056 | 0,378 | -0,545 |
| 19 | Q9UNF0 PACN2_HUMAN  | R.ALYDYEGQEHDELSFK.A         | 2 | 2,0963 | 0,271 | 0,879  |

|    |                     |                                      |              |   |        |       |        |
|----|---------------------|--------------------------------------|--------------|---|--------|-------|--------|
| 19 | O43707 ACTN4_HUMAN  | K.SFSTALYGESDL.-                     |              | 2 | 2,0658 | 0,232 | -0,378 |
| 19 | P09104 ENOG_HUMAN   | R.DGKYDLDFK.S                        |              | 2 | 2,0614 | 0,227 | -0,111 |
| 19 | P00558 PGK1_HUMAN   | K.VLPGVDALSNI.-                      |              | 2 | 2,0228 | 0,301 | -0,444 |
| 19 | P36542 ATPG_HUMAN   | K.ELIEIISGAAALD.-                    |              | 2 | 2,0103 | 0,423 | -0,464 |
| 20 | O95785 WIZ_HUMAN    | K.NPEDKSPQLSLSRPAS#PK.A              | S1017:       | 3 | 3,6731 | 0,248 | 0,086  |
| 20 | O75351 VPS4B_HUMAN  | K.EGQPSPADEKGNDS#DGEGESDDPEKK.K      | S102:        | 3 | 4,9521 | 0,513 | -0,785 |
| 20 | P17096 HMGA1_HUMAN  | K.KLEKEEEEGISQES#S#EEEQ.-            | S102:S103:   | 3 | 4,4482 | 0,344 | -0,305 |
| 20 | P05387 RLA2_HUMAN   | K.KDEKKEES#EES#DDDM*GFGLFD.-         | S102:S105:   | 3 | 4,4879 | 0,433 | -0,209 |
| 20 | P17096 HMGA1_HUMAN  | K.KLEKEEEEGISQESS#EEEQ.-             | S103:        | 3 | 4,6495 | 0,325 | -0,079 |
| 20 | Q01658 NC2B_HUMAN   | R.KAS#SRLENLGIPEEELLR.Q              | S105:        | 3 | 4,5398 | 0,347 | -0,086 |
| 20 | Q8NDI1 EHBP1_HUMAN  | K.AAITETQRKPS#EDEVLNK.G              | S1058:       | 3 | 4,0869 | 0,314 | 0      |
| 20 | Q5VZL5 ZMYM4_HUMAN  | K.KTLS#QGESQTSEHELFLDTK.I            | S1064:       | 3 | 2,7134 | 0,358 | -0,078 |
| 20 | P30414 NKTR_HUMAN   | K.SSEEDLSGKHDTVTVS#SDLDQFTK.D        | S1076:       | 3 | 5,699  | 0,389 | -0,135 |
| 20 | Q5JVS0 HABP4_HUMAN  | R.KSLPAPVAQRPDS#PGGGLQAPGQK.R        | S108:        | 3 | 4,6624 | 0,315 | 0,3    |
| 20 | Q9Y478 AAKB1_HUMAN  | R.S#HNNFVAILDLPEGEHQYK.F             | S108:        | 3 | 4,3406 | 0,388 | 0,24   |
| 20 | O43741 AAKB2_HUMAN  | K.S#HNDNFVAILDLPEGEHQYK.F            | S108:        | 3 | 3,5443 | 0,337 | 0,718  |
| 20 | Q5T5Y3 CAMP1_HUMAN  | K.APVHFVEPLS#PTGVAGHR.K              | S1080:       | 3 | 3,6949 | 0,262 | 0,281  |
| 20 | Q9NYV4 CD2L7_HUMAN  | R.KETTSGTSTEPVKNSS#PAPPQPAPGK.V      | S1083:       | 3 | 4,2522 | 0,272 | 0,411  |
| 20 | Q5VZK9 LR16A_HUMAN  | K.SERPPTILM*TEEPSS#PKGAVR.S          | S1094:       | 3 | 4,002  | 0,201 | 0,615  |
| 20 | P42677 RS27_HUMAN   | K.DLLHPS#PEEEKR.K                    | S11:         | 3 | 3,5481 | 0,317 | -0,06  |
| 20 | Q8IX90 CM003_HUMAN  | K.KNS#VHEQEAINSDPELNCENFQK.T         | S110:        | 3 | 4,3978 | 0,479 | 0,947  |
| 20 | P48634 BAT2_HUMAN   | R.GSETGS#ETHESDLAPSDKEAPTPK.E        | S1110:       | 3 | 3,8343 | 0,245 | 0,287  |
| 20 | B2CI53 B2CI53_HUMAN | R.SNM*SPDKPVSVKIS#FEDEPR.K           | S1115:       | 3 | 3,5123 | 0,4   | 0,466  |
| 20 | O95049 ZO3_HUMAN    | K.ASPSSPGRQDS#DEDDGPQRVEVDQGR.G      | S112:        | 3 | 3,5648 | 0,431 | -0,183 |
| 20 | P48634 BAT2_HUMAN   | R.GSETGSETHESDLAPS#DKEAPTPK.E        | S1120:       | 3 | 4,6463 | 0,278 | 0,359  |
| 20 | Q6VMQ6 MCAF1_HUMAN  | K.NKQDDDLNCEPLS#PHNITPEPVSK.L        | S113:        | 3 | 5,9114 | 0,449 | 0,582  |
| 20 | Q3KQU3 MA7D1_HUMAN  | R.RSS#QPSPTAVPASDSPPTKQEVK.K         | S113:        | 3 | 4,5038 | 0,343 | 0,074  |
| 20 | P46379 BAT3_HUMAN   | R.APPQTHLPSGASSGTGSASATHGGGS#PPGTR.G | S113:        | 3 | 3,7715 | 0,403 | 0,255  |
| 20 | O15417 TNC18_HUMAN  | R.LALSPEDKPIRLS#PSK.I                | S1136:       | 3 | 3,3304 | 0,403 | -0,499 |
| 20 | Q9Y4H2 IRS2_HUMAN   | R.HSS#ETFSSTTTVTPVSPSFAHNP.K         | S1149:       | 3 | 4,6913 | 0,344 | -0,348 |
| 20 | O15027 SC16A_HUMAN  | R.FTGS#FDDDDPDRDPYGEVDR.R            | S1149:       | 3 | 3,7144 | 0,24  | 0,415  |
| 20 | P55196 AFAD_HUMAN   | R.ADHRSS#PNVANQPPS#PGGK.S            | S1156:S1165: | 3 | 3,6386 | 0,245 | -0,969 |
| 20 | Q9UDY2 ZO2_HUMAN    | R.GSYGS#DAEEEEYRQQLSEHSK.R           | S1159:       | 3 | 2,8235 | 0,297 | 0,656  |

|    |                       |                                  |              |   |        |       |        |
|----|-----------------------|----------------------------------|--------------|---|--------|-------|--------|
| 20 | Q8TBA6 GOGA5_HUMAN    | R.KKS#EPDDELLFDLNLSSQK.E         | S116:        | 3 | 4,442  | 0,219 | 0,237  |
| 20 | P55265 DSRAD_HUMAN    | K.KLCS#FR.Y                      | S1170:       | 2 | 2,2013 | 0,123 | -0,068 |
| 20 | Q13017 RHG05_HUMAN    | R.RTHS#DAS#DDEAFTTSK.T           | S1173:S1176: | 3 | 3,2169 | 0,48  | -0,285 |
| 20 | Q7Z6E9 RBBP6_HUMAN    | K.ISKLEVTEIVKPS#PK.R             | S1179:       | 3 | 4,4724 | 0,353 | -0,105 |
| 20 | Q9NTI5 PDS5B_HUMAN    | R.LDSSEM*DHS#ENEDYTM*SSPLPGKK.S  | S1182:       | 3 | 4,717  | 0,35  | -0,261 |
| 20 | Q9NTI5 PDS5B_HUMAN    | K.GRLDSSEM*DHS#ENEDYTM*SSPLPGK.K | S1182:       | 3 | 3,9378 | 0,439 | 0,695  |
| 20 | Q04637 IF4G1_HUMAN    | K.RS#FS#KEVEER.S                 | S1186:S1188: | 2 | 2,4401 | 0,378 | -0,599 |
| 20 | P19484 TFEB_HUMAN     | K.FAAHISPAQGSPKPPAAS#PGVR.A      | S122:        | 3 | 4,0278 | 0,39  | 0,394  |
| 20 | O95487 SC24B_HUMAN    | R.DSRPLS#PILHIVK.D               | S1224:       | 2 | 2,4071 | 0,237 | 0      |
| 20 | Q14160 LAP4_HUMAN     | R.NSLESISSIDRELS#PEGPGKEK.E      | S1232:       | 3 | 4,0536 | 0,398 | 0,224  |
| 20 | P46013 KI67_HUMAN     | R.RVS#RSS#FSSDPDEK.A             | S125:S128:   | 3 | 2,844  | 0,319 | 0      |
| 20 | P46013 KI67_HUMAN     | R.RVS#RSS#FSSDPDEK.A             | S125:S128:   | 2 | 2,7478 | 1     | -0,278 |
| 20 | Q13428 TCOF_HUMAN     | K.DDPDGKQEAKPQQAAGMLS#PK.T       | S1257:       | 3 | 3,1497 | 0,316 | -0,16  |
| 20 | Q15040 JOS1_HUMAN     | K.AKS#ESLELPPQAAPPQIYHEK.Q       | S13:         | 3 | 2,8938 | 0,156 | 1,106  |
| 20 | P51858 HDGF_HUMAN     | K.GNAEGS#SDEEGKLVIDEPAKEK.N      | S132:        | 3 | 3,567  | 0,285 | 0,154  |
| 20 | P98174 FGD1_HUMAN     | R.LRS#DPGPPTETPSQRPSPLK.R        | S135:        | 3 | 3,3341 | 0,299 | 0,49   |
| 20 | Q14498 RBM39_HUMAN    | K.DKS#PVREPIDNLTPER.D            | S136:        | 3 | 5,7248 | 0,485 | 0,705  |
| 20 | Q9Y314 NOSIP_HUMAN    | K.ALSGTS#PDDVQPGPSVGPSPKDKDK.V   | S138:        | 3 | 4,853  | 0,469 | -0,286 |
| 20 | P26373 RL13_HUMAN     | K.KGDS#SAEELKLATQLTGPMV*PVR.N    | S139:        | 3 | 4,7575 | 0,41  | -0,073 |
| 20 | ##B2BBS0 B2BBS0_HUMAN | R.SLS#PKPAPQVPSGAAARDTQKK.L      | S139:        | 3 | 2,9544 | 0,147 | 0,079  |
| 20 | O14686 MLL2_HUMAN     | K.LEGPVS#PDVEPGKEETEEKK.R        | S1396:       | 3 | 3,9407 | 0,434 | -0,542 |
| 20 | Q8NI27 THOC2_HUMAN    | K.HKS#ES#PCESPYPNEK.D            | S1399:S1401: | 3 | 4,6696 | 0,343 | -0,188 |
| 20 | Q6P0Q8 MAST2_HUMAN    | R.VQS#AEKLAALAASEKK.L            | S1407:       | 3 | 3,1357 | 0,195 | -1,019 |
| 20 | Q9NRL2 BAZ1A_HUMAN    | R.KRQS#PEPS#PVTLGR.R             | S1413:S1417: | 2 | 3,2249 | 0,479 | -0,57  |
| 20 | Q8TEW0 PAR3_HUMAN     | R.RSS#DPALIGLSTSVSDSNFSSEEPSRK.N | S144:        | 3 | 5,067  | 0,551 | -0,561 |
| 20 | P13010 KU86_HUMAN     | R.FSKS#QLDIIHSLK.K               | S145:        | 3 | 2,9464 | 0,251 | 0      |
| 20 | Q9H4L7 SMRCD_HUMAN    | R.RNDDIS#ELEDLSELEDLKDAK.L       | S146:        | 3 | 3,354  | 0,3   | 0,217  |
| 20 | P11216 PYGB_HUMAN     | R.KQIS#VR.G                      | S15:         | 2 | 2,1137 | 0,117 | 0,376  |
| 20 | P46821 MAP1B_HUMAN    | R.KLGDVS#PTQIDVSVQFGSFKEDTK.M    | S1501:       | 3 | 5,8459 | 0,423 | 0,421  |
| 20 | Q9HCD5 NCOA5_HUMAN    | R.YRDS#FDGR.G                    | S151:        | 2 | 2,4034 | 0,288 | 0,111  |
| 20 | Q9BUH6 CI142_HUMAN    | R.KS#PRPAGPQLFLPDPDPQR.G         | S152:        | 3 | 4,0211 | 0,3   | 0,25   |
| 20 | Q7L2J0 MEPCE_HUMAN    | R.RNS#CNVGGGGGFK.H               | S152:        | 2 | 2,5219 | 0,292 | 0      |
| 20 | O95684 FR1OP_HUMAN    | K.EKGPTTGEGALDLS#DVHSPPKS#PEGK.T | S152:S160:   | 3 | 3,6228 | 0,346 | 0,197  |

|    |                     |                                    |                 |   |        |       |        |
|----|---------------------|------------------------------------|-----------------|---|--------|-------|--------|
| 20 | Q9UGU0 TCF20_HUMAN  | K.AEEKENDTVTIS#PKQEGFPPK.G         | S1522:          | 3 | 2,9578 | 0,345 | -0,302 |
| 20 | P46100 ATRX_HUMAN   | K.LREVIEWEDAS#PTKCPITTK.L          | S1527:          | 3 | 3,2386 | 0,413 | 0,307  |
| 20 | Q8IWS0 PHF6_HUMAN   | K.TAHNSEADLEESFNEHELEPS#SPK.S      | S154:           | 3 | 4,0497 | 0,325 | 0,527  |
| 20 | Q5TAX3 ZCH11_HUMAN  | K.SEKVPS#SPAEAEGPSLLK.D            | S155:           | 3 | 4,2095 | 0,376 | 0,511  |
| 20 | Q5JRC6 Q5JRC6_HUMAN | K.TAHNSEAADLEESFNEHELEPSS#PK.S     | S156:           | 3 | 4,4351 | 0,468 | 0,321  |
| 20 | O95684 FR1OP_HUMAN  | K.EKGPTTGEGALDLSVDVHS#PPKS#PEGK.T  | S156:S160:      | 3 | 5,1264 | 0,516 | 0,59   |
| 20 | Q92733 PRCC_HUMAN   | K.IAAPELHKGDS#DSEDEPTK.K           | S157:           | 3 | 3,0665 | 0,407 | -0,244 |
| 20 | Q14839 CHD4_HUMAN   | K.IEENS#LKEESIEGEKEVK.S            | S1570:          | 3 | 4,9606 | 0,45  | -0,159 |
| 20 | Q9HCD6 TANC2_HUMAN  | R.YQQETSVSQLPGRPKS#PLSK.M          | S1579:          | 3 | 3,9724 | 0,436 | 0,079  |
| 20 | Q96JC9 EAF1_HUMAN   | K.TS#PLKDNPSPEPQLDDIKR.E           | S158:           | 3 | 3,7696 | 0,356 | -0,164 |
| 20 | Q9UJF2 NGAP_HUMAN   | R.RS#ISGTSTSEKPNM*DTANTSPFK.V      | S16:            | 3 | 2,7544 | 0,274 | 0,347  |
| 20 | Q03164 HRX_HUMAN    | R.VRS#PTRS#PSVKTS#PR.K             | S161:S165:S171: | 3 | 3,2103 | 0,221 | -0,29  |
| 20 | Q9Y2U5 M3K2_HUMAN   | R.DRSS#PPPGYIPDELHQVAR.N           | S164:           | 3 | 5,6123 | 0,51  | 0,578  |
| 20 | Q96G03 PGM2_HUMAN   | K.LCAGIM*ITAS#HNPKQDNGYK.V         | S165:           | 3 | 3,1568 | 0,288 | 1,028  |
| 20 | P54727 RD23B_HUMAN  | K.QEKPAEKPAETPVATSPTATDS#TSGDSSR.S | S166:           | 3 | 4,2578 | 1     | 0,06   |
| 20 | Q9H4A3 WNK1_HUMAN   | K.DRPVS#QPSLVGSKEEPPPAR.S          | S167:           | 3 | 3,366  | 0,392 | -0,329 |
| 20 | Q9Y5S2 MRCKB_HUMAN  | K.HSTPNSSSNPSGPPS#PNS#PHR.S        | S1690:S1693:    | 3 | 4,9639 | 0,59  | -0,477 |
| 20 | P20020 AT2B1_HUMAN  | K.NS#LKEANHDGDFGITLAELR.A          | S17:            | 3 | 4,024  | 0,449 | 0,16   |
| 20 | Q9H7D0 DOCK5_HUMAN  | K.SQVIAEKAPEPDLM*S#PTRK.A          | S1756:          | 3 | 4,3949 | 0,322 | 0,25   |
| 20 | Q8IWW6 RHG12_HUMAN  | R.TRS#FGHFGPEFLDVEK.T              | S176:           | 3 | 4,3501 | 0,371 | -0,09  |
| 20 | Q58FF8 H90B2_HUMAN  | K.IEDVGS#DEEDDSGKDKK.K             | S177:           | 3 | 3,9437 | 0,32  | -0,47  |
| 20 | Q9Y6K0 CEPT1_HUMAN  | R.CGDSHPES#PVGFGHM*STTGCVLNK.L     | S18:            | 3 | 3,6858 | 0,386 | 0,891  |
| 20 | O00264 PGRC1_HUMAN  | K.LLKEGEEPTVYS#DEEEKDESAR.K        | S181:           | 3 | 4,7999 | 0,449 | -0,402 |
| 20 | O96013 PAK4_HUMAN   | R.DKRPLS#GPDVGTQPAGLASGAK.L        | S181:           | 3 | 3,3454 | 0,275 | 0,477  |
| 20 | O00264 PGRC1_HUMAN  | K.EGEEPTVYS#DEEEKDESARK.N          | S181:           | 3 | 3,0491 | 0,359 | -0,073 |
| 20 | P43487 RANG_HUMAN   | K.LEALS#VKEETKEDAEKQ.-             | S188:           | 3 | 3,538  | 0,303 | -0,339 |
| 20 | P43243 MATR3_HUMAN  | R.RDS#FDDR.G                       | S188:           | 2 | 2,7152 | 0,189 | -0,308 |
| 20 | Q9P2W9 STX18_HUMAN  | K.VSQS#PSKDSEENPATEERPEK.I         | S189:           | 3 | 3,7987 | 0,169 | 0,075  |
| 20 | Q9BVC5 ASHWN_HUMAN  | R.KSPSGPVKS#PPLSPVGTTPVK.L         | S189:           | 3 | 3,4293 | 0,149 | 0,085  |
| 20 | Q9H1E3 NUCKS_HUMAN  | R.KVVDYSQFQES#DDADEDYGR.D          | S19:            | 3 | 6,1603 | 0,5   | 0,524  |
| 20 | P35579 MYH9_HUMAN   | R.KGAGDGS#DEEVDGKADGAEAKPAE.-      | S1943:          | 3 | 5,9612 | 0,468 | -0,077 |
| 20 | Q9NYF8 BCLF1_HUMAN  | K.SQEPPKDTFEHDPS#ESIDFNK.S         | S196:           | 3 | 3,5109 | 0,293 | 0,272  |
| 20 | Q96ST2 IWS1_HUMAN   | R.HQAS#DS#ENEEPPKPR.M              | S196:S198:      | 3 | 3,4687 | 0,407 | 0      |

|    |                     |                                  |                 |   |        |       |        |
|----|---------------------|----------------------------------|-----------------|---|--------|-------|--------|
| 20 | Q9BRD0 BUD13_HUMAN  | R.HDS#PDPS#PPRR.A                | S197:S201:      | 2 | 2,4445 | 0,26  | -0,515 |
| 20 | Q9UQ35 SRRM2_HUMAN  | R.SRTS#PITR.R                    | S1975:          | 2 | 2,6133 | 0,281 | -0,245 |
| 20 | Q9NYF8 BCLF1_HUMAN  | K.SQEEPKDTFEHDPSES#IDFNK.S       | S198:           | 3 | 4,3145 | 0,292 | 0,408  |
| 20 | Q8NCF5 NF2IP_HUMAN  | K.KKTEFLDLDNS#PLSPPS#PR.T        | S198:S204:      | 3 | 5,1922 | 0,417 | -0,239 |
| 20 | Q07955 SFRS1_HUMAN  | R.VKVDGPRS#PS#YGR.S              | S199:S201:      | 3 | 2,6935 | 0,321 | -0,348 |
| 20 | Q07955 SFRS1_HUMAN  | R.VKVDGPRS#PS#YGR.S              | S199:S201:      | 2 | 2,2532 | 0,278 | 0,155  |
| 20 | Q07955 SFRS1_HUMAN  | R.VKVDGPRS#PS#YGRS#R.S           | S199:S201:S205: | 2 | 2,1363 | 0,083 | 0,963  |
| 20 | Q07955 SFRS1_HUMAN  | R.VKVDGPRS#PSY#GRS#R.S           | S199:Y202:S205: | 3 | 2,6405 | 0,126 | -0,385 |
| 20 | Q8NCF5 NF2IP_HUMAN  | K.KKTEFLDLDNSPLS#PPS#PR.T        | S201:S204:      | 3 | 5,4628 | 0,463 | 0      |
| 20 | Q13242 SFRS9_HUMAN  | R.GRDS#PYQSR.G                   | S204:           | 2 | 2,3553 | 0,166 | -0,639 |
| 20 | P67870 CSK2B_HUMAN  | K.IHPM*AYQLQLQAASNFKS#PVK.T      | S209:           | 3 | 3,6638 | 0,35  | 0,667  |
| 20 | P60174 TPIS_HUMAN   | R.KQS#LGELIGTLNAAK.V             | S21:            | 3 | 3,3356 | 0,132 | 0      |
| 20 | P60174 TPIS_HUMAN   | R.KQS#LGELIGTLNAAK.V             | S21:            | 2 | 2,9627 | 0,448 | 0,075  |
| 20 | Q8WXV6 Q8WXV6_HUMAN | R.TSS#EDNLYLAVLR.A               | S21:            | 2 | 2,3474 | 0,234 | 0      |
| 20 | Q8TF01 SFR18_HUMAN  | R.QRS#PIALPVKQEPQIDAVK.R         | S211:           | 3 | 3,8587 | 0,312 | 0,319  |
| 20 | O75376 NCOR1_HUMAN  | R.SHVSSEPYEPIS#PPQVPVVHEK.Q      | S2151:          | 3 | 5,7235 | 0,566 | 1,016  |
| 20 | Q15019 SEPT2_HUMAN  | K.IYHLPDAES#DEDEDFKEQTR.L        | S218:           | 3 | 4,5843 | 0,509 | 0      |
| 20 | Q09161 NCBP1_HUMAN  | R.KTS#DANETEDHLESICK.V           | S22:            | 3 | 4,5303 | 0,455 | 0,506  |
| 20 | Q5UIP0 RIF1_HUMAN   | R.RVS#FADPIYQAGLADDIDRR.C        | S2205:          | 3 | 3,4714 | 0,37  | -0,233 |
| 20 | Q99618 CDCA3_HUMAN  | K.RPS#PLSENVSELKEGAILGTGR.L      | S222:           | 3 | 3,9591 | 0,389 | -0,077 |
| 20 | Q96SK2 TM209_HUMAN  | R.YRSS#PTVYNSPTDKEDYM*TDLR.T     | S222:           | 3 | 3,4649 | 0,363 | 0,602  |
| 20 | Q8IWB9 TEX2_HUMAN   | K.SLS#TDTSRQESDTVSYKPPDSK.L      | S222:           | 3 | 2,8642 | 0,358 | -0,438 |
| 20 | Q9BRD0 BUD13_HUMAN  | R.VRHDS#PDPS#PPR.R               | S222:S226:      | 3 | 3,4862 | 0,2   | -0,301 |
| 20 | Q96QD9 FYTD1_HUMAN  | K.ARS#NENLDKIDM*SLDDIHK.L        | S23:            | 3 | 4,4041 | 0,415 | -0,08  |
| 20 | Q13283 G3BP1_HUMAN  | K.SSS#PAPADIAQTVQEDLR.T          | S232:           | 2 | 3,5267 | 0,396 | -0,435 |
| 20 | Q13283 G3BP1_HUMAN  | K.SSS#PAPADIAQTVQEDLR.T          | S232:           | 3 | 3,2808 | 0,261 | -0,093 |
| 20 | Q3V6T2 GRDN_HUMAN   | R.DGLHFLPHASSSAQS#PCGSPGM*K.R    | S233:           | 3 | 4,4714 | 0,328 | 0,594  |
| 20 | Q9H7L9 SDS3_HUMAN   | K.RPAS#PSSPEHLPATPAESPAQR.F      | S234:           | 3 | 4,481  | 0,397 | -0,155 |
| 20 | Q15424 SAFB1_HUMAN  | K.SEPVKEESS#ELEQPPAQDTSSVGPDRK.L | S235:           | 3 | 3,4774 | 0,415 | 0,479  |
| 20 | Q8NDT2 RB15B_HUMAN  | R.RNS#LEGYSR.S                   | S235:           | 2 | 2,0616 | 0,262 | -0,42  |
| 20 | Q96ST2 IWS1_HUMAN   | R.HQAS#DS#ENEELPKPR.I            | S235:S237:      | 2 | 4,2636 | 0,441 | 0,257  |
| 20 | Q96ST2 IWS1_HUMAN   | R.HQAS#DS#ENEELPKPR.I            | S235:S237:      | 3 | 3,8447 | 0,387 | 0      |
| 20 | P62753 RS6_HUMAN    | R.RLS#SLRAS#TSK.S                | S235:S240:      | 2 | 2,7613 | 0,4   | -0,536 |

|    |                     |                                  |                 |   |        |       |        |
|----|---------------------|----------------------------------|-----------------|---|--------|-------|--------|
| 20 | O75962 TRIO_HUMAN   | K.VLES#PRKGAANASGSSPDAPAK.D      | S2358:          | 3 | 3,2243 | 0,132 | 0,501  |
| 20 | Q13416 ORC2_HUMAN   | R.DKTS#DLVEEYFEAHSSSK.V          | S237:           | 3 | 3,6865 | 0,272 | 0,085  |
| 20 | P61247 RS3A_HUMAN   | K.LM*ELHGEHSSS#GKATGDETGAK.V     | S238:           | 3 | 4,2457 | 0,432 | -0,081 |
| 20 | Q09666 AHNK_HUMAN   | K.ISM*PDLDLHLKS#PK.A             | S2397:          | 2 | 4,6881 | 0,453 | -0,289 |
| 20 | Q09666 AHNK_HUMAN   | K.ISM*PDLDLHLKS#PK.A             | S2397:          | 3 | 3,8092 | 0,472 | 0,108  |
| 20 | B2RTR1 B2RTR1_HUMAN | K.DKS#FDDEESVDGNRPSSAASAFK.V     | S241:           | 3 | 3,9693 | 0,47  | 0,432  |
| 20 | Q8WY36 BBX_HUMAN    | R.QKS#PLFQFAEISSSTSHSDASTK.Q     | S243:           | 3 | 2,632  | 0,282 | -0,214 |
| 20 | P35659 DEK_HUMAN    | K.NKEES#S#DDEDKES#EEEEPPKK.T     | S243:S244:S251: | 3 | 2,939  | 0,228 | -0,283 |
| 20 | Q9HB58 SP110_HUMAN  | R.DKEDPQEM*PHS#PLGSM*PEIR.D      | S244:           | 3 | 4,3389 | 0,481 | 0,761  |
| 20 | Q9HB20 PKHA3_HUMAN  | R.TYS#DTDSCSDIPLDPDRPVHCSK.N     | S244:           | 3 | 4,2276 | 0,453 | 0,637  |
| 20 | Q8N6T3 ARFG1_HUMAN  | K.ASELGHS#LNENVLKPAQEK.V         | S246:           | 3 | 3,3191 | 0,213 | 0,427  |
| 20 | Q9H3N1 TXND1_HUMAN  | K.KVEEQEADEEDVS#EEEEASK.E        | S247:           | 3 | 4,7674 | 0,466 | -0,363 |
| 20 | Q9BYG3 MK671_HUMAN  | R.KS#QVAELNDDDKDDEIVFK.Q         | S247:           | 3 | 3,9612 | 0,464 | 0,4    |
| 20 | P16949 STMN1_HUMAN  | R.ASGQAFELILS#PR.S               | S25:            | 2 | 2,4798 | 0,253 | -0,166 |
| 20 | Q8NFC6 FA44A_HUMAN  | R.GLEGNANS#PAHLRGPEQTSGQTAK.D    | S2501:          | 3 | 3,4726 | 0,219 | -0,366 |
| 20 | P46013 KI67_HUMAN   | K.AFKES#PKQILDPAASVTGSR.R        | S2528:          | 3 | 4,573  | 0,322 | 0,587  |
| 20 | Q14155 ARHG7_HUMAN  | K.SGTLKS#PPKGFDTTAINK.S          | S257:           | 3 | 3,6367 | 0,283 | 0,283  |
| 20 | Q14155 ARHG7_HUMAN  | K.SGTLKS#PPKGFDTTAINK.S          | S257:           | 2 | 2,5432 | 0,213 | 0,754  |
| 20 | Q96T37 RBM15_HUMAN  | R.S#RS#PLDKDITYPPSASVVGASVGGHR.H | S257:S259:      | 3 | 3,539  | 0,194 | 0,61   |
| 20 | Q96T37 RBM15_HUMAN  | R.SRS#PLDKDITY#PPSASVVGASVGGHR.H | S259:Y266:      | 3 | 3,6958 | 0,289 | 0,542  |
| 20 | Q8IYB3 SRRM1_HUMAN  | K.VPKPEPIPEPKEPS#PEK.N           | S260:           | 3 | 4,0322 | 0,211 | -0,092 |
| 20 | Q8IYB3 SRRM1_HUMAN  | K.VPKPEPIPEPKEPS#PEK.N           | S260:           | 2 | 3,5833 | 0,465 | -0,493 |
| 20 | P49792 RBP2_HUMAN   | K.KKPEDS#PSDDDLIVYELTPTAEQK.A    | S2626:          | 3 | 3,0973 | 0,424 | -0,632 |
| 20 | Q99504 EYA3_HUMAN   | K.LSSGDPSTSPS#LSQTTPSKDTDDQSRK.N | S264:           | 3 | 2,6698 | 0,205 | -0,189 |
| 20 | Q9UQ35 SRRM2_HUMAN  | R.KPIDS#LRDS#R.S                 | S2684:S2688:    | 2 | 2,9171 | 0,344 | -0,181 |
| 20 | P22234 PUR6_HUMAN   | K.TKEVYELLS#PGKVLLQSK.D          | S27:            | 3 | 4,8382 | 0,544 | -0,082 |
| 20 | P49736 MCM2_HUMAN   | R.RGNDPLTSS#PGR.S                | S27:            | 3 | 3,1875 | 0,307 | 0,068  |
| 20 | P49736 MCM2_HUMAN   | R.RGNDPLTSS#PGR.S                | S27:            | 2 | 2,3671 | 0,174 | 0,091  |
| 20 | Q9NXG2 THUM1_HUMAN  | K.YNLQEVVKS#PKDPSQLNSK.Q         | S270:           | 3 | 3,55   | 0,23  | 0,406  |
| 20 | Q5T4S7 UBR4_HUMAN   | R.HVTLPSS#PR.S                   | S2719:          | 2 | 2,7826 | 0,418 | -0,227 |
| 20 | Q8N655 CJ012_HUMAN  | R.EDNPEEPSKEITSHEEGGDVS#PR.K     | S273:           | 3 | 4,0076 | 0,376 | -0,547 |
| 20 | O00203 AP3B1_HUMAN  | K.EGDELEDNGKNFYES#DDDQKEK.T      | S276:           | 3 | 4,8576 | 0,474 | 0,273  |
| 20 | O95793 STAU1_HUMAN  | K.TKPIVKPQTS#PEYGGQGINPISR.L     | S278:           | 3 | 4,01   | 0,252 | 0,147  |

|    |                    |                                 |            |   |        |       |        |
|----|--------------------|---------------------------------|------------|---|--------|-------|--------|
| 20 | P53367 ARFP1_HUMAN | K.NSAAEIPVTSNGEVDDSREHS#FNR.D   | S28:       | 3 | 3,0598 | 0,128 | -0,27  |
| 20 | P14921 ETS1_HUMAN  | R.VPS#YDSFDESDYPAALPNHKPK.G     | S282:      | 3 | 5,7892 | 0,417 | 1,145  |
| 20 | P25054 APC_HUMAN   | K.RHS#GSYLVTSV.-                | S2835:     | 2 | 2,1406 | 0,323 | -0,285 |
| 20 | P61978 HNRPK_HUMAN | R.RDYDDM*S#PR.R                 | S284:      | 2 | 2,0111 | 0,283 | -0,293 |
| 20 | Q96QF0 RAB31_HUMAN | R.NKS#TSSAM*SGSHQDLSVIQPIVK.D   | S288:      | 3 | 4,04   | 0,341 | -0,292 |
| 20 | P08559 ODPA_HUMAN  | R.YHGHS#M*SDPGVS#YR.T           | S293:S300: | 2 | 3,9743 | 0,542 | 0      |
| 20 | P08559 ODPA_HUMAN  | R.YHGHS#MSDPGVS#YR.T            | S293:S300: | 2 | 3,5596 | 0,492 | 0      |
| 20 | P08559 ODPA_HUMAN  | R.YHGHS#M*SDPGVS#YR.T           | S293:S300: | 3 | 2,9121 | 0,25  | -0,414 |
| 20 | Q9UQ35 SRRM2_HUMAN | K.THTTALAGRS#PS#PASGR.R         | S295:S297: | 3 | 3,5039 | 0,371 | -0,901 |
| 20 | Q9UQ35 SRRM2_HUMAN | K.THTTALAGRS#PS#PASGR.R         | S295:S297: | 2 | 3,3549 | 0,44  | 0,267  |
| 20 | Q6P4R8 NFRKB_HUMAN | R.KGS#LAALYDLAVLKK.K            | S298:      | 3 | 5,5071 | 0,565 | 0      |
| 20 | Q6P4R8 NFRKB_HUMAN | R.KGS#LAALYDLAVLKK.K            | S298:      | 2 | 2,9616 | 0,457 | 0,219  |
| 20 | Q4G0J3 LARP7_HUMAN | R.KRS#S#SEDAESLAPR.S            | S298:S299: | 2 | 3,4521 | 0,373 | 0,072  |
| 20 | Q4G0J3 LARP7_HUMAN | R.KRS#S#SEDAESLAPR.S            | S298:S300: | 3 | 4,048  | 0,295 | 0      |
| 20 | Q15032 R3HD1_HUMAN | R.DRIFS#QDLSLCSQENYIIDKR.L      | S299:      | 3 | 2,9175 | 0,218 | 1,354  |
| 20 | Q8TAQ2 SMRC2_HUMAN | R.KRS#PSPS#PTPEAK.K             | S302:S306: | 2 | 3,8355 | 0,438 | -0,633 |
| 20 | P35659 DEK_HUMAN   | K.KESESEDS#S#DDEPLIKK.L         | S306:S307: | 3 | 3,0749 | 0,167 | -0,087 |
| 20 | P49454 CENPF_HUMAN | K.VAQRS#PVDSGTLREPTTK.S         | S3150:     | 3 | 2,9916 | 0,318 | -0,171 |
| 20 | Q7L4I2 RSRC2_HUMAN | K.KEQSEVSVS#PR.A                | S32:       | 2 | 2,1724 | 0,195 | -0,46  |
| 20 | Q9UQ35 SRRM2_HUMAN | R.RGEGDAPFSEPGTSTQRPSS#PETATK.Q | S323:      | 3 | 3,3919 | 0,256 | -0,446 |
| 20 | P62136 PP1A_HUMAN  | K.YGQFSGLNPGRRPITPPRNS#AK.A     | S325:      | 3 | 4,9983 | 0,474 | 0,535  |
| 20 | P50548 ERF_HUMAN   | R.YLQAHTQSVYNYHLS#PR.A          | S327:      | 3 | 3,3713 | 0,269 | 0,509  |
| 20 | Q6PJF5 RHDF2_HUMAN | R.GIPHSASPV#PDGVQIPLKEYGR.A     | S328:      | 3 | 3,5794 | 0,164 | 0      |
| 20 | Q92922 SMRC1_HUMAN | R.KHS#PS#PPPPTPTESR.K           | S328:S330: | 3 | 4,4722 | 0,349 | -0,721 |
| 20 | O00712 NFIB_HUMAN  | K.KPEKPLFSSAS#PQDSS#PR.L        | S328:S333: | 3 | 5,2776 | 0,453 | -0,086 |
| 20 | Q15459 SF3A1_HUMAN | K.FGESEEVEM*EVES#DEEDDKQEK.A    | S329:      | 3 | 5,9228 | 0,418 | -0,472 |
| 20 | Q14978 NOLC1_HUMAN | K.QQPVESSDESDES#EEEEKPPPTK.A    | S333:      | 3 | 2,6526 | 0,324 | -0,601 |
| 20 | Q9UGV2 NDRG3_HUMAN | R.SRTHSTS#SS#LGSGESPF#SR.S      | S333:S335: | 3 | 4,0551 | 1     | 0,344  |
| 20 | P49759 CLK1_HUMAN  | K.VVDFGSATYDDEHHSTLVS#TR.H      | S341:      | 3 | 3,4051 | 0,448 | -0,379 |
| 20 | Q9UMX1 SUFU_HUMAN  | R.APS#RKDS#LES#SSTAIIPHELIR.T   | S342:S346: | 3 | 4,4068 | 0,365 | -0,205 |
| 20 | Q9HCI7 MSL2_HUMAN  | R.SRS#ESDSEKQPLPISTIIR.G        | S345:      | 3 | 4,3961 | 0,367 | -0,079 |
| 20 | Q9UMX1 SUFU_HUMAN  | R.KDS#LES#SSTAIIPHELIR.T        | S346:      | 3 | 4,5839 | 0,24  | 0      |
| 20 | Q9Y383 LC7L2_HUMAN | R.FRDQDLAS#CDR.D                | S347:      | 3 | 3,6874 | 0,117 | 0,25   |

|    |                     |                                  |                 |   |        |       |        |
|----|---------------------|----------------------------------|-----------------|---|--------|-------|--------|
| 20 | Q02952 AKA12_HUMAN  | K.EQEPEKVDTEEDGKAEVAS#EK.L       | S347:           | 3 | 3,6402 | 0,344 | 0,151  |
| 20 | Q9H307 PININ_HUMAN  | K.EIAIVHS#DAEKEQEEEEQK.Q         | S347:           | 3 | 2,8422 | 0,302 | -0,394 |
| 20 | Q9Y383 LC7L2_HUMAN  | R.FRQDLAS#CDR.D                  | S347:           | 2 | 2,575  | 0,374 | -0,417 |
| 20 | Q13636 RAB31_HUMAN  | R.FVQDHFHDHNIS#PTIGASFM*TK.T     | S35:            | 3 | 4,0482 | 0,385 | 0,809  |
| 20 | Q15642 CIP4_HUMAN   | K.NKPRPPPLSPLGGPVPSALPNGPPS#PR.S | S351:           | 3 | 5,7286 | 0,445 | -0,198 |
| 20 | P55072 TERA_HUMAN   | R.AHVIVM*AATNRPNIS#IDPALR.R      | S352:           | 3 | 3,0774 | 0,275 | 0,163  |
| 20 | Q99856 ARI3A_HUMAN  | R.RQS#FGGSLFAYSPGGAHGM*LSSPK.L   | S353:           | 3 | 5,002  | 0,473 | 0,217  |
| 20 | Q02952 AKA12_HUMAN  | K.LTAS#EQAHPQEPESAHEPR.L         | S353:           | 3 | 2,8996 | 0,216 | 0,162  |
| 20 | Q5SW79 CE170_HUMAN  | R.TEEDSKS#IKSDVPVYLK.R           | S356:           | 3 | 3,2467 | 0,43  | 0,272  |
| 20 | P27816 MAP4_HUMAN   | K.ETERAS#PIKMDLAPSK.D            | S358:           | 3 | 2,9037 | 0,192 | 0,395  |
| 20 | P27816 MAP4_HUMAN   | K.ETERAS#PIKM*DLAPSK.D           | S358:           | 2 | 2,7675 | 0,326 | 0,326  |
| 20 | P17096 HMGGA1_HUMAN | R.KQPPVS#PGTALVGSQKEPSEVPTPK.R   | S36:            | 3 | 4,265  | 0,415 | 0,624  |
| 20 | Q9UHB6 LIMA1_HUMAN  | K.SEVQQPVHPKPLS#PDSR.A           | S362:           | 2 | 3,2189 | 0,389 | -0,37  |
| 20 | P36578 RL4_HUMAN    | K.AAAAAALQAKS#DEKAAVAGK.K        | S365:           | 3 | 3,642  | 0,246 | -0,734 |
| 20 | P17302 CXA1_HUMAN   | K.LAAGHELQPLAIVDQRPSS#R.A        | S365:           | 3 | 2,7822 | 0,341 | 0,245  |
| 20 | P05455 LA_HUMAN     | K.FAS#DDEHDEHDENGATGPVK.R        | S366:           | 3 | 3,1027 | 0,429 | 0,325  |
| 20 | Q7Z4V5 HDGR2_HUMAN  | R.GEAERGS#GGS#S#GDELREDDEPVKK.R  | S366:S369:S370: | 3 | 3,719  | 0,253 | 0,533  |
| 20 | Q9ULM3 YETS2_HUMAN  | K.ASS#PIKQSHEPVPDTSVEK.G         | S367:           | 3 | 3,8894 | 0,202 | -0,173 |
| 20 | Q13523 PRP4B_HUMAN  | R.SRS#PLLNDR.R                   | S368:           | 2 | 3,0986 | 0,159 | -0,429 |
| 20 | Q03135 CAV1_HUMAN   | K.AM*ADELS#EKQVYDAHTK.E          | S37:            | 3 | 3,9269 | 0,44  | 0,18   |
| 20 | Q92903 CDS1_HUMAN   | R.EGEAAGGDHETESTS#DKETDIDDR.Y    | S37:            | 3 | 3,5578 | 0,403 | -0,415 |
| 20 | Q01484 ANK2_HUMAN   | R.GGS#PIIQEPEEPSEHREESSPR.K      | S3790:          | 3 | 2,8186 | 0,262 | -0,217 |
| 20 | Q01484 ANK2_HUMAN   | R.GGSPIIQEPEEPSEHREES#SPR.K      | S3806:          | 3 | 2,8713 | 0,253 | -0,29  |
| 20 | O94876 TMCC1_HUMAN  | R.NKFGS#ADNIPNLKDSLEEGQVDDAGK.A  | S382:           | 3 | 4,0992 | 0,499 | -0,386 |
| 20 | Q8IYB3 SRRM1_HUMAN  | R.RLS#PS#ASPPRR.R                | S389:S391:      | 2 | 2,4662 | 0,398 | -0,353 |
| 20 | P53367 ARFP1_HUMAN  | K.HSLPS#GLGLSETQITSHGFDNTK.E     | S39:            | 3 | 3,8445 | 0,514 | -0,073 |
| 20 | P49736 MCM2_HUMAN   | R.RTDALTSS#PGR.D                 | S41:            | 2 | 2,1674 | 0,27  | -0,688 |
| 20 | Q14566 MCM6_HUMAN   | K.HVEEFS#PR.A                    | S413:           | 2 | 2,2254 | 0,362 | 0      |
| 20 | Q9UQ49 NEUR3_HUMAN  | R.EILSHLQGDCTS#PGRNPSQFK.S       | S417:           | 3 | 3,0774 | 0,197 | 0,373  |
| 20 | Q15223 PVRL1_HUMAN  | K.AGIPQHHPM*AQNQLQYPDDS#DDEK.K   | S422:           | 3 | 5,8086 | 0,474 | 0,654  |
| 20 | Q9Y490 TLN1_HUMAN   | K.DHFGLEGEESTM*LEDSVS#PKK.S      | S425:           | 3 | 4,2156 | 0,562 | 0,647  |
| 20 | Q9Y3R0 GRIP1_HUMAN  | R.RQS#IPEEFKGSTVVELM*K.K         | S43:            | 3 | 3,468  | 0,312 | 0,505  |
| 20 | Q8IWC1 MA7D3_HUMAN  | K.ESVKGS#PKESM*EASPEAM*VK.A      | S433:           | 3 | 3,1653 | 0,189 | -0,082 |



|    |                    |                                 |                 |   |        |       |        |
|----|--------------------|---------------------------------|-----------------|---|--------|-------|--------|
| 20 | P33981 TTK_HUMAN   | K.HTTFEQPVFSVSKQS#PPISTSK.W     | S436:           | 3 | 4,4904 | 0,441 | 0,874  |
| 20 | A2A3K4 PTPC1_HUMAN | K.LISHCYIQS#PEPDLHK.E           | S438:           | 3 | 4,9167 | 0,391 | 0,433  |
| 20 | P17096 HMGA1_HUMAN | R.KQPPVSPGTALVGS#QKEPSEVPTPK.R  | S44:            | 3 | 3,5312 | 0,37  | 0,069  |
| 20 | Q9H307 PININ_HUMAN | K.S#LSPGKENVS#ALDM*EKESSEEK.E   | S441:S450:      | 3 | 3,0523 | 0,37  | -0,255 |
| 20 | P27448 MARK3_HUMAN | R.RYS#DHAGPAIPSVVAYPK.R         | S442:           | 3 | 3,4134 | 0,145 | 0,364  |
| 20 | Q9H307 PININ_HUMAN | K.SLS#PGKENVSALDM*EKESSEEK.E    | S443:           | 3 | 2,9323 | 0,367 | 0,381  |
| 20 | P18887 XRCC1_HUMAN | K.TKPTQAAGPSS#PQKPPTPEETK.A     | S447:           | 3 | 4,2477 | 0,394 | -0,233 |
| 20 | P50579 AMPM2_HUMAN | K.S#KGPSSAAGEQEPDKESGASVDEVAR.Q | S45:            | 3 | 2,7432 | 0,517 | -0,567 |
| 20 | Q53EL6 PDCD4_HUMAN | K.RFVS#EGDGGR.L                 | S457:           | 2 | 2,2824 | 0,337 | -0,105 |
| 20 | Q5T5X7 K1553_HUMAN | R.TSEKHSVDS#VLTALQDSSK.R        | S46:            | 3 | 3,5497 | 0,331 | -0,173 |
| 20 | O95685 PPR3D_HUMAN | R.ACRPPGS#PGRAPPPTPAPSGCDPR.L   | S46:            | 3 | 2,8687 | 0,138 | 0,433  |
| 20 | Q8IYB3 SRRM1_HUMAN | R.KVELS#ES#EEDKGGK.M            | S463:S465:      | 2 | 3,4075 | 0,294 | 0,072  |
| 20 | Q9NZN4 EHD2_HUMAN  | K.SKYDEIFYNLAPADGKLS#GSK.A      | S468:           | 3 | 4,5837 | 0,271 | -0,077 |
| 20 | Q13433 S39A6_HUMAN | K.YESQLS#TNEEKVDTDDRTEGYLR.A    | S472:           | 3 | 3,5923 | 0,458 | 0,97   |
| 20 | Q96PU5 NED4L_HUMAN | K.DTLS#NQSPQSPYNSPKPQHK.V       | S475:           | 3 | 2,78   | 0,214 | -0,507 |
| 20 | Q9Y4E1 FA21C_HUMAN | R.KVQS#TADIFGDEEGDLFKEK.A       | S478:           | 3 | 6,5785 | 0,402 | -0,235 |
| 20 | Q9ULW0 TPX2_HUMAN  | K.KVLPITVPKS#PAFALK.N           | S486:           | 3 | 3,6208 | 0,381 | -0,102 |
| 20 | Q658P3 STE3_HUMAN  | K.FTLPTDHAEKTS#HV.-             | S486:           | 2 | 3,423  | 0,479 | 0,462  |
| 20 | O94913 PCF11_HUMAN | K.S#RSPPIHS#PK.R                | S487:S494:      | 2 | 2,9449 | 0,173 | -0,666 |
| 20 | O94913 PCF11_HUMAN | K.SRS#PIIHS#PK.R                | S489:S494:      | 3 | 2,6807 | 0,101 | -0,214 |
| 20 | Q8TAD8 SNIP1_HUMAN | R.RPDHS#GGSPS#PPTSEPAR.S        | S49:S54:        | 3 | 3,5363 | 0,383 | -0,551 |
| 20 | Q6UN15 FIP1_HUMAN  | R.ERDHS#PTPSVFNS#DEER.Y         | S492:S500:      | 3 | 3,4145 | 0,345 | 0,423  |
| 20 | Q96JG6 CC132_HUMAN | K.FM*EQSRSPS#VSPSKQPVSTSSK.T    | S496:           | 3 | 3,348  | 0,352 | -0,148 |
| 20 | P10243 MYBA_HUMAN  | R.S#RSEDEDDLQYADHDYEVQQK.G      | S5:             | 3 | 4,8038 | 0,558 | 0,639  |
| 20 | Q9Y2X3 NOL5_HUMAN  | K.HIKKEPLS#EEEPCTST#AIAS#PEKK.K | S502:T510:S514: | 3 | 4,5427 | 0,345 | 0,434  |
| 20 | P40222 TXLNA_HUMAN | R.RPEGGAQAPS#SPR.V              | S514:           | 2 | 3,6705 | 0,413 | -0,574 |
| 20 | Q96EA4 CCD99_HUMAN | K.SVSIHTPVVLS#PHK.N             | S515:           | 3 | 2,9858 | 0,249 | 0,219  |
| 20 | Q03164 HRX_HUMAN   | R.SDTPEVHPLPIS#QSPENESNDRR.S    | S516:           | 3 | 3,7775 | 0,408 | -0,395 |
| 20 | Q03164 HRX_HUMAN   | R.SDTPEVHPLPISQS#PENESNDRR.S    | S518:           | 3 | 3,6089 | 0,362 | -0,066 |
| 20 | Q8TAD8 SNIP1_HUMAN | R.RPDHSGGS#PS#PPTSEPAR.S        | S52:S54:        | 3 | 3,7952 | 0,249 | -0,643 |
| 20 | Q8TAD8 SNIP1_HUMAN | R.RPDHSGGS#PS#PPTSEPAR.S        | S52:S54:        | 2 | 2,2133 | 1     | -0,674 |
| 20 | Q13586 STIM1_HUMAN | R.DLTHSDS#ESSLHM*SDR.Q          | S521:           | 3 | 2,6181 | 0,284 | 0      |
| 20 | Q5H9R7 SAPS3_HUMAN | R.NTVDLVTTCHIHSSS#DDEIDFK.E     | S525:           | 3 | 4,0536 | 0,32  | 0,42   |

|    |                    |                                |            |   |        |       |        |
|----|--------------------|--------------------------------|------------|---|--------|-------|--------|
| 20 | O60318 MCM3A_HUMAN | K.KPGDGEVS#PSTEDAPFQHSPLGK.A   | S527:      | 3 | 3,6544 | 0,426 | -0,297 |
| 20 | Q15042 RB3GP_HUMAN | R.DEGKKT#ASDVTNIYPGDAGK.A      | S537:      | 3 | 3,7928 | 0,372 | 0,492  |
| 20 | O60318 MCM3A_HUMAN | K.KPGDGEVSPSTEDAPFQHS#PLGK.A   | S538:      | 3 | 5,1265 | 0,441 | 0,595  |
| 20 | Q5U5Q3 MEX3C_HUMAN | R.RGSQPS#TPRLS#PTFPESIEHPLAR.R | S540:S545: | 3 | 2,6828 | 0,234 | -0,584 |
| 20 | Q9H1B7 EAP1_HUMAN  | R.KAS#PEPPDSAEGALKLGEQQR.Q     | S547:      | 3 | 5,0488 | 0,363 | 0,53   |
| 20 | Q9Y6M7 S4A7_HUMAN  | R.AVYIGVHVVPFSKES#R.R          | S55:       | 3 | 2,7214 | 0,32  | 0,103  |
| 20 | Q9NWH9 SLTM_HUMAN  | R.ISSKS#PGHM*VILDQTK.G         | S553:      | 3 | 4,3577 | 0,491 | 0      |
| 20 | Q9NWH9 SLTM_HUMAN  | R.ISSKS#PGHM*VILDQTK.G         | S553:      | 2 | 3,3808 | 0,471 | -0,797 |
| 20 | Q9NWH9 SLTM_HUMAN  | R.ISSKS#PGHMVILDQTK.G          | S553:      | 3 | 3,0217 | 0,24  | 0,201  |
| 20 | Q09666 AHNK_HUMAN  | K.GGLKGS#EVGFHGAAPDISVK.G      | S5530:     | 3 | 2,862  | 0,243 | -0,182 |
| 20 | O15085 ARHGB_HUMAN | K.SSSQSTFHIPLS#PVEVKPGNVR.N    | S556:      | 3 | 3,202  | 0,458 | -0,075 |
| 20 | Q7Z7F0 K0907_HUMAN | K.GFGLVAYAADS#SDEEEHGGHK.N     | S571:      | 3 | 3,3995 | 0,276 | 0,384  |
| 20 | Q86UU1 PHLB1_HUMAN | R.KNS#ITEISDNEDDLLEYHR.R       | S578:      | 3 | 5,318  | 0,423 | 0,309  |
| 20 | O43719 HTSF1_HUMAN | K.DLDEEGS#EKELHENVLDK.E        | S579:      | 3 | 2,7479 | 0,216 | 0,168  |
| 20 | Q13428 TCOF_HUMAN  | K.SLGNILQAKPTSS#PAKGPPQK.A     | S583:      | 3 | 4,517  | 0,462 | -0,083 |
| 20 | Q09666 AHNK_HUMAN  | K.GHYEVTGS#DDETKLQSGVSLASK.K   | S5841:     | 3 | 5,5222 | 0,567 | 0,352  |
| 20 | Q9Y289 SC5A6_HUMAN | R.S#YGQDHLDTGLFPEKPR.N         | S585:      | 3 | 3,7558 | 0,315 | 0,538  |
| 20 | Q9Y2X7 GIT1_HUMAN  | R.HGS#GADSDYENTQSGDLLGLEGKR.F  | S592:      | 3 | 4,5403 | 0,519 | 0,546  |
| 20 | Q13107 UBP4_HUMAN  | R.KSRPSS#TSSASALYGQPLLSVPK.H   | S593:      | 3 | 3,9035 | 0,286 | 0,215  |
| 20 | Q96T23 RSF1_HUMAN  | K.TFLDKDAQRLS#PIPEEVPK.S       | S594:      | 3 | 5,3495 | 0,404 | 0,404  |
| 20 | O75122 CLAP2_HUMAN | R.VLNTGS#DVEEAVADALKKPAR.R     | S596:      | 3 | 3,6777 | 0,286 | -0,162 |
| 20 | Q3B726 RPA43_HUMAN | R.HIALS#PR.Y                   | S60:       | 2 | 2,4185 | 0,326 | 0,07   |
| 20 | Q9Y2W2 WBP11_HUMAN | K.GATAAPQRKS#EDDSAVPLAK.A      | S600:      | 3 | 3,9053 | 0,408 | 0,262  |
| 20 | Q92615 LARP5_HUMAN | R.SPS#PAHLPPDDPKVAEK.Q         | S601:      | 3 | 4,3197 | 0,357 | 0,207  |
| 20 | Q92615 LARP5_HUMAN | R.SPS#PAHLPPDDPKVAEK.Q         | S601:      | 2 | 2,9655 | 0,338 | 0,414  |
| 20 | Q96RT1 LAP2_HUMAN  | K.HIVNHDDVFESEELS#S#DEEM*K.M   | S602:S603: | 3 | 4,9481 | 0,492 | 0,393  |
| 20 | Q8IYB3 SRRM1_HUMAN | R.RYS#PS#PPPKR.R               | S605:S607: | 3 | 2,6826 | 0,201 | 0      |
| 20 | Q8IYB3 SRRM1_HUMAN | R.RYS#PS#PPPKR.R               | S605:S607: | 2 | 2,4089 | 0,226 | -0,635 |
| 20 | Q9H2P0 ADNP_HUMAN  | K.ADIPVKS#SPQAAPVYKK.D         | S607:      | 2 | 3,1355 | 0,276 | -0,065 |
| 20 | Q13586 STIM1_HUMAN | K.AHSLM*ELSPSAPPGGS#PHLDSSR.S  | S608:      | 3 | 4,593  | 0,437 | 0,226  |
| 20 | Q9NUW8 TYDP1_HUMAN | R.KIS#PVKFSNTDSVLPK.R          | S61:       | 3 | 3,9485 | 0,467 | 0,378  |
| 20 | Q9Y4B5 K0802_HUMAN | R.DHAPSPTS#PFGDSLESSTELRR.H    | S613:      | 3 | 3,177  | 0,316 | -0,071 |
| 20 | Q96T58 MINT_HUMAN  | R.RAS#YDYNQDR.T                | S623:      | 2 | 2,9948 | 0,211 | -0,268 |

|    |                    |                                     |            |   |        |       |        |
|----|--------------------|-------------------------------------|------------|---|--------|-------|--------|
| 20 | P42684 ABL2_HUMAN  | R.DKS#PSSLLEDAKETCFTR.D             | S631:      | 3 | 3,8918 | 0,466 | -0,169 |
| 20 | Q2M2I8 AAK1_HUMAN  | R.RILS#DVTHSAVFGVPASK.S             | S637:      | 3 | 4,0271 | 0,442 | 0,093  |
| 20 | Q2M2I8 AAK1_HUMAN  | R.RILS#DVTHSAVFGVPASK.S             | S637:      | 2 | 3,7507 | 0,475 | -0,497 |
| 20 | O14776 TCRG1_HUMAN | R.DDNKDIDS#EKEAAM*EAEIK.A           | S638:      | 3 | 3,9174 | 0,29  | -0,407 |
| 20 | Q3YEC7 PARF_HUMAN  | R.LKNDSDLFGLGLEEAGPKESS#EEGK.E      | S641:      | 3 | 4,6497 | 0,397 | 0,268  |
| 20 | Q92738 US6NL_HUMAN | R.GLAHPPSYSNPPVYHGNS#PK.H           | S642:      | 3 | 4,0697 | 0,279 | 0,499  |
| 20 | Q86TC9 MYPN_HUMAN  | K.TPEPSS#PVKEPPPVLAKPK.L            | S644:      | 3 | 4,4785 | 0,339 | 0,176  |
| 20 | P78364 PHC1_HUMAN  | R.KADS#EEERDDVSTLGSMLPAK.A          | S645:      | 3 | 4,2492 | 0,396 | 0,462  |
| 20 | Q9BZF1 OSBL8_HUMAN | K.DLHQPSLS#PASPHSQGFER.G            | S65:       | 3 | 3,4584 | 0,215 | 0,253  |
| 20 | Q15361 TTF1_HUMAN  | K.DFQHLISS#PLKK.S                   | S65:       | 3 | 2,7276 | 0,287 | 0,061  |
| 20 | Q9UKN8 TF3C4_HUMAN | R.SKEGDVEEPTDDS#LPTTGDAGGREPM*EEK.L | S652:      | 3 | 5,2438 | 0,269 | 0,346  |
| 20 | Q8IYB3 SRRM1_HUMAN | R.RS#PSLSSK.H                       | S653:      | 2 | 2,073  | 0,414 | -0,324 |
| 20 | O75362 ZN217_HUMAN | R.TKADVTPPPDPGSTTHNLEVS#PK.E        | S662:      | 3 | 5,5558 | 0,467 | -0,463 |
| 20 | O75665 OFD1_HUMAN  | K.NSAKS#PLAAKS#PPSLHLLEAFK.N        | S663:S669: | 3 | 3,9332 | 0,33  | -0,148 |
| 20 | Q96T37 RBM15_HUMAN | R.HCAPS#PDRS#PELSSSR.D              | S670:S674: | 3 | 3,3978 | 0,442 | -1,224 |
| 20 | Q08945 SSRP1_HUMAN | K.SKEFVSSDESS#S#GENKSK.K            | S672:S673: | 3 | 4,3145 | 0,304 | -0,35  |
| 20 | Q9H2J7 S6A15_HUMAN | R.VLKEPVNLEGDDTS#LIHGK.I            | S675:      | 3 | 5,2562 | 0,374 | 0,768  |
| 20 | Q6AI39 K0240_HUMAN | K.VVGSS#PGHPAVQVESHGGQK.R           | S675:      | 3 | 3,6376 | 0,32  | -0,258 |
| 20 | Q9BZF1 OSBL8_HUMAN | K.DLHQPSLSPAS#PHSQGFER.G            | S68:       | 3 | 3,1095 | 0,295 | 0,084  |
| 20 | Q9UEY8 ADDG_HUMAN  | K.SPEKIEEVLSPEGSPSKS#PSK.K          | S681:      | 3 | 5,8158 | 0,378 | 0,479  |
| 20 | Q9P275 UBP36_HUMAN | K.LKSPVLSNTTTEPASTM*S#PPPAKK.L      | S682:      | 3 | 4,3715 | 0,176 | -0,213 |
| 20 | Q12959 DLG1_HUMAN  | K.HVTSNAS#DSESSYR.G                 | S687:      | 2 | 3,9314 | 0,401 | -0,678 |
| 20 | P19634 SL9A1_HUMAN | K.INNYLTVPAHKLDS#PTM*SR.A           | S693:      | 3 | 2,6445 | 0,11  | 0,406  |
| 20 | Q8NG27 PJA1_HUMAN  | R.SRS#PFSTTR.R                      | S70:       | 2 | 2,3019 | 0,288 | -0,545 |
| 20 | Q8NE01 CNNM3_HUMAN | K.TTTAAGSSHSRPGVPVEGS#PGRNPGV.-     | S700:      | 3 | 4,8427 | 0,524 | 0,43   |
| 20 | P35612 ADDB_HUMAN  | K.DKTESVTSGPM*SPEGSPSKS#PSK.K       | S701:      | 3 | 3,6123 | 0,097 | -0,303 |
| 20 | Q9BWT3 PAPOG_HUMAN | K.RLPS#KELPDSSSPVPANNIR.V           | S708:      | 3 | 3,3447 | 0,268 | -0,162 |
| 20 | O43493 TGON2_HUMAN | K.DSPSKSS#AEAQTPEDTPNKSGAEAK.T      | S71:       | 3 | 4,0473 | 0,389 | -0,56  |
| 20 | Q9P275 UBP36_HUMAN | R.ATGNDLRPPPPS#PSSDLTHPM*K.T        | S713:      | 3 | 3,959  | 0,404 | 0,986  |
| 20 | Q8IYB3 SRRM1_HUMAN | R.RQS#PSPST#RPIR.R                  | S713:T718: | 2 | 2,6352 | 0,329 | -0,791 |
| 20 | Q6P996 PDXD1_HUMAN | R.GSDALS#ETSSVSHIEDLEKVER.L         | S718:      | 3 | 3,4309 | 0,247 | -0,148 |
| 20 | Q92615 LARP5_HUMAN | K.RLS#REQSTPPKS#PQ.-                | S727:S736: | 3 | 2,7054 | 0,203 | -0,207 |
| 20 | O60271 JIP4_HUMAN  | R.SAS#QSSLDKLDQELKEQQK.E            | S730:      | 3 | 3,6047 | 0,167 | 0,571  |

|    |                     |                                 |            |   |        |       |        |
|----|---------------------|---------------------------------|------------|---|--------|-------|--------|
| 20 | O95685 PPR3D_HUMAN  | R.ARS#LPS#SPERR.Q               | S74:S77:   | 2 | 2,1128 | 0,322 | -0,776 |
| 20 | P28749 RBL1_HUMAN   | K.VKS#PVSLTAHSLIGASPK.Q         | S749:      | 3 | 4,3285 | 0,501 | 0,293  |
| 20 | P28749 RBL1_HUMAN   | K.VKS#PVSLTAHSLIGASPK.Q         | S749:      | 2 | 3,6941 | 0,447 | 0,587  |
| 20 | Q7KZF4 SND1_HUMAN   | K.VES#PAKIHVFYIDYGNR.E          | S755:      | 3 | 2,8231 | 0,33  | -0,175 |
| 20 | O75152 ZC11A_HUMAN  | R.RLS#SASTGKPLSVEDDFEK.L        | S758:      | 3 | 3,9113 | 0,345 | 0,652  |
| 20 | Q5T5C0 STXB5_HUMAN  | R.KLS#LPTDLKPDLDVK.D            | S759:      | 2 | 3,644  | 0,365 | 0,138  |
| 20 | Q86TC9 MYPN_HUMAN   | R.TVS#KESLLVSHPSVQTK.S          | S759:      | 3 | 2,9327 | 0,4   | 0,191  |
| 20 | Q8N4C8 MINK1_HUMAN  | R.SDSVLPASHGHL PQAGS#LER.N      | S763:      | 3 | 3,8514 | 0,361 | 0,342  |
| 20 | Q9HAW4 CLSPN_HUMAN  | K.SETDENSGKQPSKLEDDSCS#LLTK.E   | S764:      | 3 | 4,76   | 0,436 | 0,959  |
| 20 | Q5VT52 K0460_HUMAN  | K.IISPGSSTPSSTRS#PPPGRDESYPR.E  | S769:      | 3 | 3,2239 | 0,374 | 0      |
| 20 | Q6GYQ0 GRIPE_HUMAN  | R.VRHFS#QSEETGNEVFGALNEEQPLPR.S | S773:      | 3 | 2,9141 | 0,235 | -0,36  |
| 20 | A8MVW0 U560A_HUMAN  | R.RDS#LTSPEDELGAEVGDEAGDKK.S    | S789:      | 3 | 6,2087 | 0,524 | 0,659  |
| 20 | A3KN83 SBNO1_HUMAN  | K.KKS#IDPDSIQSALLASGLGSK.R      | S794:      | 3 | 3,7814 | 0,32  | 0      |
| 20 | O94979 SC31A_HUMAN  | R.AQGEPVAGHES#PKIPYEK.Q         | S799:      | 2 | 2,5084 | 0,425 | -0,544 |
| 20 | Q53GS9 SNUT2_HUMAN  | R.EREVEDS#EPER.E                | S82:       | 3 | 4,0019 | 0,261 | -0,35  |
| 20 | Q53GS9 SNUT2_HUMAN  | R.EREVEDS#EPER.E                | S82:       | 2 | 2,5914 | 0,38  | -0,699 |
| 20 | Q2KHM9 K0753_HUMAN  | K.ISAISEKPLS#PHPIR.I            | S826:      | 3 | 3,3334 | 0,322 | 0,318  |
| 20 | Q09666 AHNK_HUMAN   | K.VESEIKVPDVELKS#AK.M           | S856:      | 3 | 3,0018 | 0,242 | 0,099  |
| 20 | Q8N2M8 SFR16_HUMAN  | R.AHLDHIPDYTPLLTTIS#PEQESDER.K  | S86:       | 3 | 4,5252 | 0,447 | -0,18  |
| 20 | Q9NXG2 THUM1_HUMAN  | K.FTDKQKQPS#GSEGEDDDAEALKK.E    | S86:       | 3 | 3,0779 | 0,346 | 0,138  |
| 20 | Q96QB1 RHG07_HUMAN  | R.KRS#DDS#DEDEPCAISGK.W         | S86:S89:   | 3 | 2,6249 | 0,12  | 0      |
| 20 | Q6GYQ0 GRIPE_HUMAN  | R.RGS#SPGSLEIPKLDLPDILNK.Q      | S860:      | 3 | 4,2794 | 0,404 | -0,165 |
| 20 | Q8TD19 NEK9_HUMAN   | K.VASEAPLEHKPQVEASS#PR.L        | S869:      | 3 | 3,8197 | 0,279 | -0,26  |
| 20 | B2RTT4 B2RTT4_HUMAN | K.EAVVDLHADD#RISEDETER.N        | S882:      | 3 | 3,6063 | 0,35  | 0,232  |
| 20 | Q69YQ0 CYTSA_HUMAN  | R.HS#ISGPISTSKPLTALSDK.R        | S887:      | 3 | 4,166  | 0,407 | 0      |
| 20 | O95819 M4K4_HUMAN   | R.KGS#VVNVNPTNTRPQSDTPEIR.K     | S900:      | 3 | 3,0616 | 0,319 | 0,441  |
| 20 | Q13428 TCOF_HUMAN   | R.AALAPAKES#PRKGAAPT#PPGK.T     | S906:T914: | 3 | 2,6782 | 0,195 | 0,168  |
| 20 | Q52LW3 RHG29_HUMAN  | K.SLFFSS#KEDIHTSESESK.I         | S930:      | 3 | 3,7999 | 0,32  | 1,027  |
| 20 | Q5VY92 Q5VY92_HUMAN | R.ERQELGS#PEER.L                | S932:      | 3 | 2,8516 | 0,243 | -0,389 |
| 20 | Q5VY92 Q5VY92_HUMAN | R.ERQELGS#PEER.L                | S932:      | 2 | 2,0496 | 0,198 | -0,952 |
| 20 | Q01831 XPC_HUMAN    | K.VIKDEALS#DGGDLRDFPSDLK.K      | S94:       | 3 | 3,2631 | 0,287 | -0,075 |
| 20 | Q8IXM2 CQ049_HUMAN  | K.VYEDSGIPLPAES#PKKGPK.K        | S96:       | 3 | 3,2383 | 0,445 | -0,087 |
| 20 | Q9UBB9 TFP11_HUMAN  | K.GAAEEAELEDS#DDEEKPVKQDDFPK.D  | S98:       | 3 | 5,4422 | 0,432 | 0,446  |

|    |                     |                                     |              |   |        |       |        |
|----|---------------------|-------------------------------------|--------------|---|--------|-------|--------|
| 20 | B0QZ62 B0QZ62_HUMAN | K.RT#SPSDGAM*ANYESTEVN*GDGESAHDSR.D | T1016:       | 3 | 6,0646 | 0,541 | -0,578 |
| 20 | Q5T200 ZC3HD_HUMAN  | R.GPRT#PPITTKELVEM*CNGK.N           | T1033:       | 3 | 3,7697 | 0,272 | 0,233  |
| 20 | O00512 BCL9_HUMAN   | R.DPGT#PNDDSDIKECNSADHIK.S          | T115:        | 3 | 3,185  | 0,391 | 0,304  |
| 20 | P11137 MAP2_HUMAN   | K.ADEGKKET#SPESSLIQDEIAVK.L         | T1154:       | 3 | 2,7834 | 0,12  | 1,267  |
| 20 | Q9HAW4 CLSPN_HUMAN  | R.NFVFHT#LSPVKAEEAAK.E              | T1287:       | 2 | 4,9203 | 0,489 | -0,199 |
| 20 | P46013 KI67_HUMAN   | R.RPQT#PKEEAQALEDLTGFK.E            | T1335:       | 3 | 3,6646 | 0,391 | 0      |
| 20 | O75976 CBPD_HUMAN   | K.SLLSHEFQDET#DTEEETLYSSKH.-        | T1368:       | 3 | 6,5312 | 0,604 | 0,196  |
| 20 | Q8N9Q2 S12IP_HUMAN  | K.HSST#PNSSEFSR.K                   | T146:        | 2 | 2,4654 | 0,181 | -0,603 |
| 20 | Q86UP2 KTN1_HUMAN   | K.KVEPVPVTKQPT#PPSEAAASK.K          | T153:        | 3 | 4,2639 | 0,305 | -0,082 |
| 20 | Q9BRD0 BUD13_HUMAN  | R.ARHDT#PDPS#PLR.G                  | T159:S163:   | 3 | 3,5515 | 0,192 | 0,24   |
| 20 | Q9BRD0 BUD13_HUMAN  | R.ARHDT#PDPS#PLR.G                  | T159:S163:   | 2 | 3,2912 | 0,533 | 0      |
| 20 | P46013 KI67_HUMAN   | K.AM*HT#PKPAVGEEKDINTFLGT#PVQK.L    | T1784:T1801: | 3 | 5,2431 | 0,568 | 0,634  |
| 20 | Q1ED39 TS118_HUMAN  | R.DVGDT#CSVGKKDEEQAALGQK.R          | T183:        | 3 | 2,6664 | 0,145 | 0      |
| 20 | Q5VV41 ARHGG_HUMAN  | K.LQALAEPSQPHT#RSPAK.N              | T189:        | 3 | 2,658  | 0,117 | -0,986 |
| 20 | P27361 MK03_HUMAN   | R.IADPEHDHTGFLT#EYVATR.W            | T202:        | 3 | 3,6759 | 0,322 | -0,162 |
| 20 | Q7Z589 EMSY_HUMAN   | R.RRT#NS#SSSPVVLK.E                 | T207:S209:   | 3 | 2,7984 | 0,103 | 0,109  |
| 20 | Q7Z589 EMSY_HUMAN   | R.RRT#NSSS#SSPVVLK.E                | T207:S211:   | 2 | 3,6875 | 1     | 0,073  |
| 20 | Q3T8J9 GON4L_HUMAN  | R.TCPVHESPSGIDT#SETSPKAPR.G         | T2103:       | 3 | 4,5154 | 0,483 | 0      |
| 20 | Q9BU76 MMTA2_HUMAN  | R.RPAEAT#SS#PTSPERPR.H              | T215:S217:   | 2 | 4,2184 | 1     | -0,9   |
| 20 | Q08EQ4 TMSL1_HUMAN  | K.TET#QEKNPLPSKETIEQEK.Q            | T23:         | 3 | 3,8177 | 0,369 | -0,158 |
| 20 | P15880 RS2_HUMAN    | K.ETVFT#KSPYQFTDHLVK.T              | T262:        | 3 | 2,8915 | 0,282 | -0,407 |
| 20 | O15446 RPA34_HUMAN  | K.TVKQEQINTEPLEDT#VLSPTKK.R         | T282:        | 3 | 3,5413 | 0,206 | 0,781  |
| 20 | P50552 VASP_HUMAN   | K.ATQVGEKT#PKDESANQEEPEAR.V         | T284:        | 3 | 4,8403 | 0,427 | -0,734 |
| 20 | Q13428 TCOF_HUMAN   | R.AASAPAKGT#PGKGATPAPPK.A           | T310:        | 3 | 3,1316 | 0,285 | -0,67  |
| 20 | Q08357 S20A2_HUMAN  | R.ALSM*T#HGSVKS#PISNGTFGFDGHTR.S    | T318:S324:   | 3 | 3,884  | 0,276 | -0,461 |
| 20 | Q9NQW6 ANLN_HUMAN   | K.T#PISPLKTGVSKPIVK.S               | T320:        | 2 | 2,6078 | 0,366 | 0,419  |
| 20 | P28715 ERCC5_HUMAN  | K.LKTEKEDAT#PPS#PR.T                | T338:S341:   | 3 | 3,7193 | 0,4   | 0,1    |
| 20 | P80723 BASP_HUMAN   | K.KAEGAATEEEGT#PKESQPAAAEPAAEK.E    | T36:         | 3 | 4,6914 | 0,521 | 0,063  |
| 20 | Q92597 NDRG1_HUMAN  | R.SHT#SEGAHLDITPNSGAAGNSAGPK.S      | T366:        | 3 | 4,8484 | 0,428 | -0,223 |
| 20 | A6NNT1 A6NNT1_HUMAN | R.FVQRLIHTGRSMRASIGT#S#ES#SGR.W     | T38:S39:S41: | 3 | 3,4274 | 0,244 | 0,637  |
| 20 | Q13043 STK4_HUMAN   | R.RDET#M*QPAKPSFLEYFEQK.E           | T387:        | 3 | 3,6085 | 0,368 | -0,075 |
| 20 | Q9NQ84 GPC5C_HUMAN  | R.AEDM*YSAQSHQAAT#PPKDGK.N          | T423:        | 3 | 3,0703 | 0,28  | 0      |
| 20 | O75533 SF3B1_HUMAN  | R.KLTAT#PTPLGGM*TGFHM*QTEDR.T       | T434:        | 3 | 2,922  | 0,353 | 0,658  |

|    |                    |                                |                 |   |        |       |        |
|----|--------------------|--------------------------------|-----------------|---|--------|-------|--------|
| 20 | P35611 ADDA_HUMAN  | K.EDGHRTST#SAVPNLFVPLNTNPK.E   | T482:           | 3 | 3,5334 | 0,236 | 0,142  |
| 20 | Q15003 CND2_HUMAN  | R.KAPLNIPGT#PVLEDFPQNDDEKER.L  | T49:            | 3 | 5,2374 | 0,482 | 0,131  |
| 20 | Q9NYV4 CD2L7_HUMAN | R.DSKPIALKEEIVT#PK.E           | T514:           | 3 | 3,0278 | 0,369 | 0,105  |
| 20 | P17096 HMGA1_HUMAN | R.KQPPVSPGTALVGSQKEPSEVPT#PK.R | T53:            | 3 | 3,4956 | 0,289 | 0,277  |
| 20 | O94776 MTA2_HUMAN  | K.DLVAQAPLKPCT#PR.G            | T534:           | 3 | 3,2171 | 0,322 | 0,227  |
| 20 | Q3KR37 GRM1B_HUMAN | R.VPHLEEV*SPVTTPT#DEDVGHR.I    | T587:           | 3 | 4,9468 | 0,313 | 0,072  |
| 20 | Q9Y3Z3 SAMH1_HUMAN | R.NFTKPQGDVIAPLIT#PQKK.E       | T592:           | 3 | 5,3687 | 0,415 | 0,399  |
| 20 | Q8IYB3 SRRM1_HUMAN | K.RRT#AS#PPPPK.R               | T614:S616:      | 3 | 3,1759 | 0,198 | -0,335 |
| 20 | Q8WVC0 LEO1_HUMAN  | K.KLT#S#DEEGEPSGKR.K           | T629:S630:      | 3 | 4,7906 | 0,504 | -0,648 |
| 20 | Q8WVC0 LEO1_HUMAN  | K.KLT#S#DEEGEPSGKR.K           | T629:S630:      | 2 | 3,7853 | 0,475 | -0,721 |
| 20 | Q96SB4 SRPK1_HUMAN | K.HFTEDIQT#R.Q                 | T685:           | 2 | 2,893  | 0,319 | 0      |
| 20 | Q9ULW0 TPX2_HUMAN  | R.KANLQQAIVT#PLKPVNTYYK.E      | T72:            | 3 | 4,6002 | 0,411 | 1,399  |
| 20 | Q13435 SF3B2_HUMAN | K.KIEEAM*DGSET#PQLFTVLPEKR.T   | T757:           | 3 | 5,0638 | 0,413 | -0,35  |
| 20 | O43148 MCES_HUMAN  | K.EFEDDLVKESSCGKDT#PSK.K       | T77:            | 3 | 3,5288 | 0,402 | 0,626  |
| 20 | Q6PKG0 LARP1_HUMAN | R.NTRT#PRT#PRT#PQLK.D          | T782:T785:T788: | 2 | 2,6335 | 0,35  | 0,256  |
| 20 | Q16513 PKN2_HUMAN  | R.GREDSVNFDEFTSEAPILT#PPREPR.I | T958:           | 3 | 2,7431 | 0,355 | 0,06   |
| 20 | P28482 MK01_HUMAN  | R.VADPDHDHTGFLTEY#VATR.W       | Y187:           | 3 | 5,0754 | 0,489 | 0,823  |
| 20 | P27361 MK03_HUMAN  | R.IADPEHDHTGFLTEY#VATR.W       | Y204:           | 3 | 4,7867 | 0,442 | 0,487  |
| 20 | P54577 SYYC_HUMAN  | K.IITVEKHPDADSLY#VEK.I         | Y388:           | 3 | 3,8703 | 0,278 | 0,449  |
| 20 | Q58EX7 PKHG4_HUMAN | R.KAY#SFDR.N                   | Y676:           | 2 | 2,3307 | 0,371 | 0,063  |
| 20 | Q01844 EWS_HUMAN   | R.QDHPSSM*GVYQESGGFSGPGENR.S   |                 | 3 | 6,1086 | 0,501 | -0,293 |
| 20 | P06396 GELS_HUMAN  | K.DSQEEKEALTSK.R               |                 | 3 | 5,3846 | 0,444 | -0,11  |
| 20 | P13639 EF2_HUMAN   | R.GHVFEESQVAGTPM*FVVK.A        |                 | 2 | 5,3507 | 0,562 | 0,679  |
| 20 | P29401 TKT_HUMAN   | R.TSRPENAIYNNNEDFQVGQAK.V      |                 | 3 | 5,2605 | 0,349 | 0,146  |
| 20 | P49257 LMAN1_HUMAN | K.GHPDLQGQPAEEIFESVGDR.E       |                 | 3 | 5,2589 | 0,505 | -0,336 |
| 20 | P62937 PPIA_HUMAN  | K.SIYGKFEFENFILK.H             |                 | 2 | 5,1361 | 0,523 | 0,333  |
| 20 | P67809 YBOX1_HUMAN | R.EDGNEEDKENQGDDETQGGQPPQR.R   |                 | 3 | 5,0511 | 0,462 | -0,418 |
| 20 | P05387 RLA2_HUMAN  | K.ILDSVGIEADDDRLNK.V           |                 | 2 | 5,0361 | 0,437 | -0,619 |
| 20 | P61158 ARP3_HUMAN  | R.DREVGIPPEQSLETAK.A           |                 | 2 | 4,8876 | 0,516 | 0,621  |
| 20 | Q9Y295 DRG1_HUMAN  | K.DHTLEDEDVIQVK.K              |                 | 2 | 4,8578 | 0,478 | -0,295 |
| 20 | P62316 SMD2_HUMAN  | K.REEEFNTGPLSVLTQSVK.N         |                 | 3 | 4,795  | 0,441 | -0,169 |
| 20 | Q8IUI8 CRLF3_HUMAN | R.DSIGVCAEKQDGYDSLQR.D         |                 | 3 | 4,6984 | 0,488 | 0,448  |
| 20 | P07355 ANXA2_HUMAN | K.TDLEKDIISDTSGDFR.K           |                 | 2 | 4,6872 | 0,51  | -1,01  |

|    |                    |                            |   |        |       |        |
|----|--------------------|----------------------------|---|--------|-------|--------|
| 20 | P13639 EF2_HUMAN   | K.YRCELLYEGPPDDEAAM*GIK.S  | 3 | 4,6864 | 0,349 | 0,468  |
| 20 | Q9UNZ2 NSF1C_HUMAN | R.DLIHDQDEDEEEEEEGQR.F     | 3 | 4,6782 | 0,357 | 0,088  |
| 20 | P62491 RB11A_HUMAN | R.DHADSNIVIM*LVGNK.S       | 2 | 4,6732 | 0,501 | -0,372 |
| 20 | Q9UPN3 MACF1_HUMAN | K.DKNSVFSVLDEEIAK.A        | 2 | 4,6693 | 0,478 | 0      |
| 20 | P10809 CH60_HUMAN  | K.CEFQDAYVLLSEKK.I         | 3 | 4,6491 | 0,471 | 0      |
| 20 | P12814 ACTN1_HUMAN | R.KDDPLTNLNTAFDVAEK.Y      | 2 | 4,6473 | 0,48  | -0,581 |
| 20 | P62424 RL7A_HUMAN  | R.LKVPPAINQFTQALDR.Q       | 3 | 4,6402 | 0,341 | -0,303 |
| 20 | P07951 TPM2_HUMAN  | K.CGDLEELKIVTNNLK.S        | 3 | 4,6311 | 0,387 | -0,39  |
| 20 | Q9Y5B9 SP16H_HUMAN | K.NEDEEEEEEEKDEAEDLLGR.G   | 3 | 4,6247 | 0,495 | 0,38   |
| 20 | P07195 LDHB_HUMAN  | K.EKLIAPVAEEETVPNNK.I      | 2 | 4,5926 | 0,505 | 0,875  |
| 20 | Q9NYL9 TMOD3_HUMAN | K.YKDLDEDELLGNLSETLK.Q     | 3 | 4,5825 | 0,323 | 0      |
| 20 | P08195 4F2_HUMAN   | K.NQKDDVAQTDLLQIDPNFGSK.E  | 3 | 4,5341 | 0,275 | 0,39   |
| 20 | O14920 IKKB_HUMAN  | R.DLKPENIVLQQGEQR.L        | 3 | 4,5203 | 0,229 | -0,311 |
| 20 | P67936 TPM4_HUMAN  | K.CGDLEELKNVTNNLK.S        | 3 | 4,5199 | 0,386 | -0,195 |
| 20 | P82933 RT09_HUMAN  | R.HLANM*M*GEDPETFTQEDIDR.A | 3 | 4,4813 | 0,451 | 0,538  |
| 20 | Q01105 SET_HUMAN   | K.EQQEAIHIDEVQNEIDR.L      | 3 | 4,4748 | 0,397 | 0,5    |
| 20 | O43617 TPPC3_HUMAN | K.DYENDEDVNKQLDK.M         | 2 | 4,4076 | 0,444 | -0,071 |
| 20 | P11233 RALA_HUMAN  | R.VKEDENVPFLLVGNK.S        | 2 | 4,3745 | 0,369 | 0,287  |
| 20 | Q58FF8 H90B2_HUMAN | K.HSQFLGYPTILYLEK.E        | 3 | 4,3677 | 0,453 | -0,202 |
| 20 | Q96AG4 LRC59_HUMAN | R.LVNLQHLDLLNNK.L          | 2 | 4,3604 | 0,462 | 0,159  |
| 20 | P27694 RFA1_HUMAN  | K.DKNEQAFEEVFQANFR.S       | 3 | 4,3473 | 0,278 | -0,088 |
| 20 | P50454 SERPH_HUMAN | R.DEEVHAGLGELLR.S          | 3 | 4,3395 | 0,335 | -0,064 |
| 20 | P14618 KPYM_HUMAN  | K.KGVNLPGAADVLPVSEK.D      | 3 | 4,3315 | 0,392 | 0,207  |
| 20 | Q16891 IMMT_HUMAN  | R.GIEQAVQSHAVAEER.K        | 3 | 4,3149 | 0,199 | 0,1    |
| 20 | Q00610 CLH1_HUMAN  | R.GQFSTDELVAEVEKR.N        | 2 | 4,3113 | 0,515 | 0,5    |
| 20 | O60216 RAD21_HUMAN | K.M*AFRPGVVDLPEENR.E       | 3 | 4,3049 | 0,289 | -0,105 |
| 20 | Q9UJN8 MCD2L_HUMAN | R.DDDKNNDGYIDYAEFAK.S      | 2 | 4,2939 | 0,581 | 0,918  |
| 20 | P06396 GELS_HUMAN  | K.DSQEEEEKTEALSAK.R        | 2 | 4,2503 | 0,477 | 0,073  |
| 20 | O43815 STRN_HUMAN  | K.EALKEFDLVTSEEGDNESR.S    | 3 | 4,2258 | 0,366 | -0,237 |
| 20 | P00338 LDHA_HUMAN  | K.DQLIYNLLKEEQTPQNK.I      | 3 | 4,2183 | 0,268 | 0      |
| 20 | P35579 MYH9_HUMAN  | R.IAEFTTNLTETEEKSK.S       | 2 | 4,1837 | 0,453 | 0,718  |
| 20 | P05198 IF2A_HUMAN  | K.HAVSDPSILDSLNLNEDER.E    | 3 | 4,182  | 0,398 | -0,086 |
| 20 | P08237 K6PF_HUMAN  | R.DLQANVEHLVQK.M           | 2 | 4,1612 | 0,391 | -0,525 |

|    |                    |                               |   |        |       |        |
|----|--------------------|-------------------------------|---|--------|-------|--------|
| 20 | Q15691 MARE1_HUMAN | R.KNPGVGNNGDDEAAELM*QQVNVLK.L | 3 | 4,1448 | 0,36  | 0,674  |
| 20 | P35237 SPB6_HUMAN  | K.SGGGGDIHQGFQSLLEVNK.T       | 3 | 4,1327 | 0,391 | -0,089 |
| 20 | Q5H9R7 SAPS3_HUMAN | R.YKYPNISCELLTSDVSM*QNDL.L    | 3 | 4,1179 | 0,415 | -0,287 |
| 20 | P00367 DHE3_HUMAN  | R.DSNYHLLM*SVQESLER.K         | 2 | 4,1    | 0,485 | -0,504 |
| 20 | P62258 1433E_HUMAN | K.LAEQAERYDEM*VESM*K.K        | 3 | 4,0947 | 0,349 | 0,187  |
| 20 | P54709 AT1B3_HUMAN | R.SDPTSYAGYIEDLKK.F           | 2 | 4,0851 | 0,511 | -0,289 |
| 20 | Q01433 AMPD2_HUMAN | K.TSDSDLQLYKEQGEGQDR.S        | 3 | 4,0767 | 0,388 | -0,408 |
| 20 | P02545 LMNA_HUMAN  | R.VAVEEVDEEGKFVR.L            | 2 | 4,0708 | 0,494 | 0,304  |
| 20 | P35080 PROF2_HUMAN | K.DREGFTNGLTLGAK.K            | 2 | 4,0643 | 0,338 | 0,6    |
| 20 | P0C7M2 RA1L3_HUMAN | R.GFAFVTDDHDSVDK.I            | 2 | 4,0405 | 0,44  | 0,933  |
| 20 | P62491 RB11A_HUMAN | R.DHADSNIVIM*LVGNK.S          | 3 | 4,0384 | 0,342 | 0      |
| 20 | Q12905 ILF2_HUMAN  | R.VKPAPDETSFSEALLK.R          | 3 | 4,0332 | 0,415 | 0,106  |
| 20 | Q8TDN6 BXDC2_HUMAN | K.DKLFVINEVCEM*K.N            | 3 | 4,0312 | 0,329 | 0      |
| 20 | Q02952 AKA12_HUMAN | K.LKETCVSGEDPTQGADLSPDEK.V    | 3 | 4,0225 | 0,372 | 0,462  |
| 20 | P09936 UCHL1_HUMAN | -.M*QLKPM*EINPEM*LNK.V        | 3 | 4,0068 | 0,088 | 0,196  |
| 20 | P51991 ROA3_HUMAN  | K.IFVGGIKEDTEEYNLR.D          | 3 | 3,9925 | 0,528 | 0,583  |
| 20 | P07355 ANXA2_HUMAN | R.RAEDGSVIDYELIDQDAR.D        | 3 | 3,9923 | 0,246 | 0,089  |
| 20 | Q16555 DPYL2_HUMAN | R.NLHQSGFSLGAQIDDNIPR.R       | 3 | 3,963  | 0,406 | 0,084  |
| 20 | Q96T88 UHRF1_HUMAN | K.DRPASGSPFQLFLSK.V           | 2 | 3,9607 | 0,375 | 0,074  |
| 20 | P00558 PGK1_HUMAN  | K.VADKIQLINNM*LDK.V           | 3 | 3,9558 | 0,223 | 0,112  |
| 20 | P33176 KINH_HUMAN  | K.QLDDKDEEINQSQLVEK.L         | 3 | 3,9491 | 0,192 | 1,271  |
| 20 | Q96FV9 THOC1_HUMAN | R.DKPVTGEQIEVFANK.L           | 2 | 3,9359 | 0,472 | -0,291 |
| 20 | Q9UQ80 PA2G4_HUMAN | K.SDQDYILKEGDLVK.I            | 2 | 3,9357 | 0,376 | 0,526  |
| 20 | P07910 HNRPC_HUMAN | K.DDEKEAEEGEDDRDSANGEDDS.-    | 3 | 3,9278 | 0,578 | -0,829 |
| 20 | Q01105 SET_HUMAN   | R.LNEQASEEILKVEQK.Y           | 2 | 3,9031 | 0,396 | -0,208 |
| 20 | P67936 TPM4_HUMAN  | K.DEEKM*EIQEM*QLK.E           | 3 | 3,9019 | 0,28  | -0,109 |
| 20 | O75821 EIF3G_HUMAN | K.EKLPGELEPVQATQNK.T          | 3 | 3,8829 | 0,351 | 0,103  |
| 20 | Q9BYG3 MK671_HUMAN | K.KGIDYDFPSLILQK.T            | 2 | 3,8817 | 0,263 | -0,149 |
| 20 | P06737 PYGL_HUMAN  | K.DFSELEPKFQNK.T              | 2 | 3,8672 | 0,336 | 0,382  |
| 20 | Q99798 ACON_HUMAN  | K.IVYGHLDPPASQEIER.G          | 3 | 3,8361 | 0,373 | 0,298  |
| 20 | Q01814 AT2B2_HUMAN | K.CGIIHPGEDFLCLEGK.E          | 3 | 3,8323 | 0,39  | -1,388 |
| 20 | Q8NE71 ABCF1_HUMAN | K.DVDDDGEEKELM*ER.L           | 2 | 3,8253 | 0,463 | -0,576 |
| 20 | P07355 ANXA2_HUMAN | K.TDLEKDIISDTSGDFR.K          | 3 | 3,819  | 0,459 | -0,101 |



|    |                     |                                 |   |        |       |        |
|----|---------------------|---------------------------------|---|--------|-------|--------|
| 20 | P62906 RL10A_HUMAN  | K.FSVCVLGDQQHCDEAK.A            | 2 | 3,8168 | 0,442 | 1,16   |
| 20 | P52272 HNRPM_HUMAN  | K.EKVGEVTVYVELLM*DAEGK.S        | 3 | 3,7949 | 0,185 | -0,181 |
| 20 | P06737 PYGL_HUMAN   | K.IGEDYVKDLSQLTK.L              | 2 | 3,7894 | 0,431 | -0,455 |
| 20 | Q9UPN3 MACF1_HUMAN  | K.DKNSVFSVLDEEIAK.A             | 3 | 3,7846 | 0,304 | -0,216 |
| 20 | Q9BXF6 RFIP5_HUMAN  | R.DEHVQELESYIDR.L               | 3 | 3,7655 | 0,282 | 0      |
| 20 | Q09666 AHNK_HUMAN   | K.ISM*PDVDLHLK.G                | 3 | 3,763  | 0,361 | -0,214 |
| 20 | P12270 TPR_HUMAN    | R.SNASLTNNQNLIQSLKEDLNK.V       | 3 | 3,7629 | 0,368 | 0,078  |
| 20 | O95202 LETM1_HUMAN  | K.ADDKLIAEEGVDSLNVK.E           | 3 | 3,7476 | 0,425 | -0,101 |
| 20 | O75533 SF3B1_HUMAN  | R.NRPLSDEELDAM*FPEGYK.V         | 3 | 3,7469 | 0,281 | 0,344  |
| 20 | P18859 ATP5J_HUMAN  | K.FEDPKFEVIEKPQA.-              | 3 | 3,7438 | 0,361 | 0,327  |
| 20 | Q96FV9 THOC1_HUMAN  | R.DKPVTGEQIEVFANK.L             | 3 | 3,7435 | 0,307 | 0      |
| 20 | Q9Y490 TLN1_HUMAN   | R.DDILNGSHPVSFDK.A              | 2 | 3,731  | 0,421 | -0,316 |
| 20 | P05787 K2C8_HUMAN   | K.DVDEAYM*NKVELESR.L            | 3 | 3,7301 | 0,275 | 0,303  |
| 20 | O43768 ENSA_HUMAN   | K.QEEENPAEETGEEKQDTQEK.E        | 3 | 3,7255 | 0,373 | 0,078  |
| 20 | P61106 RAB14_HUMAN  | K.TGENVEDAFLEAAKK.I             | 3 | 3,7191 | 0,358 | -0,113 |
| 20 | A4D1I8 A4D1I8_HUMAN | R.DEPLHALYDNVEK.L               | 2 | 3,7181 | 0,43  | 0,474  |
| 20 | Q12756 KIF1A_HUMAN  | R.EHPLLGPYVEDLSK.L              | 3 | 3,7115 | 0,338 | -0,229 |
| 20 | P05787 K2C8_HUMAN   | K.DVDEAYMKNKVELESR.L            | 3 | 3,7058 | 0,31  | 0,305  |
| 20 | P48643 TCPE_HUMAN   | R.DVDFELIKVEGK.V                | 2 | 3,7051 | 0,511 | -0,263 |
| 20 | P13674 P4HA1_HUMAN  | R.FHDIISDAEIEIVK.D              | 3 | 3,7037 | 0,34  | -0,225 |
| 20 | Q9UBK8 MTRR_HUMAN   | K.DVHDALVQISK.E                 | 2 | 3,6846 | 0,47  | -0,274 |
| 20 | Q01813 K6PP_HUMAN   | R.DLQSNVEHLTEK.M                | 2 | 3,6837 | 0,323 | -0,518 |
| 20 | P52565 GDIR1_HUMAN  | K.SIQEIQELDKDDESLR.K            | 2 | 3,679  | 0,412 | 0,509  |
| 20 | Q96T88 UHRF1_HUMAN  | K.DRPASGSPFQLFLSK.V             | 3 | 3,6767 | 0,451 | -0,222 |
| 20 | P62195 PRS8_HUMAN   | R.EHAPSIIFM*DEIDSIGSSR.L        | 3 | 3,6758 | 0,364 | -0,345 |
| 20 | Q9BZK7 TBL1R_HUMAN  | R.DKLAQQQAAAAAAAAAAAAASQQGSAK.N | 3 | 3,6475 | 0,317 | 0,637  |
| 20 | P14625 ENPL_HUMAN   | R.ELISNASDALDKIR.L              | 2 | 3,6426 | 0,444 | 0,316  |
| 20 | P36776 LONM_HUMAN   | K.GDKDGSLEVTGQLGEVM*K.E         | 3 | 3,6404 | 0,345 | 0,195  |
| 20 | O75642 IF1AH_HUMAN  | R.DYQDNKADVILK.Y                | 2 | 3,6267 | 0,396 | 0      |
| 20 | Q8IXM3 RM41_HUMAN   | K.DFKDGTFFDPDNLEK.Y             | 2 | 3,6245 | 0,213 | 0,52   |
| 20 | Q07021 C1QBP_HUMAN  | K.AFVDFLSDEIKEER.K              | 2 | 3,6203 | 0,476 | 0,216  |
| 20 | Q99832 TCPH_HUMAN   | R.AIKNDSVVAGGGAIEM*ELSK.Y       | 3 | 3,6173 | 0,264 | 0,182  |
| 20 | P40937 RFC5_HUMAN   | K.DKEFGSM*VLELNASDDR.G          | 3 | 3,6088 | 0,277 | 0,471  |

|    |                    |                          |   |        |       |        |
|----|--------------------|--------------------------|---|--------|-------|--------|
| 20 | Q9UK45 LSM7_HUMAN  | R.DPDDQYKLTEDTR.Q        | 3 | 3,6082 | 0,114 | 0      |
| 20 | P43243 MATR3_HUMAN | R.DLDELSRYPEDK.I         | 2 | 3,602  | 0,228 | 0,412  |
| 20 | P33993 MCM7_HUMAN  | R.M*VDVVEKEDVNEAIR.L     | 3 | 3,5968 | 0,363 | -0,208 |
| 20 | P00558 PGK1_HUMAN  | K.VSHVSTGGGASLELLEGGK.V  | 3 | 3,5947 | 0,37  | 0,21   |
| 20 | P23284 PPIB_HUMAN  | K.IEVEKPFAIAKE.-         | 2 | 3,5744 | 0,365 | -0,355 |
| 20 | P29966 MARCS_HUMAN | K.GEAAAERPGEAAVASSPSK.A  | 3 | 3,5678 | 0,364 | -0,102 |
| 20 | P55081 MFAP1_HUMAN | R.DFSAPTLEDHFNK.T        | 2 | 3,5614 | 0,474 | 0,481  |
| 20 | P08670 VIME_HUMAN  | R.KVESLQEEIAFLK.K        | 3 | 3,5596 | 0,105 | -0,119 |
| 20 | P50991 TCPD_HUMAN  | K.DIEREDIEFICK.T         | 3 | 3,5533 | 0,364 | 0      |
| 20 | Q9UQ80 PA2G4_HUMAN | K.HELLQPFNVLYEK.E        | 2 | 3,5489 | 0,433 | -0,15  |
| 20 | Q8WUM4 PDC6I_HUMAN | R.DELLKDLQQSIAR.E        | 2 | 3,5489 | 0,363 | -0,239 |
| 20 | Q58FF8 H90B2_HUMAN | R.YESLTDPSKLDGSGK.E      | 2 | 3,5457 | 0,548 | 0,238  |
| 20 | Q09666 AHNK_HUMAN  | K.GPHVDVSGPDIDIEGPEGK.L  | 3 | 3,5424 | 0,184 | 0,286  |
| 20 | Q9NVG8 TBC13_HUMAN | K.DNEVLLQIDKDVR.R        | 2 | 3,538  | 0,39  | -0,235 |
| 20 | P21333 FLNA_HUMAN  | K.TGVAVNKPAEFTVDAK.H     | 3 | 3,5263 | 0,571 | 0,222  |
| 20 | P23381 SYWC_HUMAN  | K.DYTSGAM*LTGELKK.A      | 2 | 3,525  | 0,32  | 0,399  |
| 20 | P48729 KC1A_HUMAN  | R.DIKPDNFLM*GIGR.H       | 3 | 3,5237 | 0,353 | 0      |
| 20 | P08670 VIME_HUMAN  | R.DGQVINETSQHDDLE.-      | 2 | 3,522  | 0,414 | -0,465 |
| 20 | Q9NZM1 MYOF_HUMAN  | K.KLEPISNDDLIVVEK.Y      | 3 | 3,5197 | 0,336 | 0,107  |
| 20 | Q14697 GANAB_HUMAN | R.VSQGSKDPAEGDGAQEETPR.D | 3 | 3,5189 | 0,309 | -0,934 |
| 20 | Q13813 SPTA2_HUMAN | R.LIQSHPESAEDLQEK.C      | 3 | 3,5115 | 0,32  | 0      |
| 20 | P62158 CALM_HUMAN  | K.EAFSLFDKDGDTITTK.E     | 2 | 3,5058 | 0,515 | -0,463 |
| 20 | P08865 RSSA_HUMAN  | R.DPEEIEKEEQAAAEEK.A     | 2 | 3,4984 | 0,531 | 0,427  |
| 20 | Q9BXF6 RFIP5_HUMAN | R.DEHVQELSYIDR.L         | 2 | 3,4956 | 0,451 | -0,149 |
| 20 | P00492 HPRT_HUMAN  | R.DLNHVCVISETGK.A        | 2 | 3,4947 | 0,389 | -0,332 |
| 20 | Q86UL3 PLCF_HUMAN  | K.DPTSLEEEIKEIR.R        | 2 | 3,4944 | 0,338 | 0,313  |
| 20 | Q14696 MESD2_HUMAN | K.DDDIEEGDLPEHK.R        | 2 | 3,4813 | 0,448 | -0,081 |
| 20 | Q06124 PTN11_HUMAN | R.FDSLTDLVEHYK.K         | 2 | 3,4781 | 0,425 | -0,083 |
| 20 | Q99873 ANM1_HUMAN  | R.DKWLPDGLIFPDR.A        | 3 | 3,4728 | 0,3   | -0,334 |
| 20 | O75475 PSIP1_HUMAN | R.DFKPGDLIFAK.M          | 3 | 3,4681 | 0,372 | 0,292  |
| 20 | P62070 RRAS2_HUMAN | K.DRDEFPM*ILIGNK.A       | 3 | 3,4557 | 0,244 | 0      |
| 20 | O75439 MPPB_HUMAN  | K.DLVDYITTHYK.G          | 2 | 3,4412 | 0,476 | -0,446 |
| 20 | P09493 TPM1_HUMAN  | K.DEEKM*EIQEIQLK.E       | 3 | 3,4386 | 0,262 | 0,111  |

|    |                     |                            |   |        |       |        |
|----|---------------------|----------------------------|---|--------|-------|--------|
| 20 | Q86U44 MTA70_HUMAN  | K.DHTPSQELALTQSVGGDSSADR.L | 3 | 3,4385 | 0,189 | 0,161  |
| 20 | Q00325 MPCP_HUMAN   | R.LPRPPPEM*PESLK.K         | 3 | 3,4293 | 0,401 | 0,114  |
| 20 | Q9Y295 DRG1_HUMAN   | K.DHTLEDEDVIQIVK.K         | 3 | 3,4266 | 0,191 | -0,111 |
| 20 | P34932 HSP74_HUMAN  | K.SEENEPEM*ETDQNAKEEEK.M   | 3 | 3,4265 | 0,33  | -0,401 |
| 20 | Q6P582 F128A_HUMAN  | R.DKGSAAALGGVLALAER.S      | 3 | 3,4241 | 0,192 | -0,06  |
| 20 | Q00839 HNRPU_HUMAN  | K.KDCEVVM*M*IGLPGAGK.T     | 2 | 3,4239 | 0,436 | 0,281  |
| 20 | Q9NTJ3 SMC4_HUMAN   | K.DTEKEVDDLTAELK.S         | 2 | 3,4138 | 0,381 | 0,076  |
| 20 | Q9ULW0 TPX2_HUMAN   | R.M*PTKEDEEEDEPVVIK.A      | 3 | 3,4034 | 0,271 | -0,192 |
| 20 | P21333 FLNA_HUMAN   | K.SPFEVYVDKSQGDASK.V       | 3 | 3,3959 | 0,306 | 0,416  |
| 20 | P60174 TPIS_HUMAN   | K.DCGATWVVLGHSER.R         | 2 | 3,3928 | 0,399 | 0,846  |
| 20 | Q13619 CUL4A_HUMAN  | K.DKDM*VQDLLDFK.D          | 3 | 3,3861 | 0,173 | 0,185  |
| 20 | P40937 RFC5_HUMAN   | K.DKEFGSM*VLELNASDDR.G     | 2 | 3,382  | 0,566 | 0,188  |
| 20 | Q92499 DDX1_HUMAN   | R.TKIDCDNLEQYFIQQGGGPK.K   | 3 | 3,3792 | 0,223 | 0,452  |
| 20 | P62937 PPIA_HUMAN   | R.VSFELFADKVPK.T           | 2 | 3,3781 | 0,444 | -0,354 |
| 20 | P68104 EF1A1_HUMAN  | R.YEEIVKEVSTYIK.K          | 3 | 3,3641 | 0,393 | 0      |
| 20 | Q9NR45 SIAS_HUMAN   | K.GSDHSASLEPGELAEVLR.S     | 2 | 3,3566 | 0,439 | -0,85  |
| 20 | P12956 KU70_HUMAN   | R.IM*LFTNEDNPHGNDSAK.A     | 3 | 3,3565 | 0,427 | 0,381  |
| 20 | Q9NVI7 ATD3A_HUMAN  | R.INEM*VHFDLPGQEER.E       | 3 | 3,355  | 0,125 | -0,2   |
| 20 | B2RDU1 B2RDU1_HUMAN | R.DTSSDKDLDDALDK.L         | 2 | 3,3521 | 0,3   | 0,793  |
| 20 | Q16555 DPYL2_HUMAN  | K.DHGVNSFLVYM*AFK.D        | 3 | 3,352  | 0,223 | 0      |
| 20 | Q70UQ0 IKIP_HUMAN   | K.DIKDEIAHISDM*N.-         | 2 | 3,3458 | 0,554 | 0,322  |
| 20 | Q13464 ROCK1_HUMAN  | R.DVKPDNM*LLDK.S           | 3 | 3,3416 | 0,277 | 0,07   |
| 20 | P78371 TCPB_HUMAN   | R.EALLSSAVDHGSDEVK.F       | 2 | 3,3411 | 0,547 | 0,442  |
| 20 | P27144 KAD4_HUMAN   | K.DVAKPVIELYK.S            | 2 | 3,3287 | 0,37  | 0,096  |
| 20 | Q00610 CLH1_HUMAN   | R.ALEHFTDLYDIK.R           | 3 | 3,3261 | 0,188 | 0,187  |
| 20 | Q92616 GCN1L_HUMAN  | R.EGVLTSPEQKEEAAK.A        | 2 | 3,3218 | 0,353 | 0,438  |
| 20 | P61224 RAP1B_HUMAN  | R.VKDIDDVPM*ILVGNK.C       | 3 | 3,3208 | 0,286 | -0,441 |
| 20 | Q00610 CLH1_HUMAN   | K.DSLYKDAM*QYASESK.D       | 3 | 3,3194 | 0,414 | 0,313  |
| 20 | Q99873 ANM1_HUMAN   | R.DKWLPDGLIFPDR.A          | 2 | 3,3124 | 0,344 | -0,149 |
| 20 | Q15843 NEDD8_HUMAN  | K.EIEIDIEPTDKVER.I         | 2 | 3,3066 | 0,402 | 0,072  |
| 20 | P35613 BASI_HUMAN   | R.SELHIENLNM*EADPGQYR.C    | 3 | 3,3049 | 0,28  | -0,172 |
| 20 | Q723T8 ZFY16_HUMAN  | K.DHGGFLFITPTFQK.L         | 2 | 3,3034 | 0,506 | -0,152 |
| 20 | P10301 RRAS_HUMAN   | K.DRDDFPVVLVGNK.A          | 3 | 3,294  | 0,301 | 0,062  |

|    |                    |                              |   |        |       |        |
|----|--------------------|------------------------------|---|--------|-------|--------|
| 20 | P25205 MCM3_HUMAN  | R.ALKDFVASIDATYAK.Q          | 3 | 3,2793 | 0,167 | 0      |
| 20 | P00558 PGK1_HUMAN  | K.LGDVYVNDAFGTAHR.A          | 3 | 3,279  | 0,447 | 0,336  |
| 20 | O60934 NBN_HUMAN   | K.DTKPELEIDVK.V              | 3 | 3,2756 | 0,162 | 0,071  |
| 20 | Q8IYB3 SRRM1_HUMAN | K.VKEPSVQEATSTSDILK.V        | 3 | 3,2633 | 0,256 | 0,399  |
| 20 | P50750 CDK9_HUMAN  | K.AYVRDPYALDLIDK.L           | 3 | 3,2619 | 0,316 | 0      |
| 20 | Q9UBF2 COPG2_HUMAN | K.HPSAVTACNLDLENLITDSNR.S    | 3 | 3,2594 | 0,327 | 0,078  |
| 20 | P13639 EF2_HUMAN   | K.GLKEGIPALDNFLDK.L          | 3 | 3,2557 | 0,308 | -0,112 |
| 20 | P06493 CDC2_HUMAN  | R.DLKPQNLLIDDK.G             | 3 | 3,2553 | 0,281 | -0,13  |
| 20 | P0C7M2 RA1L3_HUMAN | R.KLFIGGLSFETTDESLR.S        | 3 | 3,2498 | 0,216 | 0      |
| 20 | P21333 FLNA_HUMAN  | K.ATCAPQHGAPGPGPADASK.V      | 3 | 3,2473 | 0,349 | -0,409 |
| 20 | Q9Y3A5 SBDS_HUMAN  | K.KEDLISAFGTDDQTEICK.Q       | 3 | 3,247  | 0,273 | 0,265  |
| 20 | Q96RP9 EFG1_HUMAN  | R.DNSHPFVGLAFK.L             | 3 | 3,2452 | 0,277 | 0,206  |
| 20 | P45974 UBP5_HUMAN  | R.DRVTSAVEALLSADSASR.K       | 2 | 3,242  | 0,416 | -0,33  |
| 20 | P46063 RECQ1_HUMAN | K.DILQNVFKLEK.F              | 2 | 3,2364 | 0,256 | -0,272 |
| 20 | Q9H0A0 NAT10_HUMAN | K.TLSDDLDEAAKEFQEK.H         | 2 | 3,2361 | 0,429 | -0,663 |
| 20 | P11177 ODPB_HUMAN  | R.DAINQGM*DEELERDEK.V        | 2 | 3,2235 | 0,382 | -0,064 |
| 20 | P62256 UBE2H_HUMAN | K.HEVTILGGLNEFVVK.F          | 3 | 3,2216 | 0,336 | 0      |
| 20 | P35080 PROF2_HUMAN | K.DREGFFTNGTLGAK.K           | 3 | 3,2194 | 0,348 | 0,337  |
| 20 | P22626 ROA2_HUMAN  | R.GFGFVTDDHDPVVK.I           | 2 | 3,2153 | 0,445 | 0,144  |
| 20 | Q9Y678 COPG_HUMAN  | K.HPSAVTACNLDLENLVTDNSNR.S   | 3 | 3,2145 | 0,237 | 0,786  |
| 20 | O00267 SPT5H_HUMAN | R.DQREEELGEYYM*K.K           | 3 | 3,1989 | 0,22  | -1,179 |
| 20 | P19338 NUCL_HUMAN  | K.VTQDELKEVFEDAAEIR.L        | 3 | 3,1907 | 0,343 | -0,184 |
| 20 | Q8WU90 ZC3HF_HUMAN | K.EEKEDEISLEDLIER.E          | 3 | 3,1856 | 0,302 | -0,297 |
| 20 | Q8TAQ2 SMRC2_HUMAN | K.EGQEEVLKEVVESEGER.K        | 3 | 3,1683 | 0,379 | 0,564  |
| 20 | P11169 GTR3_HUMAN  | R.SGKDGVM*EM*NSIEPAKETTTNV.- | 3 | 3,1682 | 0,127 | 0,54   |
| 20 | Q00610 CLH1_HUMAN  | K.DSLYKDAM*QYASESK.D         | 2 | 3,1671 | 0,529 | 0,696  |
| 20 | O00159 MYO1C_HUMAN | R.DRLLQSNPVLEAFGNAK.T        | 3 | 3,1668 | 0,095 | -0,293 |
| 20 | Q14240 IF4A2_HUMAN | R.DFTVSALHGDM*DQK.E          | 2 | 3,1649 | 0,36  | 1,081  |
| 20 | Q9UNM6 PSD13_HUMAN | K.LYENFISEFEHR.V             | 2 | 3,1586 | 0,391 | -0,308 |
| 20 | Q8IUD2 RBG12_HUMAN | K.DDRIEELER.E                | 3 | 3,1426 | 0,181 | -0,123 |
| 20 | Q9UBK8 MTRR_HUMAN  | K.DVHDALVQIISK.E             | 3 | 3,1321 | 0,166 | -0,068 |
| 20 | P18887 XRCC1_HUMAN | R.DSTHLICAFANTPK.Y           | 3 | 3,1237 | 0,289 | 0,348  |
| 20 | O43707 ACTN4_HUMAN | K.VLAGDKNFITAEELR.R          | 3 | 3,114  | 0,327 | 0,218  |

|    |                    |                              |   |        |       |        |
|----|--------------------|------------------------------|---|--------|-------|--------|
| 20 | Q8IX01 SFR14_HUMAN | K.NCFFEIHKPFDK.Y             | 2 | 3,1135 | 0,311 | -0,157 |
| 20 | P46777 RL5_HUMAN   | R.YLM*EEDEDAYKK.Q            | 3 | 3,1087 | 0,128 | 0,354  |
| 20 | O14818 PSA7_HUMAN  | R.DIVVLGVEKK.S               | 2 | 3,1069 | 0,291 | -0,111 |
| 20 | Q14738 2A5D_HUMAN  | K.DSPTQEREELFIQK.L           | 2 | 3,1041 | 0,212 | 0,851  |
| 20 | O43143 DHX15_HUMAN | R.YGVILDEAHER.T              | 3 | 3,1033 | 0,396 | 0,194  |
| 20 | Q9UQ80 PA2G4_HUMAN | K.HELLQPFNVLYEK.E            | 3 | 3,1023 | 0,383 | 0      |
| 20 | Q8N4Q1 MIA40_HUMAN | K.KPAEQAEETAPIEATATKEEEGSS.- | 3 | 3,1005 | 0,405 | 0,804  |
| 20 | P50552 VASP_HUMAN  | K.VKEEIIEAFVQELR.K           | 3 | 3,0918 | 0,2   | -0,322 |
| 20 | Q8IWW6 RHG12_HUMAN | R.SFGHFPGPEFLDVEK.T          | 3 | 3,0858 | 0,24  | 0,858  |
| 20 | Q9P0L0 VAPA_HUMAN  | K.HEQILVLDPPTDLK.F           | 3 | 3,0856 | 0,1   | 0,339  |
| 20 | P12814 ACTN1_HUMAN | K.M*LDAEDIVGTARPDEK.A        | 3 | 3,0748 | 0,491 | 0,103  |
| 20 | P46013 KI67_HUMAN  | K.FTQTSGETTDADKEPAGEDK.G     | 3 | 3,0725 | 0,2   | -0,086 |
| 20 | Q7KZF4 SND1_HUMAN  | R.DYVAPTANLDQKDK.Q           | 2 | 3,0627 | 0,306 | 0,464  |
| 20 | Q8WUM4 PDC6I_HUMAN | R.DELLKDLQQSIAR.E            | 3 | 3,0627 | 0,261 | 0      |
| 20 | Q8TCS8 PNPT1_HUMAN | R.KENGPVVETVQVPLSK.R         | 3 | 3,0588 | 0,209 | 0,106  |
| 20 | P31943 HNRH1_HUMAN | R.EGRPSGEAFVELESEDEVK.L      | 3 | 3,055  | 0,189 | 0,347  |
| 20 | O96019 ACL6A_HUMAN | R.DDGSTLM*EIDGDKKGK.Q        | 2 | 3,0438 | 0,439 | -0,076 |
| 20 | O95571 ETHE1_HUMAN | R.LSGAQADLHIEDGDSIR.F        | 3 | 3,0313 | 0,296 | 0,407  |
| 20 | Q00610 CLH1_HUMAN  | R.ALEHFTDLYDIK.R             | 2 | 3,0313 | 0,455 | 0,167  |
| 20 | P50991 TCPD_HUMAN  | K.DIEREDIEFICK.T             | 2 | 3,0265 | 0,305 | 0,156  |
| 20 | Q9Y217 MTMR6_HUMAN | R.DCHDIYNSLLQLSK.Q           | 3 | 3,0208 | 0,222 | -0,214 |
| 20 | Q9Y4L1 HYOU1_HUMAN | R.EKAANSLEAFIFETQDK.L        | 3 | 3,0178 | 0,224 | -0,283 |
| 20 | P68104 EF1A1_HUMAN | K.YYVTIIDAPGHR.D             | 3 | 3,0107 | 0,281 | 0,13   |
| 20 | O95340 PAPS2_HUMAN | K.DIHelfVPENK.L              | 2 | 3,0035 | 0,417 | 0      |
| 20 | Q9NRR4 RNC_HUMAN   | R.DLYDKFEEELGSR.Q            | 2 | 3,0016 | 0,488 | 0,229  |
| 20 | P60842 IF4A1_HUMAN | R.DFTVSAM*HGDM*DQK.E         | 2 | 2,9991 | 0,528 | -0,151 |
| 20 | Q15149 PLEC1_HUMAN | R.CRPDQLTGLSLLPLSEK.A        | 3 | 2,9943 | 0,308 | -0,19  |
| 20 | P61011 SRP54_HUMAN | K.DKVDVASVIVTK.L             | 3 | 2,9914 | 0,259 | 0,072  |
| 20 | P06576 ATPB_HUMAN  | R.IM*DPNIVGSEHYDVAR.G        | 3 | 2,9896 | 0,214 | 0,3    |
| 20 | Q9P258 RCC2_HUMAN  | R.NHTLALTETGVSFAFGENK.M      | 3 | 2,9874 | 0,168 | 0,09   |
| 20 | P63279 UBC9_HUMAN  | K.DHPFGFVAVPTK.N             | 2 | 2,9848 | 0,353 | 0,278  |
| 20 | P55084 ECHB_HUMAN  | K.DNGIRPSSLEQM*AK.L          | 2 | 2,9829 | 0,331 | 0,312  |
| 20 | Q9UQE7 SMC3_HUMAN  | R.LFYHIVDSDEVSTK.I           | 3 | 2,9812 | 0,298 | 0,111  |

|    |                    |                               |   |        |       |        |
|----|--------------------|-------------------------------|---|--------|-------|--------|
| 20 | P41091 IF2G_HUMAN  | K.VGQEIEVRPGIVSK.D            | 3 | 2,9807 | 0,367 | -0,303 |
| 20 | O14979 HNRDL_HUMAN | K.DAASVDKVLLEK.E              | 3 | 2,9735 | 0,186 | 0,142  |
| 20 | P08670 VIME_HUMAN  | K.VESLQEEIAFLKK.L             | 3 | 2,9726 | 0,389 | -0,119 |
| 20 | O75937 DNJC8_HUMAN | K.EGKPTIVEEDDPELKF.Q          | 3 | 2,972  | 0,26  | 0,099  |
| 20 | P29692 EF1D_HUMAN  | K.SLAGSSGPGASSGTSGDHGELVVR.I  | 3 | 2,9572 | 0,27  | 0,335  |
| 20 | P61247 RS3A_HUMAN  | K.ACQSIYPLHDVFVR.K            | 3 | 2,956  | 0,362 | -0,215 |
| 20 | P05787 K2C8_HUMAN  | R.TEM*ENEFVLIKK.D             | 3 | 2,9545 | 0,34  | 0,122  |
| 20 | Q86UL3 PLCF_HUMAN  | K.DPTSLEEEIKEIR.R             | 3 | 2,9539 | 0,358 | 0      |
| 20 | O94826 TOM70_HUMAN | K.CIDLEPDNATTYVHK.G           | 3 | 2,9454 | 0,302 | 0,206  |
| 20 | Q9BRA2 TXD17_HUMAN | R.YEEVSVSGFEFHR.A             | 3 | 2,9391 | 0,515 | -0,213 |
| 20 | P06737 PYGL_HUMAN  | K.DIINM*LFYHDR.F              | 2 | 2,9329 | 0,337 | -0,168 |
| 20 | P07237 PDIA1_HUMAN | R.NNFEGEVTKENLLDFIK.H         | 3 | 2,9177 | 0,304 | -0,182 |
| 20 | P02786 TFR1_HUMAN  | R.VEYHFLSPYVSPK.E             | 3 | 2,9162 | 0,131 | 0      |
| 20 | Q13136 LIPA1_HUMAN | R.NSTGSQDGPVSNPSSSNSSQDSLHK.A | 3 | 2,913  | 0,213 | 0      |
| 20 | P45974 UBP5_HUMAN  | R.DRVTSAVEALLSADSASR.K        | 3 | 2,9125 | 0,221 | 0      |
| 20 | P12814 ACTN1_HUMAN | K.M*LDAEDIVGTARPDEK.A         | 2 | 2,9108 | 0,344 | -0,893 |
| 20 | O75369 FLNB_HUMAN  | K.FADEHVPGSPFTVK.I            | 3 | 2,9108 | 0,244 | -0,06  |
| 20 | P17858 K6PL_HUMAN  | R.TNVLGHQLQGGAPTTFDR.N        | 3 | 2,9107 | 0,244 | 0,575  |
| 20 | P31946 1433B_HUMAN | K.LAEQAERYDDM*AAAM*K.A        | 3 | 2,9086 | 0,337 | 0,099  |
| 20 | P19338 NUCL_HUMAN  | K.GLSEDTEETLKESFDGSRV.A       | 3 | 2,906  | 0,349 | 0,083  |
| 20 | P08670 VIME_HUMAN  | R.ETNLDSLPLVDTHSK.R           | 2 | 2,8966 | 0,462 | 0,219  |
| 20 | P61224 RAP1B_HUMAN | R.VKDTPDDVPM*ILVGNK.C         | 2 | 2,8885 | 0,331 | -0,294 |
| 20 | Q13242 SFRS9_HUMAN | R.FEDPRDAEDAIYGR.N            | 3 | 2,8788 | 0,357 | 0      |
| 20 | O76071 CIAO1_HUMAN | K.NQDDFECVTTLEGHENEVK.S       | 3 | 2,8622 | 0,26  | 0,889  |
| 20 | P31153 METK2_HUMAN | K.YLDEDTIYHLQPSGR.F           | 3 | 2,8618 | 0,319 | -0,304 |
| 20 | Q96B23 CR025_HUMAN | R.DSSESQLASTESDKPTTGR.V       | 3 | 2,8615 | 0,292 | -0,092 |
| 20 | O96000 NDUBA_HUMAN | R.DYKVDQEIINIM*QDR.L          | 2 | 2,8552 | 0,291 | -0,257 |
| 20 | Q09666 AHNK_HUMAN  | K.VESEIKVPDVELK.S             | 3 | 2,8469 | 0,332 | -0,185 |
| 20 | P51114 FXR1_HUMAN  | R.KVPGVTAIELDEDTGTFR.I        | 3 | 2,8405 | 0,187 | 0,188  |
| 20 | Q14696 MESD2_HUMAN | K.DDDIEEGDLPEHK.R             | 3 | 2,8339 | 0,248 | 0,242  |
| 20 | Q13885 TBB2A_HUMAN | R.LHFFM*PGFAPLTSR.G           | 3 | 2,8261 | 0,335 | 0,112  |
| 20 | Q58FG0 HS905_HUMAN | K.HSQFIGYPITLFEK.K            | 3 | 2,8235 | 0,176 | -0,308 |
| 20 | Q96AG4 LRC59_HUMAN | R.LVNLQHLDLLNNK.L             | 3 | 2,8197 | 0,447 | 0,179  |

|    |                    |                          |   |        |       |        |
|----|--------------------|--------------------------|---|--------|-------|--------|
| 20 | Q8IUD2 RB6I2_HUMAN | K.DDRIEELEEALR.E         | 2 | 2,8169 | 0,25  | 0,328  |
| 20 | Q13685 AAMP_HUMAN  | K.DASLVVTTSGDHK.A        | 2 | 2,8109 | 0,448 | 0,183  |
| 20 | P33993 MCM7_HUMAN  | K.DVLVDVYIEHR.L          | 2 | 2,8108 | 0,301 | 0,291  |
| 20 | P67936 TPM4_HUMAN  | K.CGDLEELKNVTNNLK.S      | 2 | 2,8101 | 0,33  | -0,455 |
| 20 | P19525 E2AK2_HUMAN | R.DGIISDIFDKK.E          | 2 | 2,8076 | 0,449 | -0,195 |
| 20 | P28702 RXR_B_HUMAN | K.DKDGEGAGGAPEEM*PVDR.I  | 3 | 2,8006 | 0,14  | -0,091 |
| 20 | Q8NBU5 ATAD1_HUMAN | R.HVDLLEVAQETDGFSGSDLK.E | 3 | 2,7996 | 0,197 | -0,423 |
| 20 | P31943 HNRH1_HUMAN | R.EGRPSGEAFVELESEDEVK.L  | 2 | 2,7983 | 0,456 | 0,579  |
| 20 | P05787 K2C8_HUMAN  | K.DVDEAYM*NKVELESR.L     | 2 | 2,7968 | 0,412 | 0,807  |
| 20 | P06737 PYGL_HUMAN  | K.IGEDYVKDLSQLTK.L       | 3 | 2,7944 | 0,445 | -0,114 |
| 20 | P49736 MCM2_HUMAN  | R.GVCLIDEFDKM*NDQDR.T    | 3 | 2,7741 | 0,297 | -0,371 |
| 20 | Q10713 MPPA_HUMAN  | R.FDSKDEILLTLEK.H        | 3 | 2,7727 | 0,204 | 0      |
| 20 | P04818 TYSY_HUMAN  | R.YSLRDEFPLTTK.R         | 3 | 2,7672 | 0,276 | 0,116  |
| 20 | P07237 PDIA1_HUMAN | R.NNFEGEVTKENLLDFIK.H    | 2 | 2,7661 | 0,392 | -0,182 |
| 20 | P49755 TMEDA_HUMAN | R.RLEDLSESIVNDFAYM*K.K   | 3 | 2,7631 | 0,083 | -0,358 |
| 20 | O14979 HNRDL_HUMAN | K.DAASVDKVLK.E           | 2 | 2,7622 | 0,33  | 0,189  |
| 20 | P19525 E2AK2_HUMAN | R.DGIISDIFDKK.E          | 3 | 2,7618 | 0,32  | 0,512  |
| 20 | P18621 RL17_HUMAN  | K.EQIVPKPEEEVAQK.K       | 2 | 2,7584 | 0,363 | -0,225 |
| 20 | P35580 MYH10_HUMAN | K.LDPHLVLDQLR.C          | 3 | 2,7553 | 0,212 | 0,069  |
| 20 | Q15459 SF3A1_HUMAN | R.TDIFGVEETAIGKK.I       | 3 | 2,7405 | 0,311 | 0,121  |
| 20 | Q13885 TBB2A_HUMAN | R.LHFFM*PGFAPLTSR.G      | 2 | 2,7329 | 0,362 | 0,298  |
| 20 | Q13885 TBB2A_HUMAN | R.EIVHIQAGQCGNQIGAK.F    | 3 | 2,7327 | 0,182 | 0,602  |
| 20 | O00629 IMA4_HUMAN  | R.NVPHEICEDSDIDGDYR.V    | 3 | 2,7236 | 0,271 | 0,341  |
| 20 | Q7L5N1 CSN6_HUMAN  | R.SQEGRPVQVIGALIGK.Q     | 3 | 2,7194 | 0,36  | 0,111  |
| 20 | P35268 RL22_HUMAN  | R.YFQINQDEEEED.-         | 2 | 2,7192 | 0,491 | 0,695  |
| 20 | O60313 OPA1_HUMAN  | R.EFDLTKEEDLAALR.H       | 3 | 2,7154 | 0,291 | 0,333  |
| 20 | P63173 RL38_HUMAN  | R.YLYTLVITDKEK.A         | 3 | 2,7118 | 0,32  | 0,615  |
| 20 | P62736 ACTA_HUMAN  | R.LDLAGRDLTDYLM*K.I      | 3 | 2,7005 | 0,347 | -0,112 |
| 20 | O43719 HTSF1_HUMAN | K.DNQGNLKGDLCCYLK.R      | 3 | 2,697  | 0,321 | 0,394  |
| 20 | P61011 SRP54_HUMAN | K.DKVDVASVIVTK.L         | 2 | 2,6944 | 0,332 | 0,192  |
| 20 | Q16543 CDC37_HUMAN | R.QYM*EGFNDELEAFKER.V    | 3 | 2,6846 | 0,284 | 0      |
| 20 | Q8TCS8 PNPT1_HUMAN | R.LYAVFTDYEHDK.V         | 3 | 2,6842 | 0,323 | 0,183  |
| 20 | P21266 GSTM3_HUMAN | K.LKPQYLEELPGQLK.Q       | 3 | 2,6841 | 0,127 | -0,11  |

|    |                    |                           |   |        |       |        |
|----|--------------------|---------------------------|---|--------|-------|--------|
| 20 | P05787 K2C8_HUMAN  | R.TEM*ENEFVLIKK.D         | 2 | 2,6801 | 0,216 | 0,326  |
| 20 | Q9NR30 DDX21_HUMAN | K.SDKTEEIAEEEEIVFPK.A     | 3 | 2,6786 | 0,091 | 1,016  |
| 20 | P29401 TKT_HUMAN   | R.VLDPFTIKPLDR.K          | 2 | 2,675  | 0,321 | -0,259 |
| 20 | Q15424 SAFB1_HUMAN | K.AIEDEGGNPDEIEITSEGNKK.T | 3 | 2,6734 | 0,136 | 0,163  |
| 20 | Q13685 AAMP_HUMAN  | K.DASLVVTTSGDHK.A         | 3 | 2,6727 | 0,367 | 0,206  |
| 20 | P27695 APEX1_HUMAN | K.GAVAEDGDEL RTEPEAK.K    | 3 | 2,6668 | 0,231 | 0      |
| 20 | O94855 SC24D_HUMAN | K.KLDPDSIPSPIQVIENDR.A    | 3 | 2,6647 | 0,178 | -0,359 |
| 20 | Q71UM5 RS27L_HUMAN | R.DLLHPSLEEEK.K           | 2 | 2,6622 | 0,473 | -0,279 |
| 20 | Q15181 IPYR_HUMAN  | K.DPLNPIKQDVK.K           | 3 | 2,6611 | 0,28  | -0,072 |
| 20 | Q06124 PTN11_HUMAN | R.FDSLTDLVEHYK.K          | 3 | 2,6608 | 0,344 | -0,187 |
| 20 | P06493 CDC2_HUMAN  | R.DLKPQNLLIDDK.G          | 2 | 2,655  | 0,384 | -0,173 |
| 20 | P13667 PDIA4_HUMAN | R.YKVEGFPTIYFAPSGDK.K     | 3 | 2,6482 | 0,273 | -0,095 |
| 20 | P31948 STIP1_HUMAN | K.AAALEFLNRFEEAK.R        | 2 | 2,6446 | 0,223 | 0      |
| 20 | P62937 PPIA_HUMAN  | R.VSFELFADKVPK.T          | 3 | 2,643  | 0,39  | -0,133 |
| 20 | P47897 SYQ_HUMAN   | R.LGYFSVDPDSHQGK.L        | 3 | 2,6402 | 0,291 | 0,236  |
| 20 | Q01469 FABP5_HUMAN | K.M*GAM*AKPDCIITCDGK.N    | 3 | 2,6278 | 0,315 | 0,406  |
| 20 | Q15459 SF3A1_HUMAN | R.EKQSDDEVYAPGLDIESSLK.Q  | 3 | 2,6246 | 0,212 | -0,165 |
| 20 | P23368 MAOM_HUMAN  | R.DRTQQYDDLIDEFM*K.A      | 3 | 2,6242 | 0,183 | -0,095 |
| 20 | P12814 ACTN1_HUMAN | K.AGTQIENIEEDFRDGLK.L     | 3 | 2,6203 | 0,279 | -0,189 |
| 20 | O43301 HS12A_HUMAN | R.DFYHDLDPNEAK.Q          | 3 | 2,6201 | 0,146 | 0,25   |
| 20 | Q14566 MCM6_HUMAN  | K.YLQLAEELIRPER.N         | 2 | 2,6187 | 0,236 | -0,15  |
| 20 | Q13561 DCTN2_HUMAN | R.LLHEVQELTTEVEK.I        | 3 | 2,6147 | 0,132 | -0,11  |
| 20 | O43707 ACTN4_HUMAN | K.M*LDAEDIVNTARPDEK.A     | 2 | 2,5978 | 0,398 | 0,533  |
| 20 | O94776 MTA2_HUMAN  | K.DLVAQAPLKP.T            | 2 | 2,5968 | 0,278 | 0,31   |
| 20 | O00231 PSD11_HUMAN | R.DDPIISTHLAK.L           | 2 | 2,5908 | 0,264 | -0,101 |
| 20 | P27695 APEX1_HUMAN | K.GAVAEDGDEL RTEPEAK.K    | 2 | 2,5757 | 0,342 | -0,41  |
| 20 | O15160 RPAC1_HUMAN | K.DSSDPNELVYVNHK.V        | 2 | 2,5529 | 0,314 | -0,402 |
| 20 | O60499 STX10_HUMAN | K.DHM*VSPTAVAFLE.N        | 2 | 2,5004 | 0,358 | 0,768  |
| 20 | P50454 SERPH_HUMAN | R.DEEVHAGLGELLR.S         | 2 | 2,4966 | 0,395 | -0,255 |
| 20 | P23368 MAOM_HUMAN  | R.DRTQQYDDLIDEFM*K.A      | 2 | 2,4863 | 0,339 | -0,442 |
| 20 | P27694 RFA1_HUMAN  | K.DKNEQAFEEVFQANANFR.S    | 2 | 2,4353 | 0,392 | -0,468 |
| 20 | Q13200 PSMD2_HUMAN | K.DTSLYRPALEELR.R         | 2 | 2,4248 | 0,131 | 0,624  |
| 20 | P30101 PDIA3_HUMAN | R.EATNPPVIQEEKPK.K        | 2 | 2,4186 | 0,299 | 0,154  |



|    |                    |                                 |                    |   |        |       |        |
|----|--------------------|---------------------------------|--------------------|---|--------|-------|--------|
| 20 | Q15287 RNPS1_HUMAN | K.DHIM*EIFSTYGK.I               |                    | 2 | 2,3959 | 0,429 | 0,419  |
| 20 | P46777 RL5_HUMAN   | K.NSVTPDM*M*EEM*YKK.A           |                    | 2 | 2,3545 | 0,418 | 0      |
| 20 | P18754 RCC1_HUMAN  | R.DNNGVIGLLEPM*KK.S             |                    | 2 | 2,3526 | 0,146 | -0,316 |
| 20 | P62258 1433E_HUMAN | K.LAEQAERYDEM*VESM*K.K          |                    | 2 | 2,2857 | 0,261 | -0,436 |
| 20 | P42677 RS27_HUMAN  | K.DLLHPSPEEEK.R                 |                    | 2 | 2,2832 | 0,277 | 0,849  |
| 20 | O75937 DNJC8_HUMAN | K.EGKPTIVEEDDPELFK.Q            |                    | 2 | 2,2774 | 0,363 | 0,463  |
| 20 | Q9H8Y5 ANKZ1_HUMAN | K.DKPLLSALDFEK.Q                |                    | 2 | 2,2525 | 0,26  | -0,266 |
| 20 | O95352 ATG7_HUMAN  | R.DVAHSIIFEVK.L                 |                    | 2 | 2,2403 | 0,322 | -0,097 |
| 20 | A4D1E9 GTPBA_HUMAN | K.DFLHLFEK.N                    |                    | 2 | 2,2215 | 0,298 | 0      |
| 20 | Q96T23 RSF1_HUMAN  | K.DADSSISVLEIHSQK.A             |                    | 2 | 2,1942 | 0,333 | 0,449  |
| 20 | Q9P0L0 VAPA_HUMAN  | K.HEQILVLDPPTDLK.F              |                    | 2 | 2,1884 | 0,086 | 0,226  |
| 20 | Q05655 KPCD_HUMAN  | R.DLKLDNVLLDR.D                 |                    | 2 | 2,1618 | 0,101 | 0,093  |
| 20 | Q15208 STK38_HUMAN | R.DIKPDNLLLSK.G                 |                    | 2 | 2,1499 | 0,197 | 0      |
| 20 | Q96RP9 EFG1_HUMAN  | R.DNSHPFVGLAFK.L                |                    | 2 | 2,0957 | 0,223 | -0,092 |
| 21 | Q9P265 DIP2B_HUMAN | R.YRS#DIHTEAVQAALAK.H           | S100:              | 3 | 4,0845 | 0,37  | 0,395  |
| 21 | Q5T200 ZC3HD_HUMAN | R.KKS#KGDS#DIS#DEEAAQQSK.K      | S1010:S1014:S1017: | 3 | 3,7256 | 0,392 | 0,08   |
| 21 | P46019 KPB2_HUMAN  | R.RFS#ADEQFFSVGQAASSSAHSSK.S    | S1015:             | 3 | 5,716  | 0,442 | 0,437  |
| 21 | O75351 VPS4B_HUMAN | K.EGQPSPADEKGNDS#DGEGESDDPEKK.K | S102:              | 3 | 4,3244 | 0,478 | -0,131 |
| 21 | Q96EI5 TCAL4_HUMAN | R.EGKPEIEGKPE#EGEPGSETR.A       | S102:              | 3 | 2,841  | 0,251 | 0,394  |
| 21 | P05387 RLA2_HUMAN  | K.KDEKKEES#EES#DDDM*GFGLFD.-    | S102:S105:         | 3 | 4,508  | 0,508 | -0,348 |
| 21 | Q9Y618 NCOR2_HUMAN | K.SRS#PAPPADKEAFAAEAQK.L        | S1025:             | 3 | 2,7341 | 0,113 | 0,268  |
| 21 | Q9NS91 RAD18_HUMAN | R.NHLLQFALESPAKS#PASSSSK.N      | S103:              | 3 | 5,0357 | 0,541 | 0,161  |
| 21 | P17096 HMG1_HUMAN  | K.KLEKEEEEGISQESS#EEEQ.-        | S103:              | 3 | 4,9145 | 0,409 | 0,237  |
| 21 | Q9BQ70 TCF25_HUMAN | R.GNTES#KTDGDDTETVPSEQSHASGK.L  | S104:              | 3 | 4,1151 | 0,356 | 0,482  |
| 21 | Q5VZ89 DEN4C_HUMAN | R.RSS#LPLDHGSPAQENPESEK.S       | S1042:             | 3 | 4,1137 | 0,196 | 0      |
| 21 | O60293 CC131_HUMAN | R.RS#FLESNYFTKPNLK.H            | S1046:             | 3 | 4,0217 | 0,488 | 0,19   |
| 21 | O95503 CBX6_HUMAN  | R.ISDVHFSVKPSASAS#SPK.L         | S106:              | 3 | 3,7292 | 0,366 | 0,095  |
| 21 | Q01658 NC2B_HUMAN  | R.KASS#RLENLGIPEEELLR.Q         | S106:              | 3 | 3,1099 | 0,183 | -0,171 |
| 21 | Q12888 TP53B_HUMAN | R.GNLLHFPS#QGEEKEK.L            | S1068:             | 3 | 2,6403 | 0,269 | 0,182  |
| 21 | Q12888 TP53B_HUMAN | R.GNLLHFPS#QGEEKEK.L            | S1068:             | 2 | 2,358  | 0,087 | 0,607  |
| 21 | Q9UKY7 CDV3_HUMAN  | R.VQAM*QISS#EKEEDDNEKR.Q        | S107:              | 3 | 3,5956 | 0,432 | -0,82  |
| 21 | P02545 LMNA_HUMAN  | R.LQLELS#KVREEFK.E              | S107:              | 2 | 2,9371 | 0,362 | 0      |
| 21 | P46013 KI67_HUMAN  | R.TFKES#PKQILDPAAR.V            | S1071:             | 3 | 4,0514 | 0,376 | 0      |

|    |                    |                                  |              |   |        |       |        |
|----|--------------------|----------------------------------|--------------|---|--------|-------|--------|
| 21 | P46013 KI67_HUMAN  | R.TFKES#PKQILDPAAR.V             | S1071:       | 2 | 2,7095 | 0,45  | 0,206  |
| 21 | Q5JVS0 HABP4_HUMAN | R.KSLPAPVAQRPD5#PGGGLQAPGQK.R    | S108:        | 3 | 4,1272 | 0,274 | 0,601  |
| 21 | Q96JM3 ZN828_HUMAN | K.ETDPVK5#PPLPEHQK.I             | S108:        | 3 | 2,7861 | 0,115 | 0,616  |
| 21 | Q96JM3 ZN828_HUMAN | K.ETDPVK5#PPLPEHQK.I             | S108:        | 2 | 2,0361 | 0,213 | 0,274  |
| 21 | Q9NYV4 CD2L7_HUMAN | R.KETTSGTSTEPVKNSS#PAPPQPAPGK.V  | S1083:       | 3 | 4,3206 | 0,347 | 0,616  |
| 21 | Q562F6 SGOL2_HUMAN | R.KTS#IDPSPESHEVM*ER.I           | S1085:       | 3 | 4,1679 | 0,282 | 0,094  |
| 21 | Q5VT52 K0460_HUMAN | R.RM*S#GEPiQTVESIRVPGK.G         | S1099:       | 3 | 4,2623 | 0,404 | 0,44   |
| 21 | P42677 RS27_HUMAN  | K.DLLHPS#PEEEKR.K                | S11:         | 3 | 4,2803 | 0,263 | 0,418  |
| 21 | Q96RQ1 ERGI2_HUMAN | K.KTLS#LVKELDAFPK.V              | S11:         | 3 | 2,7536 | 0,114 | -0,219 |
| 21 | Q5VVJ2 MYSM1_HUMAN | K.IM*VHS#PTKPASYSVK.W            | S110:        | 2 | 3,5916 | 0,441 | 0,21   |
| 21 | Q5VVJ2 MYSM1_HUMAN | K.IM*VHS#PTKPASYSVK.W            | S110:        | 3 | 2,6643 | 0,187 | 0,105  |
| 21 | P11388 TOP2A_HUMAN | K.EAQQKVPDEEENEES#DNEKETEK.S     | S1106:       | 3 | 5,5273 | 0,344 | 0,26   |
| 21 | P48634 BAT2_HUMAN  | R.QRGS#ETGSET#HESDLAPSDKEAPTK.E  | S1106:T1112: | 3 | 2,6228 | 0,415 | 0,377  |
| 21 | Q9UQ35 SRRM2_HUMAN | R.SSSPVTELASRS#PIRQDR.G          | S1112:       | 3 | 2,7427 | 0,226 | 0,089  |
| 21 | Q8IVL0 NAV3_HUMAN  | R.KTS#LDGSQNDVVLHVSSK.T          | S1113:       | 3 | 5,683  | 0,523 | -0,409 |
| 21 | Q13459 MYO9B_HUMAN | R.SPLEHS#SPEKEAPSPEK.T           | S1114:       | 3 | 4,1732 | 0,401 | 0,284  |
| 21 | Q13459 MYO9B_HUMAN | R.SPLEHSS#PEKEAPSPEK.T           | S1115:       | 2 | 3,7526 | 0,547 | 0,506  |
| 21 | Q3KQU3 MA7D1_HUMAN | R.RSS#QPSPTAVPASDSPPTKQEVK.K     | S113:        | 3 | 4,602  | 0,319 | -0,37  |
| 21 | Q03701 CEBPZ_HUMAN | K.ASLIEEDEPAEKENSS#KK.E          | S114:        | 3 | 2,7944 | 0,21  | 0,088  |
| 21 | O43379 WDR62_HUMAN | R.AGTGYAS#PDRTHVLAAGK.A          | S1144:       | 2 | 3,4392 | 0,387 | 0,329  |
| 21 | Q9UNS1 TIM_HUMAN   | K.KAGLAS#PEEEDAVGKEPLK.A         | S1149:       | 3 | 6,0624 | 0,465 | 0,357  |
| 21 | Q14207 NPAT_HUMAN  | K.KVS#PTEIVLESFHK.A              | S1151:       | 3 | 5,2742 | 0,477 | -0,108 |
| 21 | Q14207 NPAT_HUMAN  | K.KVS#PTEIVLESFHK.A              | S1151:       | 2 | 3,4929 | 0,535 | -0,216 |
| 21 | Q9UDY2 ZO2_HUMAN   | R.GSYGS#DAEEEEYRQQLSEHSK.R       | S1159:       | 3 | 3,3454 | 0,437 | 0,51   |
| 21 | Q8TBA6 GOGA5_HUMAN | R.KKS#EPDDELLDFLNSSQK.E          | S116:        | 3 | 4,5469 | 0,389 | -0,158 |
| 21 | Q9HAN9 NMNA1_HUMAN | K.LEASDCDHQNS#PTLERPGR.K         | S117:        | 3 | 4,4835 | 0,394 | 0,153  |
| 21 | Q07889 SOS1_HUMAN  | K.HLDS#PPAIPPRQPTSK.A            | S1178:       | 3 | 3,8821 | 0,415 | -0,1   |
| 21 | Q7Z6E9 RBBP6_HUMAN | K.ISKLEVTEIVKPS#PK.R             | S1179:       | 3 | 4,9706 | 0,478 | -0,209 |
| 21 | Q7Z6E9 RBBP6_HUMAN | K.ISKLEVTEIVKPS#PK.R             | S1179:       | 2 | 4,0834 | 0,435 | -0,279 |
| 21 | Q8WYH8 ING5_HUMAN  | R.FEADLKDKM*EGS#DFESSGGR.G       | S118:        | 3 | 3,1984 | 0,291 | 0,08   |
| 21 | Q9NTI5 PDS5B_HUMAN | K.GRLDSSEM*DHS#ENEDYTM*SSPLPGK.K | S1182:       | 3 | 4,0476 | 0,51  | 0,316  |
| 21 | O75376 NCOR1_HUMAN | R.M*PIEDS#SPEKGREEASK.G          | S1195:       | 3 | 3,3409 | 0,255 | 0,267  |
| 21 | O95218 ZRAB2_HUMAN | R.ENVEYIEREES#DGEYDEFGRK.K       | S120:        | 3 | 4,2665 | 0,296 | 0,137  |

|    |                     |                                   |              |   |        |       |        |
|----|---------------------|-----------------------------------|--------------|---|--------|-------|--------|
| 21 | Q9NR30 DDX21_HUMAN  | K.VTKNEEPS#EEEEIDAPKPK.K          | S121:        | 3 | 4,6876 | 0,452 | 0,345  |
| 21 | Q96T58 MINT_HUMAN   | R.SLVHEVGKPPQDVTDDS#PPSK.K        | S1222:       | 3 | 4,6286 | 0,5   | 0,237  |
| 21 | Q86TC9 MYPN_HUMAN   | K.HSPNLSFEPNFCQDNPRS#PTSSK.E      | S124:        | 3 | 4,2387 | 0,369 | 1,946  |
| 21 | Q8WYP5 AHTF1_HUMAN  | K.ETRIS#FVEEDVHPK.W               | S1241:       | 2 | 2,8166 | 0,426 | 0,76   |
| 21 | Q5VUA4 ZN318_HUMAN  | K.LEDQLSEGRNS#PEKAENK.R           | S1243:       | 3 | 4,6746 | 0,195 | -0,517 |
| 21 | P11388 TOP2A_HUMAN  | K.IKNENTEGS#PQEDGVELEGLKQR.L      | S1247:       | 3 | 4,0431 | 0,395 | 0,483  |
| 21 | Q5QPG4 Q5QPG4_HUMAN | K.RKLS#SIGIQVDCIQVVK.E            | S126:        | 3 | 4,9635 | 0,462 | 0,259  |
| 21 | A6NDB9 PALM3_HUMAN  | R.QGHRPLSQS#IVEAGSVGQTDLNK.R      | S126:        | 3 | 4,0518 | 0,302 | 0,512  |
| 21 | P26358 DNMT1_HUMAN  | R.VGM*ADANS#PPKPLS#KPRTPR.R       | S127:S133:   | 3 | 3,158  | 0,327 | 0,159  |
| 21 | Q9BZ29 DOCK9_HUMAN  | K.SNS#LDKHQQSSTLGNSVVR.C          | S1275:       | 3 | 4,0901 | 0,519 | -0,257 |
| 21 | Q7Z6E9 RBBP6_HUMAN  | R.KVTGTGESSSTLVDTSTSSSTGGS#PVRK.S | S1277:       | 3 | 5,0816 | 0,439 | 0,446  |
| 21 | Q96RT1 LAP2_HUMAN   | R.HPS#REQLIDYLM*LK.V              | S1286:       | 3 | 2,8087 | 0,13  | -0,298 |
| 21 | Q92974 ARHG2_HUMAN  | R.ERPSSAIYPSDS#FRQSLLGSR.R        | S129:        | 3 | 2,6381 | 0,352 | -0,301 |
| 21 | O60573 IF4E2_HUMAN  | K.FDALKDDDS#GDHDQNEENSTQK.D       | S13:         | 3 | 3,8407 | 0,475 | -0,071 |
| 21 | Q5T3I0 GPTC4_HUMAN  | K.M*ATLTSGGEKPNKDLESCS#DDDNQGSK.S | S130:        | 3 | 6,1223 | 0,491 | 0,675  |
| 21 | Q9NVI1 FANCI_HUMAN  | R.EDGEDENEEGTAS#EHGGQNKEPAK.K     | S1312:       | 3 | 2,9459 | 0,1   | -0,555 |
| 21 | P51858 HDGF_HUMAN   | K.KGNAEGS#SDEEGKLVIDEPAK.E        | S132:        | 3 | 4,4999 | 0,484 | 0,406  |
| 21 | P51858 HDGF_HUMAN   | K.GNAEGS#SDEEGKLVIDEPAKEK.N       | S132:        | 3 | 3,9081 | 0,221 | 0,23   |
| 21 | Q9UMY1 NOL7_HUMAN   | K.LTTASQTNIKKS#PGK.V              | S133:        | 2 | 3,232  | 0,404 | -0,811 |
| 21 | Q8NI27 THOC2_HUMAN  | K.LYINHTPPPLS#KSK.E               | S1333:       | 3 | 2,7467 | 0,287 | 0      |
| 21 | Q9NQG5 CT077_HUMAN  | K.LSM*EDSKS#PPPKATEEK.K           | S134:        | 2 | 2,9633 | 0,362 | -0,619 |
| 21 | P46100 ATRX_HUMAN   | R.HKLTVS#DGES#GEEK.K              | S1348:S1352: | 2 | 4,7012 | 0,441 | 0,291  |
| 21 | Q8IYH5 ZZZ3_HUMAN   | R.SEAPNSSEEDS#PIKSDKESVEQR.S      | S135:        | 3 | 4,1682 | 0,349 | 0,418  |
| 21 | P42695 CNDD3_HUMAN  | K.ARPM*SLSTIAILNS#VKK.A           | S1357:       | 3 | 2,6454 | 0,112 | 0,095  |
| 21 | Q14498 RBM39_HUMAN  | K.DKS#PVPREPIDLNLTPEER.D          | S136:        | 3 | 5,7137 | 0,497 | 0,529  |
| 21 | P55327 TPD52_HUMAN  | K.NSPTFKS#FEKVENLK.S              | S136:        | 2 | 3,1117 | 0,489 | -0,555 |
| 21 | Q9H2Y7 ZF106_HUMAN  | R.AAHVPENS#DTEQDVLTVKPVR.K        | S1370:       | 3 | 2,7388 | 0,162 | 0,153  |
| 21 | P11388 TOP2A_HUMAN  | K.ELKPQKS#VVSDLEADDVK.G           | S1374:       | 3 | 2,7428 | 0,132 | -0,44  |
| 21 | Q13428 TCOF_HUMAN   | K.KLGAGEGGEASVS#PEKTSTTSK.G       | S1378:       | 3 | 3,8808 | 0,268 | 0      |
| 21 | Q9Y266 NUDC_HUMAN   | K.NGSLDS#PGKQDT#EEDEEEDKDKGK.L    | S139:T145:   | 3 | 5,5334 | 0,518 | 0,062  |
| 21 | Q13428 TCOF_HUMAN   | K.GKGS#LGSQGAKDEPEEELQK.G         | S1407:       | 3 | 3,7592 | 0,203 | -0,084 |
| 21 | P18858 DNL1_HUMAN   | R.TIQEVLEEQS#EDEDREAKR.K          | S141:        | 3 | 4,5017 | 0,456 | 0,46   |
| 21 | P18583 SON_HUMAN    | K.TKS#HDDGNIDLESDFSFLK.F          | S142:        | 3 | 4,7643 | 0,428 | -0,087 |

|    |                     |                                 |            |   |        |       |        |
|----|---------------------|---------------------------------|------------|---|--------|-------|--------|
| 21 | Q14847 LASP1_HUMAN  | R.MGPSGGEGMEPERRDS#QDGSSYR.R    | S146:      | 3 | 3,3786 | 0,256 | 0,285  |
| 21 | Q86U06 RBM23_HUMAN  | R.EKS#PVREPVNLSPEER.D           | S149:      | 3 | 3,867  | 0,294 | 0,178  |
| 21 | P29375 JAD1A_HUMAN  | R.FLHIM*EDDS#M*EEKPLK.V         | S1493:     | 3 | 3,1576 | 0,408 | 0,088  |
| 21 | P11388 TOP2A_HUMAN  | K.SKGES#DDFHM*DFDSAVAPR.A       | S1495:     | 3 | 4,514  | 0,459 | -0,332 |
| 21 | A2AJT9 CX023_HUMAN  | K.HRS#LS#PVPR.N                 | S15:S17:   | 3 | 2,9956 | 0,286 | -0,076 |
| 21 | Q8TEP8 CE192_HUMAN  | K.HGGNVSLDVLVKGPGQS#PLLSR.A     | S1514:     | 3 | 5,2647 | 0,4   | -0,456 |
| 21 | Q53RE8 ANR39_HUMAN  | R.GHGDICSLLLQHS#PALK.A          | S153:      | 3 | 3,2155 | 0,323 | -0,095 |
| 21 | Q86VI3 IQGA3_HUMAN  | K.KQPS#LHYTAAQLEK.G             | S1534:     | 3 | 3,5617 | 0,211 | 0      |
| 21 | Q5JTV8 TOIP1_HUMAN  | R.GLRDS#HSSEDEASSQTDLSTISK.K    | S154:      | 3 | 6,2994 | 0,469 | 0,394  |
| 21 | Q8IWS0 PHF6_HUMAN   | K.TAHNSEADLEESFNEHELEPSS#PK.S   | S155:      | 3 | 4,4626 | 0,424 | 0,593  |
| 21 | Q5JRC6 Q5JRC6_HUMAN | K.TAHNSEAADLEESFNEHELEPSS#PK.S  | S156:      | 3 | 4,5323 | 0,432 | 0,321  |
| 21 | O95684 FR1OP_HUMAN  | K.EKGPTTGEGALDLSVHS#PPKS#PEGK.T | S156:S160: | 3 | 4,2531 | 0,391 | 0,328  |
| 21 | Q92733 PRCC_HUMAN   | K.IAAPELHKGDS#DSEDEPTK.K        | S157:      | 3 | 3,5584 | 0,409 | 0      |
| 21 | Q14839 CHD4_HUMAN   | K.IEENSLKEES#IEGEKEVK.S         | S1576:     | 3 | 4,5554 | 0,38  | 0,398  |
| 21 | P41162 ETV3_HUMAN   | R.FHFPLDTHS#PTNDVQGR.F          | S159:      | 3 | 4,586  | 0,493 | 0,163  |
| 21 | Q92733 PRCC_HUMAN   | K.IAAPELHKGDS#EDEPTK.K          | S159:      | 3 | 3,0943 | 0,398 | 0,081  |
| 21 | Q9UIG0 BAZ1B_HUMAN  | K.SDGACDSPS#SDKENSSQIAQDHQK.K   | S160:      | 3 | 4,3087 | 0,288 | 0,617  |
| 21 | O14497 ARI1A_HUMAN  | R.TSPS#KSPFLHSGM*K.M            | S1602:     | 2 | 2,1314 | 0,344 | 0,229  |
| 21 | Q9UPY8 MARE3_HUMAN  | K.KLIGTAVPQRTS#PTGPK.N          | S162:      | 3 | 4,0085 | 0,394 | 0      |
| 21 | Q9UPY8 MARE3_HUMAN  | K.KLIGTAVPQRTS#PTGPK.N          | S162:      | 2 | 3,7804 | 0,377 | 0,2    |
| 21 | Q9Y2U5 M3K2_HUMAN   | R.DRSS#PPPGYIPDELHQVAR.N        | S164:      | 3 | 4,5403 | 0,297 | 0      |
| 21 | Q14320 FA50A_HUMAN  | K.NPDVDTS#FLPDRDREEEENR.L       | S165:      | 3 | 3,4384 | 0,438 | -0,073 |
| 21 | P51858 HDGF_HUMAN   | R.AGDLLEDSD#PKRPK.E             | S165:      | 3 | 3,0723 | 0,28  | -0,061 |
| 21 | P51858 HDGF_HUMAN   | R.AGDLLEDSD#PKRPK.E             | S165:      | 2 | 2,4491 | 0,324 | -0,081 |
| 21 | O43399 TPD54_HUMAN  | R.NSATFKS#FEDRVGTIK.S           | S166:      | 3 | 2,7442 | 0,395 | -0,097 |
| 21 | O43399 TPD54_HUMAN  | R.NSATFKS#FEDRVGTIK.S           | S166:      | 2 | 2,5813 | 0,37  | 0      |
| 21 | Q7L4I2 RSRC2_HUMAN  | R.DGLAPEKTS#PDRDK.K             | S17:       | 2 | 2,174  | 0,384 | 0,152  |
| 21 | Q8IWW6 RHG12_HUMAN  | R.TRS#FGHFPGPEFLDVEK.T          | S176:      | 3 | 3,6956 | 0,211 | -0,358 |
| 21 | P08240 SRPR_HUMAN   | K.KEGS#DGPLATSKVPAEK.S          | S177:      | 3 | 2,9784 | 0,292 | 0,484  |
| 21 | Q58FF8 H90B2_HUMAN  | K.IEDVGS#DEEDDSGKDKK.K          | S177:      | 2 | 2,682  | 0,341 | 0,125  |
| 21 | Q8TF44 NLF3_HUMAN   | K.ESLFHSEHGALAQVGS#PGAGR.R      | S178:      | 3 | 3,7245 | 0,315 | 0,335  |
| 21 | P42167 LAP2B_HUMAN  | R.QNGSNDSDRYSDNEEDSKIELK.L      | S180:      | 3 | 2,7333 | 0,094 | 0,558  |
| 21 | O00264 PGRC1_HUMAN  | K.LLKEGEEPTVYS#DEEEKDESAR.K     | S181:      | 3 | 5,5878 | 0,431 | 0,469  |

|    |                    |                                     |                 |   |        |       |        |
|----|--------------------|-------------------------------------|-----------------|---|--------|-------|--------|
| 21 | O96013 PAK4_HUMAN  | R.DKRPLS#GPDVGTQPAGLASGAK.L         | S181:           | 3 | 4,5772 | 0,379 | 0,318  |
| 21 | O00264 PGRC1_HUMAN | K.EGEEPTVYS#DEEEPKDESARK.N          | S181:           | 3 | 2,9032 | 0,316 | 0,073  |
| 21 | Q9H2G4 TSYL2_HUMAN | K.SKEEAIIVEDEDEDERES#M*R.S          | S182:           | 3 | 3,388  | 0,285 | -0,559 |
| 21 | Q6FI81 CPIN1_HUMAN | K.KS#SPSVKPAVDPAAAK.L               | S182:           | 2 | 3,0287 | 0,382 | 0,075  |
| 21 | Q6FI81 CPIN1_HUMAN | K.KSS#PSVKPAVDPAAAK.L               | S183:           | 3 | 4,1681 | 0,362 | -0,112 |
| 21 | P42167 LAP2B_HUMAN | R.QNGSNDSDRYS#DNEEDSKIELK.L         | S184:           | 3 | 2,6021 | 0,135 | 0,558  |
| 21 | P46777 RL5_HUMAN   | R.FPGYDS#ESKEFNAEVHR.K              | S185:           | 3 | 4,1385 | 0,433 | 0,437  |
| 21 | P43243 MATR3_HUMAN | R.RDS#FDDRGPVSLNPVLDYDHGS#R.S       | S188:S206:      | 3 | 3,1604 | 0,279 | 0,342  |
| 21 | Q9BVC5 ASHWN_HUMAN | R.KSPSGPVKS#PPLSPVGTTPVK.L          | S189:           | 3 | 5,3479 | 0,342 | 0,085  |
| 21 | Q9P2W9 STX18_HUMAN | K.VSQS#PSKDSEENPATEERPEK.I          | S189:           | 3 | 4,0344 | 0,224 | -0,377 |
| 21 | Q9H1E3 NUCKS_HUMAN | R.KVVDYSQFQES#DDADEDYGR.D           | S19:            | 3 | 5,6636 | 0,47  | -0,673 |
| 21 | Q01433 AMPD2_HUMAN | R.AKQDFLKTDS#DSDLQLYK.E             | S190:           | 3 | 4,5953 | 0,347 | 0,333  |
| 21 | Q00059 TFAM_HUMAN  | K.NLS#DSEKELYIQHAK.E                | S193:           | 2 | 3,6818 | 0,281 | 0,395  |
| 21 | Q00059 TFAM_HUMAN  | K.NLS#DSEKELYIQHAK.E                | S193:           | 3 | 2,7185 | 0,238 | 0      |
| 21 | O43237 DC1L2_HUMAN | K.FVKDFQDYM*EPEEGCQGS#PQRR.G        | S194:           | 3 | 3,3475 | 0,282 | 0,588  |
| 21 | P35579 MYH9_HUMAN  | R.KGAGDGS#DEEVDGKADGAEAKPAE.-       | S1943:          | 3 | 5,6902 | 0,376 | -0,154 |
| 21 | Q13459 MYO9B_HUMAN | R.IQS#IKEEKEDITYR.L                 | S1973:          | 3 | 3,4144 | 0,253 | 0,2    |
| 21 | Q13459 MYO9B_HUMAN | R.IQS#IKEEKEDITYR.L                 | S1973:          | 2 | 2,9495 | 0,439 | 0,466  |
| 21 | Q07955 SFRS1_HUMAN | R.VKVDGPRS#PS#YGRS#R.S              | S199:S201:S205: | 3 | 2,8715 | 0,09  | 0,385  |
| 21 | Q07955 SFRS1_HUMAN | R.VKVDGPRS#PSY#GRS#R.S              | S199:Y202:S205: | 3 | 2,9834 | 0,234 | 0,385  |
| 21 | Q9H4A3 WNK1_HUMAN  | R.DVDDGSGS#PHSPHQLSSK.S             | S2029:          | 3 | 2,8614 | 0,382 | -0,095 |
| 21 | Q9H1E3 NUCKS_HUMAN | K.TPS#PKEEDEEPESPPEKK.T             | S204:           | 3 | 3,43   | 0,161 | 0,257  |
| 21 | P67870 CSK2B_HUMAN | K.IHPM*AYQLQLQAASNFKS#PVK.T         | S209:           | 3 | 2,6694 | 0,288 | 0,148  |
| 21 | O95674 CDS2_HUMAN  | R.VAHEPVAPPEDKES#ESEAK.V            | S21:            | 3 | 4,3608 | 0,424 | -0,086 |
| 21 | P60174 TPIS_HUMAN  | R.KQS#LGELIGTLNAAK.V                | S21:            | 2 | 3,5009 | 0,488 | -0,15  |
| 21 | P60174 TPIS_HUMAN  | R.KQS#LGELIGTLNAAK.V                | S21:            | 3 | 3,4307 | 0,323 | -0,225 |
| 21 | Q6R327 RICTR_HUMAN | R.GRND5#GEENVPLDLTREPSDNL.R.E       | S21:            | 3 | 3,2372 | 0,419 | 0,412  |
| 21 | Q9NR00 CH004_HUMAN | R.VSPS#IHGYHFDTASR.K                | S21:            | 2 | 2,8437 | 0,524 | 0,417  |
| 21 | Q9H4L7 SMRCD_HUMAN | R.KLS#SSSEPYEDEFNDDQSIKK.T          | S211:           | 3 | 4,4898 | 0,362 | -0,138 |
| 21 | Q14558 KPRA_HUMAN  | R.LGLAVIHGEAQCTELDM*DDGRHS#PPM*VK.N | S215:           | 3 | 3,4811 | 0,378 | 1,263  |
| 21 | O75376 NCOR1_HUMAN | R.SHVSSEPYEPIS#PPQVPVVHEK.Q         | S2151:          | 3 | 5,5453 | 0,463 | 0,435  |
| 21 | P21333 FLNA_HUMAN  | R.RAPS#VANVGSHCDLSLK.I              | S2152:          | 2 | 3,0205 | 0,441 | 0,387  |
| 21 | P21333 FLNA_HUMAN  | R.RAPS#VANVGSHCDLSLK.I              | S2152:          | 3 | 2,729  | 0,214 | 0,193  |

|    |                    |                                 |            |   |        |       |        |
|----|--------------------|---------------------------------|------------|---|--------|-------|--------|
| 21 | P51608 MECP2_HUMAN | R.VLEKS#PGKLLVK.M               | S216:      | 3 | 3,0544 | 0,335 | 0,197  |
| 21 | Q15019 SEPT2_HUMAN | K.IYHLPDAES#DEDEDFKEQTR.L       | S218:      | 3 | 5,1119 | 0,502 | 0      |
| 21 | P49006 MRP_HUMAN   | R.GDVTAEAAAGAS#PAKANGQENGHVK.S  | S22:       | 3 | 4,9529 | 0,435 | 0,074  |
| 21 | Q09161 NCBP1_HUMAN | R.KTS#DANETEDHLES LICK.V        | S22:       | 3 | 4,0849 | 0,455 | 0,337  |
| 21 | Q9H9L7 CA108_HUMAN | K.RPM*EFEAALLSPGS#PKR.R         | S22:       | 3 | 3,33   | 0,142 | 0      |
| 21 | Q9NTJ3 SMC4_HUMAN  | R.RREGPPPPS#PDGAS#SDAEPEPPSGR.T | S22:S27:   | 3 | 3,7178 | 0,195 | 0,452  |
| 21 | Q9NTJ3 SMC4_HUMAN  | R.RREGPPPPS#PDGASS#DAEPEPPSGR.T | S22:S28:   | 3 | 3,5646 | 0,314 | 0,517  |
| 21 | Q9BRD0 BUD13_HUMAN | R.VRHDS#PDPS#PPR.R              | S222:S226: | 2 | 2,9126 | 0,512 | -0,482 |
| 21 | Q9BRD0 BUD13_HUMAN | R.VRHDS#PDPS#PPR.R              | S222:S226: | 3 | 2,7059 | 0,222 | -1,083 |
| 21 | P08670 VIME_HUMAN  | R.KVES#LQEEIAFLKK.L             | S226:      | 3 | 4,9808 | 0,469 | -0,21  |
| 21 | Q7L804 RFIP2_HUMAN | R.LSSAHS#M*SDLSGSHM*SSEK.L      | S227:      | 3 | 4,9809 | 0,403 | -0,7   |
| 21 | Q9Y450 HBS1L_HUMAN | K.SANPPHTIQASEEQS#STPAPVKK.S    | S229:      | 3 | 3,8939 | 0,322 | 0,147  |
| 21 | Q9UNE7 STUB1_HUMAN | R.LGAGGGSPKES#PSAQELKEQGNR.L    | S23:       | 3 | 4,0095 | 0,394 | 0,693  |
| 21 | Q9NVR2 INT10_HUMAN | R.STQIENQHQAQDTS DLM*S#PSKR.S   | S231:      | 3 | 6,054  | 0,538 | 0,207  |
| 21 | Q13283 G3BP1_HUMAN | K.SSS#PAPADIAQTVQEDLR.T         | S232:      | 2 | 4,1406 | 0,5   | -0,559 |
| 21 | Q13283 G3BP1_HUMAN | K.SSS#PAPADIAQTVQEDLR.T         | S232:      | 3 | 3,6717 | 0,333 | -0,465 |
| 21 | O15231 ZN185_HUMAN | R.RES#CGSSVLTDFEGKDVATK.V       | S233:      | 3 | 4,6552 | 0,44  | 0,323  |
| 21 | Q9Y6M7 S4A7_HUMAN  | R.IPLVRS#FADIGKK.H              | S233:      | 3 | 3,8183 | 0,377 | 0      |
| 21 | P07910 HNRPC_HUMAN | K.QAVEM*KNDKS#EEEQSSSSVK.K      | S233:      | 3 | 3,3712 | 0,377 | -1,096 |
| 21 | Q3V6T2 GRDN_HUMAN  | R.DGLHFLPHASSSAQS#PCGS#PGM*KR.T | S233:S237: | 3 | 3,0366 | 0,321 | -0,474 |
| 21 | P61247 RS3A_HUMAN  | K.LM*ELHGE GSSS#GKATGDETGA K.V  | S238:      | 3 | 3,4451 | 0,174 | 0,729  |
| 21 | Q96L14 C170L_HUMAN | K.SSPVNNHHS#PGQTPTLGQPEAR.A     | S238:      | 3 | 3,4308 | 0,242 | 0,153  |
| 21 | Q8WXE1 ATRIP_HUMAN | R.KNPSVVIKPEACS#PQFGK.T         | S239:      | 3 | 4,2315 | 0,49  | 0,089  |
| 21 | Q09666 AHNK_HUMAN  | K.ISM*PDLDLHLKS#PK.A            | S2397:     | 3 | 3,5107 | 0,314 | -0,433 |
| 21 | Q09666 AHNK_HUMAN  | K.ISM*PDLDLHLKS#PK.A            | S2397:     | 2 | 3,4484 | 0,351 | -0,217 |
| 21 | Q9ULU4 PKCB1_HUMAN | R.KFPS#PPHSSNGHSPQDTST#SPIK.K   | S24:T39:   | 3 | 4,167  | 1     | 0,564  |
| 21 | Q6PJ61 FBX46_HUMAN | R.VAEAVAHFEAQRDS#PPTK.G         | S240:      | 3 | 3,7195 | 0,115 | 0      |
| 21 | Q8WY36 BBX_HUMAN   | R.QKS#PLFQFAEISSSTSHSDASTK.Q    | S243:      | 3 | 3,09   | 0,15  | 0,642  |
| 21 | Q14684 RRP1B_HUMAN | K.TKVG DGDLS#AEEIPENEVSLRR.A    | S245:      | 3 | 3,2762 | 0,331 | 0,587  |
| 21 | Q92890 UFD1_HUMAN  | K.GVEPS#PSPIKPGDIK.R.G          | S245:      | 2 | 2,8357 | 0,359 | -0,069 |
| 21 | Q14677 EPN4_HUMAN  | R.S#PKGEFKDEEETVTTK.H           | S245:      | 2 | 2,6754 | 0,469 | 0,512  |
| 21 | Q9H3N1 TXND1_HUMAN | K.KVEEQEADEEDVS#EEEAESK.E       | S247:      | 3 | 4,7449 | 0,468 | 0,363  |
| 21 | Q92890 UFD1_HUMAN  | K.KGVEPSPS#PIKPGDIK.R           | S247:      | 3 | 3,0795 | 0,273 | 0,106  |

|    |                     |                                   |                 |   |        |       |        |
|----|---------------------|-----------------------------------|-----------------|---|--------|-------|--------|
| 21 | P25054 APC_HUMAN    | R.KLEESASFESLSPSSRPAS#PTR.S       | S2473:          | 3 | 4,0502 | 0,412 | 0,3    |
| 21 | Q9Y2W1 TR150_HUMAN  | R.ERS#PALKSPLQSVVVR.R             | S248:           | 3 | 2,9604 | 0,445 | 0,198  |
| 21 | P46100 ATRX_HUMAN   | K.LHDFLAHS#SEESEETSSPPR.L         | S25:            | 3 | 3,8363 | 0,461 | 0,235  |
| 21 | Q9NWK9 CA181_HUMAN  | K.SGGGLHSVAEGVRLS#PEPGR.E         | S25:            | 3 | 3,1029 | 0,39  | 0,269  |
| 21 | Q9NWK9 CA181_HUMAN  | K.SGGGLHSVAEGVRLS#PEPGR.E         | S25:            | 2 | 2,5214 | 0,392 | 0,777  |
| 21 | P16949 STMN1_HUMAN  | R.ASQQAFELILS#PR.S                | S25:            | 2 | 2,2067 | 0,235 | -0,498 |
| 21 | P46013 KI67_HUMAN   | K.LTRTS#GETTQHTHEPTGDSK.S         | S2505:          | 3 | 3,9854 | 0,47  | -0,904 |
| 21 | P06733 ENOA_HUMAN   | R.S#GKYDLDFKSPDDPSR.Y             | S254:           | 3 | 3,8923 | 0,417 | 0,096  |
| 21 | Q86X53 ERIC1_HUMAN  | R.ARQEEGADAS#EEDPTPAGEEDVKDAR.E   | S254:           | 3 | 3,6021 | 0,273 | 0,128  |
| 21 | P17302 CXA1_HUMAN   | K.SDPYHATSGALS#PAKDCGSQK.Y        | S255:           | 3 | 2,6523 | 0,355 | 0,243  |
| 21 | Q14155 ARHG7_HUMAN  | K.SGTLKS#PPKGFDTTAINK.S           | S257:           | 3 | 3,8654 | 0,34  | 0,094  |
| 21 | P09874 PARP1_HUMAN  | K.KVCS#TNDLKELLIFNK.Q             | S257:           | 3 | 3,8354 | 0,31  | -0,274 |
| 21 | P55198 AF17_HUMAN   | K.KRPES#PPSILTPPVPTADK.V          | S258:           | 3 | 3,9122 | 0,161 | 0,083  |
| 21 | Q8IYB3 SRRM1_HUMAN  | K.VPKPEIPEPEPS#PEK.N              | S260:           | 3 | 3,1571 | 0,159 | 0,185  |
| 21 | Q9NZ63 CI078_HUMAN  | R.VGDTEKPEPERS#PPNR.K             | S261:           | 3 | 2,9575 | 0,245 | -1,066 |
| 21 | P07900 HS90A_HUMAN  | K.ESEDKPEIEDVGS#DEEEEK.D          | S263:           | 3 | 4,259  | 0,355 | 0,305  |
| 21 | P07900 HS90A_HUMAN  | K.EEKESEDKPEIEDVGS#DEEEEK.K       | S263:           | 3 | 4,2497 | 0,384 | 0,206  |
| 21 | P09104 ENOG_HUMAN   | R.DGKYDLDFKS#PTDPSR.Y             | S263:           | 3 | 2,6455 | 0,159 | 0,476  |
| 21 | Q15365 PCBP1_HUMAN  | R.QQSHFAM*M*HGGTGAFAGIDSSS#PEVK.G | S264:           | 3 | 3,6528 | 0,461 | 0,471  |
| 21 | P49792 RBP2_HUMAN   | K.NRPDYVS#EEEEDEDFETAVKK.L        | S2668:          | 3 | 4,2277 | 0,529 | 0,403  |
| 21 | Q5BKZ1 ZN326_HUMAN  | K.ISLSKS#PTKTDPK.N                | S270:           | 2 | 2,8161 | 0,262 | -0,247 |
| 21 | Q8N655 CJ012_HUMAN  | R.EDNPEEPSKEITSHEEGGDVS#PR.K      | S273:           | 3 | 3,7112 | 0,393 | 0,342  |
| 21 | Q3KR37 GRM1B_HUMAN  | K.SSIETKPDAS#PQLPKK.S             | S274:           | 2 | 3,0906 | 0,385 | 0,338  |
| 21 | Q3KR37 GRM1B_HUMAN  | K.SSIETKPDAS#PQLPKK.S             | S274:           | 3 | 2,7119 | 0,213 | 0,203  |
| 21 | O00203 AP3B1_HUMAN  | K.EGDELEDNGKNFYES#DDDQKEK.T       | S276:           | 3 | 5,2144 | 0,49  | 0,545  |
| 21 | Q96RK0 CIC_HUMAN    | K.SSS#EAKPTSGLAGGHK.E             | S279:           | 2 | 2,2601 | 0,381 | -0,286 |
| 21 | Q5W189 Q5W189_HUMAN | R.RREPES#PPASAPIPLFGADTIGQR.S     | S28:            | 3 | 3,5379 | 0,096 | -0,138 |
| 21 | O00273 DFFA_HUMAN   | R.NYS#REQHGVAASCLEDLR.S           | S28:            | 3 | 3,2288 | 0,274 | -0,502 |
| 21 | P01106 MYC_HUMAN    | R.SESGS#PSAGGHSKPPHS#PLVLK.R      | S281:S293:      | 3 | 4,2343 | 0,366 | 0,237  |
| 21 | Q49MG5 MAP9_HUMAN   | K.SDENKENS#FSADHVTTAVEK.S         | S289:           | 3 | 2,8494 | 0,086 | 0,32   |
| 21 | Q9UQ35 SRRM2_HUMAN  | K.THTTALAGRS#PS#PASGR.R           | S295:S297:      | 3 | 2,6723 | 0,193 | -0,1   |
| 21 | Q9UQ35 SRRM2_HUMAN  | K.THTTALAGRS#PS#PAS#GRR.G         | S295:S297:S300: | 3 | 3,1018 | 0,198 | 0,089  |
| 21 | Q9UIS9 MBD1_HUMAN   | R.RPGAQLPPPPPSQS#PEPTEPHPR.A      | S297:           | 3 | 6,1133 | 0,408 | 0,484  |

|    |                    |                                    |            |   |        |       |        |
|----|--------------------|------------------------------------|------------|---|--------|-------|--------|
| 21 | Q68DK2 ZFY26_HUMAN | R.ATASGKVS#PDHLDPER.A              | S297:      | 3 | 3,5876 | 0,354 | 0,208  |
| 21 | P09382 LEG1_HUMAN  | R.VRGEVAPDAKS#FVLNLGK.D            | S30:       | 3 | 3,9444 | 0,341 | -0,092 |
| 21 | P09382 LEG1_HUMAN  | R.VRGEVAPDAKS#FVLNLGK.D            | S30:       | 2 | 3,2007 | 0,376 | -0,185 |
| 21 | P41229 JAD1C_HUMAN | K.TFLESKEELSHS#PEPCTK.M            | S301:      | 3 | 3,6199 | 0,347 | 0,166  |
| 21 | Q3B726 RPA43_HUMAN | K.HQEVQDQDPVFGSDSSGYQS#DHK.K       | S304:      | 3 | 6,3183 | 0,577 | 0,458  |
| 21 | P17706 PTN2_HUMAN  | K.ELSKEDLSPAFDHS#PNK.I             | S304:      | 3 | 3,5322 | 0,394 | 0,183  |
| 21 | Q9BX67 JAM3_HUMAN  | R.HKS#SFVI.-                       | S306:      | 2 | 2,0466 | 0,305 | 0      |
| 21 | P46013 KI67_HUMAN  | K.SGGSGHAVAEPAS#PEQELDQNKGG.K      | S308:      | 3 | 3,9091 | 0,549 | -0,444 |
| 21 | Q01518 CAP1_HUMAN  | R.SGPKPFSAPKPQTS#PSPK.R            | S308:      | 3 | 2,7797 | 0,114 | -0,095 |
| 21 | Q9NZN5 ARHGC_HUMAN | R.TDCSSGDASRPSSDNADS#PKSGPK.E      | S309:      | 3 | 4,2309 | 0,532 | -0,512 |
| 21 | Q01518 CAP1_HUMAN  | R.SGPKPFSAPKPQTS#PK.R              | S310:      | 2 | 4,6384 | 0,409 | 0      |
| 21 | Q96QC0 PP1RA_HUMAN | K.KVLS#PTAAKPSFEGK.T               | S313:      | 2 | 2,7929 | 0,374 | 0,562  |
| 21 | Q8IX01 SFR14_HUMAN | R.KM*S#FDIIDKSDVFSR.F              | S315:      | 3 | 3,2485 | 0,247 | -0,291 |
| 21 | Q70CQ2 UBP34_HUMAN | R.RVS#SDEEHTVDSCISDM*K.T           | S3207:     | 3 | 4,364  | 0,525 | 0,25   |
| 21 | Q9UQ35 SRRM2_HUMAN | R.RGEGDAPFSEPGTTSTQRPS#PETATK.Q    | S323:      | 3 | 4,4409 | 0,458 | 0,51   |
| 21 | O15033 K0317_HUMAN | R.RPS#TAVDEEDEDSPSECHTPEK.V        | S327:      | 3 | 5,4213 | 0,346 | 0,494  |
| 21 | P50548 ERF_HUMAN   | R.YLQAHTQSVYNYHLS#PR.A             | S327:      | 3 | 4,1136 | 0,195 | -0,594 |
| 21 | Q9UKJ3 GPTC8_HUMAN | K.SSAPADSERGPKPEPPGSGS#PAPPR.R     | S327:      | 3 | 3,8186 | 0,296 | 0,802  |
| 21 | Q15459 SF3A1_HUMAN | K.FGESEEVEM*EVES#DEEDDKQEK.A       | S329:      | 3 | 5,9673 | 0,524 | 0,202  |
| 21 | P11142 HSP7C_HUMAN | K.LDKS#QIHDIVLVGGSTR.I             | S329:      | 3 | 3,1675 | 0,244 | 0,286  |
| 21 | Q09666 AHNK_HUMAN  | K.AGLRVS#APEVSVGHK.G               | S332:      | 3 | 3,8315 | 0,354 | 0      |
| 21 | Q16181 SEPT7_HUMAN | K.GQLTKS#PLAQM*EEERR.E             | S334:      | 3 | 3,4048 | 0,316 | -0,65  |
| 21 | Q6AI08 HEAT6_HUMAN | K.KIQQGEEEEEKES#SGEIEAAPVTGTGR.V   | S336:      | 3 | 4,2265 | 0,466 | 0,387  |
| 21 | P30622 CLIP1_HUMAN | R.KIS#GTTALQEALKEK.Q               | S348:      | 3 | 3,6374 | 0,498 | 0,216  |
| 21 | O60271 JIP4_HUMAN  | K.DLS#GYKGSSTPTKGIENK.A            | S358:      | 3 | 2,7415 | 0,271 | -0,093 |
| 21 | Q14004 CD2L5_HUMAN | R.RLPRS#PS#PYSR.R                  | S358:S360: | 3 | 3,3225 | 0,263 | -0,062 |
| 21 | Q8WU90 ZC3HF_HUMAN | R.FSTYTS#DKDENKLSEASGGR.A          | S360:      | 3 | 4,7992 | 0,489 | 0,483  |
| 21 | Q9UHB6 LIMA1_HUMAN | K.SEVQQPVHPKPLS#PDSR.A             | S362:      | 3 | 3,8112 | 0,29  | 0,369  |
| 21 | Q9UHB6 LIMA1_HUMAN | K.SEVQQPVHPKPLS#PDSR.A             | S362:      | 2 | 2,4911 | 0,379 | 0,37   |
| 21 | Q92597 NDRG1_HUMAN | R.S#RSHT#SEGAHLDTPNSSGAAGNSAGPK.S  | S362:T366: | 3 | 4,1082 | 0,279 | 0,593  |
| 21 | Q00613 HSF1_HUMAN  | R.GHTDTEGRPPS#PPPTSTPEK.C          | S363:      | 3 | 3,0397 | 0,211 | -0,338 |
| 21 | P05455 LA_HUMAN    | K.FAS#DDEHDEHDENGATGPVK.R          | S366:      | 3 | 3,1297 | 0,418 | 0,163  |
| 21 | O15042 SR140_HUMAN | R.SSDVHSSGSSDAHM*DASGPS#DSDM*PSR.T | S37:       | 3 | 5,4422 | 0,546 | -0,649 |



|    |                    |                                |            |   |        |       |        |
|----|--------------------|--------------------------------|------------|---|--------|-------|--------|
| 21 | Q03135 CAV1_HUMAN  | K.AM*ADELS#EKQVYDAHTK.E        | S37:       | 3 | 4,2569 | 0,367 | 0,09   |
| 21 | Q03135 CAV1_HUMAN  | K.AMADELS#EKQVYDAHTK.E         | S37:       | 3 | 3,9821 | 0,444 | 0,181  |
| 21 | Q03135 CAV1_HUMAN  | K.AM*ADELS#EKQVYDAHTK.E        | S37:       | 2 | 3,0364 | 0,467 | 0,6    |
| 21 | O75717 WDHD1_HUMAN | R.QRS#HILEDDENSVDISM*LK.T      | S374:      | 3 | 3,1615 | 0,235 | -0,236 |
| 21 | Q96ST2 IWS1_HUMAN  | K.M*DS#DEDEKEGEEKVAK.R         | S377:      | 3 | 3,067  | 0,382 | -0,443 |
| 21 | Q9NZT2 OGFR_HUMAN  | R.SQGDEAGGHGEDRPEPLS#PK.E      | S378:      | 3 | 3,7888 | 0,39  | 0      |
| 21 | Q01484 ANK2_HUMAN  | R.GGS#PIIQEPEEPSEHREESSPR.K    | S3790:     | 3 | 3,2666 | 0,225 | 0,072  |
| 21 | P16949 STMN1_HUMAN | R.SKESVPEFPLS#PPKK.K           | S38:       | 3 | 3,7528 | 0,33  | -0,209 |
| 21 | Q15424 SAFB1_HUMAN | K.ESSTSEGADQKM*S#SPEDDSDTKR.L  | S383:      | 3 | 4,0686 | 0,298 | -0,354 |
| 21 | Q9NYF8 BCLF1_HUMAN | K.GRAEGEWEDQEALDYFS#DKESGK.Q   | S385:      | 3 | 5,7039 | 0,429 | -0,537 |
| 21 | Q8IYB3 SRRM1_HUMAN | R.HRPS#PPAT#PPPK.T             | S402:T406: | 2 | 3,228  | 0,455 | -0,592 |
| 21 | Q8IYB3 SRRM1_HUMAN | R.HRPS#PPAT#PPPK.T             | S402:T406: | 3 | 2,7178 | 0,092 | -0,19  |
| 21 | Q9Y5T5 UBP16_HUMAN | K.KTVEDEDQDS#EEEKDNDYIK.E      | S415:      | 3 | 3,7901 | 0,348 | -0,211 |
| 21 | O14974 MYPT1_HUMAN | K.FPTTATKIS#PKEER.K            | S422:      | 3 | 2,9014 | 0,196 | 0      |
| 21 | Q9Y490 TLN1_HUMAN  | K.SKDHFGLEGDEESTM*LEDSVS#PK.K  | S425:      | 3 | 4,7503 | 0,443 | 0,347  |
| 21 | Q9Y4F1 FARP1_HUMAN | K.VSAGEPGSHPS#PAPRRS#PAGNK.Q   | S427:S433: | 3 | 2,7398 | 0,289 | -0,948 |
| 21 | O60934 NBN_HUMAN   | K.M*RIPNYQLS#PTKLPSINK.S       | S432:      | 3 | 3,7684 | 0,305 | -0,25  |
| 21 | Q05519 SFR11_HUMAN | R.DYDEEEQGYDS#EKEKK.E          | S434:      | 3 | 2,8834 | 0,416 | 0,177  |
| 21 | P33981 TTK_HUMAN   | K.HTTFEQPVFSVSKQS#PPISTSK.W    | S436:      | 3 | 4,8008 | 0,443 | 0,655  |
| 21 | Q8IU81 I2BP1_HUMAN | K.NVAEALGHS#PKDPGGGGPVR.A      | S436:      | 3 | 3,3542 | 0,316 | -0,089 |
| 21 | Q9ULU4 PKCB1_HUMAN | R.SPM*STNSSVHTGS#DVEQDAEKK.A   | S444:      | 3 | 4,1548 | 0,436 | 0,151  |
| 21 | P18887 XRCC1_HUMAN | K.TKPTQAAGPSS#PQKPPTPEETK.A    | S447:      | 3 | 4,1556 | 0,383 | 0,233  |
| 21 | P53396 ACLY_HUMAN  | R.TASFS#ESRADEVAPAKK.A         | S457:      | 2 | 2,9656 | 0,28  | 0,195  |
| 21 | P11274 BCR_HUMAN   | R.HQDGLPYIDDS#PSSSPHLSSK.G     | S459:      | 3 | 4,9816 | 0,42  | -0,078 |
| 21 | Q9UJM3 ERRFI_HUMAN | R.KHLSYVVS#P.-                 | S461:      | 2 | 3,3661 | 0,438 | -0,11  |
| 21 | P53985 MOT1_HUMAN  | K.ESKEETS#IDVAGKPNEVTK.A       | S467:      | 3 | 3,2821 | 0,234 | 0,161  |
| 21 | Q9NZN4 EHD2_HUMAN  | K.SKYDEIFYNLAPADGKLS#GSK.A     | S468:      | 3 | 4,0649 | 0,271 | -0,23  |
| 21 | Q9UPV0 CE164_HUMAN | K.GLEERLS#PPLPHEER.A           | S472:      | 3 | 2,8978 | 0,13  | -0,398 |
| 21 | Q92945 FUBP2_HUMAN | K.LFIIRGS#PQQIDHAK.Q           | S480:      | 3 | 2,9584 | 0,279 | 0,101  |
| 21 | Q14676 MDC1_HUMAN  | R.AHS#EKDQPFGSDSDSVEADK.S      | S485:      | 3 | 5,7225 | 0,485 | 0,389  |
| 21 | Q96D71 REPS1_HUMAN | R.SHS#GTSPDNTAPPPPPRPQPSHS#R.S | S485:S506: | 3 | 3,3357 | 1     | 0,398  |
| 21 | Q9UHB7 AFF4_HUMAN  | K.VNPHKVS#PASSVDSNIPSSQGYK.K   | S487:      | 3 | 4,0062 | 0,314 | 1,624  |
| 21 | Q8TAD8 SNIP1_HUMAN | R.RPDHS#GGSPS#PPTSEPAR.S       | S49:S54:   | 3 | 3,1272 | 0,128 | -0,276 |

|    |                     |                                |            |   |        |       |        |
|----|---------------------|--------------------------------|------------|---|--------|-------|--------|
| 21 | Q9Y2K2 QSK_HUMAN    | R.RAS#DGGANIQLHAQQLLK.R        | S493:      | 3 | 4,7521 | 0,344 | 0,091  |
| 21 | O60825 F262_HUMAN   | R.NYSVGSRPLKPLS#PLR.A          | S493:      | 3 | 3,584  | 0,431 | -0,098 |
| 21 | Q6VY07 PACS1_HUMAN  | K.TDLQGSAS#PSKVEGVHTPR.Q       | S495:      | 3 | 4,4901 | 0,477 | 0,089  |
| 21 | Q9H0D6 XRN2_HUMAN   | K.RKAEDS#DS#EPEPEDNVR.L        | S499:S501: | 3 | 3,754  | 0,212 | 0,429  |
| 21 | Q9H0D6 XRN2_HUMAN   | K.RKAEDS#DS#EPEPEDNVR.L        | S499:S501: | 2 | 3,4403 | 0,444 | 1,03   |
| 21 | Q5JSH3 WDR44_HUMAN  | K.VGNES#PVQELKQDVSKK.I         | S50:       | 3 | 3,3827 | 0,238 | -0,745 |
| 21 | Q59EW8 Q59EW8_HUMAN | R.TSS#FTEQLDEGTPNRENASTHASK.S  | S50:       | 3 | 3,096  | 0,303 | 0,272  |
| 21 | Q9Y6J9 TAF6L_HUMAN  | R.KM*PQLTASAIVSPHGDES#PR.G     | S501:      | 3 | 3,5879 | 0,231 | 0,083  |
| 21 | Q9Y2X3 NOL5_HUMAN   | K.HIKKEPLS#EEEPCTSTAIASPEK.K   | S502:      | 3 | 5,4348 | 0,401 | 0,619  |
| 21 | Q14680 MELK_HUMAN   | R.CRS#VELDLNQAHM*EETPK.R       | S505:      | 3 | 4,0411 | 0,372 | 0,162  |
| 21 | Q9UBF8 PI4KB_HUMAN  | R.RLS#EQLAHTPTAFK.R            | S511:      | 3 | 3,8103 | 0,393 | 0,327  |
| 21 | Q9UBF8 PI4KB_HUMAN  | R.RLS#EQLAHTPTAFK.R            | S511:      | 2 | 2,5368 | 0,314 | 0,436  |
| 21 | Q9NYF8 BCLF1_HUMAN  | K.LKDLDYDYS#PPLHK.N            | S512:      | 2 | 4,3224 | 0,518 | 0,295  |
| 21 | Q9NYF8 BCLF1_HUMAN  | K.LKDLDYDYS#PPLHK.N            | S512:      | 3 | 3,1192 | 0,426 | -0,111 |
| 21 | Q12767 K0195_HUMAN  | R.SKHP#GSNV#FSR.D              | S513:S518: | 2 | 3,2129 | 0,382 | 0,079  |
| 21 | Q13586 STIM1_HUMAN  | R.DLTHS#DSESSLHM*SDR.Q         | S519:      | 2 | 2,5821 | 0,321 | 0,191  |
| 21 | P55081 MFAP1_HUMAN  | K.RPDYAPM*ES#SDEEDEFQFIKK.A    | S52:       | 3 | 4,9923 | 0,487 | 0,657  |
| 21 | Q8TAD8 SNIP1_HUMAN  | R.RPDHSGGS#PS#PPTSEPAR.S       | S52:S54:   | 2 | 2,2092 | 1     | 0,368  |
| 21 | O00567 NOL5A_HUMAN  | K.SFSKEELM*SS#DLEETAGSTSIPKR.K | S520:      | 3 | 5,4889 | 0,457 | -0,403 |
| 21 | O00567 NOL5A_HUMAN  | K.KSFSKEELM*SS#DLEETAGSTSIPK.R | S520:      | 3 | 4,8982 | 0,559 | -0,543 |
| 21 | Q13586 STIM1_HUMAN  | R.DLTHSDS#ESSLHM*SDR.Q         | S521:      | 3 | 2,8665 | 0,184 | 0,287  |
| 21 | Q15057 CENB2_HUMAN  | K.FVDKYSISLS#PPEQKK.F          | S521:      | 3 | 2,8653 | 0,13  | 0      |
| 21 | Q5H9R7 SAPS3_HUMAN  | R.NTVDLVTTCHIHSSS#DDEIDFK.E    | S525:      | 3 | 4,779  | 0,424 | 0,35   |
| 21 | Q8WUF5 IASPP_HUMAN  | R.RGS#M*EQAPAVALPPTHK.K        | S526:      | 3 | 4,841  | 0,408 | 0,194  |
| 21 | Q86XL3 ANKL2_HUMAN  | R.AFAGPLS#PAKAEDFRK.L          | S528:      | 3 | 3,1097 | 0,232 | -0,205 |
| 21 | Q6VY07 PACS1_HUMAN  | R.TNS#SDSERSPDLGHSTQIPR.K      | S528:      | 3 | 2,9743 | 0,461 | 0      |
| 21 | Q86VM9 ZCH18_HUMAN  | K.KKLGVS#VS#PSR.A              | S532:S534: | 3 | 3,3609 | 0,146 | 0,069  |
| 21 | Q86VM9 ZCH18_HUMAN  | K.KKLGVS#VS#PSR.A              | S532:S534: | 2 | 2,7624 | 0,371 | -0,093 |
| 21 | P62736 ACTA_HUMAN   | R.HQGV#M*VGM*GQKDS#YVGDEAQSK.R | S54:       | 3 | 4,1021 | 0,419 | 0,149  |
| 21 | P17987 TCPA_HUMAN   | K.DDKHGS#YEDAVHSGALND.-        | S544:      | 2 | 3,7662 | 0,377 | 0,728  |
| 21 | Q8WYA6 CTBL1_HUMAN  | K.EYAENIGDGRS#PEFRENEQK.R      | S545:      | 3 | 3,6693 | 0,384 | 0,374  |
| 21 | Q01804 OTUD4_HUMAN  | K.RPEPSTLENITDDKYATVSS#PSK.S   | S546:      | 3 | 4,5953 | 0,517 | 0,42   |
| 21 | Q96SN8 CK5P2_HUMAN  | K.KQS#SDYEELIQVLKK.E           | S547:      | 3 | 3,7997 | 0,269 | -0,194 |

|    |                    |                               |            |   |        |       |        |
|----|--------------------|-------------------------------|------------|---|--------|-------|--------|
| 21 | Q8N350 DOS_HUMAN   | R.GAGDDTEPPAAPARPRS#PR.A      | S548:      | 3 | 2,716  | 0,296 | 0      |
| 21 | Q9Y6M7 S4A7_HUMAN  | R.AVYIGVHVPFKES#R.R           | S55:       | 3 | 2,7798 | 0,398 | 0,103  |
| 21 | Q9Y6M7 S4A7_HUMAN  | R.AVYIGVHVPFKES#R.R           | S55:       | 2 | 2,4701 | 0,449 | 0,207  |
| 21 | Q9NWH9 SLTM_HUMAN  | R.ISSKS#PGHM*VILDQTK.G        | S553:      | 3 | 3,827  | 0,48  | 0      |
| 21 | Q32MZ4 LRRF1_HUMAN | K.EPDEEKS#DQQGEALDSSQKK.T     | S555:      | 3 | 2,7269 | 0,175 | -0,079 |
| 21 | Q9Y6M7 S4A7_HUMAN  | R.KIPVFHNGS#TPTLGETPK.E       | S556:      | 3 | 3,6012 | 0,417 | -0,274 |
| 21 | Q86VX9 MON1A_HUMAN | R.S#YEDLTESEDGAASGDHKEGTR.G   | S56:       | 3 | 3,0495 | 0,345 | 0,073  |
| 21 | Q9Y4W2 LAS1L_HUMAN | K.AQQQEEQGS#VNDVKEEEKEEK.E    | S560:      | 3 | 3,7497 | 0,155 | 0,288  |
| 21 | Q96T23 RSF1_HUMAN  | K.TALSSTESCTM*KGEEKS#PK.T     | S560:      | 3 | 3,0729 | 0,276 | 0      |
| 21 | O75167 PHAR2_HUMAN | R.KLS#LRPTVAELQAR.R           | S560:      | 3 | 2,7666 | 0,443 | 0,11   |
| 21 | Q9Y217 MTMR6_HUMAN | K.ELLHSVHPES#PNLK.T           | S561:      | 3 | 3,1547 | 0,274 | 0,218  |
| 21 | P27824 CALX_HUMAN  | K.SDAEEDGGTVS#QEEEDRKP.K.A    | S564:      | 3 | 3,8223 | 0,362 | 0,4    |
| 21 | Q92613 JADE3_HUMAN | R.NSSTETDQQPHS#PDSVVHSIR.N    | S566:      | 3 | 4,779  | 0,485 | 0,286  |
| 21 | Q7Z7F0 K0907_HUMAN | K.GFGLVAYAADS#\$DEEEHGGHK.N   | S571:      | 3 | 3,15   | 0,368 | 0,614  |
| 21 | Q8IXT5 RB12B_HUMAN | R.FPPEDFRHS#PEDFR.R           | S575:      | 3 | 3,7351 | 0,264 | -0,099 |
| 21 | Q86UU1 PHLB1_HUMAN | R.KNS#ITEISDNEDDLEYHR.R       | S578:      | 3 | 4,6393 | 0,449 | -0,077 |
| 21 | Q6XZF7 DNMBP_HUMAN | R.HFS#IM*DFNSEKDIVR.G         | S578:      | 3 | 3,2098 | 0,241 | 0      |
| 21 | Q09666 AHNK_HUMAN  | K.GHYEVTGS#DDETGKLGSGVSLASK.K | S5841:     | 3 | 4,8201 | 0,392 | 0,633  |
| 21 | Q9Y2X7 GIT1_HUMAN  | R.HGS#GADSDYENTQSGDPLLGLEGR.F | S592:      | 3 | 5,4754 | 0,439 | 0,546  |
| 21 | P35612 ADDB_HUMAN  | K.KLELDGEKETAPEEPGS#PAK.S     | S592:      | 3 | 4,664  | 0,488 | 0,166  |
| 21 | Q02952 AKA12_HUMAN | K.GLAEVQQDGEAEAGATS#DGEKKR.E  | S598:      | 3 | 4,7822 | 0,445 | 0,516  |
| 21 | Q92615 LARP5_HUMAN | R.SPS#PAHLPDDPKVAEK.Q         | S601:      | 3 | 3,6928 | 0,382 | 0,103  |
| 21 | Q92615 LARP5_HUMAN | R.SPS#PAHLPDDPKVAEK.Q         | S601:      | 2 | 2,9435 | 0,466 | 0,276  |
| 21 | Q9UHB6 LIMA1_HUMAN | R.SRPFTVAASFQSTSVKS#PK.T      | S604:      | 3 | 5,8243 | 0,413 | 0,174  |
| 21 | Q8IYB3 SRRM1_HUMAN | R.RYS#PS#PPPKR.R              | S605:S607: | 2 | 2,5794 | 0,18  | -1,089 |
| 21 | Q14157 UBP2L_HUMAN | R.RYPSSISS#PQKDLTQAK.N        | S609:      | 3 | 2,6278 | 0,118 | 0,265  |
| 21 | Q9HC35 EMAL4_HUMAN | R.LAISEDHVAS#VKK.S            | S61:       | 2 | 3,2145 | 0,344 | 0,248  |
| 21 | Q92541 RTF1_HUMAN  | K.DKDLNSKS#ASDLSDFK.V         | S610:      | 3 | 3,537  | 0,323 | 0,175  |
| 21 | Q3B820 YB032_HUMAN | K.SVTEDKES#FNEEKIEER.E        | S613:      | 3 | 4,1369 | 0,149 | -0,08  |
| 21 | Q9P2E9 RRBP1_HUMAN | R.NTDVAQS#PEAPKQAPAKK.K       | S615:      | 3 | 2,696  | 0,229 | -0,438 |
| 21 | O43395 PRPF3_HUMAN | K.WDEQTSNTKGDDEES#DEEAVKK.T   | S619:      | 3 | 6,9965 | 0,499 | 0,334  |
| 21 | P01106 MYC_HUMAN   | K.KFELLTPPLS#PSRR.S           | S62:       | 3 | 3,241  | 0,108 | 0      |
| 21 | P01106 MYC_HUMAN   | K.KFELLTPPLS#PSRR.S           | S62:       | 2 | 2,6827 | 0,222 | 0,336  |

|    |                     |                                 |            |   |        |       |        |
|----|---------------------|---------------------------------|------------|---|--------|-------|--------|
| 21 | O60238 BNI3L_HUMAN  | K.NGGLEHVPS#SSSIHNGDM*EK.I      | S62:       | 3 | 2,6447 | 0,231 | 0,25   |
| 21 | Q9NVM9 CL011_HUMAN  | R.GKEELAEAEIHKDSPDS#PEPPNK.K    | S626:      | 3 | 5,4408 | 0,398 | 0,569  |
| 21 | Q8I221 PHAR4_HUMAN  | R.KLS#QRPTVAELLAR.K             | S628:      | 3 | 3,0172 | 0,329 | 0,22   |
| 21 | Q16825 PTN21_HUMAN  | K.RNS#IEVAGLSHGLEGLR.L          | S637:      | 3 | 5,1056 | 0,554 | -0,388 |
| 21 | Q2M2I8 AAK1_HUMAN   | R.RILS#DVTHSAVFGVPASK.S         | S637:      | 3 | 3,8581 | 0,501 | -0,093 |
| 21 | Q2M2I8 AAK1_HUMAN   | R.RILS#DVTHSAVFGVPASK.S         | S637:      | 2 | 3,4871 | 0,508 | -0,435 |
| 21 | O95544 NADK_HUMAN   | R.TRS#LHGPCPVTTFGPK.A           | S64:       | 3 | 3,3974 | 0,171 | 0,1    |
| 21 | Q8IY81 RRMJ3_HUMAN  | R.SRGPKS#DDDGFEIVPIEDPAK.H      | S644:      | 3 | 5,6312 | 0,313 | -0,156 |
| 21 | P49756 RBM25_HUMAN  | K.KLPVDSVFNKFEDEDS#DDVPR.K      | S644:      | 3 | 4,1734 | 0,384 | -0,217 |
| 21 | Q7Z6Z7 HUWE1_HUMAN  | R.RRS#SDPLGDTASNLSAVDELM*R.H    | S648:      | 3 | 3,867  | 0,323 | -0,216 |
| 21 | Q9H5Y7 SLIK6_HUMAN  | R.DNS#PVHLQYSM*YGHK.T           | S652:      | 2 | 3,7097 | 0,556 | 0,913  |
| 21 | Q9H5Y7 SLIK6_HUMAN  | R.DNS#PVHLQYSM*YGHK.T           | S652:      | 3 | 3,3667 | 0,365 | 0,489  |
| 21 | Q8N1G2 K0082_HUMAN  | K.QHSSDS#FDDAFKADSLVEGTSSR.Y    | S66:       | 3 | 3,4422 | 0,362 | 0,57   |
| 21 | P20042 IF2B_HUMAN   | K.KDAS#DDLDDLNFNQQK.K           | S67:       | 3 | 3,6248 | 0,237 | -0,175 |
| 21 | Q86VM9 ZCH18_HUMAN  | R.GPSQEEEDNHS#DEEDRASEPK.S      | S67:       | 3 | 3,1538 | 0,3   | -0,816 |
| 21 | Q9Y2X7 GIT1_HUMAN   | R.AAQEFKHDS#FVPCSEK.I           | S670:      | 3 | 3,34   | 0,41  | 0      |
| 21 | P25205 MCM3_HUMAN   | R.SEDES#ETEDEEEKSQEDQEQR.K      | S672:      | 3 | 4,1655 | 0,48  | 0,463  |
| 21 | P35268 RL22_HUMAN   | R.SKS#KITVTSEVPFSK.R            | S68:       | 3 | 3,6827 | 0,422 | -0,745 |
| 21 | O14617 AP3D1_HUMAN  | R.KQEQANNPFYIKSS#PSPQK.R        | S686:      | 3 | 3,8565 | 0,381 | 0,322  |
| 21 | Q63HJ5 Q63HJ5_HUMAN | R.KLANDFPLDLS#PVKK.R            | S688:      | 3 | 4,9002 | 0,442 | -0,207 |
| 21 | Q63HJ5 Q63HJ5_HUMAN | R.KLANDFPLDLS#PVKK.R            | S688:      | 2 | 4,0435 | 0,326 | 0,277  |
| 21 | Q9H1B7 EAP1_HUMAN   | R.AHGCFQDGRS#PGPPPPVGVK.T       | S69:       | 3 | 2,8292 | 0,242 | 0,427  |
| 21 | Q9P246 STIM2_HUMAN  | R.HTS#CSSAGNDSKPVQEAPSVAR.I     | S697:      | 3 | 3,8536 | 0,363 | 0,387  |
| 21 | P06748 NPM_HUMAN    | K.DELHIVEAEAM*NYEGS#PIK.V       | S70:       | 3 | 2,8863 | 0,109 | -0,408 |
| 21 | Q8NE01 CNNM3_HUMAN  | K.TTTAAGSSHSRPGVPVEGS#PGRNPGV.- | S700:      | 3 | 5,2567 | 0,518 | 0,072  |
| 21 | P40763 STAT3_HUMAN  | K.YCRPESQEHEADPGS#AAPYLK.T      | S701:      | 3 | 3,5476 | 0,394 | 0,496  |
| 21 | A7KAX9 A7KAX9_HUMAN | R.SAKS#EESLTSLHAVDGDGSK.L       | S706:      | 3 | 4,9754 | 0,43  | 0,359  |
| 21 | Q9BWT3 PAPOG_HUMAN  | K.RLPS#KELPDSSSPVANNIR.V        | S708:      | 3 | 4,0307 | 0,472 | 0,243  |
| 21 | Q02543 RL18A_HUMAN  | K.KSSGEIVYCGQVFEKS#PLR.V        | S71:       | 3 | 5,1035 | 0,434 | -0,242 |
| 21 | Q9BVV6 K0586_HUMAN  | K.HSVPVLPHGDDQYLFS#PSR.E        | S713:      | 3 | 3,4666 | 0,408 | 0,326  |
| 21 | Q8TEW0 PARD3_HUMAN  | R.RIS#HSLYSGIEGLDESPSR.N        | S715:      | 3 | 5,6882 | 0,438 | 0,251  |
| 21 | Q8WUM0 NU133_HUMAN  | R.M*FPHHS#ITESVNYDVK.T          | S72:       | 3 | 3,6729 | 0,33  | -0,274 |
| 21 | Q66K74 MAP1S_HUMAN  | R.S#ASPHDLDLCLVS#PCEFEHRK.A     | S729:S741: | 3 | 2,6043 | 0,293 | -0,069 |

|    |                    |                                |            |   |        |       |        |
|----|--------------------|--------------------------------|------------|---|--------|-------|--------|
| 21 | Q66K74 MAP1S_HUMAN | R.RSAS#PHDVDLCLVS#PCEFEHR.K    | S731:S741: | 3 | 4,6279 | 0,359 | 0,343  |
| 21 | O60271 JIP4_HUMAN  | R.SASQSS#LDKLDQELKEQQK.E       | S733:      | 3 | 4,8292 | 0,32  | -0,49  |
| 21 | Q96T23 RSF1_HUMAN  | K.KPDS#PPKVLEPENK.Q            | S738:      | 3 | 4,9381 | 0,39  | 0,221  |
| 21 | Q9BYW2 SETD2_HUMAN | K.KSES#PFRETEPLVS#PHQDK.L      | S744:S754: | 3 | 4,2661 | 0,389 | 0,309  |
| 21 | Q13427 PPIG_HUMAN  | K.KFDHESS#PGT#DEDKSG.-         | S745:T748: | 3 | 5,409  | 0,459 | -1,158 |
| 21 | Q13427 PPIG_HUMAN  | K.KFDHESS#PGT#DEDKSG.-         | S745:T748: | 2 | 4,0491 | 0,586 | -0,965 |
| 21 | Q8TDD1 DDX54_HUMAN | R.KLGPGRPLPTFPTSECTS#DVEPDTR.E | S75:       | 3 | 4,7611 | 0,44  | 0,129  |
| 21 | Q96FF9 CDCA5_HUMAN | R.IVAHAVEVPAVQS#PRRS#PR.I      | S75:S79:   | 3 | 3,0026 | 0,399 | 0,328  |
| 21 | O75152 ZC11A_HUMAN | R.RLS#SASTGKPLSVEDDFEK.L       | S758:      | 3 | 3,9333 | 0,34  | 0,245  |
| 21 | Q5T5C0 STXB5_HUMAN | R.KLS#LPTDLKPDLDVK.D           | S759:      | 3 | 3,1966 | 0,268 | -0,104 |
| 21 | P50502 F10A1_HUMAN | K.KVEEDLKADEPSS#EESDLEIDK.E    | S76:       | 3 | 6,0954 | 0,454 | 0,566  |
| 21 | P28749 RBL1_HUMAN  | K.VKSPVSLTAHSLIGAS#PK.Q        | S762:      | 3 | 3,5776 | 0,256 | 0,195  |
| 21 | Q8N4C8 MINK1_HUMAN | R.SDSVLPASHGHLPOAGS#LER.N      | S763:      | 3 | 4,2945 | 0,369 | 0,171  |
| 21 | Q96T37 RBM15_HUMAN | K.LKS#PSQKQDGGTAPVASASPK.L     | S765:      | 3 | 3,981  | 0,34  | 0,086  |
| 21 | Q96EV2 RBM33_HUMAN | K.VKPAS#PVAQPKKEAK.T           | S775:      | 2 | 2,3378 | 0,504 | -1,324 |
| 21 | Q02790 FKBP4_HUMAN | K.DKFS#FDLGKGEVIK.A            | S78:       | 2 | 4,1954 | 0,359 | 0,587  |
| 21 | Q02086 SP2_HUMAN   | R.KLVPIKPAPLPLS#PGK.N          | S78:       | 3 | 3,7474 | 0,421 | 0,211  |
| 21 | Q7Z628 ARHG8_HUMAN | R.EKDDDVVS#LSSLDLKEPSNK.R      | S78:       | 3 | 3,401  | 0,28  | -0,478 |
| 21 | Q02790 FKBP4_HUMAN | K.DKFS#FDLGKGEVIK.A            | S78:       | 3 | 3,3371 | 0,286 | -0,11  |
| 21 | A3KN83 SBNO1_HUMAN | K.KKS#IDPDSIQSALLASGLGSK.R     | S794:      | 3 | 4,1697 | 0,569 | -0,167 |
| 21 | Q9BXW9 FACD2_HUMAN | R.LS#KSEDKESLTEDASK.T          | S8:        | 2 | 2,6037 | 0,579 | -0,396 |
| 21 | Q9UHB7 AFF4_HUMAN  | K.EKDLLPS#PAGPVPSKDPK.T        | S814:      | 2 | 2,5209 | 0,214 | 0,499  |
| 21 | Q2PPJ7 AS250_HUMAN | R.RS#SSPAELDLKDDLQQTQGK.C      | S819:      | 3 | 3,5771 | 0,446 | 0,08   |
| 21 | Q9BUT9 CP014_HUMAN | R.RAPSTSPS#FEGTQETYVAHEENVR.F  | S82:       | 3 | 3,2153 | 0,5   | 0,701  |
| 21 | Q2PPJ7 AS250_HUMAN | R.RSS#SPAELDLKDDLQQTQGK.C      | S820:      | 3 | 4,9741 | 0,415 | -0,319 |
| 21 | Q6PKG0 LARP1_HUMAN | R.HSS#NPPLESHVGWVM*DSR.E       | S824:      | 3 | 3,394  | 0,299 | -0,343 |
| 21 | Q7Z3C6 ATG9A_HUMAN | R.HPEPVPEEGS#EDELPPQVHKV.-     | S828:      | 3 | 5,5189 | 0,478 | -0,151 |
| 21 | Q7Z3C6 ATG9A_HUMAN | R.HPEPVPEEGS#EDELPPQVHKV.V     | S828:      | 3 | 4,0864 | 0,359 | 0,314  |
| 21 | O14617 AP3D1_HUMAN | R.NTETSKS#PEKDVPM*VEK.K        | S829:      | 3 | 3,7582 | 0,408 | -0,545 |
| 21 | O14617 AP3D1_HUMAN | R.NTETSKS#PEKDVPMVEK.K         | S829:      | 3 | 2,7214 | 0,223 | 0,549  |
| 21 | O14617 AP3D1_HUMAN | R.NTETSKS#PEKDVPM*VEK.K        | S829:      | 2 | 2,2198 | 0,351 | 0,787  |
| 21 | Q96JP5 ZFP91_HUMAN | R.RSS#PSARPPDVPGQPQAAK.S       | S83:       | 3 | 3,7597 | 0,319 | -0,085 |
| 21 | O60524 SDCG1_HUMAN | K.KLPS#DSGDLEALEGKDK.E         | S831:      | 3 | 4,7591 | 0,454 | -0,097 |

|    |                     |                                 |                 |   |        |       |        |
|----|---------------------|---------------------------------|-----------------|---|--------|-------|--------|
| 21 | O60524 SDCG1_HUMAN  | K.KLPS#DSGDLEALEGKDK.E          | S831:           | 2 | 2,4764 | 0,364 | -0,324 |
| 21 | Q9Y2K7 JHD1A_HUMAN  | K.LQAITASSANLRHS#PR.V           | S832:           | 2 | 2,5157 | 0,246 | 0,135  |
| 21 | Q8WY36 BBX_HUMAN    | R.TADGRVS#PAGGTLDKPK.E          | S844:           | 2 | 2,7334 | 0,227 | 0,523  |
| 21 | P16333 NCK1_HUMAN   | K.RKPS#VPDSASPADDSFVDPGER.L     | S85:            | 3 | 4,6809 | 0,498 | 0      |
| 21 | Q8TD19 NEK9_HUMAN   | K.VASEAPLEHKPQVEAS#SPR.L        | S868:           | 3 | 2,9693 | 0,172 | 0,26   |
| 21 | Q8TEW0 PAR3_HUMAN   | K.AGS#PSRDVGPVSLGLK.S           | S873:           | 3 | 3,4477 | 0,273 | 0      |
| 21 | O94887 FARP2_HUMAN  | R.TVCTRPPRS#PNEVSLEQESEDAR.G    | S876:           | 3 | 4,6896 | 0,351 | 0,77   |
| 21 | Q6P0Q8 MAST2_HUMAN  | R.SLS#EEKEDHSDGLAGLK.G          | S876:           | 2 | 3,0765 | 0,428 | 0,708  |
| 21 | Q8N122 RPTOR_HUMAN  | K.GVHIHQAGGS#PPASSTSSSLTNDVAK.Q | S877:           | 3 | 7,5742 | 0,439 | 0,274  |
| 21 | Q6NV74 CB055_HUMAN  | R.SKS#FLITPVKPAVDR.K            | S881:           | 3 | 3,5103 | 0,317 | -0,316 |
| 21 | O75400 PR40A_HUMAN  | R.HKS#DS#PES#DAEREK.D           | S883:S885:S888: | 3 | 3,028  | 0,345 | -0,888 |
| 21 | B2RTT4 B2RTT4_HUMAN | K.EAVVDLHADDSRIS#EETER.N        | S885:           | 3 | 3,4244 | 0,208 | 0,773  |
| 21 | Q9Y2E4 DIP2C_HUMAN  | R.YRS#DVHTEAVQAALAK.H           | S89:            | 3 | 3,7272 | 0,352 | -0,398 |
| 21 | Q9C0C2 TB182_HUMAN  | K.RDS#LGAYASQDANEQGDGKR.D       | S893:           | 3 | 4,7855 | 0,49  | 0,372  |
| 21 | Q9BTE7 DCNL5_HUMAN  | R.KS#PGVAAVAEDGGLK.K            | S9:             | 3 | 5,3627 | 0,48  | 0,218  |
| 21 | Q9BTE7 DCNL5_HUMAN  | R.KS#PGVAAVAEDGGLK.K            | S9:             | 2 | 2,3836 | 0,303 | 0,291  |
| 21 | P42696 RBM34_HUMAN  | R.NEEEE#TSQIERPLSQEPAK.V        | S90:            | 3 | 4,5483 | 0,362 | 0,656  |
| 21 | Q12872 SFRS8_HUMAN  | R.SRGVS#QEKEAQISSAIVSSVQSK.I    | S909:           | 3 | 5,5614 | 0,554 | 0,147  |
| 21 | Q7Z333 SETX_HUMAN   | K.KSS#PFKDLM*TVPESR.D           | S911:           | 3 | 2,8015 | 0,234 | -0,101 |
| 21 | Q9UDT6 CLIP2_HUMAN  | R.VLLLEANRHS#PGPER.D            | S923:           | 3 | 3,5219 | 0,212 | 0      |
| 21 | Q13523 PRP4B_HUMAN  | K.EVIDASDKEGM*S#PAKR.T          | S93:            | 2 | 2,092  | 0,286 | 0,133  |
| 21 | Q7Z2Z1 CO042_HUMAN  | R.SHS#VSAVDGLEDKLDNFK.K         | S938:           | 3 | 5,4313 | 0,49  | -0,359 |
| 21 | Q14689 DIP2A_HUMAN  | R.FRS#DVHTEAVQAALAK.Y           | S94:            | 2 | 4,1147 | 0,493 | 0,669  |
| 21 | Q6PD62 CTR9_HUMAN   | R.RKGS#GS#EQEGEDEEGGER.K        | S941:S943:      | 3 | 3,8458 | 0,452 | -0,524 |
| 21 | Q96NW4 ANR27_HUMAN  | R.DRS#VPNLTEGSLHEPGR.Q          | S962:           | 3 | 3,9716 | 0,295 | -0,094 |
| 21 | Q0VF46 Q0VF46_HUMAN | K.HS#PIKEEPCGSLSETVCK.R         | S99:            | 3 | 4,848  | 0,504 | 0,171  |
| 21 | Q9NS91 RAD18_HUMAN  | R.NHLLQFALES#PAKSPASSSSK.N      | S99:            | 3 | 4,5537 | 0,55  | 0,321  |
| 21 | P55011 S12A2_HUMAN  | K.KES#KGPIVPLNVADQK.L           | S994:           | 3 | 4,5211 | 0,405 | 0      |
| 21 | P55011 S12A2_HUMAN  | K.KES#KGPIVPLNVADQK.L           | S994:           | 2 | 3,5369 | 0,384 | 0,677  |
| 21 | Q7Z7G8 VP13B_HUMAN  | R.RKEDEV#IGS#APLAK.Q            | S999:S1002:     | 3 | 2,7046 | 0,127 | -0,104 |
| 21 | Q5VZL5 ZMYM4_HUMAN  | K.KTLSQGESQT#SEHELFLDTK.I       | T1070:          | 3 | 4,6895 | 0,403 | 0      |
| 21 | Q8NE71 ABCF1_HUMAN  | K.KLSVPT#SDEEDEVPAKPR.G         | T108:           | 3 | 4,0001 | 0,359 | 0,252  |
| 21 | P14618 KPYM_HUMAN   | R.TGLIKSGT#AEVELK.K             | T129:           | 3 | 3,2871 | 0,426 | 0,214  |

|    |                    |                                          |            |   |        |       |        |
|----|--------------------|------------------------------------------|------------|---|--------|-------|--------|
| 21 | P46013 KI67_HUMAN  | R.RPQT#PKEEAQALEDLTGFK.E                 | T1335:     | 3 | 3,0804 | 0,425 | -0,245 |
| 21 | Q9UHD8 SEPT9_HUMAN | R.AEVLGHKT#PEPAPR.R                      | T142:      | 3 | 3,2617 | 0,312 | 0,231  |
| 21 | Q9UHD8 SEPT9_HUMAN | R.AEVLGHKT#PEPAPR.R                      | T142:      | 2 | 2,9009 | 0,383 | 0,386  |
| 21 | Q8N9M1 CS047_HUMAN | R.M*IT#NSLNHDSPPST#PPRRPDTSTSK.I         | T144:T155: | 3 | 2,7545 | 1     | 0,377  |
| 21 | Q9ULW0 TPX2_HUMAN  | K.RCAT#PVIIDEILPSKK.M                    | T147:      | 3 | 4,3737 | 0,282 | -0,191 |
| 21 | Q86UP2 KTN1_HUMAN  | K.KVEPVPVTKQPT#PPSEAAASK.K               | T153:      | 3 | 3,4692 | 0,222 | 0,082  |
| 21 | P54727 RD23B_HUMAN | K.QEKPAEKPAETPVAT#SPTATDSTSGDSSR.S       | T159:      | 3 | 4,0871 | 1     | 0,423  |
| 21 | Q9BRD0 BUD13_HUMAN | R.ARHDT#PDPS#PLR.G                       | T159:S163: | 2 | 2,8219 | 0,339 | 0,16   |
| 21 | O96013 PAK4_HUMAN  | R.DKRPLSGPDVGT#PQPAGLASGAK.L             | T187:      | 3 | 3,2582 | 0,205 | 0,159  |
| 21 | Q15527 SURF2_HUMAN | R.KDLGSTEDGDGTTDDFLT#DKEDEK.A            | T195:      | 3 | 5,6168 | 0,35  | 0,631  |
| 21 | Q9Y5N6 ORC6_HUMAN  | K.IGQQVDREPGDVAT#PPRK.R                  | T195:      | 3 | 4,3419 | 0,385 | 0,269  |
| 21 | Q02952 AKA12_HUMAN | K.DKTEKPDTVQLLT#VK.K                     | T200:      | 3 | 3,3957 | 0,168 | 0      |
| 21 | Q9H1E3 NUCKS_HUMAN | K.EKT#PS#PKEEDEEPESPEKK.T                | T202:S204: | 3 | 3,3156 | 0,294 | -0,074 |
| 21 | Q13595 TRA2A_HUMAN | R.AHT#PTPGIYM*GRPHTS#GGGGGGGGGGGGGGGGR.R | T202:S215: | 3 | 2,9065 | 0,319 | 1,048  |
| 21 | P53350 PLK1_HUMAN  | R.KKT#LCGTPNYIAPEVLSK.K                  | T210:      | 3 | 6,0415 | 0,449 | 0,261  |
| 21 | Q05519 SFR11_HUMAN | K.LNHVAAGLVSPSLKSDT#SSK.E                | T214:      | 3 | 3,3508 | 0,345 | 0,35   |
| 21 | P61247 RS3A_HUMAN  | K.LM*ELHGEHSSSGKAT#GDETGAK.V             | T242:      | 3 | 5,2602 | 0,409 | 0,324  |
| 21 | Q5T200 ZC3HD_HUMAN | K.KGPRT#PS#PPPIPEDIALGKK.Y               | T263:S265: | 3 | 4,2951 | 0,386 | 0,311  |
| 21 | P49792 RBP2_HUMAN  | K.KKPEDSPSDDDLVIVYELT#PTAEQK.A           | T2639:     | 3 | 3,4816 | 0,378 | -0,632 |
| 21 | Q01518 CAP1_HUMAN  | R.SGPKPFSAPKQPT#SPSPK.R                  | T307:      | 3 | 3,3161 | 0,279 | -0,572 |
| 21 | P62136 PP1A_HUMAN  | K.GKYGQFSGLNPGGRPIT#PPR.N                | T320:      | 3 | 2,9839 | 0,261 | -0,588 |
| 21 | P27816 MAP4_HUMAN  | K.ET#ERASPIKM*DLAPSK.D                   | T354:      | 2 | 2,2236 | 0,204 | 0      |
| 21 | Q92597 NDRG1_HUMAN | R.SHT#SEGAHLDITPNSGAAGNSAGPK.S           | T366:      | 3 | 6,4227 | 0,497 | 0,298  |
| 21 | P06400 RB_HUMAN    | R.KSNLDEEVNVIPT#PVR.T                    | T373:      | 3 | 4,5865 | 0,297 | 0,517  |
| 21 | Q96T23 RSF1_HUMAN  | K.SVT#PTKEFLKDEIK.Q                      | T398:      | 3 | 3,9442 | 0,358 | -0,533 |
| 21 | P08670 VIME_HUMAN  | R.ETNLDLPLVDT#HSKR.T                     | T436:      | 2 | 2,4555 | 0,421 | 0,769  |
| 21 | Q09666 AHNK_HUMAN  | K.VKT#PEM*IIQKPK.I                       | T490:      | 3 | 3,9051 | 0,279 | 0      |
| 21 | Q09666 AHNK_HUMAN  | K.VKT#PEM*IIQKPK.I                       | T490:      | 2 | 2,1418 | 0,251 | 0      |
| 21 | Q14004 CD2L5_HUMAN | K.ASNTST#PTKGTETSASASQTNHVK.D            | T494:      | 3 | 6,2601 | 1     | -0,704 |
| 21 | O60832 DKC1_HUMAN  | K.AGLESQAEPGDGSDTT#KKK.K                 | T497:      | 3 | 4,4649 | 0,341 | 0,179  |
| 21 | Q9NYV4 CD2L7_HUMAN | R.DSKPIALKEEIVT#PK.E                     | T514:      | 2 | 4,3462 | 0,431 | 0,419  |
| 21 | Q6PKG0 LARP1_HUMAN | R.QHYQKET#ESAPGS#PR.A                    | T515:S521: | 2 | 2,0952 | 0,237 | -0,716 |
| 21 | Q7Z3D4 LYSM3_HUMAN | R.ST#SRDRLLDIIVLTK.D                     | T54:       | 2 | 3,2054 | 0,382 | 0,202  |

|    |                     |                                 |              |   |        |       |        |
|----|---------------------|---------------------------------|--------------|---|--------|-------|--------|
| 21 | O75151 PHF2_HUMAN   | K.SRESASPT#IPNLDLLEAHTK.E       | T541:        | 3 | 4,1417 | 0,247 | -0,243 |
| 21 | Q9Y6M7 S4A7_HUMAN   | R.KIPVFHNGST#PTLGETPK.E         | T557:        | 2 | 3,0253 | 0,541 | 0      |
| 21 | Q12888 TP53B_HUMAN  | K.TKGDDT#DTRDDISILATGCK.G       | T591:        | 3 | 4,1298 | 0,373 | 0,162  |
| 21 | Q8IYB3 SRRM1_HUMAN  | K.RRT#AS#PPPPPK.R               | T614:S616:   | 3 | 3,2202 | 0,294 | 0,201  |
| 21 | Q13435 SF3B2_HUMAN  | K.KIEEAM*DGSET#PQLFTVLPEKR.T    | T757:        | 3 | 5,6925 | 0,484 | 0,21   |
| 21 | Q13435 SF3B2_HUMAN  | K.KKIEEAM*DGSET#PQLFTVLPEK.R    | T757:        | 3 | 4,6803 | 0,278 | -0,212 |
| 21 | O43148 MCES_HUMAN   | K.EFEDDLVKESSCGKDT#PSK.K        | T77:         | 3 | 3,1272 | 0,306 | 0,548  |
| 21 | Q9BW71 HIRP3_HUMAN  | K.GKRPPT#PCS#DPER.K             | T84:S87:     | 3 | 3,5383 | 0,135 | -0,662 |
| 21 | Q562F6 SGOL2_HUMAN  | K.GVHDLEKDNFFSLT#PK.D           | T845:        | 3 | 4,1201 | 0,378 | -0,38  |
| 21 | Q6PD62 CTR9_HUMAN   | K.KGGFDEFVNDT#DDDLPIKSK.K       | T925:        | 3 | 6,5261 | 0,466 | 0      |
| 21 | Q9UQ35 SRRM2_HUMAN  | K.VKPET#PPRQS#HSGSISPYK.V       | T983:S988:   | 3 | 2,7673 | 0,162 | -0,078 |
| 21 | Q14669 TRIPC_HUMAN  | K.Y#SPPRDDDKVDNQAQS#PTTTQSPK.S  | Y1015:S1030: | 3 | 2,9127 | 1     | 0,774  |
| 21 | Q9Y6M7 S4A7_HUMAN   | K.ALKY#SPDKPVSVK.I              | Y1187:       | 3 | 3,4673 | 0,309 | -0,121 |
| 21 | O15173 PGRC2_HUMAN  | R.LLKPGEEPSEY#T#DEEDTKDHNKQD.-  | Y210:T211:   | 3 | 4,7858 | 0,531 | 0,492  |
| 21 | Q07912 ACK1_HUMAN   | K.KPTY#DPVSEDQDPLSSDFKR.L       | Y518:        | 3 | 3,7194 | 0,374 | -0,381 |
| 21 | P40763 STAT3_HUMAN  | K.YCRPESQEHPADPGSAAPY#LK.T      | Y705:        | 3 | 4,1013 | 0,395 | 0,567  |
| 21 | P35579 MYH9_HUMAN   | K.KLEEEQIILEDQNCK.L             |              | 2 | 6,2298 | 0,517 | 0,517  |
| 21 | P14618 KPYM_HUMAN   | K.QKGADFLVTEVENGSLGSK.K         |              | 3 | 5,3712 | 0,383 | 0      |
| 21 | P27694 RFA1_HUMAN   | K.DKNEQAFEEVFQANFR.S            |              | 3 | 5,3124 | 0,427 | -0,526 |
| 21 | Q9HB71 CYBP_HUMAN   | K.KAELLDNEKPAAVVAPITTYGTVK.I    |              | 3 | 5,2856 | 0,429 | 0,289  |
| 21 | P07355 ANXA2_HUMAN  | R.RAEDGSVIDYELIDQDAR.D          |              | 3 | 5,2455 | 0,315 | 0,532  |
| 21 | P60174 TPIS_HUMAN   | R.KQSLGELIGTLNAAK.V             |              | 2 | 5,1071 | 0,417 | -0,316 |
| 21 | P08670 VIME_HUMAN   | R.KVESLQEEIAFLK.K               |              | 2 | 5,0252 | 0,194 | -0,318 |
| 21 | P35232 PHB_HUMAN    | R.KLEAAEDIAYQLSR.S              |              | 2 | 5,0137 | 0,376 | 0,456  |
| 21 | O95232 CROP_HUMAN   | K.ESDTKNEVNGTSEDIKSEGDTQSN.-    |              | 3 | 5,0108 | 0,467 | 0,212  |
| 21 | O00139 KIF2A_HUMAN  | K.DLDVITIPSKDVVM*VHEPK.Q        |              | 3 | 4,9816 | 0,399 | -0,085 |
| 21 | P09874 PARP1_HUMAN  | R.GGSDDSSKDPIDVNYEK.L           |              | 2 | 4,9739 | 0,495 | -0,134 |
| 21 | Q13547 HDAC1_HUMAN  | K.LHISPSNM*TNQNTNEYLEK.I        |              | 3 | 4,962  | 0,209 | 0,569  |
| 21 | Q15084 PDIA6_HUMAN  | K.KDVIELTDDSDFK.N               |              | 2 | 4,8857 | 0,498 | 0,08   |
| 21 | P27348 1433T_HUMAN  | R.KQTIDNSQGAYQEAFFDISK.K        |              | 3 | 4,8769 | 0,397 | 0,256  |
| 21 | Q9Y3Y2 CA077_HUMAN  | K.TKGHLDAELDAYM*AQTDPETND.-     |              | 3 | 4,8301 | 0,295 | 0,149  |
| 21 | Q05D20 Q05D20_HUMAN | K.DSRPSQAAGDNQGDEVK.E           |              | 3 | 4,8228 | 0,486 | -0,206 |
| 21 | P55884 EIF3B_HUMAN  | K.DRPQEADGIDSIVVDNVPQVGPDRLEK.L |              | 3 | 4,7841 | 0,399 | -0,478 |



|    |                    |                             |   |        |       |        |
|----|--------------------|-----------------------------|---|--------|-------|--------|
| 21 | Q86UP2 KTN1_HUMAN  | R.LLEEQLQHEISNK.M           | 2 | 4,7496 | 0,299 | 0,386  |
| 21 | P35080 PROF2_HUMAN | K.DREGFFTNGLTGAK.K          | 2 | 4,7303 | 0,375 | -0,375 |
| 21 | P06396 GELS_HUMAN  | K.DSQEEEKTEALTSAK.R         | 3 | 4,7225 | 0,372 | 0,329  |
| 21 | Q7Z2W4 ZCCHV_HUMAN | R.EHGLNPDVVQNIQDICNSK.H     | 3 | 4,7089 | 0,231 | 0      |
| 21 | P11021 GRP78_HUMAN | K.KSDIDEIVLVGGSTR.I         | 2 | 4,6799 | 0,527 | 0,461  |
| 21 | P63220 RS21_HUMAN  | K.DHASIQM*NVAEVDK.V         | 2 | 4,5927 | 0,548 | 0,31   |
| 21 | Q00610 CLH1_HUMAN  | K.EDKLECSEELGDLVK.S         | 2 | 4,5634 | 0,383 | 0,623  |
| 21 | P67809 YBOX1_HUMAN | R.EDGNEEDKENQGDETQGGQPPQR.R | 3 | 4,5175 | 0,462 | -0,766 |
| 21 | Q9NZ45 CISD1_HUMAN | K.IVHAFDM*EDLGDK.A          | 3 | 4,5034 | 0,333 | 0,243  |
| 21 | P62136 PP1A_HUMAN  | R.AHQVVEDGYEFFAK.R          | 3 | 4,4923 | 0,491 | -0,558 |
| 21 | Q9BTT0 AN32E_HUMAN | K.IKDLSTVEALQNLK.N          | 2 | 4,4707 | 0,524 | 0,078  |
| 21 | P10301 RRAS_HUMAN  | K.DRDDFPVVLVGNK.A           | 2 | 4,468  | 0,488 | 0      |
| 21 | P09622 DLDH_HUMAN  | K.SEEQLKEEGIEYK.V           | 3 | 4,4555 | 0,46  | 0,231  |
| 21 | P42224 STAT1_HUMAN | R.FHDLLSQLDDQYSR.F          | 3 | 4,4533 | 0,247 | -0,527 |
| 21 | P35637 FUS_HUMAN   | K.LKGEATVSFDDPPSAK.A        | 3 | 4,4411 | 0,394 | 0,33   |
| 21 | Q9Y2D5 AKAP2_HUMAN | K.DDDHGILDQFSR.S            | 3 | 4,4411 | 0,163 | 0,064  |
| 21 | P25786 PSA1_HUMAN  | R.HM*SEFM*ECNLNELVK.H       | 3 | 4,4004 | 0,262 | 0,191  |
| 21 | P17980 PRS6A_HUMAN | R.KM*NVSPDVNYEELAR.C        | 3 | 4,3983 | 0,31  | 0,308  |
| 21 | P31939 PUR9_HUMAN  | K.HVSPAGAAVGIPLSEDEAK.V     | 2 | 4,3981 | 0,588 | 0,528  |
| 21 | P34931 HS71L_HUMAN | K.ATAGDTHLGGEDFDNR.L        | 2 | 4,3734 | 0,517 | 0      |
| 21 | P14324 FPPS_HUMAN  | R.LKEVLEYNAIGGK.Y           | 3 | 4,3469 | 0,515 | 0,064  |
| 21 | P27824 CALX_HUMAN  | K.TPELNLDQFHDK.T            | 3 | 4,3447 | 0,26  | -0,063 |
| 21 | P12081 SYHC_HUMAN  | R.HGAEVIDTPVFELK.E          | 2 | 4,3438 | 0,465 | -0,157 |
| 21 | Q9GZR7 DDX24_HUMAN | R.DKLDILGAAETGSGK.T         | 2 | 4,3373 | 0,481 | 0,165  |
| 21 | P35613 BASI_HUMAN  | R.KPEDVLDDDDAGSAPLK.S       | 2 | 4,3262 | 0,533 | 0,615  |
| 21 | P68371 TBB2C_HUMAN | R.EIVHLQAGQCGNQIGAK.F       | 3 | 4,324  | 0,395 | -0,201 |
| 21 | P19338 NUCL_HUMAN  | R.KFGYVDFESAEDLEK.A         | 2 | 4,3161 | 0,449 | -0,481 |
| 21 | O43617 TPPC3_HUMAN | K.DYENDEVDNKQLDK.M          | 2 | 4,3115 | 0,424 | 0,283  |
| 21 | P62937 PPIA_HUMAN  | K.SIYGKFEFEDENFILK.H        | 2 | 4,2987 | 0,49  | -0,4   |
| 21 | Q9Y5P4 C43BP_HUMAN | R.DKVVEDDEDDFPTRR.S         | 3 | 4,2954 | 0,242 | 0,103  |
| 21 | P21796 VDAC1_HUMAN | K.TKSENGLEFTSSGSANTETTK.V   | 3 | 4,2941 | 0,47  | 0      |
| 21 | P06396 GELS_HUMAN  | K.DSQEEEKTEALTSAK.R         | 2 | 4,2809 | 0,505 | 0,073  |
| 21 | Q13526 PIN1_HUMAN  | R.TKEEALELINGYIQK.I         | 3 | 4,2764 | 0,276 | -0,627 |

|    |                    |                            |   |        |       |        |
|----|--------------------|----------------------------|---|--------|-------|--------|
| 21 | P11021 GRP78_HUMAN | R.AKFEELNM*DLFR.S          | 3 | 4,2712 | 0,423 | 0      |
| 21 | P54578 UBP14_HUMAN | K.GKENQLQLSCFINQEVK.Y      | 3 | 4,2528 | 0,404 | -0,539 |
| 21 | Q15149 PLEC1_HUMAN | K.AKLEQLFQDEVAK.A          | 2 | 4,2407 | 0,446 | 0,321  |
| 21 | P16152 CBR1_HUMAN  | R.FHQLDIDDLQSIR.A          | 2 | 4,2291 | 0,456 | -0,61  |
| 21 | Q9NR30 DDX21_HUMAN | K.SDKTEEIAEEEEIVFPK.A      | 2 | 4,2046 | 0,484 | 0,246  |
| 21 | P62805 H4_HUMAN    | R.KTVTAM*DVVYALK.R         | 2 | 4,1972 | 0,372 | 0,252  |
| 21 | P35579 MYH9_HUMAN  | K.KANLQIDQINTDLNLER.S      | 3 | 4,1763 | 0,362 | -0,549 |
| 21 | P62979 RS27A_HUMAN | K.CCLTYCFNKPEDK.-          | 2 | 4,1608 | 0,498 | 0,141  |
| 21 | O95218 ZRAB2_HUMAN | K.YKLDEDEDEDDADLSK.Y       | 2 | 4,1436 | 0,47  | 0,706  |
| 21 | P20042 IF2B_HUMAN  | K.KDASDDLDDLNFFNQK.K       | 2 | 4,1341 | 0,462 | -0,453 |
| 21 | Q02790 FKBP4_HUMAN | R.GEAHLAVNDFELAR.A         | 3 | 4,1324 | 0,31  | 0      |
| 21 | P16401 H15_HUMAN   | R.KATGPPVSELITK.A          | 3 | 4,1224 | 0,399 | 0,136  |
| 21 | P67936 TPM4_HUMAN  | K.CGDLEELKNVTNNLK.S        | 3 | 4,1223 | 0,448 | -0,488 |
| 21 | Q14789 GOGB1_HUMAN | K.SLKDQLTDLNSLEK.C         | 3 | 4,1199 | 0,307 | -0,108 |
| 21 | P11142 HSP7C_HUMAN | K.SQIHDIVLVGGSTR.I         | 2 | 4,1178 | 0,563 | 0,165  |
| 21 | P16152 CBR1_HUMAN  | R.FHQLDIDDLQSIR.A          | 3 | 4,1113 | 0,214 | -0,457 |
| 21 | P20618 PSB1_HUMAN  | K.NM*QNVHEHVPLSLDR.A       | 2 | 4,1098 | 0,391 | 0,439  |
| 21 | P42704 LPPRC_HUMAN | R.KVIEEQLEPAVEK.I          | 2 | 4,1073 | 0,444 | -0,081 |
| 21 | P40227 TCPZ_HUMAN  | K.DGNVLLHEM*QIQHPTASLIAK.V | 3 | 4,1062 | 0,334 | 0,157  |
| 21 | P07951 TPM2_HUMAN  | K.GTEDEVEKYESVK.E          | 2 | 4,0964 | 0,479 | 0,229  |
| 21 | P26038 MOES_HUMAN  | K.KTQEQLALEM*AELTAR.I      | 3 | 4,0764 | 0,278 | 0,297  |
| 21 | O75376 NCOR1_HUMAN | R.SEHEISEIIDGLSEQENNEK.Q   | 3 | 4,07   | 0,324 | -0,398 |
| 21 | Q58FF8 H90B2_HUMAN | K.IEDVGSDEEDDSGKDK.K       | 2 | 4,0647 | 0,444 | 0,211  |
| 21 | P02545 LMNA_HUMAN  | R.NSNLVGAAHEELQQSR.I       | 2 | 4,0459 | 0,559 | 0,07   |
| 21 | Q9ULW0 TPX2_HUMAN  | K.NQEEYKEVNFTSEL.R.K       | 3 | 4,0333 | 0,351 | -0,194 |
| 21 | Q9UJX4 APC5_HUMAN  | K.KAEALEAAIENLNEAK.N       | 3 | 4,0266 | 0,339 | -0,107 |
| 21 | P62491 RB11A_HUMAN | R.DHADSNIVIM*LVGNK.S       | 3 | 4,0121 | 0,357 | 0,334  |
| 21 | Q9BQG0 MBB1A_HUMAN | R.KALVDILSEVSK.A           | 2 | 4,0108 | 0,377 | -0,094 |
| 21 | Q09666 AHNK_HUMAN  | R.HELTEISNVQVETQSGK.T      | 3 | 3,9815 | 0,412 | 0      |
| 21 | P07195 LDHB_HUMAN  | K.IVADKDYSVTANSK.I         | 2 | 3,9787 | 0,58  | 0,161  |
| 21 | P35237 SPB6_HUMAN  | K.SGGGGDIHQGFQSLLEVNK.T    | 3 | 3,9715 | 0,318 | -0,179 |
| 21 | O75694 NU155_HUMAN | K.HGEPEEDIVGLQAFQER.L      | 3 | 3,9681 | 0,249 | 0      |
| 21 | Q9Y265 RUVB1_HUMAN | K.EHVVEISELFYDAK.S         | 3 | 3,9616 | 0,376 | 0      |

|    |                     |                            |   |        |       |        |
|----|---------------------|----------------------------|---|--------|-------|--------|
| 21 | P49591 SYSC_HUMAN   | K.IEQFVYSSPHDNK.S          | 2 | 3,9533 | 0,259 | 0,156  |
| 21 | P06493 CDC2_HUMAN   | R.HPNIVSLQDVLVLM*QDSR.L    | 3 | 3,9511 | 0,392 | -0,294 |
| 21 | P68400 CSK21_HUMAN  | R.GKYSEVFEAINITNNEK.V      | 3 | 3,9476 | 0,177 | -0,655 |
| 21 | P52907 CAZA1_HUMAN  | K.DHYSNGFCTVYAK.T          | 2 | 3,9339 | 0,552 | 0,078  |
| 21 | P26641 EF1G_HUMAN   | R.KLDPGSEETQTLVR.E         | 3 | 3,9277 | 0,291 | 0      |
| 21 | O43395 PRPF3_HUMAN  | R.FVDKLFEEAVEEGR.S         | 2 | 3,9252 | 0,488 | 0      |
| 21 | Q13263 TIF1B_HUMAN  | K.DHQYQFLEDAVR.N           | 2 | 3,9179 | 0,569 | 0,241  |
| 21 | P07900 HS90A_HUMAN  | K.SLTNDWEDHLAVK.H          | 2 | 3,9153 | 0,405 | 0,479  |
| 21 | P05198 IF2A_HUMAN   | K.HAVSDPSILDSLNLNEDER.E    | 3 | 3,9062 | 0,204 | -0,258 |
| 21 | Q15149 PLEC1_HUMAN  | R.EQLRQEQALLEEIER.H        | 3 | 3,9045 | 0,306 | 0      |
| 21 | P50454 SERPH_HUMAN  | R.TGLYNYDDDEKEK.L          | 2 | 3,9014 | 0,388 | 0,298  |
| 21 | P35080 PROF2_HUMAN  | K.DREGFFTNGTLGAK.K         | 3 | 3,9011 | 0,354 | -0,112 |
| 21 | P26038 MOES_HUMAN   | R.GM*LREDAVLEYLK.I         | 3 | 3,8911 | 0,309 | 0,236  |
| 21 | Q9Y678 COPG_HUMAN   | K.HPSAVTACNLDLLENLVTDSNR.S | 3 | 3,8893 | 0,37  | -0,315 |
| 21 | O43402 CX4NB_HUMAN  | K.DHSYVIAGYYQANER.V        | 3 | 3,8862 | 0,319 | -0,41  |
| 21 | P35579 MYH9_HUMAN   | K.KLEEEQIILEDQNCK.L        | 3 | 3,8798 | 0,331 | 0      |
| 21 | P22234 PUR6_HUMAN   | K.TKEYVELLDSPGK.V          | 2 | 3,8644 | 0,368 | -0,082 |
| 21 | Q02952 AKA12_HUMAN  | K.LEHETAVTVSEEVSK.Q        | 3 | 3,8627 | 0,344 | 0,11   |
| 21 | P39023 RL3_HUMAN    | K.TVFAEHISDECK.R           | 2 | 3,8592 | 0,466 | 0,425  |
| 21 | B2RDE1 B2RDE1_HUMAN | R.KIQVLQQQADDAEER.A        | 3 | 3,828  | 0,421 | 0      |
| 21 | O15347 HMGB3_HUMAN  | K.KNPEVPVNFAEFSK.K         | 3 | 3,8179 | 0,373 | 0      |
| 21 | P58546 MTPN_HUMAN   | K.NGDLDEVKDYVAK.G          | 2 | 3,8089 | 0,483 | -0,666 |
| 21 | Q8WUA2 PPIL4_HUMAN  | K.QDTKYDLILDEQAEDSK.S      | 3 | 3,7986 | 0,369 | 0,091  |
| 21 | O75534 CSDE1_HUMAN  | K.EKEAEDGIIAYDDCGVK.L      | 3 | 3,7855 | 0,398 | -0,383 |
| 21 | P36543 VATE1_HUMAN  | R.ARDDLITDLLNEAK.Q         | 3 | 3,7798 | 0,235 | -0,23  |
| 21 | P15880 RS2_HUMAN    | K.SPYQEFTDHLVK.T           | 3 | 3,7737 | 0,369 | 0,125  |
| 21 | Q00610 CLH1_HUMAN   | R.KFNALFAQGNYSEAAK.V       | 3 | 3,7716 | 0,368 | 0,312  |
| 21 | P61247 RS3A_HUMAN   | R.EVQTNDLKEVVNK.L          | 2 | 3,7687 | 0,354 | -0,241 |
| 21 | O75694 NU155_HUMAN  | K.HGEPEEDIVGLQAFQER.L      | 2 | 3,7669 | 0,487 | 0,624  |
| 21 | P08195 4F2_HUMAN    | K.IKVAEDEAEAAAAAK.F        | 3 | 3,7664 | 0,25  | 0,43   |
| 21 | P42704 LPPRC_HUMAN  | K.LVEKGETDLIQK.A           | 2 | 3,7652 | 0,309 | -0,267 |
| 21 | P62495 ERF1_HUMAN   | R.KVAETAVQLFISGDK.V        | 3 | 3,7633 | 0,195 | -0,114 |
| 21 | P54652 HSP72_HUMAN  | K.STAGDTHLGGEDFDNR.M       | 2 | 3,7618 | 0,51  | 0,072  |

|    |                    |                        |   |        |       |        |
|----|--------------------|------------------------|---|--------|-------|--------|
| 21 | Q15149 PLEC1_HUMAN | K.DTHDQLSEPSEVR.S      | 2 | 3,7486 | 0,469 | 0      |
| 21 | P27824 CALX_HUMAN  | K.TPELNLDQFHDK.T       | 2 | 3,7421 | 0,418 | 0,167  |
| 21 | Q9Y265 RUVB1_HUMAN | K.EHVEEISELFYDAK.S     | 2 | 3,7411 | 0,537 | -0,214 |
| 21 | P25325 THTM_HUMAN  | R.HIPGAFFDIDQCSDR.T    | 3 | 3,7409 | 0,248 | -0,099 |
| 21 | Q01082 SPTB2_HUMAN | K.HLLGVEDLLQK.H        | 3 | 3,7353 | 0,112 | 0,072  |
| 21 | P60842 IF4A1_HUMAN | R.GFKDQIYDIFQK.L       | 2 | 3,735  | 0,31  | -0,406 |
| 21 | P09622 DLDH_HUMAN  | K.SEEQLKEEGIEYK.V      | 2 | 3,733  | 0,465 | -0,308 |
| 21 | P19338 NUCL_HUMAN  | R.KFGYVDFESAEDLEK.A    | 3 | 3,7229 | 0,295 | -0,103 |
| 21 | P35580 MYH10_HUMAN | R.HATALEELSEQLEQAK.R   | 3 | 3,7148 | 0,325 | -0,611 |
| 21 | P09874 PARP1_HUMAN | R.GGSDDSSKDPIDVNYEK.L  | 3 | 3,7143 | 0,211 | 0,2    |
| 21 | Q02952 AKA12_HUMAN | K.EESESTAVGQAHS DISK.D | 2 | 3,7134 | 0,515 | 0,344  |
| 21 | P14625 ENPL_HUMAN  | K.EVEEDEYKAFYK.S       | 2 | 3,7127 | 0,24  | 1,181  |
| 21 | Q86UA1 PRP39_HUMAN | R.KVEFLEDFGSDV NK.L    | 3 | 3,7118 | 0,234 | 0      |
| 21 | O75347 TBCA_HUMAN  | K.DLEEAEEYKEAR.L       | 2 | 3,7097 | 0,46  | -0,082 |
| 21 | Q96EU6 CF153_HUMAN | R.DREEDGGGLEPAAVAR.D   | 2 | 3,7022 | 0,401 | 0,669  |
| 21 | Q8N3U4 STAG2_HUMAN | R.SQLIDELADKFNR.L      | 2 | 3,6913 | 0,381 | -0,236 |
| 21 | P25398 RS12_HUMAN  | K.ESQAKDVIEEYFK.C      | 2 | 3,6912 | 0,455 | -0,385 |
| 21 | P08670 VIME_HUMAN  | R.VEVERDNLAEDIM*R.L    | 3 | 3,6911 | 0,343 | 0,215  |
| 21 | P54577 SYYC_HUMAN  | K.M*SSSEEEKIDLLDR.K    | 3 | 3,6873 | 0,363 | 0,208  |
| 21 | P62136 PP1A_HUMAN  | R.AHQVVEDGYEFFAK.R     | 2 | 3,6865 | 0,599 | 0      |
| 21 | P23526 SAHH_HUMAN  | R.GISEETTTGVHNLK.M     | 2 | 3,6863 | 0,453 | 0,444  |
| 21 | P62851 RS25_HUMAN  | R.DKLNNLVLFDK.A        | 2 | 3,6851 | 0,335 | -0,093 |
| 21 | O15160 RPAC1_HUMAN | K.DSSDPNELVYVNHK.V     | 2 | 3,6834 | 0,488 | 0,161  |
| 21 | P26038 MOES_HUMAN  | R.QEAEAKEALLQASR.D     | 3 | 3,6809 | 0,432 | 0,219  |
| 21 | P46013 KI67_HUMAN  | K.VGVKEELLAVGK.F       | 3 | 3,6799 | 0,376 | -0,368 |
| 21 | Q99700 ATX2_HUMAN  | K.CDLVLDAAEHEK.S       | 3 | 3,6751 | 0,273 | 0      |
| 21 | P48556 PSMD8_HUMAN | K.HPVLSLEQYLM*EGSYNK.V | 2 | 3,6734 | 0,524 | -0,192 |
| 21 | Q01813 K6PP_HUMAN  | R.DLQSNVEHLTEK.M       | 2 | 3,669  | 0,389 | -0,518 |
| 21 | P62495 ERF1_HUMAN  | K.FHTEALTALLSDDSK.F    | 2 | 3,6687 | 0,587 | -0,148 |
| 21 | O75832 PSD10_HUMAN | K.LEELKESILADK.S       | 2 | 3,6681 | 0,277 | 0,791  |
| 21 | Q9Y2B0 CNPY2_HUMAN | R.SEAHLTELLEEICDR.M    | 3 | 3,6622 | 0,269 | -0,302 |
| 21 | P60842 IF4A1_HUMAN | R.GFKDQIYDIFQK.L       | 3 | 3,6616 | 0,413 | -0,061 |
| 21 | Q14320 FA50A_HUMAN | K.FSAHYDAVEAELK.S      | 3 | 3,6591 | 0,323 | 0,124  |

|    |                    |                           |   |        |       |        |
|----|--------------------|---------------------------|---|--------|-------|--------|
| 21 | P60174 TPIS_HUMAN  | K.DCGATWVVLGHSER.R        | 2 | 3,6589 | 0,459 | 0,538  |
| 21 | P62888 RL30_HUMAN  | R.KSEIEYYAM*LAK.T         | 2 | 3,6572 | 0,414 | 0,334  |
| 21 | Q9BXF6 RFIP5_HUMAN | R.DEHVQELESYIDR.L         | 3 | 3,6547 | 0,38  | 0,112  |
| 21 | O75874 IDHC_HUMAN  | R.FKDIFQEIYDK.Q           | 2 | 3,6525 | 0,272 | -0,253 |
| 21 | Q8N5K1 CISD2_HUMAN | K.HNELTGDNVGPLILK.K       | 2 | 3,6312 | 0,491 | -0,301 |
| 21 | Q13310 PABP4_HUMAN | K.NLDDTIDDEKLR.K          | 2 | 3,6303 | 0,349 | 0,253  |
| 21 | O75494 FUSIP_HUMAN | R.DAEDALHNLDLDR.K         | 2 | 3,6267 | 0,33  | 0,096  |
| 21 | P00558 PGK1_HUMAN  | K.VSHVSTGGGASLELLEGG.V    | 3 | 3,6231 | 0,406 | 0,21   |
| 21 | Q9Y3F4 STRAP_HUMAN | R.IYDLNKPEAEPK.E          | 2 | 3,6188 | 0,333 | 0,172  |
| 21 | P46777 RL5_HUMAN   | R.YLM*EEDEDAYKK.Q         | 2 | 3,6183 | 0,341 | 0,079  |
| 21 | P68104 EF1A1_HUMAN | K.YYVTIIDAPGHR.D          | 3 | 3,6163 | 0,401 | 0,195  |
| 21 | P35232 PHB_HUMAN   | R.KLEAAEDIAYQLSR.S        | 3 | 3,6158 | 0,38  | 0,341  |
| 21 | P38646 GRP75_HUMAN | K.M*EEFKDQLPADECNK.L      | 2 | 3,6156 | 0,48  | 0,848  |
| 21 | P14625 ENPL_HUMAN  | R.ELISNASDALDKIR.L        | 2 | 3,6151 | 0,492 | -0,316 |
| 21 | P84077 ARF1_HUMAN  | R.HYFQNTQGLIFVVDSDNR.E    | 3 | 3,5881 | 0,212 | -0,425 |
| 21 | P63313 TYB10_HUMAN | K.NTLPTKETIEQEK.R         | 2 | 3,5881 | 0,207 | -0,08  |
| 21 | Q14789 GOGB1_HUMAN | K.SLKDQLTDLNSLEK.C        | 2 | 3,5856 | 0,432 | 0      |
| 21 | P09936 UCHL1_HUMAN | K.QIEELKGQEVSPK.V         | 2 | 3,5829 | 0,461 | 0,164  |
| 21 | Q9UBF2 COPG2_HUMAN | K.HPSAVTACNLDLENLITDSNR.S | 3 | 3,5823 | 0,407 | -0,313 |
| 21 | P35998 PRS7_HUMAN  | R.KIEFSLPDLEGR.T          | 2 | 3,5775 | 0,427 | -0,348 |
| 21 | Q13813 SPTA2_HUMAN | R.KVEDLFLTFK.K            | 2 | 3,569  | 0,3   | -0,558 |
| 21 | P61011 SRP54_HUMAN | K.DKVDVASVIVTK.L          | 3 | 3,5677 | 0,352 | 0      |
| 21 | P02545 LMNA_HUMAN  | R.LQTM*KEELDFQK.N         | 2 | 3,5658 | 0,377 | 0,16   |
| 21 | P05976 MLE1_HUMAN  | R.VFDKEGNGTVM*GAELR.H     | 2 | 3,5644 | 0,401 | 0,561  |
| 21 | Q96ER9 CCD51_HUMAN | R.DLHNLM*VDLR.G           | 3 | 3,5536 | 0,33  | 0,074  |
| 21 | P50991 TCPD_HUMAN  | K.GIHPTIISESFQK.A         | 3 | 3,5506 | 0,304 | 0,126  |
| 21 | Q08EQ4 TMSL1_HUMAN | K.NPLPSKETIEQEKQAGES.-    | 2 | 3,5423 | 0,35  | 0,553  |
| 21 | P33316 DUT_HUMAN   | K.HFIDVGAGVIDEDYR.G       | 3 | 3,5387 | 0,107 | -0,214 |
| 21 | P22061 PIMT_HUMAN  | K.TDKVFEVM*LATDR.S        | 3 | 3,5363 | 0,317 | 0      |
| 21 | Q9UJX4 APC5_HUMAN  | K.KAEALEAAIENLNEAK.N      | 2 | 3,5357 | 0,369 | 0,285  |
| 21 | P27635 RL10_HUMAN  | K.FNADEFEDM*VAEKR.L       | 2 | 3,5281 | 0,445 | 0,426  |
| 21 | P07951 TPM2_HUMAN  | R.KLVILEGELER.S           | 3 | 3,5272 | 0,37  | 0,282  |
| 21 | O60506 HNRPQ_HUMAN | R.GFCFLEYEDHK.T           | 2 | 3,5225 | 0,434 | 0,169  |

|    |                     |                          |   |        |       |        |
|----|---------------------|--------------------------|---|--------|-------|--------|
| 21 | Q9GZT8 NIF3L_HUMAN  | R.DM*LDSHLENK.I          | 2 | 3,5224 | 0,273 | 0,1    |
| 21 | P78371 TCPB_HUMAN   | R.SLHDALCVLAQTVK.D       | 2 | 3,5172 | 0,521 | -0,314 |
| 21 | Q9BR76 COR1B_HUMAN  | R.AGEAGKLEEVN*QELR.A     | 3 | 3,5162 | 0,276 | -0,218 |
| 21 | Q9BZI7 REN3B_HUMAN  | R.DRFDGYVFLDNK.G         | 2 | 3,5144 | 0,171 | 0,082  |
| 21 | O75153 EIF3X_HUMAN  | K.VKELAETIAADDGTDPR.S    | 3 | 3,5072 | 0,326 | 0      |
| 21 | P51572 BAP31_HUMAN  | K.LDVGNAEVKLEENR.S       | 3 | 3,5064 | 0,47  | -0,533 |
| 21 | P06733 ENOA_HUMAN   | K.IDKLM*IEM*DGTEENK.S    | 2 | 3,5029 | 0,442 | 0,146  |
| 21 | Q13885 TBB2A_HUMAN  | R.EIVHIQAGQCGNQIGAK.F    | 2 | 3,4961 | 0,441 | 0,201  |
| 21 | P25705 ATPA_HUMAN   | K.HALIIYDDLKQ.Q          | 2 | 3,4907 | 0,399 | 0,189  |
| 21 | O14980 XPO1_HUMAN   | K.NVDILKDPETVK.Q         | 2 | 3,4907 | 0,352 | 0,623  |
| 21 | Q99873 ANM1_HUMAN   | K.GKVEEVELPVEK.V         | 2 | 3,4886 | 0,413 | 0,18   |
| 21 | P30044 PRDX5_HUMAN  | K.THLPGFVEQAEALK.A       | 3 | 3,4882 | 0,303 | 0,238  |
| 21 | O75874 IDHC_HUMAN   | R.FKDIFQEYDK.Q           | 3 | 3,4857 | 0,171 | 0      |
| 21 | P43243 MATR3_HUMAN  | R.DLDELSRYPEDK.I         | 2 | 3,4799 | 0,238 | -0,082 |
| 21 | P55884 EIF3B_HUMAN  | K.ITNDFYPEEDGKTK.G       | 2 | 3,4746 | 0,456 | 0,81   |
| 21 | Q5TFE4 NT5D1_HUMAN  | K.DIVAAIQHNYK.M          | 2 | 3,4696 | 0,235 | -0,192 |
| 21 | P00558 PGK1_HUMAN   | K.VADKIQLINNM*LDK.V      | 3 | 3,4694 | 0,322 | 0,112  |
| 21 | Q8WWM7 ATX2L_HUMAN  | K.DKFTDSAIAM*NSK.V       | 2 | 3,4652 | 0,468 | 0      |
| 21 | Q9Y2L1 RRP44_HUMAN  | K.IEDTVFHVFDK.V          | 2 | 3,4647 | 0,408 | 0      |
| 21 | P07237 PDIA1_HUMAN  | K.YQLDKDGVVLFK.K         | 2 | 3,4598 | 0,373 | 0,086  |
| 21 | O95793 STAU1_HUMAN  | K.NAAIAVLEELKK.L         | 2 | 3,4524 | 0,349 | -0,47  |
| 21 | Q9NR30 DDX21_HUMAN  | K.SDKTEEIAEEEEETVFPK.A   | 3 | 3,451  | 0,274 | 0      |
| 21 | B2RDE1 B2RDE1_HUMAN | R.KIQVLQQQADDAEER.A      | 2 | 3,4484 | 0,527 | 0,62   |
| 21 | Q14240 IF4A2_HUMAN  | R.GFKDQIYEIFQK.L         | 3 | 3,4451 | 0,288 | -0,241 |
| 21 | P23258 TBG1_HUMAN   | K.IHEDIFDIIDR.E          | 2 | 3,4403 | 0,446 | -0,264 |
| 21 | Q9BT25 NYS48_HUMAN  | R.SFAQVLELSAEASK.E       | 2 | 3,4386 | 0,501 | -0,577 |
| 21 | P14866 HNRPL_HUMAN  | K.SKPGAAM*VEM*ADGYAVDR.A | 3 | 3,4361 | 0,392 | 0,096  |
| 21 | P10301 RRAS_HUMAN   | K.DRDDFPVVLVGNK.A        | 3 | 3,4297 | 0,168 | 0,062  |
| 21 | Q96KR1 ZFR_HUMAN    | R.DSDGVDGFEEAGKK.D       | 2 | 3,4214 | 0,437 | 0,42   |
| 21 | P29375 JAD1A_HUMAN  | K.NLLDDVEEFHER.A         | 2 | 3,4203 | 0,355 | -0,724 |
| 21 | P19338 NUCL_HUMAN   | K.TEADA EKTFEEK.Q        | 2 | 3,4128 | 0,44  | 0,175  |
| 21 | Q9BV73 CP250_HUMAN  | R.DRQDLAEQLQLSSAK.E      | 2 | 3,4083 | 0,429 | -0,694 |
| 21 | P13489 RINI_HUMAN   | K.ESLKELSLAGNELGDEGAR.L  | 3 | 3,408  | 0,191 | 0      |

|    |                     |                                |   |        |       |        |
|----|---------------------|--------------------------------|---|--------|-------|--------|
| 21 | Q8IWS0 PHF6_HUMAN   | R.DKECGQLLISENQK.V             | 3 | 3,4073 | 0,148 | 0,33   |
| 21 | Q15459 SF3A1_HUMAN  | K.IGEEEEIQKPEEK.V              | 2 | 3,3952 | 0,277 | 0,171  |
| 21 | Q14974 IMB1_HUMAN   | K.TVSPDRLELEAAQK.F             | 2 | 3,3941 | 0,236 | 0,392  |
| 21 | Q08211 DHX9_HUMAN   | R.TPLHEIALSIK.L                | 3 | 3,3891 | 0,373 | -0,299 |
| 21 | P46063 RECQ1_HUMAN  | R.QKPSNTEDFIEDIVK.L            | 3 | 3,3823 | 0,262 | -0,311 |
| 21 | Q96NC0 ZMAT2_HUMAN  | K.DSINFLDHINGK.K               | 2 | 3,3797 | 0,29  | -0,622 |
| 21 | P62333 PRS10_HUMAN  | R.ADHDFVQEDFM*K.A              | 2 | 3,3708 | 0,386 | 0      |
| 21 | Q7Z6B7 SRGP1_HUMAN  | K.DKEIIAEYESQVK.E              | 3 | 3,3699 | 0,263 | 0,236  |
| 21 | O75832 PSD10_HUMAN  | K.LEELKESILADK.S               | 3 | 3,3661 | 0,368 | -0,329 |
| 21 | P54577 SYYC_HUMAN   | K.M*SSSEEEKIDLLDR.K            | 2 | 3,3658 | 0,425 | 0,209  |
| 21 | Q9HAU5 RENT2_HUMAN  | K.HVPCVEDEDFIQALDK.M           | 3 | 3,352  | 0,229 | -0,287 |
| 21 | Q9P0L0 VAPA_HUMAN   | K.HEQILVLDPPTDLK.F             | 2 | 3,3517 | 0,398 | 0,151  |
| 21 | Q12874 SF3A3_HUMAN  | R.VKPLQDQNELFGK.I              | 3 | 3,344  | 0,288 | 0      |
| 21 | P20042 IF2B_HUMAN   | K.KDASDDLDDLNFFNQK.K           | 3 | 3,3432 | 0,149 | -0,291 |
| 21 | P52565 GDIR1_HUMAN  | K.IDKTDYM*VGSYGPR.A            | 3 | 3,3411 | 0,261 | 0,226  |
| 21 | P16401 H15_HUMAN    | R.KATGPPVSELITK.A              | 2 | 3,3282 | 0,356 | 0      |
| 21 | P55060 XPO2_HUMAN   | R.IVEDEPNKICEADR.V             | 2 | 3,3241 | 0,326 | 0,217  |
| 21 | O75794 CD123_HUMAN  | R.DYTQYYDHISK.Q                | 2 | 3,3222 | 0,46  | -0,17  |
| 21 | Q16352 AINX_HUMAN   | R.HSAEVAGYQDSIGQLENDLR.N       | 3 | 3,3211 | 0,283 | -0,249 |
| 21 | P11021 GRP78_HUMAN  | K.KSQIFSTASDNQPTVTIK.V         | 3 | 3,3158 | 0,359 | 0,093  |
| 21 | Q9NZM1 MYOF_HUMAN   | R.FKGFPQPILSEDGSR.I            | 3 | 3,3158 | 0,198 | 0      |
| 21 | P17655 CAN2_HUMAN   | K.GHAYSVTGAEVEENGLQK.L         | 3 | 3,3145 | 0,258 | 1,064  |
| 21 | Q9NYJ1 CHCH8_HUMAN  | K.KDDEEDPLDQLISR.S             | 3 | 3,3138 | 0,231 | -0,305 |
| 21 | Q13642 FHL1_HUMAN   | K.GEDFYCVTCHETK.F              | 2 | 3,3072 | 0,462 | 1,26   |
| 21 | P06733 ENOA_HUMAN   | K.YDLDFKSPDDPSR.Y              | 2 | 3,3045 | 0,366 | -0,471 |
| 21 | Q92896 GSLG1_HUMAN  | R.VAELSSDDFHLDR.H              | 3 | 3,3044 | 0,354 | -0,243 |
| 21 | P35580 MYH10_HUMAN  | K.ADFCIIHYAGK.V                | 2 | 3,3021 | 0,397 | 0,471  |
| 21 | P05023 AT1A1_HUMAN  | R.DKYEPAAVSEQGDK.K             | 2 | 3,3012 | 0,345 | 0,238  |
| 21 | Q9UQ80 PA2G4_HUMAN  | K.HELLQPFNVLYEK.E              | 3 | 3,2985 | 0,297 | 0,112  |
| 21 | P62805 H4_HUMAN     | R.KTVTAM*DVVYALK.R             | 3 | 3,2983 | 0,379 | 0      |
| 21 | Q09028 RBBP4_HUMAN  | K.IGEEQSPEDAEDGPELLFIHGGHTAK.I | 3 | 3,2913 | 0,445 | 0,382  |
| 21 | P55145 ARMET_HUMAN  | K.DSQICELKYDK.Q                | 2 | 3,2722 | 0,364 | 0,174  |
| 21 | Q05D20 Q05D20_HUMAN | K.DSRPSQAAGDNQGDEVK.E          | 2 | 3,2696 | 0,325 | -0,757 |

|    |                    |                          |   |        |       |        |
|----|--------------------|--------------------------|---|--------|-------|--------|
| 21 | P26641 EF1G_HUMAN  | R.KLDPGSEETQTLVR.E       | 2 | 3,2641 | 0,419 | 0,078  |
| 21 | P42704 LPPRC_HUMAN | K.EKNVQGIIEILK.G         | 2 | 3,2562 | 0,236 | 0,176  |
| 21 | P11021 GRP78_HUMAN | R.AKFEELNM*DLFR.S        | 2 | 3,2538 | 0,514 | -0,319 |
| 21 | P42704 LPPRC_HUMAN | R.KVIEEQLEPAVEK.I        | 3 | 3,2483 | 0,141 | 0,242  |
| 21 | Q92598 HS105_HUMAN | K.EKENLSYDLVPLK.N        | 2 | 3,2479 | 0,423 | 0      |
| 21 | Q9H8Y8 GORS2_HUMAN | K.DNDTLKDLLK.A           | 2 | 3,2473 | 0,216 | -0,415 |
| 21 | O75369 FLNB_HUMAN  | R.VEVGKDQEFVDTR.G        | 3 | 3,2465 | 0,426 | 0,113  |
| 21 | P35579 MYH9_HUMAN  | K.KANLQIDQINTDLNLER.S    | 2 | 3,2457 | 0,321 | -0,611 |
| 21 | Q13185 CBX3_HUMAN  | K.KVEEAPEEFVVEK.V        | 3 | 3,241  | 0,369 | -0,44  |
| 21 | P00338 LDHA_HUMAN  | K.DQLIYNLLKEEQTPQNK.I    | 3 | 3,238  | 0,142 | -0,265 |
| 21 | P68104 EF1A1_HUMAN | R.EHALLAYTLGVK.Q         | 3 | 3,2367 | 0,286 | -0,278 |
| 21 | Q8IV38 ANKY2_HUMAN | K.DGENKLDTLIK.S          | 3 | 3,2366 | 0,255 | 0,22   |
| 21 | Q9Y2Q3 GSTK1_HUMAN | R.M*ELLAHLLGEK.W         | 2 | 3,2352 | 0,416 | -0,384 |
| 21 | P53985 MOT1_HUMAN  | K.DLHDANTDLIGR.H         | 3 | 3,2335 | 0,328 | -0,546 |
| 21 | P61011 SRP54_HUMAN | K.DKVDVASVIVTK.L         | 2 | 3,227  | 0,348 | 0      |
| 21 | Q8TEX9 IPO4_HUMAN  | K.QHTDSFQAALGSLPVDK.A    | 2 | 3,2261 | 0,259 | 0,135  |
| 21 | Q9P0L0 VAPA_HUMAN  | K.HEQILVLDPPDLDK.F       | 3 | 3,2252 | 0,238 | 0      |
| 21 | Q9Y312 CT004_HUMAN | K.HSM*DLSYALETVLNK.Q     | 3 | 3,2218 | 0,267 | -0,316 |
| 21 | P78417 GSTO1_HUMAN | K.EFTKLEEVLTNK.K         | 2 | 3,2217 | 0,446 | -0,252 |
| 21 | P08670 VIME_HUMAN  | R.LQDEIQNM*KEEM*AR.H     | 2 | 3,2179 | 0,537 | -0,621 |
| 21 | Q15149 PLEC1_HUMAN | R.EQLRQEQALLEEIER.H      | 2 | 3,2175 | 0,321 | -0,13  |
| 21 | Q9P0L0 VAPA_HUMAN  | K.FKGPFTDVVTTNLK.L       | 3 | 3,2167 | 0,186 | 0,233  |
| 21 | Q03701 CEBPZ_HUMAN | K.DKQNIFFER.Q            | 2 | 3,2049 | 0,401 | -0,248 |
| 21 | Q9UNH7 SNX6_HUMAN  | K.DVDDFFEHER.T           | 2 | 3,2038 | 0,493 | 0,186  |
| 21 | Q15424 SAFB1_HUMAN | R.KFDFDACNEVPPAPK.E      | 2 | 3,2038 | 0,354 | -0,703 |
| 21 | Q96AG4 LRC59_HUMAN | R.LVNLQHLDLLNNK.L        | 3 | 3,2008 | 0,441 | 0,06   |
| 21 | O43852 CALU_HUMAN  | K.TFDQLTPEESKER.L        | 2 | 3,1974 | 0,328 | 0,618  |
| 21 | P62244 RS15A_HUMAN | R.FDVQLKDLEK.W           | 3 | 3,1962 | 0,237 | 0,148  |
| 21 | Q58FF8 H90B2_HUMAN | R.YESLTDPSKLDLSDGK.E     | 2 | 3,1936 | 0,547 | 0,158  |
| 21 | Q9BTT0 AN32E_HUMAN | K.IKDLSTVEALQNLK.N       | 3 | 3,1921 | 0,287 | 0,116  |
| 21 | Q9H583 HEAT1_HUMAN | K.ITKPFFAAISDEK.V        | 3 | 3,1861 | 0,181 | 0,062  |
| 21 | P49642 PRI1_HUMAN  | K.VFEHFLENLDK.S          | 3 | 3,1855 | 0,323 | -0,131 |
| 21 | P62873 GBB1_HUMAN  | R.KACADATLSQITNNIDPVGR.I | 3 | 3,1806 | 0,183 | 0,256  |



|    |                    |                          |   |        |       |        |
|----|--------------------|--------------------------|---|--------|-------|--------|
| 21 | P08579 RU2B_HUMAN  | R.HDIAFVEFENDGQAGAAR.D   | 3 | 3,1781 | 0,234 | 0,376  |
| 21 | Q8WUA2 PPIL4_HUMAN | R.IGADEEIDDFKGR.S        | 3 | 3,176  | 0,508 | 0,125  |
| 21 | P25440 BRD2_HUMAN  | R.DYRDAQEFAADV.R.L       | 3 | 3,1722 | 0,391 | 0      |
| 21 | Q9H910 HN1L_HUMAN  | K.DHVFLCEGEEP.K.S        | 3 | 3,1707 | 0,263 | 0,188  |
| 21 | Q9BSJ8 ESYT1_HUMAN | R.IHVLEAQDLIAK.D         | 3 | 3,1687 | 0,344 | -0,135 |
| 21 | Q68CQ4 DEF_HUMAN   | R.DFGEEHPFYDR.V          | 2 | 3,1687 | 0,477 | -0,259 |
| 21 | P49642 PRI1_HUMAN  | K.VFEHFLENLDK.S          | 2 | 3,1649 | 0,317 | -0,439 |
| 21 | Q15149 PLEC1_HUMAN | K.DTHDQLSEPSEVR.S        | 3 | 3,1642 | 0,236 | 0,06   |
| 21 | Q9UMX0 UBQL1_HUMAN | K.SHTDQLVLIFAGK.I        | 3 | 3,1634 | 0,13  | 0,128  |
| 21 | P68104 EF1A1_HUMAN | K.YYVTIIDAPGHR.D         | 2 | 3,1591 | 0,431 | 0,087  |
| 21 | O43670 ZN207_HUMAN | K.LIHPDEDISLEER.R        | 3 | 3,1512 | 0,088 | -0,234 |
| 21 | Q15019 SEPT2_HUMAN | R.ILDEIEEHNIK.I          | 2 | 3,1476 | 0,278 | -0,09  |
| 21 | Q9Y5S9 RBM8A_HUMAN | R.M*REDYDSVEQDGDEPGPQR.S | 3 | 3,1439 | 0,31  | -0,082 |
| 21 | P62256 UBE2H_HUMAN | R.VDLPDKYPFK.S           | 3 | 3,1425 | 0,314 | -0,075 |
| 21 | P07737 PROF1_HUMAN | K.TDKTLVLLM*GK.E         | 2 | 3,1407 | 0,405 | 0      |
| 21 | O94776 MTA2_HUMAN  | R.EFEEESKQPGVSEQQR.H     | 3 | 3,1378 | 0,209 | 0,863  |
| 21 | P46734 MP2K3_HUMAN | R.DVKPSNVLINK.E          | 3 | 3,1363 | 0,182 | 0,224  |
| 21 | O43707 ACTN4_HUMAN | R.KDDPVNTLNNAFEVAEK.Y    | 3 | 3,1294 | 0,291 | -0,384 |
| 21 | Q99613 EIF3C_HUMAN | K.DAHNALLDIQSSGR.A       | 2 | 3,1233 | 0,486 | 0,082  |
| 21 | P68104 EF1A1_HUMAN | R.EHALLAYTLGVK.Q         | 2 | 3,1175 | 0,39  | 0,093  |
| 21 | P62805 H4_HUMAN    | R.DAVTYTEHAK.R           | 2 | 3,1162 | 0,339 | -0,215 |
| 21 | Q9H2U1 DHX36_HUMAN | R.REEQIVQLLNSVQAK.N      | 3 | 3,115  | 0,347 | -0,417 |
| 21 | P32929 CGL_HUMAN   | K.NDRDVLGISDTLIR.L       | 2 | 3,1097 | 0,171 | 0      |
| 21 | Q70UQ0 IKIP_HUMAN  | K.DIKDEIAHISDM*N.-       | 2 | 3,1075 | 0,54  | 0,08   |
| 21 | P47897 SYQ_HUMAN   | R.SHPLDPIDTVDFER.E       | 2 | 3,1047 | 0,353 | 0,149  |
| 21 | Q96DE0 NUD16_HUMAN | K.DHGLEVLGLVR.V          | 2 | 3,1011 | 0,578 | -0,404 |
| 21 | P49591 SYSC_HUMAN  | K.IEQFVYSSPHDNK.S        | 3 | 3,0984 | 0,206 | 0,117  |
| 21 | P18206 VINC_HUMAN  | K.SLLDASEEAIKK.D         | 2 | 3,0973 | 0,371 | 0,094  |
| 21 | P62277 RS13_HUMAN  | K.LTSDDVKEQIYK.L         | 2 | 3,0964 | 0,45  | 0,085  |
| 21 | P16403 H12_HUMAN   | R.KASGPPVSELITK.A        | 2 | 3,0943 | 0,365 | 0      |
| 21 | P07951 TPM2_HUMAN  | R.KLVILEGELER.S          | 2 | 3,0942 | 0,391 | 0,094  |
| 21 | P49327 FAS_HUMAN   | R.SDEAVKPFGLK.V          | 2 | 3,0845 | 0,289 | -0,102 |
| 21 | P01112 RASH_HUMAN  | R.VKDSDDVPM*VLVGNK.C     | 3 | 3,073  | 0,102 | 0      |

|    |                     |                         |   |        |       |        |
|----|---------------------|-------------------------|---|--------|-------|--------|
| 21 | P00367 DHE3_HUMAN   | K.HGGTIPIVPTAEFQDR.I    | 2 | 3,0728 | 0,494 | 0,562  |
| 21 | P42704 LPPRC_HUMAN  | K.LVEKGETDLIQK.A        | 3 | 3,0632 | 0,359 | 0      |
| 21 | P62495 ERF1_HUMAN   | K.FHTEALTALLSDDSK.F     | 3 | 3,0576 | 0,238 | 0      |
| 21 | O75642 IF1AH_HUMAN  | R.DYQDNKADVILK.Y        | 3 | 3,0575 | 0,442 | 0,064  |
| 21 | Q9NQP4 PFD4_HUMAN   | K.KAAAEDVNVTFEDQQK.I    | 3 | 3,0574 | 0,1   | 0,51   |
| 21 | P07195 LDHB_HUMAN   | K.IVADKDYSVTANSK.I      | 3 | 3,0565 | 0,277 | -0,303 |
| 21 | P21926 CD9_HUMAN    | K.EVQEFYKDTYNK.L        | 2 | 3,0562 | 0,307 | 0,312  |
| 21 | A6NJL0 A6NJL0_HUMAN | K.TIDDLK.L              | 2 | 3,0555 | 0,333 | 0      |
| 21 | P08195 4F2_HUMAN    | K.FTGLSKEELLK.V         | 2 | 3,055  | 0,218 | -0,193 |
| 21 | Q14240 IF4A2_HUMAN  | R.GFKDQIYEIFQK.L        | 2 | 3,0509 | 0,4   | -0,161 |
| 21 | O60361 NDK8_HUMAN   | K.DRPFPPGLVK.Y          | 2 | 3,0402 | 0,283 | -0,415 |
| 21 | P49750 YLPM1_HUMAN  | K.KDAEEEESELGYIPK.S     | 3 | 3,0381 | 0,274 | -0,632 |
| 21 | Q9UQ80 PA2G4_HUMAN  | K.HELLQPFNVLYEK.E       | 2 | 3,0311 | 0,409 | -0,15  |
| 21 | O14737 PDCD5_HUMAN  | R.LSNLALVKPEK.T         | 3 | 3,0298 | 0,308 | 0      |
| 21 | P20042 IF2B_HUMAN   | K.KIFDIDAEAGV.K         | 2 | 3,0258 | 0,19  | 0,082  |
| 21 | P05023 AT1A1_HUMAN  | R.DKYEPAAVSEQGDK.K      | 3 | 3,0168 | 0,168 | 0,357  |
| 21 | O43390 HNRPR_HUMAN  | K.DYAFVHFEDR.G          | 2 | 3,0116 | 0,435 | -0,094 |
| 21 | P22087 FBRL_HUMAN   | R.VSISEGDDKIEYR.A       | 2 | 3,0098 | 0,44  | 0,646  |
| 21 | Q8NFV4 ABHDB_HUMAN  | R.VNLDALTQHLDK.I        | 3 | 3,0055 | 0,246 | -0,067 |
| 21 | Q15021 CND1_HUMAN   | R.HSQELPAILDDTTLSGSDR.N | 3 | 3,0049 | 0,363 | -0,178 |
| 21 | P63104 1433Z_HUMAN  | R.YLAEVAAGDDKK.G        | 3 | 3,0031 | 0,457 | -0,571 |
| 21 | Q8NBJ5 GT251_HUMAN  | R.NAAHALPTTLGALER.L     | 3 | 2,9942 | 0,247 | 0,357  |
| 21 | P07355 ANXA2_HUMAN  | K.DIISDTSGDFRK.L        | 2 | 2,989  | 0,364 | -0,541 |
| 21 | O15042 SR140_HUMAN  | K.SNLELFKEELK.Q         | 3 | 2,9867 | 0,303 | 0      |
| 21 | Q13347 EIF3I_HUMAN  | K.LFDSTTLEHQK.T         | 2 | 2,9848 | 0,356 | 0,37   |
| 21 | P13010 KU86_HUMAN   | K.EEASGSSVTAEAKK.F      | 2 | 2,9844 | 0,558 | -0,721 |
| 21 | P31943 HNRH1_HUMAN  | R.DLNYCFSGM*SDHR.Y      | 2 | 2,9802 | 0,41  | 0,226  |
| 21 | P63241 IF5A1_HUMAN  | R.LPEGDLGKEIEQK.Y       | 3 | 2,9789 | 0,087 | 0,188  |
| 21 | Q96AE4 FUBP1_HUMAN  | R.IQFKPDDGTTPER.I       | 3 | 2,9768 | 0,326 | 0      |
| 21 | Q9UMX0 UBQL1_HUMAN  | K.EKEEFAVPENSSVQQFK.E   | 3 | 2,9737 | 0,205 | 0      |
| 21 | Q71U36 TBA1A_HUMAN  | R.NLDIERPTYTNLNR.L      | 2 | 2,9684 | 0,211 | 0,213  |
| 21 | P49721 PSB2_HUMAN   | K.NGIHDLDNISFPK.Q       | 2 | 2,9663 | 0,387 | -0,083 |
| 21 | P47897 SYQ_HUMAN    | R.TDFKEEPEPGFK.R        | 2 | 2,9638 | 0,229 | 0,343  |

|    |                    |                           |   |        |       |        |
|----|--------------------|---------------------------|---|--------|-------|--------|
| 21 | Q6S8J3 A26CA_HUMAN | R.AVFPSIVGRPR.Q           | 2 | 2,9575 | 0,182 | -0,305 |
| 21 | P14625 ENPL_HUMAN  | K.DISTNYYASQKK.T          | 2 | 2,9537 | 0,446 | -0,086 |
| 21 | O95260 ATE1_HUMAN  | K.TLSDDIKESLESEGK.N       | 2 | 2,9491 | 0,363 | 0      |
| 21 | Q08EQ4 TMSL1_HUMAN | K.NPLPSKETIEQEKGAGES.-    | 3 | 2,9485 | 0,287 | -0,092 |
| 21 | P60174 TPIS_HUMAN  | K.DCGATWVVLGHSER.R        | 3 | 2,9426 | 0,378 | 0,231  |
| 21 | P14868 SYDC_HUMAN  | R.YGISSM*IQSQEKPDR.V      | 3 | 2,9357 | 0,363 | -0,104 |
| 21 | P08670 VIME_HUMAN  | R.DGQVINETSQHDDLE.-       | 2 | 2,9266 | 0,4   | 0,332  |
| 21 | Q15149 PLEC1_HUMAN | R.SLESLSHFVAAATK.E        | 3 | 2,9214 | 0,254 | 0      |
| 21 | P55084 ECHB_HUMAN  | K.KAQDEGLLSDVVPEFK.V      | 2 | 2,9183 | 0,386 | -0,148 |
| 21 | O95347 SMC2_HUMAN  | K.DQEALEAVKR.L            | 2 | 2,9173 | 0,278 | 0      |
| 21 | Q99613 EIF3C_HUMAN | K.DAHNALLDIQSSGR.A        | 3 | 2,9162 | 0,187 | -0,367 |
| 21 | Q8IWZ8 SF04_HUMAN  | K.DNPAFAFLHDK.N           | 2 | 2,9155 | 0,425 | 0      |
| 21 | P49327 FAS_HUMAN   | R.FDASFFGVHPK.Q           | 3 | 2,9108 | 0,415 | 0,365  |
| 21 | O00186 STXB3_HUMAN | K.SVDCFLHDFASK.S          | 2 | 2,9101 | 0,352 | -0,171 |
| 21 | Q14203 DCTN1_HUMAN | R.AESLQQEVEALKER.V        | 3 | 2,9072 | 0,382 | -0,112 |
| 21 | Q9UBD5 ORC3_HUMAN  | R.KISLPIEDYFNK.G          | 3 | 2,9058 | 0,195 | -0,312 |
| 21 | P55084 ECHB_HUMAN  | K.KAQDEGLLSDVVPEFK.V      | 3 | 2,9026 | 0,3   | -0,222 |
| 21 | Q9H2M9 RBGPR_HUMAN | R.DAENPDEPKEGVNR.S        | 2 | 2,9015 | 0,304 | -0,078 |
| 21 | P04406 G3P_HUMAN   | R.VVDLM*AHM*ASKE.-        | 2 | 2,9008 | 0,401 | -0,716 |
| 21 | Q9Y2Q3 GSTK1_HUMAN | R.M*ELLAHLLGEK.W          | 3 | 2,8985 | 0,263 | -0,072 |
| 21 | Q9H553 ALG2_HUMAN  | R.DSVPKPSVLFHPDLGVGGAER.L | 3 | 2,8889 | 0,145 | -0,32  |
| 21 | Q8NI77 KI18A_HUMAN | K.SSEEILHLLDNGNK.N        | 2 | 2,886  | 0,257 | 0,233  |
| 21 | Q15050 RRS1_HUMAN  | R.KFQPLFGDFAAEK.K         | 2 | 2,88   | 0,149 | -0,244 |
| 21 | P21333 FLNA_HUMAN  | K.VDVGKDQEFTVK.S          | 2 | 2,8796 | 0,373 | -0,268 |
| 21 | P47897 SYQ_HUMAN   | R.TDFKEEPEPGFK.R          | 3 | 2,8782 | 0,389 | 0,257  |
| 21 | Q15050 RRS1_HUMAN  | R.KFQPLFGDFAAEK.K         | 3 | 2,8774 | 0,158 | 0      |
| 21 | P40227 TCPZ_HUMAN  | R.EM*DRETLDIVAR.T         | 3 | 2,8771 | 0,118 | 0,187  |
| 21 | P29144 TPP2_HUMAN  | K.DLKEEFTEALR.D           | 3 | 2,8756 | 0,225 | 0      |
| 21 | P55884 EIF3B_HUMAN | K.ITNDFYPEEDGKTK.G        | 3 | 2,8723 | 0,227 | 0      |
| 21 | Q13151 ROA0_HUMAN  | R.GFGFVYFQNHDAADK.A       | 2 | 2,8718 | 0,271 | 0,569  |
| 21 | P50991 TCPD_HUMAN  | K.GIHPTIISESFQK.A         | 2 | 2,8698 | 0,442 | -0,251 |
| 21 | P12268 IMDH2_HUMAN | K.REDLVVAPAGITLK.E        | 3 | 2,8668 | 0,146 | -0,123 |
| 21 | P46013 KI67_HUMAN  | K.KADVEEEFLAFR.K          | 3 | 2,8602 | 0,14  | -0,126 |

|    |                    |                            |   |        |       |        |
|----|--------------------|----------------------------|---|--------|-------|--------|
| 21 | P06733 ENOA_HUMAN  | K.YDLDFKSPDDPSR.Y          | 3 | 2,8538 | 0,284 | -0,235 |
| 21 | P55209 NP1L1_HUMAN | K.FYEEVHDLER.K             | 2 | 2,8501 | 0,345 | 0      |
| 21 | P00367 DHE3_HUMAN  | K.HGGTIPIVPTAEFQDR.I       | 3 | 2,8499 | 0,111 | 0,21   |
| 21 | Q58FF7 H90B3_HUMAN | R.APFDLFENKK.K             | 2 | 2,8471 | 0,303 | 0,101  |
| 21 | Q99733 NP1L4_HUMAN | R.KYAALYQPLFDK.R           | 3 | 2,845  | 0,24  | 0      |
| 21 | Q9HAU5 RENT2_HUMAN | R.DSLSHDFNGLNLSK.Y         | 3 | 2,8419 | 0,359 | 0,236  |
| 21 | Q14008 CKAP5_HUMAN | R.KEGLDEVAGIINDAK.F        | 3 | 2,8387 | 0,18  | 0      |
| 21 | P63220 RS21_HUMAN  | K.DHASIQM*NVAEVDK.V        | 3 | 2,8324 | 0,312 | -0,233 |
| 21 | P13667 PDIA4_HUMAN | K.DLGLSESGEDVNAAILDESGKK.F | 3 | 2,8296 | 0,169 | 0,733  |
| 21 | P23528 COF1_HUMAN  | K.AVLFCLSEDKK.N            | 2 | 2,8246 | 0,366 | -0,093 |
| 21 | Q15181 IPYR_HUMAN  | K.DPLNPIKQDVK.K            | 3 | 2,8233 | 0,261 | 0,072  |
| 21 | Q9BV57 MTND_HUMAN  | K.LDADKYENDPELEK.I         | 3 | 2,8224 | 0,268 | 0,327  |
| 21 | P29373 RABP2_HUMAN | K.VGEEFEEQTVDGRPCK.S       | 3 | 2,8173 | 0,277 | -0,195 |
| 21 | Q9Y3T9 NOC2L_HUMAN | K.ERLEDLNFPEIK.R           | 3 | 2,8171 | 0,093 | -0,183 |
| 21 | P19338 NUCL_HUMAN  | K.GLSEDTEETLKESFDGSRV.A    | 3 | 2,814  | 0,278 | -0,416 |
| 21 | Q8N5N7 RM50_HUMAN  | R.VRDVLDIFYNVPIQDR.S       | 3 | 2,8081 | 0,256 | -0,198 |
| 21 | P53985 MOT1_HUMAN  | K.DLHDANTDLIGR.H           | 2 | 2,8022 | 0,47  | -0,091 |
| 21 | P16949 STMN1_HUMAN | R.SKESVPEFPLSPPK.K         | 3 | 2,802  | 0,185 | 0      |
| 21 | Q86W50 MET10_HUMAN | K.DKPPDFAYLASK.Y           | 3 | 2,7983 | 0,261 | 0,203  |
| 21 | O15347 HMGB3_HUMAN | K.KNPEVPVNFAEFSK.K         | 2 | 2,7888 | 0,348 | 0,304  |
| 21 | O15144 ARPC2_HUMAN | K.DSIVHQAGM*LK.R           | 2 | 2,7826 | 0,4   | 0      |
| 21 | Q13242 SFRS9_HUMAN | R.GSPHYFSPFRPY.-           | 3 | 2,7805 | 0,095 | -0,126 |
| 21 | P14324 FPPS_HUMAN  | K.QDFVQHFSQIVR.V           | 3 | 2,7758 | 0,408 | 0,061  |
| 21 | Q92688 AN32B_HUMAN | K.LKDISTLEPLK.K            | 2 | 2,7747 | 0,314 | 0,097  |
| 21 | Q15021 CND1_HUMAN  | R.HSQELPAILDDTTLSGSDR.N    | 2 | 2,7681 | 0,503 | -0,356 |
| 21 | Q9BZI7 REN3B_HUMAN | R.DRFDGYVFLDNK.G           | 3 | 2,7591 | 0,317 | 0,061  |
| 21 | P35579 MYH9_HUMAN  | K.QELEEEICHDLEAR.V         | 3 | 2,7571 | 0,141 | 0,334  |
| 21 | Q86V48 LUZP1_HUMAN | R.M*AELEKLEEAFSR.S         | 3 | 2,7531 | 0,294 | -0,466 |
| 21 | Q86VS8 HOOK3_HUMAN | R.DSLKETIEELR.C            | 2 | 2,7498 | 0,341 | 0,275  |
| 21 | Q92526 TCPW_HUMAN  | K.QADLYISEGLHPR.I          | 3 | 2,7466 | 0,254 | -0,183 |
| 21 | Q8IV38 ANKY2_HUMAN | K.DGENKLDTLIK.S            | 2 | 2,7458 | 0,125 | 0,196  |
| 21 | Q9BTL3 F103A_HUMAN | R.FTENDKEYQEYLK.R          | 3 | 2,7433 | 0,356 | -0,536 |
| 21 | P63241 IF5A1_HUMAN | R.EDLRLPEGDLGK.E           | 2 | 2,7417 | 0,345 | -0,727 |

|    |                    |                         |   |        |       |        |
|----|--------------------|-------------------------|---|--------|-------|--------|
| 21 | P49736 MCM2_HUMAN  | R.ISHLPLVEELR.S         | 3 | 2,7412 | 0,098 | 0,07   |
| 21 | P26641 EF1G_HUMAN  | K.STFVLDEFKR.K          | 2 | 2,7324 | 0,4   | -0,098 |
| 21 | P02786 TFR1_HUMAN  | K.DSAQNSVIIVDKNGR.L     | 2 | 2,7306 | 0,202 | 0,302  |
| 21 | O95487 SC24B_HUMAN | K.AEFFQHIEDR.T          | 3 | 2,7279 | 0,459 | -0,195 |
| 21 | P34931 HS71L_HUMAN | K.ATAGDTHLGGEDFDNR.L    | 3 | 2,7253 | 0,458 | 0      |
| 21 | P37198 NUP62_HUMAN | K.RLDQELDFILSQQK.E      | 3 | 2,7235 | 0,276 | -0,633 |
| 21 | Q02880 TOP2B_HUMAN | K.DKLDETGVALK.V         | 2 | 2,7131 | 0,122 | 0,205  |
| 21 | P35613 BASI_HUMAN  | R.KPEDVLDDDDAGSAPLK.S   | 3 | 2,7073 | 0,124 | 0      |
| 21 | Q02878 RL6_HUMAN   | K.VLATVTKPVGGDK.N       | 2 | 2,7007 | 0,505 | 0,19   |
| 21 | Q9NQR4 NIT2_HUMAN  | K.IHLFDIDVPGK.I         | 3 | 2,6946 | 0,181 | 0      |
| 21 | O60506 HNRPQ_HUMAN | K.DYAFIHFDER.D          | 2 | 2,6927 | 0,468 | -0,279 |
| 21 | Q9GZT3 SLIRP_HUMAN | K.LPQTSDEKKDF.-         | 2 | 2,6913 | 0,333 | -0,086 |
| 21 | Q09666 AHNK_HUMAN  | K.VEGDLKGPEVDIK.G       | 2 | 2,6903 | 0,237 | -0,087 |
| 21 | P62937 PPIA_HUMAN  | K.VKEGM*NIVEAM*ER.F     | 3 | 2,6817 | 0,175 | 0,119  |
| 21 | O43847 NRDC_HUMAN  | K.YPDENGDAFLKK.H        | 3 | 2,6696 | 0,222 | 0,355  |
| 21 | P07237 PDIA1_HUMAN | K.THILLFLPK.S           | 2 | 2,6686 | 0,365 | 0      |
| 21 | O75534 CSDE1_HUMAN | K.VGDDVEFEVSSDRR.T      | 3 | 2,6626 | 0,09  | 0      |
| 21 | Q9NQR4 NIT2_HUMAN  | K.IHLFDIDVPGK.I         | 2 | 2,6616 | 0,32  | -0,097 |
| 21 | Q9BSJ8 ESYT1_HUMAN | K.DLDKDDFLGR.C          | 2 | 2,6609 | 0,314 | -0,409 |
| 21 | P33992 MCM5_HUMAN  | K.QPAEHLQLLEAAK.E       | 3 | 2,6574 | 0,141 | 0,116  |
| 21 | Q9UBL3 ASH2L_HUMAN | K.DKDIIPFIDK.Y          | 2 | 2,6542 | 0,234 | -0,101 |
| 21 | Q15181 IPYR_HUMAN  | K.DPLNPIKQDVK.K         | 2 | 2,6479 | 0,253 | 0,096  |
| 21 | P62249 RS16_HUMAN  | K.EIKDILIQYDR.T         | 3 | 2,6467 | 0,087 | -0,065 |
| 21 | P39687 AN32A_HUMAN | K.IKDLSTIEPLK.K         | 3 | 2,6466 | 0,133 | 0,145  |
| 21 | P35579 MYH9_HUMAN  | R.QAQQERDELADEIANSSGK.G | 3 | 2,6433 | 0,214 | 0,35   |
| 21 | Q9UNS2 CSN3_HUMAN  | K.DGM*VSFHDNPEK.Y       | 2 | 2,6423 | 0,264 | 0,088  |
| 21 | P13010 KU86_HUMAN  | K.SQLDIIIHSLK.K         | 2 | 2,6294 | 0,364 | -0,096 |
| 21 | Q99613 EIF3C_HUMAN | R.DFESHITSYK.Q          | 2 | 2,6273 | 0,402 | -0,099 |
| 21 | P47897 SYQ_HUMAN   | R.SHPLDPIDTVDFER.E      | 3 | 2,6269 | 0,145 | 0,334  |
| 21 | Q15811 ITSN1_HUMAN | R.DQLDEVEKETR.S         | 2 | 2,6203 | 0,149 | 0      |
| 21 | P06748 NPM_HUMAN   | K.VDNDENEHQLSLR.T       | 3 | 2,6152 | 0,242 | 0      |
| 21 | P46013 KI67_HUMAN  | R.KADVVEEFLALR.K        | 3 | 2,6123 | 0,116 | -0,064 |
| 21 | Q01082 SPTB2_HUMAN | K.HLLGVEDLLQK.H         | 2 | 2,6088 | 0,407 | -0,289 |

|    |                    |                          |   |        |       |        |
|----|--------------------|--------------------------|---|--------|-------|--------|
| 21 | P15559 NQO1_HUMAN  | K.EGHLSPDIVAEQK.K        | 2 | 2,6051 | 0,354 | 0,086  |
| 21 | P63241 IF5A1_HUMAN | K.VHLVGIDIFTGK.K         | 3 | 2,6048 | 0,257 | 0,211  |
| 21 | P26038 MOES_HUMAN  | R.GM*LREDAVLEYLK.I       | 2 | 2,5985 | 0,133 | -0,314 |
| 21 | P07951 TPM2_HUMAN  | K.QLEEEQALQKK.L          | 2 | 2,5856 | 0,314 | 0,332  |
| 21 | Q00610 CLH1_HUMAN  | K.IVLDNSVFSEHR.N         | 2 | 2,5846 | 0,371 | 1,896  |
| 21 | P19784 CSK22_HUMAN | R.HLVSPEALDLLDK.L        | 2 | 2,5699 | 0,275 | -0,252 |
| 21 | P61289 PSME3_HUMAN | K.KLLELDSFLK.E           | 2 | 2,5503 | 0,333 | -0,506 |
| 21 | P43897 EFTS_HUMAN  | R.EGSLKDQLALAIGK.L       | 2 | 2,543  | 0,281 | -0,254 |
| 21 | Q02952 AKA12_HUMAN | K.SVPEDDGHALLAER.I       | 2 | 2,5385 | 0,389 | 0,162  |
| 21 | P49588 SYAC_HUMAN  | R.EADGILKPLPK.K          | 2 | 2,538  | 0,242 | -0,103 |
| 21 | Q8TC12 RDH11_HUMAN | R.DVEKGELVAK.E           | 2 | 2,5335 | 0,367 | -0,112 |
| 21 | P00558 PGK1_HUMAN  | K.LTLDKLDVK.G            | 2 | 2,5256 | 0,202 | 0,233  |
| 21 | P63241 IF5A1_HUMAN | K.VHLVGIDIFTGK.K         | 2 | 2,5229 | 0,442 | -0,376 |
| 21 | P00558 PGK1_HUMAN  | K.SLLGKDVFLK.D           | 2 | 2,5156 | 0,205 | -0,297 |
| 21 | Q9NYU2 UGGG1_HUMAN | R.DLHPDLEGQLK.E          | 2 | 2,5099 | 0,101 | 0,193  |
| 21 | P29144 TPP2_HUMAN  | K.DLKEEFTEALR.D          | 2 | 2,5088 | 0,262 | -0,361 |
| 21 | P18077 RL35A_HUMAN | R.DETEFYLGKR.C           | 2 | 2,486  | 0,29  | -0,582 |
| 21 | P07910 HNRPC_HUMAN | R.GDDQLELIKDDEK.E        | 2 | 2,4832 | 0,31  | -0,241 |
| 21 | P00491 PNPH_HUMAN  | R.DHINLPGFSGQNPLR.G      | 2 | 2,4829 | 0,229 | -0,22  |
| 21 | O15144 ARPC2_HUMAN | K.ELQAHGADELLK.R         | 2 | 2,4787 | 0,403 | 0,092  |
| 21 | P30044 PRDX5_HUMAN | K.THLPGFVEQAEALK.A       | 2 | 2,4747 | 0,33  | -0,238 |
| 21 | Q07065 CKAP4_HUMAN | K.DLSDGIHVVK.D           | 2 | 2,4476 | 0,379 | -0,113 |
| 21 | P06756 ITAV_HUMAN  | R.DYAKDDPLEFK.S          | 2 | 2,4395 | 0,316 | -0,182 |
| 21 | P62072 TIM10_HUMAN | K.EAELSKGESVCLDR.C       | 2 | 2,4321 | 0,142 | 0,23   |
| 21 | Q86UP2 KTN1_HUMAN  | R.ELKDLLTELQK.K          | 2 | 2,4147 | 0,305 | -0,275 |
| 21 | P15531 NDKA_HUMAN  | K.DRPFFAGLVK.Y           | 2 | 2,4043 | 0,291 | -0,743 |
| 21 | Q92621 NU205_HUMAN | R.DILQDVHDK.I            | 2 | 2,3831 | 0,198 | -0,113 |
| 21 | Q14203 DCTN1_HUMAN | R.DLEEKLETLR.L           | 2 | 2,3574 | 0,182 | 0,098  |
| 21 | P14618 KPYM_HUMAN  | K.QKGADFLVTEVENGGSLGSK.K | 2 | 2,3536 | 0,412 | 0,599  |
| 21 | O43707 ACTN4_HUMAN | R.KDDPVTNLNNAFEVAEK.Y    | 2 | 2,3399 | 0,215 | -0,192 |
| 21 | P00813 ADA_HUMAN   | R.DM*GFTEEEFKR.L         | 2 | 2,3371 | 0,424 | 0,087  |
| 21 | Q14914 LTB4D_HUMAN | K.TVESLEETLKK.A          | 2 | 2,3217 | 0,297 | 0,478  |
| 21 | Q7LOY3 RG9D1_HUMAN | R.EVPEHITEEELK.T         | 2 | 2,319  | 0,128 | 0,084  |

|    |                     |                                   |            |   |        |       |        |
|----|---------------------|-----------------------------------|------------|---|--------|-------|--------|
| 21 | Q13619 CUL4A_HUMAN  | K.DVFEAFYKK.D                     |            | 2 | 2,315  | 0,379 | 0,106  |
| 21 | Q58FF7 H90B3_HUMAN  | K.EGLELPEDEEEK.K                  |            | 2 | 2,314  | 0,275 | 0,316  |
| 21 | P30048 PRDX3_HUMAN  | K.DLSLDDFKGK.Y                    |            | 2 | 2,3095 | 0,191 | -0,214 |
| 21 | Q9UN86 G3BP2_HUMAN  | K.TEELKPQVEEK.N                   |            | 2 | 2,2947 | 0,293 | -0,55  |
| 21 | P49327 FAS_HUMAN    | R.FDASFFGVHPK.Q                   |            | 2 | 2,2943 | 0,416 | 0      |
| 21 | P14866 HNRPL_HUMAN  | K.SKPGAAM*VEM*ADGYAVDR.A          |            | 2 | 2,2837 | 0,533 | 0,385  |
| 21 | P35270 SPRE_HUMAN   | K.LLSLLEKDEFK.S                   |            | 2 | 2,2719 | 0,185 | -0,091 |
| 21 | Q05086 UBE3A_HUMAN  | R.DHIIDDALVR.L                    |            | 2 | 2,2554 | 0,189 | 0,105  |
| 21 | Q15287 RNPS1_HUMAN  | K.DHIMEIFSTYGK.I                  |            | 2 | 2,2488 | 0,2   | -0,085 |
| 21 | Q99729 ROAA_HUMAN   | K.DLKDYFTK.F                      |            | 2 | 2,2331 | 0,093 | -0,237 |
| 21 | P02545 LMNA_HUMAN   | K.EAALSTALSEKR.T                  |            | 2 | 2,226  | 0,246 | 0,478  |
| 21 | P51991 ROA3_HUMAN   | K.YGKIETIEVM*EDR.Q                |            | 2 | 2,2254 | 0,298 | 0,687  |
| 21 | P09960 LKHA4_HUMAN  | K.DFLYSYFKDK.V                    |            | 2 | 2,2149 | 0,193 | -0,368 |
| 21 | P51858 HDGF_HUMAN   | K.DLFPYEESEK.F                    |            | 2 | 2,1689 | 0,216 | -0,529 |
| 21 | Q96CS2 CCDC5_HUMAN  | R.DRDVYLVIEDLK.Q                  |            | 2 | 2,1682 | 0,139 | 0      |
| 21 | A4D1E9 GTPBA_HUMAN  | K.DFLHLFEK.N                      |            | 2 | 2,0963 | 0,136 | -0,349 |
| 21 | P21333 FLNA_HUMAN   | K.DKGEYTLVVK.W                    |            | 2 | 2,0889 | 0,248 | -0,212 |
| 21 | O60841 IF2P_HUMAN   | K.DELIHELK.Q                      |            | 2 | 2,0764 | 0,119 | -0,061 |
| 21 | Q7L5Y1 ENOF1_HUMAN  | K.DLKDIVGDFR.G                    |            | 2 | 2,0534 | 0,189 | -0,311 |
| 21 | P28838 AMPL_HUMAN   | K.EKEDDVPQFTSAGENFDK.L            |            | 2 | 2,0382 | 0,525 | -0,356 |
| 22 | Q9H3Z4 DNJC5_HUMAN  | R.SLS#TSGESLYHVLGLDKNATSDDIKK.S   | S10:       | 3 | 3,1161 | 0,307 | -0,576 |
| 22 | Q9P265 DIP2B_HUMAN  | R.YRS#DIHTEAVQAALAK.H             | S100:      | 3 | 4,6622 | 0,366 | 0,197  |
| 22 | Q56D06 Q56D06_HUMAN | K.SRS#PAPPADKEAEKPVFFPAFAAEQAQK.L | S1007:     | 3 | 3,819  | 0,389 | -0,247 |
| 22 | P05386 RLA1_HUMAN   | K.KEES#EES#DDDM*GFGLFD.-          | S101:S104: | 2 | 2,1719 | 0,285 | -0,115 |
| 22 | O75122 CLAP2_HUMAN  | K.ASLLHSMPTHSS#PR.S               | S1013:     | 3 | 3,0915 | 0,204 | 0,228  |
| 22 | A8MSX0 A8MSX0_HUMAN | R.SHTS#LKDELSDVSQGGSK.A           | S102:      | 2 | 4,9754 | 0,603 | -0,187 |
| 22 | A8MSX0 A8MSX0_HUMAN | R.SHTS#LKDELSDVSQGGSK.A           | S102:      | 3 | 4,5899 | 0,512 | 0      |
| 22 | P05387 RLA2_HUMAN   | K.KDEKKEES#EESDDDM*GFGLFD.-       | S102:      | 3 | 3,5849 | 0,415 | 0,431  |
| 22 | P05387 RLA2_HUMAN   | K.KDEKKEES#EES#DDDM*GFGLFD.-      | S102:S105: | 3 | 3,4493 | 0,364 | -0,418 |
| 22 | P35658 NU214_HUMAN  | K.SHLVHGS#SPGVM*GTSVATSASK.I      | S1044:     | 3 | 4,2705 | 0,518 | -0,667 |
| 22 | O60293 CC131_HUMAN  | R.RS#FLESNYFTKPNLK.H              | S1046:     | 3 | 4,4187 | 0,449 | -0,285 |
| 22 | O60293 CC131_HUMAN  | R.RS#FLESNYFTKPNLK.H              | S1046:     | 2 | 2,1042 | 0,098 | -0,254 |
| 22 | Q5SW79 CE170_HUMAN  | R.TPLTS#ADEHVHVK.L                | S1059:     | 3 | 2,6583 | 0,251 | 0      |

|    |                     |                                  |            |   |        |       |        |
|----|---------------------|----------------------------------|------------|---|--------|-------|--------|
| 22 | O60841 IF2P_HUMAN   | K.KQS#FDDNDSEELEDKDSK.S          | S107:      | 3 | 4,8977 | 0,464 | 0      |
| 22 | Q9UKY7 CDV3_HUMAN   | R.VQAM*QISS#EKEEDDNEKR.Q         | S107:      | 3 | 2,9077 | 0,148 | -0,984 |
| 22 | P48634 BAT2_HUMAN   | R.TASETRS#EGSEYEEIPKR.R          | S1089:     | 3 | 3,5076 | 0,429 | -1,022 |
| 22 | Q9H6W3 NO66_HUMAN   | R.REPYGHLGPAELLEAS#PAAR.S        | S109:      | 3 | 4,6103 | 0,41  | -0,165 |
| 22 | Q5VZK9 LR16A_HUMAN  | R.SKSERPPTILM*TEEPS#PK.G         | S1094:     | 3 | 3,9911 | 0,443 | -1,076 |
| 22 | Q86VX9 MON1A_HUMAN  | R.KRSS#ECLDGLTPSDGQSM*ER.A       | S11:       | 3 | 3,9688 | 0,421 | -0,075 |
| 22 | Q6ZQU7 Q6ZQU7_HUMAN | R.HRTPS#LRS#PDQPPPCPQFM*AQGK.T   | S111:S114: | 3 | 3,1971 | 0,231 | 0      |
| 22 | Q9UNZ2 NSF1C_HUMAN  | R.KKS#PNELVDDLK.G                | S114:      | 3 | 4,6141 | 0,265 | -0,68  |
| 22 | Q5CZB5 Q5CZB5_HUMAN | K.KDEGEAAGAGDHDQPS#LGAGEAASK.E   | S114:      | 3 | 4,2046 | 0,253 | -0,584 |
| 22 | Q9UNZ2 NSF1C_HUMAN  | R.KKS#PNELVDDLK.G                | S114:      | 2 | 4,1644 | 0,49  | -0,681 |
| 22 | Q12982 BNIP2_HUMAN  | R.KGS#ITEYTAEEKEDGR.R            | S114:      | 3 | 4,0308 | 0,408 | -0,466 |
| 22 | Q9NRA8 4ET_HUMAN    | R.VKEDDLVVLS#PQRR.S              | S115:      | 3 | 3,012  | 0,247 | -0,198 |
| 22 | Q12830 BPTF_HUMAN   | K.DRVLDDVS#IRSPETK.C             | S1158:     | 3 | 2,9103 | 0,276 | -0,202 |
| 22 | Q15121 PEA15_HUMAN  | K.YKDIIRQPS#EEEEIK.L             | S116:      | 3 | 3,9545 | 0,329 | -0,188 |
| 22 | Q15121 PEA15_HUMAN  | K.YKDIIRQPS#EEEEIK.L             | S116:      | 2 | 2,2848 | 0,171 | -0,377 |
| 22 | Q96RV3 PCX1_HUMAN   | R.RKDS#NGSPDPGGGIEM*SEFIR.E      | S117:      | 3 | 3,1283 | 0,25  | 0      |
| 22 | Q92934 BAD_HUMAN    | R.RM*S#DEFVDSFKK.G               | S118:      | 3 | 3,752  | 0,331 | 0      |
| 22 | Q52LW3 RHG29_HUMAN  | R.GNEEKPAS#PSAAVPPGTDHDPHGLVVK.S | S1185:     | 3 | 3,9779 | 0,21  | -0,263 |
| 22 | P29692 EF1D_HUMAN   | R.LNVLEKSS#PGHR.A                | S119:      | 2 | 3,9691 | 0,507 | -0,775 |
| 22 | Q7Z460 CLAP1_HUMAN  | K.FSFRS#QEDLNEPIKR.D             | S1196:     | 3 | 3,7495 | 0,1   | -0,188 |
| 22 | O95218 ZRAB2_HUMAN  | R.ENVEYIEREES#DGEYDEFGRK.K       | S120:      | 3 | 5,3609 | 0,412 | -0,411 |
| 22 | O95218 ZRAB2_HUMAN  | R.ENVEYIEREES#DGEYDEFGRK.K       | S120:      | 3 | 4,2797 | 0,356 | -0,144 |
| 22 | Q96Q45 AL2S4_HUMAN  | K.TRLPLELETS#STQKK.S             | S120:      | 3 | 2,6033 | 0,093 | 0      |
| 22 | Q9NR30 DDX21_HUMAN  | K.VTKNEEPS#EEEEIDAPKPK.K         | S121:      | 3 | 4,2962 | 0,234 | -0,086 |
| 22 | Q14498 RBM39_HUMAN  | K.IGLPHSIKLS#R.R                 | S121:      | 3 | 2,825  | 0,265 | 0,211  |
| 22 | Q9P266 K1462_HUMAN  | R.LRS#PSKVIESLQEK.L              | S1235:     | 3 | 3,4399 | 0,118 | -0,108 |
| 22 | Q86TC9 MYPN_HUMAN   | K.HSPNLSFEPNFCQDNPRS#PTSSK.E     | S124:      | 3 | 4,6175 | 0,436 | 0,067  |
| 22 | P22087 FBRL_HUMAN   | K.RVS#ISEGDDKIEYR.A              | S124:      | 3 | 3,6183 | 0,482 | 0,105  |
| 22 | P11388 TOP2A_HUMAN  | K.IKNENTEGS#PQEDGVELEGLKQR.L     | S1247:     | 3 | 4,3056 | 0,515 | -0,138 |
| 22 | Q15149 PLEC1_HUMAN  | R.TPHVQAVQGPLGS#PPKR.G           | S125:      | 3 | 3,8259 | 0,346 | -0,297 |
| 22 | Q96EE5 Q96EE5_HUMAN | R.S#KSLKEGLTVQER.L               | S126:      | 2 | 2,6677 | 0,378 | -0,235 |
| 22 | Q9BQG0 MBB1A_HUMAN  | K.KNQKPSQVNGAPGS#PTEPAGQK.Q      | S1267:     | 3 | 3,8786 | 0,191 | -1,034 |
| 22 | Q8IWF6 F116A_HUMAN  | R.RVS#LHCLLDQFDK.D               | S127:      | 3 | 3,1663 | 0,261 | -0,321 |



|    |                    |                                 |              |   |        |       |        |
|----|--------------------|---------------------------------|--------------|---|--------|-------|--------|
| 22 | P10586 PTRF_HUMAN  | R.THS#PSSKDEQSIGLK.D            | S1281:       | 3 | 3,1656 | 0,342 | -0,432 |
| 22 | Q9NTI5 PDS5B_HUMAN | R.LKEDILENEDEQNS#PPKK.G         | S1283:       | 3 | 4,9692 | 0,222 | -0,166 |
| 22 | Q96T58 MINT_HUMAN  | R.LLSVKGS#PKVDEK.V              | S1287:       | 3 | 2,7762 | 0,205 | -0,124 |
| 22 | O43426 SYNJ1_HUMAN | R.SRS#SHSLPSEASSQPQVK.T         | S1292:       | 3 | 3,3469 | 0,258 | -0,551 |
| 22 | Q6R327 RICTR_HUMAN | R.RAQS#LKAPSIATIK.S             | S1302:       | 3 | 3,0138 | 0,313 | 0      |
| 22 | Q8NI27 THOC2_HUMAN | K.IDTHSPSPS#HSSTVK.D            | S1304:       | 2 | 2,6685 | 0,321 | -0,465 |
| 22 | P51858 HDGF_HUMAN  | K.KGNAEGS#SDEEGKLVIDEPAK.E      | S132:        | 3 | 3,6365 | 0,347 | -0,406 |
| 22 | P51858 HDGF_HUMAN  | K.KGNAEGS#S#DEEGKLVIDEPAKEK.N   | S132:S133:   | 3 | 5,8946 | 0,392 | -0,424 |
| 22 | Q96T23 RSF1_HUMAN  | K.KPYRIES#DEEEDFENVGK.V         | S1335:       | 3 | 5,6701 | 0,54  | -0,162 |
| 22 | Q8IYW5 RN168_HUMAN | R.RAS#EEEEKASEEYIQR.L           | S134:        | 3 | 4,6136 | 0,41  | -0,17  |
| 22 | P46100 ATRX_HUMAN  | R.HKLTVS#DGES#GEEK.K            | S1348:S1352: | 2 | 4,629  | 0,472 | -0,291 |
| 22 | Q14498 RBM39_HUMAN | K.DKS#PVREPIDNLTPER.D           | S136:        | 3 | 4,1856 | 0,272 | -0,353 |
| 22 | Q13428 TCOF_HUMAN  | K.KLGAGEGGEASVS#PEKTSTTSK.G     | S1378:       | 3 | 4,5329 | 0,46  | -0,748 |
| 22 | Q8IWS0 PHF6_HUMAN  | K.KTAHNS#EADLEESFNEHELEPSS#PK.S | S138:S155:   | 3 | 2,9578 | 0,159 | -0,368 |
| 22 | Q9C0C2 TB182_HUMAN | R.HNGSLS#PGLEARDPLEAR.E         | S1385:       | 3 | 2,6576 | 0,218 | -0,366 |
| 22 | P49736 MCM2_HUMAN  | R.GLLYDS#DEEDEERPARK.R          | S139:        | 3 | 2,7622 | 0,338 | 0,174  |
| 22 | Q9Y266 NUDC_HUMAN  | K.NGSLDS#PGKQDT#EEDEEEDKDKGK.L  | S139:T145:   | 3 | 5,7079 | 0,539 | 0,374  |
| 22 | Q14676 MDC1_HUMAN  | K.NRS#SGKTPETLVPTAPK.L          | S1399:       | 3 | 3,5866 | 0,336 | -0,098 |
| 22 | Q6P0Q8 MAST2_HUMAN | K.RVQS#AEKLAALAASEK.K           | S1407:       | 3 | 3,1143 | 0,349 | -0,201 |
| 22 | P18858 DNL1_HUMAN  | K.RTIQEVLEEES#EDEDREAR.R        | S141:        | 3 | 3,493  | 0,368 | -0,307 |
| 22 | P18858 DNL1_HUMAN  | R.TIQEVLEEES#EDEDREAR.K         | S141:        | 3 | 3,102  | 0,214 | -0,307 |
| 22 | Q13428 TCOF_HUMAN  | K.GKGSLS#QGAKDEPEEELQK.G        | S1410:       | 3 | 3,003  | 0,335 | -0,591 |
| 22 | P26358 DNMT1_HUMAN | R.SKS#DGEAKPEPSPPR.I            | S143:        | 3 | 3,3725 | 0,323 | 0      |
| 22 | P46940 IQGA1_HUMAN | K.S#KSVKEDSNLTLQEK.K            | S1441:       | 2 | 3,8598 | 0,487 | -0,342 |
| 22 | P46940 IQGA1_HUMAN | K.SKS#VKEDSNLTLQEK.K            | S1443:       | 3 | 4,1109 | 0,451 | -0,41  |
| 22 | P53999 TCP4_HUMAN  | K.SKELVSSSSSGS#DSDSEVDK.L       | S15:         | 3 | 4,8206 | 0,476 | -0,327 |
| 22 | Q07666 KHDR1_HUMAN | K.KDDEENYLDLFS#HK.N             | S150:        | 3 | 3,4029 | 0,147 | -0,499 |
| 22 | P11388 TOP2A_HUMAN | K.SKGESDDFHM*DFDS#AVAPR.A       | S1504:       | 3 | 4,6464 | 0,424 | -0,166 |
| 22 | Q9H0B6 KLC2_HUMAN  | R.KLDEDAS#PNEEKGDVVK.D          | S151:        | 3 | 2,8496 | 0,098 | -0,469 |
| 22 | Q9Y6D5 BIG2_HUMAN  | K.HLDVDLDRQS#LSS#IDKNPSEK.G     | S1511:S1514: | 3 | 3,3197 | 0,48  | -0,071 |
| 22 | Q9H1H9 KI13A_HUMAN | K.KIDS#EEEEENELEAINRK.L         | S1529:       | 3 | 4,097  | 0,272 | -0,258 |
| 22 | Q9UQ35 SRRM2_HUMAN | R.SRS#GSSQELDVKPSASPQER.S       | S1539:       | 3 | 4,348  | 0,387 | -0,987 |
| 22 | Q8IWS0 PHF6_HUMAN  | K.TAHNSEADLEESFNEHELEPSS#PK.S   | S155:        | 3 | 4,2976 | 0,265 | -0,198 |

|    |                     |                                 |              |   |        |       |        |
|----|---------------------|---------------------------------|--------------|---|--------|-------|--------|
| 22 | Q5UIP0 RIF1_HUMAN   | R.RASQGLLSSIENSES#DSSEAKEEGSR.K | S1554:       | 3 | 5,466  | 0,621 | -0,323 |
| 22 | Q9ULH0 ARMS_HUMAN   | R.VPKS#PEHSAEPIR.T              | S1555:       | 2 | 2,8379 | 0,368 | 0,08   |
| 22 | Q9ULH0 ARMS_HUMAN   | R.VPKS#PEHSAEPIR.T              | S1555:       | 3 | 2,8033 | 0,387 | 0,12   |
| 22 | Q13428 TCOF_HUMAN   | K.TVANLLSGKS#PRK.S              | S156:        | 2 | 2,1717 | 0,201 | 0,084  |
| 22 | P48200 IREB2_HUMAN  | K.AGKLS#PLKVQPK.K               | S157:        | 3 | 3,6559 | 0,302 | -0,068 |
| 22 | P42575 CASP2_HUMAN  | K.LRLS#TDTVEHSLDNK.D            | S157:        | 3 | 3,0255 | 0,231 | -0,101 |
| 22 | Q92733 PRCC_HUMAN   | K.IAAPELHKGDS#DS#EEDEPTKK.K     | S157:S159:   | 3 | 5,186  | 0,42  | 0      |
| 22 | Q9NS91 RAD18_HUMAN  | K.SKFS#PQKEASPAK.T              | S158:        | 3 | 2,6168 | 0,239 | 0,353  |
| 22 | Q15154 PCM1_HUMAN   | K.SKDASTS#PPNRETIGSAQCK.E       | S159:        | 3 | 3,3616 | 0,098 | -0,083 |
| 22 | Q96CW6 S7A6O_HUMAN  | R.KRS#AEPAEALVLACK.R            | S16:         | 3 | 5,3057 | 0,455 | -0,106 |
| 22 | A8MTJ2 A8MTJ2_HUMAN | R.RPS#LPALHFIK.G                | S16:         | 3 | 3,8011 | 0,402 | 0      |
| 22 | P05023 AT1A1_HUMAN  | R.DKYEPAAVS#EQGDKK.G            | S16:         | 2 | 3,2303 | 0,298 | -0,14  |
| 22 | P05023 AT1A1_HUMAN  | R.DKYEPAAVS#EQGDKK.G            | S16:         | 3 | 3,1611 | 0,37  | -0,419 |
| 22 | O14497 ARI1A_HUMAN  | R.TSPS#KSPFLHSGM*K.M            | S1602:       | 2 | 2,0121 | 0,215 | -0,763 |
| 22 | Q1KMD3 HNRL2_HUMAN  | K.REEDEPEERS#GDETPGSEVPGDK.A    | S161:        | 3 | 4,3967 | 0,379 | -0,837 |
| 22 | Q92766 RREB1_HUMAN  | K.IHEKDPNSATATAPPS#PLK.R        | S161:        | 3 | 3,4001 | 0,31  | -0,445 |
| 22 | P51858 HDGF_HUMAN   | R.AGDLLDS#PKRPK.E               | S165:        | 2 | 3,3838 | 0,405 | -0,567 |
| 22 | P51858 HDGF_HUMAN   | R.AGDLLDS#PKRPK.E               | S165:        | 3 | 2,9145 | 0,197 | -0,243 |
| 22 | O95613 PCNT_HUMAN   | R.RES#EVLDLKEQLEK.M             | S1653:       | 3 | 3,374  | 0,345 | -0,204 |
| 22 | Q13523 PRP4B_HUMAN  | R.SSS#TKGKLELVDNK.I             | S166:        | 2 | 3,6265 | 0,258 | 0,077  |
| 22 | O43399 TPD54_HUMAN  | R.NSATFKS#FEDRVGTIK.S           | S166:        | 3 | 2,9458 | 0,453 | -0,097 |
| 22 | Q7L4I2 RSRC2_HUMAN  | R.DGLAPEKTS#PDRDK.K             | S17:         | 2 | 2,2994 | 0,321 | 0      |
| 22 | Q8N8E3 CCD46_HUMAN  | R.SHS#LS#PTHREDGQNITPK.I        | S171:S173:   | 3 | 2,6255 | 0,275 | -0,507 |
| 22 | Q9P0K8 FOXJ2_HUMAN  | R.HPPDDDLSDSPEQEASKS#PR.G       | S172:        | 3 | 5,1885 | 0,495 | -0,152 |
| 22 | Q15154 PCM1_HUMAN   | R.ILEDHGS#PAGEIDDEDKDKDETETVK.Q | S1729:       | 3 | 5,3788 | 0,465 | -0,37  |
| 22 | Q14997 PSME4_HUMAN  | R.KRDPGS#VGDITPSAELVK.R         | S1746:       | 3 | 3,5243 | 0,382 | -0,188 |
| 22 | Q99759 M3K3_HUMAN   | R.HLSVSSQNPRSS#PPPGYVPER.Q      | S176:        | 3 | 3,9936 | 0,306 | -0,151 |
| 22 | Q58FF8 H90B2_HUMAN  | K.IEDVGS#DEEDDSGKDKK.K          | S177:        | 3 | 4,577  | 0,341 | -0,376 |
| 22 | Q9Y618 NCOR2_HUMAN  | R.HSSS#PLS#PGGPHTLTKPTTSSSER.E  | S1775:S1778: | 3 | 3,4929 | 1     | -0,27  |
| 22 | Q8TF44 NLF3_HUMAN   | K.ESLFHSEHGALAQVGS#PGAGR.R      | S178:        | 3 | 4,6787 | 0,343 | -0,167 |
| 22 | Q9UHB7 AFF4_HUMAN   | R.S#SSPGKQAVSSLNSSHRS.S         | S178:        | 3 | 4,4241 | 0,45  | -0,642 |
| 22 | Q53ER8 Q53ER8_HUMAN | R.HRVSS#QAEDTSSFDNLFIDR.L       | S179:        | 3 | 4,4221 | 0,524 | -0,514 |
| 22 | O75907 DGAT1_HUMAN  | R.TGSRPSS#HGGGGPAAAEVEVR.D      | S18:         | 3 | 3,8658 | 0,314 | -0,35  |

|    |                     |                               |            |   |        |       |        |
|----|---------------------|-------------------------------|------------|---|--------|-------|--------|
| 22 | Q9H6F5 CCD86_HUMAN  | R.RLGGLRPES#PELTSVSR.T        | S18:       | 3 | 2,8148 | 0,337 | -0,181 |
| 22 | Q9H1E3 NUCKS_HUMAN  | R.LKATVTPS#PVK GK.G           | S181:      | 2 | 5,1588 | 0,489 | -0,434 |
| 22 | Q9H1E3 NUCKS_HUMAN  | R.LKATVTPS#PVK GK.G           | S181:      | 3 | 3,8363 | 0,495 | -0,715 |
| 22 | P41227 ARD1A_HUMAN  | R.HVVLGAIENKVES#K.G           | S182:      | 2 | 4,504  | 0,544 | 0,304  |
| 22 | Q6FI81 CPIN1_HUMAN  | K.KSS#PSVKPAVDPAAAK.L         | S183:      | 3 | 4,4414 | 0,287 | 0      |
| 22 | O60271 JIP4_HUMAN   | K.LHQLS#GSDQLESTHSR.I         | S183:      | 3 | 4,0268 | 0,393 | -0,376 |
| 22 | Q6FI81 CPIN1_HUMAN  | K.KSS#PSVKPAVDPAAAK.L         | S183:      | 2 | 2,866  | 0,23  | -0,299 |
| 22 | Q05D20 Q05D20_HUMAN | K.SSS#KDSRPSQAAGDNQGDEVK.E    | S184:      | 3 | 3,2325 | 0,336 | -0,979 |
| 22 | O60749 SNX2_HUMAN   | R.RFS#DFLGLHSK.L              | S185:      | 3 | 3,1888 | 0,394 | 0,066  |
| 22 | O60749 SNX2_HUMAN   | R.RFS#DFLGLHSK.L              | S185:      | 2 | 2,6658 | 0,333 | -0,528 |
| 22 | P27708 PYR1_HUMAN   | R.IHRAS#DPGLPAEEP K.E         | S1859:     | 2 | 3,8751 | 0,418 | -0,288 |
| 22 | P27708 PYR1_HUMAN   | R.IHRAS#DPGLPAEEP K.E         | S1859:     | 3 | 3,5413 | 0,361 | -0,754 |
| 22 | Q9BXB4 OSB11_HUMAN  | R.RPS#QNAISFFNVGHSK.L         | S189:      | 3 | 5,4229 | 0,531 | -0,098 |
| 22 | Q9BXB4 OSB11_HUMAN  | R.RPS#QNAISFFNVGHSK.L         | S189:      | 2 | 4,3233 | 0,558 | -0,588 |
| 22 | Q05209 PTN12_HUMAN  | R.VQAM*KS#PDHNGEDNFAR.D       | S19:       | 3 | 2,8627 | 0,271 | -0,273 |
| 22 | P35222 CTNB1_HUMAN  | R.HAIM*RS#PQM*VSAIVR.T        | S191:      | 3 | 3,1219 | 0,368 | -0,405 |
| 22 | P21291 CSR1_HUMAN   | K.GFGFGQGAGALVHS#E.-          | S192:      | 2 | 2,8205 | 0,467 | -0,081 |
| 22 | Q92805 GOGA1_HUMAN  | K.KEES#LGKM*EQELEAR.T         | S194:      | 3 | 2,6343 | 0,089 | -0,195 |
| 22 | P35579 MYH9_HUMAN   | R.KGAGDGS#DEEVDGKADGAEAKPAE.- | S1943:     | 3 | 5,8789 | 0,465 | 0,077  |
| 22 | Q6PID6 TTC33_HUMAN  | K.KSEAPAETHFS#PK.S            | S197:      | 3 | 3,8486 | 0,396 | -0,114 |
| 22 | Q9BVG4 CX026_HUMAN  | K.GADS#GEEKEEGINREDK.T        | S197:      | 3 | 2,6283 | 0,349 | -1,318 |
| 22 | P10244 MYBB_HUMAN   | R.TRCEDLDELHYQDTS#DVPEQR.D    | S20:       | 3 | 5,1842 | 0,494 | -0,719 |
| 22 | Q8NCF5 NF2IP_HUMAN  | K.KKTEFLDLNSPLSPPS#PR.T       | S204:      | 3 | 5,4185 | 0,417 | -0,165 |
| 22 | Q9H1E3 NUCKS_HUMAN  | K.EKTPS#PKEEDEEPES#PPEKK.T    | S204:S214: | 3 | 4,0674 | 0,283 | 0,148  |
| 22 | O75157 T22D2_HUMAN  | R.SGDCIRHS#STFDQTAER.D        | S205:      | 3 | 3,6538 | 0,432 | -0,536 |
| 22 | Q14671 PUM1_HUMAN   | R.RPGQS FHVNSEVNSVLS#PR.S     | S209:      | 3 | 4,5741 | 0,323 | 0,084  |
| 22 | P60174 TPIS_HUMAN   | R.KQS#LGELIGTLNAAK.V          | S21:       | 2 | 4,0691 | 0,577 | -0,301 |
| 22 | P60174 TPIS_HUMAN   | R.KQS#LGELIGTLNAAK.V          | S21:       | 3 | 2,8952 | 0,244 | -0,338 |
| 22 | Q9H1E3 NUCKS_HUMAN  | K.TPSPKEEDEEPES#PPEKK.T       | S214:      | 3 | 4,6325 | 0,275 | -0,429 |
| 22 | Q9H1E3 NUCKS_HUMAN  | K.EKTPSPKEEDEEPES#PPEK.K      | S214:      | 3 | 3,27   | 0,156 | 0      |
| 22 | P21333 FLNA_HUMAN   | R.RAPS#VANVGSHCDLSLK.I        | S2152:     | 3 | 3,2534 | 0,323 | -0,097 |
| 22 | P21333 FLNA_HUMAN   | R.RAPS#VANVGSHCDLSLK.I        | S2152:     | 2 | 3,1367 | 0,463 | -0,387 |
| 22 | Q8ND56 LS14A_HUMAN  | R.RS#PVSTRPLPSASQK.A          | S216:      | 2 | 2,01   | 0,341 | -0,505 |

|    |                     |                                  |            |   |        |       |        |
|----|---------------------|----------------------------------|------------|---|--------|-------|--------|
| 22 | Q15019 SEPT2_HUMAN  | K.IYHLPDAES#DEDEDKFKEQTR.L       | S218:      | 3 | 5,0356 | 0,44  | -0,073 |
| 22 | Q09161 NCBP1_HUMAN  | R.KTS#DANETEDHLES LICK.V         | S22:       | 3 | 4,4702 | 0,462 | -0,084 |
| 22 | Q9H9L7 CA108_HUMAN  | K.RPM*EFEAALLSPGS#PKR.R          | S22:       | 3 | 4,0594 | 0,246 | -0,277 |
| 22 | Q9NTJ3 SMC4_HUMAN   | R.RREEGPPPPS#PDGAS#SDAEPEPPSGR.T | S22:S27:   | 3 | 4,2107 | 0,389 | -0,388 |
| 22 | Q9NTJ3 SMC4_HUMAN   | R.RREEGPPPPS#PDGASS#DAEPEPPSGR.T | S22:S28:   | 3 | 4,0043 | 0,34  | -0,259 |
| 22 | Q6ZW31 SYDE1_HUMAN  | R.YHLDSSVGGPGPAAGPGGTRS#PR.A     | S224:      | 3 | 5,0248 | 0,435 | 0,241  |
| 22 | Q9NY27 PP4R2_HUMAN  | K.NHSDSSTSEVSSVS#PLKNK.H         | S226:      | 3 | 3,9967 | 0,481 | -0,239 |
| 22 | P08621 RU17_HUMAN   | R.YDERPGPS#PLPHR.D               | S226:      | 3 | 3,5077 | 0,275 | -0,228 |
| 22 | P08621 RU17_HUMAN   | R.YDERPGPS#PLPHR.D               | S226:      | 2 | 2,234  | 0,299 | -0,152 |
| 22 | Q8IYB3 SRRM1_HUMAN  | K.KEKTPELPEPS#VK.V               | S227:      | 2 | 3,0937 | 0,318 | 0,078  |
| 22 | Q9NVW2 RNF12_HUMAN  | R.SRS#PLHPM*SEIPR.R              | S230:      | 3 | 3,6093 | 0,322 | -0,456 |
| 22 | Q8WU90 ZC3HF_HUMAN  | K.KEEKEDEIS#LEDLIER.E            | S231:      | 3 | 4,6444 | 0,329 | -0,178 |
| 22 | Q13283 G3BP1_HUMAN  | K.SSS#PAPADIAQTVQEDLR.T          | S232:      | 3 | 3,3478 | 0,307 | -0,279 |
| 22 | Q13283 G3BP1_HUMAN  | K.SSS#PAPADIAQTVQEDLR.T          | S232:      | 2 | 3,2698 | 0,381 | -0,435 |
| 22 | Q9Y5K6 CD2AP_HUMAN  | R.TSS#SETEEKKPEKPLILQSLGPK.T     | S233:      | 3 | 3,8612 | 0,467 | -0,421 |
| 22 | Q8NC51 PAIRB_HUMAN  | R.GSGSHNWGTVKDELTES#PK.Y         | S234:      | 3 | 4,3605 | 0,326 | 0,169  |
| 22 | Q8N6T3 ARFG1_HUMAN  | K.FGS#QASQKASELGHSLNENVLKPAQEK.V | S234:      | 3 | 3,1765 | 0,31  | -0,43  |
| 22 | P62753 RS6_HUMAN    | R.RRLS#S#LR.A                    | S235:S236: | 2 | 2,0565 | 0,207 | -0,349 |
| 22 | P12956 KU70_HUMAN   | R.VHFEESS#KLEDLLR.K              | S237:      | 2 | 2,1017 | 0,192 | -0,479 |
| 22 | Q8WXE1 ATRIP_HUMAN  | R.KNPSVVIKPEACS#PQFGK.T          | S239:      | 3 | 4,5204 | 0,49  | 0      |
| 22 | Q9BZL6 KPCD2_HUMAN  | R.RPPSSSSSS#ASSYTGRPIELDK.M      | S242:      | 3 | 3,4628 | 1     | -0,222 |
| 22 | Q9UFC0 LRWD1_HUMAN  | K.RPDDVPLSLS#PSKR.A              | S243:      | 3 | 5,798  | 0,506 | 0      |
| 22 | Q9UFC0 LRWD1_HUMAN  | K.RPDDVPLSLS#PSKR.A              | S243:      | 2 | 4,1926 | 0,442 | 0,222  |
| 22 | Q56NI9 ESCO2_HUMAN  | K.SKSEVIEDS#DVETVSEKK.T          | S244:      | 3 | 3,8725 | 0,433 | 0,263  |
| 22 | Q8NB78 AOF1_HUMAN   | R.AAATGNAS#PGKLEHSK.A            | S247:      | 2 | 3,5599 | 0,348 | 0      |
| 22 | Q9Y2W1 TR150_HUMAN  | R.ERSPALKS#PLQSVVVR.R            | S253:      | 3 | 3,6692 | 0,225 | -0,198 |
| 22 | Q86X53 ERIC1_HUMAN  | R.ARQEEGADAS#EEDPTPAGEEDVKDAR.E  | S254:      | 3 | 3,5141 | 0,275 | -0,192 |
| 22 | P21359 NF1_HUMAN    | R.KS#FDHLISDTK.A                 | S2543:     | 3 | 3,057  | 0,087 | 0,067  |
| 22 | Q92466 DDB2_HUMAN   | R.SRS#PLELEPEAKK.L               | S26:       | 3 | 3,8308 | 0,221 | -0,117 |
| 22 | Q92466 DDB2_HUMAN   | R.SRS#PLELEPEAKK.L               | S26:       | 2 | 2,7455 | 0,197 | -0,312 |
| 22 | Q13595 TRA2A_HUMAN  | R.RRS#PS#PYYSR.Y                 | S260:S262: | 2 | 2,2648 | 0,384 | -0,598 |
| 22 | Q9NZ63 CI078_HUMAN  | R.VGDTEKPEPERS#PPNR.K            | S261:      | 3 | 4,2864 | 0,352 | -0,581 |
| 22 | Q8N707 Q8N707_HUMAN | K.LQLHES#QKDYSK.G                | S261:      | 2 | 3,3084 | 0,498 | -0,863 |

|    |                     |                               |              |   |        |       |        |
|----|---------------------|-------------------------------|--------------|---|--------|-------|--------|
| 22 | P06733 ENOA_HUMAN   | R.SGKYDLDFKS#PDDPSR.Y         | S263:        | 2 | 4,305  | 0,367 | -0,32  |
| 22 | P06733 ENOA_HUMAN   | R.SGKYDLDFKS#PDDPSR.Y         | S263:        | 3 | 3,8418 | 0,475 | 0      |
| 22 | Q96IF1 JUB_HUMAN    | R.GAQPGRHS#VTGYGDCAVGAR.Y     | S263:        | 3 | 3,2808 | 0,287 | -0,175 |
| 22 | P07900 HS90A_HUMAN  | K.EEKESDKPEIEDVGS#DEEEK.K     | S263:        | 3 | 3,0468 | 0,265 | -0,413 |
| 22 | P07900 HS90A_HUMAN  | K.ESEDKPEIEDVGS#DEEEK.K       | S263:        | 3 | 2,9527 | 0,284 | -0,533 |
| 22 | Q9Y385 UB2J1_HUMAN  | R.RLS#TSPDVIQGHQPR.D          | S266:        | 3 | 4,6395 | 0,328 | -0,207 |
| 22 | P18887 XRCC1_HUMAN  | K.KTPSKPPAQLS#PSVPK.R         | S266:        | 2 | 3,6743 | 0,268 | -0,63  |
| 22 | Q9Y385 UB2J1_HUMAN  | R.RLS#TSPDVIQGHQPR.D          | S266:        | 2 | 3,2638 | 0,372 | -0,413 |
| 22 | P15822 ZEP1_HUMAN   | K.AHSEVFTKPSGQQTLS#PDR.Q      | S2681:       | 3 | 2,7873 | 0,241 | -0,253 |
| 22 | Q9UQ35 SRRM2_HUMAN  | R.KPIDSLRDS#RSLSYSPVER.R      | S2688:S2690: | 3 | 3,0296 | 0,282 | 0,309  |
| 22 | Q5BKZ1 ZN326_HUMAN  | K.ISLSKS#PTKTDPK.N            | S270:        | 2 | 2,7713 | 0,199 | -0,988 |
| 22 | Q8NFC6 FA44A_HUMAN  | R.KQHLYSS#EDEDNPDVLDLR.I      | S2780:       | 3 | 5,9005 | 0,526 | -0,36  |
| 22 | Q05D32 CTSL2_HUMAN  | R.KYS#EVDDSLPSGGKPSK.N        | S28:         | 3 | 4,0519 | 0,43  | 0,091  |
| 22 | Q5W189 Q5W189_HUMAN | R.RREPES#PPASAPIPLFGADTIGQR.S | S28:         | 3 | 3,6737 | 0,283 | -0,277 |
| 22 | Q8IXT5 RB12B_HUMAN  | R.SRS#PLGFVHVK.N              | S280:        | 3 | 4,1322 | 0,383 | 0,062  |
| 22 | Q8IXT5 RB12B_HUMAN  | R.SRS#PLGFVHVK.N              | S280:        | 2 | 2,9608 | 0,268 | -0,164 |
| 22 | Q96S38 KS6C1_HUMAN  | R.KGVDLLLEGVQGESS#PTRR.E      | S282:        | 3 | 4,0572 | 0,302 | 0      |
| 22 | Q9Y624 JAM1_HUMAN   | K.KVIYSQPSARS#EGEFK.Q         | S287:        | 3 | 3,5233 | 0,354 | -0,384 |
| 22 | O14974 MYPT1_HUMAN  | R.DKKS#PLIESTANM*DNNQSQK.T    | S299:        | 3 | 5,6383 | 0,393 | -0,546 |
| 22 | Q05655 KPCD_HUMAN   | R.AS#RRSDSASSEPVGIYQGFVK.K    | S299:        | 3 | 3,5377 | 0,358 | -0,233 |
| 22 | Q9H410 DSN1_HUMAN   | K.THDHQLESSLS#PVEVFAK.T       | S30:         | 3 | 5,3023 | 0,435 | 0,348  |
| 22 | Q01518 CAP1_HUMAN   | R.SGPKPFSAPKQTS#PSPK.R        | S308:        | 2 | 4,0017 | 0,488 | 0,445  |
| 22 | O15143 ARC1B_HUMAN  | K.KAS#SEGGTAAGAGLDSLHK.N      | S310:        | 2 | 3,5235 | 0,493 | -0,664 |
| 22 | Q9NZT2 OGFR_HUMAN   | R.KVEEEGS#PGDPDHEASTQGR.T     | S315:        | 3 | 3,4814 | 0,225 | -0,415 |
| 22 | O00273 DFFA_HUMAN   | R.SISASKAS#PPGDLQNPKR.A       | S315:        | 3 | 3,0593 | 0,084 | -0,284 |
| 22 | Q3B726 RPA43_HUMAN  | R.KHS#EEAEFTPLKCS#PK.R        | S316:S328:   | 3 | 2,9507 | 0,082 | 0,426  |
| 22 | Q9HC62 SEN2_HUMAN   | R.RRS#DSTLFSTVDTDEIPAK.R      | S32:         | 3 | 3,4367 | 0,282 | -0,165 |
| 22 | Q6ZV89 SH2D5_HUMAN  | R.TLRPLS#HAKSEAELQGLG.-       | S327:        | 2 | 2,5496 | 0,43  | -0,307 |
| 22 | Q3B726 RPA43_HUMAN  | K.HSEAEFTPLKCS#PK.R           | S328:        | 3 | 4,3757 | 0,419 | 0,189  |
| 22 | Q15459 SF3A1_HUMAN  | K.FGESEEVEM*EVES#DEEDDKQEK.A  | S329:        | 3 | 4,9846 | 0,265 | -0,337 |
| 22 | Q8IWE5 PKHM2_HUMAN  | K.SRS#DEEASPLHPACSQK.K        | S329:        | 3 | 4,2192 | 0,246 | -0,74  |
| 22 | Q9Y2U5 M3K2_HUMAN   | R.RRGS#DIDNPTLVMDISPPSR.S     | S331:        | 3 | 5,0243 | 0,531 | -0,378 |
| 22 | Q9Y2U5 M3K2_HUMAN   | R.RRGS#DIDNPTLVMDISPPSR.S     | S331:        | 3 | 3,8662 | 0,282 | 0,38   |

|    |                    |                                    |            |   |        |       |        |
|----|--------------------|------------------------------------|------------|---|--------|-------|--------|
| 22 | Q6ZV89 SH2D5_HUMAN | R.TLRPLSHAKS#EAELQGLG.-            | S331:      | 3 | 2,8926 | 0,123 | -0,276 |
| 22 | P08651 NFIC_HUMAN  | K.KTEM*DKS#PFNSPSPQDSPR.L          | S333:      | 3 | 3,6905 | 0,321 | -0,082 |
| 22 | Q16181 SEPT7_HUMAN | K.GQLTKS#PLAQMEEERR.E              | S334:      | 3 | 3,5115 | 0,373 | -0,468 |
| 22 | P48634 BAT2_HUMAN  | K.LKFS#DEEDGRDS#DEEGAEGHR.D        | S342:S350: | 3 | 3,1976 | 0,411 | -0,433 |
| 22 | Q9NVF7 FBX28_HUMAN | R.EVM*ESAVGNSSGSGQNEES#PRKR.K      | S344:      | 3 | 3,1924 | 0,31  | 0,145  |
| 22 | Q8NEF9 SRFB1_HUMAN | R.KLESVFFHLSL#GSK.S                | S349:      | 2 | 3,7029 | 0,464 | 0,371  |
| 22 | Q8WVV9 HNRL1_HUMAN | R.LKTEEGEIDYS#AEEGENRR.E           | S35:       | 3 | 2,7144 | 0,252 | 0,159  |
| 22 | P48634 BAT2_HUMAN  | K.FSDEEDGRDS#DEEGAEGHR.D           | S350:      | 3 | 5,3524 | 0,433 | -0,413 |
| 22 | Q9UK58 CCNL1_HUMAN | R.EVKAEEKS#PISINVK.T               | S352:      | 3 | 2,9294 | 0,306 | -0,104 |
| 22 | Q03164 HRX_HUMAN   | R.SAS#PSVPGPTKPKPK.T               | S3527:     | 2 | 2,381  | 0,154 | 0,078  |
| 22 | Q5J8M3 TMM85_HUMAN | R.GRSDRGS#GQGDSLYPVGYLDK.Q         | S36:       | 3 | 3,1951 | 0,358 | -0,317 |
| 22 | Q9UIG0 BAZ1B_HUMAN | K.NSKS#PEEHLEEM*M*K.M              | S361:      | 3 | 3,3985 | 0,39  | -0,203 |
| 22 | Q00613 HSF1_HUMAN  | R.GHTDTEGRPPS#PPPTSTPEK.C          | S363:      | 3 | 3,1065 | 0,271 | -0,759 |
| 22 | P05455 LA_HUMAN    | K.FAS#DDEHDEHDENGATGPVK.R          | S366:      | 3 | 2,6766 | 0,237 | -0,407 |
| 22 | Q8NCF5 NF2IP_HUMAN | K.HQTLEVSLSRDS#PLK.T               | S369:      | 2 | 4,1227 | 0,586 | -0,477 |
| 22 | Q8NCF5 NF2IP_HUMAN | K.HQTLEVSLSRDS#PLK.T               | S369:      | 3 | 2,8262 | 0,315 | -0,204 |
| 22 | O15042 SR140_HUMAN | R.SSDVHSSGSSDAHM*DASGPS#DSDM*PSR.T | S37:       | 3 | 5,4624 | 0,364 | -0,455 |
| 22 | O94763 RMP_HUMAN   | R.KNS#TGSGHSAQELPTIR.T             | S371:      | 2 | 3,4762 | 0,281 | -0,262 |
| 22 | O94763 RMP_HUMAN   | R.KNS#TGSGHSAQELPTIR.T             | S371:      | 3 | 3,4671 | 0,264 | -0,196 |
| 22 | Q9NZT2 OGFR_HUMAN  | R.SQGDEAGGHGEDRPEPLS#PK.E          | S378:      | 3 | 3,289  | 0,42  | -0,171 |
| 22 | Q9UKT9 IKZF3_HUMAN | R.GLS#PNNSGH DSTDTDSNHEER.Q        | S378:      | 3 | 2,9823 | 0,408 | -0,623 |
| 22 | P16949 STMN1_HUMAN | R.SKESVPEFPLS#PPKK.K               | S38:       | 3 | 4,0876 | 0,411 | -0,314 |
| 22 | P16949 STMN1_HUMAN | R.SKESVPEFPLS#PPKK.K               | S38:       | 2 | 3,4415 | 0,379 | -0,488 |
| 22 | Q9NRM7 LATS2_HUMAN | R.RDS#LQKPGLEAPPR.A                | S380:      | 3 | 3,0536 | 0,126 | -0,223 |
| 22 | Q92597 NDRG1_HUMAN | R.SHTSEGAHL DITPN SGAAGNS#AGPK.S   | S384:      | 3 | 5,2857 | 0,54  | -0,447 |
| 22 | Q9NYF8 BCLF1_HUMAN | K.GRAEGEWEDQEALDYFS#DKESGK.Q       | S385:      | 3 | 4,9825 | 0,403 | 0,268  |
| 22 | Q8IYU2 HACE1_HUMAN | K.NKRDS#TEITSILLK.Q                | S385:      | 3 | 3,2366 | 0,227 | -0,215 |
| 22 | P31629 ZEP2_HUMAN  | K.KGQDSEPSLNLLS#PHSK.G             | S389:      | 3 | 4,0451 | 0,383 | -0,191 |
| 22 | Q7Z422 CA144_HUMAN | R.KSKS#PPKVPIVIQDDSLPAGPPPQIR.I    | S39:       | 3 | 4,91   | 0,415 | 0,643  |
| 22 | Q9UPU5 UBP24_HUMAN | K.KTLLSESSSQSKS#PSLSSK.Q           | S391:      | 3 | 4,1427 | 0,267 | -0,426 |
| 22 | Q13427 PPIG_HUMAN  | K.SELNEIKENQRS#PVR.V               | S397:      | 3 | 2,8708 | 0,303 | -0,195 |
| 22 | O43663 PRC1_HUMAN  | -.M*RRS#EVLAESIVCLQK.A             | S4:        | 3 | 4,0845 | 0,384 | 0,512  |
| 22 | Q96ST2 IWS1_HUMAN  | R.KAAVLSDS#EDEEKASAK.K             | S400:      | 3 | 3,0934 | 0,283 | -0,591 |

|    |                    |                                 |            |   |        |       |        |
|----|--------------------|---------------------------------|------------|---|--------|-------|--------|
| 22 | Q8IYB3 SRRM1_HUMAN | R.HRPS#PPAT#PPPK.T              | S402:T406: | 3 | 3,6477 | 0,228 | 0      |
| 22 | Q8IYB3 SRRM1_HUMAN | R.HRPS#PPAT#PPPK.T              | S402:T406: | 2 | 2,6422 | 0,252 | -0,762 |
| 22 | Q9Y5T5 UBP16_HUMAN | K.KTVEDEDQDS#EEEKDNDYSIK.E      | S415:      | 3 | 3,8064 | 0,506 | -0,493 |
| 22 | Q86SQ0 PHLB2_HUMAN | R.KSS#ISSIS#GRDDLMDYHR.R        | S415:S420: | 3 | 3,5033 | 1     | -0,329 |
| 22 | Q8NHZ8 CDC26_HUMAN | K.KQKEDVEVGGGS#DGEAIGLSSDPK.S   | S42:       | 3 | 4,935  | 0,349 | -0,354 |
| 22 | P61978 HNRPK_HUMAN | R.HESGAS#IKIDEPLEGSEDR.I        | S420:      | 3 | 3,9342 | 0,433 | 0,085  |
| 22 | Q13029 PRDM2_HUMAN | K.RKPS#QTLQPSEDLADGK.A          | S421:      | 3 | 3,6351 | 0,344 | -0,469 |
| 22 | O14974 MYPT1_HUMAN | K.KFPTTATKIS#PK.E               | S422:      | 3 | 2,7672 | 0,344 | -0,196 |
| 22 | Q9NTZ6 RBM12_HUMAN | R.SRS#PHEAGFCVYLK.G             | S424:      | 3 | 2,811  | 0,294 | 0,106  |
| 22 | Q9Y490 TLN1_HUMAN  | K.SKDHFGLEGDEESTM*LEDSVS#PK.K   | S425:      | 3 | 6,9338 | 0,571 | -0,417 |
| 22 | Q9Y490 TLN1_HUMAN  | K.SKDHFGLEGDEESTMLEDSVS#PK.K    | S425:      | 3 | 6,7583 | 0,533 | -0,629 |
| 22 | Q9UBF8 PI4KB_HUMAN | R.IRS#TRS#VENLPECGITHEQR.A      | S425:S428: | 3 | 4,9314 | 0,403 | 0,072  |
| 22 | Q86UE4 LYRIC_HUMAN | K.SQEPIPDDQKVS#DDDKEKEGALPTGK.S | S426:      | 3 | 4,994  | 0,474 | -0,679 |
| 22 | Q9UBF8 PI4KB_HUMAN | R.STRS#VENLPECGITHEQR.A         | S428:      | 3 | 4,6398 | 0,427 | -0,25  |
| 22 | Q96AQ6 PBIP1_HUMAN | R.ALQAPHS#PSKTDGK.E             | S43:       | 3 | 2,7701 | 0,17  | 0      |
| 22 | Q05519 SFR11_HUMAN | R.DYDEEQGYDS#EKEKK.E            | S434:      | 3 | 2,8584 | 0,321 | 0,088  |
| 22 | Q96ST2 IWS1_HUMAN  | K.TIAS#DS#EEEAGKELSDKKNEEK.D    | S438:S440: | 3 | 2,8565 | 0,254 | -0,352 |
| 22 | O43318 M3K7_HUMAN  | R.RRS#IQDLTVTGTEPGQVSSR.S       | S439:      | 3 | 6,266  | 0,607 | 0,565  |
| 22 | Q66GS9 CP135_HUMAN | R.DRS#PSRLDTFLK.G               | S439:      | 2 | 2,4475 | 0,29  | -0,483 |
| 22 | Q9Y4C1 JHD2A_HUMAN | K.HLEHAPS#PSDVSNAPVK.A          | S445:      | 3 | 4,7888 | 0,414 | -0,183 |
| 22 | Q13136 LIPA1_HUMAN | K.RLS#DTVDKLLESNER.L            | S448:      | 3 | 4,0899 | 0,368 | -0,094 |
| 22 | Q14BN4 SLMAP_HUMAN | R.AKESDFSDTLS#PSKEK.S           | S452:      | 3 | 3,1581 | 0,302 | -0,396 |
| 22 | O60832 DKC1_HUMAN  | R.KRESESES#DETPPAAPQLIK.K       | S455:      | 3 | 3,5651 | 0,217 | 0      |
| 22 | P53396 ACLY_HUMAN  | R.TAS#FSESRADEVAPAKK.A          | S455:      | 3 | 3,1648 | 0,486 | 0,195  |
| 22 | P11274 BCR_HUMAN   | R.HQDGLPYIDDS#PSSSPHLSSK.G      | S459:      | 3 | 6,0436 | 0,512 | -0,468 |
| 22 | Q96FX7 TRM61_HUMAN | R.HS#VDLIGRPFPGSK.V             | S46:       | 3 | 3,2055 | 0,297 | -0,061 |
| 22 | Q9ULU4 PKCB1_HUMAN | K.KATSSHFS#ASEESM*DFLDK.S       | S460:      | 3 | 4,2375 | 0,38  | -0,496 |
| 22 | Q9UPZ3 HPS5_HUMAN  | R.RGS#QSDIEDSCSLHSQTLSEDER.F    | S461:      | 3 | 5,5785 | 0,54  | -0,422 |
| 22 | Q9UJM3 ERRFI_HUMAN | R.KHLSYVVS#P.-                  | S461:      | 2 | 3,3842 | 0,46  | -0,11  |
| 22 | P53985 MOT1_HUMAN  | K.KES#KEEETS#IDVAGKPNEVTK.A     | S461:S467: | 3 | 4,1177 | 0,346 | -0,517 |
| 22 | Q96T23 RSF1_HUMAN  | K.FYETKEESYS#PSKDR.N            | S463:      | 3 | 3,0941 | 0,357 | -0,188 |
| 22 | Q96T23 RSF1_HUMAN  | K.FYETKEESYS#PSKDR.N            | S463:      | 2 | 2,4065 | 0,32  | 0,502  |
| 22 | Q9H6R7 CB044_HUMAN | K.KLIESLS#PDFCHQNK.G            | S468:      | 3 | 2,9102 | 0,278 | 0,193  |

|    |                     |                                 |            |   |        |       |        |
|----|---------------------|---------------------------------|------------|---|--------|-------|--------|
| 22 | Q15435 PP1R7_HUMAN  | K.HSSGIVADLSEQS#LKDGEER.G       | S47:       | 3 | 4,7836 | 0,535 | -0,409 |
| 22 | Q8IZL8 PELP1_HUMAN  | R.S#PRGSPDGSLQTGKPSAPK.K        | S477:      | 3 | 4,5385 | 0,52  | -0,282 |
| 22 | Q8IZL8 PELP1_HUMAN  | K.LRS#PRGS#PDGSLQTGKPSAPK.K     | S477:S481: | 3 | 4,0408 | 0,296 | -0,797 |
| 22 | Q8IZL8 PELP1_HUMAN  | K.LRS#PRGSPDGSLQTGKPSAPK.K      | S477:S485: | 3 | 3,724  | 0,301 | -0,478 |
| 22 | Q86WP2 GPBP1_HUMAN  | R.HNS#SDGFDSAIGRPNNGNFGR.K      | S49:       | 3 | 3,1522 | 0,454 | -0,245 |
| 22 | Q7Z4V5 HDGR2_HUMAN  | K.FALKVDS#PDVKR.C               | S490:      | 3 | 3,3729 | 0,409 | -0,063 |
| 22 | Q7Z4V5 HDGR2_HUMAN  | K.FALKVDS#PDVKR.C               | S490:      | 2 | 2,8596 | 0,119 | -0,168 |
| 22 | O15014 ZN609_HUMAN  | R.NCPS#PVLIDCPHPNCNKK.Y         | S491:      | 3 | 2,773  | 0,137 | 0,164  |
| 22 | O60832 DKC1_HUMAN   | K.AGLESQAEPGDGDS#DTTKKK.K       | S494:      | 3 | 4,0535 | 0,421 | 0      |
| 22 | Q8NCD3 HJURP_HUMAN  | K.AKS#LSEAFENLGKR.S             | S496:      | 3 | 3,1998 | 0,349 | -0,112 |
| 22 | P47736 RPGP1_HUMAN  | R.RSS#AIGIENIQEVQEKR.E          | S499:      | 3 | 4,4226 | 0,494 | -0,269 |
| 22 | Q9H0D6 XRN2_HUMAN   | K.RKAEDS#DS#EPEPEDNVR.L         | S499:S501: | 3 | 3,9478 | 0,262 | -0,086 |
| 22 | Q14320 FA50A_HUMAN  | K.KFS#AHYDAVEAELK.S             | S50:       | 3 | 4,267  | 0,412 | -0,108 |
| 22 | Q3KR37 GRM1B_HUMAN  | K.GSDHSS#DKSPSTPEQGVQR.S        | S50:       | 3 | 3,8889 | 0,356 | -0,528 |
| 22 | Q07960 RHG01_HUMAN  | K.SDDSKSS#SPELVTHLK.W           | S50:       | 3 | 2,9997 | 0,355 | -0,606 |
| 22 | Q96AT1 K1143_HUMAN  | K.RIQPPDEEDGDHS#DKEDEQPQVVVLK.K | S50:       | 3 | 2,9325 | 0,238 | -0,345 |
| 22 | Q9Y2X3 NOL5_HUMAN   | K.HIKEEPLS#EEEPCTSTAIASPEK.K    | S502:      | 3 | 4,5527 | 0,345 | -0,481 |
| 22 | Q9Y2X3 NOL5_HUMAN   | K.HIKEEPLS#EEEEPCTSTAIAS#PEKK.K | S502:S514: | 3 | 5,0507 | 0,371 | 0,446  |
| 22 | Q14160 LAP4_HUMAN   | R.RSEACPQPDGSGS#PLPAEEEEKR.L    | S504:      | 3 | 5,3089 | 0,439 | 0,284  |
| 22 | Q5VZ89 DEN4C_HUMAN  | R.HPTGNSITKS#PPLM*AK.R          | S505:      | 3 | 3,4621 | 0,335 | -0,412 |
| 22 | Q8N108 MIER1_HUMAN  | R.RVNS#NGKES#PGSSEFFQEAVSHGK.F  | S507:S512: | 3 | 4,8387 | 0,545 | -0,468 |
| 22 | A8K2B4 A8K2B4_HUMAN | R.TNTM*NGSKS#PVISRPK.S          | S508:      | 2 | 2,6498 | 0,331 | -0,471 |
| 22 | P18858 DNL1_HUMAN   | K.EWNGVVSSESDS#PVKRPGR.K        | S51:       | 3 | 2,9232 | 0,092 | 0,088  |
| 22 | Q9UBF8 PI4KB_HUMAN  | R.RLS#EQLAHTPTAFK.R             | S511:      | 3 | 3,9696 | 0,456 | 0      |
| 22 | Q9UBF8 PI4KB_HUMAN  | R.RLS#EQLAHTPTAFK.R             | S511:      | 2 | 2,7446 | 0,49  | -0,509 |
| 22 | Q9NYF8 BCLF1_HUMAN  | K.LKDLDYDYS#PPLHK.N             | S512:      | 2 | 4,3212 | 0,576 | -0,295 |
| 22 | Q9NYF8 BCLF1_HUMAN  | K.LKDLDYDYS#PPLHK.N             | S512:      | 3 | 3,7807 | 0,492 | -0,553 |
| 22 | Q9Y2X3 NOL5_HUMAN   | K.HIKEEPLSEEEEPCTSTAIAS#PEK.K   | S514:      | 3 | 5,6439 | 0,379 | 0,344  |
| 22 | Q08AE8 SPIR1_HUMAN  | K.S#KSM*DKSDEELQFPK.E           | S517:      | 3 | 3,2422 | 0,289 | 0,098  |
| 22 | Q8WXE1 ATRIP_HUMAN  | R.SLVHRLS#DGDM*TSALR.G          | S518:      | 3 | 3,6044 | 0,388 | 0,296  |
| 22 | Q08AE8 SPIR1_HUMAN  | K.SKS#M*DKSDEELQFPK.E           | S519:      | 2 | 2,4384 | 0,372 | 0,458  |
| 22 | O00567 NOL5A_HUMAN  | K.KSFSKEELM*SS#DLEETAGSTSIPK.R  | S520:      | 3 | 5,1563 | 0,617 | -0,746 |
| 22 | O00567 NOL5A_HUMAN  | K.KSFSKEELMSS#DLEETAGSTSIPK.R   | S520:      | 3 | 3,0595 | 0,362 | -0,409 |



|    |                    |                                |            |   |        |       |        |
|----|--------------------|--------------------------------|------------|---|--------|-------|--------|
| 22 | Q92560 BAP1_HUMAN  | R.SANPTRPS#SPVTSISK.V          | S520:      | 2 | 2,7349 | 0,426 | -0,33  |
| 22 | Q8NEN9 PDZD8_HUMAN | R.AQNEFKDEAQSLSHS#PK.R         | S521:      | 3 | 5,6704 | 0,359 | 0      |
| 22 | Q15057 CENB2_HUMAN | R.KFVDKYSISLS#PPEQK.K          | S521:      | 3 | 2,8711 | 0,143 | -0,176 |
| 22 | Q5H9R7 SAPS3_HUMAN | R.NTVDLVTTCHIHSS#SDDEIDFK.E    | S524:      | 3 | 3,876  | 0,109 | -0,42  |
| 22 | Q14004 CD2L5_HUMAN | K.IEHAPSPS#SGGTLKNDK.A         | S527:      | 3 | 3,3859 | 0,409 | 0      |
| 22 | A1X283 SPD2B_HUMAN | R.KES#IIKSEGELLER.E            | S528:      | 3 | 4,047  | 0,504 | 0      |
| 22 | A1X283 SPD2B_HUMAN | R.KES#IIKSEGELLER.E            | S528:      | 2 | 2,7584 | 0,198 | -0,499 |
| 22 | P62736 ACTA_HUMAN  | R.HQGVM*VGM*GQKDS#YVGDEAQS.K.R | S54:       | 3 | 2,828  | 0,128 | -0,594 |
| 22 | Q96NE9 FRMD6_HUMAN | K.TSTDRHS#LSLDDIR.L            | S542:      | 2 | 2,8225 | 0,276 | -0,504 |
| 22 | Q8NHQ9 DDX55_HUMAN | R.KREEGS#DIEDEDM*EELLNDTR.L    | S544:      | 3 | 6,0688 | 0,486 | -0,629 |
| 22 | Q8NHQ9 DDX55_HUMAN | R.KREEGS#DIEDEDMEELLNDTR.L     | S544:      | 3 | 5,5695 | 0,464 | -0,562 |
| 22 | Q3KR37 GRM1B_HUMAN | K.TESTYLAEM*HRQS#PK.E          | S550:      | 2 | 2,7306 | 0,297 | -0,716 |
| 22 | Q9NWH9 SLTM_HUMAN  | K.RISS#KS#PGHM*VILDQTK.G       | S551:S553: | 3 | 2,737  | 0,213 | -0,441 |
| 22 | P27824 CALX_HUMAN  | K.QKS#DAEEDGGT#VSQEEEDRKP.K.A  | S554:T562: | 3 | 2,8129 | 0,317 | 0,07   |
| 22 | Q9Y6M7 S4A7_HUMAN  | R.KIPVFNHGS#TPTLGETPK.E        | S556:      | 3 | 3,7351 | 0,409 | -0,183 |
| 22 | Q9Y4W2 LAS1L_HUMAN | K.AQQQEEQGS#VNDVKEEEKEEK.E     | S560:      | 3 | 3,4559 | 0,18  | 0,144  |
| 22 | Q9Y217 MTMR6_HUMAN | K.ELLHSVHPES#PNLK.T            | S561:      | 3 | 3,1843 | 0,274 | 0,109  |
| 22 | P27824 CALX_HUMAN  | K.SDAEEDGGTVS#QEEEDRKP.K.A     | S564:      | 3 | 4,3588 | 0,401 | 0,08   |
| 22 | Q9BVJ6 UT14A_HUMAN | K.KKEQM*IDLQNLTTQS#PSVK.S      | S569:      | 3 | 5,0085 | 0,511 | -0,229 |
| 22 | P15822 ZEP1_HUMAN  | K.VVVHHVTVS#PLRTDS#PK.A        | S571:S577: | 3 | 3,3554 | 0,386 | -0,36  |
| 22 | Q14738 2A5D_HUMAN  | R.RKS#ELPQDVYTIK.A             | S573:      | 2 | 4,1327 | 0,495 | -0,295 |
| 22 | Q14738 2A5D_HUMAN  | R.RKS#ELPQDVYTIK.A             | S573:      | 3 | 3,7972 | 0,323 | -0,773 |
| 22 | Q09666 AHNK_HUMAN  | K.GKGGVTGS#PEASISGSKGDLK.S     | S5731:     | 3 | 3,9027 | 0,437 | -0,364 |
| 22 | Q09666 AHNK_HUMAN  | K.GKGGVTGSPEASISGS#KGDLK.S     | S5739:     | 3 | 3,8747 | 0,223 | -0,636 |
| 22 | Q13586 STIM1_HUMAN | R.LIEGVHPPGSLVEKLPDS#PALAKK.A  | S575:      | 3 | 4,8668 | 0,367 | -0,221 |
| 22 | Q8IZ21 PHAR4_HUMAN | R.RLS#QRPTPEEQR.N              | S590:      | 2 | 2,6033 | 0,124 | 0,134  |
| 22 | Q9UPN7 SAPS1_HUMAN | K.NM*VDLVNTHHLHS#SS#DDEDDR.L   | S591:S593: | 3 | 3,9214 | 0,333 | -0,56  |
| 22 | Q6NZY4 ZCHC8_HUMAN | K.KSEAGHASS#PDSEVTSLCQK.E      | S598:      | 3 | 6,1468 | 0,319 | -0,583 |
| 22 | Q02952 AKA12_HUMAN | K.GLAEVQQDGEAEEGATS#DGEKKR.E   | S598:      | 3 | 5,3388 | 0,441 | -0,516 |
| 22 | Q12888 TP53B_HUMAN | K.TKGDDTDTRDDIS#ILATGCK.G      | S598:      | 3 | 3,5222 | 0,383 | -0,243 |
| 22 | P0C7M2 RA1L3_HUMAN | K.SES#PKEPEQLRK.L              | S6:        | 3 | 3,3962 | 0,319 | -0,667 |
| 22 | Q6PL18 ATAD2_HUMAN | K.AGDGS#SVKEVETYHR.T           | S60:       | 3 | 4,7709 | 0,489 | -0,64  |
| 22 | Q96RT1 LAP2_HUMAN  | K.HIVNHDDVFESEELSS#DEEM*K.M    | S603:      | 3 | 5,0905 | 0,414 | -0,27  |

|    |                     |                                 |            |   |        |       |        |
|----|---------------------|---------------------------------|------------|---|--------|-------|--------|
| 22 | Q9UHB6 LIMA1_HUMAN  | R.SRPFTVAASFQSTSVKS#PK.T        | S604:      | 3 | 6,2372 | 0,384 | -0,261 |
| 22 | Q15424 SAFB1_HUMAN  | R.SVVS#FDKVKEPR.K               | S604:      | 2 | 2,3306 | 0,251 | -0,664 |
| 22 | Q14157 UBP2L_HUMAN  | R.RYPSSISS#PQKDLTQAK.N          | S609:      | 3 | 3,3248 | 0,362 | -0,088 |
| 22 | Q9BW27 NUP85_HUMAN  | R.RPVHGES#DTEQLQDDDIETTK.V      | S617:      | 3 | 2,7163 | 0,182 | 0,66   |
| 22 | Q6PJT7 ZC3HE_HUMAN  | K.NGDECAYHHPIS#PCK.A            | S620:      | 3 | 2,8476 | 0,212 | -0,392 |
| 22 | Q8IZ21 PHAR4_HUMAN  | R.KLS#QRPTVAELLAR.K             | S628:      | 3 | 3,1005 | 0,416 | 0      |
| 22 | Q9NY61 AATF_HUMAN   | R.KLASAS#LLDSDKR.Y              | S63:       | 3 | 3,9432 | 0,323 | -0,122 |
| 22 | Q6UB98 ANR12_HUMAN  | K.IKDEDHS#PTFENS DCTLK.K        | S630:      | 3 | 4,5206 | 0,517 | -0,33  |
| 22 | Q99550 MPP9_HUMAN   | K.RS#PKENLS#PGFSHLLSK.N         | S632:S638: | 3 | 3,3989 | 0,185 | -0,089 |
| 22 | P78312 CD008_HUMAN  | K.RPPS#VGDVDFHGISK.E            | S642:      | 2 | 2,3476 | 0,314 | -0,697 |
| 22 | Q7Z6Z7 HUWE1_HUMAN  | R.RRSS#DPLGDTASNLSAVDELM*R.H    | S649:      | 3 | 3,7328 | 0,373 | -0,216 |
| 22 | Q96B23 CR025_HUMAN  | R.RDS#SESQLASTESDKPTTGR.V       | S66:       | 3 | 4,9497 | 0,583 | -1,066 |
| 22 | Q9ULH7 MKL2_HUMAN   | R.TREQLVDQGIM*PPLKS#PAAFHEQIK.S | S66:       | 3 | 4,8238 | 0,36  | -0,437 |
| 22 | Q8IU81 I2BP1_HUMAN  | R.SHVLPEGRS#PGPPALK.H           | S66:       | 3 | 2,6367 | 0,297 | -0,319 |
| 22 | Q9ULU4 PKCB1_HUMAN  | K.DKAS#PEPEKDFSEK.A             | S668:      | 2 | 3,6046 | 0,202 | -0,579 |
| 22 | P20042 IF2B_HUMAN   | R.KKDAS#DDLDDLNFNQK.K           | S67:       | 3 | 5,7312 | 0,376 | -0,175 |
| 22 | P46087 NOL1_HUMAN   | K.TNKS#PEAKPLPGK.L              | S67:       | 3 | 3,6358 | 0,361 | -0,253 |
| 22 | P46100 ATRX_HUMAN   | R.RPTETNPVTSNS#DEECNETVKEK.Q    | S677:      | 3 | 5,812  | 0,458 | -0,6   |
| 22 | Q99618 CDA3_HUMAN   | K.HAQDSDPRS#PTLGIART#PM*K.T     | S68:T76:   | 3 | 3,7848 | 0,334 | -0,311 |
| 22 | O14617 AP3D1_HUMAN  | R.KQEQANNPFYIKSS#PSPQK.R        | S686:      | 3 | 4,4076 | 0,405 | 0,242  |
| 22 | Q63HJ5 Q63HJ5_HUMAN | R.KLANDFPLDLS#PVKK.R            | S688:      | 3 | 4,106  | 0,34  | -0,415 |
| 22 | Q9H1B7 EAP1_HUMAN   | R.AHGCFQDGRS#PGPPPPVGVK.T       | S69:       | 3 | 3,6864 | 0,434 | -0,256 |
| 22 | P06748 NPM_HUMAN    | K.DELHIVEAEAM*NYEGS#PIK.V       | S70:       | 3 | 3,6339 | 0,146 | -0,653 |
| 22 | P55072 TERA_HUMAN   | K.LAIRES#IESEIRR.E              | S702:      | 3 | 2,81   | 0,441 | 0      |
| 22 | P49321 NASP_HUMAN   | R.KPTDGASS#SNCVTDISHLVR.K       | S705:      | 3 | 4,2484 | 0,356 | -0,823 |
| 22 | Q02543 RL18A_HUMAN  | K.KSSGEIVYCGQVFEKS#PLR.V        | S71:       | 3 | 4,1284 | 0,341 | -0,566 |
| 22 | P10636 TAU_HUMAN    | K.AKTDHGAEIVYKS#PVVSGDTS#PR.H   | S713:S721: | 3 | 5,5028 | 0,468 | 0,284  |
| 22 | P40818 UBP8_HUMAN   | K.RSYS#SPDITQAIQEEER.K          | S718:      | 3 | 3,7613 | 0,379 | -1,238 |
| 22 | Q9P246 STIM2_HUMAN  | R.ISS#IPHDLCHNGEK.S             | S719:      | 3 | 2,706  | 0,308 | 0,108  |
| 22 | Q9P246 STIM2_HUMAN  | R.ISS#IPHDLCHNGEK.S             | S719:      | 2 | 2,4545 | 0,331 | 0,289  |
| 22 | Q9H4I2 ZHX3_HUMAN   | R.KVS#PIKINLK.N                 | S723:      | 3 | 2,8416 | 0,186 | 0,075  |
| 22 | Q9Y6X9 MORC2_HUMAN  | K.KTES#PIKLSPATPSR.K            | S725:      | 3 | 4,2427 | 0,324 | 0,108  |
| 22 | Q9NYL2 MLTK_HUMAN   | R.VSQSALNPHQS#PDFKRS#PR.D       | S727:S733: | 3 | 3,835  | 0,311 | -0,396 |

|    |                     |                                 |       |   |        |       |        |
|----|---------------------|---------------------------------|-------|---|--------|-------|--------|
| 22 | Q8IWB9 TEX2_HUMAN   | K.SSGVSGGKPGLLPAHS#R.H          | S732: | 3 | 3,5308 | 0,29  | -0,217 |
| 22 | Q96T23 RSF1_HUMAN   | K.KPDS#PPKVLEPENK.Q             | S738: | 3 | 4,6619 | 0,324 | -0,221 |
| 22 | O60927 PP1RB_HUMAN  | R.AFGESS#TESDEEEEGCGHTHCVR.G    | S74:  | 3 | 4,4994 | 0,494 | -0,26  |
| 22 | O15014 ZN609_HUMAN  | R.AEEGKS#PFRESSGDGM*K.M         | S758: | 3 | 2,7663 | 0,277 | 0,288  |
| 22 | O60930 RNH1_HUMAN   | K.SAS#PEVSEGHENQHGGQSEAK.A      | S76:  | 3 | 2,7274 | 0,25  | -0,553 |
| 22 | Q68DN6 RGPD1_HUMAN  | K.HSTPS#PTKYSLSPSK.S            | S772: | 3 | 3,0899 | 0,417 | -0,323 |
| 22 | Q9Y6X9 MORC2_HUMAN  | K.KDSNELS#DSAGEEDSADLKR.A       | S777: | 3 | 5,1826 | 0,397 | -0,489 |
| 22 | Q8NA72 CE037_HUMAN  | R.ISTIHDILHSQGNNS#EVR.E         | S78:  | 3 | 4,6977 | 0,409 | -0,348 |
| 22 | Q92540 SMG7_HUMAN   | K.AVPALGKS#PPHHSFGFQQYQQADASK.Q | S781: | 3 | 4,2495 | 0,446 | -0,67  |
| 22 | Q76I76 SSH2_HUMAN   | K.KNS#IHELLER.A                 | S784: | 3 | 4,4499 | 0,239 | -0,192 |
| 22 | Q9UGU5 HM2L1_HUMAN  | R.KHS#SDDYYGDISSLESSQK.K        | S79:  | 3 | 4,7001 | 0,471 | -0,23  |
| 22 | Q9UKD2 MRT4_HUMAN   | K.VM*M*VALGRS#PSDEYKDNLHQVSK.R  | S80:  | 3 | 4,2663 | 0,383 | 0,876  |
| 22 | Q9H410 DSN1_HUMAN   | K.SLHLS#PQEQSASYQDRR.Q          | S81:  | 3 | 3,0342 | 0,257 | 0,088  |
| 22 | Q9H0C8 ILKAP_HUMAN  | R.KTS#EEEKNGSEELVEK.K           | S82:  | 3 | 4,2491 | 0,291 | -0,286 |
| 22 | Q96JP5 ZFP91_HUMAN  | R.RSS#PSARPPDVPGQQPQAAK.S       | S83:  | 3 | 3,191  | 0,11  | -0,255 |
| 22 | Q14103 HNRPD_HUMAN  | K.IDASKNEEDEGHNS#PR.H           | S83:  | 3 | 2,9734 | 0,1   | -0,713 |
| 22 | Q9Y5B0 CTDP1_HUMAN  | R.KRQPS#M*SETMPLYTLCK.E         | S839: | 3 | 4,0096 | 0,214 | -0,169 |
| 22 | Q9Y5B0 CTDP1_HUMAN  | R.KRQPS#M*SETM*PLYTLCK.E        | S839: | 3 | 3,5506 | 0,311 | -0,419 |
| 22 | O94880 PHF14_HUMAN  | K.VKEEQLKNS#AEEVLSSEK.Q         | S84:  | 3 | 3,924  | 0,35  | -0,73  |
| 22 | Q9Y6M7 S4A7_HUMAN   | K.ESDKEDGRES#PSYDTPSQR.V        | S84:  | 3 | 2,6212 | 0,23  | -0,485 |
| 22 | P16333 NCK1_HUMAN   | K.RKPS#VPDSASPADDSFVDPGER.L     | S85:  | 3 | 4,5466 | 0,336 | -0,228 |
| 22 | Q92547 TOPB1_HUMAN  | K.RKPS#TPLSEVIVK.N              | S860: | 3 | 3,432  | 0,226 | -0,06  |
| 22 | Q5VZ89 DEN4C_HUMAN  | R.THS#FENVSCHLPDSR.T            | S863: | 3 | 3,0824 | 0,26  | 0,196  |
| 22 | Q9H0E3 SP130_HUMAN  | R.KS#PPKEYIDEEGVR.Y             | S875: | 3 | 4,0611 | 0,345 | -0,212 |
| 22 | Q9H0E3 SP130_HUMAN  | R.KS#PPKEYIDEEGVR.Y             | S875: | 2 | 2,6435 | 0,4   | -0,636 |
| 22 | P38159 HNRPG_HUMAN  | K.AIKEVQATKPS#FESGR.R           | S88:  | 2 | 3,6638 | 0,609 | -0,467 |
| 22 | Q2VIN3 Q2VIN3_HUMAN | K.AIKEVQATKPS#FER.G             | S88:  | 3 | 3,0725 | 0,262 | -0,434 |
| 22 | Q5T5U3 RHG21_HUMAN  | R.SKS#YDEGLDDYREDAK.L           | S880: | 3 | 3,2337 | 0,346 | -0,093 |
| 22 | B2RTT4 B2RTT4_HUMAN | K.EAVVDLHADDSTRIS#EETER.N       | S885: | 3 | 3,1319 | 0,381 | 0,077  |
| 22 | Q99700 ATX2_HUMAN   | K.RGPEVTSQGVQTSS#PACKQEK.D      | S888: | 3 | 3,7159 | 0,098 | 0,078  |
| 22 | Q9Y2E4 DIP2C_HUMAN  | R.YRS#DVHTEAVQAALAK.H           | S89:  | 3 | 3,3494 | 0,325 | -0,099 |
| 22 | Q9C0C2 TB182_HUMAN  | K.RDS#LGAYASQDANEQGQDLGKR.D     | S893: | 3 | 5,9541 | 0,514 | 0,223  |
| 22 | Q9BTE7 DCNL5_HUMAN  | R.KS#PGVAAVAEDGGLKK.C           | S9:   | 3 | 5,3776 | 0,43  | 0      |

|    |                    |                                 |                    |   |        |       |        |
|----|--------------------|---------------------------------|--------------------|---|--------|-------|--------|
| 22 | P05787 K2C8_HUMAN  | R.VTQKS#YKVVSTSGPR.A            | S9:                | 3 | 2,7254 | 0,297 | -0,113 |
| 22 | Q71F56 MD13L_HUMAN | K.M*EVEDGLGS#PKPEEIKDFSIVHK.V   | S923:              | 3 | 4,6711 | 0,273 | -0,737 |
| 22 | Q71F56 MD13L_HUMAN | K.MEVEDGLGS#PKPEEIKDFSIVHK.V    | S923:              | 3 | 4,2728 | 0,285 | -0,404 |
| 22 | Q9Y2W1 TR150_HUMAN | K.WAHDKFS#GEEGEIEDDESSTENR.E    | S928:              | 3 | 5,9637 | 0,54  | -0,269 |
| 22 | Q9GZR7 DDX24_HUMAN | R.KAQAVSEEEEEEGKSSS#PK.K        | S94:               | 3 | 4,4287 | 0,492 | 0,891  |
| 22 | Q9P275 UBP36_HUMAN | R.HSCSPM*GDGDPEAM*EES#PRK.K     | S952:              | 3 | 3,2082 | 0,405 | -0,471 |
| 22 | Q03188 CENPC_HUMAN | K.KKEAS#LQFVVEPSEATNR.S         | S96:               | 3 | 2,8061 | 0,101 | -0,26  |
| 22 | Q5VZK9 LR16A_HUMAN | K.RS#SGFISELPEEGKK.L            | S967:              | 3 | 2,8489 | 0,334 | 0,1    |
| 22 | Q9UBB9 TFP11_HUMAN | K.KGAAEEAELEDS#DDEEKPVK.Q       | S98:               | 3 | 4,9553 | 0,312 | -0,161 |
| 22 | Q9HBD1 RC3H2_HUMAN | R.KHSS#TGDLLELQQAQ.S            | S983:              | 3 | 3,518  | 0,208 | -0,567 |
| 22 | Q5TAQ9 WD42A_HUMAN | R.VHDRS#EEEEEEEEEEQPR.R         | S99:               | 3 | 5,0523 | 0,506 | -0,066 |
| 22 | P17096 HMGA1_HUMAN | K.KLEKEEEEGIS#QESSEEEQ.-        | S99:               | 3 | 3,6759 | 0,354 | -0,316 |
| 22 | Q66GS9 CP135_HUMAN | R.HGLAT#PPLS#STLRSPSHS#PEHR.N   | T1121:S1125:S1134: | 3 | 2,8588 | 1     | -0,632 |
| 22 | P11388 TOP2A_HUMAN | K.KIKNENT#EGSPQEDGVELEGLK.Q     | T1244:             | 3 | 4,3418 | 0,369 | -0,66  |
| 22 | O75367 H2AY_HUMAN  | K.GKLEAIT#PPPAKK.A              | T129:              | 3 | 3,4009 | 0,328 | 0,237  |
| 22 | P39687 AN32A_HUMAN | R.NRT#PSDVKELVLDNSR.S           | T15:               | 3 | 4,4643 | 0,455 | 0      |
| 22 | P29966 MARCS_HUMAN | K.AEDGATPSPSNET#PKKK.K          | T150:              | 2 | 2,5159 | 0,388 | -0,399 |
| 22 | Q9UPY8 MARE3_HUMAN | K.KLIGTAVPQRT#SPTGPK.N          | T161:              | 3 | 3,1733 | 0,302 | -0,4   |
| 22 | Q9P206 K1522_HUMAN | R.RST#VLGLPQHVK.E               | T162:              | 3 | 3,1058 | 0,331 | 0      |
| 22 | P11137 MAP2_HUMAN  | K.KVAIIRT#PPKS#PATPK.Q          | T1649:S1653:       | 3 | 4,2578 | 0,329 | 0      |
| 22 | Q9NY27 PP4R2_HUMAN | R.SNINGPGT#PRPLNRPK.V           | T173:              | 3 | 2,7292 | 0,1   | -0,509 |
| 22 | Q8N350 DOS_HUMAN   | R.YT#LTEGDFHHLK.N               | T174:              | 3 | 2,7174 | 0,318 | 0      |
| 22 | Q02952 AKA12_HUMAN | K.VHSESDKAIT#PQAQEELQK.Q        | T1760:             | 3 | 4,3171 | 0,368 | -0,165 |
| 22 | Q9H1E3 NUCKS_HUMAN | R.LKATVT#PSPVKGK.G              | T179:              | 2 | 4,1606 | 0,46  | -0,521 |
| 22 | Q9H1E3 NUCKS_HUMAN | K.EKT#PSPKEEDEEPES#PPEKK.T      | T202:S214:         | 3 | 3,1481 | 0,208 | -0,148 |
| 22 | Q8NDT2 RB15B_HUMAN | R.DRT#PPHLLYSR.D                | T205:              | 3 | 3,0848 | 0,3   | 0,118  |
| 22 | Q09161 NCBP1_HUMAN | R.RKT#S#DANETEDHLESICK.V        | T21:S22:           | 3 | 3,1655 | 0,323 | -0,532 |
| 22 | Q01082 SPTB2_HUMAN | R.T#SSKESPIPSPTSDRK.A           | T2159:             | 3 | 3,2565 | 0,254 | -0,485 |
| 22 | Q8IYB3 SRRM1_HUMAN | K.KEKT#PELPEPSVK.V              | T220:              | 3 | 4,5364 | 0,432 | -0,117 |
| 22 | P23396 RS3_HUMAN   | K.KPLPDHVSIVEPKDEILPT#TPISEQK.G | T220:              | 3 | 3,9862 | 0,411 | -0,367 |
| 22 | Q8IYB3 SRRM1_HUMAN | K.KEKT#PELPEPSVK.V              | T220:              | 2 | 3,3381 | 0,402 | -0,781 |
| 22 | P23396 RS3_HUMAN   | K.KPLPDHVSIVEPKDEILPTT#PISEQK.G | T221:              | 3 | 5,906  | 0,605 | -0,612 |
| 22 | Q9NZ63 CI078_HUMAN | R.VGDT#EKPEPERSPPNR.K           | T253:              | 3 | 2,6541 | 0,095 | -0,678 |

|    |                       |                                 |                 |   |        |       |        |
|----|-----------------------|---------------------------------|-----------------|---|--------|-------|--------|
| 22 | Q5T200 ZC3HD_HUMAN    | K.KKGPRT#PS#PPPIPEDIALGK.K      | T263:S265:      | 3 | 4,8376 | 0,355 | -0,311 |
| 22 | ##Q6ZSP1 Q6ZSP1_HUMAN | R.SLGRCP#ATRAEHLGHEMEAT#S#TK.S  | T293:T307:S308: | 3 | 3,0186 | 0,135 | -1,207 |
| 22 | Q01518 CAP1_HUMAN     | R.SGPKPFSAPKQT#SPS#PKR.A        | T307:S310:      | 3 | 3,5287 | 0,18  | -0,34  |
| 22 | P63313 TYB10_HUMAN    | K.NTLPT#KETIEQEKR.S             | T31:            | 3 | 3,6441 | 0,362 | -0,311 |
| 22 | P46013 KI67_HUMAN     | K.KPM*KT#SPEM*DIQNPDDGAR.K      | T3127:          | 3 | 4,4799 | 0,33  | -0,653 |
| 22 | Q8TD16 BICD2_HUMAN    | K.LPLDNKTST#PKK.E               | T319:           | 3 | 2,9366 | 0,158 | 0      |
| 22 | O75152 ZC11A_HUMAN    | K.KVEAPETNIDKT#PK.K             | T321:           | 3 | 3,8749 | 0,237 | 0      |
| 22 | Q9Y2U5 M3K2_HUMAN     | R.RRGSDIDNPT#LTVM*DISPPS#RSPR.A | T337:S347:      | 3 | 2,9778 | 0,141 | 0      |
| 22 | Q7Z4Q2 HEAT3_HUMAN    | R.RKT#FVSDLLPPTDK.E             | T340:           | 3 | 4,457  | 0,233 | -0,108 |
| 22 | P30622 CLIP1_HUMAN    | R.KISGT#TALQEALKEK.Q            | T350:           | 3 | 4,4678 | 0,45  | 0      |
| 22 | Q15910 EZH2_HUMAN     | R.GRLPNSSRPST#PTINVLESK.D       | T367:           | 3 | 3,165  | 0,285 | -0,234 |
| 22 | Q9UHD1 CHRD1_HUMAN    | K.RRT#TDFSDFLSIVGCTK.G          | T47:            | 3 | 3,8639 | 0,449 | -0,439 |
| 22 | Q8N108 MIER1_HUMAN    | K.KPLHADM*DTNGYET#DNLTTDPK.L    | T472:           | 3 | 5,7297 | 0,494 | -0,427 |
| 22 | P10636 TAU_HUMAN      | K.KVAVVRT#PPKSPS#SAK.S          | T548:S554:      | 3 | 2,9398 | 0,114 | -0,505 |
| 22 | Q9BZL4 PP12C_HUMAN    | R.RST#QGVTLTDLKEAEK.A           | T560:           | 3 | 4,1553 | 0,26  | -0,493 |
| 22 | Q75T46 Q75T46_HUMAN   | R.RHT#VIAAQSLEALSGLQK.A         | T58:            | 3 | 3,2347 | 0,253 | -0,365 |
| 22 | Q9NRL2 BAZ1A_HUMAN    | K.ELDQDMVT#EDEDDPGSHKR.G        | T731:           | 3 | 3,9309 | 0,271 | -1,036 |
| 22 | Q9NRL2 BAZ1A_HUMAN    | K.ELDQDM*VT#EDEDDPGSHKR.G       | T731:           | 3 | 3,4228 | 0,349 | -0,396 |
| 22 | Q13435 SF3B2_HUMAN    | K.KKIEEAM*DGSET#PQLFTVLPEK.R    | T757:           | 3 | 4,0055 | 0,145 | -0,495 |
| 22 | Q14118 DAG1_HUMAN     | K.GKLTLEDQAT#FIKK.G             | T790:           | 3 | 4,6003 | 0,463 | -0,219 |
| 22 | Q562F6 SGOL2_HUMAN    | K.GVHDLEKDNFFSLT#PK.D           | T845:           | 3 | 3,1186 | 0,145 | -0,38  |
| 22 | Q562F6 SGOL2_HUMAN    | K.GVHDLEKDNFFSLT#PK.D           | T845:           | 2 | 2,5838 | 0,38  | 0,127  |
| 22 | Q6PD62 CTR9_HUMAN     | K.KGGEFDEFVNDT#DDDLPISKK.K      | T925:           | 3 | 6,9349 | 0,499 | 0,357  |
| 22 | P52756 RBM5_HUMAN     | R.SEDGY#HSDGDYGEHDYR.H          | Y76:            | 3 | 3,4656 | 0,381 | -0,088 |
| 22 | Q08752 PPID_HUMAN     | K.DGSGDSDHPDFPEDADIDLKDVVK.I    |                 | 3 | 7,5219 | 0,59  | -0,368 |
| 22 | Q02790 FKBP4_HUMAN    | K.VGEVCHITCKPEYAYGSAGSPPK.I     |                 | 3 | 6,4608 | 0,458 | 0,146  |
| 22 | B2RDE1 B2RDE1_HUMAN   | R.KIQVLQQQADDAEER.A             |                 | 2 | 5,208  | 0,562 | -0,62  |
| 22 | P43304 GPDM_HUMAN     | R.CKDVLTGQEFDVR.A               |                 | 3 | 4,9636 | 0,374 | -0,117 |
| 22 | Q15717 ELAV1_HUMAN    | R.SEAEEAITSFNGHKPPGSSEPITVK.F   |                 | 3 | 4,9209 | 0,433 | -0,14  |
| 22 | P43243 MATR3_HUMAN    | R.DSFDDRGPVSLNPLVDYDHGSR.S      |                 | 3 | 4,8626 | 0,301 | -0,852 |
| 22 | P02545 LMNA_HUMAN     | R.NSNLVGAAHEELQQR.I             |                 | 2 | 4,8255 | 0,556 | -0,418 |
| 22 | P20810 ICAL_HUMAN     | R.DTSQSDKDLDDALDKLSDSLGQR.Q     |                 | 3 | 4,8199 | 0,457 | -0,29  |
| 22 | Q9HB71 CYBP_HUMAN     | K.KAELLDNEKPAAVVAPITTYGTVK.I    |                 | 3 | 4,8027 | 0,312 | -0,289 |

|    |                    |                                  |   |        |       |        |
|----|--------------------|----------------------------------|---|--------|-------|--------|
| 22 | P67936 TPM4_HUMAN  | R.KIQALQQQADEAEDR.A              | 2 | 4,7743 | 0,501 | -0,56  |
| 22 | Q12789 TF3C1_HUMAN | R.NDHDDDEEVEVISK.T               | 3 | 4,7609 | 0,428 | -0,331 |
| 22 | Q9Y3Y2 CA077_HUMAN | K.TKGHLDAELDAYM*AQTDPETND.-      | 3 | 4,7553 | 0,427 | -0,373 |
| 22 | Q02952 AKA12_HUMAN | K.M*EDTLEHTDKEVSVETVSILSK.T      | 3 | 4,6858 | 0,468 | -0,511 |
| 22 | P47756 CAPZB_HUMAN | R.KLEVEANNAFDQYR.D               | 2 | 4,6849 | 0,477 | -0,359 |
| 22 | P04818 TYSY_HUMAN  | K.IDDFKAEDFQIEGYNPHPTIK.M        | 3 | 4,6435 | 0,378 | 0,148  |
| 22 | P14618 KPYM_HUMAN  | K.KGVNLPGAAVDLPVSEKDIQDLK.F      | 3 | 4,6173 | 0,388 | -0,295 |
| 22 | P21333 FLNA_HUMAN  | K.DAGEGLLAVQITDPEGKPKK.T         | 3 | 4,6107 | 0,405 | -0,089 |
| 22 | P02545 LMNA_HUMAN  | R.LQEKEDLQELNDR.L                | 2 | 4,5651 | 0,408 | -0,225 |
| 22 | P49368 TCPG_HUMAN  | R.IVSRPEELREDDVGTGAGLLEIK.K      | 3 | 4,5543 | 0,344 | 0,44   |
| 22 | Q16576 RBBP7_HUMAN | K.IGEEQSAEDAEDGPPPELLFIHGGHTAK.I | 3 | 4,5495 | 0,46  | -0,386 |
| 22 | P19256 LFA3_HUMAN  | K.DKVAELENSEFR.A                 | 3 | 4,5316 | 0,393 | 0      |
| 22 | P04083 ANXA1_HUMAN | K.GDRSEDFGVNEDLADSDAR.A          | 3 | 4,5257 | 0,362 | 0,088  |
| 22 | O00170 AIP_HUMAN   | R.TLHSDDEGTVLDDSR.A              | 2 | 4,5023 | 0,594 | -0,368 |
| 22 | P24534 EF1B_HUMAN  | K.KLQIQCVVEDDK.V                 | 2 | 4,5006 | 0,442 | 0,083  |
| 22 | Q9UQE7 SMC3_HUMAN  | R.KAEELGELEAK.L                  | 2 | 4,4976 | 0,351 | 0      |
| 22 | P09382 LEG1_HUMAN  | R.FNAHGDANTIVCNSK.D              | 2 | 4,4911 | 0,537 | -0,518 |
| 22 | P31946 1433B_HUMAN | K.AVTEQGHELSNEER.N               | 2 | 4,4684 | 0,493 | -0,076 |
| 22 | P43246 MSH2_HUMAN  | K.NKTEYEEAQDAIVK.E               | 2 | 4,4657 | 0,46  | -0,372 |
| 22 | P33176 KINH_HUMAN  | K.TKEYELLSDELNQK.S               | 3 | 4,3943 | 0,34  | 0      |
| 22 | Q14554 PDIA5_HUMAN | K.DKNQDLCQQEAVK.G                | 3 | 4,3905 | 0,377 | 0      |
| 22 | Q13442 HAP28_HUMAN | R.KGVEGLIDIENPNR.V               | 2 | 4,3854 | 0,507 | -0,471 |
| 22 | P17661 DESM_HUMAN  | R.TNEKVELQELNDR.F                | 3 | 4,373  | 0,34  | -0,115 |
| 22 | Q14683 SMC1A_HUMAN | K.SKLESELANFGPR.I                | 3 | 4,3559 | 0,362 | -0,063 |
| 22 | O15144 ARPC2_HUMAN | K.YFQFQEEGKEGENR.A               | 2 | 4,3483 | 0,493 | 0,416  |
| 22 | Q9Y265 RUVB1_HUMAN | K.DSIEKEHVVEISELFYDAK.S          | 3 | 4,3239 | 0,403 | -0,321 |
| 22 | Q00653 NFKB2_HUMAN | R.ASDGSFSLPLKPVISQPIHDSK.S       | 3 | 4,3144 | 0,445 | -0,157 |
| 22 | Q9UNF1 MAGD2_HUMAN | K.HLDGEEEDGSSDQSQASGTTGGR.R      | 3 | 4,2896 | 0,452 | -0,751 |
| 22 | P35579 MYH9_HUMAN  | K.HSQAVEELAEQLEQTK.R             | 2 | 4,2844 | 0,469 | -0,729 |
| 22 | P11717 MPRI_HUMAN  | R.HQDEAVVLSYVNGDR.C              | 3 | 4,2759 | 0,369 | -0,43  |
| 22 | Q969G3 SMCE1_HUMAN | R.KLEAELLQIEER.H                 | 3 | 4,2737 | 0,286 | 0,186  |
| 22 | Q658Y4 F91A1_HUMAN | R.DHLM*LYPYHLSDIM*VK.G           | 3 | 4,2628 | 0,469 | -0,729 |
| 22 | P09493 TPM1_HUMAN  | R.SKQLEDELVSLQK.K                | 2 | 4,2521 | 0,43  | -0,483 |

|    |                     |                                 |   |        |       |        |
|----|---------------------|---------------------------------|---|--------|-------|--------|
| 22 | B2RDU1 B2RDU1_HUMAN | R.DTSSDKLDDALDKLSDSLGQR.Q       | 3 | 4,2495 | 0,344 | -0,382 |
| 22 | A8K9D9 A8K9D9_HUMAN | R.DKLPSTEVKEDSAYGSQSVEQEAEK.L   | 3 | 4,2484 | 0,395 | 0,066  |
| 22 | Q13185 CBX3_HUMAN   | K.WKDSDEADLVLAK.E               | 3 | 4,1744 | 0,287 | -0,307 |
| 22 | P20645 MPRD_HUMAN   | R.HTLADNFNPVSEER.G              | 2 | 4,1692 | 0,501 | -0,3   |
| 22 | P17661 DESM_HUMAN   | R.TNEKVELQELNDR.F               | 2 | 4,1586 | 0,469 | -0,538 |
| 22 | Q00653 NFKB2_HUMAN  | R.DKLPSTAIEVKEDSAYGSQSVEQEAEK.L | 3 | 4,1449 | 0,433 | 0,065  |
| 22 | Q13263 TIF1B_HUMAN  | K.DHQQFLEDAVR.N                 | 2 | 4,1375 | 0,521 | -0,401 |
| 22 | Q15149 PLEC1_HUMAN  | R.ARQEELYSELQAR.E               | 3 | 4,1051 | 0,29  | 0      |
| 22 | Q9H2J4 PDCL3_HUMAN  | K.ESLKELEEEAEQQR.I              | 2 | 4,0943 | 0,561 | -0,33  |
| 22 | Q9Y5S9 RBM8A_HUMAN  | R.M*REDYDSVEQDGPQQR.S           | 3 | 4,0857 | 0,439 | -0,409 |
| 22 | P09622 DLDH_HUMAN   | K.SEEQLKEEGIEYK.V               | 2 | 4,0753 | 0,508 | -0,077 |
| 22 | P17096 HMGA1_HUMAN  | K.KLEKEEEEGISQESSEEEQ.-         | 3 | 4,0617 | 0,445 | -0,818 |
| 22 | P07951 TPM2_HUMAN   | R.KLVILEGELER.S                 | 3 | 4,0533 | 0,335 | 0,141  |
| 22 | P48634 BAT2_HUMAN   | R.DGGGRGPDELEGPDSK.L            | 3 | 4,0478 | 0,259 | -0,461 |
| 22 | O75643 U520_HUMAN   | K.HINM*DGTVNDDFK.I              | 2 | 4,0327 | 0,509 | -0,522 |
| 22 | P60174 TPIS_HUMAN   | R.HVFGESDELIGQK.V               | 2 | 4,0277 | 0,54  | -0,502 |
| 22 | Q99615 DNJC7_HUMAN  | R.KLDDAIEDCTNAVK.L              | 2 | 4,0268 | 0,5   | 1,839  |
| 22 | P16401 H15_HUMAN    | K.KALAAGGYDVEK.N                | 3 | 4,0108 | 0,344 | 0,374  |
| 22 | Q9Y3Y2 CA077_HUMAN  | K.TKGHLDAELDAYMAQTDPETND.-      | 3 | 3,9947 | 0,447 | 0,526  |
| 22 | P61978 HNRPK_HUMAN  | K.RPAEDM*EEEQAFK.R              | 3 | 3,9928 | 0,384 | -0,115 |
| 22 | Q02952 AKA12_HUMAN  | K.EKEDAQEVLEQEGK.V              | 3 | 3,9891 | 0,289 | -0,224 |
| 22 | P09493 TPM1_HUMAN   | K.LEEAEKAADESER.G               | 2 | 3,9852 | 0,464 | -0,413 |
| 22 | P35579 MYH9_HUMAN   | K.HSQAVEELAEQLEQTK.R            | 3 | 3,9837 | 0,351 | -0,398 |
| 22 | Q8NB78 AOF1_HUMAN   | K.DKTQLQDVPLGKIEIYK.A           | 3 | 3,9781 | 0,34  | -0,244 |
| 22 | Q07065 CKAP4_HUMAN  | R.QREELGQGLQGVEQK.V             | 3 | 3,968  | 0,302 | -0,323 |
| 22 | Q9UL26 RB22A_HUMAN  | R.DAKDYADSIHAIFVETSAK.N         | 3 | 3,9653 | 0,422 | -0,264 |
| 22 | Q02750 MP2K1_HUMAN  | K.KLEELDEQQR.K                  | 3 | 3,964  | 0,25  | 0,478  |
| 22 | P09493 TPM1_HUMAN   | K.KATDAEADVASLNR.R              | 2 | 3,9586 | 0,438 | -0,418 |
| 22 | Q9UQE7 SMC3_HUMAN   | K.AKDLQDELAGNSEQR.K             | 3 | 3,9579 | 0,348 | 0,219  |
| 22 | P60660 MYL6_HUMAN   | K.NKDQGTIEDYVEGLR.V             | 2 | 3,9567 | 0,568 | -0,819 |
| 22 | Q9H2J4 PDCL3_HUMAN  | K.ESLKELEEEAEQQR.I              | 3 | 3,9373 | 0,401 | -0,099 |
| 22 | Q96CT7 CC124_HUMAN  | K.SHLEVPLEENVNR.R               | 3 | 3,9319 | 0,217 | 0,238  |
| 22 | P06753 TPM3_HUMAN   | R.KLVIEGDLER.T                  | 3 | 3,9318 | 0,403 | -0,285 |

|    |                    |                         |   |        |       |        |
|----|--------------------|-------------------------|---|--------|-------|--------|
| 22 | Q12789 TF3C1_HUMAN | R.NDHDDDEDEEVISK.T      | 2 | 3,9224 | 0,442 | -0,662 |
| 22 | Q15185 TEBP_HUMAN  | K.SKLTFSCLGGSDNFK.H     | 2 | 3,9138 | 0,532 | 0,073  |
| 22 | P17812 PYRG1_HUMAN | R.KLYGDADYLEER.H        | 2 | 3,8918 | 0,501 | 0,083  |
| 22 | P25325 THTM_HUMAN  | R.HIPGAAFFDIDQCSDR.T    | 3 | 3,8783 | 0,282 | -0,396 |
| 22 | O43390 HNRPR_HUMAN | K.TKENILEEFSK.V         | 2 | 3,8714 | 0,414 | -0,091 |
| 22 | P11021 GRP78_HUMAN | K.M*KETAEAYLGK.K        | 3 | 3,8695 | 0,258 | -0,073 |
| 22 | Q96T23 RSF1_HUMAN  | R.NRNELAETLALLK.A       | 3 | 3,8582 | 0,216 | -0,185 |
| 22 | Q15185 TEBP_HUMAN  | K.SKLTFSCLGGSDNFK.H     | 3 | 3,8537 | 0,37  | -0,11  |
| 22 | Q15397 K0020_HUMAN | R.HAEASAIVEYAYNDK.A     | 3 | 3,8491 | 0,471 | -0,218 |
| 22 | P11586 C1TC_HUMAN  | R.IFHELTSQTDK.A         | 3 | 3,8441 | 0,356 | 0,148  |
| 22 | Q96P20 PUS7_HUMAN  | K.NKETSVAIEVIEDTK.E     | 3 | 3,8375 | 0,259 | -0,109 |
| 22 | P07951 TPM2_HUMAN  | R.CKQLEEEQALQK.K        | 3 | 3,8374 | 0,125 | -0,112 |
| 22 | Q08945 SSRP1_HUMAN | K.SDHPGISITDLSK.K       | 3 | 3,8328 | 0,318 | 0,133  |
| 22 | P19256 LFA3_HUMAN  | K.DKVAELENSEFR.A        | 2 | 3,8271 | 0,359 | -0,17  |
| 22 | Q8TCD5 NT5C_HUMAN  | R.DKTVVLGDLIDDKDTVR.G   | 3 | 3,8216 | 0,402 | -0,454 |
| 22 | Q8IZT6 ASPM_HUMAN  | K.DNSQPVHLESTIAHEIYQK.I | 3 | 3,8081 | 0,465 | -0,083 |
| 22 | P37108 SRP14_HUMAN | K.KGTVEGFEPADNK.C       | 2 | 3,8043 | 0,447 | -0,438 |
| 22 | Q02539 H11_HUMAN   | K.KALAAAGYDVEK.N        | 3 | 3,797  | 0,266 | 0      |
| 22 | P54652 HSP72_HUMAN | K.STAGDTHLGGEDFDNR.M    | 2 | 3,7917 | 0,571 | -0,865 |
| 22 | P26641 EF1G_HUMAN  | R.KLDPGSEETQTLVR.E      | 3 | 3,7844 | 0,192 | 0,116  |
| 22 | Q12756 KIF1A_HUMAN | R.EREEATYLLEQQR.L       | 3 | 3,7734 | 0,172 | -0,11  |
| 22 | P60174 TPIS_HUMAN  | R.HVFGESDELIGQK.V       | 3 | 3,7714 | 0,128 | -0,251 |
| 22 | P09874 PARP1_HUMAN | K.KPPLNNADSVQAK.V       | 3 | 3,7544 | 0,326 | 0,122  |
| 22 | P09493 TPM1_HUMAN  | R.RIQLVEEELDR.A         | 3 | 3,7519 | 0,106 | -0,131 |
| 22 | Q07955 SFRS1_HUMAN | R.TKDIEDVFK.Y           | 2 | 3,7434 | 0,313 | 0,097  |
| 22 | O75643 U520_HUMAN  | K.KADEVLEILK.T          | 2 | 3,736  | 0,365 | -0,211 |
| 22 | P31947 1433S_HUMAN | K.GAVEKGEELSCEER.N      | 2 | 3,7326 | 0,439 | -0,689 |
| 22 | Q99871 UC5IP_HUMAN | K.SEEEEKLAELAR.Q        | 3 | 3,7321 | 0,32  | 0,261  |
| 22 | Q8NE71 ABCF1_HUMAN | R.KNQDEESQEAPELLK.R     | 3 | 3,7089 | 0,209 | 0,624  |
| 22 | P15531 NDKA_HUMAN  | R.NIIHGSDSVESA EK.E     | 2 | 3,7071 | 0,544 | -0,739 |
| 22 | P16152 CBR1_HUMAN  | R.FHQLDIDDLQSIR.A       | 3 | 3,6994 | 0,289 | -0,229 |
| 22 | P11940 PABP1_HUMAN | R.AKEFTNVYIK.N          | 3 | 3,6964 | 0,293 | 0,075  |
| 22 | P09622 DLDH_HUMAN  | K.SEEQLKEEGIEYK.V       | 3 | 3,6914 | 0,514 | 0      |



|    |                    |                              |   |        |       |        |
|----|--------------------|------------------------------|---|--------|-------|--------|
| 22 | P35580 MYH10_HUMAN | R.AGVLAHLEEER.D              | 2 | 3,691  | 0,413 | -0,199 |
| 22 | P30101 PDIA3_HUMAN | K.IFRDGEEAGAYDGPR.T          | 3 | 3,6865 | 0,322 | -0,111 |
| 22 | Q9Y3T9 NOC2L_HUMAN | R.DREIQLEISGK.E              | 3 | 3,6773 | 0,177 | 0,284  |
| 22 | P17812 PYRG1_HUMAN | R.KLYGDADYLEER.H             | 3 | 3,6771 | 0,128 | 0,062  |
| 22 | P30050 RL12_HUMAN  | R.HPHDIIDDINSGAVECPAS.-      | 3 | 3,6758 | 0,497 | 0      |
| 22 | P46063 RECQ1_HUMAN | K.VKDILQNVFK.L               | 3 | 3,6659 | 0,15  | 0,304  |
| 22 | Q9BVJ6 UT14A_HUMAN | R.KVNPAAALEELEK.I            | 3 | 3,6622 | 0,189 | 0      |
| 22 | O60506 HNRPQ_HUMAN | K.TKEQILEEFSK.V              | 2 | 3,6485 | 0,434 | -0,632 |
| 22 | Q8WXX5 DNJC9_HUMAN | K.KISLEDIQAFEK.T             | 3 | 3,6447 | 0,354 | -0,064 |
| 22 | O60841 IF2P_HUMAN  | R.HFEATDILVSK.I              | 3 | 3,6413 | 0,293 | 0,073  |
| 22 | O60506 HNRPQ_HUMAN | K.TKEQILEEFSK.V              | 3 | 3,6406 | 0,231 | 0,135  |
| 22 | P15531 NDKA_HUMAN  | R.NIIHGSDSVESA EK.E          | 3 | 3,6388 | 0,408 | -0,677 |
| 22 | P20042 IF2B_HUMAN  | K.KTSFVNFTDICK.L             | 3 | 3,6367 | 0,272 | -0,251 |
| 22 | O60333 KIF1B_HUMAN | K.EKEEADLLLEQQR.L            | 3 | 3,6366 | 0,148 | -0,114 |
| 22 | P20042 IF2B_HUMAN  | K.KIFDIDAE EGVK.D            | 3 | 3,6335 | 0,329 | 0,184  |
| 22 | P09493 TPM1_HUMAN  | R.RIQLVEEELDR.A              | 2 | 3,6259 | 0,367 | -0,174 |
| 22 | P05023 AT1A1_HUMAN | R.DKYEPAAVSEQGDK.K           | 3 | 3,6172 | 0,222 | 0,119  |
| 22 | O95881 TXD12_HUMAN | K.VHPEIINENGNPSYK.Y          | 3 | 3,611  | 0,334 | -0,107 |
| 22 | P17096 HMGA1_HUMAN | R.KQPPVSPGTALVGSQKEPSEVTPK.R | 3 | 3,6087 | 0,352 | -0,358 |
| 22 | Q13263 TIF1B_HUMAN | K.DHQQFLEDAVR.N              | 3 | 3,6036 | 0,286 | -0,06  |
| 22 | P54652 HSP72_HUMAN | R.ARFEELNADLFR.G             | 3 | 3,5917 | 0,191 | -0,123 |
| 22 | P62937 PPIA_HUMAN  | K.VKEGM*NIVEAM*ER.F          | 2 | 3,5775 | 0,513 | -0,873 |
| 22 | P49756 RBM25_HUMAN | R.DREEDEEDAYER.R             | 2 | 3,5707 | 0,385 | -0,549 |
| 22 | P06748 NPM_HUMAN   | K.DELHIVEAEAM*NYEGSPIK.V     | 3 | 3,5684 | 0,234 | -0,254 |
| 22 | Q5T9A4 ATD3B_HUMAN | K.LKEYEAAVEQLK.S             | 3 | 3,5676 | 0,162 | 0,064  |
| 22 | P54136 SYRC_HUMAN  | R.M*NDIVKEFEDR.G             | 2 | 3,558  | 0,46  | -0,432 |
| 22 | P06748 NPM_HUMAN   | K.VDNDENEHQLSLR.T            | 2 | 3,5574 | 0,382 | -0,544 |
| 22 | P07951 TPM2_HUMAN  | R.KLVILEGELER.S              | 2 | 3,5543 | 0,364 | -0,47  |
| 22 | Q14320 FA50A_HUMAN | K.FSAHYDAVEAE LK.S           | 3 | 3,5527 | 0,28  | 0,062  |
| 22 | Q8N1F7 NUP93_HUMAN | K.NEKDNALLSAIEESR.K          | 3 | 3,5442 | 0,214 | 0,108  |
| 22 | P20645 MPRD_HUMAN  | R.HTLADNFNPVSEER.G           | 3 | 3,5418 | 0,269 | 0,112  |
| 22 | Q02539 H11_HUMAN   | K.KALAAAGYDVEK.N             | 2 | 3,5337 | 0,464 | 0,197  |
| 22 | O43707 ACTN4_HUMAN | K.DHGGALGP EEFK.A            | 3 | 3,5319 | 0,226 | 0,436  |

|    |                     |                           |   |        |       |        |
|----|---------------------|---------------------------|---|--------|-------|--------|
| 22 | Q9Y394 DHR57_HUMAN  | K.EKDILVLPDLTDTGSHEAATK.A | 3 | 3,5314 | 0,278 | -0,464 |
| 22 | P02545 LMNA_HUMAN   | R.LKDLEALLNSK.E           | 2 | 3,5287 | 0,331 | -0,098 |
| 22 | Q99627 CSN8_HUMAN   | R.KPVAGALDVSNK.F          | 3 | 3,5175 | 0,309 | -0,204 |
| 22 | P39023 RL3_HUMAN    | K.DDPSKPVHLTAFLGYK.A      | 3 | 3,5156 | 0,416 | 0,205  |
| 22 | P11142 HSP7C_HUMAN  | K.MKEIAEAYLGK.T           | 3 | 3,5102 | 0,287 | 0,219  |
| 22 | Q9NY61 AATF_HUMAN   | K.DKGGPEFSSALK.N          | 3 | 3,5082 | 0,23  | 0,296  |
| 22 | P04908 H2A1B_HUMAN  | R.NDEELNKLLGR.V           | 2 | 3,504  | 0,34  | -0,375 |
| 22 | P62314 SMD1_HUMAN   | K.NREPVQLETLSIR.G         | 3 | 3,5019 | 0,309 | 0      |
| 22 | Q15370 ELOB_HUMAN   | R.LYKDDQLDDGK.T           | 3 | 3,4973 | 0,339 | 0,064  |
| 22 | Q13442 HAP28_HUMAN  | R.KGVEGLIDIENPNR.V        | 3 | 3,4965 | 0,167 | -0,118 |
| 22 | P35749 MYH11_HUMAN  | K.KEEELQAALAR.L           | 3 | 3,4946 | 0,285 | 0,145  |
| 22 | P08621 RU17_HUMAN   | R.GYAFIEYEHER.D           | 2 | 3,4911 | 0,388 | -0,259 |
| 22 | P02545 LMNA_HUMAN   | R.LKDLEALLNSK.E           | 3 | 3,4795 | 0,197 | -0,367 |
| 22 | Q01082 SPTB2_HUMAN  | K.HLLGVEDLLQK.H           | 2 | 3,4764 | 0,415 | -0,482 |
| 22 | Q03252 LMNB2_HUMAN  | R.CQSLQEELDFRK.S          | 3 | 3,4764 | 0,366 | -0,236 |
| 22 | P26641 EF1G_HUMAN   | R.KLDPGSEETQTLVR.E        | 2 | 3,466  | 0,397 | -0,543 |
| 22 | P06733 ENOA_HUMAN   | K.LNVTEQEKIDK.L           | 2 | 3,453  | 0,274 | -0,556 |
| 22 | P31947 1433S_HUMAN  | K.GAVEKGEELSCEER.N        | 3 | 3,4513 | 0,262 | 0,23   |
| 22 | P52701 MSH6_HUMAN   | R.VHVQFFDSDPTR.G          | 3 | 3,4462 | 0,296 | 0,189  |
| 22 | P25705 ATPA_HUMAN   | K.HALIIYDDLK.Q            | 2 | 3,4325 | 0,47  | 0      |
| 22 | P07237 PDIA1_HUMAN  | K.NFEDVAFDEKK.N           | 2 | 3,4149 | 0,334 | -0,364 |
| 22 | P78527 PRKDC_HUMAN  | R.HGDLPIQIK.H             | 2 | 3,4132 | 0,388 | 0,107  |
| 22 | P50395 GDIB_HUMAN   | K.EPEKEIRPALELLEPIEQK.F   | 3 | 3,4106 | 0,154 | -0,485 |
| 22 | P22234 PUR6_HUMAN   | K.TKEVYELLDSPGK.V         | 2 | 3,3981 | 0,4   | -0,495 |
| 22 | B2RDE1 B2RDE1_HUMAN | R.AREQAEAEVASLNR.R        | 3 | 3,3956 | 0,237 | 0      |
| 22 | P21333 FLNA_HUMAN   | K.GKLDVQFSGTK.G           | 3 | 3,394  | 0,288 | 0      |
| 22 | P62736 ACTA_HUMAN   | K.DSYVGDEAQSKR.G          | 2 | 3,3919 | 0,503 | -1,531 |
| 22 | P09493 TPM1_HUMAN   | R.SKQLEDELVSLQK.K         | 3 | 3,3903 | 0,199 | 0,06   |
| 22 | P62937 PPIA_HUMAN   | K.VKEGM*NIVEAMER.F        | 3 | 3,3885 | 0,297 | 0      |
| 22 | O14818 PSA7_HUMAN   | R.GRDIVVLGVEK.K           | 2 | 3,3873 | 0,301 | -0,103 |
| 22 | P02545 LMNA_HUMAN   | R.TLEGELHDLR.G            | 2 | 3,3775 | 0,225 | -0,413 |
| 22 | P00558 PGK1_HUMAN   | R.AHSSM*VGVNLPQK.A        | 3 | 3,3754 | 0,226 | 0,264  |
| 22 | Q6DD88 ATLA3_HUMAN  | K.DQHSFELDEK.A            | 2 | 3,3719 | 0,301 | -0,391 |

|    |                     |                          |   |        |       |        |
|----|---------------------|--------------------------|---|--------|-------|--------|
| 22 | P61086 UBE2K_HUMAN  | K.KIENLCAM*GFDR.N        | 3 | 3,3699 | 0,223 | 0,124  |
| 22 | P11142 HSP7C_HUMAN  | K.M*KEIAEAYLGK.T         | 2 | 3,3551 | 0,421 | 0      |
| 22 | P19105 MLRM_HUMAN   | R.DGFIDKEDLHDM*LASLGK.N  | 2 | 3,3463 | 0,621 | -0,544 |
| 22 | Q8NE71 ABCF1_HUMAN  | K.KTFFEELAVEDK.Q         | 3 | 3,3405 | 0,273 | -0,063 |
| 22 | P43246 MSH2_HUMAN   | K.NKTEYEEAQDAIVK.E       | 3 | 3,3399 | 0,289 | -0,223 |
| 22 | P15559 NQO1_HUMAN   | K.EGHLSPDIVAEQK.K        | 3 | 3,3312 | 0,098 | 0      |
| 22 | Q13177 PAK2_HUMAN   | K.KNPQAVLDVLK.F          | 3 | 3,3291 | 0,266 | 0,373  |
| 22 | P16403 H12_HUMAN    | R.SGVSLAALKK.A           | 2 | 3,3274 | 0,228 | -0,125 |
| 22 | P49756 RBM25_HUMAN  | R.DREEDEEDAYER.R         | 3 | 3,3261 | 0,244 | -0,235 |
| 22 | Q2TAL8 QRIC1_HUMAN  | R.M*KEFLDSLASK.G         | 3 | 3,3228 | 0,276 | -0,071 |
| 22 | Q14137 BOP1_HUMAN   | R.TRDELQFLDK.M           | 2 | 3,3177 | 0,202 | -0,354 |
| 22 | O60341 LSD1_HUMAN   | K.TQEELKELLNK.M          | 2 | 3,309  | 0,309 | -0,907 |
| 22 | Q05524 ENO1B_HUMAN  | R.IGAEVYHNLK.N           | 2 | 3,3079 | 0,274 | -0,213 |
| 22 | P62937 PPIA_HUMAN   | K.VKEGMNIVEAM*ER.F       | 3 | 3,3023 | 0,13  | -0,36  |
| 22 | Q8IWR0 Z3H7A_HUMAN  | K.DHLIGPNDNDFGK.Y        | 3 | 3,2999 | 0,345 | -0,444 |
| 22 | Q9Y3A3 MOBL3_HUMAN  | R.HTLDGAACLLNSNK.Y       | 3 | 3,2955 | 0,266 | 0,242  |
| 22 | Q86VP6 CAND1_HUMAN  | K.DSIKLDDSER.K           | 3 | 3,2862 | 0,432 | 0,566  |
| 22 | Q01518 CAP1_HUMAN   | K.KEPAVLELEGK.K          | 3 | 3,2839 | 0,342 | 0,301  |
| 22 | P07355 ANXA2_HUMAN  | R.RAEDGSVIDYELIDQDAR.D   | 3 | 3,2774 | 0,204 | 0,089  |
| 22 | A0JLS5 A0JLS5_HUMAN | R.LDDHALTGASDSR.V        | 3 | 3,2657 | 0,302 | 0,135  |
| 22 | Q8TAF3 WDR48_HUMAN  | K.DKELVASAGLDR.Q         | 3 | 3,2522 | 0,355 | 0,144  |
| 22 | Q99805 TM9S2_HUMAN  | K.RPSENLGQVLFGER.I       | 3 | 3,2464 | 0,217 | 0,799  |
| 22 | P56589 PEX3_HUMAN   | K.HSLSLLDLEQK.L          | 3 | 3,2434 | 0,182 | 0,214  |
| 22 | Q15691 MARE1_HUMAN  | K.LEHEYIQNFK.I           | 3 | 3,2423 | 0,208 | 0,277  |
| 22 | P24534 EF1B_HUMAN   | K.KLQIQCVVEDDK.V         | 3 | 3,2353 | 0,279 | 0,31   |
| 22 | Q9NW13 RBM28_HUMAN  | K.RPIVEFSLEDR.R          | 3 | 3,2345 | 0,351 | -0,269 |
| 22 | P13010 KU86_HUMAN   | R.HIEIFDLSSR.F           | 2 | 3,234  | 0,444 | -0,37  |
| 22 | Q9Y696 CLIC4_HUMAN  | K.HPESNTAGM*DIFAK.F      | 3 | 3,2225 | 0,336 | 0,06   |
| 22 | P30622 CLIP1_HUMAN  | K.QQHIEQLLAER.D          | 3 | 3,2218 | 0,096 | 0      |
| 22 | P09874 PARP1_HUMAN  | R.HPDVEVDGFSEL.R.W       | 3 | 3,2214 | 0,219 | 0,061  |
| 22 | B2RDE1 B2RDE1_HUMAN | R.KIQVLQQQADDAEER.A      | 3 | 3,2183 | 0,371 | 0      |
| 22 | P26640 SYVC_HUMAN   | R.KVDEAIALFQK.M          | 2 | 3,2163 | 0,295 | -0,193 |
| 22 | Q14697 GANAB_HUMAN  | R.DVHNIYGLYVHM*ATADGLR.Q | 3 | 3,2107 | 0,356 | -0,085 |

|    |                    |                         |   |        |       |        |
|----|--------------------|-------------------------|---|--------|-------|--------|
| 22 | P62495 ERF1_HUMAN  | R.YVLHCQGTEEEK.I        | 3 | 3,2099 | 0,396 | 0      |
| 22 | Q15276 RABE1_HUMAN | K.DKQELEDFIK.Q          | 3 | 3,2098 | 0,191 | 0,361  |
| 22 | P00338 LDHA_HUMAN  | K.DQLIYNLLKKEEQTPQNK.I  | 3 | 3,2076 | 0,137 | -0,176 |
| 22 | O00273 DFFA_HUMAN  | R.EQHGVAASCLEDLR.S      | 3 | 3,2075 | 0,326 | 0,115  |
| 22 | Q13200 PSMD2_HUMAN | K.LKEIYENM*APGENK.R     | 3 | 3,2052 | 0,133 | -0,111 |
| 22 | P02545 LMNA_HUMAN  | K.AAYEAEELGDARK.T       | 2 | 3,1991 | 0,447 | -0,283 |
| 22 | P08107 HSP71_HUMAN | R.ARFEELCSDLFR.S        | 2 | 3,1969 | 0,457 | -0,554 |
| 22 | Q96E29 MTER1_HUMAN | K.NHAIFSEDLLENLK.T      | 3 | 3,1957 | 0,264 | 0      |
| 22 | P07108 ACBP_HUMAN  | K.AYINKVEELK.K          | 2 | 3,1924 | 0,272 | 0,101  |
| 22 | P62937 PPIA_HUMAN  | K.VKEGM*NIVEAM*ER.F     | 3 | 3,1897 | 0,188 | -0,357 |
| 22 | P30086 PEBP1_HUMAN | K.NRPTSISWDGLDSGK.L     | 3 | 3,1829 | 0,337 | 0,224  |
| 22 | P36507 MP2K2_HUMAN | K.VGELKDDDFER.I         | 3 | 3,1828 | 0,416 | 0,069  |
| 22 | Q14CX7 CL030_HUMAN | R.LRPIYDYLDNGNNK.M      | 3 | 3,182  | 0,27  | 0,324  |
| 22 | P12814 ACTN1_HUMAN | R.KAGTQIENIEEDFR.D      | 3 | 3,175  | 0,128 | -0,111 |
| 22 | P07195 LDHB_HUMAN  | K.LKDDEVAQLK.K          | 2 | 3,1669 | 0,386 | -0,421 |
| 22 | P09874 PARP1_HUMAN | K.LQLEDDKENR.Y          | 2 | 3,1645 | 0,371 | -0,267 |
| 22 | Q9NRR5 UBQL4_HUMAN | K.DKEEIVICDR.A          | 2 | 3,1597 | 0,34  | -0,382 |
| 22 | Q8WXX5 DNJC9_HUMAN | K.KISLEDIQAFEK.T        | 2 | 3,1596 | 0,356 | -0,429 |
| 22 | Q9Y5S9 RBM8A_HUMAN | R.MREDYDSVEQDGPQR.S     | 3 | 3,1386 | 0,126 | -0,329 |
| 22 | Q9NSD9 SYFB_HUMAN  | K.DRYDSFIELQEK.L        | 3 | 3,1304 | 0,216 | 0,237  |
| 22 | Q7KZF4 SND1_HUMAN  | K.IHVFYIDYGNR.E         | 2 | 3,1291 | 0,508 | 0      |
| 22 | Q96GC5 RM48_HUMAN  | K.ARPELEELLAK.L         | 3 | 3,1282 | 0,183 | -0,144 |
| 22 | P42704 LPPRC_HUMAN | K.NTKLDDLFLK.R          | 2 | 3,1278 | 0,32  | 0      |
| 22 | O00268 TAF4_HUMAN  | K.DDDRYEQASDVR.A        | 3 | 3,1275 | 0,241 | 0,125  |
| 22 | P11142 HSP7C_HUMAN | K.M*KEIAEAYLGK.T        | 3 | 3,125  | 0,296 | -0,432 |
| 22 | Q14683 SMC1A_HUMAN | K.LYHNEVEIEK.L          | 3 | 3,123  | 0,092 | 0,072  |
| 22 | O43143 DHX15_HUMAN | R.HQSFVLVGETGSGK.T      | 3 | 3,1205 | 0,222 | 0,253  |
| 22 | Q7L1Q6 BZW1_HUMAN  | K.KEELVAEQAIK.H         | 3 | 3,1137 | 0,167 | 0,073  |
| 22 | Q9Y224 CN166_HUMAN | R.HDDYLVLM*LK.A         | 2 | 3,1106 | 0,389 | 0      |
| 22 | P62753 RS6_HUMAN   | K.LFNLSKEDDVR.Q         | 2 | 3,0931 | 0,29  | -0,365 |
| 22 | O60841 IF2P_HUMAN  | K.KQDFEDDILK.E          | 2 | 3,0897 | 0,245 | -0,625 |
| 22 | Q9UBB9 TFP11_HUMAN | K.DKFNEALDIM*NR.A       | 3 | 3,088  | 0,186 | 0,247  |
| 22 | Q13177 PAK2_HUMAN  | K.DPLSANHSLKPLPSVPEEK.K | 3 | 3,0815 | 0,179 | 0,089  |

|    |                    |                           |   |        |       |        |
|----|--------------------|---------------------------|---|--------|-------|--------|
| 22 | Q9NZ01 GPSN2_HUMAN | K.HYEVEILDAK.T            | 2 | 3,081  | 0,406 | 0      |
| 22 | O60841 IF2P_HUMAN  | R.HFEATDILVSK.I           | 2 | 3,076  | 0,516 | -0,097 |
| 22 | P48643 TCPE_HUMAN  | K.IDDIRKPGESEE.-          | 2 | 3,0698 | 0,369 | -0,703 |
| 22 | P11142 HSP7C_HUMAN | K.MKEIAEAYLGK.T           | 2 | 3,0655 | 0,258 | -0,779 |
| 22 | Q9Y490 TLN1_HUMAN  | K.LKPLPGETM*EK.C          | 3 | 3,0544 | 0,344 | 1,816  |
| 22 | P08107 HSP71_HUMAN | R.ARFEELCSDLFR.S          | 3 | 3,0524 | 0,432 | 0,119  |
| 22 | Q00839 HNRPU_HUMAN | K.LLEQYKEESK.K            | 2 | 3,0464 | 0,303 | -0,481 |
| 22 | P55786 PSA_HUMAN   | R.KPYPD DENLVEVK.F        | 3 | 3,0446 | 0,194 | 0      |
| 22 | P16403 H12_HUMAN   | R.KASGPPVSELITK.A         | 3 | 3,0396 | 0,28  | 0,207  |
| 22 | P39687 AN32A_HUMAN | K.CPNLTHLNLSGNK.I         | 3 | 3,0381 | 0,336 | 0,187  |
| 22 | Q6S8J3 A26CA_HUMAN | K.QEYDESGPSIVHR.K         | 3 | 3,038  | 0,398 | -0,121 |
| 22 | O00165 HAX1_HUMAN  | R.FHDNFGFDDLVR.D          | 3 | 3,0328 | 0,239 | -0,062 |
| 22 | Q9Y3P9 RBGP1_HUMAN | K.DLDNAEEKADALNKELLM*TK.Q | 3 | 3,0173 | 0,197 | 0,241  |
| 22 | P04083 ANXA1_HUMAN | K.CATSKPAFFAEK.L          | 3 | 3,0127 | 0,361 | 0,404  |
| 22 | P07237 PDIA1_HUMAN | K.YKPESEELTAER.I          | 3 | 3,0041 | 0,271 | 0,378  |
| 22 | P04908 H2A1B_HUMAN | R.NDEELNKLLGR.V           | 3 | 2,9996 | 0,204 | -0,211 |
| 22 | P13796 PLSL_HUMAN  | K.KLENCNYAVELGK.N         | 3 | 2,9991 | 0,24  | 0,119  |
| 22 | O43143 DHX15_HUMAN | K.DRFTDILVR.H             | 2 | 2,9976 | 0,287 | -0,215 |
| 22 | P30085 KCY_HUMAN   | R.KNPDSQYGELIEK.Y         | 3 | 2,9951 | 0,29  | 0,24   |
| 22 | P07900 HS90A_HUMAN | R.APFDFL FENRK.K          | 2 | 2,9943 | 0,269 | -0,099 |
| 22 | P54136 SYRC_HUMAN  | R.M*NDIVKEFEDR.G          | 3 | 2,9942 | 0,319 | -0,194 |
| 22 | Q8TEQ6 GEMI5_HUMAN | R.NDSQH L FIEPR.T         | 3 | 2,9938 | 0,272 | 0,067  |
| 22 | P62244 RS15A_HUMAN | R.FDVQLKDLEK.W            | 3 | 2,9914 | 0,235 | 0,296  |
| 22 | Q03519 TAP2_HUMAN  | R.AHQILVLQEGK.L           | 3 | 2,9889 | 0,162 | 0,148  |
| 22 | P35749 MYH11_HUMAN | K.KEEELQAALAR.L           | 2 | 2,9732 | 0,337 | -0,291 |
| 22 | Q1KMD3 HNRL2_HUMAN | K.DRYGGQPLFSEK.F          | 2 | 2,973  | 0,323 | -0,175 |
| 22 | Q01433 AMPD2_HUMAN | K.CKEIAEELFTR.S           | 3 | 2,9712 | 0,091 | -0,393 |
| 22 | P06396 GELS_HUMAN  | K.SEDC FILDHGK.D          | 3 | 2,9702 | 0,359 | 0,138  |
| 22 | P49023 PAXI_HUMAN  | R.KDYFDM*FAPK.C           | 3 | 2,9658 | 0,311 | 0,501  |
| 22 | Q13247 SFRS6_HUMAN | R.ALDKLDGTEINGR.N         | 3 | 2,9567 | 0,385 | 0      |
| 22 | Q9P289 MST4_HUMAN  | K.KTSYLTELIDR.F           | 2 | 2,9505 | 0,373 | -0,091 |
| 22 | Q02218 ODO1_HUMAN  | R.KELEQIFCQFDSK.L         | 3 | 2,9372 | 0,279 | -1,094 |
| 22 | P62888 RL30_HUMAN  | R.KSEIEYYAM*LAK.T         | 3 | 2,9242 | 0,321 | 0      |

|    |                    |                       |   |        |       |        |
|----|--------------------|-----------------------|---|--------|-------|--------|
| 22 | P26373 RL13_HUMAN  | R.VITEEEKNFK.A        | 2 | 2,9221 | 0,373 | -0,296 |
| 22 | P16401 H15_HUMAN   | R.NGLSLAALKK.A        | 2 | 2,9202 | 0,302 | 0,3    |
| 22 | P52272 HNRPM_HUMAN | R.ADILEDKDGK.S        | 2 | 2,9199 | 0,357 | -0,221 |
| 22 | P25205 MCM3_HUMAN  | R.SKDIFDQLAK.S        | 2 | 2,9109 | 0,255 | -0,209 |
| 22 | Q58FF8 H90B2_HUMAN | K.IRYESLTDPSK.L       | 3 | 2,9091 | 0,096 | 0,14   |
| 22 | P11021 GRP78_HUMAN | K.MKETAEAYLGK.K       | 3 | 2,9047 | 0,285 | 0,442  |
| 22 | Q7KZF4 SND1_HUMAN  | K.IHVFYIDYGNR.E       | 3 | 2,8949 | 0,297 | 0      |
| 22 | P35580 MYH10_HUMAN | K.KFDQLLAEEK.S        | 3 | 2,889  | 0,22  | 0,3    |
| 22 | P33778 H2B1B_HUMAN | R.KESYSIYVYK.V        | 2 | 2,8885 | 0,43  | -0,095 |
| 22 | O43852 CALU_HUMAN  | K.M*ADKDGDLIATK.E     | 3 | 2,8858 | 0,277 | 0,141  |
| 22 | O75874 IDHC_HUMAN  | R.FKDIFQEYDK.Q        | 2 | 2,8839 | 0,243 | -0,338 |
| 22 | P11586 C1TC_HUMAN  | R.IFHELTSQTDK.A       | 2 | 2,8781 | 0,352 | -0,198 |
| 22 | P54652 HSP72_HUMAN | K.STAGDTHLGGEDFDNR.M  | 3 | 2,8758 | 0,466 | 0,216  |
| 22 | P56192 SYMC_HUMAN  | K.ADKNEVAEVAK.L       | 3 | 2,8674 | 0,26  | 0,294  |
| 22 | O15085 ARHGB_HUMAN | K.DQHGFVFTVSGDR.I     | 3 | 2,8653 | 0,175 | 0,129  |
| 22 | Q02790 FKBP4_HUMAN | K.DKFSFDLGK.G         | 2 | 2,8631 | 0,447 | -0,346 |
| 22 | P68104 EF1A1_HUMAN | K.STTTGHLIYK.C        | 2 | 2,862  | 0,464 | -0,327 |
| 22 | Q08EQ4 TMSL1_HUMAN | K.TETQEKPLPSK.E       | 3 | 2,8617 | 0,335 | -0,267 |
| 22 | P38159 HNRPG_HUMAN | K.VEQATKPSFESGR.R     | 3 | 2,8615 | 0,35  | 0,255  |
| 22 | Q7L2E3 DHX30_HUMAN | K.EHYLEDILAK.L        | 3 | 2,8614 | 0,15  | 0      |
| 22 | P22314 UBA1_HUMAN  | R.KPLLESGTLGTK.G      | 3 | 2,8586 | 0,254 | 0,147  |
| 22 | O75431 MTX2_HUMAN  | K.GHSLSDGLEEVQK.A     | 3 | 2,8562 | 0,159 | -0,065 |
| 22 | P49189 AL9A1_HUMAN | R.EREDEIATM*ECINNGK.S | 3 | 2,8532 | 0,369 | -0,285 |
| 22 | Q04637 IF4G1_HUMAN | K.DKDDDEVFEK.K        | 2 | 2,8531 | 0,203 | -0,394 |
| 22 | Q99590 SFRIP_HUMAN | R.KSEQEFSFDTPADR.S    | 3 | 2,8524 | 0,239 | 0      |
| 22 | P34931 HS71L_HUMAN | K.ATAGDTHLGGEDFDNR.L  | 3 | 2,8492 | 0,238 | 0      |
| 22 | O60812 HNRCL_HUMAN | K.QKVDSLLENLEK.I      | 3 | 2,8393 | 0,169 | -0,517 |
| 22 | P09493 TPM1_HUMAN  | K.LEEAEEKADESER.G     | 3 | 2,8383 | 0,433 | -0,248 |
| 22 | Q13242 SFRS9_HUMAN | R.EKDLEDLFYK.Y        | 3 | 2,8339 | 0,281 | -0,352 |
| 22 | P11940 PABP1_HUMAN | R.KEFSPFGTITSAK.V     | 2 | 2,8307 | 0,286 | -0,173 |
| 22 | P49368 TCPG_HUMAN  | R.IDDIVSGHK.K         | 2 | 2,818  | 0,309 | 0,062  |
| 22 | P53611 PGTB2_HUMAN | R.M*NREEILAFIK.S      | 3 | 2,8103 | 0,164 | -0,066 |
| 22 | P32969 RL9_HUMAN   | R.KFLDGIYVSEK.G       | 2 | 2,8092 | 0,318 | -0,376 |

|    |                    |                             |   |        |       |        |
|----|--------------------|-----------------------------|---|--------|-------|--------|
| 22 | P09874 PARP1_HUMAN | R.HPDVEVDGFSELR.W           | 2 | 2,8    | 0,445 | -0,325 |
| 22 | Q969G6 RIFK_HUMAN  | K.IKEDNFFQVSK.S             | 3 | 2,7996 | 0,196 | 0,135  |
| 22 | Q9NTJ3 SMC4_HUMAN  | R.DNTSVYHISGK.K             | 2 | 2,7992 | 0,34  | -0,1   |
| 22 | Q58FF7 H90B3_HUMAN | R.APFDFLENKK.K              | 2 | 2,798  | 0,339 | -0,202 |
| 22 | P48643 TCPE_HUMAN  | K.EKFEEM*IQQIK.E            | 2 | 2,7963 | 0,168 | -0,339 |
| 22 | P11142 HSP7C_HUMAN | R.M*VNHFIAEFK.R             | 3 | 2,7957 | 0,189 | 0,365  |
| 22 | P62807 H2B1C_HUMAN | R.KESYSVYVYK.V              | 2 | 2,7949 | 0,396 | -0,193 |
| 22 | P08107 HSP71_HUMAN | R.LVNHFVEEFK.R              | 3 | 2,7925 | 0,366 | 0,217  |
| 22 | Q15056 IF4H_HUMAN  | R.GSNM*DFREPTEEER.A         | 3 | 2,7874 | 0,296 | -0,534 |
| 22 | Q8WTT2 NOC3L_HUMAN | K.LREFEEGLVSQYK.F           | 3 | 2,787  | 0,229 | 0      |
| 22 | P21980 TGM2_HUMAN  | K.YRDCLTESNLIK.V            | 3 | 2,7858 | 0,151 | 0,06   |
| 22 | P62807 H2B1C_HUMAN | R.KESYSVYVYK.V              | 3 | 2,7848 | 0,367 | 0,144  |
| 22 | Q8WUM4 PDC6I_HUMAN | K.DNDFIYHDR.V               | 2 | 2,7817 | 0,295 | 0      |
| 22 | P50454 SERPH_HUMAN | K.LSSLILM*PHHVEPLER.L       | 3 | 2,7793 | 0,165 | 0      |
| 22 | P09429 HMGB1_HUMAN | K.HPDASVNFSEFSK.K           | 3 | 2,7653 | 0,293 | 0,187  |
| 22 | P11940 PABP1_HUMAN | K.NFGEDM*DDERLK.D           | 2 | 2,7649 | 0,312 | -0,411 |
| 22 | P42704 LPPRC_HUMAN | K.SYVSEKDVTSK.A             | 2 | 2,764  | 0,293 | -0,464 |
| 22 | Q13813 SPTA2_HUMAN | R.EKEPIVGSTDYGKDESDAEALLK.K | 3 | 2,7634 | 0,231 | -0,22  |
| 22 | Q08257 QOR_HUMAN   | K.DLSLLSHGGR.V              | 2 | 2,756  | 0,281 | -0,231 |
| 22 | Q13442 HAP28_HUMAN | K.KVTQLDLGPK.E              | 3 | 2,7496 | 0,251 | 0,151  |
| 22 | P55209 NP1L1_HUMAN | K.FYEEVHDLER.K              | 2 | 2,7449 | 0,441 | -0,73  |
| 22 | Q9Y3T9 NOC2L_HUMAN | R.DREIQLEISGK.E             | 2 | 2,7447 | 0,291 | -0,663 |
| 22 | O43390 HNRPR_HUMAN | K.DYAFVHFEDR.G              | 2 | 2,7445 | 0,407 | -0,47  |
| 22 | P33778 H2B1B_HUMAN | R.KESYSIYVYK.V              | 3 | 2,7416 | 0,254 | 0,429  |
| 22 | P52907 CAZA1_HUMAN | K.DHYSNGFCTVYAK.T           | 3 | 2,7405 | 0,345 | 0,468  |
| 22 | P55327 TPD52_HUMAN | K.SFEEKVENLK.S              | 2 | 2,7399 | 0,177 | -0,1   |
| 22 | Q9UGV6 HMG1X_HUMAN | K.GEHPGLSIGDVAK.K           | 2 | 2,7366 | 0,368 | 0      |
| 22 | O00170 AIP_HUMAN   | R.TLHSDDEGTVLDDSR.A         | 3 | 2,735  | 0,145 | 0      |
| 22 | Q13442 HAP28_HUMAN | K.KVTQLDLGPK.E              | 2 | 2,7335 | 0,312 | 0,201  |
| 22 | P15531 NDKA_HUMAN  | K.DRPFFAGLVK.Y              | 2 | 2,7294 | 0,369 | -1,061 |
| 22 | P00558 PGK1_HUMAN  | R.AHSSM*VGVNLPQK.A          | 2 | 2,7257 | 0,346 | -0,176 |
| 22 | P50454 SERPH_HUMAN | K.HLAGLGLTEAIDK.N           | 3 | 2,7254 | 0,222 | 0,205  |
| 22 | P11142 HSP7C_HUMAN | R.M*VNHFIAEFK.R             | 2 | 2,7216 | 0,377 | -0,097 |

|    |                    |                            |   |        |       |        |
|----|--------------------|----------------------------|---|--------|-------|--------|
| 22 | Q9BWF3 RBM4_HUMAN  | K.NYGFVHIEDK.T             | 2 | 2,7106 | 0,391 | -0,599 |
| 22 | O60812 HNRCL_HUMAN | K.KSDVEAIFSK.Y             | 2 | 2,7086 | 0,308 | 0,651  |
| 22 | Q8WWY3 PRP31_HUMAN | K.VGYELKDEIER.K            | 3 | 2,7065 | 0,242 | -0,135 |
| 22 | Q9NZ45 CISD1_HUMAN | K.HNEETGDNVGPLIIK.K        | 3 | 2,7052 | 0,134 | -0,224 |
| 22 | P43686 PRS6B_HUMAN | R.KIEFPLPDR.R              | 2 | 2,7038 | 0,139 | 0      |
| 22 | P05198 IF2A_HUMAN  | R.VSPEEAIKCEDK.F           | 2 | 2,7026 | 0,202 | -0,434 |
| 22 | O60361 NDK8_HUMAN  | K.DRPFFPGLVK.Y             | 2 | 2,7025 | 0,247 | 0      |
| 22 | P19105 MLRM_HUMAN  | R.DGFIDKEDLHDM*LASLGK.N    | 3 | 2,7021 | 0,188 | -0,272 |
| 22 | Q9NTJ3 SMC4_HUMAN  | K.SLVHDLFQK.V              | 2 | 2,6997 | 0,198 | 0,112  |
| 22 | P07814 SYEP_HUMAN  | K.DEDFKQYVNK.N             | 3 | 2,6993 | 0,156 | 0,071  |
| 22 | Q8N1F7 NUP93_HUMAN | K.NADKVLELM*NK.L           | 3 | 2,6971 | 0,32  | 0,071  |
| 22 | P19338 NUCL_HUMAN  | K.TEADAECTFEK.Q            | 3 | 2,6932 | 0,298 | 0      |
| 22 | O43390 HNRPR_HUMAN | K.TKENILEEFSK.V            | 3 | 2,6928 | 0,196 | 0,068  |
| 22 | Q00839 HNRPU_HUMAN | K.DIDIHEVR.I               | 2 | 2,6861 | 0,22  | -0,306 |
| 22 | Q05086 UBE3A_HUMAN | R.DHIIDALVR.L              | 2 | 2,6835 | 0,262 | -0,418 |
| 22 | P54652 HSP72_HUMAN | K.VQVEYKGETK.T             | 2 | 2,6807 | 0,382 | -0,31  |
| 22 | P36542 ATPG_HUMAN  | R.THSDQFLVAFK.E            | 3 | 2,6764 | 0,269 | -0,141 |
| 22 | P42704 LPPRC_HUMAN | K.ALYEHLTAK.N              | 2 | 2,6641 | 0,282 | -0,233 |
| 22 | Q9UGV6 HMG1X_HUMAN | K.GEHPGLSIGDVAK.K          | 3 | 2,6638 | 0,136 | 0,143  |
| 22 | P20700 LMNB1_HUMAN | R.CQSLTELEFRK.S            | 3 | 2,6624 | 0,304 | -0,36  |
| 22 | Q9NZ01 GPSN2_HUMAN | K.HYEVEILDAK.T             | 3 | 2,6578 | 0,165 | 0,376  |
| 22 | O75083 WDR1_HUMAN  | R.NIDNPALADIYTEHAHQVVVAK.Y | 3 | 2,6544 | 0,218 | -0,076 |
| 22 | Q6ZRV2 FA83H_HUMAN | R.DSFAQQLHQEAER.Q          | 3 | 2,6439 | 0,335 | 0      |
| 22 | Q58FF8 H90B2_HUMAN | K.EKYIDQEELNK.T            | 2 | 2,6402 | 0,346 | -0,693 |
| 22 | P61160 ARP2_HUMAN  | K.HLWDYTFGPEK.L            | 2 | 2,6364 | 0,452 | -0,788 |
| 22 | P08865 RSSA_HUMAN  | R.KSDGIYIINLK.R            | 3 | 2,6309 | 0,09  | 0,217  |
| 22 | Q9NZI8 IF2B1_HUMAN | K.LKEENFFGPK.E             | 3 | 2,6189 | 0,201 | 0,302  |
| 22 | P09874 PARP1_HUMAN | R.DSEEAEIIRK.Y             | 2 | 2,6139 | 0,236 | 0,308  |
| 22 | P26641 EF1G_HUMAN  | K.STFVLDEFKR.K             | 2 | 2,6124 | 0,292 | -0,295 |
| 22 | Q9NRY5 F1142_HUMAN | K.DITELFSQLHVSSKPEK.L      | 3 | 2,6073 | 0,347 | -0,374 |
| 22 | Q8N0Z6 TTC5_HUMAN  | R.QREQQLLEFLDR.L           | 3 | 2,6046 | 0,263 | -0,116 |
| 22 | P30050 RL12_HUMAN  | R.HPHDIIDDINSGAVECPAS.-    | 2 | 2,6045 | 0,471 | -0,596 |
| 22 | P60842 IF4A1_HUMAN | R.GFKDQIYDIFQK.L           | 3 | 2,6025 | 0,27  | -0,304 |



|    |                    |                   |   |        |       |        |
|----|--------------------|-------------------|---|--------|-------|--------|
| 22 | Q13242 SFRS9_HUMAN | R.EKDLEDLFYK.Y    | 2 | 2,6014 | 0,409 | 0,094  |
| 22 | Q00610 CLH1_HUMAN  | K.HDVVFLITK.Y     | 2 | 2,597  | 0,425 | 0,228  |
| 22 | P62280 RS11_HUMAN  | K.EAIEGTYIDKK.C   | 2 | 2,5888 | 0,3   | -0,385 |
| 22 | P62701 RS4X_HUMAN  | K.YALTGDEVKK.I    | 2 | 2,5879 | 0,347 | -0,76  |
| 22 | P43686 PRS6B_HUMAN | K.DEQEHEFYK.-     | 2 | 2,5797 | 0,303 | -0,398 |
| 22 | P07602 SAP_HUMAN   | K.DGGFCEVCKK.L    | 2 | 2,5781 | 0,261 | -0,102 |
| 22 | P30085 KCY_HUMAN   | R.KNPDSQYGELIEK.Y | 2 | 2,5738 | 0,361 | 0,08   |
| 22 | Q99613 EIF3C_HUMAN | R.DFESHITSYK.Q    | 2 | 2,5568 | 0,328 | -0,398 |
| 22 | P20962 PTMS_HUMAN  | R.AAEEEDEADPKR.Q  | 2 | 2,5372 | 0,159 | -0,718 |
| 22 | P62750 RL23A_HUMAN | K.KLYDIDVAK.V     | 2 | 2,5343 | 0,314 | 0      |
| 22 | P25705 ATPA_HUMAN  | R.GYLDKLEPSK.I    | 2 | 2,5308 | 0,388 | -0,318 |
| 22 | Q12798 CETN1_HUMAN | K.DTKEEILK.A      | 2 | 2,5125 | 0,196 | 0      |
| 22 | P42704 LPPRC_HUMAN | K.DAHLLESK.N      | 2 | 2,5088 | 0,231 | -0,121 |
| 22 | P35580 MYH10_HUMAN | K.KFDQLLAEEK.S    | 2 | 2,4969 | 0,169 | -0,4   |
| 22 | Q14204 DYHC1_HUMAN | R.TSFLDDAFRK.N    | 2 | 2,4922 | 0,332 | 0,203  |
| 22 | P21333 FLNA_HUMAN  | R.DAPQDFHPDR.V    | 2 | 2,4893 | 0,321 | -0,509 |
| 22 | O43707 ACTN4_HUMAN | R.DHALLEEQSK.Q    | 2 | 2,4793 | 0,397 | -0,104 |
| 22 | P60842 IF4A1_HUMAN | K.KEELTLEGIR.Q    | 2 | 2,4704 | 0,184 | -0,205 |
| 22 | Q9Y2T3 GUAD_HUMAN  | R.DHLLGVSDSGK.I   | 2 | 2,4665 | 0,407 | -0,433 |
| 22 | P49411 EFTU_HUMAN  | K.GDECELLGHSK.N   | 2 | 2,4655 | 0,211 | -0,098 |
| 22 | P14625 ENPL_HUMAN  | R.GLFDEYGSKK.S    | 2 | 2,4556 | 0,303 | -0,32  |
| 22 | Q58FF7 H90B3_HUMAN | K.EDQTEYLEERR.V   | 2 | 2,4548 | 0,309 | -0,665 |
| 22 | P00558 PGK1_HUMAN  | K.LTLDKLDVK.G     | 2 | 2,4462 | 0,215 | 0      |
| 22 | P63104 1433Z_HUMAN | R.YLAEVAAGDDKK.G  | 2 | 2,4252 | 0,229 | -0,477 |
| 22 | P0C0S8 H2A1_HUMAN  | R.NDEELNKLLGK.V   | 2 | 2,4244 | 0,366 | -0,288 |
| 22 | P04179 SODM_HUMAN  | R.DFGSFDKFK.E     | 2 | 2,4153 | 0,359 | -0,112 |
| 22 | P49915 GUAA_HUMAN  | R.ESQSVEEALKK.L   | 2 | 2,4139 | 0,307 | -0,489 |
| 22 | Q16658 FSCN1_HUMAN | R.FLIVAHDDGR.W    | 2 | 2,4093 | 0,316 | -0,107 |
| 22 | Q5T200 ZC3HD_HUMAN | R.DSLALDKER.M     | 2 | 2,403  | 0,183 | -0,233 |
| 22 | P40429 RL13A_HUMAN | K.IDKYTEVLK.T     | 2 | 2,393  | 0,246 | 0      |
| 22 | Q96CT7 CC124_HUMAN | K.SHLEVPLEENVNR.R | 2 | 2,3899 | 0,324 | -0,159 |
| 22 | P16403 H12_HUMAN   | R.KASGPPVSELITK.A | 2 | 2,3854 | 0,31  | -0,46  |
| 22 | A3KN83 SBNO1_HUMAN | K.DLLDKLEK.L      | 2 | 2,3603 | 0,142 | 0      |

|    |                    |                                  |   |        |       |        |
|----|--------------------|----------------------------------|---|--------|-------|--------|
| 22 | Q5H9R7 SAPS3_HUMAN | R.KPEQIVDFLK.K                   | 2 | 2,3575 | 0,12  | 0,301  |
| 22 | P11021 GRP78_HUMAN | K.VYEGERPLTK.D                   | 2 | 2,3564 | 0,374 | -0,614 |
| 22 | P31948 STIP1_HUMAN | K.DAIHFYNK.S                     | 2 | 2,33   | 0,222 | 0,061  |
| 22 | Q86VP6 CAND1_HUMAN | R.HEM*LPEFYK.T                   | 2 | 2,3288 | 0,332 | -0,706 |
| 22 | P17987 TCPA_HUMAN  | R.SLHDALCVVK.R                   | 2 | 2,3287 | 0,351 | -0,107 |
| 22 | Q86V81 THOC4_HUMAN | R.SLGTADVHFER.K                  | 2 | 2,3075 | 0,444 | -0,099 |
| 22 | Q01518 CAP1_HUMAN  | K.KEPAVLELEGK.K                  | 2 | 2,3062 | 0,316 | -0,302 |
| 22 | P62917 RL8_HUMAN   | K.DIIHDPGR.G                     | 2 | 2,2974 | 0,242 | -0,264 |
| 22 | P15121 ALDR_HUMAN  | K.REELFIVSK.L                    | 2 | 2,2926 | 0,194 | 0,109  |
| 22 | P46063 RECQ1_HUMAN | K.VKDILQNVFK.L                   | 2 | 2,2667 | 0,194 | -0,101 |
| 22 | P46940 IQGA1_HUMAN | R.DHINDIIK.I                     | 2 | 2,2437 | 0,214 | 0,063  |
| 22 | Q96125 SPF45_HUMAN | K.KSDSNPLTEILK.C                 | 2 | 2,2225 | 0,258 | 0,091  |
| 22 | P23526 SAHH_HUMAN  | R.ESLIDGIKR.A                    | 2 | 2,2217 | 0,107 | -0,118 |
| 22 | P55081 MFAP1_HUMAN | R.DVFERPSAK.K                    | 2 | 2,2203 | 0,2   | 0,116  |
| 22 | Q8N5C6 SRBD1_HUMAN | K.DKDTLDFIR.N                    | 2 | 2,1937 | 0,27  | -0,217 |
| 22 | P62280 RS11_HUMAN  | R.VLLGETGKEK.L                   | 2 | 2,1772 | 0,285 | -0,227 |
| 22 | Q93008 USP9X_HUMAN | R.DHEDYDPQTVR.L                  | 2 | 2,1771 | 0,25  | 0,089  |
| 22 | Q14008 CKAP5_HUMAN | K.DFYDKIEAK.K                    | 2 | 2,1755 | 0,18  | -0,324 |
| 22 | Q14103 HNRPD_HUMAN | K.DLKDYFSK.F                     | 2 | 2,1563 | 0,25  | -0,42  |
| 22 | P15559 NQO1_HUMAN  | K.EGHLSPDIVAEQK.K                | 2 | 2,1563 | 0,205 | -0,171 |
| 22 | P08107 HSP71_HUMAN | R.KFGDPVVQSDM*K.H                | 2 | 2,1497 | 0,351 | -0,268 |
| 22 | Q13206 DDX10_HUMAN | K.DKEVFDVSK.L                    | 2 | 2,1426 | 0,301 | -0,114 |
| 22 | P50990 TCPQ_HUMAN  | R.ELEVQHPAAK.M                   | 2 | 2,1346 | 0,218 | 0,109  |
| 22 | Q92621 NU205_HUMAN | R.DILQDVHDK.I                    | 2 | 2,1295 | 0,21  | -0,338 |
| 22 | O60812 HNRCL_HUMAN | K.QKVDSLLENLEK.I                 | 2 | 2,1212 | 0,448 | -0,431 |
| 22 | P12814 ACTN1_HUMAN | K.ATLPDADKER.L                   | 2 | 2,114  | 0,293 | -0,219 |
| 22 | Q99729 ROAA_HUMAN  | K.DLKDYFTK.F                     | 2 | 2,1124 | 0,087 | -0,355 |
| 22 | Q15286 RAB35_HUMAN | R.DYDHLFK.L                      | 2 | 2,1085 | 0,095 | 0      |
| 22 | P62834 RAP1A_HUMAN | K.YDPTIEDSYRK.Q                  | 2 | 2,0397 | 0,186 | -0,176 |
| 22 | P38919 IF4A3_HUMAN | K.RDELTLEGIK.Q                   | 2 | 2,0157 | 0,169 | -0,208 |
| 22 | P56381 ATP5E_HUMAN | R.DALKTEFK.A                     | 2 | 2,0113 | 0,167 | -0,32  |
| 22 | P08670 VIME_HUMAN  | R.EKLQEEM*LQR.E                  | 2 | 2,011  | 0,248 | -0,462 |
| 23 | Q9H307 PININ_HUMAN | R.ESRQES#DPEDDDVKKPALQSSVVATSK.E | 3 | 3,4856 | 0,393 | -0,907 |

S100:

|    |                     |                             |        |   |        |       |        |
|----|---------------------|-----------------------------|--------|---|--------|-------|--------|
| 23 | Q9P265 DIP2B_HUMAN  | R.YRS#DIHTEAVQAALAK.H       | S100:  | 3 | 3,3452 | 0,407 | 0,592  |
| 23 | Q9UGU0 TCF20_HUMAN  | R.GRS#PSQYHDFAEK.L          | S1005: | 3 | 3,1693 | 0,393 | -0,114 |
| 23 | Q5VUA4 ZN318_HUMAN  | K.S#KSPEKVSSFSNSSSNK.E      | S1008: | 2 | 3,8247 | 0,447 | 0,389  |
| 23 | P49006 MRP_HUMAN    | K.KPFKLS#GLSFK.R            | S101:  | 3 | 3,3662 | 0,15  | -0,069 |
| 23 | P49006 MRP_HUMAN    | K.KPFKLS#GLSFK.R            | S101:  | 2 | 2,692  | 0,263 | -0,641 |
| 23 | Q5VUA4 ZN318_HUMAN  | K.SKS#PEKVSSFSNSSSNK.E      | S1010: | 3 | 3,9922 | 0,462 | 0      |
| 23 | P05387 RLA2_HUMAN   | K.KDEKKEES#EESDDDM*GFGLFD.- | S102:  | 3 | 3,9685 | 0,487 | -0,719 |
| 23 | P17096 HMGA1_HUMAN  | K.KLEKEEEEGISQES#SEEEQ.-    | S102:  | 3 | 3,1348 | 0,275 | -0,711 |
| 23 | Q96KR1 ZFR_HUMAN    | R.RDS#DGVDFEAEAGKK.D        | S1054: | 3 | 5,0201 | 0,505 | 0,108  |
| 23 | Q5SW79 CE170_HUMAN  | R.TPLTS#ADEHVHVK.L          | S1059: | 2 | 2,4615 | 0,333 | -0,65  |
| 23 | A9CQZ4 A9CQZ4_HUMAN | R.RAS#GKEALQNINDQSDR.L      | S107:  | 3 | 3,9424 | 0,413 | -1,569 |
| 23 | O60841 IF2P_HUMAN   | K.KQS#FDDNDSELEDKDSK.S      | S107:  | 3 | 3,9276 | 0,262 | 0      |
| 23 | O60361 NDK8_HUMAN   | R.NIIHGSDS#VKSAAEK.E        | S107:  | 3 | 3,0885 | 0,363 | 0      |
| 23 | Q9BQF6 SEN7_HUMAN   | R.RPS#SSEIITEGKR.K          | S11:   | 3 | 3,1728 | 0,233 | -0,356 |
| 23 | Q99547 MPH6_HUMAN   | K.HKAEVEDETVELDVS#DEEM*AR.R | S110:  | 3 | 5,2775 | 0,526 | -0,413 |
| 23 | Q8N2U9 PQLC1_HUMAN  | R.RS#FTAADSKDEEVK.V         | S110:  | 3 | 3,2464 | 0,379 | -0,22  |
| 23 | Q8N7R7 CCYL1_HUMAN  | K.SNHLNHVS#PGQLTK.K         | S112:  | 3 | 3,1235 | 0,286 | -0,34  |
| 23 | O60885 BRD4_HUMAN   | R.SEPFS#PSLRPEPPKHPESIK.A   | S1126: | 3 | 2,9805 | 0,273 | -0,939 |
| 23 | O60841 IF2P_HUMAN   | K.KQSFDDNDS#EELEDKDSK.S     | S113:  | 3 | 4,9784 | 0,394 | -0,166 |
| 23 | Q9UNZ2 NSF1C_HUMAN  | R.KKS#PNELVDDLFK.G          | S114:  | 3 | 4,5773 | 0,348 | -0,227 |
| 23 | Q9UNZ2 NSF1C_HUMAN  | R.KKS#PNELVDDLFK.G          | S114:  | 2 | 4,0114 | 0,52  | -0,983 |
| 23 | O60238 BNI3L_HUMAN  | R.DHSS#QSEEEVVEGEKEVEALKK.S | S118:  | 3 | 4,3872 | 0,421 | -0,499 |
| 23 | Q92934 BAD_HUMAN    | R.RM*S#DEFVDSFKK.G          | S118:  | 3 | 3,8367 | 0,329 | -0,231 |
| 23 | Q92934 BAD_HUMAN    | R.RM*S#DEFVDSFKK.G          | S118:  | 2 | 2,8179 | 0,381 | -0,693 |
| 23 | P29692 EF1D_HUMAN   | R.LNVLEKS#SPGHR.A           | S118:  | 3 | 2,7593 | 0,341 | 0      |
| 23 | Q5VZL5 ZMYM4_HUMAN  | R.KKS#IIVAVEPR.S            | S1181: | 3 | 3,267  | 0,151 | 0,53   |
| 23 | Q6P1X5 TAF2_HUMAN   | K.EKDKEPFTFS#SPASGR.S       | S1184: | 3 | 4,3147 | 0,389 | -0,295 |
| 23 | Q6P1X5 TAF2_HUMAN   | K.EKDKEPFTFS#SPASGR.S       | S1184: | 2 | 2,7407 | 0,433 | -0,393 |
| 23 | P29692 EF1D_HUMAN   | R.LNVLEKSS#PGHR.A           | S119:  | 2 | 3,7646 | 0,531 | -0,517 |
| 23 | Q86SQ4 GP126_HUMAN  | R.NSHTDNVSYEHS#FNK.S        | S1199: | 3 | 3,3677 | 0,383 | -0,492 |
| 23 | O60238 BNI3L_HUMAN  | R.DHSSQS#EEEVVEGEKEVEALKK.S | S120:  | 3 | 5,1358 | 0,532 | -0,356 |
| 23 | O95218 ZRAB2_HUMAN  | R.ENVEYIEREES#DGEYDEFGRK.K  | S120:  | 3 | 3,3107 | 0,188 | -0,274 |
| 23 | Q14814 MEF2D_HUMAN  | R.RAS#EELDGLFRR.Y           | S121:  | 3 | 3,0858 | 0,445 | 0      |

|    |                     |                                |              |   |        |       |        |
|----|---------------------|--------------------------------|--------------|---|--------|-------|--------|
| 23 | Q5VZL5 ZMYM4_HUMAN  | R.RVTQHE\$#DNENEIQNK.L         | S122:        | 3 | 5,5796 | 0,454 | -0,728 |
| 23 | Q14204 DYHC1_HUMAN  | R.RKDS#AIQQQVANLQM*K.I         | S1230:       | 3 | 3,5021 | 0,205 | -0,562 |
| 23 | P22087 FBRL_HUMAN   | K.RVS#ISEGDDKIEYR.A            | S124:        | 3 | 3,4271 | 0,496 | -0,209 |
| 23 | P22087 FBRL_HUMAN   | K.RVS#ISEGDDKIEYR.A            | S124:        | 2 | 2,9217 | 0,463 | -0,698 |
| 23 | P11388 TOP2A_HUMAN  | K.KIKNENTEGS#PQEDGVELEGLK.Q    | S1247:       | 3 | 5,592  | 0,457 | -0,587 |
| 23 | Q15149 PLEC1_HUMAN  | R.RTPHVQAVQGPLGS#PPK.R         | S125:        | 3 | 4,9722 | 0,357 | -0,297 |
| 23 | Q15149 PLEC1_HUMAN  | R.RTPHVQAVQGPLGS#PPK.R         | S125:        | 2 | 3,5262 | 0,481 | -0,858 |
| 23 | O14514 BAI1_HUMAN   | K.RPS#LPREEK.L                 | S1257:       | 3 | 3,6062 | 0,299 | 0,065  |
| 23 | Q9BQG0 MBB1A_HUMAN  | K.KNQKPSQVNGAPGS#PTEPAGQK.Q    | S1267:       | 3 | 5,1273 | 0,383 | -0,557 |
| 23 | Q96EE5 Q96EE5_HUMAN | R.SKS#LKEGLTVQER.L             | S128:        | 3 | 4,5972 | 0,297 | -0,353 |
| 23 | Q96EE5 Q96EE5_HUMAN | R.SKS#LKEGLTVQER.L             | S128:        | 2 | 3,1336 | 0,435 | 0,078  |
| 23 | P10586 PTRF_HUMAN   | R.THS#PSSKDEQSIGLK.D           | S1281:       | 3 | 3,8957 | 0,407 | -0,324 |
| 23 | Q8WWQ0 PHIP_HUMAN   | K.KKVL\$#DS#EDEEKDADVPGTSTR.K  | S1281:S1283: | 3 | 4,2334 | 0,52  | -0,499 |
| 23 | O15400 STX7_HUMAN   | R.ASSRV\$#GSFPEDSSKER.N        | S129:        | 3 | 3,1005 | 0,264 | -0,192 |
| 23 | Q8N201 INT1_HUMAN   | R.RPS#AAAKPSGHPPPQDFIALGSK.G   | S13:         | 3 | 4,2069 | 0,342 | -0,391 |
| 23 | Q13496 MTM1_HUMAN   | K.YNSHS#LENESIKR.T             | S13:         | 3 | 3,2645 | 0,194 | -0,442 |
| 23 | Q8NI27 THOC2_HUMAN  | K.IDTHPS#PSHSSTVKDSLIELK.E     | S1302:       | 3 | 3,6655 | 0,265 | -0,463 |
| 23 | Q15648 MED1_HUMAN   | R.NKKPS#LTAVIDK.L              | S1302:       | 3 | 3,1974 | 0,251 | -0,131 |
| 23 | P55327 TPD52_HUMAN  | K.KLEDVKNS#PTFK.S              | S131:        | 2 | 3,8837 | 0,516 | -0,821 |
| 23 | Q6UB98 ANR12_HUMAN  | R.RCS#M*PSVICEHTK.Q            | S1311:       | 3 | 3,5985 | 0,373 | 0,108  |
| 23 | P51858 HDGF_HUMAN   | K.KGNAEG\$#S#DEEGKLVIDEPAKEK.N | S132:S133:   | 3 | 4,7523 | 0,234 | -0,777 |
| 23 | Q02952 AKA12_HUMAN  | K.KDDALELQSHAKS#PPS#PVER.E     | S1328:S1331: | 3 | 3,8889 | 0,353 | -0,387 |
| 23 | O95490 LPHN2_HUMAN  | R.THS#LLYQPQKK.V               | S1334:       | 3 | 3,9565 | 0,43  | 0,257  |
| 23 | Q96T23 RSF1_HUMAN   | K.KPYRIES#DEEEDFENVGK.V        | S1335:       | 3 | 5,5822 | 0,421 | -0,485 |
| 23 | Q9H501 ESF1_HUMAN   | K.GSENKTDLDNS#IGIKK.M          | S134:        | 3 | 3,148  | 0,238 | 0,305  |
| 23 | Q9HCM1 CL035_HUMAN  | K.HSSLGQ\$LS#PEKIK.L           | S1358:       | 3 | 4,0777 | 0,428 | -0,115 |
| 23 | Q9HCM1 CL035_HUMAN  | K.HSSLGQ\$LS#PEKIK.L           | S1358:       | 2 | 3,7676 | 0,508 | -0,46  |
| 23 | Q14498 RBM39_HUMAN  | R.KDKS#PVREPIDNLT#PEER.D       | S136:T146:   | 3 | 3,7368 | 0,302 | -0,321 |
| 23 | Q9H2Y7 ZF106_HUMAN  | R.AAHVPENS#DT#EQDVLTVKPV\$K.V  | S1370:T1372: | 3 | 3,3151 | 0,513 | -0,564 |
| 23 | P49736 MCM2_HUMAN   | R.RGLLYDS#DEEDEERPAR.K         | S139:        | 3 | 3,1633 | 0,264 | -0,344 |
| 23 | P43243 MATR3_HUMAN  | K.SFQQSSLSRDS#QGHGR.D          | S14:         | 3 | 2,9835 | 0,376 | 0      |
| 23 | Q02363 ID2_HUMAN    | R.KNS#LSDHSLGISR.S             | S14:         | 3 | 2,6759 | 0,228 | 0,184  |
| 23 | P18858 DNL1_HUMAN   | K.RTIQEVLEE\$S#EDEDREAK.R      | S141:        | 3 | 3,347  | 0,266 | -0,46  |

|    |                     |                                 |              |   |        |       |        |
|----|---------------------|---------------------------------|--------------|---|--------|-------|--------|
| 23 | Q8IWS0 PHF6_HUMAN   | K.KTAHNSEADLEES#FNEHELEPSS#PK.S | S145:S155:   | 3 | 2,6671 | 0,122 | -0,552 |
| 23 | Q9UQ35 SRRM2_HUMAN  | R.HLSLGS#SPGM*KDIPRT#PSR.G      | S1462:T1472: | 3 | 4,3245 | 0,373 | -0,335 |
| 23 | Q0VG05 Q0VG05_HUMAN | R.KPTH#QEPQGPEAM*ER.R           | S1489:       | 3 | 3,8782 | 0,461 | -0,477 |
| 23 | Q9BWH2 FUND2_HUMAN  | K.IRKS#NQIPTEVR.S               | S151:        | 3 | 3,7066 | 0,227 | 0,301  |
| 23 | Q9BWH2 FUND2_HUMAN  | K.IRKS#NQIPTEVR.S               | S151:        | 2 | 2,9984 | 0,416 | -0,321 |
| 23 | Q9H501 ESF1_HUMAN   | K.FKIDSNIS#PKK.D                | S153:        | 2 | 3,4072 | 0,206 | -0,36  |
| 23 | Q96I25 SPF45_HUMAN  | R.RPDPDS#DEDEDYERER.R           | S155:        | 3 | 2,992  | 0,3   | -0,522 |
| 23 | O95684 FR1OP_HUMAN  | K.EKGPTTGEGALDLSDVHS#PPKSPEGK.T | S156:        | 3 | 3,9453 | 0,36  | -0,539 |
| 23 | Q9UIG0 BAZ1B_HUMAN  | K.KSDGACDS#PS#SDKENSSQIAQDHQK.K | S158:S160:   | 3 | 3,7536 | 1     | -0,508 |
| 23 | Q9NUQ6 SPS2L_HUMAN  | R.LLQQKLS#LDGNPKPIHGTTTER.S     | S159:        | 3 | 3,2473 | 0,247 | -0,302 |
| 23 | O95684 FR1OP_HUMAN  | K.EKGPTTGEGALDLSDVHSPPKS#PEGK.T | S160:        | 3 | 4,6429 | 0,538 | -0,405 |
| 23 | Q00653 NFKB2_HUMAN  | R.LRS#RPQGLTEAEQR.E             | S161:        | 2 | 2,5383 | 0,303 | -0,284 |
| 23 | O75179 ANR17_HUMAN  | R.KSDNHS#PAVVTTTVSSK.K          | S1639:       | 3 | 3,5006 | 0,377 | -0,398 |
| 23 | P51858 HDGF_HUMAN   | R.AGDLEDS#PKRPK.E               | S165:        | 2 | 3,3157 | 0,362 | -0,324 |
| 23 | P51858 HDGF_HUMAN   | R.AGDLEDS#PKRPK.E               | S165:        | 3 | 2,9252 | 0,218 | -0,182 |
| 23 | Q96GV9 CE030_HUMAN  | R.AHSKS#LDYLNLDK.M              | S167:        | 3 | 4,4227 | 0,448 | -0,231 |
| 23 | Q12888 TP53B_HUMAN  | R.KLITSEEERS#PAK.R              | S1678:       | 2 | 3,5234 | 0,36  | -0,156 |
| 23 | Q12888 TP53B_HUMAN  | R.KLITSEEERS#PAK.R              | S1678:       | 3 | 3,4411 | 0,337 | -1,4   |
| 23 | Q9Y5S2 MRCKB_HUMAN  | K.HSTPSNSSNPSGPPS#PNSPHR.S      | S1690:       | 3 | 5,0066 | 0,523 | -0,412 |
| 23 | Q8IUD2 RB6I2_HUMAN  | R.SVGKVEPSSQS#PGRSPR.L          | S17:         | 2 | 3,1399 | 0,241 | -0,399 |
| 23 | P39687 AN32A_HUMAN  | R.NRTPS#DVKELVLDNSR.S           | S17:         | 2 | 2,729  | 0,267 | -0,381 |
| 23 | Q6NT76 HMBX1_HUMAN  | R.RDS#SVIKEEIK.A                | S170:        | 3 | 2,6571 | 0,167 | 0,066  |
| 23 | P04920 B3A2_HUMAN   | R.KAERTSPS#S#PAPLPHQEATPR.A     | S172:S173:   | 3 | 3,7195 | 0,225 | -0,378 |
| 23 | Q9NYF8 BCLF1_HUMAN  | K.KAEGEPQEE#PLKSK.S             | S177:        | 3 | 4,4689 | 0,349 | 0,316  |
| 23 | Q58FF8 H90B2_HUMAN  | K.IEDVGS#DEEDDSGKDKK.K          | S177:        | 3 | 4,1654 | 0,395 | 1,504  |
| 23 | Q9NYF8 BCLF1_HUMAN  | K.KAEGEPQEE#PLKSK.S             | S177:        | 2 | 3,8854 | 0,443 | 0,211  |
| 23 | Q9C073 F117A_HUMAN  | K.ERGS#PLLDGHAVR.G              | S178:        | 3 | 2,9727 | 0,215 | 0,184  |
| 23 | O14647 CHD2_HUMAN   | K.SPLDHRS#PLER.S                | S1807:       | 3 | 2,7618 | 0,181 | -0,066 |
| 23 | O00264 PGRC1_HUMAN  | K.LLKEGEEPTVYS#DEECPKDESARK.N   | S181:        | 3 | 4,3891 | 0,501 | -0,448 |
| 23 | Q9H1E3 NUCKS_HUMAN  | R.LKATVTPS#PVKKG.G              | S181:        | 2 | 2,869  | 0,43  | -0,347 |
| 23 | Q3V6T2 GRDN_HUMAN   | R.RTS#IHDFLTK.D                 | S1820:       | 2 | 3,5832 | 0,217 | -0,094 |
| 23 | Q9NYF8 BCLF1_HUMAN  | K.SKS#QEEPKDTFEHDPSESIDFNK.S    | S183:        | 3 | 4,6819 | 0,458 | -0,567 |
| 23 | O60749 SNX2_HUMAN   | R.RFS#DFLGLHSK.L                | S185:        | 2 | 2,9259 | 0,312 | -0,792 |

|    |                     |                               |        |   |        |       |        |
|----|---------------------|-------------------------------|--------|---|--------|-------|--------|
| 23 | O60749 SNX2_HUMAN   | R.RFS#DFLGLHSK.L              | S185:  | 3 | 2,6486 | 0,194 | -0,33  |
| 23 | P27708 PYR1_HUMAN   | R.IHRAS#DPGLPAEEPK.E          | S1859: | 2 | 3,8149 | 0,424 | 0,288  |
| 23 | P27708 PYR1_HUMAN   | R.IHRAS#DPGLPAEEPK.E          | S1859: | 3 | 3,2871 | 0,29  | -0,323 |
| 23 | P62070 RRAS2_HUMAN  | R.KFQEQECPSS#PEPTRK.E         | S186:  | 3 | 3,6404 | 0,316 | -0,539 |
| 23 | Q9UPN3 MACF1_HUMAN  | K.RQGS#FSEDEVISHK.G           | S1860: | 3 | 3,6713 | 0,364 | 0      |
| 23 | Q9UPN3 MACF1_HUMAN  | K.RQGS#FSEDEVISHK.G           | S1860: | 2 | 3,1625 | 0,434 | -0,622 |
| 23 | Q14008 CKAP5_HUMAN  | K.KKYS#DADIEPFLK.N            | S1861: | 3 | 3,6105 | 0,233 | -0,112 |
| 23 | O95218 ZRAB2_HUMAN  | K.YNLDAS#EEEDSNKKK.S          | S188:  | 2 | 3,5613 | 0,539 | -0,66  |
| 23 | Q9BXB4 OSB11_HUMAN  | R.RPS#QNAISFFNVGHSK.L         | S189:  | 3 | 4,0738 | 0,487 | -0,685 |
| 23 | Q9H1E3 NUCKS_HUMAN  | R.KVVDYSQFQES#DDADEDYGR.D     | S19:   | 3 | 6,6829 | 0,503 | -0,598 |
| 23 | P35251 RFC1_HUMAN   | K.RKELS#QNTDESGLNDEAIAK.Q     | S190:  | 3 | 5,2753 | 0,515 | -0,478 |
| 23 | Q9NZM1 MYOF_HUMAN   | R.HTIIPAKS#PEK.C              | S1915: | 3 | 3,2894 | 0,28  | -0,633 |
| 23 | Q9NZM1 MYOF_HUMAN   | R.HTIIPAKS#PEK.C              | S1915: | 2 | 2,7309 | 0,415 | -0,281 |
| 23 | Q96T58 MINT_HUMAN   | R.SVYATM*GDHENRS#PVKEPVEQPR.V | S1918: | 3 | 3,1572 | 0,336 | -1,075 |
| 23 | O43513 MED7_HUMAN   | R.VKTEPM*DADDS#NNCTGQNEHQR.E  | S194:  | 3 | 2,796  | 0,271 | -0,693 |
| 23 | P35580 MYH10_HUMAN  | R.RQLHLEGASLELS#DDDTESK.T     | S1956: | 3 | 6,4678 | 0,469 | -0,315 |
| 23 | Q6PJM5 Q6PJM5_HUMAN | K.RGS#IGENQIKDEK.I            | S196:  | 2 | 2,6625 | 0,327 | 0      |
| 23 | Q92622 K0226_HUMAN  | R.KHES#PLLVTK.S               | S197:  | 3 | 3,7382 | 0,342 | 0,074  |
| 23 | Q6PID6 TTC33_HUMAN  | K.KSEAPAEVTHFS#PK.S           | S197:  | 3 | 3,4313 | 0,333 | -0,227 |
| 23 | Q9BVG4 CX026_HUMAN  | K.GADS#GEEKEEGINREDK.T        | S197:  | 3 | 2,7412 | 0,254 | -0,753 |
| 23 | Q9H5N1 RABE2_HUMAN  | R.HAPSLHGSTELLPLS#R.D         | S200:  | 3 | 2,8366 | 0,561 | -0,306 |
| 23 | Q8WUJ0 STYX_HUMAN   | R.SLSVHSGTTGS#LKR.T           | S201:  | 3 | 2,9895 | 0,246 | 0,182  |
| 23 | Q8NCF5 NF2IP_HUMAN  | K.KKTEFLDLNSPLSPPS#PR.T       | S204:  | 3 | 5,4004 | 0,463 | -0,412 |
| 23 | Q14671 PUM1_HUMAN   | R.RPGQSFHVNSEVNSVLS#PR.S      | S209:  | 3 | 5,03   | 0,452 | -0,418 |
| 23 | Q7L9B9 EEP1_HUMAN   | R.SIPRDPDLSDLS#R.K            | S21:   | 3 | 2,7483 | 0,202 | 0      |
| 23 | Q8IUD2 RB6I2_HUMAN  | R.SVGKVEPSSQSPGRS#PR.L        | S21:   | 3 | 2,7196 | 0,135 | -0,299 |
| 23 | Q8TF01 SFR18_HUMAN  | R.DRQRS#PIALPVKQEPPIQIDAVK.R  | S211:  | 3 | 4,3687 | 0,451 | -0,285 |
| 23 | Q8WU20 FRS2_HUMAN   | K.NRTS#VHVPLEAR.V             | S211:  | 3 | 2,9761 | 0,161 | 0,063  |
| 23 | Q8TF01 SFR18_HUMAN  | R.QRS#PIALPVKQEPPIQIDAVKR.R   | S211:  | 3 | 2,6916 | 0,275 | -0,523 |
| 23 | Q9H1E3 NUCKS_HUMAN  | K.EKTPSPKEEDEEPES#PPEK.K      | S214:  | 3 | 3,6306 | 0,361 | 0      |
| 23 | Q9UKV3 ACINU_HUMAN  | K.SSSISEEKGDS#DDEKPR.K        | S216:  | 3 | 3,5685 | 0,27  | -0,376 |
| 23 | Q15019 SEPT2_HUMAN  | K.IYHLPDAES#DEDEDFKEQTR.L     | S218:  | 3 | 3,6472 | 0,397 | -0,291 |
| 23 | O60610 DIAP1_HUMAN  | K.KGRS#PDELPSAGGDGGK.S        | S22:   | 3 | 3,1344 | 0,1   | -0,428 |

|    |                     |                              |            |   |        |       |        |
|----|---------------------|------------------------------|------------|---|--------|-------|--------|
| 23 | Q6NYC8 PHTNS_HUMAN  | R.KEVESRLS#PGESAYQK.L        | S224:      | 3 | 4,0251 | 0,372 | -0,388 |
| 23 | Q6NYC8 PHTNS_HUMAN  | R.KEVESRLS#PGESAYQK.L        | S224:      | 2 | 3,2933 | 0,485 | -0,452 |
| 23 | Q03188 CENPC_HUMAN  | K.KIEIDNKVS#DEEDKT#SEGQER.K  | S225:T231: | 3 | 2,6542 | 0,135 | -0,281 |
| 23 | Q9NY27 PP4R2_HUMAN  | K.NHSDSSTSESEVSSVS#PLKNK.H   | S226:      | 3 | 5,0996 | 0,505 | -0,08  |
| 23 | P08621 RU17_HUMAN   | R.YDERPGPS#PLPHR.D           | S226:      | 3 | 4,1282 | 0,393 | -0,228 |
| 23 | Q9NVW2 RNF12_HUMAN  | R.SRS#PLHPM*SEIPR.R          | S230:      | 3 | 3,0668 | 0,336 | 0      |
| 23 | Q7Z417 NUFP2_HUMAN  | R.RNS#AKGCENLNIVQDK.I        | S230:      | 3 | 3,0484 | 0,231 | -0,76  |
| 23 | Q13283 G3BP1_HUMAN  | K.SSS#PAPADIAQTVQEDLR.T      | S232:      | 2 | 2,1623 | 0,357 | -0,559 |
| 23 | Q9Y5K6 CD2AP_HUMAN  | R.TSS#SETEEKKPEKPLILQSLGPK.T | S233:      | 3 | 3,9336 | 0,395 | -0,421 |
| 23 | Q96ST2 IWS1_HUMAN   | R.HQAS#DSENEELPKPR.I         | S235:      | 3 | 4,6136 | 0,427 | -0,403 |
| 23 | P62753 RS6_HUMAN    | R.RLS#SLRAS#TSKSESSQK.-      | S235:S240: | 3 | 3,0568 | 0,298 | -0,546 |
| 23 | P62753 RS6_HUMAN    | R.RLSS#LRAS#TSKSESSQK.-      | S236:S240: | 2 | 2,6135 | 0,363 | 0,303  |
| 23 | Q9BSQ5 CCM2_HUMAN   | R.AIFDGAS#TPTHHLSLHSDSSTK.V  | S238:      | 3 | 3,3849 | 0,317 | -0,585 |
| 23 | Q13136 LIPA1_HUMAN  | K.RSS#DGSLSHEEDLAK.V         | S239:      | 3 | 3,6486 | 0,336 | -0,535 |
| 23 | Q13136 LIPA1_HUMAN  | K.RSS#DGSLSHEEDLAK.V         | S239:      | 2 | 3,4294 | 0,431 | -0,856 |
| 23 | B1AM35 B1AM35_HUMAN | K.RPAS#VSSAAVEHEQR.E         | S240:      | 3 | 4,1475 | 0,256 | -0,715 |
| 23 | B1AM35 B1AM35_HUMAN | K.RPAS#VSSAAVEHEQR.E         | S240:      | 2 | 3,651  | 0,543 | 0,136  |
| 23 | Q9UFC0 LRWD1_HUMAN  | K.RPDDVPLS#LSPSKR.A          | S241:      | 2 | 4,0365 | 0,376 | -0,667 |
| 23 | Q9UFC0 LRWD1_HUMAN  | K.RPDDVPLSLS#PSKR.A          | S243:      | 3 | 5,8863 | 0,477 | -0,444 |
| 23 | Q9UFC0 LRWD1_HUMAN  | K.RPDDVPLSLS#PSKR.A          | S243:      | 2 | 4,0639 | 0,429 | -0,741 |
| 23 | Q9BZD4 NUF2_HUMAN   | K.TKIVDS#PEKLN               | S247:      | 3 | 2,6388 | 0,172 | 0,342  |
| 23 | P38159 HNRPG_HUMAN  | R.DYGHS#SSRDDYPSR.G          | S249:      | 2 | 2,5308 | 0,326 | 0,213  |
| 23 | P78346 RPP30_HUMAN  | K.KPRPS#EGDEDCLPASK.K        | S251:      | 3 | 5,0293 | 0,414 | -0,098 |
| 23 | P78346 RPP30_HUMAN  | K.KPRPS#EGDEDCLPASK.K        | S251:      | 2 | 3,4845 | 0,449 | 0,523  |
| 23 | P21359 NF1_HUMAN    | R.KS#FDHLISDTK.A             | S2543:     | 3 | 3,6865 | 0,276 | -0,333 |
| 23 | P21359 NF1_HUMAN    | R.KS#FDHLISDTK.A             | S2543:     | 2 | 2,7975 | 0,383 | -0,356 |
| 23 | Q08499 PDE4D_HUMAN  | R.APSKRS#PM*CNQPSINK.A       | S255:      | 3 | 2,9434 | 0,105 | -0,67  |
| 23 | Q92466 DDB2_HUMAN   | R.SRS#PLELEPEAKK.L           | S26:       | 3 | 3,8423 | 0,33  | 0      |
| 23 | Q92466 DDB2_HUMAN   | R.SRS#PLELEPEAKK.L           | S26:       | 2 | 2,4143 | 0,346 | -0,546 |
| 23 | Q8IYB3 SRRM1_HUMAN  | K.VPKPEPIPEKPS#PEKNSK.K      | S260:      | 3 | 3,9556 | 0,294 | -0,793 |
| 23 | Q14247 SRC8_HUMAN   | K.LQLHES#QKDYK.T             | S261:      | 2 | 3,553  | 0,424 | -0,415 |
| 23 | Q9Y5B6 GCFC_HUMAN   | R.LVREDENDAS#DDEDDDEKR.R     | S262:      | 3 | 3,8058 | 0,426 | -0,858 |
| 23 | Q5JSH3 WDR44_HUMAN  | K.RKS#ELEFETLK.T             | S262:      | 2 | 3,401  | 0,427 | -0,585 |

|    |                    |                                 |            |   |        |       |        |
|----|--------------------|---------------------------------|------------|---|--------|-------|--------|
| 23 | Q5JSH3 WDR44_HUMAN | K.RKS#ELEFETLK.T                | S262:      | 3 | 3,3358 | 0,146 | -0,188 |
| 23 | P07900 HS90A_HUMAN | K.ESEDKPEIEDVGS#DEEEK.K.D       | S263:      | 3 | 3,7293 | 0,357 | -0,838 |
| 23 | Q8TCU4 ALMS1_HUMAN | K.HVNLSAS#LDQNNSHFK.V           | S2631:     | 3 | 2,7009 | 0,174 | -0,484 |
| 23 | O95766 CG028_HUMAN | R.HIEPELAGRDS#PIR.A             | S266:      | 2 | 2,7166 | 0,249 | -0,365 |
| 23 | O94761 RECQ4_HUMAN | R.GRRPS#QDDVEAAPEETR.A          | S27:       | 3 | 3,4323 | 0,363 | -0,184 |
| 23 | Q13415 ORC1_HUMAN  | R.KVAFSEITS#PSKR.S              | S273:      | 3 | 2,8727 | 0,098 | -0,598 |
| 23 | Q9Y266 NUDC_HUMAN  | K.KINPENSCLS#DLDETR.S           | S277:      | 3 | 3,4366 | 0,352 | -0,451 |
| 23 | Q8NFC6 FA44A_HUMAN | R.KQHLYS#SEDEPDDNPDVLSR.I       | S2779:     | 3 | 4,5994 | 0,433 | -0,072 |
| 23 | Q8IXT5 RB12B_HUMAN | R.S#RSPLGFVHVK.N                | S278:      | 3 | 3,2081 | 0,334 | -0,308 |
| 23 | Q8IXT5 RB12B_HUMAN | R.S#RSPLGFVHVK.N                | S278:      | 2 | 2,3148 | 0,368 | -0,576 |
| 23 | Q9UBL0 ARP21_HUMAN | R.S#KSIEEREEYQR.V               | S278:      | 2 | 2,0976 | 0,397 | -0,415 |
| 23 | Q9Y2K7 JHD1A_HUMAN | R.RYEDDGIS#DDEIEGKR.T           | S28:       | 2 | 3,7882 | 0,565 | -0,494 |
| 23 | Q9Y2K7 JHD1A_HUMAN | R.RYEDDGIS#DDEIEGKR.T           | S28:       | 3 | 3,4646 | 0,561 | -0,278 |
| 23 | Q9NTJ3 SMC4_HUMAN  | R.RREEGPPPPSPDGASS#DAEPEPPSGR.T | S28:       | 3 | 3,0805 | 0,238 | 0,333  |
| 23 | P32418 NAC1_HUMAN  | R.GM*IEHEGDRPS#SKTEIEM*DGK.V    | S284:      | 3 | 4,7907 | 0,407 | -0,356 |
| 23 | Q641Q2 FA21A_HUMAN | K.RSRPTS#FADELAAR.I             | S288:      | 2 | 2,3545 | 0,216 | -0,221 |
| 23 | Q08170 SFRS4_HUMAN | K.IQNNDNVGPKS#RS#PSR.H          | S288:S290: | 3 | 2,993  | 0,276 | -0,445 |
| 23 | P08559 ODPA_HUMAN  | R.YHGHS#M*SDPGVSYR.T            | S293:      | 3 | 2,9829 | 0,306 | -0,325 |
| 23 | Q96B01 R51A1_HUMAN | R.KPLEIRS#PSAESK.K              | S294:      | 3 | 2,8289 | 0,181 | 0,12   |
| 23 | Q9HCE3 ZN532_HUMAN | K.KAASDSCKEPPVANS#RESS#PLPK.E   | S294:S298: | 3 | 3,6521 | 0,139 | -0,509 |
| 23 | Q9UQ35 SRRM2_HUMAN | K.THTTALAGRS#PSPASGR.R          | S295:      | 3 | 2,6963 | 0,356 | -0,314 |
| 23 | Q96B01 R51A1_HUMAN | R.KPLEIRSPS#AESK.K              | S296:      | 2 | 3,2864 | 0,403 | -0,641 |
| 23 | Q9H410 DSN1_HUMAN  | K.THDHQLESSLS#PVEVFAK.T         | S30:       | 3 | 4,0683 | 0,419 | -0,609 |
| 23 | Q5JXC2 IIP45_HUMAN | R.RKS#FDASDTLALPR.H             | S303:      | 3 | 4,3294 | 0,332 | -0,221 |
| 23 | P17706 PTN2_HUMAN  | K.ELSKEDLSPAFDHS#PNKIM*TEK.Y    | S304:      | 3 | 3,2827 | 0,391 | -0,63  |
| 23 | P35659 DEK_HUMAN   | K.KESEEDS#SDDEPLIKK.L           | S306:      | 3 | 4,7277 | 0,359 | -0,454 |
| 23 | O15143 ARC1B_HUMAN | R.FQNLDKKAS#SEGGTAAGAGLDSLHK.N  | S310:      | 3 | 4,6017 | 0,369 | -0,213 |
| 23 | Q8NDX5 PHC3_HUMAN  | K.HQQIPLHS#PPSK.V               | S315:      | 3 | 3,6676 | 0,255 | 0,126  |
| 23 | Q9NZT2 OGFR_HUMAN  | R.KVEEEGS#PGDPDHEASTQGR.T       | S315:      | 3 | 3,0842 | 0,11  | -0,415 |
| 23 | Q3B726 RPA43_HUMAN | R.KHS#EEAEFTPLK.C               | S316:      | 3 | 4,5002 | 0,374 | 0,344  |
| 23 | Q3B726 RPA43_HUMAN | R.KHS#EEAEFTPLK.C               | S316:      | 2 | 3,5932 | 0,458 | -0,46  |
| 23 | P46100 ATRX_HUMAN  | K.VYEHTSRFS#PK.K                | S316:      | 2 | 2,0801 | 0,265 | -0,512 |
| 23 | Q3B726 RPA43_HUMAN | R.KHS#EEAEFTPLKCS#PK.R          | S316:S328: | 3 | 4,2712 | 0,312 | 0,085  |



|    |                    |                              |                 |   |        |       |        |
|----|--------------------|------------------------------|-----------------|---|--------|-------|--------|
| 23 | Q5T200 ZC3HD_HUMAN | R.DKPRS#T#SPAGQHHS#PISSR.H   | S316:T317:S325: | 3 | 3,1778 | 0,433 | -0,801 |
| 23 | Q70CQ2 UBP34_HUMAN | R.RRV#S#DEEHTVDSCISDM*K.T    | S3207:S3208:    | 3 | 3,5239 | 0,444 | -0,678 |
| 23 | Q9UGV2 NDRG3_HUMAN | R.S#RTHSTSSSLGSGESPF.S       | S327:           | 3 | 2,7612 | 0,172 | -0,715 |
| 23 | O00712 NFIB_HUMAN  | K.KPEKPLFSSAS#PQDSSPR.L      | S328:           | 3 | 5,4414 | 0,494 | -0,359 |
| 23 | Q92922 SMRC1_HUMAN | R.KHS#PSPPTPTESR.K           | S328:           | 3 | 4,1848 | 0,366 | -0,216 |
| 23 | Q15459 SF3A1_HUMAN | K.FGESEEVEM*EVES#DEEDDKQEK.A | S329:           | 3 | 4,1003 | 0,41  | -0,54  |
| 23 | Q9UGV2 NDRG3_HUMAN | R.SRTHS#TSSSLGSGESPF.S       | S331:           | 2 | 2,1284 | 0,532 | -0,358 |
| 23 | Q9UGV2 NDRG3_HUMAN | R.SRTHSTS#SSLGSGESPF.S       | S333:           | 3 | 3,8277 | 0,394 | -0,268 |
| 23 | O60343 TBCD4_HUMAN | R.HAS#APSHVQPSDSEK.N         | S341:           | 3 | 3,5125 | 0,381 | -0,442 |
| 23 | P28715 ERCC5_HUMAN | K.LKTEKEDATPPS#PR.T          | S341:           | 3 | 3,1835 | 0,198 | -0,21  |
| 23 | O60343 TBCD4_HUMAN | R.HAS#APSHVQPSDSEK.N         | S341:           | 2 | 2,9418 | 0,462 | -0,589 |
| 23 | P48634 BAT2_HUMAN  | K.LKFS#DEEDGRDS#DEEGAEGHR.D  | S342:S350:      | 3 | 3,9623 | 0,489 | -0,649 |
| 23 | Q86X27 RGPS2_HUMAN | K.CHS#LGYNFIHK.M             | S343:           | 3 | 3,8371 | 0,218 | 0,126  |
| 23 | Q86X27 RGPS2_HUMAN | K.CHS#LGYNFIHK.M             | S343:           | 2 | 2,2547 | 0,348 | -0,587 |
| 23 | Q9P1Q0 VPS54_HUMAN | K.HIRPVPS#LPDVCPK.E          | S35:            | 3 | 3,6154 | 0,293 | -0,647 |
| 23 | Q8WVV9 HNRL_HUMAN  | R.LKTEEGEIDYS#AEENRR.E       | S35:            | 3 | 2,7037 | 0,237 | -0,635 |
| 23 | Q9P1Q0 VPS54_HUMAN | K.HIRPVPS#LPDVCPK.E          | S35:            | 2 | 2,5141 | 0,193 | -0,504 |
| 23 | P30305 MPIP2_HUMAN | R.RRS#VTPPEEQEAEPEK.A        | S353:           | 3 | 2,9835 | 0,15  | -0,088 |
| 23 | Q9BXF6 RFIP5_HUMAN | R.HRSS#ISGSLPSSGLQAVSSR.F    | S357:           | 3 | 4,1081 | 0,337 | -0,168 |
| 23 | P26045 PTN3_HUMAN  | R.RS#LSVEHLETK.S             | S357:           | 3 | 2,6873 | 0,193 | 0,133  |
| 23 | Q7Z5H3 RHG22_HUMAN | R.KHSQLFTAPVPEGPTS#PR.G      | S359:           | 3 | 2,7859 | 0,16  | -0,18  |
| 23 | Q15435 PP1R7_HUMAN | K.KHS#SGIVADLSEQLK.D         | S36:            | 3 | 2,8209 | 0,2   | -0,308 |
| 23 | Q7Z5L9 I2BP2_HUMAN | K.RKPS#PEPEGEVGPPK.I         | S360:           | 3 | 3,9033 | 0,361 | -0,217 |
| 23 | Q7Z5L9 I2BP2_HUMAN | K.RKPS#PEPEGEVGPPK.I         | S360:           | 2 | 3,4425 | 0,415 | -0,58  |
| 23 | Q2LD37 K1109_HUMAN | R.SKS#ISASGRPPLK.R           | S3619:          | 3 | 2,6197 | 0,248 | 0      |
| 23 | P35613 BASI_HUMAN  | R.RKPEDVLDDDDAGS#APLK.S      | S362:           | 3 | 4,4576 | 0,233 | -0,453 |
| 23 | P35613 BASI_HUMAN  | R.RKPEDVLDDDDAGS#APLK.S      | S362:           | 2 | 3,8602 | 0,449 | -0,483 |
| 23 | Q76FK4 NOL8_HUMAN  | R.VSCHDS#DDDIM*RNDR.E        | S365:           | 3 | 3,1396 | 0,291 | -0,474 |
| 23 | Q8NCF5 NF2IP_HUMAN | K.HQTEVLSLRDS#PLK.T          | S369:           | 2 | 3,0968 | 0,333 | -0,204 |
| 23 | P16402 H13_HUMAN   | K.RKAS#GPPVSELITK.A          | S37:            | 3 | 3,3657 | 0,397 | 0      |
| 23 | P16402 H13_HUMAN   | K.RKAS#GPPVSELITK.A          | S37:            | 2 | 2,1257 | 0,091 | -0,234 |
| 23 | Q2PPJ7 AS250_HUMAN | R.RLS#NSSLCSIEEHR.M          | S373:           | 3 | 4,6079 | 0,505 | -0,386 |
| 23 | Q9Y2W1 TR150_HUMAN | K.IKEKGS#FSDTGLGDGK.M        | S377:           | 3 | 3,8029 | 0,447 | 0      |

|    |                     |                                |            |   |        |       |        |
|----|---------------------|--------------------------------|------------|---|--------|-------|--------|
| 23 | Q15652 JHD2C_HUMAN  | R.LRTDNVSDFSESS#DSENSNKR.I     | S379:      | 3 | 4,1692 | 0,325 | -0,445 |
| 23 | Q9Y2W1 TR150_HUMAN  | K.IKEKGSFSDTGLGDGK.M           | S379:      | 2 | 2,5368 | 0,347 | -0,71  |
| 23 | Q13428 TCOF_HUMAN   | K.TSQVGAASAPAKES#PRKGAAPPGK.T  | S381:      | 3 | 4,7438 | 0,516 | 0,291  |
| 23 | Q5QJE6 TDIF2_HUMAN  | K.KS#PIKASDLTK.F               | S381:      | 3 | 4,2293 | 0,279 | 0      |
| 23 | Q69YQ0 CYTSA_HUMAN  | R.SRKGS#SGNASEVSVACLTER.I      | S384:      | 3 | 5,0615 | 0,403 | -0,673 |
| 23 | Q8IYU2 HACE1_HUMAN  | K.NKRDS#TEITSILLK.Q            | S385:      | 3 | 4,0339 | 0,408 | -0,431 |
| 23 | Q8IYU2 HACE1_HUMAN  | K.NKRDS#TEITSILLK.Q            | S385:      | 2 | 3,1765 | 0,289 | -0,287 |
| 23 | Q8N3F8 MILK1_HUMAN  | K.KKPAPLPSSS#PGPPSQDSR.Q       | S391:      | 3 | 3,9079 | 0,351 | -0,433 |
| 23 | Q96ST2 IWS1_HUMAN   | R.KAAVLS#DS#EDEEKASAKK.S       | S398:S400: | 3 | 2,7304 | 0,453 | 0      |
| 23 | Q9UQ26 RIMS2_HUMAN  | R.RHS#DVSLANADLEDSR.I          | S400:      | 3 | 4,4979 | 0,452 | -0,294 |
| 23 | Q9ULE6 PALD_HUMAN   | K.KLEGIRPES#PAQSGSR.H          | S406:      | 3 | 4,0392 | 0,347 | -0,495 |
| 23 | Q14157 UBP2L_HUMAN  | K.NPSDSAVHS#PFTKR.Q            | S416:      | 2 | 2,7174 | 0,404 | -0,601 |
| 23 | Q15223 PVRL1_HUMAN  | K.AGIPQHPPM*AQNLQYPDDS#DDEKK.A | S422:      | 3 | 4,5266 | 0,391 | -0,375 |
| 23 | Q96MU7 YTDC1_HUMAN  | R.LSSESHHGG#PIHWVLPAGM*SAK.M   | S424:      | 3 | 2,7173 | 0,171 | -0,221 |
| 23 | Q9Y490 TLN1_HUMAN   | K.SKDHFLGEGDEESTM*LEDSVS#PK.K  | S425:      | 3 | 5,9791 | 0,539 | -0,278 |
| 23 | P08865 RSSA_HUMAN   | K.RKS#DGIYIINLK.R              | S43:       | 3 | 3,8026 | 0,414 | -0,427 |
| 23 | P08865 RSSA_HUMAN   | K.RKS#DGIYIINLK.R              | S43:       | 2 | 3,5425 | 0,334 | -0,732 |
| 23 | Q92609 TBCD5_HUMAN  | R.RTS#STLDSEGTFNYSYRK.E        | S43:       | 3 | 3,4274 | 0,406 | -0,541 |
| 23 | O94776 MTA2_HUMAN   | R.GHLRPEAQSL#PYTTSANR.A        | S435:      | 3 | 4,7718 | 0,441 | -0,487 |
| 23 | Q6WKZ4 RFIP1_HUMAN  | R.RSS#LLSLM*TGKK.D             | S435:      | 3 | 3,5025 | 0,331 | 0,065  |
| 23 | P47712 PA24A_HUMAN  | K.HIVSNDSSDS#DDESHEPK.G        | S437:      | 3 | 4,1551 | 0,447 | -0,528 |
| 23 | Q96L34 MARK4_HUMAN  | K.RS#PTSTGEAELKEER.L           | S438:      | 3 | 3,8645 | 0,353 | -0,31  |
| 23 | O43318 M3K7_HUMAN   | R.RRS#IQDLTVGTGTEPGQVSSR.S     | S439:      | 3 | 5,0214 | 0,488 | -0,484 |
| 23 | Q8NI08 NCOA7_HUMAN  | K.KDTLKECLS#LDPEER.K           | S441:      | 3 | 2,9006 | 0,12  | -0,382 |
| 23 | Q9H307 PININ_HUMAN  | K.S#LSPGKENVSAIDMEKESEEK.E     | S441:      | 3 | 2,6773 | 0,092 | -0,198 |
| 23 | Q8WWL2 SPIR2_HUMAN  | R.DRSFS#EHDLAQLR.S             | S442:      | 3 | 3,2037 | 0,353 | -0,221 |
| 23 | Q9H307 PININ_HUMAN  | K.SLS#PGKENVSAIDM*EKESEEK.E    | S443:      | 3 | 3,1755 | 0,195 | -0,59  |
| 23 | Q9Y4C1 JHD2A_HUMAN  | K.HLEHAPS#PSDVNAPEVK.A         | S445:      | 3 | 4,3921 | 0,347 | -0,459 |
| 23 | Q6IQ55 TTBK2_HUMAN  | R.SIHS#FELEKR.L                | S448:      | 3 | 2,6526 | 0,195 | 0      |
| 23 | Q75T46 Q75T46_HUMAN | R.RFS#NVGLVHTSER.R             | S45:       | 3 | 4,1918 | 0,354 | 0      |
| 23 | O60832 DKC1_HUMAN   | R.KRES#ES#ESDETPPAAPQLIKK.E    | S451:S453: | 3 | 5,5848 | 0,332 | -0,585 |
| 23 | O60832 DKC1_HUMAN   | R.KRESESES#DETPPAAPQLIK.K      | S455:      | 3 | 3,7859 | 0,192 | -0,639 |
| 23 | Q05519 SFR11_HUMAN  | K.TKECS#VEKGTGDSL.R            | S456:      | 3 | 3,0681 | 0,373 | -0,314 |

|    |                    |                                |            |   |        |       |        |
|----|--------------------|--------------------------------|------------|---|--------|-------|--------|
| 23 | Q6PJG2 CN043_HUMAN | R.RRAS#QEANLLTLAQK.A           | S461:      | 3 | 4,1046 | 0,488 | -0,206 |
| 23 | Q8IYB3 SRRM1_HUMAN | R.KVELS#ESEEDKGGK.M            | S463:      | 2 | 3,3353 | 0,401 | 0      |
| 23 | P21127 CD2L1_HUMAN | R.DSKRDS#LEEGELR.D             | S47:       | 3 | 3,7169 | 0,237 | -0,113 |
| 23 | P21127 CD2L1_HUMAN | R.DSKRDS#LEEGELR.D             | S47:       | 2 | 2,3893 | 0,176 | -0,227 |
| 23 | Q96PU5 NED4L_HUMAN | R.AVKDTLS#NPQSPQSPYNSPKPQHK.V  | S475:      | 3 | 3,7115 | 0,391 | 0,648  |
| 23 | Q8IZL8 PELP1_HUMAN | K.LRS#PRGS#PDGSLQTGKPSAPK.K    | S477:S481: | 3 | 4,0062 | 0,376 | -0,478 |
| 23 | Q5T0N5 FBP1L_HUMAN | R.HS#SDINHVLVTQGR.E            | S488:      | 3 | 3,2857 | 0,307 | 0,118  |
| 23 | Q5T0N5 FBP1L_HUMAN | R.HS#SDINHVLVTQGR.E            | S488:      | 2 | 2,0051 | 0,303 | -0,158 |
| 23 | Q6UN15 FIP1_HUMAN  | R.ERDHS#PTPSVFNSDEER.Y         | S492:      | 3 | 3,0167 | 0,368 | -0,176 |
| 23 | Q6UN15 FIP1_HUMAN  | R.ERDHS#PTPS#VFNSDEERYR.Y      | S492:S496: | 3 | 2,6012 | 0,347 | -0,664 |
| 23 | Q9Y2X3 NOL5_HUMAN  | K.HIKEEPLS#EEEEPTSTAIAS#PEKK.K | S502:S514: | 3 | 5,5693 | 0,417 | -0,51  |
| 23 | Q15642 CIP4_HUMAN  | R.HARPPDPASAPPDSSNS#ASQDTK.E   | S504:      | 3 | 4,9253 | 0,443 | 0,211  |
| 23 | O14974 MYPT1_HUMAN | R.RLAS#TSDIEEKENR.D            | S507:      | 3 | 3,2766 | 0,315 | -0,318 |
| 23 | O14974 MYPT1_HUMAN | R.RLAS#TSDIEEKENR.D            | S507:      | 2 | 2,7591 | 0,506 | -0,141 |
| 23 | P36915 GNL1_HUMAN  | R.EEQTDTS#DGESVTHHIR.R         | S51:       | 2 | 2,4268 | 0,51  | -0,664 |
| 23 | Q9Y426 CU025_HUMAN | R.KKS#TIISGISK.T               | S511:      | 3 | 4,079  | 0,352 | -0,135 |
| 23 | Q9NYF8 BCLF1_HUMAN | K.LKDLDYDYS#PPLHK.N            | S512:      | 2 | 2,9951 | 0,367 | -0,59  |
| 23 | Q9NYF8 BCLF1_HUMAN | K.LKDLDYDYS#PPLHK.N            | S512:      | 3 | 2,8903 | 0,284 | -0,332 |
| 23 | Q15742 NAB2_HUMAN  | R.RSS#VKVEAEASRQ.-             | S515:      | 3 | 2,629  | 0,142 | 0,24   |
| 23 | O00567 NOL5A_HUMAN | K.KSFSKEELM*#SDLEETAGSTSIPK.R  | S519:      | 3 | 4,0677 | 0,497 | -0,475 |
| 23 | Q9Y6D6 BIG1_HUMAN  | K.ACEVALEEIKAEKQSPHGEAK.A      | S52:       | 3 | 4,169  | 0,452 | -0,603 |
| 23 | Q8N2M8 SFR16_HUMAN | R.EKLTRPAAS#PAVGEK.L           | S532:      | 3 | 2,9567 | 0,304 | -0,112 |
| 23 | Q8NHQ9 DDX55_HUMAN | R.KREEGS#DIEDEDM*EELLNDTR.L    | S544:      | 3 | 6,0066 | 0,463 | -0,629 |
| 23 | Q96NE9 FRMD6_HUMAN | K.TSTDHRHLS#LDDIR.L            | S544:      | 3 | 2,7644 | 0,224 | -0,539 |
| 23 | Q9H1B7 EAP1_HUMAN  | K.RKAS#PEPPDSAEGALK.L          | S547:      | 2 | 2,9765 | 0,466 | -0,634 |
| 23 | O95365 ZBT7A_HUMAN | K.HFKDEDEDEDVAS#PDGLGR.L       | S549:      | 3 | 6,419  | 0,516 | -0,745 |
| 23 | Q5T5X7 K1553_HUMAN | K.HSVDSVLTLAQDSS#KR.K          | S55:       | 3 | 3,3036 | 0,449 | -0,502 |
| 23 | Q14738 2A5D_HUMAN  | R.RKS#ELPQDVYTIK.A             | S573:      | 3 | 4,1593 | 0,297 | -0,442 |
| 23 | Q14738 2A5D_HUMAN  | R.RKS#ELPQDVYTIK.A             | S573:      | 2 | 3,5907 | 0,531 | -0,736 |
| 23 | O43719 HTSF1_HUMAN | K.DLDEEGS#EKELHENVLDK.E        | S579:      | 3 | 2,6799 | 0,299 | -0,756 |
| 23 | Q8TD16 BICD2_HUMAN | R.GRRS#PILLPK.G                | S582:      | 3 | 3,1668 | 0,104 | 0,3    |
| 23 | O14639 ABLM1_HUMAN | R.RSS#GREEDDEELLR.R            | S587:      | 3 | 3,2932 | 0,231 | 0      |
| 23 | Q8IZ21 PHAR4_HUMAN | R.RLS#QRPTPEEQR.N              | S590:      | 3 | 3,131  | 0,345 | -0,402 |

|    |                    |                                  |            |   |        |       |        |
|----|--------------------|----------------------------------|------------|---|--------|-------|--------|
| 23 | Q8IZ21 PHAR4_HUMAN | R.RLS#QRPTPEELEQR.N              | S590:      | 2 | 2,7529 | 0,17  | -0,537 |
| 23 | Q6NZY4 ZCHC8_HUMAN | K.KSEAGHASS#PDSEVTSLCQK.E        | S598:      | 3 | 5,3295 | 0,396 | 0,166  |
| 23 | P43243 MATR3_HUMAN | R.SYS#PDGKESPSDKK.S              | S598:      | 2 | 2,2326 | 0,341 | -0,532 |
| 23 | P0C7M2 RA1L3_HUMAN | K.SES#PKEPEQLRK.L                | S6:        | 3 | 3,7352 | 0,33  | -0,424 |
| 23 | Q15424 SAFB1_HUMAN | R.SVVS#FDKVKEPR.K                | S604:      | 2 | 2,4411 | 0,227 | -0,664 |
| 23 | O14777 NDC80_HUMAN | K.RTS#GHGSRNS#QLGIFSSSEK.I       | S62:S69:   | 3 | 2,839  | 0,212 | -0,558 |
| 23 | Q02952 AKA12_HUMAN | R.RPS#ESDKEDLDK.V                | S627:      | 2 | 2,828  | 0,339 | -0,6   |
| 23 | Q02952 AKA12_HUMAN | R.RPS#ES#DKEDLDKVK.S             | S627:S629: | 2 | 2,9834 | 0,258 | -0,504 |
| 23 | Q02952 AKA12_HUMAN | R.RPS#ES#DKEDLDKVK.S             | S627:S629: | 3 | 2,8793 | 0,222 | -0,378 |
| 23 | Q8WVC0 LEO1_HUMAN  | K.KLTS#DEEGEPSGKR.K              | S630:      | 3 | 4,0535 | 0,261 | -0,113 |
| 23 | Q9BPX5 ARP5L_HUMAN | R.AFHAALRNS#PVNTK.N              | S64:       | 2 | 4,1713 | 0,517 | -0,836 |
| 23 | Q9HCE9 TM16H_HUMAN | R.RRPGPSPEALLEEGS#PTM*VEK.G      | S641:      | 3 | 3,379  | 0,129 | -0,385 |
| 23 | Q86Y91 KI18B_HUMAN | R.RRPS#ALEADSPM*APK.R            | S645:      | 3 | 3,7935 | 0,368 | -0,212 |
| 23 | P21580 TNAP3_HUMAN | K.HFAAASGKVS#PTASR.F             | S645:      | 3 | 3,0009 | 0,374 | -0,233 |
| 23 | P14923 PLAK_HUMAN  | R.KRVS#VELTNSLFK.H               | S664:      | 3 | 3,3197 | 0,278 | -0,343 |
| 23 | P08237 K6PF_HUMAN  | R.KNVLGHM*QQGGS#PTPFDR.N         | S667:      | 3 | 3,7981 | 0,435 | -0,177 |
| 23 | P20042 IF2B_HUMAN  | R.KKDAS#DDLDDLNFNQK.K            | S67:       | 3 | 4,6617 | 0,364 | -0,524 |
| 23 | Q9Y618 NCOR2_HUMAN | R.RRPS#LLSEFQPGNER.S             | S67:       | 3 | 4,2917 | 0,501 | -0,49  |
| 23 | P19338 NUCL_HUMAN  | K.KVVVS#PTKK.V                   | S67:       | 2 | 2,8704 | 0,139 | -0,458 |
| 23 | Q9BXP5 ARS2_HUMAN  | R.ERFS#PPRHLS#PPQK.R             | S67:S74:   | 2 | 2,7866 | 0,251 | -0,435 |
| 23 | P25098 ARBK1_HUMAN | K.NKPRS#PVVELSK.V                | S670:      | 2 | 3,2253 | 0,32  | -0,51  |
| 23 | P46100 ATRX_HUMAN  | R.RPTETNPVTSNS#DEECNETVKEK.Q     | S677:      | 3 | 4,4241 | 0,357 | -0,067 |
| 23 | Q969R5 LMBL2_HUMAN | R.VKEEHLDVAS#PDK.A               | S683:      | 3 | 3,5906 | 0,288 | -0,236 |
| 23 | O14617 AP3D1_HUMAN | R.KQEQANNPFYIKS#SPS#PQKR.Y       | S685:S688: | 3 | 4,1682 | 0,36  | -0,438 |
| 23 | Q969R5 LMBL2_HUMAN | R.VKEEHLDVASPKAS#SPELPSVVENIK.Q  | S688:      | 3 | 3,8076 | 0,261 | -0,855 |
| 23 | Q12996 CSTF3_HUMAN | K.RPNEDS#DEDEEKGAVVPPVHDIYR.A    | S691:      | 3 | 4,3013 | 0,318 | -0,579 |
| 23 | P05114 HMG1_HUMAN  | R.KVS#SAEGAAKEEPK.R              | S7:        | 3 | 3,873  | 0,189 | -1,029 |
| 23 | Q14671 PUM1_HUMAN  | R.RDS#LTGSSDLYKR.T               | S709:      | 3 | 3,5677 | 0,34  | -0,116 |
| 23 | Q7Z5L9 I2BP2_HUMAN | R.AHGCFPEGRS#PPGAAASAAKPPPLSAK.D | S71:       | 3 | 3,9112 | 0,273 | -0,461 |
| 23 | P10636 TAU_HUMAN   | K.AKTDHGAEIVYKS#PVVSGDTS#PR.H    | S713:S721: | 3 | 4,3131 | 0,299 | -0,213 |
| 23 | O00418 EF2K_HUMAN  | K.SERYSSS#GSPANSFHFKE            | S72:       | 3 | 2,6382 | 0,233 | -0,558 |
| 23 | Q9NQS7 INCE_HUMAN  | R.RIS#YVQDENRDPPIR.R             | S72:       | 2 | 2,1894 | 0,133 | -1,06  |
| 23 | Q9H4I2 ZHX3_HUMAN  | R.KVS#PIKINLK.N                  | S723:      | 3 | 2,7861 | 0,244 | 0,3    |

|    |                    |                                |            |   |        |       |        |
|----|--------------------|--------------------------------|------------|---|--------|-------|--------|
| 23 | Q9NZM1 MYOF_HUMAN  | R.SRS#LSQIHEAAVR.M             | S729:      | 3 | 3,312  | 0,34  | 0,298  |
| 23 | Q13625 ASPP2_HUMAN | K.KRSS#ITEPEGPNQNIQK.L         | S737:      | 3 | 5,374  | 0,307 | 0      |
| 23 | P53365 ARFP2_HUMAN | R.HPSHS#TTPSGPGDEVAR.G         | S74:       | 3 | 3,0006 | 0,085 | 0      |
| 23 | Q13671 RIN1_HUMAN  | R.SRGEEQGCQGDGDAGVKAS#PR.D     | S744:      | 3 | 4,5496 | 0,373 | -0,163 |
| 23 | Q9UHC1 MLH3_HUMAN  | R.KKLS#LSSQLGSLEK.F            | S746:      | 3 | 3,6788 | 0,261 | -0,458 |
| 23 | Q86UP2 KTN1_HUMAN  | K.KEIQNGNLHES#DSESVPR.D        | S75:       | 3 | 4,1034 | 0,433 | -0,604 |
| 23 | Q2NKX8 ERC6L_HUMAN | K.LNKPQQPS#PLLSTHHTQEEDISSK.M  | S755:      | 3 | 3,4147 | 0,415 | -0,19  |
| 23 | Q9Y6M7 S4A7_HUMAN  | K.ES#DKEDGRESPTYDTPSQR.V       | S76:       | 3 | 2,927  | 0,096 | -0,323 |
| 23 | Q9H8M5 CNNM2_HUMAN | K.SPPRPCGLNHSDS#LSR.S          | S761:      | 3 | 3,3379 | 0,125 | -0,295 |
| 23 | Q13136 LIPA1_HUMAN | K.GALHTVS#HEDIR.D              | S763:      | 2 | 2,7343 | 0,414 | -0,604 |
| 23 | P27540 ARNT_HUMAN  | R.FARS#DDEQSSADKER.L           | S77:       | 3 | 4,9296 | 0,335 | -0,502 |
| 23 | P27540 ARNT_HUMAN  | R.FARS#DDEQSSADKER.L           | S77:       | 2 | 2,9606 | 0,318 | -0,938 |
| 23 | Q68DN6 RGPD1_HUMAN | K.HSTPS#PTKYSLSPK.S            | S772:      | 3 | 2,9912 | 0,397 | 0,216  |
| 23 | Q9Y6X9 MORC2_HUMAN | K.KDSNELSDS#AGEEDSADLKR.A      | S779:      | 3 | 3,1147 | 0,231 | -0,407 |
| 23 | Q92540 SMG7_HUMAN  | K.AVPALGKS#PPHHSGFQQYQQADASK.Q | S781:      | 3 | 4,0513 | 0,493 | -0,804 |
| 23 | Q9UGU5 HM2L1_HUMAN | R.KHS#SDDYYGDISSLESSQK.K       | S79:       | 3 | 3,5695 | 0,4   | -1,149 |
| 23 | Q86W92 LIPB1_HUMAN | R.RRPS#DENTIAPSEVQK.W          | S794:      | 3 | 4,2889 | 0,388 | -0,192 |
| 23 | P05114 HMG1_HUMAN  | R.KVSS#AEGAAKEEPK.R            | S8:        | 2 | 2,9965 | 0,378 | -0,969 |
| 23 | O95696 BRD1_HUMAN  | R.SRS#TCGDSEVEEESPGKR.L        | S803:      | 3 | 5,3606 | 0,38  | -0,263 |
| 23 | Q14721 KCNB1_HUMAN | R.SEKNHFESSPLPTS#PK.F          | S805:      | 3 | 3,4315 | 0,214 | -0,687 |
| 23 | Q9UMZ2 SYNG_HUMAN  | R.HTKEDSAS#VKS#LDLPSIGGSSVGK.E | S809:S812: | 3 | 2,9518 | 0,276 | -0,429 |
| 23 | Q9P1Y6 K1542_HUMAN | R.KENPS#PLFSIKK.T              | S814:      | 2 | 3,813  | 0,317 | -0,499 |
| 23 | Q96JP5 ZFP91_HUMAN | R.RRS#S#PSARPPDVPGQQPQAAK.S    | S82:S83:   | 3 | 2,8276 | 0,267 | -0,306 |
| 23 | Q14103 HNRPD_HUMAN | K.IDASKNEEDEGHSNNS#PR.H        | S83:       | 3 | 3,2155 | 0,317 | -0,357 |
| 23 | O60524 SDCG1_HUMAN | K.KKLPS#DSGDLEALEGK.D          | S831:      | 3 | 4,1625 | 0,344 | 0      |
| 23 | O94880 PHF14_HUMAN | R.S#FVPEEEKHEER.V              | S835:      | 2 | 2,9429 | 0,295 | -0,459 |
| 23 | Q86VM9 ZCH18_HUMAN | R.YEPSDKDRQS#PPPAK.R           | S842:      | 2 | 2,2586 | 0,231 | -0,748 |
| 23 | O95819 M4K4_HUMAN  | K.HKS#SSSFTPFIDPR.L            | S852:      | 2 | 2,839  | 0,315 | -0,507 |
| 23 | O43491 E41L2_HUMAN | K.KQKS#YTLVVAK.D               | S87:       | 3 | 3,2105 | 0,403 | 0,272  |
| 23 | P09493 TPM1_HUMAN  | K.KATDAEADVAS#LNRR.I           | S87:       | 3 | 2,6498 | 0,321 | 0      |
| 23 | Q8IYB7 DI3L2_HUMAN | K.RPGTQGHGPEKEEES#DGEPEDSSTS.- | S875:      | 3 | 2,6326 | 0,197 | -0,432 |
| 23 | Q92625 ANS1A_HUMAN | R.HDS#LHDPAAPSR.A              | S887:      | 3 | 3,1864 | 0,243 | -0,264 |
| 23 | Q6DN90 IQEC1_HUMAN | K.LQHSTS#ILRK.Q                | S89:       | 2 | 3,0348 | 0,415 | -0,483 |

|    |                    |                                  |            |   |        |       |        |
|----|--------------------|----------------------------------|------------|---|--------|-------|--------|
| 23 | Q2TAC6 KIF19_HUMAN | R.SRS#FEVTGQGLSHPK.T             | S895:      | 3 | 3,4378 | 0,234 | -0,214 |
| 23 | Q12872 SFRS8_HUMAN | R.S#RGVSQEKEAQISSAIVSSVQSK.I     | S905:      | 3 | 3,4562 | 0,291 | -0,663 |
| 23 | Q13428 TCOF_HUMAN  | R.AALAPAKES#PRKGAAPTTPGK.T       | S906:      | 3 | 3,7326 | 0,241 | -0,437 |
| 23 | Q8WWQ0 PHIP_HUMAN  | K.VNEEKDGPIS#PKK.K               | S911:      | 3 | 2,6593 | 0,347 | 0      |
| 23 | Q6ZRV2 FA83H_HUMAN | R.RGS#PVPPVPERR.S                | S914:      | 3 | 3,1406 | 0,131 | -0,128 |
| 23 | P30876 RPB2_HUMAN  | R.VRS#VRIPQIGDK.F                | S925:      | 3 | 3,2131 | 0,23  | 0,063  |
| 23 | Q9Y2W1 TR150_HUMAN | K.WAHDKFS#GEEGEIEDDES#GTENREEK.D | S928:S939: | 3 | 2,9243 | 0,363 | -0,46  |
| 23 | Q9H2Y7 ZF106_HUMAN | R.HS#AQLSSDHIIPLM*HLAK.D         | S937:      | 3 | 2,7342 | 0,132 | -0,524 |
| 23 | Q9GZR7 DDX24_HUMAN | R.KAQAVSEEEEEEGKSSS#PK.K         | S94:       | 3 | 4,6896 | 0,406 | -0,162 |
| 23 | Q9HC35 EMAL4_HUMAN | R.KPS#HTSAVSIAGK.E               | S94:       | 3 | 3,6642 | 0,431 | -0,335 |
| 23 | Q01831 XPC_HUMAN   | K.VIKDEALS#DGDDLDFPSDLKK.A       | S94:       | 3 | 3,4996 | 0,343 | -0,573 |
| 23 | Q9HC35 EMAL4_HUMAN | R.KPS#HTSAVSIAGK.E               | S94:       | 2 | 3,2537 | 0,456 | -0,627 |
| 23 | Q92794 MYST3_HUMAN | R.GQLKKS#PEALK.C                 | S954:      | 3 | 3,7587 | 0,327 | 0      |
| 23 | P16333 NCK1_HUMAN  | K.RKPSVPDASPADD#FVDPGER.L        | S96:       | 3 | 5,4407 | 0,422 | -0,759 |
| 23 | P53602 ERG19_HUMAN | R.RNS#RDGDPLPSSLCK.V             | S96:       | 3 | 3,7293 | 0,315 | -0,294 |
| 23 | P53602 ERG19_HUMAN | R.RNS#RDGDPLPSSLCK.V             | S96:       | 2 | 2,0836 | 0,387 | -0,588 |
| 23 | Q9NWH9 SLTM_HUMAN  | K.KHEADELSGDAS#VEDDAFIK.D        | S97:       | 3 | 3,2361 | 0,271 | -0,324 |
| 23 | Q8IZQ1 WDFY3_HUMAN | R.VHKPSS#LSYEPEN*R.S             | S970:      | 3 | 3,7994 | 0,299 | -0,104 |
| 23 | Q5TAQ9 WD42A_HUMAN | R.VHDRS#EEEEEEEEEEEQPR.R         | S99:       | 3 | 4,2304 | 0,302 | 0,399  |
| 23 | Q6WCQ1 MRIP_HUMAN  | K.SKS#NPDFLKK.D                  | S992:      | 3 | 2,9601 | 0,148 | 0,294  |
| 23 | Q6WCQ1 MRIP_HUMAN  | K.SKS#NPDFLKK.D                  | S992:      | 2 | 2,7456 | 0,271 | -0,392 |
| 23 | Q9BY89 K1671_HUMAN | R.RKT#DVISDTFPGK.I               | T1179:     | 3 | 3,9413 | 0,267 | -0,592 |
| 23 | Q8NEZ5 FBX22_HUMAN | R.KRT#SM*ETALALEK.L              | T127:      | 3 | 2,6738 | 0,32  | -0,232 |
| 23 | P62241 RS8_HUMAN   | K.KGAKLT#PEEEIILNK.K             | T130:      | 3 | 4,2272 | 0,179 | -0,617 |
| 23 | P55327 TPD52_HUMAN | K.KLEDVKNST#FK.S                 | T133:      | 3 | 3,3992 | 0,132 | -0,8   |
| 23 | O94811 TPPP_HUMAN  | K.AANRT#PPKS#PGDPSKDR.A          | T14:S18:   | 3 | 2,8794 | 0,204 | -0,843 |
| 23 | P35251 RFC1_HUMAN  | R.STNSHLGTSNMKKNEENT#K.T         | T148:      | 3 | 2,8264 | 0,101 | -0,083 |
| 23 | P38919 IF4A3_HUMAN | R.KLDYGQHVVAGT#PGR.V             | T163:      | 3 | 3,015  | 0,23  | 0,109  |
| 23 | P38919 IF4A3_HUMAN | R.KLDYGQHVVAGT#PGR.V             | T163:      | 2 | 2,9631 | 0,395 | -0,582 |
| 23 | Q00765 REEP5_HUMAN | K.KATVNLLGEEKST#.-               | T189:      | 3 | 3,9584 | 0,377 | -0,114 |
| 23 | Q9HDC9 APMAP_HUMAN | R.RPLRPQVVT#DDDGOAPEAK.D         | T19:       | 3 | 3,1285 | 0,151 | 0,421  |
| 23 | Q14980 NUMA1_HUMAN | K.RVSLEPHQGPQT#PESK.K            | T2000:     | 3 | 2,9089 | 0,253 | -0,102 |
| 23 | Q8NDT2 RB15B_HUMAN | R.DRT#PPHLLYSR.D                 | T205:      | 3 | 3,5899 | 0,287 | -0,236 |

|    |                     |                                 |            |   |        |       |        |
|----|---------------------|---------------------------------|------------|---|--------|-------|--------|
| 23 | O15173 PGRC2_HUMAN  | R.LLKPGEEPSEYT#DEEDTKDHNKQD.-   | T211:      | 3 | 5,0177 | 0,411 | -0,821 |
| 23 | Q86UD0 CI140_HUMAN  | R.RHT#IASGVDCGLLK.Q             | T219:      | 3 | 4,1543 | 0,33  | -0,228 |
| 23 | Q8IYB3 SRRM1_HUMAN  | K.KEKT#PELPEPSVK.V              | T220:      | 3 | 3,5592 | 0,303 | 0,234  |
| 23 | Q8IYB3 SRRM1_HUMAN  | K.KEKT#PELPEPSVK.V              | T220:      | 2 | 3,3437 | 0,41  | -0,625 |
| 23 | P23396 RS3_HUMAN    | K.KPLPDHVSIVEPKDEILPTT#PISEQK.G | T221:      | 3 | 3,1484 | 0,39  | -0,428 |
| 23 | Q9H4A3 WKN1_HUMAN   | R.KGT#FTDDLHK.L                 | T2245:     | 3 | 3,7523 | 0,346 | -0,074 |
| 23 | Q08EQ4 TMSL1_HUMAN  | K.KTET#QEKNPLPSK.E              | T23:       | 3 | 3,7684 | 0,195 | -0,347 |
| 23 | P63313 TYB10_HUMAN  | K.KTET#QEKNLPTK.E               | T23:       | 3 | 2,9834 | 0,252 | -0,114 |
| 23 | Q08EQ4 TMSL1_HUMAN  | K.KTET#QEKNPLPSK.E              | T23:       | 2 | 2,1832 | 0,214 | -0,927 |
| 23 | Q5T200 ZC3HD_HUMAN  | K.KKGPRT#PS#PPPIPIEDIALGK.K     | T263:S265: | 3 | 3,3992 | 0,121 | -0,388 |
| 23 | O43166 SI1L1_HUMAN  | R.SKSET#GDSSIFRK.L              | T290:      | 3 | 2,8338 | 0,27  | -0,841 |
| 23 | Q8NFB5 NUP53_HUMAN  | K.ASTSDYQVSDRQT#PKKDESLVSK.A    | T308:      | 3 | 4,4869 | 0,252 | -0,53  |
| 23 | O75152 ZC11A_HUMAN  | K.KVEAPETNIDKT#PK.K             | T321:      | 3 | 3,9181 | 0,269 | -0,554 |
| 23 | O75152 ZC11A_HUMAN  | K.KVEAPETNIDKT#PK.K             | T321:      | 2 | 3,7945 | 0,249 | -0,739 |
| 23 | Q13769 THOC5_HUMAN  | R.RPT#LGVQLDDKR.K               | T328:      | 2 | 3,8026 | 0,404 | -0,743 |
| 23 | P27816 MAP4_HUMAN   | K.ET#ERASPIKM*DLAPSKDM*GPPK.E   | T354:      | 3 | 3,8092 | 0,285 | 0,51   |
| 23 | Q9Y230 RUVB2_HUMAN  | R.KGT#EVQVDDIKR.V               | T419:      | 3 | 3,4106 | 0,371 | 0,062  |
| 23 | Q5T6U8 Q5T6U8_HUMAN | R.KQPPKEPSEVPT#PK.R             | T42:       | 3 | 3,6021 | 0,385 | -0,223 |
| 23 | Q13029 PRDM2_HUMAN  | K.RKPSQT#LQPSIDLADGK.A          | T423:      | 3 | 4,0849 | 0,315 | -0,844 |
| 23 | Q96ST2 IWS1_HUMAN   | R.EKT#IASDS#EEEEAGKELSDKK.N     | T435:S440: | 3 | 2,6325 | 0,357 | -1,088 |
| 23 | Q8TF01 SFR18_HUMAN  | K.KRT#PNETTSVLEPK.K             | T485:      | 3 | 3,9537 | 0,332 | -0,653 |
| 23 | Q8TF01 SFR18_HUMAN  | K.KRT#PNETTSVLEPK.K             | T485:      | 2 | 2,8268 | 0,307 | 0,29   |
| 23 | Q92558 WASF1_HUMAN  | K.RHPST#LPVISDAR.S              | T490:      | 3 | 2,9745 | 0,083 | 0,179  |
| 23 | Q9Y4J8 DTNA_HUMAN   | R.LRLEHEQASQPT#PEK.A            | T504:      | 3 | 3,2188 | 0,21  | -0,298 |
| 23 | Q9NYV4 CD2L7_HUMAN  | R.DSKPIALKEEIVT#PKETETSEK.E     | T514:      | 3 | 3,598  | 0,254 | -0,573 |
| 23 | Q86UU1 PHLB1_HUMAN  | R.RT#RSPS#PTLGESLAPHK.G         | T516:S520: | 3 | 4,339  | 0,343 | 0,092  |
| 23 | P10636 TAU_HUMAN    | K.KVAVVRT#PPKS#PSSAK.S          | T548:S552: | 2 | 3,1185 | 0,171 | 0,067  |
| 23 | P27824 CALX_HUMAN   | K.QKSDAEEDGGT#VS#QEEEDRKPK.A    | T562:S564: | 3 | 2,6875 | 0,272 | -0,419 |
| 23 | Q02952 AKA12_HUMAN  | K.GLAEVQQDGEAEEGAT#SDGEKKR.E    | T597:      | 3 | 3,9904 | 0,383 | -0,295 |
| 23 | Q96B01 R51A1_HUMAN  | R.KEEIPVQEK#PK.K                | T66:       | 3 | 4,24   | 0,272 | -0,061 |
| 23 | Q9P2K8 E2AK4_HUMAN  | R.HERPAGPGT#PPPSGPLAK.D         | T667:      | 3 | 2,8497 | 0,2   | -0,746 |
| 23 | Q9Y496 KIF3A_HUMAN  | R.KRSKPET#VIDSLLQ.-             | T695:      | 2 | 2,114  | 0,321 | -0,484 |
| 23 | P46013 KI67_HUMAN   | K.KPVGEVHSQFSTGHANSPECT#IIIGK.A | T716:      | 3 | 2,6212 | 0,227 | -0,6   |

|    |                     |                                |            |   |        |       |        |
|----|---------------------|--------------------------------|------------|---|--------|-------|--------|
| 23 | Q9H3T3 SEM6B_HUMAN  | R.ASHGDFPLT#PHAS#PDRR.R        | T790:S794: | 3 | 3,2958 | 0,321 | -0,453 |
| 23 | Q8IZQ1 WDFY3_HUMAN  | R.HAYHSVST#PPVYPPK.N           | T818:      | 3 | 2,8276 | 0,337 | -0,104 |
| 23 | Q9H0E3 SP130_HUMAN  | R.KQQHVISTEEGDM*M*ETNST#DDEK.S | T856:      | 3 | 6,2928 | 0,477 | 0,662  |
| 23 | P07814 SYEP_HUMAN   | K.SLIGVEY#KPVSATGAEDKDKK.K     | Y950:      | 3 | 3,6144 | 0,407 | -0,395 |
| 23 | Q9Y490 TLN1_HUMAN   | R.LASEAKPAAVAAENEEIGSHIK.H     |            | 3 | 6,156  | 0,361 | -0,737 |
| 23 | A8K9D9 A8K9D9_HUMAN | R.DKLPSTEVKEDSAYGSQSVEQAEK.L   |            | 3 | 5,8248 | 0,431 | -0,797 |
| 23 | P62318 SMD3_HUMAN   | K.VLHEAEGHIVTCETNTGEVYR.G      |            | 3 | 5,5618 | 0,525 | -1,364 |
| 23 | P49915 GUAA_HUMAN   | R.GLQKEEVLLTHGDSVDK.V          |            | 3 | 5,3949 | 0,479 | -0,558 |
| 23 | O75347 TBCA_HUMAN   | R.ILENEKDLEEAEEYKEAR.L         |            | 3 | 5,3423 | 0,393 | -0,249 |
| 23 | P61353 RL27_HUMAN   | K.NIDDGTSRPPYSHALVAGIDR.Y      |            | 3 | 5,1019 | 0,483 | -0,564 |
| 23 | P63220 RS21_HUMAN   | K.DHASIQM*NVAEVDKVTGR.F        |            | 3 | 5,0767 | 0,578 | -0,553 |
| 23 | P13639 EF2_HUMAN    | K.ARPFPDGLAEDIDKGEVSAR.Q       |            | 3 | 4,9533 | 0,353 | -0,171 |
| 23 | Q9UQ35 SRRM2_HUMAN  | K.EETPGQRPAVTETHQLAELNEK.K     |            | 3 | 4,908  | 0,44  | -0,148 |
| 23 | P57740 NU107_HUMAN  | K.DNGEFSHHDLAPALDTGTTEEDR.L    |            | 3 | 4,8527 | 0,349 | -0,869 |
| 23 | Q08EQ4 TMSL1_HUMAN  | K.TETQEKNPLPSKETIEQEQAGES.-    |            | 3 | 4,8481 | 0,321 | -0,542 |
| 23 | O96013 PAK4_HUMAN   | R.DKRPLSGPDVGTQPAGLASGAK.L     |            | 3 | 4,7424 | 0,401 | -0,824 |
| 23 | Q02952 AKA12_HUMAN  | K.ERPPAPSSVFQEETKEQSK.M        |            | 3 | 4,7054 | 0,457 | -0,867 |
| 23 | P17661 DESM_HUMAN   | R.TNEKVELQELNDR.F              |            | 3 | 4,7045 | 0,354 | -0,461 |
| 23 | Q6P3X3 TTC27_HUMAN  | R.NKEFQECVECFER.S              |            | 3 | 4,6021 | 0,265 | 0      |
| 23 | P31948 STIP1_HUMAN  | K.DPQALSEHLKNPVIAQK.I          |            | 2 | 4,5324 | 0,481 | -0,517 |
| 23 | P17252 KPCA_HUMAN   | R.DLKLDNVM*LDSEGHK.I           |            | 3 | 4,5114 | 0,34  | -0,595 |
| 23 | P17480 UBF1_HUMAN   | R.DYIQKHPELNISEEGITK.S         |            | 3 | 4,5001 | 0,477 | -0,26  |
| 23 | P07951 TPM2_HUMAN   | R.CKQLEEEQQALQK.K              |            | 2 | 4,4833 | 0,449 | 0      |
| 23 | P27797 CALR_HUMAN   | K.HEQNIDCGGGYVK.L              |            | 2 | 4,4055 | 0,443 | -0,413 |
| 23 | P43243 MATR3_HUMAN  | R.DSFDDRGPVSLNPVLDYDHGSR.S     |            | 3 | 4,4053 | 0,288 | -0,775 |
| 23 | Q9UPN9 TRI33_HUMAN  | R.DIGKPEVEYDCDNLQHSK.K         |            | 3 | 4,3553 | 0,448 | -0,426 |
| 23 | P17661 DESM_HUMAN   | R.TNEKVELQELNDR.F              |            | 2 | 4,3084 | 0,399 | -1,152 |
| 23 | Q96FV9 THOC1_HUMAN  | K.NIKPLLSTFSQVPGSENEKK.C       |            | 3 | 4,2837 | 0,263 | -0,33  |
| 23 | P07910 HNRPC_HUMAN  | R.GDDQLELIKDDEKEAEEGEDDR.D     |            | 3 | 4,2665 | 0,42  | -0,431 |
| 23 | P13667 PDIA4_HUMAN  | R.SHM*M*DVGSTQDSAIDKDFVLK.Y    |            | 3 | 4,2578 | 0,51  | -0,309 |
| 23 | P11021 GRP78_HUMAN  | K.NGRVEIANDQGNR.I              |            | 3 | 4,2536 | 0,355 | -0,353 |
| 23 | Q9Y223 GLCNE_HUMAN  | K.SKDYIVALQHPVTTDIK.H          |            | 3 | 4,2247 | 0,392 | -0,569 |
| 23 | Q96R05 RET7_HUMAN   | K.FKVGEEFDEDNR.G               |            | 3 | 4,2191 | 0,238 | 0,308  |



|    |                     |                              |   |        |       |        |
|----|---------------------|------------------------------|---|--------|-------|--------|
| 23 | P17096 HMGA1_HUMAN  | K.KLEKEEEEGISQESSEEEQ.-      | 3 | 4,192  | 0,466 | -0,409 |
| 23 | Q14137 BOP1_HUMAN   | R.TRDELDQFLDK.M              | 3 | 4,1642 | 0,089 | -0,066 |
| 23 | P49411 EFTU_HUMAN   | K.KYEEIDNAPEER.A             | 2 | 4,155  | 0,407 | -0,654 |
| 23 | P09493 TPM1_HUMAN   | K.GTEDELDKYSEALKDAQEK.L      | 3 | 4,1353 | 0,387 | -0,59  |
| 23 | Q15717 ELAV1_HUMAN  | R.DKVAGHSLGYGFVNYVTAK.D      | 3 | 4,1141 | 0,293 | -0,361 |
| 23 | Q99996 AKAP9_HUMAN  | K.DKTDEVHLLNDTLASEQK.K       | 3 | 4,109  | 0,394 | -0,712 |
| 23 | O94833 BPAEA_HUMAN  | K.DAYKPITDADKIEDEVTR.Q       | 3 | 4,1043 | 0,289 | -0,528 |
| 23 | P07951 TPM2_HUMAN   | R.CKQLEEEQQALQK.K            | 3 | 4,0867 | 0,261 | 0,224  |
| 23 | P46940 IQGA1_HUMAN  | K.DSLHEKFPDAGEDELLK.I        | 3 | 4,0735 | 0,205 | -0,282 |
| 23 | P06493 CDC2_HUMAN   | R.DLKPNQLLIDDKGTIK.L         | 3 | 4,0734 | 0,301 | 0,404  |
| 23 | Q08EQ4 TMSL1_HUMAN  | K.TETQEKNPLPSKETIEQEK.Q      | 3 | 4,0733 | 0,4   | -0,657 |
| 23 | Q15149 PLEC1_HUMAN  | R.KQEELQLEQQR.R              | 2 | 4,0708 | 0,197 | -0,392 |
| 23 | O14776 TCRG1_HUMAN  | R.DDNKDIDSEKEAAM*EAEIK.A     | 3 | 4,0504 | 0,12  | -0,422 |
| 23 | P09493 TPM1_HUMAN   | R.RIQLVEEELDR.A              | 3 | 4,0416 | 0,25  | 0,065  |
| 23 | Q96RR4 KKCC2_HUMAN  | R.DIKPSNLLVGEDGHIK.I         | 3 | 4,0319 | 0,227 | -0,527 |
| 23 | Q9UHR5 S30BP_HUMAN  | K.DNTEAEKRDPQELVASFSER.V     | 3 | 4,0305 | 0,34  | -0,473 |
| 23 | P17987 TCPA_HUMAN   | K.HGSYEDAVHSGALND.-          | 2 | 4,0203 | 0,586 | -0,31  |
| 23 | Q13951 PEBB_HUMAN   | R.SKFEENEFFR.K               | 3 | 4,0017 | 0,232 | 0,137  |
| 23 | Q13435 SF3B2_HUMAN  | R.EQQAQVEKEDFSDM*VAEHAAK.Q   | 3 | 3,9921 | 0,266 | -0,152 |
| 23 | B2RTR1 B2RTR1_HUMAN | K.DKSFDDDEESVDGNRPSSAASAFK.V | 3 | 3,9687 | 0,388 | -0,744 |
| 23 | Q13131 AAPK1_HUMAN  | R.DLKPENVLLDAH*NAK.I         | 3 | 3,9586 | 0,39  | -0,201 |
| 23 | O43768 ENSA_HUMAN   | K.NLVTGDHIPTQDLPQRK.S        | 3 | 3,9411 | 0,28  | -0,18  |
| 23 | Q13416 ORC2_HUMAN   | R.DKTSDLVEEYFEAHSSSK.V       | 3 | 3,9316 | 0,492 | -0,53  |
| 23 | P63241 IF5A1_HUMAN  | R.EDLRLPEGDLGKEIEQK.Y        | 2 | 3,9015 | 0,389 | -0,496 |
| 23 | Q96A26 E2IG5_HUMAN  | R.FKKEDEIPETVSLEM*LDAAK.N    | 3 | 3,8799 | 0,305 | -0,317 |
| 23 | Q9Y295 DRG1_HUMAN   | K.DHTLEDEDVIQIVKK.-          | 3 | 3,8293 | 0,385 | -0,308 |
| 23 | P63241 IF5A1_HUMAN  | R.EDLRLPEGDLGKEIEQK.Y        | 3 | 3,809  | 0,355 | -0,464 |
| 23 | O95239 KIF4A_HUMAN  | K.NKPIVNIDPQTAEINHLK.Q       | 3 | 3,7979 | 0,284 | -0,716 |
| 23 | Q9NYF8 BCLF1_HUMAN  | K.SQECPKDTFEHDPSESIDEFNK.S   | 3 | 3,7672 | 0,217 | -0,491 |
| 23 | Q9UHD1 CHRD1_HUMAN  | K.FQEHIQAPKPVEAIK.R          | 3 | 3,7438 | 0,377 | 0,099  |
| 23 | O95340 PAPS2_HUMAN  | R.HNEFDIFSGTR.M              | 2 | 3,7438 | 0,449 | -0,646 |
| 23 | P61289 PSME3_HUMAN  | R.RLDECEEFQGTK.V             | 2 | 3,7282 | 0,441 | -0,462 |
| 23 | O60508 PRP17_HUMAN  | K.DVAKPSEEEQKELDEITAK.R      | 3 | 3,6985 | 0,351 | -0,424 |

|    |                     |                           |   |        |       |        |
|----|---------------------|---------------------------|---|--------|-------|--------|
| 23 | P08670 VIME_HUMAN   | K.SRLGDLYEEEM*R.E         | 3 | 3,6725 | 0,237 | 0,181  |
| 23 | P49756 RBM25_HUMAN  | R.DREEDEEDAYER.R          | 2 | 3,6693 | 0,397 | -0,627 |
| 23 | P62269 RS18_HUMAN   | K.RAGELTEDEVER.V          | 3 | 3,647  | 0,301 | -0,065 |
| 23 | P04843 RPN1_HUMAN   | R.LKTEGSDLCDR.V           | 3 | 3,6385 | 0,245 | 0,565  |
| 23 | O95292 VAPB_HUMAN   | R.CVFELPAENDKPHDVEINK.I   | 3 | 3,6264 | 0,345 | -0,243 |
| 23 | Q58FF8 H90B2_HUMAN  | K.EKYIDQEELNK.T           | 2 | 3,6231 | 0,304 | -0,087 |
| 23 | Q99615 DNJC7_HUMAN  | K.KDYNEAYNYTK.A           | 3 | 3,6057 | 0,262 | -0,233 |
| 23 | P06576 ATPB_HUMAN   | K.AHGGYSVFAGVGER.T        | 2 | 3,6029 | 0,58  | -0,52  |
| 23 | P04083 ANXA1_HUMAN  | K.AAYLQETGKPLDETLKK.A     | 2 | 3,5959 | 0,487 | -0,64  |
| 23 | Q07065 CKAP4_HUMAN  | R.HSEAFEALQQK.S           | 3 | 3,5921 | 0,106 | 0,142  |
| 23 | Q02952 AKA12_HUMAN  | K.EQEPEKVDTEEDGKAEVASEK.L | 3 | 3,5892 | 0,432 | -0,468 |
| 23 | Q9BZE4 NOG1_HUMAN   | R.DDKERPPFIPEGVVAR.R      | 3 | 3,5891 | 0,194 | -0,802 |
| 23 | Q9NV70 EXOC1_HUMAN  | K.DAIKENPEFDLHFEK.I       | 2 | 3,5704 | 0,451 | -0,599 |
| 23 | P09493 TPM1_HUMAN   | R.RIQLVEEELDR.A           | 2 | 3,5683 | 0,282 | -0,523 |
| 23 | Q99714 HCD2_HUMAN   | K.GQTHLEDFQR.V            | 3 | 3,5586 | 0,257 | 0,069  |
| 23 | Q09161 NCBP1_HUMAN  | R.KDGVLEEQUIER.L          | 3 | 3,5162 | 0,092 | 0,208  |
| 23 | Q15181 IPYR_HUMAN   | K.M*EIATKDPLNPIKQDVK.K    | 3 | 3,4979 | 0,452 | -0,374 |
| 23 | P28074 PSB5_HUMAN   | K.RGPGLYVVDSEGNR.I        | 3 | 3,4943 | 0,363 | 0,116  |
| 23 | P61026 RAB10_HUMAN  | R.NIDEHANEDVER.M          | 2 | 3,494  | 0,554 | -0,339 |
| 23 | B2RDE1 B2RDE1_HUMAN | R.AREQAEAEVASLNR.R        | 3 | 3,4885 | 0,198 | 0,118  |
| 23 | Q6PJT7 ZC3HE_HUMAN  | K.FNHDGEEEEEDDYGSR.T      | 3 | 3,4764 | 0,13  | -0,537 |
| 23 | O95573 ACSL3_HUMAN  | K.TKADFFEDENGQR.W         | 3 | 3,4714 | 0,273 | -0,47  |
| 23 | P62736 ACTA_HUMAN   | K.DSYVGDEAQSQR.G          | 2 | 3,4403 | 0,564 | -0,54  |
| 23 | P78527 PRKDC_HUMAN  | R.HGDLPDIQIK.H            | 2 | 3,4332 | 0,359 | -0,215 |
| 23 | P41227 ARD1A_HUMAN  | K.M*EEDPDDVPHGHITSLAVK.R  | 3 | 3,4281 | 0,231 | -0,521 |
| 23 | Q03701 CEBPZ_HUMAN  | R.ALTVAHELLCNKPEEEK.A     | 3 | 3,4185 | 0,341 | -0,554 |
| 23 | Q8WUM4 PDC6I_HUMAN  | K.DNDFIYHDR.V             | 2 | 3,4168 | 0,358 | -0,306 |
| 23 | O43390 HNRPR_HUMAN  | K.TKENILEEFSK.V           | 2 | 3,4142 | 0,406 | -0,638 |
| 23 | P05787 K2C8_HUMAN   | R.SRAEAESM*YQIK.Y         | 3 | 3,4089 | 0,218 | 0      |
| 23 | Q71U36 TBA1A_HUMAN  | R.QLFHPEQLITGKEDAANNYAR.G | 3 | 3,4046 | 0,425 | -0,303 |
| 23 | P08243 ASNS_HUMAN   | K.APSPEKAEESER.L          | 3 | 3,3977 | 0,371 | 0,063  |
| 23 | Q9UQE7 SMC3_HUMAN   | R.SEDLDNSIDKTEAGIKELQK.S  | 3 | 3,3882 | 0,385 | -0,41  |
| 23 | P13987 CD59_HUMAN   | K.FEHCNFDVTR.L            | 3 | 3,3867 | 0,101 | -0,356 |

|    |                     |                                |   |        |       |        |
|----|---------------------|--------------------------------|---|--------|-------|--------|
| 23 | P35749 MYH11_HUMAN  | K.KEEELQAALAR.L                | 3 | 3,385  | 0,269 | 0,218  |
| 23 | O60812 HNRCL_HUMAN  | K.KSDVEAIFSK.Y                 | 2 | 3,3808 | 0,299 | -0,217 |
| 23 | P09429 HMGB1_HUMAN  | K.HPDASVNFSEFSK.K              | 3 | 3,3745 | 0,316 | 0,187  |
| 23 | Q8N5S9 KKCC1_HUMAN  | R.DIKPSNLLLGDGHVK.I            | 3 | 3,373  | 0,11  | 0,319  |
| 23 | Q02878 RL6_HUMAN    | R.HQEGEIFDTEK.E                | 2 | 3,3597 | 0,45  | -0,549 |
| 23 | O15355 PPM1G_HUMAN  | K.ALDM*SYDHKPEDEVELAR.I        | 3 | 3,3582 | 0,322 | -0,6   |
| 23 | Q9NZ01 GPSN2_HUMAN  | K.HYEVEILDAK.T                 | 2 | 3,3545 | 0,433 | -0,201 |
| 23 | P11021 GRP78_HUMAN  | K.M*KETAEAYLGK.K               | 3 | 3,3543 | 0,25  | 0,145  |
| 23 | Q7KZF4 SND1_HUMAN   | R.SSHYDELLAAEAR.A              | 2 | 3,348  | 0,411 | -0,334 |
| 23 | P12270 TPR_HUMAN    | K.AIQDHLLEVEQSKDQM*EK.E        | 3 | 3,3475 | 0,32  | -0,339 |
| 23 | P42704 LPPRC_HUMAN  | K.EKDIQEESTFSSR.K              | 2 | 3,3419 | 0,395 | 0,157  |
| 23 | Q02952 AKA12_HUMAN  | K.DKTEKPDTVQLLTVK.K            | 2 | 3,3385 | 0,34  | -0,569 |
| 23 | P68104 EF1A1_HUMAN  | K.SVEM*HHEALSEALPGDNVGFNVK.N   | 3 | 3,3236 | 0,397 | -0,44  |
| 23 | P46940 IQGA1_HUMAN  | K.NKYQELINDIAR.D               | 3 | 3,3227 | 0,173 | -0,371 |
| 23 | P62269 RS18_HUMAN   | K.RAGELTEDEVER.V               | 2 | 3,3179 | 0,319 | -0,608 |
| 23 | Q9Y676 RT18B_HUMAN  | R.DHGLLIYHIPQVEPR.D            | 3 | 3,3111 | 0,288 | -0,512 |
| 23 | Q9Y6B6 SAR1B_HUMAN  | K.IDRPEAISEER.L                | 3 | 3,3108 | 0,384 | 0,139  |
| 23 | Q00839 HNRPU_HUMAN  | K.GPEEKKDCEVVM*M*IGLPGAGK.T    | 3 | 3,3066 | 0,245 | -0,321 |
| 23 | P35580 MYH10_HUMAN  | K.KFDQLLAEEK.S                 | 3 | 3,2996 | 0,143 | 0,225  |
| 23 | Q15008 PSMD6_HUMAN  | K.RLDEELEDIAEK.N               | 3 | 3,287  | 0,259 | 0,068  |
| 23 | P00387 NB5R3_HUMAN  | K.DPDDHTVCHLLFANQTEK.D         | 3 | 3,2807 | 0,259 | -0,855 |
| 23 | O60493 SNX3_HUMAN   | R.KQGLEQFINK.V                 | 3 | 3,2683 | 0,225 | 0,683  |
| 23 | O75347 TBCA_HUMAN   | K.KQAEILQESR.M                 | 3 | 3,2672 | 0,155 | 0,456  |
| 23 | A7XZE4 A7XZE4_HUMAN | K.SLM*ASEEEYSTKEDKYEEIEK.L     | 3 | 3,2633 | 0,421 | -0,215 |
| 23 | Q15418 KS6A1_HUMAN  | R.DLKPENILLDEEGHIK.L           | 3 | 3,2556 | 0,16  | -0,687 |
| 23 | Q8WU90 ZC3HF_HUMAN  | K.HFLEAIENNK.Y                 | 2 | 3,2493 | 0,327 | -0,603 |
| 23 | P35579 MYH9_HUMAN   | R.ASREEILAQAK.E                | 2 | 3,2484 | 0,191 | -0,602 |
| 23 | Q9H0D6 XRN2_HUMAN   | K.NKFDVDAADEK.F                | 3 | 3,2475 | 0,322 | 0,584  |
| 23 | P50990 TCPO_HUMAN   | K.HFSGLEAVYR.N                 | 3 | 3,2451 | 0,201 | 0,21   |
| 23 | P63244 GBLP_HUMAN   | K.TNHIGHTGYLNTVTVSPDGLCASGGK.D | 3 | 3,2439 | 0,313 | -0,2   |
| 23 | Q15008 PSMD6_HUMAN  | K.RLDEELEDIAEK.N               | 2 | 3,2409 | 0,28  | -0,815 |
| 23 | P04792 HSPB1_HUMAN  | K.TKDGVEITGK.H                 | 2 | 3,2402 | 0,469 | -0,213 |
| 23 | P11142 HSP7C_HUMAN  | R.RFDDAVVQSDM*K.H              | 3 | 3,2371 | 0,116 | 0,064  |

|    |                    |                                 |   |        |       |        |
|----|--------------------|---------------------------------|---|--------|-------|--------|
| 23 | Q05682 CALD1_HUMAN | K.SAKPTKPAASDLPVPAEGVR.N        | 3 | 3,2367 | 0,272 | -0,827 |
| 23 | P05388 RLAO_HUMAN  | R.GHLENNPALEK.L                 | 2 | 3,2302 | 0,426 | -0,2   |
| 23 | P38919 IF4A3_HUMAN | K.RDELTLGKIQ.Q                  | 2 | 3,2271 | 0,338 | -0,312 |
| 23 | Q15418 KS6A1_HUMAN | K.DKLPQSQLSHQDLQLVK.G           | 3 | 3,2054 | 0,182 | -0,463 |
| 23 | P06493 CDC2_HUMAN  | R.DLKPNLLIDDKGTIK.L             | 2 | 3,1911 | 0,31  | -0,943 |
| 23 | P52597 HNRPF_HUMAN | K.HSGPNSADSANDGFVR.L            | 2 | 3,1842 | 0,512 | -0,374 |
| 23 | P62736 ACTA_HUMAN  | R.HQGVM*VGM*GQK.D               | 3 | 3,1801 | 0,175 | 0,456  |
| 23 | Q15365 PCBP1_HUMAN | R.QQSHFAM*M*HGGTGFAGIDSSSPEVK.G | 3 | 3,1773 | 0,289 | -0,347 |
| 23 | P11142 HSP7C_HUMAN | R.RFDDAVVQSDM*K.H               | 2 | 3,1706 | 0,437 | -0,171 |
| 23 | Q99436 PSB7_HUMAN  | K.FRPDM*EEEEAK.N                | 3 | 3,163  | 0,314 | -0,065 |
| 23 | P30626 SORCN_HUMAN | R.QHFISFDTR.S                   | 3 | 3,1609 | 0,309 | -0,361 |
| 23 | Q9NQP4 PFD4_HUMAN  | K.KNLQEEIDALESR.V               | 2 | 3,16   | 0,295 | -0,553 |
| 23 | P27694 RFA1_HUMAN  | R.VKVETYNDESR.I                 | 3 | 3,1595 | 0,251 | -0,136 |
| 23 | Q92878 RAD50_HUMAN | R.NEELKEVEEER.K                 | 3 | 3,1487 | 0,245 | -0,326 |
| 23 | Q8N357 CB018_HUMAN | R.GRPLAEESEQR.L                 | 3 | 3,1399 | 0,351 | 0      |
| 23 | Q02790 FKBP4_HUMAN | K.GEHSIVYLKPSYAFGSVGK.E         | 3 | 3,128  | 0,313 | -0,628 |
| 23 | O60493 SNX3_HUMAN  | R.KQGLEQFINK.V                  | 2 | 3,1083 | 0,237 | -0,405 |
| 23 | Q58FF7 H90B3_HUMAN | R.RAPFDLFENK.K                  | 2 | 3,1053 | 0,195 | -0,592 |
| 23 | Q9H0D6 XRN2_HUMAN  | K.NKFDVDADEK.F                  | 2 | 3,0995 | 0,363 | -0,097 |
| 23 | P42166 LAP2A_HUMAN | R.NRPPLPAGTNSK.G                | 2 | 3,095  | 0,477 | -0,682 |
| 23 | Q9NYV4 CD2L7_HUMAN | R.DSKPIALKEEIVTPK.E             | 3 | 3,0947 | 0,242 | -0,548 |
| 23 | P31943 HNRH1_HUMAN | R.VHIEIGPDGR.V                  | 2 | 3,0864 | 0,548 | -0,223 |
| 23 | P06576 ATPB_HUMAN  | K.AHGGYSVFAGVGER.T              | 3 | 3,0804 | 0,111 | 0,13   |
| 23 | Q96TA2 YMEL1_HUMAN | R.DRGS DVESLDK.L                | 3 | 3,0681 | 0,231 | 0,3    |
| 23 | Q9Y262 IF3EI_HUMAN | K.KSEEEIDFLR.S                  | 2 | 3,066  | 0,452 | -0,578 |
| 23 | P21333 FLNA_HUMAN  | R.DVDIIDHHDNTYTVK.Y             | 2 | 3,063  | 0,425 | -0,478 |
| 23 | Q02952 AKA12_HUMAN | K.DKTEKPDTVQLLTVK.K             | 3 | 3,0568 | 0,159 | 0      |
| 23 | P33991 MCM4_HUMAN  | R.LHGLDEEAEQK.L                 | 3 | 3,0533 | 0,107 | 0,144  |
| 23 | Q9Y262 IF3EI_HUMAN | K.KSEEEIDFLR.S                  | 3 | 3,0424 | 0,274 | 0,361  |
| 23 | Q13505 MTX1_HUMAN  | R.LQLLTGEHRPEDEEELEK.E          | 3 | 3,037  | 0,145 | -0,084 |
| 23 | P52565 GDIR1_HUMAN | K.SIQEIQELDKDDESLRK.Y           | 3 | 3,0328 | 0,368 | -0,715 |
| 23 | P05787 K2C8_HUMAN  | R.SRAEAESM*YQIK.Y               | 2 | 3,0245 | 0,401 | -0,342 |
| 23 | P36776 LONM_HUMAN  | K.DAKGDKDGSLEVTGQLGEVM*K.E      | 3 | 3,0159 | 0,091 | -0,5   |

|    |                    |                           |   |        |       |        |
|----|--------------------|---------------------------|---|--------|-------|--------|
| 23 | Q8NE71 ABCF1_HUMAN | K.FAALDNEEEDKEEIIKEK.E    | 3 | 3,0078 | 0,196 | -0,08  |
| 23 | P27797 CALR_HUMAN  | K.HEQNIDCGGGYVK.L         | 3 | 3,0072 | 0,18  | -0,124 |
| 23 | P62805 H4_HUMAN    | K.RISGLIYEETR.G           | 2 | 2,9956 | 0,303 | -0,548 |
| 23 | P50402 EMD_HUMAN   | K.KEDALLYQSK.G            | 2 | 2,9954 | 0,282 | -0,204 |
| 23 | P30050 RL12_HUMAN  | R.HPHDIIDDINSGAVECPAS.-   | 2 | 2,9887 | 0,506 | -0,536 |
| 23 | Q14204 DYHC1_HUMAN | K.KYEFGESDLR.S            | 3 | 2,982  | 0,301 | 0,147  |
| 23 | P42704 LPPRC_HUMAN | K.EKDIQEESTFSSR.K         | 3 | 2,976  | 0,348 | 0,588  |
| 23 | P35580 MYH10_HUMAN | K.KFDQLLAEEK.S            | 2 | 2,9694 | 0,298 | -0,4   |
| 23 | Q13435 SF3B2_HUMAN | K.KPGDLSDEL.R.I           | 2 | 2,969  | 0,346 | 0      |
| 23 | P07195 LDHB_HUMAN  | K.LKGEM*M*DLQHGSFLQTPK.I  | 3 | 2,9596 | 0,211 | -0,332 |
| 23 | P62750 RL23A_HUMAN | K.KLYDIDVAK.V             | 2 | 2,9569 | 0,307 | -0,115 |
| 23 | P50990 TCPQ_HUMAN  | K.HFSGLEEA VYR.N          | 2 | 2,9459 | 0,462 | -0,653 |
| 23 | P15531 NDKA_HUMAN  | K.FM*QASEDLLKEHYVDL.K.D   | 3 | 2,9409 | 0,176 | -0,791 |
| 23 | Q13813 SPTA2_HUMAN | K.QKLDILDQER.A            | 3 | 2,9326 | 0,166 | 0,145  |
| 23 | P36542 ATPG_HUMAN  | K.HLLIGVSSDR.G            | 2 | 2,9278 | 0,377 | -0,556 |
| 23 | P46013 KI67_HUMAN  | K.HGDVITIHDR.S            | 2 | 2,9134 | 0,387 | -0,107 |
| 23 | O14641 DVL2_HUMAN  | R.DIVHKPGPIVLTVAK.C       | 3 | 2,9122 | 0,175 | 0      |
| 23 | P62807 H2B1C_HUMAN | R.KESYSVYVYK.V            | 3 | 2,9101 | 0,292 | 0,072  |
| 23 | O15320 CTGE5_HUMAN | R.AKDLEEELER.T            | 2 | 2,9083 | 0,32  | -0,495 |
| 23 | Q06210 GFPT1_HUMAN | K.HGPLALVDK.L             | 2 | 2,9047 | 0,349 | 0,064  |
| 23 | P12268 IMDH2_HUMAN | R.HGFCGIPITDTGR.M         | 2 | 2,9009 | 0,526 | -0,512 |
| 23 | P00491 PNPH_HUMAN  | R.DHINLPGFSGQNPLRGPNDER.F | 3 | 2,8881 | 0,232 | -0,235 |
| 23 | P43490 NAMPT_HUMAN | K.EHFQDDVFNEK.G           | 3 | 2,8847 | 0,26  | 0,52   |
| 23 | O15075 DCLK1_HUMAN | R.DIKPENLLVYEHQDGSK.S     | 3 | 2,8774 | 0,183 | -0,553 |
| 23 | Q9UHB9 SRP68_HUMAN | K.KVTELLTDNR.Y            | 2 | 2,8734 | 0,343 | -0,278 |
| 23 | P07900 HS90A_HUMAN | R.RAPFDLFENR.K            | 2 | 2,8727 | 0,181 | -0,579 |
| 23 | P46940 IQGA1_HUMAN | K.NKYQELINDIAR.D          | 2 | 2,868  | 0,41  | -0,496 |
| 23 | Q8WUM4 PDC6I_HUMAN | R.NREILDESLR.L            | 3 | 2,8649 | 0,205 | 0,367  |
| 23 | P48163 MAOX_HUMAN  | K.NFEHLNSDFDR.Y           | 3 | 2,8584 | 0,178 | 0,197  |
| 23 | A6NHR9 SMHD1_HUMAN | K.IAHLAQIEDDR.A           | 3 | 2,8496 | 0,172 | 0,071  |
| 23 | Q86XP3 DDX42_HUMAN | K.KANAEELANLQ.K           | 3 | 2,8433 | 0,168 | 0,07   |
| 23 | P51153 RAB13_HUMAN | K.SIKENASAGVER.L          | 3 | 2,8384 | 0,139 | 0,29   |
| 23 | P33778 H2B1B_HUMAN | R.KESYSIYVYK.V            | 3 | 2,8298 | 0,124 | 0,857  |

|    |                    |                            |   |        |       |        |
|----|--------------------|----------------------------|---|--------|-------|--------|
| 23 | P30048 PRDX3_HUMAN | K.HLSVNDLPVGR.S            | 2 | 2,8215 | 0,408 | -0,606 |
| 23 | O75533 SF3B1_HUMAN | K.THEDIEAQIR.E             | 3 | 2,8207 | 0,103 | 0,075  |
| 23 | Q14978 NOLC1_HUMAN | R.VREEEIEVDSR.V            | 3 | 2,8052 | 0,193 | 0,134  |
| 23 | Q86UP2 KTN1_HUMAN  | R.LTSKEEELKDIQNM*NFLK.A    | 3 | 2,7934 | 0,132 | -0,396 |
| 23 | Q15149 PLEC1_HUMAN | R.DALDGPAAEAPEHSFDGLRR.K   | 3 | 2,7807 | 0,163 | -0,812 |
| 23 | Q8TDN6 BXDC2_HUMAN | K.RNEIDAEPPAK.R            | 3 | 2,78   | 0,141 | 0      |
| 23 | P62424 RL7A_HUMAN  | K.KVVNPLFEK.R              | 2 | 2,7794 | 0,204 | -0,114 |
| 23 | P51858 HDGF_HUMAN  | K.GNAEGSSDEEGKLVIDEPAKEK.N | 3 | 2,7739 | 0,196 | -0,397 |
| 23 | P12270 TPR_HUMAN   | K.NKELEIAQDR.N             | 3 | 2,7663 | 0,095 | 0,376  |
| 23 | P14314 GLU2B_HUMAN | R.SLKDM*EESIR.N            | 3 | 2,762  | 0,163 | 0,448  |
| 23 | P60660 MYL6_HUMAN  | K.NKDQGTIEDYVEGLR.V        | 3 | 2,7578 | 0,309 | -0,512 |
| 23 | P62805 H4_HUMAN    | K.RISGLIYEETR.G            | 3 | 2,744  | 0,158 | 0      |
| 23 | Q13838 UAP56_HUMAN | K.HFILDECDK.M              | 2 | 2,7311 | 0,329 | -0,518 |
| 23 | P61158 ARP3_HUMAN  | R.LKLSEELSGGR.L            | 2 | 2,7292 | 0,315 | -0,103 |
| 23 | P08670 VIME_HUMAN  | R.EKLQEEM*LQR.E            | 2 | 2,7258 | 0,288 | -0,832 |
| 23 | P52298 NCBP2_HUMAN | R.DEYRQDYDAGR.G            | 3 | 2,7235 | 0,312 | 0,066  |
| 23 | O43707 ACTN4_HUMAN | R.DHALLEEQSK.Q             | 2 | 2,7229 | 0,351 | -0,417 |
| 23 | Q16222 UAP1_HUMAN  | R.DVVNVYEPQLQHHVAQK.K      | 2 | 2,7208 | 0,415 | -0,244 |
| 23 | Q8WUM4 PDC6I_HUMAN | R.NREILDESLR.L             | 2 | 2,7205 | 0,189 | -0,098 |
| 23 | P31948 STIP1_HUMAN | R.IGNSYFKEEK.Y             | 2 | 2,7169 | 0,178 | -0,1   |
| 23 | Q06203 PUR1_HUMAN  | R.HNVQTLDIISR.S            | 2 | 2,7146 | 0,449 | -0,471 |
| 23 | P31949 S10AB_HUMAN | K.NQKDPGVLDR.M             | 2 | 2,71   | 0,186 | 0      |
| 23 | P04908 H2A1B_HUMAN | R.NDEELNKLLGR.V            | 2 | 2,71   | 0,348 | -1,125 |
| 23 | P25205 MCM3_HUMAN  | R.SKDIFDQLAK.S             | 2 | 2,7069 | 0,3   | -0,419 |
| 23 | O75431 MTX2_HUMAN  | R.IEQHYFEDR.G              | 3 | 2,7042 | 0,348 | 0      |
| 23 | O43169 CYB5B_HUMAN | K.QYYIGDIHPSDLKPESGSK.D    | 3 | 2,6981 | 0,233 | -0,429 |
| 23 | P08670 VIME_HUMAN  | R.EKLQEEM*LQR.E            | 3 | 2,6961 | 0,146 | 0,208  |
| 23 | Q9Y696 CLIC4_HUMAN | K.NSRPEANEALER.G           | 2 | 2,6946 | 0,255 | -0,704 |
| 23 | Q9Y310 CV028_HUMAN | R.RNLDFQDVLDK.L            | 3 | 2,6943 | 0,282 | 0,134  |
| 23 | Q14789 GOGB1_HUMAN | K.DLEITKENLAQAVEHR.K       | 3 | 2,6827 | 0,084 | -0,882 |
| 23 | P26639 SYTC_HUMAN  | K.AEHDSILAEK.A             | 2 | 2,6812 | 0,327 | -0,438 |
| 23 | P25788 PSA3_HUMAN  | R.CKDGVVFGVEK.L            | 2 | 2,6795 | 0,342 | -0,394 |
| 23 | Q9NZ01 GPSN2_HUMAN | K.SLKDEDVLQK.L             | 2 | 2,6747 | 0,207 | -0,104 |

|    |                    |                              |   |        |       |        |
|----|--------------------|------------------------------|---|--------|-------|--------|
| 23 | Q53H12 AGK_HUMAN   | R.KLQFFCDPR.K                | 3 | 2,6644 | 0,232 | 0,604  |
| 23 | Q14697 GANAB_HUMAN | R.FRIDELEPR.R                | 2 | 2,6557 | 0,124 | -0,935 |
| 23 | P15170 ERF3A_HUMAN | R.KGEFETGFEK.G               | 2 | 2,6456 | 0,305 | -0,416 |
| 23 | P61221 ABCE1_HUMAN | R.LKPDEGGEVPLNVSYKPQK.I      | 3 | 2,6433 | 0,215 | -0,083 |
| 23 | P12270 TPR_HUMAN   | K.HVEDLLTK.L                 | 2 | 2,6395 | 0,328 | -0,256 |
| 23 | P43487 RANG_HUMAN  | K.ICANHYYITPM*M*ELKPNAGSDR.A | 3 | 2,625  | 0,092 | -0,672 |
| 23 | Q96A26 E2IG5_HUMAN | R.HETLTSLNLEK.K              | 2 | 2,6119 | 0,519 | -0,57  |
| 23 | P11172 PYR5_HUMAN  | K.CHEFLIFEDR.K               | 2 | 2,6106 | 0,41  | -0,089 |
| 23 | P15924 DESP_HUMAN  | R.NKYETEINITK.T              | 3 | 2,6105 | 0,126 | 0,135  |
| 23 | P08195 4F2_HUMAN   | K.GRLDYLSSLK.V               | 2 | 2,6105 | 0,245 | -0,741 |
| 23 | P18669 PGAM1_HUMAN | K.NLKPIKPM*QFLGDEETVR.K      | 3 | 2,6069 | 0,319 | -0,601 |
| 23 | Q13951 PEBB_HUMAN  | R.SKFEENEFFR.K               | 2 | 2,5998 | 0,355 | -0,458 |
| 23 | P37108 SRP14_HUMAN | K.KGTVEGFEPADNK.C            | 2 | 2,5967 | 0,337 | -0,964 |
| 23 | Q9Y224 CN166_HUMAN | R.HDDYLVN*LK.A               | 2 | 2,5878 | 0,212 | 0      |
| 23 | Q14258 TRI25_HUMAN | K.RDEFEFLEK.A                | 2 | 2,5856 | 0,206 | -0,604 |
| 23 | O95340 PAPS2_HUMAN | R.DAEFYEHR.K                 | 2 | 2,5747 | 0,289 | -0,457 |
| 23 | P21333 FLNA_HUMAN  | K.AEISFEDRK.D                | 2 | 2,5699 | 0,161 | -0,111 |
| 23 | Q58FG0 HS905_HUMAN | K.HIYYITGETK.D               | 2 | 2,5471 | 0,501 | -0,1   |
| 23 | P09429 HMGB1_HUMAN | K.HPDASVNFSEFSK.K            | 2 | 2,5246 | 0,294 | -0,416 |
| 23 | P04843 RPN1_HUMAN  | R.LKTEGSDLCDR.V              | 2 | 2,4908 | 0,355 | -0,094 |
| 23 | P60900 PSA6_HUMAN  | R.HITIFSPEGR.L               | 2 | 2,4881 | 0,426 | 0      |
| 23 | P46940 IQGA1_HUMAN | R.DHINDIIK.I                 | 2 | 2,4639 | 0,245 | -0,441 |
| 23 | Q96TA2 YMEL1_HUMAN | R.DRGSDVESLDK.L              | 2 | 2,4547 | 0,242 | -0,6   |
| 23 | Q14247 SRC8_HUMAN  | K.YGVQADRVDK.S               | 2 | 2,4425 | 0,244 | -0,424 |
| 23 | Q99459 CDC5L_HUMAN | K.DRIESLEK.R                 | 2 | 2,4242 | 0,088 | -0,308 |
| 23 | P15311 EZRI_HUMAN  | R.AQEEAERLEADR.M             | 2 | 2,4213 | 0,243 | -0,431 |
| 23 | Q16181 SEPT7_HUMAN | K.LKDSEAELQR.R               | 2 | 2,388  | 0,113 | -0,41  |
| 23 | P49756 RBM25_HUMAN | R.EKEELEIR.Q                 | 2 | 2,374  | 0,093 | -0,727 |
| 23 | Q9Y2H2 SAC2_HUMAN  | K.DHYILQQGER.A               | 2 | 2,3717 | 0,169 | -0,097 |
| 23 | Q86VP6 CAND1_HUMAN | K.HTVDDGLDIR.K               | 2 | 2,3674 | 0,334 | -0,214 |
| 23 | Q8TC07 TBC15_HUMAN | K.DDVVLPALHFHQGDSK.L         | 2 | 2,3515 | 0,39  | -0,206 |
| 23 | P23396 RS3_HUMAN   | R.KFVADGIFK.A                | 2 | 2,3476 | 0,172 | 0      |
| 23 | P08670 VIME_HUMAN  | K.SRLGDLYEEM*R.E             | 2 | 2,33   | 0,229 | -0,403 |

|    |                     |                                  |        |   |        |       |        |
|----|---------------------|----------------------------------|--------|---|--------|-------|--------|
| 23 | P62316 SMD2_HUMAN   | R.HCNM*VLENVK.E                  |        | 2 | 2,3134 | 0,221 | -0,678 |
| 23 | P22061 PIMT_HUMAN   | R.KDDPTLLSSGR.V                  |        | 2 | 2,3093 | 0,121 | -0,103 |
| 23 | P08133 ANXA6_HUMAN  | K.NKPLFFADK.L                    |        | 2 | 2,2995 | 0,286 | 0,113  |
| 23 | Q99439 CNN2_HUMAN   | K.YDPQKEAELR.T                   |        | 2 | 2,2949 | 0,376 | 0,391  |
| 23 | P68104 EF1A1_HUMAN  | K.STTTGHLIYK.C                   |        | 2 | 2,2718 | 0,433 | 0      |
| 23 | Q53H82 LACB2_HUMAN  | R.DHSGGIGDICK.S                  |        | 2 | 2,2664 | 0,343 | -0,211 |
| 23 | P14625 ENPL_HUMAN   | K.LGVIEDHSNR.T                   |        | 2 | 2,2437 | 0,315 | -0,535 |
| 23 | P15170 ERF3A_HUMAN  | K.HLIVLINK.M                     |        | 2 | 2,2422 | 0,201 | 0      |
| 23 | O15075 DCLK1_HUMAN  | R.DIKPENLLVYEHQDGSK.S            |        | 2 | 2,233  | 0,418 | -0,983 |
| 23 | P52209 6PGD_HUMAN   | K.SFLEDIRK.A                     |        | 2 | 2,2115 | 0,196 | -0,182 |
| 23 | Q8NBZ0 CCD95_HUMAN  | R.DKSFLDR.L                      |        | 2 | 2,202  | 0,116 | -0,368 |
| 23 | Q13045 FLII_HUMAN   | K.KFESLFPKG.L                    |        | 2 | 2,1801 | 0,252 | -0,232 |
| 23 | P62736 ACTA_HUMAN   | R.DLTDYLM*K.I                    |        | 2 | 2,1765 | 0,234 | -0,18  |
| 23 | Q96RS6 NUDC1_HUMAN  | K.DHQFLEGK.L                     |        | 2 | 2,1727 | 0,239 | -0,251 |
| 23 | P29401 TKT_HUMAN    | K.NSTFSEIFKK.E                   |        | 2 | 2,1544 | 0,336 | -0,711 |
| 23 | Q15149 PLEC1_HUMAN  | K.ISYKDALDR.S                    |        | 2 | 2,1435 | 0,086 | -0,226 |
| 23 | Q15021 CND1_HUMAN   | K.NFFNELSHK.G                    |        | 2 | 2,089  | 0,225 | -0,752 |
| 23 | P29401 TKT_HUMAN    | R.SGKPAELLK.M                    |        | 2 | 2,0701 | 0,178 | -0,129 |
| 23 | Q9Y3I0 CV028_HUMAN  | R.RNLDFQDVLDK.L                  |        | 2 | 2,0555 | 0,121 | -0,537 |
| 23 | P41227 ARD1A_HUMAN  | R.HVVLGAIENK.V                   |        | 2 | 2,0098 | 0,237 | 0      |
| 23 | B2RN19 B2RN19_HUMAN | R.DHQLPFK.H                      |        | 2 | 2,005  | 0,235 | 0      |
| 24 | P23193 TCEA1_HUMAN  | K.KKEPAITSQNS#PEAR.E             | S100:  | 3 | 4,8657 | 0,344 | -0,527 |
| 24 | Q9HC35 EMAL4_HUMAN  | R.KPSHTSAVS#IAGK.E               | S100:  | 3 | 2,6087 | 0,214 | 0      |
| 24 | O75351 VPS4B_HUMAN  | K.EGQPSPADEKGNDS#DGEGESDDPEKKK.L | S102:  | 3 | 4,6494 | 0,528 | -0,688 |
| 24 | P05387 RLA2_HUMAN   | K.KDEKKEESEES#DDDM*GFGLFD.-      | S105:  | 3 | 2,8425 | 0,086 | -0,647 |
| 24 | Q96KR1 ZFR_HUMAN    | R.RRDS#DGVDGFEAEGK.K             | S1054: | 3 | 3,7934 | 0,312 | 0      |
| 24 | Q96KR1 ZFR_HUMAN    | R.RRDS#DGVDGFEAEGK.K             | S1054: | 2 | 2,3445 | 0,265 | 0,071  |
| 24 | Q8WXG6 MADD_HUMAN   | R.KRS#PTESVNTVPVGK.D             | S1059: | 3 | 3,3631 | 0,315 | -0,232 |
| 24 | P46100 ATRX_HUMAN   | K.KKDELS#DYAEK.S                 | S1061: | 2 | 3,8188 | 0,379 | -0,521 |
| 24 | Q96HN2 SAHH3_HUMAN  | R.HRDGGEALVS#PDGTVTEAPR.T        | S107:  | 3 | 4,3183 | 0,332 | -0,341 |
| 24 | A8MSX0 A8MSX0_HUMAN | R.SHTSLKDELS#DVSQGGSK.A          | S108:  | 3 | 3,0574 | 0,454 | -0,561 |
| 24 | Q5T5Y3 CAMP1_HUMAN  | K.VKAPVHFVEPLS#PTGVAGHR.K        | S1080: | 3 | 4,3762 | 0,36  | -0,588 |
| 24 | Q9BQF6 SEN7_HUMAN   | R.RPS#SSEIITEGKR.K               | S11:   | 3 | 2,8748 | 0,197 | -0,238 |



|    |                     |                                   |        |   |        |       |        |
|----|---------------------|-----------------------------------|--------|---|--------|-------|--------|
| 24 | P48634 BAT2_HUMAN   | R.QRGS#ETGSETHESDLAPSDKEAPTPK.E   | S1106: | 3 | 3,3057 | 0,233 | -0,581 |
| 24 | A8MSX0 A8MSX0_HUMAN | R.SHTSLKDELSDVDS#QGGSK.A          | S111:  | 3 | 4,4488 | 0,471 | -0,749 |
| 24 | O60841 IF2P_HUMAN   | K.KQSFDNDNS#EELEDKDSK.S           | S113:  | 3 | 3,9191 | 0,366 | -0,414 |
| 24 | Q5VU97 CAHD1_HUMAN  | R.SHQHM*SPLAAQEM*S#VR.M           | S1138: | 3 | 4,2885 | 0,353 | -1,143 |
| 24 | Q9UPN4 AZI1_HUMAN   | K.KRPAS#LSTAPSEK.G                | S114:  | 3 | 2,9216 | 0,315 | 0,189  |
| 24 | Q9UNZ2 NSF1C_HUMAN  | R.KKS#PNELVDDLK.G                 | S114:  | 3 | 2,7041 | 0,124 | -0,454 |
| 24 | Q8N4C6 NIN_HUMAN    | R.RHVLS#DLEDDEV.R                 | S1145: | 3 | 4,4007 | 0,328 | -0,44  |
| 24 | A8MSX0 A8MSX0_HUMAN | R.SHTSLKDELSDVDS#QGGSK.A          | S115:  | 3 | 4,6388 | 0,499 | -0,936 |
| 24 | Q5T1M5 FKB15_HUMAN  | K.ELSTEAGSTVAGAALRPSHHS#QR.S      | S1158: | 3 | 2,8238 | 0,162 | -0,362 |
| 24 | Q14596 NBR1_HUMAN   | K.KPLAHYSS#LVR.V                  | S116:  | 3 | 2,9174 | 0,279 | 0,135  |
| 24 | Q9Y4H2 IRS2_HUMAN   | R.HNS#ASVENVSLRK.S                | S1174: | 3 | 2,9936 | 0,323 | -0,12  |
| 24 | Q5VZL5 ZMYM4_HUMAN  | R.KKS#IHAVEPR.S                   | S1181: | 3 | 3,1719 | 0,172 | -0,076 |
| 24 | Q9NTI5 PDS5B_HUMAN  | K.GRLDSSEM*DHS#ENEDYTM*SSPLPGKK.S | S1182: | 3 | 3,6159 | 0,107 | -0,363 |
| 24 | Q6P1X5 TAF2_HUMAN   | K.EKDKEPFTFSS#PASGR.S             | S1185: | 3 | 3,1972 | 0,296 | -0,295 |
| 24 | Q8TER5 SOLO_HUMAN   | R.HKLENGLAALS#PSSK.G              | S1187: | 3 | 2,7042 | 0,221 | -0,112 |
| 24 | Q86SQ4 GP126_HUMAN  | R.NSHTDNVSYEHS#FNK.S              | S1199: | 2 | 4,9605 | 0,598 | -0,525 |
| 24 | Q86SQ4 GP126_HUMAN  | R.NSHTDNVSYEHS#FNK.S              | S1199: | 3 | 3,4316 | 0,345 | -0,394 |
| 24 | Q13286 CLN3_HUMAN   | R.RRFS#DSEGEETVPEPR.L             | S12:   | 3 | 3,8081 | 0,292 | -0,371 |
| 24 | Q96T58 MINT_HUMAN   | R.SLVHEVGKPPQDVTDDS#PPSKK.K       | S1222: | 3 | 4,6794 | 0,514 | -0,675 |
| 24 | Q5VUA4 ZN318_HUMAN  | K.LQLKEEVKKES#PTSSSFGK.F          | S1267: | 3 | 3,4945 | 0,195 | -0,665 |
| 24 | Q96T58 MINT_HUMAN   | R.HGSFHEDEDPIGS#PR.L              | S1278: | 3 | 3,5053 | 0,408 | -0,416 |
| 24 | Q9NTI5 PDS5B_HUMAN  | K.RLKEDILENEDEQNS#PPK.K           | S1283: | 3 | 4,4017 | 0,476 | -0,491 |
| 24 | P07948 LYN_HUMAN    | K.SKGKDSLS#DDGVDLK.T              | S13:   | 3 | 3,6552 | 0,452 | -0,779 |
| 24 | Q8N201 INT1_HUMAN   | R.RPS#AAAKPSGHPPPQDFIALGSK.G      | S13:   | 3 | 3,4639 | 0,165 | -0,469 |
| 24 | Q9Y3M8 STA13_HUMAN  | R.KKGDDS#DEEDLCISNK.W             | S133:  | 3 | 4,8719 | 0,372 | -0,189 |
| 24 | Q9Y3M8 STA13_HUMAN  | R.KKGDDS#DEEDLCISNK.W             | S133:  | 2 | 4,6092 | 0,552 | -0,568 |
| 24 | Q8NI27 THOC2_HUMAN  | K.LYINHTPPPLSKS#KER.E             | S1335: | 3 | 4,8218 | 0,566 | -0,373 |
| 24 | Q8NI27 THOC2_HUMAN  | K.LYINHTPPPLSKS#KER.E             | S1335: | 2 | 2,6835 | 0,183 | -0,125 |
| 24 | Q9NQG5 CT077_HUMAN  | K.LSM*EDSKS#PPPKATEEKK.S          | S134:  | 3 | 3,0753 | 0,169 | -0,523 |
| 24 | Q9H7D0 DOCK5_HUMAN  | K.KRAS#FYENIIK.A                  | S1347: | 2 | 3,0243 | 0,228 | -0,926 |
| 24 | Q5VUA4 ZN318_HUMAN  | R.RRS#PGLCSDSLEK.S                | S136:  | 3 | 3,0929 | 0,174 | -0,231 |
| 24 | Q7Z333 SETX_HUMAN   | R.RLS#DCESTDVKR.A                 | S1366: | 3 | 3,8741 | 0,402 | -0,237 |
| 24 | Q8WWA1 TMM40_HUMAN  | R.RRGS#DPASGEVEASQLR.R            | S137:  | 3 | 3,2751 | 0,33  | -0,193 |

|    |                     |                                 |              |   |        |       |        |
|----|---------------------|---------------------------------|--------------|---|--------|-------|--------|
| 24 | Q14789 GOGB1_HUMAN  | K.HDKS#STEEM*EIEK.I             | S138:        | 3 | 3,5188 | 0,317 | -0,512 |
| 24 | Q9Y266 NUDC_HUMAN   | K.NGSLDS#PGKQDTEEEDEKDKGK.L     | S139:        | 3 | 5,2398 | 0,403 | -0,896 |
| 24 | Q8NI27 THOC2_HUMAN  | K.HKS#ESPCESPYPNEK.D            | S1399:       | 3 | 4,4333 | 0,249 | -0,587 |
| 24 | P42696 RBM34_HUMAN  | R.KRS#VQEGENPDDGVR.G            | S14:         | 3 | 4,7423 | 0,297 | -0,518 |
| 24 | P42696 RBM34_HUMAN  | R.KRS#VQEGENPDDGVR.G            | S14:         | 2 | 2,3501 | 0,318 | -0,829 |
| 24 | Q9NRL2 BAZ1A_HUMAN  | R.KRQS#PEPSPVTLGR.R             | S1413:       | 3 | 3,3058 | 0,309 | -0,112 |
| 24 | P11388 TOP2A_HUMAN  | K.RKPS#TSDDSDSNFEK.I            | S1469:       | 3 | 3,8056 | 0,393 | -0,612 |
| 24 | Q14247 SRC8_HUMAN   | K.HAS#QKDYSSGFSGK.Y             | S150:        | 3 | 3,1204 | 0,472 | -0,354 |
| 24 | Q12986 NFX1_HUMAN   | R.SESGTDLREHS#PSESEKEVVGADPR.G  | S150:        | 3 | 3,1035 | 0,333 | -0,329 |
| 24 | Q96I25 SPF45_HUMAN  | R.RPDPDS#DEDEDYERER.R           | S155:        | 3 | 2,8646 | 0,322 | -0,522 |
| 24 | Q92733 PRCC_HUMAN   | K.IAAPELHKGDS#DSEEDPTKK.K       | S157:        | 3 | 2,7008 | 0,137 | -0,308 |
| 24 | P29966 MARCS_HUMAN  | K.RFS#FKKS#FK.L                 | S159:S163:   | 2 | 2,8418 | 0,39  | -0,64  |
| 24 | P51858 HDGF_HUMAN   | R.AGDLEDS#PKRPK.E               | S165:        | 2 | 3,1174 | 0,395 | -0,486 |
| 24 | Q9Y5S2 MRCKB_HUMAN  | K.HSTPSNSSNPSGPPS#PNSPHR.S      | S1690:       | 3 | 5,5714 | 0,48  | -0,412 |
| 24 | Q9UIF9 BAZ2A_HUMAN  | K.RKS#GYSLNFGDGR.R              | S1720:       | 3 | 4,0962 | 0,46  | -0,313 |
| 24 | Q9NYF8 BCLF1_HUMAN  | K.KAEGEPQES#PLKSK.S             | S177:        | 3 | 4,0168 | 0,295 | 0,632  |
| 24 | Q58FF8 H90B2_HUMAN  | K.DDEEKPKIEDVGS#DEEDDSGKDK.K    | S177:        | 3 | 3,9988 | 0,212 | -0,619 |
| 24 | Q58FF8 H90B2_HUMAN  | K.IEDVGS#DEEDDSGKDK.K           | S177:        | 3 | 3,8018 | 0,402 | -0,658 |
| 24 | Q13496 MTM1_HUMAN   | K.YNSHLENES#IKR.T               | S18:         | 3 | 2,8464 | 0,372 | -0,11  |
| 24 | O00264 PGRC1_HUMAN  | K.LLKEGEEPTVYS#DEEKPDESARK.N    | S181:        | 3 | 4,6202 | 0,437 | -0,576 |
| 24 | P43243 MATR3_HUMAN  | R.RDS#FDDRGPVSLNPVLDYDHGSR.S    | S188:        | 3 | 3,9119 | 0,311 | -1,056 |
| 24 | Q6PJM5 Q6PJM5_HUMAN | K.RGS#IGENQIKDEK.I              | S196:        | 2 | 2,9115 | 0,366 | -0,942 |
| 24 | Q92622 K0226_HUMAN  | R.KHES#PLLVTK.S                 | S197:        | 3 | 4,7355 | 0,315 | 0,371  |
| 24 | Q5PSV4 BRM1L_HUMAN  | R.KDPFS#PDKK.K                  | S197:        | 2 | 2,3699 | 0,268 | -1,175 |
| 24 | A6NHR9 SMHD1_HUMAN  | K.CNDSLRS#PKVETDCPVPPK.R        | S1974:       | 3 | 2,9576 | 0,21  | -0,581 |
| 24 | Q14980 NUMA1_HUMAN  | R.KRVS#LEPHQGGT#PESK.K          | S1991:T2000: | 3 | 3,8516 | 0,292 | -0,456 |
| 24 | Q9H4A3 WNK1_HUMAN   | K.KEKPELSEPSHLNGPS#SDPEAAFLSR.D | S2011:       | 3 | 2,9886 | 0,317 | -0,63  |
| 24 | Q9H1E3 NUCKS_HUMAN  | K.TPSPKEEDEEPES#PPEKK.T         | S214:        | 3 | 3,216  | 0,295 | -0,343 |
| 24 | Q9P2B7 K1430_HUMAN  | K.KHVSGITLLS#PK.H               | S218:        | 3 | 4,0642 | 0,11  | -0,067 |
| 24 | O60610 DIAP1_HUMAN  | K.KGRS#PDELPSAGGDGGK.S          | S22:         | 3 | 3,2252 | 0,236 | -0,535 |
| 24 | P08238 HS90B_HUMAN  | K.EREKEIS#DDEAEEEK.G            | S226:        | 3 | 3,1807 | 0,179 | -0,286 |
| 24 | P08238 HS90B_HUMAN  | K.EREKEIS#DDEAEEEK.G            | S226:        | 2 | 2,7607 | 0,436 | -0,191 |
| 24 | Q08AE8 SPIR1_HUMAN  | R.KLRPVS#PEEIR.R                | S228:        | 3 | 3,5963 | 0,312 | 0,065  |

|    |                    |                                  |            |   |        |       |        |
|----|--------------------|----------------------------------|------------|---|--------|-------|--------|
| 24 | O43432 IF4G3_HUMAN | K.QEEKPKPDPVLKSPS#PVLRL          | S232:      | 3 | 3,3783 | 0,1   | -0,329 |
| 24 | P62753 RS6_HUMAN   | R.RLSS#LRAS#TSKSESSQK.-          | S236:S240: | 3 | 2,6816 | 0,229 | -0,546 |
| 24 | Q9Y2W2 WBP11_HUMAN | R.RRDEDM*LYS#PELAQR.G            | S237:      | 3 | 3,0286 | 0,395 | -0,37  |
| 24 | Q96ST2 IWS1_HUMAN  | R.HQASDS#ENEELPKPR.I             | S237:      | 3 | 2,9795 | 0,22  | -0,101 |
| 24 | Q9Y2W2 WBP11_HUMAN | R.RRDEDM*LYS#PELAQR.G            | S237:      | 2 | 2,5716 | 0,348 | -0,494 |
| 24 | P07910 HNRPC_HUMAN | K.NDKSEEEQS#SSS#VKKDETNVK.M      | S238:S241: | 3 | 3,0818 | 0,22  | -0,868 |
| 24 | Q3B726 RPA43_HUMAN | K.KKDPETYEVDVDS#GTTK.L           | S242:      | 3 | 3,3088 | 0,345 | -0,412 |
| 24 | Q9Y6M7 S4A7_HUMAN  | K.HS#DPHLLER.N                   | S242:      | 2 | 2,1292 | 0,417 | -0,515 |
| 24 | Q9BYG3 MK671_HUMAN | R.RKS#QVAELNDDDKDDEIVFK.Q        | S247:      | 3 | 6,424  | 0,352 | -0,599 |
| 24 | Q9NWK9 CA181_HUMAN | K.SGGGLHSVAEGVRLS#PEPGREGVR.D    | S25:       | 3 | 2,9606 | 0,182 | -0,147 |
| 24 | Q7Z6Z7 HUWE1_HUMAN | R.HADHSSLTLGSGSS#TTR.L           | S2535:     | 3 | 3,7727 | 0,324 | -0,612 |
| 24 | Q96T37 RBM15_HUMAN | R.RS#RS#PLDKDTYPPSASVVGASVGGHR.H | S257:S259: | 3 | 2,8311 | 0,146 | -0,897 |
| 24 | Q92466 DDB2_HUMAN  | K.RSR#PLELEPEAK.K                | S26:       | 3 | 4,0148 | 0,458 | -0,115 |
| 24 | Q8IYB3 SRRM1_HUMAN | K.VPKPEPIPEPKEPS#PEKNSK.K        | S260:      | 3 | 4,2942 | 0,354 | -0,714 |
| 24 | Q5JSH3 WDR44_HUMAN | K.RKS#ELEFETLK.T                 | S262:      | 3 | 4,0589 | 0,306 | -0,376 |
| 24 | P07900 HS90A_HUMAN | K.EEKESEDKPEIEDVGS#DEEEK.D       | S263:      | 3 | 4,4277 | 0,379 | -0,394 |
| 24 | P07900 HS90A_HUMAN | K.ESEDKPEIEDVGS#DEEEKDGDK.K      | S263:      | 3 | 3,9869 | 0,46  | -0,585 |
| 24 | P46013 KI67_HUMAN  | R.LTQTSGQSTHHEKAS#GDEGIK.V       | S2638:     | 3 | 3,1202 | 0,091 | -0,515 |
| 24 | Q9NTJ3 SMC4_HUMAN  | R.RREEGPPPPSPDGAS#SDAEPEPPSGR.T  | S27:       | 3 | 3,3389 | 0,314 | 0,732  |
| 24 | Q9NXG2 THUM1_HUMAN | R.KYNLQEVVKS#PKDPSQLNSK.Q        | S270:      | 3 | 3,1912 | 0,205 | -0,384 |
| 24 | Q9UJM3 ERRFI_HUMAN | R.ISNCCIHRASPNS#DEDKPEVPPR.V     | S276:      | 3 | 2,7643 | 0,34  | -0,597 |
| 24 | Q9Y2K7 JHD1A_HUMAN | R.RYEDDGIS#DDEIEGKR.T            | S28:       | 2 | 2,9388 | 0,328 | -0,37  |
| 24 | Q3KR37 GRM1B_HUMAN | R.KRS#RS#PTPQNQGDGM*VEK.G        | S28:S30:   | 3 | 3,735  | 0,341 | -0,545 |
| 24 | Q2KHM9 K0753_HUMAN | K.EIQEELDKLS#PHKIK.H             | S287:      | 3 | 3,1121 | 0,245 | -0,291 |
| 24 | P01106 MYC_HUMAN   | R.SESGSPSAGGHSKPPHS#PLVLK.R      | S293:      | 3 | 3,6143 | 0,293 | -0,655 |
| 24 | P08559 ODPA_HUMAN  | R.YHGHS#M*SDPGVSYR.T             | S293:      | 3 | 3,298  | 0,316 | -0,542 |
| 24 | P08559 ODPA_HUMAN  | R.YHGHS#M*SDPGVSYR.T             | S293:      | 2 | 2,9285 | 0,463 | -0,65  |
| 24 | Q9UQ35 SRRM2_HUMAN | K.THTTALAGRS#PS#PASGRR.G         | S295:S297: | 3 | 2,6069 | 0,282 | -0,646 |
| 24 | Q4G0J3 LARP7_HUMAN | R.KRS#SEDAESLAPR.S               | S298:      | 2 | 3,2085 | 0,245 | -0,378 |
| 24 | Q4G0J3 LARP7_HUMAN | R.KRSS#EDAESLAPR.S               | S300:      | 3 | 4,6747 | 0,326 | -0,113 |
| 24 | Q8NAP3 ZBT38_HUMAN | R.SKS#PNNEGVDVHFSR.E             | S309:      | 3 | 3,2135 | 0,38  | 0      |
| 24 | O43164 PJA2_HUMAN  | K.NHGSS#PEQVVRPK.V               | S309:      | 3 | 3,1182 | 0,395 | 0,06   |
| 24 | Q01518 CAP1_HUMAN  | R.SGPKPFSAPKPQTSPS#PKR.A         | S310:      | 3 | 2,7037 | 0,103 | -0,617 |

|    |                    |                                |            |   |        |       |        |
|----|--------------------|--------------------------------|------------|---|--------|-------|--------|
| 24 | Q14669 TRIPC_HUMAN | K.KRSES#PPAELPSLR.R            | S312:      | 3 | 3,0859 | 0,137 | -0,555 |
| 24 | Q8NDX5 PHC3_HUMAN  | K.HQIQIPLHS#PPSK.V             | S315:      | 3 | 3,231  | 0,188 | -0,189 |
| 24 | P46100 ATRX_HUMAN  | K.VYEHTSRFS#PK.K               | S316:      | 2 | 2,8318 | 0,367 | -0,853 |
| 24 | Q8N350 DOS_HUMAN   | R.RHAS#LDGASPYFK.V             | S319:      | 3 | 3,4658 | 0,245 | -0,419 |
| 24 | Q15459 SF3A1_HUMAN | K.FGESEEVEM*EVES#DEEDDKQEK.A   | S329:      | 3 | 3,8207 | 0,411 | -0,337 |
| 24 | P26583 HMGB2_HUMAN | K.KHPDS#SVNFAEFSK.K            | S34:       | 3 | 3,0221 | 0,312 | -0,328 |
| 24 | P09429 HMGB1_HUMAN | K.KHPDAS#VNFSEFSK.K            | S35:       | 2 | 4,1883 | 0,388 | -0,583 |
| 24 | P51636 CAV2_HUMAN  | K.FADS#DQDRDPHR.L              | S36:       | 3 | 2,9833 | 0,173 | -0,238 |
| 24 | Q9NQ29 LUC7L_HUMAN | K.M*AS#RRSEEKEAGEI.-           | S360:      | 3 | 2,6074 | 0,194 | -0,325 |
| 24 | Q14451 GRB7_HUMAN  | R.HLHPSCLGS#PPLR.S             | S361:      | 3 | 4,284  | 0,476 | 0      |
| 24 | P35613 BASI_HUMAN  | R.RKPEDVLDDDDAGS#APLK.S        | S362:      | 3 | 4,2413 | 0,186 | -0,634 |
| 24 | O14497 ARI1A_HUMAN | R.SHHAPM*S#PGSSGGGGQPLAR.T     | S363:      | 3 | 2,8001 | 0,168 | -0,553 |
| 24 | P05455 LA_HUMAN    | K.TKFAS#DDEHDEHDENGATGPVK.R    | S366:      | 3 | 3,6809 | 0,454 | -0,738 |
| 24 | O15013 ARHGA_HUMAN | R.TKS#LIAQDHR.S                | S379:      | 2 | 3,4549 | 0,561 | -0,586 |
| 24 | P16949 STMN1_HUMAN | R.SKESVPEFPLS#PPKKK.D          | S38:       | 3 | 2,6545 | 0,172 | -1,071 |
| 24 | Q9Y383 LC7L2_HUMAN | R.SEDRRS#SEEREAGEI.-           | S383:      | 3 | 2,8453 | 0,342 | 0,1    |
| 24 | Q15154 PCM1_HUMAN  | R.KPS#ASERLPDEKVELFSK.M        | S384:      | 3 | 3,8844 | 0,395 | -0,598 |
| 24 | Q5JSZ5 K0515_HUMAN | K.LKFS#DDEEEEEVVKDGRPK.W       | S388:      | 3 | 3,8831 | 0,135 | -0,785 |
| 24 | P09429 HMGB1_HUMAN | K.KHPDASVNFS#EFSK.K            | S39:       | 3 | 4,1391 | 0,247 | -0,656 |
| 24 | Q8WWM7 ATX2L_HUMAN | R.GPHHLDNS#PGPGSEAR.G          | S391:      | 3 | 3,4715 | 0,202 | 0,102  |
| 24 | Q14978 NOLC1_HUMAN | K.NSSNKPAVTTKS#PAVKPAAAPK.Q    | S397:      | 3 | 3,0821 | 0,38  | -0,571 |
| 24 | Q9UQ26 RIMS2_HUMAN | R.RHS#DVSLANADLEDSR.I          | S400:      | 3 | 4,5717 | 0,514 | -0,294 |
| 24 | Q6PJT7 ZC3HE_HUMAN | R.TPRIS#PPIKEEETKGDSEK.N       | S409:      | 3 | 2,9278 | 0,402 | -0,631 |
| 24 | Q9Y490 TLN1_HUMAN  | K.SKDHFGLEGDEESTM*LEDSVS#PKK.S | S425:      | 3 | 4,5812 | 0,485 | -0,729 |
| 24 | Q9Y490 TLN1_HUMAN  | K.SKDHFGLEGDEESTM*LEDSVS#PK.K  | S425:      | 3 | 3,429  | 0,327 | -0,208 |
| 24 | Q05519 SFR11_HUMAN | R.DYDEEEQGYDS#EKEKKEEK.K       | S434:      | 3 | 3,9029 | 0,455 | -0,521 |
| 24 | O15427 MOT4_HUMAN  | K.LHKPPADS#GVDLR.E             | S436:      | 3 | 2,9568 | 0,376 | 0,308  |
| 24 | O15427 MOT4_HUMAN  | K.LHKPPADS#GVDLR.E             | S436:      | 2 | 2,8176 | 0,256 | -0,246 |
| 24 | Q9H3H1 MOD5_HUMAN  | R.RLSDAVNTIESQSVS#PDHNKEPK.E   | S443:      | 3 | 4,9762 | 0,432 | -0,466 |
| 24 | O43290 SNUT1_HUMAN | R.RRVS#EVEEEKEPVPQPLPSDDTR.V   | S448:      | 3 | 3,744  | 0,21  | -0,528 |
| 24 | O60832 DKC1_HUMAN  | K.RKRES#ES#ESDETPPAAPQLIK.K    | S451:S453: | 3 | 3,7698 | 0,136 | -0,651 |
| 24 | P48634 BAT2_HUMAN  | R.RKQS#SSEISLAVER.A            | S456:      | 3 | 3,9244 | 0,279 | -0,329 |
| 24 | P48634 BAT2_HUMAN  | R.RKQS#SSEISLAVER.A            | S456:      | 2 | 3,0093 | 0,361 | -0,438 |

|    |                    |                                 |            |   |        |       |        |
|----|--------------------|---------------------------------|------------|---|--------|-------|--------|
| 24 | Q8N5S9 KKCC1_HUMAN | R.KRS#FGNPFEPQAR.R              | S458:      | 3 | 3,8996 | 0,212 | -0,68  |
| 24 | P23588 IF4B_HUMAN  | K.EEDCHS#PTSKPPKPDQPLK.V        | S459:      | 3 | 3,2513 | 0,234 | -0,564 |
| 24 | P11274 BCR_HUMAN   | R.RHQDGLPYIDDS#PSSS#PHLSSK.G    | S459:S463: | 3 | 3,8683 | 1     | -0,425 |
| 24 | P53985 MOT1_HUMAN  | K.KES#KEEETSIDVAGKPNEVTK.A      | S461:      | 3 | 4,6203 | 0,365 | -0,763 |
| 24 | Q8IYB3 SRRM1_HUMAN | R.KVELSES#EEDKGGK.M             | S465:      | 2 | 3,2386 | 0,343 | -0,604 |
| 24 | P35368 ADA1B_HUMAN | R.GRHDS#GPLFTFK.L               | S470:      | 3 | 3,8024 | 0,37  | -0,127 |
| 24 | P35368 ADA1B_HUMAN | R.GRHDS#GPLFTFK.L               | S470:      | 2 | 3,031  | 0,442 | -0,677 |
| 24 | P40692 MLH1_HUMAN  | R.HREDS#DVEM*VEDDSR.K           | S477:      | 3 | 5,1305 | 0,428 | -0,478 |
| 24 | Q8TF61 FBX41_HUMAN | R.RHS#TEGEEGDVSDVGSR.T          | S478:      | 3 | 3,205  | 0,461 | -0,386 |
| 24 | Q9P2B4 CT2NL_HUMAN | R.HKFQSQADQDQQASGLQS#PPSR.D     | S481:      | 3 | 5,4054 | 0,441 | -0,436 |
| 24 | O95400 CD2B2_HUMAN | K.GKHSlds#DEEEDDDGGSSK.Y        | S49:       | 3 | 4,3098 | 0,494 | -0,748 |
| 24 | Q6UN15 FIP1_HUMAN  | R.ERDHS#PTPSVFNSDEER.Y          | S492:      | 3 | 3,1175 | 0,249 | -0,439 |
| 24 | Q9Y2X3 NOL5_HUMAN  | K.HIKEEPLS#EEEPCTSTAIASPEK.K    | S502:      | 3 | 4,1098 | 0,286 | -1,1   |
| 24 | Q9Y2X3 NOL5_HUMAN  | K.KHIKEEPLS#EEEPCTSTAIAS#PEK.K  | S502:S514: | 3 | 6,5332 | 0,351 | -0,383 |
| 24 | O14974 MYPT1_HUMAN | R.RLAS#TSDIEEKENR.D             | S507:      | 3 | 3,5839 | 0,418 | -0,635 |
| 24 | O14974 MYPT1_HUMAN | R.RLAS#TSDIEEKENR.D             | S507:      | 2 | 3,3563 | 0,48  | -0,777 |
| 24 | Q9H4G0 E41L1_HUMAN | K.HQAS#INELKR.T                 | S510:      | 2 | 2,7774 | 0,303 | -1,147 |
| 24 | Q9UK59 DBR1_HUMAN  | K.RLS#DEHEPEQR.K                | S514:      | 3 | 3,4603 | 0,267 | 0,558  |
| 24 | Q15742 NAB2_HUMAN  | R.RSS#VKVEAEASR.Q               | S515:      | 3 | 3,428  | 0,252 | 0      |
| 24 | Q15742 NAB2_HUMAN  | R.RSS#VKVEAEASR.Q               | S515:      | 2 | 3,2318 | 0,314 | -0,959 |
| 24 | Q9C0C9 UBE2O_HUMAN | R.KKS#IPLSIK.N                  | S515:      | 2 | 2,8145 | 0,197 | -0,223 |
| 24 | Q15742 NAB2_HUMAN  | R.RSS#VKVEAEASRQ.-              | S515:      | 2 | 2,0777 | 0,409 | -1,039 |
| 24 | O00567 NOL5A_HUMAN | K.KSFSKEELM*SS#DLEETAGSTSIPK.R  | S520:      | 3 | 3,1604 | 0,387 | -0,475 |
| 24 | Q5VUA4 ZN318_HUMAN | R.RRS#FPDIEDEEK.F               | S527:      | 3 | 3,9117 | 0,326 | 0      |
| 24 | Q5VUA4 ZN318_HUMAN | R.RRS#FPDIEDEEK.F               | S527:      | 2 | 2,4228 | 0,343 | -0,533 |
| 24 | P50548 ERF_HUMAN   | R.RVS#SDLQHATAQLSLEHR.D         | S531:      | 3 | 5,5276 | 0,386 | -0,602 |
| 24 | Q6UB98 ANR12_HUMAN | K.DDTSLHLFHISTGKS#PK.H          | S543:      | 3 | 4,6567 | 0,385 | -0,652 |
| 24 | O95365 ZBT7A_HUMAN | K.HFKDEDEDEDVAS#PDGLGR.L        | S549:      | 3 | 6,3713 | 0,463 | -0,496 |
| 24 | O75385 ULK1_HUMAN  | R.LHS#APNLSDLHVVRPK.L           | S556:      | 3 | 3,2131 | 0,494 | -0,785 |
| 24 | Q8NCD3 HJURP_HUMAN | K.SVS#PSKTLSPDKEVPGHGR.N        | S557:      | 3 | 3,5321 | 0,311 | -0,339 |
| 24 | Q7Z478 DHX29_HUMAN | K.HRDS#IVETLK.R                 | S580:      | 3 | 3,514  | 0,091 | 0,143  |
| 24 | Q8TD16 BICD2_HUMAN | R.GRRS#PILLPK.G                 | S582:      | 3 | 3,2144 | 0,097 | -1,653 |
| 24 | Q09666 AHNK_HUMAN  | K.SKGHYEVTGS#DDETGKLGSGVSLASK.K | S5841:     | 3 | 4,7989 | 0,495 | -0,649 |

|    |                     |                                   |            |   |        |       |        |
|----|---------------------|-----------------------------------|------------|---|--------|-------|--------|
| 24 | Q09666 AHNK_HUMAN   | K.SKGHYEVTGS#DDETGK.L             | S5841:     | 2 | 4,0911 | 0,604 | -0,545 |
| 24 | Q09666 AHNK_HUMAN   | K.GHYEVTGS#DDETGKLGSGVSLASKK.S    | S5841:     | 3 | 3,8963 | 0,366 | -0,67  |
| 24 | Q09666 AHNK_HUMAN   | K.SKGHYEVTGS#DDETGK.L             | S5841:     | 3 | 3,3059 | 0,259 | -0,613 |
| 24 | Q9UPN7 SAPS1_HUMAN  | K.NM*VDLVNTHHLHSS#S#DDEDDRK.E     | S592:S593: | 3 | 4,2562 | 0,456 | -0,641 |
| 24 | Q96T23 RSF1_HUMAN   | K.KTFLDKDAQRLS#PIPEEVPK.S         | S594:      | 3 | 3,0741 | 0,174 | -0,765 |
| 24 | Q9P2R6 RERE_HUMAN   | R.KKQPAS#PDGRT#SPINEDIR.S         | S594:T599: | 3 | 3,0238 | 0,316 | -0,484 |
| 24 | O43491 E41L2_HUMAN  | R.EVRS#PTKAPHLQLIEGK.K            | S598:      | 3 | 2,7037 | 0,326 | -0,277 |
| 24 | P0C7M2 RA1L3_HUMAN  | K.SES#PKPEQLRK.L                  | S6:        | 3 | 3,254  | 0,35  | -0,121 |
| 24 | Q02952 AKA12_HUMAN  | R.RPS#ESDKEDLDK.V                 | S627:      | 2 | 2,876  | 0,408 | -0,6   |
| 24 | Q8WVC0 LEO1_HUMAN   | K.KLTS#DEEGEPSGKR.K               | S630:      | 3 | 3,8237 | 0,182 | -0,454 |
| 24 | Q9NSM8 Q9NSM8_HUMAN | K.LPDLS#PVENKEHKPGPIGK.E          | S652:      | 3 | 3,2144 | 0,227 | -0,257 |
| 24 | Q92541 RTF1_HUMAN   | R.RS#LNLEDYKK.R                   | S657:      | 3 | 4,5304 | 0,297 | 0      |
| 24 | Q96D71 REPS1_HUMAN  | R.LKS#EDELREVDDEHTQK.T            | S657:      | 3 | 3,0264 | 0,159 | -0,858 |
| 24 | O14617 AP3D1_HUMAN  | K.HRPS#EADEEELAR.R                | S658:      | 3 | 4,3438 | 0,369 | -0,113 |
| 24 | P46087 NOL1_HUMAN   | K.TNKS#PEAKPLPGKLPK.G             | S67:       | 3 | 4,0131 | 0,305 | -0,615 |
| 24 | Q9Y618 NCOR2_HUMAN  | R.RRPS#LLSEFQPGNER.S              | S67:       | 3 | 3,9775 | 0,473 | -0,588 |
| 24 | P25098 ARBK1_HUMAN  | K.NKPRS#PVVELSK.V                 | S670:      | 2 | 2,7622 | 0,152 | -0,425 |
| 24 | P25098 ARBK1_HUMAN  | K.NKPRS#PVVELSK.V                 | S670:      | 3 | 2,7561 | 0,137 | -0,064 |
| 24 | Q05209 PTN12_HUMAN  | R.HNIAGTTHSGAEKDVDVSEDS#PPPLPER.T | S673:      | 3 | 5,2583 | 0,453 | -0,603 |
| 24 | Q9UK61 CC063_HUMAN  | R.SSHS#LDYDKDR.V                  | S673:      | 3 | 3,1315 | 0,209 | 0      |
| 24 | O43719 HTSF1_HUMAN  | K.KAEEGDADEKLFEEES#DDKEDEDADGK.E  | S676:      | 3 | 3,2343 | 0,424 | -0,306 |
| 24 | Q92738 US6NL_HUMAN  | R.RPHGSTLSVSAS#PEK.S              | S680:      | 3 | 3,9236 | 0,36  | -0,448 |
| 24 | Q9UEY8 ADDG_HUMAN   | K.SPEKIEEVLSPEGSPSKS#PSKK.K       | S681:      | 3 | 4,3967 | 0,131 | -0,529 |
| 24 | Q12996 CSTF3_HUMAN  | K.RPNEDS#DEDEEKGAVVPPVHDIYR.A     | S691:      | 3 | 3,9284 | 0,362 | -0,643 |
| 24 | P38398 BRCA1_HUMAN  | K.RHDS#DTFPELK.L                  | S694:      | 3 | 3,7929 | 0,406 | -0,193 |
| 24 | P38398 BRCA1_HUMAN  | K.RHDS#DTFPELK.L                  | S694:      | 2 | 3,2694 | 0,228 | -0,343 |
| 24 | Q9NR30 DDX21_HUMAN  | K.KKAEPSEVDM*NS#PK.S              | S71:       | 3 | 4,0036 | 0,23  | -0,221 |
| 24 | P35611 ADDA_HUMAN   | K.FRTPS#FLKK.S                    | S726:      | 2 | 2,0725 | 0,304 | -0,507 |
| 24 | Q96T23 RSF1_HUMAN   | K.KPDS#PPKVLEPENKQEK.T            | S738:      | 3 | 3,7385 | 0,277 | -0,627 |
| 24 | Q9BYW2 SETD2_HUMAN  | K.KSES#PFRETEPLVSPHQDK.L          | S744:      | 3 | 3,7523 | 0,208 | -0,878 |
| 24 | Q13427 PPIG_HUMAN   | K.KFDHESS#PGTDEDKSG.-             | S745:      | 3 | 3,0614 | 0,178 | -0,101 |
| 24 | Q05682 CALD1_HUMAN  | K.TPDGNKS#PAPKPSDLRPGDVSSK.R      | S759:      | 3 | 3,9453 | 0,351 | -0,527 |
| 24 | Q14980 NUMA1_HUMAN  | R.KHPS#SPECLVSAQK.V               | S76:       | 3 | 4,3236 | 0,462 | -0,222 |

|    |                     |                                 |              |   |        |       |        |
|----|---------------------|---------------------------------|--------------|---|--------|-------|--------|
| 24 | P27540 ARNT_HUMAN   | R.FARS#DDEQSSADKER.L            | S77:         | 3 | 3,7653 | 0,366 | -1,105 |
| 24 | Q68DN6 RGPD1_HUMAN  | R.NADSEIKHSTPS#PTKYSLSPSK.S     | S772:        | 3 | 3,6314 | 0,369 | -0,522 |
| 24 | Q8TDD1 DDX54_HUMAN  | K.QKIDDRDS#DEEGASDR.R           | S782:        | 3 | 2,6399 | 0,388 | -0,477 |
| 24 | Q8TDD1 DDX54_HUMAN  | K.QKIDDRDS#DEEGASDR.R           | S782:        | 2 | 2,0721 | 0,388 | -0,892 |
| 24 | Q99700 ATX2_HUMAN   | K.GIS#PVVSEHRK.Q                | S783:        | 2 | 2,0504 | 0,13  | -0,568 |
| 24 | Q8TB72 PUM2_HUMAN   | R.RSGQGFHGNSEVNAILS#PR.S        | S82:         | 3 | 3,1043 | 0,314 | -0,521 |
| 24 | Q53GS9 SNUT2_HUMAN  | R.EREVDEDS#EPEREVR.A            | S82:         | 2 | 2,2933 | 0,409 | -0,437 |
| 24 | O14617 AP3D1_HUMAN  | R.NTETSKS#PEKDVPM*VEKK.S        | S829:        | 3 | 4,0085 | 0,163 | -0,512 |
| 24 | O60524 SDCG1_HUMAN  | K.KLPS#DSGDLEALEGKDK.E          | S831:        | 3 | 3,261  | 0,413 | -0,684 |
| 24 | P11137 MAP2_HUMAN   | R.RKS#VPSETVVEDSR.T             | S833:        | 3 | 3,6634 | 0,255 | -0,219 |
| 24 | Q9HCM7 AUT2L_HUMAN  | R.DREPHGYS#PER.L                | S864:        | 3 | 2,8083 | 0,219 | 0,129  |
| 24 | Q9Y520 Q9Y520_HUMAN | R.S#VEDVRPHHTDANNQSACFEAPDQK.T  | S878:        | 3 | 4,9576 | 0,541 | -0,25  |
| 24 | Q6NV74 CB055_HUMAN  | R.SKS#FLITPVKPAVDRK.Q           | S881:        | 3 | 3,232  | 0,387 | -0,49  |
| 24 | Q8WWQ0 PHIP_HUMAN   | K.KVNEEKDGPIS#PK.K              | S911:        | 2 | 3,3209 | 0,437 | -0,963 |
| 24 | P05455 LA_HUMAN     | R.RS#PSKPLPEVTDEYKNDVK.N        | S92:         | 3 | 5,4732 | 0,399 | -0,802 |
| 24 | Q6PJG2 CN043_HUMAN  | R.RES#PSEERLEPK.R               | S923:        | 2 | 3,1257 | 0,342 | -0,794 |
| 24 | Q6ZRV2 FA83H_HUMAN  | R.RSS#PVPPVPERR.G               | S925:        | 3 | 2,6226 | 0,099 | -0,502 |
| 24 | Q7Z2Z1 CO042_HUMAN  | R.SHS#VSAVDGLEDKLDNFKK.N        | S938:        | 3 | 3,3564 | 0,361 | -0,59  |
| 24 | Q8IXM2 CQ049_HUMAN  | R.KVYEDSGIPLAES#PKKGPK.K        | S96:         | 3 | 5,6218 | 0,381 | -0,494 |
| 24 | P23193 TCEA1_HUMAN  | K.KKEPAITS#QNSPEAR.E            | S97:         | 2 | 3,7318 | 0,411 | -0,914 |
| 24 | Q9UBB9 TFP11_HUMAN  | K.KGAAEEAELEDS#DDEEKPVKQDDFPK.D | S98:         | 3 | 4,7275 | 0,342 | -0,427 |
| 24 | Q6WCQ1 MRIP_HUMAN   | K.SKS#NPDFLKK.D                 | S992:        | 3 | 3,184  | 0,196 | -0,514 |
| 24 | Q6WCQ1 MRIP_HUMAN   | K.SKS#NPDFLKK.D                 | S992:        | 2 | 2,8236 | 0,282 | -0,392 |
| 24 | Q96JH7 VCIP1_HUMAN  | R.SRESS#PSHGLLK.L               | S998:        | 2 | 2,1253 | 0,106 | -0,354 |
| 24 | Q9Y3B9 RRP15_HUMAN  | K.VLNKKT#PESKPTILVK.N           | T104:        | 3 | 4,9454 | 0,465 | -0,488 |
| 24 | Q86SQ4 GP126_HUMAN  | K.RNSHT#DNVS#YEHSFNK.S          | T1191:S1195: | 3 | 3,1485 | 0,09  | -0,349 |
| 24 | Q9H2Y7 ZF106_HUMAN  | R.AAHVPENSdT#EQDVLTVKPVVK.V     | T1372:       | 3 | 4,5479 | 0,531 | -0,582 |
| 24 | Q9Y490 TLN1_HUMAN   | K.KEEITGT#LRK.D                 | T144:        | 2 | 2,4044 | 0,306 | -0,292 |
| 24 | Q9H0S4 DDX47_HUMAN  | K.KPHIIAT#PGR.L                 | T149:        | 3 | 4,1045 | 0,355 | 0      |
| 24 | O15173 PGRC2_HUMAN  | R.LLKPGEPESEY#DEEDTKDHNK.Q      | T211:        | 3 | 3,9774 | 0,4   | 0,276  |
| 24 | Q08EQ4 TMSL1_HUMAN  | K.KTET#QEKNPSPKETIEQEK.Q        | T23:         | 3 | 4,15   | 0,252 | 0,525  |
| 24 | Q9UKX7 NUP50_HUMAN  | K.LQQESTFLFHGNKTEDT#PDKK.M      | T246:        | 3 | 3,2972 | 0,134 | -0,719 |
| 24 | Q13769 THOC5_HUMAN  | R.RRPT#LGVQLDDK.R               | T328:        | 3 | 2,843  | 0,314 | -0,557 |

|    |                    |                                |            |   |        |       |        |
|----|--------------------|--------------------------------|------------|---|--------|-------|--------|
| 24 | Q9UGV2 NDRG3_HUMAN | R.SRTHST#SSSLGSGESPFSSR.S      | T332:      | 3 | 4,1296 | 0,354 | -0,447 |
| 24 | Q6PKG0 LARP1_HUMAN | R.KFDGVEGPRT#PK.Y              | T376:      | 2 | 2,268  | 0,114 | -0,605 |
| 24 | O60583 CCNT2_HUMAN | K.HHGPISTT#PGIIPQK.M           | T426:      | 3 | 3,0602 | 0,086 | -0,22  |
| 24 | P53985 MOT1_HUMAN  | K.KESKEEET#S#IDVAGKPNEVTK.A    | T466:S467: | 3 | 4,7399 | 0,163 | -0,591 |
| 24 | Q9H6S3 ES8L2_HUMAN | K.HSPTSEPTPPGDALPPVSSPHT#HR.G  | T483:      | 3 | 3,4965 | 0,239 | -0,213 |
| 24 | Q15910 EZH2_HUMAN  | R.VKESSIIAPAPAEDVDT#PPRKK.K    | T487:      | 3 | 5,8837 | 0,562 | -0,226 |
| 24 | O60318 MCM3A_HUMAN | K.EKKPGDGEVSPST#EDAPFQHSPLGK.A | T530:      | 3 | 2,9543 | 0,392 | -0,067 |
| 24 | Q8WWK9 CKAP2_HUMAN | K.TKDPTHDVKT#PNT#ETR.T         | T579:T582: | 3 | 3,589  | 0,298 | -0,732 |
| 24 | Q8WVC0 LEO1_HUMAN  | K.KLT#SDEEGEPSGKR.K            | T629:      | 2 | 2,6567 | 0,317 | -0,908 |
| 24 | Q5SW79 CE170_HUMAN | R.RRT#LPQLPNEEK.S              | T644:      | 3 | 3,7126 | 0,184 | 0      |
| 24 | P19338 NUCL_HUMAN  | K.KVVVSPT#KK.V                 | T69:       | 2 | 2,9679 | 0,236 | -0,687 |
| 24 | P12036 NFH_HUMAN   | K.KVPT#PEKEAPAKVEVK.E          | T911:      | 3 | 3,2786 | 0,216 | -0,8   |
| 24 | O15173 PGRC2_HUMAN | R.LLKPGEEPSEY#TDEEDTKDHNKQD.-  | Y210:      | 3 | 4,7268 | 0,466 | 0,253  |
| 24 | O00193 SMAP_HUMAN  | R.TGEEDKKINEELESQYQQSM*DSK.L   |            | 3 | 6,7176 | 0,59  | -0,335 |
| 24 | O00232 PSD12_HUMAN | R.KGSLESPATDVFSTEEGEKR.W       |            | 3 | 6,4057 | 0,547 | -0,576 |
| 24 | P63220 RS21_HUMAN  | K.DHASIQM*NVAEVDKVTGR.F        |            | 3 | 6,206  | 0,557 | -0,368 |
| 24 | O75347 TBCA_HUMAN  | R.ILENEKDLEEAEEYKEAR.L         |            | 3 | 6,0635 | 0,445 | -0,829 |
| 24 | O43684 BUB3_HUMAN  | K.M*HDLNTDQENLVGTHDAPIR.C      |            | 3 | 5,8629 | 0,473 | -0,479 |
| 24 | Q9Y266 NUDC_HUMAN  | K.NGSLDSPGKQDTEEDDEEEDKDK.G    |            | 3 | 5,8551 | 0,378 | -0,423 |
| 24 | P08670 VIME_HUMAN  | K.TVETRDGQVINETSQHDDLE.-       |            | 3 | 5,4797 | 0,33  | -0,604 |
| 24 | P63220 RS21_HUMAN  | K.DHASIQM*NVAEVDKVTGR.F        |            | 2 | 5,459  | 0,604 | -0,553 |
| 24 | P27348 1433T_HUMAN | R.KQTIDNSQGAYQEAFDISKK.E       |            | 3 | 5,4079 | 0,44  | -0,725 |
| 24 | P13639 EF2_HUMAN   | K.ARPFPDGLAEDIDKGEVSAR.Q       |            | 3 | 5,3277 | 0,418 | -0,598 |
| 24 | Q9Y6Y8 S23IP_HUMAN | K.VANQIKEEEKQVVEAEK.V          |            | 3 | 5,2576 | 0,375 | -0,261 |
| 24 | Q9Y490 TLN1_HUMAN  | K.SKDHFGLEGDEESTM*LEDSVSPK.K   |            | 3 | 5,1304 | 0,429 | -0,645 |
| 24 | P58546 MTPN_HUMAN  | K.NGDLDEVKDYVAKGEDVNR.T        |            | 3 | 5,0904 | 0,39  | -0,771 |
| 24 | Q02952 AKA12_HUMAN | K.ERPPAPSSFVFQEETKEQSK.M       |            | 3 | 5,0717 | 0,455 | -0,709 |
| 24 | P14625 ENPL_HUMAN  | R.FQSSHPTDITSLDQYVER.M         |            | 3 | 5,0558 | 0,479 | -0,729 |
| 24 | P05387 RLA2_HUMAN  | K.KILDSVGIADDRLNK.V            |            | 3 | 5,029  | 0,497 | -0,577 |
| 24 | P43487 RANG_HUMAN  | K.LEALSVKEETKEDAEKQ.-          |            | 3 | 5,0033 | 0,496 | 0,176  |
| 24 | Q9BYG3 MK671_HUMAN | R.KSQVAELNDDDKDDEIVFK.Q        |            | 3 | 4,987  | 0,48  | -0,414 |
| 24 | Q9Y295 DRG1_HUMAN  | K.DHTLEDEDVIQIVKK.-            |            | 2 | 4,973  | 0,492 | -0,685 |
| 24 | O15347 HMGB3_HUMAN | R.KKVEEEDDEEEEEEEEEEEDE.-      |            | 3 | 4,9091 | 0,523 | -0,438 |



|    |                     |                              |   |        |       |        |
|----|---------------------|------------------------------|---|--------|-------|--------|
| 24 | P62263 RS14_HUMAN   | K.VKADRDESSPYAAM*LAAQDVAQR.C | 3 | 4,8707 | 0,448 | -0,438 |
| 24 | O15027 SC16A_HUMAN  | K.DDTHKVDVINFAQNK.A          | 3 | 4,8384 | 0,325 | -0,42  |
| 24 | Q3MI39 Q3MI39_HUMAN | -.DDHDSVDKIVIQK.Y            | 3 | 4,828  | 0,375 | 0      |
| 24 | P35579 MYH9_HUMAN   | R.KGAGDGSDEEVDGKADGAEAKPAE.- | 3 | 4,782  | 0,318 | -0,556 |
| 24 | P07355 ANXA2_HUMAN  | K.TDLEKDIISDTSGDFRK.L        | 3 | 4,6978 | 0,45  | -0,66  |
| 24 | P42166 LAP2A_HUMAN  | K.DKLKSELVANNVTLPAGEQR.K     | 3 | 4,6809 | 0,258 | -0,838 |
| 24 | Q2QD06 Q2QD06_HUMAN | R.ALKDEEKM*ELQELQLK.E        | 2 | 4,6767 | 0,348 | -0,622 |
| 24 | Q13206 DDX10_HUMAN  | K.SAIKDAEEDDDTGGINLHK.A      | 3 | 4,6708 | 0,394 | -0,451 |
| 24 | P09493 TPM1_HUMAN   | K.GTEDELDKYSEALKDAQEK.L      | 3 | 4,6644 | 0,455 | -0,759 |
| 24 | P09493 TPM1_HUMAN   | R.AQKDEEKM*EIQEIQLK.E        | 3 | 4,6446 | 0,309 | -0,555 |
| 24 | Q9BUJ2 HNRL1_HUMAN  | R.KAIVICPTDEDLKDR.T          | 3 | 4,6346 | 0,422 | -0,103 |
| 24 | P49915 GUAA_HUMAN   | R.GLQKEEVVLLTHGDSVDK.V       | 3 | 4,5722 | 0,564 | -0,837 |
| 24 | P56537 IF6_HUMAN    | R.HGLLVPNNTDQELQHIR.N        | 3 | 4,5488 | 0,488 | -0,702 |
| 24 | Q08EQ4 TMSL1_HUMAN  | K.TETQEKNPLPSKETIEQEK.Q      | 3 | 4,5374 | 0,265 | -0,41  |
| 24 | P11940 PABP1_HUMAN  | R.SKVDEAVAVLQAHQAK.E         | 3 | 4,5138 | 0,489 | -0,432 |
| 24 | Q8TAQ2 SMRC2_HUMAN  | K.EGQEEVLKEVVESEGERK.T       | 3 | 4,5107 | 0,381 | -0,529 |
| 24 | P11142 HSP7C_HUMAN  | K.LDKSQIHDIVLVGGSTR.I        | 3 | 4,4637 | 0,305 | -0,498 |
| 24 | P60866 RS20_HUMAN   | K.DTGKTPVEPEVAIHR.I          | 3 | 4,44   | 0,449 | -0,111 |
| 24 | O15027 SC16A_HUMAN  | K.DDTHKVDVINFAQNK.A          | 2 | 4,4366 | 0,475 | -0,56  |
| 24 | P38646 GRP75_HUMAN  | K.ERVEAVNM*AEGIIHDTETK.M     | 3 | 4,4311 | 0,431 | -0,593 |
| 24 | Q14839 CHD4_HUMAN   | K.IEENSLKEEESIEGEKEVK.S      | 3 | 4,4283 | 0,275 | -0,082 |
| 24 | P62258 1433E_HUMAN  | K.LAEQAERYDEM*VESM*KK.V      | 3 | 4,4235 | 0,366 | 0,263  |
| 24 | P22087 FBRL_HUMAN   | R.DHAVVGVYRPPPK.V            | 3 | 4,4173 | 0,474 | -0,179 |
| 24 | Q8NAV1 PR38A_HUMAN  | K.DAHSIHGTNPQYLVEK.I         | 3 | 4,4117 | 0,413 | -0,506 |
| 24 | Q9Y2X3 NOL5_HUMAN   | K.VKVEEEEEKVAEEEEETSVK.K     | 3 | 4,3599 | 0,336 | -0,701 |
| 24 | P07237 PDIA1_HUMAN  | K.LGETYKDHENIVIAK.M          | 3 | 4,3356 | 0,381 | -0,317 |
| 24 | Q02790 FKBP4_HUMAN  | K.DKFSFDLGKGEVIK.A           | 2 | 4,3079 | 0,458 | -1,002 |
| 24 | Q15019 SEPT2_HUMAN  | R.KVENEDM*NKDQILLEK.E        | 3 | 4,2828 | 0,25  | -0,28  |
| 24 | P22087 FBRL_HUMAN   | R.DHAVVGVYRPPPK.V            | 2 | 4,2738 | 0,52  | -0,477 |
| 24 | P07951 TPM2_HUMAN   | K.GTEDEVEKYSESVKEAQEK.L      | 3 | 4,2468 | 0,421 | -0,586 |
| 24 | P35998 PRS7_HUMAN   | K.LREVVETPLLHPER.F           | 3 | 4,245  | 0,282 | -0,433 |
| 24 | Q02952 AKA12_HUMAN  | R.AEAERPEEQAEASGLKK.E        | 3 | 4,2171 | 0,366 | -0,595 |
| 24 | Q00610 CLH1_HUMAN   | R.ALEHFTDLYDIKR.A            | 3 | 4,214  | 0,38  | -0,451 |

|    |                    |                              |   |        |       |        |
|----|--------------------|------------------------------|---|--------|-------|--------|
| 24 | Q00688 FKBP3_HUMAN | K.DHLVTAYNHLFETK.R           | 2 | 4,1799 | 0,287 | -0,578 |
| 24 | Q86UP2 KTN1_HUMAN  | K.DKLLAAVKEDAAATK.D          | 2 | 4,1753 | 0,504 | -0,553 |
| 24 | P43490 NAMPT_HUMAN | K.DVYKEHFQDDVFNEK.G          | 3 | 4,1684 | 0,298 | -0,478 |
| 24 | O75955 FLOT1_HUMAN | K.DIHDDQDYLHSLGK.A           | 2 | 4,1554 | 0,567 | -0,442 |
| 24 | P05556 ITB1_HUMAN  | R.DKLPQPVPDPVSHCK.E          | 3 | 4,1444 | 0,329 | -0,297 |
| 24 | Q9H900 ZWILC_HUMAN | K.DTEVETLKHDTAAVDR.S         | 3 | 4,1351 | 0,447 | -0,61  |
| 24 | P63241 IF5A1_HUMAN | R.EDLRLPEGDLGKEIEQK.Y        | 3 | 4,1311 | 0,404 | -0,743 |
| 24 | Q9Y696 CLIC4_HUMAN | K.NSRPEANEALER.G             | 3 | 4,1307 | 0,24  | -0,132 |
| 24 | P53985 MOT1_HUMAN  | K.ESKEEETSIDVAGKPNEVTK.A     | 3 | 4,1244 | 0,414 | -0,752 |
| 24 | P20042 IF2B_HUMAN  | K.KKPFM*LDEEGDTQTEETQPSETK.E | 3 | 4,1222 | 0,255 | -0,204 |
| 24 | Q02952 AKA12_HUMAN | K.DKTEKPDTVQLLTVK.K          | 2 | 4,1085 | 0,444 | -0,569 |
| 24 | O75937 DNJC8_HUMAN | K.KEGKPTIVEEDDPELFK.Q        | 3 | 4,1074 | 0,398 | -0,371 |
| 24 | P08238 HS90B_HUMAN | K.HLEINPDHPIVETLR.Q          | 3 | 4,0589 | 0,426 | -0,718 |
| 24 | P63241 IF5A1_HUMAN | K.KYEDICPSTHNM*DVPNIK.R      | 3 | 4,0546 | 0,362 | -0,42  |
| 24 | P52565 GDIR1_HUMAN | K.SIQEIQELDKDDESLRK.Y        | 3 | 4,0489 | 0,326 | -0,536 |
| 24 | P06753 TPM3_HUMAN  | R.ALKDEEKM*ELQEIQLK.E        | 3 | 3,9669 | 0,417 | -0,746 |
| 24 | Q6PJT7 ZC3HE_HUMAN | R.HEAAVPLAIPSARPEK.R         | 3 | 3,9035 | 0,324 | -0,615 |
| 24 | P12956 KU70_HUMAN  | R.QIILEKEETEELKR.F           | 2 | 3,8845 | 0,408 | -0,416 |
| 24 | P05455 LA_HUMAN    | R.SPSKPLPEVTDEYKNDVK.N       | 3 | 3,868  | 0,336 | -0,447 |
| 24 | Q6NVY1 HIBCH_HUMAN | K.SPSKENIASVLENYHTESK.I      | 3 | 3,853  | 0,32  | -0,515 |
| 24 | P17661 DESM_HUMAN  | R.TNEKVELQELNDR.F            | 3 | 3,8522 | 0,253 | 0      |
| 24 | P12956 KU70_HUMAN  | R.QIILEKEETEELKR.F           | 3 | 3,8434 | 0,349 | -0,312 |
| 24 | Q9P258 RCC2_HUMAN  | R.DVACGANHTLVLDSQKR.V        | 3 | 3,8398 | 0,564 | -0,388 |
| 24 | Q9UPN3 MACF1_HUMAN | K.DAYRPTTDADKIEDEVTR.Q       | 3 | 3,8347 | 0,272 | -0,699 |
| 24 | Q00839 HNRPU_HUMAN | K.HAAENPGKYNILGTNTIM*DK.M    | 3 | 3,8145 | 0,433 | -0,83  |
| 24 | O76021 RL1D1_HUMAN | R.KTASVLSKDDVAPESGDTTVK.K    | 3 | 3,8102 | 0,277 | 0,17   |
| 24 | Q00688 FKBP3_HUMAN | K.FLQEHGSDSFLAEHK.L          | 3 | 3,7696 | 0,408 | -0,629 |
| 24 | P43490 NAMPT_HUMAN | K.DVYKEHFQDDVFNEK.G          | 2 | 3,7559 | 0,45  | -0,383 |
| 24 | P21283 VATC1_HUMAN | R.DFQYNEEEM*KADKEEM*NR.L     | 3 | 3,7487 | 0,439 | -0,548 |
| 24 | Q2PZI1 D19L1_HUMAN | K.DSKPHFTTVFQNSVYK.V         | 3 | 3,7475 | 0,324 | -0,193 |
| 24 | Q99961 SH3G1_HUMAN | K.VGGAEGTKLDDDFKEM*EK.K      | 3 | 3,729  | 0,349 | -0,461 |
| 24 | Q02952 AKA12_HUMAN | K.VHSESDKAITPQAQEELQK.Q      | 3 | 3,7193 | 0,388 | -0,257 |
| 24 | Q86XP3 DDX42_HUMAN | R.ERPGLGSENM*DR.G            | 3 | 3,7085 | 0,248 | 0,066  |

|    |                    |                               |   |        |       |        |
|----|--------------------|-------------------------------|---|--------|-------|--------|
| 24 | Q07666 KHDR1_HUMAN | K.KDDEENYLDFSHK.N             | 3 | 3,6707 | 0,279 | -0,626 |
| 24 | P07951 TPM2_HUMAN  | R.AM*KDEEKM*ELQEM*QLK.E       | 3 | 3,6691 | 0,425 | -0,541 |
| 24 | Q5JRA6 MIA3_HUMAN  | K.DSDYLKNDNPEEHLK.T           | 3 | 3,6435 | 0,197 | -0,302 |
| 24 | O15269 SPTC1_HUMAN | K.DHPALNYNIVSGPPSHK.T         | 3 | 3,6109 | 0,321 | -0,595 |
| 24 | P23284 PPIB_HUMAN  | R.DKPLKDVIIADCGK.I            | 3 | 3,6041 | 0,309 | -0,116 |
| 24 | P13010 KU86_HUMAN  | K.KDEKTDLTLEDFPTTK.I          | 3 | 3,6031 | 0,421 | -0,583 |
| 24 | O60573 IF4E2_HUMAN | K.FDALKDDDSGDHDQNEENSTQK.D    | 3 | 3,5912 | 0,317 | -0,219 |
| 24 | Q9BRQ6 CHCH6_HUMAN | R.DRPHEVLLCSDLVK.A            | 3 | 3,5733 | 0,171 | -0,326 |
| 24 | P05387 RLA2_HUMAN  | K.KILDSVGIEADDDRLNK.V         | 2 | 3,5694 | 0,538 | -0,642 |
| 24 | O15269 SPTC1_HUMAN | K.DHPALNYNIVSGPPSHK.T         | 2 | 3,5486 | 0,474 | -0,661 |
| 24 | P09874 PARP1_HUMAN | K.GFSLLATEDKEALKK.Q           | 2 | 3,5361 | 0,44  | -0,739 |
| 24 | Q9Y448 T4AF1_HUMAN | K.SEEELKDKNQLEAVNK.Q          | 3 | 3,5087 | 0,358 | -0,736 |
| 24 | O14777 NDC80_HUMAN | K.IKEAEEDEKCASELESLEK.H       | 3 | 3,5019 | 0,429 | -0,077 |
| 24 | Q92600 RCD1_HUMAN  | K.DTTFAQVLKDDTTTKR.W          | 3 | 3,4649 | 0,479 | -0,696 |
| 24 | Q15019 SEPT2_HUMAN | R.YLHDESGLNR.R                | 3 | 3,4636 | 0,229 | 0,152  |
| 24 | P61353 RL27_HUMAN  | K.NIDDGTSRDPYSHALVAGIDR.Y     | 3 | 3,4571 | 0,359 | -0,564 |
| 24 | P08670 VIME_HUMAN  | R.KVESLQEEIAFLKK.L            | 2 | 3,4546 | 0,127 | -0,587 |
| 24 | Q92878 RAD50_HUMAN | K.DIENYIQDGKDDYKK.Q           | 2 | 3,437  | 0,339 | -0,066 |
| 24 | Q9BRQ6 CHCH6_HUMAN | R.DRPHEVLLCSDLVK.A            | 2 | 3,4352 | 0,291 | -0,508 |
| 24 | P43304 GPDM_HUMAN  | K.DKLVGAIVYYDQGHNDAR.M        | 3 | 3,4306 | 0,237 | -0,63  |
| 24 | Q13283 G3BP1_HUMAN | K.NSSYVHGGLDSNGKPADAVYGQK.E   | 3 | 3,4047 | 0,298 | -0,31  |
| 24 | Q9H814 RNUXA_HUMAN | K.DLDKELDEYM*HGGK.K           | 3 | 3,4026 | 0,358 | -0,329 |
| 24 | P08238 HS90B_HUMAN | K.HLEINPDHPIVETLR.Q           | 2 | 3,4011 | 0,421 | -0,753 |
| 24 | Q9BXJ9 NARG1_HUMAN | K.KDDDEEIGGPKEELIPEK.L        | 3 | 3,3926 | 0,195 | -0,594 |
| 24 | Q8N4Q1 MIA40_HUMAN | R.EKKPAEQAEETAPIEATATKEEGSS.- | 3 | 3,3665 | 0,299 | -0,133 |
| 24 | P62081 RS7_HUMAN   | K.AQQNNVEHKVETFSGVYK.K        | 3 | 3,3617 | 0,272 | -0,44  |
| 24 | Q14568 HS902_HUMAN | K.LDSGKELHINLIPNK.Q           | 3 | 3,3589 | 0,18  | -0,433 |
| 24 | P17987 TCPA_HUMAN  | K.DDKHGSYEDAVHSGALND.-        | 2 | 3,3475 | 0,365 | -0,126 |
| 24 | Q15833 STXB2_HUMAN | R.KGPEDTAQLAHAVLAK.L          | 3 | 3,3291 | 0,428 | -0,444 |
| 24 | P35580 MYH10_HUMAN | K.DKADFCIIHYAGK.V             | 3 | 3,3248 | 0,225 | -0,238 |
| 24 | Q15185 TEBP_HUMAN  | K.HLNEIDLFCIDPNSK.H           | 3 | 3,3154 | 0,294 | -0,62  |
| 24 | P02545 LMNA_HUMAN  | R.KLLEGEER.L                  | 2 | 3,3137 | 0,243 | -0,664 |
| 24 | O75351 VPS4B_HUMAN | R.SLSNTKPTVNEHLLK.L           | 3 | 3,3008 | 0,328 | -0,204 |

|    |                    |                          |   |        |       |        |
|----|--------------------|--------------------------|---|--------|-------|--------|
| 24 | Q00610 CLH1_HUMAN  | R.KVSQPIEGHAASFAQFK.M    | 3 | 3,299  | 0,193 | -0,496 |
| 24 | Q13098 CSN1_HUMAN  | R.GHDDLGDHYLDCGDLNALK.C  | 3 | 3,2899 | 0,325 | -0,743 |
| 24 | P42677 RS27_HUMAN  | K.DLLHPSPEEEKR.K         | 3 | 3,2883 | 0,213 | -0,063 |
| 24 | P13639 EF2_HUMAN   | K.DLEEDHACIPIKK.S        | 2 | 3,2683 | 0,307 | -0,778 |
| 24 | Q9BUJ2 HNRL1_HUMAN | R.TDEEGKDVPDHAVLEM*K.A   | 3 | 3,256  | 0,346 | 0      |
| 24 | Q00688 FKBP3_HUMAN | K.DHLVTAYNHLFETK.R       | 3 | 3,2551 | 0,378 | -0,433 |
| 24 | Q9Y295 DRG1_HUMAN  | K.DHTLEDEDVIQIVKK.-      | 3 | 3,2488 | 0,391 | -0,411 |
| 24 | Q8IZP0 ABI1_HUMAN  | R.KPIDYTVLDDVGHGVK.W     | 3 | 3,2479 | 0,334 | -0,521 |
| 24 | POCOS8 H2A1_HUMAN  | R.NDEELNKLLGK.V          | 2 | 3,2326 | 0,379 | -0,575 |
| 24 | Q02952 AKA12_HUMAN | K.DKTEKPDTVQLLTVK.K      | 3 | 3,2069 | 0,23  | -0,32  |
| 24 | P62736 ACTA_HUMAN  | K.DSYVGDEAQSQR.G         | 2 | 3,1988 | 0,45  | -0,63  |
| 24 | P12956 KU70_HUMAN  | K.VEYSEELKTHISK.G        | 2 | 3,1895 | 0,46  | -0,288 |
| 24 | Q9GZR7 DDX24_HUMAN | K.TLKKDEDIPLFPVQTK.Y     | 3 | 3,1841 | 0,088 | -0,489 |
| 24 | Q13619 CUL4A_HUMAN | K.DKDM*VQDLLDFKDK.V      | 3 | 3,1756 | 0,081 | -0,53  |
| 24 | P52272 HNRPM_HUMAN | K.DKFNECGHVLYADIK.M      | 2 | 3,1747 | 0,403 | -0,674 |
| 24 | Q01518 CAP1_HUMAN  | R.SGPKPFSAPKQTSPPK.R     | 3 | 3,1641 | 0,258 | -0,498 |
| 24 | O15355 PPM1G_HUMAN | K.ELAQIAGRPTEDEDEKEK.V   | 3 | 3,1576 | 0,331 | -0,267 |
| 24 | P04181 OAT_HUMAN   | R.DNGLLAKPTHGDIIR.F      | 2 | 3,1557 | 0,272 | -0,527 |
| 24 | Q9BPW8 NIPS1_HUMAN | K.NNKEYLEFR.R            | 3 | 3,152  | 0,223 | 0      |
| 24 | Q969G3 SMCE1_HUMAN | K.SRAEAALEESR.Q          | 3 | 3,1302 | 0,204 | 0,136  |
| 24 | P11234 RALB_HUMAN  | R.VKAEEDKIPLLVGNK.S      | 3 | 3,1269 | 0,142 | -0,418 |
| 24 | P04181 OAT_HUMAN   | R.DNGLLAKPTHGDIIR.F      | 3 | 3,1265 | 0,247 | -0,339 |
| 24 | Q9NV70 EXOC1_HUMAN | K.DAIKENPEFDLHFEK.I      | 3 | 3,1061 | 0,217 | -0,699 |
| 24 | P12270 TPR_HUMAN   | K.NKELEIAQDR.N           | 2 | 3,104  | 0,25  | -0,803 |
| 24 | O00567 NOL5A_HUMAN | R.ELNEDKLEKLEELTM*DGAK.A | 3 | 3,1014 | 0,224 | -0,577 |
| 24 | Q9H910 HN1L_HUMAN  | K.DHVFLCEGEEPKSDLK.A     | 3 | 3,096  | 0,276 | -0,384 |
| 24 | Q53R41 FAKD1_HUMAN | R.DHPQFLTLHNLATNK.F      | 3 | 3,0829 | 0,38  | -0,523 |
| 24 | Q10567 AP1B1_HUMAN | R.VDKITEYLCEPLRK.C       | 3 | 3,073  | 0,345 | -1,037 |
| 24 | P21333 FLNA_HUMAN  | R.TGVELGKPTHFTVNAK.A     | 3 | 3,0393 | 0,353 | -0,323 |
| 24 | Q00610 CLH1_HUMAN  | R.ALEHFTDLYDIKR.A        | 2 | 3,0299 | 0,442 | -0,677 |
| 24 | P78406 RAE1L_HUMAN | K.DKQNKPTGFALGSIAGR.V    | 3 | 3,0286 | 0,247 | -0,302 |
| 24 | P08670 VIME_HUMAN  | R.KVESLQEEIAFLKK.L       | 3 | 3,018  | 0,167 | -0,44  |
| 24 | Q13136 LIPA1_HUMAN | R.EATSVHDLNDKLENEIANK.D  | 3 | 3,001  | 0,343 | -0,855 |

|    |                    |                           |   |        |       |        |
|----|--------------------|---------------------------|---|--------|-------|--------|
| 24 | O95049 ZO3_HUMAN   | K.DKHALLDVTPSAIER.L       | 3 | 2,9989 | 0,102 | -0,659 |
| 24 | P62269 RS18_HUMAN  | R.KADIDLT.K               | 2 | 2,9931 | 0,227 | -0,135 |
| 24 | O75323 NIPS2_HUMAN | K.LQFHNVKPECLEAYNK.I      | 3 | 2,9877 | 0,218 | -0,368 |
| 24 | Q14204 DYHC1_HUMAN | R.EHSNPNYDKTSAPITCELLNK.Q | 3 | 2,984  | 0,244 | -0,226 |
| 24 | P53621 COPA_HUMAN  | R.M*CTLIDKFDEHDGPVR.G     | 3 | 2,981  | 0,452 | -0,282 |
| 24 | Q06830 PRDX1_HUMAN | K.KQGGLGPM*NIPLVSDPKR.T   | 3 | 2,9607 | 0,149 | -0,38  |
| 24 | Q13838 UAP56_HUMAN | K.HFILDECDK.M             | 2 | 2,9575 | 0,357 | -0,311 |
| 24 | P13010 KU86_HUMAN  | K.KDEKTDLTLEDLFPPTK.I     | 2 | 2,9477 | 0,464 | -0,584 |
| 24 | O95239 KIF4A_HUMAN | R.HLNDLLEDR.K             | 2 | 2,9428 | 0,3   | -0,651 |
| 24 | P04792 HSPB1_HUMAN | K.DGVVEITGKHEER.Q         | 3 | 2,9344 | 0,317 | 0,311  |
| 24 | P05198 IF2A_HUMAN  | R.VSPEEAIKCEDKFTK.S       | 2 | 2,9313 | 0,425 | -0,754 |
| 24 | P43686 PRS6B_HUMAN | R.ELLKPNASVALHK.H         | 3 | 2,9213 | 0,265 | 0,193  |
| 24 | Q9Y383 LC7L2_HUMAN | R.FRQDLASCDR.D            | 3 | 2,915  | 0,175 | 0,397  |
| 24 | Q14019 COTL1_HUMAN | K.ELEEDFIKSELKK.A         | 2 | 2,8994 | 0,177 | -0,607 |
| 24 | P62826 RAN_HUMAN   | R.HLTGEFEK.K              | 2 | 2,8988 | 0,324 | -0,254 |
| 24 | P21333 FLNA_HUMAN  | R.DVDIIDHHDNTYTVK.Y       | 2 | 2,8935 | 0,52  | -1,435 |
| 24 | P62906 RL10A_HUMAN | K.AVDIPHM*DIEALKK.L       | 2 | 2,89   | 0,232 | -0,612 |
| 24 | Q8WU90 ZC3HF_HUMAN | K.HFLEAIENNK.Y            | 2 | 2,8884 | 0,322 | -0,502 |
| 24 | P46937 YAP1_HUMAN  | R.KLPDSFFKPEPK.S          | 3 | 2,8778 | 0,281 | -0,299 |
| 24 | P17706 PTN2_HUMAN  | K.ELSKEDLSPAFDHSPNK.I     | 3 | 2,8707 | 0,293 | -0,287 |
| 24 | P60981 DEST_HUMAN  | K.HECQANGPEDLNR.A         | 3 | 2,8641 | 0,232 | 0      |
| 24 | Q9NP77 SSU72_HUMAN | K.DKELYTQNGILHM*LDR.N     | 3 | 2,831  | 0,197 | -0,559 |
| 24 | Q96A65 EXOC4_HUMAN | K.REEEEDFIR.A             | 3 | 2,801  | 0,282 | 0,15   |
| 24 | O43395 PRPF3_HUMAN | K.AADHLKPFLLDSTLR.F       | 3 | 2,7948 | 0,146 | -0,323 |
| 24 | P63241 IF5A1_HUMAN | R.EDLRLPEGDLGKEIEQK.Y     | 2 | 2,7847 | 0,511 | -0,682 |
| 24 | Q99436 PSB7_HUMAN  | K.LDFLRPYTVPNKK.G         | 3 | 2,777  | 0,214 | -0,345 |
| 24 | P60842 IF4A1_HUMAN | R.DFTVSAM*HGDM*DQKER.D    | 3 | 2,7632 | 0,306 | -0,578 |
| 24 | P26639 SYTC_HUMAN  | K.DSKPIKVTLPDGK.Q         | 3 | 2,7565 | 0,238 | 0      |
| 24 | Q02878 RL6_HUMAN   | K.HLTDAYFK.K              | 2 | 2,733  | 0,449 | -0,123 |
| 24 | P62805 H4_HUMAN    | R.DAVTYTEHAK.R            | 2 | 2,7306 | 0,163 | -0,323 |
| 24 | Q00610 CLH1_HUMAN  | K.HELIEFR.R               | 2 | 2,7161 | 0,355 | 0      |
| 24 | Q02790 FKBP4_HUMAN | K.DKFSFDLGKGEVIK.A        | 3 | 2,7086 | 0,305 | -0,693 |
| 24 | P54132 BLM_HUMAN   | K.DLDTSDRKEDVLSTSK.D      | 3 | 2,691  | 0,29  | -0,101 |

|    |                    |                           |   |        |       |        |
|----|--------------------|---------------------------|---|--------|-------|--------|
| 24 | Q58FF8 H90B2_HUMAN | K.AKFENLCK.F              | 2 | 2,6683 | 0,317 | 0      |
| 24 | Q16643 DREB_HUMAN  | K.KSESEVEEAAAIIAQRPDNPR.E | 3 | 2,6677 | 0,209 | -0,713 |
| 24 | Q8N328 PGBD3_HUMAN | K.DHIDKVPLESDVALK.K       | 3 | 2,6648 | 0,338 | -0,109 |
| 24 | P34931 HS71L_HUMAN | R.LSKEEIER.M              | 2 | 2,6531 | 0,158 | -0,304 |
| 24 | P11142 HSP7C_HUMAN | R.LSKEDIER.M              | 2 | 2,6399 | 0,154 | -0,431 |
| 24 | P13639 EF2_HUMAN   | K.DLEEDHACIPIKK.S         | 3 | 2,6311 | 0,262 | -0,467 |
| 24 | P58546 MTPN_HUMAN  | K.NGDLDEVKDYVAKGEDVNR.T   | 2 | 2,6248 | 0,461 | -0,685 |
| 24 | Q13619 CUL4A_HUMAN | K.DM*ELSKDIM*VHFK.Q       | 3 | 2,6241 | 0,194 | -0,45  |
| 24 | O75937 DNJC8_HUMAN | R.QLSILVHPDKNQDDADR.A     | 3 | 2,6149 | 0,314 | -0,466 |
| 24 | Q15785 TOM34_HUMAN | K.NRVPSAGDVEK.A           | 2 | 2,6149 | 0,219 | -0,521 |
| 24 | P08670 VIME_HUMAN  | R.RQVDQLTNDK.A            | 2 | 2,6092 | 0,353 | -0,802 |
| 24 | P60866 RS20_HUMAN  | K.DTGKTPVEPEVAIHR.I       | 2 | 2,5894 | 0,282 | -0,444 |
| 24 | P21127 CD2L1_HUMAN | R.DRLEQLER.K              | 2 | 2,5587 | 0,135 | 0      |
| 24 | P62136 PP1A_HUMAN  | K.HDLDLICR.A              | 2 | 2,5091 | 0,478 | 0      |
| 24 | P83881 RL36A_HUMAN | K.HFELGGDK.K              | 2 | 2,497  | 0,194 | 0      |
| 24 | P0C0S8 H2A1_HUMAN  | R.HLQLAIR.N               | 2 | 2,4577 | 0,163 | 0,215  |
| 24 | P78527 PRKDC_HUMAN | R.HNLEIHK.T               | 2 | 2,4402 | 0,141 | -0,141 |
| 24 | Q6NUK1 SCMC1_HUMAN | K.HEGLGAFYK.G             | 2 | 2,4359 | 0,281 | -0,418 |
| 24 | Q58FF7 H90B3_HUMAN | K.EGLELPEDEEEKKK.M        | 2 | 2,4306 | 0,327 | -0,438 |
| 24 | Q92688 AN32B_HUMAN | K.KLELSENR.I              | 2 | 2,3481 | 0,096 | -0,185 |
| 24 | P07355 ANXA2_HUMAN | K.TDLEKDIISDTSGDFRK.L     | 2 | 2,3383 | 0,422 | -0,503 |
| 24 | Q9UHV9 PFD2_HUMAN  | K.GKELNEFR.E              | 2 | 2,3229 | 0,17  | -0,246 |
| 24 | P05556 ITB1_HUMAN  | R.DKLPQPVPQDPVSHCK.E      | 2 | 2,3224 | 0,274 | -0,331 |
| 24 | Q14764 MVP_HUMAN   | R.HADLEIR.L               | 2 | 2,3014 | 0,249 | -0,143 |
| 24 | Q14847 LASP1_HUMAN | R.YKEEFEK.N               | 2 | 2,2909 | 0,105 | 0,125  |
| 24 | Q96KR1 ZFR_HUMAN   | K.DKKDYDNF.-              | 2 | 2,2625 | 0,271 | -0,35  |
| 24 | P06733 ENOA_HUMAN  | R.NFRNPLAK.-              | 2 | 2,2091 | 0,089 | -0,127 |
| 24 | O75531 BAF_HUMAN   | K.KDEDLFR.E               | 2 | 2,1698 | 0,265 | -0,198 |
| 24 | Q9Y5S9 RBM8A_HUMAN | K.NIHLNLDR.R              | 2 | 2,128  | 0,203 | 0,061  |
| 24 | Q02790 FKBP4_HUMAN | K.DKLFQQR.E               | 2 | 2,0791 | 0,175 | -0,397 |
| 24 | P08670 VIME_HUMAN  | R.ETNLDSLPLVDTHSKR.T      | 2 | 2,0556 | 0,317 | -0,869 |

**Table S6:** Peptide identification information for trypsin(B) workflow. SCX fraction number, protein reference, peptide sequence, phosphorylation localization, charge state, and SEQUEST scoring metrics (cross correlation, delta correlation, and ppm) are provided. Reverse hits that pass filters are included and used to maintain <1% false positive rate.

| Fraction | Ref                | Sequence                         | ModSite            | Charge | XCorr  | dCn   | PPM    |
|----------|--------------------|----------------------------------|--------------------|--------|--------|-------|--------|
| 1        | P23193 TCEA1_HUMAN | K.KKEPAITSQNS#PEAR.E             | S100:              | 3      | 3,3988 | 0,163 | -0,527 |
| 1        | O95251 MYST2_HUMAN | R.SS#GS#ETEQQVDFSDR.E            | S100:S102:         | 2      | 2,7551 | 0,277 | -0,406 |
| 1        | Q86W92 LIPB1_HUMAN | R.SPS#ASITDEDSNV.-               | S1001:             | 2      | 2,2996 | 0,438 | -0,609 |
| 1        | Q86W92 LIPB1_HUMAN | R.SPS#AS#ITDEDSNV.-              | S1001:S1003:       | 2      | 2,1523 | 0,388 | -0,082 |
| 1        | Q8NG31 CASC5_HUMAN | K.S#LGTPTVICTPT#EESVFFPGNGESDR.L | S1008:T1019:       | 3      | 4,9059 | 1     | 0,186  |
| 1        | P05386 RLA1_HUMAN  | K.KEES#EES#DDDMGFGLFD.-          | S101:S104:         | 2      | 4,9127 | 0,597 | 0      |
| 1        | P05386 RLA1_HUMAN  | K.KEES#EES#DDDM*GFGLFD.-         | S101:S104:         | 2      | 4,8337 | 0,657 | 1,033  |
| 1        | P05386 RLA1_HUMAN  | K.KEES#EES#DDDMGFGLFD.-          | S101:S104:         | 3      | 2,7454 | 0,207 | -0,173 |
| 1        | Q8NCY6 K1826_HUMAN | K.LVGSGFPLPSS#DLDDS#LTEEIDEK.I   | S101:S106:         | 3      | 3,7539 | 0,381 | -0,47  |
| 1        | Q00587 BORG5_HUMAN | R.M*AS#PPAPSPAPPAIS#PIIK.N       | S101:S113:         | 3      | 2,9873 | 0,097 | -0,181 |
| 1        | Q5T200 ZC3HD_HUMAN | K.S#KGDS#DIS#DEEAAQQSK.K         | S1010:S1014:S1017: | 3      | 3,0114 | 0,395 | -0,539 |
| 1        | Q5T200 ZC3HD_HUMAN | K.S#KGDS#DIS#DEEAAQQSK.K         | S1010:S1014:S1017: | 2      | 2,6955 | 0,486 | -0,48  |
| 1        | Q5T200 ZC3HD_HUMAN | K.GDS#DIS#DEEAAQQSK.K            | S1014:S1017:       | 2      | 2,6315 | 0,404 | -0,491 |
| 1        | Q7Z333 SETX_HUMAN  | R.GQVIIS#DS#DDDDDER.I            | S1017:S1019:       | 2      | 4,0912 | 0,543 | -0,25  |
| 1        | Q8NG08 HELB_HUMAN  | R.WQLS#S#PDGVDTDDDLPK.S          | S1020:S1021:       | 2      | 4,2415 | 0,432 | 1,192  |
| 1        | Q01804 OTUD4_HUMAN | K.EES#S#EDENEVSNILR.S            | S1023:S1024:       | 2      | 4,1793 | 0,472 | 0,256  |
| 1        | Q9H2Y7 ZF106_HUMAN | R.ATGDGS#S#PELPSLER.K            | S1025:S1026:       | 2      | 2,7763 | 0,346 | 0      |
| 1        | Q5VZL5 ZMYM4_HUMAN | K.DNLVS#S#IHTDDS#LEVER.R         | S103:S104:S110:    | 3      | 3,332  | 0,419 | 0,084  |
| 1        | O60231 DHX16_HUMAN | R.LLEDSEES#S#EETVSR.A            | S103:S106:S107:    | 2      | 3,5678 | 0,45  | -0,438 |
| 1        | O60231 DHX16_HUMAN | R.LLEDSEESS#EETVSR.A             | S103:S107:         | 2      | 5,6313 | 0,502 | -0,522 |
| 1        | A1L390 PKHG3_HUMAN | R.S#PLS#PTETFSWPDVR.E            | S1037:S1040:       | 2      | 4,4477 | 1     | 0,26   |
| 1        | P00533 EGFR_HUMAN  | R.TPLLSLSATS#NNS#TVACIDR.N       | S1042:S1045:       | 3      | 3,3696 | 1     | 0,232  |
| 1        | Q8NA72 CE037_HUMAN | K.TDESS#PVLS#PR.K                | S105:S109:         | 2      | 3,2038 | 0,223 | -0,362 |
| 1        | P20042 IF2B_HUMAN  | K.IES#DVQEPT#EPEDDLDIMLGNK.K     | S105:T111:         | 3      | 3,3634 | 0,422 | -0,138 |
| 1        | Q8N3U4 STAG2_HUMAN | R.NSLLAGGDDDTMS#VIS#GIS#SR.G     | S1058:S1061:S1064: | 3      | 4,8503 | 0,468 | 0      |
| 1        | Q86VQ1 GLCI1_HUMAN | R.GSPS#S#PTPAAAAPAEQAPR.A        | S107:S108:         | 3      | 2,8324 | 0,241 | -0,259 |
| 1        | P53805 RCAN1_HUMAN | K.QFLIS#PPAS#PPVGWK.Q            | S108:S112:         | 2      | 2,8356 | 0,223 | -0,137 |

|   |                    |                                    |                    |   |        |       |        |
|---|--------------------|------------------------------------|--------------------|---|--------|-------|--------|
| 1 | P35251 RFC1_HUMAN  | R.QDPVTYIS#ET#DEEDDFM*CK.K         | S108:T110:         | 3 | 4,0282 | 0,386 | 0,22   |
| 1 | P48634 BAT2_HUMAN  | R.TAS#ETRS#EGS#EYEEIPK.R           | S1085:S1089:S1092: | 3 | 4,7022 | 1     | -0,255 |
| 1 | Q6KC79 NIPBL_HUMAN | K.YAEIS#S#DEDNDS#DEAFESSR.K        | S1089:S1090:S1096: | 3 | 3,7251 | 0,379 | -0,146 |
| 1 | Q56P03 EAPP_HUMAN  | R.YYDDIYFDS#DS#EDED.R.A            | S109:S111:         | 3 | 3,157  | 0,179 | -0,249 |
| 1 | Q13464 ROCK1_HUMAN | K.LLDLSDS#TSVAS#FPSADET#DGNLPESR.I | S1100:S1105:T1112: | 3 | 3,081  | 1     | 0,478  |
| 1 | Q9UQ35 SRRM2_HUMAN | R.SS#S#PVTELASR.S                  | S1102:S1103:       | 2 | 3,2462 | 0,369 | -0,094 |
| 1 | Q9UQ35 SRRM2_HUMAN | R.SS#S#PVTELASR#PIR.Q              | S1102:S1103:S1112: | 2 | 2,5649 | 1     | -0,067 |
| 1 | Q13464 ROCK1_HUMAN | K.LLDLSDSTS#VAS#FPSADET#DGNLPESR.I | S1102:S1105:       | 3 | 4,1256 | 1     | -0,061 |
| 1 | Q6BDS2 URFB1_HUMAN | R.TVS#QQS#FDGVS#LDSSG#PEDR.I       | S1103:S1106:       | 3 | 3,1333 | 0,197 | 0      |
| 1 | Q92900 RENT1_HUMAN | K.SQIDVALS#QDS#TYQGER.A            | S1107:S1110:       | 2 | 4,6844 | 0,521 | -0,593 |
| 1 | Q92900 RENT1_HUMAN | K.SQIDVALS#QDS#TYQGER.A            | S1107:S1110:       | 3 | 4,3153 | 0,41  | -0,356 |
| 1 | Q7Z5J4 RAI1_HUMAN  | K.AAS#SPSNPAALPVASDSS#PMGSK.T      | S1107:S1122:       | 3 | 3,6832 | 1     | -1,039 |
| 1 | Q5T3F8 TM63B_HUMAN | R.LTS#VSS#SVDFDQR.D                | S111:S114:         | 2 | 4,701  | 1     | 0,076  |
| 1 | Q07889 SOS1_HUMAN  | R.SAS#VSS#ISLTK.G                  | S1134:S1137:       | 2 | 2,1452 | 0,372 | -0,394 |
| 1 | Q9C086 ZNIH4_HUMAN | R.AWLDEDS#NLSPS#PLR.D              | S114:S119:         | 2 | 2,7007 | 0,149 | 0,131  |
| 1 | Q8TDJ6 DMXL2_HUMAN | R.VS#VDS#NLFVYSK.S                 | S1140:S1143:       | 2 | 3,6802 | 0,411 | -0,723 |
| 1 | Q7Z309 F122B_HUMAN | R.IDFTPV#PAPS#PTR.G                | S115:S119:         | 2 | 3,2746 | 0,325 | 0,519  |
| 1 | P27816 MAP4_HUMAN  | R.EAQTLD#SQIQETS#I.-               | S1151:             | 2 | 3,681  | 0,343 | 0      |
| 1 | Q9BQG0 MBB1A_HUMAN | K.EIPS#AT#QSPISK.K                 | S1159:T1161:       | 2 | 2,8608 | 0,463 | -0,172 |
| 1 | Q86SQ4 GP126_HUMAN | K.S#LSSS#SIGS#NSTYLTSK.S           | S1160:S1164:S1168: | 3 | 3,4285 | 1     | 0,374  |
| 1 | Q86SQ4 GP126_HUMAN | K.S#LSSSS#IGSNSTYLTSK.S            | S1160:S1165:       | 2 | 4,6457 | 1     | -0,13  |
| 1 | Q86SQ4 GP126_HUMAN | K.S#LSSSS#IGS#NSTYLTSK.S           | S1160:S1165:S1168: | 2 | 6,2245 | 1     | -0,125 |
| 1 | Q5T1M5 FKB15_HUMAN | R.S#SLS#GDEEDELFK.G                | S1161:S1164:       | 2 | 4,5097 | 0,498 | 0,076  |
| 1 | Q9NTI5 PDS5B_HUMAN | R.METVSNASSSS#NPSS#PGR.I           | S1162:S1166:       | 2 | 4,1236 | 1     | -0,437 |
| 1 | Q86SQ4 GP126_HUMAN | K.SLSSSS#IGS#NSTYLTSK.S            | S1165:S1168:       | 2 | 4,6459 | 1     | -0,26  |
| 1 | Q92766 RREB1_HUMAN | R.ANS#GGVDLDS#SGEFASIEK.M          | S1167:S1174:       | 2 | 3,772  | 0,416 | 0,239  |
| 1 | Q5QJE6 TDIF2_HUMAN | R.QILIACS#PVSS#VR.K                | S117:S121:         | 2 | 2,9855 | 0,397 | -0,384 |
| 1 | Q9NRY4 GRLF1_HUMAN | R.TSFS#VGS#DDELGPIR.K              | S1176:S1179:       | 2 | 3,0229 | 0,506 | -0,281 |
| 1 | O14737 PDCD5_HUMAN | K.VM*DS#DEDDDY.-                   | S119:              | 2 | 2,4385 | 0,285 | -0,094 |
| 1 | Q6P1X5 TAF2_HUMAN  | R.SIRS#PS#LS#D.-                   | S1194:S1196:S1198: | 2 | 2,4874 | 0,368 | -0,203 |
| 1 | Q13286 CLN3_HUMAN  | R.FS#DS#EGEETVPEPR.L               | S12:S14:           | 2 | 4,1529 | 0,3   | -0,14  |
| 1 | Q8WXI9 P66B_HUMAN  | R.LTPS#PDIIVLS#DNEASS#PR.S         | S122:S129:S135:    | 3 | 2,9378 | 0,133 | 0,325  |
| 1 | Q8WXI9 P66B_HUMAN  | R.LTPS#PDIIVLSDNEASS#PR.S          | S122:S135:         | 3 | 4,3724 | 0,382 | 0      |



|   |                    |                                     |                    |   |        |       |        |
|---|--------------------|-------------------------------------|--------------------|---|--------|-------|--------|
| 1 | Q14160 LAP4_HUMAN  | R.NS#LES#IS#SIDRELSPEGP.GK.E        | S1220:S1223:S1225: | 3 | 3,263  | 0,306 | -0,233 |
| 1 | Q14160 LAP4_HUMAN  | R.NS#LES#ISS#IDR.E                  | S1220:S1223:S1226: | 2 | 3,8116 | 0,487 | -0,167 |
| 1 | Q14160 LAP4_HUMAN  | R.NSLES#IS#SIDR.E                   | S1223:S1225:       | 2 | 3,4324 | 0,512 | 0,177  |
| 1 | Q13428 TCOF_HUMAN  | K.LDS#S#PSVSSTLAAK.D                | S1227:S1228:       | 2 | 2,7239 | 0,386 | -0,801 |
| 1 | Q13428 TCOF_HUMAN  | K.LDS#SPS#VVSSTLAAK.D               | S1227:S1230:       | 2 | 2,8115 | 0,282 | -1,122 |
| 1 | Q9NQP4 PFD4_HUMAN  | K.FGS#NINLEADES.-                   | S125:              | 2 | 2,9954 | 0,397 | 0,089  |
| 1 | Q14137 BOP1_HUMAN  | R.IGDEYAEDS#S#DEEDIR.N              | S126:S127:         | 2 | 5,6531 | 0,575 | -0,487 |
| 1 | Q9UJM3 ERRFI_HUMAN | K.LTVNGVCAS#TPPLT#PIK.N             | S126:T131:         | 2 | 2,9326 | 0,468 | -0,063 |
| 1 | Q13459 MYO9B_HUMAN | R.VSPAPGS#APET#PEDK.S               | S1267:T1271:       | 2 | 2,7507 | 0,335 | -0,421 |
| 1 | Q9UPT8 ZC3H4_HUMAN | K.TGSGS#PFAGNS#PAR.E                | S1269:S1275:       | 2 | 3,4969 | 0,344 | -0,499 |
| 1 | P46821 MAP1B_HUMAN | R.S#VNFSLT#PNEIK.V                  | S1276:T1282:       | 2 | 3,3851 | 0,178 | -1,051 |
| 1 | Q96RR4 KKCC2_HUMAN | R.CICPSLPYS#PVSS#PQSS#PR.L          | S129:S133:S137:    | 3 | 5,1774 | 1     | -0,233 |
| 1 | Q8WXI9 P66B_HUMAN  | R.LTPSPDIIVLS#DNEASS#PR.S           | S129:S135:         | 3 | 5,1515 | 0,414 | -0,084 |
| 1 | Q14160 LAP4_HUMAN  | K.MAESPCS#PSGQQPPS#PPS#PDEL PANVK.Q | S1298:S1306:S1309: | 3 | 4,064  | 0,322 | -0,12  |
| 1 | Q14160 LAP4_HUMAN  | K.M*AESPCSPSGQQPPS#PPS#PDEL PANVK.Q | S1306:S1309:       | 3 | 3,5982 | 0,408 | -0,184 |
| 1 | Q14160 LAP4_HUMAN  | K.MAESPCS#PSGQQPPS#PPS#PDEL PANVK.Q | S1306:S1309:       | 3 | 3,4886 | 0,396 | -0,185 |
| 1 | O60341 LSD1_HUMAN  | R.EMDESLANLS#EDEYYS#EEER.N          | S131:S137:         | 3 | 5,082  | 0,538 | -0,07  |
| 1 | O60341 LSD1_HUMAN  | R.EM*DESLANLS#EDEYYS#EEER.N         | S131:S137:         | 3 | 4,6133 | 0,356 | 0,7    |
| 1 | Q9UQ35 SRRM2_HUMAN | K.ELNS#NS#PLRENSFGS#PLEFR.N         | S1318:S1320:S1329: | 3 | 3,3811 | 0,34  | 0      |
| 1 | Q70CQ2 UBP34_HUMAN | R.ESTGSYSYDLYPDS#DDSS#EDQVENS.K.N   | S1318:S1322:       | 3 | 3,0128 | 0,209 | -0,44  |
| 1 | P55081 MFAP1_HUMAN | R.EDS#S#EEEEEEIDDEEIER.R            | S132:S133:         | 3 | 5,3242 | 0,485 | -0,309 |
| 1 | Q9UQ35 SRRM2_HUMAN | K.ELNS#NS#PLRENS#FGS#PLEFR.N        | S1320:S1326:S1329: | 3 | 3,6146 | 0,306 | 0,076  |
| 1 | Q9UQ35 SRRM2_HUMAN | R.ENS#FGS#PLEFR.N                   | S1326:S1329:       | 2 | 2,8851 | 0,352 | 0,085  |
| 1 | Q15021 CND1_HUMAN  | R.YQPLAS#TAS#DNDFVTPEPR.R           | S1330:S1333:       | 3 | 3,5438 | 0,124 | 0,242  |
| 1 | Q15021 CND1_HUMAN  | R.YQPLAS#TAS#DNDFVT#PEPR.L          | S1330:S1333:T1339: | 3 | 4,134  | 0,404 | -0,078 |
| 1 | Q96AY4 TTC28_HUMAN | K.GSIS#TPNS#PVK.M                   | S1339:S1343:       | 2 | 2,3855 | 0,222 | -0,294 |
| 1 | P46100 ATRX_HUMAN  | K.LTVS#DGES#GEEK.K                  | S1348:S1352:       | 2 | 3,159  | 0,379 | -0,519 |
| 1 | Q96T23 RSF1_HUMAN  | K.VGS#PLDYS#LVDLPSTNGQS#PGK.A       | S1349:S1354:S1365: | 3 | 4,1827 | 0,356 | 0,518  |
| 1 | Q15388 TOM20_HUMAN | R.IVS#AQSLAEDDVE.-                  | S135:              | 2 | 4,1973 | 0,482 | 0,587  |
| 1 | O60841 IF2P_HUMAN  | K.VEM*YS#GS#DDDDDFNK.L              | S135:S137:         | 2 | 3,9568 | 0,334 | -0,255 |
| 1 | Q7Z309 F122B_HUMAN | K.MFVSSSGLPPS#PVPS#PR.R             | S137:S141:         | 2 | 3,2465 | 0,392 | -0,064 |
| 1 | P11388 TOP2A_HUMAN | K.S#VVS#DLEADDVK.G                  | S1374:S1377:       | 2 | 4,4907 | 0,556 | 0      |
| 1 | Q9UQ35 SRRM2_HUMAN | R.S#S#GHSSSELS#PDAVEK.A             | S1378:S1379:S1387: | 2 | 2,3148 | 0,098 | -1,183 |

|   |                     |                                      |                    |   |        |       |        |
|---|---------------------|--------------------------------------|--------------------|---|--------|-------|--------|
| 1 | P46821 MAP1B_HUMAN  | R.ASVS#PMDEPVPDSES#PIEK.V            | S1378:S1389:       | 3 | 3,9044 | 0,238 | 0,168  |
| 1 | Q15388 TOM20_HUMAN  | R.IVSAQS#LAEDDVE.-                   | S138:              | 2 | 3,2617 | 0,366 | 0,168  |
| 1 | Q43597 SPY2_HUMAN   | R.LLGSS#FSS#GPVADGIIR.V              | S139:S142:         | 2 | 4,211  | 0,432 | -0,465 |
| 1 | Q02952 AKA12_HUMAN  | K.EVSS#LEGS#PPPCLGQEEAVCTK.I         | S1391:S1395:       | 3 | 4,9083 | 0,411 | 0      |
| 1 | Q9UQ35 SRRM2_HUMAN  | K.AGMSS#NQSISS#PVLDAVPR.T            | S1398:S1404:       | 3 | 3,5941 | 1     | -0,264 |
| 1 | Q5TGY3 AHDC1_HUMAN  | K.AYS#PTCS#PTLGFK.E                  | S1399:S1403:       | 2 | 3,2695 | 0,434 | -0,154 |
| 1 | Q15583 TGIF1_HUMAN  | K.GIVAAS#GS#ET#EDEDSDIPLDLSSSAGSGK.R | S140:S142:T144:    | 3 | 3,5944 | 0,27  | 0,116  |
| 1 | Q60499 STX10_HUMAN  | K.SPSDLLDAS#AVS#ATSR.Y               | S140:S143:         | 2 | 4,5185 | 0,46  | 0,843  |
| 1 | Q5JW51 Q5JW51_HUMAN | R.LLGLLELALS#S#DAESAAGGPAGVR.T       | S141:S142:         | 3 | 3,3883 | 0,33  | 0,474  |
| 1 | Q8NEJ9 NGDN_HUMAN   | K.LS#\$#EDEEEDAEEDDQSEASGK.K         | S142:S143:         | 3 | 6,3084 | 0,498 | -0,446 |
| 1 | Q12888 TP53B_HUMAN  | R.ETAVPGPLGIEDIS#PNLS#PDDK.S         | S1426:S1430:       | 3 | 3,1575 | 0,269 | 0,151  |
| 1 | Q96E09 F122A_HUMAN  | R.IDFIPVS#PAPS#PTR.G                 | S143:S147:         | 2 | 3,2748 | 0,481 | -0,074 |
| 1 | Q9NQS7 INCE_HUMAN   | R.AAAAAAATMALAAPSS#PTPES#PTMLTK.K    | S143:S148:         | 3 | 3,9136 | 1     | 0      |
| 1 | Q96AT1 K1143_HUMAN  | K.NSSLLS#FDNEDENE.-                  | S146:              | 2 | 2,1507 | 0,301 | 0,144  |
| 1 | Q9NZ63 CI078_HUMAN  | R.GDS#ES#EEDQDSEEV.R.L               | S15:S17:           | 2 | 4,5155 | 0,495 | -0,732 |
| 1 | Q00193 SMAP_HUMAN   | R.S#AS#PDDDLGSSNWEAADLGNEER.K        | S15:S17:           | 3 | 4,1003 | 0,429 | -0,212 |
| 1 | Q99959 PKP2_HUMAN   | R.LEIS#PDSS#PER.A                    | S151:S155:         | 2 | 2,6357 | 0,225 | -0,351 |
| 1 | Q02880 TOP2B_HUMAN  | K.VVEAVNS#DS#DSEFGIPK.K              | S1522:S1524:       | 2 | 4,9662 | 0,477 | -0,187 |
| 1 | Q02880 TOP2B_HUMAN  | K.VVEAVNS#DS#DSEFGIPK.K              | S1522:S1524:       | 3 | 3,1361 | 0,165 | -0,187 |
| 1 | P11388 TOP2A_HUMAN  | K.YLEES#DEDDLF.-                     | S1525:             | 2 | 2,7885 | 0,422 | 0,587  |
| 1 | Q9UQ35 SRRM2_HUMAN  | R.S#GS#SQELDVKPSAS#PQER.S            | S1539:S1541:S1552: | 2 | 4,1325 | 0,52  | -0,57  |
| 1 | P42166 LAP2A_HUMAN  | R.SS#T#PLPTISSAENTR.Q                | S159:T160:         | 2 | 3,6991 | 1     | -0,405 |
| 1 | P16949 STMN1_HUMAN  | R.AS#GQAFELILS#PR.S                  | S16:S25:           | 2 | 3,7602 | 0,423 | 0,079  |
| 1 | Q12873 CHD3_HUMAN   | K.METEADAPS#PAPS#LGER.L              | S1601:S1605:       | 2 | 4,1907 | 0,459 | -0,382 |
| 1 | Q12873 CHD3_HUMAN   | K.M*ETEADAPS#PAPS#LGER.L             | S1601:S1605:       | 2 | 4,146  | 0,584 | -0,82  |
| 1 | Q9NVU0 RPC5_HUMAN   | R.EAANEAGDS#S#QDEAEDDVK.Q            | S161:S162:         | 2 | 4,9415 | 0,544 | -0,912 |
| 1 | Q9NVU0 RPC5_HUMAN   | R.EAANEAGDS#S#QDEAEDDVK.Q            | S161:S162:         | 3 | 3,5966 | 0,379 | -0,513 |
| 1 | Q02880 TOP2B_HUMAN  | K.YFAES#DEEEDDVDFAM*FN.-             | S1613:             | 2 | 2,8368 | 0,535 | -0,323 |
| 1 | Q9C0C2 TB182_HUMAN  | R.VPS#S#DEEVVEEPQSR.R                | S1620:S1621:       | 2 | 4,1072 | 0,455 | -0,595 |
| 1 | O00566 MPP10_HUMAN  | K.S#PVFS#DEDS#DLDFDISKLEQQSK.V       | S163:S167:S171:    | 3 | 4,1069 | 0,548 | -0,191 |
| 1 | Q9H9L4 CL041_HUMAN  | R.GDPDS#EADS#IDS#DQEDPLK.H           | S168:S172:S175:    | 3 | 4,0519 | 0,369 | -0,322 |
| 1 | Q43598 RCL_HUMAN    | R.YFEADPPGQVAAS#PDPTT.-              | S169:              | 2 | 4,0967 | 0,501 | -0,251 |
| 1 | Q75179 ANR17_HUMAN  | K.S#GSPSLSS#PNGK.L                   | S1693:S1700:       | 2 | 2,0353 | 0,268 | -0,379 |

|   |                    |                                      |                    |   |        |       |        |
|---|--------------------|--------------------------------------|--------------------|---|--------|-------|--------|
| 1 | Q96QD8 S38A2_HUMAN | R.FSISPDEDS#SSYSS#NSDFNYSYPTK.Q      | S17:S22:           | 3 | 3,7669 | 1     | -0,613 |
| 1 | Q5SRE5 NU188_HUMAN | R.GAPSS#PATGVLPSP#PQGK.S             | S1709:S1717:       | 2 | 3,9321 | 0,421 | -0,285 |
| 1 | Q8NDI1 EHBP1_HUMAN | K.ATDEDMQS#LAS#LMSMK.Q               | S171:S174:         | 2 | 4,8825 | 0,533 | -0,254 |
| 1 | Q9BXB4 OSB11_HUMAN | R.S#FSLASSSNS#PISQR.R                | S172:S181:         | 2 | 2,791  | 1     | -0,141 |
| 1 | Q8NI08 NCOA7_HUMAN | R.LSSSS#PGATVSPS#SS#DAEYDKLPDADLAR.K | S173:S181:S183:    | 3 | 2,8537 | 1     | 0,116  |
| 1 | O75367 H2AY_HUMAN  | K.AASADS#T#TEGTPADGFTVLSTK.S         | S173:T174:         | 3 | 3,5829 | 1     | -0,24  |
| 1 | Q86V15 CASZ1_HUMAN | R.TPALAALAALGAPGAPTAASS#P.-          | S1758:             | 3 | 3,9953 | 0,347 | -0,089 |
| 1 | Q15154 PCM1_HUMAN  | K.NVRS#DIS#DQEEDEES#EGCPVSINLSK.A    | S1764:S1767:S1775: | 3 | 4,9999 | 0,59  | -0,461 |
| 1 | Q9H7D0 DOCK5_HUMAN | R.LS#PFHGSSPPQSTPLS#PPPLT#PK.A       | S1775:S1789:T1794: | 3 | 3,8939 | 0,341 | -0,281 |
| 1 | Q86TB9 PATL1_HUMAN | R.STS#PIIGS#PPVR.A                   | S179:S184:         | 2 | 3,0964 | 0,231 | 0,089  |
| 1 | P46821 MAP1B_HUMAN | R.ES#SPLYS#PTFSDSTSAVK.E             | S1792:S1797:       | 2 | 2,3043 | 1     | -0,118 |
| 1 | P46821 MAP1B_HUMAN | R.ESS#PLYS#PTFSDSTSAVK.E             | S1793:S1797:       | 3 | 2,6307 | 1     | 0      |
| 1 | Q53H80 CF166_HUMAN | R.TLDFDPLLS#PAS#PK.R                 | S18:S21:           | 2 | 3,09   | 0,443 | 0,22   |
| 1 | Q9P260 K1468_HUMAN | R.AGS#ISTLDS#LDFAR.Y                 | S180:S186:         | 2 | 4,5267 | 0,443 | -0,151 |
| 1 | Q9P260 K1468_HUMAN | R.AGS#IST#LDSLDFAR.Y                 | S180:T183:         | 2 | 4,1331 | 0,495 | -0,151 |
| 1 | Q9P260 K1468_HUMAN | R.AGS#IST#LDS#LDFAR.Y                | S180:T183:S186:    | 2 | 4,6679 | 0,463 | 0,144  |
| 1 | Q9NQC3 RTN4_HUMAN  | R.GS#S#GSVDETLFALPAASEPVIR.S         | S181:S182:         | 3 | 5,1008 | 0,5   | 0      |
| 1 | Q9BVC5 ASHWN_HUMAN | K.S#PSGPVKS#PPLS#PVGTTTPVK.L         | S182:S189:S193:    | 3 | 5,851  | 0,439 | 0      |
| 1 | Q9Y2F5 K0947_HUMAN | R.S#CSSPAVSAVSQLPLS#PK.E             | S1888:S1903:       | 3 | 4,7102 | 0,406 | -0,093 |
| 1 | P24928 RPB1_HUMAN  | K.YSPTSPTYSPYS#PVYT#PTSPK.Y          | S1899:T1903:       | 3 | 2,8884 | 0,121 | 0,378  |
| 1 | Q6Y7W6 PERQ2_HUMAN | R.ALS#SGGSITS#PPLSPALPK.Y            | S19:S26:           | 2 | 4,131  | 1     | -0,063 |
| 1 | Q7Z6Z7 HUWE1_HUMAN | R.GS#GTAS#DDEFENLR.I                 | S1903:S1907:       | 2 | 3,4141 | 0,533 | 1,619  |
| 1 | Q9NV56 MRGBP_HUMAN | K.VLTANS#NPSS#PSAAK.R                | S191:S195:         | 2 | 2,4136 | 0,337 | -0,38  |
| 1 | P24928 RPB1_HUMAN  | K.YS#PTSPTYSPYS#PK.Y                 | S1910:S1920:       | 2 | 3,6002 | 1     | -0,438 |
| 1 | P24928 RPB1_HUMAN  | K.YSPTS#PTYSPYS#PTSPK.Y              | S1913:S1917:       | 2 | 4,897  | 1     | -0,292 |
| 1 | P24928 RPB1_HUMAN  | K.YSPTS#PTYSPYS#PK.Y                 | S1913:S1920:       | 2 | 3,8736 | 1     | -0,511 |
| 1 | Q5T8D3 ACBD5_HUMAN | K.AES#SDS#GAEESEEEEAQEEVK.G          | S193:S196:         | 3 | 2,8168 | 0,149 | -0,557 |
| 1 | Q92621 NU205_HUMAN | R.LQDS#FAS#ETNLDFR.S                 | S1939:S1942:       | 2 | 5,8817 | 0,541 | -0,203 |
| 1 | Q13158 FADD_HUMAN  | R.SGAMS#PMSWNSDASTSEAS.-             | S194:              | 2 | 3,9377 | 0,621 | -0,246 |
| 1 | Q9GZM8 NDEL1_HUMAN | K.S#APSS#PTLDCEK.M                   | S194:S198:         | 2 | 2,9964 | 0,393 | -0,504 |
| 1 | Q9HCK8 CHD8_HUMAN  | R.SS#SAAS#M*AEEEEASAVSTAAAQFTK.L     | S1940:S1944:       | 3 | 4,6018 | 1     | -0,438 |
| 1 | P30622 CLIP1_HUMAN | K.TASES#ISNLS#EAGS#IK.K              | S195:S200:S204:    | 2 | 5,3382 | 1     | 0,067  |
| 1 | P30622 CLIP1_HUMAN | K.TASES#ISNLSEAGS#IK.K               | S195:S204:         | 2 | 6,0486 | 1     | -0,487 |

|   |                     |                                  |                 |   |        |       |        |
|---|---------------------|----------------------------------|-----------------|---|--------|-------|--------|
| 1 | Q8TEA8 DTD1_HUMAN   | R.SAS#S#GAEGDVSSEREP.-           | S196:S197:      | 2 | 4,1571 | 0,481 | -0,424 |
| 1 | Q9BW71 HIRP3_HUMAN  | R.EES#EES#EAEPVQR.T              | S196:S199:      | 2 | 2,9426 | 0,358 | -0,363 |
| 1 | Q9BW71 HIRP3_HUMAN  | R.EES#EES#EAEPVQR.T              | S196:S199:      | 3 | 2,8112 | 0,138 | -0,218 |
| 1 | Q8TEA8 DTD1_HUMAN   | R.SASS#GAEGDVSS#EREP.-           | S197:S205:      | 2 | 2,9035 | 0,274 | -0,424 |
| 1 | P30622 CLIP1_HUMAN  | K.TASESISNLS#EAGS#IK.K           | S200:S204:      | 2 | 5,4522 | 0,535 | 0      |
| 1 | Q8IYH0 Q8IYH0_HUMAN | K.TVDLGIS#DLEDDC.-               | S201:           | 2 | 3,1724 | 0,405 | 0,239  |
| 1 | P16989 DBPA_HUMAN   | R.NYAGEEEEEGS#GS#S#EGFDPPATDR.Q  | S201:S203:S204: | 3 | 3,7553 | 0,303 | -0,33  |
| 1 | P16989 DBPA_HUMAN   | R.NYAGEEEEEGS#GSS#EGFDPPATDR.Q   | S201:S204:      | 3 | 4,0074 | 0,4   | -0,068 |
| 1 | Q96B36 AKTS1_HUMAN  | R.S#SDEENGPPSS#PDLDR.I           | S202:S212:      | 3 | 2,6222 | 0,303 | -0,197 |
| 1 | Q9H0H5 RGAP1_HUMAN  | R.S#IGS#AVDQGNESIVAK.T           | S203:S206:      | 2 | 4,6977 | 0,44  | 0      |
| 1 | Q96B36 AKTS1_HUMAN  | R.SS#DEENGPPSS#PDLDR.I           | S203:S212:      | 2 | 3,6342 | 0,38  | -0,459 |
| 1 | Q86WR0 CCD25_HUMAN  | K.VENM*SSNQDGNDS#DEFM*.-         | S204:           | 2 | 3,348  | 0,435 | -0,661 |
| 1 | Q9Y5J1 UTP18_HUMAN  | K.TS#S#DDESEEEDEDDLQR.T          | S205:S206:      | 3 | 4,7421 | 0,368 | -0,342 |
| 1 | Q01130 SFRS2_HUMAN  | R.S#KS#PPKS#PEEEGAVSS.-          | S206:S208:S212: | 2 | 3,5541 | 0,312 | -0,526 |
| 1 | Q8NI08 NCOA7_HUMAN  | R.VLS#STS#EEDEPGVVK.F            | S208:S211:      | 2 | 4,5364 | 0,561 | -0,351 |
| 1 | Q8NI08 NCOA7_HUMAN  | R.VLSS#STS#EEDEPGVVK.F           | S209:S211:      | 2 | 3,5911 | 0,408 | 0      |
| 1 | Q09666 AHNK_HUMAN   | R.LPS#GSGAAS#PTGSAVDIR.A         | S210:S216:      | 2 | 5,8458 | 1     | -0,068 |
| 1 | Q8TBF4 ZCRB1_HUMAN  | K.STYFS#DEEELS#D.-               | S210:S216:      | 2 | 3,3318 | 0,411 | 0,309  |
| 1 | Q09666 AHNK_HUMAN   | R.LPS#GSGAAS#PTGS#AVDIR.A        | S210:S216:S220: | 2 | 5,2128 | 1     | -0,389 |
| 1 | Q14934 NFAC4_HUMAN  | R.FGLGS#PLPS#PR.A                | S213:S217:      | 2 | 2,7571 | 0,331 | -0,284 |
| 1 | Q8TBF4 ZCRB1_HUMAN  | K.STYFSDEEELS#D.-                | S216:           | 2 | 3,0636 | 0,337 | 0,325  |
| 1 | Q09666 AHNK_HUMAN   | R.LPSGSGAAS#PTGS#AVDIR.A         | S216:S220:      | 2 | 4,1864 | 0,462 | -0,271 |
| 1 | Q01082 SPTB2_HUMAN  | K.ESS#PIPS#PTSDR.K               | S2165:S2169:    | 2 | 2,5112 | 0,35  | -0,426 |
| 1 | Q9UBQ5 EIF3K_HUMAN  | K.IDFDSVSSIMASS#Q.-              | S217:           | 2 | 3,2483 | 0,438 | 0,545  |
| 1 | Q9UBQ5 EIF3K_HUMAN  | K.IDFDSVSSIM*ASS#Q.-             | S217:           | 2 | 3,2098 | 0,458 | -0,154 |
| 1 | Q5UIP0 RIF1_HUMAN   | R.CVWS#PLAS#PSTSILK.R            | S2172:S2176:    | 2 | 4,1641 | 0,434 | 0      |
| 1 | Q02750 MP2K1_HUMAN  | K.LCDFGVSGQLIDS#M*ANS#FVGTR.S    | S218:S222:      | 3 | 4,5013 | 0,475 | 0,287  |
| 1 | Q02750 MP2K1_HUMAN  | K.LCDFGVSGQLIDS#MANS#FVGTR.S     | S218:S222:      | 3 | 4,0456 | 0,359 | 0,144  |
| 1 | Q13404 UB2V1_HUMAN  | K.LQPPEGQCYS#N.-                 | S220:           | 2 | 2,1491 | 0,355 | -0,083 |
| 1 | Q8WYP5 AHTF1_HUMAN  | R.LIS#PLAS#PADGVK.S              | S2231:S2235:    | 2 | 3,8611 | 0,446 | 0,256  |
| 1 | Q8WZ73 RFFL_HUMAN   | R.VPAEDETQS#IDS#EDSFVPGR.R       | S226:S229:      | 3 | 3,2232 | 0,292 | -0,235 |
| 1 | Q9BXX1 KLF16_HUMAN  | R.STSPS#DSLPCSLAGSPAPSPAPAPAGL.- | S228:           | 3 | 4,2611 | 0,381 | 0,133  |
| 1 | Q9BXY0 RBM13_HUMAN  | R.EFVEDGEVDES#DIS#DFEDM*DK.L     | S229:S232:      | 3 | 4,5676 | 0,47  | 0,418  |

|   |                    |                                  |                 |   |        |       |        |
|---|--------------------|----------------------------------|-----------------|---|--------|-------|--------|
| 1 | Q9BXY0 RBM13_HUMAN | R.EFVEDGEVDES#DIS#DFEDMDK.L      | S229:S232:      | 3 | 3,438  | 0,227 | 0,28   |
| 1 | Q96A57 CT030_HUMAN | R.LS#S#TDDGYIDLQFK.K             | S23:S24:        | 2 | 3,8839 | 0,445 | -0,346 |
| 1 | Q6Y7W6 PERQ2_HUMAN | R.ALSSGGS#ITS#PPLS#PALPK.Y       | S23:S26:S30:    | 2 | 3,8528 | 1     | -0,06  |
| 1 | Q13085 ACACA_HUMAN | R.FIIGS#VSEDNS#EDEISNLVK.L       | S23:S29:        | 3 | 5,3713 | 0,387 | 0,233  |
| 1 | P35367 HRH1_HUMAN  | R.S#LPS#FSEIK.L                  | S230:S233:      | 2 | 2,2773 | 0,117 | -0,418 |
| 1 | Q9BYG3 MK67I_HUMAN | K.TVDS#QGPT#PVCT#PTFLER.R        | S230:T234:T238: | 3 | 2,8677 | 0,214 | 0,163  |
| 1 | P04183 KITH_HUMAN  | K.LFAPQQILQCS#PAN.-              | S231:           | 2 | 2,0772 | 0,235 | 0,146  |
| 1 | P27348 1433T_HUMAN | R.DNLTLWTSDS#AGEECDAAEGAEN.-     | S232:           | 3 | 2,8037 | 0,275 | 0,072  |
| 1 | Q7Z6Z7 HUWE1_HUMAN | R.DGGS#GNS#TIIVSR.S              | S2362:S2365:    | 2 | 3,0297 | 0,333 | -0,686 |
| 1 | Q9Y2W1 TR150_HUMAN | R.AS#AVSELS#PR.E                 | S237:S243:      | 2 | 2,1203 | 0,204 | -0,311 |
| 1 | O75962 TRIO_HUMAN  | R.AGAAS#PLNS#PLSSAVPSLGK.E       | S2396:S2400:    | 3 | 2,6453 | 0,232 | 0      |
| 1 | O75420 PERQ1_HUMAN | R.ALSGGGSVAS#PPPS#PAM*PK.Y       | S24:S28:        | 2 | 3,3824 | 0,399 | -0,583 |
| 1 | O75420 PERQ1_HUMAN | R.ALSGGGSVAS#PPPS#PAMPK.Y        | S24:S28:        | 2 | 2,4171 | 0,236 | 0      |
| 1 | Q16204 CCDC6_HUMAN | K.LDQPVS#APPS#PR.D               | S240:S244:      | 2 | 3,7148 | 0,536 | -0,086 |
| 1 | Q16204 CCDC6_HUMAN | K.LDQPVS#APPS#PR.D               | S240:S244:      | 3 | 2,6639 | 0,184 | -0,193 |
| 1 | Q9BZG1 RAB34_HUMAN | R.INS#DDS#NLYLTASK.K             | S241:S244:      | 2 | 3,0881 | 0,328 | -0,143 |
| 1 | P85037 FOXK1_HUMAN | R.SM*VSPVPS#PTGTISVPNSCPAS#PR.G  | S243:S257:      | 3 | 4,2289 | 1     | -0,352 |
| 1 | P85037 FOXK1_HUMAN | R.SMSPVPS#PT#GTISVPNSCPAS#PR.G   | S243:T245:S257: | 3 | 3,1136 | 1     | 0      |
| 1 | O75376 NCOR1_HUMAN | R.EPAPLLSAQYETLS#DSDD.-          | S2436:          | 2 | 3,3918 | 0,51  | 0,18   |
| 1 | O75376 NCOR1_HUMAN | R.EPAPLLSAQYETLS#DS#DD.-         | S2436:S2438:    | 2 | 4,3057 | 0,618 | 0,116  |
| 1 | Q96ST2 IWS1_HUMAN  | R.IS#DS#ESEDPPR.H                | S248:S250:      | 2 | 2,1522 | 0,292 | -0,263 |
| 1 | Q9H0G5 CCD55_HUMAN | K.VEENPDADS#DFDAKS#S#ADDEIEETR.V | S248:S254:S255: | 3 | 3,5053 | 0,293 | -0,242 |
| 1 | P0C1Z6 TFPT_HUMAN  | K.LLPYPTLAS#PAS#D.-              | S249:S252:      | 2 | 3,1849 | 0,341 | -0,405 |
| 1 | O95685 PPR3D_HUMAN | R.SLS#CLS#DLDDGGVALEPR.A         | S25:S28:        | 3 | 3,3141 | 0,262 | 0      |
| 1 | O95685 PPR3D_HUMAN | R.SLS#CLS#DLDDGGVALEPR.A         | S25:S28:        | 2 | 2,3615 | 0,234 | 0,063  |
| 1 | Q6ZU65 K2030_HUMAN | R.QAS#DT#EEDDITDNQK.H            | S250:T252:      | 2 | 2,1418 | 0,191 | -0,457 |
| 1 | Q9UFC0 LRWD1_HUMAN | R.ACAS#PSAQVEGS#PVAGSDGSQPAVK.L  | S251:S259:      | 3 | 4,7738 | 0,435 | -0,218 |
| 1 | P0C1Z6 TFPT_HUMAN  | K.LLPYPTLASPAS#D.-               | S252:           | 2 | 3,2314 | 0,552 | -0,257 |
| 1 | P05787 K2C8_HUMAN  | R.S#LDMDS#IIAEVK.A               | S253:S258:      | 2 | 4,4768 | 0,462 | 0      |
| 1 | P05787 K2C8_HUMAN  | R.S#LDM*DS#IIAEVK.A              | S253:S258:      | 2 | 4,0749 | 0,46  | 0,163  |
| 1 | Q13426 XRCC4_HUMAN | K.DDS#IIS#SLDVTDIAPSR.K          | S256:S259:      | 2 | 4,0631 | 0,472 | -0,808 |
| 1 | Q15942 ZYX_HUMAN   | R.GPPASS#PAPAPKFS#PVT#PK.F       | S259:S267:T270: | 3 | 3,257  | 0,306 | 0,176  |
| 1 | Q8NFH5 NUP53_HUMAN | R.CALSS#PSLAFT#PPIK.T            | S259:T265:      | 2 | 2,9244 | 0,45  | 1,674  |

|   |                    |                                  |                    |   |        |       |        |
|---|--------------------|----------------------------------|--------------------|---|--------|-------|--------|
| 1 | Q6Y7W6 PERQ2_HUMAN | R.ALSSGGSITS#PPLS#PALPK.Y        | S26:S30:           | 3 | 3,1942 | 0,367 | -0,094 |
| 1 | Q6KC79 NIPBL_HUMAN | K.AITS#LLGGGS#PK.N               | S2652:S2658:       | 2 | 3,5105 | 0,352 | -0,677 |
| 1 | Q8IWB9 TEX2_HUMAN  | K.TAPSS#PLTS#PSDTR.S             | S266:S270:         | 2 | 2,9339 | 1     | -0,542 |
| 1 | Q15942 ZYG_HUMAN   | K.FS#PVT#PK.F                    | S267:T270:         | 2 | 2,0821 | 0,282 | -0,196 |
| 1 | Q9UJU6 DBNL_HUMAN  | R.AMS#TTSISS#PQP GK.L            | S269:S275:         | 2 | 3,122  | 1     | -0,393 |
| 1 | Q9UJU6 DBNL_HUMAN  | R.AM*S#TT#SISSPQPKG.L            | S269:T271:         | 2 | 2,1392 | 0,327 | -0,233 |
| 1 | Q9UQ35 SRRM2_HUMAN | R.S#LS#YS#PVER.R                 | S2690:S2692:S2694: | 2 | 3,0865 | 0,394 | 0      |
| 1 | Q9UQ35 SRRM2_HUMAN | R.SLS#YS#PVER.R                  | S2692:S2694:       | 2 | 3,4496 | 0,354 | -0,102 |
| 1 | O94806 KPCD3_HUMAN | K.SVLPTAIPAVLPAAS#PCSS#PK.T      | S27:S31:           | 3 | 3,7577 | 0,334 | 0,165  |
| 1 | P21127 CD2L1_HUMAN | R.DLLS#DLQDIS#DSER.K             | S277:S283:         | 2 | 4,6503 | 0,592 | -0,276 |
| 1 | Q13435 SF3B2_HUMAN | R.S#S#LQGQSAS#ETEEDTVSVSK.K      | S279:S280:S286:    | 2 | 2,0593 | 1     | -0,448 |
| 1 | Q13435 SF3B2_HUMAN | R.S#SLGQS#AS#ETEEDTVSVSK.K       | S279:S284:S286:    | 2 | 2,9776 | 1     | 0      |
| 1 | O94888 UBXD7_HUMAN | R.SES#LIDAS EDS#QLEAAIR.A        | S280:S288:         | 3 | 4,6079 | 0,552 | -0,175 |
| 1 | Q5C9Z4 NOM1_HUMAN  | K.AQEAEAQ#EDDDEDT#EEEQGEEK.E     | S280:T287:         | 3 | 3,8319 | 0,48  | -0,066 |
| 1 | P15924 DESP_HUMAN  | K.GLPSPYNM*SS#APGS#R.S           | S2821:S2825:       | 2 | 3,1691 | 0,293 | -0,072 |
| 1 | P21127 CD2L1_HUMAN | R.DLLSDLQDIS#DS#ER.K             | S283:S285:         | 2 | 3,3489 | 0,476 | 0,069  |
| 1 | Q02952 AKA12_HUMAN | K.SAES#PTS#PVTSETGSTFK.K         | S283:S286:         | 2 | 4,6616 | 1     | -0,247 |
| 1 | Q02952 AKA12_HUMAN | K.SAES#PTS#PVTS#ETGSTFK.K        | S283:S286:S290:    | 2 | 2,8445 | 1     | 0,238  |
| 1 | P98172 EFNB1_HUMAN | R.AAALSLS#TLAS#PK.G              | S283:S287:         | 2 | 3,3798 | 0,288 | 0,088  |
| 1 | Q13435 SF3B2_HUMAN | R.SSLGQS#AS#ET#EEDTVSVSK.K       | S284:S286:T288:    | 2 | 2,3227 | 1     | -0,336 |
| 1 | Q02952 AKA12_HUMAN | K.SAESPTS#PVT#SETGSTFK.K         | S286:T289:         | 2 | 5,0067 | 1     | -0,371 |
| 1 | Q7Z6Z7 HUWE1_HUMAN | R.AGSS#T#PGDAPPAVAEVQGR.S        | S2888:T2889:       | 2 | 4,9372 | 0,559 | 0      |
| 1 | Q7Z6Z7 HUWE1_HUMAN | R.AGSS#T#PGDAPPAVAEVQGR.S        | S2888:T2889:       | 3 | 4,7788 | 0,403 | -0,19  |
| 1 | Q5T8I3 F102B_HUMAN | K.ILQSQDFSLDS#S#AEEELR.L         | S289:S290:         | 3 | 4,2238 | 0,361 | 0,08   |
| 1 | Q9BW71 HIRP3_HUMAN | R.LLGDS#DS#EEEQK.E               | S289:S291:         | 2 | 3,1358 | 0,387 | -0,485 |
| 1 | Q9BVJ6 UT14A_HUMAN | K.DYLLS#ES#EDEGDNDGER.K          | S29:S31:           | 3 | 5,0802 | 0,423 | -0,261 |
| 1 | Q8WVC0 LEO1_HUMAN  | K.NAIAS#DS#EADS#DTEVPK.D         | S294:S296:S300:    | 2 | 4,1854 | 0,606 | -0,675 |
| 1 | P25440 BRD2_HUMAN  | K.ADTTPTPTAILAPGS#PAS#PPGSLEPK.A | S298:S301:         | 3 | 3,2299 | 0,169 | 0,335  |
| 1 | Q76FK4 NOL8_HUMAN  | R.NSIS#DDDT#DS#EDEL.R.M          | S298:T302:S304:    | 2 | 3,9552 | 0,45  | -0,438 |
| 1 | Q4G0J3 LARP7_HUMAN | R.SS#S#EDAESLAPR.S               | S299:S300:         | 2 | 2,2137 | 0,272 | -0,346 |
| 1 | Q96CW6 S7A6O_HUMAN | K.EFGYDS#PHDLDS#D.-              | S302:S308:         | 2 | 3,8317 | 0,53  | 0,074  |
| 1 | P05388 RLA0_HUMAN  | K.VEAKEES#EES#DEDMGFGLFD.-       | S304:S307:         | 3 | 4,1254 | 0,359 | -0,151 |
| 1 | P05388 RLA0_HUMAN  | K.VEAKEES#EES#DEDM*GFGLFD.-      | S304:S307:         | 3 | 3,5737 | 0,379 | 0,225  |

|   |                    |                                       |                 |   |        |       |        |
|---|--------------------|---------------------------------------|-----------------|---|--------|-------|--------|
| 1 | P05388 RLA0_HUMAN  | K.EES#EES#DEDM*GFGLFD.-               | S304:S307:      | 2 | 3,31   | 0,505 | 1,031  |
| 1 | P05388 RLA0_HUMAN  | K.EES#EES#DEDM*GFGLFD.-               | S304:S307:      | 3 | 2,7239 | 0,278 | 0,091  |
| 1 | Q6ZTU2 E400N_HUMAN | R.TPGVLLPGAGGAAGFGMTS#PPPPT#SPSR.T    | S304:T309:      | 3 | 3,8334 | 0,308 | -0,334 |
| 1 | Q969H4 CNKR1_HUMAN | R.S#PSLSLAPLS#PR.A                    | S305:S314:      | 2 | 3,4379 | 0,435 | -0,176 |
| 1 | P05388 RLA0_HUMAN  | K.EESEES#DEDMGFGLFD.-                 | S307:           | 2 | 3,5627 | 0,582 | 0,127  |
| 1 | P05388 RLA0_HUMAN  | K.EESEES#DEDM*GFGLFD.-                | S307:           | 2 | 3,3632 | 0,534 | -0,189 |
| 1 | Q6PD74 P34_HUMAN   | R.DEIEGLS#S#DEEH.-                    | S310:S311:      | 2 | 2,049  | 0,215 | -0,321 |
| 1 | Q96ST2 IWS1_HUMAN  | K.GPAS#DS#ETEDASR.H                   | S313:S315:      | 2 | 2,0668 | 0,443 | -0,329 |
| 1 | P67809 YBOX1_HUMAN | K.AADPPAENSS#APEAEQGGAE.-             | S314:           | 3 | 3,8943 | 0,467 | -0,37  |
| 1 | P67809 YBOX1_HUMAN | K.AADPPAENSS#APEAEQGGAE.-             | S314:           | 2 | 3,5951 | 0,556 | -0,37  |
| 1 | Q9BW85 CCD94_HUMAN | K.EANPTPLTPGASSLSQLGAYLDS#DDS#NGS#N.- | S316:S319:S322: | 3 | 3,3973 | 0,371 | 0      |
| 1 | O75436 VP26A_HUMAN | R.FESPES#QASAEQPEM.-                  | S318:           | 2 | 3,4326 | 0,295 | 0      |
| 1 | O15127 SCAM2_HUMAN | R.AASS#AAQGAFQGN.-                    | S320:           | 2 | 3,0163 | 0,54  | -0,097 |
| 1 | Q13546 RIPK1_HUMAN | R.M*QS#LQLDCVAVPS#SR.S                | S320:S330:      | 2 | 3,6837 | 0,459 | 0,719  |
| 1 | Q86WC4 OSTM1_HUMAN | R.LKS#STS#FANIQENSN.-                 | S322:S325:      | 2 | 4,238  | 0,581 | 0,068  |
| 1 | Q9H330 CI005_HUMAN | R.GESAPTLTSPSPSSPS#PTSPS#PTLGR.R      | S327:S332:      | 3 | 4,1859 | 1     | -0,2   |
| 1 | Q13426 XRCC4_HUMAN | R.NSS#PEDLFDEI.-                      | S328:           | 2 | 2,1736 | 0,218 | 0      |
| 1 | Q14676 MDC1_HUMAN  | R.AQPFGFIDS#DT#DAEEER.I               | S329:T331:      | 2 | 3,8973 | 0,541 | -0,117 |
| 1 | Q92597 NDRG1_HUMAN | R.TAS#GSS#VTSLDGTR.S                  | S330:S333:      | 2 | 3,8146 | 1     | -0,244 |
| 1 | Q92597 NDRG1_HUMAN | R.TAS#GSS#VT#SLDGTR.S                 | S330:S333:T335: | 2 | 3,5558 | 1     | -0,155 |
| 1 | Q9BVS4 RIOK2_HUMAN | K.EGS#EFS#FSDGEVAEK.A                 | S332:S335:      | 2 | 3,1959 | 0,305 | -0,206 |
| 1 | Q9BVS4 RIOK2_HUMAN | K.EGS#EFS#FS#DGEVAEK.A                | S332:S335:S337: | 2 | 4,2299 | 0,234 | 0,066  |
| 1 | Q9BVS4 RIOK2_HUMAN | K.EGS#EFS#FS#DGEVAEK.A                | S332:S337:      | 2 | 4,3143 | 0,495 | 0      |
| 1 | Q9UN36 NDRG2_HUMAN | R.TAS#LTAAS#VDGNR.S                   | S332:S338:      | 2 | 2,9448 | 0,57  | -0,242 |
| 1 | P40925 MDHC_HUMAN  | K.ESAFELSS#A.-                        | S333:           | 2 | 2,1801 | 0,268 | -0,209 |
| 1 | Q9NYV4 CD2L7_HUMAN | R.SS#S#PFLSK.R                        | S333:S334:      | 2 | 2,478  | 0,19  | -0,06  |
| 1 | Q03188 CENPC_HUMAN | R.TIS#PAES#TALFQGR.K                  | S333:S337:      | 2 | 3,8438 | 0,557 | 0,223  |
| 1 | Q8WX19 P66B_HUMAN  | R.VSS#PLPS#PSAMTDAANSQAAAK.L          | S334:S338:      | 3 | 4,5416 | 1     | 0,405  |
| 1 | P49790 NU153_HUMAN | R.IPSIVSS#PLNS#PLDR.S                 | S334:S338:      | 2 | 4,4942 | 0,512 | -0,07  |
| 1 | Q8WX19 P66B_HUMAN  | R.VSS#PLPSPS#AM*TDAANSQAAAK.L         | S334:S340:      | 3 | 2,9809 | 0,317 | -0,321 |
| 1 | Q8IY81 RRMJ3_HUMAN | K.ALDISLS#S#GEEDEGEDSTAGTTK.Q         | S335:S336:      | 3 | 5,4594 | 1     | 0,606  |
| 1 | Q9UK58 CCNL1_HUMAN | K.GLNPDGTPALSTLGGFS#PAS#KPS#SPR.E     | S335:S338:S341: | 3 | 3,6131 | 1     | 0      |
| 1 | Q9C086 ZNHI4_HUMAN | R.LGGPEGPGS#PLLAT.-                   | S338:           | 2 | 2,4445 | 0,447 | 0,091  |

|   |                    |                                  |                    |   |        |       |        |
|---|--------------------|----------------------------------|--------------------|---|--------|-------|--------|
| 1 | P82094 TMF1_HUMAN  | R.S#VSEINS#DDELSGK.G             | S338:S344:         | 2 | 3,5437 | 0,492 | -0,446 |
| 1 | Q659C4 LARP2_HUMAN | R.IGS#PLS#PK.K                   | S340:S343:         | 2 | 2,5847 | 0,32  | -0,064 |
| 1 | P49585 PCY1A_HUMAN | K.TS#PPCS#PANLSR.H               | S343:S347:         | 2 | 3,0209 | 0,374 | -0,253 |
| 1 | O60716 CTND1_HUMAN | R.GSLAS#LDS#LR.K                 | S349:S352:         | 2 | 3,5721 | 0,414 | 0      |
| 1 | Q03164 HRX_HUMAN   | K.ALSSAVQASPTS#PGGS#PSS#PSSGQR.S | S3511:S3515:S3518: | 3 | 4,8038 | 1     | -0,432 |
| 1 | P30462 1B14_HUMAN  | K.GGSYSQAASSDS#AQGSDVSLTA.-      | S352:              | 2 | 3,6475 | 1     | -0,344 |
| 1 | O15014 ZN609_HUMAN | R.FCDS#PTS#DLEMR.N               | S358:S361:         | 2 | 4,1078 | 0,415 | 0      |
| 1 | P30462 1B14_HUMAN  | K.GGSYSQAASSDSAQGS#LTA.-         | S359:              | 2 | 2,2898 | 0,237 | -0,115 |
| 1 | Q6VN20 RBP10_HUMAN | K.SQDS#YPGS#PSLS#PR.H            | S361:S365:S369:    | 2 | 3,6067 | 1     | -0,213 |
| 1 | P49585 PCY1A_HUMAN | K.AAAYDIS#EDEED.-                | S362:              | 2 | 2,5131 | 0,4   | 0      |
| 1 | Q6VN20 RBP10_HUMAN | K.SQDSYPGS#PSLS#PR.H             | S365:S369:         | 2 | 2,1424 | 0,084 | -0,372 |
| 1 | P49768 PSN1_HUMAN  | R.AAVQELSS#S#ILAGEDPEER.G        | S366:S367:         | 3 | 4,3193 | 0,368 | -0,085 |
| 1 | O43303 CE110_HUMAN | K.LPS#PEPSM*S#PK.M               | S366:S372:         | 2 | 3,3206 | 0,372 | -0,363 |
| 1 | O43303 CE110_HUMAN | K.LPS#PEPSMS#PK.M                | S366:S372:         | 2 | 2,1342 | 0,276 | -0,275 |
| 1 | Q5T200 ZC3HD_HUMAN | R.S#AS#PYPSHLS#SPQR.K            | S370:S372:S380:    | 2 | 3,2343 | 1     | -0,398 |
| 1 | P31350 RIR2_HUMAN  | R.MGVMSS#PTENSFTLDADF.-          | S377:              | 2 | 3,7328 | 0,553 | 0,18   |
| 1 | P31350 RIR2_HUMAN  | R.M*GVM*SS#PTENSFTLDADF.-        | S377:              | 2 | 2,5931 | 0,355 | 0,118  |
| 1 | P31350 RIR2_HUMAN  | R.MGVM*SS#PTENSFTLDADF.-         | S377:              | 2 | 2,1338 | 0,322 | 0,119  |
| 1 | Q9HCD5 NCOA5_HUMAN | R.S#STDS#LPGPIR.Q                | S377:S381:         | 2 | 3,5876 | 0,389 | 0,089  |
| 1 | O95817 BAG3_HUMAN  | K.VPPAPVPCPPPS#PGPSAVPS#SPK.S    | S377:S385:         | 3 | 3,3558 | 0,428 | 0,231  |
| 1 | O95817 BAG3_HUMAN  | K.VPPAPVPCPPPS#PGPSAVPSS#PK.S    | S377:S386:         | 3 | 3,4906 | 0,503 | 0,154  |
| 1 | Q9C0B0 UNK_HUMAN   | R.NSSLGS#PSNLCGS#PPGSIR.K        | S378:S385:         | 3 | 4,3456 | 0,455 | -0,179 |
| 1 | Q76FK4 NOL8_HUMAN  | R.EYDS#GDT#DEIIAM*K.K            | S378:T381:         | 2 | 2,1543 | 0,248 | -0,346 |
| 1 | P22059 OSBP1_HUMAN | R.TGS#NIS#GAS#SDISLDEQYK.H       | S379:S382:S385:    | 3 | 4,9578 | 1     | 0,662  |
| 1 | Q4KMP7 TB10B_HUMAN | R.QQPPLGPSS#SLLS#LPGLK.S         | S382:S386:         | 3 | 3,061  | 0,163 | -0,277 |
| 1 | Q4KMP7 TB10B_HUMAN | R.QQPPLGPSS#LLS#LPGLK.S          | S383:S386:         | 2 | 3,1141 | 0,523 | 0      |
| 1 | Q86SQ0 PHLB2_HUMAN | R.NFS#CGS#VEFDEADLESLR.Q         | S384:S387:         | 3 | 6,8624 | 0,51  | 0      |
| 1 | Q9Y3X0 CCDC9_HUMAN | K.EGAASPAPETPQPTS#PETS#PK.E      | S386:S390:         | 3 | 4,1794 | 0,425 | -0,245 |
| 1 | Q16659 MK06_HUMAN  | R.ALS#DVT#DEEEVQVDPR.K           | S386:T389:         | 2 | 4,2872 | 0,435 | 0,187  |
| 1 | P55010 IF5_HUMAN   | K.EAEEES#S#GGEEDENIEVVYSK.A      | S389:S390:         | 3 | 4,5985 | 0,49  | 0,575  |
| 1 | Q8IYB3 SRRM1_HUMAN | R.LS#PSAS#PPR.R                  | S389:S393:         | 2 | 2,273  | 0,366 | -0,228 |
| 1 | Q8TDD1 DDX54_HUMAN | R.GS#DS#EDGEFEIQAEDDAR.A         | S39:S41:           | 3 | 5,3452 | 0,423 | 0,258  |
| 1 | Q96DF8 DGC14_HUMAN | K.GLS#PAMS#PALQR.L               | S391:S395:         | 2 | 3,1175 | 0,403 | 0,088  |



|   |                     |                                   |                    |   |        |       |        |
|---|---------------------|-----------------------------------|--------------------|---|--------|-------|--------|
| 1 | Q8N108 MIER1_HUMAN  | R.LLDES#ESAAS#S#R.A               | S391:S396:S397:    | 2 | 2,1064 | 0,163 | -0,405 |
| 1 | Q8NC51 PAIRB_HUMAN  | K.SSAS#APDVDDPEAFPALA.-           | S394:              | 2 | 2,4509 | 0,254 | -0,398 |
| 1 | Q14527 HLTF_HUMAN   | K.TAVQYIES#S#DSEEIETSELQK.M       | S397:S398:         | 3 | 3,8763 | 1     | -0,069 |
| 1 | Q14527 HLTF_HUMAN   | K.TAVQYIES#S#DS#EEIETSELQK.M      | S397:S398:S400:    | 3 | 4,7198 | 1     | 0      |
| 1 | Q96ST2 IWS1_HUMAN   | K.AAVLS#DS#EDEEK.A                | S398:S400:         | 2 | 3,6065 | 0,254 | -0,42  |
| 1 | P51114 FXR1_HUMAN   | R.GPNYTSGYGTNSELS#NPS#ETESER.K    | S406:S409:         | 3 | 4,2095 | 1     | -0,334 |
| 1 | Q9UBB5 MBD2_HUMAN   | R.AADTEEM*DIEMDS#GDEA.-           | S407:              | 2 | 2,9064 | 0,483 | -0,127 |
| 1 | Q9UBB5 MBD2_HUMAN   | R.AADTEEMDIEM*DS#GDEA.-           | S407:              | 2 | 2,3802 | 0,353 | -0,317 |
| 1 | Q15276 RABE1_HUMAN  | R.AQS#TDS#LGTSGSLQSK.A            | S407:S410:         | 2 | 4,4848 | 1     | -0,283 |
| 1 | Q96AJ1 CLUA1_HUMAN  | K.SEPLDES#DNDF.-                  | S409:              | 2 | 2,5655 | 0,273 | 0,272  |
| 1 | Q9UKV3 ACINU_HUMAN  | K.ASLVALPEQTAS#EEET#PPPLLT.K.E    | S410:T414:         | 3 | 3,5769 | 0,175 | -0,071 |
| 1 | Q9Y6E2 BZW2_HUMAN   | K.FVEWLQNAEEES#ES#EGEEN.-         | S412:S414:         | 3 | 3,7642 | 0,422 | 0,227  |
| 1 | Q7L1Q6 BZW1_HUMAN   | K.NAEEES#EAEEGD.-                 | S413:              | 2 | 2,1935 | 0,373 | -0,228 |
| 1 | B2RMZ9 B2RMZ9_HUMAN | R.LNS#S#PRAPVS#PLK.F              | S416:S417:S423:    | 2 | 2,2867 | 0,203 | -0,076 |
| 1 | P85037 FOXK1_HUMAN  | R.S#APAS#PTHPGLMS#PR.S            | S416:S420:S428:    | 2 | 3,2234 | 0,332 | -0,21  |
| 1 | Q13547 HDAC1_HUMAN  | R.IACEEFS#DS#EEEGEGGR.K           | S421:S423:         | 2 | 2,0587 | 0,244 | -0,446 |
| 1 | P42858 HD_HUMAN     | R.SGS#IVELIAGGGSSCS#PVLSR.K       | S421:S434:         | 3 | 5,7214 | 0,494 | -0,417 |
| 1 | Q8TEQ0 SNX29_HUMAN  | R.NVEPQS#GDL.-                    | S425:              | 2 | 2,0204 | 0,311 | 0      |
| 1 | Q96AP0 ACD_HUMAN    | R.TPSS#PLQSQCTPSLS#PR.S           | S425:S435:         | 2 | 3,6264 | 1     | -0,195 |
| 1 | Q53EZ4 CEP55_HUMAN  | K.VAAS#PKSPT#AALNES#LVECPK.C      | S425:T430:S436:    | 3 | 5,5796 | 0,393 | 0,456  |
| 1 | Q8NDI1 EHBP1_HUMAN  | K.DLSTS#PKPS#PIPS#PVLGR.K         | S428:S432:S436:    | 3 | 2,7396 | 0,24  | 0,35   |
| 1 | Q13112 CAF1B_HUMAN  | R.TQDPSS#PGT#TPPQAR.Q             | S429:T432:         | 2 | 2,4216 | 0,419 | -0,215 |
| 1 | P27987 IP3KB_HUMAN  | R.AVLS#PGSVFS#PGR.G               | S43:S49:           | 2 | 3,5637 | 0,467 | 0      |
| 1 | Q9H8Y8 GORS2_HUMAN  | R.VGDSTPVVS#EKPVSAAVDANASES#P.-   | S436:S451:         | 3 | 3,2426 | 0,198 | -0,666 |
| 1 | Q9BVJ6 UT14A_HUMAN  | R.SELS#QDAEPAGS#QETK.D            | S437:S445:         | 2 | 2,1297 | 0,412 | -0,664 |
| 1 | Q15149 PLEC1_HUMAN  | R.S#SSVGS#SSYPIS#PAVSR.T          | S4384:S4396:       | 3 | 2,7568 | 1     | 0      |
| 1 | Q15149 PLEC1_HUMAN  | R.SSS#VGS#SSYPIS#PAVSR.T          | S4386:S4389:S4396: | 2 | 3,926  | 1     | -0,306 |
| 1 | Q15149 PLEC1_HUMAN  | R.SSS#VGS#SSYPIS#PAVSR.T          | S4386:S4396:       | 2 | 3,7331 | 1     | -0,127 |
| 1 | Q9BQE3 TBA1C_HUMAN  | K.DYEEVGADS#ADGEDEGEY.-           | S439:              | 2 | 4,2769 | 0,546 | -0,339 |
| 1 | A5YM69 A5YM69_HUMAN | R.AEELS#PAALS#PLEPIR.C            | S445:S450:         | 2 | 4,2921 | 0,411 | -0,186 |
| 1 | Q8WWY3 PRP31_HUMAN  | R.S#SGT#ASSVAFT#PLQGLEIVNPQAAEK.K | S445:T448:T455:    | 3 | 3,3185 | 1     | 0,258  |
| 1 | Q8WUM0 NU133_HUMAN  | K.GLPLGSAVSS#PVLFS#PVGR.R         | S45:S50:           | 2 | 3,3149 | 0,506 | 0,061  |
| 1 | Q8WUM0 NU133_HUMAN  | K.GLPLGSAVSS#PVLFS#PVGR.R         | S45:S50:           | 3 | 2,8779 | 0,241 | 0,183  |

|   |                    |                                     |                 |   |        |       |        |
|---|--------------------|-------------------------------------|-----------------|---|--------|-------|--------|
| 1 | Q02790 FKBP4_HUMAN | K.SNTAGS#QSQVETEA.-                 | S451:           | 2 | 3,1409 | 0,471 | -0,41  |
| 1 | Q8WWY3 PRP31_HUMAN | R.SSGTASS#VAFT#PLQGLEIVNPQAAEK.K    | S451:T455:      | 3 | 4,2777 | 1     | 0      |
| 1 | Q14676 MDC1_HUMAN  | R.DS#DT#DVVEEELPVENR.E              | S453:T455:      | 2 | 3,9414 | 0,395 | -0,479 |
| 1 | Q53ET0 CRTC2_HUMAN | K.QFS#PT#M*SPTLSSITQGVPLDTSK.L      | S456:T458:      | 3 | 3,4609 | 1     | 0,141  |
| 1 | Q7Z5K2 WAPL_HUMAN  | K.YFGFDDL#ES#EDDEDDCQVER.K          | S459:S461:      | 3 | 3,357  | 0,37  | -0,064 |
| 1 | Q15149 PLEC1_HUMAN | K.GYSPYSVSGSGS#TAGS#R.T             | S4622:S4626:    | 2 | 4,758  | 1     | -0,251 |
| 1 | Q99717 SMAD5_HUMAN | K.VLTQM*GSPLNPISS#VS#.-             | S463:S465:      | 2 | 2,7759 | 0,278 | -0,203 |
| 1 | Q14157 UBP2L_HUMAN | K.STSAPQM*S#PGSSDNQSSS#PQPAQQK.L    | S467:S477:      | 3 | 3,282  | 1     | -0,473 |
| 1 | Q9BZE4 NOG1_HUMAN  | R.TAAGEYDS#VS#ESEDEEM*LEIR.Q        | S468:S470:      | 3 | 3,1641 | 0,135 | 0,866  |
| 1 | Q9BZE4 NOG1_HUMAN  | R.TAAGEYDS#VS#ES#EDEEMLEIR.Q        | S468:S470:S472: | 3 | 4,5239 | 1     | 0,141  |
| 1 | Q96D46 NMD3_HUMAN  | R.DSAIPVES#DT#DDEGAPR.I             | S468:T470:      | 2 | 2,8142 | 0,374 | -0,442 |
| 1 | Q99543 DNJC2_HUMAN | R.NAS#AS#FQELEDK.K                  | S47:S49:        | 2 | 5,1317 | 0,58  | 0      |
| 1 | Q14157 UBP2L_HUMAN | K.STSAPQMSPGS#SDNQSSS#PQPAQQK.L     | S470:S477:      | 3 | 3,2315 | 1     | -0,612 |
| 1 | Q9H0D6 XRN2_HUMAN  | R.M*QNNSSPS#ISPNTS#FTSDGSPSPLGGIK.R | S473:S479:      | 3 | 2,9609 | 1     | 0,245  |
| 1 | P05787 K2C8_HUMAN  | K.LVS#ES#SDVLPK.-                   | S475:S477:      | 2 | 3,4397 | 0,23  | 1,098  |
| 1 | P05787 K2C8_HUMAN  | K.LVS#ESS#DVLPK.-                   | S475:S478:      | 2 | 3,7702 | 0,16  | -0,457 |
| 1 | Q9ULG1 INOC1_HUMAN | R.NISS#DDS#EDGLDDSNPLLPQSGDPLIQVK.E | S48:S51:        | 3 | 3,1436 | 0,157 | -0,113 |
| 1 | Q8NFC6 FA44A_HUMAN | K.YYS#DS#DDELTVQR.R                 | S482:S484:      | 3 | 3,3552 | 0,299 | -0,097 |
| 1 | Q96Q42 ALS2_HUMAN  | R.LS#LPGLLSQVS#PR.L                 | S483:S492:      | 2 | 3,7043 | 0,326 | -0,08  |
| 1 | O60832 DKC1_HUMAN  | K.AGLES#GAEPGDGDS#DTTK.K            | S485:S494:      | 2 | 3,9544 | 0,451 | -0,523 |
| 1 | Q9BQC3 DPH2_HUMAN  | R.GIAIAYEDEGS#G.-                   | S488:           | 2 | 2,9614 | 0,445 | -0,097 |
| 1 | Q86SQ0 PHLB2_HUMAN | K.LQLS#DEES#VFEEALM*SPDTR.Y         | S489:S493:      | 3 | 5,0284 | 0,361 | -0,222 |
| 1 | Q86SQ0 PHLB2_HUMAN | K.LQLS#DEESVFEEALM*S#PDTR.Y         | S489:S501:      | 3 | 5,6837 | 0,545 | -0,296 |
| 1 | Q9C0C2 TB182_HUMAN | R.LDS#PPPS#PITEASEAAEAAEAGNLAVSSR.E | S494:S498:      | 3 | 4,6785 | 0,567 | -0,061 |
| 1 | P78362 SRPK2_HUMAN | R.TVS#ASST#GDLPK.A                  | S494:T498:      | 2 | 3,2176 | 0,295 | -0,184 |
| 1 | Q9NYZ3 GTSE1_HUMAN | R.SS#GPAPQSLLS#AR.R                 | S495:S504:      | 2 | 3,3874 | 0,473 | -0,171 |
| 1 | Q9C0C2 TB182_HUMAN | R.LDSPPPS#PITEAS#EAAEAAEAGNLAVSSR.E | S498:S504:      | 3 | 4,5429 | 0,525 | -0,061 |
| 1 | Q9H0D6 XRN2_HUMAN  | K.AEDS#DS#EPEPEDNVR.L               | S499:S501:      | 2 | 4,8718 | 0,513 | -0,726 |
| 1 | Q9UQR0 SCML2_HUMAN | R.S#PQQTVPYVVPLS#PK.L               | S499:S511:      | 2 | 3,2861 | 0,245 | 0,136  |
| 1 | O43818 U3IP2_HUMAN | K.MNEEIS#S#DS#EESLAPR.K             | S50:S51:S53:    | 3 | 3,2886 | 0,293 | 0,086  |
| 1 | O43818 U3IP2_HUMAN | K.MNEEIS#SDS#EESLAPR.K              | S50:S53:        | 2 | 3,2393 | 0,259 | -0,419 |
| 1 | Q9Y2X3 NOL5_HUMAN  | K.EEPLS#EEEEPCTSTAIAS#PEK.K         | S502:S514:      | 3 | 2,7559 | 0,28  | -0,155 |
| 1 | O14974 MYPT1_HUMAN | R.LAS#TS#DIEEK.E                    | S507:S509:      | 2 | 2,5769 | 0,336 | -0,195 |

|   |                       |                                    |                 |   |        |       |        |
|---|-----------------------|------------------------------------|-----------------|---|--------|-------|--------|
| 1 | P27816 MAP4_HUMAN     | K.DMS#PLS#ETEM*ALGK.D              | S507:S510:      | 2 | 4,4902 | 0,404 | 0      |
| 1 | P27816 MAP4_HUMAN     | K.DMS#PLS#ETEMALGK.D               | S507:S510:      | 2 | 4,0519 | 0,548 | 0,146  |
| 1 | P27816 MAP4_HUMAN     | K.DM*S#PLS#ETEMALGK.D              | S507:S510:      | 2 | 3,2417 | 0,488 | 0,072  |
| 1 | ##A2ABS9 A2ABS9_HUMAN | R.EKSDQTTCS#SAKNLPS#PS#FK.E        | S51:S58:S60:    | 3 | 2,7366 | 0,202 | 1,94   |
| 1 | Q9Y6G9 DC1L1_HUMAN    | R.KPVTVS#PTT#PTS#PTEGEAS.-         | S510:T513:S516: | 2 | 3,3952 | 1     | -0,344 |
| 1 | Q12888 TP53B_HUMAN    | K.LMLSTSEYS#QS#PK.M                | S523:S525:      | 2 | 3,7692 | 1     | -0,449 |
| 1 | Q12888 TP53B_HUMAN    | K.LM*LSTSEYS#QS#PK.M               | S523:S525:      | 2 | 2,9084 | 0,199 | -0,37  |
| 1 | Q86VM9 ZCH18_HUMAN    | K.LGVSV#VS#PSR.A                   | S532:S534:      | 2 | 3,5342 | 0,332 | -0,23  |
| 1 | Q6XQN6 PNCB_HUMAN     | R.LQALVNSLCAGQS#P.-                | S537:           | 2 | 2,4824 | 0,31  | 0      |
| 1 | Q3KQU3 MA7D1_HUMAN    | K.ESAAPAS#PAPS#PAPS#PTPAPPQK.E     | S544:S548:S552: | 3 | 3,3217 | 0,344 | -0,382 |
| 1 | Q3KQU3 MA7D1_HUMAN    | K.ESAAPAS#PAPS#PAPSPT#PAPPQK.E     | S544:S548:T554: | 3 | 3,1928 | 0,333 | -0,153 |
| 1 | Q3KQU3 MA7D1_HUMAN    | K.ESAAPAS#PAPSPAPS#PTPAPPQK.E      | S544:S552:      | 3 | 3,5752 | 0,334 | -0,316 |
| 1 | Q96QG7 MTMR9_HUMAN    | R.QLAELETEDGM*QES#P.-              | S548:           | 2 | 4,1741 | 0,511 | -0,069 |
| 1 | Q96QG7 MTMR9_HUMAN    | R.QLAELETEDGMQES#P.-               | S548:           | 2 | 2,2849 | 0,316 | -0,208 |
| 1 | Q9NQG6 SMC7L_HUMAN    | R.AIS#APTS#PTR.L                   | S55:S59:        | 2 | 2,1717 | 0,268 | -0,105 |
| 1 | Q9P2B4 CT2NL_HUMAN    | K.VS#SPLSPLS#PGIKS#PTIPR.A         | S556:S563:S568: | 3 | 3,5947 | 1     | -0,084 |
| 1 | Q9P2B4 CT2NL_HUMAN    | K.VSS#PLSPLS#PGIK.S                | S557:S563:      | 2 | 2,4986 | 0,316 | -0,592 |
| 1 | Q9P2B4 CT2NL_HUMAN    | K.VSSPLS#PLS#PGIK.S                | S560:S563:      | 2 | 3,0876 | 0,505 | -0,169 |
| 1 | P38432 P80C_HUMAN     | R.LIIES#PSNTSSTEP.A.-              | S566:           | 2 | 2,9252 | 0,402 | 0      |
| 1 | Q9H792 SG269_HUMAN    | K.S#APTS#PTATNISSK.T               | S568:S572:      | 2 | 2,5559 | 1     | -0,241 |
| 1 | Q3MIN7 RGL3_HUMAN     | R.DAPAGS#PPAS#PGPQGPSTK.L          | S569:S573:      | 2 | 2,613  | 0,26  | -0,455 |
| 1 | Q9UJX2 CDC23_HUMAN    | R.NQGETPTTEVPAPFFLPAS#LSANNT#PTR.R | S570:T576:      | 3 | 4,2781 | 1     | 0,235  |
| 1 | Q01201 RELB_HUMAN     | R.EAAFGGGILLS#PGPEAT.-             | S573:           | 2 | 2,9671 | 0,399 | 0,079  |
| 1 | P17812 PYRG1_HUMAN    | R.SGS#S#S#PDSEITELKFPSINHD.-       | S573:S574:S575: | 3 | 4,9161 | 1     | 0,074  |
| 1 | P17812 PYRG1_HUMAN    | R.SGS#SS#PDSEITELK.F               | S573:S575:      | 2 | 3,9578 | 1     | 0      |
| 1 | P17812 PYRG1_HUMAN    | R.SGS#SS#PDS#EITELKFPSINHD.-       | S573:S575:S578: | 3 | 4,716  | 1     | 0,294  |
| 1 | P17812 PYRG1_HUMAN    | R.SGSS#S#PDSEITELK.F               | S574:S575:      | 2 | 4,5007 | 1     | 0,076  |
| 1 | Q09666 AHNK_HUMAN     | K.AS#LGS#LEGEAEAEASSPK.G           | S5749:S5752:    | 2 | 4,4827 | 0,462 | 0,129  |
| 1 | Q09666 AHNK_HUMAN     | K.ASLGS#LEGEAEAEASS#PK.G           | S5752:S5763:    | 3 | 3,5373 | 0,417 | -0,387 |
| 1 | Q09666 AHNK_HUMAN     | K.ASLGS#LEGEAEAEASS#PK.G           | S5752:S5763:    | 2 | 2,8431 | 0,476 | 0,064  |
| 1 | Q13523 PRP4B_HUMAN    | R.S#PS#PDDILR.V                    | S578:S580:      | 2 | 3,1098 | 0,417 | 0,095  |
| 1 | P46013 KI67_HUMAN     | K.AQSLVIS#PPAPS#PR.K               | S579:S584:      | 2 | 2,9877 | 0,427 | 0,077  |
| 1 | Q9UJX2 CDC23_HUMAN    | R.RVSV#PLNLS#SVT#P.-               | S582:S587:T590: | 2 | 2,8711 | 0,403 | -0,081 |

|   |                     |                            |                 |   |        |       |        |
|---|---------------------|----------------------------|-----------------|---|--------|-------|--------|
| 1 | Q9UJX2 CDC23_HUMAN  | R.VS#PLNLSSVT#P.-          | S582:T590:      | 2 | 2,0564 | 0,225 | 0,192  |
| 1 | P41440 S19A1_HUMAN  | K.LGLQLCLPS#DGVQNVNQ.-     | S583:           | 2 | 3,9336 | 0,365 | 0,067  |
| 1 | Q5PRF9 SAM4B_HUMAN  | R.M*GLLS#PSGIGGVS#PR.H     | S592:S600:      | 2 | 4,141  | 0,577 | -0,304 |
| 1 | Q5PRF9 SAM4B_HUMAN  | R.MGLLS#PSGIGGVS#PR.H      | S592:S600:      | 2 | 4,0225 | 0,449 | 0,231  |
| 1 | P23588 IF4B_HUMAN   | K.YAALS#VDGEDENEGEDYAE.-   | S597:           | 2 | 5,1261 | 0,652 | -0,226 |
| 1 | Q13442 HAP28_HUMAN  | K.SLDS#DES#EDEEDDYQQK.R    | S60:S63:        | 3 | 5,1287 | 0,33  | 0      |
| 1 | Q14157 UBP2L_HUMAN  | R.YPSS#ISSS#PQK.D          | S605:S609:      | 2 | 3,3563 | 0,341 | -0,364 |
| 1 | P52948 NUP98_HUMAN  | K.NLNNS#NLFS#PVNR.D        | S608:S612:      | 2 | 4,6786 | 0,354 | 0,074  |
| 1 | Q9H0B6 KLC2_HUMAN   | R.TLSSS#SM*DLS#R.R         | S610:S615:      | 2 | 2,3455 | 0,091 | -0,449 |
| 1 | Q9NSK0 KLC4_HUMAN   | R.GLSAS#TMDLSSSS.-         | S611:           | 2 | 2,6457 | 0,466 | -0,092 |
| 1 | Q70L73 Q70L73_HUMAN | R.S#SFSS#DPDESEGIPLK.R     | S62:S66:        | 2 | 3,7075 | 0,271 | 0,658  |
| 1 | P52756 RBM5_HUMAN   | R.GLVAAYS#GDS#DNEEELVER.L  | S621:S624:      | 3 | 3,6974 | 0,201 | -0,413 |
| 1 | Q9HB23 Q9HB23_HUMAN | K.ENVATTDLTLESTTVGSS#V.-   | S624:           | 2 | 2,3543 | 0,243 | -0,323 |
| 1 | Q9H165 BC11A_HUMAN  | K.LLLGS#PSSLS#PFSK.R       | S625:S630:      | 2 | 3,9963 | 0,561 | 0,077  |
| 1 | Q6PKG0 LARP1_HUMAN  | K.NTFTAWS#DEES#DYEIDDR.D   | S627:S631:      | 3 | 3,7066 | 0,439 | 0,078  |
| 1 | P08107 HSP71_HUMAN  | K.GGS#GSGPTIEEVD.-         | S631:           | 2 | 2,9945 | 0,32  | -0,285 |
| 1 | Q13614 MTMR2_HUMAN  | R.ASS#PAQCVTPVQTVV.-       | S631:           | 2 | 2,7627 | 0,493 | 0,301  |
| 1 | Q9Y6X4 K0888_HUMAN  | K.AVDS#S#SEEIEVEVPVVD.R    | S635:S636:      | 2 | 4,2811 | 0,423 | -0,23  |
| 1 | Q12888 TP53B_HUMAN  | R.S#EALS#S#VLDQEEAMEIK.E   | S635:S639:S640: | 3 | 3,3374 | 0,097 | 0,086  |
| 1 | Q12888 TP53B_HUMAN  | R.SEALS#S#VLDQEEAMEIK.E    | S639:S640:      | 2 | 5,3922 | 0,59  | 0,06   |
| 1 | Q12888 TP53B_HUMAN  | R.SEALS#S#VLDQEEAMEIK.E    | S639:S640:      | 3 | 4,6639 | 0,343 | -0,628 |
| 1 | A1L390 PKHG3_HUMAN  | R.SSS#VLS#LEGSEK.G         | S640:S643:      | 2 | 2,2284 | 0,252 | 0      |
| 1 | Q86X29 LSR_HUMAN    | K.NLALS#RES#LVV.-          | S643:S646:      | 2 | 2,6592 | 0,418 | -0,179 |
| 1 | A1L390 PKHG3_HUMAN  | R.SSSVLS#LEGS#EK.G         | S643:S647:      | 2 | 3,1456 | 0,381 | 0,176  |
| 1 | Q02952 AKA12_HUMAN  | K.SATLS#S#TESTASEMQEEM*K.G | S644:S645:      | 3 | 5,1404 | 1     | -0,165 |
| 1 | Q15154 PCM1_HUMAN   | R.VTNDIS#PESS#PGVGR.R      | S65:S69:        | 2 | 3,4924 | 0,425 | -0,364 |
| 1 | P24386 RAE1_HUMAN   | K.ESTNLGNLEES#SE.-         | S651:           | 2 | 2,4897 | 0,268 | -0,246 |
| 1 | Q96JM3 ZN828_HUMAN  | K.GQES#SS#DQEQVDVESIDFSK.E | S651:S653:      | 3 | 6,5276 | 0,515 | 0,231  |
| 1 | Q96JM3 ZN828_HUMAN  | K.GQESS#S#DQEQVDVESIDFSK.E | S652:S653:      | 3 | 4,0773 | 0,189 | 0,694  |
| 1 | P49848 TAF6_HUMAN   | K.QEAGDS#PPPAPGT#PK.A      | S653:T660:      | 2 | 3,2132 | 0,474 | 0      |
| 1 | Q8WVCO LEO1_HUMAN   | K.YVIS#DEEEEDDD.-          | S658:           | 2 | 2,9071 | 0,389 | -0,079 |
| 1 | Q9H1B7 EAP1_HUMAN   | R.NSS#S#PVS#PASVPGQR.R     | S658:S659:S662: | 2 | 2,2464 | 0,242 | -0,285 |
| 1 | Q9H1B7 EAP1_HUMAN   | R.NSSS#PVS#PASVPGQR.R      | S659:S662:      | 2 | 3,3245 | 1     | -0,299 |

|   |                    |                                   |                 |   |        |       |        |
|---|--------------------|-----------------------------------|-----------------|---|--------|-------|--------|
| 1 | P42166 LAP2A_HUMAN | K.GPPDFS#S#DEEREPT#PVLGSGAAAAGR.S | S66:S67:T74:    | 3 | 6,3491 | 0,554 | 0,912  |
| 1 | P18858 DNL1_HUMAN  | R.VLGS#EGEEDEALS#PAK.G            | S66:S76:        | 2 | 4,5085 | 0,573 | -0,381 |
| 1 | P18858 DNL1_HUMAN  | R.VLGS#EGEEDEALS#PAK.G            | S66:S76:        | 3 | 3,9402 | 0,432 | -0,286 |
| 1 | O15085 ARHGB_HUMAN | R.S#LENPT#PPFTPK.M                | S663:T668:      | 2 | 3,5036 | 0,19  | 0      |
| 1 | O15085 ARHGB_HUMAN | R.S#LENPT#PPFT#PK.M               | S663:T668:T672: | 2 | 3,3058 | 0,409 | -0,156 |
| 1 | Q8N163 K1967_HUMAN | R.S#VAS#NQSEMEFSSLQDMPK.E         | S675:S678:      | 3 | 4,7048 | 0,383 | -0,08  |
| 1 | Q8N163 K1967_HUMAN | R.S#VAS#NQS#EMEFSSLQDMPK.E        | S675:S678:S681: | 3 | 6,216  | 0,533 | 0,078  |
| 1 | Q8N163 K1967_HUMAN | K.LEDSEVRS#VAS#NQS#EMEFSSLQDMPK.E | S675:S678:S681: | 3 | 3,5507 | 1     | 0,115  |
| 1 | Q8N163 K1967_HUMAN | R.S#VASNQS#EM*EFSSLQDMPK.E        | S675:S681:      | 3 | 3,0958 | 0,248 | 1,278  |
| 1 | Q8N163 K1967_HUMAN | R.SVAS#NQS#EMEFSSLQDM*PK.E        | S678:S681:      | 3 | 5,258  | 0,497 | 0,639  |
| 1 | Q8N163 K1967_HUMAN | R.SVAS#NQS#EM*EFSSLQDMPK.E        | S678:S681:      | 3 | 3,9785 | 0,412 | -0,24  |
| 1 | Q9C0B5 ZDHC5_HUMAN | K.S#LGSASPGPGQPLS#SPTR.G          | S679:S693:      | 2 | 3,0136 | 0,311 | -0,187 |
| 1 | Q14978 NOLC1_HUMAN | R.GGS#ISVQVNSIKFDS#E.-            | S686:S698:      | 2 | 5,2724 | 0,479 | -0,2   |
| 1 | P49959 MRE11_HUMAN | K.GVDFES#S#EDDDDDPFM*NTSSLR.R     | S688:S689:      | 3 | 5,4102 | 0,483 | 0,207  |
| 1 | P35251 RFC1_HUMAN  | R.IYDS#DS#ESEETLQVK.N             | S69:S71:        | 3 | 5,3277 | 0,34  | 0,181  |
| 1 | Q9ULT0 TTC7A_HUMAN | R.LEEAMS#ELT#MPSSVLK.Q            | S690:T693:      | 2 | 2,4804 | 0,239 | 0      |
| 1 | Q7Z417 NUFP2_HUMAN | R.IITYNEAMDS#PDQ.-                | S692:           | 2 | 4,5013 | 0,455 | -0,232 |
| 1 | Q6PJG2 CN043_HUMAN | R.TNS#AEVT#PPVLSVMGEAT#PVSIEPR.I  | S700:T704:T715: | 3 | 3,9224 | 1     | -0,065 |
| 1 | P25205 MCM3_HUMAN  | K.DGDS#YDPYDFS#DTEEEMPQVHT#PK.T   | S704:S711:T722: | 3 | 4,7703 | 1     | -0,18  |
| 1 | Q9NYY8 FAKD2_HUMAN | K.IYSVEALPVAAVNVQS#TQ.-           | S708:           | 3 | 5,1042 | 0,368 | 0,186  |
| 1 | Q9NYY8 FAKD2_HUMAN | K.IYSVEALPVAAVNVQS#TQ.-           | S708:           | 2 | 4,6319 | 0,548 | 0,062  |
| 1 | P25205 MCM3_HUMAN  | K.DGDSYDPYDFS#DT#EEEMPQVHT#PK.T   | S711:T713:T722: | 3 | 4,879  | 0,381 | -0,18  |
| 1 | O43719 HTSF1_HUMAN | K.LFDEEEDS#S#EK.L                 | S713:S714:      | 2 | 2,441  | 0,368 | -0,328 |
| 1 | O43719 HTSF1_HUMAN | K.LFDEEEDS#S#EKLFDSD#DER.G        | S713:S714:S721: | 3 | 5,4918 | 0,563 | 0,144  |
| 1 | Q96PD2 DCBD2_HUMAN | R.TDS#CSS#AAQAYDTPK.A             | S724:S727:      | 2 | 3,6416 | 0,453 | -0,335 |
| 1 | P46100 ATRX_HUMAN  | K.QSETVDQNS#DS#DEMLAILK.G         | S729:S731:      | 3 | 3,7679 | 0,341 | 0      |
| 1 | P46100 ATRX_HUMAN  | K.QSETVDQNS#DS#DEM*LAILK.G        | S729:S731:      | 3 | 3,7464 | 0,427 | 0,159  |
| 1 | Q14684 RRP1B_HUMAN | K.TPTSS#PASS#PLVAK.K              | S732:S736:      | 2 | 2,823  | 0,309 | -0,162 |
| 1 | Q9H7N4 SFR19_HUMAN | R.EVLYDS#EGLS#GEER.G              | S734:S738:      | 2 | 4,6199 | 0,527 | -0,35  |
| 1 | P54259 ATN1_HUMAN  | K.QEPAEEYETPES#PVPPARS#PS#PPPK.V  | S734:S741:S743: | 3 | 2,9812 | 0,081 | -0,248 |
| 1 | P98175 RBM10_HUMAN | R.GLVAAYSGES#DS#EEEQER.G          | S735:S737:      | 2 | 5,14   | 0,634 | -0,115 |
| 1 | P98175 RBM10_HUMAN | R.GLVAAYSGES#DS#EEEQER.G          | S735:S737:      | 3 | 3,859  | 0,427 | 0,086  |
| 1 | Q9UER7 DAXX_HUMAN  | K.TSVATQCDPEEIVLS#DSD.-           | S737:           | 2 | 4,6103 | 0,524 | 0,113  |

|   |                    |                                          |                 |   |        |       |        |
|---|--------------------|------------------------------------------|-----------------|---|--------|-------|--------|
| 1 | P28290 SSFA2_HUMAN | R.SQS#LPTTLLS#PVR.V                      | S739:S746:      | 2 | 3,9956 | 0,409 | 0      |
| 1 | Q14C86 GAPD1_HUMAN | R.LQELESCS#GLGS#TSDDTDVR.E               | S742:S746:      | 3 | 3,2127 | 0,233 | 0,471  |
| 1 | P50502 F10A1_HUMAN | K.ADEPS#S#EES#DLEIDK.E                   | S75:S76:S79:    | 2 | 3,5696 | 0,279 | -0,192 |
| 1 | A0FGR8 ESYT2_HUMAN | K.EPTPS#IAS#DIS#LPIATQELR.Q              | S755:S758:S761: | 3 | 5,5401 | 0,281 | -0,231 |
| 1 | A0FGR8 ESYT2_HUMAN | K.EPTPSIAS#DIS#LPIATQELR.Q               | S758:S761:      | 3 | 5,3372 | 0,445 | 0      |
| 1 | Q96MH2 HEXI2_HUMAN | R.TQS#PGGCS#AEAVLAR.K                    | S76:S81:        | 2 | 3,7152 | 0,405 | -0,22  |
| 1 | Q8TF40 FNIP1_HUMAN | K.VTFLIGDSM*S#PDS#DTEL.R.S               | S760:S763:      | 3 | 3,5423 | 0,151 | 0,763  |
| 1 | Q9C0C4 SEM4C_HUMAN | R.CQPGGGPPS#PPPPIPQPLPS#PTR.L            | S760:S772:      | 3 | 3,9703 | 0,348 | 0      |
| 1 | Q9C0C4 SEM4C_HUMAN | R.CQPGGGPPS#PPPPIPQPLPSPT#R.L            | S760:T774:      | 3 | 2,8719 | 0,23  | 0      |
| 1 | P48634 BAT2_HUMAN  | R.SDS#GGS#SSEPFDR.H                      | S761:S764:      | 2 | 3,3931 | 1     | -0,574 |
| 1 | Q9UHJ3 SMBT1_HUMAN | R.TFS#FS#DDENKPPS#PK.E                   | S765:S767:S775: | 3 | 4,3783 | 0,427 | -0,189 |
| 1 | Q6PKG0 LARP1_HUMAN | R.S#LPTTVPEP#PNYR.N                      | S766:S774:      | 2 | 2,5491 | 0,384 | -0,226 |
| 1 | Q02446 SP4_HUMAN   | R.IVTVAAIS#QDSNPAT#PNVSTNMEEF.-          | S767:T774:      | 3 | 3,1482 | 0,15  | 0,262  |
| 1 | P54259 ATN1_HUMAN  | R.SEEIS#ES#ESEETNAPK.K                   | S77:S79:        | 2 | 2,8034 | 0,443 | -0,57  |
| 1 | Q9UKI8 TLK1_HUMAN  | R.FTGVASGSTGS#TGS#CS#VGAK.A              | S77:S80:S82:    | 2 | 2,8892 | 0,451 | -0,119 |
| 1 | Q99856 ARI3A_HUMAN | R.AAAAGLGHAS#PGGS#EDGPPGS#EEEDAAR.E      | S77:S81:S88:    | 3 | 5,3293 | 0,432 | -0,442 |
| 1 | Q6IN85 SMEK1_HUMAN | K.TNLTSQSSTTNLPGSPGS#PGSPGS#PGS#PGSVPK.N | S771:S777:S780: | 3 | 3,1465 | 1     | 0,223  |
| 1 | Q8N4C8 MINK1_HUMAN | K.LDSS#PVL#PGNK.A                        | S778:S782:      | 2 | 3,0253 | 0,429 | -0,178 |
| 1 | P13861 KAP2_HUMAN  | K.GDS#ES#EEDEDLEVPVPSR.F                 | S78:S80:        | 3 | 3,6764 | 0,25  | 0,255  |
| 1 | Q9UGH3 S23A2_HUMAN | K.SSLAETLDS#TGS#LDPQR.S                  | S78:S81:        | 2 | 4,2719 | 0,436 | 0,693  |
| 1 | O00178 GTPB1_HUMAN | R.S#AM*DSPVPASMFAPPS#SPGAAR.A            | S8:S24:         | 3 | 2,8767 | 0,257 | 0      |
| 1 | Q15637 SF01_HUMAN  | R.S#PS#PEPIYNSEGK.R                      | S80:S82:        | 2 | 4,034  | 0,435 | -0,468 |
| 1 | Q9H6F5 CCD86_HUMAN | R.LQQGAGLES#PQQQPEPGAAS#PQR.Q            | S80:S91:        | 3 | 4,1637 | 0,38  | -0,297 |
| 1 | O60293 CC131_HUMAN | K.TSSSS#PANS#DVEIDGIGR.I                 | S805:S809:      | 2 | 5,4616 | 1     | -0,5   |
| 1 | Q9BTC0 DIDO1_HUMAN | R.QEAIPDLEDS#PPVSDS#EEQQESAR.A           | S805:S811:      | 3 | 4,5282 | 0,507 | -0,065 |
| 1 | Q86TC9 MYPN_HUMAN  | R.CVS#PIPVSPS#R.I                        | S813:S821:      | 2 | 2,9877 | 0,361 | -0,334 |
| 1 | Q8IWX8 CHERP_HUMAN | R.S#RS#PT#PPSSAGLGSNSAPPIPDSR.L          | S815:S817:T819: | 3 | 4,648  | 1     | -0,142 |
| 1 | Q8IWX8 CHERP_HUMAN | R.SRS#PTPPS#S#AGLGSNSAPPIPDSR.L          | S817:S822:S823: | 3 | 3,2701 | 1     | -0,213 |
| 1 | Q9BUW7 CI016_HUMAN | R.LEFQQQLGEAPSDAS#P.-                    | S82:            | 2 | 3,414  | 0,494 | 0      |
| 1 | O14976 GAK_HUMAN   | R.DES#EVS#DEGGSPISSEGEPR.A               | S826:S829:      | 3 | 2,7309 | 0,46  | -0,233 |
| 1 | P46821 MAP1B_HUMAN | R.SLMS#S#PEDLTK.D                        | S831:S832:      | 2 | 4,524  | 0,509 | -0,089 |
| 1 | P46821 MAP1B_HUMAN | R.SLM*S#S#PEDLTK.D                       | S831:S832:      | 2 | 4,4901 | 0,462 | -0,088 |
| 1 | Q9NRZ9 HELLS_HUMAN | K.ILENSED#S#PECLF.-                      | S832:S833:      | 2 | 2,7393 | 0,455 | 0,203  |

|   |                     |                                    |                 |   |        |       |        |
|---|---------------------|------------------------------------|-----------------|---|--------|-------|--------|
| 1 | Q7Z2Z1 CO042_HUMAN  | R.S#VSGS#PESDELQELR.T              | S834:S838:      | 2 | 5,3964 | 0,516 | 1,089  |
| 1 | O15541 R113A_HUMAN  | K.AAYGDLS#S#EEEEENEPESLGVVYK.S     | S84:S85:        | 3 | 4,2379 | 0,231 | 0,065  |
| 1 | Q6PKG0 LARP1_HUMAN  | R.TAS#ISSSPSEGTPTVGSYGCT#PQSLPK.F  | S847:T865:      | 3 | 3,9271 | 1     | -0,384 |
| 1 | Q96RS0 TGS1_HUMAN   | K.GIGLDES#ELDS#EAELM*R.S           | S85:S89:        | 3 | 3,9805 | 0,356 | 0,179  |
| 1 | Q9UQ35 SRRM2_HUMAN  | R.QGSITS#PQANEQSVT#PQR.R           | S857:T866:      | 3 | 4,4279 | 0,303 | -0,175 |
| 1 | Q8N122 RPTOR_HUMAN  | R.VLDTSSLTQS#APAS#PTNK.G           | S859:S863:      | 2 | 3,8019 | 1     | -0,185 |
| 1 | Q9Y5B0 CTDP1_HUMAN  | K.EVDDILGEGS#DDS#DSEK.R            | S869:S872:      | 2 | 3,5701 | 0,364 | 0      |
| 1 | Q9UQ35 SRRM2_HUMAN  | R.S#CFESS#PDPELK.S                 | S871:S876:      | 2 | 3,3648 | 0,44  | -0,235 |
| 1 | Q9UQ35 SRRM2_HUMAN  | R.SCFES#S#PDPELK.S                 | S875:S876:      | 2 | 3,964  | 0,368 | -0,078 |
| 1 | Q5QP82 WDR32_HUMAN  | R.SGELGLPGAPESSTASAPGEPSPPS#PPCR.R | S89:S92:        | 3 | 2,8047 | 0,359 | -0,62  |
| 1 | P43358 MAGA4_HUMAN  | R.QPNEGSS#SQEEEGPST#SPDAESLFR.E    | S89:T98:        | 3 | 4,1374 | 1     | -0,065 |
| 1 | P29317 EPHA2_HUMAN  | R.VS#IRLPS#TSGS#EGVPFR.T           | S892:S897:S901: | 3 | 2,819  | 0,385 | -0,18  |
| 1 | P29317 EPHA2_HUMAN  | R.LPS#TS#GSEGVFR.T                 | S897:S899:      | 2 | 2,3245 | 0,201 | 0,245  |
| 1 | P29317 EPHA2_HUMAN  | R.LPS#TS#GS#EGVPFR.T               | S897:S899:S901: | 2 | 2,571  | 0,29  | 0,465  |
| 1 | P29317 EPHA2_HUMAN  | R.LPS#TSGS#EGVPFR.T                | S897:S901:      | 2 | 2,9189 | 0,368 | -0,082 |
| 1 | Q9H5H4 ZN768_HUMAN  | R.S#PGLVPPS#PEFAPR.S               | S90:S97:        | 2 | 2,7345 | 0,407 | 0,151  |
| 1 | Q14202 ZMYM3_HUMAN  | K.AS#SDLCDLVSNSQ#AEGLLDCDLFGPAR.D  | S949:S960:      | 3 | 3,9381 | 0,406 | 0,229  |
| 1 | Q9UQ35 SRRM2_HUMAN  | R.S#VS#PCSNVESR.L                  | S952:S954:      | 2 | 3,5878 | 0,463 | -0,265 |
| 1 | O15068 MCF2L_HUMAN  | R.ALEQSQS#LPLPAPTSTS#PSR.G         | S965:S975:      | 3 | 2,7717 | 0,141 | -1,889 |
| 1 | B2R8U0 B2R8U0_HUMAN | K.AAAGPLDM*S#LPST#PDIK.I           | S97:T101:       | 2 | 3,8341 | 0,475 | 0      |
| 1 | Q96QT6 PHF12_HUMAN  | K.GDAS#LLQDGVLAEK.L                | S977:           | 2 | 2,0998 | 0,19  | -0,163 |
| 1 | Q9HC35 EMAL4_HUMAN  | K.ATLLEDQQDPPSPS#S.-               | S980:           | 2 | 3,2838 | 0,451 | -0,078 |
| 1 | Q5T200 ZC3HD_HUMAN  | R.GNIETTS#EDGQVFS#PK.K             | S986:S993:      | 2 | 4,4841 | 0,475 | -0,326 |
| 1 | P35658 NU214_HUMAN  | R.YYEDLDEVSS#T#SS#VVSQSLESEDAR.T   | S986:T987:S989: | 3 | 5,5224 | 1     | 0      |
| 1 | Q8WW11 LMO7_HUMAN   | R.LPSPTS#PFS#SLSQDQAATSK.A         | S991:S994:      | 3 | 3,9124 | 1     | -0,083 |
| 1 | Q15648 MED1_HUMAN   | R.SQT#PPGVAT#PPIPK.I               | T1051:T1057:    | 2 | 3,7903 | 0,439 | -0,236 |
| 1 | Q8N3U4 STAG2_HUMAN  | R.NSLLAGGDDDT#M*SVISGIS#SR.G       | T1056:S1064:    | 3 | 2,9811 | 0,287 | -0,161 |
| 1 | O96028 NSD2_HUMAN   | K.GIGT#PPNT#TPIKNGS#PEIK.L         | T110:T114:S121: | 3 | 2,6349 | 0,201 | -0,085 |
| 1 | Q3KQU3 MA7D1_HUMAN  | R.SSQSPST#AVPASDS#PPTK.Q           | T118:S125:      | 2 | 2,0076 | 0,319 | -0,51  |
| 1 | Q8WX19 P66B_HUMAN   | R.GRLT#PS#PDIIVLSDNEASS#PR.S       | T120:S122:S135: | 3 | 5,9614 | 0,474 | 0,223  |
| 1 | Q2KHR3 QSER1_HUMAN  | K.GQDTVAIEGFT#DEEDT#ESGGEGQYR.E    | T1341:T1346:    | 3 | 4,1415 | 0,49  | -0,257 |
| 1 | P08069 IGF1R_HUMAN  | R.ALPLQSS#C.-                      | T1366:          | 2 | 2,6257 | 0,436 | 0      |
| 1 | P06493 CDC2_HUMAN   | K.IGEGT#Y#GVVYK.G                  | T14:Y15:        | 2 | 3,8979 | 0,407 | -0,091 |

|   |                    |                                    |                 |   |        |       |        |
|---|--------------------|------------------------------------|-----------------|---|--------|-------|--------|
| 1 | Q9Y4B5 K0802_HUMAN | K.EDVT#PPLS#PDDLK.Y                | T1408:S1412:    | 2 | 3,0094 | 0,192 | -0,308 |
| 1 | Q76176 SSH2_HUMAN  | R.TTNPFYNT#M.-                     | T1422:          | 2 | 3,4168 | 0,461 | -0,104 |
| 1 | Q76176 SSH2_HUMAN  | R.TTNPFYNT#M*.-                    | T1422:          | 2 | 2,8376 | 0,44  | -0,103 |
| 1 | Q14839 CHD4_HUMAN  | K.TPTPST#PGDTQPNT#PAPVPPAEDGIK.I   | T1545:T1553:    | 3 | 4,5525 | 1     | -0,2   |
| 1 | Q14839 CHD4_HUMAN  | K.TPTPSTPGDT#QPNT#PAPVPPAEDGIK.I   | T1549:T1553:    | 3 | 4,9987 | 1     | -0,4   |
| 1 | P42166 LAP2A_HUMAN | R.SST#PLPTISS#AENTR.Q              | T160:S168:      | 2 | 4,5692 | 1     | -0,202 |
| 1 | Q5SRE5 NU188_HUMAN | R.GAPSSPAT#GVLPS#PQ GK.S           | T1712:S1717:    | 2 | 2,6247 | 0,322 | 0,357  |
| 1 | Q12888 TP53B_HUMAN | K.LPDGPT#GS#SEEEEFLEIPPFNK.Q       | T1756:S1758:    | 3 | 2,7115 | 0,109 | 0,067  |
| 1 | O94842 TOX4_HUMAN  | R.LSTT#PS#PTSS#LHEDGVEDFR.R        | T176:S178:S182: | 3 | 2,8239 | 1     | -0,076 |
| 1 | P19105 MLRM_HUMAN  | R.AT#S#NVFAM*FDQSQIQEFK.E          | T18:S19:        | 3 | 6,0906 | 0,45  | 0,161  |
| 1 | Q9NQS7 INCE_HUMAN  | R.T#LSPTPASATAPTSQGIPTS#DEESTPK.K  | T195:S214:      | 3 | 3,7503 | 1     | 0,259  |
| 1 | O95297 MPZL1_HUMAN | R.DYTGCS#SESL#PVK.Q                | T205:S210:      | 2 | 3,3378 | 1     | -0,341 |
| 1 | O75533 SF3B1_HUMAN | R.WDQTADQT#PGAT#PK.K               | T207:T211:      | 2 | 3,2197 | 0,425 | 0,364  |
| 1 | P63104 1433Z_HUMAN | R.DNLTLWTS#D#QGDEAEAGEGGEN.-       | T232:           | 3 | 4,251  | 0,378 | 0,441  |
| 1 | Q9BYG3 MK67I_HUMAN | K.TVDSQGPT#PVCT#PTFLER.R           | T234:T238:      | 3 | 4,3628 | 0,473 | -0,085 |
| 1 | P17275 JUNB_HUMAN  | R.DAT#PPVS#PINMEDQER.I             | T255:S259:      | 2 | 4,7733 | 0,39  | -0,125 |
| 1 | P17275 JUNB_HUMAN  | R.DAT#PPVS#PINMEDQER.I             | T255:S259:      | 3 | 4,0295 | 0,379 | 0      |
| 1 | P17275 JUNB_HUMAN  | R.DAT#PPVS#PINM*EDQER.I            | T255:S259:      | 2 | 3,2206 | 0,412 | -0,371 |
| 1 | Q9UHR4 BI2L1_HUMAN | K.TPASTPVSGT#PQAS#PM*IER.S         | T257:S261:      | 3 | 3,4019 | 0,216 | -0,174 |
| 1 | Q9UHR4 BI2L1_HUMAN | K.TPASTPVSGT#PQAS#PMIER.S          | T257:S261:      | 3 | 2,8649 | 0,296 | -0,088 |
| 1 | Q96KB5 TOPK_HUMAN  | K.SVLCSTPT#INIPAS#PFM*QK.L         | T26:S32:        | 3 | 4,1961 | 0,446 | -0,161 |
| 1 | Q8IWB9 TEX2_HUMAN  | K.T#APSSPLTS#PSDTR.S               | T262:S270:      | 2 | 2,8039 | 1     | -0,387 |
| 1 | Q5T200 ZC3HD_HUMAN | R.T#PS#PPPIPEDIALGK.K              | T263:S265:      | 2 | 3,6368 | 0,324 | 0,205  |
| 1 | Q96G46 DUS3L_HUMAN | R.QENCGAQQVPAGPGTST#PPS#SPVR.T     | T273:S276:      | 3 | 3,4066 | 1     | -0,213 |
| 1 | Q96G46 DUS3L_HUMAN | R.QENCGAQQVPAGPGTST#PPSS#PVR.T     | T273:S277:      | 3 | 4,3339 | 1     | -0,213 |
| 1 | Q8NFH5 NUP53_HUMAN | K.TLGTPT#QPGS#T#PR.I               | T275:S279:T280: | 2 | 2,7807 | 0,204 | -0,314 |
| 1 | Q8NFH5 NUP53_HUMAN | K.TLGTPT#QPGST#PR.I                | T275:T280:      | 2 | 2,8965 | 0,239 | -0,331 |
| 1 | Q99436 PSB7_HUMAN  | K.ITPLEIEVLEETVQTM*DT#S.-          | T276:           | 3 | 4,197  | 0,505 | 0,082  |
| 1 | Q86VR2 F134C_HUMAN | R.GQTPLT#EGS#EDLDGHS#DPEESFAR.D    | T310:S313:S320: | 3 | 4,4364 | 0,516 | 0      |
| 1 | P43897 EFTS_HUMAN  | R.FECGEGEEAAET#E.-                 | T324:           | 2 | 2,443  | 0,357 | -0,317 |
| 1 | Q9UK58 CCNL1_HUMAN | K.GLNP DGT#PALSTLGGFS#PASKPSS#PR.E | T325:S335:S342: | 3 | 4,0237 | 1     | -0,067 |
| 1 | Q92597 NDRG1_HUMAN | R.T#AS#GSSVTS LDGTR.S              | T328:S330:      | 2 | 3,2571 | 1     | -0,244 |
| 1 | Q92597 NDRG1_HUMAN | R.T#ASGS#SVTS#LDGTR.S              | T328:S332:S336: | 2 | 2,9471 | 1     | -0,155 |



|   |                     |                                        |                 |   |        |       |        |
|---|---------------------|----------------------------------------|-----------------|---|--------|-------|--------|
| 1 | Q641Q2 FA21A_HUMAN  | R.T#PS#DDEEDNLFAPPK.L                  | T331:S333:      | 2 | 3,0115 | 0,369 | 0,2    |
| 1 | Q13541 4EBP1_HUMAN  | R.VVLGDGVQLPPGDYSTT#PGGTLFSTT#PGGTR.I  | T37:T46:        | 3 | 3,9287 | 1     | 0      |
| 1 | Q13541 4EBP1_HUMAN  | R.VVLGDGVQLPPGDYSTT#PGGTLFSTT#PGGT#R.I | T37:T50:        | 3 | 3,6682 | 1     | -0,114 |
| 1 | O75821 EIF3G_HUMAN  | K.GIPLAT#GDTS#PEPELLPGAPLPPP.K.E       | T38:S42:        | 3 | 3,6784 | 0,215 | 0,139  |
| 1 | O75821 EIF3G_HUMAN  | K.GIPLAT#GDT#SPEPELLPGAPLPPP.K.E       | T38:T41:        | 3 | 4,9231 | 0,296 | 0      |
| 1 | Q9UQ80 PA2G4_HUMAN  | K.TAENATSGET#LEENEAGD.-                | T386:           | 2 | 2,5258 | 0,134 | -0,191 |
| 1 | Q14527 HLTF_HUMAN   | K.T#AVQY#IESS#DSEEIETSELPQK.M          | T390:Y394:S398: | 3 | 4,0555 | 1     | -0,672 |
| 1 | Q14247 SRC8_HUMAN   | K.TQT#PPVS#PAPQPTTEER.L                | T401:S405:      | 2 | 4,5392 | 0,544 | -0,58  |
| 1 | Q14247 SRC8_HUMAN   | K.TQT#PPVS#PAPQPTTEER.L                | T401:S405:      | 3 | 3,0189 | 0,334 | -0,097 |
| 1 | O75821 EIF3G_HUMAN  | K.GIPLATGDT#S#PEPELLPGAPLPPP.K.E       | T41:S42:        | 3 | 5,0305 | 0,368 | -0,07  |
| 1 | Q9Y606 TRUA_HUMAN   | K.VSPLEGSEGDGDT#D.-                    | T426:           | 2 | 3,5202 | 0,601 | -0,392 |
| 1 | P85037 FOXK1_HUMAN  | R.SGGLQT#PECLS#R.E                     | T436:S441:      | 2 | 3,336  | 0,403 | -0,333 |
| 1 | Q969V6 MKL1_HUMAN   | K.FGSTGST#PPVS#PTPSER.S                | T450:S454:      | 2 | 2,6399 | 0,168 | -0,458 |
| 1 | Q15149 PLEC1_HUMAN  | K.GYSPYSVSGSGST#AGS#R.T                | T4623:S4626:    | 3 | 3,3288 | 1     | -0,094 |
| 1 | P17544 ATF7_HUMAN   | R.TDSVIIADQT#PT#PTR.F                  | T51:T53:        | 2 | 3,34   | 0,446 | -0,137 |
| 1 | Q12888 TP53B_HUMAN  | K.LM*LST#SEYSQS#PK.M                   | T519:S525:      | 2 | 2,714  | 1     | 0      |
| 1 | Q9H4L7 SMRCD_HUMAN  | R.ANT#PDS#DITEK.T                      | T54:S57:        | 2 | 2,7215 | 0,408 | -0,271 |
| 1 | Q8ND82 Z280C_HUMAN  | K.LPTAPFGCAPGTSFLQVT#PPTS#QNTTAR.N     | T540:S544:      | 3 | 3,2539 | 0,224 | 0,238  |
| 1 | Q09666 AHNK_HUMAN   | R.EFSGPSTPT#GT#LEFEGGEVSLEGGK.V        | T5796:T5798:    | 3 | 3,3065 | 1     | -0,342 |
| 1 | Q9UJX2 CDC23_HUMAN  | R.VSPLNLSVTP.#-                        | T590:           | 2 | 2,4981 | 0,374 | 0,102  |
| 1 | B2RP63 B2RP63_HUMAN | R.T#SSISGPLS#PAYTGQVPYNYNQLEGR.F       | T6:S14:         | 3 | 5,3768 | 1     | -0,247 |
| 1 | Q2M2I8 AAK1_HUMAN   | K.VGSLT#PPSS#PK.T                      | T620:S624:      | 2 | 2,1878 | 0,111 | -0,298 |
| 1 | Q9NXH9 TRM1_HUMAN   | R.VSADAAPDCPETSNT#PPGPGAAAGPGID.-      | T646:           | 3 | 3,2198 | 0,159 | -0,131 |
| 1 | Q6PJG2 CN043_HUMAN  | R.SFELPPYT#PPPILS#PVR.E                | T655:S661:      | 3 | 3,1233 | 0,436 | -0,088 |
| 1 | O15085 ARHGB_HUMAN  | R.SLENPT#PPFT#PK.M                     | T668:T672:      | 2 | 2,9215 | 0,364 | -0,082 |
| 1 | P40763 STAT3_HUMAN  | K.FICVT#PTTCSNTIDLPM#PR.T              | T714:S727:      | 3 | 4,8205 | 0,339 | 0,37   |
| 1 | P40763 STAT3_HUMAN  | K.FICVTPT#TCSNTIDLPM*S#PR.T            | T716:S727:      | 3 | 4,6485 | 0,386 | 0      |
| 1 | Q8N350 DOS_HUMAN    | R.LAEPVVATPALVAAAPT#SPDHS#PA.-         | T718:S723:      | 3 | 5,4585 | 0,49  | 0      |
| 1 | Q08050 FOXM1_HUMAN  | R.SLT#EGLVLDTM*NDS#LSK.I               | T719:S730:      | 2 | 4,0638 | 0,473 | 0,244  |
| 1 | O60343 TBCD4_HUMAN  | R.T#SST#CSNESLSVGGTSVTPR.R             | T749:T752:      | 3 | 3,2777 | 1     | -0,084 |
| 1 | O60343 TBCD4_HUMAN  | R.T#SST#CS#NESLSVGGTSVTPR.R            | T749:T752:S754: | 3 | 3,3285 | 1     | 0,081  |
| 1 | Q9UJH3 SMBT1_HUMAN  | R.T#FSFS#DDENKPPS#PK.E                 | T763:S767:S775: | 2 | 3,4993 | 0,41  | 0      |
| 1 | P42684 ABL2_HUMAN   | R.T#VSTSS#QPEENVDR.A                   | T815:S820:      | 2 | 3,0815 | 0,265 | -0,357 |

|   |                    |                                       |                 |   |        |       |        |
|---|--------------------|---------------------------------------|-----------------|---|--------|-------|--------|
| 1 | Q6PKG0 LARP1_HUMAN | R.T#ASISSS#PS#EGTPTVGSYGCTPQSLPK.F    | T845:S851:S853: | 3 | 3,6518 | 1     | -0,062 |
| 1 | Q6PKG0 LARP1_HUMAN | R.T#ASISSPS#EGTPTVGSYGCTPQSLPK.F      | T845:S853:      | 3 | 5,057  | 1     | -0,32  |
| 1 | Q76FK4 NOL8_HUMAN  | R.FLET#DS#EEEEQEEVNEK.K               | T888:S890:      | 2 | 4,5847 | 0,455 | -0,577 |
| 1 | Q76FK4 NOL8_HUMAN  | R.FLET#DS#EEEEQEEVNEK.K               | T888:S890:      | 3 | 4,1848 | 0,293 | -0,087 |
| 1 | P29317 EPHA2_HUMAN | R.LPST#\$#GS#EGVPFR.T                 | T898:S899:S901: | 2 | 2,4739 | 0,249 | 0      |
| 1 | Q8WWI1 LMO7_HUMAN  | R.TPNNVVST#PAPS#PDASQLASSLSSQK.E      | T956:S960:      | 3 | 3,4389 | 0,319 | 0,6    |
| 1 | P35658 NU214_HUMAN | R.YYEDLDEVSST#SS#VSQSLESEDAR.T        | T987:S989:      | 3 | 4,6031 | 1     | 0,384  |
| 1 | O60841 IF2P_HUMAN  | K.VEMY#SGS#DDDDDFNK.L                 | Y134:S137:      | 2 | 5,5536 | 0,455 | -0,064 |
| 1 | P24928 RPB1_HUMAN  | K.Y#\$SPTSPTYSPVYTPT#SPK.Y            | Y1888:T1905:    | 3 | 2,6035 | 0,172 | 0,908  |
| 1 | Q9BW85 CCD94_HUMAN | K.EANPTPLTPGASSLSQLGAY#LDSDDS#NGS#N.- | Y313:S319:S322: | 3 | 4,436  | 0,424 | -0,114 |
| 1 | Q6VN20 RBP10_HUMAN | K.SQDSY#PGSPSL#PR.H                   | Y362:S369:      | 2 | 2,0438 | 0,162 | -0,447 |
| 1 | Q76FK4 NOL8_HUMAN  | R.EY#DSGDT#DEIIAM*K.K                 | Y376:T381:      | 2 | 3,3198 | 0,287 | -0,208 |
| 1 | Q9BZ67 FRMD8_HUMAN | R.QLSLGQGSY#TVVQPGDSLEQG.-            | Y452:           | 3 | 3,6097 | 0,209 | -0,082 |
| 1 | P07355 ANXA2_HUMAN | R.TNQELQEINR.V                        |                 | 2 | 3,089  | 0,25  | -0,49  |
| 1 | P37802 TAGL2_HUMAN | R.NFSDNQLQEGK.N                       |                 | 2 | 2,9581 | 0,385 | -0,381 |
| 1 | P08670 VIME_HUMAN  | K.FADLSEAANR.N                        |                 | 2 | 2,9044 | 0,379 | -0,112 |
| 1 | Q6S8J3 A26CA_HUMAN | K.AGFAGDDAPR.A                        |                 | 2 | 2,8323 | 0,321 | -0,25  |
| 1 | P61978 HNRPK_HUMAN | K.GSDFDCELR.L                         |                 | 2 | 2,8121 | 0,184 | 0      |
| 1 | P67936 TPM4_HUMAN  | K.TIDDLEEK.L                          |                 | 2 | 2,671  | 0,228 | -0,19  |
| 1 | Q10589 BST2_HUMAN  | K.LQDASAEVER.L                        |                 | 2 | 2,5893 | 0,166 | -0,327 |
| 1 | P17661 DESM_HUMAN  | K.VELQELNDR.F                         |                 | 2 | 2,4096 | 0,258 | 0      |
| 1 | P06748 NPM_HUMAN   | K.GPSSVEDIK.A                         |                 | 2 | 2,387  | 0,366 | -0,131 |
| 1 | P31946 1433B_HUMAN | R.YLSEVASGDNK.Q                       |                 | 2 | 2,33   | 0,377 | -0,309 |
| 1 | P26038 MOES_HUMAN  | R.ALELEQR.K                           |                 | 2 | 2,3241 | 0,142 | -0,617 |
| 1 | P06703 S10A6_HUMAN | R.LM*EDLDR.N                          |                 | 2 | 2,1913 | 0,151 | 0      |
| 1 | O95678 K2C75_HUMAN | K.AQYEDIANR.S                         |                 | 2 | 2,1808 | 0,36  | 0,226  |
| 2 | Q9H6Z4 RANB3_HUMAN | R.SAGGS#\$#PEGGEDS#DREDGNYCPPVK.R     | S100:S101:S108: | 3 | 4,3012 | 0,481 | -0,456 |
| 2 | Q86YP4 P66A_HUMAN  | R.RPPS#PDVIVLS#DNEQPSS#PR.V           | S100:S107:S114: | 3 | 6,6486 | 0,437 | 0      |
| 2 | P05386 RLA1_HUMAN  | K.KEES#EESDDDM*GFGLFD.-               | S101:           | 2 | 2,9596 | 0,478 | -0,298 |
| 2 | P54259 ATN1_HUMAN  | K.TEQELPRPQS#PS#DLDS#LDGR.S           | S101:S103:S107: | 3 | 5,7895 | 0,553 | -0,148 |
| 2 | P05386 RLA1_HUMAN  | K.KEES#EES#DDDM*GFGLFD.-              | S101:S104:      | 2 | 5,3227 | 0,637 | -0,115 |
| 2 | P05386 RLA1_HUMAN  | K.KEES#EES#DDDMGFGLFD.-               | S101:S104:      | 2 | 4,0063 | 0,647 | -0,347 |
| 2 | P05386 RLA1_HUMAN  | K.KEES#EES#DDDM*GFGLFD.-              | S101:S104:      | 3 | 2,74   | 0,378 | -0,258 |

|   |                    |                                        |                    |   |        |       |        |
|---|--------------------|----------------------------------------|--------------------|---|--------|-------|--------|
| 2 | Q5T200 ZC3HD_HUMAN | K.S#KGDS#DIS#DEEAAQSK.K                | S1010:S1014:S1017: | 3 | 4,5867 | 0,362 | -0,36  |
| 2 | Q7Z333 SETX_HUMAN  | R.GQVIIIS#DS#DDDDDER.I                 | S1017:S1019:       | 2 | 4,6122 | 0,545 | -0,438 |
| 2 | Q6PD62 CTR9_HUMAN  | K.AIISSS#DDS#S#DEDKLL.I                | S1017:S1020:S1021: | 2 | 3,2387 | 0,37  | -0,501 |
| 2 | P37275 ZEB1_HUMAN  | R.ASPS#QGDS#DERESLT#R.E                | S1018:S1022:T1029: | 2 | 2,0948 | 0,357 | -0,618 |
| 2 | O15164 TIF1A_HUMAN | R.NES#EDNKFS#DDS#DDDFVQPR.K            | S1019:S1025:S1028: | 3 | 5,0451 | 0,538 | -0,282 |
| 2 | P17096 HMGA1_HUMAN | K.KLEKEEEEGISQES#S#EEEEQ.-             | S102:S103:         | 3 | 3,734  | 0,401 | -0,153 |
| 2 | P17096 HMGA1_HUMAN | K.LEKEEEEGISQES#S#EEEEQ.-              | S102:S103:         | 3 | 2,6504 | 0,251 | -0,323 |
| 2 | Q9H2Y7 ZF106_HUMAN | R.ATGDGS#S#PELPSLER.K                  | S1025:S1026:       | 2 | 3,9914 | 0,462 | -0,437 |
| 2 | O60231 DHX16_HUMAN | R.LLEDSEES#S#EETVSR.A                  | S103:S107:         | 2 | 3,6176 | 0,432 | -0,261 |
| 2 | O43159 HUCE1_HUMAN | K.QGPPCS#DS#EEEVER.K                   | S104:S106:         | 2 | 2,1561 | 0,332 | -0,412 |
| 2 | Q8NA72 CE037_HUMAN | K.TDESS#PVLS#PR.K                      | S105:S109:         | 2 | 2,2109 | 0,122 | -0,091 |
| 2 | Q9UHB7 AFF4_HUMAN  | K.AVGM*PS#PVSPK.L                      | S1055:S1058:       | 2 | 2,0708 | 0,322 | -0,294 |
| 2 | O60231 DHX16_HUMAN | R.LLEDSEES#S#EETVSR.A                  | S106:S107:         | 2 | 4,1469 | 0,485 | -0,457 |
| 2 | P49023 PAXI_HUMAN  | K.TSSVSNPQDSVGS#PCS#R.V                | S106:S109:         | 2 | 3,1852 | 0,538 | -0,38  |
| 2 | P52948 NUP98_HUMAN | K.FTSGAFLS#PSVS#VQECRT#PR.A            | S1060:S1064:T1070: | 3 | 3,6083 | 0,381 | 0      |
| 2 | Q07889 SOS1_HUMAN  | R.IPESETESTAS#APNS#PR.T                | S1078:S1082:       | 2 | 3,1345 | 0,357 | -0,316 |
| 2 | Q76FK4 NOL8_HUMAN  | R.LQDS#S#S#EEEDVTEETDHR.N              | S1082:S1083:S1084: | 3 | 3,2778 | 0,394 | -0,234 |
| 2 | P21333 FLNA_HUMAN  | K.AFGPGLQGGSAGS#PAR.F                  | S1084:             | 2 | 2,3779 | 0,371 | -0,485 |
| 2 | P48634 BAT2_HUMAN  | R.TAS#ET#RSEGS#EYEEIPK.R               | S1085:T1087:S1092: | 3 | 3,281  | 0,184 | -0,17  |
| 2 | Q9UQ35 SRRM2_HUMAN | R.S#RS#S#SPVTELASR.S                   | S1099:S1101:S1102: | 3 | 3,9817 | 0,209 | -0,226 |
| 2 | Q9UQ35 SRRM2_HUMAN | R.S#RS#SS#SPVTELASR.S                  | S1099:S1101:S1103: | 2 | 2,9489 | 0,17  | -0,226 |
| 2 | Q9UH99 UN84B_HUMAN | R.GTGGGS#ES#SRAS#GLVGR.K               | S110:S112:S116:    | 3 | 2,6676 | 0,264 | -0,319 |
| 2 | Q86UE8 TLK2_HUMAN  | R.S#SPQHS#LS#NPLPR.R                   | S110:S115:S117:    | 3 | 3,6609 | 0,329 | -0,11  |
| 2 | Q9UQ35 SRRM2_HUMAN | R.SRS#S#S#SPVTELASR.S                  | S1101:S1102:S1103: | 3 | 2,9119 | 0,143 | 0      |
| 2 | Q9UQ35 SRRM2_HUMAN | R.S#SS#PVTELASRS#PIR.Q                 | S1101:S1103:S1112: | 2 | 2,8632 | 1     | 0,534  |
| 2 | Q9UQ35 SRRM2_HUMAN | R.SS#S#PVTELASRS#PIR.Q                 | S1102:S1103:S1112: | 2 | 2,4205 | 1     | -0,334 |
| 2 | Q9UK61 CC063_HUMAN | K.GGNLPPVS#PNDS#GAK.I                  | S1103:S1107:       | 2 | 2,6858 | 0,306 | -1,088 |
| 2 | Q9UPT8 ZC3H4_HUMAN | R.AAKPGPAEAPS#PTAS#PSGDAS#PPATAPYDPR.V | S1104:S1108:S1114: | 3 | 3,4588 | 1     | -0,231 |
| 2 | Q92900 RENT1_HUMAN | K.SQIDVALS#QDS#TYQGER.A                | S1107:S1110:       | 2 | 4,723  | 0,527 | -1,186 |
| 2 | Q96ST3 SIN3A_HUMAN | R.YM*NS#DTTS#PELR.E                    | S1108:S1112:       | 2 | 3,1076 | 0,403 | 0,153  |
| 2 | Q5T3F8 TM63B_HUMAN | R.LTS#VSSS#VDFDQR.D                    | S111:S115:         | 2 | 2,4573 | 1     | -0,229 |
| 2 | Q3KQU3 MA7D1_HUMAN | R.S#SQPS#PTAVPASDS#PPTKQEVK.K          | S112:S116:S125:    | 3 | 2,9827 | 0,131 | -0,369 |
| 2 | Q9UQ35 SRRM2_HUMAN | R.GEFS#AS#PM*LK.S                      | S1122:S1124:       | 2 | 2,031  | 0,354 | -0,196 |

|   |                     |                                 |                    |   |        |       |        |
|---|---------------------|---------------------------------|--------------------|---|--------|-------|--------|
| 2 | Q3KQU3 MA7D1_HUMAN  | R.RSS#QPS#PTAVPAS#DSPPTK.Q      | S113:S116:S123:    | 3 | 3,1544 | 1     | -0,34  |
| 2 | Q3KQU3 MA7D1_HUMAN  | R.RSS#QPS#PTAVPASDS#PPTK.Q      | S113:S116:S125:    | 2 | 3,1654 | 1     | -0,454 |
| 2 | Q3KQU3 MA7D1_HUMAN  | R.RSS#QPS#PTAVPASDS#PPTK.Q      | S113:S116:S125:    | 3 | 2,9143 | 1     | -0,425 |
| 2 | Q96T60 PNKP_HUMAN   | R.TPES#QPDTP#PPGTPLVS#QDEKR.D   | S114:T118:S126:    | 3 | 3,8143 | 0,263 | -0,073 |
| 2 | Q7Z309 F122B_HUMAN  | R.IDFTPVS#PAPS#PTR.G            | S115:S119:         | 2 | 2,1852 | 0,282 | -0,148 |
| 2 | P55327 TPD52_HUMAN  | K.ASAAFSS#VGS#VITK.K            | S116:S119:         | 2 | 2,1088 | 0,369 | 0,657  |
| 2 | Q9NTI5 PDS5B_HUMAN  | R.M*ETVSNASSSS#NPSS#PGR.I       | S1162:S1166:       | 2 | 2,5913 | 1     | -0,495 |
| 2 | Q86SQ4 GP126_HUMAN  | K.SLSSSS#IGSNS#TYLTSK.S         | S1165:S1170:       | 2 | 4,1139 | 1     | -0,325 |
| 2 | Q92766 RREB1_HUMAN  | R.ANSGGVDLDS#S#GEFASIEK.M       | S1174:S1175:       | 2 | 3,026  | 0,411 | -0,358 |
| 2 | Q04637 IF4G1_HUMAN  | R.SFS#KEVEER.S                  | S1188:             | 2 | 2,3966 | 0,216 | -0,717 |
| 2 | Q8WYP5 AHTF1_HUMAN  | R.S#TPLASPS#PSPGRS#PQR.L        | S1218:S1225:S1231: | 3 | 3,2064 | 1     | -0,093 |
| 2 | Q8WXI9 P66B_HUMAN   | R.GRLTPS#PDIIVLS#DNEASS#PR.S    | S122:S129:S135:    | 3 | 6,5525 | 0,298 | -0,074 |
| 2 | Q8WYP5 AHTF1_HUMAN  | R.STPLAS#PS#PSPGRS#PQR.L        | S1223:S1225:S1231: | 2 | 3,1519 | 1     | -1,306 |
| 2 | Q8WYP5 AHTF1_HUMAN  | R.STPLASPS#PS#PGRS#PQR.L        | S1225:S1227:S1231: | 2 | 2,7739 | 0,272 | -0,187 |
| 2 | Q8N488 RYBP_HUMAN   | K.SDILKDPSPS#EANS#IQS#ANATTK.T  | S123:S127:S130:    | 3 | 4,9341 | 0,353 | 1,81   |
| 2 | A6NFL4 A6NFL4_HUMAN | R.GPSFM*TS#PS#PK.H              | S1250:S1252:       | 2 | 2,3781 | 0,123 | 0      |
| 2 | Q14137 BOP1_HUMAN   | R.IGDEYAEDS#S#DEEDIR.N          | S126:S127:         | 2 | 4,2972 | 0,546 | -0,487 |
| 2 | Q9UJM3 ERRFI_HUMAN  | K.LTVNGVCAS#TPPLT#PIK.N         | S126:T131:         | 2 | 2,3617 | 0,206 | -0,19  |
| 2 | Q13459 MYO9B_HUMAN  | R.VSPAPGS#APET#PEDK.S           | S1267:T1271:       | 2 | 3,3138 | 0,486 | -0,281 |
| 2 | Q9UPT8 ZC3H4_HUMAN  | K.TGSGS#PFAGNS#PAR.E            | S1269:S1275:       | 2 | 3,5328 | 0,323 | -0,166 |
| 2 | Q96A00 PP14A_HUMAN  | R.QPS#PSHDGS#LS#PLQDR.A         | S128:S134:S136:    | 3 | 2,8652 | 0,089 | 0      |
| 2 | Q96BY6 DOC10_HUMAN  | R.AS#LASLDS#NPSTNEK.S           | S1286:S1292:       | 2 | 2,434  | 0,273 | -0,36  |
| 2 | Q96RR4 KKCC2_HUMAN  | R.CICPSLPYS#PVSS#PQS#SPRLPR.R   | S129:S133:S136:    | 3 | 4,1064 | 1     | -0,47  |
| 2 | Q9UQ35 SRRM2_HUMAN  | K.ELNS#NS#PLRENSFGS#PLEFR.N     | S1318:S1320:S1329: | 3 | 4,3697 | 0,394 | -0,378 |
| 2 | Q9UQ35 SRRM2_HUMAN  | K.ELNS#NS#PLRENS#FGS#PLEFR.N    | S1320:S1326:S1329: | 3 | 4,4804 | 0,462 | -0,227 |
| 2 | Q9UQ35 SRRM2_HUMAN  | R.ENS#FGS#PLEFR.N               | S1326:S1329:       | 2 | 2,6648 | 0,478 | -0,085 |
| 2 | Q13464 ROCK1_HUMAN  | R.TLS#TRS#TANQS#FR.K            | S1333:S1336:S1341: | 2 | 2,2548 | 0,315 | -0,5   |
| 2 | Q15021 CND1_HUMAN   | R.YQPLASTAS#DNDFVT#PEPR.R       | S1333:T1339:       | 3 | 3,4951 | 0,343 | -0,242 |
| 2 | Q09666 AHNK_HUMAN   | R.LKS#EDGVEGDLGETQSR.T          | S135:              | 3 | 3,4342 | 0,353 | -0,289 |
| 2 | O60841 IF2P_HUMAN   | K.VEM*YS#GS#DDDDDFNK.L          | S135:S137:         | 2 | 4,206  | 0,38  | -0,574 |
| 2 | Q99549 MPP8_HUMAN   | R.LSLNNDIFEANS#DS#DQQSETK.E     | S136:S138:         | 3 | 3,3988 | 0,332 | -0,291 |
| 2 | Q7Z309 F122B_HUMAN  | K.M*FVSSGLPSP#PVPS#PR.R         | S137:S141:         | 2 | 3,4615 | 0,406 | 1,081  |
| 2 | Q9UM11 FZR_HUMAN    | K.RS#SPDDGNDVSP#PYSLSP#PVSNSK.S | S137:S146:S151:    | 3 | 3,634  | 0,206 | -0,149 |

|   |                    |                                |                    |   |        |       |        |
|---|--------------------|--------------------------------|--------------------|---|--------|-------|--------|
| 2 | P46013 KI67_HUMAN  | K.M*PCES#SPPEADT#PTSTR.R       | S1375:T1383:       | 3 | 3,6566 | 0,127 | -0,516 |
| 2 | Q9UQ35 SRRM2_HUMAN | R.S#S#GHSSSELS#PDAVEK.A        | S1378:S1379:S1387: | 2 | 3,5209 | 1     | -0,329 |
| 2 | Q9UQ35 SRRM2_HUMAN | R.SSGHS#S#SELS#PDAVEK.A        | S1382:S1383:S1387: | 2 | 4,4976 | 1     | -0,394 |
| 2 | Q5SYE7 NHSL1_HUMAN | R.NHS#PS#PPVT#PTGAAPSLASPK.Q   | S1386:S1388:T1392: | 3 | 3,8023 | 0,29  | -0,081 |
| 2 | P50914 RL14_HUMAN  | K.AALLKAS#PK.K                 | S139:              | 2 | 2,0713 | 0,141 | -0,374 |
| 2 | Q9UQ35 SRRM2_HUMAN | K.AGMSSNQ#ISS#PVLDAVPRT#PSR.E  | S1401:S1404:T1413: | 3 | 5,9229 | 1     | 0,07   |
| 2 | Q5QJE6 TDIF2_HUMAN | K.ESYTEEIVS#EAES#HVS#GISR.I    | S141:S145:S148:    | 3 | 4,1461 | 1     | -0,224 |
| 2 | Q96E09 F122A_HUMAN | R.IDFIPVS#PAPS#PTR.G           | S143:S147:         | 2 | 2,2402 | 0,111 | -0,147 |
| 2 | O15085 ARHGB_HUMAN | K.SLGGES#S#GGTTPVGS#FHTEAAR.W  | S1457:S1458:S1466: | 3 | 2,966  | 0,19  | -0,156 |
| 2 | Q8WWQ0 PHIP_HUMAN  | K.SESSTS#AFS#TPTR.S            | S1476:S1479:       | 2 | 3,4667 | 1     | 1,768  |
| 2 | Q15648 MED1_HUMAN  | K.SYQNS#PS#S#DDGIRPLPEYSTEK.H  | S1479:S1481:S1482: | 3 | 3,9646 | 1     | 0,135  |
| 2 | Q9UQ35 SRRM2_HUMAN | R.S#RS#PSS#PELNK.C             | S1497:S1499:S1502: | 2 | 3,5907 | 0,478 | -0,314 |
| 2 | Q99959 PKP2_HUMAN  | R.LEIS#PDSS#PER.A              | S151:S155:         | 2 | 2,0877 | 0,083 | -0,176 |
| 2 | Q9H6H4 REEP4_HUMAN | R.SFS#M*QDLR.S                 | S152:              | 2 | 2,0342 | 0,1   | -0,678 |
| 2 | Q02880 TOP2B_HUMAN | K.VVEAVNS#DS#DSEFGIPK.K        | S1522:S1524:       | 2 | 4,7597 | 0,537 | -0,125 |
| 2 | Q5VZL5 ZMYM4_HUMAN | K.AKSEDS#DVELS#D.-             | S1542:S1547:       | 2 | 3,19   | 0,483 | -0,252 |
| 2 | O60292 SI1L3_HUMAN | R.TLS#DES#LCS#GRR.E            | S1544:S1547:S1550: | 2 | 2,1703 | 0,403 | -0,376 |
| 2 | P42166 LAP2A_HUMAN | R.S#ST#PLPTISSAENTR.Q          | S158:T160:         | 2 | 3,0557 | 1     | -0,202 |
| 2 | P16949 STMN1_HUMAN | R.AS#GQAFELILS#PR.S            | S16:S25:           | 2 | 4,024  | 0,312 | -0,394 |
| 2 | Q12873 CHD3_HUMAN  | K.M*ETEADAPS#PAPS#LGER.L       | S1601:S1605:       | 2 | 3,4527 | 0,52  | -0,379 |
| 2 | Q9C0C2 TB182_HUMAN | R.VPS#S#DEEVVEEPQSR.R          | S1620:S1621:       | 2 | 4,4197 | 0,491 | -0,33  |
| 2 | O00566 MPP10_HUMAN | R.KS#PVFS#DEDS#DLDFDISK.L      | S163:S167:S171:    | 3 | 4,2546 | 0,392 | 0      |
| 2 | O43395 PRPF3_HUMAN | K.QLSFIS#PPT#PQPK.T            | S164:T167:         | 2 | 2,0605 | 0,091 | 0,381  |
| 2 | O43166 SI1L1_HUMAN | K.SLHGFEFS#AS#DSS#LTDIQETR.R   | S1645:S1647:S1650: | 3 | 3,88   | 0,229 | -0,151 |
| 2 | Q9H4L4 SENP3_HUMAN | K.NHLS#PQQGGAT#PQVPS#PCCR.F    | S169:T176:S181:    | 3 | 3,3982 | 0,179 | -0,075 |
| 2 | Q5SRE5 NU188_HUMAN | R.GAPS#SPATGVLPS#PQGK.S        | S1708:S1717:       | 2 | 3,7692 | 0,425 | 0,143  |
| 2 | Q5SRE5 NU188_HUMAN | R.GAPSS#PATGVLPS#PQGK.S        | S1709:S1717:       | 2 | 4,1777 | 0,494 | 0,143  |
| 2 | Q86V15 CASZ1_HUMAN | R.TPALAALAALGAPGAPTAASS#P.-    | S1758:             | 3 | 2,6243 | 0,142 | -0,535 |
| 2 | Q58FF8 H90B2_HUMAN | K.IEDVGS#DEEDDSGKDK.K          | S177:              | 2 | 3,5721 | 0,548 | -0,604 |
| 2 | Q58FF8 H90B2_HUMAN | K.IEDVGS#DEEDDSGKDK.K          | S177:              | 3 | 3,0794 | 0,39  | -0,402 |
| 2 | Q86TB9 PATL1_HUMAN | R.RS#TS#PIIGS#PPVR.A           | S177:S179:S184:    | 2 | 2,5202 | 0,404 | -0,304 |
| 2 | Q9H7D0 DOCK5_HUMAN | R.LS#PFHGSSPPQSTPLS#PPPLT#PK.A | S1775:S1789:T1794: | 3 | 5,119  | 0,346 | -0,21  |
| 2 | Q9BXB4 OSB11_HUMAN | R.SFSLASS#SNS#PISQR.R          | S178:S181:         | 2 | 3,3451 | 0,306 | 0,777  |

|   |                     |                                      |                    |   |        |       |        |
|---|---------------------|--------------------------------------|--------------------|---|--------|-------|--------|
| 2 | Q9H7D0 DOCK5_HUMAN  | R.LSPFHGSS#PPQSTPLS#PPPLT#PK.A       | S1781:S1789:T1794: | 3 | 4,8522 | 1     | -0,14  |
| 2 | P46821 MAP1B_HUMAN  | K.SDIS#PLT#PR.E                      | S1785:T1788:       | 2 | 2,771  | 0,414 | 0      |
| 2 | Q8NI08 NCOA7_HUMAN  | R.LSSSSPGATVS#PS#S#SDAEYDKLPDADLAR.K | S179:S181:S182:    | 3 | 2,9007 | 1     | -0,116 |
| 2 | Q52LW3 RHG29_HUMAN  | K.SFENVSVES#VDS#SSEK.G               | S179:S182:         | 2 | 3,4695 | 0,398 | -0,258 |
| 2 | Q86TB9 PATL1_HUMAN  | R.STS#PIIGS#PPVR.A                   | S179:S184:         | 2 | 2,9609 | 0,297 | 0,089  |
| 2 | P02545 LMNA_HUMAN   | R.SGAQASS#TPLSPT#R.I                 | S18:T24:           | 2 | 2,4315 | 0,268 | -0,161 |
| 2 | P49790 NU153_HUMAN  | K.DSTSQHDDDNIS#TTS#GFS#SR.A          | S182:S185:S188:    | 3 | 3,3472 | 0,308 | -0,305 |
| 2 | P50548 ERF_HUMAN    | R.LGRGS#VS#DCS#DGTSELEEPLGEDPR.A     | S185:S187:S190:    | 3 | 4,2559 | 1     | -0,252 |
| 2 | P24928 RPB1_HUMAN   | K.YS#PTSPKYS#PTS#PK.Y                | S1861:S1868:S1871: | 2 | 3,975  | 1     | -0,48  |
| 2 | P24928 RPB1_HUMAN   | K.YSPTSPTY#PTT#PK.Y                  | S1882:T1885:       | 2 | 3,149  | 1     | -0,506 |
| 2 | Q13242 SFRS9_HUMAN  | R.STS#YGYS#R.S                       | S189:S193:         | 2 | 2,4671 | 0,182 | -0,452 |
| 2 | Q147X3 MAK3_HUMAN   | R.LLSS#SLTADCS#LRSPS#GR.E            | S189:S196:S201:    | 3 | 3,3185 | 0,237 | -0,596 |
| 2 | Q9H1E3 NUCKS_HUMAN  | R.KVVDYSQFQES#DDADEDYGR.D            | S19:               | 3 | 3,0942 | 0,288 | -0,374 |
| 2 | Q9NV56 MRGBP_HUMAN  | K.VLTANS#NPS#SPSAK.R                 | S191:S194:         | 2 | 4,7259 | 1     | -0,38  |
| 2 | P24928 RPB1_HUMAN   | K.YSPTS#PTY#PTS#PK.Y                 | S1913:S1920:       | 2 | 3,2517 | 1     | -0,656 |
| 2 | P21291 CSRP1_HUMAN  | K.GFGFGQGAGALVHS#E.-                 | S192:              | 2 | 3,3641 | 0,411 | 0      |
| 2 | Q16629 SFRS7_HUMAN  | R.YFQS#PS#R.S                        | S192:S194:         | 2 | 2,5187 | 0,203 | 0      |
| 2 | Q00587 BORG5_HUMAN  | R.SDS#LLS#FR.L                       | S192:S195:         | 2 | 2,8197 | 0,468 | -0,337 |
| 2 | Q92621 NU205_HUMAN  | R.LQDS#FAS#ETNLDFR.S                 | S1939:S1942:       | 2 | 2,854  | 0,202 | -0,541 |
| 2 | Q9BW71 HIRP3_HUMAN  | R.EES#EES#EAEPVQR.T                  | S196:S199:         | 2 | 2,7976 | 0,206 | -0,073 |
| 2 | Q9BW71 HIRP3_HUMAN  | R.EES#EES#EAEPVQR.T                  | S196:S199:         | 3 | 2,7086 | 0,184 | 0,109  |
| 2 | Q8TEA8 DTD1_HUMAN   | R.SASS#GAEGDVSS#EREP.-               | S197:S205:         | 2 | 2,3896 | 0,272 | -0,283 |
| 2 | P42356 PI4KA_HUMAN  | R.KTS#SVS#SIS#QVSPER.G               | S198:S201:S204:    | 2 | 3,0425 | 1     | -0,2   |
| 2 | Q14493 SLBP_HUMAN   | R.CDGDAS#PPS#PAR.W                   | S20:S23:           | 2 | 4,1563 | 0,506 | -0,351 |
| 2 | P30622 CLIP1_HUMAN  | K.TASESISNLS#EAGS#IK.K               | S200:S204:         | 2 | 4,2823 | 0,506 | -0,139 |
| 2 | Q8IYH0 Q8IYH0_HUMAN | K.TVDLGIS#DLEDDC.-                   | S201:              | 2 | 2,3644 | 0,099 | -0,239 |
| 2 | Q8NCF5 NF2IP_HUMAN  | K.TEFLDLNSPLS#PPS#PR.T               | S201:S204:         | 2 | 2,4536 | 0,423 | -0,477 |
| 2 | P18583 SON_HUMAN    | R.SFS#IS#PVR.L                       | S2011:S2013:       | 2 | 2,7049 | 0,325 | 0      |
| 2 | Q96B36 AKTS1_HUMAN  | R.TEARS#S#DEENGPPS#SPDLDR.I          | S202:S203:S211:    | 3 | 3,8696 | 0,158 | -0,534 |
| 2 | Q96B36 AKTS1_HUMAN  | R.TEARS#S#DEENGPPS#PDLDR.I           | S202:S203:S212:    | 3 | 4,9166 | 0,391 | -0,076 |
| 2 | Q01130 SFRS2_HUMAN  | R.S#KS#PPKS#PEEEGAVSS.-              | S206:S208:S212:    | 2 | 3,1021 | 0,308 | -0,657 |
| 2 | Q01130 SFRS2_HUMAN  | R.S#KS#PPKSPEEEGAVSS#.-              | S206:S208:S221:    | 2 | 2,3665 | 0,328 | -0,46  |
| 2 | Q8TDW0 LRC8C_HUMAN  | R.SNTIQSGPEGS#LVNSQS#LKS#IPEK.F      | S206:S212:S215:    | 3 | 3,2464 | 0,204 | -0,334 |

|   |                     |                                 |                    |   |        |       |        |
|---|---------------------|---------------------------------|--------------------|---|--------|-------|--------|
| 2 | Q9UQ35 SRRM2_HUMAN  | R.S#LT#RS#PPAIR.R               | S2067:T2069:S2071: | 2 | 2,0203 | 0,219 | -0,182 |
| 2 | Q8NI08 NCOA7_HUMAN  | R.VLS#STS#EEDEPGVVK.F           | S208:S211:         | 2 | 4,1286 | 0,475 | 0      |
| 2 | Q8WXV6 Q8WXV6_HUMAN | R.TSS#EDNLYLAVLR.A              | S21:               | 2 | 3,203  | 0,295 | 0,469  |
| 2 | Q9BRS2 RIOK1_HUMAN  | R.VVPGQFDDADS#S#DSENR.D         | S21:S22:           | 2 | 2,2577 | 0,269 | -0,244 |
| 2 | Q09666 AHNK_HUMAN   | R.LPS#GSGAASPTGSAVDIR.A         | S210:              | 2 | 3,4878 | 0,388 | -0,142 |
| 2 | Q09666 AHNK_HUMAN   | R.LPS#GSGAAS#PTGSAVDIR.A        | S210:S216:         | 2 | 3,8852 | 0,444 | -0,271 |
| 2 | Q8TBF4 ZCRB1_HUMAN  | K.KSTYFS#DEEELS#D.-             | S210:S216:         | 2 | 3,741  | 0,268 | -0,357 |
| 2 | Q96B36 AKTS1_HUMAN  | R.SSDEENGPPS#S#PDLDR.I          | S211:S212:         | 2 | 4,7413 | 0,467 | -0,459 |
| 2 | Q9H4L7 SMRCD_HUMAN  | R.KLS#S#SS#EPYEEDEFNDDQSIK.K    | S211:S212:S214:    | 3 | 6,227  | 1     | -0,409 |
| 2 | Q7Z417 NUFP2_HUMAN  | K.GADNDGS#GS#ESGYTTPK.K         | S212:S214:         | 2 | 3,213  | 0,435 | -0,338 |
| 2 | A8K0M8 A8K0M8_HUMAN | R.AAAS#PPT#PIR.S                | S212:T215:         | 2 | 3,2092 | 0,448 | -0,107 |
| 2 | Q14934 NFAC4_HUMAN  | R.FGLGS#PLPS#PR.A               | S213:S217:         | 2 | 3,0487 | 0,31  | -0,095 |
| 2 | Q9GZM8 NDEL1_HUMAN  | K.M*DSAVQASLS#LPAT#PVGK.G       | S215:T219:         | 2 | 3,2551 | 0,557 | -0,251 |
| 2 | Q09666 AHNK_HUMAN   | R.LPSGSGAAS#PTGS#AVDIR.A        | S216:S220:         | 2 | 4,5396 | 1     | -0,203 |
| 2 | Q02750 MP2K1_HUMAN  | K.LCDFGVSGQLIDS#M*ANS#FVGTR.S   | S218:S222:         | 3 | 5,0097 | 0,495 | 0      |
| 2 | P49810 PSN2_HUMAN   | R.TSLM*S#AES#PTPR.S             | S22:S25:           | 2 | 3,2396 | 0,349 | -1,008 |
| 2 | Q9UPW0 FOXJ3_HUMAN  | K.VTLYNTDQDGS#DS#PR.S           | S221:S223:         | 2 | 2,8598 | 0,444 | -0,401 |
| 2 | P49761 CLK3_HUMAN   | R.CEERS#PS#FGEDYGPS#R.S         | S224:S226:S235:    | 3 | 3,3258 | 0,434 | 0      |
| 2 | Q13283 G3BP1_HUMAN  | K.SS#SPAPADIAQTVQEDLR.T         | S231:              | 3 | 4,5191 | 0,419 | -0,186 |
| 2 | Q9UPU9 SAM4A_HUMAN  | K.AYSS#PS#TTPEAR.R              | S231:S233:         | 2 | 2,1004 | 0,278 | -0,342 |
| 2 | Q13283 G3BP1_HUMAN  | K.SSS#PAPADIAQTVQEDLR.T         | S232:              | 2 | 3,2839 | 0,449 | -0,497 |
| 2 | Q13136 LIPA1_HUMAN  | R.SS#DGS#LS#HEEDLAK.V           | S239:S242:S244:    | 2 | 2,9943 | 0,327 | -0,213 |
| 2 | O75420 PERQ1_HUMAN  | R.ALSGGGSVAS#PPPS#PAM*PK.Y      | S24:S28:           | 2 | 3,6042 | 0,518 | -0,712 |
| 2 | Q16204 CCDC6_HUMAN  | K.LDQPVS#APPS#PR.D              | S240:S244:         | 2 | 3,6915 | 0,435 | -0,171 |
| 2 | Q16204 CCDC6_HUMAN  | K.LDQPVS#APPS#PR.D              | S240:S244:         | 3 | 2,7353 | 0,328 | -0,321 |
| 2 | Q9UBC2 EP15R_HUMAN  | R.STPS#HGSVSSLNS#TGSL#PK.H      | S241:S250:S255:    | 3 | 2,8043 | 1     | -0,253 |
| 2 | Q8IU60 DCP2_HUMAN   | R.FGDS#S#DS#DNGFSSTGTPAKPTVEK.L | S246:S247:S249:    | 3 | 3,6184 | 0,317 | -0,332 |
| 2 | Q9P0V3 SH3B4_HUMAN  | R.SYS#LSELS#VLQAK.S             | S246:S251:         | 2 | 2,3194 | 0,255 | -0,077 |
| 2 | Q96ST2 IWS1_HUMAN   | R.IS#DS#ESEDPPR.H               | S248:S250:         | 2 | 2,1933 | 0,212 | -0,438 |
| 2 | P16949 STMN1_HUMAN  | R.ASGQAFELILS#PR.S              | S25:               | 2 | 3,7019 | 0,35  | 0      |
| 2 | P52701 MSH6_HUMAN   | R.VIS#DSES#DIGGS#DVEFKPDTK.E    | S252:S256:S261:    | 3 | 6,74   | 0,563 | -0,074 |
| 2 | Q9UHR4 BI2L1_HUMAN  | K.TPASTPVS#GTPQAS#PMIER.S       | S255:S261:         | 3 | 3,3236 | 0,413 | -0,263 |
| 2 | Q15477 SKIV2_HUMAN  | R.ASS#LEDLVLK.E                 | S256:              | 2 | 2,1274 | 0,403 | -0,106 |

|   |                     |                                 |                 |   |        |       |        |
|---|---------------------|---------------------------------|-----------------|---|--------|-------|--------|
| 2 | Q9H426 RIMS4_HUMAN  | R.QASQLS#LES#TVGPCGER.S         | S257:S260:      | 2 | 3,2044 | 0,447 | 0      |
| 2 | Q8NFH5 NUP53_HUMAN  | R.CALS#SPSLAFT#PPIK.T           | S258:T265:      | 3 | 2,6683 | 0,233 | -0,209 |
| 2 | Q15942 ZYX_HUMAN    | R.GPPASS#PAPAPKFS#PVT#PK.F      | S259:S267:T270: | 3 | 3,8042 | 0,325 | 0,088  |
| 2 | Q8NFH5 NUP53_HUMAN  | R.CALSS#PSLAFT#PPIK.T           | S259:T265:      | 2 | 3,2734 | 0,479 | -0,279 |
| 2 | Q92466 DDB2_HUMAN   | R.SRS#PLELEPEAK.K               | S26:            | 2 | 3,8963 | 0,353 | -0,17  |
| 2 | Q92466 DDB2_HUMAN   | R.SRS#PLELEPEAK.K               | S26:            | 3 | 3,3997 | 0,279 | -0,255 |
| 2 | P49736 MCM2_HUMAN   | R.GNDPLTS#S#PGR.S               | S26:S27:        | 2 | 3,0817 | 0,439 | -0,097 |
| 2 | Q96A19 C102A_HUMAN  | K.GSLLTILGS#PS#PER.M            | S26:S28:        | 2 | 3,355  | 0,469 | -0,308 |
| 2 | Q6Y7W6 PERQ2_HUMAN  | R.ALSSGGSITS#PPLS#PALPK.Y       | S26:S30:        | 2 | 3,677  | 0,414 | -0,503 |
| 2 | Q8TF44 NLF3_HUMAN   | R.HGS#LS#ADDSTPDAS#PGSR.R       | S262:S264:S273: | 2 | 5,5914 | 1     | -0,367 |
| 2 | Q8IWB9 TEX2_HUMAN   | K.TAPSS#PLTS#PSDTR.S            | S266:S270:      | 2 | 3,4218 | 1     | -0,309 |
| 2 | Q9UQ35 SRRM2_HUMAN  | R.SLS#YS#PVER.R                 | S2692:S2694:    | 2 | 3,0125 | 0,433 | -0,204 |
| 2 | Q8WUM0 NU133_HUMAN  | R.GPLAGLPGS#T#PR.T              | S27:T28:        | 2 | 2,6824 | 0,274 | -0,182 |
| 2 | Q8WUM0 NU133_HUMAN  | R.GPLAGLPGS#T#PRT#ASR.K         | S27:T28:T31:    | 2 | 3,7755 | 0,473 | -0,067 |
| 2 | Q96G46 DUS3L_HUMAN  | R.QENCGAQQPAGPGTS#TPPSS#PVR.T   | S272:S277:      | 3 | 3,9443 | 1     | -0,142 |
| 2 | Q13501 SQSTM_HUMAN  | R.LTPVS#PESSS#TEEK.S            | S272:S277:      | 2 | 2,0397 | 0,249 | 0,739  |
| 2 | Q6KC79 NIPBL_HUMAN  | R.NAASFPLRS#PQPVCS#PAGSEGT#PK.G | S274:S280:T287: | 3 | 3,9658 | 0,349 | 0,475  |
| 2 | Q13435 SF3B2_HUMAN  | R.SS#LGQS#ASET#EEDTVSVSKK.E     | S280:S284:T288: | 3 | 2,6288 | 0,306 | 0      |
| 2 | O94880 PHF14_HUMAN  | K.VLSRNS#ADDEELT#NDS#LTLQSK.S   | S280:T287:S290: | 3 | 4,4391 | 0,256 | -0,066 |
| 2 | P15924 DESP_HUMAN   | K.GLPSPYNM*SS#APGS#R.S          | S2821:S2825:    | 2 | 2,8924 | 0,399 | -0,216 |
| 2 | P21127 CD2L1_HUMAN  | R.DLLSDLQDIS#DSER.K             | S283:           | 2 | 2,5788 | 0,191 | 0,072  |
| 2 | Q02952 AKA12_HUMAN  | K.SAES#PTS#PVTSETGSTFK.K        | S283:S286:      | 2 | 3,4545 | 1     | -0,371 |
| 2 | Q02952 AKA12_HUMAN  | K.SAES#PT#SPVT#SETGSTFKK.F      | S283:T285:T289: | 3 | 3,3305 | 0,281 | -0,419 |
| 2 | O95817 BAG3_HUMAN   | R.SS#TPLHS#PS#PIR.V             | S284:S289:S291: | 3 | 3,1541 | 0,243 | 0      |
| 2 | Q02952 AKA12_HUMAN  | K.SAESPTS#PVT#SETGSTFK.K        | S286:T289:      | 2 | 3,4037 | 1     | -0,247 |
| 2 | Q6WCQ1 MRIP_HUMAN   | K.AEEQQLPPPLS#PPS#PS#TPNHR.R    | S288:S291:S293: | 3 | 3,5299 | 0,197 | -0,145 |
| 2 | Q6WCQ1 MRIP_HUMAN   | K.AEEQQLPPPLS#PPS#PST#PNHR.R    | S288:S291:T294: | 3 | 3,4513 | 0,252 | 0,508  |
| 2 | Q96MH2 HEXI2_HUMAN  | K.TSGAPGS#PQT#PPER.H            | S29:T32:        | 2 | 2,659  | 0,317 | -0,554 |
| 2 | Q86YS7 K0528_HUMAN  | K.NQYS#FS#PSK.S                 | S293:S295:      | 2 | 2,0439 | 0,32  | -0,185 |
| 2 | Q13371 PHLP_HUMAN   | R.NSATCHS#EDS#DLEID.-           | S293:S296:      | 2 | 2,5386 | 0,367 | -0,329 |
| 2 | Q59F18 Q59F18_HUMAN | R.LQDGTQAALS#PLT#PAR.L          | S295:T298:      | 2 | 4,6717 | 0,518 | 0,322  |
| 2 | Q13247 SFRS6_HUMAN  | R.S#QS#RSNS#PLVPPSK.A           | S297:S299:S303: | 2 | 2,4545 | 0,235 | -0,268 |
| 2 | Q9UJD0 RIMS3_HUMAN  | R.RLSQS#SLES#ATSPSCS.-          | S297:S301:      | 2 | 2,7221 | 1     | -0,263 |



|   |                    |                                   |                 |   |        |       |        |
|---|--------------------|-----------------------------------|-----------------|---|--------|-------|--------|
| 2 | Q96QR8 PURB_HUMAN  | R.RGGGS#GGGEES#EGEEVDED.-         | S298:S304:      | 2 | 2,5829 | 0,562 | -0,364 |
| 2 | Q7L4I2 RSRC2_HUMAN | K.EQSEVS#VS#PR.A                  | S30:S32:        | 2 | 2,8463 | 0,354 | -0,191 |
| 2 | P38432 P80C_HUMAN  | K.LGFS#LT#PSK.G                   | S301:T303:      | 2 | 2,4856 | 0,361 | 0      |
| 2 | P05388 RLA0_HUMAN  | K.VEAKEES#EES#DEDM*GFGLFD.-       | S304:S307:      | 3 | 3,4762 | 0,439 | -0,225 |
| 2 | Q13769 THOC5_HUMAN | K.ALFKPPEDS#QDDES#DS#DAEEEEQTTK.R | S307:S312:S314: | 3 | 2,7323 | 0,265 | -0,24  |
| 2 | Q9BTV5 FSD1_HUMAN  | R.TAS#PINS#PARGTPS#PK.R           | S313:S317:S324: | 2 | 2,0163 | 0,132 | -0,268 |
| 2 | P49585 PCY1A_HUMAN | R.MLQAIS#PKQS#PSS#SPTR.E          | S315:S319:S322: | 3 | 2,9256 | 0,184 | -0,356 |
| 2 | Q9NYV4 CD2L7_HUMAN | R.S#GSYSGRS#PS#PYGR.R             | S316:S323:S325: | 2 | 2,518  | 0,186 | -0,216 |
| 2 | Q5C9Z4 NOM1_HUMAN  | R.FAEDEEKS#ENS#S#EDGDITDK.S       | S317:S320:S321: | 3 | 5,8643 | 0,506 | -0,295 |
| 2 | Q9NYV4 CD2L7_HUMAN | R.SGS#YSGRS#PS#PYGR.R             | S318:S323:S325: | 3 | 3,2733 | 1     | -0,215 |
| 2 | Q9NYV4 CD2L7_HUMAN | R.SGS#YSGRS#PS#PYGR.R             | S318:S323:S325: | 2 | 2,2263 | 1     | -0,287 |
| 2 | Q6P4F7 RHGBA_HUMAN | R.IAQLSES#PVILT#PNAK.R            | S318:T323:      | 2 | 3,1058 | 0,409 | -0,066 |
| 2 | P61073 CXCR4_HUMAN | K.TSAQHALTS#VSR.G                 | S319:           | 2 | 2,3645 | 0,238 | -0,365 |
| 2 | Q9Y608 LRRF2_HUMAN | R.NSASATTPLS#GNSS#R.R             | S320:S324:      | 2 | 3,2551 | 0,484 | -0,227 |
| 2 | P26651 TTP_HUMAN   | R.LPIFNRI#VS#E.-                  | S323:S325:      | 2 | 2,6925 | 0,299 | -0,425 |
| 2 | Q92597 NDRG1_HUMAN | R.S#RT#AS#GSSVTSLDGTR.S           | S326:T328:S330: | 2 | 2,5949 | 0,178 | -0,067 |
| 2 | Q6PJT7 ZC3HE_HUMAN | R.TGS#ISS#SVS#VPAKPER.R           | S327:S330:S333: | 2 | 3,1814 | 1     | -0,596 |
| 2 | O15075 DCLK1_HUMAN | R.S#GKSPSPSPT#S#PGSLR.K           | S327:T336:S337: | 2 | 2,24   | 1     | -0,548 |
| 2 | Q14676 MDC1_HUMAN  | R.AQPFGFIDS#DT#DAEEER.I           | S329:T331:      | 2 | 2,8582 | 0,435 | -0,468 |
| 2 | Q14676 MDC1_HUMAN  | R.AQPFGFIDS#DT#DAEEER.I           | S329:T331:      | 3 | 2,6643 | 0,417 | -0,175 |
| 2 | P49790 NU153_HUMAN | K.RIPS#IVS#SPLNS#PLDR.S           | S330:S333:S338: | 2 | 2,5232 | 0,387 | -0,061 |
| 2 | Q92597 NDRG1_HUMAN | R.SRTAS#GSS#VT#SLDGTR.S           | S330:S333:T335: | 2 | 3,1782 | 1     | -0,268 |
| 2 | Q9UN36 NDRG2_HUMAN | R.SRTAS#LT#SAAS#VDGNR.S           | S332:T334:S338: | 2 | 2,0152 | 0,308 | -0,2   |
| 2 | Q9NYV4 CD2L7_HUMAN | R.SS#S#PFLSK.R                    | S333:S334:      | 2 | 2,3059 | 0,253 | -0,181 |
| 2 | Q9UGV2 NDRG3_HUMAN | R.THSTS#S#S#LGSGESPFGR.S          | S333:S334:S335: | 2 | 3,6846 | 1     | -0,373 |
| 2 | Q9UGV2 NDRG3_HUMAN | R.THSTS#SS#LGSGES#PFGR.S          | S333:S335:S341: | 2 | 3,8647 | 1     | -0,373 |
| 2 | P82094 TMF1_HUMAN  | R.IDSFSVQS#LDS#R.S                | S333:S336:      | 2 | 3,596  | 0,406 | -0,161 |
| 2 | Q03188 CENPC_HUMAN | R.TIS#PAES#TALFQGR.K              | S333:S337:      | 2 | 2,9437 | 0,426 | -0,149 |
| 2 | P08651 NFIC_HUMAN  | K.TEMDKS#PFNSPS#PQDS#PR.L         | S333:S339:S343: | 3 | 3,803  | 0,374 | -0,486 |
| 2 | P49790 NU153_HUMAN | R.IPSIVSS#PLNS#PLDR.S             | S334:S338:      | 2 | 4,3087 | 0,507 | -0,348 |
| 2 | Q86WB0 NIPA_HUMAN  | R.SQDATFS#PGS#EQAEK.S             | S335:S338:      | 2 | 2,0592 | 0,144 | -0,42  |
| 2 | Q9UK58 CCNL1_HUMAN | K.GLNPDGTPALSTLGGFS#PAS#KPS#SPR.E | S335:S338:S341: | 3 | 3,44   | 1     | -0,2   |
| 2 | Q86WB0 NIPA_HUMAN  | R.SQDATFS#PGS#EQAEKS#PGPIVSR.T    | S335:S338:S344: | 3 | 3,2328 | 0,27  | -0,14  |

|   |                     |                                       |                 |   |        |       |        |
|---|---------------------|---------------------------------------|-----------------|---|--------|-------|--------|
| 2 | Q16643 DREB_HUMAN   | R.S#PSDSSTAST#PVAEQIER.A              | S337:T346:      | 3 | 3,0987 | 1     | -0,452 |
| 2 | Q9P206 K1522_HUMAN  | R.FSS#VSS#PQPR.S                      | S339:S342:      | 2 | 2,2712 | 0,318 | -0,195 |
| 2 | O75676 KS6A4_HUMAN  | R.LEPVYS#PPGS#PPPGDPR.I               | S343:S347:      | 2 | 3,5491 | 0,502 | -0,127 |
| 2 | O60716 CTND1_HUMAN  | R.GSLAS#LDS#LR.K                      | S349:S352:      | 2 | 2,9325 | 0,324 | -0,207 |
| 2 | Q9GZR1 SENPE6_HUMAN | R.RES#IS#PQPADSACS#SPAPSTGK.V         | S350:S352:S361: | 3 | 5,5953 | 0,492 | -0,519 |
| 2 | Q6ZS17 FA65A_HUMAN  | R.FSTYSQS#PPDT#PSLR.E                 | S351:T355:      | 2 | 3,2236 | 0,204 | 0      |
| 2 | Q03164 HRX_HUMAN    | K.ALSSAVQASPTS#PGGSPSSPS#GQR.S        | S3511:S3521:    | 3 | 3,1753 | 1     | 0      |
| 2 | P01892 1A02_HUMAN   | K.GGSYSQAASSDSAQGS#DVS#LTACKV.-       | S356:S359:      | 3 | 4,6585 | 1     | -0,141 |
| 2 | Q96Q15 SMG1_HUMAN   | K.NLATS#ADT#PPSTVPGTGK.S              | S3566:T3569:    | 2 | 2,387  | 0,14  | -0,195 |
| 2 | O15014 ZN609_HUMAN  | R.FCDS#PTS#DLEM*R.N                   | S358:S361:      | 2 | 2,6996 | 0,437 | -0,149 |
| 2 | P78426 NKX61_HUMAN  | K.SSSGGGGGLLLHAS#EPES#SS.-            | S361:S365:      | 2 | 2,7381 | 0,352 | 0,803  |
| 2 | P11532 DMD_HUMAN    | K.VNGTTVSS#PSTS#LQR.S                 | S3613:S3617:    | 2 | 2,7189 | 1     | -0,36  |
| 2 | P49768 PSN1_HUMAN   | R.AAVQELS#S#SILAGEDPEER.G             | S365:S366:      | 2 | 2,7056 | 0,485 | -0,113 |
| 2 | Q9NQZ2 SAS10_HUMAN  | K.TSAAACAVTDLS#DDS#DFDEK.A            | S365:S368:      | 3 | 3,7772 | 0,304 | 0,321  |
| 2 | Q6VN20 RBP10_HUMAN  | K.SQDSYPGS#PSLS#PR.H                  | S365:S369:      | 2 | 3,7847 | 0,492 | -0,223 |
| 2 | P49768 PSN1_HUMAN   | R.AAVQELS#S#SILAGEDPEER.G             | S366:S367:      | 3 | 3,1512 | 0,25  | -0,169 |
| 2 | Q3KQU3 MA7D1_HUMAN  | R.SASAS#PLT#PCSVTR.S                  | S368:T371:      | 2 | 2,2403 | 0,403 | -0,383 |
| 2 | Q5T200 ZC3HD_HUMAN  | R.S#AS#PYPSHSLSS#PQR.K                | S370:S372:S381: | 2 | 3,2449 | 1     | -0,597 |
| 2 | O95817 BAG3_HUMAN   | K.VPPAPVPCPPS#PGPSAVPS#SPK.S          | S377:S385:      | 3 | 2,644  | 0,093 | 0      |
| 2 | Q9UQ35 SRRM2_HUMAN  | R.HGGS#PQPLATTPLS#QEPVNPPEASPT#R.D    | S377:S387:T400: | 3 | 3,5219 | 1     | -0,473 |
| 2 | Q9UQ35 SRRM2_HUMAN  | R.HGGS#PQPLAT#TPLSQEPVNPPEAS#EASPTR.D | S377:T383:S395: | 3 | 2,9712 | 1     | -1,065 |
| 2 | Q9UQ35 SRRM2_HUMAN  | R.HGGS#PQPLAT#TPLSQEPVNPPEAS#PTR.D    | S377:T383:S398: | 3 | 3,3462 | 1     | -0,355 |
| 2 | Q9UQ35 SRRM2_HUMAN  | R.HGGS#PQPLAT#TPLSQEPVNPPEAS#EASPTR.D | S377:T384:S395: | 3 | 2,8297 | 1     | 0,592  |
| 2 | Q9C0B0 UNK_HUMAN    | R.NSSLGSPS#NLCGS#PPGSIR.K             | S380:S385:      | 2 | 2,5329 | 0,28  | -0,894 |
| 2 | Q9H511 SUV92_HUMAN  | K.GSGDIS#SDS#IDHS#PAK.K               | S381:S384:S388: | 2 | 2,6039 | 0,349 | -0,202 |
| 2 | Q4KMP7 TB10B_HUMAN  | R.QQPPLGPSSS#LLS#LPGLK.S              | S383:S386:      | 3 | 3,1391 | 0,312 | -0,185 |
| 2 | Q4KMP7 TB10B_HUMAN  | R.QQPPLGPSSS#LLS#LPGLK.S              | S383:S386:      | 2 | 2,3813 | 0,422 | -0,308 |
| 2 | P55010 IF5_HUMAN    | K.EAEEEE#S#GEEEEDEDENIEVVYSK.A        | S389:S390:      | 3 | 3,48   | 0,389 | -0,064 |
| 2 | Q6T4R5 NHS_HUMAN    | R.VQQEIDS#DES#PVAR.E                  | S394:S397:      | 2 | 4,8587 | 0,457 | -0,493 |
| 2 | Q14004 CD2L5_HUMAN  | R.S#RS#PYS#PVL.R                      | S395:S397:S400: | 2 | 2,5743 | 0,397 | -0,087 |
| 2 | Q14004 CD2L5_HUMAN  | R.S#RSPY#S#PVL.R                      | S395:Y399:S400: | 3 | 2,7268 | 0,129 | -0,13  |
| 2 | Q96ST2 IWS1_HUMAN   | K.AAVLS#DS#EDEEK.A                    | S398:S400:      | 2 | 4,4858 | 0,393 | -0,168 |
| 2 | P49736 MCM2_HUMAN   | R.TDALTS#S#PGR.D                      | S40:S41:        | 2 | 2,7192 | 0,241 | -0,314 |

|   |                     |                                  |                 |   |        |       |        |
|---|---------------------|----------------------------------|-----------------|---|--------|-------|--------|
| 2 | Q5UIP0 RIF1_HUMAN   | K.GASS#PYGAPGT#PR.M              | S402:T409:      | 2 | 2,6263 | 0,246 | -0,266 |
| 2 | Q8WXE0 CSKI2_HUMAN  | R.VGLSPDSPAGDRNS#VGS#EGS#VGSIR.S | S403:S406:S409: | 3 | 2,9999 | 0,303 | -0,139 |
| 2 | Q8IYW5 RN168_HUMAN  | R.KVS#PES#S#PDQEETEINFQK.L       | S411:S414:S415: | 3 | 3,9728 | 0,196 | 1,156  |
| 2 | B2RMZ9 B2RMZ9_HUMAN | R.LNS#S#PRAPVS#PLK.F             | S416:S417:S423: | 3 | 2,6585 | 0,088 | -0,114 |
| 2 | B2RMZ9 B2RMZ9_HUMAN | R.LNS#S#PRAPVS#PLK.F             | S416:S417:S423: | 2 | 2,5469 | 0,335 | -0,304 |
| 2 | Q8N350 DOS_HUMAN    | R.LEAAEAAGGAS#PDS#PPER.G         | S416:S419:      | 2 | 3,1777 | 0,432 | -0,259 |
| 2 | Q14247 SRC8_HUMAN   | R.LPS#S#PVYEDAASF.K.A            | S417:S418:      | 2 | 4,2975 | 0,529 | -0,073 |
| 2 | Q2TB10 ZN800_HUMAN  | K.VEPADSVES#SPPS#IT#HSPQNELK.G   | S418:S422:T424: | 3 | 2,8508 | 0,278 | -0,476 |
| 2 | Q9P2I0 CPSF2_HUMAN  | K.EADIDS#S#DES#DIEEDIDQPSAHK.T   | S419:S420:S423: | 3 | 4,3078 | 0,223 | -0,131 |
| 2 | Q8NEM2 SHCBP_HUMAN  | K.GLFQDEDS#CS#DCSYR.D            | S42:S44:        | 2 | 3,1851 | 0,452 | -0,366 |
| 2 | Q13547 HDAC1_HUMAN  | R.IACEEFS#DS#EEEEGEGGR.K         | S421:S423:      | 3 | 4,0327 | 0,351 | 0      |
| 2 | Q92769 HDAC2_HUMAN  | R.IACDEEFS#DS#EDEGEGGR.R         | S422:S424:      | 3 | 2,864  | 0,332 | -0,254 |
| 2 | Q53EZ4 CEP55_HUMAN  | K.VAAS#PKS#PTAALNES#LVECPK.C     | S425:S428:S436: | 3 | 4,6633 | 0,32  | -0,076 |
| 2 | O95232 CROP_HUMAN   | K.NEVNGTSEDIKS#EGDTQS#N.-        | S425:S431:      | 3 | 3,8229 | 0,26  | -0,251 |
| 2 | O60269 GRIN2_HUMAN  | R.APASEDS#LS#VEGR.R              | S427:S429:      | 2 | 2,8959 | 0,335 | -1,404 |
| 2 | Q13112 CAF1B_HUMAN  | R.TQDPSS#PGTT#PPQAR.Q            | S429:T433:      | 2 | 3,016  | 0,342 | -0,431 |
| 2 | P35658 NU214_HUMAN  | K.S#PGSTPTT#PTSSQAPQK.L          | S430:T437:      | 2 | 2,2636 | 1     | -0,266 |
| 2 | A2ABF8 A2ABF8_HUMAN | R.GVSNDS#SLET#ER.G               | S435:T439:      | 2 | 2,4047 | 0,316 | -0,157 |
| 2 | Q9P107 GMIP_HUMAN   | R.SLDS#PTSS#PGAGTR.Q             | S437:S441:      | 2 | 2,3888 | 0,29  | -0,409 |
| 2 | Q96ST2 IWS1_HUMAN   | K.TIAS#DS#EEEAGK.E               | S438:S440:      | 2 | 2,0144 | 0,239 | -0,262 |
| 2 | Q15149 PLEC1_HUMAN  | R.SSS#VGSSSYPIS#PAVSR.T          | S4386:S4396:    | 2 | 4,5755 | 1     | -0,255 |
| 2 | P47974 TISD_HUMAN   | R.RLSDS#PVFDAPPS#PPDS#LSDR.D     | S440:S448:S452: | 3 | 2,8935 | 0,251 | -0,073 |
| 2 | P23443 KS6B1_HUMAN  | R.FIGS#PRT#PVS#PVK.F             | S441:T444:S447: | 2 | 4,3935 | 0,368 | -0,225 |
| 2 | Q8TAP8 CG047_HUMAN  | R.APVPEPGLDLS#LS#PRPDS#PQPR.H    | S45:S47:S52:    | 3 | 4,6647 | 0,368 | -0,428 |
| 2 | P29374 ARI4A_HUMAN  | K.SEPEENIDS#NS#ES#EREIEELK.S     | S453:S455:S457: | 3 | 2,8527 | 0,093 | -0,406 |
| 2 | Q15797 SMAD1_HUMAN  | K.VLTQM*GSPHNPISS#VS#.-          | S463:S465:      | 2 | 2,9731 | 0,498 | -0,267 |
| 2 | P30414 NKTR_HUMAN   | R.ILIPS#DIES#SKSS#TR.R           | S463:S467:S471: | 2 | 2,2214 | 0,213 | -0,195 |
| 2 | Q13191 CBLB_HUMAN   | R.QNSPVTS#PGS#SPLAQR.R           | S480:S483:      | 2 | 2,3305 | 0,208 | -0,205 |
| 2 | Q9P2B4 CT2NL_HUMAN  | K.FQSQADQDQQASGLQS#PPS#R.D       | S481:S484:      | 3 | 5,8202 | 0,472 | -0,235 |
| 2 | Q8NFC6 FA44A_HUMAN  | K.YYS#DS#DDELTVQR.R              | S482:S484:      | 2 | 4,1944 | 0,407 | -0,389 |
| 2 | O75925 PIAS1_HUMAN  | R.TCPSLS#PTS#PLNNK.G             | S485:S488:      | 2 | 3,161  | 0,261 | -0,073 |
| 2 | O75925 PIAS1_HUMAN  | R.TCPSLS#PT#SPLNNK.G             | S485:T487:      | 2 | 3,0571 | 0,165 | 0,073  |
| 2 | P15822 ZEP1_HUMAN   | K.ALSIHS#DVEDS#GES#EEEGATDER.Q   | S487:S492:S495: | 3 | 4,7613 | 0,317 | -0,339 |

|   |                    |                                |                 |   |        |       |        |
|---|--------------------|--------------------------------|-----------------|---|--------|-------|--------|
| 2 | Q6UN15 FIP1_HUMAN  | R.DHS#PTPS#VFNS#DEER.Y         | S492:S496:S500: | 2 | 4,5343 | 0,476 | -0,561 |
| 2 | Q6UN15 FIP1_HUMAN  | R.DHS#PT#PSVFNS#DEER.Y         | S492:T494:S500: | 3 | 4,4768 | 0,433 | -0,374 |
| 2 | P78362 SRPK2_HUMAN | R.TV5#ASST#GDLPK.A             | S494:T498:      | 2 | 2,8218 | 0,41  | -0,461 |
| 2 | Q9H0D6 XRN2_HUMAN  | K.AEDS#DS#EPEPEDNVR.L          | S499:S501:      | 2 | 5,0685 | 0,546 | -0,33  |
| 2 | Q6ZRV2 FA83H_HUMAN | R.S#QS#S#SQGDNPLAPGYLPPHYK.E   | S5:S7:S8:       | 3 | 3,8708 | 0,237 | 0      |
| 2 | Q12888 TP53B_HUMAN | K.TSEIEPKNS#PEDLGLSLT#GDS#CK.L | S500:T509:S512: | 3 | 2,8287 | 0,291 | 0,202  |
| 2 | O43818 U3IP2_HUMAN | K.MNEISS#DS#EESLAPR.K          | S51:S53:        | 2 | 3,0601 | 0,444 | -0,598 |
| 2 | Q9NZJO DTL_HUMAN   | R.TPS#SPPIT#PPASET.K           | S510:T516:      | 2 | 2,4899 | 1     | -0,833 |
| 2 | Q09666 AHNK_HUMAN  | K.FKAEAPLPS#PK.L               | S5110:          | 3 | 2,6368 | 0,163 | -0,072 |
| 2 | P10636 TAU_HUMAN   | R.SGYSS#PGS#PGTSGSR.S          | S516:S519:      | 2 | 2,8711 | 1     | -0,471 |
| 2 | P10636 TAU_HUMAN   | R.SGYSSPGS#PGT#PGSR.S          | S519:T522:      | 2 | 2,7078 | 0,434 | 0,079  |
| 2 | Q12888 TP53B_HUMAN | K.LM*LSTSEYS#QS#PK.M           | S523:S525:      | 2 | 3,1557 | 1     | -0,37  |
| 2 | Q86VM9 ZCH18_HUMAN | K.LGVS#VS#PSR.A                | S532:S534:      | 2 | 2,4878 | 0,358 | -0,23  |
| 2 | Q8TEH3 DEN1A_HUMAN | R.TLRES#DS#AEGDEAES#PEQQVR.K   | S536:S538:S546: | 3 | 3,9493 | 0,297 | -0,071 |
| 2 | Q6XQN6 PNCB_HUMAN  | R.LQALVNSLCAGQS#P.-            | S537:           | 2 | 2,1016 | 0,348 | -0,079 |
| 2 | Q3KQU3 MA7D1_HUMAN | K.ESAAPAS#PAPSPAPS#PTPAPPQK.E  | S544:S552:      | 3 | 3,7601 | 0,312 | -0,316 |
| 2 | Q9NQG6 SMC7L_HUMAN | R.AIS#APTS#PTR.L               | S55:S59:        | 2 | 2,4532 | 0,34  | -0,315 |
| 2 | Q9P2B4 CT2NL_HUMAN | K.VSSPLS#PLS#PGIKS#PTIPR.A     | S560:S563:S568: | 3 | 4,0072 | 1     | -0,253 |
| 2 | Q5JSH3 WDR44_HUMAN | K.YNTEGRVS#PSPS#QES#LSSSK.S    | S561:S565:S568: | 3 | 3,5893 | 0,162 | -0,384 |
| 2 | Q13442 HAP28_HUMAN | K.KS#LDS#DES#EDEEDDYQK.R       | S57:S60:S63:    | 3 | 4,8234 | 0,36  | -0,076 |
| 2 | Q09666 AHNK_HUMAN  | K.GGVTGS#PEAS#ISGSK.G          | S5731:S5735:    | 2 | 2,4427 | 0,328 | -0,082 |
| 2 | P17812 PYRG1_HUMAN | R.SGSS#S#PDSEITELK.F           | S574:S575:      | 2 | 3,5066 | 1     | 0,458  |
| 2 | Q86TV6 TTC7B_HUMAN | R.VEQALSEVAS#S#LQSSAPK.Q       | S575:S576:      | 2 | 4,1245 | 0,467 | -0,184 |
| 2 | Q09666 AHNK_HUMAN  | K.ASLGS#LEGEAEAEASSPK.G        | S5752:          | 2 | 2,5785 | 0,35  | -0,202 |
| 2 | Q09666 AHNK_HUMAN  | K.ASLGS#LEGEAEAEASS#PK.G       | S5752:S5763:    | 2 | 4,0861 | 0,362 | -0,064 |
| 2 | Q8IZM8 ZN654_HUMAN | K.KCQTLFGFDS#DDES#A.-          | S576:S580:      | 2 | 3,3702 | 0,198 | -0,26  |
| 2 | P46013 KI67_HUMAN  | K.AQSLVIS#PPAPS#PR.K           | S579:S584:      | 2 | 2,2975 | 0,333 | -0,077 |
| 2 | Q9UJX2 CDC23_HUMAN | R.RVS#PLNLSSVT#P.-             | S582:T590:      | 2 | 3,3367 | 0,492 | -0,171 |
| 2 | Q15678 PTN14_HUMAN | K.YVSGS#S#PDLVTR.K             | S593:S594:      | 2 | 3,1917 | 0,349 | -0,169 |
| 2 | Q05209 PTN12_HUMAN | R.TPLSFTNPLHS#DDS#DS#DER.N     | S603:S606:S608: | 3 | 4,8718 | 0,452 | -0,308 |
| 2 | Q15424 SAFB1_HUMAN | R.SVVS#FDKVK.E                 | S604:           | 2 | 2,561  | 0,379 | 0,112  |
| 2 | Q8IYB3 SRRM1_HUMAN | R.YS#PS#PPPK.R                 | S605:S607:      | 2 | 2,0952 | 0,309 | -0,354 |
| 2 | Q684P5 RPGP2_HUMAN | K.SETS#S#NPSSPEICPNK.E         | S608:S609:      | 2 | 2,8383 | 1     | -0,58  |

|   |                    |                                      |                 |   |        |       |        |
|---|--------------------|--------------------------------------|-----------------|---|--------|-------|--------|
| 2 | P52948 NUP98_HUMAN | K.NLNNS#NLFS#PVNR.D                  | S608:S612:      | 2 | 2,1124 | 0,272 | -0,074 |
| 2 | P02545 LMNA_HUMAN  | K.ASASGSGAQVGGPISSGSS#ASS#VTVTR.S    | S616:S619:      | 3 | 5,4008 | 1     | -0,145 |
| 2 | P49848 TAF6_HUMAN  | K.GGPTSHPS#PVPPPASS#PSPLS#GSALCGGK.Q | S626:S634:S639: | 3 | 3,9046 | 1     | -0,376 |
| 2 | Q5SW79 CE170_HUMAN | R.STGS#ATS#LASQGER.R                 | S630:S633:      | 2 | 2,1779 | 0,242 | -0,323 |
| 2 | Q5SW79 CE170_HUMAN | R.STGSATS#LAS#QGER.R                 | S633:S636:      | 2 | 2,6087 | 0,219 | -0,323 |
| 2 | Q08999 RBL2_HUMAN  | R.ADEICIAGS#PLT#PR.R                 | S639:T642:      | 2 | 4,0014 | 0,497 | 0      |
| 2 | P13807 GYS1_HUMAN  | R.YPRPAS#VPPS#PSLS#R.H               | S641:S645:S649: | 2 | 3,1404 | 0,427 | 0      |
| 2 | P13807 GYS1_HUMAN  | R.YPRPAS#VPPS#PSLS#R.H               | S641:S645:S649: | 3 | 2,8449 | 0,125 | 0      |
| 2 | A1L390 PKHG3_HUMAN | R.SSSVLS#LEGS#EK.G                   | S643:S647:      | 2 | 3,7443 | 0,336 | 0,088  |
| 2 | Q96GP6 SREC2_HUMAN | R.GEIGLSLS#PS#PER.R                  | S646:S648:      | 2 | 2,4097 | 0,379 | -0,157 |
| 2 | Q15154 PCM1_HUMAN  | R.VTNDIS#PES#SPGVGR.R                | S65:S68:        | 2 | 4,4666 | 0,397 | -0,437 |
| 2 | Q15154 PCM1_HUMAN  | R.VTNDIS#PESS#PGVGR.R                | S65:S69:        | 2 | 4,2475 | 0,51  | -0,51  |
| 2 | P49848 TAF6_HUMAN  | K.QEAGDS#PPPAPGT#PK.A                | S653:T660:      | 2 | 2,9615 | 0,474 | -0,379 |
| 2 | Q9NYF8 BCLF1_HUMAN | R.IDIS#PSTLR.K                       | S658:           | 2 | 2,2433 | 0,106 | -0,113 |
| 2 | Q9H1B7 EAP1_HUMAN  | R.RNSS#S#PVS#PASVPGQR.R              | S658:S659:S662: | 2 | 4,041  | 1     | -0,196 |
| 2 | Q9H1B7 EAP1_HUMAN  | R.NSSS#PVS#PASVPGQR.R                | S659:S662:      | 3 | 3,5906 | 0,317 | -0,112 |
| 2 | Q9H1B7 EAP1_HUMAN  | R.NSSS#PVS#PASVPGQR.R                | S659:S662:      | 2 | 3,2575 | 1     | -0,299 |
| 2 | P42166 LAP2A_HUMAN | K.GPPDFS#S#DEEREPT#PVLGSGAAAAGR.S    | S66:S67:T74:    | 3 | 6,3997 | 0,504 | -0,065 |
| 2 | P18858 DNL1_HUMAN  | R.VLGS#EGEEDEALS#PAK.G               | S66:S76:        | 2 | 2,7117 | 0,441 | -0,508 |
| 2 | Q4V328 GRAP1_HUMAN | R.TQTGDSSS#IS#SFSYR.E                | S666:S668:      | 2 | 3,8044 | 1     | 0      |
| 2 | Q9UBH6 XPR1_HUMAN  | K.YNQS#IS#LR.R                       | S666:S668:      | 2 | 2,4145 | 0,404 | 0,107  |
| 2 | Q9Y3T9 NOC2L_HUMAN | K.DLFDLNS#S#EEDDTEGFSE.R             | S672:S673:      | 3 | 3,4132 | 0,368 | -0,309 |
| 2 | Q9UEY8 ADDG_HUMAN  | K.IEEVLS#PEGS#PSKS#PSK.K             | S673:S677:S681: | 3 | 2,9954 | 0,164 | -0,546 |
| 2 | Q9UEY8 ADDG_HUMAN  | K.IEEVLS#PEGS#PSKS#PSK.K             | S673:S677:S681: | 2 | 2,5368 | 0,247 | -0,364 |
| 2 | Q9P2R6 RERE_HUMAN  | K.TQEIS#RPNS#PS#EGEGESSDSR.S         | S675:S679:S681: | 3 | 3,7847 | 1     | -0,294 |
| 2 | Q9UKE5 TNIK_HUMAN  | R.TTS#IS#PALAR.K                     | S678:S680:      | 2 | 2,3901 | 0,331 | -0,104 |
| 2 | P35251 RFC1_HUMAN  | R.IYDS#DS#ESEETLQVK.N                | S69:S71:        | 2 | 4,4169 | 0,479 | -0,242 |
| 2 | Q8IYB3 SRRM1_HUMAN | R.APQTSS#S#PPPVR.R                   | S695:S696:      | 2 | 3,5838 | 0,32  | -0,441 |
| 2 | Q6ZRV2 FA83H_HUMAN | R.SQS#S#S#QGDNPLAPGYLPPHYK.E         | S7:S8:S9:       | 3 | 2,8269 | 0,183 | -0,147 |
| 2 | Q13439 GOGA4_HUMAN | R.VPS#VESLFR.S                       | S71:            | 2 | 2,443  | 0,354 | -0,329 |
| 2 | O43719 HTSF1_HUMAN | K.LFDEEEDS#S#EK.L                    | S713:S714:      | 2 | 2,3934 | 0,14  | -0,246 |
| 2 | O43719 HTSF1_HUMAN | K.LFDEEEDS#S#EKLFDSD#DER.G           | S713:S714:S721: | 3 | 4,558  | 0,346 | 0      |
| 2 | P82094 TMF1_HUMAN  | K.SNTEPQS#PPIAS#PK.A                 | S72:S77:        | 2 | 2,7993 | 0,486 | -0,303 |

|   |                     |                                      |                 |   |        |       |        |
|---|---------------------|--------------------------------------|-----------------|---|--------|-------|--------|
| 2 | Q9Y2D5 AKAP2_HUMAN  | R.TLS#M*IEEEIR.A                     | S720:           | 2 | 3,0383 | 0,371 | -0,556 |
| 2 | Q14684 RRP1B_HUMAN  | K.TPTSS#PASS#PLVAK.K                 | S732:S736:      | 2 | 3,4709 | 1     | 0      |
| 2 | Q9H7N4 SFR19_HUMAN  | R.EVLYDS#EGLS#GEER.G                 | S734:S738:      | 2 | 4,6125 | 0,562 | -0,56  |
| 2 | P54259 ATN1_HUMAN   | K.QEPAAEYETPES#PVPPARS#PS#PPPK.V     | S734:S741:S743: | 3 | 3,9222 | 0,354 | -0,371 |
| 2 | P98175 RBM10_HUMAN  | R.GLVAAYSGES#DS#EEEQER.G             | S735:S737:      | 3 | 3,355  | 0,362 | -0,086 |
| 2 | P28290 SSFA2_HUMAN  | R.SQS#LPTLLS#PVR.V                   | S739:S746:      | 2 | 2,1171 | 0,183 | -0,157 |
| 2 | Q13136 LIPA1_HUMAN  | K.CETS#PPS#SPR.A                     | S741:S744:      | 2 | 2,3009 | 0,353 | -0,477 |
| 2 | Q9Y618 NCOR2_HUMAN  | R.GECSPATVNNNS#SDTES#IPSPHT#EAAK.D   | S745:S750:T756: | 3 | 3,9588 | 1     | -0,061 |
| 2 | P50502 F10A1_HUMAN  | K.VEEDLKADEPS#S#EES#DLEIDK.E         | S75:S76:S79:    | 3 | 4,6636 | 0,398 | 0,14   |
| 2 | A0FGR8 ESYT2_HUMAN  | K.EPTPSIAS#DIS#LPIATQELR.Q           | S758:S761:      | 3 | 5,4954 | 0,375 | -0,398 |
| 2 | Q9Y2J4 AMOL2_HUMAN  | R.AAS#LDS#VATSR.V                    | S759:S762:      | 2 | 2,366  | 0,35  | -0,197 |
| 2 | Q96MH2 HEX12_HUMAN  | R.TQS#PGGCS#AEAVLAR.K                | S76:S81:        | 2 | 3,8091 | 0,499 | -1,393 |
| 2 | Q9C0C4 SEM4C_HUMAN  | R.CQPGGGPPS#PPPPIGQPLPS#PTR.L        | S760:S772:      | 3 | 3,2051 | 0,311 | 0      |
| 2 | P54259 ATN1_HUMAN   | R.SEEIS#ES#ESEETNAPK.K               | S77:S79:        | 2 | 3,3139 | 0,594 | -0,38  |
| 2 | P54259 ATN1_HUMAN   | R.SEEIS#ES#ESEETNAPK.K               | S77:S79:        | 3 | 2,7003 | 0,181 | -0,19  |
| 2 | Q9UKI8 TLK1_HUMAN   | R.FTGVASGSGS#TGS#CSVGAK.A            | S77:S80:        | 2 | 2,3783 | 1     | -0,555 |
| 2 | Q99856 ARI3A_HUMAN  | R.AAAAGLGHPAS#PGGS#EDGPPGS#EEEDAAR.E | S77:S81:S88:    | 3 | 5,2386 | 0,442 | -0,505 |
| 2 | P13861 KAP2_HUMAN   | K.GDS#ES#EEDEDLEVPVPSR.F             | S78:S80:        | 2 | 3,7376 | 0,306 | -0,341 |
| 2 | Q15003 CND2_HUMAN   | R.VFDLQFS#TDS#PR.L                   | S78:S81:        | 2 | 3,5703 | 0,542 | -0,388 |
| 2 | Q2NL81 Q2NL81_HUMAN | R.GYQS#LSDS#PPGAR.V                  | S789:S793:      | 2 | 3,1603 | 0,327 | -0,571 |
| 2 | Q8IWB9 TEX2_HUMAN   | R.S#PQRS#PLQSAESS#PTAGK.K            | S790:S794:S802: | 3 | 2,7247 | 0,138 | -0,531 |
| 2 | Q9UKI8 TLK1_HUMAN   | R.FTGVASGSGTSGS#CS#VGAK.A            | S80:S82:        | 2 | 4,3919 | 1     | -0,123 |
| 2 | Q9H6F5 CCD86_HUMAN  | R.LQQGAGLES#PQQQPEPGAAS#PQR.Q        | S80:S91:        | 3 | 3,8367 | 0,328 | -0,149 |
| 2 | Q92598 HS105_HUMAN  | K.IES#PKLER.T                        | S809:           | 2 | 2,0414 | 0,115 | -0,348 |
| 2 | Q86TC9 MYPN_HUMAN   | R.CVS#PIPVS#PTSR.I                   | S813:S818:      | 2 | 2,5913 | 0,314 | -0,084 |
| 2 | Q8IWX8 CHERP_HUMAN  | R.S#RS#PTPPS#SAGLGSNSAPPIDSR.L       | S815:S817:S822: | 3 | 5,2843 | 1     | -0,426 |
| 2 | Q8IWX8 CHERP_HUMAN  | R.S#RS#PT#PPSSAGLGSNSAPPIDSR.L       | S815:S817:T819: | 3 | 5,5359 | 1     | -0,213 |
| 2 | P46821 MAP1B_HUMAN  | R.SLM*S#S#PEDLTK.D                   | S831:S832:      | 2 | 2,8027 | 0,416 | -0,353 |
| 2 | P46821 MAP1B_HUMAN  | R.SLMS#S#PEDLTK.D                    | S831:S832:      | 2 | 2,1119 | 0,342 | -0,624 |
| 2 | Q9NQ57 INCE_HUMAN   | K.INPDNYGMDLNS#DDS#T#DDEAHPR.K       | S833:S836:T837: | 3 | 3,1125 | 0,205 | -0,323 |
| 2 | Q13595 TRA2A_HUMAN  | R.S#RSY#T#PEYR.R                     | S84:Y87:T88:    | 2 | 2,5964 | 0,416 | -0,262 |
| 2 | O15014 ZN609_HUMAN  | K.TNS#PAYS#DIS#DAGEDGEGKVDVK.S       | S842:S846:S849: | 3 | 5,1092 | 1     | -0,273 |
| 2 | Q9UQ35 SRRM2_HUMAN  | R.QGSITS#PQANEQSVT#PQR.R             | S857:T866:      | 3 | 2,8032 | 0,179 | -0,526 |

|   |                    |                                   |                    |   |        |       |        |
|---|--------------------|-----------------------------------|--------------------|---|--------|-------|--------|
| 2 | Q8N122 RPTOR_HUMAN | R.VLDTSSLTQS#APAS#PTNK.G          | S859:S863:         | 2 | 4,1501 | 1     | -0,185 |
| 2 | Q6GYQ0 GRIPE_HUMAN | R.RGS#S#PGS#LEIPK.D               | S860:S861:S864:    | 2 | 2,8982 | 0,306 | 0      |
| 2 | Q9UK76 HN1_HUMAN   | R.RNS#SEASSGDFLDLK.G              | S87:               | 2 | 3,1797 | 0,357 | -0,358 |
| 2 | Q9UQ35 SRRM2_HUMAN | R.S#CFESS#PDPELK.S                | S871:S876:         | 2 | 2,3433 | 0,241 | -0,235 |
| 2 | Q9UQ35 SRRM2_HUMAN | R.SCFES#S#PDPELK.S                | S875:S876:         | 2 | 4,5973 | 0,448 | 0      |
| 2 | Q9UK76 HN1_HUMAN   | R.RNSS#EASSGDFLDLK.G              | S88:               | 3 | 2,8729 | 0,417 | -0,214 |
| 2 | Q96N67 DOCK7_HUMAN | R.S#RSLSNS#NPDISGTPTS#PDDEV.R.S   | S894:S900:S910:    | 3 | 4,9296 | 1     | -0,205 |
| 2 | P29317 EPHA2_HUMAN | R.LPS#TSGS#EGVPFR.T               | S897:S901:         | 2 | 2,3125 | 0,22  | -0,082 |
| 2 | Q14C86 GAPD1_HUMAN | R.S#RSSDIVSSVR.R                  | S900:              | 3 | 2,9588 | 0,143 | 0,144  |
| 2 | Q15811 ITSN1_HUMAN | R.SAFTPATATGSS#PS#PVLGQGEK.V      | S902:S904:         | 3 | 3,189  | 0,262 | -0,244 |
| 2 | Q9BYX2 TBD2A_HUMAN | R.RAVS#EGCAS#EDEVEGEA.-           | S904:S909:         | 2 | 3,3541 | 0,519 | -0,312 |
| 2 | Q9P107 GMIP_HUMAN  | R.GPS#PAAAS#PEGS#PLRR.T           | S914:S919:S923:    | 3 | 2,845  | 0,47  | -0,102 |
| 2 | P15336 ATF2_HUMAN  | K.M*PLDLS#PLAT#PIIR.S             | S94:T98:           | 2 | 3,0143 | 0,478 | -0,427 |
| 2 | Q9UQ35 SRRM2_HUMAN | R.S#RS#VS#PCSNVESR.L              | S950:S952:S954:    | 2 | 3,5687 | 0,447 | -0,501 |
| 2 | Q9UQ35 SRRM2_HUMAN | R.S#RS#VS#PCSNVESR.L              | S950:S952:S954:    | 3 | 3,2165 | 0,319 | -0,322 |
| 2 | Q9UQ35 SRRM2_HUMAN | R.S#VS#PCSNVESR.L                 | S952:S954:         | 2 | 3,0328 | 0,47  | -0,088 |
| 2 | Q5T200 ZC3HD_HUMAN | R.GNIETTS#EDGQVFS#PK.K            | S986:S993:         | 2 | 3,4589 | 0,377 | -0,261 |
| 2 | O15417 TNC18_HUMAN | K.AVS#PPPS#PRAS#PVAALK.A          | S991:S995:S999:    | 2 | 2,3198 | 0,31  | -0,324 |
| 2 | Q9UQ35 SRRM2_HUMAN | K.AQT#PPGPSLSGS#KS#PCPQEK.S       | T1003:S1012:S1014: | 3 | 2,8586 | 0,412 | -0,718 |
| 2 | Q9UH99 UN84B_HUMAN | R.GT#GGSESS#RAS#GLVGR.K           | T107:S113:S116:    | 2 | 2,8025 | 0,286 | -0,355 |
| 2 | Q9UKA4 AKA11_HUMAN | R.NVIPDT#PPS#TPLVPSR.A            | T1100:S1103:       | 2 | 2,2795 | 0,196 | 0,198  |
| 2 | Q96T60 PNKP_HUMAN  | R.TPESQPDT#PPGT#PLVSQDEK.R        | T118:T122:         | 3 | 3,2963 | 0,294 | -0,24  |
| 2 | Q8WXI9 P66B_HUMAN  | R.GRLT#PS#PDIIVLSDNEASS#PR.S      | T120:S122:S135:    | 3 | 5,6663 | 0,44  | 0      |
| 2 | Q8WXI9 P66B_HUMAN  | R.GRLT#PSPDIIVLS#DNEASS#PR.S      | T120:S129:S135:    | 3 | 5,5495 | 0,275 | -0,148 |
| 2 | Q8NEZ4 MLL3_HUMAN  | K.IINQNSVAVLQT#PPDIQS#EHS#R.D     | T1219:S1225:S1228: | 3 | 4,3455 | 0,406 | 0,068  |
| 2 | Q14181 DPOA2_HUMAN | R.AIST#PET#PLTK.R                 | T127:T130:         | 2 | 2,474  | 0,456 | -0,37  |
| 2 | Q5VZK9 LR16A_HUMAN | R.T#ASRPDDIPDS#PS#SPK.V           | T1278:S1288:S1290: | 2 | 2,6472 | 0,454 | -0,511 |
| 2 | P55196 AFAD_HUMAN  | K.SVT#PAS#TLTK.S                  | T1313:S1316:       | 2 | 2,3524 | 0,129 | -0,314 |
| 2 | Q03252 LMNB2_HUMAN | R.AGGPAT#PLS#PTR.L                | T14:S17:           | 2 | 2,7876 | 0,493 | 0      |
| 2 | P06493 CDC2_HUMAN  | K.IGEGT#Y#GVVYK.G                 | T14:Y15:           | 2 | 3,6467 | 0,353 | -0,091 |
| 2 | Q63ZY6 NSN5C_HUMAN | R.QLEEGAGT#PS#PVR.L               | T141:S143:         | 3 | 2,8441 | 0,125 | -0,114 |
| 2 | Q7KZ85 SPT6H_HUMAN | R.T#RTPAS#INAT#PANINLADLTR.A      | T1530:S1535:T1539: | 3 | 5,2483 | 0,404 | -0,224 |
| 2 | Q12873 CHD3_HUMAN  | K.T#SPTPEASATNS#PCT#SKPATPAPSEK.G | T1537:S1549:T1552: | 3 | 3,0944 | 1     | -0,372 |

|   |                    |                                 |                 |   |        |       |        |
|---|--------------------|---------------------------------|-----------------|---|--------|-------|--------|
| 2 | P42166 LAP2A_HUMAN | R.SST#PLPTISSSAENTR.Q           | T160:           | 2 | 2,7465 | 0,369 | -0,353 |
| 2 | P42166 LAP2A_HUMAN | R.SST#PLPTISSS#AENTR.Q          | T160:S168:      | 2 | 3,6138 | 1     | -0,135 |
| 2 | Q1KMD3 HNRL2_HUMAN | R.SGDET#PGS#EVPGDK.A            | T165:S168:      | 2 | 3,446  | 0,443 | -0,159 |
| 2 | P19105 MLRM_HUMAN  | R.AT#SNVFAM*FDQSQIQEFK.E        | T18:            | 3 | 3,2049 | 0,322 | -0,084 |
| 2 | Q99666 RGPD5_HUMAN | R.YVASVLGLT#PS#PR.Q             | T19:S21:        | 2 | 2,5051 | 0,301 | 0      |
| 2 | P49792 RBP2_HUMAN  | R.YIASVQGST#PS#PR.Q             | T19:S21:        | 2 | 2,2707 | 0,324 | -0,561 |
| 2 | P02545 LMNA_HUMAN  | R.SGAQASST#PLS#PTR.I            | T19:S22:        | 2 | 4,0926 | 1     | -0,241 |
| 2 | P24928 RPB1_HUMAN  | K.YSPTSPT#Y#SPTSPK.Y            | T1915:Y1916:    | 2 | 4,1204 | 1     | -0,219 |
| 2 | P20700 LMNB1_HUMAN | R.AGGPTT#PLS#PTR.L              | T20:S23:        | 2 | 2,6238 | 0,248 | -0,278 |
| 2 | O75533 SF3B1_HUMAN | R.WDQTADQT#PGAT#PK.K            | T207:T211:      | 2 | 4,057  | 0,444 | -0,437 |
| 2 | Q8IWW6 RHG12_HUMAN | R.ATT#PPNQGRPDS#PVY#ANLQELK.I   | T231:S240:Y243: | 3 | 3,0812 | 0,25  | -0,208 |
| 2 | Q9BYG3 MK67I_HUMAN | K.TVDSQGPT#PVCT#PTFLER.R        | T234:T238:      | 3 | 3,5182 | 0,282 | -0,169 |
| 2 | Q9BYG3 MK67I_HUMAN | K.TVDSQGPT#PVCT#PTFLER.R        | T234:T238:      | 2 | 2,3998 | 0,558 | -0,113 |
| 2 | Q8N0Z3 CCD52_HUMAN | K.IATQSQIT#PPGT#PSSALSSGEQR.A   | T235:T239:      | 3 | 3,3604 | 0,212 | 0,074  |
| 2 | Q9UHR4 BI2L1_HUMAN | K.TPASTPVSQT#PQAS#PM*IER.S      | T257:S261:      | 3 | 2,9819 | 0,31  | 0,261  |
| 2 | Q8IWB9 TEX2_HUMAN  | R.NTGGDSKT#APSS#PLTS#PSDTR.S    | T262:S266:S270: | 3 | 3,999  | 1     | -0,395 |
| 2 | Q96G46 DUS3L_HUMAN | R.QENCGAQQPAGPGTST#PPS#SPVR.T   | T273:S276:      | 3 | 3,7115 | 0,397 | -0,425 |
| 2 | Q7L4E1 FA73B_HUMAN | R.TLM*LPLT#EGS#LR.L             | T273:S276:      | 2 | 2,5643 | 0,38  | -0,405 |
| 2 | O95817 BAG3_HUMAN  | R.SST#PLHS#PS#PIR.V             | T285:S289:S291: | 2 | 3,0532 | 0,366 | -0,482 |
| 2 | O94880 PHF14_HUMAN | R.NSADDEELT#NDS#LTLSQSK.S       | T287:S290:      | 3 | 3,158  | 0,267 | 0      |
| 2 | Q86VR2 F134C_HUMAN | R.GQTPLT#EGS#EDLDGHS#DPEESFAR.D | T310:S313:S320: | 3 | 2,8216 | 0,283 | -0,325 |
| 2 | Q9GZR1 SENP6_HUMAN | R.KT#SLSDLNDPIILS#S#DDDDNDNR.T  | T323:S335:S336: | 3 | 4,7825 | 0,217 | -0,457 |
| 2 | Q70CQ2 UBP34_HUMAN | R.EVLT#PT#STSDNETR.D            | T3230:T3232:    | 2 | 3,6974 | 1     | -0,214 |
| 2 | Q9UKS6 PACN3_HUMAN | R.SPDEVT#LTS#IVPTR.D            | T324:S327:      | 2 | 4,3519 | 0,384 | -0,219 |
| 2 | Q86X27 RGPS2_HUMAN | K.SVAAEGALLPQT#PPS#PR.N         | T326:S329:      | 2 | 2,5713 | 0,214 | -0,066 |
| 2 | O75533 SF3B1_HUMAN | R.GGDSIGET#PT#PGASK.R           | T326:T328:      | 2 | 2,7364 | 0,392 | -0,318 |
| 2 | Q9UJZ1 STML2_HUMAN | K.APVPGT#PDS#LSSGSSR.D          | T327:S330:      | 2 | 3,5945 | 1     | -0,291 |
| 2 | Q92597 NDRG1_HUMAN | R.SRT#AS#GSSVTS#LDGTR.S         | T328:S330:S336: | 2 | 4,4363 | 1     | -0,134 |
| 2 | Q9NQZ2 SAS10_HUMAN | K.TSAAACAVT#DLS#DDS#DFDEKAK.L   | T362:S365:S368: | 3 | 4,3985 | 0,317 | 0      |
| 2 | Q0JRZ9 FCHO2_HUMAN | K.VSIGNIT#LS#PAISR.H            | T385:S387:      | 2 | 2,4034 | 0,197 | 0,384  |
| 2 | Q14247 SRC8_HUMAN  | K.TQT#PPVS#PAPQPTEER.L          | T401:S405:      | 2 | 4,0516 | 0,441 | -0,58  |
| 2 | Q14247 SRC8_HUMAN  | K.TQT#PPVS#PAPQPTEER.L          | T401:S405:      | 3 | 3,2952 | 0,326 | 0,193  |
| 2 | P85037 FOXK1_HUMAN | R.SGGLQT#PECLS#R.E              | T436:S441:      | 2 | 2,9983 | 0,331 | -0,25  |



|   |                     |                                 |                 |   |        |       |        |
|---|---------------------|---------------------------------|-----------------|---|--------|-------|--------|
| 2 | Q969V6 MKL1_HUMAN   | K.FGSTGST#PPVS#PTPSER.S         | T450:S454:      | 2 | 2,1689 | 0,35  | -0,327 |
| 2 | Q6NZY4 ZCHC8_HUMAN  | R.GT#PPPVFT#PPLPK.G             | T479:T485:      | 3 | 2,967  | 0,264 | 0,728  |
| 2 | Q9NUL3 STAU2_HUMAN  | K.GSSPT#PPCS#PVQPSK.Q           | T488:S492:      | 2 | 3,525  | 0,373 | -0,289 |
| 2 | P17544 ATF7_HUMAN   | R.TDSVIIADQT#PT#PTR.F           | T51:T53:        | 2 | 3,9211 | 0,448 | -0,344 |
| 2 | P15336 ATF2_HUMAN   | R.NDSVIVADQT#PT#PTR.F           | T51:T53:        | 2 | 3,6113 | 0,48  | -0,688 |
| 2 | Q9Y6G9 DC1L1_HUMAN  | R.KPVTVSPT#TPTSPT#EGEAS.-       | T512:T518:      | 3 | 3,0801 | 1     | -0,089 |
| 2 | P05362 ICAM1_HUMAN  | K.GT#PM*KPNTQAT#PP.-            | T521:T530:      | 2 | 2,6988 | 0,287 | -0,322 |
| 2 | P57740 NU107_HUMAN  | R.T#PSS#FRQPFT#PTRS.S           | T55:S58:T64:    | 2 | 2,0364 | 0,125 | -0,264 |
| 2 | Q14978 NOLC1_HUMAN  | K.LQT#PNT#FPK.R                 | T607:T610:      | 2 | 3,3905 | 0,179 | -0,202 |
| 2 | Q15154 PCM1_HUMAN   | R.VT#NDISPESS#PGVGR.R           | T61:S69:        | 3 | 3,5473 | 0,178 | -0,437 |
| 2 | Q2M2I8 AAK1_HUMAN   | K.VGSLT#PPSS#PK.T               | T620:S624:      | 2 | 2,5811 | 0,198 | -0,198 |
| 2 | Q6QNY0 BL1S3_HUMAN  | R.VAGEAAET#DS#EPEPEPEPTAAPR.D   | T63:S65:        | 3 | 4,7518 | 0,415 | -0,292 |
| 2 | Q9H6F5 CCD86_HUMAN  | R.AGLGSPERPPKT#SPGS#PR.L        | T65:S69:        | 3 | 2,6518 | 0,325 | -0,188 |
| 2 | Q9UHH3 SMBT1_HUMAN  | R.T#FSFS#DDENKPPS#PK.E          | T763:S767:S775: | 2 | 2,6855 | 0,465 | -0,063 |
| 2 | Q6PKG0 LARP1_HUMAN  | R.SLPTT#VPES#PNYR.N             | T770:S774:      | 2 | 2,0682 | 0,089 | -0,376 |
| 2 | P42684 ABL2_HUMAN   | R.TVST#S#SQPEENVDR.A            | T818:S819:      | 2 | 2,4376 | 1     | -0,143 |
| 2 | Q9UQ35 SRRM2_HUMAN  | K.SGT#PPRQGSITS#PQANEQSVT#PQR.R | T848:S857:T866: | 3 | 4,8932 | 1     | -0,464 |
| 2 | A7MD96 A7MD96_HUMAN | R.RSPT#DS#DVS#LDSGAK.S          | T856:S858:S861: | 3 | 2,9451 | 0,115 | 0      |
| 2 | Q76FK4 NOL8_HUMAN   | R.FLET#DS#EEEEQEEVNEK.K         | T888:S890:      | 2 | 3,5384 | 0,442 | -0,462 |
| 2 | Q9P2J2 TUTLA_HUMAN  | R.SPET#PPVS#PR.E                | T972:S976:      | 2 | 2,5608 | 0,291 | -0,298 |
| 2 | P13807 GYS1_HUMAN   | R.Y#PRPASVPPS#PSLS#R.H          | Y636:S645:S649: | 2 | 2,3057 | 0,242 | -0,132 |
| 2 | P25205 MCM3_HUMAN   | K.DGDSYDPY#DFSDEEEM*PQVHT#PK.T  | Y708:T722:      | 3 | 4,1512 | 0,409 | -0,184 |
| 2 | Q13595 TRA2A_HUMAN  | R.SY#T#PEYR.R                   | Y87:T88:        | 2 | 2,161  | 0,298 | -0,113 |
| 2 | Q9NS69 TOM22_HUMAN  | K.GDAEKPEEELEDDDEELDETLSE.L     |                 | 3 | 5,1162 | 0,541 | -0,063 |
| 2 | P30443 1A01_HUMAN   | R.DGEDQTQDTELVETRPAGDGTQK.W     |                 | 3 | 3,4611 | 0,419 | -0,208 |
| 2 | Q9BT25 NYS48_HUMAN  | R.SFAQVLELSAEASK.E              |                 | 2 | 3,2962 | 0,477 | -0,577 |
| 2 | P35268 RL22_HUMAN   | R.YFQINQDEEEED.-                |                 | 2 | 2,0816 | 0,29  | -0,189 |
| 3 | P05386 RLA1_HUMAN   | K.KEES#EES#DDDM*GFGLFD.-        | S101:S104:      | 2 | 4,221  | 0,632 | -0,459 |
| 3 | P05386 RLA1_HUMAN   | K.KEES#EES#DDDMGFGLFD.-         | S101:S104:      | 2 | 3,6151 | 0,585 | -0,347 |
| 3 | P52926 HMGA2_HUMAN  | K.KPAQEETEETS#SQES#AEED.-       | S101:S105:      | 3 | 3,5878 | 0,201 | -0,32  |
| 3 | P17096 HMGA1_HUMAN  | K.KLEKEEEEGISQES#SEEEQ.-        | S102:S103:      | 3 | 3,1704 | 0,255 | -0,229 |
| 3 | O60231 DHX16_HUMAN  | R.LLEDSEESS#EETVSR.A            | S103:S107:      | 2 | 2,8682 | 0,417 | 0,131  |
| 3 | P31943 HNRH1_HUMAN  | K.HTGPNS#PDTANDGFVR.L           | S104:           | 3 | 3,3172 | 0,332 | -0,415 |

|   |                    |                                        |                    |   |        |       |        |
|---|--------------------|----------------------------------------|--------------------|---|--------|-------|--------|
| 3 | P20042 IF2B_HUMAN  | K.IES#DVQEPTPEDDLDIM*LGNK.K            | S105:              | 3 | 3,0226 | 0,447 | 0      |
| 3 | O95696 BRD1_HUMAN  | R.VHGEPTS#DLS#DID.-                    | S1052:S1055:       | 2 | 2,3761 | 0,342 | -0,237 |
| 3 | P24534 EF1B_HUMAN  | K.DDDDIDLFGS#DDEEESEAK.R               | S106:              | 3 | 3,2735 | 0,279 | 0      |
| 3 | Q96RT1 LAP2_HUMAN  | R.QSS#VSS#TAS#VNLGDPGSTRR.A            | S1079:S1082:S1085: | 3 | 2,9995 | 1     | 0      |
| 3 | Q76FK4 NOL8_HUMAN  | R.LQDS#S#S#EEEDVTEETDHR.N              | S1082:S1083:S1084: | 3 | 4,1267 | 0,378 | -0,078 |
| 3 | P21333 FLNA_HUMAN  | K.AFGPGLQGSAGS#PAR.F                   | S1084:             | 2 | 2,91   | 0,387 | -0,485 |
| 3 | Q9UPT8 ZC3H4_HUMAN | R.AAKPGPAEAPS#PTASPS#GDAS#PPATAPYDPR.V | S1104:S1110:S1114: | 3 | 3,2104 | 1     | -0,346 |
| 3 | Q96T60 PNKP_HUMAN  | R.TPES#QPDT#PPGT#PLVSQDEKR.D           | S114:T118:T122:    | 3 | 4,7002 | 0,384 | -0,291 |
| 3 | Q8N488 RYBP_HUMAN  | K.SDILKDPPS#EANS#IQS#ANATTK.T          | S123:S127:S130:    | 3 | 4,7722 | 0,534 | -0,072 |
| 3 | Q14137 BOP1_HUMAN  | R.IGDEYAEDS#S#DEEDIR.N                 | S126:S127:         | 2 | 3,8733 | 0,523 | -0,426 |
| 3 | Q9H1E3 NUCKS_HUMAN | K.DSGS#DEDFLM*EDDDSDYGSSK.K            | S132:              | 3 | 3,7344 | 0,376 | -0,435 |
| 3 | O95425 SVIL_HUMAN  | R.S#PVEM*DEDFVIFDPYAPK.L               | S1322:             | 3 | 3,0272 | 0,241 | 0,079  |
| 3 | Q71F23 CENPU_HUMAN | K.LRPIS#DDS#ES#IEESDTR.R               | S136:S139:S141:    | 3 | 4,5535 | 0,334 | -0,084 |
| 3 | Q5SYE7 NHSL1_HUMAN | R.NHS#PS#PPVT#PTGAAPSLASPK.Q           | S1386:S1388:T1392: | 3 | 2,7342 | 0,287 | -0,162 |
| 3 | O15085 ARHGB_HUMAN | K.SLGGES#S#GGT#TPVGSFHTEAAR.W          | S1457:S1458:T1461: | 3 | 2,9191 | 0,123 | -1,014 |
| 3 | Q02880 TOP2B_HUMAN | K.VVEAVNS#DS#DS#EFGIPKK.T              | S1522:S1524:S1526: | 3 | 3,0365 | 0,304 | -0,169 |
| 3 | O43166 SI1L1_HUMAN | K.FHALS#SPQS#PFPST#PTSR.R              | S1564:S1568:T1573: | 3 | 3,124  | 1     | -0,168 |
| 3 | O43166 SI1L1_HUMAN | K.FHALSS#PQS#PFPST#PTSR.R              | S1565:S1568:T1573: | 3 | 3,6079 | 1     | -0,084 |
| 3 | Q16629 SFRS7_HUMAN | R.S#RS#IS#LR.R                         | S163:S165:S167:    | 2 | 2,9379 | 0,239 | -0,23  |
| 3 | Q9H4L4 SENP3_HUMAN | K.NHLS#PQQGGAT#PQVPS#PCCR.F            | S169:T176:S181:    | 3 | 4,8362 | 0,337 | -0,226 |
| 3 | Q9Y2F5 K0947_HUMAN | R.RAS#PPDPS#PS#PSAASASER.V             | S1692:S1697:S1699: | 3 | 4,2433 | 0,445 | 0,26   |
| 3 | Q9NSI6 BRWD1_HUMAN | K.LKAES#IS#EEADS#EPGR.S                | S1786:S1788:S1793: | 2 | 4,7961 | 0,45  | -0,187 |
| 3 | Q9NSI6 BRWD1_HUMAN | K.LKAES#IS#EEADS#EPGR.S                | S1786:S1788:S1793: | 3 | 3,509  | 0,372 | -0,093 |
| 3 | O60841 IF2P_HUMAN  | R.SRINS#S#GES#GDESDEFLOSR.K            | S182:S183:S186:    | 3 | 4,5307 | 0,378 | -0,45  |
| 3 | O60841 IF2P_HUMAN  | R.SRINS#SGES#GDES#DEFLOSR.K            | S182:S186:S190:    | 3 | 3,8635 | 1     | -0,525 |
| 3 | P46013 KI67_HUMAN  | K.ILCKS#PQS#DPADTPT#NTK.Q              | S1861:S1864:T1871: | 3 | 2,9079 | 0,208 | -0,744 |
| 3 | Q9BVC5 ASHWN_HUMAN | K.SPSGPVKS#PPLS#PVGTT#PVK.L            | S189:S193:T198:    | 3 | 3,5558 | 0,389 | -0,084 |
| 3 | Q9H1E3 NUCKS_HUMAN | R.KVVDYSQFQES#DDADEDYGR.D              | S19:               | 3 | 5,9929 | 0,429 | -0,299 |
| 3 | Q16629 SFRS7_HUMAN | R.YFQS#PS#RS#R.S                       | S192:S194:S196:    | 2 | 3,2215 | 0,191 | -0,178 |
| 3 | P18583 SON_HUMAN   | R.RS#FS#IS#PSR.R                       | S1948:S1950:S1952: | 2 | 2,3103 | 0,288 | -0,191 |
| 3 | P42356 PI4KA_HUMAN | R.KTS#SVS#SIS#QVSPER.G                 | S198:S201:S204:    | 2 | 3,4528 | 1     | -0,2   |
| 3 | P18583 SON_HUMAN   | R.RS#FS#IS#PVR.L                       | S2009:S2011:S2013: | 2 | 2,6001 | 0,243 | -0,189 |
| 3 | P23760 PAX3_HUMAN  | R.ASAPQS#DEGS#DIDS#EPDLPLKR.K          | S201:S205:S209:    | 3 | 2,9744 | 0,227 | -1,069 |

|   |                    |                               |                    |   |        |       |        |
|---|--------------------|-------------------------------|--------------------|---|--------|-------|--------|
| 3 | Q96B36 AKTS1_HUMAN | R.TEARSS#DEENGPPS#S#PDLDR.I   | S203:S211:S212:    | 3 | 4,394  | 0,365 | -0,381 |
| 3 | O75179 ANR17_HUMAN | K.EHYPVSS#PS#SPS#PPAQPGGVSR.N | S2042:S2044:S2047: | 3 | 4,119  | 1     | 0,149  |
| 3 | Q01130 SFRS2_HUMAN | R.SKS#PPKS#PEEEGAVSS#.-       | S208:S212:S221:    | 2 | 2,3793 | 0,352 | -0,394 |
| 3 | Q8TBF4 ZCRB1_HUMAN | K.KSTYFS#DEEELS#D.-           | S210:S216:         | 2 | 3,566  | 0,269 | -0,143 |
| 3 | Q09666 AHNK_HUMAN  | R.LPSGS#GAASPTGSAVDIR.A       | S212:              | 2 | 3,2519 | 0,449 | -0,496 |
| 3 | P35659 DEK_HUMAN   | K.CPEILSDDES#S#S#DEDEKK.N     | S230:S231:S232:    | 3 | 3,3834 | 0,281 | -0,249 |
| 3 | Q13283 G3BP1_HUMAN | K.SSS#PAPADIAQTVQEDLR.T       | S232:              | 2 | 2,8354 | 0,449 | -0,373 |
| 3 | P46013 KI67_HUMAN  | K.IACKS#PQPDPVDT#PAS#TK.Q     | S2344:T2352:S2355: | 3 | 4,807  | 0,354 | -0,17  |
| 3 | P46013 KI67_HUMAN  | K.IACKS#PQPDPVDT#PAST#K.Q     | S2344:T2352:T2356: | 2 | 3,4154 | 0,464 | -0,227 |
| 3 | Q9UBC2 EP15R_HUMAN | R.STPSHGSVSS#LNSTGS#LS#PK.H   | S247:S253:S255:    | 3 | 2,9249 | 1     | -0,084 |
| 3 | Q15477 SKIV2_HUMAN | R.ASS#LEDLVLK.E               | S256:              | 2 | 2,2482 | 0,383 | -0,106 |
| 3 | Q8IWB9 TEX2_HUMAN  | R.NTGGDS#KTAPSS#PLTS#PSDTR.S  | S260:S266:S270:    | 3 | 5,1676 | 1     | -0,079 |
| 3 | Q9UQ35 SRRM2_HUMAN | R.DSRSL#YS#PVER.R             | S2690:S2692:S2694: | 2 | 3,3446 | 0,352 | -0,075 |
| 3 | Q9UQ35 SRRM2_HUMAN | R.SLS#YS#PVER.R               | S2692:S2694:       | 2 | 2,196  | 0,24  | -0,306 |
| 3 | Q14934 NFAC4_HUMAN | R.RYS#SSGTPS#SASPALS#R.R      | S272:S278:S285:    | 2 | 3,9985 | 1     | -0,5   |
| 3 | Q13435 SF3B2_HUMAN | R.SSLGQS#AS#ET#EEDTVSVSKK.E   | S284:S286:T288:    | 3 | 4,1478 | 0,238 | -0,079 |
| 3 | Q8WVC0 LEO1_HUMAN  | R.KNAIAS#DS#EADS#DTEVPK.D     | S294:S296:S300:    | 2 | 3,9633 | 0,504 | -0,576 |
| 3 | Q8WVC0 LEO1_HUMAN  | R.KNAIAS#DS#EADSDT#EVPK.D     | S294:S296:T302:    | 3 | 3,7734 | 0,296 | -0,173 |
| 3 | O00499 BIN1_HUMAN  | K.GNKS#PS#PPDGS#PAATPEIR.V    | S296:S298:S303:    | 3 | 4,6589 | 0,383 | -0,086 |
| 3 | O00499 BIN1_HUMAN  | K.GNKS#PS#PPDGS#PAATPEIR.V    | S296:S298:S303:    | 2 | 2,5403 | 0,467 | -0,23  |
| 3 | P35659 DEK_HUMAN   | K.KES#ESEDSS#DDEPLIK.K        | S301:S306:S307:    | 2 | 3,8682 | 0,383 | -0,238 |
| 3 | P35659 DEK_HUMAN   | K.KESES#EDS#S#DDEPLIK.K       | S303:S306:S307:    | 2 | 3,3522 | 0,434 | -0,238 |
| 3 | Q08AE8 SPIR1_HUMAN | R.APTLAELDS#S#ES#EEETLHK.S    | S305:S306:S308:    | 3 | 4,8006 | 0,399 | 0      |
| 3 | Q5C9Z4 NOM1_HUMAN  | R.FAEDEEKS#ENS#S#EDGDITDK.S   | S317:S320:S321:    | 3 | 3,244  | 0,294 | 0,663  |
| 3 | P61073 CXCR4_HUMAN | K.TSAQHALTS#VSR.G             | S319:              | 2 | 3,0285 | 0,452 | -0,456 |
| 3 | P36915 GNL1_HUMAN  | R.GLQDGLRS#S#S#NSR.S          | S32:S33:S34:       | 2 | 2,501  | 0,259 | -0,377 |
| 3 | P49790 NU153_HUMAN | K.RIPS#IVS#SPLNS#PLDR.S       | S330:S333:S338:    | 2 | 3,2491 | 0,426 | -0,919 |
| 3 | P49790 NU153_HUMAN | K.RIPS#IVSS#PLNS#PLDR.S       | S330:S334:S338:    | 2 | 3,2366 | 0,54  | -0,797 |
| 3 | P49790 NU153_HUMAN | K.RIPS#IVSS#PLNS#PLDR.S       | S330:S334:S338:    | 3 | 3,2249 | 0,42  | -0,184 |
| 3 | Q9NYV4 CD2L7_HUMAN | R.RS#S#S#PFLSK.R              | S332:S333:S334:    | 2 | 2,8706 | 0,345 | -0,098 |
| 3 | P49790 NU153_HUMAN | K.RIPSIVS#S#PLNS#PLDR.S       | S333:S334:S338:    | 3 | 2,8631 | 0,265 | -0,184 |
| 3 | Q9NQ55 SSF1_HUMAN  | R.VGGS#DEEASGIPSR.T           | S359:              | 2 | 2,7481 | 0,381 | 0      |
| 3 | Q15652 JHD2C_HUMAN | R.LRTDNVSDFS#ES#SDS#ENSNK.R   | S376:S378:S381:    | 3 | 2,9625 | 0,111 | -0,37  |

|   |                     |                                     |                 |   |        |       |        |
|---|---------------------|-------------------------------------|-----------------|---|--------|-------|--------|
| 3 | Q9BVS4 RIOK2_HUMAN  | R.SSGDPEQIKEDS#LS#EES#ADAR.S        | S380:S382:S385: | 3 | 3,46   | 0,266 | -0,22  |
| 3 | Q8IYB3 SRRM1_HUMAN  | R.RLS#PS#AS#PPR.R                   | S389:S391:S393: | 2 | 3,3189 | 0,312 | -0,28  |
| 3 | P02545 LMNA_HUMAN   | R.LRLS#PS#PTS#QR.S                  | S390:S392:S395: | 2 | 3,4433 | 0,337 | 0      |
| 3 | P20700 LMNB1_HUMAN  | R.LKLS#PS#PS#SR.V                   | S391:S393:S395: | 2 | 2,3382 | 0,165 | -0,279 |
| 3 | Q7Z4V5 HDGR2_HUMAN  | R.GRGPPS#S#SDS#EPEAELER.E           | S395:S396:S399: | 3 | 3,5635 | 0,244 | 0,085  |
| 3 | Q14004 CD2L5_HUMAN  | R.S#RS#PYS#PVLR.R                   | S395:S397:S400: | 2 | 2,7301 | 0,377 | -0,261 |
| 3 | Q9NYF8 BCLF1_HUMAN  | K.FNDS#EGDDTEETEDYR.Q               | S397:           | 2 | 3,2837 | 0,437 | -0,427 |
| 3 | Q8N1F8 S11IP_HUMAN  | R.RAS#IS#EPS#DTDPEPR.T              | S398:S400:S403: | 2 | 2,9007 | 0,445 | -0,129 |
| 3 | Q8WUM0 NU133_HUMAN  | R.KGLPLGS#AVS#SPVLF#PVGR.R          | S41:S44:S50:    | 3 | 4,9296 | 0,464 | -0,331 |
| 3 | O94763 RMP_HUMAN    | R.SRENS#VCS#DTS#ESSAAEFDDR.R        | S417:S420:S423: | 3 | 3,9287 | 1     | -0,283 |
| 3 | P23443 KS6B1_HUMAN  | R.FIGS#PRT#PVS#PVK.F                | S441:T444:S447: | 2 | 2,5879 | 0,252 | 1,126  |
| 3 | A8K703 A8K703_HUMAN | K.S#AEDLTDGSDYDDLNAEQQLK.L          | S45:            | 3 | 4,4738 | 0,424 | -0,153 |
| 3 | Q9H7L9 SDS3_HUMAN   | R.GRES#DEDT#EDAS#ETDLAK.H           | S45:T49:S53:    | 3 | 4,9445 | 0,358 | -0,331 |
| 3 | O00418 EF2K_HUMAN   | R.KYES#DEDS#LGS#SGR.V               | S470:S474:S477: | 2 | 3,1285 | 0,479 | -0,276 |
| 3 | O00418 EF2K_HUMAN   | R.KYES#DEDS#LGSS#GR.V               | S470:S474:S478: | 2 | 2,0778 | 0,509 | -0,345 |
| 3 | P11169 GTR3_HUMAN   | K.DGVM*EM*NS#IEPAK.E                | S485:           | 2 | 2,4154 | 0,284 | -0,318 |
| 3 | O43379 WDR62_HUMAN  | R.TRLS#T#AS#EETVQNR.V               | S49:T50:S52:    | 2 | 4,4685 | 1     | -0,4   |
| 3 | P05783 K1C18_HUMAN  | R.ISVSRS#T#S#FR.G                   | S51:T52:S53:    | 2 | 2,1621 | 0,395 | -0,177 |
| 3 | Q13191 CBLB_HUMAN   | K.GIVRS#PCGS#PTGS#PK.S              | S521:S525:S529: | 2 | 2,8823 | 0,302 | -0,421 |
| 3 | Q9NPI6 DCP1A_HUMAN  | R.KAS#SPS#PLTIGT#PESQR.K            | S522:S525:T531: | 3 | 4,1602 | 1     | 0,092  |
| 3 | Q9NPI6 DCP1A_HUMAN  | R.KASS#PS#PLTIGT#PESQR.K            | S523:S525:T531: | 2 | 3,196  | 1     | -0,122 |
| 3 | Q86VM9 ZCH18_HUMAN  | K.LGVS#VS#PSR.A                     | S532:S534:      | 2 | 2,1339 | 0,213 | 0,23   |
| 3 | Q3KQU3 MA7D1_HUMAN  | R.ASNEKESAAPAS#PAPS#PAPS#PTPAPPQK.E | S544:S548:S552: | 3 | 3,7027 | 0,447 | -0,438 |
| 3 | P08670 VIME_HUMAN   | R.SLYASS#PGGVYATR.S                 | S56:            | 2 | 3,3428 | 0,473 | -0,243 |
| 3 | Q9NRF8 PYRG2_HUMAN  | K.LSSDRYS#DAS#DDS#FSEPR.I           | S568:S571:S574: | 3 | 3,5366 | 0,377 | 0,155  |
| 3 | Q63HK3 ZKSC2_HUMAN  | R.ASAPS#PST#PEEVPSPS#RQER.G         | S591:T594:S602: | 3 | 3,1399 | 1     | -0,467 |
| 3 | Q7Z460 CLAP1_HUMAN  | R.SRS#DIDVNAASAK.S                  | S600:           | 3 | 3,8928 | 0,352 | -0,123 |
| 3 | P13807 GYS1_HUMAN   | R.YPRPAS#VPPS#PSLS#R.H              | S641:S645:S649: | 2 | 3,1673 | 0,395 | -0,33  |
| 3 | P13807 GYS1_HUMAN   | R.YPRPAS#VPPS#PSLS#R.H              | S641:S645:S649: | 3 | 2,7555 | 0,188 | -0,198 |
| 3 | Q9HAW4 CLSPN_HUMAN  | R.KVLQDS#DS#ETEDTNAS#PEK.T          | S65:S67:S75:    | 3 | 3,3986 | 0,232 | -0,549 |
| 3 | O00116 ADAS_HUMAN   | R.RAAS#AAT#AAP#ATPAAQESGTIPK.K      | S65:T68:T72:    | 3 | 3,4093 | 0,213 | -0,295 |
| 3 | Q9H1B7 EAP1_HUMAN   | R.RNS#SS#PVS#PASVPGQR.R             | S657:S659:S662: | 2 | 4,2    | 1     | -0,392 |
| 3 | Q9NYF8 BCLF1_HUMAN  | R.IDIS#PSTLR.K                      | S658:           | 2 | 2,5558 | 0,361 | -0,226 |

|   |                    |                                  |                    |   |        |       |        |
|---|--------------------|----------------------------------|--------------------|---|--------|-------|--------|
| 3 | Q9H1B7 EAP1_HUMAN  | R.RNSS#S#PVS#PASVPGQR.R          | S658:S659:S662:    | 3 | 3,0413 | 0,243 | -0,098 |
| 3 | Q8N5P1 ZC3H8_HUMAN | R.SKDYDVYS#DNDICS#QES#EDNFAK.E   | S77:S83:S86:       | 3 | 3,8239 | 0,245 | -0,37  |
| 3 | Q8IWB9 TEX2_HUMAN  | R.S#PQRSPLQS#AES#SPTAGK.K        | S790:S798:S801:    | 3 | 3,1457 | 0,198 | -0,265 |
| 3 | Q9BZF1 OSBL8_HUMAN | K.GYSSPEPDIQDS#S#GS#EAQSVKPSTR.R | S807:S808:S810:    | 3 | 2,7146 | 0,337 | 0,064  |
| 3 | Q8IWX8 CHERP_HUMAN | R.S#RS#PTPPSS#AGLGSNSAPPIDSR.L   | S815:S817:S823:    | 3 | 4,6407 | 1     | -0,497 |
| 3 | Q8IWX8 CHERP_HUMAN | R.SRS#PT#PPSS#AGLGSNSAPPIDSR.L   | S817:T819:S823:    | 3 | 4,6185 | 1     | -0,355 |
| 3 | P04792 HSPB1_HUMAN | R.QLS#SGVSEIR.H                  | S82:               | 2 | 3,1704 | 0,264 | -0,211 |
| 3 | Q13595 TRA2A_HUMAN | R.S#RS#YT#PEYR.R                 | S84:S86:T88:       | 2 | 2,7612 | 0,481 | -0,087 |
| 3 | Q9UQ35 SRRM2_HUMAN | R.QGSITS#PQANEQS#VT#PQRR.S       | S857:S864:T866:    | 3 | 3,6871 | 0,212 | -0,551 |
| 3 | Q6GYQ0 GRIPE_HUMAN | R.RGS#S#PGS#LEIPK.D              | S860:S861:S864:    | 2 | 3,0478 | 0,322 | 0,083  |
| 3 | Q8IYB3 SRRM1_HUMAN | K.KETES#EAEDNLDDLEK.H            | S874:              | 3 | 3,5829 | 0,262 | -0,564 |
| 3 | Q8WX93 PALLD_HUMAN | R.IAS#DEEIQGTK.D                 | S893:              | 2 | 3,2123 | 0,381 | -0,096 |
| 3 | P18858 DNL1_HUMAN  | R.KQSQIQNQGEDS#GS#DPEDTY.-       | S911:S913:         | 3 | 4,2455 | 0,482 | 0      |
| 3 | Q9P107 GMIP_HUMAN  | R.GRGPS#PAAAS#PEGS#PLR.R         | S914:S919:S923:    | 3 | 4,5011 | 0,241 | 0      |
| 3 | Q9P107 GMIP_HUMAN  | R.GRGPS#PAAAS#PEGS#PLR.R         | S914:S919:S923:    | 2 | 3,6634 | 0,4   | -0,198 |
| 3 | Q01970 PLCB3_HUMAN | R.RPPGPTTS#PASTS#LS#SPGQR.D      | S926:S931:S933:    | 3 | 3,2976 | 1     | -0,247 |
| 3 | Q9UQ35 SRRM2_HUMAN | R.S#VS#PCSNVESR.L                | S952:S954:         | 2 | 2,7981 | 0,45  | -0,088 |
| 3 | Q9ULD4 BRPF3_HUMAN | R.VLENGEDHGVAGS#PAS#PAS#IEEER.H  | S959:S962:S965:    | 3 | 2,9581 | 0,352 | -0,204 |
| 3 | P17301 ITA2_HUMAN  | K.M*TKNPDEIDETT#ELSS#.-          | T1177:S1181:       | 2 | 4,2752 | 0,499 | -0,184 |
| 3 | Q96T60 PNKP_HUMAN  | R.TPESQPDT#PPGT#PLVS#QDEKR.D     | T118:T122:S126:    | 3 | 5,3444 | 0,44  | -0,363 |
| 3 | Q8WYP5 AHTF1_HUMAN | R.ST#LRSTPLAS#PS#PSPGR.S         | T1215:S1223:S1225: | 3 | 2,7125 | 0,103 | -0,188 |
| 3 | Q5VT06 CE350_HUMAN | R.SQKT#PTS#PLS#PSSQK.S           | T1253:S1256:S1259: | 2 | 4,097  | 1     | -0,202 |
| 3 | P06493 CDC2_HUMAN  | K.IGEGT#Y#GVVYK.G                | T14:Y15:           | 2 | 3,8749 | 0,401 | -0,181 |
| 3 | Q9BTC0 DIDO1_HUMAN | K.GGDDHDDT#S#DS#DSDGLTLK.E       | T151:S152:S154:    | 3 | 3,7097 | 0,248 | 0,167  |
| 3 | Q86TB9 PATL1_HUMAN | R.RST#S#PIGS#PPVR.A              | T178:S179:S184:    | 2 | 2,4252 | 0,384 | -0,228 |
| 3 | Q9H7D0 DOCK5_HUMAN | R.LSPFHGSSPPQST#PLS#PPPLT#PK.A   | T1786:S1789:T1794: | 3 | 4,004  | 0,194 | -0,07  |
| 3 | P42356 PI4KA_HUMAN | R.KT#SS#VSS#ISQVSPER.G           | T197:S199:S202:    | 2 | 2,3153 | 0,355 | 0      |
| 3 | Q7L2J0 MEPCE_HUMAN | R.TLNAET#PKS#S#PLPAK.G           | T213:S216:S217:    | 2 | 3,6729 | 0,408 | -0,476 |
| 3 | Q8IWB9 TEX2_HUMAN  | R.NTGGDSKT#APSS#PLTS#PSDTR.S     | T262:S266:S270:    | 3 | 4,8752 | 1     | -0,158 |
| 3 | Q13501 SQSTM_HUMAN | R.SRLT#PVS#PESS#STEEK.S          | T269:S272:S276:    | 3 | 3,5297 | 1     | -0,093 |
| 3 | Q15751 HERC1_HUMAN | R.RAQT#PPISS#LPTS#PSDEVGR.R      | T2701:S2706:S2710: | 3 | 4,6067 | 1     | -0,313 |
| 3 | Q92597 NDRG1_HUMAN | R.SRT#AS#GSSVTS#LDGTR.S          | T328:S330:S336:    | 2 | 3,9914 | 1     | -0,335 |
| 3 | Q92597 NDRG1_HUMAN | R.SRT#ASGSS#VTS#LDGTR.S          | T328:S333:S336:    | 2 | 2,9861 | 1     | -0,268 |

|   |                     |                                    |                 |   |        |       |        |
|---|---------------------|------------------------------------|-----------------|---|--------|-------|--------|
| 3 | Q14247 SRC8_HUMAN   | R.AKT#QT#PPVS#PAPQPTEER.L          | T399:T401:S405: | 3 | 3,7754 | 0,162 | -0,337 |
| 3 | Q14247 SRC8_HUMAN   | K.TQT#PPVS#PAPQPTEER.L             | T401:S405:      | 2 | 3,2344 | 0,397 | -0,386 |
| 3 | O60832 DKC1_HUMAN   | K.AGLESGAEPGDGSDT#TK.K             | T496:           | 2 | 2,1346 | 0,152 | 0,137  |
| 3 | P17252 KPCA_HUMAN   | R.T#FCGTPDYIAPEIIAYQPYGK.S         | T497:           | 3 | 3,2052 | 0,412 | -0,221 |
| 3 | Q9Y6G9 DC1L1_HUMAN  | R.KPVTVSPTT#PTS#PTEGEAS.-          | T513:S516:      | 2 | 2,8067 | 1     | -0,477 |
| 3 | Q9Y6G9 DC1L1_HUMAN  | R.KPVTVSPTT#PT#SPTEGEAS.-          | T513:T515:      | 2 | 2,0231 | 1     | -0,298 |
| 3 | P27816 MAP4_HUMAN   | K.DVT#PPPETEVLK.N                  | T521:           | 2 | 2,0782 | 0,313 | 0,302  |
| 3 | Q14978 NOLC1_HUMAN  | K.LQT#PNT#FPK.R                    | T607:T610:      | 2 | 2,5332 | 0,141 | -0,202 |
| 3 | Q8TD16 BICD2_HUMAN  | K.TKPAT#PS#L.-                     | T821:S823:      | 2 | 2,1848 | 0,364 | -0,063 |
| 3 | Q99460 PSMD1_HUMAN  | K.IEEEEQEPEPPEPFEYIDD.-            |                 | 3 | 3,2075 | 0,276 | -0,235 |
| 3 | Q9UCN2 Q9UCN2_HUMAN | -.PYQYPALTPEQK.K                   |                 | 2 | 2,9472 | 0,308 | -0,085 |
| 3 | Q69YN2 C19L1_HUMAN  | K.DFEPYDFTLDD.-                    |                 | 2 | 2,456  | 0,418 | -0,266 |
| 3 | Q93034 CUL5_HUMAN   | R.DESDINTFIYM*A.-                  |                 | 2 | 2,2484 | 0,481 | -0,085 |
| 3 | B2RA01 B2RA01_HUMAN | K.AQYEDIAQK.S                      |                 | 2 | 2,0991 | 0,258 | -0,229 |
| 4 | Q9UBL3 ASH2L_HUMAN  | K.DTLEGAGDTSEVM*DTQAGS#VDEENGR.Q   | S101:           | 3 | 2,8923 | 0,284 | -0,132 |
| 4 | P05386 RLA1_HUMAN   | K.KES#EES#DDDM*GFGLFD.-            | S101:S104:      | 2 | 4,4604 | 0,645 | -0,459 |
| 4 | P05386 RLA1_HUMAN   | K.KES#EES#DDDMGFGLFD.-             | S101:S104:      | 2 | 2,6371 | 0,444 | -0,463 |
| 4 | Q14690 RRP5_HUMAN   | K.DS#ETVDEDEEVDPALTVGTIK.K         | S1010:          | 3 | 5,5504 | 0,46  | -0,312 |
| 4 | P20042 IF2B_HUMAN   | K.IES#DVQEPTPEDDLDM*LGNK.K         | S105:           | 3 | 3,4127 | 0,403 | 0,142  |
| 4 | P24534 EF1B_HUMAN   | K.DDDDIDLFGS#DDEESEEAK.R           | S106:           | 3 | 4,7255 | 0,336 | 0      |
| 4 | Q9H1E3 NUCKS_HUMAN  | R.EM*LM*EDVGS#EEEEEEDEAPFQEK.D     | S113:           | 3 | 5,2271 | 0,448 | -0,062 |
| 4 | Q9Y4D8 K0614_HUMAN  | R.SM*SAPS#DLEM*IGNEDLEFTR.A        | S114:           | 3 | 3,0348 | 0,168 | -0,233 |
| 4 | Q6IN85 SMEK1_HUMAN  | K.DPSVDITQDLVDES#EEER.F            | S117:           | 2 | 2,9924 | 0,447 | -0,34  |
| 4 | Q70E73 RAPH1_HUMAN  | R.LTQAEISEQPTM*ATVVPQVPTS#PK.S     | S1206:          | 3 | 2,7796 | 0,234 | -0,069 |
| 4 | Q9BZH6 BRWD2_HUMAN  | K.DLLNELES#PKKEPIEE.-              | S1216:          | 2 | 2,6407 | 0,195 | -0,248 |
| 4 | P49023 PAXI_HUMAN   | K.S#AEPSTVM*STSLGSNLSELDL.R        | S126:           | 3 | 3,4713 | 0,433 | -0,154 |
| 4 | Q9BY77 PDIP3_HUMAN  | R.S#SPAAFINPPIGTVTPALK.L           | S126:           | 2 | 2,3214 | 0,357 | -0,249 |
| 4 | Q9H1E3 NUCKS_HUMAN  | K.DS#GSDEDFLM*EDDDSDYGSSK.K        | S130:           | 3 | 5,7378 | 0,624 | -0,217 |
| 4 | P16989 DBPA_HUMAN   | R.S#VGDGETVEFDVVEGEK.G             | S134:           | 2 | 5,0043 | 0,597 | 0,846  |
| 4 | Q09666 AHNK_HUMAN   | R.LKS#EDGVEGDLGETQSR.T             | S135:           | 3 | 3,426  | 0,35  | -0,289 |
| 4 | Q9BXP5 ARS2_HUMAN   | R.LGS#IAEIDLGVPPPVM*K.T            | S136:           | 2 | 3,5215 | 0,529 | -0,333 |
| 4 | Q5SXM2 SNPC4_HUMAN  | R.VGS#ESEDELLSELELADR.D            | S1398:          | 2 | 2,5448 | 0,523 | -0,335 |
| 4 | Q14160 LAP4_HUMAN   | R.LAEAPSPAPTPSPTPVEDLGPQTSTS#PGR.L | S1561:          | 3 | 3,7763 | 0,362 | 0,187  |

|   |                    |                                   |                    |   |        |       |        |
|---|--------------------|-----------------------------------|--------------------|---|--------|-------|--------|
| 4 | Q12789 TF3C1_HUMAN | K.DGS#LEDEDEEDDLDEGVGGK.R         | S1611:             | 3 | 5,9341 | 0,488 | 0,079  |
| 4 | O43399 TPD54_HUMAN | R.NSATFKS#FEDR.V                  | S166:              | 2 | 3,427  | 0,515 | -0,088 |
| 4 | Q96FW1 OTUB1_HUMAN | K.QEPLGSDS#EGVNCLAYDEAIM*AQQDR.I  | S18:               | 3 | 4,379  | 0,465 | -0,734 |
| 4 | Q9H7D0 DOCK5_HUMAN | R.TLSSPS#LQTDGIAATPVPPPPPK.S      | S1805:             | 3 | 5,1109 | 0,383 | -0,149 |
| 4 | Q9NQC3 RTN4_HUMAN  | R.GSSGS#VDETLFALPAASEPVIR.S       | S184:              | 3 | 5,3445 | 0,333 | -0,24  |
| 4 | P18583 SON_HUMAN   | R.RS#FS#IS#PVR.L                  | S2009:S2011:S2013: | 2 | 2,4747 | 0,313 | -0,284 |
| 4 | Q86X95 CIR_HUMAN   | R.NLTANDPSQEYVAS#EGEEDPEVEFLK.S   | S202:              | 3 | 3,5594 | 0,243 | -0,245 |
| 4 | O75179 ANR17_HUMAN | K.EHYPVSS#PSS#PS#PPAQPGGVSR.N     | S2042:S2045:S2047: | 3 | 4,2569 | 1     | -0,223 |
| 4 | Q86T90 K1328_HUMAN | R.DFS#DEEQSVVYVPGISAEGNVR.S       | S21:               | 3 | 4,6995 | 0,394 | -0,222 |
| 4 | O60841 IF2P_HUMAN  | K.NKPGNIES#GNEDDDASF.K            | S214:              | 3 | 3,3692 | 0,466 | -0,173 |
| 4 | Q5UIP0 RIF1_HUMAN  | R.VS#FADPIYQAGLADDIDR.R           | S2205:             | 3 | 3,2119 | 0,224 | 0,089  |
| 4 | Q9BST9 RTKN_HUMAN  | R.ASLDS#AGGSGSSPILLPTPVGGPR.Y     | S235:              | 3 | 4,573  | 0,296 | 0      |
| 4 | Q9BTK6 PA1_HUMAN   | R.DLFLDSEDPSPAS#PPLR.S            | S237:              | 2 | 2,8599 | 0,428 | 0,121  |
| 4 | Q13426 XRCC4_HUMAN | K.DDS#IISLVDTDIAPSR.K             | S256:              | 2 | 3,8057 | 0,46  | -0,13  |
| 4 | Q5THJ4 VP13D_HUMAN | R.DS#PGAVAAPLISGVEIK.A            | S2692:             | 2 | 2,1114 | 0,398 | -0,43  |
| 4 | Q14938 NFX_HUMAN   | K.S#IDDSEM*ESPVDDVFPYGTGR.S       | S280:              | 3 | 4,1053 | 0,431 | -0,152 |
| 4 | Q13435 SF3B2_HUMAN | R.SSLGQS#AS#ET#EEDTVSVSKK.E       | S284:S286:T288:    | 3 | 3,4189 | 0,346 | -0,238 |
| 4 | Q8WVC0 LEO1_HUMAN  | R.KNAIAS#DS#EADS#DTEVPK.D         | S294:S296:S300:    | 2 | 3,71   | 0,377 | -0,115 |
| 4 | P05388 RLA0_HUMAN  | K.EES#EES#DEDM*GFGLFD.-           | S304:S307:         | 2 | 2,1857 | 0,396 | -0,303 |
| 4 | Q14934 NFAC4_HUMAN | R.DPGS#PGPFYVYGAPPAESIPQK.T       | S311:              | 3 | 3,4525 | 0,193 | -0,079 |
| 4 | Q9UPS8 ANR26_HUMAN | R.DSDS#QDEVVVESLPTTSIK.V          | S314:              | 2 | 3,8227 | 0,451 | -0,229 |
| 4 | Q9UN79 SOX13_HUMAN | R.DLQSS#PPSLPLGFLGEGDAVTK.A       | S317:              | 3 | 6,51   | 0,504 | -0,555 |
| 4 | Q15554 TERF2_HUMAN | K.DLVLPTQALPAS#PALK.N             | S323:              | 2 | 4,2753 | 0,457 | -0,285 |
| 4 | P19419 ELK1_HUMAN  | R.DLELPLS#PSLLGGGPPER.T           | S324:              | 2 | 2,1771 | 0,238 | -0,253 |
| 4 | Q9UJM3 ERRFI_HUMAN | K.S#LPSYLNQVM*PPTQSFAPDPK.Y       | S337:              | 3 | 2,6564 | 0,247 | -0,234 |
| 4 | Q8TAQ2 SMRC2_HUMAN | K.DM*DEPS#PVPNVEEVTLPK.T          | S347:              | 3 | 3,3761 | 0,143 | 0,262  |
| 4 | P01892 1A02_HUMAN  | R.KGGSYSQAAS#SDS#AQGS#DVSLTACKV.- | S349:S352:S356:    | 3 | 2,8254 | 1     | -1,045 |
| 4 | Q8N350 DOS_HUMAN   | R.AAS#ESTEQUEEGDAPQEDFIQYIAR.A    | S361:              | 3 | 4,1701 | 0,418 | 0,53   |
| 4 | O60502 NCOAT_HUMAN | K.LENEGS#DEDIETDVLYSPQM*ALK.L     | S364:              | 3 | 2,8416 | 0,123 | 0      |
| 4 | Q9H307 PININ_HUMAN | K.QQDS#QPEEVM*DVLEM*VENVK.H       | S381:              | 3 | 4,8349 | 0,376 | -0,298 |
| 4 | Q8IYB3 SRRM1_HUMAN | R.RLS#PS#AS#PPR.R                 | S389:S391:S393:    | 2 | 2,7416 | 0,336 | -0,187 |
| 4 | Q9Y6M4 KC1G3_HUMAN | R.S#NAPITAPTEVEVM*DETK.C          | S413:              | 2 | 2,0773 | 0,313 | -0,722 |
| 4 | Q9BS91 S35A5_HUMAN | R.LTKPKS#DES#DEDT#F.-             | S416:S419:T423:    | 2 | 2,1727 | 0,228 | -0,329 |

|   |                      |                                     |                 |   |        |       |        |
|---|----------------------|-------------------------------------|-----------------|---|--------|-------|--------|
| 4 | O75821 EIF3G_HUMAN   | K.GIPLATGDTs#PEPELLPGAPLPPPK.E      | S42:            | 3 | 4,9336 | 0,471 | -0,144 |
| 4 | A8K703 A8K703_HUMAN  | K.S#AEDLTGSDYDDLNAEQLQK.L           | S45:            | 3 | 6,0763 | 0,477 | -0,153 |
| 4 | Q92994 TF3B_HUMAN    | K.DASGDGELDLS#GIDDLEIDR.Y           | S450:           | 2 | 2,4161 | 0,336 | -0,335 |
| 4 | Q9NV70 EXOC1_HUMAN   | R.SQSS#SLLDM*GNM*SASDLVDADR.T       | S490:           | 3 | 4,9971 | 0,416 | -0,379 |
| 4 | Q9BUR4 WDR79_HUMAN   | R.VFPEPTES#GDEGEELGLPLLSTR.H        | S491:           | 3 | 3,6928 | 0,238 | -0,645 |
| 4 | Q86SQ0 PHLB2_HUMAN   | K.LQLSDEES#VFEEALM*SPDTR.Y          | S493:           | 3 | 4,4709 | 0,433 | -0,153 |
| 4 | Q9NYZ3 GTSE1_HUMAN   | R.RVS#ALPT#PAS#R.R                  | S509:T513:S516: | 2 | 2,0838 | 0,271 | -0,087 |
| 4 | O94880 PHF14_HUMAN   | K.DS#GEGSCSDSEENILEEELNEDIK.V       | S53:            | 3 | 3,2014 | 0,303 | 0,659  |
| 4 | P62854 RS26_HUMAN    | R.DIS#EASVFDAYVLPK.L                | S54:            | 2 | 2,8927 | 0,398 | -0,493 |
| 4 | Q3KQU3 MA7D1_HUMAN   | R.ASNEKESAAPAS#PAPS#PAPS#PTPAPPQK.E | S544:S548:S552: | 3 | 5,6545 | 0,421 | -0,626 |
| 4 | Q8WX92 NELFB_HUMAN   | R.KPS#PAQAAETPALELPLSPVAPAPL.-      | S557:           | 3 | 3,5772 | 0,467 | -0,554 |
| 4 | P42566 EP15_HUMAN    | R.SS#PELLPSGVTDENEVTTAVTEK.V        | S563:           | 3 | 3,9664 | 0,42  | -0,221 |
| 4 | P62854 RS26_HUMAN    | R.DISEAS#VFDAYVLPK.L                | S57:            | 3 | 2,9306 | 0,335 | -0,316 |
| 4 | Q96ER3 SAAL1_HUMAN   | K.SSS#DDEEQLTELDEEM*ENEICR.V        | S57:            | 3 | 2,858  | 0,343 | 0,598  |
| 4 | ##Q9H1K0 RBNS5_HUMAN | R.SGHVSNPSQSPS#THTSLS#EK.S          | S570:S576:      | 3 | 3,0076 | 0,223 | -1,889 |
| 4 | P53814 SMTN_HUMAN    | R.S#PLSAEELM*TIEDEGVLDK.M           | S576:           | 2 | 3,7591 | 0,596 | -0,674 |
| 4 | Q9NZ53 PDXL2_HUMAN   | R.DPEDS#DVFEEDTHL.-                 | S596:           | 2 | 3,3971 | 0,536 | -0,212 |
| 4 | Q7Z417 NUFP2_HUMAN   | K.DYEIESQNPLAS#PTNTLLGSAK.E         | S629:           | 3 | 6,1126 | 0,521 | -0,226 |
| 4 | Q99543 DNJC2_HUMAN   | K.ELSEES#EDEELQLEEFPM*LK.T          | S63:            | 3 | 5,2417 | 0,342 | -0,218 |
| 4 | Q8IY81 RRMJ3_HUMAN   | K.S#DDDGFEIVPIEDPAK.H               | S644:           | 2 | 3,5968 | 0,507 | -0,468 |
| 4 | Q9UK58 CCNL1_HUMAN   | R.LS#PTPSM*QDGLDLPSETDLR.I          | S65:            | 3 | 4,963  | 0,319 | 0,242  |
| 4 | Q9BZL6 KPCD2_HUMAN   | R.S#VVGTPAYLAPEVLLNQGYNR.S          | S710:           | 3 | 4,6365 | 0,595 | -0,391 |
| 4 | Q15398 DLG7_HUMAN    | K.EGISDVVEGM*ELNSSITSQDVLM*SS#PEK.N | S767:           | 3 | 2,6468 | 0,444 | -0,355 |
| 4 | Q86UE8 TLK2_HUMAN    | R.KSVSTSPAGAAIASTSGASNNS#SS#N.-     | S769:S771:      | 3 | 3,0566 | 1     | 0      |
| 4 | P53367 ARFP1_HUMAN   | K.EGVIEAGAFQGSPPPLPSVM*S#PSR.V      | S79:            | 3 | 4,5269 | 0,434 | -0,071 |
| 4 | A3KN83 SBNO1_HUMAN   | K.S#IDPDSIQSALLASGLGSK.R            | S794:           | 2 | 4,2374 | 0,583 | -0,315 |
| 4 | Q96ST3 SIN3A_HUMAN   | R.GDLS#DVEEEEEEM*DVDEATGAVK.K       | S832:           | 3 | 5,9507 | 0,477 | 0,067  |
| 4 | Q32LY9 Q32LY9_HUMAN  | R.EAEALLQSM*GLTPESIVPPPM*SPSS#K.S   | S84:            | 3 | 2,9363 | 0,265 | -0,063 |
| 4 | Q13595 TRA2A_HUMAN   | R.S#RS#YT#PEYR.R                    | S84:S86:T88:    | 2 | 2,3973 | 0,351 | -0,349 |
| 4 | P18858 DNL1_HUMAN    | R.KQSQIQNQGGEDS#GS#DPEDTY.-         | S911:S913:      | 3 | 4,4091 | 0,498 | -0,146 |
| 4 | Q9P107 GMIP_HUMAN    | R.GRGPS#PAAAS#PEGS#PLR.R            | S914:S919:S923: | 3 | 3,8495 | 0,442 | -0,198 |
| 4 | Q9P2D0 IBTK_HUMAN    | R.SDS#SGGYNLSDIQSPSTGLLK.S          | S992:           | 3 | 4,7057 | 0,303 | -0,456 |
| 4 | O60927 PP1RB_HUMAN   | R.ATLGPTPTT#PPQPPDPSQPPPGPM*QH.-    | T109:           | 3 | 2,6791 | 0,245 | -1,136 |



|   |                     |                                       |                    |   |        |       |        |
|---|---------------------|---------------------------------------|--------------------|---|--------|-------|--------|
| 4 | Q7Z2Z1 CO042_HUMAN  | R.ISHT#PQT#PLYT#PER.L                 | T1127:T1130:T1134: | 3 | 3,3018 | 0,282 | -0,195 |
| 4 | P06493 CDC2_HUMAN   | K.IGEGT#Y#GVVYK.G                     | T14:Y15:           | 2 | 2,8518 | 0,368 | -0,272 |
| 4 | P21675 TAF1_HUMAN   | R.DASVFQDESNM*SVLDIPSAT#PEK.Q         | T1680:             | 3 | 4,183  | 0,382 | -0,355 |
| 4 | Q9H7D0 DOCK5_HUMAN  | R.T#LSSPSLQTDGIAATPVPPPPPK.S          | T1800:             | 3 | 4,0705 | 0,319 | -0,448 |
| 4 | O60516 4EBP3_HUMAN  | R.DQLPDCYSTTPGGTLYAT#TPGGTR.I         | T31:               | 3 | 2,9991 | 0,322 | -0,421 |
| 4 | Q9BZF1 OSBL8_HUMAN  | K.DVLGPSTVVANSDESQLLT#PGK.M           | T39:               | 3 | 2,6562 | 0,222 | -0,238 |
| 4 | P49321 NASP_HUMAN   | K.DGAVNGPSVVGDTPIEPQT#SIER.L          | T396:              | 3 | 3,3807 | 0,188 | -0,144 |
| 4 | Q9NW68 BSDC1_HUMAN  | K.DFDLDM*T#EEEVQM*ALSK.V              | T404:              | 2 | 4,6059 | 0,563 | -0,346 |
| 4 | Q9Y6R9 CCD61_HUMAN  | R.GGHRRRGKPPSPT#PWS#GSNMK.S           | T411:S414:         | 3 | 3,0584 | 0,113 | 1,12   |
| 4 | Q9BUR4 WDR79_HUMAN  | R.VFPEPT#ESGDEGEELGPLLSTR.H           | T489:              | 3 | 3,7521 | 0,386 | -0,43  |
| 4 | P17252 KPCA_HUMAN   | R.T#FCGTPDYIAPEIIAYQPYGK.S            | T497:              | 3 | 3,3287 | 0,308 | -0,295 |
| 4 | Q6RW13 ATRAP_HUMAN  | R.SAY#QTIDSAEAPDPFAVPEGR.S            | Y133:              | 3 | 2,9726 | 0,214 | -1,234 |
| 4 | Q96T23 RSF1_HUMAN   | K.VGSPLDY#SLVDLPSTNGQSPGK.A           | Y1353:             | 3 | 3,568  | 0,282 | -0,079 |
| 4 | P01892 1A02_HUMAN   | R.KGGSY#SQAASDSAQGS#DVS#LTACKV.-      | Y344:S356:S359:    | 3 | 2,6177 | 0,147 | -0,261 |
| 4 | Q9H0E2 TOLIP_HUMAN  | K.DAAINLLQM*GEEP.-                    |                    | 2 | 3,3447 | 0,383 | 0      |
| 4 | Q99627 CSN8_HUMAN   | R.KPVAGALDVSNK.F                      |                    | 3 | 3,0754 | 0,267 | 0,272  |
| 4 | P35232 PHB_HUMAN    | R.NITYLPAGQSVLLQLPQ.-                 |                    | 3 | 2,9897 | 0,125 | -0,296 |
| 4 | P55072 TERA_HUMAN   | R.FPSGNQGGAGPSQSGGGTGGSVYTEDNDDDLYG.- |                    | 3 | 2,9091 | 0,382 | 0,114  |
| 4 | Q9UCG5 Q9UCG5_HUMAN | -.DATNVGDEGGFAPNIX.-                  |                    | 2 | 2,6253 | 0,322 | -0,691 |
| 4 | P36542 ATPG_HUMAN   | K.ELIEISGAAALD.-                      |                    | 2 | 2,5559 | 0,422 | -0,371 |
| 4 | Q69YN2 C19L1_HUMAN  | K.DFEPYDFTLDD.-                       |                    | 2 | 2,3827 | 0,407 | -0,443 |
| 4 | Q9BXP5 ARS2_HUMAN   | R.DLDAPDDVDF.-                        |                    | 2 | 2,1095 | 0,315 | -0,385 |
| 5 | O94768 ST17B_HUMAN  | R.S#ISGLLTTTPQPIK.M                   | S10:               | 2 | 3,673  | 0,397 | -0,37  |
| 5 | Q6P0N0 CN106_HUMAN  | R.ILLPSFQDS#EDDDDLIPNM*DK.N           | S1008:             | 3 | 2,7607 | 0,187 | -0,073 |
| 5 | Q9UBL3 ASH2L_HUMAN  | K.DTLEGAGDTSEVM*DTQAGS#VDEENGR.Q      | S101:              | 3 | 3,0336 | 0,231 | -0,198 |
| 5 | Q00587 BORG5_HUMAN  | R.M*AS#PPASPAPPAPISPIK.N              | S101:              | 2 | 2,2001 | 0,468 | -0,504 |
| 5 | P05386 RLA1_HUMAN   | K.KEES#EES#DDDM*GFGLFD.-              | S101:S104:         | 2 | 4,4184 | 0,613 | -0,344 |
| 5 | P17096 HMGA1_HUMAN  | K.KLEKEEEEGISQES#S#EEEQ.-             | S102:S103:         | 3 | 3,4141 | 0,294 | -0,153 |
| 5 | Q8NB46 ANR52_HUMAN  | K.DAVS#PFSFSLK.N                      | S1028:             | 2 | 2,8234 | 0,248 | -0,614 |
| 5 | Q9UQ35 SRRM2_HUMAN  | K.S#STPPGESYFGVSSLQLK.G               | S1041:             | 3 | 3,8469 | 0,442 | 0      |
| 5 | Q5JTH9 RRP12_HUMAN  | R.ALS#QAAVEEEEEEEEEEPAQGK.G           | S1049:             | 3 | 3,3346 | 0,37  | 0,832  |
| 5 | Q6ZS32 Q6ZS32_HUMAN | K.FDDS#DTEQIAEEGDDNLAK.Y              | S107:              | 3 | 5,7365 | 0,477 | 0,584  |
| 5 | Q6DN90 IQEC1_HUMAN  | R.SLS#ESYELSSDLQDK.Q                  | S107:              | 2 | 5,7199 | 0,554 | -0,137 |

|   |                     |                                       |        |   |        |       |        |
|---|---------------------|---------------------------------------|--------|---|--------|-------|--------|
| 5 | B2CI53 B2CI53_HUMAN | K.YSVDP5#IVNISDEM*AK.T                | S1073: | 2 | 2,56   | 0,26  | 0,131  |
| 5 | P31629 ZEP2_HUMAN   | R.QAS#FSGSPEISQGEVGM*DQSVK.Q          | S1085: | 3 | 6,7403 | 0,552 | 0      |
| 5 | Q68E09 Q68E09_HUMAN | R.GAS#PPISAIIEEFSIPEAPM*R.S           | S11:   | 3 | 3,0585 | 0,211 | -0,317 |
| 5 | Q02790 FKBP4_HUMAN  | K.ATES#GAQSAPLPM*EGVDISPK.Q           | S11:   | 3 | 2,7239 | 0,215 | -0,084 |
| 5 | P50851 LRBA_HUMAN   | K.S#IVEEEEDDDYVELK.V                  | S1100: | 2 | 4,8571 | 0,524 | -1,096 |
| 5 | Q9Y4D8 K0614_HUMAN  | R.SM*S#APSDLEM*IGNEDLEFTR.A           | S111:  | 3 | 3,0677 | 0,116 | -0,155 |
| 5 | Q12888 TP53B_HUMAN  | K.M*VIQGPSS#PQGEAM*VTDVLEDQK.E        | S1114: | 3 | 6,1691 | 0,532 | 0,142  |
| 5 | P08708 RS17_HUMAN   | K.LLDFGS#LSNLQVTQPTVGM*NFK.T          | S113:  | 3 | 5,5301 | 0,378 | -0,146 |
| 5 | Q9H1E3 NUCKS_HUMAN  | R.EM*LM*EDVGS#EEEEEEEEDEAPFQEK.D      | S113:  | 3 | 5,2479 | 0,497 | 0,986  |
| 5 | Q15185 TEBP_HUMAN   | K.DWEDDS#DEDM*SNFDR.F                 | S113:  | 2 | 3,8239 | 0,633 | 0,062  |
| 5 | Q9UNZ2 NSF1C_HUMAN  | K.S#PNELVDDLK.G                       | S114:  | 2 | 3,1581 | 0,355 | -0,36  |
| 5 | P48634 BAT2_HUMAN   | K.EGTLTQVPLAPPPGAPPS#PAPAR.F          | S1147: | 3 | 2,7205 | 0,372 | 0      |
| 5 | P46821 MAP1B_HUMAN  | R.DVM*SDETNNNEETES#PSQEFVNITK.Y       | S1154: | 3 | 4,8461 | 0,46  | -0,644 |
| 5 | Q92766 RREB1_HUMAN  | R.ANS#GGVDLDSSGEFASIEK.M              | S1167: | 2 | 5,0179 | 0,6   | -0,186 |
| 5 | Q5MIZ7 SMEK2_HUMAN  | K.DPSVEVTQDLIDES#EEER.F               | S117:  | 2 | 3,4262 | 0,443 | -0,225 |
| 5 | P29966 MARCS_HUMAN  | K.EAPAEGEAAEPGS#PTAAEGEAASAASSTSSPK.A | S118:  | 3 | 4,0643 | 0,487 | -0,061 |
| 5 | Q9UH99 UN84B_HUMAN  | R.YS#QGDDDDGSSSSGSSVAGSQSTLTK.D       | S12:   | 3 | 4,3008 | 0,431 | -0,565 |
| 5 | Q00587 BORG5_HUMAN  | K.NAIS#LPQLNQAAYDSLTVGK.L             | S121:  | 3 | 5,2059 | 0,532 | -0,419 |
| 5 | Q9BZH6 BRWD2_HUMAN  | K.DLLNELES#PKEEPIEE.-                 | S1216: | 2 | 2,219  | 0,158 | -0,186 |
| 5 | O43379 WDR62_HUMAN  | R.S#ISLGDSEGPVATLAQPLR.R              | S1226: | 2 | 2,7587 | 0,459 | -0,348 |
| 5 | O43379 WDR62_HUMAN  | R.SIS#LGDSEGPVATLAQPLR.R              | S1228: | 3 | 3,3965 | 0,454 | -0,261 |
| 5 | O43379 WDR62_HUMAN  | R.SIS#LGDSEGPVATLAQPLR.R              | S1228: | 2 | 2,0668 | 0,503 | -0,464 |
| 5 | O43379 WDR62_HUMAN  | R.SISLGDSEGPVATLAQPLR.R               | S1232: | 3 | 3,227  | 0,26  | -0,174 |
| 5 | Q9UQ35 SRRM2_HUMAN  | K.EQNSALPTS#SQDEELM*EVVEK.S           | S1232: | 3 | 2,7453 | 0,113 | -0,074 |
| 5 | Q92797 SYMPK_HUMAN  | R.S#PQTLAPVGEDAM*K.T                  | S1243: | 2 | 2,8289 | 0,424 | 0,713  |
| 5 | P46100 ATRX_HUMAN   | K.S#VPVTVDDDDDDNDPENR.I               | S1253: | 2 | 2,3339 | 0,492 | -0,582 |
| 5 | Q9BY77 PDIP3_HUMAN  | R.S#SPAAFINPPIGTVTPALK.L              | S126:  | 2 | 4,5389 | 0,464 | -0,56  |
| 5 | P49023 PAXI_HUMAN   | K.S#AEPSPTVM*STSLGNSLSELDL.R          | S126:  | 3 | 3,3346 | 0,251 | 0,231  |
| 5 | Q8NCF5 NF2IP_HUMAN  | R.LVLDPGEAPLVPVYS#GK.V                | S127:  | 2 | 3,5408 | 0,532 | -0,466 |
| 5 | Q9H7D0 DOCK5_HUMAN  | K.DS#YYYVYQQLK.E                      | S1287: | 2 | 2,6441 | 0,404 | -0,226 |
| 5 | Q6T4R5 NHS_HUMAN    | K.APSAGLEEVAQPESVDVITSQSDS#PTR.A      | S1308: | 3 | 4,4566 | 0,41  | -0,321 |
| 5 | Q8IY17 PLPL6_HUMAN  | R.DEGGS#PEGASPSTASEM*EEEK.S           | S1330: | 3 | 3,3032 | 0,42  | -0,412 |
| 5 | Q96PE2 ARHG_HUMAN   | R.SS#M*SLYTAASVIDTASK.Y               | S1331: | 2 | 3,7224 | 0,544 | -0,267 |

|   |                     |                                    |              |   |        |       |        |
|---|---------------------|------------------------------------|--------------|---|--------|-------|--------|
| 5 | P16989 DBPA_HUMAN   | R.S#VGDGETVEFDVVEGEK.G             | S134:        | 2 | 5,3593 | 0,564 | -0,13  |
| 5 | Q96T23 RSF1_HUMAN   | K.VGS#PLDYSLVLDLPSTNGQSPGK.A       | S1349:       | 3 | 3,3727 | 0,333 | -0,158 |
| 5 | Q09666 AHNK_HUMAN   | R.LKS#EDGVEGDLGETQSR.T             | S135:        | 3 | 4,7275 | 0,489 | 0,193  |
| 5 | Q96R06 SPAG5_HUMAN  | K.TIVLVPS#PLGQQQDM*IFEAR.L         | S135:        | 3 | 3,2279 | 0,376 | -0,469 |
| 5 | Q96T23 RSF1_HUMAN   | K.VGSPLDYSLVLDLPSTNGQS#PGK.A       | S1365:       | 3 | 4,0436 | 0,177 | 0,317  |
| 5 | Q9UGU0 TCF20_HUMAN  | R.SAS#SNSAEAGGDTVTLDDILSLK.S       | S1369:       | 3 | 3,6737 | 0,224 | -0,235 |
| 5 | O15320 CTGE5_HUMAN  | R.S#NSELEDEILCLEK.E                | S137:        | 3 | 3,6437 | 0,364 | -0,208 |
| 5 | P49023 PAXI_HUMAN   | K.SAEPSPTVM*STS#LGSNLSELDR.L       | S137:        | 3 | 2,6659 | 0,269 | -0,077 |
| 5 | P42695 CNDD3_HUMAN  | R.S#LGVLPFTLNLSGSPEK.T             | S1372:       | 2 | 2,8274 | 0,317 | -0,283 |
| 5 | Q9UPN3 MACF1_HUMAN  | R.M*LS#SSDAITQEFM*DLR.T            | S1376:       | 2 | 6,1451 | 0,632 | -0,312 |
| 5 | P49815 TSC2_HUMAN   | K.S#SSPELQTLQDILGDPGDK.A           | S1385:       | 3 | 2,9961 | 0,096 | -0,338 |
| 5 | P49815 TSC2_HUMAN   | K.SSS#PELQTLQDILGDPGDK.A           | S1387:       | 3 | 3,7081 | 0,284 | -0,169 |
| 5 | Q6XZF7 DNMBP_HUMAN  | R.QNSGSTLTFNPS#SM*AVSFTSGSCQK.Q    | S1388:       | 3 | 4,0167 | 0,262 | -0,067 |
| 5 | P49815 TSC2_HUMAN   | K.SSS#PELQTLQDILGDPGDK.A           | S1388:       | 2 | 2,4028 | 0,414 | -0,45  |
| 5 | O15320 CTGE5_HUMAN  | R.SNS#ELEDEILCLEK.E                | S139:        | 2 | 5,0715 | 0,58  | -0,347 |
| 5 | P46821 MAP1B_HUMAN  | K.VLS#PLRS#PPLIGSEYSEFLSADDK.A     | S1396:S1400: | 3 | 4,9227 | 0,432 | -0,374 |
| 5 | Q9NQ57 INCE_HUMAN   | R.AAAAAAATM*ALAAPSS#PTPESPTM*LTK.K | S143:        | 3 | 3,3388 | 0,29  | -0,067 |
| 5 | Q12888 TP53B_HUMAN  | R.ETAVPGPLGIEDISPNLS#PDDK.S        | S1430:       | 3 | 2,8892 | 0,244 | 0,234  |
| 5 | P46821 MAP1B_HUMAN  | K.QGS#PDQVSPVSEM*TSTSLYQDK.Q       | S1438:       | 3 | 3,6964 | 0,376 | 0,59   |
| 5 | Q9H1E3 NUCKS_HUMAN  | K.DSGSDEDFLM*EDDDDS#DYGSSK.K       | S144:        | 3 | 4,6465 | 0,454 | -0,072 |
| 5 | P31629 ZEP2_HUMAN   | R.M*LS#PASSLELFM*ETK.Q             | S1443:       | 2 | 3,1617 | 0,45  | -0,543 |
| 5 | O75179 ANR17_HUMAN  | K.NAS#ILLEELDLEK.L                 | S1457:       | 2 | 4,3499 | 0,268 | -0,311 |
| 5 | Q9H4Z3 PCIF1_HUMAN  | K.IEIPVTPTGQSVSPSSPS#IPGTPTLK.M    | S146:        | 3 | 2,8545 | 0,223 | -0,283 |
| 5 | Q02880 TOP2B_HUMAN  | K.FDS#NEEDSASVFSFGLK.Q             | S1466:       | 3 | 3,2291 | 0,289 | -0,256 |
| 5 | Q02880 TOP2B_HUMAN  | K.FDS#NEEDSASVFSFGLK.Q             | S1466:       | 2 | 2,8426 | 0,52  | -0,797 |
| 5 | P46821 MAP1B_HUMAN  | K.LGDVS#PTQJIDVSQFGSFK.E           | S1501:       | 2 | 4,0089 | 0,592 | -0,304 |
| 5 | O43149 ZZEF1_HUMAN  | K.LPSSSGLPAADVSPATAEEPLS#PSTPTR.R  | S1518:       | 3 | 2,9707 | 0,165 | -0,39  |
| 5 | O60216 RAD21_HUMAN  | R.EEVGNIS#ILQENDFGDFGM*DDR.E       | S153:        | 3 | 3,9315 | 0,327 | -0,141 |
| 5 | Q96RS0 TGS1_HUMAN   | K.EYEEDDILAS#DDPSSIEQYENTR.T       | S154:        | 3 | 3,6595 | 0,404 | -0,719 |
| 5 | Q5QNZ9 Q5QNZ9_HUMAN | K.DDS#ILCFLEVK.E                   | S1548:       | 2 | 3,5089 | 0,44  | -0,344 |
| 5 | P48380 RFX3_HUMAN   | R.AS#PATIEM*AIETLQK.S              | S155:        | 3 | 3,4608 | 0,306 | 0      |
| 5 | Q9P2M7 CING_HUMAN   | K.VAS#PGSTIDTAPLSSVDSLK.F          | S159:        | 3 | 4,9295 | 0,444 | -0,569 |
| 5 | O75376 NCOR1_HUMAN  | R.QLS#PTPGYPSQYQLYAM*ENTR.Q        | S1592:       | 3 | 4,2686 | 0,373 | -0,36  |

|   |                    |                                   |        |   |        |       |        |
|---|--------------------|-----------------------------------|--------|---|--------|-------|--------|
| 5 | Q96FW1 OTUB1_HUMAN | K.QEPLGS#DSEGVNCLAYDEAIM*AQQDR.I  | S16:   | 3 | 3,8893 | 0,383 | -0,489 |
| 5 | O95049 ZO3_HUMAN   | R.S#PGGGSEANGLALVSGFK.R           | S164:  | 2 | 5,5788 | 0,541 | -0,424 |
| 5 | Q9Y3Q8 T22D4_HUMAN | R.S#FTGGLGQLVVPK.A                | S165:  | 2 | 3,5554 | 0,167 | -0,166 |
| 5 | Q9Y4I1 MYO5A_HUMAN | R.TS#SIADEGTYTLDSILR.Q            | S1651: | 2 | 2,0212 | 0,375 | -0,762 |
| 5 | Q9Y4I1 MYO5A_HUMAN | R.TSS#IADEGTYTLDSILR.Q            | S1652: | 3 | 3,8155 | 0,364 | -0,095 |
| 5 | Q5JSZ5 K0515_HUMAN | R.LLS#FSPEEFPTLK.A                | S166:  | 2 | 2,3269 | 0,32  | -0,615 |
| 5 | Q14966 ZN638_HUMAN | K.DVTVLS#VAEEQDLLK.Q              | S1667: | 2 | 5,1428 | 0,425 | -0,491 |
| 5 | Q14966 ZN638_HUMAN | K.DVTVLS#VAEEQDLLK.Q              | S1667: | 3 | 4,4785 | 0,424 | -0,526 |
| 5 | Q14676 MDC1_HUMAN  | R.LLLAEDS#EEEVDFLSER.R            | S168:  | 3 | 4,5104 | 0,36  | 0,088  |
| 5 | Q14676 MDC1_HUMAN  | R.LLLAEDS#EEEVDFLSER.R            | S168:  | 2 | 3,7252 | 0,568 | -0,471 |
| 5 | Q96I25 SPF45_HUMAN | R.S#M*GGAAIAPPTSLVEK.D            | S169:  | 2 | 3,425  | 0,463 | 0,676  |
| 5 | O00193 SMAP_HUMAN  | R.SAS#PDDDLGSSNWEAADLGNEER.K      | S17:   | 3 | 5,5473 | 0,56  | -0,145 |
| 5 | Q15942 ZYX_HUMAN   | R.VSS#GYVPPVATPFSSK.S             | S170:  | 2 | 2,5471 | 0,392 | -0,068 |
| 5 | O75616 ERAL_HUMAN  | K.ETQVILLDTPGIIS#PGK.Q            | S173:  | 2 | 3,4374 | 0,53  | -0,459 |
| 5 | Q16763 UBE2S_HUMAN | R.ALAS#GTEASSTDPGAPGGPGAEGPM*AK.K | S173:  | 3 | 3,0944 | 0,247 | 0,288  |
| 5 | P49454 CENPF_HUMAN | R.S#LLGIDTEDAIQGR.N               | S1750: | 2 | 2,7954 | 0,366 | -0,389 |
| 5 | O14497 ARI1A_HUMAN | K.VSS#PAPM*EGGEEEEELLGPK.L        | S1755: | 3 | 4,2576 | 0,408 | -0,168 |
| 5 | Q9C0E8 LNP_HUMAN   | R.NLS#PTPASPQGGPPQVPVSPGPPK.D     | S177:  | 3 | 5,5882 | 0,465 | 0,576  |
| 5 | O15027 SC16A_HUMAN | R.LLPSAPQTLPDGPLAS#PAR.V          | S1786: | 2 | 4,2886 | 0,466 | -0,246 |
| 5 | O15027 SC16A_HUMAN | R.LLPSAPQTLPDGPLAS#PAR.V          | S1786: | 3 | 3,7616 | 0,319 | 0      |
| 5 | Q9NQT8 KI13B_HUMAN | R.S#ATLSGSATNLASLTAALAK.A         | S1791: | 2 | 3,3761 | 0,514 | -0,38  |
| 5 | Q93009 UBP7_HUMAN  | K.AGEQQLS#EPEDM*EM*EAGDTDDPPR.I   | S18:   | 3 | 5,7061 | 0,485 | 0,597  |
| 5 | Q96S97 MYADM_HUMAN | R.TTITTTTTSSS#GLGSPM*IVGSPR.A     | S18:   | 3 | 3,1909 | 0,424 | -0,234 |
| 5 | Q9P260 K1468_HUMAN | R.AGS#ISTLDSLDFAR.Y               | S180:  | 2 | 3,3111 | 0,538 | -0,159 |
| 5 | Q9H7D0 DOCK5_HUMAN | R.TLSS#PSLQTDGIAATPVPPPPPK.S      | S1803: | 3 | 3,1847 | 0,245 | -0,075 |
| 5 | Q9H7D0 DOCK5_HUMAN | R.TLSSPS#LQTDGIAATPVPPPPPK.S      | S1805: | 3 | 3,4933 | 0,134 | -0,075 |
| 5 | Q6UB99 ANR11_HUMAN | R.QQSVPAASS#YDSPM*PPSM*EDR.A      | S1821: | 3 | 3,8248 | 0,42  | -0,229 |
| 5 | Q96B36 AKTS1_HUMAN | K.S#LPVSVPVWGFK.E                 | S183:  | 2 | 2,6302 | 0,43  | -0,262 |
| 5 | P12270 TPR_HUMAN   | R.EEEEEDS#TIEASDQVSDDTVEM*PLPK.K  | S1838: | 3 | 2,8004 | 0,254 | -0,443 |
| 5 | Q9NQC3 RTN4_HUMAN  | R.GSSGS#VDETLFALPAASEPVIR.S       | S184:  | 3 | 4,7192 | 0,38  | -0,16  |
| 5 | Q5UIP0 RIF1_HUMAN  | R.EEICDM*DS#SEAM*SLESQESPENFK.T   | S1843: | 3 | 3,2583 | 0,374 | -0,061 |
| 5 | O15417 TNC18_HUMAN | R.ALS#PGLSEESGLLLAR.F             | S1857: | 2 | 3,1324 | 0,492 | -0,293 |
| 5 | Q99728 BARD1_HUMAN | K.DASAAQQDSYEFVSPS#PPADVSR.A      | S186:  | 3 | 3,4009 | 0,269 | -0,143 |

|   |                    |                                        |                    |   |        |       |        |
|---|--------------------|----------------------------------------|--------------------|---|--------|-------|--------|
| 5 | P46939 UTRO_HUMAN  | R.S#SLLPTDYLVEINK.I                    | S1865:             | 2 | 3,5679 | 0,403 | -0,146 |
| 5 | P50548 ERF_HUMAN   | R.GSVS#DCSDGTSELEEPLGEDPR.A            | S187:              | 3 | 5,2001 | 0,487 | 0,076  |
| 5 | Q96CX2 KCD12_HUMAN | R.SPS#GGAAGPLLTSPQSLDGSR.R             | S187:              | 3 | 3,7894 | 0,329 | 0,09   |
| 5 | Q96CX2 KCD12_HUMAN | R.SPS#GGAAGPLLTSPQSLDGSR.R             | S187:              | 2 | 2,5582 | 0,528 | -0,06  |
| 5 | P19105 MLRM_HUMAN  | R.ATS#NVFAM*FDQSQIQEFK.E               | S19:               | 3 | 6,9737 | 0,506 | 0,251  |
| 5 | Q9NUE0 ZDH18_HUMAN | K.DCEYQQISPGAAPLPAS#PGAR.R             | S19:               | 3 | 2,7564 | 0,283 | -0,081 |
| 5 | O43399 TPD54_HUMAN | K.GLLS#DSM*TDVPVDTGVAAR.T              | S19:               | 2 | 2,2983 | 0,249 | 0,488  |
| 5 | Q15365 PCBP1_HUMAN | R.VM*TIPYQMPASS#PVICAGGQDR.C           | S190:              | 3 | 5,0069 | 0,551 | -0,356 |
| 5 | Q15365 PCBP1_HUMAN | R.VM*TIPYQPM*PASS#PVICAGGQDR.C         | S190:              | 3 | 4,2234 | 0,419 | -0,141 |
| 5 | Q5JRA6 MIA3_HUMAN  | R.DEPPASQSTSQDCSQALKQS#P.-             | S1906:             | 3 | 4,4056 | 0,401 | -0,375 |
| 5 | P24928 RPB1_HUMAN  | K.YSPTSPTYSPTSPVYTPS#PK.Y              | S1906:             | 3 | 3,3635 | 0,422 | 0,078  |
| 5 | Q9HCK8 CHD8_HUMAN  | R.S#SSAASM*AEEEASAVSTAAAQFTK.L         | S1939:             | 3 | 4,6954 | 0,535 | -0,301 |
| 5 | Q5TDH0 DDI2_HUMAN  | R.LFS#ADPFDLEAQAK.I                    | S194:              | 2 | 4,2653 | 0,514 | -0,374 |
| 5 | O43237 DC1L2_HUMAN | K.DFQDYM*EPEEGCQGS#PQR.R               | S194:              | 3 | 4,1937 | 0,514 | 0,161  |
| 5 | Q5TDH0 DDI2_HUMAN  | R.LFS#ADPFDLEAQAK.I                    | S194:              | 3 | 3,3316 | 0,238 | 0      |
| 5 | Q04323 SAKS1_HUMAN | K.YGGSVGSQPPPVAPEPGVPVS#SPSQEPPTK.R    | S199:              | 3 | 3,2063 | 0,3   | -0,183 |
| 5 | Q13459 MYO9B_HUMAN | R.GS#DEENLDSETSASTESLLEER.A            | S1993:             | 3 | 5,1125 | 0,505 | -0,443 |
| 5 | Q1L5Z9 LONF2_HUMAN | -.M*S#PEPVP PPPPQCPGCDR.A              | S2:                | 3 | 2,7887 | 0,116 | -0,083 |
| 5 | P31350 RIR2_HUMAN  | R.VPLAPITDPQQLQLS#PLK.G                | S20:               | 2 | 2,666  | 0,469 | -0,539 |
| 5 | Q9H8G2 CI082_HUMAN | K.ILEGDNM*DS#DM*EEEADDGSK.M            | S203:              | 3 | 4,4502 | 0,444 | 0,077  |
| 5 | Q9H0H5 RGAP1_HUMAN | R.S#IGSAVDQGNESIVAK.T                  | S203:              | 2 | 4,1314 | 0,535 | 0,147  |
| 5 | O75179 ANR17_HUMAN | K.EHYPVSS#PSS#PS#PPAQPGGVSR.N          | S2042:S2045:S2047: | 3 | 3,8754 | 1     | -0,149 |
| 5 | Q9UBT2 SAE2_HUMAN  | K.YLFNQLFGEEADQEVVS#PDR.A              | S207:              | 3 | 3,4811 | 0,305 | -0,149 |
| 5 | Q9UBB9 TFP11_HUMAN | R.TTQSM*QDFPVVDS#EEEEEEEFQK.E          | S210:              | 3 | 3,9435 | 0,336 | -0,327 |
| 5 | Q8NFC6 FA44A_HUMAN | R.VTTEEFAPM*PSAVSGDDS#QLTASR.S         | S2128:             | 3 | 5,6267 | 0,529 | -0,202 |
| 5 | O75376 NCOR1_HUMAN | R.S#PGSISYLPFFTK.L                     | S2184:             | 2 | 3,0413 | 0,572 | -0,53  |
| 5 | O95219 SNX4_HUMAN  | R.QLQPAPLEPLGS#PDAGLGAAVVGK.E          | S22:               | 3 | 3,4262 | 0,516 | -0,242 |
| 5 | P18887 XRCC1_HUMAN | K.TSPVTASDPAGPSYAAATLQASSAASSAS#PVSR.A | S226:              | 3 | 3,9388 | 0,5   | -0,349 |
| 5 | O95685 PPR3D_HUMAN | R.S#LSCLSDLDGGVALEPR.A                 | S23:               | 2 | 3,9931 | 0,405 | -0,131 |
| 5 | Q13085 ACACA_HUMAN | R.FIIGS#VSEDNSEDEISNLVK.L              | S23:               | 3 | 3,8573 | 0,307 | -0,08  |
| 5 | Q99590 SFRIP_HUMAN | R.S#PISDNSGCDAPGNSNPSLSPSSAESEK.Q      | S23:               | 3 | 3,3797 | 0,212 | -0,062 |
| 5 | Q8TEU7 RPGF6_HUMAN | R.LPEGPVDS#EDDEEEDDEIDR.T              | S230:              | 3 | 5,4944 | 0,476 | 0,611  |
| 5 | Q96B97 SH3K1_HUMAN | R.S#IEVENDFLPVEK.T                     | S230:              | 2 | 4,0236 | 0,582 | -0,153 |

|   |                    |                                  |              |   |        |       |        |
|---|--------------------|----------------------------------|--------------|---|--------|-------|--------|
| 5 | Q13283 G3BP1_HUMAN | K.SSS#PAPADIAQTVQEDLR.T          | S232:        | 2 | 4,335  | 0,442 | 0,062  |
| 5 | O95613 PCNT_HUMAN  | R.LS#PGSGGPEAQTAGVTPASISGR.F     | S2352:       | 3 | 4,1326 | 0,395 | -0,241 |
| 5 | Q9BTK6 PA1_HUMAN   | R.DLFLDSEDPSPAS#PPLR.S           | S237:        | 3 | 4,3371 | 0,408 | 0,09   |
| 5 | Q9BTK6 PA1_HUMAN   | R.DLFLDSEDPSPAS#PPLR.S           | S237:        | 2 | 3,9874 | 0,571 | -0,362 |
| 5 | Q96A57 CTO30_HUMAN | R.LSS#TDDGYIDLQFK.K              | S24:         | 2 | 4,5643 | 0,525 | 0      |
| 5 | O00178 GTPB1_HUMAN | R.SAM*DSPVPASMFAPSP#SPGAAR.A     | S24:         | 3 | 2,7903 | 0,091 | 0,233  |
| 5 | O15530 PDPK1_HUMAN | R.ANS#FVGTAQYVSPPELLTEK.S        | S241:        | 3 | 5,2534 | 0,403 | -0,086 |
| 5 | O15530 PDPK1_HUMAN | R.ANS#FVGTAQYVSPPELLTEK.S        | S241:        | 2 | 2,43   | 0,533 | -0,114 |
| 5 | Q8NEB9 PK3C3_HUMAN | K.DGDESS#PILTSFELVK.V            | S244:        | 2 | 4,1182 | 0,539 | -0,403 |
| 5 | P78559 MAP1A_HUMAN | R.GELS#PSFLNPPLPPSIDDR.D         | S2449:       | 3 | 3,2192 | 0,258 | -0,258 |
| 5 | Q14684 RRP1B_HUMAN | K.VGDGDL#AEEIPENEVSLR.R          | S245:        | 2 | 4,2654 | 0,53  | -0,347 |
| 5 | Q14684 RRP1B_HUMAN | K.VGDGDL#AEEIPENEVSLR.R          | S245:        | 3 | 3,2293 | 0,176 | 0,087  |
| 5 | P11717 MPRI_HUMAN  | K.LVS#FHDDS#DEDLLHI.-            | S2479:S2484: | 3 | 3,6697 | 0,363 | -0,191 |
| 5 | Q9NYL9 TMOD3_HUMAN | K.DLDEDELLGNLS#ETELK.Q           | S25:         | 2 | 4,9974 | 0,511 | -0,364 |
| 5 | Q8NC51 PAIRB_HUMAN | R.FDQLFDES#DPFEVLK.A             | S25:         | 2 | 4,7567 | 0,461 | -0,422 |
| 5 | O95685 PPR3D_HUMAN | R.SLS#CLSDLGGVALEPR.A            | S25:         | 2 | 4,445  | 0,49  | -0,326 |
| 5 | O00178 GTPB1_HUMAN | R.SAM*DSPVPASM*FAPEPSS#PGAAR.A   | S25:         | 3 | 3,5346 | 0,375 | 0,309  |
| 5 | Q9NYL9 TMOD3_HUMAN | K.DLDEDELLGNLS#ETELK.Q           | S25:         | 3 | 2,9826 | 0,097 | -0,091 |
| 5 | P49792 RBP2_HUMAN  | R.TDVIQGDDVADATSEVEVSSTS#ETTPK.A | S2501:       | 3 | 3,161  | 0,139 | -0,128 |
| 5 | Q9UFC0 LRWD1_HUMAN | R.ACAS#PSAQVEGSPVAGSDGSQPAVK.L   | S251:        | 3 | 4,8646 | 0,528 | -0,15  |
| 5 | Q8N1G0 ZN687_HUMAN | K.ATDIPAS#ASPPVAGVPFFK.Q         | S251:        | 2 | 2,8622 | 0,524 | -0,476 |
| 5 | O60303 K0556_HUMAN | R.S#SPGPDTLVVLEFNPASK.S          | S252:        | 2 | 3,6152 | 0,616 | -0,252 |
| 5 | P05787 K2C8_HUMAN  | R.S#LDMDSIIAEVK.A                | S253:        | 2 | 4,005  | 0,429 | -0,261 |
| 5 | P05787 K2C8_HUMAN  | R.S#LDM*DSIIAEVK.A               | S253:        | 2 | 3,9793 | 0,45  | 0,172  |
| 5 | O15541 R113A_HUMAN | R.YGVYEDENYEVGS#DDEEIPFK.C       | S253:        | 3 | 3,3433 | 0,333 | -0,071 |
| 5 | Q9Y4B5 K0802_HUMAN | R.GAPPGS#PEPPALLAAPLAAGACPGGR.S  | S254:        | 3 | 3,9823 | 0,43  | -0,15  |
| 5 | Q96LW4 CC111_HUMAN | R.LGS#AEQSSPDLSFLVVK.N           | S255:        | 2 | 5,0679 | 0,572 | -0,394 |
| 5 | P15924 DESP_HUMAN  | R.SGS#LSLTQFADM*ISLK.N           | S2551:       | 2 | 4,1492 | 0,513 | -0,34  |
| 5 | Q969K3 RNF34_HUMAN | R.ASL#DLSSLDVVEGM*SVR.Q          | S256:        | 2 | 5,3158 | 0,426 | -0,247 |
| 5 | Q9HB58 SP110_HUMAN | R.DNS#PEPNDPEEPQEVSTPSDK.K       | S256:        | 3 | 4,3564 | 0,389 | -0,221 |
| 5 | P07910 HNRPC_HUMAN | K.M*ESEGGADDS#AEEDLLDDDDNEDR.G   | S260:        | 3 | 5,6968 | 0,481 | 0,917  |
| 5 | P07910 HNRPC_HUMAN | K.MESEGGADDS#AEEDLLDDDDNEDR.G    | S260:        | 3 | 4,0577 | 0,315 | -0,132 |
| 5 | Q06210 GFPT1_HUMAN | R.VDS#TTCLFPVEEK.A               | S261:        | 2 | 4,0589 | 0,5   | 0,076  |

|   |                    |                                  |            |   |        |       |        |
|---|--------------------|----------------------------------|------------|---|--------|-------|--------|
| 5 | Q8N3V7 SYNPO_HUMAN | K.VAS#EEEEVPLVVYLK.E             | S263:      | 2 | 3,2411 | 0,391 | -0,616 |
| 5 | Q92733 PRCC_HUMAN  | K.QITQEEDDS#DEEVAPENFFSLPEK.A    | S267:      | 3 | 3,9846 | 0,332 | 0,064  |
| 5 | Q66PJ3 AR6P4_HUMAN | R.S#AGEEEDGPVLTDEQK.S            | S271:      | 2 | 4,5507 | 0,477 | 0,752  |
| 5 | P52701 MSH6_HUMAN  | K.EEGS#SDEISSGVGDSESEGLNSPVK.V   | S274:      | 3 | 5,1019 | 0,395 | 0,426  |
| 5 | Q9NPB6 PAR6A_HUMAN | R.LTGPPSAGPGAEPDS#DDDSSDLVIENR.Q | S278:      | 3 | 3,4551 | 0,396 | 0,634  |
| 5 | Q16637 SMN_HUMAN   | R.GTGQS#DDSDIWDDTALIK.A          | S28:       | 2 | 2,4728 | 0,362 | -0,363 |
| 5 | O94888 UBXD7_HUMAN | R.SES#LIDASEDSQLEAAIR.A          | S280:      | 2 | 6,0993 | 0,598 | -0,182 |
| 5 | Q96EZ8 MCRS1_HUMAN | K.GDQVLNFS#DAEDLIDDSK.L          | S282:      | 2 | 3,6549 | 0,432 | -0,355 |
| 5 | Q13085 ACACA_HUMAN | R.FIIGSVSEDNS#EDEISNLVK.L        | S29:       | 3 | 3,1512 | 0,329 | -0,402 |
| 5 | Q8TDN4 CABL1_HUMAN | R.SS#LETLEDIEENAPLR.R            | S291:      | 2 | 2,0349 | 0,302 | -0,322 |
| 5 | Q12888 TP53B_HUMAN | K.S#PEPEVLSTQEDLFDQSNK.T         | S294:      | 3 | 4,9224 | 0,483 | -0,163 |
| 5 | P49454 CENPF_HUMAN | R.GS#PLLGPVVPGPSPIPSVTEK.R       | S2996:     | 2 | 3,1743 | 0,57  | -0,463 |
| 5 | Q9UHD8 SEPT9_HUMAN | R.S#FEVEEVETPNSTPPR.R            | S30:       | 2 | 4,9058 | 0,627 | -0,514 |
| 5 | O75379 VAMP4_HUMAN | R.NLLEDDS#DEEEDFFLR.G            | S30:       | 3 | 4,6145 | 0,412 | 0      |
| 5 | O75379 VAMP4_HUMAN | R.NLLEDDS#DEEEDFFLR.G            | S30:       | 2 | 4,0311 | 0,579 | -0,472 |
| 5 | Q5JTD0 TJAP1_HUMAN | R.GS#PEEELPLPAFEK.L              | S300:      | 2 | 2,8009 | 0,445 | 0,075  |
| 5 | Q99459 CDC5L_HUMAN | K.LVLPAPQIS#DAELQEVVK.V          | S303:      | 2 | 2,9431 | 0,526 | -0,601 |
| 5 | Q05655 KPCD_HUMAN  | R.SDS#ASSEPVGIYQGFVK.K           | S304:      | 2 | 4,3292 | 0,515 | -0,13  |
| 5 | P05388 RLA0_HUMAN  | K.EES#EES#DEDM*GFGFLD.-          | S304:S307: | 2 | 2,7288 | 0,469 | -0,061 |
| 5 | O60664 M6PBP_HUMAN | R.VAS#M*PLISSTCDM*VSAAYASTK.E    | S31:       | 3 | 2,7065 | 0,407 | 0,381  |
| 5 | Q01850 CDR2_HUMAN  | R.SSS#ETILSSLAGSDIVK.G           | S311:      | 2 | 3,5401 | 0,52  | -0,275 |
| 5 | Q9Y2D8 ADIP_HUMAN  | R.VDDSTGTVIS#DVEEDAGELSR.E       | S312:      | 3 | 4,8002 | 0,352 | -0,322 |
| 5 | Q8NCF5 NF2IP_HUMAN | R.ILLFGETELS#PTATPR.T            | S314:      | 2 | 3,1233 | 0,392 | -0,189 |
| 5 | P46937 YAP1_HUMAN  | R.SQLPTLEQDGGTQNPVSS#PGM*SQELR.T | S317:      | 3 | 5,6065 | 0,554 | 0,77   |
| 5 | Q9ULQ0 FA40B_HUMAN | R.AAS#PPSYTLDLGESQLAPPSK.L       | S318:      | 3 | 3,0272 | 0,424 | 0      |
| 5 | P35659 DEK_HUMAN   | R.EES#EEEEDEDEEEEEEEK.E          | S32:       | 3 | 6,3302 | 0,447 | -0,223 |
| 5 | P78527 PRKDC_HUMAN | K.LTPLPEDNS#M*NVDQDGDPSDR.M      | S3205:     | 3 | 4,4493 | 0,398 | 0,152  |
| 5 | P50552 VASP_HUMAN  | K.S#SSSVTTSETQPCTPSSSDYDLQR.V    | S322:      | 3 | 3,2325 | 0,348 | 0,46   |
| 5 | Q15554 TERF2_HUMAN | K.DLVLPTQALPAS#PALK.N            | S323:      | 2 | 3,8968 | 0,394 | -0,214 |
| 5 | O75674 TM1L1_HUMAN | K.EATNTTSEPSAQDLDLSPS#PR.M       | S323:      | 3 | 3,5399 | 0,476 | 0,212  |
| 5 | O95628 CNOT4_HUMAN | R.S#PFEGAVTESQSLFSDNFR.H         | S324:      | 3 | 4,6643 | 0,425 | -0,083 |
| 5 | P19419 ELK1_HUMAN  | R.DLELPLS#PSLLGGPGPER.T          | S324:      | 2 | 3,451  | 0,399 | -0,507 |
| 5 | Q70CQ2 UBP34_HUMAN | R.DSSIIDPGTEQDLPS#PENSSVK.E      | S3255:     | 3 | 2,813  | 0,202 | 0,229  |

|   |                    |                                   |                 |   |        |       |        |
|---|--------------------|-----------------------------------|-----------------|---|--------|-------|--------|
| 5 | Q16828 DUS6_HUMAN  | K.SNIS#PNFNFM*GQLLDFER.T          | S331:           | 3 | 3,9243 | 0,469 | -0,082 |
| 5 | Q9Y2U5 M3K2_HUMAN  | R.GS#DIDNPTLTVM*DISPPSR.S         | S331:           | 2 | 2,75   | 0,409 | -0,578 |
| 5 | Q641Q2 FA21A_HUMAN | R.TPS#DDEEDNLFAPPK.L              | S333:           | 2 | 4,8189 | 0,424 | -0,139 |
| 5 | Q8WXI9 P66B_HUMAN  | R.VS#SPLPSPSAM*TDAANSQAAAK.L      | S333:           | 3 | 3,1166 | 0,413 | 0,666  |
| 5 | Q9NQQ7 S35C2_HUMAN | K.GLGS#SPDLELLLR.S                | S335:           | 2 | 3,623  | 0,375 | -0,421 |
| 5 | Q9ULJ8 NEB1_HUMAN  | K.SEIPSPQS#QLLEDAEANLVGR.E        | S341:           | 3 | 3,0096 | 0,222 | -0,235 |
| 5 | P01892 1A02_HUMAN  | K.GGS#YSQAASSDSAQGSVDVSLTACKV.-   | S343:           | 3 | 4,864  | 0,514 | 0,364  |
| 5 | Q9UGV2 NDRG3_HUMAN | R.S#VTSNQSDGTQESCESPDVLDLDR.H     | S346:           | 3 | 5,7274 | 0,587 | 0,22   |
| 5 | Q5T1M5 FKB15_HUMAN | K.SNS#LSEQLAINTSPDAVK.A           | S346:           | 2 | 3,7499 | 0,447 | -1,062 |
| 5 | P46937 YAP1_HUMAN  | R.DES#TDSGLSM*SSYSVPR.T           | S347:           | 2 | 4,5128 | 0,468 | -0,191 |
| 5 | Q8TAQ2 SMRC2_HUMAN | K.DM*DEPS#PVPNVVEVTLPK.T          | S347:           | 3 | 3,4883 | 0,313 | 0,437  |
| 5 | Q9NWB7 IFT57_HUMAN | R.LLS#EVM*EELEK.V                 | S347:           | 2 | 2,8896 | 0,327 | -0,948 |
| 5 | Q96SI1 KCD15_HUMAN | R.S#PVSPLAAQGIPLPAQLTK.S          | S35:            | 2 | 4,6022 | 0,544 | -0,186 |
| 5 | Q9UN36 NDRG2_HUMAN | R.TLS#QSSESGTLSSGPPGHTM*EVSC.-    | S350:           | 3 | 4,9164 | 0,51  | -0,072 |
| 5 | Q13671 RIN1_HUMAN  | R.SM*S#AAFCSLLAPER.Q              | S351:           | 2 | 3,5358 | 0,445 | 0      |
| 5 | P18031 PTN1_HUMAN  | K.GS#PLNAAPYGIESM*SQDTEVR.S       | S352:           | 3 | 4,1248 | 0,424 | 0      |
| 5 | P01892 1A02_HUMAN  | R.KGGSYSQAASSDS#AQGS#DVS#LTACKV   | S352:S356:S359: | 3 | 6,5495 | 1     | 0,474  |
| 5 | P01892 1A02_HUMAN  | R.KGGSYSQAASSDS#AQGS#DVS#LTACKV.- | S352:S356:S359: | 3 | 5,4216 | 1     | -0,327 |
| 5 | Q9UQ35 SRRM2_HUMAN | R.SS#TGPEPPAPTPLLAER.H            | S358:           | 2 | 3,4454 | 0,387 | -0,136 |
| 5 | P17029 ZKSC1_HUMAN | R.SFS#LSSNFTTPEEVPTGTK.S          | S359:           | 2 | 2,5329 | 0,362 | -0,347 |
| 5 | Q9BQL6 FERM1_HUMAN | K.ADS#LLEDITDIPK.L                | S361:           | 2 | 3,8491 | 0,518 | -0,323 |
| 5 | P20810 ICAL_HUMAN  | R.S#ESELIDELSEDFDR.S              | S364:           | 2 | 4,6948 | 0,482 | -0,393 |
| 5 | P20810 ICAL_HUMAN  | R.S#ESELIDELSEDFDR.S              | S364:           | 3 | 3,406  | 0,219 | 0      |
| 5 | Q14160 LAP4_HUMAN  | R.S#LEELLLDANQLR.E                | S37:            | 2 | 4,3893 | 0,352 | -0,153 |
| 5 | Q9BXX5 B2L13_HUMAN | K.SS#PATSLFVELDEEEVK.A            | S371:           | 2 | 2,1281 | 0,192 | -0,249 |
| 5 | Q5VT52 K0460_HUMAN | R.DVEDM*ELS#DVEDDGSK.I            | S374:           | 2 | 4,4207 | 0,401 | -0,195 |
| 5 | Q8NDI1 EHBP1_HUMAN | K.S#TPPPNVLNPNVQELETER.R          | S377:           | 3 | 4,0223 | 0,337 | 0      |
| 5 | Q7Z5K2 WAPL_HUMAN  | R.S#M*DEFTASTPADLGEAGR.L          | S380:           | 2 | 5,0976 | 0,639 | 1,001  |
| 5 | Q9H307 PININ_HUMAN | K.QQDS#QPPEVM*DVLEM*VENVK.H       | S381:           | 3 | 6,9487 | 0,422 | -0,149 |
| 5 | Q9BY77 PDIP3_HUMAN | R.VNS#ASSSNPPAEVDPDTILK.A         | S383:           | 2 | 3,3411 | 0,589 | -0,23  |
| 5 | Q86SQ0 PHLB2_HUMAN | R.NFS#CGSVEFDEADLESLR.Q           | S384:           | 2 | 3,5461 | 0,53  | -0,226 |
| 5 | O95817 BAG3_HUMAN  | K.VPPAPVPCPPSPGPSAVPSS#PK.S       | S386:           | 3 | 3,7754 | 0,333 | 0,716  |
| 5 | Q12851 M4K2_HUMAN  | R.SAS#EFQELDSPDDTM*GTIK.R         | S386:           | 2 | 2,0128 | 0,294 | -0,788 |



|   |                     |                                   |                 |   |        |       |        |
|---|---------------------|-----------------------------------|-----------------|---|--------|-------|--------|
| 5 | Q9UK32 KS6A6_HUMAN  | K.GFS#FVATSIAEEYK.I               | S389:           | 2 | 4,3722 | 0,583 | -0,375 |
| 5 | Q8IYB3 SRRM1_HUMAN  | R.RLS#PS#AS#PPR.R                 | S389:S391:S393: | 2 | 3,0606 | 0,335 | 0      |
| 5 | O43741 AAKB2_HUMAN  | K.IM*VGS#TDDPSVFLPDSK.L           | S39:            | 2 | 4,252  | 0,5   | -0,245 |
| 5 | Q9BVS4 RIOK2_HUMAN  | R.S#FEM*TEFNQALEEIK.G             | S390:           | 2 | 4,893  | 0,477 | -0,064 |
| 5 | Q01167 FOXK2_HUMAN  | R.EGS#PAPLEPEPGAAQPK.L            | S398:           | 2 | 2,9734 | 0,476 | -0,487 |
| 5 | P05783 K1C18_HUMAN  | R.LLEDGEDFNLDALDSSNS#M*QTIQK.T    | S401:           | 3 | 4,7148 | 0,436 | -0,323 |
| 5 | P14618 KPYM_HUMAN   | R.LAPITS#DPTEATAVGAVEASF.K.C      | S406:           | 3 | 4,5156 | 0,433 | -0,162 |
| 5 | O14686 MLL2_HUMAN   | R.VS#PAAAQLADTLFSK.G              | S4084:          | 2 | 3,2155 | 0,553 | -0,153 |
| 5 | Q5T2T1 MPP7_HUMAN   | R.S#QESDGVYIFISK.H                | S409:           | 2 | 3,2573 | 0,508 | -0,073 |
| 5 | O14662 STX16_HUMAN  | R.S#IAAELDELADDR.M                | S41:            | 2 | 3,9134 | 0,546 | -0,244 |
| 5 | Q9UKV3 ACINU_HUMAN  | K.ASLVALPEQTAS#EEETPPPLLTK.E      | S410:           | 3 | 4,7542 | 0,416 | -0,073 |
| 5 | Q9Y6M4 KC1G3_HUMAN  | R.S#NAPITAPTEVEVM*DETK.C          | S413:           | 2 | 2,146  | 0,542 | -0,241 |
| 5 | O60524 SDCG1_HUMAN  | R.NPYLLS#EEEDDDVDGDVNVEK.N        | S417:           | 3 | 3,3036 | 0,262 | -0,074 |
| 5 | Q8IVF2 AHNK2_HUMAN  | K.TDLSIQS#PSADLEVQAGQVDVK.L       | S4185:          | 3 | 4,3995 | 0,156 | -0,074 |
| 5 | O75821 EIF3G_HUMAN  | K.GIPLATGDT#PEPELLPGAPLPPPK.E     | S42:            | 3 | 4,5915 | 0,329 | -0,288 |
| 5 | Q9NZJ4 SACS_HUMAN   | R.DSAPSTPTS#PTEFLTPGLR.S          | S4264:          | 2 | 3,0809 | 0,486 | -0,356 |
| 5 | O43318 M3K7_HUMAN   | R.S#IQDLTVTGTEPGQVSSR.S           | S439:           | 2 | 6,1307 | 0,591 | -0,374 |
| 5 | Q96PU5 NED4L_HUMAN  | R.SLS#SPTVTLAPLEGAK.D             | S448:           | 2 | 4,144  | 0,608 | -0,07  |
| 5 | Q96PU5 NED4L_HUMAN  | R.SLS#SPTVTLAPLEGAK.D             | S448:           | 3 | 2,7311 | 0,296 | 0,21   |
| 5 | Q9NP61 ARFG3_HUMAN  | R.LS#ASSSISADLFEPR.K              | S451:           | 2 | 4,7893 | 0,579 | -0,39  |
| 5 | Q53ET0 CRTC2_HUMAN  | K.QFS#PTM*SPTLSSITQGVPLDTSK.L     | S456:           | 3 | 2,7534 | 0,138 | -0,291 |
| 5 | Q14721 KCNB1_HUMAN  | R.S#IEM*M*DIVVEK.N                | S457:           | 2 | 2,2674 | 0,208 | 0,26   |
| 5 | Q15149 PLEC1_HUMAN  | R.GS#FDATGSGFSM*TFSSSYSSSGYGR.R   | S4642:          | 3 | 4,3057 | 0,188 | 0      |
| 5 | Q96SI9 STRBP_HUMAN  | K.VLQAM*GYPTGFDADIECM*S#SDEK.S    | S465:           | 3 | 5,7584 | 0,491 | -0,137 |
| 5 | Q6NX51 Q6NX51_HUMAN | R.S#GELQGGPDDNLEGGGTK.F           | S468:           | 2 | 3,0029 | 0,582 | -0,507 |
| 5 | Q86YR5 GPSM1_HUMAN  | R.APS#SDEECFFDLLTK.F              | S469:           | 2 | 3,7607 | 0,414 | -0,531 |
| 5 | Q86YR5 GPSM1_HUMAN  | R.APSS#DEECFFDLLTK.F              | S470:           | 3 | 4,0682 | 0,339 | -0,298 |
| 5 | O60885 BRD4_HUMAN   | K.M*PDEPEEPVAVSS#PAVPPPTK.V       | S470:           | 3 | 2,9719 | 0,2   | 0,154  |
| 5 | Q6P1R3 CK061_HUMAN  | R.GAS#PLGPGSAAGSGAAASGGLGLGLGGR.S | S48:            | 3 | 4,8633 | 0,432 | 0,079  |
| 5 | Q9P107 GMIP_HUMAN   | R.DPDLGDGLENGLS#PFGK.W            | S480:           | 2 | 5,3963 | 0,641 | -0,327 |
| 5 | Q9UMX1 SUFU_HUMAN   | K.VSILPDVVFDS#PLH.-               | S481:           | 2 | 3,4741 | 0,473 | -0,226 |
| 5 | P11169 GTR3_HUMAN   | K.DGVM*EM*NS#IEPAKETTTNV.-        | S485:           | 3 | 3,3232 | 0,323 | 0,336  |
| 5 | Q9P2B4 CT2NL_HUMAN  | R.DLS#PTLIDNSAAK.Q                | S488:           | 2 | 3,7467 | 0,55  | -0,171 |

|   |                    |                                    |        |   |        |       |        |
|---|--------------------|------------------------------------|--------|---|--------|-------|--------|
| 5 | O15446 RPA34_HUMAN | R.M*PETVPQEEM*PGPPLNS#ESGEEAPTGR.D | S488:  | 3 | 2,9156 | 0,242 | -0,369 |
| 5 | Q9NV70 EXOC1_HUMAN | R.SQS#SSLLDM*GNM*SASDLDVADR.T      | S489:  | 3 | 5,2657 | 0,466 | 0      |
| 5 | Q86SQ0 PHLB2_HUMAN | K.LQLS#DEESVFEEALM*SPDTR.Y         | S489:  | 3 | 4,3966 | 0,292 | -0,229 |
| 5 | Q9H7E2 TDRD3_HUMAN | R.SNS#FIGVPNGEVEM*PLK.G            | S489:  | 2 | 2,2534 | 0,448 | -1,211 |
| 5 | Q9UBI6 GBG12_HUMAN | R.S#DPLLIPTSENPFK.D                | S49:   | 2 | 2,4742 | 0,298 | -0,337 |
| 5 | O15446 RPA34_HUMAN | R.M*PETVPQEEM*PGPPLNSES#GEEAPTGR.D | S490:  | 3 | 4,6749 | 0,506 | 0,737  |
| 5 | Q86X29 LSR_HUMAN   | R.S#VDALDDLTPSTAESGSR.S            | S493:  | 2 | 3,2226 | 0,467 | -0,183 |
| 5 | O43432 IF4G3_HUMAN | R.S#PVPAQIAITVPK.T                 | S495:  | 2 | 2,8612 | 0,509 | 0,087  |
| 5 | O94833 BPAEA_HUMAN | R.S#TSVSSQAAQAASPQVPATTPK.I        | S4984: | 3 | 3,6054 | 0,248 | -0,08  |
| 5 | Q9NRA8 4ET_HUMAN   | R.S#M*GETESGDAFLDLK.K              | S5:    | 2 | 5,2276 | 0,49  | 0,072  |
| 5 | Q05655 KPCD_HUMAN  | R.AS#TFCGTPDYIAPEILQGLK.Y          | S506:  | 3 | 4,8154 | 0,434 | -0,162 |
| 5 | A0MZ66 SHOT1_HUMAN | K.S#M*PVLGSVSSVTK.T                | S506:  | 2 | 2,9903 | 0,337 | 0,176  |
| 5 | P27816 MAP4_HUMAN  | K.DM*S#PLSETEM*ALGK.D              | S507:  | 2 | 4,4663 | 0,481 | -0,151 |
| 5 | O15047 SET1A_HUMAN | K.FSFLAS#DTEEEENSSM*VLGAR.D        | S508:  | 3 | 5,4163 | 0,421 | -0,503 |
| 5 | P18615 NELFE_HUMAN | R.SLS#EQPVM*DTATATEQAK.Q           | S51:   | 2 | 5,5069 | 0,46  | -0,365 |
| 5 | P18615 NELFE_HUMAN | R.SLS#EQPVM*DTATATEQAK.Q           | S51:   | 3 | 4,6905 | 0,551 | 0,091  |
| 5 | Q99549 MPP8_HUMAN  | R.GAEAFGDS#EEDGEDVFEVEK.I          | S51:   | 3 | 3,9077 | 0,41  | -0,163 |
| 5 | P18615 NELFE_HUMAN | R.SLS#EQPVMDTATATEQAK.Q            | S51:   | 3 | 3,7726 | 0,366 | 0,184  |
| 5 | P27816 MAP4_HUMAN  | K.DM*SPLS#ETEM*ALGK.D              | S510:  | 2 | 2,3009 | 0,13  | -0,151 |
| 5 | Q14669 TRIPC_HUMAN | R.S#SAVVVDAIPVFLEK.L               | S515:  | 2 | 3,3091 | 0,505 | -0,369 |
| 5 | Q8N1G4 LRC47_HUMAN | K.EEGS#LSDTEADAVSQQLPDPTTNPSAGK.D  | S518:  | 3 | 3,382  | 0,146 | -0,385 |
| 5 | Q96SD1 DCR1C_HUMAN | R.NDEITDESLENFPSSTVAGGSQS#PK.L     | S518:  | 3 | 3,275  | 0,208 | 0,068  |
| 5 | Q9BTC8 MTA3_HUMAN  | R.DIS#NTLIM*LADK.H                 | S52:   | 2 | 2,5825 | 0,435 | -1,28  |
| 5 | O95365 ZBT7A_HUMAN | R.GGAPDPSPGATATPGAPAQPSS#PDAR.R    | S526:  | 3 | 3,0911 | 0,27  | -0,076 |
| 5 | P50402 EMD_HUMAN   | R.LSPPSS#SAASSYSFSDLNSTR.G         | S53:   | 3 | 4,9668 | 0,576 | 0,082  |
| 5 | Q9ULT0 TTC7A_HUMAN | R.GSPS#AAFTFPDPTDDFGK.L            | S53:   | 2 | 4,3414 | 0,616 | -0,265 |
| 5 | Q13330 MTA1_HUMAN  | R.DISS#TLIALADK.H                  | S53:   | 2 | 3,013  | 0,342 | -0,184 |
| 5 | Q96T23 RSF1_HUMAN  | K.AQIEEPDPPEM*ETS#LDSSEM*AK.D      | S530:  | 3 | 2,8349 | 0,403 | 0,719  |
| 5 | Q9BWU0 NADAP_HUMAN | K.ASSQVLSESPS#QDSLDAFM*SEM*K.S     | S532:  | 3 | 5,1037 | 0,477 | -0,283 |
| 5 | Q68E01 INT3_HUMAN  | K.DESCYDNAEAAFS#DDEEDLNSK.G        | S537:  | 3 | 4,4045 | 0,401 | -0,141 |
| 5 | Q9Y4E1 FA21C_HUMAN | K.GLFS#DEEDSEDLFSSQSASNLK.G        | S539:  | 3 | 5,7878 | 0,435 | -0,221 |
| 5 | Q641Q2 FA21A_HUMAN | K.GLFS#DEEDSEDLFSSQSASK.L          | S539:  | 3 | 3,408  | 0,35  | -0,162 |
| 5 | Q8NHQ9 DDX55_HUMAN | R.EEGS#DIEDEDM*EELLNDTR.L          | S544:  | 3 | 5,1856 | 0,322 | -0,078 |

|   |                     |                                        |        |   |        |       |        |
|---|---------------------|----------------------------------------|--------|---|--------|-------|--------|
| 5 | Q09666 AHNK_HUMAN   | R.IS#APNVDFNLEGPK.V                    | S5448: | 2 | 2,0574 | 0,256 | 0,077  |
| 5 | O00255 MEN1_HUMAN   | R.GPEGGSTAQVPAPAAS#PPPEGPVLTQSEK.M     | S548:  | 3 | 3,457  | 0,459 | -0,368 |
| 5 | Q9Y3L3 3BP1_HUMAN   | R.S#PPETAAPVEDM*AR.R                   | S550:  | 2 | 3,4848 | 0,372 | -0,311 |
| 5 | O43491 E41L2_HUMAN  | R.S#LDGAPIGVM*DQSLM*K.D                | S550:  | 2 | 3,3673 | 0,479 | -0,069 |
| 5 | Q12888 TP53B_HUMAN  | R.IDEDGENTQIEDTEPM*S#PVLNSK.F          | S552:  | 3 | 5,2545 | 0,415 | -0,413 |
| 5 | Q96ST2 IWS1_HUMAN   | R.DGGTFIS#DADDVVSAM*IVK.M              | S554:  | 3 | 3,4742 | 0,175 | -0,539 |
| 5 | Q96ST2 IWS1_HUMAN   | R.DGGTFIS#DADDVVSAM*IVK.M              | S554:  | 2 | 2,4571 | 0,348 | -0,539 |
| 5 | Q8WX92 NELFB_HUMAN  | R.KPS#PAQAAETPALELPLSPVAPAPL.-         | S557:  | 3 | 2,8129 | 0,347 | -0,277 |
| 5 | P29374 ARI4A_HUMAN  | K.CDS#EGEEDEEDM*EPCLTGTK.V             | S561:  | 3 | 6,8908 | 0,55  | 0      |
| 5 | P42566 EP15_HUMAN   | R.S#SPELLPSGVTDENEVTTAVTEK.V           | S562:  | 3 | 4,3329 | 0,485 | 0      |
| 5 | Q9Y4L1 HYOU1_HUMAN  | R.VESVFETLVEDS#AEESTLTK.L              | S567:  | 3 | 2,9851 | 0,115 | 0,227  |
| 5 | Q13442 HAP28_HUMAN  | K.S#LDSDESEDEDDYQQK.R                  | S57:   | 2 | 4,3099 | 0,404 | -0,462 |
| 5 | Q6ZRP7 QSOX2_HUMAN  | R.DNLLDTYSADQGDS#SEGGTLAR.G            | S578:  | 3 | 3,691  | 0,382 | 0,155  |
| 5 | Q8N3V7 SYNPO_HUMAN  | R.S#PPSYSVLYPSSDPK.S                   | S580:  | 2 | 3,0215 | 0,535 | -0,215 |
| 5 | Q14161 GIT2_HUMAN   | K.QNS#TPESDYDNTPNDM*EPDGM*GSSR.K       | S586:  | 3 | 3,0741 | 0,323 | -0,448 |
| 5 | O00116 ADAS_HUMAN   | R.GIS#DPLTVFEQTEAAAR.E                 | S589:  | 2 | 3,6796 | 0,525 | -0,518 |
| 5 | O15085 ARHGB_HUMAN  | R.LS#TGSFPEDLLESDDR.S                  | S589:  | 2 | 3,3771 | 0,601 | -0,254 |
| 5 | O00116 ADAS_HUMAN   | R.GIS#DPLTVFEQTEAAAR.E                 | S589:  | 3 | 3,2363 | 0,501 | -0,485 |
| 5 | O75122 CLAP2_HUMAN  | R.VLNTGS#DVEEAVADALK.K                 | S596:  | 2 | 3,9576 | 0,528 | -0,337 |
| 5 | Q86W92 LIPB1_HUMAN  | R.S#QSTTFNPDDM*SEPEFK.R                | S599:  | 2 | 2,7686 | 0,385 | -0,119 |
| 5 | P05783 K1C18_HUMAN  | R.GGM*GS#GGLATGIAGGLAGM*GGIQNEK.E      | S60:   | 3 | 5,3201 | 0,353 | -0,077 |
| 5 | P78371 TCPB_HUMAN   | R.DAS#LM*VTNDGATILK.N                  | S60:   | 2 | 2,2927 | 0,209 | -0,371 |
| 5 | Q7Z460 CLAP1_HUMAN  | R.SRS#DIDVNAASAK.S                     | S600:  | 3 | 2,6262 | 0,168 | -0,369 |
| 5 | Q9UKN8 TF3C4_HUMAN  | K.ILLVDS#PGM*GNADDEQQEETSSK.Q          | S611:  | 3 | 4,5435 | 0,506 | 0,07   |
| 5 | Q03188 CENPC_HUMAN  | R.CS#LSEPLESDEADLAK.K                  | S613:  | 2 | 3,4507 | 0,384 | -0,265 |
| 5 | O15211 RGL2_HUMAN   | R.S#ASCGSPLSGGAEASGGTGYGGEGSGPGASDCR.I | S617:  | 3 | 5,4176 | 0,57  | 1,501  |
| 5 | Q8TDY2 RBCC1_HUMAN  | K.AAQS#LDEM*SQTITDLLSEQK.A             | S624:  | 3 | 4,2122 | 0,327 | -0,238 |
| 5 | Q7Z417 NUFP2_HUMAN  | K.DYEIESQNPLAS#PTNTLLGSAK.E            | S629:  | 3 | 6,3282 | 0,593 | -0,075 |
| 5 | Q02952 AKA12_HUMAN  | K.S#ATLSSTESTASEM*QEEM*K.G             | S640:  | 3 | 3,8593 | 0,412 | 0      |
| 5 | Q7Z6Z7 HUWE1_HUMAN  | R.S#SDPLGDTASNLGSAVDELM*R.H            | S648:  | 3 | 3,9943 | 0,438 | 0,164  |
| 5 | Q9UK58 CCNL1_HUMAN  | R.LS#PTPSM*QDGLDLPSETDLR.I             | S65:   | 3 | 4,024  | 0,35  | 0,161  |
| 5 | Q2M2I8 AAK1_HUMAN   | K.S#TQLLQAAAAEASLNK.S                  | S652:  | 2 | 5,7968 | 0,613 | -0,144 |
| 5 | Q68E09 Q68E09_HUMAN | R.DYSTVSAS#PTALSTLK.Q                  | S662:  | 2 | 3,6901 | 0,577 | 0,567  |

|   |                    |                                        |            |   |        |       |        |
|---|--------------------|----------------------------------------|------------|---|--------|-------|--------|
| 5 | O00267 SPT5H_HUMAN | R.DVTNFTVGGFAPM*S#PR.I                 | S666:      | 2 | 3,5618 | 0,607 | -0,409 |
| 5 | O00267 SPT5H_HUMAN | R.DVTNFTVGGFAPM*S#PR.I                 | S666:      | 3 | 3,5341 | 0,45  | 0,204  |
| 5 | P20042 IF2B_HUMAN  | K.DAS#DDLDDLNFNQK.K                    | S67:       | 2 | 4,1927 | 0,479 | -0,332 |
| 5 | P20042 IF2B_HUMAN  | K.DAS#DDLDDLNFNQK.K                    | S67:       | 3 | 3,5077 | 0,328 | -0,1   |
| 5 | Q9UER7 DAXX_HUMAN  | K.ICTLPSPPS#PLASLAPVADSSTR.V           | S671:      | 3 | 4,5766 | 0,38  | -0,151 |
| 5 | Q9Y3T9 NOC2L_HUMAN | K.DLFDLNS#SEEDDTEGFSE.R.G              | S672:      | 3 | 4,3137 | 0,416 | 0      |
| 5 | Q9Y3T9 NOC2L_HUMAN | K.DLFDLNS#EEDDTEGFSE.R.G               | S673:      | 3 | 4,7862 | 0,441 | -0,24  |
| 5 | Q14126 DSG2_HUMAN  | K.VVPSFLPVDQGG#LVGR.N                  | S680:      | 2 | 4,5338 | 0,259 | -0,338 |
| 5 | Q8N556 AFAP1_HUMAN | R.TLENSPISS#CDTSDTEGPVPVNSAAVLK.K      | S683:      | 3 | 3,4336 | 0,287 | 0,123  |
| 5 | Q9Y496 KIF3A_HUMAN | R.S#AKPETVIDSLLQ.-                     | S690:      | 2 | 3,2939 | 0,442 | -0,247 |
| 5 | Q8TEW0 PARD3_HUMAN | K.S#PGSPPGPELPIETALDDR.E               | S692:      | 3 | 2,6009 | 0,219 | 0      |
| 5 | Q92974 ARHG2_HUMAN | R.EPALPLEPDSGGNTS#PGVTANGEAR.T         | S695:      | 3 | 3,6333 | 0,306 | 0,145  |
| 5 | Q8TEW0 PARD3_HUMAN | K.SPGS#PPGPELPIETALDDR.E               | S695:      | 2 | 3,2376 | 0,373 | -0,481 |
| 5 | Q9UMX3 BOK_HUMAN   | R.S#SVFAAEIM*DAFDR.S                   | S7:        | 2 | 3,4263 | 0,542 | -0,369 |
| 5 | P25205 MCM3_HUMAN  | K.DGDSYDPYDFS#DTEEM*PQVHT#PK.T         | S711:T722: | 3 | 4,3242 | 0,431 | -0,369 |
| 5 | P25205 MCM3_HUMAN  | K.DGDSYDPYDFS#DTEEMPQVHT#PK.T          | S711:T722: | 3 | 3,8394 | 0,208 | -0,247 |
| 5 | P26358 DNMT1_HUMAN | K.EADDDEEVDNIPEM*PS#PK.K               | S714:      | 3 | 3,8172 | 0,331 | 0,082  |
| 5 | Q9UPQ0 LIMC1_HUMAN | K.S#PEPEATLTFPFLDK.M                   | S718:      | 2 | 3,0056 | 0,381 | -0,551 |
| 5 | P40763 STAT3_HUMAN | K.FICVTPTCSNTIDLPM*S#PR.T              | S727:      | 3 | 4,3482 | 0,512 | 0,152  |
| 5 | P46019 KPB2_HUMAN  | K.S#LNLVDSPQPLEK.V                     | S729:      | 2 | 4,7087 | 0,475 | -0,075 |
| 5 | Q9UKI8 TLK1_HUMAN  | R.SNS#SGNLHM*AGLTASPTPPSSIITY.-        | S743:      | 3 | 3,551  | 0,303 | -0,681 |
| 5 | Q6NV74 CB055_HUMAN | R.NEVIAIESGPGVGYDS#EDELEESR.G          | S75:       | 3 | 5,1212 | 0,487 | -0,629 |
| 5 | A0FGR8 ESYT2_HUMAN | K.EPTPSIAS#DISLPIATQELR.Q              | S758:      | 3 | 4,0117 | 0,339 | -0,165 |
| 5 | Q96PE2 ARHGH_HUMAN | R.AATSEPTGFSVDSNLLGSL#PK.T             | S764:      | 3 | 4,0255 | 0,361 | -0,077 |
| 5 | Q86UE8 TLK2_HUMAN  | R.KSVSTSPAGAAIASTSGASNNS#SS#N.-        | S769:S771: | 3 | 3,3324 | 0,296 | -0,439 |
| 5 | Q8N5P1 ZC3H8_HUMAN | K.DYDVYS#DNDICSQESDNFAK.E              | S77:       | 3 | 3,3181 | 0,387 | -0,071 |
| 5 | O60307 MAST3_HUMAN | R.GPS#PSLLNTISLDTM*PK.F                | S774:      | 2 | 3,2974 | 0,442 | -0,457 |
| 5 | Q00536 PCTK1_HUMAN | K.M*GS#DGESDQASATSSDEVQSPVR.V          | S78:       | 3 | 4,8011 | 0,372 | 0,075  |
| 5 | P53367 ARFP1_HUMAN | K.EGVIEAGAFQGSAPPPLPSVM*S#PSR.V        | S79:       | 3 | 4,1107 | 0,446 | -0,142 |
| 5 | P05387 RLA2_HUMAN  | K.LASVPAGGAVAVSAAPGS#AAPAAGSAPAAAEEK.K | S79:       | 3 | 3,8466 | 0,248 | 0,833  |
| 5 | Q96GQ7 DDX27_HUMAN | R.S#ADFNPDFVFTEK.E                     | S79:       | 2 | 2,2207 | 0,275 | -0,229 |
| 5 | Q7Z460 CLAP1_HUMAN | R.VLSTS#TDLEAAVADALK.K                 | S797:      | 2 | 2,2383 | 0,426 | -0,547 |
| 5 | Q00536 PCTK1_HUMAN | K.MGSDGES#DQASATSSDEVQSPVR.V           | S82:       | 3 | 2,858  | 0,228 | -0,227 |

|   |                     |                                    |              |   |        |       |        |
|---|---------------------|------------------------------------|--------------|---|--------|-------|--------|
| 5 | O14976 GAK_HUMAN    | R.DES#EVSDEGGSPISSEGEPR.A          | S826:        | 3 | 3,6931 | 0,237 | 0,242  |
| 5 | Q9Y2H2 SAC2_HUMAN   | K.S#DSSLETM*ENTGVM*DK.V            | S827:        | 2 | 3,8457 | 0,509 | -0,394 |
| 5 | Q658Y4 F91A1_HUMAN  | R.SPS#SLLIANLHLQ.-                 | S828:        | 2 | 3,3087 | 0,329 | -0,331 |
| 5 | Q13561 DCTN2_HUMAN  | R.TGYES#GEYEM*LGEGLGVK.E           | S83:         | 2 | 3,706  | 0,481 | -0,424 |
| 5 | Q9Y5B0 CTDP1_HUMAN  | R.QPS#M*SETM*PLYTLCK.E             | S839:        | 2 | 2,2283 | 0,169 | 1,414  |
| 5 | Q13595 TRA2A_HUMAN  | R.S#RS#YT#PEYR.R                   | S84:S86:T88: | 2 | 2,4331 | 0,439 | -0,262 |
| 5 | Q5MIZ7 SMEK2_HUMAN  | K.GSLVGLVDYPDDEEEDEESS#PR.K        | S840:        | 3 | 4,0678 | 0,292 | -0,264 |
| 5 | Q70EL4 UBP43_HUMAN  | R.S#TSQSIVSLLTGAGEDEK.S            | S845:        | 3 | 3,126  | 0,279 | -0,183 |
| 5 | Q9HAW4 CLSPN_HUMAN  | K.LSEPSLPIEDSQDLYNAS#PEPK.T        | S846:        | 3 | 4,1071 | 0,217 | 0      |
| 5 | Q70EL4 UBP43_HUMAN  | R.STS#QSIVSLLTGAGEDEK.S            | S847:        | 2 | 4,8467 | 0,589 | -0,487 |
| 5 | Q6PKG0 LARP1_HUMAN  | R.TASIS#SSPSEGTPVGSYGCTPQSLPK.F    | S849:        | 3 | 3,342  | 0,278 | -0,198 |
| 5 | Q8IWI9 MGAP_HUMAN   | K.LM*ETSM*GFSSNAPTS#PVVYQLPTK.S    | S851:        | 3 | 2,7391 | 0,171 | -0,136 |
| 5 | Q05469 LIPS_HUMAN   | R.S#VSEAALAQPGPLGTDSLK.N           | S853:        | 2 | 3,3483 | 0,458 | -0,357 |
| 5 | Q8N328 PGBD3_HUMAN  | K.DDS#PDEVPSTFTVQQPPPSR.R          | S86:         | 3 | 3,9114 | 0,253 | 0,482  |
| 5 | Q8WVB6 CTF18_HUMAN  | R.VENSPQVDGS#PPGLELLGGIGE.K        | S871:        | 3 | 5,0523 | 0,463 | -0,151 |
| 5 | Q96HP0 DOCK6_HUMAN  | K.SISS#NPD LAVAPGSVDDEVSR.I        | S884:        | 3 | 3,2114 | 0,255 | 1,443  |
| 5 | Q9C0C2 TB182_HUMAN  | R.DS#LGAYASQDANEQQDLGK.R           | S893:        | 3 | 5,5121 | 0,512 | -0,17  |
| 5 | Q53EK9 Q53EK9_HUMAN | R.ADGAPSAAPPDGLLAS#PDLGLLK.L       | S90:         | 3 | 3,3862 | 0,281 | -0,164 |
| 5 | Q99614 TTC1_HUMAN   | K.SNEDVNSS#ELDEEYLIELEK.N          | S90:         | 3 | 3,2808 | 0,264 | -0,451 |
| 5 | Q9Y4H2 IRS2_HUMAN   | K.S#PGEYINIDFGEPGAR.L              | S915:        | 2 | 3,68   | 0,433 | -0,271 |
| 5 | Q5QP82 WDR32_HUMAN  | R.SGELGLPGAPESSTASAPGEPSPPS#PPCR.R | S92:         | 3 | 3,0237 | 0,354 | -0,255 |
| 5 | Q6S8J3 A26CA_HUMAN  | K.LCYVALDFEQEM*ATAASS#SSLEK.S      | S933:        | 3 | 6,176  | 0,51  | -0,207 |
| 5 | Q6S8J3 A26CA_HUMAN  | K.S#YELPDGQVITIGNER.F              | S939:        | 2 | 4,2435 | 0,326 | 0      |
| 5 | Q14814 MEF2D_HUMAN  | K.GFNGCDS#PEPDGDSLEQSPLLEDK.Y      | S98:         | 3 | 2,6913 | 0,186 | -0,455 |
| 5 | Q8WWI1 LMO7_HUMAN   | R.LPS#PTSPFSSLSQDQAATSK.A          | S988:        | 2 | 2,0959 | 0,573 | -0,115 |
| 5 | P13861 KAP2_HUMAN   | R.VS#VCAETYNPDEEEDTDPR.V           | S99:         | 3 | 3,7603 | 0,357 | 0,075  |
| 5 | P52948 NUP98_HUMAN  | K.ASLLT#DEEDVDM*ALDQR.F            | T1000:       | 2 | 4,1952 | 0,474 | -0,544 |
| 5 | P52948 NUP98_HUMAN  | K.ASLLT#DEEDVDM*ALDQR.F            | T1000:       | 3 | 4,1851 | 0,416 | -0,181 |
| 5 | O60749 SNX2_HUMAN   | R.EPILSSEPSPAVTPVT#PTTLIAPR.I      | T104:        | 3 | 3,6191 | 0,276 | -0,358 |
| 5 | Q9UQ35 SRRM2_HUMAN  | K.SST#PPGESYFGVSSSLQLK.G           | T1043:       | 3 | 6,0785 | 0,503 | 0,093  |
| 5 | Q9UQ35 SRRM2_HUMAN  | K.SST#PPGESYFGVSSSLQLK.G           | T1043:       | 2 | 4,4905 | 0,577 | -0,497 |
| 5 | P35251 RFC1_HUMAN   | R.QDPVTYISET#DEEDDFM*CK.K          | T110:        | 3 | 4,3036 | 0,491 | -0,076 |
| 5 | P20042 IF2B_HUMAN   | K.IESDVQEPT#EPEDLDLIM*LGNK.K       | T111:        | 3 | 4,7114 | 0,501 | -0,142 |

|   |                     |                                    |              |   |        |       |        |
|---|---------------------|------------------------------------|--------------|---|--------|-------|--------|
| 5 | O95239 KIF4A_HUMAN  | K.T#PPAPSPFDLPELK.H                | T1181:       | 2 | 3,611  | 0,497 | -0,307 |
| 5 | Q8WYG6 MADD_HUMAN   | R.GT#LSDSEIETNSATSTIFGK.A          | T1237:       | 2 | 4,5119 | 0,655 | -0,342 |
| 5 | P51608 MECP2_HUMAN  | K.VGDT#SLDPNDFDFTVTGR.G            | T148:        | 2 | 2,9358 | 0,506 | -0,539 |
| 5 | Q9H4Z3 PCIF1_HUMAN  | K.IEIPVTPTGQSVSPSSIPGTPT#LK.M      | T152:        | 3 | 3,0784 | 0,4   | -0,212 |
| 5 | Q9NQ57 INCE_HUMAN   | R.AAAAAAATM*ALAAPSSPTPESPTM*LT#K.K | T153:        | 3 | 4,6931 | 0,448 | 0,81   |
| 5 | Q969V6 MKL1_HUMAN   | R.VSEPLLSATSASPT#QVVSQPLM*GR.D     | T158:        | 3 | 3,2855 | 0,3   | 0      |
| 5 | Q5JSH3 WDR44_HUMAN  | K.LTQTSST#EQLNVLETETEVLNK.E        | T163:        | 3 | 5,0818 | 0,37  | -0,286 |
| 5 | Q3V6T2 GRDN_HUMAN   | K.T#GSPGSEVVTLLQQFLEESNK.L         | T1673:       | 3 | 5,3729 | 0,375 | -0,574 |
| 5 | P16144 ITB4_HUMAN   | R.LT#VPGLSENVVY#KFK.V              | T1702:Y1712: | 2 | 2,0375 | 0,157 | 1,911  |
| 5 | Q63HQ0 CD016_HUMAN  | R.LSSDAT#VLTPTNESSCDLM*TK.T        | T178:        | 3 | 2,7531 | 0,322 | 0,232  |
| 5 | P19105 MLRM_HUMAN   | R.AT#SNVFAMFDQSQIQEFK.E            | T18:         | 3 | 4,0536 | 0,397 | -0,253 |
| 5 | Q9UPU5 UBP24_HUMAN  | R.T#ISAQDTLAYATALLNEK.E            | T1809:       | 2 | 2,6296 | 0,608 | -0,792 |
| 5 | Q9UPU5 UBP24_HUMAN  | R.TISAQDT#LAYATALLNEK.E            | T1815:       | 3 | 3,887  | 0,377 | -0,183 |
| 5 | Q9BZD3 GRL1B_HUMAN  | R.VSSQAEDT#SSSFDNLFIDR.L           | T184:        | 3 | 3,1189 | 0,344 | -0,333 |
| 5 | P53350 PLK1_HUMAN   | K.T#LCGTPNYIAPEVLSK.K              | T210:        | 2 | 3,5883 | 0,449 | -0,199 |
| 5 | Q9UN86 G3BP2_HUMAN  | K.STT#PPPAEPVSLPQEPK.A             | T227:        | 3 | 3,2409 | 0,289 | 0,469  |
| 5 | Q9UN86 G3BP2_HUMAN  | K.STT#PPPAEPVSLPQEPK.A             | T227:        | 2 | 2,9715 | 0,416 | 0,438  |
| 5 | Q13153 PAK1_HUMAN   | R.DVATSPISPTENNTT#PPDALTR.N        | T230:        | 3 | 4,689  | 0,451 | 0      |
| 5 | Q96A65 EXOC4_HUMAN  | K.DASVPLIDVTNLPT#PR.K              | T237:        | 2 | 3,3604 | 0,425 | -0,273 |
| 5 | P53814 SMTN_HUMAN   | K.T#TSPEPQESPTLPSTEGQVVNK.L        | T243:        | 3 | 3,6472 | 0,295 | 0,152  |
| 5 | P55036 PSMD4_HUMAN  | R.AAAASAAEAGIATTGT#EDSDDALLK.M     | T253:        | 3 | 3,0487 | 0,252 | 0      |
| 5 | P17275 JUNB_HUMAN   | R.DAT#PPVSPINM*EDQER.I             | T255:        | 2 | 2,476  | 0,297 | -0,258 |
| 5 | O95359 TACC2_HUMAN  | R.M*SESPT#PCSGSSFEETEALVNTAAK.N    | T2571:       | 3 | 3,737  | 0,42  | 0,067  |
| 5 | A8K1N6 A8K1N6_HUMAN | K.AT#PPPSPLSELLK.K                 | T264:        | 3 | 2,9824 | 0,248 | -0,119 |
| 5 | Q9Y608 LRRF2_HUMAN  | R.GSGDT#SSLIDPDTLSSELR.D           | T331:        | 2 | 3,715  | 0,486 | -0,541 |
| 5 | Q9H330 CI005_HUMAN  | R.GESAPTLSTSPSPSPSPTSPT#LGR.R      | T334:        | 3 | 3,9563 | 0,493 | -0,069 |
| 5 | Q9UQ35 SRRM2_HUMAN  | R.SST#GPEPPAPTPLLAER.H             | T359:        | 2 | 3,1426 | 0,445 | -0,203 |
| 5 | Q02446 SP4_HUMAN    | K.T#SGSQDSQPSPLALLAATCSK.I         | T37:         | 3 | 3,206  | 0,135 | -0,499 |
| 5 | P55209 NP1L1_HUMAN  | R.QLT#VQM*M*QNPQILAALQER.L         | T39:         | 3 | 2,6058 | 0,135 | 0      |
| 5 | O75821 EIF3G_HUMAN  | K.GIPLATGDT#SPEPELLPGAPLPPK.E      | T41:         | 3 | 4,5705 | 0,441 | -0,216 |
| 5 | Q9UKV3 ACINU_HUMAN  | K.ASLVALPEQTASEEET#PPPLTK.E        | T414:        | 3 | 2,8036 | 0,142 | -0,146 |
| 5 | Q9UHR4 BI2L1_HUMAN  | K.LLEENETEAVTVPTSPPT#PVR.S         | T416:        | 3 | 3,6271 | 0,187 | 0,078  |
| 5 | P46108 CRK_HUMAN    | R.DSST#SPGDYVLSVENS.R.V            | T42:         | 2 | 4,6504 | 0,497 | -0,37  |

|   |                    |                                      |            |   |        |       |        |
|---|--------------------|--------------------------------------|------------|---|--------|-------|--------|
| 5 | Q9NPF5 DMAP1_HUMAN | K.DTIIDVVGAPLT#PNSR.K                | T445:      | 2 | 3,5895 | 0,352 | -0,209 |
| 5 | Q9Y2D5 AKAP2_HUMAN | R.SVNVSLT#QEELDSGLDELSVR.S           | T467:      | 3 | 3,1982 | 0,274 | -0,077 |
| 5 | Q9UK59 DBR1_HUMAN  | R.ILPGSM*IVSSDDT#VDSTIDR.E           | T482:      | 3 | 2,8032 | 0,199 | -0,083 |
| 5 | Q9BUR4 WDR79_HUMAN | R.VFPEPT#ESGDEGEELGLPLLSTR.H         | T489:      | 3 | 4,3575 | 0,385 | -0,502 |
| 5 | P27816 MAP4_HUMAN  | K.DM*SPLSET#EM*ALGK.D                | T512:      | 2 | 2,7026 | 0,334 | -0,151 |
| 5 | P27816 MAP4_HUMAN  | K.DVT#PPPETEVLK.N                    | T521:      | 3 | 3,9722 | 0,369 | -0,113 |
| 5 | P27816 MAP4_HUMAN  | K.DVT#PPPETEVLK.N                    | T521:      | 2 | 3,308  | 0,449 | 0      |
| 5 | Q8N8S7 ENAH_HUMAN  | K.ST#PLSQPSANGVQTEGLDYDR.L           | T538:      | 3 | 3,1761 | 0,298 | 0,237  |
| 5 | Q13263 TIF1B_HUMAN | R.GAAAAATGQPGTAPAGT#PGAPPLAGM*AIVK.E | T541:      | 3 | 3,9476 | 0,33  | -0,206 |
| 5 | Q96KQ7 EHMT2_HUMAN | R.GDGVTP#PPAGTAAPPPPLSQDVPGR.A       | T555:      | 3 | 3,1502 | 0,282 | 0,456  |
| 5 | Q09666 AHNK_HUMAN  | R.EFSGPSTPT#GTLEFEGGEVSLEGK.V        | T5796:     | 3 | 5,894  | 0,463 | -0,565 |
| 5 | P55209 NP1L1_HUMAN | R.LDGLVET#PTGYIESLPR.V               | T62:       | 3 | 4,5879 | 0,489 | -0,094 |
| 5 | P55209 NP1L1_HUMAN | R.LDGLVET#PTGYIESLPR.V               | T62:       | 2 | 3,5879 | 0,489 | -0,314 |
| 5 | P35221 CTNA1_HUMAN | R.T#PEELDDSDFETEDFDVR.S              | T634:      | 3 | 2,966  | 0,151 | 0,082  |
| 5 | Q99607 ELF4_HUMAN  | R.SPT#PAPFSPFNPTSLIK.M               | T643:      | 2 | 3,1164 | 0,401 | -0,324 |
| 5 | Q96S44 PRPK_HUMAN  | R.ATT#PADGEEPAPEAEALAAAR.E           | T8:        | 3 | 3,559  | 0,435 | 0      |
| 5 | Q9Y2H0 DLGP4_HUMAN | R.QNSAT#ESADSIYVPEAQTR.L             | T972:      | 3 | 3,4346 | 0,389 | 0      |
| 5 | Q9BTE3 CJ119_HUMAN | R.SY#EDDDDM*DLQPNK.Q                 | Y168:      | 2 | 2,0686 | 0,295 | -0,548 |
| 5 | Q15942 ZYX_HUMAN   | R.VSSGY#VPPPVATPFSSK.S               | Y172:      | 2 | 2,5321 | 0,327 | 0,068  |
| 5 | P20020 AT2B1_HUMAN | K.Y#GDLLPADGILIQGNDLK.I              | Y220:      | 2 | 3,6041 | 0,432 | -0,245 |
| 5 | Q9P0V3 SH3B4_HUMAN | R.SY#SLSLSVLQAK.S                    | Y245:      | 2 | 3,756  | 0,492 | -0,162 |
| 5 | Q9NZJ4 SACS_HUMAN  | R.Y#ASNVCFTTLGTEFGQK.E               | Y2509:     | 2 | 4,0222 | 0,583 | -0,244 |
| 5 | P61978 HNRPK_HUMAN | R.GSY#GDLGGPIITTQVTIPK.D             | Y380:      | 2 | 4,488  | 0,443 | -0,367 |
| 5 | Q8WXH0 SYNE2_HUMAN | R.GSM*SY#LAAVEEEVEESSVK.S            | Y4111:     | 3 | 6,5507 | 0,516 | -0,342 |
| 5 | Q15418 KS6A1_HUMAN | R.AENGLLM*TPCY#TANFVAPEVLK.R         | Y576:      | 3 | 3,9569 | 0,404 | -0,505 |
| 5 | Q7Z460 CLAP1_HUMAN | K.VSSSGTTPFSSAAALPPGSY#ASLGR.I       | Y634:      | 3 | 3,3999 | 0,22  | -0,072 |
| 5 | P25205 MCM3_HUMAN  | K.DGDSYDPY#DFSDTEEM*PQVHT#PK.T       | Y708:T722: | 3 | 4,7304 | 0,421 | -0,307 |
| 5 | Q53EZ4 CEP55_HUMAN | R.Y#STTALLEQLEETTR.E                 | Y95:       | 2 | 2,0657 | 0,108 | -0,332 |
| 5 | Q9P2D0 IBTK_HUMAN  | R.SDSSGGY#NLSDIIQSPSSTGLLK.S         | Y996:      | 3 | 5,7421 | 0,344 | -0,228 |
| 5 | P54727 RD23B_HUMAN | K.NENLAANFLLQQNFDED.-                |            | 2 | 4,7666 | 0,532 | -0,612 |
| 5 | P23588 IF4B_HUMAN  | K.YAALSVDGEDENEGEDYAE.-              |            | 2 | 3,6642 | 0,637 | 0      |
| 5 | Q9HC35 EMAL4_HUMAN | K.ATLLEDQQDPSPSS.-                   |            | 2 | 3,1698 | 0,427 | -0,082 |
| 5 | O15372 EIF3H_HUMAN | K.LFM*AQALQEYNN.-                    |            | 2 | 3,1452 | 0,459 | 0,167  |

|   |                      |                                |            |   |        |       |        |
|---|----------------------|--------------------------------|------------|---|--------|-------|--------|
| 5 | P07355 ANXA2_HUMAN   | K.ALLYLCCGGDD.-                |            | 2 | 2,9552 | 0,487 | -0,222 |
| 5 | Q9BTT0 AN32E_HUMAN   | R.DAEDDGEEDD.-                 |            | 2 | 2,8861 | 0,438 | -0,295 |
| 5 | A8K4V4 A8K4V4_HUMAN  | R.EVQDPAPAQVQAQ.-              |            | 2 | 2,8783 | 0,401 | -0,177 |
| 5 | P35268 RL22_HUMAN    | R.YFQINQDEEEEEDED.-            |            | 2 | 2,844  | 0,489 | -0,063 |
| 5 | P67809 YBOX1_HUMAN   | K.AADPPAENSAPAEQGGAE.-         |            | 3 | 2,7836 | 0,245 | -0,193 |
| 5 | P54727 RD23B_HUMAN   | K.NENLAANFLLQQNFDED.-          |            | 3 | 2,6986 | 0,173 | -0,275 |
| 5 | P09525 ANXA4_HUMAN   | K.VLLVLCGGDD.-                 |            | 2 | 2,6518 | 0,425 | -0,115 |
| 5 | P54725 RD23A_HUMAN   | K.NENLAANFLLSQNFDE.-           |            | 3 | 2,638  | 0,118 | -0,749 |
| 5 | Q86VP6 CAND1_HUMAN   | K.DSSSTNLESMDTS.-              |            | 2 | 2,6351 | 0,477 | -0,71  |
| 5 | O75436 VP26A_HUMAN   | R.FESPESQASAEQPEM*.-           |            | 2 | 2,6291 | 0,27  | 0,435  |
| 5 | Q9UBG0 MRC2_HUMAN    | K.NILVSDM*EM*NEQQE.-           |            | 2 | 2,5076 | 0,342 | -0,285 |
| 5 | P00558 PGK1_HUMAN    | K.VLPGVDALSNI.-                |            | 2 | 2,5008 | 0,334 | -0,111 |
| 5 | Q9UQ80 PA2G4_HUMAN   | K.TAENATSGETLEENEAGD.-         |            | 2 | 2,4684 | 0,321 | -0,332 |
| 5 | O60831 PRAF2_HUMAN   | R.TPM*GLLLEALGQEQEAGS.-        |            | 2 | 2,4415 | 0,471 | -0,131 |
| 5 | A6NJL0 A6NJL0_HUMAN  | R.M*LDQTLIDLNEM*.-             |            | 2 | 2,3594 | 0,259 | 0      |
| 5 | ##Q02809 PLOD1_HUMAN | K.EPDLFIK.T                    |            | 2 | 2,2841 | 0,104 | 0,142  |
| 5 | Q86VP6 CAND1_HUMAN   | K.DSSSTNLESMDTS.-              |            | 2 | 2,1814 | 0,456 | -0,439 |
| 5 | Q8N884 CF150_HUMAN   | R.NNEFPVFDEF.-                 |            | 2 | 2,1791 | 0,49  | -0,097 |
| 5 | P08758 ANXA5_HUMAN   | K.ALLLLCGEDD.-                 |            | 2 | 2,1213 | 0,426 | -0,109 |
| 5 | P61247 RS3A_HUMAN    | R.ADGYEPPVQESV.-               |            | 2 | 2,113  | 0,448 | 0,095  |
| 5 | P62937 PIIA_HUMAN    | K.ITIADCGQLE.-                 |            | 2 | 2,1035 | 0,12  | 0      |
| 5 | O75155 CAND2_HUMAN   | K.DSASAPSTDSM*ELS.-            |            | 2 | 2,0902 | 0,353 | -0,345 |
| 5 | Q96B49 OBTP_HUMAN    | R.NLSDIDLIM*APQPGV.-           |            | 2 | 2,0157 | 0,355 | -0,246 |
| 6 | Q9H3Z4 DNJC5_HUMAN   | R.SLS#TSGES#LYHVLGLDK.N        | S10:S15:   | 3 | 3,2286 | 0,323 | -0,186 |
| 6 | O95251 MYST2_HUMAN   | R.SS#GSETEQVVDSDR.E            | S100:      | 2 | 4,339  | 0,508 | -0,212 |
| 6 | Q01433 AMPD2_HUMAN   | R.S#LPGPAPCLK.H                | S100:      | 2 | 2,5645 | 0,287 | -0,109 |
| 6 | Q9ULJ3 ZN295_HUMAN   | K.IQPLEPDS#PTGLSENPTPATEK.L    | S1003:     | 3 | 4,5637 | 0,569 | 0      |
| 6 | O43314 VIP2_HUMAN    | R.S#GEQITSSPVSPK.S             | S1006:     | 2 | 3,539  | 0,436 | -0,262 |
| 6 | P05386 RLA1_HUMAN    | K.KEES#EES#DDDM*GFGLFD.-       | S101:S104: | 2 | 4,539  | 0,654 | -0,574 |
| 6 | P17096 HMGA1_HUMAN   | K.KLEKEEEEGISQES#S#EEEQ.-      | S102:S103: | 3 | 4,3104 | 0,31  | -0,382 |
| 6 | Q8WWI1 LMO7_HUMAN    | K.ATLSSTSGLDLM*SESGEGEIS#PQR.E | S1026:     | 3 | 5,1291 | 0,511 | -0,072 |
| 6 | Q8NB46 ANR52_HUMAN   | K.DAVS#PFSFLLK.N               | S1028:     | 2 | 2,2519 | 0,271 | -0,526 |
| 6 | O75122 CLAP2_HUMAN   | R.DYNPNYSDSIS#PFNK.S           | S1029:     | 2 | 3,7917 | 0,522 | -0,304 |



|   |                     |                                   |        |   |        |       |        |
|---|---------------------|-----------------------------------|--------|---|--------|-------|--------|
| 6 | O95155 UBE4B_HUMAN  | R.S#QSM*DIGVSCEK.S                | S103:  | 2 | 2,2533 | 0,215 | 0,236  |
| 6 | O14980 XPO1_HUMAN   | K.EFAGEDTS#DLFLEER.E              | S1031: | 2 | 4,1393 | 0,534 | -0,398 |
| 6 | Q8IZL8 PELP1_HUMAN  | R.GADTAPTLAPEALPS#QGEVER.E        | S1033: | 3 | 2,9339 | 0,117 | -0,084 |
| 6 | P18754 RCC1_HUMAN   | R.DTS#VEGSEM*VPGK.V               | S104:  | 2 | 3,0501 | 0,462 | -0,682 |
| 6 | Q9UQ35 SRRM2_HUMAN  | K.S#STPPGESYFGVSSLQLK.G           | S1041: | 2 | 4,5739 | 0,541 | -0,559 |
| 6 | Q9UQ35 SRRM2_HUMAN  | K.S#STPPGESYFGVSSLQLK.G           | S1041: | 3 | 4,1492 | 0,379 | 0,093  |
| 6 | Q6DN90 IQEC1_HUMAN  | R.S#LSESYELSSDLQDK.Q              | S105:  | 2 | 4,1468 | 0,563 | -0,343 |
| 6 | Q6P1L5 AL2SC_HUMAN  | R.TS#PTVATQTGASATSTR.G            | S106:  | 2 | 3,1839 | 0,485 | -0,213 |
| 6 | Q5TDH0 DDI2_HUMAN   | R.IDFSSIAVPGTSS#PR.Q              | S106:  | 2 | 2,4701 | 0,319 | -0,076 |
| 6 | Q5VT52 K0460_HUMAN  | R.VS#SSCLDLPDSTEEK.G              | S1068: | 2 | 4,6752 | 0,467 | -0,349 |
| 6 | Q09666 AHNK_HUMAN   | K.M*S#LPDVDLDLK.G                 | S1068: | 2 | 2,5504 | 0,283 | -0,091 |
| 6 | Q5VZK9 LR16A_HUMAN  | K.SS#GFLNLIK.S                    | S1068: | 2 | 2,4086 | 0,083 | -0,346 |
| 6 | Q96HN2 SAHH3_HUMAN  | R.DGGEALVS#PDGTVTEAPR.T           | S107:  | 2 | 5,0021 | 0,436 | -0,198 |
| 6 | Q13428 TCOF_HUMAN   | R.LAS#TNSSVLGADLPSSM*K.E          | S107:  | 2 | 4,4442 | 0,573 | -0,26  |
| 6 | B2CI53 B2CI53_HUMAN | K.YSVDPS#IVNISDEM*AK.T            | S1073: | 3 | 4,5028 | 0,44  | 0      |
| 6 | B2CI53 B2CI53_HUMAN | K.YSVDPS#IVNISDEM*AK.T            | S1073: | 2 | 3,635  | 0,498 | -0,262 |
| 6 | Q96SN8 CK5P2_HUMAN  | K.ENPEDVLS#PTSVATYLSSK.S          | S1074: | 2 | 3,2703 | 0,452 | -0,461 |
| 6 | Q8NG31 CASC5_HUMAN  | K.DVQS#PGFLNEPLSSK.S              | S1076: | 2 | 3,52   | 0,397 | 0,144  |
| 6 | Q7Z2Z1 CO042_HUMAN  | K.SLLFGAM*SEM*IS#PSEK.G           | S1078: | 2 | 3,749  | 0,473 | -0,398 |
| 6 | Q86VQ1 GLCI1_HUMAN  | R.GPSPSS#PTPPAAAAAEQAPR.A         | S108:  | 3 | 2,7961 | 0,17  | -0,359 |
| 6 | O75152 ZC11A_HUMAN  | K.TVLPTVPES#PEEEVK.A              | S108:  | 2 | 2,718  | 0,24  | -0,493 |
| 6 | Q9UQE7 SMC3_HUMAN   | R.GSGS#QSSVPSVDQFTGVGIR.V         | S1083: | 2 | 2,934  | 0,405 | -0,537 |
| 6 | P31629 ZEP2_HUMAN   | R.QAS#FSGSPEISQGEVGM*DQSVK.Q      | S1085: | 3 | 3,2132 | 0,368 | 0      |
| 6 | Q63HJ5 Q63HJ5_HUMAN | R.GSALSQLSFEVGAPM*S#PK.M          | S1090: | 2 | 2,3521 | 0,301 | 0      |
| 6 | Q9UNL2 SSRG_HUMAN   | K.QQS#EEDLLLQDFSR.N               | S11:   | 3 | 3,8355 | 0,134 | -0,307 |
| 6 | Q9UNL2 SSRG_HUMAN   | K.QQS#EEDLLLQDFSR.N               | S11:   | 2 | 2,4346 | 0,166 | 0,205  |
| 6 | Q9UH62 ARMX3_HUMAN  | R.AS#PNSDDTVLSPQELQK.V            | S110:  | 2 | 5,1247 | 0,454 | -0,192 |
| 6 | Q7Z5J4 RAI1_HUMAN   | K.AAS#SPSNPAALPVASDSSPM*GSK.T     | S1107: | 3 | 3,8061 | 0,381 | -0,082 |
| 6 | Q13428 TCOF_HUMAN   | R.TQPSSGVDSAVGTLPATSP#PQSTSVQAK.G | S1111: | 3 | 3,8546 | 0,317 | -0,205 |
| 6 | Q5SW79 CE170_HUMAN  | R.LGEAS#DSELADADK.A               | S1112: | 2 | 4,5875 | 0,541 | -0,163 |
| 6 | Q8N573 OXR1_HUMAN   | R.VVS#STSEEEAFTEK.F               | S112:  | 2 | 4,2478 | 0,62  | -0,905 |
| 6 | Q3KQU3 MA7D1_HUMAN  | R.S#SQPSPTAVPASDSPPTK.Q           | S112:  | 3 | 3,0838 | 0,26  | -0,199 |
| 6 | Q7Z5J4 RAI1_HUMAN   | K.AASSPSNPAALPVASDSSPM*GS#K.T     | S1126: | 3 | 3,3704 | 0,287 | -0,164 |

|   |                    |                                  |              |   |        |       |        |
|---|--------------------|----------------------------------|--------------|---|--------|-------|--------|
| 6 | Q15185 TEBP_HUMAN  | K.DWEDDS#DEDM*SNFDR.F            | S113:        | 2 | 5,9672 | 0,583 | -0,371 |
| 6 | Q15185 TEBP_HUMAN  | K.DWEDDS#DEDMSNFDR.F             | S113:        | 2 | 5,7982 | 0,539 | -0,25  |
| 6 | Q3KQU3 MA7D1_HUMAN | R.SS#QPSPTAVPASDSPPTK.Q          | S113:        | 2 | 3,024  | 0,447 | -0,466 |
| 6 | P18615 NELFE_HUMAN | R.S#ISADDDLQESSR.R               | S113:        | 2 | 2,0247 | 0,089 | -0,325 |
| 6 | Q9P035 PTAD1_HUMAN | R.WLDES#DAEM*ELR.A               | S114:        | 2 | 4,3976 | 0,512 | -0,077 |
| 6 | Q9UNZ2 NSF1C_HUMAN | K.S#PNELVDDLFK.G                 | S114:        | 2 | 2,8563 | 0,375 | -0,36  |
| 6 | Q9UQ35 SRRM2_HUMAN | R.FQSDSSS#YPTVDSNSLLGQSR.L       | S1144:       | 3 | 3,7997 | 0,389 | -0,311 |
| 6 | Q641Q2 FA21A_HUMAN | R.GEADLFDSGDIFSTGTGSQS#VER.T     | S1144:       | 3 | 3,7147 | 0,327 | -0,149 |
| 6 | Q09666 AHNK_HUMAN  | R.EVFSSCSSEVVLS#GDDEEYQR.I       | S115:        | 3 | 5,6096 | 0,429 | 0,146  |
| 6 | Q32MZ4 LRRF1_HUMAN | R.NM*PGLSAATLASLGGTS#SR.R        | S115:        | 2 | 4,3391 | 0,597 | -0,259 |
| 6 | Q8TEP8 CE192_HUMAN | K.GEVISS#GSKPLS#PGPCLDIPSILSNK.Q | S1153:S1159: | 3 | 3,5995 | 0,362 | -0,52  |
| 6 | P11137 MAP2_HUMAN  | K.ETS#PESSLIQDEIAVK.L            | S1155:       | 2 | 3,9213 | 0,516 | -0,2   |
| 6 | P49815 TSC2_HUMAN  | R.VGALDVPASQFLGSATS#PGPR.T       | S1155:       | 3 | 3,5518 | 0,294 | -0,174 |
| 6 | Q8N3X1 FNBP4_HUMAN | K.ATGGLCLLGAYADS#DDDDNDVSEK.L    | S116:        | 3 | 5,3993 | 0,449 | 0,071  |
| 6 | P22466 GALA_HUMAN  | R.LLDLPAAS#SEDIERS.-             | S116:        | 2 | 4,1393 | 0,463 | -0,414 |
| 6 | Q32MZ4 LRRF1_HUMAN | R.NM*PGLSAATLASLGGTSS#R.R        | S116:        | 3 | 3,0695 | 0,193 | -0,194 |
| 6 | Q86SQ4 GP126_HUMAN | K.S#LSSSIGSNSTYLTSK.S            | S1160:       | 2 | 4,9655 | 0,505 | -0,136 |
| 6 | Q5T1M5 FKB15_HUMAN | R.SSL#GDEEDELFK.G                | S1164:       | 2 | 3,7662 | 0,497 | 0      |
| 6 | Q92766 RREB1_HUMAN | R.ANS#GGVDLDSSGEFASIEK.M         | S1167:       | 2 | 7,1634 | 0,63  | -0,249 |
| 6 | Q9UPW5 CBPC1_HUMAN | K.VTS#PTTYVLDEDEPR.F             | S1168:       | 2 | 3,2147 | 0,463 | 0,068  |
| 6 | Q9UQ35 SRRM2_HUMAN | K.M*ALPPQEDATAS#PPR.Q            | S1179:       | 3 | 4,0863 | 0,448 | 0      |
| 6 | Q9UQ35 SRRM2_HUMAN | K.M*ALPPQEDATAS#PPR.Q            | S1179:       | 2 | 3,1666 | 0,487 | -0,073 |
| 6 | Q92785 REQU_HUMAN  | K.EGLISQDGSS#LEALLR.T            | S118:        | 2 | 2,4387 | 0,361 | 0,138  |
| 6 | O14497 ARI1A_HUMAN | R.S#NSVGIQDAFNDGSDSTFQK.R        | S1182:       | 3 | 6,0163 | 0,545 | -0,167 |
| 6 | Q8WW12 PCNP_HUMAN  | K.TLSVAAAFNEDEDS#EPEEM*PPEAK.M   | S119:        | 3 | 5,5482 | 0,482 | 0,203  |
| 6 | Q15390 MTFR1_HUMAN | R.QIS#LPDLSQEELQK.T              | S119:        | 2 | 3,2806 | 0,407 | -0,541 |
| 6 | Q27J81 INF2_HUMAN  | K.S#FSEDAVTDSSSGTLPR.A           | S1192:       | 2 | 5,6009 | 0,608 | 0      |
| 6 | P20020 AT2B1_HUMAN | R.IEDS#EPHIPLIDDT#DAEDDAPTK.R    | S1193:T1203: | 3 | 5,2477 | 0,52  | -0,339 |
| 6 | Q719H9 KCTD1_HUMAN | R.SPAS#PLNNQGIPTPAQLTK.S         | S12:         | 2 | 3,2255 | 0,514 | -0,182 |
| 6 | Q8NI35 INADL_HUMAN | K.ALTDSS#DENEEDAFTDQK.I          | S1212:       | 3 | 5,8646 | 0,455 | -0,081 |
| 6 | Q9C0J8 WDR33_HUMAN | R.SS#SLQGM*DM*ASLPPR.K           | S1218:       | 2 | 2,8014 | 0,415 | 0,072  |
| 6 | Q9C0J8 WDR33_HUMAN | R.SSS#LQGM*DM*ASLPPR.K           | S1219:       | 3 | 3,7663 | 0,217 | 0      |
| 6 | Q9C0J8 WDR33_HUMAN | R.SSS#LQGM*DM*ASLPPR.K           | S1219:       | 2 | 2,6236 | 0,333 | -0,433 |

|   |                     |                                    |        |   |        |       |        |
|---|---------------------|------------------------------------|--------|---|--------|-------|--------|
| 6 | Q92870 APBB2_HUMAN  | K.NLS#PTAVINITSEK.L                | S123:  | 2 | 3,157  | 0,461 | -0,234 |
| 6 | Q9BRG2 SH23A_HUMAN  | R.S#FSEDTLM*DGPARG.I               | S123:  | 2 | 2,0204 | 0,287 | 0,08   |
| 6 | Q01814 AT2B2_HUMAN  | K.SATSS#SPGSPHISLETSL.-            | S1230: | 2 | 2,273  | 1     | -0,332 |
| 6 | Q01814 AT2B2_HUMAN  | K.SATSSSPGS#PIHSLETSL.-            | S1234: | 2 | 4,4791 | 1     | -0,664 |
| 6 | Q9UKA4 AKA11_HUMAN  | R.SVS#PTFLNPSDENLK.T               | S1242: | 2 | 3,1269 | 0,403 | 0      |
| 6 | Q92797 SYMPK_HUMAN  | R.S#PQTLAPVGEDAM*K.T               | S1243: | 2 | 3,4245 | 0,348 | 0,079  |
| 6 | Q92797 SYMPK_HUMAN  | R.S#PQTLAPVGEDAM*K.T               | S1243: | 3 | 2,6005 | 0,28  | 0,238  |
| 6 | Q3T8J9 GON4L_HUMAN  | K.LEPQELS#PLSATVFPK.V              | S1255: | 2 | 4,1334 | 0,477 | -0,266 |
| 6 | O15534 PER1_HUMAN   | K.ASSS#QDLAM*EEEEEGR.S             | S1263: | 2 | 3,5477 | 0,347 | 0,458  |
| 6 | Q07890 SOS2_HUMAN   | R.DISTCPNSPSTPPSTPS#PR.V           | S1267: | 2 | 2,398  | 0,522 | -0,352 |
| 6 | Q8N350 DOS_HUMAN    | R.VS#FNEAALFEQSR.K                 | S127:  | 2 | 4,1515 | 0,517 | -0,309 |
| 6 | P07355 ANXA2_HUMAN  | K.GLGTDEDS#LIEIICSR.T              | S127:  | 2 | 3,1892 | 0,245 | -0,066 |
| 6 | Q7Z6E9 RBBP6_HUMAN  | K.VTGTEGSSSTLVDTSTSSSTGGS#PVR.K    | S1277: | 3 | 5,4961 | 0,596 | 0      |
| 6 | P51523 ZNF84_HUMAN  | K.SNS#EGDLGLILK.H                  | S128:  | 2 | 4,5123 | 0,467 | -0,254 |
| 6 | Q9H7D0 DOCK5_HUMAN  | K.DS#YYVYTQQELK.E                  | S1287: | 2 | 2,4345 | 0,416 | -0,226 |
| 6 | Q8WXI9 P66B_HUMAN   | R.LTPSPDIIVLS#DNEASSPR.S           | S129:  | 3 | 3,806  | 0,355 | 0,175  |
| 6 | Q96RK0 CIC_HUMAN    | R.GEPPTPPS#PAPAPAVAPGGSSESSGR.A    | S1294: | 3 | 3,4929 | 0,284 | 0,145  |
| 6 | Q09666 AHNK_HUMAN   | K.VDVEVPDVS#LEGPEGK.L              | S1298: | 2 | 3,0892 | 0,476 | -0,349 |
| 6 | P07948 LYN_HUMAN    | K.DSL#DDGVDLK.T                    | S13:   | 2 | 3,3067 | 0,183 | 0      |
| 6 | Q14160 LAP4_HUMAN   | K.M*AESPCSPSGQQPPSPPS#PDEL PANVK.Q | S1309: | 3 | 2,9014 | 0,325 | -0,063 |
| 6 | Q9BYW2 SETD2_HUMAN  | K.M*EIGDTLSTAEISS#PPK.S            | S131:  | 2 | 4,645  | 0,573 | -0,452 |
| 6 | O60341 LSD1_HUMAN   | R.EM*DESLANLS#EDEYSEEER.N          | S131:  | 3 | 3,8483 | 0,411 | -0,144 |
| 6 | P18615 NELFE_HUMAN  | K.S#LYESFVSSDR.L                   | S131:  | 2 | 3,3282 | 0,47  | -0,251 |
| 6 | Q9P0V3 SH3B4_HUMAN  | R.NSTLSDSGM*IDNLPDS#PDEVAK.E       | S131:  | 3 | 3,2937 | 0,25  | -0,152 |
| 6 | A2RUU9 A2RUU9_HUMAN | K.TGS#DFSM*FEALR.D                 | S1318: | 2 | 3,6149 | 0,49  | -0,168 |
| 6 | Q9NTI5 PDS5B_HUMAN  | K.S#GPPAPEEEEEER.Q                 | S1319: | 2 | 2,2193 | 0,422 | -0,44  |
| 6 | Q6P158 DHX57_HUMAN  | R.GLS#GEEEDDEPDCCNDER.Y            | S132:  | 3 | 4,6011 | 0,395 | 0,083  |
| 6 | P39880 CUX1_HUMAN   | R.ELFIEIQAGSQGAGASDS#PSAR.S        | S1321: | 3 | 5,9778 | 0,615 | -0,145 |
| 6 | Q8IY17 PLPL6_HUMAN  | R.DEGGS#PEGASPSTASEM*EEEK.S        | S1330: | 3 | 4,3302 | 0,403 | -0,247 |
| 6 | Q96PE2 ARHG_HUMAN   | R.SSM*S#LYTAASVIDTASK.Y            | S1333: | 2 | 2,8107 | 0,363 | -0,267 |
| 6 | Q96T23 RSF1_HUMAN   | R.IES#DEEEDFENVGK.V                | S1335: | 2 | 5,0622 | 0,567 | -0,284 |
| 6 | Q8IY17 PLPL6_HUMAN  | R.DEGGSPEGAS#PSTASEM*EEEK.S        | S1335: | 3 | 4,9954 | 0,306 | -0,494 |
| 6 | Q96T23 RSF1_HUMAN   | R.IES#DEEEDFENVGK.V                | S1335: | 3 | 4,1732 | 0,505 | 0,319  |

|   |                    |                                  |              |   |        |       |        |
|---|--------------------|----------------------------------|--------------|---|--------|-------|--------|
| 6 | P11388 TOP2A_HUMAN | K.FTM*DLSDSEDFS#DFDEK.T          | S1337:       | 2 | 2,3586 | 0,376 | -0,34  |
| 6 | Q7Z3K3 POGZ_HUMAN  | R.SFLVASVLPDPGNINS#PTR.N         | S1338:       | 3 | 3,6974 | 0,206 | -0,172 |
| 6 | Q7Z3K3 POGZ_HUMAN  | R.SFLVASVLPDPGNINS#PTR.N         | S1338:       | 2 | 2,5934 | 0,422 | -0,69  |
| 6 | Q8WXI9 P66B_HUMAN  | R.LTPSPDIIVLSDNEASS#PR.S         | S135:        | 3 | 3,3165 | 0,313 | 0      |
| 6 | Q9NTI5 PDS5B_HUMAN | R.AES#PESSAIESTQSTPQK.G          | S1358:       | 2 | 4,3274 | 0,585 | -0,312 |
| 6 | Q5VZK9 LR16A_HUMAN | K.SNDS#GEEAEKEFIV.-              | S1360:       | 2 | 2,9042 | 0,438 | -0,48  |
| 6 | O75396 SC22B_HUMAN | R.NLGS#INTELQDVQR.I              | S137:        | 2 | 5,2658 | 0,547 | -0,293 |
| 6 | Q7Z4V5 HDGR2_HUMAN | R.GVM*AVTAVTATAAS#DR.M           | S137:        | 2 | 4,6129 | 0,583 | -0,075 |
| 6 | P49023 PAXI_HUMAN  | K.SAEPSPTVM*STS#LGSNLSELDR.L     | S137:        | 3 | 4,1971 | 0,442 | -0,077 |
| 6 | Q9P0T7 TMEM9_HUMAN | R.S#M*AAAAASLGGPR.A              | S137:        | 2 | 3,4972 | 0,424 | -0,291 |
| 6 | O15320 CTGE5_HUMAN | R.S#NSELEDEILCLEK.E              | S137:        | 3 | 3,1304 | 0,292 | -0,624 |
| 6 | Q7Z5J4 RAI1_HUMAN  | K.GAGGS#PVGVEEGLVNVGTGQK.L       | S1374:       | 2 | 4,0977 | 0,539 | -0,123 |
| 6 | P11388 TOP2A_HUMAN | K.S#VVSLEADDVK.G                 | S1374:       | 2 | 3,9159 | 0,516 | -0,09  |
| 6 | Q7Z5J4 RAI1_HUMAN  | K.GAGGS#PVGVEEGLVNVGTGQK.L       | S1374:       | 3 | 3,2214 | 0,238 | 0,092  |
| 6 | Q9UPN3 MACF1_HUMAN | R.M*LS#SSDAITQEFM*DLR.T          | S1376:       | 2 | 4,3448 | 0,591 | -0,437 |
| 6 | Q9UPN3 MACF1_HUMAN | R.M*LS#SDAITQEFM*DLR.T           | S1377:       | 3 | 3,1649 | 0,238 | -0,094 |
| 6 | P11388 TOP2A_HUMAN | K.SVVS#DLEADDVK.G                | S1377:       | 2 | 2,9568 | 0,42  | -0,18  |
| 6 | P46821 MAP1B_HUMAN | R.ASVS#PM*DEVPDSESPIEK.V         | S1378:       | 2 | 2,4534 | 0,337 | -0,231 |
| 6 | Q5VTR2 BRE1A_HUMAN | K.ALVVPEPEPDS#NQER.K             | S138:        | 2 | 2,1488 | 0,326 | -0,56  |
| 6 | P42695 CNDD3_HUMAN | R.SLGVLPFTLNSGS#PEK.T            | S1384:       | 2 | 4,2888 | 0,482 | -0,566 |
| 6 | P49815 TSC2_HUMAN  | K.SSSS#PELQTLQDILGDPGDK.A        | S1388:       | 3 | 3,2692 | 0,324 | -0,422 |
| 6 | P46821 MAP1B_HUMAN | R.ASVSPM*DEVPDSES#PIEK.V         | S1389:       | 2 | 2,7897 | 0,414 | -0,463 |
| 6 | O15320 CTGE5_HUMAN | R.SNS#ELEDEILCLEK.E              | S139:        | 2 | 4,7537 | 0,599 | -0,624 |
| 6 | O43597 SPY2_HUMAN  | R.LLGSS#FSSGPVADGIIR.V           | S139:        | 2 | 4,0392 | 0,549 | -0,486 |
| 6 | Q02952 AKA12_HUMAN | K.EVSS#LEGSPPPCLGQEEAVCTK.I      | S1391:       | 3 | 4,7484 | 0,429 | 0      |
| 6 | Q02952 AKA12_HUMAN | K.EVSSLEGS#PPPCLGQEEAVCTK.I      | S1395:       | 3 | 4,5297 | 0,374 | -0,149 |
| 6 | P46821 MAP1B_HUMAN | K.VLS#PLRS#PPLIGSESAYESFLSADDK.A | S1396:S1400: | 3 | 3,1096 | 0,314 | -0,498 |
| 6 | Q9Y2U8 MAN1_HUMAN  | K.VLLGFS#SDESDEVASPR.D           | S140:        | 2 | 4,9458 | 0,516 | -0,323 |
| 6 | Q8NE71 ABCF1_HUMAN | K.GGNVFAALIQQDS#EEEEEEK.H        | S140:        | 3 | 3,9001 | 0,251 | -0,527 |
| 6 | Q9HCK8 CHD8_HUMAN  | R.VLDNFS#DIVEGVDFDK.D            | S1400:       | 2 | 2,8516 | 0,267 | -0,193 |
| 6 | Q13009 TIAM1_HUMAN | K.TES#LPSSQQYVPFGGK.R            | S1407:       | 2 | 4,3206 | 0,397 | -0,135 |
| 6 | O43432 IF4G3_HUMAN | K.LDFIESDS#PCSSEALSK.K           | S1409:       | 2 | 5,8795 | 0,515 | -0,435 |
| 6 | Q8NEJ9 NGDN_HUMAN  | K.LSS#EDEEEDEAEDDQSEASGK.K       | S143:        | 3 | 6,6033 | 0,552 | -0,231 |

|   |                     |                              |            |   |        |       |        |
|---|---------------------|------------------------------|------------|---|--------|-------|--------|
| 6 | P54578 UBP14_HUMAN  | R.AS#GEM*ASAQYITAALR.D       | S143:      | 2 | 4,2156 | 0,582 | -0,351 |
| 6 | Q9Y2U8 MAN1_HUMAN   | K.VLLGFSSDES#DVEASPR.D       | S144:      | 2 | 4,7081 | 0,558 | 0,646  |
| 6 | O75179 ANR17_HUMAN  | K.NAS#ILLEELDLEK.L           | S1457:     | 2 | 3,7157 | 0,341 | -0,545 |
| 6 | Q09028 RBBP4_HUMAN  | K.TPSS#DVLVFDYTK.H           | S147:      | 2 | 2,5212 | 0,388 | -0,079 |
| 6 | Q96E09 F122A_HUMAN  | R.IDFIPVSPAPS#PTR.G          | S147:      | 2 | 2,0594 | 0,154 | -0,309 |
| 6 | P54578 UBP14_HUMAN  | R.ASGEM*AS#AQYITAALR.D       | S148:      | 3 | 3,0243 | 0,229 | 0      |
| 6 | Q8N5F7 NKAP_HUMAN   | R.IGELGAPEVWGLS#PK.N         | S149:      | 2 | 3,5852 | 0,273 | -0,598 |
| 6 | Q5H9R5 Q5H9R5_HUMAN | R.CS#PLEPDFVPDEK.K           | S149:      | 2 | 2,3146 | 0,338 | 0      |
| 6 | Q9Y618 NCOR2_HUMAN  | K.LEPVS#PPS#PPHTDPELELVPPR.L | S149:S152: | 3 | 2,783  | 0,295 | -0,071 |
| 6 | O00193 SMAP_HUMAN   | R.S#ASPDDLGSNWEAADLGNEER.K   | S15:       | 3 | 3,5515 | 0,326 | 0      |
| 6 | Q02790 FKBP4_HUMAN  | K.ATESGAQS#APLPM*EGVDISPK.Q  | S15:       | 3 | 3,1527 | 0,157 | -0,252 |
| 6 | O95218 ZRAB2_HUMAN  | K.ES#EGEEDEDEDLSK.Y          | S153:      | 2 | 3,5984 | 0,544 | -0,402 |
| 6 | Q00536 PCTK1_HUMAN  | R.VS#LSEIGFGK.L              | S153:      | 2 | 2,5353 | 0,531 | 0      |
| 6 | Q9H0H5 RGAP1_HUMAN  | R.LSTIDESGSILS#DISFDK.T      | S154:      | 2 | 4,6612 | 0,546 | -0,243 |
| 6 | Q8IX90 CM003_HUMAN  | R.S#PQLSDFGLER.Y             | S155:      | 2 | 2,8743 | 0,337 | -0,184 |
| 6 | Q8WYP5 AHTF1_HUMAN  | R.NLS#FNELYPSGTLK.L          | S1550:     | 2 | 3,5474 | 0,507 | -0,367 |
| 6 | Q8WYP5 AHTF1_HUMAN  | R.NLS#FNELYPSGTLK.L          | S1550:     | 3 | 2,6696 | 0,162 | -0,11  |
| 6 | P23528 COF1_HUMAN   | K.LGGS#AVISLEGKPL.-          | S156:      | 2 | 3,3997 | 0,508 | -0,258 |
| 6 | Q93008 USP9X_HUMAN  | R.NGILAIEGTGSDDDDM*#SGDEK.Q  | S1593:     | 3 | 5,9517 | 0,506 | 0      |
| 6 | Q96S97 MYADM_HUMAN  | R.TTITTTTTSSGLGSPM*IVGSPR.A  | S16:       | 3 | 3,5958 | 1     | -0,312 |
| 6 | P16949 STMN1_HUMAN  | R.AS#GQAFELILSPR.S           | S16:       | 2 | 3,4513 | 0,285 | -0,249 |
| 6 | Q14839 CHD4_HUMAN   | K.STAPETAIECTQAPAPAS#EDEK.V  | S1602:     | 3 | 5,1932 | 0,475 | -0,23  |
| 6 | Q12792 TWF1_HUMAN   | K.YLLSQSS#PAPLTAAEEELR.Q     | S161:      | 3 | 5,9831 | 0,457 | -0,34  |
| 6 | Q8TBC3 SHKB1_HUMAN  | R.S#NTM*PPNLGNAGLLGR.M       | S161:      | 2 | 4,1223 | 0,482 | -0,071 |
| 6 | Q1KMD3 HNRL2_HUMAN  | R.S#GDETPGSEVPGDK.A          | S161:      | 2 | 3,1689 | 0,579 | -0,168 |
| 6 | Q12792 TWF1_HUMAN   | K.YLLSQSS#PAPLTAAEEELR.Q     | S161:      | 2 | 2,0379 | 0,505 | -0,679 |
| 6 | Q12923 PTN13_HUMAN  | K.DSSQPSCVEQSTS#SDENEM*SDK.S | S1629:     | 3 | 2,9734 | 1     | -0,072 |
| 6 | Q96AY4 TTC28_HUMAN  | R.DVLSLLNLS#PR.H             | S1633:     | 2 | 2,9841 | 0,466 | -0,467 |
| 6 | O95049 ZO3_HUMAN    | R.S#PGGGSEANGLALVSGFK.R      | S164:      | 2 | 5,9323 | 0,575 | -0,141 |
| 6 | Q12802 AKP13_HUMAN  | R.VDSLVSLS#EEDLESQQR.E       | S1647:     | 2 | 5,3003 | 0,52  | -0,122 |
| 6 | Q9Y4I1 MYO5A_HUMAN  | R.TS#SIADEGTYTLDSILR.Q       | S1651:     | 2 | 2,4116 | 0,294 | -0,952 |
| 6 | Q9Y4I1 MYO5A_HUMAN  | R.TSS#IADEGTYTLDSILR.Q       | S1652:     | 3 | 3,3239 | 0,353 | -0,571 |
| 6 | Q9C0C2 TB182_HUMAN  | K.VNLFPGLS#PSALK.A           | S1652:     | 2 | 2,7719 | 0,417 | -0,429 |

|   |                    |                                     |              |   |        |       |        |
|---|--------------------|-------------------------------------|--------------|---|--------|-------|--------|
| 6 | Q14676 MDC1_HUMAN  | R.LLLAEDS#EEEVDFLSER.R              | S168:        | 3 | 3,9241 | 0,419 | -0,353 |
| 6 | Q14676 MDC1_HUMAN  | R.LLLAEDS#EEEVDFLSER.R              | S168:        | 2 | 2,7582 | 0,498 | -0,941 |
| 6 | Q5JSZ5 K0515_HUMAN | R.LLSFS#PEEFPTLK.A                  | S168:        | 2 | 2,3476 | 0,391 | -0,384 |
| 6 | Q9ULI4 KI26A_HUMAN | R.DSEATGSASSAPDSM*SESGAAS#PGAR.T    | S1687:       | 3 | 3,1421 | 0,384 | -0,074 |
| 6 | Q9HCD6 TANC2_HUMAN | K.DCSYGAVTS#PTSTLESR.D              | S169:        | 2 | 4,1298 | 0,577 | -0,447 |
| 6 | P05387 RLA2_HUMAN  | R.YVASYLLAALGGNSS#PSAK.D            | S17:         | 3 | 4,6793 | 0,379 | -0,188 |
| 6 | P05387 RLA2_HUMAN  | R.YVASYLLAALGGNSS#PSAK.D            | S17:         | 2 | 4,5276 | 0,501 | -0,313 |
| 6 | Q96EY5 F125A_HUMAN | R.DM*QGLS#LDAASQPSK.G               | S170:        | 2 | 4,0682 | 0,464 | -0,148 |
| 6 | Q8NFC6 FA44A_HUMAN | R.AGS#ISSEVDGSGQNM*M*R.M            | S1701:       | 2 | 3,7654 | 0,556 | -0,372 |
| 6 | P55196 AFAD_HUMAN  | K.TQVLS#PDSLFTAK.F                  | S1704:       | 2 | 3,6617 | 0,431 | 0      |
| 6 | Q9HCM1 CL035_HUMAN | R.SFS#ADGFEM*LQNPVK.D               | S1708:       | 2 | 4,1289 | 0,503 | 0      |
| 6 | Q2T9J0 TYS1_HUMAN  | R.DDEV#EDEEADQLR.A                  | S171:        | 2 | 3,5156 | 0,288 | -0,071 |
| 6 | O60292 SI1L3_HUMAN | R.SSS#EITLSECAEDAGEPR.G             | S172:        | 2 | 3,5933 | 0,474 | -0,229 |
| 6 | Q96L91 EP400_HUMAN | R.VAVNALAVGEPGTAS#KPAS#PIGGPTQEEK.T | S1728:S1732: | 3 | 4,5214 | 0,422 | -0,561 |
| 6 | Q15365 PCBP1_HUMAN | K.QICLVM*LETLSQS#PQGR.V             | S173:        | 3 | 5,3832 | 0,344 | 0      |
| 6 | Q15366 PCBP2_HUMAN | K.QICVVM*LETLSQS#PPK.G              | S173:        | 3 | 4,233  | 0,398 | 0      |
| 6 | Q5VUA4 ZN318_HUMAN | R.LGS#PVDNLEDM*DR.D                 | S173:        | 2 | 3,3291 | 0,426 | -0,078 |
| 6 | Q15365 PCBP1_HUMAN | K.QICLVM*LETLSQS#PQGR.V             | S173:        | 2 | 3,2299 | 0,526 | -0,356 |
| 6 | Q15366 PCBP2_HUMAN | K.QICVVM*LETLSQS#PPK.G              | S173:        | 2 | 2,6216 | 0,41  | -0,697 |
| 6 | O75691 UTP20_HUMAN | K.S#LSDNGQPGTDPADSGGTSK.E           | S1732:       | 2 | 2,1468 | 0,326 | 0      |
| 6 | Q9Y6A5 TACC3_HUMAN | K.VS#GSPEQAVEENLSSYSLDR.R           | S175:        | 3 | 4,1237 | 0,405 | -0,407 |
| 6 | Q8N9T8 KRI1_HUMAN  | R.AFVEDS#EDEDGAGEGGSSLLQK.R         | S177:        | 3 | 6,8858 | 0,477 | 0,158  |
| 6 | Q58FF8 H90B2_HUMAN | K.IEDVGS#DEEDDSGK.D                 | S177:        | 2 | 2,6287 | 0,295 | -0,077 |
| 6 | Q09666 AHNK_HUMAN  | K.DIDISS#PEFK.I                     | S177:        | 2 | 2,5447 | 0,399 | -0,099 |
| 6 | Q8WXH0 SYNE2_HUMAN | K.ALS#PSDSLEIFTK.L                  | S1772:       | 2 | 3,2661 | 0,528 | -0,328 |
| 6 | Q04721 NOTC2_HUMAN | K.AEDEALLS#EEDDPIDR.R               | S1778:       | 2 | 3,94   | 0,513 | -0,257 |
| 6 | O15027 SC16A_HUMAN | R.LLPSAPQTLPDGPLAS#PAR.V            | S1786:       | 2 | 3,3048 | 0,471 | -0,493 |
| 6 | Q93009 UBP7_HUMAN  | K.AGEQQLS#EPEDM*EM*EAGDTDDPPR.I     | S18:         | 3 | 3,8497 | 0,399 | -0,332 |
| 6 | Q9P260 K1468_HUMAN | R.AGS#ISTLDSLDFAR.Y                 | S180:        | 2 | 4,2813 | 0,499 | -0,159 |
| 6 | Q9NQ3 RTN4_HUMAN   | R.RGS#SGS#VDETLFALPAASEPVIR.S       | S181:S184:   | 3 | 3,8304 | 0,297 | -0,726 |
| 6 | Q6UB99 ANR11_HUMAN | R.QQSVPAAS#SYDSM*PPSM*EDR.A         | S1820:       | 3 | 2,6513 | 0,13  | -0,535 |
| 6 | P16070 CD44_HUMAN  | R.TNPEDIYPSNPTDDVSSGSS#SER.S        | S183:        | 3 | 2,621  | 0,32  | -0,345 |
| 6 | Q5VT06 CE350_HUMAN | R.SPS#PISISSETSSIM*QK.L             | S1830:       | 2 | 3,9172 | 0,502 | -0,187 |

|   |                     |                                  |        |   |        |       |        |
|---|---------------------|----------------------------------|--------|---|--------|-------|--------|
| 6 | Q9H7D0 DOCK5_HUMAN  | R.NS#TELAPLPVR.R                 | S1834: | 2 | 2,4021 | 0,332 | 0      |
| 6 | Q8TD26 CHD6_HUMAN   | R.NLS#SDQQLIDLLENK.S             | S1839: | 2 | 2,822  | 0,458 | -0,202 |
| 6 | P24928 RPB1_HUMAN   | K.YTPTSPSYSOSS#PEYTPTSPK.Y       | S1850: | 3 | 2,826  | 1     | 0,155  |
| 6 | Q5UIP0 RIF1_HUMAN   | R.EEICDM*DSSEAM*SLESQES#PNENFK.T | S1854: | 3 | 5,8716 | 0,501 | -0,364 |
| 6 | Q8TDJ6 DMXL2_HUMAN  | R.NLAS#PEGTLATLGLK.T             | S1857: | 2 | 3,9988 | 0,443 | -0,39  |
| 6 | O15417 TNC18_HUMAN  | R.ALS#PGLLEESGLLLAR.F            | S1857: | 2 | 3,9146 | 0,53  | -0,367 |
| 6 | Q9Y3S1 WNK2_HUMAN   | K.QAS#LPVSGSVAGDFVK.K            | S1862: | 2 | 2,0022 | 0,154 | 0      |
| 6 | Q8WUF5 IASPP_HUMAN  | R.GS#PLAEGPQAFFPER.G             | S187:  | 2 | 3,0348 | 0,425 | 0,073  |
| 6 | P04792 HSPB1_HUMAN  | K.LATQSNEITIPVTFES#R.A           | S187:  | 2 | 2,1686 | 0,24  | -0,43  |
| 6 | P42858 HD_HUMAN     | K.LLSPQM*S#GEEEDSDLAALK.L        | S1876: | 3 | 3,6339 | 0,322 | -0,272 |
| 6 | A4QN18 A4QN18_HUMAN | R.NDGLLALS#SPDAEEPQLPDGTGR.E     | S1879: | 3 | 4,5651 | 0,392 | -0,075 |
| 6 | O14530 TXND9_HUMAN  | R.LGSSDILNYS#GNLM*EPPFQNK.K      | S188:  | 3 | 5,2489 | 0,385 | -0,359 |
| 6 | Q13596 SNX1_HUMAN   | R.FS#DFLGLYEK.L                  | S188:  | 2 | 2,9918 | 0,39  | -0,188 |
| 6 | P46821 MAP1B_HUMAN  | R.S#PDEEDYDYESYEK.T              | S1881: | 2 | 3,5748 | 0,515 | -0,198 |
| 6 | P19105 MLRM_HUMAN   | R.ATS#NVFAM*FDQSQIQEFK.E         | S19:   | 3 | 5,4357 | 0,447 | -0,251 |
| 6 | Q9H1E3 NUCKS_HUMAN  | K.VVDYSQFQES#DDADEDYGR.D         | S19:   | 3 | 4,829  | 0,511 | 0,316  |
| 6 | Q13442 HAP28_HUMAN  | R.QYTS#PEEIDAQLQAEK.Q            | S19:   | 3 | 4,3606 | 0,335 | -0,095 |
| 6 | Q13442 HAP28_HUMAN  | R.QYTS#PEEIDAQLQAEK.Q            | S19:   | 2 | 3,2247 | 0,399 | -0,316 |
| 6 | Q01433 AMPD2_HUMAN  | K.TDS#DSDLQLYK.E                 | S190:  | 2 | 3,8822 | 0,455 | -0,179 |
| 6 | Q12906 ILF3_HUMAN   | K.VLAGETLS#VNDPPDVLDR.Q          | S190:  | 2 | 3,8028 | 0,422 | -0,491 |
| 6 | Q15365 PCBP1_HUMAN  | R.VM*TIPYQPM*PASS#PVICAGGQDR.C   | S190:  | 3 | 3,0881 | 0,316 | -0,071 |
| 6 | Q52LW3 RHG29_HUMAN  | K.GNFS#PLELDNVLLK.N              | S190:  | 2 | 2,2901 | 0,257 | -0,298 |
| 6 | O15027 SC16A_HUMAN  | R.ADSGPTQPPLSLS#PAPETK.R         | S1905: | 2 | 3,6124 | 0,398 | -0,309 |
| 6 | Q5JRA6 MIA3_HUMAN   | R.DEPPASQSTSQDCSQALKQS#P.-       | S1906: | 3 | 3,6897 | 0,23  | -0,525 |
| 6 | P46821 MAP1B_HUMAN  | K.SPS#DSGYSYETIGK.T              | S1917: | 2 | 2,1211 | 0,283 | -0,311 |
| 6 | O43237 DC1L2_HUMAN  | K.DFQDYM*EPEEGCQGS#PQR.R         | S194:  | 3 | 4,0766 | 0,556 | -0,161 |
| 6 | O43237 DC1L2_HUMAN  | K.DFQDYMEPEEGCQGS#PQR.R          | S194:  | 3 | 2,7839 | 0,304 | 0      |
| 6 | Q9H2D6 TARA_HUMAN   | R.QALDYVELSPLTQAS#PQR.A          | S1955: | 3 | 3,5226 | 0,296 | -0,087 |
| 6 | Q9H2D6 TARA_HUMAN   | R.QALDYVELSPLTQAS#PQR.A          | S1955: | 2 | 2,9412 | 0,451 | -0,349 |
| 6 | Q92734 TFG_HUMAN    | K.NVM*SAFGLTDDQVSGPPS#APAEDR.S   | S197:  | 3 | 6,3444 | 0,531 | -0,215 |
| 6 | P55072 TERA_HUMAN   | R.EDEEES#LNEVGYDDIGGCR.K         | S197:  | 3 | 2,6161 | 0,159 | -0,161 |
| 6 | Q9UJD0 RIMS3_HUMAN  | R.S#SSISGEICGSQQAGGGAGTTAK.K     | S20:   | 3 | 2,9588 | 0,311 | -0,08  |
| 6 | P31350 RIR2_HUMAN   | R.VPLAPITDPQQLQLS#PLK.G          | S20:   | 3 | 2,6665 | 0,128 | -0,09  |

|   |                     |                                  |            |   |        |       |        |
|---|---------------------|----------------------------------|------------|---|--------|-------|--------|
| 6 | P31350 RIR2_HUMAN   | R.VPLAPITDPQQQLS#PLK.G           | S20:       | 2 | 2,5685 | 0,422 | -0,359 |
| 6 | O75643 U520_HUMAN   | R.NALLQLTDS#QIADVAR.F            | S2002:     | 2 | 5,6816 | 0,505 | -0,54  |
| 6 | O75643 U520_HUMAN   | R.NALLQLTDS#QIADVAR.F            | S2002:     | 3 | 4,1707 | 0,498 | -0,202 |
| 6 | Q5VWN6 CJ018_HUMAN  | K.ES#PTQISIGAFPSTK.I             | S2009:     | 2 | 2,7117 | 0,424 | -0,297 |
| 6 | Q9H8G2 CI082_HUMAN  | K.ILEGDNMG*DS#DM*EEEADDGSK.M     | S203:      | 3 | 6,7853 | 0,537 | -0,154 |
| 6 | Q9H0H5 RGAP1_HUMAN  | R.S#IGSAVDQGNESIVAK.T            | S203:      | 2 | 5,3113 | 0,579 | -0,221 |
| 6 | Q9H0H5 RGAP1_HUMAN  | R.S#IGSAVDQGNESIVAK.T            | S203:      | 3 | 3,3801 | 0,246 | 0      |
| 6 | Q8NCF5 NF2IP_HUMAN  | K.TEFLDLDNSPLSPPS#PR.T           | S204:      | 2 | 4,2534 | 0,448 | -0,621 |
| 6 | Q8NCF5 NF2IP_HUMAN  | K.TEFLDLDNSPLSPPS#PR.T           | S204:      | 3 | 4,0584 | 0,312 | -0,186 |
| 6 | Q92793 CBP_HUMAN    | R.SIS#PSALQDLLR.T                | S2063:     | 2 | 3,0682 | 0,383 | -0,442 |
| 6 | P63104 1433Z_HUMAN  | K.TAFDEAIAELDTLS#EESYK.D         | S207:      | 3 | 3,8701 | 0,315 | -0,331 |
| 6 | O43166 SI1L1_HUMAN  | R.EYGS#TSS#IDKQGTSGESFFDLLK.G    | S208:S211: | 3 | 3,499  | 1     | -0,276 |
| 6 | Q8WXV6 Q8WXV6_HUMAN | R.TSS#EDNLYLAVLR.A               | S21:       | 2 | 3,6786 | 0,317 | -0,391 |
| 6 | Q53H80 CF166_HUMAN  | R.TLDFDPLLSPAS#PK.R              | S21:       | 2 | 3,5889 | 0,534 | -0,386 |
| 6 | P60174 TPIS_HUMAN   | K.QS#LGELIGTLNAAK.V              | S21:       | 2 | 3,3849 | 0,525 | -0,571 |
| 6 | Q6R327 RICTR_HUMAN  | R.NDS#GEENVPLDLTR.E              | S21:       | 2 | 2,9708 | 0,298 | 0,074  |
| 6 | Q53H80 CF166_HUMAN  | R.TLDFDPLLSPAS#PK.R              | S21:       | 3 | 2,6999 | 0,201 | -0,116 |
| 6 | O43399 TPD54_HUMAN  | K.GLLSDS#M*TDVPVDTGVAAR.T        | S21:       | 2 | 2,229  | 0,379 | -0,244 |
| 6 | Q9UBB9 TFP11_HUMAN  | R.TTQSM*QDFPVVDS#EEEEEEEFQK.E    | S210:      | 3 | 5,376  | 0,459 | -0,458 |
| 6 | Q09666 AHNK_HUMAN   | R.LPS#GSGAASPTGSAVDIR.A          | S210:      | 2 | 4,84   | 0,555 | -0,283 |
| 6 | P62258 1433E_HUMAN  | K.AAFDDAIAELDTLS#EESYK.D         | S210:      | 3 | 4,2316 | 0,503 | -0,253 |
| 6 | O95297 MPZL1_HUMAN  | R.DYTGCSSESLS#PVK.Q              | S210:      | 2 | 3,9872 | 0,549 | -0,357 |
| 6 | P62258 1433E_HUMAN  | K.AAFDDAIAELDTLS#EESYK.D         | S210:      | 2 | 2,6783 | 0,565 | -0,338 |
| 6 | O75369 FLNB_HUMAN   | R.APS#VATVGSICDLNLK.I            | S2107:     | 2 | 4,6591 | 0,625 | -0,071 |
| 6 | Q8NI08 NCOA7_HUMAN  | R.VLSSTS#EEDEPGVVK.F             | S211:      | 2 | 3,3061 | 0,404 | -0,884 |
| 6 | Q6P1J9 CDC73_HUMAN  | R.S#FVDAEVDVTR.D                 | S212:      | 2 | 3,646  | 0,54  | 0,463  |
| 6 | Q9H4L4 SENP3_HUMAN  | R.GS#PPVPSGPPM*EEDGLR.W          | S212:      | 2 | 3,5321 | 0,394 | -0,268 |
| 6 | Q9H4A3 WNK1_HUMAN   | K.VPPAVIIPPAAPLS#GR.R            | S2121:     | 3 | 2,7718 | 0,296 | 0      |
| 6 | Q9UQ35 SRRM2_HUMAN  | R.S#PGM*LEPLGSSR.T               | S2132:     | 2 | 2,7638 | 0,491 | -0,276 |
| 6 | P46013 KI67_HUMAN   | R.DIVEELS#ALK.Q                  | S2135:     | 2 | 2,8113 | 0,242 | -0,306 |
| 6 | Q9BZL6 KPCD2_HUMAN  | R.LGTSES#LPCTAEELSR.S            | S214:      | 2 | 3,82   | 0,455 | -0,467 |
| 6 | Q9NUA8 ZBT40_HUMAN  | R.NAETPAETPTAEACS#PSPAVQTFSEAK.K | S214:      | 3 | 3,4262 | 0,219 | -0,8   |
| 6 | P61978 HNRPK_HUMAN  | K.IILDILISES#PIK.G               | S216:      | 2 | 4,1566 | 0,472 | -0,258 |



|   |                    |                                |        |   |        |       |        |
|---|--------------------|--------------------------------|--------|---|--------|-------|--------|
| 6 | P21333 FLNA_HUMAN  | K.IPEISIQDM*TAQVTS#PSGK.T      | S2180: | 3 | 5,0287 | 0,405 | 0      |
| 6 | O75376 NCOR1_HUMAN | R.S#PGSISYLPSFFTK.L            | S2184: | 2 | 3,5921 | 0,621 | -0,53  |
| 6 | Q15139 KPCD1_HUMAN | R.TSS#AELSTSAPDEPLLQK.S        | S219:  | 2 | 3,6584 | 0,489 | -0,062 |
| 6 | Q8WU79 SMAP2_HUMAN | K.DLDLLASVPS#PSSSGSR.K         | S219:  | 2 | 3,1056 | 0,388 | -0,483 |
| 6 | Q9NTJ3 SMC4_HUMAN  | R.EEGPPPPS#PDGASSDAEPEPPSGR.T  | S22:   | 3 | 2,8562 | 0,204 | -0,225 |
| 6 | Q02750 MP2K1_HUMAN | K.LCDFGVSGQLIDSM*ANS#FVGTR.S   | S222:  | 3 | 3,3399 | 0,346 | -0,37  |
| 6 | O75643 U520_HUMAN  | R.EEAS#DDDM*EGDEAVVR.C         | S225:  | 3 | 5,1389 | 0,39  | -0,098 |
| 6 | O75643 U520_HUMAN  | R.EEAS#DDDM*EGDEAVVR.C         | S225:  | 2 | 4,509  | 0,484 | -0,458 |
| 6 | O75643 U520_HUMAN  | R.EEAS#DDDMEGDEAVVR.C          | S225:  | 2 | 4,4584 | 0,501 | -0,33  |
| 6 | Q9UN86 G3BP2_HUMAN | K.S#TTPPPAEPVSLPQEPPK.A        | S225:  | 3 | 3,0587 | 0,2   | -0,187 |
| 6 | O75643 U520_HUMAN  | R.EEAS#DDDMEGDEAVVR.C          | S225:  | 3 | 2,7513 | 0,105 | 0      |
| 6 | Q8NE71 ABCF1_HUMAN | K.AEQGS#EEEEEGEEEEEGGESK.A     | S228:  | 3 | 2,7187 | 0,294 | -0,601 |
| 6 | Q9NZM3 ITSN2_HUMAN | K.AQSLIDLGSSSSTSSTASLSGNS#PK.T | S229:  | 3 | 3,7185 | 0,368 | 0      |
| 6 | Q96A57 CT030_HUMAN | R.LS#STDDGYIDLQFK.K            | S23:   | 2 | 3,7762 | 0,497 | 0      |
| 6 | Q96B97 SH3K1_HUMAN | R.S#IEVENDFLPVEK.T             | S230:  | 2 | 4,8688 | 0,493 | 0,153  |
| 6 | Q8WU90 ZC3HF_HUMAN | K.EDEIS#LEDLIER.E              | S231:  | 2 | 3,7265 | 0,499 | -0,396 |
| 6 | Q14814 MEF2D_HUMAN | R.AS#PGLLPVANGNSLNK.V          | S231:  | 2 | 3,4873 | 0,409 | 0      |
| 6 | Q13283 G3BP1_HUMAN | K.SSS#PAPADIAQTVQEDLR.T        | S232:  | 2 | 4,7389 | 0,457 | -0,186 |
| 6 | Q13283 G3BP1_HUMAN | K.SSS#PAPADIAQTVQEDLR.T        | S232:  | 3 | 4,6842 | 0,45  | 0      |
| 6 | Q9BTK6 PA1_HUMAN   | R.DLFLDSEDSPAS#PPLR.S          | S237:  | 2 | 4,7571 | 0,578 | -0,663 |
| 6 | Q9BTK6 PA1_HUMAN   | R.DLFLDSEDSPAS#PPLR.S          | S237:  | 3 | 3,7891 | 0,469 | -0,271 |
| 6 | Q9Y2W2 WBP11_HUMAN | R.DEDM*LYS#PELAQR.G            | S237:  | 2 | 3,0526 | 0,31  | -0,073 |
| 6 | Q8TDY2 RBCC1_HUMAN | R.S#TELVLSPPDM*PR.T            | S237:  | 2 | 2,8848 | 0,349 | 0      |
| 6 | P41743 KPCI_HUMAN  | K.AS#SSLGLQDFDLLR.V            | S237:  | 2 | 2,4409 | 0,413 | -0,533 |
| 6 | Q86V81 THOC4_HUMAN | K.QQLS#AEELDAQLDAYNAR.M        | S239:  | 2 | 3,5973 | 0,549 | -0,115 |
| 6 | Q96DQ3 YN003_HUMAN | K.S#SPVCSTAPVETEPK.L           | S239:  | 2 | 2,5777 | 0,396 | -0,439 |
| 6 | O75962 TRIO_HUMAN  | R.AGAAS#PLNSPLSSAVPSLGK.E      | S2396: | 2 | 2,7919 | 0,342 | -0,064 |
| 6 | Q96A57 CT030_HUMAN | R.LSS#TDDGYIDLQFK.K            | S24:   | 2 | 4,4618 | 0,493 | -0,29  |
| 6 | O00178 GTPB1_HUMAN | R.SAM*DSPVPASM*FAPEPS#SPGAAR.A | S24:   | 3 | 3,2385 | 0,235 | -0,231 |
| 6 | Q96A57 CT030_HUMAN | R.LSS#TDDGYIDLQFK.K            | S24:   | 3 | 3,2129 | 0,148 | 0      |
| 6 | Q9BZG1 RAB34_HUMAN | R.INS#DDSNLYLTASK.K            | S241:  | 2 | 5,0625 | 0,457 | -0,452 |
| 6 | Q9BST9 RTKN_HUMAN  | R.ASLDSAGSGSS#PILLPTPVGGPR.Y   | S242:  | 3 | 3,5996 | 0,201 | 0      |
| 6 | Q8NEB9 PK3C3_HUMAN | K.DGDESS#PILTSFELVK.V          | S244:  | 2 | 2,6955 | 0,387 | -0,537 |

|   |                    |                                  |              |   |        |       |        |
|---|--------------------|----------------------------------|--------------|---|--------|-------|--------|
| 6 | P49368 TCPG_HUMAN  | R.IVLLDSS#LEYK.K                 | S244:        | 2 | 2,5668 | 0,318 | 0,09   |
| 6 | Q14684 RRP1B_HUMAN | K.VGDGDLS#AEEIPENEVSLR.R         | S245:        | 2 | 5,0692 | 0,568 | -0,463 |
| 6 | O43815 STRN_HUMAN  | K.FLESAAADFS#DEDEDDVDGR.E        | S245:        | 3 | 3,0749 | 0,316 | 0,305  |
| 6 | Q9P0V3 SH3B4_HUMAN | R.SYS#LSELSVLQAK.S               | S246:        | 2 | 4,9825 | 0,445 | 0      |
| 6 | Q8WW1 LMO7_HUMAN   | R.EDS#FESLDSLGR.S                | S246:        | 2 | 3,9171 | 0,482 | -0,16  |
| 6 | Q9P0V3 SH3B4_HUMAN | R.SYS#LSELSVLQAK.S               | S246:        | 3 | 3,6262 | 0,334 | -0,122 |
| 6 | Q9H3N1 TXND1_HUMAN | K.VEEEQEADEEDVS#EEEEASK.E        | S247:        | 3 | 5,8004 | 0,573 | 0,077  |
| 6 | P11717 MPRI_HUMAN  | K.LVS#FHDDS#DEDLLHI.-            | S2479:S2484: | 3 | 4,3896 | 0,408 | -0,287 |
| 6 | P11717 MPRI_HUMAN  | K.LVS#FHDDS#DEDLLHI.-            | S2479:S2484: | 2 | 2,0685 | 0,238 | -1,274 |
| 6 | O60675 MAFK_HUMAN  | K.EAGENAPVLS#DDELVSM*SVR.E       | S25:         | 3 | 4,616  | 0,271 | -0,083 |
| 6 | Q8NC51 PAIRB_HUMAN | R.FDQLFDES#DPFEVLK.A             | S25:         | 2 | 3,6378 | 0,481 | -0,482 |
| 6 | O00178 GTPB1_HUMAN | R.SAM*DSPVPASM*FAPEPSS#PGAAR.A   | S25:         | 3 | 2,9842 | 0,287 | -0,154 |
| 6 | Q5JR12 PPM1J_HUMAN | K.S#PDLPNAASAPPAAPEAPRS#PPAK.A   | S25:S45:     | 3 | 4,9722 | 0,447 | 0      |
| 6 | Q9UFC0 LRWD1_HUMAN | R.ACAS#PSAQVEGSPVAGSDGSQPAVK.L   | S251:        | 3 | 5,8662 | 0,538 | -0,3   |
| 6 | Q9NZJ4 SACS_HUMAN  | R.YAS#NVCFCTLGTEFGQK.E           | S2511:       | 2 | 4,4575 | 0,582 | -0,487 |
| 6 | P21359 NF1_HUMAN   | K.GSEGYLAATYPTVGQTS#PR.A         | S2515:       | 3 | 3,4131 | 0,35  | -0,18  |
| 6 | P21359 NF1_HUMAN   | K.S#M*SLDM*GQPSQANTK.K           | S2521:       | 2 | 3,3608 | 0,543 | 0      |
| 6 | O15541 R113A_HUMAN | R.YGVYEDENYEVGS#DDEEIPFK.C       | S253:        | 3 | 3,6188 | 0,298 | -0,284 |
| 6 | Q8N1G0 ZN687_HUMAN | K.ATDIPASAS#PPPVAGVPFFK.Q        | S253:        | 3 | 2,7389 | 0,234 | -0,179 |
| 6 | Q8N1G0 ZN687_HUMAN | K.ATDIPASAS#PPPVAGVPFFK.Q        | S253:        | 2 | 2,5813 | 0,441 | -0,357 |
| 6 | Q15477 SKIV2_HUMAN | R.ASS#LEDLVLK.E                  | S256:        | 2 | 2,8678 | 0,52  | -0,106 |
| 6 | Q9BQI3 E2AK1_HUMAN | R.AAIELPSLEVLVS#DQEEDR.E         | S258:        | 3 | 4,4268 | 0,377 | -0,349 |
| 6 | P05787 K2C8_HUMAN  | R.SLDM*DS#IIAEVK.A               | S258:        | 2 | 3,7697 | 0,384 | -0,086 |
| 6 | Q58FF8 H90B2_HUMAN | K.S#IYYITGESK.E                  | S258:        | 2 | 2,5231 | 0,549 | -0,098 |
| 6 | Q9BQI3 E2AK1_HUMAN | R.AAIELPSLEVLVS#DQEEDR.E         | S258:        | 2 | 2,1924 | 0,431 | -0,35  |
| 6 | Q86VR2 F134C_HUMAN | R.AM*DNHS#DS#EEELAAFCPLDDSTVAR.E | S258:S260:   | 3 | 2,7611 | 0,232 | -0,237 |
| 6 | Q8NFH5 NUP53_HUMAN | R.CALSS#PSLAFTPPIK.T             | S259:        | 2 | 2,9323 | 0,438 | -0,146 |
| 6 | Q6Y7W6 PERQ2_HUMAN | R.ALSSGGSITS#PPLSPALPK.Y         | S26:         | 2 | 4,9617 | 0,496 | -0,328 |
| 6 | P07910 HNRPC_HUMAN | K.M*ESEGGADDS#AEEGDLLDDDDNEDR.G  | S260:        | 3 | 5,4093 | 0,445 | -0,065 |
| 6 | P07910 HNRPC_HUMAN | K.MESEGGADDS#AEEGDLLDDDDNEDR.G   | S260:        | 3 | 3,4389 | 0,32  | -0,329 |
| 6 | Q86YS7 K0528_HUMAN | K.LSSPAAFLPACNS#PSK.E            | S260:        | 2 | 2,5215 | 0,294 | -0,283 |
| 6 | Q06210 GFPT1_HUMAN | R.VDS#TTCLFPVEEK.A               | S261:        | 2 | 3,4596 | 0,407 | -0,152 |
| 6 | Q5T200 ZC3HD_HUMAN | R.TPS#PPPIPEDIALGK.K             | S265:        | 2 | 3,5111 | 0,436 | -0,214 |

|   |                     |                               |            |   |        |       |        |
|---|---------------------|-------------------------------|------------|---|--------|-------|--------|
| 6 | Q8TF74 WIPF2_HUMAN  | R.QPPGVPNGPS#SPTNESAPELPQR.H  | S266:      | 3 | 3,6269 | 0,257 | -0,15  |
| 6 | Q13439 GOGA4_HUMAN  | K.EENPES#DGEPVVEDGTSVK.T      | S266:      | 2 | 2,162  | 0,317 | 0,116  |
| 6 | Q9UHI6 DDX20_HUMAN  | R.LNS#SDPSLIQK.Q              | S268:      | 2 | 4,2322 | 0,465 | -0,184 |
| 6 | Q9UBP0 SPAST_HUMAN  | R.APS#YSGLSM*VSGVK.Q          | S268:      | 2 | 3,363  | 0,387 | 0,083  |
| 6 | Q5TAI8 Q5TAI8_HUMAN | R.VSS#SGLTDSLFIK.E            | S270:      | 2 | 3,2003 | 0,489 | -0,237 |
| 6 | Q66PJ3 AR6P4_HUMAN  | R.S#AGEEEDGPVLTDEQK.S         | S271:      | 2 | 5,0965 | 0,486 | -0,205 |
| 6 | Q8NEM2 SHCBP_HUMAN  | R.SLSNCSNDS#EQENISM*VEGLK.L   | S275:      | 3 | 4,538  | 0,275 | -0,072 |
| 6 | Q8WW1 LMO7_HUMAN    | R.EGFES#DTDSEFTFK.M           | S276:      | 2 | 3,8723 | 0,555 | -0,071 |
| 6 | Q9Y3T6 R3HC1_HUMAN  | R.FGS#TLQLDEK.G               | S276:      | 2 | 3,8241 | 0,375 | -0,183 |
| 6 | Q9Y6D5 BIG2_HUMAN   | R.GSS#LSGTDDGAQEVVK.D         | S277:      | 2 | 3,702  | 0,419 | -0,075 |
| 6 | Q6UB99 ANR11_HUMAN  | K.VANS#PTM*VNLLGK.G           | S277:      | 2 | 2,9342 | 0,417 | -0,157 |
| 6 | Q9Y3Q8 T22D4_HUMAN  | K.S#PDPFGAVAAQK.F             | S279:      | 2 | 3,5739 | 0,45  | 0      |
| 6 | Q6ZRS2 SRCAP_HUMAN  | R.GAASTLVPGVSETSASPGS#PSVR.S  | S2790:     | 3 | 3,37   | 0,168 | 0,25   |
| 6 | Q6MZQ0 PTOR2_HUMAN  | R.FM*S#SPVLSLPR.F             | S28:       | 2 | 3,2679 | 0,522 | -0,169 |
| 6 | Q96EZ8 MCRS1_HUMAN  | K.GDQVLNFS#DAEDLIDDSK.L       | S282:      | 2 | 4,1692 | 0,552 | -0,829 |
| 6 | Q96EZ8 MCRS1_HUMAN  | K.GDQVLNFS#DAEDLIDDSK.L       | S282:      | 3 | 3,7    | 0,42  | -0,178 |
| 6 | P21127 CD2L1_HUMAN  | R.DLLSDLQDIS#DSER.K           | S283:      | 2 | 4,7386 | 0,539 | -0,434 |
| 6 | P21127 CD2L1_HUMAN  | R.DLLSDLQDIS#DSER.K           | S283:      | 3 | 4,0741 | 0,373 | 0,108  |
| 6 | Q7Z2W4 ZCCHV_HUMAN  | R.AS#LEDAPVDDLTR.K            | S284:      | 2 | 2,299  | 0,389 | 0,082  |
| 6 | O15446 RPA34_HUMAN  | K.QEQINTEPLEDTVLS#PTK.K       | S285:      | 2 | 2,8543 | 0,474 | -0,46  |
| 6 | P13994 CC130_HUMAN  | R.TALATS#PITVGDGIVR.R         | S286:      | 2 | 4,4627 | 0,528 | -0,692 |
| 6 | Q04726 TLE3_HUMAN   | K.DAPTS#PASVASSSTPSSK.T       | S286:      | 2 | 3,3323 | 0,479 | -0,463 |
| 6 | Q04724 TLE1_HUMAN   | K.DASSS#PASTASSSTSLK.S        | S286:      | 2 | 2,5225 | 0,408 | -0,134 |
| 6 | Q9Y624 JAM1_HUMAN   | R.S#EGEFKQTSSFLV.-            | S287:      | 2 | 2,0528 | 0,377 | -0,159 |
| 6 | O14745 NHERF_HUMAN  | R.S#ASSDTSEELNSQDSPPK.Q       | S288:      | 2 | 4,8441 | 0,48  | -0,623 |
| 6 | O94888 UBXD7_HUMAN  | R.SESLIDASEDS#QLEAAIR.A       | S288:      | 2 | 3,6926 | 0,517 | -0,424 |
| 6 | P18206 VINC_HUMAN   | R.DPSAS#PGDAGEQAIR.Q          | S290:      | 2 | 4,3065 | 0,476 | -0,393 |
| 6 | O14745 NHERF_HUMAN  | R.SASS#DTSEELNSQDSPPK.Q       | S291:      | 2 | 3,6158 | 0,473 | -0,498 |
| 6 | Q9NQS7 INCE_HUMAN   | R.VLAPILPDNFS#TPTGSR.T        | S291:      | 2 | 2,4449 | 0,392 | -0,523 |
| 6 | Q8TDN4 CABL1_HUMAN  | R.SS#LETLEDIEENAPLR.R         | S291:      | 2 | 2,1224 | 0,35  | -0,322 |
| 6 | Q69YH5 CDCA2_HUMAN  | K.GSSDAVS#PDTFTAEVSSDAVPDVR.S | S292:      | 3 | 2,7779 | 0,204 | 0,441  |
| 6 | Q8NFC6 FA44A_HUMAN  | R.S#LTVSDDAESSEPER.K          | S2954:     | 2 | 4,1151 | 0,525 | -0,43  |
| 6 | Q99590 SFRIP_HUMAN  | K.TEELIESPKLES#S#EGEIIQTVDR.Q | S298:S299: | 3 | 2,8398 | 0,168 | -0,861 |

|   |                    |                                  |        |   |        |       |        |
|---|--------------------|----------------------------------|--------|---|--------|-------|--------|
| 6 | O14974 MYPT1_HUMAN | K.S#PLIESTANM*DNNQSQK.T          | S299:  | 3 | 2,9141 | 0,274 | -0,371 |
| 6 | Q9UHD8 SEPT9_HUMAN | R.S#FEVEEVETPNSTPPR.R            | S30:   | 2 | 5,4916 | 0,519 | -0,707 |
| 6 | Q3KR37 GRM1B_HUMAN | R.S#PTPQNQDGDGM*VEK.G            | S30:   | 2 | 2,6511 | 0,231 | 0      |
| 6 | Q5JTD0 TJAP1_HUMAN | R.GS#PEEELPLPAFEK.L              | S300:  | 2 | 3,9589 | 0,475 | -0,451 |
| 6 | Q5JTD0 TJAP1_HUMAN | R.GS#PEEELPLPAFEK.L              | S300:  | 3 | 3,0882 | 0,123 | 0      |
| 6 | Q05655 KPCD_HUMAN  | R.SDS#ASSEPVGIYQGFKEK.K          | S304:  | 2 | 3,8288 | 0,479 | -0,389 |
| 6 | P05783 K1C18_HUMAN | R.TVQS#LEIDLDSM*R.N              | S305:  | 2 | 3,7978 | 0,463 | -0,228 |
| 6 | P05783 K1C18_HUMAN | R.TVQS#LEIDLDSM*R.N              | S305:  | 3 | 3,3308 | 0,158 | 0,114  |
| 6 | Q01850 CDR2_HUMAN  | R.S#SSETILSSLAGSDIVK.G           | S309:  | 2 | 2,8702 | 0,531 | -0,206 |
| 6 | Q9NR55 BATF3_HUMAN | R.SVAAPGNQPQPQQQS#PEDDDR.K       | S31:   | 3 | 2,7019 | 0,333 | -0,214 |
| 6 | Q9Y2D8 ADIP_HUMAN  | R.VDDSTGTVIS#DVEEDAGELSR.E       | S312:  | 3 | 5,6734 | 0,47  | -0,402 |
| 6 | Q9BWU0 NADAP_HUMAN | K.M*LGEDS#DEEEEM*DTSER.K         | S312:  | 3 | 4,6889 | 0,469 | -0,173 |
| 6 | Q9BWU0 NADAP_HUMAN | K.MLGEDS#DEEEEM*DTSER.K          | S312:  | 3 | 3,6918 | 0,281 | -0,262 |
| 6 | Q9Y446 PKP3_HUMAN  | R.LSS#GFDDIDLPSAVK.Y             | S314:  | 2 | 4,1981 | 0,494 | -0,297 |
| 6 | Q9Y446 PKP3_HUMAN  | R.LSS#GFDDIDLPSAVK.Y             | S314:  | 3 | 3,4071 | 0,213 | -0,223 |
| 6 | Q99569 PKP4_HUMAN  | R.VGS#PLTLTDAQTR.V               | S314:  | 2 | 3,0175 | 0,45  | -0,17  |
| 6 | Q15811 ITSN1_HUMAN | R.SGS#GISVISSTSVQDR.L            | S315:  | 2 | 4,4779 | 0,387 | -0,515 |
| 6 | P46937 YAP1_HUMAN  | R.SQLPTLEQDGGTQNPVS#SPGM*SQELR.T | S316:  | 3 | 3,8817 | 0,399 | -0,449 |
| 6 | Q9Y6A5 TACC3_HUMAN | R.AM*TLS#PQEEVAAGQM*ASSSR.S      | S317:  | 2 | 2,7712 | 0,451 | 0,113  |
| 6 | Q9UHW9 S12A6_HUMAN | K.IDDIPGLSDTS#PDLSSR.S           | S32:   | 2 | 2,8262 | 0,437 | -0,131 |
| 6 | Q13043 STK4_HUMAN  | R.EVDQDDEENS#EEDEM*DSGTM*VR.A    | S320:  | 3 | 6,3278 | 0,468 | -0,206 |
| 6 | Q13043 STK4_HUMAN  | R.EVDQDDEENS#EEDEMDSGTM*VR.A     | S320:  | 3 | 3,0647 | 0,208 | -0,482 |
| 6 | Q13043 STK4_HUMAN  | R.EVDQDDEENS#EEDEM*DSGTMVR.A     | S320:  | 3 | 2,8829 | 0,154 | -0,069 |
| 6 | P78527 PRKDC_HUMAN | K.LTPLPEDNS#M*NVDQDGDPSDR.M      | S3205: | 3 | 4,7697 | 0,465 | 0      |
| 6 | O75674 TM1L1_HUMAN | K.EATNTTSEPSAPSQDLLDLS#PSPR.M    | S321:  | 3 | 3,7941 | 0,433 | -0,423 |
| 6 | O75674 TM1L1_HUMAN | K.EATNTTSEPSAPSQDLLDLS#PR.M      | S323:  | 3 | 3,8512 | 0,353 | 0      |
| 6 | Q08AE8 SPIR1_HUMAN | K.STSSSSVS#PSFPEEPVLEAVSTR.K     | S323:  | 3 | 3,0325 | 0,251 | -0,744 |
| 6 | Q16204 CCDC6_HUMAN | R.QLS#EESSELEM*DDER.Y            | S323:  | 2 | 2,9538 | 0,554 | -0,33  |
| 6 | P42566 EP15_HUMAN  | K.NIIGSS#PVADFSAIK.E             | S324:  | 2 | 4,1583 | 0,585 | 0,153  |
| 6 | Q16204 CCDC6_HUMAN | R.QLSES#ESSELEM*DDER.Y           | S325:  | 3 | 2,9435 | 0,216 | -0,198 |
| 6 | Q14676 MDC1_HUMAN  | R.AQPFGFIDS#DTDAEEER.I           | S329:  | 2 | 4,2077 | 0,581 | -0,547 |
| 6 | Q8ND30 LIPB2_HUMAN | R.TLS#INEEPEGGFSK.W              | S329:  | 2 | 3,7282 | 0,329 | 0,071  |
| 6 | Q86WB0 NIPA_HUMAN  | R.S#QDATFSPGSEQAEK.S             | S329:  | 2 | 3,5767 | 0,347 | -0,514 |

|   |                    |                                   |       |   |        |       |        |
|---|--------------------|-----------------------------------|-------|---|--------|-------|--------|
| 6 | Q9UHR4 BI2L1_HUMAN | R.S#VSVATGLNM*M*K.K               | S329: | 2 | 3,0249 | 0,492 | -0,271 |
| 6 | P05787 K2C8_HUMAN  | R.AS#LEAAIADAEQR.G                | S330: | 3 | 2,8326 | 0,214 | 0,193  |
| 6 | Q9UHR4 BI2L1_HUMAN | R.SVS#VATGLNM*M*K.K               | S331: | 2 | 2,3145 | 0,247 | -0,09  |
| 6 | Q9H330 CI005_HUMAN | R.GESAPTLSTSPSPSSPSPTSPS#PTLGR.R  | S332: | 3 | 3,1343 | 0,247 | -0,275 |
| 6 | Q9HB21 PKHA1_HUMAN | R.SNS#LVSTFTM*EK.R                | S332: | 2 | 2,5321 | 0,405 | -0,085 |
| 6 | Q641Q2 FA21A_HUMAN | R.TPS#DDEEDNLFAPPK.L              | S333: | 2 | 4,4271 | 0,513 | -0,07  |
| 6 | Q86SQ0 PHLB2_HUMAN | K.TSASEGNPYVSTLSVPAS#PR.V         | S334: | 3 | 3,7785 | 0,333 | -0,418 |
| 6 | Q14498 RBM39_HUMAN | R.TDASS#ASSFLDSELER.T             | S334: | 2 | 3,138  | 0,555 | -0,575 |
| 6 | Q8WXI9 P66B_HUMAN  | R.VSS#PLPSPSAM*TDAANSQAAAK.L      | S334: | 3 | 3,095  | 0,23  | -0,167 |
| 6 | Q5VSL9 FA40A_HUMAN | R.AAS#PPASASDLIEQQQK.R            | S335: | 3 | 5,5527 | 0,323 | 0      |
| 6 | Q5VSL9 FA40A_HUMAN | R.AAS#PPASASDLIEQQQK.R            | S335: | 2 | 5,0188 | 0,454 | -0,469 |
| 6 | Q9NQQ7 S35C2_HUMAN | K.GLGS#SPDLELLLR.S                | S335: | 2 | 3,7774 | 0,27  | -0,505 |
| 6 | Q14680 MELK_HUMAN  | R.LS#SFSCGQASATPFTDIK.S           | S335: | 2 | 3,7092 | 0,425 | -0,428 |
| 6 | Q8IY81 RRMJ3_HUMAN | K.ALDISLSS#GEEDEGDEEDSTAGTTK.Q    | S336: | 3 | 3,8603 | 0,406 | -0,416 |
| 6 | Q16643 DREB_HUMAN  | R.S#PSDSSTASTPVAEQIER.A           | S337: | 3 | 3,6335 | 0,322 | -0,094 |
| 6 | Q02156 KPCE_HUMAN  | K.LIAGAESPQPASGSS#PSEEDR.S        | S337: | 3 | 2,6412 | 0,275 | -0,591 |
| 6 | P49790 NU153_HUMAN | R.IPSIVSSPLNS#PLDR.S              | S338: | 2 | 3,6408 | 0,452 | 0,073  |
| 6 | P82094 TMF1_HUMAN  | R.S#VSEINSDELSESGK.G              | S338: | 2 | 3,3717 | 0,432 | -0,313 |
| 6 | Q16643 DREB_HUMAN  | R.SPS#DSSTASTPVAEQIER.A           | S339: | 2 | 5,0071 | 0,653 | 0,314  |
| 6 | Q86YP4 P66A_HUMAN  | K.GTTATSAQANSTPTSVASVTSAES#PASR.Q | S340: | 3 | 5,1904 | 0,475 | -0,26  |
| 6 | P49790 NU153_HUMAN | R.S#GIDITDFQAK.R                  | S343: | 2 | 3,3144 | 0,498 | 0      |
| 6 | Q8N7R7 CCYL1_HUMAN | R.SFS#ADNFIGIQR.S                 | S344: | 2 | 3,2074 | 0,306 | -0,17  |
| 6 | Q15942 ZYX_HUMAN   | R.S#PGAPGPLTLK.E                  | S344: | 2 | 3,0459 | 0,379 | -0,218 |
| 6 | Q9Y6M4 KC1G3_HUMAN | K.QLPTPVGAVQQDPALSS#NR.E          | S345: | 3 | 2,7212 | 0,262 | -0,089 |
| 6 | Q5T1M5 FKB15_HUMAN | K.SNS#LSEQLAINTSPDAVK.A           | S346: | 2 | 5,3264 | 0,593 | 0,125  |
| 6 | Q9NWB7 IFT57_HUMAN | R.LLS#EVM*EELEK.V                 | S347: | 2 | 3,1988 | 0,433 | -0,689 |
| 6 | Q9UGV2 NDRG3_HUMAN | R.SVTS#NQSDGTQESCESPDVLDLDR.H     | S349: | 3 | 4,2134 | 0,42  | 0,22   |
| 6 | Q13671 RIN1_HUMAN  | R.S#M*SAAFCSLLAPER.Q              | S349: | 2 | 4,0282 | 0,467 | -0,224 |
| 6 | Q9NNT2 OGFR_HUMAN  | R.S#VEPQDAGPLER.S                 | S349: | 2 | 3,0884 | 0,368 | -0,443 |
| 6 | Q13671 RIN1_HUMAN  | R.SM*S#AAFCSSLLAPER.Q             | S351: | 2 | 3,9884 | 0,505 | -0,075 |
| 6 | Q641Q2 FA21A_HUMAN | K.LTDEDFS#PFGSGGLFSGGK.G          | S352: | 2 | 3,9598 | 0,477 | -0,475 |
| 6 | Q16799 RTN1_HUMAN  | K.GSIS#EDELITAIK.E                | S352: | 2 | 3,9199 | 0,522 | 0      |
| 6 | Q9NTZ6 RBM12_HUMAN | K.FLS#PQDTFEALK.R                 | S352: | 2 | 2,0789 | 0,339 | 0,248  |

|   |                    |                              |        |   |        |       |        |
|---|--------------------|------------------------------|--------|---|--------|-------|--------|
| 6 | Q96K21 ZFY19_HUMAN | R.LPDS#DDDEDEETAIQR.V        | S354:  | 3 | 3,2964 | 0,269 | -0,095 |
| 6 | Q96K21 ZFY19_HUMAN | R.LPDS#DDDEDEETAIQR.V        | S354:  | 2 | 2,775  | 0,673 | -0,57  |
| 6 | O75970 MPDZ_HUMAN  | R.TAPTALGITLSSS#PTSTPELR.V   | S354:  | 3 | 2,6374 | 0,087 | -0,084 |
| 6 | P11532 DMD_HUMAN   | K.GLSPLSPPEM*M*PTS#PQSPR.D   | S3549: | 3 | 2,7363 | 0,227 | -0,082 |
| 6 | Q14157 UBP2L_HUMAN | K.GGS#TTGSQFLEQFK.T          | S356:  | 2 | 3,8894 | 0,471 | -0,078 |
| 6 | O76021 RL1D1_HUMAN | K.ATNES#EDEIQLVPIGK.K        | S361:  | 3 | 3,6751 | 0,335 | 0,381  |
| 6 | Q9BQL6 FERM1_HUMAN | K.ADS#LLEDITDIPK.L           | S361:  | 2 | 3,0526 | 0,495 | -0,404 |
| 6 | O76021 RL1D1_HUMAN | K.ATNES#EDEIQLVPIGK.K        | S361:  | 2 | 2,3806 | 0,246 | -0,381 |
| 6 | Q9H5J0 ZBTB3_HUMAN | K.VEAIVIS#DEETDVSDEQPQGP.R.A | S362:  | 3 | 6,6193 | 0,547 | -0,349 |
| 6 | Q9H6X2 ANTR1_HUMAN | K.EVPPPAEES#EEEDDDGLPK.K     | S362:  | 3 | 3,1973 | 0,12  | -0,891 |
| 6 | Q5M775 SPEC1_HUMAN | K.CSTAGSSPNS#VSELSLASLTK.I   | S364:  | 3 | 3,9309 | 0,45  | -0,317 |
| 6 | P49768 PSN1_HUMAN  | R.AAVQELSSS#ILAGEDPEER.G     | S367:  | 3 | 3,8163 | 0,417 | 0,264  |
| 6 | Q99575 POP1_HUMAN  | K.SAVCIADPLTPS#QEK.S         | S367:  | 2 | 3,4446 | 0,349 | 0,544  |
| 6 | P49768 PSN1_HUMAN  | R.AAVQELSSS#ILAGEDPEER.G     | S367:  | 2 | 2,3043 | 0,426 | -0,352 |
| 6 | Q96JN0 LCOR_HUMAN  | K.AS#PVTTSTPTAATTQNPVLSK.L   | S37:   | 2 | 2,2358 | 0,374 | -0,476 |
| 6 | Q0VDD7 CS057_HUMAN | R.ALEVAGPDGQASASPAS#PR.R     | S370:  | 3 | 3,5008 | 0,219 | -0,834 |
| 6 | Q8WWL2 SPIR2_HUMAN | R.GFGS#LPCILNACSGDAK.S       | S371:  | 2 | 4,1822 | 0,546 | -0,595 |
| 6 | Q5VT52 K0460_HUMAN | R.DVEDM*ELS#DVEDDGSK.I       | S374:  | 2 | 4,6993 | 0,494 | -0,325 |
| 6 | Q5VT52 K0460_HUMAN | R.DVEDM*ELS#DVEDDGSK.I       | S374:  | 3 | 3,5573 | 0,312 | -0,097 |
| 6 | Q9NXX6 NSE4A_HUMAN | K.TFEISEPVITPS#QR.Q          | S377:  | 2 | 4,0413 | 0,413 | 0,145  |
| 6 | O95817 BAG3_HUMAN  | K.VPPAPVPCPPPS#PGPSAVPSSPK.S | S377:  | 3 | 3,1157 | 0,378 | 0      |
| 6 | Q9UNK9 ANGE1_HUMAN | K.NVLLANSSS#PQVEGDFAM*APR.G  | S38:   | 3 | 3,6254 | 0,196 | -0,159 |
| 6 | P16949 STMN1_HUMAN | K.ESVPEFPLS#PPK.K            | S38:   | 2 | 2,3364 | 0,405 | -0,173 |
| 6 | Q12888 TP53B_HUMAN | R.STPFIVPSS#PTEQEGR.Q        | S380:  | 2 | 2,7209 | 0,241 | -0,269 |
| 6 | P50395 GDIB_HUMAN  | K.FVS#ISDLLVPK.D             | S382:  | 2 | 3,4476 | 0,344 | -0,376 |
| 6 | Q9UKS6 PACN3_HUMAN | R.ALYDYAGQEADELS#FR.A        | S383:  | 2 | 3,3667 | 0,54  | -0,443 |
| 6 | Q8NC44 F134A_HUMAN | R.QALDS#EEEEEDVAAK.E         | S385:  | 2 | 4,2342 | 0,529 | -0,28  |
| 6 | Q16659 MK06_HUMAN  | R.ALS#DVTDEEEVQVDPR.K        | S386:  | 2 | 4,8708 | 0,391 | -0,324 |
| 6 | Q9Y3X0 CCDC9_HUMAN | K.EGAASPAPETPQPTS#PETSPPK.E  | S386:  | 3 | 4,235  | 0,406 | -0,169 |
| 6 | Q4KMP7 TB10B_HUMAN | R.QQPPLGPSSSLLS#LPGLK.S      | S386:  | 2 | 3,7039 | 0,519 | -0,45  |
| 6 | Q7Z2W4 ZCCHV_HUMAN | R.S#SLGSLQTPEAVTTR.K         | S386:  | 2 | 2,4333 | 0,107 | 0      |
| 6 | Q86SQ0 PHLB2_HUMAN | R.NFSCGS#VEFDEADLES.R.Q      | S387:  | 3 | 4,4445 | 0,443 | -0,594 |
| 6 | Q86SQ0 PHLB2_HUMAN | R.NFSCGS#VEFDEADLES.R.Q      | S387:  | 2 | 3,848  | 0,591 | -0,34  |

|   |                    |                               |                 |   |        |       |        |
|---|--------------------|-------------------------------|-----------------|---|--------|-------|--------|
| 6 | Q92622 K0226_HUMAN | R.S#SFSEGQTLTVTSGAK.K         | S387:           | 2 | 3,8118 | 0,49  | -0,654 |
| 6 | Q9Y6K9 NEMO_HUMAN  | R.S#PPEEPPDFCCPK.C            | S387:           | 2 | 2,2866 | 0,344 | -0,298 |
| 6 | P55010 IF5_HUMAN   | K.EAEEES#SGGEEDEDENIEVVYSK.A  | S389:           | 3 | 4,1316 | 0,479 | -0,132 |
| 6 | Q9UK32 KS6A6_HUMAN | K.GFS#FVATSIAEEYK.I           | S389:           | 2 | 3,9908 | 0,498 | -0,449 |
| 6 | Q8IYB3 SRRM1_HUMAN | R.RLS#PS#AS#PPR.R             | S389:S391:S393: | 2 | 2,3787 | 0,29  | -0,28  |
| 6 | Q9Y2D5 AKAP2_HUMAN | K.S#PGALETPSAAGSQGNTASQ GK.E  | S393:           | 3 | 5,0868 | 0,537 | -0,087 |
| 6 | Q9BXF6 RFIP5_HUMAN | R.SNS#SSEAVLQGEELSAQAK.V      | S395:           | 3 | 4,0308 | 0,421 | 0,182  |
| 6 | Q01167 FOXK2_HUMAN | R.EGS#PAPLEPEPGAAQPK.L        | S398:           | 2 | 3,1771 | 0,456 | -0,487 |
| 6 | Q01167 FOXK2_HUMAN | R.EGS#PAPLEPEPGAAQPK.L        | S398:           | 3 | 2,8185 | 0,285 | -0,104 |
| 6 | Q96HE9 PRR11_HUMAN | K.LITPPPPPS#PER.V             | S40:            | 3 | 2,762  | 0,105 | -0,124 |
| 6 | Q14527 HLTF_HUMAN  | K.TAVQYIESSDS#EEIETSELPQK.M   | S400:           | 3 | 4,5066 | 0,524 | -0,214 |
| 6 | Q8N5Y2 MS3L1_HUMAN | R.SSS#PIPLTPS#KEGSAVFAGFEGR.R | S400:S407:      | 3 | 3,0867 | 1     | -0,369 |
| 6 | A6NKF1 SAC31_HUMAN | R.TLEEVVM*AEEDDEGTDRPGS#PA.-  | S401:           | 3 | 3,1093 | 0,351 | 0,074  |
| 6 | Q86Y91 KI18B_HUMAN | K.LQVYEGGGQPPPQDLPGS#PK.S     | S404:           | 3 | 3,1674 | 0,311 | 0      |
| 6 | Q14686 MLL2_HUMAN  | R.VS#PAAAQLADTLFSK.G          | S4084:          | 2 | 3,7651 | 0,489 | 0      |
| 6 | Q9NTJ3 SMC4_HUMAN  | R.TES#PATAAETASEELDNR.S       | S41:            | 2 | 5,0069 | 0,662 | -0,433 |
| 6 | Q14662 STX16_HUMAN | R.S#IAAELDELADDR.M            | S41:            | 2 | 4,6485 | 0,62  | -0,244 |
| 6 | Q9NTJ3 SMC4_HUMAN  | R.TES#PATAAETASEELDNR.S       | S41:            | 3 | 4,5976 | 0,566 | 0,186  |
| 6 | Q09666 AHNK_HUMAN  | R.DDGVFVQEVTVQNS#PAAR.T       | S41:            | 2 | 4,5854 | 0,356 | -0,383 |
| 6 | Q8TDD1 DDX54_HUMAN | R.GSDS#EDGEFEIQAEDDAR.A       | S41:            | 2 | 4,0945 | 0,544 | -0,357 |
| 6 | P46108 CRK_HUMAN   | R.DSS#TSPGDYVLSVSENSR.V       | S41:            | 3 | 3,9446 | 0,291 | 0,277  |
| 6 | Q9BYI3 HYCCI_HUMAN | R.AQS#ENLELLSLK.R             | S415:           | 2 | 3,741  | 0,416 | -0,257 |
| 6 | O60524 SDCG1_HUMAN | R.NPYLLS#EEEDDDVDGDVNVEK.N    | S417:           | 3 | 4,7564 | 0,328 | 0,592  |
| 6 | Q8WUX9 CHMP7_HUMAN | R.IS#DAELEAELEK.L             | S417:           | 2 | 3,3597 | 0,478 | 0,342  |
| 6 | Q14247 SRC8_HUMAN  | R.LPSS#PVYEDAASF.K.A          | S418:           | 2 | 3,3786 | 0,529 | -0,077 |
| 6 | Q14247 SRC8_HUMAN  | R.LPSS#PVYEDAASF.K.A          | S418:           | 3 | 3,2144 | 0,447 | -0,115 |
| 6 | Q1ED39 TS118_HUMAN | R.YSVLNDDYFADVVS#PLR.A        | S42:            | 3 | 4,3159 | 0,379 | -0,088 |
| 6 | Q14188 TFDP2_HUMAN | K.GNISFVAFVSNNTNS#PTK.I       | S42:            | 2 | 3,7511 | 0,519 | -0,498 |
| 6 | Q9BXK5 B2L13_HUMAN | R.EES#LVEELSPASEK.K           | S420:           | 2 | 2,1855 | 0,317 | -0,15  |
| 6 | Q15911 ZFH3_HUMAN  | K.TPITSVPLGPLAS#SPTK.S        | S425:           | 2 | 2,2033 | 0,425 | -0,349 |
| 6 | Q9C0C2 TB182_HUMAN | R.FS#EGVLQSPSQDQEK.L          | S429:           | 2 | 4,1236 | 0,475 | -0,208 |
| 6 | Q86WR7 CJ047_HUMAN | R.S#FTLDDESLK.Y               | S43:            | 2 | 2,7133 | 0,174 | -0,099 |
| 6 | P08865 RSSA_HUMAN  | K.S#DGIYIINLK.R               | S43:            | 2 | 2,2152 | 0,354 | 0,1    |

|   |                    |                                    |            |   |        |       |        |
|---|--------------------|------------------------------------|------------|---|--------|-------|--------|
| 6 | O43242 PSMD3_HUMAN | K.LQLDS#PEDAEFIVAK.A               | S430:      | 2 | 4,2735 | 0,535 | -0,487 |
| 6 | Q6VY07 PACS1_HUMAN | K.DTTS#PM*ELAALEK.I                | S430:      | 2 | 3,236  | 0,43  | -0,162 |
| 6 | P35658 NU214_HUMAN | K.S#PGSTPTTPTSSQAPQK.L             | S430:      | 2 | 2,8967 | 0,57  | -0,139 |
| 6 | Q53ET0 CRTC2_HUMAN | R.VPLS#PLSLLAGPADAR.R              | S433:      | 2 | 4,0232 | 0,397 | -0,442 |
| 6 | Q92615 LARP5_HUMAN | R.GPGLLES#PSIFNFTADR.L             | S434:      | 2 | 2,4707 | 0,358 | -0,064 |
| 6 | Q15149 PLEC1_HUMAN | R.SSS#VGSSSSYPISPAVSR.T            | S4386:     | 2 | 4,2841 | 0,444 | -0,399 |
| 6 | Q9BZ29 DOCK9_HUMAN | R.QM*LATTSPALM*NGSGQS#PSVLK.G      | S443:      | 3 | 2,9315 | 0,171 | -0,157 |
| 6 | O14974 MYPT1_HUMAN | K.TGS#YGALAEITASK.E                | S445:      | 2 | 4,1741 | 0,553 | 0      |
| 6 | Q96PU5 NED4L_HUMAN | R.S#LSSPTVTLAPLEGAK.D              | S446:      | 2 | 3,6932 | 0,504 | -0,281 |
| 6 | Q9Y6X4 K0888_HUMAN | K.TSLITEEEDS#TSEVLDEELK.L          | S447:      | 3 | 5,0927 | 0,303 | -0,234 |
| 6 | Q9H8N7 ZN395_HUMAN | R.S#LSFSEPQQPAPAM*K.S              | S447:      | 2 | 3,3097 | 0,551 | 0,285  |
| 6 | Q14247 SRC8_HUMAN  | R.GPVSGETPEPVYS#M*EAADYR.E         | S447:      | 3 | 3,0118 | 0,257 | 0      |
| 6 | Q96BD5 PF21A_HUMAN | K.YNAVLGFGALTPTS#PQSSHPPDS#PENЕК.T | S447:S455: | 3 | 2,9035 | 0,233 | -0,122 |
| 6 | Q96PU5 NED4L_HUMAN | R.SLS#SPTVTLAPLEGAK.D              | S448:      | 2 | 4,0696 | 0,603 | -0,211 |
| 6 | Q9Y6X4 K0888_HUMAN | K.TSLITEEEDSTS#EVLDEELK.L          | S449:      | 3 | 3,9506 | 0,316 | -0,234 |
| 6 | Q8N2F6 ARM10_HUMAN | K.S#AGALEEGTSEGQLCGR.S             | S45:       | 2 | 4,7372 | 0,624 | -0,406 |
| 6 | O60832 DKC1_HUMAN  | R.ES#ESEDETTPAAPQLIK.K             | S451:      | 2 | 3,3717 | 0,549 | -0,425 |
| 6 | Q9BVJ6 UT14A_HUMAN | K.DSGS#QEVLSLR.V                   | S453:      | 2 | 3,8449 | 0,282 | 0,087  |
| 6 | Q14157 UBP2L_HUMAN | K.SPAVATSTAAPPPS#SPLPSK.S          | S453:      | 3 | 3,4961 | 0,396 | 0      |
| 6 | Q14157 UBP2L_HUMAN | K.SPAVATSTAAPPPSS#PLPSK.S          | S454:      | 2 | 3,3954 | 0,614 | -0,718 |
| 6 | Q5BKX6 S45A4_HUMAN | R.S#M*SDLYDM*QK.R                  | S454:      | 2 | 2,0119 | 0,141 | -0,183 |
| 6 | O14686 MLL2_HUMAN  | K.IPNSYEVLPES#PAR.G                | S4547:     | 2 | 4,4383 | 0,508 | 0,068  |
| 6 | P22314 UBA1_HUMAN  | K.NGS#EADIDGLYSR.Q                 | S46:       | 2 | 4,9816 | 0,527 | -0,076 |
| 6 | Q96TC7 FA82C_HUMAN | R.SQS#LPNSLDYTQTS DPGR.H           | S46:       | 3 | 4,0069 | 0,502 | 0,358  |
| 6 | Q96TC7 FA82C_HUMAN | R.SQS#LPNSLDYTQTS DPGR.H           | S46:       | 2 | 3,3538 | 0,493 | -0,537 |
| 6 | P16949 STMN1_HUMAN | K.DLS#LEEIQK.K                     | S46:       | 2 | 3,0047 | 0,238 | -0,211 |
| 6 | Q6PJG2 CN043_HUMAN | R.AS#QEANLLLAQK.A                  | S461:      | 2 | 2,7984 | 0,462 | -0,083 |
| 6 | Q6P597 KLC3_HUMAN  | R.AM*S#LNTLNVDAPR.A                | S466:      | 2 | 4,3778 | 0,476 | -0,977 |
| 6 | Q96D46 NMD3_HUMAN  | R.DSAIPVES#DTDDEGAPR.I             | S468:      | 2 | 3,1012 | 0,424 | -0,329 |
| 6 | Q99640 PMYT1_HUMAN | R.DALDLS#DINSEPPR.G                | S469:      | 2 | 3,2472 | 0,44  | 0,226  |
| 6 | O60885 BRD4_HUMAN  | K.M*PDEPEEPVVAVSS#PAVPPPTK.V       | S470:      | 3 | 2,986  | 0,176 | -0,077 |
| 6 | Q86YR5 GPSM1_HUMAN | R.APSS#DEECFFDLLTK.F               | S470:      | 2 | 2,9058 | 0,495 | -0,265 |
| 6 | Q9H3U1 UN45A_HUMAN | R.AS#FITANGVSLK.D                  | S472:      | 2 | 3,0111 | 0,384 | -0,348 |



|   |                      |                                   |            |   |        |       |        |
|---|----------------------|-----------------------------------|------------|---|--------|-------|--------|
| 6 | Q86WK6 AMGO1_HUMAN   | R.RM*S#DPESVSSVFSDTPIVV.-         | S477:      | 2 | 2,281  | 0,495 | -0,454 |
| 6 | O76080 ZFAN5_HUMAN   | R.M*S#PM*GTASGSNSPTSASVQR.A       | S48:       | 3 | 4,3649 | 0,422 | -0,242 |
| 6 | O76080 ZFAN5_HUMAN   | R.M*S#PMGTASGSNSPTSASVQR.A        | S48:       | 3 | 4,1565 | 0,424 | -0,325 |
| 6 | Q6P1R3 CK061_HUMAN   | R.GAS#PLGPGSAAGSGAAASGGLGLGLGGR.S | S48:       | 3 | 2,801  | 0,213 | -0,079 |
| 6 | Q9UHV7 MED13_HUMAN   | R.VS#VSDDVGM*DADSASQR.L           | S481:      | 2 | 4,3514 | 0,537 | -0,199 |
| 6 | Q8NFC6 FA44A_HUMAN   | K.YYS#DSDELVEQR.R                 | S482:      | 2 | 4,8136 | 0,461 | -0,271 |
| 6 | Q02952 AKA12_HUMAN   | K.ETCVSGEDPTQGADLS#PDEK.V         | S483:      | 3 | 3,1463 | 0,288 | 0,083  |
| 6 | Q8NDF8 PAPD5_HUMAN   | R.VGS#QDVSLESSQAVGK.M             | S484:      | 2 | 4,4475 | 0,553 | -0,292 |
| 6 | P34947 GRK5_HUMAN    | K.DVLDIEQF5#TVK.G                 | S484:      | 2 | 3,8362 | 0,41  | -0,166 |
| 6 | Q8NFC6 FA44A_HUMAN   | K.YYSDS#DDELVEQR.R                | S484:      | 3 | 2,9582 | 0,119 | 0,102  |
| 6 | P11169 GTR3_HUMAN    | K.DGVM*EM*NS#IEPAKETTTNV.-        | S485:      | 3 | 3,5835 | 0,428 | 0,168  |
| 6 | Q9ULU4 PKCB1_HUMAN   | K.TGQAGS#LSGS#PKPFSPQLSAPITTK.T   | S486:S490: | 3 | 4,4831 | 0,486 | -0,21  |
| 6 | Q15361 TTF1_HUMAN    | R.YLSADSGDADDS#DADLGSVAVK.Q       | S487:      | 2 | 2,3431 | 0,539 | -0,227 |
| 6 | Q9P2B4 CT2NL_HUMAN   | R.DLS#PTLIDNSAAK.Q                | S488:      | 2 | 3,9942 | 0,467 | 0      |
| 6 | Q86UE4 LYRIC_HUMAN   | K.TIS#TSDPAEVLVK.N                | S494:      | 2 | 3,5953 | 0,449 | 0,169  |
| 6 | Q8NEN9 PDZD8_HUMAN   | R.ELDS#EFEDLASDVR.A               | S496:      | 2 | 4,9121 | 0,57  | -0,429 |
| 6 | P47736 RPGP1_HUMAN   | R.S#SAIGIENIQEVQEK.R              | S498:      | 2 | 3,5545 | 0,499 | -0,495 |
| 6 | O94833 BPAEA_HUMAN   | R.STS#VSSQAAQAASPQVPATTPK.I       | S4986:     | 3 | 3,9931 | 0,276 | -0,319 |
| 6 | Q9NRA8 4ET_HUMAN     | R.S#M*GETESGD AFLDK.K             | S5:        | 2 | 4,6341 | 0,378 | -0,36  |
| 6 | Q8WUM0 NU133_HUMAN   | K.GLPLGSVAVSSPVVLF#PVGR.R         | S50:       | 2 | 4,7325 | 0,538 | -0,572 |
| 6 | P61081 UBC12_HUMAN   | K.TCDIS#FSDPDDLNF.K.L             | S50:       | 2 | 4,2758 | 0,482 | -0,31  |
| 6 | Q8WUM0 NU133_HUMAN   | K.GLPLGSVAVSSPVVLF#PVGR.R         | S50:       | 3 | 2,7914 | 0,436 | -0,286 |
| 6 | Q13610 PWP1_HUMAN    | K.LQEEGGGS#DEEETGSPSEDGM*QSAR.T   | S50:       | 3 | 2,6766 | 0,278 | -0,068 |
| 6 | Q12888 TP53B_HUMAN   | K.NS#PEDLGLSLTGDSCK.L             | S500:      | 2 | 4,4659 | 0,559 | -0,275 |
| 6 | Q9BZE9 ASPC1_HUMAN   | R.AAGS#PSPLPAPDPAPK.S             | S500:      | 2 | 3,7566 | 0,426 | -0,314 |
| 6 | Q86SQ0 PHLB2_HUMAN   | K.LQLSDEESVFEEALM*S#PDTR.Y        | S501:      | 3 | 4,1069 | 0,423 | 0      |
| 6 | Q13263 TIF1B_HUMAN   | R.LDLTLTADS#QPPVFK.V              | S501:      | 2 | 3,566  | 0,371 | -0,21  |
| 6 | Q9NV70 EXOC1_HUMAN   | R.SQSSLLDM*GNM*SAS#DLDVADR.T      | S501:      | 3 | 2,6927 | 0,122 | -0,228 |
| 6 | Q9NU22 MDN1_HUMAN    | R.EDS#DTEEQVPEALER.K              | S5015:     | 2 | 3,861  | 0,435 | -0,401 |
| 6 | Q13470 TNK1_HUMAN    | R.S#LESVLSLGRPTGGGSS#PPEIR.Q      | S502:S519: | 3 | 3,5059 | 0,285 | -0,224 |
| 6 | Q86TI0 TBCD1_HUMAN   | R.S#LTESLESILSR.G                 | S503:      | 2 | 2,5239 | 0,395 | -0,259 |
| 6 | ##Q03431 PTHR1_HUMAN | R.SGTPAEKDEES#EPYLK.G             | S503:      | 2 | 2,0694 | 0,107 | 0,984  |
| 6 | Q6ZML7 Q6ZML7_HUMAN  | R.AEELSPAALS#PSLEPIR.C            | S504:      | 2 | 4,9673 | 0,466 | -0,459 |

|   |                     |                                 |        |   |        |       |        |
|---|---------------------|---------------------------------|--------|---|--------|-------|--------|
| 6 | A0MZ66 SHOT1_HUMAN  | K.S#M*PVLGSVSSVTK.T             | S506:  | 2 | 2,2921 | 0,236 | -0,088 |
| 6 | P27816 MAP4_HUMAN   | K.DM*S#PLSETEM*ALGK.D           | S507:  | 2 | 4,1792 | 0,551 | 0,301  |
| 6 | Q99549 MPP8_HUMAN   | R.GAEAFGDS#EEDGEDVFEVEK.I       | S51:   | 3 | 3,6782 | 0,34  | 0      |
| 6 | Q9ULT0 TTC7A_HUMAN  | R.GS#PSAAFTFPDPTDDFGK.L         | S51:   | 2 | 2,8095 | 0,534 | -0,531 |
| 6 | Q9UQR0 SCML2_HUMAN  | R.SPQQTVPYVVPLS#PK.L            | S511:  | 2 | 3,5506 | 0,388 | 0      |
| 6 | Q9UQR0 SCML2_HUMAN  | R.SPQQTVPYVVPLS#PK.L            | S511:  | 3 | 3,0082 | 0,282 | -0,213 |
| 6 | Q8ND30 LIPB2_HUMAN  | R.TQS#GNFYTDTLGM*AEFR.R         | S512:  | 2 | 3,7464 | 0,518 | -0,36  |
| 6 | Q14676 MDC1_HUMAN   | R.S#QASTTVDINTQVEK.E            | S513:  | 2 | 4,908  | 0,548 | -0,43  |
| 6 | Q99550 MPP9_HUMAN   | K.DSS#PGSSSTSLLIK.K             | S518:  | 2 | 2,851  | 0,348 | -0,167 |
| 6 | O94776 MTA2_HUMAN   | R.DIS#SSLNSLADSNAR.E            | S52:   | 2 | 5,1761 | 0,599 | -0,075 |
| 6 | P12956 KU70_HUMAN   | R.LGS#LVDEFK.E                  | S520:  | 2 | 3,3339 | 0,459 | -0,336 |
| 6 | Q9Y4W2 LAS1L_HUMAN  | R.ICSIYQSGENSLVQEGSEAS#PIGK.S   | S523:  | 3 | 5,0917 | 0,617 | -0,268 |
| 6 | O95365 ZBT7A_HUMAN  | R.GGAPDPSPGATATPGAPAQPSS#PDAR.R | S526:  | 3 | 4,4939 | 0,436 | 0      |
| 6 | Q5VUA4 ZN318_HUMAN  | R.S#FPDIEDEEK.F                 | S527:  | 2 | 2,3546 | 0,31  | -0,189 |
| 6 | Q8NFH5 NUP53_HUMAN  | R.S#ISGPSVGM*EM*R.S             | S53:   | 2 | 2,2543 | 0,482 | -0,25  |
| 6 | Q2TB40 Q2TB40_HUMAN | R.TSS#TDEVLSLEEK.D              | S530:  | 2 | 4,1284 | 0,502 | 0      |
| 6 | O15320 CTGE5_HUMAN  | R.AFLS#PPTLLEGPLR.L             | S536:  | 2 | 2,737  | 0,238 | -0,23  |
| 6 | Q68E01 INT3_HUMAN   | K.DESCYDNAEAAFS#DDEEDLNSK.G     | S537:  | 3 | 5,3715 | 0,508 | -0,492 |
| 6 | Q3KQU3 MA7D1_HUMAN  | K.ESAAPAS#PAPSPAPSPTAPPQK.E     | S544:  | 3 | 2,8955 | 0,231 | -0,164 |
| 6 | Q09666 AHNK_HUMAN   | R.IS#APNVDFNLEGPK.V             | S5448: | 3 | 3,8327 | 0,393 | 0,231  |
| 6 | Q09666 AHNK_HUMAN   | R.IS#APNVDFNLEGPK.V             | S5448: | 2 | 2,5797 | 0,503 | -0,154 |
| 6 | Q9Y3L3 3BP1_HUMAN   | R.S#PPETAAPVEDM*AR.R            | S550:  | 3 | 3,5064 | 0,128 | -0,233 |
| 6 | Q9Y3L3 3BP1_HUMAN   | R.S#PPETAAPVEDM*AR.R            | S550:  | 2 | 3,4633 | 0,498 | -0,623 |
| 6 | Q12888 TP53B_HUMAN  | R.IDEDGENTQIEDTEPM*S#PVLNSK.F   | S552:  | 3 | 5,5126 | 0,419 | -0,551 |
| 6 | Q96GX5 MASTL_HUMAN  | R.DYLSSS#FLCSDDDR.A             | S552:  | 2 | 4,3875 | 0,537 | -0,347 |
| 6 | Q09666 AHNK_HUMAN   | K.GPAFNM*AS#PESDFGINLK.G        | S5552: | 2 | 5,4233 | 0,332 | -0,306 |
| 6 | Q13625 ASPP2_HUMAN  | R.VLLS#PSIPSVGQDQTLSPGSK.Q      | S556:  | 3 | 3,1541 | 0,396 | -0,084 |
| 6 | Q8IWI9 MGAP_HUMAN   | K.TDQGILVTNQDACALASSVSS#PVK.S   | S56:   | 3 | 5,2172 | 0,439 | -0,36  |
| 6 | Q9NQW6 ANLN_HUMAN   | R.EIEM*SVDDDDINSS#K.V           | S562:  | 2 | 3,6035 | 0,532 | -0,408 |
| 6 | P51957 NEK4_HUMAN   | R.DLFAFQES#PPR.F                | S563:  | 2 | 2,9125 | 0,467 | -0,176 |
| 6 | Q86SQ0 PHLB2_HUMAN  | K.ASSES#SYLSILPK.T              | S565:  | 2 | 3,4053 | 0,376 | -0,25  |
| 6 | O60343 TBCD4_HUMAN  | R.S#LTSSLENIFSR.G               | S566:  | 2 | 3,0993 | 0,295 | -0,255 |
| 6 | Q9Y4L1 HYOU1_HUMAN  | R.VESVFETLVEDS#AEESTLTK.L       | S567:  | 3 | 2,9496 | 0,247 | -0,076 |

|   |                    |                                   |            |   |        |       |        |
|---|--------------------|-----------------------------------|------------|---|--------|-------|--------|
| 6 | Q9Y2K2 QSK_HUMAN   | R.FS#DGAASIQAFK.A                 | S568:      | 2 | 2,8386 | 0,413 | -0,185 |
| 6 | Q9BVJ6 UT14A_HUMAN | K.EQM*IDLQNLTTQS#PSVK.S           | S569:      | 2 | 3,1716 | 0,492 | -1,14  |
| 6 | Q13442 HAP28_HUMAN | K.S#LDSDESEDEEDDYQQK.R            | S57:       | 2 | 3,6172 | 0,462 | -0,578 |
| 6 | Q86XJ1 GA2L3_HUMAN | K.SALNLNQPVSVSVS#PVK.A            | S570:      | 2 | 4,0077 | 0,388 | -0,192 |
| 6 | Q09666 AHNK_HUMAN  | R.IS#M*SEVDLNVAAPK.V              | S570:      | 2 | 3,9041 | 0,465 | -0,233 |
| 6 | Q43663 PRC1_HUMAN  | R.NFS#INSVASTYSEFAK.D             | S571:      | 2 | 4,5194 | 0,503 | -0,727 |
| 6 | P17812 PYRG1_HUMAN | R.S#GSSS#PDSEITELKFPSINHD.-       | S571:S575: | 3 | 3,2482 | 1     | -0,304 |
| 6 | Q09666 AHNK_HUMAN  | R.ISM*S#EVDLNVAAPK.V              | S572:      | 2 | 4,8512 | 0,442 | -0,078 |
| 6 | Q09666 AHNK_HUMAN  | K.ASLGS#LEGEAEAEASSPK.G           | S5752:     | 2 | 4,1701 | 0,519 | -0,202 |
| 6 | Q09666 AHNK_HUMAN  | K.ASLGS#LEGEAEAEASSPK.G           | S5752:     | 3 | 3,413  | 0,387 | 0,303  |
| 6 | Q6ZRP7 QSOX2_HUMAN | R.DNLLDTYSADQGDS#SEGGTLAR.G       | S578:      | 3 | 5,0687 | 0,41  | 0,077  |
| 6 | Q8IY81 RRMJ3_HUMAN | K.TEIM*S#PLYQDEAPK.G              | S584:      | 2 | 3,879  | 0,398 | 0      |
| 6 | P46013 KI67_HUMAN  | K.AQSLVISPPAPS#PR.K               | S584:      | 2 | 3,1822 | 0,409 | 0,325  |
| 6 | Q9H0B6 KLC2_HUMAN  | K.S#VEEPTQPGGTGLSDSR.T            | S589:      | 2 | 2,8213 | 0,325 | -0,204 |
| 6 | Q9UQR0 SCML2_HUMAN | R.SVPGTTSSPLVGDIS#PK.S            | S590:      | 2 | 3,2927 | 0,459 | -0,213 |
| 6 | O15085 ARHGB_HUMAN | R.LSTGS#FPEDLLESDSSR.S            | S592:      | 2 | 3,2168 | 0,428 | -0,699 |
| 6 | Q8WWM7 ATX2L_HUMAN | K.EVDGLLTSEPM*GS#PVSSK.T          | S594:      | 2 | 4,3977 | 0,589 | -0,38  |
| 6 | Q8WWM7 ATX2L_HUMAN | K.EVDGLLTSEPM*GS#PVSSK.T          | S594:      | 3 | 3,2892 | 0,416 | 0,19   |
| 6 | Q96T23 RSF1_HUMAN  | R.LS#PIPEEVPK.S                   | S594:      | 2 | 2,229  | 0,12  | -0,103 |
| 6 | O75122 CLAP2_HUMAN | R.VLNTGS#DVVEAVADALK.K            | S596:      | 3 | 5,4369 | 0,384 | -0,303 |
| 6 | O75122 CLAP2_HUMAN | R.VLNTGS#DVVEAVADALK.K            | S596:      | 2 | 5,3334 | 0,544 | -0,674 |
| 6 | Q9Y4F5 K0284_HUMAN | K.M*IDQVFGVLES#PELSR.A            | S597:      | 2 | 3,6551 | 0,468 | -0,764 |
| 6 | Q9Y4F5 K0284_HUMAN | K.M*IDQVFGVLES#PELSR.A            | S597:      | 3 | 3,3979 | 0,127 | -0,095 |
| 6 | Q02952 AKA12_HUMAN | K.GLAEVQQDGEAEEGATS#DGEK.K        | S598:      | 3 | 3,3487 | 0,245 | 0      |
| 6 | Q9BWT3 PAPOG_HUMAN | K.TVS#PPTVCTIPTVVGR.N             | S599:      | 2 | 2,6612 | 0,397 | 0      |
| 6 | Q86W92 LIPB1_HUMAN | R.S#QSTTFNPDDM*SEPEFK.R           | S599:      | 2 | 2,0162 | 0,253 | -0,356 |
| 6 | Q9ULD5 ZN777_HUMAN | R.S#SPLSFSPVQEETLR.Q              | S6:        | 2 | 2,1479 | 0,431 | -0,263 |
| 6 | P05783 K1C18_HUMAN | R.GGM*GS#GGLATGIAGGLAGM*GGIQNEK.E | S60:       | 3 | 6,3827 | 0,482 | -0,077 |
| 6 | O00505 IMA3_HUMAN  | R.NVPQEESLEDS#DVDADFK.A           | S60:       | 2 | 2,5995 | 0,499 | -0,231 |
| 6 | Q86W92 LIPB1_HUMAN | R.SQS#TTFNPDDM*SEPEFK.R           | S601:      | 2 | 2,5864 | 0,333 | -0,475 |
| 6 | Q14497 ARI1A_HUMAN | R.FPPPQELS#QDSFGSQASSAPSM*TSSK.G  | S604:      | 3 | 3,3208 | 0,338 | -0,262 |
| 6 | Q96S38 KS6C1_HUMAN | R.IDS#KDS#ASELLGLDFGEK.L          | S605:S608: | 3 | 3,6941 | 0,161 | -0,263 |
| 6 | Q96S38 KS6C1_HUMAN | R.IDS#KDS#ASELLGLDFGEK.L          | S605:S608: | 2 | 3,4415 | 0,488 | -0,468 |

|   |                     |                                     |            |   |        |       |        |
|---|---------------------|-------------------------------------|------------|---|--------|-------|--------|
| 6 | Q7Z417 NUFP2_HUMAN  | K.ADTSS#QGALVFLSK.D                 | S608:      | 2 | 2,9722 | 0,328 | -0,325 |
| 6 | Q8N1G1 REXO1_HUMAN  | K.EVDFDS#DPM*EECLR.I                | S610:      | 2 | 3,6878 | 0,37  | -0,199 |
| 6 | Q70L73 Q70L73_HUMAN | R.S#SFSSDPDESEGIPLK.R               | S62:       | 2 | 3,5978 | 0,481 | -0,481 |
| 6 | Q5T4S7 UBR4_HUMAN   | K.AAPPPPPPPPLESS#PR.V               | S620:      | 3 | 2,9559 | 0,315 | 0,103  |
| 6 | O76094 SRP72_HUMAN  | K.TVSS#PPTSPPRPGS#AATVSASTSNIIPPR.H | S621:S630: | 3 | 3,2807 | 1     | -0,506 |
| 6 | Q9UPR5 NAC2_HUMAN   | R.GIS#ALLLNQGDGDR.K                 | S622:      | 2 | 2,575  | 0,374 | -0,404 |
| 6 | P52756 RBM5_HUMAN   | R.GLVAAYSGDS#DNEEELVER.L            | S624:      | 2 | 4,8912 | 0,619 | -0,458 |
| 6 | A6NC44 A6NC44_HUMAN | R.NFS#INSVASTYSEFAR.E               | S625:      | 2 | 3,9818 | 0,549 | -0,195 |
| 6 | Q9H165 BC11A_HUMAN  | K.LLLGS#PSSLSPFSK.R                 | S625:      | 2 | 3,7022 | 0,391 | -0,484 |
| 6 | Q96JM3 ZN828_HUMAN  | K.DNQESS#DAELSSSEYIK.T              | S627:      | 2 | 5,0886 | 0,482 | -0,493 |
| 6 | P02545 LMNA_HUMAN   | R.S#VGGSGGSGFGDNLVTR.S              | S628:      | 2 | 4,4786 | 0,592 | 0,074  |
| 6 | Q96AE4 FUBP1_HUMAN  | R.QQAAYYAQTS#PQGMPQHPPAPQGQ.-       | S630:      | 3 | 3,7073 | 0,269 | -0,55  |
| 6 | Q96AE4 FUBP1_HUMAN  | R.QQAAYYAQTS#PQGM*PQHPPAPQGQ.-      | S630:      | 3 | 3,5544 | 0,28  | -0,205 |
| 6 | Q99661 KIF2C_HUMAN  | K.EEEELSSQM*SS#FNEAM*TQIR.E         | S633:      | 3 | 3,36   | 0,278 | -0,149 |
| 6 | Q92878 RAD50_HUMAN  | K.LFDVCGS#QDFESDLDR.L               | S635:      | 2 | 5,6808 | 0,547 | -0,554 |
| 6 | Q12888 TP53B_HUMAN  | R.SEALS#SVLDQEEAM*EIK.E             | S639:      | 2 | 3,3631 | 0,312 | -1,359 |
| 6 | P35221 CTNA1_HUMAN  | R.TPEELDDS#DFETEDFDVR.S             | S641:      | 3 | 3,4211 | 0,327 | 0      |
| 6 | Q02952 AKA12_HUMAN  | K.SATLS#STESTASEM*QEEM*K.G          | S644:      | 3 | 5,6966 | 0,521 | 0,085  |
| 6 | Q9ULT0 TTC7A_HUMAN  | K.DGS#FGEGLTM*K.K                   | S647:      | 2 | 2,6184 | 0,427 | 0      |
| 6 | P46013 KI67_HUMAN   | R.S#GASEANLIVAK.S                   | S648:      | 2 | 3,7979 | 0,471 | -0,394 |
| 6 | Q96JM3 ZN828_HUMAN  | K.GQES#SSDQEQVDVESIDFSK.E           | S651:      | 3 | 5,1231 | 0,348 | -0,239 |
| 6 | Q02952 AKA12_HUMAN  | K.SATLSSTESTAS#EM*QEEM*K.G          | S651:      | 3 | 5,0356 | 0,448 | -0,169 |
| 6 | P35658 NU214_HUMAN  | R.S#AQGSSSPVPSM*VQK.S               | S651:      | 2 | 3,6538 | 0,42  | -0,154 |
| 6 | P35221 CTNA1_HUMAN  | R.TS#VQTEDDQLIAGQSAR.A              | S655:      | 2 | 3,4785 | 0,504 | -0,257 |
| 6 | Q9BZ95 NSD3_HUMAN   | R.GLS#DLQVGFQK.Q                    | S659:      | 2 | 4,045  | 0,534 | -0,305 |
| 6 | P18858 DNL1_HUMAN   | R.VLGS#EGEEDEALSPAK.G               | S66:       | 2 | 4,7464 | 0,575 | -0,464 |
| 6 | P42166 LAP2A_HUMAN  | K.GPPDFS#S#DEEREPTVVLGSGAAAAGR.S    | S66:S67:   | 3 | 5,1823 | 0,484 | -0,335 |
| 6 | O15085 ARHGB_HUMAN  | R.S#LENPTPPFTPK.M                   | S663:      | 2 | 2,904  | 0,206 | 0      |
| 6 | Q05655 KPCD_HUMAN   | K.NLIDSM*DQSAFAGFS#FVNPK.F          | S664:      | 3 | 3,6028 | 0,41  | -0,32  |
| 6 | Q15648 MED1_HUMAN   | K.DNPAQDFSTLYGSS#PLER.Q             | S664:      | 3 | 3,2133 | 0,106 | -0,176 |
| 6 | O00267 SPT5H_HUMAN  | R.DVTNFTVGGFAPM*S#PR.I              | S666:      | 2 | 4,1973 | 0,586 | -0,477 |
| 6 | Q9UER7 DAXX_HUMAN   | K.ICTLPS#PPSPLASLAPVADSSTR.V        | S668:      | 3 | 3,3771 | 0,397 | -0,681 |
| 6 | Q9UER7 DAXX_HUMAN   | K.ICTLSPSPS#PLASLAPVADSSTR.V        | S671:      | 3 | 3,5485 | 0,356 | -0,378 |

|   |                    |                                |            |   |        |       |        |
|---|--------------------|--------------------------------|------------|---|--------|-------|--------|
| 6 | Q05209 PTN12_HUMAN | K.DVDVSEDS#PPPLPER.T           | S673:      | 2 | 4,0414 | 0,379 | -0,211 |
| 6 | Q05209 PTN12_HUMAN | K.DVDVSEDS#PPPLPER.T           | S673:      | 3 | 2,8639 | 0,255 | 0,106  |
| 6 | Q8IY81 RRMJ3_HUMAN | R.ILDPEGLALGAVIAS#SK.K         | S676:      | 2 | 4,4618 | 0,539 | -0,493 |
| 6 | Q6P2E9 EDC4_HUMAN  | K.LQLDGSLTM*SSSGSLQAS#PR.G     | S676:      | 3 | 2,6486 | 0,302 | 0,086  |
| 6 | Q8N163 K1967_HUMAN | R.SVAS#NQSEM*EFSSLQDM*PK.E     | S678:      | 3 | 4,6007 | 0,338 | 0      |
| 6 | Q969S2 NEIL2_HUMAN | R.FDLDEEM*GPPGSS#PTPEPPQK.E    | S68:       | 3 | 4,6289 | 0,423 | -0,078 |
| 6 | Q12905 ILF2_HUMAN  | R.NQDLAPNS#AEQASILSLVTK.I      | S68:       | 3 | 4,3353 | 0,446 | -0,42  |
| 6 | Q14126 DSG2_HUMAN  | K.VVPSFLPVDQGGG#LVGR.N         | S680:      | 2 | 3,2851 | 0,271 | -0,608 |
| 6 | Q8N163 K1967_HUMAN | R.SVASNQS#EM*EFSSLQDM*PK.E     | S681:      | 3 | 3,1067 | 0,153 | 0,164  |
| 6 | Q9H1A4 APC1_HUMAN  | R.NDFEGLS#PVIAPK.K             | S688:      | 2 | 4,2784 | 0,527 | -0,502 |
| 6 | Q9UER7 DAXX_HUMAN  | R.VDS#PSHGLVTSSLCPIS#PAR.L     | S688:S702: | 3 | 3,0647 | 0,385 | -0,082 |
| 6 | A6NI28 RH10L_HUMAN | K.SLGLWTT#PESSKET#PK.A         | S689:T697: | 3 | 2,6001 | 0,141 | 1,484  |
| 6 | P35251 RFC1_HUMAN  | R.IIYDS#DSESEETLQVK.N          | S69:       | 2 | 4,7617 | 0,499 | -0,252 |
| 6 | P35251 RFC1_HUMAN  | R.IIYDS#DSESEETLQVK.N          | S69:       | 3 | 2,7844 | 0,162 | 0,094  |
| 6 | Q9Y496 KIF3A_HUMAN | R.S#AKPETVIDSLQ.-              | S690:      | 2 | 3,1437 | 0,5   | -0,247 |
| 6 | Q8TEW0 PARD3_HUMAN | K.S#PGSPGPPELPIETALDDR.E       | S692:      | 2 | 2,8799 | 0,42  | -0,481 |
| 6 | Q8TEW0 PARD3_HUMAN | K.S#PGSPGPPELPIETALDDR.E       | S692:      | 3 | 2,7314 | 0,212 | -0,18  |
| 6 | Q9H501 ESF1_HUMAN  | K.DGTS#PEEEIEIER.Q             | S694:      | 2 | 3,3775 | 0,426 | -0,385 |
| 6 | Q92974 ARHG2_HUMAN | R.EPALPLEPDSGGNTS#PGVTANGEAR.T | S695:      | 3 | 3,82   | 0,42  | 0,073  |
| 6 | Q8TEW0 PARD3_HUMAN | K.SPGS#PPGPPELPIETALDDR.E      | S695:      | 2 | 2,0565 | 0,286 | -0,481 |
| 6 | Q9UMX3 BOK_HUMAN   | R.S#SVFAAEIM*DAFDR.S           | S7:        | 2 | 3,7126 | 0,553 | -0,59  |
| 6 | P25787 PSA2_HUMAN  | R.GYS#FSLTTFSPSGK.L            | S7:        | 2 | 3,4069 | 0,542 | -0,313 |
| 6 | P19634 SL9A1_HUMAN | R.IGS#DPLAYEPK.E               | S703:      | 2 | 3,3861 | 0,486 | 0,192  |
| 6 | O75151 PHF2_HUMAN  | R.DLS#FLLDK.K                  | S705:      | 2 | 2,5128 | 0,166 | -0,355 |
| 6 | Q8NDI1 EHBP1_HUMAN | K.DM*S#PPFICEETDEQK.L          | S710:      | 2 | 2,8243 | 0,303 | -0,063 |
| 6 | P25205 MCM3_HUMAN  | K.DGDSYDPYDFS#DTEEM*PQVHT#PK.T | S711:T722: | 3 | 3,6371 | 0,443 | -0,369 |
| 6 | P25205 MCM3_HUMAN  | K.DGDSYDPYDFS#DTEEMPQVHT#PK.T  | S711:T722: | 3 | 2,9069 | 0,301 | -0,432 |
| 6 | P26358 DNMT1_HUMAN | K.EADDDEEVDDNIPEM*PS#PK.K      | S714:      | 3 | 3,1986 | 0,366 | 0,082  |
| 6 | P40818 UBP8_HUMAN  | R.SYS#SPDITQAIQEEER.R          | S718:      | 2 | 3,779  | 0,521 | -0,32  |
| 6 | Q9Y2D5 AKAP2_HUMAN | R.TLS#M*IEEEIR.A               | S720:      | 2 | 3,5093 | 0,458 | -0,093 |
| 6 | Q9HAW4 CLSPN_HUMAN | K.SLS#SDSTLLLFK.D              | S720:      | 2 | 3,1206 | 0,379 | -0,351 |
| 6 | Q08J23 NSUN2_HUMAN | K.EGVILTNEAAS#TGQPDNDVTEGQR.A  | S724:      | 3 | 4,3905 | 0,49  | -0,137 |
| 6 | P40763 STAT3_HUMAN | K.FICVPTTCSNTIDLPM*S#PR.T      | S727:      | 3 | 4,7871 | 0,426 | -0,152 |

|   |                     |                                    |       |   |        |       |        |
|---|---------------------|------------------------------------|-------|---|--------|-------|--------|
| 6 | P13807 GYS1_HUMAN   | R.NSVDTATSSSLSTPSEPLS#PTSSLGEERN.- | S727: | 3 | 2,9146 | 0,447 | -0,543 |
| 6 | Q12888 TP53B_HUMAN  | K.ECSEAM*EVETSVISIDS#PQK.L         | S727: | 3 | 2,7311 | 0,176 | -0,157 |
| 6 | P42224 STAT1_HUMAN  | R.LQTTDNLPM*S#PEEFDEVSR.I          | S727: | 3 | 2,6263 | 0,455 | -0,227 |
| 6 | A7KAX9 A7KAX9_HUMAN | R.SSS#DALASAFNGEM*LGNR.C           | S732: | 2 | 3,3117 | 0,495 | 0,315  |
| 6 | P28290 SSFA2_HUMAN  | R.S#QSLPTLLSPVR.V                  | S737: | 2 | 2,1928 | 0,183 | -0,165 |
| 6 | P28290 SSFA2_HUMAN  | R.SQS#LPTLLSPVR.V                  | S739: | 2 | 3,6164 | 0,359 | -0,165 |
| 6 | Q9Y6X9 MORC2_HUMAN  | R.SVAVS#DEEEVEEAER.R               | S743: | 2 | 4,1008 | 0,343 | -0,259 |
| 6 | Q8TEW8 PAR3L_HUMAN  | K.SSS#LESLQTAVAEVR.K               | S746: | 2 | 2,7003 | 0,424 | -0,368 |
| 6 | Q13885 TBB2A_HUMAN  | R.AILVDLEPGTM*DS#VR.S              | S75:  | 2 | 2,4989 | 0,131 | -0,784 |
| 6 | Q9UMZ2 SYNG_HUMAN   | R.QLS#LEGSGLGVEDLK.D               | S752: | 2 | 4,6547 | 0,506 | -0,3   |
| 6 | Q13435 SF3B2_HUMAN  | K.IEEAM*DGS#ETPQLFTVLPEK.R         | S755: | 3 | 3,5325 | 0,316 | -0,157 |
| 6 | A0FGR8 ESYT2_HUMAN  | K.EPTPS#IASDISLIATQELR.Q           | S755: | 3 | 2,9828 | 0,217 | -0,412 |
| 6 | Q66K74 MAP1S_HUMAN  | K.AVPM*APAPAS#PGSSNDSSAR.S         | S759: | 2 | 3,328  | 0,408 | -0,683 |
| 6 | Q66K74 MAP1S_HUMAN  | K.AVPM*APAPAS#PGSSNDSSAR.S         | S759: | 3 | 2,7798 | 0,304 | -0,465 |
| 6 | P34932 HSP74_HUMAN  | R.AFS#DPFVEAEK.S                   | S76:  | 2 | 2,8381 | 0,426 | -0,37  |
| 6 | A0FGR8 ESYT2_HUMAN  | K.EPTPSIASDIS#LPIATQELR.Q          | S761: | 3 | 4,3855 | 0,354 | -0,165 |
| 6 | Q9Y4B5 K0802_HUMAN  | R.EGPVGGES#DSEEM*FEK.T             | S767: | 2 | 4,1675 | 0,46  | -0,402 |
| 6 | Q7Z5K2 WAPL_HUMAN   | K.VEEESTGDPFGFDS#DDESLPVSSK.N      | S77:  | 3 | 3,5316 | 0,439 | -0,483 |
| 6 | P19634 SL9A1_HUMAN  | K.ETSSPGTDDVFTAPASDS#PSSQR.I       | S785: | 3 | 3,5137 | 0,293 | -0,224 |
| 6 | Q6ZRV2 FA83H_HUMAN  | R.S#LESCLDLR.D                     | S785: | 2 | 3,2546 | 0,463 | -0,095 |
| 6 | P55287 CAD11_HUMAN  | K.LADLYGS#KDTFDDDS.-               | S788: | 2 | 3,1605 | 0,602 | -0,07  |
| 6 | Q6GYQ0 GRIPE_HUMAN  | R.SSS#TSDILEPFTVER.A               | S797: | 2 | 3,3403 | 0,546 | -0,209 |
| 6 | Q9UMX3 BOK_HUMAN    | R.SS#VFAAEIM*DAFDR.S               | S8:   | 2 | 3,7681 | 0,594 | -0,442 |
| 6 | P51608 MECP2_HUMAN  | K.AETSESGSGAPAVPEASAS#PK.Q         | S80:  | 2 | 4,1304 | 0,597 | -0,546 |
| 6 | P51608 MECP2_HUMAN  | K.AETSESGSGAPAVPEASAS#PK.Q         | S80:  | 3 | 3,1732 | 0,289 | -0,091 |
| 6 | Q641Q2 FA21A_HUMAN  | K.TVLS#LFDEEEDK.M                  | S802: | 2 | 3,4579 | 0,435 | -0,324 |
| 6 | Q9Y467 SALL2_HUMAN  | R.GDSEEAS#GAEEEVGTVAAAATAGK.E      | S806: | 3 | 4,3027 | 0,523 | -0,08  |
| 6 | Q96N64 PWP2A_HUMAN  | R.S#PEAVGPELEAEK.L                 | S81:  | 2 | 4,106  | 0,548 | -0,156 |
| 6 | O60271 JIP4_HUMAN   | R.ETDYPAGEDLS#ESGQVDK.A            | S813: | 2 | 2,695  | 0,422 | -0,362 |
| 6 | Q2NKX8 ERC6L_HUMAN  | K.GFGS#VEELCTNSSLGM*EK.S           | S820: | 2 | 3,2498 | 0,504 | -0,179 |
| 6 | Q9UMN6 MLL4_HUMAN   | K.VAASM*PLS#PGGQM*EEVAGAVK.Q       | S821: | 3 | 2,6443 | 0,164 | 0,085  |
| 6 | Q658Y4 F91A1_HUMAN  | R.SPSS#LLIANLHLQ.-                 | S829: | 2 | 3,6865 | 0,342 | -0,497 |
| 6 | Q13561 DCTN2_HUMAN  | R.TGYES#GEYEM*LGEGLGVK.E           | S83:  | 2 | 2,5203 | 0,482 | -0,182 |

|   |                     |                                   |            |   |        |       |        |
|---|---------------------|-----------------------------------|------------|---|--------|-------|--------|
| 6 | Q9Y2H2 SAC2_HUMAN   | K.SDSS#LETM*ENTGVM*DK.V           | S830:      | 2 | 3,9634 | 0,521 | -0,263 |
| 6 | Q96K76 UBP47_HUMAN  | R.LFVLLPEQS#PVSYSK.R              | S832:      | 2 | 3,9755 | 0,365 | -0,683 |
| 6 | Q76L83 ASXL2_HUMAN  | K.APS#PTGPALIS#GASPVHCAADGTVELK.A | S834:S842: | 3 | 3,8194 | 0,226 | -0,265 |
| 6 | Q9C0C2 TB182_HUMAN  | R.S#QEADVQDWEFR.K                 | S836:      | 2 | 4,0762 | 0,571 | 0,23   |
| 6 | Q07157 ZO1_HUMAN    | R.LSYLSAPGSEYSM*YSTDS#R.H         | S837:      | 3 | 3,4055 | 0,316 | -0,166 |
| 6 | Q8NCF5 NF2IP_HUMAN  | R.GAADEVEVEPEPPGPVAS#R.D          | S84:       | 3 | 2,6992 | 0,329 | -0,088 |
| 6 | Q70EL4 UBP43_HUMAN  | R.STS#QSIVSLLTGAGEDEK.S           | S847:      | 2 | 2,8653 | 0,456 | -0,244 |
| 6 | O95819 M4K4_HUMAN   | K.SS#SSFTPFIDPR.L                 | S853:      | 2 | 3,3254 | 0,454 | -0,172 |
| 6 | Q9Y2K5 R3HD2_HUMAN  | K.SAS#TDLGTADVVLGR.V              | S855:      | 2 | 3,9645 | 0,305 | -0,237 |
| 6 | Q9H9J4 UBP42_HUMAN  | R.DSALAEAPEGLS#PAPPAR.S           | S856:      | 2 | 3,5808 | 0,391 | -0,4   |
| 6 | Q9Y6Q9 NCOA3_HUMAN  | R.AVS#LDSPVSVGSSPPVK.N            | S857:      | 2 | 4,1619 | 0,507 | -0,572 |
| 6 | O75448 MED24_HUMAN  | R.LLS#SNEDDANILSSPTDR.S           | S862:      | 2 | 3,9841 | 0,474 | -0,783 |
| 6 | O75448 MED24_HUMAN  | R.LLS#SNEDDANILSSPTDR.S           | S862:      | 3 | 3,7593 | 0,248 | -0,271 |
| 6 | Q8N122 RPTOR_HUMAN  | R.VLDTSSLTQSAPAS#PTNK.G           | S863:      | 2 | 2,2375 | 0,2   | -0,45  |
| 6 | Q2NKX8 ERC6L_HUMAN  | K.QEALQEDPLES#FNYVLSK.S           | S864:      | 3 | 3,5891 | 0,444 | -0,501 |
| 6 | Q9UK76 HN1_HUMAN    | R.NS#SEASSGDFLDLK.G               | S87:       | 2 | 4,3231 | 0,39  | 0,079  |
| 6 | A7KAX9 A7KAX9_HUMAN | K.LSPFFTLDL#PTEDK.S               | S871:      | 2 | 4,5576 | 0,568 | -0,341 |
| 6 | Q8WVB6 CTF18_HUMAN  | R.VENSPQVDGS#PPGLELLGGIGEK.G      | S871:      | 3 | 3,7443 | 0,465 | -0,527 |
| 6 | Q96HP0 DOCK6_HUMAN  | K.SISS#SNPDLAVAPGSVDDEVSR.I       | S883:      | 3 | 4,0354 | 0,289 | -0,16  |
| 6 | P07814 SYEP_HUMAN   | K.EYIPGQPPLSQSSDSS#PTR.N          | S886:      | 2 | 2,1412 | 0,418 | -0,459 |
| 6 | Q96RS0 TGS1_HUMAN   | K.GIGLDESELDS#EAELM*R.S           | S89:       | 2 | 5,3824 | 0,601 | -0,062 |
| 6 | P43358 MAGA4_HUMAN  | R.QPNEGSS#SQEEEGPSTSPDAESLFR.E    | S89:       | 3 | 4,2103 | 0,349 | 0      |
| 6 | Q9UPN4 AZI1_HUMAN   | R.SGS#PRPTEPTDFLM*LFEGS#PSGK.K    | S89:S105:  | 3 | 4,8765 | 0,395 | -0,35  |
| 6 | P19838 NFKB1_HUMAN  | R.QM*GYTEAIEVIQAASS#PVK.T         | S893:      | 3 | 4,2338 | 0,322 | 0      |
| 6 | P19838 NFKB1_HUMAN  | R.QM*GYTEAIEVIQAASS#PVK.T         | S893:      | 2 | 3,5769 | 0,481 | -0,461 |
| 6 | Q9BTE7 DCNL5_HUMAN  | K.S#PGVAAVAEDGGLK.K               | S9:        | 2 | 4,1413 | 0,547 | -0,257 |
| 6 | Q96N67 DOCK7_HUMAN  | R.SLSNS#NPDISGTPTSPDDEV.R.S       | S900:      | 3 | 3,5592 | 0,318 | -0,161 |
| 6 | Q96T88 UHRF1_HUMAN  | R.DSELS#DTDSGCCLGQSESDK.S         | S91:       | 3 | 5,9202 | 0,656 | -0,161 |
| 6 | Q9H6F5 CCD86_HUMAN  | R.LQQGAGLESPOGQPEPGAAS#PQR.Q      | S91:       | 3 | 5,3266 | 0,221 | -0,154 |
| 6 | Q9Y4H2 IRS2_HUMAN   | K.S#PGEYINIDFGEPGAR.L             | S915:      | 2 | 4,0924 | 0,49  | -0,474 |
| 6 | Q9UMZ2 SYNG_HUMAN   | K.LSPFVLSAGS#GSPSATSILQK.K        | S917:      | 3 | 2,8473 | 0,289 | -0,516 |
| 6 | Q13409 DC1I2_HUMAN  | K.S#VSTPSEAGSQDSGDGAVGSR.T        | S92:       | 3 | 3,8043 | 0,489 | -0,36  |
| 6 | Q15154 PCM1_HUMAN   | R.YM*SQM*#VPEQAELEK.L             | S93:       | 2 | 4,4146 | 0,484 | -0,13  |

|   |                     |                                  |              |   |        |       |        |
|---|---------------------|----------------------------------|--------------|---|--------|-------|--------|
| 6 | Q6ZSR9 YJ005_HUMAN  | K.LGGAVPFAPPEVS#PEQAK.T          | S93:         | 2 | 2,9783 | 0,467 | -0,456 |
| 6 | P52701 M5H6_HUMAN   | K.AGFDS#DYDQALADIR.E             | S935:        | 2 | 4,7954 | 0,49  | -0,421 |
| 6 | Q5JUX1 Q5JUX1_HUMAN | R.GALSS#SLRDLSDAGVCY.-           | S937:        | 2 | 3,7038 | 0,467 | -0,396 |
| 6 | Q6S8J3 A26CA_HUMAN  | K.S#YELPDGQVITIGNER.F            | S939:        | 2 | 3,1718 | 0,466 | -0,196 |
| 6 | P15336 ATF2_HUMAN   | K.M*PLDLS#PLATPIIR.S             | S94:         | 2 | 2,8092 | 0,413 | -0,299 |
| 6 | Q99618 CDCA3_HUMAN  | K.QLS#EVFETEDSK.S                | S94:         | 2 | 2,1796 | 0,344 | -0,327 |
| 6 | Q7Z3T8 ZFY16_HUMAN  | R.NEIIQSPISQVPS#VEK.L            | S946:        | 2 | 3,6358 | 0,49  | -0,33  |
| 6 | O15258 RER1_HUMAN   | K.VDPSLM*EDS#DDGPSLPTK.Q         | S95:         | 2 | 2,176  | 0,442 | -0,488 |
| 6 | Q8IXM2 CQ049_HUMAN  | K.VYEDSGIPLAES#PK.K              | S96:         | 2 | 3,5951 | 0,497 | -0,29  |
| 6 | Q14683 SMC1A_HUMAN  | K.GTM*DDISQEEGSSQGEDSVSGS#QR.I   | S966:        | 3 | 3,9522 | 0,496 | 0      |
| 6 | P21333 FLNA_HUMAN   | K.SPF5VAVSPS#LDLSK.I             | S968:        | 2 | 3,931  | 0,34  | -0,227 |
| 6 | Q07157 ZO1_HUMAN    | R.LEEPTPAPSTSYS#PQADSLR.T        | S968:        | 3 | 3,6602 | 0,3   | -0,247 |
| 6 | Q5VZK9 LR16A_HUMAN  | R.SS#GFISELPSEEGK.K              | S968:        | 2 | 3,0082 | 0,535 | -0,158 |
| 6 | P43358 MAGA4_HUMAN  | R.QPNEGSSSQEEGPSTS#PDAESLFR.E    | S99:         | 3 | 4,2036 | 0,382 | -0,133 |
| 6 | Q86UE8 TLK2_HUMAN   | K.ISDYFEFAGGSAPGTS#PGR.S         | S99:         | 2 | 3,1085 | 0,53  | -0,183 |
| 6 | Q9UQ35 SRRM2_HUMAN  | K.SST#PPGESYFGVSSLQLK.G          | T1043:       | 3 | 5,6444 | 0,473 | 0,093  |
| 6 | Q15648 MED1_HUMAN   | R.SQT#PPGVATPPIPK.I              | T1051:       | 2 | 3,7574 | 0,408 | -0,166 |
| 6 | Q14004 CD2L5_HUMAN  | R.T#NTPQGVLPSSQLK.S              | T1056:       | 2 | 2,5851 | 0,243 | 0      |
| 6 | Q7Z5J4 RAI1_HUMAN   | R.T#PGPPGLTTTPAPPDK.L            | T1068:       | 2 | 2,6485 | 0,389 | -0,15  |
| 6 | P20042 IF2B_HUMAN   | K.IESDVQEPT#EPEDDLDIM*LGNK.K     | T111:        | 3 | 4,7537 | 0,479 | -0,142 |
| 6 | P30414 NKTR_HUMAN   | R.LDT#PDINIVLK.Q                 | T1155:       | 2 | 3,9618 | 0,344 | -0,092 |
| 6 | Q9Y6M7 S4A7_HUMAN   | R.M*LQDDDDT#VHLPFEGGS#LLQIPVK.A  | T1167:S1176: | 3 | 3,7628 | 0,385 | -0,129 |
| 6 | Q9NRY4 GRLF1_HUMAN  | R.T#SFSVGSDDDELGPIR.K            | T1173:       | 2 | 2,5109 | 0,363 | -0,441 |
| 6 | Q9NZN5 ARHGC_HUMAN  | R.T#ASQGQPTDSVIQNSENIK.A         | T1286:       | 3 | 4,8549 | 0,519 | -0,087 |
| 6 | Q15021 CND1_HUMAN   | R.YQPLAST#ASDNDFVTPEPR.R         | T1331:       | 3 | 3,6308 | 0,332 | -0,167 |
| 6 | Q9Y314 NOSIP_HUMAN  | K.ALSGT#SPDDVQPGPSVGPPSK.D       | T137:        | 3 | 4,1212 | 0,201 | -0,088 |
| 6 | Q9NVR5 CN104_HUMAN  | K.QSM*SLT#PPLIEVLQVTDNK.I        | T141:        | 3 | 3,3213 | 0,294 | -0,166 |
| 6 | Q9ULW0 TPX2_HUMAN   | R.CAT#PVIIDEILPSK.K              | T147:        | 2 | 3,8141 | 0,416 | -0,373 |
| 6 | Q14839 CHD4_HUMAN   | K.TPTPSTPGDT#QPNT PAPVPPAEDGIK.I | T1549:       | 3 | 2,9019 | 0,102 | -0,206 |
| 6 | Q9BY89 K1671_HUMAN  | R.LSSLSSQT#EPTSAGDQYDCSR.D       | T1579:       | 3 | 3,3745 | 0,358 | -0,309 |
| 6 | P42166 LAP2A_HUMAN  | R.SST#PLPTISSAENTR.Q             | T160:        | 2 | 3,3301 | 0,465 | -0,282 |
| 6 | O75367 H2AY_HUMAN   | K.AASADSTT#EGTPADGFTVLSTK.S      | T175:        | 3 | 2,8974 | 0,183 | -0,083 |
| 6 | P04792 HSPB1_HUMAN  | K.LATQSNEIT#IPVTFESR.A           | T180:        | 2 | 3,0973 | 0,308 | -0,491 |



|   |                     |                                |            |   |        |       |        |
|---|---------------------|--------------------------------|------------|---|--------|-------|--------|
| 6 | P18858 DNL1_HUMAN   | K.AET#PTESVSEPEVATK.Q          | T195:      | 2 | 4,0212 | 0,619 | -0,417 |
| 6 | P18858 DNL1_HUMAN   | K.AETPT#ESVSEPEVATK.Q          | T197:      | 3 | 2,7636 | 0,378 | 0,208  |
| 6 | O95297 MPZL1_HUMAN  | R.DYTGCS#SESLSPVK.Q            | T205:      | 2 | 3,2873 | 0,385 | -0,357 |
| 6 | P23396 RS3_HUMAN    | K.DEILPTT#PISEQK.G             | T221:      | 2 | 3,0226 | 0,318 | 0,157  |
| 6 | Q9UN86 G3BP2_HUMAN  | K.STT#PPPAEPVSLPQEPPK.A        | T227:      | 3 | 3,2928 | 0,327 | 0,094  |
| 6 | Q9UN86 G3BP2_HUMAN  | K.STT#PPPAEPVSLPQEPPK.A        | T227:      | 2 | 3,1052 | 0,403 | -0,375 |
| 6 | Q01082 SPTB2_HUMAN  | R.AQT#LPTS#VVTITSESSPGK.R      | T2328:     | 2 | 3,6949 | 0,41  | -0,246 |
| 6 | Q01082 SPTB2_HUMAN  | R.AQT#LPTS#VVTITSESSPGK.R      | T2328:     | 3 | 2,707  | 0,203 | 0,092  |
| 6 | Q96A65 EXOC4_HUMAN  | K.DASVPLIDVTNLPT#PR.K          | T237:      | 3 | 2,7879 | 0,255 | -0,205 |
| 6 | Q96A65 EXOC4_HUMAN  | K.DASVPLIDVTNLPT#PR.K          | T237:      | 2 | 2,5214 | 0,413 | -0,341 |
| 6 | P55036 PSMD4_HUMAN  | R.AAAASAAEAGIATT#GTEDSDDALLK.M | T251:      | 3 | 3,3766 | 0,214 | -0,305 |
| 6 | O94915 FRYL_HUMAN   | R.DET#PTLEASLDNANSR.L          | T2547:     | 2 | 4,2406 | 0,45  | -0,202 |
| 6 | P17275 JUNB_HUMAN   | R.DAT#PPVSPINM*EDQER.I         | T255:      | 3 | 3,0983 | 0,274 | -0,29  |
| 6 | P17275 JUNB_HUMAN   | R.DAT#PPVSPINM*EDQER.I         | T255:      | 2 | 2,5031 | 0,414 | -0,515 |
| 6 | A8K1N6 A8K1N6_HUMAN | K.AT#PPPSPLSELLK.K             | T264:      | 3 | 3,1221 | 0,2   | -0,119 |
| 6 | A8K1N6 A8K1N6_HUMAN | K.AT#PPPSPLSELLK.K             | T264:      | 2 | 2,2621 | 0,316 | -0,474 |
| 6 | P54252 ATX3_HUMAN   | R.NISQDM*#QTS#GTNLTSEELR.K     | T269:      | 3 | 3,8199 | 0,346 | -0,158 |
| 6 | Q9UN22 NSF1C_HUMAN  | K.LGSTAPQVLST#SSPAQQAENEAK.A   | T270:      | 3 | 2,608  | 0,159 | -0,229 |
| 6 | Q9NQ57 INCE_HUMAN   | R.VLAPILPDNFST#PTGSR.T         | T292:      | 3 | 2,6245 | 0,364 | -0,196 |
| 6 | Q86VR2 F134C_HUMAN  | R.GQT#PLTEGSEDLDGHS#DPEESFAR.D | T307:S320: | 3 | 5,289  | 0,54  | -0,268 |
| 6 | Q9Y6A5 TACC3_HUMAN  | R.AM*#T#LSPQEEVAAGQM*ASSSR.S   | T315:      | 3 | 4,1795 | 0,34  | 0,085  |
| 6 | Q15345 LRC41_HUMAN  | R.ST#QESLTAGGTDLK.R            | T327:      | 2 | 2,1591 | 0,278 | -0,41  |
| 6 | Q6NZY4 ZCHC8_HUMAN  | K.DGT#DGETEVGEIQNK.S           | T342:      | 2 | 5,5966 | 0,541 | -0,407 |
| 6 | Q9NRX5 SERC1_HUMAN  | K.LTLT#SDESTLIEDGGAR.S         | T347:      | 2 | 3,8499 | 0,371 | 0,197  |
| 6 | P30305 MPIP2_HUMAN  | R.SVT#PPEEQQAEEPK.A            | T355:      | 2 | 2,0516 | 0,491 | -0,069 |
| 6 | Q9UQ35 SRRM2_HUMAN  | R.SST#GPEPPAPTPLLAER.H         | T359:      | 2 | 2,8282 | 0,23  | -0,068 |
| 6 | Q5T4S7 UBR4_HUMAN   | R.T#GSTSSKEDDY#ESDAATIVQK.C    | T360:Y370: | 3 | 3,0191 | 0,098 | -0,076 |
| 6 | Q2M2I8 AAK1_HUMAN   | K.AGQTQPNPILPIQPALT#PR.K       | T389:      | 3 | 3,5654 | 0,334 | 0      |
| 6 | O43741 AAKB2_HUMAN  | K.IM*VGST#DDPSVFLPDSK.L        | T40:       | 2 | 3,5596 | 0,429 | -0,368 |
| 6 | Q14247 SRC8_HUMAN   | K.TQT#PPVSPAPQPTEER.L          | T401:      | 2 | 2,0909 | 0,374 | -0,134 |
| 6 | Q9UKV3 ACINU_HUMAN  | K.ASLVALPEQTASEEET#PPPLLTKE    | T414:      | 3 | 4,11   | 0,431 | -0,293 |
| 6 | P46108 CRK_HUMAN    | R.DSST#SPGDYVLSVSENSR.V        | T42:       | 2 | 3,8571 | 0,556 | -0,678 |
| 6 | Q53EZ4 CEP55_HUMAN  | K.SPT#AALNESLVECPK.C           | T430:      | 2 | 3,4972 | 0,572 | 0      |

|   |                     |                                 |            |   |        |       |        |
|---|---------------------|---------------------------------|------------|---|--------|-------|--------|
| 6 | P35658 NU214_HUMAN  | K.SPGSTPT#TPTSSQAPQK.L          | T436:      | 3 | 3,3322 | 0,469 | -0,104 |
| 6 | O14974 MYPT1_HUMAN  | K.T#GSGYALAEITASK.E             | T443:      | 3 | 3,6797 | 0,273 | 0,063  |
| 6 | P35269 T2FA_HUMAN   | K.TT#PNSGDVQVTEDAVR.R           | T446:      | 2 | 3,6199 | 0,489 | -0,138 |
| 6 | P30622 CLIP1_HUMAN  | K.ASST#PSSETQEEFVDDFR.V         | T45:       | 2 | 3,3893 | 0,494 | -0,116 |
| 6 | Q15233 NONO_HUMAN   | R.FGQAATM*EGIGAIGGT#PPAFNR.A    | T450:      | 3 | 4,5409 | 0,368 | 0      |
| 6 | Q96D46 NMD3_HUMAN   | R.DSAIPVESDT#DDEGAPR.I          | T470:      | 2 | 3,3218 | 0,432 | -0,395 |
| 6 | Q6NZY4 ZCHC8_HUMAN  | R.GT#PPPVFTPLPK.G               | T479:      | 2 | 2,3808 | 0,328 | -0,085 |
| 6 | Q15910 EZH2_HUMAN   | K.ESSIIAPAPAEDVDT#PPR.K         | T487:      | 3 | 3,7239 | 0,37  | 0,188  |
| 6 | Q15910 EZH2_HUMAN   | K.ESSIIAPAPAEDVDT#PPR.K         | T487:      | 2 | 2,8959 | 0,497 | -0,439 |
| 6 | Q15758 AAAT_HUMAN   | R.ST#EPELIQVK.S                 | T494:      | 2 | 2,9895 | 0,37  | -0,299 |
| 6 | Q96G74 OTUD5_HUMAN  | R.AT#SPLVSLYPALECR.A            | T507:      | 2 | 2,7726 | 0,423 | -0,417 |
| 6 | P78344 IF4G2_HUMAN  | R.TQT#PPLGQTPQLGLK.T            | T508:      | 2 | 3,3597 | 0,451 | -0,294 |
| 6 | P27816 MAP4_HUMAN   | K.DVT#PPPETEVVLIK.N             | T521:      | 2 | 3,5184 | 0,549 | -0,302 |
| 6 | P27816 MAP4_HUMAN   | K.DVT#PPPETEVVLIK.N             | T521:      | 3 | 2,8644 | 0,4   | 0      |
| 6 | Q5W0B1 RN219_HUMAN  | R.T#SSEASM*DAAYLDK.I            | T524:      | 2 | 3,518  | 0,39  | -0,231 |
| 6 | P35222 CTNB1_HUMAN  | R.T#SM*GGTQQQFVEGVR.M           | T551:      | 2 | 2,0199 | 0,273 | -0,284 |
| 6 | Q12906 ILF3_HUMAN   | K.LFPDT#PLALDANK.K              | T592:      | 2 | 2,7805 | 0,367 | -0,245 |
| 6 | P18206 VINC_HUMAN   | R.M*QEAM*TQEVSDVFSDTT#PIK.L     | T604:      | 3 | 3,7768 | 0,321 | -0,296 |
| 6 | P55209 NP1L1_HUMAN  | R.LDGLVET#PTGYIESLPR.V          | T62:       | 3 | 4,8097 | 0,399 | -0,471 |
| 6 | P55209 NP1L1_HUMAN  | R.LDGLVET#PTGYIESLPR.V          | T62:       | 2 | 4,1292 | 0,555 | -0,755 |
| 6 | Q02952 AKA12_HUMAN  | K.SAT#LSSTESTASEM*QEEM*K.G      | T642:      | 3 | 3,9889 | 0,206 | -0,254 |
| 6 | Q02952 AKA12_HUMAN  | K.SAT#LSSTESTASEM*QEEM*K.G      | T642:      | 2 | 2,316  | 0,462 | -0,339 |
| 6 | Q02952 AKA12_HUMAN  | K.SATLSSTEST#ASEM*QEEM*K.G      | T649:      | 3 | 4,5034 | 0,403 | 1,356  |
| 6 | Q9UKV3 ACINU_HUMAN  | K.DPSSGQEVAT#PPVPQLQVCEPK.E     | T682:      | 3 | 4,3104 | 0,449 | 0,15   |
| 6 | Q92974 ARHG2_HUMAN  | R.EPALPLEPDSGGNT#SPGVTANGEAR.T  | T694:      | 3 | 2,89   | 0,282 | -0,073 |
| 6 | P25205 MCM3_HUMAN   | K.DGDSYDPYDFSDT#EEEM*PQVHT#PK.T | T713:T722: | 3 | 2,994  | 0,175 | -0,184 |
| 6 | Q3MHD2 LSM12_HUMAN  | R.TET#PPPLASLNVSK.L             | T75:       | 2 | 3,7648 | 0,265 | 0,08   |
| 6 | Q6PKG0 LARP1_HUMAN  | R.SLPT#TVPESPNYR.N              | T769:      | 2 | 2,0617 | 0,21  | -0,158 |
| 6 | Q96S44 PRPK_HUMAN   | R.ATT#PADGEEPAPEAEALAAAR.E      | T8:        | 3 | 4,2882 | 0,499 | 0      |
| 6 | Q5M775 SPEC1_HUMAN  | R.T#SPTPPESATTVK.S              | T809:      | 2 | 2,0187 | 0,172 | -0,262 |
| 6 | O95425 SVIL_HUMAN   | R.YQT#QPVTLGEVEQVQSGK.L         | T852:      | 3 | 6,6276 | 0,454 | 0,177  |
| 6 | O95425 SVIL_HUMAN   | R.YQT#QPVTLGEVEQVQSGK.L         | T852:      | 2 | 2,3259 | 0,505 | -0,589 |
| 6 | A7MD96 A7MD96_HUMAN | R.SPT#DSVSLDSEDSGAK.S           | T856:      | 2 | 4,3542 | 0,569 | -0,682 |

|   |                     |                               |       |   |        |       |        |
|---|---------------------|-------------------------------|-------|---|--------|-------|--------|
| 6 | Q7Z2K8 GRIN1_HUMAN  | R.SVAT#GPM*TPQAAAPPAPFEVR.V   | T873: | 3 | 2,86   | 0,118 | -0,083 |
| 6 | Q6PD62 CTR9_HUMAN   | K.GGEFDEFVNDT#DDDLPIK.K       | T925: | 3 | 3,7361 | 0,401 | -0,159 |
| 6 | O43639 NCK2_HUMAN   | R.DASPTPST#DAEYPANGSGADR.I    | T95:  | 3 | 4,5015 | 0,41  | -0,169 |
| 6 | P08581 MET_HUMAN    | R.SVSPT#TEM*VSNESVDYR.A       | T992: | 3 | 4,9766 | 0,499 | 0      |
| 6 | Q9BTE3 CJ119_HUMAN  | R.SY#EDDDDM*DLQPNK.Q          | Y168: | 2 | 2,2606 | 0,179 | -0,548 |
| 6 | B1AVS6 B1AVS6_HUMAN | R.QY#ATLDVYNPFETR.E           | Y35:  | 2 | 3,5098 | 0,526 | -0,068 |
| 6 | P46937 YAP1_HUMAN   | R.DESTDSGLSM*SSY#SVPR.T       | Y357: | 2 | 2,4817 | 0,288 | -0,127 |
| 6 | P29353 SHC1_HUMAN   | R.ELFDDPSY#VNVQNLDK.A         | Y427: | 2 | 3,0286 | 0,217 | -0,741 |
| 6 | Q15059 BRD3_HUMAN   | K.QASASY#DSEEEEEGLPM*SYDEK.R  | Y561: | 3 | 5,0563 | 0,456 | -0,424 |
| 6 | Q5FWF4 ZRAB3_HUMAN  | R.DIIDY#ESDVEPETK.R           | Y567: | 2 | 3,4384 | 0,325 | -0,422 |
| 6 | P18433 PTPRA_HUMAN  | K.VVQEYIDAFSDY#ANFK.-         | Y798: | 2 | 4,9852 | 0,508 | -0,491 |
| 6 | P18433 PTPRA_HUMAN  | K.VVQEYIDAFSDY#ANFK.-         | Y798: | 3 | 4,1569 | 0,32  | -0,644 |
| 6 | Q96FV9 THOC1_HUMAN  | K.SGLSDLAESLTNDNETNS.-        |       | 2 | 4,4058 | 0,538 | -0,457 |
| 6 | Q96AT1 K1143_HUMAN  | K.NSSLLSFDNEDENE.-            |       | 2 | 3,681  | 0,478 | -0,227 |
| 6 | O15372 EIF3H_HUMAN  | K.LFM*AQALQEYNN.-             |       | 2 | 3,3874 | 0,502 | 0,167  |
| 6 | Q15388 TOM20_HUMAN  | R.IVSAQSLAEDDVE.-             |       | 2 | 3,0882 | 0,525 | 0,089  |
| 6 | Q5VYJ4 RUEL1_HUMAN  | K.GDNITLLQSVSN.-              |       | 2 | 3,0485 | 0,418 | 0,194  |
| 6 | P43897 EFTS_HUMAN   | R.FECGEGEEAAETE.-             |       | 2 | 2,936  | 0,492 | -0,335 |
| 6 | P55735 SEC13_HUMAN  | K.GQGSVSASVTEGQQNEQ.-         |       | 2 | 2,9269 | 0,392 | -0,143 |
| 6 | Q14839 CHD4_HUMAN   | R.APEPTPQQVAQQQ.-             |       | 2 | 2,9231 | 0,201 | -0,343 |
| 6 | P00558 PGK1_HUMAN   | K.VLPGVDALSNI.-               |       | 2 | 2,6389 | 0,333 | -0,111 |
| 6 | O75400 PR40A_HUMAN  | R.TLLEQLDDDQ.-                |       | 2 | 2,5844 | 0,099 | 0      |
| 6 | P62937 PPIA_HUMAN   | K.ITIADCGQLE.-                |       | 2 | 2,5292 | 0,42  | 0      |
| 6 | Q9UNS1 TIM_HUMAN    | R.YQIEDDED.-                  |       | 2 | 2,4084 | 0,352 | -0,214 |
| 6 | Q59GL1 Q59GL1_HUMAN | K.GVEAGPDLLQ.-                |       | 2 | 2,3833 | 0,207 | -0,122 |
| 6 | P43358 MAGA4_HUMAN  | R.EAALLEEEEGV.-               |       | 2 | 2,3594 | 0,173 | 0      |
| 6 | Q8N108 MIER1_HUMAN  | K.FEELNTDD.-                  |       | 2 | 2,2398 | 0,453 | 0,219  |
| 6 | P46459 NSF_HUMAN    | R.EEGASPLDFD.-                |       | 2 | 2,1281 | 0,412 | -0,226 |
| 6 | Q9NRF9 DPOE3_HUMAN  | R.LEEEEQNEEEVDN.-             |       | 2 | 2,0979 | 0,148 | -0,281 |
| 6 | Q14116 IL18_HUMAN   | R.SIM*FTVQNE.-                |       | 2 | 2,0702 | 0,22  | 0      |
| 6 | P08133 ANXA6_HUMAN  | K.ALLALCGGED.-                |       | 2 | 2,0052 | 0,483 | 0,12   |
| 7 | Q68CQ4 DEF_HUMAN    | R.SQS#QLLNTLTK.K              | S10:  | 2 | 3,9845 | 0,463 | -0,093 |
| 7 | Q6P1L5 AL2SC_HUMAN  | R.NGS#PTPAGSLGGGAVATAGGPGSR.L | S10:  | 2 | 2,6068 | 0,617 | -0,353 |

|   |                     |                                |            |   |        |       |        |
|---|---------------------|--------------------------------|------------|---|--------|-------|--------|
| 7 | Q9H3Z4 DNJC5_HUMAN  | R.SLS#TS#GESLYHVLGLDK.N        | S10:S12:   | 2 | 2,5175 | 0,242 | -0,372 |
| 7 | O95251 MYST2_HUMAN  | R.SS#GSETEQVVDSDR.E            | S100:      | 2 | 4,018  | 0,492 | 0,425  |
| 7 | Q01433 AMPD2_HUMAN  | R.S#LPGPAPCLK.H                | S100:      | 2 | 2,7796 | 0,3   | 0      |
| 7 | Q9UKV3 ACINU_HUMAN  | R.TAQVPS#PPR.G                 | S1004:     | 2 | 2,5471 | 0,167 | -0,118 |
| 7 | P29966 MARCS_HUMAN  | K.GEPAAAAAPEAGAS#PVEK.E        | S101:      | 2 | 4,6663 | 0,411 | -0,358 |
| 7 | P05386 RLA1_HUMAN   | K.KEES#EESDDDMGFGLFD.-         | S101:      | 2 | 2,4399 | 0,456 | -0,541 |
| 7 | P05386 RLA1_HUMAN   | K.KEES#EES#DDDM*GFGLFD.-       | S101:S104: | 2 | 4,1512 | 0,6   | -0,459 |
| 7 | Q8WUF5 IASPP_HUMAN  | R.SES#APTLHPYS#PLSPK.G         | S102:S110: | 3 | 3,1262 | 0,278 | -0,293 |
| 7 | Q8WUF5 IASPP_HUMAN  | R.SES#APTLHPYSPLS#PK.G         | S102:S113: | 2 | 2,9039 | 0,166 | -0,261 |
| 7 | Q8NG08 HELB_HUMAN   | R.WQLSS#PDGVDTDDDLPK.S         | S1021:     | 2 | 5,4791 | 0,503 | -0,186 |
| 7 | Q01804 OTUD4_HUMAN  | K.EESS#EDENEVSNILR.S           | S1024:     | 2 | 3,8809 | 0,418 | -0,067 |
| 7 | Q9H2Y7 ZF106_HUMAN  | R.ATGDGSS#PELPSLER.K           | S1026:     | 2 | 3,0481 | 0,482 | 0,306  |
| 7 | Q2NKX8 ERC6L_HUMAN  | R.IVS#DGEDEDDFSFK.D            | S1028:     | 2 | 2,8374 | 0,315 | -0,159 |
| 7 | Q12888 TP53B_HUMAN  | K.NGSTAVAESVAS#PQK.T           | S1028:     | 2 | 2,4425 | 0,319 | -0,24  |
| 7 | O75122 CLAP2_HUMAN  | R.DYNPNYNSDSIS#PFNK.S          | S1029:     | 2 | 2,5955 | 0,312 | -0,304 |
| 7 | O60231 DHX16_HUMAN  | R.LLEDSS#EESSEETVSR.A          | S103:      | 2 | 4,8146 | 0,607 | -0,409 |
| 7 | O95239 KIF4A_HUMAN  | K.FLEQS#M*DIEDLK.Y             | S1038:     | 2 | 4,5595 | 0,311 | 0,156  |
| 7 | P27708 PYR1_HUMAN   | R.VLGTSS#PEAIDSAENR.F          | S1038:     | 2 | 3,9569 | 0,529 | -0,372 |
| 7 | P21796 VDAC1_HUMAN  | K.LTFDSSFS#PNTGK.K             | S104:      | 2 | 3,5189 | 0,491 | -0,082 |
| 7 | P49006 MRP_HUMAN    | K.LSGLS#FK.R                   | S104:      | 2 | 2,1067 | 0,122 | 0,22   |
| 7 | Q7Z612 Q7Z612_HUMAN | K.KEESEES#DDDM*GFGLF.-         | S104:      | 2 | 2,0606 | 0,329 | 0      |
| 7 | P52948 NUP98_HUMAN  | R.S#LVGGLLQSK.F                | S1043:     | 2 | 3,0893 | 0,371 | -0,113 |
| 7 | Q14203 DCTN1_HUMAN  | R.QSQIQVFEDGADTTS#PETPDSSASK.V | S105:      | 3 | 4,2731 | 0,516 | 0,203  |
| 7 | O95155 UBE4B_HUMAN  | R.SQS#M*DIGVSCCK.S             | S105:      | 2 | 4,0762 | 0,621 | -0,393 |
| 7 | Q92667 AKAP1_HUMAN  | R.S#ESSGILPNTTDM*R.L           | S105:      | 2 | 3,3964 | 0,38  | -0,152 |
| 7 | O15014 ZN609_HUMAN  | K.APS#LTDLVK.S                 | S1055:     | 2 | 3,3144 | 0,342 | 0      |
| 7 | Q9UHB7 AFF4_HUMAN   | K.AVGM*PSPVS#PK.L              | S1058:     | 2 | 2,1248 | 0,208 | -0,314 |
| 7 | Q15434 RBMS2_HUMAN  | K.GYGFVDFDS#PSAAQK.A           | S106:      | 2 | 4,6452 | 0,526 | -0,292 |
| 7 | P49023 PAXI_HUMAN   | K.TSSVSNPQDSVGS#PCSR.V         | S106:      | 2 | 3,89   | 0,431 | -0,132 |
| 7 | Q5VZK9 LR16A_HUMAN  | K.SS#GFLNLIK.S                 | S1068:     | 2 | 2,1332 | 0,186 | -0,23  |
| 7 | Q8NG31 CASC5_HUMAN  | K.DVQS#PGFLNEPLSSK.S           | S1076:     | 2 | 3,9726 | 0,49  | 0      |
| 7 | Q96RT1 LAP2_HUMAN   | R.QS#SVSSTASVNLGDPGSTR.R       | S1078:     | 3 | 3,6348 | 0,351 | 0,095  |
| 7 | Q96RT1 LAP2_HUMAN   | R.QSS#SVSSTASVNLGDPGSTR.R      | S1079:     | 2 | 3,0075 | 0,506 | -0,379 |

|   |                     |                                 |              |   |        |       |        |
|---|---------------------|---------------------------------|--------------|---|--------|-------|--------|
| 7 | O75152 ZC11A_HUMAN  | K.TVLPTVPES#PEEEVK.A            | S108:        | 2 | 2,3659 | 0,211 | -0,211 |
| 7 | Q5JTH9 RRP12_HUMAN  | K.GDSIEEILADS#EDEEDNEEEER.S     | S1080:       | 3 | 4,662  | 0,48  | 0,07   |
| 7 | Q08999 RBL2_HUMAN   | K.IFYFNS#PSK.R                  | S1080:       | 2 | 2,537  | 0,19  | -0,341 |
| 7 | Q7Z3B3 K1267_HUMAN  | R.ETEAAPTS#PPIVPLK.S            | S1082:       | 2 | 2,4382 | 0,29  | 0,15   |
| 7 | Q9NYV4 CD2L7_HUMAN  | K.NSS#PAPPQPAPGK.V              | S1083:       | 2 | 2,7309 | 0,442 | -0,184 |
| 7 | P21333 FLNA_HUMAN   | K.AFGPGLQGGGAGS#PAR.F           | S1084:       | 2 | 3,5547 | 0,543 | -0,404 |
| 7 | P48634 BAT2_HUMAN   | R.TAS#ETRS#EGSEYEEIPK.R         | S1085:S1089: | 3 | 3,7704 | 0,26  | -0,088 |
| 7 | Q5VZ89 DEN4C_HUMAN  | R.STS#LSALVR.S                  | S1089:       | 2 | 2,7484 | 0,159 | 0,12   |
| 7 | Q14151 SAFB2_HUMAN  | K.M*EEEGTEDNGLEDDS#R.D          | S109:        | 2 | 5,6833 | 0,638 | -0,571 |
| 7 | Q9BXX1 KLF16_HUMAN  | R.GGPGAAPGGASPASSSSAASS#PSSGR.A | S109:        | 3 | 3,2148 | 0,369 | -0,417 |
| 7 | Q63HJ5 Q63HJ5_HUMAN | R.GSALSQLSFEVGAPM*S#PK.M        | S1090:       | 2 | 4,2334 | 0,485 | 0,064  |
| 7 | O43896 KIF1C_HUMAN  | R.S#APDLKESGAAV.-               | S1092:       | 2 | 2,6699 | 0,388 | -0,299 |
| 7 | P46013 KI67_HUMAN   | K.EEAQS#LEDLAGFK.E              | S1098:       | 2 | 2,6546 | 0,371 | -0,161 |
| 7 | O96018 APBA3_HUMAN  | R.SPS#GPPAM*DLEGPR.D            | S11:         | 2 | 3,607  | 0,522 | -0,486 |
| 7 | Q6ZSZ5 ARHG1_HUMAN  | R.SLS#PILPGR.H                  | S1103:       | 2 | 2,1287 | 0,29  | -0,06  |
| 7 | Q92900 RENT1_HUMAN  | K.SQIDVALS#QDSTYQGER.A          | S1107:       | 2 | 4,6986 | 0,587 | 0,617  |
| 7 | Q92900 RENT1_HUMAN  | K.SQIDVALS#QDSTYQGER.A          | S1107:       | 3 | 2,9536 | 0,312 | 0,37   |
| 7 | Q8WWM7 ATX2L_HUMAN  | K.GPPQS#PVFEGVYNNR.M            | S111:        | 3 | 5,1159 | 0,328 | 0      |
| 7 | Q8WWM7 ATX2L_HUMAN  | K.GPPQS#PVFEGVYNNR.M            | S111:        | 2 | 5,029  | 0,641 | -0,467 |
| 7 | Q96AP0 ACD_HUMAN    | R.ELILGSETPSS#PR.A              | S111:        | 2 | 3,8886 | 0,468 | 0,333  |
| 7 | Q5T3F8 TM63B_HUMAN  | R.LTS#VSSVDFDQR.D               | S111:        | 2 | 3,8829 | 0,481 | 0,401  |
| 7 | P49792 RBP2_HUMAN   | K.NVSGIS#FTENM*GSSQQK.N         | S1110:       | 2 | 3,3399 | 0,483 | -0,447 |
| 7 | Q5SW79 CE170_HUMAN  | R.LGEAS#DSELADADK.A             | S1112:       | 2 | 4,9996 | 0,551 | -0,163 |
| 7 | Q9BX95 SGPP1_HUMAN  | R.NS#LTGEEQLAR.V                | S112:        | 2 | 3,5256 | 0,511 | -0,18  |
| 7 | Q7Z417 NUFP2_HUMAN  | K.NLS#SDEATNPISR.V              | S112:        | 2 | 3,1888 | 0,371 | -0,329 |
| 7 | P55060 XPO2_HUMAN   | K.QLS#DAISIIGR.E                | S112:        | 2 | 2,2156 | 0,289 | 0,097  |
| 7 | Q14997 PSME4_HUMAN  | K.NPSINQILLS#PEK.I              | S1121:       | 2 | 3,1306 | 0,31  | -0,159 |
| 7 | Q9UQ35 SRRM2_HUMAN  | R.GEFSAS#PM*LK.S                | S1124:       | 2 | 2,625  | 0,225 | -0,315 |
| 7 | Q15185 TEBP_HUMAN   | K.DWEDDS#DEDM*SNFDR.F           | S113:        | 2 | 6,1183 | 0,577 | -0,124 |
| 7 | Q15185 TEBP_HUMAN   | K.DWEDDS#DEDMSNFDR.F            | S113:        | 2 | 5,2201 | 0,544 | -0,437 |
| 7 | Q15185 TEBP_HUMAN   | K.DWEDDS#DEDM*SNFDR.F           | S113:        | 3 | 3,6366 | 0,36  | 0,186  |
| 7 | O60841 IF2P_HUMAN   | K.QSFDDNDS#EELEDK.D             | S113:        | 2 | 3,2638 | 0,343 | 0      |
| 7 | Q9HB09 B2L12_HUMAN  | R.GEAAGS#PVPT#PPRSPAQEPTDFLSR.L | S113:T117:   | 3 | 3,7938 | 0,419 | -0,449 |

|   |                     |                                |        |   |        |       |        |
|---|---------------------|--------------------------------|--------|---|--------|-------|--------|
| 7 | Q92576 PHF3_HUMAN   | R.M*APPVDDL#PK.K               | S1133: | 2 | 2,877  | 0,464 | -0,289 |
| 7 | Q07889 SOS1_HUMAN   | R.SAS#VSSISLTK.G               | S1134: | 2 | 3,1791 | 0,545 | 0      |
| 7 | Q7Z589 EMSY_HUMAN   | K.LTSPVTSIS#PIQASEK.T          | S1136: | 2 | 4,5508 | 0,489 | 0,281  |
| 7 | Q9P035 PTAD1_HUMAN  | R.WLDES#DAEM*ELR.A             | S114:  | 2 | 4,5159 | 0,486 | -0,153 |
| 7 | O75391 SPAG7_HUMAN  | K.EFAPS#DEELDSYR.R             | S114:  | 2 | 2,2566 | 0,283 | 0,298  |
| 7 | P78312 CD008_HUMAN  | K.LVLAES#PQPK.G                | S1144: | 2 | 2,9983 | 0,343 | -0,105 |
| 7 | P18615 NELFE_HUMAN  | R.SIS#ADDDLQESSR.R             | S115:  | 2 | 4,3238 | 0,548 | -0,325 |
| 7 | P45880 VDAC2_HUMAN  | K.LTFDFTFS#PNTGK.K             | S115:  | 2 | 3,6528 | 0,583 | -0,162 |
| 7 | Q9UQ35 SRRM2_HUMAN  | R.FQSDSSSYPTVDSNS#LLGQSR.L     | S1152: | 3 | 4,4788 | 0,465 | -0,155 |
| 7 | Q76L83 ASXL2_HUMAN  | R.FCLSS#PTEALK.M               | S1154: | 2 | 2,8555 | 0,353 | 0,092  |
| 7 | Q8N3X1 FNBP4_HUMAN  | K.ATGGLCLLGAYADS#DDDDNDVSEK.L  | S116:  | 3 | 5,1796 | 0,512 | -0,496 |
| 7 | Q32MZ4 LRRF1_HUMAN  | R.NM*PGLSAATLASLGGTSS#R.R      | S116:  | 3 | 3,6138 | 0,329 | 0,291  |
| 7 | Q3KQU3 MA7D1_HUMAN  | R.SSQPS#PTAVPASDSPPTK.Q        | S116:  | 2 | 2,9777 | 0,458 | -0,266 |
| 7 | P28370 SMCA1_HUMAN  | K.S#PTSPLNM*K.L                | S116:  | 2 | 2,0961 | 0,458 | -0,114 |
| 7 | Q14571 ITPR2_HUMAN  | K.GGEEPIEESNILS#PVQDGTK.K      | S1160: | 3 | 3,5157 | 0,217 | 0,168  |
| 7 | P28290 SSFA2_HUMAN  | R.ASVALTPTAPS#R.T              | S1161: | 2 | 2,385  | 0,203 | -0,098 |
| 7 | Q86SQ4 GP126_HUMAN  | K.SLSSSS#IGSNSTYLTSK.S         | S1165: | 2 | 3,6492 | 0,411 | -0,339 |
| 7 | P55196 AFAD_HUMAN   | R.SSPNVANQPPS#PGGK.S           | S1165: | 2 | 2,7147 | 0,346 | -0,322 |
| 7 | Q9NTI5 PDS5B_HUMAN  | R.M*ETVSNASSSSNPSS#PGR.I       | S1166: | 2 | 3,4311 | 0,405 | -0,323 |
| 7 | O60841 IF2P_HUMAN   | K.IEPIGES#PK.M                 | S1168: | 2 | 2,147  | 0,119 | 0      |
| 7 | Q5QJE6 TDIF2_HUMAN  | R.QILACS#PVSSVR.K              | S117:  | 2 | 2,8705 | 0,411 | -0,081 |
| 7 | A4ZYW4 A4ZYW4_HUMAN | K.DETFGEYS#DNEEK.A             | S1172: | 2 | 3,8093 | 0,437 | -0,297 |
| 7 | Q9UNS1 TIM_HUMAN    | R.QLLDS#DEEQEEDGR.N            | S1173: | 3 | 4,5876 | 0,375 | 0,098  |
| 7 | Q9UNS1 TIM_HUMAN    | R.QLLDS#DEEQEEDGR.N            | S1173: | 2 | 3,901  | 0,576 | -0,456 |
| 7 | Q7Z3U7 MON2_HUMAN   | K.SFQEILQIVS#PVR.D             | S1178: | 2 | 4,1774 | 0,348 | -0,153 |
| 7 | Q9NRY4 GRLF1_HUMAN  | R.TSFSVGS#DDELGPIR.K           | S1179: | 2 | 4,4475 | 0,601 | -0,147 |
| 7 | Q9UQ35 SRRM2_HUMAN  | K.M*ALPPQEDATAS#PPR.Q          | S1179: | 2 | 3,901  | 0,505 | -0,291 |
| 7 | Q9UQ35 SRRM2_HUMAN  | K.M*ALPPQEDATAS#PPR.Q          | S1179: | 3 | 2,8554 | 0,421 | 0,218  |
| 7 | Q9UQ35 SRRM2_HUMAN  | K.MALPPQEDATAS#PPR.Q           | S1179: | 2 | 2,7984 | 0,54  | 0,073  |
| 7 | Q8IZ21 PHAR4_HUMAN  | R.SSS#PVQVEEPPVR.L             | S118:  | 2 | 2,8046 | 0,32  | -0,16  |
| 7 | P53999 TCP4_HUMAN   | K.EQIS#DIDDAVR.K               | S118:  | 2 | 2,2747 | 0,129 | 0,273  |
| 7 | Q8WW12 PCNP_HUMAN   | K.TLSVAAAFNEDEDS#EPEEM*PPEAK.M | S119:  | 3 | 3,9986 | 0,394 | -0,271 |
| 7 | Q00536 PCTK1_HUMAN  | R.LS#LPADIR.L                  | S119:  | 2 | 2,2041 | 0,12  | 0,126  |

|   |                    |                               |              |   |        |       |        |
|---|--------------------|-------------------------------|--------------|---|--------|-------|--------|
| 7 | Q92508 FA38A_HUMAN | R.SGS#EEAVTDPGER.E            | S1190:       | 2 | 2,9006 | 0,29  | -0,086 |
| 7 | Q8N1G0 ZN687_HUMAN | R.SDPDGGDS#PLPASGGPLTCK.V     | S1191:       | 3 | 4,6665 | 0,427 | 0,182  |
| 7 | Q8N1G0 ZN687_HUMAN | R.SDPDGGDS#PLPASGGPLTCK.V     | S1191:       | 2 | 2,2319 | 0,547 | -0,243 |
| 7 | P20020 AT2B1_HUMAN | R.IEDS#EPHIPLIDDT#DAEDDAPTK.R | S1193:T1203: | 3 | 8,1731 | 0,512 | -0,475 |
| 7 | Q96B01 R51A1_HUMAN | K.ELPTVTTNVQNS#QDK.S          | S120:        | 2 | 3,8947 | 0,421 | -0,417 |
| 7 | O95218 ZRAB2_HUMAN | R.EES#DGEYDEFGR.K             | S120:        | 2 | 3,4541 | 0,562 | -0,161 |
| 7 | Q14814 MEF2D_HUMAN | R.AS#EELDGLFR.R               | S121:        | 2 | 2,8027 | 0,365 | 0      |
| 7 | P11388 TOP2A_HUMAN | K.TQM*AEVLP#PR.G              | S1213:       | 2 | 3,6099 | 0,552 | -0,092 |
| 7 | Q92508 FA38A_HUMAN | R.TAS#ELLLDR.R                | S1215:       | 2 | 3,2824 | 0,447 | -0,111 |
| 7 | Q13017 RHG05_HUMAN | K.GGIDNPAITS#DQELDDK.K        | S1218:       | 3 | 5,0258 | 0,444 | 0,392  |
| 7 | Q13017 RHG05_HUMAN | K.GGIDNPAITS#DQELDDK.K        | S1218:       | 2 | 4,7916 | 0,508 | -0,327 |
| 7 | Q9NYF3 FA53C_HUMAN | R.SLS#VPVDLSR.W               | S122:        | 2 | 2,5412 | 0,399 | -0,212 |
| 7 | Q13428 TCOF_HUMAN  | K.LDSS#PSVSSTLAAK.D           | S1228:       | 2 | 3,4178 | 0,438 | -0,254 |
| 7 | Q9H2G2 SLK_HUMAN   | K.FYPIPS#LHSTGS.-             | S1229:       | 2 | 2,0004 | 0,193 | 0,264  |
| 7 | P49916 DNL3_HUMAN  | K.LTTTGQVTS#PVK.G             | S123:        | 2 | 2,9642 | 0,478 | -0,372 |
| 7 | O75534 CSDE1_HUMAN | K.SPAAPGQS#PTGSVCYER.N        | S123:        | 2 | 2,7888 | 0,429 | 0,199  |
| 7 | P61020 RAB5B_HUMAN | R.QAS#PSIVIALAGNK.A           | S123:        | 2 | 2,5304 | 0,42  | -0,084 |
| 7 | Q01814 AT2B2_HUMAN | K.SATSSS#PGSPIHSLETSL.-       | S1231:       | 2 | 2,1386 | 1     | -0,664 |
| 7 | Q04637 IF4G1_HUMAN | R.EAALPPVS#PLK.A              | S1232:       | 2 | 2,6325 | 0,307 | 0,305  |
| 7 | Q01814 AT2B2_HUMAN | K.SATSSSPGS#PIHSLETSL.-       | S1234:       | 2 | 2,1512 | 0,095 | -0,664 |
| 7 | Q9BUL5 PHF23_HUMAN | R.LQAPDS#ATLLEK.M             | S124:        | 2 | 3,2792 | 0,382 | -0,357 |
| 7 | Q13868 EXOS2_HUMAN | R.S#AEDELAM*R.G               | S124:        | 2 | 3,1274 | 0,423 | -0,109 |
| 7 | P51148 RAB5C_HUMAN | R.QAS#PNIVIALAGNK.A           | S124:        | 2 | 3,0299 | 0,354 | -0,248 |
| 7 | Q8N9M1 CS047_HUMAN | K.AATESVPCS#PSPLAGEIR.R       | S124:        | 2 | 2,6516 | 0,397 | 1,016  |
| 7 | Q9UKA4 AKA11_HUMAN | R.SVS#PTFLNPSDENLK.T          | S1242:       | 2 | 3,654  | 0,415 | -0,141 |
| 7 | P11388 TOP2A_HUMAN | K.NENTEGS#PQEDGVELEGLK.Q      | S1247:       | 3 | 4,1381 | 0,486 | 0,517  |
| 7 | P11388 TOP2A_HUMAN | K.NENTEGS#PQEDGVELEGLK.Q      | S1247:       | 2 | 2,9316 | 0,394 | 0,574  |
| 7 | P20020 AT2B1_HUMAN | K.SATSSSPGSPLHSLETSL.-        | S1257:       | 2 | 3,4506 | 0,463 | -0,398 |
| 7 | Q9H6Z4 RANB3_HUMAN | R.TSS#LTQFPPSQSEER.S          | S126:        | 2 | 3,4989 | 0,433 | -0,55  |
| 7 | Q8TDM6 DLG5_HUMAN  | R.LGS#SSNLQFK.A               | S1263:       | 2 | 3,3961 | 0,446 | 0      |
| 7 | P46821 MAP1B_HUMAN | K.SPSPSPSPS#PLEK.T            | S1265:       | 2 | 3,2963 | 0,288 | -0,487 |
| 7 | Q13459 MYO9B_HUMAN | R.VSPAPGS#APETPEDK.S          | S1267:       | 2 | 2,1813 | 0,364 | -0,515 |
| 7 | Q6P158 DHX57_HUMAN | R.DLQEQDADAGS#ER.G            | S127:        | 2 | 4,3116 | 0,526 | -0,322 |

|   |                     |                               |              |   |        |       |        |
|---|---------------------|-------------------------------|--------------|---|--------|-------|--------|
| 7 | P07355 ANXA2_HUMAN  | K.GLGTDEDS#LIEIICSR.T         | S127:        | 2 | 3,9479 | 0,438 | -0,525 |
| 7 | O75822 EIF3J_HUMAN  | K.LQEES#DLELAK.E              | S127:        | 2 | 3,6674 | 0,375 | -0,18  |
| 7 | Q5SW79 CE170_HUMAN  | R.LQS#AGSAM*PTSSSFK.H         | S1270:       | 2 | 4,4152 | 0,582 | -0,459 |
| 7 | Q6P4R8 NFRKB_HUMAN  | K.AVSTVVVTTAPS#PK.Q           | S1291:       | 2 | 3,2896 | 0,544 | -0,34  |
| 7 | Q9UPU5 UBP24_HUMAN  | R.VSDQNS#PVLPK.K              | S1297:       | 2 | 2,4098 | 0,144 | -0,193 |
| 7 | Q6ZU65 K2030_HUMAN  | R.VAFISLS#PVR.R               | S13:         | 2 | 3,5491 | 0,426 | -0,209 |
| 7 | Q92685 ALG3_HUMAN   | R.SGS#AAQAEGLCCK.Q            | S13:         | 2 | 3,4927 | 0,61  | -0,388 |
| 7 | P07948 LYN_HUMAN    | K.DSLS#DDGVDLK.T              | S13:         | 2 | 3,3874 | 0,275 | -0,294 |
| 7 | Q9NR30 DDX21_HUMAN  | R.SDAGLES#DTAM*K.K            | S13:         | 2 | 2,2197 | 0,178 | -0,092 |
| 7 | Q07020 RL18_HUMAN   | K.ILTFDQLALDS#PK.G            | S130:        | 2 | 3,9481 | 0,511 | -0,317 |
| 7 | P15374 UCHL3_HUMAN  | K.FLEESVSM*S#PEER.A           | S130:        | 2 | 3,6019 | 0,524 | -0,224 |
| 7 | Q07002 PCTK3_HUMAN  | R.AS#LSDIGFGK.L               | S130:        | 2 | 2,3073 | 0,363 | 0,114  |
| 7 | P18615 NELFE_HUMAN  | K.S#LYESFVSSDR.L              | S131:        | 2 | 3,6707 | 0,407 | 0,167  |
| 7 | Q9P0V3 SH3B4_HUMAN  | R.NSTLSDSGM*IDNLPDS#PDEVAK.E  | S131:        | 3 | 3,5231 | 0,345 | 0      |
| 7 | Q96QT6 PHF12_HUMAN  | R.TTS#PSSDTDLLDR.S            | S131:        | 2 | 3,2598 | 0,506 | 0,246  |
| 7 | Q9NXV6 CARF_HUMAN   | R.GIS#SSNEGVPEPSK.K           | S131:        | 2 | 3,0727 | 0,323 | -0,325 |
| 7 | Q5M775 SPEC1_HUMAN  | K.S#VSSPTSSNTPTPK.H           | S131:        | 2 | 2,9889 | 0,483 | -0,388 |
| 7 | Q9H582 ZN644_HUMAN  | K.KPAS#ITETSFSLLM*AEAAAS.-    | S1312:       | 2 | 2,4756 | 0,562 | -0,238 |
| 7 | Q86UP2 KTN1_HUMAN   | K.AAGDTTVIENS DV S#PETESSEK.E | S1313:       | 3 | 4,2613 | 0,327 | 0      |
| 7 | Q9UQ35 SRRM2_HUMAN  | K.ELNS#NS#PLRENSFGSPLEFR.N    | S1318:S1320: | 3 | 3,8115 | 0,324 | -0,156 |
| 7 | Q6P158 DHX57_HUMAN  | R.GLS#GEEEDDEPDCCNDER.Y       | S132:        | 3 | 3,4442 | 0,276 | -0,083 |
| 7 | A6H8Y3 A6H8Y3_HUMAN | K.APS#PPPLLTDR.Q              | S132:        | 2 | 2,2512 | 0,109 | -0,098 |
| 7 | Q9H910 HN1L_HUMAN   | R.S#IPAGAEPGEK.G              | S132:        | 2 | 2,1313 | 0,131 | -0,107 |
| 7 | P51858 HDGF_HUMAN   | K.GNAEGS#S#DEEGKLVIDEPAK.E    | S132:S133:   | 3 | 2,8756 | 0,254 | 0,083  |
| 7 | Q9UQ35 SRRM2_HUMAN  | K.ELNS#NS#PLRENSFGS#PLEFR.N   | S1320:S1329: | 3 | 4,6819 | 0,406 | -0,156 |
| 7 | P46013 KI67_HUMAN   | K.LDLTENLTGS#K.R              | S1329:       | 2 | 3,9542 | 0,445 | -0,096 |
| 7 | O95295 S25BP_HUMAN  | R.AM*LDSGIYPPGS#PGK.-         | S133:        | 2 | 4,2673 | 0,561 | 0,539  |
| 7 | Q15021 CND1_HUMAN   | R.YQPLAS#TASDNDFVTPEPR.R      | S1330:       | 3 | 2,6687 | 0,299 | 0,334  |
| 7 | Q15021 CND1_HUMAN   | R.YQPLASTAS#DNDFVTPEPR.R      | S1333:       | 3 | 2,9103 | 0,095 | 0,251  |
| 7 | Q96T23 RSF1_HUMAN   | R.IES#DEEEDFENVGK.V           | S1335:       | 2 | 5,2208 | 0,61  | 0,426  |
| 7 | Q5VZK9 LR16A_HUMAN  | K.S#NDSGEEAEKEFIV.-           | S1357:       | 2 | 2,432  | 0,505 | -0,411 |
| 7 | Q9NTI5 PDS5B_HUMAN  | R.AES#PESSAIESTQSTPQK.G       | S1358:       | 2 | 5,3134 | 0,566 | -0,623 |
| 7 | P41229 JAD1C_HUMAN  | K.VQGLLENGDSVTS#PEK.V         | S1359:       | 2 | 4,2877 | 0,526 | -0,487 |



|   |                    |                                  |              |   |        |       |        |
|---|--------------------|----------------------------------|--------------|---|--------|-------|--------|
| 7 | Q5VUA4 ZN318_HUMAN | R.S#PGLCSDSLEK.S                 | S136:        | 2 | 2,945  | 0,356 | 0      |
| 7 | O75396 SC22B_HUMAN | R.NLGS#INTELQDVQR.I              | S137:        | 2 | 4,8481 | 0,478 | -0,366 |
| 7 | O75396 SC22B_HUMAN | R.NLGS#INTELQDVQR.I              | S137:        | 3 | 4,5635 | 0,369 | 0,219  |
| 7 | Q8WWA1 TMM40_HUMAN | R.GS#DPASGEVEASQLR.R             | S137:        | 2 | 3,8984 | 0,513 | -0,231 |
| 7 | Q7Z4V5 HDGR2_HUMAN | R.GVM*AVTAVTATAAS#DR.M           | S137:        | 3 | 3,4909 | 0,376 | 0      |
| 7 | Q7Z4V5 HDGR2_HUMAN | R.GVM*AVTAVTATAAS#DR.M           | S137:        | 2 | 3,308  | 0,379 | -0,226 |
| 7 | Q7Z4V5 HDGR2_HUMAN | R.GVMAVTAVTATAAS#DR.M            | S137:        | 2 | 2,2269 | 0,347 | 0,229  |
| 7 | Q9P0T7 TMEM9_HUMAN | R.S#M*AAAAASLGGPR.A              | S137:        | 2 | 2,1125 | 0,204 | -0,291 |
| 7 | P11388 TOP2A_HUMAN | K.SVVS#DLEADDVK.G                | S1377:       | 2 | 3,325  | 0,416 | -0,18  |
| 7 | Q13428 TCOF_HUMAN  | K.LGAGEGGEASVS#PEK.T             | S1378:       | 2 | 4,437  | 0,528 | -0,166 |
| 7 | Q14160 LAP4_HUMAN  | R.VS#LVGADDLR.K                  | S1378:       | 2 | 2,3156 | 0,411 | -0,108 |
| 7 | Q5VTR2 BRE1A_HUMAN | K.ALVVPEPEPDS#NQER.K             | S138:        | 2 | 3,4738 | 0,456 | -0,498 |
| 7 | Q76L83 ASXL2_HUMAN | K.VSS#SPQSGCPSPTIPAGK.V          | S138:        | 2 | 2,4799 | 0,341 | -0,063 |
| 7 | P78357 CNTP1_HUMAN | R.DQNLQPQILEES#RSE.-             | S1381:       | 2 | 3,2924 | 0,331 | -0,562 |
| 7 | P30291 WEE1_HUMAN  | K.SPAAPYFLGSSFS#PVR.C            | S139:        | 2 | 3,7859 | 0,413 | -0,208 |
| 7 | P41162 ETV3_HUMAN  | R.SSGVVPQS#APPVPTASSR.F          | S139:        | 2 | 3,5792 | 0,397 | -0,473 |
| 7 | P11388 TOP2A_HUMAN | K.GSVPLS#S#PPATHFPDETEITNPVVK.K  | S1391:S1392: | 3 | 4,1285 | 1     | -0,447 |
| 7 | P11388 TOP2A_HUMAN | K.GSVPLS#SS#PPATHFPDETEITNPVVK.K | S1391:S1393: | 3 | 4,1278 | 0,413 | -0,383 |
| 7 | P11388 TOP2A_HUMAN | K.GSVPLS#S#PPATHFPDETEITNPVVK.K  | S1392:S1393: | 3 | 3,0565 | 0,276 | -0,256 |
| 7 | Q02952 AKA12_HUMAN | K.EVSSLEGS#PPPCLGQEEAVCTK.I      | S1395:       | 3 | 5,9275 | 0,606 | 0,447  |
| 7 | P51580 TPMT_HUMAN  | R.TSLDIEEYS#DTEVQK.N             | S14:         | 2 | 5,0111 | 0,462 | 0,531  |
| 7 | P45973 CBX5_HUMAN  | R.TADSSSS#EDEEEYVVEK.V           | S14:         | 2 | 4,6509 | 0,545 | -0,308 |
| 7 | P42696 RBM34_HUMAN | R.S#VQEGENPDDGVR.G               | S14:         | 2 | 3,7734 | 0,455 | -0,165 |
| 7 | P13051 UNG_HUMAN   | K.TLYSFFSPS#PAR.K                | S14:         | 2 | 3,6203 | 0,477 | -0,252 |
| 7 | O15085 ARHGB_HUMAN | R.LSS#LSSLGDSAPER.K              | S14:         | 2 | 3,432  | 0,536 | 0,326  |
| 7 | Q7Z3C6 ATG9A_HUMAN | R.LEAS#YSDS#PPGEEDLLVHVAEGSK.S   | S14:S18:     | 3 | 3,6217 | 0,365 | -0,272 |
| 7 | Q8NE71 ABCF1_HUMAN | K.GGNVFAALIQDQS#EEEEEEK.H        | S140:        | 3 | 4,6615 | 0,458 | -0,602 |
| 7 | Q9Y2U8 MAN1_HUMAN  | K.VLLGFS#SDESVEASPR.D            | S140:        | 3 | 2,9026 | 0,276 | 0,194  |
| 7 | Q9UQ35 SRRM2_HUMAN | K.AGM*SSNQSISS#PVLDVPR.T         | S1404:       | 3 | 2,7926 | 0,132 | 0,364  |
| 7 | Q9UQ35 SRRM2_HUMAN | K.AGM*SSNQSISS#PVLDVPR#PSR.E     | S1404:T1413: | 3 | 6,7108 | 1     | 0,217  |
| 7 | O43432 IF4G3_HUMAN | K.LDFIESDS#PCSSEALSK.K           | S1409:       | 2 | 5,0093 | 0,498 | -0,435 |
| 7 | Q6IAA8 CK059_HUMAN | R.IAAYAYS#ALSQIR.V               | S141:        | 2 | 3,2767 | 0,407 | 0      |
| 7 | Q13177 PAK2_HUMAN  | K.YLS#FTPPEK.D                   | S141:        | 2 | 2,7859 | 0,142 | -0,105 |

|   |                    |                                 |              |   |        |       |        |
|---|--------------------|---------------------------------|--------------|---|--------|-------|--------|
| 7 | P41279 M3K8_HUMAN  | R.NIGS#DFIPR.G                  | S141:        | 2 | 2,6684 | 0,226 | -0,888 |
| 7 | Q13177 PAK2_HUMAN  | K.YLS#FTPPEKDGFPST#PALNAK.G     | S141:T154:   | 3 | 4,9901 | 0,437 | -0,293 |
| 7 | Q92785 REQU_HUMAN  | R.VDDDS#LGEFPVTSR.A             | S142:        | 2 | 4,7371 | 0,546 | -0,211 |
| 7 | Q92785 REQU_HUMAN  | R.VDDDS#LGEFPVTSR.A             | S142:        | 3 | 3,1849 | 0,254 | 0      |
| 7 | O43597 SPY2_HUMAN  | R.LLGSSFSS#GPVADGIIR.V          | S142:        | 2 | 2,8035 | 0,523 | -0,486 |
| 7 | P16220 CREB1_HUMAN | K.ILNDLS#SDAPGVPR.I             | S142:        | 2 | 2,4855 | 0,155 | -0,636 |
| 7 | Q9BYP7 WNK3_HUMAN  | K.QPSS#DSEFSASLAGSGK.S          | S1424:       | 2 | 2,9509 | 0,426 | -0,211 |
| 7 | P46821 MAP1B_HUMAN | R.GAES#PFEEK.S                  | S1427:       | 2 | 2,6086 | 0,261 | -0,114 |
| 7 | Q63ZY6 NSN5C_HUMAN | R.QLEEPGAGTPS#PVR.L             | S143:        | 2 | 2,6399 | 0,33  | -0,482 |
| 7 | O95490 LPHN2_HUMAN | R.GNS#DGVIIPINK.E               | S1430:       | 2 | 2,3019 | 0,27  | 0      |
| 7 | Q96N67 DOCK7_HUMAN | R.SPS#GSAFGSQENLR.W             | S1432:       | 2 | 3,7184 | 0,502 | -0,241 |
| 7 | Q15648 MED1_HUMAN  | K.NYGS#PLISGSTPK.H              | S1433:       | 2 | 2,7386 | 0,411 | -0,261 |
| 7 | O15061 DMN_HUMAN   | R.TFVLAGSADS#PELGK.L            | S1435:       | 2 | 2,8935 | 0,553 | 0,233  |
| 7 | Q15149 PLEC1_HUMAN | K.AQLEPVAS#PAK.K                | S1435:       | 2 | 2,2607 | 0,316 | -0,205 |
| 7 | Q9Y2U8 MAN1_HUMAN  | K.VLLGFSSDES#DVEASPR.D          | S144:        | 2 | 4,7914 | 0,59  | -0,388 |
| 7 | Q14160 LAP4_HUMAN  | R.QSPAS#PPPLGGAPVR.T            | S1448:       | 2 | 2,1006 | 0,3   | -0,389 |
| 7 | P29966 MARCS_HUMAN | K.AEDGATPS#PSNETPK.K            | S145:        | 2 | 2,6268 | 0,23  | -0,463 |
| 7 | Q02880 TOP2B_HUMAN | K.SQDFGNLFSFPS#YSQK.S           | S1452:       | 2 | 2,8145 | 0,234 | -0,253 |
| 7 | Q8IWI9 MGAP_HUMAN  | K.GLPFYAGLS#PAGK.L              | S1457:       | 2 | 3,2067 | 0,326 | -0,27  |
| 7 | P46783 RS10_HUMAN  | K.AEAGAGS#ATEFQFR.G             | S146:        | 2 | 4,7901 | 0,502 | 0,561  |
| 7 | Q02880 TOP2B_HUMAN | K.SEDDS#AKFDS#NEEDSASVFSPSFLK.Q | S1461:S1466: | 3 | 4,42   | 0,312 | -0,495 |
| 7 | Q9UIG0 BAZ1B_HUMAN | R.LAEDEGDS#EPEAVGQSR.G          | S1468:       | 2 | 4,6602 | 0,466 | -0,457 |
| 7 | P40855 PEX19_HUMAN | K.NATDLQNSS#M*SEEELTK.A         | S147:        | 2 | 4,9339 | 0,553 | -0,429 |
| 7 | P61966 AP1S1_HUMAN | K.AIEQADLLQEEDES#PR.S           | S147:        | 3 | 4,4963 | 0,347 | 0,285  |
| 7 | P40855 PEX19_HUMAN | K.NATDLQNSS#MSEEELTK.A          | S147:        | 2 | 4,4166 | 0,532 | -0,432 |
| 7 | P61966 AP1S1_HUMAN | K.AIEQADLLQEEDES#PR.S           | S147:        | 2 | 2,8059 | 0,57  | 0,698  |
| 7 | O75376 NCOR1_HUMAN | K.AQLS#PGIYDDTSAR.R             | S1472:       | 2 | 3,5406 | 0,546 | -0,31  |
| 7 | Q5SYE7 NHSL1_HUMAN | R.SEPSDAPESPSSCS#PSK.N          | S1472:       | 2 | 3,0499 | 0,491 | -0,317 |
| 7 | Q14160 LAP4_HUMAN  | R.VQS#PEPPAPER.A                | S1475:       | 2 | 2,7288 | 0,309 | -0,948 |
| 7 | Q9BUH6 CI142_HUMAN | R.LAAAEETAVS#PR.K               | S148:        | 2 | 3,7733 | 0,532 | -0,188 |
| 7 | Q6P0Q8 MAST2_HUMAN | R.NQSLGQS#APSLTAGLK.E           | S148:        | 2 | 3,665  | 0,538 | 0,074  |
| 7 | P04406 G3P_HUMAN   | K.IIS#NASCTTNCLAPLAK.V          | S148:        | 2 | 3,417  | 0,321 | -0,127 |
| 7 | Q99594 TEAD3_HUMAN | K.FSPPS#PLPQAVFSTSSR.F          | S148:        | 2 | 2,4898 | 0,289 | -0,259 |

|   |                    |                              |              |   |        |       |        |
|---|--------------------|------------------------------|--------------|---|--------|-------|--------|
| 7 | Q9P2M7 CING_HUMAN  | R.SNS#M*LELAPK.V             | S149:        | 2 | 3,6768 | 0,253 | 0      |
| 7 | A6NGB9 WIPF3_HUMAN | K.TISGPLIPPAS#PR.L           | S149:        | 2 | 2,5497 | 0,566 | 0      |
| 7 | Q9Y618 NCOR2_HUMAN | K.LEPVS#PPS#PPHTDPELELVPPR.L | S149:S152:   | 3 | 2,6232 | 0,218 | -0,428 |
| 7 | P04792 HSPB1_HUMAN | R.GPS#WDPFR.D                | S15:         | 2 | 2,663  | 0,359 | -0,234 |
| 7 | Q15398 DLG7_HUMAN  | K.DIS#TEM*IR.T               | S15:         | 2 | 2,3533 | 0,152 | 0      |
| 7 | Q9H611 PIF1_HUMAN  | R.DFVTIS#PVQPEER.R           | S151:        | 2 | 2,3832 | 0,3   | 0,306  |
| 7 | Q8WW11 LMO7_HUMAN  | R.GES#LDNLDSPR.S             | S1510:       | 2 | 3,6835 | 0,449 | -0,285 |
| 7 | Q9H6H4 REEP4_HUMAN | R.SFS#M*QDLR.S               | S152:        | 2 | 2,699  | 0,318 | -0,226 |
| 7 | Q02880 TOP2B_HUMAN | K.VVEAVNS#DSDSEFGIPK.K       | S1522:       | 2 | 3,8207 | 0,487 | -0,651 |
| 7 | P38398 BRCA1_HUMAN | R.NYPS#QEELIK.V              | S1524:       | 2 | 2,2015 | 0,107 | 0,094  |
| 7 | Q12756 KIF1A_HUMAN | R.TPQPCS#RPAS#PEPELLPEADSK.K | S1528:S1532: | 3 | 4,6545 | 0,425 | 0,642  |
| 7 | Q9NY61 AATF_HUMAN  | K.TPGFSVQS#ISDFEK.F          | S153:        | 2 | 4,2847 | 0,495 | -0,527 |
| 7 | Q00536 PCTK1_HUMAN | R.VS#LSEIGFGK.L              | S153:        | 2 | 2,6253 | 0,488 | -0,218 |
| 7 | O43166 SI1L1_HUMAN | K.LIDLES#PTPESQK.S           | S1549:       | 2 | 3,827  | 0,393 | 0,397  |
| 7 | Q9NY61 AATF_HUMAN  | K.TPGFSVQSIS#DFEK.F          | S155:        | 2 | 4,2403 | 0,48  | -0,226 |
| 7 | Q8IX90 CM003_HUMAN | R.S#PQLSDFGLER.Y             | S155:        | 2 | 2,7125 | 0,426 | -0,275 |
| 7 | Q6WKZ4 RFIP1_HUMAN | R.NNM*TAS#MFDLSM*K.D         | S156:        | 2 | 3,1034 | 0,296 | -0,152 |
| 7 | Q14669 TRIPC_HUMAN | R.LLDTNPEINQSDS#QDSR.V       | S1577:       | 2 | 4,5931 | 0,439 | -0,485 |
| 7 | Q69YN4 VIR_HUMAN   | R.SFLSEPS#SPGR.T             | S1578:       | 2 | 3,0365 | 0,404 | -0,392 |
| 7 | O95292 VAPB_HUMAN  | K.SLS#SSLDDTEVK.K            | S158:        | 2 | 3,8355 | 0,267 | 0,09   |
| 7 | A4D1S0 KLRG2_HUMAN | R.FLTVPVPES#PAFSR.H          | S158:        | 2 | 3,0036 | 0,424 | -0,225 |
| 7 | Q641Q2 FA21A_HUMAN | K.AGNS#DS#EEDDANGRVELILEPK.D | S158:S160:   | 3 | 3,3157 | 0,31  | -0,291 |
| 7 | O43166 SI1L1_HUMAN | R.TLS#DESIYNSQR.E            | S1585:       | 2 | 4,1605 | 0,54  | -0,245 |
| 7 | Q9UKI8 TLK1_HUMAN  | K.ISDYFEYQGGNGSS#PVR.G       | S159:        | 2 | 5,4941 | 0,409 | -0,686 |
| 7 | Q9NY27 PP4R2_HUMAN | R.M*NGVM*FPGNS#PSYTER.S      | S159:        | 2 | 4,1133 | 0,558 | -0,257 |
| 7 | Q9UKI8 TLK1_HUMAN  | K.ISDYFEYQGGNGSS#PVR.G       | S159:        | 3 | 3,8284 | 0,244 | -0,468 |
| 7 | Q9NY27 PP4R2_HUMAN | R.M*NGVM*FPGNS#PSYTER.S      | S159:        | 3 | 3,1319 | 0,272 | 0,096  |
| 7 | P42166 LAP2A_HUMAN | R.SS#TPLPTISSAENTR.Q         | S159:        | 2 | 2,8174 | 0,35  | -0,353 |
| 7 | P12268 IMDH2_HUMAN | R.LVGIIS#SR.D                | S159:        | 2 | 2,179  | 0,241 | -0,066 |
| 7 | Q5T1V6 DDX59_HUMAN | K.ADSEPES#PLNASYVYK.E        | S160:        | 2 | 3,9867 | 0,459 | 0      |
| 7 | O00161 SNP23_HUMAN | R.EDEM*EENLTQVGS#ILGNLK.D    | S161:        | 3 | 4,8945 | 0,329 | -0,578 |
| 7 | Q6SPF0 SAMD1_HUMAN | R.AAAAAATAPPS#PGPAQPGR.A     | S161:        | 2 | 4,6031 | 0,448 | -0,465 |
| 7 | Q6SPF0 SAMD1_HUMAN | R.AAAAAATAPPS#PGPAQPGR.A     | S161:        | 3 | 3,2693 | 0,287 | -0,1   |

|   |                    |                          |            |   |        |       |        |
|---|--------------------|--------------------------|------------|---|--------|-------|--------|
| 7 | Q1KMD3 HNRL2_HUMAN | R.S#GDETPGSEVPGDK.A      | S161:      | 2 | 3,2168 | 0,568 | 0,168  |
| 7 | Q12888 TP53B_HUMAN | K.AADIS#LDNLVEGK.R       | S1618:     | 2 | 3,8378 | 0,443 | -0,086 |
| 7 | Q9Y6M1 IF2B2_HUMAN | K.ISYIPDEEVSS#PSPPQR.A   | S162:      | 3 | 2,9026 | 0,142 | 0,185  |
| 7 | Q9C0C2 TB182_HUMAN | R.VPS#SDEEVVEEPQSR.R     | S1620:     | 2 | 4,4785 | 0,515 | -0,345 |
| 7 | Q9C0C2 TB182_HUMAN | R.VPSS#DEEVVEEPQSR.R     | S1621:     | 2 | 4,5317 | 0,547 | -0,345 |
| 7 | P29966 MARCS_HUMAN | K.S#FKLS#GFSFK.K         | S163:S167: | 2 | 2,5031 | 0,138 | -0,466 |
| 7 | Q96AY4 TTC28_HUMAN | R.DVLSLLNLS#PR.H         | S1633:     | 2 | 3,2882 | 0,491 | -0,56  |
| 7 | Q9Y6M1 IF2B2_HUMAN | K.ISYIPDEEVSSPS#PPQR.A   | S164:      | 2 | 3,6241 | 0,478 | 0,616  |
| 7 | O95997 PTTG1_HUMAN | K.LFQLGPPS#PVK.M         | S165:      | 2 | 2,9294 | 0,301 | 0      |
| 7 | P51858 HDGF_HUMAN  | R.AGDLLDS#PK.R           | S165:      | 2 | 2,8013 | 0,275 | 0      |
| 7 | Q9C0C2 TB182_HUMAN | K.VNLFPGLS#PSALK.A       | S1652:     | 2 | 3,1508 | 0,403 | -0,429 |
| 7 | Q9C0C2 TB182_HUMAN | R.S#AEEGELAESK.S         | S1666:     | 2 | 3,534  | 0,472 | -0,298 |
| 7 | P30307 MPIP3_HUMAN | K.YLGS#PITTVPK.L         | S168:      | 2 | 2,8937 | 0,373 | 0      |
| 7 | Q9BZ23 PANK2_HUMAN | R.AS#SASVPAVGASAEGTR.R   | S168:      | 2 | 2,8834 | 0,509 | 0,153  |
| 7 | Q5UIP0 RIF1_HUMAN  | R.DS#FDNCSLGESSK.I       | S1688:     | 2 | 3,3142 | 0,622 | -0,32  |
| 7 | Q9BZ23 PANK2_HUMAN | R.ASS#ASVPAVGASAEGTR.R   | S169:      | 2 | 3,1639 | 0,442 | -0,382 |
| 7 | P18583 SON_HUMAN   | K.ESDQTLAALLS#PK.E       | S1697:     | 2 | 4,315  | 0,469 | -0,084 |
| 7 | P18583 SON_HUMAN   | K.ESDQTLAALLS#PK.E       | S1697:     | 3 | 3,871  | 0,295 | 0,189  |
| 7 | Q9H1H9 KI13A_HUMAN | R.TGS#CSELDACPSK.I       | S1698:     | 2 | 3,7767 | 0,46  | -0,164 |
| 7 | P05387 RLA2_HUMAN  | R.YVASYLLAALGGNSS#PSAK.D | S17:       | 2 | 4,3681 | 0,284 | -0,501 |
| 7 | Q8IY67 RAVR1_HUMAN | K.S#GAEVEAGDAAER.R       | S17:       | 2 | 3,861  | 0,372 | -0,273 |
| 7 | P53999 TCP4_HUMAN  | K.ELVSSSSGSDS#DSEVDK.K   | S17:       | 2 | 3,5968 | 0,471 | -0,644 |
| 7 | P05387 RLA2_HUMAN  | R.YVASYLLAALGGNSS#PSAK.D | S17:       | 3 | 3,3421 | 0,212 | -0,282 |
| 7 | Q96EY5 F125A_HUMAN | R.DM*QGLS#LDAASQPSK.G    | S170:      | 2 | 3,1016 | 0,309 | -0,52  |
| 7 | P29966 MARCS_HUMAN | K.LSGFS#FK.K             | S170:      | 2 | 2,0674 | 0,223 | 0,141  |
| 7 | P55196 AFAD_HUMAN  | K.TQVLS#PDSLFTAK.F       | S1704:     | 2 | 2,9616 | 0,342 | -0,574 |
| 7 | Q5SRE5 NU188_HUMAN | R.GAPS#SPATGVLPSQPK.S    | S1708:     | 2 | 3,3093 | 0,515 | -0,449 |
| 7 | Q5SRE5 NU188_HUMAN | R.GAPSS#PATGVLPSQPK.S    | S1709:     | 2 | 3,5706 | 0,388 | -0,15  |
| 7 | Q15545 TAF7_HUMAN  | R.LLS#TDAEAVSTR.W        | S171:      | 2 | 3,5854 | 0,421 | -0,091 |
| 7 | Q5SRE5 NU188_HUMAN | R.GAPSSPATGVLPS#PQPK.S   | S1717:     | 2 | 3,4532 | 0,406 | -0,299 |
| 7 | Q9HCD6 TANC2_HUMAN | K.DCSYGAVTSPPTS#TLESR.D  | S172:      | 2 | 3,78   | 0,569 | -0,128 |
| 7 | Q9UQ35 SRRM2_HUMAN | R.S#PSVSSPEPAEK.S        | S1727:     | 2 | 2,9485 | 0,473 | -0,283 |
| 7 | Q15365 PCBP1_HUMAN | K.QICLVM*LETLSQS#PQGR.V  | S173:      | 3 | 5,1563 | 0,429 | 0,089  |

|   |                     |                                |            |   |        |       |        |
|---|---------------------|--------------------------------|------------|---|--------|-------|--------|
| 7 | O95817 BAG3_HUMAN   | R.SQS#PAASDCSSSSSASLPSSGR.S    | S173:      | 3 | 3,7454 | 0,47  | -0,241 |
| 7 | Q15365 PCBP1_HUMAN  | K.QICLVMLETLSQS#PQGR.V         | S173:      | 2 | 2,719  | 0,426 | -0,06  |
| 7 | Q96RK0 CIC_HUMAN    | R.TQS#LSALPK.E                 | S173:      | 2 | 2,5956 | 0,298 | -0,357 |
| 7 | P53621 COPA_HUMAN   | K.NLS#PGAVESDVR.G              | S173:      | 2 | 2,196  | 0,324 | 0,092  |
| 7 | Q9BRJ6 CG050_HUMAN  | R.ELDEEGS#DPPLPGR.A            | S175:      | 2 | 3,2639 | 0,255 | -0,077 |
| 7 | Q9H7D0 DOCK5_HUMAN  | K.APEPDLM*S#PTR.K              | S1756:     | 2 | 2,3229 | 0,301 | -0,279 |
| 7 | P18583 SON_HUMAN    | R.AGIEGPLLAS#DVGR.D            | S1759:     | 2 | 4,0155 | 0,264 | -0,085 |
| 7 | Q9BXF6 RFIP5_HUMAN  | R.NNLSAS#M*FDLSM*K.D           | S176:      | 2 | 3,6373 | 0,426 | -0,311 |
| 7 | Q9BXF6 RFIP5_HUMAN  | R.NNLSAS#MFDLSM*K.D            | S176:      | 2 | 3,1473 | 0,404 | -0,471 |
| 7 | Q9H7D0 DOCK5_HUMAN  | K.S#LQLM*DNR.L                 | S1766:     | 2 | 2,1889 | 0,334 | -0,114 |
| 7 | Q9HCK8 CHD8_HUMAN   | R.VS#PSDTTPLVSR.S              | S1767:     | 2 | 2,5222 | 0,467 | -0,364 |
| 7 | P18583 SON_HUMAN    | R.SAAS#PVVSSM*PER.A            | S1769:     | 2 | 2,7644 | 0,372 | 0,173  |
| 7 | Q58FF8 H90B2_HUMAN  | K.IEDVGS#DEEDDSGK.D            | S177:      | 2 | 4,3835 | 0,469 | -0,465 |
| 7 | Q9NYF8 BCLF1_HUMAN  | K.AEGEPQEE#PLK.S               | S177:      | 2 | 3,1289 | 0,346 | -0,438 |
| 7 | Q09666 AHNK_HUMAN   | K.DIDISS#PEFK.I                | S177:      | 2 | 2,5455 | 0,294 | 0      |
| 7 | Q04721 NOTC2_HUMAN  | K.AEDEALLS#EEDDPIDR.R          | S1778:     | 2 | 4,5237 | 0,506 | -0,386 |
| 7 | Q04721 NOTC2_HUMAN  | K.AEDEALLS#EEDDPIDR.R          | S1778:     | 3 | 4,3712 | 0,469 | 0,096  |
| 7 | Q9NZJ4 SACS_HUMAN   | R.IADLQS#PLFR.G                | S1779:     | 2 | 2,1535 | 0,373 | -0,295 |
| 7 | Q8WWQ0 PHIP_HUMAN   | R.TAFYNEDDS#EEEQR.Q            | S1783:     | 2 | 5,2833 | 0,492 | -0,337 |
| 7 | Q86TB9 PATL1_HUMAN  | R.STS#PIIGSPPVR.A              | S179:      | 2 | 2,6904 | 0,291 | -0,095 |
| 7 | P46821 MAP1B_HUMAN  | R.ESSPLYS#PTFSDSTSAVK.E        | S1797:     | 2 | 2,961  | 0,237 | -0,677 |
| 7 | A8MQ02 A8MQ02_HUMAN | R.LFS#QGQDVSNK.V               | S1799:     | 2 | 3,1726 | 0,29  | 0,375  |
| 7 | O43310 K0427_HUMAN  | R.S#QEIEELER.F                 | S18:       | 2 | 3,5504 | 0,271 | -0,302 |
| 7 | Q9Y383 LC7L2_HUMAN  | R.AM*LDQLM*GTS#R.D             | S18:       | 2 | 3,442  | 0,529 | -0,091 |
| 7 | Q00537 PCTK2_HUMAN  | R.AS#LSEIGFGK.M                | S180:      | 2 | 2,5774 | 0,425 | 0      |
| 7 | Q96N67 DOCK7_HUMAN  | R.S#M*SIDDTPR.G                | S180:      | 2 | 2,1204 | 0,365 | 0      |
| 7 | Q92945 FUBP2_HUMAN  | K.VQIS#PDSGGLPER.S             | S181:      | 2 | 3,2062 | 0,483 | 0      |
| 7 | O00264 PGRC1_HUMAN  | K.EGEEPTVYS#DEEEK.D            | S181:      | 2 | 2,9797 | 0,416 | -0,47  |
| 7 | Q9NZI8 IF2B1_HUMAN  | R.QGS#PVAAGAPAK.Q              | S181:      | 2 | 2,3435 | 0,427 | -0,323 |
| 7 | Q9NQC3 RTN4_HUMAN   | R.RGS#SGS#VDETLFALPAASEPVIR.S  | S181:S184: | 3 | 5,3347 | 0,421 | -0,218 |
| 7 | Q9NQC3 RTN4_HUMAN   | R.RGS#SGS#VDET#LFALPAASEPVIR.S | S181:T188: | 3 | 3,2168 | 0,308 | 0,291  |
| 7 | Q9HCD6 TANC2_HUMAN  | R.SCELSPVS#PTQGGYPSEPTR.S      | S1827:     | 3 | 3,1725 | 0,307 | -0,156 |
| 7 | O15355 PPM1G_HUMAN  | K.SGGGTGEEPGS#QGLNGEAGPEDSTR.E | S183:      | 3 | 3,0446 | 0,19  | -0,377 |

|   |                    |                              |              |   |        |       |        |
|---|--------------------|------------------------------|--------------|---|--------|-------|--------|
| 7 | Q9H7D0 DOCK5_HUMAN | R.NS#TELAPPLPVR.R            | S1834:       | 2 | 2,6812 | 0,344 | 0,444  |
| 7 | Q04721 NOTC2_HUMAN | R.GPDGCTPLM*LAS#LR.G         | S1836:       | 2 | 3,4096 | 0,517 | -0,385 |
| 7 | Q03164 HRX_HUMAN   | K.GPGEPDS#PTLHPPT#PPILSTDR.S | S1837:T1845: | 3 | 4,6682 | 0,291 | -0,216 |
| 7 | Q8NG31 CASC5_HUMAN | R.TPS#SCSSSLDSIK.A           | S1845:       | 2 | 2,992  | 0,523 | -0,084 |
| 7 | P37802 TAGL2_HUMAN | R.GAS#QAGM*TGyGM*PR.Q        | S185:        | 2 | 3,6218 | 0,562 | -0,245 |
| 7 | P48382 RFX5_HUMAN  | K.GSES#PEM*GPEVTPAPR.D       | S185:        | 2 | 3,1723 | 0,317 | -0,492 |
| 7 | Q8TDJ6 DMXL2_HUMAN | R.NLAS#PEGTLATLGLK.T         | S1857:       | 2 | 2,7909 | 0,405 | -0,234 |
| 7 | Q9P260 K1468_HUMAN | R.AGSISTLDS#LDFAR.Y          | S186:        | 2 | 3,8087 | 0,492 | -0,08  |
| 7 | Q9Y3S1 WNK2_HUMAN  | K.QAS#LPVSGSVAGDFVK.K        | S1862:       | 2 | 2,3648 | 0,335 | -0,074 |
| 7 | Q15032 R3HD1_HUMAN | K.LEQEILDFIGNNE#PR.K         | S187:        | 2 | 5,4638 | 0,476 | -0,5   |
| 7 | P13798 ACPH_HUMAN  | K.ALDVSA#DDEIAR.L            | S187:        | 2 | 3,2738 | 0,385 | -0,085 |
| 7 | Q15032 R3HD1_HUMAN | K.LEQEILDFIGNNE#PR.K         | S187:        | 3 | 3,0014 | 0,3   | -0,281 |
| 7 | P42858 HD_HUMAN    | K.LLSPQM*S#GEEEDSDLAAL.L     | S1876:       | 2 | 2,1987 | 0,433 | -0,242 |
| 7 | Q99607 ELF4_HUMAN  | R.STS#PVTDPPIR.K             | S188:        | 2 | 3,0028 | 0,398 | 0,252  |
| 7 | P49792 RBP2_HUMAN  | K.EGFSIPVS#ADGFK.F           | S1894:       | 2 | 2,3484 | 0,256 | -0,596 |
| 7 | Q9H1E3 NUCKS_HUMAN | K.VVDYSQFQES#DDADEDYGR.D     | S19:         | 3 | 6,6722 | 0,573 | 0,71   |
| 7 | P49116 NR2C2_HUMAN | R.IQISTDSAVAS#PQR.I          | S19:         | 2 | 4,5476 | 0,495 | 0,806  |
| 7 | P02786 TFR1_HUMAN  | R.SAFSNLFGGEPLS#YTR.F        | S19:         | 2 | 2,8162 | 0,329 | -0,535 |
| 7 | Q9H4A3 WNK1_HUMAN  | K.QSSTPGSLFSL#PPAPAPK.N      | S19:         | 2 | 2,4685 | 0,267 | -0,393 |
| 7 | Q01433 AMPD2_HUMAN | K.TDS#DSDLQLYK.E             | S190:        | 2 | 3,7272 | 0,304 | -0,179 |
| 7 | Q14103 HNRPD_HUMAN | K.IFVGGLS#PDTPEEK.I          | S190:        | 2 | 3,2213 | 0,343 | 0      |
| 7 | O15027 SC16A_HUMAN | R.ADSGPTQPPLSLS#PAPETK.R     | S1905:       | 2 | 3,2516 | 0,355 | 0,433  |
| 7 | O15381 NVL_HUMAN   | K.DSFFLDLS#CEK.S             | S191:        | 2 | 2,6942 | 0,359 | -0,677 |
| 7 | P24928 RBP1_HUMAN  | K.YSPTS#PTYSPTSPK.Y          | S1913:       | 2 | 3,6292 | 0,547 | -0,383 |
| 7 | P21291 CSRP1_HUMAN | K.GFGFGQGAGALVHS#E.-         | S192:        | 2 | 4,4011 | 0,559 | -0,161 |
| 7 | Q00587 BORG5_HUMAN | R.SDS#LLSFR.L                | S192:        | 2 | 3,0564 | 0,353 | -0,061 |
| 7 | P24928 RBP1_HUMAN  | K.YSPTSPTYSPTS#PK.Y          | S1920:       | 2 | 2,4071 | 0,311 | -0,383 |
| 7 | O95772 MENTO_HUMAN | R.LLIVQDAS#ER.A              | S193:        | 2 | 3,2212 | 0,299 | -0,1   |
| 7 | Q9BVC5 ASHWN_HUMAN | K.SPPLS#PVGTTVPVK.L          | S193:        | 2 | 2,8278 | 0,35  | 0      |
| 7 | P46013 KI67_HUMAN  | K.LDLLGNLPGS#K.R             | S1937:       | 2 | 2,817  | 0,383 | -0,202 |
| 7 | O43237 DC1L2_HUMAN | K.DFQDYM*EPEEGCQGS#PQR.R     | S194:        | 3 | 4,0527 | 0,338 | -0,161 |
| 7 | Q92621 NU205_HUMAN | R.LQDSFAS#ETNLDFR.S          | S1942:       | 2 | 5,4802 | 0,518 | -0,354 |
| 7 | P30622 CLIP1_HUMAN | K.TASES#ISNLSEAGSIK.K        | S195:        | 2 | 4,5764 | 0,518 | 0,656  |

|   |                    |                                      |        |   |        |       |        |
|---|--------------------|--------------------------------------|--------|---|--------|-------|--------|
| 7 | Q9NV56 MRGBP_HUMAN | K.VLTANSNPSS#PSAAK.R                 | S195:  | 2 | 3,5716 | 0,418 | -0,32  |
| 7 | Q12830 BPTF_HUMAN  | K.VGS#PATVTFQQNK.N                   | S1959: | 2 | 3,2543 | 0,332 | -0,335 |
| 7 | Q8IWB9 TEX2_HUMAN  | K.SLS#TEVEPK.E                       | S196:  | 2 | 2,767  | 0,32  | 0,114  |
| 7 | P46821 MAP1B_HUMAN | K.TTS#PPEVSGYSYEK.T                  | S1965: | 2 | 3,3278 | 0,498 | -0,15  |
| 7 | P55072 TERA_HUMAN  | R.EDEEES#LNEVGYDDIGGCR.K             | S197:  | 3 | 5,9412 | 0,576 | -0,161 |
| 7 | Q8TEA8 DTD1_HUMAN  | R.SASS#GAEGDVSSEREP.-                | S197:  | 2 | 3,3245 | 0,524 | 0,074  |
| 7 | O14686 MLL2_HUMAN  | R.CPSLDNLAVPES#PGVGGGK.A             | S1985: | 3 | 2,8156 | 0,148 | 0      |
| 7 | P18858 DNL1_HUMAN  | K.AETPTES#VSEPEVATK.Q                | S199:  | 2 | 4,3284 | 0,563 | -0,278 |
| 7 | Q9UQN3 CHM2B_HUMAN | K.ATIS#DEEIER.Q                      | S199:  | 2 | 2,9606 | 0,34  | -0,294 |
| 7 | O43502 RA51C_HUMAN | R.DLVSFPLS#PAVR.V                    | S20:   | 2 | 2,9871 | 0,418 | -0,442 |
| 7 | Q7Z478 DHX29_HUMAN | K.FQSPQIQATIS#PPLQPK.T               | S200:  | 2 | 5,1735 | 0,444 | -0,373 |
| 7 | Q7Z478 DHX29_HUMAN | K.FQSPQIQATIS#PPLQPK.T               | S200:  | 3 | 5,0307 | 0,394 | 0,093  |
| 7 | P30622 CLIP1_HUMAN | K.TASESISNLS#EAGSIK.K                | S200:  | 2 | 2,5921 | 0,092 | 0,073  |
| 7 | P16989 DBPA_HUMAN  | R.NYAGEEEEEGS#GSSEGFDPATDR.Q         | S201:  | 3 | 3,3413 | 0,335 | -0,28  |
| 7 | P50991 TCPD_HUMAN  | K.VIDPATATS#VDLR.D                   | S202:  | 2 | 2,6973 | 0,184 | 0      |
| 7 | O75391 SPAG7_HUMAN | R.S#IEEAM*NEIR.A                     | S202:  | 2 | 2,4505 | 0,412 | -0,284 |
| 7 | Q9NYB0 TE2IP_HUMAN | K.YLLGDAPVS#PSSQK.L                  | S203:  | 2 | 4,6416 | 0,462 | 0,475  |
| 7 | Q9Y580 RBM7_HUMAN  | R.M*NS#YPYLADR.H                     | S204:  | 2 | 3,6966 | 0,331 | -0,368 |
| 7 | Q8NCF5 NF2IP_HUMAN | K.TEFLDLNLSPLSPS#PR.T                | S204:  | 2 | 2,6588 | 0,257 | -0,621 |
| 7 | Q58FF7 H90B3_HUMAN | K.EIS#DDEAEEEK.G                     | S205:  | 2 | 2,3159 | 0,174 | -0,089 |
| 7 | Q6ZN18 AEBP2_HUMAN | R.GS#LEM*SSDGEPLSR.M                 | S206:  | 2 | 3,2815 | 0,45  | -0,235 |
| 7 | Q7Z698 SPRE2_HUMAN | R.QVS#FPDDDEEIVR.I                   | S206:  | 2 | 2,621  | 0,267 | -0,749 |
| 7 | Q9NS23 RASF1_HUMAN | R.TS#FYLPK.D                         | S207:  | 2 | 2,6501 | 0,145 | 0      |
| 7 | O95297 MPZL1_HUMAN | R.DYTGCSSES#LSPVK.Q                  | S208:  | 2 | 3,1621 | 0,368 | -0,428 |
| 7 | Q53EP0 FND3B_HUMAN | R.LNS#PPSSIIK.S                      | S208:  | 2 | 2,6114 | 0,239 | -0,103 |
| 7 | P27815 PDE4A_HUMAN | R.S#PLGGPTPVCK.A                     | S209:  | 2 | 2,3825 | 0,389 | -0,409 |
| 7 | Q2M2I8 AAK1_HUMAN  | R.EQGGSLGSGSS#GGGGSTSLGSGYIGR.V      | S21:   | 3 | 4,4529 | 0,563 | 0,668  |
| 7 | P49840 GSK3A_HUMAN | R.TSS#FAEPGGGGGGGGGPGGSASGPGGTGGGK.A | S21:   | 3 | 3,2686 | 0,473 | -0,218 |
| 7 | Q6R327 RICTR_HUMAN | R.NDS#GEENVPLDLTR.E                  | S21:   | 2 | 3,1668 | 0,464 | -0,074 |
| 7 | Q53H80 CF166_HUMAN | R.TLDFDLLSPAS#PK.R                   | S21:   | 2 | 2,2568 | 0,264 | -0,154 |
| 7 | Q09666 AHNK_HUMAN  | R.LPS#GSGAASPTGSAVDIR.A              | S210:  | 2 | 4,8747 | 0,558 | -0,425 |
| 7 | O95297 MPZL1_HUMAN | R.DYTGCSSESLS#PVK.Q                  | S210:  | 2 | 4,3618 | 0,469 | -0,285 |
| 7 | P04406 G3P_HUMAN   | R.GALQNIIPAS#TGAAK.A                 | S210:  | 2 | 2,151  | 0,149 | -0,164 |

|   |                    |                           |            |   |        |       |        |
|---|--------------------|---------------------------|------------|---|--------|-------|--------|
| 7 | Q5VUA4 ZN318_HUMAN | R.IPS#PNILK.T             | S2101:     | 2 | 2,7345 | 0,263 | 0      |
| 7 | Q8NI08 NCOA7_HUMAN | R.VLSSTS#EEDEPGVVK.F      | S211:      | 2 | 4,0021 | 0,473 | -0,295 |
| 7 | O43684 BUB3_HUMAN  | R.VAVEYLDPS#PEVQK.K       | S211:      | 2 | 3,4286 | 0,412 | 0,369  |
| 7 | Q16186 ADRM1_HUMAN | R.S#QSAAVTPSSTTSSTR.A     | S211:      | 2 | 3,2107 | 0,296 | -0,37  |
| 7 | Q13242 SFRS9_HUMAN | R.GS#PHYFS#PFRPY.-        | S211:S216: | 3 | 2,6573 | 0,239 | -0,227 |
| 7 | Q13242 SFRS9_HUMAN | R.GS#PHYFS#PFRPY.-        | S211:S216: | 2 | 2,5884 | 0,428 | -0,68  |
| 7 | Q7Z417 NUFP2_HUMAN | K.GADNDGS#GSESGYTTPK.K    | S212:      | 2 | 3,9358 | 0,591 | -0,496 |
| 7 | Q8IW41 MAPK5_HUMAN | K.SGIPTS#PTPYTYNK.S       | S212:      | 2 | 3,49   | 0,42  | 0,497  |
| 7 | P60174 TPIS_HUMAN  | R.IIYGG#VTGATCK.E         | S212:      | 2 | 2,0707 | 0,391 | -0,347 |
| 7 | Q53LP3 ANR57_HUMAN | R.DLVM*GSS#PQLK.R         | S213:      | 2 | 3,1531 | 0,408 | -0,192 |
| 7 | Q8N565 MREG_HUMAN  | K.ELHYLPFPS#P.-           | S213:      | 2 | 2,0424 | 0,172 | -0,286 |
| 7 | P85037 FOXK1_HUMAN | K.EEAPAS#PLRPLYPQIS#PLK.I | S213:S223: | 3 | 2,6151 | 0,355 | 0      |
| 7 | Q9BZL6 KPCD2_HUMAN | R.LGTSES#LPCTAEELSR.S     | S214:      | 2 | 4,126  | 0,39  | -0,8   |
| 7 | Q9GZM8 NDEL1_HUMAN | K.M*DSAVQASLS#LPATPVGK.G  | S215:      | 2 | 5,9276 | 0,539 | 0,849  |
| 7 | P55196 AFAD_HUMAN  | R.TIS#NPEVVMK.R           | S215:      | 2 | 3,2587 | 0,406 | -0,204 |
| 7 | P55196 AFAD_HUMAN  | R.TIS#NPEVVM*K.R          | S215:      | 2 | 2,9756 | 0,424 | -0,302 |
| 7 | P61978 HNRPK_HUMAN | K.IILDISES#PIK.G          | S216:      | 2 | 3,7361 | 0,414 | -0,172 |
| 7 | Q9Y490 TLN1_HUMAN  | R.QELAVFCS#PEPPAK.T       | S2162:     | 2 | 2,8863 | 0,399 | -0,221 |
| 7 | P46734 MP2K3_HUMAN | K.M*CDFGISGYLVDS#VAK.T    | S218:      | 2 | 5,3091 | 0,63  | -0,854 |
| 7 | P46734 MP2K3_HUMAN | K.M*CDFGISGYLVDS#VAK.T    | S218:      | 3 | 4,2697 | 0,532 | -0,492 |
| 7 | Q53HL2 BOREA_HUMAN | R.IYNISGNGS#PLADSK.E      | S219:      | 2 | 4,8678 | 0,539 | 0      |
| 7 | Q8N4S0 CCD82_HUMAN | R.VVEDEGS#SVEM*EQK.T      | S219:      | 2 | 4,3154 | 0,45  | -0,441 |
| 7 | Q8NE71 ABCF1_HUMAN | K.QQPPEPEWIGDGESTS#PSDK.V | S22:       | 3 | 4,0069 | 0,485 | 0,162  |
| 7 | P02545 LMNA_HUMAN  | R.SGAQASSTPLS#PTR.I       | S22:       | 2 | 3,7609 | 0,468 | -0,085 |
| 7 | P49006 MRP_HUMAN   | R.GDVTAEEAAGAS#PAK.A      | S22:       | 2 | 3,6168 | 0,338 | -0,336 |
| 7 | Q9BRS2 RIOK1_HUMAN | R.VVPGQFDDADSS#DSENR.D    | S22:       | 2 | 2,4003 | 0,477 | -0,445 |
| 7 | Q9UKX7 NUP50_HUMAN | K.VAAEQS#PSLFGSTK.L       | S221:      | 2 | 3,9303 | 0,547 | -0,228 |
| 7 | Q9NYF8 BCLF1_HUMAN | K.SSATSGDIWPGLSAYDNS#PR.S | S222:      | 3 | 4,6394 | 0,364 | -0,423 |
| 7 | Q69YN4 VIR_HUMAN   | R.EDYFEPIS#PDR.N          | S222:      | 2 | 2,399  | 0,239 | 0,337  |
| 7 | Q9NYF8 BCLF1_HUMAN | K.SSATSGDIWPGLSAYDNS#PR.S | S222:      | 2 | 2,2549 | 0,48  | -0,452 |
| 7 | O75962 TRIO_HUMAN  | R.NFLNALTS#PIEQR.N        | S2223:     | 2 | 3,0756 | 0,475 | -0,349 |
| 7 | O75962 TRIO_HUMAN  | R.NFLNALTS#PIEQR.N        | S2223:     | 3 | 2,8397 | 0,224 | -0,419 |
| 7 | P11831 SRF_HUMAN   | K.ALIQTCLNSPDS#PPR.S      | S224:      | 2 | 3,342  | 0,428 | 0,419  |



|   |                    |                              |              |   |        |       |        |
|---|--------------------|------------------------------|--------------|---|--------|-------|--------|
| 7 | Q13573 SNW1_HUMAN  | R.GPPS#PPAPVM*HS#PSR.K       | S224:S232:   | 3 | 2,7644 | 0,259 | 0,108  |
| 7 | O95071 UBR5_HUMAN  | R.DLS#LEVDR.D                | S2241:       | 2 | 2,5372 | 0,118 | 0,119  |
| 7 | O75643 U520_HUMAN  | R.EEAS#DDDM*EGDEAVVR.C       | S225:        | 2 | 4,6884 | 0,547 | -0,393 |
| 7 | O75643 U520_HUMAN  | R.EEAS#DDDM*EGDEAVVR.C       | S225:        | 2 | 4,4567 | 0,525 | -0,396 |
| 7 | O75643 U520_HUMAN  | R.EEAS#DDDM*EGDEAVVR.C       | S225:        | 3 | 4,3896 | 0,338 | -0,196 |
| 7 | O43482 OIP5_HUMAN  | K.ILSEVTPDQS#KPEN.-          | S225:        | 2 | 3,1897 | 0,377 | -0,149 |
| 7 | Q7L2E3 DHX30_HUMAN | R.GS#SFEM*TDDDSAIR.A         | S225:        | 2 | 2,2425 | 0,273 | -0,225 |
| 7 | Q6ZV73 FGD6_HUMAN  | R.IEFADLS#PSPSSFVK.V         | S226:        | 2 | 3,3121 | 0,36  | 0,211  |
| 7 | Q96H22 CENPN_HUMAN | R.S#LGLDINM*DSR.I            | S226:        | 2 | 3,3018 | 0,42  | 0,278  |
| 7 | O43815 STRN_HUMAN  | K.SELTDS#ASVLDNFK.F          | S227:        | 2 | 4,9924 | 0,525 | -0,152 |
| 7 | P52701 M5H6_HUMAN  | K.SEEDNEIES#EEVQPK.T         | S227:        | 2 | 3,9313 | 0,332 | -0,681 |
| 7 | P49792 RBP2_HUMAN  | R.FGESTTGFNFS#FK.S           | S2270:       | 2 | 3,747  | 0,511 | -0,315 |
| 7 | Q9UQ35 SRRM2_HUMAN | R.TPAAAAAM*NLAS#PR.T         | S2272:       | 2 | 3,909  | 0,454 | 0      |
| 7 | Q8NE71 ABCF1_HUMAN | K.AEQGS#EEEEEGEEEEEGESK.A    | S228:        | 3 | 6,6624 | 0,618 | -0,15  |
| 7 | Q9Y4E8 UBP15_HUMAN | K.S#PGASNFSTLPK.I            | S229:        | 2 | 4,0011 | 0,556 | 0      |
| 7 | P55010 IF5_HUMAN   | K.VLTLS#DDLER.T              | S229:        | 2 | 3,1057 | 0,421 | 0,197  |
| 7 | Q92619 HMHA1_HUMAN | R.AGS#PSPQPSGELPR.K          | S23:         | 2 | 3,725  | 0,461 | -0,084 |
| 7 | Q5VV41 ARHGG_HUMAN | R.GLNTSQES#DDDILDESSPEGTQK.V | S230:        | 3 | 6,0792 | 0,488 | 0,556  |
| 7 | Q13283 G3BP1_HUMAN | K.S#SSPAPADIAQTVQEDLR.T      | S230:        | 3 | 4,7328 | 0,466 | -0,186 |
| 7 | P15408 FOSL2_HUMAN | K.QEPLEEDS#PSSSAGLDK.A       | S230:        | 2 | 3,8287 | 0,505 | -0,312 |
| 7 | Q13009 TIAM1_HUMAN | R.ANS#LGDLYAQK.N             | S231:        | 2 | 2,7088 | 0,333 | -0,291 |
| 7 | Q14814 MEF2D_HUMAN | R.AS#PGLLPVANGNSLNK.V        | S231:        | 2 | 2,6868 | 0,413 | -0,299 |
| 7 | O95359 TACC2_HUMAN | K.LDNTPAS#PPRS#PAEPNDIPIAK.G | S2317:S2321: | 3 | 4,203  | 0,255 | 0,372  |
| 7 | Q13283 G3BP1_HUMAN | K.SSS#PAPADIAQTVQEDLR.T      | S232:        | 2 | 3,9743 | 0,495 | -0,621 |
| 7 | Q96KQ7 EHMT2_HUMAN | K.LNS#GGGLSEELGSAR.R         | S232:        | 2 | 3,4959 | 0,411 | 0,479  |
| 7 | P10809 CH60_HUMAN  | R.GYISPYFINTS#K.G            | S232:        | 2 | 2,5352 | 0,317 | -0,415 |
| 7 | Q9P107 GMIP_HUMAN  | R.SQGS#PEDSAPQASPGPSK.Q      | S234:        | 2 | 3,821  | 0,381 | -0,473 |
| 7 | Q9UPX8 SHAN2_HUMAN | R.QGIAVM*TPTVPGS#PK.A        | S235:        | 2 | 3,2933 | 0,328 | -0,232 |
| 7 | Q9Y2W2 WBP11_HUMAN | R.DEDM*LYS#PELAQR.G          | S237:        | 2 | 4,3811 | 0,404 | 0,44   |
| 7 | Q9Y446 PKP3_HUMAN  | R.AGGLDWPEATEVS#PSR.T        | S238:        | 2 | 3,1355 | 0,291 | -0,488 |
| 7 | Q9H019 FA54B_HUMAN | K.ASS#FADM*M*GILK.D          | S238:        | 2 | 2,973  | 0,315 | 0,529  |
| 7 | Q15773 MLF2_HUMAN  | R.LAIQGPEDS#PSR.Q            | S238:        | 2 | 2,9721 | 0,271 | 0,994  |
| 7 | Q9H019 FA54B_HUMAN | K.ASS#FADMM*GILK.D           | S238:        | 2 | 2,2568 | 0,236 | -0,179 |

|   |                     |                                   |            |   |        |       |        |
|---|---------------------|-----------------------------------|------------|---|--------|-------|--------|
| 7 | Q9UQ35 SRRM2_HUMAN  | R.M*APALSGANLTS#PR.V              | S2382:     | 2 | 3,4959 | 0,456 | -0,165 |
| 7 | Q8WUB8 PHF10_HUMAN  | K.GTSDSSSGNV#EGESPDSQEDSFQGR.Q    | S239:      | 3 | 3,7569 | 0,318 | -0,519 |
| 7 | Q86Y04 Q86Y04_HUMAN | K.VDLTLLS#PK.S                    | S239:      | 2 | 2,9408 | 0,419 | 0,343  |
| 7 | O75420 PERQ1_HUMAN  | R.ALSGGGSVAS#PPSPAM*PK.Y          | S24:       | 2 | 3,4291 | 0,536 | -0,271 |
| 7 | Q6ZN18 AEBP2_HUMAN  | R.LSPLPPGS#PGSAAR.G               | S24:       | 2 | 2,8128 | 0,45  | -0,264 |
| 7 | Q9Y2W1 TR150_HUMAN  | R.ASAVSELS#PR.E                   | S243:      | 2 | 2,8594 | 0,347 | -0,222 |
| 7 | Q8TDY2 RBCC1_HUMAN  | R.STELVLS#PDM*PR.T                | S243:      | 2 | 2,782  | 0,212 | -1,693 |
| 7 | Q9BZG1 RAB34_HUMAN  | R.INSDDS#NLYLTASK.K               | S244:      | 2 | 4,4916 | 0,465 | -0,376 |
| 7 | Q16204 CCDC6_HUMAN  | K.LDQPVSAAPS#PR.D                 | S244:      | 2 | 3,5365 | 0,37  | -0,272 |
| 7 | P49368 TCPG_HUMAN   | R.IVLLDSS#LEYK.K                  | S244:      | 2 | 3,4491 | 0,444 | -0,179 |
| 7 | Q8WW11 LMO7_HUMAN   | R.EDS#FESLDSLGSR.S                | S246:      | 2 | 3,2447 | 0,499 | 0      |
| 7 | P05787 K2C8_HUMAN   | R.ELQSQISDTSVVLS#M*DNR.S          | S247:      | 3 | 4,7462 | 0,375 | 0,415  |
| 7 | Q96ST2 IWS1_HUMAN   | R.IS#DSESEDPPR.H                  | S248:      | 2 | 2,2005 | 0,381 | -0,372 |
| 7 | Q9UDY4 DNJB4_HUMAN  | R.DGS#NIIYTAK.I                   | S248:      | 2 | 2,1852 | 0,441 | -0,105 |
| 7 | Q7Z3B3 K1267_HUMAN  | R.LS#PGTSDSSNLGGVK.L              | S249:      | 2 | 2,2729 | 0,319 | -0,651 |
| 7 | P16949 STMN1_HUMAN  | R.ASGQAFELILS#PR.S                | S25:       | 2 | 4,0811 | 0,351 | -0,166 |
| 7 | P16949 STMN1_HUMAN  | R.ASGQAFELILS#PR.S                | S25:       | 3 | 3,8525 | 0,28  | 0,125  |
| 7 | Q9Y6A5 TACC3_HUMAN  | K.NTENCDFLFS#PPEVTGR.S            | S25:       | 2 | 2,7028 | 0,482 | -0,237 |
| 7 | O95359 TACC2_HUMAN  | K.FSS#PTEELDYSR.N                 | S2512:     | 2 | 2,8132 | 0,239 | 0,257  |
| 7 | P21359 NF1_HUMAN    | K.GSEGYLEAATYPTVGQTS#PR.A         | S2515:     | 3 | 4,1492 | 0,353 | 0,09   |
| 7 | P21359 NF1_HUMAN    | K.GSEGYLEAATYPTVGQTS#PR.A         | S2515:     | 2 | 2,5282 | 0,534 | -0,42  |
| 7 | Q8IUD2 RB6I2_HUMAN  | R.DLNQLFQQDSSS#R.T                | S252:      | 2 | 2,7131 | 0,264 | -0,603 |
| 7 | P21359 NF1_HUMAN    | K.S#M*SLDM*GQPSQANTK.K            | S2521:     | 2 | 4,0779 | 0,499 | -0,429 |
| 7 | P78345 RPP38_HUMAN  | R.QAS#VTLQPLK.I                   | S253:      | 2 | 2,0423 | 0,323 | -0,105 |
| 7 | Q15477 SKIV2_HUMAN  | R.ASS#LEDLVLK.E                   | S256:      | 2 | 3,2685 | 0,541 | -0,317 |
| 7 | Q08357 S20A2_HUMAN  | R.VS#DES#LSKVQEAESPVFK.E          | S256:S259: | 3 | 4,545  | 0,384 | 0,086  |
| 7 | P45985 MP2K4_HUMAN  | K.LCDFGISGQLVDS#IAK.T             | S257:      | 2 | 4,574  | 0,56  | -0,406 |
| 7 | P05787 K2C8_HUMAN   | R.SLDM*DS#IIAEVK.A                | S258:      | 2 | 4,7122 | 0,474 | 0,517  |
| 7 | P05787 K2C8_HUMAN   | R.SLDMDS#IIAEVK.A                 | S258:      | 2 | 3,3287 | 0,363 | -0,261 |
| 7 | P05787 K2C8_HUMAN   | R.SLDM*DS#IIAEVK.A                | S258:      | 3 | 2,8106 | 0,215 | 0,129  |
| 7 | Q86VR2 F134C_HUMAN  | R.AM*DNHS#DS#EEELAAFCPQLDDSTVAR.E | S258:S260: | 3 | 4,7891 | 0,409 | -0,356 |
| 7 | Q8NFH5 NUP53_HUMAN  | R.CALSS#PSLAFTPIK.T               | S259:      | 2 | 3,1883 | 0,347 | -0,292 |
| 7 | Q6UN15 FIP1_HUMAN   | K.AEFTS#PPSLFK.T                  | S259:      | 2 | 3,1322 | 0,46  | 0,187  |

|   |                     |                               |            |   |        |       |        |
|---|---------------------|-------------------------------|------------|---|--------|-------|--------|
| 7 | Q15942 ZYX_HUMAN    | R.GPPASS#PAPAPK.F             | S259:      | 2 | 2,2921 | 0,191 | -0,316 |
| 7 | Q6Y7W6 PERQ2_HUMAN  | R.ALSSGGSITS#PPLSPALPK.Y      | S26:       | 2 | 4,2441 | 0,472 | -0,459 |
| 7 | Q6Y7W6 PERQ2_HUMAN  | R.ALSSGGSITS#PPLSPALPK.Y      | S26:       | 3 | 3,0419 | 0,247 | 0      |
| 7 | P54920 SNAA_HUMAN   | K.NSQS#FFSGLFGGSSK.I          | S26:       | 2 | 2,3692 | 0,361 | -0,524 |
| 7 | Q86YS7 K0528_HUMAN  | K.LSSPAAFLPACNS#PSK.E         | S260:      | 2 | 3,7355 | 0,444 | -0,424 |
| 7 | O95297 MPZL1_HUMAN  | K.SES#VVYADIR.K               | S260:      | 2 | 3,4449 | 0,345 | -0,2   |
| 7 | Q9UHR4 BI2L1_HUMAN  | K.TPASTPVSGTPQAS#PMIER.S      | S261:      | 2 | 4,8151 | 0,55  | -0,304 |
| 7 | Q8NFH5 NUP53_HUMAN  | R.CALSSPS#LAFTPIK.T           | S261:      | 3 | 4,1535 | 0,278 | -0,11  |
| 7 | Q9UHR4 BI2L1_HUMAN  | K.TPASTPVSGTPQAS#PMIER.S      | S261:      | 3 | 3,7469 | 0,294 | -0,182 |
| 7 | Q6UN15 FIP1_HUMAN   | K.AEFTSPPS#LFK.T              | S262:      | 2 | 2,4028 | 0,422 | -0,094 |
| 7 | B2CI53 B2CI53_HUMAN | R.NGILASPQS#APGNLDNSK.S       | S263:      | 2 | 4,8515 | 0,591 | -0,72  |
| 7 | Q6NW34 CC017_HUMAN  | K.LFLINEQS#PR.A               | S265:      | 2 | 3,0726 | 0,303 | -0,188 |
| 7 | Q9UNF1 MAGD2_HUMAN  | K.LQSS#QEPEAPPPR.D            | S265:      | 2 | 2,89   | 0,389 | -0,483 |
| 7 | Q6KC79 NIPBL_HUMAN  | K.AITSLGGGS#PK.N              | S2658:     | 2 | 4,2258 | 0,327 | -0,207 |
| 7 | Q13435 SF3B2_HUMAN  | R.QEEM*NS#QQEEEEEM*ETDAR.S    | S266:      | 3 | 5,844  | 0,471 | -0,315 |
| 7 | Q8NFC6 FA44A_HUMAN  | K.STADS#GGEGLETAPK.S          | S266:      | 2 | 4,1727 | 0,5   | -0,488 |
| 7 | Q9NR19 ACSA_HUMAN   | R.AELGM*GDSTSQS#PPIK.R        | S267:      | 2 | 4,1193 | 0,53  | -0,498 |
| 7 | Q8TF74 WIPF2_HUMAN  | R.QPPGVPNGPSS#PTNESAPELPQR.H  | S267:      | 3 | 3,613  | 0,331 | -0,15  |
| 7 | Q14573 ITPR3_HUMAN  | R.LGFVDVQNCIS#R.-             | S2670:     | 2 | 3,5944 | 0,452 | 0,246  |
| 7 | O60271 JIP4_HUMAN   | K.AVEQEDELSDVS#QGGSK.A        | S268:      | 2 | 3,9296 | 0,507 | -0,394 |
| 7 | Q9UBP0 SPAST_HUMAN  | R.APS#YSGLSM*VSGVK.Q          | S268:      | 2 | 3,4471 | 0,285 | 0,33   |
| 7 | Q9Y6Y0 NS1BP_HUMAN  | K.QISS#SSTGCLSSPNATVQSPK.H    | S269:      | 3 | 4,0609 | 0,296 | 0      |
| 7 | Q9UJU6 DBNL_HUMAN   | R.AM*S#TTSISSPQPGK.L          | S269:      | 2 | 3,796  | 0,582 | 0      |
| 7 | P49454 CENPF_HUMAN  | R.DANSS#FFDNSSS#PHLLDQLK.A    | S269:S276: | 3 | 3,9618 | 1     | -0,154 |
| 7 | P12956 KU70_HUMAN   | K.TEGDEEAEEEEQENLEAS#GDYK.Y   | S27:       | 3 | 6,0142 | 0,534 | -0,496 |
| 7 | B2RUZ4 B2RUZ4_HUMAN | R.DGVSLGAVS#STEEASR.C         | S27:       | 2 | 4,9991 | 0,543 | 0      |
| 7 | P22234 PUR6_HUMAN   | K.EVYELLS#PGK.V               | S27:       | 2 | 3,5649 | 0,484 | 0,092  |
| 7 | Q6IAA8 CK059_HUMAN  | K.LLLDPSS#PPTK.A              | S27:       | 2 | 3,2363 | 0,407 | 0      |
| 7 | Q93100 KPBB_HUMAN   | R.SGS#VVEPLK.S                | S27:       | 2 | 2,2136 | 0,361 | 0      |
| 7 | Q9NQX3 GEPH_HUMAN   | R.DTASLSTTPSES#PR.A           | S270:      | 2 | 2,426  | 0,353 | -0,16  |
| 7 | P46013 KI67_HUMAN   | K.IPCES#PPLEVVDTTASTK.R       | S2708:     | 2 | 2,9205 | 0,394 | 0      |
| 7 | Q8WYQ5 DGCR8_HUMAN  | K.YGGDS#DHPS#DGGETSVQPM*MTK.I | S271:S275: | 3 | 4,0804 | 0,274 | -0,152 |
| 7 | P49023 PAXI_HUMAN   | R.ELDELM*AS#LSDFK.I           | S272:      | 2 | 3,5497 | 0,53  | -0,153 |

|   |                    |                               |              |   |        |       |        |
|---|--------------------|-------------------------------|--------------|---|--------|-------|--------|
| 7 | Q8NEM2 SHCBP_HUMAN | R.SLSNCNS#DSEQENISM*VEGLK.L   | S273:        | 3 | 4,6953 | 0,386 | 0,217  |
| 7 | Q9HB09 B2L12_HUMAN | R.ACPGPPPPS#PEPLAR.L          | S273:        | 2 | 2,6133 | 0,264 | -0,226 |
| 7 | Q8WW11 LMO7_HUMAN  | R.EGFES#DTDSEFTFK.M           | S276:        | 2 | 3,6888 | 0,348 | -0,284 |
| 7 | Q8IZD4 DCP1B_HUMAN | R.SLS#YEEPR.R                 | S276:        | 2 | 2,4851 | 0,175 | 0      |
| 7 | Q07157 ZO1_HUMAN   | R.ATLLNVPDLSDS#IHS#ANASER.D   | S277:S280:   | 3 | 3,8276 | 0,415 | -0,309 |
| 7 | Q9Y2K7 JHD1A_HUMAN | R.YEDDGIS#DDEIEGK.R           | S28:         | 2 | 4,7404 | 0,591 | -0,293 |
| 7 | Q9NTJ3 SMC4_HUMAN  | R.EEGPPPPSPDGASS#DAEPEPPSGR.T | S28:         | 3 | 3,5824 | 0,297 | -0,3   |
| 7 | Q8IYL3 CA174_HUMAN | R.LAS#AQEVAGSTSAK.T           | S28:         | 2 | 3,4287 | 0,396 | 0      |
| 7 | Q96A19 C102A_HUMAN | K.GSLLTILGSPS#PER.M           | S28:         | 2 | 3,4009 | 0,395 | -0,405 |
| 7 | Q15018 K0157_HUMAN | R.QM*PSESLDPAFS#PR.M          | S280:        | 2 | 3,5611 | 0,463 | -0,147 |
| 7 | Q14757 CHK1_HUMAN  | R.VTS#GGVSESPSGFSK.H          | S280:        | 2 | 3,2621 | 0,341 | -0,324 |
| 7 | Q9UNS1 TIM_HUMAN   | R.FGGS#YIVQGLK.S              | S281:        | 2 | 3,6429 | 0,358 | 0,098  |
| 7 | P98172 EFNB1_HUMAN | R.AAALS#LSTLASPK.G            | S281:        | 2 | 2,6066 | 0,412 | 0      |
| 7 | Q15942 ZYX_HUMAN   | K.FS#PGAPGGSGSQPNQK.L         | S281:        | 2 | 2,5481 | 0,427 | -0,153 |
| 7 | Q96EZ8 MCRS1_HUMAN | K.GDQVLNFS#DAEDLIDDSK.L       | S282:        | 3 | 3,6395 | 0,361 | -0,266 |
| 7 | Q9Y5Q9 TF3C3_HUMAN | R.ILNLLS#PSDGER.F             | S282:        | 2 | 3,0805 | 0,328 | -0,525 |
| 7 | P15924 DESP_HUMAN  | K.GLPSYNM*SSAPGS#R.S          | S2825:       | 2 | 2,1526 | 0,295 | -0,453 |
| 7 | P21127 CD2L1_HUMAN | R.DLLSDLQDIS#DSER.K           | S283:        | 2 | 4,8907 | 0,549 | -0,507 |
| 7 | P21127 CD2L1_HUMAN | R.DLLSDLQDIS#DSER.K           | S283:        | 3 | 3,6964 | 0,361 | -0,108 |
| 7 | Q9Y624 JAM1_HUMAN  | K.VIYSQPS#AR.S                | S284:        | 2 | 2,4114 | 0,359 | 0      |
| 7 | Q96N66 MBOA7_HUMAN | R.AGGGPTLQCPPSS#PEK.A         | S285:        | 2 | 2,9768 | 0,413 | -0,347 |
| 7 | Q9UPA5 BSN_HUMAN   | R.SLS#DPKPLS#PTAEESAK.E       | S2851:S2857: | 2 | 2,8951 | 0,492 | -0,318 |
| 7 | Q04724 TLE1_HUMAN  | K.DASSS#PASTASSASSTSLK.S      | S286:        | 2 | 4,1528 | 0,611 | -0,201 |
| 7 | Q02952 AKA12_HUMAN | K.SAESPTS#PVTSETGSTFK.K       | S286:        | 2 | 3,9147 | 0,562 | -0,516 |
| 7 | Q04726 TLE3_HUMAN  | K.DAPTS#PASVASSSTPSSK.T       | S286:        | 2 | 3,6337 | 0,477 | -0,596 |
| 7 | Q9NUI1 DECR2_HUMAN | K.GLPDFAS#FSAK.L              | S287:        | 2 | 2,1598 | 0,48  | -0,1   |
| 7 | Q15424 SAFB1_HUMAN | K.ADS#LLAVVK.R                | S288:        | 2 | 3,9908 | 0,333 | 0      |
| 7 | O94888 UBXD7_HUMAN | R.SESLIDASEDS#QLEAAIR.A       | S288:        | 3 | 2,9695 | 0,207 | 0,182  |
| 7 | Q7Z6Z7 HUWE1_HUMAN | R.AGS#STPGDAPPAVAEVQGR.S      | S2887:       | 3 | 3,8671 | 0,384 | -0,099 |
| 7 | Q7Z6Z7 HUWE1_HUMAN | R.AGSS#TPGDAPPAVAEVQGR.S      | S2888:       | 2 | 3,5882 | 0,491 | 1,057  |
| 7 | O75170 SAPS2_HUMAN | R.VGTEGLVDS#FSQGLER.S         | S289:        | 2 | 4,4532 | 0,512 | -0,069 |
| 7 | Q9NWH9 SLTM_HUMAN  | K.DGQDAIAQS#PEK.E             | S289:        | 2 | 2,6853 | 0,365 | -0,273 |
| 7 | Q5VSY0 GKAP1_HUMAN | R.FALLQVDSGSGSDS#EPGK.G       | S29:         | 2 | 3,649  | 0,454 | -0,326 |

|   |                    |                               |            |   |        |       |        |
|---|--------------------|-------------------------------|------------|---|--------|-------|--------|
| 7 | Q15311 RBP1_HUMAN  | R.TPS#SEEISPTK.F              | S29:       | 2 | 2,089  | 0,276 | 0      |
| 7 | O14745 NHERF_HUMAN | R.SAS#SDTSEELNSQDSPPK.Q       | S290:      | 2 | 5,5201 | 0,519 | -0,81  |
| 7 | P18206 VINC_HUMAN  | R.DPSAS#PGDAGEQAIR.Q          | S290:      | 2 | 4,7149 | 0,554 | -0,315 |
| 7 | Q8NFC6 FA44A_HUMAN | K.TDTGIVTVEQS#PSSSK.L         | S2905:     | 2 | 4,0177 | 0,537 | -0,071 |
| 7 | P51648 AL3A2_HUMAN | R.ILS#LLEGQK.I                | S293:      | 2 | 3,2232 | 0,127 | -0,226 |
| 7 | Q99590 SFRIP_HUMAN | K.TEELIES#PKLESS#EGEIIQTVDR.Q | S293:S299: | 3 | 3,8654 | 0,185 | -0,464 |
| 7 | Q96T37 RBM15_HUMAN | R.SLS#PGGAALGYR.D             | S294:      | 2 | 2,7307 | 0,415 | -0,199 |
| 7 | O00499 BIN1_HUMAN  | K.S#PSPPDGS PAATPEIR.V        | S296:      | 2 | 3,3198 | 0,523 | 0      |
| 7 | Q8N370 LAT4_HUMAN  | K.LCLS#TVDLEVK.C              | S297:      | 2 | 3,3555 | 0,368 | -0,09  |
| 7 | O14495 LPP3_HUMAN  | K.EILS#PVDIIDR.N              | S297:      | 2 | 2,3197 | 0,365 | -0,452 |
| 7 | Q92890 UFD1_HUMAN  | R.FVAFSGEGQS#LR.K             | S299:      | 2 | 4,1787 | 0,537 | 0      |
| 7 | Q4G0J3 LARP7_HUMAN | R.SS#SEDAESLAPR.S             | S299:      | 2 | 3,5071 | 0,328 | -0,184 |
| 7 | Q12874 SF3A3_HUMAN | K.SLESLDTS#LFAK.N             | S299:      | 2 | 3,3665 | 0,41  | -0,088 |
| 7 | Q99590 SFRIP_HUMAN | K.LESS#EGEIIQTVDR.Q           | S299:      | 2 | 3,3072 | 0,417 | -0,589 |
| 7 | Q6P0N0 CN106_HUMAN | K.NGS#LLM*VSDSER.T            | S299:      | 2 | 3,2832 | 0,508 | -0,608 |
| 7 | P07910 HNRPC_HUMAN | K.EAEEGEDDRDS#ANGEDDS.-       | S299:      | 2 | 2,6714 | 0,405 | -0,362 |
| 7 | P09382 LEG1_HUMAN  | K.S#FVLNLGK.D                 | S30:       | 2 | 2,0398 | 0,147 | -0,127 |
| 7 | P49023 PAXI_HUMAN  | R.S#SPGGQDEGGFM*AQGK.T        | S302:      | 3 | 3,2318 | 0,26  | 0,555  |
| 7 | Q13247 SFRS6_HUMAN | R.SNS#PLPVPSK.A               | S303:      | 2 | 3,5329 | 0,359 | -0,101 |
| 7 | P49023 PAXI_HUMAN  | R.SS#SPGGQDEGGFM*AQGK.T       | S303:      | 2 | 3,1872 | 0,51  | -0,296 |
| 7 | P49023 PAXI_HUMAN  | R.SS#SPGGQDEGGFMAQGK.T        | S303:      | 2 | 2,9664 | 0,508 | -0,374 |
| 7 | Q03164 HRX_HUMAN   | R.NSSTPGLQVPVS#PTVPIQNQK.Y    | S3036:     | 3 | 3,6234 | 0,34  | 0,564  |
| 7 | Q86YS7 K0528_HUMAN | R.QSS#SSDTLTLTPK.T            | S305:      | 2 | 3,2264 | 0,348 | -0,237 |
| 7 | Q6FI81 CPIN1_HUMAN | K.VLLS#DSNLHDA.-              | S305:      | 2 | 2,9965 | 0,423 | 0,097  |
| 7 | Q8N884 CF150_HUMAN | R.GGS#PAVTLTLLISEK.I          | S305:      | 2 | 2,1475 | 0,383 | -0,271 |
| 7 | Q9UQR1 ZN148_HUMAN | K.GGLLTSEEDSGFSTS#PK.D        | S306:      | 2 | 5,25   | 0,472 | -0,204 |
| 7 | Q96QE3 ATAD5_HUMAN | K.SGYIS#ESENSEISQQVR.F        | S306:      | 2 | 5,1871 | 0,452 | 0,735  |
| 7 | Q96QE3 ATAD5_HUMAN | K.SGYIS#ESENSEISQQVR.F        | S306:      | 3 | 4,7283 | 0,277 | 0,459  |
| 7 | P49589 SYCC_HUMAN  | K.ALQEGEGDLSIS#ADR.L          | S307:      | 2 | 4,668  | 0,512 | -0,223 |
| 7 | Q9Y2I7 FYV1_HUMAN  | R.SAS#ITNLSLDR.S              | S307:      | 2 | 3,5602 | 0,453 | 0,291  |
| 7 | Q96MU7 YTDC1_HUMAN | R.GIS#PIVFD.R.S               | S308:      | 2 | 2,7332 | 0,255 | -0,225 |
| 7 | Q00341 VIGLN_HUMAN | K.VATLNS#EEESDPPTYK.D         | S31:       | 2 | 3,7644 | 0,538 | -0,525 |
| 7 | Q9NR55 BATF3_HUMAN | R.SVAAPGNQPQPQQQS#PEDDDR.K    | S31:       | 3 | 3,4445 | 0,441 | -0,57  |

|   |                     |                               |        |   |        |       |        |
|---|---------------------|-------------------------------|--------|---|--------|-------|--------|
| 7 | Q5HYI7 MTX3_HUMAN   | K.LTPAEENNSFQRLS#P.-          | S311:  | 2 | 2,4535 | 0,475 | 1,787  |
| 7 | P49454 CENPF_HUMAN  | K.LALS#PLSLGK.E               | S3119: | 2 | 3,2946 | 0,465 | 0      |
| 7 | Q9BWU0 NADAP_HUMAN  | K.M*LGEDS#DEEEEM*DTSER.K      | S312:  | 2 | 4,5399 | 0,615 | -0,693 |
| 7 | Q14669 TRIPC_HUMAN  | R.SES#PPAELPSLR.R             | S312:  | 2 | 3,4835 | 0,526 | -0,09  |
| 7 | Q9BWU0 NADAP_HUMAN  | K.M*LGEDS#DEEEEM*DTSER.K      | S312:  | 3 | 2,9669 | 0,33  | -0,346 |
| 7 | Q8TC05 MDM1_HUMAN   | K.FLS#PAQYLYK.A               | S314:  | 2 | 3,0403 | 0,239 | -0,186 |
| 7 | Q9H788 SH24A_HUMAN  | R.TLS#SSAQEDIIR.W             | S315:  | 2 | 4,011  | 0,477 | 0,349  |
| 7 | Q15811 ITSN1_HUMAN  | R.SGS#GISVISSTSVDQR.L         | S315:  | 2 | 3,5916 | 0,356 | 0,368  |
| 7 | O60347 TBC12_HUMAN  | R.S#GGFADFFTR.N               | S315:  | 2 | 3,0365 | 0,389 | -0,412 |
| 7 | P04637 P53_HUMAN    | R.ALPNNTSSS#PQPK.K            | S315:  | 2 | 2,1486 | 0,302 | -0,172 |
| 7 | Q9Y6A5 TACC3_HUMAN  | R.AM*TLS#PQEEVAAGQM*ASSSR.S   | S317:  | 3 | 4,9037 | 0,395 | -0,085 |
| 7 | P51659 DHB4_HUMAN   | R.ATS#TATSGFAGAIGQK.L         | S318:  | 2 | 3,1955 | 0,457 | -0,158 |
| 7 | Q9UPQ6 Q9UPQ6_HUMAN | R.SESS#DFEVVVK.R              | S319:  | 2 | 3,26   | 0,355 | 0,187  |
| 7 | Q9UHW9 S12A6_HUMAN  | K.IDDIPGLSDTS#PDLSSR.S        | S32:   | 2 | 3,3301 | 0,549 | -0,261 |
| 7 | Q96A65 EXOC4_HUMAN  | R.TLS#TSDDEVDR.E              | S32:   | 2 | 2,0858 | 0,434 | -0,37  |
| 7 | Q13043 STK4_HUMAN   | R.EVDQDDEENS#EEDEM*DSGTM*VR.A | S320:  | 3 | 3,8295 | 0,201 | -0,48  |
| 7 | Q13546 RIPK1_HUMAN  | R.M*QS#LQLDCVAVPSSR.S         | S320:  | 2 | 3,7837 | 0,493 | -0,273 |
| 7 | Q13043 STK4_HUMAN   | R.EVDQDDEENS#EEDEMDSGTM*VR.A  | S320:  | 3 | 3,6523 | 0,325 | -0,345 |
| 7 | Q13043 STK4_HUMAN   | R.EVDQDDEENS#EEDEM*DSGTMVR.A  | S320:  | 3 | 3,5671 | 0,281 | -0,207 |
| 7 | Q9NWT1 PK1IP_HUMAN  | K.ESLPPAAEPS#PVSK.E           | S320:  | 2 | 2,693  | 0,404 | -0,41  |
| 7 | Q86WB0 NIPA_HUMAN   | R.LPLVPES#PR.R                | S321:  | 2 | 2,232  | 0,192 | -0,112 |
| 7 | P51659 DHB4_HUMAN   | R.ATSTATS#GFAGAIGQK.L         | S322:  | 3 | 2,8771 | 0,308 | 0      |
| 7 | Q16204 CCDC6_HUMAN  | R.QLS#EESSELEM*DDER.Y         | S323:  | 2 | 3,901  | 0,507 | -0,066 |
| 7 | Q9BX40 LS14B_HUMAN  | K.SFFDNIS#SELK.T              | S323:  | 2 | 3,4542 | 0,481 | -0,357 |
| 7 | P26651 TTP_HUMAN    | R.LPIFNIS#VSE.-               | S323:  | 2 | 3,0953 | 0,347 | -0,45  |
| 7 | Q9NQW6 ANLN_HUMAN   | K.TPIS#PLK.T                  | S323:  | 2 | 2,4459 | 0,225 | 0,146  |
| 7 | P42566 EP15_HUMAN   | K.NIIGSS#PVADFSAIK.E          | S324:  | 2 | 3,6419 | 0,521 | -0,305 |
| 7 | Q14678 KANK1_HUMAN  | R.SYS#AGNASQLEQLSR.A          | S325:  | 2 | 3,612  | 0,529 | 0,577  |
| 7 | Q9BRD0 BUD13_HUMAN  | K.YEYDPDIS#PPR.K              | S325:  | 2 | 3,285  | 0,48  | 0,17   |
| 7 | P08670 VIME_HUMAN   | R.QVQS#LTCEVDALK.G            | S325:  | 2 | 3,2587 | 0,419 | 0      |
| 7 | Q8ND76 CCNY_HUMAN   | R.SAS#ADNLTLPR.W              | S326:  | 2 | 3,497  | 0,266 | -0,199 |
| 7 | Q99500 EDG3_HUMAN   | R.AS#PIQPALDPSR.S             | S326:  | 2 | 2,1493 | 0,292 | -0,366 |
| 7 | Q13469 NFAC2_HUMAN  | K.TS#PDPSPVSAAPSK.A           | S326:  | 2 | 2,081  | 0,412 | -0,258 |

|   |                     |                                   |            |   |        |       |        |
|---|---------------------|-----------------------------------|------------|---|--------|-------|--------|
| 7 | Q12774 ARHG5_HUMAN  | K.SGELTALEFSAS#PGLR.R             | S327:      | 2 | 3,6187 | 0,369 | 0,071  |
| 7 | Q99708 RBBP8_HUMAN  | R.VSS#PVFGATSSIK.S                | S327:      | 2 | 2,6451 | 0,361 | 0,179  |
| 7 | O43823 AKAP8_HUMAN  | R.VDSEGDFFS#ENDDAAGDFR.S          | S328:      | 3 | 4,4379 | 0,408 | 0,361  |
| 7 | O43823 AKAP8_HUMAN  | R.VDSEGDFFS#ENDDAAGDFR.S          | S328:      | 2 | 4,1519 | 0,427 | 0,663  |
| 7 | P82094 TMF1_HUMAN   | R.IDS#FVSQSLDSR.S                 | S328:      | 2 | 3,666  | 0,539 | 0,425  |
| 7 | Q14676 MDC1_HUMAN   | R.AQPFQFIDS#DTDAEEER.I            | S329:      | 2 | 4,0906 | 0,551 | -0,547 |
| 7 | P35568 IRS1_HUMAN   | R.AS#SDGEGTM*SRPASVDGSPVS#PSTNR.T | S329:S348: | 3 | 4,1693 | 1     | -0,067 |
| 7 | Q99598 TSNAX_HUMAN  | K.DVNSSS#PVM*LAFK.S               | S33:       | 2 | 3,1918 | 0,405 | -0,082 |
| 7 | P05787 K2C8_HUMAN   | R.AS#LEAAIADAEQR.G                | S330:      | 2 | 3,9041 | 0,474 | -0,086 |
| 7 | P05787 K2C8_HUMAN   | R.AS#LEAAIADAEQR.G                | S330:      | 3 | 3,1115 | 0,221 | 0,257  |
| 7 | Q92597 NDRG1_HUMAN  | R.TAS#GSSVTSLDGTR.S               | S330:      | 2 | 2,4155 | 0,419 | -0,172 |
| 7 | Q13546 RIPK1_HUMAN  | R.M*QSLQLDCVAVPSS#R.S             | S331:      | 2 | 3,3834 | 0,467 | -0,137 |
| 7 | Q9UHR4 BI2L1_HUMAN  | R.SVS#VATGLNM*M*K.K               | S331:      | 2 | 3,3522 | 0,491 | 0,181  |
| 7 | Q9H6S0 YTDC2_HUMAN  | R.VDGPNDSS#DSEM*EDK.T             | S331:      | 2 | 3,1914 | 0,426 | -0,399 |
| 7 | Q9UHR4 BI2L1_HUMAN  | R.SVS#VATGLNM*MK.K                | S331:      | 2 | 2,8228 | 0,337 | 0,457  |
| 7 | Q9UHR4 BI2L1_HUMAN  | R.SVS#VATGLNM*M*K.K               | S331:      | 3 | 2,6829 | 0,284 | 0,203  |
| 7 | Q9UHR4 BI2L1_HUMAN  | R.SVS#VATGLNMM*K.K                | S331:      | 2 | 2,4806 | 0,124 | -0,549 |
| 7 | Q9HB21 PKHA1_HUMAN  | R.SNS#LVSTFTM*EK.R                | S332:      | 2 | 3,2315 | 0,329 | 0,593  |
| 7 | P78310 CXAR_HUMAN   | R.TPQS#PTLPPAK.V                  | S332:      | 2 | 2,4272 | 0,235 | -0,301 |
| 7 | Q03188 CENPC_HUMAN  | R.TIS#PAESTALFQGR.K               | S333:      | 3 | 3,3702 | 0,369 | 0      |
| 7 | Q03188 CENPC_HUMAN  | R.TIS#PAESTALFQGR.K               | S333:      | 2 | 3,2484 | 0,588 | -0,078 |
| 7 | P40925 MDHC_HUMAN   | K.ELTEEKESAFEFLSS#A.-             | S333:      | 2 | 2,9554 | 0,361 | -0,257 |
| 7 | P49790 NU153_HUMAN  | R.IPSIVSS#PLNSPLDR.S              | S334:      | 2 | 4,1801 | 0,542 | -0,291 |
| 7 | Q07352 TISB_HUMAN   | R.LPIFSRLS#ISDD.-                 | S334:      | 2 | 3,8286 | 0,537 | -0,254 |
| 7 | Q86SQ0 PHLB2_HUMAN  | K.TSASEGNPYVSTLSVPAS#PR.V         | S334:      | 3 | 3,5282 | 0,333 | 0,418  |
| 7 | P49790 NU153_HUMAN  | R.IPSIVSS#PLNSPLDR.S              | S334:      | 3 | 3,1388 | 0,215 | -0,109 |
| 7 | Q16181 SEPT7_HUMAN  | K.S#PLAQM*EEER.R                  | S334:      | 2 | 2,0061 | 0,411 | -0,285 |
| 7 | Q5VSL9 FA40A_HUMAN  | R.AAS#PPASASDLIEQQQK.R            | S335:      | 3 | 5,4743 | 0,39  | 0,1    |
| 7 | Q5VSL9 FA40A_HUMAN  | R.AAS#PPASASDLIEQQQK.R            | S335:      | 2 | 4,3971 | 0,443 | -0,268 |
| 7 | O75139 O75139_HUMAN | R.LGLLS#LR.G                      | S335:      | 2 | 2,076  | 0,111 | 0,215  |
| 7 | Q15036 SNX17_HUMAN  | R.VTSSVPLPSGSTSS#PGR.G            | S336:      | 2 | 2,619  | 0,34  | -0,432 |
| 7 | Q14498 RBM39_HUMAN  | R.TDASSASS#FLDSDELER.T            | S337:      | 2 | 4,3412 | 0,631 | -0,256 |
| 7 | Q9BVS4 RIOK2_HUMAN  | K.EGSEFSFS#DGEVAEK.A              | S337:      | 2 | 4,3341 | 0,49  | -0,072 |

|   |                    |                               |        |   |        |       |        |
|---|--------------------|-------------------------------|--------|---|--------|-------|--------|
| 7 | P49790 NU153_HUMAN | R.IPSIVSSPLNS#PLDR.S          | S338:  | 2 | 5,1782 | 0,537 | -0,291 |
| 7 | P49790 NU153_HUMAN | R.IPSIVSSPLNS#PLDR.S          | S338:  | 3 | 4,0272 | 0,323 | -0,109 |
| 7 | Q8NCN4 RN169_HUMAN | R.CVS#APDLTIEK.R              | S339:  | 2 | 3,1809 | 0,21  | 0,093  |
| 7 | Q86VM9 ZCH18_HUMAN | R.DSGS#DQDLGAGVR.A            | S34:   | 2 | 4,4109 | 0,384 | -0,414 |
| 7 | P58340 MLF1_HUMAN  | R.SFS#EPFGR.D                 | S34:   | 2 | 2,0416 | 0,139 | -0,061 |
| 7 | Q5VVJ2 MYSM1_HUMAN | R.QLPS#PEPCEIQK.N             | S340:  | 2 | 2,4555 | 0,248 | -0,243 |
| 7 | A6NJT0 UNC4_HUMAN  | K.ASPFSVESLLSDS#PPR.R         | S341:  | 2 | 3,4537 | 0,494 | -0,759 |
| 7 | Q9NZN5 ARHGC_HUMAN | K.SETIQDQDQSLVGS#PSTR.I       | S341:  | 3 | 2,9703 | 0,148 | 0      |
| 7 | Q09666 AHNK_HUMAN  | K.M*PFLSISS#PK.V              | S3412: | 2 | 3,0009 | 0,284 | -0,101 |
| 7 | Q09666 AHNK_HUMAN  | K.MPFLSISS#PK.V               | S3412: | 2 | 2,8358 | 0,35  | -0,206 |
| 7 | P11940 PABP1_HUMAN | K.GFGFVCFS#PEEATK.A           | S342:  | 2 | 3,5397 | 0,517 | -0,35  |
| 7 | Q99728 BARD1_HUMAN | R.TSILS#TSGDFVK.Q             | S342:  | 2 | 2,7533 | 0,378 | -0,183 |
| 7 | Q9BVG4 SSBP4_HUMAN | K.SS#PGAVAGLSNAPGTPR.D        | S342:  | 2 | 2,047  | 0,085 | 0      |
| 7 | O60934 NBN_HUMAN   | K.TTTPGPSLS#QGVSVDEK.L        | S343:  | 2 | 4,2422 | 0,536 | -0,411 |
| 7 | Q9NVF7 FBX28_HUMAN | R.EVM*ESAVGNSSGSGQNEES#PR.K   | S344:  | 3 | 5,4804 | 0,541 | -0,489 |
| 7 | Q8N7R7 CCYL1_HUMAN | R.SFS#ADNFIGIQR.S             | S344:  | 2 | 3,9703 | 0,479 | -0,085 |
| 7 | Q8N7R7 CCYL1_HUMAN | R.SFS#ADNFIGIQR.S             | S344:  | 3 | 2,7996 | 0,121 | 0      |
| 7 | Q15942 ZYG_HUMAN   | R.S#PGAPGPLTK.E               | S344:  | 2 | 2,3659 | 0,34  | -0,327 |
| 7 | O75676 KS6A4_HUMAN | R.LEPVYSPPGS#PPPGDPR.I        | S347:  | 2 | 3,7947 | 0,383 | -0,066 |
| 7 | Q9NZT2 OGFR_HUMAN  | R.S#VEPQDAGPLER.S             | S349:  | 2 | 2,8514 | 0,422 | -0,531 |
| 7 | Q01650 LAT1_HUMAN  | K.SADGS#APAGEGEGVTLQR.N       | S35:   | 2 | 4,1127 | 0,529 | -0,479 |
| 7 | Q8WVV9 HNRL_HUMAN  | K.TEEGEIDYS#AEEGENR.R         | S35:   | 2 | 3,5735 | 0,529 | -0,128 |
| 7 | Q6KC79 NIPBL_HUMAN | K.AAM*YDISS#PSK.D             | S350:  | 2 | 3,8581 | 0,494 | -0,354 |
| 7 | Q9Y2U8 MAN1_HUMAN  | R.NLEEAAAAEQGGGCDQVDS#SPVPR.Y | S351:  | 3 | 3,9674 | 0,47  | 0      |
| 7 | Q9UGV2 NDRG3_HUMAN | R.SVTSNQS#DGTQESCESPDVLDLDR.H | S352:  | 3 | 5,3351 | 0,548 | -0,073 |
| 7 | Q641Q2 FA21A_HUMAN | K.LTDEDFS#PFGSGGLFSGGK.G      | S352:  | 2 | 3,4895 | 0,601 | -0,475 |
| 7 | Q641Q2 FA21A_HUMAN | K.LTDEDFS#PFGSGGLFSGGK.G      | S352:  | 3 | 2,9407 | 0,264 | -0,445 |
| 7 | O60293 CC131_HUMAN | R.IS#TSDILSEK.K               | S352:  | 2 | 2,0483 | 0,344 | 0,312  |
| 7 | Q96K21 ZFY19_HUMAN | R.LPDS#DDDEDEETAIQR.V         | S354:  | 2 | 3,1415 | 0,631 | -0,57  |
| 7 | P51991 ROA3_HUMAN  | R.SS#GSPYGGYGGSGGGSGGYGSR.R   | S356:  | 2 | 5,3387 | 0,657 | -0,49  |
| 7 | Q14157 UBP2L_HUMAN | K.GGS#TTGSQFLEQFK.T           | S356:  | 2 | 3,6127 | 0,506 | -0,389 |
| 7 | Q96Q15 SMG1_HUMAN  | K.NLATS#ADTPPSTVPGTGK.S       | S3566: | 2 | 3,2458 | 0,355 | -0,136 |
| 7 | P46013 KI67_HUMAN  | K.TPVQYSQQNS#PQK.H            | S357:  | 2 | 3,4603 | 0,483 | -0,427 |



|   |                     |                                   |            |   |        |       |        |
|---|---------------------|-----------------------------------|------------|---|--------|-------|--------|
| 7 | O15014 ZN609_HUMAN  | R.FCDS#PTSDLEM*R.N                | S358:      | 2 | 3,8823 | 0,433 | -0,079 |
| 7 | Q2KHR2 RFXD2_HUMAN  | R.SPTTVLTSS#PIK.T                 | S358:      | 2 | 3,0209 | 0,506 | -0,251 |
| 7 | Q9UBU7 DBF4A_HUMAN  | K.YSVGSL#PVSASVLK.K               | S359:      | 2 | 4,204  | 0,521 | -0,078 |
| 7 | Q9NQ55 SSF1_HUMAN   | R.VGGS#DEEASGIPSR.T               | S359:      | 2 | 3,4803 | 0,391 | -0,254 |
| 7 | P04075 ALDOA_HUMAN  | K.GILAADES#TGSIAK.R               | S36:       | 2 | 4,1251 | 0,524 | -0,259 |
| 7 | Q9H3C7 GGNB2_HUMAN  | R.LEQLCEEFS#EEER.V                | S360:      | 2 | 4,528  | 0,457 | 0,412  |
| 7 | Q14157 UBP2L_HUMAN  | K.GGSTTGS#QFLEQFK.T               | S360:      | 2 | 3,4109 | 0,388 | -0,156 |
| 7 | Q16566 KCC4_HUMAN   | R.DPS#PIQDGNEDM*K.A               | S360:      | 2 | 2,7631 | 0,41  | -0,237 |
| 7 | Q9UGV2 NDRG3_HUMAN  | R.SVTSNQSDGTQESCES#PDVLDLDR.H     | S361:      | 3 | 5,3582 | 0,492 | -0,22  |
| 7 | Q8IY92 BTBDC_HUMAN  | R.FLLGPPQGG#PR.G                  | S361:      | 2 | 2,0029 | 0,226 | 0,467  |
| 7 | Q9Y2X7 GIT1_HUMAN   | K.SLSS#PTDNLELSL.R                | S362:      | 2 | 3,3264 | 0,402 | -0,227 |
| 7 | Q99728 BARD1_HUMAN  | K.QTVPENIPLPECSS#PPSCK.R          | S364:      | 3 | 3,861  | 0,397 | 0,238  |
| 7 | P98174 FGD1_HUMAN   | R.QES#VELTVQQK.V                  | S365:      | 2 | 2,782  | 0,314 | -0,267 |
| 7 | P49768 PSN1_HUMAN   | R.AAVQELS#SSILAGEDPEER.G          | S365:      | 2 | 2,0695 | 0,463 | -0,586 |
| 7 | P49768 PSN1_HUMAN   | R.AAVQELSS#ILAGEDPEER.G           | S367:      | 2 | 2,3068 | 0,31  | -0,117 |
| 7 | Q8IZT6 ASPM_HUMAN   | K.ILS#PDSFIK.D                    | S367:      | 2 | 2,2594 | 0,138 | -0,111 |
| 7 | Q9UN79 SOX13_HUMAN  | K.DLISLDSS#PAK.E                  | S368:      | 2 | 2,5959 | 0,261 | -0,299 |
| 7 | Q14CV6 Q14CV6_HUMAN | R.GAPM*DPNES#PAAPEAALPK.A         | S37:       | 2 | 3,7618 | 0,483 | -0,436 |
| 7 | P14618 KPYM_HUMAN   | R.LDIDS#PPITAR.N                  | S37:       | 2 | 2,5687 | 0,243 | 0,191  |
| 7 | Q14694 UBP10_HUMAN  | K.YSPPAIS#PLVSEK.Q                | S370:      | 2 | 2,3785 | 0,459 | 0,249  |
| 7 | Q8IXU6 S35F2_HUMAN  | K.LEENLQETHS#AVL.-                | S371:      | 2 | 2,6131 | 0,184 | 0,39   |
| 7 | P20810 ICAL_HUMAN   | R.SESELIDELS#EDFDR.S              | S373:      | 2 | 4,1958 | 0,557 | -0,458 |
| 7 | Q9UHB6 LIMA1_HUMAN  | R.ASSLSESS#PPK.A                  | S374:      | 2 | 2,446  | 0,173 | -0,104 |
| 7 | Q9UQ35 SRRM2_HUMAN  | R.HGGS#PQPLATTPLSQEPVNPPEAS#PTR.D | S377:S398: | 3 | 7,4865 | 1     | -0,364 |
| 7 | Q9UQ35 SRRM2_HUMAN  | R.HGGS#PQPLATTPLSQEPVNPPEASPT#R.D | S377:T400: | 3 | 4,5293 | 1     | 0,668  |
| 7 | Q9UKV8 I2C2_HUMAN   | R.SAS#FNTDPYVR.E                  | S379:      | 2 | 3,2469 | 0,471 | 0      |
| 7 | Q06587 RING1_HUMAN  | R.TPQEAIM*DGTEIAVS#PR.S           | S38:       | 2 | 4,7045 | 0,53  | 0,447  |
| 7 | Q06587 RING1_HUMAN  | R.TPQEAIM*DGTEIAVS#PR.S           | S38:       | 3 | 3,4208 | 0,291 | 0,287  |
| 7 | P30050 RL12_HUMAN   | K.IGPLGLS#PK.K                    | S38:       | 2 | 2,9475 | 0,434 | -0,063 |
| 7 | P16949 STMN1_HUMAN  | K.ESVPEFPLS#PPK.K                 | S38:       | 2 | 2,4184 | 0,419 | 0      |
| 7 | P35367 HRH1_HUMAN   | R.SGS#NTGLDYIK.F                  | S380:      | 2 | 3,3625 | 0,345 | 0      |
| 7 | Q12888 TP53B_HUMAN  | R.STPFIVPSS#PTEQEGR.Q             | S380:      | 2 | 3,1713 | 0,384 | -0,202 |
| 7 | Q6NYC1 JMJD6_HUMAN  | R.TCS#M*VGNGDTSQDDCVSK.E          | S381:      | 2 | 2,2581 | 0,275 | -0,679 |

|   |                     |                                     |            |   |        |       |        |
|---|---------------------|-------------------------------------|------------|---|--------|-------|--------|
| 7 | Q86WB0 NIPA_HUMAN   | R.S#M*GTGDTPGLEVPSS#PLRK.A          | S381:S395: | 3 | 3,8825 | 0,295 | 0,348  |
| 7 | Q7Z417 NUFP2_HUMAN  | K.TIQNSSVSPTSSSSS#SSSSTGETQTQSSSR.L | S382:      | 3 | 3,6597 | 1     | -0,492 |
| 7 | O94876 TMCC1_HUMAN  | K.FGS#ADNIPNLK.D                    | S382:      | 2 | 3,3842 | 0,324 | 0,097  |
| 7 | Q9UKS6 PACN3_HUMAN  | R.ALYDYAGQEADELS#FR.A               | S383:      | 2 | 3,8619 | 0,571 | -0,316 |
| 7 | Q9UKS6 PACN3_HUMAN  | R.ALYDYAGQEADELS#FR.A               | S383:      | 3 | 3,2546 | 0,437 | 0,19   |
| 7 | Q5JU85 IQEC2_HUMAN  | R.M*QFS#FEEYEK.A                    | S383:      | 2 | 3,0021 | 0,247 | -0,596 |
| 7 | Q92598 HS105_HUMAN  | R.GCALQCAILS#PAFK.V                 | S384:      | 2 | 3,9602 | 0,359 | -0,302 |
| 7 | Q92598 HS105_HUMAN  | R.GCALQCAILS#PAFK.V                 | S384:      | 3 | 3,247  | 0,269 | 0,113  |
| 7 | Q8NC44 F134A_HUMAN  | R.QALDS#EEEEEDVAAK.E                | S385:      | 2 | 4,0952 | 0,564 | -0,35  |
| 7 | Q8NC44 F134A_HUMAN  | R.QALDS#EEEEEDVAAK.E                | S385:      | 3 | 3,8012 | 0,325 | -0,105 |
| 7 | O75955 FLOT1_HUMAN  | K.ITLVSSGS#GTM*GAAK.V               | S385:      | 2 | 2,7606 | 0,276 | -0,248 |
| 7 | Q01813 K6PP_HUMAN   | R.S#FAGNLNTYK.R                     | S386:      | 2 | 2,7369 | 0,363 | -0,102 |
| 7 | Q8IY92 BTBDC_HUMAN  | R.GGTSQVGS#PTLLSPAVPSK.Q            | S387:      | 2 | 4,8994 | 0,382 | 0,786  |
| 7 | Q86YC2 PALB2_HUMAN  | K.SLSLEATS#PLSAEK.H                 | S387:      | 2 | 3,5168 | 0,482 | 0,323  |
| 7 | O43318 M3K7_HUMAN   | R.M*S#ADM*SEIEAR.I                  | S389:      | 2 | 3,4964 | 0,387 | -0,271 |
| 7 | Q99613 EIF3C_HUMAN  | K.QPLLLS#EDEEDTK.R                  | S39:       | 2 | 2,7361 | 0,447 | 0,382  |
| 7 | Q9BPX3 CND3_HUMAN   | R.GDFS#YIGNLM*TK.E                  | S390:      | 2 | 3,8322 | 0,507 | 0      |
| 7 | O43463 SUV91_HUMAN  | R.M*DSNFLAGLPGS#PK.K                | S391:      | 2 | 4,8397 | 0,518 | -0,154 |
| 7 | Q8NEY1 NAV1_HUMAN   | K.SGYM*S#DSDLM*GK.T                 | S391:      | 2 | 3,8195 | 0,462 | -0,174 |
| 7 | O15027 SC16A_HUMAN  | K.QIDSS#PVGGETDETTVSQNYR.G          | S391:      | 3 | 3,7079 | 0,496 | -0,232 |
| 7 | O43463 SUV91_HUMAN  | R.MDSNFLAGLPGS#PK.K                 | S391:      | 2 | 2,9128 | 0,427 | 0,388  |
| 7 | Q9UPU9 SAM4A_HUMAN  | R.GFGQSNS#LPTAGSVGGGM*GR.R          | S391:      | 2 | 2,3069 | 0,42  | -0,126 |
| 7 | Q14684 RRP1B_HUMAN  | R.VFCVEEEDS#ESSLQK.R                | S392:      | 2 | 6,0547 | 0,484 | -0,392 |
| 7 | Q14684 RRP1B_HUMAN  | R.VFCVEEEDS#ESSLQK.R                | S392:      | 3 | 4,157  | 0,46  | -0,294 |
| 7 | P98082 DAB2_HUMAN   | K.S#SPNPFVGSPPK.G                   | S393:      | 2 | 2,2266 | 0,357 | 0      |
| 7 | P49792 RBP2_HUMAN   | K.SGQSALYDALFSSQS#PK.D              | S394:      | 2 | 3,8006 | 0,458 | -0,392 |
| 7 | P49792 RBP2_HUMAN   | K.SGQSALYDALFSSQS#PK.D              | S394:      | 3 | 3,7277 | 0,42  | -0,098 |
| 7 | Q8NC51 PAIRB_HUMAN  | R.TDKSSAS#APDVDDPEAFPALA.-          | S394:      | 2 | 2,0491 | 0,458 | -0,112 |
| 7 | Q86WB0 NIPA_HUMAN   | R.SM*GTGDTPGLEVPSS#PLR.K            | S395:      | 2 | 3,6198 | 0,44  | -0,193 |
| 7 | Q9NYF8 BCLF1_HUMAN  | K.FNDS#EGDDTEETEDYR.Q               | S397:      | 2 | 5,7032 | 0,566 | -0,61  |
| 7 | O60934 NBN_HUMAN    | R.M*LS#QDAPTVK.E                    | S397:      | 2 | 3,4129 | 0,345 | -0,103 |
| 7 | Q8N5Y2 MS3L1_HUMAN  | R.SS#SPIPLTPS#KEGSAVFAGFEGR.R       | S399:S407: | 3 | 4,2503 | 1     | -0,295 |
| 7 | Q68DK7 Q68DK7_HUMAN | K.S#PLGGGGSGASSQAACLK.Q             | S4:        | 2 | 5,3964 | 0,627 | -0,49  |

|   |                    |                              |            |   |        |       |        |
|---|--------------------|------------------------------|------------|---|--------|-------|--------|
| 7 | Q96BD0 SO4A1_HUMAN | R.ASPGTPLS#PGSLR.S           | S40:       | 2 | 2,4413 | 0,245 | -0,739 |
| 7 | A6NKF1 SAC31_HUMAN | R.TLEEVVM*AEEEDEGTDRPGS#PA.- | S401:      | 3 | 3,1393 | 0,382 | 0      |
| 7 | P98082 DAB2_HUMAN  | K.SSPNPFVGS#PPK.G            | S401:      | 2 | 2,5563 | 0,086 | 0      |
| 7 | Q9UKG1 DP13A_HUMAN | R.VNQSALEAVTPS#PSFQQR.H      | S401:      | 2 | 2,4756 | 0,6   | -0,419 |
| 7 | Q5T3J3 CA103_HUMAN | K.DTLQTVSSS#PVTEISR.E        | S402:      | 2 | 4,59   | 0,396 | -0,474 |
| 7 | Q8NCN4 RN169_HUMAN | R.VLS#PLIIK.S                | S403:      | 2 | 2,7728 | 0,115 | -0,253 |
| 7 | Q9NZT2 OGFR_HUMAN  | R.EQPPTPEGPQS#ASEVEK.I       | S403:      | 2 | 2,1986 | 0,093 | -0,452 |
| 7 | Q8IVT5 KSR1_HUMAN  | R.TES#VPSDINNPVDR.A          | S404:      | 2 | 2,4884 | 0,121 | 0,301  |
| 7 | O94885 SASH1_HUMAN | R.TCS#FGGFDLTNR.S            | S407:      | 2 | 3,4252 | 0,447 | -0,084 |
| 7 | Q9C0H5 K1688_HUMAN | R.QLVYVEQAGSS#PK.L           | S407:      | 2 | 3,3555 | 0,483 | -0,082 |
| 7 | Q9NTJ3 SMC4_HUMAN  | R.TES#PATAAETASEELDNR.S      | S41:       | 2 | 4,9497 | 0,6   | 0,309  |
| 7 | Q09666 AHNK_HUMAN  | R.DDGVFVQEVTQNS#PAAR.T       | S41:       | 3 | 4,5636 | 0,51  | 0,478  |
| 7 | Q13439 GOGA4_HUMAN | R.TSS#FTEQLDEGTPNR.E         | S41:       | 2 | 3,8932 | 0,49  | -0,623 |
| 7 | Q9NTJ3 SMC4_HUMAN  | R.TES#PATAAETASEELDNR.S      | S41:       | 3 | 3,8434 | 0,528 | 0,186  |
| 7 | Q09666 AHNK_HUMAN  | R.DDGVFVQEVTQNS#PAAR.T       | S41:       | 2 | 3,6732 | 0,302 | 0,51   |
| 7 | Q9Y2V2 CHSP1_HUMAN | R.GNVVPS#PLPTR.R             | S41:       | 2 | 2,074  | 0,129 | -0,301 |
| 7 | Q9Y6I3 EPN1_HUMAN  | R.S#PGAFFDM*SGVR.G           | S410:      | 2 | 2,3211 | 0,283 | -0,3   |
| 7 | Q8IY17 PLPL6_HUMAN | R.CVS#M*PGDISGLQGGPR.S       | S411:      | 2 | 4,9035 | 0,584 | -0,424 |
| 7 | Q9UQR1 ZN148_HUMAN | K.QPLEQNQTIS#PLSTYEESK.V     | S412:      | 3 | 3,4816 | 0,184 | 0,242  |
| 7 | Q8NCD3 HJURP_HUMAN | K.WLIS#PVK.I                 | S412:      | 2 | 2,5389 | 0,256 | 0      |
| 7 | Q9Y4P8 WIPI2_HUMAN | K.GTYVPSS#PTR.L              | S413:      | 2 | 2,2935 | 0,184 | -0,213 |
| 7 | O94876 TMCC1_HUMAN | K.ALGVISNFQSS#PK.Y           | S414:      | 2 | 2,9472 | 0,398 | -0,171 |
| 7 | O14545 TRAD1_HUMAN | R.LDSQPQETS#PELPR.R          | S415:      | 2 | 3,2283 | 0,267 | 0,364  |
| 7 | Q14247 SRC8_HUMAN  | R.LPSS#PVYEDAASF.K           | S418:      | 2 | 3,9804 | 0,59  | -0,153 |
| 7 | Q1ED39 TS118_HUMAN | R.YSVLNDDYFADVS#PLR.A        | S42:       | 2 | 4,6286 | 0,578 | -0,354 |
| 7 | O75643 U520_HUMAN  | R.DEPTGEVLS#LVGK.L           | S42:       | 2 | 2,6458 | 0,36  | -0,171 |
| 7 | Q53GA4 PHLA2_HUMAN | R.LSLFPAS#PR.A               | S42:       | 2 | 2,3757 | 0,315 | 0,114  |
| 7 | Q96PE2 ARHGH_HUMAN | R.SPS#FGAGEGLLR.S            | S420:      | 2 | 2,8425 | 0,462 | -0,192 |
| 7 | Q03001 BPA1_HUMAN  | R.LLDPEDVDVSS#PDEK.S         | S421:      | 2 | 4,595  | 0,433 | 0,07   |
| 7 | P42166 LAP2A_HUMAN | K.FQETEFLS#PPR.K             | S424:      | 2 | 2,4311 | 0,246 | 0,256  |
| 7 | Q53EZ4 CEP55_HUMAN | K.VAAS#PKSPT#AALNESLVECPK.C  | S425:T430: | 3 | 5,5515 | 0,413 | -0,157 |
| 7 | Q8NDI1 EHBP1_HUMAN | K.DLS#TSPKPSIPS#PVLGR.K      | S426:S436: | 2 | 2,6983 | 0,498 | 0,486  |
| 7 | Q96AD5 PLPL2_HUMAN | R.NNLS#LGDALAK.W             | S428:      | 2 | 3,0009 | 0,274 | 0,102  |

|   |                     |                                   |            |   |        |       |        |
|---|---------------------|-----------------------------------|------------|---|--------|-------|--------|
| 7 | Q5H9R5 Q5H9R5_HUMAN | R.VAS#ETHS#EGSEYEELPK.R           | S428:S432: | 2 | 2,4488 | 0,292 | 0,238  |
| 7 | Q5H9R5 Q5H9R5_HUMAN | R.VAS#ET#HSEGESEYEELPK.R          | S428:T430: | 3 | 3,5461 | 0,285 | -0,089 |
| 7 | Q9Y6I3 EPN1_HUMAN   | R.GSLAEAVGS#PPPAATPTPTPTR.K       | S429:      | 3 | 4,4747 | 0,39  | 0,406  |
| 7 | Q9C0C2 TB182_HUMAN  | R.FS#EGVLQSPSQDQEK.L              | S429:      | 2 | 3,0581 | 0,281 | -0,208 |
| 7 | Q13112 CAF1B_HUMAN  | R.TQDPSS#PGTTPPQAR.Q              | S429:      | 2 | 2,6385 | 0,31  | -0,301 |
| 7 | Q9UHR5 S30BP_HUMAN  | K.GGLVS#DAYGEDDFSR.L              | S43:       | 2 | 4,5872 | 0,464 | -0,219 |
| 7 | P27987 IP3KB_HUMAN  | R.AVLS#PGSVFSPGR.G                | S43:       | 2 | 2,4142 | 0,474 | -0,27  |
| 7 | Q96R06 SPAG5_HUMAN  | R.S#PACSSLTPSLCK.L                | S43:       | 2 | 2,3458 | 0,439 | 0      |
| 7 | P35658 NU214_HUMAN  | K.S#PGSTPTTPTSSQAPQK.L            | S430:      | 2 | 3,3445 | 0,403 | -0,557 |
| 7 | O14639 ABLM1_HUMAN  | R.TLS#PTPSAEGYQDVR.D              | S431:      | 2 | 3,5113 | 0,5   | -0,215 |
| 7 | Q9Y230 RUVB2_HUMAN  | R.VYS#LFLDESR.S                   | S431:      | 2 | 3,1009 | 0,34  | -0,466 |
| 7 | Q8N1G0 ZN687_HUMAN  | K.AVVLPGGTATS#PK.M                | S433:      | 2 | 2,3392 | 0,4   | -0,191 |
| 7 | Q05519 SFR11_HUMAN  | R.DYDEEEQGYDS#EK.E                | S434:      | 2 | 4,7698 | 0,502 | -0,072 |
| 7 | P42858 HD_HUMAN     | R.SGSIVELIAGGGSSCS#PVLSR.K        | S434:      | 3 | 2,8299 | 0,277 | -0,519 |
| 7 | Q6WKZ4 RFIP1_HUMAN  | R.S#SLLSLM*TGK.K                  | S434:      | 2 | 2,1488 | 0,232 | -0,108 |
| 7 | P42858 HD_HUMAN     | R.SGSIVELIAGGGSSCS#PVLSR.K        | S434:      | 2 | 2,0059 | 0,204 | -0,462 |
| 7 | Q96AP0 ACD_HUMAN    | R.TPSSPLQCTPSLS#PR.S              | S435:      | 2 | 4,0083 | 0,435 | 0,34   |
| 7 | Q9C0C2 TB182_HUMAN  | R.FSEGLVQS#PSQDQEK.L              | S435:      | 2 | 3,6169 | 0,382 | 0,208  |
| 7 | Q6WKZ4 RFIP1_HUMAN  | R.SS#LLSLMTGK.K                   | S435:      | 2 | 2,4151 | 0,286 | -0,437 |
| 7 | Q9UPZ3 HPS5_HUMAN   | R.S#S#ISSHESFILDGSIYR.I           | S436:S437: | 3 | 2,8664 | 0,215 | -0,256 |
| 7 | Q9BVJ6 UT14A_HUMAN  | R.SELS#QDAEPAGSQETK.D             | S437:      | 2 | 4,6331 | 0,605 | -0,347 |
| 7 | O94804 STK10_HUMAN  | K.QVAEQGGDLS#PAANR.S              | S438:      | 2 | 3,824  | 0,455 | -0,153 |
| 7 | Q15149 PLEC1_HUMAN  | R.SSS#VGSSSYPISPAVSR.T            | S4386:     | 2 | 4,5498 | 0,41  | -0,598 |
| 7 | O00178 GTPB1_HUMAN  | R.LHGGFDS#DCS#EDGEALNGEPELDLTSK.L | S44:S47:   | 3 | 3,0949 | 0,22  | -0,3   |
| 7 | O14578 CTRO_HUMAN   | R.SESVVSGLDS#PAK.T                | S440:      | 2 | 3,4816 | 0,483 | -0,09  |
| 7 | Q9H307 PININ_HUMAN  | K.S#LS#PGKENVSALDM*EK.E           | S441:S443: | 2 | 3,6622 | 0,463 | -0,843 |
| 7 | Q9BVJ6 UT14A_HUMAN  | R.SELSQDAEPAGS#QETK.D             | S445:      | 2 | 3,1349 | 0,356 | -0,278 |
| 7 | O14974 MYPT1_HUMAN  | K.TGS#YGALAEITASK.E               | S445:      | 2 | 2,4104 | 0,212 | 0,337  |
| 7 | Q7Z3T8 ZFY16_HUMAN  | K.SILLQS#LIEGM*EDR.K              | S446:      | 2 | 2,9611 | 0,18  | -0,646 |
| 7 | Q9UKA4 AKA11_HUMAN  | R.EDSGLFS#PIR.S                   | S448:      | 2 | 2,0982 | 0,285 | 0      |
| 7 | Q99741 CDC6_HUMAN   | K.LEPTNVQTVTCS#PR.V               | S45:       | 2 | 3,4028 | 0,34  | -0,58  |
| 7 | Q8TAP8 CG047_HUMAN  | R.APVPEPGLDLS#LSRPRDS#PQPR.H      | S45:S52:   | 3 | 4,4679 | 0,372 | -0,147 |
| 7 | Q9H8Y8 GORS2_HUMAN  | R.VGDSTPVEKPVSAAVDANASES#P.-      | S451:      | 3 | 3,7193 | 0,336 | 0      |

|   |                    |                                |            |   |        |       |        |
|---|--------------------|--------------------------------|------------|---|--------|-------|--------|
| 7 | Q09666 AHNK_HUMAN  | K.SPQIS#M*SDIDLNLK.G           | S4520:     | 2 | 4,8659 | 0,435 | -0,368 |
| 7 | Q9NU22 MDN1_HUMAN  | K.AEENTDQAS#PQEDYAGFER.L       | S4538:     | 3 | 4,707  | 0,562 | 0      |
| 7 | Q13098 CSN1_HUMAN  | R.EGS#QGELTPANSQSR.M           | S454:      | 2 | 3,6367 | 0,339 | -0,669 |
| 7 | Q14157 UBP2L_HUMAN | K.SPAVATSTAAPPPSS#PLPSK.S      | S454:      | 2 | 3,4131 | 0,498 | -0,538 |
| 7 | Q14157 UBP2L_HUMAN | K.SPAVATSTAAPPPSS#PLPSK.S      | S454:      | 3 | 3,1172 | 0,218 | 0,09   |
| 7 | Q8WTW3 COG1_HUMAN  | K.ELLVSALQELESS#TSNSPSNK.H     | S455:      | 3 | 4,2476 | 0,407 | -0,237 |
| 7 | Q7KZI7 MARK2_HUMAN | K.VPAS#PLPGLER.K               | S456:      | 2 | 3,6515 | 0,367 | 0,301  |
| 7 | Q07866 KLC1_HUMAN  | K.VDS#PTVTTTLK.N               | S456:      | 2 | 3,1784 | 0,36  | -0,393 |
| 7 | Q9NYZ3 GTSE1_HUMAN | K.FS#IGDSPDSSTPK.L             | S457:      | 2 | 2,5306 | 0,324 | -0,172 |
| 7 | O60658 PDE8A_HUMAN | R.LS#GNEYVLSTK.N               | S457:      | 2 | 2,3819 | 0,441 | -0,095 |
| 7 | Q96TC7 FA82C_HUMAN | R.SQS#LPNSLDYTQTSDPGR.H        | S46:       | 3 | 4,5748 | 0,482 | 0,447  |
| 7 | P22314 UBA1_HUMAN  | K.NGS#EADIDEGLYSR.Q            | S46:       | 2 | 4,3091 | 0,528 | -0,228 |
| 7 | P49116 NR2C2_HUMAN | K.IQIVTAVDASGS#PK.Q            | S46:       | 2 | 4,1423 | 0,549 | 0,416  |
| 7 | Q86VM9 ZCH18_HUMAN | R.AS#DLEDEESAAR.G              | S46:       | 2 | 3,9067 | 0,443 | -0,533 |
| 7 | Q96TC7 FA82C_HUMAN | R.SQS#LPNSLDYTQTSDPGR.H        | S46:       | 2 | 3,771  | 0,483 | 0,656  |
| 7 | Q02446 SP4_HUMAN   | K.TSGSQSQPS#PLALLAATCSK.I      | S46:       | 3 | 2,8421 | 0,15  | -0,25  |
| 7 | P16949 STMN1_HUMAN | K.DLS#LEEIQK.K                 | S46:       | 2 | 2,307  | 0,342 | 0,317  |
| 7 | Q3KQU3 MA7D1_HUMAN | R.LSASTASELS#PK.S              | S460:      | 2 | 3,4089 | 0,476 | -0,288 |
| 7 | P19338 NUCL_HUMAN  | R.SIS#LYYTGEK.G                | S460:      | 2 | 2,2133 | 0,121 | 0,098  |
| 7 | Q16875 F263_HUMAN  | R.NS#VTPLASPEPTK.K             | S461:      | 2 | 3,6075 | 0,39  | -0,429 |
| 7 | Q8IWC1 MA7D3_HUMAN | K.TSLEASM*EAS#PK.A             | S461:      | 2 | 2,3738 | 0,297 | -0,544 |
| 7 | Q15149 PLEC1_HUMAN | K.GYYS#PYSVSGSGSTAGSR.T        | S4613:     | 2 | 4,8002 | 0,568 | -0,458 |
| 7 | Q15149 PLEC1_HUMAN | K.GYYS#PYSVSGSGSTAGS#R.T       | S4626:     | 2 | 5,0207 | 0,579 | -0,262 |
| 7 | Q15149 PLEC1_HUMAN | K.GYYS#PYSVSGSGSTAGS#R.T       | S4626:     | 3 | 2,8692 | 0,282 | 0      |
| 7 | Q08378 GOGA3_HUMAN | R.QDS#LSSEVDTLK.Q              | S465:      | 2 | 3,2005 | 0,289 | 0,174  |
| 7 | Q6ZTN6 AN13D_HUMAN | R.GPGS#PPRT#PPAPGPPSFEEQLR.L   | S465:T469: | 3 | 3,9965 | 0,34  | 0      |
| 7 | Q9BWU0 NADAP_HUMAN | K.NWEDEDFYDS#DDDTFLDR.T        | S466:      | 3 | 4,277  | 0,383 | -0,308 |
| 7 | O60825 F262_HUMAN  | R.NS#FTPLSSNTIR.R              | S466:      | 2 | 3,7471 | 0,529 | 0,162  |
| 7 | Q14157 UBP2L_HUMAN | K.STSAPQM*#S#PGSSDNQSSSPQAQK.L | S467:      | 3 | 5,1906 | 0,426 | 0,139  |
| 7 | Q14157 UBP2L_HUMAN | K.STSAPQMS#PGSSDNQSSSPQAQK.L   | S467:      | 3 | 5,1407 | 0,456 | -0,28  |
| 7 | O15014 ZN609_HUMAN | R.TNS#M*GSATGPLPGTK.V          | S467:      | 2 | 3,9836 | 0,572 | -0,403 |
| 7 | Q96D46 NMD3_HUMAN  | R.DSAIPVES#DTDDEGAPR.I         | S468:      | 2 | 3,66   | 0,472 | -0,527 |
| 7 | Q86SQ0 PHLB2_HUMAN | R.LS#TGTTVEDVQK.I              | S468:      | 2 | 2,3301 | 0,373 | -0,449 |

|   |                    |                                 |            |   |        |       |        |
|---|--------------------|---------------------------------|------------|---|--------|-------|--------|
| 7 | Q99543 DNJC2_HUMAN | R.NAS#ASFQELEDK.K               | S47:       | 2 | 4,152  | 0,629 | 0,43   |
| 7 | P31946 1433B_HUMAN | R.NLLS#VAYK.N                   | S47:       | 2 | 2,1486 | 0,157 | -0,062 |
| 7 | Q81W41 MAPK5_HUMAN | K.QVIEEQTTSHES#Q.-              | S472:      | 2 | 2,2775 | 0,091 | 0,076  |
| 7 | Q8NCD3 HJURP_HUMAN | R.GGPAS#PGGLQGLETR.R            | S473:      | 2 | 3,7508 | 0,558 | 0,578  |
| 7 | Q13263 TIF1B_HUMAN | R.S#GEGEVSGLM*R.K               | S473:      | 2 | 3,5329 | 0,444 | -0,1   |
| 7 | P05787 K2C8_HUMAN  | K.LVS#ESSDVLPK.-                | S475:      | 2 | 3,4034 | 0,395 | 0,292  |
| 7 | Q14157 UBP2L_HUMAN | K.STSAPQM*SPGSSDNQSSS#PQPAQQK.L | S477:      | 3 | 3,8859 | 0,511 | -0,209 |
| 7 | Q86VW2 GEFT_HUMAN  | R.DFLNALQS#PIEYQR.R             | S477:      | 2 | 3,5001 | 0,432 | -0,55  |
| 7 | P05787 K2C8_HUMAN  | K.LVSES#SDVLPK.-                | S477:      | 2 | 3,1264 | 0,249 | -0,195 |
| 7 | P05787 K2C8_HUMAN  | K.LVSESS#DVLPK.-                | S478:      | 2 | 3,1855 | 0,304 | -0,097 |
| 7 | Q12774 ARHG5_HUMAN | R.LESLETPGPSS#PR.Q              | S48:       | 2 | 3,4944 | 0,581 | -0,397 |
| 7 | P62805 H4_HUMAN    | R.IS#GLIYEETR.G                 | S48:       | 2 | 2,9694 | 0,3   | 0      |
| 7 | O95544 NADK_HUMAN  | R.SLS#ASPALGSTK.E               | S48:       | 2 | 2,6039 | 0,328 | -0,102 |
| 7 | O76080 ZFN5_HUMAN  | R.M*S#PM*GTASGSNSPTSASVQR.A     | S48:       | 2 | 2,3729 | 0,497 | -0,323 |
| 7 | Q02952 AKA12_HUMAN | K.ETCVSGEDPTQGADLS#PDEK.V       | S483:      | 3 | 3,3133 | 0,314 | 0,083  |
| 7 | O75970 MPDZ_HUMAN  | K.DADLS#PVNASIIK.E              | S483:      | 2 | 2,3074 | 0,172 | -0,086 |
| 7 | Q8NFC6 FA44A_HUMAN | K.YYSDS#DDELTVQR.R              | S484:      | 2 | 4,9497 | 0,446 | -0,61  |
| 7 | P34947 GRK5_HUMAN  | K.DVLDIEQFS#TVK.G               | S484:      | 2 | 3,1518 | 0,445 | -0,414 |
| 7 | P11169 GTR3_HUMAN  | K.DGVM*EM*NS#IEPAK.E            | S485:      | 2 | 3,2353 | 0,447 | -0,398 |
| 7 | O60832 DKC1_HUMAN  | K.AGLES#GAEPGDGSDTTK.K          | S485:      | 2 | 3,1544 | 0,358 | -0,478 |
| 7 | Q9NQW6 ANLN_HUMAN  | K.TQS#LPVTEK.V                  | S485:      | 2 | 2,7081 | 0,352 | -0,225 |
| 7 | Q8WXI9 P66B_HUMAN  | R.LQQQAALS#PTTAPAVSSVSK.Q       | S486:      | 3 | 3,5915 | 0,406 | -0,089 |
| 7 | Q9ULU4 PKCB1_HUMAN | K.TGQAGS#LSGS#PKPFSPQLSAPITTK.T | S486:S490: | 3 | 3,7227 | 0,284 | 0,14   |
| 7 | Q12756 KIF1A_HUMAN | R.EDGGTLGVFS#PK.K               | S487:      | 2 | 2,3392 | 0,176 | 0      |
| 7 | Q15052 ARHG6_HUMAN | R.M*S#GFIYQGK.I                 | S488:      | 2 | 3,3914 | 0,264 | 0      |
| 7 | Q15052 ARHG6_HUMAN | R.MS#GFIYQGK.I                  | S488:      | 2 | 2,8347 | 0,448 | 0,22   |
| 7 | Q9ULU4 PKCB1_HUMAN | K.TGQAGSLS#GS#PKPFSPQLSAPITTK.T | S488:S490: | 3 | 3,3762 | 0,12  | -0,28  |
| 7 | P38432 P80C_HUMAN  | K.LLELTSSYS#PDVSDYK.E           | S489:      | 2 | 4,5315 | 0,594 | -0,386 |
| 7 | Q6NV74 CB055_HUMAN | R.IGTEPSTAPAPS#PPAPK.S          | S490:      | 2 | 3,0345 | 0,193 | -0,575 |
| 7 | Q09666 AHNK_HUMAN  | K.M*PS#LEISAPK.V                | S4908:     | 2 | 3,4592 | 0,351 | 0      |
| 7 | Q5JTD0 TJAP1_HUMAN | R.EEEELNLPIS#PEEER.Q            | S491:      | 2 | 3,8262 | 0,415 | -0,129 |
| 7 | Q96Q42 ALS2_HUMAN  | R.LSLPGLLSQVS#PR.L              | S492:      | 2 | 3,4531 | 0,413 | -0,422 |
| 7 | Q96Q42 ALS2_HUMAN  | R.LSLPGLLSQVS#PR.L              | S492:      | 3 | 2,7314 | 0,215 | -0,063 |

|   |                     |                                 |            |   |        |       |        |
|---|---------------------|---------------------------------|------------|---|--------|-------|--------|
| 7 | Q15758 AAAT_HUMAN   | R.S#TEPELIQVK.S                 | S493:      | 2 | 2,6159 | 0,353 | -0,199 |
| 7 | A0MZ66 SHOT1_HUMAN  | K.VTAEADSSS#PTGILATSESK.S       | S494:      | 2 | 4,9006 | 0,561 | -0,18  |
| 7 | O60832 DKC1_HUMAN   | K.AGLESGAEPGDGDS#DTTK.K         | S494:      | 2 | 4,333  | 0,581 | -0,478 |
| 7 | P17181 INAR1_HUMAN  | K.NLLSTS#EEQIEK.C               | S495:      | 2 | 3,632  | 0,486 | 0,462  |
| 7 | Q5H9F3 BCRL1_HUMAN  | R.CLPGVLAS#PELR.S               | S496:      | 2 | 2,1482 | 0,177 | 0      |
| 7 | Q641Q2 FA21A_HUMAN  | K.AVAS#PEATVSQTDENK.A           | S498:      | 2 | 4,7564 | 0,355 | -0,212 |
| 7 | Q8TEV9 SMCR8_HUMAN  | K.SDSQASLTVPLS#PQVVR.S          | S498:      | 2 | 3,6597 | 0,475 | 0      |
| 7 | Q9H0D6 XRN2_HUMAN   | K.AEDS#DSEPEPEDNVR.L            | S499:      | 2 | 3,3213 | 0,422 | -0,345 |
| 7 | P20962 PTMS_HUMAN   | K.S#VEAAAELSAK.D                | S5:        | 2 | 2,4588 | 0,326 | -0,106 |
| 7 | Q9NX63 CHCH3_HUMAN  | R.YS#GAYGASVSDEELK.R            | S50:       | 2 | 4,1384 | 0,5   | -0,368 |
| 7 | Q13610 PWP1_HUMAN   | K.LQEEGGGS#DEEETGSPSEDGMQSAR.T  | S50:       | 3 | 3,4728 | 0,295 | -0,206 |
| 7 | Q13610 PWP1_HUMAN   | K.LQEEGGGS#DEEETGSPSEDGM*QSAR.T | S50:       | 3 | 3,4435 | 0,359 | -0,342 |
| 7 | Q5JSH3 WDR44_HUMAN  | K.VGNES#PVQELK.Q                | S50:       | 2 | 2,6799 | 0,247 | -0,095 |
| 7 | Q12888 TP53B_HUMAN  | K.NS#PEDLGLSLTGDSCK.L           | S500:      | 2 | 4,7335 | 0,555 | -0,069 |
| 7 | Q9BZE9 ASPC1_HUMAN  | R.AAGS#PSPLPAPDPAPK.S           | S500:      | 2 | 3,627  | 0,345 | -0,236 |
| 7 | Q13263 TIF1B_HUMAN  | R.LDLDLTADS#QPPVFK.V            | S501:      | 2 | 4,2366 | 0,426 | -0,561 |
| 7 | Q68E01 INT3_HUMAN   | K.FPEFCSSPS#PPVEVK.I            | S502:      | 2 | 4,6204 | 0,361 | -0,478 |
| 7 | Q6P597 KLC3_HUMAN   | R.TLSASTQDLS#PH.-               | S502:      | 2 | 2,824  | 0,465 | 0      |
| 7 | Q96JJ3 ELMO2_HUMAN  | R.SLS#YSEILR.L                  | S503:      | 2 | 2,6795 | 0,316 | 0      |
| 7 | Q6ZML7 Q6ZML7_HUMAN | R.AEELSPAALS#PSLEPIR.C          | S504:      | 2 | 4,8693 | 0,515 | -0,394 |
| 7 | Q3MII6 TBC25_HUMAN  | R.QAS#LDGLQLR.D                 | S506:      | 2 | 2,5832 | 0,332 | -0,093 |
| 7 | Q12888 TP53B_HUMAN  | K.NSPEDLGLS#LTGDSC.L            | S507:      | 2 | 4,3176 | 0,607 | 0,482  |
| 7 | O14974 MYPT1_HUMAN  | R.LAS#TSDIEEK.E                 | S507:      | 2 | 2,4909 | 0,365 | -0,104 |
| 7 | O43818 U3IP2_HUMAN  | K.M*NEEISS#DSESESLAPR.K         | S51:       | 2 | 4,4084 | 0,555 | -0,309 |
| 7 | P61604 CH10_HUMAN   | K.VLQATVVAVGS#GSK.G             | S51:       | 2 | 3,5804 | 0,575 | 0      |
| 7 | P35659 DEK_HUMAN    | K.S#LIVEGK.R                    | S51:       | 2 | 2,1995 | 0,201 | 0,074  |
| 7 | Q09666 AHNK_HUMAN   | K.ISM*QDVDLSLGS#PK.L            | S511:      | 2 | 4,5228 | 0,423 | 0,539  |
| 7 | Q09666 AHNK_HUMAN   | K.ISMQDVDLSLGS#PK.L             | S511:      | 2 | 3,9806 | 0,475 | -0,233 |
| 7 | Q9UQR0 SCML2_HUMAN  | R.SPQQTVPYVPLS#PK.L             | S511:      | 2 | 3,029  | 0,349 | -0,142 |
| 7 | Q3MIN7 RGL3_HUMAN   | R.VIEPPAASCPS#SPR.I             | S511:      | 2 | 2,8307 | 0,206 | -0,631 |
| 7 | Q96RR4 KKCC2_HUMAN  | R.SLS#APGNLLTK.K                | S511:      | 2 | 2,7125 | 0,198 | -0,207 |
| 7 | Q9UQR0 SCML2_HUMAN  | R.SPQQTVPYVPLS#PK.L             | S511:      | 3 | 2,6484 | 0,234 | -0,106 |
| 7 | O00567 NOL5A_HUMAN  | K.S#FSKEELM*S#SDLEETAGSTSIPK.R  | S511:S519: | 3 | 4,2236 | 0,362 | 0,276  |

|   |                     |                                    |            |   |        |       |        |
|---|---------------------|------------------------------------|------------|---|--------|-------|--------|
| 7 | Q09666 AHNK_HUMAN   | K.AEAPLPS#PK.L                     | S5110:     | 2 | 2,0642 | 0,238 | 0      |
| 7 | Q6P4Q7 CNNM4_HUMAN  | K.SEILDES#DM*YTDNR.S               | S512:      | 2 | 4,584  | 0,526 | -0,479 |
| 7 | P49790 NU153_HUMAN  | K.VQM*TS#PSSTGSPM*FK.F             | S516:      | 2 | 3,6249 | 0,423 | -0,431 |
| 7 | P49790 NU153_HUMAN  | K.VQM*TS#PSSTGSPMFK.F              | S516:      | 2 | 3,0456 | 0,437 | -0,436 |
| 7 | Q9NUQ3 TXLNG_HUMAN  | R.SAVQKPPS#TGSAPAIESVD.-           | S517:      | 2 | 3,6012 | 0,486 | -0,572 |
| 7 | Q99567 NUP88_HUMAN  | R.EDVEVAES#PLR.V                   | S517:      | 2 | 3,3218 | 0,428 | -0,184 |
| 7 | Q9ULM3 YETS2_HUMAN  | K.QPGQVIGATTPTGS#PTNK.I            | S519:      | 2 | 2,2026 | 0,396 | -0,318 |
| 7 | O00567 NOL5A_HUMAN  | K.SFSKEELM*#S#DLEETAGSTSIPK.R      | S519:S520: | 3 | 3,5477 | 0,345 | 0,76   |
| 7 | Q9UHR5 S30BP_HUMAN  | K.GGLVSDAYGEDDFS#R.L               | S52:       | 2 | 4,9168 | 0,654 | -0,219 |
| 7 | O94776 MTA2_HUMAN   | R.DIS#SSLNSLADSNAR.E               | S52:       | 2 | 4,1926 | 0,577 | -0,075 |
| 7 | Q9BVJ6 UT14A_HUMAN  | K.LLEAISS#LDGK.N                   | S52:       | 2 | 3,8357 | 0,509 | 0      |
| 7 | Q9Y2V2 CHSP1_HUMAN  | R.TFS#ATVR.A                       | S52:       | 2 | 2,1404 | 0,16  | 0      |
| 7 | P12956 KU70_HUMAN   | R.LGS#LVDEFK.E                     | S520:      | 2 | 3,2019 | 0,409 | -0,224 |
| 7 | Q13330 MTA1_HUMAN   | R.LPEASQS#PLVLK.Q                  | S522:      | 2 | 4,7482 | 0,344 | 0,269  |
| 7 | P49790 NU153_HUMAN  | K.VQM*TS#PSSTGS#PM*FK.F            | S522:      | 2 | 3,4678 | 0,398 | -0,288 |
| 7 | Q92609 TBCD5_HUMAN  | K.SES#M*PVQLNK.G                   | S522:      | 2 | 2,803  | 0,327 | 0      |
| 7 | Q9BTC0 DIDO1_HUMAN  | K.TAAPS#PSLLYK.S                   | S523:      | 2 | 2,6011 | 0,284 | 0      |
| 7 | O75164 JHD3A_HUMAN  | R.DSISS#DSETSEPLSCR.A              | S523:      | 2 | 2,3584 | 0,35  | -0,462 |
| 7 | Q16584 M3K11_HUMAN  | R.NVFEVGP GD S#PTFPR.F             | S524:      | 2 | 4,4038 | 0,478 | -0,215 |
| 7 | Q8IWC1 MA7D3_HUMAN  | K.NCPPS#PLPLISK.Q                  | S524:      | 2 | 3,1127 | 0,349 | -1,391 |
| 7 | Q12888 TP53B_HUMAN  | K.LM*LSTSEYSQS#PK.M                | S525:      | 2 | 3,7599 | 0,538 | -0,156 |
| 7 | Q96CV9 OPTN_HUMAN   | R.TS#DSDQQAYLVQR.G                 | S526:      | 2 | 2,3995 | 0,385 | -0,23  |
| 7 | Q8ND24 RN214_HUMAN  | K.NSPLLSVS#SQITIK.E                | S53:       | 2 | 3,806  | 0,517 | -0,078 |
| 7 | Q9H0W8 CS061_HUMAN  | R.DAS#EETSTSV M*QK.T               | S53:       | 2 | 3,7874 | 0,52  | -0,323 |
| 7 | O43818 U3IP2_HUMAN  | K.M*NEEISSDS#EESLAPR.K             | S53:       | 3 | 2,9778 | 0,276 | 0      |
| 7 | O60504 VINEX_HUMAN  | R.LCDDGPQLPTS#PR.L                 | S530:      | 2 | 3,8353 | 0,518 | -0,238 |
| 7 | Q2TB40 Q2TB40_HUMAN | R.TSS#TDEVLSLEEK.D                 | S530:      | 2 | 3,184  | 0,368 | 0,563  |
| 7 | P02545 LMNA_HUMAN   | R.TALINS#TGEEVAM*R.K               | S533:      | 2 | 3,8985 | 0,474 | -0,768 |
| 7 | Q86VM9 ZCH18_HUMAN  | K.LGVSVS#PSR.A                     | S534:      | 2 | 3,0344 | 0,388 | 0,062  |
| 7 | Q9UPZ3 HPS5_HUMAN   | R.SPS#PLVSLQAVK.E                  | S534:      | 2 | 2,7083 | 0,287 | -0,187 |
| 7 | Q3KQU3 MA7D1_HUMAN  | R.AS#NEKESAAPAS#PAPSPAPSPTPAPPQK.E | S534:S544: | 3 | 4,929  | 0,407 | -0,451 |
| 7 | Q8N2Y8 RUSC2_HUMAN  | R.LSEGPAAM*AGPGS#PPR.R             | S536:      | 2 | 4,8619 | 0,589 | -0,537 |
| 7 | P15311 EZRI_HUMAN   | R.QLLTLSS#ELSQR.D                  | S536:      | 2 | 3,0223 | 0,458 | -0,24  |



|   |                     |                               |            |   |        |       |        |
|---|---------------------|-------------------------------|------------|---|--------|-------|--------|
| 7 | Q01970 PLCB3_HUMAN  | K.S#LGDEGLNR.G                | S537:      | 2 | 2,6728 | 0,352 | -0,117 |
| 7 | Q96EB6 SIRT1_HUMAN  | K.ELAYLSELPTPLHVSEDS#SS#PER.T | S538:S540: | 3 | 4,0849 | 1     | -0,78  |
| 7 | Q13206 DDX10_HUMAN  | R.APS#LTNDEVEEFR.A            | S539:      | 2 | 3,8501 | 0,494 | -0,154 |
| 7 | Q9ULW0 TPX2_HUMAN   | R.TVEICPFS#FDSR.D             | S539:      | 2 | 2,7117 | 0,343 | -0,397 |
| 7 | O94776 MTA2_HUMAN   | R.DISSS#LNSLADSNAR.E          | S54:       | 2 | 4,1444 | 0,474 | 0,15   |
| 7 | Q9NQW6 ANLN_HUMAN   | R.QPLSEASNQQPLS#GGEEK.S       | S54:       | 2 | 3,4095 | 0,581 | -0,308 |
| 7 | Q6SZW1 SARM1_HUMAN  | R.EVS#PGAGTEVQDALER.A         | S54:       | 2 | 3,26   | 0,448 | -0,14  |
| 7 | Q9NQW6 ANLN_HUMAN   | R.QPLSEASNQQPLS#GGEEK.S       | S54:       | 3 | 2,9482 | 0,134 | -0,185 |
| 7 | O43306 ADCY6_HUMAN  | R.DAEPSS#PTPAGPPR.C           | S54:       | 2 | 2,0963 | 0,396 | -0,332 |
| 7 | Q5JTD0 TJAP1_HUMAN  | R.KDS#LTQAQEQGNLLN.-          | S545:      | 2 | 3,9418 | 0,422 | -0,491 |
| 7 | Q15022 SUZ12_HUMAN  | K.ASMSEFLES#EDGEVEQQR.T       | S546:      | 2 | 4,161  | 0,58  | -0,227 |
| 7 | Q15022 SUZ12_HUMAN  | K.ASMSEFLES#EDGEVEQQR.T       | S546:      | 3 | 3,9125 | 0,389 | -0,17  |
| 7 | Q15022 SUZ12_HUMAN  | K.ASM*SEFLES#EDGEVEQQR.T      | S546:      | 2 | 2,4722 | 0,448 | -0,338 |
| 7 | P52292 IMA2_HUMAN   | R.NVSS#FPDDATSPLQENR.N        | S55:       | 2 | 5,946  | 0,508 | -0,249 |
| 7 | P52292 IMA2_HUMAN   | R.NVSS#FPDDATSPLQENR.N        | S55:       | 3 | 2,771  | 0,13  | -0,093 |
| 7 | Q96GX5 MASTL_HUMAN  | R.DYLSSS#FLCSDDDR.A           | S552:      | 2 | 4,3227 | 0,55  | -0,416 |
| 7 | Q7Z4H7 FA29A_HUMAN  | R.AVLSDS#PQLSEGK.E            | S552:      | 2 | 4,0243 | 0,526 | -0,519 |
| 7 | Q9Y5T5 UBP16_HUMAN  | K.NINM*DNDLEVLTS#PTR.N        | S552:      | 2 | 4,0228 | 0,443 | -0,363 |
| 7 | Q9Y5T5 UBP16_HUMAN  | K.NINM*DNDLEVLTS#PTR.N        | S552:      | 3 | 3,4924 | 0,347 | 0,091  |
| 7 | P35222 CTNB1_HUMAN  | R.TS#MGGTQQQFVEGVR.M          | S552:      | 2 | 2,633  | 0,498 | 0,859  |
| 7 | Q09666 AHNK_HUMAN   | K.GPAFNM*AS#PESDFGINLK.G      | S5552:     | 2 | 3,9849 | 0,389 | -0,123 |
| 7 | P19532 TFE3_HUMAN   | R.AASDPLLSSVS#PAVSK.A         | S556:      | 2 | 4,1906 | 0,522 | -0,303 |
| 7 | Q9NPH3 IL1AP_HUMAN  | R.SSS#DEQGLSYSSLK.N           | S557:      | 2 | 3,4959 | 0,29  | -0,623 |
| 7 | O95453 PARN_HUMAN   | R.NNS#FTAPSTVGK.R             | S557:      | 2 | 2,1627 | 0,376 | -0,094 |
| 7 | Q8WWM7 ATX2L_HUMAN  | K.LQPSS#SPENSLDPFPPR.I        | S558:      | 2 | 2,1755 | 0,274 | -0,188 |
| 7 | Q8WWM7 ATX2L_HUMAN  | K.LQPSS#SPENSLDPFPPR.I        | S559:      | 3 | 3,6427 | 0,276 | -0,094 |
| 7 | Q6IAA8 CK059_HUMAN  | R.TDEQALLS#ILAK.T             | S56:       | 2 | 4,0519 | 0,426 | -0,997 |
| 7 | A9CQZ4 A9CQZ4_HUMAN | K.TIDFDSL#VGR.G               | S56:       | 2 | 4,0337 | 0,418 | 0,095  |
| 7 | Q6IAA8 CK059_HUMAN  | R.TDEQALLS#ILAK.T             | S56:       | 3 | 3,7655 | 0,173 | -0,436 |
| 7 | P08670 VIME_HUMAN   | R.SLYASS#PGGVYATR.S           | S56:       | 2 | 3,4821 | 0,488 | 0      |
| 7 | P28066 PSA5_HUMAN   | R.ITS#PLM*EPSSIEK.I           | S56:       | 2 | 3,1604 | 0,378 | -0,16  |
| 7 | P28066 PSA5_HUMAN   | R.ITS#PLMEPSSIEK.I            | S56:       | 2 | 2,4732 | 0,277 | 0,646  |
| 7 | Q9Y5S9 RBM8A_HUMAN  | R.EDYDS#VEQDGDPEGPQR.S        | S56:       | 2 | 2,4577 | 0,329 | -0,484 |

|   |                    |                                  |            |   |        |       |        |
|---|--------------------|----------------------------------|------------|---|--------|-------|--------|
| 7 | Q9NQW6 ANLN_HUMAN  | R.EIEM*SVDDDDINS#SK.V            | S561:      | 2 | 2,8371 | 0,4   | -0,681 |
| 7 | Q5JSH3 WDR44_HUMAN | R.VS#PSPSQESLSSSK.S              | S561:      | 2 | 2,0633 | 0,422 | -0,163 |
| 7 | Q9NQW6 ANLN_HUMAN  | R.EIEM*SVDDDDINSS#K.V            | S562:      | 2 | 3,6878 | 0,432 | -0,476 |
| 7 | O60504 VINEX_HUMAN | R.SPADPTDLGGQTS#PR.R             | S563:      | 2 | 4,1671 | 0,505 | -0,386 |
| 7 | Q9H0L4 CSTFT_HUMAN | K.QGGSQPSSFS#PGQSQVTPQDQEK.A     | S563:      | 3 | 4,0087 | 0,244 | -0,221 |
| 7 | Q9P2B4 CT2NL_HUMAN | K.VSSPLSPLS#PGIKS#PTIPR.A        | S563:S568: | 3 | 3,0007 | 0,236 | -0,175 |
| 7 | Q86SQ0 PHLB2_HUMAN | K.ASS#ESSYLSILPKT#PEGISEEQR.S    | S563:T574: | 3 | 3,0808 | 0,209 | -0,137 |
| 7 | P27824 CALX_HUMAN  | K.SDAEEDGGTVS#QEEEDR.K           | S564:      | 2 | 3,2175 | 0,504 | -0,568 |
| 7 | Q9P2N5 RBM27_HUMAN | R.AM*S#GLEGPLTK.K                | S566:      | 2 | 2,8123 | 0,349 | -0,61  |
| 7 | Q9Y2K2 QSK_HUMAN   | R.FS#DGAASIQAFK.A                | S568:      | 2 | 2,8886 | 0,534 | 0,185  |
| 7 | Q9BVJ6 UT14A_HUMAN | K.EQM*IDLQNLTTQS#PSVK.S          | S569:      | 2 | 3,4802 | 0,559 | -0,684 |
| 7 | Q96I24 FUBP3_HUMAN | R.QQVAFYQGTLGQAQHS#QEQ.-         | S569:      | 3 | 2,8293 | 0,081 | 0,477  |
| 7 | O00264 PGRC1_HUMAN | R.GDQPAASGDS#DDDEPPPLPR.L        | S57:       | 3 | 4,6862 | 0,363 | 0      |
| 7 | O00264 PGRC1_HUMAN | R.GDQPAASGDS#DDDEPPPLPR.L        | S57:       | 2 | 4,0154 | 0,445 | -0,577 |
| 7 | Q86XJ1 GA2L3_HUMAN | K.SALNLNQPVSVSVS#PVK.A           | S570:      | 2 | 3,6371 | 0,532 | 0,576  |
| 7 | P17812 PYRG1_HUMAN | R.S#GSSS#PDSEITELKFPSINHD.-      | S571:S575: | 3 | 4,3492 | 1     | -0,608 |
| 7 | Q52LW3 RHG29_HUMAN | R.TPS#SGTM*SSADDLDER.E           | S572:      | 2 | 3,759  | 0,533 | -0,553 |
| 7 | Q8N2Y8 RUSC2_HUMAN | R.VSVGDSSEQEFS#PIQEAQQDR.G       | S574:      | 3 | 4,6872 | 0,306 | 0,32   |
| 7 | P17812 PYRG1_HUMAN | R.SGSSS#PDSEITELK.F              | S575:      | 2 | 3,0103 | 0,38  | -0,08  |
| 7 | Q8IVT2 CS021_HUMAN | R.NALFPEVFS#PTPDENSQNSR.S        | S575:      | 3 | 2,6478 | 0,276 | -0,15  |
| 7 | Q09666 AHNK_HUMAN  | K.ASLGS#LEGEAEAEASSPK.G          | S5752:     | 2 | 4,3215 | 0,495 | -0,202 |
| 7 | Q09666 AHNK_HUMAN  | K.ASLGSLEGEAEAEASS#PK.G          | S5763:     | 2 | 4,3392 | 0,623 | -0,135 |
| 7 | Q8N3F8 MILK1_HUMAN | R.VEQM*PQAS#PGLAPR.T             | S578:      | 2 | 3,0907 | 0,329 | -0,309 |
| 7 | Q86W92 LIPB1_HUMAN | R.NSPFQIPPPS#PDSK.K              | S579:      | 2 | 2,7096 | 0,281 | -0,077 |
| 7 | O75526 HNRGT_HUMAN | R.GFAFVTFES#PADAK.A              | S58:       | 2 | 3,9501 | 0,437 | -0,156 |
| 7 | O43847 NRDC_HUMAN  | K.S#TCSCPDLPNGQDLGENSR.V         | S58:       | 3 | 3,5019 | 0,378 | 0,079  |
| 7 | P46087 NOL1_HUMAN  | R.LGS#VEAPK.T                    | S58:       | 2 | 3,0847 | 0,321 | -0,069 |
| 7 | Q96EU6 CF153_HUMAN | R.GTSNM*SFEELLELS#QVGTK.T        | S58:       | 3 | 2,9024 | 0,27  | 0,08   |
| 7 | Q9H0B6 KLC2_HUMAN  | R.AS#SLNFLNKS#VEEPTQPGGTGLSDSR.T | S581:S589: | 3 | 3,6422 | 0,286 | -0,257 |
| 7 | Q16513 PKN2_HUMAN  | R.ASS#LGEIDESSEL.R.V             | S583:      | 2 | 3,5885 | 0,456 | 0,31   |
| 7 | Q8IY81 RRMJ3_HUMAN | K.TEIM*S#PLYQDEAPK.G             | S584:      | 2 | 4,4218 | 0,519 | -0,284 |
| 7 | P46013 KI67_HUMAN  | K.AQSLVISPPAPS#PR.K              | S584:      | 2 | 3,8433 | 0,399 | 0,488  |
| 7 | Q9NVU7 SDA1_HUMAN  | K.YIEIDS#DEEPR.G                 | S585:      | 2 | 4,2714 | 0,506 | 0,084  |

|   |                     |                                  |            |   |        |       |        |
|---|---------------------|----------------------------------|------------|---|--------|-------|--------|
| 7 | Q15021 CND1_HUMAN   | R.ES#TGNM*VTGQTVCK.N             | S585:      | 2 | 2,6763 | 0,382 | -0,304 |
| 7 | Q8TB72 PUM2_HUMAN   | R.ES#LSTSSDLYK.R                 | S587:      | 2 | 2,1516 | 0,333 | -0,093 |
| 7 | Q96LD4 TRI47_HUMAN  | R.GGIPAS#PIDPFQSR.L              | S588:      | 2 | 3,3917 | 0,468 | -0,16  |
| 7 | O60343 TBCD4_HUMAN  | R.LGS#VDSFER.S                   | S588:      | 2 | 3,1471 | 0,269 | -0,224 |
| 7 | Q9Y2X7 GIT1_HUMAN   | R.HGS#GADS#DYENTQSGDPLLGLEGK.R   | S592:S596: | 3 | 5,0131 | 1     | 0,07   |
| 7 | Q8WWM7 ATX2L_HUMAN  | K.EVDGLLTSEPM*GS#PVSSK.T         | S594:      | 3 | 3,9208 | 0,473 | 0,379  |
| 7 | Q8WWM7 ATX2L_HUMAN  | K.EVDGLLTSEPM*GS#PVSSK.T         | S594:      | 2 | 2,236  | 0,43  | 0,506  |
| 7 | Q96T23 RSF1_HUMAN   | R.LS#PIPEEVPK.S                  | S594:      | 2 | 2,0641 | 0,149 | 0      |
| 7 | A4LAA3 A4LAA3_HUMAN | K.LTPVS#LSNS#PIKGADCQEVQDK.D     | S594:S598: | 3 | 3,3636 | 0,112 | 0,485  |
| 7 | Q7RTP8 Q7RTP8_HUMAN | R.ASS#LNVLNVGGK.A                | S596:      | 2 | 3,6137 | 0,487 | 0      |
| 7 | Q02952 AKA12_HUMAN  | K.GLAEVQQDGEAEEGATS#DGEK.K       | S598:      | 3 | 5,1202 | 0,36  | 0      |
| 7 | Q8IY81 RRMJ3_HUMAN  | K.GTEASS#GTEAATGLEGEEK.D         | S599:      | 2 | 3,3588 | 0,591 | -0,513 |
| 7 | Q15742 NAB2_HUMAN   | R.APS#PTAEQPPGGGDSAR.R           | S6:        | 2 | 4,1226 | 0,603 | -0,656 |
| 7 | Q96E15 TCAL4_HUMAN  | K.LYS#ENEGM*ASNQ GK.M            | S6:        | 2 | 3,3984 | 0,487 | -0,451 |
| 7 | O00505 IMA3_HUMAN   | R.NVPQEESLEDS#DVDADFK.A          | S60:       | 3 | 4,1737 | 0,467 | 0,086  |
| 7 | O00505 IMA3_HUMAN   | R.NVPQEESLEDS#DVDADFK.A          | S60:       | 2 | 3,6705 | 0,551 | -0,461 |
| 7 | Q8NG31 CASC5_HUMAN  | R.VS#FADTIK.V                    | S60:       | 2 | 2,1531 | 0,286 | -0,063 |
| 7 | Q99543 DNJC2_HUMAN  | K.KELS#EES#EDEELQLEEFPM*LK.T     | S60:S63:   | 3 | 3,8394 | 0,209 | -0,738 |
| 7 | Q9C0C2 TB182_HUMAN  | R.YESQEPLAQES#PLPLATR.E          | S601:      | 3 | 4,4083 | 0,46  | 0,338  |
| 7 | P51116 FXR2_HUMAN   | R.TDGS#IS#GDRQPVTVADYISR.A       | S601:S603: | 3 | 5,4261 | 0,424 | 0,08   |
| 7 | Q96JM3 ZN828_HUMAN  | K.CDILVQEELLAS#PK.K              | S603:      | 2 | 4,5069 | 0,514 | -0,432 |
| 7 | P02545 LMNA_HUMAN   | K.ASASGS#GAQVGGPISSGSSASSVTVTR.S | S603:      | 3 | 2,8217 | 0,115 | 0,299  |
| 7 | Q8TD16 BICD2_HUMAN  | R.ADGGTGDS#SPSPGSSLPSPSDPR.R     | S605:      | 3 | 3,7334 | 0,159 | -0,394 |
| 7 | Q7Z417 NUFP2_HUMAN  | K.ADTS#SQGALVFLSK.D              | S607:      | 2 | 3,07   | 0,319 | -0,325 |
| 7 | Q96JM7 LMBL3_HUMAN  | R.LSGEM*PPAS#PSFPR.N             | S608:      | 2 | 3,3692 | 0,261 | -0,078 |
| 7 | Q14157 UBP2L_HUMAN  | R.YPSSISS#SPQK.D                 | S608:      | 2 | 2,064  | 0,346 | -0,387 |
| 7 | Q8N1G1 REXO1_HUMAN  | K.EVDFDS#DPMEECLR.I              | S610:      | 2 | 4,4199 | 0,443 | 0      |
| 7 | Q8N1G1 REXO1_HUMAN  | K.EVDFDS#DPM*EECLR.I             | S610:      | 2 | 4,0566 | 0,453 | 0,465  |
| 7 | Q02952 AKA12_HUMAN  | R.EGVTPWAS#FK.K                  | S612:      | 2 | 2,2241 | 0,44  | -0,812 |
| 7 | Q5VT52 K0460_HUMAN  | K.ASIGQS#PGLPSTTFK.L             | S614:      | 2 | 4,1319 | 0,454 | 0,466  |
| 7 | P02545 LMNA_HUMAN   | K.ASASGSGAQVGGPISSGS#SASSVTVTR.S | S615:      | 3 | 3,3555 | 0,355 | -0,15  |
| 7 | Q8IYB3 SRRM1_HUMAN  | R.TAS#PPPPPK.R                   | S616:      | 2 | 2,171  | 0,372 | -0,314 |
| 7 | Q9Y4W2 LAS1L_HUMAN  | R.M*EVGPFSTGQES#PTAENAR.L        | S617:      | 3 | 3,6947 | 0,504 | 0,087  |

|   |                    |                                |       |   |        |       |        |
|---|--------------------|--------------------------------|-------|---|--------|-------|--------|
| 7 | Q5H9R7 SAPS3_HUMAN | R.IQQFDDGGS#DEEDIWEEK.H        | S617: | 3 | 3,6445 | 0,159 | 0,247  |
| 7 | P49756 RBM25_HUMAN | K.LGASNS#PGQPNSVK.R            | S618: | 2 | 3,6937 | 0,217 | -0,255 |
| 7 | P19338 NUCL_HUMAN  | K.GFGFVDFNS#EEDAK.A            | S619: | 2 | 4,5298 | 0,457 | -0,149 |
| 7 | P49959 MRE11_HUMAN | R.NM*S#IIDAFK.S                | S619: | 2 | 3,1954 | 0,427 | 0,107  |
| 7 | P52292 IMA2_HUMAN  | R.NVSSFPDDATS#PLQENR.N         | S62:  | 2 | 4,5023 | 0,428 | 0,436  |
| 7 | P52292 IMA2_HUMAN  | R.NVSSFPDDATS#PLQENR.N         | S62:  | 3 | 4,4941 | 0,412 | 0,187  |
| 7 | P56211 ARP19_HUMAN | K.YFDS#GDYNM*AK.A              | S62:  | 2 | 4,0694 | 0,384 | -0,607 |
| 7 | Q03188 CENPC_HUMAN | R.CSLSEPLES#DEADLAK.K          | S620: | 2 | 3,1463 | 0,359 | 0,662  |
| 7 | Q9Y490 TLN1_HUMAN  | K.GLAGAVS#ELLR.S               | S620: | 2 | 3,1166 | 0,162 | 0,419  |
| 7 | Q5T4S7 UBR4_HUMAN  | K.AAPPPPPPPPLESS#PR.V          | S620: | 3 | 2,7361 | 0,215 | 0,103  |
| 7 | Q8N3F8 MILK1_HUMAN | R.SPVSPGSSS#PQLQVK.S           | S621: | 2 | 4,0495 | 0,528 | -0,146 |
| 7 | P52948 NUP98_HUMAN | R.DSENLAS#PSEYPENGER.F         | S623: | 2 | 5,6079 | 0,589 | -0,495 |
| 7 | P52948 NUP98_HUMAN | R.DSENLASPS#EYPENGER.F         | S625: | 3 | 2,6648 | 0,201 | -0,185 |
| 7 | Q6PJG9 LRFN4_HUMAN | R.GVGGGS#AERLEESVV.-           | S626: | 2 | 2,048  | 0,226 | 0      |
| 7 | P02545 LMNA_HUMAN  | R.S#VGGSGGSGFDNLVTR.S          | S628: | 2 | 5,0476 | 0,602 | 0,741  |
| 7 | Q13442 HAP28_HUMAN | K.SLDSDES#EDEEDDYQQK.R         | S63:  | 2 | 5,2287 | 0,448 | -0,462 |
| 7 | Q96AE4 FUBP1_HUMAN | R.QQAAYYAQTS#PQGM*PQHPPAPQGG.- | S630: | 3 | 2,7364 | 0,257 | -0,478 |
| 7 | P49750 YLPM1_HUMAN | R.GPASQFYITPSTSL#PR.Q          | S634: | 2 | 4,5774 | 0,56  | -0,581 |
| 7 | P49757 NUMB_HUMAN  | R.TNPS#PTNPFSSDLQK.T           | S634: | 2 | 2,3624 | 0,224 | 0,214  |
| 7 | Q86WJ1 CHD1L_HUMAN | R.VLS#PEELED.R.Q               | S636: | 2 | 2,7634 | 0,397 | 0,193  |
| 7 | Q9NYL2 MLTK_HUMAN  | R.SSS#PTQYGLTK.N               | S637: | 2 | 2,3387 | 0,397 | -0,195 |
| 7 | Q9NW82 WDR70_HUMAN | K.TM*FAQVES#DDEEAK.N           | S638: | 2 | 4,821  | 0,551 | -0,719 |
| 7 | Q9H3Q1 BORG4_HUMAN | K.AGEPDGES#LDEQPSSSSSK.R       | S64:  | 2 | 3,7556 | 0,414 | -0,491 |
| 7 | P35221 CTNA1_HUMAN | R.TPEELDDS#DFETEDFDVR.S        | S641: | 3 | 2,6941 | 0,115 | 0      |
| 7 | Q6AI08 HEAT6_HUMAN | K.APAGSLEETS#VSS#PK.G          | S643: | 2 | 4,0809 | 0,449 | -0,149 |
| 7 | Q8NI35 INADL_HUMAN | R.LFDDEAS#VDEPR.R              | S645: | 2 | 3,9575 | 0,335 | 0      |
| 7 | Q7Z460 CLAP1_HUMAN | R.QS#SGSATNVASTPDNR.G          | S646: | 2 | 3,391  | 0,574 | -0,438 |
| 7 | Q9ULT0 TTC7A_HUMAN | K.DGS#FGEGLTM*K.K              | S647: | 2 | 2,6469 | 0,548 | 0      |
| 7 | P33778 H2B1B_HUMAN | K.AM*GIM*NS#FVNDIFER.I         | S65:  | 2 | 5,0938 | 0,536 | -0,329 |
| 7 | Q15154 PCM1_HUMAN  | R.VTNDIS#PESSPGVGR.R           | S65:  | 2 | 3,8801 | 0,46  | -0,535 |
| 7 | Q02952 AKA12_HUMAN | K.SATLSSTESTAS#EM*QEEM*K.G     | S651: | 2 | 2,4188 | 0,474 | -0,678 |
| 7 | Q7Z417 NUFP2_HUMAN | R.NDS#WGSFDLR.A                | S652: | 2 | 3,3336 | 0,473 | 0      |
| 7 | Q96RL1 UIMC1_HUMAN | R.VPS#PGM*EEAGCSR.E            | S653: | 2 | 2,7369 | 0,261 | -0,249 |

|   |                     |                                  |            |   |        |       |        |
|---|---------------------|----------------------------------|------------|---|--------|-------|--------|
| 7 | P49848 TAF6_HUMAN   | K.QEAGDS#PPPAPGTPK.A             | S653:      | 2 | 2,4964 | 0,251 | -0,319 |
| 7 | Q4V328 GRAP1_HUMAN  | R.SGLEELVLSEM*NS#PSR.T           | S655:      | 2 | 3,7809 | 0,451 | -0,463 |
| 7 | Q4V328 GRAP1_HUMAN  | R.SGLEELVLSEM*NS#PSR.T           | S655:      | 3 | 2,8777 | 0,151 | -0,496 |
| 7 | P35658 NU214_HUMAN  | R.SAQGSSS#PVPSM*VQK.S            | S657:      | 2 | 2,5515 | 0,298 | -0,385 |
| 7 | Q66K74 MAP1S_HUMAN  | R.LSLS#PLR.G                     | S657:      | 2 | 2,0865 | 0,129 | -0,07  |
| 7 | Q16825 PTN21_HUMAN  | R.TLS#ASAAEVAPR.A                | S658:      | 2 | 3,2994 | 0,421 | -0,097 |
| 7 | Q9NYF8 BCLF1_HUMAN  | R.IDIS#PSTLR.K                   | S658:      | 2 | 2,507  | 0,34  | 0,113  |
| 7 | Q9H307 PININ_HUMAN  | R.GFS#DSGGGPPAK.Q                | S66:       | 2 | 3,6647 | 0,415 | -0,316 |
| 7 | O60841 IF2P_HUMAN   | K.ELEELS#LEAQGIK.A               | S66:       | 2 | 2,1004 | 0,18  | 0      |
| 7 | P42166 LAP2A_HUMAN  | K.GPPDFS#S#DEEREPTVVLGSGAAAAGR.S | S66:S67:   | 3 | 6,3535 | 0,503 | -0,335 |
| 7 | Q5JR12 PPM1J_HUMAN  | R.AS#FSRPTFLQLS#PGGLR.R          | S66:S76:   | 3 | 3,1301 | 0,206 | -0,459 |
| 7 | P42166 LAP2A_HUMAN  | K.GPPDFS#SDEEREPT#PVLGSGAAAAGR.S | S66:T74:   | 3 | 5,4522 | 0,497 | 0,402  |
| 7 | Q86YC2 PALB2_HUMAN  | K.EGSCIFPEELS#PK.R               | S660:      | 2 | 2,1912 | 0,399 | -0,31  |
| 7 | Q15398 DLG7_HUMAN   | R.NEM*GIPQQTTS#PENAGPQNTK.S      | S662:      | 3 | 3,5557 | 0,489 | -0,313 |
| 7 | Q92625 ANS1A_HUMAN  | K.SPS#FASEWDEIEK.I               | S663:      | 2 | 3,2866 | 0,452 | -0,152 |
| 7 | O75153 EIF3X_HUMAN  | K.SEDPPGQEAGS#EEEGSSASGLAK.V     | S664:      | 3 | 5,0128 | 0,485 | -0,318 |
| 7 | Q6P4Q7 CNNM4_HUMAN  | R.SAS#LSYPDR.T                   | S664:      | 2 | 2,7558 | 0,234 | 0      |
| 7 | Q5VT52 K0460_HUMAN  | K.LESESTS#PSLEM*K.I              | S665:      | 2 | 3,841  | 0,499 | -0,398 |
| 7 | P42166 LAP2A_HUMAN  | K.GPPDFS#DEEREPT#PVLGSGAAAAGR.S  | S67:T74:   | 3 | 5,2985 | 0,484 | 0,402  |
| 7 | Q969R5 LMBL2_HUMAN  | R.EAGELPTS#PLHLLSPGT#PR.S        | S67:T76:   | 2 | 2,3293 | 0,288 | -0,458 |
| 7 | Q9C0C2 TB182_HUMAN  | R.AS#PEPPGPSSR.W                 | S672:      | 2 | 2,0019 | 0,221 | -0,266 |
| 7 | Q05209 PTN12_HUMAN  | K.DVDVSEDS#PPPLPER.T             | S673:      | 3 | 4,3687 | 0,413 | 0,211  |
| 7 | Q05209 PTN12_HUMAN  | K.DVDVSEDS#PPPLPER.T             | S673:      | 2 | 3,9538 | 0,426 | -0,141 |
| 7 | Q8TC07 TBC15_HUMAN  | R.NDS#PTQIPVSSDVCR.L             | S675:      | 2 | 3,1553 | 0,44  | -0,278 |
| 7 | Q9H0D6 XRN2_HUMAN   | R.NS#LGGDVLVFGK.H                | S678:      | 2 | 3,0459 | 0,44  | -0,474 |
| 7 | Q9Y2W1 TR150_HUMAN  | R.IDIS#PSTFR.K                   | S682:      | 2 | 2,4065 | 0,142 | 0,219  |
| 7 | Q96D71 REPS1_HUMAN  | K.TGVLAASQPS#IPR.S               | S684:      | 2 | 2,2642 | 0,27  | -0,441 |
| 7 | Q16659 MK06_HUMAN   | K.QLESIGIQFHS#PVGS#PLK.S         | S684:S688: | 3 | 2,7633 | 0,198 | -0,083 |
| 7 | O00512 BCL9_HUMAN   | R.IPVEGPLS#PSR.G                 | S687:      | 2 | 3,016  | 0,273 | -0,198 |
| 7 | Q9H2J7 S6A15_HUMAN  | K.IPSEM*PS#PNFGK.N               | S687:      | 2 | 2,3521 | 0,225 | -0,349 |
| 7 | Q9H1A4 APC1_HUMAN   | R.NDFEGLS#PVIAPK.K               | S688:      | 2 | 5,622  | 0,521 | -0,646 |
| 7 | Q9H1A4 APC1_HUMAN   | R.NDFEGLS#PVIAPK.K               | S688:      | 3 | 4,5824 | 0,406 | -0,108 |
| 7 | Q63HJ5 Q63HJ5_HUMAN | K.LANDFPLDLS#PVK.K               | S688:      | 2 | 2,7672 | 0,415 | -0,162 |

|   |                    |                                 |            |   |        |       |        |
|---|--------------------|---------------------------------|------------|---|--------|-------|--------|
| 7 | Q9UER7 DAXX_HUMAN  | R.VDS#PSHGLVTSSLCIPS#PAR.L      | S688:S702: | 3 | 3,4982 | 0,282 | -0,082 |
| 7 | Q68DH5 LMBD2_HUMAN | R.YLSM*SRS#DIFNDV.-             | S689:      | 2 | 3,2793 | 0,282 | -0,371 |
| 7 | Q8IXQ3 CI040_HUMAN | K.IDAGTM*AEPSAS#PSK.R           | S69:       | 2 | 3,2208 | 0,453 | 0,078  |
| 7 | Q9C0C2 TB182_HUMAN | R.WLDDLLAS#PPPSGGGAR.R          | S691:      | 2 | 5,1102 | 0,483 | -0,546 |
| 7 | Q9C0B5 ZDHC5_HUMAN | K.SLGSASPGPGQPPLSS#PTR.G        | S694:      | 2 | 3,8921 | 0,514 | -0,521 |
| 7 | O14497 ARI1A_HUMAN | R.GPS#PSPVGPSPASVAQSR.S         | S696:      | 2 | 2,9266 | 0,424 | -0,367 |
| 7 | Q14978 NOLC1_HUMAN | R.GGSISVQVNSIKFDS#E.-           | S698:      | 2 | 4,2352 | 0,549 | -0,279 |
| 7 | O75382 TRIM3_HUMAN | R.EDS#PGPEVQPM*DK.Q             | S7:        | 2 | 2,2848 | 0,197 | -0,4   |
| 7 | P10809 CH60_HUMAN  | R.TVIIQSWGS#PK.V                | S70:       | 2 | 3,5023 | 0,491 | -0,257 |
| 7 | Q9BU23 LMF2_HUMAN  | K.DSGAASEQATAAPNPCSSSS#R.T      | S700:      | 3 | 2,9527 | 0,157 | -0,258 |
| 7 | O43719 HTSF1_HUMAN | K.LFEDDDDS#NEKLFDEEDSS#EK.L     | S702:S714: | 3 | 7,1278 | 0,475 | -0,068 |
| 7 | Q9C0B5 ZDHC5_HUMAN | K.KVS#GVGGTTYEISV.-             | S704:      | 2 | 3,0464 | 0,541 | 0,33   |
| 7 | O60271 JIP4_HUMAN  | R.DGGS#VVGASVFYK.D              | S705:      | 2 | 3,2415 | 0,424 | -0,268 |
| 7 | O15231 ZN185_HUMAN | K.STGS#PTQETQAPFIAK.R           | S71:       | 2 | 3,9723 | 0,502 | -0,21  |
| 7 | Q7Z478 DHX29_HUMAN | K.IYSFNS#TNDSSGPANLDK.S         | S71:       | 2 | 2,9614 | 0,454 | 0,728  |
| 7 | Q13439 GOGA4_HUMAN | R.VPS#VESLFR.S                  | S71:       | 2 | 2,7332 | 0,334 | -0,329 |
| 7 | Q96KQ4 ASPP1_HUMAN | R.SS#ITEPEGPGGPNIQK.L           | S710:      | 2 | 3,7867 | 0,348 | -0,433 |
| 7 | P25205 MCM3_HUMAN  | K.DGDSYDPYDFS#DTEEEMPQVHT#PK.T  | S711:T722: | 3 | 4,0697 | 0,417 | -0,371 |
| 7 | P25205 MCM3_HUMAN  | K.DGDSYDPYDFS#DTEEEM*PQVHT#PK.T | S711:T722: | 3 | 3,5243 | 0,257 | -0,43  |
| 7 | Q12873 CHD3_HUMAN  | K.ELQGDGPPS#SPTNDPTVK.Y         | S712:      | 2 | 2,2617 | 0,118 | -0,572 |
| 7 | O43719 HTSF1_HUMAN | K.LFDEEEDS#S#EKLFDDSDER.G       | S713:S714: | 3 | 5,2518 | 0,401 | -0,148 |
| 7 | Q32MZ4 LRRF1_HUMAN | K.IDGATQSS#PAEPK.S              | S714:      | 2 | 2,718  | 0,149 | -0,353 |
| 7 | P51812 KS6A3_HUMAN | R.NQS#PVLEPVGR.S                | S715:      | 2 | 2,4658 | 0,436 | -0,287 |
| 7 | Q9Y2D5 AKAP2_HUMAN | R.TLS#M*IEEEIR.A                | S720:      | 2 | 3,1867 | 0,453 | 0      |
| 7 | Q6ZV73 FGD6_HUMAN  | R.AES#LDDQM*LSR.E               | S721:      | 2 | 3,6999 | 0,477 | -0,269 |
| 7 | Q9HAW4 CLSPN_HUMAN | K.SLSSDS#TLLLFK.D               | S723:      | 2 | 3,369  | 0,308 | -0,526 |
| 7 | O60271 JIP4_HUMAN  | R.S#ASQSS#LDKLDQELK.E           | S728:S733: | 2 | 3,9536 | 0,34  | -0,337 |
| 7 | P05412 JUN_HUMAN   | K.LAS#PELER.L                   | S73:       | 2 | 3,2009 | 0,161 | -0,061 |
| 7 | Q99575 POP1_HUMAN  | R.VQAYEEPSVASS#PNGK.E           | S730:      | 3 | 4,1292 | 0,394 | -0,105 |
| 7 | Q13164 MK07_HUMAN  | K.SQVEDPLPPVFS#GTPK.G           | S730:      | 2 | 3,226  | 0,345 | 0      |
| 7 | Q14684 RRP1B_HUMAN | K.TPTSS#PASSPLVAK.K             | S732:      | 2 | 3,735  | 0,422 | 0      |
| 7 | P46087 NOL1_HUMAN  | K.GTDTQTPAVLS#PSK.T             | S732:      | 2 | 3,2239 | 0,366 | -0,247 |
| 7 | Q6ZSZ5 ARHGI_HUMAN | R.AETFAGYDCTNS#PTK.N            | S733:      | 2 | 3,7908 | 0,498 | -1,401 |

|   |                    |                                  |            |   |        |       |        |
|---|--------------------|----------------------------------|------------|---|--------|-------|--------|
| 7 | Q96RV3 PCX1_HUMAN  | K.EGEVLDELS#LLGR.A               | S735:      | 2 | 3,8086 | 0,389 | -0,323 |
| 7 | Q9BQ52 RNZ2_HUMAN  | K.VPLFS#PNFSEK.V                 | S736:      | 2 | 4,208  | 0,519 | -0,454 |
| 7 | Q9ULW0 TPX2_HUMAN  | K.SSDQPLTPVVS#PK.F               | S738:      | 2 | 3,4033 | 0,357 | -0,085 |
| 7 | P28290 SSFA2_HUMAN | R.SQS#LPTTLLSPVR.V               | S739:      | 2 | 3,7582 | 0,394 | -0,082 |
| 7 | Q12789 TF3C1_HUMAN | K.TSQPPVPQGEAEEDS#QGK.E          | S739:      | 2 | 2,5157 | 0,39  | -0,559 |
| 7 | P27707 DCK_HUMAN   | R.WCNVQSTQDEFEELTM*S#QK.N        | S74:       | 3 | 4,8048 | 0,508 | -0,074 |
| 7 | Q96C19 EFHD2_HUMAN | R.ADLNQGIGEPQS#PSR.R             | S74:       | 2 | 2,4188 | 0,308 | -0,222 |
| 7 | Q9Y6X9 MORC2_HUMAN | R.SVAVS#DEEEVEEEAER.R            | S743:      | 2 | 4,992  | 0,611 | 0,453  |
| 7 | Q9Y6X9 MORC2_HUMAN | R.SVAVS#DEEEVEEEAER.R            | S743:      | 3 | 4,1747 | 0,318 | 0,485  |
| 7 | Q9ULC8 ZDHC8_HUMAN | R.LGPATGPPGPSAS#PTR.H            | S743:      | 2 | 2,1123 | 0,302 | -0,316 |
| 7 | P12931 SRC_HUMAN   | K.LFGGFNSSDTVTS#PQR.A            | S75:       | 2 | 4,3079 | 0,578 | -0,612 |
| 7 | Q02952 AKA12_HUMAN | K.NGQLSTINGVAEQDELS#LQEGDLNGQK.G | S75:       | 3 | 4,2211 | 0,431 | -0,249 |
| 7 | Q99569 PKP4_HUMAN  | R.LGAES#PSIASTSSTEK.S            | S75:       | 2 | 3,6824 | 0,433 | 0      |
| 7 | Q5VZ89 DEN4C_HUMAN | K.VPS#GIFDVNSR.K                 | S753:      | 2 | 2,4728 | 0,266 | 0      |
| 7 | Q08499 PDE4D_HUMAN | K.DSGS#QVEEDTSCSDSK.T            | S754:      | 2 | 2,8736 | 0,273 | -0,202 |
| 7 | Q14C86 GAPD1_HUMAN | R.EVS#SRPST#PGLSVVSGISATSEDPNK.I | S757:T762: | 3 | 2,8403 | 1     | -0,255 |
| 7 | O75152 ZC11A_HUMAN | R.LS#SAS#TGKPLSVEDDFEK.L         | S758:S761: | 3 | 3,5914 | 0,47  | 0,338  |
| 7 | Q66K74 MAP1S_HUMAN | K.AVPMAPAPAS#PGSSNDSSAR.S        | S759:      | 2 | 4,081  | 0,513 | -0,063 |
| 7 | Q66K74 MAP1S_HUMAN | K.AVPM*APAPAS#PGSSNDSSAR.S       | S759:      | 3 | 3,8011 | 0,479 | -0,093 |
| 7 | Q66K74 MAP1S_HUMAN | K.AVPM*APAPAS#PGSSNDSSAR.S       | S759:      | 2 | 3,0408 | 0,432 | -0,683 |
| 7 | P18858 DNL1_HUMAN  | R.VLGSEGEEDS#PAK.G               | S76:       | 2 | 4,7952 | 0,573 | -0,597 |
| 7 | Q96MH2 HEXI2_HUMAN | R.TQS#PGGCSAEAVLAR.K             | S76:       | 2 | 3,8766 | 0,441 | -0,693 |
| 7 | Q17R98 ZN827_HUMAN | R.TTTS#PFFSEDTR.Q                | S760:      | 2 | 3,2987 | 0,512 | -0,227 |
| 7 | Q03188 CENPC_HUMAN | R.IDYQGRPS#GGFVISGVLS#PDTISSK.R  | S763:S773: | 3 | 5,1802 | 1     | -0,467 |
| 7 | Q9NXC5 MIO_HUMAN   | R.GFSQYGVSGS#PTK.S               | S766:      | 2 | 3,3467 | 0,515 | -0,262 |
| 7 | Q12888 TP53B_HUMAN | R.VDVS#CEPLEGVEK.C               | S771:      | 2 | 4,15   | 0,43  | 0,238  |
| 7 | O14497 ARI1A_HUMAN | R.NPQM*PQYSSPQPGSALS#PR.Q        | S772:      | 3 | 3,8693 | 0,286 | -0,342 |
| 7 | Q2NKX8 ERC6L_HUMAN | K.M*AS#VVIDLPK.E                 | S774:      | 2 | 3,9136 | 0,425 | 0,19   |
| 7 | P17858 K6PL_HUMAN  | R.TLS#M*DKGF.-                   | S775:      | 2 | 2,5396 | 0,4   | -0,184 |
| 7 | Q8N4C8 MINK1_HUMAN | K.LDSS#PVLSPGNK.A                | S778:      | 2 | 3,7475 | 0,503 | -0,189 |
| 7 | P45974 UBP5_HUMAN  | R.SAADS#ISESVVPGPK.V             | S783:      | 2 | 4,6199 | 0,55  | 0      |
| 7 | Q96QK1 VPS35_HUMAN | R.RES#PESEGPYIEGLIL.-            | S783:      | 2 | 2,8866 | 0,429 | -0,196 |
| 7 | Q9Y6N8 CAD10_HUMAN | K.LAEM*YGGGES#DKDS.-             | S784:      | 2 | 3,5529 | 0,518 | -0,314 |

|   |                    |                                  |            |   |        |       |        |
|---|--------------------|----------------------------------|------------|---|--------|-------|--------|
| 7 | Q9Y6N8 CAD10_HUMAN | K.LAEMYGGGES#DKDS.-              | S784:      | 2 | 2,1165 | 0,163 | -0,476 |
| 7 | P45974 UBP5_HUMAN  | R.SAADSI#ESVPGPK.V               | S785:      | 2 | 3,2806 | 0,504 | 0      |
| 7 | P46087 NOL1_HUMAN  | K.GPQPPTVS#PIR.S                 | S786:      | 2 | 2,2679 | 0,424 | 0      |
| 7 | P54259 ATN1_HUMAN  | R.SEEISES#ESEETNAPK.K            | S79:       | 2 | 4,4134 | 0,512 | -0,793 |
| 7 | P53814 SMTN_HUMAN  | R.STS#FGVNPANSIK.Q               | S792:      | 2 | 2,4581 | 0,301 | 0,435  |
| 7 | Q13029 PRDM2_HUMAN | R.ETVS#PPCFDEYK.M                | S796:      | 2 | 2,2587 | 0,148 | -0,393 |
| 7 | Q86V81 THOC4_HUMAN | K.M*DM*S#LDDIIK.L                | S8:        | 2 | 3,6752 | 0,316 | -0,283 |
| 7 | Q9UKY7 CDV3_HUMAN  | R.S#LDNFFAK.R                    | S8:        | 2 | 3,0677 | 0,313 | -0,239 |
| 7 | P63027 VAMP2_HUMAN | R.ADALQAGASQFETS#AAK.L           | S80:       | 2 | 4,8479 | 0,39  | -0,07  |
| 7 | P60174 TPIS_HUMAN  | K.VTNGAFTGEIS#PGM*IK.D           | S80:       | 2 | 4,2958 | 0,527 | -0,284 |
| 7 | P60174 TPIS_HUMAN  | K.VTNGAFTGEIS#PGMIK.D            | S80:       | 2 | 4,1644 | 0,501 | 0,574  |
| 7 | Q0ZGT2 NEXN_HUMAN  | K.EM*LAS#DDEEDVSSK.V             | S80:       | 2 | 3,3962 | 0,476 | -0,296 |
| 7 | Q15637 SF01_HUMAN  | R.TGDLGIPPNPEDRS#PS#PEPIYNSEGK.R | S80:S82:   | 3 | 3,6165 | 0,338 | -0,375 |
| 7 | O95239 KIF4A_HUMAN | R.TFS#LTEVR.G                    | S801:      | 2 | 2,5079 | 0,259 | 0      |
| 7 | Q641Q2 FA21A_HUMAN | K.TVLS#LFDEEDK.M                 | S802:      | 2 | 3,368  | 0,416 | -0,568 |
| 7 | P28290 SSFA2_HUMAN | K.STIFIS#PSSVK.K                 | S803:      | 2 | 2,8657 | 0,387 | 0,196  |
| 7 | P06400 RB_HUMAN    | R.IPGGNIYIS#PLKS#PYK.I           | S807:S811: | 3 | 2,7355 | 0,229 | -0,096 |
| 7 | P06400 RB_HUMAN    | R.IPGGNIYIS#PLKS#PYK.I           | S807:S811: | 2 | 2,1579 | 0,367 | -0,256 |
| 7 | P06400 RB_HUMAN    | R.IPGGNIYIS#PLKSPY#K.I           | S807:Y813: | 2 | 2,0999 | 0,387 | -0,256 |
| 7 | Q15003 CND2_HUMAN  | R.VFDLQFSTDS#PR.L                | S81:       | 2 | 3,7858 | 0,584 | -0,082 |
| 7 | O95759 TBCD8_HUMAN | R.ASAPS#PEDSVFADTGK.T            | S811:      | 2 | 3,0789 | 0,456 | 0,441  |
| 7 | P42566 EP15_HUMAN  | K.LNDPFQFPNGDS#PK.E              | S814:      | 2 | 4,5446 | 0,308 | -0,348 |
| 7 | O15534 PER1_HUMAN  | R.GLDSSSTAPS#ALGER.G             | S815:      | 2 | 3,5836 | 0,503 | 0,16   |
| 7 | Q96QE3 ATAD5_HUMAN | K.AADPVPSFDESS#QDTSEK.S          | S817:      | 2 | 3,6406 | 0,398 | -0,368 |
| 7 | P42684 ABL2_HUMAN  | R.TVS#TSSQPEENVDR.A              | S817:      | 2 | 3,5794 | 0,534 | -0,375 |
| 7 | P31629 ZEP2_HUMAN  | R.SES#AELVACTQDK.A               | S819:      | 2 | 3,6608 | 0,311 | -0,804 |
| 7 | Q96G25 MED8_HUMAN  | R.NQVIPLVLS#PDR.D                | S82:       | 2 | 3,2858 | 0,344 | -0,553 |
| 7 | Q9BUA3 YK007_HUMAN | K.QQVSWEQEFLVGSS#PGGSGR.A        | S82:       | 3 | 2,6454 | 0,12  | -0,165 |
| 7 | P04792 HSPB1_HUMAN | R.QLS#SGVSEIR.H                  | S82:       | 2 | 2,6074 | 0,118 | -0,739 |
| 7 | P11137 MAP2_HUMAN  | R.LAS#VSADAEVAR.R                | S821:      | 2 | 3,6842 | 0,556 | -0,192 |
| 7 | Q9NPR2 SEM4B_HUMAN | R.LGS#EIRDSVV.-                  | S825:      | 2 | 2,5284 | 0,531 | 0      |
| 7 | Q2NKX8 ERC6L_HUMAN | K.GFGSVEELCTNSS#LGM*EK.S         | S829:      | 2 | 3,1804 | 0,492 | -1,315 |
| 7 | P10644 KAP0_HUMAN  | R.EDEIS#PPPNPVVK.G               | S83:       | 2 | 3,0332 | 0,317 | -0,611 |



|   |                    |                                    |            |   |        |       |        |
|---|--------------------|------------------------------------|------------|---|--------|-------|--------|
| 7 | Q8N8A6 DDX51_HUMAN | R.VNDAEPGS#PEAPQGK.R               | S83:       | 2 | 2,6726 | 0,361 | -0,542 |
| 7 | O43426 SYNJ1_HUMAN | R.SAEDLDLLNAS#FQDESK.I             | S830:      | 2 | 6,2501 | 0,591 | -0,498 |
| 7 | P49327 FAS_HUMAN   | R.GTPLIS#PLIK.W                    | S831:      | 2 | 2,0955 | 0,26  | -0,109 |
| 7 | Q9UKV3 ACINU_HUMAN | K.GVPAGNS#DTEGGQPGR.K              | S838:      | 2 | 2,7904 | 0,4   | -0,155 |
| 7 | P29374 ARI4A_HUMAN | K.NFSS#ATEDEIDQCVK.E               | S840:      | 2 | 5,2066 | 0,547 | 0,402  |
| 7 | Q9UQ35 SRRM2_HUMAN | K.S#GTPPRQGSITS#PQANEQSVTPQR.R     | S846:S857: | 3 | 4,5884 | 1     | -0,409 |
| 7 | Q14160 LAP4_HUMAN  | R.LPLLPES#PGPLR.Q                  | S853:      | 2 | 2,8433 | 0,473 | -0,166 |
| 7 | O95819 M4K4_HUMAN  | K.SSS#SFTPFIDPR.L                  | S854:      | 2 | 2,6795 | 0,441 | -0,172 |
| 7 | Q13045 FLII_HUMAN  | R.NAEAVLQS#PGLSGK.V                | S856:      | 2 | 3,9604 | 0,499 | -0,336 |
| 7 | Q9H9J4 UBP42_HUMAN | R.DSALAEPEGLS#PAPPAR.S             | S856:      | 2 | 3,6932 | 0,526 | 0,534  |
| 7 | Q9H9J4 UBP42_HUMAN | R.DSALAEPEGLS#PAPPAR.S             | S856:      | 3 | 3,4854 | 0,521 | 0,4    |
| 7 | P10075 GLI4_HUMAN  | R.S#PGSQAPDEGAGGALR.S              | S86:       | 2 | 4,4099 | 0,612 | -0,236 |
| 7 | Q9H2Y7 ZF106_HUMAN | R.SLS#ESSVIM*DR.A                  | S861:      | 2 | 3,9225 | 0,471 | -0,185 |
| 7 | Q7Z2K8 GRIN1_HUMAN | R.DAGLQVS#LGAAETR.S                | S862:      | 2 | 4,2398 | 0,525 | 0      |
| 7 | Q8N122 RPTOR_HUMAN | R.VLDTSSLTQSAPAS#PTNK.G            | S863:      | 2 | 4,0126 | 0,528 | -0,515 |
| 7 | Q96N67 DOCK7_HUMAN | R.LPNTYPNSS#SPGPGGLGGSVHYAT#M*AR.S | S863:T878: | 3 | 5,5818 | 1     | 0,703  |
| 7 | P29317 EPHA2_HUMAN | K.FADIVS#ILDK.L                    | S869:      | 2 | 3,1994 | 0,281 | -0,406 |
| 7 | Q9UK76 HN1_HUMAN   | R.NS#SEASSGDFLDLK.G                | S87:       | 2 | 4,5868 | 0,439 | -0,157 |
| 7 | O75448 MED24_HUMAN | R.LLSSNEDDANILSS#PTDR.S            | S873:      | 2 | 3,6052 | 0,504 | 0,361  |
| 7 | Q9NZM3 ITSN2_HUMAN | R.TVS#PGSVS#PIHGQQVVENLK.A         | S883:S888: | 3 | 3,151  | 0,386 | 0,479  |
| 7 | P07814 SYEP_HUMAN  | K.EYIPGQPPLSQSSDSS#PTR.N           | S886:      | 2 | 2,6821 | 0,385 | -0,344 |
| 7 | Q96RS0 TGS1_HUMAN  | K.GIGLDESELDS#EAELM*R.S            | S89:       | 2 | 5,4031 | 0,538 | -0,374 |
| 7 | Q147X3 MAK3_HUMAN  | R.CPQQPEQQQLNGLIS#PELR.H           | S89:       | 3 | 3,0726 | 0,181 | -0,228 |
| 7 | Q9UPN4 AZI1_HUMAN  | R.SGS#PRPTEPTDFLM*LFEGS#PSGK.K     | S89:S105:  | 3 | 3,4249 | 0,41  | -0,49  |
| 7 | Q6WCQ1 MRIP_HUMAN  | R.TLLTGDDGGGEATGS#PLAQGK.D         | S890:      | 2 | 4,8336 | 0,611 | -0,128 |
| 7 | Q8TEA7 TBCK_HUMAN  | K.IKPTGLLTIPS#PQI.-                | S890:      | 2 | 3,2255 | 0,317 | -0,235 |
| 7 | P29317 EPHA2_HUMAN | R.VS#IRLPS#TSGSEGVVFR.T            | S892:S897: | 3 | 4,0331 | 0,521 | 0,094  |
| 7 | P29317 EPHA2_HUMAN | R.VS#IRLPSTSGS#EGVVPFR.T           | S892:S901: | 3 | 3,8386 | 0,278 | -0,094 |
| 7 | P29317 EPHA2_HUMAN | R.VS#IRLPSTSGS#EGVVPFR.T           | S892:S901: | 2 | 2,0963 | 0,273 | -0,376 |
| 7 | Q6ZRV2 FA83H_HUMAN | R.GS#PTTGFIQKGS#PTSAYPER.R         | S892:S903: | 3 | 3,7719 | 0,311 | 0,232  |
| 7 | P19838 NFKB1_HUMAN | R.QM*GYTEAIEVIQAASS#PVK.T          | S893:      | 3 | 2,63   | 0,268 | 0,345  |
| 7 | Q8WX93 PALLD_HUMAN | R.IAS#DEEIQGTK.D                   | S893:      | 2 | 2,4378 | 0,233 | -0,288 |
| 7 | Q2M1P5 KIF7_HUMAN  | R.SGS#NGSVVSLEQQQK.I               | S895:      | 2 | 4,6065 | 0,433 | -0,375 |

|   |                    |                                |       |   |        |       |        |
|---|--------------------|--------------------------------|-------|---|--------|-------|--------|
| 7 | Q86SQ0 PHLB2_HUMAN | K.EGLYLS#DTLPR.K               | S896: | 2 | 2,7969 | 0,405 | -0,363 |
| 7 | P29317 EPHA2_HUMAN | R.LPS#TSGSEGVPPFR.T            | S897: | 2 | 3,4969 | 0,532 | 0,173  |
| 7 | Q9NYM9 BET1L_HUMAN | R.AQS#PGAVEEILDR.E             | S9:   | 2 | 3,9582 | 0,54  | -0,083 |
| 7 | Q96N67 DOCK7_HUMAN | R.SLSNS#NPDISGTPPTSPDDEVR.S    | S900: | 3 | 2,7881 | 0,193 | -0,081 |
| 7 | Q14C86 GAPD1_HUMAN | R.SS#DIVSSVR.R                 | S903: | 2 | 2,6075 | 0,389 | 0,237  |
| 7 | Q15811 ITSN1_HUMAN | R.SAFTPATATGSSPS#PVLGQGEK.V    | S904: | 3 | 4,3016 | 0,434 | 0,337  |
| 7 | Q9H6F5 CCD86_HUMAN | R.LQQGAGLESPQGQPEPGAAS#PQR.Q   | S91:  | 3 | 5,2806 | 0,266 | -0,307 |
| 7 | Q05397 FAK1_HUMAN  | K.LQPQEIS#PPPTANLDR.S          | S910: | 2 | 3,3506 | 0,379 | 0,526  |
| 7 | O14974 MYPT1_HUMAN | R.SGS#YSYLEER.K                | S910: | 2 | 3,3357 | 0,508 | -0,384 |
| 7 | Q5VT52 K0460_HUMAN | R.LSSSPGLFGAFS#VR.G            | S917: | 2 | 2,9451 | 0,517 | -0,405 |
| 7 | P28290 SSFA2_HUMAN | R.TPLGAS#LDEQSSSTLK.G          | S92:  | 2 | 3,8673 | 0,376 | -0,214 |
| 7 | O76021 RL1D1_HUMAN | R.SDS#EDICLFTK.D               | S92:  | 2 | 2,4317 | 0,361 | -0,087 |
| 7 | Q6ZRV2 FA83H_HUMAN | R.SS#PVPPVPER.R                | S925: | 2 | 2,0233 | 0,338 | -0,213 |
| 7 | Q15154 PCM1_HUMAN  | R.YMSQM*S#VPEQAELEK.L          | S93:  | 2 | 6,0579 | 0,499 | -0,523 |
| 7 | Q15154 PCM1_HUMAN  | R.YM*SQM*S#VPEQAELEK.L         | S93:  | 2 | 4,9845 | 0,594 | -0,389 |
| 7 | Q15154 PCM1_HUMAN  | R.YM*SQMS#VPEQAELEK.L          | S93:  | 2 | 4,3272 | 0,122 | 0,327  |
| 7 | Q15154 PCM1_HUMAN  | R.YM*SQM*S#VPEQAELEK.L         | S93:  | 3 | 2,6195 | 0,2   | 0      |
| 7 | Q9UMZ2 SYNG_HUMAN  | K.ETSEFGS#SENITMTSLK.V         | S935: | 2 | 2,7011 | 0,445 | 0,193  |
| 7 | P42684 ABL2_HUMAN  | K.VPVLIS#PTLK.H                | S936: | 2 | 2,8523 | 0,35  | -0,106 |
| 7 | Q7Z3T8 ZFY16_HUMAN | R.NEIIQS#PISQVPSVEK.L          | S939: | 3 | 4,1915 | 0,282 | -0,099 |
| 7 | Q7Z3T8 ZFY16_HUMAN | R.NEIIQS#PISQVPSVEK.L          | S939: | 2 | 3,7262 | 0,366 | -0,396 |
| 7 | P15336 ATF2_HUMAN  | K.M*PLDLS#PLATPIIR.S           | S94:  | 2 | 3,2275 | 0,478 | -0,224 |
| 7 | Q9H4I2 ZHX3_HUMAN  | R.VPEASSEPFDTSS#PQAGR.Q        | S946: | 3 | 3,5723 | 0,341 | -0,565 |
| 7 | P24534 EF1B_HUMAN  | K.YGPADVEDTTGSGATDS#K.D        | S95:  | 2 | 5,2815 | 0,529 | -0,396 |
| 7 | O15258 RER1_HUMAN  | K.VDPPLM*EDS#DDGPSLPTK.Q       | S95:  | 2 | 5,1812 | 0,454 | -0,488 |
| 7 | Q00536 PCTK1_HUMAN | K.M*GSDGESDQASATSSDEVQS#PVR.V  | S95:  | 3 | 5,0767 | 0,472 | -0,376 |
| 7 | O15258 RER1_HUMAN  | K.VDPPLMEDS#DDGPSLPTK.Q        | S95:  | 2 | 3,8431 | 0,49  | -0,677 |
| 7 | Q9HB90 RRAGC_HUMAN | K.M*SPNETLFLES#TNK.I           | S95:  | 2 | 3,6701 | 0,516 | -0,786 |
| 7 | Q13425 SNTB2_HUMAN | R.GLGPPS#PPAPPR.G              | S95:  | 2 | 2,2571 | 0,249 | -0,898 |
| 7 | O75122 CLAP2_HUMAN | R.GVTEAIQNFS#FR.S              | S952: | 2 | 2,9693 | 0,436 | -0,505 |
| 7 | Q9UJF2 NGAP_HUMAN  | R.QQTQQVQSPVDSATM*S#PVER.T     | S954: | 3 | 4,2517 | 0,339 | -0,317 |
| 7 | P49792 RBP2_HUMAN  | R.FESPATGILS#PR.G              | S955: | 2 | 3,6652 | 0,426 | 0,18   |
| 7 | Q14683 SMC1A_HUMAN | K.GTM*DDISQEEGSS#QGEDSVSGSQR.I | S957: | 3 | 4,0634 | 0,474 | -0,354 |

|   |                     |                                       |            |   |        |       |        |
|---|---------------------|---------------------------------------|------------|---|--------|-------|--------|
| 7 | O43847 NRDC_HUMAN   | R.GSLS#NAGDPEIVK.S                    | S96:       | 2 | 3,0751 | 0,402 | -0,357 |
| 7 | Q8IXM2 CQ049_HUMAN  | K.VYEDSGIPLPAES#PK.K                  | S96:       | 2 | 2,7313 | 0,464 | -0,435 |
| 7 | P46379 BAT3_HUMAN   | R.AS#PEPQRENAS#PAPGTTAEEM*SR.G        | S964:S973: | 3 | 4,8697 | 0,524 | -0,55  |
| 7 | P21333 FLNA_HUMAN   | K.SPFSVAVS#PSLDLSK.I                  | S966:      | 2 | 4,4362 | 0,391 | -0,302 |
| 7 | Q5VZK9 LR16A_HUMAN  | R.SS#GFISELPSEEGK.K                   | S968:      | 2 | 2,7674 | 0,409 | 0,315  |
| 7 | P46379 BAT3_HUMAN   | R.ENAS#PAPGTTAEEMSR.G                 | S973:      | 2 | 3,8016 | 0,487 | -0,543 |
| 7 | P46379 BAT3_HUMAN   | R.ENAS#PAPGTTAEEM*SR.G                | S973:      | 3 | 3,5286 | 0,387 | 0      |
| 7 | P46379 BAT3_HUMAN   | R.ENAS#PAPGTTAEEM*SR.G                | S973:      | 2 | 3,1703 | 0,485 | -0,538 |
| 7 | Q9UK61 CC063_HUMAN  | R.SSDYQFPSS#PFTDTLK.G                 | S979:      | 2 | 3,4407 | 0,333 | -0,45  |
| 7 | Q9H7F0 AT133_HUMAN  | R.VLSLETYPVSS#PK.S                    | S98:       | 2 | 3,0698 | 0,518 | 0,569  |
| 7 | A8K720 A8K720_HUMAN | K.GLNGCES#PDADDYFEHS#PLSEDR.F         | S98:S108:  | 3 | 5,4518 | 0,466 | 0,528  |
| 7 | Q12802 AKP13_HUMAN  | K.ALQLSNS#PGASSAFLK.A                 | S983:      | 2 | 4,921  | 0,565 | -0,146 |
| 7 | Q5T200 ZC3HD_HUMAN  | R.GNIETTS#EDGQVFSPK.K                 | S986:      | 2 | 4,5611 | 0,476 | -0,477 |
| 7 | Q14669 TRIPC_HUMAN  | R.DDS#LDLSPQGR.L                      | S987:      | 2 | 3,7536 | 0,214 | -0,095 |
| 7 | Q8WWI1 LMO7_HUMAN   | K.EVAATEEDVTRLPS#PT#SPFSSLSQDQAATSK.A | S988:T990: | 3 | 3,4111 | 1     | -0,429 |
| 7 | P43358 MAGA4_HUMAN  | R.QPNEGSSSQEEEGPSTS#PDAESLFR.E        | S99:       | 3 | 4,3012 | 0,378 | -0,133 |
| 7 | Q86UE8 TLK2_HUMAN   | K.ISDYFEFAGGSAPGTS#PGR.S              | S99:       | 2 | 3,6656 | 0,485 | -0,245 |
| 7 | Q86UE8 TLK2_HUMAN   | K.ISDYFEFAGGSAPGTS#PGR.S              | S99:       | 3 | 2,8986 | 0,309 | -0,183 |
| 7 | Q14669 TRIPC_HUMAN  | R.DDSLDS#PQGRLS#DVLK.R                | S991:S997: | 2 | 3,1749 | 0,525 | -0,544 |
| 7 | Q86V48 LUZP1_HUMAN  | R.TQS#SLTVSEVLTR.R                    | S995:      | 2 | 3,0455 | 0,484 | -0,163 |
| 7 | B2R8U0 B2R8U0_HUMAN | K.AAAGPLDM*SLPST#PDIK.I               | T101:      | 2 | 4,116  | 0,525 | -0,206 |
| 7 | Q9UQ35 SRRM2_HUMAN  | K.SST#PPGESYFGVSSLQLK.G               | T1043:     | 2 | 2,0966 | 0,317 | -0,621 |
| 7 | Q15648 MED1_HUMAN   | R.SQT#PPGVATPPIPK.I                   | T1051:     | 2 | 3,4838 | 0,437 | 0      |
| 7 | Q8N3U4 STAG2_HUMAN  | R.NSLLAGDDDDT#M*SVISGISSR.G           | T1056:     | 3 | 3,9536 | 0,327 | 0,25   |
| 7 | Q641Q2 FA21A_HUMAN  | R.LAAQESSET#EDM*SVPR.G                | T1056:     | 2 | 3,1106 | 0,301 | -1,652 |
| 7 | P46821 MAP1B_HUMAN  | K.AAEAGGAEQYGFLLTPT#K.Q               | T1069:     | 3 | 4,8425 | 0,486 | -0,181 |
| 7 | Q6P1L5 AL2SC_HUMAN  | R.TSPT#VATQTGASATSTR.G                | T108:      | 2 | 3,245  | 0,523 | -0,426 |
| 7 | Q9HAU5 RENT2_HUMAN  | K.ENET#DEENTEVM*IK.G                  | T1088:     | 2 | 2,8317 | 0,233 | -0,206 |
| 7 | P06744 G6PI_HUMAN   | R.SNT#PILVDGK.D                       | T109:      | 2 | 2,3819 | 0,397 | -0,543 |
| 7 | O95248 MTMR5_HUMAN  | R.LGLGT#LSSSLR.A                      | T1137:     | 2 | 3,0561 | 0,508 | -0,192 |
| 7 | P38432 P80C_HUMAN   | R.AFQLEEGEET#EPDCK.Y                  | T122:      | 2 | 4,3477 | 0,465 | -1,245 |
| 7 | P07355 ANXA2_HUMAN  | K.GLGT#DEDSLIEIICSR.T                 | T123:      | 3 | 2,9894 | 0,236 | -0,394 |
| 7 | Q9H6Z4 RANB3_HUMAN  | R.T#SSLTQFPQSSEER.S                   | T124:      | 2 | 3,3916 | 0,459 | -0,206 |

|   |                      |                                  |              |   |        |       |        |
|---|----------------------|----------------------------------|--------------|---|--------|-------|--------|
| 7 | Q9UJM3 ERRFI_HUMAN   | K.LTVNGVCAST#PPLTPIK.N           | T127:        | 2 | 2,7294 | 0,352 | -0,264 |
| 7 | Q13459 MYO9B_HUMAN   | R.VSPAPGASAPET#PEDK.S            | T1271:       | 2 | 2,9916 | 0,557 | -0,441 |
| 7 | Q15021 CND1_HUMAN    | R.YQPLASTASDNDFVT#PEPR.R         | T1339:       | 3 | 5,2764 | 0,436 | 0,334  |
| 7 | P49792 RBP2_HUMAN    | K.ELVGPPLAETVFT#PKT#SPENVQDR.F   | T1396:T1399: | 3 | 4,4944 | 0,385 | -0,526 |
| 7 | P06493 CDC2_HUMAN    | K.IGEGT#YGVVYK.G                 | T14:         | 2 | 3,8759 | 0,357 | -0,193 |
| 7 | P42166 LAP2A_HUMAN   | R.SST#PLPTISSAENTR.Q             | T160:        | 2 | 3,8711 | 0,46  | -0,353 |
| 7 | P42166 LAP2A_HUMAN   | R.SST#PLPTISSAENTR.Q             | T160:        | 3 | 2,6655 | 0,163 | 0,212  |
| 7 | Q9P289 MST4_HUMAN    | K.LADFGVAGQLTDT#QIK.R            | T172:        | 2 | 5,2819 | 0,477 | -0,486 |
| 7 | Q13188 STK3_HUMAN    | K.LADFGVAGQLTDT#M*AK.R           | T174:        | 2 | 5,0332 | 0,579 | 0,281  |
| 7 | O75691 UTP20_HUMAN   | K.SLSDNGQPQT#PDPADSGGTSAK.E      | T1741:       | 2 | 2,0836 | 0,236 | -0,456 |
| 7 | Q9H3P2 NELFA_HUMAN   | K.NALTTLAGPLT#PPVK.H             | T178:        | 3 | 3,9488 | 0,312 | 0      |
| 7 | Q9H3P2 NELFA_HUMAN   | K.NALTTLAGPLT#PPVK.H             | T178:        | 2 | 3,1097 | 0,602 | -0,233 |
| 7 | Q8TEM1 PO210_HUMAN   | R.DLAVPAALT#PR.A                 | T1844:       | 2 | 2,8465 | 0,298 | 0,101  |
| 7 | P24928 RPB1_HUMAN    | K.YSPTSPT#YSPTSPK.Y              | T1915:       | 2 | 2,7045 | 0,363 | -0,46  |
| 7 | O94915 FRYL_HUMAN    | R.SNT#LDIM*DGR.I                 | T1959:       | 2 | 3,0533 | 0,465 | -0,1   |
| 7 | P80723 BASP_HUMAN    | K.ETPAATEAPSST#PK.A              | T196:        | 2 | 2,205  | 0,411 | -0,582 |
| 7 | Q13535 ATR_HUMAN     | K.GVELCFPENET#PPEGK.N            | T1989:       | 2 | 3,4673 | 0,395 | -0,13  |
| 7 | O95297 MPZL1_HUMAN   | R.DYTGCSST#SESLSPVK.Q            | T205:        | 2 | 3,5553 | 0,389 | -0,285 |
| 7 | Q8N488 RYBP_HUMAN    | R.SST#PKGDM*SAVNDESF.-           | T215:        | 2 | 2,6361 | 0,205 | -0,345 |
| 7 | Q8IYB3 SRRM1_HUMAN   | K.T#PELPEPSVK.V                  | T220:        | 2 | 2,1853 | 0,472 | -0,104 |
| 7 | P23396 RS3_HUMAN     | K.DEILPTT#PISEQK.G               | T221:        | 2 | 2,9732 | 0,401 | 0,157  |
| 7 | P49792 RBP2_HUMAN    | K.LNQSGTSVGT#DEESDVTQEEER.D      | T2293:       | 3 | 5,9934 | 0,432 | -0,294 |
| 7 | Q8IWW6 RHG12_HUMAN   | R.ATT#PPNQGRPDS#PVYANLQELK.I     | T231:S240:   | 3 | 3,6853 | 0,464 | 0,358  |
| 7 | Q8N0Z3 CCD52_HUMAN   | K.IATQSQIT#PPGTPSSALSSGEQR.A     | T235:        | 3 | 4,1621 | 0,402 | -0,229 |
| 7 | Q5T200 ZC3HD_HUMAN   | K.GPRT#PS#PPPIPEDIALGK.K         | T263:S265:   | 3 | 4,0644 | 0,253 | 0,087  |
| 7 | A8K1N6 A8K1N6_HUMAN  | K.M*LGQKAT#PPPS#PLLSELLK.K       | T264:S268:   | 3 | 3,1054 | 0,17  | -0,5   |
| 7 | Q9UJU6 DBNL_HUMAN    | R.AMST#TSISSPQPGK.L              | T270:        | 2 | 3,0545 | 0,41  | -0,083 |
| 7 | Q9NQS7 INCE_HUMAN    | R.VLAPILPDNFST#PTGSR.T           | T292:        | 2 | 3,5815 | 0,586 | -0,458 |
| 7 | Q8NFC6 FA44A_HUMAN   | R.SLT#VSDDAESSEPER.K             | T2956:       | 2 | 4,2736 | 0,545 | -0,43  |
| 7 | Q9P0K7 RAI14_HUMAN   | R.SITST#PLS#GKESVFFAEPFK.A       | T297:S300:   | 3 | 2,8119 | 0,191 | 0,151  |
| 7 | P38432 P80C_HUMAN    | K.LGFSLT#PSK.G                   | T303:        | 2 | 2,9874 | 0,429 | 0,118  |
| 7 | ##Q9UPR6 K1086_HUMAN | R.DEEALT#DSVLKLAR.E              | T313:        | 2 | 2,1976 | 0,091 | -0,446 |
| 7 | Q9UQ35 SRRM2_HUMAN   | R.GEGDAPFSEPGT#TSTQRPS#SPETATK.Q | T315:S322:   | 3 | 2,9195 | 1     | -0,589 |

|   |                     |                                    |            |   |        |       |        |
|---|---------------------|------------------------------------|------------|---|--------|-------|--------|
| 7 | P43351 RAD52_HUMAN  | K.DFLAGVT#QELIK.T                  | T318:      | 2 | 3,3067 | 0,431 | -0,259 |
| 7 | Q3KR37 GRM1B_HUMAN  | R.SPT#PQNQDGMT*VEK.G               | T32:       | 2 | 2,4725 | 0,326 | -0,49  |
| 7 | Q6P3X3 TTC27_HUMAN  | K.NLELNDDT#ILNDIK.L                | T321:      | 2 | 3,993  | 0,249 | -0,143 |
| 7 | P62736 ACTA_HUMAN   | K.EITALAPST#M*K.I                  | T326:      | 2 | 2,7572 | 0,206 | -0,097 |
| 7 | Q16643 DREB_HUMAN   | R.M*APT#PIPTRSPS#DSSTASTPVAEQIER.A | T331:S339: | 3 | 5,9427 | 1     | -0,244 |
| 7 | Q8TD19 NEK9_HUMAN   | R.SST#VTEAPIAVVTSR.T               | T333:      | 2 | 3,8115 | 0,456 | -0,611 |
| 7 | Q5T4S7 UBR4_HUMAN   | R.T#GSTSS#KEDDYESDAATIVQK.C        | T360:S365: | 3 | 5,2519 | 1     | 0,382  |
| 7 | A8K040 A8K040_HUMAN | K.NQVVSST#NGELNTDDPTAGR.S          | T368:      | 3 | 3,8375 | 0,263 | -0,34  |
| 7 | Q09666 AHNK_HUMAN   | K.VDIDT#PDINIEGSEGK.F              | T3716:     | 2 | 5,5349 | 0,504 | -0,479 |
| 7 | Q6NYC1 JMJD6_HUMAN  | R.T#CSM*VGNGDTSQDDCVSK.E           | T379:      | 3 | 4,1279 | 0,375 | -0,17  |
| 7 | Q9NTJ3 SMC4_HUMAN   | R.T#ESPATAAETASEELDNR.S            | T39:       | 3 | 4,7232 | 0,514 | 0,464  |
| 7 | Q14247 SRC8_HUMAN   | K.TQT#PPVSPAPQPTTEER.L             | T401:      | 2 | 3,984  | 0,591 | -0,471 |
| 7 | Q14247 SRC8_HUMAN   | K.TQT#PPVSPAPQPTTEER.L             | T401:      | 3 | 3,1657 | 0,417 | 0,202  |
| 7 | Q9H8Y8 GORS2_HUMAN  | K.ADAASSLTVDVT#PPATAK.A            | T415:      | 3 | 5,0719 | 0,399 | 0,212  |
| 7 | Q9H8Y8 GORS2_HUMAN  | K.ADAASSLTVDVT#PPATAK.A            | T415:      | 2 | 2,3436 | 0,297 | 0,637  |
| 7 | O60271 JIP4_HUMAN   | R.EVENLILENT#QLLETK.N              | T418:      | 3 | 4,2764 | 0,342 | -0,186 |
| 7 | O60271 JIP4_HUMAN   | R.EVENLILENT#QLLETK.N              | T418:      | 2 | 4,0398 | 0,525 | -0,683 |
| 7 | Q0VDF9 HSP7E_HUMAN  | R.FTVLFPSGT#PLPAR.R                | T420:      | 2 | 2,2199 | 0,265 | -0,462 |
| 7 | P36404 ARL2_HUMAN   | K.FNGEDIDT#ISPTLGFNIK.T            | T43:       | 2 | 2,9262 | 0,393 | -0,118 |
| 7 | Q9UHY1 NRBP_HUMAN   | K.TPT#PEPAEVETR.K                  | T433:      | 2 | 3,1082 | 0,46  | 0,087  |
| 7 | P30041 PRDX6_HUMAN  | R.DFT#PVCTTELGR.A                  | T44:       | 2 | 3,0677 | 0,267 | 0,165  |
| 7 | Q09666 AHNK_HUMAN   | K.GPSLDIDT#PDVNIEGPEGK.L           | T4430:     | 2 | 3,9655 | 0,362 | -0,3   |
| 7 | Q15233 NONO_HUMAN   | R.FGQAATM*EGIGAIGGT#PPAFNR.A       | T450:      | 3 | 5,0299 | 0,435 | -0,081 |
| 7 | Q9BTA9 WAC_HUMAN    | R.IST#PQTNTPVIKPLISTPPVS#SQPK.V    | T457:S475: | 3 | 3,0193 | 1     | -0,328 |
| 7 | Q9Y230 RUVB2_HUMAN  | K.EYQDAFLFNELKGETM*DT#S.-          | T462:      | 3 | 4,6061 | 0,507 | -0,078 |
| 7 | Q96D46 NMD3_HUMAN   | R.DSAIPVESDT#DDEGAPR.I             | T470:      | 2 | 3,4009 | 0,469 | -0,658 |
| 7 | Q15910 EZH2_HUMAN   | K.ESSIIAPAPAEDVDT#PPR.K            | T487:      | 2 | 2,931  | 0,484 | 0,376  |
| 7 | Q9NU22 MDN1_HUMAN   | K.NGGEDT#DNEEGEEENPLEIK.E          | T4898:     | 3 | 2,7204 | 0,132 | 0,637  |
| 7 | P78344 IF4G2_HUMAN  | R.TQT#PPLGQTPQLGLK.T               | T508:      | 2 | 4,2353 | 0,567 | -0,074 |
| 7 | Q14195 DPYL3_HUMAN  | R.GM*YDGPVFDLTTT#PK.G              | T509:      | 2 | 4,7479 | 0,55  | -0,421 |
| 7 | Q16555 DPYL2_HUMAN  | R.GLYDGPVCEVSVT#PK.T               | T509:      | 2 | 3,7269 | 0,522 | 0,072  |
| 7 | O76080 ZFAN5_HUMAN  | R.M*SPM*GT#ASGSNSPTSASVQR.A        | T52:       | 3 | 3,9142 | 0,308 | -0,242 |
| 7 | P05362 ICAM1_HUMAN  | K.GT#PM*KPNTQATPP.-                | T521:      | 2 | 2,7339 | 0,294 | -0,255 |

|   |                     |                                    |            |   |        |       |        |
|---|---------------------|------------------------------------|------------|---|--------|-------|--------|
| 7 | P05362 ICAM1_HUMAN  | K.GT#PMKPNTQATPP.-                 | T521:      | 2 | 2,1584 | 0,322 | -0,172 |
| 7 | Q99567 NUP88_HUMAN  | R.VLAET#PDSFEK.H                   | T525:      | 2 | 2,9833 | 0,326 | -0,371 |
| 7 | O00425 IF2B3_HUMAN  | R.DQT#PDENDQVVVK.I                 | T528:      | 2 | 3,9586 | 0,492 | -0,389 |
| 7 | Q9NZI8 IF2B1_HUMAN  | R.DQT#PDENDQVIVK.I                 | T528:      | 2 | 3,9247 | 0,361 | -0,154 |
| 7 | P17544 ATF7_HUMAN   | R.TDSVIIADQTPT#PTR.F               | T53:       | 2 | 3,1104 | 0,378 | -0,432 |
| 7 | O94964 CT117_HUMAN  | R.T#KSVSSM*S#EFESLLDCSPYLAGGDAR.G  | T53:S60:   | 3 | 3,5366 | 1     | -0,429 |
| 7 | P35222 CTNB1_HUMAN  | R.T#SM*GGTQQQFVEGVR.M              | T551:      | 3 | 4,5    | 0,296 | 0,106  |
| 7 | Q53QW1 CB057_HUMAN  | K.T#ATPRAIS#TSGDKDK.S              | T56:S63:   | 2 | 2,0358 | 0,114 | -1,214 |
| 7 | Q9Y5K6 CD2AP_HUMAN  | K.ANTT#AFLTPLEIK.A                 | T561:      | 2 | 2,1302 | 0,257 | 1,302  |
| 7 | P27816 MAP4_HUMAN   | K.DGVLTLANNVT#PAK.D                | T571:      | 2 | 4,0458 | 0,507 | -0,082 |
| 7 | Q9NQG6 SMC7L_HUMAN  | R.AISAPT#SPTR.L                    | T58:       | 2 | 2,0748 | 0,241 | 0      |
| 7 | Q12906 ILF3_HUMAN   | K.LFPDT#PLALDANK.K                 | T592:      | 2 | 3,2549 | 0,486 | -0,163 |
| 7 | P51116 FXR2_HUMAN   | R.T#DGSIS#GDRQPVTVADYISR.A         | T598:S603: | 3 | 4,2778 | 0,161 | -0,08  |
| 7 | P13051 UNG_HUMAN    | K.APAGQEEPGT#PPSSPLSAEQLDR.I       | T60:       | 3 | 3,1864 | 0,344 | 0,303  |
| 7 | P55265 DSRAD_HUMAN  | K.TAESQT#PTPSATSFSGK.S             | T601:      | 2 | 2,915  | 0,311 | -0,317 |
| 7 | P05412 JUN_HUMAN    | K.NSDLLT#SPDVGLLK.L                | T62:       | 2 | 2,9529 | 0,326 | -0,079 |
| 7 | O76094 SRP72_HUMAN  | K.TVSSPPT#S#PRPGSAATVSASTSNIIPPR.H | T624:S625: | 3 | 3,1299 | 1     | 0,442  |
| 7 | Q6P0N0 CN106_HUMAN  | K.AYILVT#PLK.S                     | T653:      | 2 | 2,7946 | 0,373 | -0,111 |
| 7 | Q14676 MDC1_HUMAN   | R.ENLTDLVVDTDT#LGESTQPQR.E         | T654:      | 3 | 4,7857 | 0,427 | -0,455 |
| 7 | Q8TC07 TBC15_HUMAN  | R.NDSPT#QIPVSSDVCR.L               | T677:      | 3 | 2,9159 | 0,218 | 0,104  |
| 7 | Q9HD15 SRA1_HUMAN   | R.VPASET#SPGPPPM*GPPPPSSK.A        | T68:       | 3 | 2,9432 | 0,304 | -0,173 |
| 7 | Q9UKF6 CPSF3_HUMAN  | R.LYEALT#PVH.-                     | T681:      | 2 | 2,1347 | 0,412 | -0,217 |
| 7 | P28370 SMCA1_HUMAN  | K.ESELTDEDITT#ILER.G               | T691:      | 2 | 3,0777 | 0,366 | -0,066 |
| 7 | O14974 MYPT1_HUMAN  | R.ST#QGVTLTDLQEAEK.T               | T696:      | 2 | 3,8591 | 0,562 | -0,287 |
| 7 | Q3MHD2 LSM12_HUMAN  | R.T#ETPPPLASLNVSK.L                | T73:       | 3 | 2,9563 | 0,234 | 0,179  |
| 7 | P28290 SSFA2_HUMAN  | R.SQSLPTT#LLSPVR.V                 | T743:      | 2 | 2,2499 | 0,153 | -0,082 |
| 7 | Q3MHD2 LSM12_HUMAN  | R.TET#PPPLASLNVSK.L                | T75:       | 2 | 3,8496 | 0,407 | -0,159 |
| 7 | Q5M775 SPEC1_HUMAN  | R.T#SPTPPESATTVK.S                 | T809:      | 2 | 2,1151 | 0,148 | 0      |
| 7 | Q14160 LAP4_HUMAN   | R.M*VEPENAVTIT#PLRPEDDYS#PR.E      | T826:S835: | 3 | 4,5529 | 0,468 | 0,473  |
| 7 | P83731 RL24_HUMAN   | R.AIT#GASLADIM*AK.R                | T83:       | 2 | 4,311  | 0,454 | 0,18   |
| 7 | Q8NCM9 Q8NCM9_HUMAN | R.SSDITSDLGNVLTST#PNAK.T           | T84:       | 2 | 4,3071 | 0,588 | -0,366 |
| 7 | Q8NCM9 Q8NCM9_HUMAN | R.SSDITSDLGNVLTST#PNAK.T           | T84:       | 3 | 2,9382 | 0,302 | -0,183 |
| 7 | Q562F6 SGOL2_HUMAN  | K.DNFFSLT#PK.D                     | T845:      | 2 | 2,28   | 0,393 | -0,106 |

|   |                     |                                  |            |   |        |       |        |
|---|---------------------|----------------------------------|------------|---|--------|-------|--------|
| 7 | O95425 SVIL_HUMAN   | R.YQT#QPVTLGEVEQVQSGK.L          | T852:      | 3 | 5,7376 | 0,47  | 0      |
| 7 | Q15147 PLCB4_HUMAN  | K.ANVT#PQSS#SELRPTTTAALASGVEAK.K | T886:S890: | 3 | 4,681  | 1     | -0,133 |
| 7 | P29317 EPHA2_HUMAN  | R.LPST#SGSEGVPRF.T               | T898:      | 2 | 2,7081 | 0,462 | 0,345  |
| 7 | Q5T3S6 Q5T3S6_HUMAN | R.SFT#FGAYGGVDK.S                | T9:        | 2 | 3,4017 | 0,437 | 0,092  |
| 7 | Q9H8G2 CI082_HUMAN  | R.ST#DSSSVSGSLQQETK.Y            | T90:       | 2 | 5,3737 | 0,604 | -0,354 |
| 7 | Q5VZK9 LR16A_HUMAN  | R.LEDLDTCM*M*T#PK.S              | T916:      | 2 | 3,2911 | 0,276 | -0,468 |
| 7 | Q6PD62 CTR9_HUMAN   | K.GGEFDEFVNDT#DDDLPIK.K          | T925:      | 3 | 5,1576 | 0,496 | -0,079 |
| 7 | Q6ZRV2 FA83H_HUMAN  | R.GSLT#LTISGESPK.A               | T938:      | 2 | 2,2415 | 0,335 | 0,178  |
| 7 | O94804 STK10_HUMAN  | K.LSEEAECNPST#PSK.A              | T952:      | 2 | 3,6428 | 0,517 | -1,131 |
| 7 | P30044 PRDX5_HUMAN  | K.GVLFGVPGAFT#PGCSK.T            | T97:       | 2 | 2,4678 | 0,314 | -0,146 |
| 7 | Q13428 TCOF_HUMAN   | R.SPAGPAATPAQAQAAST#PR.K         | T983:      | 2 | 3,551  | 0,473 | -0,333 |
| 7 | P06493 CDC2_HUMAN   | K.IGEGTY#GVVYK.G                 | Y15:       | 2 | 2,6297 | 0,436 | 0      |
| 7 | P06493 CDC2_HUMAN   | K.IGEGTYGVVY#K.G                 | Y19:       | 2 | 2,9379 | 0,395 | -0,289 |
| 7 | O00401 WASL_HUMAN   | K.VIY#DFIEK.T                    | Y256:      | 2 | 2,1493 | 0,232 | 0      |
| 7 | Q08945 SSRP1_HUMAN  | K.EGM*NPSYDEY#ADS#DEDQHDAYLER.M  | Y441:S444: | 3 | 2,8637 | 0,284 | -0,544 |
| 7 | Q9NP56 PDE7B_HUMAN  | R.GSY#PFIDFR.L                   | Y46:       | 2 | 2,0692 | 0,215 | -0,31  |
| 7 | P55735 SEC13_HUMAN  | K.GQGSVSASVTEGQQNEQ.-            |            | 2 | 4,2207 | 0,558 | -0,501 |
| 7 | P62258 1433E_HUMAN  | K.EALQDVEDENQ.-                  |            | 2 | 2,6531 | 0,31  | -0,378 |
| 7 | Q7L1Q6 BZW1_HUMAN   | K.NAEEESEAEEGD.-                 |            | 2 | 2,412  | 0,311 | -0,4   |
| 7 | P62899 RL31_HUMAN   | K.NLQTVNVNVDEN.-                 |            | 2 | 2,2888 | 0,319 | 0      |
| 7 | Q7L2H7 EIF3M_HUMAN  | K.NSLLSLSDT.-                    |            | 2 | 2,2114 | 0,347 | 0,064  |
| 8 | P61313 RL15_HUMAN   | R.SLQS#VAEER.A                   | S100:      | 2 | 2,6194 | 0,181 | 0,111  |
| 8 | A6H8Y1 BDP1_HUMAN   | R.ISS#TSSLVK.S                   | S100:      | 2 | 2,0002 | 0,17  | -0,365 |
| 8 | Q86YP4 P66A_HUMAN   | R.RPPS#PDVIVLSDNAEQPSS#PR.V      | S100:S114: | 3 | 2,97   | 0,291 | -0,311 |
| 8 | O95239 KIF4A_HUMAN  | K.LTLLQVAS#R.Q                   | S1001:     | 2 | 3,7824 | 0,352 | 0,226  |
| 8 | Q9UKV3 ACINU_HUMAN  | R.TAQVPS#PPR.G                   | S1004:     | 2 | 2,2178 | 0,209 | -0,118 |
| 8 | Q01804 OTUD4_HUMAN  | K.TAADVVS#PGANSVDSR.V            | S1006:     | 2 | 4,3555 | 0,366 | -0,6   |
| 8 | P05386 RLA1_HUMAN   | K.KEES#EESDDDMGFGLFD.-           | S101:      | 2 | 3,2716 | 0,438 | -0,361 |
| 8 | Q9BX95 SGPP1_HUMAN  | R.NGLAAELGPAS#PR.R               | S101:      | 2 | 3,1769 | 0,227 | -0,183 |
| 8 | Q7Z612 Q7Z612_HUMAN | K.KEES#EESDDDM*GFGLF.-           | S101:      | 2 | 2,352  | 0,469 | -0,632 |
| 8 | P54259 ATN1_HUMAN   | K.TEQELPRQS#PSDLDS#LDGR.S        | S101:S107: | 3 | 3,3956 | 0,396 | -0,381 |
| 8 | Q9H6Z4 RANB3_HUMAN  | R.SAGGSS#PEGGEDS#DREDGNYPVK.R    | S101:S108: | 3 | 4,0535 | 0,281 | -0,403 |
| 8 | Q9NWH9 SLTM_HUMAN   | R.IVQISGNS#M*PR.G                | S1014:     | 2 | 2,96   | 0,431 | -0,47  |

|   |                     |                                  |              |   |        |       |        |
|---|---------------------|----------------------------------|--------------|---|--------|-------|--------|
| 8 | Q14C86 GAPD1_HUMAN  | R.FSTLTDDPS#PR.L                 | S1019:       | 2 | 2,9936 | 0,34  | -0,185 |
| 8 | O75351 VPS4B_HUMAN  | K.GNDS#DGEGESDDPEK.K             | S102:        | 2 | 3,2651 | 0,421 | -0,449 |
| 8 | P52948 NUP98_HUMAN  | K.ADTS#QEICSPR.L                 | S1023:       | 2 | 2,824  | 0,404 | 0,091  |
| 8 | P78332 RBM6_HUMAN   | K.LQSFDS#PER.K                   | S1025:       | 2 | 3,0325 | 0,327 | -0,105 |
| 8 | Q12888 TP53B_HUMAN  | K.NGSTAVAESVAS#PQK.T             | S1028:       | 2 | 3,9826 | 0,51  | -0,4   |
| 8 | Q52LW3 RHG29_HUMAN  | R.LLLAS#PPNER.N                  | S1029:       | 2 | 2,8105 | 0,203 | -0,103 |
| 8 | P21796 VDAC1_HUMAN  | K.LTFDSSFS#PNTGK.K               | S104:        | 2 | 3,7187 | 0,546 | -0,494 |
| 8 | O00512 BCL9_HUMAN   | R.SIS#ADSFQQR.D                  | S104:        | 2 | 3,4206 | 0,447 | -0,708 |
| 8 | P05386 RLA1_HUMAN   | K.KEESEES#DDDM*GFGLFD.-          | S104:        | 2 | 3,3797 | 0,45  | -0,596 |
| 8 | Q7Z612 Q7Z612_HUMAN | K.KEESEES#DDDM*GFGLF.-           | S104:        | 2 | 3,1866 | 0,509 | -0,506 |
| 8 | P05386 RLA1_HUMAN   | K.KEESEES#DDDMGFGLFD.-           | S104:        | 2 | 2,4699 | 0,44  | -0,481 |
| 8 | P49006 MRP_HUMAN    | K.LSGLS#FK.R                     | S104:        | 2 | 2,1758 | 0,137 | 0,073  |
| 8 | Q14669 TRIPC_HUMAN  | K.SSFLAS#LNPK.T                  | S1044:       | 2 | 2,7618 | 0,223 | -0,32  |
| 8 | Q9P266 K1462_HUMAN  | R.GLS#APDLR.S                    | S1044:       | 2 | 2,4015 | 0,218 | -0,067 |
| 8 | Q8TEW0 PARD3_HUMAN  | K.IQES#FTSEEER.I                 | S1046:       | 2 | 3,2024 | 0,31  | -0,255 |
| 8 | Q8NG08 HELB_HUMAN   | R.TCGVNDDES#PSKIFM*VGES#PQVSSR.L | S1048:S1058: | 3 | 3,7448 | 0,348 | 0,315  |
| 8 | O95155 UBE4B_HUMAN  | R.SQS#M*DIRGVSCEK.S              | S105:        | 2 | 4,1145 | 0,54  | -0,472 |
| 8 | P20042 IF2B_HUMAN   | K.IES#DVQEPT#EPEDDLDIM*LGNKK.K   | S105:T111:   | 3 | 2,8269 | 0,19  | -0,328 |
| 8 | Q96PY6 NEK1_HUMAN   | R.TCS#LPDLSK.L                   | S1052:       | 2 | 2,7399 | 0,234 | -0,111 |
| 8 | O60231 DHX16_HUMAN  | R.LLEDSEES#SEETVSR.A             | S106:        | 2 | 4,59   | 0,509 | -0,682 |
| 8 | P49023 PAXI_HUMAN   | K.TSSVSNPQDSVGS#PCSR.V           | S106:        | 3 | 3,9904 | 0,343 | -0,099 |
| 8 | P49023 PAXI_HUMAN   | K.TSSVSNPQDSVGS#PCSR.V           | S106:        | 2 | 3,792  | 0,444 | 0,198  |
| 8 | O75475 PSIP1_HUMAN  | K.QSNASS#DVEVEEK.E               | S106:        | 2 | 3,1792 | 0,439 | -0,325 |
| 8 | Q7Z628 ARHG8_HUMAN  | R.VTSLANLIS#PVR.N                | S106:        | 2 | 2,9768 | 0,298 | 0      |
| 8 | P30876 RPB2_HUMAN   | R.DGAPS#PM*M*PNEAR.L             | S106:        | 2 | 2,78   | 0,333 | -0,74  |
| 8 | P52948 NUP98_HUMAN  | K.FTSGAFLS#PSVSVQCERT#PR.A       | S1060:T1070: | 3 | 4,1334 | 0,38  | -0,767 |
| 8 | Q9UQE7 SMC3_HUMAN   | K.GDVEGSQS#QDEGEGSGESER.G        | S1067:       | 2 | 3,9291 | 0,539 | -0,691 |
| 8 | P18054 LOX12_HUMAN  | R.WVQGEDILS#LPEGT#AR.L           | S107:T112:   | 2 | 2,3396 | 0,195 | -0,632 |
| 8 | Q9P1Y5 K1543_HUMAN  | R.APS#PSGLM*SPSR.L               | S1074:       | 2 | 3,0989 | 0,391 | -0,38  |
| 8 | Q9NX40 OCAD1_HUMAN  | K.LENS#PLGEALR.S                 | S108:        | 2 | 2,3884 | 0,153 | -0,286 |
| 8 | Q9NYV4 CD2L7_HUMAN  | K.NSS#PAPPQPAPGK.V               | S1083:       | 2 | 3,3434 | 0,532 | -0,368 |
| 8 | P21333 FLNA_HUMAN   | K.AFGPGLQGGSAGS#PAR.F            | S1084:       | 2 | 4,1401 | 0,522 | -0,404 |
| 8 | P48634 BAT2_HUMAN   | R.TAS#ETRS#EGSEYEEIPK.R          | S1085:S1089: | 3 | 4,4402 | 1     | 0      |



|   |                    |                              |              |   |        |       |        |
|---|--------------------|------------------------------|--------------|---|--------|-------|--------|
| 8 | Q5VZ89 DEN4C_HUMAN | R.STS#LSALVR.S               | S1089:       | 2 | 2,7197 | 0,196 | 0,06   |
| 8 | Q14151 SAFB2_HUMAN | K.M*EEEGTEDNGLEDD#R.D        | S109:        | 2 | 5,3677 | 0,65  | 0,19   |
| 8 | Q8NA72 CE037_HUMAN | K.TDESSPVLS#PR.K             | S109:        | 2 | 2,717  | 0,404 | -0,77  |
| 8 | Q56P03 EAPP_HUMAN  | R.YYDDIYFDS#DS#EDEDRAVQVTK.K | S109:S111:   | 3 | 4,0784 | 0,274 | -0,129 |
| 8 | Q12830 BPTF_HUMAN  | K.NLSES#PVITK.A              | S1092:       | 2 | 2,1058 | 0,195 | 0      |
| 8 | Q76FK4 NOL8_HUMAN  | R.NSS#PGEASLLEK.E            | S1099:       | 2 | 2,436  | 0,354 | -0,093 |
| 8 | P57740 NU107_HUMAN | R.SGFGEISS#PVIR.E            | S11:         | 2 | 3,3103 | 0,386 | -0,184 |
| 8 | Q13425 SNTB2_HUMAN | R.GPAGEAGAS#PPVR.R           | S110:        | 2 | 3,708  | 0,384 | -0,49  |
| 8 | Q15154 PCM1_HUMAN  | R.INFS#DLDQR.S               | S110:        | 2 | 3,4694 | 0,341 | 0,205  |
| 8 | P25786 PSA1_HUMAN  | R.LVS#LIGSK.T                | S110:        | 2 | 2,7066 | 0,272 | -0,272 |
| 8 | P50402 EMD_HUMAN   | R.TYGEPES#AGPSR.A            | S110:        | 2 | 2,5827 | 0,415 | 1,375  |
| 8 | Q9UK61 CC063_HUMAN | K.GGNLPPVS#PNDSGAK.I         | S1103:       | 2 | 2,8132 | 0,346 | -0,655 |
| 8 | Q6ZSZ5 ARHGI_HUMAN | R.SLS#PILPGR.H               | S1103:       | 2 | 2,2829 | 0,324 | -0,12  |
| 8 | Q9UQ35 SRRM2_HUMAN | R.SSS#PVTELASRS#PIR.Q        | S1103:S1112: | 2 | 2,6816 | 0,243 | -0,349 |
| 8 | P11388 TOP2A_HUMAN | K.VPDEEENEES#DNEK.E          | S1106:       | 2 | 3,2905 | 0,394 | -0,35  |
| 8 | Q92900 RENT1_HUMAN | K.SQIDVALS#QDSTYQGER.A       | S1107:       | 2 | 5,1403 | 0,457 | -0,309 |
| 8 | Q92900 RENT1_HUMAN | K.SQIDVALS#QDSTYQGER.A       | S1107:       | 3 | 3,184  | 0,432 | -0,093 |
| 8 | Q8WWM7 ATX2L_HUMAN | K.GPPQS#PVFEGVYNNR.M         | S111:        | 2 | 5,3357 | 0,648 | -0,534 |
| 8 | Q8WWM7 ATX2L_HUMAN | K.GPPQS#PVFEGVYNNR.M         | S111:        | 3 | 4,729  | 0,358 | 0      |
| 8 | O95251 MYST2_HUMAN | R.SSGSETEQVVD#DR.E           | S111:        | 2 | 4,1736 | 0,423 | 0      |
| 8 | Q96ST3 SIN3A_HUMAN | R.YM*NSDTTS#PELR.E           | S1112:       | 2 | 3,2463 | 0,373 | -0,323 |
| 8 | Q9BX95 SGPP1_HUMAN | R.NS#LTGEEQLAR.V             | S112:        | 2 | 3,6506 | 0,507 | -0,45  |
| 8 | Q9NVM6 DJC17_HUMAN | R.QAQAES#EEEEESR.S           | S112:        | 2 | 2,1185 | 0,377 | 0      |
| 8 | O95425 SVIL_HUMAN  | K.TPTGEGLLDS#PSK.T           | S1120:       | 2 | 3,5698 | 0,478 | -1,148 |
| 8 | Q14997 PSME4_HUMAN | K.NPSINQILLS#PEK.I           | S1121:       | 2 | 3,1467 | 0,391 | -0,159 |
| 8 | Q9UQ35 SRRM2_HUMAN | R.GEFSAS#PM*LK.S             | S1124:       | 2 | 2,327  | 0,307 | -0,734 |
| 8 | Q92900 RENT1_HUMAN | R.AYQHGGVTGLS#QY.-           | S1127:       | 2 | 2,7741 | 0,429 | -0,334 |
| 8 | O60841 IF2P_HUMAN  | K.QSFDDNDS#EELEDK.D          | S113:        | 2 | 3,5387 | 0,399 | -0,279 |
| 8 | Q6NV74 CB055_HUMAN | R.VFS#QENVCDR.I              | S113:        | 2 | 3,2293 | 0,353 | 0      |
| 8 | Q9NRY4 GRLF1_HUMAN | K.AQSN#GNGSDSEM*DTSSLR.G     | S1130:       | 3 | 3,721  | 0,412 | -0,493 |
| 8 | Q92576 PHF3_HUMAN  | R.M*APPVDDL#PK.K             | S1133:       | 2 | 2,6695 | 0,377 | -0,386 |
| 8 | Q14191 WRN_HUMAN   | K.SIM*VQS#PEK.A              | S1133:       | 2 | 2,6374 | 0,327 | -0,109 |
| 8 | Q9Y4F5 K0284_HUMAN | R.LGDAS#DTEAADGER.G          | S1135:       | 2 | 4,2033 | 0,494 | -0,082 |

|   |                    |                         |              |   |        |       |        |
|---|--------------------|-------------------------|--------------|---|--------|-------|--------|
| 8 | Q9NP64 NO40_HUMAN  | R.S#FQDYTGQK.I          | S114:        | 2 | 2,2219 | 0,093 | -0,211 |
| 8 | Q9UPT6 JIP3_HUMAN  | K.LGFS#FVR.I            | S1143:       | 2 | 3,0467 | 0,251 | -0,269 |
| 8 | P78312 CD008_HUMAN | K.LVLAES#PQPK.G         | S1144:       | 2 | 3,0101 | 0,213 | -0,105 |
| 8 | P18615 NELFE_HUMAN | R.SIS#ADDDLQESSR.R      | S115:        | 2 | 4,5051 | 0,565 | -0,162 |
| 8 | Q9Y3S1 WVK2_HUMAN  | K.ELS#DSCGAFGGGR.L      | S1150:       | 2 | 2,3102 | 0,297 | -0,08  |
| 8 | Q9UIF9 BAZ2A_HUMAN | K.M*ELAGSNTTASS#PAR.A   | S1157:       | 2 | 4,2592 | 0,425 | -0,384 |
| 8 | Q9Y343 SNX24_HUMAN | K.AESCGS#FDETESEESSK.L  | S116:        | 2 | 4,9514 | 0,645 | -0,436 |
| 8 | Q9NU19 TB22B_HUMAN | R.SQS#TTSDVPANYK.V      | S116:        | 2 | 2,3844 | 0,173 | -0,165 |
| 8 | Q9H4Z3 PCIF1_HUMAN | R.QLS#EEQPSGNGVK.K      | S116:        | 2 | 2,2159 | 0,175 | -0,252 |
| 8 | Q5SW79 CE170_HUMAN | R.LGS#LSARS#DSEATISR.S  | S1160:S1165: | 2 | 2,7794 | 0,483 | 0,135  |
| 8 | Q6R327 RICTR_HUMAN | K.TLQLETS#FM*GNK.H      | S1162:       | 2 | 2,3037 | 0,256 | -0,25  |
| 8 | Q9BQG0 MBB1A_HUMAN | K.EIPSATQS#PISK.K       | S1163:       | 2 | 2,9324 | 0,499 | -0,821 |
| 8 | P55196 AFAD_HUMAN  | R.SSPNVANQPPS#PGGK.S    | S1165:       | 2 | 3,8083 | 0,464 | -0,563 |
| 8 | Q96QZ7 MAGI1_HUMAN | K.GFGFS#LR.G            | S1165:       | 2 | 2,1205 | 0,29  | 0,141  |
| 8 | Q9NTI5 PDS5B_HUMAN | R.M*ETVSNASSSNPSS#PGR.I | S1166:       | 2 | 5,3538 | 0,478 | -0,839 |
| 8 | Q9NTI5 PDS5B_HUMAN | R.METVSNASSSNPSS#PGR.I  | S1166:       | 2 | 3,8546 | 0,496 | -0,325 |
| 8 | Q9NTI5 PDS5B_HUMAN | R.M*ETVSNASSSNPSS#PGR.I | S1166:       | 3 | 3,3769 | 0,281 | -0,193 |
| 8 | Q5QJE6 TDIF2_HUMAN | R.QILACS#PVSSVR.K       | S117:        | 2 | 2,9155 | 0,478 | -0,162 |
| 8 | Q13136 LIPA1_HUMAN | R.VTSSM*SS#PSM*QPK.K    | S1172:       | 2 | 2,7724 | 0,231 | -0,33  |
| 8 | Q9UNS1 TIM_HUMAN   | R.QLLDS#DEEQEEDGR.N     | S1173:       | 2 | 3,214  | 0,499 | -0,521 |
| 8 | Q9NRY4 GRLF1_HUMAN | R.TSFSVGS#DDELGPIR.K    | S1179:       | 2 | 4,0059 | 0,51  | -0,294 |
| 8 | P25490 TY1_HUMAN   | R.EEVVGGDDS#DGLR.A      | S118:        | 2 | 2,961  | 0,466 | -0,085 |
| 8 | P53999 TCP4_HUMAN  | K.EQIS#DIDDAVR.K        | S118:        | 2 | 2,9382 | 0,463 | -0,182 |
| 8 | Q8IZ21 PHAR4_HUMAN | R.SSS#PVQVEEPPVR.L      | S118:        | 2 | 2,6945 | 0,33  | 0      |
| 8 | Q504Q3 PAN2_HUMAN  | K.VPEPEGQTS#PK.N        | S1189:       | 2 | 2,648  | 0,355 | -0,782 |
| 8 | Q7Z569 BRAP_HUMAN  | K.ECINAAPDPS#K.Q        | S119:        | 2 | 2,4019 | 0,34  | -0,357 |
| 8 | P28370 SMCA1_HUMAN | K.SPTS#PLNM*K.L         | S119:        | 2 | 2,367  | 0,402 | 0,114  |
| 8 | Q5T1M5 FKB15_HUMAN | K.AQPEEEDDEV#M*K.G      | S1195:       | 2 | 2,503  | 0,344 | -0,423 |
| 8 | Q96A19 C102A_HUMAN | R.LAES#PQLSK.G          | S12:         | 2 | 2,6947 | 0,246 | -0,348 |
| 8 | O95218 ZRAB2_HUMAN | R.EES#DGEYDEFGR.K       | S120:        | 2 | 3,2311 | 0,567 | 0      |
| 8 | P11388 TOP2A_HUMAN | K.TQM*AEVLPS#PR.G       | S1213:       | 2 | 3,4496 | 0,533 | -0,276 |
| 8 | P11388 TOP2A_HUMAN | K.TQMAEVLPS#PR.G        | S1213:       | 2 | 2,9999 | 0,402 | -0,466 |
| 8 | Q7Z589 EMSY_HUMAN  | R.ESCSS#PSTVGSLLTR.K    | S1213:       | 2 | 2,9221 | 0,377 | -0,281 |

|   |                     |                                 |              |   |        |       |        |
|---|---------------------|---------------------------------|--------------|---|--------|-------|--------|
| 8 | Q14160 LAP4_HUMAN   | R.NSLES#ISSIDR.E                | S1223:       | 2 | 3,906  | 0,366 | -0,094 |
| 8 | Q14160 LAP4_HUMAN   | R.NSLES#ISS#IDRELSPEGPBK.E      | S1223:S1226: | 3 | 4,6121 | 0,377 | -0,402 |
| 8 | Q14160 LAP4_HUMAN   | R.NSLESISS#IDR.E                | S1226:       | 2 | 3,5769 | 0,467 | -0,188 |
| 8 | P49916 DNL3_HUMAN   | K.LTTTGQVTS#PVK.G               | S123:        | 2 | 2,9554 | 0,383 | -0,651 |
| 8 | Q15154 PCM1_HUMAN   | K.TGFSVS#VEK.S                  | S1230:       | 2 | 2,595  | 0,147 | -0,118 |
| 8 | Q01664 TFAP4_HUMAN  | R.FIQELSGSS#PK.R                | S124:        | 2 | 3,0083 | 0,359 | -0,192 |
| 8 | Q13099 IFT88_HUMAN  | R.GPAS#PLEAK.K                  | S124:        | 2 | 2,9803 | 0,448 | 0,193  |
| 8 | P31749 AKT1_HUMAN   | R.SGS#PSDNS#GAEEM*EVSLAKPK.H    | S124:S129:   | 3 | 2,7075 | 0,403 | -0,08  |
| 8 | Q01814 AT2B2_HUMAN  | K.SATSSSPGSPHISLETS#L.-         | S1242:       | 2 | 3,3813 | 0,531 | -0,597 |
| 8 | Q8IVL0 NAV3_HUMAN   | K.YPDIAS#PTFR.R                 | S1245:       | 2 | 2,863  | 0,287 | -0,391 |
| 8 | Q9H5H4 ZN768_HUMAN  | R.YEQS#PGYEPR.S                 | S125:        | 2 | 2,7056 | 0,42  | -0,174 |
| 8 | P20020 AT2B1_HUMAN  | K.SATSSSPGSPHISLETS#L.-         | S1257:       | 2 | 2,7129 | 0,471 | -0,531 |
| 8 | Q9HCF4 ALO17_HUMAN  | K.EDQEAELLS#EPEEESER.H          | S1258:       | 2 | 2,177  | 0,418 | -0,225 |
| 8 | P49023 PAXI_HUMAN   | K.QKS#AEPS#PTVM*STSLGSLNLSLDR.L | S126:S130:   | 3 | 4,1018 | 1     | -0,068 |
| 8 | Q9H4A3 WNK1_HUMAN   | R.FIVS#PVPESR.L                 | S1261:       | 2 | 2,0248 | 0,254 | -0,202 |
| 8 | P46821 MAP1B_HUMAN  | K.SPSLSPSPS#PLEK.T              | S1265:       | 2 | 2,6743 | 0,311 | -0,406 |
| 8 | Q9UPT8 ZC3H4_HUMAN  | K.TGSGS#PFAGNS#PAREGEQDAASLK.D  | S1269:S1275: | 3 | 3,0097 | 0,382 | -0,367 |
| 8 | Q6P158 DHX57_HUMAN  | R.DLQEQDADAGS#ER.G              | S127:        | 2 | 4,3984 | 0,476 | -0,322 |
| 8 | B0I1T5 B0I1T5_HUMAN | R.SLGGIS#PSEDR.R                | S1274:       | 2 | 3,0823 | 0,38  | -0,102 |
| 8 | Q9UPT8 ZC3H4_HUMAN  | K.TGSGSPFAGNS#PAR.E             | S1275:       | 2 | 3,2157 | 0,391 | -0,088 |
| 8 | Q14966 ZN638_HUMAN  | K.QSSVTQVTEQS#PK.V              | S128:        | 2 | 3,1815 | 0,527 | 0      |
| 8 | Q8N5U6 RNF10_HUMAN  | R.AEFS#PAQFSGPK.K               | S128:        | 2 | 3,0596 | 0,45  | -0,091 |
| 8 | Q95696 BRD1_HUMAN   | R.IVEYS#PPSAPR.R                | S128:        | 2 | 2,3082 | 0,113 | -0,188 |
| 8 | Q96A00 PP14A_HUMAN  | R.QPS#PSHDGSL#PLQDR.A           | S128:S136:   | 3 | 3,1871 | 0,221 | -0,195 |
| 8 | Q75533 SF3B1_HUMAN  | R.TM*IIS#PER.L                  | S129:        | 2 | 2,3038 | 0,315 | -0,351 |
| 8 | P30622 CLIP1_HUMAN  | R.QLSSS#SGNTDTQADEDER.A         | S1293:       | 2 | 3,7016 | 0,57  | -0,362 |
| 8 | Q9C0C2 TB182_HUMAN  | R.NM*APGAVCS#PGESK.E            | S1297:       | 2 | 3,7077 | 0,377 | -0,732 |
| 8 | Q9UPU5 UBP24_HUMAN  | R.VSDQNS#PVLPK.K                | S1297:       | 2 | 2,9256 | 0,176 | -0,097 |
| 8 | P20962 PTMS_HUMAN   | K.SVEAAAELS#AK.D                | S13:         | 2 | 3,8388 | 0,503 | -0,844 |
| 8 | Q92685 ALG3_HUMAN   | R.SGS#AAQAEGLCK.Q               | S13:         | 2 | 3,547  | 0,614 | -0,194 |
| 8 | Q86VM9 ZCH18_HUMAN  | R.DPHS#PEDEEQPQGLS#DDDILR.D     | S13:S24:     | 3 | 3,8446 | 0,319 | 0,574  |
| 8 | Q6YBN2 Q6YBN2_HUMAN | K.NDGSQS#DTAVGTLGTSGK.K         | S130:        | 2 | 3,4696 | 0,576 | -0,344 |
| 8 | Q9P266 K1462_HUMAN  | R.GQAGLPGGLVS#PGSGDR.A          | S1304:       | 2 | 2,9614 | 0,295 | -0,076 |

|   |                    |                                  |              |   |        |       |        |
|---|--------------------|----------------------------------|--------------|---|--------|-------|--------|
| 8 | Q29RF7 PDS5A_HUMAN | R.AAVGQES#PGGLEAGNAK.A           | S1305:       | 2 | 4,7279 | 0,507 | -0,97  |
| 8 | Q9BQG0 MBB1A_HUMAN | R.LSLVIRS#PSLLQS#GAK.K           | S1308:S1314: | 3 | 2,8756 | 0,318 | -0,2   |
| 8 | Q96F86 EDC3_HUMAN  | K.SQDVAVS#PQQQQCSK.S             | S131:        | 2 | 3,7324 | 0,429 | -0,483 |
| 8 | Q9BQG0 MBB1A_HUMAN | R.SPS#LLQSGAK.K                  | S1310:       | 2 | 3,5319 | 0,439 | -0,114 |
| 8 | Q9BQG0 MBB1A_HUMAN | R.LSLVIRSPS#LLQS#GAK.K           | S1310:S1314: | 2 | 3,1933 | 0,193 | -0,6   |
| 8 | Q12756 KIF1A_HUMAN | R.NLFGSGS#LR.A                   | S1312:       | 2 | 2,5403 | 0,288 | 0      |
| 8 | Q9UQ35 SRRM2_HUMAN | K.ELS#NS#PLRENSFGSPLEFR.N        | S1318:S1320: | 3 | 3,9563 | 0,261 | -0,391 |
| 8 | Q08AD1 CA1L1_HUMAN | R.SESVEGFLS#PSR.C                | S1319:       | 2 | 3,2678 | 0,464 | 0,177  |
| 8 | O75152 ZC11A_HUMAN | K.LSVQSNPS#PQLR.S                | S132:        | 2 | 2,7838 | 0,328 | -0,868 |
| 8 | P51858 HDGF_HUMAN  | K.GNAEGS#S#DEEGKLVIDEPK.E        | S132:S133:   | 3 | 4,523  | 0,34  | 0      |
| 8 | P55081 MFAP1_HUMAN | R.M*EREDS#S#EEEEEEIDDEEIER.R     | S132:S133:   | 3 | 2,9442 | 0,251 | -0,261 |
| 8 | Q9UQ35 SRRM2_HUMAN | K.ELNS#PLRENSFGS#PLEFR.N         | S1320:S1329: | 3 | 4,0477 | 0,17  | 0      |
| 8 | Q9NZN5 ARHGC_HUMAN | R.TGTGDIATCYS#PR.T               | S1327:       | 2 | 3,6533 | 0,337 | -0,743 |
| 8 | Q9UQ35 SRRM2_HUMAN | R.ENSGS#PLEFR.N                  | S1329:       | 2 | 2,7169 | 0,305 | -0,269 |
| 8 | Q9UGU0 TCF20_HUMAN | R.NCPAVTLTS#PAK.T                | S1335:       | 2 | 2,8593 | 0,352 | -0,456 |
| 8 | P07814 SYEP_HUMAN  | R.LLS#VNIR.V                     | S1336:       | 2 | 2,143  | 0,118 | -0,068 |
| 8 | Q05D32 CTSL2_HUMAN | K.LEDNPSSGS#PPR.T                | S134:        | 2 | 2,3921 | 0,395 | -0,274 |
| 8 | P18615 NELFE_HUMAN | K.SLYES#FVSSDR.L                 | S135:        | 2 | 3,6362 | 0,505 | -0,67  |
| 8 | O60841 IF2P_HUMAN  | K.VEM*YS#GS#DDDDDFNKLPK.K        | S135:S137:   | 3 | 2,7966 | 0,251 | -0,081 |
| 8 | Q02446 SP4_HUMAN   | K.ENNVSQPASSSSSSSSNNGSAS#PTK.T   | S136:        | 3 | 3,2782 | 0,412 | -0,355 |
| 8 | Q9Y580 RBM7_HUMAN  | R.SFS#SPENFQR.Q                  | S136:        | 2 | 2,8433 | 0,282 | -0,191 |
| 8 | Q9P1Y6 K1542_HUMAN | K.AEAPSS#PDVAPAGKEDS#PSASGR.V    | S1360:S1371: | 3 | 3,2724 | 0,43  | -0,547 |
| 8 | Q5T200 ZC3HD_HUMAN | R.LIS#DSVER.D                    | S1364:       | 2 | 2,9258 | 0,22  | -0,366 |
| 8 | Q5T200 ZC3HD_HUMAN | R.LISDS#VER.D                    | S1366:       | 2 | 2,6791 | 0,359 | 0      |
| 8 | Q9NWS9 ZN446_HUMAN | K.TEEPLGS#PHPSGTVES#PGEQDTR.I    | S137:S146:   | 3 | 4,1028 | 0,317 | 0,605  |
| 8 | P42695 CNDD3_HUMAN | R.SRS#LGVLPFTLNSGS#PEK.T         | S1372:S1384: | 3 | 2,6438 | 0,151 | -0,446 |
| 8 | P11388 TOP2A_HUMAN | K.SVVS#DLEADDVK.G                | S1377:       | 2 | 3,4558 | 0,497 | -0,36  |
| 8 | Q13428 TCOF_HUMAN  | K.LGAGEGGEASVS#PEK.T             | S1378:       | 2 | 4,2294 | 0,416 | -0,499 |
| 8 | P41162 ETV3_HUMAN  | R.SSGVVQSS#APPVPTASSR.F          | S139:        | 3 | 2,9793 | 0,2   | -0,304 |
| 8 | P11388 TOP2A_HUMAN | K.GSVPLSS#S#PPATHFPDETEITNPVVK.K | S1392:S1393: | 3 | 2,7145 | 0,206 | -0,447 |
| 8 | Q7Z6Z7 HUWE1_HUMAN | R.AES#PEEVACR.K                  | S1395:       | 2 | 3,5955 | 0,477 | 0      |
| 8 | Q8TDJ6 DMXL2_HUMAN | R.TIS#VSGS#TAKETVTVGK.D          | S1400:S1404: | 2 | 4,0396 | 1     | -0,334 |
| 8 | Q14966 ZN638_HUMAN | K.AVIVSS#PK.A                    | S1401:       | 2 | 2,0755 | 0,263 | 0,138  |

|   |                    |                                   |              |   |        |       |        |
|---|--------------------|-----------------------------------|--------------|---|--------|-------|--------|
| 8 | Q9UQ35 SRRM2_HUMAN | K.AGM*SSNQSISS#PVLDAVPRT#PSR.E    | S1404:T1413: | 3 | 6,5497 | 1     | -0,361 |
| 8 | Q9UQ35 SRRM2_HUMAN | K.AGMSNQSISS#PVLDAVPRT#PSR.E      | S1404:T1413: | 3 | 4,434  | 0,452 | -0,145 |
| 8 | P27708 PYR1_HUMAN  | R.LS#SFVTK.G                      | S1406:       | 2 | 2,1598 | 0,259 | -0,142 |
| 8 | P18858 DNL1_HUMAN  | R.TIQEVLEEQS#EDED.R.E             | S141:        | 2 | 5,6551 | 0,56  | -0,385 |
| 8 | Q96CT7 CC124_HUMAN | R.VLEEGS#VEAR.T                   | S141:        | 2 | 3,2088 | 0,35  | 0,104  |
| 8 | P41279 M3K8_HUMAN  | R.NIGS#DFIPR.G                    | S141:        | 2 | 2,8109 | 0,291 | -0,222 |
| 8 | P18858 DNL1_HUMAN  | R.TIQEVLEEQS#EDED.R.E             | S141:        | 3 | 2,6305 | 0,205 | 0,193  |
| 8 | Q13177 PAK2_HUMAN  | K.YLS#FT#PPEKDGFPSPALNAK.G        | S141:T143:   | 3 | 4,7079 | 0,175 | 0,586  |
| 8 | Q9BXW9 FACD2_HUMAN | K.SQNSQESTADES#EDDM*SSQASK.S      | S1412:       | 3 | 5,1141 | 0,487 | -0,149 |
| 8 | Q13523 PRP4B_HUMAN | K.VQSGM*GLILQGYES#GS#EEEEGEIHEK.A | S142:S144:   | 3 | 3,3788 | 0,392 | 0,063  |
| 8 | P46821 MAP1B_HUMAN | R.GAES#PFEEK.S                    | S1427:       | 2 | 2,6322 | 0,253 | -0,114 |
| 8 | Q63ZY6 NSN5C_HUMAN | R.QLEEPGAGTPS#PVR.L               | S143:        | 2 | 2,6019 | 0,352 | -0,08  |
| 8 | Q8IY33 MILK2_HUMAN | K.LPS#PAPAR.K                     | S143:        | 2 | 2,4127 | 0,291 | 0      |
| 8 | Q15648 MED1_HUMAN  | K.NYGS#PLISGSTPK.H                | S1433:       | 2 | 2,7528 | 0,397 | -0,261 |
| 8 | Q15149 PLEC1_HUMAN | K.AQLEPVAS#PAK.K                  | S1435:       | 2 | 2,0953 | 0,308 | -0,307 |
| 8 | Q13153 PAK1_HUMAN  | K.YM*#S#FTDK.S                    | S144:        | 2 | 3,0781 | 0,261 | -0,185 |
| 8 | P29966 MARCS_HUMAN | K.AEDGATPS#PSNETPK.K              | S145:        | 2 | 2,8414 | 0,283 | -1,081 |
| 8 | O43399 TPD54_HUMAN | K.TSAALS#TVGSAISR.K               | S145:        | 2 | 2,565  | 0,412 | -0,174 |
| 8 | P21333 FLNA_HUMAN  | K.CSGPGLS#PGM*VR.A                | S1459:       | 2 | 3,3388 | 0,409 | -0,279 |
| 8 | P46783 RS10_HUMAN  | K.AEAGAGS#ATEFQFR.G               | S146:        | 2 | 3,5643 | 0,409 | -0,16  |
| 8 | Q02880 TOP2B_HUMAN | K.SEDDSAKFDS#NEEDSASVFS#PSFGLK.Q  | S1466:S1476: | 3 | 5,1147 | 1     | -0,495 |
| 8 | Q9UIG0 BAZ1B_HUMAN | R.LAEDEGDS#EPEAVGQSR.G            | S1468:       | 2 | 5,1664 | 0,516 | -0,783 |
| 8 | O14514 BAI1_HUMAN  | K.NENVATLSVSS#LER.R               | S1469:       | 2 | 3,5075 | 0,508 | -0,458 |
| 8 | P40855 PEX19_HUMAN | K.NATDLQNSS#MSEEELTK.A            | S147:        | 2 | 4,3424 | 0,627 | -0,309 |
| 8 | P18085 ARF4_HUMAN  | K.LGLQS#LR.N                      | S147:        | 2 | 2,7061 | 0,198 | 0,07   |
| 8 | O75376 NCOR1_HUMAN | K.AQLS#PGIYDDTSAR.R               | S1472:       | 2 | 3,8839 | 0,602 | -0,465 |
| 8 | Q14160 LAP4_HUMAN  | R.VQS#PEPPAPER.A                  | S1475:       | 2 | 3,067  | 0,258 | -0,474 |
| 8 | Q15648 MED1_HUMAN  | K.SYQNS#PSS#DDGIRPLPEYSTEK.H      | S1479:S1482: | 3 | 4,5898 | 1     | -0,278 |
| 8 | Q9BUH6 CI142_HUMAN | R.LAAAEETAVS#PR.K                 | S148:        | 2 | 3,7174 | 0,505 | -0,471 |
| 8 | Q6POQ8 MAST2_HUMAN | R.NQSLGQS#APSLTAGLK.E             | S148:        | 2 | 2,8901 | 0,236 | -0,295 |
| 8 | Q14160 LAP4_HUMAN  | R.ALS#PAELR.A                     | S1486:       | 2 | 2,5292 | 0,32  | 0,13   |
| 8 | P40855 PEX19_HUMAN | K.NATDLQNSSM*S#EEELTK.A           | S149:        | 2 | 5,1069 | 0,581 | -0,796 |
| 8 | O43399 TPD54_HUMAN | K.TSAALSTVGS#AISR.K               | S149:        | 2 | 2,0264 | 0,122 | -0,435 |

|   |                    |                                     |                 |   |        |       |        |
|---|--------------------|-------------------------------------|-----------------|---|--------|-------|--------|
| 8 | Q02952 AKA12_HUMAN | K.GLSS#DLEGEK.T                     | S1498:          | 2 | 2,9576 | 0,42  | 0,109  |
| 8 | P04792 HSPB1_HUMAN | R.GPS#WDPFR.D                       | S15:            | 2 | 2,9551 | 0,3   | -0,117 |
| 8 | Q9BWH2 FUND2_HUMAN | K.S#NQIPTEVR.S                      | S151:           | 2 | 2,8224 | 0,242 | 0      |
| 8 | O15085 ARHGB_HUMAN | R.NSHELGPCPEDGSDAPLEDSTADAAAS#PGP.- | S1519:          | 3 | 4,7392 | 0,489 | -0,601 |
| 8 | Q9H6H4 REEP4_HUMAN | R.SFS#MQDLR.S                       | S152:           | 2 | 2,7104 | 0,324 | -0,115 |
| 8 | Q9H6H4 REEP4_HUMAN | R.SFS#M*QDLR.S                      | S152:           | 2 | 2,5473 | 0,293 | -0,113 |
| 8 | Q12756 KIF1A_HUMAN | R.TPQPCS#RPAS#PEPELLPEADSK.K        | S1528:S1532:    | 3 | 3,7158 | 0,316 | 0      |
| 8 | Q8N4C6 NIN_HUMAN   | R.NEITTLNEEDS#ISNLK.L               | S1538:          | 2 | 3,6699 | 0,389 | 0,514  |
| 8 | Q9UQ35 SRRM2_HUMAN | R.S#GSSQELDVKPSAS#PQER.S            | S1539:S1552:    | 2 | 2,1795 | 0,24  | -0,473 |
| 8 | Q99959 PKP2_HUMAN  | R.LEISPDS#SPER.A                    | S154:           | 2 | 2,1999 | 0,143 | 0,186  |
| 8 | Q5JTV8 TOIP1_HUMAN | R.DS#HSS#EEDEASSQTDLSQTISK.K        | S154:S157:      | 3 | 4,5419 | 1     | -0,72  |
| 8 | Q9UQ35 SRRM2_HUMAN | R.SGS#SQELDVKPSAS#PQER.S            | S1541:S1552:    | 3 | 4,285  | 0,438 | -0,266 |
| 8 | Q43166 SI1L1_HUMAN | K.LIDLES#PTPESQK.S                  | S1549:          | 2 | 3,8775 | 0,445 | -0,397 |
| 8 | Q5UIP0 RIF1_HUMAN  | K.SNES#VDIQDQEEK.V                  | S1579:          | 2 | 4,6333 | 0,482 | -0,305 |
| 8 | Q69YN4 VIR_HUMAN   | R.SFLSEPSS#PGR.T                    | S1579:          | 2 | 2,7066 | 0,383 | -0,196 |
| 8 | Q03468 ERCC6_HUMAN | K.IIEQLS#PQAATSR.D                  | S158:           | 2 | 3,5142 | 0,513 | -0,245 |
| 8 | Q641Q2 FA21A_HUMAN | K.AGNS#DS#EEDDANGRVELILEPK.D        | S158:S160:      | 3 | 3,6522 | 0,28  | -0,436 |
| 8 | Q8IVF2 AHNK2_HUMAN | K.VQM*PS#FK.M                       | S1583:          | 2 | 2,0602 | 0,28  | 0      |
| 8 | Q15742 NAB2_HUMAN  | R.SFS#PKS#PLELGEKLS#PLPGGPGAGDPR.I  | S159:S162:S171: | 3 | 2,6497 | 0,235 | -0,437 |
| 8 | Q99871 UC5IP_HUMAN | R.GGDDYS#EDEGDSSVSR.A               | S16:            | 2 | 4,4739 | 0,49  | 0,487  |
| 8 | Q96QD9 FYTD1_HUMAN | R.LVGATATSS#PPPK.A                  | S16:            | 2 | 3,2377 | 0,443 | -0,28  |
| 8 | Q32MZ4 LRRF1_HUMAN | R.EIDCLS#PEAQK.L                    | S16:            | 2 | 3,1637 | 0,342 | 0      |
| 8 | Q9H5H4 ZN768_HUMAN | K.TQS#PEFEAQSSK.F                   | S160:           | 2 | 3,4443 | 0,45  | 0,172  |
| 8 | Q9NVU0 RPC5_HUMAN  | R.EAANEAGDSS#QDEAEDDVK.Q            | S162:           | 2 | 4,4488 | 0,611 | -0,474 |
| 8 | P82979 HCC1_HUMAN  | R.FGLNVS#SISR.K                     | S162:           | 2 | 3,7677 | 0,367 | 0      |
| 8 | O95453 PARN_HUMAN  | R.SQANGAGALSYVS#PNTSK.C             | S163:           | 2 | 5,1748 | 0,589 | -0,533 |
| 8 | P37802 TAGL2_HUMAN | R.NFS#DNQLQEGK.N                    | S163:           | 2 | 4,042  | 0,449 | -0,09  |
| 8 | O95453 PARN_HUMAN  | R.SQANGAGALSYVS#PNTSK.C             | S163:           | 3 | 3,9521 | 0,288 | -0,3   |
| 8 | P82979 HCC1_HUMAN  | R.FGLNVSS#ISR.K                     | S163:           | 2 | 2,9574 | 0,385 | -0,21  |
| 8 | P29966 MARCS_HUMAN | K.S#FKLS#GFSFK.K                    | S163:S167:      | 2 | 2,2085 | 0,212 | -0,56  |
| 8 | O75396 SC22B_HUMAN | R.GEALS#ALDSK.A                     | S164:           | 2 | 2,9825 | 0,451 | 0      |
| 8 | Q92614 MY18A_HUMAN | K.LATLS#DQVNR.R                     | S1640:          | 2 | 2,5379 | 0,244 | -0,204 |
| 8 | Q00537 PCTK2_HUMAN | K.LQINS#PPFDQPM*SR.R                | S165:           | 2 | 3,1659 | 0,309 | -0,424 |

|   |                     |                                |              |   |        |       |        |
|---|---------------------|--------------------------------|--------------|---|--------|-------|--------|
| 8 | P51858 HDGF_HUMAN   | R.AGDLLEDS#PK.R                | S165:        | 2 | 2,6974 | 0,3   | -0,434 |
| 8 | Q14320 FA50A_HUMAN  | K.NPDVDT#FLPDR.D               | S165:        | 2 | 2,482  | 0,377 | 0,335  |
| 8 | Q99613 EIF3C_HUMAN  | K.QNPEQS#ADEDAEK.N             | S166:        | 2 | 2,5981 | 0,351 | -0,554 |
| 8 | Q4ZG52 Q4ZG52_HUMAN | R.VRIS#SSTPVVEDTQS.-           | S167:        | 2 | 3,857  | 0,631 | -0,362 |
| 8 | Q14CZ0 CP072_HUMAN  | R.LTVVS#PNR.A                  | S167:        | 2 | 2,0828 | 0,181 | -0,189 |
| 8 | P32519 ELF1_HUMAN   | K.YADSPGASS#PEQPK.R            | S168:        | 2 | 3,5302 | 0,509 | -0,564 |
| 8 | P42166 LAP2A_HUMAN  | R.SSTPLPTISS#AENTR.Q           | S168:        | 2 | 2,7455 | 0,417 | -0,282 |
| 8 | Q8TDN4 CABL1_HUMAN  | R.GFAS#PLGAGR.A                | S168:        | 2 | 2,4831 | 0,26  | -0,06  |
| 8 | P18583 SON_HUMAN    | K.ESDQTLAALLS#PK.E             | S1697:       | 3 | 4,2686 | 0,478 | 0,126  |
| 8 | P18583 SON_HUMAN    | K.ESDQTLAALLS#PK.E             | S1697:       | 2 | 4,0503 | 0,417 | 0,168  |
| 8 | P53999 TCP4_HUMAN   | K.ELVSSSSGSDS#DSEVDK.K         | S17:         | 2 | 4,9796 | 0,577 | -0,386 |
| 8 | Q68D06 SLN13_HUMAN  | K.YNLINEGS#PPSK.I              | S170:        | 2 | 2,5475 | 0,285 | -0,349 |
| 8 | P29966 MARCS_HUMAN  | K.LSGFS#FK.K                   | S170:        | 2 | 2,1657 | 0,216 | -0,564 |
| 8 | P35579 MYH9_HUMAN   | R.DELADEIANSS#GK.G             | S1714:       | 2 | 3,8895 | 0,485 | 0,171  |
| 8 | O95817 BAG3_HUMAN   | R.SQS#PAASDCSSSSSASLPSSGR.S    | S173:        | 3 | 4,59   | 0,577 | -0,241 |
| 8 | P53621 COPA_HUMAN   | K.NLS#PGAVESDVR.G              | S173:        | 2 | 3,6525 | 0,349 | -0,276 |
| 8 | A8K719 A8K719_HUMAN | R.QQDPS#PGSNLGGDDLK.L          | S173:        | 2 | 2,6006 | 0,484 | -0,277 |
| 8 | P67809 YBOX1_HUMAN  | K.NEGS#ESAPEGQAQQR.R           | S174:        | 2 | 3,3316 | 0,48  | -0,439 |
| 8 | Q9BRJ6 CG050_HUMAN  | R.ELDEEGS#DPPLPGR.A            | S175:        | 2 | 2,7887 | 0,401 | -0,077 |
| 8 | Q12802 AKP13_HUMAN  | R.TFS#YIK.N                    | S1750:       | 2 | 2,367  | 0,184 | 0,218  |
| 8 | O14497 ARI1A_HUMAN  | R.FSKVS#S#PAPM*EGGEEEEELLGPK.L | S1754:S1755: | 3 | 5,7408 | 0,464 | -0,07  |
| 8 | Q9UIF9 BAZ2A_HUMAN  | R.YSEEGLS#PSK.R                | S1756:       | 2 | 3,2362 | 0,373 | -0,518 |
| 8 | Q9H7D0 DOCK5_HUMAN  | K.APEPDLM*S#PTR.K              | S1756:       | 2 | 2,2698 | 0,223 | -0,466 |
| 8 | Q13442 HAP28_HUMAN  | R.M*QS#LSLNK.-                 | S176:        | 2 | 3,0295 | 0,161 | 0      |
| 8 | Q9H7D0 DOCK5_HUMAN  | K.S#LQLM*DNR.L                 | S1766:       | 2 | 2,606  | 0,486 | -0,114 |
| 8 | P18583 SON_HUMAN    | R.SAAS#PVVSSM*PER.A            | S1769:       | 2 | 3,1598 | 0,357 | -0,173 |
| 8 | Q58FF8 H90B2_HUMAN  | K.IEDVGS#DEEDDSGK.D            | S177:        | 2 | 4,7178 | 0,52  | -1,472 |
| 8 | Q96CV9 OPTN_HUMAN   | K.LNSSGSSSEDS#FVEIR.M          | S177:        | 2 | 4,34   | 0,322 | -0,214 |
| 8 | Q9NYF8 BCLF1_HUMAN  | K.AEGEPQEE#PLK.S               | S177:        | 2 | 3,2384 | 0,34  | -0,263 |
| 8 | Q09666 AHNK_HUMAN   | K.DIDISS#PEFK.I                | S177:        | 2 | 2,6133 | 0,348 | -0,396 |
| 8 | Q9H7D0 DOCK5_HUMAN  | R.LS#PFHGSSPPQSTPLS#PPPLTPK.A  | S1775:S1789: | 3 | 4,6497 | 1     | -0,289 |
| 8 | Q9NZJ4 SACS_HUMAN   | R.IADLQS#PLFR.G                | S1779:       | 2 | 2,1227 | 0,234 | -0,197 |
| 8 | Q7Z6J9 SEN54_HUMAN  | R.FQPSSVLS#PYER.Q              | S178:        | 2 | 2,69   | 0,287 | -0,246 |

|   |                     |                                 |              |   |        |       |        |
|---|---------------------|---------------------------------|--------------|---|--------|-------|--------|
| 8 | Q13442 HAP28_HUMAN  | R.M*QSL#LNK.-                   | S178:        | 2 | 2,6195 | 0,208 | -0,12  |
| 8 | O94842 TOX4_HUMAN   | R.LSTTPS#PTSS#LHEDGVEDFR.R      | S178:S182:   | 3 | 3,2871 | 0,288 | -0,157 |
| 8 | P18583 SON_HUMAN    | R.AS#ES#SSEEKDDYEIVK.V          | S1780:S1782: | 2 | 2,0256 | 0,344 | -0,345 |
| 8 | Q9H7D0 DOCK5_HUMAN  | R.LSPFHGSS#PPQSTPLS#PPPLTPK.A   | S1781:S1789: | 3 | 4,7206 | 0,326 | 0,289  |
| 8 | Q14980 NUMA1_HUMAN  | R.SQAPLESS#LDSLGDVFLDS#GRK.T    | S1789:S1800: | 3 | 4,4222 | 0,284 | -0,369 |
| 8 | Q86TB9 PATL1_HUMAN  | R.STS#PIIGSPPVR.A               | S179:        | 3 | 2,6296 | 0,14  | 0,283  |
| 8 | Q86TB9 PATL1_HUMAN  | R.STS#PIIGSPPVR.A               | S179:        | 2 | 2,506  | 0,177 | -0,189 |
| 8 | Q6UB99 ANR11_HUMAN  | R.SVS#VDIR.R                    | S1793:       | 2 | 2,2222 | 0,154 | 0      |
| 8 | A8MQ02 A8MQ02_HUMAN | R.LFS#QGQDVSNK.V                | S1799:       | 2 | 3,2777 | 0,286 | -0,375 |
| 8 | Q9HAS0 NJMU_HUMAN   | K.ELES#SEEGSAEER.R              | S18:         | 2 | 4,4486 | 0,396 | -0,538 |
| 8 | Q9Y383 LC7L2_HUMAN  | R.AM*LDQLM*GTS#R.D              | S18:         | 2 | 3,5656 | 0,423 | -0,366 |
| 8 | O00418 EF2K_HUMAN   | R.LEGVDGGQS#PR.A                | S18:         | 2 | 2,9996 | 0,465 | -0,102 |
| 8 | Q9BV40 VAMP8_HUMAN  | R.NLQS#EVEGVK.N                 | S18:         | 2 | 2,1478 | 0,246 | -0,103 |
| 8 | O15231 ZN185_HUMAN  | R.RSS#TSGDT#EEEEEEVVPFSSDEQK.R  | S18:T23:     | 3 | 5,0078 | 1     | -0,857 |
| 8 | POC1Z6 TFPT_HUMAN   | R.TPAPPEPGS#PAPGEGPSGR.K        | S180:        | 2 | 3,3127 | 0,515 | -0,398 |
| 8 | Q92945 FUBP2_HUMAN  | K.VQIS#PDSGGLPER.S              | S181:        | 2 | 3,14   | 0,391 | -0,34  |
| 8 | Q5T4S7 UBR4_HUMAN   | K.ELASPV#PELR.Q                 | S181:        | 2 | 2,5634 | 0,26  | 0      |
| 8 | Q9H1E3 NUCKS_HUMAN  | K.ATVTPS#PVK.G                  | S181:        | 2 | 2,4001 | 0,405 | -0,498 |
| 8 | Q9NQ3 RTN4_HUMAN    | R.RGS#SGS#VDETLFALPAASEPVIR.S   | S181:S184:   | 3 | 3,4212 | 0,244 | -0,508 |
| 8 | Q5UIP0 RIF1_HUMAN   | K.EDNDTINDS#LIVSETK.S           | S1810:       | 2 | 4,5804 | 0,533 | 0      |
| 8 | Q5VT06 CE350_HUMAN  | K.ATS#PGPTDLETR.S               | S1818:       | 2 | 2,192  | 0,48  | -0,737 |
| 8 | Q96N67 DOCK7_HUMAN  | R.SM*S#IDDTPR.G                 | S182:        | 2 | 2,9137 | 0,408 | 0      |
| 8 | Q8TB72 PUM2_HUMAN   | R.QAS#PTEVVER.L                 | S182:        | 2 | 2,4073 | 0,407 | -0,408 |
| 8 | Q9NQW6 ANLN_HUMAN   | K.AAS#PPRPLSNASAT#PVGR.R        | S182:T194:   | 3 | 3,0786 | 0,314 | -0,362 |
| 8 | O15372 EIF3H_HUMAN  | K.DFS#PEALK.K                   | S183:        | 2 | 2,1248 | 0,097 | -0,062 |
| 8 | Q8WUF5 IASPP_HUMAN  | R.AGS#PRGS#PLAEGPQAFFPER.G      | S183:S187:   | 3 | 4,5824 | 0,457 | -0,164 |
| 8 | Q14573 ITPR3_HUMAN  | R.VAS#FSIPGSSSR.Y               | S1832:       | 2 | 2,8079 | 0,479 | -0,383 |
| 8 | Q8WVT3 TTC15_HUMAN  | K.SPS#FGGASEASAR.T              | S184:        | 2 | 2,875  | 0,368 | -0,936 |
| 8 | P50548 ERF_HUMAN    | R.LGRGS#VSDCS#DGTSELEEPLGEDPR.A | S185:S190:   | 3 | 5,8134 | 1     | -0,065 |
| 8 | Q9Y2F5 K0947_HUMAN  | R.LDTGS#PEPETR.G                | S1854:       | 2 | 3,4858 | 0,465 | -0,286 |
| 8 | O43572 AKA10_HUMAN  | K.QSSLAEPVS#PSK.K               | S187:        | 2 | 2,5279 | 0,274 | -0,279 |
| 8 | O95218 ZRAB2_HUMAN  | K.YNLDAS#EEEDSNK.K              | S188:        | 2 | 5,5628 | 0,604 | -0,919 |
| 8 | Q96PY5 FMNL2_HUMAN  | R.GSNLPSVGN#VSR.S               | S188:        | 2 | 3,3298 | 0,452 | -0,168 |



|   |                     |                                |              |   |        |       |        |
|---|---------------------|--------------------------------|--------------|---|--------|-------|--------|
| 8 | Q9Y388 RBMX2_HUMAN  | R.EVQAEQPSSSS#PR.R             | S188:        | 2 | 2,7522 | 0,438 | -0,165 |
| 8 | Q13111 CAF1A_HUMAN  | R.S#CPELTSGPR.M                | S188:        | 2 | 2,209  | 0,256 | 0      |
| 8 | Q8IYI6 EXOC8_HUMAN  | R.QLES#GGFEAR.L                | S19:         | 2 | 2,9974 | 0,331 | -0,104 |
| 8 | Q9UNE7 STUB1_HUMAN  | R.LGAGGGS#PEKS#PSAQELK.E       | S19:S23:     | 2 | 3,8433 | 0,485 | -0,391 |
| 8 | O60841 IF2P_HUMAN   | R.INSSGESGDES#DEFLQSR.K        | S190:        | 3 | 3,1715 | 0,347 | 0,18   |
| 8 | Q7Z6Z7 HUWE1_HUMAN  | R.GS#GTASDDEFENLR.I            | S1903:       | 2 | 3,5961 | 0,434 | -0,232 |
| 8 | Q7Z6Z7 HUWE1_HUMAN  | R.GSGTAS#DDEFENLR.I            | S1907:       | 3 | 3,6574 | 0,21  | -0,464 |
| 8 | P21291 CSRP1_HUMAN  | K.GFGFGQGAGALVHS#E.-           | S192:        | 2 | 4,2831 | 0,55  | -0,161 |
| 8 | Q00587 BORG5_HUMAN  | R.SDS#LLSFR.L                  | S192:        | 2 | 3,0228 | 0,432 | 0      |
| 8 | B0I1T6 B0I1T6_HUMAN | K.LGFS#SPYEGVLNKS#PK.T         | S1925:S1935: | 2 | 2,8832 | 0,245 | -0,454 |
| 8 | Q9BVC5 ASHWN_HUMAN  | K.SPPLS#PVGTTVPK.L             | S193:        | 2 | 3,2343 | 0,22  | -0,269 |
| 8 | Q6IQ26 RA6I1_HUMAN  | R.FNS#YDISR.D                  | S193:        | 2 | 2,8108 | 0,223 | 0      |
| 8 | Q5TBA9 FRY_HUMAN    | K.NSDLLTVLS#R.S                | S1936:       | 2 | 2,1623 | 0,287 | 0      |
| 8 | P35580 MYH10_HUMAN  | R.GGPISFS#SSR.S                | S1937:       | 2 | 2,6003 | 0,245 | 0,114  |
| 8 | Q14151 SAFB2_HUMAN  | K.NTLETS#SLNFK.V               | S194:        | 2 | 3,2837 | 0,497 | -0,091 |
| 8 | P35579 MYH9_HUMAN   | K.GAGDGS#DEEVDGK.A             | S1943:       | 2 | 2,7468 | 0,357 | -0,464 |
| 8 | Q9NV56 MRGBP_HUMAN  | K.VLTANSNPSS#PSAAK.R           | S195:        | 2 | 3,521  | 0,465 | -0,56  |
| 8 | Q00587 BORG5_HUMAN  | R.SDSLLS#FR.L                  | S195:        | 2 | 2,4881 | 0,326 | -0,121 |
| 8 | Q8IWB9 TEX2_HUMAN   | K.SLS#TEVEPK.E                 | S196:        | 2 | 2,8676 | 0,281 | 0,114  |
| 8 | Q8TEA8 DTD1_HUMAN   | R.SASS#GAEGDVSSEREP.-          | S197:        | 2 | 2,9924 | 0,513 | -0,519 |
| 8 | P35908 K22E_HUMAN   | K.FAS#FIDK.V                   | S197:        | 2 | 2,7531 | 0,262 | 0      |
| 8 | Q8IWI9 MGAP_HUMAN   | K.QNSGAATSEETLNDS#LEDR.G       | S1985:       | 2 | 3,1299 | 0,449 | -0,231 |
| 8 | Q9UQN3 CHM2B_HUMAN  | K.ATIS#DEEIER.Q                | S199:        | 2 | 3,0041 | 0,31  | -0,393 |
| 8 | O14686 MLL2_HUMAN   | K.ASEPLS#PPPFGESR.K            | S1999:       | 2 | 2,6851 | 0,301 | -0,293 |
| 8 | P30622 CLIP1_HUMAN  | K.TASESISNLS#EAGSIK.K          | S200:        | 2 | 4,8975 | 0,444 | -0,292 |
| 8 | Q92785 REQU_HUMAN   | K.LDAS#ILEDR.D                 | S200:        | 2 | 2,2716 | 0,151 | 0,219  |
| 8 | P16989 DBPA_HUMAN   | R.NYAGEEEEEGS#GSSEGFDPATDR.Q   | S201:        | 3 | 5,1254 | 0,469 | -0,421 |
| 8 | Q9Y3X0 CCDC9_HUMAN  | R.S#GPLEESER.D                 | S202:        | 2 | 2,3035 | 0,412 | 0,225  |
| 8 | Q03164 HRX_HUMAN    | R.NSAILSDPSVFSPLNKS#ET#K.S     | S202:T204:   | 3 | 2,643  | 0,089 | -0,319 |
| 8 | Q9P265 DIP2B_HUMAN  | K.GTSGS#LADVFNTR.I             | S203:        | 2 | 3,6817 | 0,451 | -0,248 |
| 8 | P12270 TPR_HUMAN    | R.AADSQNSGEGNTGAAESS#FSQEVSR.E | S2034:       | 3 | 6,1138 | 0,444 | -0,214 |
| 8 | Q8TEA8 DTD1_HUMAN   | R.SASSGAEGDVSS#EREP.-          | S205:        | 2 | 3,9759 | 0,503 | -0,593 |
| 8 | Q8NEY8 PPHLN_HUMAN  | R.DTS#PSSGS#AVSSSK.V           | S205:        | 2 | 3,1477 | 0,437 | -0,532 |

|   |                     |                               |            |   |        |       |        |
|---|---------------------|-------------------------------|------------|---|--------|-------|--------|
| 8 | Q58FF7 H90B3_HUMAN  | K.EIS#DDEAEEEK.G              | S205:      | 2 | 2,3766 | 0,396 | -0,089 |
| 8 | O75683 SURF6_HUMAN  | K.VEVS#EDEPASK.A              | S206:      | 2 | 3,1966 | 0,376 | -0,384 |
| 8 | Q01130 SFRS2_HUMAN  | R.S#KS#PPKSPEEEGAVSS.-        | S206:S208: | 2 | 3,0632 | 0,441 | -0,687 |
| 8 | O75179 ANR17_HUMAN  | R.NSPLDCGSAS#PNK.V            | S2067:     | 2 | 2,5234 | 0,308 | 0,171  |
| 8 | P49327 FAS_HUMAN    | R.LGM*LS#PEGTCK.A             | S207:      | 2 | 2,7022 | 0,319 | -0,757 |
| 8 | Q9NS23 RASF1_HUMAN  | R.TS#FYLPK.D                  | S207:      | 2 | 2,2157 | 0,201 | -0,065 |
| 8 | Q53EP0 FND3B_HUMAN  | R.LNS#PPSSIIK.S               | S208:      | 2 | 2,6169 | 0,237 | -0,206 |
| 8 | P38159 HNRPG_HUMAN  | R.DVYLS#PR.D                  | S208:      | 2 | 2,0663 | 0,18  | -1,378 |
| 8 | P38159 HNRPG_HUMAN  | R.DVYLS#PRDDGYS#TK.D          | S208:S215: | 2 | 3,2259 | 0,379 | -0,275 |
| 8 | Q14244 MAP7_HUMAN   | R.LSSSATLLNS#PDR.A            | S209:      | 2 | 3,7218 | 0,496 | -0,24  |
| 8 | P49790 NU153_HUMAN  | K.NTSLPPLWS#PEAER.S           | S209:      | 2 | 2,7487 | 0,373 | -0,291 |
| 8 | Q6IQ22 RAB12_HUMAN  | R.AGGGGGLGAGS#PALSGGQGR.R     | S21:       | 2 | 5,3458 | 0,623 | -0,587 |
| 8 | Q9BRS2 RIOK1_HUMAN  | R.VVPGQFDDADS#SDSEN.R.D       | S21:       | 2 | 2,9815 | 0,513 | -0,636 |
| 8 | O95671 ASML_HUMAN   | R.VVLASAS#PR.R                | S21:       | 2 | 2,9754 | 0,471 | 0,125  |
| 8 | Q3KR37 GRM1B_HUMAN  | R.STPACS#PILR.K               | S21:       | 2 | 2,3859 | 0,325 | -0,206 |
| 8 | P78347 GTF2I_HUMAN  | R.SILS#PGGSCGPIK.V            | S210:      | 2 | 2,8162 | 0,404 | -0,09  |
| 8 | Q5VUA4 ZN318_HUMAN  | R.IPS#PNILK.T                 | S2101:     | 2 | 3,2647 | 0,267 | 0      |
| 8 | Q13242 SFRS9_HUMAN  | R.GS#PHYFS#PFRPY.-            | S211:S216: | 3 | 2,6197 | 0,272 | 0      |
| 8 | Q13242 SFRS9_HUMAN  | R.GS#PHYFS#PFRPY.-            | S211:S216: | 2 | 2,4431 | 0,322 | -0,907 |
| 8 | P18433 PTPRA_HUMAN  | R.TEDVEPQSVPLLARS#PST#NR.K    | S211:T214: | 3 | 3,2841 | 0,269 | -0,233 |
| 8 | Q7Z417 NUFP2_HUMAN  | K.GADNDGS#GSESGYTTPK.K        | S212:      | 2 | 4,6417 | 0,565 | -0,567 |
| 8 | Q96B36 AKTS1_HUMAN  | R.SSDEENGPPSS#PDLDR.I         | S212:      | 2 | 3,922  | 0,407 | 0,616  |
| 8 | P60174 TPIS_HUMAN   | R.IIYGGs#VTGATCK.E            | S212:      | 2 | 3,4205 | 0,52  | 0,087  |
| 8 | O95639 CPSF4_HUMAN  | R.SSSLIQLTSQNSS#PNQQR.T       | S212:      | 3 | 3,2052 | 0,112 | -0,178 |
| 8 | P02545 LMNA_HUMAN   | K.NIYS#EELR.E                 | S212:      | 2 | 2,5716 | 0,298 | -0,111 |
| 8 | Q9NP61 ARFG3_HUMAN  | K.ATLEVSS#IIK.K               | S212:      | 2 | 2,4095 | 0,189 | -0,107 |
| 8 | O95639 CPSF4_HUMAN  | R.SSSLIQLTSQNSS#PNQQR.T       | S212:      | 2 | 2,3635 | 0,567 | -0,356 |
| 8 | A8K0M8 A8K0M8_HUMAN | R.AAAS#PPTPIR.S               | S212:      | 2 | 2,0544 | 0,159 | 0      |
| 8 | Q8TDW0 LRC8C_HUMAN  | R.SNTIQSGPEGLVNSQS#LKS#IPEK.F | S212:S215: | 3 | 2,9344 | 0,186 | -0,206 |
| 8 | Q09666 AHNK_HUMAN   | K.TVIRLPSGS#GAAS#PTGSAVDIR.A  | S212:S216: | 3 | 3,1614 | 0,253 | -0,242 |
| 8 | Q9H4L7 SMRCD_HUMAN  | R.KLSS#SSEPY#EEDEFNDDQSIK.K   | S212:Y217: | 3 | 5,1432 | 1     | -0,491 |
| 8 | Q99698 LYST_HUMAN   | K.LTGS#LGCSIDR.L              | S2124:     | 2 | 3,3119 | 0,425 | -0,097 |
| 8 | Q8N565 MREG_HUMAN   | K.ELHYLPFPS#P.-               | S213:      | 2 | 2,8422 | 0,349 | -0,572 |

|   |                    |                         |            |   |        |       |        |
|---|--------------------|-------------------------|------------|---|--------|-------|--------|
| 8 | Q14934 NFAC4_HUMAN | R.FGLGS#PLPSPR.A        | S213:      | 2 | 2,0713 | 0,402 | 0,808  |
| 8 | Q01082 SPTB2_HUMAN | K.GEQVSQNGLPAEQGS#PR.M  | S2138:     | 2 | 4,6559 | 0,538 | -0,133 |
| 8 | Q01082 SPTB2_HUMAN | K.GEQVSQNGLPAEQGS#PR.M  | S2138:     | 3 | 2,753  | 0,109 | -0,299 |
| 8 | Q9H0H5 RGAP1_HUMAN | R.SIGSAVDQGNES#IVAK.T   | S214:      | 2 | 4,8121 | 0,436 | -0,369 |
| 8 | Q7Z417 NUFP2_HUMAN | K.GADNDGSGS#ESGYTTPK.K  | S214:      | 3 | 3,7537 | 0,409 | 0      |
| 8 | Q9H1E3 NUCKS_HUMAN | K.EEDEEPES#PPEK.K       | S214:      | 2 | 2,242  | 0,28  | -0,653 |
| 8 | A4D1S0 KLRG2_HUMAN | R.ASPAEGSAGSPGS#PTCCR.C | S215:      | 2 | 3,7798 | 0,577 | -0,6   |
| 8 | Q01082 SPTB2_HUMAN | K.ESSPIPS#PTSDR.K       | S2169:     | 2 | 2,0392 | 0,136 | -0,09  |
| 8 | P05023 AT1A1_HUMAN | K.VDNSS#LTGESEPQTR.S    | S217:      | 2 | 2,9641 | 0,348 | -0,287 |
| 8 | Q8N4S0 CCD82_HUMAN | R.VVEDEGS#SVEM*EQK.T    | S219:      | 2 | 4,9522 | 0,491 | -0,294 |
| 8 | Q53HL2 BOREA_HUMAN | R.IYNISGNGS#PLADSK.E    | S219:      | 2 | 4,5814 | 0,556 | -0,227 |
| 8 | P49006 MRP_HUMAN   | R.GDVTAEEAAGAS#PAK.A    | S22:       | 2 | 3,8476 | 0,541 | -0,42  |
| 8 | P02545 LMNA_HUMAN  | R.SGAQASSTPLS#PTR.I     | S22:       | 2 | 3,3242 | 0,481 | -0,169 |
| 8 | Q9BRS2 RIOK1_HUMAN | R.VVPGQFDDADSS#DSENR.D  | S22:       | 3 | 2,8804 | 0,428 | -0,477 |
| 8 | Q9UBN7 HDAC6_HUMAN | R.QNPQS#PPQDSSVTSK.R    | S22:       | 2 | 2,3301 | 0,195 | -0,508 |
| 8 | Q9BRS2 RIOK1_HUMAN | R.VVPGQFDDADSS#DSENR.D  | S22:       | 2 | 2,0026 | 0,155 | -0,573 |
| 8 | Q969R8 ITFG2_HUMAN | K.DTGS#PPASEGPTDGSR.E   | S220:      | 2 | 2,3558 | 0,41  | -0,606 |
| 8 | Q9UKX7 NUP50_HUMAN | K.VAAEQS#PSLFGSTK.L     | S221:      | 2 | 3,6707 | 0,353 | -0,152 |
| 8 | O15231 ZN185_HUMAN | R.QSS#PSGSEQLVR.R       | S221:      | 2 | 2,1018 | 0,341 | -0,45  |
| 8 | Q9UPW0 FOXJ3_HUMAN | K.VTLYNTDQDGS#PR.S      | S223:      | 2 | 4,7446 | 0,625 | -0,489 |
| 8 | A1L170 YA022_HUMAN | R.ASS#PSLIER.N          | S223:      | 2 | 2,4875 | 0,43  | 0      |
| 8 | P05549 AP2A_HUMAN  | R.LSLLSS#TSK.Y          | S223:      | 2 | 2,3958 | 0,201 | 0      |
| 8 | Q14315 FLNC_HUMAN  | R.LGS#FGSITR.Q          | S2233:     | 2 | 2,2339 | 0,294 | 0,24   |
| 8 | Q13573 SNW1_HUMAN  | R.GPPS#PPAPVM*HS#PSR.K  | S224:S232: | 2 | 3,6236 | 0,445 | -0,505 |
| 8 | Q13573 SNW1_HUMAN  | R.GPPS#PPAPVM*HS#PSR.K  | S224:S232: | 3 | 3,0866 | 0,308 | 0,108  |
| 8 | O95071 UBR5_HUMAN  | R.DLS#LEVDR.D           | S2241:     | 2 | 2,1937 | 0,125 | -0,238 |
| 8 | O75643 U520_HUMAN  | R.EEAS#DDDM*EGDEAVVR.C  | S225:      | 2 | 4,3801 | 0,477 | -0,59  |
| 8 | Q2KHR2 RFXD2_HUMAN | K.LQS#PLPGESAAK.K       | S225:      | 2 | 3,4897 | 0,387 | -0,573 |
| 8 | P41440 S19A1_HUMAN | R.CETSAS#ELER.M         | S225:      | 2 | 2,5324 | 0,303 | -0,774 |
| 8 | Q9H8W4 PKHF2_HUMAN | R.SDS#YSQSLK.S          | S226:      | 2 | 2,6423 | 0,42  | 0,223  |
| 8 | P52701 MSH6_HUMAN  | K.SEEDNEIES#EEEVQPK.T   | S227:      | 3 | 4,9984 | 0,356 | 0,278  |
| 8 | P52701 MSH6_HUMAN  | K.SEEDNEIES#EEEVQPK.T   | S227:      | 2 | 4,6264 | 0,417 | 0,248  |
| 8 | Q9BW71 HIRP3_HUMAN | K.ESEQES#EEEILAQK.K     | S227:      | 2 | 3,4901 | 0,303 | 0,212  |

|   |                    |                                   |              |   |        |       |        |
|---|--------------------|-----------------------------------|--------------|---|--------|-------|--------|
| 8 | Q5JTV8 TOIP1_HUMAN | K.VNFSEEGETEEDDQDS#SHS#SVTTVK.A   | S227:S230:   | 3 | 4,0651 | 1     | -0,439 |
| 8 | Q9UQ35 SRRM2_HUMAN | R.TPAAAAAM*NLAS#PR.T              | S2272:       | 2 | 4,6476 | 0,535 | 0      |
| 8 | O94915 FRYL_HUMAN  | K.TYGGDTGS#PEISFTK.I              | S2272:       | 2 | 4,4551 | 0,54  | -0,446 |
| 8 | Q9UQ35 SRRM2_HUMAN | R.TPAAAAAMNLAS#PR.T               | S2272:       | 2 | 3,6506 | 0,454 | -0,086 |
| 8 | Q9UQ35 SRRM2_HUMAN | R.TPAAAAAM*NLAS#PR.T              | S2272:       | 3 | 2,9975 | 0,261 | 0,064  |
| 8 | Q8NE71 ABCF1_HUMAN | K.AEQGS#EEEEEGEEEEEGGESK.A        | S228:        | 3 | 5,5514 | 0,643 | -0,451 |
| 8 | Q13033 STRN3_HUMAN | K.NLEQILNGGES#PK.Q                | S229:        | 2 | 4,0609 | 0,428 | -0,083 |
| 8 | Q13033 STRN3_HUMAN | K.NLEQILNGGES#PK.Q                | S229:        | 3 | 2,8685 | 0,283 | 0,185  |
| 8 | P51608 MECP2_HUMAN | K.M*PFQTS#PGGK.A                  | S229:        | 2 | 2,738  | 0,22  | 0,106  |
| 8 | Q00653 NFKB2_HUMAN | K.LNSS#IVEPK.E                    | S23:         | 2 | 2,5485 | 0,222 | -0,457 |
| 8 | P20700 LMNB1_HUMAN | R.AGGPTTPLS#PTR.L                 | S23:         | 2 | 2,1942 | 0,347 | -0,593 |
| 8 | O75970 MPDZ_HUMAN  | R.GSLPQLVS#PIVSR.S                | S230:        | 2 | 2,8112 | 0,374 | -0,341 |
| 8 | P30305 MPIP2_HUMAN | R.EAFAQRPS#APDLM*CLS#PDR.K        | S230:S238:   | 3 | 3,2426 | 0,308 | -0,226 |
| 8 | Q9UPU9 SAM4A_HUMAN | K.AYSS#PSTTPEAR.R                 | S231:        | 2 | 2,5058 | 0,432 | -0,272 |
| 8 | O95359 TACC2_HUMAN | K.LDNTPAS#PPRS#PAEPNDIPIAK.G      | S2317:S2321: | 3 | 4,8957 | 0,294 | -0,744 |
| 8 | Q13283 G3BP1_HUMAN | K.SSS#PAPADIAQTVQEDLR.T           | S232:        | 3 | 4,8541 | 0,402 | -0,186 |
| 8 | Q13283 G3BP1_HUMAN | K.SSS#PAPADIAQTVQEDLR.T           | S232:        | 2 | 3,8073 | 0,576 | -0,373 |
| 8 | P08559 ODPA_HUMAN  | R.YGMGTS#VER.A                    | S232:        | 2 | 3,2203 | 0,53  | -0,226 |
| 8 | Q9BST9 RTKN_HUMAN  | R.VRAS#LDSAGGS#GSSPILLPTPVVGGPR.Y | S232:S239:   | 3 | 3,1226 | 0,081 | 0,406  |
| 8 | Q9BST9 RTKN_HUMAN  | R.VRAS#LDSAGSGSS#PILLPTPVVGGPR.Y  | S232:S242:   | 3 | 4,1856 | 1     | -0,406 |
| 8 | Q9GZY8 CB033_HUMAN | R.GILSIQS#STR.R                   | S233:        | 2 | 2,9845 | 0,358 | -0,486 |
| 8 | O95644 NFAC1_HUMAN | R.GLGACTLLGS#PR.H                 | S233:        | 2 | 2,1878 | 0,333 | 0,095  |
| 8 | Q9P107 GMIP_HUMAN  | R.SQGS#PEDSAPQASPGPSK.Q           | S234:        | 2 | 4,7548 | 0,512 | -0,743 |
| 8 | Q9UQ35 SRRM2_HUMAN | R.TAAALAPAS#LTSAR.M               | S2365:       | 2 | 2,9173 | 0,269 | -0,53  |
| 8 | Q2Y0W8 S4A8_HUMAN  | R.S#FAEVGK.K                      | S237:        | 2 | 2,3103 | 0,446 | 0,149  |
| 8 | Q86X53 ERIC1_HUMAN | R.EEDGADAS#EEDLTR.A               | S238:        | 2 | 3,7415 | 0,425 | -0,528 |
| 8 | Q86VS8 HOOK3_HUMAN | R.LNQSDSIEDPNS#PAGR.R             | S238:        | 2 | 3,5162 | 0,492 | -0,891 |
| 8 | Q15773 MLF2_HUMAN  | R.LAIQGPEDS#PSR.Q                 | S238:        | 2 | 2,8362 | 0,33  | -0,542 |
| 8 | Q6U841 S4A10_HUMAN | R.S#FADIGK.K                      | S238:        | 2 | 2,2323 | 0,12  | -0,373 |
| 8 | Q13136 LIPA1_HUMAN | R.S#S#DGSLSHEEDLAK.V              | S238:S239:   | 2 | 2,1775 | 0,254 | 0,299  |
| 8 | Q9UQ35 SRRM2_HUMAN | R.M*APALSGANLTS#PR.V              | S2382:       | 2 | 3,8422 | 0,557 | -0,329 |
| 8 | Q9UQ35 SRRM2_HUMAN | R.VPLS#AYER.V                     | S2388:       | 2 | 2,9057 | 0,342 | -0,06  |
| 8 | Q5QJE6 TDIF2_HUMAN | K.QIVGTPVNSEDS#DTR.Q              | S239:        | 2 | 2,8945 | 0,377 | 0,216  |

|   |                    |                                |            |   |        |       |        |
|---|--------------------|--------------------------------|------------|---|--------|-------|--------|
| 8 | Q9UGP4 LIMD1_HUMAN | R.SS#EGSLGGQNSGIGGR.S          | S240:      | 2 | 4,9161 | 0,503 | -0,633 |
| 8 | Q8N6H7 ARFG2_HUMAN | K.VSSQS#FSEIER.Q               | S240:      | 2 | 2,9067 | 0,292 | -0,362 |
| 8 | O60664 M6PBP_HUMAN | R.LGS#LSER.L                   | S241:      | 2 | 2,0434 | 0,117 | 0      |
| 8 | Q9UBC2 EP15R_HUMAN | R.STPS#HGSVSSLNSTGSL#PK.H      | S241:S255: | 3 | 4,2931 | 1     | -0,088 |
| 8 | Q5T200 ZC3HD_HUMAN | K.TSAVSS#PLLDQQR.N             | S242:      | 2 | 3,4487 | 0,493 | -0,082 |
| 8 | Q9P107 GMIP_HUMAN  | R.SQGSPEDSAPQAS#PGPSK.Q        | S243:      | 2 | 3,9729 | 0,455 | -0,675 |
| 8 | Q8TDY2 RBCC1_HUMAN | R.STELVLS#PDM*PR.T             | S243:      | 2 | 3,1539 | 0,245 | -0,593 |
| 8 | Q9Y2W1 TR150_HUMAN | R.ASAVSELS#PR.E                | S243:      | 2 | 2,9285 | 0,378 | -0,556 |
| 8 | Q96C92 SDCG3_HUMAN | R.VSPAS#PAGS#PSADFAVHGESLGDR.H | S243:S247: | 3 | 2,9519 | 0,255 | -0,296 |
| 8 | Q5THJ4 VP13D_HUMAN | R.NSS#SESAIVPK.T               | S2435:     | 2 | 2,6408 | 0,193 | 0      |
| 8 | Q9BZG1 RAB34_HUMAN | R.INSDDS#NLYLTASK.K            | S244:      | 2 | 4,6231 | 0,561 | -0,301 |
| 8 | Q16204 CCDC6_HUMAN | K.LDQPVSAAPS#PR.D              | S244:      | 2 | 3,5027 | 0,442 | -1,271 |
| 8 | Q56NI9 ESCO2_HUMAN | K.SEVIEDS#DVETVSEK.K           | S244:      | 2 | 3,0572 | 0,334 | -0,419 |
| 8 | Q5T230 UTF1_HUMAN  | R.GPGS#PPPPAR.E                | S245:      | 2 | 2,3078 | 0,229 | -0,22  |
| 8 | Q9H0G5 CCD55_HUMAN | K.VEENPDADS#DFDAK.S            | S248:      | 2 | 4,226  | 0,448 | -0,374 |
| 8 | P06400 RB_HUMAN    | K.TAVIPINGS#PR.T               | S249:      | 2 | 2,6639 | 0,153 | -0,203 |
| 8 | Q9Y6A5 TACC3_HUMAN | K.NTENCDFLFS#PPEVTGR.S         | S25:       | 3 | 4,4321 | 0,419 | -0,355 |
| 8 | P16949 STMN1_HUMAN | R.ASGQAFELILS#PR.S             | S25:       | 2 | 4,0794 | 0,333 | -0,249 |
| 8 | Q9Y6A5 TACC3_HUMAN | K.NTENCDFLFS#PPEVTGR.S         | S25:       | 2 | 4,0074 | 0,582 | -0,473 |
| 8 | P16949 STMN1_HUMAN | R.ASGQAFELILS#PR.S             | S25:       | 3 | 2,7244 | 0,208 | -0,125 |
| 8 | Q96ST2 IWS1_HUMAN  | R.ISDS#ESEDPPR.H               | S250:      | 2 | 2,999  | 0,426 | -0,279 |
| 8 | Q9UPT5 EXOC7_HUMAN | K.SSSSSGVPYS#PAIPNK.R          | S250:      | 2 | 2,1847 | 0,353 | -0,515 |
| 8 | Q8IWI9 MGAP_HUMAN  | K.M*GSDEFDIS#PR.I              | S2502:     | 2 | 3,6017 | 0,389 | -0,09  |
| 8 | Q8IUD2 RB6I2_HUMAN | R.DLNQLFQQDSS#SR.T             | S251:      | 2 | 3,3404 | 0,429 | -0,302 |
| 8 | O15085 ARHGB_HUMAN | R.NSVLSDPGLDS#PR.T             | S251:      | 2 | 2,0836 | 0,26  | 0,17   |
| 8 | O95359 TACC2_HUMAN | K.FSS#PTEELDYR.N               | S2512:     | 2 | 3,3323 | 0,546 | -0,428 |
| 8 | Q8IUD2 RB6I2_HUMAN | R.DLNQLFQQDSS#R.T              | S252:      | 3 | 2,9152 | 0,165 | 0      |
| 8 | Q9P2M7 CING_HUMAN  | K.QPAQSQNLS#PLSGFSR.S          | S252:      | 2 | 2,7319 | 0,346 | 0,475  |
| 8 | P52701 MSH6_HUMAN  | R.VIS#DSESDIGGS#DVEFKPDTK.E    | S252:S261: | 3 | 2,844  | 0,398 | -0,153 |
| 8 | Q3KQU3 MA7D1_HUMAN | R.CSVS#AVNLPK.H                | S254:      | 2 | 3,7025 | 0,327 | -0,106 |
| 8 | Q9H3P2 NELFA_HUMAN | R.SPTAPSVFS#PTGNR.T            | S254:      | 2 | 2,5414 | 0,279 | 0,163  |
| 8 | P52701 MSH6_HUMAN  | R.VISDS#ESDIGGS#DVEFKPDTK.E    | S254:S261: | 3 | 4,6374 | 0,373 | 0      |
| 8 | Q93008 USP9X_HUMAN | R.AQENYEGSEEV#PPQTK.D          | S2540:     | 2 | 4,6511 | 0,475 | -0,618 |

|   |                     |                                 |              |   |        |       |        |
|---|---------------------|---------------------------------|--------------|---|--------|-------|--------|
| 8 | Q9P2D1 CHD7_HUMAN   | R.NIPS#PGQLDPDTR.I              | S2559:       | 2 | 2,0162 | 0,11  | -0,246 |
| 8 | P49790 NU153_HUMAN  | K.TSQLGDS#PFYPGK.T              | S257:        | 2 | 3,5206 | 0,449 | -0,165 |
| 8 | Q8TDY2 RBCC1_HUMAN  | R.TTNESLLTS#FPK.S               | S257:        | 2 | 3,0072 | 0,511 | -0,172 |
| 8 | Q15942 ZYG_HUMAN    | R.GPPAS#SPAPAPKFS#PVTPK.F       | S258:S267:   | 2 | 4,0848 | 0,388 | -0,857 |
| 8 | O00443 P3C2A_HUMAN  | K.VSNLQVS#PK.S                  | S259:        | 2 | 3,382  | 0,367 | -0,116 |
| 8 | Q15942 ZYG_HUMAN    | R.GPPASS#PAPAPK.F               | S259:        | 2 | 2,8494 | 0,332 | -0,633 |
| 8 | Q15942 ZYG_HUMAN    | R.GPPASS#PAPAPKFS#PVTPK.F       | S259:S267:   | 2 | 4,8055 | 0,452 | -0,98  |
| 8 | Q15942 ZYG_HUMAN    | R.GPPASS#PAPAPKFS#PVTPK.F       | S259:S267:   | 3 | 2,9721 | 0,263 | -0,642 |
| 8 | Q6P1Q9 MTL2B_HUMAN  | R.FLS#DPA.V                     | S26:         | 2 | 2,226  | 0,19  | 0,344  |
| 8 | B2CI53 B2CI53_HUMAN | R.NGILASPQS#APGNLDSK.S          | S263:        | 2 | 4,6566 | 0,578 | -0,524 |
| 8 | Q15059 BRD3_HUMAN   | R.SES#PPPLSDPK.Q                | S263:        | 2 | 2,6542 | 0,431 | -0,198 |
| 8 | Q8NEF9 SRFB1_HUMAN  | K.EYFDDS#TEER.F                 | S264:        | 2 | 2,2396 | 0,246 | -0,623 |
| 8 | Q6NW34 CC017_HUMAN  | K.LFLINEQS#PR.A                 | S265:        | 2 | 3,3432 | 0,394 | -0,282 |
| 8 | Q12888 TP53B_HUMAN  | R.SEDM#PFS#PK.A                 | S265:        | 2 | 2,405  | 0,325 | 0      |
| 8 | Q8NFC6 FA44A_HUMAN  | K.STADS#GGEGLETAPK.S            | S266:        | 2 | 4,3069 | 0,543 | -0,569 |
| 8 | Q9NR19 ACSA_HUMAN   | R.AELGM#GDSTSQS#PPIK.R          | S267:        | 2 | 3,6853 | 0,493 | -0,498 |
| 8 | Q14573 ITPR3_HUMAN  | R.LGFVDVQNCIS#R.-               | S2670:       | 2 | 3,9591 | 0,505 | -0,246 |
| 8 | Q86XL3 ANKL2_HUMAN  | K.TSLPLS#PVK.T                  | S268:        | 2 | 2,1975 | 0,295 | -0,358 |
| 8 | Q9UQ35 SRRM2_HUMAN  | R.SLS#YSPVER.R                  | S2692:       | 2 | 2,4613 | 0,235 | 0,437  |
| 8 | Q9UQ35 SRRM2_HUMAN  | R.SLSYS#PVER.R                  | S2694:       | 2 | 2,3357 | 0,229 | 0,327  |
| 8 | P12956 KU70_HUMAN   | K.TEGDEEAEEEEQENLEAS#GDYK.Y     | S27:         | 3 | 6,0582 | 0,479 | -0,496 |
| 8 | P49736 MCM2_HUMAN   | R.GNDPLTSS#PGR.S                | S27:         | 2 | 2,9123 | 0,45  | -0,103 |
| 8 | Q9NQX3 GEPH_HUMAN   | R.DTASLSTTPSES#PR.A             | S270:        | 2 | 2,4849 | 0,213 | -0,319 |
| 8 | Q99848 EBP2_HUMAN   | R.ESYDDVSS#FR.A                 | S270:        | 2 | 2,4241 | 0,277 | -0,19  |
| 8 | Q13367 AP3B2_HUMAN  | K.AFYGS#EEDEAK.G                | S272:        | 2 | 2,5953 | 0,302 | 0      |
| 8 | Q12802 AKP13_HUMAN  | K.SGSLDSELSVS#PK.R              | S2728:       | 2 | 2,5346 | 0,272 | 0,176  |
| 8 | Q15768 EFNB3_HUMAN  | R.GGS#LGLGGGGGM#GPR.E           | S274:        | 2 | 3,5061 | 0,54  | -0,184 |
| 8 | Q9UJU6 DBNL_HUMAN   | R.AM#STTSIS#SPQPGK.L            | S274:        | 2 | 3,3231 | 0,51  | -0,41  |
| 8 | Q6KC79 NIPBL_HUMAN  | R.NAASFPLRS#PQPVCSS#PAGSEGTPK.G | S274:S280:   | 3 | 4,2897 | 0,308 | 0,07   |
| 8 | O75592 MYCB2_HUMAN  | R.S#LS#PNHNTLQTLK.S             | S2749:S2751: | 2 | 2,4096 | 0,15  | -0,454 |
| 8 | Q9NYQ6 CELR1_HUMAN  | R.TDLGESTAS#LDS#IVRDEGIQK.L     | S2761:S2764: | 3 | 3,5297 | 0,271 | -0,459 |
| 8 | O14757 CHK1_HUMAN   | R.VTS#GGVSESPGFSK.H             | S280:        | 2 | 3,837  | 0,446 | -0,567 |
| 8 | P33981 TTK_HUMAN    | R.VPVNLLNS#PDCDVK.T             | S281:        | 2 | 4,7423 | 0,373 | -0,296 |

|   |                    |                                 |              |   |        |       |        |
|---|--------------------|---------------------------------|--------------|---|--------|-------|--------|
| 8 | Q15942 ZYG_HUMAN   | K.FS#PGAPGGSGSQPNQK.L           | S281:        | 2 | 2,8133 | 0,33  | 0,229  |
| 8 | Q96H22 CENPN_HUMAN | K.SGLNGS#ILAER.E                | S282:        | 2 | 2,9542 | 0,387 | -0,204 |
| 8 | Q9NXR1 NDE1_HUMAN  | R.NLVYDQS#PNR.T                 | S282:        | 2 | 2,4017 | 0,392 | -0,19  |
| 8 | P15924 DESP_HUMAN  | K.GLPSPYNM*SSAPGS#R.S           | S2825:       | 2 | 3,5022 | 0,495 | -0,302 |
| 8 | Q8TAQ2 SMRC2_HUMAN | K.TLTDEVNS#PDSDR.R              | S283:        | 2 | 3,3391 | 0,515 | -0,798 |
| 8 | Q9Y624 JAM1_HUMAN  | K.VIYSQPS#AR.S                  | S284:        | 2 | 2,8024 | 0,43  | -0,222 |
| 8 | P61978 HNRPK_HUMAN | R.DYDDM*S#PR.R                  | S284:        | 2 | 2,2786 | 0,383 | -0,892 |
| 8 | P61978 HNRPK_HUMAN | R.DYDDMS#PR.R                   | S284:        | 2 | 2,0801 | 0,442 | 0      |
| 8 | Q9NWH9 SLTM_HUMAN  | K.DGQDAIAQS#PEK.E               | S289:        | 2 | 3,1971 | 0,381 | -0,182 |
| 8 | Q9C073 F117A_HUMAN | R.GCS#PPAPAGSPR.A               | S29:         | 2 | 2,782  | 0,471 | -0,099 |
| 8 | Q96MH2 HEX12_HUMAN | K.TSGAPGS#PQTPPER.H             | S29:         | 2 | 2,3825 | 0,281 | -0,417 |
| 8 | P18206 VINC_HUMAN  | R.DPSAS#PGDAGEQAIR.Q            | S290:        | 2 | 4,0883 | 0,419 | -0,787 |
| 8 | P05787 K2C8_HUMAN  | K.YEELQS#LAGK.H                 | S291:        | 2 | 3,5924 | 0,191 | -0,701 |
| 8 | Q9UDT6 CLIP2_HUMAN | R.IGFPSTS#PAK.A                 | S294:        | 2 | 2,6091 | 0,381 | -0,225 |
| 8 | Q5TON5 FBP1L_HUMAN | R.TIS#DGTISASK.Q                | S295:        | 2 | 2,2948 | 0,398 | -0,105 |
| 8 | Q9Y624 JAM1_HUMAN  | R.SEGEFKQTSS#FLV.-              | S296:        | 2 | 2,7636 | 0,453 | -0,238 |
| 8 | Q13371 PHLP_HUMAN  | R.NSATCHSEDS#DLEID.-            | S296:        | 2 | 2,5979 | 0,178 | -0,069 |
| 8 | Q8NFC6 FA44A_HUMAN | R.SLTVSDDAESS#EPER.K            | S2964:       | 2 | 4,0727 | 0,454 | -0,502 |
| 8 | Q96EQ0 SGTB_HUMAN  | R.SFS#SSAEHS.-                  | S297:        | 2 | 2,3792 | 0,376 | 0      |
| 8 | Q86UE4 LYRIC_HUMAN | K.LSSQIS#AGEEK.W                | S298:        | 2 | 2,5492 | 0,292 | 0      |
| 8 | P08670 VIME_HUMAN  | K.FADLS#EAANR.N                 | S299:        | 2 | 4,247  | 0,347 | -0,104 |
| 8 | Q92890 UFD1_HUMAN  | R.FVAFSGEGQS#LR.K               | S299:        | 2 | 3,959  | 0,546 | -0,443 |
| 8 | P49454 CENPF_HUMAN | K.QDSRGS#PLLGPPVPGPS#PIPSVTEK.R | S2996:S3007: | 3 | 2,856  | 0,155 | -0,274 |
| 8 | P53814 SMTN_HUMAN  | R.SLS#VLSPR.Q                   | S301:        | 2 | 2,0486 | 0,247 | -0,195 |
| 8 | O94880 PHF14_HUMAN | K.SNEDS#LILEK.S                 | S302:        | 2 | 3,1091 | 0,3   | 0      |
| 8 | Q86W56 PARG_HUMAN  | K.ESEPE#PM*DVDNSK.N             | S302:        | 2 | 2,5606 | 0,437 | -0,441 |
| 8 | Q96CW6 S7A6O_HUMAN | K.YPLDVQKEFGYDS#PHDLDS#D.-      | S302:S308:   | 3 | 4,731  | 0,483 | -0,366 |
| 8 | P49023 PAXI_HUMAN  | R.SS#PGGQDEGGFM*AQGK.T          | S303:        | 2 | 3,3505 | 0,527 | 0,222  |
| 8 | Q13247 SFRS6_HUMAN | R.SNS#PLPVPPSK.A                | S303:        | 2 | 3,0184 | 0,322 | 0      |
| 8 | A6NDB9 PALM3_HUMAN | R.VPEVVQTSS#PR.L                | S303:        | 2 | 2,8919 | 0,43  | -0,191 |
| 8 | P07195 LDHB_HUMAN  | R.GLTS#VINQK.L                  | S303:        | 2 | 2,8399 | 0,252 | -0,117 |
| 8 | Q6P0N0 CN106_HUMAN | K.NGSLLM*VS#DSER.T              | S304:        | 2 | 3,5584 | 0,493 | -0,521 |
| 8 | Q15007 FL2D_HUMAN  | R.EGNTTEDDFPS#SPGNGNK.S         | S305:        | 3 | 2,6772 | 0,108 | -0,282 |

|   |                     |                                   |            |   |        |       |        |
|---|---------------------|-----------------------------------|------------|---|--------|-------|--------|
| 8 | Q15007 FL2D_HUMAN   | R.EGNTTEDDFPSS#PGNGNK.S           | S306:      | 2 | 3,934  | 0,498 | -1,066 |
| 8 | Q9Y2I7 FYV1_HUMAN   | R.SAS#ITNLSLDR.S                  | S307:      | 2 | 3,889  | 0,516 | -0,194 |
| 8 | Q9BXF6 RFIP5_HUMAN  | R.TYS#DEANQM*R.V                  | S307:      | 2 | 3,3563 | 0,391 | -0,465 |
| 8 | Q15054 DPOD3_HUMAN  | R.VAL#DDETK.E                     | S307:      | 2 | 2,6388 | 0,491 | -0,115 |
| 8 | Q96MU7 YTDC1_HUMAN  | R.GIS#PIVFDR.S                    | S308:      | 2 | 3,2999 | 0,326 | -0,45  |
| 8 | Q9BW19 KIFC1_HUMAN  | K.APSQLPLS#GSR.L                  | S31:       | 2 | 2,8174 | 0,439 | -0,102 |
| 8 | Q92522 H1X_HUMAN    | K.AGGSAAALS#PSK.K                 | S31:       | 2 | 2,6477 | 0,39  | -0,119 |
| 8 | Q6PD74 P34_HUMAN    | K.AFWM*AIGGDRDEIEGLS#S#DEEH.-     | S310:S311: | 3 | 3,2342 | 0,184 | -0,693 |
| 8 | Q5HYI7 MTX3_HUMAN   | K.LTPAEENNSFQRLS#P.-              | S311:      | 2 | 3,0386 | 0,368 | -0,255 |
| 8 | O75122 CLAP2_HUMAN  | K.SS#GSVASLPQSDR.S                | S311:      | 2 | 2,2926 | 0,339 | -0,178 |
| 8 | Q9Y446 PKP3_HUMAN   | R.TLQRLS#S#GFDDIDLPSAVK.Y         | S313:S314: | 3 | 3,4725 | 0,202 | -1,153 |
| 8 | Q15678 PTN14_HUMAN  | K.ICTEQSNS#PPPIR.R                | S314:      | 2 | 2,9649 | 0,147 | -0,618 |
| 8 | Q9Y5K3 PCY1B_HUMAN  | R.M*LQALS#PK.Q                    | S315:      | 2 | 2,6477 | 0,205 | 0      |
| 8 | P49585 PCY1A_HUMAN  | R.M*LQAIS#PK.Q                    | S315:      | 2 | 2,435  | 0,151 | 0      |
| 8 | P04637 P53_HUMAN    | R.ALPNNTSSS#PQPK.K                | S315:      | 2 | 2,1245 | 0,412 | -0,172 |
| 8 | Q9UPQ6 Q9UPQ6_HUMAN | R.SESS#DFEVVPK.R                  | S319:      | 2 | 3,1841 | 0,364 | -0,094 |
| 8 | O95243 MBD4_HUMAN   | R.SLSS#GSNFCSEQK.T                | S319:      | 2 | 2,5791 | 0,249 | -0,646 |
| 8 | Q13523 PRP4B_HUMAN  | K.SINEENGEVS#EDQSQNK.H            | S32:       | 2 | 4,4958 | 0,469 | -0,368 |
| 8 | O76024 WFS1_HUMAN   | R.LNATAS#LEQER.S                  | S32:       | 2 | 3,5388 | 0,472 | -0,558 |
| 8 | Q96A65 EXOC4_HUMAN  | R.TLS#TSDDEVDR.E                  | S32:       | 2 | 2,8601 | 0,525 | -0,37  |
| 8 | Q9NY61 AATF_HUMAN   | R.YLVDGTKPNAGSEEIS#S#EDDELVEEK.K  | S320:S321: | 3 | 4,0179 | 0,37  | -0,607 |
| 8 | Q9BYI3 HYCCI_HUMAN  | R.NAVTSM*S#IR.G                   | S321:      | 2 | 2,7284 | 0,386 | -0,227 |
| 8 | Q86WB0 NIPA_HUMAN   | R.LPLVPES#PR.R                    | S321:      | 2 | 2,6643 | 0,2   | -0,224 |
| 8 | Q9UQ35 SRRM2_HUMAN  | R.GEGDAPFSEP GTTSTQRPS#S#PETATK.Q | S322:S323: | 3 | 4,5652 | 1     | -0,524 |
| 8 | P78310 CXAR_HUMAN   | K.TQYNQVPS#EDFER.T                | S323:      | 2 | 3,9659 | 0,451 | -0,288 |
| 8 | P26651 TTP_HUMAN    | R.LPIFNRI#VSE.-                   | S323:      | 2 | 2,8501 | 0,358 | -0,36  |
| 8 | Q9NQW6 ANLN_HUMAN   | K.TPIS#PLK.T                      | S323:      | 2 | 2,6011 | 0,289 | -0,73  |
| 8 | Q9Y608 LRRF2_HUMAN  | R.NSASATTPLSGNSS#R.R              | S324:      | 2 | 2,2345 | 0,274 | 0,159  |
| 8 | Q9BRD0 BUD13_HUMAN  | K.YEYDPDIS#PPR.K                  | S325:      | 2 | 3,5481 | 0,481 | -0,256 |
| 8 | Q8ND76 CCNY_HUMAN   | R.SAS#ADNLTLPR.W                  | S326:      | 2 | 3,0926 | 0,153 | -0,498 |
| 8 | Q9UKS6 PACN3_HUMAN  | R.SPDEVTLTS#IVPTR.D               | S327:      | 2 | 3,2564 | 0,386 | 0      |
| 8 | O14545 TRAD1_HUMAN  | R.ALPSLNTGSSS#PR.G                | S327:      | 2 | 2,4617 | 0,379 | -0,268 |
| 8 | P20749 BCL3_HUMAN   | R.APS#PEPAAPR.G                   | S33:       | 2 | 2,8966 | 0,31  | -0,227 |



|   |                     |                               |            |   |        |       |        |
|---|---------------------|-------------------------------|------------|---|--------|-------|--------|
| 8 | Q92597 NDRG1_HUMAN  | R.TAS#GSSVTSLDGTR.S           | S330:      | 2 | 3,3136 | 0,598 | -0,086 |
| 8 | P78310 CXAR_HUMAN   | R.TPQS#PTLPPAK.V              | S332:      | 2 | 2,9968 | 0,336 | -0,1   |
| 8 | P40925 MDHC_HUMAN   | K.ELTEEKESAFEFLS#SA.-         | S332:      | 2 | 2,5339 | 0,423 | -0,064 |
| 8 | P49915 GUAA_HUMAN   | K.TLNMTRS#PEEK.R              | S332:      | 2 | 2,3573 | 0,4   | -0,642 |
| 8 | Q8NFB2 T185A_HUMAN  | R.VVITQS#PGK.Y                | S333:      | 2 | 2,2773 | 0,373 | -0,242 |
| 8 | Q07352 TISB_HUMAN   | R.LPIFSRLS#ISDD.-             | S334:      | 2 | 3,3491 | 0,407 | -0,592 |
| 8 | Q86WB0 NIPA_HUMAN   | R.SQDATFS#PGSEQAEK.S          | S335:      | 2 | 4,8066 | 0,464 | -0,514 |
| 8 | Q9Y4K4 M4K5_HUMAN   | R.TAS#EINFDK.L                | S335:      | 2 | 3,1441 | 0,442 | -0,331 |
| 8 | Q86WB0 NIPA_HUMAN   | R.SQDATFS#PGSEQAEKS#PGPIVSR.T | S335:S344: | 3 | 4,8463 | 0,498 | -0,361 |
| 8 | Q92597 NDRG1_HUMAN  | R.TASGSSVTS#LDGTR.S           | S336:      | 2 | 3,3424 | 0,56  | -0,344 |
| 8 | Q99569 PKP4_HUMAN   | R.VASPSQGVGSSS#PK.R           | S337:      | 2 | 2,6583 | 0,117 | -0,734 |
| 8 | Q9UN36 NDRG2_HUMAN  | R.TASLTSAAAS#VDGNR.S          | S338:      | 2 | 3,9437 | 0,478 | -0,512 |
| 8 | Q8NCN4 RN169_HUMAN  | R.CVS#APDLTIEK.R              | S339:      | 2 | 3,0195 | 0,169 | 0      |
| 8 | Q2QGD7 ZXDC_HUMAN   | R.APAPLGAS#PAR.R              | S34:       | 2 | 3,0165 | 0,292 | -0,224 |
| 8 | P31751 AKT2_HUMAN   | K.SDGS#FIGYK.E                | S34:       | 2 | 2,3084 | 0,39  | -0,347 |
| 8 | P58340 MLF1_HUMAN   | R.SFS#EPFGR.D                 | S34:       | 2 | 2,104  | 0,15  | -0,303 |
| 8 | Q14498 RBM39_HUMAN  | R.TDASSASSFLDS#DELER.T        | S341:      | 2 | 3,8549 | 0,543 | -0,575 |
| 8 | Q9NVF7 FBX28_HUMAN  | R.EVM*ESAVGNSSGSGQNEES#PR.K   | S344:      | 3 | 4,6437 | 0,384 | -0,407 |
| 8 | P82094 TMF1_HUMAN   | R.SVSEINS#DDELSGK.G           | S344:      | 2 | 4,0345 | 0,423 | -0,313 |
| 8 | Q9BQ67 GRWD1_HUMAN  | K.SGS#PVATFK.Q                | S344:      | 2 | 3,2959 | 0,435 | 0      |
| 8 | Q9Y2U5 M3K2_HUMAN   | R.GSDIDNPTLTVM*DIS#PPSR#PR.A  | S344:S349: | 3 | 3,3778 | 0,195 | 0,217  |
| 8 | O14681 EI24_HUMAN   | K.FPS#PHPS#PAK.L              | S345:S349: | 2 | 2,9421 | 0,168 | -0,299 |
| 8 | Q8IY17 PLPL6_HUMAN  | R.LFPS#PGLPTRTS#PVR.G         | S345:S353: | 2 | 2,0535 | 0,211 | -0,547 |
| 8 | Q5QP82 WDR32_HUMAN  | R.TTS#SSDLTSSSSGPR.V          | S349:      | 2 | 3,221  | 1     | -0,632 |
| 8 | Q96G23 LASS2_HUMAN  | R.EETESS#EGEEAAAGGGAK.S       | S349:      | 2 | 2,4937 | 0,343 | -0,614 |
| 8 | Q15696 U2AFM_HUMAN  | R.DIYLS#PDR.T                 | S349:      | 2 | 2,2029 | 0,316 | 0      |
| 8 | Q9BVS4 RIOK2_HUMAN  | K.AEVYGS#ENESER.N             | S350:      | 2 | 3,422  | 0,475 | -0,252 |
| 8 | Q59FE8 Q59FE8_HUMAN | R.STPAEDDS#PGDSQVK.S          | S352:      | 2 | 3,0178 | 0,521 | -0,303 |
| 8 | P18615 NELFE_HUMAN  | K.SVWGLAVQNS#PK.G             | S353:      | 2 | 2,6963 | 0,407 | -0,42  |
| 8 | Q5SW79 CE170_HUMAN  | K.S#IKS#DVPVYLK.R             | S356:S359: | 2 | 2,9524 | 0,384 | -0,173 |
| 8 | P46013 KI67_HUMAN   | K.TPVQYSQQNS#PQK.H            | S357:      | 2 | 4,4649 | 0,538 | -0,641 |
| 8 | P46013 KI67_HUMAN   | K.TPVQYSQQNS#PQK.H            | S357:      | 3 | 4,1614 | 0,325 | -0,107 |
| 8 | P51991 ROA3_HUMAN   | R.SSGS#PYGGGYGSGGGGGYGSR.R    | S358:      | 2 | 4,181  | 0,68  | -0,797 |

|   |                    |                                   |            |   |        |       |        |
|---|--------------------|-----------------------------------|------------|---|--------|-------|--------|
| 8 | O15014 ZN609_HUMAN | R.FCDS#PTSDLEM*R.N                | S358:      | 2 | 3,3151 | 0,441 | -0,236 |
| 8 | P35611 ADDA_HUMAN  | R.SPGS#PVGEGTGSPPK.W              | S358:      | 2 | 3,1332 | 0,476 | -0,34  |
| 8 | Q9NQ55 SSF1_HUMAN  | R.VGGS#DEEASGIPSR.T               | S359:      | 2 | 3,8348 | 0,5   | -0,339 |
| 8 | P04075 ALDOA_HUMAN | K.GILAADES#TGSIK.R                | S36:       | 2 | 3,5539 | 0,583 | -0,259 |
| 8 | Q9NRX1 PNO1_HUMAN  | R.QAEQLS#AAGEGGDAGR.M             | S36:       | 2 | 3,4413 | 0,507 | -0,076 |
| 8 | P04222 1C03_HUMAN  | K.GGSCSQAASSNSAQGSDES#LIACKA.-    | S360:      | 3 | 4,1571 | 0,44  | -0,073 |
| 8 | Q9UGV2 NDRG3_HUMAN | R.SVTSNQSDGTQESCES#PDVLDR.H       | S361:      | 3 | 4,973  | 0,472 | -0,441 |
| 8 | O14929 HAT1_HUMAN  | R.LIS#PYK.K                       | S361:      | 2 | 2,1683 | 0,113 | 0      |
| 8 | P11532 DMD_HUMAN   | K.VNGTTVSS#PSTSLQR.S              | S3613:     | 2 | 2,3557 | 0,289 | -0,529 |
| 8 | Q8N568 DCLK2_HUMAN | R.SSS#NVNGPELDR.C                 | S362:      | 2 | 2,0565 | 0,207 | -0,346 |
| 8 | Q15910 EZH2_HUMAN  | R.LPNNS#SRPS#TPTINVLESK.D         | S362:S366: | 3 | 3,6233 | 0,198 | -0,165 |
| 8 | Q8IY17 PLPL6_HUMAN | R.M*VS#TSATDEPR.E                 | S363:      | 2 | 3,0733 | 0,364 | -0,378 |
| 8 | O94806 KPCD3_HUMAN | R.GLDDTEEPS#PPEDK.M               | S364:      | 2 | 3,3225 | 0,434 | -0,228 |
| 8 | Q9UKV3 ACINU_HUMAN | K.TTS#PLEEEER.E                   | S365:      | 2 | 2,935  | 0,304 | -0,384 |
| 8 | Q96T37 RBM15_HUMAN | R.EVDEIS#PEDDQR.A                 | S365:      | 2 | 2,5259 | 0,277 | -0,726 |
| 8 | Q9UPT6 JIP3_HUMAN  | R.TGSS#PTQGIVNK.A                 | S365:      | 2 | 2,0284 | 0,151 | -0,288 |
| 8 | Q9Y613 FHOD1_HUMAN | R.S#LEGGGCPAR.A                   | S367:      | 2 | 2,9945 | 0,364 | -0,225 |
| 8 | Q8N6H7 ARFG2_HUMAN | K.DNPFSLGES#FGSR.W                | S368:      | 2 | 3,4655 | 0,429 | -0,327 |
| 8 | Q96S94 CCNL2_HUMAN | K.ADS#PVNGLPK.G                   | S369:      | 2 | 2,9771 | 0,31  | 0      |
| 8 | P14618 KPYM_HUMAN  | R.LDIDS#PPITAR.N                  | S37:       | 2 | 3,6137 | 0,382 | -0,191 |
| 8 | Q03135 CAV1_HUMAN  | K.AM*ADELS#EK.Q                   | S37:       | 2 | 2,9393 | 0,452 | -0,224 |
| 8 | Q03135 CAV1_HUMAN  | K.AMADELS#EK.Q                    | S37:       | 2 | 2,8793 | 0,309 | -0,227 |
| 8 | P51991 ROA3_HUMAN  | R.SSGSPYGGGYGSGGGGS#GGYGSR.R      | S370:      | 2 | 4,1114 | 0,585 | -0,368 |
| 8 | O60343 TBCD4_HUMAN | R.FEINLIS#PDTK.S                  | S370:      | 2 | 3,1873 | 0,399 | -0,539 |
| 8 | Q9BW71 HIRP3_HUMAN | R.EVS#DSEAGGGPQGER.K              | S370:      | 2 | 3,138  | 0,28  | -0,628 |
| 8 | Q14694 UBP10_HUMAN | K.YSPPAIS#PLVSEK.Q                | S370:      | 2 | 2,2561 | 0,302 | -0,831 |
| 8 | Q15154 PCM1_HUMAN  | R.QAESLS#LTR.E                    | S372:      | 2 | 2,1314 | 0,149 | 0      |
| 8 | Q9UHB6 LIMA1_HUMAN | R.ASSLSESS#PPK.A                  | S374:      | 2 | 3,1648 | 0,229 | -0,313 |
| 8 | P51991 ROA3_HUMAN  | R.SSGSPYGGGYGSGGGSGGYGS#R.R       | S375:      | 2 | 5,5225 | 0,599 | -0,49  |
| 8 | Q9UQ35 SRRM2_HUMAN | R.HGGS#PQPLATTPLSQEPVNPPEAS#PTR.D | S377:S398: | 3 | 7,0323 | 1     | -0,425 |
| 8 | Q9UKV8 I2C2_HUMAN  | R.SAS#FNTDPYVR.E                  | S379:      | 2 | 3,5095 | 0,508 | -0,365 |
| 8 | P30050 RL12_HUMAN  | K.IGPLGLS#PK.K                    | S38:       | 2 | 3,1071 | 0,459 | -0,063 |
| 8 | P30307 MPIP3_HUMAN | R.DTS#FTVCPDVPRT#PVGK.F           | S38:T48:   | 3 | 2,9328 | 0,298 | -0,359 |

|   |                     |                          |            |   |        |       |        |
|---|---------------------|--------------------------|------------|---|--------|-------|--------|
| 8 | P48730 KC1D_HUMAN   | R.GAPVNIS#SSDLTGR.Q      | S382:      | 2 | 3,239  | 0,479 | -0,42  |
| 8 | Q8TEW0 PARD3_HUMAN  | R.FS#PDSQYIDNR.S         | S383:      | 2 | 3,2274 | 0,402 | -0,257 |
| 8 | Q5JU85 IQEC2_HUMAN  | R.M*QFS#FEEYEK.A         | S383:      | 2 | 2,0085 | 0,21  | 0,17   |
| 8 | Q92598 HS105_HUMAN  | R.GCALQCAILS#PAFK.V      | S384:      | 2 | 3,4181 | 0,407 | -1,057 |
| 8 | P28715 ERCC5_HUMAN  | R.NAPAAVDEGSIS#PR.T      | S384:      | 2 | 3,0078 | 0,336 | -0,25  |
| 8 | Q9Y383 LC7L2_HUMAN  | R.SS#EEREAGEI.-          | S384:      | 2 | 2,7123 | 0,298 | -0,206 |
| 8 | Q9BSQ5 CCM2_HUMAN   | R.GIITDS#FGR.H           | S384:      | 2 | 2,568  | 0,41  | -0,233 |
| 8 | Q9Y2W3 S45A1_HUMAN  | K.YGS#FISR.D             | S384:      | 2 | 2,3455 | 0,356 | 0,201  |
| 8 | Q9C0B0 UNK_HUMAN    | R.NSSLGSPSNLCGS#PPGSIR.K | S385:      | 2 | 3,2574 | 0,412 | -0,062 |
| 8 | Q9C0B0 UNK_HUMAN    | R.NSSLGSPSNLCGS#PPGSIR.K | S385:      | 3 | 3,0111 | 0,246 | 0      |
| 8 | Q01813 K6PP_HUMAN   | R.S#FAGNLNTYK.R          | S386:      | 2 | 2,9142 | 0,343 | -0,102 |
| 8 | Q13330 MTA1_HUMAN   | K.AGVVNGTGAPGQS#PGAGR.A  | S386:      | 2 | 2,6226 | 0,175 | 0,224  |
| 8 | P04075 ALDOA_HUMAN  | K.GILAADESTGS#IAK.R      | S39:       | 2 | 4,3313 | 0,522 | -0,518 |
| 8 | Q99613 EIF3C_HUMAN  | K.QPLLLS#EDEEDTK.R       | S39:       | 2 | 2,2298 | 0,222 | -0,229 |
| 8 | Q99459 CDC5L_HUMAN  | K.GGLNTPHES#DFSGVT#PQR.Q | S390:T396: | 3 | 5,3494 | 0,39  | -0,253 |
| 8 | Q01484 ANK2_HUMAN   | R.VVLKS#DTEQSEDNNE.-     | S3914:     | 2 | 3,7598 | 0,434 | 0,273  |
| 8 | O95067 CCNB2_HUMAN  | K.DLAS#PLIGR.S           | S392:      | 2 | 2,3221 | 0,332 | 0,06   |
| 8 | Q8N108 MIER1_HUMAN  | R.LLDESES#AASSR.A        | S393:      | 2 | 3,7108 | 0,438 | 0,091  |
| 8 | Q6T4R5 NHS_HUMAN    | R.VQQEIDS#DESPVAR.E      | S394:      | 2 | 4,9882 | 0,511 | -0,369 |
| 8 | O95239 KIF4A_HUMAN  | K.NQS#LVEENEK.L          | S394:      | 2 | 3,6968 | 0,354 | -0,576 |
| 8 | P41970 ELK3_HUMAN   | R.AAS#PVLLSSNSQK.S       | S396:      | 2 | 2,8245 | 0,178 | -0,706 |
| 8 | Q8N5Y2 MS3L1_HUMAN  | R.SSS#PIPLTPSK.E         | S400:      | 2 | 3,0899 | 0,291 | -0,307 |
| 8 | Q96ST2 IWS1_HUMAN   | K.AAVLSDS#EDEEK.A        | S400:      | 2 | 3,0002 | 0,441 | -0,444 |
| 8 | Q03252 LMNB2_HUMAN  | R.ATSS#SSGSLSATGR.L      | S400:      | 2 | 2,7339 | 0,507 | -0,452 |
| 8 | Q9BY84 DUS16_HUMAN  | R.SFS#LDIK.S             | S401:      | 2 | 2,9833 | 0,159 | 0      |
| 8 | P98082 DAB2_HUMAN   | K.SSPNPFVGS#PPK.G        | S401:      | 2 | 2,6116 | 0,301 | -0,094 |
| 8 | Q5JSH3 WDR44_HUMAN  | K.EYVSNDAAS#DDEEK.L      | S403:      | 2 | 4,6673 | 0,496 | -0,548 |
| 8 | Q0JRZ9 FCHO2_HUMAN  | R.NLS#NEELTK.S           | S403:      | 2 | 3,0881 | 0,26  | -0,541 |
| 8 | Q4W5T8 Q4W5T8_HUMAN | R.TGS#GIGNLQR.T          | S403:      | 2 | 2,4897 | 0,124 | -0,451 |
| 8 | Q4KMP7 TB10B_HUMAN  | R.AAGGAPS#PPPPVR.R       | S403:      | 2 | 2,2876 | 0,248 | -0,097 |
| 8 | Q99569 PKP4_HUMAN   | R.S#AVSPDLHIT#PIYEGR.T   | S403:T412: | 2 | 3,1789 | 0,44  | -0,191 |
| 8 | Q14247 SRC8_HUMAN   | K.TQTPPVS#PAPQPTEER.L    | S405:      | 2 | 3,9928 | 0,415 | -0,538 |
| 8 | Q9ULU4 PKCB1_HUMAN  | K.LNFDMTAS#PK.I          | S406:      | 2 | 2,6828 | 0,467 | 0,203  |

|   |                    |                                 |            |   |        |       |        |
|---|--------------------|---------------------------------|------------|---|--------|-------|--------|
| 8 | P15151 PVR_HUMAN   | R.ENS#SSQDPQTEGTR.-             | S406:      | 2 | 2,6015 | 0,445 | -0,378 |
| 8 | Q6UWZ7 CCD98_HUMAN | K.GFGEYSRS#PTF.-                | S406:      | 2 | 2,1211 | 0,325 | 0      |
| 8 | O94885 SASH1_HUMAN | R.TCS#FGGFDLTNR.S               | S407:      | 2 | 3,951  | 0,484 | -0,168 |
| 8 | O75362 ZN217_HUMAN | R.AGAES#PTMSVDGR.Q              | S407:      | 2 | 3,3794 | 0,491 | 0      |
| 8 | O75362 ZN217_HUMAN | R.AGAES#PTM*SVDGR.Q             | S407:      | 2 | 3,2286 | 0,377 | -0,178 |
| 8 | O43237 DC1L2_HUMAN | R.GGPASVPSSS#PGTSVK.K           | S407:      | 2 | 2,8639 | 0,312 | -0,653 |
| 8 | Q8IZM8 ZN654_HUMAN | R.SDDTVSNIS#LIDQK.M             | S407:      | 2 | 2,6408 | 0,122 | 0,076  |
| 8 | Q96KM6 Z512B_HUMAN | K.AAGPAS#PPEEDPER.T             | S409:      | 2 | 2,9152 | 0,227 | -0,406 |
| 8 | O14713 ITBP1_HUMAN | R.SSTVAS#LDTDSTK.S              | S41:       | 2 | 3,8487 | 0,506 | -0,789 |
| 8 | Q9Y2V2 CHSP1_HUMAN | R.GNVVPS#PLPTR.R                | S41:       | 2 | 2,1274 | 0,132 | -0,201 |
| 8 | Q12834 CDC20_HUMAN | K.EAAGPAPS#PM*R.A               | S41:       | 2 | 2,1043 | 0,218 | -0,517 |
| 8 | Q8NCD3 HJURP_HUMAN | K.WLIS#PVK.I                    | S412:      | 2 | 2,6166 | 0,237 | -0,529 |
| 8 | Q659A1 NARG2_HUMAN | K.VS#KSPS#PASTSTVPMN*TDAPTAPK.A | S414:S418: | 3 | 4,1084 | 0,255 | -1,365 |
| 8 | O14545 TRAD1_HUMAN | R.LDSQPQETS#PELPR.R             | S415:      | 2 | 3,1474 | 0,34  | -0,218 |
| 8 | Q7RTX8 HIN1L_HUMAN | R.TPS#QIIR.K                    | S415:      | 2 | 2,8581 | 0,099 | -0,068 |
| 8 | Q53F19 CQ085_HUMAN | K.M*ISTPS#PK.K                  | S415:      | 2 | 2,0098 | 0,267 | 0,064  |
| 8 | Q8TEV9 SMCR8_HUMAN | K.VLISVGS#YK.S                  | S417:      | 2 | 2,4299 | 0,32  | 0,117  |
| 8 | Q2VPK5 CP084_HUMAN | R.LSQM*QS#PIPLTETR.T            | S419:      | 2 | 4,1913 | 0,401 | -0,359 |
| 8 | Q92917 GPKOW_HUMAN | R.LADSGDGAGPS#PEEK.D            | S42:       | 2 | 5,1245 | 0,43  | -0,323 |
| 8 | Q8NEM2 SHCBP_HUMAN | K.GLFQDEDS#CSDCSYR.D            | S42:       | 2 | 3,8246 | 0,568 | -0,445 |
| 8 | Q86U28 ISCA2_HUMAN | R.EASSSS#PEAGEGQIR.L            | S42:       | 2 | 3,203  | 0,393 | -0,693 |
| 8 | Q53GA4 PHLA2_HUMAN | R.LSLFPAS#PR.A                  | S42:       | 2 | 2,9654 | 0,362 | 0,228  |
| 8 | P85037 FOXK1_HUMAN | R.SAPAS#PTHPGLM*S#PR.S          | S420:S428: | 2 | 2,9672 | 0,451 | -0,435 |
| 8 | Q13547 HDAC1_HUMAN | R.IACEEFS#DSEEEGEGGR.K          | S421:      | 2 | 4,3868 | 0,475 | -0,347 |
| 8 | Q9Y6G9 DC1L1_HUMAN | R.SVSSNVASVS#PIPAGSK.K          | S421:      | 2 | 3,4943 | 0,517 | 0,22   |
| 8 | P42858 HD_HUMAN    | R.SGS#IVELIAGGGSS#CSPVLSRK.Q    | S421:S432: | 3 | 2,9264 | 0,279 | -0,788 |
| 8 | Q08357 S20A2_HUMAN | K.LVGDTVVS#YSK.K                | S422:      | 2 | 2,8075 | 0,323 | -0,106 |
| 8 | P28290 SSFA2_HUMAN | K.LDSDFNIS#SHS#ELENSELK.S       | S424:S427: | 3 | 3,685  | 0,167 | -0,228 |
| 8 | O75116 ROCK2_HUMAN | R.ENLLSDS#PSCR.E                | S425:      | 2 | 3,7493 | 0,404 | -0,166 |
| 8 | P26045 PTN3_HUMAN  | K.GSLAPQDS#DSEVSQNR.S           | S425:      | 2 | 3,7265 | 0,461 | 0      |
| 8 | Q9C0G0 ZN407_HUMAN | R.NILVLGNS#FR.R                 | S426:      | 2 | 2,4538 | 0,284 | -0,302 |
| 8 | Q96AD5 PLPL2_HUMAN | R.NNLS#LGDALAK.W                | S428:      | 2 | 3,552  | 0,354 | -0,306 |
| 8 | Q13112 CAF1B_HUMAN | R.TQDPSS#PGTTPPQAR.Q            | S429:      | 2 | 3,9685 | 0,494 | -0,603 |

|   |                    |                                   |            |   |        |       |        |
|---|--------------------|-----------------------------------|------------|---|--------|-------|--------|
| 8 | Q9C0B5 ZDHC5_HUMAN | R.SSS#LKS#AQGTGFELGQLQSIR.S       | S429:S432: | 3 | 3,808  | 1     | -0,233 |
| 8 | Q86U44 MTA70_HUMAN | R.NPEAALS#PTFR.S                  | S43:       | 2 | 3,7089 | 0,41  | 0,285  |
| 8 | Q9H2J4 PDCL3_HUMAN | R.ILQQS#VVK.T                     | S43:       | 2 | 2,9919 | 0,11  | -0,061 |
| 8 | Q9UH62 ARMX3_HUMAN | K.M*AEGGS#GDVDDAGDCSGAR.Y         | S43:       | 2 | 2,9718 | 0,532 | -0,444 |
| 8 | P05787 K2C8_HUMAN  | R.VGS#SNFR.G                      | S43:       | 2 | 2,3873 | 0,23  | 0,144  |
| 8 | Q8N1F7 NUP93_HUMAN | K.LNQVCFDGDTSS#PQDR.L             | S430:      | 2 | 3,3998 | 0,407 | -0,36  |
| 8 | Q9Y3M8 STA13_HUMAN | R.TGS#ISLGR.E                     | S430:      | 2 | 2,4022 | 0,416 | 0      |
| 8 | Q9HCD6 TANC2_HUMAN | R.ELPLTQPPSAHSSITSGS#CPGT#PEM*R.R | S430:T434: | 3 | 2,7323 | 1     | -0,126 |
| 8 | Q15061 WDR43_HUMAN | K.S#GGNEVSIEER.L                  | S431:      | 2 | 2,7587 | 0,185 | -0,291 |
| 8 | Q08170 SFRS4_HUMAN | R.GES#ENAGTNQETR.S                | S431:      | 2 | 2,1677 | 0,332 | -0,249 |
| 8 | P52272 HNRPM_HUMAN | R.VGS#EIER.M                      | S432:      | 2 | 2,7432 | 0,223 | 0,07   |
| 8 | P35269 T2FA_HUMAN  | R.LDTGPQSLG#GK.S                  | S433:      | 2 | 3,0951 | 0,447 | -0,206 |
| 8 | Q05519 SFR11_HUMAN | R.DYDEEEQGYDS#EK.E                | S434:      | 2 | 4,7121 | 0,546 | -0,506 |
| 8 | Q92754 AP2C_HUMAN  | K.SYM*NPGDQS#PADSNK.T             | S434:      | 2 | 4,5048 | 0,515 | -0,715 |
| 8 | Q9Y6A5 TACC3_HUMAN | K.SGCSEAQPES#PETR.L               | S434:      | 2 | 4,098  | 0,499 | -0,428 |
| 8 | P07814 SYEP_HUMAN  | R.LNLNNTVLS#K.R                   | S434:      | 2 | 3,077  | 0,281 | -0,306 |
| 8 | Q9C0C2 TB182_HUMAN | R.FSEGVLS#PSQDQEK.L               | S435:      | 2 | 3,4614 | 0,407 | 0,208  |
| 8 | Q05209 PTN12_HUMAN | R.NLS#FEIK.K                      | S435:      | 2 | 2,4709 | 0,155 | -0,131 |
| 8 | P30260 CDC27_HUMAN | K.LDSS#IISEGK.I                   | S435:      | 2 | 2,3292 | 0,249 | -1,189 |
| 8 | Q13535 ATR_HUMAN   | R.LS#SSLNPSK.R                    | S435:      | 2 | 2,13   | 0,247 | -0,301 |
| 8 | O94804 STK10_HUMAN | K.QVAEQGGDLS#PAANR.S              | S438:      | 2 | 4,3646 | 0,553 | -0,536 |
| 8 | A6NIE6 RN3L1_HUMAN | R.ALENDFFNS#PPR.K                 | S44:       | 2 | 2,8602 | 0,367 | -0,41  |
| 8 | Q8N8R5 U565_HUMAN  | R.CS#LSAEVR.R                     | S44:       | 2 | 2,0562 | 0,143 | 0      |
| 8 | Q96RL1 UIMC1_HUMAN | R.LEDAFIVIS#DS#DGEEPKEENGLQK.T    | S44:S46:   | 3 | 2,9892 | 0,298 | -0,584 |
| 8 | O00178 GTPB1_HUMAN | R.LHGGFDS#DCS#EDGEALNGEPELDLTSK.L | S44:S47:   | 3 | 6,1443 | 0,483 | -0,36  |
| 8 | Q5T230 UTF1_HUMAN  | R.RPASPS#ALGELGLPVS#PGSAQR.T      | S44:S54:   | 3 | 3,8753 | 0,183 | -0,396 |
| 8 | O14578 CTRO_HUMAN  | R.SESVVSGLDS#PAK.T                | S440:      | 2 | 3,6999 | 0,491 | -0,54  |
| 8 | P35269 T2FA_HUMAN  | K.STPQPPS#GKTT#PNSGDVQVTEDAVR.R   | S442:T446: | 3 | 3,2598 | 0,345 | -0,402 |
| 8 | Q01804 OTUD4_HUMAN | R.ESNYFGLS#PEER.R                 | S443:      | 2 | 2,3657 | 0,272 | -0,566 |
| 8 | Q86UU1 PHLB1_HUMAN | R.TLQPPEP#PR.L                    | S443:      | 2 | 2,1564 | 0,302 | 0      |
| 8 | Q9H307 PININ_HUMAN | K.SLS#PGKENVS#ALDM*EK.E           | S443:S450: | 2 | 3,4972 | 0,416 | -0,389 |
| 8 | Q9BVJ6 UT14A_HUMAN | R.SELSQDAEPAGS#QETK.D             | S445:      | 2 | 3,8017 | 0,44  | -0,694 |
| 8 | O43237 DC1L2_HUMAN | K.TGSPGS#PGAGGVQSTAK.K            | S446:      | 2 | 2,8575 | 0,378 | -0,396 |

|   |                    |                                |            |   |        |       |        |
|---|--------------------|--------------------------------|------------|---|--------|-------|--------|
| 8 | Q9UKA4 AKA11_HUMAN | R.EDSGLFS#PIR.S                | S448:      | 2 | 2,057  | 0,196 | -0,102 |
| 8 | Q8IWI9 MGAP_HUMAN  | K.WLPSS#PSGVAK.A               | S449:      | 2 | 2,1667 | 0,214 | -0,202 |
| 8 | Q13247 SFRS6_HUMAN | K.NGYGFVEFEDS#R.D              | S45:       | 2 | 3,8994 | 0,538 | -0,163 |
| 8 | O94804 STK10_HUMAN | K.ASQS#RPNSS#ALETLGGEK.L       | S450:S455: | 2 | 2,5989 | 0,388 | -0,368 |
| 8 | Q14C86 GAPD1_HUMAN | K.SSS#LEM*TPYNTPQLS#PATTANKK.N | S454:S466: | 3 | 3,84   | 1     | -0,401 |
| 8 | Q7KZI7 MARK2_HUMAN | K.VPAS#PLPLER.K                | S456:      | 2 | 3,3095 | 0,397 | -0,301 |
| 8 | P51957 NEK4_HUMAN  | K.DQS#LALSPK.L                 | S457:      | 2 | 2,0783 | 0,098 | 0,117  |
| 8 | Q96NT5 PCFT_HUMAN  | K.ADPHLEFQQFPQS#P.-            | S458:      | 2 | 2,6516 | 0,322 | -0,213 |
| 8 | Q86VM9 ZCH18_HUMAN | R.AS#DLEDEESAAR.G              | S46:       | 2 | 4,0054 | 0,477 | -0,267 |
| 8 | P29966 MARCS_HUMAN | K.VNGDAS#PAAAESGAK.E           | S46:       | 2 | 3,5826 | 0,56  | -0,514 |
| 8 | P04075 ALDOA_HUMAN | R.LQS#IGTENTEENR.R             | S46:       | 2 | 2,6933 | 0,34  | 1,942  |
| 8 | Q3KQU3 MA7D1_HUMAN | R.LSASTASELS#PK.S              | S460:      | 2 | 3,3013 | 0,511 | -0,384 |
| 8 | Q9ULU4 PKCB1_HUMAN | K.ATSSHFS#ASEES#M*DFLDK.S      | S460:S465: | 3 | 4,2355 | 0,365 | -0,338 |
| 8 | Q9NYZ3 GTSE1_HUMAN | K.FSIGDS#PDSSTPK.L             | S461:      | 2 | 3,6198 | 0,437 | -0,258 |
| 8 | Q8IWC1 MA7D3_HUMAN | K.TSLEASM*EAS#PK.A             | S461:      | 2 | 2,7065 | 0,434 | -0,453 |
| 8 | Q9BTU6 P4K2A_HUMAN | R.SSS#ESYTQSFQSR.K             | S462:      | 2 | 3,645  | 0,351 | -0,388 |
| 8 | Q15149 PLEC1_HUMAN | K.GYYPYSVSGSGTAGS#R.T          | S4626:     | 2 | 5,6912 | 0,585 | -0,393 |
| 8 | Q15149 PLEC1_HUMAN | K.GYYPYSVSGSGTAGS#R.T          | S4626:     | 3 | 3,2526 | 0,326 | -0,295 |
| 8 | O95835 LATS1_HUMAN | R.SNS#FNNPLGNR.A               | S464:      | 2 | 3,8798 | 0,417 | -0,094 |
| 8 | Q9P275 UBP36_HUMAN | K.NIGNGISS#PLTGK.R             | S464:      | 2 | 3,1744 | 0,505 | 0,084  |
| 8 | P11166 GTR1_HUMAN  | R.TFDEIAS#GFR.Q                | S465:      | 2 | 3,3851 | 0,459 | -0,299 |
| 8 | Q6ZUM4 RHG27_HUMAN | K.SSQDGDTPAQAS#PPEEK.V         | S466:      | 2 | 3,4982 | 0,44  | -0,134 |
| 8 | O60825 F262_HUMAN  | R.NS#FTPLSSNTIR.R              | S466:      | 2 | 2,5541 | 0,357 | -0,081 |
| 8 | O15047 SET1A_HUMAN | R.S#GS#PAPETTNEVPFAQHSSLDSR.I  | S468:S470: | 3 | 4,0457 | 0,289 | -0,756 |
| 8 | O75385 ULK1_HUMAN  | R.SGSTS#PLGFAR.A               | S469:      | 2 | 2,8765 | 0,36  | -0,105 |
| 8 | Q9UPN4 AZI1_HUMAN  | R.SVS#VVTGSEQK.R               | S47:       | 2 | 3,8213 | 0,542 | -0,203 |
| 8 | P31946 1433B_HUMAN | R.NLLS#VAYK.N                  | S47:       | 2 | 3,0134 | 0,227 | -0,37  |
| 8 | Q96EB6 SIRT1_HUMAN | R.S#PGEPGGAAPER.E              | S47:       | 2 | 2,6696 | 0,433 | -0,304 |
| 8 | Q99543 DNJC2_HUMAN | R.NAS#ASFQELEDK.K              | S47:       | 2 | 2,6081 | 0,49  | -0,258 |
| 8 | Q96BT3 CENPT_HUMAN | R.ALLETAS#PR.K                 | S47:       | 2 | 2,5388 | 0,41  | -0,118 |
| 8 | Q8N684 CPSF7_HUMAN | R.SS#STEPPPPVR.Q               | S47:       | 2 | 2,059  | 0,2   | -0,297 |
| 8 | Q14157 UBP2L_HUMAN | K.STSAPQM*SPGS#SDNQSSSPQAQK.L  | S470:      | 3 | 4,4873 | 0,538 | -0,278 |
| 8 | Q9NS91 RAD18_HUMAN | K.NDLQDTEIS#PR.Q               | S471:      | 2 | 2,1358 | 0,249 | -0,624 |

|   |                    |                                 |            |   |        |       |        |
|---|--------------------|---------------------------------|------------|---|--------|-------|--------|
| 8 | Q8IW41 MAPK5_HUMAN | K.QVIEEQTTSHES#Q.-              | S472:      | 2 | 4,1973 | 0,467 | -0,306 |
| 8 | Q13433 S39A6_HUMAN | K.YESQLS#TNEEK.V                | S472:      | 2 | 3,2669 | 0,447 | 0      |
| 8 | Q8NCD3 HJURP_HUMAN | R.GGPAS#PGGLQGLETR.R            | S473:      | 2 | 3,5121 | 0,521 | 0,248  |
| 8 | Q9HCH0 K1602_HUMAN | K.SPSPGGPQLS#PQLPR.N            | S473:      | 2 | 2,68   | 0,239 | -0,305 |
| 8 | Q5VT52 K0460_HUMAN | K.NTGVS#PASRPSGTPT#SPSNLTSGLK.T | S473:T484: | 3 | 3,6582 | 1     | -0,274 |
| 8 | Q14157 UBP2L_HUMAN | K.STSAPQM*SPGSSDNQSSS#PQPAQQK.L | S477:      | 3 | 5,1826 | 0,479 | -0,348 |
| 8 | P05787 K2C8_HUMAN  | K.LVSESS#DVLPK.-                | S478:      | 2 | 2,6582 | 0,321 | -0,195 |
| 8 | Q9P270 SLAI2_HUMAN | R.SGAVQGAGSLGPGS#PVR.A          | S48:       | 2 | 3,8159 | 0,411 | -0,696 |
| 8 | Q8N684 CPSF7_HUMAN | R.SSS#TEPPPPVR.Q                | S48:       | 2 | 2,0169 | 0,29  | -0,099 |
| 8 | O60583 CCNT2_HUMAN | K.QGQSQAASSSVTS#PIK.M           | S480:      | 2 | 3,2621 | 0,514 | -0,56  |
| 8 | Q9P2B4 CT2NL_HUMAN | K.FQSQADQDQQASGLQS#PPSR.D       | S481:      | 3 | 4,9605 | 0,466 | -0,974 |
| 8 | Q9NQW6 ANLN_HUMAN  | K.TQS#LPVTEK.V                  | S485:      | 2 | 2,3959 | 0,236 | -0,451 |
| 8 | Q9ULW0 TPX2_HUMAN  | K.S#PAFALK.N                    | S486:      | 2 | 2,147  | 0,602 | 0,15   |
| 8 | Q15052 ARHG6_HUMAN | R.M*S#GFIYQGK.I                 | S488:      | 2 | 3,7418 | 0,277 | -0,217 |
| 8 | P10809 CH60_HUMAN  | K.NAGVEGS#LIVEK.I               | S488:      | 2 | 3,5262 | 0,419 | -0,471 |
| 8 | Q15052 ARHG6_HUMAN | R.MS#GFIYQGK.I                  | S488:      | 2 | 2,6664 | 0,58  | -0,22  |
| 8 | Q99543 DNJC2_HUMAN | R.NASAS#FQELEDK.K               | S49:       | 2 | 3,443  | 0,45  | -0,43  |
| 8 | Q9Y3Q8 T22D4_HUMAN | R.LPNGEPS#PDPGGK.G              | S49:       | 2 | 2,4217 | 0,266 | -0,272 |
| 8 | Q8IWC1 MA7D3_HUMAN | R.LSS#YTECYK.W                  | S490:      | 2 | 2,4688 | 0,251 | 0      |
| 8 | P52292 IMA2_HUMAN  | K.ASL#LIEK.Y                    | S490:      | 2 | 2,4505 | 0,165 | 0,13   |
| 8 | Q8IXS8 F126B_HUMAN | R.YSTVS#LQEDR.L                 | S491:      | 2 | 2,8929 | 0,395 | -0,286 |
| 8 | P27448 MARK3_HUMAN | K.GIAPAS#PM*LGNASNPNK.A         | S492:      | 2 | 3,9629 | 0,458 | -0,352 |
| 8 | Q3YEC7 PARF_HUMAN  | K.GPAPAPQQCS#EPETK.W            | S492:      | 2 | 3,4702 | 0,436 | -0,364 |
| 8 | Q1MSJ5 CSPP1_HUMAN | R.SGLSSALGEM*VS#PR.I            | S492:      | 2 | 3,0794 | 0,494 | -0,082 |
| 8 | O60832 DKC1_HUMAN  | K.AGLESGAEPGDGDS#DTTK.K         | S494:      | 2 | 3,5852 | 0,508 | -0,41  |
| 8 | P23588 IF4B_HUMAN  | R.SQS#SDTEQQSPTSGGGK.V          | S497:      | 2 | 2,8487 | 0,415 | -0,416 |
| 8 | Q641Q2 FA21A_HUMAN | K.AVAS#PEATVSQTDENK.A           | S498:      | 2 | 5,0494 | 0,537 | -0,071 |
| 8 | Q9H0D6 XRN2_HUMAN  | K.AEDS#DSEPEPEDNVR.L            | S499:      | 2 | 3,9449 | 0,442 | -0,552 |
| 8 | Q8N3X1 FNBP4_HUMAN | K.IDENS#DKEM*EEVES#PEK.I        | S499:S508: | 3 | 4,6844 | 0,238 | -0,251 |
| 8 | Q9UHI6 DDX20_HUMAN | R.NNS#VSGLSVK.S                 | S500:      | 2 | 3,1184 | 0,274 | -0,112 |
| 8 | Q12888 TP53B_HUMAN | K.TSEIEPKNS#PEDLGLS#LTGDSC.L    | S500:S507: | 3 | 4,272  | 0,45  | -0,278 |
| 8 | P42679 MATK_HUMAN  | R.SAGAPASVSGQDADGSTS#PR.S       | S501:      | 2 | 3,6975 | 0,51  | -0,643 |
| 8 | Q9NPQ8 RIC8A_HUMAN | R.VIQPM*GM*S#PR.G               | S501:      | 2 | 2,0437 | 0,247 | -0,199 |

|   |                    |                                  |            |   |        |       |        |
|---|--------------------|----------------------------------|------------|---|--------|-------|--------|
| 8 | P13639 EF2_HUMAN   | K.FSVS#PVVR.V                    | S502:      | 2 | 2,2664 | 0,098 | 0,314  |
| 8 | Q9Y2X3 NOL5_HUMAN  | K.EEPLS#EEEPCTSTAIAS#PEKK.K      | S502:S514: | 3 | 3,0892 | 0,349 | -0,073 |
| 8 | Q92574 TSC1_HUMAN  | R.GGFDS#PFYR.D                   | S505:      | 2 | 2,8446 | 0,106 | 0      |
| 8 | O60237 MYPT2_HUMAN | K.LNSTS#DIEEKENR.E               | S506:      | 2 | 2,255  | 0,238 | -0,604 |
| 8 | Q12888 TP53B_HUMAN | K.NSPEDLGLS#LTGDSC.L             | S507:      | 2 | 4,2114 | 0,487 | 0,138  |
| 8 | Q16584 M3K11_HUMAN | R.ITVQAS#PGLDR.R                 | S507:      | 2 | 3,3378 | 0,279 | -0,493 |
| 8 | O14974 MYPT1_HUMAN | R.LAS#TSDIEEK.E                  | S507:      | 2 | 3,2334 | 0,467 | -0,104 |
| 8 | Q08AM6 VAC14_HUMAN | R.AGLLNTS#GTK.G                  | S509:      | 2 | 2,5383 | 0,302 | 0      |
| 8 | Q6UVJ0 SAS6_HUMAN  | R.SGIS#PNLNVVDGR.L               | S510:      | 2 | 3,2335 | 0,423 | -1,04  |
| 8 | Q9Y6G9 DC1L1_HUMAN | R.KPVTVS#PTTPTSPTGEAS.-          | S510:      | 2 | 3,0887 | 0,582 | 0,31   |
| 8 | Q09666 AHNK_HUMAN  | K.AEAPLS#PK.L                    | S5110:     | 2 | 2,3497 | 0,417 | -0,062 |
| 8 | Q9Y2U5 M3K2_HUMAN  | R.LQTICLS#GTGM*K.S               | S514:      | 2 | 2,7527 | 0,315 | -0,087 |
| 8 | Q99567 NUP88_HUMAN | R.EDVEVAES#PLR.V                 | S517:      | 2 | 2,2707 | 0,303 | -0,184 |
| 8 | Q16204 CCDC6_HUMAN | K.SGGIVIS#PFR.L                  | S52:       | 2 | 3,2206 | 0,35  | -0,11  |
| 8 | Q9UHR5 S30BP_HUMAN | K.GGLVSDAYGEDDFS#R.L             | S52:       | 2 | 2,5132 | 0,38  | 0,146  |
| 8 | Q14135 VGLL4_HUMAN | R.TGPPIS#PSK.R                   | S52:       | 2 | 2,4034 | 0,302 | 0      |
| 8 | Q9Y2V2 CHSP1_HUMAN | R.TFS#ATVR.A                     | S52:       | 2 | 2,1085 | 0,172 | -1,203 |
| 8 | Q9BST9 RTKN_HUMAN  | R.TFS#LDAVPPDHS#PR.A             | S520:S529: | 2 | 4,237  | 0,642 | -0,287 |
| 8 | Q9BST9 RTKN_HUMAN  | R.TFS#LDAVPPDHS#PR.A             | S520:S529: | 3 | 3,2608 | 0,369 | 0      |
| 8 | Q92609 TBCD5_HUMAN | K.SES#M*PVQLNK.G                 | S522:      | 2 | 3,603  | 0,403 | -0,199 |
| 8 | Q8NI35 INADL_HUMAN | K.VPDS#PENELK.S                  | S522:      | 2 | 2,944  | 0,345 | 0      |
| 8 | Q9P2B4 CT2NL_HUMAN | R.FTSQQGPIKPVVS#PNSS#PFGTDYR.N   | S523:S527: | 3 | 5,6036 | 0,374 | 0,411  |
| 8 | Q8IWC1 MA7D3_HUMAN | K.NCPPS#PLPLISK.Q                | S524:      | 2 | 2,8708 | 0,4   | -0,174 |
| 8 | P49756 RBM25_HUMAN | K.QEPES#EEEEEEK.Q                | S524:      | 2 | 2,0489 | 0,128 | -0,31  |
| 8 | O94979 SC31A_HUMAN | K.DSDQVAQS#DGEES#PAAEEQLLGEHIK.E | S527:S532: | 3 | 4,7822 | 0,531 | -0,435 |
| 8 | Q5VTL8 PR38B_HUMAN | R.SQS#IEQESQEK.Q                 | S529:      | 2 | 3,2835 | 0,452 | -0,355 |
| 8 | P49790 NU153_HUMAN | K.FSS#PIVK.S                     | S529:      | 2 | 2,629  | 0,126 | 0,071  |
| 8 | Q14680 MELK_HUMAN  | K.VFGS#LER.G                     | S529:      | 2 | 2,0131 | 0,127 | 0,137  |
| 8 | Q8N1G2 K0082_HUMAN | K.ASTTSLSGS#DSETEGK.Q            | S53:       | 2 | 3,7992 | 0,493 | -0,596 |
| 8 | Q52LA3 LIN52_HUMAN | K.SPITSS#PPK.W                   | S53:       | 2 | 2,1274 | 0,27  | 0,123  |
| 8 | O60504 VINEX_HUMAN | R.LCDDGPQLPTS#PR.L               | S530:      | 2 | 3,7404 | 0,431 | -0,079 |
| 8 | Q96S66 CLCC1_HUMAN | K.SEAAGSPDQGSTYS#PAR.G           | S532:      | 2 | 3,6797 | 0,453 | -0,624 |
| 8 | Q9BYW2 SETD2_HUMAN | R.CCS#PPNELGFR.R                 | S532:      | 2 | 2,5514 | 0,307 | -0,258 |



|   |                     |                                   |            |   |        |       |        |
|---|---------------------|-----------------------------------|------------|---|--------|-------|--------|
| 8 | Q9UPN3 MACF1_HUMAN  | R.TSLAGDTSNSSS#PASTGAK.T          | S5334:     | 2 | 3,6521 | 0,54  | -0,537 |
| 8 | Q86VM9 ZCH18_HUMAN  | K.LGVSVS#PSR.A                    | S534:      | 2 | 3,4583 | 0,398 | -0,186 |
| 8 | Q8WYP5 AHTF1_HUMAN  | R.CLVAGLLS#PR.F                   | S537:      | 2 | 3,1279 | 0,49  | -0,209 |
| 8 | Q01970 PLCB3_HUMAN  | K.S#LGDEGLNR.G                    | S537:      | 2 | 3,1004 | 0,275 | -0,234 |
| 8 | Q52LR7 EPC2_HUMAN   | R.LLNLQDS#DSEECTSR.K              | S538:      | 2 | 4,7693 | 0,52  | -0,264 |
| 8 | Q03188 CENPC_HUMAN  | K.SEES#PVVSNSSVR.N                | S538:      | 2 | 3,8972 | 0,546 | -0,722 |
| 8 | Q15758 AAAT_HUMAN   | R.GPAGDATVASEKES#VM*.-            | S539:      | 2 | 4,2886 | 0,549 | -0,371 |
| 8 | Q92609 TBCD5_HUMAN  | K.NISSS#PSVESLPGGR.E              | S539:      | 2 | 2,978  | 0,336 | -0,545 |
| 8 | Q9NQW6 ANLN_HUMAN   | R.QPLSEASNQPLS#GGEEK.S            | S54:       | 2 | 3,3121 | 0,428 | -0,185 |
| 8 | Q9NQW6 ANLN_HUMAN   | R.QPLSEASNQPLS#GGEEK.S            | S54:       | 3 | 3,0455 | 0,203 | -0,185 |
| 8 | Q43306 ADCY6_HUMAN  | R.DAEPSP#PTPAGPPR.C               | S54:       | 2 | 2,2774 | 0,263 | -0,748 |
| 8 | Q14721 KCNB1_HUMAN  | K.TQS#QPILNTK.E                   | S541:      | 2 | 2,5815 | 0,227 | -0,101 |
| 8 | Q9UKV5 AMFR2_HUMAN  | R.VPLDLS#PR.L                     | S542:      | 2 | 2,6347 | 0,291 | -0,25  |
| 8 | Q13144 EI2BE_HUMAN  | R.GGS#PQM*DDIK.V                  | S544:      | 2 | 2,9739 | 0,25  | -0,533 |
| 8 | Q13144 EI2BE_HUMAN  | R.GGS#PQMDDIK.V                   | S544:      | 2 | 2,8264 | 0,289 | -0,216 |
| 8 | Q5JTD0 TJAP1_HUMAN  | R.KDS#LTQAQEQGNLLN.-              | S545:      | 2 | 4,7034 | 0,471 | -0,702 |
| 8 | Q86SQ0 PHLB2_HUMAN  | R.NDELLS#DLTR.T                   | S545:      | 2 | 3,7813 | 0,204 | -0,097 |
| 8 | Q9P206 K1522_HUMAN  | K.GLAGPPAS#PGK.A                  | S545:      | 2 | 2,9401 | 0,51  | 0,118  |
| 8 | Q15022 SUZ12_HUMAN  | K.ASM*SEFLES#EDGEVEQQR.T          | S546:      | 3 | 4,6614 | 0,365 | -0,338 |
| 8 | Q15022 SUZ12_HUMAN  | K.ASMSEFLES#EDGEVEQQR.T           | S546:      | 2 | 3,2151 | 0,51  | -0,34  |
| 8 | Q9H4G0 E41L1_HUMAN  | R.LPSSPASPS#PK.G                  | S546:      | 2 | 2,7746 | 0,335 | 0,106  |
| 8 | Q15022 SUZ12_HUMAN  | K.ASM*SEFLES#EDGEVEQQR.T          | S546:      | 2 | 2,2548 | 0,399 | -0,45  |
| 8 | Q96FS4 SIPA1_HUMAN  | R.SGS#DAGEARPPTPAS#PR.A           | S55:S67:   | 2 | 3,7378 | 0,342 | 0,404  |
| 8 | Q14692 BMS1_HUMAN   | K.AGLS#PANCSQSDR.V                | S552:      | 2 | 2,6639 | 0,236 | -1,89  |
| 8 | Q8IVH2 FOXP4_HUMAN  | K.M*TGS#PTLVK.N                   | S554:      | 2 | 3,1303 | 0,259 | 0      |
| 8 | Q6ZV73 FGD6_HUMAN   | R.GVSSS#FDM*PK.R                  | S554:      | 2 | 2,0898 | 0,106 | -0,212 |
| 8 | Q95453 PARN_HUMAN   | R.NNS#FTAPSTVGK.R                 | S557:      | 2 | 3,673  | 0,571 | 0,094  |
| 8 | Q9Y5B6 GCFC_HUMAN   | K.M*ADHLEGLS#S#DDEETSTDITNFNLEK.D | S557:S558: | 3 | 4,3756 | 1     | -0,474 |
| 8 | Q9UGU0 TCF20_HUMAN  | K.AGS#SPAQGAQNEPPR.L              | S558:      | 2 | 2,7937 | 0,382 | -0,552 |
| 8 | Q9GZU1 MCLN1_HUMAN  | R.GSGS#ACSLCCCGR.D                | S559:      | 2 | 3,672  | 0,56  | -0,075 |
| 8 | Q9UGU0 TCF20_HUMAN  | K.AGSS#PAQGAQNEPPR.L              | S559:      | 2 | 2,5524 | 0,374 | -0,631 |
| 8 | Q6IAA8 CK059_HUMAN  | R.TDEQALLS#ILAK.T                 | S56:       | 2 | 3,9994 | 0,47  | -0,748 |
| 8 | A9CQZ4 A9CQZ4_HUMAN | K.TIDFDSL#VGR.G                   | S56:       | 2 | 3,59   | 0,462 | -0,378 |

|   |                      |                               |              |   |        |       |        |
|---|----------------------|-------------------------------|--------------|---|--------|-------|--------|
| 8 | Q6DEN2 Q6DEN2_HUMAN  | K.TLDFDALS#VGQR.G             | S56:         | 2 | 3,5691 | 0,548 | 0,261  |
| 8 | P08670 VIME_HUMAN    | R.SLYASS#PGGVYATR.S           | S56:         | 2 | 2,3473 | 0,421 | -0,243 |
| 8 | P08670 VIME_HUMAN    | R.SLYASS#PGGVYATRS#SAVR.L     | S56:S65:     | 3 | 2,7215 | 0,187 | 0      |
| 8 | Q13042 CDC16_HUMAN   | K.NIIS#PPWDFR.E               | S560:        | 2 | 2,7464 | 0,349 | -0,46  |
| 8 | Q9P2B4 CT2NL_HUMAN   | K.VSSPLS#PLSPGIKSPT#IPR.A     | S560:T570:   | 3 | 3,6333 | 0,335 | 0,175  |
| 8 | Q9NQW6 ANLN_HUMAN    | R.EIEM*SVDDDDINS#SK.V         | S561:        | 2 | 4,0221 | 0,39  | -0,204 |
| 8 | Q16512 PKN1_HUMAN    | K.LNLGTDSDSS#PQK.S            | S562:        | 2 | 3,2119 | 0,498 | -0,846 |
| 8 | O60504 VINEX_HUMAN   | R.SPADPTDLGGQTS#PR.R          | S563:        | 2 | 4,366  | 0,461 | -0,464 |
| 8 | P28715 ERCC5_HUMAN   | K.FDSSLSS#DDETK.C             | S563:        | 2 | 4,3366 | 0,529 | -0,32  |
| 8 | Q6PJI9 WDR59_HUMAN   | R.AVS#PTEPTPR.S               | S564:        | 2 | 2,9817 | 0,386 | -0,107 |
| 8 | P27824 CALX_HUMAN    | K.SDAEEDGGTVS#QEEEDR.K        | S564:        | 2 | 2,6971 | 0,484 | 0,442  |
| 8 | Q9C0I1 MTMRC_HUMAN   | R.QLS#LPLTQSK.S               | S564:        | 2 | 2,5027 | 0,459 | -0,306 |
| 8 | Q9H2G2 SLK_HUMAN     | K.VDEDS#AEDTQS#NDGKEVVEVGQK.L | S565:S571:   | 3 | 4,9883 | 0,439 | -1,04  |
| 8 | Q9UKL3 C8AP2_HUMAN   | K.LNLTL#PAK.K                 | S567:        | 2 | 2,1799 | 0,28  | 0      |
| 8 | O00264 PGRC1_HUMAN   | R.GDQPAASGDS#DDDEPPPLPR.L     | S57:         | 3 | 3,1227 | 0,246 | -0,259 |
| 8 | Q9BRK4 LZTS2_HUMAN   | R.AAAGVGG#LR.A                | S570:        | 2 | 2,8136 | 0,433 | -0,13  |
| 8 | Q8IVF2 AHNK2_HUMAN   | K.LGFSS#PTK.K                 | S5707:       | 2 | 2,308  | 0,392 | -0,243 |
| 8 | P17812 PYRG1_HUMAN   | R.DTYSDRS#GSSS#PDSEITELK.F    | S571:S575:   | 3 | 3,9204 | 1     | -0,392 |
| 8 | Q09666 AHNK_HUMAN    | K.GGVTGS#PEASISGSK.G          | S5731:       | 2 | 3,8401 | 0,434 | -0,345 |
| 8 | P17812 PYRG1_HUMAN   | R.SGSS#S#PDSEITELKFPSINHD.-   | S574:S575:   | 3 | 4,7146 | 1     | -0,304 |
| 8 | P17812 PYRG1_HUMAN   | R.SGSS#SPDS#EITELKFPSINHD.-   | S574:S578:   | 3 | 3,7664 | 1     | -0,456 |
| 8 | Q12959 DLG1_HUMAN    | R.EQM*M*NSSISSGSGS#LR.T       | S575:        | 2 | 4,8546 | 0,519 | 0,411  |
| 8 | Q13586 STIM1_HUMAN   | K.LPDS#PALAK.K                | S575:        | 2 | 3,5403 | 0,422 | -0,246 |
| 8 | P17812 PYRG1_HUMAN   | R.SGSS#PDSEITELK.F            | S575:        | 2 | 3,3851 | 0,318 | -0,161 |
| 8 | Q9NYZ3 GTSE1_HUMAN   | R.LVDVS#PDR.G                 | S575:        | 2 | 2,4703 | 0,17  | -0,062 |
| 8 | Q09666 AHNK_HUMAN    | K.ASLGS#LEGEAEAEASS#PKGK.F    | S5752:S5763: | 3 | 3,9507 | 0,362 | 0      |
| 8 | Q09666 AHNK_HUMAN    | K.ASLGSLEGEAEAEASS#PK.G       | S5763:       | 2 | 4,5791 | 0,612 | 0,135  |
| 8 | Q5H9R7 SAPS3_HUMAN   | K.FADQDDIGNVS#FDR.V           | S579:        | 2 | 5,1195 | 0,577 | 0,145  |
| 8 | Q86W92 LIPB1_HUMAN   | R.NSPFQIPPPS#PDSK.K           | S579:        | 2 | 2,6036 | 0,202 | 0,153  |
| 8 | P46087 NOL1_HUMAN    | R.LGS#VEAPK.T                 | S58:         | 2 | 2,996  | 0,346 | -0,069 |
| 8 | Q9H6K5 YS027_HUMAN   | R.WAELLS#PLDESR.A             | S580:        | 2 | 2,7022 | 0,175 | -0,408 |
| 8 | Q9UMZ2 SYNG_HUMAN    | K.TADSVS#PLEPPTK.D            | S580:        | 2 | 2,1258 | 0,215 | -0,257 |
| 8 | ##Q9UK73 FEM1B_HUMAN | R.AAILPTS#R.Q                 | S581:        | 2 | 2,274  | 0,172 | -0,418 |

|   |                     |                                   |            |   |        |       |        |
|---|---------------------|-----------------------------------|------------|---|--------|-------|--------|
| 8 | Q9H0B6 KLC2_HUMAN   | R.ASS#LNFLNK.S                    | S582:      | 2 | 2,9759 | 0,318 | -0,227 |
| 8 | Q9UNN5 FAF1_HUMAN   | R.TPS#GEFLER.R                    | S582:      | 2 | 2,9337 | 0,363 | 0,109  |
| 8 | Q9P275 UBP36_HUMAN  | R.DVVLSTS#PK.L                    | S582:      | 2 | 2,3107 | 0,288 | 0,238  |
| 8 | Q9UJX2 CDC23_HUMAN  | R.RVS#PLNLSSVTP.-                 | S582:      | 2 | 2,2907 | 0,387 | 0,09   |
| 8 | Q9NVU7 SDA1_HUMAN   | K.YIEIDS#DEEPR.G                  | S585:      | 2 | 3,8096 | 0,466 | -0,169 |
| 8 | P51114 FXR1_HUMAN   | K.AINGPTSAS#GDDISK.L              | S587:      | 2 | 2,2868 | 0,196 | -0,403 |
| 8 | Q96LD4 TRI47_HUMAN  | R.GGIPAS#PIDPFQSR.L               | S588:      | 2 | 3,1712 | 0,556 | -0,16  |
| 8 | O60343 TBCD4_HUMAN  | R.LGS#VDSFER.S                    | S588:      | 2 | 2,9532 | 0,345 | -0,448 |
| 8 | Q9NRY4 GRLF1_HUMAN  | K.NS#LSDPNIDR.I                   | S589:      | 2 | 2,9194 | 0,384 | -0,907 |
| 8 | O60343 TBCD4_HUMAN  | R.LGSVDS#FER.S                    | S591:      | 2 | 3,3274 | 0,286 | -0,112 |
| 8 | Q9BXW9 FACD2_HUMAN  | R.SES#PSLTQER.A                   | S592:      | 2 | 3,0775 | 0,469 | -0,201 |
| 8 | Q9Y2X7 GIT1_HUMAN   | R.HGS#GADS#DYENTQSGDPLLGLEGK.R    | S592:S596: | 3 | 4,0719 | 1     | -0,211 |
| 8 | Q08J23 NSUN2_HUMAN  | R.NNS#GEEFDCAFR.L                 | S593:      | 2 | 3,1188 | 0,528 | -0,16  |
| 8 | Q5VT52 K0460_HUMAN  | K.SFNYS#PNSSTSEVSSTSASK.A         | S593:      | 3 | 3,0611 | 0,314 | -0,17  |
| 8 | Q92841 DDX17_HUMAN  | R.SS#QSSSQQFSGIGR.S               | S593:      | 2 | 2,2837 | 0,372 | -0,477 |
| 8 | Q15678 PTN14_HUMAN  | K.YVSGSS#PDLVTR.K                 | S594:      | 2 | 2,9925 | 0,419 | -0,179 |
| 8 | A4LAA3 A4LAA3_HUMAN | K.LTPVS#LSNS#PIKGADCQEVQDK.D      | S594:S598: | 3 | 3,7879 | 0,279 | -0,069 |
| 8 | Q8NE71 ABCF1_HUMAN  | K.NQDEES#QEAPELLK.R               | S595:      | 2 | 4,6874 | 0,376 | -0,285 |
| 8 | Q7RTP8 Q7RTP8_HUMAN | R.ASS#LNVLVGGK.A                  | S596:      | 2 | 3,179  | 0,553 | 0,098  |
| 8 | Q3YEC7 PARF_HUMAN   | R.ADDFPVRDDPS#DVT#DEDEGPAEPPPPK.L | S596:T599: | 3 | 3,4377 | 0,322 | -0,578 |
| 8 | Q02952 AKA12_HUMAN  | K.GLAEVQQDGEAEEGATS#DGEK.K        | S598:      | 3 | 3,2062 | 0,256 | -0,998 |
| 8 | P55265 DSRAD_HUMAN  | K.TAES#QTPTPSATSFSGK.S            | S599:      | 2 | 2,1599 | 0,281 | -1,078 |
| 8 | Q15742 NAB2_HUMAN   | R.APS#PTAEQPPGGGDSAR.R            | S6:        | 2 | 3,9901 | 0,617 | -0,583 |
| 8 | Q86U90 YRDC_HUMAN   | R.LPGSGAVQAAS#PER.A               | S60:       | 2 | 3,1015 | 0,368 | -0,516 |
| 8 | O00505 IMA3_HUMAN   | R.NVPQEESLEDS#DVDADFK.A           | S60:       | 2 | 2,9527 | 0,537 | -0,346 |
| 8 | Q659C4 LARP2_HUMAN  | K.LNGPGENVS#EDEAQSSNQR.K          | S60:       | 2 | 2,825  | 0,458 | -0,347 |
| 8 | Q99543 DNJC2_HUMAN  | K.KELS#EES#EDEELQLEEFPM*LK.T      | S60:S63:   | 3 | 4,0493 | 0,215 | -0,335 |
| 8 | P51116 FXR2_HUMAN   | R.TDGS#IS#GDRQPVTVADYISR.A        | S601:S603: | 3 | 5,3834 | 0,454 | 0,08   |
| 8 | Q96QE3 ATAD5_HUMAN  | R.ISS#TPTTETIR.G                  | S602:      | 2 | 2,54   | 0,131 | 0,285  |
| 8 | Q05209 PTN12_HUMAN  | R.TPLSFTNPLHS#DDS#DSDER.N         | S603:S606: | 3 | 5,0559 | 0,521 | 0,08   |
| 8 | Q15424 SAFB1_HUMAN  | R.SVVS#FDK.V                      | S604:      | 2 | 2,3076 | 0,284 | 0,071  |
| 8 | Q14157 UBP2L_HUMAN  | R.YPS#SISSS#PQKDLTQAK.N           | S604:S609: | 3 | 3,3236 | 1     | -0,183 |
| 8 | Q6KC79 NIPBL_HUMAN  | K.KS#DPELS#KSEMK.Q                | S604:S609: | 2 | 2,948  | 0,137 | 1,189  |

|   |                    |                                     |            |   |        |       |        |
|---|--------------------|-------------------------------------|------------|---|--------|-------|--------|
| 8 | Q8IYB3 SRRM1_HUMAN | R.YS#PSPPPK.R                       | S605:      | 2 | 2,1064 | 0,261 | 0,064  |
| 8 | Q9NRH2 SNRK_HUMAN  | K.ASPSENNAGGGS#PSSGSGGNPTNTSGTTR.R  | S607:      | 3 | 3,8814 | 0,337 | -0,681 |
| 8 | Q14157 UBP2L_HUMAN | R.YPSSIS#SSPQK.D                    | S607:      | 2 | 2,7876 | 0,254 | -0,484 |
| 8 | Q14157 UBP2L_HUMAN | R.YPSSISS#PQK.D                     | S609:      | 2 | 3,2599 | 0,366 | -0,29  |
| 8 | Q9H0B6 KLC2_HUMAN  | R.TLSSS#SMDLSR.R                    | S610:      | 2 | 2,8816 | 0,458 | -0,386 |
| 8 | Q9H0B6 KLC2_HUMAN  | R.TLSSS#SM*DLSR.R                   | S610:      | 2 | 2,6744 | 0,375 | 0      |
| 8 | P52948 NUP98_HUMAN | K.NLNNSNLFS#PVNR.D                  | S612:      | 3 | 3,5899 | 0,318 | 0,466  |
| 8 | O95835 LATS1_HUMAN | K.QITTS#PITVR.K                     | S613:      | 2 | 2,0665 | 0,343 | 0,102  |
| 8 | P49790 NU153_HUMAN | K.EGSVLDILKS#PGFAS#PK.I             | S614:S619: | 3 | 2,8423 | 0,25  | -0,48  |
| 8 | P49790 NU153_HUMAN | K.EGSVLDILKS#PGFAS#PK.I             | S614:S619: | 2 | 2,7524 | 0,415 | -0,512 |
| 8 | Q8IYB3 SRRM1_HUMAN | R.TAS#PPPPK.R                       | S616:      | 2 | 2,7935 | 0,348 | -0,314 |
| 8 | O43719 HTSF1_HUMAN | K.VLDEEGS#ER.E                      | S616:      | 2 | 2,6507 | 0,23  | -0,219 |
| 8 | Q9UPN6 RBM16_HUMAN | K.ETVQTTQS#PTPVEK.E                 | S617:      | 2 | 3,004  | 0,345 | -0,601 |
| 8 | P49756 RBM25_HUMAN | K.LGASNS#PGQPNSVK.R                 | S618:      | 2 | 4,043  | 0,447 | -0,085 |
| 8 | P52272 HNRPM_HUMAN | R.M*GLAM*GGGGAS#FDR.A               | S618:      | 2 | 3,6019 | 0,465 | 0,163  |
| 8 | P49756 RBM25_HUMAN | K.LGASNS#PGQPNSVK.R                 | S618:      | 3 | 2,8309 | 0,202 | 0      |
| 8 | P52292 IMA2_HUMAN  | R.NVSSFPDDATS#PLQENR.N              | S62:       | 2 | 5,5176 | 0,502 | -0,499 |
| 8 | P56211 ARP19_HUMAN | K.YFDS#GDYNM*AK.A                   | S62:       | 2 | 4,2731 | 0,487 | -0,26  |
| 8 | P52292 IMA2_HUMAN  | R.NVSSFPDDATS#PLQENR.N              | S62:       | 3 | 3,7301 | 0,48  | -0,093 |
| 8 | P52948 NUP98_HUMAN | R.DSENLAS#PSEYPENGER.F              | S623:      | 2 | 3,2768 | 0,42  | 0,742  |
| 8 | Q14677 EPN4_HUMAN  | K.QDAFANFANFS#K.-                   | S624:      | 2 | 3,2142 | 0,403 | -0,169 |
| 8 | P49848 TAF6_HUMAN  | K.GGPTSHPS#PVPPPASS#PSPLSGSALCGGK.Q | S626:S634: | 3 | 4,6151 | 1     | -0,772 |
| 8 | Q13442 HAP28_HUMAN | K.SLDSDES#EDEEDDYQQK.R              | S63:       | 2 | 5,3534 | 0,485 | -0,462 |
| 8 | Q01105 SET_HUMAN   | R.LNEQAS#EEILK.V                    | S63:       | 2 | 3,172  | 0,267 | -0,09  |
| 8 | P02545 LMNA_HUMAN  | R.SVGGG#GGGSGFDNLVTR.S              | S632:      | 2 | 4,684  | 0,575 | 0,148  |
| 8 | Q96JM3 ZN828_HUMAN | K.DNQESSDAELS#SSEYIK.T              | S632:      | 2 | 3,0358 | 0,435 | -0,369 |
| 8 | P02545 LMNA_HUMAN  | R.SVGGSGGGG#FGDNLVTR.S              | S636:      | 2 | 4,8658 | 0,581 | -0,222 |
| 8 | Q86WJ1 CHD1L_HUMAN | R.VLS#PEELED.R.Q                    | S636:      | 2 | 2,8399 | 0,304 | -0,096 |
| 8 | Q9NW82 WDR70_HUMAN | K.TM*FAQVES#DDEEAK.N                | S638:      | 2 | 4,0144 | 0,482 | 0,288  |
| 8 | O75420 PERQ1_HUMAN | R.SLS#VPDSGR.L                      | S638:      | 2 | 2,0257 | 0,244 | -0,611 |
| 8 | Q9C0C7 AMRA1_HUMAN | R.LELSSAS#PQEER.T                   | S639:      | 2 | 3,3001 | 0,32  | 0,565  |
| 8 | Q8WVB6 CTF18_HUMAN | R.GDAASS#PAPAASVGSSQGGAR.K          | S64:       | 2 | 3,9895 | 0,502 | -0,519 |
| 8 | Q9H3Q1 BORG4_HUMAN | K.AGEPDGES#LDEQPSSSSSK.R            | S64:       | 2 | 2,7342 | 0,309 | -0,368 |

|   |                     |                                 |            |   |        |       |        |
|---|---------------------|---------------------------------|------------|---|--------|-------|--------|
| 8 | Q6P6C2 ALKB5_HUMAN  | K.YQEDS#DPERS#DYEEQQLQK.E       | S64:S69:   | 3 | 5,7345 | 0,583 | -0,718 |
| 8 | P54259 ATN1_HUMAN   | R.APS#PGAYK.T                   | S640:      | 2 | 2,3631 | 0,233 | 0      |
| 8 | Q9H2Y7 ZF106_HUMAN  | R.ELSTS#PCNPVIR.Q               | S641:      | 2 | 2,8952 | 0,212 | -0,084 |
| 8 | P35221 CTNA1_HUMAN  | R.TPEELDDSD#DFETEDFDVRS#R.T     | S641:S652: | 3 | 3,6703 | 0,291 | -0,5   |
| 8 | A1L390 PKHG3_HUMAN  | R.SSSVLS#LEGSEK.G               | S643:      | 2 | 3,0275 | 0,396 | -0,468 |
| 8 | P49756 RBM25_HUMAN  | K.FEDEDSD#DDVPR.K               | S644:      | 2 | 3,439  | 0,417 | -0,087 |
| 8 | Q7Z460 CLAP1_HUMAN  | R.QS#SGSATNVASTPDNR.G           | S646:      | 2 | 4,0457 | 0,603 | -0,365 |
| 8 | Q6ZRV2 FA83H_HUMAN  | K.VPVPVPGS#GGNGPER.E            | S647:      | 2 | 2,8969 | 0,246 | 0      |
| 8 | Q5TKA1 LIN9_HUMAN   | R.LFS#DEDDR.Q                   | S65:       | 2 | 2,7425 | 0,108 | -0,227 |
| 8 | Q9NSM8 Q9NSM8_HUMAN | K.LPDLS#PVENK.E                 | S652:      | 2 | 4,2496 | 0,356 | -0,205 |
| 8 | Q7Z417 NUFP2_HUMAN  | R.NDS#WGSFDLR.A                 | S652:      | 2 | 3,9974 | 0,412 | 0      |
| 8 | P02545 LMNA_HUMAN   | R.SYLLGNSS#PR.T                 | S652:      | 2 | 2,4482 | 0,36  | -0,208 |
| 8 | P35221 CTNA1_HUMAN  | R.S#RTS#VQTEDDQLIAGQSAR.A       | S652:S655: | 3 | 3,0893 | 0,199 | 0      |
| 8 | Q96RL1 UIMC1_HUMAN  | R.VPS#PGM*EEAGCSR.E             | S653:      | 2 | 4,1342 | 0,415 | -0,58  |
| 8 | Q8TDY2 RBCC1_HUMAN  | K.ASVSQTSQOSASS#PR.M            | S653:      | 2 | 3,1655 | 0,469 | -0,544 |
| 8 | P49848 TAF6_HUMAN   | K.QEAGDS#PPPAPGTPK.A            | S653:      | 2 | 3,1111 | 0,196 | -0,638 |
| 8 | Q4V328 GRAP1_HUMAN  | R.SGLEELVLSEM*NS#PSR.T          | S655:      | 2 | 3,0066 | 0,322 | -0,331 |
| 8 | P42684 ABL2_HUMAN   | K.GGFFSS#FMK.K                  | S655:      | 2 | 2,4221 | 0,21  | -0,673 |
| 8 | P42684 ABL2_HUMAN   | K.GGFFSS#FM*K.K                 | S655:      | 2 | 2,2267 | 0,229 | -0,221 |
| 8 | Q7Z3C6 ATG9A_HUMAN  | R.SFS#PLQPGQAPTGR.A             | S656:      | 2 | 2,544  | 0,363 | -0,08  |
| 8 | P35658 NU214_HUMAN  | R.SAQGSSS#PVPSM*VQK.S           | S657:      | 2 | 3,8957 | 0,428 | -0,539 |
| 8 | Q66K74 MAP1S_HUMAN  | R.LSLSD#PLR.G                   | S657:      | 2 | 2,3424 | 0,149 | -0,141 |
| 8 | Q9NYF8 BCLF1_HUMAN  | R.IDIS#PSTLR.K                  | S658:      | 2 | 2,5583 | 0,311 | -0,226 |
| 8 | Q9H1B7 EAP1_HUMAN   | R.NSSS#PVSPASVPGQR.R            | S659:      | 2 | 3,3512 | 0,464 | -0,63  |
| 8 | Q9H307 PININ_HUMAN  | R.GFS#DSGGGPPAK.Q               | S66:       | 2 | 3,3906 | 0,508 | 0,105  |
| 8 | P07741 APT_HUMAN    | R.IDYIAGLDS#R.G                 | S66:       | 2 | 2,7385 | 0,225 | 0,913  |
| 8 | P42166 LAP2A_HUMAN  | K.GPPDFS#S#DEEREPTVVGSGAAAAGR.S | S66:S67:   | 3 | 6,6459 | 0,509 | -0,335 |
| 8 | Q9UQL6 HDAC5_HUMAN  | R.TQS#SPAAPGGM*K.S              | S661:      | 2 | 2,2445 | 0,215 | -0,397 |
| 8 | Q5H9F3 BCRL1_HUMAN  | K.ALLSTVLS#R.S                  | S663:      | 2 | 3,1606 | 0,371 | 0      |
| 8 | P16615 AT2A2_HUMAN  | R.EFDELNPS#AQR.D                | S663:      | 2 | 2,2669 | 0,14  | 0      |
| 8 | Q6P4Q7 CNNM4_HUMAN  | R.SAS#LSYPDR.T                  | S664:      | 2 | 2,7679 | 0,161 | 0,227  |
| 8 | P28290 SSFA2_HUMAN  | K.SLAS#IEAK.C                   | S668:      | 2 | 2,7802 | 0,097 | 0,068  |
| 8 | Q8N556 AFAP1_HUMAN  | K.SGTSSPQS#PVFR.H               | S668:      | 2 | 2,2183 | 0,152 | 1,376  |

|   |                    |                                  |            |   |        |       |        |
|---|--------------------|----------------------------------|------------|---|--------|-------|--------|
| 8 | P42166 LAP2A_HUMAN | K.GPPDFSS#DEEREPT#PVLGSGAAAAGR.S | S67:T74:   | 3 | 5,7831 | 0,469 | -0,335 |
| 8 | P25205 MCM3_HUMAN  | R.SEDES#ETEDEEEK.S               | S672:      | 2 | 3,534  | 0,633 | 0      |
| 8 | Q05209 PTN12_HUMAN | K.DVDVSEDS#PPPLPER.T             | S673:      | 2 | 3,9049 | 0,402 | -0,493 |
| 8 | Q9Y5B0 CTDP1_HUMAN | R.LVLS#PDAPDR.A                  | S674:      | 2 | 2,814  | 0,29  | -0,315 |
| 8 | P46087 NOL1_HUMAN  | K.TQASSS#FQDSSQPAGK.A            | S675:      | 2 | 4,3152 | 0,51  | -0,215 |
| 8 | Q53EU6 PLCH_HUMAN  | K.NSAS#VGIIQR.D                  | S68:       | 2 | 3,1276 | 0,326 | -0,217 |
| 8 | Q9Y2W1 TR150_HUMAN | R.IDIS#PSTFR.K                   | S682:      | 2 | 2,5377 | 0,132 | -0,328 |
| 8 | P25098 ARBK1_HUMAN | K.VPLVQRGS#ANGL.-                | S685:      | 2 | 3,4691 | 0,508 | 0,473  |
| 8 | P16070 CD44_HUMAN  | K.LVINS#GNGAVEDR.K               | S686:      | 2 | 3,7928 | 0,501 | -0,514 |
| 8 | Q9UHB7 AFF4_HUMAN  | R.M*FS#PM*EEK.E                  | S694:      | 2 | 2,893  | 0,199 | 0,22   |
| 8 | Q8IYB3 SRRM1_HUMAN | R.APQTSSS#PPPVR.R                | S696:      | 2 | 3,0252 | 0,149 | -0,187 |
| 8 | Q14978 NOLC1_HUMAN | R.GGSISVQVNSIKFDS#E.-            | S698:      | 2 | 4,4773 | 0,554 | -0,21  |
| 8 | Q8N128 CN024_HUMAN | R.VIHFVSGETM*EEYS#T#DEDEVDGLEK.K | S70:T71:   | 3 | 3,0179 | 0,228 | -0,302 |
| 8 | P52272 HNRPM_HUMAN | K.FES#PEVAER.A                   | S701:      | 2 | 2,9193 | 0,255 | -0,213 |
| 8 | O43719 HTSF1_HUMAN | K.LFEDDDS#NEK.L                  | S702:      | 2 | 3,149  | 0,305 | -0,283 |
| 8 | Q5VWQ8 DAB2P_HUMAN | R.LPS#PTPENK.D                   | S702:      | 2 | 3,0763 | 0,193 | -0,23  |
| 8 | O43719 HTSF1_HUMAN | K.LFEDDDS#NEKLFDEEDSS#EK.L       | S702:S714: | 3 | 6,6048 | 0,472 | -0,273 |
| 8 | Q9UHB7 AFF4_HUMAN  | K.ELLS#PLS#EPDDRYPLIVK.I         | S703:S706: | 3 | 2,9263 | 0,329 | -0,571 |
| 8 | Q9H2P0 ADNP_HUMAN  | R.LNQS#PSLAPVK.R                 | S709:      | 2 | 3,4424 | 0,289 | -0,198 |
| 8 | Q9Y6A5 TACC3_HUMAN | R.ILS#PSM*ASK.L                  | S71:       | 2 | 2,2684 | 0,083 | -0,118 |
| 8 | Q9NR30 DDX21_HUMAN | K.AEPSEVDM*NS#PK.S               | S71:       | 2 | 2,1934 | 0,435 | -0,697 |
| 8 | Q13439 GOGA4_HUMAN | R.VPS#VESLFR.S                   | S71:       | 2 | 2,1915 | 0,296 | -0,438 |
| 8 | Q13439 GOGA4_HUMAN | R.VPS#VESLFRS#PIK.E              | S71:S78:   | 2 | 3,0352 | 0,2   | -0,528 |
| 8 | O43719 HTSF1_HUMAN | K.LFDEEEDS#SEK.L                 | S713:      | 2 | 3,7106 | 0,32  | -1,127 |
| 8 | O43719 HTSF1_HUMAN | K.LFDEEEDS#S#EKLFDDSDER.G        | S713:S714: | 3 | 5,4043 | 0,292 | -0,223 |
| 8 | O43719 HTSF1_HUMAN | K.LFDEEEDS#SEKLFDDSDER.G         | S713:S721: | 3 | 5,3837 | 0,428 | -0,371 |
| 8 | O43719 HTSF1_HUMAN | K.LFDEEEDSS#EK.L                 | S714:      | 2 | 3,9285 | 0,339 | -0,173 |
| 8 | Q32MZ4 LRRF1_HUMAN | K.IDGATQSS#PAEPK.S               | S714:      | 2 | 3,3437 | 0,387 | -0,442 |
| 8 | P51812 KS6A3_HUMAN | R.NQS#PVLEPVGR.S                 | S715:      | 2 | 2,8897 | 0,439 | -0,382 |
| 8 | Q8TEW0 PARD3_HUMAN | R.IS#HSLYSGIEGLDES#PSR.N         | S715:S728: | 2 | 3,3645 | 0,395 | -0,347 |
| 8 | Q5W0B1 RN219_HUMAN | K.IQSSLSSAS#PSK.A                | S719:      | 2 | 2,8765 | 0,493 | -0,288 |
| 8 | Q86V15 CASZ1_HUMAN | K.DTEHEES#S#NDDLVDVSALSSK.N      | S720:S721: | 3 | 3,0864 | 0,164 | 0,074  |
| 8 | O43719 HTSF1_HUMAN | K.LFDDSDER.G                     | S721:      | 2 | 3,1822 | 0,382 | -0,227 |

|   |                    |                                      |            |   |        |       |        |
|---|--------------------|--------------------------------------|------------|---|--------|-------|--------|
| 8 | P10636 TAU_HUMAN   | K.SPVVSGDTS#PR.H                     | S721:      | 2 | 3,1816 | 0,374 | -0,31  |
| 8 | P05412 JUN_HUMAN   | K.LAS#PELER.L                        | S73:       | 2 | 3,0267 | 0,205 | 0,061  |
| 8 | Q86SQ0 PHLB2_HUMAN | R.SPS#PLGTSVR.S                      | S73:       | 2 | 2,7374 | 0,249 | -0,113 |
| 8 | Q99575 POP1_HUMAN  | R.VQAYEEPSVASS#PNGK.E                | S730:      | 2 | 4,0156 | 0,539 | -0,35  |
| 8 | O60271 JIP4_HUMAN  | R.SAS#QSS#LDKLDQELK.E                | S730:S733: | 3 | 3,8613 | 0,388 | 0,202  |
| 8 | P46087 NOL1_HUMAN  | K.GTDTQTPAVLS#PSK.T                  | S732:      | 2 | 3,5861 | 0,531 | 0,165  |
| 8 | Q14684 RRP1B_HUMAN | K.TPTSS#PASSPLVAK.K                  | S732:      | 2 | 2,7905 | 0,311 | 0,086  |
| 8 | Q15418 KS6A1_HUMAN | R.KLPS#TTL.-                         | S732:      | 2 | 2,6204 | 0,427 | 0,073  |
| 8 | Q32MZ4 LRRF1_HUMAN | R.CTLPEHES#PSQDIS#DACEAESTER.C       | S733:S739: | 3 | 5,1589 | 0,426 | -0,189 |
| 8 | Q9BQ52 RNZ2_HUMAN  | K.VPLFS#PNFSEK.V                     | S736:      | 2 | 2,9393 | 0,384 | -0,181 |
| 8 | Q9P2G1 AKIB1_HUMAN | R.GVAPADS#PEAPR.R                    | S737:      | 2 | 2,9949 | 0,454 | -0,294 |
| 8 | A0FGR8 ESYT2_HUMAN | R.SSS#\$LLASPGHISVK.E                | S738:S739: | 2 | 2,7305 | 1     | -0,15  |
| 8 | A0FGR8 ESYT2_HUMAN | R.SSS#SLLAS#PGHISVK.E                | S738:S743: | 3 | 3,2418 | 0,263 | -0,224 |
| 8 | Q96C19 EFHD2_HUMAN | R.ADLNQGIGEPQS#PSR.R                 | S74:       | 2 | 4,1213 | 0,508 | 0,148  |
| 8 | Q08J23 NSUN2_HUMAN | R.AGEPNS#PDAEEANS#PDVTAGCDPAGVHPPR.- | S743:S751: | 3 | 3,061  | 0,212 | -0,461 |
| 8 | Q7Z2K8 GRIN1_HUMAN | R.SPS#GAGEGASCSDGPR.G                | S75:       | 2 | 3,376  | 0,449 | -0,155 |
| 8 | P12931 SRC_HUMAN   | K.LFGGFNSSDTVTS#PQR.A                | S75:       | 2 | 3,1509 | 0,509 | 0,817  |
| 8 | Q969J3 L12R1_HUMAN | K.GLLSGQTS#PTNAK.L                   | S75:       | 2 | 3,0725 | 0,32  | -0,36  |
| 8 | Q96S55 WRIP1_HUMAN | R.LS#ESSALK.Q                        | S75:       | 2 | 2,1031 | 0,162 | -0,067 |
| 8 | Q8IXK0 PHC2_HUMAN  | R.CSDNSSYEEPLS#PISASSTSR.R           | S751:      | 3 | 4,6234 | 0,397 | -0,525 |
| 8 | Q5VZ89 DEN4C_HUMAN | K.VPS#GIFDVNSR.K                     | S753:      | 2 | 3,7616 | 0,502 | -0,288 |
| 8 | Q08499 PDE4D_HUMAN | K.DSGS#QVEEDTSCSDSK.T                | S754:      | 2 | 3,6116 | 0,333 | -0,539 |
| 8 | Q9P266 K1462_HUMAN | R.SLS#PSSNSAFSR.T                    | S757:      | 2 | 2,8384 | 0,303 | 0      |
| 8 | Q9UJ70 NAGK_HUMAN  | R.SLGLSL\$#GGDQEDAGR.I               | S76:       | 2 | 3,3217 | 0,463 | -0,074 |
| 8 | Q8NEY1 NAV1_HUMAN  | K.SIGS#PESTPK.N                      | S760:      | 2 | 2,1203 | 0,289 | -0,113 |
| 8 | Q7LBC6 JHD2B_HUMAN | K.TFS#NVFGR.H                        | S766:      | 2 | 3,0604 | 0,33  | 0,061  |
| 8 | Q9UHJ3 SMBT1_HUMAN | R.TFSFS#DDENKPPS#PK.E                | S767:S775: | 2 | 3,472  | 0,266 | -0,329 |
| 8 | O94854 K0754_HUMAN | K.NLS#GDCQDFR.F                      | S77:       | 2 | 3,0999 | 0,362 | -0,378 |
| 8 | Q9BVJ6 UT14A_HUMAN | K.VSEFNVS#SEGSGEK.L                  | S77:       | 2 | 2,9508 | 0,348 | -0,874 |
| 8 | P82094 TMF1_HUMAN  | K.SNTEPQSPPIAS#PK.A                  | S77:       | 2 | 2,9233 | 0,339 | -0,478 |
| 8 | Q99856 ARI3A_HUMAN | R.AAAAGLGHPAS#PGGS#EDGPPGSEEDAAR.E   | S77:S81:   | 3 | 8,0492 | 0,524 | -0,908 |
| 8 | P10644 KAP0_HUMAN  | R.TDS#REDEIS#PPPPNPVVK.G             | S77:S83:   | 3 | 2,7108 | 0,161 | -0,257 |
| 8 | Q9NRY4 GRLF1_HUMAN | R.NLNLVSS#TASIK.D                    | S770:      | 2 | 4,1776 | 0,373 | -0,368 |

|   |                    |                                     |            |   |        |       |        |
|---|--------------------|-------------------------------------|------------|---|--------|-------|--------|
| 8 | Q15398 DLG7_HUMAN  | K.NTASQNS#ILEEGETK.I                | S777:      | 2 | 4,6934 | 0,412 | -0,502 |
| 8 | Q8N4C8 MINK1_HUMAN | K.LDSS#PVLSPGNK.A                   | S778:      | 2 | 3,9695 | 0,446 | -0,566 |
| 8 | Q9NR30 DDX21_HUMAN | R.SFS#KAFGQ.-                       | S778:      | 2 | 2,3611 | 0,381 | 0,256  |
| 8 | Q15003 CND2_HUMAN  | R.VFDLQFS#TDSR.L                    | S78:       | 2 | 3,6283 | 0,535 | -0,245 |
| 8 | P13861 KAP2_HUMAN  | R.VADAKGDS#ES#EEDEDLEVPVPSR.F       | S78:S80:   | 3 | 3,3669 | 0,212 | -0,486 |
| 8 | P45974 UBP5_HUMAN  | R.SAADS#ISESVPVGP.V                 | S783:      | 2 | 3,8555 | 0,529 | -0,64  |
| 8 | Q9Y6N8 CAD10_HUMAN | K.LAEM*YGGGES#DKDS.-                | S784:      | 2 | 3,7556 | 0,518 | -0,157 |
| 8 | Q9H4G0 E41L1_HUMAN | R.SLS#PIIGK.D                       | S784:      | 2 | 2,5795 | 0,277 | 0      |
| 8 | P46087 NOL1_HUMAN  | K.GPQPPTVS#PIR.S                    | S786:      | 2 | 2,8351 | 0,4   | -0,199 |
| 8 | P49792 RBP2_HUMAN  | R.YSL#PSK.S                         | S788:      | 2 | 2,2043 | 0,18  | 0,142  |
| 8 | P42566 EP15_HUMAN  | R.S#INKLDS#PDPFK.L                  | S790:S796: | 2 | 2,9832 | 0,309 | -0,16  |
| 8 | Q8IYB3 SRRM1_HUMAN | K.SPTSPS#PPR.N                      | S797:      | 2 | 2,6684 | 0,27  | -0,111 |
| 8 | Q15637 SF01_HUMAN  | R.TGDLGIPPNEPDRS#PS#PEPIYNSEGK.R    | S80:S82:   | 3 | 4,0101 | 0,36  | -0,5   |
| 8 | O95239 KIF4A_HUMAN | R.TFS#LTEVR.G                       | S801:      | 2 | 3,0549 | 0,252 | 0      |
| 8 | O95819 M4K4_HUMAN  | R.AASSLNLS#NGETESVK.T               | S805:      | 2 | 4,4655 | 0,446 | -0,072 |
| 8 | Q9UMZ2 SYNG_HUMAN  | K.EDS#AS#VKSLDLPISIGGSSVGK.E        | S807:S809: | 3 | 2,7718 | 0,168 | -0,083 |
| 8 | P06400 RB_HUMAN    | R.IPGGNIYIS#PLKS#PYK.I              | S807:S811: | 2 | 4,1093 | 0,467 | -0,32  |
| 8 | P06400 RB_HUMAN    | R.IPGGNIYIS#PLKS#PYK.I              | S807:S811: | 3 | 3,8374 | 0,361 | 0,096  |
| 8 | O60293 CC131_HUMAN | K.TSSSPANS#DVEIDGIGR.I              | S809:      | 2 | 4,2889 | 0,619 | -0,326 |
| 8 | Q9UGH3 S23A2_HUMAN | K.SSLAETLDSTGS#LDPQR.S              | S81:       | 2 | 4,5337 | 0,511 | 0,788  |
| 8 | Q15003 CND2_HUMAN  | R.VFDLQFSTDS#PR.L                   | S81:       | 2 | 3,8201 | 0,568 | -0,327 |
| 8 | Q99856 ARI3A_HUMAN | R.AAAAGLGHASPAGGS#EDGPPGS#EEEDAAR.E | S81:S88:   | 3 | 7,1352 | 0,549 | -0,584 |
| 8 | O15534 PER1_HUMAN  | R.GLDSSSTAPS#ALGER.G                | S815:      | 2 | 4,2772 | 0,471 | -0,479 |
| 8 | Q8IWX8 CHERP_HUMAN | R.S#RS#PTPPSSAGLSNSAPPIDSR.L        | S815:S817: | 3 | 5,3226 | 1     | -0,073 |
| 8 | Q86TC9 MYPN_HUMAN  | R.CVSPIPVS#PTSR.I                   | S818:      | 2 | 3,3202 | 0,34  | -0,177 |
| 8 | P46100 ATRX_HUMAN  | R.QTQSESSNYDS#ELEK.E                | S819:      | 2 | 3,2865 | 0,443 | -0,267 |
| 8 | Q9GZR7 DDX24_HUMAN | K.AQAVS#EEEEEEGK.S                  | S82:       | 2 | 4,9658 | 0,643 | 0,148  |
| 8 | P04792 HSPB1_HUMAN | R.QLS#SGVSEIR.H                     | S82:       | 2 | 2,8186 | 0,139 | -0,422 |
| 8 | P42684 ABL2_HUMAN  | R.TVSTSS#QPEENVDR.A                 | S820:      | 2 | 2,8732 | 0,384 | -0,375 |
| 8 | Q99523 SORT_HUMAN  | K.SGYHDDS#DEDLLE.-                  | S825:      | 2 | 2,6811 | 0,201 | -0,387 |
| 8 | Q86VM9 ZCH18_HUMAN | K.SQDQDS#EVNELSR.G                  | S83:       | 2 | 4,1701 | 0,493 | 0,077  |
| 8 | Q8N8A6 DDX51_HUMAN | R.VNDAEPGS#PEAPQGK.R                | S83:       | 2 | 3,5555 | 0,514 | -0,542 |
| 8 | Q9H5H4 ZN768_HUMAN | R.FEPES#PGFESR.S                    | S83:       | 2 | 2,5783 | 0,325 | -0,269 |



|   |                    |                                   |            |   |        |       |        |
|---|--------------------|-----------------------------------|------------|---|--------|-------|--------|
| 8 | P48960 CD97_HUMAN  | R.ALRAS#ESGI.-                    | S831:      | 2 | 2,8902 | 0,521 | -0,93  |
| 8 | P49327 FAS_HUMAN   | R.GTPLIS#PLIK.W                   | S831:      | 2 | 2,2707 | 0,426 | -0,436 |
| 8 | Q9UKV3 ACINU_HUMAN | K.GVPAGNS#DTEGGQPGR.K             | S838:      | 2 | 3,8983 | 0,476 | -0,541 |
| 8 | Q9UKV3 ACINU_HUMAN | K.GVPAGNS#DTEGGQPGR.K             | S838:      | 3 | 3,5741 | 0,268 | -0,348 |
| 8 | Q9UBW7 ZMYM2_HUMAN | K.M*TGSAPPPS#PTPNK.E              | S838:      | 2 | 2,3652 | 0,205 | -0,413 |
| 8 | Q9H307 PININ_HUMAN | R.DLEGAVS#R.L                     | S84:       | 2 | 2,391  | 0,161 | 0      |
| 8 | Q8WXH0 SYNE2_HUMAN | K.NLTDVS#PDLDIR.L                 | S841:      | 2 | 3,3717 | 0,367 | 0      |
| 8 | Q9UQ35 SRRM2_HUMAN | K.S#GTPPRQGSITS#PQANEQSVTPQR.R    | S846:S857: | 3 | 5,1584 | 1     | 0,477  |
| 8 | Q9NUU7 DD19A_HUMAN | R.DPNS#PLYSVK.S                   | S85:       | 2 | 3,9972 | 0,419 | -0,102 |
| 8 | Q12770 SCAP_HUMAN  | K.AGPEEPGDS#PPLR.H                | S851:      | 2 | 3,0317 | 0,328 | 0,348  |
| 8 | Q13045 FLII_HUMAN  | R.NAEAVLQS#PGLSGK.V               | S856:      | 2 | 4,4042 | 0,545 | -0,336 |
| 8 | Q13045 FLII_HUMAN  | R.NAEAVLQS#PGLSGK.V               | S856:      | 3 | 3,6288 | 0,393 | -0,126 |
| 8 | Q14687 GSE1_HUMAN  | R.YSPDEM*NNS#PNFE EK.K            | S857:      | 2 | 2,2131 | 0,238 | 0,322  |
| 8 | Q6GYQ0 GRIPE_HUMAN | R.GS#SPGSLEIPK.D                  | S860:      | 2 | 2,5917 | 0,276 | 0      |
| 8 | Q86XL3 ANKL2_HUMAN | K.SAVLCYS#PSDR.Q                  | S866:      | 2 | 3,2511 | 0,286 | -0,274 |
| 8 | Q69YQ0 CYTSA_HUMAN | R.TPLS#PSPM*K.T                   | S868:      | 2 | 2,9015 | 0,396 | 0      |
| 8 | Q9Y5B0 CTDP1_HUMAN | K.EDLES M*DKEVDDILGEGS#DDS#DSEK.R | S869:S872: | 3 | 4,3245 | 0,388 | -0,437 |
| 8 | Q9UK76 HN1_HUMAN   | R.NS#SEASSGDFLDLK.G               | S87:       | 2 | 4,3101 | 0,461 | -0,315 |
| 8 | P09493 TPM1_HUMAN  | K.ATDAEADV AS#LNR.R               | S87:       | 2 | 3,2422 | 0,465 | -1,641 |
| 8 | Q99618 CDCA3_HUMAN | K.TSSGDPPS#PLVK.Q                 | S87:       | 2 | 2,8183 | 0,494 | -0,289 |
| 8 | O95049 ZO3_HUMAN   | R.SSEP VQADES QS#PR.D             | S870:      | 2 | 2,9091 | 0,414 | -0,611 |
| 8 | Q6ZRV2 FA83H_HUMAN | K.GS#PTSAYPER.K                   | S870:      | 2 | 2,0906 | 0,305 | -0,32  |
| 8 | Q9UGU0 TCF20_HUMAN | R.SVICDIS#PLR.Q                   | S871:      | 2 | 2,1264 | 0,276 | -0,098 |
| 8 | Q9Y4F1 FARP1_HUMAN | K.SSSPAPEFLASS#PPDNK.S            | S872:      | 2 | 4,2167 | 0,416 | -0,472 |
| 8 | Q9C0C2 TB182_HUMAN | R.DS#LGTYS SR.D                   | S872:      | 2 | 2,4724 | 0,428 | -0,229 |
| 8 | Q14160 LAP4_HUMAN  | R.GLGFS#IAGGK.G                   | S875:      | 2 | 2,9655 | 0,422 | 0,124  |
| 8 | Q9UQ35 SRRM2_HUMAN | R.SCFESS#PDPELK.S                 | S876:      | 2 | 3,9434 | 0,562 | -0,248 |
| 8 | Q9UID6 ZN639_HUMAN | R.NQNYLVPS#PVL R.I                | S88:       | 2 | 3,2859 | 0,523 | -0,33  |
| 8 | Q96HP0 DOCK6_HUMAN | R.SKS#ISS#SNPDLAVAPGSVDDEVSR.I    | S880:S883: | 3 | 4,4006 | 1     | -0,142 |
| 8 | P46939 UTRO_HUMAN  | R.GFDS#FLGR.Y                     | S881:      | 2 | 2,3277 | 0,298 | -0,187 |
| 8 | P51826 AFF3_HUMAN  | R.SPIS#PLSDASK.H                  | S881:      | 2 | 2,2884 | 0,299 | -0,103 |
| 8 | Q9NZM3 ITSN2_HUMAN | R.TVS#PGSVS#PIHGQGVVENLK.A        | S883:S888: | 3 | 3,366  | 0,407 | -0,08  |
| 8 | Q99700 ATX2_HUMAN  | R.GPEVTSQGVQTSS#PACK.Q            | S888:      | 2 | 3,7489 | 0,575 | -0,471 |

|   |                     |                           |            |   |        |       |        |
|---|---------------------|---------------------------|------------|---|--------|-------|--------|
| 8 | Q92547 TOPB1_HUMAN  | R.NAVALSAS#PQLK.E         | S888:      | 2 | 3,2198 | 0,345 | -0,382 |
| 8 | Q8NI08 NCOA7_HUMAN  | R.YYS#IDDNQNK.T           | S89:       | 2 | 2,6527 | 0,262 | 0,091  |
| 8 | Q9NR30 DDX21_HUMAN  | K.EEPSQNDIS#PK.T          | S89:       | 2 | 2,3034 | 0,297 | -0,092 |
| 8 | P05114 HMG1_HUMAN   | K.TEESPAS#DEAGEK.E        | S89:       | 2 | 2,0979 | 0,216 | -0,427 |
| 8 | Q8TEA7 TBCK_HUMAN   | K.IKPTGLLTIPS#PQI.-       | S890:      | 2 | 3,2109 | 0,402 | -0,548 |
| 8 | Q8WX93 PALD_HUMAN   | R.IAS#DEEIQGTK.D          | S893:      | 2 | 3,8227 | 0,536 | -0,192 |
| 8 | P29317 EPA2_HUMAN   | R.LPS#TSGSEGVPPFR.T       | S897:      | 2 | 2,8342 | 0,426 | -0,518 |
| 8 | O95562 SFT2B_HUMAN  | K.VLS#GQDTEDR.S           | S9:        | 2 | 2,2779 | 0,357 | 0,102  |
| 8 | P24534 EF1B_HUMAN   | K.YGPADVEDTTGS#GATDSK.D   | S90:       | 2 | 4,995  | 0,477 | 1,055  |
| 8 | Q6PJF5 RHDF2_HUMAN  | K.SVS#LQEPR.S             | S90:       | 2 | 2,4771 | 0,125 | -0,061 |
| 8 | P29317 EPA2_HUMAN   | R.LPSTSGS#EGVPFR.T        | S901:      | 2 | 3,5173 | 0,523 | -0,431 |
| 8 | A6ZJA4 A6ZJA4_HUMAN | K.NTETQPTS#PQLGTK.T       | S906:      | 2 | 3,5118 | 0,357 | 0,231  |
| 8 | Q7Z4H7 FA29A_HUMAN  | R.SLS#PLIK.F              | S908:      | 2 | 2,4911 | 0,178 | 0,146  |
| 8 | Q7Z4H7 FA29A_HUMAN  | R.SLS#PLIKFS#PVEQR.L      | S908:S914: | 3 | 2,7932 | 0,395 | -0,415 |
| 8 | Q7KZF4 SND1_HUMAN   | R.ADDADEFGYS#R.-          | S909:      | 2 | 3,7909 | 0,459 | -0,184 |
| 8 | Q14687 GSE1_HUMAN   | K.ALSAAVADSLTNS#PR.D      | S909:      | 2 | 2,6944 | 0,376 | -0,393 |
| 8 | Q96K76 UBP47_HUMAN  | K.STETSDFENIES#PLNER.D    | S910:      | 2 | 4,6155 | 0,597 | -0,477 |
| 8 | O14974 MYPT1_HUMAN  | R.SGS#YSYLEER.K           | S910:      | 2 | 3,2964 | 0,535 | -0,096 |
| 8 | Q05397 FAK1_HUMAN   | K.LQPQEIS#PPPTANLDR.S     | S910:      | 2 | 2,4148 | 0,279 | -0,197 |
| 8 | O95425 SVIL_HUMAN   | K.FSSS#IENS DSPVR.S       | S914:      | 2 | 3,2244 | 0,363 | -0,73  |
| 8 | Q96PE2 ARHGH_HUMAN  | K.LADILS#PR.L             | S914:      | 2 | 2,7851 | 0,182 | 0,063  |
| 8 | Q6ZRV2 FA83H_HUMAN  | R.GS#PVPPVPER.R           | S914:      | 2 | 2,0736 | 0,084 | -0,438 |
| 8 | P33527 MRP1_HUMAN   | R.QLS#SSSSYSGDISR.H       | S915:      | 2 | 2,0802 | 0,305 | 0,157  |
| 8 | O75044 FNBP2_HUMAN  | R.LDS#PQIR.K              | S916:      | 2 | 2,5497 | 0,173 | 0,067  |
| 8 | P45973 CBX5_HUMAN   | K.S#NFSNSADDIK.S          | S92:       | 2 | 3,3319 | 0,48  | -0,286 |
| 8 | Q7Z2Z1 CO042_HUMAN  | R.NLFNQELLS#PSK.R         | S923:      | 2 | 2,8697 | 0,313 | 0      |
| 8 | Q8IVF2 AHNK2_HUMAN  | K.VEM*PS#FK.M             | S923:      | 2 | 2,0136 | 0,348 | -0,327 |
| 8 | Q6ZRV2 FA83H_HUMAN  | R.S#SPVPPVPER.R           | S924:      | 2 | 2,3684 | 0,278 | -0,852 |
| 8 | Q9BZ29 DOCK9_HUMAN  | K.AEYPVAS#EYK.T           | S927:      | 2 | 2,8844 | 0,48  | 0      |
| 8 | P27816 MAP4_HUMAN   | R.LATNTS#APDLK.N          | S928:      | 2 | 3,271  | 0,351 | 0      |
| 8 | P19021 AMD_HUMAN    | K.GSGGLNLGNFFAS#R.K       | S929:      | 2 | 3,1704 | 0,473 | -0,661 |
| 8 | Q15651 HMG1_HUMAN   | K.AEEAQKTES#VDNEGE.-      | S93:       | 2 | 2,9148 | 0,485 | -0,284 |
| 8 | Q9Y2W1 TR150_HUMAN  | K.FSGEEGEI EDDDES#GTENR.E | S939:      | 3 | 3,4287 | 0,354 | -0,88  |

|   |                    |                                 |              |   |        |       |        |
|---|--------------------|---------------------------------|--------------|---|--------|-------|--------|
| 8 | Q86UU0 BCL9L_HUMAN | K.SPTLSQVHS#PLVTSPS#ANLK.S      | S942:S949:   | 3 | 3,5138 | 0,193 | -0,082 |
| 8 | O60293 CC131_HUMAN | R.LDSS#PVSSPR.K                 | S949:        | 2 | 2,3796 | 0,435 | -1,518 |
| 8 | Q9HB90 RRAGC_HUMAN | K.M*SPNETLFLES#TNK.I            | S95:         | 2 | 4,3048 | 0,519 | -0,429 |
| 8 | Q13185 CBX3_HUMAN  | K.SLS#DSEDDSK.S                 | S95:         | 2 | 3,0673 | 0,474 | -0,488 |
| 8 | Q8WXD5 GEMI6_HUMAN | K.AYS#PEDLEER.K                 | S95:         | 2 | 2,7629 | 0,349 | -0,473 |
| 8 | Q9BW61 DDA1_HUMAN  | R.TDS#PDM*HEDT.-                | S95:         | 2 | 2,1021 | 0,226 | -0,392 |
| 8 | Q13425 SNTB2_HUMAN | R.GLGPPS#PPAPPRGPAGEAGAS#PPVR.R | S95:S110:    | 3 | 2,7306 | 0,325 | -0,224 |
| 8 | Q9NRA8 4ET_HUMAN   | R.SSS#PVGLAK.W                  | S951:        | 2 | 2,7872 | 0,263 | -0,066 |
| 8 | O75122 CLAP2_HUMAN | R.GVTEAIQNFS#FR.S               | S952:        | 2 | 4,1393 | 0,53  | -0,505 |
| 8 | Q96Q05 NIBP_HUMAN  | K.FNFESFPES#PGEK.G              | S953:        | 2 | 3,473  | 0,532 | -0,689 |
| 8 | P49792 RBP2_HUMAN  | R.FESPATGILS#PR.G               | S955:        | 2 | 3,1416 | 0,434 | -0,09  |
| 8 | Q14683 SMC1A_HUMAN | K.GTM*DDISQEEGS#SQGEDSVSGSQR.I  | S956:        | 3 | 4,1866 | 0,47  | -0,496 |
| 8 | Q03701 CEBPZ_HUMAN | K.GTDDDFDFAGS#FQGPR.K           | S959:        | 2 | 3,6497 | 0,332 | -0,647 |
| 8 | P78316 NOP14_HUMAN | R.FGEYNSNM*S#PEEK.M             | S96:         | 2 | 4,0052 | 0,417 | -0,45  |
| 8 | Q5JSH3 WDR44_HUMAN | K.ELSDQATAS#PIVAR.T             | S96:         | 2 | 3,7623 | 0,387 | 0,317  |
| 8 | Q96H55 MYO19_HUMAN | R.LIHVTSS#AFTGLG.-              | S964:        | 2 | 2,9811 | 0,484 | -0,265 |
| 8 | P46379 BAT3_HUMAN  | R.AS#PEPQRENAS#PAPGTTAEEM*SR.G  | S964:S973:   | 3 | 4,7245 | 0,408 | -0,413 |
| 8 | Q9H910 HN1L_HUMAN  | K.TSDIFGS#PVTATSR.L             | S97:         | 2 | 4,1173 | 0,528 | -0,161 |
| 8 | Q9NUQ3 TXLNG_HUMAN | R.NLVS#PAYCTQESR.E              | S97:         | 2 | 3,4393 | 0,526 | -0,228 |
| 8 | Q9H089 LSG1_HUMAN  | R.TGLLSFEES#QR.I                | S97:         | 2 | 2,5201 | 0,15  | -0,272 |
| 8 | P46379 BAT3_HUMAN  | R.ENAS#PAPGTTAEEM*SR.G          | S973:        | 2 | 3,3355 | 0,541 | -0,807 |
| 8 | Q9BPX3 CND3_HUMAN  | R.CQTAEADS#ES#DHEVPEPESEM.K.M   | S973:S975:   | 3 | 5,0353 | 0,393 | -0,206 |
| 8 | Q9BPX3 CND3_HUMAN  | R.CQTAEADS#ES#DHEVPEPESEM*K.M   | S973:S975:   | 3 | 4,3128 | 0,239 | -0,614 |
| 8 | P50402 EMD_HUMAN   | K.GYNDDYEEES#YFTTR.T            | S98:         | 2 | 3,1511 | 0,542 | -0,426 |
| 8 | Q9NS56 TOPRS_HUMAN | K.LQQTVPADAS#PDSK.C             | S98:         | 2 | 2,6848 | 0,324 | 0,079  |
| 8 | Q02078 MEF2A_HUMAN | R.GCDS#PDPDTSYVLT#PHTEEK.Y      | S98:T108:    | 3 | 4,1661 | 0,299 | -0,38  |
| 8 | Q15811 ITSN1_HUMAN | K.STSM*DSGSS#ESPASLK.R          | S984:        | 2 | 4,447  | 0,437 | -0,146 |
| 8 | Q14669 TRIPC_HUMAN | R.DDSLDSL#PQGR.L                | S991:        | 2 | 3,0215 | 0,326 | -0,19  |
| 8 | Q5T200 ZC3HD_HUMAN | R.GNIETTSQVFS#PK.K              | S993:        | 2 | 4,1838 | 0,595 | -0,409 |
| 8 | Q5T200 ZC3HD_HUMAN | R.GNIETTSQVFS#PK.K              | S993:        | 3 | 2,7811 | 0,225 | -0,102 |
| 8 | Q9UQ35 SRRM2_HUMAN | K.AQT#PPGPSLSGSK.S              | T1003:       | 2 | 2,8745 | 0,318 | -0,653 |
| 8 | Q9UQ35 SRRM2_HUMAN | K.AQT#PPGPSLSGSKS#PCPQEK.S      | T1003:S1014: | 3 | 2,9436 | 0,443 | -0,579 |
| 8 | Q14847 LASP1_HUMAN | K.GFSVVADT#PELQR.I              | T104:        | 2 | 3,6002 | 0,46  | -0,163 |

|   |                     |                                 |              |   |        |       |        |
|---|---------------------|---------------------------------|--------------|---|--------|-------|--------|
| 8 | O75044 FNBP2_HUMAN  | K.TNATSPGVNSST#SPQSTDK.S        | T1060:       | 2 | 3,4177 | 0,362 | -0,623 |
| 8 | Q6SPF0 SAMD1_HUMAN  | R.GAT#PPAPPR.A                  | T107:        | 2 | 2,3065 | 0,357 | 0,065  |
| 8 | Q02952 AKA12_HUMAN  | K.VVGQTT#PESFEK.A               | T1116:       | 2 | 3,6781 | 0,408 | -0,609 |
| 8 | P49792 RBP2_HUMAN   | K.SVFGT#PTLETANK.N              | T1144:       | 2 | 3,256  | 0,492 | 0      |
| 8 | Q92618 ZN516_HUMAN  | R.ASEGLDACASPT#K.S              | T118:        | 2 | 3,5264 | 0,352 | 0,088  |
| 8 | Q8WXI9 P66B_HUMAN   | R.GRLT#PS#PDIIVLSDNASSPR.S      | T120:S122:   | 3 | 4,2621 | 0,358 | -0,153 |
| 8 | Q8WXI9 P66B_HUMAN   | R.GRLT#PSPDIIVLSDNASS#PR.S      | T120:S135:   | 3 | 4,1845 | 0,293 | 0,077  |
| 8 | Q27J81 INF2_HUMAN   | K.SFSEDAVTDSGSGT#LPR.A          | T1206:       | 2 | 5,1777 | 0,472 | -0,193 |
| 8 | P19338 NUCL_HUMAN   | K.ALVAT#PGK.K                   | T121:        | 2 | 2,1448 | 0,253 | 0,073  |
| 8 | P55196 AFAD_HUMAN   | R.EYFT#FPASK.S                  | T1215:       | 2 | 2,3589 | 0,445 | -0,209 |
| 8 | P38432 P80C_HUMAN   | R.AFQLEEGEET#EPDCK.Y            | T122:        | 2 | 5,2352 | 0,505 | -0,393 |
| 8 | Q92797 SYMPK_HUMAN  | R.SPQTLAPVGEDAM*KT#PS#PAAEDAR.E | T1257:S1259: | 3 | 4,3104 | 0,346 | -1,399 |
| 8 | Q13459 MYO9B_HUMAN  | R.VSPPAPGSAPET#PEDK.S           | T1271:       | 2 | 2,6532 | 0,449 | -0,074 |
| 8 | Q5VZK9 LR16A_HUMAN  | R.T#ASRPDDIPDPS#SPK.V           | T1278:S1290: | 2 | 3,4264 | 0,382 | -0,533 |
| 8 | P46821 MAP1B_HUMAN  | R.SVNFSLT#PNEIK.V               | T1282:       | 2 | 2,2508 | 0,157 | -0,427 |
| 8 | O75367 H2AY_HUMAN   | K.LEAIT#PPPAK.K                 | T129:        | 2 | 2,0476 | 0,198 | -0,198 |
| 8 | P46013 KI67_HUMAN   | K.LDLTENLT#GSK.R                | T1327:       | 2 | 2,5155 | 0,298 | -0,096 |
| 8 | Q13459 MYO9B_HUMAN  | R.ATGAALT#PTEER.R               | T1346:       | 2 | 2,5961 | 0,355 | -0,188 |
| 8 | Q14669 TRIPC_HUMAN  | R.EST#DDESPLGR.A                | T1377:       | 2 | 2,924  | 0,267 | -0,087 |
| 8 | P06493 CDC2_HUMAN   | K.IGEGT#YGVVYK.G                | T14:         | 2 | 3,6186 | 0,389 | -0,193 |
| 8 | Q96BY6 DOC10_HUMAN  | R.SQT#LPIIR.G                   | T1437:       | 2 | 2,4528 | 0,303 | 0,061  |
| 8 | P29966 MARCS_HUMAN  | K.AEDGATPSPSNET#PK.K            | T150:        | 2 | 3,0372 | 0,393 | -0,54  |
| 8 | Q96AE4 FUBP1_HUMAN  | R.SCM*LTGT#PESVQSAK.R           | T153:        | 2 | 5,1205 | 0,462 | -0,216 |
| 8 | Q86UP2 KTN1_HUMAN   | K.QPT#PPSEAAASK.K               | T153:        | 2 | 2,2302 | 0,391 | -0,193 |
| 8 | P46013 KI67_HUMAN   | K.NIYAFM*GT#PVQK.L              | T1557:       | 2 | 3,7809 | 0,142 | -0,333 |
| 8 | A8K8Z5 A8K8Z5_HUMAN | R.QGVDDAFYT#LVR.E               | T158:        | 2 | 3,0133 | 0,441 | -0,333 |
| 8 | P42166 LAP2A_HUMAN  | R.SST#PLPTISSAENTR.Q            | T160:        | 2 | 3,9112 | 0,406 | -0,494 |
| 8 | P61006 RAB8A_HUMAN  | K.ANINVENAFFT#LAR.D             | T164:        | 2 | 2,3508 | 0,304 | -0,368 |
| 8 | Q1KMD3 HNRL2_HUMAN  | R.SGDET#PGSEVPGDK.A             | T165:        | 2 | 3,1684 | 0,413 | 0,252  |
| 8 | O15446 RPA34_HUMAN  | R.SALAPNLLT#SGK.K               | T171:        | 2 | 2,0924 | 0,202 | -0,195 |
| 8 | Q8WUF5 IASPP_HUMAN  | R.QQGPT#PFDFLGR.A               | T173:        | 2 | 2,0387 | 0,12  | -0,634 |
| 8 | O75691 UTP20_HUMAN  | K.SLSDNGQPQT#PDPADSGGTSK.E      | T1741:       | 3 | 2,6318 | 0,241 | -0,342 |
| 8 | O75691 UTP20_HUMAN  | K.SLSDNGQPQT#PDPADSGGTSK.E      | T1741:       | 2 | 2,1267 | 0,424 | -0,685 |

|   |                     |                                  |                 |   |        |       |        |
|---|---------------------|----------------------------------|-----------------|---|--------|-------|--------|
| 8 | Q9H3P2 NELFA_HUMAN  | K.NALTTLAGPLT#PPVK.H             | T178:           | 2 | 2,7024 | 0,347 | 0      |
| 8 | P46013 KI67_HUMAN   | K.DINTFVGT#PVEK.L                | T1923:          | 2 | 3,725  | 0,462 | 0      |
| 8 | Q14103 HNRPD_HUMAN  | K.IFVGGLSPDT#PEEK.I              | T193:           | 2 | 3,6596 | 0,31  | -0,078 |
| 8 | O94915 FRYL_HUMAN   | R.SNT#LDIM*DGR.I                 | T1959:          | 2 | 3,0841 | 0,477 | -0,2   |
| 8 | P80723 BASP_HUMAN   | K.ETPAATEAPSST#PK.A              | T196:           | 2 | 2,2912 | 0,477 | -0,582 |
| 8 | Q13535 ATR_HUMAN    | K.GVELCFPENET#PPEGK.N            | T1989:          | 2 | 3,4292 | 0,437 | -0,259 |
| 8 | Q14980 NUMA1_HUMAN  | R.QSM*AFSILNT#PK.K               | T2055:          | 2 | 2,4634 | 0,484 | 0      |
| 8 | Q8TD26 CHD6_HUMAN   | K.YSEEEKSST#S#GITGDIGDELQEAR.A   | T2057:S2058:    | 3 | 2,6278 | 0,216 | -0,257 |
| 8 | Q8IWW7 UBR1_HUMAN   | R.M*EISAELPQT#PQR.L              | T21:            | 2 | 2,9295 | 0,174 | -0,382 |
| 8 | O75533 SF3B1_HUMAN  | R.WDQTADQTPGAT#PK.K              | T211:           | 2 | 3,6923 | 0,431 | -0,917 |
| 8 | P04406 G3P_HUMAN    | R.GALQNIIPAST#GAAK.A             | T211:           | 2 | 2,8709 | 0,346 | -0,327 |
| 8 | Q01082 SPTB2_HUMAN  | K.TALPAQSAAT#LPAR.T              | T2187:          | 2 | 3,2097 | 0,482 | 0,084  |
| 8 | P49327 FAS_HUMAN    | K.ADEASELACPT#PK.E               | T2204:          | 2 | 2,9925 | 0,236 | -0,166 |
| 8 | Q92841 DDX17_HUMAN  | R.GVEICIAT#PGR.L                 | T222:           | 2 | 2,688  | 0,42  | 0,39   |
| 8 | Q969Z4 TR19L_HUMAN  | R.TEDANEDT#IGVLVR.L              | T223:           | 2 | 2,0475 | 0,259 | -0,53  |
| 8 | P08559 ODPA_HUMAN   | R.YGM*GT#SVER.A                  | T231:           | 2 | 2,7262 | 0,297 | -0,445 |
| 8 | Q8IWW6 RHG12_HUMAN  | R.ATT#PPNQGRPDS#PVYANLQELK.I     | T231:S240:      | 3 | 4,3041 | 0,449 | -0,286 |
| 8 | Q5QJE6 TDIF2_HUMAN  | K.QIVGT#PVNSEDSDTR.Q             | T232:           | 2 | 2,6911 | 0,396 | -0,144 |
| 8 | Q12802 AKP13_HUMAN  | R.DM*AECSTPLPEDCSPT#HS#PR.V      | T2400:S2402:    | 3 | 4,2217 | 0,425 | -0,669 |
| 8 | P46013 KI67_HUMAN   | K.NINTFVET#PVQK.L                | T2406:          | 2 | 3,8182 | 0,406 | -0,332 |
| 8 | O95835 LATS1_HUMAN  | R.SVT#PPPPPR.G                   | T246:           | 2 | 2,3998 | 0,338 | -0,237 |
| 8 | Q13428 TCOF_HUMAN   | K.VGDVT#PQVK.G                   | T249:           | 2 | 3,443  | 0,361 | -0,06  |
| 8 | Q5T200 ZC3HD_HUMAN  | K.GPRT#PS#PPPIPEDIALGK.K         | T263:S265:      | 3 | 4,5747 | 0,449 | -0,174 |
| 8 | A8K1N6 A8K1N6_HUMAN | K.M*LGQKAT#PPPS#PLSELLK.K        | T264:S268:      | 3 | 3,7371 | 0,316 | -0,417 |
| 8 | A8K1N6 A8K1N6_HUMAN | K.AT#PPPS#PLSELLK.K              | T264:S268:      | 2 | 2,2721 | 0,398 | -0,766 |
| 8 | A8K1N6 A8K1N6_HUMAN | K.M*LGQKAT#PPPS#PLSELLK.K        | T264:S272:      | 3 | 4,2657 | 0,303 | -0,583 |
| 8 | Q8NFH5 NUP53_HUMAN  | R.CALSSPSLAFT#PPIK.T             | T265:           | 2 | 3,5964 | 0,432 | 0,073  |
| 8 | O94906 PRP6_HUMAN   | R.LSQVSDSVSGQT#VVDPK.G           | T266:           | 2 | 4,5054 | 0,465 | 0,468  |
| 8 | Q7Z2W4 ZCCHV_HUMAN  | R.SCT#PS#PDQISHRAS#LEDAPVDDLTR.K | T273:S275:S284: | 3 | 3,492  | 1     | -0,304 |
| 8 | Q9H0G5 CCD55_HUMAN  | K.VIET#PENDFK.H                  | T275:           | 2 | 2,9515 | 0,274 | -0,384 |
| 8 | P27816 MAP4_HUMAN   | K.DM*ESPT#KLDVT#LAK.D            | T282:T287:      | 2 | 3,8903 | 0,353 | -0,354 |
| 8 | O94967 WDR47_HUMAN  | K.AAYADLLT#PLISK.L               | T285:           | 2 | 3,9484 | 0,505 | -0,335 |
| 8 | Q9Y2S7 PDIP2_HUMAN  | R.IFSLSGT#LETVR.G                | T292:           | 2 | 3,4647 | 0,409 | -0,261 |

|   |                    |                                   |            |   |        |       |        |
|---|--------------------|-----------------------------------|------------|---|--------|-------|--------|
| 8 | Q9BRQ0 PYGO2_HUMAN | R.GGGT#PDANSLAPPGK.A              | T302:      | 2 | 4,1213 | 0,507 | -0,86  |
| 8 | P38432 P80C_HUMAN  | K.LGFSLT#PSK.G                    | T303:      | 2 | 2,9696 | 0,451 | 0,237  |
| 8 | O00512 BCL9_HUMAN  | R.AVT#PVSQGSNSSSADPK.A            | T315:      | 2 | 4,2386 | 0,528 | -0,713 |
| 8 | Q9NR30 DDX21_HUMAN | R.NGIDILVGT#PGR.I                 | T315:      | 2 | 3,6667 | 0,4   | -0,283 |
| 8 | O00512 BCL9_HUMAN  | R.AVT#PVSQGSNSSSADPK.A            | T315:      | 3 | 2,681  | 0,333 | -0,427 |
| 8 | Q9NQW6 ANLN_HUMAN  | K.SCEGQNPELLPKT#PIS#PLK.T         | T320:S323: | 3 | 2,7969 | 0,25  | -0,403 |
| 8 | Q9UJZ1 STML2_HUMAN | K.APVPGT#PDSLSSGSSR.D             | T327:      | 2 | 2,8694 | 0,317 | 0,918  |
| 8 | P49915 GUAA_HUMAN  | K.TLNM*TT#SPEEK.R                 | T331:      | 2 | 3,038  | 0,42  | -0,544 |
| 8 | O15075 DCLK1_HUMAN | K.SPSPSPT#SPGSLR.K                | T336:      | 2 | 2,939  | 0,297 | -0,181 |
| 8 | Q4G0J3 LARP7_HUMAN | R.DIEIST#EEEEK.D                  | T338:      | 2 | 2,7764 | 0,202 | -1,054 |
| 8 | Q9UN36 NDRG2_HUMAN | R.SRT#LS#QSSSEGLTSSGPPGHTM*EVSC.- | T348:S350: | 3 | 4,0884 | 1     | -0,385 |
| 8 | P19338 NUCL_HUMAN  | K.ALELT#GLK.V                     | T367:      | 2 | 2,3057 | 0,172 | 0      |
| 8 | Q9ULW0 TPX2_HUMAN  | R.DPQT#PVLQTK.H                   | T369:      | 2 | 3,0077 | 0,345 | 0      |
| 8 | P28749 RBL1_HUMAN  | R.SFAPST#PLTGR.R                  | T369:      | 2 | 2,7658 | 0,4   | 0,302  |
| 8 | P04075 ALDOA_HUMAN | K.GILAADEST#GSIK.R                | T37:       | 2 | 2,063  | 0,307 | -0,345 |
| 8 | Q09666 AHNK_HUMAN  | K.VDIDT#PDINIEGSEGK.F             | T3716:     | 2 | 4,5763 | 0,548 | -0,137 |
| 8 | Q13131 AAPK1_HUMAN | R.VPFLVAET#PR.A                   | T373:      | 2 | 3,0214 | 0,391 | -0,202 |
| 8 | Q96DF8 DGC14_HUMAN | R.VTENLASLT#PK.G                  | T386:      | 2 | 3,4812 | 0,347 | -0,487 |
| 8 | Q9H8Y8 GORS2_HUMAN | K.ADAASSLTVDVT#PPATAK.A           | T415:      | 2 | 3,3627 | 0,412 | -0,142 |
| 8 | Q9UHY1 NRBP_HUMAN  | K.TPT#PEPAEVETR.K                 | T433:      | 2 | 3,1311 | 0,474 | -0,347 |
| 8 | P85037 FOXK1_HUMAN | R.SGGLQT#PECLSR.E                 | T436:      | 2 | 2,5534 | 0,246 | -0,793 |
| 8 | P35658 NU214_HUMAN | K.SPGSTPTT#PTSSQAPQK.L            | T437:      | 2 | 3,9364 | 0,438 | -0,766 |
| 8 | Q9HAU0 PKHA5_HUMAN | R.GVISYQT#LPR.N                   | T438:      | 2 | 2,1543 | 0,149 | -0,101 |
| 8 | P18206 VINC_HUMAN  | R.SLGEISALT#SK.L                  | T442:      | 2 | 3,2359 | 0,453 | -0,206 |
| 8 | Q86X29 LSR_HUMAN   | R.SVDALDDLT#PPSTAESGSR.S          | T501:      | 2 | 4,6595 | 0,583 | -0,061 |
| 8 | Q99733 NP1L4_HUMAN | R.LDNVPHT#PSS#YIETLPK.A           | T51:S54:   | 3 | 4,1269 | 1     | -0,088 |
| 8 | Q99733 NP1L4_HUMAN | R.LDNVPHT#PSS#YIETLPK.A           | T51:S54:   | 2 | 2,5543 | 0,292 | -0,471 |
| 8 | Q99733 NP1L4_HUMAN | R.LDNVPHT#PSS#YIETLPK.A           | T51:Y55:   | 3 | 3,2912 | 0,229 | -0,353 |
| 8 | Q9BST9 RTKN_HUMAN  | R.T#FSLDAVPPDHS#PR.A              | T518:S529: | 2 | 3,5741 | 0,527 | -0,287 |
| 8 | Q99567 NUP88_HUMAN | R.VLAET#PDSFEK.H                  | T525:      | 2 | 3,1183 | 0,298 | -0,278 |
| 8 | P15336 ATF2_HUMAN  | R.NDSVIVADQTPTR#PTR.F             | T53:       | 2 | 3,5591 | 0,518 | -0,504 |
| 8 | Q13428 TCOF_HUMAN  | K.VGPAT#PSAQVGK.W                 | T533:      | 2 | 2,8884 | 0,321 | 0      |
| 8 | O96028 NSD2_HUMAN  | R.IQDPTEDAEEDT#PR.K               | T544:      | 2 | 4,753  | 0,558 | -0,207 |

|   |                    |                                |            |   |        |       |        |
|---|--------------------|--------------------------------|------------|---|--------|-------|--------|
| 8 | Q9Y2K7 JHD1A_HUMAN | R.LT#PVRPAAAS#PIVSGAR.R        | T550:S558: | 2 | 3,0038 | 0,31  | -0,067 |
| 8 | Q8NCN4 RN169_HUMAN | R.EQFEGLGST#PDAK.L             | T554:      | 2 | 3,6601 | 0,514 | -0,251 |
| 8 | Q9Y2L9 LRCH1_HUMAN | R.NLESIDPQFT#IR.R              | T568:      | 2 | 3,7278 | 0,349 | -0,161 |
| 8 | Q9NQG6 SMC7L_HUMAN | R.AISAPT#SPTR.L                | T58:       | 2 | 2,4122 | 0,213 | 0,226  |
| 8 | P68431 H31_HUMAN   | K.ST#ELLIR.K                   | T59:       | 2 | 2,2375 | 0,232 | 0,067  |
| 8 | O60271 JIP4_HUMAN  | R.SST#LSQLPGDK.S               | T595:      | 2 | 3,3333 | 0,38  | 0      |
| 8 | Q8WWK9 CKAP2_HUMAN | K.YNVSTT#PYLQSVK.K             | T597:      | 2 | 2,5525 | 0,172 | -0,232 |
| 8 | Q13177 PAK2_HUMAN  | K.IISIFSGT#EK.G                | T60:       | 2 | 2,1431 | 0,244 | -0,104 |
| 8 | Q9BY89 K1671_HUMAN | R.GGSSVEAPCPSDVT#PEDDR.S       | T600:      | 2 | 3,2564 | 0,478 | 0,475  |
| 8 | Q2M2I8 AAK1_HUMAN  | K.VQTT#PPPAVQGQK.V             | T606:      | 3 | 4,7009 | 0,369 | 0      |
| 8 | Q2M2I8 AAK1_HUMAN  | K.VQTT#PPPAVQGQK.V             | T606:      | 2 | 2,8781 | 0,372 | 0,171  |
| 8 | Q8WWK9 CKAP2_HUMAN | K.FLT#PVR.R                    | T623:      | 2 | 2,2991 | 0,132 | 0,225  |
| 8 | P08670 VIME_HUMAN  | R.SLYASSPGGVYAT#R.S            | T63:       | 2 | 3,99   | 0,45  | -0,404 |
| 8 | O00192 ARVC_HUMAN  | R.NFDT#LDLPK.R                 | T642:      | 2 | 3,4864 | 0,382 | -0,107 |
| 8 | O15439 MRP4_HUMAN  | K.DNEESEQPPVPGT#PTLR.N         | T646:      | 2 | 2,0212 | 0,379 | -0,314 |
| 8 | Q96S38 KS6C1_HUMAN | K.AQDT#ISRGS#DDSVVISFK.D       | T659:S664: | 3 | 2,9072 | 0,196 | -0,419 |
| 8 | O15085 ARHGB_HUMAN | R.SLENPT#PPFTPK.M              | T668:      | 2 | 3,3959 | 0,262 | -0,087 |
| 8 | O15085 ARHGB_HUMAN | R.SLENPT#PPFT#PK.M             | T672:      | 2 | 2,594  | 0,257 | -0,26  |
| 8 | Q14847 LASP1_HUMAN | K.QSFTM*VADT#PENLR.L           | T68:       | 2 | 3,2352 | 0,331 | -0,215 |
| 8 | Q9NYV4 CD2L7_HUMAN | K.AIT#PPQQPYK.K                | T692:      | 2 | 2,2795 | 0,268 | 0      |
| 8 | Q9NZN5 ARHGC_HUMAN | K.QVGETSAPGDTLDGT#PR.T         | T703:      | 2 | 3,0353 | 0,444 | 0,206  |
| 8 | O75145 LIPA3_HUMAN | R.GEGPAIPGDT#PPPTPR.S          | T714:      | 2 | 2,6284 | 0,211 | -0,149 |
| 8 | Q86V15 CASZ1_HUMAN | K.DT#EHEES#SNDDLVDLSALSSK.N    | T715:S720: | 3 | 4,1781 | 0,45  | -0,147 |
| 8 | P21127 CD2L1_HUMAN | R.GT#S#PRPPEGGLGYSQLGDDDLK.E   | T751:S752: | 3 | 5,1466 | 0,46  | 0,378  |
| 8 | Q9H910 HN1L_HUMAN  | K.GSGIFDEST#PVQTR.Q            | T76:       | 2 | 3,2392 | 0,429 | -0,233 |
| 8 | O15400 STX7_HUMAN  | K.EFGSLPTT#PSEQR.Q             | T79:       | 2 | 3,2689 | 0,458 | -0,479 |
| 8 | Q14118 DAG1_HUMAN  | K.LTLEDQAT#FIK.K               | T790:      | 2 | 2,5651 | 0,314 | -0,09  |
| 8 | P06400 RB_HUMAN    | K.ISEGLPTPT#KM*T#PR.S          | T823:T826: | 2 | 2,9789 | 0,289 | -0,358 |
| 8 | Q8N201 INT1_HUMAN  | K.LSST#PPLSALGR.L              | T83:       | 2 | 3,1488 | 0,489 | -0,382 |
| 8 | Q562F6 SGOL2_HUMAN | K.DNFFSLT#PK.D                 | T845:      | 2 | 2,3411 | 0,235 | -0,319 |
| 8 | Q05D32 CTSL2_HUMAN | R.DIDNNLITST#PR.A              | T86:       | 2 | 3,6466 | 0,475 | -0,085 |
| 8 | Q96QT6 PHF12_HUMAN | K.TPPT#PPSSIVAK.V              | T880:      | 2 | 2,341  | 0,238 | -0,287 |
| 8 | Q96CN9 GCC1_HUMAN  | R.CST#HSEDS#TGATSLDTAASLTSTK.G | T89:S94:   | 3 | 5,0986 | 1     | -0,68  |

|   |                    |                                   |              |   |        |       |        |
|---|--------------------|-----------------------------------|--------------|---|--------|-------|--------|
| 8 | Q6PJG2 CN043_HUMAN | R.NGTLTFGDVDT#SDEK.S              | T893:        | 2 | 3,4534 | 0,48  | 0,073  |
| 8 | Q86SQ0 PHLB2_HUMAN | K.EGLYLSDT#LPR.K                  | T898:        | 2 | 2,8718 | 0,517 | -0,182 |
| 8 | O94804 STK10_HUMAN | K.LSEEAECNPST#PSK.A               | T952:        | 2 | 3,7417 | 0,529 | 0,071  |
| 8 | Q9HB90 RRAGC_HUMAN | K.MSPNETLFLEST#NK.I               | T96:         | 2 | 2,8555 | 0,411 | -0,505 |
| 8 | Q13428 TCOF_HUMAN  | R.SPAGPAATPAQAQAAST#PR.K          | T983:        | 2 | 3,7365 | 0,566 | 0,4    |
| 8 | Q9UBW7 ZMYM2_HUMAN | K.AVSGY#QSHDDS#SDNSECSFPFK.Y      | Y1054:S1060: | 3 | 4,5662 | 1     | 0,558  |
| 8 | Q13523 PRP4B_HUMAN | K.VQSGM*GLILQGY#ESGS#EEEEGEIHEK.A | Y140:S144:   | 3 | 4,961  | 0,348 | 0,698  |
| 8 | O95602 RPA1_HUMAN  | K.QEEEVVDY#ESEEEEEER.E            | Y1428:       | 2 | 2,6934 | 0,333 | 0,668  |
| 8 | P06493 CDC2_HUMAN  | K.IGEGTY#GVVYK.G                  | Y15:         | 2 | 2,3923 | 0,355 | -0,193 |
| 8 | P06493 CDC2_HUMAN  | K.IGEGTYGVVY#K.G                  | Y19:         | 2 | 2,6809 | 0,369 | -0,193 |
| 8 | P05787 K2C8_HUMAN  | R.SY#TSGPGSR.I                    | Y25:         | 2 | 2,0521 | 0,33  | -0,308 |
| 8 | O00401 WASL_HUMAN  | K.VIY#DFIEK.T                     | Y256:        | 2 | 2,528  | 0,234 | 0,331  |
| 8 | P05023 AT1A1_HUMAN | R.GIVVY#TGDR.T                    | Y260:        | 2 | 2,3084 | 0,354 | -0,115 |
| 8 | P49840 GSK3A_HUMAN | R.GEPNVSY#ICSR.Y                  | Y279:        | 2 | 2,397  | 0,349 | 0      |
| 8 | Q13627 DYR1A_HUMAN | R.IYQY#IQSR.F                     | Y321:        | 2 | 2,6943 | 0,237 | -0,318 |
| 8 | Q16891 IMMT_HUMAN  | R.Y#STSGSSGLTTGK.I                | Y33:         | 2 | 3,1614 | 0,496 | -0,644 |
| 8 | Q16625 OCLN_HUMAN  | R.Y#SSGGNFETPSK.R                 | Y368:        | 2 | 2,2015 | 0,099 | -0,18  |
| 8 | Q9HCG8 NCM_HUMAN   | R.SY#DSSM*ESR.N                   | Y62:         | 2 | 2,4902 | 0,458 | -0,422 |
| 8 | Q13263 TIF1B_HUMAN | R.LQEKLSPPY#SS#PQEFAQDVGR.M       | Y755:S757:   | 3 | 2,6989 | 0,122 | -0,072 |
| 8 | P60709 ACTB_HUMAN  | K.DLYANTVLSGGTTM*YPGIADR.M        |              | 3 | 4,3888 | 0,407 | -0,246 |
| 8 | P30041 PRDX6_HUMAN | K.DGDSVM*VLPTIPEEEAK.K            |              | 2 | 2,2679 | 0,249 | -0,33  |
| 9 | P05783 K1C18_HUMAN | R.STFS#TNYR.S                     | S10:         | 2 | 2,484  | 0,287 | 0      |
| 9 | P83369 LSM11_HUMAN | R.S#AGAGSPARPPS#PR.L              | S10:S21:     | 2 | 2,0515 | 0,161 | -0,499 |
| 9 | P23193 TCEA1_HUMAN | K.EPAITSQNS#PEAR.E                | S100:        | 3 | 3,4028 | 0,301 | -0,309 |
| 9 | P23193 TCEA1_HUMAN | K.EPAITSQNS#PEAR.E                | S100:        | 2 | 2,9253 | 0,454 | -0,495 |
| 9 | Q86YP4 P66A_HUMAN  | R.RPPS#PDVIVLS#DNEQPSSPR.V        | S100:S107:   | 3 | 3,8458 | 0,197 | 0,623  |
| 9 | Q86YP4 P66A_HUMAN  | R.RPPS#PDVIVLS#DNEQPSS#PR.V       | S100:S114:   | 3 | 5,5826 | 0,437 | -0,078 |
| 9 | Q8N1G0 ZN687_HUMAN | R.SFCS#APSLR.R                    | S1004:       | 2 | 2,1018 | 0,326 | 0,221  |
| 9 | Q9UKV3 ACINU_HUMAN | R.TAQVPS#PPR.G                    | S1004:       | 2 | 2,0072 | 0,218 | -0,354 |
| 9 | P05386 RLA1_HUMAN  | K.KES#EES#DDDM*GFGLFD.-           | S101:S104:   | 2 | 3,7628 | 0,627 | -0,23  |
| 9 | P05386 RLA1_HUMAN  | K.KES#EES#DDDMGFGLFD.-            | S101:S104:   | 2 | 2,5226 | 0,483 | -0,231 |
| 9 | P54259 ATN1_HUMAN  | K.TEQELPRPQS#PSDLDS#LDGR.S        | S101:S107:   | 3 | 3,9528 | 0,365 | 0,305  |
| 9 | Q9H6Z4 RANB3_HUMAN | R.SAGGSS#PEGGEDS#DREDGNYCPPVK.R   | S101:S108:   | 3 | 4,9863 | 0,411 | -0,201 |



|   |                     |                              |              |   |        |       |        |
|---|---------------------|------------------------------|--------------|---|--------|-------|--------|
| 9 | Q9NYI0 PSD3_HUMAN   | K.SHS#SPSLNPD#SPITAK.V       | S1011:T1019: | 2 | 2,8668 | 1     | -0,257 |
| 9 | O95785 WIZ_HUMAN    | K.SPQLSLS#PRPAS#PK.A         | S1012:S1017: | 3 | 2,9398 | 0,144 | 0,225  |
| 9 | O95785 WIZ_HUMAN    | K.SPQLSLS#PRPAS#PK.A         | S1012:S1017: | 2 | 2,5955 | 0,24  | -0,225 |
| 9 | P05387 RLA2_HUMAN   | K.DEKKEES#EES#DDDM*GFGLFD.-  | S102:S105:   | 3 | 3,1422 | 0,407 | -0,366 |
| 9 | Q6PD62 CTR9_HUMAN   | K.AIISSDDDS#S#DEDKLK.I       | S1020:S1021: | 2 | 4,2839 | 0,471 | -0,718 |
| 9 | P52948 NUP98_HUMAN  | K.ADTSQEICS#PR.L             | S1028:       | 2 | 2,9167 | 0,461 | -0,363 |
| 9 | Q8IX90 CM003_HUMAN  | K.YGYS#PR.V                  | S103:        | 2 | 2,26   | 0,361 | 0,148  |
| 9 | P15822 ZEP1_HUMAN   | K.M*KS#VGDEELQQNESGTS#PK.S   | S1035:S1050: | 3 | 3,3884 | 0,353 | -0,544 |
| 9 | P28749 RBL1_HUMAN   | R.VIAIDS#DAES#PAKR.V         | S1037:S1041: | 2 | 3,2351 | 0,288 | -0,15  |
| 9 | P05386 RLA1_HUMAN   | K.KEESEES#DDDM*GFGLFD.-      | S104:        | 2 | 4,1785 | 0,41  | -0,596 |
| 9 | Q96BR3 Q96BR3_HUMAN | R.GSASYS#PPR.K               | S104:        | 2 | 2,397  | 0,458 | -0,426 |
| 9 | P49006 MRP_HUMAN    | K.LSGLS#FK.R                 | S104:        | 2 | 2,1475 | 0,146 | 0,22   |
| 9 | Q9UHB7 AFF4_HUMAN   | K.NSYNNSQAPS#PGLGSK.A        | S1043:       | 3 | 2,8854 | 0,153 | -0,108 |
| 9 | Q14202 ZMYM3_HUMAN  | R.LVLS#ESCSR.D               | S1045:       | 2 | 2,5501 | 0,303 | 0      |
| 9 | P06756 ITAV_HUMAN   | R.EQLQPHENGEGNS#ET.-         | S1046:       | 2 | 2,6318 | 0,279 | -0,558 |
| 9 | Q9Y6N7 ROBO1_HUMAN  | K.TFNS#PNLK.D                | S1055:       | 2 | 2,0298 | 0,23  | -0,061 |
| 9 | P49023 PAXI_HUMAN   | K.TSSVSNPQDSVGS#PCSR.V       | S106:        | 2 | 3,707  | 0,487 | -0,727 |
| 9 | O75475 PSIP1_HUMAN  | K.QSNASS#DVEVEEK.E           | S106:        | 2 | 3,2214 | 0,491 | -0,406 |
| 9 | P24534 EF1B_HUMAN   | K.DDDIDLFGS#DDEEES#EEAKR.L   | S106:S112:   | 3 | 3,8495 | 0,332 | 0,212  |
| 9 | P52948 NUP98_HUMAN  | K.FTSGAFLS#PSVSVQECRT#PR.A   | S1060:T1070: | 3 | 4,5875 | 0,431 | -0,153 |
| 9 | Q12789 TF3C1_HUMAN  | K.NSSTDQGS#DEEGSLQK.E        | S1068:       | 2 | 4,7033 | 0,367 | -0,277 |
| 9 | Q2NKX8 ERC6L_HUMAN  | K.NDIS#PPGR.F                | S1069:       | 2 | 2,1579 | 0,215 | 0      |
| 9 | Q96FF9 CDCA5_HUMAN  | K.THS#VPAT#PTSTPVPNPEAESSK.E | S107:T111:   | 3 | 3,6506 | 1     | 0,442  |
| 9 | Q9UMZ2 SYNG_HUMAN   | R.SLS#LGDK.E                 | S1075:       | 2 | 2,3156 | 0,136 | 0,229  |
| 9 | P35568 IRS1_HUMAN   | R.VNLS#PNR.N                 | S1078:       | 2 | 2,1207 | 0,185 | 0      |
| 9 | P35251 RFC1_HUMAN   | R.QDPVTYIS#ET#DEEDDFM*CKK.A  | S108:T110:   | 3 | 3,0553 | 0,381 | -0,418 |
| 9 | Q92974 ARHG2_HUMAN  | K.NNTALQSVS#LR.S             | S109:        | 2 | 3,5085 | 0,334 | 0,095  |
| 9 | Q7Z460 CLAP1_HUMAN  | K.NSSNTSVGS#PSNTIGR.T        | S1091:       | 2 | 3,8678 | 0,539 | -0,957 |
| 9 | Q13425 SNTB2_HUMAN  | R.GPAGEAGAS#PPVR.R           | S110:        | 2 | 3,6045 | 0,448 | -0,294 |
| 9 | Q9BYG4 PAR6G_HUMAN  | R.GSLGAGS#LCR.R              | S110:        | 2 | 2,8522 | 0,371 | -0,115 |
| 9 | B2CI53 B2CI53_HUMAN | R.S#NM*SPDKPVS#VK.I          | S1102:S1111: | 2 | 3,0208 | 0,266 | -0,5   |
| 9 | Q9UQ35 SRRM2_HUMAN  | R.SSS#PVTELASRS#PIR.Q        | S1103:S1112: | 2 | 2,4932 | 0,315 | 0,559  |
| 9 | B2CI53 B2CI53_HUMAN | R.SNM*S#PDKPVS#VK.I          | S1105:S1111: | 3 | 3,1543 | 0,322 | -0,125 |

|   |                    |                                    |              |   |        |       |        |
|---|--------------------|------------------------------------|--------------|---|--------|-------|--------|
| 9 | P11388 TOP2A_HUMAN | K.VPDEEENEES#DNEK.E                | S1106:       | 2 | 3,5777 | 0,422 | -0,49  |
| 9 | Q96ST3 SIN3A_HUMAN | R.YM*NSDTTS#PELR.E                 | S1112:       | 2 | 2,7456 | 0,34  | -0,323 |
| 9 | Q9NVM6 DJC17_HUMAN | R.QAQAES#EEEEESR.S                 | S112:        | 2 | 3,6091 | 0,429 | -0,635 |
| 9 | Q92900 RENT1_HUMAN | R.AYQHGGVTGLS#QY.-                 | S1127:       | 2 | 2,701  | 0,569 | 0      |
| 9 | Q9HCK8 CHD8_HUMAN  | K.DDDLVEFS#DLES#EDDERPR.S          | S1141:S1145: | 3 | 3,592  | 0,397 | -0,075 |
| 9 | Q9NW75 GPTC2_HUMAN | K.DHS#DS#DDQM*LVAK.R               | S115:S117:   | 2 | 4,7177 | 0,473 | -0,447 |
| 9 | Q7Z309 F122B_HUMAN | R.IDFTPVS#PAPS#PTRGFGK.M           | S115:S119:   | 2 | 2,5664 | 0,312 | -0,42  |
| 9 | Q6KC79 NIPBL_HUMAN | R.NRS#PSDS#DM*EDYSPPSLSEVAR.K      | S1150:S1154: | 3 | 3,7701 | 0,225 | 0,067  |
| 9 | Q3KQU3 MA7D1_HUMAN | R.SSQPS#PTAVPASDS#PPTKQEVK.K       | S116:S125:   | 3 | 3,3334 | 1     | -0,305 |
| 9 | Q86SQ4 GP126_HUMAN | K.SSDNLGKS#LSSSS#IGSNSTYLTSK.S     | S1160:S1165: | 3 | 3,4076 | 1     | 0,425  |
| 9 | P55196 AFAD_HUMAN  | R.SSPNVANQPPS#PGGK.S               | S1165:       | 2 | 4,3832 | 0,5   | -0,563 |
| 9 | Q8WYH8 ING5_HUMAN  | K.M*EGS#DFESSGGR.G                 | S118:        | 2 | 3,3698 | 0,351 | -0,45  |
| 9 | O14737 PDCD5_HUMAN | R.KVM*DS#DEDDDY.-                  | S119:        | 2 | 3,0435 | 0,467 | -0,513 |
| 9 | P28370 SMCA1_HUMAN | K.SPTS#PLNM*K.L                    | S119:        | 2 | 2,0705 | 0,414 | -0,114 |
| 9 | Q15648 MED1_HUMAN  | K.LAS#PM*KVPVGT#PPSSK.A            | S1207:T1215: | 2 | 2,5689 | 0,486 | -0,62  |
| 9 | Q5BKZ1 ZN326_HUMAN | R.NSLDS#FGGR.N                     | S121:        | 2 | 2,9774 | 0,349 | -0,118 |
| 9 | Q9H9C1 CN133_HUMAN | R.TRPGS#FQS#LSDALSDTPAK.S          | S121:S124:   | 3 | 4,61   | 0,313 | -0,257 |
| 9 | Q8N1G0 ZN687_HUMAN | K.SCDs#PLNLK.T                     | S1211:       | 2 | 3,159  | 0,273 | -0,438 |
| 9 | Q8WYP5 AHTF1_HUMAN | R.STPLAS#PSPSPGRS#PQR.L            | S1223:S1231: | 2 | 2,3708 | 0,353 | -0,519 |
| 9 | Q14160 LAP4_HUMAN  | R.NSLESISS#IDR.E                   | S1226:       | 2 | 2,5447 | 0,351 | 0,094  |
| 9 | Q8WYP5 AHTF1_HUMAN | R.STPLASPPS#PGRS#PQR.L             | S1227:S1231: | 2 | 3,0407 | 0,229 | -0,583 |
| 9 | Q2KHR3 QSER1_HUMAN | K.NLEHLSS#FSS#DEDDPGYSQDAYK.S      | S1228:S1231: | 3 | 3,2491 | 0,278 | -0,199 |
| 9 | P31749 AKT1_HUMAN  | R.SGS#PSDNS#GAEEM*EVSLAKPK.H       | S124:S129:   | 3 | 2,8517 | 0,141 | -0,239 |
| 9 | Q9H4L7 SMRCD_HUMAN | K.TFNKDTVIVS#EPSEDEES#QGLPTM*AR.R  | S124:S132:   | 3 | 2,9163 | 0,232 | -0,462 |
| 9 | Q9H7P9 PKHG2_HUMAN | R.LES#SDLTPPHS#PPPSSR.Q            | S1253:S1261: | 2 | 2,8456 | 1     | -1,056 |
| 9 | O15400 STX7_HUMAN  | R.ASS#RVS#GSFPEDSSK.E              | S126:S129:   | 2 | 2,8984 | 0,383 | -0,502 |
| 9 | Q6P158 DHX57_HUMAN | R.DLQEQDADAGS#ER.G                 | S127:        | 2 | 4,1609 | 0,492 | -0,484 |
| 9 | Q7Z6E9 RBBP6_HUMAN | K.VTGTEGSSSTLVDYTS#TSSTGGGS#PVRK.S | S1270:S1277: | 3 | 3,5211 | 1     | 0,713  |
| 9 | Q9UPT8 ZC3H4_HUMAN | K.TGSGSPFAGNS#PAR.E                | S1275:       | 2 | 2,1771 | 0,427 | -0,528 |
| 9 | Q9BY89 K1671_HUMAN | R.TSS#PLFNK.A                      | S128:        | 2 | 2,6208 | 0,248 | 0,063  |
| 9 | Q8WWQ0 PHIP_HUMAN  | K.VLS#DS#EDEEKDADVPGTSTR.K         | S1281:S1283: | 3 | 4,8629 | 0,309 | -0,238 |
| 9 | Q96T58 MINT_HUMAN  | R.LLS#VKGS#PK.V                    | S1283:S1287: | 2 | 2,4041 | 0,192 | -0,336 |
| 9 | Q9BQG0 MBB1A_HUMAN | K.GVLGKS#PLS#ALAR.K                | S1290:S1293: | 2 | 2,8866 | 0,238 | -0,342 |

|   |                     |                                         |                 |   |        |       |        |
|---|---------------------|-----------------------------------------|-----------------|---|--------|-------|--------|
| 9 | Q2LD37 K1109_HUMAN  | K.SVGQS#PLRS#PLK.R                      | S1301:S1305:    | 2 | 2,5029 | 0,274 | 0,256  |
| 9 | Q9BQG0 MBB1A_HUMAN  | R.LSLVIRS#PSLLQS#GAK.K                  | S1308:S1314:    | 3 | 2,9973 | 0,384 | -0,3   |
| 9 | Q96F86 EDC3_HUMAN   | K.SQDVAVS#PQQQQCSK.S                    | S131:           | 2 | 4,5008 | 0,54  | -0,414 |
| 9 | Q9P2M7 CING_HUMAN   | R.SHS#QAS#LAGPGVPDPSNR.S                | S131:S134:      | 3 | 4,4725 | 0,422 | -0,283 |
| 9 | Q96F86 EDC3_HUMAN   | K.SQDVAVS#PQQQQCSKS#YVDR.H              | S131:S140:      | 3 | 4,0828 | 0,422 | -0,296 |
| 9 | Q12756 KIF1A_HUMAN  | R.NLFGS#GSLR.A                          | S1310:          | 2 | 2,1089 | 0,156 | 0,118  |
| 9 | Q9BQG0 MBB1A_HUMAN  | R.LSLVIRSPS#LLQS#GAK.K                  | S1310:S1314:    | 2 | 2,8837 | 0,285 | -0,334 |
| 9 | Q12756 KIF1A_HUMAN  | R.NLFGSGS#LR.A                          | S1312:          | 2 | 2,7831 | 0,296 | -0,118 |
| 9 | P55081 MFAP1_HUMAN  | R.M*EREDS#S#EEEEEEIDDEEIER.R            | S132:S133:      | 3 | 6,6338 | 0,374 | 0,653  |
| 9 | P51858 HDGF_HUMAN   | K.GNAEGS#S#DEEGKLVIDEPAK.E              | S132:S133:      | 3 | 4,6454 | 0,458 | 0,498  |
| 9 | Q9UQ35 SRRM2_HUMAN  | K.ELNS#PLRENSFGS#PLEFR.N                | S1320:S1329:    | 3 | 3,6408 | 0,253 | -0,156 |
| 9 | Q8N201 INT1_HUMAN   | K.SS#PEQPIGQGR.I                        | S1327:          | 2 | 2,1904 | 0,354 | -0,494 |
| 9 | Q02952 AKA12_HUMAN  | K.SPSS#PVER.E                           | S1331:          | 2 | 2,4706 | 0,173 | 0      |
| 9 | Q9Y4M2 Q9Y4M2_HUMAN | K.SSFLSS#PER.A                          | S134:           | 2 | 2,3907 | 0,143 | 0      |
| 9 | Q9UGY1 NOL12_HUMAN  | R.LLGLTPPEGGAGDRS#EEEAS#S#TEKPTK.A      | S134:S139:S140: | 3 | 2,862  | 0,091 | -0,183 |
| 9 | Q14839 CHD4_HUMAN   | K.QVNYNDGS#QEDR.D                       | S1349:          | 2 | 2,3439 | 0,368 | -0,486 |
| 9 | Q60841 IF2P_HUMAN   | K.VEM*YS#GS#DDDDDFNKLPK.K               | S135:S137:      | 3 | 4,3537 | 0,451 | 0,081  |
| 9 | Q99549 MPP8_HUMAN   | R.LSLNNDIFEANS#DS#DQQSETKEDTSPK.K       | S136:S138:      | 3 | 3,5019 | 0,331 | 0,231  |
| 9 | Q9P1Y6 K1542_HUMAN  | K.AEAPSS#PDVAPAGKEDS#PSASGR.V           | S1360:S1371:    | 3 | 3,5352 | 0,435 | -0,469 |
| 9 | Q5T200 ZC3HD_HUMAN  | R.LISDS#VER.D                           | S1366:          | 2 | 2,4048 | 0,302 | -0,427 |
| 9 | Q9Y580 RBM7_HUMAN   | R.SFSS#PENFQR.Q                         | S137:           | 2 | 2,5283 | 0,326 | 0,191  |
| 9 | Q7Z309 F122B_HUMAN  | K.M*FVSSSGLPPS#PVPS#PRR.F               | S137:S141:      | 3 | 4,3827 | 0,465 | 0,529  |
| 9 | P42695 CNDD3_HUMAN  | R.SRS#LGVLPFTLNSGS#PEK.T                | S1372:S1384:    | 2 | 2,946  | 0,417 | -0,715 |
| 9 | P02765 FETUA_HUMAN  | K.CDSSPDS#AEDVR.K                       | S138:           | 2 | 3,8885 | 0,509 | -0,516 |
| 9 | Q96T58 MINT_HUMAN   | R.DLEPGEVPS#DS#DEDGEHK.S                | S1380:S1382:    | 2 | 2,2848 | 0,296 | -0,462 |
| 9 | Q9UQ35 SRRM2_HUMAN  | R.SSGHS#S#SELSPDAVEK.A                  | S1382:S1383:    | 2 | 4,1313 | 1     | -0,206 |
| 9 | Q9UQ35 SRRM2_HUMAN  | R.SSGHS#SSELS#PDAVEK.A                  | S1382:S1387:    | 2 | 3,5719 | 1     | -0,481 |
| 9 | Q9ULT8 HECD1_HUMAN  | R.KGS#S#SSVCSVASSSDISLGSTK.T            | S1386:S1387:    | 3 | 4,729  | 1     | -0,08  |
| 9 | Q5SYE7 NHSL1_HUMAN  | R.NHS#PS#PPVTPTGAAPSLASPK.Q             | S1386:S1388:    | 3 | 5,3253 | 0,459 | 0,337  |
| 9 | Q7Z6Z7 HUWE1_HUMAN  | R.AES#PEEVACR.K                         | S1395:          | 2 | 3,4226 | 0,409 | -0,497 |
| 9 | Q96RK0 CIC_HUMAN    | R.KNS#TDLDSAPEDPT#SPK.R                 | S1397:T1408:    | 2 | 4,6072 | 0,296 | -0,684 |
| 9 | A8K630 A8K630_HUMAN | R.LQQQHS#EQPPLQPS#PVTTTR.R              | S14:S22:        | 3 | 4,3064 | 0,288 | -0,392 |
| 9 | Q15583 TGIF1_HUMAN  | K.GIVAAS#GS#ETEDEDISM*DIPLDLSSSAGSGKR.R | S140:S142:      | 3 | 2,7824 | 0,328 | -0,787 |

|   |                    |                                     |                    |   |        |       |        |
|---|--------------------|-------------------------------------|--------------------|---|--------|-------|--------|
| 9 | Q02880 TOP2B_HUMAN | K.VKAS#PITNDGEDEFVPS#DGLDK.D        | S1400:S1413:       | 3 | 3,7109 | 0,126 | -0,147 |
| 9 | Q9UQ35 SRRM2_HUMAN | K.AGM*SSNQSISS#PVLDAVPRT#PSR.E      | S1404:T1413:       | 3 | 7,1337 | 1     | -0,289 |
| 9 | Q13523 PRP4B_HUMAN | K.VQSGM*GLILQGYES#GS#EEEEIEHEK.A    | S142:S144:         | 3 | 5,973  | 0,51  | 0,19   |
| 9 | Q9BVC5 ASHWN_HUMAN | R.KLS#NSSSSVS#PLILSSNLPVNNK.T       | S143:S150:         | 3 | 4,305  | 1     | 0      |
| 9 | Q96N67 DOCK7_HUMAN | R.SPSGSAFGS#QENLR.W                 | S1438:             | 2 | 4,1132 | 0,372 | 0,161  |
| 9 | Q6VEQ5 WASH2_HUMAN | R.QDDSSSSAS#PSVQGAPR.E              | S144:              | 2 | 3,0564 | 0,393 | -0,556 |
| 9 | Q07343 PDE4B_HUMAN | R.SDSYDLS#PK.A                      | S145:              | 2 | 2,8598 | 0,372 | -0,202 |
| 9 | Q5TZA2 CROCC_HUMAN | R.APS#PAPRPVPGS#PAR.D               | S1451:S1460:       | 3 | 3,6583 | 0,401 | -0,113 |
| 9 | Q5TZA2 CROCC_HUMAN | R.APS#PAPRPVPGS#PAR.D               | S1451:S1460:       | 2 | 2,3176 | 0,408 | -0,151 |
| 9 | P21333 FLNA_HUMAN  | K.CSGPGLS#PGM*VR.A                  | S1459:             | 2 | 3,2374 | 0,468 | -0,279 |
| 9 | Q02880 TOP2B_HUMAN | K.SEDDSAKFDS#NEEDS#ASVFSPSFLK.Q     | S1466:S1471:       | 3 | 3,515  | 0,304 | -0,495 |
| 9 | Q15648 MED1_HUMAN  | K.SYQNS#PSS#DDGIRPLPEYSTEK.H        | S1479:S1482:       | 3 | 5,0653 | 1     | 0,278  |
| 9 | Q14690 RRP5_HUMAN  | K.KAGLS#EEDDS#LVDVYYR.E             | S1493:S1498:       | 2 | 4,1119 | 0,479 | -0,115 |
| 9 | Q14690 RRP5_HUMAN  | K.KAGLS#EEDDS#LVDVYYR.E             | S1493:S1498:       | 3 | 3,9997 | 0,11  | -0,086 |
| 9 | P27707 DCK_HUMAN   | R.SCPFSAS#SEGTR.I                   | S15:               | 2 | 3,1148 | 0,491 | -0,252 |
| 9 | P30305 MPIP2_HUMAN | R.FQS#M*PVR.L                       | S151:              | 2 | 2,4936 | 0,142 | -0,19  |
| 9 | Q15751 HERC1_HUMAN | K.SRS#ESDLSQPES#DEEGYALSGR.Q        | S1512:S1521:       | 3 | 3,6549 | 1     | 0,929  |
| 9 | Q12923 PTN13_HUMAN | K.NSSGLGFS#FSR.E                    | S1514:             | 2 | 2,8693 | 0,476 | -0,295 |
| 9 | O15085 ARHGB_HUMAN | R.NSHELGPCPEDGSDAPLEDSTADAAAS#PGP.- | S1519:             | 3 | 4,4636 | 0,607 | 0,601  |
| 9 | O95684 FR1OP_HUMAN | K.GPTTGEGALDLS#DVHS#PPKS#PEGK.T     | S152:S156:S160:    | 3 | 4,9446 | 0,353 | -0,14  |
| 9 | O94913 PCF11_HUMAN | K.NELQEPADS#PK.V                    | S1520:             | 2 | 2,159  | 0,104 | -0,524 |
| 9 | Q9ULH0 ARMS_HUMAN  | R.YQKLPS#DEDES#GTEESDNTPLK.D        | S1521:S1526:       | 3 | 2,879  | 0,216 | -0,531 |
| 9 | O43149 ZZEF1_HUMAN | R.LLS#FRS#M*EEAR.L                  | S1537:S1540:       | 2 | 2,5876 | 0,326 | -0,081 |
| 9 | Q9UQ35 SRRM2_HUMAN | R.SGS#SQELDVKPSAS#PQER.S            | S1541:S1552:       | 3 | 2,9527 | 0,151 | -0,177 |
| 9 | Q5UIP0 RIF1_HUMAN  | R.ASQGLSSIENS#ES#DSSEAKEEGSR.K      | S1552:S1554:       | 3 | 3,6043 | 0,269 | 0,066  |
| 9 | O95292 VAPB_HUMAN  | K.S#LSSS#LDDTEVKK.V                 | S156:S160:         | 2 | 3,9912 | 0,496 | -0,156 |
| 9 | P42166 LAP2A_HUMAN | R.EQGTES#RSST#PLPTISSAENTR.Q        | S156:T160:         | 3 | 4,3239 | 1     | -0,353 |
| 9 | Q8N5F7 NKAP_HUMAN  | K.NPEPDS#DEHT#PVEDEEPK.K            | S157:T161:         | 3 | 3,7751 | 0,328 | -0,658 |
| 9 | Q69YN4 VIR_HUMAN   | R.SFLSEPS#PGR.T                     | S1579:             | 2 | 2,0375 | 0,236 | 0      |
| 9 | P42166 LAP2A_HUMAN | R.EQGTESRS#ST#PLPTISSAENTR.Q        | S158:T160:         | 3 | 3,7622 | 1     | 0,282  |
| 9 | Q15742 NAB2_HUMAN  | R.SFS#PKS#PLELGEK.L                 | S159:S162:         | 3 | 4,0268 | 0,34  | 0,116  |
| 9 | Q15742 NAB2_HUMAN  | R.SFS#PKS#PLELGEK.L                 | S159:S162:         | 2 | 3,7497 | 0,374 | -0,077 |
| 9 | Q9ULH0 ARMS_HUMAN  | R.SSES#S#PNHS#LHNEVADDSQLEK.A       | S1593:S1594:S1598: | 3 | 3,5511 | 0,211 | -0,483 |

|   |                    |                                  |              |   |        |       |        |
|---|--------------------|----------------------------------|--------------|---|--------|-------|--------|
| 9 | P28066 PSA5_HUMAN  | R.GVNTFS#PEGR.L                  | S16:         | 2 | 2,676  | 0,396 | -0,32  |
| 9 | Q9Y3C1 U384_HUMAN  | K.FGYS#VNR.K                     | S16:         | 2 | 2,5036 | 0,314 | 0      |
| 9 | P16949 STMN1_HUMAN | K.RAS#GQAFELILS#PR.S             | S16:S25:     | 2 | 5,0133 | 0,45  | -0,143 |
| 9 | P16949 STMN1_HUMAN | K.RAS#GQAFELILS#PR.S             | S16:S25:     | 3 | 4,3236 | 0,371 | 0      |
| 9 | Q6NY19 KANK3_HUMAN | R.GVPRS#PR.G                     | S160:        | 2 | 2,0557 | 0,127 | 0      |
| 9 | Q8N1I0 DOCK4_HUMAN | R.NSAPASVS#PDGTR.V               | S1620:       | 2 | 2,5775 | 0,368 | -0,547 |
| 9 | P29966 MARCS_HUMAN | K.S#FKLS#GFSFK.K                 | S163:S167:   | 2 | 2,5686 | 0,188 | -0,466 |
| 9 | O00566 MPP10_HUMAN | R.KS#PVFSEDEDS#DLDFDISK.L        | S163:S171:   | 3 | 6,0335 | 0,459 | 0,166  |
| 9 | O60841 IF2P_HUMAN  | K.WDGS#EEDEDNSK.K                | S164:        | 2 | 4,5417 | 0,597 | -0,573 |
| 9 | Q9NZN8 CNOT2_HUMAN | R.TNSM*SSSGLGS#PNR.S             | S165:        | 2 | 4,3174 | 0,595 | -0,491 |
| 9 | P67809 YBOX1_HUMAN | R.NYQQNYQNS#ESGEK.N              | S165:        | 2 | 3,8161 | 0,449 | -0,345 |
| 9 | P51858 HDGF_HUMAN  | R.AGDLEDS#PK.R                   | S165:        | 2 | 2,3054 | 0,265 | -0,542 |
| 9 | Q12888 TP53B_HUMAN | K.LITS#EEERS#PAK.R               | S1673:S1678: | 2 | 3,2503 | 0,175 | -0,321 |
| 9 | P18583 SON_HUMAN   | K.ESDQTLAALLS#PK.E               | S1697:       | 2 | 2,8709 | 0,308 | -0,252 |
| 9 | Q68D06 SLN13_HUMAN | K.YNLINEGS#PPSK.I                | S170:        | 2 | 2,1577 | 0,211 | 0,436  |
| 9 | Q8WVC0 LEO1_HUMAN  | R.AQGS#DEDKLNQNS#DDDEK.M         | S171:S179:   | 3 | 3,3888 | 0,32  | -0,089 |
| 9 | P80723 BASP_HUMAN  | K.SDGAPASDS#KPGSSEAAPSS#K.E      | S172:S183:   | 3 | 3,1216 | 1     | -0,524 |
| 9 | P67809 YBOX1_HUMAN | K.NEGSES#APEGQAQQR.R             | S176:        | 2 | 3,2992 | 0,387 | -0,585 |
| 9 | Q13442 HAP28_HUMAN | R.M*QS#LSLNK.-                   | S176:        | 2 | 3,099  | 0,176 | -0,3   |
| 9 | Q15154 PCM1_HUMAN  | K.NVRS#DIS#DQEEDDESEGCPVSINLSK.A | S1764:S1767: | 3 | 3,3599 | 0,13  | 0      |
| 9 | Q58FF8 H90B2_HUMAN | K.IEDVGS#DEEDDSGK.D              | S177:        | 2 | 4,19   | 0,517 | -0,697 |
| 9 | Q09666 AHNK_HUMAN  | K.DIDISS#PEFK.I                  | S177:        | 2 | 2,3515 | 0,289 | -0,198 |
| 9 | Q58FF8 H90B2_HUMAN | K.IEDVGS#DEEDDS#GKDK.K           | S177:S183:   | 2 | 5,1927 | 0,527 | -0,579 |
| 9 | Q58FF8 H90B2_HUMAN | K.IEDVGS#DEEDDS#GKDK.K           | S177:S183:   | 3 | 3,8312 | 0,353 | -0,289 |
| 9 | Q6ZUT9 RA61L_HUMAN | R.YNS#YDISR.D                    | S178:        | 2 | 3,2043 | 0,431 | -0,222 |
| 9 | Q13442 HAP28_HUMAN | R.M*QSL#LNK.-                    | S178:        | 2 | 2,2577 | 0,125 | -0,3   |
| 9 | Q5T4S7 UBR4_HUMAN  | K.TLSDVEDQKELAS#PVS#PELR.Q       | S178:S181:   | 3 | 2,8856 | 0,111 | 0,385  |
| 9 | Q8TB72 PUM2_HUMAN  | R.TPGS#RQAS#PTEVVER.L            | S178:S182:   | 3 | 3,1935 | 0,099 | -0,309 |
| 9 | Q8TB72 PUM2_HUMAN  | R.TPGS#RQAS#PTEVVER.L            | S178:S182:   | 2 | 2,7037 | 0,391 | -0,619 |
| 9 | Q92538 GBF1_HUMAN  | R.AASSSPGS#PVASSPSR.L            | S1784:       | 2 | 2,209  | 0,223 | -0,606 |
| 9 | P46821 MAP1B_HUMAN | K.SDIS#PLTPR.E                   | S1785:       | 2 | 2,3731 | 0,256 | 0,114  |
| 9 | Q9H7D0 DOCK5_HUMAN | R.LSPFHGSSPPQSTPLS#PPPLT#PK.A    | S1789:T1794: | 3 | 4,8657 | 0,407 | -0,072 |
| 9 | O00418 EF2K_HUMAN  | R.LEGVDGGQS#PR.A                 | S18:         | 2 | 3,0574 | 0,466 | -0,408 |

|   |                    |                            |              |   |        |       |        |
|---|--------------------|----------------------------|--------------|---|--------|-------|--------|
| 9 | Q86UX6 ST32C_HUMAN | R.GSSAAASPGS#PPPGR.A       | S18:         | 2 | 2,0849 | 0,357 | -0,443 |
| 9 | Q53H80 CF166_HUMAN | R.TLDFDPLLS#PAS#PKR.R      | S18:S21:     | 3 | 3,8102 | 0,435 | -0,403 |
| 9 | Q9H6F5 CCD86_HUMAN | R.LGGLRPES#PES#LTSVSR.T    | S18:S21:     | 3 | 3,5906 | 0,438 | -0,094 |
| 9 | Q53H80 CF166_HUMAN | R.TLDFDPLLS#PAS#PKR.R      | S18:S21:     | 2 | 3,4973 | 0,503 | 0      |
| 9 | Q9H6F5 CCD86_HUMAN | R.LGGLRPES#PES#LTSVSR.T    | S18:S21:     | 2 | 2,6057 | 0,361 | -0,188 |
| 9 | Q9H6F5 CCD86_HUMAN | R.LGGLRPES#PESLTS#VSR.T    | S18:S24:     | 3 | 4,0545 | 0,4   | -0,376 |
| 9 | Q9Y446 PKP3_HUMAN  | R.ADYDTLS#LRS#LR.L         | S180:S183:   | 2 | 2,4866 | 0,102 | 0      |
| 9 | Q9BXB4 OSB11_HUMAN | R.SFSLASSSNS#PISQR.R       | S181:        | 2 | 2,902  | 0,398 | -0,074 |
| 9 | P52594 NUPL_HUMAN  | K.GTPSQS#PVVGR.S           | S181:        | 2 | 2,1444 | 0,402 | -0,419 |
| 9 | Q9ULT0 TTC7A_HUMAN | R.LPNS#IASR.F              | S182:        | 2 | 2,8213 | 0,439 | 0      |
| 9 | Q99828 CIB1_HUMAN  | R.SPDFAS#SFK.I             | S185:        | 2 | 2,6254 | 0,448 | 0      |
| 9 | O15381 NVL_HUMAN   | K.KDS#FFLDLS#CEK.S         | S185:S191:   | 2 | 3,4425 | 0,47  | -0,296 |
| 9 | Q99661 KIF2C_HUMAN | R.GSSSANPVNS#VR.R          | S187:        | 2 | 3,1221 | 0,429 | -0,292 |
| 9 | Q5T4S7 UBR4_HUMAN  | R.M*NYS#GDQGQTIR.Q         | S1878:       | 2 | 3,0035 | 0,364 | -0,499 |
| 9 | Q9Y388 RBMX2_HUMAN | R.EVQAEQPSSS#PR.R          | S188:        | 2 | 2,4915 | 0,351 | -0,412 |
| 9 | Q13242 SFRS9_HUMAN | R.STS#YGYSR.S              | S189:        | 2 | 2,172  | 0,316 | -0,183 |
| 9 | Q9BVC5 ASHWN_HUMAN | K.SPSGPVKs#PPLS#PVGTTVPK.L | S189:S193:   | 3 | 5,8125 | 0,276 | 0,087  |
| 9 | Q8IYI6 EXOC8_HUMAN | R.QLES#GGFEAR.L            | S19:         | 2 | 2,6395 | 0,315 | -0,831 |
| 9 | Q6PK04 CC137_HUMAN | R.VQAGPGS#PR.R             | S19:         | 2 | 2,4727 | 0,218 | -0,257 |
| 9 | Q9UNE7 STUB1_HUMAN | R.LGAGGGS#PEKS#PSAQELK.E   | S19:S23:     | 3 | 4,794  | 0,412 | -0,098 |
| 9 | Q9UNE7 STUB1_HUMAN | R.LGAGGGS#PEKS#PSAQELK.E   | S19:S23:     | 2 | 3,845  | 0,477 | -0,651 |
| 9 | Q16629 SFRS7_HUMAN | R.YFQS#PSR.S               | S192:        | 2 | 2,1649 | 0,222 | -0,253 |
| 9 | P35580 MYH10_HUMAN | R.GGPISFSSS#R.S            | S1939:       | 2 | 3,0822 | 0,441 | 0,114  |
| 9 | O94915 FRYL_HUMAN  | R.S#NSLRSL#LIGDR.R         | S1939:S1945: | 2 | 2,3981 | 0,343 | -0,327 |
| 9 | Q9H4M7 PKHA4_HUMAN | R.ISES#PEVTR.L             | S194:        | 2 | 2,8027 | 0,204 | -0,445 |
| 9 | Q8WYP5 AHTF1_HUMAN | R.EVS#PSDVR.E              | S1953:       | 2 | 2,3336 | 0,182 | -0,063 |
| 9 | Q14493 SLBP_HUMAN  | R.CDGDAS#PPSPAR.W          | S20:         | 2 | 3,2961 | 0,385 | -0,652 |
| 9 | Q9HC35 EMAL4_HUMAN | K.IPS#T#PKLIPK.V           | S200:T201:   | 2 | 2,3066 | 0,244 | -0,097 |
| 9 | Q9Y5J1 UTP18_HUMAN | R.KTS#S#DDESEEDDLLQR.T     | S205:S206:   | 3 | 4,6565 | 0,324 | -0,242 |
| 9 | Q9Y5J1 UTP18_HUMAN | R.KTS#S#DDES#EEDDLLQR.T    | S205:S210:   | 3 | 4,4227 | 0,246 | 0,403  |
| 9 | Q9H165 BC11A_HUMAN | R.IYLESEHGS#PLT#PR.V       | S205:T208:   | 2 | 2,745  | 0,369 | -0,139 |
| 9 | Q96CB9 NSUN4_HUMAN | R.NLAANDLS#PSR.I           | S206:        | 2 | 3,3686 | 0,412 | -0,197 |
| 9 | Q01130 SFRS2_HUMAN | R.S#KS#PPKSPEEEGAVSS.-     | S206:S208:   | 2 | 2,7337 | 0,354 | -0,618 |

|   |                    |                                 |                 |   |        |       |        |
|---|--------------------|---------------------------------|-----------------|---|--------|-------|--------|
| 9 | Q9C0D5 TANC1_HUMAN | K.TAANKS#PCETISS#PSSTLESK.D     | S207:S214:      | 3 | 3,2204 | 1     | -0,311 |
| 9 | Q5T8I3 F102B_HUMAN | R.RNTS#VGS#TSTGVESILEPCDEIEQK.I | S208:S211:      | 3 | 2,6954 | 1     | -0,316 |
| 9 | Q6IQ22 RAB12_HUMAN | R.AGGGGGLGAGS#PALSGGQGR.R       | S21:            | 2 | 5,0343 | 0,555 | -0,587 |
| 9 | Q6IQ22 RAB12_HUMAN | R.AGGGGGLGAGS#PALSGGQGR.R       | S21:            | 3 | 2,8816 | 0,275 | -0,33  |
| 9 | Q96T58 MINT_HUMAN  | K.NVDAAVS#PR.G                  | S2101:          | 2 | 3,1471 | 0,427 | -0,242 |
| 9 | O00308 WWP2_HUMAN  | R.TTPATGEQS#PGAR.S              | S211:           | 2 | 2,0074 | 0,321 | -0,541 |
| 9 | Q13242 SFRS9_HUMAN | R.GS#PHYFS#PFRPY.-              | S211:S216:      | 2 | 2,7134 | 0,473 | -0,378 |
| 9 | Q96B36 AKTS1_HUMAN | R.SSDEENGPPSS#PDLDR.I           | S212:           | 2 | 4,8272 | 0,528 | -0,548 |
| 9 | P22626 ROA2_HUMAN  | R.GGNFGFGDS#R.G                 | S212:           | 2 | 3,125  | 0,143 | 0,112  |
| 9 | Q9H4L7 SMRCD_HUMAN | R.KLSS#SS#EPYEEDEFNDDQSIK.K     | S212:S214:      | 3 | 6,1813 | 1     | 0,702  |
| 9 | Q8N565 MREG_HUMAN  | K.ELHYLPFPS#P.-                 | S213:           | 2 | 2,6687 | 0,338 | -0,381 |
| 9 | Q9H1E3 NUCKS_HUMAN | K.EEDEEPES#PPEK.K               | S214:           | 2 | 3,0379 | 0,126 | -0,49  |
| 9 | P08670 VIME_HUMAN  | R.QDVDNAS#LAR.L                 | S214:           | 2 | 2,9141 | 0,368 | -0,104 |
| 9 | Q9Y6D5 BIG2_HUMAN  | R.ELEKPIQS#KPQS#PVIQAAAVS#PK.F  | S214:S218:S227: | 3 | 3,4333 | 0,363 | 0,613  |
| 9 | O95391 SLU7_HUMAN  | K.LVEQANS#PK.H                  | S215:           | 2 | 2,3437 | 0,342 | -0,229 |
| 9 | Q03164 HRX_HUMAN   | R.TPSYS#PTQR.S                  | S2151:          | 2 | 3,0318 | 0,393 | -0,328 |
| 9 | Q01082 SPTB2_HUMAN | R.TSS#KESS#PIPSPTSDR.K          | S2161:S2165:    | 2 | 2,389  | 1     | -0,532 |
| 9 | Q01082 SPTB2_HUMAN | R.TSS#KESSPIPS#PTSDR.K          | S2161:S2169:    | 3 | 3,3813 | 1     | -0,199 |
| 9 | Q01082 SPTB2_HUMAN | R.TSS#KESSPIPS#PTSDR.K          | S2161:S2169:    | 2 | 3,1796 | 1     | 0,199  |
| 9 | Q5UIP0 RIF1_HUMAN  | R.SQEDEISS#PVNK.V               | S2196:          | 2 | 3,5158 | 0,361 | -0,518 |
| 9 | P02545 LMNA_HUMAN  | R.SGAQASSTPLS#PTR.I             | S22:            | 2 | 2,9969 | 0,31  | -0,169 |
| 9 | P08670 VIME_HUMAN  | R.M*FGGPGTAS#RPSS#SR.S          | S22:S26:        | 2 | 2,6918 | 0,378 | -0,584 |
| 9 | P50851 LRBA_HUMAN  | R.ISLAS#PR.Q                    | S2201:          | 2 | 2,4495 | 0,253 | 0,148  |
| 9 | P11831 SRF_HUMAN   | K.ALIQTCLNS#PDS#PPRSDPTTDQR.M   | S221:S224:      | 3 | 3,376  | 0,235 | -0,067 |
| 9 | Q13573 SNW1_HUMAN  | R.GPPS#PPAPVM*HS#PSR.K          | S224:S232:      | 2 | 3,6067 | 0,443 | -0,144 |
| 9 | Q13573 SNW1_HUMAN  | R.GPPS#PPAPVM*HS#PSR.K          | S224:S232:      | 3 | 3,5044 | 0,409 | -0,216 |
| 9 | Q13573 SNW1_HUMAN  | R.GPPS#PPAPVMHS#PSR.K           | S224:S232:      | 3 | 3,0401 | 0,336 | -0,219 |
| 9 | P41440 S19A1_HUMAN | R.CETSAS#ELER.M                 | S225:           | 2 | 2,3984 | 0,31  | -0,387 |
| 9 | Q9Y4E8 UBP15_HUMAN | R.GPS#TPKS#PGASNFSTLPK.I        | S225:S229:      | 2 | 4,2263 | 1     | -0,568 |
| 9 | Q9NYB9 ABI2_HUMAN  | R.NM*APSQQS#PVR.T               | S227:           | 2 | 3,4364 | 0,403 | -0,838 |
| 9 | P49792 RBP2_HUMAN  | K.SALS#PSKS#PAK.L               | S2276:S2280:    | 2 | 2,3539 | 0,281 | -0,693 |
| 9 | Q13033 STRN3_HUMAN | K.NLEQILNGGES#PK.Q              | S229:           | 2 | 2,223  | 0,292 | -0,33  |
| 9 | Q14493 SLBP_HUMAN  | R.CDGDASPPS#PAR.W               | S23:            | 2 | 2,6574 | 0,335 | -0,186 |

|   |                    |                                 |                 |   |        |       |        |
|---|--------------------|---------------------------------|-----------------|---|--------|-------|--------|
| 9 | Q13283 G3BP1_HUMAN | K.SSS#PAPADIAQTVQEDLR.T         | S232:           | 2 | 4,1952 | 0,447 | -0,497 |
| 9 | Q13283 G3BP1_HUMAN | K.SSS#PAPADIAQTVQEDLR.T         | S232:           | 3 | 4,1468 | 0,42  | -0,279 |
| 9 | O60271 JIP4_HUMAN  | K.FQELS#QPR.S                   | S238:           | 2 | 2,1917 | 0,253 | -0,112 |
| 9 | Q13136 LIPA1_HUMAN | R.S#SDGS#LSHEEDLAK.V            | S238:S242:      | 2 | 2,7311 | 0,247 | -0,149 |
| 9 | Q15773 MLF2_HUMAN  | R.LAIQGPEDS#PSRQS#R.R           | S238:S243:      | 3 | 3,2452 | 0,369 | 0      |
| 9 | Q15773 MLF2_HUMAN  | R.LAIQGPEDS#PSRQS#R.R           | S238:S243:      | 2 | 2,9791 | 0,35  | -0,339 |
| 9 | O95425 SVIL_HUMAN  | R.DSS#FTEVPRS#PK.H              | S238:S245:      | 2 | 2,6193 | 0,385 | 0      |
| 9 | O95644 NFAC1_HUMAN | R.GLGACTLLGSPRHSPS#T#S#PR.A     | S239:T240:S241: | 3 | 2,6564 | 0,23  | 0,319  |
| 9 | Q92466 DDB2_HUMAN  | R.S#RS#PLELEPEAK.K              | S24:S26:        | 3 | 3,2742 | 0,195 | 0,121  |
| 9 | Q92466 DDB2_HUMAN  | R.S#RS#PLELEPEAK.K              | S24:S26:        | 2 | 2,6767 | 0,294 | 0,322  |
| 9 | Q99729 ROAA_HUMAN  | K.EVYQQQQYGS#GGR.G              | S242:           | 2 | 3,4499 | 0,456 | -0,772 |
| 9 | Q9Y2W1 TR150_HUMAN | R.ASAVSELS#PR.E                 | S243:           | 2 | 3,0915 | 0,388 | -0,445 |
| 9 | Q9Y570 PPME1_HUMAN | K.QCEGITS#PEGSK.S               | S243:           | 2 | 2,0172 | 0,24  | -0,622 |
| 9 | P16949 STMN1_HUMAN | R.ASGQAFELILS#PR.S              | S25:            | 2 | 3,6566 | 0,317 | -0,332 |
| 9 | Q7L9B9 EEDP1_HUMAN | R.KFS#AACNFS#NILVNQER.L         | S25:S31:        | 3 | 5,1531 | 0,236 | 0      |
| 9 | P25788 PSA3_HUMAN  | K.ESLKEEDS#DDDNM*.-             | S250:           | 2 | 4,0421 | 0,475 | -0,627 |
| 9 | P18615 NELFE_HUMAN | R.SDS#FPER.R                    | S251:           | 2 | 2,7407 | 0,305 | -1,329 |
| 9 | P52701 MSH6_HUMAN  | R.VIS#DS#ESDIGGS#DVEFKPDTK.E    | S252:S254:      | 3 | 2,9534 | 0,296 | 0,614  |
| 9 | P52701 MSH6_HUMAN  | R.VISDS#ESDIGGS#DVEFKPDTK.E     | S254:S261:      | 3 | 4,1679 | 0,463 | -0,23  |
| 9 | O00443 P3C2A_HUMAN | K.VSNLQVS#PK.S                  | S259:           | 2 | 3,1908 | 0,38  | 0      |
| 9 | Q96A00 PP14A_HUMAN | R.GPGGS#PGGLQK.R                | S26:            | 2 | 3,3201 | 0,36  | -0,236 |
| 9 | Q8N1G2 K0082_HUMAN | R.VAELALS#LSSTS#DDEPPSSVSHGAK.A | S26:S31:        | 3 | 5,4449 | 1     | 0,138  |
| 9 | Q9NQ57 INCE_HUMAN  | R.IAQVS#PGPR.D                  | S263:           | 2 | 2,5957 | 0,282 | -0,607 |
| 9 | Q12888 TP53B_HUMAN | R.SEDM*PFS#PK.A                 | S265:           | 2 | 2,3143 | 0,278 | -0,323 |
| 9 | Q6ICG6 CV009_HUMAN | R.VSTGDT#PCGTEEDSSPAS#PM*HER.V  | S267:S279:      | 3 | 4,2318 | 1     | -0,608 |
| 9 | Q15942 ZYX_HUMAN   | R.GPPASSPAPAPKFS#PVT#PK.F       | S267:T270:      | 3 | 2,691  | 0,322 | 0      |
| 9 | O95831 AIFM1_HUMAN | R.SLS#AIDR.A                    | S268:           | 2 | 2,1576 | 0,12  | 0,362  |
| 9 | Q9UQ35 SRRM2_HUMAN | R.SLSYS#PVER.R                  | S2694:          | 2 | 2,4958 | 0,316 | -0,109 |
| 9 | P49736 MCM2_HUMAN  | R.GNDPLTSS#PGR.S                | S27:            | 2 | 3,321  | 0,404 | -0,413 |
| 9 | Q9UJM3 ERRFI_HUMAN | R.AS#PNS#DEDKPEVPPR.V           | S273:S276:      | 2 | 3,5287 | 0,412 | -0,543 |
| 9 | O00203 AP3B1_HUMAN | K.NFYES#DDDQK.E                 | S276:           | 2 | 2,6185 | 0,38  | -0,637 |
| 9 | Q12857 NFIA_HUMAN  | R.LKS#VEDEM*DS#PGEEPFTGQGR.S    | S280:S287:      | 3 | 5,9456 | 0,458 | -0,415 |
| 9 | Q15942 ZYX_HUMAN   | K.FTPVASKFS#PGAPGGSGS#QPNQK.L   | S281:S290:      | 3 | 3,4258 | 0,358 | 0,38   |



|   |                     |                                 |            |   |        |       |        |
|---|---------------------|---------------------------------|------------|---|--------|-------|--------|
| 9 | P18583 SON_HUMAN    | K.SVESTS#PEPSK.I                | S283:      | 2 | 2,6707 | 0,363 | -0,795 |
| 9 | P23588 IF4B_HUMAN   | R.AFGS#GYR.R                    | S283:      | 2 | 2,0033 | 0,271 | 0,291  |
| 9 | P61978 HNRPK_HUMAN  | R.DYDDM*S#PR.R                  | S284:      | 2 | 2,3235 | 0,439 | -0,892 |
| 9 | Q641Q2 FA21A_HUMAN  | R.S#RPTS#FADELAAR.I             | S284:S288: | 2 | 3,0337 | 0,338 | 0,077  |
| 9 | Q13435 SF3B2_HUMAN  | R.SSLGQSAS#ETEEDT#VSVSKK.E      | S286:T292: | 3 | 3,3359 | 0,091 | -0,903 |
| 9 | Q99961 SH3G1_HUMAN  | K.IAASSS#FR.S                   | S288:      | 2 | 2,5377 | 0,395 | -1,261 |
| 9 | Q16269 Q16269_HUMAN | R.SCQGACGPS#PPDQK.T             | S29:       | 2 | 4,4209 | 0,403 | -0,233 |
| 9 | P27987 IP3KB_HUMAN  | K.SGGGPGPS#GSETPPPPR.R          | S29:       | 2 | 2,778  | 0,319 | -0,378 |
| 9 | Q96RU3 FNBP1_HUMAN  | R.TVS#DNSLSNSR.G                | S296:      | 2 | 3,0714 | 0,499 | -0,387 |
| 9 | Q13371 PHLP_HUMAN   | R.NSATCHESDS#DLEID.-            | S296:      | 2 | 2,4028 | 0,173 | -0,482 |
| 9 | O00499 BIN1_HUMAN   | K.GNKS#PS#PPDGSPAATPEIR.V       | S296:S298: | 3 | 3,498  | 0,246 | -0,539 |
| 9 | Q15642 CIP4_HUMAN   | R.APS#DS#SLGTPSDGRPELR.G        | S296:S298: | 3 | 2,6648 | 0,174 | -0,274 |
| 9 | Q96M11 HYLS1_HUMAN  | R.KLPFPLS#PS.-                  | S297:      | 2 | 3,1251 | 0,422 | -0,229 |
| 9 | Q07157 ZO1_HUMAN    | R.DDISEIQLSAS#DHS#GR.S          | S297:S300: | 2 | 3,2135 | 0,444 | -0,194 |
| 9 | Q5VWG9 TAF3_HUMAN   | K.TAQSPAM*VGS#PIRS#PK.T         | S297:S301: | 2 | 3,2036 | 0,249 | -0,474 |
| 9 | P53667 LIMK1_HUMAN  | R.SCS#IDRSPGAGSLGS#PASQR.K      | S298:S310: | 3 | 4,5274 | 1     | -0,851 |
| 9 | Q7Z3D7 Q7Z3D7_HUMAN | R.GGGESLQEAS#PR.L               | S30:       | 2 | 2,8202 | 0,365 | -0,385 |
| 9 | Q3KR37 GRM1B_HUMAN  | R.SRS#PT#PQNQDGDGM*VEK.G        | S30:T32:   | 3 | 2,8524 | 0,182 | -0,443 |
| 9 | Q96CW6 S7A6O_HUMAN  | K.YPLDVQKEFGYDS#PHDLDS#D.-      | S302:S308: | 3 | 3,3445 | 0,31  | -0,293 |
| 9 | P53814 SMTN_HUMAN   | R.SLSVLS#PR.Q                   | S304:      | 2 | 2,411  | 0,202 | 0,13   |
| 9 | Q15007 FL2D_HUMAN   | R.EGNTTEDDFPSS#PGNGNK.S         | S306:      | 2 | 2,8509 | 0,55  | -0,627 |
| 9 | Q9NQS7 INCE_HUMAN   | R.HS#PIAPS#SPSPQVLAQK.Y         | S306:S311: | 2 | 2,8324 | 0,479 | -0,385 |
| 9 | Q9NQS7 INCE_HUMAN   | R.HS#PIAPSS#PSPQVLAQK.Y         | S306:S312: | 3 | 3,1098 | 0,276 | -0,288 |
| 9 | P42167 LAP2B_HUMAN  | K.HAS#PILPITEFS#DIPR.R          | S306:S315: | 2 | 3,9526 | 0,298 | -0,25  |
| 9 | Q13769 THOC5_HUMAN  | K.ALFKPPEDS#QDDESDS#DAEEEQTTK.R | S307:S314: | 3 | 3,9029 | 0,387 | 0      |
| 9 | Q92522 H1X_HUMAN    | K.AGGSAAALS#PSK.K               | S31:       | 2 | 2,7169 | 0,426 | -0,119 |
| 9 | P16949 STMN1_HUMAN  | R.SKES#VPEFPLS#PPK.K            | S31:S38:   | 2 | 2,7982 | 0,304 | 0,358  |
| 9 | P53667 LIMK1_HUMAN  | R.SPGAGSLGS#PASQR.K             | S310:      | 2 | 3,0065 | 0,382 | -0,271 |
| 9 | O43293 DAPK3_HUMAN  | K.SHS#S#LPPNNSYADFER.F          | S311:S312: | 2 | 4,4343 | 0,552 | -0,062 |
| 9 | P37275 ZEB1_HUMAN   | K.TSQCSS#PSLSASPGS#PTRPQIR.Q    | S313:S322: | 3 | 4,714  | 1     | -0,149 |
| 9 | Q5JTV8 TOIP1_HUMAN  | K.SELGNQS#PSTSSR.Q              | S315:      | 2 | 3,9311 | 0,521 | -0,512 |
| 9 | P04637 P53_HUMAN    | R.ALPNNTSSS#PQPK.K              | S315:      | 2 | 2,0804 | 0,408 | -0,343 |
| 9 | Q9P0K7 RAI14_HUMAN  | K.AEISS#IR.E                    | S318:      | 2 | 2,0807 | 0,207 | 0,143  |

|   |                    |                                  |            |   |        |       |        |
|---|--------------------|----------------------------------|------------|---|--------|-------|--------|
| 9 | Q7L4I2 RSRC2_HUMAN | K.EQSEVSVS#PR.A                  | S32:       | 2 | 2,556  | 0,402 | -0,407 |
| 9 | Q9Y608 LRRF2_HUMAN | R.NSASATTPLS#GNSSR.R             | S320:      | 2 | 3,2626 | 0,486 | -0,638 |
| 9 | Q6ZW76 ANKS3_HUMAN | R.DVTS#PINER.D                   | S320:      | 2 | 2,2174 | 0,212 | -0,22  |
| 9 | Q9BYI3 HYCCI_HUMAN | R.NAVTSM*S#IR.G                  | S321:      | 2 | 2,9774 | 0,382 | -0,341 |
| 9 | Q2KHR2 RFXD2_HUMAN | K.TPQNPAS#PGGDR.S                | S321:      | 2 | 2,7771 | 0,239 | -0,266 |
| 9 | Q86YS7 K0528_HUMAN | K.TGM*GS#GS#AGKEGGPFK.A          | S321:S323: | 2 | 3,1987 | 0,413 | -0,445 |
| 9 | Q9NQW6 ANLN_HUMAN  | K.TPIS#PLK.T                     | S323:      | 2 | 2,5584 | 0,264 | 0,146  |
| 9 | Q9Y608 LRRF2_HUMAN | R.NSASATTPLSGNSS#R.R             | S324:      | 2 | 2,8335 | 0,541 | -0,319 |
| 9 | P33991 MCM4_HUMAN  | R.IAEPS#VCGR.C                   | S326:      | 2 | 2,1612 | 0,297 | -0,114 |
| 9 | Q9Y608 LRRF2_HUMAN | R.RGS#GDT#SLIDPDTSLSELR.D        | S328:S332: | 3 | 4,5459 | 0,333 | -0,404 |
| 9 | P38159 HNRPG_HUMAN | R.DSYS#SSRS#DLYSSGR.D            | S328:S332: | 2 | 3,4953 | 1     | -0,267 |
| 9 | Q9Y608 LRRF2_HUMAN | R.RGS#GDTSSLIDPDTSLSELR.D        | S328:S340: | 3 | 5,206  | 1     | -0,161 |
| 9 | Q9UIG0 BAZ1B_HUMAN | K.TDNSSL#SPLNPK.L                | S329:      | 2 | 2,6659 | 0,316 | -0,678 |
| 9 | Q9BW71 HIRP3_HUMAN | R.LSGS#S#EDEEDSGKEPTAK.G         | S332:S333: | 3 | 3,4047 | 0,408 | -0,966 |
| 9 | Q9UN36 NDRG2_HUMAN | R.TAS#L TSAASVDGNRS#R.S          | S332:S344: | 2 | 2,2468 | 0,248 | -0,139 |
| 9 | P40925 MDHC_HUMAN  | K.ELTEEKESAFELSS#A.-             | S333:      | 2 | 2,9877 | 0,322 | -0,579 |
| 9 | Q9UGV2 NDRG3_HUMAN | R.THSTS#S#SLGSGESPFGR.S          | S333:S334: | 3 | 4,3057 | 1     | 0      |
| 9 | P08651 NFIC_HUMAN  | K.TEM*DKS#PFNSPQDS#PR.L          | S333:S343: | 3 | 5,1633 | 0,382 | -0,25  |
| 9 | Q9NYV4 CD2L7_HUMAN | R.SSS#PFLSK.R                    | S334:      | 2 | 2,1825 | 0,293 | -0,327 |
| 9 | Q4G0J3 LARP7_HUMAN | R.DIEIS#T#EEEKDTGDLK.D           | S337:T338: | 3 | 2,9481 | 0,209 | -0,369 |
| 9 | Q4G0J3 LARP7_HUMAN | R.DIEIS#T#EEEKDTGDLK.D           | S337:T338: | 2 | 2,7871 | 0,242 | -0,246 |
| 9 | O00443 P3C2A_HUMAN | R.SQS#LNIR.T                     | S338:      | 2 | 2,1662 | 0,083 | 0,068  |
| 9 | Q86WB0 NIPA_HUMAN  | R.SQDATFSPGS#EQAES#PGPIVSR.T     | S338:S344: | 3 | 4,8172 | 0,443 | 0,577  |
| 9 | P08651 NFIC_HUMAN  | K.SPFNSPS#PQDSR.L                | S339:      | 2 | 3,4149 | 0,47  | -0,326 |
| 9 | P49585 PCY1A_HUMAN | R.WPFSGKTS#PPCS#PANLSR.H         | S343:S347: | 3 | 3,2564 | 0,1   | 0,17   |
| 9 | P01892 1A02_HUMAN  | R.KGGS#YSQAASSDSAQGS#DVSLTACKV.- | S343:S356: | 3 | 5,8023 | 1     | 0,941  |
| 9 | O14681 EI24_HUMAN  | K.FPS#PHPS#PAK.L                 | S345:S349: | 2 | 2,7322 | 0,165 | -0,1   |
| 9 | P05787 K2C8_HUMAN  | R.ISS#SSFSR.V                    | S35:       | 2 | 2,0376 | 0,107 | 0      |
| 9 | Q9BVS4 RIOK2_HUMAN | K.AEVYGS#ENESER.N                | S350:      | 2 | 3,378  | 0,456 | -0,505 |
| 9 | O60716 CTND1_HUMAN | R.GSLASLDS#LR.K                  | S352:      | 2 | 2,3677 | 0,242 | -0,111 |
| 9 | Q9UBU7 DBF4A_HUMAN | R.IKYS#VGSLS#PVSASVLK.K          | S354:S359: | 2 | 4,7054 | 0,448 | -0,451 |
| 9 | P46013 KI67_HUMAN  | K.TPVQYSQQNS#PQK.H               | S357:      | 2 | 3,4159 | 0,448 | -0,57  |
| 9 | P51991 ROA3_HUMAN  | R.SSGS#PYGGGYGSGGGSGGYGSR.R      | S358:      | 2 | 5,3449 | 0,663 | -0,552 |

|   |                      |                                    |                 |   |        |       |        |
|---|----------------------|------------------------------------|-----------------|---|--------|-------|--------|
| 9 | Q13009 TIAM1_HUMAN   | R.SNATNSSYS#PTTGR.A                | S358:           | 2 | 3,1789 | 0,447 | -0,32  |
| 9 | P05787 K2C8_HUMAN    | R.ISSS#SFSR.V                      | S36:            | 2 | 2,0851 | 0,125 | 0,064  |
| 9 | P09651 ROA1_HUMAN    | R.NQGGYGGSSS#SSSYGSGR.R            | S362:           | 2 | 4,3937 | 0,581 | -0,825 |
| 9 | P09651 ROA1_HUMAN    | R.NQGGYGGSSS#SSYGSGR.R             | S363:           | 2 | 4,4712 | 0,499 | -0,687 |
| 9 | P49674 KC1E_HUMAN    | R.IQPAGNTS#PR.A                    | S363:           | 2 | 2,203  | 0,304 | -0,544 |
| 9 | Q8TEW8 PAR3L_HUMAN   | R.LGGKPS#SPSLS#PLM*GFGSNK.N        | S363:S368:      | 3 | 3,2675 | 0,191 | 0,342  |
| 9 | Q96PM9 Z385A_HUMAN   | R.TAHGPILFS#PY.-                   | S364:           | 2 | 2,5131 | 0,36  | -0,285 |
| 9 | Q9NQZ2 SAS10_HUMAN   | K.TSAAACAVTDLS#DDS#DFDEKAK.L       | S365:S368:      | 3 | 2,9828 | 0,257 | -0,222 |
| 9 | P09651 ROA1_HUMAN    | R.NQGGYGGSSSSSYGS#GR.R             | S368:           | 2 | 5,0972 | 0,594 | -0,55  |
| 9 | Q96S53 TESK2_HUMAN   | R.SQS#DIFSR.K                      | S369:           | 2 | 2,9354 | 0,316 | -0,06  |
| 9 | Q7Z4V5 HDGR2_HUMAN   | R.GSGGS#S#GDELREDDEPVK.K           | S369:S370:      | 2 | 4,7457 | 0,459 | -0,551 |
| 9 | Q03135 CAV1_HUMAN    | K.AM*ADELS#EK.Q                    | S37:            | 2 | 2,662  | 0,245 | -0,112 |
| 9 | P05787 K2C8_HUMAN    | R.ISSS#FVR.V                       | S37:            | 2 | 2,331  | 0,09  | -0,898 |
| 9 | Q5T200 ZC3HD_HUMAN   | R.SAS#PYPSHLS#PQR.K                | S372:S381:      | 2 | 2,7134 | 1     | -0,624 |
| 9 | Q9UHB6 LIMA1_HUMAN   | R.ASSLSES#SPPK.A                   | S373:           | 2 | 2,2277 | 0,122 | -0,521 |
| 9 | Q9UHB6 LIMA1_HUMAN   | R.ASSLSESS#PPK.A                   | S374:           | 2 | 2,9729 | 0,232 | -0,417 |
| 9 | Q9Y6X4 K0888_HUMAN   | K.LESTARPSES#S#EEFLEEEPEQR.G       | S378:S379:      | 3 | 4,4722 | 1     | -0,334 |
| 9 | P22059 OSBP1_HUMAN   | K.RTGS#NIS#GASSDISLDEQYK.H         | S379:S382:      | 3 | 3,9755 | 1     | -0,32  |
| 9 | ##Q9HBT7 ZN287_HUMAN | K.LLS#PYK.R                        | S380:           | 2 | 2,2009 | 0,091 | 0,305  |
| 9 | Q9NYV4 CD2L7_HUMAN   | R.HSS#IS#PVRLPLNSSLGAELS#R.K       | S383:S385:S400: | 3 | 3,5256 | 0,32  | 0,149  |
| 9 | Q86SQ0 PHLB2_HUMAN   | R.RNFS#CGS#VEFDEADLESR.Q           | S384:S387:      | 3 | 5,7983 | 0,432 | -0,459 |
| 9 | Q01167 FOXK2_HUMAN   | R.SAPASPNHAGVLSAHS#SGAQT#PESLS#R.E | S384:T389:S394: | 3 | 2,755  | 0,101 | 0,448  |
| 9 | P42167 LAP2B_HUMAN   | R.M*EES#FSSK.Y                     | S385:           | 2 | 2,0889 | 0,266 | -0,234 |
| 9 | P35269 T2FA_HUMAN    | R.GNS#RPGT#PSAEGGSTSTLR.A          | S385:T389:      | 3 | 4,7389 | 0,395 | -0,352 |
| 9 | Q9Y2W3 S45A1_HUMAN   | K.YGSFIS#R.D                       | S387:           | 2 | 2,4296 | 0,392 | 0,067  |
| 9 | P24864 CCNE1_HUMAN   | K.AM*LSEQNRAS#PLPSGLLT#PPQSGK.K    | S387:T395:      | 3 | 3,1851 | 0,169 | -0,207 |
| 9 | Q7Z6L1 K1358_HUMAN   | R.SHSGS#SSS#LLSAGCFGDEV.R          | S388:S391:      | 3 | 4,5623 | 1     | -0,078 |
| 9 | Q8TDD1 DDX54_HUMAN   | R.GAASQARG#DS#EDGEFEIQAEDDAR.A     | S39:S41:        | 3 | 6,3894 | 0,489 | -0,132 |
| 9 | P04637 P53_HUMAN     | K.LM*FKTEGPDSD.-                   | S392:           | 2 | 2,4428 | 0,306 | 0      |
| 9 | Q8NHV4 NEDD1_HUMAN   | K.NQDFSS#FDDTGK.S                  | S397:           | 2 | 2,8669 | 0,483 | 0      |
| 9 | P52272 HNRPM_HUMAN   | K.QGGGGGGGS#VPGIER.M               | S397:           | 2 | 2,0413 | 0,411 | -0,268 |
| 9 | Q96ST2 IWS1_HUMAN    | K.AAVLS#DS#EDEEKASAK.K             | S398:S400:      | 2 | 3,455  | 0,429 | -0,742 |
| 9 | Q9BUL5 PHF23_HUMAN   | R.LGGPPKS#GEP.-                    | S400:           | 2 | 2,2968 | 0,34  | -0,18  |

|   |                     |                                   |                 |   |        |       |        |
|---|---------------------|-----------------------------------|-----------------|---|--------|-------|--------|
| 9 | P49674 KC1E_HUMAN   | R.IPAS#QTS#VPFDHLGK.-             | S405:S408:      | 2 | 2,5467 | 0,441 | 0      |
| 9 | Q9Y2K6 UBP20_HUMAN  | K.LSSS#PPRAS#PVR.M                | S408:S413:      | 2 | 2,1814 | 0,306 | -0,69  |
| 9 | P49736 MCM2_HUMAN   | R.TDALTSS#PGR.D                   | S41:            | 2 | 2,9467 | 0,405 | -0,337 |
| 9 | Q86WR7 CJ047_HUMAN  | R.S#RS#FTLDDESLK.Y                | S41:S43:        | 2 | 2,1412 | 0,357 | -0,392 |
| 9 | P08621 RU17_HUMAN   | R.GGGGGQDNGLEGLGND#R.D            | S410:           | 2 | 4,7766 | 0,416 | -0,351 |
| 9 | Q53F19 CQ085_HUMAN  | K.M*ISTPS#PK.K                    | S415:           | 2 | 2,1256 | 0,171 | -0,191 |
| 9 | Q15036 SNX17_HUMAN  | R.SDSQQAVKS#PPLLES#PDATR.E        | S415:S421:      | 3 | 3,1149 | 0,257 | 0,24   |
| 9 | Q9HAV4 XPO5_HUMAN   | K.TDS#PSCEYSR.F                   | S416:           | 2 | 2,8203 | 0,344 | -0,095 |
| 9 | B2RMZ9 B2RMZ9_HUMAN | R.LNS#SPRAPVS#PLK.F               | S416:S423:      | 2 | 2,6214 | 0,305 | 0,4    |
| 9 | P85037 FOXK1_HUMAN  | R.S#APASPTHPLM*S#PR.S             | S416:S428:      | 2 | 2,9425 | 0,388 | -0,58  |
| 9 | B2RMZ9 B2RMZ9_HUMAN | R.LNSS#PRAPVS#PLK.F               | S417:S423:      | 3 | 3,0764 | 0,19  | 0,24   |
| 9 | Q9NQC7 CYLD_HUMAN   | R.FHS#LPFS#LTK.M                  | S418:S422:      | 2 | 2,8521 | 0,189 | 0,091  |
| 9 | Q9Y5S9 RBM8A_HUMAN  | R.GFGS#EEGSR.A                    | S42:            | 2 | 2,6138 | 0,268 | -0,121 |
| 9 | P85037 FOXK1_HUMAN  | R.SAPAS#PTHPLM*S#PR.S             | S420:S428:      | 2 | 2,6328 | 0,319 | -0,29  |
| 9 | Q7L7X3 TAOK1_HUMAN  | R.ASDPQS#PPQVSR.H                 | S421:           | 2 | 3,2486 | 0,288 | -0,452 |
| 9 | Q53EZ4 CEP55_HUMAN  | K.VAASP#K#PTAALNES#LVECPK.C       | S428:S436:      | 3 | 4,1445 | 0,386 | 0,55   |
| 9 | P05787 K2C8_HUMAN   | R.VGS#SNFR.G                      | S43:            | 2 | 2,7439 | 0,254 | 0,072  |
| 9 | P85037 FOXK1_HUMAN  | R.S#GGLQTPECLS#REGS#PIPHDPEFGSK.L | S431:S441:S445: | 3 | 4,5772 | 0,514 | -0,242 |
| 9 | Q9Y4K4 M4K5_HUMAN   | R.RQS#S#PSCGPVAETSSIGNGDGISK.L    | S433:S434:      | 3 | 7,4896 | 0,504 | 0,43   |
| 9 | P35269 T2FA_HUMAN   | R.LDTGPOSL#GKS#TPQPPSGK.T         | S433:S436:      | 3 | 3,466  | 1     | -0,427 |
| 9 | Q92754 AP2C_HUMAN   | K.SYM*NGDQS#PADSNK.T              | S434:           | 2 | 3,9595 | 0,432 | -0,5   |
| 9 | Q9Y6A5 TACC3_HUMAN  | K.SGCSEAQPES#PETR.L               | S434:           | 2 | 3,1725 | 0,443 | -0,57  |
| 9 | Q9Y6A5 TACC3_HUMAN  | K.SGCSEAQPES#PETR.L               | S434:           | 3 | 2,919  | 0,345 | -0,107 |
| 9 | Q05209 PTN12_HUMAN  | R.NLS#FEIK.K                      | S435:           | 2 | 2,1774 | 0,139 | 0,066  |
| 9 | Q9NPQ8 RIC8A_HUMAN  | R.GLM*AGGRPEGQYS#EDED#DTDEYK.E    | S435:T440:      | 3 | 5,8363 | 1     | -0,451 |
| 9 | Q14004 CD2L5_HUMAN  | R.HSS#IS#PSTLTLK.S                | S437:S439:      | 2 | 2,7237 | 0,147 | -0,171 |
| 9 | O94804 STK10_HUMAN  | K.QVAEQGGDLS#PAANR.S              | S438:           | 2 | 2,9664 | 0,337 | -0,23  |
| 9 | Q96ST2 IWS1_HUMAN   | K.TIAS#DS#EEEAGKELSDK.K           | S438:S440:      | 2 | 4,4322 | 0,514 | -0,496 |
| 9 | P47974 TISD_HUMAN   | R.RLS#DSPVFDAPPS#PPDSLSDR.D       | S438:S448:      | 3 | 3,1347 | 0,248 | -0,076 |
| 9 | P47974 TISD_HUMAN   | R.RLS#DSPVFDAPPS#PPDSLSDR.D       | S438:S452:      | 3 | 3,012  | 0,102 | 0,152  |
| 9 | P05787 K2C8_HUMAN   | R.VGSS#NFR.G                      | S44:            | 2 | 2,4913 | 0,13  | 0,072  |
| 9 | Q5T230 UTF1_HUMAN   | R.RPASPS#ALGELGLPVS#PGSAQR.T      | S44:S54:        | 3 | 3,211  | 0,229 | -0,396 |
| 9 | O75362 ZN217_HUMAN  | R.GEGGS#EDGS#EDGLPEGIHLDK.N       | S441:S445:      | 3 | 4,043  | 0,454 | -0,162 |

|   |                    |                                    |                 |   |        |       |        |
|---|--------------------|------------------------------------|-----------------|---|--------|-------|--------|
| 9 | Q92667 AKAP1_HUMAN | K.TYVSLCKS#LLSS#PTK.D              | S441:S445:      | 2 | 2,419  | 0,14  | -0,397 |
| 9 | Q13492 PICAL_HUMAN | K.S#S#GDVHLSISSDVFTR.T             | S443:S444:      | 3 | 2,7123 | 0,236 | 0      |
| 9 | O00418 EF2K_HUMAN  | R.ESENSGDSGYPS#EK.R                | S445:           | 2 | 3,0157 | 0,39  | -0,545 |
| 9 | Q96PU5 NED4L_HUMAN | R.S#LSS#PTVTLAPLEGAKDS#PVRR.A      | S446:S449:S464: | 3 | 2,7826 | 1     | -0,491 |
| 9 | Q9H0D6 XRN2_HUMAN  | R.NS#PGSQVASNPR.Q                  | S448:           | 2 | 3,0492 | 0,505 | -0,566 |
| 9 | O94804 STK10_HUMAN | K.ASQS#RPNS#SALETLGGEK.L           | S450:S454:      | 2 | 2,2697 | 0,203 | -0,184 |
| 9 | O43719 HTSF1_HUMAN | K.TEDGGEFEEGASENNAKES#S#PEK.E      | S452:S453:      | 3 | 3,5625 | 0,305 | -0,281 |
| 9 | Q14676 MDC1_HUMAN  | R.SQTTTERDS#DT#DVEEEELPVENR.E      | S453:T455:      | 3 | 6,2134 | 1     | 0,064  |
| 9 | P53396 ACLY_HUMAN  | R.TAS#FSESR.A                      | S455:           | 2 | 2,307  | 0,303 | -0,126 |
| 9 | Q53EL6 PDCD4_HUMAN | R.FVS#EGDGGR.L                     | S457:           | 2 | 2,8834 | 0,279 | -0,182 |
| 9 | Q96NT5 PCFT_HUMAN  | K.ADPHLEFQQFPQS#P.-                | S458:           | 2 | 3,0508 | 0,332 | -0,142 |
| 9 | Q9ULU4 PKCB1_HUMAN | K.ATSSHFS#ASEES#M*DFLDK.S          | S460:S465:      | 3 | 4,4615 | 0,33  | 0,085  |
| 9 | O15427 MOT4_HUMAN  | K.NGEVVHTPETS#V.-                  | S464:           | 2 | 2,721  | 0,43  | -0,362 |
| 9 | O95835 LATS1_HUMAN | R.SNS#FNNPLGNR.A                   | S464:           | 2 | 2,7063 | 0,328 | 0      |
| 9 | Q6GQQ9 OTU7B_HUMAN | R.STPES#GDS#DKESVGSSTSNEGGR.R      | S464:S467:      | 3 | 3,6481 | 0,369 | -0,509 |
| 9 | Q15149 PLEC1_HUMAN | R.RGS#FDATGSGFSM*TFSSSS#YSSSGYGR.R | S4642:S4658:    | 3 | 4,1816 | 1     | 0,124  |
| 9 | Q14C86 GAPD1_HUMAN | K.SSSLEM*TPYNTPQLS#PATT#PANKK.N    | S466:T470:      | 3 | 5,4356 | 1     | 0,601  |
| 9 | P19484 TFEB_HUMAN  | R.RSS#FSM*EEGDVL.-                 | S467:           | 2 | 3,3428 | 0,426 | 0,504  |
| 9 | Q9BTU6 P4K2A_HUMAN | R.VAAAAGSGPS#PPGS#PGHDR.E          | S47:S51:        | 3 | 3,2537 | 0,312 | -0,396 |
| 9 | Q9BTU6 P4K2A_HUMAN | R.VAAAAGSGPS#PPGS#PGHDR.E          | S47:S51:        | 2 | 2,3282 | 0,16  | -0,66  |
| 9 | Q9NS91 RAD18_HUMAN | K.NDLQDTEIS#PR.Q                   | S471:           | 2 | 3,4512 | 0,376 | -0,178 |
| 9 | Q9NUY8 TBC23_HUMAN | R.SSINSVDGES#PNGSSDR.G             | S474:           | 2 | 4,8784 | 0,541 | -0,546 |
| 9 | Q2TBE0 C19L2_HUMAN | K.STFAGS#PER.E                     | S475:           | 2 | 2,3831 | 0,361 | -0,355 |
| 9 | Q5VT52 K0460_HUMAN | K.NTGVSPASRPS#PGT#PTSPSNLTSLK.T    | S479:T482:      | 3 | 4,191  | 0,09  | -0,206 |
| 9 | Q9P2B4 CT2NL_HUMAN | K.FQSQADQDQQASGLQS#PPSR.D          | S481:           | 3 | 3,8214 | 0,29  | -0,568 |
| 9 | Q96L73 NSD1_HUMAN  | K.SLAFDS#EHS#ADEK.E                | S483:S486:      | 2 | 4,0013 | 0,482 | -0,229 |
| 9 | Q96Q42 ALS2_HUMAN  | R.RLS#LPGLLSQVS#PR.L               | S483:S492:      | 3 | 3,7702 | 0,375 | -0,326 |
| 9 | Q96Q42 ALS2_HUMAN  | R.RLS#LPGLLSQVS#PR.L               | S483:S492:      | 2 | 3,655  | 0,496 | -0,725 |
| 9 | O60832 DKC1_HUMAN  | K.AGLES#GAEPGDGDS#DTTKK.K          | S485:S494:      | 3 | 3,9799 | 0,241 | -0,275 |
| 9 | O60832 DKC1_HUMAN  | K.AGLES#GAEPGDGDS#DTTKK.K          | S485:S494:      | 2 | 2,3226 | 0,422 | -0,55  |
| 9 | Q03468 ERCC6_HUMAN | R.LKLEDDS#EES#DAEFDEGFK.V          | S486:S489:      | 3 | 3,995  | 0,24  | 0      |
| 9 | Q6UN15 FIP1_HUMAN  | R.DHS#PTPS#VFNSDEER.Y              | S492:S496:      | 2 | 4,7286 | 0,431 | -0,455 |
| 9 | Q6UN15 FIP1_HUMAN  | R.DHS#PTPS#VFNSDEER.Y              | S492:S496:      | 3 | 3,9125 | 0,285 | 0,097  |

|   |                     |                                  |                 |   |        |       |        |
|---|---------------------|----------------------------------|-----------------|---|--------|-------|--------|
| 9 | Q6UN15 FIP1_HUMAN   | R.DHS#PT#PSVFNSEER.Y             | S492:T494:      | 2 | 3,9586 | 0,446 | -0,325 |
| 9 | Q14676 MDC1_HUMAN   | K.DQPPFGDS#DDS#VEADKS#SPGIHLER.S | S495:S498:S504: | 3 | 3,7998 | 0,369 | -0,187 |
| 9 | B2R6A5 B2R6A5_HUMAN | K.DTDGGPKKEES#PV.-               | S498:           | 2 | 3,3238 | 0,433 | -0,424 |
| 9 | Q9H7N4 SFR19_HUMAN  | R.QRS#PS#PAPAPAAAAAGPPTTR.K      | S498:S500:      | 3 | 3,9953 | 0,268 | -0,516 |
| 9 | Q8N3X1 FNBP4_HUMAN  | K.IDENS#DKEM*EVEES#PEK.I         | S499:S508:      | 3 | 5,2447 | 0,317 | -0,419 |
| 9 | Q9UQR0 SCML2_HUMAN  | K.RS#PQQTVPYVVVPLS#PK.L          | S499:S511:      | 2 | 3,7406 | 0,407 | -0,25  |
| 9 | Q8NI08 NCOA7_HUMAN  | K.QDIM*PEVDKQS#GS#PESR.V         | S500:S502:      | 3 | 2,9363 | 0,26  | -0,264 |
| 9 | Q9BUH8 BEGIN_HUMAN  | R.AGGDLSLS#PGR.S                 | S502:           | 2 | 2,3878 | 0,26  | -0,22  |
| 9 | Q86X29 LSR_HUMAN    | R.SVDALDDLTPPS#TAESGSR#PTSNGGR.S | S504:S512:      | 3 | 3,9859 | 1     | 0,194  |
| 9 | Q9UHI6 DDX20_HUMAN  | R.NNSVSGLS#VK.S                  | S505:           | 2 | 2,9519 | 0,353 | -0,225 |
| 9 | P83436 COG7_HUMAN   | K.YLSDSCS#PR.S                   | S506:           | 2 | 2,9721 | 0,536 | -0,314 |
| 9 | Q86XN8 MEX3D_HUMAN  | R.SS#GAGT#PRHS#PTLPEPGGLR.L      | S506:T510:S514: | 3 | 2,7301 | 0,246 | 0,083  |
| 9 | Q9Y6G9 DC1L1_HUMAN  | R.KPVTVS#PTTPTSPTEGEAS.-         | S510:           | 2 | 3,8201 | 0,558 | -0,31  |
| 9 | Q969V6 MKL1_HUMAN   | R.AGSCCLS#PGGR.A                 | S511:           | 2 | 2,0226 | 0,099 | -0,305 |
| 9 | Q9Y6G9 DC1L1_HUMAN  | R.KPVTVSPTTPTS#PTEGEAS.-         | S516:           | 2 | 4,54   | 0,537 | -0,621 |
| 9 | Q07866 KLC1_HUMAN   | R.S#RES#LNVDVVK.Y                | S517:S520:      | 2 | 2,9679 | 0,21  | 0,434  |
| 9 | Q16555 DPYL2_HUMAN  | K.TVTPAS#SAKTS#PAK.Q             | S517:S522:      | 2 | 2,4141 | 0,274 | -0,648 |
| 9 | Q86UU1 PHLB1_HUMAN  | R.S#PS#PTLGESLAPHK.G             | S518:S520:      | 2 | 2,1115 | 0,325 | 0,309  |
| 9 | P10636 TAU_HUMAN    | R.SGYSSPGS#PGTTPGSR.S            | S519:           | 2 | 3,008  | 0,433 | -0,414 |
| 9 | Q6PKG0 LARP1_HUMAN  | K.ETESAPGS#PR.A                  | S521:           | 2 | 2,3417 | 0,389 | -0,439 |
| 9 | Q86TV6 TTC7B_HUMAN  | K.SCYNLTNPSDSGRGS#S#LLDR.T       | S527:S528:      | 3 | 3,6698 | 0,41  | 0      |
| 9 | P49790 NU153_HUMAN  | K.FSS#PIVK.S                     | S529:           | 2 | 2,402  | 0,085 | 0,213  |
| 9 | Q5TC82 RC3H1_HUMAN  | K.IDHLS#SSAPGS#PPDLLESVPK.S      | S529:S535:      | 3 | 3,7373 | 0,428 | -0,238 |
| 9 | Q5TC82 RC3H1_HUMAN  | K.IDHLSS#APGS#PPDLLESVPK.S       | S531:S535:      | 3 | 3,6546 | 0,422 | -0,317 |
| 9 | Q8TEH3 DEN1A_HUMAN  | R.TLRES#DSAEGDEAES#PEQQVR.K      | S536:S546:      | 3 | 5,808  | 0,52  | 0      |
| 9 | A9Z1X7 A9Z1X7_HUMAN | R.WQS#PVTK.S                     | S547:           | 2 | 2,1668 | 0,215 | 0,066  |
| 9 | Q96FS4 SIPA1_HUMAN  | R.SGS#DAGEARPPTPAS#PR.A          | S55:S67:        | 3 | 3,7167 | 0,386 | -0,202 |
| 9 | Q96FS4 SIPA1_HUMAN  | R.SGS#DAGEARPPTPAS#PR.A          | S55:S67:        | 2 | 3,3683 | 0,295 | -0,538 |
| 9 | Q14692 BMS1_HUMAN   | K.AGLS#PANCSQSDR.V               | S552:           | 2 | 2,1718 | 0,114 | -0,36  |
| 9 | P27824 CALX_HUMAN   | K.QKS#DAEEDGGTVS#QEEEDR.K        | S554:S564:      | 3 | 3,6644 | 0,416 | -0,564 |
| 9 | Q14C86 GAPD1_HUMAN  | K.TLRF#LCS#DNLEGISEGPSNR.S       | S566:S569:      | 3 | 5,0887 | 0,389 | -0,073 |
| 9 | Q9HAU0 PKHA5_HUMAN  | R.SEVS#SPIQR.G                   | S567:           | 2 | 2,452  | 0,369 | 0,338  |
| 9 | O95251 MYST2_HUMAN  | R.LSQSSQDSS#PVR.N                | S57:            | 2 | 2,8382 | 0,372 | -0,445 |

|   |                    |                                    |                 |   |        |       |        |
|---|--------------------|------------------------------------|-----------------|---|--------|-------|--------|
| 9 | Q86V48 LUZP1_HUMAN | K.AIGALASS#R.R                     | S570:           | 2 | 2,8712 | 0,445 | 0,066  |
| 9 | P17812 PYRG1_HUMAN | R.DTYSDRS#GS#SSPDS#EITELKFPSINHD.- | S571:S573:S578: | 3 | 2,8761 | 1     | -0,568 |
| 9 | Q9UGU0 TCF20_HUMAN | R.LNAS#PAAREEATS#PGAK.D            | S574:S583:      | 2 | 3,2798 | 0,527 | -0,667 |
| 9 | Q09666 AHNK_HUMAN  | K.ASLGS#LEGEAEAEASS#PKGK.F         | S5752:S5763:    | 3 | 3,215  | 0,228 | 0      |
| 9 | Q8IZM8 ZN654_HUMAN | K.KCQTLFGFDS#DDESA.-               | S576:           | 2 | 3,0074 | 0,37  | -0,339 |
| 9 | Q8TDC3 BRSK1_HUMAN | R.NSFLGS#PR.F                      | S579:           | 2 | 2,8648 | 0,369 | 0,127  |
| 9 | P46013 KI67_HUMAN  | K.AQSLVIS#PPAPS#PRKT#PVASDQR.R     | S579:S584:T588: | 3 | 4,5486 | 0,442 | 0,485  |
| 9 | O43847 NRDC_HUMAN  | K.AKS#TCS#CPDLQPNGQDLGENSR.V       | S58:S61:        | 3 | 4,8507 | 0,499 | 0,423  |
| 9 | Q92560 BAP1_HUMAN  | K.GS#SPSIRPIQGSQSSS#PVEK.E         | S582:S597:      | 3 | 3,2033 | 1     | -0,081 |
| 9 | Q8IV63 VRK3_HUMAN  | R.GLNSSFETS#PK.K                   | S59:            | 2 | 2,65   | 0,438 | -0,196 |
| 9 | Q9H2Y7 ZF106_HUMAN | K.IEFQVHALEDES#DGETS#DTEK.H        | S590:S595:      | 3 | 5,7805 | 0,497 | -0,144 |
| 9 | Q9BXW9 FACD2_HUMAN | R.SES#PSLTQER.A                    | S592:           | 2 | 2,6927 | 0,424 | -0,402 |
| 9 | Q96Q07 BTBD9_HUMAN | R.APSGSSLPS#SPGSNSR.S              | S598:           | 2 | 3,2684 | 0,414 | -0,545 |
| 9 | Q12830 BPTF_HUMAN  | R.ES#HT#PVSIEIVGDFK.S              | S598:T600:      | 3 | 4,3744 | 0,401 | -0,441 |
| 9 | Q08AD1 CA1L1_HUMAN | K.LNQSS#PDNVTDTK.G                 | S599:           | 2 | 3,3231 | 0,443 | -0,733 |
| 9 | P31949 S10AB_HUMAN | K.ISS#PTETER.C                     | S6:             | 2 | 2,6236 | 0,149 | -0,555 |
| 9 | O00443 P3C2A_HUMAN | R.GFELSSS#TR.K                     | S60:            | 2 | 2,62   | 0,338 | 0      |
| 9 | Q13442 HAP28_HUMAN | K.KSLDS#DES#EDEEDDYQK.R            | S60:S63:        | 3 | 5,9137 | 0,32  | -0,158 |
| 9 | P50579 AMPM2_HUMAN | K.GPSAAGEQEPDKES#GAS#VDEVAR.Q      | S60:S63:        | 3 | 4,0753 | 0,509 | -0,374 |
| 9 | Q13442 HAP28_HUMAN | K.SLDS#DES#EDEEDDYQK.R             | S60:S63:        | 3 | 3,491  | 0,336 | -0,312 |
| 9 | Q15424 SAFB1_HUMAN | R.S#VVS#FDKVK.E                    | S601:S604:      | 2 | 2,7954 | 0,424 | 0      |
| 9 | P19634 SL9A1_HUMAN | K.IPSAVS#TVS#M*QNIHPK.S            | S602:S605:      | 2 | 3,1503 | 0,312 | -0,647 |
| 9 | Q05209 PTN12_HUMAN | R.TPLSFTNPLHS#DDS#DSDER.N          | S603:S606:      | 3 | 5,4258 | 1     | 0,08   |
| 9 | Q14157 UBP2L_HUMAN | R.YPS#SISS#SPQKDLTQAK.N            | S604:S608:      | 2 | 4,3768 | 1     | -0,428 |
| 9 | Q14157 UBP2L_HUMAN | R.YPS#SISS#PQKDLTQAK.N             | S604:S609:      | 2 | 4,06   | 1     | 0,55   |
| 9 | Q14157 UBP2L_HUMAN | R.YPSS#ISS#PQKDLTQAK.N             | S605:S609:      | 3 | 3,3746 | 1     | 0,275  |
| 9 | Q8IWI9 MGAP_HUMAN  | K.VVNANQNAS#PNVPGK.R               | S607:           | 2 | 2,8029 | 0,264 | -0,307 |
| 9 | Q14157 UBP2L_HUMAN | R.YPSSISS#PQK.D                    | S609:           | 2 | 2,6374 | 0,155 | -0,387 |
| 9 | Q9UHB6 LIMA1_HUMAN | K.TVS#PPIR.K                       | S609:           | 2 | 2,0058 | 0,085 | 0,502  |
| 9 | Q9P246 STIM2_HUMAN | R.KQS#PPLSLEIYQTL#PR.K             | S609:S621:      | 3 | 3,7636 | 0,163 | -0,691 |
| 9 | Q16831 UPP1_HUMAN  | K.FVCVGS#PSR.M                     | S61:            | 2 | 2,6656 | 0,398 | 0      |
| 9 | P52948 NUP98_HUMAN | K.NLNNSNLFS#PVNR.D                 | S612:           | 2 | 4,4891 | 0,447 | -0,078 |
| 9 | Q9H0B6 KLC2_HUMAN  | R.TLSSSM*DLS#R.R                   | S615:           | 2 | 2,0942 | 0,126 | -0,763 |

|   |                    |                                  |            |   |        |       |        |
|---|--------------------|----------------------------------|------------|---|--------|-------|--------|
| 9 | O43719 HTSF1_HUMAN | K.VLDEEGS#ER.E                   | S616:      | 2 | 2,9364 | 0,442 | -0,219 |
| 9 | P49756 RBM25_HUMAN | K.LGAS#NSPGQPNSVK.R              | S616:      | 2 | 2,4517 | 0,241 | -1,954 |
| 9 | Q8IYB3 SRRM1_HUMAN | R.TAS#PPPPPK.R                   | S616:      | 2 | 2,4317 | 0,275 | -0,314 |
| 9 | P42684 ABL2_HUMAN  | R.GAQASS#GSPALPR.K               | S618:      | 2 | 2,3386 | 0,29  | -0,477 |
| 9 | O43395 PRPF3_HUMAN | K.GDDDEES#DEEAVK.K               | S619:      | 2 | 3,0637 | 0,493 | -0,402 |
| 9 | O43719 HTSF1_HUMAN | R.EFDEDS#DEKEEEDT#YEK.V          | S624:T633: | 3 | 3,6418 | 0,209 | -0,377 |
| 9 | Q96JM7 LMBL3_HUMAN | R.TDANESSSS#PEIR.D               | S625:      | 2 | 2,9537 | 0,279 | -0,331 |
| 9 | Q9NYL2 MLTK_HUMAN  | K.YQQITPVNQS#R.S                 | S633:      | 2 | 2,3625 | 0,313 | -0,863 |
| 9 | O75420 PERQ1_HUMAN | R.SLS#VPDSGR.L                   | S638:      | 2 | 2,0392 | 0,247 | 0,061  |
| 9 | Q96MG7 MAGG1_HUMAN | R.GPGGSQGSQGPS#PQGAR.R           | S64:       | 2 | 2,0043 | 0,185 | -0,532 |
| 9 | Q6P6C2 ALKB5_HUMAN | K.YQEDS#DPER#DYEEQQLQK.E         | S64:S69:   | 3 | 6,1144 | 0,55  | -0,431 |
| 9 | Q8NCD3 HJURP_HUMAN | K.LPSS#PLGCR.K                   | S642:      | 2 | 2,5873 | 0,159 | 0      |
| 9 | Q14978 NOLC1_HUMAN | R.VADNS#FDAK.R                   | S643:      | 2 | 3,4205 | 0,431 | -0,583 |
| 9 | Q96JM3 ZN828_HUMAN | K.GQES#SS#DQEQVDVESIDFSKENK.M    | S651:S653: | 3 | 4,5609 | 0,397 | -0,333 |
| 9 | Q9UID3 CK002_HUMAN | R.TFSVYS#SSR.Q                   | S652:      | 2 | 2,5603 | 0,463 | -0,11  |
| 9 | Q9ULU4 PKCB1_HUMAN | K.STS#PAS#EKADPGAVK.D            | S652:S655: | 2 | 3,2493 | 0,296 | -0,38  |
| 9 | Q8WWI5 CTL1_HUMAN  | R.ELKPM*ASGAS#SA.-               | S655:      | 2 | 2,5246 | 0,207 | -0,098 |
| 9 | P35658 NU214_HUMAN | R.SAQSSS#PVPSM*VQKS#PR.I         | S657:S666: | 3 | 2,6752 | 0,304 | -0,274 |
| 9 | Q8WVC0 LEO1_HUMAN  | K.KYVIS#DEEEEDDD.-               | S658:      | 2 | 3,8437 | 0,502 | -0,586 |
| 9 | Q9NYF8 BCLF1_HUMAN | R.IDIS#PSTLR.K                   | S658:      | 2 | 2,1905 | 0,111 | 0,113  |
| 9 | Q86YS7 K0528_HUMAN | R.SQS#ESS#DEVTELDLSHGK.K         | S659:S662: | 3 | 4,4862 | 0,464 | -0,087 |
| 9 | Q86YS7 K0528_HUMAN | R.SQSES#S#DEVTELDLSHGK.K         | S661:S662: | 2 | 2,224  | 0,222 | -0,347 |
| 9 | Q9H1B7 EAP1_HUMAN  | R.NSSSPVS#PASVPGQR.R             | S662:      | 2 | 2,9979 | 0,366 | -0,236 |
| 9 | Q9UKJ3 GPTC8_HUMAN | K.ATGPPSQNSNIGTGRGS#EGDCS#PEDK.N | S663:S668: | 3 | 4,4606 | 0,431 | -0,461 |
| 9 | Q7Z4V5 HDGR2_HUMAN | R.ARGDS#EALDEES.-                | S664:      | 2 | 2,7298 | 0,452 | -0,269 |
| 9 | Q9UBH6 XPR1_HUMAN  | K.YNQS#ISLR.R                    | S666:      | 2 | 2,3871 | 0,342 | 0      |
| 9 | Q9P275 UBP36_HUMAN | K.LKS#PVLSNTTTEPASTM*S#PPPAK.K   | S667:S682: | 3 | 4,6574 | 1     | -0,289 |
| 9 | P62280 RS11_HUMAN  | K.CPFTGNVS#IR.G                  | S67:       | 2 | 2,5703 | 0,324 | -0,297 |
| 9 | P25205 MCM3_HUMAN  | R.SEDES#ET#EDEEEKSQEDQEQK.R      | S672:T674: | 3 | 3,8933 | 0,442 | -0,681 |
| 9 | Q9P2R6 RERE_HUMAN  | K.TQEIS#RPNS#PSEGESESSDSR.S      | S675:S679: | 3 | 4,0608 | 0,359 | -0,608 |
| 9 | Q96TA1 NIBL1_HUMAN | K.AAPEAS#SPPAS#PLQHLLPGK.A       | S678:S683: | 2 | 2,7443 | 0,293 | -0,344 |
| 9 | Q96TA1 NIBL1_HUMAN | K.AAPEASS#PPAS#PLQHLLPGK.A       | S679:S683: | 2 | 2,8697 | 0,493 | -0,344 |
| 9 | Q96TA1 NIBL1_HUMAN | K.AAPEASS#PPAS#PLQHLLPGK.A       | S679:S683: | 3 | 2,7671 | 0,321 | -1,032 |



|   |                    |                                      |                 |   |        |       |        |
|---|--------------------|--------------------------------------|-----------------|---|--------|-------|--------|
| 9 | Q9NYV4 CD2L7_HUMAN | R.HLLTDLPLPPELPGGDLS#PPDS#PEPK.A     | S681:S685:      | 3 | 3,2202 | 0,211 | -0,38  |
| 9 | Q8IY81 RRMJ3_HUMAN | R.DLIDNS#FNR.Y                       | S688:           | 2 | 3,0337 | 0,273 | 0,104  |
| 9 | P49959 MRE11_HUMAN | K.GVDFES#S#EDDDDDPFM*NTSSLRR.N       | S688:S689:      | 3 | 3,6942 | 0,351 | -0,651 |
| 9 | Q14160 LAP4_HUMAN  | R.AEEEEAS#T#EEEDKEGAVVSAPSVK.G       | S688:T689:      | 3 | 3,8391 | 0,409 | -0,341 |
| 9 | Q9H5Y7 SLIK6_HUMAN | R.SPS#FGPK.H                         | S694:           | 2 | 2,2045 | 0,157 | 0,305  |
| 9 | Q8IYB3 SRRM1_HUMAN | R.APQTSSS#PPPVR.R                    | S696:           | 2 | 3,3705 | 0,193 | -0,187 |
| 9 | Q14978 NOLC1_HUMAN | R.GGSISVQVNSIKFDS#E.-                | S698:           | 2 | 3,8588 | 0,572 | -0,279 |
| 9 | Q8N128 CN024_HUMAN | R.VIHFVSGETM*EEYS#T#DEDEVDGLEK.K     | S70:T71:        | 3 | 3,9237 | 0,417 | -0,362 |
| 9 | O43719 HTSF1_HUMAN | K.LFEDDD#NEK.L                       | S702:           | 2 | 3,3362 | 0,426 | -0,283 |
| 9 | P25205 MCM3_HUMAN  | K.DGDSYDPYDFS#DT#EEEM*PQVHTPK.T      | S711:T713:      | 3 | 3,07   | 0,385 | 0      |
| 9 | O43719 HTSF1_HUMAN | K.LFDEEEDS#S#EKLFDSDER.G             | S713:S714:      | 3 | 3,8706 | 0,161 | -0,074 |
| 9 | Q9UHI6 DDX20_HUMAN | K.YQES#PGIQM*K.T                     | S714:           | 2 | 2,7419 | 0,305 | -0,382 |
| 9 | Q5W0B1 RN219_HUMAN | K.IQSSLSSAS#PSK.A                    | S719:           | 2 | 2,7375 | 0,3   | -0,48  |
| 9 | Q15149 PLEC1_HUMAN | R.SDEGQLS#PATR.G                     | S720:           | 2 | 3,1772 | 0,4   | -0,492 |
| 9 | P10636 TAU_HUMAN   | K.SPVVSGDTS#PR.H                     | S721:           | 2 | 3,7737 | 0,437 | -0,619 |
| 9 | O43719 HTSF1_HUMAN | K.LFDDS#DER.G                        | S721:           | 2 | 3,4936 | 0,379 | -0,227 |
| 9 | Q05682 CALD1_HUMAN | K.GNVFSS#PTAAGT#PNKETAGLK.V          | S724:T730:      | 3 | 3,0094 | 0,391 | 0,166  |
| 9 | P15056 BRAF1_HUMAN | R.SAS#EPSLNR.A                       | S729:           | 2 | 2,5276 | 0,188 | -0,234 |
| 9 | Q66K74 MAP1S_HUMAN | R.S#AS#PHDVLCLVS#PCEFEHR.K           | S729:S731:S741: | 3 | 3,2026 | 0,266 | -0,212 |
| 9 | P05412 JUN_HUMAN   | K.LAS#PELER.L                        | S73:            | 2 | 2,9448 | 0,237 | 0      |
| 9 | Q15418 KS6A1_HUMAN | R.KLPS#TTL.-                         | S732:           | 2 | 2,7562 | 0,454 | -0,871 |
| 9 | A0FGR8 ESYT2_HUMAN | R.SSS#S#LLASPGHISVK.E                | S738:S739:      | 3 | 5,0799 | 0,344 | -0,224 |
| 9 | A0FGR8 ESYT2_HUMAN | R.SSS#S#LLASPGHISVK.E                | S738:S739:      | 2 | 2,1441 | 0,325 | 0,15   |
| 9 | Q08J23 NSUN2_HUMAN | R.AGEPNS#PDAEEANS#PDVTAGCDPAGVHPPR.- | S743:S751:      | 3 | 4,077  | 0,451 | -0,461 |
| 9 | O60524 SDCG1_HUMAN | R.DELNEELIQEES#S#EDEGEYEEVRK.D       | S747:S748:      | 3 | 2,9312 | 0,225 | -0,06  |
| 9 | Q9H4G0 E41L1_HUMAN | K.DYSEADGLS#ERTT#PSK.A               | S75:T79:        | 2 | 2,6204 | 0,417 | -0,318 |
| 9 | Q13263 TIF1B_HUMAN | R.LQEKLS#PPYSS#PQEFAQDVGR.M          | S752:S757:      | 3 | 3,6511 | 0,327 | -0,072 |
| 9 | P48634 BAT2_HUMAN  | R.S#DSGGSSSEPFDR.H                   | S759:           | 2 | 2,2402 | 0,224 | -0,52  |
| 9 | P50502 F10A1_HUMAN | K.VEEDLKADEPSS#EES#DLEIDK.E          | S76:S79:        | 3 | 5,4499 | 0,347 | 0      |
| 9 | P31321 KAP1_HUMAN  | K.SNSQSDS#HDEEVS#PTPPNPVVK.A         | S77:S83:        | 3 | 3,972  | 0,196 | 0,292  |
| 9 | Q15154 PCM1_HUMAN  | K.IQALQTACPDQLS#AAS#VGNCPKTKK.Y      | S776:S779:      | 3 | 4,2635 | 0,414 | 0,129  |
| 9 | Q8IYL2 U383_HUMAN  | R.GPGPGQGS#PGGGPGPR.S                | S78:            | 2 | 3,1372 | 0,427 | -0,346 |
| 9 | P42677 RS27_HUMAN  | R.LTEGCS#FR.R                        | S78:            | 2 | 2,0178 | 0,275 | -0,232 |

|   |                     |                                    |                |   |        |       |        |
|---|---------------------|------------------------------------|----------------|---|--------|-------|--------|
| 9 | P04792 HSPB1_HUMAN  | R.ALS#RQLS#SGVSEIR.H               | S78:S82:       | 3 | 3,8727 | 0,367 | 0      |
| 9 | P04792 HSPB1_HUMAN  | R.ALS#RQLS#SGVSEIR.H               | S78:S82:       | 2 | 2,5669 | 0,089 | -0,147 |
| 9 | P49792 RBP2_HUMAN   | R.YLS#PSK.S                        | S788:          | 2 | 2,2307 | 0,139 | 0      |
| 9 | Q2NL81 Q2NL81_HUMAN | R.GYQSLSDS#PPGAR.V                 | S793:          | 2 | 3,6908 | 0,443 | -0,345 |
| 9 | Q8IYB3 SRRM1_HUMAN  | K.SPTSPSP#PPRNS#DQEGGGK.K          | S797:S802:     | 3 | 2,7939 | 0,256 | -0,712 |
| 9 | O95239 KIF4A_HUMAN  | R.GQVSESEDS#ITK.Q                  | S815:          | 2 | 3,0362 | 0,404 | -0,538 |
| 9 | Q8IWX8 CHERP_HUMAN  | R.SRS#PT#PPSSAGLGSNSAPPIDSR.L      | S817:T819:     | 3 | 4,4881 | 1     | 0,367  |
| 9 | P04792 HSPB1_HUMAN  | R.QLS#SGVSEIR.H                    | S82:           | 2 | 2,808  | 0,219 | -0,211 |
| 9 | Q96JP5 ZFP91_HUMAN  | R.S#SPSARPPDVPGQQPQAAS#PS#PVQGK.K  | S82:S101:S103: | 3 | 5,0424 | 0,398 | -0,623 |
| 9 | P46013 KI67_HUMAN   | K.CSAS#PPLR.R                      | S827:          | 2 | 2,0283 | 0,361 | 0,063  |
| 9 | Q14008 CKAP5_HUMAN  | K.HS#T#SGTDEGEDGDEPDDGSNDVVDLLPR.T | S828:T829:     | 3 | 3,5886 | 0,302 | -0,474 |
| 9 | Q86VM9 ZCH18_HUMAN  | K.SQDQDS#EVNELSR.G                 | S83:           | 2 | 4,3928 | 0,453 | -0,154 |
| 9 | Q8N8A6 DDX51_HUMAN  | R.VNDAEPGS#PEAPQGK.R               | S83:           | 2 | 2,9182 | 0,481 | -0,387 |
| 9 | P48960 CD97_HUMAN   | R.ALRS#ESGI.-                      | S831:          | 2 | 3,0161 | 0,574 | -0,31  |
| 9 | Q9NQS7 INCE_HUMAN   | K.INPDNYGM*DLNS#DDS#TDDEAHPR.K     | S833:S836:     | 3 | 4,1856 | 0,302 | -0,397 |
| 9 | Q7Z2Z1 CO042_HUMAN  | R.RS#VSGS#PESDELQELR.T             | S834:S838:     | 3 | 3,1708 | 0,242 | -0,094 |
| 9 | Q9NQS7 INCE_HUMAN   | K.INPDNYGM*DLNSDDS#T#DDEAHPR.K     | S836:T837:     | 3 | 4,0515 | 0,29  | 0      |
| 9 | Q9UKV3 ACINU_HUMAN  | K.GVPAGNS#DTEGGQPGR.K              | S838:          | 2 | 3,678  | 0,343 | -0,232 |
| 9 | Q9ULH1 DDEF1_HUMAN  | R.TLS#DPPS#PLPHGPPNK.G             | S839:S843:     | 3 | 3,1934 | 0,37  | 0,303  |
| 9 | Q9ULH1 DDEF1_HUMAN  | R.TLS#DPPS#PLPHGPPNK.G             | S839:S843:     | 2 | 2,7518 | 0,355 | 0,471  |
| 9 | Q9H307 PININ_HUMAN  | R.DLEGAVS#R.L                      | S84:           | 2 | 2,8775 | 0,092 | 0,132  |
| 9 | Q8WXE0 CSKI2_HUMAN  | R.SQS#FALR.A                       | S858:          | 2 | 2,3391 | 0,135 | 0      |
| 9 | P05114 HMGNI1_HUMAN | K.EDLPAENGETKTEES#PAS#DEAGEK.E     | S86:S89:       | 3 | 3,2567 | 0,238 | -0,544 |
| 9 | Q9Y5B0 CTDP1_HUMAN  | K.EDLES#M*DKEVDDILGEGS#DDS#DSEK.R  | S869:S872:     | 3 | 5,4703 | 0,477 | -0,374 |
| 9 | Q15003 CND2_HUMAN   | R.LLAS#PSSR.S                      | S87:           | 2 | 2,028  | 0,198 | 0,067  |
| 9 | Q9UK76 HN1_HUMAN    | R.RNS#S#EASSGDFDLK.G               | S87:S88:       | 2 | 4,7407 | 0,549 | -0,205 |
| 9 | Q5T200 ZC3HD_HUMAN  | R.S#LS#PSHLTEDR.Q                  | S875:S877:     | 2 | 2,4346 | 0,451 | -0,348 |
| 9 | Q9BVI0 PHF20_HUMAN  | R.GSALDDAVNPLHENGDDS#LS#PR.L       | S878:S880:     | 3 | 4,0436 | 0,349 | 0      |
| 9 | Q14152 EIF3A_HUMAN  | R.LGDSS#LSR.K                      | S882:          | 2 | 2,6345 | 0,124 | 0      |
| 9 | Q01831 XPC_HUMAN    | K.SEAAAPHTDAGGGLS#S#DEEETSSQAEAR.I | S883:S884:     | 3 | 3,1147 | 1     | -0,36  |
| 9 | Q15003 CND2_HUMAN   | R.LLASPS#SR.S                      | S89:           | 2 | 2,0085 | 0,11  | 0,067  |
| 9 | Q8TEA7 TBCK_HUMAN   | K.IKPTGLLTIPS#PQI.-                | S890:          | 2 | 2,501  | 0,192 | -0,47  |
| 9 | Q9N67 DOCK7_HUMAN   | R.SRS#LSNS#NPDISGTPTSPDDEVR.S      | S896:S900:     | 3 | 5,0708 | 1     | -0,282 |

|   |                     |                                   |                 |   |        |       |        |
|---|---------------------|-----------------------------------|-----------------|---|--------|-------|--------|
| 9 | P29317 EPHA2_HUMAN  | R.VSIRLPS#TSGS#EGVPFR.T           | S897:S901:      | 2 | 3,9645 | 1     | -0,438 |
| 9 | P29317 EPHA2_HUMAN  | R.VSIRLPS#TSGS#EGVPFR.T           | S897:S901:      | 3 | 3,2926 | 0,444 | 0,094  |
| 9 | Q02241 KIF23_HUMAN  | R.GGGQSVQFTDIETLKQES#PNGS#R.K     | S902:S906:      | 3 | 4,1357 | 0,26  | 0,07   |
| 9 | Q70E73 RAPH1_HUMAN  | K.QQSFCAKPPPS#PLS#PVPSVVK.Q       | S905:S908:      | 3 | 2,7596 | 0,216 | -0,38  |
| 9 | Q8TF72 SHRM3_HUMAN  | R.DRPGS#PES#PLLDAPFSR.A           | S909:S912:      | 3 | 2,9412 | 0,211 | 0      |
| 9 | Q9GZR1 SENP6_HUMAN  | R.LNYSDES#PEAGK.M                 | S919:           | 2 | 3,4359 | 0,405 | -0,439 |
| 9 | O95425 SVIL_HUMAN   | K.FSSSIENS#PVR.S                  | S920:           | 2 | 3,6678 | 0,486 | -0,486 |
| 9 | O75351 VPS4B_HUMAN  | K.EGQPS#PADEKGNDS#DGEGESDDPEK.K   | S93:S102:       | 3 | 3,2722 | 0,432 | -0,399 |
| 9 | Q5VY92 Q5VY92_HUMAN | R.QELGS#PEER.L                    | S932:           | 2 | 2,4548 | 0,292 | -0,217 |
| 9 | Q5VY92 Q5VY92_HUMAN | R.LQDSS#DPDTGSEEEGSS#RLSPPHS#PR.D | S941:S953:S960: | 3 | 4,5777 | 1     | -0,426 |
| 9 | Q52LW3 RHG29_HUMAN  | R.ATS#FEESER.K                    | S949:           | 2 | 2,8373 | 0,422 | -0,43  |
| 9 | O60293 CC131_HUMAN  | R.LDSS#PVSSPR.K                   | S949:           | 2 | 2,6162 | 0,476 | -0,434 |
| 9 | Q9UQ35 SRRM2_HUMAN  | R.SVS#PCSNVESR.L                  | S954:           | 2 | 3,2065 | 0,538 | -0,187 |
| 9 | Q9ULD4 BRPF3_HUMAN  | R.VLENGEDHGAVGSPAS#PAS#IEEER.H    | S962:S965:      | 3 | 4,7764 | 0,325 | 0,701  |
| 9 | Q9BPX3 CND3_HUMAN   | R.CQTAEADS#ES#DHEVPEPESEM*K.M     | S973:S975:      | 3 | 4,0587 | 0,425 | -0,682 |
| 9 | P35658 NU214_HUMAN  | R.SAFLS#QR.Y                      | S974:           | 2 | 2,3887 | 0,222 | 0,206  |
| 9 | Q14814 MEF2D_HUMAN  | K.KGFNGCDS#PEPDGEDS#LEQSPLLEDK.Y  | S98:S106:       | 3 | 3,1108 | 0,23  | -0,605 |
| 9 | Q86UU0 BCL9L_HUMAN  | K.SPQVLGSSLS#VRSPTGS#PSR.L        | S984:S991:      | 3 | 2,7194 | 0,131 | 0,085  |
| 9 | P17096 HMGA1_HUMAN  | K.KLEKEEEEGIS#QES#S#EEEQ.-        | S99:S102:S103:  | 3 | 4,124  | 0,436 | -0,443 |
| 9 | Q86W92 LIPB1_HUMAN  | K.EDDM*FKDFAARS#PS#ASITDEDSNV.-   | S999:S1001:     | 3 | 4,9802 | 0,432 | -0,583 |
| 9 | Q6GYQ0 GRIPE_HUMAN  | R.SQT#PS#PSTLNIDHM*EQK.D          | T1002:S1004:    | 3 | 3,381  | 0,39  | -0,263 |
| 9 | Q9UQ35 SRRM2_HUMAN  | K.AQT#PPGPSLSGSKS#PCPQEK.S        | T1003:S1014:    | 3 | 4,2089 | 0,388 | -0,248 |
| 9 | Q12888 TP53B_HUMAN  | R.SEDPPTT#PIR.G                   | T1056:          | 2 | 2,4263 | 0,365 | -0,307 |
| 9 | Q14137 BOP1_HUMAN   | K.TTEEQVQAST#PCPR.T               | T106:           | 2 | 3,4022 | 0,454 | -0,435 |
| 9 | Q96B54 ZN428_HUMAN  | R.SPLGEAPPGT#PPCR.L               | T108:           | 2 | 2,9508 | 0,556 | -0,322 |
| 9 | P17301 ITA2_HUMAN   | K.M*TKNPDEIDETT#ELSS.-            | T1177:          | 2 | 2,7068 | 0,382 | 1,024  |
| 9 | P46013 KI67_HUMAN   | K.AFM*GT#PVQK.L                   | T1193:          | 2 | 2,3701 | 0,273 | -0,454 |
| 9 | Q8WXI9 P66B_HUMAN   | R.GRLT#PS#PDIIVLSDNEASSPR.S       | T120:S122:      | 3 | 5,6271 | 0,451 | 0      |
| 9 | Q8WXI9 P66B_HUMAN   | R.GRLT#PSPDIIVLS#DNEASSPR.S       | T120:S129:      | 3 | 4,5337 | 0,334 | -0,23  |
| 9 | Q8WXI9 P66B_HUMAN   | R.GRLT#PSPDIIVLSDNEASS#PR.S       | T120:S135:      | 3 | 5,4233 | 0,453 | 0      |
| 9 | Q8NEY8 PPHLN_HUMAN  | R.DNT#FFRES#PVGR.K                | T128:S133:      | 2 | 2,627  | 0,297 | 0,462  |
| 9 | Q03252 LMNB2_HUMAN  | R.AGGPAT#PLSPTR.L                 | T14:            | 2 | 2,7317 | 0,253 | -0,506 |
| 9 | Q92859 NEO1_HUMAN   | K.TASIGT#LGR.S                    | T1404:          | 2 | 2,5081 | 0,334 | -0,128 |

|   |                    |                                   |                 |   |        |       |        |
|---|--------------------|-----------------------------------|-----------------|---|--------|-------|--------|
| 9 | Q86VI3 IQGA3_HUMAN | R.QACTAQT#PEPLR.R                 | T1415:          | 2 | 2,5587 | 0,431 | -0,336 |
| 9 | P49790 NU153_HUMAN | K.NVFSSTGT#SFSGR.K                | T1460:          | 2 | 3,1373 | 0,33  | -0,345 |
| 9 | Q7KZ85 SPT6H_HUMAN | R.T#RTPAS#INATPANINLADLTR.A       | T1530:S1535:    | 3 | 4,7018 | 0,421 | -0,077 |
| 9 | Q1KMD3 HNRL2_HUMAN | R.SGDET#PGSEVPGDK.A               | T165:           | 2 | 3,4729 | 0,453 | -0,419 |
| 9 | Q1KMD3 HNRL2_HUMAN | R.SGDET#PGS#EVPGDKAAEEQGDDQDSEK.S | T165:S168:      | 3 | 4,8182 | 0,495 | -0,436 |
| 9 | P04920 B3A2_HUMAN  | R.T#SPSS#PAPLPHQEATPR.A           | T169:S173:      | 2 | 2,0756 | 0,456 | -0,316 |
| 9 | Q5THJ4 VP13D_HUMAN | K.EVQDKDYPLT#PPPS#PTVDEPK.I       | T1761:S1765:    | 3 | 4,2279 | 0,435 | -0,218 |
| 9 | P46821 MAP1B_HUMAN | K.SDISPLT#PR.E                    | T1788:          | 2 | 2,5867 | 0,391 | 0,114  |
| 9 | P37802 TAGL2_HUMAN | K.NVIGLQM*GT#NR.G                 | T180:           | 2 | 2,224  | 0,317 | -0,188 |
| 9 | Q3V6T2 GRDN_HUMAN  | K.DSNPYAT#LPR.A                   | T1801:          | 2 | 2,4631 | 0,182 | 0,101  |
| 9 | Q9BXS6 NUSAP_HUMAN | R.TAITT#PNFK.K                    | T182:           | 2 | 2,0829 | 0,321 | -0,114 |
| 9 | Q03188 CENPC_HUMAN | K.RET#YTFENS#VNM*LPSSTEVSVK.T     | T183:S189:      | 3 | 7,0767 | 0,469 | 0,204  |
| 9 | P24928 RPB1_HUMAN  | K.YSPT#SPKYSPT#SPK.Y              | T1863:T1870:    | 2 | 3,5888 | 1     | -0,215 |
| 9 | Q8WVC0 LEO1_HUMAN  | K.M*QNT#DDEERQLS#DDER.Q           | T188:S197:      | 3 | 3,4452 | 0,374 | -0,325 |
| 9 | Q15527 SURF2_HUMAN | K.DLGSTEDGDGT#DDFLT#DKEDEK.A      | T190:T195:      | 3 | 5,6353 | 0,441 | 0,714  |
| 9 | P51858 HDGF_HUMAN  | K.NST#PSEPGSGR.G                  | T200:           | 2 | 2,3703 | 0,423 | -0,418 |
| 9 | Q96PY5 FMNL2_HUMAN | R.YNT#LPSR.R                      | T202:           | 2 | 2,618  | 0,21  | -0,131 |
| 9 | Q7L2J0 MEPCE_HUMAN | R.TLNAET#PKSS#PLPAK.G             | T213:S217:      | 2 | 5,0489 | 0,415 | -0,712 |
| 9 | Q01082 SPTB2_HUMAN | R.T#SSKES#PIPSPTSDR.K             | T2159:S2165:    | 2 | 3,3394 | 1     | -0,598 |
| 9 | Q9Y4E8 UBP15_HUMAN | R.GPST#PKS#PGASNFSTLPK.I          | T226:S229:      | 3 | 4,1526 | 0,435 | 0,284  |
| 9 | O75683 SURF6_HUMAN | K.GNLT#PLTGR.N                    | T229:           | 2 | 2,6019 | 0,288 | -0,423 |
| 9 | O95644 NFAC1_HUMAN | R.GLGACT#LLGS#PRHSPSTS#PR.A       | T229:S233:S241: | 3 | 2,8311 | 1     | 0,24   |
| 9 | P08559 ODPA_HUMAN  | R.YGM*GT#SVR.A                    | T231:           | 2 | 3,0865 | 0,353 | -0,223 |
| 9 | P18858 DNL1_HUMAN  | K.TLSSFFT#PR.K                    | T233:           | 2 | 2,6161 | 0,343 | -0,322 |
| 9 | P23396 RS3_HUMAN   | K.GGKPEPPAM*PQPVPPT#A.-           | T242:           | 2 | 2,5666 | 0,456 | -0,146 |
| 9 | P25054 APC_HUMAN   | R.QST#FIKEAPS#PTLR.R              | T2442:S2449:    | 3 | 2,7595 | 0,174 | -0,316 |
| 9 | P49792 RBP2_HUMAN  | K.DSLIT#PHVS#R.S                  | T2450:S2454:    | 2 | 2,4522 | 0,262 | 0,095  |
| 9 | Q96B36 AKTS1_HUMAN | R.LNT#SDFQK.L                     | T246:           | 2 | 3,18   | 0,227 | -0,354 |
| 9 | O95835 LATS1_HUMAN | R.SVT#PPPPR.G                     | T246:           | 2 | 2,0335 | 0,191 | -0,237 |
| 9 | O95835 LATS1_HUMAN | R.SVT#PPPPRQT#PPPR.G              | T246:T255:      | 2 | 2,145  | 0,206 | -0,464 |
| 9 | Q13428 TCOF_HUMAN  | K.VGDVT#PQVK.G                    | T249:           | 2 | 2,7781 | 0,334 | -0,358 |
| 9 | Q5T200 ZC3HD_HUMAN | K.GPRT#PS#PPPIPEDIALGK.K          | T263:S265:      | 3 | 4,391  | 0,419 | -0,436 |
| 9 | Q13435 SF3B2_HUMAN | R.QEEM*NSQQEEEM*ET#DAR.S          | T275:           | 3 | 2,9812 | 0,196 | -0,236 |

|   |                    |                                   |                 |   |        |       |        |
|---|--------------------|-----------------------------------|-----------------|---|--------|-------|--------|
| 9 | Q53TN4 CYBR1_HUMAN | R.NLALDEAGQRST#M*.-               | T285:           | 2 | 4,2559 | 0,536 | -0,894 |
| 9 | O95817 BAG3_HUMAN  | R.SST#PLHS#PSPPIR.V               | T285:S289:      | 3 | 3,4711 | 0,279 | -0,064 |
| 9 | O95817 BAG3_HUMAN  | R.SST#PLHS#PSPPIR.V               | T285:S289:      | 2 | 2,9385 | 0,228 | -0,17  |
| 9 | O95817 BAG3_HUMAN  | R.SST#PLHSPS#PIR.V                | T285:S291:      | 2 | 2,1186 | 0,104 | -0,339 |
| 9 | Q8N1G2 K0082_HUMAN | R.VAELALSLSST#S#DDEPPSSVSHGAK.A   | T30:S31:        | 3 | 3,1138 | 1     | -0,069 |
| 9 | Q13620 CUL4B_HUMAN | R.SATDGNTSTT#PPTSAK.K             | T31:            | 2 | 3,3047 | 0,472 | -0,604 |
| 9 | Q9NXF1 TEX10_HUMAN | K.LQNATPT#NFK.T                   | T31:            | 2 | 2,9582 | 0,309 | -0,603 |
| 9 | Q99460 PSMD1_HUMAN | K.TSSAFVGKT#PEAS#PEPK.D           | T311:S315:      | 2 | 3,8675 | 0,552 | -0,451 |
| 9 | Q99460 PSMD1_HUMAN | K.TSSAFVGKT#PEAS#PEPK.D           | T311:S315:      | 3 | 3,4554 | 0,336 | -0,097 |
| 9 | P50552 VASP_HUMAN  | K.NSTT#LPR.M                      | T316:           | 2 | 2,2104 | 0,298 | 0,14   |
| 9 | Q9NQW6 ANLN_HUMAN  | K.SCEGQNPELLPKT#PIS#PLK.T         | T320:S323:      | 3 | 3,211  | 0,4   | -0,242 |
| 9 | P27987 IP3KB_HUMAN | K.SGGGPGPSGSET#PPPPR.R            | T33:            | 2 | 3,1839 | 0,435 | -0,454 |
| 9 | Q641Q2 FA21A_HUMAN | R.RT#PS#DDEEDNLFAPPK.L            | T331:S333:      | 2 | 5,0718 | 0,573 | -0,306 |
| 9 | Q9UQB8 BAIP2_HUMAN | K.LSDSYSNT#LPVR.K                 | T340:           | 2 | 3,5355 | 0,394 | 0      |
| 9 | P28749 RBL1_HUMAN  | R.SFAPST#PLTGR.R                  | T369:           | 2 | 2,8828 | 0,389 | 0,101  |
| 9 | Q86WB0 NIPA_HUMAN  | R.SM*GTGDT#PGLEVPSS#PLRK.A        | T387:S395:      | 3 | 5,521  | 0,438 | -0,087 |
| 9 | Q6P1L5 AL2SC_HUMAN | R.SSST#RS#IDTQTPGGADR.G           | T389:S391:      | 2 | 2,1579 | 1     | -0,257 |
| 9 | P36507 MP2K2_HUMAN | R.LNQPGT#PTR.T                    | T394:           | 2 | 2,5561 | 0,154 | -0,573 |
| 9 | Q9ULJ3 ZN295_HUMAN | R.IKT#EPSS#PLSDPSDIIR.V           | T431:S435:      | 3 | 4,1226 | 0,316 | -0,091 |
| 9 | P62191 PRS4_HUMAN  | K.KQEGT#PEGLYL.-                  | T434:           | 2 | 2,9681 | 0,308 | 0,093  |
| 9 | P85037 FOXK1_HUMAN | R.SGGLQT#PECLS#REGS#PIPHDPEFGSK.L | T436:S441:S445: | 3 | 3,4354 | 0,458 | -0,242 |
| 9 | Q9Y6A5 TACC3_HUMAN | K.SGCSEAQPPEPET#R.L               | T437:           | 2 | 2,5052 | 0,387 | -0,214 |
| 9 | O43318 M3K7_HUMAN  | R.RSIQDLTVT#GTEPGQVSS#R.S         | T446:S455:      | 3 | 3,0062 | 0,204 | -0,084 |
| 9 | Q14676 MDC1_HUMAN  | R.SQTTT#ERSDT#DVEEEELPVENR.E      | T449:T455:      | 3 | 3,6284 | 1     | 0,129  |
| 9 | Q15208 STK38_HUMAN | R.FEGLT#AR.G                      | T452:           | 2 | 2,1894 | 0,242 | 0,14   |
| 9 | Q13098 CSN1_HUMAN  | R.EGSQGELT#PANSQSR.M              | T459:           | 2 | 3,9471 | 0,585 | -0,297 |
| 9 | O76021 RL1D1_HUMAN | K.FFTT#PSK.S                      | T465:           | 2 | 2,7795 | 0,17  | -0,134 |
| 9 | O76021 RL1D1_HUMAN | K.FFTT#PSKS#VR.K                  | T465:S469:      | 2 | 2,218  | 0,397 | 0      |
| 9 | Q99733 NP1L4_HUMAN | R.LDNVPHT#PS#SYIETLPK.A           | T51:S53:        | 2 | 2,2274 | 0,278 | -0,236 |
| 9 | Q99733 NP1L4_HUMAN | R.LDNVPHT#PSS#YIETLPK.A           | T51:S54:        | 3 | 3,3037 | 0,205 | -0,088 |
| 9 | Q99733 NP1L4_HUMAN | R.LDNVPHT#PSS#YIETLPK.A           | T51:S54:        | 2 | 2,9947 | 0,445 | -0,236 |
| 9 | P37198 NUP62_HUMAN | R.SFRIT#FD.-                      | T520:           | 2 | 2,151  | 0,419 | -0,253 |
| 9 | P50548 ERF_HUMAN   | R.GEGPGEAGGPLT#PR.R               | T526:           | 2 | 3,0285 | 0,397 | -0,444 |

|   |                    |                                  |              |   |        |       |        |
|---|--------------------|----------------------------------|--------------|---|--------|-------|--------|
| 9 | P05362 ICAM1_HUMAN | K.GTPM*KPNTQAT#PP.-              | T530:        | 2 | 2,7193 | 0,3   | -0,425 |
| 9 | Q9ULU4 PKCB1_HUMAN | K.ELSEVQQQST#PVPLIS#PKR.Q        | T541:S547:   | 3 | 2,9472 | 0,214 | -0,307 |
| 9 | Q09666 AHNK_HUMAN  | K.GGVT#GSPEAS#ISGSKGDLK.S        | T5729:S5735: | 2 | 3,3744 | 0,473 | -0,384 |
| 9 | Q12830 BPTF_HUMAN  | R.ESHT#PVS#IQEEIVGDFK.S          | T600:S603:   | 2 | 2,0471 | 0,295 | -0,47  |
| 9 | P19634 SL9A1_HUMAN | K.IPSAVST#VVS#M*QNIHPK.S         | T603:S605:   | 3 | 2,9796 | 0,148 | -0,194 |
| 9 | Q2M2I8 AAK1_HUMAN  | K.VQTT#PPPAVQGQK.V               | T606:        | 2 | 2,8684 | 0,348 | -0,512 |
| 9 | Q8NDX5 PHC3_HUMAN  | R.M*DRT#PPPPTLS#PAAITVGR.G       | T609:S616:   | 3 | 5,7906 | 0,377 | 0,17   |
| 9 | Q8IXK0 PHC2_HUMAN  | K.LPQQDHT#TTTDS#EM*EOPYLQESK.E   | T616:S621:   | 3 | 4,1385 | 1     | -0,254 |
| 9 | Q86V15 CASZ1_HUMAN | K.DT#EHEESS#NDDLVDLSALSSK.N      | T715:S721:   | 3 | 5,8087 | 0,48  | -0,147 |
| 9 | Q8TDD1 DDX54_HUMAN | K.LGPGRPLPTFTSECT#S#DVEPDTR.E    | T74:S75:     | 3 | 2,8241 | 0,083 | 0,459  |
| 9 | P06400 RB_HUMAN    | K.ISEGLPT#PTKM*T#PR.S            | T821:T826:   | 2 | 3,6634 | 0,327 | -0,501 |
| 9 | P06400 RB_HUMAN    | K.ISEGLPT#TKM*T#PR.S             | T823:T826:   | 2 | 3,4117 | 0,372 | -0,286 |
| 9 | Q9ULH1 DDEF1_HUMAN | R.T#LSDPPS#PLPHGPPNK.G           | T837:S843:   | 2 | 2,807  | 0,31  | 0,605  |
| 9 | O95235 KI20A_HUMAN | R.NLLPRT#PTCQSSTDCS#PYAR.I       | T857:S867:   | 3 | 3,5555 | 1     | 0,147  |
| 9 | Q8IYB3 SRRM1_HUMAN | K.KET#ES#EAEDNLDDLEK.H           | T872:S874:   | 3 | 5,4894 | 0,309 | -0,361 |
| 9 | Q8IYB3 SRRM1_HUMAN | K.KET#ES#EAEDNLDDLEK.H           | T872:S874:   | 2 | 3,5621 | 0,548 | -0,663 |
| 9 | O95251 MYST2_HUMAN | R.SQQQPTPVT#PK.K                 | T88:         | 2 | 2,5976 | 0,281 | -0,284 |
| 9 | Q13595 TRA2A_HUMAN | R.SYT#PEYR.R                     | T88:         | 2 | 2,1909 | 0,317 | -0,306 |
| 9 | Q02241 KIF23_HUMAN | R.GGGQSVQFT#DIETLKQESPNGS#R.K    | T893:S906:   | 3 | 3,1989 | 0,234 | 0,353  |
| 9 | O60716 CTND1_HUMAN | K.SLDNNYST#PNER.G                | T906:        | 2 | 2,9049 | 0,346 | -0,082 |
| 9 | Q96PY5 FMNL2_HUMAN | K.GYLDPAVT#R.K                   | T92:         | 2 | 2,6481 | 0,447 | 0,114  |
| 9 | Q9Y6N7 ROBO1_HUMAN | R.KVPSFTT#PT#VTYQR.G             | T944:T946:   | 3 | 3,1593 | 0,19  | 0      |
| 9 | O60841 IF2P_HUMAN  | K.VEMY#SGS#DDDDDFNKLPK.K         | Y134:S137:   | 3 | 4,3888 | 0,385 | 0      |
| 9 | O60841 IF2P_HUMAN  | K.VEM*Y#SGS#DDDDDFNKLPK.K        | Y134:S137:   | 3 | 2,9406 | 0,118 | 0,488  |
| 9 | Q07343 PDE4B_HUMAN | R.ESFLY#RSDSDYDLS#PK.A           | Y136:S145:   | 3 | 2,6648 | 0,261 | 0      |
| 9 | Q13523 PRP4B_HUMAN | K.VQSGM*GLILQGY#ES#GSEEEGEIHEK.A | Y140:S142:   | 3 | 3,1099 | 0,411 | -0,127 |
| 9 | Q9NYZ3 GTSE1_HUMAN | K.RETY#YLSDS#PLLGPVGEPR.L        | Y147:S152:   | 3 | 5,092  | 1     | 0,152  |
| 9 | Q13404 UB2V1_HUMAN | K.ENM*KLPQPEGQCY#SN.-            | Y219:        | 2 | 2,666  | 0,369 | -0,491 |
| 9 | O95297 MPZL1_HUMAN | K.SESVVY#ADIR.K                  | Y263:        | 2 | 2,747  | 0,231 | -0,3   |
| 9 | P49840 GSK3A_HUMAN | R.GEPNVSY#ICSR.Y                 | Y279:        | 2 | 2,5245 | 0,438 | 0,358  |
| 9 | Q13627 DYR1A_HUMAN | R.IYQY#IQSR.F                    | Y321:        | 2 | 2,6287 | 0,226 | -0,212 |
| 9 | Q86Z02 HIPK1_HUMAN | K.AVCSTY#LQSR.Y                  | Y352:        | 2 | 2,1833 | 0,307 | -0,675 |
| 9 | Q9UBU7 DBF4A_HUMAN | R.IKY#SVGSL#PVSASVLK.K           | Y353:S359:   | 3 | 3,1185 | 0,282 | -0,386 |

|    |                    |                                      |                    |   |        |       |        |
|----|--------------------|--------------------------------------|--------------------|---|--------|-------|--------|
| 9  | P17812 PYRG1_HUMAN | R.DTY#SDRSGSSS#PDSEITELK.F           | Y567:S575:         | 3 | 3,5401 | 1     | -1,097 |
| 9  | Q92934 BAD_HUMAN   | R.HSSY#PAGTEDDEGM*GEEPS#PFR.G        | Y76:S91:           | 3 | 4,0936 | 0,383 | 0,427  |
| 9  | Q9UK61 CC063_HUMAN | R.QRSSDY#QFPSS#PFTDTLK.G             | Y974:S979:         | 3 | 3,3248 | 1     | -0,162 |
| 9  | P05387 RLA2_HUMAN  | K.LASVPAGGAVAVSAAPGSAAPAAGSAPAAAEK.K |                    | 3 | 4,7524 | 0,487 | -0,066 |
| 9  | Q05524 ENO1B_HUMAN | K.DATNVGDEGGFAPNILENK.E              |                    | 3 | 4,0966 | 0,386 | -0,093 |
| 9  | P09211 GSTP1_HUMAN | K.DQQEAALVDM*VNDGVEDLR.C             |                    | 3 | 4,0535 | 0,396 | -0,257 |
| 9  | O75821 EIF3G_HUMAN | K.GIPLATGDTSPPELLPGAPLPPK.E          |                    | 3 | 3,8045 | 0,226 | -0,297 |
| 9  | P09211 GSTP1_HUMAN | K.DQQEAALVDM*VNDGVEDLR.C             |                    | 2 | 3,5165 | 0,467 | -0,343 |
| 9  | Q05524 ENO1B_HUMAN | K.DATNVGDEGGFAPNILENK.E              |                    | 2 | 3,5016 | 0,508 | -0,249 |
| 9  | P07737 PROF1_HUMAN | R.DSLLQDGEFSM*DLR.T                  |                    | 2 | 3,4338 | 0,439 | -0,223 |
| 9  | O75369 FLNB_HUMAN  | K.DGTYAVTYVPLTAGM*YTLTM*K.Y          |                    | 3 | 3,3219 | 0,29  | -0,393 |
| 9  | P13667 PDIA4_HUMAN | K.DGDDVIIIIVFK.G                     |                    | 2 | 2,9577 | 0,162 | -0,567 |
| 9  | P54105 ICLN_HUMAN  | R.DYEDGM*EVDTTPTVAGQFEDADVDH.-       |                    | 3 | 2,7082 | 0,21  | -0,198 |
| 9  | O00159 MYO1C_HUMAN | R.DGTIDFTPGSELLITK.A                 |                    | 2 | 2,1741 | 0,376 | -0,429 |
| 10 | Q86YP4 P66A_HUMAN  | R.RPPS#PDVIVLS#DNEQPSSPR.V           | S100:S107:         | 3 | 3,5397 | 0,299 | 0,311  |
| 10 | O95785 WIZ_HUMAN   | K.NPEDKS#PQLSLS#PRPAS#PK.A           | S1006:S1012:S1017: | 3 | 4,5355 | 0,328 | -0,24  |
| 10 | P05386 RLA1_HUMAN  | K.KEES#EES#DDDM*GFGLFD.-             | S101:S104:         | 2 | 4,198  | 0,55  | -0,115 |
| 10 | P05386 RLA1_HUMAN  | K.VEAKKEES#EES#DDDM*GFGLFD.-         | S101:S104:         | 3 | 2,9652 | 0,192 | 0      |
| 10 | P05387 RLA2_HUMAN  | K.DEKKEES#EES#DDDM*GFGLFD.-          | S102:S105:         | 3 | 3,1832 | 0,326 | -0,073 |
| 10 | O15164 TIF1A_HUMAN | R.NESDNKFS#DDS#DDDFVQPR.K            | S1025:S1028:       | 3 | 4,8305 | 0,509 | -0,073 |
| 10 | Q9NSY1 BMP2K_HUMAN | R.RDS#QSS#NEFLTISDSK.E               | S1029:S1032:       | 2 | 4,6927 | 0,509 | -0,495 |
| 10 | P15822 ZEP1_HUMAN  | K.M*KS#VGDEELQQNESGT#SPK.S           | S1035:T1049:       | 3 | 4,2145 | 0,345 | -0,699 |
| 10 | P28749 RBL1_HUMAN  | R.VIAIDS#DAES#PAKR.V                 | S1037:S1041:       | 2 | 4,5826 | 0,29  | -0,374 |
| 10 | P05386 RLA1_HUMAN  | K.KEESEES#DDDM*GFGLFD.-              | S104:              | 2 | 2,2934 | 0,429 | -0,239 |
| 10 | O15061 DMN_HUMAN   | R.QRS#PAPGS#PDEEGGAEAPAAGIR.F        | S1044:S1049:       | 3 | 5,1086 | 0,323 | -0,154 |
| 10 | O95696 BRD1_HUMAN  | R.VHGEPTSCLS#DID.-                   | S1055:             | 2 | 2,4845 | 0,367 | 0      |
| 10 | Q8WVM7 STAG1_HUMAN | R.NSLVTGGEDDRM*S#VNS#GSSSSK.T        | S1062:S1065:       | 3 | 3,7052 | 1     | -0,459 |
| 10 | Q12789 TF3C1_HUMAN | R.KNS#STDQGS#DEEGSLQK.E              | S1062:S1068:       | 3 | 4,1072 | 0,385 | -0,279 |
| 10 | Q12789 TF3C1_HUMAN | R.KNS#STDQGS#DEEGSLQK.E              | S1062:S1068:       | 2 | 2,5414 | 0,349 | -0,681 |
| 10 | Q2NKX8 ERC6L_HUMAN | K.NDIS#PPGR.F                        | S1069:             | 2 | 2,2118 | 0,203 | 0      |
| 10 | O60841 IF2P_HUMAN  | K.KQS#FDDNDS#EELEDK.D                | S107:S113:         | 2 | 4,598  | 0,604 | -0,374 |
| 10 | Q76FK4 NOL8_HUMAN  | R.LQDSS#S#EEEDVTEETDHR.N             | S1083:S1084:       | 3 | 4,1635 | 0,415 | 0      |
| 10 | P07948 LYN_HUMAN   | K.GKDS#LS#DDGVDLK.T                  | S11:S13:           | 2 | 3,1347 | 0,43  | 0,404  |

|    |                     |                                     |                    |   |        |       |        |
|----|---------------------|-------------------------------------|--------------------|---|--------|-------|--------|
| 10 | Q92685 ALG3_HUMAN   | R.GRS#GS#AAQAEGELCK.Q               | S11:S13:           | 3 | 2,7816 | 0,083 | 0      |
| 10 | Q9UQ35 SRRM2_HUMAN  | R.SRS#S#SPVTELASR.S                 | S1101:S1102:       | 3 | 4,2272 | 0,265 | 0,238  |
| 10 | Q9UQ35 SRRM2_HUMAN  | R.SRS#SS#PVTELASR.S                 | S1101:S1103:       | 2 | 3,7224 | 0,219 | 0      |
| 10 | P48634 BAT2_HUMAN   | R.GS#ET#GS#ETHESDLAPSDKEAPTPK.E     | S1106:T1108:S1110: | 3 | 3,5201 | 1     | -0,338 |
| 10 | Q13459 MYO9B_HUMAN  | R.SPLEHS#S#PEKEAPS#PEK.T            | S1114:S1115:S1122: | 3 | 2,6777 | 0,246 | -0,263 |
| 10 | Q3KQU3 MA7D1_HUMAN  | R.RSS#QPS#PTAVPASDS#PPTKQEVK.K      | S113:S116:S125:    | 3 | 4,5793 | 1     | 0,417  |
| 10 | Q5SW79 CE170_HUMAN  | K.ASVASEVSTTS#S#TSKPPTGR.R          | S1132:S1133:       | 3 | 2,852  | 1     | 0,433  |
| 10 | Q13017 RHG05_HUMAN  | R.THS#DAS#DDEAFTTSK.T               | S1173:S1176:       | 2 | 5,4858 | 0,723 | -0,413 |
| 10 | Q9Y6M7 S4A7_HUMAN   | R.M*LQDDDDTVHLPFEGGS#LLQIPVK.A      | S1176:             | 3 | 4,9952 | 0,342 | -0,265 |
| 10 | P17301 ITA2_HUMAN   | K.M*TKNPDEIDETELS#S.-               | S1180:             | 2 | 4,6611 | 0,622 | -0,384 |
| 10 | O14737 PDCD5_HUMAN  | R.KVM*DS#DEDDDY.-                   | S119:              | 2 | 2,8777 | 0,367 | -0,598 |
| 10 | O14737 PDCD5_HUMAN  | R.KVMDS#DEDDDY.-                    | S119:              | 2 | 2,855  | 0,369 | 0      |
| 10 | Q96MU7 YTDC1_HUMAN  | R.LSS#SAS#REPYK.N                   | S119:S122:         | 2 | 2,3502 | 0,281 | -0,352 |
| 10 | Q13286 CLN3_HUMAN   | R.RFS#DS#EGEETVPEPR.L               | S12:S14:           | 2 | 4,2883 | 0,596 | -0,451 |
| 10 | Q9Y5J1 UTP18_HUMAN  | R.VQEHEDS#GDS#EVENEAK.G             | S121:S124:         | 3 | 5,5355 | 0,412 | 0,177  |
| 10 | Q9Y5J1 UTP18_HUMAN  | R.VQEHEDS#GDS#EVENEAK.G             | S121:S124:         | 2 | 3,7051 | 0,511 | -0,71  |
| 10 | Q8N488 RYBP_HUMAN   | K.SDILKDPSP#EANS#IQSANATTK.T        | S123:S127:         | 3 | 3,837  | 0,408 | -0,075 |
| 10 | Q96T23 RSF1_HUMAN   | R.RLS#SS#ESEESYLSK.N                | S1235:S1237:       | 2 | 3,1731 | 0,505 | -0,277 |
| 10 | Q9BQG0 MBB1A_HUMAN  | K.SPAPGAPTRS#PST#PAK.S              | S1241:T1244:       | 2 | 3,4921 | 0,37  | -0,58  |
| 10 | Q9UGU0 TCF20_HUMAN  | R.VRS#FIS#PIPSK.R                   | S1259:S1262:       | 3 | 2,8508 | 0,215 | 0,197  |
| 10 | Q8N488 RYBP_HUMAN   | K.SDILKDPPEANS#IQS#ANATTK.T         | S127:S130:         | 3 | 4,8174 | 0,4   | 0,449  |
| 10 | Q9P2E9 RRBP1_HUMAN  | K.SHVEDGDIAGAPAS#S#PEAPPAEQDPVQLK.T | S1276:S1277:       | 3 | 5,8719 | 0,369 | -0,119 |
| 10 | Q9P2M7 CING_HUMAN   | R.S#HS#QASLAGPGPVDPSNR.S            | S129:S131:         | 2 | 2,3757 | 0,273 | -0,63  |
| 10 | O75494 FUSIP_HUMAN  | R.S#RS#FDYNYR.R                     | S131:S133:         | 3 | 3,0388 | 0,138 | 0,201  |
| 10 | Q9P2M7 CING_HUMAN   | R.SHS#QAS#LAGPGPVDPSNR.S            | S131:S134:         | 3 | 4,4225 | 0,354 | -0,661 |
| 10 | Q99959 PKP2_HUMAN   | R.GTAQYSS#QKS#VEER.S                | S132:S135:         | 2 | 2,9593 | 0,328 | -0,141 |
| 10 | Q8TBS0 Q8TBS0_HUMAN | R.SFVSTLKS#NPAT#PASK.L              | S133:T137:         | 2 | 4,5612 | 0,482 | 1,02   |
| 10 | P38398 BRCA1_HUMAN  | R.HQSES#QGVGLS#DKELVS#DDEER.G       | S1330:S1336:S1342: | 3 | 4,0974 | 0,453 | -0,273 |
| 10 | P11388 TOP2A_HUMAN  | K.TKFTM*DLDS#DEDFS#DFDEK.T          | S1332:S1337:       | 3 | 5,511  | 0,441 | 0,149  |
| 10 | Q96HC4 PDLI5_HUMAN  | K.APRPFGS#VSS#PK.V                  | S134:S137:         | 2 | 2,3773 | 0,083 | -0,088 |
| 10 | P46100 ATRX_HUMAN   | K.LTVS#DGES#GEEKK.T                 | S1348:S1352:       | 2 | 3,5497 | 0,442 | -0,396 |
| 10 | P46100 ATRX_HUMAN   | K.LTVS#DGES#GEEKK.T                 | S1348:S1352:       | 3 | 3,2759 | 0,232 | 0,119  |
| 10 | Q96GY3 LIN37_HUMAN  | R.EREC#PS#SPLPLPEDEEGSEVTNSK.S      | S135:S137:         | 3 | 2,7638 | 0,266 | 0,845  |



|    |                    |                                  |                    |   |        |       |        |
|----|--------------------|----------------------------------|--------------------|---|--------|-------|--------|
| 10 | O60841 IF2P_HUMAN  | K.VEM*YS#GS#DDDDDFNKLPK.K        | S135:S137:         | 3 | 2,6351 | 0,152 | 0,488  |
| 10 | P11388 TOP2A_HUMAN | K.TDDEDFVPS#DAS#PPKT#KTSPK.L     | S1351:S1354:T1358: | 3 | 3,3101 | 0,21  | 0      |
| 10 | Q9P1Y6 K1542_HUMAN | K.AEAPS#S#PDVAPAGKEDSPSASGR.V    | S1359:S1360:       | 3 | 2,6034 | 0,16  | -0,39  |
| 10 | Q9UQ35 SRRM2_HUMAN | R.SS#GHSSSELS#PDAVEK.A           | S1379:S1387:       | 3 | 3,6147 | 0,191 | 0,206  |
| 10 | Q8IWS0 PHF6_HUMAN  | K.TAHNS#EADLEES#FNEHELEPSS#PK.S  | S138:S145:S155:    | 3 | 4,4885 | 0,322 | 0,187  |
| 10 | Q9UM11 FZR_HUMAN   | K.RSS#PDDGNDVSPYSL#PVS NK.S      | S138:S151:         | 3 | 3,4025 | 0,125 | -0,231 |
| 10 | Q9UQ35 SRRM2_HUMAN | R.SSGHS#SSELS#PDAVEK.A           | S1382:S1387:       | 2 | 4,7921 | 1     | -0,549 |
| 10 | Q9UQ35 SRRM2_HUMAN | R.SSGHS#SELS#PDAVEK.A            | S1383:S1387:       | 2 | 4,7574 | 1     | 0,412  |
| 10 | Q14181 DPOA2_HUMAN | R.SVSTRS#PHQLS#PS#SFSPSATPSQK.Y  | S141:S147:S149:    | 3 | 5,1547 | 1     | -0,192 |
| 10 | P29966 MARCS_HUMAN | K.AEDGATPS#PSNET#PKK.K           | S145:T150:         | 2 | 2,3386 | 0,32  | -0,273 |
| 10 | O15085 ARHGB_HUMAN | K.SLGGESS#GGT#TPVGSFHTEAAR.W     | S1458:T1461:       | 3 | 4,0229 | 1     | 0,162  |
| 10 | Q9HBM6 TAF9B_HUMAN | R.LS#VGA VSSKPTTPTIATPQTVSVPNK.V | S147:              | 3 | 5,6462 | 0,426 | 0,138  |
| 10 | Q8IZ21 PHAR4_HUMAN | R.LGS#TGSQPNSEAESVPENVPKPLLPPK.R | S147:              | 3 | 4,2503 | 0,33  | -0,248 |
| 10 | Q16594 TAF9_HUMAN  | R.LS#VGSVTSRPTTLGTPTPQTM*SVSTK.V | S149:              | 3 | 3,631  | 0,305 | -0,063 |
| 10 | Q9Y6N7 ROBO1_HUMAN | R.ETYDDLPPPPVPPPAIKS#PTAQSK.T    | S1492:             | 3 | 3,1057 | 0,326 | -0,134 |
| 10 | Q9Y6N7 ROBO1_HUMAN | R.ETYDDLPPPPVPPPAIKSPTAQSK.T     | S1497:             | 3 | 3,122  | 0,36  | 0      |
| 10 | Q9UQ35 SRRM2_HUMAN | R.S#RS#PSSPELNNK.C               | S1497:S1499:       | 2 | 2,6046 | 0,355 | -0,413 |
| 10 | Q9NZ63 CI078_HUMAN | R.RGDS#ES#EEDEQDSEEV.R.L         | S15:S17:           | 2 | 2,67   | 0,422 | -0,453 |
| 10 | P83369 LSM11_HUMAN | R.SAGAGS#PARPPS#PR.L             | S15:S21:           | 2 | 2,9846 | 0,306 | -0,499 |
| 10 | P83369 LSM11_HUMAN | R.SAGAGS#PARPPS#PR.L             | S15:S21:           | 3 | 2,6673 | 0,354 | -0,187 |
| 10 | Q8IZ21 PHAR4_HUMAN | R.LGSTGS#QPNSEAESVPENVPKPLLPPK.R | S150:              | 3 | 4,5182 | 0,345 | -0,062 |
| 10 | Q02880 TOP2B_HUMAN | K.VVEAVNS#DS#DSEFGIPKK.T         | S1522:S1524:       | 3 | 3,4518 | 0,238 | 0,088  |
| 10 | Q5JTV8 TOIP1_HUMAN | R.GLRDS#HS#S#EEDEASSQTDLSTISK.K  | S154:S156:S157:    | 3 | 5,319  | 1     | 0,621  |
| 10 | Q8WVCO LEO1_HUMAN  | K.SDQS#DDEKIQNS#DDEER.A          | S154:S162:         | 3 | 3,6894 | 0,286 | 0      |
| 10 | Q5UIP0 RIF1_HUMAN  | R.ASQGLLSIENS#ES#DSSEAKEEGSR.K   | S1552:S1554:       | 3 | 6,3229 | 1     | 0,066  |
| 10 | P42166 LAP2A_HUMAN | R.EQGTES#RSST#PLPTISSAENTR.Q     | S156:T160:         | 3 | 3,594  | 1     | -0,423 |
| 10 | O43166 SI1L1_HUMAN | K.FHALS#SPQSPFPST#PTSR.R         | S1564:T1573:       | 3 | 2,7107 | 0,182 | 0,261  |
| 10 | O75376 NCOR1_HUMAN | K.HEAPSS#PISGQPCGDDQNAS#PSK.L    | S158:S172:         | 3 | 5,9174 | 0,51  | -0,435 |
| 10 | P42166 LAP2A_HUMAN | R.EQGTESRS#ST#PLPTISSAENTR.Q     | S158:T160:         | 3 | 3,2345 | 0,217 | -0,564 |
| 10 | P16949 STMN1_HUMAN | K.RAS#GQAFELILS#PR.S             | S16:S25:           | 2 | 5,0798 | 0,503 | -0,286 |
| 10 | P16949 STMN1_HUMAN | K.RAS#GQAFELILS#PR.S             | S16:S25:           | 3 | 4,2177 | 0,303 | 0,107  |
| 10 | Q9C0C2 TB182_HUMAN | R.ASRVPS#S#DEEVVEEPQSR.R         | S1620:S1621:       | 3 | 3,0999 | 0,194 | -0,169 |
| 10 | Q12888 TP53B_HUMAN | R.SNVSS#PATPTASS#SSSTTPTRK.I     | S1635:S1643:       | 3 | 3,3855 | 1     | -0,475 |

|    |                     |                                    |                    |   |        |       |        |
|----|---------------------|------------------------------------|--------------------|---|--------|-------|--------|
| 10 | O43166 SI1L1_HUMAN  | K.SLHGFEFSAS#DSS#LTDIQETR.R        | S1647:S1650:       | 3 | 4,8111 | 1     | 0,235  |
| 10 | Q8WUA7 TB22A_HUMAN  | R.S#QSLPHSATVTLGGTSDPSTLSSSALSER.E | S165:              | 3 | 6,6023 | 0,626 | 0,867  |
| 10 | P29966 MARCS_HUMAN  | K.SFKLS#GFS#FK.K                   | S167:S170:         | 2 | 2,6083 | 0,356 | -0,093 |
| 10 | O00566 MPP10_HUMAN  | R.KSPVFS#DEDS#DLDFDISK.L           | S167:S171:         | 3 | 3,601  | 0,403 | 0,083  |
| 10 | O14646 CHD1_HUMAN   | R.ASS#SGPRS#PLDQR.S                | S1672:S1677:       | 3 | 3,1094 | 0,358 | 0,06   |
| 10 | O14646 CHD1_HUMAN   | R.ASS#SGPRS#PLDQR.S                | S1672:S1677:       | 2 | 2,6104 | 0,272 | -0,402 |
| 10 | Q14676 MDC1_HUMAN   | R.LLLAEDS#EEEVDFLSER.R             | S168:              | 2 | 2,6827 | 0,415 | 0      |
| 10 | Q9BZ23 PANK2_HUMAN  | R.RAS#S#ASVPAVGASAEGTR.R           | S168:S169:         | 2 | 3,8322 | 0,497 | -0,266 |
| 10 | Q6NZI2 PTRF_HUMAN   | K.LSIS#KS#LK.E                     | S169:S171:         | 2 | 2,4306 | 0,112 | 0      |
| 10 | Q9H4L4 SEN3_HUMAN   | K.NHLS#PQGGATPQVPS#PCCR.F          | S169:S181:         | 3 | 4,5772 | 0,284 | 0      |
| 10 | Q9NYV6 RRN3_HUMAN   | K.EGDVDVS#DS#DDEDNLNLPANFDTCHR.A   | S170:S172:         | 3 | 3,9198 | 0,314 | -0,061 |
| 10 | Q5VUA4 ZN318_HUMAN  | R.LGS#PVDNLEDM*DRDDLDDSVFTR.S      | S173:              | 3 | 5,2288 | 0,549 | 0,065  |
| 10 | Q6PGN9 PSRC1_HUMAN  | K.RES#PTCNLFPASKS#PASSPLT#R.S      | S175:S186:T193:    | 3 | 4,6791 | 1     | 0      |
| 10 | Q58FF8 H90B2_HUMAN  | K.IEDVGS#DEEDDSGKDK.K              | S177:              | 3 | 2,9967 | 0,167 | -0,47  |
| 10 | Q58FF8 H90B2_HUMAN  | K.IEDVGS#DEEDDS#GKDK.K             | S177:S183:         | 2 | 4,1893 | 0,512 | -0,579 |
| 10 | Q58FF8 H90B2_HUMAN  | K.IEDVGS#DEEDDS#GKDK.K             | S177:S183:         | 3 | 3,6556 | 0,17  | -0,386 |
| 10 | Q9NZJ4 SACS_HUMAN   | R.IADLQS#PLFRGPDDDDPAALFEM*AK.S    | S1779:             | 3 | 3,9014 | 0,33  | -0,539 |
| 10 | P46821 MAP1B_HUMAN  | K.VQSLEGEKLS#PKS#DIS#PLTPR.E       | S1779:S1782:S1785: | 3 | 3,1507 | 0,301 | 0,145  |
| 10 | P46821 MAP1B_HUMAN  | K.VQSLEGEKLS#PKS#DISPLT#PR.E       | S1779:S1782:T1788: | 3 | 4,5043 | 0,444 | 0,218  |
| 10 | Q9H501 ESF1_HUMAN   | K.NIVQHTTDS#S#LEEK.Q               | S179:S180:         | 2 | 3,5814 | 0,24  | 0,069  |
| 10 | Q9H6F5 CCD86_HUMAN  | R.LGGLRPES#PES#LTSVSR.T            | S18:S21:           | 2 | 2,7043 | 0,471 | -0,188 |
| 10 | Q9Y446 PKP3_HUMAN   | R.ADYDTLS#LRS#LR.L                 | S180:S183:         | 2 | 2,2319 | 0,228 | 0,622  |
| 10 | Q9Y4B5 K0802_HUMAN  | R.GRS#PS#PIGVGSEM*CR.E             | S1803:S1805:       | 3 | 3,6769 | 0,207 | 0,207  |
| 10 | Q9Y4B5 K0802_HUMAN  | R.GRS#PS#PIGVGSEM*CR.E             | S1803:S1805:       | 2 | 2,8062 | 0,418 | 0,691  |
| 10 | Q9BVC5 ASHWN_HUMAN  | R.KS#PSGPVKS#PPLS#PVGTTVPK.L       | S182:S189:S193:    | 3 | 4,9346 | 0,394 | -0,159 |
| 10 | Q15643 TRIPB_HUMAN  | K.S#VPNTPLRPNQSVVNSSSFSELFVK.F     | S1842:             | 3 | 3,8139 | 0,275 | -0,192 |
| 10 | Q13111 CAF1A_HUMAN  | R.GDSQECS#PRS#CPELTSGPR.M          | S185:S188:         | 3 | 3,8063 | 0,349 | -0,401 |
| 10 | P46013 KI67_HUMAN   | K.ILCKS#PQSDPADT#PTNTK.Q           | S1861:T1869:       | 3 | 4,4537 | 0,367 | -0,172 |
| 10 | P46013 KI67_HUMAN   | K.ILCKS#PQSDPADT#PTNTK.Q           | S1861:T1869:       | 2 | 2,8819 | 0,3   | -0,686 |
| 10 | Q99661 KIF2C_HUMAN  | R.GSSSANPVNS#VR.R                  | S187:              | 2 | 2,9522 | 0,402 | -0,292 |
| 10 | O95218 ZBRAB2_HUMAN | K.YNLDAS#EEEDS#NKK.K               | S188:S193:         | 2 | 3,8137 | 0,497 | -0,88  |
| 10 | Q9NQX3 GEPH_HUMAN   | K.EVHDELEDLPS#PPPPLS#PPPTTS#PHK.Q  | S188:S194:S200:    | 3 | 3,0245 | 0,291 | -0,12  |
| 10 | O00165 HAX1_HUMAN   | R.TREDNDLDS#QVS#QEGLPVLQPQPK.S     | S189:S192:         | 3 | 3,8849 | 0,322 | 0      |

|    |                     |                                    |                    |   |        |       |        |
|----|---------------------|------------------------------------|--------------------|---|--------|-------|--------|
| 10 | Q52LD0 Q52LD0_HUMAN | K.AGGS#PAS#YHGSTSPR.V              | S192:S195:         | 2 | 3,782  | 0,457 | -0,23  |
| 10 | Q92621 NU205_HUMAN  | R.RLQDS#FAS#ETNLDFR.S              | S1939:S1942:       | 2 | 2,7748 | 0,311 | -0,685 |
| 10 | P42356 PI4KA_HUMAN  | R.KTS#SVSSIS#QVSPER.G              | S198:S204:         | 2 | 4,8371 | 1     | -0,209 |
| 10 | P30622 CLIP1_HUMAN  | K.TASESISNLS#EAGS#IKK.G            | S200:S204:         | 2 | 3,3094 | 0,515 | -0,519 |
| 10 | Q14244 MAP7_HUMAN   | K.RLS#SSSATLNS#PDR.A               | S200:S209:         | 2 | 4,9334 | 1     | 0,553  |
| 10 | Q96B36 AKTS1_HUMAN  | R.TEARS#S#DEENGPPSPDLDR.I          | S202:S203:         | 3 | 4,4203 | 0,38  | -0,079 |
| 10 | Q9H4A3 WNK1_HUMAN   | R.DVDDGS#GS#PHS#PHQLSSK.S          | S2027:S2029:S2032: | 3 | 2,9601 | 0,333 | -0,175 |
| 10 | Q9H4A3 WNK1_HUMAN   | R.DVDDGS#GS#PHSPHQLS#SK.S          | S2027:S2029:S2037: | 3 | 3,011  | 0,252 | -0,263 |
| 10 | Q9H0H5 RGAP1_HUMAN  | K.TRS#IGS#AVDQGNESIVAK.T           | S203:S206:         | 3 | 3,6908 | 0,226 | -0,276 |
| 10 | Q96B36 AKTS1_HUMAN  | R.TEARSS#DEENGPPS#SPDLDR.I         | S203:S211:         | 3 | 4,3643 | 0,421 | 0,631  |
| 10 | O75179 ANR17_HUMAN  | K.EHYPVS#SPSS#PSPPAQPGGVS.R.N      | S2041:S2045:       | 3 | 3,1644 | 0,086 | -0,461 |
| 10 | Q9UQ35 SRRM2_HUMAN  | R.S#RS#PLAIR.R                     | S2044:S2046:       | 2 | 2,4233 | 0,192 | -0,691 |
| 10 | Q14980 NUMA1_HUMAN  | R.RQS#M*AFSILNT#PK.K               | S2047:T2055:       | 3 | 2,7217 | 0,122 | 0      |
| 10 | Q15139 KPCD1_HUMAN  | R.RLS#NVS#LTGVSTIR.T               | S205:S208:         | 2 | 3,8344 | 0,453 | 0,22   |
| 10 | Q15139 KPCD1_HUMAN  | R.RLS#NVS#LTGVSTIR.T               | S205:S208:         | 3 | 3,2109 | 0,347 | 0      |
| 10 | Q9H165 BC11A_HUMAN  | R.IYLESEHGS#PLT#PR.V               | S205:T208:         | 2 | 3,2024 | 0,353 | -0,069 |
| 10 | Q6ZN18 AEBP2_HUMAN  | R.RGS#LEM*#S#SDGEPLSR.M            | S206:S210:         | 2 | 3,2984 | 0,519 | 1,494  |
| 10 | Q6ZN18 AEBP2_HUMAN  | R.RGS#LEM*#SS#DGEPLSR.M            | S206:S211:         | 2 | 3,5163 | 0,525 | -1,154 |
| 10 | P05787 K2C8_HUMAN   | R.AFS#SRSY#TSGPGSR.I               | S21:Y25:           | 2 | 3,4595 | 1     | -0,301 |
| 10 | Q13242 SFRS9_HUMAN  | R.GS#PHYFS#PFRPY.-                 | S211:S216:         | 2 | 2,0398 | 0,21  | -0,227 |
| 10 | P22626 ROA2_HUMAN   | R.GGNFGFGDS#R.G                    | S212:              | 2 | 2,879  | 0,253 | 0,446  |
| 10 | Q9UQ35 SRRM2_HUMAN  | R.MSCFSRPS#M*S#PTPLDR.C            | S2121:S2123:       | 3 | 3,3605 | 0,465 | 0,179  |
| 10 | Q9UQ35 SRRM2_HUMAN  | R.M*SCFSRPS#MSPT#PLDR.C            | S2121:T2125:       | 3 | 3,6597 | 0,341 | 0      |
| 10 | Q7L2J0 MEPCE_HUMAN  | R.TLNAETPKS#S#PLPAK.G              | S216:S217:         | 3 | 2,7166 | 0,283 | 0      |
| 10 | Q8IVF2 AHNK2_HUMAN  | K.SIEASVDVS#PPKVEADM*SLPSM*QGDLK.T | S2179:             | 3 | 4,9828 | 0,48  | 0,062  |
| 10 | Q9BST9 RTKN_HUMAN   | R.LATKLS#S#SLGR.S                  | S218:S219:         | 2 | 3,5089 | 0,423 | -0,094 |
| 10 | Q6WCQ1 MRIP_HUMAN   | R.TKDQPDGSSLS#PAQS#PSQSQPPAASSLR.E | S219:S223:         | 3 | 5,2187 | 1     | -0,368 |
| 10 | Q7Z5K2 WAPL_HUMAN   | K.RPESPS#EIS#PIK.G                 | S223:S226:         | 3 | 2,7272 | 0,112 | -0,488 |
| 10 | Q9BW71 HIRP3_HUMAN  | K.SLKES#EQES#EEEILAQK.K            | S223:S227:         | 3 | 5,1866 | 0,228 | 0,086  |
| 10 | P49761 CLK3_HUMAN   | R.CEERS#PS#FGEDYYGPSR.S            | S224:S226:         | 3 | 3,9773 | 0,348 | 0      |
| 10 | P49792 RBP2_HUMAN   | R.EDALDDSVSSS#SVHAS#PLAS#SPVRK.N   | S2241:S2246:S2250: | 3 | 4,2281 | 1     | 0,066  |
| 10 | Q5UIP0 RIF1_HUMAN   | K.GFLS#PGSRS#PK.F                  | S2260:S2265:       | 2 | 2,7303 | 0,443 | 0,094  |
| 10 | P49792 RBP2_HUMAN   | K.SALS#PSKS#PAK.L                  | S2276:S2280:       | 2 | 2,3515 | 0,173 | -0,495 |

|    |                     |                                 |                    |   |        |       |        |
|----|---------------------|---------------------------------|--------------------|---|--------|-------|--------|
| 10 | Q96IZ0 PAWR_HUMAN   | R.YKS#TT#SVSEEDVSSR.Y           | S228:T230:         | 2 | 3,8826 | 1     | -0,598 |
| 10 | P04183 KITH_HUMAN   | R.KLFAPQQILQCS#PAN.-            | S231:              | 2 | 4,2882 | 0,42  | 0,136  |
| 10 | Q13283 G3BP1_HUMAN  | K.SSS#PAPADIAQTVQEDLR.T         | S232:              | 2 | 4,1059 | 0,456 | -0,248 |
| 10 | P46013 KI67_HUMAN   | K.IACKS#PQPDPVDTPAST#K.Q        | S2344:T2356:       | 3 | 3,4005 | 0,181 | -0,265 |
| 10 | P62753 RS6_HUMAN    | R.LSS#LRAS#TSSK#ESSQK.-         | S236:S240:S244:    | 3 | 2,7324 | 1     | -0,094 |
| 10 | P11274 BCR_HUMAN    | R.GRSSES#S#CGVDGDYEDAELNPR.F    | S238:S239:         | 3 | 5,5051 | 0,416 | -0,143 |
| 10 | Q5T200 ZC3HD_HUMAN  | R.KTS#AVSS#PLLDQQR.N            | S238:S242:         | 2 | 4,2189 | 0,578 | -0,217 |
| 10 | Q6PGQ7 BORA_HUMAN   | K.CRS#PLQTPSSGQFSSS#PIQASAK.K   | S239:S252:         | 3 | 5,9293 | 1     | -0,071 |
| 10 | Q6PGN9 PSRC1_HUMAN  | K.FLHPS#PPGPPT#PIR.S            | S239:T245:         | 3 | 3,2066 | 0,217 | 0      |
| 10 | Q9Y4U1 MMAC_HUMAN   | R.LALLGLAQSEKPS#PSPDLPFTTPAPK.K | S245:              | 3 | 5,5659 | 0,541 | -0,373 |
| 10 | Q9ULT8 HECD1_HUMAN  | R.M*AAAGGTVS#GPS#SACKPGR.S      | S248:S251:         | 3 | 3,2041 | 0,409 | -0,661 |
| 10 | P06400 RB_HUMAN     | K.TAVIPINGS#PRT#PR.R            | S249:T252:         | 2 | 3,4127 | 0,299 | 0,447  |
| 10 | P25788 PSA3_HUMAN   | K.ESLKEEDES#DDDNM*.-            | S250:              | 2 | 4,7247 | 0,538 | -0,348 |
| 10 | P25788 PSA3_HUMAN   | K.ESLKEEDES#DDDNM.-             | S250:              | 2 | 3,9054 | 0,426 | 0,07   |
| 10 | P25788 PSA3_HUMAN   | K.ESLKEEDES#DDDNM*.-            | S250:              | 3 | 3,2266 | 0,438 | 0      |
| 10 | Q7L2J0 MEPCE_HUMAN  | K.DITDPLSLNTCTDEGHVVLAS#PLK.T   | S254:              | 3 | 3,3334 | 0,37  | -0,068 |
| 10 | Q96PM5 ZN363_HUMAN  | R.RIS#LDQQ.-                    | S257:              | 2 | 2,2243 | 0,139 | -0,13  |
| 10 | Q8TF44 NLF3_HUMAN   | R.HGS#LSADDSTPDAS#PGSR.R        | S262:S273:         | 2 | 3,1327 | 1     | -0,318 |
| 10 | ##Q5T4S7 UBR4_HUMAN | R.S#T#HLS#ALLSK.S               | S2649:T2650:S2653: | 2 | 2,0082 | 0,131 | -1,129 |
| 10 | Q7KZ85 SPT6H_HUMAN  | R.S#IFEM*YEPSELESSHLTDQDNEIR.A  | S267:              | 3 | 2,9842 | 0,262 | -0,247 |
| 10 | O95639 CPSF4_HUMAN  | K.GHLAFLS#GQ.-                  | S267:              | 2 | 2,7018 | 0,548 | -0,242 |
| 10 | P49736 MCM2_HUMAN   | R.GNDPLTSS#PGR.S                | S27:               | 2 | 2,1883 | 0,359 | -0,827 |
| 10 | P49736 MCM2_HUMAN   | R.GNDPLTSS#PGRSS#R.R            | S27:S32:           | 3 | 3,1566 | 0,302 | 0,23   |
| 10 | P49736 MCM2_HUMAN   | R.GNDPLTSS#PGRSS#R.R            | S27:S32:           | 2 | 2,1058 | 0,428 | 0,077  |
| 10 | O95817 BAG3_HUMAN   | R.SSVQGASS#REGS#PAR.S           | S275:S279:         | 2 | 2,8549 | 0,251 | -0,373 |
| 10 | P18583 SON_HUMAN    | K.SVLKS#VESTS#PEPSK.I           | S278:S283:         | 2 | 3,0641 | 0,18  | -0,352 |
| 10 | Q5C9Z4 NOM1_HUMAN   | K.AQEAEQS#EDDDED#EEEEQGEEKEK.G  | S280:T287:         | 3 | 3,2689 | 0,425 | -0,302 |
| 10 | P23588 IF4B_HUMAN   | R.AFGS#GYR.R                    | S283:              | 2 | 2,2674 | 0,356 | 0,146  |
| 10 | Q02952 AKA12_HUMAN  | K.SAES#PTS#PVTSETGSTFKK.F       | S283:S286:         | 3 | 2,773  | 0,155 | 0,435  |
| 10 | O95817 BAG3_HUMAN   | R.S#STPLHS#PSPIR.V              | S283:S289:         | 2 | 2,917  | 0,354 | -0,339 |
| 10 | Q02952 AKA12_HUMAN  | K.SAES#PT#SPVTSETGSTFKK.F       | S283:T285:         | 3 | 3,1505 | 0,33  | 0,174  |
| 10 | Q13435 SF3B2_HUMAN  | R.SSLGQS#AS#ETEEDTVSVSKK.E      | S284:S286:         | 3 | 3,1557 | 0,186 | -0,246 |
| 10 | Q13435 SF3B2_HUMAN  | R.SSLGQS#ASET#EEDTVSVSKK.E      | S284:T288:         | 3 | 3,6032 | 0,329 | -0,246 |

|    |                    |                                    |              |   |        |       |        |
|----|--------------------|------------------------------------|--------------|---|--------|-------|--------|
| 10 | Q96ST2 IWS1_HUMAN  | R.NQAS#DS#ENEELPKPR.V              | S287:S289:   | 2 | 2,8896 | 0,282 | 0,456  |
| 10 | O95817 BAG3_HUMAN  | R.SSTPLHS#PS#PIR.V                 | S289:S291:   | 2 | 2,7384 | 0,175 | -0,339 |
| 10 | Q9BVJ6 UT14A_HUMAN | K.DYLLS#ES#EDEGDNDGERK.H           | S29:S31:     | 3 | 2,8409 | 0,217 | 0,082  |
| 10 | Q8TF01 SFR18_HUMAN | R.SKFDSD#DEEEEDTENVEAASS#GK.V      | S290:S305:   | 3 | 5,2374 | 0,413 | 0,071  |
| 10 | O00499 BIN1_HUMAN  | K.GNKS#PS#PPDGSPAATPEIR.V          | S296:S298:   | 3 | 4,6635 | 0,463 | -0,269 |
| 10 | O00499 BIN1_HUMAN  | K.GNKS#PSPPDGS#PAATPEIR.V          | S296:S303:   | 3 | 2,6964 | 0,258 | -0,449 |
| 10 | Q96M11 HYLS1_HUMAN | R.KLPFPLS#PS.-                     | S297:        | 2 | 2,8902 | 0,384 | 0      |
| 10 | P25440 BRD2_HUMAN  | R.KADTTTTPTAILAPGS#PAS#PPGSLEPK.A  | S298:S301:   | 3 | 5,6697 | 0,473 | 0,064  |
| 10 | Q9Y2V2 CHSP1_HUMAN | R.ERS#PS#PLRGNVPS#PLPTR.R          | S30:S32:S41: | 3 | 3,0216 | 0,343 | 0,716  |
| 10 | Q9BYX4 IFIH1_HUMAN | R.AS#PEPELQLRPYQM*EVAQPALEGK.N     | S301:        | 3 | 2,7135 | 0,446 | 0,066  |
| 10 | Q05655 KPCD_HUMAN  | R.RSDS#ASSEVGIY#QGF EK.K           | S304:Y313:   | 2 | 2,2018 | 0,209 | -0,231 |
| 10 | O43765 SGTA_HUMAN  | R.SRTPS#ASNDQEQE.-                 | S305:        | 2 | 3,9881 | 0,394 | -0,403 |
| 10 | Q9NXR1 NDE1_HUMAN  | R.RPS#STS#VPLGDK.G                 | S306:S309:   | 2 | 2,3969 | 0,344 | -0,087 |
| 10 | Q13769 THOC5_HUMAN | K.ALFKPPEDSQDDES#DS#DAEEEQTTK.R    | S312:S314:   | 3 | 6,2242 | 1     | -0,246 |
| 10 | Q6PEV8 CX039_HUMAN | R.AHS#DSNLS#ASAAER.I               | S316:S321:   | 2 | 4,6942 | 0,561 | 0,077  |
| 10 | Q2TB10 ZN800_HUMAN | R.DS#ITPDIATKPGQPLFLDSISPK.K       | S317:        | 3 | 4,4033 | 0,469 | 0,145  |
| 10 | Q9BTV5 FSD1_HUMAN  | R.TASPINS#PARGTSP#PK.R             | S317:S324:   | 2 | 2,4902 | 0,091 | -0,491 |
| 10 | Q9NYV4 CD2L7_HUMAN | R.SGS#YS#GRSPSPYGR.R               | S318:S320:   | 3 | 2,6655 | 0,219 | -0,113 |
| 10 | Q8N350 DOS_HUMAN   | R.HAS#LDGAS#PYFK.V                 | S319:S324:   | 2 | 3,7138 | 0,404 | -0,168 |
| 10 | Q9Y5U2 TSSC4_HUMAN | R.NKSSS#PEDPGA EV.-                | S321:        | 2 | 2,3749 | 0,419 | -0,349 |
| 10 | Q92922 SMRC1_HUMAN | K.HS#PS#PPPPTPTESR.K               | S328:S330:   | 2 | 2,211  | 0,143 | -0,519 |
| 10 | Q14676 MDC1_HUMAN  | R.AQPFGFIDS#DTDAEEERIPATPVVIPM*K.K | S329:        | 3 | 3,4026 | 0,422 | -0,231 |
| 10 | P38159 HNRPG_HUMAN | R.DSYSS#SRS#DLYSSGR.D              | S329:S332:   | 2 | 2,3822 | 0,415 | -0,601 |
| 10 | O15075 DCLK1_HUMAN | K.S#PSPSPTS#PGSLRK.Q               | S330:S337:   | 2 | 2,6541 | 0,325 | -0,235 |
| 10 | O15075 DCLK1_HUMAN | K.S#PSPSPTSPGS#LRK.Q               | S330:S340:   | 2 | 2,1863 | 0,152 | -0,313 |
| 10 | Q9UGV2 NDRG3_HUMAN | R.THS#TSS#SLGSGESPF SR.S           | S331:S334:   | 2 | 4,6665 | 1     | -0,194 |
| 10 | Q68CZ2 TENS3_HUMAN | R.WDS#YENLSADGEVLHTQG PVDGSLYAK.V  | S332:        | 3 | 3,0701 | 0,296 | 0,241  |
| 10 | Q13671 RIN1_HUMAN  | R.GS#PATS#PHLGR.R                  | S333:S337:   | 2 | 2,4039 | 0,41  | -0,295 |
| 10 | P08651 NFIC_HUMAN  | K.TEMDKS#PFNSPS#PQDSPR.L           | S333:S339:   | 3 | 3,2167 | 0,237 | -0,587 |
| 10 | Q9UGV2 NDRG3_HUMAN | R.THSTS#SSLGSGES#PF SR.S           | S333:S341:   | 3 | 2,7113 | 1     | -0,097 |
| 10 | Q9UGV2 NDRG3_HUMAN | R.THSTSS#S#LGSGESPF SR.S           | S334:S335:   | 2 | 3,3665 | 1     | 0,389  |
| 10 | Q2TB10 ZN800_HUMAN | R.DSITPDIATKPGQPLFLDSIS#PK.K       | S336:        | 3 | 4,0087 | 0,393 | -0,218 |
| 10 | Q6PL18 ATAD2_HUMAN | R.LSS#AGPRS#PYCK.R                 | S337:S342:   | 3 | 2,8992 | 0,296 | 0,123  |

|    |                    |                                    |                 |   |        |       |        |
|----|--------------------|------------------------------------|-----------------|---|--------|-------|--------|
| 10 | Q6PL18 ATAD2_HUMAN | R.LSS#AGPRS#PYCK.R                 | S337:S342:      | 2 | 2,3906 | 0,221 | -0,411 |
| 10 | Q9HCN4 GPN1_HUMAN  | R.GTLDEEDEEADS#DT#DDIDHR.V         | S338:T340:      | 3 | 3,8227 | 0,486 | -0,225 |
| 10 | P08651 NFIC_HUMAN  | K.TEM*DKSPFNPS#PQDS#PR.L           | S339:S343:      | 3 | 3,6896 | 0,349 | -0,083 |
| 10 | Q9BQP7 CT072_HUMAN | K.NQNIQKPEYS#E.-                   | S343:           | 2 | 3,3551 | 0,406 | -0,427 |
| 10 | P49585 PCY1A_HUMAN | R.WPFSGKTS#PPCS#PANLSR.H           | S343:S347:      | 3 | 2,9192 | 0,224 | 0,511  |
| 10 | Q9NPB6 PAR6A_HUMAN | R.IRGDGSFGS#L.-                    | S345:           | 2 | 2,1724 | 0,458 | -0,112 |
| 10 | O60307 MAST3_HUMAN | K.DPLEEM*VPLSHLEEQPPAPES#PESR.A    | S348:           | 3 | 3,7738 | 0,316 | 0,361  |
| 10 | Q9GZR1 SENP6_HUMAN | R.RES#IS#PQPADSACSSPAPSTGK.V       | S350:S352:      | 3 | 5,7754 | 0,517 | -0,153 |
| 10 | P01892 1A02_HUMAN  | R.KGGSYSQAASS#DS#AQGSDVSLTACKV.-   | S350:S352:      | 3 | 4,0105 | 0,188 | 0,134  |
| 10 | Q9UK58 CCNL1_HUMAN | K.AEEKS#PIS#INVK.T                 | S352:S355:      | 2 | 3,1235 | 0,224 | 0      |
| 10 | P20749 BCL3_HUMAN  | K.ATRPAS#TSQPDPS#PDR.S             | S359:S366:      | 3 | 3,402  | 0,09  | -0,397 |
| 10 | P17096 HMGA1_HUMAN | R.KQPPVS#PGTALVGS#QKEPSEVPT#PK.R   | S36:S44:T53:    | 3 | 3,8078 | 0,249 | -0,262 |
| 10 | P09651 ROA1_HUMAN  | R.NQGGYGGSSSS#SYGSGR.R             | S364:           | 2 | 4,5125 | 0,648 | -0,619 |
| 10 | P34931 HS71L_HUMAN | R.DLNKS#INPDEAVAYGAAVQAAILM*GDK.S  | S364:           | 3 | 2,8957 | 0,371 | -0,51  |
| 10 | Q6P3S6 FBX42_HUMAN | R.APLS#PSLNSRSPISATPPALVPETR.E     | S365:           | 3 | 5,1035 | 0,261 | -0,067 |
| 10 | Q14978 NOLC1_HUMAN | K.AAESSDS#S#DSDSSEDEAPSKPAGTTK.N   | S365:S366:      | 3 | 2,9396 | 0,205 | -0,564 |
| 10 | P09651 ROA1_HUMAN  | R.NQGGYGGSSSSSYGS#GR.R             | S368:           | 2 | 5,2    | 0,564 | -0,412 |
| 10 | Q14676 MDC1_HUMAN  | R.GPGAPGLAHLQESQAGS#DT#DVEEGK.A    | S376:T378:      | 3 | 4,1913 | 0,427 | -0,07  |
| 10 | Q76FK4 NOL8_HUMAN  | R.NDREYDS#GDT#DEIIAM*K.K           | S378:T381:      | 3 | 3,3681 | 0,38  | -0,341 |
| 10 | Q9BVS4 RIOK2_HUMAN | R.SSGDPEQIKEDSL#EES#ADAR.S         | S382:S385:      | 3 | 3,9934 | 0,447 | -0,304 |
| 10 | Q9Y383 LC7L2_HUMAN | R.RS#S#EEREAGEI.-                  | S383:S384:      | 2 | 3,1857 | 0,359 | -0,429 |
| 10 | Q9NYV4 CD2L7_HUMAN | R.HSS#IS#PVRLPLNSSLGAELS#R.K       | S383:S385:S400: | 3 | 4,1836 | 0,378 | 0,372  |
| 10 | O75717 WDHD1_HUMAN | R.SHILEDDENS#VDIS#M*LK.T           | S383:S387:      | 2 | 3,1085 | 0,509 | 0      |
| 10 | Q9C0H9 SNIP_HUMAN  | R.KDS#GSSSVFAES#PGGK.T             | S385:S394:      | 2 | 4,2836 | 0,467 | -0,502 |
| 10 | Q7Z422 CA144_HUMAN | K.S#PPKVPIVQDDSLPAGPPPQIR.I        | S39:            | 3 | 5,1842 | 0,313 | -0,073 |
| 10 | Q8N0S6 CENPL_HUMAN | R.KQSS#FIL#PPR.R                   | S39:T43:        | 2 | 2,2631 | 0,441 | 0,34   |
| 10 | Q9NRH2 SNRK_HUMAN  | K.IDVPQDLEDDL TATPLSHATVPQS#PAR.A  | S390:           | 3 | 3,3186 | 0,259 | -0,185 |
| 10 | P02545 LMNA_HUMAN  | R.LRLS#PS#PTSQR.S                  | S390:S392:      | 2 | 3,0776 | 0,358 | -0,348 |
| 10 | P20700 LMNB1_HUMAN | R.LKLS#PS#PSSR.V                   | S391:S393:      | 2 | 2,3948 | 0,202 | 0      |
| 10 | Q7Z6L1 K1358_HUMAN | R.SHSGSSSS#LLS#AGCFFGDEV.R.G       | S391:S394:      | 3 | 4,1232 | 1     | -0,078 |
| 10 | Q14684 RRP1B_HUMAN | R.VFCVEEDS#ESS#LQKR.R              | S392:S395:      | 3 | 3,1948 | 0,281 | 0      |
| 10 | Q9NR46 SHLB2_HUMAN | K.GKVPVTYLELLS#.-                  | S395:           | 2 | 3,1414 | 0,349 | -0,087 |
| 10 | Q9UQ35 SRRM2_HUMAN | R.HGGSPQPLATTPLSQEPVNPSS#EAS#PTR.D | S395:S398:      | 3 | 5,8483 | 0,435 | -0,304 |

|    |                    |                                         |            |   |        |       |        |
|----|--------------------|-----------------------------------------|------------|---|--------|-------|--------|
| 10 | Q96ST2 IWS1_HUMAN  | K.AAVLS#DS#EDEEKASAK.K                  | S398:S400: | 2 | 4,679  | 0,447 | -0,607 |
| 10 | Q96ST2 IWS1_HUMAN  | K.AAVLS#DS#EDEEKASAK.K                  | S398:S400: | 3 | 3,3228 | 0,456 | -0,202 |
| 10 | Q9Y6M7 S4A7_HUMAN  | K.GNGSGGS#RENS#TVDFSK.V                 | S403:S407: | 3 | 3,4572 | 0,42  | -0,492 |
| 10 | Q9Y6M7 S4A7_HUMAN  | K.GNGSGGS#RENSTVDFSK.V                  | S403:S412: | 3 | 2,8855 | 0,258 | 0      |
| 10 | Q9Y6M7 S4A7_HUMAN  | K.GNGSGGS#RENST#VDFSK.V                 | S403:T408: | 2 | 2,7089 | 0,248 | -0,853 |
| 10 | Q9BTX1 NDC1_HUMAN  | K.KLNS#PEETAFT#PK.S                     | S406:T414: | 2 | 4,0813 | 0,291 | -0,209 |
| 10 | Q6ULP2 AFTIN_HUMAN | R.KFTNFQSPNIDPTEENDLDDS#LS#VK.N         | S409:S411: | 3 | 4,333  | 0,349 | -0,121 |
| 10 | Q8WUM0 NU133_HUMAN | R.KGLPLGS#AVS#SPVLFSPVGR.R              | S41:S44:   | 3 | 3,2754 | 0,263 | -0,258 |
| 10 | Q13112 CAF1B_HUMAN | R.GSS#PGPRPVEGT#PASR.T                  | S410:T419: | 2 | 2,4776 | 0,29  | -1,069 |
| 10 | Q9BS91 S35A5_HUMAN | R.LTKPKS#DES#DEDTF.-                    | S416:S419: | 2 | 3,5551 | 0,453 | -0,551 |
| 10 | Q12756 KIF1A_HUMAN | R.AAS#VSS#LHER.I                        | S416:S419: | 2 | 2,5698 | 0,415 | -0,301 |
| 10 | P61158 ARP3_HUMAN  | R.HNPVFGVM*#S.-                         | S418:      | 2 | 2,7129 | 0,486 | 0      |
| 10 | Q9NQC7 CYLD_HUMAN  | R.FHS#LPFS#LTK.M                        | S418:S422: | 2 | 2,0414 | 0,104 | -0,183 |
| 10 | P42858 HD_HUMAN    | R.SRS#GSIVELIAGGSSCS#PVLRS.K            | S419:S434: | 3 | 4,7727 | 1     | 0,075  |
| 10 | Q9C0C2 TB182_HUMAN | R.RFS#EGVLQS#PSQDQEK.L                  | S429:S435: | 2 | 4,3022 | 0,505 | -0,061 |
| 10 | Q9C0C2 TB182_HUMAN | R.RFS#EGVLQS#PSQDQEK.L                  | S429:S435: | 3 | 3,5947 | 0,246 | 0,183  |
| 10 | Q4KMP7 TB10B_HUMAN | R.ASAGPAPGPVVTAEGLHPSLPS#PTGNSTPLGSSK.E | S432:      | 3 | 2,8709 | 0,314 | -0,114 |
| 10 | Q14004 CD2L5_HUMAN | R.HSS#IS#PSTLTLK.S                      | S437:S439: | 2 | 3,6773 | 1     | -0,085 |
| 10 | Q15036 SNX17_HUMAN | K.LSSKLS#AVS#LR.G                       | S437:S440: | 2 | 3,0182 | 0,129 | -0,092 |
| 10 | Q15036 SNX17_HUMAN | K.LSSKLS#AVS#LR.G                       | S437:S440: | 3 | 2,9521 | 0,332 | 0,069  |
| 10 | Q96ST2 IWS1_HUMAN  | K.TIAS#DS#EEEAGKELSDK.K                 | S438:S440: | 2 | 5,0796 | 0,602 | -0,31  |
| 10 | Q96GE4 CCD45_HUMAN | R.SHS#LS#PSPVVK.H                       | S449:S451: | 2 | 3,7239 | 0,409 | -0,186 |
| 10 | Q8WUM0 NU133_HUMAN | R.KGLPLGS#AVS#PVLFS#PVGR.R              | S45:S50:   | 3 | 3,3206 | 0,148 | 0,086  |
| 10 | Q8WUM0 NU133_HUMAN | R.KGLPLGS#AVS#PVLFS#PVGR.R              | S45:S50:   | 2 | 3,1232 | 0,418 | -0,229 |
| 10 | Q9H7L9 SDS3_HUMAN  | R.GRES#DEDTEDAS#ETDLAK.H                | S45:S53:   | 2 | 3,5709 | 0,485 | -0,459 |
| 10 | Q9P0V9 SEP10_HUMAN | R.KNS#NFL.-                             | S451:      | 2 | 2,1942 | 0,473 | 0,076  |
| 10 | Q96N67 DOCK7_HUMAN | R.TTS#GDDACNLTSFRPATLTVTNFFK.Q          | S452:      | 3 | 3,145  | 0,499 | -0,45  |
| 10 | Q9NR09 BIRC6_HUMAN | K.LEGSDDLLS#DS#EEHSR.S                  | S452:S454: | 3 | 3,3352 | 0,287 | -0,476 |
| 10 | Q3KQU3 MA7D1_HUMAN | R.ARLS#ASTASELS#PK.S                    | S452:S460: | 3 | 3,0225 | 0,311 | 0,116  |
| 10 | Q14676 MDC1_HUMAN  | R.SQTTTERDS#DT#DVEEEELPVENR.E           | S453:T455: | 3 | 5,5683 | 1     | -0,129 |
| 10 | Q9NYZ3 GTSE1_HUMAN | K.IPKFS#IGDS#PDSSTPK.L                  | S457:S461: | 2 | 3,6897 | 0,452 | 0      |
| 10 | Q7Z5K2 WAPL_HUMAN  | K.IKYFGFDDLS#ES#EDDEDDCQVER.K           | S459:S461: | 3 | 3,1879 | 0,354 | -0,474 |
| 10 | Q96JM3 ZN828_HUMAN | R.KTS#PAS#LDFPESQK.S                    | S459:S462: | 2 | 3,9099 | 0,474 | 0,072  |

|    |                     |                                    |                    |   |        |       |        |
|----|---------------------|------------------------------------|--------------------|---|--------|-------|--------|
| 10 | Q9H4G0 E41L1_HUMAN  | R.DEDGES#GGQRS#EAEEGEVRTPT#K.I     | S461:S466:T477:    | 3 | 4,0277 | 0,335 | -0,542 |
| 10 | Q15149 PLEC1_HUMAN  | K.GYYPYSVSGSGSTAGS#RT#GSRTGS#R.A   | S4626:T4628:S4634: | 3 | 3,1203 | 1     | -0,389 |
| 10 | Q8IYB3 SRRM1_HUMAN  | K.VELS#ES#EEDKGGK.M                | S463:S465:         | 2 | 3,6715 | 0,441 | -0,389 |
| 10 | Q99543 DNJC2_HUMAN  | R.NAS#AS#FQELEDKK.E                | S47:S49:           | 2 | 3,0113 | 0,392 | 0,075  |
| 10 | Q9BTU6 P4K2A_HUMAN  | R.VAAAAGSGPS#PPGS#PGHDR.E          | S47:S51:           | 2 | 4,751  | 0,54  | -0,594 |
| 10 | Q9BTU6 P4K2A_HUMAN  | R.VAAAAGSGPS#PPGS#PGHDR.E          | S47:S51:           | 3 | 4,0816 | 0,411 | -0,396 |
| 10 | O60716 CTND1_HUMAN  | R.VRVS#PQDANPLM*ANGT#LTR.R         | S47:T59:           | 3 | 3,9514 | 0,202 | 0,578  |
| 10 | O14974 MYPT1_HUMAN  | R.SAS#S#PRLSSSLDNK.E               | S472:S473:         | 3 | 3,0983 | 0,247 | -0,114 |
| 10 | O75151 PHF2_HUMAN   | R.EKEEPPS#PIEAT#PPQSLEK.V          | S474:T479:         | 3 | 2,908  | 0,363 | 0      |
| 10 | P05787 K2C8_HUMAN   | R.DGKLVES#ESS#DVLPK.-              | S475:S478:         | 2 | 3,3598 | 0,147 | 1,045  |
| 10 | P05787 K2C8_HUMAN   | R.DGKLVSES#S#DVLPK.-               | S477:S478:         | 2 | 2,5687 | 0,146 | 0,224  |
| 10 | Q96Q42 ALS2_HUMAN   | R.RLS#LPGLLSQVS#PR.L               | S483:S492:         | 2 | 3,7136 | 0,335 | -0,145 |
| 10 | Q96Q42 ALS2_HUMAN   | R.RLS#LPGLLSQVS#PR.L               | S483:S492:         | 3 | 3,3919 | 0,43  | -0,109 |
| 10 | Q8N3F8 MILK1_HUMAN  | R.APS#AS#PLALHASR.L                | S484:S486:         | 3 | 3,4595 | 0,503 | 0,064  |
| 10 | Q8N3F8 MILK1_HUMAN  | R.APS#AS#PLALHASR.L                | S484:S486:         | 2 | 3,2301 | 0,448 | 0      |
| 10 | O60832 DKC1_HUMAN   | K.AGLES#GAEPGDGDS#DTTKK.K          | S485:S494:         | 3 | 3,7257 | 0,298 | 0      |
| 10 | O60832 DKC1_HUMAN   | K.AGLES#GAEPGDGDS#DTTKK.K          | S485:S494:         | 2 | 3,0202 | 0,427 | 0      |
| 10 | Q9BR39 JPH2_HUMAN   | R.ETPRPEGGSPS#PAGT#PPQPK.R         | S486:T490:         | 3 | 3,1637 | 0,284 | -0,341 |
| 10 | Q9UPY2 Q9UPY2_HUMAN | R.SAS#PCRLS#PR.E                   | S49:S54:           | 3 | 2,6418 | 0,337 | -0,071 |
| 10 | O43379 WDR62_HUMAN  | R.TRLS#T#ASEETVQNR.V               | S49:T50:           | 2 | 4,4852 | 0,443 | -1,045 |
| 10 | Q6UN15 FIP1_HUMAN   | R.DHS#PTPS#VFNSDEER.Y              | S492:S496:         | 2 | 5,8358 | 0,472 | -0,325 |
| 10 | Q6UN15 FIP1_HUMAN   | R.DHS#PTPS#VFNSDEER.Y              | S492:S496:         | 3 | 4,3083 | 0,423 | 0      |
| 10 | Q6UN15 FIP1_HUMAN   | R.DHS#PT#PSVFNSDEER.Y              | S492:T494:         | 2 | 3,9945 | 0,484 | -0,455 |
| 10 | Q96JG6 CC132_HUMAN  | K.FM*EQSRS#PSVS#PSK.Q              | S494:S498:         | 3 | 2,6838 | 0,125 | 0      |
| 10 | Q71F23 CENPU_HUMAN  | K.CKPIDVDFDPDNS#DVS#SIGR.L         | S50:S53:           | 3 | 4,3842 | 0,229 | -0,226 |
| 10 | Q71F23 CENPU_HUMAN  | K.CKPIDVDFDPDNS#DVSS#IGR.L         | S50:S54:           | 3 | 3,3513 | 0,288 | 0      |
| 10 | Q13610 PWP1_HUMAN   | K.EKLQEEGGGS#DEEETGS#PSEDGMQSAR.T  | S50:S57:           | 3 | 6,0713 | 0,63  | 0,427  |
| 10 | Q13610 PWP1_HUMAN   | K.EKLQEEGGGS#DEEETGS#PSEDGM*QSAR.T | S50:S57:           | 3 | 5,3932 | 0,412 | -0,486 |
| 10 | Q8NI08 NCOA7_HUMAN  | K.QDIM*PEVDKQS#GS#PESR.V           | S500:S502:         | 3 | 3,4684 | 0,302 | -0,44  |
| 10 | Q9Y6M5 ZNT1_HUMAN   | K.NM*PNKQPESS#L.-                  | S506:              | 2 | 2,7452 | 0,279 | -0,182 |
| 10 | O14974 MYPT1_HUMAN  | R.LAS#TS#DIEEKENR.D                | S507:S509:         | 3 | 2,8626 | 0,439 | -0,221 |
| 10 | O95365 ZBT7A_HUMAN  | R.VRGGAPDPS#PGATATPGAPAQPSS#PDAR.R | S511:S526:         | 3 | 5,1522 | 0,388 | 0,467  |
| 10 | O60832 DKC1_HUMAN   | K.AKEVELVS#E.-                     | S513:              | 2 | 2,6777 | 0,23  | -0,113 |



|    |                    |                                     |                 |   |        |       |        |
|----|--------------------|-------------------------------------|-----------------|---|--------|-------|--------|
| 10 | Q9Y6G9 DC1L1_HUMAN | R.KPVTVSPPTPTS#PTEGEAS.-            | S516:           | 2 | 4,0954 | 0,515 | -0,31  |
| 10 | O00567 NOL5A_HUMAN | K.SFSKEELM*#S#DLEETAGSTSIPK.R       | S519:S520:      | 3 | 3,9126 | 0,302 | 0,138  |
| 10 | P55081 MFAP1_HUMAN | K.RPDYAPM*ES#S#DEEDEFQFIK.K         | S52:S53:        | 3 | 6,436  | 0,505 | 0,267  |
| 10 | Q8TEH3 DEN1A_HUMAN | R.RTS#VPS#PEQPQPYR.T                | S520:S523:      | 2 | 2,6541 | 0,18  | 1,354  |
| 10 | Q9NPI6 DCP1A_HUMAN | R.KAS#S#PSPLTIGTPESQR.K             | S522:S523:      | 3 | 3,4095 | 0,305 | 0,095  |
| 10 | Q9NPI6 DCP1A_HUMAN | R.KAS#SPS#PLTIGTPESQR.K             | S522:S525:      | 2 | 4,2577 | 0,479 | 0,637  |
| 10 | O60291 MGRN1_HUMAN | R.AASIENVLQDS#S#PEHCGR.G            | S523:S524:      | 3 | 2,7424 | 0,12  | -0,172 |
| 10 | Q5H9R7 SAPS3_HUMAN | R.NTVDLVTTCHIH#S#S#DDEIDFK.E        | S523:S524:S525: | 3 | 5,5715 | 1     | 0,462  |
| 10 | Q9NPI6 DCP1A_HUMAN | R.KASS#PS#PLTIGTPESQR.K             | S523:S525:      | 2 | 2,3617 | 0,303 | -0,318 |
| 10 | Q9NPI6 DCP1A_HUMAN | R.KASSPS#PLTIGT#PESQR.K             | S525:T531:      | 3 | 4,3661 | 0,18  | 0,382  |
| 10 | Q96PE2 ARHG_HUMAN  | R.DSPSAGGPVQLEPIPIAPAS#PGTRPTLK.D   | S527:           | 3 | 3,8323 | 0,317 | -0,245 |
| 10 | Q71F23 CENPU_HUMAN | K.CKPIDVDFDPNSDVS#S#IGR.L           | S53:S54:        | 3 | 3,2705 | 0,121 | -0,377 |
| 10 | Q8TEH3 DEN1A_HUMAN | R.TLRES#DSAEGDEAES#PEQQVR.K         | S536:S546:      | 3 | 6,8437 | 0,466 | 0,22   |
| 10 | O60504 VINEX_HUMAN | R.HPS#S#PSALRS#PADPTDLGGQTSR.R      | S544:S545:S551: | 3 | 5,0895 | 0,522 | 0,616  |
| 10 | Q3KQU3 MA7D1_HUMAN | R.ASNEKESAAPAS#PAPSPAPSPT#PAPPQK.E  | S544:T554:      | 3 | 4,4097 | 0,289 | -0,515 |
| 10 | P55196 AFAD_HUMAN  | R.LSDRVSS#AS#STAER.G                | S546:S548:      | 2 | 2,1923 | 0,132 | -0,421 |
| 10 | O60504 VINEX_HUMAN | R.HPSSPS#ALRS#PADPTDLGGQT#SPR.R     | S547:S551:T562: | 3 | 3,4076 | 1     | 0      |
| 10 | Q9H1B7 EAP1_HUMAN  | R.KAS#PEPPDS#AEGALK.L               | S547:S553:      | 3 | 3,4822 | 0,201 | -0,331 |
| 10 | Q99829 CPNE1_HUMAN | R.NCSS#PEFSK.T                      | S55:            | 2 | 2,7725 | 0,346 | 0,107  |
| 10 | Q96RS0 TGS1_HUMAN  | R.DSGNNS#GDQAT#EEEEGGYSCGTAESHDSK.G | S55:T60:        | 3 | 2,639  | 0,274 | -0,576 |
| 10 | P27824 CALX_HUMAN  | K.QKS#DAEEDGGTVS#QEEEDR.K           | S554:S564:      | 3 | 2,9195 | 0,312 | -0,242 |
| 10 | Q9NPH3 IL1AP_HUMAN | R.RSS#S#DEQGLSYSSLK.N               | S556:S557:      | 2 | 4,1497 | 0,405 | -0,271 |
| 10 | Q96JG6 CC132_HUMAN | K.SAYQEYDS#DS#DVPEELKR.D            | S559:S561:      | 3 | 4,19   | 0,337 | 0,479  |
| 10 | Q13442 HAP28_HUMAN | K.KS#LSDSES#EEDDDYQQK.R             | S57:S63:        | 3 | 3,1426 | 0,217 | -0,079 |
| 10 | Q9UGU0 TCF20_HUMAN | R.LNAS#PAAREEATS#PGAK.D             | S574:S583:      | 2 | 2,8464 | 0,431 | -0,2   |
| 10 | Q9NYZ3 GTSE1_HUMAN | R.LVDVS#PDRGS#PPSR.V                | S575:S580:      | 3 | 2,7475 | 0,175 | 0,223  |
| 10 | Q9NYZ3 GTSE1_HUMAN | R.LVDVS#PDRGS#PPSR.V                | S575:S580:      | 2 | 2,6434 | 0,182 | -0,297 |
| 10 | O15014 ZN609_HUMAN | R.LVEPHS#PS#PSSK.F                  | S576:S578:      | 2 | 3,3957 | 0,413 | -0,257 |
| 10 | Q13523 PRP4B_HUMAN | R.TR#PS#PDDILER.V                   | S578:S580:      | 2 | 3,934  | 0,443 | -0,079 |
| 10 | Q13523 PRP4B_HUMAN | R.TR#PS#PDDILER.V                   | S578:S580:      | 3 | 3,158  | 0,323 | 0      |
| 10 | Q9H1E3 NUCKS_HUMAN | K.NSQEDS#EDS#EDKDKV.T               | S58:S61:        | 2 | 4,0397 | 0,357 | -0,453 |
| 10 | Q9H6F5 CCD86_HUMAN | R.AGLGS#PERPPKTS#PGS#PR.L           | S58:S66:S69:    | 3 | 3,3889 | 0,439 | 0,54   |
| 10 | Q9H6F5 CCD86_HUMAN | R.AGLGS#PERPPKT#SPGS#PR.L           | S58:T65:S69:    | 3 | 2,8043 | 0,188 | -0,54  |

|    |                    |                                     |            |   |        |       |        |
|----|--------------------|-------------------------------------|------------|---|--------|-------|--------|
| 10 | Q659C4 LARP2_HUMAN | K.LFDVSEITSAAM*VHSLPTAVPES#PR.I     | S593:      | 3 | 3,1402 | 0,266 | 0,266  |
| 10 | Q8TF40 FNIP1_HUMAN | R.NKS#S#LLFK.E                      | S593:S594: | 2 | 3,4426 | 0,196 | -0,111 |
| 10 | Q8WWM7 ATX2L_HUMAN | K.EKEVDGLLTSEPM*GS#PVSS#K.T         | S594:S598: | 3 | 2,9729 | 0,144 | 0,242  |
| 10 | P43243 MATR3_HUMAN | R.SYS#PDGKES#PSDK.K                 | S598:S604: | 2 | 2,5399 | 0,332 | -0,47  |
| 10 | Q13442 HAP28_HUMAN | K.KSLDS#DES#EDEEDDYQQK.R            | S60:S63:   | 3 | 6,2941 | 0,358 | 0,158  |
| 10 | Q13442 HAP28_HUMAN | K.SLDS#DES#EDEEDDYQQKR.K            | S60:S63:   | 3 | 4,439  | 0,483 | 0,623  |
| 10 | P19634 SL9A1_HUMAN | K.IPSAVS#TVS#M*QNIHPK.S             | S602:S605: | 2 | 3,1219 | 0,392 | -0,453 |
| 10 | P35612 ADDB_HUMAN  | K.EAETKS#PLVS#PSK.S                 | S613:S617: | 2 | 2,2359 | 0,086 | -0,239 |
| 10 | P49756 RBM25_HUMAN | K.LGASNS#PGQPNS#VKR.K               | S618:S624: | 3 | 3,9394 | 0,354 | 0      |
| 10 | Q8NFG4 FLCN_HUMAN  | R.AHS#PAEGASVES#SSPGPK.K            | S62:S71:   | 2 | 4,3403 | 1     | -0,329 |
| 10 | Q9H165 BC11A_HUMAN | K.KLLGS#PSSLS#PFSK.R                | S625:S630: | 2 | 3,6838 | 0,488 | 0,142  |
| 10 | Q96QE2 MYCT_HUMAN  | K.GSNYHLSNDAS#DVE.-                 | S626:      | 2 | 4,1493 | 0,415 | -0,43  |
| 10 | P49848 TAF6_HUMAN  | K.GGPTSHPSVPVPPAS#SPSPLS#GSALCGGK.Q | S633:S639: | 3 | 3,7868 | 0,299 | -0,579 |
| 10 | P13807 GYS1_HUMAN  | R.YPRPAS#VPPS#PSLSR.H               | S641:S645: | 3 | 3,1689 | 0,356 | -0,103 |
| 10 | P13807 GYS1_HUMAN  | R.YPRPAS#VPPSPS#LSR.H               | S641:S647: | 3 | 3,0893 | 0,167 | 0,207  |
| 10 | P13807 GYS1_HUMAN  | R.YPRPASVPPS#PS#LSR.H               | S645:S647: | 2 | 3,1247 | 0,383 | -0,482 |
| 10 | P13807 GYS1_HUMAN  | R.YPRPASVPPS#PSLS#R.H               | S645:S649: | 2 | 2,9016 | 0,384 | -0,138 |
| 10 | Q13541 4EBP1_HUMAN | R.NS#PVTKT#PPR.D                    | S65:T70:   | 2 | 2,2861 | 0,279 | -0,291 |
| 10 | Q66K74 MAP1S_HUMAN | R.SPAEGSERLS#LS#PLR.G               | S655:S657: | 3 | 2,6844 | 0,344 | 0      |
| 10 | Q9H1B7 EAP1_HUMAN  | R.RNS#SS#PVSPASVPGQR.R              | S657:S659: | 2 | 3,7447 | 1     | 0,478  |
| 10 | Q9H1B7 EAP1_HUMAN  | R.RNS#SS#PVSPASVPGQR.R              | S657:S659: | 3 | 2,9608 | 0,119 | 0,205  |
| 10 | Q8WVC0 LEO1_HUMAN  | K.KYVIS#DEEEEDDD.-                  | S658:      | 2 | 3,9493 | 0,511 | -0,366 |
| 10 | Q14004 CD2L5_HUMAN | R.CLLADLPLPELPGGDDLKSKS#PEEK.K      | S664:      | 3 | 4,0022 | 0,337 | -0,594 |
| 10 | Q7Z4V5 HDGR2_HUMAN | R.ARGDS#EALDEES.-                   | S664:      | 2 | 2,5826 | 0,408 | -0,09  |
| 10 | Q9Y3T9 NOC2L_HUMAN | K.QFKDLFDLNS#S#EEDDTEGFSEK.G        | S672:S673: | 3 | 5,4992 | 0,555 | -0,529 |
| 10 | Q9P2R6 RERE_HUMAN  | K.TQEISRPN#PS#EGEGESSDSR.S          | S679:S681: | 3 | 4,1713 | 0,332 | -0,304 |
| 10 | Q8IYB3 SRRM1_HUMAN | R.APQTSSS#PPPVR.R                   | S696:      | 2 | 2,6631 | 0,23  | -0,094 |
| 10 | Q9NR30 DDX21_HUMAN | K.LRS#DAGLES#DTAM*K.K               | S7:S13:    | 3 | 2,9225 | 0,245 | -0,329 |
| 10 | O00418 EF2K_HUMAN  | R.YS#S#SGSPANSFHF.K.E               | S70:S71:   | 2 | 3,0475 | 1     | -0,51  |
| 10 | P25205 MCM3_HUMAN  | K.DGDSYDPYDFS#DTEEM*PQVHTPK.T       | S711:      | 3 | 3,5504 | 0,318 | -0,063 |
| 10 | Q9BWH6 RPAP1_HUMAN | R.DVVM*LDNLPLPALVPS#PPKR.A          | S72:       | 3 | 5,2996 | 0,409 | -0,295 |
| 10 | O00418 EF2K_HUMAN  | R.YSSS#GS#PANSFHF.K.E               | S72:S74:   | 3 | 3,2704 | 1     | 0,109  |
| 10 | Q9H2P0 ADNP_HUMAN  | K.LDDDS#DSPSFFEEKPEEPVVLALDPK.G     | S736:      | 3 | 3,9828 | 0,258 | -0,305 |

|    |                    |                                  |                 |   |        |       |        |
|----|--------------------|----------------------------------|-----------------|---|--------|-------|--------|
| 10 | P51812 KS6A3_HUMAN | K.KITS#TAL.-                     | S737:           | 2 | 2,401  | 0,376 | 0,45   |
| 10 | Q9H2P0 ADNP_HUMAN  | K.LDDSDS#PSFFEEKPEEPVVLALDPK.G   | S738:           | 3 | 2,9878 | 0,155 | -0,671 |
| 10 | Q9H2P0 ADNP_HUMAN  | K.LDDSDSPS#FFEEKPEEPVVLALDPK.G   | S740:           | 3 | 3,0216 | 0,143 | -0,427 |
| 10 | Q86UP2 KTN1_HUMAN  | K.EIQNGNLHES#DS#ESVPR.D          | S75:S77:        | 3 | 2,9682 | 0,136 | -0,883 |
| 10 | Q8N5P1 ZC3H8_HUMAN | R.SKDYDVYS#DNDICS#QESEDNFAK.E    | S77:S83:        | 3 | 6,912  | 0,507 | 0,063  |
| 10 | Q14669 TRIPC_HUMAN | R.SAS#PDYNRTNS#PSSAK.K           | S77:S85:        | 2 | 3,1904 | 1     | -0,397 |
| 10 | P19634 SL9A1_HUMAN | R.SKETSS#PGTDDVFTPAPSDS#PSSQR.I  | S771:S785:      | 3 | 4,1068 | 1     | 0,868  |
| 10 | Q5T5C0 STXB5_HUMAN | R.SSS#VTS#IDKESR.E               | S782:S785:      | 2 | 2,8214 | 1     | -0,419 |
| 10 | Q5T5C0 STXB5_HUMAN | R.SSS#VTS#IDKESR.E               | S782:S785:      | 3 | 2,6034 | 0,164 | -0,063 |
| 10 | Q8IY92 BTBDC_HUMAN | R.DCRS#PGLLDTT#PIR.G             | S786:T793:      | 3 | 3,0625 | 0,278 | 0      |
| 10 | Q15637 SF01_HUMAN  | R.S#PS#PEPIYNSEGKR.L             | S80:S82:        | 2 | 2,6874 | 0,28  | -0,354 |
| 10 | O60447 EVI5_HUMAN  | R.RES#YSTTV.-                    | S805:           | 2 | 2,5739 | 0,52  | -0,119 |
| 10 | Q8IWX8 CHERP_HUMAN | R.SRS#PT#PPSSAGLGSNSAPPIDSR.L    | S817:T819:      | 3 | 4,3479 | 1     | -0,367 |
| 10 | Q8TD16 BICD2_HUMAN | K.TKPATPS#L.-                    | S823:           | 2 | 2,3001 | 0,283 | -0,068 |
| 10 | Q99650 OSMR_HUMAN  | K.S#LTETELTKPNLYLLPTEK.N         | S826:           | 3 | 3,4523 | 0,273 | -0,376 |
| 10 | P46013 KI67_HUMAN  | K.CSAS#PPLR.R                    | S827:           | 2 | 2,2714 | 0,424 | 0,063  |
| 10 | Q9NQ57 INCE_HUMAN  | K.INPDNYGM*DLNS#DDST#DDEAHPR.K   | S833:T837:      | 3 | 4,4592 | 0,348 | -0,331 |
| 10 | Q9C0C9 UBE2O_HUMAN | K.NM*TVEQLLTGS#PTS#PTVEPEKPTR.E  | S836:S839:      | 3 | 5,3612 | 1     | 1,05   |
| 10 | Q96FS4 SIPA1_HUMAN | R.TEFLHSQNS#LS#PR.S              | S837:S839:      | 2 | 4,0869 | 0,471 | 0,728  |
| 10 | Q96FS4 SIPA1_HUMAN | R.TEFLHSQNS#LS#PR.S              | S837:S839:      | 3 | 2,8451 | 0,283 | 0,109  |
| 10 | Q9UQ35 SRRM2_HUMAN | K.S#GTPPRQGSITS#PQANEQSVT#PQRR.S | S846:S857:T866: | 3 | 3,4359 | 1     | 0,627  |
| 10 | Q9NXG2 THUM1_HUMAN | K.FTDKQDQPS#GS#EGEDDDAEAAALK.K   | S86:S88:        | 3 | 5,2032 | 0,489 | -0,07  |
| 10 | Q92993 TIP60_HUMAN | K.NGLPGS#RPGS#PER.E              | S86:S90:        | 2 | 2,2554 | 0,29  | -0,576 |
| 10 | Q6GYQ0 GRIPE_HUMAN | R.RGS#S#PGSLEIPK.D               | S860:S861:      | 2 | 3,8623 | 0,463 | 0,615  |
| 10 | Q6GYQ0 GRIPE_HUMAN | R.RGS#S#PGS#LEIPKDLPDILNK.Q      | S860:S861:S864: | 3 | 3,8783 | 0,352 | 0,154  |
| 10 | O60716 CTND1_HUMAN | R.SQS#SHSYDDST#LPLIDR.N          | S861:T869:      | 3 | 4,5819 | 1     | 0,176  |
| 10 | Q9NS56 TOPRS_HUMAN | K.TRS#LS#VEIVYEGK.A              | S864:S866:      | 2 | 2,1554 | 0,284 | 0,372  |
| 10 | Q9UQ35 SRRM2_HUMAN | R.QGSITSPQANEQS#VT#PQRR.S        | S864:T866:      | 3 | 3,0917 | 0,281 | 0,082  |
| 10 | Q9C0C9 UBE2O_HUMAN | R.LIHGEDS#DS#EGEEEGR.G           | S87:S89:        | 2 | 3,6025 | 0,454 | -0,445 |
| 10 | Q9UK76 HN1_HUMAN   | R.RNS#SEAS#SGDFDLK.G             | S87:S91:        | 2 | 5,15   | 0,441 | -0,273 |
| 10 | Q9UQ35 SRRM2_HUMAN | R.SCFES#SPDPELKS#R.T             | S875:S883:      | 2 | 3,3844 | 0,408 | -0,203 |
| 10 | P51826 AFF3_HUMAN  | K.M*LRS#PIS#PLSDASK.H            | S878:S881:      | 2 | 3,3323 | 0,322 | -0,145 |
| 10 | P07814 SYEP_HUMAN  | K.TGKEYIPGQPLSQSS#DSS#PTR.N      | S883:S886:      | 3 | 3,5826 | 1     | -0,147 |

|    |                     |                                     |                 |   |        |       |        |
|----|---------------------|-------------------------------------|-----------------|---|--------|-------|--------|
| 10 | O75400 PR40A_HUMAN  | K.S#DSPES#DAEREK.D                  | S883:S888:      | 2 | 2,3802 | 0,23  | -0,323 |
| 10 | Q8NE00 TM104_HUMAN  | R.M*ENLKEEEDDSDS#STAS#DSDVLIR.D     | S90:S94:        | 3 | 6,2602 | 1     | -0,528 |
| 10 | P19838 NFKB1_HUMAN  | K.TTQAHS#LPLS#PASTR.Q               | S903:S907:      | 2 | 3,169  | 0,451 | -0,202 |
| 10 | Q70E73 RAPH1_HUMAN  | K.QQSFCAKPPPS#PLS#PVPSVVK.Q         | S905:S908:      | 3 | 3,9511 | 0,38  | 0,076  |
| 10 | Q3KQU3 MA7D1_HUMAN  | K.S#RGPT#PPAMGPR.D                  | S93:T97:        | 3 | 3,0282 | 0,228 | 0      |
| 10 | O60220 TIM8A_HUMAN  | K.SKPVFSES#LSD.-                    | S94:            | 2 | 2,1528 | 0,415 | 0      |
| 10 | P78317 RNF4_HUMAN   | R.LPQDHADSCVVS#S#DDEELSR.D          | S94:S95:        | 3 | 5,3393 | 0,436 | 0,076  |
| 10 | O43847 NRDC_HUMAN   | R.RGS#LS#NAGDPEIVK.S                | S94:S96:        | 2 | 3,9967 | 0,43  | -0,304 |
| 10 | B2R8U0 B2R8U0_HUMAN | K.KAAAGPLDM*S#LPS#TPDIK.I           | S97:S100:       | 2 | 2,8185 | 0,247 | 1,657  |
| 10 | P49327 FAS_HUMAN    | R.LFDHPES#PTPNPTEPLFLAQAEVYK.E      | S974:           | 3 | 3,429  | 0,412 | -0,251 |
| 10 | Q14814 MEF2D_HUMAN  | K.KGFNGCDS#PEPDGEDSLEQS#PILLEDK.Y   | S98:S110:       | 3 | 5,2453 | 0,388 | -0,182 |
| 10 | P17096 HMGA1_HUMAN  | K.KLEKEEEEGIS#QES#S#EEEQ.-          | S99:S102:S103:  | 3 | 4,8324 | 0,427 | -0,148 |
| 10 | P17096 HMGA1_HUMAN  | K.KLEKEEEEGIS#QESS#EEEQ.-           | S99:S103:       | 3 | 3,3999 | 0,298 | -0,153 |
| 10 | P00533 EGFR_HUMAN   | R.M*HLPS#PTDS#NFYR.A                | S991:S995:      | 2 | 2,9822 | 0,363 | 0,07   |
| 10 | Q9NWH9 SLTM_HUMAN   | R.AGAGM*ITQHS#SNAS#PINR.I           | S998:S1002:     | 3 | 2,9444 | 0,371 | -0,276 |
| 10 | Q9GZT3 SLIRP_HUMAN  | K.LPQT#S#DDEKKDF.-                  | T101:S102:      | 3 | 3,6504 | 0,464 | -0,231 |
| 10 | A8MSX0 A8MSX0_HUMAN | R.SHT#S#LKDELSDVS#QGGSK.A           | T101:S102:S111: | 3 | 3,8365 | 1     | -0,606 |
| 10 | Q8NE71 ABCF1_HUMAN  | K.LSVPT#S#DEEDEVPAPKPR.G            | T108:S109:      | 3 | 3,3353 | 0,244 | 0,172  |
| 10 | Q70EL4 UBP43_HUMAN  | K.YHT#LS#LGR.K                      | T1110:S1112:    | 2 | 2,6513 | 0,195 | -0,22  |
| 10 | Q9Y6M7 S4A7_HUMAN   | R.M*LQDDDDT#VHLPFEGGSLQIPVK.A       | T1167:          | 3 | 6,5793 | 0,476 | -0,464 |
| 10 | Q96T60 PNKP_HUMAN   | R.TPESQPDT#PPGTPLVS#QDEKR.D         | T118:S126:      | 3 | 3,177  | 0,203 | -0,3   |
| 10 | Q70E73 RAPH1_HUMAN  | R.NDST#RLTQAEISEQPTM*ATVVPQVPTSPK.S | T1183:          | 3 | 2,8566 | 0,369 | -0,114 |
| 10 | P11388 TOP2A_HUMAN  | K.IKNENT#EGS#PQEDGVELEGLK.Q         | T1244:S1247:    | 3 | 4,4711 | 0,487 | -0,15  |
| 10 | O75976 CBPD_HUMAN   | K.SLLSHEFQDET#DT#EEETLYSSK.H        | T1368:T1370:    | 3 | 4,151  | 0,4   | 1,132  |
| 10 | Q53T59 H1BP3_HUMAN  | K.DAELAGSPELLEFLGT#RSPGAAGLTSR.D    | T137:           | 3 | 2,8413 | 0,31  | -0,196 |
| 10 | Q9BRD0 BUD13_HUMAN  | R.HDT#PDPS#PLR.G                    | T159:S163:      | 2 | 3,3263 | 0,343 | -0,188 |
| 10 | Q5THJ4 VP13D_HUMAN  | K.EVQDKDYPLT#PPPS#PTVDEPK.I         | T1761:S1765:    | 3 | 3,595  | 0,344 | 0      |
| 10 | Q9UGU0 TCF20_HUMAN  | K.SASNGSKT#DT#EEEEQQQQK.E           | T1762:T1764:    | 3 | 4,8536 | 0,207 | -0,432 |
| 10 | Q9H7D0 DOCK5_HUMAN  | R.LSPFHGSSPPQST#PLS#PPPLTPK.A       | T1786:S1789:    | 3 | 3,4348 | 0,097 | 0,362  |
| 10 | Q9H1E3 NUCKS_HUMAN  | K.ATVT#PS#PVKKG.G                   | T179:S181:      | 2 | 2,35   | 0,446 | -0,49  |
| 10 | Q9Y4M2 Q9Y4M2_HUMAN | R.APDKGT#DSPS#PPPLEETSNGGR.M        | T18:S22:        | 3 | 3,6804 | 0,255 | 0,927  |
| 10 | Q8WVC0 LEO1_HUMAN   | K.MQNT#DDEERPQLS#DDER.Q             | T188:S197:      | 3 | 3,8077 | 0,353 | 0,327  |
| 10 | Q8WVC0 LEO1_HUMAN   | K.M*QNT#DDEERPQLS#DDER.Q            | T188:S197:      | 3 | 3,6341 | 0,211 | -0,649 |

|    |                    |                                   |                 |   |        |       |        |
|----|--------------------|-----------------------------------|-----------------|---|--------|-------|--------|
| 10 | Q4W5G0 TIGD2_HUMAN | K.CLPSRT#LT#LETDQS#TSGCR.S        | T190:T192:S198: | 3 | 3,0867 | 0,17  | -0,906 |
| 10 | Q12802 AKP13_HUMAN | K.FLSHST#DS#LNK.I                 | T1930:S1932:    | 2 | 2,7582 | 0,301 | -0,52  |
| 10 | P18858 DNL1_HUMAN  | K.TSKAET#PTESVS#EPEVATK.Q         | T195:S201:      | 3 | 3,7503 | 0,183 | 0,595  |
| 10 | Q9H1E3 NUCKS_HUMAN | K.EKT#PS#PKEEDEEPES#PPEK.K        | T202:S204:S214: | 3 | 2,7856 | 0,138 | -0,302 |
| 10 | Q7Z589 EMSY_HUMAN  | R.RT#NS#SSSSPVVVK.E               | T207:S209:      | 2 | 3,0174 | 0,288 | 0,08   |
| 10 | Q7L2J0 MEPCE_HUMAN | R.TLNAET#PKSS#PLPAK.G             | T213:S217:      | 2 | 3,7033 | 0,361 | 0,427  |
| 10 | Q9Y3Q8 T22D4_HUMAN | R.VEAEAGGSGART#PPLS#R.R           | T229:S233:      | 3 | 3,1207 | 0,283 | 0      |
| 10 | Q96MH2 HEXI2_HUMAN | K.T#SGAGPSPQT#PPERHDSGSLPLT#PR.M  | T23:T32:T46:    | 3 | 4,0109 | 1     | -0,258 |
| 10 | Q5T200 ZC3HD_HUMAN | R.KT#SAVSS#PLLDQQR.N              | T237:S242:      | 3 | 3,3664 | 0,27  | 0,216  |
| 10 | Q9Y3Y2 CA077_HUMAN | K.GHLDAELDAYM*AQT#DPETND.-        | T242:           | 3 | 3,9326 | 0,448 | -0,159 |
| 10 | P10398 ARAF_HUMAN  | R.GGSDGT#PRGS#PSPASVSSGR.K        | T253:S257:      | 3 | 3,4034 | 0,406 | -0,278 |
| 10 | P17275 JUNB_HUMAN  | R.SRDAT#PPVS#PINM*EDQER.I         | T255:S259:      | 3 | 3,1315 | 0,405 | -0,412 |
| 10 | Q63ZY6 NSN5C_HUMAN | K.ASAPERT#PS#PAPK.R               | T258:S260:      | 2 | 2,5695 | 0,12  | -0,498 |
| 10 | Q7Z2W4 ZCCHV_HUMAN | R.SCT#PS#PDQISHR.A                | T273:S275:      | 2 | 2,8877 | 0,137 | -0,237 |
| 10 | Q7Z2W4 ZCCHV_HUMAN | R.SCT#PS#PDQISHR.A                | T273:S275:      | 3 | 2,7653 | 0,218 | 0,118  |
| 10 | P27816 MAP4_HUMAN  | K.DM*ESPT#KLDVTLAK.D              | T282:           | 3 | 3,6251 | 0,264 | 0,111  |
| 10 | O95817 BAG3_HUMAN  | R.SST#PLHS#PSPIR.V                | T285:S289:      | 3 | 3,0669 | 0,19  | 0,064  |
| 10 | Q02952 AKA12_HUMAN | K.SAESPT#SPVT#SETGSTFKK.F         | T285:T289:      | 3 | 3,2036 | 0,263 | -0,174 |
| 10 | Q8N1G2 K0082_HUMAN | R.VAELALSLSST#S#DDEPPSSVSHGAK.A   | T30:S31:        | 3 | 3,5469 | 1     | 0,9    |
| 10 | Q99460 PSMD1_HUMAN | K.TSSAFVGTK#PEAS#PEPK.D           | T311:S315:      | 2 | 4,6122 | 0,512 | -0,516 |
| 10 | Q13426 XRCC4_HUMAN | K.EHISAENM*SLET#LRNS#SPEDLFDEI.-  | T323:S327:      | 3 | 3,1393 | 0,321 | -0,3   |
| 10 | Q92597 NDRG1_HUMAN | R.SRT#AS#GSSVTSLDGTR.S            | T328:S330:      | 2 | 3,624  | 1     | -0,56  |
| 10 | Q9UN36 NDRG2_HUMAN | R.SRT#AS#LTSAAASVDGNR.S           | T330:S332:      | 2 | 4,4169 | 1     | -0,487 |
| 10 | P46013 KI67_HUMAN  | K.M*KT#PVQYQQQNS#PQK.H            | T347:S357:      | 3 | 5,0458 | 0,334 | -0,442 |
| 10 | Q9UQ35 SRRM2_HUMAN | R.HGGSPQPLAT#TPLSQEPVNPPEAS#PTR.D | T383:S398:      | 3 | 3,6476 | 1     | -0,182 |
| 10 | P17096 HMGA1_HUMAN | R.KQPPVSPGT#ALVGSQKEPS#EVPT#PK.R  | T39:S49:T53:    | 3 | 3,9124 | 0,32  | -0,065 |
| 10 | P36507 MP2K2_HUMAN | R.LNQPGT#PTR.T                    | T394:           | 2 | 2,3803 | 0,149 | -0,459 |
| 10 | Q14247 SRC8_HUMAN  | R.AKTQT#PPVS#PAPQTEER.L           | T401:S405:      | 3 | 3,8997 | 0,306 | 0,087  |
| 10 | P51116 FXR2_HUMAN  | K.AGYST#DESS#SSSLHATR.T           | T411:S415:      | 3 | 2,6576 | 0,368 | 0,095  |
| 10 | P85037 FOXK1_HUMAN | R.SGGLQT#PECLS#REGS#PIPHDPEFGSK.L | T436:S441:S445: | 3 | 3,4172 | 0,424 | -0,242 |
| 10 | P23443 KS6B1_HUMAN | R.FIGSPRT#PVS#PVK.F               | T444:S447:      | 2 | 3,2847 | 0,258 | -0,316 |
| 10 | O43379 WDR62_HUMAN | R.T#RLS#TASEETVQNR.V              | T46:S49:        | 3 | 3,7999 | 0,285 | -0,209 |
| 10 | Q16555 DPYL2_HUMAN | K.TVT#PAS#SAKTS#PAKQQAPPVR.N      | T514:S517:S522: | 3 | 3,0089 | 1     | -0,387 |

|    |                    |                                   |              |   |        |       |        |
|----|--------------------|-----------------------------------|--------------|---|--------|-------|--------|
| 10 | P05362 ICAM1_HUMAN | R.LQQAQKGT#PM*KPNTQAT#PP.-        | T521:T530:   | 3 | 4,0416 | 0,229 | -0,331 |
| 10 | Q16513 PKN2_HUMAN  | R.AIPT#VNHSGETSPQAPVPTTVPVVDVR.I  | T527:        | 3 | 3,9948 | 0,248 | 0,83   |
| 10 | P05362 ICAM1_HUMAN | K.GTPM*KPNTQAT#PP.-               | T530:        | 2 | 2,2132 | 0,291 | -0,17  |
| 10 | Q9Y618 NCOR2_HUMAN | K.TDDT#S#GEDNDEKEAVASK.G          | T553:S554:   | 3 | 4,8708 | 0,378 | -0,353 |
| 10 | P01106 MYC_HUMAN   | K.KFELLPT#PPLS#PSR.R              | T58:S62:     | 2 | 3,011  | 0,363 | -0,28  |
| 10 | P13051 UNG_HUMAN   | K.KAPAGQEETPGT#PPS#SPLSAEQLDR.I   | T60:S63:     | 3 | 5,3199 | 0,533 | -0,209 |
| 10 | P13051 UNG_HUMAN   | K.KAPAGQEETPGT#PPSS#PLSAEQLDR.I   | T60:S64:     | 3 | 4,4876 | 0,393 | -0,279 |
| 10 | Q2M218 AAK1_HUMAN  | K.VGSLT#PPSS#PKTQR.A              | T620:S624:   | 3 | 3,1313 | 0,292 | 0      |
| 10 | P98174 FGD1_HUMAN  | K.LLNSTNREDED#PPNS#PNVDLGK.R      | T711:S715:   | 3 | 5,0888 | 0,268 | 0,068  |
| 10 | Q5VT52 K0460_HUMAN | R.SGT#PTQDEMM*DKPTSSSVDTM*SLLSK.I | T732:        | 3 | 3,4896 | 0,348 | -0,444 |
| 10 | Q5VT52 K0460_HUMAN | R.SGT#PTQDEM*M*DKPTSSSVDTMSLLSK.I | T732:        | 3 | 3,4036 | 0,339 | -0,127 |
| 10 | Q9ULL5 PRR12_HUMAN | K.KQETAAVCGET#DEEAGES#GGEGIFR.E   | T740:S747:   | 3 | 6,0569 | 0,495 | 0,525  |
| 10 | Q8TAP8 CG047_HUMAN | R.LT#PPSPVRSEPPAVPQELEM*PVLK.S    | T84:         | 3 | 2,7464 | 0,124 | 0,839  |
| 10 | Q8IYB3 SRRM1_HUMAN | K.KET#ES#EAEDNLDDLEK.H            | T872:S874:   | 3 | 6,3287 | 0,49  | 0,542  |
| 10 | Q76FK4 NOL8_HUMAN  | R.FLET#DS#EEEQEEVNEKK.T           | T888:S890:   | 3 | 3,8683 | 0,315 | -0,408 |
| 10 | Q8NFC6 FA44A_HUMAN | K.QHY#LSS#EDEPDDNPDVLSR.I         | Y2777:S2780: | 3 | 3,356  | 0,252 | -0,147 |
| 10 | Q14247 SRC8_HUMAN  | K.AELSY#RGPVSGTEPEPVYSM*EAADYR.E  | Y433:        | 3 | 6,0081 | 0,543 | 0      |
| 10 | Q9NRF8 PYRG2_HUMAN | K.LSSSDRY#SDAS#DDSFSEPR.I         | Y567:S571:   | 3 | 4,6393 | 1     | -0,241 |
| 10 | P05783 K1C18_HUMAN | R.LLEDGEDFNGLDALDSSNSM*QTIQK.T    |              | 3 | 6,6878 | 0,556 | -0,199 |
| 10 | Q6S8J3 A26CA_HUMAN | K.LCYVALDFEQEM*ATAASSSLEK.S       |              | 3 | 6,6005 | 0,522 | 0,214  |
| 10 | P14618 KPYM_HUMAN  | R.AEGSDVANAVLDGADCIM*LSGETAK.G    |              | 3 | 6,3481 | 0,654 | -0,146 |
| 10 | P60709 ACTB_HUMAN  | K.DLYANTVLSGGTTM*YPGIADR.M        |              | 3 | 6,3224 | 0,584 | 0,738  |
| 10 | P61978 HNRPK_HUMAN | R.IITITGTQDQIQNAQYLLQNSVK.Q       |              | 3 | 5,9922 | 0,478 | -0,353 |
| 10 | Q9H0N0 RAB6C_HUMAN | R.DSAAAVVYDITNVNSFQQTK.W          |              | 3 | 5,7879 | 0,509 | -0,077 |
| 10 | P14618 KPYM_HUMAN  | R.LAPITSDPTEATAVGAVEASFK.C        |              | 3 | 5,6502 | 0,46  | 0      |
| 10 | P25205 MCM3_HUMAN  | R.DYLDFLDDEEDQGIYQSK.V            |              | 3 | 5,4853 | 0,507 | -0,083 |
| 10 | P10809 CH60_HUMAN  | K.IM*QSSSEVGYDAM*AGDFVNM*VEK.G    |              | 3 | 5,2975 | 0,419 | -0,143 |
| 10 | Q7Z417 NUFP2_HUMAN | K.DYEIESQNPLASPTNTLLGSAK.E        |              | 3 | 5,2791 | 0,393 | 0,078  |
| 10 | Q8TAQ2 SMRC2_HUMAN | R.DIGEGNLSTAAAAAALAAAVK.A         |              | 2 | 5,266  | 0,552 | -0,453 |
| 10 | P42765 THIM_HUMAN  | K.DM*DLVEVNEAFAPQYLAVR.S          |              | 3 | 5,2579 | 0,439 | -0,315 |
| 10 | P31930 QCR1_HUMAN  | K.AVELLGDIVQNCLEDSQIEK.E          |              | 3 | 5,2186 | 0,537 | -0,078 |
| 10 | P13667 PDIA4_HUMAN | K.DFPEYTFIAIDEEDYAGEVK.D          |              | 3 | 5,1574 | 0,491 | -0,158 |
| 10 | P55263 ADK_HUMAN   | R.DDTIM*ATESEVTAFVLDQDQK.E        |              | 3 | 4,9378 | 0,548 | -0,15  |

|    |                     |                                |   |        |       |        |
|----|---------------------|--------------------------------|---|--------|-------|--------|
| 10 | P35579 MYH9_HUMAN   | K.DFSALESQLQDTQELLQEENR.Q      | 3 | 4,9344 | 0,598 | -0,22  |
| 10 | Q71U36 TBA1A_HUMAN  | R.AVFVDLEPTVIDEVR.T            | 3 | 4,7831 | 0,464 | -0,215 |
| 10 | Q13547 HDAC1_HUMAN  | K.VM*EM*FQPSAVVLQCGSDSLSGDR.L  | 3 | 4,6377 | 0,418 | 0,072  |
| 10 | P55072 TERA_HUMAN   | R.LIVDEAINEDNSVVLSQPK.M        | 3 | 4,6344 | 0,344 | 0,421  |
| 10 | Q8TAQ2 SMRC2_HUMAN  | R.DIGEGNLSTAAAAALAAAVK.A       | 3 | 4,6032 | 0,405 | -0,097 |
| 10 | O00299 CLIC1_HUMAN  | R.EEFASTCPDDEEIELAYEQVAK.A     | 3 | 4,5963 | 0,521 | -0,213 |
| 10 | P55060 XPO2_HUMAN   | K.LLQTDDEEEAGLLELLK.S          | 3 | 4,588  | 0,284 | -0,284 |
| 10 | P04406 G3P_HUMAN    | K.WGDAGAIEYVVESTGVFTTM*EK.A    | 3 | 4,5639 | 0,441 | -0,239 |
| 10 | P31689 DNJA1_HUMAN  | K.EVEETDEM*DQVELVDFDPNQR.R     | 3 | 4,5156 | 0,437 | 0,068  |
| 10 | Q96ST2 IWS1_HUMAN   | R.DGGTFISDADDVVSAM*IVK.M       | 2 | 4,5046 | 0,516 | -0,125 |
| 10 | P43490 NAMPT_HUMAN  | R.VIQGDGVDINTLQEIVEGM*K.Q      | 3 | 4,4838 | 0,434 | -0,084 |
| 10 | Q09666 AHNK_HUMAN   | K.ADIDVSGPSVDTDAPDLIDIEGPEGK.L | 3 | 4,4387 | 0,321 | 0      |
| 10 | P11586 C1TC_HUMAN   | K.LVGPEGFVVTEAGFGADIGM*EK.F    | 3 | 4,432  | 0,42  | 0,082  |
| 10 | P08238 HS90B_HUMAN  | R.GFEVVYM*TEPIDEYCVQLK.E       | 3 | 4,4158 | 0,54  | 0,297  |
| 10 | Q03252 LMNB2_HUMAN  | R.DVM*QQQLAEYQELLDVK.L         | 3 | 4,3935 | 0,29  | 0      |
| 10 | Q9Y490 TLN1_HUMAN   | K.LGAASLGAEDPETQVVLINAVK.D     | 3 | 4,3729 | 0,428 | -0,083 |
| 10 | Q07021 C1QBP_HUMAN  | K.VEEQEPELTSTPNFVVEVIK.N       | 3 | 4,3627 | 0,414 | 0,08   |
| 10 | P23528 COF1_HUMAN   | K.EILVGDVGQTVDDPYATFVK.M       | 3 | 4,359  | 0,446 | 0      |
| 10 | P0C0S8 H2A1_HUMAN   | K.VTIAQGGVLPNIQAVLLPK.K        | 3 | 4,3131 | 0,363 | -0,474 |
| 10 | P22314 UBA1_HUMAN   | K.SLVASLAEPDFVVTDFAK.F         | 3 | 4,2499 | 0,415 | -0,192 |
| 10 | P13010 KU86_HUMAN   | K.YAPTEAQLNAVDALIDSM*SLAK.K    | 3 | 4,2196 | 0,35  | -0,391 |
| 10 | Q9Y490 TLN1_HUMAN   | K.AQEACGPLEM*DSALSVVQNLEK.D    | 3 | 4,1802 | 0,278 | 0,152  |
| 10 | Q92882 OSTF1_HUMAN  | K.DIVEM*LFTQPNIELNQNK.L        | 3 | 4,1691 | 0,321 | -0,719 |
| 10 | P36957 ODO2_HUMAN   | K.ASAFALQEQPVVNAVIDDTTK.E      | 3 | 4,1598 | 0,451 | -0,165 |
| 10 | P31939 PUR9_HUMAN   | R.EVSDGIIAPGYEEEALTILSK.K      | 3 | 4,1183 | 0,401 | -0,164 |
| 10 | P48047 ATPO_HUMAN   | R.GEVPCTVTSASPLEEATLSELK.T     | 3 | 4,1009 | 0,467 | 0      |
| 10 | Q86UA3 Q86UA3_HUMAN | K.LLAQLLGTSEEDSM*VGTLYDK.M     | 3 | 4,1005 | 0,395 | -0,159 |
| 10 | P54105 ICLN_HUMAN   | R.DYEDGM*EVDTTPTVAGQFEDADVDH.- | 3 | 4,0696 | 0,393 | -0,132 |
| 10 | P49327 FAS_HUMAN    | K.LPEDPLLSGLLDSPALK.A          | 2 | 4,0363 | 0,483 | -0,343 |
| 10 | Q15365 PCBP1_HUMAN  | R.VM*TIPYQPM*PASSPVICAGGQDR.C  | 3 | 4,0362 | 0,507 | 0,073  |
| 10 | P22314 UBA1_HUMAN   | K.SLVASLAEPDFVVTDFAK.F         | 2 | 4,0035 | 0,457 | -0,256 |
| 10 | Q53T59 H1BP3_HUMAN  | K.DAELAGSPELLEFLGTR.S          | 2 | 3,9827 | 0,551 | -0,336 |
| 10 | P50991 TCPD_HUMAN   | K.LGGTIDDCELVEGLVLTQK.V        | 3 | 3,9701 | 0,423 | -0,444 |

|    |                    |                              |   |        |       |        |
|----|--------------------|------------------------------|---|--------|-------|--------|
| 10 | Q9NQW6 ANLN_HUMAN  | K.VINDLFSVDVLEEGELDM*EK.S    | 3 | 3,9513 | 0,436 | 0,083  |
| 10 | P78527 PRKDC_HUMAN | K.ITAQSIEELCAVNLYGPDAQVDR.S  | 3 | 3,8974 | 0,32  | -0,071 |
| 10 | Q9Y490 TLN1_HUMAN  | R.IPEAPAGPPSDFGLFLSDDDPK.K   | 3 | 3,8549 | 0,388 | 0      |
| 10 | P42166 LAP2A_HUMAN | R.DSGSFVAFQNIPEGSELM*SSFAK.T | 3 | 3,8361 | 0,366 | -0,392 |
| 10 | P27708 PYR1_HUMAN  | R.VIM*GEEVEPVGLM*TGSGVVGVK.V | 3 | 3,832  | 0,368 | 0      |
| 10 | Q92547 TOPB1_HUMAN | K.DDEPDPLILEENDVDNM*ATNNK.E  | 3 | 3,8175 | 0,386 | 0,872  |
| 10 | P19338 NUCL_HUMAN  | K.VEGTEPTTAFNLFVGNLNFNK.S    | 3 | 3,7943 | 0,297 | -0,158 |
| 10 | P08708 RS17_HUMAN  | R.DNYVPEVSALDQEIEVDPDTK.E    | 3 | 3,7423 | 0,305 | -0,294 |
| 10 | Q96ST2 IWS1_HUMAN  | R.DGGTFISDADDVVSAM*IVK.M     | 3 | 3,733  | 0,367 | -0,281 |
| 10 | Q9Y696 CLIC4_HUMAN | K.LDEYLN SPLPDEIDENSM*EDIK.F | 3 | 3,7211 | 0,326 | 0,705  |
| 10 | Q99459 CDC5L_HUMAN | K.LVLPAPQISDAELQEVVK.V       | 3 | 3,7071 | 0,155 | -0,375 |
| 10 | P12004 PCNA_HUMAN  | K.LM*DLDVEQLGIPEQEYSCVVK.M   | 3 | 3,6856 | 0,241 | 0      |
| 10 | P38432 P80C_HUMAN  | K.DYSLPLLLAAPQVGEK.I         | 2 | 3,6771 | 0,513 | -0,137 |
| 10 | O15371 EIF3D_HUMAN | R.YLEVSEPDIECCGALEYDYK.A     | 3 | 3,6534 | 0,314 | -0,142 |
| 10 | O14929 HAT1_HUMAN  | R.YYTEFPTVLDITAEDPSK.S       | 3 | 3,6531 | 0,288 | -0,175 |
| 10 | P49321 NASP_HUMAN  | K.DGAVNGPSVVGDTPIEPQTSIER.L  | 3 | 3,6465 | 0,314 | -0,223 |
| 10 | Q71U36 TBA1A_HUMAN | R.AVFVDLEPTVIDEVR.T          | 2 | 3,6377 | 0,448 | -0,215 |
| 10 | O00159 MYO1C_HUMAN | R.DGTIDFTPGSELLITK.A         | 2 | 3,6151 | 0,525 | -0,214 |
| 10 | P34931 HS71L_HUMAN | K.SINPDEAVAYGAAVQAAILM*GDK.S | 3 | 3,61   | 0,389 | -0,315 |
| 10 | P09972 ALDOC_HUMAN | K.GVVPLAGTDGETTTQGLDGLSER.C  | 3 | 3,6002 | 0,31  | 0,483  |
| 10 | P62854 RS26_HUMAN  | R.DISEASVFDAYVLPK.L          | 2 | 3,5918 | 0,504 | -0,369 |
| 10 | P07737 PROF1_HUMAN | R.DSLLQDGEFSM*DLR.T          | 2 | 3,5682 | 0,484 | -0,149 |
| 10 | P11142 HSP7C_HUMAN | K.SINPDEAVAYGAAVQAAILSGDK.S  | 3 | 3,5288 | 0,308 | -0,243 |
| 10 | Q8TCS8 PNPT1_HUMAN | R.LLTDILGIEDYNGDM*DFK.I      | 3 | 3,5203 | 0,412 | -0,175 |
| 10 | P06576 ATPB_HUMAN  | R.AIAELGIYPAVDPLDSTR.I       | 3 | 3,5034 | 0,253 | -0,184 |
| 10 | P21333 FLNA_HUMAN  | K.DGSCGVAYVVQEPGDYEVSVK.F    | 3 | 3,5019 | 0,236 | 0,081  |
| 10 | P05388 RLA0_HUMAN  | R.AGAIAPCEVTVPAQNTGLGPEK.T   | 3 | 3,4969 | 0,393 | 0,923  |
| 10 | P17980 PRS6A_HUMAN | K.DSYLILETLPTDYDSR.V         | 2 | 3,4962 | 0,459 | -0,382 |
| 10 | Q86W92 LIPB1_HUMAN | R.DAM*ELPDYVLLTATAK.V        | 3 | 3,4914 | 0,354 | -0,311 |
| 10 | P42704 LPPRC_HUMAN | R.DAGIEPGPDTYLALLNAYA EK.G   | 3 | 3,491  | 0,321 | -0,412 |
| 10 | P53992 SC24C_HUMAN | R.ETETVFPVIQAGM*EALK.A       | 3 | 3,4867 | 0,242 | -0,092 |
| 10 | P30041 PRDX6_HUMAN | K.DGD SVM*VLPTIPEEEAK.K      | 2 | 3,4835 | 0,293 | -0,132 |
| 10 | Q15020 SART3_HUMAN | K.DSITV FVSNLPYSM*QEPDTK.L   | 3 | 3,4338 | 0,351 | -0,08  |



|    |                    |                                |   |        |       |        |
|----|--------------------|--------------------------------|---|--------|-------|--------|
| 10 | P26641 EF1G_HUMAN  | K.AAAPAPEEEM*DECEQALAAEPK.A    | 3 | 3,433  | 0,26  | -0,308 |
| 10 | Q9Y5K6 CD2AP_HUMAN | K.VLFEYIPQNEDELELK.V           | 2 | 3,367  | 0,383 | -0,185 |
| 10 | P06576 ATPB_HUMAN  | R.AIAELGIYPAVDPLDSTSR.I        | 2 | 3,3662 | 0,534 | -0,491 |
| 10 | Q13813 SPTA2_HUMAN | K.EAALTSEEVGADLEQVEVLQK.K      | 3 | 3,3321 | 0,258 | -0,324 |
| 10 | O95602 RPA1_HUMAN  | R.DSDGSSVVQFLYGEDGLDIPK.T      | 3 | 3,3114 | 0,248 | -0,425 |
| 10 | P06576 ATPB_HUMAN  | R.IPSAVGYQPTLATDM*GTM*QER.I    | 3 | 3,2574 | 0,185 | 0,08   |
| 10 | P60174 TPIS_HUMAN  | K.VPADTEVVCAPPTAYIDFAR.Q       | 3 | 3,2397 | 0,263 | -0,25  |
| 10 | P31948 STIP1_HUMAN | K.ELDPTNM*TYITNQAAVYFEK.G      | 3 | 3,2292 | 0,196 | -0,077 |
| 10 | P17987 TCPA_HUMAN  | K.M*LVDDIGDVTITNDGATILK.L      | 3 | 3,166  | 0,157 | 0,086  |
| 10 | POC0S8 H2A1_HUMAN  | K.VTIAQGGVLPNIQAVLLPK.K        | 2 | 3,1579 | 0,457 | -0,695 |
| 10 | P23786 CPT2_HUMAN  | K.DSTQTPAVTPQSQPATTDSTVTVQK.L  | 3 | 3,1372 | 0,404 | -0,071 |
| 10 | Q14974 IMB1_HUMAN  | K.ESTLEAIGYICQDIDPEQLQDK.S     | 3 | 3,131  | 0,39  | -0,071 |
| 10 | P50991 TCPD_HUMAN  | K.AQDIEAGDGTTSSVIIAGSLLDSCTK.L | 3 | 3,1181 | 0,301 | 0,07   |
| 10 | P21333 FLNA_HUMAN  | K.YTPVQQGPVGVNVTYGGDPIPK.S     | 3 | 3,1092 | 0,328 | -0,32  |
| 10 | Q13561 DCTN2_HUMAN | K.LLGPDAAINLTDPDGALAK.R        | 2 | 3,1048 | 0,298 | -0,131 |
| 10 | P00338 LDHA_HUMAN  | K.DLADELALVDVIEDK.L            | 2 | 3,1043 | 0,457 | -0,294 |
| 10 | O95602 RPA1_HUMAN  | R.DSDGSSVVQFLYGEDGLDIPK.T      | 2 | 3,072  | 0,385 | -0,113 |
| 10 | Q9Y4L1 HYOU1_HUMAN | R.LIPEM*DQIFTEVEM*TTLEK.V      | 3 | 3,0553 | 0,329 | 0,159  |
| 10 | P84077 ARF1_HUMAN  | R.DAVLLVFANK.Q                 | 2 | 3,0539 | 0,472 | 0      |
| 10 | P35579 MYH9_HUMAN  | R.IIGLDQVAGM*SETALPGAFK.T      | 2 | 3,0145 | 0,523 | -0,18  |
| 10 | P40227 TCPZ_HUMAN  | K.NAIDDGCVVPGAGAVEVAM*AEALIK.H | 3 | 3,0132 | 0,219 | 0,294  |
| 10 | P22314 UBA1_HUMAN  | K.GNVQVVIPFLTESYSSSQDPPEK.S    | 3 | 3,0089 | 0,226 | -0,073 |
| 10 | Q86TX2 ACOT1_HUMAN | K.DGYADIVDVLNSPLEGPDQK.S       | 2 | 3,0053 | 0,528 | -0,455 |
| 10 | P40227 TCPZ_HUMAN  | K.VATAQDDITGDGTTSNVLIIGELLK.Q  | 3 | 3,0029 | 0,184 | -0,216 |
| 10 | Q9H7D0 DOCK5_HUMAN | R.DDNGNILDPEDETSTIALFK.A       | 3 | 2,9756 | 0,32  | -0,44  |
| 10 | Q9NVI1 FANCI_HUMAN | K.DVPLTAAEEFEVVEK.A            | 2 | 2,9732 | 0,353 | -0,143 |
| 10 | Q00653 NFKB2_HUMAN | K.EPAPETADGPYLVIVEQPK.Q        | 3 | 2,9692 | 0,244 | 0,267  |
| 10 | Q14008 CKAP5_HUMAN | K.LDDIFEPVLIPEK.I              | 2 | 2,9668 | 0,442 | -0,3   |
| 10 | P12956 KU70_HUMAN  | R.NIPPYFVALVPQEEELDDQK.I       | 3 | 2,9573 | 0,201 | -0,234 |
| 10 | Q7KZF4 SND1_HUMAN  | R.NLPGLVQEGEPFSEEATLFTK.E      | 3 | 2,9484 | 0,227 | -0,238 |
| 10 | Q96SB3 NEB2_HUMAN  | K.DSEGLGISIIGM*GAGADM*GLEK.L   | 3 | 2,9455 | 0,203 | -0,085 |
| 10 | Q86TX2 ACOT1_HUMAN | K.DGYADIVDVLNSPLEGPDQK.S       | 3 | 2,9129 | 0,2   | -0,256 |
| 10 | Q05519 SFR11_HUMAN | R.ALIVVPPYAEGVIPDEAK.A         | 3 | 2,9098 | 0,269 | 0,103  |

|    |                     |                               |   |        |       |        |
|----|---------------------|-------------------------------|---|--------|-------|--------|
| 10 | Q5H9R7 SAPS3_HUMAN  | R.DQM*LQIQNSTEPDLLATLEK.Q     | 3 | 2,8997 | 0,271 | 0,229  |
| 10 | Q14690 RRP5_HUMAN   | K.DSETVDEDEEVDPALTVGTIK.K     | 3 | 2,898  | 0,219 | -0,243 |
| 10 | P10809 CH60_HUMAN   | K.IM*QSSSEVGYDAMAGDFVNM*VEK.G | 3 | 2,8763 | 0,167 | -0,144 |
| 10 | Q9Y679 AUP1_HUMAN   | R.LPPTPLLLFPEEEATNGR.E        | 3 | 2,8752 | 0,222 | -0,275 |
| 10 | Q5UIP0 RIF1_HUMAN   | R.LVSDIIDPVALEIPLSK.N         | 2 | 2,867  | 0,436 | -0,067 |
| 10 | P12956 KU70_HUMAN   | R.DSLIFLVDASK.A               | 2 | 2,8533 | 0,307 | -0,202 |
| 10 | Q8TCS8 PNPT1_HUMAN  | R.LLTDILGIEDYNGDM*DFK.I       | 2 | 2,8447 | 0,609 | -0,467 |
| 10 | Q9BZE4 NOG1_HUMAN   | R.DLELEM*GDDYILDQLK.Y         | 2 | 2,8267 | 0,415 | -0,38  |
| 10 | P08648 ITA5_HUMAN   | R.DLDGNGYPDLIVGSFGVDK.A       | 2 | 2,8137 | 0,425 | -0,308 |
| 10 | Q92598 HS105_HUMAN  | R.GPFELEAFYSDPQGVYPEAK.I      | 3 | 2,8042 | 0,207 | -0,86  |
| 10 | P20042 IF2B_HUMAN   | K.IESDVQEPTEPEDDLDIM*LGNK.K   | 3 | 2,7794 | 0,338 | 0,073  |
| 10 | P62899 RL31_HUMAN   | K.LYTLVTVYVPVTTFK.N           | 2 | 2,7621 | 0,399 | -0,222 |
| 10 | Q9NWX6 THG1_HUMAN   | R.DYFEDQPLLYPPGFDGR.V         | 3 | 2,7458 | 0,343 | -0,27  |
| 10 | O60841 IF2P_HUMAN   | K.DDIDLALAAEIEGAGAAK.E        | 2 | 2,7327 | 0,424 | -0,197 |
| 10 | Q12906 ILF3_HUMAN   | R.VLECLASGIVM*PDGSGIYDPCEK.E  | 3 | 2,7289 | 0,106 | 0,29   |
| 10 | Q6PD62 CTR9_HUMAN   | K.DLITQATLLYTM*ADK.I          | 2 | 2,7284 | 0,359 | -0,57  |
| 10 | Q86Y56 HEAT2_HUMAN  | R.DVQETLM*PQVLTLEEDSK.M       | 3 | 2,7157 | 0,346 | -0,501 |
| 10 | P13667 PDIA4_HUMAN  | K.DGDDVIIIIGVFK.G             | 2 | 2,6884 | 0,141 | -0,473 |
| 10 | Q14152 EIF3A_HUMAN  | K.DIDIEDLEELDPDFIM*AK.Q       | 2 | 2,6819 | 0,53  | -0,343 |
| 10 | P62854 RS26_HUMAN   | R.DISEASVFDAYVLPK.L           | 3 | 2,6513 | 0,197 | 0      |
| 10 | Q92922 SMRC1_HUMAN  | K.DM*EDPTVPNIEEVVLPK.N        | 3 | 2,635  | 0,254 | 0,09   |
| 10 | Q92922 SMRC1_HUMAN  | K.DM*EDPTVPNIEEVVLPK.N        | 2 | 2,6165 | 0,522 | -0,239 |
| 10 | P35232 PHB_HUMAN    | K.AAELIANSLATAGDGLIELR.K      | 3 | 2,6096 | 0,195 | -0,183 |
| 10 | P52209 6PGD_HUMAN   | K.LVPLLDTGDIIDGGNSEYR.D       | 3 | 2,604  | 0,231 | -0,254 |
| 10 | Q59GR1 Q59GR1_HUMAN | K.DNGQAPFTITPVFSDFPVR.G       | 3 | 2,602  | 0,182 | -0,434 |
| 10 | Q15417 CNN3_HUMAN   | K.DGIILCELINK.L               | 2 | 2,5884 | 0,4   | -0,189 |
| 10 | Q9H7D0 DOCK5_HUMAN  | R.DDNGNILDPEDETSTIALFK.A      | 2 | 2,5353 | 0,461 | -0,352 |
| 10 | Q8TAQ2 SMRC2_HUMAN  | K.DM*DEPSPVPNVEEVTLPK.T       | 2 | 2,5166 | 0,347 | -0,061 |
| 10 | P62701 RS4X_HUMAN   | R.TDITYPAGFM*DVISIDK.T        | 2 | 2,385  | 0,265 | -0,706 |
| 10 | P10515 ODP2_HUMAN   | R.DVPLGTPLCIIVEK.E            | 2 | 2,3802 | 0,429 | -0,157 |
| 10 | P05388 RLA0_HUMAN   | R.VLALSVDYTFPLAEK.V           | 2 | 2,3784 | 0,318 | -0,193 |
| 10 | P13804 ETFA_HUMAN   | K.GLLPEELTPLILATQK.Q          | 2 | 2,3739 | 0,269 | -0,211 |
| 10 | P45974 UBP5_HUMAN   | R.DGLGLPDIVR.D                | 2 | 2,2926 | 0,088 | -0,549 |

|    |                    |                                    |                    |   |        |       |        |
|----|--------------------|------------------------------------|--------------------|---|--------|-------|--------|
| 10 | P61088 UBE2N_HUMAN | K.LEFLPEEYPM*AAPK.V                |                    | 2 | 2,2422 | 0,238 | 0,207  |
| 10 | Q92616 GCN1L_HUMAN | R.DGYIM*M*FNYPITFGDK.F             |                    | 2 | 2,1832 | 0,462 | -0,475 |
| 10 | Q8IXM3 RM41_HUMAN  | K.EM*VPEFVVPDLTGFK.L               |                    | 2 | 2,1674 | 0,253 | 0,071  |
| 10 | P62736 ACTA_HUMAN  | R.DLTDYLM*K.I                      |                    | 2 | 2,1521 | 0,298 | 0,06   |
| 10 | Q86W92 LIPB1_HUMAN | R.DAM*ELPDYVLLTATAK.V              |                    | 2 | 2,1452 | 0,33  | -0,414 |
| 10 | Q5TKA1 LIN9_HUMAN  | K.DLPDEIPLPLVIGTK.V                |                    | 2 | 2,1423 | 0,27  | -0,226 |
| 10 | P35606 COPB2_HUMAN | K.AAESLADPTEYENLFPGLK.E            |                    | 2 | 2,1403 | 0,416 | 0,236  |
| 10 | P28482 MK01_HUMAN  | K.DVYIVQDLM*ETDLYK.L               |                    | 2 | 2,1306 | 0,289 | 0,262  |
| 10 | Q8N8N7 ZADH1_HUMAN | K.DVPYPPPLSPAIEAIQK.E              |                    | 2 | 2,0818 | 0,231 | -0,332 |
| 10 | Q6ZSR9 YJ005_HUMAN | R.TTELPAAADPFALAPFPSK.S            |                    | 2 | 2,0411 | 0,277 | -0,261 |
| 10 | P42345 FRAP_HUMAN  | R.DLELAVPGTYDPNQPIIR.I             |                    | 2 | 2,006  | 0,209 | -0,182 |
| 11 | P14618 KPYM_HUMAN  | R.TATESFAS#DPILYRPVAVALDTK.G       | S100:              | 3 | 4,3573 | 0,382 | -0,216 |
| 11 | Q9BPX3 CND3_HUMAN  | K.SKLNLAQFLNEDLS#.-                | S1015:             | 2 | 5,1229 | 0,409 | -0,73  |
| 11 | P05387 RLA2_HUMAN  | K.DEKKEES#EES#DDDM*GFGLFD.-        | S102:S105:         | 3 | 3,2778 | 0,317 | -0,073 |
| 11 | Q9H2Y7 ZF106_HUMAN | R.RATGDGS#S#PELPSLER.K             | S1025:S1026:       | 2 | 4,2444 | 0,528 | -0,266 |
| 11 | P52926 HMGA2_HUMAN | K.KPAQEETEETSSQES#AEED.-           | S105:              | 3 | 4,0252 | 0,437 | -0,083 |
| 11 | Q8IXQ4 K1704_HUMAN | K.QDDS#PPRPIIGPALPPGFIK.S          | S105:              | 3 | 3,8663 | 0,175 | 0,083  |
| 11 | P20042 IF2B_HUMAN  | K.DLKIES#DVQEPTPEDDLDIM*LGNK.K     | S105:              | 3 | 3,4904 | 0,257 | -0,56  |
| 11 | Q6PKG0 LARP1_HUMAN | R.CPS#QSSSRPAAM*ISQPPPTPTGQPVR.E   | S1056:             | 3 | 4,1709 | 0,274 | -0,84  |
| 11 | Q6ZNB6 NFXL1_HUMAN | R.KLVEEQFS#SS#SEEGDEDFEGK.Q        | S106:S108:         | 3 | 3,981  | 0,429 | 0,289  |
| 11 | P26373 RL13_HUMAN  | R.NKS#TES#LQANVQR.L                | S106:S109:         | 2 | 3,965  | 0,413 | -0,299 |
| 11 | Q12789 TF3C1_HUMAN | R.KNS#STDQGS#DEEGSLQK.E            | S1062:S1068:       | 3 | 5,0849 | 0,436 | -0,371 |
| 11 | Q12789 TF3C1_HUMAN | R.KNS#STDQGS#DEEGSLQK.E            | S1062:S1068:       | 2 | 4,1144 | 0,526 | -0,434 |
| 11 | Q86YP4 P66A_HUMAN  | R.RPPSPDVIVLS#DNEQPSS#PR.V         | S107:S114:         | 3 | 2,9227 | 0,268 | 0,856  |
| 11 | Q6ZUT9 RA61L_HUMAN | R.RLS#ITS#LTGK.N                   | S1076:S1079:       | 2 | 3,1788 | 0,279 | -0,197 |
| 11 | P48634 BAT2_HUMAN  | R.TAS#ETRS#EGS#EYEEIPKR.R          | S1085:S1089:S1092: | 3 | 2,6587 | 0,218 | 0,079  |
| 11 | Q9UQ35 SRRM2_HUMAN | R.S#RS#SSPVTELASR.S                | S1099:S1101:       | 3 | 3,1074 | 0,134 | 0      |
| 11 | Q8IXM2 CQ049_HUMAN | K.VASGVLS#PPPAAPPPSSSVPEAGGPPIKK.Q | S110:              | 3 | 3,0982 | 0,158 | 0,064  |
| 11 | Q8WX93 PALLD_HUMAN | R.S#RS#RDS#GDENEPIQER.F            | S1116:S1118:S1121: | 3 | 4,1944 | 0,48  | -0,519 |
| 11 | Q3KQU3 MA7D1_HUMAN | R.RS#SQPSPT#AVPASDS#PPTKQEVK.K     | S112:T118:S125:    | 3 | 4,66   | 1     | 0,278  |
| 11 | Q3KQU3 MA7D1_HUMAN | R.RSS#QPS#PTAVPASDS#PPTKQEVK.K     | S113:S116:S125:    | 3 | 5,841  | 1     | -0,486 |
| 11 | O95785 WIZ_HUMAN   | K.KLPPPPGS#PLGHS#PTAS#PPPTAR.K     | S1146:S1151:S1155: | 3 | 3,5405 | 0,414 | 0,146  |
| 11 | O95785 WIZ_HUMAN   | K.KLPPPPGS#PLGHS#PT#ASPPPTAR.K     | S1146:S1151:T1153: | 3 | 3,7302 | 0,391 | 0,879  |

|    |                    |                                   |                    |   |        |       |        |
|----|--------------------|-----------------------------------|--------------------|---|--------|-------|--------|
| 11 | Q7Z309 F122B_HUMAN | K.RIDFTPVS#PAPS#PTR.G             | S115:S119:         | 2 | 4,1698 | 0,509 | 0,677  |
| 11 | Q7Z309 F122B_HUMAN | K.RIDFTPVS#PAPSPT#R.G             | S115:T121:         | 3 | 3,5204 | 0,235 | 0,102  |
| 11 | Q8TEP8 CE192_HUMAN | K.GEVISSGSKPLS#PGPCLDIPSILSNK.Q   | S1159:             | 3 | 3,7491 | 0,5   | -0,134 |
| 11 | Q5SYE7 NHSL1_HUMAN | R.S#PGAPSAGEAEARSPSTTLPDSSPSR.K   | S1167:             | 3 | 3,4265 | 0,43  | -0,328 |
| 11 | P36871 PGM1_HUMAN  | K.AIGGIILTAS#HNPPGGPNGDFGIK.F     | S117:              | 3 | 5,5331 | 0,494 | 0,08   |
| 11 | Q6R327 RICTR_HUMAN | K.HIEDTGS#TPS#IGENDLK.F           | S1174:S1177:       | 2 | 3,3707 | 0,277 | 0,124  |
| 11 | Q9Y6M7 S4A7_HUMAN  | R.M*LQDDDDTVHLPFEGGS#LLQIPVK.A    | S1176:             | 3 | 5,5692 | 0,396 | -0,397 |
| 11 | Q12888 TP53B_HUMAN | R.TS#SVLGM*SVESAPAVEEEEKGELEQK.E  | S118:              | 3 | 3,4004 | 0,259 | -0,256 |
| 11 | Q9NTI5 PDS5B_HUMAN | R.LDSSEM*DHS#ENEDYTM*SSPLPGK.K    | S1182:             | 3 | 4,0084 | 0,432 | -0,205 |
| 11 | O14737 PDCD5_HUMAN | R.KVM*DS#DEDDDY.-                 | S119:              | 2 | 2,4424 | 0,317 | -0,256 |
| 11 | Q8IX90 CM003_HUMAN | K.NSVHEQEAINS#DPELS#NCENFQK.T     | S119:S124:         | 3 | 4,4873 | 0,365 | -0,257 |
| 11 | P20020 AT2B1_HUMAN | R.IEDS#EPHIPLIDDTAEDDAPTK.R       | S1193:             | 3 | 7,6484 | 0,555 | 0,629  |
| 11 | Q13286 CLN3_HUMAN  | R.RFS#DS#EGEETVPEPR.L             | S12:S14:           | 2 | 3,8172 | 0,366 | -0,322 |
| 11 | Q07864 DPOE1_HUMAN | R.QVTM*AEASEDS#PRPSAPDM*EDFGLVK.L | S1204:             | 3 | 3,2312 | 0,354 | 1,128  |
| 11 | Q9Y5J1 UTP18_HUMAN | R.VQEHEDS#GDS#EVENEAK.G           | S121:S124:         | 3 | 4,5215 | 0,373 | -0,266 |
| 11 | Q9Y6M7 S4A7_HUMAN  | K.KYVDAETS#L.-                    | S1213:             | 2 | 2,7621 | 0,413 | 0,11   |
| 11 | Q07889 SOS1_HUMAN  | R.TPDVFSSS#PLHLQPPPLGK.K          | S1229:             | 3 | 2,9777 | 0,28  | -0,087 |
| 11 | Q96T23 RSF1_HUMAN  | R.GRS#T#DEYS#EADEEEEEEGKPSR.K     | S1267:T1268:S1272: | 3 | 5,9989 | 0,546 | -0,126 |
| 11 | Q8N488 RYBP_HUMAN  | K.SDILKDPPEANS#IQS#ANATTK.T       | S127:S130:         | 3 | 3,7126 | 0,421 | -0,374 |
| 11 | Q5VZK9 LR16A_HUMAN | R.TASRPDDIPDS#PS#SPK.V            | S1288:S1290:       | 2 | 2,7507 | 0,291 | 0,667  |
| 11 | Q5VZK9 LR16A_HUMAN | R.TASRPDDIPDS#PSS#PK.V            | S1288:S1291:       | 2 | 4,6313 | 0,368 | 0,4    |
| 11 | Q49A26 NP60_HUMAN  | R.KLS#LS#EGK.V                    | S130:S132:         | 2 | 2,3628 | 0,1   | -0,895 |
| 11 | O60293 CC131_HUMAN | R.KPISDNSFS#S#DEEQSTGPIK.Y        | S1303:S1304:       | 3 | 5,2354 | 0,371 | 0,079  |
| 11 | Q96QT6 PHF12_HUMAN | K.RTTS#PS#SDTDLLDR.S              | S131:S133:         | 2 | 3,3851 | 1     | -0,071 |
| 11 | O75494 FUSIP_HUMAN | R.S#RS#FDYNYR.R                   | S131:S133:         | 2 | 2,2516 | 0,48  | -0,357 |
| 11 | P38398 BRCA1_HUMAN | R.HQSES#QGVGLS#DKELVS#DDEER.G     | S1330:S1336:S1342: | 3 | 3,6646 | 0,396 | 0,136  |
| 11 | Q96HC4 PDLI5_HUMAN | K.APRPFGS#VSS#PK.V                | S134:S137:         | 3 | 2,8923 | 0,1   | 0      |
| 11 | O15381 NVL_HUMAN   | R.KGNPDS#VSNTP#PEM*EQR.E          | S134:T138:         | 3 | 3,4414 | 0,399 | 0,186  |
| 11 | Q12923 PTN13_HUMAN | K.TFSSS#PPKPGDIFEVELAK.N          | S1359:             | 3 | 2,975  | 0,291 | 0,086  |
| 11 | Q16656 NRF1_HUMAN  | R.VGQQAIVLCISPS#KPNPVFK.V         | S138:              | 3 | 4,1598 | 0,288 | 0,647  |
| 11 | P11388 TOP2A_HUMAN | K.GSVPLSS#SPPATHFPDETEITNPVFK.K   | S1392:             | 3 | 3,486  | 0,402 | 0,066  |
| 11 | Q7Z3C6 ATG9A_HUMAN | R.LEAS#YSDSPPGEEDLLVHVAEGSK.S     | S14:               | 3 | 3,9586 | 0,515 | -0,07  |
| 11 | P46821 MAP1B_HUMAN | K.VLSPLRS#PPLIGSESAYESFLSADDK.A   | S1400:             | 3 | 3,6204 | 0,372 | -0,32  |

|    |                    |                                      |                    |   |        |       |        |
|----|--------------------|--------------------------------------|--------------------|---|--------|-------|--------|
| 11 | Q6UB98 ANR12_HUMAN | K.NTAPVNTVM*DS#PVHLEPSSQVGVIQNK.S    | S1401:             | 3 | 3,721  | 0,27  | 0,928  |
| 11 | Q13177 PAK2_HUMAN  | K.YLS#FTPPEKDGFPSTPALNAK.G           | S141:              | 3 | 4,7782 | 0,442 | 0      |
| 11 | Q7Z2Z1 CO042_HUMAN | K.GLS#LSPQS#PPERR.G                  | S1428:S1433:       | 2 | 2,0549 | 0,104 | -0,077 |
| 11 | Q96E09 F122A_HUMAN | K.RIDFIPVS#PAPS#PTR.G                | S143:S147:         | 2 | 4,5258 | 0,541 | 0,673  |
| 11 | Q9BTC0 DIDO1_HUMAN | R.NS#VERPAEPVAGAATPSLVEQQK.M         | S1456:             | 3 | 3,0969 | 0,149 | -0,372 |
| 11 | P11388 TOP2A_HUMAN | R.KPS#TS#DDSDSNFEK.I                 | S1469:S1471:       | 2 | 3,6937 | 0,455 | 0,071  |
| 11 | Q9Y6N7 ROBO1_HUMAN | R.ETYDDLPPPPVPPAIKS#PTAQSK.T         | S1492:             | 3 | 3,0547 | 0,334 | 0,47   |
| 11 | Q9UQ35 SRRM2_HUMAN | R.S#RS#PSSPELNNK.C                   | S1497:S1499:       | 2 | 2,9121 | 0,289 | -0,248 |
| 11 | Q9NZ63 CI078_HUMAN | R.RGDS#ES#EEDEQDSEVR.L               | S15:S17:           | 2 | 2,0234 | 0,281 | -0,792 |
| 11 | Q02880 TOP2B_HUMAN | K.KVVEAVNS#DS#DSEFGIPK.K             | S1522:S1524:       | 3 | 2,9361 | 0,215 | 0,264  |
| 11 | Q9UQ35 SRRM2_HUMAN | R.SRSGS#S#QELDVKPSAS#PQER.S          | S1541:S1542:S1552: | 3 | 3,5991 | 1     | -0,69  |
| 11 | Q02880 TOP2B_HUMAN | R.KAS#GS#ENEGDYNPGR.K                | S1550:S1552:       | 3 | 4,6676 | 0,409 | -0,42  |
| 11 | Q02880 TOP2B_HUMAN | R.KAS#GS#ENEGDYNPGR.K                | S1550:S1552:       | 2 | 4,3758 | 0,359 | -0,701 |
| 11 | P51531 SMCA2_HUMAN | K.AKPVVS#DFDS#DEEQDER.E              | S1564:S1568:       | 3 | 4,5105 | 0,43  | -0,172 |
| 11 | O43166 SI1L1_HUMAN | K.FHALSSPQS#PPFST#PTSR.R             | S1568:T1573:       | 3 | 2,9635 | 0,208 | 0      |
| 11 | Q96ST2 IWS1_HUMAN  | K.HPAS#DS#EIEELQK.S                  | S157:S159:         | 2 | 2,3978 | 0,239 | 0,743  |
| 11 | O75376 NCOR1_HUMAN | K.HEAPS#SPISQPCGDDQNAS#PSK.L         | S157:S172:         | 3 | 4,1991 | 0,375 | -0,724 |
| 11 | P42166 LAP2A_HUMAN | R.EQGTERSR#ST#PLPTISSAENTR.Q         | S158:T160:         | 3 | 3,5764 | 1     | -0,423 |
| 11 | P16949 STMN1_HUMAN | K.RAS#GQAFELILS#PR.S                 | S16:S25:           | 3 | 3,9669 | 0,324 | -0,107 |
| 11 | Q8NI08 NCOA7_HUMAN | K.LFTHTIVPGQVLFVPDANS#PSSTLR.L       | S162:              | 3 | 3,7624 | 0,204 | -0,066 |
| 11 | O00566 MPP10_HUMAN | K.SDLRKS#PVFS#DEDS#DLDFDISK.L        | S163:S167:S171:    | 3 | 5,8915 | 0,53  | 0,664  |
| 11 | P32519 ELF1_HUMAN  | K.YADS#PGASS#PEQPKR.K                | S163:S168:         | 3 | 3,1948 | 0,253 | -0,105 |
| 11 | P18583 SON_HUMAN   | K.DTEEPLPVKESDQTLAALLS#PK.E          | S1697:             | 3 | 4,0158 | 0,477 | -0,52  |
| 11 | Q5VUA4 ZN318_HUMAN | R.LGS#PVDNLEDM*DRDDLTDSDVFTR.S       | S173:              | 3 | 4,8046 | 0,527 | -0,389 |
| 11 | Q6PGN9 PSRC1_HUMAN | K.RES#PTCNLFPASKS#PASS#PLTR.S        | S175:S186:S190:    | 3 | 4,529  | 1     | 0,208  |
| 11 | Q15024 EXOS7_HUMAN | R.VLEDEEGS#KDIELSDDPYDCIR.L          | S177:              | 3 | 6,2024 | 0,412 | 0,888  |
| 11 | Q58FF8 H90B2_HUMAN | K.IEDVGS#DEEDDSGKDKK.K               | S177:              | 3 | 3,4834 | 0,149 | -0,47  |
| 11 | P11137 MAP2_HUMAN  | R.VDHGAEIITQS#PGRS#SVAS#PR.R         | S1782:S1786:S1790: | 3 | 2,9703 | 0,191 | -0,152 |
| 11 | Q8NI08 NCOA7_HUMAN | R.LSSSSPGATVS#PSSSDAEYDKLPDADLAR.K   | S179:              | 3 | 4,0909 | 0,401 | -0,122 |
| 11 | Q86TB9 PATL1_HUMAN | R.RSTS#PIIGS#PPVR.A                  | S179:S184:         | 2 | 3,3307 | 0,431 | -0,08  |
| 11 | Q86TB9 PATL1_HUMAN | R.RSTS#PIIGS#PPVR.A                  | S179:S184:         | 3 | 2,7808 | 0,163 | 0,18   |
| 11 | P05783 K1C18_HUMAN | R.SLGS#VQAPSYGARPVSSAASVYAGAGGSGSR.I | S18:               | 3 | 3,8145 | 0,45  | -0,312 |
| 11 | Q7Z3C6 ATG9A_HUMAN | R.LEASYSYS#PPGEEDLLVHVAEGSK.S        | S18:               | 3 | 2,9115 | 0,215 | -0,351 |

|    |                    |                                     |                    |   |        |       |        |
|----|--------------------|-------------------------------------|--------------------|---|--------|-------|--------|
| 11 | Q5T230 UTF1_HUMAN  | R.RPPPLAPPAPPS#PAS#PDPEPR.T         | S18:S21:           | 3 | 5,0669 | 0,391 | 0      |
| 11 | P51636 CAV2_HUMAN  | K.ADVQLFM*DDDS#YSHHS#GLEADPEK.F     | S18:S23:           | 3 | 3,831  | 1     | 0,901  |
| 11 | Q9Y4B5 K0802_HUMAN | R.GRS#PS#PIGVGSEM*CR.E              | S1803:S1805:       | 2 | 2,4778 | 0,423 | 0,345  |
| 11 | Q9BVC5 ASHWN_HUMAN | R.KS#PSGPVK#PPLS#PVGTTVPK.L         | S182:S189:S193:    | 3 | 2,6195 | 0,163 | 0,08   |
| 11 | Q03164 HRX_HUMAN   | K.GPGEPPS#PTPLHPPTPPILSTDR.S        | S1837:             | 3 | 4,2703 | 0,408 | -0,223 |
| 11 | Q9H7D0 DOCK5_HUMAN | R.KSGIPTSEPGS#Q.-                   | S1869:             | 2 | 2,0789 | 0,187 | -0,192 |
| 11 | Q9Y2T7 YBOX2_HUMAN | R.FIPRPPS#VAPPPM*VAEIPSAGTGPVSK.G   | S189:              | 3 | 5,8321 | 0,523 | 0,133  |
| 11 | Q9UNF1 MAGD2_HUMAN | K.HLDGEEDGS#S#DQSQASGTTGGR.R        | S190:S191:         | 3 | 4,0557 | 0,409 | -0,233 |
| 11 | Q00587 BORG5_HUMAN | R.RSDS#LLS#FR.L                     | S192:S195:         | 2 | 2,2788 | 0,365 | 0,197  |
| 11 | Q14980 NUMA1_HUMAN | K.TCYPLESRPS#LSLGTITDEEM*K.T        | S1945:             | 3 | 4,119  | 0,342 | -0,558 |
| 11 | Q9BRD0 BUD13_HUMAN | R.HDS#PDPS#PPR.R                    | S197:S201:         | 2 | 2,3881 | 0,313 | -0,386 |
| 11 | Q9BZL6 KPCD2_HUMAN | R.RLS#ST#SLASGHS#VR.L               | S197:T199:S206:    | 3 | 2,6361 | 0,237 | 0      |
| 11 | Q92614 MY18A_HUMAN | K.NKLEGDS#DVDS#ELEDV.V              | S1970:S1974:       | 2 | 4,3818 | 0,54  | -0,123 |
| 11 | Q9Y657 SPIN1_HUMAN | R.IM#PDSNDS#PPAEREPEVVDVSLVVK.Q     | S199:              | 3 | 3,3348 | 0,308 | 1,071  |
| 11 | Q8NCF5 NF2IP_HUMAN | K.KTEFLDLDNSPLS#PPS#PR.T            | S201:S204:         | 3 | 2,6252 | 0,172 | 0,084  |
| 11 | Q9H4A3 WNK1_HUMAN  | R.DVDDGS#GS#PHS#PHQLSSK.S           | S2027:S2029:S2032: | 3 | 2,8415 | 0,408 | -0,438 |
| 11 | P00558 PGK1_HUMAN  | K.ALES#PERPFLAILGGAK.V              | S203:              | 3 | 3,4546 | 0,407 | -0,396 |
| 11 | Q92614 MY18A_HUMAN | R.YSHSYLS#DS#DTEAK.L                | S2041:S2043:       | 2 | 4,577  | 1     | -0,692 |
| 11 | O75179 ANR17_HUMAN | K.EHYPVSSPS#PS#PPAQPGGVSR.N         | S2045:S2047:       | 3 | 5,1146 | 1     | -0,077 |
| 11 | P80723 BASP_HUMAN  | K.AQGPAAS#AEKPKVEAPAANSQDQTVTKVKE.- | S205:              | 3 | 4,2071 | 0,284 | -0,308 |
| 11 | Q3L8U1 CHD9_HUMAN  | K.SENLKEEPQS#S#EEESM*SSVETR.T       | S2058:S2059:       | 3 | 4,6668 | 0,454 | -0,408 |
| 11 | Q6WKZ4 RFIP1_HUMAN | K.DSGSDTASAIIPSTTPSVSDDES#VVKDK.K   | S206:              | 3 | 4,4922 | 0,496 | 0      |
| 11 | Q5T200 ZC3HD_HUMAN | R.SKLS#PS#PSLR.K                    | S207:S209:         | 2 | 3,0795 | 0,283 | -0,792 |
| 11 | Q6P1L5 AL2SC_HUMAN | K.TRQPS#SS#PSSIIR.R                 | S208:S210:         | 2 | 2,3376 | 0,242 | -0,232 |
| 11 | Q9BYW2 SETD2_HUMAN | R.RSS#LS#PPSSAYER.G                 | S2080:S2082:       | 2 | 3,5185 | 0,38  | -0,229 |
| 11 | P25445 TNR6_HUMAN  | K.ENQGS#HESPTLNPEVAINLSDVDLSK.Y     | S209:              | 3 | 3,8147 | 0,391 | -0,246 |
| 11 | Q9UJV9 DDX41_HUMAN | R.TDEVPAGGS#RSEAEDDEDYVPYVPLR.Q     | S21:               | 3 | 2,852  | 0,322 | 0,344  |
| 11 | Q5HYW2 NHSL2_HUMAN | R.SVS#LVKDEPGLLEGGALPK.D            | S210:              | 3 | 3,2505 | 0,254 | 0,253  |
| 11 | Q9UQ35 SRRM2_HUMAN | R.NHS#GS#RT#PPVALNSSR.M             | S2100:S2102:T2104: | 3 | 3,3201 | 0,393 | 0,191  |
| 11 | Q9UQ35 SRRM2_HUMAN | R.NHS#GS#RT#PPVALNSSR.M             | S2100:S2102:T2104: | 2 | 2,9248 | 0,457 | 0,636  |
| 11 | Q8TF01 SFR18_HUMAN | R.S#PIALPVKQEPPIQIDAVK.R            | S211:              | 3 | 3,3358 | 0,172 | 0,455  |
| 11 | Q9H4L7 SMRCD_HUMAN | R.KLS#S#SS#EPYEEDEFNDDQSIKK.T       | S211:S212:S214:    | 3 | 5,4884 | 0,537 | 0,13   |
| 11 | Q9H4L7 SMRCD_HUMAN | R.KLS#S#SSEPY#EEDEFNDDQSIKK.T       | S211:S212:Y217:    | 3 | 4,5834 | 1     | -0,195 |

|    |                    |                                     |                    |   |        |       |        |
|----|--------------------|-------------------------------------|--------------------|---|--------|-------|--------|
| 11 | O60841 IF2P_HUMAN  | K.NKPGPNIES#GNEDDDAS#FK.I           | S214:S222:         | 3 | 4,1784 | 0,504 | -0,334 |
| 11 | Q01082 SPTB2_HUMAN | R.TSS#KES#SPIPS#PTSDRK.A            | S2161:S2164:S2169: | 3 | 3,3957 | 1     | -0,179 |
| 11 | Q9NQ57 INCE_HUMAN  | R.TLSPTPASATAPTSQGIPTSDEES#TPKK.S   | S218:              | 3 | 4,4227 | 0,397 | 0,635  |
| 11 | Q5VVJ2 MYSM1_HUMAN | K.IEKLS#DDEEVDITDEVDELSSQTPQK.N     | S218:              | 3 | 3,6209 | 0,429 | -0,421 |
| 11 | Q9BST9 RTKN_HUMAN  | R.LATKLS#S#SLGR.S                   | S218:S219:         | 3 | 2,8958 | 0,349 | 0,212  |
| 11 | Q9BST9 RTKN_HUMAN  | R.LATKLS#S#SLGR.S                   | S218:S219:         | 2 | 2,8796 | 0,385 | -0,377 |
| 11 | Q5VUA4 ZN318_HUMAN | K.DKLC#PLS#EPGDPSK.C                | S2189:S2192:       | 2 | 2,9002 | 0,243 | 0,614  |
| 11 | Q9NTJ3 SMC4_HUMAN  | R.REEGPPPPS#PDGAS#SDAEPEPPSGR.T     | S22:S27:           | 3 | 4,1559 | 0,348 | -0,205 |
| 11 | Q7Z5K2 WAPL_HUMAN  | K.RPES#PSEIS#PIK.G                  | S221:S226:         | 2 | 3,0333 | 0,494 | 0      |
| 11 | Q7Z5K2 WAPL_HUMAN  | K.RPESPS#EIS#PIK.G                  | S223:S226:         | 3 | 2,9176 | 0,181 | 0      |
| 11 | P49761 CLK3_HUMAN  | R.CEERS#PS#FGEDYYGPSR.S             | S224:S226:         | 3 | 3,2595 | 0,401 | 0,25   |
| 11 | P49761 CLK3_HUMAN  | R.CEERS#PS#FGEDYYGPS#RSR.H          | S224:S226:S235:    | 3 | 3,124  | 0,36  | -0,218 |
| 11 | P51608 MECP2_HUMAN | K.M*PFQTS#PGGKAEGGGATTSTQVM*VIK.R   | S229:              | 3 | 2,8717 | 0,207 | -0,272 |
| 11 | P31629 ZEP2_HUMAN  | R.GPHALQSSGPPS#TPSS#PR.L            | S2297:S2301:       | 2 | 2,7946 | 1     | -0,445 |
| 11 | P13051 UNG_HUMAN   | R.HAPS#PEPAVQGTGVAGVPEESGDAAAIPAK.K | S23:               | 3 | 3,9589 | 0,268 | 0      |
| 11 | Q96S82 UBL7_HUMAN  | R.DM*PGGFLFEGLS#DDEDDFHPNTR.S       | S230:              | 3 | 3,0741 | 0,336 | -0,406 |
| 11 | Q9BUB4 ADAT1_HUMAN | K.SGPISPGIHS#CDLTVEGLATVTR.I        | S232:              | 3 | 2,9704 | 0,23  | 0,374  |
| 11 | Q9H7L9 SDS3_HUMAN  | K.RPAS#PSS#PEHLPAT#PAESPAQR.F       | S234:S237:T244:    | 3 | 4,2639 | 0,329 | -0,29  |
| 11 | P62753 RS6_HUMAN   | R.LSS#LRAS#TSK.S                    | S236:S240:         | 2 | 2,0551 | 0,42  | -0,101 |
| 11 | P62753 RS6_HUMAN   | R.LSS#LRASTSKS#ESS#QK.-             | S236:S244:S247:    | 3 | 2,7251 | 1     | -0,567 |
| 11 | O95155 UBE4B_HUMAN | R.DENPFASLTATSQPIAAAARS#PDR.N       | S238:              | 3 | 4,1497 | 0,494 | 0      |
| 11 | Q5T200 ZC3HD_HUMAN | R.KTS#AVSS#PLLDQQR.N                | S238:S242:         | 2 | 4,2074 | 0,493 | -0,217 |
| 11 | Q9H7N4 SFR19_HUMAN | R.FDIYDPFHPTDEAYS#PPPAPEQK.Y        | S239:              | 3 | 5,4326 | 0,308 | -0,133 |
| 11 | P55884 EIF3B_HUMAN | K.GYIFLEYAS#PAHAVDAVK.N             | S239:              | 3 | 2,9822 | 0,319 | 0,18   |
| 11 | Q13136 LIPA1_HUMAN | K.RSS#DGS#LS#HEEDLAK.V              | S239:S242:S244:    | 2 | 3,8462 | 0,421 | -0,457 |
| 11 | P25054 APC_HUMAN   | R.KLEESAS#FESLSPSS#RPAS#PTR.S       | S2461:S2469:S2473: | 3 | 4,0695 | 1     | -0,07  |
| 11 | O95071 UBR5_HUMAN  | R.S#VVDM*DLDDTDDGDDNAPLFYQPGKR.G    | S2486:             | 3 | 4,7901 | 0,559 | 0,428  |
| 11 | P25788 PSA3_HUMAN  | K.ESLKEEDES#DDDNM*.-                | S250:              | 2 | 4,9803 | 0,571 | 0,139  |
| 11 | P25788 PSA3_HUMAN  | K.ESLKEEDES#DDDNM.-                 | S250:              | 2 | 3,7283 | 0,516 | 0,351  |
| 11 | Q70Z53 F10C1_HUMAN | K.SRLS#S#AEEASK.K                   | S251:S252:         | 2 | 3,133  | 0,396 | -0,46  |
| 11 | P52701 MSH6_HUMAN  | R.RVIS#DSES#DIGGS#DVEFKPDTK.E       | S252:S256:S261:    | 3 | 5,2015 | 0,459 | 0,977  |
| 11 | Q4G0J3 LARP7_HUMAN | R.SRPTS#EGS#DIESTEPQK.Q             | S258:S261:         | 3 | 3,4938 | 0,242 | 0      |
| 11 | Q13595 TRA2A_HUMAN | R.RS#PS#PYYSR.Y                     | S260:S262:         | 2 | 2,372  | 0,227 | -0,192 |

|    |                    |                                      |                 |   |        |       |        |
|----|--------------------|--------------------------------------|-----------------|---|--------|-------|--------|
| 11 | Q8TF44 NLF3_HUMAN  | R.HGSL#ADDSTPDAS#PGSR.R              | S264:S273:      | 2 | 3,6165 | 1     | -0,446 |
| 11 | Q9UQ35 SRRM2_HUMAN | R.SLS#YS#PVERR.R                     | S2692:S2694:    | 3 | 2,8496 | 0,206 | 0,135  |
| 11 | Q7L4I2 RSRC2_HUMAN | K.KEQS#EVSVS#PR.A                    | S27:S32:        | 2 | 2,6624 | 0,26  | 0,087  |
| 11 | Q9UBQ7 GRHPR_HUMAN | K.IAAAGLDVTS#PEPLPTNHPLTLK.N         | S272:           | 3 | 4,6358 | 0,345 | -0,144 |
| 11 | O43610 SPY3_HUMAN  | R.KIS#SGS#APFPK.A                    | S274:S277:      | 2 | 2,307  | 0,315 | -0,191 |
| 11 | Q8WVC0 LEO1_HUMAN  | K.SESARGS#DS#EDEVLR.M                | S277:S279:      | 2 | 2,4328 | 0,273 | -1,29  |
| 11 | P27816 MAP4_HUMAN  | K.DM*ES#PTKLDVTLAK.D                 | S280:           | 3 | 3,8085 | 0,418 | 0      |
| 11 | Q9P0K7 RAI14_HUMAN | R.KAPPPPIS#PTQLS#DVSSPR.S            | S281:S286:      | 3 | 2,9811 | 0,188 | -0,086 |
| 11 | Q12872 SFRS8_HUMAN | K.SGVSS#DNEDDDDEEDGNYLHPSLFASK.K     | S283:           | 3 | 3,8869 | 0,526 | -0,182 |
| 11 | Q13435 SF3B2_HUMAN | R.SSLGQS#AS#ETEEDTVSVSKK.E           | S284:S286:      | 3 | 2,932  | 0,155 | -0,082 |
| 11 | Q96ST2 IWS1_HUMAN  | R.NQAS#DS#ENEELPKPR.V                | S287:S289:      | 2 | 4,617  | 0,354 | 0,326  |
| 11 | Q96ST2 IWS1_HUMAN  | R.NQAS#DS#ENEELPKPR.V                | S287:S289:      | 3 | 3,2588 | 0,395 | 0,195  |
| 11 | Q6WCQ1 MRIP_HUMAN  | K.AEEQQLPPPLS#PPS#PST#PNHRR.S        | S288:S291:T294: | 3 | 3,1909 | 0,212 | 0,684  |
| 11 | Q8TF01 SFR18_HUMAN | R.SKFDS#DEEEEDTENVEAAS#S#GKVTR.S     | S290:S304:S305: | 3 | 5,6779 | 0,468 | -0,183 |
| 11 | Q99590 SFRIP_HUMAN | K.TEELIES#PKLESSEGEIQTVD.R           | S293:           | 3 | 4,9908 | 0,323 | -0,205 |
| 11 | Q99590 SFRIP_HUMAN | K.TEELIESPKLESS#EGEIIQTVDR.Q         | S299:           | 3 | 3,3069 | 0,197 | -0,273 |
| 11 | Q9Y2V2 CHSP1_HUMAN | R.ERS#PS#PLRGNVPS#PLPTR.R            | S30:S32:S41:    | 3 | 2,7985 | 0,281 | 0,477  |
| 11 | O43765 SGTA_HUMAN  | R.SQIRS#RT#PSASNDQQE.-               | S301:T303:      | 3 | 3,2833 | 0,178 | -0,264 |
| 11 | Q00613 HSF1_HUMAN  | R.VKEEPPS#PPQS#PR.V                  | S303:S307:      | 2 | 3,5386 | 0,354 | -0,607 |
| 11 | Q00613 HSF1_HUMAN  | R.VKEEPPS#PPQS#PR.V                  | S303:S307:      | 3 | 2,6658 | 0,232 | -0,341 |
| 11 | Q96QR8 PURB_HUMAN  | R.RGGGSGGGEES#EGEEVDED.-             | S304:           | 2 | 3,9209 | 0,53  | -1,579 |
| 11 | O43765 SGTA_HUMAN  | R.SRTPS#ASNDQQE.-                    | S305:           | 2 | 2,9947 | 0,373 | -0,564 |
| 11 | Q9NQ57 INCE_HUMAN  | R.TDSQSVRHS#PIAPSS#PS#PQVLAQK.Y      | S306:S312:S314: | 3 | 5,126  | 1     | -0,265 |
| 11 | Q13769 THOC5_HUMAN | K.ALFKPPEDS#QDDES#DAEEEQTTK.R        | S307:S314:      | 3 | 3,9108 | 1     | 0      |
| 11 | Q00341 VIGLN_HUMAN | K.VATLNS#EEEDPPTYKDAFPPLPEK.A        | S31:            | 3 | 4,5303 | 0,512 | 0,577  |
| 11 | Q13247 SFRS6_HUMAN | K.ARS#VS#PPPK.R                      | S314:S316:      | 2 | 2,3017 | 0,127 | -0,333 |
| 11 | Q14004 CD2L5_HUMAN | R.RS#LS#PLGGR.D                      | S315:S317:      | 2 | 2,2693 | 0,32  | -0,111 |
| 11 | Q6PEV8 CX039_HUMAN | R.AHS#DSNLS#ASAAER.I                 | S316:S321:      | 2 | 4,1245 | 0,546 | -0,232 |
| 11 | Q9P0K7 RAI14_HUMAN | K.AEIS#S#IRENK.D                     | S317:S318:      | 2 | 2,7865 | 0,347 | -0,093 |
| 11 | Q6PEV8 CX039_HUMAN | R.AHS#DS#NLS#ASAAER.I                | S318:S321:      | 3 | 2,8317 | 0,193 | 0,232  |
| 11 | Q9NYV4 CD2L7_HUMAN | R.SGS#YSGRSPS#PYGR.R                 | S318:S325:      | 3 | 3,0115 | 1     | 0,113  |
| 11 | P36915 GNL1_HUMAN  | R.GLQDGLRS#SS#NSR.S                  | S32:S34:        | 2 | 2,3799 | 0,324 | -0,397 |
| 11 | P49023 PAXI_HUMAN  | K.TGS#SSPPGGPPKPGSQLDSM*LGSLSQDLNK.L | S320:           | 3 | 2,7911 | 0,229 | -0,06  |



|    |                    |                                      |                 |   |        |       |        |
|----|--------------------|--------------------------------------|-----------------|---|--------|-------|--------|
| 11 | P49023 PAXI_HUMAN  | K.TGSSS#PPGGPPKPGSQLDSM*LGSLQSDLNK.L | S322:           | 3 | 3,1295 | 0,519 | 1,145  |
| 11 | Q6PJF5 RHDF2_HUMAN | R.GIPHS#AS#PVS#PDGVQIPLKEYGR.A       | S323:S325:S328: | 3 | 4,7374 | 0,494 | 0,969  |
| 11 | Q9C0F1 K1712_HUMAN | K.S#EVERPASISLSSGYSTASSDSTPR.A       | S324:           | 3 | 2,6911 | 0,122 | 0,275  |
| 11 | Q9UJM3 ERRFI_HUMAN | K.VPPREPLS#PSNS#RTPS#PK.S            | S326:S330:S334: | 3 | 2,9073 | 0,343 | -0,335 |
| 11 | Q96D09 GASP2_HUMAN | R.TNREDCFES#ES#EDEFYK.Q              | S328:S330:      | 3 | 2,9034 | 0,104 | 0,312  |
| 11 | O60271 JIP4_HUMAN  | R.NVS#TGSAENEKSEVQAIESTPELDM*DK.D    | S329:           | 3 | 3,2391 | 0,349 | -0,225 |
| 11 | P36915 GNL1_HUMAN  | R.GLQDGLRSS#SNS#R.S                  | S33:S36:        | 2 | 3,0064 | 0,194 | 0      |
| 11 | P36915 GNL1_HUMAN  | R.GLQDGLRSS#SNS#R.S                  | S33:S36:        | 3 | 2,7035 | 0,291 | 0      |
| 11 | Q92597 NDRG1_HUMAN | R.SRTAS#GSS#VTSLDGTR.S               | S330:S333:      | 2 | 3,9123 | 1     | 0,35   |
| 11 | Q9NYV4 CD2L7_HUMAN | R.RS#SS#PFLSK.R                      | S332:S334:      | 2 | 2,9849 | 0,32  | 0      |
| 11 | P49790 NU153_HUMAN | K.RIPSIVSS#PLNS#PLDR.S               | S334:S338:      | 2 | 5,309  | 0,472 | 0,702  |
| 11 | P49790 NU153_HUMAN | K.RIPSIVSS#PLNS#PLDR.S               | S334:S338:      | 3 | 4,9269 | 0,537 | 0,191  |
| 11 | Q9UGV2 NDRG3_HUMAN | R.THSTSSS#LGS#GESPFSSR.S             | S335:S338:      | 2 | 3,1208 | 1     | 0,518  |
| 11 | Q9UK58 CCNL1_HUMAN | K.AKGLNPDGTPALSTLGGFS#PAS#KPS#SPR.E  | S335:S338:S341: | 3 | 3,9363 | 0,204 | -0,372 |
| 11 | Q2TB10 ZN800_HUMAN | R.DSITPDIATKPGQPLFLDISIS#PK.K        | S336:           | 3 | 3,622  | 0,381 | 0      |
| 11 | Q16643 DREB_HUMAN  | R.MAPTPIPTRSPS#DSSTASTPVAEQIER.A     | S339:           | 3 | 4,5249 | 0,518 | 1,07   |
| 11 | Q13428 TCOF_HUMAN  | K.AGKPEEDS#ESSEESSDS#EEETPAAK.A      | S339:S349:      | 3 | 3,9174 | 1     | -0,255 |
| 11 | O14681 EI24_HUMAN  | K.TVYLQSALSSSTSAEKFPS#PHPS#PAK.L     | S345:S349:      | 3 | 3,3511 | 0,418 | 0,954  |
| 11 | Q9H2G2 SLK_HUMAN   | R.ASSDLSIAS#SEEDKLSQNACILESVSEK.T    | S347:           | 3 | 2,969  | 0,313 | 0,357  |
| 11 | Q99567 NUP88_HUMAN | K.NQS#PTEAEKPASSSLPSSPPPQLLTR.N      | S35:            | 3 | 4,3816 | 0,438 | -0,392 |
| 11 | P01892 1A02_HUMAN  | R.KGGSYSQAASS#DSAQGSQSDVS#LTACKV.-   | S350:S359:      | 3 | 4,8308 | 1     | 0,941  |
| 11 | Q9UQ35 SRRM2_HUMAN | K.SATRPS#PS#PER.S                    | S351:S353:      | 3 | 3,2452 | 0,366 | -0,068 |
| 11 | Q9UQ35 SRRM2_HUMAN | K.SATRPS#PS#PER.S                    | S351:S353:      | 2 | 2,5706 | 0,321 | -0,635 |
| 11 | Q9UK58 CCNL1_HUMAN | K.AEEKS#PIS#INVK.T                   | S352:S355:      | 3 | 2,9876 | 0,348 | 0,186  |
| 11 | P35611 ADDA_HUMAN  | K.S#RSPGS#PVGEGTGSPPK.W              | S353:S358:      | 2 | 3,8573 | 0,397 | -0,417 |
| 11 | Q8N554 ZN276_HUMAN | R.VKDEFS#DLS#EGDVLS#EDENDKK.Q        | S357:S360:S366: | 3 | 5,0484 | 0,286 | 0,334  |
| 11 | P17096 HMGA1_HUMAN | R.KQPPVS#PGTALVGS#QKEPSEVPT#PK.R     | S36:S44:T53:    | 3 | 4,4658 | 0,303 | -0,327 |
| 11 | P17096 HMGA1_HUMAN | R.KQPPVS#PGT#ALVGSQKEPSEVPT#PK.R     | S36:T39:T53:    | 3 | 3,7816 | 0,231 | -0,196 |
| 11 | Q96E09 F122A_HUMAN | R.SNS#APLIHGLSDTSPVFQAEAPSAR.R       | S37:            | 3 | 6,273  | 0,477 | 0,07   |
| 11 | P49354 FNNTA_HUMAN | K.HSTENDS#PTNVQQ.-                   | S373:           | 2 | 2,5056 | 0,278 | -0,318 |
| 11 | Q5VT52 K0460_HUMAN | R.DVEDM*ELS#DVEDDGSKIIVEDR.K         | S374:           | 3 | 4,2755 | 0,401 | 0,07   |
| 11 | Q01484 ANK2_HUMAN  | K.AM*IVPSS#PSKTPEEVSTPAEEK.L         | S3760:          | 3 | 4,2493 | 0,461 | 0,648  |
| 11 | Q76FK4 NOL8_HUMAN  | R.NDREYDS#GDT#DEIIAM*K.K             | S378:T381:      | 3 | 3,681  | 0,42  | -0,341 |

|    |                     |                                      |                    |   |        |       |        |
|----|---------------------|--------------------------------------|--------------------|---|--------|-------|--------|
| 11 | Q96S11 KCD15_HUMAN  | R.LSLTRSPVS#PLAAQGIPLPAQLTK.S        | S38:               | 3 | 3,5247 | 0,346 | -0,144 |
| 11 | O94876 TMCC1_HUMAN  | K.FGS#ADNIPNLKDSLEEGQVDDAGK.A        | S382:              | 3 | 4,5953 | 0,444 | -0,07  |
| 11 | O75717 WDHD1_HUMAN  | R.SHILEDDENS#VDIS#M*LK.T             | S383:S387:         | 3 | 3,8713 | 0,349 | 0,345  |
| 11 | Q8IYB3 SRRM1_HUMAN  | R.RLS#PS#ASPPR.R                     | S389:S391:         | 2 | 2,7054 | 0,337 | 0      |
| 11 | Q8IYB3 SRRM1_HUMAN  | R.RLS#PSAS#PPR.R                     | S389:S393:         | 3 | 3,4348 | 0,207 | 0,372  |
| 11 | Q8IYB3 SRRM1_HUMAN  | R.RLS#PSAS#PPR.R                     | S389:S393:         | 2 | 2,6836 | 0,281 | -0,596 |
| 11 | Q8N0S6 CENPL_HUMAN  | R.KQSS#FILT#PPR.R                    | S39:T43:           | 3 | 3,0907 | 0,319 | -0,191 |
| 11 | P02545 LMNA_HUMAN   | R.LRLS#PS#PTSQR.S                    | S390:S392:         | 2 | 3,0987 | 0,405 | 0,174  |
| 11 | P02545 LMNA_HUMAN   | R.LRLS#PSPTS#QR.S                    | S390:S395:         | 2 | 2,9766 | 0,296 | -0,174 |
| 11 | P02545 LMNA_HUMAN   | R.LRLS#PSPT#SQR.S                    | S390:T394:         | 2 | 2,3821 | 0,181 | 0,087  |
| 11 | P20700 LMNB1_HUMAN  | R.LKLS#PS#PSSR.V                     | S391:S393:         | 2 | 2,4739 | 0,166 | -0,495 |
| 11 | P20700 LMNB1_HUMAN  | R.LKLS#PSPS#SR.V                     | S391:S395:         | 2 | 2,9308 | 0,21  | -0,396 |
| 11 | Q8TAD8 SNIP1_HUMAN  | R.KDDEDEEEEEVS#DS.-                  | S394:              | 2 | 3,9742 | 0,507 | -0,72  |
| 11 | O14980 XPO1_HUMAN   | R.ESPFSTSASPLLSGS#QHFDVPPR.R         | S397:              | 3 | 2,8569 | 0,328 | 0,508  |
| 11 | Q96ST2 IWS1_HUMAN   | K.AAVLS#DS#EDEEKASAK.K               | S398:S400:         | 2 | 4,1949 | 0,571 | -0,135 |
| 11 | A2BFH1 PPAL4_HUMAN  | -.MVNS#VIFFDIT#VDGKPLGRISIK.Q        | S4:T11:            | 3 | 3,1101 | 0,17  | -0,068 |
| 11 | Q14692 BMS1_HUMAN   | R.VTLFSDSKPLGS#EDIDNQLM*M*PK.E       | S403:              | 3 | 5,6    | 0,485 | 1,338  |
| 11 | Q9Y6M7 S4A7_HUMAN   | K.GNGSGGS#RENS#TVDFSK.V              | S403:S407:         | 3 | 3,3572 | 0,45  | -0,295 |
| 11 | Q9Y6M7 S4A7_HUMAN   | K.GNGSGGS#RENS#TVDFSK.V              | S403:S407:         | 2 | 3,1215 | 0,451 | -0,656 |
| 11 | Q7Z5L9 I2BP2_HUMAN  | K.IPM*TPTSSFVSPPPPTAS#PHSNR.T        | S406:              | 3 | 3,839  | 0,28  | 0,439  |
| 11 | Q5JRA6 MIA3_HUMAN   | R.DTM*DLESSS#SEEEKEDDDALVPDSK.Q      | S407:              | 3 | 2,8389 | 0,356 | -0,184 |
| 11 | Q15276 RABE1_HUMAN  | R.RAQS#TDS#LGTSGSLQSK.A              | S407:S410:         | 2 | 4,4164 | 1     | 0,194  |
| 11 | Q96AJ1 CLUA1_HUMAN  | R.KSEPLDES#DNDF.-                    | S409:              | 2 | 2,8438 | 0,386 | -0,165 |
| 11 | Q53F19 CQ085_HUMAN  | K.M*IS#TPS#PKK.S                     | S412:S415:         | 2 | 2,092  | 0,182 | -0,419 |
| 11 | Q86SQ0 PHLB2_HUMAN  | R.KSS#ISS#ISGR.D                     | S415:S418:         | 2 | 3,5518 | 0,397 | 0      |
| 11 | Q8WXH0 SYNE2_HUMAN  | R.AS#S#S#SGTIVQEAYGK.I               | S4156:S4157:S4158: | 2 | 2,3877 | 0,131 | -1,344 |
| 11 | B2RMZ9 B2RMZ9_HUMAN | R.RLNS#S#PRAPVS#PLK.F                | S416:S417:S423:    | 2 | 2,4836 | 0,266 | -0,139 |
| 11 | Q9BS91 S35A5_HUMAN  | R.LTKPKS#DES#DEDTF.-                 | S416:S419:         | 2 | 3,4785 | 0,386 | -0,482 |
| 11 | Q12756 KIF1A_HUMAN  | R.AAS#VSS#LHER.I                     | S416:S419:         | 2 | 2,2114 | 0,427 | -0,201 |
| 11 | P05783 K1C18_HUMAN  | R.SLGSVQAPSYGARPVSSAASVYAGAGGS#GSR.I | S42:               | 3 | 3,1987 | 0,349 | 0,811  |
| 11 | Q13547 HDAC1_HUMAN  | R.IACEEFS#DS#EEEEGEGGRK.N            | S421:S423:         | 3 | 4,2215 | 0,46  | 0,631  |
| 11 | Q92769 HDAC2_HUMAN  | R.IACDEEFS#DS#EDEGEGGRR.N            | S422:S424:         | 3 | 4,1157 | 0,458 | 0,71   |
| 11 | Q14807 KIF22_HUMAN  | R.GPEEEIIGSPEPM*AAPASAS#QKLSPLQK.L   | S423:              | 3 | 5,5408 | 0,321 | -0,308 |

|    |                    |                                  |                 |   |        |       |        |
|----|--------------------|----------------------------------|-----------------|---|--------|-------|--------|
| 11 | Q9C0B5 ZDHC5_HUMAN | K.SFHFDPLSS#GS#R.S               | S423:S425:      | 2 | 2,5449 | 0,128 | 0,082  |
| 11 | O95232 CROP_HUMAN  | K.ESDTKNEVNGTSEDIKS#EGDTQS#N.-   | S425:S431:      | 3 | 7,2515 | 1     | -0,867 |
| 11 | Q9UPX8 SHAN2_HUMAN | K.QSNVEDS#PEKTCIPIPTIIVK.E       | S426:           | 3 | 3,5302 | 0,21  | -0,144 |
| 11 | Q7KZF4 SND1_HUMAN  | K.VNVTVDYIRPAS#PATETVPAFSE.R     | S426:           | 3 | 3,3673 | 0,344 | 0,949  |
| 11 | Q96JM3 ZN828_HUMAN | R.KPGPPLS#PEIRS#PAGS#PELR.K      | S427:S432:S436: | 3 | 4,428  | 0,409 | -0,079 |
| 11 | O60508 PRP17_HUMAN | K.S#PSSKPSLAVAVDSAPEVAVK.E       | S43:            | 3 | 3,6247 | 0,126 | 0,691  |
| 11 | Q15569 TESK1_HUMAN | R.CRS#LPSS#PELPR.R               | S437:S441:      | 3 | 3,2191 | 0,21  | 0      |
| 11 | Q3KQU3 MA7D1_HUMAN | K.RQS#LPAS#PR.A                  | S442:S446:      | 2 | 2,6558 | 0,217 | 0,416  |
| 11 | P42166 LAP2A_HUMAN | K.SVEERDSGS#FVAFQNIQSELM*SSFAK.T | S444:           | 3 | 2,9149 | 0,165 | -0,607 |
| 11 | Q9UKA4 AKA11_HUMAN | K.ASREDS#GLFS#PIR.S              | S444:S448:      | 2 | 2,607  | 0,317 | -0,612 |
| 11 | O43290 SNUT1_HUMAN | R.VS#EVEEEEKEPVPQPLPSDDTR.V      | S448:           | 3 | 4,6011 | 0,28  | 0      |
| 11 | Q96GE4 CCD45_HUMAN | R.SHS#LS#PSPVKN.H                | S449:S451:      | 2 | 3,9412 | 0,382 | -0,279 |
| 11 | Q8WUM0 NU133_HUMAN | R.KGLPLGSAVSS#PVLFS#PVGR.R       | S45:S50:        | 3 | 5,5602 | 0,323 | 0      |
| 11 | Q8WUM0 NU133_HUMAN | R.KGLPLGSAVSS#PVLFS#PVGR.R       | S45:S50:        | 2 | 3,3822 | 0,36  | -0,229 |
| 11 | Q8WWY3 PRP31_HUMAN | R.SSGTAS#SVAFTPLQGLEIVNPQAAEKK.V | S450:           | 3 | 2,8054 | 0,351 | -0,13  |
| 11 | Q96N67 DOCK7_HUMAN | R.TTS#GDDACNLTSFRPATLTVTNFFK.Q   | S452:           | 3 | 3,3777 | 0,406 | -0,45  |
| 11 | O95544 NADK_HUMAN  | K.SRS#LS#ASPALGSTK.E             | S46:S48:        | 2 | 2,7874 | 0,362 | -0,24  |
| 11 | P51956 NEK3_HUMAN  | K.GPLSEETEASDSVDGGHDS#VILDPER.L  | S462:           | 3 | 5,5166 | 0,468 | 0,983  |
| 11 | O75151 PHF2_HUMAN  | R.EKEEPPS#PIEAT#PPQSLLEK.V       | S474:T479:      | 3 | 4,1335 | 0,367 | 0      |
| 11 | Q8NBN3 TM87A_HUMAN | R.FAFSPLS#EEEEDEQKEPM*LK.E       | S475:           | 3 | 3,1556 | 0,287 | 0,07   |
| 11 | Q96PU5 NED4L_HUMAN | K.DTLS#NPQSPQSPY#NS#PKPQHK.V     | S475:Y485:S487: | 3 | 3,3783 | 1     | 0,545  |
| 11 | Q96PU5 NED4L_HUMAN | K.DTLNPNQS#PQPS#PYNS#PKPQHK.V    | S479:S483:S487: | 3 | 3,6757 | 0,321 | -0,272 |
| 11 | Q96PU5 NED4L_HUMAN | K.DTLNPNQS#PQPS#PY#NSPKPQHK.V    | S479:S483:Y485: | 3 | 3,3613 | 0,265 | -0,409 |
| 11 | P22681 CBL_HUMAN   | K.VERPPS#PFSM*APQASLPPVPPR.L     | S483:           | 3 | 3,532  | 0,307 | 0,522  |
| 11 | Q9ULU4 PKCB1_HUMAN | K.TGQAGS#LSGSPKPFSPQLSAPITTK.T   | S486:           | 3 | 4,1867 | 0,427 | 0,793  |
| 11 | O43379 WDR62_HUMAN | R.TRLS#TAS#EETVQNR.V             | S49:S52:        | 3 | 3,4412 | 0,118 | 0,209  |
| 11 | O43379 WDR62_HUMAN | R.TRLS#T#ASEETVQNR.V             | S49:T50:        | 2 | 4,5163 | 1     | -0,766 |
| 11 | Q9UKV3 ACINU_HUMAN | K.AES#PAEKVPEESVLPVQK.S          | S490:           | 3 | 2,7244 | 0,108 | 0,344  |
| 11 | Q9H8M2 BRD9_HUMAN  | R.LSVGEPDVTHTDYPYFLQS#PEPAASAK.T | S492:           | 3 | 4,731  | 0,356 | 0,978  |
| 11 | Q9BUK6 MSTO1_HUMAN | R.VAPPYPHFLSSCSPPGM*VLDGS#PK.G   | S495:           | 3 | 3,3958 | 0,335 | 0,139  |
| 11 | Q09666 AHNK_HUMAN  | K.VEAPS#LDVHM*DSPDINIEGPDVK.I    | S4953:          | 3 | 2,7636 | 0,193 | 0,924  |
| 11 | Q09666 AHNK_HUMAN  | K.VEAPSLDVHM*DS#PDINIEGPDVK.I    | S4960:          | 3 | 5,308  | 0,451 | 0,782  |
| 11 | Q8TCJ2 STT3B_HUMAN | R.ENPPVEDS#S#DEDDKR.N            | S498:S499:      | 2 | 2,5113 | 0,395 | -0,645 |

|    |                    |                                   |                 |   |        |       |        |
|----|--------------------|-----------------------------------|-----------------|---|--------|-------|--------|
| 11 | Q9H0D6 XRN2_HUMAN  | R.KAEDS#DS#EPEPEDNVR.L            | S499:S501:      | 2 | 5,2169 | 0,497 | -0,802 |
| 11 | Q9H0D6 XRN2_HUMAN  | R.KAEDS#DS#EPEPEDNVR.L            | S499:S501:      | 3 | 4,0748 | 0,3   | -0,185 |
| 11 | Q68E01 INT3_HUMAN  | R.EKFPEFCS#SPS#PPVEVK.I           | S499:S502:      | 3 | 3,1032 | 0,284 | 0,172  |
| 11 | Q9P258 RCC2_HUMAN  | R.CSSSSGGGS#S#GDEDGLELDGAPGGGKR.A | S50:S51:        | 3 | 4,9329 | 1     | -0,207 |
| 11 | O95251 MYST2_HUMAN | R.SSARLS#QSSQDSS#PVR.N            | S50:S57:        | 2 | 3,5815 | 1     | -0,593 |
| 11 | O95251 MYST2_HUMAN | R.SSARLS#QSSQDSS#PVR.N            | S50:S57:        | 3 | 3,464  | 1     | -0,79  |
| 11 | O94929 ABLM3_HUMAN | R.RFS#S#GGEEDDFDR.S               | S503:S504:      | 2 | 4,6993 | 0,417 | -0,218 |
| 11 | P43007 SATT_HUMAN  | K.SEEETS#PLVTHQNPAGPVASAPELESK.E  | S507:           | 3 | 4,9228 | 0,505 | 0,19   |
| 11 | O60832 DKC1_HUMAN  | K.AKEVELVS#E.-                    | S513:           | 2 | 2,7597 | 0,27  | -0,225 |
| 11 | Q99567 NUP88_HUMAN | R.EDVEVAES#PLRVLAETPDSFEK.H       | S517:           | 3 | 3,3166 | 0,27  | -0,648 |
| 11 | O00567 NOL5A_HUMAN | K.SFSKEELM*#S#S#DLEETAGSTSIPK.R   | S519:S520:      | 3 | 3,2192 | 0,174 | -0,207 |
| 11 | Q8NEM7 FA48A_HUMAN | R.KSSVDLNQVSM*LS#PAALSPAS#SSQR.T  | S519:S527:      | 3 | 5,675  | 1     | 0,401  |
| 11 | Q8TAP8 CG047_HUMAN | R.APVPEPGLDLSLSPRPDS#PQPR.H       | S52:            | 3 | 3,6922 | 0,356 | 0,685  |
| 11 | P55081 MFAP1_HUMAN | K.RPDYAPM*ES#S#DEEDEEFQFIK.K      | S52:S53:        | 3 | 6,2365 | 0,538 | -0,334 |
| 11 | Q9NPI6 DCP1A_HUMAN | R.KAS#SPS#PLTIGTPESQR.K           | S522:S525:      | 2 | 2,2621 | 0,215 | 0,828  |
| 11 | Q9NPI6 DCP1A_HUMAN | R.KAS#SPSPLTIGT#PESQR.K           | S522:T531:      | 3 | 3,7049 | 0,289 | -0,382 |
| 11 | O75122 CLAP2_HUMAN | R.IPRPSVS#QGCS#R.E                | S525:S529:      | 3 | 3,2438 | 0,42  | -0,061 |
| 11 | Q9NPI6 DCP1A_HUMAN | R.KASSPS#PLTIGT#PESQR.K           | S525:T531:      | 2 | 2,7965 | 0,365 | -0,127 |
| 11 | Q5VTL8 PR38B_HUMAN | R.RS#QS#IEQESQEK.Q                | S527:S529:      | 2 | 2,2469 | 0,265 | -0,455 |
| 11 | P29590 PML_HUMAN   | R.S#PVIGSEVFLPNSNHVASGAGEAEER.V   | S530:           | 3 | 3,9647 | 0,428 | 0,937  |
| 11 | Q09019 DMWD_HUMAN  | R.YHS#LGNIS#R.G                   | S530:S535:      | 2 | 2,3663 | 0,318 | -0,809 |
| 11 | Q86VM9 ZCH18_HUMAN | K.KLGV#VS#PSR.A                   | S532:S534:      | 2 | 3,3209 | 0,418 | -0,103 |
| 11 | Q3KQU3 MA7D1_HUMAN | R.AS#NEKESAAPASPAPSPAPTAPPQK.E    | S534:           | 3 | 6,5286 | 0,501 | 0      |
| 11 | Q16513 PKN2_HUMAN  | R.AIPTVNHSGTFS#PQAPVPTTVPVVDVR.I  | S535:           | 3 | 4,2043 | 0,295 | -0,064 |
| 11 | Q96EB6 SIRT1_HUMAN | K.ELAYLSELPTPLHVSEDS#SSPER.T      | S538:           | 3 | 2,7812 | 0,151 | -0,067 |
| 11 | Q96EB6 SIRT1_HUMAN | K.ELAYLSELPTPLHVSEDS#SSPER.T      | S540:           | 3 | 2,7941 | 0,235 | -0,134 |
| 11 | Q13144 EI2BE_HUMAN | R.GGS#PQM*DDIKVFQNEVLGTLQR.G      | S544:           | 3 | 5,5433 | 0,451 | -0,507 |
| 11 | O60504 VINEX_HUMAN | R.HPSS#PSALRS#PADPTDLGGQTS#PR.R   | S545:S551:S563: | 3 | 4,0056 | 1     | 0,685  |
| 11 | Q96QG7 MTMR9_HUMAN | R.RQLAELETEDGM*QES#P.-            | S548:           | 2 | 5,1978 | 0,534 | -0,127 |
| 11 | Q8IYB3 SRRM1_HUMAN | R.RS#PS#PPPTR.R                   | S549:S551:      | 2 | 2,0648 | 0,098 | -0,528 |
| 11 | Q9H307 PININ_HUMAN | K.LTEVPVEPVLTVHPES#K.S            | S552:           | 3 | 2,6029 | 0,092 | 0,281  |
| 11 | Q96JG6 CC132_HUMAN | K.SAYQEYDS#DS#DVPEELKR.D          | S559:S561:      | 3 | 3,8786 | 0,259 | 1,118  |
| 11 | Q8IYB3 SRRM1_HUMAN | R.RS#PS#PAPPR.R                   | S560:S562:      | 2 | 2,1449 | 0,296 | -0,599 |

|    |                     |                                        |              |   |        |       |        |
|----|---------------------|----------------------------------------|--------------|---|--------|-------|--------|
| 11 | Q13523 PRP4B_HUMAN  | R.TRS#PS#PDDILER.V                     | S578:S580:   | 2 | 4,0909 | 0,505 | -0,158 |
| 11 | Q13523 PRP4B_HUMAN  | R.TRS#PS#PDDILER.V                     | S578:S580:   | 3 | 3,6441 | 0,451 | -0,118 |
| 11 | Q9H1E3 NUCKS_HUMAN  | K.NSQEDS#EDS#EDKDKV.K                  | S58:S61:     | 2 | 4,0117 | 0,334 | -0,712 |
| 11 | Q9H6F5 CCD86_HUMAN  | R.AGLGS#PERPPKTS#PGS#PR.L              | S58:S66:S69: | 3 | 3,1983 | 0,344 | 0,18   |
| 11 | Q9H6F5 CCD86_HUMAN  | R.AGLGS#PERPPKT#S#PGSPR.L              | S58:T65:S66: | 3 | 2,9617 | 0,282 | -0,721 |
| 11 | Q9H6F5 CCD86_HUMAN  | R.AGLGS#PERPPKT#SPGS#PR.L              | S58:T65:S69: | 2 | 2,7123 | 0,322 | 0,841  |
| 11 | Q765P7 MTSSL_HUMAN  | R.ALSS#AGPIPIRPPIVPK.T                 | S580:        | 2 | 3,0191 | 0,196 | -0,193 |
| 11 | Q53TX8 Q53TX8_HUMAN | R.SHS#FSDPS#PK.F                       | S583:S588:   | 2 | 2,8475 | 0,299 | -0,293 |
| 11 | Q7L1V2 MON1B_HUMAN  | K.DKDQPPS#PS#PPPQSEALSSTR.L            | S59:S61:     | 3 | 3,2517 | 0,371 | -0,445 |
| 11 | Q8TF40 FNIP1_HUMAN  | R.NKS#S#LLFK.E                         | S593:S594:   | 2 | 3,081  | 0,175 | -0,111 |
| 11 | P05783 K1C18_HUMAN  | R.STSFRGGM*GS#GGLATGIAGGLAGM*GGIQNEK.E | S60:         | 3 | 5,0218 | 0,376 | 1,24   |
| 11 | Q13442 HAP28_HUMAN  | K.KSLDS#DES#EDEEDDYQK.R                | S60:S63:     | 3 | 6,4191 | 0,395 | 0,237  |
| 11 | Q13442 HAP28_HUMAN  | K.SLDS#DES#EDEEDDYQK.R                 | S60:S63:     | 3 | 3,8624 | 0,439 | 0,156  |
| 11 | Q9BX79 STRA6_HUMAN  | R.TM*AAPQDS#LRPGEDEGM*QLLQTK.D         | S605:        | 3 | 3,2588 | 0,351 | 0      |
| 11 | Q8IYB3 SRRM1_HUMAN  | R.RYS#PS#PPPK.R                        | S605:S607:   | 2 | 2,5241 | 0,195 | -0,205 |
| 11 | Q14157 UBP2L_HUMAN  | R.RYPSS#ISS#PQK.D                      | S605:S609:   | 2 | 3,0854 | 1     | -0,734 |
| 11 | P49756 RBM25_HUMAN  | K.LGAS#NSPGQPN#VKR.K                   | S616:S624:   | 2 | 2,2095 | 0,295 | -0,219 |
| 11 | O95453 PARN_HUMAN   | K.KELS#PAGS#ISK.N                      | S619:S623:   | 2 | 3,1159 | 0,476 | -0,287 |
| 11 | Q96R06 SPAG5_HUMAN  | K.LGLQEGS#NNS#PVDFVNNKR.T              | S62:S66:     | 3 | 3,105  | 0,215 | 0,783  |
| 11 | Q13309 SKP2_HUMAN   | K.EEPDSENIPQELLSNLGHPES#PPR.K          | S64:         | 3 | 2,7925 | 0,36  | -0,265 |
| 11 | P13807 GYS1_HUMAN   | R.YRPASVPPS#PSLS#R.H                   | S645:S649:   | 2 | 2,8877 | 0,37  | 1,171  |
| 11 | Q96GP6 SREC2_HUMAN  | R.ARGEIGGLSLS#PS#PER.R                 | S646:S648:   | 3 | 3,8896 | 0,147 | 0      |
| 11 | Q13615 MTMR3_HUMAN  | R.S#LELSSLAGPGEDPLSADSLGKPTR.V         | S647:        | 3 | 3,2972 | 0,381 | -0,213 |
| 11 | P12270 TPR_HUMAN    | K.RPSTS#QTVSTPAPVPIESTEIEAK.A          | S648:        | 3 | 5,5148 | 0,408 | 0,659  |
| 11 | Q7Z460 CLAP1_HUMAN  | R.RQSSGS#AT#NVASTPDNR.G                | S649:T651:   | 3 | 2,7625 | 0,317 | -0,288 |
| 11 | Q9H1B7 EAP1_HUMAN   | R.RNS#SS#PVSPASVPGQR.R                 | S657:S659:   | 2 | 3,6378 | 1     | 0,205  |
| 11 | Q8WVCO LEO1_HUMAN   | K.KYVIS#DEEEEDDD.-                     | S658:        | 2 | 3,887  | 0,529 | -0,659 |
| 11 | P42166 LAP2A_HUMAN  | K.GPPDFS#SDEEREPTVLGSGAAAAGR.S         | S66:         | 3 | 5,6632 | 0,505 | 0,621  |
| 11 | O15164 TIF1A_HUMAN  | R.TVQS#PNSSVPSPLAGPVTM*TSVHPPIR.S      | S660:        | 3 | 4,4817 | 0,56  | -0,252 |
| 11 | Q9NQW6 ANLN_HUMAN   | R.AESGDS#LGSEDRDLLYSIDAYR.S            | S661:        | 3 | 4,7315 | 0,451 | -0,364 |
| 11 | Q14004 CD2L5_HUMAN  | R.CLLADLPLPELPGDDLS#KSPEEK.K           | S662:        | 3 | 2,6619 | 0,303 | -0,396 |
| 11 | P51610 HCFC1_HUMAN  | K.TITLVKS#PISVPGGALISNLGK.V            | S666:        | 3 | 5,6623 | 0,501 | -0,078 |
| 11 | P42166 LAP2A_HUMAN  | K.GPPDFS#DEEREPTVLGSGAAAAGR.S          | S67:         | 3 | 5,8912 | 0,407 | 0,621  |

|    |                    |                                  |                 |   |        |       |        |
|----|--------------------|----------------------------------|-----------------|---|--------|-------|--------|
| 11 | Q9Y3T9 NOC2L_HUMAN | K.QFKDLFDLNS#S#EEDDTEGFSER.G     | S672:S673:      | 3 | 3,0789 | 0,277 | -0,529 |
| 11 | Q9UEY8 ADDG_HUMAN  | K.SPEKIEEVLS#PEGS#PSK.S          | S673:S677:      | 2 | 3,8655 | 0,371 | -0,495 |
| 11 | Q9UEY8 ADDG_HUMAN  | K.SPEKIEEVLS#PEGS#PSKS#PSK.K     | S673:S677:S681: | 3 | 3,4838 | 0,319 | 0      |
| 11 | O43896 KIF1C_HUMAN | R.LYADS#DS#GDDSDKR.S             | S674:S676:      | 2 | 3,8895 | 0,511 | -0,286 |
| 11 | Q15398 DLG7_HUMAN  | R.S#SIEDAQCPGLPDLIEENHVVNK.T     | S689:           | 3 | 3,338  | 0,212 | 0,761  |
| 11 | Q4V328 GRAP1_HUMAN | R.SLSS#PQAQPPRPAELSDDEVAELFQR.L  | S692:           | 3 | 3,5039 | 0,384 | -0,24  |
| 11 | Q6ZRV2 FA83H_HUMAN | R.RSQS#S#S#QGDNPLAPGYLPPHYK.E    | S7:S8:S9:       | 3 | 4,4312 | 0,202 | 0,485  |
| 11 | O60271 JIP4_HUMAN  | R.DGGS#VVGASVFKVDVAGLDTEGSK.Q    | S705:           | 3 | 3,6433 | 0,275 | -0,45  |
| 11 | Q86SQ0 PHLB2_HUMAN | K.RS#PS#PLGTSVR.S                | S71:S73:        | 2 | 2,3472 | 0,125 | 0      |
| 11 | Q8N122 RPTOR_HUMAN | R.LRS#VSS#YGNIR.A                | S719:S722:      | 2 | 3,8242 | 0,454 | 0,432  |
| 11 | Q9BWH6 RPAP1_HUMAN | R.DVVM*LDNLPDLPALVPS#PPKR.A      | S72:            | 3 | 5,24   | 0,321 | -0,295 |
| 11 | P18206 VINC_HUMAN  | K.M*TGLVDEAIDTKS#LLDASEEAIK.K    | S721:           | 3 | 3,5851 | 0,251 | -0,216 |
| 11 | Q12888 TP53B_HUMAN | K.KECSEAM*EVETSVIS#IDS#PQK.L     | S724:S727:      | 3 | 3,0972 | 0,325 | 0,863  |
| 11 | Q9H7N4 SFR19_HUMAN | K.REVLYDS#EGLS#GEER.G            | S734:S738:      | 2 | 4,9391 | 0,551 | -0,193 |
| 11 | Q9H7N4 SFR19_HUMAN | K.REVLYDS#EGLS#GEER.G            | S734:S738:      | 3 | 3,5814 | 0,365 | 0,193  |
| 11 | Q15596 NCOA2_HUMAN | K.DLSQESSSTAPGSEVTIKQEPVS#PK.K   | S736:           | 3 | 3,5058 | 0,352 | -0,068 |
| 11 | Q8IYB3 SRRM1_HUMAN | K.KAAS#PS#PQSVR.R                | S738:S740:      | 2 | 3,5845 | 0,346 | -0,474 |
| 11 | Q96RK0 CIC_HUMAN   | K.SAAATS#PAPHLVAGPLLGTVGK.A      | S739:           | 3 | 3,7357 | 0,389 | 0,175  |
| 11 | O95685 PPR3D_HUMAN | R.ARS#LPSS#PER.R                 | S74:S78:        | 2 | 2,8508 | 0,384 | -0,775 |
| 11 | O75506 HSBP1_HUMAN | K.NIADLM*TQAGVEELENKIPATQKS#.-   | S76:            | 3 | 3,4315 | 0,322 | 0,754  |
| 11 | P48634 BAT2_HUMAN  | R.ERSDS#GGSS#SEPFDR.H            | S761:S765:      | 2 | 2,1835 | 1     | 0,413  |
| 11 | Q8WUA4 TF3C2_HUMAN | K.ADLIPYQDS#PEGPDHSSASSGVPNPPK.A | S765:           | 3 | 3,0212 | 0,35  | 0,708  |
| 11 | Q12830 BPTF_HUMAN  | R.S#PILEEKDIPPLEFPK.S            | S77:            | 2 | 3,1425 | 0,396 | -0,316 |
| 11 | Q12830 BPTF_HUMAN  | R.S#PILEEKDIPPLEFPK.S            | S77:            | 3 | 3,0545 | 0,254 | 0      |
| 11 | P54259 ATN1_HUMAN  | R.SEEIS#ES#ESEETNAPKK.T          | S77:S79:        | 3 | 2,8755 | 0,18  | -0,534 |
| 11 | P50219 MNX1_HUMAN  | R.LRAES#PS#PPR.L                 | S77:S79:        | 2 | 2,393  | 0,163 | -0,192 |
| 11 | Q9Y6X9 MORC2_HUMAN | K.DSNELS#DS#AGEEDSADLKR.A        | S777:S779:      | 3 | 3,4685 | 0,332 | -0,083 |
| 11 | Q14676 MDC1_HUMAN  | R.ESEDSETQPFDTHLEAYGPCLS#PPR.A   | S780:           | 3 | 5,6058 | 0,57  | 0,622  |
| 11 | P19634 SL9A1_HUMAN | R.SKETSSPGTDDVFTAPASDS#PS#SQR.I  | S785:S787:      | 3 | 5,0601 | 0,476 | -0,134 |
| 11 | Q4LE39 ARI4B_HUMAN | R.KDIEVLS#EDT#DYEEDEVTK.K        | S790:T793:      | 3 | 5,2222 | 0,468 | 0,076  |
| 11 | Q14721 KCNB1_HUMAN | K.NHFESS#PLPTS#PK.F              | S800:S805:      | 2 | 4,2474 | 0,521 | -0,229 |
| 11 | Q641Q2 FA21A_HUMAN | K.TVLS#LFDEEEDKM*EDQNIQAPQK.E    | S802:           | 3 | 3,9273 | 0,461 | -0,251 |
| 11 | Q96G25 MED8_HUMAN  | R.NQVIPLVLS#PDRDEDLM*R.Q         | S82:            | 3 | 3,1211 | 0,295 | -0,237 |

|    |                     |                                    |                    |   |        |       |        |
|----|---------------------|------------------------------------|--------------------|---|--------|-------|--------|
| 11 | Q96ST3 SIN3A_HUMAN  | R.GDLS#DVEEEEEEM*DVDEATGAVKK.H     | S832:              | 3 | 3,5048 | 0,463 | 1,028  |
| 11 | Q96FS4 SIPA1_HUMAN  | R.TEFLHSQNS#LS#PR.S                | S837:S839:         | 2 | 2,9694 | 0,22  | 1,019  |
| 11 | Q9UQ35 SRRM2_HUMAN  | K.S#GTPPRQGSITS#PQANEQSVT#PQRR.S   | S846:S857:T866:    | 3 | 2,8245 | 1     | 0,564  |
| 11 | Q9UQ35 SRRM2_HUMAN  | K.VK#GTPPRQGSIT#SPQANEQSVT#PQR.R   | S846:T856:T866:    | 3 | 4,2572 | 1     | 0,428  |
| 11 | Q9UQ35 SRRM2_HUMAN  | R.QGSITS#PQANEQSVT#PQRR.S          | S857:T866:         | 3 | 2,6993 | 0,24  | -0,652 |
| 11 | Q9C0C9 UBE2O_HUMAN  | R.LIHGEDS#DS#EGEEEGR.G             | S87:S89:           | 2 | 4,1665 | 0,539 | -0,445 |
| 11 | Q9C0C9 UBE2O_HUMAN  | R.LIHGEDS#DS#EGEEEGR.G             | S87:S89:           | 3 | 3,4949 | 0,413 | 0,095  |
| 11 | Q6P2E9 EDC4_HUMAN   | R.DS#QDASAEQSDHDDEVASLASASGGFGTK.V | S871:              | 3 | 4,2777 | 0,504 | 0,741  |
| 11 | Q6P2E9 EDC4_HUMAN   | R.DSQDAS#AEQSDHDDEVASLASASGGFGTK.V | S875:              | 3 | 4,6619 | 0,464 | 1,297  |
| 11 | Q9BZL6 KPCD2_HUMAN  | R.DLGGACPPQDHDHDM*QGLAERIS#VL.-    | S876:              | 3 | 4,6769 | 0,38  | 0,711  |
| 11 | P51826 AFF3_HUMAN   | K.M*LRS#PIS#PLSDASK.H              | S878:S881:         | 2 | 2,7954 | 0,264 | -0,945 |
| 11 | Q9ULH0 ARMS_HUMAN   | R.RV#QNS#LGEM*TK.L                 | S882:S885:         | 2 | 2,6789 | 0,374 | -0,4   |
| 11 | O75400 PR40A_HUMAN  | K.S#DSPES#DAEREK.D                 | S883:S888:         | 2 | 2,0707 | 0,233 | -0,323 |
| 11 | O75400 PR40A_HUMAN  | K.SDS#PES#DAEREK.D                 | S885:S888:         | 3 | 2,7495 | 0,306 | -0,242 |
| 11 | Q6P2E9 EDC4_HUMAN   | R.DSQDASAEQSDHDDEVAS#LASASGGFGTK.V | S887:              | 3 | 3,1269 | 0,161 | 0,803  |
| 11 | Q9UPN4 AZI1_HUMAN   | R.SGS#PRPTEPTDFLM*LFEGSPSGK.K      | S89:               | 3 | 5,9913 | 0,544 | -0,361 |
| 11 | Q70E73 RAPH1_HUMAN  | K.QQS#FCAKPPPSPLSPVPSVVK.Q         | S897:              | 3 | 2,6285 | 0,174 | 0,864  |
| 11 | P78317 RNF4_HUMAN   | R.LPQDHADSCVVS#S#DDEELSR.D         | S94:S95:           | 3 | 4,6534 | 0,379 | 0,681  |
| 11 | P15336 ATF2_HUMAN   | K.KM*PLDLS#PLAT#PIIR.S             | S94:T98:           | 2 | 4,8743 | 0,508 | 0      |
| 11 | Q6PD62 CTR9_HUMAN   | R.KGS#GS#EQEGEDEEGGER.K            | S941:S943:         | 3 | 5,0637 | 0,369 | -0,472 |
| 11 | Q9UQ35 SRRM2_HUMAN  | R.S#RSVS#PCSNVESR.L                | S950:S954:         | 2 | 3,9137 | 0,323 | -0,375 |
| 11 | Q9UQ35 SRRM2_HUMAN  | R.SRS#VS#PCSNVESR.L                | S952:S954:         | 3 | 3,581  | 0,207 | 0      |
| 11 | Q9UQ35 SRRM2_HUMAN  | R.SRS#VS#PCSNVESR.L                | S952:S954:         | 2 | 3,3638 | 0,326 | -0,451 |
| 11 | O60220 TIM8A_HUMAN  | K.SKPVFSESL#D.-                    | S96:               | 2 | 2,8741 | 0,524 | 0,096  |
| 11 | B2R8U0 B2R8U0_HUMAN | K.KAAAGPLDM*S#LPS#TPDIK.I          | S97:S100:          | 2 | 2,0281 | 0,304 | -0,123 |
| 11 | B2R8U0 B2R8U0_HUMAN | K.KAAAGPLDM*S#LPST#PDIK.I          | S97:T101:          | 3 | 3,1742 | 0,158 | 0,092  |
| 11 | Q9P1Y6 K1542_HUMAN  | R.TVTCVTVVEPEAPPS#PDVLQAATHR.V     | S973:              | 3 | 3,2003 | 0,318 | 0,399  |
| 11 | Q9NQ66 PLCB1_HUMAN  | K.S#EPSSPDHGSSTIEQDLAALDAEM*TQK.L  | S978:              | 3 | 2,918  | 0,309 | -0,311 |
| 11 | P62899 RL31_HUMAN   | R.NEDED#PNKLYTLVTVVPVTTFK.N        | S98:               | 3 | 2,6117 | 0,263 | -0,332 |
| 11 | P17096 HMGA1_HUMAN  | K.KLEKEEEEGIS#QES#S#EEEQ.-         | S99:S102:S103:     | 3 | 4,2085 | 0,327 | 0,443  |
| 11 | Q9UQ35 SRRM2_HUMAN  | K.VKAQT#PPGPSLS#GSKS#PCPQEK.S      | T1003:S1010:S1014: | 3 | 3,3442 | 0,273 | 0,29   |
| 11 | Q7Z5J4 RAI1_HUMAN   | R.SLTALSEPRT#PGPPGLTTTPAPPDK.L     | T1068:             | 3 | 3,1247 | 0,224 | -0,425 |
| 11 | Q96FF9 CDCA5_HUMAN  | K.THSVPAT#PTST#PVPNPEAESSK.E       | T111:T115:         | 3 | 3,6873 | 1     | -0,221 |

|    |                    |                                    |                    |   |        |       |        |
|----|--------------------|------------------------------------|--------------------|---|--------|-------|--------|
| 11 | Q6R327 RICTR_HUMAN | R.TLT#EPSVDFNHSDFTPISTVQK.T        | T1135:             | 3 | 3,4181 | 0,408 | 0,619  |
| 11 | Q9Y6M7 S4A7_HUMAN  | R.M*LQDDDDT#VHLPFEGGSLQIPVK.A      | T1167:             | 3 | 4,0383 | 0,339 | -0,265 |
| 11 | Q96T60 PNKP_HUMAN  | R.TPESQPDT#PPGT#PLVSQDEKR.D        | T118:T122:         | 3 | 4,5964 | 0,39  | -0,3   |
| 11 | Q9BQG0 MBB1A_HUMAN | R.KSEDTGTPAEDGT#PAATGGSQPPS#M*GR.K | T1196:S1207:       | 3 | 4,8491 | 0,428 | -0,478 |
| 11 | Q86UW6 N4BP2_HUMAN | R.AVT#PENHESM*TSIFPSAAVGLK.N       | T1210:             | 3 | 3,5486 | 0,103 | 0,23   |
| 11 | Q9UJM3 ERRFI_HUMAN | K.KLTVNGVCAST#PPLT#PIK.N           | T127:T131:         | 3 | 4,3544 | 0,315 | -0,089 |
| 11 | Q9BRD0 BUD13_HUMAN | R.HGT#PDPS#PR.K                    | T135:S139:         | 2 | 2,9421 | 0,47  | -0,217 |
| 11 | O75781 PALM_HUMAN  | R.KTEVVM*NSQQT#PVGTT#PK.D          | T141:T145:         | 3 | 3,2432 | 0,376 | -0,181 |
| 11 | Q9Y6N7 ROBO1_HUMAN | R.ETYDDLPPPPVPPPAIKSPT#AQSK.T      | T1494:             | 3 | 2,6854 | 0,275 | 0,738  |
| 11 | Q7KZ85 SPT6H_HUMAN | K.DHYQDPVPGIT#PSSSS#R.T            | T1523:S1528:       | 2 | 3,696  | 1     | -0,244 |
| 11 | Q9BRD0 BUD13_HUMAN | R.HDT#PDPS#PLR.G                   | T159:S163:         | 2 | 2,9456 | 0,427 | -0,094 |
| 11 | O14686 MLL2_HUMAN  | K.ASPVPSDPEKPGT#PGEGM*LSSDLDR.I    | T1590:             | 3 | 3,0824 | 0,371 | -0,069 |
| 11 | Q14676 MDC1_HUMAN  | K.TPEPVPTAPEPHPTTSTDQPVTT#PK.L     | T1630:             | 3 | 4,7441 | 0,472 | -0,406 |
| 11 | Q12888 TP53B_HUMAN | R.SNVSSPAT#PTAS#SSSSTTPTRK.I       | T1638:S1642:       | 3 | 3,6503 | 1     | -0,633 |
| 11 | Q8TBN0 R3GEF_HUMAN | K.TLVITST#PASPRLHPQLLS#PTK.A       | T165:S179:         | 3 | 4,8156 | 1     | 0,464  |
| 11 | O94842 TOX4_HUMAN  | R.LST#TPS#PTS#SLHEDGVDFRR.Q        | T175:S178:S181:    | 3 | 2,7605 | 1     | 0      |
| 11 | Q92785 REQU_HUMAN  | R.ILEPDDFLDDLDEDEYEEDT#PKR.R       | T176:              | 3 | 4,2844 | 0,439 | -0,509 |
| 11 | O94842 TOX4_HUMAN  | R.LSTT#PS#PTSS#LHEDGVDFRR.Q        | T176:S178:S182:    | 3 | 3,3288 | 1     | -0,142 |
| 11 | O94842 TOX4_HUMAN  | R.LSTT#PSPT#SS#LHEDGVDFRR.Q        | T176:T180:S182:    | 3 | 3,4503 | 1     | -0,142 |
| 11 | P11137 MAP2_HUMAN  | R.VDHGAEIIT#QSPGRSS#VAS#PR.R       | T1780:S1787:S1790: | 3 | 3,5474 | 0,285 | -0,304 |
| 11 | Q9H1E3 NUCKS_HUMAN | R.LKATVT#PS#PVK.G                  | T179:S181:         | 3 | 3,2685 | 0,268 | 0,07   |
| 11 | Q9H1E3 NUCKS_HUMAN | K.ATVT#PS#PVKGG.K                  | T179:S181:         | 2 | 2,698  | 0,32  | -0,392 |
| 11 | Q8N5P1 ZC3H8_HUMAN | K.T#ATDSRIDDEIDTEVEETQEEK.I        | T18:               | 3 | 6,3727 | 0,482 | 0,509  |
| 11 | Q16539 MK14_HUMAN  | R.HTDDEM*T#GY#VATR.W               | T180:Y182:         | 2 | 3,9587 | 0,505 | -0,511 |
| 11 | Q16539 MK14_HUMAN  | R.HTDDEM*T#GY#VATR.W               | T180:Y182:         | 3 | 3,5642 | 0,33  | -0,438 |
| 11 | Q8WVC0 LEO1_HUMAN  | K.M*QNT#DDEERPQLS#DDER.Q           | T188:S197:         | 3 | 2,6438 | 0,092 | -0,568 |
| 11 | Q01082 SPTB2_HUMAN | R.T#SSKES#SPIPS#PTSDRK.A           | T2159:S2164:S2169: | 3 | 3,359  | 1     | -0,269 |
| 11 | Q9NRS6 SNX15_HUMAN | K.EEGAAPSPT#HVAELATM*EVESAR.L      | T229:              | 3 | 3,9077 | 0,288 | -0,221 |
| 11 | P31629 ZEP2_HUMAN  | R.GPHALQSSGPPST#PS#SPR.L           | T2298:S2300:       | 3 | 4,1268 | 0,443 | -0,095 |
| 11 | Q9UBP9 GULP1_HUMAN | K.SPSTDIFDM*IPFSPISHQSSM*PT#R.N    | T233:              | 3 | 2,8529 | 0,32  | -0,525 |
| 11 | Q9UBC2 EP15R_HUMAN | R.STPSHGVSLSNST#GSL#PK.H           | T251:S255:         | 3 | 3,088  | 0,18  | -0,088 |
| 11 | P17275 JUNB_HUMAN  | R.SRDAT#PPVS#PINM*EDQER.I          | T255:S259:         | 3 | 5,4034 | 0,498 | -0,082 |
| 11 | P17275 JUNB_HUMAN  | R.SRDAT#PPVS#PINMEDQER.I           | T255:S259:         | 3 | 2,7864 | 0,131 | -0,166 |



|    |                      |                                        |                 |   |        |       |        |
|----|----------------------|----------------------------------------|-----------------|---|--------|-------|--------|
| 11 | Q4G0J3 LARP7_HUMAN   | R.SRPT#SEGS#DIESTEPQK.Q                | T257:S261:      | 2 | 2,2441 | 0,204 | -0,668 |
| 11 | Q13501 SQSTM_HUMAN   | R.SRLT#PVS#PESSTEEK.S                  | T269:S272:      | 2 | 3,4976 | 1     | -0,515 |
| 11 | Q5T4S7 UBR4_HUMAN    | R.HVT#LPSS#PR.S                        | T2715:S2719:    | 2 | 3,6035 | 0,444 | -1,163 |
| 11 | Q7Z2W4 ZCCHV_HUMAN   | R.SCT#PS#PDQISHR.A                     | T273:S275:      | 3 | 4,178  | 0,423 | -0,118 |
| 11 | Q7Z2W4 ZCCHV_HUMAN   | R.SCT#PS#PDQISHR.A                     | T273:S275:      | 2 | 2,9947 | 0,21  | -0,553 |
| 11 | Q9P0K7 RAI14_HUMAN   | R.KAPPPPISPT#QLSDVSS#PR.S              | T283:S290:      | 3 | 3,7611 | 0,372 | 0,429  |
| 11 | Q96D31 CRCM1_HUMAN   | R.GDHPLT#PGS#HYA.-                     | T295:S298:      | 2 | 2,9039 | 0,302 | -0,173 |
| 11 | ##Q8N3K9 CMYA5_HUMAN | K.DT#SPPLSLDELPSMLPFT#EAKQK.Q          | T2986:T3002:    | 3 | 2,9865 | 0,138 | -1,759 |
| 11 | Q2TB10 ZN800_HUMAN   | R.DSIT#PDIATKPGQPLFLDSISPK.K           | T319:           | 3 | 4,3241 | 0,454 | -0,145 |
| 11 | Q92597 NDRG1_HUMAN   | R.SRT#AS#GSSVTSLDGTR.S                 | T328:S330:      | 2 | 3,6686 | 1     | -0,35  |
| 11 | O15033 K0317_HUMAN   | R.RPST#AVDEEDEDSD#PSECHT#PEK.V         | T328:S337:T343: | 3 | 2,9029 | 0,212 | -0,266 |
| 11 | Q16643 DREB_HUMAN    | R.M*APTIPT#RSPSDSSTASTPVAEQIER.A       | T335:           | 3 | 5,9066 | 0,463 | -0,376 |
| 11 | O95602 RPA1_HUMAN    | K.LPEEVATPT#TDEEKDSLIAIDR.S            | T359:           | 3 | 2,9757 | 0,384 | 0,87   |
| 11 | Q16543 CDC37_HUMAN   | K.EGEEAGPGDPLLEAVPKT#GDEKDVSV.-        | T370:           | 3 | 4,6022 | 0,461 | -0,337 |
| 11 | Q13043 STK4_HUMAN    | R.DET#M*QPAKPSFLEYFEQK.E               | T387:           | 3 | 5,4497 | 0,433 | 0,16   |
| 11 | Q14247 SRC8_HUMAN    | R.AKTQT#PPVS#PAPQPTEER.L               | T401:S405:      | 3 | 3,865  | 0,217 | -0,262 |
| 11 | Q92922 SMRC1_HUMAN   | K.DSENTPVKGGT#VADLDEQDEETVTAGGK.E      | T404:           | 3 | 4,5654 | 0,402 | -0,249 |
| 11 | Q14676 MDC1_HUMAN    | K.SQASM#VINSDT#DDEEEVSAALTLAHLK.E      | T404:           | 3 | 3,2738 | 0,279 | -0,493 |
| 11 | O94966 UBP19_HUMAN   | K.VAVPTGPTPLDST#PPGGAPHPLTGQEEAR.A     | T407:           | 3 | 3,5713 | 0,305 | 0,312  |
| 11 | Q92692 PVRL2_HUMAN   | K.EQTLQGAEEDEDLEGGPSYKPPT#PK.A         | T410:           | 3 | 3,28   | 0,25  | 0,645  |
| 11 | P05783 K1C18_HUMAN   | R.ST#SFRGGM*GSGGLATGIAGGLAGM*GGIQNEK.E | T52:            | 3 | 6,6096 | 0,471 | 1,302  |
| 11 | Q96FV9 THOC1_HUMAN   | K.ELPPPSEEIKT#GEDEDEEDNDALLK.E         | T542:           | 3 | 3,2828 | 0,409 | -0,506 |
| 11 | O43581 SYT7_HUMAN    | K.NSLETVGT#PDS#GRGR.S                  | T57:S60:        | 3 | 2,622  | 0,276 | 0      |
| 11 | Q13523 PRP4B_HUMAN   | R.T#RSPS#PDDILER.V                     | T576:S580:      | 3 | 3,2868 | 0,327 | 0,118  |
| 11 | P01106 MYC_HUMAN     | K.KFELLPT#PPLS#PSR.R                   | T58:S62:        | 2 | 2,9418 | 0,444 | -0,21  |
| 11 | Q8IYB3 SRRM1_HUMAN   | R.RT#PS#PPPR.R                         | T581:S583:      | 2 | 2,2136 | 0,187 | -0,457 |
| 11 | P13051 UNG_HUMAN     | K.KAPAGQEEPPT#PPSS#PLSAEQLDR.I         | T60:S64:        | 3 | 4,9436 | 0,32  | -0,209 |
| 11 | Q14978 NOLC1_HUMAN   | K.IKLQT#PNT#FPK.R                      | T607:T610:      | 2 | 3,745  | 0,462 | 0,169  |
| 11 | Q14978 NOLC1_HUMAN   | K.IKLQT#PNT#FPK.R                      | T607:T610:      | 3 | 3,1832 | 0,217 | 0      |
| 11 | Q14978 NOLC1_HUMAN   | K.LQT#PNT#FPKR.K                       | T607:T610:      | 2 | 2,2461 | 0,085 | 0      |
| 11 | Q96PZ0 PUS7_HUMAN    | K.IPLFNTDVDNLEGKT#PPVFASEGK.Y          | T610:           | 3 | 4,5758 | 0,283 | -0,411 |
| 11 | Q8IYB3 SRRM1_HUMAN   | R.RT#AS#PPPPK.R                        | T614:S616:      | 2 | 2,654  | 0,451 | -0,404 |
| 11 | Q8WVCO LEO1_HUMAN    | K.KLT#S#DEEGEPSGK.R                    | T629:S630:      | 2 | 4,822  | 0,572 | -0,238 |

|    |                    |                                     |                 |   |        |       |        |
|----|--------------------|-------------------------------------|-----------------|---|--------|-------|--------|
| 11 | Q8WVC0 LEO1_HUMAN  | K.KLT#S#DEEGEPSGK.R                 | T629:S630:      | 3 | 3,5411 | 0,31  | 0      |
| 11 | Q66K74 MAP1S_HUMAN | R.T#PS#PES#HRSPAEGSER.L             | T638:S640:S643: | 3 | 2,8299 | 0,211 | -0,559 |
| 11 | P25205 MCM3_HUMAN  | K.DGDSYDPYDFSDTEEM*PQVHT#PK.T       | T722:           | 3 | 2,8284 | 0,295 | 0      |
| 11 | Q8WUM4 PDC6I_HUMAN | R.EPSAPSIPT#PAYQSSPAGGHAPTPPTPAPR.T | T724:           | 3 | 3,0656 | 0,39  | 0,789  |
| 11 | Q9ULL5 PRR12_HUMAN | K.KQETAAVCGET#DEEAGES#GGEGIFR.E     | T740:S747:      | 3 | 6,8755 | 0,637 | 0,394  |
| 11 | O95239 KIF4A_HUMAN | R.RT#FS#LTEVR.G                     | T799:S801:      | 2 | 3,2014 | 0,436 | 0,192  |
| 11 | Q8IYB3 SRRM1_HUMAN | K.KET#ES#EAEDNLDDLEK.H              | T872:S874:      | 3 | 4,2208 | 0,114 | 0,542  |
| 11 | Q9BVJ6 UT14A_HUMAN | K.LVLADLLEPVKT#SSSLATVK.K           | T96:            | 3 | 3,1459 | 0,314 | -0,338 |
| 11 | O43166 SI1L1_HUMAN | R.EY#GSTSSIDKQGTSGESFFDLLK.G        | Y206:           | 3 | 3,1434 | 0,132 | -0,284 |
| 11 | Q9NRZ5 PLCD_HUMAN  | R.NVVSAVY#DCTLNFR.N                 | Y226:           | 2 | 2,5239 | 0,144 | 1,545  |
| 11 | Q04726 TLE3_HUMAN  | R.Y#DSDGDKSDDLVDVSNEDPATPR.V        | Y238:           | 3 | 5,2734 | 0,458 | 0,68   |
| 11 | Q14160 LAP4_HUMAN  | R.M*VEPENAVTITLPRPEDDY#SPR.E        | Y834:           | 3 | 3,8894 | 0,38  | 0,836  |
| 11 | P35580 MYH10_HUMAN | R.IAQLEEEEEEQSNM*ELLNDR.F           |                 | 3 | 6,8164 | 0,52  | 0      |
| 11 | P05783 K1C18_HUMAN | R.GGM*GSGGLATGIAGGLAGM*GGIQNEK.E    |                 | 3 | 6,0515 | 0,491 | 0,08   |
| 11 | P25205 MCM3_HUMAN  | R.DYLDFLDDEEDQGIYQSK.V              |                 | 3 | 5,9848 | 0,489 | 0      |
| 11 | P35579 MYH9_HUMAN  | K.DFSALESQLQDTQELLQEENR.Q           |                 | 3 | 5,5781 | 0,497 | -0,44  |
| 11 | Q05524 ENO1B_HUMAN | K.DATNVGDEGGFAPNILENK.E             |                 | 2 | 5,4765 | 0,571 | 0,062  |
| 11 | O00299 CLIC1_HUMAN | K.LAALNPESNTAGLDIFAK.F              |                 | 2 | 5,4704 | 0,563 | -0,331 |
| 11 | Q9Y6E2 BZW2_HUMAN  | R.DTLVQGLNEAGDDLEAVAK.F             |                 | 2 | 5,4198 | 0,568 | -0,436 |
| 11 | Q9NVI7 ATD3A_HUMAN | K.DALNLAQM*QEQLQLEQQSK.L            |                 | 3 | 5,3807 | 0,446 | 0,392  |
| 11 | P25205 MCM3_HUMAN  | R.DSEEPFSSVEIQAALSK.M               |                 | 2 | 5,3606 | 0,505 | 0,531  |
| 11 | P62263 RS14_HUMAN  | R.DESSPYAAM*LAAQDVAQR.C             |                 | 3 | 5,3044 | 0,487 | 0,472  |
| 11 | Q12906 ILF3_HUMAN  | K.VLAGETLSVNDPPDVLDR.Q              |                 | 3 | 5,2807 | 0,475 | 0,192  |
| 11 | Q12905 ILF2_HUMAN  | R.NQDLAPNSAEQASILSLVTK.I            |                 | 3 | 5,249  | 0,575 | 0,174  |
| 11 | Q13561 DCTN2_HUMAN | K.LLGPDAAINLTDPDGALAK.R             |                 | 2 | 5,227  | 0,486 | -0,131 |
| 11 | Q14247 SRC8_HUMAN  | R.GPVSGETEPEPVYSM*EAADYR.E          |                 | 3 | 5,2197 | 0,475 | 0,674  |
| 11 | Q01130 SFRS2_HUMAN | R.DAEDAM*DAM*DGAVLDGR.E             |                 | 2 | 5,215  | 0,454 | -0,479 |
| 11 | Q86TX2 ACOT1_HUMAN | K.DGYADIVDVLNSPLEGPDQK.S            |                 | 3 | 5,1873 | 0,546 | -0,426 |
| 11 | P42704 LPPRC_HUMAN | K.LLM*SEDYFTQAM*EVK.A               |                 | 2 | 5,1461 | 0,486 | 0,664  |
| 11 | Q92734 TFG_HUMAN   | K.NVM*SAFGLTDDQVSGPPSAPAEDR.S       |                 | 3 | 5,1166 | 0,519 | 0,295  |
| 11 | P11177 ODPB_HUMAN  | K.VFLLGEEVAQYDGAYK.V                |                 | 2 | 5,1007 | 0,549 | -0,135 |
| 11 | P40926 MDHM_HUMAN  | K.SQETECTYFSTPLLLGK.K               |                 | 2 | 5,0995 | 0,588 | -0,433 |
| 11 | P07437 TBB5_HUMAN  | R.ALTVPELTSQVFDK.N                  |                 | 3 | 5,0737 | 0,457 | 0,11   |

|    |                     |                               |   |        |       |        |
|----|---------------------|-------------------------------|---|--------|-------|--------|
| 11 | O15155 BET1_HUMAN   | K.LLAEM*DSQFDSTTGFLGK.T       | 2 | 5,0719 | 0,593 | 0,803  |
| 11 | O00629 IMA4_HUMAN   | K.M*AEDEAETIGNLIEECGGLK.I     | 3 | 5,0632 | 0,468 | -0,315 |
| 11 | Q5T6G5 Q5T6G5_HUMAN | K.QAPELSLSSQDLEVGGNQGH.-      | 3 | 5,0084 | 0,331 | 0,62   |
| 11 | P63167 DYL1_HUMAN   | K.NADM*SEEM*QQDSVECATQALEK.Y  | 3 | 4,9699 | 0,398 | 0,431  |
| 11 | P52272 HNRPM_HUMAN  | K.VGEVTVVELLM*DAEGK.S         | 2 | 4,9494 | 0,544 | -0,276 |
| 11 | P07910 HNRPC_HUMAN  | R.M*IAGQVLDINLAAEPK.V         | 2 | 4,9481 | 0,497 | 0,646  |
| 11 | O43399 TPD54_HUMAN  | K.GLLSDSM*TDVPVDTGVAAR.T      | 2 | 4,9293 | 0,583 | -0,127 |
| 11 | Q9H0N0 RAB6C_HUMAN  | R.DSAAAVVVDITNVNSFQQTTK.W     | 3 | 4,9042 | 0,367 | 0,154  |
| 11 | Q9Y6E2 BZW2_HUMAN   | R.DTLVQGLNEAGDDLEAVAK.F       | 3 | 4,9013 | 0,473 | -0,187 |
| 11 | Q71U36 TBA1A_HUMAN  | R.AVFVDLEPTVIDEVR.T           | 2 | 4,8987 | 0,472 | -0,573 |
| 11 | P13667 PDIA4_HUMAN  | K.DLGLSESGEDVNAAILDESGK.K     | 3 | 4,8735 | 0,473 | 0,259  |
| 11 | P50570 DYN2_HUMAN   | K.DQAENEDGAQENTFSM*DPQLER.Q   | 3 | 4,8667 | 0,467 | 0,072  |
| 11 | P25685 DNJB1_HUMAN  | K.EGDQTSNNIPADIVFLK.D         | 2 | 4,8389 | 0,593 | -0,498 |
| 11 | P28070 PSB4_HUMAN   | R.VNNSTM*LGASGDYADFQYLK.Q     | 3 | 4,8093 | 0,359 | 0,414  |
| 11 | O60568 PLOD3_HUMAN  | R.DVFSGSDTDPDM*AFCK.S         | 2 | 4,8029 | 0,507 | -0,405 |
| 11 | Q9Y2X3 NOL5_HUMAN   | K.FQDTAEALAAFTALM*EGK.I       | 3 | 4,8028 | 0,421 | -0,569 |
| 11 | P55036 PSMD4_HUMAN  | R.AAAASAAEAGIATTGTEDSDDALLK.M | 3 | 4,7589 | 0,429 | 0      |
| 11 | Q92616 GCN1L_HUMAN  | R.EEFAIM*QTPAGELYDK.S         | 2 | 4,7573 | 0,532 | 0,394  |
| 11 | Q9HAV4 XPO5_HUMAN   | R.VLSDVDAFIAYVGTDQK.S         | 2 | 4,7533 | 0,514 | -0,133 |
| 11 | Q99798 ACON_HUMAN   | K.DINQEVYNFLATAGAK.Y          | 2 | 4,7154 | 0,39  | -0,487 |
| 11 | P09211 GSTP1_HUMAN  | K.DQQEAAALVDM*VNDGVEDLR.C     | 3 | 4,6825 | 0,44  | 0,6    |
| 11 | Q08J23 NSUN2_HUMAN  | K.EGVILTNESAASTGQPDNDVTEGQR.A | 3 | 4,6711 | 0,533 | 0      |
| 11 | P18084 ITB5_HUMAN   | R.DAPEGGFDAVLQAAVCK.E         | 2 | 4,6338 | 0,6   | -0,558 |
| 11 | P33316 DUT_HUMAN    | R.IFYPEIEEVQALDDTER.G         | 3 | 4,6304 | 0,368 | -0,177 |
| 11 | P11177 ODPB_HUMAN   | K.VFLLGEEVAQYDGAYK.V          | 3 | 4,5968 | 0,379 | 0      |
| 11 | Q12906 ILF3_HUMAN   | K.VLAGETLSVNDPPDVLDLDR.Q      | 2 | 4,5846 | 0,432 | 0,256  |
| 11 | P35580 MYH10_HUMAN  | K.DAASLESQIQDTQELLQEETR.Q     | 3 | 4,5578 | 0,407 | -0,152 |
| 11 | Q99714 HCD2_HUMAN   | R.LVGQGASAVLLDLPNSSGGEAQAK.K  | 3 | 4,5474 | 0,357 | 0      |
| 11 | O00159 MYO1C_HUMAN  | R.DGTIDFTPGSELLITK.A          | 2 | 4,543  | 0,533 | -0,357 |
| 11 | Q02952 AKA12_HUMAN  | K.GDDVDDPENQNSALADTDASGGLTK.E | 3 | 4,5244 | 0,469 | -0,219 |
| 11 | P78527 PRKDC_HUMAN  | K.LTPLPEDNSM*NVDQDGDPSDR.M    | 3 | 4,517  | 0,418 | 0,549  |
| 11 | P48735 IDHP_HUMAN   | R.DQTDDQVTIDSALATQK.Y         | 2 | 4,5095 | 0,529 | 0,396  |
| 11 | P07437 TBB5_HUMAN   | K.M*AVTFIGNSTAIQELFK.R        | 2 | 4,4994 | 0,477 | -0,323 |

|    |                    |                                |   |        |       |        |
|----|--------------------|--------------------------------|---|--------|-------|--------|
| 11 | P20042 IF2B_HUMAN  | K.DASDDLDDLNFFNQK.K            | 2 | 4,498  | 0,443 | -0,347 |
| 11 | Q71U36 TBA1A_HUMAN | K.VGINYQPPTVVPGGDLAK.V         | 2 | 4,4919 | 0,426 | 0,669  |
| 11 | P12814 ACTN1_HUMAN | K.DDPLTNLNTAFDVAEK.Y           | 2 | 4,4886 | 0,356 | 0      |
| 11 | P06737 PYGL_HUMAN  | K.LITSVADVNNNDPM*VGSK.L        | 3 | 4,4868 | 0,437 | 0,293  |
| 11 | P09211 GSTP1_HUMAN | K.AFLASPEYVNLPIGNGKQ.-         | 3 | 4,4818 | 0,377 | 0,18   |
| 11 | P19387 RPB3_HUMAN  | R.DNDPNDYVEQDDILIVK.L          | 2 | 4,4683 | 0,446 | 0,243  |
| 11 | Q96E29 MTER1_HUMAN | K.DVGIEDNQLGAFLTK.N            | 2 | 4,4614 | 0,553 | -0,151 |
| 11 | P11021 GRP78_HUMAN | R.IINEPTAAAIAYGLDK.R           | 3 | 4,4536 | 0,377 | 0,22   |
| 11 | Q00610 CLH1_HUMAN  | K.VGEQAQVVIIDM*NDPSNPIR.R      | 3 | 4,4476 | 0,361 | 0,414  |
| 11 | P55209 NP1L1_HUMAN | R.LDGLVETPTGYIESLPR.V          | 2 | 4,4457 | 0,438 | -0,328 |
| 11 | P09211 GSTP1_HUMAN | K.DQQEAALVDM*VNDGVEDLR.C       | 2 | 4,413  | 0,565 | -0,458 |
| 11 | P55072 TERA_HUMAN  | R.LIVDEAINEDNSVVSLSQPK.M       | 3 | 4,41   | 0,309 | 0,674  |
| 11 | P38646 GRP75_HUMAN | R.VINEPTAAALAYGLDK.S           | 2 | 4,4093 | 0,529 | 0,667  |
| 11 | P62829 RL23_HUMAN  | R.ISLGLPVGAVINCADNTGAK.N       | 3 | 4,3854 | 0,422 | -0,093 |
| 11 | P62316 SMD2_HUMAN  | R.EEEFNTGPLSVLTQSVK.N          | 2 | 4,385  | 0,623 | -0,426 |
| 11 | Q14103 HNRPD_HUMAN | R.EYFGGFGEVESIELPM*DNK.T       | 3 | 4,3815 | 0,422 | -0,252 |
| 11 | Q9UL25 RAB21_HUMAN | R.DSNGAILVYDITDEDSFQK.V        | 3 | 4,376  | 0,505 | 0,086  |
| 11 | Q9BV86 CI032_HUMAN | K.DNM*AQEGVILDDVDSSVCR.D       | 3 | 4,3704 | 0,505 | 0,513  |
| 11 | P15311 EZRI_HUMAN  | R.VTTM*DAELEFAIQPNTTGK.Q       | 3 | 4,3685 | 0,379 | 0,439  |
| 11 | Q9NYL9 TMOD3_HUMAN | K.DLDEDELLGNLSETLK.Q           | 2 | 4,3661 | 0,456 | -0,505 |
| 11 | P62263 RS14_HUMAN  | R.DESSPYAAM*LAAQDVAQR.C        | 2 | 4,3601 | 0,605 | 0,378  |
| 11 | Q71U36 TBA1A_HUMAN | R.AVFVDLEPTVIDEVR.T            | 3 | 4,3418 | 0,487 | -0,107 |
| 11 | P27824 CALX_HUMAN  | K.APVPTGEVYFADSFDR.G           | 2 | 4,3335 | 0,495 | -0,276 |
| 11 | Q05524 ENO1B_HUMAN | K.DATNVGDEGGFAPNILENK.E        | 3 | 4,3247 | 0,434 | 0      |
| 11 | P08195 4F2_HUMAN   | K.DDVAQTDLLQIDPNFGSK.E         | 2 | 4,3137 | 0,58  | 0,062  |
| 11 | P07355 ANXA2_HUMAN | R.AEDGSVIDYELIDQDAR.D          | 3 | 4,3084 | 0,339 | 0      |
| 11 | P10644 KAP0_HUMAN  | R.LTVADALEPVQFEDGQK.I          | 2 | 4,303  | 0,515 | -0,328 |
| 11 | P23381 SYWC_HUMAN  | K.DLTLDQAYSAYAVENAK.D          | 2 | 4,2768 | 0,555 | -0,406 |
| 11 | A3KN83 SBNO1_HUMAN | K.SIDPDSIQSALLASGLGSK.R        | 2 | 4,2736 | 0,565 | -0,853 |
| 11 | Q9Y2X3 NOL5_HUMAN  | K.FQDTAEALAAFTALM*EGK.I        | 2 | 4,272  | 0,552 | -0,316 |
| 11 | P14618 KPYM_HUMAN  | R.AEGSDVANAVLDGADCIM*LSGETAK.G | 3 | 4,2634 | 0,445 | -0,146 |
| 11 | P06576 ATPB_HUMAN  | R.IPSAVGYQPTLATDM*GTM*QER.I    | 3 | 4,2619 | 0,403 | 0,239  |
| 11 | Q02790 FKBP4_HUMAN | R.FEIGEGENLDLPYGLER.A          | 2 | 4,2588 | 0,59  | -0,188 |

|    |                    |                             |   |        |       |        |
|----|--------------------|-----------------------------|---|--------|-------|--------|
| 11 | P26368 U2AF2_HUMAN | K.LFIGGLPNYLNDDQVK.E        | 2 | 4,2515 | 0,379 | -0,608 |
| 11 | P61081 UBC12_HUMAN | K.TCDISFSDPDDLNF.K.L        | 2 | 4,2219 | 0,501 | -0,388 |
| 11 | Q08211 DHX9_HUMAN  | K.TTQVPQFILDFFIQNDR.A       | 3 | 4,2049 | 0,375 | -0,446 |
| 11 | O75643 U520_HUMAN  | R.M*DTDLETM*DLDQGGEALAPR.Q  | 3 | 4,2012 | 0,428 | 0,414  |
| 11 | P20042 IF2B_HUMAN  | K.DASDDLDDLNFFNQK.K         | 3 | 4,2006 | 0,233 | 0      |
| 11 | O00410 IMB3_HUMAN  | K.FM*QDASDVM*QLLLK.T        | 2 | 4,1951 | 0,437 | 0,292  |
| 11 | Q8NDI1 EHBP1_HUMAN | K.DTSQYVVGELAALENEQK.Q      | 2 | 4,1827 | 0,499 | -0,367 |
| 11 | P62258 1433E_HUMAN | K.AAFDDAIAELDTLSEESYK.D     | 3 | 4,1811 | 0,42  | -0,35  |
| 11 | P20700 LMNB1_HUMAN | R.DQM*QQQLNDYEQLLDVK.L      | 3 | 4,175  | 0,319 | -0,258 |
| 11 | P30050 RL12_HUMAN  | R.QAQIEVVPASALI.K.A         | 2 | 4,1601 | 0,347 | -0,22  |
| 11 | Q03252 LMNB2_HUMAN | R.DVM*QQQLAEYQELLDVK.L      | 3 | 4,159  | 0,334 | 0      |
| 11 | P51991 ROA3_HUMAN  | K.LFIGGLSFETTDDSLR.E        | 2 | 4,1553 | 0,442 | -0,413 |
| 11 | P13639 EF2_HUMAN   | R.CELLYEGPPDEAAM*GIK.S      | 3 | 4,1532 | 0,439 | 0,723  |
| 11 | Q9UHX1 PUF60_HUMAN | K.DIDDDLEGEVTEECGK.F        | 2 | 4,1433 | 0,529 | -0,134 |
| 11 | P26640 SYVC_HUMAN  | R.DPGVITYDLPTPPGEK.K        | 2 | 4,1411 | 0,462 | 0,144  |
| 11 | Q9Y490 TLN1_HUMAN  | K.VVAPTISSPVCQEQLVEAGR.L    | 3 | 4,1319 | 0,367 | 0,684  |
| 11 | Q9C0C4 SEM4C_HUMAN | R.DLPAEQPGSFLYDAR.L         | 2 | 4,126  | 0,481 | 0,436  |
| 11 | P23246 SFPQ_HUMAN  | R.LFVGNLPADITEFEK.R         | 2 | 4,1229 | 0,457 | -0,135 |
| 11 | P50990 TCPQ_HUMAN  | K.DM*LEAGILDTYLGK.Y         | 2 | 4,116  | 0,628 | -0,314 |
| 11 | P31946 1433B_HUMAN | K.TAFDEAIAELDTLNEESYK.D     | 3 | 4,1048 | 0,546 | -0,339 |
| 11 | Q9UL25 RAB21_HUMAN | R.DSNGAILVYDITDEDSFQK.V     | 2 | 4,0903 | 0,468 | -0,115 |
| 11 | P11021 GRP78_HUMAN | R.IINEPTAAAIAYGLDK.R        | 2 | 4,0901 | 0,445 | 0,441  |
| 11 | O60841 IF2P_HUMAN  | R.DPIVM*GVTVEAGQVK.Q        | 2 | 4,0841 | 0,525 | 0,391  |
| 11 | O14744 ANM5_HUMAN  | R.DLNCVPEIADTLGAVAK.Q       | 3 | 4,0725 | 0,44  | -0,205 |
| 11 | P35579 MYH9_HUMAN  | R.IAQLEEEEEEQGNTELINDR.L    | 3 | 4,0635 | 0,525 | 0,222  |
| 11 | Q02952 AKA12_HUMAN | R.EVIAEEEPPTVTEPLPENR.E     | 3 | 4,053  | 0,52  | 0,511  |
| 11 | P52272 HNRPM_HUMAN | K.VGEVTVVELLM*DAEGK.S       | 3 | 4,0356 | 0,289 | -0,31  |
| 11 | P05198 IF2A_HUMAN  | R.ADIEVACYGYEGIDAVK.E       | 3 | 4,0346 | 0,388 | 0,195  |
| 11 | O14744 ANM5_HUMAN  | R.DLNCVPEIADTLGAVAK.Q       | 2 | 4,0272 | 0,506 | -0,342 |
| 11 | P62316 SMD2_HUMAN  | R.EEEEFNTGPLSVLTQSVK.N      | 3 | 4,0197 | 0,46  | -0,182 |
| 11 | O60271 JIP4_HUMAN  | R.EVENLILENTQLLETK.N        | 2 | 4,0172 | 0,433 | -0,388 |
| 11 | P55060 XPO2_HUMAN  | K.LLQTDDEEEAGLLELLK.S       | 2 | 4,0137 | 0,453 | -0,316 |
| 11 | Q9Y490 TLN1_HUMAN  | K.AQEACGPLEM*DSALSVVQNLEK.D | 3 | 4,0099 | 0,268 | -0,913 |

|    |                     |                              |   |        |       |        |
|----|---------------------|------------------------------|---|--------|-------|--------|
| 11 | Q16555 DPYL2_HUMAN  | R.FQM*PDQGM*TSADFFQGTK.A     | 3 | 3,9916 | 0,422 | 0,335  |
| 11 | P51149 RAB7A_HUMAN  | R.DPENFPFVVLGNK.I            | 2 | 3,9883 | 0,463 | -0,331 |
| 11 | P22626 ROA2_HUMAN   | K.LFIGGLSFETTEESLR.N         | 2 | 3,9875 | 0,463 | -0,407 |
| 11 | P78371 TCPB_HUMAN   | R.DASLM*VTNDGATILK.N         | 2 | 3,963  | 0,542 | 0      |
| 11 | P61221 ABCE1_HUMAN  | K.ADIFM*FDEPSSYLDVK.Q        | 2 | 3,9554 | 0,49  | -0,451 |
| 11 | Q8TAQ2 SMRC2_HUMAN  | R.DIGEGNLSTAAAAALAAAVK.A     | 2 | 3,9548 | 0,452 | -0,259 |
| 11 | P13667 PDIA4_HUMAN  | K.DLGLSESGEDVNAAILDESGK.K    | 2 | 3,9479 | 0,572 | 0,576  |
| 11 | P31939 PUR9_HUMAN   | R.M*SSFQDFVALSDVCDVPTAK.I    | 3 | 3,9449 | 0,285 | -0,423 |
| 11 | P49023 PAXI_HUMAN   | K.SAEPSPTVM*STSLGNSLSELDL.L  | 3 | 3,9432 | 0,408 | 1,116  |
| 11 | Q9UNF1 MAGD2_HUMAN  | R.EAPATQASSTTQLTDTQVLAENK.S  | 3 | 3,9422 | 0,381 | 0,148  |
| 11 | Q96RI4 Q96RI4_HUMAN | K.TLNDELEIIEGM*KFD.-         | 2 | 3,9422 | 0,561 | -0,479 |
| 11 | P31939 PUR9_HUMAN   | R.DVSELTFPEM*LGGR.V          | 2 | 3,9306 | 0,484 | 0      |
| 11 | Q96ST2 IWS1_HUMAN   | R.DGGTFISDADDVVSAM*IVK.M     | 2 | 3,9269 | 0,576 | -0,187 |
| 11 | P25705 ATPA_HUMAN   | K.GM*SLNLEPDNVGVVFGNDK.L     | 3 | 3,9179 | 0,394 | 0,086  |
| 11 | O75390 CISY_HUMAN   | K.GLVYETSVLDPDEGIR.F         | 3 | 3,9161 | 0,254 | 0      |
| 11 | P07737 PROF1_HUMAN  | R.DSLLQDGEFSM*DLR.T          | 2 | 3,9094 | 0,505 | 0,223  |
| 11 | Q70CQ2 UBP34_HUMAN  | K.DASQTLLDLALAR.H            | 2 | 3,9085 | 0,459 | -0,152 |
| 11 | Q6PD62 CTR9_HUMAN   | K.DLITQATLLYTM*ADK.I         | 2 | 3,9012 | 0,524 | -0,641 |
| 11 | O00442 RTC1_HUMAN   | R.DLYVNIQPVQEPK.D            | 2 | 3,8998 | 0,376 | 0,237  |
| 11 | Q8IZH2 XRN1_HUMAN   | K.DNLEDETEDDLFETEFR.Q        | 3 | 3,8769 | 0,27  | -0,164 |
| 11 | P21333 FLNA_HUMAN   | K.DGSCGVAYVVQEPGDYEVSVK.F    | 3 | 3,8727 | 0,273 | 0,81   |
| 11 | Q9Y4L1 HYOU1_HUMAN  | R.DAVVYPILVEFTR.E            | 3 | 3,8707 | 0,43  | -0,24  |
| 11 | Q09161 NCBP1_HUMAN  | K.DVPNPNQDDDDDEGFSFNPLK.I    | 3 | 3,8609 | 0,439 | 0,077  |
| 11 | Q6NZI2 PTRF_HUMAN   | K.IIGAVDQIQLTQAQLEER.Q       | 3 | 3,8558 | 0,383 | 0,361  |
| 11 | P30101 PDIA3_HUMAN  | K.DLLIAYYVDVYEK.N            | 2 | 3,8452 | 0,517 | -0,226 |
| 11 | P06576 ATPB_HUMAN   | R.AIAELGIYPAVDPLDSTSR.I      | 2 | 3,845  | 0,578 | -0,245 |
| 11 | Q96ST2 IWS1_HUMAN   | R.DGGTFISDADDVVSAM*IVK.M     | 3 | 3,8388 | 0,272 | -0,374 |
| 11 | P40939 ECHA_HUMAN   | R.DSIFSNLTGQLDYQGFEK.A       | 3 | 3,833  | 0,523 | -0,089 |
| 11 | P10644 KAP0_HUMAN   | R.LTVADALEPVQFEDGQK.I        | 3 | 3,8325 | 0,289 | -0,295 |
| 11 | Q14204 DYHC1_HUMAN  | K.DFPLNDLLSATELDK.I          | 2 | 3,8305 | 0,418 | -0,433 |
| 11 | P04181 OAT_HUMAN    | R.VAIAALEVLEENLAENADK.L      | 3 | 3,8283 | 0,414 | 0,085  |
| 11 | Q04917 1433F_HUMAN  | K.QAFDDAIAELDTLNEDSYK.D      | 2 | 3,8227 | 0,586 | -0,339 |
| 11 | P10809 CH60_HUMAN   | K.LVQDVANNTNEEAGDGTATVTLAR.S | 3 | 3,8201 | 0,42  | -0,286 |

|    |                    |                            |   |        |       |        |
|----|--------------------|----------------------------|---|--------|-------|--------|
| 11 | P08107 HSP71_HUMAN | R.IINEPTAAAIAYGLDR.T       | 2 | 3,815  | 0,447 | 0      |
| 11 | P52597 HNRPF_HUMAN | K.ITGEAFVQFASQELA EK.A     | 3 | 3,8111 | 0,412 | -0,196 |
| 11 | Q8IU8 MINA_HUMAN   | R.DDPALATYYGSLFK.L         | 2 | 3,811  | 0,604 | -0,234 |
| 11 | P31948 STIP1_HUMAN | K.DCEECIQLEPTFIK.G         | 2 | 3,807  | 0,411 | 0,137  |
| 11 | P09211 GSTP1_HUMAN | K.AFLASPEYVNLPIGNGK.Q      | 2 | 3,7957 | 0,482 | -0,513 |
| 11 | P55786 PSA_HUMAN   | K.QM*GFPLIYVEAEQVEDDR.L    | 3 | 3,7834 | 0,443 | 0      |
| 11 | P55145 ARMET_HUMAN | R.DVTFSPATIENELIK.F        | 2 | 3,7723 | 0,494 | -0,582 |
| 11 | P11586 C1TC_HUMAN  | K.YVVVTGITPTPLGEGK.S       | 2 | 3,7676 | 0,529 | 0,524  |
| 11 | P33993 MCM7_HUMAN  | K.LFADAVQELLQYK.E          | 2 | 3,7651 | 0,284 | -0,597 |
| 11 | P55209 NP1L1_HUMAN | R.QLTVQM*M*QNPQILAALQER.L  | 3 | 3,7619 | 0,328 | 0      |
| 11 | O75643 U520_HUMAN  | R.LTAIDILTCAADIQR.Q        | 3 | 3,7608 | 0,472 | -0,309 |
| 11 | P07737 PROF1_HUMAN | K.TFVNITPAEVGVLVGK.D       | 2 | 3,757  | 0,515 | -0,223 |
| 11 | P62988 UBIQ_HUMAN  | K.TITLEVEPSDTIENVK.A       | 2 | 3,7569 | 0,419 | 0,751  |
| 11 | P05388 RLA0_HUMAN  | R.AGAIAPCEVTVPAQNTGLGPEK.T | 3 | 3,7523 | 0,357 | 0,755  |
| 11 | Q02952 AKA12_HUMAN | K.EVSSLEGSPPPCLGQEEAVCTK.I | 3 | 3,7436 | 0,354 | -0,308 |
| 11 | Q7KZF4 SND1_HUMAN  | K.DTNGENIAESLVAEGLATR.R    | 2 | 3,7336 | 0,501 | -0,436 |
| 11 | P07437 TBB5_HUMAN  | R.ALTVPQLTQVFDK.N          | 2 | 3,7333 | 0,48  | -0,294 |
| 11 | Q9P015 RM15_HUMAN  | R.DYGVQLVEEGADTFTAK.V      | 2 | 3,7285 | 0,489 | -0,794 |
| 11 | Q9NUY8 TBC23_HUMAN | K.DLEEAL EAGGCDLETLR.N     | 2 | 3,7151 | 0,5   | -0,387 |
| 11 | P30419 NMT1_HUMAN  | K.ELYTLLNENYVEDDDNM*FR.F   | 3 | 3,7058 | 0,126 | -0,304 |
| 11 | Q6NXR4 CH041_HUMAN | K.DLGD LIEATEFDR.L         | 2 | 3,7053 | 0,512 | -0,49  |
| 11 | P98082 DAB2_HUMAN  | K.DISSDAFTALDPLGDK.E       | 2 | 3,7017 | 0,509 | 0,22   |
| 11 | Q14669 TRIPC_HUMAN | R.SSAVVVDAIPVFLEK.L        | 2 | 3,6949 | 0,461 | -0,388 |
| 11 | Q13885 TBB2A_HUMAN | K.M*SATFIGNSTAIQELFK.R     | 2 | 3,6816 | 0,36  | -0,586 |
| 11 | P63104 1433Z_HUMAN | K.GIVDQSQQAYQEA FEISK.K    | 2 | 3,68   | 0,591 | -0,299 |
| 11 | P42704 LPPRC_HUMAN | K.TVQLTSSSELESTLETLK.A     | 3 | 3,6741 | 0,432 | -0,097 |
| 11 | A3KN83 SBNO1_HUMAN | K.SIDPDSIQSALLASGLGSK.R    | 3 | 3,668  | 0,38  | -0,295 |
| 11 | P12004 PCNA_HUMAN  | R.AEDNADTLALVFEAPNQEK.V    | 3 | 3,6554 | 0,288 | 0,176  |
| 11 | Q01518 CAP1_HUMAN  | R.VENQENVSNLVIEDTELK.Q     | 3 | 3,6514 | 0,261 | 0,176  |
| 11 | Q8NI27 THOC2_HUMAN | R.VFSDIIVTVASCTENEASR.Y    | 3 | 3,6499 | 0,424 | -1,438 |
| 11 | P17980 PRS6A_HUMAN | K.DSYLILETLPT EYDSR.V      | 2 | 3,6485 | 0,503 | -0,382 |
| 11 | Q8IY81 RRMJ3_HUMAN | K.SDDDGFEIVPIEDPAK.H       | 2 | 3,6311 | 0,395 | -0,279 |
| 11 | P62854 RS26_HUMAN  | R.DISEASVFDAYVLPK.L        | 2 | 3,623  | 0,533 | -0,443 |

|    |                     |                               |   |        |       |        |
|----|---------------------|-------------------------------|---|--------|-------|--------|
| 11 | P20020 AT2B1_HUMAN  | K.YGDLLPADGILIQGNDLK.I        | 2 | 3,6226 | 0,435 | -0,382 |
| 11 | P52597 HNRPF_HUMAN  | K.ITGEAFVQFASQELA EK.A        | 2 | 3,6202 | 0,398 | -0,261 |
| 11 | Q14697 GANAB_HUMAN  | R.DENSVELTM*AEGPYK.I          | 2 | 3,6153 | 0,523 | -0,072 |
| 11 | Q8TAQ2 SMRC2_HUMAN  | R.DIGEGNLSTAAAAA LAAAVK.A     | 3 | 3,5992 | 0,398 | -0,194 |
| 11 | P20020 AT2B1_HUMAN  | K.YGDLLPADGILIQGNDLK.I        | 3 | 3,5881 | 0,291 | -0,191 |
| 11 | P40939 ECHA_HUMAN   | K.DLNSDM*DSILASLK.L           | 2 | 3,5843 | 0,386 | 0,238  |
| 11 | Q04637 IF4G1_HUMAN  | K.EFLPEGQDIGAFVAEQK.V         | 2 | 3,5776 | 0,463 | -0,455 |
| 11 | Q15293 RCN1_HUMAN   | K.EIVVLETLEDIDK.N             | 2 | 3,5745 | 0,386 | -0,322 |
| 11 | O15145 ARPC3_HUMAN  | K.DTDIVDEAIYYFK.A             | 2 | 3,5738 | 0,539 | -0,383 |
| 11 | P60709 ACTB_HUMAN   | K.DLYANTVLSGGTTM*YPGIADR.M    | 3 | 3,568  | 0,441 | 0,902  |
| 11 | P08133 ANXA6_HUMAN  | R.EDAQVAAEILEIADTPSGDK.T      | 2 | 3,5652 | 0,513 | -0,353 |
| 11 | P27348 1433T_HUMAN  | K.TAFDEAIAELDTLNEDSYK.D       | 3 | 3,5628 | 0,359 | -0,341 |
| 11 | Q9Y4L1 HYOU1_HUMAN  | K.DAVITVPVFFNQAER.R           | 2 | 3,5577 | 0,432 | -0,215 |
| 11 | P55072 TERA_HUMAN   | R.LDQLIYIPLPDEK.S             | 2 | 3,5572 | 0,277 | -0,157 |
| 11 | P46778 RL21_HUMAN   | R.TNGKEPELLEPIPYEFM*A.-       | 3 | 3,5477 | 0,259 | -0,175 |
| 11 | O75643 U520_HUMAN   | R.AALETDENLLL CAPTGAGK.T      | 2 | 3,546  | 0,411 | 0,126  |
| 11 | Q12802 AKP13_HUMAN  | K.DNEVEQEDLAQSLSLVK.D         | 2 | 3,5441 | 0,391 | -0,573 |
| 11 | O14657 TOR1B_HUMAN  | K.DLEPVLSVGVFN NK.H           | 2 | 3,5323 | 0,51  | -0,319 |
| 11 | Q7Z2W4 ZCCHV_HUMAN  | K.DQVYPQYVIEYTEDK.A           | 2 | 3,5232 | 0,449 | 0,775  |
| 11 | P78527 PRKDC_HUMAN  | K.DVD FM*YVELIQR.C            | 2 | 3,5165 | 0,366 | 0      |
| 11 | P14406 CX7A2_HUMAN  | K.LFQEDDEIPLYLK.G             | 2 | 3,5163 | 0,267 | 0      |
| 11 | Q9NQX3 GEPH_HUMAN   | K.DLVQDPSLLGGTISAYK.I         | 2 | 3,5152 | 0,391 | -0,206 |
| 11 | Q9NYL9 TMOD3_HUMAN  | K.DLDEDELLGNLSETELK.Q         | 3 | 3,5151 | 0,384 | 0      |
| 11 | O43399 TPD54_HUMAN  | K.GLLSDSM*TDVPVDTGVAAR.T      | 3 | 3,509  | 0,313 | 0,095  |
| 11 | Q0D2N1 Q0D2N1_HUMAN | R.VAAAPDEDLDGDEDDAEDENNIDNR.T | 3 | 3,5017 | 0,347 | 0,711  |
| 11 | Q03252 LMNB2_HUMAN  | R.DVM*QQQLAEYQELLDVK.L        | 2 | 3,5011 | 0,32  | -0,236 |
| 11 | Q9HAV7 GRPE1_HUMAN  | K.DLLEVADVLEK.A               | 2 | 3,5007 | 0,451 | -0,196 |
| 11 | P31942 HNRH3_HUMAN  | R.ATENDIANFFSPLNPIR.V         | 2 | 3,4993 | 0,417 | -0,191 |
| 11 | P33778 H2B1B_HUMAN  | K.AM*GIM*NSFVNDIFER.I         | 2 | 3,4903 | 0,657 | -0,412 |
| 11 | P62888 RL30_HUMAN   | R.VCTLAIIDPGDSDIIR.S          | 2 | 3,4902 | 0,433 | -0,139 |
| 11 | P62854 RS26_HUMAN   | R.DISEASVFDAYVLPK.L           | 3 | 3,4896 | 0,449 | 0      |
| 11 | P61923 COPZ1_HUMAN  | R.GEDVPLTEQTVSQVLQSAK.E       | 2 | 3,4875 | 0,466 | -0,481 |
| 11 | Q92616 GCN1L_HUMAN  | K.QLDDEEVSEFALDGLK.Q          | 2 | 3,4831 | 0,53  | -0,135 |



|    |                    |                          |   |        |       |        |
|----|--------------------|--------------------------|---|--------|-------|--------|
| 11 | Q16822 PPCKM_HUMAN | R.LGTPVLQALGDGDFVK.C     | 2 | 3,473  | 0,492 | -0,15  |
| 11 | P40939 ECHA_HUMAN  | K.DLNSDM*DSILASLK.L      | 3 | 3,4632 | 0,332 | 0      |
| 11 | P49411 EFTU_HUMAN  | R.TIGTGLVTNTLAM*TEEEK.N  | 2 | 3,4598 | 0,524 | 0,063  |
| 11 | P61981 1433G_HUMAN | K.TAFDDAIAELDTLNEDSYK.D  | 3 | 3,4576 | 0,393 | -0,258 |
| 11 | Q9BZH6 BRWD2_HUMAN | K.DLLNELESPKEPIEE.-      | 2 | 3,4527 | 0,357 | -1,036 |
| 11 | P08107 HSP71_HUMAN | R.IINEPTAAAIAYGLDR.T     | 3 | 3,4418 | 0,344 | -0,108 |
| 11 | Q8NDI1 EHBP1_HUMAN | K.DTSQYVVGELAALENEQK.Q   | 3 | 3,4284 | 0,348 | -0,092 |
| 11 | P40939 ECHA_HUMAN  | R.DSIFSNLTGQLDYQGFEK.A   | 2 | 3,426  | 0,687 | 0      |
| 11 | P49589 SYCC_HUMAN  | R.DM*EALNVLPDVLTR.V      | 2 | 3,4207 | 0,42  | 0,144  |
| 11 | Q15149 PLEC1_HUMAN | R.LLDPEDVDVPQPDEK.S      | 2 | 3,41   | 0,444 | -0,143 |
| 11 | P35270 SPRE_HUMAN  | R.DM*LFQVLALEEPNVR.V     | 3 | 3,4076 | 0,328 | -0,204 |
| 11 | Q15233 NONO_HUMAN  | R.LFVGNLPPDITEEEM*R.K    | 3 | 3,4068 | 0,29  | 0,195  |
| 11 | Q9Y508 ZN313_HUMAN | R.DCGGAAQLAGPAAEADPLGR.F | 3 | 3,3945 | 0,313 | -0,193 |
| 11 | P06744 G6PI_HUMAN  | K.TLAQLNPESSLFIIASK.T    | 3 | 3,391  | 0,339 | -0,3   |
| 11 | Q9P2J5 SYLC_HUMAN  | R.VDIGDTIYLVH.-          | 2 | 3,3879 | 0,347 | -0,539 |
| 11 | Q13405 RM49_HUMAN  | K.DVEDFLSPLLK.T          | 2 | 3,38   | 0,485 | -0,366 |
| 11 | O14818 PSA7_HUMAN  | R.LTVEDPVTVEYITR.Y       | 2 | 3,3783 | 0,465 | 0,672  |
| 11 | P62136 PP1A_HUMAN  | K.TFTDCFNCLPIAAIVDEK.I   | 3 | 3,3621 | 0,294 | -0,606 |
| 11 | P34931 HS71L_HUMAN | K.AFYPEEISSM*VLTK.L      | 3 | 3,3599 | 0,324 | 0      |
| 11 | O00299 CLIC1_HUMAN | K.FLDGNELTLADCNLLPK.L    | 2 | 3,3596 | 0,487 | -0,442 |
| 11 | P25705 ATPA_HUMAN  | R.TGAIVDVPVGEELLGR.V     | 3 | 3,3558 | 0,396 | -0,338 |
| 11 | Q16186 ADRM1_HUMAN | R.TSGNVEDDLIIFPDDCEFK.R  | 3 | 3,3531 | 0,127 | -0,413 |
| 11 | P61978 HNRPK_HUMAN | K.IILDLISESPIK.G         | 2 | 3,3173 | 0,463 | -0,273 |
| 11 | O94906 PRP6_HUMAN  | K.DDEEADAIYAALDK.R       | 2 | 3,308  | 0,533 | -0,793 |
| 11 | P08670 VIME_HUMAN  | R.EM*EENFAVEAANYQDTIGR.L | 3 | 3,304  | 0,437 | 0,166  |
| 11 | P13667 PDIA4_HUMAN | K.VEGFPTIYFAPSGDK.K      | 2 | 3,3015 | 0,495 | 0,075  |
| 11 | Q99798 ACON_HUMAN  | K.DINQEVYNFLATAGAK.Y     | 3 | 3,2976 | 0,384 | -0,521 |
| 11 | P35749 MYH11_HUMAN | K.QLLQANPILEAFGNAK.T     | 2 | 3,2843 | 0,497 | -0,212 |
| 11 | Q9UNX4 WDR3_HUMAN  | R.DVIGFNM*AGLDYLK.R      | 2 | 3,2818 | 0,428 | -0,233 |
| 11 | P25205 MCM3_HUMAN  | R.GDINILLIGDPSVAK.S      | 2 | 3,2739 | 0,511 | -0,16  |
| 11 | Q15054 DPOD3_HUMAN | K.DSGPLFNTDYDILK.S       | 2 | 3,2724 | 0,119 | 0      |
| 11 | Q53GS9 SNUT2_HUMAN | R.AYDGTTYLPGIVGLNNIK.A   | 2 | 3,2719 | 0,406 | -0,32  |
| 11 | P16615 AT2A2_HUMAN | K.DIVPGDIVEIAVGDK.V      | 3 | 3,2658 | 0,192 | -0,119 |

|    |                     |                             |   |        |       |        |
|----|---------------------|-----------------------------|---|--------|-------|--------|
| 11 | P22102 PUR2_HUMAN   | R.FGDPECQVILPLLK.S          | 2 | 3,2574 | 0,446 | -0,075 |
| 11 | B2RWN5 B2RWN5_HUMAN | K.NFGAENPDPFVPLSTAVK.L      | 2 | 3,2531 | 0,435 | -0,366 |
| 11 | P68371 TBB2C_HUMAN  | R.AVLVDLEPGTM*DSVR.S        | 2 | 3,2498 | 0,413 | 0,905  |
| 11 | P53396 ACLY_HUMAN   | R.TIAIIAEGIPEALTR.K         | 2 | 3,2465 | 0,444 | -0,233 |
| 11 | P61981 1433G_HUMAN  | K.TAFDDAIAELDTLNEDSYK.D     | 2 | 3,2432 | 0,536 | -0,458 |
| 11 | P25705 ATPA_HUMAN   | K.GM*SLNLEPDNVGVVVFVFGNDK.L | 2 | 3,2417 | 0,517 | -0,46  |
| 11 | P35579 MYH9_HUMAN   | K.NLPIYSEEIVEM*YK.G         | 2 | 3,24   | 0,458 | -0,14  |
| 11 | P0C7M2 RA1L3_HUMAN  | K.LFIGGLSFETTDESLR.S        | 2 | 3,2364 | 0,428 | -0,478 |
| 11 | P17252 KPCA_HUMAN   | K.DVVIQDDDVECTM*VEK.R       | 2 | 3,2138 | 0,341 | 0,255  |
| 11 | O75390 CISY_HUMAN   | K.GLVYETSVLDPDEGIR.F        | 2 | 3,2135 | 0,322 | 0,277  |
| 11 | O95260 ATE1_HUMAN   | K.DPSEEAVALQYASLVGQK.C      | 3 | 3,2028 | 0,234 | -0,096 |
| 11 | P50990 TCPQ_HUMAN   | K.IAVYSCPFDGM*ITETK.G       | 2 | 3,2    | 0,514 | 0,528  |
| 11 | Q9Y248 PSF2_HUMAN   | K.ELVTIIPNFSLDK.I           | 2 | 3,1965 | 0,255 | -0,41  |
| 11 | P13667 PDIA4_HUMAN  | K.DGDDVVIIGVFK.G            | 2 | 3,1961 | 0,197 | -0,284 |
| 11 | P31150 GDIA_HUMAN   | K.EVEPALELLEPIDQK.F         | 2 | 3,1919 | 0,486 | -0,071 |
| 11 | Q86TX2 ACOT1_HUMAN  | K.DGYADIVDVLNPLEGPDQK.S     | 2 | 3,1909 | 0,567 | -0,341 |
| 11 | O43491 E41L2_HUMAN  | K.DYFGLLFQESPEQK.N          | 2 | 3,1904 | 0,328 | -0,287 |
| 11 | P26639 SYTC_HUMAN   | R.QVM*VVPVGPTCDEYAQK.V      | 3 | 3,1896 | 0,202 | 0,283  |
| 11 | Q8N7H5 PAF1_HUMAN   | R.DQEEEM*DYAPDDVYDYK.I      | 2 | 3,1828 | 0,442 | 0,912  |
| 11 | Q13564 ULA1_HUMAN   | K.NVNTALNTTQIPSSIEDIFNDDR.C | 3 | 3,1783 | 0,372 | -0,568 |
| 11 | Q71U36 TBA1A_HUMAN  | K.VGINYQPPTVVPGGDLAK.V      | 3 | 3,1776 | 0,151 | 0,301  |
| 11 | P08648 ITA5_HUMAN   | R.DLDGNGYPDLIVGSFGVVK.A     | 2 | 3,1774 | 0,499 | -0,308 |
| 11 | Q13885 TBB2A_HUMAN  | R.AILVDLEPGTM*DSVR.S        | 2 | 3,1704 | 0,453 | 0,673  |
| 11 | Q8IXH7 NELFD_HUMAN  | R.DYIM*EPSIFNTLK.R          | 2 | 3,1674 | 0,377 | 0      |
| 11 | P54819 KAD2_HUMAN   | K.LVSDEM*VVELIEK.N          | 2 | 3,1653 | 0,401 | 0      |
| 11 | P55072 TERA_HUMAN   | R.LGDVISIQPCPDVK.Y          | 2 | 3,1649 | 0,317 | -0,079 |
| 11 | Q04917 1433F_HUMAN  | K.QAFDDAIAELDTLNEDSYK.D     | 3 | 3,1642 | 0,334 | -0,339 |
| 11 | Q6PGP7 TTC37_HUMAN  | K.DDYELIDVLVNNAK.T          | 2 | 3,164  | 0,408 | -0,376 |
| 11 | Q12792 TWF1_HUMAN   | K.DYDSFVLPLEDK.Q            | 2 | 3,1613 | 0,514 | -0,471 |
| 11 | P31943 HNRH1_HUMAN  | R.ATENDIYNFFSPLNPVR.V       | 3 | 3,1564 | 0,238 | -0,55  |
| 11 | P52565 GDIR1_HUMAN  | R.AEEYEFLTPVEEAPK.G         | 2 | 3,1562 | 0,375 | 0,627  |
| 11 | P62258 1433E_HUMAN  | K.AAFDDAIAELDTLSEESYK.D     | 2 | 3,1554 | 0,574 | -0,467 |
| 11 | Q7KZ85 SPT6H_HUMAN  | K.DLDLDAFAEELER.Q           | 2 | 3,1554 | 0,385 | -0,477 |

|    |                     |                            |   |        |       |        |
|----|---------------------|----------------------------|---|--------|-------|--------|
| 11 | Q00839 HNRPU_HUMAN  | K.DCEVVM*M*IGLPGAGK.T      | 2 | 3,1514 | 0,423 | 0      |
| 11 | P07737 PROF1_HUMAN  | K.TFVNITPAEVLVGVGK.D       | 3 | 3,1434 | 0,437 | -0,222 |
| 11 | P00558 PGK1_HUMAN   | K.VLNNM*EIGTSLFDEEGAK.I    | 3 | 3,1213 | 0,298 | 0,277  |
| 11 | P62820 RAB1A_HUMAN  | K.EFADSLGIPFLETSK.N        | 2 | 3,115  | 0,422 | -0,424 |
| 11 | P29401 TKT_HUMAN    | R.SVPTSTVFYPSDGVATEK.A     | 2 | 3,1141 | 0,399 | 0      |
| 11 | P24752 THIL_HUMAN   | K.DGLTDVYNK.I              | 2 | 3,1088 | 0,471 | -0,119 |
| 11 | Q9NYY8 FAKD2_HUMAN  | K.DIISELLTSDDM*K.N         | 2 | 3,105  | 0,459 | -0,489 |
| 11 | Q15738 NSDHL_HUMAN  | R.DPQLVPILIEAAR.N          | 3 | 3,0987 | 0,247 | -0,191 |
| 11 | P62701 RS4X_HUMAN   | R.TDITYPAGFM*DVISDK.T      | 2 | 3,0984 | 0,322 | -0,321 |
| 11 | Q09666 AHNK_HUMAN   | K.VDIDVPDVNLEAPEGK.L       | 2 | 3,0944 | 0,299 | 0,499  |
| 11 | P18031 PTN1_HUMAN   | R.SGTFCLADTCLLM*DK.R       | 2 | 3,0911 | 0,327 | -0,656 |
| 11 | Q9UBI6 GBG12_HUMAN  | R.SDLLIGIPTSSENPFK.D       | 2 | 3,082  | 0,415 | -0,071 |
| 11 | Q5T4S7 UBR4_HUMAN   | K.DGETSGSQEDQLCTALVNQLNK.F | 3 | 3,0639 | 0,294 | -0,152 |
| 11 | P11142 HSP7C_HUMAN  | K.TVTNAVVTVPAYFNDSQR.Q     | 2 | 3,0501 | 0,361 | 0,739  |
| 11 | P06744 G6PI_HUMAN   | K.TLAQLNPESSLFIIASK.T      | 2 | 3,0473 | 0,408 | -0,333 |
| 11 | P04792 HSPB1_HUMAN  | K.LATQSNEITIPVTFESR.A      | 2 | 3,04   | 0,447 | 0,64   |
| 11 | P06733 ENOA_HUMAN   | R.AAVPSGASTGIYEALER.D      | 2 | 3,0368 | 0,345 | -0,338 |
| 11 | Q99459 CDC5L_HUMAN  | K.ESDLPSAILQTSGVSEFTK.K    | 2 | 3,0224 | 0,5   | -0,243 |
| 11 | O43390 HNRPR_HUMAN  | R.DLYEDELVPLFEK.A          | 3 | 3,0211 | 0,165 | 0,114  |
| 11 | Q9NUY8 TBC23_HUMAN  | K.DLEEALAGGCDLETLR.N       | 3 | 3,0161 | 0,252 | -0,193 |
| 11 | O43390 HNRPR_HUMAN  | R.DLYEDELVPLFEK.A          | 2 | 3,0152 | 0,36  | -0,606 |
| 11 | P05362 ICAM1_HUMAN  | K.DGTFPLPIGESVTVTR.D       | 2 | 3,0147 | 0,451 | -0,144 |
| 11 | P08670 VIME_HUMAN   | R.DNLAEDIM*R.L             | 2 | 3,0144 | 0,266 | 0      |
| 11 | P62988 UBIQ_HUMAN   | K.TITLEVEPSDTIENVK.A       | 3 | 3,0115 | 0,287 | 0,102  |
| 11 | Q93008 USP9X_HUMAN  | R.DGLFDTIQR.S              | 2 | 3,0048 | 0,251 | 0      |
| 11 | P46940 IQGA1_HUMAN  | R.ILAIAGLINEALDEGDAQK.T    | 2 | 2,9968 | 0,413 | -0,389 |
| 11 | Q92615 LARP5_HUMAN  | R.GPGLLESPIFNFTADR.L       | 2 | 2,9895 | 0,157 | -0,335 |
| 11 | P07195 LDHB_HUMAN   | K.SLADELALVDVLEDK.L        | 2 | 2,9856 | 0,343 | -0,524 |
| 11 | Q9BTE3 CJ119_HUMAN  | R.DASALLDPM*ECTDTAEEQR.V   | 3 | 2,9701 | 0,236 | 0,506  |
| 11 | Q96RI4 Q96RI4_HUMAN | K.TLNDELEIIEGM*KFD.-       | 3 | 2,9684 | 0,234 | 0      |
| 11 | P35270 SPRE_HUMAN   | R.DM*LFQVLALEPNVR.V        | 2 | 2,9604 | 0,329 | -0,409 |
| 11 | Q8NEB9 PK3C3_HUMAN  | K.DGDESSPILTSFELVK.V       | 2 | 2,958  | 0,409 | -0,351 |
| 11 | P78371 TCPB_HUMAN   | K.LGGSLADSYLDEGFLLDK.K     | 2 | 2,9415 | 0,471 | -0,51  |

|    |                    |                            |   |        |       |        |
|----|--------------------|----------------------------|---|--------|-------|--------|
| 11 | P25705 ATPA_HUMAN  | R.TGAIVDVPVGEELLGR.V       | 2 | 2,9365 | 0,248 | -0,075 |
| 11 | Q15029 U5S1_HUMAN  | K.FFDDPM*LLELAK.Q          | 2 | 2,9318 | 0,355 | -0,252 |
| 11 | Q99497 PARK7_HUMAN | K.GAEEM*ETVIPVDVM*R.R      | 2 | 2,9308 | 0,412 | 0,5    |
| 11 | P55084 ECHB_HUMAN  | K.DQLLLGPTYATPK.V          | 2 | 2,9199 | 0,315 | 0      |
| 11 | O95747 OXSR1_HUMAN | R.DTAEGVSQELISAGLVDGR.D    | 2 | 2,9086 | 0,41  | -0,446 |
| 11 | P21333 FLNA_HUMAN  | R.EGPYSISVLYGDEEVPR.S      | 2 | 2,9075 | 0,513 | -0,319 |
| 11 | P08648 ITA5_HUMAN  | R.DLDGNGYPDLIVGSFGVDK.A    | 3 | 2,9071 | 0,282 | -0,462 |
| 11 | P27816 MAP4_HUMAN  | K.DM*QPSM*ESDM*ALVK.D      | 2 | 2,9067 | 0,262 | 0,15   |
| 11 | P61081 UBC12_HUMAN | K.TCDISFSDPDDLNF.K.L       | 3 | 2,9047 | 0,14  | -0,388 |
| 11 | Q13838 UAP56_HUMAN | K.FM*QDPM*EIFVDDTEK.L      | 2 | 2,9027 | 0,386 | 0,455  |
| 11 | P33316 DUT_HUMAN   | R.IFYPEIEEVQALDDTER.G      | 2 | 2,8981 | 0,493 | 0      |
| 11 | P27348 1433T_HUMAN | K.TAFDEAIAELDTLNEDSYK.D    | 2 | 2,8894 | 0,546 | -0,569 |
| 11 | Q99961 SH3G1_HUMAN | K.ELGGESNFGDALLDAGESM*K.R  | 3 | 2,8813 | 0,318 | -0,267 |
| 11 | Q8TE02 DERP6_HUMAN | R.DSLILPFQFSSEK.Q          | 2 | 2,8777 | 0,097 | -0,242 |
| 11 | Q96RP9 EFG1_HUMAN  | K.VIGVLEPLDPEDYTK.L        | 2 | 2,8662 | 0,372 | -0,072 |
| 11 | P41208 CETN2_HUMAN | R.EAFDLFDADGTGTIDVK.E      | 2 | 2,864  | 0,132 | -0,336 |
| 11 | O60282 KIF5C_HUMAN | K.DVLEGYNGTIFAYGQTSSGK.T   | 2 | 2,8615 | 0,535 | -0,116 |
| 11 | Q9H0D6 XRN2_HUMAN  | R.ELTM*ASLPFTFDVER.S       | 2 | 2,86   | 0,571 | -0,895 |
| 11 | Q9Y333 LSM2_HUMAN  | R.YVQLPADEVDTQLLQDAAR.K    | 2 | 2,8574 | 0,442 | -0,114 |
| 11 | Q53T59 H1BP3_HUMAN | K.DAELAGSPELLEFLGTR.S      | 2 | 2,8539 | 0,455 | -0,336 |
| 11 | Q9BQG0 MBB1A_HUMAN | R.AM*FLQPDLDSLVDFTNNQK.K   | 3 | 2,8448 | 0,256 | -0,557 |
| 11 | O43747 AP1G1_HUMAN | K.ELLYFLDSCEPEFK.A         | 2 | 2,8417 | 0,482 | -0,477 |
| 11 | Q13283 G3BP1_HUMAN | K.LPNFGFVVFDSEPVQK.V       | 2 | 2,8385 | 0,511 | -0,315 |
| 11 | P23434 GCSH_HUMAN  | K.M*TLNPSSELDELM*SEEAYEK.Y | 3 | 2,8344 | 0,113 | -0,234 |
| 11 | P52565 GDIR1_HUMAN | R.AEEYEFLTPVEEAPK.G        | 3 | 2,8334 | 0,311 | 0,313  |
| 11 | O75153 EIF3X_HUMAN | K.DAAAFLLSCQIPGLVK.D       | 3 | 2,831  | 0,281 | -0,107 |
| 11 | P30041 PRDX6_HUMAN | K.DGDSVM*VLPTIPEEEAK.K     | 2 | 2,8296 | 0,427 | 0,793  |
| 11 | P31942 HNRH3_HUMAN | R.ATENDIANFFSPLNPIR.V      | 3 | 2,8258 | 0,088 | -0,381 |
| 11 | P63104 1433Z_HUMAN | K.GIVDQSQQAYQEAFFEISK.K    | 3 | 2,8247 | 0,278 | -0,269 |
| 11 | P30086 PEBP1_HUMAN | K.LYTLVLTDPDAPSR.K         | 2 | 2,8243 | 0,482 | 0,078  |
| 11 | P31943 HNRH1_HUMAN | R.ATENDIYNFFSPLNPVR.V      | 2 | 2,8201 | 0,402 | -0,122 |
| 11 | Q14108 SCRB2_HUMAN | K.DEVLYVFPSPDFCR.S         | 2 | 2,8104 | 0,376 | 0      |
| 11 | O95573 ACSL3_HUMAN | R.SVNSLDGLASVLYPGCDTLDK.V  | 3 | 2,8096 | 0,189 | 0,247  |

|    |                    |                               |   |        |       |        |
|----|--------------------|-------------------------------|---|--------|-------|--------|
| 11 | P42704 LPPRC_HUMAN | K.TVQLTSSELESTLETLK.A         | 2 | 2,8081 | 0,302 | -0,519 |
| 11 | P04792 HSPB1_HUMAN | K.DGVVEITGK.H                 | 2 | 2,8073 | 0,357 | -0,066 |
| 11 | Q70CQ2 UBP34_HUMAN | K.DM*TEFFTDLITK.I             | 2 | 2,8027 | 0,513 | 0,248  |
| 11 | Q15233 NONO_HUMAN  | R.LFVGNLPPDITEEEM*R.K         | 2 | 2,7988 | 0,291 | 0,52   |
| 11 | P60510 PP4C_HUMAN  | K.DFIIFEAAPQETR.G             | 2 | 2,7957 | 0,292 | -0,556 |
| 11 | P17812 PYRG1_HUMAN | K.YIDSADLEPITSQEPPVR.Y        | 2 | 2,7921 | 0,465 | 1,302  |
| 11 | P13639 EF2_HUMAN   | R.CELLYEGPPDDEAAM*GIK.S       | 2 | 2,7827 | 0,401 | 0,482  |
| 11 | Q8WVM8 SCFD1_HUMAN | K.SLLDIISDPDAGTPEDK.M         | 2 | 2,7805 | 0,39  | -0,273 |
| 11 | P04075 ALDOA_HUMAN | K.YTPSGQAGAAASESLFVSNHAY.-    | 3 | 2,7695 | 0,376 | 0,246  |
| 11 | Q16630 CPSF6_HUMAN | R.DYM*DTLPPTVGDDVGK.G         | 2 | 2,7682 | 0,384 | -0,07  |
| 11 | Q01433 AMPD2_HUMAN | R.SAPYEFPEESPIEQLEER.R        | 3 | 2,7676 | 0,165 | 0,17   |
| 11 | Q9UNZ2 NSF1C_HUMAN | K.LGSTAPQVLSTSSPAQAENEAK.A    | 3 | 2,7671 | 0,276 | -0,474 |
| 11 | Q06210 GFPT1_HUMAN | R.VIFLEDDDDVAAVVDGR.L         | 2 | 2,7575 | 0,431 | -0,211 |
| 11 | P34931 HS71L_HUMAN | K.AFYPEEISSM*VLTK.L           | 2 | 2,7569 | 0,468 | 0      |
| 11 | Q15155 NOMO1_HUMAN | R.DGENYVLLDSTLPR.S            | 2 | 2,7556 | 0,226 | -0,289 |
| 11 | P20810 ICAL_HUMAN  | K.DTM*SDQALEALSASLGTR.Q       | 2 | 2,7468 | 0,441 | 0      |
| 11 | Q9BV86 CI032_HUMAN | K.DNM*AQEGVILDDVDSSVCR.D      | 2 | 2,7309 | 0,462 | 0,913  |
| 11 | Q9NYK5 RM39_HUMAN  | K.DLPFETLEVEAK.V              | 2 | 2,7273 | 0,382 | 0      |
| 11 | Q9HAV4 XPO5_HUMAN  | R.VLSDVDAFIAYVGTDQK.S         | 3 | 2,7202 | 0,243 | 0,099  |
| 11 | P04181 OAT_HUMAN   | R.VAIAALEVLEENLAENADK.L       | 2 | 2,7142 | 0,528 | -0,228 |
| 11 | P31948 STIP1_HUMAN | K.ALSVGNIDDALQCYSEAIK.L       | 3 | 2,7117 | 0,22  | -0,442 |
| 11 | Q9UQE7 SMC3_HUMAN  | R.DTAYPETNDAIPM*ISK.L         | 2 | 2,7093 | 0,36  | 0,685  |
| 11 | P12814 ACTN1_HUMAN | K.DDPLTNLNTAFDVAEK.Y          | 3 | 2,7083 | 0,117 | 0      |
| 11 | P62333 PRS10_HUMAN | R.EVIELPLTNPELFQR.V           | 2 | 2,6987 | 0,291 | -0,271 |
| 11 | O75312 ZPR1_HUMAN  | R.IPELDFEIPAFSQK.G            | 2 | 2,6965 | 0,421 | -0,299 |
| 11 | P41227 ARD1A_HUMAN | K.DLSEVSETTESTDVKDSSEASDSAS.- | 3 | 2,6951 | 0,18  | 0,781  |
| 11 | P50990 TCPQ_HUMAN  | K.DM*LEAGILDTYLGK.Y           | 3 | 2,6939 | 0,299 | 0      |
| 11 | Q1KMD3 HNRL2_HUMAN | K.EVEGDDVPESIM*LEM*K.A        | 2 | 2,6775 | 0,36  | 0,329  |
| 11 | O15145 ARPC3_HUMAN | K.DTDIVDEAIYFK.A              | 3 | 2,6725 | 0,29  | -0,23  |
| 11 | O14925 TIM23_HUMAN | R.YLVQDTDEFILPTGANK.T         | 2 | 2,6725 | 0,223 | 0,127  |
| 11 | Q9BY44 EIF2A_HUMAN | K.DGTAGIPNLQLYDVK.T           | 2 | 2,6537 | 0,338 | -0,152 |
| 11 | Q5VT52 K0460_HUMAN | R.ESFADVLPEAAALVK.D           | 2 | 2,6476 | 0,305 | -0,235 |
| 11 | Q9Y3P9 RBGP1_HUMAN | K.DDLLLLDFEGALK.F             | 2 | 2,6444 | 0,365 | -0,421 |

|    |                      |                          |   |        |       |        |
|----|----------------------|--------------------------|---|--------|-------|--------|
| 11 | O75489 NDUS3_HUMAN   | K.TYTDELTPIESAVSVFK.A    | 2 | 2,6328 | 0,424 | -0,321 |
| 11 | Q09666 AHNK_HUMAN    | K.VDVEVPDVSLEGPEGK.L     | 2 | 2,6315 | 0,368 | 0,146  |
| 11 | P15880 RS2_HUMAN     | K.SLEEIYLFSLPIK.E        | 2 | 2,6285 | 0,364 | -0,157 |
| 11 | P17980 PRS6A_HUMAN   | R.QTYFLPVLGLVDAEK.L      | 2 | 2,6272 | 0,367 | -0,144 |
| 11 | P16615 AT2A2_HUMAN   | K.DIVPGDIVEIAVGDK.V      | 2 | 2,6148 | 0,389 | -0,317 |
| 11 | Q14978 NOLC1_HUMAN   | R.DNQLSEVANK.F           | 2 | 2,6052 | 0,299 | 0      |
| 11 | Q9UHB9 SRP68_HUMAN   | K.DLPDVQELITQVR.S        | 2 | 2,5998 | 0,328 | -0,16  |
| 11 | P46199 IF2M_HUMAN    | R.DLPSAGEEILEVESEPR.A    | 2 | 2,5964 | 0,189 | -0,652 |
| 11 | P50395 GDIB_HUMAN    | R.NPYYGGESASITPLEDLK.R   | 2 | 2,5875 | 0,506 | -0,346 |
| 11 | A6NHR9 SMHD1_HUMAN   | R.DSTEYFIVFEPR.L         | 2 | 2,583  | 0,292 | -0,162 |
| 11 | O15355 PPM1G_HUMAN   | K.NLPPEEQM*ISALPDIK.V    | 2 | 2,579  | 0,195 | 0,606  |
| 11 | P07339 CATD_HUMAN    | R.DPDAQPGGELM*LGGTDSK.Y  | 2 | 2,5626 | 0,476 | -0,203 |
| 11 | P11388 TOP2A_HUMAN   | R.FLEEFITPIVK.V          | 2 | 2,5602 | 0,334 | -0,274 |
| 11 | Q9UHY7 ENOPH_HUMAN   | K.DILFPYIEENVK.E         | 2 | 2,5577 | 0,351 | -0,33  |
| 11 | P62736 ACTA_HUMAN    | K.DSYVGDEAQSK.R          | 2 | 2,5566 | 0,454 | -0,407 |
| 11 | P12956 KU70_HUMAN    | R.DLLAVVFGTEK.D          | 2 | 2,5529 | 0,475 | 0      |
| 11 | P51398 RT29_HUMAN    | K.ELLFLSNANPSLLER.H      | 2 | 2,5495 | 0,373 | -0,64  |
| 11 | ##P37088 SCNNA_HUMAN | R.DLEELEEK.I             | 2 | 2,5455 | 0,19  | 0,061  |
| 11 | P09211 GSTP1_HUMAN   | K.AFLASPEYVNLPIGNGKQ.-   | 2 | 2,5327 | 0,402 | -0,18  |
| 11 | Q00610 CLH1_HUMAN    | K.LTDQLPLIIVCDR.F        | 2 | 2,5173 | 0,376 | 0,078  |
| 11 | Q08211 DHX9_HUMAN    | K.TTQVPQFILDFFIQNDR.A    | 2 | 2,4944 | 0,362 | -0,476 |
| 11 | P36578 RL4_HUMAN     | R.IEEVPELPLVVEDK.V       | 2 | 2,4941 | 0,26  | -0,303 |
| 11 | P31946 1433B_HUMAN   | K.TAFDEAIAELDTLNEESYK.D  | 2 | 2,4893 | 0,422 | -0,339 |
| 11 | Q03154 ACY1_HUMAN    | K.DM*NLTLEPEIM*PAATDNR.Y | 2 | 2,4699 | 0,436 | -0,118 |
| 11 | P46108 CRK_HUMAN     | R.ALDFDFNGNDEEDLPFK.K    | 2 | 2,4571 | 0,236 | -0,326 |
| 11 | P45974 UBP5_HUMAN    | K.IVILPDYLEIAR.D         | 2 | 2,4416 | 0,397 | -0,259 |
| 11 | Q8N163 K1967_HUMAN   | K.VLLSSPGLLELYR.C        | 2 | 2,4362 | 0,337 | -0,23  |
| 11 | P04843 RPN1_HUMAN    | R.ATSFLLALEPELEAR.L      | 2 | 2,4309 | 0,407 | -0,22  |
| 11 | Q07955 SFRS1_HUMAN   | R.DGTGVVFEVFR.K          | 2 | 2,4069 | 0,249 | -0,113 |
| 11 | O95571 ETHE1_HUMAN   | R.EAVLIDPVLETAPR.D       | 2 | 2,4028 | 0,306 | -0,24  |
| 11 | P31939 PUR9_HUMAN    | K.ALFEVPELLTEAEK.K       | 2 | 2,4015 | 0,239 | -0,355 |
| 11 | O76031 CLPX_HUMAN    | R.DLIEFGM*IPEFVGR.L      | 2 | 2,4    | 0,424 | -0,298 |
| 11 | P30040 ERP29_HUMAN   | R.DGDFENVPYTGAVK.V       | 2 | 2,3817 | 0,292 | 0      |

|    |                      |                                   |                 |   |        |       |        |
|----|----------------------|-----------------------------------|-----------------|---|--------|-------|--------|
| 11 | Q9NU22 MDN1_HUMAN    | K.DFADILVQPTLEENK.G               |                 | 2 | 2,379  | 0,348 | -0,07  |
| 11 | P08621 RU17_HUMAN    | R.DPIPYLPPLEK.L                   |                 | 2 | 2,3467 | 0,439 | 0      |
| 11 | Q9BXP2 S12A9_HUMAN   | R.DDLFGVILAPAK.V                  |                 | 2 | 2,3137 | 0,264 | 0      |
| 11 | P35606 COPB2_HUMAN   | K.AAESLADPTEYENLFPGLK.E           |                 | 2 | 2,3089 | 0,387 | -0,355 |
| 11 | Q32MZ4 LRRF1_HUMAN   | K.DM*LLELEEQLAESR.R               |                 | 2 | 2,3074 | 0,217 | 0,433  |
| 11 | P62258 1433E_HUMAN   | K.LICCDILDVLDK.H                  |                 | 2 | 2,2888 | 0,3   | -0,248 |
| 11 | Q13362 2A5G_HUMAN    | K.DSTLTPEPVVM*ALLK.Y              |                 | 2 | 2,2676 | 0,278 | -0,08  |
| 11 | Q13200 PSMD2_HUMAN   | R.EDVLTLLLPVM*GDSK.S              |                 | 2 | 2,2603 | 0,379 | -0,296 |
| 11 | Q15738 NSDHL_HUMAN   | R.DPQLVPILIEAAR.N                 |                 | 2 | 2,2444 | 0,218 | -0,34  |
| 11 | P31949 S10AB_HUMAN   | K.TEFLSFM*NTELAFTK.N              |                 | 2 | 2,2337 | 0,133 | -0,392 |
| 11 | Q9NT62 ATG3_HUMAN    | K.ALEVAEYLTPVLK.E                 |                 | 2 | 2,2192 | 0,294 | -0,253 |
| 11 | Q9H8M5 CNNM2_HUMAN   | K.DLAFVDPDDCTPLK.T                |                 | 2 | 2,2161 | 0,305 | 0,38   |
| 11 | ##O75844 FACE1_HUMAN | K.WHGLEHGLVALVEENK.C              |                 | 2 | 2,208  | 0,143 | -0,933 |
| 11 | Q5JTH9 RRP12_HUMAN   | K.DLLPCFPEGLVK.S                  |                 | 2 | 2,206  | 0,305 | -0,527 |
| 11 | Q86VP6 CAND1_HUMAN   | K.LTLIDPETLLPR.L                  |                 | 2 | 2,18   | 0,286 | -0,442 |
| 11 | Q96F07 CYFP2_HUMAN   | K.DFVSEAYLLTLGK.F                 |                 | 2 | 2,1626 | 0,337 | -0,335 |
| 11 | P19387 RPB3_HUMAN    | R.LGLIPLISDDIVDK.L                |                 | 2 | 2,1603 | 0,184 | -0,323 |
| 11 | O95793 STAU1_HUMAN   | R.ELLYGGTSPTAETILK.N              |                 | 2 | 2,1573 | 0,184 | -0,072 |
| 11 | P13804 ETFA_HUMAN    | K.LEVAPISDIIAIK.S                 |                 | 2 | 2,1444 | 0,259 | -0,265 |
| 11 | O43776 SYNC_HUMAN    | K.EDGTFYEFGEDIPEAPER.L            |                 | 2 | 2,1129 | 0,328 | -0,232 |
| 11 | O75688 PPM1B_HUMAN   | R.DNM*SIVLVCFSNAPK.V              |                 | 2 | 2,1014 | 0,139 | 1,498  |
| 11 | Q04917 1433F_HUMAN   | K.ELETVCNDVLSLLDK.F               |                 | 2 | 2,083  | 0,263 | -0,14  |
| 11 | Q9HAV4 XPO5_HUMAN    | R.DPLLLAIIPK.Y                    |                 | 2 | 2,0744 | 0,175 | -0,112 |
| 11 | O14745 NHERF_HUMAN   | R.LLVVDPETDEQLQK.L                |                 | 2 | 2,0682 | 0,175 | -0,3   |
| 11 | Q6NVY1 HIBCH_HUMAN   | K.LAM*LEEDLLALK.S                 |                 | 2 | 2,0612 | 0,188 | -0,177 |
| 11 | P31948 STIP1_HUMAN   | K.ALSVGNIDDALQCYSEAIK.L           |                 | 2 | 2,0568 | 0,335 | -0,354 |
| 11 | Q92616 GCN1L_HUMAN   | K.DLAPYLPSVTPGLK.A                |                 | 2 | 2,0548 | 0,302 | 0,166  |
| 11 | Q9Y4L1 HYOU1_HUMAN   | R.DAVVYPILVEFTR.E                 |                 | 2 | 2,0347 | 0,235 | -0,16  |
| 12 | Q9H3Z4 DNJC5_HUMAN   | R.SLS#TSGESLYHVLGLDK.N            | S10:            | 3 | 3,449  | 0,325 | -0,291 |
| 12 | Q9H3Z4 DNJC5_HUMAN   | R.SLS#TSGESLYHVLGLDK.N            | S10:            | 2 | 3,2137 | 0,218 | -0,323 |
| 12 | Q9H6Z4 RANB3_HUMAN   | R.SAGGS#S#PEGGEDS#DREDGNYCPPVKR.E | S100:S101:S108: | 3 | 4,1579 | 0,501 | -0,185 |
| 12 | Q8TDM6 DLG5_HUMAN    | K.IDYLLPGGPAHS#PQPSK.R            | S1000:          | 3 | 2,6641 | 0,23  | 0,468  |
| 12 | P05386 RLA1_HUMAN    | K.KEES#EES#DDDM*GFGLFD.-          | S101:S104:      | 2 | 3,9263 | 0,509 | -0,344 |

|    |                    |                                    |                    |   |        |       |        |
|----|--------------------|------------------------------------|--------------------|---|--------|-------|--------|
| 12 | Q09666 AHNK_HUMAN  | K.FSM*PS#LKGEPEFDVNLK.A            | S1010:             | 3 | 2,9308 | 0,227 | 0,588  |
| 12 | P35658 NU214_HUMAN | R.TPS#IQPSLLPHAAPFAK.S             | S1023:             | 3 | 4,0008 | 0,379 | 0      |
| 12 | P35658 NU214_HUMAN | R.TPS#IQPSLLPHAAPFAK.S             | S1023:             | 2 | 3,9783 | 0,557 | -0,526 |
| 12 | Q7Z3B3 K1267_HUMAN | R.TFPLAHS#PQAECEQLDAQER.A          | S1045:             | 3 | 4,4722 | 0,37  | 0      |
| 12 | P24534 EF1B_HUMAN  | K.DDDIDLFGS#DDEESEEAKR.L           | S106:              | 3 | 3,0859 | 0,45  | -0,219 |
| 12 | Q6PKG0 LARP1_HUMAN | R.CPSQSSS#RPAAM*ISQPPTPTGQPVR.E    | S1060:             | 3 | 3,5369 | 0,241 | -0,065 |
| 12 | Q9UQ35 SRRM2_HUMAN | K.GQSQTSPDHRS#DTS#S#PEVR.Q         | S1069:S1072:S1073: | 3 | 2,6314 | 0,199 | 0,238  |
| 12 | P06744 G6PI_HUMAN  | R.S#NTPILVDGKDVM*PEVVK.V           | S107:              | 2 | 2,1532 | 0,536 | 0,714  |
| 12 | Q9UHF7 TRPS1_HUMAN | K.HPNYS#PPGS#PIEK.Y                | S1081:S1085:       | 2 | 2,9408 | 0,411 | -0,231 |
| 12 | Q9NYV4 CD2L7_HUMAN | K.ETTSSTSTEPVKNSS#PAPPQPAPGK.V     | S1083:             | 3 | 3,6741 | 0,246 | -0,359 |
| 12 | Q2NXX8 ERC6L_HUMAN | R.S#LINM*VLDHVEDM*EER.L            | S1098:             | 2 | 2,9021 | 0,437 | -0,299 |
| 12 | Q9UQ35 SRRM2_HUMAN | K.GGRS#RS#SS#PVTELASR.S            | S1099:S1101:S1103: | 3 | 3,0646 | 0,27  | 0      |
| 12 | Q8IXM2 CQ049_HUMAN | K.KVASGVLS#PPPAAPPPSSSVPEAGGPPIK.K | S110:              | 3 | 3,2839 | 0,39  | -0,384 |
| 12 | Q8IXM2 CQ049_HUMAN | K.VASGVLS#PPPAAPPPSSSVPEAGGPPIK.Q  | S110:              | 3 | 3,1483 | 0,25  | -0,448 |
| 12 | Q12888 TP53B_HUMAN | K.M*VIQGPSS#PQGEAM*VTDVLEDQKEGR.S  | S1114:             | 3 | 4,2687 | 0,403 | -0,377 |
| 12 | Q14160 LAP4_HUMAN  | R.DPTDEGIFISKVS#PTGAAGR.D          | S1140:             | 3 | 3,8065 | 0,207 | 0      |
| 12 | Q7Z309 F122B_HUMAN | K.RIDFTPVS#PAPS#PTR.G              | S115:S119:         | 2 | 3,3132 | 0,451 | -1,49  |
| 12 | Q68CZ2 TENS3_HUMAN | K.ASEAASPLPDS#PGDKLVIVK.F          | S1154:             | 3 | 2,9313 | 0,091 | 0,088  |
| 12 | P55196 AFAD_HUMAN  | R.ADHRS#S#PNVANQPPS#PGGK.S         | S1155:S1156:S1165: | 3 | 3,9235 | 0,24  | -0,255 |
| 12 | P36871 PGM1_HUMAN  | K.AIGGIILTAS#HNPGGPNGDFGIK.F       | S117:              | 3 | 4,8768 | 0,482 | -0,32  |
| 12 | Q86VM9 ZCH18_HUMAN | R.TSDLRDEAS#S#VTR.E                | S117:S118:         | 3 | 3,1194 | 0,343 | -0,229 |
| 12 | Q5SYE7 NHSL1_HUMAN | R.SPGAPSAGEAEARSPSTTLPDS#SPSR.K    | S1190:             | 3 | 4,7457 | 0,469 | -1,051 |
| 12 | Q9H9J4 UBP42_HUMAN | R.HQQDS#DLS#AACS#DADLHR.H          | S1220:S1223:S1227: | 3 | 5,2238 | 0,466 | 0,081  |
| 12 | Q9H9J4 UBP42_HUMAN | R.HQQDS#DLS#AACS#DADLHR.H          | S1220:S1223:S1227: | 2 | 2,1321 | 0,433 | -0,323 |
| 12 | Q9P1Y6 K1542_HUMAN | R.LPALGEAHVS#PEVATADK.A            | S1229:             | 3 | 2,962  | 0,206 | -0,097 |
| 12 | P49916 DNL3_HUMAN  | K.LTTTGQVTS#PVKGASFVSTNPR.K        | S123:              | 3 | 3,4169 | 0,372 | -0,226 |
| 12 | Q5UIP0 RIF1_HUMAN  | K.FDGSENRPF#PSPLNNISSTVTVK.N       | S1236:             | 3 | 3,9224 | 0,348 | -0,616 |
| 12 | Q92797 SYMPK_HUMAN | R.SPQTLAPVGEDAM*KTPS#PAAEDAR.E     | S1259:             | 3 | 3,8055 | 0,351 | -0,217 |
| 12 | P49023 PAXI_HUMAN  | K.QKS#AEPSPTVM*STSLGSNLSELDR.L     | S126:              | 3 | 3,7108 | 0,414 | -0,417 |
| 12 | O75533 SF3B1_HUMAN | R.TM*IIS#PERLDPFADGGK.T            | S129:              | 3 | 3,0707 | 0,166 | -0,471 |
| 12 | O75494 FUSIP_HUMAN | R.S#RS#RS#FDYNYR.R                 | S129:S131:S133:    | 2 | 2,414  | 0,337 | -0,144 |
| 12 | O75533 SF3B1_HUMAN | R.TM*IIS#PERLDPFADGGK#PDPK.M       | S129:T142:         | 3 | 3,4415 | 0,217 | -0,071 |
| 12 | Q92538 GBF1_HUMAN  | R.ADAPDAGAQS#DSELPYHQNDVSLDR.G     | S1298:             | 3 | 5,2739 | 0,53  | -0,193 |



|    |                    |                                    |              |   |        |       |        |
|----|--------------------|------------------------------------|--------------|---|--------|-------|--------|
| 12 | Q86VM9 ZCH18_HUMAN | R.DPHS#PEDEEQPQGLSDDDLR.D          | S13:         | 3 | 3,9561 | 0,394 | -0,518 |
| 12 | Q05655 KPCD_HUMAN  | K.VLM*SVQYFLEDVDCKQS#M*R.S         | S130:        | 3 | 3,0842 | 0,183 | -0,446 |
| 12 | Q7Z2Z1 CO042_HUMAN | K.RPGNSTVTSS#PPVT#PK.K             | S1303:T1307: | 3 | 3,4653 | 0,244 | -0,307 |
| 12 | Q9BTV5 FSD1_HUMAN  | K.DGVTM*APAFRLS#LK.A               | S133:        | 2 | 2,499  | 0,127 | 0,228  |
| 12 | Q8NEY8 PPHLN_HUMAN | R.DNTFFRES#PVGR.K                  | S133:        | 2 | 2,3488 | 0,266 | 0,162  |
| 12 | Q12756 KIF1A_HUMAN | R.VTGVYELSLCHVADAGS#PGM*QR.R       | S1337:       | 3 | 6,0329 | 0,479 | 0,15   |
| 12 | Q16656 NRF1_HUMAN  | R.VGQQAIVLCIS#PSKPNPVFK.V          | S136:        | 3 | 3,5378 | 0,312 | -0,162 |
| 12 | Q15021 CND1_HUMAN  | K.VVFSS#DESSEEDLSAEM*TEDETPKK.T    | S1367:       | 3 | 3,0293 | 0,392 | 1,205  |
| 12 | Q9NWS9 ZN446_HUMAN | K.TEEPLGS#PHPSGTVESPGEGPDTR.I      | S137:        | 3 | 3,8169 | 0,254 | -0,139 |
| 12 | Q13428 TCOF_HUMAN  | K.KLGAGEGGEAS#VS#PEK.T             | S1376:S1378: | 3 | 4,4486 | 0,349 | -0,109 |
| 12 | Q13428 TCOF_HUMAN  | K.KLGAGEGGEAS#VS#PEK.T             | S1376:S1378: | 2 | 3,0566 | 0,359 | -0,437 |
| 12 | Q9HAZ1 CLK4_HUMAN  | R.S#IEDDEEGHLCQSGDVLR.A            | S138:        | 3 | 2,7371 | 0,267 | -0,162 |
| 12 | P49815 TSC2_HUMAN  | K.SSS#SPELQTLQDILGDPGDKADVGR.L     | S1387:       | 3 | 3,0871 | 0,225 | -0,206 |
| 12 | P49759 CLK1_HUMAN  | R.S#VEDDEEGHLCQSGDVLSAR.Y          | S140:        | 3 | 4,6785 | 0,285 | 0      |
| 12 | Q8N9Q2 S12IP_HUMAN | K.HSS#TPNS#SEFSR.K                 | S145:S149:   | 2 | 2,4381 | 0,229 | -0,489 |
| 12 | Q02880 TOP2B_HUMAN | K.SQDFGNLFSFPSYS#QKSEDDSAK.F       | S1454:       | 3 | 3,117  | 0,227 | -0,343 |
| 12 | Q9BTC0 DIDO1_HUMAN | R.NS#VERPAEPVAGAATPSLVEQQK.M       | S1456:       | 3 | 5,4338 | 0,374 | -0,223 |
| 12 | P78316 NOP14_HUMAN | K.HNDIVDS#DS#DAEDR.G               | S146:S148:   | 2 | 5,6515 | 0,555 | -0,838 |
| 12 | P78316 NOP14_HUMAN | K.HNDIVDS#DS#DAEDR.G               | S146:S148:   | 3 | 3,4416 | 0,392 | -0,733 |
| 12 | Q02880 TOP2B_HUMAN | K.SEDDS#AKFDSNEEDSASVFSFGLK.Q      | S1461:       | 3 | 3,0972 | 0,371 | -0,255 |
| 12 | Q9BUA3 YK007_HUMAN | R.AEQPS#PPNSDSGQDAHPDPDANPDAAR.M   | S148:        | 3 | 3,1322 | 0,39  | -0,387 |
| 12 | Q13177 PAK2_HUMAN  | K.YLSFTPPEKDGFP#GTPALNAK.G         | S152:        | 3 | 2,7619 | 0,105 | 0,454  |
| 12 | Q12756 KIF1A_HUMAN | R.TPQPCSRPAS#PEPELLPEADSK.K        | S1532:       | 3 | 4,026  | 0,425 | 0,515  |
| 12 | Q02880 TOP2B_HUMAN | K.KTSFDQDS#DVIDIFPSDFPTEPPSLPR.T   | S1581:       | 3 | 4,3792 | 0,372 | -0,303 |
| 12 | P49327 FAS_HUMAN   | R.DIM*LATGKLS#PDAIPGK.W            | S1584:       | 3 | 4,2377 | 0,43  | 0,301  |
| 12 | Q15742 NAB2_HUMAN  | R.SFS#PKSPELELGEKLS#PLPGGPGAGDPR.I | S159:S171:   | 3 | 2,9965 | 0,141 | -0,321 |
| 12 | Q9UJF2 NGAP_HUMAN  | R.S#ISGTSTSEKPNM*DTANTSPFK.V       | S16:         | 3 | 3,4923 | 0,531 | -0,074 |
| 12 | P25205 MCM3_HUMAN  | R.RYS#DLTTLVAFSSSVYPTK.D           | S160:        | 3 | 3,746  | 0,166 | -0,158 |
| 12 | Q9H2U1 DHX36_HUMAN | R.S#YIDRDSEYLLQENEPDGTLDQK.L       | S161:        | 3 | 4,7991 | 0,245 | -1,238 |
| 12 | Q1KMD3 HNRL2_HUMAN | R.S#GDETPGSEVPGDKAAEEQGDDQDSEK.S   | S161:        | 3 | 4,2366 | 0,464 | 0,256  |
| 12 | Q9NVU0 RPC5_HUMAN  | R.EREAANEAGDS#S#QDEAEDDVK.Q        | S161:S162:   | 3 | 4,9901 | 0,403 | -0,075 |
| 12 | P38398 BRCA1_HUMAN | K.VAESAQ#PAAAHTTDTAGYNAM*EESVSR.E  | S1613:       | 3 | 5,8367 | 0,51  | -0,435 |
| 12 | Q92734 TFG_HUMAN   | K.QSTQVM*AAS#M*SAFDPLKNQDEINK.N    | S164:        | 3 | 4,1518 | 0,372 | 0      |

|    |                     |                                   |                    |   |        |       |        |
|----|---------------------|-----------------------------------|--------------------|---|--------|-------|--------|
| 12 | P51608 MECP2_HUMAN  | K.VGDTSLDPNDFDFTVTGRGS#PSR.R      | S164:              | 3 | 4,1261 | 0,198 | -0,363 |
| 12 | Q8IZH2 XRN1_HUMAN   | K.EAQSSQATPVQTSQPDSSNIVKVS#PR.E   | S1645:             | 3 | 4,4048 | 0,404 | -0,324 |
| 12 | ##Q92858 ATO1_HUMAN | K.SLKKDNNS#PIVNR.L                | S167:              | 2 | 2,1312 | 0,17  | -1,354 |
| 12 | P46013 KI67_HUMAN   | K.AFM*ES#PKQILDSAASLTGSK.R        | S1679:             | 3 | 3,8138 | 0,237 | -0,252 |
| 12 | Q01433 AMPD2_HUMAN  | R.QIS#QDVKLEPDILLR.A              | S168:              | 3 | 3,0932 | 0,291 | 0      |
| 12 | P18583 SON_HUMAN    | K.DTEEPLPVKESDQTLAALLS#PK.E       | S1697:             | 3 | 3,5806 | 0,378 | -0,297 |
| 12 | Q15742 NAB2_HUMAN   | K.SPLELGEKLS#PLPGGPGAGDPR.I       | S171:              | 3 | 3,2481 | 0,271 | 0,329  |
| 12 | P35579 MYH9_HUMAN   | R.DELADEIANSS#GKGALALEEK.R        | S1714:             | 3 | 5,1914 | 0,55  | 0,245  |
| 12 | Q8IWW6 RHG12_HUMAN  | R.S#FGHFPGPEFLDVEK.T              | S176:              | 3 | 3,1289 | 0,174 | -0,41  |
| 12 | Q9NQW6 ANLN_HUMAN   | K.AAS#PPRPLLSNASATPVGR.R          | S182:              | 3 | 5,2428 | 0,533 | 0,283  |
| 12 | Q9BVC5 ASHWN_HUMAN  | K.S#PSGPKVSPPLSPVGTTPVK.L         | S182:              | 3 | 3,4884 | 0,082 | 0      |
| 12 | O60271 JIP4_HUMAN   | K.LHQLS#GS#DQLES#TAHSR.I          | S183:S185:S190:    | 3 | 2,8379 | 0,264 | -0,087 |
| 12 | Q03164 HRX_HUMAN    | K.GPGEPS#PTPLHPPTPILSTDR.S        | S1837:             | 3 | 2,8878 | 0,203 | -0,223 |
| 12 | Q9BVC5 ASHWN_HUMAN  | R.KSPS#GPVKSPPLS#PVGTT#TPVK.L     | S184:S193:T197:    | 3 | 3,9948 | 1     | -0,159 |
| 12 | Q03164 HRX_HUMAN    | R.SGSDRNS#AILSDPVSFPLNK.S         | S187:              | 3 | 4,1665 | 0,361 | -0,242 |
| 12 | Q9UQ35 SRRM2_HUMAN  | R.S#RS#RT#PLISR.R                 | S1876:S1878:T1880: | 2 | 2,2179 | 0,208 | -0,432 |
| 12 | Q15003 CND2_HUMAN   | K.DAPS#LEEVEGHVADGSATEM*GTTK.K    | S189:              | 3 | 4,4014 | 0,356 | 0      |
| 12 | Q9H1E3 NUCKS_HUMAN  | K.VVDYSQFQES#DDADEDYGRDSGPPTK.K   | S19:               | 3 | 5,4395 | 0,514 | 1,159  |
| 12 | Q9Y3A4 ZG14_HUMAN   | R.DPEDRIPS#PLGYAAPIK.F            | S19:               | 3 | 4,0288 | 0,303 | 0      |
| 12 | Q9UNF1 MAGD2_HUMAN  | K.HLDGEEDGS#S#DQSQASGTTGGR.R      | S190:S191:         | 3 | 3,3025 | 0,173 | 0      |
| 12 | Q9UNF1 MAGD2_HUMAN  | K.HLDGEEDGSS#DQSQAS#GTTGGR.R      | S191:S197:         | 3 | 3,2563 | 0,32  | 0,156  |
| 12 | Q9BUI4 RPC3_HUMAN   | K.DM*YLVPKLS#LIGK.G               | S194:              | 3 | 3,4661 | 0,227 | -0,116 |
| 12 | O43663 PRC1_HUMAN   | R.QIILCM*EELDHTPDTS#FER.D         | S195:              | 3 | 2,6271 | 0,341 | -0,376 |
| 12 | Q9BZL6 KPCD2_HUMAN  | R.RLS#S#STSLAS#GHSVR.L            | S197:S198:S203:    | 2 | 2,6213 | 1     | -1,078 |
| 12 | Q9BZL6 KPCD2_HUMAN  | R.RLS#STSLAS#GHS#VR.L             | S197:S203:S206:    | 3 | 2,854  | 0,223 | -0,539 |
| 12 | Q08752 PPID_HUMAN   | K.DGS#GDSHPDFPEDADIDLK.D          | S198:              | 3 | 3,8854 | 0,269 | -0,087 |
| 12 | Q9Y657 SPIN1_HUMAN  | R.IM*PDSNDS#PPAEREPGEVVDSL VGK.Q  | S199:              | 3 | 3,3453 | 0,302 | -0,134 |
| 12 | Q07955 SFRS1_HUMAN  | K.VDGRPS#PSY#GRS#R.S              | S199:Y202:S205:    | 2 | 2,1656 | 0,202 | -0,292 |
| 12 | Q15003 CND2_HUMAN   | K.DAPSLEEVEGHVADGS#ATEM*GTTK.K    | S201:              | 3 | 3,8799 | 0,292 | -0,434 |
| 12 | Q9BRG2 SH23A_HUMAN  | K.APAPLGTVADSLRAS#DGQLQAK.A       | S201:              | 3 | 3,0543 | 0,363 | 0      |
| 12 | Q04323 SAKS1_HUMAN  | K.YGGSVGSQPPVAPEPGVPSSPS#QEPTKR.E | S202:              | 3 | 3,5358 | 0,423 | -0,347 |
| 12 | P00558 PGK1_HUMAN   | K.ALES#PERPFLAILGGAK.V            | S203:              | 3 | 5,3264 | 0,504 | 0,099  |
| 12 | P00558 PGK1_HUMAN   | K.ALES#PERPFLAILGGAK.V            | S203:              | 2 | 3,739  | 0,286 | -0,792 |

|    |                     |                                      |                    |   |        |       |        |
|----|---------------------|--------------------------------------|--------------------|---|--------|-------|--------|
| 12 | Q9UQ35 SRRM2_HUMAN  | R.S#RS#RT#PLLPR.K                    | S2030:S2032:T2034: | 2 | 2,3763 | 0,429 | -0,086 |
| 12 | P41227 ARD1A_HUMAN  | K.GLAAEDS#GGDSKDLSEVSETTESTDVK.D     | S205:              | 3 | 2,8277 | 0,342 | -0,13  |
| 12 | Q6WKZ4 RFIP1_HUMAN  | K.DSGSDTASAIIPSTTPSVSDDES#VVKDK.K    | S206:              | 3 | 3,8342 | 0,239 | -0,244 |
| 12 | Q5T200 ZC3HD_HUMAN  | R.SKLS#PS#PSLR.K                     | S207:S209:         | 2 | 2,5462 | 0,282 | -1,288 |
| 12 | P25445 TNR6_HUMAN   | K.ENQGS#HESPTLNPETVAINLSVDLSK.Y      | S209:              | 3 | 4,3371 | 0,158 | -0,246 |
| 12 | P50548 ERF_HUMAN    | K.TPADTGFAFPDWAYKPES#PGSR.Q          | S21:               | 3 | 4,8803 | 0,387 | -0,642 |
| 12 | Q9UQ35 SRRM2_HUMAN  | R.NHS#GS#RT#PPVALN SSR.M             | S2100:S2102:T2104: | 3 | 3,1827 | 0,348 | 0,286  |
| 12 | Q9UQ35 SRRM2_HUMAN  | R.NHS#GS#RT#PPVALN SSR.M             | S2100:S2102:T2104: | 2 | 3,1481 | 0,46  | 0,636  |
| 12 | O15027 SC16A_HUMAN  | K.VLSSAASLPGSELPSRPEGSQGGELS#R.C     | S2113:             | 3 | 3,3657 | 0,407 | -0,258 |
| 12 | Q96T58 MINT_HUMAN   | R.ESGVAVS#PEKSES#PQKEDGLSSQLK.S      | S2120:S2126:       | 3 | 2,6322 | 0,207 | -0,382 |
| 12 | Q8TF68 ZN384_HUMAN  | R.M*LESGLP EM*NDPYVLS#PEDDDDHQK.D    | S214:              | 3 | 4,7542 | 0,169 | 0,061  |
| 12 | Q5JTV8 TOIP1_HUMAN  | K.VNFS#EEGETEEDDQDSSHSSVTTVK.A       | S215:              | 3 | 4,0785 | 0,44  | -0,387 |
| 12 | P80723 BASP_HUMAN   | K.AQGPAASAE EPKPVEAPAANS#DQTVTVKE.-  | S219:              | 3 | 3,4936 | 0,375 | -0,062 |
| 12 | Q8N5P1 ZC3H8_HUMAN  | K.TATDS#DERIDDEIDTEVEETQEEK.I        | S22:               | 3 | 5,6954 | 0,489 | 0,827  |
| 12 | Q9NTJ3 SMC4_HUMAN   | R.REEGPPPS#PDGASS#DAEPEPPSGR.T       | S22:S28:           | 3 | 6,153  | 0,412 | -1,368 |
| 12 | Q86UU1 PHLB1_HUMAN  | K.KPAATS#PLS#PM*ANGGR.Y              | S220:S223:         | 2 | 3,0493 | 0,35  | -0,634 |
| 12 | P11831 SRF_HUMAN    | K.ALIQTCLNSPDS#PPRSDPTTDQR.M         | S224:              | 3 | 4,4071 | 0,403 | 0,553  |
| 12 | B1ALX9 B1ALX9_HUMAN | K.SEGDNYSATLLEPAASSLS#PDHK.N         | S226:              | 3 | 4,3072 | 0,322 | -0,074 |
| 12 | Q96S82 UBL7_HUMAN   | R.DM*PGGFLFEGLS#DDEDDFHPNTR.S        | S230:              | 3 | 4,2155 | 0,515 | -0,406 |
| 12 | P15408 FOSL2_HUMAN  | R.SGGGSV GAVVVKQEPLEEDS#PSSSSAGLDK.A | S230:              | 3 | 4,0275 | 0,355 | -0,186 |
| 12 | P21333 FLNA_HUMAN   | K.FNEEHIPDSPFVVPVAS#PSGDAR.R         | S2327:             | 3 | 4,3732 | 0,237 | -0,287 |
| 12 | Q15424 SAFB1_HUMAN  | K.SEPVKEES#SELEQPFAQDTSSVGPDR.K      | S234:              | 3 | 4,7609 | 0,445 | -0,562 |
| 12 | Q9BST9 RTKN_HUMAN   | R.VRASLDS#AGGSGSSPILLPTPVVGGPR.Y     | S235:              | 3 | 4,7719 | 0,422 | -0,139 |
| 12 | P62753 RS6_HUMAN    | R.RLS#S#LRAS#TSK.S                   | S235:S236:S240:    | 2 | 2,7794 | 0,421 | -1,519 |
| 12 | O95155 UBE4B_HUMAN  | R.DENPFASLTATSQPIAAAARS#PDR.N        | S238:              | 3 | 4,8887 | 0,413 | -0,214 |
| 12 | Q9Y2U5 M3K2_HUMAN   | R.AQS#YPDNHQEFSDYDNPIFEK.F           | S239:              | 3 | 4,4531 | 0,511 | 0,697  |
| 12 | P22059 OSBP1_HUMAN  | R.SLS#ELESKLPAESNEK.I                | S240:              | 2 | 3,262  | 0,473 | -0,562 |
| 12 | P22059 OSBP1_HUMAN  | R.SLS#ELESKLPAESNEK.I                | S240:              | 3 | 3,0313 | 0,225 | -0,094 |
| 12 | O75179 ANR17_HUMAN  | R.APS#PAPSSVPLGSEKPSNVSQDR.K         | S2401:             | 3 | 3,9637 | 0,504 | -0,23  |
| 12 | P11717 MPRI_HUMAN   | K.ALSSLHGDDQDS#EDEVLTIPVK.V          | S2409:             | 3 | 3,9882 | 0,224 | -0,355 |
| 12 | P35659 DEK_HUMAN    | K.NKEES#S#DDEDKES#EEEEPK.K           | S243:S244:S251:    | 3 | 2,8634 | 0,298 | -0,074 |
| 12 | P11717 MPRI_HUMAN   | K.LVSFHDDS#DEDLLHI.-                 | S2484:             | 2 | 5,1998 | 0,432 | -0,399 |
| 12 | Q9HB96 FANCE_HUMAN  | K.SLESLADGGSAS#PIKDQPV M*AVK.T       | S249:              | 3 | 3,0241 | 0,304 | 0,076  |

|    |                    |                                    |                 |   |        |       |        |
|----|--------------------|------------------------------------|-----------------|---|--------|-------|--------|
| 12 | P49792 RBP2_HUMAN  | K.AVVS#PPKFVFGSESVK.S              | S2510:          | 3 | 3,9295 | 0,473 | 0,104  |
| 12 | P49792 RBP2_HUMAN  | K.AVVS#PPKFVFGSESVK.S              | S2510:          | 2 | 3,0673 | 0,547 | -0,416 |
| 12 | P52701 MSH6_HUMAN  | R.RVIS#DS#ESDIGGS#DVEFKPDTK.E      | S252:S254:S261: | 3 | 5,7848 | 0,479 | -0,07  |
| 12 | O95684 FR1OP_HUMAN | K.AGLCPDEDDM*EGDS#FFDDPIPKPEK.T    | S254:           | 3 | 3,24   | 0,56  | -0,376 |
| 12 | O15417 TNC18_HUMAN | K.ATDGDLAQEPGPGLTFEDSGNPKS#PDK.A   | S2543:          | 3 | 4,113  | 0,394 | -0,518 |
| 12 | Q9C0B1 FATSO_HUMAN | R.SAVAVYSYSCGPEEES#EDDSHLEGR.D     | S256:           | 3 | 5,467  | 0,467 | -0,245 |
| 12 | O00303 EIF3F_HUMAN | K.TCFS#PNRVIGLSSDLQQVGGASAR.I      | S258:           | 3 | 4,2354 | 0,439 | -0,352 |
| 12 | Q9BQI3 E2AK1_HUMAN | R.AAIELPSLEVLSDQEEDREQCGVK.N       | S258:           | 3 | 2,9095 | 0,336 | -0,327 |
| 12 | P21359 NF1_HUMAN   | R.KVS#VSESNVLLDEEVLTDPK.I          | S2597:          | 3 | 4,9191 | 0,335 | 0,08   |
| 12 | Q13595 TRA2A_HUMAN | R.RS#PS#PYYSR.Y                    | S260:S262:      | 2 | 2,6659 | 0,202 | -0,479 |
| 12 | Q15545 TAF7_HUMAN  | K.LNES#DEQHQENEGTNQLVM*GIQK.Q      | S264:           | 3 | 5,8066 | 0,349 | -0,468 |
| 12 | Q8N556 AFAP1_HUMAN | K.EAYSGCSGPVDSECPPPPSS#PVHK.A      | S265:           | 3 | 3,8802 | 0,278 | -0,907 |
| 12 | Q15942 ZYG_HUMAN   | R.GPPASSPAPAPKFS#PVTPK.F           | S267:           | 2 | 5,2741 | 0,5   | -0,191 |
| 12 | Q03111 ENL_HUMAN   | K.LESTS#PKGKGGPPPPPPPPR.A          | S267:           | 3 | 3,8877 | 0,228 | -0,184 |
| 12 | Q15942 ZYG_HUMAN   | R.GPPASSPAPAPKFS#PVTPK.F           | S267:           | 3 | 2,6191 | 0,374 | 0,191  |
| 12 | Q03111 ENL_HUMAN   | K.LESTS#PKGKGGPPPPPPPPR.A          | S267:           | 2 | 2,0391 | 0,366 | 0,307  |
| 12 | P49454 CENPF_HUMAN | R.DANS#SFFDNSSPHLLDQLK.A           | S268:           | 3 | 3,2195 | 0,392 | 0,159  |
| 12 | P58107 EPIPL_HUMAN | R.QVS#ASELHTSGILGPETLR.D           | S2691:          | 3 | 4,0966 | 0,166 | 0,353  |
| 12 | P22234 PUR6_HUMAN  | K.EVYELDS#PGKVLLQSK.D              | S27:            | 3 | 3,8635 | 0,362 | 0      |
| 12 | Q99638 RAD9A_HUMAN | K.DSLLDGHFVLATLSDTDSHS#QDLGS#PER.H | S272:S277:      | 3 | 2,6527 | 0,437 | -0,231 |
| 12 | P49454 CENPF_HUMAN | R.DANSSFFDNSSPHLLDQLK.A            | S276:           | 3 | 3,278  | 0,376 | -0,079 |
| 12 | P27816 MAP4_HUMAN  | K.DM*ES#PTKLDVTLAK.D               | S280:           | 3 | 3,8918 | 0,235 | 0      |
| 12 | Q96EZ8 MCRS1_HUMAN | K.GDQVLNFS#DAEDLIDDSK.LK.D         | S282:           | 3 | 3,3705 | 0,212 | -0,159 |
| 12 | Q12872 SFRS8_HUMAN | K.SGVSS#DNEDDDDEEDGNYLHPSLFASK.K   | S283:           | 3 | 4,9518 | 0,557 | 1,211  |
| 12 | Q9NWH9 SLTM_HUMAN  | K.DGQDAIAQS#PEKESK.D               | S289:           | 2 | 2,7968 | 0,316 | -0,29  |
| 12 | Q8TF01 SFR18_HUMAN | R.SKFD#DEEEEDTENVEAS#S#GKVTR.S     | S290:S304:S305: | 3 | 4,9271 | 0,324 | -0,061 |
| 12 | Q7L412 RSRC2_HUMAN | K.KEQSEVS#VS#PR.A                  | S30:S32:        | 2 | 2,4177 | 0,134 | -0,26  |
| 12 | P49023 PAXI_HUMAN  | R.DGGRS#SPGGQDEGGFM*AQGK.T         | S302:           | 3 | 5,1297 | 0,336 | -0,54  |
| 12 | Q00613 HSF1_HUMAN  | R.VKEEPPS#PPQS#PR.V                | S303:S307:      | 2 | 4,2701 | 0,5   | -0,531 |
| 12 | Q96QR8 PURB_HUMAN  | R.RGGGSGGGEES#EGEEVDED.-           | S304:           | 2 | 2,1614 | 0,349 | -0,505 |
| 12 | Q9UQR1 ZN148_HUMAN | K.GGLLTSEEDSGFSTS#PKDNSLPK.K       | S306:           | 3 | 2,8532 | 0,131 | -0,449 |
| 12 | Q9HCN4 GPN1_HUMAN  | K.DSLS#PVLHPSDLILTR.G              | S314:           | 2 | 2,0935 | 0,268 | -0,331 |
| 12 | Q13247 SFRS6_HUMAN | K.ARS#VS#PPK.R                     | S314:S316:      | 2 | 2,1208 | 0,33  | -0,111 |

|    |                     |                                  |                 |   |        |       |        |
|----|---------------------|----------------------------------|-----------------|---|--------|-------|--------|
| 12 | B1ALC7 B1ALC7_HUMAN | R.DSHS#PDLQLPTPEVIPSSGSK.L       | S317:           | 3 | 3,2109 | 0,268 | 0,242  |
| 12 | Q9UQ35 SRRM2_HUMAN  | R.GEGDAPFSEPGTTSTQRPS#SPETATK.Q  | S322:           | 3 | 3,1881 | 0,203 | -0,202 |
| 12 | Q86WC4 OSTM1_HUMAN  | K.RLKS#ST#SFANIQENSN.-           | S322:T324:      | 2 | 4,6534 | 0,586 | -0,187 |
| 12 | Q9UKJ3 GPTC8_HUMAN  | R.GPKPEPPGS#GS#PAPPR.R           | S325:S327:      | 3 | 4,4957 | 0,484 | -0,325 |
| 12 | Q9UKJ3 GPTC8_HUMAN  | R.GPKPEPPGS#GS#PAPPR.R           | S325:S327:      | 2 | 3,614  | 0,509 | -0,434 |
| 12 | Q9UQQ2 SH2B3_HUMAN  | R.GLESTEAEEM*HIPSALEPSTSSS#PR.G  | S330:           | 3 | 4,0827 | 0,406 | 0,281  |
| 12 | Q9BW71 HIRP3_HUMAN  | K.RLS#GS#S#EDEEDSGKGEPTAK.G      | S330:S332:S333: | 3 | 3,1483 | 0,327 | -0,079 |
| 12 | O15075 DCLK1_HUMAN  | R.SGKS#PS#PSPTS#PGSLRK.Q         | S330:S332:S337: | 3 | 3,7143 | 1     | -0,67  |
| 12 | P13994 CC130_HUMAN  | R.VPEEAAQDRPM*S#PGDCPPETTETPK.C  | S332:           | 3 | 6,168  | 0,514 | -0,774 |
| 12 | Q969V6 MKL1_HUMAN   | R.QNS#TSLTGKPGALPANLDDM*K.V      | S333:           | 3 | 3,4317 | 0,349 | 0,325  |
| 12 | P04083 ANXA1_HUMAN  | K.GGPGS#AVSPYPTFNPSSDVAALHK.A    | S34:            | 3 | 3,5296 | 0,289 | -0,075 |
| 12 | Q5JSH3 WDR44_HUMAN  | R.S#NSGRELTDEEILASVM*IK.N        | S342:           | 3 | 3,2112 | 0,205 | -0,167 |
| 12 | Q8IZ21 PHAR4_HUMAN  | R.S#PSPPLPTHIPPEPRT#PPFPAK.T     | S342:T358:      | 3 | 4,2266 | 0,413 | -0,28  |
| 12 | Q8IZ21 PHAR4_HUMAN  | R.SPS#PPLPT#HIPPEPRTPPFPAK.T     | S344:T349:      | 3 | 4,0284 | 0,41  | 0      |
| 12 | Q8IZ21 PHAR4_HUMAN  | R.SPS#PPLPTHIPPEPRT#PPFPAK.T     | S344:T358:      | 3 | 4,4546 | 0,338 | 0,559  |
| 12 | O14681 EI24_HUMAN   | K.TVYLQALSSSTA EKFPS#PHPS#PAK.L  | S345:S349:      | 3 | 4,9667 | 1     | -0,191 |
| 12 | Q96G23 LASS2_HUMAN  | R.SDREETES#S#EGEEAAAGGGAK.S      | S348:S349:      | 3 | 3,6064 | 0,369 | -0,493 |
| 12 | Q8IY18 SMC5_HUMAN   | R.KNS#APQLPLLQSSGPFVEGSIVR.I     | S35:            | 3 | 6,1064 | 0,531 | -0,073 |
| 12 | Q8IXM2 CQ049_HUMAN  | K.LGELTM*QLHPVADS#SPAGAK.W       | S35:            | 3 | 3,392  | 0,293 | 0,259  |
| 12 | Q8IY81 RRMJ3_HUMAN  | K.QPS#KEEEEEEEQLNQT LAEM*K.A     | S356:           | 3 | 3,0739 | 0,287 | -0,318 |
| 12 | P01892 1A02_HUMAN   | R.KGGSYSQAASSDSAQGS#DVS#LTACKV.- | S356:S359:      | 3 | 5,3852 | 0,349 | -0,134 |
| 12 | O00559 RCAS1_HUMAN  | R.KLS#GDQITLPTTVDYSSVVK.Q        | S36:            | 3 | 3,5156 | 0,206 | 0,246  |
| 12 | P20810 ICAL_HUMAN   | R.SES#ELIDELSEDFDRSECK.E         | S366:           | 3 | 2,7167 | 0,259 | -0,232 |
| 12 | Q9UJM3 ERRFI_HUMAN  | R.QNS#EGSASKVPCILPIIENGK.K       | S369:           | 3 | 4,2201 | 0,403 | -0,079 |
| 12 | P04083 ANXA1_HUMAN  | K.GGPGSAVS#PYPTFNPSSDVAALHK.A    | S37:            | 3 | 3,6519 | 0,189 | 0,526  |
| 12 | Q5VT52 K0460_HUMAN  | R.DVEDM*ELS#DVEDDGSKIIVEDR.K     | S374:           | 3 | 4,9402 | 0,315 | -0,211 |
| 12 | Q8NEZ4 MLL3_HUMAN   | K.VEGNAVACPVSSAQ#PPHSAGAPAAK.G   | S3758:          | 3 | 4,318  | 0,422 | -0,648 |
| 12 | Q9UQ35 SRRM2_HUMAN  | R.HGGS#PQPLATTPLSQEPVNPSEASPTR.D | S377:           | 3 | 5,028  | 0,303 | 0,125  |
| 12 | Q15276 RABE1_HUMAN  | R.GSVHS#LDAGLLPSGDPPFSK.S        | S377:           | 3 | 3,2707 | 0,159 | -0,705 |
| 12 | Q9H307 PININ_HUMAN  | R.ESEKQQDS#QPEEVM*DVLEM*VENVK.H  | S381:           | 3 | 7,2919 | 0,395 | -0,312 |
| 12 | O94876 TMCC1_HUMAN  | K.FGS#ADNIPNLKDSLEEGQVDDAGK.A    | S382:           | 3 | 4,5656 | 0,217 | -0,774 |
| 12 | Q9H0E9 BRD8_HUMAN   | R.SGVAEAPVGS#KAPS#IDGKEELDLAEK.M | S383:S387:      | 3 | 4,7773 | 0,323 | -0,265 |
| 12 | Q8IYB3 SRRM1_HUMAN  | R.RLS#PS#ASPPR.R                 | S389:S391:      | 2 | 2,703  | 0,267 | -0,397 |

|    |                     |                                      |                 |   |        |       |        |
|----|---------------------|--------------------------------------|-----------------|---|--------|-------|--------|
| 12 | Q8IYB3 SRRM1_HUMAN  | R.RLS#PSAS#PPR.R                     | S389:S393:      | 2 | 2,4191 | 0,244 | -0,397 |
| 12 | P02545 LMNA_HUMAN   | R.LRLS#PS#PTSQR.S                    | S390:S392:      | 2 | 2,7936 | 0,251 | -0,261 |
| 12 | P02545 LMNA_HUMAN   | R.LRLS#PSPT#\$#QRSR.G                | S390:T394:S395: | 2 | 3,0114 | 0,388 | -1,981 |
| 12 | O14980 XPO1_HUMAN   | R.ESPFSTSAS#PLLSGSQHFDVPPR.R         | S391:           | 3 | 4,4882 | 0,437 | -0,218 |
| 12 | P20700 LMNB1_HUMAN  | R.LKLS#PS#PSSR.V                     | S391:S393:      | 2 | 2,4078 | 0,314 | -1,288 |
| 12 | Q8TAD8 SNIP1_HUMAN  | R.KDDEDEEEEEVSDES#.-                 | S396:           | 2 | 4,7579 | 0,525 | -0,589 |
| 12 | Q96ST2 IWS1_HUMAN   | R.KAAVLS#DS#EDEEK.A                  | S398:S400:      | 2 | 5,4575 | 0,476 | -0,54  |
| 12 | P30989 NTR1_HUMAN   | R.KADS#VS#SNHTLS#SNATR.E             | S401:S403:S409: | 3 | 2,8457 | 0,187 | -0,091 |
| 12 | P30989 NTR1_HUMAN   | R.KADS#VS#SNHTLSS#NATR.E             | S401:S403:S410: | 3 | 2,7977 | 0,189 | -0,363 |
| 12 | Q9UHK0 NUFP1_HUMAN  | K.TEADVLAENQVLDSAPKS#PSQDVK.A        | S403:           | 3 | 4,8958 | 0,446 | 0      |
| 12 | Q96AJ1 CLUA1_HUMAN  | R.VRKS#EPLDES#DNDF.-                 | S403:S409:      | 2 | 3,2862 | 0,34  | 0,404  |
| 12 | P41219 PERI_HUMAN   | K.M*ALDIEIATYRKLLLEGES#R.I           | S405:           | 3 | 2,6309 | 0,099 | -0,15  |
| 12 | Q7Z5L9 I2BP2_HUMAN  | K.IPM*TPTSSFVSPPTAS#PHSNR.T          | S406:           | 3 | 4,4537 | 0,353 | -0,219 |
| 12 | Q13435 SF3B2_HUMAN  | K.GFEEHKDS#DDDS#S#DDEQEK.K           | S408:S412:S413: | 3 | 2,986  | 0,11  | 0      |
| 12 | Q13439 GOGA4_HUMAN  | R.TSS#FTEQLDEGTPNRESGDTQSFAQK.L      | S41:            | 3 | 3,1423 | 0,276 | -0,062 |
| 12 | Q9H4Z2 ZN335_HUMAN  | R.TPVEAGVSQS#DAENAAPSCPEHDTLPR.R     | S418:           | 3 | 3,0153 | 0,266 | -0,121 |
| 12 | Q7Z3K3 POGZ_HUMAN   | K.SLDSEPSVPS#AAKPPSPEK.T             | S419:           | 3 | 2,6932 | 0,286 | 0,183  |
| 12 | P05783 K1C18_HUMAN  | R.SLGSVQAPSYGARPVSSAASVYAGAGGS#GSR.I | S42:            | 3 | 5,8128 | 0,56  | -0,249 |
| 12 | Q96MH2 HEX12_HUMAN  | R.HDSGGS#LPLT#PR.M                   | S42:T46:        | 2 | 2,6242 | 0,432 | -0,349 |
| 12 | P49321 NASP_HUMAN   | K.LVPS#QEETKLSVEESEAAGDGVDTK.V       | S421:           | 3 | 2,8983 | 0,259 | -0,203 |
| 12 | Q13547 HDAC1_HUMAN  | R.IACEEEFS#DS#EEEGEGGRK.N            | S421:S423:      | 3 | 2,8457 | 0,251 | 0,947  |
| 12 | Q92769 HDAC2_HUMAN  | R.IACDEEFS#DS#EDEGEGGRR.N            | S422:S424:      | 3 | 3,9538 | 0,302 | -0,789 |
| 12 | Q7Z3K3 POGZ_HUMAN   | K.SLDSEPSVPSAAKPPS#PEK.T             | S425:           | 2 | 3,5351 | 0,454 | -0,426 |
| 12 | Q96JM3 ZN828_HUMAN  | R.KPGPPLS#PEIRS#PAGS#PELR.K          | S427:S432:S436: | 3 | 4,318  | 0,494 | -0,157 |
| 12 | O60508 PRP17_HUMAN  | K.S#PSSKPSLAVAVDSAPEVAVK.E           | S43:            | 3 | 4,459  | 0,391 | 0,086  |
| 12 | Q6AW89 Q6AW89_HUMAN | K.DGPHGS#VLEEGLDDYLTR.L              | S435:           | 3 | 3,5275 | 0,363 | 0,267  |
| 12 | Q96B97 SH3K1_HUMAN  | R.GDS#PKIDLAGSSLSGILDK.D             | S436:           | 2 | 3,2386 | 0,466 | 0      |
| 12 | Q8NDI1 EHBP1_HUMAN  | K.DLSTSPKPSIPS#PVLGR.K               | S436:           | 3 | 3,1222 | 0,329 | -0,095 |
| 12 | Q15149 PLEC1_HUMAN  | R.AGTLSITEFADM*LSGNAGGFRS#R.S        | S4382:          | 3 | 4,4017 | 0,534 | -0,298 |
| 12 | O94887 FARP2_HUMAN  | K.DSSSSLTDPQVSYVKS#PAAER.R           | S439:           | 3 | 2,6952 | 0,259 | 0,159  |
| 12 | Q3KQU3 MA7D1_HUMAN  | K.RQS#LPAS#PR.A                      | S442:S446:      | 2 | 2,866  | 0,371 | -0,104 |
| 12 | Q08945 SSRP1_HUMAN  | K.EGM*NPSYDEYADS#DEDQHDAYLER.M       | S444:           | 3 | 4,9651 | 0,44  | 0      |
| 12 | Q08945 SSRP1_HUMAN  | K.EGMNPSYDEYADS#DEDQHDAYLER.M        | S444:           | 3 | 3,1006 | 0,164 | -0,312 |

|    |                     |                                        |                 |   |        |       |        |
|----|---------------------|----------------------------------------|-----------------|---|--------|-------|--------|
| 12 | Q8NB49 AT11C_HUMAN  | K.GVTQEVDGLS#QTDGTLTYFDKVDK.N          | S445:           | 3 | 3,965  | 0,351 | -0,407 |
| 12 | Q8IZD4 DCP1B_HUMAN  | R.QLPISGSQTGSSGVIS#PQELLKK.L           | S449:           | 3 | 3,1768 | 0,288 | 0,433  |
| 12 | A8K703 A8K703_HUMAN | R.SSKS#AEDLTDGSYDDVLNAEQLQK.L          | S45:            | 3 | 6,5328 | 0,4   | 0,476  |
| 12 | Q9UPN4 AZI1_HUMAN   | R.TQDVLAQDAAGDNLEM*M*APSRGS#AK.S       | S450:           | 3 | 4,7138 | 0,399 | -0,068 |
| 12 | O60832 DKC1_HUMAN   | R.KRES#ES#ES#DETPPAAPQLIK.K            | S451:S453:S455: | 3 | 3,5405 | 0,096 | -0,149 |
| 12 | O60832 DKC1_HUMAN   | R.KRES#ESES#DET#PPAAPQLIK.K            | S451:S455:T458: | 3 | 2,6205 | 0,136 | 0,448  |
| 12 | Q8IYB3 SRRM1_HUMAN  | R.KVELS#ES#EEDK.G                      | S463:S465:      | 2 | 4,0944 | 0,334 | -0,42  |
| 12 | O15047 SET1A_HUMAN  | R.S#GSPAPETTNEVPFAQHSSLDSR.I           | S468:           | 3 | 3,365  | 0,383 | -0,071 |
| 12 | Q8ND04 CQ071_HUMAN  | K.LYEVAIDGKEEDLGS#PTGELTSK.I           | S469:           | 3 | 5,0871 | 0,48  | 0,578  |
| 12 | Q9H6F5 CCD86_HUMAN  | R.ALVEFESNPEETREPGS#PPSVQR.A           | S47:            | 3 | 5,1514 | 0,441 | 0      |
| 12 | Q8TAP8 CG047_HUMAN  | R.APVPEPGLDLSLS#PRPDSPOPR.H            | S47:            | 3 | 2,6499 | 0,322 | 0,456  |
| 12 | O00418 EF2K_HUMAN   | R.KYES#DEDS#LGSSGR.V                   | S470:S474:      | 2 | 3,289  | 0,455 | -0,578 |
| 12 | O00418 EF2K_HUMAN   | R.KYES#DEDS#LGSSGR.V                   | S470:S474:      | 3 | 3,0357 | 0,131 | -0,108 |
| 12 | Q8WXE0 CSKI2_HUMAN  | R.S#GEQIFTQDVRPEQLLEGK.D               | S471:           | 3 | 3,8603 | 0,423 | 0,081  |
| 12 | Q96PU5 NED4L_HUMAN  | K.DTLNPNQS#PQPS#PYNS#PKPQHK.V          | S479:S483:S487: | 3 | 3,7811 | 0,45  | -0,136 |
| 12 | O75534 CSDE1_HUMAN  | K.DVEGSTS#PQIGDKVEFSISDK.Q             | S482:           | 3 | 3,2068 | 0,206 | 0      |
| 12 | P22681 CBL_HUMAN    | K.VERPPS#PFM*APQASLPPVPPR.L            | S483:           | 3 | 4,02   | 0,219 | 0,075  |
| 12 | Q9NZT2 OGFR_HUMAN   | K.VDEGAGDSAASVSGGAQTLALAGS#PAPSGHPK.A  | S484:           | 3 | 3,8133 | 0,388 | -0,438 |
| 12 | Q9ULW0 TPX2_HUMAN   | K.VLPITVPKS#PAFALK.N                   | S486:           | 2 | 3,682  | 0,491 | -0,22  |
| 12 | Q9ULU4 PKCB1_HUMAN  | K.TGQAGSLSGS#PKPFPQLSAPITTK.T          | S490:           | 3 | 5,2934 | 0,543 | -0,144 |
| 12 | Q9UKV3 ACINU_HUMAN  | K.AES#PAEKVPEESVPLVQK.S                | S490:           | 2 | 2,3364 | 0,372 | 0,802  |
| 12 | Q09666 AHNK_HUMAN   | K.LS#GPSLKM*PSLEISAPK.V                | S4900:          | 2 | 3,4601 | 0,486 | -0,198 |
| 12 | Q09666 AHNK_HUMAN   | K.LSGPS#LKM*PSLEISAPK.V                | S4903:          | 3 | 4,5368 | 0,578 | 0      |
| 12 | Q9UER7 DAXX_HUMAN   | K.DGDKS#PM*SSLQISNEK.N                 | S495:           | 3 | 2,8511 | 0,265 | 0      |
| 12 | Q9H0D6 XRN2_HUMAN   | R.KAEDS#DS#EPEPEDNVR.L                 | S499:S501:      | 2 | 4,7598 | 0,483 | -0,555 |
| 12 | Q9H0D6 XRN2_HUMAN   | R.KAEDS#DS#EPEPEDNVR.L                 | S499:S501:      | 3 | 3,7687 | 0,324 | -0,37  |
| 12 | Q12888 TP53B_HUMAN  | K.TSEIEPKNS#PEDLGLSLTGDSC.L            | S500:           | 3 | 4,8423 | 0,523 | -0,072 |
| 12 | Q9BZL4 PP12C_HUMAN  | R.IPEPES#PAKPNVPTASTAPPADSR.D          | S509:           | 3 | 4,4988 | 0,385 | -0,219 |
| 12 | P05783 K1C18_HUMAN  | R.S#TSFRGGM*GSGGLATGIAGGLAGM*GGIQNEK.E | S51:            | 3 | 5,1142 | 0,43  | -0,062 |
| 12 | Q9P2B4 CT2NL_HUMAN  | R.FTSQQGPIKPV#PNSSPFGTDYR.N            | S523:           | 3 | 5,8531 | 0,54  | 0      |
| 12 | O75122 CLAP2_HUMAN  | R.IPRPSVS#QGCS#R.E                     | S525:S529:      | 2 | 2,1977 | 0,276 | -0,406 |
| 12 | O94979 SC31A_HUMAN  | K.DSDQVAQS#DGEESPAEEQLLGEHIK.E         | S527:           | 3 | 4,1296 | 0,331 | -0,128 |
| 12 | P05783 K1C18_HUMAN  | R.STS#FRGGM*GSGGLATGIAGGLAGM*GGIQNEK.E | S53:            | 3 | 7,6252 | 0,531 | -0,062 |

|    |                     |                                      |            |   |        |       |        |
|----|---------------------|--------------------------------------|------------|---|--------|-------|--------|
| 12 | Q86VM9 ZCH18_HUMAN  | K.KLGV#VS#PSR.A                      | S532:S534: | 2 | 2,8428 | 0,189 | -0,308 |
| 12 | Q01970 PLCB3_HUMAN  | K.S#LGDEGLNRGPYVLGPADR.E             | S537:      | 3 | 4,1108 | 0,303 | 0      |
| 12 | Q86VI3 IQGA3_HUMAN  | R.VLAVSLINEALDKGS#PEK.T              | S539:      | 2 | 4,1416 | 0,528 | -0,249 |
| 12 | Q13144 EI2BE_HUMAN  | R.GGS#PQM*DDIKVFQNEVLGTLQR.G         | S544:      | 3 | 5,1133 | 0,456 | -0,362 |
| 12 | Q9ULU4 PKCB1_HUMAN  | K.ELSESVQQQSTPVPLIS#PKR.Q            | S547:      | 3 | 3,8655 | 0,432 | -0,238 |
| 12 | O94964 CT117_HUMAN  | R.TKS#VSSM*SEFESLLDCSPYLAGGDAR.G     | S55:       | 3 | 5,3895 | 0,433 | -0,378 |
| 12 | Q969Z0 TBRG4_HUMAN  | R.DFVAPHLAQPTGSQS#PPPGSK.R           | S553:      | 3 | 3,6529 | 0,227 | 0,25   |
| 12 | Q14966 ZN638_HUMAN  | K.CFRS#VS#PER.M                      | S558:S560: | 3 | 2,842  | 0,186 | -0,07  |
| 12 | Q3MIN7 RGL3_HUMAN   | R.SRDAPAGS#PPAS#PGPQGPSTK.L          | S569:S573: | 3 | 4,4207 | 0,526 | -0,345 |
| 12 | P17812 PYRG1_HUMAN  | R.SGSS#SPDSEITELKFPSINHD.-           | S574:      | 3 | 3,6852 | 0,298 | 0,393  |
| 12 | Q68EM7 RHG17_HUMAN  | R.AESSGGGTVPSSAGILEQGPSPGDGS#PPKPK.D | S575:      | 3 | 4,5362 | 0,394 | 0,971  |
| 12 | Q9Y2W1 TR150_HUMAN  | R.M*DS#FDEDLARPSGLLAQER.K            | S575:      | 3 | 3,8939 | 0,37  | -0,081 |
| 12 | P17812 PYRG1_HUMAN  | R.SGSS#PDSEITELKFPSINHD.-            | S575:      | 3 | 2,9543 | 0,264 | 0,157  |
| 12 | Q9H0B6 KLC2_HUMAN   | R.ASSLNFLNKS#VEEPTQPGGTGLSDSR.T      | S589:      | 3 | 4,7914 | 0,22  | 0,264  |
| 12 | Q13496 MTM1_HUMAN   | K.LSDPPTSPSS#PSQM*M*PHVQTHF.-        | S591:      | 3 | 2,9899 | 0,405 | -0,145 |
| 12 | Q6Y7W6 PERQ2_HUMAN  | R.VPFS#PGPAPPHM*GELDQER.L            | S593:      | 3 | 3,0373 | 0,188 | 0,081  |
| 12 | Q8IV36 CQ028_HUMAN  | R.TGS#QEGTSM*EGSRPAAPAEPGLK.T        | S593:      | 3 | 2,8582 | 0,252 | -0,149 |
| 12 | Q8N612 CK056_HUMAN  | R.S#LLPEEDRNNVGEGEREEELGR.R          | S596:      | 3 | 3,1532 | 0,261 | -0,522 |
| 12 | A4LAA3 A4LAA3_HUMAN | K.LTPVSL#NSPIKGADCQEVQDK.D           | S596:      | 3 | 2,6746 | 0,27  | -0,071 |
| 12 | P51116 FXR2_HUMAN   | R.TDGS#ISGDRQPVTVADYISR.A            | S601:      | 3 | 4,0221 | 0,374 | -0,165 |
| 12 | Q14157 UBP2L_HUMAN  | R.RYPSS#IS#SSPQK.D                   | S605:S607: | 2 | 2,7909 | 0,143 | -0,408 |
| 12 | Q8IYB3 SRRM1_HUMAN  | R.RYS#PS#PPPK.R                      | S605:S607: | 2 | 2,7853 | 0,31  | -0,41  |
| 12 | Q9UJ41 RABX5_HUMAN  | K.LDAQSLNLSQEDFDRYM*SGQTS#PR.K       | S607:      | 3 | 4,8168 | 0,487 | 0,513  |
| 12 | P82909 RT36_HUMAN   | K.GSKS#PDLLM*YQGGPDTAEIK.T           | S61:       | 3 | 3,1098 | 0,16  | -0,155 |
| 12 | P49790 NU153_HUMAN  | K.EGSVLDILKS#PGFASPK.I               | S614:      | 2 | 2,5695 | 0,295 | -0,201 |
| 12 | Q8TDZ2 MICA1_HUMAN  | K.SM*AHS#PGPVSQASPGTSSAVLFLSK.L      | S617:      | 3 | 4,4102 | 0,511 | 0,576  |
| 12 | Q92625 ANS1A_HUMAN  | R.S#LSKSDSLLTCSPTEDATM*GSR.S         | S622:      | 3 | 5,1885 | 0,486 | -0,143 |
| 12 | Q92625 ANS1A_HUMAN  | R.SLS#KSDSLLTCSPTEDATM*GSR.S         | S624:      | 3 | 5,9025 | 0,508 | 0      |
| 12 | Q9HCJ3 RAVR2_HUMAN  | K.TGIASSILDAISQGS#QHALEK.C           | S624:      | 3 | 2,7428 | 0,199 | -0,151 |
| 12 | Q6IAA8 CK059_HUMAN  | K.TAS#NIIDVSAADSQGM*EQHEYM*DR.A      | S63:       | 3 | 4,2332 | 0,415 | 0,132  |
| 12 | Q8IZ40 RCOR2_HUMAN  | R.VGTNYQAVIPECKPES#PAR.Y             | S63:       | 3 | 3,1234 | 0,082 | -0,083 |
| 12 | Q8N9T8 KRI1_HUMAN   | R.QLPALDGLSM*GPES#PPAQEEEEAPVSPHK.K  | S634:      | 3 | 3,5494 | 0,535 | -0,243 |
| 12 | Q8WXH0 SYNE2_HUMAN  | R.LTSCPTGLEDEKEAS#ENETDM*EDPR.E      | S6361:     | 3 | 4,5928 | 0,395 | -0,434 |



|    |                     |                                  |                 |   |        |       |        |
|----|---------------------|----------------------------------|-----------------|---|--------|-------|--------|
| 12 | Q2M2I8 AAK1_HUMAN   | R.ILS#DVTHSAVFGVPASK.S           | S637:           | 3 | 4,6929 | 0,395 | 0,202  |
| 12 | Q2M2I8 AAK1_HUMAN   | R.ILS#DVTHSAVFGVPASK.S           | S637:           | 2 | 3,4377 | 0,461 | -0,54  |
| 12 | A8MYB5 A8MYB5_HUMAN | R.RS#PT#EDFR.Q                   | S638:T640:      | 2 | 2,1716 | 0,12  | -0,209 |
| 12 | Q8IY81 RRMJ3_HUMAN  | R.GPKS#DDDGFEIVPIEDPAK.H         | S644:           | 2 | 2,6953 | 0,265 | -0,347 |
| 12 | P37275 ZEB1_HUMAN   | K.M*QAGQISVQSSEPPS#PEPGKVNIPAK.N | S646:           | 3 | 4,2936 | 0,367 | -0,464 |
| 12 | Q99590 SFRIP_HUMAN  | R.IDRDS#YS#PR.W                  | S646:S648:      | 2 | 2,5275 | 0,286 | -0,288 |
| 12 | Q9H1B7 EAP1_HUMAN   | R.RNSSS#PVS#PASVPGQR.R           | S659:S662:      | 3 | 3,5888 | 0,286 | -0,615 |
| 12 | Q9H1B7 EAP1_HUMAN   | R.RNSSS#PVS#PASVPGQR.R           | S659:S662:      | 2 | 2,3576 | 0,369 | -0,41  |
| 12 | P42166 LAP2A_HUMAN  | K.GPPDFS#SDEEREPTVVLGSGAAAAGR.S  | S66:            | 3 | 5,2384 | 0,492 | -0,276 |
| 12 | Q96B23 CR025_HUMAN  | R.RDS#SES#QLAST#ESDKPTTGR.V      | S66:S69:T74:    | 3 | 3,8898 | 1     | -0,153 |
| 12 | Q9NQW6 ANLN_HUMAN   | R.AESGDS#LGSEDRDLLYSIDAYR.S      | S661:           | 3 | 6,0518 | 0,451 | -0,437 |
| 12 | Q0VG06 FP100_HUMAN  | R.APS#PLGPTRDPVATFLETGR.E        | S667:           | 3 | 5,357  | 0,48  | -0,242 |
| 12 | P78559 MAP1A_HUMAN  | K.AELEEM*EEVHPS#DEEEEDATK.A      | S667:           | 3 | 3,8551 | 0,297 | -0,576 |
| 12 | P42166 LAP2A_HUMAN  | K.GPPDFS#DEEREPTVVLGSGAAAAGR.S   | S67:            | 3 | 5,131  | 0,51  | -0,345 |
| 12 | Q68EM7 RHG17_HUMAN  | R.S#PSPPTQHTGQPPGQPSAPSQLSAPR.R  | S674:           | 3 | 3,8005 | 0,273 | -0,34  |
| 12 | P46100 ATRX_HUMAN   | R.RPTETNPVTS#NS#DEECNETVK.E      | S675:S677:      | 3 | 4,4909 | 0,285 | 0,641  |
| 12 | Q68EM7 RHG17_HUMAN  | R.SPS#PPTQHTGQPPGQPSAPSQLSAPR.R  | S676:           | 3 | 5,2912 | 0,327 | -0,068 |
| 12 | Q8IY81 RRMJ3_HUMAN  | R.ILDPEGLALGAVIASS#KK.A          | S677:           | 2 | 3,931  | 0,538 | -0,59  |
| 12 | Q12959 DLG1_HUMAN   | K.HVTS#NAS#DSESSYR.G             | S684:S687:      | 2 | 3,7198 | 1     | -0,431 |
| 12 | Q15398 DLG7_HUMAN   | R.S#SIEDAQCPGLPDLIEENHVVNK.T     | S689:           | 3 | 4,312  | 0,409 | -0,277 |
| 12 | Q8TEW0 PARD3_HUMAN  | K.CNELKS#PGSPPGPELPIETALDDR.E    | S692:           | 3 | 3,0465 | 0,35  | 0      |
| 12 | P06748 NPM_HUMAN    | K.DELHIVEAEAM*NYEGS#PIK.V        | S70:            | 3 | 4,7641 | 0,401 | 0      |
| 12 | Q9H063 MAF1_HUMAN   | K.QFCQEGQPHVLEALSPPQTSGLSPS#R.L  | S70:            | 3 | 4,4169 | 0,3   | 0,312  |
| 12 | O43719 HTSF1_HUMAN  | K.LFEDDDS#NEKLFDEEEDSSEK.L       | S702:           | 3 | 5,5224 | 0,461 | -0,141 |
| 12 | P25205 MCM3_HUMAN   | K.DGDSYDPYDFS#DTEEEM*PQVHTPK.T   | S711:           | 3 | 4,5814 | 0,407 | -0,189 |
| 12 | P10636 TAU_HUMAN    | K.TDHGAEIVYKS#PVVS#GDTS#PR.H     | S713:S717:S721: | 3 | 4,9046 | 0,5   | 0,149  |
| 12 | Q9NQW6 ANLN_HUMAN   | R.CS#DNTEVEVSNLENKQPVESTSAK.S    | S72:            | 3 | 3,2479 | 0,256 | 0,733  |
| 12 | Q86V15 CASZ1_HUMAN  | K.DTEHEESS#NDDLVDLDFLSSK.N       | S721:           | 3 | 2,6362 | 0,222 | 0,076  |
| 12 | Q9Y6X9 MORC2_HUMAN  | K.KTES#PIKLS#PATPS#R.K           | S725:S730:S735: | 3 | 3,7146 | 0,337 | -0,296 |
| 12 | Q9Y6X9 MORC2_HUMAN  | K.KTES#PIKLS#PATPS#R.K           | S725:S730:S735: | 2 | 3,1823 | 0,286 | -0,198 |
| 12 | Q9Y6X9 MORC2_HUMAN  | K.KTES#PIKLS#PAT#PSR.K           | S725:S730:T733: | 3 | 3,5396 | 0,226 | -0,198 |
| 12 | Q6P4Q7 CNNM4_HUMAN  | R.M*ENS#PQFPIDGCTTHM*ENLAEK.S    | S728:           | 3 | 3,7936 | 0,248 | -0,069 |
| 12 | Q9Y6Q9 NCOA3_HUMAN  | K.DTSSITSCGDGNVVKQEQLS#PK.K      | S728:           | 3 | 2,6962 | 0,184 | 0,151  |

|    |                    |                                     |                 |   |        |       |        |
|----|--------------------|-------------------------------------|-----------------|---|--------|-------|--------|
| 12 | O43583 DENR_HUMAN  | K.LTVENS#PKQEAGISEGQGTAGEEEEEK.K    | S73:            | 3 | 6,7361 | 0,555 | -0,131 |
| 12 | Q32M24 LRRF1_HUMAN | R.CTLPEHES#PSQDISDACEAESTER.C       | S733:           | 3 | 5,6367 | 0,411 | -0,259 |
| 12 | Q9H7N4 SFR19_HUMAN | K.REVLYDS#EGLS#GEER.G               | S734:S738:      | 3 | 4,0023 | 0,27  | 0,096  |
| 12 | Q96T58 MINT_HUMAN  | R.RPQS#PGAS#PSQAER.L                | S736:S740:      | 3 | 2,8562 | 0,206 | -0,112 |
| 12 | Q96T58 MINT_HUMAN  | R.RPQS#PGAS#PSQAER.L                | S736:S740:      | 2 | 2,8522 | 0,279 | -0,15  |
| 12 | Q8IYB3 SRRM1_HUMAN | K.KAAS#PS#PQSVR.R                   | S738:S740:      | 2 | 3,2304 | 0,393 | -0,284 |
| 12 | O95685 PPR3D_HUMAN | R.ARS#LPS#SPER.R                    | S74:S77:        | 2 | 2,5607 | 0,301 | -0,484 |
| 12 | Q8IYB3 SRRM1_HUMAN | R.RVS#SSRS#VSGS#PEPAAK.K            | S748:S752:S756: | 3 | 3,0363 | 1     | -0,188 |
| 12 | P21127 CD2L1_HUMAN | R.GTS#PRPPEGGLGYSQLGDDDLK.E         | S752:           | 3 | 4,9441 | 0,439 | 0,313  |
| 12 | O75152 ZC11A_HUMAN | R.LSS#ASTGKPPLSVEDDFEK.L            | S759:           | 3 | 2,9508 | 0,431 | 0      |
| 12 | Q2V2M9 FHOD3_HUMAN | R.GSIS#PDAEPNDKVPETAPVQPK.T         | S763:           | 3 | 3,5909 | 0,242 | -0,155 |
| 12 | Q14149 MORC3_HUMAN | K.SES#PDHM*VSQYQQALEEIER.L          | S765:           | 3 | 5,7389 | 0,483 | -0,222 |
| 12 | Q99856 ARI3A_HUMAN | R.AAAAGLGHPPAS#PGGSEDPGPPGSEEEAAR.E | S77:            | 3 | 5,6471 | 0,464 | -0,2   |
| 12 | P50219 MNX1_HUMAN  | R.LRAES#PS#PPR.L                    | S77:S79:        | 2 | 2,2209 | 0,143 | -0,48  |
| 12 | Q9UJX5 APC4_HUMAN  | K.IKEEVLS#ESEAEENQQAGAAALAPEIVIK.V  | S777:           | 3 | 3,7237 | 0,378 | -0,243 |
| 12 | Q14676 MDC1_HUMAN  | R.ESEDSETQPFDTHEAYGPCLS#PPR.A       | S780:           | 3 | 3,677  | 0,379 | -0,684 |
| 12 | P19634 SL9A1_HUMAN | R.CLS#DPGPHPEPGEPEFFPK.G            | S796:           | 3 | 3,2312 | 0,199 | 0,241  |
| 12 | Q9H3Z4 DNJC5_HUMAN | R.S#LSTSGESLYHVLGLDK.N              | S8:             | 2 | 3,8283 | 0,535 | -0,712 |
| 12 | Q7Z4H7 FA29A_HUMAN | K.LEPNS#PM*HGGTLEDVVGGR.Q           | S805:           | 3 | 3,5476 | 0,11  | -0,252 |
| 12 | Q99856 ARI3A_HUMAN | R.AAAAGLGHPPASPGGS#EDGPPGSEEEAAR.E  | S81:            | 3 | 5,0881 | 0,386 | -0,267 |
| 12 | P27816 MAP4_HUMAN  | K.TTTAAAVASTGPSSRSPS#TLLPK.K        | S827:           | 3 | 2,8491 | 0,182 | -0,16  |
| 12 | P04406 G3P_HUMAN   | K.LVINGNPITIFQERDPS#K.I             | S83:            | 3 | 2,8715 | 0,259 | -0,172 |
| 12 | Q96ST3 SIN3A_HUMAN | R.GDLS#DVEEEEEEM*DVDEATGAVKK.H      | S832:           | 3 | 3,7122 | 0,522 | -0,257 |
| 12 | Q8N3V7 SYNPO_HUMAN | R.AAS#PAKPSLDLVPNLPK.G              | S833:           | 2 | 3,9814 | 0,514 | -0,388 |
| 12 | Q14160 LAP4_HUMAN  | R.M*VEPENAVTITPLRPEDDYS#PR.E        | S835:           | 3 | 3,3812 | 0,379 | -0,348 |
| 12 | Q6PL18 ATAD2_HUMAN | K.DAQNSS#DSSFENVEITEQLANGR.H        | S85:            | 3 | 4,0759 | 0,294 | -0,202 |
| 12 | Q8TEW0 PARD3_HUMAN | K.S#M*DLGIADETKLNTVDDQK.A           | S852:           | 3 | 3,2858 | 0,253 | 0,167  |
| 12 | Q13595 TRA2A_HUMAN | R.SRS#YT#PEYR.R                     | S86:T88:        | 2 | 3,4801 | 0,33  | -0,555 |
| 12 | Q6GYQ0 GRIPE_HUMAN | R.GSSPGS#LEIPKDLPDILNK.Q            | S864:           | 2 | 2,2387 | 0,341 | -0,237 |
| 12 | Q9UPN4 AZI1_HUMAN  | R.S#GSPRPTEPTDFLM*LFEGSPS#GKK.R     | S87:S107:       | 3 | 3,5897 | 0,49  | -0,267 |
| 12 | Q86UU0 BCL9L_HUMAN | K.ANQIS#PSNSSLKNPQAGVPPFSSLK.G      | S88:            | 3 | 4,56   | 0,316 | 0,484  |
| 12 | O14981 BTAF1_HUMAN | R.TRQEPTS#ESS#M*EDSPTTER.L          | S88:S91:        | 3 | 3,2876 | 0,331 | -0,078 |
| 12 | P46100 ATRX_HUMAN  | R.ETFS#SAEGTVDKDTTIM*ELR.D          | S889:           | 3 | 3,5673 | 0,241 | 0,393  |

|    |                      |                                    |                 |   |        |       |        |
|----|----------------------|------------------------------------|-----------------|---|--------|-------|--------|
| 12 | Q9UL54 TAOK2_HUMAN   | R.AGS#LKDPDVAELFFK.D               | S9:             | 3 | 3,5289 | 0,185 | -0,213 |
| 12 | P49841 GSK3B_HUMAN   | R.TTS#FAESCKPVQQPSAFGSM*K.V        | S9:             | 3 | 3,4968 | 0,311 | -0,23  |
| 12 | Q7L7X3 TAOK1_HUMAN   | R.AGS#LKDPEIAELFFK.E               | S9:             | 3 | 3,2433 | 0,178 | -0,419 |
| 12 | Q12872 SFRS8_HUMAN   | R.GVS#QEKEAQISSAIVSSVQSK.I         | S909:           | 3 | 4,3073 | 0,416 | 0,734  |
| 12 | O76021 RL1D1_HUMAN   | R.SDS#EDICLFTKDEPNSTPEK.T          | S92:            | 3 | 4,1961 | 0,429 | -0,153 |
| 12 | Q15311 RBP1_HUMAN    | K.RTEGYAAFQEDS#S#GDEAESPSK.M       | S92:S93:        | 3 | 5,3924 | 0,476 | -0,29  |
| 12 | Q69YH5 CDCA2_HUMAN   | R.TICTFDSSGFESM*S#PIKETVSSR.Q      | S937:           | 3 | 3,3623 | 0,389 | 0,069  |
| 12 | Q9UQ35 SRRM2_HUMAN   | R.SRS#VS#PCSNVESR.L                | S952:S954:      | 2 | 3,7522 | 0,346 | -0,3   |
| 12 | Q9UQ35 SRRM2_HUMAN   | R.SRS#VS#PCSNVESR.L                | S952:S954:      | 3 | 2,9596 | 0,101 | 0      |
| 12 | P46379 BAT3_HUMAN    | R.AS#PEPQRENASPAGTTAEEAM*SR.G      | S964:           | 3 | 6,2755 | 0,505 | -0,496 |
| 12 | Q14498 RBM39_HUMAN   | R.YRS#PYS#GPK.F                    | S97:S100:       | 2 | 2,917  | 0,335 | -0,201 |
| 12 | Q6WCQ1 MRIP_HUMAN    | K.AATEALGEKSPDS#ATVSGYDIM*K.S      | S979:           | 3 | 4,6069 | 0,397 | -0,075 |
| 12 | Q14814 MEF2D_HUMAN   | K.GFNGCDS#PEPDGDSLEQSPLLEDKYR.R    | S98:            | 3 | 3,0822 | 0,53  | 0,234  |
| 12 | P04792 HSPB1_HUMAN   | R.VS#LDVNHFPDELTVK.T               | S98:            | 3 | 2,968  | 0,462 | -0,196 |
| 12 | Q9C0C2 TB182_HUMAN   | R.SFGTRPLS#SGFSPEEAQQQDEEFEK.K     | S983:           | 3 | 4,6836 | 0,438 | -0,377 |
| 12 | O95382 M3K6_HUMAN    | R.VPEEPAAEPPAS#PEESSGLSLLHQESK.R   | S984:           | 3 | 5,0794 | 0,447 | 0      |
| 12 | Q96S90 LYSM1_HUMAN   | R.DLFNGLDS#EEEKDGEEL.V             | S99:            | 3 | 2,8006 | 0,152 | -0,18  |
| 12 | BOQZ62 BOQZ62_HUMAN  | R.T#SPSDGAM*ANYESTEVM*GDGESAHDSR.D | T1016:          | 3 | 2,8765 | 0,325 | -0,365 |
| 12 | Q9UIF8 BAZ2B_HUMAN   | R.DTSGGIDLGEEQHPLGT#PTPGR.K        | T1087:          | 3 | 3,7073 | 0,493 | -0,158 |
| 12 | P06744 G6PI_HUMAN    | R.SNT#PILVDGKDVMS*PEVNK.V          | T109:           | 3 | 3,3029 | 0,491 | 0,089  |
| 12 | P20042 IF2B_HUMAN    | K.IESDVQEPT#EPEDDLDIM*LGK.K        | T111:           | 3 | 4,5874 | 0,471 | -0,202 |
| 12 | ##A6NCI4 VWA3A_HUMAN | R.LLDQT#QNVHT#VLLGNDNSQGLGNMKN.Q   | T1114:T1119:    | 3 | 2,8571 | 0,149 | 0,613  |
| 12 | P46013 KI67_HUMAN    | K.ELFQT#PGHTEELVAAGK.T             | T1233:          | 2 | 2,0418 | 0,386 | -0,192 |
| 12 | Q7Z2Z1 CO042_HUMAN   | K.RPGNSTVT#SSPPVT#PK.K             | T1301:T1307:    | 2 | 4,0664 | 1     | -0,41  |
| 12 | P30622 CLIP1_HUMAN   | R.KVQAEDENGLQTT#PAS#R.A            | T140:S143:      | 3 | 4,2023 | 0,423 | -0,441 |
| 12 | O75781 PALM_HUMAN    | R.KTEVVM*NSQQT#PVGT#PK.D           | T141:T145:      | 3 | 4,3003 | 0,216 | -0,272 |
| 12 | Q13177 PAK2_HUMAN    | K.YLSFT#PPEKDGFPSTPALNAK.G         | T143:           | 3 | 3,6531 | 0,146 | 0,076  |
| 12 | Q9NRS6 SNX15_HUMAN   | R.DLHILPPLIPT#PPPDDPR.L            | T148:           | 3 | 2,7288 | 0,183 | -0,252 |
| 12 | P42166 LAP2A_HUMAN   | K.LREQGT#ESRSS#T#PLPTISSAENTR.Q    | T154:S159:T160: | 3 | 3,8295 | 1     | -0,311 |
| 12 | Q14676 MDC1_HUMAN    | R.SSVKT#PESIVPIAPELQPSTSR.N        | T1567:          | 3 | 4,3595 | 0,293 | 0      |
| 12 | Q8IU85 KCC1D_HUMAN   | K.GDVM*ST#ACGTPGYVAPEVLAQKPYSK.A   | T180:           | 3 | 3,2568 | 0,453 | 0,065  |
| 12 | Q16539 MK14_HUMAN    | R.HTDDEM*T#GY#VATR.W               | T180:Y182:      | 2 | 3,7056 | 0,498 | 0      |
| 12 | Q9UKY7 CDV3_HUMAN    | R.KT#PQGPPEIYSDTQFPSTQSTAK.H       | T182:           | 3 | 6,8577 | 0,399 | -0,211 |

|    |                     |                                  |                    |   |        |       |        |
|----|---------------------|----------------------------------|--------------------|---|--------|-------|--------|
| 12 | Q15527 SURF2_HUMAN  | K.DLGSTEDGDGT#DDFLTDKEDEK.A      | T190:              | 3 | 3,6957 | 0,342 | -0,295 |
| 12 | Q9ULV3 CIZ1_HUMAN   | K.DSSSQT#M*PVEDKSDPPEGSEEAAPR.M  | T202:              | 3 | 3,2656 | 0,191 | -0,637 |
| 12 | Q01082 SPTB2_HUMAN  | R.T#SSKES#SPIPS#PTSDRK.A         | T2159:S2164:S2169: | 3 | 3,1515 | 0,096 | -0,448 |
| 12 | O60271 JIP4_HUMAN   | K.ERPISLGIFPLPAGDGLLT#PDAQK.G    | T217:              | 3 | 4,7488 | 0,368 | -0,354 |
| 12 | P17275 JUNB_HUMAN   | R.SRDAT#PPVS#PINM*EDQER.I        | T255:S259:         | 3 | 4,0894 | 0,427 | -0,082 |
| 12 | A8K1N6 A8K1N6_HUMAN | K.M*LGQKAT#PPPSPLSELLK.K         | T264:              | 3 | 3,6725 | 0,218 | -0,346 |
| 12 | P49959 MRE11_HUMAN  | K.NEQQLFYISQPGSSVVT#SLSPGEAVKK.H | T272:              | 3 | 3,875  | 0,294 | -0,185 |
| 12 | Q13136 LIPA1_HUMAN  | R.LASLSSHVT#ELEEELDTAR.K         | T281:              | 3 | 2,6452 | 0,103 | -0,253 |
| 12 | P27816 MAP4_HUMAN   | K.DM*ESPT#KLDVTLAK.D             | T282:              | 2 | 3,5324 | 0,292 | 0,223  |
| 12 | Q92625 ANS1A_HUMAN  | K.EVDKT#PPPQPPLISSM*DSISQK.S     | T318:              | 3 | 4,093  | 0,36  | -0,147 |
| 12 | Q9Y2W1 TR150_HUMAN  | K.SPPST#GSTYGSSQKEESAASGGAAYTK.R | T324:              | 3 | 2,6131 | 0,266 | -0,681 |
| 12 | O75533 SF3B1_HUMAN  | R.GGDSIGET#PT#PGAS#KRK.S         | T326:T328:S332:    | 3 | 2,894  | 0,285 | -0,096 |
| 12 | P78310 CXAR_HUMAN   | K.TQYNQVPSEDFERT#PQSPTLPPAK.V    | T329:              | 3 | 2,7419 | 0,23  | 0,456  |
| 12 | Q16643 DREB_HUMAN   | R.M*APTIPT#RSPSDSSTASTPVAEQIER.A | T335:              | 3 | 6,4809 | 0,481 | -0,313 |
| 12 | P80723 BASP_HUMAN   | K.AEGAATEEEGT#PKESEPQAAAEPAEAK.E | T36:               | 3 | 6,1261 | 0,544 | -0,659 |
| 12 | Q5T4S7 UBR4_HUMAN   | R.TGST#SSKEDDYESDAATIVQK.C       | T363:              | 3 | 3,3955 | 0,254 | 0,396  |
| 12 | Q13043 STK4_HUMAN   | R.DET#M*QPAKPSFLEYFEQK.E         | T387:              | 3 | 4,5896 | 0,424 | -0,561 |
| 12 | P41743 KPCI_HUMAN   | K.EGLRPGDTTST#FCGTPNYIAPEILR.G   | T403:              | 3 | 4,2722 | 0,376 | -0,322 |
| 12 | Q16630 CPSF6_HUMAN  | R.EM*DTART#PLSEAEFEEIM*NR.N      | T407:              | 3 | 3,6163 | 0,25  | -0,074 |
| 12 | P51114 FXR1_HUMAN   | R.RGPNYTSYGTNSELSNPSET#ES#ER.K   | T411:S413:         | 3 | 2,6422 | 0,212 | -0,506 |
| 12 | Q96D71 REPS1_HUMAN  | R.T#GSDHTNPTS#PLLVKPSDLLEENK.I   | T421:S430:         | 3 | 4,1687 | 0,127 | -0,332 |
| 12 | Q53EZ4 CEP55_HUMAN  | K.VAASPKSPT#AALNESLVECPK.C       | T430:              | 3 | 3,6553 | 0,184 | -0,163 |
| 12 | Q92667 AKAP1_HUMAN  | R.DKAIT#PPLPESTVPFSNGVLK.G       | T533:              | 3 | 4,1417 | 0,286 | 0      |
| 12 | Q86SQ0 PHLB2_HUMAN  | R.NDELLSDLT#RTPPPSSTFPK.A        | T548:              | 3 | 3,4744 | 0,215 | 0      |
| 12 | Q59FH2 Q59FH2_HUMAN | K.RLEDEQPST#LS#PK.K              | T570:S572:         | 2 | 3,5872 | 0,38  | 0,221  |
| 12 | Q86SQ0 PHLB2_HUMAN  | K.ASSSEYLSILPKT#PEGISEEQR.S      | T574:              | 3 | 4,0956 | 0,482 | -0,353 |
| 12 | Q9H0H5 RGAP1_HUMAN  | K.VSLGVPVT#TPEHQLLK.T            | T579:              | 2 | 3,3316 | 0,399 | -0,404 |
| 12 | P51114 FXR1_HUMAN   | R.T#PGEKINTLKEENTQEAAVLNGVS.-    | T597:              | 3 | 3,4874 | 0,417 | -0,399 |
| 12 | Q8IXK0 PHC2_HUMAN   | K.LPQQDHTT#TTDSEM*EEPYLQESK.E    | T617:              | 3 | 3,0741 | 0,205 | -0,392 |
| 12 | Q5H9R7 SAPS3_HUMAN  | K.HIAFT#PES#QR.R                 | T631:S634:         | 2 | 3,4029 | 0,417 | -0,091 |
| 12 | P12270 TPR_HUMAN    | K.RPST#SQTVSTPAPVPVIESTEAEIAK.A  | T647:              | 3 | 5,2201 | 0,384 | -0,198 |
| 12 | Q96RK0 CIC_HUMAN    | K.SAAAT#SPAPHLVAGPLLGTVGK.A      | T738:              | 3 | 2,6009 | 0,193 | -0,175 |
| 12 | P42166 LAP2A_HUMAN  | K.GPPDFSSDEEREPT#PVLGSGAAAAGR.S  | T74:               | 3 | 5,3238 | 0,522 | -0,138 |

|    |                    |                                 |          |   |        |       |        |
|----|--------------------|---------------------------------|----------|---|--------|-------|--------|
| 12 | Q96JH7 VCIP1_HUMAN | R.DGPSSAPATPTKAPYSPTT#SK.E      | T771:    | 3 | 3,1647 | 0,313 | -0,256 |
| 12 | Q9BW71 HIRP3_HUMAN | K.RPPT#PCS#DPER.K               | T84:S87: | 3 | 3,8416 | 0,431 | 0,249  |
| 12 | Q9BW71 HIRP3_HUMAN | K.RPPT#PCS#DPER.K               | T84:S87: | 2 | 3,1418 | 0,442 | 0      |
| 12 | Q9UQ35 SRRM2_HUMAN | K.SGT#PPRQGSITSPQANEQSVTPQR.R   | T848:    | 3 | 5,1218 | 0,388 | -0,422 |
| 12 | Q9P1Y6 K1542_HUMAN | R.GAVAAEGASDT#EREPTESQGLAAR.L   | T917:    | 3 | 5,0595 | 0,379 | -0,213 |
| 12 | P46821 MAP1B_HUMAN | K.AET#EEAEPEEDGEEHVCSASK.H      | T948:    | 3 | 4,0589 | 0,406 | -0,346 |
| 12 | Q7Z6E9 RBBP6_HUMAN | R.DDAT#PVRDEPM*DAESITFK.S       | T984:    | 3 | 4,3741 | 0,355 | 0      |
| 12 | Q13177 PAK2_HUMAN  | K.Y#LSFTPPEKDGFPSTPALNAK.G      | Y139:    | 3 | 3,0397 | 0,146 | -0,227 |
| 12 | O43166 SI1L1_HUMAN | R.EY#GSTSSIDKQGTSGESFFDLLK.G    | Y206:    | 3 | 3,0323 | 0,179 | -0,071 |
| 12 | Q04726 TLE3_HUMAN  | R.Y#DSDGDKSDDLVDVSNEDPATPR.V    | Y238:    | 3 | 3,6636 | 0,216 | -0,068 |
| 12 | P33981 TTK_HUMAN   | R.FLYGENM*PPQDAEIGY#RNSLR.Q     | Y255:    | 3 | 3,915  | 0,4   | 0,143  |
| 12 | Q13367 AP3B2_HUMAN | K.AFY#GSEEDEAKGAGSEETAAAAAPSR.K | Y270:    | 3 | 4,5256 | 0,393 | 0      |
| 12 | P78310 CXAR_HUMAN  | R.SY#IGSNHSSLGSM*SPSNM*EGYSK.T  | Y294:    | 3 | 5,4417 | 0,408 | -0,072 |
| 12 | P36383 CXG1_HUMAN  | K.ANTAQEQQY#GSHEENLPADLEALQR.E  | Y324:    | 3 | 3,0403 | 0,239 | 0,38   |
| 12 | P09382 LEG1_HUMAN  | R.LNLEAINYM*AADGDFK.I           |          | 2 | 6,0493 | 0,549 | -0,542 |
| 12 | P12814 ACTN1_HUMAN | K.VLAVNQENEQLM*EDYEK.L          |          | 3 | 5,9979 | 0,402 | -0,265 |
| 12 | P63167 DYL1_HUMAN  | K.NADM*SEEM*QQDSVECATQALEK.Y    |          | 3 | 5,9293 | 0,478 | -0,144 |
| 12 | P12956 KU70_HUMAN  | K.TEGDEEAEEEQEENLEASGDYK.Y      |          | 3 | 5,9122 | 0,532 | -0,146 |
| 12 | Q96FJ2 DYL2_HUMAN  | K.NADM*SEDM*QQDAVDCATQAM*EK.Y   |          | 3 | 5,7045 | 0,421 | -1,587 |
| 12 | Q05524 ENO1B_HUMAN | K.DATNVGDEGGFAPNILENK.E         |          | 2 | 5,4631 | 0,521 | -0,311 |
| 12 | Q9Y3F4 STRAP_HUMAN | K.TVDFTQDSNYLLTGGQDK.L          |          | 2 | 5,4397 | 0,597 | -0,427 |
| 12 | P02545 LMNA_HUMAN  | R.M*QQQLDEYQELLDIK.L            |          | 2 | 5,3511 | 0,523 | -0,383 |
| 12 | P35579 MYH9_HUMAN  | R.IAQLEEELEEEQGNTLINDR.L        |          | 3 | 5,3378 | 0,519 | 0,074  |
| 12 | P24534 EF1B_HUMAN  | K.SPAGLQVLNDYLADK.S             |          | 2 | 5,2456 | 0,551 | -0,228 |
| 12 | Q9Y4L1 HYOU1_HUMAN | K.AANSLEAFIFETQDK.L             |          | 2 | 5,2371 | 0,507 | 0      |
| 12 | Q9UPN3 MACF1_HUMAN | R.DQIIELDQTGNQLK.F              |          | 2 | 5,2218 | 0,414 | -0,453 |
| 12 | Q09666 AHNK_HUMAN  | R.DDGVFVQEVQNSPAAR.T            |          | 2 | 5,2126 | 0,518 | -0,133 |
| 12 | Q15365 PCBP1_HUMAN | R.ESTGAQVQVAGDM*LPNSTER.A       |          | 3 | 5,1275 | 0,499 | 0,261  |
| 12 | Q9Y230 RUVB2_HUMAN | R.TQGFLALFSGDTGEIK.S            |          | 2 | 5,0827 | 0,503 | -0,217 |
| 12 | P00813 ADA_HUMAN   | K.NDQANYSLNTDDPLIFK.S           |          | 2 | 5,0608 | 0,531 | -0,372 |
| 12 | O43747 AP1G1_HUMAN | R.NDDDSSEAM*NDILAQVATNTTETSK.N  |          | 3 | 5,0505 | 0,516 | 0,495  |
| 12 | P07355 ANXA2_HUMAN | R.AEDGSVIDYELIDQDAR.D           |          | 2 | 5,04   | 0,489 | -0,192 |
| 12 | Q01082 SPTB2_HUMAN | K.EIEELQSQQAQALSQEGK.S          |          | 3 | 5,0137 | 0,434 | -0,097 |

|    |                    |                                  |   |        |       |        |
|----|--------------------|----------------------------------|---|--------|-------|--------|
| 12 | P49792 RBP2_HUMAN  | K.DTSFLGSDDIGNIDVR.E             | 2 | 4,9735 | 0,516 | 0      |
| 12 | P05783 K1C18_HUMAN | R.GGM*GSGGLATGIAGGLAGM*GGIQNEK.E | 3 | 4,9693 | 0,461 | 0,08   |
| 12 | P39687 AN32A_HUMAN | K.SLDLNFCEVTNLNDYR.E             | 2 | 4,9278 | 0,49  | -0,433 |
| 12 | P02649 APOE_HUMAN  | K.VQAAVGTSAAPVPSDNH.-            | 2 | 4,9144 | 0,487 | -1,129 |
| 12 | P05023 AT1A1_HUMAN | K.NLEAVETLGSTSTICSDK.T           | 2 | 4,9027 | 0,635 | -0,444 |
| 12 | P16989 DBPA_HUMAN  | R.SVGDGETVEFDVVEGEK.G            | 2 | 4,8872 | 0,487 | -0,068 |
| 12 | Q86WB0 NIPA_HUMAN  | R.QLIDEGIAPEEGGVDAK.D            | 2 | 4,8652 | 0,545 | 0      |
| 12 | P14618 KPYM_HUMAN  | K.GADFLVTEVENGGSLGSK.K           | 2 | 4,8624 | 0,573 | -0,274 |
| 12 | P78527 PRKDC_HUMAN | R.DPESETDNDSQEIFK.L              | 2 | 4,8519 | 0,479 | -0,209 |
| 12 | Q5T4S7 UBR4_HUMAN  | R.DNPEATQQM*NDLIIGK.V            | 2 | 4,8003 | 0,48  | -0,338 |
| 12 | P00558 PGK1_HUMAN  | K.VLNNM*EIGTSLFDEEGAK.I          | 2 | 4,793  | 0,415 | 0,062  |
| 12 | Q15836 VAMP3_HUMAN | R.LQQTQNQVDEVVDIM*R.V            | 3 | 4,7654 | 0,487 | -0,189 |
| 12 | O14929 HAT1_HUMAN  | K.VDENFDCVEADDVEGK.I             | 2 | 4,7482 | 0,552 | 0,331  |
| 12 | P31943 HNRH1_HUMAN | R.STGEAFVQFASQEIAEK.A            | 2 | 4,7358 | 0,46  | -0,464 |
| 12 | Q7KZF4 SND1_HUMAN  | K.DTNGENIAESLVAEGLATR.R          | 2 | 4,7357 | 0,525 | -0,249 |
| 12 | O14818 PSA7_HUMAN  | K.NYTDEAIETDDLTIK.L              | 2 | 4,7342 | 0,59  | -0,14  |
| 12 | Q01518 CAP1_HUMAN  | R.VENQENVSNLVIEDTELK.Q           | 3 | 4,7065 | 0,396 | -0,265 |
| 12 | O00571 DDX3X_HUMAN | R.LEQELFSGGNTGINFEK.Y            | 2 | 4,6508 | 0,556 | -0,324 |
| 12 | P78371 TCPB_HUMAN  | R.DASLM*VTNDGATILK.N             | 3 | 4,6464 | 0,298 | -0,117 |
| 12 | Q9UII4 HERC5_HUMAN | K.YSTM*ETVEEALQEAINNNR.G         | 3 | 4,6414 | 0,477 | 0,411  |
| 12 | Q01082 SPTB2_HUMAN | K.EIEELQSQAQALSQEGK.S            | 2 | 4,6356 | 0,491 | -0,646 |
| 12 | P55072 TERA_HUMAN  | R.EDEEESLNEVGYDDIGGCR.K          | 3 | 4,6273 | 0,437 | 0      |
| 12 | P37802 TAGL2_HUMAN | R.DDGLFSGDPNWFPK.K               | 2 | 4,6197 | 0,443 | -0,153 |
| 12 | Q99459 CDC5L_HUMAN | R.EIDDTYIEDAADVDAR.K             | 2 | 4,6195 | 0,48  | -0,067 |
| 12 | P33991 MCM4_HUMAN  | R.LSEEASQALIEAYVDM*R.K           | 3 | 4,6037 | 0,366 | 0      |
| 12 | P30086 PEBP1_HUMAN | K.GNDISSGTVLSDYVGSPPK.G          | 2 | 4,5928 | 0,564 | -0,125 |
| 12 | Q6S8J3 A26CA_HUMAN | K.SYELPDGQVITIGNER.F             | 2 | 4,5921 | 0,454 | -0,272 |
| 12 | P78527 PRKDC_HUMAN | R.M*EVQEQEEDISSLIR.S             | 2 | 4,5437 | 0,442 | 0,536  |
| 12 | Q9BV86 CI032_HUMAN | K.DNM*AQEGVILDDVDSSVCR.D         | 3 | 4,5253 | 0,405 | 0      |
| 12 | P22314 UBA1_HUMAN  | R.LAGTQPLEVLEAVQR.S              | 3 | 4,525  | 0,283 | -0,225 |
| 12 | P35580 MYH10_HUMAN | R.TQLEELEDELQATEDAK.L            | 2 | 4,5208 | 0,53  | -0,56  |
| 12 | P22314 UBA1_HUMAN  | R.NEEDAAELVALAQAVNAR.A           | 3 | 4,5099 | 0,404 | -0,388 |
| 12 | P04818 TYSY_HUMAN  | R.DM*ESDYSGGQGVLDLQQR.V          | 2 | 4,4813 | 0,393 | -0,397 |

|    |                    |                            |   |        |       |        |
|----|--------------------|----------------------------|---|--------|-------|--------|
| 12 | P63104 1433Z_HUMAN | K.GIVDQSQQAYQEAFEISK.K     | 3 | 4,4806 | 0,516 | 0,09   |
| 12 | P51149 RAB7A_HUMAN | R.DPENFPFVVLGNK.I          | 2 | 4,4697 | 0,415 | -0,331 |
| 12 | Q9UHX1 PUF60_HUMAN | K.DIDDDLEGEVTEECGK.F       | 2 | 4,4652 | 0,548 | -0,468 |
| 12 | P33176 KINH_HUMAN  | R.FVCSPDEVM*DTIDEGK.S      | 2 | 4,4505 | 0,509 | -0,46  |
| 12 | Q13283 G3BP1_HUMAN | K.SSSPAPADIAQTVQEDLR.T     | 2 | 4,4499 | 0,472 | -0,453 |
| 12 | P35579 MYH9_HUMAN  | K.M*QQNIQELEEQLSEESAR.Q    | 3 | 4,4479 | 0,397 | -0,078 |
| 12 | P08670 VIME_HUMAN  | R.EM*EENFAVEAANYQDTIGR.L   | 3 | 4,446  | 0,558 | 0,664  |
| 12 | Q9UBQ7 GRHPR_HUMAN | R.GDVVNQDDLYQALASGK.I      | 2 | 4,441  | 0,633 | -0,476 |
| 12 | P35580 MYH10_HUMAN | R.TQLEELEDELQATEDAK.L      | 3 | 4,4369 | 0,254 | -0,186 |
| 12 | P18669 PGAM1_HUMAN | R.YADLTEDQLPSCESLK.D       | 2 | 4,4291 | 0,374 | -0,392 |
| 12 | P07195 LDHB_HUMAN  | K.SLADELALVDVLEDK.L        | 2 | 4,4226 | 0,434 | -0,299 |
| 12 | P62820 RAB1A_HUMAN | K.NATNVEQSFM*TM*AAEIK.K    | 3 | 4,4156 | 0,392 | 0      |
| 12 | O60568 PLOD3_HUMAN | R.DVFSGSDTDPDM*AFCK.S      | 2 | 4,4106 | 0,592 | -0,202 |
| 12 | Q9Y2Q3 GSTK1_HUMAN | R.NEDITEPQSILAAAEK.A       | 2 | 4,4032 | 0,433 | -0,141 |
| 12 | P48735 IDHP_HUMAN  | R.DQTDDQVTIDSALATQK.Y      | 2 | 4,3733 | 0,494 | -0,132 |
| 12 | P39687 AN32A_HUMAN | K.SLDLFNCEVTNLNDYR.E       | 3 | 4,3712 | 0,455 | 0,093  |
| 12 | P11021 GRP78_HUMAN | K.SQIFSTASDNQPTVTIK.V      | 2 | 4,3606 | 0,543 | 0      |
| 12 | P42704 LPPRC_HUMAN | R.LIASYCNVGDIEGASK.I       | 2 | 4,33   | 0,542 | -0,072 |
| 12 | P07900 HS90A_HUMAN | R.NPDDITNEEYGEFYK.S        | 2 | 4,3249 | 0,551 | -0,266 |
| 12 | P55072 TERA_HUMAN  | R.EAVCIVLSDDTCSDEK.I       | 2 | 4,3104 | 0,573 | -0,265 |
| 12 | P08238 HS90B_HUMAN | R.NPDDITQEEYGEFYK.S        | 2 | 4,3079 | 0,488 | -0,33  |
| 12 | Q96SB8 SMC6_HUMAN  | R.DVDSEISDLENEVENK.T       | 2 | 4,3072 | 0,45  | -0,332 |
| 12 | P07355 ANXA2_HUMAN | K.GVDEVTIVNILTNR.S         | 2 | 4,2983 | 0,454 | -0,079 |
| 12 | Q96SB8 SMC6_HUMAN  | R.DVDSEISDLENEVENK.T       | 3 | 4,2884 | 0,374 | -0,199 |
| 12 | Q9UBW7 ZMYM2_HUMAN | K.DIYDKDNYELDEDTD.-        | 2 | 4,2811 | 0,458 | -0,458 |
| 12 | Q9NQ88 CL005_HUMAN | K.IIQGGGVDEPLSETGFK.Q      | 2 | 4,2723 | 0,485 | -0,537 |
| 12 | P63104 1433Z_HUMAN | K.GIVDQSQQAYQEAFEISK.K     | 2 | 4,2671 | 0,628 | -0,239 |
| 12 | P16989 DBPA_HUMAN  | R.SVGDGGETVEFDVVEGK.G      | 3 | 4,2493 | 0,349 | 0      |
| 12 | P49327 FAS_HUMAN   | K.TGGAYGEDLGADYNLSQVCDGK.V | 3 | 4,2492 | 0,409 | 0,399  |
| 12 | P08107 HSP71_HUMAN | R.IINEPTAAAIAYGLDR.T       | 3 | 4,2351 | 0,292 | 0,108  |
| 12 | O75396 SC22B_HUMAN | R.VADGLPLAASM*QEDEQSGR.D   | 3 | 4,2341 | 0,418 | 0      |
| 12 | Q96JH7 VCIP1_HUMAN | R.DM*NQGELFDALLGDR.A       | 2 | 4,2166 | 0,536 | -0,522 |
| 12 | P06737 PYGL_HUMAN  | K.LVIDQIDNGFFSPK.Q         | 2 | 4,2158 | 0,321 | -0,077 |

|    |                    |                          |   |        |       |        |
|----|--------------------|--------------------------|---|--------|-------|--------|
| 12 | Q14697 GANAB_HUMAN | R.DENSVELTM*AEGPYK.I     | 2 | 4,2133 | 0,529 | -0,718 |
| 12 | P62820 RAB1A_HUMAN | K.NATNVEQSFM*TM*AAEIK.K  | 2 | 4,2123 | 0,475 | -0,191 |
| 12 | Q9UBQ7 GRHPR_HUMAN | R.GDVVNQDDLYQALASGK.I    | 3 | 4,2093 | 0,445 | 0,204  |
| 12 | P60842 IF4A1_HUMAN | K.M*FVLDEADEM*LSR.G      | 2 | 4,2009 | 0,447 | 0,077  |
| 12 | Q9H4A4 AMPB_HUMAN  | K.EEYNGVIEEFLATGEK.L     | 2 | 4,1945 | 0,483 | -0,4   |
| 12 | P05787 K2C8_HUMAN  | R.ELQSQISDTSVVLSM*DNSR.S | 3 | 4,192  | 0,371 | -0,086 |
| 12 | Q9Y4L1 HYOU1_HUMAN | K.AANSLEAFIFETQDK.L      | 3 | 4,1856 | 0,392 | -0,109 |
| 12 | P12236 ADT3_HUMAN  | K.DFLAGGIAAAISK.T        | 2 | 4,1838 | 0,49  | -0,198 |
| 12 | O00505 IMA3_HUMAN  | K.DSQVVQVVDGLK.N         | 3 | 4,1751 | 0,321 | -0,065 |
| 12 | P10809 CH60_HUMAN  | R.CIPALDSLTPANEDQK.I     | 2 | 4,1649 | 0,413 | 0,138  |
| 12 | Q14697 GANAB_HUMAN | K.M*M*DYLQGSGETPQTDVR.W  | 2 | 4,152  | 0,498 | 0,498  |
| 12 | P13667 PDIA4_HUMAN | K.YGIVDYM*IEQSGPPSK.E    | 2 | 4,1427 | 0,613 | 0,542  |
| 12 | P52907 CAZA1_HUMAN | K.DVQDSLTVSNEAQTAK.E     | 3 | 4,1362 | 0,465 | 0,107  |
| 12 | O75717 WDHD1_HUMAN | R.SNILSDNPDFSDEADIIK.E   | 2 | 4,134  | 0,42  | 0,122  |
| 12 | P67870 CSK2B_HUMAN | R.GNEFFCEVDEDIYQDK.F     | 2 | 4,1294 | 0,504 | -0,122 |
| 12 | Q9BV73 CP250_HUMAN | R.DQELEALQQEQQAQGEER.V   | 3 | 4,1278 | 0,367 | 0,69   |
| 12 | P19338 NUCL_HUMAN  | K.FGYVDFESAEDLEK.A       | 2 | 4,1275 | 0,59  | -0,74  |
| 12 | P05023 AT1A1_HUMAN | K.GVGIIEGNETVEDIAAR.L    | 2 | 4,1035 | 0,575 | -0,267 |
| 12 | P08107 HSP71_HUMAN | R.IINEPTAAAIAYGLDR.T     | 2 | 4,0976 | 0,554 | -0,217 |
| 12 | P14927 QCR7_HUMAN  | K.YEEENFYLEPYLK.E        | 2 | 4,0961 | 0,424 | -0,632 |
| 12 | Q99832 TCPH_HUMAN  | K.NDSVVAGGGAIEM*ELSK.Y   | 2 | 4,0825 | 0,523 | -0,144 |
| 12 | Q01105 SET_HUMAN   | R.IDFYFDENPYFENK.V       | 2 | 4,0689 | 0,464 | -0,663 |
| 12 | Q14980 NUMA1_HUMAN | R.DSALETLQGQLEEK.A       | 2 | 4,0631 | 0,208 | 1,563  |
| 12 | Q86V81 THOC4_HUMAN | K.QQLSAEELDAQLDAYNAR.M   | 3 | 4,0507 | 0,449 | 0,18   |
| 12 | Q71U36 TBA1A_HUMAN | K.TIGGGDDSFNTFFSETGAGK.H | 2 | 4,0469 | 0,559 | -0,608 |
| 12 | P55265 DSRAD_HUMAN | K.DSEDM*GVVSLGTGNR.C     | 2 | 4,0433 | 0,587 | 0,295  |
| 12 | Q567U6 CCD93_HUMAN | R.DQLNDQYLELLEK.Q        | 2 | 4,0429 | 0,34  | -0,301 |
| 12 | P47897 SYQ_HUMAN   | K.SLDIQVPNFPADTK.G       | 2 | 4,0411 | 0,456 | -0,292 |
| 12 | P05141 ADT2_HUMAN  | K.DFLAGGVAAAISK.T        | 3 | 4,0367 | 0,458 | 0,075  |
| 12 | P38646 GRP75_HUMAN | K.SQVFSTAADGQTQVEIK.V    | 2 | 4,0295 | 0,493 | -0,472 |
| 12 | P21333 FLNA_HUMAN  | R.VQVQDNEGCPVEALVK.D     | 2 | 4,0293 | 0,446 | -0,41  |
| 12 | P08238 HS90B_HUMAN | R.NPDDITQEEYGEFYK.S      | 3 | 4,0212 | 0,341 | -0,099 |
| 12 | P50991 TCPD_HUMAN  | K.TDM*DNQIVVSDYAQM*DR.V  | 3 | 4,0207 | 0,119 | 0      |



|    |                    |                               |   |        |       |        |
|----|--------------------|-------------------------------|---|--------|-------|--------|
| 12 | P20042 IF2B_HUMAN  | K.DASDDLDDLNFFNQK.K           | 3 | 4,0108 | 0,318 | 0,104  |
| 12 | Q9BRT2 CF125_HUMAN | R.DTSFSGLSLEEYK.L             | 2 | 3,9975 | 0,55  | 0      |
| 12 | Q9NXH9 TRM1_HUMAN  | R.DLTCAVITEFAR.I              | 2 | 3,988  | 0,455 | -0,262 |
| 12 | P05141 ADT2_HUMAN  | K.DFLAGGVAAAISK.T             | 2 | 3,9868 | 0,505 | 0      |
| 12 | Q9UHX1 PUF60_HUMAN | K.DIDDDLEGEVTEECGK.F          | 3 | 3,9861 | 0,321 | 0,1    |
| 12 | O15258 RER1_HUMAN  | K.VDPSLM*EDSDDGPSLPTK.Q       | 2 | 3,9799 | 0,512 | -0,127 |
| 12 | Q09666 AHNK_HUMAN  | K.GPSLDIDTPDVNIEGPEGK.L       | 2 | 3,9771 | 0,452 | -0,937 |
| 12 | P22314 UBA1_HUMAN  | R.ALPAVQQNNLDEDLIR.K          | 2 | 3,9753 | 0,58  | 0,472  |
| 12 | P50914 RL14_HUMAN  | K.LVAIVDVIDQNR.A              | 2 | 3,9709 | 0,547 | 0      |
| 12 | O00505 IMA3_HUMAN  | K.DSQVVQVVLGGLK.N             | 2 | 3,9687 | 0,388 | -0,349 |
| 12 | Q9UJZ1 STML2_HUMAN | R.DVQGTDASLDEELDR.V           | 2 | 3,9664 | 0,583 | -0,367 |
| 12 | O43809 CPSF5_HUMAN | K.LPGGELNPGEDEVEGLK.R         | 2 | 3,9637 | 0,46  | -0,209 |
| 12 | P30086 PEBP1_HUMAN | K.GNDISSGTVLSDYVGSPPK.G       | 3 | 3,9571 | 0,403 | -0,094 |
| 12 | P43358 MAGA4_HUMAN | R.QPNEGSSSQEEEGPSTSPDAESLFR.E | 3 | 3,9515 | 0,324 | -0,275 |
| 12 | Q15287 RNPS1_HUMAN | K.GYAYVEFENPDEAEK.A           | 2 | 3,9484 | 0,505 | -0,346 |
| 12 | P07737 PROF1_HUMAN | R.DSLLQDGEFSM*DLR.T           | 2 | 3,9421 | 0,514 | -0,149 |
| 12 | O43707 ACTN4_HUMAN | R.ETDTDADQVIASFV.V            | 2 | 3,9398 | 0,515 | -0,35  |
| 12 | P82979 HCC1_HUMAN  | R.FGIVTSSAGTGTTEDTEAK.K       | 2 | 3,9351 | 0,579 | -0,261 |
| 12 | Q1KMD3 HNRL2_HUMAN | R.DLLVQQASQCLSK.L             | 2 | 3,9297 | 0,478 | 0,328  |
| 12 | P47755 CAZA2_HUMAN | K.DIQDSLTVSNEVQTAK.E          | 3 | 3,9242 | 0,473 | -0,105 |
| 12 | P11021 GRP78_HUMAN | R.IINEPTAAAIAYGLDK.R          | 3 | 3,9241 | 0,323 | 0,11   |
| 12 | Q05524 ENO1B_HUMAN | K.DATNVGDEGGFAPNILENK.E       | 3 | 3,9235 | 0,464 | 0,187  |
| 12 | P62888 RL30_HUMAN  | R.VCTLAIDPGDSDIIR.S           | 2 | 3,9193 | 0,448 | 0      |
| 12 | Q9BUF5 TBB6_HUMAN  | K.M*ASTFIGNSTAIQELFK.R        | 2 | 3,9167 | 0,495 | -0,26  |
| 12 | Q16204 CCDC6_HUMAN | R.DISM*EIDSPENM*M*R.H         | 2 | 3,913  | 0,324 | -0,071 |
| 12 | Q9NZL4 HPBP1_HUMAN | K.LLQTCFSSPADDSM*DR.-         | 2 | 3,9075 | 0,569 | 0,985  |
| 12 | O75083 WDR1_HUMAN  | K.YAPSGFYIASGDVSGK.L          | 2 | 3,9063 | 0,645 | -0,226 |
| 12 | O60264 SMCA5_HUMAN | K.ESEITDEDIDGILER.G           | 2 | 3,9056 | 0,445 | -0,141 |
| 12 | P50991 TCPD_HUMAN  | K.TDM*DNQIVVSDYAQM*DR.V       | 2 | 3,9001 | 0,596 | -0,6   |
| 12 | O75534 CSDE1_HUMAN | K.DQFGFINYEVGDSK.K            | 2 | 3,8964 | 0,503 | -1,055 |
| 12 | O60506 HNRPO_HUMAN | K.EFNEDGALAVLQQFK.D           | 2 | 3,8933 | 0,411 | -0,286 |
| 12 | P42126 D3D2_HUMAN  | R.DADVQNFVFSISK.D             | 2 | 3,8932 | 0,532 | 0      |
| 12 | P20042 IF2B_HUMAN  | K.DASDDLDDLNFFNQK.K           | 2 | 3,8887 | 0,402 | -0,486 |

|    |                     |                           |   |        |       |        |
|----|---------------------|---------------------------|---|--------|-------|--------|
| 12 | Q02952 AKA12_HUMAN  | K.GLAEVQQDGEAEEGATSDGEK.K | 3 | 3,8867 | 0,422 | -0,345 |
| 12 | O43707 ACTN4_HUMAN  | R.ETTDTDADQVIASFV.K       | 3 | 3,884  | 0,456 | -0,105 |
| 12 | Q14974 IMB1_HUMAN   | K.LAATNALLNSLEFTK.A       | 2 | 3,875  | 0,298 | -0,684 |
| 12 | P51452 DUS3_HUMAN   | R.EIGPNDGFLAQLCQLNDR.L    | 3 | 3,8686 | 0,311 | -0,355 |
| 12 | Q05682 CALD1_HUMAN  | K.TTTTNTQVEGDDEAAFLER.L   | 3 | 3,8536 | 0,382 | -0,087 |
| 12 | P00505 AATM_HUMAN   | K.TCGFDFTGAVEDISK.I       | 2 | 3,8391 | 0,492 | -0,074 |
| 12 | Q15149 PLEC1_HUMAN  | R.LLDPEDVDVQPDEK.S        | 2 | 3,838  | 0,468 | -0,357 |
| 12 | P78371 TCPB_HUMAN   | R.DASLM*VTNDGATILK.N      | 2 | 3,8252 | 0,498 | -0,078 |
| 12 | P33778 H2B1B_HUMAN  | K.AM*GIM*NSFVNDIFER.I     | 2 | 3,8219 | 0,577 | -0,344 |
| 12 | Q13765 NACA_HUMAN   | K.IEDLSQQAQLAAAEK.F       | 2 | 3,818  | 0,469 | -0,076 |
| 12 | P10809 CH60_HUMAN   | K.TLNDELEIIEGM*K.F        | 3 | 3,8067 | 0,264 | 0,06   |
| 12 | O00273 DFFA_HUMAN   | K.AAFGEEVDAVDTGISR.E      | 2 | 3,8038 | 0,521 | -0,224 |
| 12 | Q9HB66 Q9HB66_HUMAN | K.NDDIPEQDSLGLSNLQK.S     | 2 | 3,8033 | 0,406 | -0,194 |
| 12 | P07339 CATD_HUMAN   | R.DPDAQPGGELM*LGGTDSK.Y   | 2 | 3,8015 | 0,596 | -0,271 |
| 12 | Q09666 AHNK_HUMAN   | K.VDIEGPDVNIIEGPEGK.L     | 2 | 3,8004 | 0,486 | -0,146 |
| 12 | P24534 EF1B_HUMAN   | K.SPAGLQVLNDYLADK.S       | 3 | 3,8002 | 0,328 | -0,342 |
| 12 | Q02952 AKA12_HUMAN  | K.ETCVSGEDPTQGADLSPDEK.V  | 2 | 3,795  | 0,547 | -0,114 |
| 12 | P07437 TBB5_HUMAN   | R.ALTVPELTQQVFDK.N        | 3 | 3,7881 | 0,47  | -0,551 |
| 12 | Q9Y262 IF3EI_HUMAN  | R.QLEVYTSGGDPESVAGEYGR.H  | 2 | 3,7821 | 0,561 | -0,346 |
| 12 | Q00169 PIPNA_HUMAN  | K.NETGGGEGVEVLVNEPYEK.D   | 2 | 3,7712 | 0,497 | -0,302 |
| 12 | O75396 SC22B_HUMAN  | R.VADGLPLAASM*QEDEQSGR.D  | 2 | 3,7705 | 0,548 | 0,061  |
| 12 | Q09666 AHNK_HUMAN   | K.M*DVNVGDIDIEGPEGK.L     | 2 | 3,7685 | 0,5   | -0,286 |
| 12 | P35080 PROF2_HUMAN  | R.DSLYVDGDCTM*DIR.T       | 2 | 3,7652 | 0,389 | 0,073  |
| 12 | Q99613 EIF3C_HUMAN  | R.TEPTAQQLALQLAEK.L       | 2 | 3,7634 | 0,397 | 0,348  |
| 12 | P46937 YAP1_HUMAN   | R.DESTDSGLSM*SSYSVPR.T    | 2 | 3,7591 | 0,512 | -0,732 |
| 12 | Q6NXR4 CH041_HUMAN  | K.DLGDIEATEFDR.L          | 2 | 3,756  | 0,504 | -0,49  |
| 12 | P63104 1433Z_HUMAN  | R.DICNDVLSLLEK.F          | 2 | 3,751  | 0,286 | -0,43  |
| 12 | Q9Y224 CN166_HUMAN  | K.NAEPLINLDVNNPDFK.A      | 2 | 3,7488 | 0,445 | -0,269 |
| 12 | P50395 GDIB_HUMAN   | R.TDDYLDQPCYETINR.I       | 2 | 3,7365 | 0,458 | -0,449 |
| 12 | P07355 ANXA2_HUMAN  | K.GLGTDEDSLIEIICSR.T      | 2 | 3,7322 | 0,449 | -0,069 |
| 12 | P02545 LMNA_HUMAN   | R.M*QQQLDEYQELLDIK.L      | 3 | 3,7257 | 0,336 | -0,096 |
| 12 | Q8WXH0 SYNE2_HUMAN  | R.DFQEYLAAVESSM*K.A       | 3 | 3,7149 | 0,304 | -0,112 |
| 12 | P42704 LPPRC_HUMAN  | K.NNNIDAAIENIENM*LTSENK.V | 3 | 3,7109 | 0,343 | -0,243 |

|    |                     |                        |   |        |       |        |
|----|---------------------|------------------------|---|--------|-------|--------|
| 12 | Q14498 RBM39_HUMAN  | R.TDASSASSFLDSDELER.T  | 2 | 3,7106 | 0,443 | 0,067  |
| 12 | Q14566 MCM6_HUMAN   | K.EIESEIDSEELINK.K     | 3 | 3,7019 | 0,302 | -0,206 |
| 12 | P12956 KU70_HUMAN   | R.DSLIFLVDASK.A        | 2 | 3,7011 | 0,48  | -0,303 |
| 12 | Q9Y490 TLN1_HUMAN   | K.EADESLNFEEQILEAAK.S  | 2 | 3,7002 | 0,417 | -0,378 |
| 12 | Q9UPN3 MACF1_HUMAN  | K.ELEEAVTSAQQETEK.S    | 2 | 3,6987 | 0,419 | 0,811  |
| 12 | P23284 PIIB_HUMAN   | K.DTNGSQFFITTVK.T      | 2 | 3,6907 | 0,551 | 0,418  |
| 12 | P28370 SMCA1_HUMAN  | K.ESELTDEDITILER.G     | 2 | 3,683  | 0,492 | -0,277 |
| 12 | P49588 SYAC_HUMAN   | K.DIINEEVQFLK.T        | 2 | 3,679  | 0,388 | -0,248 |
| 12 | P42126 D3D2_HUMAN   | R.DADVQNFVFSISK.D      | 3 | 3,6783 | 0,412 | -0,124 |
| 12 | Q9BTT0 AN32E_HUMAN  | K.DLSTVEALQNLK.N       | 3 | 3,6761 | 0,327 | 0      |
| 12 | P55072 TERA_HUMAN   | R.VINQILTEM*DGM*STK.K  | 3 | 3,6741 | 0,424 | -0,107 |
| 12 | Q9H9C1 CN133_HUMAN  | R.DFVDDDDDDDLER.V      | 2 | 3,6738 | 0,53  | 0,462  |
| 12 | O43707 ACTN4_HUMAN  | R.M*APYQGPDAVPGALDYK.S | 2 | 3,6678 | 0,484 | -0,202 |
| 12 | P05387 RLA2_HUMAN   | R.YVASYLALGGNSSPSAK.D  | 2 | 3,6666 | 0,384 | -0,326 |
| 12 | Q86W92 LIPB1_HUMAN  | R.DTEGLIQEINDLR.L      | 3 | 3,666  | 0,302 | 0,121  |
| 12 | Q9NUQ9 FA49B_HUMAN  | K.DAEGILEDLQSYR.G      | 2 | 3,664  | 0,483 | -0,243 |
| 12 | Q9BPY3 F118B_HUMAN  | K.DCLYEVFDDLESK.M      | 2 | 3,6628 | 0,527 | -0,374 |
| 12 | Q06210 GFPT1_HUMAN  | R.VDSTTCLFPVEEK.A      | 2 | 3,6584 | 0,344 | -0,48  |
| 12 | P52907 CAZA1_HUMAN  | K.DVQDSLTVSNEAQTAK.E   | 2 | 3,6513 | 0,494 | -0,143 |
| 12 | Q07020 RL18_HUMAN   | K.ILTFDQLALDSPK.G      | 2 | 3,6411 | 0,502 | -0,167 |
| 12 | P62995 TRA2B_HUMAN  | R.GFAFVYFENVDDAK.E     | 2 | 3,6395 | 0,537 | -0,301 |
| 12 | P62195 PRS8_HUMAN   | R.TM*LELLNQLDGFEATK.N  | 2 | 3,6312 | 0,493 | -0,199 |
| 12 | P04406 G3P_HUMAN    | K.LVINGNPITIFQER.D     | 2 | 3,6264 | 0,354 | -0,378 |
| 12 | Q6S8J3 A26CA_HUMAN  | K.SYELPDGQVITIGNER.F   | 3 | 3,625  | 0,239 | 0,204  |
| 12 | Q14157 UBP2L_HUMAN  | R.DGSLASNPYSGDLTK.F    | 2 | 3,616  | 0,385 | 0,24   |
| 12 | P54136 SYRC_HUMAN   | K.SDGGYTYDTSDLAAIK.Q   | 2 | 3,6146 | 0,495 | -0,073 |
| 12 | P67775 PP2AA_HUMAN  | K.SPDTNYLFM*GDYVDR.G   | 3 | 3,607  | 0,165 | 0,303  |
| 12 | P12814 ACTN1_HUMAN  | R.ETADTDTADQVM*ASFK.I  | 2 | 3,6055 | 0,524 | -0,489 |
| 12 | P46782 RS5_HUMAN    | K.TIAECLADELINAAG.G    | 2 | 3,6002 | 0,498 | -0,449 |
| 12 | P10619 PPGB_HUMAN   | K.DLECVTNLQEVAR.I      | 2 | 3,5982 | 0,403 | 0,237  |
| 12 | Q96NX8 Q96NX8_HUMAN | R.QLLAEQELDELADDR.M    | 2 | 3,5969 | 0,509 | -0,486 |
| 12 | Q09666 AHNK_HUMAN   | K.VDIDVPDVLNLEAPEGK.L  | 2 | 3,5893 | 0,403 | -0,713 |
| 12 | P10809 CH60_HUMAN   | K.CEFQDAYVLLSEK.K      | 2 | 3,5867 | 0,569 | -0,228 |

|    |                     |                               |   |        |       |        |
|----|---------------------|-------------------------------|---|--------|-------|--------|
| 12 | Q6UX04 SDC10_HUMAN  | K.DASM*QSDTFEIIDPR.N          | 2 | 3,5805 | 0,44  | -0,256 |
| 12 | P14625 ENPL_HUMAN   | K.EEASDYLELDTIK.N             | 2 | 3,5804 | 0,48  | 0,08   |
| 12 | A6NJJ0 A6NJJ0_HUMAN | K.DYGVVLEDSGHTL.-             | 2 | 3,5726 | 0,603 | 0,083  |
| 12 | Q9Y262 IF3EI_HUMAN  | K.GDPQVYEELFSYSCPK.F          | 2 | 3,5684 | 0,381 | -0,254 |
| 12 | Q9UBT2 SAE2_HUMAN   | K.DVEFEVVGDAPEK.V             | 2 | 3,5641 | 0,317 | 0,085  |
| 12 | P11940 PABP1_HUMAN  | R.SLGYAYVNFQQPADAER.A         | 3 | 3,5619 | 0,292 | -0,095 |
| 12 | Q9NZM1 MYOF_HUMAN   | R.AEDIPQM*DDAFSQTVK.E         | 2 | 3,5598 | 0,48  | 0,674  |
| 12 | Q00610 CLH1_HUMAN   | R.TSIDAYDNFDNISLAQR.L         | 2 | 3,5596 | 0,533 | -0,251 |
| 12 | A5YKK6 CNOT1_HUMAN  | R.DAIAALGLLQK.A               | 2 | 3,5535 | 0,358 | 0      |
| 12 | P05023 AT1A1_HUMAN  | R.QGAIVAVTGDGVNDSPALK.K       | 2 | 3,5517 | 0,495 | -0,135 |
| 12 | Q01130 SFRS2_HUMAN  | R.DAEDAM*DAM*DGAVLDGR.E       | 2 | 3,5444 | 0,509 | 0,137  |
| 12 | P42704 LPPRC_HUMAN  | K.VIEEQLEPAVEK.I              | 2 | 3,5342 | 0,345 | 0      |
| 12 | Q9NW13 RBM28_HUMAN  | R.SEQLEELFSQVGPVK.Q           | 3 | 3,5303 | 0,342 | 0      |
| 12 | P38646 GRP75_HUMAN  | K.STNGDTFLGGEDFDQALLR.H       | 2 | 3,5254 | 0,621 | -0,237 |
| 12 | Q9Y490 TLN1_HUMAN   | K.TLAESALQLLYTAK.E            | 2 | 3,512  | 0,391 | -0,321 |
| 12 | Q9NX58 LYAR_HUMAN   | R.ELLEQISAFDNVPR.K            | 3 | 3,5112 | 0,404 | -0,112 |
| 12 | Q6NVY1 HIBCH_HUMAN  | K.LAM*LEEDLLALK.S             | 2 | 3,5096 | 0,285 | -0,177 |
| 12 | P07910 HNRPC_HUMAN  | K.M*ESEGGADDSAEEDLLDDDDNEDR.G | 3 | 3,5044 | 0,405 | -0,404 |
| 12 | P62258 1433E_HUMAN  | K.LICCDILDVLDK.H              | 2 | 3,4978 | 0,466 | -0,33  |
| 12 | P11586 C1TC_HUMAN   | R.AAQAPSSFQLLYDLK.L           | 2 | 3,4931 | 0,304 | -0,074 |
| 12 | P58546 MTPN_HUMAN   | K.GPDGLTAFEATDNQAIK.A         | 3 | 3,493  | 0,336 | 0,105  |
| 12 | P47755 CAZA2_HUMAN  | K.DIQDSLTVSNEVQTAK.E          | 2 | 3,491  | 0,482 | -0,14  |
| 12 | Q8WY22 BRI3B_HUMAN  | R.TVNTFSQSVSFLGEDNVR.A        | 3 | 3,4886 | 0,412 | -0,526 |
| 12 | Q07020 RL18_HUMAN   | K.TAVVVGTITDDVR.V             | 2 | 3,4874 | 0,446 | 0      |
| 12 | Q86UP2 KTN1_HUMAN   | K.SVEELLEAELLK.V              | 2 | 3,4855 | 0,405 | -0,444 |
| 12 | Q53F64 Q53F64_HUMAN | K.IFVGGLNPEATEEK.I            | 2 | 3,4839 | 0,443 | 0      |
| 12 | Q9NUQ9 FA49B_HUMAN  | K.DAEGILEDLQSYR.G             | 3 | 3,4819 | 0,435 | -0,121 |
| 12 | Q96CW5 GCP3_HUMAN   | R.DILYVFQIGIDGK.N             | 2 | 3,4744 | 0,416 | -0,178 |
| 12 | P07602 SAP_HUMAN    | K.SDVYCEVCEFLVK.E             | 2 | 3,4658 | 0,546 | -0,222 |
| 12 | P12277 KCRB_HUMAN   | R.GTGGVDTAAVGGVFDVSNADR.L     | 2 | 3,4629 | 0,517 | 0,807  |
| 12 | Q29RF7 PDS5A_HUMAN  | K.EVQLAQIFEPLSR.S             | 2 | 3,4599 | 0,443 | -0,239 |
| 12 | P18085 ARF4_HUMAN   | R.DAVLLL FANK.Q               | 2 | 3,4596 | 0,496 | -0,442 |
| 12 | Q9Y3B7 RM11_HUMAN   | K.DLSSEELAAFQK.E              | 2 | 3,4515 | 0,393 | -0,091 |

|    |                     |                          |   |        |       |        |
|----|---------------------|--------------------------|---|--------|-------|--------|
| 12 | P46782 RS5_HUMAN    | K.TIAECLADELINA.AK.G     | 3 | 3,4459 | 0,325 | -0,336 |
| 12 | Q13765 NACA_HUMAN   | K.IEDLSQQAQLAAA.EK.F     | 3 | 3,4453 | 0,317 | 0      |
| 12 | Q9HAV7 GRPE1_HUMAN  | K.DLLEVADVLEK.A          | 2 | 3,4436 | 0,385 | -0,098 |
| 12 | P68371 TBB2C_HUMAN  | R.AVLVDLEPGTM*DSVR.S     | 2 | 3,4385 | 0,286 | -0,302 |
| 12 | P42765 THIM_HUMAN   | K.AANDAGYFNDEM*APIEVK.T  | 2 | 3,438  | 0,42  | -1,052 |
| 12 | P78527 PRKDC_HUMAN  | K.NILEESLCELVAK.Q        | 2 | 3,4379 | 0,547 | -0,563 |
| 12 | O00148 DDX39_HUMAN  | K.GLAITFVSDENDAK.I       | 2 | 3,4332 | 0,538 | 0,165  |
| 12 | O95817 BAG3_HUMAN   | K.ELLALDSVDPEGR.A        | 2 | 3,4316 | 0,532 | 0      |
| 12 | Q14566 MCM6_HUMAN   | K.DFYVAFQDLPTR.H         | 2 | 3,4311 | 0,515 | 0,166  |
| 12 | Q12905 ILF2_HUMAN   | R.NQDLAPNSAEQASILSLVTK.I | 3 | 3,4285 | 0,322 | -0,174 |
| 12 | Q9H3S7 PTN23_HUMAN  | R.DLLEEDELLEQK.F         | 2 | 3,4231 | 0,437 | -0,248 |
| 12 | O75718 CRTAP_HUMAN  | K.NAAPCAVSYLLFDQNDK.V    | 2 | 3,4163 | 0,512 | -0,317 |
| 12 | Q9GZS3 WDR61_HUMAN  | K.ENSETVVTGSLDDLK.V      | 2 | 3,4132 | 0,443 | -0,858 |
| 12 | Q53G79 Q53G79_HUMAN | K.ALEDVFDALGK.S          | 2 | 3,4122 | 0,427 | -0,28  |
| 12 | P06576 ATPB_HUMAN   | K.TVLIM*ELINNVAK.A       | 2 | 3,4078 | 0,406 | -0,248 |
| 12 | P78344 IF4G2_HUMAN  | R.LAEDAPNFDGPAAEQPGQK.Q  | 3 | 3,4048 | 0,34  | 0      |
| 12 | P40925 MDHC_HUMAN   | K.ELTEEKESAFELSSA.-      | 2 | 3,4041 | 0,505 | 0      |
| 12 | P09960 LKHA4_HUMAN  | R.TLTGTAALTVQSQEDNLR.S   | 3 | 3,4027 | 0,396 | -0,095 |
| 12 | Q9Y2Q3 GSTK1_HUMAN  | R.NEDITEPQSILAAA.EK.A    | 3 | 3,401  | 0,11  | -0,212 |
| 12 | P49755 TMEDA_HUMAN  | R.IPDQLVILDM*K.H         | 2 | 3,3953 | 0,438 | -0,375 |
| 12 | Q58FG1 HS904_HUMAN  | R.TLTIVDTGIGM*TK.A       | 2 | 3,3946 | 0,482 | -0,179 |
| 12 | O76021 RL1D1_HUMAN  | K.ATNESEDEIPQLVPIGK.K    | 2 | 3,3891 | 0,331 | -0,265 |
| 12 | P61081 UBC12_HUMAN  | K.TCDISFSDPDDLNFK.L      | 2 | 3,3858 | 0,474 | -0,323 |
| 12 | Q9HC35 EMAL4_HUMAN  | K.LSLPQNETVADTTLTK.A     | 2 | 3,3797 | 0,419 | -0,211 |
| 12 | Q9NW13 RBM28_HUMAN  | R.SEQLEELFSQVGPVK.Q      | 2 | 3,3788 | 0,358 | -0,361 |
| 12 | P07237 PDIA1_HUMAN  | K.VDATEESDLAQYGV.R.G     | 3 | 3,3781 | 0,283 | 0,103  |
| 12 | P13667 PDIA4_HUMAN  | K.FAM*EPEEFSDTLR.E       | 2 | 3,3764 | 0,522 | -0,287 |
| 12 | Q9NP64 NO40_HUMAN   | K.DLDPNNVHIEQEER.R       | 2 | 3,3757 | 0,533 | -0,072 |
| 12 | Q07955 SFRS1_HUMAN  | R.GGPPFAFVEFEDPR.D       | 2 | 3,3654 | 0,503 | -0,312 |
| 12 | Q9Y3F4 STRAP_HUMAN  | R.FSPDGELYASGSEDGTLR.L   | 2 | 3,3646 | 0,607 | -0,449 |
| 12 | P11142 HSP7C_HUMAN  | K.TVTNAVVTVPAYFNDSQR.Q   | 3 | 3,3622 | 0,334 | 0      |
| 12 | P50914 RL14_HUMAN   | K.LVAIVDVIDQNR.A         | 3 | 3,361  | 0,261 | 0,067  |
| 12 | P55072 TERA_HUMAN   | R.VINQILTEM*DGM*STK.K    | 2 | 3,361  | 0,547 | -0,285 |

|    |                    |                         |   |        |       |        |
|----|--------------------|-------------------------|---|--------|-------|--------|
| 12 | Q8WUM0 NU133_HUMAN | K.DLLQADQLGSLK.S        | 2 | 3,3591 | 0,5   | 0,281  |
| 12 | O43290 SNUT1_HUMAN | R.ADDLLPLGDQTQDGFGR.L   | 2 | 3,3504 | 0,629 | -0,06  |
| 12 | Q8IY81 RRMJ3_HUMAN | K.SDDDGFEIVPIEDPAK.H    | 2 | 3,3376 | 0,401 | -0,419 |
| 12 | Q9UNN8 EPCR_HUMAN  | R.EFLEDTCVQYVQK.H       | 2 | 3,3367 | 0,294 | -1,177 |
| 12 | P84103 SFRS3_HUMAN | R.NPPGFVFEFEDPR.D       | 3 | 3,3279 | 0,25  | -0,226 |
| 12 | P31948 STIP1_HUMAN | R.LAYINPDALAEK.N        | 2 | 3,3256 | 0,331 | -0,164 |
| 12 | Q13243 SFRS5_HUMAN | R.DADDAVYELDGK.E        | 2 | 3,3202 | 0,507 | -0,279 |
| 12 | Q86W92 LIPB1_HUMAN | R.DTEGLIQEINDLR.L       | 2 | 3,3168 | 0,263 | -0,402 |
| 12 | P49327 FAS_HUMAN   | R.DNLEFFLAGIGR.L        | 2 | 3,3111 | 0,413 | -0,451 |
| 12 | Q07021 C1QBP_HUMAN | K.AFVDFLSDEIK.E         | 2 | 3,3044 | 0,381 | -0,38  |
| 12 | P07195 LDHB_HUMAN  | K.LIAPVAEEEEATVPNNK.I   | 2 | 3,3025 | 0,45  | 0,504  |
| 12 | P06753 TPM3_HUMAN  | K.TIDDLEDELYAQK.L       | 2 | 3,3019 | 0,475 | -0,079 |
| 12 | Q14980 NUMA1_HUMAN | R.DSALETLQGQLEEK.A      | 3 | 3,2998 | 0,232 | 0      |
| 12 | P22314 UBA1_HUMAN  | R.LAGTQPLEVLEAVQR.S     | 2 | 3,2885 | 0,412 | -0,3   |
| 12 | P55072 TERA_HUMAN  | R.LGDVISIQPCPDVK.Y      | 2 | 3,287  | 0,447 | 0,238  |
| 12 | P18085 ARF4_HUMAN  | K.QDLPNAM*AISEM*TDK.L   | 2 | 3,2838 | 0,412 | -0,36  |
| 12 | Q13185 CBX3_HUMAN  | K.DSDEADLVLAK.E         | 2 | 3,2807 | 0,434 | 0,207  |
| 12 | Q15393 SF3B3_HUMAN | K.NVIDGDLCEQFNSM*EPNK.Q | 2 | 3,2805 | 0,585 | -0,115 |
| 12 | Q9BTT0 AN32E_HUMAN | K.DLSTVEALQNLK.N        | 2 | 3,2725 | 0,364 | 0      |
| 12 | O75526 HNRGT_HUMAN | R.GFAFVTFESPADAK.A      | 2 | 3,2706 | 0,477 | -0,164 |
| 12 | P46109 CRKL_HUMAN  | R.DSSTCPGDYVLSVSENSR.V  | 3 | 3,2686 | 0,168 | 0,278  |
| 12 | Q9NYY8 FAKD2_HUMAN | K.DIISELLTSDDM*K.N      | 2 | 3,2678 | 0,428 | -0,082 |
| 12 | Q8WXH0 SYNE2_HUMAN | R.DFQEYLAIVESM*K.A      | 2 | 3,2638 | 0,45  | -0,075 |
| 12 | Q12840 KIF5A_HUMAN | K.ISFLENNLEQLTK.V       | 2 | 3,2583 | 0,243 | 0,079  |
| 12 | P12004 PCNA_HUMAN  | R.AEDNADTLALVFEAPNQEK.V | 3 | 3,2565 | 0,264 | -0,793 |
| 12 | P36406 ARD1_HUMAN  | R.DALLLIFANK.Q          | 2 | 3,2453 | 0,355 | -0,655 |
| 12 | Q14152 EIF3A_HUMAN | R.FNVLQYVVPEVK.D        | 2 | 3,2447 | 0,356 | -0,425 |
| 12 | Q14318 FKBP8_HUMAN | K.TAVDGPDLEM*LTGQER.V   | 2 | 3,2426 | 0,223 | 0,907  |
| 12 | P07437 TBB5_HUMAN  | R.ALTVPELTQQVFDK.N      | 2 | 3,2415 | 0,414 | -0,22  |
| 12 | P61224 RAP1B_HUMAN | K.DTDDVPM*ILVGNK.C      | 2 | 3,2392 | 0,419 | 0,085  |
| 12 | Q99832 TCPH_HUMAN  | K.LPIGDVATQYFADR.D      | 2 | 3,2382 | 0,58  | -0,39  |
| 12 | O00442 RTC1_HUMAN  | R.DLYVNIQPVQEPK.D       | 2 | 3,2326 | 0,5   | 0      |
| 12 | P00492 HPRT_HUMAN  | K.NVLIVEDIIDTGK.T       | 2 | 3,2312 | 0,256 | -0,085 |

|    |                     |                             |   |        |       |        |
|----|---------------------|-----------------------------|---|--------|-------|--------|
| 12 | O15513 O15513_HUMAN | K.EENLSM*HQM*LDQTLLELNNM*.- | 3 | 3,23   | 0,18  | -0,075 |
| 12 | Q9HC35 EMAL4_HUMAN  | K.DVIINQEGEYIK.M            | 2 | 3,2249 | 0,363 | 0      |
| 12 | Q07065 CKAP4_HUMAN  | R.LEGLGSSEADQDGLASTVR.S     | 2 | 3,224  | 0,57  | -0,32  |
| 12 | P62847 RS24_HUMAN   | K.TTGFGM*IYDSL DYAK.K       | 2 | 3,2231 | 0,475 | -1,653 |
| 12 | P21333 FLNA_HUMAN   | K.DAGEGGLSLAIEGPSK.A        | 2 | 3,2181 | 0,475 | 0,163  |
| 12 | P55084 ECHB_HUMAN   | K.DQLLLGPTYATPK.V           | 2 | 3,2086 | 0,445 | 0,086  |
| 12 | P33992 MCM5_HUMAN   | K.LQPFATEADVEEALR.L         | 2 | 3,2084 | 0,523 | -0,072 |
| 12 | Q09666 AHNK_HUMAN   | K.IDVTAPDVSIEEPEGK.L        | 2 | 3,2002 | 0,475 | -0,287 |
| 12 | O95747 OXSR1_HUMAN  | R.DLVIVAANLQK.I             | 2 | 3,196  | 0,389 | -0,103 |
| 12 | Q2NL82 TSR1_HUMAN   | R.LEEM*FPDEVDTPR.D          | 2 | 3,1934 | 0,349 | 0,077  |
| 12 | P53621 COPA_HUMAN   | R.DADSITLFDVQQK.R           | 2 | 3,1923 | 0,4   | 0      |
| 12 | P07602 SAP_HUMAN    | K.SDVYCEVCEFLVK.E           | 3 | 3,1902 | 0,253 | -0,222 |
| 12 | P19404 NDUV2_HUMAN  | K.DIEEIIDELK.A              | 2 | 3,1899 | 0,243 | -0,401 |
| 12 | P07355 ANXA2_HUMAN  | K.GVDEVTIVNILTNR.S          | 3 | 3,1884 | 0,266 | -0,119 |
| 12 | Q14166 TTL12_HUMAN  | R.DFAYGETDPLIR.K            | 2 | 3,1865 | 0,578 | 0,175  |
| 12 | P04792 HSPB1_HUMAN  | K.LATQSNEITIPVTFESR.A       | 2 | 3,1863 | 0,489 | -0,32  |
| 12 | Q96I24 FUBP3_HUMAN  | R.QQVAFYQGTLGQAQHSQEQ.-     | 3 | 3,1858 | 0,212 | 0,082  |
| 12 | A0AVT1 UBA6_HUMAN   | K.GM*ITVTPDLIEK.S           | 2 | 3,1781 | 0,436 | 0,253  |
| 12 | P84077 ARF1_HUMAN   | R.DAVLLVFANK.Q              | 2 | 3,1772 | 0,51  | -0,224 |
| 12 | P07737 PROF1_HUMAN  | R.DSLLQDGEFSM*DLR.T         | 3 | 3,1753 | 0,396 | 0      |
| 12 | P08670 VIME_HUMAN   | K.VESLQEEIAFLK.K            | 2 | 3,1658 | 0,454 | -0,347 |
| 12 | Q02952 AKA12_HUMAN  | K.SATLSSTESTASEM*QEEM*K.G   | 2 | 3,1607 | 0,591 | -0,352 |
| 12 | P62241 RS8_HUMAN    | R.IIDVVYNASNELVR.T          | 3 | 3,1607 | 0,307 | 0,213  |
| 12 | O43172 PRP4_HUMAN   | R.ALGEPITLFGGPAER.R         | 2 | 3,1519 | 0,469 | -0,074 |
| 12 | P05787 K2C8_HUMAN   | R.LEGLTDEINFLR.Q            | 2 | 3,1506 | 0,463 | -0,086 |
| 12 | Q6NZY4 ZCHC8_HUMAN  | K.DGTDGETEVGEIQQNK.S        | 2 | 3,15   | 0,358 | 0      |
| 12 | Q9Y266 NUDC_HUMAN   | K.GQPAIIDGELYNEVK.V         | 2 | 3,1252 | 0,373 | 0,148  |
| 12 | O43592 XPOT_HUMAN   | R.ILM*AIDSELVDR.D           | 2 | 3,1206 | 0,348 | 0,088  |
| 12 | O00567 NOL5A_HUMAN  | R.IDCFSEVPTSVFGEK.L         | 2 | 3,1176 | 0,361 | 0,142  |
| 12 | Q13185 CBX3_HUMAN   | K.VEEAEPEEFVVEK.V           | 2 | 3,1171 | 0,435 | 0      |
| 12 | Q6IQ22 RAB12_HUMAN  | K.DNFNVDEIFLK.L             | 2 | 3,1165 | 0,459 | -0,27  |
| 12 | P16152 CBR1_HUMAN   | R.SETITEELVGLM*NK.F         | 2 | 3,1105 | 0,363 | 0,286  |
| 12 | P05783 K1C18_HUMAN  | R.TVQSLEIDLDSM*R.N          | 3 | 3,1044 | 0,266 | 0,06   |

|    |                    |                           |   |        |       |        |
|----|--------------------|---------------------------|---|--------|-------|--------|
| 12 | P46108 CRK_HUMAN   | R.DSSTSPGDYVLSVSENSR.V    | 2 | 3,0996 | 0,611 | 0,321  |
| 12 | P11021 GRP78_HUMAN | K.ELEEIVQPIISK.L          | 2 | 3,0983 | 0,353 | 0,087  |
| 12 | Q6NZI2 PTRF_HUMAN  | R.QAEM*EGAVQSIQGELSK.L    | 3 | 3,0949 | 0,248 | -0,1   |
| 12 | Q15021 CND1_HUMAN  | R.DLAYCVSQLPLTER.G        | 2 | 3,0915 | 0,43  | -0,073 |
| 12 | P38646 GRP75_HUMAN | R.AQFEGIVTDLIR.R          | 2 | 3,0901 | 0,383 | -0,358 |
| 12 | P04083 ANXA1_HUMAN | K.GVDEATIIDILTK.R         | 2 | 3,0868 | 0,451 | -0,352 |
| 12 | Q6P2Q9 PRP8_HUMAN  | K.DNPNULLFNM*CGFECR.I     | 2 | 3,0791 | 0,568 | -0,128 |
| 12 | P36969 GPX4_HUMAN  | R.YGPM*EEPLVIEK.D         | 2 | 3,0784 | 0,207 | -0,172 |
| 12 | P17301 ITA2_HUMAN  | R.QIPAAEQPFIVSNQNK.R      | 3 | 3,0755 | 0,18  | 0,191  |
| 12 | Q9H9Y2 RPF1_HUMAN  | R.DFTDLIVINEDR.K          | 2 | 3,0744 | 0,511 | -0,084 |
| 12 | Q13330 MTA1_HUMAN  | R.DISSTLIALADK.H          | 2 | 3,0736 | 0,456 | -0,489 |
| 12 | Q9BTC8 MTA3_HUMAN  | R.DISNTLIM*LADK.H         | 2 | 3,0706 | 0,397 | -0,181 |
| 12 | Q01970 PLCB3_HUMAN | R.DVLEAIAETAFAK.T         | 2 | 3,0663 | 0,56  | -0,093 |
| 12 | Q9NVD7 PARVA_HUMAN | K.DLAEDLYDGQVLQK.L        | 2 | 3,0645 | 0,368 | -0,076 |
| 12 | Q02952 AKA12_HUMAN | K.SATLSSTESTASEM*QEEM*K.G | 3 | 3,0634 | 0,147 | -0,616 |
| 12 | Q96IZ0 PAWR_HUMAN  | R.DANVSGTLVSSSTLEK.K      | 2 | 3,0624 | 0,533 | 0,607  |
| 12 | Q6YP21 KAT3_HUMAN  | K.DSTLDAEEIHK.A           | 2 | 3,0523 | 0,397 | -0,093 |
| 12 | O95347 SMC2_HUMAN  | K.DTSATTALELVAGER.L       | 3 | 3,0514 | 0,26  | 0      |
| 12 | P11021 GRP78_HUMAN | K.TFAPEEISAM*VLTK.M       | 2 | 3,045  | 0,389 | -0,236 |
| 12 | P46459 NSF_HUMAN   | K.DIEAM*DPSILK.G          | 2 | 3,0449 | 0,293 | -0,098 |
| 12 | P23396 RS3_HUMAN   | K.DEILPTPISEQK.G          | 2 | 3,0401 | 0,417 | 0      |
| 12 | P07900 HS90A_HUMAN | R.GVVDESDLPLNISR.E        | 2 | 3,0399 | 0,278 | 0,242  |
| 12 | Q15008 PSMD6_HUMAN | R.DNNM*APYYEALCK.S        | 2 | 3,038  | 0,226 | -0,228 |
| 12 | P49458 SRP09_HUMAN | K.VTDDLVLCLVYK.T          | 2 | 3,0374 | 0,365 | 0,092  |
| 12 | Q27J81 INF2_HUMAN  | R.ALDELFEAIEQK.Q          | 2 | 3,0359 | 0,296 | -0,434 |
| 12 | P09874 PARP1_HUMAN | R.VVSEDFLQDVSASTK.S       | 2 | 3,03   | 0,565 | -0,075 |
| 12 | Q14152 EIF3A_HUMAN | R.LLDM*DGIIVEK.Q          | 2 | 3,0272 | 0,274 | 0      |
| 12 | O00429 DNM1L_HUMAN | K.DTLQSELVGQLYK.S         | 2 | 3,0252 | 0,404 | -0,327 |
| 12 | P84103 SFRS3_HUMAN | R.NPPGFVFEFEDPR.D         | 2 | 3,0226 | 0,506 | -0,301 |
| 12 | P46778 RL21_HUMAN  | R.TNGKEPELLEPIPYEFM*A.-   | 3 | 3,0222 | 0,25  | -0,262 |
| 12 | Q9UHB9 SRP68_HUMAN | R.FETFLDPSLVTK.Q          | 2 | 3,0211 | 0,475 | -0,47  |
| 12 | P11142 HSP7C_HUMAN | K.SFYPEEVSSM*VLTK.M       | 2 | 3,0208 | 0,441 | 0,598  |
| 12 | P07195 LDHB_HUMAN  | K.LIAPVAEEEEATVPNNK.I     | 3 | 3,0177 | 0,418 | 0,324  |



|    |                    |                          |   |        |       |        |
|----|--------------------|--------------------------|---|--------|-------|--------|
| 12 | Q9BXR0 TGT_HUMAN   | R.DVPGFAIGGLSGGESK.S     | 2 | 3,0153 | 0,391 | -0,082 |
| 12 | Q15417 CNN3_HUMAN  | K.DGIILCELINK.L          | 2 | 3,0143 | 0,436 | -0,284 |
| 12 | P27816 MAP4_HUMAN  | K.DM*QPSM*ESDM*ALVK.D    | 2 | 3,0133 | 0,407 | 0,15   |
| 12 | P33991 MCM4_HUMAN  | R.ALADDDFLTVTGK.T        | 2 | 3,0125 | 0,417 | -0,536 |
| 12 | Q9NVD7 PARVA_HUMAN | K.DLAEDLYDGQVLQK.L       | 3 | 3,0123 | 0,384 | -0,114 |
| 12 | Q9Y3B4 PM14_HUMAN  | R.GTAYVVYEDIFDAK.N       | 3 | 3,009  | 0,32  | 0      |
| 12 | P10809 CH60_HUMAN  | K.CEFQDAYVLLSEK.K        | 3 | 3,0068 | 0,234 | -0,114 |
| 12 | Q9H845 ACAD9_HUMAN | K.IPVENILGEVGDGFK.V      | 2 | 3,0058 | 0,393 | -0,154 |
| 12 | P27816 MAP4_HUMAN  | K.DGVLTLANNVTPAK.D       | 2 | 3,0043 | 0,48  | 0      |
| 12 | Q9BXP5 ARS2_HUMAN  | K.EVAFFNNFLTDAK.R        | 2 | 3,0034 | 0,516 | -0,563 |
| 12 | P10515 ODP2_HUMAN  | K.GVETIANDVVSLATK.A      | 2 | 2,9998 | 0,537 | -0,402 |
| 12 | Q9NYJ1 CHCH8_HUMAN | K.DDEEEDPLDQLISR.S       | 2 | 2,998  | 0,256 | -1,895 |
| 12 | Q09666 AHNK_HUMAN  | R.DDGVFVQEVTVQNSPAAR.T   | 3 | 2,9969 | 0,337 | 0,299  |
| 12 | Q92616 GCN1L_HUMAN | R.IIIEDLLEATR.S          | 2 | 2,9963 | 0,359 | -0,474 |
| 12 | P46199 IF2M_HUMAN  | K.DAQPVIILAVNK.C         | 2 | 2,9952 | 0,348 | -0,19  |
| 12 | P62258 1433E_HUMAN | K.VAGM*DVELTVEER.N       | 2 | 2,9946 | 0,489 | -0,25  |
| 12 | P00558 PGK1_HUMAN  | K.YSLEPVAVELK.S          | 2 | 2,9833 | 0,416 | 0,293  |
| 12 | Q7Z7H8 RM10_HUMAN  | K.DSVM*SANGKPDPTVPDS.-   | 2 | 2,9762 | 0,269 | -0,264 |
| 12 | P09211 GSTP1_HUMAN | K.DQQEAALVDM*VNDGVEDLR.C | 3 | 2,976  | 0,272 | -0,257 |
| 12 | Q13885 TBB2A_HUMAN | R.AILVDLEPGTM*DSVR.S     | 2 | 2,9699 | 0,499 | -0,15  |
| 12 | O60216 RAD21_HUMAN | R.DVIDEPIIEPSR.L         | 2 | 2,9681 | 0,295 | 0      |
| 12 | P40926 MDHM_HUMAN  | K.VDFPQDQLTALTGR.I       | 2 | 2,968  | 0,473 | 0      |
| 12 | P16615 AT2A2_HUMAN | K.VGEATETALTCLVEK.M      | 2 | 2,9622 | 0,401 | 0,075  |
| 12 | Q9NSI2 CU070_HUMAN | R.DALPELLGLEAGSR.R       | 2 | 2,9595 | 0,428 | -0,169 |
| 12 | P27816 MAP4_HUMAN  | K.DM*SPLSETEM*ALGK.D     | 2 | 2,947  | 0,442 | -0,633 |
| 12 | Q9BYT8 NEUL_HUMAN  | K.DGSPiADDLLEK.L         | 2 | 2,94   | 0,4   | 0      |
| 12 | P29353 SHC1_HUMAN  | R.ELFDDPSYVNVQNLDK.A     | 2 | 2,9328 | 0,368 | -0,515 |
| 12 | Q8WU90 ZC3HF_HUMAN | R.DVDETGITVASLER.F       | 2 | 2,9314 | 0,433 | 0,081  |
| 12 | Q09666 AHNK_HUMAN  | K.VNVEAPDVNLEGLGGK.L     | 2 | 2,9287 | 0,36  | -0,076 |
| 12 | Q09666 AHNK_HUMAN  | K.LDADM*PEVAVEGPNKG.W    | 2 | 2,9262 | 0,347 | -0,442 |
| 12 | P46821 MAP1B_HUMAN | R.DM*SLYASLTSEK.V        | 2 | 2,9257 | 0,376 | -0,179 |
| 12 | P55060 XPO2_HUMAN  | K.DAAIYLVTSLASK.A        | 2 | 2,9253 | 0,435 | -0,361 |
| 12 | P09525 ANXA4_HUMAN | K.SETSGSFEDALLAIVK.C     | 2 | 2,925  | 0,471 | -0,293 |

|    |                    |                         |   |        |       |        |
|----|--------------------|-------------------------|---|--------|-------|--------|
| 12 | P40227 TCPZ_HUMAN  | K.GIDPFSLDALSK.E        | 2 | 2,9245 | 0,508 | -0,193 |
| 12 | O75643 U520_HUMAN  | R.DEPTGEVLSLVGK.L       | 2 | 2,9236 | 0,321 | 0      |
| 12 | Q14498 RBM39_HUMAN | R.DLEEFFSTVGK.V         | 2 | 2,9231 | 0,553 | -0,288 |
| 12 | Q9Y4E8 UBP15_HUMAN | R.IFAM*DENLSSIM*ER.D    | 2 | 2,9138 | 0,375 | -0,723 |
| 12 | Q9UHL4 DPP2_HUMAN  | K.DLFLQGAYDTR.V         | 2 | 2,9106 | 0,192 | 0,436  |
| 12 | Q06203 PUR1_HUMAN  | R.GQESAGIVTSDGSSVPTFK.S | 2 | 2,9082 | 0,396 | -1,372 |
| 12 | P78527 PRKDC_HUMAN | K.DLLLNTM*SQEEK.A       | 2 | 2,9043 | 0,386 | -0,085 |
| 12 | P04406 G3P_HUMAN   | K.IISNASCTTNCLAPLAK.V   | 2 | 2,9035 | 0,323 | -0,2   |
| 12 | Q01813 K6PP_HUMAN  | R.M*LAIYDGFDFGFAK.G     | 2 | 2,9026 | 0,389 | -0,167 |
| 12 | Q12905 ILF2_HUMAN  | K.ILPTLEAVAALGNK.V      | 2 | 2,9007 | 0,403 | -0,173 |
| 12 | P29401 TKT_HUMAN   | K.LDNLVAILDINR.L        | 2 | 2,8906 | 0,393 | -0,267 |
| 12 | Q09028 RBBP4_HUMAN | K.TPSSDVLVFDYTK.H       | 2 | 2,8811 | 0,451 | 0,083  |
| 12 | Q9UNZ2 NSF1C_HUMAN | R.LGAAPPEESAYVAGEK.R    | 3 | 2,8803 | 0,142 | -0,564 |
| 12 | O95433 AHSA1_HUMAN | K.DEPDTNLVALM*K.E       | 2 | 2,8777 | 0,332 | -0,09  |
| 12 | P23381 SYWC_HUMAN  | K.DIIACGFDINK.T         | 2 | 2,8715 | 0,449 | 0,193  |
| 12 | P51149 RAB7A_HUMAN | R.DPENFPFVVLGNK.I       | 3 | 2,8601 | 0,131 | -0,062 |
| 12 | P09874 PARP1_HUMAN | R.VVSEDFLQDVSASTK.S     | 3 | 2,8595 | 0,363 | -0,338 |
| 12 | Q9NYK5 RM39_HUMAN  | K.DLPFETLEVEAK.V        | 2 | 2,8581 | 0,405 | 0,088  |
| 12 | P31949 S10AB_HUMAN | K.DGYNYTLK.T            | 2 | 2,8579 | 0,464 | -0,115 |
| 12 | Q8TAA5 GRPE2_HUMAN | K.DLVEVADILEK.T         | 2 | 2,8563 | 0,443 | -0,294 |
| 12 | Q13616 CUL1_HUMAN  | K.DGEDLM*DESVLK.F       | 2 | 2,8552 | 0,266 | 0      |
| 12 | P39687 AN32A_HUMAN | K.LLPQLTYLDGYDR.D       | 2 | 2,8511 | 0,422 | -0,078 |
| 12 | Q01518 CAP1_HUMAN  | R.ALLVTASQCQQAENK.L     | 2 | 2,8509 | 0,454 | -0,347 |
| 12 | O14908 GIPC1_HUMAN | R.DTELAATM*VELGK.D      | 2 | 2,8475 | 0,47  | -0,175 |
| 12 | P62750 RL23A_HUMAN | R.LAPDYDALDVANK.I       | 2 | 2,8467 | 0,537 | -0,087 |
| 12 | P05787 K2C8_HUMAN  | R.SLDM*DSIIAEVK.A       | 2 | 2,8417 | 0,424 | -0,091 |
| 12 | Q92598 HS105_HUMAN | K.DISTTLNADEAVAR.G      | 2 | 2,8408 | 0,366 | 0,248  |
| 12 | P38606 VATA_HUMAN  | R.DFPELTM*EVDGK.V       | 2 | 2,8367 | 0,487 | 0,349  |
| 12 | P18615 NELFE_HUMAN | R.SLSEQPVM*DTATATEQAK.Q | 2 | 2,8337 | 0,451 | -0,19  |
| 12 | P21333 FLNA_HUMAN  | R.EGPYSISVLYGDEEVPR.S   | 2 | 2,833  | 0,491 | -0,192 |
| 12 | P07355 ANXA2_HUMAN | K.GLGTDEDSLIEICSR.T     | 3 | 2,8232 | 0,187 | -0,206 |
| 12 | P12268 IMDH2_HUMAN | R.EDLVVAPAGITLK.E       | 2 | 2,8203 | 0,234 | -0,184 |
| 12 | P31948 STIP1_HUMAN | R.LAYINPDLALEEK.N       | 3 | 2,8187 | 0,308 | 0,184  |

|    |                    |                          |   |        |       |        |
|----|--------------------|--------------------------|---|--------|-------|--------|
| 12 | Q9UQR1 ZN148_HUMAN | R.GPGTSAEFSEFPLVNVNDNR.A | 3 | 2,8106 | 0,298 | -0,17  |
| 12 | P63104 1433Z_HUMAN | R.DICNDVLSLLEK.F         | 3 | 2,8083 | 0,234 | -0,258 |
| 12 | P11142 HSP7C_HUMAN | K.TVTNAVVTVPAYFNDSQR.Q   | 2 | 2,8024 | 0,393 | -0,062 |
| 12 | Q86Y56 HEAT2_HUMAN | R.AIQDAILEVLK.E          | 2 | 2,7961 | 0,341 | -0,503 |
| 12 | Q86SX6 GLRX5_HUMAN | R.DYAAYNVLDDPELR.Q       | 2 | 2,7959 | 0,462 | -0,148 |
| 12 | O00571 DDX3X_HUMAN | K.DLLDLLVEAK.Q           | 2 | 2,7925 | 0,435 | -0,432 |
| 12 | Q92616 GCN1L_HUMAN | K.QLDDEEVSEFALDGLK.Q     | 2 | 2,7918 | 0,392 | -0,067 |
| 12 | Q96RP9 EFG1_HUMAN  | K.DGVGAVM*DSM*ELER.Q     | 2 | 2,79   | 0,38  | 0,079  |
| 12 | P05455 LA_HUMAN    | K.GSIFVVFDSIESAK.K       | 2 | 2,7728 | 0,463 | -0,407 |
| 12 | Q9BQG0 MBB1A_HUMAN | R.VLDLVEVLVTK.Q          | 2 | 2,7693 | 0,427 | -0,298 |
| 12 | Q13765 NACA_HUMAN  | K.DIELVM*SQANVSR.A       | 3 | 2,7662 | 0,46  | 0,062  |
| 12 | P08670 VIME_HUMAN  | K.ILLAELEQLK.G           | 2 | 2,7617 | 0,359 | -0,104 |
| 12 | P12814 ACTN1_HUMAN | R.FAIQDISVEETSAK.E       | 2 | 2,7603 | 0,47  | 0,952  |
| 12 | O00231 PSD11_HUMAN | K.EQSILELGSLAK.T         | 2 | 2,7502 | 0,427 | -0,435 |
| 12 | O95352 ATG7_HUMAN  | R.FDNVLPVSLAFDK.C        | 2 | 2,7479 | 0,329 | -0,416 |
| 12 | P27348 1433T_HUMAN | K.QTIDNSQGAYQEAFFDISK.K  | 3 | 2,7466 | 0,265 | 0,182  |
| 12 | P52272 HNRPM_HUMAN | R.AFITNIPFDVK.W          | 2 | 2,7421 | 0,394 | -0,193 |
| 12 | P11169 GTR3_HUMAN  | K.DGVM*EM*NSIEPAK.E      | 2 | 2,7393 | 0,346 | 0      |
| 12 | P10809 CH60_HUMAN  | K.TLNDELEIIEGM*K.F       | 2 | 2,7379 | 0,425 | -0,241 |
| 12 | O43592 XPOT_HUMAN  | K.DGPVGFADFVYK.H         | 2 | 2,7374 | 0,444 | -0,278 |
| 12 | Q969S9 EFG2_HUMAN  | R.DYLSPLADLAQR.R         | 2 | 2,7341 | 0,476 | -0,501 |
| 12 | Q96MW1 CCD43_HUMAN | K.EDEVQAIATLIEK.Q        | 2 | 2,7327 | 0,293 | -0,251 |
| 12 | Q09666 AHNK_HUMAN  | K.VDIEGPDVNIIEGPEGK.L    | 3 | 2,7318 | 0,186 | -0,219 |
| 12 | P35749 MYH11_HUMAN | R.DLGEELEALK.T           | 2 | 2,7317 | 0,304 | -0,109 |
| 12 | O94906 PRP6_HUMAN  | K.DDEEADAIYAALDK.R       | 2 | 2,7291 | 0,396 | -0,079 |
| 12 | P08238 HS90B_HUMAN | R.TLTLVDTGIGM*TK.A       | 2 | 2,7205 | 0,447 | -0,268 |
| 12 | P07814 SYEP_HUMAN  | R.DQDLEPGAPSM*GAK.S      | 2 | 2,7203 | 0,244 | -0,511 |
| 12 | Q13765 NACA_HUMAN  | K.DIELVM*SQANVSR.A       | 2 | 2,7153 | 0,286 | 0,083  |
| 12 | O60506 HNRPQ_HUMAN | K.EFNEDGALAVLQQFK.D      | 3 | 2,7122 | 0,163 | 0,535  |
| 12 | P51858 HDGF_HUMAN  | K.SCVEEPEPEPEAAEGDGDK.K  | 2 | 2,7104 | 0,536 | -1,134 |
| 12 | P40926 MDHM_HUMAN  | K.GYLGPEQLPDCLK.G        | 2 | 2,6977 | 0,344 | -0,409 |
| 12 | Q9UDY8 MALT1_HUMAN | R.NDYDDTIPILDALK.V       | 2 | 2,6965 | 0,311 | 0,076  |
| 12 | P17174 AATC_HUMAN  | K.EPESILQVLSQM*EK.I      | 2 | 2,6844 | 0,414 | -0,37  |

|    |                     |                         |   |        |       |        |
|----|---------------------|-------------------------|---|--------|-------|--------|
| 12 | O60271 JIP4_HUMAN   | R.ETDYPAGEDLSESGQVDK.A  | 2 | 2,6826 | 0,548 | -0,189 |
| 12 | Q9UHD8 SEPT9_HUMAN  | K.VPEVPTAPATDAAPK.R     | 2 | 2,6823 | 0,315 | -0,25  |
| 12 | Q92620 PRP16_HUMAN  | R.DNSIVIVVGETGSGK.T     | 2 | 2,6798 | 0,401 | -0,248 |
| 12 | Q9BZE4 NOG1_HUMAN   | K.DFIDLTLK.T            | 2 | 2,6747 | 0,28  | 0,232  |
| 12 | Q16864 VATF_HUMAN   | K.DTTINEIEDTFR.Q        | 2 | 2,6714 | 0,416 | 0,168  |
| 12 | P27816 MAP4_HUMAN   | K.DM*AQLPETEIAPAK.D     | 2 | 2,6693 | 0,384 | 0,08   |
| 12 | P14868 SYDC_HUMAN   | R.EAGVEM*GDEDDLSTPNEK.L | 2 | 2,6639 | 0,419 | -0,625 |
| 12 | Q8N1G4 LRC47_HUMAN  | K.DVM*DALILK.M          | 2 | 2,6627 | 0,322 | -0,118 |
| 12 | P62805 H4_HUMAN     | K.TVTAM*DVVYALK.R       | 2 | 2,6551 | 0,444 | 0,092  |
| 12 | P46013 KI67_HUMAN   | R.DIVEELSALK.Q          | 2 | 2,6458 | 0,372 | -0,109 |
| 12 | Q00610 CLH1_HUMAN   | K.LTDQLPLIIVCDR.F       | 2 | 2,6379 | 0,423 | 0      |
| 12 | Q9BS26 TXND4_HUMAN  | K.EDTESLEIFQNEVAR.Q     | 2 | 2,637  | 0,22  | -0,137 |
| 12 | Q96SB4 SRPK1_HUMAN  | R.EM*VVQLLDDFK.I        | 2 | 2,6303 | 0,345 | -0,271 |
| 12 | Q15084 PDIA6_HUMAN  | R.GSTAPVGGGAFPTIVER.E   | 2 | 2,6294 | 0,372 | 0,151  |
| 12 | P98082 DAB2_HUMAN   | K.DLFQVIYNVK.K          | 2 | 2,6263 | 0,334 | -0,098 |
| 12 | P53621 COPA_HUMAN   | R.DADSITLFDVQQK.R       | 3 | 2,625  | 0,141 | -0,062 |
| 12 | P61978 HNRPK_HUMAN  | K.IILDLISESPIK.G        | 2 | 2,6185 | 0,311 | -0,273 |
| 12 | O15355 PPM1G_HUMAN  | K.EEPGSDSGTTAVVALIR.G   | 2 | 2,6147 | 0,382 | 0,287  |
| 12 | Q7KZF4 SND1_HUMAN   | R.EADGSETPEPFAAEAK.F    | 2 | 2,6127 | 0,33  | -1,628 |
| 12 | P11940 PABP1_HUMAN  | R.SLGYAYVNFQQPADAER.A   | 2 | 2,6102 | 0,404 | 0      |
| 12 | P35579 MYH9_HUMAN   | R.LTEM*ETLQSQLM*A EK.L  | 3 | 2,61   | 0,155 | 0,205  |
| 12 | Q99497 PARK7_HUMAN  | R.DVVICPDASLEDAK.K      | 2 | 2,6082 | 0,373 | -0,08  |
| 12 | Q15758 AAAT_HUMAN   | K.EVLDSFLDLAR.N         | 2 | 2,6075 | 0,381 | -0,286 |
| 12 | P50750 CDK9_HUMAN   | R.DPYALDLIDK.L          | 2 | 2,6001 | 0,237 | 0      |
| 12 | P12277 KCRB_HUMAN   | K.DLFDPIIEDR.H          | 2 | 2,5884 | 0,482 | -0,198 |
| 12 | O00429 DNM1L_HUMAN  | K.SSLLDLLTESEDM*AQR.R   | 2 | 2,5784 | 0,527 | -0,44  |
| 12 | Q03701 CEBPZ_HUMAN  | K.ELLITDLLPDNR.K        | 2 | 2,5783 | 0,458 | -0,346 |
| 12 | P27694 RFA1_HUMAN   | K.DSLVDIIGICK.S         | 2 | 2,5764 | 0,49  | -0,198 |
| 12 | P30040 ERP29_HUMAN  | K.GALPLDVTTFYK.V        | 2 | 2,5755 | 0,43  | -0,552 |
| 12 | P78527 PRKDC_HUMAN  | R.SDPGLLTNTM*DVVFK.E    | 2 | 2,5647 | 0,442 | -0,369 |
| 12 | Q16543 CDC37_HUMAN  | K.DVQM*LQDAISK.M        | 2 | 2,5571 | 0,276 | 0,483  |
| 12 | Q8WY22 BRI3B_HUMAN  | R.TVNTFSQSVSLFGEDNVR.A  | 2 | 2,5517 | 0,526 | -0,702 |
| 12 | Q9NQTS5 EXOS3_HUMAN | K.DM*EPEM*VCIDSCGR.A    | 2 | 2,5515 | 0,232 | -0,564 |

|    |                    |                            |   |        |       |        |
|----|--------------------|----------------------------|---|--------|-------|--------|
| 12 | O00264 PGRC1_HUMAN | R.GDQPAASGSDSDDEPPPLPR.L   | 2 | 2,5475 | 0,373 | -0,42  |
| 12 | Q15398 DLG7_HUMAN  | K.DFM*FQPLDGLK.T           | 2 | 2,5471 | 0,429 | -0,184 |
| 12 | P12814 ACTN1_HUMAN | K.VLAVNQENEQLM*EDYEK.L     | 2 | 2,5465 | 0,531 | -0,236 |
| 12 | P55072 TERA_HUMAN  | K.DVDLEFLAK.M              | 2 | 2,5407 | 0,298 | 0,116  |
| 12 | Q9GZP4 CA128_HUMAN | R.DLTGELEYATK.I            | 2 | 2,5407 | 0,368 | 0,886  |
| 12 | O95433 AHSA1_HUMAN | K.ETFLTSPEELYR.V           | 2 | 2,5377 | 0,242 | -0,082 |
| 12 | P53396 ACLY_HUMAN  | R.EAYPEEAYIADLDAK.S        | 2 | 2,537  | 0,319 | 0,072  |
| 12 | Q15042 RB3GP_HUMAN | R.DYIEEEVIDEK.G            | 2 | 2,5355 | 0,295 | 0,265  |
| 12 | O60610 DIAP1_HUMAN | K.ELGEYFLDPK.K             | 2 | 2,5335 | 0,271 | -0,359 |
| 12 | Q96HC4 PDLI5_HUMAN | K.DFNM*PLTISSLK.D          | 2 | 2,5304 | 0,37  | -0,088 |
| 12 | Q969V3 NCLN_HUMAN  | R.DPEFVFDQLK.Q             | 2 | 2,5293 | 0,271 | -0,174 |
| 12 | P31946 1433B_HUMAN | K.DSTLIM*QLLR.D            | 2 | 2,5272 | 0,134 | -0,303 |
| 12 | P51452 DUS3_HUMAN  | R.EIGPNDGFLAQLCQLNDR.L     | 2 | 2,5267 | 0,447 | -0,118 |
| 12 | P55327 TPD52_HUMAN | K.VEEEIQTLSQVLAKE.E        | 2 | 2,5239 | 0,183 | -0,221 |
| 12 | O14980 XPO1_HUMAN  | R.EPEVLSTM*AIIVNK.L        | 2 | 2,522  | 0,363 | 0      |
| 12 | P55084 ECHB_HUMAN  | K.AQDEGLLSDVVPFK.V         | 2 | 2,5215 | 0,352 | -0,241 |
| 12 | Q14008 CKAP5_HUMAN | K.NLGIPITVLGDSK.N          | 2 | 2,5207 | 0,384 | -0,085 |
| 12 | O14965 STK6_HUMAN  | R.VEFTFPDFVTEGAR.D         | 2 | 2,5118 | 0,387 | -0,227 |
| 12 | P42704 LPPRC_HUMAN | K.SVLELIPELNEK.E           | 2 | 2,503  | 0,265 | -0,264 |
| 12 | O00505 IMA3_HUMAN  | R.NVPQEESESDVDADFK.A       | 2 | 2,5014 | 0,527 | -0,06  |
| 12 | P51648 AL3A2_HUMAN | R.YIAPTVLTDVDPK.T          | 2 | 2,5009 | 0,327 | -0,256 |
| 12 | Q06203 PUR1_HUMAN  | R.EVLPGEIVEISR.H           | 2 | 2,4855 | 0,374 | 0,364  |
| 12 | Q9UHD8 SEPT9_HUMAN | R.SQEATEAAPSCVGDGM*ADTPR.D | 2 | 2,4853 | 0,324 | 0      |
| 12 | P38646 GRP75_HUMAN | K.NAVITVPAYFNDSQR.Q        | 2 | 2,4799 | 0,123 | -0,072 |
| 12 | O60888 CUTA_HUMAN  | K.TQSSLVPALTDVFR.S         | 2 | 2,4788 | 0,256 | -0,477 |
| 12 | O75489 NDUS3_HUMAN | R.VVAEPVELAQEFR.K          | 2 | 2,4769 | 0,35  | -0,082 |
| 12 | Q9BQG0 MBB1A_HUMAN | K.ATLQEILPEVLK.A           | 2 | 2,4761 | 0,217 | -0,451 |
| 12 | Q14764 MVP_HUMAN   | R.DLAVAGPEM*QVK.L          | 2 | 2,4715 | 0,337 | -0,096 |
| 12 | P02786 TFR1_HUMAN  | K.VSASPLLYTLIEK.T          | 2 | 2,4713 | 0,468 | -0,17  |
| 12 | P11021 GRP78_HUMAN | R.ITPSYVAFTPEGER.L         | 2 | 2,4652 | 0,492 | -0,078 |
| 12 | Q9H490 PIGU_HUMAN  | K.DGTEAM*LVLK.-            | 2 | 2,4539 | 0,344 | -0,335 |
| 12 | P06733 ENOA_HUMAN  | R.GNPTVEVDLFTSK.G          | 2 | 2,4502 | 0,376 | 0,26   |
| 12 | P22314 UBA1_HUMAN  | R.NEEDAAELVALAQAVNAR.A     | 2 | 2,4453 | 0,405 | -0,518 |

|    |                    |                        |   |        |       |        |
|----|--------------------|------------------------|---|--------|-------|--------|
| 12 | Q9UGR2 Z3H7B_HUMAN | R.DLLFDPLGGVK.R        | 2 | 2,4442 | 0,323 | -0,208 |
| 12 | P30041 PRDX6_HUMAN | R.DFTPVCTTELGR.A       | 2 | 2,443  | 0,384 | 0      |
| 12 | P12956 KU70_HUMAN  | K.ELVYPPDYNPEGK.V      | 2 | 2,4391 | 0,265 | -0,08  |
| 12 | Q92598 HS105_HUMAN | K.DLLNM*YIETEGK.M      | 2 | 2,4303 | 0,458 | 0      |
| 12 | A6NHR9 SMHD1_HUMAN | R.DSTEYFIVFEPR.L       | 2 | 2,4268 | 0,363 | -0,244 |
| 12 | Q9Y262 IF3EI_HUMAN | R.QYEQQTYQVIPEVIK.N    | 2 | 2,4208 | 0,154 | 0,065  |
| 12 | P62857 RS28_HUMAN  | R.EGDVLTLESER.E        | 2 | 2,4201 | 0,249 | 0,269  |
| 12 | O75694 NU155_HUMAN | R.LLEVYDQLFK.S         | 2 | 2,42   | 0,267 | -0,289 |
| 12 | P07195 LDHB_HUMAN  | K.M*VVESAYEVIK.L       | 2 | 2,4183 | 0,154 | -0,285 |
| 12 | P49736 MCM2_HUMAN  | R.DTVDPVQDEM*LAR.F     | 2 | 2,4132 | 0,31  | -0,162 |
| 12 | P30837 AL1B1_HUMAN | K.EEIFGPVQPLFK.F       | 2 | 2,4118 | 0,145 | -0,521 |
| 12 | Q16718 NDUA5_HUMAN | K.ILDVLEEIPK.N         | 2 | 2,4113 | 0,243 | -0,209 |
| 12 | Q13509 TBB3_HUMAN  | K.M*SSTFIGNSTAIQELFK.R | 2 | 2,4111 | 0,384 | 0      |
| 12 | O75390 CISY_HUMAN  | K.DILADLIPK.E          | 2 | 2,4025 | 0,162 | -0,122 |
| 12 | P62263 RS14_HUMAN  | R.IEDVTPIPSDSTR.R      | 2 | 2,4017 | 0,428 | 0      |
| 12 | P53396 ACLY_HUMAN  | K.AFDSGIIPM*EFVNK.M    | 2 | 2,3995 | 0,303 | 0,077  |
| 12 | P08243 ASNS_HUMAN  | K.AM*TEDGFLAVCSEAK.G   | 2 | 2,3887 | 0,232 | -0,519 |
| 12 | Q86VI3 IQGA3_HUMAN | R.VLAVSLINEALDK.G      | 2 | 2,3769 | 0,33  | -0,705 |
| 12 | P60900 PSA6_HUMAN  | K.YGYEIPVDM*LCK.R      | 2 | 2,374  | 0,356 | 0      |
| 12 | Q92621 NU205_HUMAN | R.DPPM*FIPTPVDR.Y      | 2 | 2,3603 | 0,291 | 0      |
| 12 | P11388 TOP2A_HUMAN | R.FLEEFITPIVK.V        | 2 | 2,3587 | 0,384 | -0,091 |
| 12 | Q9BZI7 REN3B_HUMAN | K.M*TSTPETLLEEIEAK.N   | 2 | 2,3584 | 0,363 | -0,5   |
| 12 | Q9BQL6 FERM1_HUMAN | K.ADSLLEDITDIPK.L      | 2 | 2,3543 | 0,232 | -0,256 |
| 12 | Q8WUM0 NU133_HUMAN | K.DGIQLSEYLPEVK.D      | 2 | 2,3491 | 0,304 | -0,164 |
| 12 | Q9UHB9 SRP68_HUMAN | K.DLPDVQELITQVR.S      | 2 | 2,3444 | 0,324 | -0,08  |
| 12 | Q9NRL2 BAZ1A_HUMAN | K.DAIDPLLFK.Y          | 2 | 2,3376 | 0,158 | 0      |
| 12 | Q5TC12 ATPF1_HUMAN | K.DTVYAVIPA EK.F       | 2 | 2,3345 | 0,309 | 0,202  |
| 12 | P05783 K1C18_HUMAN | R.TVQSLEIDLDSM*R.N     | 2 | 2,3254 | 0,227 | -0,641 |
| 12 | P31942 HNRH3_HUMAN | R.DGM*DNQGGYGSVGR.M    | 2 | 2,3245 | 0,241 | -0,598 |
| 12 | P30040 ERP29_HUMAN | R.DGDFENVPYTGAVK.V     | 2 | 2,3201 | 0,362 | -0,152 |
| 12 | Q7Z4G4 TRM11_HUMAN | R.IDALEFLPFEGK.V       | 2 | 2,3167 | 0,233 | -0,354 |
| 12 | Q92598 HS105_HUMAN | K.VLGTAFDPFLGGK.N      | 2 | 2,3013 | 0,338 | -0,277 |
| 12 | P55209 NP1L1_HUMAN | K.YAVLYQPLFDK.R        | 2 | 2,2982 | 0,388 | 0      |

|    |                    |                          |   |        |       |        |
|----|--------------------|--------------------------|---|--------|-------|--------|
| 12 | Q86UK7 ZN598_HUMAN | R.DDDFPSLQAIAR.I         | 2 | 2,2918 | 0,355 | -0,091 |
| 12 | P42765 THIM_HUMAN  | K.DFTATDLSEFAAK.A        | 2 | 2,2777 | 0,227 | 0,172  |
| 12 | Q9H4A4 AMPB_HUMAN  | R.VDIIPGFEDR.W           | 2 | 2,2768 | 0,395 | -0,187 |
| 12 | Q8IYI6 EXOC8_HUMAN | R.DFEGAVDLLDK.L          | 2 | 2,2661 | 0,229 | -0,599 |
| 12 | Q9BXR0 TGT_HUMAN   | K.DFGPIDPECTCPTCQK.H     | 2 | 2,2601 | 0,351 | -0,254 |
| 12 | Q9HD20 AT131_HUMAN | R.DLEDESTPIVK.L          | 2 | 2,2571 | 0,369 | -0,685 |
| 12 | Q9H6T3 RPAP3_HUMAN | K.QDFETVLLLEPGNK.Q       | 2 | 2,2516 | 0,235 | -0,152 |
| 12 | P09211 GSTP1_HUMAN | K.DQQEAALVDM*VNDGVEDLR.C | 2 | 2,2361 | 0,424 | -0,114 |
| 12 | Q96T88 UHRF1_HUMAN | R.DSELSDTDSGCCLGQSESDK.S | 2 | 2,2354 | 0,468 | -0,223 |
| 12 | P62249 RS16_HUMAN  | K.LLEPVLLLGK.E           | 2 | 2,2341 | 0,239 | -0,668 |
| 12 | Q6DHV7 ADAL_HUMAN  | K.DFLEPLLEAK.K           | 2 | 2,2237 | 0,273 | 0,208  |
| 12 | Q86W92 LIPB1_HUMAN | R.DLGQSNSDLDM*PFAK.W     | 2 | 2,2227 | 0,357 | 0,074  |
| 12 | P23396 RS3_HUMAN   | R.FGFPEGSVELYAEK.V       | 2 | 2,2222 | 0,522 | -0,155 |
| 12 | Q53EL6 PDCD4_HUMAN | K.DLPELALDTPR.A          | 2 | 2,2203 | 0,421 | 0,098  |
| 12 | Q9Y606 TRUA_HUMAN  | K.TIEDDLVSALVR.S         | 2 | 2,22   | 0,399 | -0,275 |
| 12 | P62191 PRS4_HUMAN  | R.TM*LELLNQLDGFDSR.G     | 2 | 2,2145 | 0,418 | -0,345 |
| 12 | P14618 KPYM_HUMAN  | K.GVNLPGAAVDLPVSEK.D     | 2 | 2,2035 | 0,184 | 0      |
| 12 | Q96P16 P15RS_HUMAN | K.DFAPVIVEAFK.H          | 2 | 2,2017 | 0,308 | -0,296 |
| 12 | P13639 EF2_HUMAN   | K.EGIPALDNFLDK.L         | 2 | 2,1966 | 0,355 | -0,275 |
| 12 | P19338 NUCL_HUMAN  | K.GYAFIEFASFEDAK.E       | 2 | 2,1937 | 0,275 | -0,382 |
| 12 | P16949 STMN1_HUMAN | K.ESVPEFPLSPPK.K         | 2 | 2,1795 | 0,273 | 0,368  |
| 12 | Q8NEM2 SHCBP_HUMAN | K.ASEVQEFTAEFLEK.V       | 2 | 2,1782 | 0,181 | -0,6   |
| 12 | Q7L9L4 MOL1A_HUMAN | R.ELAPLQELIEK.L          | 2 | 2,1719 | 0,407 | -0,19  |
| 12 | P43246 MSH2_HUMAN  | K.DSLIIDEDELGR.G         | 2 | 2,1624 | 0,3   | -0,196 |
| 12 | Q09666 AHNK_HUMAN  | K.VDIDAPDVSIEGPDAAK.L    | 2 | 2,1624 | 0,164 | -0,149 |
| 12 | P46100 ATRX_HUMAN  | K.SVPVTVDDDDDDNDPENR.I   | 2 | 2,1583 | 0,334 | 0,06   |
| 12 | P46060 RAGP1_HUMAN | R.DAALAVAEAM*ADK.A       | 2 | 2,1492 | 0,493 | -0,283 |
| 12 | P21980 TGM2_HUMAN  | K.TVEIPDPVEAGEEVK.V      | 2 | 2,1481 | 0,34  | 0,076  |
| 12 | P40939 ECHA_HUMAN  | K.DLNSDM*DSILASLK.L      | 2 | 2,1457 | 0,225 | -0,238 |
| 12 | Q10567 AP1B1_HUMAN | K.DLDYYGTLK.K            | 2 | 2,1426 | 0,219 | -0,102 |
| 12 | Q9Y2Q3 GSTK1_HUMAN | K.DFLSVM*LEK.G           | 2 | 2,1256 | 0,293 | 0,222  |
| 12 | Q8WWY3 PRP31_HUMAN | K.ASEVM*GPVEAAPEYR.V     | 2 | 2,1115 | 0,329 | -0,903 |
| 12 | Q5UIP0 RIF1_HUMAN  | R.GLEEIPVFDISEK.T        | 2 | 2,1014 | 0,314 | -0,083 |

|    |                       |                                |            |   |        |       |        |
|----|-----------------------|--------------------------------|------------|---|--------|-------|--------|
| 12 | O75122 CLAP2_HUMAN    | R.DYNPYNYSISPFNK.S             |            | 2 | 2,0954 | 0,317 | -0,317 |
| 12 | P50990 TCPQ_HUMAN     | R.LVPGGGATEIELAK.Q             |            | 2 | 2,0629 | 0,364 | -0,18  |
| 12 | P62195 PRS8_HUMAN     | K.IAELM*PGASGAEVK.G            |            | 2 | 2,0468 | 0,125 | -0,264 |
| 12 | P08754 GNAI3_HUMAN    | R.EYQLNDSASYLNDLDR.I           |            | 2 | 2,0438 | 0,288 | -0,352 |
| 12 | P12532 KCRU_HUMAN     | R.GTGGVDTAATGGVFDISNLDR.L      |            | 2 | 2,0436 | 0,375 | -0,121 |
| 12 | P62318 SMD3_HUMAN     | R.FLILPDM*LK.N                 |            | 2 | 2,0396 | 0,087 | 0      |
| 12 | Q01518 CAP1_HUMAN     | R.VENQENVSNLVIEDTELK.Q         |            | 2 | 2,035  | 0,446 | -0,471 |
| 12 | Q9BZG1 RAB34_HUMAN    | K.DLSTPAQYALM*EK.D             |            | 2 | 2,0254 | 0,244 | 0,082  |
| 12 | P51114 FXR1_HUMAN     | R.EDGM*VPFVFGTK.E              |            | 2 | 2,0157 | 0,238 | 0,423  |
| 12 | P08621 RU17_HUMAN     | R.DPIPYLPPLEK.L                |            | 2 | 2,0152 | 0,34  | -0,285 |
| 12 | Q96D46 NMD3_HUMAN     | R.DSAIPVESDTDEGAPR.I           |            | 2 | 2,0136 | 0,271 | -0,275 |
| 12 | P27816 MAP4_HUMAN     | K.TDYIPLLDVDEK.T               |            | 2 | 2,0057 | 0,148 | -0,172 |
| 12 | O60664 M6PBP_HUMAN    | K.DTVATQLSEAVDATR.G            |            | 2 | 2,0032 | 0,309 | -0,077 |
| 13 | Q9H9T3 ELP3_HUMAN     | R.KGDLS#PAELM*M*LTIGDVIK.Q     | S10:       | 3 | 4,4021 | 0,386 | -0,256 |
| 13 | Q9H3Z4 DNJC5_HUMAN    | R.SLS#TSGESLYHVLGLDK.N         | S10:       | 3 | 2,907  | 0,238 | -0,194 |
| 13 | Q9H3Z4 DNJC5_HUMAN    | R.SLS#TSGESLYHVLGLDK.N         | S10:       | 2 | 2,4496 | 0,445 | -0,776 |
| 13 | ##Q4KN30 Q4KN30_HUMAN | -.SSDTQDASRS#ACLDKNS#INR.R     | S10:S17:   | 3 | 2,9458 | 0,12  | -1,611 |
| 13 | Q5VZ89 DEN4C_HUMAN    | R.NLADEIESYM*NLKS#PLGSK.S      | S1008:     | 3 | 2,9182 | 0,354 | -0,83  |
| 13 | P54259 ATN1_HUMAN     | K.TEQLPRPQS#PSDLDSLDR.S        | S101:      | 3 | 3,123  | 0,245 | -0,394 |
| 13 | Q68E09 Q68E09_HUMAN   | R.DS#GRPPGDSSGQAVAPSEGANK.H    | S1011:     | 3 | 3,9895 | 0,339 | -0,845 |
| 13 | P17096 HMGA1_HUMAN    | K.KLEKEEEEGISQES#S#EEEEQ.-     | S102:S103: | 3 | 3,5818 | 0,369 | 0      |
| 13 | Q9C0C2 TB182_HUMAN    | R.GSGGLFS#PSTAHVPD GALQR.D     | S1029:     | 3 | 3,5624 | 0,282 | 0,262  |
| 13 | O60293 CC131_HUMAN    | R.S#FLESNYFTKPNLK.H            | S1046:     | 2 | 2,152  | 0,332 | -0,483 |
| 13 | Q9H3Q1 BORG4_HUMAN    | R.DM*LGS#LRDSALFVK.N           | S105:      | 2 | 3,1033 | 0,231 | 0,592  |
| 13 | Q9UBW7 ZMYM2_HUMAN    | K.AVSGYQS#HDDSSDNSECSFPFK.Y    | S1056:     | 3 | 5,1121 | 0,449 | 0,144  |
| 13 | P24534 EF1B_HUMAN     | K.DDDIDLFGS#DDEESEEAKR.L       | S106:      | 3 | 4,0689 | 0,392 | 0      |
| 13 | O15504 NUPL2_HUMAN    | K.EGFGLSENPFASLS#PDEQKDEK.K    | S106:      | 3 | 2,7258 | 0,253 | -0,511 |
| 13 | Q09666 AHNK_HUMAN     | K.M*S#LPDVLDLKGP.K.M           | S1068:     | 2 | 2,9036 | 0,284 | -0,376 |
| 13 | Q96PN7 TREF1_HUMAN    | K.S#SPSHSTTSGETDPTTIFPCK.E     | S1069:     | 3 | 3,1842 | 0,155 | 0,632  |
| 13 | P27816 MAP4_HUMAN     | K.VGS#LDNVGHL PAGGAVK.T        | S1073:     | 3 | 3,7287 | 0,372 | 0,219  |
| 13 | Q9NYV4 CD2L7_HUMAN    | K.ETTSSTSTEPVKNSS#PAPPQPAPGK.V | S1083:     | 3 | 3,9539 | 0,344 | -0,647 |
| 13 | P49815 TSC2_HUMAN     | R.SLLGLDSGELQSGPESS#SPGVHVR.Q  | S1096:     | 3 | 3,6725 | 0,428 | -0,568 |
| 13 | Q96RQ1 ERGI2_HUMAN    | K.TLS#LVKELDAFPK.V             | S11:       | 2 | 3,1972 | 0,409 | -0,554 |



|    |                     |                                      |              |   |        |       |        |
|----|---------------------|--------------------------------------|--------------|---|--------|-------|--------|
| 13 | P42677 RS27_HUMAN   | K.DLLHPS#PEEEK.R                     | S11:         | 2 | 2,7071 | 0,315 | 0,178  |
| 13 | Q5VZL5 ZMYM4_HUMAN  | K.DNLVSSIHTDDS#LEVER.R               | S110:        | 3 | 3,3298 | 0,332 | -0,546 |
| 13 | Q9H792 SG269_HUMAN  | R.EDGKEDISDPM*DPNPCS#ATYSNLGQSR.A    | S1104:       | 3 | 2,9487 | 0,368 | -0,238 |
| 13 | Q9UPT8 ZC3H4_HUMAN  | R.AAKPGPAEAPS#PTASPSGDASPPATAPYDPR.V | S1104:       | 3 | 2,9144 | 0,392 | -0,122 |
| 13 | Q9UPT8 ZC3H4_HUMAN  | R.AAKPGPAEAPSPTASPSGDAS#PPATAPYDPR.V | S1114:       | 3 | 4,0157 | 0,32  | -0,425 |
| 13 | Q6ZSZ5 ARHGI_HUMAN  | R.HSPAPPPDPGPFAPS#PPPADSPSEGFSLK.A   | S1124:       | 3 | 4,877  | 0,419 | -0,556 |
| 13 | O95382 M3K6_HUMAN   | R.AALGVLGPEVEKEAVS#PR.S              | S1129:       | 3 | 2,6758 | 0,245 | 0,096  |
| 13 | Q9UHR5 S30BP_HUMAN  | R.NM*S#PDEIKIPPEPPGR.C               | S113:        | 3 | 4,1771 | 0,139 | 0      |
| 13 | Q8WUF5 IASPP_HUMAN  | R.SESAPTLHPYSPLS#PK.G                | S113:        | 2 | 3,3161 | 0,314 | -0,204 |
| 13 | Q2NWX8 ERC6L_HUMAN  | R.LDDSSEAKGPEDYPEEGVEESS#GEASK.Y     | S1135:       | 3 | 3,4695 | 0,392 | -0,125 |
| 13 | Q5CZB5 Q5CZB5_HUMAN | K.DEGEGAAGAGDHDQPS#LGAGEAASK.E       | S114:        | 3 | 3,8567 | 0,373 | -0,539 |
| 13 | Q6ZQU7 Q6ZQU7_HUMAN | R.TPSLRS#PDQPPPCQFM*AQGK.T           | S114:        | 3 | 3,5941 | 0,217 | -0,601 |
| 13 | Q9UNS1 TIM_HUMAN    | K.AGLAS#PEEEDAVGKEPLK.A              | S1149:       | 3 | 3,6735 | 0,324 | -0,095 |
| 13 | Q8TAP9 TTDN1_HUMAN  | R.SPAGSQQFGYSPGQQQTHPQGS#PR.T        | S115:        | 3 | 4,6502 | 0,428 | -0,401 |
| 13 | Q15121 PEA15_HUMAN  | K.DIIRQPS#EEEIK.L                    | S116:        | 2 | 2,9758 | 0,292 | -0,074 |
| 13 | O95155 UBE4B_HUMAN  | K.SM*S#QVDVDSGIENM*EVDENDRR.E        | S118:        | 3 | 3,5706 | 0,389 | 0,416  |
| 13 | O95239 KIF4A_HUMAN  | K.KTPPAPS#PFDLPELK.H                 | S1186:       | 3 | 3,63   | 0,31  | 0      |
| 13 | P20020 AT2B1_HUMAN  | R.IEDS#EPHIPLIDDT#DAEDDAPTKR.N       | S1193:T1203: | 3 | 3,7627 | 0,29  | -0,449 |
| 13 | Q9UH99 UN84B_HUMAN  | R.LTRY#QGGDDGSSSSGSSVAGSQSTLFK.D     | S12:         | 3 | 7,8415 | 0,594 | -0,433 |
| 13 | Q29RF7 PDS5A_HUMAN  | R.IIS#VTPVKNIDPVK.N                  | S1206:       | 2 | 2,7637 | 0,158 | 0,457  |
| 13 | Q15648 MED1_HUMAN   | K.LAS#PM*KPVPGTTPSSK.A               | S1207:       | 3 | 3,5771 | 0,328 | -0,108 |
| 13 | Q15648 MED1_HUMAN   | K.LAS#PM*KPVPGTTPSSK.A               | S1207:       | 2 | 2,03   | 0,255 | 0,289  |
| 13 | Q13428 TCOF_HUMAN   | K.LDSS#PSVSSTLAAKDDPDGK.Q            | S1228:       | 3 | 3,1944 | 0,43  | 0      |
| 13 | Q9P1Y6 K1542_HUMAN  | R.LPALGEAHVS#PEVATADK.A              | S1229:       | 3 | 3,3088 | 0,251 | -0,776 |
| 13 | Q96SN8 CK5P2_HUMAN  | R.DLS#PPRYDSLVSQAR.E                 | S1238:       | 3 | 5,7165 | 0,348 | 0,191  |
| 13 | A7MBM2 DISP2_HUMAN  | R.QDS#QGEEAEPLPASPEAPAHSPK.A         | S1252:       | 3 | 3,2539 | 0,122 | -0,746 |
| 13 | Q5QPG4 Q5QPG4_HUMAN | R.KLS#SIGIQVDCIQVVK.E                | S126:        | 2 | 5,2389 | 0,475 | -0,435 |
| 13 | Q5QPG4 Q5QPG4_HUMAN | R.KLS#SIGIQVDCIQVVK.E                | S126:        | 3 | 4,8096 | 0,222 | 0,186  |
| 13 | P49023 PAXI_HUMAN   | K.QKS#AEPSPTVM*STSLGSLNSELDR.L       | S126:        | 3 | 3,8485 | 0,293 | -0,278 |
| 13 | Q3T8J9 GON4L_HUMAN  | K.VEHS#PGPLADAECQEGLSENSACR.W        | S1268:       | 3 | 7,1649 | 0,438 | -0,328 |
| 13 | Q9BY77 PDIP3_HUMAN  | K.RSS#PAAAFINPPIGTVTPALK.L           | S127:        | 2 | 2,7974 | 0,601 | -0,231 |
| 13 | Q9P2E9 RRBP1_HUMAN  | K.SHVEDGDIAGAPASS#PEAPPAEQDPVQLK.T   | S1277:       | 3 | 5,2916 | 0,55  | -0,55  |
| 13 | Q7Z6E9 RBBP6_HUMAN  | K.VTGTEGSSSTLVDTSTSTGGS#PVRK.S       | S1277:       | 3 | 4,3338 | 0,433 | -0,601 |

|    |                     |                                    |            |   |        |       |        |
|----|---------------------|------------------------------------|------------|---|--------|-------|--------|
| 13 | Q14739 LBR_HUMAN    | K.LTPLILKPFNGS#ISR.Y               | S128:      | 2 | 3,6525 | 0,359 | -0,351 |
| 13 | Q6PGP3 Q6PGP3_HUMAN | R.TPS#PEPVDFYSEFGNK.T              | S1284:     | 3 | 3,9466 | 0,382 | 0,428  |
| 13 | O75533 SF3B1_HUMAN  | R.TM*IIS#PERLDPFADGGKT#PDPK.M      | S129:T142: | 3 | 4,9268 | 0,441 | -1,072 |
| 13 | Q92538 GBF1_HUMAN   | R.ADAPDAGAQS#DSELPYHQNDVSLDR.G     | S1298:     | 3 | 3,8134 | 0,256 | 0,709  |
| 13 | Q9BQG0 MBB1A_HUMAN  | R.LSLVIRS#PSLLQSGAK.K              | S1308:     | 2 | 3,2715 | 0,3   | -0,14  |
| 13 | P51858 HDGF_HUMAN   | K.GNAEGS#SDEEGKLVIDEPAK.E          | S132:      | 3 | 3,8128 | 0,393 | 0,086  |
| 13 | O15357 SHIP2_HUMAN  | R.DAS#DGEDEKPPLPPR.S               | S132:      | 3 | 3,779  | 0,413 | 0      |
| 13 | Q8WUA4 TF3C2_HUMAN  | K.RPQQPNPPSAPLVPLLDQS#NPLSTPM*PK.K | S132:      | 3 | 3,2281 | 0,287 | -0,577 |
| 13 | O15357 SHIP2_HUMAN  | R.DAS#DGEDEKPPLPPR.S               | S132:      | 2 | 2,7893 | 0,246 | -0,502 |
| 13 | P51858 HDGF_HUMAN   | K.GNAEGS#SDEEGKLVIDEPAK.E          | S132:      | 2 | 2,7704 | 0,39  | -0,345 |
| 13 | Q9UQ35 SRRM2_HUMAN  | K.ELSNS#PLRENSFGSPLEFR.N           | S1320:     | 3 | 4,0483 | 0,423 | 0      |
| 13 | Q92766 RREB1_HUMAN  | R.QVAGDAPVEQATAETAS#PVHR.E         | S1320:     | 3 | 3,2948 | 0,311 | 0      |
| 13 | Q12756 KIF1A_HUMAN  | R.VTGVYELSLCHVADAGS#PGM*QR.R       | S1337:     | 3 | 5,2112 | 0,459 | 1,048  |
| 13 | Q9UK97 FBX9_HUMAN   | K.ITYTRS#PDGDGVGNSYIEDNDDDSK.M     | S136:      | 3 | 6,9587 | 0,594 | -0,325 |
| 13 | O95490 LPHN2_HUMAN  | K.SEGTDSYVSQTLTAEADHLQS#PNR.D      | S1365:     | 3 | 3,3062 | 0,209 | -0,742 |
| 13 | O60841 IF2P_HUMAN   | K.VEM*YSGS#DDDDDFNKLPK.K           | S137:      | 3 | 3,5371 | 0,244 | 0,421  |
| 13 | Q6UB98 ANR12_HUMAN  | R.DLSNVSNHSSFATS#PTGASNSK.Y        | S1372:     | 3 | 4,3888 | 0,446 | 0      |
| 13 | Q14669 TRIPC_HUMAN  | R.QFSIQAEERES#TDDSNPLGR.A          | S1376:     | 3 | 3,7709 | 0,366 | -0,141 |
| 13 | O14686 MLL2_HUMAN   | K.LEGPVS#PDVEPGKEETESK.K           | S1396:     | 3 | 3,7581 | 0,36  | 0,082  |
| 13 | P52701 M5H6_HUMAN   | R.QSTLYSFFPKS#PALSDANK.A           | S14:       | 3 | 3,7836 | 0,315 | -0,084 |
| 13 | Q5QJE6 TDIF2_HUMAN  | K.ESYTEEIVS#EAESHVSGISR.I          | S141:      | 3 | 2,6665 | 0,232 | -0,24  |
| 13 | Q13523 PRP4B_HUMAN  | K.VQSGM*GLILQGYES#GSEEEGEIHEK.A    | S142:      | 3 | 4,4919 | 0,475 | 0,979  |
| 13 | Q86VI3 IQGA3_HUMAN  | R.S#LTAHSLPLAEK.Q                  | S1424:     | 2 | 3,1    | 0,462 | -0,084 |
| 13 | Q9BVC5 ASHWN_HUMAN  | R.KLS#NSSSSVSPILSSNLPVNNK.T        | S143:      | 3 | 2,9833 | 0,372 | -0,148 |
| 13 | Q02880 TOP2B_HUMAN  | K.SQDFGNLFSFSPYSQKS#EDDSAK.F       | S1457:     | 3 | 4,1742 | 0,423 | -0,481 |
| 13 | P30307 MPIP3_HUMAN  | R.DAM*CS#SSANKENDNGNLVDSEM*K.Y     | S146:      | 3 | 4,4126 | 0,243 | 0,627  |
| 13 | Q86UE4 LYRIC_HUMAN  | R.TVEVAEGEAVRTPQS#VTAK.Q           | S146:      | 3 | 3,3188 | 0,256 | -0,089 |
| 13 | P78316 NOP14_HUMAN  | K.HNDIVDS#DS#DAEDR.G               | S146:S148: | 2 | 5,7668 | 0,555 | 0      |
| 13 | Q02880 TOP2B_HUMAN  | K.SEDDSAKFDS#NEEDSASVFSFGLK.Q      | S1466:     | 3 | 3,0263 | 0,494 | -0,573 |
| 13 | Q9BUA3 YK007_HUMAN  | R.AEQPS#PPNSDSGQDAHPDPDANPDAAR.M   | S148:      | 3 | 3,6112 | 0,333 | -0,387 |
| 13 | Q15648 MED1_HUMAN   | K.SYQNSPSS#DDGIRPLPEYSTEK.H        | S1482:     | 3 | 4,5322 | 0,414 | 0,933  |
| 13 | P50851 LRBA_HUMAN   | K.SPVDIVTGGIS#PVRDLDR.L            | S1498:     | 3 | 2,6423 | 0,33  | -0,093 |
| 13 | Q9H3Z4 DNJC5_HUMAN  | R.SLSTSGES#LYHVLGLDK.N             | S15:       | 2 | 4,3348 | 0,521 | -0,712 |

|    |                    |                                   |            |   |        |       |        |
|----|--------------------|-----------------------------------|------------|---|--------|-------|--------|
| 13 | Q96JG6 CC132_HUMAN | R.QGLKS#PQESLSDLGAIESLR.V         | S15:       | 3 | 4,3131 | 0,355 | -0,497 |
| 13 | Q15040 JOS1_HUMAN  | K.SES#LELPQAAPPQIYHEK.Q           | S15:       | 3 | 4,2028 | 0,337 | -0,086 |
| 13 | P46821 MAP1B_HUMAN | R.KLGDVSP#PTQIDVQFGSFK.E          | S1501:     | 3 | 5,8482 | 0,394 | -0,257 |
| 13 | P46821 MAP1B_HUMAN | R.KLGDVSP#PTQIDVQFGSFK.E          | S1501:     | 2 | 2,0714 | 0,369 | -0,458 |
| 13 | Q92974 ARHG2_HUMAN | K.SVS#TTNIAGHFNDESPLGLR.R         | S151:      | 3 | 3,1683 | 0,3   | 0,5    |
| 13 | P08134 RHOC_HUMAN  | R.DM*ANRIS#AFGYLECSAK.T           | S152:      | 3 | 4,2964 | 0,261 | -0,09  |
| 13 | Q9H4L7 SMRCD_HUMAN | R.NDDISELEDLS#ELEDLKDAK.L         | S152:      | 3 | 3,7249 | 0,265 | -0,54  |
| 13 | P08134 RHOC_HUMAN  | R.DM*ANRIS#AFGYLECSAK.T           | S152:      | 2 | 2,3707 | 0,273 | -0,241 |
| 13 | Q02241 KIF23_HUMAN | K.S#NDRNSM*DIQCEVDALLER.Q         | S155:      | 3 | 4,4004 | 0,28  | -0,465 |
| 13 | Q8N9N8 EIF1A_HUMAN | R.RQYHES#EEEE#EEEEAA.-            | S155:S159: | 2 | 2,2131 | 0,414 | -0,347 |
| 13 | Q8NFD5 ARI1B_HUMAN | R.M*SPS#KSPFLPSM*K.M              | S1557:     | 3 | 3,3622 | 0,113 | 0,118  |
| 13 | Q5JTV8 TOIP1_HUMAN | R.DSHS#SEEDEASSQTDLSTISK.K        | S156:      | 3 | 4,5568 | 0,414 | 0      |
| 13 | O95684 FR1OP_HUMAN | K.GPTTGEGALDLDVHS#PPKS#PEGK.T     | S156:S160: | 3 | 4,8785 | 0,208 | -0,216 |
| 13 | Q5JTV8 TOIP1_HUMAN | R.DSHSS#EEDEASSQTDLSTISK.K        | S157:      | 3 | 5,1175 | 0,453 | 0,074  |
| 13 | O75391 SPAG7_HUMAN | R.QEEEAQQGPVVVS#PASDYKDK.Y        | S158:      | 3 | 4,0062 | 0,305 | -0,447 |
| 13 | Q9UJF2 NGAP_HUMAN  | R.S#ISGTSTSEKPNM*DTANTSPFK.V      | S16:       | 3 | 3,0536 | 0,459 | -0,221 |
| 13 | Q13200 PSMD2_HUMAN | K.APVQPQQS#PAAAPGGTDEKPSGK.E      | S16:       | 3 | 2,6712 | 0,242 | -0,796 |
| 13 | Q1KMD3 HNRL2_HUMAN | R.EEDEPEERS#GDETPGSEVPGDK.A       | S161:      | 3 | 3,4321 | 0,16  | -0,371 |
| 13 | Q9BUL9 RPP25_HUMAN | R.QPGYQPPNPHPGPS#SPPAAPASK.R      | S161:      | 3 | 2,8224 | 0,323 | -0,388 |
| 13 | Q15742 NAB2_HUMAN  | R.SFSPKS#PLELGEKLS#PLPGGPGAGDPR.I | S162:S171: | 3 | 2,6582 | 0,101 | -0,514 |
| 13 | Q9Y5S2 MRCKB_HUMAN | R.SM*S#DPDQDFDKEPDSSTK.H          | S1659:     | 3 | 4,0882 | 0,541 | -0,082 |
| 13 | Q3V6T2 GRDN_HUMAN  | K.IKTGSPGS#EVVTLQQFLEESNK.L       | S1678:     | 3 | 5,9666 | 0,435 | -0,444 |
| 13 | Q01433 AMPD2_HUMAN | R.QIS#QDVKLEPDILLR.A              | S168:      | 3 | 2,7818 | 0,308 | 0      |
| 13 | Q14980 NUMA1_HUMAN | K.APVPSTCSSTFPEELS#PPSHQAK.R      | S169:      | 3 | 5,7819 | 0,527 | -0,289 |
| 13 | Q14789 GOGB1_HUMAN | R.LSGLANVVLHELHS#GDDDDTDQNM*R.A   | S17:       | 3 | 5,1156 | 0,498 | -0,776 |
| 13 | Q15742 NAB2_HUMAN  | K.SPLELGEKLS#PLPGGPGAGDPR.I       | S171:      | 3 | 3,3411 | 0,24  | 0,494  |
| 13 | Q7Z589 EMSY_HUMAN  | K.SPRPAS#PASNVVVLPSGSTVYVK.S      | S173:      | 3 | 3,6483 | 0,289 | -0,076 |
| 13 | Q86TI2 DPP9_HUMAN  | K.NGFM*VS#PM*KPLEIK.T             | S173:      | 2 | 2,7802 | 0,224 | 0,215  |
| 13 | Q96Q89 MPPH1_HUMAN | K.FGDFLQHS#PSILQSK.A              | S1740:     | 3 | 2,6043 | 0,277 | -0,103 |
| 13 | Q9H7D0 DOCK5_HUMAN | K.SQVIAEKAPEPDLM*S#PTR.K          | S1756:     | 3 | 4,5958 | 0,364 | -0,089 |
| 13 | P42694 HELZ_HUMAN  | R.RIS#SSSVQPCSEEVSTPQDSLAQCK.E    | S1763:     | 3 | 3,7145 | 0,31  | -0,128 |
| 13 | Q58FF8 H90B2_HUMAN | K.IEDVGS#DEEDDSGKDK.K             | S177:      | 2 | 3,4526 | 0,39  | -0,537 |
| 13 | Q58FF8 H90B2_HUMAN | K.IEDVGS#DEEDDSGKDK.K             | S177:      | 3 | 3,1874 | 0,324 | -0,47  |

|    |                     |                                 |                 |   |        |       |        |
|----|---------------------|---------------------------------|-----------------|---|--------|-------|--------|
| 13 | Q58FF8 H90B2_HUMAN  | K.IEDVGS#DEEDDSGKDK.K           | S177:           | 3 | 2,8974 | 0,261 | -0,101 |
| 13 | Q5T4S7 UBR4_HUMAN   | K.TLSDVEDQKELAS#PVSPELR.Q       | S178:           | 3 | 4,5654 | 0,365 | 0,08   |
| 13 | P18583 SON_HUMAN    | R.ASES#SSEEKDDYEIVK.V           | S1782:          | 2 | 2,2664 | 0,382 | 0,538  |
| 13 | Q14980 NUMA1_HUMAN  | R.SQAPLES#SLDSLGDVFLDSGRK.T     | S1788:          | 3 | 3,3153 | 0,361 | -0,686 |
| 13 | Q9H7D0 DOCK5_HUMAN  | R.LSPFHGSSPPQSTPLS#PPPLTPK.A    | S1789:          | 3 | 3,4672 | 0,101 | -0,075 |
| 13 | O15231 ZN185_HUMAN  | R.SS#TSGDTEEEEEEEVVPFSSDEQKR.R  | S18:            | 3 | 2,6476 | 0,256 | -0,252 |
| 13 | Q5T4S7 UBR4_HUMAN   | K.TLSDVEDQKELASPV#PELR.Q        | S181:           | 3 | 4,5026 | 0,391 | -0,798 |
| 13 | Q8N344 MIER2_HUMAN  | R.FLADEDREPGSSASS#DTEEDSLPANK.C | S181:           | 3 | 4,4973 | 0,415 | -0,514 |
| 13 | O00264 PGRC1_HUMAN  | K.EGEEPTVYS#DEECPKDESAR.K       | S181:           | 3 | 3,1458 | 0,317 | 0      |
| 13 | Q9NQW6 ANLN_HUMAN   | K.AAS#PPRPLLSNASATPVGR.R        | S182:           | 3 | 5,4376 | 0,495 | -0,283 |
| 13 | Q9NQC3 RTN4_HUMAN   | R.RGSSGS#VDETLFALPAASEPVIR.S    | S184:           | 3 | 3,6665 | 0,269 | -0,45  |
| 13 | P50548 ERF_HUMAN    | R.LGRGS#VSDCSGDTSELEPLGEDPR.A   | S185:           | 3 | 5,3426 | 0,477 | -0,4   |
| 13 | Q8IWC1 MA7D3_HUMAN  | R.SAS#TEKLEQGTSALIR.Q           | S185:           | 2 | 3,6064 | 0,51  | -0,207 |
| 13 | Q8IWC1 MA7D3_HUMAN  | R.SAS#TEKLEQGTSALIR.Q           | S185:           | 3 | 3,3659 | 0,321 | 0,103  |
| 13 | Q9BVC5 ASHWN_HUMAN  | K.SPSGPVK#PPLSPVGTTPVK.L        | S189:           | 3 | 2,9613 | 0,108 | 0,091  |
| 13 | Q9BVC5 ASHWN_HUMAN  | R.KSPSGPVKS#PPLS#PVGTT#PVK.L    | S189:S193:T198: | 3 | 3,5802 | 1     | 1,511  |
| 13 | Q9H1E3 NUCKS_HUMAN  | K.VVDYSQFQES#DDADEDYGRDSGPPTK.K | S19:            | 3 | 5,0189 | 0,382 | -0,61  |
| 13 | A6NJ09 RU2BL_HUMAN  | K.LDVKS#IDDEDVDENEDDVYGNSSGR.K  | S191:           | 3 | 5,237  | 0,471 | -0,319 |
| 13 | B0I1T6 B0I1T6_HUMAN | K.LGFSSPYEGVLNKS#PK.T           | S1935:          | 2 | 3,7895 | 0,374 | -0,406 |
| 13 | O43237 DC1L2_HUMAN  | K.DFQDYM*EPEEGCQGS#PQRR.G       | S194:           | 3 | 3,1239 | 0,193 | -0,075 |
| 13 | P35579 MYH9_HUMAN   | K.GAGDGS#DEEVDGKADGAEAKPAE.-    | S1943:          | 3 | 5,9605 | 0,491 | -0,487 |
| 13 | Q9NW75 GPTC2_HUMAN  | R.DQDM*DS#DRAYQYQEFTK.N         | S195:           | 3 | 3,5165 | 0,295 | -0,409 |
| 13 | Q9BZL6 KPCD2_HUMAN  | R.RLS#ST#SLAS#GHSVR.L           | S197:T199:S203: | 3 | 2,817  | 0,171 | 0      |
| 13 | Q08752 PPID_HUMAN   | K.DGS#GDS#HPDFPEDADIDLKDVDK.I   | S198:S201:      | 3 | 3,6155 | 0,398 | -0,346 |
| 13 | O96007 MOS2L_HUMAN  | K.LPLS#PPLVEDSAFEPSRK.D         | S20:            | 3 | 3,2525 | 0,251 | 0,266  |
| 13 | Q5W0Q7 USPL1_HUMAN  | K.DPATVDVSGTGRPS#PQNEGCTSK.L    | S200:           | 3 | 3,6345 | 0,344 | 0      |
| 13 | Q96B36 AKTS1_HUMAN  | K.RTEARS#S#DEENGPPS#SPDLDR.I    | S202:S203:S211: | 3 | 4,4534 | 0,319 | -0,286 |
| 13 | Q96B36 AKTS1_HUMAN  | K.RTEARS#S#DEENGPPSS#PDLDR.I    | S202:S203:S212: | 3 | 6,8726 | 0,392 | -0,286 |
| 13 | P00558 PGK1_HUMAN   | K.ALES#PERPFLAILGGAK.V          | S203:           | 3 | 3,6281 | 0,376 | -0,495 |
| 13 | P00558 PGK1_HUMAN   | K.ALES#PERPFLAILGGAK.V          | S203:           | 2 | 2,3495 | 0,302 | -0,528 |
| 13 | Q9Y6G9 DC1L1_HUMAN  | R.DFQEYVEPGEDFPAS#PQRR.N        | S207:           | 3 | 3,0629 | 0,294 | 0,234  |
| 13 | Q9BXF6 RFIP5_HUMAN  | K.KYDLES#ASAILPSSAIEDPDLGSLGK.M | S207:           | 3 | 2,9606 | 0,358 | -0,133 |
| 13 | Q5VV41 ARHGG_HUMAN  | K.GS#FKDDPQLYQEIQER.G           | S208:           | 3 | 3,8231 | 0,291 | 0,18   |

|    |                     |                                   |              |   |        |       |        |
|----|---------------------|-----------------------------------|--------------|---|--------|-------|--------|
| 13 | P38159 HNRPG_HUMAN  | R.DVYLS#PRDDGYSTK.D               | S208:        | 2 | 2,0454 | 0,39  | 0,072  |
| 13 | Q6R327 RICTR_HUMAN  | R.NDS#GEENVPLDLTREPSDNL.R.E       | S21:         | 3 | 3,4997 | 0,191 | 0      |
| 13 | Q09666 AHNK_HUMAN   | K.TVIRLPS#GSGAASPTGSAVDIR.A       | S210:        | 3 | 4,7863 | 0,393 | 0,083  |
| 13 | Q13242 SFRS9_HUMAN  | R.GS#PHYFSPFRPY.-                 | S211:        | 3 | 2,6871 | 0,086 | 0,238  |
| 13 | Q13242 SFRS9_HUMAN  | R.GS#PHYFSPFRPY.-                 | S211:        | 2 | 2,2948 | 0,495 | -0,238 |
| 13 | Q09666 AHNK_HUMAN   | K.TVIRLPSGS#GAASPTGSAVDIR.A       | S212:        | 3 | 3,0533 | 0,13  | 0,167  |
| 13 | Q96T58 MINT_HUMAN   | R.ESGVAVS#PEKSES#PQKEDGLSSQLK.S   | S2120:S2126: | 3 | 3,1074 | 0,253 | -0,318 |
| 13 | P12270 TPR_HUMAN    | R.TDGFAEAIHS#PQVAGVPR.F           | S2141:       | 3 | 5,2973 | 0,549 | 0      |
| 13 | P12270 TPR_HUMAN    | R.TDGFAEAIHS#PQVAGVPR.F           | S2141:       | 2 | 4,2454 | 0,455 | -0,568 |
| 13 | P61978 HNRPK_HUMAN  | K.IILDILISES#PIKGR.A              | S216:        | 3 | 2,9953 | 0,379 | 0      |
| 13 | Q9Y6D5 BIG2_HUMAN   | R.ELEKPIQSKPQS#PVIQAAVS#PK.F      | S218:S227:   | 3 | 4,1326 | 0,383 | -0,351 |
| 13 | O75376 NCOR1_HUMAN  | R.NDARS#PGSISYLPFFTK.L            | S2184:       | 3 | 3,9783 | 0,235 | -0,531 |
| 13 | Q5UIP0 RIF1_HUMAN   | R.RVS#FADPIYQAGLADDIDR.R          | S2205:       | 3 | 4,9437 | 0,453 | 0      |
| 13 | Q9UJX4 APC5_HUMAN   | K.QAEFFLSQQAS#LLKNDETK.A          | S221:        | 3 | 3,6511 | 0,286 | -0,402 |
| 13 | Q8WVB6 CTF18_HUMAN  | R.GGGQLDLLGVS#LASLKK.Q            | S222:        | 3 | 3,264  | 0,334 | -0,211 |
| 13 | Q9Y618 NCOR2_HUMAN  | K.TSVLGGGEDGIEPVS#PPEGM*TEPGHSR.S | S2226:       | 3 | 5,7222 | 0,479 | -0,131 |
| 13 | P11831 SRF_HUMAN    | K.ALIQTCLNSPDS#PPRSDPTDQR.M       | S224:        | 3 | 3,9522 | 0,289 | 0,76   |
| 13 | Q5T2D3 OTUD3_HUMAN  | K.GM*DS#EDDLRDEVEDAVQK.V          | S224:        | 3 | 3,9291 | 0,408 | 0,17   |
| 13 | P49792 RBP2_HUMAN   | R.EDALDDSVSSSVHAS#PLASS#PVRK.N    | S2246:S2251: | 3 | 4,9755 | 1     | -0,339 |
| 13 | Q8WVB6 CTF18_HUMAN  | R.GGGQLDLLGVS#LASLKK.Q            | S225:        | 2 | 3,2211 | 0,292 | -0,351 |
| 13 | Q5JTV8 TOIP1_HUMAN  | K.VNFSEEGETEEDDQDS#SHSSVTTVK.A    | S227:        | 3 | 4,0044 | 0,351 | -0,516 |
| 13 | Q96AG4 LRC59_HUMAN  | R.DKLDGNELDLS#LSDLNEVPVK.E        | S23:         | 3 | 3,8963 | 0,12  | -0,382 |
| 13 | P54578 UBP14_HUMAN  | K.LEAIEDDSVKETDSSS#ASAATPSK.K     | S230:        | 3 | 4,7556 | 0,322 | 0,073  |
| 13 | P56749 CLD12_HUMAN  | R.SRLS#AIEIDIPVVSHTT.-            | S231:        | 2 | 5,0834 | 0,537 | -0,509 |
| 13 | Q8TF40 FNIP1_HUMAN  | R.SAS#FFAVHSNPM*DM*PGR.E          | S232:        | 3 | 3,713  | 0,3   | 0,559  |
| 13 | P21333 FLNA_HUMAN   | K.FNEEHIPDSPFVVPVAS#PSGDAR.R      | S2327:       | 3 | 4,4118 | 0,247 | -0,503 |
| 13 | Q15424 SAFB1_HUMAN  | K.SEPVKEES#SELEQPFAQDTSSVGPDR.K   | S234:        | 3 | 4,0564 | 0,312 | -0,187 |
| 13 | Q15424 SAFB1_HUMAN  | K.SEPVKEESS#ELEQPFAQDTSSVGPDR.K   | S235:        | 3 | 4,9892 | 0,468 | -0,375 |
| 13 | Q6ZML7 Q6ZML7_HUMAN | R.YYS#PCEEHPAETNQNEGSESGTIR.Q     | S238:        | 3 | 5,1666 | 0,557 | -0,194 |
| 13 | P22059 OSBP1_HUMAN  | R.S#LSELESKLPAESNEK.I             | S238:        | 2 | 4,0451 | 0,533 | -0,562 |
| 13 | Q12802 AKP13_HUMAN  | R.DM*AECSTPLPEDCS#PTHSPR.V        | S2398:       | 3 | 4,3393 | 0,438 | -0,384 |
| 13 | O75179 ANR17_HUMAN  | R.APS#PAPSSVPLGSEKPSNVSQDR.K      | S2401:       | 3 | 4,1551 | 0,34  | -0,23  |
| 13 | P11717 MPRI_HUMAN   | K.ALSSLHGDDQDS#EDEVLTIPVK.V       | S2409:       | 3 | 3,9848 | 0,265 | -0,284 |

|    |                     |                                   |            |   |        |       |        |
|----|---------------------|-----------------------------------|------------|---|--------|-------|--------|
| 13 | Q9UNX4 WDR3_HUMAN   | K.IKGSS#PGIQDTLEAEDGAFETDEAPEDR.I | S241:      | 3 | 2,8345 | 0,499 | -0,299 |
| 13 | Q43815 STRN_HUMAN   | K.FLESAAADFS#DEDEDDVDGREGK.S      | S245:      | 3 | 5,8656 | 0,416 | -0,758 |
| 13 | Q92539 LPIN2_HUMAN  | K.SDS#ELEVKPAESLLR.S              | S245:      | 2 | 2,3058 | 0,369 | -0,348 |
| 13 | Q15424 SAFB1_HUMAN  | K.SEPVKEESSELEQPPAQDTSS#VGPDR.K   | S247:      | 3 | 5,8331 | 0,506 | -0,375 |
| 13 | P11717 MPRI_HUMAN   | K.LVSFHDDS#DEDLLHI.-              | S2484:     | 2 | 4,898  | 0,468 | -0,931 |
| 13 | B2RAW2 B2RAW2_HUMAN | R.KLS#PQDPSEDVSSM*DPLK.L          | S249:      | 3 | 3,5417 | 0,269 | 0      |
| 13 | Q53T59 H1BP3_HUMAN  | R.KLS#PQDPSEDVSSVDPLK.L           | S249:      | 2 | 2,649  | 0,46  | 0,664  |
| 13 | P49792 RBP2_HUMAN   | K.AVVS#PPKFVFGSESVK.S             | S2510:     | 3 | 3,322  | 0,414 | 0      |
| 13 | P49792 RBP2_HUMAN   | K.AVVS#PPKFVFGSESVK.S             | S2510:     | 2 | 2,158  | 0,493 | -0,486 |
| 13 | P52701 MSH6_HUMAN   | R.VIS#DSESDIGGSDFEVPDK.E          | S252:      | 3 | 4,0247 | 0,468 | -0,317 |
| 13 | Q08357 S20A2_HUMAN  | K.EGALS#RVS#DESLSKVQEAESPVK.E     | S253:S256: | 3 | 2,6029 | 0,177 | -0,465 |
| 13 | P04049 RAF1_HUMAN   | R.STS#TPNVHM*VSTTLPVDSR.M         | S259:      | 3 | 3,4071 | 0,194 | 0,258  |
| 13 | P21359 NF1_HUMAN    | R.KVS#VSESNVLLDEEVLTPK.I          | S2597:     | 3 | 5,1215 | 0,2   | -0,08  |
| 13 | P49736 MCM2_HUMAN   | R.RGNDPLTS#S#PGR.S                | S26:S27:   | 2 | 2,9764 | 0,508 | 0,086  |
| 13 | P49736 MCM2_HUMAN   | R.RGNDPLTS#S#PGR.S                | S26:S27:   | 3 | 2,961  | 0,284 | 0      |
| 13 | Q8N556 AFAP1_HUMAN  | K.EAYSGCSGPDVSECPPPS#SPVHK.A      | S264:      | 3 | 4,2483 | 0,447 | -0,489 |
| 13 | Q5T200 ZC3HD_HUMAN  | R.TPS#PPPIPEDIALGKK.Y             | S265:      | 3 | 4,499  | 0,444 | 0      |
| 13 | Q9UBF8 PI4KB_HUMAN  | R.ELPSLSPAPDTGLS#PSKR.T           | S266:      | 2 | 2,088  | 0,296 | -0,253 |
| 13 | Q15942 ZYX_HUMAN    | R.GPPASSPAPAPKFS#PVTPK.F          | S267:      | 2 | 5,2029 | 0,571 | -0,446 |
| 13 | Q03111 ENL_HUMAN    | K.LESTS#PKGGPPPPPPPPR.A           | S267:      | 3 | 3,821  | 0,166 | -0,369 |
| 13 | Q76FK4 NOL8_HUMAN   | R.TCDSITPSKS#SPVPVSDTQK.L         | S267:      | 3 | 3,6932 | 0,224 | -0,083 |
| 13 | Q96ST2 IWS1_HUMAN   | R.DSGS#DGEDDVNEQHSGSDTGSVER.H     | S27:       | 3 | 3,6072 | 0,369 | -0,429 |
| 13 | A2AB28 A2AB28_HUMAN | R.S#SSLGNS#PERGPLRPFVPEQELLR.S    | S270:S276: | 3 | 2,8181 | 0,298 | -0,389 |
| 13 | Q8WYQ5 DGCR8_HUMAN  | K.YGGDS#DHPSDGETSVQPM*M*TK.I      | S271:      | 3 | 3,7661 | 0,286 | -0,078 |
| 13 | Q9H6K1 CF106_HUMAN  | R.LSQNSVNLS#PSSHANNLSVVTYSK.G     | S272:      | 3 | 3,7482 | 0,231 | 0      |
| 13 | Q6IQ49 CA055_HUMAN  | R.VVNTDHGS#PEQLQIPVTDGR.H         | S278:      | 3 | 5,247  | 0,378 | 0,079  |
| 13 | Q5W189 Q5W189_HUMAN | R.REPES#PPASAPIPLFGADTIGQR.S      | S28:       | 3 | 4,6704 | 0,452 | -0,221 |
| 13 | Q12857 NFIA_HUMAN   | R.LKS#VEDEM*DSPGEEPFTGQGR.S       | S280:      | 3 | 5,9973 | 0,445 | 0,428  |
| 13 | P27816 MAP4_HUMAN   | K.DM*ES#PTKLDVTLAK.D              | S280:      | 3 | 4,2213 | 0,378 | 0      |
| 13 | P27816 MAP4_HUMAN   | K.DM*ES#PTKLDVTLAK.D              | S280:      | 2 | 3,643  | 0,446 | -1,039 |
| 13 | P49792 RBP2_HUMAN   | K.SIS#SPSVSSETM*DKPVDLSTR.K       | S2804:     | 3 | 2,8752 | 0,303 | -0,316 |
| 13 | P49792 RBP2_HUMAN   | K.SISS#PSVSSETM*DKPVDLSTR.K       | S2805:     | 3 | 2,7125 | 0,233 | -0,237 |
| 13 | Q96EZ8 MCRS1_HUMAN  | K.GDQVLNFS#DAEDLIDDSK.LK.D        | S282:      | 3 | 4,0891 | 0,384 | -0,556 |

|    |                    |                                  |            |   |        |       |        |
|----|--------------------|----------------------------------|------------|---|--------|-------|--------|
| 13 | Q8N3D4 EH1L1_HUMAN | R.ANEAGGQVGPPEARPPETS#PEM*R.S    | S285:      | 3 | 3,7576 | 0,518 | -0,518 |
| 13 | Q16649 NFIL3_HUMAN | R.TSETDDGVVGKSS#DGEDEQVVK.G      | S286:      | 3 | 4,7888 | 0,482 | -0,294 |
| 13 | Q8N1G2 K0082_HUMAN | R.VAELALSLS#TSDDEPPSSVSHGAK.A    | S29:       | 3 | 3,1444 | 0,187 | -0,714 |
| 13 | Q8IVF2 AHNK2_HUMAN | R.DAHDVS#PTSTDTEAQLTVER.Q        | S294:      | 3 | 4,8939 | 0,442 | 0,081  |
| 13 | P46939 UTRO_HUMAN  | K.ECEEEAINIQSTAPEEEHES#PR.A      | S295:      | 3 | 4,1314 | 0,43  | -0,412 |
| 13 | P78310 CXAR_HUMAN  | R.SYIGS#NHSSLGSM*SPSNM*EGYSK.T   | S297:      | 3 | 4,6182 | 0,384 | 0      |
| 13 | Q6P4R8 NFRKB_HUMAN | R.KGS#LAALYDLAVLK.K              | S298:      | 2 | 4,7639 | 0,397 | -0,396 |
| 13 | P25440 BRD2_HUMAN  | R.KADTTTPTTAILAPGS#PASPPGSLEPK.A | S298:      | 3 | 3,6586 | 0,262 | -0,395 |
| 13 | Q6P4R8 NFRKB_HUMAN | R.KGS#LAALYDLAVLK.K              | S298:      | 3 | 3,2612 | 0,117 | -0,237 |
| 13 | P09382 LEG1_HUMAN  | R.GEVAPDAKS#FVLNLGK.D            | S30:       | 2 | 4,3771 | 0,414 | -0,141 |
| 13 | Q7L4I2 RSRC2_HUMAN | K.KEQSEVS#VS#PR.A                | S30:S32:   | 2 | 2,5751 | 0,203 | -0,174 |
| 13 | Q96ST2 IWS1_HUMAN  | R.VS#DSESEGPQKGPASDSETEDASR.H    | S300:      | 3 | 3,8508 | 0,373 | -0,431 |
| 13 | Q6WCQ1 MRIP_HUMAN  | R.S#QVIEKFEALDIEK.A              | S300:      | 2 | 2,9403 | 0,317 | 0,071  |
| 13 | Q6WCQ1 MRIP_HUMAN  | R.S#QVIEKFEALDIEK.A              | S300:      | 3 | 2,7767 | 0,421 | -0,106 |
| 13 | P25440 BRD2_HUMAN  | R.KADTTTPTTAILAPGSPAS#PPGSLEPK.A | S301:      | 3 | 4,8174 | 0,346 | 0,526  |
| 13 | P78310 CXAR_HUMAN  | R.SYIGSNHSS#LGSM*SPSNM*EGYSK.T   | S301:      | 3 | 4,6265 | 0,362 | -0,217 |
| 13 | P42167 LAP2B_HUMAN | K.HAS#PILPITEFSDIPR.R            | S306:      | 2 | 4,4826 | 0,515 | -0,782 |
| 13 | Q9UQR1 ZN148_HUMAN | K.GGLTSEEDSGFSTS#PKDNSLPK.K      | S306:      | 3 | 4,2314 | 0,392 | 0,449  |
| 13 | P42167 LAP2B_HUMAN | K.HAS#PILPITEFSDIPR.R            | S306:      | 3 | 3,8656 | 0,381 | -0,195 |
| 13 | Q8N1G2 K0082_HUMAN | R.VAELALSLSSTS#DDEPPSSVSHGAK.A   | S31:       | 3 | 4,6903 | 0,442 | -0,357 |
| 13 | Q7RTV3 ZN367_HUMAN | K.ADQEQQDPLEYLQS#DEEDDEKR.G      | S310:      | 3 | 4,9922 | 0,403 | -0,133 |
| 13 | Q5SW79 CE170_HUMAN | K.KS#SPGTQDLLGIQTGM*M*APENK.V    | S312:      | 3 | 3,4143 | 0,229 | 0,076  |
| 13 | O94967 WDR47_HUMAN | R.S#LNPALDGLTCLTSHDK.R           | S312:      | 2 | 2,8792 | 0,302 | -0,185 |
| 13 | Q9Y446 PKP3_HUMAN  | R.TLQRLS#SGFDDIDLPSAVK.Y         | S313:      | 3 | 3,0169 | 0,247 | -0,085 |
| 13 | Q96QC0 PP1RA_HUMAN | K.VLS#PTAAKPSPFEGK.T             | S313:      | 2 | 2,0253 | 0,268 | -0,152 |
| 13 | Q13188 STK3_HUMAN  | R.ELEEEENS#DEDELDSHTM*VK.T       | S316:      | 3 | 4,1896 | 0,327 | -0,141 |
| 13 | Q2TB10 ZN800_HUMAN | R.RDS#ITPDIATKPGQPLFLDSIS#PK.K   | S317:S336: | 3 | 6,3266 | 0,525 | -0,531 |
| 13 | Q6KC79 NIPBL_HUMAN | R.DVPPDILLDS#PERK.Q              | S318:      | 2 | 3,0047 | 0,377 | -0,292 |
| 13 | P35659 DEK_HUMAN   | R.EES#EEEEDEDEEEEEEEKEK.S        | S32:       | 3 | 3,6519 | 0,394 | -0,47  |
| 13 | Q12893 TM115_HUMAN | K.VDS#PLPSDKAPTPPGK.G            | S320:      | 3 | 3,9398 | 0,29  | -0,108 |
| 13 | Q9Y2W1 TR150_HUMAN | K.S#PPSTGTYGSSQKEESAASGGAAYTK.R  | S320:      | 3 | 3,3842 | 0,459 | -0,272 |
| 13 | Q9UQ35 SRRM2_HUMAN | R.GEGDAPFSEPGTTSTQRPS#SPETATK.Q  | S322:      | 3 | 2,9057 | 0,193 | -0,202 |
| 13 | P50552 VASP_HUMAN  | R.M*KSSSS#VTTSETQPCTSSSDYDLQR.V  | S325:      | 3 | 4,2893 | 0,364 | -0,418 |

|    |                    |                                  |                 |   |        |       |        |
|----|--------------------|----------------------------------|-----------------|---|--------|-------|--------|
| 13 | Q92922 SMRC1_HUMAN | R.KHS#PS#PPPPT#PTESR.K           | S328:S330:T335: | 3 | 2,987  | 0,209 | -0,296 |
| 13 | Q92922 SMRC1_HUMAN | R.KHS#PS#PPPPT#PTESR.K           | S328:S330:T335: | 2 | 2,8988 | 0,313 | -0,132 |
| 13 | Q15459 SF3A1_HUMAN | K.FGESEEVEM*EVES#DEEDDKQEK.A     | S329:           | 3 | 6,0493 | 0,394 | -0,27  |
| 13 | P35568 IRS1_HUMAN  | R.AS#SDGEGTM*SRPASVDGSPVSPSTNR.T | S329:           | 3 | 3,9673 | 0,329 | -0,484 |
| 13 | Q76FK4 NOL8_HUMAN  | R.TTQPSINESES#DPFEVVRDDFK.S      | S331:           | 3 | 2,6746 | 0,319 | -0,698 |
| 13 | P19484 TFEB_HUMAN  | R.VHGLPTTS#PSGM*NM*AELAQQVVK.Q   | S332:           | 3 | 4,3778 | 0,484 | -0,292 |
| 13 | Q9H6Z4 RANB3_HUMAN | R.VLS#PPKLNEVSSDANR.E            | S333:           | 3 | 4,495  | 0,139 | -0,304 |
| 13 | Q9H7F4 T185B_HUMAN | R.VVITQS#PGKYVPPPK.L             | S333:           | 3 | 3,6077 | 0,414 | 0,205  |
| 13 | Q9H6Z4 RANB3_HUMAN | R.VLS#PPKLNEVSSDANR.E            | S333:           | 2 | 2,4639 | 0,427 | -0,405 |
| 13 | Q4G0J3 LARP7_HUMAN | R.DIEIS#TEEEKDTGDLK.D            | S337:           | 2 | 2,829  | 0,135 | -1,732 |
| 13 | Q4G0J3 LARP7_HUMAN | R.DIEIS#T#EEEKDTGDLKDSSLLK.T     | S337:T338:      | 3 | 4,1851 | 0,409 | -0,418 |
| 13 | P08670 VIME_HUMAN  | R.QVQSLTCEVDALKGTNES#LER.Q       | S339:           | 3 | 3,3081 | 0,34  | 1,191  |
| 13 | Q8N6H7 ARFG2_HUMAN | K.SSR#QLDLFDDVGTAFSGPPK.Y        | S340:           | 3 | 3,5201 | 0,284 | -0,556 |
| 13 | Q8IZ21 PHAR4_HUMAN | R.S#PSPPLPTHIPPEPR.T             | S342:           | 3 | 2,6493 | 0,197 | 0,102  |
| 13 | Q09666 AHNK_HUMAN  | K.VSM*PDVELNLKS#PK.V             | S3426:          | 3 | 2,9307 | 0,217 | -0,221 |
| 13 | Q5JSH3 WDR44_HUMAN | R.SNS#GRELTDEILASVM*IK.N         | S344:           | 3 | 4,4951 | 0,379 | -0,084 |
| 13 | Q86WB0 NIPA_HUMAN  | R.SQDATFSPGSEQAEKS#PGPIVSR.T     | S344:           | 3 | 3,9611 | 0,358 | 0,149  |
| 13 | Q9Y2X3 NOL5_HUMAN  | K.YGLIYHASLVGQTS#PK.H            | S351:           | 3 | 4,1988 | 0,416 | 0,202  |
| 13 | Q8IY17 PLPL6_HUMAN | R.LFPSPGLPTRTS#PVR.G             | S353:           | 2 | 3,0218 | 0,502 | -0,286 |
| 13 | Q9NYB0 TE2IP_HUMAN | R.DDGSSM*SFYVRPS#PAK.R           | S36:            | 2 | 3,165  | 0,292 | -0,464 |
| 13 | O75143 K0652_HUMAN | R.AS#PHDVLETIFVR.K               | S361:           | 3 | 3,2515 | 0,291 | -0,234 |
| 13 | O75143 K0652_HUMAN | R.AS#PHDVLETIFVR.K               | S361:           | 2 | 2,1047 | 0,344 | -0,468 |
| 13 | Q5T4S7 UBR4_HUMAN  | R.TGS#TSSKEDDYESDAATIVQK.C       | S362:           | 3 | 6,6053 | 0,472 | -0,079 |
| 13 | Q9BVS4 RIOK2_HUMAN | R.S#SGDPEQIKEDSLSEESADAR.S       | S369:           | 3 | 4,8838 | 0,463 | -0,079 |
| 13 | Q15418 KS6A1_HUMAN | R.GFS#FVATGLM*EDDGKPR.A          | S380:           | 3 | 3,0018 | 0,382 | -0,095 |
| 13 | Q9H307 PININ_HUMAN | R.ESEKQQDS#QPEEVM*DVLEM*VENVK.H  | S381:           | 3 | 6,8556 | 0,386 | -0,437 |
| 13 | Q15326 ZMY11_HUMAN | K.KEEPEPETEAVSS#QEIPTM*PQPIEK.V  | S381:           | 3 | 4,7703 | 0,348 | 0      |
| 13 | Q14966 ZN638_HUMAN | K.NYQSQADIPIRS#PFGIVK.A          | S383:           | 3 | 3,1102 | 0,337 | 0      |
| 13 | Q14966 ZN638_HUMAN | K.NYQSQADIPIRS#PFGIVK.A          | S383:           | 2 | 2,4103 | 0,418 | -0,231 |
| 13 | Q0JRZ9 FCHO2_HUMAN | K.VSIGNITLS#PAISRHS#PVQM*NR.N    | S387:S394:      | 3 | 3,0415 | 0,157 | -0,358 |
| 13 | Q9Y2X7 GIT1_HUMAN  | R.SQSDLDDQHHDYDSVAS#DEDTDQEPLR.S | S388:           | 3 | 4,0581 | 0,601 | -0,359 |
| 13 | P26358 DNMT1_HUMAN | K.LSIFDANES#GFESYEALPQHK.L       | S394:           | 3 | 4,4373 | 0,488 | -0,52  |
| 13 | Q6T4R5 NHS_HUMAN   | R.RVQQEIDS#DES#PVAR.E            | S394:S397:      | 2 | 3,3653 | 0,261 | -0,194 |



|    |                     |                                   |                 |   |        |       |        |
|----|---------------------|-----------------------------------|-----------------|---|--------|-------|--------|
| 13 | P15260 INGR1_HUMAN  | R.ESSSPLSSNQSEPGSIALNSYHS#R.N     | S399:           | 3 | 2,8805 | 0,315 | -0,14  |
| 13 | P49736 MCM2_HUMAN   | R.RTDALTS#S#PGR.D                 | S40:S41:        | 2 | 2,8372 | 0,332 | -0,185 |
| 13 | Q99569 PKP4_HUMAN   | R.S#AVSPDLHITPIYEGR.T             | S403:           | 2 | 3,8587 | 0,424 | 0,465  |
| 13 | Q13435 SF3B2_HUMAN  | K.GFEEEHKDS#DDDS#S#DDEQEK.K       | S408:S412:S413: | 3 | 4,6213 | 0,464 | -0,354 |
| 13 | Q9ULJ3 ZN295_HUMAN  | R.SFS#ASQSTDREGASPVTEVR.I         | S411:           | 3 | 4,3767 | 0,333 | -0,084 |
| 13 | Q9Y5T5 UBP16_HUMAN  | K.TVEDEDQDS#EEEKDNDSYIK.E         | S415:           | 3 | 3,3115 | 0,413 | -0,519 |
| 13 | Q9NUL3 STAU2_HUMAN  | K.GILHLS#PDVYQEM*EASR.H           | S416:           | 3 | 4,5247 | 0,407 | 0,269  |
| 13 | O00444 PLK4_HUMAN   | R.SGGGENEERYS#PTDNNANIFNFFK.E     | S421:           | 3 | 4,3128 | 0,421 | -0,591 |
| 13 | Q92769 HDAC2_HUMAN  | K.RIACDEEFS#DS#EDEGEGGR.R         | S422:S424:      | 3 | 3,0391 | 0,287 | -0,553 |
| 13 | Q07617 SPAG1_HUMAN  | R.AS#AAAAAGGGATGHPGGGQGAENPAGLK.S | S423:           | 3 | 3,2295 | 0,334 | -0,23  |
| 13 | Q9Y490 TLN1_HUMAN   | K.DHFGLEGDEESTM*LEDSVS#PK.K       | S425:           | 3 | 3,6945 | 0,268 | 0,378  |
| 13 | Q7Z3K3 POGZ_HUMAN   | K.SLDSEPSVPSAAKPPS#PEK.T          | S425:           | 2 | 3,2652 | 0,469 | -0,426 |
| 13 | Q9C0B5 ZDHC5_HUMAN  | R.S#SSLKSAQGTGFELGQLQSIR.S        | S427:           | 3 | 3,1756 | 0,214 | -0,322 |
| 13 | Q5H9R5 Q5H9R5_HUMAN | R.VAS#ETHSEGSEYEELPK.R            | S428:           | 3 | 3,0072 | 0,164 | 0,093  |
| 13 | O43768 ENSA_HUMAN   | K.YPS#LGQKPGGSDFLM*K.R            | S43:            | 3 | 2,7539 | 0,224 | -0,1   |
| 13 | Q8NAH4 Q8NAH4_HUMAN | R.GAS#SAGEASEKEPLKGGPASC.S-       | S431:           | 3 | 3,6937 | 0,378 | -0,081 |
| 13 | O60934 NBN_HUMAN    | R.IPNYQLS#PTKLPSINK.S             | S432:           | 2 | 3,1921 | 0,28  | -0,516 |
| 13 | O95628 CNOT4_HUMAN  | K.ELSVQDQPSLS#PTSLQNSSSHTTTAK.G   | S432:           | 3 | 3,0786 | 0,156 | -0,259 |
| 13 | P18206 VINC_HUMAN   | R.DDILRS#LGEISALTSK.L             | S434:           | 3 | 3,5505 | 0,194 | -0,407 |
| 13 | Q9NPQ8 RIC8A_HUMAN  | R.GLM*AGGRPEGQYS#EDEDTDDEYK.E     | S435:           | 3 | 2,9363 | 0,093 | -0,531 |
| 13 | O94887 FARP2_HUMAN  | K.DSSSLTDPQVSYVKS#PAAER.R         | S439:           | 3 | 2,8263 | 0,34  | -0,159 |
| 13 | P47974 TISD_HUMAN   | R.RLSDS#PVFDAPSPDLSLDR.D          | S440:           | 3 | 3,7822 | 0,131 | 0,157  |
| 13 | Q9H307 PININ_HUMAN  | K.S#LSPGKENVSALDM*EK.E            | S441:           | 2 | 3,4238 | 0,276 | -0,542 |
| 13 | P85037 FOXK1_HUMAN  | R.SGGLQTPECLS#REGS#PIPHDPEFGSK.L  | S441:S445:      | 3 | 5,2533 | 0,259 | 0,435  |
| 13 | Q8IZ21 PHAR4_HUMAN  | R.AHS#LLFENSDFSSEDSSTLGR.T        | S443:           | 3 | 4,5576 | 0,364 | -0,308 |
| 13 | Q9H307 PININ_HUMAN  | K.SLS#PGKENVSALDM*EK.E            | S443:           | 3 | 4,2235 | 0,327 | 0,102  |
| 13 | Q08945 SSRP1_HUMAN  | K.EGM*NPSYDEYADS#DEDQHDAYLER.M    | S444:           | 3 | 5,0686 | 0,496 | -0,062 |
| 13 | Q7Z5K2 WAPL_HUMAN   | K.LEFFGFEDHETGGDEGGSGSS#NYK.I     | S446:           | 3 | 4,0857 | 0,465 | -0,138 |
| 13 | Q9NS69 TOM22_HUMAN  | K.GDAEKPEEELEEDDDEELDETLS#ER.L    | S45:            | 3 | 5,1576 | 0,537 | -0,061 |
| 13 | Q15459 SF3A1_HUMAN  | R.EKQS#DDEVYAPGLDISSLK.Q          | S451:           | 3 | 4,2696 | 0,386 | -0,079 |
| 13 | O60832 DKC1_HUMAN   | R.KRES#ES#ES#DETPPAAPQLIK.K       | S451:S453:S455: | 3 | 5,0879 | 0,298 | 0,672  |
| 13 | P40818 UBP8_HUMAN   | R.STKPVVFS#PTLM*LTDEEK.A          | S452:           | 3 | 2,7436 | 0,265 | -0,086 |
| 13 | Q9H223 EHD4_HUMAN   | K.DKPVYDELFTLS#PINGK.I            | S459:           | 3 | 3,5955 | 0,379 | -0,588 |

|    |                     |                                     |            |   |        |       |        |
|----|---------------------|-------------------------------------|------------|---|--------|-------|--------|
| 13 | P08670 VIME_HUMAN   | R.DGQVINETS#QHHDDLE.-               | S459:      | 3 | 3,5582 | 0,439 | 0,382  |
| 13 | Q14C86 GAPD1_HUMAN  | K.SSSLEM*TPYNTPQLS#PATTPANKK.N      | S466:      | 3 | 6,1608 | 0,445 | -0,206 |
| 13 | Q9H6F5 CCD86_HUMAN  | R.ALVEFESNPEETREPGS#PPSVQR.A        | S47:       | 3 | 4,2333 | 0,355 | 0,069  |
| 13 | O00418 EF2K_HUMAN   | R.KYSEDEDS#LGS#SGR.V                | S474:S477: | 2 | 3,1855 | 0,599 | -0,505 |
| 13 | Q1ED39 TS118_HUMAN  | R.ATS#PS#KVAHGQAPEM*PLVK.K          | S48:S50:   | 3 | 2,7472 | 0,206 | -0,248 |
| 13 | B2R6A5 B2R6A5_HUMAN | K.AAES#PDQKDTDGGPKEEESPV.-          | S483:      | 3 | 3,0127 | 0,221 | -0,161 |
| 13 | Q5VT52 K0460_HUMAN  | K.NTGVPASRSPGTPPTS#PSNLTSGLK.T      | S485:      | 3 | 3,4733 | 0,326 | 0,283  |
| 13 | Q9NQW6 ANLN_HUMAN   | K.TQS#LPVTEKVTENQIPAK.N             | S485:      | 3 | 3,3993 | 0,241 | 0      |
| 13 | Q96S66 CLCC1_HUMAN  | K.ES#STESSQSAKPVSGQDTSGNTEGSPAEEK.A | S486:      | 3 | 3,585  | 0,436 | -0,422 |
| 13 | P38432 P80C_HUMAN   | K.LLELTSS#YSPDVSDYKEGR.I            | S487:      | 3 | 4,5014 | 0,354 | 0      |
| 13 | P38432 P80C_HUMAN   | K.LLELTSSYSPDVS#DYKEGR.I            | S493:      | 3 | 2,7748 | 0,247 | 0,082  |
| 13 | Q96C34 RUND1_HUMAN  | R.KLS#QSFALPVTGGTVVTPK.Q            | S497:      | 2 | 3,2907 | 0,513 | -0,121 |
| 13 | Q02952 AKA12_HUMAN  | K.VLSKPPEGVVS#EVEM*LSSQER.M         | S498:      | 3 | 2,8648 | 0,249 | 0,076  |
| 13 | Q8N3X1 FNBP4_HUMAN  | K.IDENS#DKEM*EVEESPEK.I             | S499:      | 3 | 4,3954 | 0,269 | -0,348 |
| 13 | Q96C34 RUND1_HUMAN  | R.KLSQS#FALPVTGGTVVTPK.Q            | S499:      | 3 | 2,6364 | 0,243 | -0,091 |
| 13 | Q02535 ID3_HUMAN    | K.ALS#PVRGCYEA VCCLSER.S            | S5:        | 3 | 5,4911 | 0,374 | -0,249 |
| 13 | Q99567 NUP88_HUMAN  | K.NQSPTEAEKPASSSLPSS#PPPQLLTR.N     | S50:       | 3 | 4,7192 | 0,405 | -0,261 |
| 13 | Q12888 TP53B_HUMAN  | K.TSEIEPKNS#PEDLGLSLTGDSC.L         | S500:      | 3 | 4,7269 | 0,439 | -0,143 |
| 13 | Q8IW35 CEP97_HUMAN  | K.DDNHS#LTFFPESTEQK.Q               | S500:      | 3 | 3,1251 | 0,171 | -0,093 |
| 13 | Q13428 TCOF_HUMAN   | K.S#PQVKPASTM*GM*GPLGK.G            | S503:      | 2 | 2,8501 | 0,411 | -0,407 |
| 13 | Q02952 AKA12_HUMAN  | K.VLSKPPEGVSEVEM*LSS#QER.M          | S505:      | 3 | 3,601  | 0,287 | -0,153 |
| 13 | Q09666 AHNK_HUMAN   | K.M*YFPDVEFDIKS#PK.F                | S5099:     | 3 | 4,0474 | 0,243 | 0,101  |
| 13 | Q09666 AHNK_HUMAN   | K.M*YFPDVEFDIKS#PK.F                | S5099:     | 2 | 3,7333 | 0,503 | -0,337 |
| 13 | Q16514 TAF12_HUMAN  | K.IPGTPGAGGRS#PENNVQLTK.K           | S51:       | 3 | 3,2981 | 0,3   | 0      |
| 13 | Q86V48 LUZP1_HUMAN  | R.TFS#DTTHGVSVDPLGR.A               | S512:      | 2 | 3,1174 | 0,379 | -0,395 |
| 13 | Q86X29 LSR_HUMAN    | R.SVDALDDLTPSTAESGSR#PTSNGGR.S      | S512:      | 3 | 2,9342 | 0,306 | -0,332 |
| 13 | Q03164 HRX_HUMAN    | R.SDTPEVHPPLISQS#PENESNDR.R         | S518:      | 3 | 6,3833 | 0,468 | 0,418  |
| 13 | Q9NQW6 ANLN_HUMAN   | K.SS#PLKITLFLEEDK.S                 | S518:      | 3 | 3,4132 | 0,265 | -0,538 |
| 13 | Q16204 CCDC6_HUMAN  | K.SGGIVIS#PFRLEELTNR.L              | S52:       | 3 | 3,5665 | 0,481 | -0,837 |
| 13 | O95365 ZBT7A_HUMAN  | R.GGAPDPSPGATATPGAPAQPS#SPDARR.N    | S525:      | 3 | 4,0688 | 0,499 | -0,428 |
| 13 | Q9UPN3 MACF1_HUMAN  | R.S#SSSASQSNHSCSTM*PSSPATPASGTK.V   | S5276:     | 3 | 3,6791 | 0,263 | -0,067 |
| 13 | Q86VI3 IQGA3_HUMAN  | R.VLAVSLINEALDKGS#PEK.T             | S539:      | 2 | 4,787  | 0,457 | -0,559 |
| 13 | Q99733 NP1L4_HUMAN  | R.LDNVPHTPSS#YIETLPK.A              | S54:       | 2 | 4,4638 | 0,532 | -0,245 |

|    |                    |                                  |            |   |        |       |        |
|----|--------------------|----------------------------------|------------|---|--------|-------|--------|
| 13 | Q3KQU3 MA7D1_HUMAN | R.ASNEKESAAPAS#PAPSPAPSPTAPPQK.E | S544:      | 3 | 5,2624 | 0,426 | -0,596 |
| 13 | Q9H5J0 ZBTB3_HUMAN | R.SKPDPEVGPLLGVQPLPGS#PTADR.Q    | S549:      | 3 | 4,7645 | 0,352 | -0,073 |
| 13 | Q969Z0 TBRG4_HUMAN | R.DFVAPHLAQPTGSQS#PPPGSK.R       | S553:      | 3 | 4,7272 | 0,465 | 0,25   |
| 13 | Q5W0B1 RN219_HUMAN | K.ISELDSM*M*SESDNSKS#PCNNGFK.S   | S553:      | 3 | 4,6407 | 0,463 | -0,68  |
| 13 | Q96FV9 THOC1_HUMAN | K.TGEDEDEEDNDALLKENES#PDVR.R     | S560:      | 3 | 6,114  | 0,609 | -0,271 |
| 13 | P00519 ABL1_HUMAN  | K.GQGESDPLDHEPAVS#PLLPR.K        | S569:      | 3 | 3,3717 | 0,257 | 0      |
| 13 | P17812 PYRG1_HUMAN | R.SGSS#SPDSEITELKFPSINHD.-       | S574:      | 3 | 3,0787 | 0,326 | -0,629 |
| 13 | P17812 PYRG1_HUMAN | R.SGSS#PDSEITELKFPSINHD.-        | S575:      | 3 | 3,5361 | 0,415 | 0,157  |
| 13 | Q5JSH3 WDR44_HUMAN | K.SDTDTGVCS#GTDEDPDDKNAPFR.Q     | S582:      | 3 | 4,9539 | 0,478 | -0,213 |
| 13 | Q71RC2 LARP4_HUMAN | K.DGLNQTTIPVS#PPSTTKPSR.A        | S583:      | 3 | 3,0726 | 0,397 | -0,084 |
| 13 | Q9NVU7 SDA1_HUMAN  | K.YIEIDS#DEEPRGELLSR.D           | S585:      | 3 | 3,2323 | 0,419 | 0      |
| 13 | Q5VSL9 FA40A_HUMAN | R.KDS#EGYSESPDLEFEYADTDK.W       | S59:       | 3 | 6,487  | 0,484 | 0,073  |
| 13 | Q9Y2X7 GIT1_HUMAN  | R.HGS#GADSDYENTQSGDPLLGLEGK.R    | S592:      | 3 | 5,3171 | 0,503 | 0,507  |
| 13 | Q6Y7W6 PERQ2_HUMAN | R.VPFS#PGPAPPPHM*GELDQER.L       | S593:      | 3 | 3,5044 | 0,276 | 0,406  |
| 13 | O43683 BUB1_HUMAN  | K.TLAPS#PKS#PGDFTSAAQLASTPFHK.L  | S593:S596: | 3 | 5,0823 | 0,272 | -0,606 |
| 13 | Q96T23 RSF1_HUMAN  | K.DAQRLS#PIPEEVPK.S              | S594:      | 2 | 3,2642 | 0,184 | 0,221  |
| 13 | Q96T23 RSF1_HUMAN  | K.DAQRLS#PIPEEVPK.S              | S594:      | 3 | 3,111  | 0,303 | 0,11   |
| 13 | O43683 BUB1_HUMAN  | K.S#PGDFTSAAQLASTPFHK.L          | S596:      | 2 | 2,9626 | 0,579 | -0,44  |
| 13 | O43683 BUB1_HUMAN  | K.S#PGDFTSAAQLASTPFHK.L          | S596:      | 3 | 2,6678 | 0,267 | 0,094  |
| 13 | Q9UNL2 SSRG_HUMAN  | K.GS#SKQQSEEDLLLQDFSR.N          | S6:        | 3 | 4,4296 | 0,242 | -0,852 |
| 13 | Q99543 DNJC2_HUMAN | K.KELS#EESEDEELQLEEFPM*LK.T      | S60:       | 3 | 4,4598 | 0,337 | -0,622 |
| 13 | P51116 FXR2_HUMAN  | R.TDGSIS#GDRQPVTVADYISR.A        | S603:      | 3 | 3,6215 | 0,304 | -0,33  |
| 13 | Q9UQL6 HDAC5_HUMAN | K.DEEGES#GAEEGPDLEEPGAGYKK.L     | S611:      | 3 | 3,9625 | 0,221 | -0,296 |
| 13 | Q9P2H5 UBP35_HUMAN | R.LGS#VM*RPTEDITAR.E             | S612:      | 3 | 3,0092 | 0,326 | 0      |
| 13 | P49790 NU153_HUMAN | K.EGSVLDILKS#PGFASPK.I           | S614:      | 2 | 2,9075 | 0,446 | -0,802 |
| 13 | Q2KHR3 QSER1_HUMAN | R.SNS#RLEDQVIGVALQASK.K          | S615:      | 2 | 4,8192 | 0,553 | -0,734 |
| 13 | Q2KHR3 QSER1_HUMAN | R.SNS#RLEDQVIGVALQASK.K          | S615:      | 3 | 4,6904 | 0,276 | -0,734 |
| 13 | Q8TE76 MORC4_HUMAN | K.S#SSERSTPPYLFPEYPEASK.N        | S615:      | 3 | 2,7456 | 0,262 | -0,156 |
| 13 | Q96PN7 TREF1_HUMAN | R.DKPASS#M*SDDEM*PVLEIPR.K       | S619:      | 3 | 3,5334 | 0,298 | -0,246 |
| 13 | Q8IXK0 PHC2_HUMAN  | K.LPQQDHTTTTDS#EM*EEPYLQESK.E    | S621:      | 3 | 5,2468 | 0,415 | -0,522 |
| 13 | O43719 HTSF1_HUMAN | R.EFDEDS#DEKEEEEEDTYEK.V         | S624:      | 3 | 3,5747 | 0,195 | -0,39  |
| 13 | Q8IZ40 RCOR2_HUMAN | R.VGTNYQAVIPECKPES#PAR.Y         | S63:       | 3 | 3,9693 | 0,169 | -0,167 |
| 13 | P49848 TAF6_HUMAN  | K.GGPTSHPSVPASS#PSPLSGSALCGGK.Q  | S634:      | 3 | 4,5414 | 0,246 | -0,53  |

|    |                     |                                   |                 |   |        |       |        |
|----|---------------------|-----------------------------------|-----------------|---|--------|-------|--------|
| 13 | Q8WXH0 SYNE2_HUMAN  | R.LTSCPTGLEDEKEAS#ENETDM*EDPR.E   | S6361:          | 3 | 4,2128 | 0,451 | -0,372 |
| 13 | Q58EX7 PKHG4_HUMAN  | K.DPGPPRPPAGATQDEELQGS#PLSR.K     | S64:            | 3 | 5,2749 | 0,42  | -0,215 |
| 13 | Q6P6C2 ALKB5_HUMAN  | K.YQEDS#DPERSDYEEQLQK.E           | S64:            | 3 | 5,1451 | 0,481 | -0,297 |
| 13 | O95394 AGM1_HUMAN   | K.STIGVM*VTAS#HNPEEDNGVK.L        | S64:            | 3 | 3,0864 | 0,245 | -0,084 |
| 13 | O43719 HTSF1_HUMAN  | K.VFDDES#DEKEDEEYADEK.G           | S642:           | 3 | 4,4494 | 0,463 | 0,242  |
| 13 | P49756 RBM25_HUMAN  | K.LPVDSVFNKFEDEDS#DDVPR.K         | S644:           | 3 | 4,8836 | 0,447 | -0,305 |
| 13 | Q8IY81 RRMJ3_HUMAN  | R.GPKS#DDDGFEIVPIEDPAK.H          | S644:           | 2 | 4,552  | 0,484 | -0,463 |
| 13 | Q7L590 MCM10_HUMAN  | R.GVLEGDDVLFYDES#PPPRPK.L         | S644:           | 3 | 3,2116 | 0,203 | 0      |
| 13 | Q6ZRV2 FA83H_HUMAN  | R.VPAAFPTKVPVPGPGS#GGNGPER.E      | S647:           | 3 | 3,7532 | 0,204 | -0,081 |
| 13 | Q7Z6Z7 HUWE1_HUMAN  | R.RSS#DPLGDTASNLGSAVDELM*R.H      | S649:           | 3 | 4,6784 | 0,378 | -0,383 |
| 13 | Q86V48 LUZP1_HUMAN  | R.EKPDS#DDDLDIASLVTA.L            | S659:           | 3 | 4,1787 | 0,354 | 0,091  |
| 13 | Q641Q2 FA21A_HUMAN  | K.KTS#LFEDEEDDLFAIAK.D            | S663:           | 3 | 5,3038 | 0,466 | -0,252 |
| 13 | Q9P275 UBP36_HUMAN  | K.LKS#PVLNNTTTEPASTM*SPPPAK.K     | S667:           | 3 | 4,2151 | 0,357 | 0      |
| 13 | O75665 OFD1_HUMAN   | K.S#PPSLHLLLEAFK.N                | S669:           | 2 | 2,2832 | 0,326 | -0,43  |
| 13 | Q08945 SSRP1_HUMAN  | K.SKEFVSSDESS#S#GENK.S            | S672:S673:      | 2 | 2,9615 | 0,403 | -0,325 |
| 13 | Q53TX8 Q53TX8_HUMAN | R.DSPLQGSQGQNSQAGQRNS#TSSIEPR.L   | S673:           | 3 | 4,0254 | 0,468 | -0,456 |
| 13 | Q92610 ZN592_HUMAN  | K.HGLTS#GSASPPPALPLYDPVR.L        | S687:           | 3 | 2,994  | 0,113 | -0,152 |
| 13 | Q8TEW0 PARD3_HUMAN  | K.SPGS#PPGPELPIETALDDRER.R        | S695:           | 3 | 2,8263 | 0,461 | -0,395 |
| 13 | P06748 NPM_HUMAN    | K.DELHIVEAEAM*NYEGS#PIK.V         | S70:            | 3 | 5,2869 | 0,411 | 0      |
| 13 | O43719 HTSF1_HUMAN  | K.LFEDDDS#NEKLFDEEEDSSEK.L        | S702:           | 3 | 5,4907 | 0,425 | -0,422 |
| 13 | Q9UER7 DAXX_HUMAN   | R.VDSPSHGLVTSSLCIPS#PAR.L         | S702:           | 3 | 3,8184 | 0,321 | 0      |
| 13 | Q02543 RL18A_HUMAN  | K.SSGEIVYCGQVFEKS#PLR.V           | S71:            | 3 | 2,7572 | 0,277 | 0,6    |
| 13 | O43719 HTSF1_HUMAN  | K.LFDEEEDS#SEKLFDDSDER.G          | S713:           | 3 | 5,1119 | 0,457 | 0,077  |
| 13 | P26358 DNMT1_HUMAN  | K.EADDDEEVDNIPEM*PS#PKK.M         | S714:           | 3 | 3,3352 | 0,44  | -0,232 |
| 13 | O15063 K0355_HUMAN  | R.APQAGAHTLTPQPLAPQQS#PK.Q        | S723:           | 3 | 4,8613 | 0,389 | -0,073 |
| 13 | Q5TCQ9 MAGI3_HUMAN  | R.SGS#PKLDPSEVYLK.S               | S724:           | 2 | 3,6798 | 0,275 | -0,534 |
| 13 | Q92615 LARP5_HUMAN  | K.RLS#REQST#PPKS#PQ.-             | S727:T732:S736: | 2 | 3,4288 | 0,508 | -0,593 |
| 13 | Q9Y6Q9 NCOA3_HUMAN  | K.DTSSITSCGDGNVVKQEQLS#PK.K       | S728:           | 3 | 2,8541 | 0,365 | 0,075  |
| 13 | Q66K74 MAP1S_HUMAN  | R.S#AS#PHDVDLCLVSPCFEHR.K         | S729:S731:      | 3 | 2,6599 | 0,303 | -0,291 |
| 13 | Q12906 ILF3_HUMAN   | K.GSSEQAESDNM*DVPPEDDS#KEGAGEQK.T | S73:            | 3 | 4,0523 | 0,46  | -0,499 |
| 13 | Q32MZ4 LRRF1_HUMAN  | R.CTLPEHES#PSQDISDACEAESTER.C     | S733:           | 3 | 6,2615 | 0,549 | -0,323 |
| 13 | Q8N4C8 MINK1_HUMAN  | R.GTPKPPGPPAQPPGNASS#NPDLR.R      | S733:           | 3 | 4,3153 | 0,356 | 0,145  |
| 13 | Q9UKI8 TLK1_HUMAN   | R.RS#NSSGNLHM*AGLTASPTPPSSSIITY.- | S741:           | 3 | 3,4168 | 0,228 | -0,451 |

|    |                     |                                     |                 |   |        |       |        |
|----|---------------------|-------------------------------------|-----------------|---|--------|-------|--------|
| 13 | Q8TDD1 DDX54_HUMAN  | K.LGPGRPLPTFTSECTS#DVEPDTR.E        | S75:            | 3 | 4,8733 | 0,493 | -0,338 |
| 13 | P50502 F10A1_HUMAN  | K.KVEEDLKADEPS#S#EES#DLEIDK.E       | S75:S76:S79:    | 3 | 7,1344 | 0,473 | -0,267 |
| 13 | Q8IYB3 SRRM1_HUMAN  | R.RVSS#RS#VS#GSPEPAK.K              | S750:S752:S754: | 3 | 2,6006 | 0,115 | -0,188 |
| 13 | Q9NRA8 4ET_HUMAN    | K.ASEENLLSSSVPSADRDS#SPTTNSK.L      | S751:           | 3 | 3,8027 | 0,322 | -0,4   |
| 13 | P07737 PROF1_HUMAN  | K.CSVIRDS#LLQDGEFSM*DLR.T           | S77:            | 3 | 6,1929 | 0,419 | -0,548 |
| 13 | Q99856 ARI3A_HUMAN  | R.AAAAGLGHPPAS#PGGSEDPGPPGSEEDAAR.E | S77:            | 3 | 5,7815 | 0,303 | -0,401 |
| 13 | O75044 FNBP2_HUMAN  | R.S#SPKSEIEVISEPPEEK.V              | S795:           | 2 | 2,9797 | 0,379 | -0,248 |
| 13 | O75044 FNBP2_HUMAN  | R.SS#PKSEIEVISEPPEEK.V              | S796:           | 3 | 2,8095 | 0,087 | 0      |
| 13 | Q9H3Z4 DNJC5_HUMAN  | R.S#LSTSGESLYHVLGLDK.N              | S8:             | 2 | 3,0511 | 0,47  | -0,712 |
| 13 | Q6N043 Z280D_HUMAN  | K.SEESITVS#DKENETCLADQETGSK.N       | S806:           | 3 | 4,144  | 0,103 | -0,401 |
| 13 | P06400 RB_HUMAN     | R.IPGGNIYIS#PLKSPYK.I               | S807:           | 3 | 3,1486 | 0,327 | 0      |
| 13 | Q92628 K0232_HUMAN  | K.NFETTQVCNES#PHGDGYSSGVK.D         | S814:           | 3 | 4,7871 | 0,483 | -0,351 |
| 13 | O94762 RECQ5_HUMAN  | K.YTGEEDGAGGHS#PAPPQTEELR.E         | S815:           | 3 | 4,7938 | 0,342 | 0,072  |
| 13 | Q96JP5 ZFP91_HUMAN  | R.S#SPSARPPDVPGQPQAAK.S             | S82:            | 3 | 2,7724 | 0,272 | -0,183 |
| 13 | Q5H9R7 SAPS3_HUMAN  | K.LSTS#QDAACKDAECPETAEAK.C          | S825:           | 3 | 5,1139 | 0,432 | -0,734 |
| 13 | Q14008 CKAP5_HUMAN  | K.HS#TSGTDEGEDGDEPDDGSNDVVDLLPR.T   | S828:           | 3 | 2,8246 | 0,166 | -0,061 |
| 13 | O75530 O75530_HUMAN | R.NM*SEREVS#TAPAGTDM*PAAK.K         | S83:            | 3 | 2,9075 | 0,104 | -0,252 |
| 13 | Q6NWWY9 PR40B_HUMAN | R.ELQQAELPNRS#PGFGIK.K              | S832:           | 3 | 2,6711 | 0,206 | -0,186 |
| 13 | Q9C0C9 UBE2O_HUMAN  | K.NM*TVEQLLTGSPTS#PTVEPEKPTR.E      | S839:           | 3 | 5,7229 | 0,546 | 0,54   |
| 13 | Q9NPF0 CD320_HUMAN  | R.DLDCSDGS#DEEECRIEPTQK.G           | S84:            | 3 | 3,2952 | 0,226 | -0,07  |
| 13 | Q9ULJ8 NEB1_HUMAN   | R.TS#LGEVSKGDTM*ENLDGK.Q            | S840:           | 3 | 3,0086 | 0,343 | -0,093 |
| 13 | Q9ULJ8 NEB1_HUMAN   | R.TS#LGEVSKGDTM*ENLDGK.Q            | S840:           | 2 | 2,0063 | 0,277 | -0,123 |
| 13 | Q9NZ71 RTEL1_HUMAN  | R.AGS#PGEEQAHSCTLSLLSEK.R           | S847:           | 3 | 3,819  | 0,386 | 0,081  |
| 13 | P16333 NCK1_HUMAN   | R.KPS#VPDSASPADDVDPGER.L            | S85:            | 3 | 3,4586 | 0,275 | 0,406  |
| 13 | Q7Z4S6 KI21A_HUMAN  | R.KLSS#SDAPAQDTGSSAAAVETDASR.T      | S854:           | 3 | 6,3913 | 0,509 | -0,219 |
| 13 | Q9Y5B0 CTDP1_HUMAN  | K.EDLESM*DKEVDLILGEGSDDS#DSEK.R     | S872:           | 3 | 3,7091 | 0,201 | -0,257 |
| 13 | Q8NCF5 NF2IP_HUMAN  | R.DNS#NS#DS#EGEDRRPAGPPR.E          | S88:S90:S92:    | 3 | 3,1385 | 0,256 | -0,239 |
| 13 | P05114 HMG1_HUMAN   | K.EDLPAENGETKTEESPAS#DEAGEK.E       | S89:            | 3 | 3,6833 | 0,319 | -0,49  |
| 13 | Q9UPN4 AZI1_HUMAN   | R.SGS#PRPTEPTDFLM*LFEFS#PSGKK.R     | S89:S105:       | 3 | 4,2472 | 1     | -0,601 |
| 13 | O60841 IF2P_HUMAN   | K.NKS#EDS#TKDDIDLALAAEIEGAGAAK.E    | S9:S12:         | 3 | 3,1248 | 0,334 | -0,566 |
| 13 | Q02241 KIF23_HUMAN  | R.GGGQSVQFTDIETLKQES#PNGSR.K        | S902:           | 3 | 3,7208 | 0,119 | -0,291 |
| 13 | Q70E73 RAPH1_HUMAN  | K.QQSFCAKPPPS#PLSPVPSVVK.Q          | S905:           | 3 | 3,6321 | 0,295 | 0,707  |
| 13 | Q70E73 RAPH1_HUMAN  | K.QQSFCAKPPPSPLS#PVPSVVK.Q          | S908:           | 3 | 3,3626 | 0,363 | 0,236  |

|    |                     |                                    |                 |   |        |       |        |
|----|---------------------|------------------------------------|-----------------|---|--------|-------|--------|
| 13 | O76021 RL1D1_HUMAN  | R.SDS#EDICLFTKDEPNSTPEK.T          | S92:            | 3 | 3,069  | 0,264 | 0,688  |
| 13 | Q9ULH7 MKL2_HUMAN   | K.SGEISLPKIEEPS#PISK.M             | S921:           | 2 | 2,714  | 0,371 | 0,645  |
| 13 | Q9Y6Y8 S23IP_HUMAN  | K.VVES#PDFSKDEEDYLGK.V             | S926:           | 2 | 3,2626 | 0,564 | -0,32  |
| 13 | Q86SQ0 PHLB2_HUMAN  | K.AHLPLGQSNS#CGSVLPPSLAAM*AK.D     | S934:           | 3 | 4,6297 | 0,326 | -0,146 |
| 13 | Q14573 ITPR3_HUMAN  | R.KQS#VFSAPSLGASAAEPLDR.S          | S934:           | 3 | 3,6312 | 0,257 | 0,323  |
| 13 | Q9UJF2 NGAP_HUMAN   | R.SHESLLS#PCSTVECLDLGR.G           | S95:            | 3 | 3,0476 | 0,271 | 0      |
| 13 | Q9UQ35 SRRM2_HUMAN  | R.RS#RS#VS#PCSNVESR.L              | S950:S952:S954: | 3 | 3,0137 | 0,17  | -0,492 |
| 13 | Q5VY92 Q5VY92_HUMAN | R.LQDSSDPDTGSEEEGS#SRLSPPHS#PR.D   | S952:S960:      | 3 | 4,1529 | 1     | -0,438 |
| 13 | Q96Q05 NIBP_HUMAN   | R.M*AIQVDKFNFEFES#PGEK.G           | S953:           | 3 | 4,2639 | 0,226 | -0,229 |
| 13 | Q8IXM2 CQ049_HUMAN  | K.VYEDSGIPLPAES#PKK.G              | S96:            | 3 | 3,7037 | 0,435 | 0,404  |
| 13 | P46379 BAT3_HUMAN   | R.AS#PEPQRENASPAGTTAEEAM*SR.G      | S964:           | 3 | 5,607  | 0,414 | 0,284  |
| 13 | Q96N67 DOCK7_HUMAN  | R.M*SS#HTETSFLQTLTGR.L             | S964:           | 2 | 3,5201 | 0,55  | -0,37  |
| 13 | Q9BPX3 CND3_HUMAN   | R.CQTAEADS#ESDHEVPEPESEM*K.M       | S973:           | 3 | 4,3568 | 0,326 | -0,492 |
| 13 | P46379 BAT3_HUMAN   | R.ASPEPQRENAS#PAPGTTAEEAM*SR.G     | S973:           | 3 | 3,6964 | 0,263 | -0,496 |
| 13 | Q9BPX3 CND3_HUMAN   | R.CQTAEADSES#DHEVPEPESEM*K.M       | S975:           | 3 | 4,022  | 0,43  | -0,07  |
| 13 | P13861 KAP2_HUMAN   | R.RVS#VCAETYNPDEEEEDTDP.R.V        | S99:            | 3 | 4,6563 | 0,422 | -0,141 |
| 13 | Q96S90 LYSM1_HUMAN  | R.DLFNGLDS#EEEKDGEEK.V             | S99:            | 2 | 2,2994 | 0,405 | -0,18  |
| 13 | P17096 HMGA1_HUMAN  | K.KLEKEEEEGIS#QES#S#EEEQ.-         | S99:S102:S103:  | 3 | 3,225  | 0,32  | -0,148 |
| 13 | Q86W92 LIPB1_HUMAN  | K.EDDM*FKDFAARS#PSASITDEDSNV.-     | S999:           | 3 | 3,9919 | 0,43  | -0,734 |
| 13 | Q96FF9 CDCA5_HUMAN  | K.T#HSVPATPTSTVPVNPEAESSEK.E       | T105:           | 3 | 2,6292 | 0,142 | -0,152 |
| 13 | P42684 ABL2_HUMAN   | K.AGRPVM*PPPQVPLPT#SSISPAK.M       | T1050:          | 3 | 3,6914 | 0,291 | 0      |
| 13 | P46013 KI67_HUMAN   | R.T#PKEEAQSLEDLAGFK.E              | T1091:          | 2 | 3,3135 | 0,333 | -0,53  |
| 13 | P46013 KI67_HUMAN   | R.T#PKEEAQSLEDLAGFK.E              | T1091:          | 3 | 2,8632 | 0,302 | -0,099 |
| 13 | O60264 SMCA5_HUMAN  | K.QTELFHFQIPAAQKTPT#S#PLK.M        | T115:S116:      | 3 | 4,0756 | 0,334 | -0,42  |
| 13 | Q8WXI9 P66B_HUMAN   | R.GRLT#PSPDIIVLSDNEASSPR.S         | T120:           | 3 | 3,2504 | 0,157 | -0,079 |
| 13 | P20020 AT2B1_HUMAN  | R.IEDSEPHIPLDDT#DAEDDAPTK.R        | T1203:          | 3 | 4,5703 | 0,402 | -0,49  |
| 13 | Q6IA86 ELP2_HUMAN   | R.RT#SDPALCTLIVSAAADSAVR.L         | T121:           | 3 | 4,9988 | 0,336 | -0,568 |
| 13 | Q92870 APBB2_HUMAN  | K.NLSPT#AVINITSEKLEK.E             | T125:           | 2 | 2,6474 | 0,497 | -0,367 |
| 13 | Q9UPT8 ZC3H4_HUMAN  | K.T#GSGSPFAGNS#PAREGEQDAASLKDVFK.G | T1265:S1275:    | 3 | 3,2879 | 0,33  | -0,184 |
| 13 | Q9UQ35 SRRM2_HUMAN  | K.AGM*SSNQSISSPVLDAVPRT#PSR.E      | T1413:          | 3 | 4,9902 | 0,348 | -0,373 |
| 13 | Q9ULW0 TPX2_HUMAN   | R.CAT#PVIIDEILPSKK.M               | T147:           | 3 | 3,1367 | 0,376 | -0,415 |
| 13 | P00338 LDHA_HUMAN   | K.DQLIYNLLKEEQT#PQNK.I             | T18:            | 3 | 4,3424 | 0,331 | -0,425 |
| 13 | Q9NQR1 SETD8_HUMAN  | K.SEAAPPKT#PPSSCDSTNAIAK.Q         | T181:           | 3 | 3,5893 | 0,312 | -0,228 |

|    |                     |                                    |            |   |        |       |        |
|----|---------------------|------------------------------------|------------|---|--------|-------|--------|
| 13 | Q86YP4 P66A_HUMAN   | K.EATAQKPTGSVGVSTVTT#PPPLVR.G      | T189:      | 3 | 4,5951 | 0,415 | 0,231  |
| 13 | P21796 VDAC1_HUMAN  | R.DVFT#KGYGFGLIK.L                 | T19:       | 2 | 2,844  | 0,186 | -0,72  |
| 13 | Q15527 SURF2_HUMAN  | K.DLGSTEDGDGT#DDFLTDKEDEK.A        | T190:      | 3 | 4,5761 | 0,516 | -0,295 |
| 13 | Q15527 SURF2_HUMAN  | K.DLGSTEDGDGTDDFLT#DKKEDEK.A       | T195:      | 3 | 3,7702 | 0,408 | -0,442 |
| 13 | Q9UGJ0 AAKG2_HUMAN  | R.FCPSSFQSPT#RPPLAS#PTHYAPSK.A     | T213:S219: | 3 | 4,6899 | 1     | 0,324  |
| 13 | P49792 RBP2_HUMAN   | R.LLLDIPLQT#PHK.L                  | T2153:     | 3 | 2,7523 | 0,176 | 0,062  |
| 13 | P49792 RBP2_HUMAN   | R.LLLDIPLQT#PHK.L                  | T2153:     | 2 | 2,5187 | 0,272 | -0,249 |
| 13 | O60271 JIP4_HUMAN   | K.ERPISLGIFPLPAGDGLLT#PDAQK.G      | T217:      | 3 | 4,0445 | 0,331 | -0,425 |
| 13 | Q5JTV8 TOIP1_HUMAN  | K.VNFSEEGET#EEDDQDSSHSSVTTVK.A     | T220:      | 3 | 5,3524 | 0,423 | -0,194 |
| 13 | Q16181 SEPT7_HUMAN  | K.IYEFPET#DDEEENKLVK.K             | T228:      | 3 | 2,9546 | 0,165 | 0,336  |
| 13 | P78345 RPP38_HUMAN  | R.ELLDT#SFEDLSKPK.R                | T234:      | 2 | 2,7487 | 0,096 | -0,287 |
| 13 | P54578 UBP14_HUMAN  | K.LEAIEDDSVKETDSSSASAAT#PSK.K      | T235:      | 3 | 5,6368 | 0,465 | 0      |
| 13 | P04049 RAF1_HUMAN   | R.ST#STPNVHM*VSTTLPVDSR.M          | T258:      | 2 | 2,1411 | 0,38  | -0,23  |
| 13 | A8K1N6 A8K1N6_HUMAN | K.M*LGQKAT#PPPS#PLSELLKK.G         | T264:S268: | 3 | 3,5    | 0,256 | -0,787 |
| 13 | Q9UBU7 DBF4A_HUMAN  | R.IQT#DGDGYGGSITLQLK.E             | T273:      | 3 | 6,1153 | 0,432 | 0,089  |
| 13 | Q8N6T7 SIRT6_HUMAN  | R.ALPLPRPPT#PK.L                   | T294:      | 2 | 2,0598 | 0,107 | -0,268 |
| 13 | Q15942 ZYX_HUMAN    | K.LGHPEALSAGT#GSPQPPSFTYAQQR.E     | T306:      | 3 | 3,8335 | 0,358 | -0,547 |
| 13 | P62136 PP1A_HUMAN   | K.YGQFSGLNPGGRPIT#PPR.N            | T320:      | 3 | 3,1903 | 0,336 | -0,092 |
| 13 | Q4G0J3 LARP7_HUMAN  | R.DIEIST#EEEKDTGDLK.D              | T338:      | 3 | 3,6515 | 0,409 | 0,289  |
| 13 | Q86U44 MTA70_HUMAN  | K.DHT#PSQELALTSVGGDSSADR.L         | T348:      | 3 | 4,1661 | 0,333 | 0,156  |
| 13 | P06400 RB_HUMAN     | K.SNLDEEVNVIPT#PVR.T               | T373:      | 3 | 3,9155 | 0,345 | -0,275 |
| 13 | P15056 BRAF1_HUMAN  | R.DQGFGRDGGSTGLSAT#PPASLPGSLTNVK.A | T401:      | 3 | 3,9354 | 0,33  | -0,431 |
| 13 | Q9NPF5 DMAP1_HUMAN  | K.DTIIDVVGAPLT#PNSRK.R             | T445:      | 2 | 3,0575 | 0,388 | -0,455 |
| 13 | P08670 VIME_HUMAN   | R.DGQVINET#SQHHDDLE.-              | T458:      | 2 | 2,7175 | 0,206 | -0,191 |
| 13 | Q99733 NP1L4_HUMAN  | R.LDNVPHT#PSSYIETLPK.A             | T51:       | 2 | 3,8917 | 0,39  | -0,245 |
| 13 | Q99733 NP1L4_HUMAN  | R.LDNVPHT#PSSYIETLPK.A             | T51:       | 3 | 3,6632 | 0,324 | 0      |
| 13 | Q6PKG0 LARP1_HUMAN  | R.AVT#PVPTKTEEVSNLK.T              | T526:      | 2 | 3,4484 | 0,424 | -0,136 |
| 13 | O75676 KS6A4_HUMAN  | R.DLKPENILYADDT#PGAPVK.I           | T542:      | 3 | 3,3802 | 0,339 | -0,343 |
| 13 | Q59FH2 Q59FH2_HUMAN | K.RLEDEQPST#LS#PK.K                | T570:S572: | 2 | 2,3403 | 0,196 | -0,294 |
| 13 | Q6PJG2 CN043_HUMAN  | R.ST#RIPGTDAQQAEDM*NVK.L           | T573:      | 2 | 2,2532 | 0,414 | -0,688 |
| 13 | Q86XJ1 GA2L3_HUMAN  | K.SALNLNQPVSVSSVSPVKAT#QK.S        | T575:      | 3 | 2,9249 | 0,118 | -0,157 |
| 13 | Q9Y4B5 K0802_HUMAN  | R.DHAPSIPT#SPFGDSLESSTELR.R        | T612:      | 3 | 5,0806 | 0,629 | -0,604 |
| 13 | Q5H9R7 SAPS3_HUMAN  | K.HIAFT#PES#QR.R                   | T631:S634: | 2 | 2,4844 | 0,43  | 0      |

|    |                     |                                  |            |   |        |       |        |
|----|---------------------|----------------------------------|------------|---|--------|-------|--------|
| 13 | P04049 RAF1_HUMAN   | R.AAHTEDINACTLTT#SPRLPVF.-       | T641:      | 3 | 3,0476 | 0,179 | -0,458 |
| 13 | Q8ND04 CQ071_HUMAN  | K.LDHINFPVFEPST#PDPAPAK.N        | T657:      | 3 | 3,4469 | 0,211 | -0,161 |
| 13 | Q9H3R5 CENPH_HUMAN  | K.SM*VDASEEKT#PEQIM*QEK.Q        | T68:       | 3 | 2,8315 | 0,249 | -0,501 |
| 13 | Q9NSM8 Q9NSM8_HUMAN | K.DAQQVEPEGQEKPSPAT#VR.S         | T693:      | 3 | 2,7588 | 0,203 | -0,085 |
| 13 | Q13435 SF3B2_HUMAN  | K.IEEAM*DGSET#PQLFTVLPEKR.T      | T757:      | 3 | 5,8975 | 0,545 | -0,294 |
| 13 | P13489 RINI_HUMAN   | R.SNELGDVGVHCVLQGLQT#PSCK.I      | T82:       | 3 | 4,2791 | 0,463 | -0,221 |
| 13 | P27816 MAP4_HUMAN   | K.TTTAAAVASTGPSSRSPST#LLPK.K     | T828:      | 3 | 3,1993 | 0,354 | 0,16   |
| 13 | Q15651 HMG3_HUMAN   | K.EGTAPSENGET#KAEAAQKTESVDNEGE.- | T83:       | 3 | 3,7572 | 0,32  | -0,565 |
| 13 | Q9UQ35 SRRM2_HUMAN  | K.SGT#PPRQGSITSPQANEQSVTPQR.R    | T848:      | 3 | 3,8581 | 0,384 | -0,633 |
| 13 | Q9Y2K5 R3HD2_HUMAN  | R.QALKSAST#DLGTADVVLGR.V         | T856:      | 3 | 2,6132 | 0,177 | 0,646  |
| 13 | Q9P1Y6 K1542_HUMAN  | R.GAVAAEGASDT#EREPTESQGLAAR.L    | T917:      | 3 | 4,5339 | 0,331 | -0,425 |
| 13 | Q96N67 DOCK7_HUMAN  | R.M*SSHT#ETSSFLQTLTGR.L          | T966:      | 3 | 4,3307 | 0,449 | 0,277  |
| 13 | O95218 ZBRAB2_HUMAN | R.ENVEY#IEREESDGEYDEFGR.K        | Y114:      | 3 | 3,0273 | 0,199 | -0,288 |
| 13 | Q7RTX1 TS1R1_HUMAN  | K.Y#QVET#MVLLLQK.F               | Y194:T198: | 2 | 2,217  | 0,09  | -1,051 |
| 13 | Q13367 AP3B2_HUMAN  | K.AFY#GSEEDEAKGAGSEETAAAAAPSR.K  | Y270:      | 3 | 4,1667 | 0,402 | -0,345 |
| 13 | P78310 CXAR_HUMAN   | R.SY#IGSNHSSLGSM*SPSNM*EGYSK.T   | Y294:      | 3 | 4,1265 | 0,329 | -0,434 |
| 13 | Q8WXH0 SYNE2_HUMAN  | R.RGSM*SY#LAAVEEEVEESSVK.S       | Y4111:     | 3 | 4,3018 | 0,212 | -0,398 |
| 13 | Q96D46 NMD3_HUMAN   | K.NVNII#RDSAIPVESDDEGAPR.I       | Y459:      | 3 | 4,7569 | 0,433 | -0,21  |
| 13 | Q96JH7 VCIP1_HUMAN  | R.DGPSSAPATPTKAPY#SPTTSK.E       | Y767:      | 3 | 2,6364 | 0,145 | -0,256 |
| 13 | Q13523 PRP4B_HUMAN  | K.LCDFGSASHVADNDITPY#LVSR.F      | Y849:      | 3 | 5,8838 | 0,371 | 0,145  |
| 13 | P14618 KPYM_HUMAN   | K.GADFLVTEVENGSLGSK.K            |            | 2 | 5,6427 | 0,508 | -0,274 |
| 13 | Q9P2E9 RRBP1_HUMAN  | R.DAQDVQASQAEADQQQTR.L           |            | 2 | 5,5601 | 0,616 | -0,491 |
| 13 | O14929 HAT1_HUMAN   | K.VDENFDCVEADDVEGK.I             |            | 2 | 5,5148 | 0,527 | 0,729  |
| 13 | P04818 TYSY_HUMAN   | R.DM*ESDYSGGVDQLQR.V             |            | 2 | 5,4907 | 0,441 | -0,596 |
| 13 | P07900 HS90A_HUMAN  | R.NPDDITNEEYGEFYK.S              |            | 2 | 5,3806 | 0,465 | 0,399  |
| 13 | Q14247 SRC8_HUMAN   | K.NASTFEDVTQVSSAYQK.T            |            | 2 | 5,2794 | 0,407 | -0,325 |
| 13 | Q13813 SPTA2_HUMAN  | R.SSLSSAQADFNQLAELDR.Q           |            | 2 | 5,1566 | 0,469 | -0,625 |
| 13 | P24534 EF1B_HUMAN   | K.SPAGLQVLNDYLADK.S              |            | 2 | 4,9384 | 0,606 | -0,609 |
| 13 | Q9NTJ3 SMC4_HUMAN   | R.TESPATAAETASEELDNR.S           |            | 2 | 4,9024 | 0,519 | -0,064 |
| 13 | P07237 PDIA1_HUMAN  | K.VDATEESDLAQQYGVR.G             |            | 3 | 4,8736 | 0,428 | -0,103 |
| 13 | P35241 RADI_HUMAN   | K.NQEQLAAELAEFTAK.I              |            | 2 | 4,8599 | 0,556 | -0,367 |
| 13 | P61289 PSME3_HUMAN  | R.TVESEAASYLDQISR.Y              |            | 2 | 4,85   | 0,378 | -0,512 |
| 13 | Q02952 AKA12_HUMAN  | K.GLAEVQQDGEAEEGATSDGEEK.K       |            | 3 | 4,8271 | 0,444 | -0,518 |



|    |                     |                               |   |        |       |        |
|----|---------------------|-------------------------------|---|--------|-------|--------|
| 13 | P05198 IF2A_HUMAN   | R.ENAEVDGDDDAEEM*EAK.A        | 2 | 4,8124 | 0,52  | -0,583 |
| 13 | Q6S8J3 A26CA_HUMAN  | K.SYELPDGQVITIGNER.F          | 2 | 4,7687 | 0,41  | -0,409 |
| 13 | P51149 RAB7A_HUMAN  | K.EAINVEQAFQTIAR.N            | 2 | 4,7536 | 0,422 | -0,307 |
| 13 | Q92598 HS105_HUMAN  | R.SQFEELCAELLQK.I             | 3 | 4,7492 | 0,388 | -0,115 |
| 13 | Q13561 DCTN2_HUMAN  | R.ENLATVEGNFASIDER.M          | 2 | 4,6836 | 0,538 | -0,415 |
| 13 | P50395 GDIB_HUMAN   | R.TDDYLDQPCYETINR.I           | 2 | 4,6564 | 0,439 | -0,321 |
| 13 | P19447 ERCC3_HUMAN  | R.NSEGEATELITETFTSK.S         | 2 | 4,6408 | 0,535 | -0,526 |
| 13 | Q9Y2X3 NOL5_HUMAN   | R.YDAFGEDSSSAM*GVENR.A        | 2 | 4,6338 | 0,609 | -0,264 |
| 13 | Q12849 GRSF1_HUMAN  | R.GDALIEM*ESEQDVQK.A          | 2 | 4,6057 | 0,451 | -0,5   |
| 13 | O14818 PSA7_HUMAN   | K.NYTDEAIETDDLTIK.L           | 2 | 4,6003 | 0,535 | -0,35  |
| 13 | P78527 PRKDC_HUMAN  | R.DPESETDNDSQEIFK.L           | 2 | 4,5788 | 0,58  | -0,278 |
| 13 | Q9NTJ3 SMC4_HUMAN   | R.TESPATAAETASEELDNR.S        | 3 | 4,5704 | 0,449 | 0      |
| 13 | Q9NZM1 MYOF_HUMAN   | K.LEGALGADTTEDGDEK.S          | 2 | 4,5519 | 0,581 | -0,677 |
| 13 | Q9P2E9 RRBP1_HUMAN  | R.DAQDVQASQAEADQQQTR.L        | 3 | 4,5436 | 0,519 | -0,092 |
| 13 | Q13765 NACA_HUMAN   | K.SPASDTYIVFGEAK.I            | 2 | 4,5373 | 0,567 | 0      |
| 13 | Q8IY81 RRMJ3_HUMAN  | K.GTEASSGTEAATGLEGEEK.D       | 2 | 4,5073 | 0,562 | -0,201 |
| 13 | P30040 ERP29_HUMAN  | K.ILDQGEDFPASEM*TR.I          | 2 | 4,5016 | 0,437 | -0,141 |
| 13 | A4D186 A4D186_HUMAN | K.IQVLQQADDAEER.A             | 3 | 4,4924 | 0,504 | 0,334  |
| 13 | P35580 MYH10_HUMAN  | R.TQLEEELEDELQATEDAK.L        | 2 | 4,476  | 0,526 | -0,746 |
| 13 | Q14683 SMC1A_HUMAN  | K.GTM*DDISQEEGSSQGEDSVSGSQR.I | 3 | 4,4625 | 0,595 | -0,292 |
| 13 | P54578 UBP14_HUMAN  | K.ENQLQLSCFINQEVK.Y           | 2 | 4,4465 | 0,504 | -1,055 |
| 13 | P08238 HS90B_HUMAN  | R.NPDDITQEEYGEFYK.S           | 2 | 4,4429 | 0,495 | 0,594  |
| 13 | A4D186 A4D186_HUMAN | K.IQVLQQADDAEER.A             | 2 | 4,4428 | 0,48  | -0,149 |
| 13 | P52292 IMA2_HUMAN   | R.NVSSFPDDATSPLQENR.N         | 2 | 4,4267 | 0,486 | -0,26  |
| 13 | Q13442 HAP28_HUMAN  | R.QYTSPEEIDAQLQAEK.Q          | 2 | 4,4256 | 0,497 | -0,396 |
| 13 | P52701 MSH6_HUMAN   | K.AGFSDSDYDQALADIR.E          | 2 | 4,4025 | 0,52  | 0,589  |
| 13 | P55060 XPO2_HUMAN   | K.NLFEDQNTLTSICEK.V           | 2 | 4,383  | 0,577 | -0,404 |
| 13 | O75874 IDHC_HUMAN   | R.SDYLNTEFFM*DK.L             | 2 | 4,3803 | 0,466 | -0,24  |
| 13 | P06744 G6PI_HUMAN   | K.TFTTQETITNAETAK.E           | 2 | 4,2971 | 0,499 | 0      |
| 13 | Q99613 EIF3C_HUMAN  | K.SEQDQAENEGEDSAVLM*ER.L      | 3 | 4,2902 | 0,435 | 0      |
| 13 | P50502 F10A1_HUMAN  | K.VAAIEALNDGELQK.A            | 2 | 4,2894 | 0,447 | 0,083  |
| 13 | Q00610 CLH1_HUMAN   | R.GQFSTDELVAEVEK.R            | 2 | 4,2799 | 0,523 | -0,393 |
| 13 | P13929 ENOB_HUMAN   | K.VNQIGSVTESIQACK.L           | 2 | 4,276  | 0,584 | 0,149  |

|    |                    |                                |   |        |       |        |
|----|--------------------|--------------------------------|---|--------|-------|--------|
| 13 | Q9NQG5 CT077_HUMAN | K.ALQDLENAASGDATVR.Q           | 2 | 4,2688 | 0,502 | -0,15  |
| 13 | Q14498 RBM39_HUMAN | R.TDASSASSFLDSDELER.T          | 2 | 4,2473 | 0,486 | -0,6   |
| 13 | P61289 PSME3_HUMAN | R.TVESEAASYLDQISR.Y            | 3 | 4,2405 | 0,382 | 0,329  |
| 13 | Q6NZY4 ZCHC8_HUMAN | K.DGTDGETEVGEIQQNK.S           | 2 | 4,2334 | 0,443 | -0,426 |
| 13 | P29317 EPHA2_HUMAN | R.VLEDDPEATYTTSSGGK.I          | 2 | 4,2286 | 0,451 | -0,145 |
| 13 | Q6P3X3 TTC27_HUMAN | K.NLELNDDTILNDIK.L             | 2 | 4,202  | 0,428 | -0,599 |
| 13 | Q14980 NUMA1_HUMAN | R.DSALETLQGQLEEK.A             | 2 | 4,1891 | 0,477 | -0,156 |
| 13 | Q02952 AKA12_HUMAN | K.GLAEVQQDGEAEEGATSDGEK.K      | 2 | 4,1855 | 0,55  | -0,46  |
| 13 | P12956 KU70_HUMAN  | K.NIYVLQELDNPGAK.R             | 2 | 4,148  | 0,502 | -0,465 |
| 13 | P16989 DBPA_HUMAN  | K.GAEAAANVTGPDGVPVEGSR.Y       | 2 | 4,1174 | 0,575 | -0,137 |
| 13 | P00505 AATM_HUMAN  | K.TCGFDFTGAVEDISK.I            | 2 | 4,0945 | 0,582 | -0,296 |
| 13 | P67809 YBOX1_HUMAN | K.GAEAAANVTGPGGVPVQGSK.Y       | 2 | 4,09   | 0,568 | -0,576 |
| 13 | Q13347 EIF3I_HUMAN | R.DPSQIDNNEPYM*K.I             | 2 | 4,0832 | 0,492 | -0,467 |
| 13 | P10809 CH60_HUMAN  | K.TLNDELEIIEGM*K.F             | 3 | 4,0818 | 0,346 | -0,06  |
| 13 | P24534 EF1B_HUMAN  | K.SPAGLQVLNDYLADK.S            | 3 | 4,0746 | 0,292 | -0,114 |
| 13 | P27635 RL10_HUMAN  | K.FNADEFEDM*VAEK.R             | 2 | 4,0736 | 0,443 | -0,234 |
| 13 | Q13546 RIPK1_HUMAN | K.SSDFLESAELDSGGFGK.V          | 2 | 4,0705 | 0,622 | 0,14   |
| 13 | O00159 MYO1C_HUMAN | R.DQAVM*ISGESGAGK.T            | 2 | 4,0602 | 0,554 | 0      |
| 13 | Q6S8J3 A26CA_HUMAN | K.SYELPDGQVITIGNER.F           | 3 | 4,0601 | 0,495 | 0,102  |
| 13 | Q86V81 THOC4_HUMAN | K.QQLSAEELDAQLDAYNAR.M         | 3 | 4,0392 | 0,411 | -0,18  |
| 13 | O75694 NU155_HUMAN | K.CITDTLQELVNQSK.A             | 2 | 4,038  | 0,514 | -0,444 |
| 13 | P14868 SYDC_HUMAN  | R.EAGVEM*GDEDDLSTPNEK.L        | 2 | 4,0249 | 0,381 | 0,125  |
| 13 | Q8WUM4 PDC6I_HUMAN | R.LLDEEEATDNDLR.A              | 2 | 4,0191 | 0,569 | -0,478 |
| 13 | O00231 PSD11_HUMAN | R.DIQENDEEAVQVK.E              | 3 | 4,0161 | 0,301 | 0,06   |
| 13 | P07305 H10_HUMAN   | K.YSDM*IVAAIQAEK.N             | 2 | 4,0132 | 0,384 | 0,084  |
| 13 | Q14157 UBP2L_HUMAN | K.STSAPQM*SPGSSDNQSSSPQPAQQK.L | 3 | 4,0097 | 0,343 | -0,215 |
| 13 | Q13765 NACA_HUMAN  | K.IEDLSQQAQLAAAEK.F            | 3 | 4,0057 | 0,449 | 0,227  |
| 13 | P23193 TCEA1_HUMAN | R.SADEPM*TTFVVCNECGNR.W        | 3 | 4,001  | 0,229 | -0,261 |
| 13 | P01111 RASN_HUMAN  | R.TGEGFLCVFAINNSK.S            | 2 | 4,0002 | 0,604 | -0,442 |
| 13 | Q05524 ENO1B_HUMAN | K.VNQIGSVTESLQACK.L            | 3 | 3,9918 | 0,343 | 0,224  |
| 13 | P42704 LPPRC_HUMAN | K.NNNIDAAIENIENM*LTSENK.V      | 3 | 3,9846 | 0,36  | -0,081 |
| 13 | P10809 CH60_HUMAN  | K.CEFQDAYVLLSEK.K              | 2 | 3,9845 | 0,624 | -0,685 |
| 13 | P10809 CH60_HUMAN  | K.CEFQDAYVLLSEK.K              | 3 | 3,9766 | 0,392 | -0,228 |

|    |                    |                          |   |        |       |        |
|----|--------------------|--------------------------|---|--------|-------|--------|
| 13 | Q13206 DDX10_HUMAN | R.DEEEDADFLK.V           | 2 | 3,9745 | 0,311 | -0,091 |
| 13 | Q9Y295 DRG1_HUMAN  | R.SDATADDLIDVVEGNR.V     | 2 | 3,9738 | 0,456 | -0,505 |
| 13 | O75694 NU155_HUMAN | K.CITDTLQELVNQSK.A       | 3 | 3,9737 | 0,294 | 0      |
| 13 | P55060 XPO2_HUMAN  | R.AADEEAFEDNSEEYIR.R     | 2 | 3,9711 | 0,527 | -0,194 |
| 13 | O60264 SMCA5_HUMAN | R.TEQEEDPELLTESSK.A      | 2 | 3,9708 | 0,542 | -0,207 |
| 13 | P28331 NDUS1_HUMAN | R.NDGAAILAAVSSIAQK.I     | 3 | 3,9635 | 0,421 | -0,06  |
| 13 | P21333 FLNA_HUMAN  | R.VANPSGNLTETYVQDR.G     | 2 | 3,948  | 0,559 | -0,346 |
| 13 | Q14697 GANAB_HUMAN | K.DPAEGDGAQPEETPR.D      | 2 | 3,9348 | 0,554 | -0,622 |
| 13 | P35579 MYH9_HUMAN  | K.IAQLEEQLDNETK.E        | 2 | 3,9344 | 0,452 | -0,797 |
| 13 | P21333 FLNA_HUMAN  | K.VTAQGPGLPSGNIANK.T     | 2 | 3,9339 | 0,472 | -0,369 |
| 13 | Q1KMD3 HNRL2_HUMAN | R.DLLVQQASQCLSK.L        | 2 | 3,9337 | 0,452 | 0,819  |
| 13 | Q9NZT2 OGFR_HUMAN  | R.DADAGDEDEESEPR.A       | 3 | 3,9275 | 0,387 | 0,22   |
| 13 | P07237 PDIA1_HUMAN | K.VDATEESDLAQYGV.R       | 2 | 3,9236 | 0,489 | -0,206 |
| 13 | P25205 MCM3_HUMAN  | R.GSSGVGLTAAVTTDQETGER.R | 2 | 3,918  | 0,59  | -0,252 |
| 13 | Q8NHM5 JHD1B_HUMAN | R.DSLTEINLSDCNK.V        | 2 | 3,9012 | 0,505 | -0,162 |
| 13 | P25705 ATPA_HUMAN  | R.ILGADTSVDLEETGR.V      | 2 | 3,897  | 0,553 | 0,077  |
| 13 | Q04917 1433F_HUMAN | K.AVTELNELSNEDR.N        | 2 | 3,894  | 0,36  | -0,154 |
| 13 | P55072 TERA_HUMAN  | K.M*TNGFSGADLTEICQR.A    | 2 | 3,8873 | 0,588 | 0,672  |
| 13 | P13639 EF2_HUMAN   | R.ETVSEESNVLCLSK.S       | 2 | 3,8852 | 0,526 | -0,153 |
| 13 | P13693 TCTP_HUMAN  | R.EIADGLCLEVEGK.M        | 2 | 3,8831 | 0,583 | -0,085 |
| 13 | P23381 SYWC_HUMAN  | R.DM*NQVLDAYENK.K        | 2 | 3,8769 | 0,403 | 0      |
| 13 | O00231 PSD11_HUMAN | R.DIQENDEEAVQVK.E        | 2 | 3,8687 | 0,436 | -0,08  |
| 13 | P05783 K1C18_HUMAN | R.QAQEYEALLNIK.V         | 3 | 3,8594 | 0,237 | 0,064  |
| 13 | Q9UNZ2 NSF1C_HUMAN | R.SYQDPSNAQFLESIR.R      | 2 | 3,8517 | 0,448 | -0,626 |
| 13 | P39748 FEN1_HUMAN  | K.QLQQAQAAGAEQEVEK.F     | 2 | 3,8373 | 0,557 | -0,282 |
| 13 | P50914 RL14_HUMAN  | K.LVAIVDVIDQNR.A         | 2 | 3,8312 | 0,536 | -0,09  |
| 13 | Q9BTV5 FSD1_HUMAN  | K.NEEIQSFIYSLK.Q         | 2 | 3,8303 | 0,47  | -0,581 |
| 13 | Q99832 TCPH_HUMAN  | K.LPIGDVATQYFADR.D       | 2 | 3,8264 | 0,541 | -0,39  |
| 13 | P26640 SYVC_HUMAN  | K.VQGSDSDEEVVATTR.I      | 2 | 3,8217 | 0,568 | -0,361 |
| 13 | P36578 RL4_HUMAN   | R.GPCIIYNEDNGIHK.A       | 2 | 3,8209 | 0,298 | 0,38   |
| 13 | P43897 EFTS_HUMAN  | K.YGALVICETSEQK.T        | 2 | 3,8135 | 0,274 | 0      |
| 13 | Q99832 TCPH_HUMAN  | R.QLCDNAGFDATNILNK.L     | 2 | 3,8102 | 0,469 | 0,816  |
| 13 | P67775 PP2AA_HUMAN | K.SPDTNYLFM*GDYVDR.G     | 2 | 3,8067 | 0,531 | -0,742 |

|    |                     |                          |   |        |       |        |
|----|---------------------|--------------------------|---|--------|-------|--------|
| 13 | P30626 SORCN_HUMAN  | R.DM*SGTM*GFNEFK.E       | 2 | 3,8004 | 0,471 | -0,087 |
| 13 | P35579 MYH9_HUMAN   | K.LEEEQIILEDQNCK.L       | 2 | 3,7993 | 0,37  | -0,208 |
| 13 | Q15427 SF3B4_HUMAN  | R.NQDATVYVGGGLDEK.V      | 2 | 3,7902 | 0,526 | -0,323 |
| 13 | P07900 HS90A_HUMAN  | R.NPDDITNEEYGEFYK.S      | 3 | 3,7884 | 0,415 | 0,199  |
| 13 | P35579 MYH9_HUMAN   | R.ELEDATETADAM*NR.E      | 2 | 3,7866 | 0,541 | -0,617 |
| 13 | Q13885 TBB2A_HUMAN  | K.EVDEQM*LNQVQNK.N       | 2 | 3,7782 | 0,334 | -0,083 |
| 13 | Q07812 BAX_HUMAN    | K.TGALLLQGFQDR.A         | 2 | 3,7754 | 0,511 | -0,426 |
| 13 | P33176 KINH_HUMAN   | K.EYELLSDELNQK.S         | 2 | 3,774  | 0,25  | 0,165  |
| 13 | Q9UJZ1 STML2_HUMAN  | R.DVQGTASLDEELDR.V       | 2 | 3,7695 | 0,429 | -0,734 |
| 13 | O75909 CCNK_HUMAN   | K.DPQQPAQQQPAQQPK.K      | 3 | 3,7685 | 0,133 | -0,403 |
| 13 | P13489 RINI_HUMAN   | K.ELSLAGNELGDEGAR.L      | 2 | 3,766  | 0,482 | -0,08  |
| 13 | O95831 AIFM1_HUMAN  | K.TGGLEIDSDFGGFR.V       | 2 | 3,7639 | 0,457 | -0,498 |
| 13 | Q99575 POP1_HUMAN   | R.EAEEVM*DAGCQESAGPER.I  | 2 | 3,7607 | 0,531 | -1,232 |
| 13 | P61978 HNRPK_HUMAN  | R.TDYNASVSPDSSGPER.I     | 2 | 3,7591 | 0,533 | -0,137 |
| 13 | Q6NZI2 PTRF_HUMAN   | K.ATEM*VEVGADDDEGGAER.G  | 2 | 3,7568 | 0,562 | -0,392 |
| 13 | O14617 AP3D1_HUMAN  | K.CSDSTLLSNLLEEM*K.A     | 2 | 3,7451 | 0,366 | -0,208 |
| 13 | P61011 SRP54_HUMAN  | R.DM*YEQFQNM*K.M         | 2 | 3,7442 | 0,375 | -0,165 |
| 13 | Q9NY61 AATF_HUMAN   | K.TPGFSVQSISDFEK.F       | 2 | 3,7398 | 0,476 | -1,108 |
| 13 | Q71U36 TBA1A_HUMAN  | K.TIGGGDDSFNTFFSETGAGK.H | 2 | 3,7392 | 0,636 | -0,486 |
| 13 | O94776 MTA2_HUMAN   | R.DISSLNSLADSNAR.E       | 2 | 3,732  | 0,442 | -0,079 |
| 13 | P08670 VIME_HUMAN   | K.FADLSEAANR.N           | 2 | 3,7263 | 0,369 | 0,112  |
| 13 | P42704 LPPRC_HUMAN  | K.M*LNGLSIGLSK.M         | 2 | 3,7252 | 0,456 | 0      |
| 13 | P61011 SRP54_HUMAN  | K.SAIDLEEM*ASGLNK.R      | 2 | 3,7212 | 0,424 | -0,163 |
| 13 | Q08170 SFRS4_HUMAN  | R.DADDAVYELNGK.D         | 2 | 3,7158 | 0,501 | 0      |
| 13 | P37802 TAGL2_HUMAN  | K.QM*EQISQFLQAAER.Y      | 3 | 3,7043 | 0,371 | 0,108  |
| 13 | Q58FF8 H90B2_HUMAN  | K.ADLINNLGTIAK.F         | 2 | 3,7041 | 0,494 | 0,196  |
| 13 | Q69YH5 CDCA2_HUMAN  | K.DLSDAIEQTFQR.R         | 2 | 3,7041 | 0,371 | -0,686 |
| 13 | O75874 IDHC_HUMAN   | K.ISGGSVVEM*QGDEM*TR.I   | 2 | 3,6983 | 0,532 | 0,282  |
| 13 | O76021 RL1D1_HUMAN  | R.EINDCIGGTVLNISK.S      | 2 | 3,6969 | 0,293 | 0,747  |
| 13 | Q53F64 Q53F64_HUMAN | K.IFVGGLNPEATEEK.I       | 2 | 3,6953 | 0,486 | -0,487 |
| 13 | P35579 MYH9_HUMAN   | R.IAEFTTNLTETEEK.S       | 2 | 3,6915 | 0,241 | 0,443  |
| 13 | P11142 HSP7C_HUMAN  | K.NQVAM*NPTNTVFDK.R      | 2 | 3,6779 | 0,426 | -0,366 |
| 13 | P35579 MYH9_HUMAN   | R.DELADEIANSSGK.G        | 2 | 3,6758 | 0,523 | 0      |

|    |                     |                        |   |        |       |        |
|----|---------------------|------------------------|---|--------|-------|--------|
| 13 | O76031 CLPX_HUMAN   | R.DVGGEGVQQGLLK.L      | 2 | 3,6744 | 0,385 | -0,188 |
| 13 | P37802 TAGL2_HUMAN  | K.QM*EQISQFLQAAER.Y    | 2 | 3,6739 | 0,498 | -0,504 |
| 13 | Q9NZT2 OGFR_HUMAN   | R.DADAGDEDEESEPR.A     | 2 | 3,6723 | 0,506 | -0,367 |
| 13 | Q7L014 DDX46_HUMAN  | R.VTYVVLDEADR.M        | 2 | 3,6693 | 0,494 | 0      |
| 13 | P61604 CH10_HUMAN   | K.VLQATVVAVGSGSK.G     | 2 | 3,6594 | 0,553 | -0,278 |
| 13 | Q9BRP8 WIBG_HUMAN   | R.AAPTAASDQPDSAATTEK.A | 2 | 3,6592 | 0,616 | -0,423 |
| 13 | O60306 AQR_HUMAN    | K.DADVEDEDTEEAK.T      | 2 | 3,6546 | 0,501 | -0,583 |
| 13 | P14625 ENPL_HUMAN   | K.GVVDSDDLPLNVS.R      | 2 | 3,6527 | 0,434 | 0,575  |
| 13 | P05387 RLA2_HUMAN   | K.NIEDVIAQGIGK.L       | 2 | 3,6525 | 0,539 | -0,388 |
| 13 | P21291 CSRP1_HUMAN  | K.GFGFGQGAGALVHSE.-    | 2 | 3,6517 | 0,5   | 0,34   |
| 13 | Q13618 CUL3_HUMAN   | R.SPEYLSLFIDDK.L       | 2 | 3,6508 | 0,492 | -0,342 |
| 13 | O43390 HNRPR_HUMAN  | R.NLATTVTEEILEK.S      | 2 | 3,6445 | 0,464 | -0,668 |
| 13 | Q9UKL0 RCOR1_HUMAN  | R.DFQAISDVIGNK.S       | 2 | 3,6394 | 0,538 | -0,093 |
| 13 | Q6UX04 SDC10_HUMAN  | R.EDQTLALLNQFK.S       | 2 | 3,6394 | 0,416 | -0,516 |
| 13 | Q9BWJ5 SF3B5_HUMAN  | K.M*LQPCGPPADKPEEN.-   | 2 | 3,638  | 0,318 | 0      |
| 13 | P13797 PLST_HUMAN   | R.YTLNVLEDLGDGQK.A     | 3 | 3,638  | 0,38  | 0,234  |
| 13 | P04075 ALDOA_HUMAN  | K.GILAADESTGSIK.R      | 2 | 3,6285 | 0,567 | -0,092 |
| 13 | P28331 NDUS1_HUMAN  | R.NDGAAILAAVSSIAQK.I   | 2 | 3,627  | 0,567 | -0,638 |
| 13 | P46060 RAGP1_HUMAN  | R.DAALAVAEAM*ADK.A     | 2 | 3,6261 | 0,506 | -0,944 |
| 13 | P30520 PURA2_HUMAN  | R.M*CDLVSDFDGFSER.F    | 2 | 3,6224 | 0,514 | -0,288 |
| 13 | Q12840 KIF5A_HUMAN  | K.ISFLENNLEQLTK.V      | 2 | 3,616  | 0,46  | -0,473 |
| 13 | P18206 VINC_HUMAN   | R.DPSASPGDAGEQAIR.Q    | 2 | 3,6147 | 0,522 | -0,083 |
| 13 | Q9UFC0 LRWD1_HUMAN  | K.DASSTYSQVENLNR.E     | 2 | 3,6058 | 0,48  | -0,231 |
| 13 | A0JLS5 A0JLS5_HUMAN | K.DVTEAEQAEQAR.Q       | 2 | 3,6021 | 0,315 | -0,331 |
| 13 | P08238 HS90B_HUMAN  | R.NPDDITQEEYGEFYK.S    | 3 | 3,5996 | 0,341 | 0,396  |
| 13 | P38646 GRP75_HUMAN  | R.AQFEGIVTDLIR.R       | 2 | 3,5978 | 0,506 | -0,627 |
| 13 | O00410 IMB3_HUMAN   | K.EGFVEYTEQVVK.L       | 2 | 3,5921 | 0,403 | -0,256 |
| 13 | P61764 STXB1_HUMAN  | K.DNALLAQLIQDK.L       | 2 | 3,5902 | 0,426 | -0,364 |
| 13 | Q16643 DREB_HUMAN   | R.SPDSSTASTPVAEQIER.A  | 2 | 3,5902 | 0,496 | -0,524 |
| 13 | Q9NP72 RAB18_HUMAN  | K.TCDGVQCAFEELVEK.I    | 2 | 3,5838 | 0,591 | -0,342 |
| 13 | P29401 TKT_HUMAN    | K.LDNLVAILDINR.L       | 2 | 3,5793 | 0,423 | -0,624 |
| 13 | Q9UNL2 SSRG_HUMAN   | K.QQSEEDLLLQDFSR.N     | 2 | 3,5791 | 0,503 | -0,643 |
| 13 | P52597 HNRPF_HUMAN  | R.QSGEAFVELGSEDDVK.M   | 2 | 3,5777 | 0,478 | -0,357 |

|    |                    |                            |   |        |       |        |
|----|--------------------|----------------------------|---|--------|-------|--------|
| 13 | P40939 ECHA_HUMAN  | K.TGIEQGS DAGYLCESQK.F     | 2 | 3,5761 | 0,583 | -0,397 |
| 13 | Q99832 TCPH_HUMAN  | K.NDSVVAGGGAIEM*ELSK.Y     | 2 | 3,5713 | 0,537 | 0,577  |
| 13 | O75909 CCNK_HUMAN  | K.DPQQPAQQQPAQQPK.K        | 2 | 3,5689 | 0,33  | -0,671 |
| 13 | P11021 GRP78_HUMAN | K.NQLTSNPENTVFDK.R         | 2 | 3,5616 | 0,358 | -0,145 |
| 13 | P02786 TFR1_HUMAN  | K.DSAQNSVIIVDK.N           | 2 | 3,5614 | 0,466 | 0,095  |
| 13 | P09525 ANXA4_HUMAN | K.GAGTDEGLIEILASR.T        | 2 | 3,5559 | 0,497 | 0,808  |
| 13 | Q15459 SF3A1_HUMAN | K.VM*QQQQTTQQQLPQK.V       | 3 | 3,5507 | 0,365 | -0,28  |
| 13 | P20810 ICAL_HUMAN  | R.SESELIDELSEDFDR.S        | 3 | 3,5503 | 0,387 | -0,41  |
| 13 | P20810 ICAL_HUMAN  | R.SESELIDELSEDFDR.S        | 2 | 3,5454 | 0,552 | -0,547 |
| 13 | P30041 PRDX6_HUMAN | K.DINAYNCEEPTEK.L          | 2 | 3,5431 | 0,511 | -0,462 |
| 13 | Q13438 OS9_HUMAN   | R.EM*EEEEDEDEDEDEDER.Q     | 3 | 3,5419 | 0,294 | -0,451 |
| 13 | Q9UMY4 SNX12_HUMAN | R.GDEGIFEEFIEER.R          | 2 | 3,5394 | 0,498 | -0,368 |
| 13 | Q07020 RL18_HUMAN  | K.TAVVVGTITDDVR.V          | 2 | 3,5392 | 0,485 | 0      |
| 13 | P52926 HMGA2_HUMAN | R.GEGAGQPSTSAQGQPAAPAPQK.R | 3 | 3,5381 | 0,298 | -0,09  |
| 13 | O75306 NDUS2_HUMAN | R.LDELELLTNNR.I            | 2 | 3,5323 | 0,379 | -0,585 |
| 13 | P07737 PROF1_HUMAN | R.DSLLQDGEFSM*DLR.T        | 2 | 3,5301 | 0,441 | -0,446 |
| 13 | P05387 RLA2_HUMAN  | K.ILDSVGIEADDDR.L          | 2 | 3,528  | 0,584 | -0,086 |
| 13 | Q92841 DDX17_HUMAN | K.APILIATDVASR.G           | 2 | 3,5247 | 0,088 | 0      |
| 13 | P33778 H2B1B_HUMAN | K.AM*GIM*NSFVNDIFER.I      | 2 | 3,5201 | 0,499 | -0,275 |
| 13 | P43246 MSH2_HUMAN  | K.DSLIIDEELGR.G            | 2 | 3,5196 | 0,398 | -0,098 |
| 13 | Q9Y490 TLN1_HUMAN  | K.NGNLPEFGDAISTASK.A       | 2 | 3,4985 | 0,5   | -0,301 |
| 13 | Q9H0S4 DDX47_HUMAN | R.ILNM*DFETEVDK.I          | 2 | 3,4985 | 0,436 | -0,166 |
| 13 | P30050 RL12_HUMAN  | K.EILGTAQSVGCNVDGR.H       | 2 | 3,4973 | 0,636 | -0,291 |
| 13 | Q6PKG0 LARP1_HUMAN | K.DYEAGQLYGLEK.F           | 2 | 3,4918 | 0,35  | 0      |
| 13 | O60493 SNX3_HUMAN  | R.GDDGIFDDNFIEER.K         | 2 | 3,4909 | 0,464 | -0,52  |
| 13 | P50991 TCPD_HUMAN  | K.VIDPATATSVDLR.D          | 2 | 3,4861 | 0,539 | 0      |
| 13 | Q9Y3C6 PPIL1_HUMAN | K.DFM*IQGGDPTGTGR.G        | 2 | 3,4779 | 0,49  | -0,166 |
| 13 | O75116 ROCK2_HUMAN | K.DATIASLEETNR.T           | 2 | 3,4768 | 0,369 | -0,185 |
| 13 | Q15393 SF3B3_HUMAN | R.TVLDPVTGDLSDTR.T         | 2 | 3,4716 | 0,433 | -0,492 |
| 13 | P31150 GDIA_HUMAN  | R.FLLEGGPPESM*GR.G         | 2 | 3,468  | 0,341 | 0,578  |
| 13 | P40926 MDHM_HUMAN  | K.GYLGPQLPDCLK.G           | 2 | 3,4668 | 0,504 | 0,573  |
| 13 | P10809 CH60_HUMAN  | K.TLNDELEIIEGM*K.F         | 2 | 3,4664 | 0,447 | -0,321 |
| 13 | Q13347 EIF3I_HUMAN | R.DPSQIDNNEPYM*K.I         | 3 | 3,4637 | 0,139 | -0,117 |

|    |                     |                           |   |        |       |        |
|----|---------------------|---------------------------|---|--------|-------|--------|
| 13 | P50502 F10A1_HUMAN  | K.LDYDEDASAM*LK.E         | 2 | 3,4493 | 0,458 | 0      |
| 13 | O60832 DKC1_HUMAN   | K.AGLES GAEPGDGSDTTK.K    | 2 | 3,4491 | 0,393 | -0,643 |
| 13 | O43390 HNRPR_HUMAN  | R.NLATTVTEEILEK.S         | 3 | 3,4415 | 0,302 | -0,376 |
| 13 | Q15149 PLEC1_HUMAN  | R.LEDLLQDAQDEK.E          | 2 | 3,4393 | 0,414 | 0      |
| 13 | P18206 VINC_HUMAN   | K.M*TGLVDEAIDTK.S         | 2 | 3,4365 | 0,397 | -0,093 |
| 13 | O43143 DHX15_HUMAN  | R.EVDDLGPVGDIK.I          | 2 | 3,4326 | 0,517 | 0      |
| 13 | Q02952 AKA12_HUMAN  | K.SAESPTSPVTSETGSTFK.K    | 2 | 3,4324 | 0,48  | -0,808 |
| 13 | Q04837 SSB_HUMAN    | R.SGDSEVYQLGDVSQK.T       | 2 | 3,4311 | 0,386 | 0      |
| 13 | Q01518 CAP1_HUMAN   | R.ALLVTASQCQQAENK.L       | 2 | 3,431  | 0,4   | -0,278 |
| 13 | Q15149 PLEC1_HUMAN  | R.QTNLENLDQAFSVAER.D      | 2 | 3,4304 | 0,523 | -0,665 |
| 13 | Q9HCN4 GPN1_HUMAN   | K.DM*GSVALDAGTAK.D        | 2 | 3,4273 | 0,504 | -0,195 |
| 13 | Q14980 NUMA1_HUMAN  | K.DQLQEQLQALK.E           | 2 | 3,4268 | 0,326 | 0,186  |
| 13 | P12270 TPR_HUMAN    | K.LDELQASDVSVK.Y          | 2 | 3,4231 | 0,354 | 0,094  |
| 13 | P84077 ARF1_HUMAN   | K.QDLPNAM*NAAEITDK.L      | 2 | 3,4226 | 0,489 | -0,148 |
| 13 | Q92783 STAM1_HUMAN  | R.DFASEVSNVLNK.G          | 2 | 3,4213 | 0,456 | -0,184 |
| 13 | Q8TDP1 RNH2C_HUMAN  | R.DSGTDDQEEPLER.D         | 2 | 3,421  | 0,401 | -0,301 |
| 13 | Q9Y3Y2 CA077_HUMAN  | K.EQLDNQLDAYM*SK.T        | 2 | 3,4195 | 0,44  | -0,466 |
| 13 | P40855 PEX19_HUMAN  | K.NATDLQNSSM*SEEELTK.A    | 2 | 3,4111 | 0,527 | -0,383 |
| 13 | Q4QZC0 Q4QZC0_HUMAN | R.DGEDQTQDTELVETR.L       | 2 | 3,4104 | 0,516 | -0,562 |
| 13 | P35579 MYH9_HUMAN   | K.DM*FQETM*EAM*R.I        | 2 | 3,4101 | 0,398 | -0,085 |
| 13 | P11586 C1TC_HUMAN   | K.DVDGLTSINAGR.L          | 2 | 3,4099 | 0,428 | -0,401 |
| 13 | P21333 FLNA_HUMAN   | R.GAGTGGLGLAVEGPSEAK.M    | 2 | 3,4094 | 0,589 | 0,621  |
| 13 | Q92841 DDX17_HUMAN  | R.ELAQQVQQVADDYGK.C       | 2 | 3,4011 | 0,453 | -0,216 |
| 13 | P09874 PARP1_HUMAN  | K.AM*VEYEIDLQK.M          | 2 | 3,3992 | 0,465 | -0,36  |
| 13 | Q9NTJ3 SMC4_HUMAN   | R.DTLVADNLDQATR.V         | 2 | 3,399  | 0,418 | -0,256 |
| 13 | Q06830 PRDX1_HUMAN  | R.LVQAFQFTDK.H            | 2 | 3,3958 | 0,405 | 0      |
| 13 | Q13618 CUL3_HUMAN   | K.GLTEQEVEITLTK.A         | 2 | 3,395  | 0,47  | 0,083  |
| 13 | P07814 SYEP_HUMAN   | K.INEAVECLLSLK.A          | 2 | 3,391  | 0,436 | -0,615 |
| 13 | P07384 CAN1_HUMAN   | R.LDETDPPDDYGDR.E         | 2 | 3,3654 | 0,453 | 0      |
| 13 | P61106 RAB14_HUMAN  | K.TGENVEDAFLEAAK.K        | 2 | 3,3642 | 0,446 | -0,49  |
| 13 | P19338 NUCL_HUMAN   | K.GFGFVDFNSEEDAK.A        | 2 | 3,3628 | 0,492 | -0,469 |
| 13 | Q9UGP8 SEC63_HUMAN  | K.EQSICAAEEQPAEDGQGETNK.N | 3 | 3,3625 | 0,309 | -0,399 |
| 13 | P11388 TOP2A_HUMAN  | K.IFDEILVNAADNK.Q         | 3 | 3,3614 | 0,224 | -0,063 |

|    |                    |                          |   |        |       |        |
|----|--------------------|--------------------------|---|--------|-------|--------|
| 13 | O75821 EIF3G_HUMAN | K.ELAEQLGLSTGEK.E        | 2 | 3,3605 | 0,157 | 0      |
| 13 | P30050 RL12_HUMAN  | K.EILGTAQSVGCNVDGR.H     | 3 | 3,3601 | 0,478 | -0,109 |
| 13 | Q15019 SEPT2_HUMAN | K.TIISYIDEQFER.Y         | 2 | 3,3551 | 0,471 | -0,645 |
| 13 | Q96AE4 FUBP1_HUMAN | K.IGGDAGTSLNSNDYGYGGQK.R | 2 | 3,3436 | 0,506 | 0,062  |
| 13 | P09525 ANXA4_HUMAN | R.DEGNYLDDALVR.Q         | 2 | 3,3435 | 0,508 | 0,265  |
| 13 | P05787 K2C8_HUMAN  | R.TEM*ENEFVLIK.K         | 2 | 3,3434 | 0,328 | -0,089 |
| 13 | P23284 PPIB_HUMAN  | K.TVDNFVALATGEK.G        | 2 | 3,3401 | 0,496 | -0,089 |
| 13 | P22314 UBA1_HUMAN  | K.DNPGVVTCLEDEAR.H       | 2 | 3,339  | 0,534 | 0      |
| 13 | P31949 S10AB_HUMAN | R.CIESLIAVFQK.Y          | 2 | 3,3389 | 0,429 | -0,56  |
| 13 | Q02952 AKA12_HUMAN | K.SDEVDEQVACQEVK.V       | 2 | 3,3372 | 0,309 | -0,224 |
| 13 | Q9BRK5 CAB45_HUMAN | K.DLGGFDEDAEPR.R         | 2 | 3,3363 | 0,494 | -0,277 |
| 13 | P08729 K2C7_HUMAN  | R.SLDLDGHAIEVK.A         | 2 | 3,3315 | 0,375 | -0,383 |
| 13 | P08238 HS90B_HUMAN | K.CLELFSELAEDK.E         | 2 | 3,3279 | 0,514 | -0,42  |
| 13 | Q9UPN3 MACF1_HUMAN | R.DTDSLQSQIEDVR.L        | 2 | 3,3218 | 0,495 | 0,405  |
| 13 | Q9NSD9 SYFB_HUMAN  | R.NIFIETGTDFTK.A         | 2 | 3,3211 | 0,409 | 0,079  |
| 13 | Q13185 CBX3_HUMAN  | K.DSDEADLVLAKE.E         | 2 | 3,3196 | 0,406 | -0,207 |
| 13 | O00299 CLIC1_HUMAN | K.GVTFNVTTVDTK.R         | 2 | 3,3192 | 0,465 | 0      |
| 13 | P05787 K2C8_HUMAN  | R.SLDM*DSIIAEVK.A        | 2 | 3,3183 | 0,415 | -0,091 |
| 13 | Q10713 MPPA_HUMAN  | R.DTTM*YAVSADSK.G        | 2 | 3,3162 | 0,473 | 0,094  |
| 13 | P56192 SYMC_HUMAN  | K.ITQDIFQQLK.R           | 2 | 3,3136 | 0,333 | -0,543 |
| 13 | P11388 TOP2A_HUMAN | K.IFDEILVNAADNK.Q        | 2 | 3,3118 | 0,308 | -0,167 |
| 13 | P42224 STAT1_HUMAN | K.SLEDLQDEYDFK.C         | 2 | 3,3118 | 0,442 | 0,406  |
| 13 | Q9UPU7 TBD2B_HUMAN | K.DLEESIVQEEK.K          | 2 | 3,3026 | 0,408 | -0,093 |
| 13 | O75962 TRIO_HUMAN  | K.DSDDSAATPQDETVEER.G    | 2 | 3,2995 | 0,444 | 0,458  |
| 13 | P11586 C1TC_HUMAN  | R.DDSNLYINVK.L           | 2 | 3,2975 | 0,416 | 0,207  |
| 13 | P11586 C1TC_HUMAN  | K.TDPTTLTDEEINR.F        | 2 | 3,2969 | 0,382 | -0,243 |
| 13 | P60174 TPIS_HUMAN  | K.QSLGELIGTLNAAK.V       | 2 | 3,2952 | 0,456 | -0,345 |
| 13 | P13010 KU86_HUMAN  | K.TDTLEDLFPTTK.I         | 2 | 3,2891 | 0,438 | -0,265 |
| 13 | O15371 EIF3D_HUMAN | K.LGDDIDLIVR.C           | 2 | 3,2887 | 0,422 | -0,108 |
| 13 | P46063 RECQ1_HUMAN | R.ISSM*VVM*ENVGQK.L      | 2 | 3,287  | 0,446 | -0,308 |
| 13 | P62266 RS23_HUMAN  | K.VANVSLLALYK.G          | 2 | 3,2844 | 0,514 | -0,205 |
| 13 | P36542 ATPG_HUMAN  | R.IYGLGSLALYK.A          | 2 | 3,2819 | 0,553 | -0,46  |
| 13 | P61160 ARP2_HUMAN  | K.LCYVGYNIEQEQK.L        | 2 | 3,2798 | 0,389 | 0,52   |



|    |                    |                        |   |        |       |        |
|----|--------------------|------------------------|---|--------|-------|--------|
| 13 | Q9Y265 RUVB1_HUMAN | K.TALALAIQELGSK.V      | 2 | 3,2794 | 0,506 | -0,528 |
| 13 | P19105 MLRM_HUMAN  | R.FTDEEVDELYR.E        | 2 | 3,2769 | 0,478 | -0,431 |
| 13 | Q9NZZ3 CHMP5_HUMAN | K.NKDGVLVDEFGLPQIPAS.- | 2 | 3,2762 | 0,239 | -0,707 |
| 13 | Q9H307 PININ_HUMAN | R.DLIQDQNM*DEK.G       | 2 | 3,2735 | 0,302 | -0,179 |
| 13 | Q2TAY7 SMU1_HUMAN  | R.DTEM*LATGAQDGK.I     | 2 | 3,2731 | 0,43  | -0,271 |
| 13 | Q10567 AP1B1_HUMAN | R.CVSTLLDIQTK.V        | 2 | 3,2667 | 0,327 | -0,351 |
| 13 | P84077 ARF1_HUMAN  | R.DAVLLVFANK.Q         | 2 | 3,2646 | 0,495 | -0,672 |
| 13 | O00217 NDUS8_HUMAN | K.YVNM*QDPEM*DM*K.S    | 2 | 3,2636 | 0,326 | -0,473 |
| 13 | P04406 G3P_HUMAN   | R.GALQNIIPASTGAAK.A    | 2 | 3,2625 | 0,407 | 0,173  |
| 13 | P49748 ACADV_HUMAN | R.VPSENVLGEVGSFK.V     | 2 | 3,2612 | 0,416 | -0,241 |
| 13 | O95793 STAU1_HUMAN | R.NAAENM*LEILGFK.V     | 2 | 3,2606 | 0,526 | -0,499 |
| 13 | P40925 MDHC_HUMAN  | K.FVEGLPINDFSR.E       | 2 | 3,2589 | 0,309 | -0,175 |
| 13 | P04818 TYSY_HUMAN  | R.DFLDSLGFSTR.E        | 2 | 3,2527 | 0,499 | -0,582 |
| 13 | P40763 STAT3_HUMAN | R.GLSIEQLTTLAEK.L      | 2 | 3,2519 | 0,418 | 0      |
| 13 | Q9NTK5 OLA1_HUMAN  | R.NYIVEDGDIIFK.F       | 2 | 3,2463 | 0,409 | -0,621 |
| 13 | Q6IQ22 RAB12_HUMAN | K.DNFNVDIFLK.L         | 2 | 3,2455 | 0,458 | -0,451 |
| 13 | P12955 PEPD_HUMAN  | R.TVEEIEACM*AGCDK.A    | 2 | 3,2455 | 0,421 | -0,375 |
| 13 | P12956 KU70_HUMAN  | R.DSLIFLVDASK.A        | 2 | 3,2443 | 0,466 | -0,404 |
| 13 | Q05524 ENO1B_HUMAN | R.YISPDQLADLYK.G       | 2 | 3,2381 | 0,387 | -0,257 |
| 13 | P62424 RL7A_HUMAN  | R.AGVNTVTTLVENK.K      | 2 | 3,2376 | 0,437 | 0      |
| 13 | P11586 C1TC_HUMAN  | K.TDTESELDLISR.L       | 2 | 3,2354 | 0,449 | 0,265  |
| 13 | Q9Y5U2 TSSC4_HUMAN | R.DIFDCLEGAAR.R        | 2 | 3,2343 | 0,414 | -0,385 |
| 13 | P43487 RANG_HUMAN  | K.TLEEEDEELFK.M        | 2 | 3,2334 | 0,386 | -0,177 |
| 13 | P07355 ANXA2_HUMAN | R.TNQELQEINR.V         | 2 | 3,2306 | 0,29  | -0,098 |
| 13 | O00410 IMB3_HUMAN  | K.VIAALLQTM*EDQGNQR.V  | 3 | 3,2235 | 0,252 | -0,101 |
| 13 | Q9P265 DIP2B_HUMAN | R.DLGQIEENDLVR.K       | 2 | 3,2227 | 0,418 | -0,435 |
| 13 | P10809 CH60_HUMAN  | K.NAGVEGSLIVEK.I       | 2 | 3,22   | 0,366 | -0,1   |
| 13 | Q9NW13 RBM28_HUMAN | K.AEVEQVELPDGK.K       | 2 | 3,214  | 0,407 | -0,186 |
| 13 | P54136 SYRC_HUMAN  | R.LNDYIFSFDK.M         | 2 | 3,2139 | 0,488 | -1,063 |
| 13 | Q09666 AHNK_HUMAN  | K.VDTNAPDLSLEGPEGK.L   | 2 | 3,2135 | 0,403 | -0,074 |
| 13 | P04406 G3P_HUMAN   | R.VPTANVSVDLTCR.L      | 2 | 3,2113 | 0,515 | 0,319  |
| 13 | Q8N884 CF150_HUMAN | R.DDISTAAGM*VK.G       | 2 | 3,2063 | 0,464 | 0      |
| 13 | P39656 OST48_HUMAN | R.ELGSECGIEFDEEK.T     | 2 | 3,2031 | 0,531 | -0,223 |

|    |                     |                       |   |        |       |        |
|----|---------------------|-----------------------|---|--------|-------|--------|
| 13 | Q9HC35 EMAL4_HUMAN  | R.VQQQEDEITVLK.A      | 2 | 3,1988 | 0,399 | 0,085  |
| 13 | Q15042 RB3GP_HUMAN  | R.DYIEEEVIDEK.G       | 2 | 3,1945 | 0,337 | -0,088 |
| 13 | P50991 TCPD_HUMAN   | K.GDVTITNDGATILK.Q    | 2 | 3,1917 | 0,353 | -0,086 |
| 13 | Q9P2J5 SYLC_HUMAN   | K.STGNFLTQTQAIK.F     | 2 | 3,1894 | 0,372 | -0,566 |
| 13 | O94909 K0819_HUMAN  | R.DSLVALLEEQR.L       | 2 | 3,187  | 0,378 | -0,383 |
| 13 | O00148 DDX39_HUMAN  | K.GLAITFVSDENDAK.I    | 2 | 3,1834 | 0,52  | -0,247 |
| 13 | Q00653 NFKB2_HUMAN  | R.DSGEEAAEPSAPSR.T    | 2 | 3,1791 | 0,45  | -0,174 |
| 13 | Q14152 EIF3A_HUMAN  | R.LLDM*DGIIVEK.Q      | 2 | 3,1728 | 0,323 | 0,193  |
| 13 | Q9UCN2 Q9UCN2_HUMAN | -.PYQYPALTPEQK.K      | 2 | 3,1727 | 0,339 | -0,085 |
| 13 | Q92688 AN32B_HUMAN  | R.IFGGLDM*LAEK.L      | 2 | 3,172  | 0,303 | 0,302  |
| 13 | Q14669 TRIPC_HUMAN  | R.DDSLDSLSPQGR.L      | 2 | 3,1712 | 0,351 | 0,101  |
| 13 | P21333 FLNA_HUMAN   | R.IANLQTDLSGLR.L      | 2 | 3,1708 | 0,469 | 0,086  |
| 13 | Q15046 SYK_HUMAN    | K.LPETNLFETEETR.K     | 2 | 3,1641 | 0,287 | -0,155 |
| 13 | Q8IZ40 RCOR2_HUMAN  | K.DFGAIAEVIGNK.T      | 2 | 3,1625 | 0,375 | -0,297 |
| 13 | Q14157 UBP2L_HUMAN  | R.DGSLASNPYSGDLTK.F   | 2 | 3,1623 | 0,373 | -0,4   |
| 13 | P02545 LMNA_HUMAN   | R.TALINSTGEEVAM*R.K   | 3 | 3,1609 | 0,303 | -0,182 |
| 13 | P52907 CAZA1_HUMAN  | K.EASDPQPEEADGGLK.S   | 2 | 3,158  | 0,522 | -0,395 |
| 13 | Q12904 MCA1_HUMAN   | K.GAEADQIIEYLK.Q      | 2 | 3,1571 | 0,394 | -0,181 |
| 13 | Q9H4A4 AMPB_HUMAN   | K.TYQLVYFLDK.I        | 2 | 3,1567 | 0,385 | -0,567 |
| 13 | P06576 ATPB_HUMAN   | R.IM*NVIGEPIDER.G     | 2 | 3,1548 | 0,398 | -0,522 |
| 13 | Q8TCG1 K1524_HUMAN  | K.DLQITCDSLNK.Q       | 2 | 3,1502 | 0,265 | -0,093 |
| 13 | P62263 RS14_HUMAN   | R.IEDVTPIPSDSTR.R     | 2 | 3,1457 | 0,405 | 0,256  |
| 13 | Q14204 DYHC1_HUMAN  | K.DSAIQQQVANLQM*K.I   | 3 | 3,1452 | 0,238 | 0,23   |
| 13 | P16070 CD44_HUMAN   | K.ESSETPDQFM*TADETR.N | 2 | 3,1448 | 0,478 | -0,459 |
| 13 | Q99714 HCD2_HUMAN   | R.LVAGEM*QNEPDQGGQR.G | 2 | 3,1442 | 0,396 | -0,677 |
| 13 | Q58FG1 HS904_HUMAN  | R.TLTIVDTGIGM*TK.A    | 2 | 3,1412 | 0,493 | -0,625 |
| 13 | P55884 EIF3B_HUMAN  | R.DQYSVIFESGDR.T      | 2 | 3,1391 | 0,531 | 0      |
| 13 | Q9NQW6 ANLN_HUMAN   | R.EIEM*SVDDDDINSSK.V  | 2 | 3,139  | 0,524 | -0,427 |
| 13 | Q9Y4L1 HYOU1_HUMAN  | K.AEAGPEGVAPAPEGEK.K  | 2 | 3,1357 | 0,467 | 0      |
| 13 | Q06210 GFPT1_HUMAN  | K.GYDFESETDTETIAK.L   | 2 | 3,134  | 0,471 | -0,286 |
| 13 | P35268 RL22_HUMAN   | K.ITVTSEVPFSK.R       | 2 | 3,1305 | 0,298 | -0,202 |
| 13 | Q9NVV4 PAPD1_HUMAN  | R.DEQPSGSVETGFEDK.I   | 2 | 3,127  | 0,471 | -0,676 |
| 13 | P34896 GLYC_HUMAN   | R.ALSEALTELGYK.I      | 2 | 3,1262 | 0,537 | -0,188 |

|    |                    |                               |   |        |       |        |
|----|--------------------|-------------------------------|---|--------|-------|--------|
| 13 | Q5T4S7 UBR4_HUMAN  | K.DSDQLDVIQENR.Q              | 2 | 3,1206 | 0,256 | -0,256 |
| 13 | P53992 SC24C_HUMAN | K.SDVLQPGAEVTTDDR.A           | 2 | 3,1174 | 0,511 | -0,228 |
| 13 | Q9NPJ3 THEM2_HUMAN | K.TLAFTSVDLTNK.A              | 2 | 3,1123 | 0,498 | -0,373 |
| 13 | P09622 DLDH_HUMAN  | K.NLGLEELGIELDPR.G            | 2 | 3,1109 | 0,486 | -0,311 |
| 13 | Q16718 NDUA5_HUMAN | K.ILDVLEEIPK.N                | 2 | 3,1088 | 0,298 | -0,313 |
| 13 | Q7Z6Z7 HUWE1_HUMAN | R.DLSM*SEEDQM*M*R.A           | 2 | 3,1071 | 0,501 | -0,562 |
| 13 | P35579 MYH9_HUMAN  | K.TDLLLEPYNK.Y                | 2 | 3,1052 | 0,427 | 0      |
| 13 | Q92542 NICA_HUMAN  | R.NQVEDLLATLEK.S              | 2 | 3,1044 | 0,279 | -0,8   |
| 13 | P49458 SRP09_HUMAN | K.VTDDLVLCLVYK.T              | 2 | 3,0992 | 0,456 | -0,184 |
| 13 | Q04637 IF4G1_HUMAN | K.DITEEIM*SGAR.T              | 2 | 3,0974 | 0,489 | -0,099 |
| 13 | Q13907 IDI1_HUMAN  | R.AFSVFLFNTENK.L              | 2 | 3,0941 | 0,345 | -0,258 |
| 13 | Q13017 RHG05_HUMAN | K.DGLAQELANEIR.T              | 2 | 3,0934 | 0,317 | -0,826 |
| 13 | Q01105 SET_HUMAN   | R.VEVTEFEDIK.S                | 2 | 3,0923 | 0,393 | -0,807 |
| 13 | P51858 HDGF_HUMAN  | R.IDEM*PEAAVK.S               | 2 | 3,0913 | 0,296 | 0      |
| 13 | Q71U36 TBA1A_HUMAN | K.DVNAAIATIK.T                | 2 | 3,0887 | 0,365 | -0,36  |
| 13 | Q09161 NCBP1_HUMAN | K.DGVLEEQIER.L                | 2 | 3,088  | 0,244 | 0      |
| 13 | Q9ULH1 DDEF1_HUMAN | R.NTVTLLEEALDQDR.T            | 2 | 3,0871 | 0,403 | -0,755 |
| 13 | P29317 EPHA2_HUMAN | K.FADIVSILDK.L                | 2 | 3,0848 | 0,261 | -0,327 |
| 13 | O00571 DDX3X_HUMAN | R.VGNLGLATSFNER.N             | 2 | 3,0846 | 0,552 | -0,48  |
| 13 | O15355 PPM1G_HUMAN | K.SGGGTGEEPGSQGLNGEAGPEDSTR.E | 3 | 3,0845 | 0,203 | -0,234 |
| 13 | Q96GQ7 DDX27_HUMAN | R.SADFNPDFVFTEK.E             | 2 | 3,0828 | 0,428 | -0,483 |
| 13 | P25789 PSA4_HUMAN  | K.LLDEVFFSEK.I                | 2 | 3,0809 | 0,385 | -0,099 |
| 13 | P54886 P5CS_HUMAN  | R.GPVGLEGLLTK.W               | 2 | 3,0799 | 0,504 | -0,721 |
| 13 | Q93009 UBP7_HUMAN  | K.DDPENDNSELPTAK.E            | 2 | 3,0783 | 0,264 | -0,158 |
| 13 | P61962 WDR68_HUMAN | R.LALGSFVEEYNNK.V             | 2 | 3,0759 | 0,502 | -0,329 |
| 13 | O75533 SF3B1_HUMAN | R.QLVDTTVELANK.V              | 2 | 3,0759 | 0,387 | 0,458  |
| 13 | P34932 HSP74_HUMAN | K.ELSTTLNADEAVTR.G            | 2 | 3,0733 | 0,462 | -0,08  |
| 13 | P49327 FAS_HUMAN   | R.SEGVVAVLLTK.K               | 2 | 3,0711 | 0,476 | 0      |
| 13 | P63244 GBLP_HUMAN  | K.DVLSVAFSSDNR.Q              | 2 | 3,0693 | 0,481 | 0,279  |
| 13 | Q99536 VAT1_HUMAN  | R.EVAEAATGEDASSPPPK.T         | 2 | 3,0691 | 0,467 | -0,295 |
| 13 | Q58FF7 H90B3_HUMAN | R.DNSTM*GYM*MAK.K             | 2 | 3,0668 | 0,478 | -0,572 |
| 13 | O94925 GLSK_HUMAN  | K.DGPGETDAFGNSEGK.E           | 2 | 3,0639 | 0,564 | 0      |
| 13 | Q15393 SF3B3_HUMAN | R.LPPNTNDEVEDPTGNK.A          | 2 | 3,0615 | 0,566 | -0,263 |

|    |                     |                         |   |        |       |        |
|----|---------------------|-------------------------|---|--------|-------|--------|
| 13 | Q2T9J0 TYS1_HUMAN   | R.DDEVSEDEEADQLR.A      | 2 | 3,061  | 0,418 | -0,222 |
| 13 | Q00341 VIGLN_HUMAN  | K.DQGLSIM*VSGK.L        | 2 | 3,0603 | 0,408 | -0,106 |
| 13 | O15144 ARPC2_HUMAN  | R.DDETM*YVESK.K         | 2 | 3,0573 | 0,361 | 0      |
| 13 | O00592 PODXL_HUMAN  | K.DDLDEEEDTHL.-         | 2 | 3,0544 | 0,457 | -0,367 |
| 13 | P83876 TXN4A_HUMAN  | K.M*DEVLYSIAEK.V        | 2 | 3,0542 | 0,422 | 0,279  |
| 13 | Q9GZP4 CA128_HUMAN  | R.DLTGELEYATK.I         | 2 | 3,0509 | 0,399 | -0,197 |
| 13 | O95163 ELP1_HUMAN   | R.SVGDNSSDLSNVAVIDGNR.V | 2 | 3,0483 | 0,479 | -0,254 |
| 13 | Q9Y3A6 TMED5_HUMAN  | K.LEDILESINSIK.S        | 2 | 3,0457 | 0,452 | -0,355 |
| 13 | Q09666 AHNK_HUMAN   | K.IEGEM*QVPDVIDR.G      | 2 | 3,0429 | 0,373 | 0,483  |
| 13 | Q99541 ADFP_HUMAN   | K.DSVASTITGVM*DK.T      | 2 | 3,0422 | 0,49  | -0,091 |
| 13 | Q9Y230 RUVB2_HUMAN  | K.EYQDAFLFNLK.G         | 2 | 3,0395 | 0,392 | -0,241 |
| 13 | Q07157 ZO1_HUMAN    | R.DGNIQEGDVVLK.I        | 2 | 3,0343 | 0,403 | -0,19  |
| 13 | O00170 AIP_HUMAN    | R.EGEIAQFLCDIK.H        | 2 | 3,0332 | 0,502 | -0,257 |
| 13 | P11586 C1TC_HUMAN   | R.GDLNDCFIPCTPK.G       | 2 | 3,0262 | 0,482 | 0,556  |
| 13 | Q6P3W7 SCYL2_HUMAN  | K.SLDIGNQM*NVSEEM*K.V   | 2 | 3,0238 | 0,442 | -0,353 |
| 13 | Q9HC35 EMAL4_HUMAN  | K.DVIINQEGEYIK.M        | 2 | 3,0186 | 0,41  | 0      |
| 13 | Q15750 TAB1_HUMAN   | R.SFLESIDDALA EK.A      | 2 | 3,0174 | 0,483 | -0,509 |
| 13 | P04818 TYSY_HUMAN   | R.DM*ESDYSQGQVDQLQR.V   | 3 | 3,0165 | 0,175 | 0,099  |
| 13 | P25205 MCM3_HUMAN   | K.DAQPSFSAEDIAK.I       | 2 | 3,0161 | 0,422 | 0,088  |
| 13 | P08107 HSP71_HUMAN  | K.NQVALNPQNTVFD AK.R    | 2 | 3,0156 | 0,364 | -0,074 |
| 13 | P08133 ANXA6_HUMAN  | R.DAFVAIVQSVK.N         | 2 | 3,0155 | 0,442 | 0,207  |
| 13 | Q13765 NACA_HUMAN   | K.SPASDTYIVFGEAK.I      | 3 | 3,0131 | 0,199 | -0,062 |
| 13 | P68371 TBB2C_HUMAN  | R.IM*NTFSVVPSPK.V       | 2 | 3,0129 | 0,366 | -0,183 |
| 13 | Q9BZG1 RAB34_HUMAN  | K.DALQVAQEM*K.A         | 2 | 3,0095 | 0,29  | 0      |
| 13 | Q8WXX5 DNJC9_HUMAN  | K.ISLEDIQAFEK.T         | 2 | 3,0076 | 0,258 | -0,189 |
| 13 | Q9UBW7 ZMYM2_HUMAN  | K.DIYDKDNYELDEDTD.-     | 2 | 3,0061 | 0,389 | -0,458 |
| 13 | P05783 K1C18_HUMAN  | R.QAQEYEALLNIK.V        | 2 | 3,0018 | 0,454 | -0,258 |
| 13 | Q9Y4L1 HYOU1_HUMAN  | K.AANSLEAFIFETQDK.L     | 2 | 2,9998 | 0,357 | 0,362  |
| 13 | Q99536 VAT1_HUMAN   | R.CLVLTGFGGYDK.V        | 2 | 2,9991 | 0,467 | -0,55  |
| 13 | P49736 MCM2_HUMAN   | R.ESLVVNYEDLAAR.E       | 2 | 2,9973 | 0,362 | -0,247 |
| 13 | Q5TCU3 Q5TCU3_HUMAN | K.TIDDLEETLASAK.E       | 2 | 2,9943 | 0,497 | 0      |
| 13 | Q96RN5 MED15_HUMAN  | K.SLLDILTDP SK.R        | 2 | 2,9937 | 0,334 | -0,507 |
| 13 | P08670 VIME_HUMAN   | K.ILLAELEQLK.G          | 2 | 2,9934 | 0,285 | -0,521 |

|    |                    |                      |   |        |       |        |
|----|--------------------|----------------------|---|--------|-------|--------|
| 13 | P52272 HNRPM_HUMAN | R.AFITNIPFDVK.W      | 2 | 2,9907 | 0,498 | -0,289 |
| 13 | P07814 SYEP_HUMAN  | R.DQDLEPGAPSM*GAK.S  | 2 | 2,9856 | 0,282 | 0,17   |
| 13 | P00441 SODC_HUMAN  | K.GDGPVQGIINFEQK.E   | 2 | 2,9851 | 0,383 | -0,244 |
| 13 | Q9Y606 TRUA_HUMAN  | K.TIEDDLVSALVR.S     | 2 | 2,9836 | 0,39  | -0,367 |
| 13 | P05787 K2C8_HUMAN  | R.SLDMDSIAEVK.A      | 2 | 2,9832 | 0,516 | -0,647 |
| 13 | P54920 SNAA_HUMAN  | K.YEELFPAFSDSR.E     | 2 | 2,9817 | 0,472 | -0,418 |
| 13 | P04844 RPN2_HUMAN  | K.TGQEVVFAEPDNK.N    | 2 | 2,9813 | 0,366 | 0,159  |
| 13 | Q12931 TRAP1_HUMAN | R.GVVDESDIPLNLSR.E   | 2 | 2,9751 | 0,32  | 0,403  |
| 13 | P04843 RPN1_HUMAN  | R.SEDLLDYGPF.R.D     | 2 | 2,9724 | 0,416 | -0,093 |
| 13 | Q16864 VATF_HUMAN  | K.DTTINEIEDTFR.Q     | 2 | 2,9681 | 0,445 | -0,252 |
| 13 | P14625 ENPL_HUMAN  | K.EESDDEAAVEEEEEK.K  | 2 | 2,9657 | 0,5   | -0,261 |
| 13 | P55072 TERA_HUMAN  | R.GILLYGPPGTGK.T     | 2 | 2,9634 | 0,368 | 0,208  |
| 13 | P17987 TCPA_HUMAN  | R.ICDDELILIK.N       | 2 | 2,9625 | 0,426 | 0,198  |
| 13 | O43707 ACTN4_HUMAN | R.DYETATLSDIK.A      | 2 | 2,9593 | 0,501 | 0      |
| 13 | P09960 LKHA4_HUMAN | K.SAYEFSETESM*LK.I   | 2 | 2,9568 | 0,463 | 0,714  |
| 13 | P33240 CSTF2_HUMAN | R.GGTLLSVTGEVEPR.G   | 2 | 2,9543 | 0,29  | 0,69   |
| 13 | O95340 PAPS2_HUMAN | R.AEAETLPSLSITK.L    | 2 | 2,9529 | 0,519 | 0,179  |
| 13 | O14980 XPO1_HUMAN  | R.VDTILEFSQNM*NTK.Y  | 2 | 2,9525 | 0,228 | 0,295  |
| 13 | Q9UI30 TR112_HUMAN | K.GPVEGYEENEFLR.T    | 2 | 2,9431 | 0,492 | -0,293 |
| 13 | Q14980 NUMA1_HUMAN | R.DSALETLQGQLEEK.A   | 3 | 2,9383 | 0,175 | -0,117 |
| 13 | P50990 TCPQ_HUMAN  | R.DIDEVSSLLR.T       | 2 | 2,9328 | 0,299 | 0,106  |
| 13 | P40926 MDHM_HUMAN  | R.FVFSLV DAM*NGK.E   | 2 | 2,9317 | 0,468 | -0,182 |
| 13 | Q96PU5 NED4L_HUMAN | R.LLFEVFDENR.L       | 2 | 2,9311 | 0,377 | -0,571 |
| 13 | Q9Y3B4 PM14_HUMAN  | K.ITAEEM*YDIFGK.Y    | 2 | 2,9288 | 0,522 | -0,085 |
| 13 | P62424 RL7A_HUMAN  | K.VPPAINQFTQALDR.Q   | 3 | 2,9247 | 0,184 | -0,116 |
| 13 | P46100 ATRX_HUMAN  | K.SVPVTVDDDDNDPENR.I | 2 | 2,9241 | 0,506 | -0,242 |
| 13 | Q14789 GOGB1_HUMAN | K.DQLIQEAAAENNK.L    | 2 | 2,9226 | 0,279 | -0,338 |
| 13 | O75165 DNJCD_HUMAN | R.ENGLEVLQEAFSR.C    | 2 | 2,9196 | 0,434 | -0,572 |
| 13 | P05388 RLA0_HUMAN  | K.IIQLLDDYPK.C       | 2 | 2,9186 | 0,283 | -0,2   |
| 13 | Q8IXT5 RB12B_HUMAN | K.DSSVELFLSSK.A      | 2 | 2,9145 | 0,519 | -0,201 |
| 13 | P62937 PPIA_HUMAN  | K.KITIADCGQLE.-      | 2 | 2,9133 | 0,323 | 0,293  |
| 13 | P20042 IF2B_HUMAN  | R.DYTYEELLNR.V       | 2 | 2,9119 | 0,371 | 0,093  |
| 13 | P50454 SERPH_HUMAN | R.DTQSGSLLFIGR.L     | 2 | 2,9112 | 0,415 | -0,189 |

|    |                    |                     |   |        |       |        |
|----|--------------------|---------------------|---|--------|-------|--------|
| 13 | Q13813 SPTA2_HUMAN | K.DLIGVQNLLK.K      | 2 | 2,9111 | 0,181 | 0      |
| 13 | P00338 LDHA_HUMAN  | K.QVVESAYEVIK.L     | 2 | 2,9061 | 0,347 | 0,096  |
| 13 | P35241 RADI_HUMAN  | K.NQEQLAAELAEFTAK.I | 3 | 2,906  | 0,268 | 0      |
| 13 | Q04637 IF4G1_HUMAN | K.GVIDLIFEK.A       | 2 | 2,905  | 0,348 | -0,472 |
| 13 | P14735 IDE_HUMAN   | R.ESLDDLTLNLVVK.L   | 2 | 2,9043 | 0,396 | -0,725 |
| 13 | Q5VTR2 BRE1A_HUMAN | R.LQELTDLLQEK.H     | 2 | 2,9017 | 0,416 | -0,275 |
| 13 | P11021 GRP78_HUMAN | R.ITPSYVAFTPEGER.L  | 2 | 2,8927 | 0,508 | 0,467  |
| 13 | Q99439 CNN2_HUMAN  | K.DGTILCTLM*NK.L    | 2 | 2,8898 | 0,387 | 0,286  |
| 13 | P09874 PARP1_HUMAN | R.VVSEDFLQDVSASTK.S | 2 | 2,8892 | 0,508 | -0,45  |
| 13 | P09493 TPM1_HUMAN  | R.IQLVEEELDR.A      | 2 | 2,8812 | 0,265 | -0,098 |
| 13 | P55265 DSRAD_HUMAN | R.DINAVLIDM*ER.Q    | 2 | 2,8801 | 0,316 | 0,093  |
| 13 | O14929 HAT1_HUMAN  | R.LLVTDMM*SDAEQYR.S | 2 | 2,8782 | 0,398 | 0,157  |
| 13 | Q86UK7 ZN598_HUMAN | R.DDDFPSLQAIAR.I    | 2 | 2,8764 | 0,488 | -0,543 |
| 13 | P07355 ANXA2_HUMAN | K.DIISDTSGDFR.K     | 2 | 2,8745 | 0,457 | -0,1   |
| 13 | P82650 RT22_HUMAN  | K.DQAAEGINLIK.V     | 2 | 2,8739 | 0,43  | -0,104 |
| 13 | Q9UPN3 MACF1_HUMAN | K.NSVFVLDEEIAK.A    | 2 | 2,8733 | 0,469 | -0,42  |
| 13 | Q14166 TTL12_HUMAN | R.AFALNDLDDYEK.H    | 2 | 2,8692 | 0,458 | -0,173 |
| 13 | P49368 TCPG_HUMAN  | R.AVAQALEVIPR.T     | 2 | 2,8662 | 0,21  | -0,105 |
| 13 | Q6UB35 C1TM_HUMAN  | K.DVDGVTDINLGK.L    | 2 | 2,8643 | 0,493 | 0      |
| 13 | P60660 MYL6_HUMAN  | K.DQGTYEDYVEGLR.V   | 2 | 2,8616 | 0,467 | 0      |
| 13 | P08708 RS17_HUMAN  | R.VCEEIAIPSK.K      | 2 | 2,8612 | 0,196 | -0,097 |
| 13 | P31946 1433B_HUMAN | K.DSTLIM*QLLR.D     | 2 | 2,8541 | 0,268 | -0,202 |
| 13 | Q92973 TNPO1_HUMAN | K.YSDIDIILLK.G      | 2 | 2,8506 | 0,318 | 0      |
| 13 | P18206 VINC_HUMAN  | R.DPSASPGDAGEQAIR.Q | 3 | 2,8446 | 0,107 | -0,062 |
| 13 | P50502 F10A1_HUMAN | K.AIDLFTDAIK.L      | 2 | 2,8442 | 0,353 | -0,11  |
| 13 | P30041 PRDX6_HUMAN | K.DINAYNCEEPTK.L    | 3 | 2,843  | 0,286 | 0,116  |
| 13 | P78527 PRKDC_HUMAN | R.YPEETLSLM*TK.E    | 2 | 2,8406 | 0,416 | -0,092 |
| 13 | P05388 RLA0_HUMAN  | K.TSFFQALGITK.I     | 2 | 2,8264 | 0,451 | -0,743 |
| 13 | P34932 HSP74_HUMAN | R.AFSDPFVEAEK.S     | 2 | 2,8247 | 0,45  | -0,098 |
| 13 | Q09666 AHNK_HUMAN  | K.AEGPEVDVNLPK.A    | 2 | 2,8225 | 0,433 | 0,289  |
| 13 | POC7M2 RA1L3_HUMAN | K.IEVIEIM*TDR.G     | 2 | 2,8221 | 0,223 | -0,198 |
| 13 | Q8WU90 ZC3HF_HUMAN | K.EDEISLEDLIER.E    | 2 | 2,82   | 0,469 | -0,501 |
| 13 | Q86V81 THOC4_HUMAN | K.M*DM*SLDDIHK.L    | 2 | 2,8191 | 0,298 | -0,101 |

|    |                     |                          |   |        |       |        |
|----|---------------------|--------------------------|---|--------|-------|--------|
| 13 | P07951 TPM2_HUMAN   | K.LVILEGELER.S           | 2 | 2,8186 | 0,442 | 0,104  |
| 13 | P13798 ACPH_HUMAN   | R.SALYYVDLIGGK.C         | 2 | 2,8181 | 0,455 | -0,47  |
| 13 | Q01813 K6PP_HUMAN   | R.NVIFQPVAELK.K          | 2 | 2,8164 | 0,358 | -0,194 |
| 13 | P04181 OAT_HUMAN    | K.TVQGPPTSDDIFER.E       | 2 | 2,8101 | 0,429 | -0,078 |
| 13 | P35579 MYH9_HUMAN   | K.M*EDSVGCLETAEEVK.R     | 2 | 2,8067 | 0,168 | -0,071 |
| 13 | P50395 GDIB_HUMAN   | K.DLGTESQIFISR.T         | 2 | 2,8066 | 0,368 | 0,625  |
| 13 | Q8IU2 RB6I2_HUMAN   | R.DLNQLFQQDSSSR.T        | 2 | 2,8042 | 0,37  | -0,397 |
| 13 | Q13813 SPTA2_HUMAN  | K.DVTGAEALLER.H          | 2 | 2,8022 | 0,317 | -0,104 |
| 13 | Q99613 EIF3C_HUMAN  | K.SEQDQAENEGEDSAVLM*ER.L | 2 | 2,7968 | 0,546 | -0,113 |
| 13 | P78371 TCPB_HUMAN   | K.ILIANTGM*DTDK.I        | 2 | 2,7935 | 0,325 | -0,653 |
| 13 | P06733 ENOA_HUMAN   | K.LM*IEM*DG TENK.S       | 2 | 2,791  | 0,204 | -0,093 |
| 13 | P61158 ARP3_HUMAN   | K.DYEEIGPSICR.H          | 2 | 2,7908 | 0,313 | -0,273 |
| 13 | P13797 PLST_HUMAN   | R.DGETLEELM*K.L          | 2 | 2,7897 | 0,382 | 0      |
| 13 | P20700 LMNB1_HUMAN  | K.DAALATALGDK.K          | 2 | 2,7892 | 0,436 | 0      |
| 13 | Q08211 DHX9_HUMAN   | R.DVVQAYPEVR.I           | 2 | 2,7878 | 0,419 | 0,104  |
| 13 | O00151 PDLI1_HUMAN  | K.DFEQPLAISR.V           | 2 | 2,7858 | 0,159 | -0,207 |
| 13 | P40925 MDHC_HUMAN   | K.ELTEEKESAFELSSA.-      | 2 | 2,7857 | 0,423 | -0,537 |
| 13 | P54652 HSP72_HUMAN  | R.FEELNADLFR.G           | 2 | 2,7851 | 0,369 | -0,389 |
| 13 | Q13243 SFRS5_HUMAN  | R.DADDAVYELDGK.E         | 2 | 2,784  | 0,49  | 0,093  |
| 13 | P62736 ACTA_HUMAN   | K.DSYVGDEAQSK.R          | 2 | 2,7806 | 0,386 | -0,407 |
| 13 | P61978 HNRPK_HUMAN  | R.NTDEM*VELR.I           | 2 | 2,7798 | 0,413 | -0,326 |
| 13 | Q9BV44 THUM3_HUMAN  | R.DFGGAVQDYFK.W          | 2 | 2,7781 | 0,384 | 0      |
| 13 | Q9NZM1 MYOF_HUMAN   | R.DYSLDEFEANK.I          | 2 | 2,7763 | 0,493 | 0,458  |
| 13 | O00541 PESC_HUMAN   | K.AGEGTYALDSESCM*EK.L    | 2 | 2,7717 | 0,515 | 0,138  |
| 13 | P30041 PRDX6_HUMAN  | R.DFTPVCTTELGR.A         | 2 | 2,7711 | 0,446 | 0,175  |
| 13 | Q53G79 Q53G79_HUMAN | K.ALEDVFDALGK.S          | 2 | 2,7682 | 0,427 | -0,467 |
| 13 | Q9Y4X5 ARI1_HUMAN   | R.DISQDSLQDIK.Q          | 2 | 2,7671 | 0,386 | 0,193  |
| 13 | O75179 ANR17_HUMAN  | K.NASILLEELDLEK.L        | 2 | 2,7652 | 0,117 | -0,41  |
| 13 | O00767 ACOD_HUMAN   | K.GSTLDLSDLEAEK.L        | 2 | 2,7627 | 0,328 | -0,354 |
| 13 | Q14980 NUMA1_HUMAN  | K.VLEGSELELAK.M          | 2 | 2,761  | 0,315 | 0,411  |
| 13 | P42704 LPPRC_HUMAN  | K.VIEEQLEPAVEK.I         | 2 | 2,7602 | 0,3   | -0,353 |
| 13 | Q58FF7 H90B3_HUMAN  | R.DNSTMGYM*M*AK.K        | 2 | 2,7542 | 0,54  | -0,286 |
| 13 | P54136 SYRC_HUMAN   | R.LM*DLLGGLK.R           | 2 | 2,7536 | 0,333 | -0,11  |

|    |                    |                                |   |        |       |        |
|----|--------------------|--------------------------------|---|--------|-------|--------|
| 13 | Q9UPN3 MACF1_HUMAN | K.FLDVLELAEK.F                 | 2 | 2,751  | 0,365 | -0,415 |
| 13 | O43615 TIM44_HUMAN | K.VTDLLGGLFSK.T                | 2 | 2,7481 | 0,168 | -0,424 |
| 13 | P05783 K1C18_HUMAN | R.TVQSLEIDLDSM*R.N             | 2 | 2,7465 | 0,448 | 0      |
| 13 | O00410 IMB3_HUMAN  | K.SLVEIADTVPK.Y                | 2 | 2,7453 | 0,257 | -0,625 |
| 13 | P06733 ENOA_HUMAN  | K.DATNVGDEGGFAPNILENKEGLELLK.T | 3 | 2,7438 | 0,39  | -0,6   |
| 13 | P31946 1433B_HUMAN | R.YLSEVASGDNK.Q                | 2 | 2,7433 | 0,435 | -0,516 |
| 13 | Q16543 CDC37_HUMAN | K.DVQM*LQDAISK.M               | 2 | 2,7416 | 0,208 | 0,193  |
| 13 | O95831 AIFM1_HUMAN | K.AALSASEGEEVPQDK.A            | 2 | 2,7395 | 0,201 | -0,239 |
| 13 | Q96AE4 FUBP1_HUMAN | K.IQIAPDSGGLPER.S              | 2 | 2,7363 | 0,334 | 0,09   |
| 13 | Q12933 TRAF2_HUMAN | K.DLAM*ADLEQK.V                | 2 | 2,7347 | 0,376 | 0,106  |
| 13 | P23284 PPIB_HUMAN  | K.DTNGSQFFITTVK.T              | 2 | 2,7285 | 0,461 | -0,335 |
| 13 | P55072 TERA_HUMAN  | K.DVDLEFLAK.M                  | 2 | 2,7283 | 0,288 | -0,116 |
| 13 | P78371 TCPB_HUMAN  | R.QDLM*NIAGTTLSSK.L            | 2 | 2,7264 | 0,222 | 0,245  |
| 13 | Q6S8J3 A26CA_HUMAN | K.AGFAGDDAPR.A                 | 2 | 2,7237 | 0,361 | -0,25  |
| 13 | Q9BW27 NUP85_HUMAN | K.DAAFATLVSDR.F                | 2 | 2,7229 | 0,416 | 0      |
| 13 | P10809 CH60_HUMAN  | R.GYISPYFINTSK.G               | 2 | 2,7218 | 0,425 | 0,263  |
| 13 | P62491 RB11A_HUMAN | R.DDEYDYLFK.V                  | 2 | 2,7153 | 0,412 | 0      |
| 13 | Q01082 SPTB2_HUMAN | R.LTTLELLEVR.R                 | 2 | 2,7138 | 0,307 | -0,206 |
| 13 | P67812 SC11A_HUMAN | -.M*LSLDFLDDVR.R               | 2 | 2,7137 | 0,451 | -0,364 |
| 13 | Q8NE71 ABCF1_HUMAN | K.TFFEELAVEDK.Q                | 2 | 2,7116 | 0,395 | -0,367 |
| 13 | P52701 MSH6_HUMAN  | R.LANLPEEVIQK.G                | 2 | 2,7099 | 0,24  | -0,195 |
| 13 | Q15008 PSMD6_HUMAN | R.DNNM*APYYEALCK.S             | 2 | 2,7097 | 0,449 | -0,228 |
| 13 | P23381 SYWC_HUMAN  | K.DIIACGFDINK.T                | 2 | 2,7088 | 0,414 | 0,289  |
| 13 | P34932 HSP74_HUMAN | K.FLEM*CNDLLAR.V               | 2 | 2,7023 | 0,261 | -0,436 |
| 13 | P07195 LDHB_HUMAN  | K.M*VVESAYEVIK.L               | 2 | 2,7022 | 0,255 | -0,57  |
| 13 | Q15149 PLEC1_HUMAN | R.AEM*EVLLASK.A                | 2 | 2,6991 | 0,193 | -0,22  |
| 13 | Q14203 DCTN1_HUMAN | R.AEITDAEGLGLK.L               | 2 | 2,6985 | 0,3   | -0,301 |
| 13 | Q5T6V5 CI064_HUMAN | R.DCLLELIEQK.G                 | 2 | 2,6985 | 0,093 | -0,387 |
| 13 | Q9Y4E8 UBP15_HUMAN | R.QDTFSGTGFFPLDR.E             | 2 | 2,695  | 0,413 | -0,384 |
| 13 | Q9UHL4 DPP2_HUMAN  | R.DVTADFEQGSPK.C               | 2 | 2,6938 | 0,371 | -1,226 |
| 13 | O95373 IPO7_HUMAN  | K.EYNEFAEVFLK.A                | 2 | 2,6892 | 0,374 | -0,527 |
| 13 | Q14192 FHL2_HUMAN  | R.DDILCPDCGKDI.-               | 2 | 2,6852 | 0,278 | -0,086 |
| 13 | Q7KZF4 SND1_HUMAN  | R.EVEVEVESM*DK.A               | 2 | 2,6835 | 0,501 | -0,186 |



|    |                     |                          |   |        |       |        |
|----|---------------------|--------------------------|---|--------|-------|--------|
| 13 | B2R9R2 B2R9R2_HUMAN | K.DSM*PDESSQTSLQK.E      | 2 | 2,6768 | 0,401 | -0,467 |
| 13 | Q14683 SMC1A_HUMAN  | R.DLTLEENQVK.K           | 2 | 2,6734 | 0,339 | 0,41   |
| 13 | Q92841 DDX17_HUMAN  | R.DM*VGIAQTGSGK.T        | 2 | 2,6734 | 0,426 | -0,31  |
| 13 | P06753 TPM3_HUMAN   | K.LVIIEGDLER.T           | 2 | 2,673  | 0,415 | 0,211  |
| 13 | Q9UKV3 ACINU_HUMAN  | K.LSEGSQPAEEEEEDQETPSR.N | 2 | 2,6727 | 0,411 | -0,115 |
| 13 | Q99436 PSB7_HUMAN   | K.DGIVLGADTR.A           | 2 | 2,6645 | 0,359 | 0,3    |
| 13 | Q9BUQ8 DDX23_HUMAN  | K.AQPLSLEELLAK.K         | 2 | 2,6642 | 0,353 | -0,558 |
| 13 | P09493 TPM1_HUMAN   | K.QLEDELVSLQK.K          | 2 | 2,6641 | 0,347 | -0,094 |
| 13 | Q15008 PSMD6_HUMAN  | R.DNNM*APYYEALCK.S       | 3 | 2,6637 | 0,25  | 0,114  |
| 13 | Q15056 IF4H_HUMAN   | K.EALTYDGALLGDR.S        | 2 | 2,659  | 0,372 | -0,875 |
| 13 | Q07065 CKAP4_HUMAN  | R.DFTSLENTVEER.L         | 2 | 2,6523 | 0,37  | 0,339  |
| 13 | O96019 ACL6A_HUMAN  | R.DDGSTLM*EIDGDK.G       | 2 | 2,6497 | 0,388 | 0      |
| 13 | Q9HDC9 APMAP_HUMAN  | K.LLLSSETPIEGK.N         | 2 | 2,6485 | 0,333 | -0,284 |
| 13 | Q9H3U1 UN45A_HUMAN  | R.DNALTLLIK.A            | 2 | 2,6452 | 0,215 | -0,366 |
| 13 | Q9Y265 RUVB1_HUMAN  | K.LDPSIFESLQK.E          | 2 | 2,6423 | 0,398 | -0,382 |
| 13 | P30101 PDIA3_HUMAN  | R.ELSDFISYLQR.E          | 2 | 2,6421 | 0,238 | -0,534 |
| 13 | Q96QU8 XPO6_HUMAN   | R.DLSSLLQAVGR.L          | 2 | 2,6406 | 0,371 | -0,421 |
| 13 | P80723 BASP_HUMAN   | K.ETPAATEAPSSTPK.A       | 2 | 2,6402 | 0,475 | -0,704 |
| 13 | O43765 SGTA_HUMAN   | K.ALELDPDNETYK.S         | 2 | 2,6388 | 0,143 | -0,087 |
| 13 | Q9BYT8 NEUL_HUMAN   | K.DGSPiADDLLEK.L         | 2 | 2,6387 | 0,115 | 0,096  |
| 13 | Q08209 PP2BA_HUMAN  | R.DAM*PSDANLNSINK.A      | 2 | 2,6321 | 0,354 | -0,648 |
| 13 | Q09666 AHNK_HUMAN   | K.VDINAPDVEVQGK.V        | 2 | 2,6266 | 0,423 | -0,088 |
| 13 | Q92878 RAD50_HUMAN  | R.DVNGELIAVQR.S          | 2 | 2,6236 | 0,235 | 0,703  |
| 13 | P45974 UBP5_HUMAN   | R.SAADSISESVPVGP.K.V     | 2 | 2,6227 | 0,412 | -0,169 |
| 13 | P09382 LEG1_HUMAN   | K.DGGAWGTEQR.E           | 2 | 2,6226 | 0,225 | 0      |
| 13 | Q7KZF4 SND1_HUMAN   | R.DYVAPTANLDQK.D         | 2 | 2,618  | 0,417 | 0      |
| 13 | P21333 FLNA_HUMAN   | R.VANPSGNLTETYVQDR.G     | 3 | 2,6117 | 0,15  | 0,104  |
| 13 | Q9Y2W2 WBP11_HUMAN  | K.DDVYEAFM*K.E           | 2 | 2,6054 | 0,468 | 0      |
| 13 | Q9BZE4 NOG1_HUMAN   | K.DFIDLTLK.T             | 2 | 2,6052 | 0,415 | 0      |
| 13 | P15927 RFA2_HUMAN   | K.IDDM*TAAPM*DVR.Q       | 2 | 2,6023 | 0,43  | 0,179  |
| 13 | Q8IX01 SFR14_HUMAN  | R.VDNEFLNM*LLDK.G        | 2 | 2,5998 | 0,37  | -0,25  |
| 13 | P62750 RL23A_HUMAN  | R.LAPDYDALDVANK.I        | 2 | 2,5986 | 0,448 | -0,174 |
| 13 | Q86Y56 HEAT2_HUMAN  | R.AIQDAILEVLK.E          | 2 | 2,5952 | 0,316 | -0,402 |

|    |                    |                           |   |        |       |        |
|----|--------------------|---------------------------|---|--------|-------|--------|
| 13 | Q13347 EIF3I_HUMAN | R.DM*TM*FVTASK.D          | 2 | 2,5951 | 0,421 | -0,105 |
| 13 | Q12906 ILF3_HUMAN  | R.FVM*EVEVDGQK.F          | 2 | 2,5948 | 0,421 | 0,188  |
| 13 | P50570 DYN2_HUMAN  | R.GM*EELIPLVNK.L          | 2 | 2,5895 | 0,357 | 0      |
| 13 | Q96HS1 PGAM5_HUMAN | R.TLGDTGFM*PPDK.I         | 2 | 2,5881 | 0,439 | -0,377 |
| 13 | Q5JWF2 GNAS1_HUMAN | R.YTTPEDATPEPGEDPR.V      | 2 | 2,5844 | 0,248 | -0,962 |
| 13 | Q15833 STXB2_HUMAN | K.DVM*EDAVEDR.L           | 2 | 2,5794 | 0,343 | -0,102 |
| 13 | O95678 K2C75_HUMAN | K.AQYEDIANR.S             | 2 | 2,5775 | 0,318 | -0,226 |
| 13 | O43148 MCES_HUMAN  | K.SVLIGEFLEK.V            | 2 | 2,5766 | 0,361 | -1,075 |
| 13 | Q04637 IF4G1_HUMAN | K.EAVGDLLDAFK.E           | 2 | 2,576  | 0,264 | -0,311 |
| 13 | O94903 PROSC_HUMAN | R.TFGENYVQELLEK.A         | 2 | 2,5703 | 0,455 | -0,699 |
| 13 | Q8WXX5 DNJC9_HUMAN | K.ELGLDEGVDSLK.A          | 2 | 2,5699 | 0,528 | 0,191  |
| 13 | P38117 ETFB_HUMAN  | K.LSVISVEDPPQR.T          | 2 | 2,5635 | 0,183 | 0,182  |
| 13 | Q9NQ50 RM40_HUMAN  | R.DPNLFPFEK.E             | 2 | 2,5621 | 0,282 | 0,11   |
| 13 | Q58FF7 H90B3_HUMAN | R.DNSTM*GYM*M*AK.K        | 2 | 2,5601 | 0,468 | -0,564 |
| 13 | Q96HE7 ERO1A_HUMAN | R.LGAVDESLSEETQK.A        | 2 | 2,5491 | 0,143 | -0,243 |
| 13 | P62753 RS6_HUMAN   | K.LIEVDDER.K              | 2 | 2,5433 | 0,277 | -0,123 |
| 13 | P07237 PDIA1_HUMAN | R.LITTLEEM*TK.Y           | 2 | 2,5386 | 0,434 | -0,1   |
| 13 | Q5JTH9 RRP12_HUMAN | K.EGGGDEPLNFLDPK.V        | 2 | 2,5353 | 0,329 | -0,328 |
| 13 | Q9NZI8 IF2B1_HUMAN | R.DQTPDENDQVIVK.I         | 2 | 2,5346 | 0,183 | -0,406 |
| 13 | P78527 PRKDC_HUMAN | K.NLLTVTSSDEM*M*K.S       | 2 | 2,5334 | 0,304 | -0,325 |
| 13 | P38919 IF4A3_HUMAN | R.DELTLEGIK.Q             | 2 | 2,5325 | 0,349 | -0,06  |
| 13 | Q8N163 K1967_HUMAN | R.DDGEEEFAGAK.L           | 2 | 2,5311 | 0,44  | -0,418 |
| 13 | Q06830 PRDX1_HUMAN | R.GLFIIDDK.G              | 2 | 2,53   | 0,319 | -0,199 |
| 13 | O75821 EIF3G_HUMAN | K.EDLNCQEEEDPM*NK.L       | 2 | 2,5255 | 0,28  | -0,483 |
| 13 | P49354 FNNTA_HUMAN | K.ALELCEILAK.E            | 2 | 2,5237 | 0,248 | -0,631 |
| 13 | Q9UHX1 PUF60_HUMAN | K.QGEEEDAIEIIVK.I         | 2 | 2,523  | 0,318 | -0,179 |
| 13 | O15144 ARPC2_HUMAN | R.DDETMVYESK.K            | 2 | 2,5229 | 0,372 | -0,201 |
| 13 | P14324 FPPS_HUMAN  | K.IGTDIQDNK.C             | 2 | 2,5208 | 0,385 | -0,365 |
| 13 | Q9H488 OFUT1_HUMAN | R.VISLEDFM*EK.L           | 2 | 2,5185 | 0,167 | 0,199  |
| 13 | P52272 HNRPM_HUMAN | K.M*EEESGAPGVPSGNGAPGPK.G | 2 | 2,5177 | 0,551 | -0,259 |
| 13 | P36776 LONM_HUMAN  | R.QLEVEPEEPEAENK.H        | 2 | 2,5174 | 0,254 | -0,223 |
| 13 | Q9UHA4 MK1I1_HUMAN | K.ELAPLFEELR.Q            | 2 | 2,515  | 0,361 | -0,2   |
| 13 | Q13523 PRP4B_HUMAN | K.DLLADLIGCQR.L           | 2 | 2,5022 | 0,372 | -0,383 |

|    |                    |                     |   |        |       |        |
|----|--------------------|---------------------|---|--------|-------|--------|
| 13 | Q99755 PI51A_HUMAN | K.LEVAESEFTH.-      | 2 | 2,4994 | 0,346 | 0,105  |
| 13 | Q9NSD9 SYFB_HUMAN  | R.DLLFQALGR.T       | 2 | 2,4981 | 0,312 | -0,118 |
| 13 | Q96EY1 DNJA3_HUMAN | K.GGPTVDPEELFR.K    | 2 | 2,4979 | 0,174 | -0,278 |
| 13 | Q07021 C1QBP_HUMAN | K.AFVDFLSDEIK.E     | 2 | 2,4978 | 0,386 | -0,19  |
| 13 | P15170 ERF3A_HUMAN | K.DM*GTVVLGK.L      | 2 | 2,494  | 0,205 | 0,065  |
| 13 | Q5VZK9 LR16A_HUMAN | K.SNDSGEEAEKEFIFV.- | 2 | 2,4933 | 0,321 | -0,215 |
| 13 | Q8TE73 DYH5_HUMAN  | K.DLELLDR.V         | 2 | 2,4919 | 0,164 | -0,062 |
| 13 | P46013 KI67_HUMAN  | R.DIVEELSALK.Q      | 2 | 2,4888 | 0,311 | -0,218 |
| 13 | P05198 IF2A_HUMAN  | K.VVTDDETELAR.Q     | 2 | 2,4805 | 0,338 | -0,362 |
| 13 | P41227 ARD1A_HUMAN | R.DLTQM*ADELR.R     | 2 | 2,4786 | 0,204 | 0,808  |
| 13 | P61011 SRP54_HUMAN | R.DVQELLTQYTK.F     | 2 | 2,4749 | 0,367 | 0      |
| 13 | Q13442 HAP28_HUMAN | K.GVEGLIDIENPNR.V   | 2 | 2,4743 | 0,267 | 0,428  |
| 13 | Q06787 FMR1_HUMAN  | K.DINESDEVEVYSR.A   | 2 | 2,4682 | 0,279 | 0,078  |
| 13 | Q9UQ80 PA2G4_HUMAN | R.ITSGPFEPDLYK.S    | 2 | 2,467  | 0,27  | 0      |
| 13 | P11216 PYGB_HUMAN  | K.DFYELEPEK.F       | 2 | 2,4589 | 0,332 | 0,209  |
| 13 | Q9H3N1 TXND1_HUMAN | K.DFINFISDK.E       | 2 | 2,4556 | 0,286 | -0,555 |
| 13 | P11021 GRP78_HUMAN | K.SDIDEIVLVGGSTR.I  | 2 | 2,4486 | 0,424 | -0,084 |
| 13 | P14625 ENPL_HUMAN  | K.EEASDYLELDTIK.N   | 2 | 2,4477 | 0,36  | 0      |
| 13 | Q99961 SH3G1_HUMAN | K.QNFIDPLQNLCEK.D   | 2 | 2,4448 | 0,341 | -0,603 |
| 13 | P00492 HPRT_HUMAN  | K.VIGGDDLSTLTGK.N   | 2 | 2,4445 | 0,439 | -0,096 |
| 13 | P18583 SON_HUMAN   | K.DTEEPLPVK.E       | 2 | 2,4443 | 0,27  | -0,237 |
| 13 | P22314 UBA1_HUMAN  | R.DEFEGLFK.Q        | 2 | 2,4441 | 0,171 | -0,062 |
| 13 | P46379 BAT3_HUMAN  | R.DLEAPEVQESYR.Q    | 2 | 2,4404 | 0,361 | -0,17  |
| 13 | Q9BS26 TXND4_HUMAN | R.DLAEITTLDR.S      | 2 | 2,4378 | 0,339 | 0      |
| 13 | O94763 RMP_HUMAN   | K.TSDIFEADIANDVK.S  | 2 | 2,4363 | 0,361 | -0,079 |
| 13 | Q15286 RAB35_HUMAN | K.LLIIGDSGVGK.S     | 2 | 2,4261 | 0,421 | 0      |
| 13 | P08670 VIME_HUMAN  | R.QDVDNASLAR.L      | 2 | 2,4216 | 0,292 | -0,112 |
| 13 | P49588 SYAC_HUMAN  | K.VGAEDADGIDM*AYR.V | 2 | 2,4161 | 0,421 | -0,081 |
| 13 | Q12840 KIF5A_HUMAN | K.LYLVDLAGSEK.V     | 2 | 2,4153 | 0,29  | 0      |
| 13 | P28066 PSA5_HUMAN  | K.EELEEVIKDI.-      | 2 | 2,4151 | 0,343 | -0,301 |
| 13 | P13639 EF2_HUMAN   | K.EGIPALDNFLDK.L    | 2 | 2,413  | 0,36  | -0,55  |
| 13 | P61923 COPZ1_HUMAN | K.AILILDNDGDR.L     | 2 | 2,4086 | 0,323 | 0      |
| 13 | O00186 STXB3_HUMAN | K.DIM*EDAIDNR.L     | 2 | 2,4081 | 0,339 | -0,101 |

|    |                      |                      |   |        |       |        |
|----|----------------------|----------------------|---|--------|-------|--------|
| 13 | Q9NRL2 BAZ1A_HUMAN   | R.DFLLDIEDR.I        | 2 | 2,4075 | 0,207 | -0,967 |
| 13 | P78527 PRKDC_HUMAN   | R.AQEPESGLSEETQVK.C  | 2 | 2,4068 | 0,156 | -0,224 |
| 13 | O75746 CMC1_HUMAN    | R.DLGIFGLYK.G        | 2 | 2,4041 | 0,344 | -0,238 |
| 13 | Q93009 UBP7_HUMAN    | K.AVYM*M*PTEGDDSSK.S | 2 | 2,4003 | 0,397 | -0,468 |
| 13 | Q9UNH7 SNX6_HUMAN    | K.NLVELAELELK.H      | 2 | 2,3937 | 0,299 | -0,384 |
| 13 | P08670 VIME_HUMAN    | R.DNLAEDIM*R.L       | 2 | 2,3899 | 0,358 | 0,112  |
| 13 | Q16594 TAF9_HUMAN    | R.DFLLDIAR.Q         | 2 | 2,3889 | 0,244 | -0,063 |
| 13 | Q09666 AHNK_HUMAN    | K.DIDISSPEFK.I       | 2 | 2,3863 | 0,171 | 0      |
| 13 | Q13464 ROCK1_HUMAN   | K.DVEM*EPVQQA EK.T   | 2 | 2,3835 | 0,326 | -0,344 |
| 13 | Q9UNZ2 NSF1C_HUMAN   | K.SPNELVDDLK.G       | 2 | 2,3821 | 0,265 | -0,478 |
| 13 | P09493 TPM1_HUMAN    | K.LVIIESDLER.A       | 2 | 2,3808 | 0,285 | 0,103  |
| 13 | Q9H0S4 DDX47_HUMAN   | R.DIIGLAETGSGK.T     | 2 | 2,3799 | 0,495 | 0,105  |
| 13 | Q9UJS0 CMC2_HUMAN    | R.DLGFFGIYK.G        | 2 | 2,3796 | 0,406 | -0,23  |
| 13 | ##Q13114 TRAF3_HUMAN | K.EVSENQLLSVK.K      | 2 | 2,377  | 0,137 | -0,098 |
| 13 | P07737 PROF1_HUMAN   | K.STGGAPTFNVTVK.T    | 2 | 2,3752 | 0,44  | 0,177  |
| 13 | Q7L5D6 CG020_HUMAN   | R.DPM*YNEYLDR.I      | 2 | 2,3736 | 0,26  | -0,183 |
| 13 | P62736 ACTA_HUMAN    | R.DLTDYLM*K.I        | 2 | 2,3715 | 0,327 | -0,541 |
| 13 | Q13190 STX5_HUMAN    | K.DVAIDM*M*DSR.T     | 2 | 2,3696 | 0,302 | 0      |
| 13 | Q8WWC4 CB047_HUMAN   | K.FDLLEELVAK.E       | 2 | 2,3673 | 0,224 | -0,311 |
| 13 | Q16513 PKN2_HUMAN    | R.DEVDSL M*CEK.R     | 2 | 2,3668 | 0,392 | -0,295 |
| 13 | P07900 HS90A_HUMAN   | R.YYTSASGDEM*VSLK.D  | 2 | 2,3573 | 0,449 | 0,078  |
| 13 | P13798 ACPH_HUMAN    | K.TPLLLM*LGQEDR.R    | 2 | 2,3567 | 0,316 | -0,348 |
| 13 | P39656 OST48_HUMAN   | K.TADDP SLSLIK.Y     | 2 | 2,3566 | 0,418 | -0,105 |
| 13 | P23919 KTHY_HUMAN    | R.GALIVLEGVDR.A      | 2 | 2,3512 | 0,303 | 0      |
| 13 | Q6AI08 HEAT6_HUMAN   | K.SEDTIDFLEFK.Y      | 2 | 2,3466 | 0,307 | -0,363 |
| 13 | P30044 PRDX5_HUMAN   | R.LLADPTGAFGK.E      | 2 | 2,3314 | 0,353 | 0      |
| 13 | P49588 SYAC_HUMAN    | R.AVFDEY PDPVR.V     | 2 | 2,3278 | 0,234 | -0,087 |
| 13 | O76021 RL1D1_HUMAN   | K.DDVAPESGDTTVK.K    | 2 | 2,3268 | 0,313 | -0,274 |
| 13 | P07900 HS90A_HUMAN   | K.DQVANS AFVER.L     | 2 | 2,3198 | 0,2   | -1,382 |
| 13 | P19525 E2AK2_HUMAN   | R.DGIISDIFDK.K       | 2 | 2,319  | 0,302 | -0,217 |
| 13 | P60842 IF4A1_HUMAN   | K.DQIYDIFQK.L        | 2 | 2,3157 | 0,121 | -0,104 |
| 13 | P34931 HS71L_HUMAN   | R.TTPSYVAFTDTER.L    | 2 | 2,3148 | 0,497 | -0,164 |
| 13 | P49915 GUAA_HUMAN    | R.ELGLPEELVSR.H      | 2 | 2,3126 | 0,296 | -0,295 |

|    |                    |                      |   |        |       |        |
|----|--------------------|----------------------|---|--------|-------|--------|
| 13 | P61978 HNRPK_HUMAN | K.GSDFDCELR.L        | 2 | 2,31   | 0,291 | 0,111  |
| 13 | P48735 IDHP_HUMAN  | K.DIFQEIFDK.H        | 2 | 2,3022 | 0,098 | -0,317 |
| 13 | Q13242 SFRS9_HUMAN | K.DLEDLFYK.Y         | 2 | 2,2985 | 0,222 | -0,234 |
| 13 | Q7L9L4 MOL1A_HUMAN | R.ELAPLQELIEK.L      | 2 | 2,297  | 0,336 | -0,285 |
| 13 | P13645 K1C10_HUMAN | R.LAADDFR.L          | 2 | 2,2947 | 0,372 | 0,075  |
| 13 | O14980 XPO1_HUMAN  | K.DLLGLCEQK.R        | 2 | 2,2923 | 0,337 | 0      |
| 13 | P13639 EF2_HUMAN   | K.GEGQLGPAER.A       | 2 | 2,2897 | 0,296 | -0,421 |
| 13 | Q9Y3I0 CV028_HUMAN | K.LVM*EEAPESYK.N     | 2 | 2,2884 | 0,395 | 0      |
| 13 | Q9UQE7 SMC3_HUMAN  | K.DFVEDDTTHG.-       | 2 | 2,2864 | 0,332 | 0      |
| 13 | Q9GZZ1 NAT13_HUMAN | K.DVLEVGELAK.L       | 2 | 2,2767 | 0,344 | 0      |
| 13 | Q06210 GFPT1_HUMAN | K.EVLSM*DDEIQK.L     | 2 | 2,2754 | 0,338 | -0,738 |
| 13 | P02545 LMNA_HUMAN  | K.LLEGEEER.L         | 2 | 2,2751 | 0,193 | -0,188 |
| 13 | Q00610 CLH1_HUMAN  | K.IYIDSNNNPER.F      | 2 | 2,2743 | 0,144 | 0      |
| 13 | P05787 K2C8_HUMAN  | K.LVSESSDVLPK.-      | 2 | 2,2737 | 0,272 | -0,104 |
| 13 | O15144 ARPC2_HUMAN | R.IIEETLALK.F        | 2 | 2,2707 | 0,177 | 0      |
| 13 | P41208 CETN2_HUMAN | R.DGDGEVSEQEFLR.I    | 2 | 2,2694 | 0,258 | -0,247 |
| 13 | P12814 ACTN1_HUMAN | K.DYETATLSEIK.A      | 2 | 2,2674 | 0,285 | 0,096  |
| 13 | P06703 S10A6_HUMAN | K.LQDAEIAR.L         | 2 | 2,267  | 0,228 | -0,2   |
| 13 | P52701 MSH6_HUMAN  | R.VEQTETPEM*M*EAR.C  | 2 | 2,2563 | 0,245 | -0,308 |
| 13 | Q14247 SRC8_HUMAN  | K.FGVEQDR.M          | 2 | 2,2531 | 0,081 | -0,287 |
| 13 | P06748 NPM_HUMAN   | K.GPSSVEDIK.A        | 2 | 2,2519 | 0,327 | -0,196 |
| 13 | P13667 PDIA4_HUMAN | K.VSQGQLVVM*QPEK.F   | 2 | 2,2444 | 0,174 | -0,418 |
| 13 | Q15758 AAAT_HUMAN  | K.EVLDSFLDLAR.N      | 2 | 2,2402 | 0,212 | -0,668 |
| 13 | Q71U36 TBA1A_HUMAN | K.EIIDLVLDLDR.I      | 2 | 2,2384 | 0,403 | -0,337 |
| 13 | O60942 MCE1_HUMAN  | K.EM*LFEFIDR.C       | 2 | 2,2353 | 0,303 | -0,1   |
| 13 | Q07955 SFRS1_HUMAN | R.DGTGVVEFVR.K       | 2 | 2,2315 | 0,266 | 0      |
| 13 | Q01433 AMPD2_HUMAN | K.CGVPFDTLLDAAK.S    | 2 | 2,2273 | 0,233 | -1,908 |
| 13 | Q01844 EWS_HUMAN   | K.GDATVSYEDPPTAK.A   | 2 | 2,2268 | 0,268 | 0      |
| 13 | P20042 IF2B_HUMAN  | K.IFDIDEAEEGVK.D     | 2 | 2,2259 | 0,189 | -0,179 |
| 13 | Q13619 CUL4A_HUMAN | K.DVFEAFYK.K         | 2 | 2,2251 | 0,369 | 0      |
| 13 | P06733 ENOA_HUMAN  | R.GNPTVEVDLFTSK.G    | 2 | 2,2216 | 0,344 | -0,26  |
| 13 | P61764 STXB1_HUMAN | R.VEQDLAM*GTDAEGEK.I | 2 | 2,22   | 0,097 | 0,758  |
| 13 | Q9UPZ3 HPS5_HUMAN  | K.DFSGVSDTDNSSM*K.L  | 2 | 2,2174 | 0,301 | 1,864  |

|    |                     |                       |   |        |       |        |
|----|---------------------|-----------------------|---|--------|-------|--------|
| 13 | P02545 LMNA_HUMAN   | R.SLETENAGLR.L        | 2 | 2,2174 | 0,353 | 0      |
| 13 | P22314 UBA1_HUMAN   | R.LDQPM*TEIVSR.V      | 2 | 2,2124 | 0,272 | -0,093 |
| 13 | P12814 ACTN1_HUMAN  | R.FAIQDISVEETSAK.E    | 2 | 2,2113 | 0,324 | 0,317  |
| 13 | P17661 DESM_HUMAN   | K.LLEGEESR.I          | 2 | 2,209  | 0,304 | -0,196 |
| 13 | P27816 MAP4_HUMAN   | K.DM*ELPTEK.E         | 2 | 2,2072 | 0,107 | -0,125 |
| 13 | Q08211 DHX9_HUMAN   | K.QPAISQLDPVNER.M     | 2 | 2,2027 | 0,351 | 0,772  |
| 13 | P61313 RL15_HUMAN   | R.SLQSVAEER.A         | 2 | 2,1973 | 0,097 | 0,419  |
| 13 | O75390 CISY_HUMAN   | K.DILADLIPK.E         | 2 | 2,1954 | 0,141 | -0,306 |
| 13 | Q6P1S1 Q6P1S1_HUMAN | R.EALDVLGAVLK.A       | 2 | 2,1888 | 0,35  | -0,433 |
| 13 | Q12929 EPS8_HUMAN   | K.DDILEILDDR.K        | 2 | 2,188  | 0,264 | -0,201 |
| 13 | Q92688 AN32B_HUMAN  | K.DISTLEPLK.K         | 2 | 2,1839 | 0,25  | -0,06  |
| 13 | Q02790 FKBP4_HUMAN  | K.ALELDSNNEK.G        | 2 | 2,1761 | 0,252 | -0,215 |
| 13 | P51148 RAB5C_HUMAN  | R.QASPNIVIALAGNK.A    | 2 | 2,1759 | 0,256 | -0,087 |
| 13 | Q9BUL5 PHF23_HUMAN  | K.DSLFDLDGPK.V        | 2 | 2,172  | 0,286 | -0,331 |
| 13 | P25786 PSA1_HUMAN   | R.ETLPAEQDLTK.N       | 2 | 2,1719 | 0,153 | 0      |
| 13 | Q9Y3T9 NOC2L_HUMAN  | K.DTFLGPVLK.Q         | 2 | 2,1673 | 0,297 | -0,123 |
| 13 | P06733 ENOA_HUMAN   | R.IEEELGSK.A          | 2 | 2,162  | 0,108 | -0,067 |
| 13 | P02545 LMNA_HUMAN   | R.TALINSTGEEVAM*R.K   | 2 | 2,1612 | 0,379 | -0,405 |
| 13 | Q9NYH9 UTP6_HUMAN   | R.ELEIESQTEEQPTTK.Q   | 2 | 2,1576 | 0,295 | -0,069 |
| 13 | Q14258 TRI25_HUMAN  | R.DEFEFLEK.A          | 2 | 2,1555 | 0,19  | -0,231 |
| 13 | P16949 STMN1_HUMAN  | K.DLSLEEIQK.K         | 2 | 2,1552 | 0,221 | -0,113 |
| 13 | P12814 ACTN1_HUMAN  | K.CQLEINFNTLQTK.L     | 2 | 2,1549 | 0,123 | -0,531 |
| 13 | P09960 LKHA4_HUMAN  | R.DGETPDPEDPSR.K      | 2 | 2,1431 | 0,326 | -0,278 |
| 13 | O15226 NKRF_HUMAN   | K.DASGQPIFNASAK.H     | 2 | 2,1409 | 0,302 | -0,374 |
| 13 | O75347 TBCA_HUMAN   | R.LVLDSVKLEA.-        | 2 | 2,138  | 0,308 | -0,224 |
| 13 | B2R6A5 B2R6A5_HUMAN | K.DTDGGPKKEESP.V.-    | 2 | 2,1313 | 0,343 | 0      |
| 13 | Q9Y3F4 STRAP_HUMAN  | K.EFLVAGGEDFK.L       | 2 | 2,1292 | 0,285 | -0,805 |
| 13 | P52272 HNRPM_HUMAN  | R.M*GPAM*GPALGAGIER.M | 2 | 2,1237 | 0,475 | -0,167 |
| 13 | Q9Y265 RUVB1_HUMAN  | R.EACGVIVELIK.S       | 2 | 2,1227 | 0,215 | -0,297 |
| 13 | Q9BYJ9 YTHD1_HUMAN  | R.DTQEVPLEK.A         | 2 | 2,1212 | 0,328 | -0,115 |
| 13 | Q8NE71 ABCF1_HUMAN  | K.STLLLLLTGK.L        | 2 | 2,1201 | 0,384 | -0,461 |
| 13 | Q15843 NEDD8_HUMAN  | K.EIEIDIEPTDK.V       | 2 | 2,1189 | 0,166 | -0,187 |
| 13 | Q9COD5 TANC1_HUMAN  | K.DSGIIATITSSSENDDR.S | 2 | 2,1175 | 0,275 | 0,754  |

|    |                     |                       |   |        |       |        |
|----|---------------------|-----------------------|---|--------|-------|--------|
| 13 | Q08211 DHX9_HUMAN   | K.YSPFFVFG EK.I       | 2 | 2,1175 | 0,215 | -0,648 |
| 13 | Q9UJU6 DBNL_HUMAN   | R.AEEDVEPECIM*EK.V    | 2 | 2,1156 | 0,361 | -0,153 |
| 13 | P61201 CSN2_HUMAN   | K.SINSILDYISTSK.Q     | 2 | 2,1148 | 0,414 | -0,593 |
| 13 | P04083 ANXA1_HUMAN  | K.GTDVNVFNTILTTR.S    | 2 | 2,1057 | 0,173 | -0,157 |
| 13 | P54727 RD23B_HUMAN  | K.IDIDPEETVK.A        | 2 | 2,1    | 0,242 | -0,105 |
| 13 | P00403 COX2_HUMAN   | R.LLDVDNR.V           | 2 | 2,0961 | 0,239 | -0,072 |
| 13 | P30048 PRDX3_HUMAN  | K.DLSLDDFK.G          | 2 | 2,0945 | 0,298 | 0,128  |
| 13 | Q13347 EIF31_HUMAN  | R.EGDLLFTVAK.D        | 2 | 2,0931 | 0,365 | -0,112 |
| 13 | Q15149 PLEC1_HUMAN  | R.QVEEEILALK.A        | 2 | 2,0869 | 0,24  | 0      |
| 13 | P35749 MYH11_HUMAN  | R.DLGEELEALK.T        | 2 | 2,0834 | 0,228 | 0      |
| 13 | P67936 TPM4_HUMAN   | K.TIDDLEEK.L          | 2 | 2,0793 | 0,267 | -0,063 |
| 13 | Q16795 NDUA9_HUMAN  | K.NFD FEDVFK.I        | 2 | 2,0789 | 0,231 | -0,484 |
| 13 | O75643 U520_HUMAN   | R.EEASDDDM*EGDEAVVR.C | 2 | 2,0753 | 0,243 | -0,068 |
| 13 | Q15717 ELAV1_HUMAN  | R.SLFSSIGEVESAK.L     | 2 | 2,075  | 0,083 | -0,27  |
| 13 | Q8NFW8 NEUA_HUMAN   | K.DAIGISLLK.K         | 2 | 2,0735 | 0,182 | 0,197  |
| 13 | Q14204 DYHC1_HUMAN  | K.DYIPVDQEELR.D       | 2 | 2,0652 | 0,266 | 0      |
| 13 | P62937 PPIA_HUMAN   | R.VSFELFADK.V         | 2 | 2,0651 | 0,353 | -0,231 |
| 13 | ##Q9NYC9 DYH9_HUMAN | R.ELIEELLAK.V         | 2 | 2,0643 | 0,332 | 0      |
| 13 | P28331 NDUS1_HUMAN  | K.DFYM*TDSISR.A       | 2 | 2,062  | 0,102 | -0,293 |
| 13 | P07355 ANXA2_HUMAN  | R.DALNIETAIK.T        | 2 | 2,0609 | 0,212 | -0,449 |
| 13 | Q9ULW0 TPX2_HUMAN   | R.TVEICPFSFDSR.D      | 2 | 2,0593 | 0,231 | -0,251 |
| 13 | P06576 ATPB_HUMAN   | K.VVDLLAPYAK.G        | 2 | 2,0488 | 0,235 | -0,336 |
| 13 | P22830 HEMH_HUMAN   | R.DLM*TLPIQNK.L       | 2 | 2,0477 | 0,228 | 0,103  |
| 13 | P20340 RAB6A_HUMAN  | R.VAAALPGM*ESTQDR.S   | 2 | 2,0471 | 0,357 | 0,167  |
| 13 | Q9Y282 ERGI3_HUMAN  | K.NEGCQVYGFLEVNK.V    | 2 | 2,0459 | 0,139 | 0,295  |
| 13 | Q9Y2Q3 GSTK1_HUMAN  | K.DFLSVM*LEK.G        | 2 | 2,0426 | 0,247 | 0      |
| 13 | Q92621 NU205_HUMAN  | K.VLVDSLVEDDR.T       | 2 | 2,0409 | 0,204 | 0      |
| 13 | Q9Y314 NOSIP_HUMAN  | K.DM*VDPVTGDK.L       | 2 | 2,0384 | 0,198 | -0,112 |
| 13 | P47897 SYQ_HUMAN    | R.EAATQAQQT LGSTIDK.A | 2 | 2,0377 | 0,19  | 0,147  |
| 13 | Q99536 VAT1_HUMAN   | K.VLLVPGPEKEN.-       | 2 | 2,0375 | 0,252 | 0,102  |
| 13 | P07237 PDIA1_HUMAN  | R.ILEFFGLK.K          | 2 | 2,0347 | 0,26  | -0,252 |
| 13 | P42704 LPPRC_HUMAN  | K.NVQGIIEILK.G        | 2 | 2,0308 | 0,148 | 0      |
| 13 | P23528 COF1_HUMAN   | R.YALYDATYETK.E       | 2 | 2,0301 | 0,362 | 0,365  |

|    |                     |                                     |            |   |        |       |        |
|----|---------------------|-------------------------------------|------------|---|--------|-------|--------|
| 13 | O15066 KIF3B_HUMAN  | R.DYEGPAIAPK.V                      |            | 2 | 2,0224 | 0,345 | 0      |
| 13 | P07355 ANXA2_HUMAN  | K.SYSPYDM*LESIR.K                   |            | 2 | 2,0185 | 0,322 | 0,165  |
| 13 | P23396 RS3_HUMAN    | K.GGKPEPPAM*PQPVPPTA.-              |            | 2 | 2,0156 | 0,111 | -0,614 |
| 13 | P38646 GRP75_HUMAN  | R.TTPSVVAFTADGER.L                  |            | 2 | 2,0115 | 0,359 | 0      |
| 14 | P46939 UTRO_HUMAN   | K.YGEHEAS#PDNGQNEFSDIK.S            | S10:       | 3 | 4,9071 | 0,355 | -0,393 |
| 14 | Q96SB3 NEB2_HUMAN   | R.ASS#LNENVDSALLK.L                 | S100:      | 2 | 3,6637 | 0,339 | 0,436  |
| 14 | Q86YP4 P66A_HUMAN   | R.RPPS#PDVIVLSDNEQPSSPR.V           | S100:      | 3 | 2,6508 | 0,183 | 0,161  |
| 14 | P38398 BRCA1_HUMAN  | K.NLLEENFEEHS#M*SPER.E              | S1007:     | 3 | 2,6191 | 0,202 | 0      |
| 14 | P05386 RLA1_HUMAN   | K.KEES#EES#DDDM*GFGLFD.-            | S101:S104: | 2 | 4,0823 | 0,646 | -0,459 |
| 14 | O75044 FNBP2_HUMAN  | R.S#ASTAGDIACAFRPVK.S               | S1011:     | 2 | 2,782  | 0,294 | -0,211 |
| 14 | Q9UQ35 SRRM2_HUMAN  | K.AQTPPGPSLSGSKS#PCPQEK.S           | S1014:     | 2 | 2,0102 | 0,472 | -0,686 |
| 14 | Q8NDI1 EHBP1_HUMAN  | K.TQLQS#FSQYIENRPEM*K.R             | S1019:     | 3 | 3,1883 | 0,306 | -0,583 |
| 14 | O75351 VPS4B_HUMAN  | K.EGQPSPADEKGNDS#DGEGESDDPEK.K      | S102:      | 3 | 4,2345 | 0,465 | -0,411 |
| 14 | P05387 RLA2_HUMAN   | K.DEKKEES#EESDDDM*GFGLFD.-          | S102:      | 3 | 3,2972 | 0,405 | -0,303 |
| 14 | Q6DEN2 Q6DEN2_HUMAN | R.EESREPAPAS#PAPAGVEIR.S            | S102:      | 3 | 3,2923 | 0,173 | 0,716  |
| 14 | P17096 HMGA1_HUMAN  | K.KLEKEEEEGISQES#S#EEEQ.-           | S102:S103: | 3 | 4,1998 | 0,276 | -0,305 |
| 14 | Q6ZRV2 FA83H_HUMAN  | R.LSS#ATANALYSSNLRDDTK.A            | S1025:     | 3 | 2,6605 | 0,383 | 0,174  |
| 14 | Q5H9F3 BCRL1_HUMAN  | R.GS#STERPQLGSQVDLGR.V              | S1033:     | 3 | 4,0138 | 0,351 | 0,098  |
| 14 | A7MCZ2 A7MCZ2_HUMAN | R.S#TSVASHILNGSSHFYS.-              | S1033:     | 2 | 3,5622 | 0,478 | -0,651 |
| 14 | P05386 RLA1_HUMAN   | K.KEESEES#DDDM*GFGLFD.-             | S104:      | 2 | 3,0851 | 0,328 | -0,119 |
| 14 | O60293 CC131_HUMAN  | R.S#FLESNYFTKPNLK.H                 | S1046:     | 2 | 2,2842 | 0,457 | -0,897 |
| 14 | P24534 EF1B_HUMAN   | K.DDDDIDLFGS#DDEESEEAKR.L           | S106:      | 3 | 3,1748 | 0,256 | -0,146 |
| 14 | Q9UBW7 ZMYM2_HUMAN  | K.AVSGYQSHDDS#SDNSECSFPFK.Y         | S1060:     | 3 | 3,9221 | 0,43  | 0,072  |
| 14 | A0JLU0 A0JLU0_HUMAN | K.KQEGPATQVDSAVGTLPATPS#PQSTSVQAK.G | S1073:     | 3 | 3,9984 | 0,206 | 0,679  |
| 14 | Q9H6Z4 RANB3_HUMAN  | R.SAGGSSPEGGEDS#DREDGNYCPPVK.R      | S108:      | 3 | 4,0559 | 0,378 | -0,415 |
| 14 | O60499 STX10_HUMAN  | K.DHM*VS#PTAVAFLE.N                 | S108:      | 3 | 3,6697 | 0,181 | -0,219 |
| 14 | A1L390 PKHG3_HUMAN  | R.SHS#VPENM*VEPPLSGR.V              | S1081:     | 3 | 3,0582 | 0,169 | 0,499  |
| 14 | Q9H6W3 NO66_HUMAN   | R.EPYGHLGPAELLEAS#PAAR.S            | S109:      | 3 | 3,0664 | 0,231 | -0,178 |
| 14 | Q8NE71 ABCF1_HUMAN  | K.LSVPTS#DEEDEVPAKPR.G              | S109:      | 3 | 2,9446 | 0,291 | 0      |
| 14 | P55196 AFAD_HUMAN   | K.QGAIYHGLATLLNQPS#PM*M*QR.I        | S1090:     | 3 | 4,2871 | 0,237 | -0,525 |
| 14 | P42677 RS27_HUMAN   | K.DLLHPS#PEEEK.R                    | S11:       | 2 | 3,1212 | 0,277 | 0,178  |
| 14 | Q96HC4 PDLI5_HUMAN  | K.EVVKVPVITS#PAVSK.V                | S111:      | 2 | 2,8038 | 0,403 | 0,15   |
| 14 | P29375 JAD1A_HUMAN  | K.EKDLLEPLS#DLEEGLEETR.D            | S1111:     | 3 | 3,373  | 0,293 | -0,304 |



|    |                    |                                 |              |   |        |       |        |
|----|--------------------|---------------------------------|--------------|---|--------|-------|--------|
| 14 | Q9ULJ7 ANR50_HUMAN | R.GLPNGPTHAFSSPSES#PDSTVDR.Q    | S1113:       | 3 | 3,1995 | 0,105 | 1,428  |
| 14 | Q14997 PSME4_HUMAN | K.NPSINQILLS#PEKIK.E            | S1121:       | 3 | 4,0438 | 0,395 | -0,103 |
| 14 | Q14997 PSME4_HUMAN | K.NPSINQILLS#PEKIK.E            | S1121:       | 2 | 3,144  | 0,32  | -0,069 |
| 14 | O15417 TNC18_HUMAN | R.LALS#PEDKPIRLS#PSK.I          | S1127:S1136: | 2 | 3,3535 | 0,415 | 0,702  |
| 14 | Q6ZV89 SH2D5_HUMAN | R.DQLSQNVHALVS#FR.R             | S113:        | 2 | 3,4831 | 0,465 | -0,216 |
| 14 | Q8WUF5 IASPP_HUMAN | R.SESAPTLHPYSPLS#PK.G           | S113:        | 2 | 3,4635 | 0,458 | -0,136 |
| 14 | Q6ZV89 SH2D5_HUMAN | R.DQLSQNVHALVS#FR.R             | S113:        | 3 | 3,2636 | 0,311 | -0,216 |
| 14 | Q9NTI5 PDS5B_HUMAN | K.TTNVLGAVNKPLSS#AGK.Q          | S1140:       | 2 | 3,9165 | 0,424 | 0,07   |
| 14 | Q8TAP9 TTDN1_HUMAN | R.SPAGSQQFGYSPGQQQTHPQGS#PR.T   | S115:        | 3 | 4,5148 | 0,409 | 0,401  |
| 14 | Q6T4R5 NHS_HUMAN   | K.QKEENNTDLPYLEESTLTTAALS#PSK.I | S1155:       | 3 | 4,0331 | 0,455 | -0,618 |
| 14 | Q15121 PEA15_HUMAN | K.DIIRQPS#EEEIIK.L              | S116:        | 2 | 3,9096 | 0,345 | 0,222  |
| 14 | P00533 EGFR_HUMAN  | K.GS#HQISLDNPDYQQDFFPK.E        | S1162:       | 3 | 4,115  | 0,293 | 0      |
| 14 | Q92621 NU205_HUMAN | R.S#VSGFLHFDATK.V               | S1165:       | 2 | 3,527  | 0,516 | 0,082  |
| 14 | O43314 VIP2_HUMAN  | K.TAEISSTALRSS#PIM*R.K          | S1172:       | 2 | 2,5127 | 0,299 | 0,403  |
| 14 | Q7Z6E9 RBBP6_HUMAN | K.LEVTEIVKPS#PK.R               | S1179:       | 2 | 3,4801 | 0,32  | -0,086 |
| 14 | Q9UQ35 SRRM2_HUMAN | K.M*ALPPQEDATAS#PPRQK.D         | S1179:       | 2 | 2,374  | 0,309 | -0,694 |
| 14 | Q8NEY1 NAV1_HUMAN  | R.QNS#SDSISLNSITSHSIGSSK.D      | S1181:       | 3 | 4,4071 | 0,332 | -0,076 |
| 14 | O14497 ARI1A_HUMAN | R.SNS#VGIQDAFNDGSDSTFQKR.N      | S1184:       | 3 | 3,0329 | 0,339 | 0,233  |
| 14 | P20020 AT2B1_HUMAN | R.IEDS#EPHIPLIDDT#DAEDDAPTKR.N  | S1193:T1203: | 3 | 7,2522 | 0,504 | -0,577 |
| 14 | Q15776 ZN192_HUMAN | R.KPSAPS#PPDQTPEEDLVIVK.V       | S12:         | 3 | 3,6872 | 0,302 | 0,739  |
| 14 | O95218 ZRAB2_HUMAN | R.ENVEYIEREES#DGEYDEFGR.K       | S120:        | 3 | 5,2674 | 0,475 | 0,359  |
| 14 | O96017 CHK2_HUMAN  | R.DKS#CEYCFDEPLLK.R             | S120:        | 2 | 4,0714 | 0,312 | -0,324 |
| 14 | Q15648 MED1_HUMAN  | K.LAS#PM*KPVPGTPPSSK.A          | S1207:       | 3 | 2,6394 | 0,119 | -0,108 |
| 14 | Q9H9C1 CN133_HUMAN | R.TRPGS#FQSLSDALSDTPAK.S        | S121:        | 3 | 4,3792 | 0,372 | -0,089 |
| 14 | Q9Y2D5 AKAP2_HUMAN | R.QAPPHIELSNSS#PDPM*AEAER.T     | S121:        | 3 | 3,2138 | 0,298 | 0,463  |
| 14 | Q13017 RHG05_HUMAN | K.GGIDNPAITS#DQELDDKK.M         | S1218:       | 2 | 4,5447 | 0,52  | 0,428  |
| 14 | Q14160 LAP4_HUMAN  | R.NSLESISSIDRELS#PEGPGK.E       | S1232:       | 3 | 2,8198 | 0,319 | -0,417 |
| 14 | O95155 UBE4B_HUMAN | K.SM*SQVDVDS#GIENM*EVDENDRR.E   | S124:        | 3 | 3,7958 | 0,436 | 0,555  |
| 14 | Q9C004 SPY4_HUMAN  | R.LLDHM*APPPVADQAS#PR.A         | S125:        | 3 | 5,154  | 0,429 | 0,191  |
| 14 | Q9C004 SPY4_HUMAN  | R.LLDHM*APPPVADQAS#PR.A         | S125:        | 2 | 4,3808 | 0,326 | -0,383 |
| 14 | Q93074 MED12_HUMAN | K.GSGFTVTGGTEELPEEEGGGS#GGRR.Q  | S1260:       | 3 | 3,8985 | 0,385 | 0,286  |
| 14 | Q9NXE4 NSMA3_HUMAN | K.ASIQECILPDS#PLYHNK.V          | S130:        | 3 | 3,6335 | 0,383 | -0,177 |
| 14 | Q6R327 RICTR_HUMAN | R.AQS#LKAPSIATIK.S              | S1302:       | 2 | 2,8119 | 0,374 | 0,26   |

|    |                    |                                 |            |   |        |       |        |
|----|--------------------|---------------------------------|------------|---|--------|-------|--------|
| 14 | P51858 HDGF_HUMAN  | K.GNAEGS#SDEEGKLVIDEPAK.E       | S132:      | 3 | 4,3752 | 0,37  | 0,258  |
| 14 | O15357 SHIP2_HUMAN | R.DAS#DGEDEKPPLPPR.S            | S132:      | 3 | 3,5106 | 0,399 | 0,215  |
| 14 | O15357 SHIP2_HUMAN | R.DAS#DGEDEKPPLPPR.S            | S132:      | 2 | 2,6555 | 0,325 | 0,143  |
| 14 | P51858 HDGF_HUMAN  | K.GNAEGSS#DEEGKLVIDEPAK.E       | S133:      | 3 | 4,0162 | 0,301 | 0,344  |
| 14 | Q01105 SET_HUMAN   | R.VEVTEFEDIKS#GYR.I             | S133:      | 2 | 3,8129 | 0,546 | 1,045  |
| 14 | Q86W56 PARG_HUMAN  | K.LENVSQSL#LDKSPTEK.S           | S133:      | 3 | 2,7245 | 0,214 | 0      |
| 14 | P29692 EF1D_HUMAN  | R.ATAPQTQHVS#PM*R.Q             | S133:      | 2 | 2,3788 | 0,395 | -0,562 |
| 14 | P42695 CNDD3_HUMAN | K.ARPM*S#LSTIAILNSVK.K          | S1348:     | 2 | 2,1318 | 0,306 | -0,815 |
| 14 | Q9BX56 NUSAP_HUMAN | K.VPS#PPDEHQEAENAVSSG NR.D      | S135:      | 3 | 4,647  | 0,47  | -0,083 |
| 14 | P42695 CNDD3_HUMAN | K.ARPM*SLS#TIAILNSVK.K          | S1350:     | 3 | 3,7644 | 0,41  | -0,102 |
| 14 | P11388 TOP2A_HUMAN | K.TDDEDFVPSDAS#PPKTK.T          | S1354:     | 2 | 3,2869 | 0,492 | 0,443  |
| 14 | Q7Z5J4 RAI1_HUMAN  | K.APGASPGNPLS#PSLSDKDR.G        | S1358:     | 3 | 3,3109 | 0,181 | 0      |
| 14 | Q9HAZ1 CLK4_HUMAN  | R.S#RS#IEDDEEGHLCQSGDVL R.A     | S136:S138: | 3 | 2,6624 | 0,522 | -0,071 |
| 14 | O15320 CTGE5_HUMAN | K.LNRS#NSELEDEILCLEK.E          | S137:      | 3 | 4,7831 | 0,322 | -0,256 |
| 14 | Q86W56 PARG_HUMAN  | K.LENVSQSLDKS#PTEK.S            | S137:      | 2 | 3,9699 | 0,387 | -0,653 |
| 14 | P42695 CNDD3_HUMAN | R.SRS#LGVLPFTLNSGSPEK.T         | S1372:     | 3 | 5,2341 | 0,506 | -0,186 |
| 14 | P42695 CNDD3_HUMAN | R.SRS#LGVLPFTLNSGSPEK.T         | S1372:     | 2 | 4,2472 | 0,44  | -0,496 |
| 14 | Q14669 TRIPC_HUMAN | R.QFSIQAE DERES#TDD ESNPLGR.A   | S1376:     | 3 | 2,9714 | 0,216 | 0,562  |
| 14 | Q9UPN3 MACF1_HUMAN | R.RM*LSS#SDAITQEFM*DLR.T        | S1377:     | 3 | 4,4555 | 0,281 | 0      |
| 14 | Q13428 TCOF_HUMAN  | K.LGAGEGGEASVS#PEKTSTTSK.G      | S1378:     | 3 | 3,7451 | 0,294 | 0,088  |
| 14 | Q96GY3 LIN37_HUMAN | R.ERECSPSS#PLPPLPEDEEGSEVTNSK.S | S138:      | 3 | 3,5155 | 0,172 | 0,372  |
| 14 | Q8IWS0 PHF6_HUMAN  | K.TAHNS#EADLEESFNEHELEPSS#PK.S  | S138:S155: | 3 | 4,8505 | 0,387 | 0,512  |
| 14 | Q9ULT8 HECD1_HUMAN | R.KGS#SSSVCSVASSDISLGSTK.T      | S1386:     | 3 | 3,4212 | 0,443 | 0,414  |
| 14 | P49736 MCM2_HUMAN  | R.GLLYDS#DEEDEERPAR.K           | S139:      | 2 | 3,3724 | 0,455 | 0,495  |
| 14 | O14686 MLL2_HUMAN  | K.LEGPVS#PDVEPGKEETEESK.K       | S1396:     | 3 | 2,6456 | 0,111 | 0,164  |
| 14 | Q9H6Y2 WDR55_HUMAN | R.TCEERPAEDGS#DEEDPDSM*EAPTR.I  | S14:       | 3 | 5,9696 | 0,424 | -0,584 |
| 14 | O75122 CLAP2_HUMAN | K.SFDDEES#VDGNRPSSAASAFK.V      | S14:       | 3 | 3,9354 | 0,326 | 0,478  |
| 14 | Q6P0Q8 MAST2_HUMAN | R.VQS#AEKLAALAASEK.K            | S1407:     | 2 | 3,8773 | 0,486 | 0,073  |
| 14 | O43432 IF4G3_HUMAN | K.LDFIESDS#PCSSEALSCK.E         | S1409:     | 3 | 3,0207 | 0,322 | 0,35   |
| 14 | Q13428 TCOF_HUMAN  | K.GSLGS#QGAKDEPEEELQK.G         | S1410:     | 2 | 3,9501 | 0,364 | 0,431  |
| 14 | Q13428 TCOF_HUMAN  | K.GSLGS#QGAKDEPEEELQK.G         | S1410:     | 3 | 3,4721 | 0,146 | 0,461  |
| 14 | Q5VUA4 ZN318_HUMAN | K.AFGGEEVILKGS#PEEK.V           | S1420:     | 2 | 4,1387 | 0,233 | 0,62   |
| 14 | Q8NEJ9 NGDN_HUMAN  | K.LSS#EDEEEDEAEDDQSEASGKK.S     | S143:      | 3 | 4,345  | 0,476 | -0,73  |

|    |                     |                                     |              |   |        |       |        |
|----|---------------------|-------------------------------------|--------------|---|--------|-------|--------|
| 14 | P46940 IQGA1_HUMAN  | K.S#VKEDSNLTLQEK.K                  | S1443:       | 2 | 2,6449 | 0,417 | 0,466  |
| 14 | P11388 TOP2A_HUMAN  | R.DPALNS#GVSQKPDPAK.T               | S1449:       | 3 | 3,5391 | 0,359 | -0,644 |
| 14 | P39880 CUX1_HUMAN   | R.RPS#SLQSLFGLPEAAGAR.D             | S1454:       | 3 | 3,7858 | 0,456 | -0,472 |
| 14 | P16144 ITB4_HUMAN   | R.M*DFAFPGSTNS#LHR.M                | S1457:       | 3 | 3,4826 | 0,32  | -0,109 |
| 14 | Q8TF76 HASP_HUMAN   | R.DSGRLS#PDLVCGQPR.D                | S147:        | 2 | 3,0282 | 0,402 | 0,401  |
| 14 | O15234 CASC3_HUMAN  | K.STVTGERQS#GDGQESTEPVENK.V         | S148:        | 3 | 4,4075 | 0,331 | 0,076  |
| 14 | Q9Y3C6 PPIL1_HUMAN  | R.VGM*VETNS#QDRPVDDVK.I             | S149:        | 2 | 3,4687 | 0,475 | -0,246 |
| 14 | Q6UB98 ANR12_HUMAN  | R.DNS#PDSTPNHPSQTTPAQK.K            | S149:        | 3 | 2,8745 | 0,33  | -0,522 |
| 14 | Q9Y3C6 PPIL1_HUMAN  | R.VGM*VETNS#QDRPVDDVK.I             | S149:        | 3 | 2,8703 | 0,249 | -0,184 |
| 14 | Q9Y570 PPME1_HUMAN  | R.LPS#RPPLPGSGGSQSGAK.M             | S15:         | 3 | 3,6278 | 0,311 | -0,103 |
| 14 | P46821 MAP1B_HUMAN  | R.KLGDVS#PTQIDVVSQFGSFK.E           | S1501:       | 3 | 5,5664 | 0,436 | -0,172 |
| 14 | P11388 TOP2A_HUMAN  | K.GESDDFHM*DFDS#AVAPR.A             | S1504:       | 3 | 3,5873 | 0,228 | 0,092  |
| 14 | P11388 TOP2A_HUMAN  | K.GESDDFHM*DFDS#AVAPR.A             | S1504:       | 2 | 2,3019 | 0,279 | -0,123 |
| 14 | Q14674 ESPL1_HUMAN  | K.M*SFEILRGS#DGEDSASGGK.T           | S1508:       | 3 | 3,6346 | 0,404 | 0,449  |
| 14 | P49792 RBP2_HUMAN   | R.KQS#LPATSIPTPASFK.F               | S1509:       | 2 | 4,0772 | 0,456 | -0,348 |
| 14 | P40425 PBX2_HUMAN   | K.GGGSAAAAAAAAASGGGVS#PDNSIEHSDYR.S | S151:        | 3 | 7,265  | 0,605 | 0,133  |
| 14 | P08134 RHOC_HUMAN   | R.DM*ANRIS#AFGYLECSAK.T             | S152:        | 3 | 3,3076 | 0,212 | -0,09  |
| 14 | Q9ULH0 ARMS_HUMAN   | K.LPSDEDES#GTEESDNTPLLKDDK.D        | S1526:       | 3 | 5,5991 | 0,424 | 0,35   |
| 14 | O95218 ZRAB2_HUMAN  | K.EVEDKES#EGEEDEDEDLSK.Y            | S153:        | 3 | 5,6739 | 0,398 | -0,151 |
| 14 | Q15785 TOM34_HUMAN  | R.LKLPSIPLVPVS#AQK.R                | S153:        | 3 | 2,9787 | 0,126 | -0,329 |
| 14 | Q9HCD6 TANC2_HUMAN  | R.FSPPVGGQGKEYPS#PPPS#PLRR.G        | S1530:S1534: | 3 | 3,3597 | 0,179 | 0,912  |
| 14 | Q9UQ35 SRRM2_HUMAN  | R.SGS#SQELDVKPSASPQER.S             | S1541:       | 2 | 2,0594 | 0,408 | -0,431 |
| 14 | Q5QNZ9 Q5QNZ9_HUMAN | K.CDTKDDS#ILCFLEVK.E                | S1548:       | 3 | 4,2138 | 0,284 | -0,666 |
| 14 | Q5QNZ9 Q5QNZ9_HUMAN | K.CDTKDDS#ILCFLEVK.E                | S1548:       | 2 | 2,4286 | 0,164 | -0,508 |
| 14 | Q5UIP0 RIF1_HUMAN   | R.ASQGLLSIENSES#DSSEAKEEGSR.K       | S1554:       | 3 | 5,5728 | 0,545 | 0,205  |
| 14 | Q8NFD5 ARI1B_HUMAN  | R.M*S#PSKSPFLPSM*K.M                | S1555:       | 2 | 2,2265 | 0,209 | 0,315  |
| 14 | P18583 SON_HUMAN    | K.EM*EHNTVCAAGTS#PVGEIGEEK.I        | S1556:       | 3 | 6,2963 | 0,562 | 0,75   |
| 14 | Q8TF44 NLF3_HUMAN   | K.AQTSYGFAM*LAES#PHTR.R             | S156:        | 2 | 4,7657 | 0,527 | 0,559  |
| 14 | Q15742 NAB2_HUMAN   | R.SFS#PKSPLELGEK.L                  | S159:        | 3 | 3,2985 | 0,292 | -0,183 |
| 14 | Q15742 NAB2_HUMAN   | R.SFS#PKSPLELGEK.L                  | S159:        | 2 | 2,4468 | 0,194 | 0,081  |
| 14 | Q9ULH0 ARMS_HUMAN   | R.SSESS#PNHS#LHNEVADDSQLEK.A        | S1594:S1598: | 3 | 4,2864 | 1     | -0,498 |
| 14 | Q13200 PSMD2_HUMAN  | K.APVQPQQS#PAAAAPGGTDEKPSGK.E       | S16:         | 3 | 3,5897 | 0,305 | -0,318 |
| 14 | Q9BVG9 PTSS2_HUMAN  | R.DAGGPRPES#PVPAGR.A                | S16:         | 2 | 2,5108 | 0,35  | -0,87  |

|    |                    |                                  |            |   |        |       |        |
|----|--------------------|----------------------------------|------------|---|--------|-------|--------|
| 14 | Q92870 APBB2_HUMAN | R.TKS#FLNYYADLETSAR.E            | S160:      | 3 | 5,3506 | 0,472 | -0,374 |
| 14 | Q02241 KIF23_HUMAN | K.SNDRNS#M*DIQCEVDALLER.Q        | S160:      | 3 | 5,3062 | 0,408 | -0,387 |
| 14 | Q1KMD3 HNRL2_HUMAN | R.EEDEPEERS#GDETPGSEVPGDK.A      | S161:      | 3 | 4,357  | 0,287 | -0,074 |
| 14 | O00161 SNP23_HUMAN | R.ITNDAREDEM*EENLTQVGS#ILGNLK.D  | S161:      | 3 | 3,9702 | 0,441 | -0,507 |
| 14 | Q5UIP0 RIF1_HUMAN  | K.ATSEEDVSIKS#PICEK.Q            | S1616:     | 2 | 3,8405 | 0,351 | 1,042  |
| 14 | P29692 EF1D_HUMAN  | K.KPATPAEDEDDEDDIDLFGS#DNEEEDK.E | S162:      | 3 | 7,6553 | 0,554 | -0,49  |
| 14 | Q92974 ARHG2_HUMAN | K.SVSTTNIAGHFNDES#PLGLR.R        | S163:      | 3 | 3,009  | 0,356 | -0,167 |
| 14 | P80723 BASP_HUMAN  | K.S#DGAPASDSKPGSSEAAPSSK.E       | S164:      | 3 | 2,6253 | 0,321 | -0,454 |
| 14 | Q9H0F6 SHRPN_HUMAN | R.S#PGNLTEREELAGSLAR.A           | S165:      | 3 | 3,296  | 0,467 | -0,097 |
| 14 | Q02952 AKA12_HUMAN | K.S#VPEDDGHALLAER.I              | S1674:     | 2 | 2,8622 | 0,443 | 0,461  |
| 14 | P39687 AN32A_HUMAN | R.TPS#DVKELVLDNSR.S              | S17:       | 3 | 3,5601 | 0,306 | 0,221  |
| 14 | Q9HCK8 CHD8_HUMAN  | R.TAS#PLLRPDAPVEK.S              | S1716:     | 2 | 3,3547 | 0,297 | 0,292  |
| 14 | P04920 B3A2_HUMAN  | R.TSPS#SPAPLPHQEATPR.A           | S172:      | 2 | 2,7796 | 0,454 | -0,329 |
| 14 | Q96Q89 MPPH1_HUMAN | K.FGDFLQHS#PSILQSK.A             | S1740:     | 2 | 2,58   | 0,302 | -0,205 |
| 14 | P42694 HELZ_HUMAN  | R.RISS#SSVQPCSEEVSTPQDSLAQCK.E   | S1764:     | 3 | 3,9692 | 0,415 | 1,088  |
| 14 | Q58FF8 H90B2_HUMAN | K.IEDVGS#DEEDDSGKDK.K            | S177:      | 2 | 2,811  | 0,257 | -0,336 |
| 14 | P18583 SON_HUMAN   | R.ASES#SSEKDDYEIFVK.V            | S1782:     | 2 | 4,3539 | 0,533 | 0,657  |
| 14 | P18583 SON_HUMAN   | R.ASES#SSEKDDYEIFVK.V            | S1782:     | 3 | 3,6429 | 0,252 | 0,269  |
| 14 | Q9H6F5 CCD86_HUMAN | R.LGGLRPES#PESLTSVSR.T           | S18:       | 3 | 4,7743 | 0,451 | 0,49   |
| 14 | O75569 PRKRA_HUMAN | R.AEAPPLEREDS#GTFSLGK.M          | S18:       | 2 | 3,2468 | 0,428 | -0,43  |
| 14 | Q9H6F5 CCD86_HUMAN | R.LGGLRPES#PESLTSVSR.T           | S18:       | 2 | 2,5019 | 0,436 | 0,262  |
| 14 | O96013 PAK4_HUMAN  | K.RPLS#GPDVGTQPAGLASGAK.L        | S181:      | 3 | 3,6721 | 0,366 | 0,267  |
| 14 | P46821 MAP1B_HUMAN | K.TATCHSS#SPPIDAASAEPYGFR.A      | S1818:     | 3 | 3,9229 | 0,435 | 0,515  |
| 14 | Q9BVC5 ASHWN_HUMAN | R.KS#PSGPKS#PPLSPVGTTPVK.L       | S182:S189: | 3 | 3,728  | 0,306 | 0,165  |
| 14 | Q9NYB9 ABI2_HUMAN  | R.TTPPTQKPPS#PPM*SGK.G           | S183:      | 2 | 2,5209 | 0,494 | -0,489 |
| 14 | Q8IZP0 ABI1_HUMAN  | R.TNPPTQKPPS#PPM*SGR.G           | S183:      | 2 | 2,2017 | 0,317 | -0,341 |
| 14 | Q96EK9 KT112_HUMAN | K.ELEREESGAAES#PALVTPDSEK.S      | S184:      | 3 | 4,2858 | 0,334 | 0,528  |
| 14 | Q1KMD3 HNRL2_HUMAN | R.SGDETPGSEVPGDKAAEEQGDDQDS#EK.S | S185:      | 3 | 4,3173 | 0,413 | -0,256 |
| 14 | Q8IWC1 MA7D3_HUMAN | R.SAS#TEKLEQGTALIR.Q             | S185:      | 3 | 4,2887 | 0,349 | 0      |
| 14 | Q8IWC1 MA7D3_HUMAN | R.SAS#TEKLEQGTALIR.Q             | S185:      | 2 | 2,8406 | 0,456 | -0,62  |
| 14 | Q5VUA4 ZN318_HUMAN | K.VVIKLS#PQACSFTK.A              | S1856:     | 2 | 3,4018 | 0,263 | 0,662  |
| 14 | Q0VDF9 HSP7E_HUMAN | R.LIHEPSAALLAYGIGQDS#PTGK.S      | S186:      | 3 | 4,6276 | 0,475 | -0,474 |
| 14 | Q9P260 K1468_HUMAN | R.AGSISTLDS#LDFARYS#DDGNRETDEK.V | S186:S193: | 3 | 2,6616 | 0,325 | -0,666 |

|    |                    |                                |                 |   |        |       |        |
|----|--------------------|--------------------------------|-----------------|---|--------|-------|--------|
| 14 | P49792 RBP2_HUMAN  | K.FGHVDQENSPS#FM*FQGSSNTEFK.S  | S1871:          | 3 | 5,5899 | 0,333 | 0,472  |
| 14 | Q5VUA4 ZN318_HUMAN | K.ISAPELLLHS#PAR.S             | S1896:          | 2 | 4,0922 | 0,418 | -0,493 |
| 14 | Q5VUA4 ZN318_HUMAN | K.ISAPELLLHS#PAR.S             | S1896:          | 3 | 3,4007 | 0,285 | 0,062  |
| 14 | Q9UNE7 STUB1_HUMAN | R.LGAGGGS#PEKSPSAQELK.E        | S19:            | 3 | 4,9695 | 0,495 | 0,102  |
| 14 | Q9UNE7 STUB1_HUMAN | R.LGAGGGS#PEKSPSAQELK.E        | S19:            | 2 | 2,9529 | 0,473 | -0,408 |
| 14 | Q15464 SHB_HUMAN   | R.LIKVES#AAGGGAGDPLGGACAGGR.T  | S190:           | 3 | 4,9015 | 0,457 | 0,412  |
| 14 | Q01433 AMPD2_HUMAN | K.TDS#DSDLQLYKEQGEGQGDR.S      | S190:           | 3 | 3,7922 | 0,369 | 0,236  |
| 14 | Q01433 AMPD2_HUMAN | K.QDFLKTDS#DSDLQLYK.E          | S190:           | 2 | 2,5286 | 0,199 | -0,306 |
| 14 | Q9UNF1 MAGD2_HUMAN | K.HLDGEEDGSS#DQS#QAS#GTTGGRR.V | S191:S194:S197: | 3 | 4,8438 | 1     | -0,424 |
| 14 | O43237 DC1L2_HUMAN | K.DFQDYM*EPEEGCQGS#PQRR.G      | S194:           | 3 | 3,6453 | 0,283 | -0,151 |
| 14 | Q5TDH0 DDI2_HUMAN  | R.IRLFS#ADPFLEAQAK.I           | S194:           | 3 | 3,1848 | 0,257 | -0,289 |
| 14 | Q5TDH0 DDI2_HUMAN  | R.IRLFS#ADPFLEAQAK.I           | S194:           | 2 | 2,6867 | 0,25  | -0,578 |
| 14 | A0JLT2 MED19_HUMAN | R.TQDPVPPETPS#DSDHK.K          | S194:           | 2 | 2,0887 | 0,201 | -0,467 |
| 14 | P35579 MYH9_HUMAN  | K.GAGDGS#DEEVDGKADGAEAKPAE.-   | S1943:          | 3 | 5,8173 | 0,361 | -0,487 |
| 14 | Q6PID6 TTC33_HUMAN | K.SEAPAEVTHFS#PK.S             | S197:           | 2 | 4,6627 | 0,504 | 0,247  |
| 14 | Q9UKY7 CDV3_HUMAN  | R.KTPQGPEIYSDTQFPS#LQSTAK.H    | S197:           | 3 | 3,3116 | 0,183 | -0,141 |
| 14 | Q6PID6 TTC33_HUMAN | K.SEAPAEVTHFS#PK.S             | S197:           | 3 | 2,6051 | 0,267 | 0,185  |
| 14 | Q9NYF8 BCLF1_HUMAN | K.DTFEHDPSSES#IDFNK.S          | S198:           | 3 | 5,7195 | 0,519 | -0,092 |
| 14 | O96007 MOS2L_HUMAN | K.LPLS#PPLVEDSAFEPSRK.D        | S20:            | 3 | 4,2211 | 0,276 | -0,177 |
| 14 | P10244 MYBB_HUMAN  | R.CEDLDELHYQDTS#DVPEQR.D       | S20:            | 3 | 4,0571 | 0,454 | 0      |
| 14 | Q8NEZ4 MLL3_HUMAN  | K.ERS#PQQNIVSCSVSTQTASDDQAGK.L | S200:           | 3 | 4,7897 | 0,46  | 0,573  |
| 14 | Q15717 ELAV1_HUMAN | K.NVALLSPLYHS#PAR.R            | S202:           | 2 | 4,8967 | 0,526 | -0,592 |
| 14 | Q96B36 AKT1_HUMAN  | K.RTEARS#S#DEENGPPSS#PDLDR.I   | S202:S203:S212: | 3 | 5,2917 | 0,39  | -0,644 |
| 14 | Q9H4A3 WNK1_HUMAN  | R.DVDDGSGS#PHS#PHQLSSK.S       | S2029:S2032:    | 3 | 3,0105 | 0,251 | 0      |
| 14 | Q04206 TF65_HUMAN  | R.VNRNS#GSCLGGDEIFLLCDK.V      | S203:           | 3 | 5,0392 | 0,357 | -0,705 |
| 14 | Q9NY61 AATF_HUMAN  | R.AGDRNS#EDDGVVM*TFSSVK.V      | S203:           | 3 | 4,533  | 0,318 | 0      |
| 14 | Q9NY61 AATF_HUMAN  | R.AGDRNS#EDDGVVM*TFSSVK.V      | S203:           | 2 | 2,416  | 0,512 | -0,578 |
| 14 | Q96EV2 RBM33_HUMAN | K.DIKEES#DEEEEDDEESGR.L        | S205:           | 3 | 6,4126 | 0,483 | -0,412 |
| 14 | P43243 MATR3_HUMAN | R.GPSLNPVLDYDHGS#R.S           | S206:           | 2 | 2,9991 | 0,508 | 0,357  |
| 14 | Q5VV41 ARHGG_HUMAN | K.GS#FKDDPQLYQEIQER.G          | S208:           | 3 | 5,0053 | 0,359 | 0,27   |
| 14 | P38159 HNRPG_HUMAN | R.DVYLS#PRDDGYSTK.D            | S208:           | 2 | 2,5561 | 0,457 | 0,432  |
| 14 | P43243 MATR3_HUMAN | R.GPSLNPVLDYDHGSRS#QES#GYDR.M  | S208:S211:      | 3 | 3,673  | 1     | -0,319 |
| 14 | P60174 TPIS_HUMAN  | R.KQS#LGELIGTLNAAK.V           | S21:            | 2 | 4,8578 | 0,64  | -0,451 |

|    |                     |                                   |              |   |        |       |        |
|----|---------------------|-----------------------------------|--------------|---|--------|-------|--------|
| 14 | P60174 TPIS_HUMAN   | R.KQS#LGELIGTLNAAK.V              | S21:         | 3 | 3,2857 | 0,284 | 0      |
| 14 | A2RUQ8 A2RUQ8_HUMAN | R.M*IS#TGSELNEDYPKENDSSSNK.A      | S210:        | 3 | 4,0697 | 0,457 | 0,62   |
| 14 | Q99698 LYST_HUMAN   | R.S#RSLPAFPTSSLLTQSQK.L           | S2103:       | 3 | 4,1883 | 0,401 | -0,09  |
| 14 | P46013 KI67_HUMAN   | K.IACKS#PPPEM*DTPSTR.R            | S2105:       | 3 | 3,3318 | 0,287 | -0,177 |
| 14 | Q13242 SFRS9_HUMAN  | R.GS#PHYFSPFRPY.-                 | S211:        | 3 | 2,7896 | 0,129 | 0      |
| 14 | Q13242 SFRS9_HUMAN  | R.GS#PHYFSPFRPY.-                 | S211:        | 2 | 2,3346 | 0,494 | -1,431 |
| 14 | P08670 VIME_HUMAN   | R.EEAENTLQSFQDVDNAS#LAR.L         | S214:        | 3 | 4,3859 | 0,313 | -0,296 |
| 14 | P12270 TPR_HUMAN    | R.TDGF AEIHS#PQVAGVPR.F           | S2141:       | 3 | 4,9525 | 0,525 | 0,284  |
| 14 | P21333 FLNA_HUMAN   | R.APS#VANVGSHCDLSLK.I             | S2152:       | 2 | 3,7556 | 0,459 | 0,563  |
| 14 | P21333 FLNA_HUMAN   | R.APS#VANVGSHCDLSLK.I             | S2152:       | 3 | 3,1104 | 0,367 | 0,105  |
| 14 | P61978 HNRPK_HUMAN  | K.IILD LISES#PIKGR.A              | S216:        | 2 | 4,5194 | 0,506 | -0,896 |
| 14 | P61978 HNRPK_HUMAN  | K.IILD LISES#PIKGR.A              | S216:        | 3 | 2,9611 | 0,376 | -0,336 |
| 14 | Q9Y6D5 BIG2_HUMAN   | R.ELEKPIQSKPQS#PVIQAAAVS#PK.F     | S218:S227:   | 3 | 5,1432 | 0,457 | 0,351  |
| 14 | O75376 NCOR1_HUMAN  | R.NDARS#PGSISYLPFFTK.L            | S2184:       | 3 | 4,3103 | 0,266 | -0,442 |
| 14 | Q14566 MCM6_HUMAN   | R.IQETQAE LPRGS#IPR.S             | S219:        | 3 | 3,2147 | 0,191 | 0,103  |
| 14 | Q5TEC3 ZN697_HUMAN  | K.GM*GS#DFESEDREGDPEER.E          | S22:         | 3 | 3,3213 | 0,428 | -0,568 |
| 14 | Q15418 KS6A1_HUMAN  | K.KAYS#FCGTVEYM*APEVVNR.Q         | S221:        | 3 | 4,9406 | 0,317 | -0,158 |
| 14 | O95759 TBCD8_HUMAN  | K.SPLM*HPDALVTAQQSGSQS#PDSR.M     | S221:        | 3 | 2,6877 | 0,123 | -0,345 |
| 14 | Q9BUB5 MKNK1_HUMAN  | R.DLKPENILCES#PEKVS#PVK.I         | S221:S226:   | 3 | 3,0502 | 0,168 | -0,312 |
| 14 | P49792 RBP2_HUMAN   | R.EDALDDS#VSSSVHASPLASS#PVRK.N    | S2237:S2251: | 3 | 3,6457 | 1     | 0,474  |
| 14 | Q9Y5K6 CD2AP_HUMAN  | R.GIGFGDIFKEGS#VK.L               | S224:        | 2 | 3,5238 | 0,501 | -0,636 |
| 14 | Q8WVB6 CTF18_HUMAN  | R.GGGQLDLLGVSLAS#LKK.Q            | S225:        | 2 | 2,8312 | 0,29  | -0,633 |
| 14 | O95359 TACC2_HUMAN  | R.KTLPLTTAPEAGEVTPSDSGGQEDS#PAK.G | S2256:       | 3 | 4,6059 | 0,386 | 0,575  |
| 14 | Q9Y618 NCOR2_HUMAN  | R.M*GSKS#PGNTSQPPAFFSK.L          | S2261:       | 3 | 3,1331 | 0,168 | -0,186 |
| 14 | P56749 CLD12_HUMAN  | R.S#RLSAIEIDIPVVSHTT.-            | S228:        | 3 | 3,2088 | 0,261 | -0,191 |
| 14 | P56749 CLD12_HUMAN  | R.S#RLSAIEIDIPVVSHTT.-            | S228:        | 2 | 2,7491 | 0,31  | -0,254 |
| 14 | Q96A57 CTO30_HUMAN  | R.LS#STDDGYIDLQFKK.T              | S23:         | 2 | 3,6201 | 0,491 | -0,337 |
| 14 | Q8IYB3 SRRM1_HUMAN  | K.VKEPS#VQEATSTSDILK.V            | S234:        | 2 | 4,7943 | 0,516 | 0,383  |
| 14 | Q8NC51 PAIRB_HUMAN  | K.DELTES#PKYIQK.Q                 | S234:        | 2 | 4,1567 | 0,383 | -0,08  |
| 14 | Q8IYB3 SRRM1_HUMAN  | K.VKEPS#VQEATSTSDILK.V            | S234:        | 3 | 3,9506 | 0,344 | 0,478  |
| 14 | Q7Z4V5 HDGR2_HUMAN  | K.APSASDS#DSKADS#DGAKPEPVAM*AR.S  | S234:S240:   | 3 | 3,2876 | 0,297 | -0,347 |
| 14 | P46013 KI67_HUMAN   | K.IACKS#PQPDPVDT PASTK.Q          | S2344:       | 2 | 3,5675 | 0,541 | -0,306 |
| 14 | Q76G19 PDZD4_HUMAN  | K.DSDRDFLDDFGS#ENEGELR.A          | S236:        | 3 | 5,9925 | 0,542 | -0,379 |

|    |                     |                                |              |   |        |       |        |
|----|---------------------|--------------------------------|--------------|---|--------|-------|--------|
| 14 | Q7Z4V5 HDGR2_HUMAN  | K.ADS#DGAKPEPVAM*AR.S          | S240:        | 3 | 3,6309 | 0,127 | -0,908 |
| 14 | P46013 KI67_HUMAN   | K.LDLLGNLPGS#KRQPQT#PK.E       | S2420:T2426: | 3 | 2,8693 | 0,163 | -0,172 |
| 14 | Q86U44 MTA70_HUMAN  | K.KVS#QEILELLNTTAK.E           | S243:        | 3 | 2,8689 | 0,191 | -0,392 |
| 14 | O43815 STRN_HUMAN   | K.FLESAAADFS#DEDEDDVDGREG.S    | S245:        | 3 | 3,8693 | 0,26  | 0,62   |
| 14 | Q14684 RRP1B_HUMAN  | K.VGDGDL#AEEIPENEVSLRR.A       | S245:        | 3 | 3,5361 | 0,375 | 0,565  |
| 14 | Q15424 SAFB1_HUMAN  | K.SEPVKEESSELEQPFADTS#SVGPDR.K | S246:        | 3 | 4,6125 | 0,408 | 0,187  |
| 14 | P46013 KI67_HUMAN   | K.ITEVSCK#PQPESFK.T            | S2466:       | 2 | 3,0807 | 0,303 | -0,134 |
| 14 | P46013 KI67_HUMAN   | K.ITEVSCK#PQPESFK.T            | S2466:       | 3 | 2,8799 | 0,293 | 0,403  |
| 14 | Q92890 UFD1_HUMAN   | K.GVEPS#PIKPGDIK.R             | S247:        | 2 | 2,5577 | 0,257 | 0      |
| 14 | Q53T59 H1BP3_HUMAN  | R.KLS#PQDPSEDVSSVDPLK.L        | S249:        | 3 | 3,8694 | 0,4   | 0,453  |
| 14 | Q53T59 H1BP3_HUMAN  | R.KLS#PQDPSEDVSSVDPLK.L        | S249:        | 2 | 3,6568 | 0,519 | 0,664  |
| 14 | B2RAW2 B2RAW2_HUMAN | R.KLS#PQDPSEDVSSM*DPLK.L       | S249:        | 3 | 3,073  | 0,343 | -0,088 |
| 14 | Q7L2Z9 CENPQ_HUMAN  | K.DLDILHNSS#QM*K.S             | S249:        | 2 | 2,8538 | 0,303 | -0,326 |
| 14 | Q9NYL9 TMOD3_HUMAN  | K.YKDLDEDELLGNLS#ETELK.Q       | S25:         | 3 | 4,9517 | 0,41  | -0,159 |
| 14 | Q7L9B9 EEDP1_HUMAN  | R.KFS#AACNFSNILVNQER.L         | S25:         | 3 | 4,1016 | 0,289 | -0,44  |
| 14 | Q7L9B9 EEDP1_HUMAN  | R.KFS#AACNFSNILVNQER.L         | S25:         | 2 | 2,1642 | 0,379 | -0,235 |
| 14 | Q9HA47 UCK1_HUMAN   | R.TFS#EPGDHPGM*LTSGK.R         | S253:        | 3 | 2,714  | 0,282 | 0,104  |
| 14 | Q9HA47 UCK1_HUMAN   | R.TFS#EPGDHPGM*LTSGK.R         | S253:        | 2 | 2,2094 | 0,435 | 0,139  |
| 14 | Q969K3 RNF34_HUMAN  | R.VRAS#LSDLSLDDVEGM*SVR.Q      | S254:        | 3 | 5,3491 | 0,415 | -0,164 |
| 14 | Q86X53 ERIC1_HUMAN  | R.QEEGADAS#EEDPTPAGEEDVKDAR.E  | S254:        | 3 | 3,2296 | 0,422 | -0,488 |
| 14 | Q9HB58 SP110_HUMAN  | R.DNS#PEPNDPEEPQEVSTPSDKK.G    | S256:        | 3 | 4,6899 | 0,322 | -0,632 |
| 14 | O95433 AHSA1_HUMAN  | K.FHM*VDGNVS#GEFTDLVPEK.H      | S258:        | 3 | 3,147  | 0,108 | -0,165 |
| 14 | P46013 KI67_HUMAN   | K.IPCK#PPPELTDATSTK.R          | S2588:       | 3 | 4,8638 | 0,204 | 0,181  |
| 14 | P21359 NF1_HUMAN    | R.KVS#VSESNVLLDEEVLTDPK.I      | S2597:       | 3 | 4,3267 | 0,282 | 0,08   |
| 14 | P07355 ANXA2_HUMAN  | K.LSLEGDHSTPPSAYGS#VK.A        | S26:         | 2 | 3,6012 | 0,329 | 0,317  |
| 14 | Q8N3P4 VPS8_HUMAN   | K.TSEEELNKS#FNLEASLSK.F        | S26:         | 3 | 3,3554 | 0,315 | -0,347 |
| 14 | P07355 ANXA2_HUMAN  | K.LSLEGDHSTPPSAYGS#VK.A        | S26:         | 3 | 2,9725 | 0,29  | 0,38   |
| 14 | P52701 MSH6_HUMAN   | R.VISDESSEDIGGS#DVEFKPDTK.E    | S261:        | 3 | 2,8728 | 0,17  | 0,159  |
| 14 | Q03188 CENPC_HUMAN  | K.KS#FSTLFLETVK.R              | S261:        | 2 | 2,0126 | 0,253 | -0,577 |
| 14 | Q96H79 ZCCHL_HUMAN  | K.M*LENTDNSSPSTEHS#QGLEK.Q     | S263:        | 3 | 3,4749 | 0,244 | -0,318 |
| 14 | A8K199 A8K199_HUMAN | R.CPQDQS#PDRVGTEM*EPVSK.N      | S265:        | 3 | 3,2399 | 0,238 | 0      |
| 14 | P54252 ATX3_HUMAN   | R.NIS#QDM*TQTSGTNLTSELRK.R     | S265:        | 3 | 2,7367 | 0,252 | 0,672  |
| 14 | Q76FK4 NOL8_HUMAN   | R.TCDSITPSKSS#PVPVSDTQK.L      | S268:        | 3 | 2,8433 | 0,185 | -0,248 |

|    |                     |                                |                 |   |        |       |        |
|----|---------------------|--------------------------------|-----------------|---|--------|-------|--------|
| 14 | P46013 KI67_HUMAN   | K.IPCES#PPLEVVDTTASTKR.H       | S2708:          | 3 | 4,199  | 0,256 | 0,168  |
| 14 | P31943 HNRH1_HUMAN  | R.DLNYCFSGM*S#DHR.Y            | S272:           | 2 | 4,0955 | 0,481 | 0,216  |
| 14 | O75410 TACC1_HUMAN  | K.ASYHFSPEELDENTS#PLLGDAR.F    | S276:           | 3 | 6,1374 | 0,544 | 0,434  |
| 14 | Q9UKS6 PACN3_HUMAN  | R.DLHQGIEAAS#DEEDLR.W          | S276:           | 2 | 4,601  | 0,452 | 0,845  |
| 14 | O00203 AP3B1_HUMAN  | K.EGDELEDNGKNFYES#DDDQK.E      | S276:           | 3 | 4,5979 | 0,302 | 0,302  |
| 14 | Q9UKS6 PACN3_HUMAN  | R.DLHQGIEAAS#DEEDLR.W          | S276:           | 3 | 4,3823 | 0,449 | 0,487  |
| 14 | P63244 GBLP_HUMAN   | K.IIVDELKQEVIS#TSSK.A          | S276:           | 2 | 3,2416 | 0,475 | -0,261 |
| 14 | P42696 RBM34_HUMAN  | R.SVQEGENPDDGVRGS#PPEDYR.L     | S28:            | 3 | 3,4357 | 0,209 | 0,461  |
| 14 | Q5C9Z4 NOM1_HUMAN   | K.AQEAEAQs#EDDEDTEEEQGEEKEK.G  | S280:           | 3 | 3,8283 | 0,498 | -0,621 |
| 14 | P27816 MAP4_HUMAN   | K.DM*ES#PTKLDVTLAK.D           | S280:           | 3 | 3,363  | 0,375 | 0,556  |
| 14 | P27816 MAP4_HUMAN   | K.DM*ES#PTKLDVTLAK.D           | S280:           | 2 | 3,1775 | 0,406 | 0,223  |
| 14 | Q96S38 KS6C1_HUMAN  | K.GVDLLLEGVQGESS#PTRR.E        | S282:           | 2 | 2,8857 | 0,332 | -0,367 |
| 14 | P21127 CD2L1_HUMAN  | R.DLLSDLQDIS#DSERK.T           | S283:           | 2 | 3,5989 | 0,335 | -0,336 |
| 14 | O15446 RPA34_HUMAN  | K.TVKQEINTEPLEDTVLS#PTK.K      | S285:           | 3 | 4,3136 | 0,381 | 0,299  |
| 14 | A5PKX8 A5PKX8_HUMAN | R.CQENGQELS#PIALEPGPEPHR.A     | S288:           | 3 | 3,9087 | 0,261 | 0,45   |
| 14 | Q9NWH9 SLTM_HUMAN   | K.DGQDAIAQS#PEKESK.D           | S289:           | 2 | 3,454  | 0,399 | -0,29  |
| 14 | O95714 HERC2_HUMAN  | R.IRAEEEDLAAVPFLAS#DNEEEDEK.G  | S2928:          | 3 | 5,5945 | 0,414 | -0,312 |
| 14 | Q6ZSR9 YJ005_HUMAN  | R.HYS#PEDEPSPEAQPIAAYK.I       | S294:           | 3 | 3,6417 | 0,244 | 0,083  |
| 14 | Q8IVF2 AHNK2_HUMAN  | R.DAHDVS#PTSTDTEAQLTVER.Q      | S294:           | 3 | 3,3826 | 0,3   | 0,244  |
| 14 | Q9NQW6 ANLN_HUMAN   | K.ATS#PVKSTTSITDAK.S           | S295:           | 3 | 3,3284 | 0,302 | -0,231 |
| 14 | Q9UQ35 SRRM2_HUMAN  | K.THTTALAGRS#PS#PAS#GR.R       | S295:S297:S300: | 3 | 2,8881 | 0,133 | -0,288 |
| 14 | Q9Y3S2 ZN330_HUMAN  | R.KSDTESS#DLFTNLNLGR.T         | S296:           | 3 | 4,0787 | 0,327 | -0,175 |
| 14 | Q6P4R8 NFRKB_HUMAN  | R.KGS#LAALYDLAVLK.K            | S298:           | 2 | 4,3022 | 0,441 | -0,633 |
| 14 | P07910 HNRPC_HUMAN  | K.DDEKEAEEGEDDRDS#ANGEDDS.-    | S299:           | 3 | 3,4797 | 0,326 | 0      |
| 14 | P09382 LEG1_HUMAN   | R.GEVAPDAKS#FVLNLGK.D          | S30:            | 2 | 3,3778 | 0,369 | -0,495 |
| 14 | P78310 CXAR_HUMAN   | R.SYIGSNHS#SLGSM*SPSNM*EGYSK.T | S300:           | 3 | 4,9317 | 0,425 | 0,289  |
| 14 | Q6ZRS2 SRCAP_HUMAN  | K.NPPS#PRPSQLPVLDLDR.D         | S3016:          | 3 | 3,5586 | 0,295 | 0,417  |
| 14 | P49023 PAXI_HUMAN   | R.DGGRSS#PGGQDEGGFM*AQGK.T     | S303:           | 3 | 3,9756 | 0,281 | -0,18  |
| 14 | P78310 CXAR_HUMAN   | R.SYIGSNHSSLGSM*S#PSNM*EGYSK.T | S306:           | 3 | 4,9286 | 0,5   | 0,145  |
| 14 | P42167 LAP2B_HUMAN  | K.HAS#PILPITEFSDIPR.R          | S306:           | 3 | 4,0136 | 0,335 | -0,293 |
| 14 | P42167 LAP2B_HUMAN  | K.HAS#PILPITEFSDIPR.R          | S306:           | 2 | 3,5411 | 0,425 | -0,651 |
| 14 | Q9NQ57 INCE_HUMAN   | R.HS#PIAPSSPQVLAQK.Y           | S306:           | 3 | 2,7013 | 0,172 | 0,802  |
| 14 | Q15054 DPOD3_HUMAN  | R.VALs#DDETKETENM*R.K          | S307:           | 2 | 2,919  | 0,514 | -0,665 |



|    |                    |                                  |                 |   |        |       |        |
|----|--------------------|----------------------------------|-----------------|---|--------|-------|--------|
| 14 | Q96CW6 S7A6O_HUMAN | K.YPLDVQKEFGYDSPHDLDS#D.-        | S308:           | 3 | 4,616  | 0,535 | -0,529 |
| 14 | Q15942 ZYX_HUMAN   | K.LGHPEALSAGTGS#PQPPSFTYAQQR.E   | S308:           | 3 | 3,3545 | 0,216 | 0,615  |
| 14 | Q9NR55 BATF3_HUMAN | R.SVAAPGNQPQPQQQS#PEDDDRK.V      | S31:            | 3 | 2,8463 | 0,374 | -0,407 |
| 14 | Q7RTV3 ZN367_HUMAN | K.ADQEQQDPLEYLQS#DEEDDEKR.G      | S310:           | 3 | 5,0466 | 0,442 | -0,464 |
| 14 | Q9BWU0 NADAP_HUMAN | K.M*LGEDS#DEEEEM*DTSERK.I        | S312:           | 3 | 4,5359 | 0,435 | -0,163 |
| 14 | Q9Y2D8 ADIP_HUMAN  | R.ERVDDSTGTVIS#DVEEDAGELSR.E     | S312:           | 3 | 4,242  | 0,391 | -0,5   |
| 14 | Q96ST2 IWS1_HUMAN  | R.VSDSESEGPQKGPAS#DSETEDASR.H    | S313:           | 3 | 5,0751 | 0,505 | -0,431 |
| 14 | Q96QC0 PP1RA_HUMAN | K.VLS#PTAAKPSPFEGK.T             | S313:           | 3 | 2,7239 | 0,308 | 0,682  |
| 14 | Q96QC0 PP1RA_HUMAN | K.VLS#PTAAKPSPFEGK.T             | S313:           | 2 | 2,2056 | 0,254 | 0,076  |
| 14 | Q9ULL5 PRR12_HUMAN | R.SRPALS#PLGDI DFCPPNPGPDGPR.R   | S314:           | 3 | 4,6549 | 0,398 | -0,28  |
| 14 | Q13769 THOC5_HUMAN | K.ALFKPPEDSQDDES#DAEEEQTTK.R     | S314:           | 3 | 4,3673 | 0,287 | 0,759  |
| 14 | Q96C90 PP14B_HUMAN | R.VYFQS#PPGAAGEGPGGADDEGPVRR.Q   | S32:            | 3 | 3,7766 | 0,382 | 0,57   |
| 14 | Q92922 SMRC1_HUMAN | R.KHS#PS#PPPPT#PTESR.K           | S328:S330:T335: | 3 | 3,6354 | 0,357 | -0,197 |
| 14 | Q92922 SMRC1_HUMAN | R.KHS#PS#PPPPT#ESR.K             | S328:S330:T337: | 3 | 3,5601 | 0,272 | -0,394 |
| 14 | Q15459 SF3A1_HUMAN | K.FGESEEVEMEVE#DEEDDKQEK.A       | S329:           | 3 | 6,3396 | 0,531 | -0,475 |
| 14 | Q15459 SF3A1_HUMAN | K.FGESEEVEM*EVES#DEEDDKQEK.A     | S329:           | 3 | 6,1281 | 0,48  | 1,012  |
| 14 | Q16828 DUS6_HUMAN  | K.KSNIS#PNFNFM*GQLLDFER.T        | S331:           | 3 | 3,2718 | 0,258 | -0,855 |
| 14 | Q9Y2U5 M3K2_HUMAN  | R.RGS#DIDNPTLTVM*DISPPSR.S       | S331:           | 3 | 3,0384 | 0,251 | 0,242  |
| 14 | Q9Y2U5 M3K2_HUMAN  | R.RGS#DIDNPTLTVM*DISPPSR#PR.A    | S331:S349:      | 3 | 4,0939 | 0,356 | 0,409  |
| 14 | Q9H6Z4 RANB3_HUMAN | R.VLS#PPKLNEVSSDANR.E            | S333:           | 3 | 5,1003 | 0,292 | 0,405  |
| 14 | Q9Y608 LRRF2_HUMAN | R.RGSGDTSS#LIDPDTLSSEL.R.D       | S333:           | 3 | 4,7568 | 0,385 | -0,669 |
| 14 | Q9H6Z4 RANB3_HUMAN | R.VLS#PPKLNEVSSDANR.E            | S333:           | 2 | 2,5073 | 0,538 | 0,405  |
| 14 | Q9HCC9 ZFY28_HUMAN | K.AKDPDAELACS#M*QYDDQELEQLSR.M   | S334:           | 3 | 2,9676 | 0,432 | -0,315 |
| 14 | Q09666 AHNK_HUMAN  | K.FNFSGS#KVQTPVDVK.G             | S3362:          | 2 | 3,653  | 0,437 | 0,59   |
| 14 | Q09666 AHNK_HUMAN  | K.FNFSGS#KVQTPVDVK.G             | S3362:          | 3 | 3,5542 | 0,249 | 0,295  |
| 14 | Q4G0J3 LARP7_HUMAN | R.DIEIS#T#EEEKDTGDLKDSLLK.T      | S337:T338:      | 3 | 4,4821 | 0,215 | -0,558 |
| 14 | Q9HCN4 GPN1_HUMAN  | R.GTLDEEED#DTDDIDHR.V            | S338:           | 3 | 4,4985 | 0,517 | 0,699  |
| 14 | Q96B23 CR025_HUMAN | K.ASEQETAKEEDGS#VELESQVQK.D      | S34:            | 3 | 4,6827 | 0,229 | 0      |
| 14 | Q14004 CD2L5_HUMAN | R.SRKS#PS#PAGGGS#SPYSR.R         | S340:S342:S348: | 3 | 3,9441 | 1     | -0,477 |
| 14 | Q96G23 LASS2_HUMAN | K.LVEDERS#DREETES#SEGEAAAGGGAK.S | S341:S348:      | 3 | 3,3593 | 0,391 | -0,678 |
| 14 | Q09666 AHNK_HUMAN  | K.VSM*PDVELNLKS#PK.V             | S3426:          | 2 | 3,8348 | 0,454 | 0      |
| 14 | Q09666 AHNK_HUMAN  | K.VSM*PDVELNLKS#PK.V             | S3426:          | 3 | 3,0094 | 0,394 | 0      |
| 14 | P01892 1A02_HUMAN  | R.KGGS#YSQAASSDSAQGS DVSLTACKV.- | S343:           | 3 | 4,5252 | 0,366 | 0,346  |

|    |                    |                                   |            |   |        |       |        |
|----|--------------------|-----------------------------------|------------|---|--------|-------|--------|
| 14 | Q86WB0 NIPA_HUMAN  | R.SQDATFSPGSEQAEKS#PGPIVSR.T      | S344:      | 3 | 4,2033 | 0,467 | 0,522  |
| 14 | Q9HCI7 MSL2_HUMAN  | R.SRS#ES#DSEKVQPLPISTIIR.G        | S345:S347: | 3 | 4,3756 | 0,312 | -0,076 |
| 14 | Q63HN8 RN213_HUMAN | R.DFATPSLHTSDQS#PGK.H             | S346:      | 2 | 3,7783 | 0,494 | 0,414  |
| 14 | P35568 IRS1_HUMAN  | R.ASSDGEGTM*SRPASVDGSPVS#PSTNR.T  | S348:      | 3 | 5,9775 | 0,416 | -0,83  |
| 14 | Q5T1M5 FKB15_HUMAN | R.TKSNSLS#EQLAINTSPDAVK.A         | S348:      | 3 | 5,6056 | 0,457 | 0,251  |
| 14 | Q9Y6D5 BIG2_HUMAN  | R.QSLS#SADNLESDAQGHQVAAR.F        | S348:      | 3 | 3,1817 | 0,213 | 0,646  |
| 14 | Q15696 U2AFM_HUMAN | R.DIYLS#PDRTGSSFGK.N              | S349:      | 2 | 2,1408 | 0,492 | -0,142 |
| 14 | P40855 PEX19_HUMAN | K.AKPS#PAPPSTTTAPDASGPQK.R        | S35:       | 3 | 3,0335 | 0,221 | -0,351 |
| 14 | Q9BX66 SRBS1_HUMAN | R.VGEQDSAPTQEKPTS#PGK.A           | S350:      | 3 | 2,9314 | 0,108 | -0,283 |
| 14 | Q9Y2X3 NOL5_HUMAN  | K.YGLIYHASLVGQTS#PK.H             | S351:      | 2 | 4,5029 | 0,526 | -0,404 |
| 14 | Q6KC79 NIPBL_HUMAN | K.AAM*YDISSPS#KDSTK.L             | S352:      | 2 | 3,5197 | 0,512 | 0,404  |
| 14 | Q5SW79 CE170_HUMAN | R.TEEDS#KSIKS#DVPVYLK.R           | S354:S359: | 3 | 4,1669 | 0,232 | 0,087  |
| 14 | Q9UBU7 DBF4A_HUMAN | K.YSVGSL#PVSASVLKK.T              | S359:      | 2 | 4,0177 | 0,442 | -0,215 |
| 14 | P23588 IF4B_HUMAN  | R.AAS#IFGGAKPVDTAAR.E             | S359:      | 2 | 2,6699 | 0,466 | -0,378 |
| 14 | P17096 HMGA1_HUMAN | R.KQPPVS#PGTALVGSQKEPSEVPT#PK.R   | S36:T53:   | 3 | 4,4854 | 0,478 | 0,269  |
| 14 | O76021 RL1D1_HUMAN | K.ATNES#EDEIPQLVPIGKK.T           | S361:      | 3 | 4,4273 | 0,362 | -0,179 |
| 14 | Q7L8J4 3BP5L_HUMAN | R.GLSDHVS#LDGQELGTR.S             | S362:      | 3 | 4,6328 | 0,419 | 0,104  |
| 14 | Q14978 NOLC1_HUMAN | K.AAESS#SDSSDSDSSEDDEAPSKPAGTTK.N | S362:      | 3 | 4,5094 | 0,532 | -0,645 |
| 14 | Q7L8J4 3BP5L_HUMAN | R.GLSDHVS#LDGQELGTR.S             | S362:      | 2 | 4,3411 | 0,573 | 0,553  |
| 14 | P48634 BAT2_HUMAN  | R.DSQS#ASGEERPPEADGK.K            | S363:      | 2 | 3,1554 | 0,542 | -0,199 |
| 14 | Q9NY27 PP4R2_HUMAN | K.DLLHSEGS#ENEGPVSSSSDCR.E        | S364:      | 3 | 3,0495 | 0,176 | 0,678  |
| 14 | O14795 UN13B_HUMAN | K.DHFLGPQESFPEENAS#SPFTQAR.A      | S366:      | 3 | 4,7151 | 0,344 | -0,274 |
| 14 | Q9UN79 SOX13_HUMAN | K.DLISLDS#SPAKER.L                | S367:      | 2 | 3,5272 | 0,39  | -0,242 |
| 14 | Q86U90 YRDC_HUMAN  | R.LFRPPS#PAPAAPGAR.L              | S37:       | 2 | 3,0038 | 0,367 | 0,308  |
| 14 | Q86U90 YRDC_HUMAN  | R.LFRPPS#PAPAAPGAR.L              | S37:       | 3 | 2,6335 | 0,098 | 0      |
| 14 | Q01167 FOXK2_HUMAN | R.SAPAS#PNHAGVLSAHSSGAQT#PELSR.E  | S373:T389: | 3 | 2,8591 | 1     | 0,593  |
| 14 | Q9UBT7 CTNL1_HUMAN | K.TKS#IAEELLSILK.I                | S374:      | 3 | 3,1142 | 0,136 | -0,663 |
| 14 | Q92698 RAD54_HUMAN | R.KSS#SETQIQECFLSPFR.K            | S38:       | 2 | 3,1651 | 0,466 | -0,345 |
| 14 | Q9C0B5 ZDHC5_HUMAN | R.GDS#LKEPTSIAESSR.H              | S380:      | 3 | 2,9764 | 0,326 | 0,331  |
| 14 | Q9C0B5 ZDHC5_HUMAN | R.GDS#LKEPTSIAESSR.H              | S380:      | 2 | 2,8572 | 0,562 | 0,368  |
| 14 | Q15326 ZMY11_HUMAN | K.KEPEPETEAVSSS#QEIPTM*PQPIEK.V   | S381:      | 3 | 3,6775 | 0,493 | 0,487  |
| 14 | Q01484 ANK2_HUMAN  | R.KTS#LVIVESADNPETCER.L           | S3812:     | 3 | 5,383  | 0,376 | -0,081 |
| 14 | Q14966 ZN638_HUMAN | K.NYQSQADIPRS#PFGIVK.A            | S383:      | 3 | 3,1318 | 0,236 | 0,173  |

|    |                     |                                  |            |   |        |       |        |
|----|---------------------|----------------------------------|------------|---|--------|-------|--------|
| 14 | Q8TBP0 TBC16_HUMAN  | K.LPS#SETHPEESM*YK.R             | S383:      | 2 | 2,5652 | 0,37  | -0,634 |
| 14 | Q9NYV4 CD2L7_HUMAN  | R.HSS#IS#PVRLPLNSSLGAELSR.K      | S383:S385: | 3 | 4,7735 | 0,462 | -0,307 |
| 14 | Q96T23 RSF1_HUMAN   | K.LSDDFDS#PVKGPLCK.S             | S387:      | 2 | 4,0331 | 0,496 | 0,555  |
| 14 | Q96T23 RSF1_HUMAN   | K.LSDDFDS#PVKGPLCK.S             | S387:      | 3 | 3,5571 | 0,351 | 0,312  |
| 14 | Q9H0E9 BRD8_HUMAN   | K.APS#IDGKEELDLAEK.M             | S387:      | 2 | 3,356  | 0,377 | 0,216  |
| 14 | Q9H0E9 BRD8_HUMAN   | K.APS#IDGKEELDLAEK.M             | S387:      | 3 | 2,8844 | 0,228 | 0,108  |
| 14 | Q8WYA6 CTBL1_HUMAN  | R.TIFPLFM*K#PR.K                 | S389:      | 2 | 2,7367 | 0,347 | -0,511 |
| 14 | Q9Y2D5 AKAP2_HUMAN  | K.GQKS#PGALETPSAAGSQGNTASQGK.E   | S393:      | 3 | 6,1878 | 0,497 | -0,38  |
| 14 | Q86WB0 NIPA_HUMAN   | R.SM*GTGDTPLGLEVPS#SPLRK.A       | S394:      | 3 | 3,5578 | 0,308 | 0,181  |
| 14 | Q12888 TP53B_HUMAN  | R.QDKPM*DTS#VLSEEGEPFQK.K        | S395:      | 3 | 3,1336 | 0,197 | 0,395  |
| 14 | Q9UQ35 SRRM2_HUMAN  | R.HGGSPQPLATTPLSQEPVNPPEAS#PTR.D | S398:      | 3 | 6,2689 | 0,447 | 0,062  |
| 14 | P05783 K1C18_HUMAN  | R.RLLEDGEDFNLDALDSS#NSM*QTIQK.T  | S399:      | 3 | 6,1255 | 0,297 | -0,612 |
| 14 | O43303 CE110_HUMAN  | R.TSSACHILINNPINACELS#PK.G       | S400:      | 3 | 4,7013 | 0,4   | -0,227 |
| 14 | Q8WUQ7 CS029_HUMAN  | K.LKQEQGVES#EPLFPILK.Q           | S408:      | 3 | 3,0068 | 0,106 | -0,27  |
| 14 | Q9C0B5 ZDHC5_HUMAN  | R.SEPSLEPESFRS#PTFGK.S           | S409:      | 2 | 4,0609 | 0,584 | 0,618  |
| 14 | Q6ULP2 AFTIN_HUMAN  | R.KFTNFQSPNIDPTEENDLDDSL#VK.N    | S411:      | 3 | 7,0332 | 0,54  | -0,437 |
| 14 | Q9ULJ3 ZN295_HUMAN  | R.SFS#ASQSTDREGASPVTEVR.I        | S411:      | 3 | 3,2732 | 0,253 | 0,501  |
| 14 | Q9UQR1 ZN148_HUMAN  | R.SLKQPLEQNQTIS#PLSTYEESK.V      | S412:      | 3 | 4,4552 | 0,328 | 0      |
| 14 | Q92917 GPKOW_HUMAN  | R.LADSGDGAGPS#PEEKDFLK.T         | S42:       | 2 | 4,7833 | 0,477 | 0,788  |
| 14 | O14737 PDCD5_HUMAN  | R.EAEM*RNS#ILAQVLDQSAR.A         | S42:       | 3 | 4,4184 | 0,303 | -0,344 |
| 14 | Q92917 GPKOW_HUMAN  | R.LADSGDGAGPS#PEEKDFLK.T         | S42:       | 3 | 3,61   | 0,416 | 0,273  |
| 14 | Q9NTZ6 RBM12_HUMAN  | R.S#PHEAGFCVYLK.G                | S424:      | 3 | 3,3824 | 0,362 | 0,246  |
| 14 | O00220 TR10A_HUMAN  | R.NAS#IHTLLDALER.M               | S424:      | 2 | 2,8806 | 0,449 | -0,637 |
| 14 | Q9NTZ6 RBM12_HUMAN  | R.S#PHEAGFCVYLK.G                | S424:      | 2 | 2,1453 | 0,081 | 0,246  |
| 14 | Q9Y490 TLN1_HUMAN   | K.DHFGLEGDEESTM*LEDSVS#PK.K      | S425:      | 3 | 5,582  | 0,467 | 0,378  |
| 14 | Q9UBF8 PI4KB_HUMAN  | R.S#VENLPECGITHEQR.A             | S428:      | 2 | 3,5217 | 0,486 | 0,462  |
| 14 | Q9BRQ6 CHCH6_HUMAN  | R.M*KEPSS#PPPAPTSTFGLQDGNLR.A    | S43:       | 3 | 5,1422 | 0,344 | 0,28   |
| 14 | Q9Y5Q9 TF3C3_HUMAN  | K.GKLS#AEENPDDSEVPSSSGINSTK.S    | S43:       | 3 | 4,4655 | 0,283 | -0,579 |
| 14 | P08670 VIME_HUMAN   | R.ETNLD#LPLVDTHSK.R              | S430:      | 2 | 2,4138 | 0,291 | -0,14  |
| 14 | Q5H9R5 Q5H9R5_HUMAN | R.VASETHS#EGSEYEELPK.R           | S432:      | 3 | 3,3506 | 0,416 | 0,186  |
| 14 | O60934 NBN_HUMAN    | R.IPNYQLS#PTKLPSINK.S            | S432:      | 2 | 3,304  | 0,333 | -0,387 |
| 14 | O60934 NBN_HUMAN    | R.IPNYQLS#PTKLPSINK.S            | S432:      | 3 | 3,1747 | 0,22  | 0,097  |
| 14 | Q8WUX9 CHMP7_HUMAN  | K.LSLSEGLVPSSKS#PK.R             | S441:      | 2 | 4,1945 | 0,492 | 0,073  |

|    |                    |                                  |            |   |        |       |        |
|----|--------------------|----------------------------------|------------|---|--------|-------|--------|
| 14 | Q9H307 PININ_HUMAN | K.S#LSPGKENVSALDM*EK.E           | S441:      | 2 | 3,5334 | 0,377 | 0,339  |
| 14 | Q8NI08 NCOA7_HUMAN | K.DTLKECLS#LDPEER.K              | S441:      | 2 | 3,2223 | 0,239 | 0,41   |
| 14 | P85037 FOXK1_HUMAN | R.SGGLQTPECLS#REGS#PIPHDPEFGSK.L | S441:S445: | 3 | 4,6566 | 0,12  | 0,249  |
| 14 | Q99567 NUP88_HUMAN | K.FLGSDEEDKDSLQELS#TEQK.C        | S442:      | 3 | 3,0225 | 0,292 | -0,154 |
| 14 | Q9H307 PININ_HUMAN | K.SLS#PGKENVSAALDM*EK.E          | S443:      | 3 | 4,5004 | 0,377 | 0,203  |
| 14 | Q9H307 PININ_HUMAN | K.SLS#PGKENVSAALDMEK.E           | S443:      | 3 | 4,1417 | 0,335 | 0,102  |
| 14 | Q8NB49 AT11C_HUMAN | K.YKGVTTQEVLDGLS#QTDGTLTYFDK.V   | S445:      | 3 | 6,0946 | 0,527 | -0,346 |
| 14 | Q8NHM5 JHD1B_HUMAN | R.APKPTDGTGS#PTSTPSEDQALGK.K     | S445:      | 3 | 3,99   | 0,228 | 0,497  |
| 14 | Q96PU5 NED4L_HUMAN | R.SLS#SPTVTLAPLEGAKDS#PVRR.A     | S448:S464: | 3 | 3,6062 | 0,398 | -0,145 |
| 14 | Q8WUM0 NU133_HUMAN | R.KGLPLGSAVSS#PVLFPVGR.R         | S45:       | 3 | 3,0195 | 0,162 | -0,089 |
| 14 | Q9HBH9 MKNK2_HUMAN | R.QRAS#LSSAPVVLVDGHA.-           | S452:      | 3 | 2,7688 | 0,27  | 0,409  |
| 14 | Q09666 AHNK_HUMAN  | K.SPQIS#M*SDIDLNLKGP.K           | S4520:     | 3 | 4,1175 | 0,4   | 0,189  |
| 14 | Q14676 MDC1_HUMAN  | R.SQTTERDS#DTDVEEELPVENR.E       | S453:      | 3 | 4,639  | 0,293 | 0,531  |
| 14 | P53396 ACLY_HUMAN  | R.TAS#FESRADEVAPAK.K             | S455:      | 2 | 3,2449 | 0,461 | 0,21   |
| 14 | P53396 ACLY_HUMAN  | R.TAS#FESRADEVAPAK.K             | S455:      | 3 | 3,067  | 0,46  | 0,105  |
| 14 | Q9H4M9 EHD1_HUMAN  | K.DKPTYDEIFYTSL#PVNGK.I          | S456:      | 3 | 4,7956 | 0,415 | -0,169 |
| 14 | Q9H223 EHD4_HUMAN  | K.DKPVYDELFTSL#PINGK.I           | S459:      | 3 | 3,3783 | 0,196 | -0,336 |
| 14 | P08670 VIME_HUMAN  | R.DGQVINETS#QHHDDLE.-            | S459:      | 2 | 2,1176 | 0,323 | 0,509  |
| 14 | Q9ULU4 PKCB1_HUMAN | K.ATSSHFS#ASEESM*DFLDK.S         | S460:      | 3 | 5,3144 | 0,359 | 0,351  |
| 14 | O60784 TOM1_HUMAN  | K.AADRLPNLSS#PSAEGPPGPPSPAPR.K   | S462:      | 3 | 6,2883 | 0,482 | -0,284 |
| 14 | Q15643 TRIPB_HUMAN | R.DIS#LDSELHDLR.L                | S464:      | 2 | 3,2271 | 0,424 | 0,245  |
| 14 | Q14202 ZMYM3_HUMAN | K.TGS#PGPELLFHEGQK.R             | S464:      | 2 | 2,8037 | 0,389 | 0,406  |
| 14 | Q15149 PLEC1_HUMAN | R.RGS#FDATGSGFSM*TFSSSYSSSGYGR.R | S4642:     | 3 | 4,5977 | 0,512 | -0,319 |
| 14 | Q8TE76 MORC4_HUMAN | R.RCS#VPEEQELTDEDLCLSK.A         | S465:      | 3 | 4,5199 | 0,306 | -0,23  |
| 14 | Q14C86 GAPD1_HUMAN | K.SSSLEM*TPYNTPLS#PATTPANKK.N    | S466:      | 3 | 5,109  | 0,509 | 0,344  |
| 14 | Q96EB6 SIRT1_HUMAN | R.DGPGLERS#PGEPGGAAPER.E         | S47:       | 3 | 3,5241 | 0,301 | -0,095 |
| 14 | Q9UPQ0 LIMC1_HUMAN | R.SHS#TEPNLSSFLNDPNPM*K.Y        | S471:      | 3 | 5,1888 | 0,361 | -0,414 |
| 14 | P05787 K2C8_HUMAN  | R.DGKLV#ESSDVLPK.-               | S475:      | 2 | 4,2898 | 0,41  | 0,314  |
| 14 | P07900 HS90A_HUMAN | R.YYTSASGDEM*VS#LKDYCTR.M        | S476:      | 3 | 3,0344 | 0,216 | 0,469  |
| 14 | Q9Y4E1 FA21C_HUMAN | R.KVQS#TADIFGDEEGDLFK.E          | S478:      | 3 | 5,2803 | 0,502 | 0      |
| 14 | Q9Y4E1 FA21C_HUMAN | R.KVQS#TADIFGDEEGDLFK.E          | S478:      | 2 | 2,3691 | 0,405 | -0,47  |
| 14 | O60825 F262_HUMAN  | R.NYS#VGSRLKPLS#PLR.A            | S483:S493: | 3 | 2,8226 | 0,11  | 0,188  |
| 14 | P47736 RPGP1_HUMAN | K.AAGISLIVPGKS#PTR.K             | S484:      | 3 | 3,214  | 0,203 | 0,355  |

|    |                    |                                     |                 |   |        |       |        |
|----|--------------------|-------------------------------------|-----------------|---|--------|-------|--------|
| 14 | P11169 GTR3_HUMAN  | R.SGKDGVM*EM*NS#IEPAKETTTNV.-       | S485:           | 3 | 3,7237 | 0,203 | 0,224  |
| 14 | P38432 P80C_HUMAN  | K.LLELTSSYS#PDVSDYKEGR.I            | S489:           | 3 | 4,684  | 0,526 | -0,245 |
| 14 | Q8TAD8 SNIP1_HUMAN | R.RPDHS#GGS#PS#PPTSEPAR.S           | S49:S52:S54:    | 3 | 2,664  | 0,213 | -0,088 |
| 14 | Q6UN15 FIP1_HUMAN  | R.DHS#PTPSVFNSDEER.Y                | S492:           | 3 | 3,7354 | 0,254 | 0,305  |
| 14 | Q6UN15 FIP1_HUMAN  | R.ERDHS#PT#PSVFNS#DEER.Y            | S492:T494:S500: | 3 | 3,295  | 0,324 | 0,082  |
| 14 | Q86X29 LSR_HUMAN   | R.ARS#VDALDDLTPPSTAESGSR.S          | S493:           | 3 | 2,6725 | 0,202 | 0,082  |
| 14 | O43432 IF4G3_HUMAN | R.RS#PVPAQIAITVPK.T                 | S495:           | 3 | 4,0282 | 0,256 | -0,235 |
| 14 | Q9UER7 DAXX_HUMAN  | K.DGDKS#PM*SSLQISNEK.N              | S495:           | 2 | 3,9058 | 0,331 | -0,266 |
| 14 | Q9UER7 DAXX_HUMAN  | K.DGDKS#PM*SSLQISNEK.N              | S495:           | 3 | 3,8214 | 0,495 | 0      |
| 14 | O43432 IF4G3_HUMAN | R.RS#PVPAQIAITVPK.T                 | S495:           | 2 | 3,7317 | 0,417 | -0,157 |
| 14 | Q14676 MDC1_HUMAN  | K.DQPPFGDS#DDS#VEADKSSPGIHLER.S     | S495:S498:      | 3 | 3,738  | 0,367 | 0,448  |
| 14 | Q8N3X1 FNBP4_HUMAN | K.IDENS#DKEM*EVEESPEK.I             | S499:           | 3 | 5,7946 | 0,397 | -0,174 |
| 14 | Q8WUM0 NU133_HUMAN | R.KGLPLGSAVSSPVLFS#PVGR.R           | S50:            | 3 | 5,4992 | 0,444 | -0,536 |
| 14 | Q8NI08 NCOA7_HUMAN | K.GALDLETCEKQDIM*PEVDKQS#GS#PESR.V  | S500:S502:      | 3 | 2,668  | 0,138 | -0,458 |
| 14 | Q9BY44 EIF2A_HUMAN | R.SDKS#PDLAPTAPQSTPR.N              | S506:           | 3 | 3,3544 | 0,257 | -0,376 |
| 14 | Q96S66 CLCC1_HUMAN | K.ESSTESSQSAKPVSGQDTSNGTEGS#PAAEK.A | S509:           | 3 | 3,3404 | 0,334 | -0,603 |
| 14 | Q8IY67 RAVR1_HUMAN | K.AIGS#SPLGSGEGLLGLS#PGPNGHSHLLK.V  | S511:S524:      | 3 | 4,0196 | 0,472 | -0,325 |
| 14 | Q9NYF8 BCLF1_HUMAN | K.DLFDYS#PPLHK.N                    | S512:           | 2 | 4,0496 | 0,479 | -0,778 |
| 14 | Q6PJT7 ZC3HE_HUMAN | R.DLVQDPKPAS#PK.F                   | S515:           | 2 | 2,4777 | 0,315 | -0,799 |
| 14 | O96017 CHK2_HUMAN  | R.KFQDLLSEENESTALPQVLAQPS#TSR.K     | S516:           | 3 | 4,1486 | 0,374 | -0,123 |
| 14 | O00567 NOL5A_HUMAN | K.SFSKEELM*S#SDLEETAGSTSIPK.R       | S519:           | 3 | 3,8714 | 0,462 | 0,57   |
| 14 | Q99661 KIF2C_HUMAN | R.M*EGAEINKS#LLALK.E                | S519:           | 3 | 3,421  | 0,359 | 0,34   |
| 14 | Q7Z569 BRAP_HUMAN  | K.TTLASAVACLEGKS#PGEK.V             | S52:            | 2 | 4,4242 | 0,433 | -0,514 |
| 14 | O00567 NOL5A_HUMAN | K.SFSKEELMSS#DLEETAGSTSIPK.R        | S520:           | 3 | 3,8624 | 0,306 | -0,287 |
| 14 | Q9BST9 RTKN_HUMAN  | R.TFS#LDAVPPDHSPR.A                 | S520:           | 2 | 3,2477 | 0,412 | 0,452  |
| 14 | Q5H9R7 SAPS3_HUMAN | R.NTVDLVTTCHIHS#SS#DDEIDFK.E        | S523:S525:      | 3 | 6,1724 | 1     | -0,204 |
| 14 | Q9BST9 RTKN_HUMAN  | R.TFSLDAVPPDHS#PR.A                 | S529:           | 2 | 3,3882 | 0,379 | 0,301  |
| 14 | P50402 EMD_HUMAN   | R.RLSPPSS#SAASSYSFSDLNSTR.G         | S53:            | 3 | 5,0662 | 0,393 | 0,458  |
| 14 | Q9ULT0 TTC7A_HUMAN | R.RGSPS#AAFTFPDTRDFGK.L             | S53:            | 3 | 4,3462 | 0,452 | -0,092 |
| 14 | Q6P4Q7 CNNM4_HUMAN | R.DFS#AFKDADNELK.V                  | S533:           | 2 | 2,7401 | 0,249 | -0,232 |
| 14 | P40855 PEX19_HUMAN | R.S#PGDTAKDALFASQEK.F               | S54:            | 2 | 3,8532 | 0,631 | 0,42   |
| 14 | P40855 PEX19_HUMAN | R.S#PGDTAKDALFASQEK.F               | S54:            | 3 | 3,6269 | 0,353 | 0,21   |
| 14 | Q9UQC2 GAB2_HUMAN  | R.NNTVIDELPFKS#PITK.S               | S543:           | 2 | 5,1568 | 0,426 | 0,257  |

|    |                     |                                    |                 |   |        |       |        |
|----|---------------------|------------------------------------|-----------------|---|--------|-------|--------|
| 14 | Q9UQC2 GAB2_HUMAN   | R.NNTVIDELPFKS#PITK.S              | S543:           | 3 | 2,6037 | 0,183 | -0,193 |
| 14 | Q02952 AKA12_HUMAN  | R.GGGDEES#GEHTQVPADSPDSQEEQK.G     | S544:           | 3 | 3,9606 | 0,407 | -0,136 |
| 14 | Q09666 AHNK_HUMAN   | K.GPRIS#APNVDFNLEGP.K.V            | S5448:          | 2 | 3,6842 | 0,608 | -0,645 |
| 14 | P54278 PMS2_HUMAN   | K.APETDDSF#FSDVDCHSNQEDTGCK.F      | S545:           | 3 | 4,7572 | 0,452 | 0,204  |
| 14 | P54278 PMS2_HUMAN   | K.APETDDSF#FSDVDCHSNQEDTGCK.F      | S547:           | 3 | 4,8054 | 0,502 | -0,408 |
| 14 | A6NEK9 A6NEK9_HUMAN | R.RFS#IEY#LLEENQS#GPPAR.G          | S550:Y553:S561: | 3 | 2,7537 | 0,129 | 0,517  |
| 14 | Q9NWH9 SLTM_HUMAN   | R.ISS#KS#PGHM*VILDQTK.G            | S551:S553:      | 3 | 3,2373 | 0,192 | 0,286  |
| 14 | Q9NWH9 SLTM_HUMAN   | R.ISS#KS#PGHM*VILDQTK.G            | S551:S553:      | 2 | 2,0183 | 0,397 | 0,382  |
| 14 | Q9NWH9 SLTM_HUMAN   | K.S#PGHM*VILDQTK.G                 | S553:           | 2 | 3,2897 | 0,517 | -0,172 |
| 14 | Q9NWH9 SLTM_HUMAN   | K.S#PGHM*VILDQTK.G                 | S553:           | 3 | 3,0093 | 0,309 | 0,193  |
| 14 | Q9Y6M7 S4A7_HUMAN   | K.IPVFHNGS#TPTLGETPK.E             | S556:           | 3 | 3,543  | 0,279 | -0,195 |
| 14 | Q9Y6M7 S4A7_HUMAN   | K.IPVFHNGS#TPTLGETPK.E             | S556:           | 2 | 2,3323 | 0,081 | 0,195  |
| 14 | Q86VP6 CAND1_HUMAN  | K.VIRPLDQPSS#FDATPYIK.D            | S558:           | 3 | 3,7311 | 0,342 | -0,258 |
| 14 | Q15059 BRD3_HUMAN   | K.QASASYDS#EEEEGLPM*SYDEKR.Q       | S563:           | 3 | 2,9793 | 0,292 | 0,466  |
| 14 | P51116 FXR2_HUMAN   | R.TVM*DGGLES#DGNPM*TENGLADESRPQR.R | S566:           | 3 | 4,0106 | 0,471 | 0,601  |
| 14 | P17040 ZSC20_HUMAN  | R.HEDEDQIS#EQDIFGLPGALSK.C         | S571:           | 3 | 3,4207 | 0,323 | -0,721 |
| 14 | Q92610 ZN592_HUMAN  | K.VLHSSNPVPLYAPNLS#PPADSR.I        | S573:           | 3 | 4,5768 | 0,306 | -0,076 |
| 14 | Q96J84 KIRR1_HUMAN  | K.AIYSS#FKDDVDLK.Q                 | S574:           | 2 | 2,9623 | 0,31  | -0,077 |
| 14 | P17812 PYRG1_HUMAN  | R.SGSSS#PDSEITELKFPSINHD.-         | S575:           | 3 | 3,1909 | 0,193 | -0,157 |
| 14 | Q09666 AHNK_HUMAN   | K.ASLGSLEGEAEAEASS#PKGK.F          | S5763:          | 2 | 4,0374 | 0,524 | 0,733  |
| 14 | Q09666 AHNK_HUMAN   | K.ASLGSLEGEAEAEASS#PKGK.F          | S5763:          | 3 | 2,6813 | 0,316 | 0,275  |
| 14 | P13861 KAP2_HUMAN   | R.QS#LGHPPEPGPDR.V                 | S58:            | 3 | 2,8881 | 0,086 | -0,117 |
| 14 | O00178 GTPB1_HUMAN  | K.LLQTTNNS#PM*NSKPQQIK.M           | S580:           | 3 | 3,6882 | 0,327 | -0,342 |
| 14 | Q5JSH3 WDR44_HUMAN  | K.SDTDTGVCS#GTDEDPPDDKNAPFR.Q      | S582:           | 3 | 4,8307 | 0,516 | 0,497  |
| 14 | Q13428 TCOF_HUMAN   | K.SLGNILQAKPTSS#PAK.G              | S583:           | 2 | 3,6126 | 0,481 | 0,072  |
| 14 | Q71RC2 LARP4_HUMAN  | K.DGLNQTTIPVS#PPSTTKPSR.A          | S583:           | 3 | 3,3677 | 0,286 | 0,252  |
| 14 | Q7L1V2 MON1B_HUMAN  | K.DKDQPPS#PSPPPQSEALSSTR.L         | S59:            | 3 | 4,6473 | 0,435 | 0,306  |
| 14 | Q9Y2X7 GIT1_HUMAN   | R.HGS#GADSDYENTQSGDLLGLEGK.R       | S592:           | 3 | 5,9342 | 0,524 | -0,145 |
| 14 | Q96T23 RSF1_HUMAN   | K.DAQRSL#PIPEEVPK.S                | S594:           | 3 | 3,0134 | 0,235 | 0,331  |
| 14 | Q06124 PTN11_HUMAN  | R.VYENVGLM*QQQKS#FR.-              | S595:           | 2 | 2,9744 | 0,236 | 0,317  |
| 14 | Q12830 BPTF_HUMAN   | R.ES#HTPVSIQEEIVGDFK.S             | S598:           | 3 | 3,176  | 0,303 | -0,275 |
| 14 | P19634 SL9A1_HUMAN  | K.IPS#AVSTVSM*QNIHPK.S             | S599:           | 3 | 3,8609 | 0,259 | 0,101  |
| 14 | Q86W92 LIPB1_HUMAN  | R.SQS#TTFNPDDM*SEPEFKR.G           | S601:           | 3 | 3,1155 | 0,222 | 0,496  |

|    |                    |                                   |            |   |        |       |        |
|----|--------------------|-----------------------------------|------------|---|--------|-------|--------|
| 14 | O94880 PHF14_HUMAN | R.KAELM*GISTDIFPVDNSDTSS#SVDGR.R  | S602:      | 3 | 5,3964 | 0,514 | -0,58  |
| 14 | O94880 PHF14_HUMAN | R.KAELM*GISTDIFPVDNSDTSS#VDGR.R   | S603:      | 3 | 5,3061 | 0,476 | -0,58  |
| 14 | P19634 SL9A1_HUMAN | K.IPSAVSTVS#M*QNIHPK.S            | S605:      | 2 | 2,4469 | 0,289 | 0      |
| 14 | Q05209 PTN12_HUMAN | R.TPLSFTNPLHSDDS#DSDER.N          | S606:      | 3 | 4,9871 | 0,408 | -0,165 |
| 14 | Q14157 UBP2L_HUMAN | R.YPSSIS#SSPQKDLTQAK.N            | S607:      | 3 | 3,1154 | 0,274 | 0,286  |
| 14 | Q14157 UBP2L_HUMAN | R.YPSSISS#PQKDLTQAK.N             | S609:      | 2 | 4,3035 | 0,486 | 0,446  |
| 14 | Q14151 SAFB2_HUMAN | R.DILS#FDKIK.E                    | S613:      | 2 | 2,7885 | 0,222 | 0,105  |
| 14 | Q7Z2K8 GRIN1_HUMAN | K.VGSLPLEKGS#PVTTTK.A             | S615:      | 2 | 3,908  | 0,494 | 0,144  |
| 14 | Q9P2E9 RRBP1_HUMAN | R.NTDVAQS#PEAPKQEAPAK.K           | S615:      | 3 | 3,3857 | 0,425 | -0,093 |
| 14 | Q9UPN6 RBM16_HUMAN | K.SSEPVKETVQTQS#PTPVEK.E          | S617:      | 3 | 3,8181 | 0,384 | -0,406 |
| 14 | Q6WCQ1 MRIP_HUMAN  | R.M*EVDRS#PGLPM*SDLK.T            | S618:      | 2 | 3,7991 | 0,309 | 0,615  |
| 14 | Q12906 ILF3_HUMAN  | K.GSSEQAES#DNM*DVPPEDDSKEGAGEQK.T | S62:       | 3 | 3,6071 | 0,459 | -0,374 |
| 14 | O43719 HTSF1_HUMAN | R.EFDEDS#DEKEEEEDTYEK.V           | S624:      | 3 | 3,6231 | 0,14  | 0,234  |
| 14 | Q96RL1 UIMC1_HUMAN | R.LLS#FLEQSEHK.T                  | S627:      | 2 | 2,9982 | 0,392 | -0,605 |
| 14 | Q6P6C2 ALKB5_HUMAN | K.YQEDS#DPERSDYEEQQLQK.E          | S64:       | 3 | 4,9769 | 0,415 | 0,297  |
| 14 | Q3YEC7 PARF_HUMAN  | K.NSDSLFGLGLEEAGPKES#S#EEGKEGK.T  | S640:S641: | 3 | 4,1725 | 0,373 | -0,698 |
| 14 | O43719 HTSF1_HUMAN | K.VFDDDES#DEKEDYEYADEK.G          | S642:      | 3 | 5,042  | 0,515 | 0,644  |
| 14 | Q7Z6Z7 HUWE1_HUMAN | R.RSS#DPLGDTASNLSAVDELM*R.H       | S649:      | 3 | 4,1512 | 0,435 | -0,69  |
| 14 | O00116 ADAS_HUMAN  | R.RAAS#AATAAPTATPAAQESGTIPK.K     | S65:       | 3 | 3,9615 | 0,435 | 0,237  |
| 14 | Q6ZNB6 NFXL1_HUMAN | R.HS#PAGSQALQTTAASELN*SQK.K       | S65:       | 3 | 2,8647 | 0,207 | -0,245 |
| 14 | Q96RL1 UIMC1_HUMAN | K.SSETGAFRVPS#PGM*EEAGCSR.E       | S653:      | 3 | 4,923  | 0,436 | 0,238  |
| 14 | Q9ULW0 TPX2_HUMAN  | K.KSVAEGLSGS#LVQEPFQLATEK.R       | S654:      | 3 | 5,3486 | 0,316 | -0,839 |
| 14 | Q8NFC6 FA44A_HUMAN | R.RTS#TPVIM*EGVQEETDTR.D          | S659:      | 3 | 5,3835 | 0,333 | 0,085  |
| 14 | Q86V48 LUZP1_HUMAN | R.EKPDS#DDDLDIASLVTAK.L           | S659:      | 3 | 4,2477 | 0,491 | 0,091  |
| 14 | Q86V48 LUZP1_HUMAN | R.EKPDS#DDDLDIASLVTAK.L           | S659:      | 2 | 2,5753 | 0,46  | -0,425 |
| 14 | Q9Y3R0 GRIP1_HUMAN | R.KDEDNS#DEQESSGAIITYVELK.R       | S661:      | 3 | 4,0598 | 0,376 | -0,43  |
| 14 | Q96S38 KS6C1_HUMAN | K.AQDTISRGS#DDSVPVISFK.D          | S664:      | 3 | 4,3416 | 0,302 | -0,261 |
| 14 | O75665 OFD1_HUMAN  | K.S#PPSLHLLEAFK.N                 | S669:      | 2 | 2,0499 | 0,129 | -0,86  |
| 14 | Q9UER7 DAXX_HUMAN  | K.KICTLPSPPS#PLASLAPVADSSTR.V     | S671:      | 3 | 4,9131 | 0,479 | -0,575 |
| 14 | P25205 MCM3_HUMAN  | R.SEDES#ETEDEEEKSQEDQEQK.R        | S672:      | 3 | 5,3929 | 0,509 | -0,421 |
| 14 | Q9C0C2 TB182_HUMAN | R.TEAQDLCRAS#PEPPGPESSR.W         | S672:      | 3 | 4,3403 | 0,371 | 0,233  |
| 14 | O43719 HTSF1_HUMAN | K.LFEES#DDKEDEDADGK.E             | S676:      | 3 | 3,8669 | 0,415 | 0,381  |
| 14 | O43719 HTSF1_HUMAN | K.LFEES#DDKEDEDADGK.E             | S676:      | 2 | 2,9459 | 0,433 | -0,444 |

|    |                    |                               |                 |   |        |       |        |
|----|--------------------|-------------------------------|-----------------|---|--------|-------|--------|
| 14 | Q9NQW6 ANLN_HUMAN  | R.DLLYSIDAYRS#QR.F            | S678:           | 2 | 2,5352 | 0,397 | -0,363 |
| 14 | P35658 NU214_HUMAN | R.ITPPAAKPGS#PQAK.S           | S678:           | 2 | 2,1521 | 0,379 | -0,254 |
| 14 | Q9P275 UBP36_HUMAN | K.SPVLNNTTTEPASTM*S#PPPAKK.L  | S682:           | 3 | 3,3226 | 0,455 | -0,235 |
| 14 | Q7Z460 CLAP1_HUMAN | R.SSS#PGKLLGSGYGGLTGGSSR.G    | S688:           | 2 | 2,5723 | 0,454 | 0,487  |
| 14 | Q9H6R7 CB044_HUMAN | R.DSFHS#PGAVSSLK.V            | S690:           | 2 | 4,0828 | 0,472 | 0,244  |
| 14 | Q9H6R7 CB044_HUMAN | R.DSFHS#PGAVSSLK.V            | S690:           | 3 | 3,5741 | 0,371 | 0,366  |
| 14 | Q9Y6X9 MORC2_HUMAN | K.TASRPAPLVQQLS#PSLLPNSK.S    | S696:           | 3 | 3,3112 | 0,321 | -0,24  |
| 14 | P06748 NPM_HUMAN   | K.DELHIVEAEAM*NYEGS#PIK.V     | S70:            | 3 | 4,6207 | 0,412 | -0,653 |
| 14 | O43719 HTSF1_HUMAN | K.EVEDADEKLFEDDDS#NEK.L       | S702:           | 3 | 3,2848 | 0,228 | 0,083  |
| 14 | O75151 PHF2_HUMAN  | R.DLS#FLLDKK.A                | S705:           | 2 | 2,5602 | 0,263 | -0,211 |
| 14 | Q96T88 UHRF1_HUMAN | K.DRPAS#GSPFQLFLSK.V          | S707:           | 3 | 3,8683 | 0,364 | 0      |
| 14 | O43493 TGON2_HUMAN | K.DSPSKSS#AEAQTPEDTPNK.S      | S71:            | 3 | 3,7229 | 0,279 | -0,177 |
| 14 | Q02543 RL18A_HUMAN | K.SSGEIVYCGQVFEKS#PLR.V       | S71:            | 3 | 2,9782 | 0,214 | -0,343 |
| 14 | Q02543 RL18A_HUMAN | K.SSGEIVYCGQVFEKS#PLR.V       | S71:            | 2 | 2,408  | 0,443 | -0,343 |
| 14 | Q13459 MYO9B_HUMAN | K.AAGM*SS#PGAQSHPEELPR.G      | S717:           | 2 | 2,3289 | 0,384 | -0,318 |
| 14 | P40818 UBP8_HUMAN  | R.SYS#SPDITQAIQEEKR.K         | S718:           | 3 | 3,411  | 0,493 | 0,089  |
| 14 | P18206 VINC_HUMAN  | K.S#LLDASEEAIKK.D             | S721:           | 2 | 2,4792 | 0,38  | 0,088  |
| 14 | Q5TCQ9 MAGI3_HUMAN | R.S#GSPKLDPSEVYLK.S           | S722:           | 2 | 3,5802 | 0,329 | 0,458  |
| 14 | Q92614 MY18A_HUMAN | R.STS#FRQGPEESGLGDGTGPK.L     | S728:           | 3 | 3,8341 | 0,406 | -0,438 |
| 14 | Q66K74 MAP1S_HUMAN | R.S#ASPHDVLCLVS#PCEFEHR.K     | S729:S741:      | 3 | 3,828  | 0,382 | 0,218  |
| 14 | Q8NFH5 NUP53_HUMAN | R.SPLLAGGS#PPQPVPVPAHK.D      | S73:            | 3 | 4,6233 | 0,423 | 0      |
| 14 | Q8NFH5 NUP53_HUMAN | R.SPLLAGGS#PPQPVPVPAHK.D      | S73:            | 2 | 3,6393 | 0,448 | 0,4    |
| 14 | Q66K74 MAP1S_HUMAN | R.SAS#PHDVLCLVS#PCEFEHR.K     | S731:S741:      | 3 | 3,1414 | 0,32  | 0,073  |
| 14 | O60271 JIP4_HUMAN  | R.SASQSS#LDKLDQELK.E          | S733:           | 2 | 4,3252 | 0,434 | 0,423  |
| 14 | A0FGR8 ESYT2_HUMAN | R.SS#SLLASPGHISVK.E           | S737:           | 2 | 4,0277 | 0,396 | 0,472  |
| 14 | A0FGR8 ESYT2_HUMAN | R.SSS#SLLASPGHISVK.E          | S738:           | 3 | 3,377  | 0,295 | 0,118  |
| 14 | Q32MZ4 LRRF1_HUMAN | R.CTLPEHESPSQDIS#DACEAESTER.C | S739:           | 3 | 5,8016 | 0,515 | 0,647  |
| 14 | Q92934 BAD_HUMAN   | R.HS#SYPAGTEDDEGM*GEEPSFR.G   | S74:            | 3 | 4,7776 | 0,29  | 0,367  |
| 14 | Q13427 PIIG_HUMAN  | K.KFDHES#S#PGT#DEDKSG.-       | S744:S745:T748: | 3 | 3,6816 | 0,463 | -0,278 |
| 14 | Q13427 PIIG_HUMAN  | K.KFDHES#S#PGT#DEDKSG.-       | S744:S745:T748: | 2 | 3,0185 | 0,447 | -0,309 |
| 14 | Q9BYW2 SETD2_HUMAN | K.SES#PFRETEPLVS#PHQDK.L      | S744:S754:      | 3 | 4,8719 | 0,377 | 0      |
| 14 | Q96EV2 RBM33_HUMAN | R.CSATPSAQVKPIVS#ASPPSR.A     | S749:           | 3 | 3,5411 | 0,414 | 0,086  |
| 14 | Q96EV2 RBM33_HUMAN | R.CSATPSAQVKPIVSAS#PPSR.A     | S751:           | 3 | 3,8609 | 0,509 | 0,173  |



|    |                     |                                   |              |   |        |       |        |
|----|---------------------|-----------------------------------|--------------|---|--------|-------|--------|
| 14 | Q8IWB9 TEX2_HUMAN   | R.SSSKGS#VEEIM*SQPK.Q             | S751:        | 3 | 3,8084 | 0,209 | 0      |
| 14 | P51826 AFF3_HUMAN   | R.NELLS#PLKDSDEIR.S               | S755:        | 2 | 4,5171 | 0,439 | -0,428 |
| 14 | P51826 AFF3_HUMAN   | R.NELLS#PLKDSDEIR.S               | S755:        | 3 | 2,944  | 0,222 | 0,107  |
| 14 | O75152 ZC11A_HUMAN  | R.RLS#S#ASTGKPLSVEDDFEK.L         | S758:S759:   | 3 | 3,0876 | 0,28  | 0,394  |
| 14 | P28749 RBL1_HUMAN   | K.SPVSLTAHSLIGAS#PK.Q             | S762:        | 3 | 4,5924 | 0,368 | 0,111  |
| 14 | P28749 RBL1_HUMAN   | K.SPVSLTAHSLIGAS#PK.Q             | S762:        | 2 | 3,8035 | 0,475 | 0,593  |
| 14 | O43765 SGTA_HUMAN   | K.EM*PQDLRS#PART#PPSEEDSAEAER.L   | S77:T81:     | 3 | 2,7617 | 0,167 | -0,318 |
| 14 | Q68CZ2 TENS3_HUMAN  | R.KLS#LGQYDNDAGGQLPFSK.C          | S776:        | 2 | 2,3401 | 0,428 | -0,691 |
| 14 | P09874 PARP1_HUMAN  | R.GGS#DDSSKDPIDVNYEK.L            | S782:        | 2 | 4,2143 | 0,589 | 0,448  |
| 14 | Q8IY92 BTBDC_HUMAN  | R.DCRS#PGLLDTTPIR.G               | S786:        | 2 | 3,3744 | 0,315 | 0,653  |
| 14 | O60343 TBCD4_HUMAN  | R.VASPM*NKS#PSAM*QQQDGLDR.N       | S787:        | 3 | 4,3251 | 0,446 | -0,483 |
| 14 | Q8IWA0 WDR75_HUMAN  | K.VQDTS#NTGLGEDIIHQLSK.S          | S796:        | 3 | 4,5501 | 0,454 | -0,171 |
| 14 | Q9H3Z4 DNJC5_HUMAN  | R.S#LSTSGESLYHVLGLDK.N            | S8:          | 2 | 3,7654 | 0,491 | -0,453 |
| 14 | O00479 HMGNA4_HUMAN | R.DASTLQS#QKAEGTGDAK.-            | S80:         | 2 | 3,6671 | 0,506 | -0,41  |
| 14 | Q93075 TATD2_HUMAN  | R.NNS#SSSFSPHFLGPGVGAASK.G        | S80:         | 3 | 3,4926 | 0,408 | -0,335 |
| 14 | P23193 TCEA1_HUMAN  | K.LLDGPS#TEKDLDEK.K               | S81:         | 2 | 3,3207 | 0,244 | 0,372  |
| 14 | Q9H7F0 AT133_HUMAN  | K.LVHDS#LEDLQM*TR.Y               | S817:        | 2 | 3,7351 | 0,181 | 0,148  |
| 14 | P55265 DSRAD_HUMAN  | R.TM*LLLSRS#PEAQPK.T              | S825:        | 3 | 3,6108 | 0,286 | -0,219 |
| 14 | P55265 DSRAD_HUMAN  | R.TM*LLLSRS#PEAQPK.T              | S825:        | 2 | 3,5217 | 0,354 | 0,22   |
| 14 | Q9HAW4 CLSPN_HUMAN  | K.TTYDS#AEEENKENLYAGK.N           | S83:         | 3 | 3,2324 | 0,457 | 0,427  |
| 14 | Q14008 CKAP5_HUMAN  | K.HSTS#GTDEGEDGDEPDDGSNDVVDLLPR.T | S830:        | 3 | 4,258  | 0,428 | 0,487  |
| 14 | Q6NWWY9 PR40B_HUMAN | R.ELQQAELPNRS#PGFGIK.K            | S832:        | 2 | 2,806  | 0,448 | -0,435 |
| 14 | P22314 UBA1_HUMAN   | K.ATLPS#PDKLPGFK.M                | S835:        | 2 | 2,1428 | 0,183 | -0,42  |
| 14 | Q9NQ57 INCE_HUMAN   | K.INPDNYGM*DLNSDDS#TDDEAHPR.K     | S836:        | 3 | 3,1206 | 0,352 | 0,409  |
| 14 | Q9C0C9 UBE2O_HUMAN  | K.NM*TVEQLLTGSPTS#PTVEPEKPTR.E    | S839:        | 3 | 3,8846 | 0,127 | -0,405 |
| 14 | Q9ULH1 DDEF1_HUMAN  | R.TLS#DPPSPLPHGPPNK.G             | S839:        | 3 | 2,8359 | 0,247 | 0,422  |
| 14 | Q9ULH1 DDEF1_HUMAN  | R.TLS#DPPSPLPHGPPNK.G             | S839:        | 2 | 2,0455 | 0,307 | 0,563  |
| 14 | Q13595 TRA2A_HUMAN  | R.S#RSY#T#PEYRR.R                 | S84:Y87:T88: | 2 | 2,0416 | 0,485 | -0,157 |
| 14 | Q9Y5B0 CTDP1_HUMAN  | K.RQPSM*S#ETM*PLYTLCK.E           | S841:        | 3 | 3,3651 | 0,149 | 0,178  |
| 14 | Q9UQ35 SRRM2_HUMAN  | K.S#GTPPRQGSITSPQANEQSVT#PQRR.S   | S846:T866:   | 3 | 3,9192 | 0,39  | -0,322 |
| 14 | P16333 NCK1_HUMAN   | R.KPS#VPDSASPADDSDVDPGER.L        | S85:         | 3 | 4,6191 | 0,339 | 0,162  |
| 14 | P46013 KI67_HUMAN   | K.M*TSLETKTS#DTETEPSK.T           | S859:        | 2 | 3,4412 | 0,387 | -0,554 |
| 14 | P46013 KI67_HUMAN   | K.M*TSLETKTS#DTETEPSK.T           | S859:        | 3 | 3,3324 | 0,236 | -0,185 |

|    |                    |                                |            |   |        |       |        |
|----|--------------------|--------------------------------|------------|---|--------|-------|--------|
| 14 | P98171 RHG04_HUMAN | R.CLVPAS#PEQHVEVDK.A           | S860:      | 2 | 3,5285 | 0,398 | 0,546  |
| 14 | Q6GYQ0 GRIPE_HUMAN | R.RGS#S#PGSLEIPKDLPDILNK.Q     | S860:S861: | 3 | 3,7224 | 0,289 | -0,478 |
| 14 | Q02241 KIF23_HUMAN | K.YM*LTHQELAS#DGEIETK.L        | S867:      | 3 | 4,2725 | 0,369 | 0      |
| 14 | Q07021 C1QBP_HUMAN | K.AFVDFLS#DEIKEER.K            | S87:       | 2 | 3,3044 | 0,419 | -0,206 |
| 14 | Q8TEW0 PARD3_HUMAN | K.AGS#PSRDVGPSLGLK.K           | S873:      | 3 | 2,9675 | 0,305 | -0,12  |
| 14 | Q5SW79 CE170_HUMAN | R.ERSES#LDPDSSM*DTTLILK.D      | S881:      | 3 | 4,4179 | 0,38  | -0,082 |
| 14 | Q9NZ71 RTEL1_HUMAN | R.LVS#HPEEPVAGAQTDR.A          | S882:      | 3 | 4,2863 | 0,281 | -0,307 |
| 14 | Q9NZ71 RTEL1_HUMAN | R.LVS#HPEEPVAGAQTDR.A          | S882:      | 2 | 2,8958 | 0,234 | -0,342 |
| 14 | Q9UQE7 SMC3_HUMAN  | R.SEDLDNS#IDKTEAGIK.E          | S886:      | 2 | 2,2911 | 0,137 | 0,134  |
| 14 | P52948 NUP98_HUMAN | K.YGLQDS#DEEEEEHPSK.T          | S888:      | 2 | 3,0775 | 0,426 | -0,371 |
| 14 | Q76FK4 NOL8_HUMAN  | R.FLETDS#EEEQEEVNEKK.T         | S890:      | 3 | 2,8449 | 0,216 | -0,085 |
| 14 | P29317 EPHA2_HUMAN | K.TLADFDRVS#IR.L               | S892:      | 2 | 2,536  | 0,264 | 0      |
| 14 | O14974 MYPT1_HUMAN | R.YETSS#TSAGDRYDSSLGR.S        | S894:      | 3 | 3,2418 | 0,325 | -0,089 |
| 14 | P29317 EPHA2_HUMAN | R.VSIRLPS#TSGSEGVPPFR.T        | S897:      | 2 | 2,7953 | 0,555 | -0,588 |
| 14 | Q9BTE7 DCNL5_HUMAN | K.S#PGVAAVAEDGGLKK.C           | S9:        | 2 | 3,712  | 0,463 | 0,394  |
| 14 | Q9NYM9 BET1L_HUMAN | R.AQS#PGAVEEILDRENK.R          | S9:        | 2 | 3,025  | 0,34  | -0,332 |
| 14 | Q12872 SFRS8_HUMAN | R.S#RGVS#QEKEAQISSAIVSSVQSK.I  | S905:S909: | 3 | 4,8718 | 0,518 | -0,071 |
| 14 | Q9UPV9 TRAK1_HUMAN | R.NRS#FPTMVGSS#SMQMK.A         | S919:S926: | 2 | 2,1043 | 0,103 | -1,967 |
| 14 | Q9H2P0 ADNP_HUMAN  | K.VIPEDAS#ESEEKLDQK.E          | S921:      | 2 | 3,9073 | 0,341 | -0,257 |
| 14 | Q9Y6Y8 S23IP_HUMAN | K.VVES#PDFSKDEEDYLK.V          | S926:      | 2 | 4,0711 | 0,5   | 0,959  |
| 14 | Q99570 PI3R4_HUMAN | K.KPVIPVLSS#TILPSTYQIR.I       | S926:      | 3 | 3,5365 | 0,195 | -0,501 |
| 14 | Q9Y6Y8 S23IP_HUMAN | K.VVES#PDFSKDEEDYLK.V          | S926:      | 3 | 2,7539 | 0,296 | 0,288  |
| 14 | Q86TC9 MYPN_HUMAN  | R.TPVDES#DDEIQHDEIPTGK.C       | S928:      | 3 | 4,7332 | 0,423 | 0,166  |
| 14 | Q86SQ0 PHLB2_HUMAN | K.AHLPLGQS#NSCGSVLPPSLAAM*AK.D | S932:      | 3 | 4,1049 | 0,206 | -0,439 |
| 14 | Q96K76 UBP47_HUMAN | R.ELEQHIQTS#DPENFQSEER.S       | S933:      | 3 | 5,1452 | 0,416 | 0,382  |
| 14 | Q86SQ0 PHLB2_HUMAN | K.AHLPLGQSNS#CGSVLPPSLAAM*AK.D | S934:      | 3 | 4,3771 | 0,212 | -0,366 |
| 14 | O43399 TPD54_HUMAN | R.LGLSTLGEKQNLNLS#R.S          | S94:       | 3 | 3,199  | 0,289 | -0,107 |
| 14 | P05455 LA_HUMAN    | R.SPS#KPLPEVTDEYK.N            | S94:       | 2 | 2,7225 | 0,463 | 0,658  |
| 14 | Q9HCM7 AUT2L_HUMAN | R.DYS#PSRNPPEVEAR.-            | S961:      | 3 | 3,5094 | 0,108 | 0      |
| 14 | Q93009 UBP7_HUMAN  | K.IIGVHQEDELLECLS#PATSR.T      | S963:      | 3 | 4,3442 | 0,363 | 0,312  |
| 14 | Q92508 FA38A_HUMAN | K.DPGLEPGDPSGGSS#PPRR.Q        | S965:      | 3 | 3,1193 | 0,113 | -0,374 |
| 14 | Q9UK61 CC063_HUMAN | R.QRS#SDYQFPSSPFTDTLK.G        | S971:      | 3 | 2,8395 | 0,159 | -0,335 |
| 14 | P46379 BAT3_HUMAN  | R.ASPEPQRENAS#PAPGTTAEEAM*SR.G | S973:      | 3 | 4,7544 | 0,344 | -0,496 |

|    |                    |                                    |              |   |        |       |        |
|----|--------------------|------------------------------------|--------------|---|--------|-------|--------|
| 14 | Q14814 MEF2D_HUMAN | K.KGFNGCDS#PEPDGEDSLEQSPLEDK.Y     | S98:         | 3 | 6,4992 | 0,489 | -0,249 |
| 14 | Q8IXT5 RB12B_HUMAN | R.GRPGS#GTSGVDSLSNFIESVK.E         | S98:         | 3 | 4,0835 | 0,203 | -0,505 |
| 14 | Q96H12 CI030_HUMAN | R.SVS#PLLSTHVLGK.E                 | S98:         | 3 | 2,7135 | 0,362 | 0,193  |
| 14 | Q96H12 CI030_HUMAN | R.SVS#PLLSTHVLGK.E                 | S98:         | 2 | 2,7124 | 0,462 | 0,086  |
| 14 | P13861 KAP2_HUMAN  | R.RVS#VCAETYNPDEEEEDTDP.R.V        | S99:         | 3 | 4,7838 | 0,394 | 0,212  |
| 14 | P17096 HMGA1_HUMAN | K.KLEKEEEEGIS#QESS#EEEEQ.-         | S99:S103:    | 3 | 4,1241 | 0,339 | -0,305 |
| 14 | Q9UUK3 PARP4_HUMAN | K.NYDPYKPLDIT#PPPDQK.A             | T101:        | 3 | 3,5631 | 0,166 | -0,703 |
| 14 | O75822 EIF3J_HUMAN | K.VLT#PEEQIADKLR.L                 | T109:        | 2 | 3,1632 | 0,414 | -0,307 |
| 14 | O60264 SMCA5_HUMAN | K.QTELFHFQIPAAQKT#PTS#PLK.M        | T113:S116:   | 3 | 3,046  | 0,256 | -0,35  |
| 14 | O15047 SET1A_HUMAN | R.RKT#VS#FSAIEVVPAPPPATPPQAK.F     | T1167:S1169: | 3 | 4,0149 | 0,187 | -0,255 |
| 14 | Q9UPT8 ZC3H4_HUMAN | K.T#GSGSPFAGNS#PAREGEQDAASLKDVFK.G | T1265:S1275: | 3 | 3,2907 | 0,257 | -0,491 |
| 14 | Q96T23 RSF1_HUMAN  | R.IET#DEEESCDNAHGDNQPAR.D          | T1295:       | 3 | 3,9613 | 0,324 | -0,225 |
| 14 | Q8NI08 NCOA7_HUMAN | K.FNIT#PNKLVELNK.L                 | T134:        | 2 | 4,0596 | 0,262 | -0,53  |
| 14 | Q8NI08 NCOA7_HUMAN | K.FNIT#PNKLVELNK.L                 | T134:        | 3 | 3,9187 | 0,299 | -0,227 |
| 14 | O75976 CBPD_HUMAN  | K.SLLSHEFQDETD#EEETLYSSK.H         | T1370:       | 3 | 4,025  | 0,292 | -0,411 |
| 14 | Q8WYP5 AHTF1_HUMAN | K.DGDKDVFASEVT#PSDLQK.Q            | T1378:       | 3 | 3,5521 | 0,28  | 0,18   |
| 14 | Q8WYP5 AHTF1_HUMAN | K.DGDKDVFASEVT#PSDLQK.Q            | T1378:       | 2 | 3,4605 | 0,489 | 0,601  |
| 14 | Q9UQ35 SRRM2_HUMAN | K.AGM*SSNQSISSVLDVAVPRT#PS#RER.S   | T1413:S1415: | 3 | 4,1323 | 0,355 | 0,519  |
| 14 | P16144 ITB4_HUMAN  | R.M*DFAFPGST#NSLHR.M               | T1455:       | 2 | 3,344  | 0,493 | 0,364  |
| 14 | Q9ULW0 TPX2_HUMAN  | R.CAT#PVIIDEILPSKK.M               | T147:        | 3 | 4,8302 | 0,442 | -0,415 |
| 14 | Q9ULW0 TPX2_HUMAN  | R.CAT#PVIIDEILPSKK.M               | T147:        | 2 | 2,242  | 0,219 | -0,553 |
| 14 | P42166 LAP2A_HUMAN | R.EQGT#ESRSSTPLPTISSAENTR.Q        | T154:        | 3 | 5,2592 | 0,459 | 0,364  |
| 14 | O00512 BCL9_HUMAN  | R.SST#PSHGQTTATEPTPAQK.T           | T155:        | 3 | 4,4105 | 0,391 | -0,456 |
| 14 | O00512 BCL9_HUMAN  | R.SST#PSHGQTTATEPTPAQKT#PAK.V      | T155:T172:   | 3 | 4,104  | 0,287 | -0,516 |
| 14 | Q14839 CHD4_HUMAN  | K.SAIDLT#PIVVEDKEEK.K              | T1653:       | 2 | 4,271  | 0,419 | 0,392  |
| 14 | P04920 B3A2_HUMAN  | R.T#SPSSPAPLPHQEATPR.A             | T169:        | 2 | 2,7417 | 0,374 | -0,922 |
| 14 | P52594 NUPL_HUMAN  | K.SLLGDSAPTLHLNKG#PSQS#PVVGR.S     | T177:S181:   | 3 | 4,7272 | 0,39  | -0,34  |
| 14 | Q96A73 K1191_HUMAN | R.QPASAQSTPST#PHSSPK.Q             | T179:        | 3 | 3,0891 | 0,404 | -0,194 |
| 14 | P00338 LDHA_HUMAN  | K.DQLIYNLLKEEQ#PQNK.I              | T18:         | 3 | 4,5984 | 0,324 | -0,425 |
| 14 | Q9NVZ3 NECP2_HUMAN | R.VRPAST#GGLSLLPPPPGGK.T           | T182:        | 2 | 3,6446 | 0,324 | -0,389 |
| 14 | P28482 MK01_HUMAN  | R.VADPDHDHTGFLT#EY#VATR.W          | T185:Y187:   | 3 | 3,7605 | 0,418 | 0,159  |
| 14 | P07355 ANXA2_HUMAN | K.LSLEGDHST#PPSAYGSVK.A            | T19:         | 3 | 3,3629 | 0,209 | 0,19   |
| 14 | Q15131 CDK10_HUMAN | R.AYGVVPKPM*T#PK.V                 | T196:        | 2 | 2,5905 | 0,203 | -0,705 |

|    |                     |                                 |            |   |        |       |        |
|----|---------------------|---------------------------------|------------|---|--------|-------|--------|
| 14 | Q9H4Z3 PCIF1_HUMAN  | R.EEASLLSHSPGT#SNQSQPCS#PKPIR.L | T22:S30:   | 3 | 4,6725 | 1     | 0,447  |
| 14 | Q01082 SPTB2_HUMAN  | R.AQT#LPTSVVTITSESSPGKR.E       | T2328:     | 3 | 2,7443 | 0,282 | 0,171  |
| 14 | Q9H1I8 ASCC2_HUMAN  | R.GRLT#PSDM*PLLELK.D            | T233:      | 2 | 2,2811 | 0,206 | -0,439 |
| 14 | P78345 RPP38_HUMAN  | R.ELLDT#SFEDLSKPK.R             | T234:      | 2 | 3,159  | 0,407 | -0,717 |
| 14 | Q03188 CENPC_HUMAN  | K.KSFST#LFLETVK.R               | T264:      | 3 | 2,7827 | 0,232 | -0,247 |
| 14 | A8K1N6 A8K1N6_HUMAN | K.M*LGQKAT#PPPS#PLLELLK.G       | T264:S268: | 3 | 4,0951 | 0,437 | -0,472 |
| 14 | Q5T4S7 UBR4_HUMAN   | R.SNT#PM*GDKDDDDDDADEK.M        | T2724:     | 3 | 4,5827 | 0,399 | -0,167 |
| 14 | P46013 KI67_HUMAN   | K.FTQTSGETT#DADKEPAGEDK.G       | T2750:     | 3 | 2,678  | 0,247 | -0,166 |
| 14 | Q9NQW6 ANLN_HUMAN   | K.AT#SPVKSTTSITDAK.S            | T294:      | 2 | 3,0591 | 0,369 | -0,846 |
| 14 | Q99460 PSMD1_HUMAN  | K.TSSAFVGTK#PEASPEPK.D          | T311:      | 3 | 2,9837 | 0,395 | -0,202 |
| 14 | P62136 PP1A_HUMAN   | K.YGQFSLNPGGRPIT#PPR.N          | T320:      | 3 | 2,7683 | 0,392 | 0,275  |
| 14 | P31350 RIR2_HUMAN   | K.GLSLVDKENT#PPALSGTR.V         | T33:       | 3 | 4,2371 | 0,475 | 0,284  |
| 14 | Q9H0H5 RGAP1_HUMAN  | R.DRCPLPCIPTLIGT#PVK.I          | T342:      | 3 | 4,8292 | 0,396 | -0,181 |
| 14 | Q9H0H5 RGAP1_HUMAN  | R.DRCPLPCIPTLIGT#PVK.I          | T342:      | 2 | 2,2474 | 0,356 | -0,605 |
| 14 | Q9BXS6 NUSAP_HUMAN  | K.LTTEATQT#PVS#NKKPVFDLK.A      | T349:S352: | 3 | 3,8546 | 0,359 | 0,385  |
| 14 | Q15910 EZH2_HUMAN   | R.LPNNSSRPST#PTINVLESK.D        | T367:      | 3 | 2,8435 | 0,269 | -0,6   |
| 14 | Q99459 CDC5L_HUMAN  | K.GGLNTPHESDFSGVT#PQR.Q         | T396:      | 3 | 2,7614 | 0,208 | 0,874  |
| 14 | Q09666 AHNK_HUMAN   | K.VDIDT#PDIDIHGPEGK.L           | T4100:     | 2 | 4,7557 | 0,416 | 0,339  |
| 14 | O75044 FNBP2_HUMAN  | K.ST#VSETFM*SKPSIAK.R           | T425:      | 2 | 2,8601 | 0,482 | 0,643  |
| 14 | Q99549 MPP8_HUMAN   | R.NAFDLFKLT#PEEK.N              | T454:      | 2 | 2,189  | 0,225 | -0,449 |
| 14 | Q15003 CND2_HUMAN   | R.KAPLNIPGT#PVLEDFPQNDDK.E      | T49:       | 3 | 5,3051 | 0,451 | -0,291 |
| 14 | Q03164 HRX_HUMAN    | R.SDT#PEVHPPLISQS#PENESNDRR.S   | T506:S518: | 3 | 4,1102 | 0,503 | -0,064 |
| 14 | Q9HA05 Q9HA05_HUMAN | K.AFGSGIDIKPGT#PPIAGR.S         | T510:      | 3 | 3,9502 | 0,456 | -0,1   |
| 14 | Q8N3X1 FNBP4_HUMAN  | K.VQTT#PKVEEEQDLK.F             | T517:      | 2 | 3,925  | 0,419 | -0,142 |
| 14 | Q9BST9 RTKN_HUMAN   | R.T#FSLDAVPPDHSPR.A             | T518:      | 2 | 2,8797 | 0,362 | 0,452  |
| 14 | Q16555 DPYL2_HUMAN  | K.TVTPASSAKT#S#PAKQQAPPVR.N     | T521:S522: | 3 | 3,6173 | 1     | -0,481 |
| 14 | Q6PKG0 LARP1_HUMAN  | R.AVT#PVPTKTEEVSNLK.T           | T526:      | 2 | 3,3053 | 0,525 | 0,34   |
| 14 | Q9Y3L3 3BP1_HUMAN   | K.VT#RSPPETAAPVEDM*AR.R         | T548:      | 3 | 2,8519 | 0,146 | 0      |
| 14 | Q12906 ILF3_HUMAN   | K.LFPDT#PLALDANKK.K             | T592:      | 2 | 3,1226 | 0,198 | -0,226 |
| 14 | Q9Y2X7 GIT1_HUMAN   | R.HGSGADSDYENT#QSGDPLLGLEGK.R   | T601:      | 3 | 3,6058 | 0,285 | -0,362 |
| 14 | Q96RN5 MED15_HUMAN  | K.LKNDM*AVPT#PPPPVPPTK.Q        | T603:      | 3 | 3,7673 | 0,152 | 0,175  |
| 14 | Q8TE76 MORC4_HUMAN  | K.SSSERST#PPYLFPPEYPEASK.N      | T621:      | 3 | 3,8059 | 0,302 | -0,856 |
| 14 | Q96DT7 ZBT10_HUMAN  | R.NVNANLLAEAGT#SQDGGDAGTSHDFK.Y | T646:      | 3 | 4,0682 | 0,504 | 0,823  |

|    |                     |                                   |            |   |        |       |        |
|----|---------------------|-----------------------------------|------------|---|--------|-------|--------|
| 14 | P12270 TPR_HUMAN    | K.RPSTSQTVST#PAPVPVIESTEAEIAK.A   | T653:      | 3 | 4,3898 | 0,309 | -0,396 |
| 14 | O75151 PHF2_HUMAN   | K.ALRPPT#SPGVFGALQNFK.E           | T654:      | 3 | 3,1081 | 0,153 | -0,37  |
| 14 | P25205 MCM3_HUMAN   | R.SEDESET#EDEEEKSQEDQEQQ.R        | T674:      | 3 | 4,7512 | 0,486 | -0,421 |
| 14 | Q9UHB7 AFF4_HUMAN   | K.YPESNRT#PVKPSS#VEEEDSFFR.Q      | T674:S680: | 3 | 4,5212 | 0,258 | -0,331 |
| 14 | Q9H3R5 CENPH_HUMAN  | K.SM*VDASEEKT#PEQIM*QEK.Q         | T68:       | 3 | 3,7775 | 0,334 | -0,417 |
| 14 | Q05209 PTN12_HUMAN  | R.TPESFVLASEHNT#PVR.S             | T693:      | 3 | 3,3449 | 0,396 | -0,393 |
| 14 | Q13435 SF3B2_HUMAN  | K.KIEEAM*DGSET#PQLFTVLPEK.R       | T757:      | 3 | 3,9309 | 0,33  | 0,149  |
| 14 | O60361 NDK8_HUMAN   | R.VM*LGET#NPADSKPGTIR.G           | T79:       | 3 | 3,678  | 0,418 | 0,68   |
| 14 | O60361 NDK8_HUMAN   | R.VM*LGET#NPADSKPGTIR.G           | T79:       | 2 | 2,9263 | 0,285 | 1,297  |
| 14 | Q86VM9 ZCH18_HUMAN  | K.SSQQPST#PQQAPPGQPQQGTFVAHK.E    | T796:      | 3 | 3,3739 | 0,39  | -1,552 |
| 14 | P06400 RB_HUMAN     | K.ISEGLPTPTKM*T#PR.S              | T826:      | 2 | 2,6839 | 0,169 | 0,376  |
| 14 | Q14008 CKAP5_HUMAN  | K.HSTSGT#DEGEDGDEPDDGSNDVVDLLPR.T | T832:      | 3 | 4,2112 | 0,472 | 0,487  |
| 14 | Q92547 TOPB1_HUMAN  | K.DALAALET#PGRPSQQK.R             | T848:      | 3 | 3,6838 | 0,344 | 0,311  |
| 14 | Q9Y6D6 BIG1_HUMAN   | K.ETKELTIPT#K.S                   | T894:      | 2 | 2,1401 | 0,199 | 1,574  |
| 14 | Q6PD62 CTR9_HUMAN   | K.GGEFDEFVNDT#DDDLPISKK.K         | T925:      | 3 | 5,3436 | 0,458 | -0,676 |
| 14 | Q6ZU35 K1211_HUMAN  | K.M*PLAQKPALAPKPTSQT#PPAS#PLSK.L  | T971:S975: | 3 | 4,7587 | 1     | 0,536  |
| 14 | Q9Y3P9 RBGP1_HUMAN  | K.EVLDEDT#DEEKETLK.N              | T996:      | 2 | 3,6904 | 0,382 | 0,521  |
| 14 | Q9BTI9 Q9BTI9_HUMAN | -.Y#EGSPIKVTLATLK.M               | Y1:        | 2 | 3,0117 | 0,441 | -0,61  |
| 14 | O60841 IF2P_HUMAN   | K.VEM*Y#SGSDDDDFNKLPK.K           | Y134:      | 3 | 3,6053 | 0,387 | 0,421  |
| 14 | P07355 ANXA2_HUMAN  | K.LSLEGDHSTPPSAY#GSVK.A           | Y24:       | 2 | 3,1467 | 0,529 | 0,254  |
| 14 | Q8WXH0 SYNE2_HUMAN  | R.RGSM*SY#LAAVEEEVEESSVK.S        | Y4111:     | 3 | 3,7104 | 0,208 | -0,478 |
| 14 | Q14160 LAP4_HUMAN   | K.GSTPY#KGDDEGIFISR.V             | Y751:      | 3 | 3,48   | 0,298 | 0,301  |
| 14 | Q8ND76 CCNY_HUMAN   | R.KY#SSCSTIFLDDSTVSPNLK.Y         | Y98:       | 3 | 4,0587 | 0,404 | -0,074 |
| 14 | P62633 CNBP_HUMAN   | K.DCDLQEDACYNCGR.G                |            | 2 | 5,2566 | 0,556 | 0,206  |
| 14 | Q8N1F7 NUP93_HUMAN  | K.LNQVCFDDDGTSPPQDR.L             |            | 2 | 5,2073 | 0,535 | 0,375  |
| 14 | Q9Y4W6 AFG32_HUMAN  | R.NLETLQQELGIEGENR.V              |            | 2 | 4,9816 | 0,447 | -0,331 |
| 14 | P21796 VDAC1_HUMAN  | K.SENGLLEFTSSGSANTETTK.V          |            | 2 | 4,6631 | 0,582 | 0,249  |
| 14 | P18754 RCC1_HUMAN   | K.SGQVYFSGCNDEGALGR.D             |            | 2 | 4,6066 | 0,495 | -0,672 |
| 14 | Q9Y2Z0 SUGT1_HUMAN  | K.NYAAALETFTTEGQK.L               |            | 2 | 4,6016 | 0,549 | -0,474 |
| 14 | A4D186 A4D186_HUMAN | K.IQVLQQADDAEER.A                 |            | 2 | 4,5862 | 0,487 | 0,446  |
| 14 | Q8NE71 ABCF1_HUMAN  | R.LQGQLEQGDDTAAER.L               |            | 2 | 4,5852 | 0,517 | -0,673 |
| 14 | P63104 1433Z_HUMAN  | K.SVTEQGAELSNEER.N                |            | 2 | 4,4605 | 0,441 | -0,236 |
| 14 | Q04837 SSB_HUMAN    | R.SGDSEVYQLGDVSQK.T               |            | 2 | 4,4194 | 0,534 | 0,454  |

|    |                    |                        |   |        |       |        |
|----|--------------------|------------------------|---|--------|-------|--------|
| 14 | O75396 SC22B_HUMAN | R.NLGSINTELQDVQR.I     | 3 | 4,4113 | 0,357 | 0      |
| 14 | P54920 SNAA_HUMAN  | K.NSQSFFSGLFGGSSK.I    | 2 | 4,3818 | 0,622 | -0,551 |
| 14 | P35579 MYH9_HUMAN  | K.IAQLEEQLDNETK.E      | 2 | 4,3745 | 0,45  | 0,239  |
| 14 | O14737 PDCD5_HUMAN | R.NSILAQVLDQSAR.A      | 3 | 4,3136 | 0,348 | 0,065  |
| 14 | Q8NE71 ABCF1_HUMAN | K.NQDEESQEAPPELLK.R    | 2 | 4,2967 | 0,3   | 0,599  |
| 14 | P05787 K2C8_HUMAN  | R.ASLEAAIADAEQR.G      | 3 | 4,2204 | 0,428 | -0,816 |
| 14 | P78527 PRKDC_HUMAN | K.NLSSNEAISLEEIR.I     | 2 | 4,2084 | 0,454 | -0,31  |
| 14 | O14737 PDCD5_HUMAN | R.NSILAQVLDQSAR.A      | 2 | 4,1816 | 0,532 | -0,259 |
| 14 | P67936 TPM4_HUMAN  | K.IQALQQQADEAEDR.A     | 2 | 4,1438 | 0,573 | 0      |
| 14 | P61981 1433G_HUMAN | K.NVTELNEPLSNEER.N     | 2 | 4,1111 | 0,513 | 0,371  |
| 14 | Q8N1F7 NUP93_HUMAN | K.DNALLSAIEESR.K       | 2 | 4,0738 | 0,499 | -0,37  |
| 14 | Q14789 GOGB1_HUMAN | K.DQLIQEAAAENNK.L      | 2 | 3,9982 | 0,336 | 0,253  |
| 14 | P06744 G6PI_HUMAN  | R.FAAYFQQGDM*ESNGK.Y   | 2 | 3,9559 | 0,45  | 0,143  |
| 14 | P05386 RLA1_HUMAN  | K.KEESEESDDDM*GFGLFD.- | 2 | 3,9281 | 0,582 | -0,434 |
| 14 | Q9NZT2 OGFR_HUMAN  | R.DADAGDEDEESEPR.A     | 2 | 3,8927 | 0,53  | -0,44  |
| 14 | Q12792 TWF1_HUMAN  | K.INEVQTDVGVDTK.H      | 2 | 3,8866 | 0,467 | 0      |
| 14 | Q6P158 DHX57_HUMAN | R.DLQEQDADAGSER.G      | 2 | 3,8797 | 0,537 | -0,511 |
| 14 | P10619 PPGB_HUMAN  | K.YGDSGEQIAGFVK.E      | 2 | 3,8722 | 0,506 | 0      |
| 14 | O75396 SC22B_HUMAN | R.NLGSINTELQDVQR.I     | 2 | 3,8618 | 0,509 | 0,308  |
| 14 | P37802 TAGL2_HUMAN | K.QM*EQISQFLQAAER.Y    | 3 | 3,8607 | 0,27  | -0,108 |
| 14 | Q99832 TCPH_HUMAN  | R.CQVFEETQIGGER.Y      | 2 | 3,859  | 0,432 | 0,079  |
| 14 | P05023 AT1A1_HUMAN | R.SPFTNENPLETR.N       | 2 | 3,8579 | 0,491 | 0,401  |
| 14 | P02786 TFR1_HUMAN  | K.LAVDEEENADNNTK.A     | 2 | 3,8557 | 0,558 | -0,391 |
| 14 | Q15427 SF3B4_HUMAN | R.NQDATVYVGGGLDEK.V    | 2 | 3,8549 | 0,516 | 0,323  |
| 14 | P05387 RLA2_HUMAN  | K.NIEDVIAQGIGK.L       | 3 | 3,8366 | 0,262 | 0,291  |
| 14 | P07737 PROF1_HUMAN | R.SSFYVNGLTGGQK.C      | 2 | 3,8264 | 0,47  | -0,166 |
| 14 | Q9UQE7 SMC3_HUMAN  | K.DLQDELAGNSEQR.K      | 2 | 3,812  | 0,494 | 0,248  |
| 14 | P62241 RS8_HUMAN   | K.ISSLLEEQFQQGK.L      | 2 | 3,81   | 0,522 | 0,486  |
| 14 | P36957 ODO2_HUMAN  | K.TPAFAESVTEGDVR.W     | 2 | 3,8023 | 0,534 | 0      |
| 14 | Q8IUD2 RB6I2_HUMAN | R.DLNQLFQQDSSSR.T      | 2 | 3,7941 | 0,397 | -0,159 |
| 14 | P12814 ACTN1_HUMAN | K.AGTQIENIEEDFR.D      | 2 | 3,7919 | 0,426 | -0,481 |
| 14 | P23526 SAHH_HUMAN  | K.VPAINVNDVTK.S        | 2 | 3,7833 | 0,577 | -0,388 |
| 14 | P31942 HNRH3_HUMAN | R.DGM*DNQGGYGSVGR.M    | 2 | 3,7735 | 0,557 | -0,854 |

|    |                    |                        |   |        |       |        |
|----|--------------------|------------------------|---|--------|-------|--------|
| 14 | Q9NQP4 PFD4_HUMAN  | K.NLQEEIDALESR.V       | 2 | 3,766  | 0,446 | -0,431 |
| 14 | O14908 GIPC1_HUMAN | R.NPDELAELDER.L        | 2 | 3,766  | 0,537 | 0,089  |
| 14 | P56192 SYMC_HUMAN  | K.NNSELLNNLGNFINR.A    | 2 | 3,7617 | 0,479 | -0,141 |
| 14 | P35606 COPB2_HUMAN | K.DNNQFASASLDR.T       | 2 | 3,7566 | 0,545 | 0      |
| 14 | P05387 RLA2_HUMAN  | K.NIEDVIAQGIGK.L       | 2 | 3,7546 | 0,563 | -0,485 |
| 14 | P35579 MYH9_HUMAN  | R.ELEDATETADAM*NR.E    | 2 | 3,7492 | 0,621 | -0,848 |
| 14 | P48307 TFPI2_HUMAN | R.LQVSVDQCEGSTEK.Y     | 2 | 3,7365 | 0,551 | 0,648  |
| 14 | P48444 COPD_HUMAN  | K.NSNILEDLETLR.L       | 2 | 3,7334 | 0,517 | -0,517 |
| 14 | Q06323 PSME1_HUMAN | R.IEDGNNFGVAVQEK.V     | 2 | 3,7264 | 0,467 | 0,241  |
| 14 | Q99714 HCD2_HUMAN  | R.LVAGEM*GQNEPDQGGQR.G | 2 | 3,7226 | 0,418 | -0,677 |
| 14 | Q00341 VIGLN_HUMAN | K.DM*NQFGEQAK.I        | 2 | 3,7117 | 0,521 | 0,089  |
| 14 | Q13885 TBB2A_HUMAN | K.EVDEQM*LNQNK.N       | 2 | 3,7108 | 0,325 | -0,25  |
| 14 | P62306 RUXF_HUMAN  | R.GVEEEEEDGEM*RE.-     | 2 | 3,7102 | 0,514 | -0,707 |
| 14 | P51648 AL3A2_HUMAN | K.NVDEAINFINER.E       | 2 | 3,7099 | 0,502 | -0,51  |
| 14 | P19105 MLRM_HUMAN  | R.FTDEEVDELYR.E        | 2 | 3,7095 | 0,436 | -0,259 |
| 14 | P11021 GRP78_HUMAN | K.NQLTSNPENTVFDK.R     | 2 | 3,6972 | 0,446 | 0,509  |
| 14 | Q9BPX5 ARP5L_HUMAN | K.SSEIEQAVQSLDR.N      | 2 | 3,695  | 0,436 | -0,25  |
| 14 | Q9BVJ6 UT14A_HUMAN | K.DSGSQEVLSEL.R.V      | 2 | 3,6875 | 0,382 | 0      |
| 14 | P05787 K2C8_HUMAN  | R.ASLEAAIADAEQR.G      | 2 | 3,6685 | 0,43  | -0,454 |
| 14 | P06454 PTMA_HUMAN  | R.AAEDDEDVDTK.K        | 2 | 3,6321 | 0,608 | -0,424 |
| 14 | P05455 LA_HUMAN    | K.IIEDQQESLNK.W        | 2 | 3,6276 | 0,302 | -0,741 |
| 14 | Q14566 MCM6_HUMAN  | R.VSGVDGYETEGIR.G      | 2 | 3,6273 | 0,479 | 0      |
| 14 | Q9BT73 PSMG3_HUMAN | K.NLVAFVSQEAGNR.A      | 3 | 3,6255 | 0,338 | 0,13   |
| 14 | Q12931 TRAP1_HUMAN | R.ELISNASDALEK.L       | 2 | 3,6175 | 0,451 | 0,284  |
| 14 | P07910 HNRPC_HUMAN | K.GFAFVQYVNER.N        | 2 | 3,6049 | 0,53  | 0,092  |
| 14 | P04075 ALDOA_HUMAN | K.GILAADESTGSIK.R      | 2 | 3,6039 | 0,582 | 0,183  |
| 14 | P63244 GBLP_HUMAN  | K.DVLSVAFSSDNR.Q       | 2 | 3,5989 | 0,539 | -0,186 |
| 14 | P12081 SYHC_HUMAN  | K.ASAELIEEEVAK.L       | 2 | 3,5982 | 0,413 | 0,379  |
| 14 | P05783 K1C18_HUMAN | R.QAQEYEALLNIK.V       | 3 | 3,5956 | 0,235 | -0,064 |
| 14 | P61289 PSME3_HUMAN | R.LDECEEFQGTK.V        | 2 | 3,5888 | 0,484 | 0,086  |
| 14 | O00232 PSD12_HUMAN | K.M*EVDYSATVDQR.L      | 2 | 3,5885 | 0,446 | 0,427  |
| 14 | O76021 RL1D1_HUMAN | R.SDSEDICLFTK.D        | 2 | 3,5666 | 0,407 | 0      |
| 14 | Q70UQ0 KIP_HUMAN   | K.NIGDLLSSIDR.T        | 2 | 3,5573 | 0,547 | 0      |

|    |                    |                        |   |        |       |        |
|----|--------------------|------------------------|---|--------|-------|--------|
| 14 | Q9NTJ3 SMC4_HUMAN  | K.NTNAAEESLPEIQK.E     | 2 | 3,5506 | 0,353 | 0,316  |
| 14 | Q9NP72 RAB18_HUMAN | R.NDIVNM*LVGNK.I       | 2 | 3,5447 | 0,455 | 0,198  |
| 14 | Q99714 HCD2_HUMAN  | R.LVAGEM*GQNEPDQGGQR.G | 3 | 3,5437 | 0,343 | -0,203 |
| 14 | P07737 PROF1_HUMAN | R.DSLLQDGEFSM*DLR.T    | 2 | 3,5417 | 0,489 | -0,594 |
| 14 | P78318 IGBP1_HUMAN | R.NEDLEEIASTDLK.Y      | 2 | 3,5406 | 0,438 | -0,165 |
| 14 | P49411 EFTU_HUMAN  | R.AEAGDNLGALVR.G       | 2 | 3,5392 | 0,221 | 0      |
| 14 | O95202 LETM1_HUMAN | K.VAEVEGEQVDNK.A       | 2 | 3,5296 | 0,439 | -0,185 |
| 14 | O00571 DDX3X_HUMAN | R.DLM*ACAQTGSGK.T      | 2 | 3,5294 | 0,513 | -0,194 |
| 14 | Q02952 AKA12_HUMAN | K.SDEVDEQVACQEVK.V     | 2 | 3,5234 | 0,364 | 0,447  |
| 14 | P11142 HSP7C_HUMAN | K.NSLESYAFNM*K.A       | 2 | 3,5224 | 0,434 | 0,092  |
| 14 | Q04837 SSB_HUMAN   | R.SGDSEVYQLGDVSQK.T    | 3 | 3,5207 | 0,372 | 0,227  |
| 14 | P50995 ANX11_HUMAN | R.DAQELYAAGENR.L       | 2 | 3,52   | 0,395 | -0,274 |
| 14 | P30040 ERP29_HUMAN | K.SLNILTAFAQK.K        | 2 | 3,5128 | 0,271 | -0,322 |
| 14 | Q9BQA1 MEP50_HUMAN | K.DSVFLSCSEDNR.I       | 2 | 3,4855 | 0,347 | 0,512  |
| 14 | Q9UBQ0 VPS29_HUMAN | R.GDFDENLNYPEQK.V      | 2 | 3,4827 | 0,346 | 0,544  |
| 14 | O94925 GLSK_HUMAN  | K.DGPGETDAFGNSEGK.E    | 2 | 3,4785 | 0,578 | -0,577 |
| 14 | P31947 1433S_HUMAN | R.YLAEVATGDDK.K        | 2 | 3,4702 | 0,443 | 0,206  |
| 14 | Q9UQ80 PA2G4_HUMAN | K.SEM*EVQDAELK.A       | 2 | 3,4683 | 0,435 | -0,565 |
| 14 | P06493 CDC2_HUMAN  | K.NLDENGLDLSK.M        | 2 | 3,4547 | 0,41  | -0,275 |
| 14 | Q9NVP1 DDX18_HUMAN | K.NLQCLVIDEADR.I       | 2 | 3,454  | 0,342 | -0,169 |
| 14 | P52701 MSH6_HUMAN  | R.ENEQSLLEYLEK.Q       | 2 | 3,4368 | 0,333 | -0,49  |
| 14 | O75223 CG024_HUMAN | K.VSEEIEDIHK.K         | 2 | 3,4275 | 0,2   | -0,208 |
| 14 | Q96FW1 OTUB1_HUMAN | K.EYAEDDNIYQQK.I       | 2 | 3,4252 | 0,436 | 0,161  |
| 14 | P29692 EF1D_HUMAN  | R.GVVQELQQAISK.L       | 2 | 3,4199 | 0,39  | -0,469 |
| 14 | Q9H2G2 SLK_HUMAN   | R.DLQLQCEANVR.E        | 2 | 3,4107 | 0,381 | 0,272  |
| 14 | Q02952 AKA12_HUMAN | K.TEGTQEADQYADEK.T     | 2 | 3,4068 | 0,4   | -0,308 |
| 14 | Q06323 PSME1_HUMAN | K.TENLLGSYFPK.K        | 2 | 3,3995 | 0,346 | -0,288 |
| 14 | P04083 ANXA1_HUMAN | K.TPAQFDADEL.R.A       | 2 | 3,3988 | 0,46  | 0,193  |
| 14 | Q10567 AP1B1_HUMAN | R.DCPLNAEAASSK.L       | 2 | 3,392  | 0,421 | -0,193 |
| 14 | P17812 PYRG1_HUMAN | K.LYGDADYLEER.H        | 2 | 3,3858 | 0,504 | 0,182  |
| 14 | Q9BTE3 CJ119_HUMAN | R.SYEDDDDM*DLQPNK.Q    | 2 | 3,3829 | 0,41  | -0,646 |
| 14 | P30041 PRDX6_HUMAN | K.DINAYNCEEPTEK.L      | 2 | 3,3769 | 0,426 | -0,308 |
| 14 | P04792 HSPB1_HUMAN | R.LFDQAFGLPR.L         | 2 | 3,3742 | 0,47  | -0,21  |



|    |                    |                     |   |        |       |        |
|----|--------------------|---------------------|---|--------|-------|--------|
| 14 | Q99623 PHB2_HUMAN  | K.IVQAEGEAEAAK.M    | 2 | 3,3738 | 0,537 | -0,301 |
| 14 | P23396 RS3_HUMAN   | R.ELAEDGYSGVEVR.V   | 2 | 3,3737 | 0,528 | 0,086  |
| 14 | Q92598 HS105_HUMAN | R.AGGIETIANEFSDR.C  | 2 | 3,3712 | 0,576 | -0,66  |
| 14 | P24534 EF1B_HUMAN  | K.LQIQCVVEDDK.V     | 2 | 3,3673 | 0,344 | 0,815  |
| 14 | P25705 ATPA_HUMAN  | K.TGTAEM*SSILEER.I  | 2 | 3,3669 | 0,458 | 0,339  |
| 14 | Q9Y310 CV028_HUMAN | R.SYNDELQFLEK.I     | 2 | 3,3657 | 0,321 | -0,176 |
| 14 | P34932 HSP74_HUMAN | R.AGGIETIANEYSDR.C  | 2 | 3,362  | 0,46  | 0,489  |
| 14 | P30049 ATPD_HUMAN  | K.AQAELVGTADEATR.A  | 2 | 3,3544 | 0,524 | 0      |
| 14 | P61981 1433G_HUMAN | K.NVTELNEPLSNEER.N  | 3 | 3,3534 | 0,407 | 0,334  |
| 14 | Q13616 CUL1_HUMAN  | K.ESFESQFLADTER.F   | 2 | 3,3527 | 0,553 | 0,313  |
| 14 | P14314 GLU2B_HUMAN | K.SLEDQVEM*LR.T     | 2 | 3,3523 | 0,307 | -0,197 |
| 14 | P55060 XPO2_HUMAN  | K.SQICDAAALYAQK.Y   | 2 | 3,3471 | 0,448 | 0,576  |
| 14 | P78527 PRKDC_HUMAN | R.SQGCSEQVLTVLK.T   | 2 | 3,3463 | 0,494 | -0,084 |
| 14 | P05023 AT1A1_HUMAN | K.VDNSSLTGESEPQTR.S | 2 | 3,3387 | 0,395 | -0,527 |
| 14 | P35637 FUS_HUMAN   | K.GEATVSFDDPPSAK.A  | 2 | 3,3385 | 0,537 | 0,086  |
| 14 | P26640 SYVC_HUMAN  | K.VPLEVQEADK.L      | 2 | 3,3372 | 0,316 | 0,184  |
| 14 | Q14444 CAPR1_HUMAN | K.YQEVTTNNLEFAK.E   | 2 | 3,3349 | 0,382 | 0,251  |
| 14 | P32969 RL9_HUMAN   | K.FLDGIYVSEK.G      | 2 | 3,3338 | 0,341 | -0,104 |
| 14 | Q16181 SEPT7_HUMAN | K.LAAVTYNGVDNNK.N   | 2 | 3,3289 | 0,458 | 0      |
| 14 | P46459 NSF_HUMAN   | K.SQLSCVVDDIER.L    | 2 | 3,3285 | 0,477 | -0,401 |
| 14 | P22314 UBA1_HUMAN  | K.NGSEADIDEGLYSR.Q  | 2 | 3,3181 | 0,354 | 0,4    |
| 14 | P11586 C1TC_HUMAN  | R.DDSNLYINVK.L      | 2 | 3,3174 | 0,433 | -1,033 |
| 14 | P11142 HSP7C_HUMAN | K.NQVAM*NPTNTVFDK.R | 2 | 3,3019 | 0,385 | 0,146  |
| 14 | P05787 K2C8_HUMAN  | K.YEELQSLAGK.H      | 2 | 3,2974 | 0,096 | 0,107  |
| 14 | P04843 RPN1_HUMAN  | R.SEDLLDYGPF.R      | 2 | 3,2972 | 0,393 | -0,186 |
| 14 | P10599 THIO_HUMAN  | K.TAFQEALDAAGDK.L   | 2 | 3,2969 | 0,43  | 0,274  |
| 14 | P09493 TPM1_HUMAN  | K.ATDAEADVASLNR.R   | 2 | 3,2867 | 0,299 | 0,275  |
| 14 | P09661 RU2A_HUMAN  | K.NAIANASTLAEVER.L  | 2 | 3,2804 | 0,546 | -0,167 |
| 14 | P62805 H4_HUMAN    | R.ISGLIYEETR.G      | 2 | 3,2789 | 0,383 | 0      |
| 14 | Q15185 TEBP_HUMAN  | K.LTFSCGGSDNFK.H    | 2 | 3,2781 | 0,594 | 0,084  |
| 14 | P49792 RBP2_HUMAN  | K.TGEEDEEEFFCNR.A   | 2 | 3,2761 | 0,425 | 0,22   |
| 14 | Q86UP2 KTN1_HUMAN  | K.SVLAETEGILQK.L    | 2 | 3,2718 | 0,369 | -0,189 |
| 14 | P62269 RS18_HUMAN  | K.YSQVLANGLDNK.L    | 2 | 3,2715 | 0,461 | 0,185  |

|    |                    |                                   |   |        |       |        |
|----|--------------------|-----------------------------------|---|--------|-------|--------|
| 14 | Q8N163 K1967_HUMAN | R.DDGEEEFAGAK.L                   | 2 | 3,2697 | 0,434 | 0,104  |
| 14 | Q14980 NUMA1_HUMAN | R.AALM*ESQGQQQEER.G               | 2 | 3,2674 | 0,401 | -0,151 |
| 14 | P29692 EF1D_HUMAN  | R.GVVQELQQAISK.L                  | 3 | 3,2633 | 0,256 | 0,281  |
| 14 | Q03252 LMNB2_HUMAN | K.ALYESELADAR.R                   | 2 | 3,2624 | 0,442 | 0,296  |
| 14 | P30101 PDIA3_HUMAN | R.DGEEAGAYDGPR.T                  | 2 | 3,2555 | 0,448 | -0,197 |
| 14 | Q00653 NFKB2_HUMAN | R.GGDEVYLLCDK.V                   | 2 | 3,2546 | 0,465 | 0,096  |
| 14 | O75306 NDUS2_HUMAN | R.LDELEELLNLR.I                   | 2 | 3,2473 | 0,33  | -0,502 |
| 14 | P35232 PHB_HUMAN   | R.IFTSIGEDYDER.V                  | 2 | 3,2323 | 0,493 | 0,253  |
| 14 | P48643 TCPE_HUMAN  | K.LDVTSVEDYK.A                    | 2 | 3,227  | 0,515 | 0      |
| 14 | P37802 TAGL2_HUMAN | K.QM*EQISQFLQAAER.Y               | 2 | 3,2262 | 0,562 | 0,144  |
| 14 | Q92804 RBP56_HUMAN | K.QSSYSQQPYNNQGGQQNM*ESSGSQGGGR.A | 3 | 3,2233 | 0,41  | -0,306 |
| 14 | Q00610 CLH1_HUMAN  | R.NNLAGEELFAR.K                   | 2 | 3,2195 | 0,436 | -0,28  |
| 14 | P55884 EIF3B_HUMAN | K.ITNDFYPEEDGK.T                  | 2 | 3,2169 | 0,331 | 0,342  |
| 14 | P21333 FLNA_HUMAN  | R.IANLQTDLSGDLR.L                 | 2 | 3,2125 | 0,458 | -0,689 |
| 14 | P11388 TOP2A_HUMAN | K.ELILFSNSDNER.S                  | 2 | 3,2049 | 0,354 | -0,594 |
| 14 | P33176 KINH_HUMAN  | R.DQDNM*QAELNR.L                  | 2 | 3,2026 | 0,273 | 0,271  |
| 14 | P19338 NUCL_HUMAN  | K.GFGFVDFNSEDAK.A                 | 2 | 3,197  | 0,476 | -0,625 |
| 14 | P35579 MYH9_HUMAN  | R.ALEQQVEEM*K.T                   | 2 | 3,1968 | 0,345 | -0,3   |
| 14 | P62851 RS25_HUMAN  | K.LNNLVLFDK.A                     | 2 | 3,1908 | 0,354 | -0,227 |
| 14 | Q3SYE8 HMG4L_HUMAN | K.STNPGISIGDVAK.K                 | 2 | 3,1897 | 0,48  | 0,194  |
| 14 | O43464 HTRA2_HUMAN | R.SQYNFIADVVEK.T                  | 2 | 3,1875 | 0,45  | -0,173 |
| 14 | Q92598 HS105_HUMAN | K.NAVEEYVYEFK.D                   | 3 | 3,1868 | 0,404 | 0,193  |
| 14 | P23528 COF1_HUMAN  | R.YALYDATYETK.E                   | 2 | 3,181  | 0,53  | 0,365  |
| 14 | P27348 1433T_HUMAN | K.YLIANATNPESK.V                  | 2 | 3,1718 | 0,429 | 0,185  |
| 14 | P54136 SYRC_HUMAN  | R.LNDYIFSFDK.M                    | 2 | 3,1629 | 0,45  | -0,29  |
| 14 | P51570 GALK1_HUMAN | R.EVQLEEEAAR.D                    | 2 | 3,1627 | 0,395 | 0,095  |
| 14 | O75347 TBCA_HUMAN  | R.LEAAYLDLQR.I                    | 2 | 3,1604 | 0,429 | -0,102 |
| 14 | Q96HC4 PDLI5_HUMAN | K.GALYCELCYEK.F                   | 2 | 3,1601 | 0,405 | 0,347  |
| 14 | Q9NSE4 SYIM_HUMAN  | K.SGDLYVLAADK.V                   | 2 | 3,1571 | 0,429 | -0,212 |
| 14 | Q14165 K0152_HUMAN | R.SNPEDQILYQTER.Y                 | 2 | 3,1495 | 0,484 | 0,153  |
| 14 | P08670 VIME_HUMAN  | R.LGDLYEEEM*R.E                   | 2 | 3,1474 | 0,462 | 0,192  |
| 14 | O94906 PRP6_HUMAN  | K.LEEANGNTQM*VEK.I                | 2 | 3,1469 | 0,395 | -0,33  |
| 14 | P12270 TPR_HUMAN   | R.NLDVQLLDTK.R                    | 2 | 3,144  | 0,362 | -0,211 |

|    |                    |                         |   |        |       |        |
|----|--------------------|-------------------------|---|--------|-------|--------|
| 14 | O00139 KIF2A_HUMAN | K.FSLIDLAGNER.G         | 2 | 3,1407 | 0,402 | -0,296 |
| 14 | Q9Y5M8 SRPRB_HUMAN | R.GDVGSADIQDLEK.W       | 2 | 3,1375 | 0,464 | -0,181 |
| 14 | P34931 HS71L_HUMAN | K.NALESYAFNM*K.S        | 2 | 3,1367 | 0,471 | 0,094  |
| 14 | Q92841 DDX17_HUMAN | R.DM*VGIAQTGSGK.T       | 2 | 3,1311 | 0,469 | -0,207 |
| 14 | Q9NZM1 MYOF_HUMAN  | K.VGETIIDLENR.F         | 2 | 3,1287 | 0,423 | 0      |
| 14 | P41252 SYIC_HUMAN  | K.QLSSEELEQFQK.T        | 2 | 3,1214 | 0,379 | -0,499 |
| 14 | Q13547 HDAC1_HUMAN | R.DGIDDESYEAIKFPVM*SK.V | 3 | 3,1193 | 0,33  | -0,089 |
| 14 | P38646 GRP75_HUMAN | K.VQQTVQDLFGR.A         | 2 | 3,1175 | 0,339 | 0,284  |
| 14 | P13639 EF2_HUMAN   | R.ETVSEESNVLCLSK.S      | 2 | 3,1123 | 0,13  | -1,3   |
| 14 | P21333 FLNA_HUMAN  | R.ANLPQSFQVDTSK.A       | 2 | 3,1119 | 0,524 | -0,085 |
| 14 | O75396 SC22B_HUMAN | R.DLQQYQSQAK.Q          | 2 | 3,1118 | 0,392 | 0      |
| 14 | Q96A72 MGN2_HUMAN  | K.IGSLIDVNQSK.D         | 2 | 3,1114 | 0,304 | 0,208  |
| 14 | Q71UI9 H2AV_HUMAN  | R.GDEELDSLK.A           | 2 | 3,0961 | 0,312 | 0,218  |
| 14 | P05783 K1C18_HUMAN | R.QAQEYEALLNIK.V        | 2 | 3,0912 | 0,394 | -0,43  |
| 14 | P51858 HDGF_HUMAN  | R.IDEM*PEAAVK.S         | 2 | 3,087  | 0,373 | -0,545 |
| 14 | P07951 TPM2_HUMAN  | K.QLEEQQALQK.K          | 2 | 3,0864 | 0,266 | -0,182 |
| 14 | Q9BVJ7 DUS23_HUMAN | R.GLAAGDAIAEIR.R        | 2 | 3,0845 | 0,355 | 0,422  |
| 14 | P80723 BASP_HUMAN  | K.ESEPQAAAEPAEAK.E      | 2 | 3,0796 | 0,37  | -0,171 |
| 14 | Q15084 PDIA6_HUMAN | K.GSFSEQGINEFLR.E       | 2 | 3,0778 | 0,431 | -0,247 |
| 14 | O43242 PSMD3_HUMAN | K.FNQVLDQFGEK.F         | 2 | 3,0737 | 0,373 | 0      |
| 14 | P05387 RLA2_HUMAN  | K.ILDSVGIEADDDR.L       | 2 | 3,0727 | 0,443 | 0      |
| 14 | Q96GQ7 DDX27_HUMAN | K.DICACAATGTGK.T        | 2 | 3,0702 | 0,602 | 0,199  |
| 14 | P30101 PDIA3_HUMAN | R.FLQDYFDGNLK.R         | 2 | 3,0702 | 0,255 | 0,179  |
| 14 | P10809 CH60_HUMAN  | K.NAGVEGSLIVEK.I        | 2 | 3,0674 | 0,48  | 0,201  |
| 14 | O43399 TPD54_HUMAN | R.LGLSTLGELK.Q          | 2 | 3,0615 | 0,462 | 0      |
| 14 | Q9BPX5 ARP5L_HUMAN | K.SSEIEQAVQSLDR.N       | 3 | 3,0601 | 0,19  | 0,063  |
| 14 | Q6NVV1 R13AX_HUMAN | K.YQAVTATLEEK.R         | 2 | 3,0601 | 0,399 | 0,097  |
| 14 | O15144 ARPC2_HUMAN | R.DDETM*YVESK.K         | 2 | 3,0599 | 0,367 | -0,099 |
| 14 | O75694 NU155_HUMAN | K.ELSDSVTLSSDR.M        | 2 | 3,0588 | 0,551 | 0,262  |
| 14 | P05388 RLA0_HUMAN  | K.CFIVGADNVGSK.Q        | 2 | 3,0568 | 0,393 | -0,867 |
| 14 | P04843 RPN1_HUMAN  | K.NIEIDSPYEISR.A        | 2 | 3,0562 | 0,235 | 0,595  |
| 14 | Q9HD33 RM47_HUMAN  | K.GLEEFFDDPK.N          | 2 | 3,0545 | 0,484 | -0,102 |
| 14 | O75821 EIF3G_HUMAN | K.ELAEQLGLSTGEK.E       | 2 | 3,053  | 0,413 | 0,177  |

|    |                    |                     |   |        |       |        |
|----|--------------------|---------------------|---|--------|-------|--------|
| 14 | P54652 HSP72_HUMAN | R.FEELNADLFR.G      | 2 | 3,0417 | 0,4   | -0,389 |
| 14 | O95232 CROP_HUMAN  | R.YLQSLLAEVER.R     | 2 | 3,0409 | 0,382 | -0,277 |
| 14 | Q9Y388 RBMX2_HUMAN | K.DSEEIDDVTR.Q      | 2 | 3,0407 | 0,303 | -0,103 |
| 14 | P11586 C1TC_HUMAN  | K.DVDGLTSINAGR.L    | 2 | 3,0388 | 0,417 | -0,1   |
| 14 | P11413 G6PD_HUMAN  | R.GGYFDEFGIIR.D     | 2 | 3,0333 | 0,306 | -0,383 |
| 14 | O95373 IPO7_HUMAN  | R.ETENDDLTNVIQK.M   | 2 | 3,0327 | 0,362 | 0,161  |
| 14 | P09493 TPM1_HUMAN  | R.IQLVEEELDR.A      | 2 | 3,0302 | 0,384 | -0,098 |
| 14 | Q9Y230 RUVB2_HUMAN | R.GLGLDDALEPR.Q     | 2 | 3,0281 | 0,35  | 0,211  |
| 14 | Q9UMS4 PRP19_HUMAN | K.TLQLDNNFEVK.S     | 2 | 3,0273 | 0,354 | 0      |
| 14 | O75152 ZC11A_HUMAN | K.TLEEILLER.A       | 2 | 3,0246 | 0,228 | -0,328 |
| 14 | P62424 RL7A_HUMAN  | K.NFGIGQDIQPK.R     | 2 | 3,0203 | 0,405 | 0,401  |
| 14 | Q15833 STXB2_HUMAN | K.DVM*EDAVEDR.L     | 2 | 3,0173 | 0,413 | -0,204 |
| 14 | P07900 HS90A_HUMAN | R.APFDLFENR.K       | 2 | 3,0021 | 0,492 | -0,33  |
| 14 | Q9Y240 CLC11_HUMAN | R.DAVQALQEAQGR.A    | 2 | 2,998  | 0,424 | 0,19   |
| 14 | O60506 HNRPQ_HUMAN | R.NLANTVTTEEILEK.A  | 2 | 2,995  | 0,221 | -0,579 |
| 14 | P61289 PSME3_HUMAN | K.SNQQQLVDIIEK.V    | 2 | 2,9933 | 0,282 | 0,19   |
| 14 | Q92598 HS105_HUMAN | K.NAVEEYVYEF.R.D    | 2 | 2,9914 | 0,433 | -0,172 |
| 14 | Q14677 EPN4_HUMAN  | K.ELVEFAQDDDR.L     | 2 | 2,9912 | 0,458 | 0      |
| 14 | Q05682 CALD1_HUMAN | R.YEIEETETVTK.S     | 2 | 2,9907 | 0,446 | -0,364 |
| 14 | P35268 RL22_HUMAN  | K.AGNLGGGVVTIER.S   | 2 | 2,9899 | 0,343 | -0,196 |
| 14 | Q99436 PSB7_HUMAN  | K.DGIVLGADTR.A      | 2 | 2,9858 | 0,385 | 0,12   |
| 14 | P20700 LMNB1_HUMAN | R.IESLSSQLSNLQK.E   | 2 | 2,9829 | 0,453 | 0,337  |
| 14 | P20618 PSB1_HUMAN  | K.DVFISAAER.D       | 2 | 2,9825 | 0,442 | 0,242  |
| 14 | O14579 COPE_HUMAN  | R.DSIVAELDR.E       | 2 | 2,9789 | 0,383 | 0,12   |
| 14 | O15144 ARPC2_HUMAN | K.DDDDVVIGK.V       | 2 | 2,9768 | 0,291 | 0,125  |
| 14 | Q9HDC9 APMAP_HUMAN | K.LENGEIETIAR.F     | 2 | 2,9741 | 0,388 | 0,588  |
| 14 | P33992 MCM5_HUMAN  | R.VLGIQVDTDGSGR.S   | 2 | 2,9694 | 0,462 | 0,648  |
| 14 | P22102 PUR2_HUMAN  | R.ENLISALEEAK.K     | 2 | 2,9627 | 0,423 | -0,301 |
| 14 | Q15393 SF3B3_HUMAN | K.DYIVVGSDSGR.I     | 2 | 2,961  | 0,409 | 0,104  |
| 14 | P61923 COPZ1_HUMAN | K.AILILDNDGDR.L     | 2 | 2,9608 | 0,402 | 0      |
| 14 | P49006 MRP_HUMAN   | R.GDVTAEAAAGASPAK.A | 2 | 2,9599 | 0,341 | -0,266 |
| 14 | P42704 LPPRC_HUMAN | K.GAYDIFLNAK.E      | 2 | 2,9535 | 0,43  | -0,219 |
| 14 | P22061 PIMT_HUMAN  | K.ELVDDSINNV.R.K    | 2 | 2,9473 | 0,432 | 0,383  |

|    |                     |                     |   |        |       |        |
|----|---------------------|---------------------|---|--------|-------|--------|
| 14 | O95793 STAU1_HUMAN  | K.NAAIAVLEELK.K     | 2 | 2,9465 | 0,383 | -0,313 |
| 14 | P62937 PPIA_HUMAN   | R.VSFELFADK.V       | 2 | 2,9395 | 0,423 | -0,462 |
| 14 | P09874 PARP1_HUMAN  | K.TLGDFAAEYAK.S     | 2 | 2,931  | 0,508 | 0      |
| 14 | Q09160 1A80_HUMAN   | R.AYLEGECVDGLR.R    | 2 | 2,9267 | 0,378 | 0,53   |
| 14 | P62736 ACTA_HUMAN   | K.DSYVGDEAQSK.R     | 2 | 2,9254 | 0,481 | -0,305 |
| 14 | Q02539 H11_HUMAN    | K.ALAAAGYDVEK.N     | 2 | 2,9229 | 0,51  | 0,11   |
| 14 | P13073 COX41_HUMAN  | K.SEDFSLPAYM*DR.R   | 2 | 2,9212 | 0,292 | 0,253  |
| 14 | Q99829 CPNE1_HUMAN  | R.FGIYDIDNK.T       | 2 | 2,9125 | 0,39  | 0,337  |
| 14 | P14625 ENPL_HUMAN   | R.LSLNIDPDAK.V      | 2 | 2,9112 | 0,458 | 0,225  |
| 14 | Q8NE71 ABCF1_HUMAN  | K.NLDFGIDM*DSR.I    | 2 | 2,9103 | 0,442 | -0,376 |
| 14 | P08195 4F2_HUMAN    | K.VAEDEAEAAAAAK.F   | 2 | 2,9094 | 0,528 | -0,098 |
| 14 | Q6P158 DHX57_HUMAN  | R.TAFEEVEEDLR.L     | 2 | 2,9067 | 0,419 | -0,547 |
| 14 | B2RCB9 B2RCB9_HUMAN | K.GIIDLIEER.A       | 2 | 2,9045 | 0,328 | -0,115 |
| 14 | Q05397 FAK1_HUMAN   | K.NLLDVIDQAR.L      | 2 | 2,9021 | 0,427 | -0,316 |
| 14 | Q075844 FACE1_HUMAN | K.DIQEDSGM*EPR.N    | 2 | 2,9008 | 0,343 | -0,094 |
| 14 | P49327 FAS_HUMAN    | R.DPSQQELPR.L       | 2 | 2,9007 | 0,307 | -0,114 |
| 14 | P41250 SYG_HUMAN    | K.TVNVVQFEPK.G      | 2 | 2,8991 | 0,393 | -0,196 |
| 14 | P28838 AMPL_HUMAN   | K.LFEASITGDR.V      | 2 | 2,8982 | 0,38  | -0,099 |
| 14 | P04083 ANXA1_HUMAN  | K.DITSDTSGDFR.N     | 2 | 2,8968 | 0,442 | 0,302  |
| 14 | Q00839 HNRPU_HUMAN  | K.YNILGTNTIM*DK.M   | 2 | 2,8962 | 0,258 | 0,262  |
| 14 | Q9UNZ2 NSF1C_HUMAN  | K.SPNELVDDLK.G      | 2 | 2,896  | 0,271 | -0,478 |
| 14 | Q13813 SPTA2_HUMAN  | K.DLTNVQNLQK.K      | 2 | 2,8928 | 0,332 | 0,104  |
| 14 | Q02790 FKBP4_HUMAN  | K.LQAFSAAIESCNK.A   | 2 | 2,8876 | 0,41  | 0,17   |
| 14 | Q9BX40 LS14B_HUMAN  | K.SFFDNISSELK.T     | 2 | 2,8869 | 0,441 | -0,19  |
| 14 | Q03252 LMNB2_HUMAN  | K.LELEQTYQAK.L      | 2 | 2,8865 | 0,264 | 0      |
| 14 | O75306 NDUS2_HUMAN  | R.LDELELLTNNR.I     | 3 | 2,8859 | 0,193 | 0      |
| 14 | P30043 BLVRB_HUMAN  | R.NDLSPTTVM*SEGAR.N | 2 | 2,8812 | 0,388 | -0,327 |
| 14 | Q01105 SET_HUMAN    | R.VEVTEFEDIK.S      | 2 | 2,8808 | 0,335 | -0,202 |
| 14 | P29374 ARI4A_HUMAN  | R.DNFLQQLYK.F       | 2 | 2,8747 | 0,313 | -0,313 |
| 14 | P10809 CH60_HUMAN   | K.VGEVIVTK.D        | 2 | 2,8739 | 0,336 | -0,144 |
| 14 | P27708 PYR1_HUMAN   | R.LSLDLLQR.L        | 2 | 2,8739 | 0,275 | -0,114 |
| 14 | P62851 RS25_HUMAN   | R.AALQELLSK.G       | 2 | 2,8644 | 0,245 | -0,063 |
| 14 | P78527 PRKDC_HUMAN  | R.NELEIPGQYDGR.G    | 2 | 2,8644 | 0,254 | 0,439  |

|    |                    |                     |   |        |       |        |
|----|--------------------|---------------------|---|--------|-------|--------|
| 14 | P61254 RL26_HUMAN  | K.DDEVQVVR.G        | 2 | 2,8635 | 0,297 | -0,064 |
| 14 | P80303 NUCB2_HUMAN | K.NEEDDM*VEM*EEER.L | 2 | 2,86   | 0,365 | -0,289 |
| 14 | Q16658 FSCN1_HUMAN | R.LSCFAQTVSPA EK.W  | 2 | 2,86   | 0,43  | 0,255  |
| 14 | Q99613 EIF3C_HUMAN | R.FEELTNLIR.T       | 2 | 2,8598 | 0,109 | -0,215 |
| 14 | O95373 IPO7_HUMAN  | K.QLQDIATLADQR.R    | 2 | 2,8596 | 0,318 | -0,445 |
| 14 | P61956 SUMO2_HUMAN | K.VAGQDGSVVQFK.I    | 2 | 2,857  | 0,467 | 0,099  |
| 14 | Q14671 PUM1_HUMAN  | K.DQYANYVVQK.M      | 2 | 2,8539 | 0,42  | 0,099  |
| 14 | O60506 HNRPQ_HUMAN | R.NLANTVTTEEILEK.A  | 3 | 2,8472 | 0,247 | -0,124 |
| 14 | Q14192 FHL2_HUMAN  | K.DNQNFVPCYEK.Q     | 2 | 2,8452 | 0,29  | 0,233  |
| 14 | Q06830 PRDX1_HUMAN | R.LVQAFQFTDK.H      | 2 | 2,844  | 0,413 | 0      |
| 14 | Q8WW12 PCNP_HUMAN  | R.DTPTSAGPNSFNK.G   | 2 | 2,8411 | 0,433 | -0,457 |
| 14 | P10809 CH60_HUMAN  | K.VGLQVVAVK.A       | 2 | 2,8386 | 0,272 | 0,067  |
| 14 | P46776 RL27A_HUMAN | R.NQSFCTVNLDK.L     | 2 | 2,8377 | 0,348 | 0,171  |
| 14 | P52701 MSH6_HUMAN  | K.FFIGQFSDDR.H      | 2 | 2,8362 | 0,215 | -0,099 |
| 14 | P50990 TCPO_HUMAN  | R.GSTDNLM*DDIER.A   | 2 | 2,8307 | 0,367 | 0,265  |
| 14 | Q13630 FCL_HUMAN   | K.DADLTDTAQTR.A     | 2 | 2,8256 | 0,491 | 0,101  |
| 14 | P55060 XPO2_HUMAN  | R.DLEGSIDTR.R       | 2 | 2,8232 | 0,421 | 0      |
| 14 | Q92499 DDX1_HUMAN  | R.ELAEQTLNLIK.Q     | 2 | 2,8229 | 0,363 | 0,575  |
| 14 | P49327 FAS_HUMAN   | K.ADEASELACPTPK.E   | 2 | 2,8215 | 0,366 | -0,176 |
| 14 | P52815 RM12_HUMAN  | K.NYIQGINLVQAK.K    | 2 | 2,8181 | 0,365 | -0,448 |
| 14 | P53621 COPA_HUMAN  | K.DADSQNPDAPEGK.R   | 2 | 2,8176 | 0,329 | -0,272 |
| 14 | Q15021 CND1_HUMAN  | R.GICEM*ELLDGK.Q    | 2 | 2,8169 | 0,37  | -0,191 |
| 14 | P51003 PAPOA_HUMAN | R.SDFFTSFYDK.L      | 2 | 2,8165 | 0,475 | -0,291 |
| 14 | P24752 THIL_HUMAN  | K.DGLTDVYNK.I       | 2 | 2,815  | 0,493 | 0,357  |
| 14 | P05787 K2C8_HUMAN  | K.DVDEAYM*NK.V      | 2 | 2,8104 | 0,425 | -0,222 |
| 14 | Q14980 NUMA1_HUMAN | K.LADDLSTLQEK.M     | 2 | 2,806  | 0,34  | 0,198  |
| 14 | Q09666 AHNK_HUMAN  | K.VDINAPDV DVR.G    | 2 | 2,805  | 0,286 | -0,402 |
| 14 | Q14566 MCM6_HUMAN  | K.ESEDFIVEQYK.H     | 2 | 2,7991 | 0,381 | 0,44   |
| 14 | P35250 RFC2_HUMAN  | K.DAM*LELNASNDR.G   | 2 | 2,7975 | 0,438 | -0,447 |
| 14 | P30041 PRDX6_HUMAN | K.LPFIIDDR.N        | 2 | 2,7966 | 0,344 | -0,225 |
| 14 | Q13310 PABP4_HUMAN | K.NFGEEVDDESLK.E    | 2 | 2,7951 | 0,426 | 0,795  |
| 14 | Q15149 PLEC1_HUMAN | R.SQVEEELFSVR.V     | 2 | 2,7947 | 0,386 | -0,092 |
| 14 | Q9UPN3 MACF1_HUMAN | R.DSVLFSVADR.L      | 2 | 2,7932 | 0,417 | 0      |

|    |                    |                     |   |        |       |        |
|----|--------------------|---------------------|---|--------|-------|--------|
| 14 | P11142 HSP7C_HUMAN | R.FDDAVVQSDM*K.H    | 2 | 2,7917 | 0,481 | -0,288 |
| 14 | P19338 NUCL_HUMAN  | K.EVFEDAAEIR.L      | 2 | 2,7881 | 0,312 | 0,207  |
| 14 | P61081 UBC12_HUMAN | K.DINELNLPK.T       | 2 | 2,7876 | 0,333 | 0,116  |
| 14 | P13639 EF2_HUMAN   | R.VFSGLVSTGLK.V     | 2 | 2,7865 | 0,399 | 0,22   |
| 14 | P52272 HNRPM_HUMAN | R.INEILSNALK.R      | 2 | 2,7852 | 0,231 | 0      |
| 14 | P35659 DEK_HUMAN   | K.NVGQFSGFPFEK.G    | 2 | 2,7827 | 0,333 | -0,36  |
| 14 | Q9Y2L1 RRP44_HUMAN | K.SLTANPELIDR.L     | 2 | 2,7813 | 0,29  | 0,099  |
| 14 | P35579 MYH9_HUMAN  | R.DELADEIANSSGK.G   | 2 | 2,7812 | 0,242 | -0,09  |
| 14 | Q13243 SFRS5_HUMAN | R.GFGFVEFEDPR.D     | 2 | 2,7796 | 0,432 | -0,469 |
| 14 | O00186 STXB3_HUMAN | K.DIM*EDAIDNR.L     | 2 | 2,7783 | 0,387 | 0      |
| 14 | O75717 WDHD1_HUMAN | R.VVDESDTENQEEK.A   | 2 | 2,772  | 0,452 | -0,443 |
| 14 | P52907 CAZA1_HUMAN | K.EASDPQPEEADGGLK.S | 2 | 2,7715 | 0,416 | 0,158  |
| 14 | P04632 CPNS1_HUMAN | R.SM*VAVM*DSDTTGK.L | 2 | 2,7678 | 0,4   | -0,266 |
| 14 | P45880 VDAC2_HUMAN | K.LTLSALVDGK.S      | 2 | 2,7585 | 0,439 | -0,12  |
| 14 | Q58FF7 H90B3_HUMAN | R.DNSTM*GYM*M*AK.K  | 2 | 2,7557 | 0,493 | -0,47  |
| 14 | P16401 H15_HUMAN   | K.ALAAGGYDVEK.N     | 2 | 2,7552 | 0,399 | 0      |
| 14 | P11586 C1TC_HUMAN  | K.TDTESELDLISR.L    | 2 | 2,7522 | 0,287 | 0,619  |
| 14 | Q99873 ANM1_HUMAN  | R.ATLYVTAIEDR.Q     | 2 | 2,7512 | 0,43  | 0,292  |
| 14 | Q9BXJ9 NARG1_HUMAN | R.LPLNFLSGEK.F      | 2 | 2,7488 | 0,311 | -0,109 |
| 14 | Q04864 REL_HUMAN   | R.GGDEIFLLCDK.V     | 2 | 2,7449 | 0,37  | -0,193 |
| 14 | P49327 FAS_HUMAN   | R.AALQEELQLCK.G     | 2 | 2,741  | 0,363 | 0,375  |
| 14 | O15212 PFD6_HUMAN  | R.ETLAQLQQEFQR.A    | 2 | 2,7401 | 0,407 | -0,9   |
| 14 | P26038 MOES_HUMAN  | K.AQM*VQEDLEK.T     | 2 | 2,7374 | 0,265 | -0,505 |
| 14 | P42704 LPPRC_HUMAN | K.GDVENIEVVQK.M     | 2 | 2,737  | 0,4   | 0,298  |
| 14 | Q9NVI1 FANCI_HUMAN | K.SELEDFELDK.S      | 2 | 2,7348 | 0,367 | 0,1    |
| 14 | O00170 AIP_HUMAN   | R.GELPDFQDGTK.A     | 2 | 2,734  | 0,4   | 0      |
| 14 | O75821 EIF3G_HUMAN | K.EDLNCQEEEDPM*NK.L | 2 | 2,7315 | 0,325 | -0,345 |
| 14 | Q8TC07 TBC15_HUMAN | K.IDVEDILCK.A       | 2 | 2,7308 | 0,316 | -0,221 |
| 14 | P08865 RSSA_HUMAN  | R.YVDIAIPCNNK.G     | 2 | 2,7303 | 0,421 | 0,187  |
| 14 | O14979 HNRDL_HUMAN | R.FGEVVDCTIK.T      | 2 | 2,7272 | 0,306 | -0,313 |
| 14 | P52701 MSH6_HUMAN  | R.FPDLTVELNR.W      | 2 | 2,721  | 0,438 | -0,101 |
| 14 | P31949 S10AB_HUMAN | K.DGYNYTLSK.T       | 2 | 2,7181 | 0,419 | -0,46  |
| 14 | P06576 ATPB_HUMAN  | K.IGLFGGAGVGK.T     | 2 | 2,7163 | 0,337 | 0,063  |

|    |                    |                   |   |        |       |        |
|----|--------------------|-------------------|---|--------|-------|--------|
| 14 | P55786 PSA_HUMAN   | K.LSVEGFAVDK.M    | 2 | 2,7161 | 0,467 | 0,115  |
| 14 | Q58FF7 H90B3_HUMAN | R.APFDLFENK.K     | 2 | 2,7151 | 0,423 | -0,339 |
| 14 | Q9Y277 VDAC3_HUMAN | K.LTLSALIDGK.N    | 2 | 2,7135 | 0,368 | -0,237 |
| 14 | P60900 PSA6_HUMAN  | K.DCAVIVTQK.K     | 2 | 2,7126 | 0,321 | 0      |
| 14 | P78527 PRKDC_HUMAN | K.GLSLLCNFTK.S    | 2 | 2,7092 | 0,276 | -0,197 |
| 14 | P17844 DDX5_HUMAN  | R.LIDFLECGK.T     | 2 | 2,7055 | 0,319 | -0,334 |
| 14 | A3KN83 SBNO1_HUMAN | R.EFSDFIQAVR.R    | 2 | 2,7016 | 0,349 | -0,455 |
| 14 | P54619 AAKG1_HUMAN | K.FDVINLAAEK.T    | 2 | 2,701  | 0,317 | 0      |
| 14 | Q14839 CHD4_HUMAN  | R.ENEFSEFNDAIR.G  | 2 | 2,7004 | 0,325 | -0,166 |
| 14 | P78527 PRKDC_HUMAN | K.QM*FLTQTDGDDR.V | 2 | 2,6998 | 0,405 | -0,316 |
| 14 | Q09666 AHNK_HUMAN  | K.AEGPEVDVNLPK.A  | 2 | 2,6993 | 0,276 | 0      |
| 14 | P38919 IF4A3_HUMAN | R.DVIAQSQSGTGK.T  | 2 | 2,6988 | 0,34  | -0,41  |
| 14 | P63244 GBLP_HUMAN  | R.DETNYGIPQR.A    | 2 | 2,6982 | 0,382 | 0,205  |
| 14 | Q9BTX1 NDC1_HUMAN  | R.LQQFLEFKE.-     | 2 | 2,6978 | 0,346 | -0,206 |
| 14 | P54652 HSP72_HUMAN | K.LLQDFENGK.E     | 2 | 2,6968 | 0,287 | -0,226 |
| 14 | Q9Y496 KIF3A_HUMAN | R.SAKPETVIDSLLQ.- | 2 | 2,6942 | 0,42  | -0,174 |
| 14 | P08133 ANXA6_HUMAN | R.SEIDLLNIR.R     | 2 | 2,6918 | 0,281 | -0,114 |
| 14 | P23528 COF1_HUMAN  | K.AVLFCLSEDK.K    | 2 | 2,6912 | 0,457 | -0,206 |
| 14 | O00571 DDX3X_HUMAN | K.YLVLDEADR.M     | 2 | 2,6898 | 0,273 | 0,112  |
| 14 | P31942 HNRH3_HUMAN | R.STGEAFVQFASK.E  | 2 | 2,687  | 0,443 | -0,096 |
| 14 | P63104 1433Z_HUMAN | R.YLAEVAAGDDK.K   | 2 | 2,6866 | 0,398 | 0,106  |
| 14 | Q92541 RTF1_HUMAN  | K.FNDQDIEEIVK.E   | 2 | 2,6865 | 0,331 | -0,271 |
| 14 | O60271 JIP4_HUMAN  | K.DVAGLDTEGSK.Q   | 2 | 2,6842 | 0,346 | -0,112 |
| 14 | P05388 RLA0_HUMAN  | K.TSFFQALGITTK.I  | 2 | 2,6725 | 0,416 | -0,464 |
| 14 | P55786 PSA_HUMAN   | K.IDFVGELNDK.M    | 2 | 2,6643 | 0,33  | -0,106 |
| 14 | P55060 XPO2_HUMAN  | K.SANVNEFPVLK.A   | 2 | 2,6628 | 0,141 | 0,1    |
| 14 | Q9HAU5 RENT2_HUMAN | R.NFYENLIDLK.A    | 2 | 2,6553 | 0,246 | -0,385 |
| 14 | P34931 HS71L_HUMAN | R.TTPSYVAFTDTER.L | 2 | 2,6551 | 0,423 | -0,246 |
| 14 | Q92945 FUBP2_HUMAN | K.VQISPDSGGLPER.S | 2 | 2,6543 | 0,204 | 0,09   |
| 14 | Q15149 PLEC1_HUMAN | K.DLSELGSVR.T     | 2 | 2,6516 | 0,419 | 0      |
| 14 | O00267 SPT5H_HUMAN | R.DNELIGQTVR.I    | 2 | 2,6506 | 0,333 | 0,213  |
| 14 | Q00610 CLH1_HUMAN  | K.DAM*QYASESK.D   | 2 | 2,6502 | 0,415 | -0,745 |
| 14 | P53396 ACLY_HUMAN  | K.VDATADYICK.V    | 2 | 2,6499 | 0,323 | -0,106 |



|    |                    |                           |   |        |       |        |
|----|--------------------|---------------------------|---|--------|-------|--------|
| 14 | Q14974 IMB1_HUMAN  | R.SSAYESLM*EIVK.N         | 2 | 2,6492 | 0,334 | -0,355 |
| 14 | P51665 PSD7_HUMAN  | K.NDIAINELM*K.R           | 2 | 2,649  | 0,237 | 0      |
| 14 | P21333 FLNA_HUMAN  | K.LDVQFSGLTK.G            | 2 | 2,6488 | 0,296 | 0,11   |
| 14 | Q92841 DDX17_HUMAN | R.LIDFLESGK.T             | 2 | 2,6483 | 0,44  | -0,06  |
| 14 | P15880 RS2_HUMAN   | R.GTGIVSAPVPK.K           | 2 | 2,6475 | 0,248 | -0,238 |
| 14 | P49207 RL34_HUMAN  | R.AFLIEEQK.I              | 2 | 2,647  | 0,215 | 0,062  |
| 14 | Q9BRA2 TXD17_HUMAN | K.TIFAYFTGSK.D            | 2 | 2,6469 | 0,463 | 0      |
| 14 | Q16836 HCDH_HUMAN  | K.TFESLVDFSK.A            | 2 | 2,6452 | 0,592 | 0      |
| 14 | Q13162 PRDX4_HUMAN | R.LVQAFQYTDK.H            | 2 | 2,645  | 0,264 | -0,101 |
| 14 | P12956 KU70_HUMAN  | K.IM*ATPEQVGK.M           | 2 | 2,643  | 0,347 | -0,224 |
| 14 | Q9BVK6 TMED9_HUMAN | R.QLVEQVEQIQK.E           | 2 | 2,6377 | 0,368 | -0,091 |
| 14 | P21333 FLNA_HUMAN  | R.EATTEFSVDAR.A           | 2 | 2,6361 | 0,434 | 1,095  |
| 14 | P40925 MDHC_HUMAN  | K.ELTEEKESAFELSSA.-       | 2 | 2,6354 | 0,502 | -0,403 |
| 14 | P60228 EIF3E_HUMAN | R.M*LFDYLADK.H            | 2 | 2,6322 | 0,347 | -0,323 |
| 14 | P42704 LPPRC_HUMAN | K.NVQGIIEILK.G            | 2 | 2,6315 | 0,315 | -0,217 |
| 14 | Q969H8 CS010_HUMAN | K.SYLYFTQFK.A             | 2 | 2,6284 | 0,417 | -0,408 |
| 14 | P42704 LPPRC_HUMAN | K.LQDAINILK.E             | 2 | 2,627  | 0,306 | 0      |
| 14 | Q8TB72 PUM2_HUMAN  | K.FFEFGSLDQK.L            | 2 | 2,6255 | 0,211 | 0,1    |
| 14 | P02545 LMNA_HUMAN  | K.DLEALLNSK.E             | 2 | 2,6235 | 0,33  | -0,061 |
| 14 | Q15008 PSMD6_HUMAN | R.LDEELEDK.N              | 2 | 2,619  | 0,228 | 0      |
| 14 | Q04864 REL_HUMAN   | R.DGYEAEFGQER.R           | 2 | 2,6161 | 0,386 | 0,417  |
| 14 | Q9Y3Y2 CA077_HUMAN | K.GHLDAELDAYM*AQTDPETND.- | 3 | 2,6156 | 0,165 | 0,659  |
| 14 | P17987 TCPA_HUMAN  | R.EQLAIAEFAR.S            | 2 | 2,6156 | 0,393 | 0      |
| 14 | P40227 TCPZ_HUMAN  | K.ALQFLEEVK.V             | 2 | 2,6154 | 0,39  | 0      |
| 14 | Q9H9B4 SFYN1_HUMAN | R.NILLTNEQLESAR.K         | 2 | 2,614  | 0,294 | 0,244  |
| 14 | Q58FF7 H90B3_HUMAN | K.IDIIPNPQER.T            | 2 | 2,6122 | 0,299 | -0,306 |
| 14 | P20042 IF2B_HUMAN  | R.DYTYEELLNR.V            | 2 | 2,6108 | 0,31  | -0,185 |
| 14 | P40939 ECHA_HUMAN  | K.DATLTALDR.G             | 2 | 2,6089 | 0,258 | 0,125  |
| 14 | P60174 TPIS_HUMAN  | R.IIYGGSVTGATCK.E         | 2 | 2,6081 | 0,326 | 0,46   |
| 14 | P62913 RL11_HUMAN  | K.YDGIILPGK.-             | 2 | 2,6065 | 0,498 | 0,188  |
| 14 | P33991 MCM4_HUMAN  | K.DM*FEEALR.A             | 2 | 2,6008 | 0,281 | 0,119  |
| 14 | P08670 VIME_HUMAN  | R.DNLAEDIMR.L             | 2 | 2,5985 | 0,399 | 0,227  |
| 14 | P12956 KU70_HUMAN  | R.ILELDQFK.G              | 2 | 2,5929 | 0,104 | 0      |

|    |                    |                     |   |        |       |        |
|----|--------------------|---------------------|---|--------|-------|--------|
| 14 | P08134 RHOC_HUMAN  | R.ISAFGYLECSAK.T    | 2 | 2,5913 | 0,423 | -0,272 |
| 14 | P13929 ENOB_HUMAN  | K.VNQIGSVTESIQACK.L | 2 | 2,5908 | 0,092 | 0,523  |
| 14 | Q16795 NDUA9_HUMAN | K.NDFEDVFK.I        | 2 | 2,5893 | 0,287 | -0,581 |
| 14 | Q32MZ4 LRRF1_HUMAN | K.IDGATQSSPAEPK.S   | 2 | 2,5892 | 0,235 | -0,469 |
| 14 | P49903 SPS1_HUMAN  | R.ESFNPESYELDK.S    | 2 | 2,5879 | 0,431 | 0,167  |
| 14 | P61019 RAB2A_HUMAN | K.SCLLLQFTDK.R      | 2 | 2,5871 | 0,373 | -0,1   |
| 14 | P14174 MIF_HUMAN   | K.LLCGLLAER.L       | 2 | 2,5853 | 0,274 | 0      |
| 14 | Q9Y3I0 CV028_HUMAN | R.NLDFQDVLTK.L      | 2 | 2,5844 | 0,382 | -0,303 |
| 14 | O14979 HNRDL_HUMAN | K.DLTEYLSR.F        | 2 | 2,5797 | 0,261 | 0,122  |
| 14 | Q58FF7 H90B3_HUMAN | K.EQVANSFAVER.V     | 2 | 2,5767 | 0,333 | 0,195  |
| 14 | Q09666 AHNK_HUMAN  | K.GEGPEVDVNLPK.A    | 2 | 2,5735 | 0,183 | 0,584  |
| 14 | P11021 GRP78_HUMAN | R.NELESYAYSLK.N     | 2 | 2,5696 | 0,262 | -0,185 |
| 14 | Q92973 TNPO1_HUMAN | R.QSSFALLGLTK.A     | 2 | 2,5671 | 0,45  | -0,286 |
| 14 | P35232 PHB_HUMAN   | R.FDAGELITQR.E      | 2 | 2,5622 | 0,178 | -0,106 |
| 14 | P55884 EIF3B_HUMAN | R.VNLFTDFDK.Y       | 2 | 2,5556 | 0,383 | -0,222 |
| 14 | Q96GQ7 DDX27_HUMAN | K.SVFDELTNTSK.K     | 2 | 2,5539 | 0,136 | 0,98   |
| 14 | P35659 DEK_HUMAN   | K.SICEVLDLER.S      | 2 | 2,5522 | 0,394 | -0,297 |
| 14 | P61978 HNRPK_HUMAN | K.IDEPLGSEDR.I      | 2 | 2,5519 | 0,407 | 0,387  |
| 14 | Q15084 PDIA6_HUMAN | R.NSYLEVLLK.L       | 2 | 2,5518 | 0,393 | -0,113 |
| 14 | Q9Y230 RUVB2_HUMAN | R.VYSLFLDESR.S      | 2 | 2,5503 | 0,361 | -0,298 |
| 14 | P23284 PIIB_HUMAN  | K.VLEGM*EVVR.K      | 2 | 2,5496 | 0,409 | -0,116 |
| 14 | Q9Y6Y8 S23IP_HUMAN | R.SIIECVDDFR.V      | 2 | 2,5413 | 0,4   | -0,195 |
| 14 | Q86VP6 CAND1_HUMAN | K.TLEDPLNVR.R       | 2 | 2,5405 | 0,325 | 0,104  |
| 14 | P07900 HS90A_HUMAN | R.DNSTM*GYM*AAK.K   | 2 | 2,5394 | 0,425 | -0,7   |
| 14 | P53999 TCP4_HUMAN  | R.DDNM*FQIGK.M      | 2 | 2,5366 | 0,163 | 0,338  |
| 14 | P62191 PRS4_HUMAN  | K.DDLGADIK.A        | 2 | 2,5343 | 0,182 | -0,196 |
| 14 | P42345 FRAP_HUMAN  | R.DASAVLSLESK.S     | 2 | 2,5334 | 0,469 | 0      |
| 14 | Q00653 NFKB2_HUMAN | R.DSGEEAAEPSAPSR.T  | 2 | 2,5334 | 0,301 | -0,174 |
| 14 | P21796 VDAC1_HUMAN | K.YQIDPDACFSAK.V    | 2 | 2,5326 | 0,459 | 0      |
| 14 | O15372 EIF3H_HUMAN | R.VDEM*SQDIVK.Y     | 2 | 2,5299 | 0,233 | 0      |
| 14 | O75494 FUSIP_HUMAN | R.QIEIQFAQGDR.K     | 2 | 2,5261 | 0,329 | -0,187 |
| 14 | Q9P2J5 SYLC_HUMAN  | R.FDDPLLGPR.R       | 2 | 2,5258 | 0,388 | 0      |
| 14 | Q96RP9 EFG1_HUMAN  | K.GIVDLIEER.A       | 2 | 2,5246 | 0,106 | -0,935 |

|    |                    |                     |   |        |       |        |
|----|--------------------|---------------------|---|--------|-------|--------|
| 14 | Q14204 DYHC1_HUMAN | K.SLLQALNEVK.G      | 2 | 2,5245 | 0,333 | -0,438 |
| 14 | Q9P2J5 SYLC_HUMAN  | K.SLGLSDEEIVK.F     | 2 | 2,5219 | 0,374 | 0      |
| 14 | P62861 RS30_HUMAN  | R.FVNVVPTFGK.K      | 2 | 2,5217 | 0,376 | 0      |
| 14 | P26639 SYTC_HUMAN  | R.IYGISFPDPK.M      | 2 | 2,5204 | 0,263 | -0,322 |
| 14 | Q07955 SFRS1_HUMAN | R.EAGDVCYADVYR.D    | 2 | 2,5116 | 0,324 | 0      |
| 14 | Q96CX2 KCD12_HUMAN | K.FNFLEQAFDK.L      | 2 | 2,5115 | 0,116 | -0,291 |
| 14 | P08670 VIME_HUMAN  | R.DNLAEDIM*R.L      | 2 | 2,5072 | 0,279 | -0,223 |
| 14 | Q02952 AKA12_HUMAN | K.VVGQTTPESEK.A     | 2 | 2,5053 | 0,376 | 0      |
| 14 | Q96P70 IPO9_HUMAN  | R.ELGENLDQILR.A     | 2 | 2,5036 | 0,299 | -0,188 |
| 14 | P21980 TGM2_HUMAN  | R.DCLTESNLIK.V      | 2 | 2,5012 | 0,139 | -0,307 |
| 14 | P51991 ROA3_HUMAN  | K.IETIEVM*EDR.Q     | 2 | 2,499  | 0,384 | -0,098 |
| 14 | Q96I25 SPF45_HUMAN | K.SDSNPLTEILK.C     | 2 | 2,4981 | 0,136 | -0,401 |
| 14 | P08559 ODPA_HUMAN  | K.LPCIFICENNR.Y     | 2 | 2,4974 | 0,473 | -0,34  |
| 14 | Q9H3N1 TXND1_HUMAN | K.DFINFISDK.E       | 2 | 2,4955 | 0,304 | -0,444 |
| 14 | Q14669 TRIPC_HUMAN | R.DDSLDSLSPQGR.L    | 2 | 2,4953 | 0,299 | 0,913  |
| 14 | P47756 CAPZB_HUMAN | K.DYLLCDYNR.D       | 2 | 2,4951 | 0,348 | 0,198  |
| 14 | P04792 HSPB1_HUMAN | K.DGVVEITGK.H       | 2 | 2,4933 | 0,38  | 0      |
| 14 | P21333 FLNA_HUMAN  | R.ENGVYLIDVK.F      | 2 | 2,488  | 0,217 | 0,212  |
| 14 | Q07955 SFRS1_HUMAN | R.DAEDAVYGR.D       | 2 | 2,4819 | 0,264 | -0,245 |
| 14 | Q06830 PRDX1_HUMAN | R.GLFIIDDK.G        | 2 | 2,481  | 0,286 | -1,457 |
| 14 | P30566 PUR8_HUMAN  | R.NALDLLPK.L        | 2 | 2,48   | 0,398 | -0,122 |
| 14 | Q9H0S4 DDX47_HUMAN | R.EDAGDNDDEGAIGVR.N | 2 | 2,4791 | 0,179 | -0,597 |
| 14 | P18085 ARF4_HUMAN  | K.M*LLVDEL.R.D      | 2 | 2,4753 | 0,137 | 0,243  |
| 14 | Q14C86 GAPD1_HUMAN | R.DM*M*GLTDDR.D     | 2 | 2,4699 | 0,376 | 0      |
| 14 | P15170 ERF3A_HUMAN | K.DM*GTVVLGK.L      | 2 | 2,4667 | 0,321 | 0      |
| 14 | P21283 VATC1_HUMAN | K.IDCNLLEFK.-       | 2 | 2,4666 | 0,301 | -0,318 |
| 14 | Q99541 ADFP_HUMAN  | K.DAVTTTGTGAK.D     | 2 | 2,4613 | 0,449 | -0,115 |
| 14 | P53999 TCP4_HUMAN  | K.EQISDIDDAVR.K     | 2 | 2,4605 | 0,421 | 0,194  |
| 14 | P17568 NDUB7_HUMAN | R.DSFPNFLACK.Q      | 2 | 2,4588 | 0,407 | -0,204 |
| 14 | P62258 1433E_HUMAN | K.EAAENSLVAYK.A     | 2 | 2,4586 | 0,468 | 0,204  |
| 14 | Q9H3N1 TXND1_HUMAN | K.VDVTEQPGLSGR.F    | 2 | 2,4562 | 0,33  | 0,291  |
| 14 | P22314 UBA1_HUMAN  | R.DEFEGFLK.Q        | 2 | 2,4535 | 0,238 | -0,929 |
| 14 | P52701 MSH6_HUMAN  | R.TLLEEEYFR.E       | 2 | 2,4528 | 0,379 | -0,407 |

|    |                    |                        |   |        |       |        |
|----|--------------------|------------------------|---|--------|-------|--------|
| 14 | P31947 14335_HUMAN | R.YEDM*AAFMM*K.G       | 2 | 2,4515 | 0,223 | -0,214 |
| 14 | P13693 TCTP_HUMAN  | K.DGLEM*EKC.-          | 2 | 2,4433 | 0,384 | -0,183 |
| 14 | P61604 CH10_HUMAN  | R.DGDILGKYVD.-         | 2 | 2,4423 | 0,286 | 0,223  |
| 14 | P13489 RINI_HUMAN  | R.DLCGIVASK.A          | 2 | 2,4403 | 0,443 | 0      |
| 14 | Q9UHX1 PUF60_HUMAN | K.QGEEEDAIEIVK.I       | 2 | 2,4393 | 0,273 | -0,359 |
| 14 | P62249 RS16_HUMAN  | K.DILIQYDR.T           | 2 | 2,4371 | 0,175 | -0,118 |
| 14 | Q9Y448 T4AF1_HUMAN | R.DNCLAILESK.G         | 2 | 2,4368 | 0,157 | 0,42   |
| 14 | P23396 RS3_HUMAN   | K.GGKPEPPAM*PQPVPPTA.- | 2 | 2,4275 | 0,176 | -0,46  |
| 14 | Q14204 DYHC1_HUMAN | R.SIPLDEGEDEAQR.R      | 2 | 2,4273 | 0,319 | -0,753 |
| 14 | P43487 RANG_HUMAN  | K.TLEEEDEELFK.M        | 2 | 2,4272 | 0,232 | -0,265 |
| 14 | O14980 XPO1_HUMAN  | K.DLLGLCEQK.R          | 2 | 2,4267 | 0,392 | 0,227  |
| 14 | P08107 HSP71_HUMAN | K.FGDPVVQSDM*K.H       | 2 | 2,426  | 0,328 | 0,197  |
| 14 | P14618 KPYM_HUMAN  | R.GDLGIEIPA EK.V       | 2 | 2,4259 | 0,406 | -0,107 |
| 14 | Q13200 PSMD2_HUMAN | R.LNILDTL SK.F         | 2 | 2,4233 | 0,34  | -0,48  |
| 14 | P67936 TPM4_HUMAN  | K.M*EIQEM*QLK.E        | 2 | 2,4134 | 0,206 | -0,206 |
| 14 | P37837 TALDO_HUMAN | K.SYEPLDPGVK.S         | 2 | 2,4037 | 0,432 | -0,593 |
| 14 | Q13813 SPTA2_HUMAN | K.VLETAEDIQER.R        | 2 | 2,3939 | 0,15  | 0,375  |
| 14 | P42704 LPPRC_HUMAN | K.LDDLFLK.R            | 2 | 2,387  | 0,153 | 0,212  |
| 14 | Q14254 FLOT2_HUMAN | R.DADIGVAEAER.D        | 2 | 2,3863 | 0,221 | 0,106  |
| 14 | P61421 VA0D1_HUMAN | K.LLFEGAGSNPGDK.T      | 2 | 2,386  | 0,206 | -0,561 |
| 14 | Q9BYJ9 YTHD1_HUMAN | R.DTQEVPLEK.A          | 2 | 2,3835 | 0,289 | -0,23  |
| 14 | O43324 MCA3_HUMAN  | K.DLNSYLEDK.V          | 2 | 2,3792 | 0,308 | 0      |
| 14 | P35998 PRS7_HUMAN  | K.DFLEAVNK.V           | 2 | 2,3782 | 0,151 | -0,065 |
| 14 | Q06830 PRDX1_HUMAN | K.ATAVM*PDGQFK.D       | 2 | 2,371  | 0,272 | 0      |
| 14 | P09960 LKHA4_HUMAN | R.DGETDPDPEDPSR.K      | 2 | 2,3696 | 0,293 | -0,278 |
| 14 | A0MZ66 SHOT1_HUMAN | K.SLDPENSETELER.I      | 2 | 2,3695 | 0,337 | 0,241  |
| 14 | Q9P2J5 SYLC_HUMAN  | K.TGFFEFQAAK.D         | 2 | 2,3672 | 0,255 | -0,213 |
| 14 | P20042 IF2B_HUMAN  | K.DLEADEEDTR.K         | 2 | 2,3643 | 0,347 | -0,102 |
| 14 | P16403 H12_HUMAN   | K.ASGPPVSELITK.A       | 2 | 2,3634 | 0,338 | 0,407  |
| 14 | P46063 RECQ1_HUMAN | K.DILQNVFK.L           | 2 | 2,3628 | 0,283 | -0,062 |
| 14 | Q16658 FSCN1_HUMAN | K.YLTAEAFGFK.V         | 2 | 2,3606 | 0,302 | -0,106 |
| 14 | Q07955 SFRS1_HUMAN | R.DGTGVVEFVR.K         | 2 | 2,3599 | 0,259 | 0,113  |
| 14 | Q9BWT3 PAPOG_HUMAN | R.SDFFQSFFEK.L         | 2 | 2,359  | 0,415 | -0,571 |

|    |                     |                   |   |        |       |        |
|----|---------------------|-------------------|---|--------|-------|--------|
| 14 | Q8NBJ5 GT251_HUMAN  | K.SLVFEDDLR.F     | 2 | 2,3576 | 0,265 | -0,669 |
| 14 | P18085 ARF4_HUMAN   | R.IQEVADQLQK.M    | 2 | 2,355  | 0,159 | -0,104 |
| 14 | Q8WVM7 STAG1_HUMAN  | K.DGIEFAFK.Y      | 2 | 2,3489 | 0,374 | 0      |
| 14 | Q6FI81 CPIN1_HUMAN  | K.VLLSDSNLHDA.-   | 2 | 2,3481 | 0,3   | 0,309  |
| 14 | Q14157 UBP2L_HUMAN  | R.IDLAVLLGK.T     | 2 | 2,3364 | 0,401 | -0,324 |
| 14 | A8K6Q8 A8K6Q8_HUMAN | K.LDSTDFSTIK.L    | 2 | 2,3339 | 0,305 | 0,199  |
| 14 | P30101 PDIA3_HUMAN  | R.LAPEYAAAATR.L   | 2 | 2,3338 | 0,277 | -0,102 |
| 14 | P22314 UBA1_HUMAN   | K.QPAENVNQYLTPK.F | 2 | 2,3321 | 0,35  | 0,755  |
| 14 | P12956 KU70_HUMAN   | R.LGSLVDEFK.E     | 2 | 2,3287 | 0,346 | 0,182  |
| 14 | P22626 ROA2_HUMAN   | R.DYFEEYGK.I      | 2 | 2,326  | 0,475 | 0      |
| 14 | Q9Y3A5 SBDS_HUMAN   | K.DVEEGDEKFE.-    | 2 | 2,3256 | 0,184 | -0,204 |
| 14 | Q8N4N8 KIF2B_HUMAN  | K.FSLVDLAGNER.G   | 2 | 2,3245 | 0,243 | 0      |
| 14 | P10809 CH60_HUMAN   | K.DDAM*LLK.G      | 2 | 2,3232 | 0,178 | 0,223  |
| 14 | O00116 ADAS_HUMAN   | K.EYVDPNNIFGNR.N  | 2 | 2,3211 | 0,387 | -0,424 |
| 14 | Q7KZF4 SND1_HUMAN   | R.EVEVEVESM*DK.A  | 2 | 2,3163 | 0,333 | -0,186 |
| 14 | O95793 STAU1_HUMAN  | R.ILQNEPLPER.L    | 2 | 2,3115 | 0,174 | 0,101  |
| 14 | P46013 KI67_HUMAN   | K.LDLLGNLPGSK.R   | 2 | 2,3102 | 0,311 | 0      |
| 14 | Q14651 PLSI_HUMAN   | K.LSPEELLLR.W     | 2 | 2,3017 | 0,232 | -0,228 |
| 14 | P0C7M2 RA1L3_HUMAN  | R.DYFEQYGK.I      | 2 | 2,3006 | 0,442 | 0      |
| 14 | P62805 H4_HUMAN     | K.VFLENVIR.D      | 2 | 2,3005 | 0,09  | -0,493 |
| 14 | O95347 SMC2_HUMAN   | K.DQEALAVK.R      | 2 | 2,2925 | 0,091 | 0,061  |
| 14 | Q9Y285 SYFA_HUMAN   | R.VVDSM*EDEVQR.R  | 2 | 2,2881 | 0,368 | 0,092  |
| 14 | P07951 TPM2_HUMAN   | K.M*ELQEM*QLK.E   | 2 | 2,2858 | 0,16  | -0,619 |
| 14 | O14979 HNRDL_HUMAN  | R.GFGFVLFK.D      | 2 | 2,2857 | 0,257 | -0,133 |
| 14 | P41091 IF2G_HUMAN   | R.QDLTLDVTK.L     | 2 | 2,2836 | 0,435 | 0,215  |
| 14 | Q8N0Z6 TTC5_HUMAN   | R.EQQLLEFLDR.L    | 2 | 2,283  | 0,353 | -0,378 |
| 14 | P13674 P4HA1_HUMAN  | R.QLDEGEISTIDK.V  | 2 | 2,2816 | 0,301 | 0,362  |
| 14 | P02538 K2C6A_HUMAN  | K.EYQELM*NVK.L    | 2 | 2,281  | 0,356 | -0,313 |
| 14 | P15311 EZRI_HUMAN   | K.LFFLQVK.E       | 2 | 2,2673 | 0,12  | 0      |
| 14 | P07237 PDIA1_HUMAN  | K.NFEDVAFDEK.K    | 2 | 2,2667 | 0,259 | 0,201  |
| 14 | Q96QK1 VPS35_HUMAN  | K.NIIIALIDR.L     | 2 | 2,2649 | 0,28  | -0,234 |
| 14 | P61353 RL27_HUMAN   | R.YSVDIPLDK.T     | 2 | 2,2646 | 0,328 | -0,116 |
| 14 | Q93008 USP9X_HUMAN  | R.DGLFDTIQR.S     | 2 | 2,2574 | 0,272 | -0,344 |

|    |                    |                     |   |        |       |        |
|----|--------------------|---------------------|---|--------|-------|--------|
| 14 | P62937 PIIA_HUMAN  | K.EGM*NIVEAM*ER.F   | 2 | 2,2541 | 0,463 | -0,186 |
| 14 | P13639 EF2_HUMAN   | K.STLTDSLVC.A       | 2 | 2,2533 | 0,362 | 0,217  |
| 14 | Q9Y570 PPME1_HUMAN | K.LLLLAGVDR.L       | 2 | 2,249  | 0,258 | -0,189 |
| 14 | P47897 SYQ_HUMAN   | R.DVLNDTAPR.A       | 2 | 2,243  | 0,337 | -0,122 |
| 14 | P00338 LDHA_HUMAN  | K.QVVESAYEVIK.L     | 2 | 2,2387 | 0,086 | 0,386  |
| 14 | P55010 IF5_HUMAN   | K.VLTLSDDLER.T      | 2 | 2,2327 | 0,315 | 0,315  |
| 14 | P62736 ACTA_HUMAN  | K.EITALAPSTM*K.I    | 2 | 2,2296 | 0,242 | 0      |
| 14 | P22234 PUR6_HUMAN  | K.EVTPEGLQM*VK.K    | 2 | 2,2262 | 0,294 | 0,196  |
| 14 | P08133 ANXA6_HUMAN | R.DLM*TDLK.S        | 2 | 2,225  | 0,203 | 0,143  |
| 14 | P18206 VINC_HUMAN  | K.DEEFPEQK.A        | 2 | 2,2237 | 0,085 | -0,06  |
| 14 | P78310 CXAR_HUMAN  | R.CYVDGSEEIGSDFK.I  | 2 | 2,2174 | 0,157 | -0,456 |
| 14 | Q09161 NCBP1_HUMAN | K.DGVLEEQIER.L      | 2 | 2,2158 | 0,262 | 0,514  |
| 14 | P19105 MLRM_HUMAN  | K.LNGTDPEDVIR.N     | 2 | 2,2147 | 0,385 | 0      |
| 14 | Q13618 CUL3_HUMAN  | R.FLLESFNDR.L       | 2 | 2,2089 | 0,223 | -0,875 |
| 14 | Q92878 RAD50_HUMAN | K.DLDIYYK.T         | 2 | 2,2086 | 0,148 | 0      |
| 14 | Q96I99 SUCB2_HUMAN | R.ETYLAILM*DR.S     | 2 | 2,2063 | 0,123 | -0,295 |
| 14 | P06744 G6PI_HUMAN  | K.DVM*PEVNK.V       | 2 | 2,1994 | 0,19  | -0,193 |
| 14 | P12270 TPR_HUMAN   | R.LEQDLQQM*QAK.V    | 2 | 2,1942 | 0,13  | -0,634 |
| 14 | Q13442 HAP28_HUMAN | K.GVEGLIDIENPNR.V   | 2 | 2,1902 | 0,286 | -0,342 |
| 14 | P33778 H2B1B_HUMAN | K.ESYSIYVK.V        | 2 | 2,1872 | 0,228 | 0      |
| 14 | P49736 MCM2_HUMAN  | R.GVCLIDEFDK.M      | 2 | 2,1871 | 0,255 | -0,204 |
| 14 | Q99618 CDCA3_HUMAN | K.QLSEVFETEDSK.S    | 2 | 2,1761 | 0,13  | -0,518 |
| 14 | Q99961 SH3G1_HUMAN | K.DSLDIEVK.Q        | 2 | 2,1759 | 0,113 | 0,133  |
| 14 | P02545 LMNA_HUMAN  | R.LADALQELR.A       | 2 | 2,1714 | 0,156 | 0      |
| 14 | Q02790 FKBP4_HUMAN | R.EGTGTEM*PM*IGDR.V | 2 | 2,167  | 0,278 | -0,171 |
| 14 | Q15029 U5S1_HUMAN  | R.EGPLCDELIR.N      | 2 | 2,1662 | 0,204 | 0,102  |
| 14 | P62906 RL10A_HUMAN | R.DTLYEAVR.E        | 2 | 2,165  | 0,197 | 0,126  |
| 14 | Q13200 PSMD2_HUMAN | K.DIDENAYAK.V       | 2 | 2,1603 | 0,352 | -0,235 |
| 14 | Q12765 SCRN1_HUMAN | K.DGLVVFVK.N        | 2 | 2,1543 | 0,32  | 0,146  |
| 14 | P07686 HEXB_HUMAN  | K.DSAYPEELSR.V      | 2 | 2,1535 | 0,229 | 0      |
| 14 | P14625 ENPL_HUMAN  | K.LIINSLYK.N        | 2 | 2,1474 | 0,241 | 0      |
| 14 | P20962 PTMS_HUMAN  | K.SVEAAAELSAK.D     | 2 | 2,144  | 0,218 | 0,34   |
| 14 | P46781 RS9_HUMAN   | K.LDYILGLK.I        | 2 | 2,143  | 0,388 | 0,196  |

|    |                     |                   |   |        |       |        |
|----|---------------------|-------------------|---|--------|-------|--------|
| 14 | Q8N6T3 ARFG1_HUMAN  | R.DVTTFFSGK.A     | 2 | 2,1364 | 0,151 | -0,061 |
| 14 | Q15904 VAS1_HUMAN   | R.NVLLFLQDK.L     | 2 | 2,1347 | 0,22  | -0,224 |
| 14 | P27816 MAP4_HUMAN   | K.DM*ELPTEK.E     | 2 | 2,1341 | 0,091 | 0,125  |
| 14 | Q9BV38 WDR18_HUMAN  | R.DLDFDFSTR.F     | 2 | 2,1313 | 0,402 | 0,061  |
| 14 | Q14247 SRC8_HUMAN   | R.VDQSAVGFYQ GK.T | 2 | 2,1301 | 0,353 | 0,342  |
| 14 | Q13242 SFRS9_HUMAN  | R.DAEDAIYGR.N     | 2 | 2,1293 | 0,24  | -0,06  |
| 14 | P18031 PTN1_HUMAN   | K.LTLISEDIK.S     | 2 | 2,1278 | 0,256 | 0      |
| 14 | P18206 VINC_HUMAN   | K.AVAGNISDPGLQK.S | 2 | 2,1239 | 0,336 | 0,576  |
| 14 | Q6NUQ4 U535_HUMAN   | K.DLASLNYK.L      | 2 | 2,1232 | 0,246 | -0,449 |
| 14 | P00338 LDHA_HUMAN   | K.LVIITAGAR.Q     | 2 | 2,1207 | 0,308 | -0,067 |
| 14 | P07737 PROF1_HUMAN  | K.TLVLLM*GK.E     | 2 | 2,1199 | 0,311 | 0      |
| 14 | Q99832 TCPH_HUMAN   | K.ATISNDGATILK.L  | 2 | 2,1166 | 0,257 | -0,101 |
| 14 | Q8NI36 WDR36_HUMAN  | K.NLLNLDVIK.K     | 2 | 2,1165 | 0,251 | 0,117  |
| 14 | O00401 WASL_HUMAN   | R.DALLDQIR.Q      | 2 | 2,1158 | 0,153 | -0,065 |
| 14 | P28066 PSA5_HUMAN   | K.EELEEVIKDI.-    | 2 | 2,1146 | 0,229 | -0,602 |
| 14 | P31946 1433B_HUMAN  | K.YLIPNATQPESK.V  | 2 | 2,1134 | 0,313 | 0,09   |
| 14 | Q99829 CPNE1_HUMAN  | K.SDPFLEFFR.Q     | 2 | 2,1094 | 0,235 | -0,316 |
| 14 | Q13464 ROCK1_HUMAN  | K.NLICAFLTDR.E    | 2 | 2,1086 | 0,168 | -0,599 |
| 14 | P22626 ROA2_HUMAN   | K.TLETVPLER.K     | 2 | 2,1077 | 0,339 | 0,115  |
| 14 | Q99729 ROAA_HUMAN   | R.GFGFILFK.D      | 2 | 2,1059 | 0,252 | -0,197 |
| 14 | P28370 SMCA1_HUMAN  | R.LFELLEK.E       | 2 | 2,1    | 0,085 | 0,137  |
| 14 | P51114 FXR1_HUMAN   | K.EISEGDEVEVYSR.A | 2 | 2,0954 | 0,364 | 0,726  |
| 14 | P19338 NUCL_HUMAN   | K.ALELTGLK.V      | 2 | 2,0916 | 0,267 | 0      |
| 14 | P15311 EZRI_HUMAN   | K.DNAM*LEYLK.I    | 2 | 2,0913 | 0,253 | 0,219  |
| 14 | P29966 MARCS_HUMAN  | K.AEDGATPSNETPK.K | 2 | 2,0899 | 0,261 | -0,406 |
| 14 | O15397 IPO8_HUMAN   | R.DNIVEGIIR.S     | 2 | 2,0863 | 0,186 | -0,119 |
| 14 | P13646 K1C13_HUMAN  | R.VILEIDNAR.L     | 2 | 2,0863 | 0,109 | 0,234  |
| 14 | P61978 HNRPK_HUMAN  | K.DLAGSIIGK.G     | 2 | 2,085  | 0,119 | -0,14  |
| 14 | Q92499 DDX1_HUMAN   | K.DGFVALSK.A      | 2 | 2,0835 | 0,228 | 0,073  |
| 14 | P14625 ENPL_HUMAN   | R.SGYLLPDTK.A     | 2 | 2,0826 | 0,404 | 0,307  |
| 14 | P30048 PRDX3_HUMAN  | K.DLSLDDFK.G      | 2 | 2,0809 | 0,405 | -0,832 |
| 14 | Q15149 PLEC1_HUMAN  | R.DVAEVDTVR.R     | 2 | 2,0809 | 0,415 | 0      |
| 14 | A9CQZ4 A9CQZ4_HUMAN | K.TIDFDSLSVGR.G   | 2 | 2,0752 | 0,277 | 0,807  |

|    |                    |                           |              |   |        |       |        |
|----|--------------------|---------------------------|--------------|---|--------|-------|--------|
| 14 | Q9NVP1 DDX18_HUMAN | K.EPLYVGVDDDK.A           |              | 2 | 2,0747 | 0,3   | 0      |
| 14 | P07355 ANXA2_HUMAN | R.DLYDAGVK.R              |              | 2 | 2,0687 | 0,37  | -0,208 |
| 14 | Q86UP2 KTN1_HUMAN  | R.QQQVEAVELEAK.E          |              | 2 | 2,0674 | 0,403 | -0,089 |
| 14 | Q15149 PLEC1_HUMAN | R.DSQDAGGFGPEDR.L         |              | 2 | 2,0634 | 0,244 | -0,181 |
| 14 | O60763 USO1_HUMAN  | R.EQDLQLEELR.Q            |              | 2 | 2,0595 | 0,091 | 0      |
| 14 | Q9UJV9 DDX41_HUMAN | K.DYLAHSSM*DF.-           |              | 2 | 2,058  | 0,259 | 0,203  |
| 14 | Q08170 SFRS4_HUMAN | K.ILEVDLK.N               |              | 2 | 2,0576 | 0,16  | -0,22  |
| 14 | P26641 EF1G_HUMAN  | K.STFVLDEFK.R             |              | 2 | 2,0539 | 0,253 | -0,225 |
| 14 | P26038 MOES_HUMAN  | R.EDAVLEYLK.I             |              | 2 | 2,0496 | 0,324 | -0,113 |
| 14 | P07355 ANXA2_HUMAN | K.DIISDTSGDFR.K           |              | 2 | 2,0481 | 0,352 | 0,498  |
| 14 | O94992 HEX11_HUMAN | R.ELELELDR.L              |              | 2 | 2,0452 | 0,132 | 0,3    |
| 14 | Q71U36 TBA1A_HUMAN | K.EIIDLVLDR.I             |              | 2 | 2,0389 | 0,373 | -0,337 |
| 14 | P27348 1433T_HUMAN | K.AVTEQGAELSNEER.N        |              | 2 | 2,0346 | 0,275 | 0      |
| 14 | O94903 PROSC_HUMAN | K.APLEVAQEH.-             |              | 2 | 2,0327 | 0,289 | -0,368 |
| 14 | Q9BUQ8 DDX23_HUMAN | K.EDSAVFYELK.Q            |              | 2 | 2,0315 | 0,267 | 0,305  |
| 14 | P35232 PHB_HUMAN   | K.AAIIAEGDSK.A            |              | 2 | 2,031  | 0,333 | 0      |
| 14 | O43143 DHX15_HUMAN | R.DYLEAAIR.T              |              | 2 | 2,0233 | 0,271 | 0      |
| 14 | Q9H0A0 NAT10_HUMAN | K.AIEEQM*VAAK.D           |              | 2 | 2,023  | 0,243 | -0,221 |
| 14 | Q9Y580 RBM7_HUMAN  | R.DDFFYEDR.N              |              | 2 | 2,0184 | 0,412 | 0      |
| 14 | P00558 PGK1_HUMAN  | K.ALM*DEVVK.A             |              | 2 | 2,0141 | 0,175 | -0,066 |
| 14 | P33993 MCM7_HUMAN  | R.QIAEEDFYEK.L            |              | 2 | 2,0107 | 0,213 | 0      |
| 14 | P51149 RAB7A_HUMAN | K.ATIGADFLTK.E            |              | 2 | 2,0089 | 0,345 | 0      |
| 14 | O75822 EIF3J_HUMAN | R.DDFTEFGK.L              |              | 2 | 2,0029 | 0,171 | -0,191 |
| 14 | Q9NRW7 VPS45_HUMAN | K.EYELFEFR.R              |              | 2 | 2,0014 | 0,265 | -0,108 |
| 14 | O95373 IPO7_HUMAN  | K.SDQNLQTALELTR.R         |              | 2 | 2,0009 | 0,111 | -0,328 |
| 15 | Q15058 KIF14_HUMAN | R.NKES#SLLVSELEDTTEK.T    | S100:        | 3 | 3,5934 | 0,338 | -0,091 |
| 15 | Q96SB3 NEB2_HUMAN  | R.ASS#LNENVDSALLK.L       | S100:        | 2 | 2,502  | 0,178 | 0,727  |
| 15 | Q92794 MYST3_HUMAN | R.SSS#PPILTKPTLK.R        | S1001:       | 2 | 2,2844 | 0,181 | 0      |
| 15 | Q15058 KIF14_HUMAN | R.NKES#SLLVSELEDTTEK.T    | S101:        | 2 | 3,7193 | 0,449 | -0,488 |
| 15 | P05386 RLA1_HUMAN  | K.KEES#EES#DDDM*GFGLFD.-  | S101:S104:   | 2 | 2,4869 | 0,462 | -0,344 |
| 15 | O95785 WIZ_HUMAN   | K.NPEDKSPQLSLS#PRPAS#PK.A | S1012:S1017: | 3 | 3,9239 | 0,286 | -0,166 |
| 15 | P46821 MAP1B_HUMAN | K.GEAEQS#EEEEDEEDKAEDAR.E | S1016:       | 3 | 3,5011 | 0,405 | -0,474 |
| 15 | O95785 WIZ_HUMAN   | K.SPQLSLSRPAS#PK.A        | S1017:       | 2 | 3,384  | 0,426 | -0,395 |



|    |                    |                                |            |   |        |       |        |
|----|--------------------|--------------------------------|------------|---|--------|-------|--------|
| 15 | Q9UGU5 HM2L1_HUMAN | K.KSS#PQSTDTAM*DLLK.A          | S102:      | 2 | 4,2852 | 0,5   | -0,071 |
| 15 | O75351 VPS4B_HUMAN | K.EGQPSPADEKGNDS#DGEGESDDPEK.K | S102:      | 3 | 3,8997 | 0,459 | -0,548 |
| 15 | Q9GZT3 SLIRP_HUMAN | K.LPQTS#DDEKKDF.-              | S102:      | 2 | 2,9117 | 0,414 | 0,081  |
| 15 | P17096 HMGA1_HUMAN | K.KLEKEEEEQISQES#S#EEEEQ.-     | S102:S103: | 3 | 4,8842 | 0,372 | -0,382 |
| 15 | Q09472 EP300_HUMAN | K.TEIKKEEDQPSTSATQSS#PAPGQSK.K | S1038:     | 3 | 5,4764 | 0,59  | -0,472 |
| 15 | Q5THJ4 VP13D_HUMAN | K.NLSFDIPTGSLRDS#R.A           | S1038:     | 2 | 2,4077 | 0,166 | 0,069  |
| 15 | P21796 VDAC1_HUMAN | K.LTFDSSFS#PNTGKK.N            | S104:      | 2 | 3,4204 | 0,409 | -0,227 |
| 15 | P05386 RLA1_HUMAN  | K.KEESEES#DDDM*GFGLFD.-        | S104:      | 2 | 3,1464 | 0,387 | -0,358 |
| 15 | P28749 RBL1_HUMAN  | R.VIAIDSDAES#PAKR.V            | S1041:     | 2 | 3,0001 | 0,502 | 0,314  |
| 15 | Q9P2D0 IBTK_HUMAN  | R.DLQS#PDFTTGFHSDK.I           | S1045:     | 2 | 3,6906 | 0,506 | -0,137 |
| 15 | Q8NHQ8 RASF8_HUMAN | R.TLYRQS#LPPLAK.L              | S105:      | 2 | 2,1135 | 0,129 | -0,083 |
| 15 | P24534 EF1B_HUMAN  | K.DDDDDIDLFGS#DDEESEEAKR.L     | S106:      | 3 | 3,318  | 0,339 | 0      |
| 15 | Q8WVM7 STAG1_HUMAN | R.NSLVTGGEDDRM*S#VNSGSSSSK.T   | S1062:     | 3 | 2,808  | 0,339 | -0,079 |
| 15 | P00533 EGFR_HUMAN  | R.NGLQSCPIKEDS#FLQR.Y          | S1064:     | 3 | 3,2232 | 0,382 | -0,093 |
| 15 | Q96JM2 ZN462_HUMAN | R.NNS#RVSPVPLSGAAAGTEQK.T      | S1075:     | 3 | 4,0325 | 0,436 | 0,089  |
| 15 | Q8NG31 CASC5_HUMAN | K.NIKDVQS#PGFLNEPLSSK.S        | S1076:     | 3 | 4,2213 | 0,393 | 0,178  |
| 15 | Q96JM2 ZN462_HUMAN | R.NNSRVS#PVPLSGAAAGTEQK.T      | S1078:     | 2 | 2,0456 | 0,336 | 0,828  |
| 15 | Q08999 RBL2_HUMAN  | K.IFYFNS#PSKR.L                | S1080:     | 2 | 2,9309 | 0,241 | -0,077 |
| 15 | A1L390 PKHG3_HUMAN | R.SHS#VPENM*VEPPLSGR.V         | S1081:     | 2 | 3,6373 | 0,598 | 0,666  |
| 15 | A1L390 PKHG3_HUMAN | R.SHS#VPENM*VEPPLSGR.V         | S1081:     | 3 | 3,2238 | 0,314 | 0,399  |
| 15 | P48634 BAT2_HUMAN  | R.TASETRS#EGSEYEEIPK.R         | S1089:     | 3 | 3,3162 | 0,228 | 0,184  |
| 15 | O60271 JIP4_HUMAN  | K.FIEFEDS#QEQEKK.D             | S109:      | 2 | 4,6911 | 0,476 | 0,492  |
| 15 | Q8WXX5 DNJC9_HUMAN | K.KIS#LEDIQAFEK.T              | S109:      | 2 | 4,1271 | 0,505 | -0,488 |
| 15 | Q8NE71 ABCF1_HUMAN | K.LSVPTS#DEEDEVPAKPR.G         | S109:      | 3 | 3,0902 | 0,398 | -0,089 |
| 15 | Q9HC52 CBX8_HUMAN  | R.IPYGRS#PQDLASTSR.A           | S110:      | 3 | 3,1524 | 0,323 | 0,1    |
| 15 | Q92574 TSC1_HUMAN  | R.NKS#ESQCDEDM*TSSLSESLK.T     | S1100:     | 3 | 5,037  | 0,487 | 0,452  |
| 15 | P11388 TOP2A_HUMAN | K.VPDEEENEES#DNEKETEK.S        | S1106:     | 3 | 2,8981 | 0,339 | -0,41  |
| 15 | Q96AJ9 VTI1A_HUMAN | R.IAYSDEVARNELLGDDGNSS#ENQR.A  | S111:      | 3 | 4,65   | 0,306 | -0,275 |
| 15 | Q96HC4 PDLI5_HUMAN | K.EVVKVPVITS#PAVSK.V           | S111:      | 2 | 2,8925 | 0,531 | -0,075 |
| 15 | Q3KQU3 MA7D1_HUMAN | R.RSS#QPSPTAVPASDSPPTK.Q       | S113:      | 2 | 2,1366 | 0,351 | -0,858 |
| 15 | O95785 WIZ_HUMAN   | R.SPSDLHIS#PLAK.K              | S1134:     | 3 | 2,6184 | 0,223 | 0,068  |
| 15 | Q5THJ4 VP13D_HUMAN | K.EKDDLS#PQPLM*TDFER.S         | S1138:     | 2 | 2,6404 | 0,353 | 0,847  |
| 15 | Q9UNZ2 NSF1C_HUMAN | K.KS#PNELVDDLK.G               | S114:      | 2 | 2,9864 | 0,319 | -0,575 |

|    |                    |                                  |              |   |        |       |        |
|----|--------------------|----------------------------------|--------------|---|--------|-------|--------|
| 15 | Q08AD1 CA1L1_HUMAN | K.YDGES#DKEQFDDQK.V              | S1148:       | 2 | 3,7317 | 0,284 | -0,514 |
| 15 | Q08AD1 CA1L1_HUMAN | K.YDGES#DKEQFDDQK.V              | S1148:       | 3 | 2,9358 | 0,226 | -0,289 |
| 15 | Q9Y4H2 IRS2_HUMAN  | R.HSS#ETFSSTTTVPVS#PSFAHNP.K     | S1149:S1162: | 3 | 5,2574 | 1     | -0,406 |
| 15 | P45880 VDAC2_HUMAN | K.LTFDTTFS#PNTGKK.S              | S115:        | 2 | 3,1739 | 0,261 | 0,149  |
| 15 | Q7Z401 MYCPP_HUMAN | R.M*NS#SFSVKPFEK.T               | S1151:       | 2 | 2,8548 | 0,214 | 0,408  |
| 15 | O75781 PALM_HUMAN  | K.ENAAAPS#PVRAPAPS#PAKEER.K      | S116:S124:   | 3 | 2,7406 | 0,313 | 0,159  |
| 15 | Q12830 BPTF_HUMAN  | R.VLDDVSIRS#PETK.C               | S1161:       | 2 | 3,2852 | 0,287 | -0,159 |
| 15 | Q5UIP0 RIF1_HUMAN  | K.SLSLNNECGSLDKTS#PEM*SNSNNDER.K | S1162:       | 3 | 5,4947 | 0,506 | -0,493 |
| 15 | Q5SW79 CE170_HUMAN | R.LGSLARS#DSEATISR.S             | S1165:       | 2 | 2,7874 | 0,459 | -0,282 |
| 15 | Q8WYP5 AHTF1_HUMAN | R.SLPSSSQLKGS#PQAISR.A           | S1169:       | 2 | 3,8893 | 0,124 | 0,268  |
| 15 | Q92934 BAD_HUMAN   | R.M*S#DEFVDSFKK.G                | S118:        | 3 | 4,6576 | 0,398 | 0,128  |
| 15 | Q92934 BAD_HUMAN   | R.M*S#DEFVDSFKK.G                | S118:        | 2 | 2,4277 | 0,328 | -0,085 |
| 15 | P55884 EIF3B_HUMAN | R.SDS#RAQAVSEADAGNEGR.A          | S119:        | 3 | 4,1781 | 0,432 | -0,291 |
| 15 | Q7Z460 CLAP1_HUMAN | K.FSFRS#QEDLNEPIK.R              | S1196:       | 2 | 2,26   | 0,349 | -0,204 |
| 15 | O95218 ZRAP2_HUMAN | R.ENVEYIEREES#DGEYDEFGR.K        | S120:        | 3 | 5,9812 | 0,543 | 0,575  |
| 15 | Q8WUF5 IASPP_HUMAN | K.GRPSS#PRT#PLYLQPDAYGSLDR.A     | S120:T123:   | 3 | 4,7386 | 0,481 | -0,351 |
| 15 | Q9C0C7 AMRA1_HUMAN | R.SSQGTGTEPGAHTSS#PQPSTSR.G      | S1205:       | 3 | 2,7707 | 0,184 | -0,325 |
| 15 | P46013 KI67_HUMAN  | K.LDLAGTLPGS#KR.Q                | S1207:       | 2 | 2,0023 | 0,417 | -0,093 |
| 15 | Q9H9C1 CN133_HUMAN | R.TRPGS#FQSLSDALSDTPAK.S         | S121:        | 3 | 4,7391 | 0,396 | -0,178 |
| 15 | Q9NR30 DDX21_HUMAN | K.NEEPS#EEEIDAPKPK.K             | S121:        | 2 | 3,7854 | 0,351 | 0      |
| 15 | Q9NR30 DDX21_HUMAN | K.NEEPS#EEEIDAPKPK.K             | S121:        | 3 | 2,9941 | 0,316 | 0,102  |
| 15 | Q9ULW0 TPX2_HUMAN  | R.S#LRLS#AQKDLEQK.E              | S121:S125:   | 2 | 3,6301 | 0,512 | 0,437  |
| 15 | Q13017 RHG05_HUMAN | K.GGIDNPAITS#DQELDDKK.M          | S1218:       | 2 | 5,2565 | 0,539 | 0,489  |
| 15 | Q13017 RHG05_HUMAN | K.GGIDNPAITS#DQELDDKK.M          | S1218:       | 3 | 3,0392 | 0,313 | 0,367  |
| 15 | Q5VZL5 ZMYM4_HUMAN | R.VTQHESS#DNENEIQNK.L            | S122:        | 3 | 4,5669 | 0,241 | -0,261 |
| 15 | P12268 IMDH2_HUMAN | K.KYEQGFITDPVLS#PK.D             | S122:        | 3 | 4,3294 | 0,336 | -0,385 |
| 15 | P12268 IMDH2_HUMAN | K.KYEQGFITDPVLS#PK.D             | S122:        | 2 | 2,6115 | 0,446 | -0,578 |
| 15 | Q14160 LAP4_HUMAN  | R.NSLES#ISS#IDRELSPEGPGKEK.E     | S1223:S1226: | 3 | 4,907  | 0,322 | -0,217 |
| 15 | Q9UBS9 CA009_HUMAN | K.SGS#LPSLHDIK.G                 | S1226:       | 2 | 2,4126 | 0,266 | -0,543 |
| 15 | O95155 UBE4B_HUMAN | K.SM*SQVDVDS#GIENM*EVDENDRR.E    | S124:        | 3 | 4,6346 | 0,426 | 0,624  |
| 15 | Q8WYP5 AHTF1_HUMAN | R.IS#FVEEDVHPK.W                 | S1241:       | 3 | 3,2441 | 0,434 | 0,066  |
| 15 | Q9BQG0 MBB1A_HUMAN | K.SPAPGAPTRS#PSTPAK.S            | S1241:       | 2 | 2,8812 | 0,401 | -0,533 |
| 15 | Q8WYP5 AHTF1_HUMAN | R.IS#FVEEDVHPK.W                 | S1241:       | 2 | 2,3115 | 0,429 | 0,177  |

|    |                    |                                   |              |   |        |       |        |
|----|--------------------|-----------------------------------|--------------|---|--------|-------|--------|
| 15 | P11388 TOP2A_HUMAN | K.IKNENTEGS#PQEDGVELEGLK.Q        | S1247:       | 3 | 5,2427 | 0,504 | 0,309  |
| 15 | Q9C004 SPY4_HUMAN  | R.LLDHM*APPPVADQAS#PR.A           | S125:        | 3 | 5,2051 | 0,374 | 0,383  |
| 15 | Q92797 SYMPK_HUMAN | K.TPS#PAAEDAREPEAK.G              | S1259:       | 3 | 3,0516 | 0,413 | -0,111 |
| 15 | Q92797 SYMPK_HUMAN | K.TPS#PAAEDAREPEAK.G              | S1259:       | 2 | 2,5636 | 0,381 | -0,444 |
| 15 | Q8N488 RYBP_HUMAN  | K.SDILKDPPEANS#IQSANATTK.T        | S127:        | 3 | 5,7955 | 0,543 | 0,85   |
| 15 | Q96T23 RSF1_HUMAN  | R.STDEYS#EADEEEEEEGKPSR.K         | S1272:       | 3 | 3,5138 | 0,45  | -0,29  |
| 15 | Q7Z6E9 RBBP6_HUMAN | R.KVTGTEGSSSTLVDYTSTSSTGGS#PVR.K  | S1277:       | 3 | 3,5922 | 0,337 | 0,334  |
| 15 | Q9HAW4 CLSPN_HUMAN | R.NFVFHTLS#PVK.A                  | S1289:       | 2 | 3,4866 | 0,336 | -0,356 |
| 15 | Q6ZU65 K2030_HUMAN | R.VAFISLS#PVRR.R                  | S13:         | 3 | 2,7115 | 0,467 | 0      |
| 15 | Q9BQG0 MBB1A_HUMAN | K.ARLS#LVIRS#PSLLQSGAK.K          | S1303:S1308: | 3 | 3,6891 | 0,475 | -0,445 |
| 15 | Q9P2M7 CING_HUMAN  | R.SHS#QASLAGPGPVDPSNR.S           | S131:        | 3 | 3,581  | 0,397 | 0      |
| 15 | P51858 HDGF_HUMAN  | K.GNAEGS#S#DEEGKLVIDEPAKEK.N      | S132:S133:   | 3 | 4,4158 | 0,205 | -0,446 |
| 15 | Q9Y5P4 C43BP_HUMAN | R.HGS#M*VSLVSGASGYSATSTSS#FKK.G   | S132:S150:   | 3 | 4,408  | 1     | 0,43   |
| 15 | P54725 RD23A_HUMAN | R.EDKSPSEESAPTT#PESVSGSVPSGSSGR.E | S133:        | 3 | 4,3685 | 0,3   | 0,366  |
| 15 | P29692 EF1D_HUMAN  | R.ATAPQQTQHVS#PM*R.Q              | S133:        | 2 | 2,8517 | 0,389 | -1,124 |
| 15 | Q8NEY8 PPHLN_HUMAN | R.DNTFFRES#PVGR.K                 | S133:        | 3 | 2,7607 | 0,313 | -0,425 |
| 15 | Q8NEY8 PPHLN_HUMAN | R.DNTFFRES#PVGR.K                 | S133:        | 2 | 2,5095 | 0,354 | 0      |
| 15 | Q9BQI0 IBA2_HUMAN  | K.ANESS#PKPVGPPPER.D              | S134:        | 3 | 3,7028 | 0,307 | -0,223 |
| 15 | Q09666 AHNK_HUMAN  | R.LKS#EDGVEGDLGETQSR.T            | S135:        | 3 | 5,5062 | 0,459 | 0,096  |
| 15 | Q09666 AHNK_HUMAN  | R.LKS#EDGVEGDLGETQSR.T            | S135:        | 2 | 4,0512 | 0,587 | -0,385 |
| 15 | Q5VZK9 LR16A_HUMAN | K.DGHQGSKS#NDS#GEEAEKEFIV.-       | S1357:S1360: | 3 | 2,8594 | 0,295 | -0,142 |
| 15 | Q13428 TCOF_HUMAN  | K.LGAGEGGEASVS#PEKTSTTSK.G        | S1378:       | 3 | 3,9054 | 0,39  | -0,353 |
| 15 | Q14160 LAP4_HUMAN  | R.VS#LVGADDLRK.M                  | S1378:       | 3 | 2,7981 | 0,317 | -0,146 |
| 15 | Q9ULT8 HECD1_HUMAN | R.KGS#SSSVCVASSSDISLGSTK.T        | S1386:       | 3 | 2,934  | 0,23  | 0,248  |
| 15 | P49736 MCM2_HUMAN  | R.GLLYDS#DEEDEERPAR.K             | S139:        | 2 | 3,3473 | 0,519 | 0,433  |
| 15 | P49736 MCM2_HUMAN  | R.GLLYDS#DEEDEERPAR.K             | S139:        | 3 | 2,6367 | 0,213 | -0,185 |
| 15 | Q9UQ35 SRRM2_HUMAN | K.AGM*SS#NQSISPVLDVAVPRT#PSRER.S  | S1398:T1413: | 3 | 4,7593 | 1     | -0,325 |
| 15 | Q9H6Y2 WDR55_HUMAN | R.TCEERPAEDGS#DEEDPDSM*EAPTR.I    | S14:         | 3 | 6,0152 | 0,429 | -0,584 |
| 15 | Q9Y3C5 RNF11_HUMAN | K.SPTSDDIS#LLHESQSDR.A            | S14:         | 2 | 3,3903 | 0,535 | 0,868  |
| 15 | Q9UQ35 SRRM2_HUMAN | K.AGM*SSNQSIS#PVLDAVPRT#PSRER.S   | S1404:T1413: | 3 | 5,5574 | 1     | -0,714 |
| 15 | Q14181 DPOA2_HUMAN | R.SVSTRS#PHQLLSPSSFS#PSATPSQK.Y   | S141:S152:   | 3 | 6,1872 | 1     | -0,198 |
| 15 | P49327 FAS_HUMAN   | R.RPTPQDS#PIFLPVDDTSFR.W          | S1411:       | 3 | 3,7666 | 0,104 | 0,161  |
| 15 | Q8IVF2 AHNK2_HUMAN | K.LQM*PS#FKVVK.V                  | S1418:       | 3 | 2,9629 | 0,333 | 0,072  |

|    |                    |                                |                    |   |        |       |        |
|----|--------------------|--------------------------------|--------------------|---|--------|-------|--------|
| 15 | Q8NEJ9 NGDN_HUMAN  | K.LSS#EDEEEDEAEDDQSEASGKK.S    | S143:              | 3 | 4,0269 | 0,383 | -0,292 |
| 15 | Q9BWU0 NADAP_HUMAN | R.SLQEEQSRPPTAVSS#PGGPAR.A     | S144:              | 3 | 4,5688 | 0,437 | -0,41  |
| 15 | P46940 IQGA1_HUMAN | K.S#VKEDSNLTLQEK.K             | S1443:             | 2 | 3,3186 | 0,339 | -0,932 |
| 15 | O94916 NFAT5_HUMAN | R.HTVLYIS#PPPEDLLDNSR.M        | S145:              | 3 | 3,2662 | 0,26  | -0,682 |
| 15 | P39880 CUX1_HUMAN  | R.RPSSLQS#LFLGLEAAGAR.D        | S1458:             | 3 | 3,8234 | 0,412 | -0,472 |
| 15 | O15085 ARHGB_HUMAN | K.SLGGESS#GGTTPVGSFHTEAAR.W    | S1458:             | 3 | 2,7793 | 0,257 | 0,084  |
| 15 | Q9HC35 EMAL4_HUMAN | R.ASPS#PQPSSQPLQIHRQT#PESK.N   | S146:T160:         | 3 | 2,6354 | 0,087 | 0,214  |
| 15 | P11388 TOP2A_HUMAN | K.RKPS#TS#DDS#DSNFEK.I         | S1469:S1471:S1474: | 2 | 4,5467 | 0,51  | -0,437 |
| 15 | Q14181 DPOA2_HUMAN | R.SPHQLLS#PSSFSPSATPSQK.Y      | S147:              | 3 | 3,3857 | 0,248 | -0,169 |
| 15 | O15234 CASC3_HUMAN | K.STVTGERQS#GDGQESTEPVENK.V    | S148:              | 3 | 5,9436 | 0,402 | -0,227 |
| 15 | P62753 RS6_HUMAN   | K.LFNLS#KEDDVR.Q               | S148:              | 2 | 2,6207 | 0,201 | 0,776  |
| 15 | Q9GZR2 REXO4_HUMAN | R.APSS#PVAKPGPVK.T             | S15:               | 2 | 2,8848 | 0,367 | -0,278 |
| 15 | Q9GZR2 REXO4_HUMAN | R.APSS#PVAKPGPVK.T             | S15:               | 3 | 2,7671 | 0,442 | 0,07   |
| 15 | O75369 FLNB_HUMAN  | K.YADEEIPRS#PFK.V              | S1505:             | 2 | 3,1787 | 0,3   | 0,398  |
| 15 | O75369 FLNB_HUMAN  | K.YADEEIPRS#PFK.V              | S1505:             | 3 | 2,9556 | 0,189 | 0,179  |
| 15 | P49792 RBP2_HUMAN  | R.KQS#LPATSIPTPASFK.F          | S1509:             | 2 | 2,935  | 0,426 | -0,139 |
| 15 | Q15751 HERC1_HUMAN | K.SRS#ESDLSQPESDEEGYALSGR.Q    | S1512:             | 3 | 3,6293 | 0,323 | 1,107  |
| 15 | Q96RS0 TGS1_HUMAN  | R.KEYEEDDILAS#DDPSSIEQYENTR.T  | S154:              | 3 | 5,8191 | 0,404 | -0,625 |
| 15 | Q9UQ35 SRRM2_HUMAN | R.SGS#SQELDVKPSASPQER.S        | S1541:             | 2 | 3,0917 | 0,477 | -0,492 |
| 15 | P49916 DNL3_HUMAN  | K.FSGFSAKPNNSGEAPSS#PTPK.R     | S155:              | 3 | 4,9415 | 0,398 | 0,418  |
| 15 | Q8IX90 CM003_HUMAN | K.SPRS#PQLSDFGLER.Y            | S155:              | 3 | 4,7805 | 0,32  | 0,11   |
| 15 | Q9UQ35 SRRM2_HUMAN | R.SGSSQELDVKPSAS#PQER.S        | S1552:             | 2 | 4,3061 | 0,492 | 0,308  |
| 15 | Q9UQ35 SRRM2_HUMAN | R.SGSSQELDVKPSAS#PQER.S        | S1552:             | 3 | 3,617  | 0,232 | 0,185  |
| 15 | Q5UIP0 RIF1_HUMAN  | R.ASQGLLSSIENSES#DSSEAKEEGSR.K | S1554:             | 3 | 5,209  | 0,58  | 0,41   |
| 15 | O95292 VAPB_HUMAN  | K.S#LSSSLDDTEVKK.V             | S156:              | 2 | 3,4732 | 0,533 | 0,164  |
| 15 | Q5JTV8 TOIP1_HUMAN | R.DSHS#S#EEDEASSQTDLSTISKK.T   | S156:S157:         | 3 | 4,7898 | 0,505 | 0,206  |
| 15 | Q92733 PRCC_HUMAN  | K.IAAPELHKGDS#DS#EEDEPTK.K     | S157:S159:         | 3 | 3,9026 | 0,417 | 0,314  |
| 15 | Q14839 CHD4_HUMAN  | K.IEENS#LKEEESIEGK.E           | S1570:             | 3 | 3,2346 | 0,342 | 0,094  |
| 15 | Q14839 CHD4_HUMAN  | K.IEENS#LKEEESIEGK.E           | S1570:             | 2 | 2,5377 | 0,478 | 0,565  |
| 15 | Q96JC9 EAF1_HUMAN  | K.TS#PLKDNPS#PEPQLDDIKR.E      | S158:S165:         | 3 | 3,817  | 0,527 | 0,317  |
| 15 | Q8NFA0 UBP32_HUMAN | K.M*ADTSS#M*DEFESDYKK.Y        | S1588:             | 2 | 2,3072 | 0,592 | 0,694  |
| 15 | Q7Z401 MYCPP_HUMAN | R.SIS#TSGPLDKEDTGR.Q           | S1589:             | 2 | 2,7096 | 0,432 | 0,074  |
| 15 | Q15742 NAB2_HUMAN  | R.SFS#PKSPLELGEK.L             | S159:              | 3 | 3,8049 | 0,299 | 0,305  |

|    |                     |                                  |            |   |        |       |        |
|----|---------------------|----------------------------------|------------|---|--------|-------|--------|
| 15 | Q15742 NAB2_HUMAN   | R.SFS#PKSPLELGEK.L               | S159:      | 2 | 2,1676 | 0,281 | 0,163  |
| 15 | P16949 STMN1_HUMAN  | K.RAS#GQAFELILSPR.S              | S16:       | 2 | 3,7508 | 0,541 | -0,225 |
| 15 | Q13200 PSMD2_HUMAN  | K.APVQPQQS#PAAAAPGGTDEKPSGK.E    | S16:       | 3 | 3,6362 | 0,336 | -0,716 |
| 15 | Q9BVG9 PTSS2_HUMAN  | R.DAGGPRPES#PVPAGR.A             | S16:       | 3 | 3,0483 | 0,186 | 0      |
| 15 | Q9BVG9 PTSS2_HUMAN  | R.DAGGPRPES#PVPAGR.A             | S16:       | 2 | 2,3586 | 0,295 | -0,791 |
| 15 | Q02241 KIF23_HUMAN  | K.SNDRNS#M*DIQCEVDALLER.Q        | S160:      | 3 | 5,2586 | 0,316 | -0,465 |
| 15 | Q92870 APBB2_HUMAN  | R.TKS#FLNYYADLETSAR.E            | S160:      | 2 | 4,95   | 0,516 | -0,249 |
| 15 | Q92870 APBB2_HUMAN  | R.TKS#FLNYYADLETSAR.E            | S160:      | 3 | 4,8876 | 0,458 | -0,187 |
| 15 | Q6ZVM7 TM1L2_HUMAN  | R.KGVEFPM*ADLDALS#PIHT#PQR.S     | S160:T164: | 3 | 5,4115 | 0,415 | -0,366 |
| 15 | Q9P206 K1522_HUMAN  | R.S#TVLGLPQHVK.E                 | S161:      | 2 | 2,6093 | 0,235 | 0,264  |
| 15 | Q5UIP0 RIF1_HUMAN   | K.ATSEEDVSIKS#PICEK.Q            | S1616:     | 2 | 3,5623 | 0,45  | 0,717  |
| 15 | Q12888 TP53B_HUMAN  | K.AADIS#LDNLVEGKR.K              | S1618:     | 3 | 3,3297 | 0,415 | -0,231 |
| 15 | P29692 EF1D_HUMAN   | K.KPATPAEDEDDEDDIDLFGS#DNEEEDK.E | S162:      | 3 | 7,6391 | 0,556 | 0,612  |
| 15 | Q15742 NAB2_HUMAN   | R.SFSPKS#PLELGEK.L               | S162:      | 2 | 2,8212 | 0,285 | -0,407 |
| 15 | O00566 MPP10_HUMAN  | K.SDLRKS#PVFS#DEDSDLDFDISK.L     | S163:S167: | 3 | 4,9345 | 0,444 | -0,274 |
| 15 | O00566 MPP10_HUMAN  | K.SDLRKS#PVFSDEDS#DLDFDISK.L     | S163:S171: | 3 | 6,453  | 0,503 | -0,274 |
| 15 | O00566 MPP10_HUMAN  | R.KSPVFS#DEDS#DLDFDISKLEQQSK.V   | S167:S171: | 3 | 3,1443 | 0,389 | -0,314 |
| 15 | O95049 ZO3_HUMAN    | R.RSPGGGS#EANGLALVSGFK.R         | S169:      | 3 | 2,631  | 0,141 | -0,68  |
| 15 | Q9HCK8 CHD8_HUMAN   | R.M*NYM*QNHQAGAPAPS#LSR.C        | S1697:     | 3 | 4,0057 | 0,33  | 0,351  |
| 15 | P39687 AN32A_HUMAN  | R.TPS#DVKELVLDNSR.S              | S17:       | 3 | 3,7585 | 0,403 | 0,111  |
| 15 | P39687 AN32A_HUMAN  | R.TPS#DVKELVLDNSR.S              | S17:       | 2 | 3,3299 | 0,535 | -0,443 |
| 15 | Q7L4I2 RSRC2_HUMAN  | R.DGLAPEKTS#PDR.D                | S17:       | 2 | 3,1359 | 0,33  | -0,804 |
| 15 | Q6P597 KLC3_HUMAN   | R.RDS#LASLFPSEEEER.K             | S173:      | 2 | 4,0906 | 0,586 | -0,331 |
| 15 | Q9HCD6 TANC2_HUMAN  | R.SSS#QLGSPDVSHLIR.R             | S1740:     | 2 | 2,2546 | 0,319 | 0      |
| 15 | Q6PCE3 PGM2L_HUMAN  | K.AVAGVM*ITAS#HNR.K              | S175:      | 2 | 3,6583 | 0,475 | 0      |
| 15 | B1AM35 B1AM35_HUMAN | K.LEEPELNRQS#PNPR.R              | S175:      | 2 | 2,7749 | 0,137 | 0,394  |
| 15 | P80723 BASP_HUMAN   | K.SDGAPASDSKPGS#SEAAPSSK.E       | S176:      | 2 | 2,9069 | 0,491 | -0,485 |
| 15 | Q58FF8 H90B2_HUMAN  | K.IEDVGS#DEEDDSGKDK.K            | S177:      | 2 | 5,5604 | 0,577 | -0,94  |
| 15 | Q58FF8 H90B2_HUMAN  | K.IEDVGS#DEEDDSGKDK.K            | S177:      | 3 | 4,0822 | 0,379 | -0,846 |
| 15 | Q58FF8 H90B2_HUMAN  | K.IEDVGS#DEEDDSGKDK.K            | S177:      | 3 | 3,3692 | 0,379 | -0,101 |
| 15 | Q9NYF8 BCLF1_HUMAN  | K.AEGEPQES#PLKSK.S               | S177:      | 2 | 3,0321 | 0,448 | 0      |
| 15 | P46821 MAP1B_HUMAN  | K.VQSLEGEKLS#PK.S                | S1779:     | 2 | 3,2269 | 0,121 | -0,175 |
| 15 | Q9NUJ3 T11L1_HUMAN  | K.SKS#NDSEEGLEDAVEGADEALQK.A     | S18:       | 3 | 3,836  | 0,167 | -0,293 |

|    |                     |                                |                    |   |        |       |        |
|----|---------------------|--------------------------------|--------------------|---|--------|-------|--------|
| 15 | P48634 BAT2_HUMAN   | K.KYS#SLNLFDTYK.G              | S18:               | 2 | 3,6189 | 0,376 | -0,157 |
| 15 | P48634 BAT2_HUMAN   | K.KYS#SLNLFDTYK.G              | S18:               | 3 | 2,7383 | 0,149 | 0,117  |
| 15 | O00264 PGRC1_HUMAN  | K.EGEEPTVYS#DEEEKDESAR.K       | S181:              | 3 | 3,0669 | 0,331 | 0,231  |
| 15 | Q9NQC3 RTN4_HUMAN   | K.RRGS#S#GSVDETLFALPAASEPVIR.S | S181:S182:         | 3 | 4,1917 | 0,424 | -0,479 |
| 15 | Q96A73 K1191_HUMAN  | R.QPASAQSTPSTTPHS#SPK.Q        | S182:              | 2 | 2,4078 | 0,425 | -0,646 |
| 15 | Q9NQC3 RTN4_HUMAN   | K.RRGSS#GS#VDETLFALPAASEPVIR.S | S182:S184:         | 3 | 2,8221 | 0,394 | -0,547 |
| 15 | Q58FF8 H90B2_HUMAN  | K.IEDVGSDEEDDS#GKDK.K          | S183:              | 2 | 3,9622 | 0,512 | -0,537 |
| 15 | Q96A73 K1191_HUMAN  | R.QPASAQSTPSTTPHSS#PK.Q        | S183:              | 3 | 3,4175 | 0,37  | -0,581 |
| 15 | Q9BVC5 ASHWN_HUMAN  | R.KSPS#GPVKS#PPLSPVGTTPVK.L    | S184:S189:         | 3 | 2,7815 | 0,166 | 0,742  |
| 15 | O60749 SNX2_HUMAN   | R.FS#DFLGLHSK.L                | S185:              | 3 | 3,5114 | 0,353 | 0      |
| 15 | Q9UPN3 MACF1_HUMAN  | R.QGS#FSEDEVISHK.G             | S1860:             | 3 | 2,8554 | 0,373 | 0,065  |
| 15 | Q13596 SNX1_HUMAN   | R.RFS#DFLGLYEK.L               | S188:              | 2 | 3,3421 | 0,37  | -0,419 |
| 15 | Q9H1E3 NUCKS_HUMAN  | R.KVVDYSQFQES#DDADEDYGR.D      | S19:               | 3 | 5,1793 | 0,334 | 0,374  |
| 15 | Q9NUE0 ZDH18_HUMAN  | -.M*KDCEYQQISPGAAPLAS#PGAR.R   | S19:               | 3 | 4,3509 | 0,362 | 0,288  |
| 15 | P46821 MAP1B_HUMAN  | R.TTKS#PSDSGYSYETIGK.T         | S1915:             | 2 | 3,1549 | 0,527 | -0,193 |
| 15 | P46013 KI67_HUMAN   | K.LDLLGNLPGS#KR.R              | S1937:             | 3 | 3,0755 | 0,289 | 0,067  |
| 15 | O43237 DC1L2_HUMAN  | K.FVKDFQDYM*EPEEGCQGS#PQR.R    | S194:              | 3 | 5,5614 | 0,58  | 0,346  |
| 15 | P35580 MYH10_HUMAN  | R.QLHLEGASLELS#DDDTESK.T       | S1956:             | 3 | 4,1244 | 0,405 | -0,253 |
| 15 | A4PB67 A4PB67_HUMAN | R.KGEM*PVSGLAVGSTLPS#PR.E      | S1957:             | 3 | 3,0138 | 0,328 | -0,185 |
| 15 | Q14980 NUMA1_HUMAN  | R.RAS#M*QPIQIAEGTGITTR.Q       | S1969:             | 3 | 3,2605 | 0,235 | -0,271 |
| 15 | Q6PID6 TTC33_HUMAN  | K.SEAPAEVTHFS#PK.S             | S197:              | 2 | 4,3078 | 0,414 | 0,247  |
| 15 | P55072 TERA_HUMAN   | R.EDEEES#LNEVGYYDDIGGCRK.Q     | S197:              | 3 | 2,8332 | 0,112 | 0      |
| 15 | Q9H501 ESF1_HUMAN   | R.TLDSGTSEIVKS#PR.I            | S198:              | 2 | 3,4543 | 0,383 | 0,078  |
| 15 | P04792 HSPB1_HUMAN  | R.AQLGGPEAAKS#DETAAK.-         | S199:              | 2 | 4,6506 | 0,535 | -0,566 |
| 15 | P41208 CETN2_HUMAN  | R.M*S#PKPELTEEK.Q              | S20:               | 3 | 4,0033 | 0,205 | 0      |
| 15 | B0AZS1 B0AZS1_HUMAN | K.FVSEDDRNS#FTLK.L             | S20:               | 2 | 3,4012 | 0,386 | 0,223  |
| 15 | P18583 SON_HUMAN    | R.RRS#FS#IS#PVR.L              | S2009:S2011:S2013: | 3 | 3,3574 | 0,246 | 0,253  |
| 15 | P18583 SON_HUMAN    | R.RRS#FS#IS#PVR.L              | S2009:S2011:S2013: | 2 | 2,6396 | 0,204 | -0,253 |
| 15 | Q15717 ELAV1_HUMAN  | K.NVALLSQLYHS#PAR.R            | S202:              | 2 | 4,255  | 0,388 | -0,074 |
| 15 | Q9H4A3 WNK1_HUMAN   | R.DVDDGS#GSPHS#PHQLSSK.S       | S2027:S2032:       | 3 | 3,6548 | 1     | -0,182 |
| 15 | Q9H4A3 WNK1_HUMAN   | R.DVDDGSGS#PHS#PHQLSSK.S       | S2029:S2032:       | 3 | 2,6511 | 0,363 | -0,273 |
| 15 | Q9NY61 AATF_HUMAN   | R.AGDRNS#EDDGVVM*TFSSVK.V      | S203:              | 3 | 5,2822 | 0,464 | -0,173 |
| 15 | Q9H0H5 RGAP1_HUMAN  | K.TRS#IGSAVDQGNESIVAK.T        | S203:              | 3 | 3,3962 | 0,204 | -0,287 |

|    |                     |                                   |              |   |        |       |        |
|----|---------------------|-----------------------------------|--------------|---|--------|-------|--------|
| 15 | Q9NY61 AATF_HUMAN   | R.AGDRNS#EDDGVVM*TFSSVK.V         | S203:        | 2 | 3,0717 | 0,556 | -0,578 |
| 15 | Q8NCF5 NF2IP_HUMAN  | K.KTEFLDLDNSPLSPPS#PR.T           | S204:        | 3 | 4,2106 | 0,42  | -0,262 |
| 15 | Q8NCF5 NF2IP_HUMAN  | K.KTEFLDLDNSPLSPPS#PR.T           | S204:        | 2 | 2,8301 | 0,408 | 0      |
| 15 | Q96EV2 RBM33_HUMAN  | K.DIKEES#DEEEEDDEESGR.L           | S205:        | 3 | 6,3845 | 0,43  | -0,33  |
| 15 | Q6WKZ4 RFIP1_HUMAN  | K.NKDSGSDTASAIIPSTTPSVSDDES#VVK.D | S206:        | 3 | 3,2965 | 0,19  | 0,67   |
| 15 | P60174 TPIS_HUMAN   | R.KQS#LGELIGTLNAAK.V              | S21:         | 2 | 5,024  | 0,597 | -0,226 |
| 15 | Q5JPI9 METLA_HUMAN  | R.SDKGS#PGEDGFVPSALGTR.E          | S21:         | 2 | 4,8383 | 0,501 | 0,062  |
| 15 | P60174 TPIS_HUMAN   | R.KQS#LGELIGTLNAAK.V              | S21:         | 3 | 4,3291 | 0,459 | 0,338  |
| 15 | Q5JPI9 METLA_HUMAN  | R.SDKGS#PGEDGFVPSALGTR.E          | S21:         | 3 | 2,7217 | 0,171 | 0,093  |
| 15 | P46013 KI67_HUMAN   | K.IACKS#PPPEM*DTPSTR.R            | S2105:       | 3 | 4,5701 | 0,31  | -0,442 |
| 15 | Q13242 SFRS9_HUMAN  | R.GS#PHYFSPFRPY.-                 | S211:        | 2 | 2,3111 | 0,357 | -0,636 |
| 15 | Q9H4L7 SMRCD_HUMAN  | R.KLS#S#SSEPYEEDEFNDQSIKK.T       | S211:S212:   | 3 | 5,4541 | 1     | 0,134  |
| 15 | Q86SQ0 PHLB2_HUMAN  | R.KM*S#IQDSLALQPK.L               | S212:        | 2 | 4,122  | 0,313 | -0,235 |
| 15 | Q86SQ0 PHLB2_HUMAN  | R.KM*S#IQDSLALQPK.L               | S212:        | 3 | 3,5553 | 0,242 | 0,353  |
| 15 | Q9UQ35 SRRM2_HUMAN  | R.M*SCFSRPSM*S#PTPLDR.C           | S2123:       | 3 | 4,1396 | 0,362 | 0,462  |
| 15 | P21333 FLNA_HUMAN   | K.FADQHVPGS#PFSVK.V               | S2128:       | 3 | 4,2911 | 0,453 | 0,458  |
| 15 | P21333 FLNA_HUMAN   | K.FADQHVPGS#PFSVK.V               | S2128:       | 2 | 3,8432 | 0,431 | -0,612 |
| 15 | Q7L2J0 MEPCE_HUMAN  | R.TLNAETPKS#SPLPAK.G              | S216:        | 2 | 3,6685 | 0,331 | 0,075  |
| 15 | Q8ND56 LS14A_HUMAN  | R.S#PVSTRPLPSASQK.A               | S216:        | 2 | 2,1787 | 0,302 | -0,397 |
| 15 | Q15019 SEPT2_HUMAN  | K.IYHLPDAES#DEDEDFK.E             | S218:        | 3 | 3,1536 | 0,127 | 0,457  |
| 15 | Q5VUA4 ZN318_HUMAN  | K.DKLC#PLSEPGDPSK.C               | S2189:       | 2 | 3,0596 | 0,368 | 0,357  |
| 15 | A8K630 A8K630_HUMAN | R.LQQQHSEQPPLQPS#PVTR.R           | S22:         | 3 | 3,5661 | 0,358 | 0,244  |
| 15 | Q9UKX7 NUP50_HUMAN  | R.NSESESNKVAETQS#PSLFGSTK.L       | S221:        | 3 | 5,7566 | 0,474 | 0,443  |
| 15 | O95425 SVIL_HUMAN   | R.QAHDLS#PAAESSSTFSFSGR.D         | S221:        | 3 | 3,7673 | 0,331 | -0,169 |
| 15 | Q8TDY2 RBCC1_HUMAN  | R.LDS#LPEHEDESEK.A                | S222:        | 2 | 2,1944 | 0,335 | -0,66  |
| 15 | Q96SK2 TM209_HUMAN  | R.YRSS#PTVYNS#PTDKEDYM*TDLR.T     | S222:S228:   | 3 | 3,5389 | 1     | 0,39   |
| 15 | P46013 KI67_HUMAN   | K.IACRS#PQPDPVGT#PTIFKPQSK.R      | S2223:T2231: | 3 | 5,2161 | 0,447 | -0,212 |
| 15 | Q14978 NOLC1_HUMAN  | K.AASSSSSSSS#SSSDDEEEKAAATPK.K    | S224:        | 3 | 5,0096 | 1     | -0,482 |
| 15 | Q9Y5K6 CD2AP_HUMAN  | R.GIGFGDIFKEGS#VK.L               | S224:        | 2 | 4,5627 | 0,534 | -0,477 |
| 15 | Q13573 SNW1_HUMAN   | R.GPPS#PPAPVM*HSPSR.K             | S224:        | 3 | 3,1189 | 0,37  | -0,341 |
| 15 | Q8WXE1 ATRIP_HUMAN  | K.LAAPSVSHVS#PR.K                 | S224:        | 2 | 2,4361 | 0,372 | 0,281  |
| 15 | Q9Y4E8 UBP15_HUMAN  | R.GPS#TPKSPGASNFSTLPK.I           | S225:        | 3 | 3,622  | 0,393 | -0,395 |
| 15 | Q2NL66 Q2NL66_HUMAN | R.GPS#TPKKPLEQSC.-                | S225:        | 2 | 3,115  | 0,426 | -0,485 |

|    |                    |                                 |            |   |        |       |        |
|----|--------------------|---------------------------------|------------|---|--------|-------|--------|
| 15 | Q03188 CENPC_HUMAN | K.IEIDNKVS#DEEDKTS#EGQER.K      | S225:S232: | 3 | 3,9799 | 0,291 | 0      |
| 15 | P08670 VIME_HUMAN  | R.KVES#LQEEIAFLK.K              | S226:      | 2 | 4,7584 | 0,379 | -1,21  |
| 15 | P08670 VIME_HUMAN  | R.KVES#LQEEIAFLK.K              | S226:      | 3 | 4,3638 | 0,314 | -0,113 |
| 15 | Q9Y4E8 UBP15_HUMAN | R.GPSTPKS#PGASNFSTLPK.I         | S229:      | 2 | 3,2528 | 0,434 | -0,395 |
| 15 | Q13033 STRN3_HUMAN | K.NLEQILNGGES#PKQK.G            | S229:      | 2 | 3,0529 | 0,291 | -0,141 |
| 15 | Q9UNE7 STUB1_HUMAN | R.LGAGGGSPKES#PSAQELK.E         | S23:       | 3 | 3,6785 | 0,3   | -0,612 |
| 15 | Q9UBD5 ORC3_HUMAN  | R.KIS#LPIEDYFNK.G               | S23:       | 3 | 3,5676 | 0,278 | -0,118 |
| 15 | Q9UBD5 ORC3_HUMAN  | R.KIS#LPIEDYFNK.G               | S23:       | 2 | 3,3286 | 0,367 | -0,631 |
| 15 | Q96L14 C170L_HUMAN | K.S#SPVNNHHS#PGQTPTLGQPEAR.A    | S230:S238: | 3 | 3,1638 | 0,283 | 0,296  |
| 15 | Q13283 G3BP1_HUMAN | K.SSS#PAPADIAQTVQEDLR.T         | S232:      | 2 | 2,6687 | 0,35  | -0,435 |
| 15 | Q8IYB3 SRRM1_HUMAN | K.VKEPS#VQEATSTSDILK.V          | S234:      | 2 | 4,4407 | 0,53  | 0,638  |
| 15 | Q9H7L9 SDS3_HUMAN  | K.RPAS#PS#SPEHLPATPAESPAQR.F    | S234:S236: | 3 | 4,8454 | 0,451 | 0,374  |
| 15 | O95671 ASML_HUMAN  | K.HDSIPAADTFEDLS#DVEGGGSEPTQR.D | S239:      | 3 | 5,4442 | 0,409 | -0,26  |
| 15 | Q13136 LIPA1_HUMAN | R.SS#DGSLSHEEDLAK.V             | S239:      | 2 | 3,0776 | 0,344 | -0,471 |
| 15 | P51003 PAPOA_HUMAN | K.HYGITS#PISLAAPK.E             | S24:       | 2 | 4,2953 | 0,517 | 0      |
| 15 | Q9UPN3 MACF1_HUMAN | K.SM*DAM*SS#PTKTETVK.A          | S2429:     | 2 | 2,3687 | 0,314 | -0,637 |
| 15 | O95425 SVIL_HUMAN  | R.DSSFTEVPRS#PK.H               | S245:      | 2 | 3,5301 | 0,359 | -0,085 |
| 15 | Q14684 RRP1B_HUMAN | K.TKVGDDLS#AEEIPENEVSLR.R       | S245:      | 3 | 2,9663 | 0,129 | -0,156 |
| 15 | P49792 RBP2_HUMAN  | K.DSLITPHVS#R.S                 | S2454:     | 2 | 2,2468 | 0,143 | -0,304 |
| 15 | Q96L73 NSD1_HUMAN  | R.AAS#PHQVTPQADEK.M             | S2471:     | 2 | 2,5839 | 0,352 | -0,391 |
| 15 | Q9NYL9 TMOD3_HUMAN | K.YKDLDEDELLGNLS#ETELK.Q        | S25:       | 3 | 6,0975 | 0,387 | 0,397  |
| 15 | Q7L9B9 EEDP1_HUMAN | R.KFS#AACNFSNILVNQER.L          | S25:       | 3 | 4,733  | 0,273 | 0,176  |
| 15 | Q8ND76 CCNY_HUMAN  | R.LES#YRPDTPDLSR.E              | S25:       | 3 | 2,9066 | 0,354 | -0,06  |
| 15 | Q7L9B9 EEDP1_HUMAN | R.KFS#AACNFSNILVNQER.L          | S25:       | 2 | 2,298  | 0,268 | 0      |
| 15 | Q9H4L5 OSBL3_HUMAN | R.TYS#APAINAIQGGSFES#PKKEK.R    | S251:S265: | 3 | 3,0408 | 0,35  | 0,663  |
| 15 | P21359 NF1_HUMAN   | K.SM*S#LDM*GQPSQANTKK.L         | S2523:     | 3 | 2,7652 | 0,222 | -0,598 |
| 15 | Q9Y2W1 TR150_HUMAN | R.SPALKS#PLQSVVVR.R             | S253:      | 3 | 4,3918 | 0,478 | 0      |
| 15 | P06748 NPM_HUMAN   | K.M*QAS#IEKGGSLPK.V             | S254:      | 2 | 3,735  | 0,366 | -0,423 |
| 15 | P21359 NF1_HUMAN   | K.S#FDHLISDTK.A                 | S2543:     | 2 | 2,8956 | 0,491 | 0      |
| 15 | Q96H79 ZCCHL_HUMAN | K.M*LENTDNS#SPSTEHSQGLEK.Q      | S256:      | 3 | 2,7292 | 0,119 | -0,636 |
| 15 | P21359 NF1_HUMAN   | R.KVS#VSESNVLLDEEVLTDPK.I       | S2597:     | 3 | 3,5647 | 0,234 | 0,561  |
| 15 | P29966 MARCS_HUMAN | K.GEAAAERPGEAAVAS#SPSK.A        | S26:       | 3 | 4,5058 | 0,333 | -1,373 |
| 15 | P29966 MARCS_HUMAN | K.GEAAAERPGEAAVAS#SPSK.A        | S26:       | 2 | 3,4701 | 0,508 | -1,112 |



|    |                    |                               |            |   |        |       |        |
|----|--------------------|-------------------------------|------------|---|--------|-------|--------|
| 15 | Q9BRL6 SFR2B_HUMAN | K.VDNLTyrTS#PDSLr.R           | S26:       | 2 | 2,5332 | 0,235 | 0,569  |
| 15 | Q03188 CENPC_HUMAN | K.KS#FSTLFLetVK.R             | S261:      | 3 | 2,7408 | 0,24  | -0,062 |
| 15 | P07900 HS90A_HUMAN | K.ESEdKPEIEdVGS#DEEEeK.K      | S263:      | 3 | 3,9509 | 0,321 | 0,644  |
| 15 | P06733 ENOA_HUMAN  | K.YDLDFKS#PDDPSR.Y            | S263:      | 2 | 3,7607 | 0,424 | -0,448 |
| 15 | P06733 ENOA_HUMAN  | K.YDLDFKS#PDDPSR.Y            | S263:      | 3 | 3,2033 | 0,352 | -0,112 |
| 15 | Q03188 CENPC_HUMAN | K.KSFS#TLFLetVK.R             | S263:      | 2 | 3,1481 | 0,363 | 0      |
| 15 | Q9Y385 UB2J1_HUMAN | R.LS#TSPdVIQGHQPR.D           | S266:      | 3 | 2,768  | 0,369 | 0      |
| 15 | Q9Y385 UB2J1_HUMAN | R.LS#TSPdVIQGHQPR.D           | S266:      | 2 | 2,1593 | 0,199 | -0,378 |
| 15 | P49792 RBP2_HUMAN  | K.NRPdYVS#EEEEdDEdFetAVK.K    | S2668:     | 3 | 5,9648 | 0,495 | -0,634 |
| 15 | P24928 RPB1_HUMAN  | R.VQFGVLS#PDELKR.M            | S27:       | 2 | 3,3866 | 0,352 | -0,622 |
| 15 | Q9UJM3 ERRFI_HUMAN | R.AS#PNsDEdKPEVPPR.V          | S273:      | 3 | 2,7755 | 0,406 | -0,319 |
| 15 | Q6ZNJ1 NBEL2_HUMAN | R.RIS#QVSSGETeyNPteAR.-       | S2739:     | 3 | 4,999  | 0,344 | -0,174 |
| 15 | Q3KR37 GRM1B_HUMAN | K.SSIetKPDAS#PQLPK.K          | S274:      | 2 | 4,2217 | 0,561 | 0,218  |
| 15 | Q3KR37 GRM1B_HUMAN | K.SSIetKPDAS#PQLPK.K          | S274:      | 3 | 3,3051 | 0,321 | 0      |
| 15 | Q13885 TBB2A_HUMAN | R.LHFFM*PGFAPLTS#R.G          | S275:      | 3 | 2,9341 | 0,264 | -0,426 |
| 15 | P18206 VINC_HUMAN  | R.ALASIDS#KLNQAK.G            | S275:      | 2 | 2,8044 | 0,198 | -0,085 |
| 15 | O75410 TACC1_HUMAN | K.ASYHfSPEELdENTS#PLLGDAR.F   | S276:      | 3 | 6,1255 | 0,534 | -0,362 |
| 15 | Q9UKS6 PACN3_HUMAN | R.DLHQGIEAAS#DEEDLR.W         | S276:      | 2 | 5,7044 | 0,415 | 0,13   |
| 15 | Q9UKS6 PACN3_HUMAN | R.DLHQGIEAAS#DEEDLR.W         | S276:      | 3 | 3,9348 | 0,318 | 0      |
| 15 | Q9UBF8 PI4KB_HUMAN | R.SKS#DATASISLSSNLK.R         | S277:      | 2 | 5,1841 | 0,607 | 0,144  |
| 15 | Q9UBF8 PI4KB_HUMAN | R.SKS#DATASISLSSNLK.R         | S277:      | 3 | 3,6684 | 0,244 | 0      |
| 15 | P42696 RBM34_HUMAN | R.SVQEGENPDDGVRGS#PPedYR.L    | S28:       | 3 | 3,6385 | 0,423 | 0,154  |
| 15 | P27816 MAP4_HUMAN  | K.DM*ES#PTKLDVTLAK.D          | S280:      | 3 | 4,1076 | 0,356 | 0      |
| 15 | P27816 MAP4_HUMAN  | K.DM*ES#PTKLDVTLAK.D          | S280:      | 2 | 3,9453 | 0,403 | 0      |
| 15 | Q8NDD1 CA131_HUMAN | K.NGTLLS#PVDIKK.I             | S280:      | 2 | 3,1005 | 0,311 | -0,248 |
| 15 | Q8IXT5 RB12B_HUMAN | R.S#PLGFYVHLK.N               | S280:      | 2 | 2,0146 | 0,168 | -0,295 |
| 15 | Q9UHR4 BI2L1_HUMAN | K.DYDTLSKCS#PK.M              | S281:      | 2 | 3,4711 | 0,377 | -0,35  |
| 15 | Q02952 AKA12_HUMAN | K.SAES#PTSPVTSETGStFKK.F      | S283:      | 3 | 2,8356 | 0,183 | 0,181  |
| 15 | O75592 MYCB2_HUMAN | R.SKS#DSYTLDPDTLR.K           | S2833:     | 2 | 3,6674 | 0,47  | 0,436  |
| 15 | O75592 MYCB2_HUMAN | R.SKS#DSYTLDPDTLR.K           | S2833:     | 3 | 3,0793 | 0,211 | 0,218  |
| 15 | Q13435 SF3B2_HUMAN | R.SSLGQS#ASeteEDTVSVSKK.E     | S284:      | 3 | 3,249  | 0,498 | 0,426  |
| 15 | Q9Y624 JAM1_HUMAN  | K.KVIYSQPS#ARS#EGEFKQTSSFLV.- | S284:S287: | 3 | 3,46   | 0,41  | -0,866 |
| 15 | Q13435 SF3B2_HUMAN | R.SSLGQSAS#eteEDTVSVSKK.E     | S286:      | 3 | 4,2453 | 0,55  | 0,341  |

|    |                     |                                 |            |   |        |       |        |
|----|---------------------|---------------------------------|------------|---|--------|-------|--------|
| 15 | Q02952 AKA12_HUMAN  | K.SAESPTS#PVTSETGSTFKK.F        | S286:      | 2 | 2,1969 | 0,29  | 0,362  |
| 15 | Q9NWH9 SLTM_HUMAN   | K.DGQDAIAQS#PEKESK.D            | S289:      | 2 | 4,1443 | 0,447 | -0,58  |
| 15 | P42766 RL35_HUMAN   | K.QLDDLKVELS#QLR.V              | S29:       | 3 | 2,8444 | 0,186 | -0,112 |
| 15 | Q8TF01 SFR18_HUMAN  | R.SKFD5#DEEEEDTENVEAASSGK.V     | S290:      | 3 | 5,4279 | 0,526 | 0,516  |
| 15 | Q5VWC0 Q5VWC0_HUMAN | R.TAS#NPKVENEDEPVR.L            | S294:      | 3 | 3,6638 | 0,402 | 0      |
| 15 | Q9BSI4 TINF2_HUMAN  | R.NLGS#PTQVISKPESE.E            | S295:      | 2 | 3,3071 | 0,35  | -0,44  |
| 15 | O00499 BIN1_HUMAN   | K.GNKS#SPDPGSPAATPEIR.V         | S296:      | 2 | 4,9168 | 0,452 | 0,623  |
| 15 | Q03252 LMNB2_HUMAN  | R.M*RLES#LSYQLSGLQK.Q           | S296:      | 3 | 4,8126 | 0,411 | -0,297 |
| 15 | Q4LE39 ARI4B_HUMAN  | K.EKEDNSS#EEEEIEPFPEER.E        | S296:      | 3 | 4,7821 | 0,308 | -0,506 |
| 15 | Q03252 LMNB2_HUMAN  | R.M*RLES#LSYQLSGLQK.Q           | S296:      | 2 | 3,9734 | 0,469 | -0,396 |
| 15 | O14757 CHK1_HUMAN   | K.HIQS#NLDSPVNSASSEENVK.Y       | S296:      | 3 | 3,6314 | 0,2   | 0,461  |
| 15 | P46013 KI67_HUMAN   | K.S#GGSGHAVAEPAS#PEQELDQNKKGK.G | S296:S308: | 3 | 3,6118 | 0,19  | 0,287  |
| 15 | O00499 BIN1_HUMAN   | K.GNKSPS#PPDPGSPAATPEIR.V       | S298:      | 3 | 2,6816 | 0,174 | -0,28  |
| 15 | P07910 HNRPC_HUMAN  | K.DDEKEAEEGEDDRDS#ANGEDDS.-     | S299:      | 3 | 3,6078 | 0,395 | -0,438 |
| 15 | O75379 VAMP4_HUMAN  | R.RNLLEDDS#DEEEDFFLR.G          | S30:       | 3 | 4,6623 | 0,444 | -0,412 |
| 15 | Q9H8T0 AKTIP_HUMAN  | K.TLTGDVKT5#PPR.T               | S30:       | 2 | 2,8888 | 0,391 | 0,09   |
| 15 | O43815 STRN_HUMAN   | K.EALKEFDLVTSEEGDNES#R.S        | S301:      | 3 | 4,7926 | 0,432 | -0,306 |
| 15 | P02545 LMNA_HUMAN   | R.IRIDS#LSAQLSQLQK.Q            | S301:      | 2 | 4,1447 | 0,529 | -0,617 |
| 15 | P49023 PAXI_HUMAN   | R.DGGRS#SPGGQDEGGFM*AQGK.T      | S302:      | 3 | 5,3436 | 0,405 | -0,27  |
| 15 | Q8WVM8 SCFD1_HUMAN  | R.VNLEESSGVENS#PAGARPK.R        | S303:      | 2 | 4,4578 | 0,509 | 0,241  |
| 15 | Q8WVM8 SCFD1_HUMAN  | R.VNLEESSGVENS#PAGARPK.R        | S303:      | 3 | 3,7313 | 0,401 | -0,272 |
| 15 | P02545 LMNA_HUMAN   | R.IRIDSLS#AQLSQLQK.Q            | S303:      | 3 | 3,7165 | 0,245 | -0,308 |
| 15 | Q5JXC2 IIP45_HUMAN  | R.KS#FDASDTLALPR.H              | S303:      | 2 | 2,2264 | 0,129 | 0,081  |
| 15 | Q9H4L5 OSBL3_HUMAN  | R.LHSS#NPNLSTLDFGEEK.N          | S304:      | 2 | 4,5353 | 0,584 | -0,496 |
| 15 | P78310 CXAR_HUMAN   | R.SYIGSNHSSLGS#M*SPSNM*EGYSK.T  | S304:      | 3 | 4,4222 | 0,356 | -0,434 |
| 15 | Q05655 KPCD_HUMAN   | R.RSDS#ASSEPVGIYQGFEK.K         | S304:      | 2 | 4,4012 | 0,569 | 0,659  |
| 15 | P17706 PTN2_HUMAN   | K.EDLSPAFDHS#PNK.I              | S304:      | 2 | 2,6056 | 0,305 | 0,238  |
| 15 | P46013 KI67_HUMAN   | R.GKS#SEPVVIM*K.R               | S3041:     | 2 | 2,8938 | 0,33  | -0,288 |
| 15 | Q9UBW7 ZMYM2_HUMAN  | R.NQKQPGVDLSL#PVASLPK.Q         | S305:      | 3 | 3,2394 | 0,368 | 0      |
| 15 | Q58FF8 H90B2_HUMAN  | K.EFDGKS#LVSVTK.E               | S305:      | 2 | 2,223  | 0,392 | 0,176  |
| 15 | P78310 CXAR_HUMAN   | R.SYIGSNHSSLGSM*S#PSNM*EGYSK.T  | S306:      | 3 | 4,5602 | 0,441 | 0,434  |
| 15 | Q9NQ57 INCE_HUMAN   | R.TDSQSVRHS#PIAPS#SPSPQVLAQK.Y  | S306:S311: | 3 | 4,8567 | 1     | -0,342 |
| 15 | Q05655 KPCD_HUMAN   | R.RSDSASS#EPVGIYQGFEK.K         | S307:      | 3 | 4,0868 | 0,359 | 0,359  |

|    |                    |                                    |            |   |        |       |        |
|----|--------------------|------------------------------------|------------|---|--------|-------|--------|
| 15 | Q15054 DPOD3_HUMAN | R.VAL#DDETKETENM*R.K               | S307:      | 3 | 2,9215 | 0,39  | -0,199 |
| 15 | Q15054 DPOD3_HUMAN | R.VAL#DDETKETENM*R.K               | S307:      | 2 | 2,8621 | 0,55  | -0,532 |
| 15 | Q9Y2D8 ADIP_HUMAN  | R.ERVDDSTGTVIS#DVEEDAGELSR.E       | S312:      | 3 | 4,8639 | 0,444 | -0,5   |
| 15 | Q9BWU0 NADAP_HUMAN | K.M*LGEDS#DEEEEM*DTSERK.I          | S312:      | 3 | 3,1769 | 0,288 | -0,245 |
| 15 | Q7Z6Z7 HUWE1_HUMAN | R.LFGHSSTSALS#AILR.S               | S3122:     | 2 | 3,7615 | 0,373 | -0,67  |
| 15 | O00273 DFFA_HUMAN  | R.SISASKAS#PPGDLQNP.K              | S315:      | 2 | 4,6445 | 0,459 | -0,343 |
| 15 | P05787 K2C8_HUMAN  | R.NIS#RLQAEIEGLK.G                 | S315:      | 3 | 3,0279 | 0,322 | 0      |
| 15 | P05787 K2C8_HUMAN  | R.NIS#RLQAEIEGLK.G                 | S315:      | 2 | 2,7281 | 0,339 | -0,236 |
| 15 | Q9UKS6 PACN3_HUMAN | K.GGRS#PDEVTLTSIVPTR.D             | S319:      | 2 | 3,2772 | 0,571 | 0,065  |
| 15 | Q96A65 EXOC4_HUMAN | R.TLS#TSDDEDRENEK.G                | S32:       | 2 | 2,7807 | 0,482 | -0,805 |
| 15 | Q9Y2Z0 SUGT1_HUMAN | R.LFQQIYSDGS#DEVKR.A               | S321:      | 2 | 2,8974 | 0,251 | -0,327 |
| 15 | Q6PJF5 RHDF2_HUMAN | R.GIPHSAS#PVS#PDGVQIPLKEYGR.A      | S325:S328: | 3 | 4,5629 | 0,434 | 0      |
| 15 | Q12851 M4K2_HUMAN  | R.TPS#EIQFHQVK.F                   | S327:      | 3 | 2,7712 | 0,275 | 0,131  |
| 15 | Q5SYE7 NHSL1_HUMAN | R.LDSDAGFHS#LPR.S                  | S328:      | 2 | 3,8409 | 0,38  | 0,525  |
| 15 | Q5SYE7 NHSL1_HUMAN | R.LDSDAGFHS#LPR.S                  | S328:      | 3 | 2,6029 | 0,148 | 0,197  |
| 15 | Q15459 SF3A1_HUMAN | K.FGESEEVEM*EVES#DEEDDKQEK.A       | S329:      | 3 | 6,9945 | 0,472 | 0,472  |
| 15 | Q9H2K8 TAOK3_HUMAN | R.NGPLNESQEDEEDS#EHGTSLNR.E        | S331:      | 3 | 2,8074 | 0,278 | 0,433  |
| 15 | Q9Y2U5 M3K2_HUMAN  | R.RGS#DIDNPTLTVM*DISPPSRS#PR.A     | S331:S349: | 3 | 3,9554 | 0,474 | 0,34   |
| 15 | Q641Q2 FA21A_HUMAN | R.RTPS#DDEEDNLFAPPK.L              | S333:      | 2 | 4,1184 | 0,311 | 0,192  |
| 15 | P08651 NFIC_HUMAN  | K.TEM*DKS#PFNSPSPQDSPR.L           | S333:      | 3 | 3,6586 | 0,164 | 0,086  |
| 15 | P08651 NFIC_HUMAN  | K.TEM*DKS#PFNSPSPQDSPR.L           | S333:      | 2 | 2,6062 | 0,478 | 0,115  |
| 15 | Q9P1Y5 K1543_HUMAN | K.DLPDGHAAS#PR.G                   | S334:      | 2 | 2,1819 | 0,388 | -0,301 |
| 15 | Q9UK58 CCNL1_HUMAN | K.AKGLNPDGTPALSTLGGFS#PASKPS#SPR.E | S335:S341: | 3 | 4,1367 | 1     | 0,064  |
| 15 | Q9HCN4 GPN1_HUMAN  | R.GTLDEEDEEADS#DTDDIDHR.V          | S338:      | 3 | 4,3453 | 0,481 | 0,388  |
| 15 | P08651 NFIC_HUMAN  | K.TEM*DKSPFNPS#PQDSPR.L            | S339:      | 3 | 4,7977 | 0,3   | 0,346  |
| 15 | Q96B23 CR025_HUMAN | K.ASEQETAKEEDGS#VELESQVQK.D        | S34:       | 3 | 4,6753 | 0,254 | 0,512  |
| 15 | O75909 CCNK_HUMAN  | R.AVVVS#PKEENK.A                   | S340:      | 2 | 2,6407 | 0,204 | -0,381 |
| 15 | Q8IVF2 AHNK2_HUMAN | K.VDLKS#PQVDIK.G                   | S3408:     | 3 | 2,7373 | 0,21  | 0,207  |
| 15 | Q8IVF2 AHNK2_HUMAN | K.VDLKS#PQVDIK.G                   | S3408:     | 2 | 2,38   | 0,12  | 0,185  |
| 15 | P49759 CLK1_HUMAN  | K.VVDFGSATYDDEHHSTLVST#R.H         | S341:T342: | 3 | 4,1345 | 1     | -0,367 |
| 15 | Q09666 AHNK_HUMAN  | K.VSM*PDVELNLKS#PK.V               | S3426:     | 3 | 2,7033 | 0,318 | -0,221 |
| 15 | P01892 1A02_HUMAN  | R.KGGS#YSQAASSDSAQGSVDVSLTACK.V    | S343:      | 3 | 5,6911 | 0,448 | 0,288  |
| 15 | Q9C0B5 ZDHC5_HUMAN | R.THLGLATNEDSSLLAKDS#PPT#PTM*YK.Y  | S345:T348: | 3 | 3,9975 | 0,376 | -0,062 |

|    |                    |                                 |            |   |        |       |        |
|----|--------------------|---------------------------------|------------|---|--------|-------|--------|
| 15 | Q9UMX1 SUFU_HUMAN  | R.KDS#LES#DSSTAIIPHELIR.T       | S346:S349: | 3 | 3,5623 | 0,157 | -0,403 |
| 15 | P30622 CLIP1_HUMAN | R.KIS#GTTALQEALK.E              | S348:      | 3 | 3,237  | 0,249 | 0,063  |
| 15 | P30622 CLIP1_HUMAN | R.KIS#GTTALQEALK.E              | S348:      | 2 | 2,991  | 0,277 | 0,254  |
| 15 | Q9BU64 CENPO_HUMAN | R.KQS#EELQSVQAQEGALGTK.I        | S35:       | 2 | 3,9773 | 0,59  | 0,925  |
| 15 | O43493 TGON2_HUMAN | K.M*SGSASS#ENREGT LSDSTGSEK.D   | S352:      | 3 | 3,2258 | 0,238 | -1,266 |
| 15 | Q5SW79 CE170_HUMAN | R.TEEDSKS#IKS#DVPVYLK.R         | S356:S359: | 3 | 3,766  | 0,335 | 0,523  |
| 15 | Q92922 SMRC1_HUMAN | R.S#QKEEDEQEDLTK.D              | S357:      | 2 | 2,7373 | 0,313 | -0,736 |
| 15 | Q5SW79 CE170_HUMAN | K.SIKS#DVPVYLK.R                | S359:      | 2 | 3,7213 | 0,465 | -0,092 |
| 15 | P16403 H12_HUMAN   | R.KAS#GPPVSELITK.A              | S36:       | 3 | 3,7018 | 0,383 | 0      |
| 15 | Q12846 STX4_HUMAN  | R.LGS#PDEEFFHK.V                | S36:       | 2 | 3,125  | 0,344 | -0,176 |
| 15 | Q15435 PP1R7_HUMAN | K.HS#SGIVADLSEQSLK.D            | S36:       | 3 | 3,0702 | 0,356 | -0,111 |
| 15 | P17096 HMGA1_HUMAN | R.KQPPVS#PGTALVGSQKEPSEVPT#PK.R | S36:T53:   | 3 | 5,341  | 0,471 | 0,135  |
| 15 | Q7Z6E9 RBBP6_HUMAN | R.NLQPLM*RS#PISR.Q              | S360:      | 2 | 2,1788 | 0,247 | 0,162  |
| 15 | O76021 RL1D1_HUMAN | K.ATNES#EDEIPQLVPIGKK.T         | S361:      | 3 | 3,4172 | 0,352 | -0,268 |
| 15 | Q7L8J4 3BP5L_HUMAN | R.GLSDHVS#LDGQELGTR.S           | S362:      | 2 | 3,6866 | 0,521 | -0,069 |
| 15 | P48634 BAT2_HUMAN  | R.DSQS#ASGEERPPEADGK.K          | S363:      | 2 | 3,9278 | 0,551 | -0,663 |
| 15 | P48634 BAT2_HUMAN  | R.DSQS#ASGEERPPEADGK.K          | S363:      | 3 | 2,7972 | 0,244 | -0,398 |
| 15 | P17302 CXA1_HUMAN  | K.LAAGHELQPLAIVDQRPS#S#R.A      | S364:S365: | 3 | 3,3857 | 0,226 | -0,474 |
| 15 | Q15435 PP1R7_HUMAN | K.HSS#GIVADLSEQSLK.D            | S37:       | 2 | 4,3814 | 0,456 | 0,148  |
| 15 | Q86U90 YRDC_HUMAN  | R.LFRPPS#PAPAAPGAR.L            | S37:       | 2 | 3,631  | 0,435 | -0,154 |
| 15 | Q86U90 YRDC_HUMAN  | R.LFRPPS#PAPAAPGAR.L            | S37:       | 3 | 3,5046 | 0,261 | 0      |
| 15 | O94763 RMP_HUMAN   | K.NSTGS#GHSQAQELPTIR.T          | S374:      | 2 | 2,2744 | 0,299 | -0,141 |
| 15 | P20700 LMNB1_HUMAN | K.LALDM*EIS#AYRK.L              | S375:      | 2 | 2,1661 | 0,202 | -0,243 |
| 15 | Q96ST2 IWS1_HUMAN  | K.M*DS#DEDEKEGEEEEK.V           | S377:      | 2 | 3,8266 | 0,332 | -0,415 |
| 15 | Q96ST2 IWS1_HUMAN  | K.M*DS#DEDEKEGEEEEK.V           | S377:      | 3 | 3,3771 | 0,374 | -0,311 |
| 15 | Q09666 AHNK_HUMAN  | K.LKGPQITGPS#LEGDLGLK.G         | S379:      | 3 | 4,6818 | 0,49  | -0,481 |
| 15 | P12270 TPR_HUMAN   | R.KGAILSEEELAAM*S#PTAAAVAK.I    | S379:      | 3 | 4,3023 | 0,314 | -0,162 |
| 15 | P16949 STMN1_HUMAN | R.SKESVPEFPLS#PPK.K             | S38:       | 3 | 3,4214 | 0,321 | 0,226  |
| 15 | P16949 STMN1_HUMAN | R.SKESVPEFPLS#PPK.K             | S38:       | 2 | 3,2796 | 0,481 | 0,075  |
| 15 | Q9HB58 SP110_HUMAN | R.VTQGAAS#PGHGIQEK.L            | S380:      | 2 | 4,4796 | 0,537 | -0,156 |
| 15 | Q9C0B5 ZDHC5_HUMAN | R.GDS#LKEPTSIAESSR.H            | S380:      | 3 | 3,3818 | 0,373 | 0      |
| 15 | Q9C0B5 ZDHC5_HUMAN | R.GDS#LKEPTSIAESSR.H            | S380:      | 2 | 2,5389 | 0,518 | 0,221  |
| 15 | Q13428 TCOF_HUMAN  | K.TSQVGAASAPAKES#PR.K           | S381:      | 2 | 4,1219 | 0,449 | -0,82  |

|    |                     |                                 |                 |   |        |       |        |
|----|---------------------|---------------------------------|-----------------|---|--------|-------|--------|
| 15 | Q96T23 RSF1_HUMAN   | R.EIKLS#DDFDS#PVKGPLCK.S        | S382:S387:      | 3 | 2,7597 | 0,218 | -0,166 |
| 15 | O75717 WDHD1_HUMAN  | R.SHILEDDENS#VDISM*LK.T         | S383:           | 2 | 4,1469 | 0,531 | 0,717  |
| 15 | Q9NYV4 CD2L7_HUMAN  | R.HSS#IS#PVRLPLNSSLGAELSR.K     | S383:S385:      | 3 | 4,9147 | 0,555 | 0,154  |
| 15 | Q8IYU2 HACE1_HUMAN  | K.RDS#TEITSILLK.Q               | S385:           | 2 | 3,9071 | 0,436 | -0,503 |
| 15 | O60658 PDE8A_HUMAN  | R.IHS#M*TIEAPITK.V              | S386:           | 2 | 3,8857 | 0,559 | -0,17  |
| 15 | Q5JSZ5 K0515_HUMAN  | K.LKFS#DDEEEEVVK.D              | S388:           | 3 | 3,7355 | 0,163 | 0,206  |
| 15 | Q8WYA6 CTBL1_HUMAN  | R.TIFPLFM*KS#PR.K               | S389:           | 2 | 2,511  | 0,207 | -0,255 |
| 15 | Q8IYB3 SRRM1_HUMAN  | R.RLS#PS#AS#PPRR.R              | S389:S391:S393: | 2 | 2,1967 | 0,232 | -0,917 |
| 15 | Q99613 EIF3C_HUMAN  | K.QPLLLS#EDEEDTKR.V             | S39:            | 2 | 2,0082 | 0,221 | 0,139  |
| 15 | Q6PJT7 ZC3HE_HUMAN  | R.TRTS#QEELLAEVVQGQSR.T         | S390:           | 3 | 3,4464 | 0,277 | -0,433 |
| 15 | Q9Y2D5 AKAP2_HUMAN  | K.GQKS#PGALETPSAAGSQGNTASQGK.E  | S393:           | 3 | 6,3174 | 0,461 | -0,304 |
| 15 | Q9NYF8 BCLF1_HUMAN  | K.FNDS#EGDDTEETEDYRQFR.K        | S397:           | 3 | 2,644  | 0,26  | 0,451  |
| 15 | Q12888 TP53B_HUMAN  | R.QDKPM*DTSVLS#EEGGPEPFQK.K     | S398:           | 3 | 3,9855 | 0,109 | 0,158  |
| 15 | Q14527 HLTF_HUMAN   | R.KTAVQYIESS#DSEIETSSELPQK.M    | S398:           | 3 | 3,1438 | 0,103 | -0,204 |
| 15 | P05783 K1C18_HUMAN  | R.RLLEDGEDFNLDALDSS#NSM*QTIQK.T | S399:           | 3 | 5,8732 | 0,383 | -0,245 |
| 15 | Q96ST2 IWS1_HUMAN   | K.AAVLSDS#EDEEKASAK.K           | S400:           | 2 | 3,4093 | 0,467 | -0,564 |
| 15 | Q86Y91 KI18B_HUMAN  | K.KLQVYEGGGQPPQDLPGS#PK.S       | S404:           | 3 | 3,103  | 0,262 | 0,081  |
| 15 | Q8WUQ7 CS029_HUMAN  | K.LKQEQGVES#EPLFPILK.Q          | S408:           | 3 | 3,9215 | 0,2   | -0,629 |
| 15 | Q13112 CAF1B_HUMAN  | R.GSS#PGPRPVEGTPASR.T           | S410:           | 3 | 2,9902 | 0,353 | -0,336 |
| 15 | P05787 K2C8_HUMAN   | R.LESGM*QNM*S#IHTK.T            | S410:           | 2 | 2,7056 | 0,332 | -0,845 |
| 15 | Q9UQR1 ZN148_HUMAN  | R.SLKQPLEQNQTIS#PLSTYEESK.V     | S412:           | 3 | 5,575  | 0,346 | -0,141 |
| 15 | Q9UBU7 DBF4A_HUMAN  | K.KLLFIS#EPIPHPS#NELR.G         | S413:S420:      | 3 | 2,7937 | 0,283 | -0,51  |
| 15 | B2RMZ9 B2RMZ9_HUMAN | R.LNSS#PRAPVSPLK.F              | S417:           | 3 | 2,6134 | 0,322 | 0,126  |
| 15 | Q9P0K7 RAI14_HUMAN  | K.SSPSVLIHS#LGK.S               | S419:           | 2 | 4,1563 | 0,461 | -0,187 |
| 15 | Q2TB10 ZN800_HUMAN  | K.VKVEPADSVES#PPSITHS#PQNELK.G  | S419:S426:      | 3 | 4,6421 | 1     | 0,903  |
| 15 | Q8NHZ8 CDC26_HUMAN  | K.QKEDVEVVGGS#DGEGAIGLSSDPK.S   | S42:            | 3 | 3,7074 | 0,39  | -0,373 |
| 15 | O95232 CROP_HUMAN   | K.ESDTKNEVNGTS#EDIKSEGDTQSN.-   | S420:           | 3 | 2,9443 | 0,241 | -0,481 |
| 15 | O14974 MYPT1_HUMAN  | K.FPTTATKIS#PK.E                | S422:           | 2 | 2,2675 | 0,229 | 0,288  |
| 15 | Q2TB10 ZN800_HUMAN  | K.VKVEPADSVESPPS#ITHS#PQNELK.G  | S422:S426:      | 3 | 4,9798 | 0,362 | 0,258  |
| 15 | Q9UBF8 PI4KB_HUMAN  | R.S#VENLPECGITHEQR.A            | S428:           | 2 | 3,8503 | 0,497 | 0,594  |
| 15 | P08865 RSSA_HUMAN   | R.KS#DGIYIINLK.R                | S43:            | 2 | 2,2721 | 0,192 | -1,816 |
| 15 | P35658 NU214_HUMAN  | R.QPKS#PGSTPTTPTSSQAPQK.L       | S430:           | 3 | 2,8477 | 0,293 | -0,261 |
| 15 | P08670 VIME_HUMAN   | R.ETNLDS#LPLVDTHSK.R            | S430:           | 2 | 2,6544 | 0,504 | -0,07  |

|    |                    |                                   |            |   |        |       |        |
|----|--------------------|-----------------------------------|------------|---|--------|-------|--------|
| 15 | Q9Y4K4 M4K5_HUMAN  | R.RQS#SPSCGPVAETSSIGNGDGISK.L     | S433:      | 3 | 4,6852 | 0,549 | 0,592  |
| 15 | Q53ET0 CRTC2_HUMAN | R.RVPLS#PLSLLAGPADAR.R            | S433:      | 2 | 2,8773 | 0,27  | -0,538 |
| 15 | Q53ET0 CRTC2_HUMAN | R.RVPLS#PLSLLAGPADAR.R            | S433:      | 3 | 2,8731 | 0,104 | -0,504 |
| 15 | Q9ULJ3 ZN295_HUMAN | R.IKTEPS#SPLSDPSDIIR.V            | S434:      | 3 | 4,175  | 0,36  | 0,189  |
| 15 | Q9ULJ3 ZN295_HUMAN | R.IKTEPSS#PLSDPSDIIR.V            | S435:      | 2 | 2,2539 | 0,387 | 0,378  |
| 15 | Q9NPQ8 RIC8A_HUMAN | R.GLM*AGGRPEGQYS#EDED#DTDEYKEAK.A | S435:T440: | 3 | 3,3369 | 0,516 | 0,693  |
| 15 | Q9UPZ3 HPS5_HUMAN  | R.RSS#IS#SHESFSILDSGIYR.I         | S437:S439: | 3 | 4,9038 | 1     | -0,239 |
| 15 | Q8NI08 NCOA7_HUMAN | K.DTLKECLS#LDPEER.K               | S441:      | 2 | 2,9277 | 0,143 | -0,342 |
| 15 | P35269 T2FA_HUMAN  | K.STPQPPS#GKTT#PNSGDVQVTEDAVRR.Y  | S442:T446: | 3 | 2,7287 | 1     | 0,571  |
| 15 | O14974 MYPT1_HUMAN | R.KTGS#YGALAEITASK.E              | S445:      | 2 | 4,2661 | 0,495 | -0,387 |
| 15 | O14974 MYPT1_HUMAN | R.KTGS#YGALAEITASK.E              | S445:      | 3 | 3,8295 | 0,339 | 0      |
| 15 | P36404 ARL2_HUMAN  | K.KFNGEDIDTIS#PTLGFNIK.T          | S45:       | 3 | 4,6866 | 0,315 | -0,585 |
| 15 | Q8WUM0 NU133_HUMAN | R.KGLPLGSAVSS#PVLFSPVGR.R         | S45:       | 3 | 4,1656 | 0,392 | -0,625 |
| 15 | O94909 K0819_HUMAN | K.DRLGS#PLAVDEALR.R               | S450:      | 2 | 2,3033 | 0,297 | -0,307 |
| 15 | Q8IZ21 PHAR4_HUMAN | R.AHSLLFENS#FSEDSSTLGR.T          | S451:      | 3 | 3,6963 | 0,427 | -0,154 |
| 15 | Q7Z2K8 GRIN1_HUMAN | K.AGTVS#PGKEDPVSSR.R              | S452:      | 3 | 2,9248 | 0,26  | 0,233  |
| 15 | Q9NR09 BIRC6_HUMAN | K.LEGSDDLLLED#DSEEHSR.S           | S452:      | 3 | 2,7258 | 0,277 | 0,411  |
| 15 | Q7Z2K8 GRIN1_HUMAN | K.AGTVS#PGKEDPVSSR.R              | S452:      | 2 | 2,7052 | 0,32  | -0,467 |
| 15 | P51116 FXR2_HUMAN  | R.TGGPAYGPSSDVSTAS#ETESEKR.E      | S453:      | 3 | 3,2571 | 0,418 | -0,382 |
| 15 | O94804 STK10_HUMAN | K.ASQSRPNS#SALETLGGEK.L           | S454:      | 2 | 3,848  | 0,496 | 0,574  |
| 15 | O94804 STK10_HUMAN | K.ASQSRPNSS#ALETLGGEK.L           | S455:      | 3 | 4,5871 | 0,426 | 0,383  |
| 15 | P53396 ACLY_HUMAN  | R.TAS#FSESRADEVAPAK.K             | S455:      | 3 | 2,9327 | 0,27  | 0      |
| 15 | P53396 ACLY_HUMAN  | R.TAS#FSESRADEVAPAK.K             | S455:      | 2 | 2,9122 | 0,403 | -0,07  |
| 15 | Q9H4M9 EHD1_HUMAN  | K.DKPTYDEIFYTLS#PVNGK.I           | S456:      | 3 | 3,497  | 0,335 | -0,338 |
| 15 | Q6P1L5 AL2SC_HUMAN | K.YATS#PKPNNSYM*FK.R              | S457:      | 3 | 2,9151 | 0,366 | 0,105  |
| 15 | Q9NYZ3 GTSE1_HUMAN | K.IPKFS#IGDSDPSSTPK.L             | S457:      | 3 | 2,8225 | 0,179 | -0,104 |
| 15 | Q6PJG2 CN043_HUMAN | R.RAS#QEANLLLAQK.A                | S461:      | 2 | 4,4113 | 0,472 | -0,677 |
| 15 | Q08AD1 CA1L1_HUMAN | R.SIS#NEGLTLNNSHVS.K.H            | S464:      | 2 | 3,6872 | 0,47  | -0,411 |
| 15 | Q8IZ21 PHAR4_HUMAN | R.TRS#LPITIEM*LK.V                | S464:      | 2 | 3,6464 | 0,269 | 0,244  |
| 15 | Q6GQQ9 OTU7B_HUMAN | R.STPESGDS#DKESVGSSTSNEGGR.R      | S467:      | 3 | 4,425  | 0,446 | -0,45  |
| 15 | P53985 MOT1_HUMAN  | K.EEETS#IDVAGKPNEVTK.A            | S467:      | 2 | 2,8558 | 0,205 | 0,634  |
| 15 | Q9H6R7 CB044_HUMAN | K.LIESLS#PDFCHQNK.G               | S468:      | 2 | 3,5104 | 0,401 | -0,483 |
| 15 | Q99543 DNJC2_HUMAN | R.NAS#ASFQLEDKK.E                 | S47:       | 2 | 3,0148 | 0,531 | 0,394  |

|    |                     |                                   |            |   |        |       |        |
|----|---------------------|-----------------------------------|------------|---|--------|-------|--------|
| 15 | P34897 GLYM_HUMAN   | K.LQDFKS#FLLK.D                   | S470:      | 2 | 2,5301 | 0,268 | -0,37  |
| 15 | Q02952 AKA12_HUMAN  | K.LKETCVS#GEDPTQGADLSPDEK.V       | S472:      | 3 | 2,7039 | 0,263 | -0,149 |
| 15 | P05787 K2C8_HUMAN   | R.DGKLV#ESSDVLPK.-                | S475:      | 2 | 4,1482 | 0,347 | 0,393  |
| 15 | Q96PU5 NED4L_HUMAN  | K.DTLSNPQSPQPS#PYNS#PKPQHK.V      | S483:S487: | 3 | 4,8441 | 1     | -0,491 |
| 15 | O60825 F262_HUMAN   | R.NYS#VGSRLKPLS#PLR.A             | S483:S493: | 3 | 3,3203 | 0,375 | 0,565  |
| 15 | P11169 GTR3_HUMAN   | R.SGKDGVM*EM*NS#IEPAKETTTNV.-     | S485:      | 3 | 3,8981 | 0,245 | 0,523  |
| 15 | O60832 DKC1_HUMAN   | K.AGLES#GAEPGDGSDTTKK.K           | S485:      | 2 | 2,4338 | 0,23  | -0,255 |
| 15 | Q9ULL5 PRR12_HUMAN  | R.HPLYQAGLTPPLS#PPK.S             | S487:      | 3 | 2,6579 | 0,226 | -0,097 |
| 15 | Q9ULL5 PRR12_HUMAN  | R.HPLYQAGLTPPLS#PPK.S             | S487:      | 2 | 2,5615 | 0,344 | 0,645  |
| 15 | Q52LW3 RHG29_HUMAN  | K.HLNSS#QPSGFGPANSLEDVVR.L        | S489:      | 3 | 4,0556 | 0,313 | -0,399 |
| 15 | Q9UHB6 LIMA1_HUMAN  | R.ETPHS#PGVEDAPIAK.V              | S490:      | 3 | 3,3148 | 0,288 | -0,112 |
| 15 | Q6UN15 FIP1_HUMAN   | R.DHS#PTSPVFNSEER.Y               | S492:      | 3 | 4,0739 | 0,342 | 0      |
| 15 | Q15758 AAAT_HUMAN   | R.TESRS#TEPELIQVK.S               | S493:      | 2 | 3,4615 | 0,347 | 0,216  |
| 15 | Q6VY07 PACS1_HUMAN  | K.TDLQGS#ASPSKVEGVHT#PR.Q         | S493:T504: | 3 | 3,8382 | 0,421 | -0,086 |
| 15 | P81408 COTE1_HUMAN  | R.SHS#DPGITTSSDTADFR.D            | S494:      | 2 | 3,7397 | 0,469 | -0,391 |
| 15 | O60832 DKC1_HUMAN   | K.AGLES#GAEPGDGDS#DTTKK.K         | S494:      | 2 | 2,0762 | 0,338 | -0,637 |
| 15 | Q96K49 TM87B_HUMAN  | R.ASKS#VS#NGTAKPATSENFEDDLK.W     | S494:S496: | 3 | 4,3938 | 0,353 | 0,358  |
| 15 | Q9UER7 DAXX_HUMAN   | K.DGDKS#PM*SSLQISNEK.N            | S495:      | 3 | 5,131  | 0,495 | -0,3   |
| 15 | Q9UER7 DAXX_HUMAN   | K.DGDKS#PM*SSLQISNEK.N            | S495:      | 2 | 4,0167 | 0,274 | -0,733 |
| 15 | O75152 ZC11A_HUMAN  | R.VQQSSESTSS#PSQHEATPGAR.R        | S495:      | 3 | 2,9251 | 0,274 | -0,782 |
| 15 | B2R6A5 B2R6A5_HUMAN | K.AAESPQKDTDGGPKKEES#PV.-         | S498:      | 3 | 2,7584 | 0,463 | -0,323 |
| 15 | Q8N3X1 FNBP4_HUMAN  | K.IDENS#DKEM*EVEES#PEKIK.V        | S499:S508: | 3 | 3,9848 | 0,21  | 0,151  |
| 15 | Q13610 PWP1_HUMAN   | K.EKLQEEGGGS#DEEETGSPSEDGM*QSAR.T | S50:       | 3 | 6,0896 | 0,45  | -0,499 |
| 15 | Q9NX63 CHCH3_HUMAN  | K.SQRY#GAYGASVSDEELK.R            | S50:       | 3 | 4,6848 | 0,294 | 0,722  |
| 15 | Q8WUM0 NU133_HUMAN  | R.KGLPLGSAVSSPVLF#PVGR.R          | S50:       | 3 | 4,5123 | 0,443 | -0,357 |
| 15 | Q8WUM0 NU133_HUMAN  | R.KGLPLGSAVSSPVLF#PVGR.R          | S50:       | 2 | 2,9991 | 0,383 | -0,477 |
| 15 | Q8NI08 NCOA7_HUMAN  | K.QDIM*PEVDKQSGS#PESR.V           | S502:      | 3 | 3,5782 | 0,34  | 0      |
| 15 | O75925 PIAS1_HUMAN  | K.GILSLPHQAS#PVSR.T               | S503:      | 3 | 2,6745 | 0,237 | 0,119  |
| 15 | Q9BY44 EIF2A_HUMAN  | R.SDKS#PDLAPTAPQSTPR.N            | S506:      | 3 | 4,0335 | 0,295 | -0,376 |
| 15 | Q9BY44 EIF2A_HUMAN  | R.SDKS#PDLAPTAPQSTPR.N            | S506:      | 2 | 3,7357 | 0,567 | -0,439 |
| 15 | Q9NUY8 TBC23_HUMAN  | R.EKVIS#FIENTSTPVDR.M             | S507:      | 2 | 3,7104 | 0,546 | -0,51  |
| 15 | Q9NUY8 TBC23_HUMAN  | R.EKVIS#FIENTSTPVDR.M             | S507:      | 3 | 2,655  | 0,134 | -0,191 |
| 15 | Q8N108 MIER1_HUMAN  | R.VNS#NGKES#PGSSEFFQEAVSHGK.F     | S507:S512: | 3 | 4,164  | 0,318 | 0,425  |

|    |                      |                                   |              |   |        |       |        |
|----|----------------------|-----------------------------------|--------------|---|--------|-------|--------|
| 15 | Q9ULT0 TTC7A_HUMAN   | R.RGS#PSAAFTFPDTPDDFGK.L          | S51:         | 2 | 4,557  | 0,528 | 0      |
| 15 | Q8N5D0 WDTC1_HUMAN   | R.KDS#ISEDEM*VLR.E                | S511:        | 3 | 4,4646 | 0,362 | 0,12   |
| 15 | Q8N5D0 WDTC1_HUMAN   | R.KDS#ISEDEM*VLR.E                | S511:        | 2 | 3,4614 | 0,44  | 0,402  |
| 15 | Q9NYF8 BCLF1_HUMAN   | K.DLFDYS#PPLHK.N                  | S512:        | 2 | 3,646  | 0,459 | -0,346 |
| 15 | Q96SD1 DCR1C_HUMAN   | K.RNDEITDESLENFPSSTVAGGS#QSPK.L   | S516:        | 3 | 2,9608 | 0,35  | -0,064 |
| 15 | Q9NQW6 ANLN_HUMAN    | K.GFTECEM*TKSS#PLK.I              | S518:        | 2 | 3,7975 | 0,398 | 0,285  |
| 15 | O00567 NOL5A_HUMAN   | K.SFSKEELM*S#SDLEETAGSTSIPK.R     | S519:        | 3 | 3,5071 | 0,435 | 0,712  |
| 15 | Q12905 ILF2_HUMAN    | R.VKPAPDETS#FSEALLK.R             | S52:         | 2 | 2,7969 | 0,359 | -0,067 |
| 15 | Q8TAD8 SNIP1_HUMAN   | R.RPDHSGGS#PS#PPT#SEPAR.S         | S52:S54:T57: | 3 | 3,4103 | 0,286 | -0,441 |
| 15 | Q9BST9 RTKN_HUMAN    | R.TFS#LDAVPPDHSPR.A               | S520:        | 2 | 3,2731 | 0,513 | -0,452 |
| 15 | O00567 NOL5A_HUMAN   | K.SFSKEELM*S#DLEETAGSTSIPK.R      | S520:        | 3 | 3,135  | 0,424 | 0,641  |
| 15 | ##O15021 MAST4_HUMAN | K.ES#KESEIGPPQLSR.R               | S522:        | 2 | 2,4402 | 0,198 | -0,596 |
| 15 | O95365 ZBT7A_HUMAN   | R.VRGGAPDPSPGATATPGAPAQPS#SPDAR.R | S525:        | 3 | 5,2831 | 0,291 | 0,481  |
| 15 | O60318 MCM3A_HUMAN   | K.KPGDGEVS#PSTEDAPFQHS#PLGK.A     | S527:S538:   | 3 | 4,2841 | 0,368 | 0,288  |
| 15 | O43719 HTSF1_HUMAN   | K.ESEDDLNKES#EEEVGPTK.E           | S529:        | 3 | 3,2524 | 0,33  | 0,259  |
| 15 | P50402 EMD_HUMAN     | R.RLSPPSS#SAASSYSFSDLNSTR.G       | S53:         | 3 | 4,8565 | 0,459 | -0,229 |
| 15 | Q9ULT0 TTC7A_HUMAN   | R.RGSPS#AAFTFPDTPDDFGK.L          | S53:         | 3 | 3,672  | 0,373 | -0,275 |
| 15 | Q8TEH3 DEN1A_HUMAN   | R.TLRES#DSAEGDEAESPEQQVR.K        | S536:        | 3 | 5,1882 | 0,327 | -0,455 |
| 15 | Q15042 RB3GP_HUMAN   | K.KTS#ASDVTNIYPGDAGK.A            | S537:        | 2 | 4,3139 | 0,556 | 0,609  |
| 15 | Q71F23 CENPU_HUMAN   | K.CKPIDVDFDPDNDVSS#IGR.L          | S54:         | 3 | 2,7418 | 0,21  | -0,234 |
| 15 | Q16555 DPYL2_HUMAN   | R.NLHQSGFS#LSGAQIDDNIPR.R         | S540:        | 3 | 5,0177 | 0,286 | -0,163 |
| 15 | Q8NHQ9 DDX55_HUMAN   | K.REEGS#DIEDEDM*EELLNDTR.L        | S544:        | 3 | 3,3893 | 0,166 | 0,588  |
| 15 | Q9Y3L3 3BP1_HUMAN    | R.TESEVPPRPAS#PK.V                | S544:        | 2 | 2,7202 | 0,382 | -1,075 |
| 15 | Q96SN8 CK5P2_HUMAN   | K.KQS#SDYEELIQVLK.K               | S547:        | 2 | 4,3242 | 0,41  | -0,624 |
| 15 | Q9H1B7 EAP1_HUMAN    | R.KAS#PEPPDSAEGALK.L              | S547:        | 3 | 4,1527 | 0,458 | 0,348  |
| 15 | Q9H1B7 EAP1_HUMAN    | R.KAS#PEPPDSAEGALK.L              | S547:        | 2 | 4,0276 | 0,523 | 0,309  |
| 15 | Q96SN8 CK5P2_HUMAN   | K.KQSS#DYEELIQVLK.K               | S548:        | 3 | 4,6322 | 0,383 | -0,312 |
| 15 | Q8N0Z3 CCD52_HUMAN   | K.SNLKFS#PLQDVLR.R                | S548:        | 3 | 3,1323 | 0,27  | 0,229  |
| 15 | Q9Y3L3 3BP1_HUMAN    | K.VTRS#PPETAAPVEDM*AR.R           | S550:        | 3 | 3,3803 | 0,314 | -0,285 |
| 15 | Q5JSH3 WDR44_HUMAN   | K.YNTEGRVS#PSPSQESLSSSK.S         | S561:        | 3 | 3,0657 | 0,172 | 0,247  |
| 15 | O00264 PGRC1_HUMAN   | K.IVRGDQPAASGDS#DDDEPPPLPR.L      | S57:         | 3 | 6,6706 | 0,504 | -0,442 |
| 15 | P17040 ZSC20_HUMAN   | R.HEDEDQIS#EQDIFEGLPGALSK.C       | S571:        | 3 | 2,9747 | 0,369 | -0,216 |
| 15 | Q14738 2A5D_HUMAN    | R.KS#ELPQDVYTIK.A                 | S573:        | 3 | 4,5226 | 0,362 | 0,061  |



|    |                     |                               |            |   |        |       |        |
|----|---------------------|-------------------------------|------------|---|--------|-------|--------|
| 15 | Q14738 2A5D_HUMAN   | R.KS#ELPQDVYTIK.A             | S573:      | 2 | 3,6367 | 0,424 | -0,081 |
| 15 | Q09666 AHNK_HUMAN   | K.GGVTGS#PEASISGSKGDLK.S      | S5731:     | 3 | 3,6747 | 0,397 | -0,1   |
| 15 | Q09666 AHNK_HUMAN   | K.GGVTGS#PEASISGSKGDLK.S      | S5731:     | 2 | 3,6264 | 0,492 | 0,467  |
| 15 | Q09666 AHNK_HUMAN   | K.ASLGSLEGEAEAEASS#PKGK.F     | S5763:     | 3 | 3,0415 | 0,255 | -0,092 |
| 15 | Q09666 AHNK_HUMAN   | K.ASLGSLEGEAEAEASS#PKGK.F     | S5763:     | 2 | 2,3496 | 0,339 | -0,305 |
| 15 | Q86UU1 PHLB1_HUMAN  | R.KNS#ITEIS#DNEDDLLEYHR.R     | S578:S583: | 3 | 3,2249 | 0,354 | 0,448  |
| 15 | P07737 PROF1_HUMAN  | K.DRSS#FYVNGLTGGQK.C          | S58:       | 2 | 2,9822 | 0,467 | -0,268 |
| 15 | Q13428 TCOF_HUMAN   | K.SLGNILQAKPTSS#PAK.G         | S583:      | 2 | 3,5019 | 0,303 | 0,288  |
| 15 | Q7L1V2 MON1B_HUMAN  | K.DKDQPPS#PSPPPQSEALSSTSR.L   | S59:       | 3 | 4,1057 | 0,345 | 0,46   |
| 15 | Q8IZ21 PHAR4_HUMAN  | R.LS#QRPTPEELEQR.N            | S590:      | 3 | 2,6402 | 0,174 | -0,11  |
| 15 | Q9Y2X7 GIT1_HUMAN   | R.HGS#GADS#DYENTQSGDPLLGLGK.F | S592:S596: | 3 | 5,2987 | 1     | 0,53   |
| 15 | Q8WWM7 ATX2L_HUMAN  | K.EKEVDGLLTSEPM*GS#PVSSK.T    | S594:      | 3 | 3,6509 | 0,242 | 0,167  |
| 15 | Q92560 BAP1_HUMAN   | K.GSSPSIRPIQGSQGS#SSPVEK.E    | S595:      | 3 | 3,5198 | 0,438 | -0,085 |
| 15 | Q9NZ53 PDXL2_HUMAN  | K.RDPEDS#DVFEEDTHL.-          | S596:      | 2 | 4,4678 | 0,419 | 0,518  |
| 15 | Q6NZY4 ZCHC8_HUMAN  | K.SEAGHAS#SPDSEVTSQCQK.E      | S597:      | 3 | 5,1465 | 0,312 | 0      |
| 15 | Q92615 LARP5_HUMAN  | R.S#PSPAHLPPDPK.V             | S599:      | 2 | 2,4637 | 0,325 | 0,182  |
| 15 | Q9UID6 ZN639_HUMAN  | K.YFDNKDDDS#DTETSNDLPK.F      | S60:       | 3 | 4,6946 | 0,379 | 0,239  |
| 15 | Q9Y3X0 CCDC9_HUMAN  | R.S#VEKENVAVESEK.N            | S60:       | 2 | 3,4009 | 0,53  | -0,399 |
| 15 | Q9Y3X0 CCDC9_HUMAN  | R.S#VEKENVAVESEK.N            | S60:       | 3 | 3,0521 | 0,2   | 0,419  |
| 15 | Q92615 LARP5_HUMAN  | R.SPS#PAHLPPDPK.V             | S601:      | 2 | 2,0586 | 0,182 | -0,091 |
| 15 | Q9Y4B5 K0802_HUMAN  | R.DHAPS#IPT#SPFGDSLESSTELRR.H | S609:T612: | 3 | 2,6048 | 0,119 | -0,55  |
| 15 | Q7L1V2 MON1B_HUMAN  | K.DKDQPPSPS#PPPQSEALSSTSR.L   | S61:       | 3 | 4,3861 | 0,335 | 0,153  |
| 15 | A6ND36 FA83G_HUMAN  | R.RPS#VASSVSEEFV.R            | S610:      | 3 | 3,4884 | 0,23  | -0,095 |
| 15 | Q14151 SAFB2_HUMAN  | R.DILS#FDKIK.E                | S613:      | 2 | 2,2926 | 0,142 | -0,316 |
| 15 | Q9P2E9 RRBP1_HUMAN  | R.NTDVAQS#PEAPKQEAPAK.K       | S615:      | 3 | 3,7068 | 0,439 | -0,187 |
| 15 | Q9P2E9 RRBP1_HUMAN  | R.NTDVAQS#PEAPKQEAPAK.K       | S615:      | 2 | 3,5789 | 0,382 | -0,311 |
| 15 | Q9UPN6 RBM16_HUMAN  | K.SSEPVKETVQTQS#PTPVEK.E      | S617:      | 3 | 3,7466 | 0,347 | 0,406  |
| 15 | Q6WCQ1 MRIP_HUMAN   | R.M*EVDRS#PGLPM*SDLK.T        | S618:      | 3 | 3,2521 | 0,256 | 0,205  |
| 15 | Q6WCQ1 MRIP_HUMAN   | R.M*EVDRS#PGLPM*SDLK.T        | S618:      | 2 | 3,1118 | 0,417 | 0,478  |
| 15 | Q13586 STIM1_HUMAN  | R.SHS#PSSDPDTPSPVGD.SR.A      | S618:      | 3 | 2,6674 | 0,095 | -0,64  |
| 15 | B1ALK7 B1ALK7_HUMAN | R.KES#APQVLLPEEEK.I           | S619:      | 2 | 4,2417 | 0,424 | 0,218  |
| 15 | P01106 MYC_HUMAN    | K.KFELLPTPLS#PSR.R            | S62:       | 2 | 3,975  | 0,362 | -0,44  |
| 15 | Q96R06 SPAG5_HUMAN  | K.LGLQEGS#NNSSPVDFVNNKR.T     | S62:       | 3 | 2,8703 | 0,27  | 0      |

|    |                    |                                |            |   |        |       |        |
|----|--------------------|--------------------------------|------------|---|--------|-------|--------|
| 15 | Q9H165 BC11A_HUMAN | K.KLLGGS#PSSLSPFSK.R           | S625:      | 2 | 3,4911 | 0,384 | -0,297 |
| 15 | P31943 HNRH1_HUMAN | R.EGRPSGEAFVELES#EDEVK.L       | S63:       | 3 | 4,6472 | 0,273 | 0,418  |
| 15 | Q9BZF1 OSBL8_HUMAN | K.DLHQPS#LSPASPHS#QGFER.G      | S63:S71:   | 3 | 4,0377 | 0,23  | 0      |
| 15 | P27816 MAP4_HUMAN  | K.KCS#LPAEEDSVLEK.L            | S636:      | 3 | 4,0515 | 0,355 | 0      |
| 15 | P27816 MAP4_HUMAN  | K.KCS#LPAEEDSVLEK.L            | S636:      | 2 | 3,7151 | 0,455 | 0,29   |
| 15 | P13051 UNG_HUMAN   | K.KAPAGQEEPTPPSS#PLSAEQLD.R    | S64:       | 3 | 4,2051 | 0,222 | 0,504  |
| 15 | O95394 AGM1_HUMAN  | K.STIGVM*VTAS#HNPEEDNGVK.L     | S64:       | 3 | 2,9837 | 0,214 | -0,084 |
| 15 | P28749 RBL1_HUMAN  | R.DM*QPLS#PISVHER.Y            | S640:      | 2 | 3,4532 | 0,41  | -0,456 |
| 15 | Q86V48 LUZP1_HUMAN | R.EKPDS#DDDLDIASLVTA.K         | S659:      | 3 | 3,904  | 0,337 | -0,455 |
| 15 | Q86V48 LUZP1_HUMAN | R.EKPDS#DDDLDIASLVTA.K         | S659:      | 2 | 2,953  | 0,373 | 1,213  |
| 15 | Q68CZ2 TENS3_HUMAN | R.GVGSQHPPTDQPS#PSK.A          | S660:      | 2 | 3,4042 | 0,444 | -0,395 |
| 15 | O94854 K0754_HUMAN | R.RDS#DSFLNIFPEK.Q             | S666:      | 2 | 4,4769 | 0,429 | -0,74  |
| 15 | O94854 K0754_HUMAN | R.RDS#DSFLNIFPEK.Q             | S666:      | 3 | 4,1904 | 0,27  | 0      |
| 15 | Q9P275 UBP36_HUMAN | K.LKS#PVLNNTTEPAS#TM*SPPPAK.L  | S667:S679: | 3 | 3,176  | 0,277 | 0,275  |
| 15 | Q8ND04 CQ071_HUMAN | K.NESS#PAPPDSDADKLK.E          | S668:      | 3 | 2,8418 | 0,393 | -0,209 |
| 15 | P20042 IF2B_HUMAN  | K.KDAS#DDLDDLNFNQK.K           | S67:       | 2 | 4,8495 | 0,533 | -0,373 |
| 15 | Q9C0C2 TB182_HUMAN | R.TEAQDLCRAS#PEPPGPESSR.W      | S672:      | 3 | 3,6522 | 0,233 | 0,233  |
| 15 | Q8WWM7 ATX2L_HUMAN | K.EFNPTKPLLSVNKS#TSTPTS#PGPR.T | S678:S684: | 3 | 2,881  | 0,201 | -0,472 |
| 15 | Q96D71 REPS1_HUMAN | R.HAASYSSDS#ENQGSYSGVIPPPGR.G  | S68:       | 3 | 3,3634 | 0,203 | 0,554  |
| 15 | Q9H6R7 CB044_HUMAN | R.SDVFRDS#FSHS#PGAVSSLK.V      | S686:S690: | 3 | 2,7938 | 0,411 | 0,419  |
| 15 | Q8IXQ3 CI040_HUMAN | K.IDAGTM*AEPSAS#PSKR.R         | S69:       | 3 | 2,7418 | 0,222 | -0,534 |
| 15 | Q9H6R7 CB044_HUMAN | R.DSFSHS#PGAVSSLK.V            | S690:      | 2 | 4,3747 | 0,46  | -0,244 |
| 15 | Q9H6R7 CB044_HUMAN | R.DSFSHS#PGAVSSLK.V            | S690:      | 3 | 3,5026 | 0,323 | -0,305 |
| 15 | O60303 K0556_HUMAN | R.KDS#LSQLEEYLR.L              | S691:      | 2 | 3,4646 | 0,341 | -0,547 |
| 15 | O60303 K0556_HUMAN | R.KDSLS#QLEEYLR.L              | S693:      | 3 | 3,4565 | 0,203 | -0,117 |
| 15 | P19634 SL9A1_HUMAN | K.INNYLTVPAHKLDS#PTM*S#R.A     | S693:S697: | 3 | 3,6257 | 0,319 | -0,157 |
| 15 | O14974 MYPT1_HUMAN | R.RS#TQGVTLTDLQEA.EK.T         | S695:      | 3 | 2,8925 | 0,211 | -0,099 |
| 15 | Q9Y6X9 MORC2_HUMAN | K.TASRPAPLVQQLS#PSLLPNSKS#PR.E | S696:S705: | 3 | 5,8227 | 1     | -0,338 |
| 15 | Q9UMX3 BOK_HUMAN   | R.RS#SVFAAEIM*DAFDR.S          | S7:        | 3 | 4,7654 | 0,36  | -0,202 |
| 15 | P06748 NPM_HUMAN   | K.DELHIVEAEAM*NYEGS#PIK.V      | S70:       | 3 | 4,2993 | 0,403 | -0,408 |
| 15 | O43493 TGON2_HUMAN | K.DSPSKS#SAEAQTPEDTPNK.S       | S70:       | 3 | 3,8331 | 0,264 | 0      |
| 15 | P47897 SYQ_HUMAN   | R.RLS#FLVSYIASK.K              | S70:       | 2 | 2,3589 | 0,226 | -0,5   |
| 15 | Q15003 CND2_HUMAN  | R.S#RVFDLQFSTDSR.L             | S70:       | 2 | 2,1355 | 0,396 | -0,492 |

|    |                      |                                |            |   |        |       |        |
|----|----------------------|--------------------------------|------------|---|--------|-------|--------|
| 15 | O43150 DDEF2_HUMAN   | R.LLHEDLDES#DDDM*DEK.L         | S701:      | 2 | 6,0562 | 0,447 | 0,606  |
| 15 | O15534 PER1_HUMAN    | R.KEPVVGGTLS#PLALANK.A         | S704:      | 2 | 6,2546 | 0,537 | 0,069  |
| 15 | Q8WY36 BBX_HUMAN     | K.FNSLPQYS#PVTFDRK.C           | S704:      | 3 | 3,1059 | 0,282 | 0,389  |
| 15 | Q96T88 UHRF1_HUMAN   | K.DRPASGS#PFQLFLSK.V           | S709:      | 3 | 3,3064 | 0,28  | -0,423 |
| 15 | ##Q32P44 EMAL3_HUMAN | K.GGRSETS#GSRVLLNAS#SIAKR.S    | S711:S720: | 3 | 2,6815 | 0,119 | -1,031 |
| 15 | Q32MZ4 LRRF1_HUMAN   | K.IDGATQSS#PAEPKSEADR.C        | S714:      | 3 | 2,6926 | 0,109 | -0,089 |
| 15 | Q15004 PAF_HUMAN     | K.GIGEFFRLS#PK.D               | S72:       | 2 | 2,8341 | 0,259 | -0,458 |
| 15 | P18206 VINC_HUMAN    | K.S#LLDASEEAIAIKK.D            | S721:      | 2 | 2,8138 | 0,502 | 0,264  |
| 15 | Q8ND76 CCNY_HUMAN    | R.ASTIFLSKS#QTDVR.E            | S73:       | 2 | 2,7119 | 0,38  | 0,448  |
| 15 | Q9NZM1 MYOF_HUMAN    | R.SLS#QIHEAAVR.M               | S731:      | 2 | 2,8203 | 0,393 | -0,473 |
| 15 | P46087 NOL1_HUMAN    | R.QNAPPKGTDTQTPAVLS#PSK.T      | S732:      | 3 | 3,2686 | 0,257 | -0,691 |
| 15 | O60271 JIP4_HUMAN    | R.SASQSS#LDKLDQELK.E           | S733:      | 2 | 4,937  | 0,402 | -0,212 |
| 15 | A0FGR8 ESYT2_HUMAN   | R.SS#SSLLASPGHISVK.E           | S737:      | 2 | 3,7874 | 0,429 | -0,394 |
| 15 | A0FGR8 ESYT2_HUMAN   | R.SSS#SLLASPGHISVK.E           | S738:      | 3 | 3,8736 | 0,355 | 0,118  |
| 15 | A0FGR8 ESYT2_HUMAN   | R.SSSS#LLASPGHISVK.E           | S739:      | 3 | 2,8812 | 0,272 | 0,236  |
| 15 | A0FGR8 ESYT2_HUMAN   | R.SSSLLAS#PGHISVK.E            | S743:      | 2 | 3,4174 | 0,359 | 0,157  |
| 15 | A0FGR8 ESYT2_HUMAN   | R.SSSLLAS#PGHISVK.E            | S743:      | 3 | 2,6915 | 0,377 | -0,236 |
| 15 | Q8IWB9 TEX2_HUMAN    | R.S#SSKGSVEEIM*SQPK.Q          | S746:      | 3 | 2,9273 | 0,206 | 0,108  |
| 15 | P28749 RBL1_HUMAN    | K.VKS#PVSLTAHSLIGAS#PK.Q       | S749:S762: | 2 | 5,3108 | 0,522 | 0,438  |
| 15 | P28749 RBL1_HUMAN    | K.VKS#PVSLTAHSLIGAS#PK.Q       | S749:S762: | 3 | 4,3672 | 0,503 | 0,281  |
| 15 | Q96FF9 CDCA5_HUMAN   | R.IVAHAVEVPAVQS#PR.R           | S75:       | 2 | 3,9285 | 0,421 | 0,221  |
| 15 | Q96FF9 CDCA5_HUMAN   | R.IVAHAVEVPAVQS#PR.R           | S75:       | 3 | 3,0167 | 0,089 | 0,221  |
| 15 | Q8IWB9 TEX2_HUMAN    | R.SSSKGS#VEEIM*SQPK.Q          | S751:      | 3 | 4,4177 | 0,329 | 0      |
| 15 | Q8IWB9 TEX2_HUMAN    | R.SSSKGS#VEEIM*SQPK.Q          | S751:      | 2 | 3,224  | 0,245 | -0,433 |
| 15 | O75152 ZC11A_HUMAN   | R.RLS#S#ASTGKPLSVEDDFEK.L      | S758:S759: | 3 | 4,5275 | 1     | 0      |
| 15 | O75152 ZC11A_HUMAN   | R.RLS#SAS#TGKPLSVEDDFEK.L      | S758:S761: | 3 | 3,1649 | 0,155 | 0,473  |
| 15 | Q5VT52 K0460_HUMAN   | K.IIS#PGSSTPSSTRS#PPPGRDESYP.R | S758:S769: | 3 | 3,2866 | 1     | 0,394  |
| 15 | Q8ND82 Z280C_HUMAN   | K.GIKS#EPHS#PGIPEIFR.T         | S76:S80:   | 3 | 2,7754 | 0,379 | -0,57  |
| 15 | Q8N5P1 ZC3H8_HUMAN   | R.SKDYDVYS#DNDICSQESEDNFAK.E   | S77:       | 3 | 6,5818 | 0,457 | -0,391 |
| 15 | O15169 AXN1_HUMAN    | R.RSDLDLGYEPEGAS#PTPPYLK.W     | S77:       | 3 | 4,5553 | 0,459 | -0,296 |
| 15 | Q13136 LIPA1_HUMAN   | R.NSTGS#QDGPVSNPSSNSQDSLHK.A   | S776:      | 3 | 2,7966 | 0,199 | -0,493 |
| 15 | O94913 PCF11_HUMAN   | K.M*IFEGPNKLS#PR.I             | S777:      | 2 | 2,3165 | 0,244 | 0,082  |
| 15 | Q9Y520 Q9Y520_HUMAN  | R.DQM*EGS#PNSESFEHIAR.S        | S779:      | 3 | 2,7178 | 0,371 | -0,346 |

|    |                    |                                   |            |   |        |       |        |
|----|--------------------|-----------------------------------|------------|---|--------|-------|--------|
| 15 | Q96N96 SPT13_HUMAN | R.FRPFTFSQS#TPIGLDR.V             | S78:       | 3 | 4,172  | 0,383 | -0,375 |
| 15 | Q9BUT9 CP014_HUMAN | R.RAPS#TSPS#FEGTQETYVAHEENVR.F    | S78:S82:   | 3 | 3,7613 | 1     | 0,805  |
| 15 | P19634 SL9A1_HUMAN | R.SKETSSPGTDDVFTAPSDS#PSSQR.I     | S785:      | 3 | 4,5635 | 0,441 | 0,688  |
| 15 | P46087 NOL1_HUMAN  | K.QNDTPKGPQPPTVS#PIR.S            | S786:      | 2 | 2,0366 | 0,21  | -0,064 |
| 15 | O75400 PR40A_HUMAN | R.FVKEPAFEDITLES#ER.K             | S787:      | 2 | 5,2594 | 0,5   | -0,245 |
| 15 | Q96GQ7 DDX27_HUMAN | K.NRS#ADFNPDFVFTEK.E              | S79:       | 2 | 4,0515 | 0,441 | -0,327 |
| 15 | Q96GQ7 DDX27_HUMAN | K.NRS#ADFNPDFVFTEK.E              | S79:       | 3 | 3,0461 | 0,104 | -0,294 |
| 15 | Q12873 CHD3_HUMAN  | R.DSEEEFGS#ERDEYR.E               | S79:       | 3 | 3,012  | 0,285 | 0,1    |
| 15 | Q8IWA0 WDR75_HUMAN | K.VQDTS#NTGLGEDIIHQLSK.S          | S796:      | 3 | 4,3821 | 0,309 | -0,343 |
| 15 | Q9UMX3 BOK_HUMAN   | R.RSS#VFAAEIM*DAFDR.S             | S8:        | 2 | 5,5278 | 0,503 | -0,741 |
| 15 | Q9UMX3 BOK_HUMAN   | R.RSS#VFAAEIM*DAFDR.S             | S8:        | 3 | 4,2625 | 0,319 | -0,404 |
| 15 | Q8ND82 Z280C_HUMAN | K.SEPHS#PGIPEIFR.T                | S80:       | 3 | 3,2189 | 0,35  | 0,118  |
| 15 | O60296 TRAK2_HUMAN | R.QHAS#DALSPVLAETFR.Y             | S80:       | 3 | 2,6405 | 0,214 | -0,469 |
| 15 | Q0ZGT2 NEXN_HUMAN  | K.EM*LAS#DDEEDVSSKVEK.A           | S80:       | 2 | 2,5467 | 0,405 | 0,851  |
| 15 | Q15637 SF01_HUMAN  | R.TGDLGIPNPEDRS#PS#PEPIYNSEGKR.L  | S80:S82:   | 3 | 3,5034 | 0,472 | 0,475  |
| 15 | O15014 ZN609_HUMAN | K.AEADKIYSFTDNAPSPS#IGGSSR.L      | S806:      | 3 | 3,5618 | 0,336 | 0      |
| 15 | Q9GZR7 DDX24_HUMAN | K.AQAVS#EEEEEEGKSSSPK.K           | S82:       | 2 | 3,021  | 0,489 | -0,458 |
| 15 | P15559 NQO1_HUMAN  | K.EGHLS#PDIVAEQK.K                | S82:       | 2 | 2,3908 | 0,378 | 0,244  |
| 15 | P10644 KAP0_HUMAN  | R.TDSREDEIS#PPPPNPVVK.G           | S83:       | 3 | 3,3284 | 0,263 | 0,178  |
| 15 | O60524 SDCG1_HUMAN | K.KLPS#DSGDLEALEGK.D              | S831:      | 2 | 3,8661 | 0,48  | 0,223  |
| 15 | O60524 SDCG1_HUMAN | K.KLPS#DSGDLEALEGK.D              | S831:      | 3 | 3,2745 | 0,173 | 0,223  |
| 15 | Q6UB99 ANR11_HUMAN | K.NQFLENEDTKFSL#DDQR.D            | S835:      | 3 | 3,9573 | 0,359 | 0,161  |
| 15 | Q14008 CKAP5_HUMAN | K.HSTSGTDEGEDGDEPDDGS#NDVVDLLPR.T | S845:      | 3 | 3,2479 | 0,389 | -0,304 |
| 15 | Q86YS7 K0528_HUMAN | K.AM*TVEKAS#PVG DGNFR.N           | S852:      | 2 | 4,5235 | 0,575 | 0,069  |
| 15 | P46013 KI67_HUMAN  | K.M*TSLETKTS#DTETEPSK.T           | S859:      | 2 | 4,5111 | 0,539 | -0,678 |
| 15 | P46013 KI67_HUMAN  | K.M*TSLETKTS#DTETEPSK.T           | S859:      | 3 | 3,0476 | 0,315 | -0,369 |
| 15 | Q6GYQ0 GRIPE_HUMAN | R.RGS#S#PGSLEIPKDL PDILNK.Q       | S860:S861: | 3 | 4,5412 | 0,412 | -0,319 |
| 15 | Q6GYQ0 GRIPE_HUMAN | R.RGS#SPGS#LEIPKDL PDILNK.Q       | S860:S864: | 3 | 3,1965 | 0,349 | -0,637 |
| 15 | Q9UPN9 TRI33_HUMAN | K.QSGLSSLVNGKS#PIR.S              | S862:      | 3 | 2,8988 | 0,418 | 0,225  |
| 15 | Q02241 KIF23_HUMAN | K.YM*LTHQELAS#DGEIETK.L           | S867:      | 3 | 4,6276 | 0,283 | 0,266  |
| 15 | Q02241 KIF23_HUMAN | K.YM*LTHQELAS#DGEIETK.L           | S867:      | 2 | 2,6614 | 0,53  | 0,71   |
| 15 | Q8TEW0 PARD3_HUMAN | K.AGS#PSRDVGPSLGLK.K              | S873:      | 3 | 3,0895 | 0,324 | 0,18   |
| 15 | Q8TEW0 PARD3_HUMAN | K.AGSPS#RDVGPSLGLK.K              | S875:      | 2 | 2,8084 | 0,485 | 0,16   |

|    |                     |                                    |                |   |        |       |        |
|----|---------------------|------------------------------------|----------------|---|--------|-------|--------|
| 15 | P52948 NUP98_HUMAN  | K.YGLQDS#DEEEEEHPSK.T              | S888:          | 3 | 4,8924 | 0,432 | 0      |
| 15 | P52948 NUP98_HUMAN  | K.YGLQDS#DEEEEEHPSK.T              | S888:          | 2 | 4,4528 | 0,529 | 0,248  |
| 15 | Q8N9B5 JMY_HUMAN    | R.RVS#SPM*DEVLASLK.R               | S888:          | 3 | 3,4436 | 0,289 | 0,112  |
| 15 | Q96N67 DOCK7_HUMAN  | R.S#RSLSNSNPDISGTPSPDDEVR.S        | S894:          | 3 | 3,9297 | 0,404 | -0,437 |
| 15 | Q9BTE7 DCNL5_HUMAN  | R.KS#PGVAAVAEDGGLK.K               | S9:            | 2 | 3,7185 | 0,42  | 0      |
| 15 | Q9NYM9 BET1L_HUMAN  | R.AQS#PGAVEEILDRENK.R              | S9:            | 2 | 2,8942 | 0,565 | 0,199  |
| 15 | P98171 RHG04_HUMAN  | R.QGLGPASTTSPSPGPRS#PK.A           | S906:          | 3 | 2,8694 | 0,395 | -0,289 |
| 15 | Q4KMQ2 TM16F_HUMAN  | R.M*IEAVDNNLRPKS#E.-               | S909:          | 2 | 3,3983 | 0,407 | 0,285  |
| 15 | Q4KMQ2 TM16F_HUMAN  | R.M*IEAVDNNLRPKS#E.-               | S909:          | 3 | 2,6833 | 0,297 | 0,214  |
| 15 | Q07157 ZO1_HUMAN    | R.IDS#PGFKPASQQK.A                 | S912:          | 2 | 2,7217 | 0,389 | -0,494 |
| 15 | Q9UMZ2 SYNG_HUMAN   | R.KLSPFVLSAGSGS#PSATSILQK.K        | S919:          | 3 | 5,1487 | 0,369 | 0,243  |
| 15 | Q9NZM5 GSCR2_HUMAN  | K.LFFVDTGS#KEK.G                   | S93:           | 2 | 2,3512 | 0,253 | -0,181 |
| 15 | Q1MSJ5 CSPP1_HUMAN  | R.LLHM*DS#DDEIPIR.K                | S931:          | 3 | 4,4076 | 0,242 | 0,333  |
| 15 | Q1MSJ5 CSPP1_HUMAN  | R.LLHM*DS#DDEIPIR.K                | S931:          | 2 | 3,5448 | 0,299 | -0,074 |
| 15 | Q96K76 UBP47_HUMAN  | R.ELEQHIQTS#DPENFQSEER.S           | S933:          | 3 | 3,7614 | 0,364 | 0,764  |
| 15 | Q9Y2W1 TR150_HUMAN  | K.FSGEEGEIEDDES#GTENREEK.D         | S939:          | 3 | 5,5093 | 0,494 | 0,297  |
| 15 | P18583 SON_HUMAN    | R.CVS#VQTDPTDEIPTKK.S              | S94:           | 3 | 4,444  | 0,39  | 0      |
| 15 | P15336 ATF2_HUMAN   | K.KM*PLDLS#PLATPIIR.S              | S94:           | 2 | 3,9405 | 0,469 | -0,485 |
| 15 | P18583 SON_HUMAN    | R.CVS#VQTDPTDEIPTKK.S              | S94:           | 2 | 3,4642 | 0,388 | -0,129 |
| 15 | P15336 ATF2_HUMAN   | K.KM*PLDLS#PLATPIIR.S              | S94:           | 3 | 3,4138 | 0,273 | -0,312 |
| 15 | Q9UQN3 CHM2B_HUMAN  | K.VMNS#QMKMAGAMS#TTAKT#MQAVNK.K    | S94:S103:T108: | 3 | 2,7909 | 0,196 | 1,961  |
| 15 | Q8TF40 FNIP1_HUMAN  | R.NESSDSALGDS#ESED TGHDM*TR.Q      | S946:          | 3 | 5,1015 | 0,404 | -0,526 |
| 15 | Q9Y618 NCOR2_HUMAN  | R.ANAS#PQKPLDLK.Q                  | S956:          | 2 | 2,7249 | 0,163 | -0,179 |
| 15 | Q8IXM2 CQ049_HUMAN  | R.KVYEDSGIPLAES#PK.K               | S96:           | 2 | 4,7374 | 0,402 | -0,539 |
| 15 | Q9BZV1 UBXD1_HUMAN  | R.KELQAEATVSGS#PEAPGTNVVSEPR.E     | S96:           | 3 | 4,4915 | 0,367 | 0,278  |
| 15 | Q9UBB9 TFP11_HUMAN  | K.GAAEEAELEDS#DDEEKPVK.Q           | S98:           | 3 | 3,5939 | 0,335 | -0,085 |
| 15 | Q96H12 CI030_HUMAN  | R.SVS#PLLSTHVLGK.E                 | S98:           | 3 | 2,7559 | 0,235 | -0,064 |
| 15 | P46020 KPB1_HUMAN   | R.SVRPTDSNVS#PAIS#IHEIGAVGATK.T    | S981:S985:     | 3 | 4,0014 | 0,124 | 0,274  |
| 15 | Q5VZ89 DEN4C_HUMAN  | K.TPDESKLFS#PVIAR.N                | S989:          | 3 | 4,5451 | 0,446 | -0,104 |
| 15 | P05114 HMGN1_HUMAN  | K.TEESPASDEAGEKEAKS#D.-            | S99:           | 3 | 3,4318 | 0,233 | -0,467 |
| 15 | P05114 HMGN1_HUMAN  | K.TEESPASDEAGEKEAKS#D.-            | S99:           | 2 | 3,0353 | 0,586 | -0,747 |
| 15 | Q9P2D0 IBTK_HUMAN   | R.KRS#DS#SGGYNLSDIIQSPSTGLLK.S     | S990:S992:     | 3 | 4,2901 | 1     | -0,396 |
| 15 | A0JLU0 A0JLU0_HUMAN | K.KQEGPATQVDSAVGTLPAT#SPQSTSVQAK.G | T1072:         | 3 | 3,5637 | 0,312 | 0,679  |

|    |                    |                               |              |   |        |       |        |
|----|--------------------|-------------------------------|--------------|---|--------|-------|--------|
| 15 | Q9H3Z4 DNJC5_HUMAN | R.SLST#SGESLYHVLGLDK.N        | T11:         | 2 | 2,2826 | 0,303 | -0,453 |
| 15 | Q96T60 PNKP_HUMAN  | R.TPESQPDT#PPGTPLVSQDEKR.D    | T118:        | 3 | 4,3176 | 0,433 | -0,078 |
| 15 | Q14004 CD2L5_HUMAN | R.ILELT#PEPDRPR.I             | T1246:       | 2 | 2,5351 | 0,329 | 0,08   |
| 15 | Q92797 SYMPK_HUMAN | K.T#PSPAAEDAREPEAK.G          | T1257:       | 2 | 2,5292 | 0,489 | -0,592 |
| 15 | Q96T23 RSF1_HUMAN  | R.IET#DEEESCDNAHGDNQPAR.D     | T1295:       | 3 | 3,7192 | 0,374 | -0,525 |
| 15 | Q96MW1 CCD43_HUMAN | R.KAALLAQYADVT#DEEDEADEK.D    | T139:        | 3 | 6,1131 | 0,549 | -0,304 |
| 15 | O75533 SF3B1_HUMAN | R.LDPFADGGKT#PDPK.M           | T142:        | 2 | 2,622  | 0,255 | 0,635  |
| 15 | P29966 MARCS_HUMAN | K.AEDGATSPSPNET#PKK.K         | T150:        | 2 | 2,9048 | 0,385 | -0,5   |
| 15 | Q96G03 PGM2_HUMAN  | K.LCAGIM*IT#ASHNPK.Q          | T163:        | 2 | 3,4255 | 0,447 | 0,152  |
| 15 | P11137 MAP2_HUMAN  | K.VAIIRT#PPKS#PATPK.Q         | T1649:S1653: | 3 | 2,923  | 0,304 | -0,211 |
| 15 | P63000 RAC1_HUMAN  | R.GLKT#VFDEAIR.A              | T167:        | 2 | 3,0628 | 0,356 | -0,459 |
| 15 | O94842 TOX4_HUMAN  | R.LSTT#PSPTS#SLHEDGVEDFRR.Q   | T176:S181:   | 3 | 2,7483 | 0,197 | 0,881  |
| 15 | Q02952 AKA12_HUMAN | K.AIT#PQAQEELQKQER.E          | T1760:       | 3 | 2,7542 | 0,329 | 0,396  |
| 15 | P49790 NU153_HUMAN | K.DSTSQHDDDNISTT#SGFSSR.A     | T184:        | 3 | 2,8399 | 0,225 | -0,245 |
| 15 | P28482 MK01_HUMAN  | R.VADPDHDHTGFLT#EYVATR.W      | T185:        | 3 | 5,1761 | 0,542 | -0,329 |
| 15 | P28482 MK01_HUMAN  | R.VADPDHDHTGFLT#EY#VATR.W     | T185:Y187:   | 3 | 4,8396 | 0,563 | 0,635  |
| 15 | P46821 MAP1B_HUMAN | K.T#TRTPEEGGYSYDISEK.T        | T1946:       | 3 | 2,9849 | 0,218 | -0,364 |
| 15 | Q14980 NUMA1_HUMAN | R.VSLEPHQGGT#PESK.K           | T2000:       | 2 | 2,96   | 0,396 | -0,446 |
| 15 | P27361 MK03_HUMAN  | R.IADPEHDHTGFLT#EYVATR.W      | T202:        | 3 | 4,9339 | 0,57  | -0,325 |
| 15 | P48556 PSMD8_HUMAN | R.ILFFNT#PKK.M                | T202:        | 2 | 2,5638 | 0,237 | -0,822 |
| 15 | P27361 MK03_HUMAN  | R.IADPEHDHTGFLT#EY#VATR.W     | T202:Y204:   | 3 | 4,6687 | 0,515 | -0,078 |
| 15 | O15173 PGRC2_HUMAN | R.LLKPGEPESEY#DEEDTK.D        | T211:        | 3 | 4,1164 | 0,4   | 0      |
| 15 | Q5JSH3 WDR44_HUMAN | R.HLT#PEPDIKASTK.K            | T219:        | 2 | 3,2063 | 0,396 | 0,246  |
| 15 | Q8IYB3 SRRM1_HUMAN | K.EKT#PELPEPSVK.V             | T220:        | 2 | 2,0348 | 0,332 | 0,085  |
| 15 | Q00610 CLH1_HUMAN  | K.LHIIEVGT#PPTGNQPFVK.K       | T235:        | 3 | 3,619  | 0,275 | -0,181 |
| 15 | Q00610 CLH1_HUMAN  | K.LHIIEVGT#PPT#GNQPFVK.K      | T238:        | 3 | 2,6926 | 0,222 | -0,181 |
| 15 | Q01130 SFRS2_HUMAN | K.VDNLYRT#SPDTR.R             | T25:         | 3 | 2,9386 | 0,178 | -0,106 |
| 15 | Q5T200 ZC3HD_HUMAN | K.GPRT#PS#PPPIPEDIALGKK.Y     | T263:S265:   | 3 | 4,8789 | 0,475 | -0,082 |
| 15 | Q5T200 ZC3HD_HUMAN | K.KGPRT#PS#PPPIPEDIALGK.K     | T263:S265:   | 3 | 4,8525 | 0,37  | 0      |
| 15 | Q03188 CENPC_HUMAN | K.KSFST#LFLETVK.R             | T264:        | 3 | 3,6087 | 0,142 | 0      |
| 15 | O94906 PRP6_HUMAN  | K.GYLT#DLNS#M*IPTHGGDINDIKK.A | T275:S279:   | 3 | 4,299  | 0,381 | -0,781 |
| 15 | Q8NG27 PJA1_HUMAN  | K.IFFDT#DDDDDM*PHSTSR.W       | T277:        | 3 | 3,1814 | 0,225 | -0,087 |
| 15 | P45974 UBP5_HUMAN  | K.TDKTM*T#ELEIDM*NQR.I        | T294:        | 3 | 4,2144 | 0,325 | -0,094 |

|    |                    |                                 |                 |   |        |       |        |
|----|--------------------|---------------------------------|-----------------|---|--------|-------|--------|
| 15 | Q9NQW6 ANLN_HUMAN  | K.AT#SPVKSTTSITDAK.S            | T294:           | 2 | 3,2451 | 0,468 | -0,308 |
| 15 | Q9NQ84 GPC5C_HUMAN | R.GVGYET#ILKEQK.G               | T326:           | 2 | 2,0579 | 0,138 | 0,084  |
| 15 | Q641Q2 FA21A_HUMAN | R.RT#PSDDEEDNLFAPPK.L           | T331:           | 3 | 2,8728 | 0,269 | 0      |
| 15 | P17096 HMGA1_HUMAN | R.KQPPVSPGT#ALVGSQKEPSEVPT#PK.R | T39:T53:        | 3 | 3,7017 | 0,408 | 0,404  |
| 15 | Q14247 SRC8_HUMAN  | R.AKTQT#PPVSPAPQTEER.L          | T401:           | 3 | 4,1754 | 0,412 | -0,272 |
| 15 | O94967 WDR47_HUMAN | K.NELRDST#EQFQEYYR.Q            | T423:           | 3 | 3,9101 | 0,162 | -0,444 |
| 15 | Q8IYB1 CC059_HUMAN | R.RGSTT#SIPSPQSDGGDPNQDDR.L     | T435:           | 3 | 4,6454 | 0,417 | -0,297 |
| 15 | O43318 M3K7_HUMAN  | R.RSIQDLT#VTGTEPGQVSSR.S        | T444:           | 3 | 4,8763 | 0,424 | 0,087  |
| 15 | Q9H5P4 PDZD7_HUMAN | R.SKT#LM*NLFFK.G                | T466:           | 2 | 3,2139 | 0,336 | -0,276 |
| 15 | P36915 GNL1_HUMAN  | R.EEQT#DT#S#DGESVTHHIR.R        | T48:T50:S51:    | 3 | 3,1384 | 0,22  | -0,084 |
| 15 | Q15910 EZH2_HUMAN  | R.VKESSIAPAPAEDVDT#PPR.K        | T487:           | 3 | 4,8123 | 0,53  | 0,337  |
| 15 | O60832 DKC1_HUMAN  | K.AGLESGAEPGDGSDTT#KK.K         | T497:           | 3 | 3,4227 | 0,348 | -0,191 |
| 15 | Q8N3X1 FNBP4_HUMAN | K.VQTT#PKVEEQDLK.F              | T517:           | 2 | 3,334  | 0,38  | -0,637 |
| 15 | Q8N3X1 FNBP4_HUMAN | K.VQTT#PKVEEQDLK.F              | T517:           | 3 | 3,1612 | 0,432 | -0,212 |
| 15 | Q9BST9 RTKN_HUMAN  | R.T#FSLDAVPPDHSPR.A             | T518:           | 2 | 2,6443 | 0,38  | -0,151 |
| 15 | Q7Z628 ARHG8_HUMAN | R.RAST#VSSVTQVEVDENAYR.C        | T540:           | 3 | 2,6685 | 0,138 | 0      |
| 15 | Q15042 RB3GP_HUMAN | K.KTSASDVT#NIYPGDAGK.A          | T542:           | 3 | 3,1455 | 0,168 | 0      |
| 15 | Q9UJ14 GGT7_HUMAN  | R.KDEDAFLGDPDT#DPDSFLK.S        | T56:            | 3 | 4,0058 | 0,279 | -0,332 |
| 15 | Q9Y2L9 LRCH1_HUMAN | R.NLESIDPQFT#IRR.K              | T568:           | 2 | 2,0442 | 0,295 | 0      |
| 15 | Q13428 TCOF_HUMAN  | K.SLGNILQAKPT#SS#PAKGPPQK.A     | T581:S583:      | 3 | 3,4191 | 0,247 | 0,161  |
| 15 | Q7Z4H7 FA29A_HUMAN | R.NQIPRT#PENLITEIR.S            | T584:           | 2 | 4,2901 | 0,339 | -0,456 |
| 15 | Q7Z4H7 FA29A_HUMAN | R.NQIPRT#PENLITEIR.S            | T584:           | 3 | 3,4692 | 0,323 | -0,488 |
| 15 | P13051 UNG_HUMAN   | K.KAPAGQEEPQT#PPSSPLSAEQLDR.I   | T60:            | 3 | 4,8983 | 0,465 | 0,144  |
| 15 | P55265 DSRAD_HUMAN | K.ESEKTAESQT#PTPSATSFSGK.S      | T601:           | 3 | 3,8953 | 0,358 | -0,305 |
| 15 | Q53GT1 KLH22_HUMAN | R.SLLEPPRGT#PDR.S               | T605:           | 2 | 2,3662 | 0,324 | -1,594 |
| 15 | Q96GS4 CQ059_HUMAN | R.RAT#ISSPLELEGTVSR.H           | T62:            | 2 | 3,4121 | 0,454 | 0,272  |
| 15 | Q96GS4 CQ059_HUMAN | R.RAT#ISSPLELEGTVSR.H           | T62:            | 3 | 2,7062 | 0,272 | 0,102  |
| 15 | Q9H4G0 E41L1_HUMAN | R.DKSDSDT#EGLLFSR.D             | T652:           | 3 | 2,6211 | 0,133 | 0,111  |
| 15 | P25205 MCM3_HUMAN  | R.SEDESET#EDEEEKSQEDQEQK.R      | T674:           | 3 | 4,9213 | 0,54  | -0,561 |
| 15 | Q9P275 UBP36_HUMAN | K.LKSPVLSNTTTEPAST#M*SPPPAK.K   | T680:           | 3 | 3,8332 | 0,287 | -0,373 |
| 15 | Q9NTJ4 MA2C1_HUMAN | K.LDPT#GRLT#SLVLVAS#GR.E        | T701:T705:S712: | 3 | 2,7706 | 0,209 | 0,825  |
| 15 | Q6P996 PDXD1_HUMAN | R.GSDALSET#SS#VSHIEDLEKVER.L    | T720:S722:      | 3 | 4,7368 | 1     | 0,503  |
| 15 | Q5VT52 K0460_HUMAN | R.GPTSTSIDNIDGT#PVRDER.S        | T723:           | 3 | 3,6815 | 0,397 | 0,26   |

|    |                      |                                    |            |   |        |       |        |
|----|----------------------|------------------------------------|------------|---|--------|-------|--------|
| 15 | P21127 CD2L1_HUMAN   | K.RGT#S#PRPPEGGLGYSQLGDDDLK.E      | T751:S752: | 3 | 4,9844 | 0,436 | 0,213  |
| 15 | Q6GYQ0 GRIPE_HUMAN   | R.QKT#VDIDDAQILPR.S                | T754:      | 2 | 2,7554 | 0,269 | 0,505  |
| 15 | P46087 NOL1_HUMAN    | K.QNDTPKGPQPPT#VSPIR.S             | T784:      | 3 | 2,7606 | 0,337 | 0,096  |
| 15 | Q14118 DAG1_HUMAN    | K.LTLEDQAT#FIKK.G                  | T790:      | 2 | 3,6354 | 0,417 | -0,492 |
| 15 | O75449 KTNA1_HUMAN   | K.TLESFKLDST#PLK.A                 | T81:       | 2 | 3,2058 | 0,366 | -0,391 |
| 15 | Q6PD62 CTR9_HUMAN    | K.GGEFDEFVNDT#DDDLPISSK.K          | T925:      | 3 | 5,7584 | 0,406 | -0,3   |
| 15 | Q8NG31 CASC5_HUMAN   | K.T#VSPDEITRPM*DK.T                | T954:      | 2 | 2,456  | 0,319 | 0,362  |
| 15 | P07355 ANXA2_HUMAN   | K.LSLEGDHSTPPSAY#GSVK.A            | Y24:       | 2 | 2,7447 | 0,293 | -0,063 |
| 15 | Q96JG6 CC132_HUMAN   | K.SAYQEY#DSDSDVPEELKR.D            | Y557:      | 3 | 3,0528 | 0,228 | 0,579  |
| 15 | Q9Y2X7 GIT1_HUMAN    | R.HGSGADSDY#ENTQSGDLLGLEGK.R       | Y598:      | 3 | 5,0683 | 0,425 | -0,579 |
| 15 | Q8N128 CN024_HUMAN   | R.VIHFVSGETM*EEY#S#TDEDEVDGLEKK.D  | Y69:S70:   | 3 | 3,321  | 1     | -0,347 |
| 15 | Q9C0C2 TB182_HUMAN   | K.RDSLGA#ASQDANEQQDLGK.R           | Y897:      | 3 | 5,8066 | 0,493 | -0,318 |
| 15 | ##Q6NUT2 D19L2_HUMAN | R.LDADEY#HPHNVIPHLTSLK.I           | Y98:       | 3 | 3,0178 | 0,145 | 1,445  |
| 15 | O75531 BAF_HUMAN     | R.DFVAEPM*GEKPVGSLAGIGEVLGK.K      |            | 3 | 5,0993 | 0,565 | -0,379 |
| 15 | P68104 EF1A1_HUMAN   | R.VETGVLKPGM*VVTFAPVNVTTTEVK.S     |            | 3 | 4,5024 | 0,439 | -0,289 |
| 15 | Q86V48 LUZP1_HUMAN   | K.NNDLQDNYLSEQNK.N                 |            | 2 | 4,3705 | 0,422 | 0,288  |
| 15 | Q02952 AKA12_HUMAN   | K.TEGTQEADQYADEK.T                 |            | 2 | 4,2455 | 0,522 | -0,539 |
| 15 | P02786 TFR1_HUMAN    | K.LAVDEEENADNNTK.A                 |            | 2 | 4,0066 | 0,557 | -0,312 |
| 15 | P62306 RUXF_HUMAN    | R.GVEEEEEDGEM*RE.-                 |            | 2 | 3,967  | 0,491 | -1,021 |
| 15 | P28074 PSB5_HUMAN    | R.GPGLYVDSEGNR.I                   |            | 2 | 3,929  | 0,628 | 0,086  |
| 15 | P63104 1433Z_HUMAN   | K.SVTEQGAELSNEER.N                 |            | 2 | 3,8867 | 0,546 | 0,63   |
| 15 | P54920 SNAA_HUMAN    | K.NSQSFFSGLFGSSK.I                 |            | 2 | 3,8178 | 0,587 | -0,63  |
| 15 | P09493 TPM1_HUMAN    | K.ATDAEADVASLNR.R                  |            | 2 | 3,7975 | 0,445 | 0,092  |
| 15 | P05386 RLA1_HUMAN    | K.KEESEESDDDM*GFGLFD.-             |            | 2 | 3,7449 | 0,606 | -0,993 |
| 15 | P06454 PTMA_HUMAN    | R.AAEDDEDDDDVDTK.K                 |            | 2 | 3,7144 | 0,604 | -0,933 |
| 15 | O95202 LETM1_HUMAN   | K.VAEVEGEQVDNK.A                   |            | 2 | 3,7078 | 0,387 | -0,371 |
| 15 | P05387 RLA2_HUMAN    | K.NIEDVIAQGIGK.L                   |            | 2 | 3,6556 | 0,44  | -0,388 |
| 15 | P31942 HNRH3_HUMAN   | R.DGM*DNQGGYGSVGR.M                |            | 2 | 3,6353 | 0,512 | -0,342 |
| 15 | Q14011 CIRBP_HUMAN   | R.DSYDSYATHNE.-                    |            | 2 | 3,6026 | 0,48  | 0,281  |
| 15 | P22314 UBA1_HUMAN    | K.NGSEADIDEGLYSR.Q                 |            | 2 | 3,599  | 0,552 | 0,16   |
| 15 | P33993 MCM7_HUMAN    | K.SEDDESGAGELTR.E                  |            | 2 | 3,5891 | 0,476 | -0,536 |
| 15 | P06733 ENOA_HUMAN    | K.DATNVGDEGGFAPNILENKEGLELLK.T     |            | 3 | 3,5794 | 0,466 | -0,667 |
| 15 | P16152 CBR1_HUMAN    | K.SPEEGAETPVYLALLPPDAEGPHGQFVSEK.R |            | 3 | 3,5735 | 0,465 | -0,116 |



|    |                    |                              |   |        |       |        |
|----|--------------------|------------------------------|---|--------|-------|--------|
| 15 | P07437 TBB5_HUMAN  | R.ISVYYNEATGGK.Y             | 2 | 3,5581 | 0,43  | -0,187 |
| 15 | P49915 GUAA_HUMAN  | R.SGNIVAGIANESK.K            | 2 | 3,5043 | 0,347 | 0,387  |
| 15 | Q00610 CLH1_HUMAN  | R.NNLAGEEELFAR.K             | 2 | 3,5037 | 0,446 | -0,187 |
| 15 | Q9NVP1 DDX18_HUMAN | K.ISDIQSQLEK.L               | 2 | 3,5008 | 0,221 | -0,21  |
| 15 | P46087 NOL1_HUMAN  | K.NTGVILANDANAER.L           | 2 | 3,4881 | 0,415 | 0,251  |
| 15 | Q9HAV7 GRPE1_HUMAN | K.NSGQNLEEDM*GQSEQK.A        | 2 | 3,4859 | 0,346 | -0,539 |
| 15 | P07355 ANXA2_HUMAN | K.TPAQYDASELK.A              | 2 | 3,4725 | 0,457 | 0      |
| 15 | P11021 GRP78_HUMAN | R.VEIIANDQGNR.I              | 3 | 3,4605 | 0,329 | 0,223  |
| 15 | Q9NQP4 PFD4_HUMAN  | K.NLQEEIDALESR.V             | 2 | 3,4594 | 0,416 | 0,172  |
| 15 | P54577 SYYC_HUMAN  | K.VDAQFGGIDQR.K              | 2 | 3,437  | 0,388 | 0,911  |
| 15 | Q9NQP4 PFD4_HUMAN  | K.NLQEEIDALESR.V             | 3 | 3,4301 | 0,331 | 0      |
| 15 | P05787 K2C8_HUMAN  | K.LSELEAALQR.A               | 2 | 3,3825 | 0,099 | 0,216  |
| 15 | P56192 SYMC_HUMAN  | K.LENDQIESLR.Q               | 2 | 3,3625 | 0,297 | 0,1    |
| 15 | P78371 TCPB_HUMAN  | R.GATQQILDEAER.S             | 2 | 3,3607 | 0,47  | 0,183  |
| 15 | P43243 MATR3_HUMAN | K.SQAFIEM*ETR.E              | 2 | 3,3437 | 0,487 | 0,397  |
| 15 | P62269 RS18_HUMAN  | K.YSQVLANGLDNK.L             | 2 | 3,3084 | 0,499 | -0,092 |
| 15 | P05455 LA_HUMAN    | K.IIEDQQESLNK.W              | 2 | 3,2953 | 0,335 | -0,185 |
| 15 | Q96T88 UHRF1_HUMAN | R.NDASEVVLAGER.L             | 2 | 3,2792 | 0,478 | -0,194 |
| 15 | O15143 ARC1B_HUMAN | K.NSVSQISVLSGGK.A            | 2 | 3,2745 | 0,521 | 0,096  |
| 15 | Q14444 CAPR1_HUMAN | R.LNQDQLDAVSK.Y              | 2 | 3,2641 | 0,446 | -0,198 |
| 15 | P04075 ALDOA_HUMAN | R.LQSIGTENTEENR.R            | 2 | 3,2464 | 0,455 | -0,246 |
| 15 | P05783 K1C18_HUMAN | R.AQIFANTVDNAR.I             | 2 | 3,245  | 0,499 | 0,37   |
| 15 | Q9Y237 PIN4_HUMAN  | R.FNEVAAQYSEDK.A             | 2 | 3,2318 | 0,431 | -0,087 |
| 15 | P07355 ANXA2_HUMAN | R.DALNIETAIK.T               | 2 | 3,2225 | 0,373 | 0,112  |
| 15 | O14737 PDCD5_HUMAN | R.NSILAQVLDQSAR.A            | 2 | 3,2218 | 0,451 | -0,172 |
| 15 | P35232 PHB_HUMAN   | R.FDAGELITQR.E               | 2 | 3,214  | 0,408 | 0      |
| 15 | P07900 HS90A_HUMAN | R.APFDLFENR.K                | 2 | 3,207  | 0,457 | -0,55  |
| 15 | Q9Y490 TLN1_HUMAN  | K.ADAEGESDLENSR.K            | 2 | 3,191  | 0,446 | -0,613 |
| 15 | Q7L2E3 DHX30_HUMAN | K.DSGPLSDPITGKPYVPLLEAEVLR.L | 3 | 3,1907 | 0,244 | -0,354 |
| 15 | P02545 LMNA_HUMAN  | K.AAYEAEELGDAR.K             | 2 | 3,1876 | 0,443 | -0,105 |
| 15 | P33176 KINH_HUMAN  | R.DQDNM*QAELNR.L             | 2 | 3,1788 | 0,367 | -0,362 |
| 15 | Q00839 HNRPU_HUMAN | R.GYFEYIEENK.Y               | 2 | 3,1627 | 0,406 | -0,378 |
| 15 | P04843 RPN1_HUMAN  | K.GEDEEENLEVR.E              | 2 | 3,159  | 0,39  | -0,085 |

|    |                    |                      |   |        |       |        |
|----|--------------------|----------------------|---|--------|-------|--------|
| 15 | P62306 RUXF_HUMAN  | R.GVEEEEDGEM*RE.-    | 3 | 3,1579 | 0,314 | -0,118 |
| 15 | P11021 GRP78_HUMAN | R.VEIIANDQGNR.I      | 2 | 3,155  | 0,348 | -0,298 |
| 15 | P13667 PDIA4_HUMAN | K.M*DATANDVPSDR.Y    | 2 | 3,1525 | 0,429 | -0,373 |
| 15 | P11940 PABP1_HUMAN | K.NLDDGIDDER.L       | 2 | 3,1323 | 0,451 | 0      |
| 15 | Q15149 PLEC1_HUMAN | R.DSQDAGGFGPEDR.L    | 2 | 3,1225 | 0,394 | -0,181 |
| 15 | P05787 K2C8_HUMAN  | K.YEELQSLAGK.H       | 2 | 3,1157 | 0,089 | -0,214 |
| 15 | P17066 HSP76_HUMAN | R.VEILANDQGNR.T      | 2 | 3,0892 | 0,292 | -0,794 |
| 15 | Q99829 CPNE1_HUMAN | R.FGIYDIDNK.T        | 2 | 3,0889 | 0,439 | 0,112  |
| 15 | O43617 TPPC3_HUMAN | K.DYENDEVDNK.Q       | 2 | 3,0766 | 0,266 | -0,197 |
| 15 | P21333 FLNA_HUMAN  | R.AGQSAAGAAPGGGVDR.D | 2 | 3,0675 | 0,411 | 0,254  |
| 15 | P12268 IMDH2_HUMAN | K.VAQGVSGAVQDK.G     | 2 | 3,0596 | 0,341 | -0,526 |
| 15 | P27348 1433T_HUMAN | K.AVTEQGAELSNEER.N   | 2 | 3,0573 | 0,301 | -0,159 |
| 15 | P61221 ABCE1_HUMAN | R.NVEDLSGGELQR.F     | 2 | 3,0521 | 0,399 | -0,185 |
| 15 | P19338 NUCL_HUMAN  | K.NDLAVVDVR.I        | 2 | 3,0461 | 0,398 | -0,366 |
| 15 | P20962 PTMS_HUMAN  | K.SVEAAAELSAK.D      | 2 | 3,0425 | 0,503 | 0,34   |
| 15 | Q9UNZ2 NSF1C_HUMAN | K.SGFSLDNGELR.S      | 2 | 3,0292 | 0,384 | -0,511 |
| 15 | Q03252 LMNB2_HUMAN | K.M*AQALEELR.S       | 2 | 3,0248 | 0,339 | -0,113 |
| 15 | P68104 EF1A1_HUMAN | K.M*DSTEPPYSQK.R     | 2 | 3,0239 | 0,419 | -0,188 |
| 15 | P61978 HNRPK_HUMAN | K.IDEPLEGSEDR.I      | 2 | 3,0181 | 0,397 | 0,097  |
| 15 | P19404 NDUV2_HUMAN | R.NSDSILEAIQK.K      | 2 | 2,9995 | 0,338 | -0,2   |
| 15 | P40925 MDHC_HUMAN  | K.ELTEEKESAFELSSA.-  | 2 | 2,9952 | 0,448 | -0,134 |
| 15 | P35579 MYH9_HUMAN  | R.QLEEAEEEAQR.A      | 2 | 2,9949 | 0,401 | -0,641 |
| 15 | Q01518 CAP1_HUMAN  | K.NSLDCEIVSAK.S      | 2 | 2,9908 | 0,501 | 0,296  |
| 15 | O43765 SGTA_HUMAN  | R.TPPSEEDSAEER.L     | 2 | 2,9799 | 0,501 | -0,688 |
| 15 | Q9Y266 NUDC_HUMAN  | R.LQLEIDQK.K         | 2 | 2,9791 | 0,093 | 0,062  |
| 15 | P10644 KAP0_HUMAN  | R.SENEEFVEVGR.L      | 2 | 2,9732 | 0,208 | -0,377 |
| 15 | P30153 2AAA_HUMAN  | K.LTQDQDVVK.Y        | 2 | 2,9692 | 0,263 | -0,525 |
| 15 | P63220 RS21_HUMAN  | R.M*GESDDSILR.L      | 2 | 2,9573 | 0,504 | -0,107 |
| 15 | P02545 LMNA_HUMAN  | R.LADALQELR.A        | 2 | 2,9496 | 0,266 | 0,119  |
| 15 | P63244 GBLP_HUMAN  | K.DVLSVAFSSDNR.Q     | 2 | 2,934  | 0,547 | 0      |
| 15 | Q9Y371 SHLB1_HUMAN | K.GKVPITYLELLN.-     | 2 | 2,9294 | 0,404 | -0,359 |
| 15 | P31946 1433B_HUMAN | R.YLSEVASGDNK.Q      | 2 | 2,9175 | 0,475 | -0,413 |
| 15 | P19338 NUCL_HUMAN  | K.EAM*EDGEIDGNK.V    | 2 | 2,9087 | 0,455 | -0,737 |

|    |                     |                                    |   |        |       |        |
|----|---------------------|------------------------------------|---|--------|-------|--------|
| 15 | Q13618 CUL3_HUMAN   | K.NNSGLSFEELYR.N                   | 2 | 2,9058 | 0,509 | -0,342 |
| 15 | O75369 FLNB_HUMAN   | K.SPFEVSVDK.A                      | 2 | 2,9043 | 0,245 | 0,121  |
| 15 | P49411 EFTU_HUMAN   | K.YEEIDNAPEER.A                    | 2 | 2,9018 | 0,436 | 0      |
| 15 | O95801 TTC4_HUMAN   | R.NQNEALLQAIK.A                    | 2 | 2,9017 | 0,29  | 0      |
| 15 | Q58FF8 H90B2_HUMAN  | K.YIDQEELNK.T                      | 2 | 2,8975 | 0,288 | -0,106 |
| 15 | P60709 ACTB_HUMAN   | R.GYSFTTTAER.E                     | 2 | 2,8914 | 0,466 | 0,108  |
| 15 | Q9Y3Y2 CA077_HUMAN  | K.GHLDAELDAYM*AQTDPETND.-          | 3 | 2,8831 | 0,342 | -0,082 |
| 15 | P30101 PDIA3_HUMAN  | K.FVM*QEEFSR.D                     | 2 | 2,8789 | 0,325 | -0,205 |
| 15 | Q13618 CUL3_HUMAN   | R.FLLESFNDR.L                      | 2 | 2,87   | 0,361 | -0,097 |
| 15 | P62258 1433E_HUMAN  | R.YLAEFATGNDR.K                    | 2 | 2,8642 | 0,484 | -0,097 |
| 15 | Q6ZR64 Q6ZR64_HUMAN | K.EELEEEQRTEE.-                    | 2 | 2,863  | 0,326 | -0,343 |
| 15 | P68104 EF1A1_HUMAN  | K.SGDAAIVDM*VPGKPM*CVESFSDYPPLGR.F | 3 | 2,8621 | 0,408 | -0,302 |
| 15 | P31946 1433B_HUMAN  | R.YDDM*AAAM*K.A                    | 2 | 2,8587 | 0,543 | -0,466 |
| 15 | P62736 ACTA_HUMAN   | K.DSYVGDEAQS.K.R                   | 2 | 2,846  | 0,479 | -0,305 |
| 15 | P61254 RL26_HUMAN   | K.DDEVQVVR.G                       | 2 | 2,8435 | 0,289 | -0,127 |
| 15 | P62873 GBB1_HUMAN   | R.LLVASQDGK.L                      | 2 | 2,841  | 0,344 | -0,3   |
| 15 | Q6S8J3 A26CA_HUMAN  | K.AGFAGDDAPR.A                     | 2 | 2,8295 | 0,325 | 0,125  |
| 15 | P61604 CH10_HUMAN   | K.GGEIQPVSVK.V                     | 2 | 2,829  | 0,186 | 0,18   |
| 15 | P46459 NSF_HUMAN    | K.NFSGAELEGLVR.A                   | 2 | 2,8266 | 0,351 | 0,283  |
| 15 | P04075 ALDOA_HUMAN  | R.YASICQQNGIVIVEPEILPDGDHDLK.R     | 3 | 2,8257 | 0,208 | -0,424 |
| 15 | P23396 RS3_HUMAN    | K.AELNEFLTR.E                      | 2 | 2,8249 | 0,355 | 0,112  |
| 15 | P50990 TCPQ_HUMAN   | R.GSTDNLM*DDIER.A                  | 2 | 2,8119 | 0,405 | -0,441 |
| 15 | P34931 HS71L_HUMAN  | K.NALESYAFNM*K.S                   | 2 | 2,8101 | 0,442 | -0,468 |
| 15 | Q9Y2B0 CNPY2_HUMAN  | R.NGESSELDLQGIR.I                  | 2 | 2,8056 | 0,459 | -0,86  |
| 15 | P05362 ICAM1_HUMAN  | K.ASVSVTAEDEGTQR.L                 | 2 | 2,8046 | 0,524 | -0,421 |
| 15 | P10809 CH60_HUMAN   | K.VGGTSDVEVNEK.K                   | 2 | 2,802  | 0,443 | -0,593 |
| 15 | P33993 MCM7_HUMAN   | K.SQLLSYDR.L                       | 2 | 2,8002 | 0,385 | 0,111  |
| 15 | P62424 RL7A_HUMAN   | K.NFGIGQDIQPK.R                    | 2 | 2,7991 | 0,374 | 0,1    |
| 15 | P25685 DNJB1_HUMAN  | R.NPFDTFFGQR.N                     | 2 | 2,792  | 0,391 | -0,496 |
| 15 | Q99832 TCPH_HUMAN   | R.GGAEQFM*EETER.S                  | 2 | 2,7912 | 0,415 | 0,087  |
| 15 | P29373 RABP2_HUMAN  | R.SENFEELLK.V                      | 2 | 2,7861 | 0,425 | -0,22  |
| 15 | P31949 S10AB_HUMAN  | K.DGYNYTLK.T                       | 2 | 2,7839 | 0,483 | -0,23  |
| 15 | P17661 DESM_HUMAN   | K.VELQELNDR.F                      | 2 | 2,7778 | 0,331 | -0,328 |

|    |                    |                            |   |        |       |        |
|----|--------------------|----------------------------|---|--------|-------|--------|
| 15 | Q6S8J3 A26CA_HUMAN | K.SYELPDGQVITIGNER.F       | 2 | 2,7762 | 0,535 | -0,409 |
| 15 | P16401 H15_HUMAN   | K.ALAAGGYDVEK.N            | 2 | 2,7667 | 0,423 | -0,112 |
| 15 | P09622 DLDH_HUMAN  | K.ADGGTQVIDTK.N            | 2 | 2,7636 | 0,325 | 0      |
| 15 | P39019 RS19_HUMAN  | K.DVNQQEFVR.A              | 2 | 2,7628 | 0,332 | 0      |
| 15 | P10809 CH60_HUMAN  | K.LSDGVAVLK.V              | 2 | 2,7625 | 0,357 | 0,068  |
| 15 | P08670 VIME_HUMAN  | K.LQEEM*LQR.E              | 2 | 2,7617 | 0,23  | 0,459  |
| 15 | Q58FF7 H90B3_HUMAN | R.APFDLFENK.K              | 2 | 2,7604 | 0,376 | -0,339 |
| 15 | Q14978 NOLC1_HUMAN | R.DNQLSEVANK.F             | 2 | 2,755  | 0,249 | -0,218 |
| 15 | Q9H4B7 TBB1_HUMAN  | R.FPGQLNADLR.K             | 2 | 2,7505 | 0,28  | 0      |
| 15 | Q9Y265 RUVB1_HUMAN | K.GLGLDESLAK.Q             | 2 | 2,7459 | 0,498 | 0,23   |
| 15 | Q9H490 PIGU_HUMAN  | R.SSLAEFISER.V             | 2 | 2,7435 | 0,139 | -0,428 |
| 15 | P43246 MSH2_HUMAN  | K.NNSFVNEIISR.I            | 2 | 2,7418 | 0,425 | -0,189 |
| 15 | P09525 ANXA4_HUMAN | K.GLGTDDNTLIR.V            | 2 | 2,735  | 0,343 | -0,312 |
| 15 | P62851 RS25_HUMAN  | R.AALQELLSK.G              | 2 | 2,7305 | 0,245 | 0,063  |
| 15 | P06733 ENOA_HUMAN  | R.GNPTVEVDLFTSK.G          | 2 | 2,7023 | 0,422 | -0,607 |
| 15 | P37837 TALDO_HUMAN | R.M*ESALDQLK.Q             | 2 | 2,7013 | 0,363 | 0      |
| 15 | P27708 PYR1_HUMAN  | R.SILEQLAEK.N              | 2 | 2,6982 | 0,268 | 0,118  |
| 15 | P61978 HNRPK_HUMAN | R.NTDEM*VELR.I             | 2 | 2,6961 | 0,373 | -0,326 |
| 15 | P62937 PIIA_HUMAN  | R.VSFELFADK.V              | 2 | 2,6952 | 0,427 | -0,231 |
| 15 | P08670 VIME_HUMAN  | R.LQDEIQNM*K.E             | 2 | 2,6885 | 0,241 | -0,86  |
| 15 | Q00839 HNRPU_HUMAN | K.NGQDLGVAFK.I             | 2 | 2,6878 | 0,354 | 0,116  |
| 15 | P07951 TPM2_HUMAN  | K.CGDLEELK.I               | 2 | 2,6822 | 0,376 | 0,112  |
| 15 | Q71U36 TBA1A_HUMAN | K.DVNAAIATIK.T             | 2 | 2,6772 | 0,209 | 0,06   |
| 15 | P78356 PI42B_HUMAN | K.DNDFLNEGQK.L             | 2 | 2,6771 | 0,356 | 0,207  |
| 15 | P19338 NUCL_HUMAN  | R.SISLYTGEK.G              | 2 | 2,6753 | 0,422 | 0,105  |
| 15 | O00233 PSMD9_HUMAN | K.ANYDVLESQK.G             | 2 | 2,6721 | 0,445 | -0,105 |
| 15 | P78527 PRKDC_HUMAN | R.NELEIPGQYDGR.G           | 2 | 2,667  | 0,183 | -0,351 |
| 15 | Q58FF7 H90B3_HUMAN | K.EQVANSFAVER.V            | 2 | 2,6649 | 0,396 | 0,293  |
| 15 | Q2TB10 ZN800_HUMAN | R.DSITPDIAKPGQPLFLDSISPK.K | 3 | 2,6622 | 0,412 | -0,525 |
| 15 | P62269 RS18_HUMAN  | R.AGELTEDEVER.V            | 2 | 2,6587 | 0,433 | -0,587 |
| 15 | Q16181 SEPT7_HUMAN | K.FEDYLNAESR.V             | 2 | 2,6577 | 0,378 | -0,098 |
| 15 | P63151 ZABA_HUMAN  | K.NAAQFLLSTNDK.T           | 2 | 2,6546 | 0,45  | 0,185  |
| 15 | P30044 PRDX5_HUMAN | K.VNLAELFK.G               | 2 | 2,654  | 0,367 | -0,131 |

|    |                    |                   |   |        |       |        |
|----|--------------------|-------------------|---|--------|-------|--------|
| 15 | Q8WXX5 DNJC9_HUMAN | K.GSEEEELADIK.Q   | 2 | 2,6491 | 0,319 | -0,112 |
| 15 | P52701 M5H6_HUMAN  | K.FFIGQFSDDR.H    | 2 | 2,646  | 0,293 | -0,297 |
| 15 | Q99848 EBP2_HUMAN  | K.AVDPEDDFQR.E    | 2 | 2,6455 | 0,393 | 0,102  |
| 15 | P68104 EF1A1_HUMAN | R.LPLQDVYK.I      | 2 | 2,6429 | 0,217 | 0,188  |
| 15 | O60884 DNJA2_HUMAN | K.VSLEDLYNGK.T    | 2 | 2,6407 | 0,412 | -0,107 |
| 15 | Q9UKM9 RALY_HUMAN  | R.LEQIAAEQK.A     | 2 | 2,6401 | 0,175 | -0,118 |
| 15 | P14625 ENPL_HUMAN  | R.SGYLLPDTK.A     | 2 | 2,6301 | 0,452 | 0,061  |
| 15 | P50991 TCPD_HUMAN  | K.LVIEEAER.S      | 2 | 2,6297 | 0,219 | 0,191  |
| 15 | P08670 VIME_HUMAN  | R.EEAENTLQSFR.Q   | 2 | 2,6286 | 0,461 | 0,553  |
| 15 | P84077 ARF1_HUMAN  | R.M*LAEDEL.R.D    | 2 | 2,6257 | 0,188 | 0      |
| 15 | P41250 SYG_HUMAN   | K.GEFTIETEGK.T    | 2 | 2,6254 | 0,289 | 0,11   |
| 15 | Q05193 DYN1_HUMAN  | K.SSVLENFVGR.D    | 2 | 2,6094 | 0,158 | 0      |
| 15 | O75494 FUSIP_HUMAN | R.QIEIQFAQGDR.K   | 2 | 2,6089 | 0,305 | 0      |
| 15 | P16403 H12_HUMAN   | R.SGVSLAALK.K     | 2 | 2,6084 | 0,279 | -0,144 |
| 15 | P17987 TCPA_HUMAN  | K.SSLGPVGLDK.M    | 2 | 2,6076 | 0,276 | 0,188  |
| 15 | P54652 HSP72_HUMAN | K.LLQDFENGK.E     | 2 | 2,6002 | 0,389 | -0,226 |
| 15 | P62136 PP1A_HUMAN  | K.NVQLTENEIR.G    | 2 | 2,6    | 0,336 | -0,201 |
| 15 | P54577 SYYC_HUMAN  | R.NLQEVLGEEK.L    | 2 | 2,5952 | 0,26  | 0      |
| 15 | P63104 1433Z_HUMAN | R.YDDM*AACM*K.S   | 2 | 2,5928 | 0,448 | -0,322 |
| 15 | Q9NYU2 UGGG1_HUMAN | R.IEYQFFEDR.H     | 2 | 2,5904 | 0,362 | 0      |
| 15 | Q14683 SMC1A_HUMAN | R.TALFEEISR.S     | 2 | 2,5859 | 0,206 | 0      |
| 15 | Q8N5A5 ZGPAT_HUMAN | R.NVDFLNEK.L      | 2 | 2,5836 | 0,284 | -0,542 |
| 15 | O43719 HTSF1_HUMAN | K.LLDEDEIR.G      | 2 | 2,5809 | 0,216 | -0,182 |
| 15 | P05787 K2C8_HUMAN  | R.ASLEAAIADAEQR.G | 2 | 2,5744 | 0,287 | -0,181 |
| 15 | P62258 1433E_HUMAN | R.YDEM*VESM*K.K   | 2 | 2,5697 | 0,422 | -0,314 |
| 15 | O95831 AIFM1_HUMAN | K.LNDGSQITYEK.C   | 2 | 2,5633 | 0,247 | -0,096 |
| 15 | Q9UQ80 PA2G4_HUMAN | K.SDQDYILK.E      | 2 | 2,5556 | 0,233 | 0,186  |
| 15 | P49720 PSB3_HUMAN  | R.LNLYELK.E       | 2 | 2,5517 | 0,115 | 0      |
| 15 | P46776 RL27A_HUMAN | R.NQSFCPTVNLDK.L  | 2 | 2,5503 | 0,415 | 0,086  |
| 15 | Q16352 AINX_HUMAN  | R.DGLAEEVQR.L     | 2 | 2,5502 | 0,222 | 0      |
| 15 | Q02978 M2OM_HUMAN  | K.NGLDVLFK.V      | 2 | 2,5499 | 0,297 | -0,135 |
| 15 | P55265 DSRAD_HUMAN | R.DGSAFEDGLR.H    | 2 | 2,5434 | 0,325 | 0,114  |
| 15 | Q02790 FKBP4_HUMAN | K.VLQLYPNNK.A     | 2 | 2,5246 | 0,241 | 0      |

|    |                    |                 |   |        |       |        |
|----|--------------------|-----------------|---|--------|-------|--------|
| 15 | Q08945 SSRP1_HUMAN | R.SDFFEIETK.Q   | 2 | 2,5221 | 0,419 | -0,109 |
| 15 | O43159 HUCE1_HUMAN | R.DFLEEANR.V    | 2 | 2,519  | 0,176 | 0      |
| 15 | P54577 SYYC_HUMAN  | K.NSEPEEVIPSR.L | 2 | 2,5189 | 0,387 | -0,194 |
| 15 | Q7Z7H8 RM10_HUMAN  | R.EIAAVFQDNR.M  | 2 | 2,5169 | 0,317 | 0,525  |
| 15 | P08670 VIME_HUMAN  | R.QDVDNASLAR.L  | 2 | 2,5145 | 0,351 | -0,224 |
| 15 | P83731 RL24_HUMAN  | K.VFQFLNAK.C    | 2 | 2,5138 | 0,372 | 0,189  |
| 15 | P62826 RAN_HUMAN   | K.NLQYYDISAK.S  | 2 | 2,5053 | 0,316 | -0,1   |
| 15 | P61604 CH10_HUMAN  | K.GGIM*LPEK.S   | 2 | 2,5024 | 0,226 | 0,213  |
| 15 | P00367 DHE3_HUMAN  | K.M*VEGFFDR.G   | 2 | 2,5001 | 0,115 | 0,12   |
| 15 | P50995 ANX11_HUMAN | R.SETDLLDIR.S   | 2 | 2,4951 | 0,263 | 0,23   |
| 15 | O60812 HNRCL_HUMAN | K.SDVEAIFSK.Y   | 2 | 2,495  | 0,37  | 0      |
| 15 | Q02790 FKBP4_HUMAN | K.ALELDSNNEK.G  | 2 | 2,4941 | 0,362 | -0,323 |
| 15 | P50990 TCPQ_HUMAN  | R.AVDDGVNTFK.V  | 2 | 2,4917 | 0,52  | -0,229 |
| 15 | Q92598 HS105_HUMAN | K.SLDQDPVVR.A   | 2 | 2,4827 | 0,224 | 0      |
| 15 | P00338 LDHA_HUMAN  | K.VTLTSEEEAR.L  | 2 | 2,4811 | 0,408 | -0,215 |
| 15 | P0C0S8 H2A1_HUMAN  | R.AGLQFPVGR.V   | 2 | 2,4734 | 0,366 | 0,065  |
| 15 | P37268 FDFT_HUMAN  | R.DYLEDQQGGR.E  | 2 | 2,471  | 0,368 | -0,723 |
| 15 | Q00341 VIGLN_HUMAN | K.GNSLQEILER.T  | 2 | 2,4647 | 0,271 | -0,316 |
| 15 | P05556 ITB1_HUMAN  | R.DNTNEIYSGK.F  | 2 | 2,4644 | 0,38  | -0,107 |
| 15 | P13639 EF2_HUMAN   | K.STLTDSLVC.A   | 2 | 2,4617 | 0,458 | 0      |
| 15 | Q8IY81 RRMJ3_HUMAN | R.DLIDNSFNR.Y   | 2 | 2,4556 | 0,157 | -0,335 |
| 15 | P55072 TERA_HUMAN  | K.DVDLEFLAK.M   | 2 | 2,4513 | 0,281 | 0      |
| 15 | Q99439 CNN2_HUMAN  | K.GLQSGVDIGVK.Y | 2 | 2,4486 | 0,341 | 0,455  |
| 15 | Q06830 PRDX1_HUMAN | R.GLFIIDDK.G    | 2 | 2,4465 | 0,319 | 0,132  |
| 15 | P55884 EIF3B_HUMAN | R.VNLFTDFDK.Y   | 2 | 2,4435 | 0,306 | 0,111  |
| 15 | P30153 2AAA_HUMAN  | K.VLELDNVK.S    | 2 | 2,4384 | 0,106 | 0,131  |
| 15 | Q7KZF4 SND1_HUMAN  | K.GDVGLGLVK.E   | 2 | 2,4382 | 0,313 | 0,142  |
| 15 | P49207 RL34_HUMAN  | R.AFLIEEQK.I    | 2 | 2,4379 | 0,178 | 0,062  |
| 15 | P04075 ALDOA_HUMAN | R.QLLLTADDR.V   | 2 | 2,4267 | 0,268 | -0,117 |
| 15 | Q00688 FKBP3_HUMAN | K.SEETLDEGPPK.Y | 2 | 2,4192 | 0,458 | -0,406 |
| 15 | P08670 VIME_HUMAN  | R.DNLAEDIM*R.L  | 2 | 2,414  | 0,265 | 0      |
| 15 | P35579 MYH9_HUMAN  | K.DLEGLSQR.H    | 2 | 2,4099 | 0,186 | 0,066  |
| 15 | Q13310 PABP4_HUMAN | K.NLDDTIDDEK.L  | 2 | 2,3993 | 0,433 | -0,104 |

|    |                     |                    |   |        |       |        |
|----|---------------------|--------------------|---|--------|-------|--------|
| 15 | Q9Y230 RUVB2_HUMAN  | R.DYDAM*GSQTK.F    | 2 | 2,3978 | 0,348 | -0,323 |
| 15 | P62805 H4_HUMAN     | K.VFLENVIR.D       | 2 | 2,3917 | 0,102 | -0,37  |
| 15 | P51572 BAP31_HUMAN  | K.LDVGNAEVK.L      | 2 | 2,3864 | 0,342 | 0,129  |
| 15 | P19105 MLRM_HUMAN   | K.EAFNM*IDQNR.D    | 2 | 2,3858 | 0,37  | 0,681  |
| 15 | Q10570 CPSF1_HUMAN  | R.NVLDGELLNR.Y     | 2 | 2,3856 | 0,372 | -0,213 |
| 15 | P26373 RL13_HUMAN   | R.GFSLEELR.V       | 2 | 2,3841 | 0,379 | -0,192 |
| 15 | Q9UMS4 PRP19_HUMAN  | K.SSEQILATLK.G     | 2 | 2,364  | 0,256 | -0,224 |
| 15 | Q13011 ECH1_HUMAN   | R.YQETFNVIER.C     | 2 | 2,3633 | 0,452 | -0,094 |
| 15 | P02545 LMNA_HUMAN   | R.ITESEEVVSR.E     | 2 | 2,359  | 0,406 | -0,425 |
| 15 | Q07955 SFRS1_HUMAN  | R.DAEDAVYGR.D      | 2 | 2,3587 | 0,366 | 0,49   |
| 15 | P67936 TPM4_HUMAN   | K.TIDDLEEK.L       | 2 | 2,3519 | 0,309 | 0      |
| 15 | P62699 YPEL5_HUMAN  | R.ESEGFEEHVPSDNS.- | 2 | 2,3481 | 0,138 | -0,156 |
| 15 | Q9BVP2 GNL3_HUMAN   | K.SGFNLEELEK.N     | 2 | 2,3463 | 0,152 | -0,314 |
| 15 | P49257 LMAN1_HUMAN  | R.DIDNLVQR.N       | 2 | 2,3442 | 0,211 | 0,251  |
| 15 | P23258 TBG1_HUMAN   | K.DNFDEM*DTSR.E    | 2 | 2,3339 | 0,26  | -0,098 |
| 15 | Q32MZ4 LRRF1_HUMAN  | K.DSLAEVEEK.Y      | 2 | 2,3332 | 0,294 | 0      |
| 15 | Q00610 CLH1_HUMAN   | K.DAM*QYASESK.D    | 2 | 2,3321 | 0,455 | -0,852 |
| 15 | Q03252 LMNB2_HUMAN  | R.ELEEAM*AGER.D    | 2 | 2,3318 | 0,148 | -0,212 |
| 15 | O75083 WDR1_HUMAN   | R.DYSGQGVVK.L      | 2 | 2,3309 | 0,359 | 0      |
| 15 | P40926 MDHM_HUMAN   | R.IQEAGTEVVK.A     | 2 | 2,3239 | 0,271 | 0,114  |
| 15 | Q05682 CALD1_HUMAN  | K.EAEGAPQVEAGK.R   | 2 | 2,3231 | 0,477 | -0,206 |
| 15 | P11940 PABP1_HUMAN  | K.GFGFVSFER.H      | 2 | 2,3212 | 0,419 | 0      |
| 15 | Q01813 K6PP_HUMAN   | K.LPDDQIPK.T       | 2 | 2,3171 | 0,239 | -0,132 |
| 15 | Q15185 TEBP_HUMAN   | K.DVNVNFEK.S       | 2 | 2,3148 | 0,308 | 0,316  |
| 15 | P48643 TCPE_HUMAN   | K.LM*VELSK.S       | 2 | 2,314  | 0,111 | -0,073 |
| 15 | O94979 SC31A_HUMAN  | K.TTFEDLIQR.C      | 2 | 2,3118 | 0,249 | -0,109 |
| 15 | P26368 U2AF2_HUMAN  | K.NFAFLEFR.S       | 2 | 2,3058 | 0,179 | -0,351 |
| 15 | B1AK87 B1AK87_HUMAN | K.NDLVEALK.R       | 2 | 2,3049 | 0,118 | -0,203 |
| 15 | P19338 NUCL_HUMAN   | K.ALELTGLK.V       | 2 | 2,3038 | 0,302 | 0,144  |
| 15 | P62857 RS28_HUMAN   | R.VEFM*DDTSR.S     | 2 | 2,2986 | 0,431 | -0,109 |
| 15 | O43390 HNRPR_HUMAN  | K.ENILEEFSK.V      | 2 | 2,2931 | 0,216 | -0,11  |
| 15 | Q9H307 PININ_HUMAN  | R.DLEGAVSR.L       | 2 | 2,289  | 0,159 | 0      |
| 15 | P78371 TCPB_HUMAN   | K.EAVAM*ESYAK.A    | 2 | 2,2851 | 0,363 | 0,219  |

|    |                     |                   |   |        |       |        |
|----|---------------------|-------------------|---|--------|-------|--------|
| 15 | P68431 H31_HUMAN    | K.STELLIR.K       | 2 | 2,2814 | 0,289 | 0,073  |
| 15 | Q6P1N9 TATD1_HUMAN  | K.ELLNLAENNK.G    | 2 | 2,2792 | 0,313 | -0,316 |
| 15 | P18754 RCC1_HUMAN   | R.LGLGEGAEK.S     | 2 | 2,278  | 0,284 | 0      |
| 15 | P62753 RS6_HUMAN    | K.LIEVDDER.K      | 2 | 2,2769 | 0,342 | 0,123  |
| 15 | Q16850 CP51A_HUMAN  | K.DLNLLDR.C       | 2 | 2,2763 | 0,14  | 0,071  |
| 15 | P06744 G6PI_HUMAN   | R.M*LVDLAK.S      | 2 | 2,271  | 0,154 | 0,303  |
| 15 | Q9BUQ8 DDX23_HUMAN  | R.LIDVLENR.Y      | 2 | 2,2679 | 0,187 | 0,063  |
| 15 | O43684 BUB3_HUMAN   | K.VYTLVSGDR.L     | 2 | 2,2667 | 0,356 | 0,111  |
| 15 | Q9HB71 CYBP_HUMAN   | R.SFDLLVK.N       | 2 | 2,2652 | 0,213 | 0,074  |
| 15 | P04083 ANXA1_HUMAN  | R.SEIDM*NDIK.A    | 2 | 2,264  | 0,305 | 0,226  |
| 15 | Q9Y496 KIF3A_HUMAN  | R.SAKPETVIDSLLQ.- | 2 | 2,2635 | 0,242 | -1,132 |
| 15 | Q9UNQ2 DIMIT1_HUMAN | R.SM*DIDDFIR.L    | 2 | 2,2628 | 0,158 | -0,216 |
| 15 | O60264 SMCA5_HUMAN  | R.DDIENIAR.E      | 2 | 2,2538 | 0,181 | -0,129 |
| 15 | P21333 FLNA_HUMAN   | K.GTVEPQLEAR.G    | 2 | 2,2487 | 0,318 | -0,222 |
| 15 | Q8TBX8 PI42C_HUMAN  | K.DM*DFLNK.N      | 2 | 2,247  | 0,197 | 0      |
| 15 | P62244 RS15A_HUMAN  | R.M*NVLADALK.S    | 2 | 2,2456 | 0,105 | -0,369 |
| 15 | P47897 SYQ_HUMAN    | R.DVLNDTAPR.A     | 2 | 2,2446 | 0,247 | 0,183  |
| 15 | P19338 NUCL_HUMAN   | K.TGISDVFAK.N     | 2 | 2,2401 | 0,365 | 0,065  |
| 15 | P05787 K2C8_HUMAN   | R.LQAEIEGLK.G     | 2 | 2,2375 | 0,196 | -0,061 |
| 15 | P30101 PDIA3_HUMAN  | R.DGEEAGAYDGPR.T  | 2 | 2,2324 | 0,332 | -0,395 |
| 15 | Q12846 STX4_HUMAN   | K.NILSSADYVER.G   | 2 | 2,2294 | 0,18  | -0,289 |
| 15 | P26196 DDX6_HUMAN   | K.GNEFEDYCLK.R    | 2 | 2,2251 | 0,357 | -0,957 |
| 15 | P02545 LMNA_HUMAN   | R.DLEDLAR.E       | 2 | 2,2233 | 0,298 | 0,133  |
| 15 | P61221 ABCE1_HUMAN  | R.GSELQNYFTK.I    | 2 | 2,2122 | 0,265 | 0,206  |
| 15 | Q14697 GANAB_HUMAN  | R.LDLLED.R.S      | 2 | 2,2117 | 0,126 | 0,419  |
| 15 | P08559 ODPA_HUMAN   | R.EILAELTGR.K     | 2 | 2,2105 | 0,404 | 0,061  |
| 15 | Q14204 DYHC1_HUMAN  | R.TSFLDDAFR.K     | 2 | 2,2054 | 0,427 | 0,228  |
| 15 | Q9BQG0 MBB1A_HUMAN  | R.DGDVDQGFR.E     | 2 | 2,1975 | 0,271 | -0,302 |
| 15 | P09211 GSTP1_HUMAN  | K.ASCLYQLPK.F     | 2 | 2,1957 | 0,307 | 0      |
| 15 | Q9UQ80 PA2G4_HUMAN  | R.AFFSEVER.R      | 2 | 2,1932 | 0,386 | -0,186 |
| 15 | O60749 SNX2_HUMAN   | R.DFEQISK.T       | 2 | 2,1927 | 0,179 | 0,07   |
| 15 | P35232 PHB_HUMAN    | K.AAIIAEGDSK.A    | 2 | 2,1857 | 0,493 | 0,115  |
| 15 | O95208 EPN2_HUMAN   | K.DFYIDR.D        | 2 | 2,1844 | 0,132 | 0,255  |



|    |                    |                  |   |        |       |        |
|----|--------------------|------------------|---|--------|-------|--------|
| 15 | Q53GS9 SNUT2_HUMAN | R.NYFLEEDNYK.N   | 2 | 2,1808 | 0,109 | 0,366  |
| 15 | Q15233 NONO_HUMAN  | R.AVVIVDDR.G     | 2 | 2,1797 | 0,287 | 0,069  |
| 15 | P31946 1433B_HUMAN | R.NLLSVAYK.N     | 2 | 2,1743 | 0,22  | -0,202 |
| 15 | Q15366 PCBP2_HUMAN | K.IANPVEGSTDR.Q  | 2 | 2,1726 | 0,297 | -0,632 |
| 15 | P19105 MLRM_HUMAN  | R.ELLTTM*GDR.F   | 2 | 2,172  | 0,311 | 0,116  |
| 15 | Q8TDN6 BXDC2_HUMAN | R.NEIDAEPPAK.R   | 2 | 2,1708 | 0,106 | 0      |
| 15 | P09382 LEG1_HUMAN  | K.LPDGYEFK.F     | 2 | 2,1689 | 0,304 | 0      |
| 15 | Q9NVI7 ATD3A_HUMAN | K.QQQLLNEENLR.K  | 2 | 2,1676 | 0,368 | -0,264 |
| 15 | Q13242 SFRS9_HUMAN | R.DAEDAIYGR.N    | 2 | 2,1548 | 0,082 | 0,121  |
| 15 | P02545 LMNA_HUMAN  | R.LAVYIDR.V      | 2 | 2,1533 | 0,225 | 0,287  |
| 15 | P62273 RS29_HUMAN  | K.DIGFIKLD.-     | 2 | 2,1517 | 0,272 | -0,132 |
| 15 | P46781 RS9_HUMAN   | K.IEDFLER.R      | 2 | 2,1497 | 0,334 | 0,265  |
| 15 | Q9UL46 PSME2_HUMAN | R.DEAAYGELR.A    | 2 | 2,1493 | 0,276 | -0,119 |
| 15 | Q71U36 TBA1A_HUMAN | K.EIIDLVLDLDR.I  | 2 | 2,1451 | 0,416 | -0,337 |
| 15 | P05556 ITB1_HUMAN  | R.IGFGSFVEK.T    | 2 | 2,1364 | 0,211 | 0,248  |
| 15 | P62917 RL8_HUMAN   | R.AVVGVVAGGGR.I  | 2 | 2,1356 | 0,442 | -0,065 |
| 15 | Q71U36 TBA1A_HUMAN | K.FDLM*YAK.R     | 2 | 2,1348 | 0,215 | 0      |
| 15 | Q05524 ENO1B_HUMAN | R.YISPDQLADLYK.G | 2 | 2,1327 | 0,375 | -0,342 |
| 15 | P55769 NH2L1_HUMAN | K.QQIQSIQQSIER.L | 2 | 2,1228 | 0,387 | 0,251  |
| 15 | P14625 ENPL_HUMAN  | R.GLFDEYGSK.K    | 2 | 2,1192 | 0,454 | 0,06   |
| 15 | P09382 LEG1_HUMAN  | K.SFVLNLGK.D     | 2 | 2,1191 | 0,251 | 0,069  |
| 15 | Q15149 PLEC1_HUMAN | R.SELELTLGK.L    | 2 | 2,1103 | 0,367 | -0,062 |
| 15 | P28288 ABCD3_HUMAN | R.DLNFEVR.S      | 2 | 2,11   | 0,317 | 0,205  |
| 15 | P43034 LIS1_HUMAN  | K.FILSCADDK.T    | 2 | 2,109  | 0,348 | -0,114 |
| 15 | Q02952 AKA12_HUMAN | R.EM*VVQVER.E    | 2 | 2,1047 | 0,243 | 0,121  |
| 15 | O00299 CLIC1_HUMAN | K.NSNPALNDNLEK.G | 2 | 2,0931 | 0,363 | -0,459 |
| 15 | P05388 RLA0_HUMAN  | R.GNVGFVFTK.E    | 2 | 2,0895 | 0,367 | 0,063  |
| 15 | O00148 DDX39_HUMAN | R.DVQEIFR.L      | 2 | 2,0873 | 0,226 | 0      |
| 15 | P00558 PGK1_HUMAN  | K.ALM*DEVVK.A    | 2 | 2,0859 | 0,193 | -0,662 |
| 15 | Q7KZF4 SND1_HUMAN  | K.SLLSAEEAAK.Q   | 2 | 2,0787 | 0,324 | 0,12   |
| 15 | P10809 CH60_HUMAN  | K.DDAM*LLK.G     | 2 | 2,076  | 0,218 | 0,223  |
| 15 | P55010 IF5_HUMAN   | K.SDNKDDDDIDAI.- | 2 | 2,0727 | 0,283 | 0,168  |
| 15 | Q58FF8 H90B2_HUMAN | R.YESLTDPSK.L    | 2 | 2,0723 | 0,342 | -0,117 |

|    |                    |                               |              |   |        |       |        |
|----|--------------------|-------------------------------|--------------|---|--------|-------|--------|
| 15 | Q9Y490 TLN1_HUMAN  | K.NLGTALAE LR.T               |              | 2 | 2,0705 | 0,372 | -0,115 |
| 15 | Q8IWS0 PHF6_HUMAN  | R.AEFGDFDIK.T                 |              | 2 | 2,0701 | 0,31  | 0,234  |
| 15 | P24539 AT5F1_HUMAN | K.LAQLEEAK.Q                  |              | 2 | 2,0664 | 0,113 | 0      |
| 15 | Q14247 SRC8_HUMAN  | R.QDSA AVGF DYK.E             |              | 2 | 2,0624 | 0,354 | -0,305 |
| 15 | P60660 MYL6_HUMAN  | K.EAFQLFDR.T                  |              | 2 | 2,0559 | 0,259 | 0,119  |
| 15 | Q9Y310 CV028_HUMAN | R.NLDFQDVLDK.L                |              | 2 | 2,0556 | 0,29  | 0      |
| 15 | Q13637 RAB32_HUMAN | K.DNINIEEAAR.F                |              | 2 | 2,0468 | 0,235 | 0,107  |
| 15 | P17987 TCPA_HUMAN  | R.DCLINAAK.T                  |              | 2 | 2,044  | 0,096 | 0,067  |
| 15 | Q9Y3U8 RL36_HUMAN  | R.EVCGFAPYER.R                |              | 2 | 2,0385 | 0,367 | -0,298 |
| 15 | P78527 PRKDC_HUMAN | K.SIELFYK.F                   |              | 2 | 2,0267 | 0,113 | 0,203  |
| 15 | Q8TF74 WIPF2_HUMAN | R.SFLDDFESK.Y                 |              | 2 | 2,0198 | 0,228 | -0,112 |
| 15 | Q02218 ODO1_HUMAN  | K.LEAADEGSGDVK.Y              |              | 2 | 2,0186 | 0,112 | -0,205 |
| 15 | Q6P1M3 L2GL2_HUMAN | R.DLFQFNK.T                   |              | 2 | 2,0177 | 0,088 | 0,201  |
| 15 | P38159 HNRPG_HUMAN | K.ALEAVFGK.Y                  |              | 2 | 2,0087 | 0,145 | 0,073  |
| 15 | P23588 IF4B_HUMAN  | K.VAPAQPSEEGPGR.K             |              | 2 | 2,0081 | 0,308 | -0,754 |
| 15 | P55084 ECHB_HUMAN  | R.LEQDEYALR.S                 |              | 2 | 2,0073 | 0,168 | 0,107  |
| 16 | Q9NWH9 SLTM_HUMAN  | R.AGAGM*ITQHSSNAS#PINR.I      | S1002:       | 2 | 2,8384 | 0,483 | 0,256  |
| 16 | Q6ZRV2 FA83H_HUMAN | R.RLS#LGQG DSTEAA TEER.G      | S1003:       | 2 | 3,9534 | 0,679 | 0,578  |
| 16 | Q9UKV3 ACINU_HUMAN | R.TAQVPS#PPRGK.I              | S1004:       | 2 | 2,4956 | 0,374 | -0,2   |
| 16 | Q9UQ35 SRRM2_HUMAN | K.VKAQT PPGPS#LSGSKS#PCPQEK.S | S1008:S1014: | 3 | 2,9321 | 0,306 | -0,15  |
| 16 | P05386 RLA1_HUMAN  | K.KEES#EES#DDDM*GFGLFD.-      | S101:S104:   | 2 | 3,6178 | 0,51  | -0,344 |
| 16 | O95785 WIZ_HUMAN   | K.NPEDKSPQLSLS#PRPAS#PK.A     | S1012:S1017: | 3 | 4,166  | 0,34  | -0,414 |
| 16 | Q9BTC0 DIDO1_HUMAN | K.SILAKPSSS#PDPR.Y            | S1019:       | 2 | 2,5562 | 0,312 | -0,425 |
| 16 | Q9GZT3 SLIRP_HUMAN | K.LPQTS#DDEK KDF.-            | S102:        | 2 | 2,7822 | 0,291 | 0,162  |
| 16 | P17096 HMGA1_HUMAN | K.KLEKEEEEGISQES#S#EEEQ.-     | S102:S103:   | 3 | 3,9394 | 0,307 | -0,458 |
| 16 | Q7Z2Z1 CO042_HUMAN | R.THS#ASFYSVSQPK.S            | S1026:       | 2 | 3,383  | 0,463 | 0,482  |
| 16 | Q9BTT0 AN32E_HUMAN | K.IKDLS#TVEALQNLK.N           | S104:        | 3 | 4,7639 | 0,279 | 0,111  |
| 16 | P21796 VDAC1_HUMAN | K.LTFDSSFS#PNTGKK.N           | S104:        | 2 | 3,3831 | 0,378 | -0,379 |
| 16 | P05386 RLA1_HUMAN  | K.KEESEES#DDDM*GFGLFD.-       | S104:        | 2 | 3,3595 | 0,523 | -0,298 |
| 16 | P25054 APC_HUMAN   | K.YSDEQLNSGRQS#PSQNER.W       | S1042:       | 3 | 2,6262 | 0,092 | 0,084  |
| 16 | P52948 NUP98_HUMAN | K.TRS#LVGGLLQSK.F             | S1043:       | 2 | 4,0921 | 0,411 | -0,273 |
| 16 | P52948 NUP98_HUMAN | K.TRS#LVGGLLQSK.F             | S1043:       | 3 | 3,6226 | 0,188 | 0      |
| 16 | P41252 SYIC_HUMAN  | K.APLKPYVVS#PSDK.V            | S1051:       | 3 | 4,118  | 0,361 | -0,309 |

|    |                     |                                |              |   |        |       |        |
|----|---------------------|--------------------------------|--------------|---|--------|-------|--------|
| 16 | P41252 SYIC_HUMAN   | K.APLKPYVVS#PSDK.V             | S1051:       | 2 | 3,292  | 0,157 | -0,247 |
| 16 | A9CQZ4 A9CQZ4_HUMAN | R.AS#GKEALQNINDQSDR.L          | S107:        | 3 | 3,337  | 0,278 | -0,2   |
| 16 | P02545 LMNA_HUMAN   | R.LQLELS#KVR.E                 | S107:        | 2 | 2,9712 | 0,141 | -0,419 |
| 16 | A9CQZ4 A9CQZ4_HUMAN | R.AS#GKEALQNINDQSDR.L          | S107:        | 2 | 2,2785 | 0,35  | 0,067  |
| 16 | Q9UMZ2 SYNG_HUMAN   | R.SLS#LGDKEISR.S               | S1075:       | 3 | 2,6012 | 0,386 | -0,427 |
| 16 | P46379 BAT3_HUMAN   | K.AAGARPLTS#PELSR.D            | S1081:       | 2 | 2,5951 | 0,364 | 0,153  |
| 16 | P46013 KI67_HUMAN   | R.TPKEEAQS#LEDLAGFK.E          | S1098:       | 2 | 4,1511 | 0,553 | -0,397 |
| 16 | Q5VT52 K0460_HUMAN  | R.RM*S#GEPQTVESIR.V            | S1099:       | 3 | 3,7158 | 0,369 | 0      |
| 16 | Q5VT52 K0460_HUMAN  | R.RM*S#GEPQTVESIR.V            | S1099:       | 2 | 3,2695 | 0,458 | 0,287  |
| 16 | Q8IX90 CM003_HUMAN  | K.KNS#VHEQEAINS#DPELSNCFQK.T   | S110:S119:   | 3 | 6,0592 | 0,377 | 0,86   |
| 16 | Q9UQ35 SRRM2_HUMAN  | R.SSS#PVTELASRS#PIRQDR.G       | S1103:S1112: | 3 | 3,0786 | 0,174 | 0,341  |
| 16 | B2CI53 B2CI53_HUMAN | R.SNM*S#PDKPVSVK.I             | S1105:       | 2 | 3,344  | 0,209 | -0,529 |
| 16 | B2CI53 B2CI53_HUMAN | R.SNM*S#PDKPVSVK.I             | S1105:       | 3 | 3,2404 | 0,315 | 0,066  |
| 16 | B2CI53 B2CI53_HUMAN | R.SNMS#PDKPVSVK.I              | S1105:       | 2 | 3,0254 | 0,246 | -0,089 |
| 16 | P11388 TOP2A_HUMAN  | K.EAQQKVPDEEENEES#DNEK.E       | S1106:       | 3 | 5,8357 | 0,383 | -0,629 |
| 16 | P11388 TOP2A_HUMAN  | K.VPDEEENEES#DNEKETEK.S        | S1106:       | 3 | 2,8089 | 0,322 | -0,574 |
| 16 | Q8IWU2 LMTK2_HUMAN  | R.DSAYFS#DNDSEPEKR.S           | S1107:       | 2 | 4,1073 | 0,538 | -0,133 |
| 16 | Q99873 ANM1_HUMAN   | R.KVIGIECSS#ISDYAVK.I          | S111:        | 2 | 5,5613 | 0,47  | 0,66   |
| 16 | Q13459 MYO9B_HUMAN  | R.SPLEHSS#PEKEAPS#PEK.T        | S1115:S1122: | 3 | 2,6419 | 0,308 | 0      |
| 16 | O43379 WDR62_HUMAN  | R.ATQCLVKS#PEVK.L              | S1123:       | 3 | 3,3797 | 0,42  | -0,063 |
| 16 | O43379 WDR62_HUMAN  | R.ATQCLVKS#PEVK.L              | S1123:       | 2 | 2,6285 | 0,122 | -0,169 |
| 16 | O60841 IF2P_HUMAN   | K.QSFDDNDS#EELEDKDSK.S         | S113:        | 3 | 2,6039 | 0,214 | 0,352  |
| 16 | Q3KQU3 MA7D1_HUMAN  | R.RSS#QPSPTAVPASDS#PPTKQEVK.K  | S113:S125:   | 3 | 5,5339 | 1     | 0      |
| 16 | Q6VMQ6 MCAF1_HUMAN  | K.NKQDDDLNCEPLS#PHNIT#PEPVSK.L | S113:T118:   | 3 | 4,6282 | 0,298 | 0,692  |
| 16 | Q3KQU3 MA7D1_HUMAN  | R.RSS#QPSPT#AVPASDSPPTKQEVK.K  | S113:T118:   | 3 | 4,6043 | 1     | -0,215 |
| 16 | Q12982 BNIP2_HUMAN  | R.KGS#HITYTAAEEK.E             | S114:        | 2 | 4,9287 | 0,477 | 0      |
| 16 | Q8N4C6 NIN_HUMAN    | R.HVLS#DLEDDEV.R               | S1145:       | 2 | 4,4287 | 0,606 | 0,243  |
| 16 | Q8WTT2 NOC3L_HUMAN  | R.DLS#SSEPVHAK.K               | S115:        | 2 | 2,489  | 0,204 | 0,293  |
| 16 | O75145 LIPA3_HUMAN  | R.SAAAGALGS#PGLPLRK.L          | S1164:       | 3 | 3,4748 | 0,497 | 0,118  |
| 16 | O75145 LIPA3_HUMAN  | R.SAAAGALGS#PGLPLRK.L          | S1164:       | 2 | 2,765  | 0,386 | 0,316  |
| 16 | P55884 EIF3B_HUMAN  | R.S#DSRAQAVSEDAGGNEGR.A        | S117:        | 3 | 4,3509 | 0,427 | -0,291 |
| 16 | Q12846 STX4_HUMAN   | K.AIEPQKEEADENYNS#VNTR.M       | S117:        | 3 | 3,8998 | 0,365 | 0,16   |
| 16 | Q9NRY4 GRLF1_HUMAN  | R.TSFVSGS#DDELGPIRK.K          | S1179:       | 2 | 3,33   | 0,212 | -0,136 |

|    |                     |                                |              |   |        |       |        |
|----|---------------------|--------------------------------|--------------|---|--------|-------|--------|
| 16 | Q6P1X5 TAF2_HUMAN   | K.DKEPFTFSS#PASGR.S            | S1185:       | 3 | 4,1061 | 0,281 | 0,228  |
| 16 | Q6P1X5 TAF2_HUMAN   | K.DKEPFTFSS#PASGR.S            | S1185:       | 2 | 3,5841 | 0,42  | -0,076 |
| 16 | Q8IX90 CM003_HUMAN  | K.NSVHEQEAINS#DPELNCENFQK.T    | S119:        | 3 | 6,0384 | 0,399 | -0,066 |
| 16 | P55884 EIF3B_HUMAN  | R.SDS#RAQAVSEDAGGNEGR.A        | S119:        | 2 | 2,4298 | 0,512 | -0,647 |
| 16 | Q13286 CLN3_HUMAN   | R.RFS#DSEGEETVPEPR.L           | S12:         | 2 | 4,3812 | 0,579 | 0,538  |
| 16 | O95218 ZRAB2_HUMAN  | R.ENVEYIEREES#DGEYDEFGR.K      | S120:        | 3 | 5,941  | 0,473 | -0,288 |
| 16 | P15531 NDKA_HUMAN   | R.NIIHGS#DSVESAEK.E            | S120:        | 2 | 4,1426 | 0,512 | 0,078  |
| 16 | P42858 HD_HUMAN     | K.EKEPGEQASVPLS#PK.K           | S1201:       | 2 | 2,2583 | 0,339 | -0,146 |
| 16 | Q9Y5J1 UTP18_HUMAN  | R.VQEHEDS#GDSEVENEAK.G         | S121:        | 3 | 5,6554 | 0,399 | -0,462 |
| 16 | Q9NR30 DDX21_HUMAN  | K.NEEPS#EEEIDAPKPK.K           | S121:        | 2 | 4,1045 | 0,374 | 0,136  |
| 16 | Q9NR30 DDX21_HUMAN  | K.NEEPS#EEEIDAPKPK.K           | S121:        | 3 | 3,3587 | 0,346 | 0      |
| 16 | Q14814 MEF2D_HUMAN  | R.RAS#EELDGLFR.R               | S121:        | 3 | 2,9149 | 0,216 | 0,266  |
| 16 | Q7Z4S6 KI21A_HUMAN  | R.EKELS#PPPGLPSK.I             | S1212:       | 2 | 2,172  | 0,336 | 0,167  |
| 16 | B2RP66 B2RP66_HUMAN | R.VLM*KS#PS#PALHPPQK.Y         | S1221:S1223: | 3 | 2,824  | 0,271 | -0,405 |
| 16 | Q02952 AKA12_HUMAN  | K.ERPPAPSS#FVFEETK.E           | S1226:       | 3 | 3,6195 | 0,487 | 0      |
| 16 | Q13111 CAF1A_HUMAN  | K.LNSEAS#PSREAINGQR.E          | S123:        | 3 | 3,3459 | 0,391 | -0,708 |
| 16 | Q13111 CAF1A_HUMAN  | K.LNSEAS#PSREAINGQR.E          | S123:        | 2 | 2,0081 | 0,252 | -0,809 |
| 16 | Q8N163 K1967_HUMAN  | K.VQTLNQPLLKS#PAPPLLHVAALGQK.Q | S124:        | 3 | 4,2371 | 0,433 | -0,261 |
| 16 | Q32MZ4 LRRF1_HUMAN  | R.RGSGDTS#ISIDTEASIR.E         | S124:        | 3 | 2,9569 | 0,287 | -0,793 |
| 16 | Q9BQG0 MBB1A_HUMAN  | K.SPAPGAPTRS#PSTPAK.S          | S1241:       | 2 | 2,8418 | 0,361 | -0,99  |
| 16 | P11388 TOP2A_HUMAN  | K.IKNENTEGS#PQEDGVELEGLK.Q     | S1247:       | 3 | 5,4011 | 0,505 | 0,851  |
| 16 | Q9BW71 HIRP3_HUMAN  | K.NGVAAEVs#PAKEENPR.R          | S125:        | 2 | 5,2824 | 0,401 | -0,558 |
| 16 | Q15149 PLEC1_HUMAN  | R.TPHVQAVQGPLGS#PPK.R          | S125:        | 3 | 4,2034 | 0,376 | 0,216  |
| 16 | Q9H6Z4 RANB3_HUMAN  | R.ERTS#SLTQFPQSSEER.S          | S125:        | 3 | 3,3008 | 0,172 | -0,178 |
| 16 | Q92797 SYMPK_HUMAN  | K.TPS#PAAEDAREPEAK.G           | S1259:       | 3 | 3,2928 | 0,266 | -0,887 |
| 16 | Q9UGU0 TCF20_HUMAN  | R.VRS#FISIPSK.R                | S1259:       | 2 | 2,7264 | 0,371 | 0,372  |
| 16 | Q92797 SYMPK_HUMAN  | K.TPS#PAAEDAREPEAK.G           | S1259:       | 2 | 2,3109 | 0,386 | -0,74  |
| 16 | Q32MZ4 LRRF1_HUMAN  | R.RGSGDTSIS#IDTEASIR.E         | S126:        | 3 | 3,6877 | 0,255 | 0,198  |
| 16 | P42345 FRAP_HUMAN   | K.LHVS#TINLQK.A                | S1261:       | 2 | 3,0204 | 0,342 | 0      |
| 16 | Q8N350 DOS_HUMAN    | R.RVS#FNEAALFEQSR.K            | S127:        | 3 | 4,163  | 0,296 | -0,105 |
| 16 | Q8N350 DOS_HUMAN    | R.RVS#FNEAALFEQSR.K            | S127:        | 2 | 3,1376 | 0,485 | -0,563 |
| 16 | Q8NI27 THOC2_HUMAN  | K.TPVSGSLKS#PVPR.S             | S1278:       | 3 | 3,2016 | 0,336 | 0,195  |
| 16 | Q8NI27 THOC2_HUMAN  | K.TPVSGSLKS#PVPR.S             | S1278:       | 2 | 2,63   | 0,317 | 0      |

|    |                    |                              |              |   |        |       |        |
|----|--------------------|------------------------------|--------------|---|--------|-------|--------|
| 16 | Q96CB8 INT12_HUMAN | R.LEKPETQSS#PITVQSSK.D       | S128:        | 2 | 3,9066 | 0,606 | 0,189  |
| 16 | Q96CB8 INT12_HUMAN | R.LEKPETQSS#PITVQSSK.D       | S128:        | 3 | 2,7646 | 0,243 | -0,189 |
| 16 | Q9NTI5 PDS5B_HUMAN | R.LKEDILENEDEQNS#PPK.K       | S1283:       | 3 | 6,202  | 0,411 | 0,528  |
| 16 | O15013 ARHGA_HUMAN | K.SDLSSS#S#GSLSLSHGSSSLEHR.S | S1284:S1285: | 3 | 4,1174 | 1     | 0,077  |
| 16 | Q13459 MYO9B_HUMAN | R.VQEKPDS#PGGSTQIQR.Y        | S1290:       | 3 | 3,788  | 0,372 | 0,709  |
| 16 | O94804 STK10_HUMAN | R.ILRLS#TFEK.R               | S13:         | 2 | 2,165  | 0,384 | 0,206  |
| 16 | Q05682 CALD1_HUMAN | R.QKEFDPTITDASLS#LPSR.R      | S131:        | 3 | 3,9961 | 0,306 | 0,439  |
| 16 | Q9P2M7 CING_HUMAN  | R.SHS#QASLAGPGVPDPSNR.S      | S131:        | 3 | 3,9111 | 0,349 | -0,099 |
| 16 | P55327 TPD52_HUMAN | K.LEDVKNS#PTFK.S             | S131:        | 2 | 3,4922 | 0,194 | -0,18  |
| 16 | Q12888 TP53B_HUMAN | R.TS#SGTSLSAMHSSGSSGK.G      | S1316:       | 2 | 3,3942 | 0,564 | -0,14  |
| 16 | P51858 HDGF_HUMAN  | K.GNAEGS#S#DEEGKLVIDEPAKEK.N | S132:S133:   | 3 | 3,6143 | 0,138 | 0,223  |
| 16 | P38398 BRCA1_HUMAN | R.HQS#ESQGVGLSDKELVS#DDEER.G | S1328:S1342: | 3 | 4,1329 | 0,452 | 0,422  |
| 16 | P29692 EF1D_HUMAN  | R.ATAPQTQHVS#PM*R.Q          | S133:        | 2 | 2,8366 | 0,424 | -0,642 |
| 16 | Q8NEY8 PPHLN_HUMAN | R.DNTFFRES#PVGR.K            | S133:        | 2 | 2,0296 | 0,242 | 0,081  |
| 16 | O14686 MLL2_HUMAN  | R.NLTM*S#PLHK.R              | S1331:       | 2 | 2,7935 | 0,377 | -0,215 |
| 16 | Q9NQG5 CT077_HUMAN | K.LSM*EDSKS#PPPK.A           | S134:        | 2 | 3,1048 | 0,331 | -0,518 |
| 16 | Q9NQG5 CT077_HUMAN | K.LSM*EDSKS#PPPK.A           | S134:        | 3 | 2,7178 | 0,199 | -0,324 |
| 16 | Q03468 ERCC6_HUMAN | R.NSNFSVQHPSSTS#PTEK.C       | S1348:       | 2 | 4,3306 | 0,526 | -0,507 |
| 16 | Q09666 AHNK_HUMAN  | R.LKS#EDGVEGDLGETQSR.T       | S135:        | 3 | 5,0413 | 0,431 | 0,193  |
| 16 | Q09666 AHNK_HUMAN  | R.LKS#EDGVEGDLGETQSR.T       | S135:        | 2 | 3,7378 | 0,597 | 0,257  |
| 16 | P25054 APC_HUMAN   | K.AVEFSSGAKS#PSK.S           | S1360:       | 2 | 3,1138 | 0,407 | -0,355 |
| 16 | Q8WWA1 TMM40_HUMAN | R.RGS#DPASGEVEASQLR.R        | S137:        | 3 | 3,7415 | 0,301 | -0,526 |
| 16 | Q96IF1 JUB_HUMAN   | R.SSFASSASDASKPSS#PR.G       | S137:        | 2 | 3,6479 | 0,484 | 0,332  |
| 16 | Q8WWA1 TMM40_HUMAN | R.RGS#DPASGEVEASQLR.R        | S137:        | 2 | 3,5774 | 0,571 | 0      |
| 16 | Q86YP4 P66A_HUMAN  | K.ETSTEALM*KSS#PEER.E        | S137:        | 3 | 2,7288 | 0,276 | 0,204  |
| 16 | Q86YP4 P66A_HUMAN  | K.ETSTEALM*KSS#PEER.E        | S137:        | 2 | 2,6806 | 0,46  | 0,409  |
| 16 | Q8TDY2 RBCC1_HUMAN | R.DKDLIES#LSEDR.A            | S1370:       | 2 | 4,0168 | 0,449 | 0,325  |
| 16 | P11388 TOP2A_HUMAN | K.ELKPQKS#VVS#DLEADDVK.G     | S1374:S1377: | 3 | 3,4504 | 0,293 | 0,169  |
| 16 | Q7L2Z9 CENPQ_HUMAN | K.KM*EDLTNVS#SLLNM*ER.A      | S138:        | 3 | 4,1386 | 0,331 | -0,184 |
| 16 | Q5VTR2 BRE1A_HUMAN | R.KALVVPEPEPDS#NQER.K        | S138:        | 3 | 3,7174 | 0,323 | -0,175 |
| 16 | Q9UQ35 SRRM2_HUMAN | R.SSGHS#SSELSPDAVEK.A        | S1382:       | 2 | 4,5223 | 0,527 | -0,072 |
| 16 | Q9C0C2 TB182_HUMAN | R.HNGS#LS#PGLEARDPLEAR.E     | S1383:S1385: | 3 | 2,936  | 0,378 | -0,352 |
| 16 | P50914 RL14_HUMAN  | K.AALLKAS#PK.K               | S139:        | 2 | 3,1798 | 0,39  | -0,81  |

|    |                     |                                 |              |   |        |       |        |
|----|---------------------|---------------------------------|--------------|---|--------|-------|--------|
| 16 | P49736 MCM2_HUMAN   | R.GLLYDS#DEEDEERPAR.K           | S139:        | 2 | 3,1423 | 0,484 | -0,062 |
| 16 | O15085 ARHGB_HUMAN  | R.LSS#LSSLGDSAPERK.S            | S14:         | 3 | 3,3208 | 0,278 | 0,45   |
| 16 | Q9GZR2 REXO4_HUMAN  | R.APS#SPVAKPGPVK.T              | S14:         | 2 | 2,5856 | 0,346 | -0,742 |
| 16 | Q5SW96 ARH_HUMAN    | R.ALIRS#PSLAK.Q                 | S14:         | 2 | 2,5301 | 0,251 | -0,215 |
| 16 | Q8NE71 ABCF1_HUMAN  | K.TKGGNVFAALIQDQS#EEEEEEK.H     | S140:        | 3 | 6,9145 | 0,448 | -0,825 |
| 16 | P49815 TSC2_HUMAN   | K.ADVGRSL#PEVK.A                | S1411:       | 2 | 2,4919 | 0,097 | 0,39   |
| 16 | Q8TES7 FBF1_HUMAN   | R.RFS#SELEDPLR.G                | S142:        | 2 | 2,9976 | 0,36  | 0,079  |
| 16 | P29966 MARCS_HUMAN  | K.AEDGATPS#PSNETPKK.K           | S145:        | 2 | 2,7101 | 0,251 | -0,5   |
| 16 | Q8IWS0 PHF6_HUMAN   | K.TAHNSEADLEES#FNEHELEPS#SPK.S  | S145:S154:   | 3 | 4,6285 | 0,423 | -0,576 |
| 16 | Q5JRC6 Q5JRC6_HUMAN | K.TAHNSEAADLEES#FNEHELEPS#SPK.S | S146:S155:   | 3 | 4,2289 | 0,553 | -0,437 |
| 16 | O14514 BAI1_HUMAN   | K.NENVATLSVSS#LERR.K            | S1469:       | 2 | 2,1779 | 0,351 | -0,695 |
| 16 | P62753 RS6_HUMAN    | K.LFNLS#KEDDVR.Q                | S148:        | 2 | 2,8659 | 0,29  | 0,431  |
| 16 | Q9Y2H6 FND3A_HUMAN  | K.CPS#PINEHNGLIK.G              | S149:        | 3 | 3,4749 | 0,274 | -0,117 |
| 16 | P11388 TOP2A_HUMAN  | K.SKGES#DDFHM*DFDS#AVAPR.A      | S1495:S1504: | 3 | 3,6087 | 0,251 | 0,96   |
| 16 | Q14690 RRP5_HUMAN   | K.KAGLSEEDDS#LVDVYYR.E          | S1498:       | 3 | 3,7499 | 0,131 | 0,09   |
| 16 | P38398 BRCA1_HUMAN  | R.SSPS#KCPSLDDR.W               | S1499:       | 2 | 2,2543 | 0,31  | -0,171 |
| 16 | Q9GZR2 REXO4_HUMAN  | R.APSS#PVAKPGPVK.T              | S15:         | 3 | 3,1655 | 0,409 | -0,278 |
| 16 | Q99607 ELF4_HUMAN   | R.AGDS#DQEGHSLEEK.A             | S151:        | 2 | 4,0213 | 0,378 | -0,653 |
| 16 | Q99607 ELF4_HUMAN   | R.AGDS#DQEGHSLEEK.A             | S151:        | 3 | 2,9845 | 0,239 | -0,109 |
| 16 | P18583 SON_HUMAN    | K.SHDDGNIDLES#DSFLK.F           | S152:        | 2 | 5,6253 | 0,59  | 0,652  |
| 16 | Q8IX90 CM003_HUMAN  | K.S#PRSPQLSDFGLER.Y             | S152:        | 3 | 4,3567 | 0,315 | -0,438 |
| 16 | Q02880 TOP2B_HUMAN  | K.KVVEAVNS#DSDSEFGIPK.K         | S1522:       | 2 | 4,7742 | 0,532 | -0,244 |
| 16 | Q5SRE5 NU188_HUMAN  | R.VQRPPS#AASAAPSSSK.Q           | S1523:       | 3 | 3,4319 | 0,337 | -0,451 |
| 16 | Q02880 TOP2B_HUMAN  | K.KVVEAVNSDS#DSEFGIPK.K         | S1524:       | 2 | 5,0197 | 0,447 | -0,488 |
| 16 | Q7KZ85 SPT6H_HUMAN  | K.DHYQDPVPGITPSSSS#R.T          | S1528:       | 3 | 2,7836 | 0,205 | -0,095 |
| 16 | Q00536 PCTK1_HUMAN  | R.RVS#LSEIGFGK.L                | S153:        | 2 | 4,051  | 0,522 | 0      |
| 16 | Q00536 PCTK1_HUMAN  | R.RVS#LSEIGFGK.L                | S153:        | 3 | 3,2038 | 0,198 | 0      |
| 16 | P18583 SON_HUMAN    | K.SHDDGNIDLES#FLK.F             | S154:        | 3 | 3,1916 | 0,257 | 0,098  |
| 16 | Q9Y5B6 GCFC_HUMAN   | K.IKTELNSS#AESEQPLDK.T          | S155:        | 3 | 5,1011 | 0,347 | 0,372  |
| 16 | Q8IY57 YAF2_HUMAN   | K.SPPASSAASADQHSQSGSSS#DNTER.G  | S155:        | 3 | 4,3292 | 0,506 | -0,36  |
| 16 | Q8IX90 CM003_HUMAN  | K.SPRS#PQLSDFGLER.Y             | S155:        | 2 | 2,7741 | 0,268 | 0,146  |
| 16 | Q9UQ35 SRRM2_HUMAN  | R.SGSSQELDKPSAS#PQER.S          | S1552:       | 3 | 3,3588 | 0,246 | -0,185 |
| 16 | Q13428 TCOF_HUMAN   | K.TVANLLSGKS#PR.K               | S156:        | 2 | 3,1919 | 0,345 | -0,184 |

|    |                     |                               |            |   |        |       |        |
|----|---------------------|-------------------------------|------------|---|--------|-------|--------|
| 16 | P49761 CLK3_HUMAN   | R.YRS#PEPDPYLSYR.W            | S157:      | 3 | 3,3205 | 0,338 | 0      |
| 16 | Q92733 PRCC_HUMAN   | K.IAAPELHKGDS#DS#EEDEPTK.K    | S157:S159: | 3 | 4,5801 | 0,447 | 0      |
| 16 | Q8N5F7 NKAP_HUMAN   | K.NPEPDS#DEHT#PVEDEEPPK.S     | S157:T161: | 3 | 3,3353 | 0,273 | 0,156  |
| 16 | O95292 VAPB_HUMAN   | K.SLS#SSLDDTEVKK.V            | S158:      | 2 | 2,8192 | 0,374 | -0,574 |
| 16 | O75376 NCOR1_HUMAN  | K.HEAPSS#PISGQPCGDDQNASPSK.L  | S158:      | 3 | 2,7278 | 0,2   | 0,449  |
| 16 | O15513 O15513_HUMAN | K.LEKS#IDDLEEK.V              | S16:       | 2 | 4,5047 | 0,242 | -0,349 |
| 16 | O15513 O15513_HUMAN | K.LEKS#IDDLEEK.V              | S16:       | 3 | 3,9041 | 0,278 | -0,131 |
| 16 | Q15742 NAB2_HUMAN   | R.SFSPKS#PLELGEK.L            | S162:      | 2 | 3,544  | 0,413 | -0,326 |
| 16 | P29966 MARCS_HUMAN  | K.S#FKLSGFS#FKK.N             | S163:S170: | 2 | 2,2041 | 0,262 | -0,34  |
| 16 | P05198 IF2A_HUMAN   | K.HAVSDPSILDS#LDLNEDER.E      | S165:      | 3 | 3,811  | 0,476 | 0,083  |
| 16 | P15924 DESP_HUMAN   | R.RAS#S#KGGGGYTCQSGSGWDEFTK.H | S165:S166: | 3 | 5,7399 | 0,448 | -0,354 |
| 16 | Q99759 M3K3_HUMAN   | R.HLS#VSSQNPRSS#PPPGYVPER.Q   | S166:S176: | 3 | 4,6934 | 0,321 | 0,146  |
| 16 | Q5T5U3 RHG21_HUMAN  | R.RNS#EGSELSCTEGSLTSSLDLR.R   | S1668:     | 3 | 6,1817 | 0,478 | 0,298  |
| 16 | Q8IY57 YAF2_HUMAN   | R.SSS#PRGEASSLINGESH.-        | S167:      | 2 | 4,1231 | 0,408 | 0,363  |
| 16 | Q6NZI2 PTRF_HUMAN   | K.LPAKLS#ISK.S                | S167:      | 2 | 3,0289 | 0,355 | -0,118 |
| 16 | Q9H4A3 WNK1_HUMAN   | K.DRPVS#QPSLVGSK.E            | S167:      | 2 | 2,9674 | 0,378 | -0,168 |
| 16 | P29966 MARCS_HUMAN  | K.SFKLS#GFSFK.K               | S167:      | 2 | 2,7423 | 0,344 | -0,596 |
| 16 | Q12888 TP53B_HUMAN  | K.LITSEEERS#PAK.R             | S1678:     | 2 | 3,8613 | 0,358 | -0,254 |
| 16 | Q9BZ23 PANK2_HUMAN  | R.RAS#SASVPAVGASAEGR.R        | S168:      | 2 | 3,1582 | 0,54  | 0,139  |
| 16 | P16157 ANK1_HUMAN   | R.ITHS#PTVSQVTER.S            | S1686:     | 2 | 2,5649 | 0,304 | -0,159 |
| 16 | P53999 TCP4_HUMAN   | K.ELVSSSSGSDS#DSEVDKK.L       | S17:       | 2 | 4,7799 | 0,569 | 0,06   |
| 16 | P29966 MARCS_HUMAN  | K.LSGFS#FKK.N                 | S170:      | 2 | 2,0845 | 0,251 | -0,061 |
| 16 | O00566 MPP10_HUMAN  | R.KSPVFSDEDS#DLDFDISK.L       | S171:      | 3 | 3,9925 | 0,317 | -0,517 |
| 16 | O00566 MPP10_HUMAN  | R.KSPVFSDEDS#DLDFDISK.L       | S171:      | 2 | 2,769  | 0,453 | -0,46  |
| 16 | Q8WVC0 LEO1_HUMAN   | R.AQGS#DEDKLNQSDDEK.M         | S171:      | 3 | 2,6302 | 0,288 | -0,927 |
| 16 | Q9UGI6 KCNN3_HUMAN  | R.RDS#NPFTEIAM*SCK.Y          | S172:      | 2 | 4,1565 | 0,437 | 0,066  |
| 16 | P15822 ZEP1_HUMAN   | K.ISVGRLS#PQQESSASSK.R        | S1734:     | 3 | 2,7583 | 0,257 | -0,497 |
| 16 | Q3V6T2 GRDN_HUMAN   | R.SVS#GKTPGDFYDR.R            | S1736:     | 3 | 3,5897 | 0,381 | 0,424  |
| 16 | Q3V6T2 GRDN_HUMAN   | R.SVS#GKTPGDFYDR.R            | S1736:     | 2 | 2,8664 | 0,423 | 0,243  |
| 16 | Q9P2D3 HTR5B_HUMAN  | K.VSDS#PSHIATK.T              | S1737:     | 2 | 3,448  | 0,482 | 0      |
| 16 | Q5VV41 ARHGG_HUMAN  | K.GLGKPGGQGDALQLS#PK.L        | S174:      | 2 | 2,7645 | 0,365 | 0,072  |
| 16 | Q6PCE3 PGM2L_HUMAN  | K.AVAGVM*ITAS#HNR.K           | S175:      | 2 | 3,494  | 0,511 | -0,171 |
| 16 | O14497 ARI1A_HUMAN  | R.TLLDPGRFS#K.V               | S1751:     | 2 | 2,6738 | 0,097 | 0,101  |

|    |                    |                                |            |   |        |       |        |
|----|--------------------|--------------------------------|------------|---|--------|-------|--------|
| 16 | Q9H7D0 DOCK5_HUMAN | K.APEPDLM*#PTRK.A              | S1756:     | 3 | 2,8181 | 0,427 | 0,572  |
| 16 | O95793 STAU1_HUMAN | R.LEVNGRES#EEENLNK.S           | S176:      | 2 | 4,1115 | 0,305 | -0,53  |
| 16 | Q58FF8 H90B2_HUMAN | K.IEDVGS#DEEDDSGKDK.K          | S177:      | 3 | 3,9663 | 0,334 | -0,752 |
| 16 | Q9NYF8 BCLF1_HUMAN | K.AEGEPQEE#PLKSK.S             | S177:      | 2 | 3,2662 | 0,377 | -0,758 |
| 16 | Q09666 AHNK_HUMAN  | R.REGAKDIDISS#PEFK.I           | S177:      | 2 | 2,9029 | 0,443 | -0,906 |
| 16 | Q58FF8 H90B2_HUMAN | K.IEDVGS#DEEDDSGKDK.K          | S177:      | 3 | 2,7191 | 0,203 | 0,201  |
| 16 | P46821 MAP1B_HUMAN | K.VQSLEGEKLS#PK.S              | S1779:     | 2 | 3,6397 | 0,374 | -0,087 |
| 16 | Q8N5I9 CLO45_HUMAN | K.IEVLDS#PASKK.K               | S178:      | 2 | 3,1921 | 0,33  | -0,096 |
| 16 | Q9H501 ESF1_HUMAN  | K.NIVQHTTDS#SLEEK.Q            | S179:      | 2 | 3,547  | 0,38  | 0,508  |
| 16 | Q5T230 UTF1_HUMAN  | R.RPPPLAPPAPPS#PASPDPEPR.T     | S18:       | 3 | 4,6908 | 0,226 | -0,658 |
| 16 | Q9UKA4 AKA11_HUMAN | R.KS#FSEDEVFQSVK.S             | S18:       | 2 | 3,0171 | 0,437 | -0,165 |
| 16 | Q07666 KHDR1_HUMAN | R.S#GSM*DPSGAHPSVR.Q           | S18:       | 2 | 2,3128 | 0,278 | -0,247 |
| 16 | Q07666 KHDR1_HUMAN | R.S#GSM DPSGAHPSVR.Q           | S18:       | 2 | 2,1497 | 0,254 | 0,167  |
| 16 | Q9H1E3 NUCKS_HUMAN | K.ATVTPS#PVKKG.G               | S181:      | 2 | 2,5088 | 0,368 | -0,314 |
| 16 | Q9NQC3 RTN4_HUMAN  | K.RRGS#S#GSVDETLFALPAASEPVIR.S | S181:S182: | 3 | 4,1869 | 0,314 | -0,479 |
| 16 | Q9NQC3 RTN4_HUMAN  | K.RRGSS#GSVDET#LFALPAASEPVIR.S | S182:T188: | 3 | 2,7407 | 0,257 | -0,274 |
| 16 | Q14676 MDC1_HUMAN  | R.SLATM*DS#PPHQK.Q             | S1820:     | 2 | 3,2676 | 0,364 | -0,693 |
| 16 | Q5VVG9 TAF3_HUMAN  | K.RPLDS#PEAEELPAM*K.R          | S183:      | 2 | 3,592  | 0,541 | 0,412  |
| 16 | Q5VVG9 TAF3_HUMAN  | K.RPLDS#PEAEELPAM*K.R          | S183:      | 3 | 3,275  | 0,198 | -0,103 |
| 16 | O60749 SNX2_HUMAN  | R.FS#DFLGLHSL.L                | S185:      | 3 | 3,6049 | 0,35  | 0      |
| 16 | P62070 RRAS2_HUMAN | K.FQEQECPPS#PEPTRK.E           | S186:      | 3 | 3,002  | 0,215 | 0      |
| 16 | Q2M3G4 SHRM1_HUMAN | R.S#ASLSHPGGEGERPAR.S          | S186:      | 2 | 2,1584 | 0,408 | 0,08   |
| 16 | P62070 RRAS2_HUMAN | K.FQEQECPPS#PEPTRK.E           | S186:      | 2 | 2,0859 | 0,372 | 0,639  |
| 16 | Q9UPN3 MACF1_HUMAN | R.QGS#FSEDEVISHK.G             | S1860:     | 3 | 2,8339 | 0,27  | -0,194 |
| 16 | P17098 ZNF8_HUMAN  | R.LRENCVLSS#PNPFPEISR.G        | S187:      | 3 | 3,9368 | 0,404 | -0,561 |
| 16 | O95218 ZRAB2_HUMAN | K.YNLDAS#EEEDSNKK.K            | S188:      | 2 | 4,5669 | 0,263 | 0,142  |
| 16 | Q9H4L4 SENP3_HUMAN | R.FDS#PRGPPPPR.L               | S188:      | 3 | 3,8647 | 0,385 | 0,07   |
| 16 | Q13596 SNX1_HUMAN  | R.RFS#DFLGLYEK.L               | S188:      | 2 | 3,2503 | 0,476 | -0,587 |
| 16 | Q2M3G4 SHRM1_HUMAN | R.SAS#LSHPGGEGERPAR.S          | S188:      | 3 | 3,2391 | 0,468 | -0,06  |
| 16 | Q13596 SNX1_HUMAN  | R.RFS#DFLGLYEK.L               | S188:      | 3 | 2,6318 | 0,106 | -0,314 |
| 16 | Q9H1E3 NUCKS_HUMAN | R.KVVVDYSQFQES#DDADEDYGR.D     | S19:       | 3 | 6,2566 | 0,426 | -0,449 |
| 16 | Q9UNE7 STUB1_HUMAN | R.LGAGGGS#PEKS#PSAQELKEQGNR.L  | S19:S23:   | 3 | 3,1468 | 0,43  | -0,298 |
| 16 | Q03252 LMNB2_HUMAN | R.CQS#LQEELDFRK.S              | S194:      | 3 | 3,9155 | 0,346 | -0,448 |



|    |                     |                                 |                 |   |        |       |        |
|----|---------------------|---------------------------------|-----------------|---|--------|-------|--------|
| 16 | Q9NV56 MRGBP_HUMAN  | K.VLTANSNPS#SPSAKR.R            | S194:           | 2 | 3,6618 | 0,453 | -0,508 |
| 16 | O94915 FRYL_HUMAN   | R.SNSLRLS#LIGDR.R               | S1945:          | 3 | 2,8099 | 0,335 | 0,13   |
| 16 | Q9NV56 MRGBP_HUMAN  | R.VTDKVLANSNPSS#PSAAK.R         | S195:           | 2 | 4,0154 | 0,5   | -0,62  |
| 16 | P35580 MYH10_HUMAN  | R.QLHLEGASLELS#DDDTESK.T        | S1956:          | 3 | 4,9136 | 0,428 | 0,422  |
| 16 | O60812 HNRCL_HUMAN  | K.QKVDS#LLENLEK.I               | S196:           | 2 | 2,5139 | 0,314 | 0      |
| 16 | Q9BVG4 CX026_HUMAN  | K.GADS#GEEKEEGINR.E             | S197:           | 3 | 4,4996 | 0,337 | 0      |
| 16 | Q8WVC0 LEO1_HUMAN   | K.M*QNTDDEERPQLS#DDER.Q         | S197:           | 3 | 3,4695 | 0,238 | -1,01  |
| 16 | Q9BVG4 CX026_HUMAN  | K.GADS#GEEKEEGINR.E             | S197:           | 2 | 3,045  | 0,442 | -0,854 |
| 16 | P35908 K22E_HUMAN   | K.FAS#FIDKVR.F                  | S197:           | 2 | 2,9165 | 0,425 | -0,21  |
| 16 | Q9H501 ESF1_HUMAN   | R.TLDSGTSEIVKS#PR.I             | S198:           | 2 | 2,9361 | 0,437 | -0,155 |
| 16 | Q9Y5X1 SNX9_HUMAN   | R.ASSS#SM*KIPLNK.F              | S199:           | 2 | 2,4359 | 0,15  | -0,539 |
| 16 | Q8WXV6 Q8WXV6_HUMAN | K.RTS#SEDNLYLAVLR.A             | S20:            | 3 | 2,8539 | 0,128 | -0,213 |
| 16 | B0AZS1 B0AZS1_HUMAN | K.FVSEDDRNS#FTLK.L              | S20:            | 2 | 2,8269 | 0,493 | -0,372 |
| 16 | Q9UPW6 SATB2_HUMAN  | R.SGS#PDVKGPPPVK.V              | S20:            | 2 | 2,4596 | 0,108 | -0,091 |
| 16 | Q9ULX3 NOB1_HUMAN   | R.KDDS#DDGGGWITPSNIK.Q          | S201:           | 2 | 3,1176 | 0,412 | -0,366 |
| 16 | Q9ULX3 NOB1_HUMAN   | R.KDDS#DDGGGWITPSNIK.Q          | S201:           | 3 | 2,8507 | 0,104 | -0,183 |
| 16 | Q9Y232 CDYL1_HUMAN  | K.ILVPKS#PVK.S                  | S201:           | 2 | 2,5855 | 0,316 | -0,345 |
| 16 | Q8NCD3 HJURP_HUMAN  | R.ISGKS#PGDPAKPASS#PR.E         | S201:S211:      | 3 | 3,0754 | 0,189 | -0,707 |
| 16 | Q9H4A3 WNK1_HUMAN   | K.EKPELSEPSHLNGPS#S#DPEAAFLSR.D | S2011:S2012:    | 3 | 3,3874 | 0,454 | 0,705  |
| 16 | O43633 CHM2A_HUMAN  | K.KAEAAAS#ALADADADLEER.L        | S203:           | 3 | 3,6499 | 0,414 | -0,275 |
| 16 | Q8NCF5 NF2IP_HUMAN  | K.KTEFLDLDNSPLSPPS#PR.T         | S204:           | 3 | 4,8516 | 0,415 | -0,437 |
| 16 | P29375 JAD1A_HUMAN  | K.EKVEPEVLSTDTQTS#PEPGTR.M      | S204:           | 3 | 4,3874 | 0,426 | 0,538  |
| 16 | Q8NCF5 NF2IP_HUMAN  | K.KTEFLDLDNSPLSPPS#PR.T         | S204:           | 2 | 2,3717 | 0,408 | -0,466 |
| 16 | Q13242 SFRS9_HUMAN  | R.GRDS#PYQS#RGSPHYFS#PFRPY.-    | S204:S208:S216: | 3 | 3,6081 | 1     | -0,401 |
| 16 | Q9H1E3 NUCKS_HUMAN  | K.TPS#PKEEDEEPES#PPEKK.T        | S204:S214:      | 3 | 2,6543 | 0,091 | -0,083 |
| 16 | Q14980 NUMA1_HUMAN  | R.RQS#M*AFSILNTPK.K             | S2047:          | 3 | 3,2665 | 0,227 | 0      |
| 16 | Q14980 NUMA1_HUMAN  | R.RQS#M*AFSILNTPK.K             | S2047:          | 2 | 3,2506 | 0,433 | -0,461 |
| 16 | Q9Y4A5 TRRAP_HUMAN  | R.GLS#VDSAQEVKR.F               | S2051:          | 2 | 2,6823 | 0,516 | -0,535 |
| 16 | Q6ZN18 AEBP2_HUMAN  | R.RGS#LEM*SSDGEPLSR.M           | S206:           | 2 | 3,2628 | 0,595 | -0,213 |
| 16 | Q6ZN18 AEBP2_HUMAN  | R.RGS#LEM*SSDGEPLSR.M           | S206:           | 3 | 2,6201 | 0,217 | 0      |
| 16 | Q05519 SFR11_HUMAN  | K.LNHVAAGLVS#PSLK.S             | S207:           | 2 | 4,5652 | 0,514 | 0,328  |
| 16 | Q05519 SFR11_HUMAN  | K.LNHVAAGLVS#PSLK.S             | S207:           | 3 | 3,5435 | 0,327 | 0,123  |
| 16 | Q05519 SFR11_HUMAN  | K.LNHVAAGLVS#PS#LKSDTSSK.E      | S207:S209:      | 3 | 2,678  | 0,15  | -0,169 |

|    |                       |                              |            |   |        |       |        |
|----|-----------------------|------------------------------|------------|---|--------|-------|--------|
| 16 | Q01130 SFRS2_HUMAN    | R.SKS#PPKSPEEEGAVSS.-        | S208:      | 2 | 3,2558 | 0,195 | -0,719 |
| 16 | Q03164 HRX_HUMAN      | R.TIAHS#PTSFTESSK.E          | S2098:     | 2 | 4,066  | 0,474 | 0,147  |
| 16 | P60174 TPIS_HUMAN     | R.KQS#LGELIGTLNAAK.V         | S21:       | 2 | 4,8877 | 0,578 | -0,902 |
| 16 | P60174 TPIS_HUMAN     | R.KQS#LGELIGTLNAAK.V         | S21:       | 3 | 3,471  | 0,348 | -0,113 |
| 16 | Q53H80 CF166_HUMAN    | K.RTLDFDPLLSPAS#PK.R         | S21:       | 2 | 3,2479 | 0,485 | -0,632 |
| 16 | Q13242 SFRS9_HUMAN    | R.GS#PHYFSPFRPY.-            | S211:      | 2 | 2,1944 | 0,366 | -0,079 |
| 16 | Q9H4L7 SMRCD_HUMAN    | R.KLS#SSS#EPYEEDEFNDQSIKK.T  | S211:S214: | 3 | 4,8608 | 1     | -0,067 |
| 16 | Q9UQ35 SRRM2_HUMAN    | R.M*SCFSRPSM*S#PTPLDR.C      | S2123:     | 3 | 2,6733 | 0,147 | 0,277  |
| 16 | O60841 IF2P_HUMAN     | K.NKPGPNIES#GNEDDDASFK.I     | S214:      | 3 | 3,9479 | 0,5   | -0,087 |
| 16 | Q9Y6Q9 NCOA3_HUMAN    | K.TPHDILEDINAS#PEM*R.Q       | S214:      | 2 | 3,843  | 0,517 | 0,379  |
| 16 | Q9H1E3 NUCKS_HUMAN    | K.TPSPKEEDEEPES#PPEK.K       | S214:      | 3 | 3,4813 | 0,268 | -1,186 |
| 16 | Q8NEJ9 NGDN_HUMAN     | R.ELKEQYS#DAPEEIR.D          | S214:      | 2 | 2,5956 | 0,371 | 0,273  |
| 16 | O60841 IF2P_HUMAN     | K.NKPGPNIES#GNEDDDASFK.I     | S214:      | 2 | 2,4692 | 0,409 | 0      |
| 16 | Q9H1E3 NUCKS_HUMAN    | K.EEDEEPES#PPEK.K.T          | S214:      | 2 | 2,3732 | 0,237 | -0,451 |
| 16 | ##O95141 O95141_HUMAN | R.NRHS#SPRS#PR.L             | S214:S218: | 2 | 2,0029 | 0,087 | -0,889 |
| 16 | P38159 HNRPG_HUMAN    | R.DDGYS#TKDSYSSR.D           | S215:      | 2 | 2,242  | 0,361 | 0,156  |
| 16 | P26367 PAX6_HUMAN     | R.NRTS#FTQEQIEALEK.E         | S216:      | 3 | 3,2101 | 0,299 | -0,195 |
| 16 | Q13242 SFRS9_HUMAN    | R.GSPHYFS#PFRPY.-            | S216:      | 2 | 3,0325 | 0,473 | -0,477 |
| 16 | Q9H9L7 CA108_HUMAN    | K.RPMEFEAALLSPGS#PK.R        | S22:       | 3 | 3,0963 | 0,152 | -0,404 |
| 16 | Q9H9L7 CA108_HUMAN    | K.RPM*EFEAALLSPGS#PK.R       | S22:       | 2 | 3,068  | 0,394 | -0,468 |
| 16 | Q9UKX7 NUP50_HUMAN    | R.NSESESNKVAETQS#PSLFGSTK.L  | S221:      | 3 | 6,1221 | 0,386 | 0,074  |
| 16 | Q9BV73 CP250_HUMAN    | R.LHS#PGATSTAELGSR.G         | S2229:     | 2 | 4,391  | 0,552 | -0,468 |
| 16 | Q9BV73 CP250_HUMAN    | R.LHS#PGATSTAELGSR.G         | S2229:     | 3 | 3,1206 | 0,311 | 0      |
| 16 | Q9BW71 HIRP3_HUMAN    | K.ES#EQESEEIILAQK.K.E        | S223:      | 2 | 3,21   | 0,227 | 0,46   |
| 16 | P49761 CLK3_HUMAN     | R.CEERS#PSFGEDYGPSR.S        | S224:      | 3 | 3,9099 | 0,321 | 0,259  |
| 16 | Q6NYC8 PHTNS_HUMAN    | K.EVESRLS#PGESAYQK.L         | S224:      | 2 | 3,1595 | 0,495 | -0,624 |
| 16 | Q13573 SNW1_HUMAN     | R.GPPS#PPAPVM*HSPS#RK.M      | S224:S234: | 2 | 2,5323 | 0,299 | 0,336  |
| 16 | Q9BW71 HIRP3_HUMAN    | K.SLKESEQES#EEEIILAQK.K      | S227:      | 3 | 4,6578 | 0,34  | -0,178 |
| 16 | Q8N1G0 ZN687_HUMAN    | K.QESCS#PHHPQVLAQQGSGSS#PK.A | S227:S242: | 3 | 2,7859 | 0,239 | -0,292 |
| 16 | Q8NE71 ABCF1_HUMAN    | K.KAEQGS#EEEEEGEEEEEGGESK.A  | S228:      | 3 | 7,357  | 0,483 | -0,643 |
| 16 | Q13033 STRN3_HUMAN    | K.NLEQILNGGES#PKQK.G         | S229:      | 2 | 3,0029 | 0,178 | -0,633 |
| 16 | Q9BWT3 PAPOG_HUMAN    | K.HYGITS#PISLASPK.E          | S23:       | 2 | 4,0375 | 0,485 | 0,315  |
| 16 | P50990 TCPQ_HUMAN     | K.HFS#GLEEAVYR.N             | S23:       | 2 | 3,1931 | 0,461 | -0,264 |

|    |                     |                                 |            |   |        |       |        |
|----|---------------------|---------------------------------|------------|---|--------|-------|--------|
| 16 | P56211 ARP19_HUMAN  | K.VTS#PEKAEEAK.L                | S23:       | 2 | 2,6015 | 0,241 | -0,288 |
| 16 | Q96A57 CT030_HUMAN  | K.YSRLS#S#TDDGYIDLQFKK.T        | S23:S24:   | 3 | 3,1839 | 0,424 | 0,398  |
| 16 | Q7Z417 NUFP2_HUMAN  | R.NS#AKGCENLNIVQDK.I            | S230:      | 3 | 4,5008 | 0,214 | 0      |
| 16 | O15231 ZN185_HUMAN  | R.RES#CGS#SVLTFEGKDVATK.V       | S233:S236: | 3 | 3,5421 | 0,395 | 0,078  |
| 16 | Q3V6T2 GRDN_HUMAN   | R.DGLHFLPHASSAQS#PCGS#PGM*K.R   | S233:S237: | 3 | 4,4508 | 0,529 | -0,288 |
| 16 | Q9H7L9 SDS3_HUMAN   | K.RPAS#PS#SPEHLPATPAESPAQR.F    | S234:S236: | 3 | 4,4346 | 0,378 | 0      |
| 16 | Q9H7L9 SDS3_HUMAN   | K.RPAS#PSS#PEHLPATPAESPAQR.F    | S234:S237: | 3 | 5,0273 | 0,453 | 0,3    |
| 16 | P11274 BCR_HUMAN    | R.GRS#SESSCGVDGDYEDAELNPR.F     | S235:      | 3 | 4,0301 | 0,269 | -0,369 |
| 16 | P62753 RS6_HUMAN    | R.LS#SLRAS#TSKSESSQK.-          | S235:S240: | 2 | 2,5517 | 1     | -0,657 |
| 16 | P61247 RS3A_HUMAN   | K.LM*ELHGEGS#SSGK.A             | S236:      | 2 | 4,2443 | 0,462 | -0,342 |
| 16 | Q7Z699 SPRE1_HUMAN  | R.HVS#FQDEDEIVR.I               | S238:      | 2 | 3,7667 | 0,351 | -0,628 |
| 16 | Q13136 LIPA1_HUMAN  | R.S#SDGSLSHEDLAK.V              | S238:      | 2 | 2,7957 | 0,23  | -0,392 |
| 16 | O95671 ASML_HUMAN   | K.HDSIPAADTFEDLS#DVEGGGSEPTQR.D | S239:      | 3 | 4,0675 | 0,324 | 0,521  |
| 16 | Q9UQ35 SRRM2_HUMAN  | R.VSGRTS#PPLDR.A                | S2398:     | 2 | 3,4568 | 0,264 | -0,089 |
| 16 | P51003 PAPOA_HUMAN  | K.HYGITS#PISLAAPK.E             | S24:       | 2 | 3,9183 | 0,465 | 0,238  |
| 16 | Q86TN4 TRPT1_HUMAN  | R.KPLSLAGDEETECQSS#PK.H         | S240:      | 3 | 5,0118 | 0,466 | 0      |
| 16 | Q8IYB3 SRRM1_HUMAN  | K.VKEPSVQEATS#TSDILK.V          | S240:      | 3 | 4,57   | 0,424 | 0,287  |
| 16 | Q8TC05 MDM1_HUMAN   | K.GLS#PVKEPK.L                  | S242:      | 2 | 2,4155 | 0,304 | -0,825 |
| 16 | Q8IYB3 SRRM1_HUMAN  | K.VKEPSVQEATSTS#DILK.V          | S242:      | 2 | 2,3901 | 0,43  | -0,383 |
| 16 | Q9HB09 B2L12_HUMAN  | K.LVRLS#SDSFAR.L                | S242:      | 2 | 2,2378 | 0,472 | 0,458  |
| 16 | Q9P0V3 SH3B4_HUMAN  | K.RS#YLSSELSVLQAK.S             | S244:      | 3 | 3,3545 | 0,149 | -0,33  |
| 16 | Q6P2G2 Q6P2G2_HUMAN | K.GDSGESSGEGQPPQDHS#PGPR.T      | S244:      | 3 | 3,2593 | 0,291 | -0,254 |
| 16 | O95425 SVIL_HUMAN   | R.DSSFTEVPRS#PK.H               | S245:      | 2 | 3,3744 | 0,351 | 0,256  |
| 16 | Q9H3N1 TXND1_HUMAN  | K.KVEEQEAEDEEDVS#EEEEASK.E      | S247:      | 3 | 4,9802 | 0,512 | 0,291  |
| 16 | Q9Y2W1 TR150_HUMAN  | R.ERS#PALKS#PLQSVVVR.R          | S248:S253: | 3 | 2,7239 | 0,467 | 0      |
| 16 | P30305 MPIP2_HUMAN  | R.KM*EVEELS#PLALGR.F            | S249:      | 2 | 4,4805 | 0,542 | 0,439  |
| 16 | P30305 MPIP2_HUMAN  | R.KM*EVEELS#PLALGR.F            | S249:      | 3 | 3,7168 | 0,444 | 0,329  |
| 16 | P08670 VIME_HUMAN   | R.M*FGGPGTASRPS#SSR.S           | S25:       | 2 | 2,3132 | 0,183 | -0,383 |
| 16 | Q9Y6A5 TACC3_HUMAN  | R.HGGVCAPAAVATS#PPGAIPK.E       | S250:      | 2 | 3,3291 | 0,443 | 0,126  |
| 16 | Q9Y6A5 TACC3_HUMAN  | R.HGGVCAPAAVATS#PPGAIPK.E       | S250:      | 3 | 3,261  | 0,162 | 0,189  |
| 16 | Q86X53 ERIC1_HUMAN  | R.ARQEEGADAS#EEDPTPAGEEDVK.D    | S254:      | 3 | 5,3609 | 0,313 | -0,364 |
| 16 | P06748 NPM_HUMAN    | K.M*QAS#IEKGGSLPK.V             | S254:      | 2 | 3,3477 | 0,355 | -0,423 |
| 16 | Q99808 S29A1_HUMAN  | K.LDLIS#KGEEPR.A                | S254:      | 3 | 2,6954 | 0,343 | -0,137 |

|    |                    |                                 |            |   |        |       |        |
|----|--------------------|---------------------------------|------------|---|--------|-------|--------|
| 16 | Q9UBC2 EP15R_HUMAN | R.STPSHGVSSSLNSTGSL#PK.H        | S255:      | 2 | 4,9335 | 0,438 | 0,607  |
| 16 | O95359 TACC2_HUMAN | K.KQALYLM*FDTSQES#PVK.S         | S2557:     | 3 | 3,8496 | 0,228 | 0,088  |
| 16 | Q13586 STIM1_HUMAN | R.AEQS#LHDLQER.L                | S257:      | 3 | 2,694  | 0,278 | -0,13  |
| 16 | Q92466 DDB2_HUMAN  | R.SRS#PLELEPEAK.K               | S26:       | 2 | 3,7833 | 0,281 | 0,255  |
| 16 | Q92466 DDB2_HUMAN  | R.SRS#PLELEPEAK.K               | S26:       | 3 | 3,4868 | 0,334 | 0,127  |
| 16 | P29966 MARCS_HUMAN | K.GEAAAERPGEAAVAS#SPSK.A        | S26:       | 2 | 3,2871 | 0,497 | -0,131 |
| 16 | P29966 MARCS_HUMAN | K.GEAAAERPGEAAVAS#SPSK.A        | S26:       | 3 | 2,9442 | 0,223 | -1,373 |
| 16 | O75691 UTP20_HUMAN | K.AES#DGEEKEEVK.E               | S2601:     | 2 | 2,4934 | 0,311 | -0,683 |
| 16 | Q15208 STK38_HUMAN | R.NLNHSLPSDFTFQNM*NS#K.R        | S264:      | 3 | 5,148  | 0,383 | 0,251  |
| 16 | Q9Y2H1 ST38L_HUMAN | R.NLTHNPPSDFSFQNM*NS#K.R        | S265:      | 3 | 3,9058 | 0,312 | -0,168 |
| 16 | Q00839 HNRPU_HUMAN | R.GYFEYIEENKYS#R.A              | S266:      | 2 | 2,0516 | 0,397 | -0,275 |
| 16 | Q9NTJ3 SMC4_HUMAN  | R.REEGPPPPSPDGAS#SDAEPEPPSGR.T  | S27:       | 3 | 5,5652 | 0,434 | -0,282 |
| 16 | Q12802 AKP13_HUMAN | K.SGSLDSELSVS#PKR.N             | S2728:     | 2 | 3,5205 | 0,456 | 0,475  |
| 16 | Q8WW1 LMO7_HUMAN   | R.GGREGFES#DTDSEFTFK.M          | S276:      | 3 | 3,6543 | 0,363 | 0      |
| 16 | Q9UBF8 PI4KB_HUMAN | R.SKS#DATASISLSSNLK.R           | S277:      | 2 | 5,4416 | 0,643 | -0,65  |
| 16 | Q8N556 AFAP1_HUMAN | K.KLS#SERPSS#DGEGVVENGITTCNGK.E | S277:S283: | 3 | 6,1741 | 0,531 | 0,592  |
| 16 | Q8IXT5 RB12B_HUMAN | R.S#RS#PLGFYVHLK.N              | S278:S280: | 3 | 3,0888 | 0,198 | -0,117 |
| 16 | Q9NTJ3 SMC4_HUMAN  | R.REEGPPPPSPDGASS#DAEPEPPSGR.T  | S28:       | 3 | 5,1303 | 0,394 | 0,141  |
| 16 | Q9Y2K7 JHD1A_HUMAN | R.YEDDGIS#DDEIEGKR.T            | S28:       | 2 | 4,3359 | 0,589 | -0,201 |
| 16 | Q9Y2K7 JHD1A_HUMAN | R.YEDDGIS#DDEIEGKR.T            | S28:       | 3 | 3,1086 | 0,415 | -0,402 |
| 16 | Q9UHR4 BI2L1_HUMAN | K.DYDTLSKCS#PK.M                | S281:      | 2 | 3,1699 | 0,381 | -0,35  |
| 16 | Q9P289 MST4_HUMAN  | K.KTS#YLTELIDR.F                | S282:      | 2 | 3,2703 | 0,283 | -0,172 |
| 16 | P46013 KI67_HUMAN  | K.IPCKS#SPELEDTATSSK.R          | S2827:     | 3 | 2,9897 | 0,115 | -0,095 |
| 16 | P46013 KI67_HUMAN  | K.IPCKSS#PELEDTATSSK.R          | S2828:     | 3 | 3,3049 | 0,361 | -0,663 |
| 16 | O94909 K0819_HUMAN | R.VSEDEEKLPAS#PK.H              | S283:      | 3 | 3,257  | 0,258 | 0      |
| 16 | Q641Q2 FA21A_HUMAN | R.S#RPTFADELAAR.I               | S284:      | 3 | 4,0446 | 0,354 | 0      |
| 16 | Q6P4F7 RHGBA_HUMAN | R.RQS#VGDFVSGALNK.F             | S285:      | 2 | 4,2494 | 0,475 | 0,392  |
| 16 | Q6P4F7 RHGBA_HUMAN | R.RQS#VGDFVSGALNK.F             | S285:      | 3 | 3,1493 | 0,128 | -0,117 |
| 16 | Q02952 AKA12_HUMAN | K.SAESPTS#PVTSETGSTFKK.F        | S286:      | 2 | 3,1462 | 0,409 | 0,302  |
| 16 | Q96T88 UHRF1_HUMAN | K.IERPGECS#PM*VDNPM*R.R         | S287:      | 3 | 2,9823 | 0,255 | 0      |
| 16 | Q96T88 UHRF1_HUMAN | K.IERPGECS#PM*VDNPM*R.R         | S287:      | 2 | 2,8644 | 0,446 | 0,579  |
| 16 | Q641Q2 FA21A_HUMAN | R.SRPTS#FADELAAR.I              | S288:      | 2 | 3,6342 | 0,502 | -0,406 |
| 16 | O75170 SAPS2_HUMAN | R.RVGTEGLVDS#FSQGLER.S          | S289:      | 3 | 3,5091 | 0,302 | -0,569 |

|    |                     |                               |        |   |        |       |        |
|----|---------------------|-------------------------------|--------|---|--------|-------|--------|
| 16 | O95817 BAG3_HUMAN   | R.SSTPLHS#PSPIR.V             | S289:  | 2 | 2,6917 | 0,299 | -0,269 |
| 16 | Q8TF01 SFR18_HUMAN  | R.SKFD5#DEEEEDTENVEAASSGK.V   | S290:  | 3 | 4,8322 | 0,525 | 0,221  |
| 16 | P18206 VINC_HUMAN   | K.GWLRDPSAS#PGDAGEQAIR.Q      | S290:  | 3 | 3,0919 | 0,131 | -0,177 |
| 16 | Q96I25 SPF45_HUMAN  | K.KSDS#NPLTEILK.C             | S293:  | 2 | 2,6045 | 0,293 | -1,113 |
| 16 | Q96I24 FUBP3_HUMAN  | R.IQFKPDDGIS#PER.A            | S296:  | 3 | 3,9463 | 0,497 | 0      |
| 16 | O14495 LPP3_HUMAN   | R.KEILS#PVDIIDR.N             | S297:  | 2 | 3,7833 | 0,247 | -0,165 |
| 16 | Q9BTE3 CJ119_HUMAN  | R.VHS#PPASLVPR.I              | S298:  | 2 | 2,8949 | 0,207 | -0,098 |
| 16 | Q8NFC6 FA44A_HUMAN  | K.KEQES#DEEEEEEEDEPSGATTR.S   | S2986: | 3 | 4,8206 | 0,368 | 0,066  |
| 16 | O75379 VAMP4_HUMAN  | R.RNLLEDDS#DEEEDFFLR.G        | S30:   | 3 | 3,9301 | 0,322 | -0,659 |
| 16 | Q14457 BECN1_HUMAN  | R.CSQPLKLDTS#FK.I             | S30:   | 3 | 2,7095 | 0,202 | -0,243 |
| 16 | Q8WVM8 SCFD1_HUMAN  | R.VNLEESSGVENS#PAGARPK.R      | S303:  | 3 | 3,3245 | 0,39  | -0,543 |
| 16 | Q9UBW7 ZMYM2_HUMAN  | R.NQKQPGVDSLS#PVASLPK.Q       | S305:  | 3 | 5,4064 | 0,415 | -0,094 |
| 16 | Q9UBW7 ZMYM2_HUMAN  | R.NQKQPGVDSLS#PVASLPK.Q       | S305:  | 2 | 2,9747 | 0,353 | -0,188 |
| 16 | P46013 KI67_HUMAN   | K.SGGSGHAVAEPAS#PEQELDQNK.G   | S308:  | 3 | 5,3572 | 0,327 | -0,24  |
| 16 | P55199 ELL_HUMAN    | R.KLCQPQSTGSLGDPAAASS#PPGER.G | S309:  | 3 | 4,1935 | 0,306 | 0,217  |
| 16 | Q9NZN5 ARHGC_HUMAN  | R.TDCSSGDASRPSSDNADS#PK.S     | S309:  | 3 | 3,5642 | 0,312 | -0,429 |
| 16 | O43293 DAPK3_HUMAN  | K.S#HSSLPPNNSYADFER.F         | S309:  | 3 | 2,8358 | 0,124 | 0,096  |
| 16 | P62873 GBB1_HUMAN   | R.KACADATLS#QITNNIDPVGR.I     | S31:   | 3 | 3,7691 | 0,263 | -0,411 |
| 16 | Q6MZP7 Q6MZP7_HUMAN | K.IAIS#PLKSPNK.A              | S310:  | 2 | 2,4739 | 0,187 | 0,098  |
| 16 | O43293 DAPK3_HUMAN  | K.SHS#SLPPNNSYADFER.F         | S311:  | 3 | 3,6481 | 0,35  | -0,096 |
| 16 | Q9BWU0 NADAP_HUMAN  | K.KM*LGEDS#DEEEEM*DTSER.K     | S312:  | 3 | 5,4991 | 0,442 | 0,245  |
| 16 | Q9NQS7 INCE_HUMAN   | R.HSPIAPSS#PSPQVLAQK.Y        | S312:  | 2 | 4,8692 | 0,575 | 0,334  |
| 16 | Q9BWU0 NADAP_HUMAN  | K.KM*LGEDS#DEEEEMDTSER.K      | S312:  | 3 | 3,8776 | 0,289 | 0      |
| 16 | O43293 DAPK3_HUMAN  | K.SHS#LPPNNSYADFER.F          | S312:  | 2 | 3,646  | 0,412 | 0,385  |
| 16 | O43293 DAPK3_HUMAN  | K.SHS#LPPNNSYADFER.F          | S312:  | 3 | 3,4786 | 0,233 | -0,481 |
| 16 | Q9NQS7 INCE_HUMAN   | R.HSPIAPSS#PSPQVLAQK.Y        | S312:  | 3 | 3,2158 | 0,392 | 0,201  |
| 16 | Q9BZF1 OSBL8_HUMAN  | R.ANNLHSGDNFQLNDS#EIER.Q      | S314:  | 3 | 4,6049 | 0,305 | -0,406 |
| 16 | Q9HCE3 ZN532_HUMAN  | R.AADKS#PESQNLIDGTK.K         | S314:  | 2 | 4,4478 | 0,481 | -0,07  |
| 16 | Q6MZP7 Q6MZP7_HUMAN | K.IAISPLKS#PNK.A              | S314:  | 2 | 3,0365 | 0,262 | -0,098 |
| 16 | O00273 DFFA_HUMAN   | R.SISASKAS#PPGDLQNP.K.R       | S315:  | 2 | 4,5233 | 0,514 | -0,137 |
| 16 | P11940 PABP1_HUMAN  | R.KEFS#PFGTITSAK.V            | S315:  | 2 | 4,0665 | 0,538 | -0,245 |
| 16 | Q9BX40 LS14B_HUMAN  | K.S#KSFFDNISSELK.T            | S315:  | 3 | 3,6607 | 0,239 | -0,116 |
| 16 | O00273 DFFA_HUMAN   | R.SISASKAS#PPGDLQNP.K.R       | S315:  | 3 | 2,6463 | 0,347 | 0      |

|    |                    |                               |              |   |        |       |        |
|----|--------------------|-------------------------------|--------------|---|--------|-------|--------|
| 16 | P41229 JAD1C_HUMAN | R.NHS#NAQFIESYVCR.M           | S317:        | 2 | 4,2705 | 0,551 | -0,338 |
| 16 | Q9BX40 LS14B_HUMAN | K.SKS#FFDNISSELK.T            | S317:        | 2 | 4,2664 | 0,381 | -0,54  |
| 16 | Q8N350 DOS_HUMAN   | R.HAS#LDGASPYFK.V             | S319:        | 2 | 3,9855 | 0,624 | -0,355 |
| 16 | Q96A65 EXOC4_HUMAN | R.TLS#TSDDDVEDRENEK.G         | S32:         | 2 | 3,2352 | 0,454 | 0,134  |
| 16 | Q9Y2W1 TR150_HUMAN | K.SPVGKS#PPSTGSTYGSSQK.E      | S320:        | 3 | 4,3162 | 0,506 | -0,095 |
| 16 | Q70CQ2 UBP34_HUMAN | R.RVS#S#DEEHTVDSCISDMK.T      | S3207:S3208: | 3 | 2,9318 | 0,443 | -0,568 |
| 16 | Q86WB0 NIPA_HUMAN  | R.LPLVPES#PRR.M               | S321:        | 2 | 2,0596 | 0,373 | 0      |
| 16 | P08651 NFIC_HUMAN  | R.NWTEDM*EGGISS#PVKK.T        | S323:        | 2 | 4,2705 | 0,492 | 0      |
| 16 | Q6PJF5 RHDF2_HUMAN | R.GIPHSAS#PVS#PDGVQIPLKEYGR.A | S325:S328:   | 3 | 4,933  | 0,566 | -0,071 |
| 16 | O75122 CLAP2_HUMAN | R.SSSS#SQESLNRPFSSK.W         | S326:        | 2 | 2,48   | 0,313 | -0,405 |
| 16 | Q12851 M4K2_HUMAN  | R.TPS#EIQFHQVK.F              | S327:        | 2 | 2,9559 | 0,385 | 0,088  |
| 16 | P38159 HNRPG_HUMAN | R.DSYS#SSRSPLYSSGR.D          | S328:        | 3 | 3,7053 | 0,297 | 0,105  |
| 16 | Q15459 SF3A1_HUMAN | K.FGESEEVEM*EVES#DEEDDKQEK.A  | S329:        | 3 | 5,3921 | 0,47  | 0,405  |
| 16 | Q15459 SF3A1_HUMAN | K.FGESEEVEMEVES#DEEDDKQEK.A   | S329:        | 3 | 5,309  | 0,475 | -0,407 |
| 16 | Q86W50 MET10_HUMAN | K.ELSLKAS#PLR.S               | S329:        | 2 | 2,393  | 0,306 | 0,102  |
| 16 | P78527 PRKDC_HUMAN | R.SRS#QGCSEQVLTVLK.T          | S3290:       | 2 | 4,3469 | 0,435 | -0,551 |
| 16 | O95674 CDS2_HUMAN  | K.ESESEAKVDGETAS#DSESR.A      | S33:         | 3 | 4,121  | 0,431 | -0,612 |
| 16 | P05787 K2C8_HUMAN  | K.GQRAS#LEAAIADAEQR.G         | S330:        | 3 | 4,5593 | 0,309 | -0,207 |
| 16 | P05787 K2C8_HUMAN  | K.GQRAS#LEAAIADAEQR.G         | S330:        | 2 | 4,3657 | 0,551 | -0,622 |
| 16 | P38159 HNRPG_HUMAN | R.DSYS#SSRS#DLYSSGR.D         | S332:        | 3 | 3,2103 | 0,355 | -0,314 |
| 16 | P38159 HNRPG_HUMAN | R.DSYS#SSRS#DLYSSGR.D         | S332:        | 2 | 2,4438 | 0,349 | -0,838 |
| 16 | P49790 NU153_HUMAN | K.RIPSIVSS#PLNSPLDR.S         | S334:        | 2 | 4,0495 | 0,468 | -0,333 |
| 16 | P49790 NU153_HUMAN | K.RIPSIVSS#PLNSPLDR.S         | S334:        | 3 | 2,8274 | 0,22  | -0,1   |
| 16 | Q9P1Y5 K1543_HUMAN | K.DLPDGHAAS#PR.G              | S334:        | 2 | 2,1965 | 0,382 | 0      |
| 16 | Q2TB10 ZN800_HUMAN | R.DSITPDIATKPGQPLFLDSIS#PKK.S | S336:        | 3 | 4,0468 | 0,367 | -1,313 |
| 16 | Q99759 M3K3_HUMAN  | R.LRS#ADSENALSQER.N           | S337:        | 3 | 3,3446 | 0,251 | -0,208 |
| 16 | O95365 ZBT7A_HUMAN | R.AGAAAGDS#DEESRADDK.G        | S337:        | 3 | 3,2049 | 0,328 | -0,314 |
| 16 | Q99569 PKP4_HUMAN  | R.VASPSQGQVGSSS#PKR.S         | S337:        | 2 | 2,8635 | 0,415 | -0,665 |
| 16 | P49790 NU153_HUMAN | K.RIPSIVSSPLNS#PLDR.S         | S338:        | 2 | 3,2277 | 0,249 | 0,267  |
| 16 | Q9NUQ6 SPS2L_HUMAN | K.AARFS#CDIEQLK.A             | S338:        | 3 | 2,9413 | 0,314 | -0,12  |
| 16 | Q86X53 ERIC1_HUMAN | K.AHS#ILNFLK.S                | S339:        | 2 | 3,5132 | 0,431 | -0,326 |
| 16 | P08651 NFIC_HUMAN  | K.TEM*DKSPFNPS#PQDSPR.L       | S339:        | 3 | 2,9912 | 0,189 | 0      |
| 16 | P51957 NEK4_HUMAN  | R.ASGLLK#PASLK.A              | S340:        | 2 | 3,1368 | 0,185 | -0,097 |

|    |                     |                                 |            |   |        |       |        |
|----|---------------------|---------------------------------|------------|---|--------|-------|--------|
| 16 | O75909 CCNK_HUMAN   | R.AVVVS#PKEENK.A                | S340:      | 2 | 3,0957 | 0,238 | -0,953 |
| 16 | Q09666 AHNK_HUMAN   | K.FKM*PFLSISS#PK.V              | S3412:     | 2 | 3,2447 | 0,331 | 0,165  |
| 16 | Q09666 AHNK_HUMAN   | K.FKM*PFLSISS#PK.V              | S3412:     | 3 | 3,0444 | 0,211 | 0,062  |
| 16 | P11940 PABP1_HUMAN  | R.SKGFVFCVCFSS#PEEATK.A         | S342:      | 3 | 3,2894 | 0,326 | -0,28  |
| 16 | Q12968 NFAC3_HUMAN  | R.KTS#EDQAAILPGK.L              | S344:      | 2 | 3,8224 | 0,394 | -0,339 |
| 16 | O14681 EI24_HUMAN   | K.FPS#PHPSPAK.L                 | S345:      | 2 | 2,8088 | 0,186 | -0,107 |
| 16 | Q9H307 PININ_HUMAN  | K.EIAIVHS#DAEK.E                | S347:      | 2 | 3,304  | 0,404 | -0,094 |
| 16 | P30622 CLIP1_HUMAN  | R.KIS#GTTALQEALK.E              | S348:      | 2 | 3,9791 | 0,518 | -0,169 |
| 16 | O60716 CTND1_HUMAN  | R.GSLAS#LDSLRLK.G               | S349:      | 2 | 2,5609 | 0,161 | -0,099 |
| 16 | P01892 1A02_HUMAN   | R.KGGSYSQAASSDS#AQGSDVSLTACKV.- | S352:      | 3 | 4,805  | 0,362 | 0,416  |
| 16 | Q9UK58 CCNL1_HUMAN  | K.AEEKS#PISINVK.T               | S352:      | 2 | 3,9431 | 0,281 | -0,262 |
| 16 | Q9UK58 CCNL1_HUMAN  | K.AEEKS#PISINVK.T               | S352:      | 3 | 3,3432 | 0,247 | -1,245 |
| 16 | Q63HJ5 Q63HJ5_HUMAN | K.SPHNS#GLVNLTER.S              | S354:      | 3 | 3,8236 | 0,271 | 0,365  |
| 16 | P19338 NUCL_HUMAN   | R.KFGYVDFES#AEDLEK.A            | S356:      | 2 | 4,5011 | 0,464 | -0,394 |
| 16 | P19338 NUCL_HUMAN   | R.KFGYVDFES#AEDLEK.A            | S356:      | 3 | 3,5295 | 0,229 | -0,197 |
| 16 | P01892 1A02_HUMAN   | R.KGGSYSQAASSDSAQGSVSLTACKV.-   | S359:      | 3 | 5,6293 | 0,516 | 0,208  |
| 16 | Q5SW79 CE170_HUMAN  | K.SIKS#DVPVYLK.R                | S359:      | 2 | 3,3802 | 0,514 | 0,092  |
| 16 | P16403 H12_HUMAN    | R.KAS#GPPVSELITK.A              | S36:       | 3 | 4,3637 | 0,442 | 0,065  |
| 16 | P16403 H12_HUMAN    | R.KAS#GPPVSELITK.A              | S36:       | 2 | 3,9678 | 0,413 | 0,173  |
| 16 | O60610 DIAP1_HUMAN  | R.SPDELPSAGDGGKS#K.K            | S36:       | 2 | 2,2895 | 0,092 | -0,54  |
| 16 | Q7Z5L9 I2BP2_HUMAN  | R.KPS#PEPEGEVGPPK.I             | S360:      | 2 | 4,1187 | 0,424 | 0,24   |
| 16 | Q7Z5L9 I2BP2_HUMAN  | R.KPS#PEPEGEVGPPK.I             | S360:      | 3 | 4,0296 | 0,368 | 0      |
| 16 | Q13905 RPGF1_HUMAN  | K.LSKS#DEQLSLDR.D               | S360:      | 2 | 3,8425 | 0,534 | 0,078  |
| 16 | Q9NZT2 OGFR_HUMAN   | R.S#QGDEAGGHGEDRPEPLS#PK.E      | S361:S378: | 3 | 3,0373 | 0,415 | -0,329 |
| 16 | P35613 BASI_HUMAN   | R.KPEDVLDDDDAGS#APLK.S          | S362:      | 2 | 6,0553 | 0,555 | -1,374 |
| 16 | Q9NYL2 MLTK_HUMAN   | R.KGDSSAEM*S#VYASLFK.E          | S362:      | 3 | 2,9862 | 0,249 | -0,201 |
| 16 | Q9NRX5 SERC1_HUMAN  | R.SDGS#LEDGDDVHR.A              | S364:      | 3 | 3,5766 | 0,517 | 0,062  |
| 16 | Q9NRX5 SERC1_HUMAN  | R.SDGS#LEDGDDVHR.A              | S364:      | 2 | 3,1143 | 0,543 | 0,082  |
| 16 | O60271 JIP4_HUMAN   | K.DLSGYKGSS#TPTK.G              | S364:      | 2 | 2,3882 | 0,306 | -0,172 |
| 16 | Q15435 PP1R7_HUMAN  | K.HSS#GIVADLSEQLK.D             | S37:       | 2 | 5,1814 | 0,563 | -0,296 |
| 16 | Q9NYM9 BET1L_HUMAN  | R.LKS#LALDIDR.D                 | S37:       | 3 | 3,437  | 0,214 | 0,075  |
| 16 | Q9NYM9 BET1L_HUMAN  | R.LKS#LALDIDR.D                 | S37:       | 2 | 3,2238 | 0,357 | -0,399 |
| 16 | O75122 CLAP2_HUMAN  | R.SRS#DIDVNAAAGAK.A             | S370:      | 2 | 5,1127 | 0,496 | 0,168  |

|    |                     |                             |            |   |        |       |        |
|----|---------------------|-----------------------------|------------|---|--------|-------|--------|
| 16 | Q8TBC4 UBA3_HUMAN   | R.KENCPACSQLPQNIQFS#PSAK.L  | S377:      | 3 | 3,899  | 0,279 | -0,516 |
| 16 | Q96ST2 IWS1_HUMAN   | K.M*DS#DEDEKEGEEEEK.V       | S377:      | 2 | 3,7226 | 0,286 | -0,484 |
| 16 | Q96ST2 IWS1_HUMAN   | K.M*DS#DEDEKEGEEEEK.V       | S377:      | 3 | 3,2056 | 0,405 | -0,207 |
| 16 | P42167 LAP2B_HUMAN  | K.GAAGRPLELS#DFR.M          | S378:      | 2 | 2,0699 | 0,492 | 0,415  |
| 16 | P12270 TPR_HUMAN    | R.KGAILSEEEAAM*S#PTAAAVAK.I | S379:      | 3 | 4,9446 | 0,447 | -0,325 |
| 16 | P16949 STMN1_HUMAN  | R.SKESVPEFPLS#PPK.K         | S38:       | 3 | 4,2162 | 0,391 | 0,226  |
| 16 | P16949 STMN1_HUMAN  | R.SKESVPEFPLS#PPK.K         | S38:       | 2 | 3,2322 | 0,429 | 0,376  |
| 16 | Q13428 TCOF_HUMAN   | K.TSQVGAASAPAKES#PR.K       | S381:      | 3 | 3,0502 | 0,463 | 0,223  |
| 16 | Q5QJE6 TDIF2_HUMAN  | K.S#PIKASDLTK.F             | S381:      | 2 | 2,5265 | 0,486 | 0,321  |
| 16 | O75717 WDHD1_HUMAN  | R.SHILEDDENS#VDISM*LK.T     | S383:      | 3 | 5,0886 | 0,368 | -0,09  |
| 16 | Q8TEW0 PARD3_HUMAN  | K.NNYSSRFS#PDSQYIDNR.S      | S383:      | 3 | 4,6494 | 0,525 | -0,397 |
| 16 | O75717 WDHD1_HUMAN  | R.SHILEDDENS#VDISMLK.T      | S383:      | 2 | 4,0159 | 0,544 | 1,085  |
| 16 | O75717 WDHD1_HUMAN  | R.SHILEDDENS#VDISMLK.T      | S383:      | 3 | 3,2573 | 0,183 | 0,271  |
| 16 | O75717 WDHD1_HUMAN  | R.SHILEDDENS#VDISM*LK.T     | S383:      | 2 | 2,7299 | 0,536 | -0,897 |
| 16 | Q69YQ0 CYTSA_HUMAN  | R.KGS#SGNASEVSVACLTER.I     | S384:      | 2 | 5,1164 | 0,6   | 0      |
| 16 | Q69YQ0 CYTSA_HUMAN  | R.KGSS#GNASEVSVACLTER.I     | S385:      | 3 | 2,9231 | 0,265 | -0,095 |
| 16 | Q9Y6K9 NEMO_HUMAN   | R.RS#PPEEPPDFCCPK.C         | S387:      | 2 | 2,9142 | 0,317 | 0,204  |
| 16 | Q15464 SHB_HUMAN    | K.HGS#PEFCGILGER.V          | S388:      | 2 | 4,3235 | 0,487 | -0,476 |
| 16 | P04075 ALDOA_HUMAN  | K.GILAADESTGS#IAKR.L        | S39:       | 2 | 3,1789 | 0,535 | -0,544 |
| 16 | Q99613 EIF3C_HUMAN  | K.QPLLLS#EDEEDTKR.V         | S39:       | 2 | 2,4236 | 0,449 | -0,07  |
| 16 | Q8NCF5 NF2IP_HUMAN  | R.KLS#FFFDGTL.L             | S390:      | 2 | 3,0027 | 0,351 | -0,769 |
| 16 | Q9UHV7 MED13_HUMAN  | R.KYS#ASSGGLCEEATAAK.V      | S395:      | 2 | 4,9791 | 0,519 | 0,27   |
| 16 | O43194 GPR39_HUMAN  | R.FVQRPLLFAS#R.R            | S396:      | 3 | 3,1989 | 0,3   | -0,129 |
| 16 | Q8N1F8 S11IP_HUMAN  | R.RAS#ISEPSDTPPEPR.T        | S398:      | 2 | 3,8999 | 0,537 | -0,562 |
| 16 | Q68DK7 Q68DK7_HUMAN | R.KS#PLGGGGSGASSQAACLK.Q    | S4:        | 2 | 5,3219 | 0,637 | -0,587 |
| 16 | Q68DK7 Q68DK7_HUMAN | R.KS#PLGGGGSGASSQAACLK.Q    | S4:        | 3 | 3,5224 | 0,212 | -0,587 |
| 16 | Q3YEC7 PARF_HUMAN   | R.LDRS#FLEDTPAR.D           | S402:      | 3 | 3,4677 | 0,314 | -0,228 |
| 16 | Q3YEC7 PARF_HUMAN   | R.LDRS#FLEDTPAR.D           | S402:      | 2 | 3,3889 | 0,48  | -0,61  |
| 16 | Q9BTX1 NDC1_HUMAN   | K.KLNS#PEETAFTQPK.S         | S406:      | 2 | 4,3407 | 0,407 | -0,804 |
| 16 | Q9BTX1 NDC1_HUMAN   | K.KLNS#PEETAFTQPK.S         | S406:      | 3 | 4,3341 | 0,342 | -0,329 |
| 16 | Q15036 SNX17_HUMAN  | R.RSDS#QQAVKS#PPLLESPDATR.E | S409:S415: | 3 | 3,8107 | 0,375 | 0,524  |
| 16 | Q9H4L5 OSBL3_HUMAN  | R.IHAESLLDS#PAVAK.S         | S410:      | 2 | 5,237  | 0,535 | 0,594  |
| 16 | Q9H4L5 OSBL3_HUMAN  | R.IHAESLLDS#PAVAK.S         | S410:      | 3 | 3,7931 | 0,298 | -0,111 |



|    |                    |                                 |            |   |        |       |        |
|----|--------------------|---------------------------------|------------|---|--------|-------|--------|
| 16 | Q13112 CAF1B_HUMAN | R.GSS#PGPRPVEGTPASR.T           | S410:      | 3 | 2,8983 | 0,337 | 0,112  |
| 16 | P49407 ARRB1_HUMAN | K.DDKEEEEDGTGS#PQLNNR.-         | S412:      | 3 | 4,6655 | 0,452 | -0,087 |
| 16 | P13807 GYS1_HUMAN  | R.KLYESLLVGS#LPDM*NK.M          | S412:      | 3 | 3,7527 | 0,174 | -0,192 |
| 16 | P49023 PAXI_HUMAN  | K.DYHNLFS#PR.C                  | S414:      | 3 | 2,7098 | 0,176 | 0,223  |
| 16 | P49023 PAXI_HUMAN  | K.DYHNLFS#PR.C                  | S414:      | 2 | 2,5796 | 0,382 | -0,099 |
| 16 | Q2TB10 ZN800_HUMAN | K.VKVEPADS#VESS#PPSITHSPQNELK.G | S415:S419: | 3 | 3,8795 | 0,252 | 0,516  |
| 16 | Q14157 UBP2L_HUMAN | K.NPSDSAVHS#PFTK.R              | S416:      | 2 | 4,3882 | 0,539 | 0      |
| 16 | Q9NQ7 CYLD_HUMAN   | R.FHS#LPFSLTK.M                 | S418:      | 2 | 2,8583 | 0,322 | -0,194 |
| 16 | Q2TB10 ZN800_HUMAN | K.VKVEPADSVES#SPPSIT#HSPQNELK.G | S418:T424: | 3 | 3,3273 | 0,134 | 0,839  |
| 16 | O95671 ASML_HUMAN  | K.KAEDLFQDAYYS#PETR.L           | S421:      | 3 | 3,9907 | 0,223 | 0,171  |
| 16 | O14974 MYPT1_HUMAN | K.FPTTATKIS#PK.E                | S422:      | 2 | 2,4089 | 0,28  | -0,48  |
| 16 | Q13547 HDAC1_HUMAN | R.IACEEFSDS#EEEGEGGRK.N         | S423:      | 3 | 5,1816 | 0,456 | 0      |
| 16 | Q96S38 KS6C1_HUMAN | K.FLNRS#PEESFDIK.E              | S423:      | 3 | 3,1694 | 0,189 | 0,22   |
| 16 | Q96S38 KS6C1_HUMAN | K.FLNRS#PEES#FDIKEVK.K          | S423:S427: | 3 | 2,6309 | 0,148 | -0,61  |
| 16 | Q92769 HDAC2_HUMAN | R.IACDEEFSDS#EDEGEGGRR.N        | S424:      | 3 | 3,7579 | 0,365 | 0      |
| 16 | O76021 RL1D1_HUMAN | K.AAETPGKS#PEK.K                | S427:      | 2 | 3,0701 | 0,334 | -0,519 |
| 16 | Q96JM3 ZN828_HUMAN | R.KPGPPLS#PEIRS#PAGSPELR.K      | S427:S432: | 3 | 3,2569 | 0,276 | 0,57   |
| 16 | Q9C0C2 TB182_HUMAN | R.RFS#EGVLQSPSQDQEK.L           | S429:      | 2 | 3,4014 | 0,425 | 0,637  |
| 16 | Q86WR7 CJ047_HUMAN | R.SRS#FTLDDESLK.Y               | S43:       | 2 | 3,8607 | 0,269 | 0,083  |
| 16 | P08865 RSSA_HUMAN  | R.KS#DGIYIINLK.R                | S43:       | 2 | 2,8212 | 0,434 | 0,091  |
| 16 | O75122 CLAP2_HUMAN | R.AKLS#APLAGM*GNAK.A            | S430:      | 3 | 2,8763 | 0,089 | -0,064 |
| 16 | Q8IXS8 F126B_HUMAN | K.HLS#LPAGQVVPK.I               | S430:      | 2 | 2,7735 | 0,301 | -0,46  |
| 16 | O95232 CROP_HUMAN  | K.ESDTKNEVNGTSEDIKSEGDTQS#N.-   | S431:      | 3 | 6,2399 | 0,507 | 0,549  |
| 16 | Q8TBZ3 WDR20_HUMAN | R.S#NSLPHSAVSNAGSK.S            | S432:      | 2 | 2,8721 | 0,533 | 0,159  |
| 16 | Q8TBZ3 WDR20_HUMAN | R.SNS#LPHSAVSNAGSK.S            | S434:      | 3 | 3,4828 | 0,343 | 0      |
| 16 | Q14004 CD2L5_HUMAN | R.HSS#ISPSTLTLK.S               | S437:      | 2 | 3,0629 | 0,316 | -0,722 |
| 16 | A6NIE6 RN3L1_HUMAN | R.ALENDFFNS#PPRK.T              | S44:       | 2 | 2,2353 | 0,337 | -0,756 |
| 16 | Q96RL1 UIMC1_HUMAN | R.RLEDAFIVIS#DS#DGEEPKEENGLQK.T | S44:S46:   | 3 | 3,8003 | 0,378 | -0,492 |
| 16 | O14974 MYPT1_HUMAN | R.KTGS#YGALAEITASK.E            | S445:      | 2 | 4,0818 | 0,535 | -0,774 |
| 16 | Q9NX74 DUS2L_HUMAN | R.LGEES#PSLHK.R                 | S445:      | 2 | 2,9096 | 0,106 | -0,311 |
| 16 | P18887 XRCC1_HUMAN | K.TKPTQAAGPSS#PQKPPT#PEETK.A    | S447:T453: | 3 | 4,2086 | 0,271 | 0,225  |
| 16 | Q8N2F6 ARM10_HUMAN | R.SSKS#AGALEEGTSEGQLCGR.S       | S45:       | 3 | 3,323  | 0,504 | -0,261 |
| 16 | Q96GX5 MASTL_HUMAN | R.NFELVDSS#PCKK.I               | S453:      | 2 | 3,2563 | 0,362 | -0,162 |

|    |                    |                                 |                 |   |        |       |        |
|----|--------------------|---------------------------------|-----------------|---|--------|-------|--------|
| 16 | O94804 STK10_HUMAN | K.ASQSRPNS#SALETLGGEK.L         | S454:           | 2 | 4,2811 | 0,534 | 0,128  |
| 16 | P49593 PPM1F_HUMAN | R.RQDLPSSLPEPETQAPPRS#.-        | S454:           | 3 | 3,6176 | 0,335 | -0,502 |
| 16 | Q13098 CSN1_HUMAN  | K.SPPREGS#QGELTPANSQSR.M        | S454:           | 3 | 3,3301 | 0,111 | -0,44  |
| 16 | Q07866 KLC1_HUMAN  | K.ACKVDS#PTVTTTLK.N             | S456:           | 2 | 4,7188 | 0,454 | 0      |
| 16 | Q07866 KLC1_HUMAN  | K.ACKVDS#PTVTTTLK.N             | S456:           | 3 | 3,6664 | 0,394 | -0,457 |
| 16 | P48634 BAT2_HUMAN  | R.KQS#SSEISLAVER.A              | S456:           | 2 | 3,5496 | 0,232 | -0,161 |
| 16 | Q96JM3 ZN828_HUMAN | R.KTS#PASLDFPESQK.S             | S459:           | 2 | 4,7174 | 0,422 | 0,076  |
| 16 | O95400 CD2B2_HUMAN | K.HS#LDSDEEEDDDGGSSK.Y          | S46:            | 3 | 2,8185 | 0,403 | -1,179 |
| 16 | P08238 HS90B_HUMAN | R.YHTSQS#GDEM*TSLSEYVSR.M       | S462:           | 3 | 5,7153 | 0,476 | 0,08   |
| 16 | Q9P275 UBP36_HUMAN | K.NIGNGISS#PLTGKR.Q             | S464:           | 2 | 3,315  | 0,248 | -0,152 |
| 16 | Q8TBZ3 WDR20_HUMAN | K.FATLS#LHDR.K                  | S465:           | 2 | 2,7211 | 0,323 | -0,428 |
| 16 | Q9BWU0 NADAP_HUMAN | K.AKNWEDEDFYDS#DDDTFLDR.T       | S466:           | 3 | 4,9209 | 0,462 | -0,852 |
| 16 | Q96EPO RNF31_HUMAN | R.RLS#APLSSCGDPEK.Q             | S466:           | 2 | 3,311  | 0,445 | -0,36  |
| 16 | O76021 RL1D1_HUMAN | K.FFTTPSKS#VR.K                 | S469:           | 2 | 2,4686 | 0,328 | 0      |
| 16 | Q99543 DNJC2_HUMAN | R.NAS#ASFQELEDKK.E              | S47:            | 2 | 3,7265 | 0,436 | 0,079  |
| 16 | P35368 ADA1B_HUMAN | R.HDS#GPLFTFK.L                 | S470:           | 2 | 3,2587 | 0,344 | -0,099 |
| 16 | Q8N3F8 MILK1_HUMAN | K.SLHPWYGITPTSS#PK.T            | S471:           | 2 | 2,8244 | 0,417 | -0,557 |
| 16 | O14578 CTRO_HUMAN  | R.RVS#EVEAVLSQK.E               | S480:           | 3 | 4,3868 | 0,379 | -0,064 |
| 16 | O14578 CTRO_HUMAN  | R.RVS#EVEAVLSQK.E               | S480:           | 2 | 4,0527 | 0,423 | -0,171 |
| 16 | Q8IZL8 PELP1_HUMAN | R.GS#PDGSLQTGKPSAPK.K           | S481:           | 2 | 2,2005 | 0,109 | 0,076  |
| 16 | Q02952 AKA12_HUMAN | K.LKETCVSGEDPTQGADLS#PDEK.V     | S483:           | 3 | 5,9487 | 0,446 | 0,67   |
| 16 | Q96D71 REPS1_HUMAN | R.SHS#GTSPDNT#APPPPPRPQPS#HSR.S | S485:T492:S504: | 3 | 3,0353 | 1     | 0,386  |
| 16 | Q99543 DNJC2_HUMAN | R.NASAS#FQELEDKK.E              | S49:            | 2 | 3,8536 | 0,344 | 0,079  |
| 16 | P17096 HMGA1_HUMAN | R.KQPPVSPGTALVGSQKEPS#EVPT#PK.R | S49:T53:        | 3 | 4,0012 | 0,382 | -0,404 |
| 16 | Q7Z4V5 HDGR2_HUMAN | K.FALKVDS#PDVK.R                | S490:           | 2 | 3,5193 | 0,397 | 0,282  |
| 16 | Q6UN15 FIP1_HUMAN  | R.DHS#PT#PSVFNSEERYR.Y          | S492:T494:      | 3 | 3,1737 | 0,253 | -0,083 |
| 16 | A0MZ66 SHOT1_HUMAN | R.KVTAEADSSS#PTGILATSESK.S      | S494:           | 3 | 3,49   | 0,353 | 0,424  |
| 16 | Q96JG6 CC132_HUMAN | K.FM*EQSRSP#PSVSPSK.Q           | S494:           | 2 | 2,4626 | 0,352 | -0,88  |
| 16 | P23588 IF4B_HUMAN  | R.SSNPPARS#QSSDTEQQSPTSGGGK.V   | S495:           | 3 | 5,0253 | 0,491 | -0,37  |
| 16 | Q8NCD3 HJURP_HUMAN | K.AKS#LSEAFENLGK.R              | S496:           | 2 | 4,3356 | 0,59  | -0,248 |
| 16 | Q96JG6 CC132_HUMAN | K.FM*EQSRSPS#VS#PSKQPVSTSSK.T   | S496:S498:      | 3 | 3,5036 | 0,093 | 0,501  |
| 16 | Q96RU3 FNBP1_HUMAN | R.RQS#GLYDSQNPPTVNNCAQDR.E      | S497:           | 3 | 5,1718 | 0,426 | 0,146  |
| 16 | P56817 BACE1_HUMAN | R.QQHDDFADDIS#LLK.-             | S498:           | 3 | 3,7396 | 0,238 | -0,106 |

|    |                    |                                   |            |   |        |       |        |
|----|--------------------|-----------------------------------|------------|---|--------|-------|--------|
| 16 | Q8TCJ2 STT3B_HUMAN | R.ENPPVEDS#SDEDDKR.N              | S498:      | 2 | 2,6329 | 0,473 | -0,808 |
| 16 | Q8TCJ2 STT3B_HUMAN | R.ENPPVEDS#S#DEDDKRNQGNLYDK.A     | S498:S499: | 3 | 3,2393 | 0,238 | 0      |
| 16 | P47736 RPGP1_HUMAN | R.RSS#AIGIENIQEVQEK.R             | S499:      | 2 | 4,8    | 0,495 | -0,519 |
| 16 | Q52LW3 RHG29_HUMAN | K.HLNSSQPSGFGPANS#LEDVVR.L        | S499:      | 3 | 3,4857 | 0,331 | 0,399  |
| 16 | Q9BXW6 OSBL1_HUMAN | R.S#FEEEGEHLGSR.K                 | S499:      | 2 | 2,7272 | 0,429 | -0,335 |
| 16 | Q9UQR0 SCML2_HUMAN | R.QSTKRS#PQQTVPYVVPLS#PK.L        | S499:S511: | 3 | 2,7849 | 0,285 | -0,152 |
| 16 | Q13610 PWP1_HUMAN  | K.EKLQEEGGGS#DEEETGSPSEDGM*QSAR.T | S50:       | 3 | 6,1173 | 0,478 | 0,499  |
| 16 | Q9NX63 CHCH3_HUMAN | K.SQRY#GAYGASVSDEELK.R            | S50:       | 2 | 4,0214 | 0,557 | 0,542  |
| 16 | O15155 BET1_HUMAN  | K.SLS#IIGHEVK.T                   | S50:       | 2 | 2,8691 | 0,367 | -0,378 |
| 16 | Q68E01 INT3_HUMAN  | R.EKFPEFCSS#PSPPEVK.I             | S500:      | 3 | 3,7373 | 0,306 | 0,447  |
| 16 | Q68E01 INT3_HUMAN  | R.EKFPEFCSS#PPPEVK.I              | S502:      | 3 | 3,9406 | 0,367 | -0,268 |
| 16 | Q7Z4H7 FA29A_HUMAN | K.KIPEFEVENS#PLSDVAK.N            | S507:      | 3 | 4,6008 | 0,239 | 0,185  |
| 16 | O14974 MYPT1_HUMAN | R.LAS#TSDIEEKENR.D                | S507:      | 3 | 3,1251 | 0,35  | -0,465 |
| 16 | O14974 MYPT1_HUMAN | R.LAS#TSDIEEKENR.D                | S507:      | 2 | 2,9476 | 0,463 | -0,155 |
| 16 | Q7Z4H7 FA29A_HUMAN | K.KIPEFEVENS#PLSDVAK.N            | S507:      | 2 | 2,1079 | 0,436 | 0,8    |
| 16 | Q07960 RHG01_HUMAN | K.SSS#PELVTHLK.W                  | S51:       | 3 | 3,6028 | 0,252 | -0,358 |
| 16 | Q8N5D0 WDTC1_HUMAN | R.KDS#ISEDEM*VLR.E                | S511:      | 3 | 4,0722 | 0,355 | -0,241 |
| 16 | Q9UQR0 SCML2_HUMAN | K.RSPQQTVPYVVPLS#PK.L             | S511:      | 2 | 3,855  | 0,396 | -0,78  |
| 16 | Q8N5D0 WDTC1_HUMAN | R.KDS#ISEDEM*VLR.E                | S511:      | 2 | 3,6468 | 0,46  | 0,08   |
| 16 | O00567 NOL5A_HUMAN | K.KS#FSKEELM*SS#DLEETAGSTSIPK.R   | S511:S520: | 3 | 3,2117 | 0,295 | 0,066  |
| 16 | Q15742 NAB2_HUMAN  | R.SS#VKVEAEASR.Q                  | S515:      | 3 | 4,1037 | 0,382 | 0,147  |
| 16 | Q15742 NAB2_HUMAN  | R.SS#VKVEAEASRQ.-                 | S515:      | 3 | 3,5819 | 0,302 | -0,133 |
| 16 | Q9H2V7 SPNS1_HUMAN | R.GRS#TRVPVASVLI.-                | S518:      | 2 | 2,2067 | 0,401 | -0,255 |
| 16 | O00567 NOL5A_HUMAN | K.SFSKEELM*SS#DLEETAGSTSIPK.R     | S519:      | 3 | 3,8164 | 0,376 | -0,499 |
| 16 | P30086 PEBP1_HUMAN | K.NRPTS#ISWDGLDSGK.L              | S52:       | 2 | 3,9581 | 0,574 | -0,427 |
| 16 | Q8NI35 INADL_HUMAN | K.LEKVPDS#PENELK.S                | S522:      | 3 | 4,4592 | 0,37  | -0,116 |
| 16 | Q8NI35 INADL_HUMAN | K.LEKVPDS#PENELK.S                | S522:      | 2 | 2,7744 | 0,172 | 0,309  |
| 16 | Q14004 CD2L5_HUMAN | K.IEHAPS#PSSGGTLK.N               | S525:      | 2 | 2,1346 | 0,31  | 0      |
| 16 | Q6VY07 PACS1_HUMAN | R.TNSS#DSERS#PDLGHSTQIPR.K        | S529:S534: | 3 | 4,2046 | 1     | -0,156 |
| 16 | Q9UPN3 MACF1_HUMAN | R.SSSASQSNHSCTSM*PSS#PATPASGTK.V  | S5293:     | 3 | 3,6892 | 0,39  | -0,268 |
| 16 | Q9UJX6 ANC2_HUMAN  | R.LLHQFDFS#PER.E                  | S534:      | 3 | 3,7496 | 0,227 | -0,127 |
| 16 | Q9UJX6 ANC2_HUMAN  | R.LLHQFDFS#PER.E                  | S534:      | 2 | 2,7605 | 0,377 | 0,254  |
| 16 | A8MT19 RHN2L_HUMAN | K.KLS#FLSWGTLK.N                  | S536:      | 2 | 2,7819 | 0,31  | -0,359 |

|    |                    |                              |            |   |        |       |        |
|----|--------------------|------------------------------|------------|---|--------|-------|--------|
| 16 | Q15042 RB3GP_HUMAN | K.KTS#ASDVTNIYPGDAGK.A       | S537:      | 2 | 4,0842 | 0,556 | 0,135  |
| 16 | O75151 PHF2_HUMAN  | K.SRES#AS#PTIPNLDLLEAHTK.E   | S537:S539: | 3 | 4,0021 | 0,334 | -0,313 |
| 16 | Q14789 GGOB1_HUMAN | K.RSS#SAEESGQDVLENTFSQK.H    | S538:      | 3 | 5,5197 | 0,4   | 0,401  |
| 16 | Q9H992 MARH7_HUMAN | K.IKESLLEDSD#EEEEGDLCR.I     | S544:      | 3 | 6,3021 | 0,528 | 0,546  |
| 16 | P17987 TCPA_HUMAN  | K.HGS#YEDAVHSGALND.-         | S544:      | 2 | 5,4669 | 0,6   | -0,369 |
| 16 | Q8WYA6 CTBL1_HUMAN | K.EYAENIGDGRS#PEFR.E         | S545:      | 2 | 2,8113 | 0,39  | 0,268  |
| 16 | Q9H1B7 EAP1_HUMAN  | R.KAS#PEPPDSAEGALK.L         | S547:      | 3 | 4,6633 | 0,436 | -0,116 |
| 16 | Q9H1B7 EAP1_HUMAN  | R.KAS#PEPPDSAEGALK.L         | S547:      | 2 | 4,0972 | 0,491 | -0,077 |
| 16 | P35222 CTNB1_HUMAN | R.RTS#MGGTQQQFVEGVR.M        | S552:      | 3 | 4,6779 | 0,414 | 0,197  |
| 16 | P35222 CTNB1_HUMAN | R.RTS#M*GGTQQQFVEGVR.M       | S552:      | 2 | 4,3664 | 0,578 | 0,325  |
| 16 | P35222 CTNB1_HUMAN | R.RTS#MGGTQQQFVEGVR.M        | S552:      | 2 | 3,809  | 0,503 | 0,721  |
| 16 | P27824 CALX_HUMAN  | K.QKS#DAEEDGGTVSQEEEDR.K     | S554:      | 3 | 4,0917 | 0,459 | 0,418  |
| 16 | P27824 CALX_HUMAN  | K.S#DAEEDGGTVS#QEEEDRKP.K.A  | S554:S564: | 3 | 2,6234 | 0,189 | -0,232 |
| 16 | O60318 MCM3A_HUMAN | R.TGASSLLNKSS#PVK.K          | S557:      | 2 | 2,7701 | 0,156 | 0,498  |
| 16 | Q7Z460 CLAP1_HUMAN | R.SSS#SSQESLNRPLSAK.R        | S557:      | 2 | 2,1684 | 0,301 | -0,833 |
| 16 | Q52LW3 RHG29_HUMAN | R.SLDSESI#PGDFHR.K           | S559:      | 2 | 2,7304 | 0,352 | -0,45  |
| 16 | P28066 PSA5_HUMAN  | K.RITS#PLM*EPSSIEK.I         | S56:       | 2 | 4,0437 | 0,356 | 0,507  |
| 16 | P28066 PSA5_HUMAN  | K.RITS#PLM*EPSSIEK.I         | S56:       | 3 | 3,0358 | 0,14  | 0,326  |
| 16 | P28066 PSA5_HUMAN  | K.RITS#PLMEPSSIEK.I          | S56:       | 2 | 2,8871 | 0,263 | 0,512  |
| 16 | Q99471 PFD5_HUMAN  | K.DCLNVLNKS#NEGK.E           | S56:       | 3 | 2,8233 | 0,288 | 0,116  |
| 16 | Q99471 PFD5_HUMAN  | K.DCLNVLNKS#NEGK.E           | S56:       | 2 | 2,6766 | 0,537 | 0,233  |
| 16 | Q9NWZ5 UCKL1_HUMAN | R.LLPPVGTGRS#PR.K            | S56:       | 2 | 2,1834 | 0,228 | -0,183 |
| 16 | Q14807 KIF22_HUMAN | R.KLES#LDALEPEEK.A           | S562:      | 2 | 4,2658 | 0,371 | -0,463 |
| 16 | Q09666 AHNK_HUMAN  | K.FAGGLHFS#GPK.V             | S5620:     | 2 | 2,5604 | 0,366 | -0,509 |
| 16 | Q9UPZ3 HPS5_HUMAN  | K.IGTLHTS#PDLK.V             | S563:      | 2 | 2,1819 | 0,336 | -0,29  |
| 16 | P19338 NUCL_HUMAN  | R.LELQGRGS#PNAR.S            | S563:      | 2 | 2,1288 | 0,222 | -0,662 |
| 16 | Q8WUF5 IASPP_HUMAN | R.HGGPGPGGPEPELS#PITEGSEAR.A | S567:      | 3 | 5,6599 | 0,431 | 0,079  |
| 16 | Q9Y2K2 QSK_HUMAN   | R.RFS#DGAASIQAFK.A           | S568:      | 2 | 3,7766 | 0,537 | -0,413 |
| 16 | Q9Y2K2 QSK_HUMAN   | R.RFS#DGAASIQAFK.A           | S568:      | 3 | 2,9302 | 0,264 | 0,681  |
| 16 | Q9Y3E5 PTH2_HUMAN  | K.THTDTESEAS#ILGDSGEYK.M     | S57:       | 2 | 4,0645 | 0,566 | 0,806  |
| 16 | Q7Z417 NUFP2_HUMAN | K.RTS#PQVLGSILK.S            | S572:      | 3 | 3,4094 | 0,13  | -0,066 |
| 16 | Q7Z417 NUFP2_HUMAN | K.RTS#PQVLGSILK.S            | S572:      | 2 | 3,2911 | 0,373 | -0,531 |
| 16 | P17812 PYRG1_HUMAN | R.SGSSS#PDSEITELKFPSINH.D.-  | S575:      | 3 | 2,6562 | 0,205 | -0,314 |

|    |                     |                               |            |   |        |       |        |
|----|---------------------|-------------------------------|------------|---|--------|-------|--------|
| 16 | O15014 ZN609_HUMAN  | R.LVEPHS#PSPSSK.F             | S576:      | 2 | 2,7188 | 0,334 | -0,726 |
| 16 | Q86UU1 PHLB1_HUMAN  | R.KNS#ITEIS#DNEDDLLEYHR.R     | S578:S583: | 3 | 2,9519 | 0,109 | 0,597  |
| 16 | Q7Z309 F122B_HUMAN  | R.HS#LEEGLDM*VNR.E            | S58:       | 2 | 3,8326 | 0,436 | 0      |
| 16 | P68431 H31_HUMAN    | R.YQKS#TELLIR.K               | S58:       | 2 | 2,486  | 0,415 | 0,275  |
| 16 | Q9UMZ2 SYNG_HUMAN   | K.TADSVS#PLEPPTKDK.T          | S580:      | 3 | 2,9458 | 0,187 | -0,549 |
| 16 | Q3KR37 GRM1B_HUMAN  | R.VPHLEEVMS*SPVTTPT#DEDVGHR.I | S581:T587: | 3 | 4,9467 | 0,458 | 0,07   |
| 16 | Q09666 AHNK_HUMAN   | K.FGTFGGLGS#KSK.G             | S5830:     | 2 | 2,3619 | 0,38  | 0      |
| 16 | O14639 ABLM1_HUMAN  | R.SS#GREEDDEELLR.R            | S587:      | 3 | 3,3028 | 0,311 | -0,113 |
| 16 | Q8TEH3 DEN1A_HUMAN  | K.S#LEDLRAPK.D                | S592:      | 2 | 2,0018 | 0,37  | -0,22  |
| 16 | Q9NZ53 PDXL2_HUMAN  | K.RDPEDS#DVFEEDTHL.-          | S596:      | 2 | 4,3744 | 0,489 | 0,453  |
| 16 | Q9NZ53 PDXL2_HUMAN  | K.RDPEDS#DVFEEDTHL.-          | S596:      | 3 | 3,4355 | 0,277 | 0,194  |
| 16 | P0C7M2 RA1L3_HUMAN  | K.SES#PKEPEQLR.K              | S6:        | 3 | 3,5343 | 0,34  | -0,663 |
| 16 | P0C7M2 RA1L3_HUMAN  | K.SES#PKEPEQLR.K              | S6:        | 2 | 2,5561 | 0,48  | -0,796 |
| 16 | O00629 IMA4_HUMAN   | R.NVPHEDECEDS#DIDGDYR.V       | S60:       | 3 | 4,9873 | 0,444 | 0,41   |
| 16 | Q7Z460 CLAP1_HUMAN  | R.SRS#DIDVNAASAK.S            | S600:      | 2 | 5,2016 | 0,511 | 0,082  |
| 16 | P51116 FXR2_HUMAN   | R.GNRTDGS#IS#GDRQPVTVADYISR.A | S601:S603: | 3 | 2,6793 | 0,254 | -0,488 |
| 16 | Q15424 SAFB1_HUMAN  | R.S#VVS#FDKVKPR.K             | S601:S604: | 2 | 2,855  | 0,388 | -0,157 |
| 16 | Q15424 SAFB1_HUMAN  | R.SVVS#FDKVK.E                | S604:      | 2 | 3,0545 | 0,278 | -0,336 |
| 16 | Q9BVQ7 SPA5L_HUMAN  | R.GSKS#SQQEFQEVFNR.S          | S609:      | 3 | 3,3175 | 0,217 | -0,198 |
| 16 | P50395 GDIB_HUMAN   | R.FKIPGS#PPESM*GR.G           | S61:       | 2 | 2,3977 | 0,245 | 0      |
| 16 | Q86TM6 SYVN1_HUMAN  | R.LQKLES#PVAH.-               | S613:      | 2 | 3,2966 | 0,481 | -0,203 |
| 16 | O00429 DNM1L_HUMAN  | K.SKPIIMPAS#PQK.G             | S616:      | 2 | 3,289  | 0,375 | 0,166  |
| 16 | O00429 DNM1L_HUMAN  | K.SKPIPIM*PAS#PQK.G           | S616:      | 2 | 2,8329 | 0,456 | 0      |
| 16 | O60244 MED14_HUMAN  | R.KLS#DDPCPVESK.K             | S617:      | 2 | 3,8373 | 0,493 | -0,755 |
| 16 | Q07157 ZO1_HUMAN    | K.S#REDLSAQPVQTK.F            | S617:      | 2 | 2,3983 | 0,354 | 0,238  |
| 16 | Q13586 STIM1_HUMAN  | R.SHS#PSSDPDTPSPVGDSR.A       | S618:      | 2 | 3,992  | 0,629 | -0,488 |
| 16 | P01106 MYC_HUMAN    | K.KFELLPTPLS#PSR.R            | S62:       | 2 | 3,7134 | 0,433 | -0,514 |
| 16 | Q70L73 Q70L73_HUMAN | R.RVRSRS#S#FSSDPDESEGIPLK.R   | S62:S63:   | 3 | 3,941  | 0,252 | 0,311  |
| 16 | Q9UPR5 NAC2_HUMAN   | K.RGIS#ALLLNQGDGDR.K          | S622:      | 3 | 3,9845 | 0,276 | -0,22  |
| 16 | Q99700 ATX2_HUMAN   | R.M*SSEGPFRM*S#PK.A           | S623:      | 2 | 2,8862 | 0,186 | -0,345 |
| 16 | O75132 ZBED4_HUMAN  | K.TEVSETARPSS#PDTR.V          | S624:      | 3 | 3,9061 | 0,463 | -0,214 |
| 16 | Q9H165 BC11A_HUMAN  | K.KLLLGS#PSSLSPFSK.R          | S625:      | 3 | 3,6298 | 0,37  | -0,223 |
| 16 | Q9H165 BC11A_HUMAN  | K.KLLLGS#PSSLSPFSK.R          | S625:      | 2 | 3,2706 | 0,401 | -0,52  |

|    |                     |                                 |            |   |        |       |        |
|----|---------------------|---------------------------------|------------|---|--------|-------|--------|
| 16 | P31943 HNRH1_HUMAN  | R.EGRPSGEAFVELES#EDEVK.L        | S63:       | 3 | 4,5783 | 0,194 | 0      |
| 16 | P23763 VAMP1_HUMAN  | R.DQKLS#ELDDR.A                 | S63:       | 2 | 3,3021 | 0,338 | -0,47  |
| 16 | P05412 JUN_HUMAN    | R.AKNSDLLTS#PDVGLLK.L           | S63:       | 3 | 3,0854 | 0,199 | 0      |
| 16 | Q9H165 BC11A_HUMAN  | K.KLLLGSPSSLS#PFSK.R            | S630:      | 2 | 4,6131 | 0,435 | -0,52  |
| 16 | Q9H165 BC11A_HUMAN  | K.KLLLGSPSSLS#PFSK.R            | S630:      | 3 | 3,8126 | 0,39  | -0,223 |
| 16 | P42684 ABL2_HUMAN   | R.DKS#PSSLLEDAK.E               | S631:      | 2 | 3,8681 | 0,375 | 0      |
| 16 | O15085 ARHGB_HUMAN  | R.SRS#DVIDM*DAAAEATR.L          | S635:      | 2 | 5,0723 | 0,59  | 0      |
| 16 | O15085 ARHGB_HUMAN  | R.SRS#DVIDMDAAAEATR.L           | S635:      | 2 | 4,6412 | 0,461 | 0,656  |
| 16 | P27816 MAP4_HUMAN   | K.KCS#LPAEEDSVLEK.L             | S636:      | 2 | 4,1862 | 0,514 | 0      |
| 16 | Q3YEC7 PARF_HUMAN   | R.LKNDSDLFGLGLEEAGPKES#S#EEGK.E | S640:S641: | 3 | 4,482  | 0,498 | -0,326 |
| 16 | Q6AI08 HEAT6_HUMAN  | K.KAPAGPSLEETS#PK.G             | S643:      | 2 | 3,4909 | 0,565 | 0,277  |
| 16 | P52569 CTR2_HUMAN   | R.NLS#SPFIFHEK.T                | S646:      | 2 | 2,5543 | 0,287 | 0,087  |
| 16 | P21127 CD2L1_HUMAN  | R.MEITIRNS#PYR.R                | S65:       | 3 | 2,8832 | 0,285 | -0,313 |
| 16 | Q13541 4EBP1_HUMAN  | K.FLMECRNS#PVTK.T               | S65:       | 2 | 2,4923 | 0,257 | -0,391 |
| 16 | Q9NSM8 Q9NSM8_HUMAN | K.AQKLPDLS#PVENK.E              | S652:      | 3 | 3,9714 | 0,267 | -0,06  |
| 16 | Q9NSM8 Q9NSM8_HUMAN | K.AQKLPDLS#PVENK.E              | S652:      | 2 | 3,9521 | 0,428 | -0,08  |
| 16 | Q9ULU4 PKCB1_HUMAN  | K.STS#PASEKADPGAVK.D            | S652:      | 2 | 2,31   | 0,225 | -0,24  |
| 16 | Q13613 MTMR1_HUMAN  | R.GSS#PSHSATSVHTSV.-            | S653:      | 2 | 2,6844 | 0,418 | -0,08  |
| 16 | P35221 CTNA1_HUMAN  | R.SRTS#VQTEDDQLIAGQSAR.A        | S655:      | 3 | 5,5264 | 0,419 | 0,427  |
| 16 | Q05682 CALD1_HUMAN  | R.AEFLNKS#VQK.S                 | S656:      | 2 | 3,1256 | 0,36  | -0,392 |
| 16 | Q6NZY4 ZCHC8_HUMAN  | K.IHS#PIPDM*SK.F                | S658:      | 2 | 3,2023 | 0,393 | -1,199 |
| 16 | Q68CZ2 TENS3_HUMAN  | R.GVGSGPHPPDTQQPS#PSK.A         | S660:      | 2 | 2,3714 | 0,314 | 0,263  |
| 16 | Q16659 MK06_HUMAN   | R.GHEEGFLNNS#GEFLFNK.Q          | S665:      | 2 | 4,2984 | 0,516 | -0,604 |
| 16 | Q9UJF2 NGAP_HUMAN   | K.LKSPS#QDNTDSYFR.G             | S665:      | 3 | 2,9048 | 0,169 | -0,316 |
| 16 | Q96AC1 FERM2_HUMAN  | R.AKDQNES#LDEEM*FYK.L           | S666:      | 3 | 4,1792 | 0,27  | 0,377  |
| 16 | Q96AC1 FERM2_HUMAN  | R.AKDQNES#LDEEMFYK.L            | S666:      | 3 | 4,1473 | 0,452 | 0,38   |
| 16 | O94854 K0754_HUMAN  | R.RDS#DSFLNIFPEK.Q              | S666:      | 3 | 3,6648 | 0,295 | -0,222 |
| 16 | O94854 K0754_HUMAN  | R.RDS#DSFLNIFPEK.Q              | S666:      | 2 | 3,507  | 0,363 | -0,444 |
| 16 | Q96AC1 FERM2_HUMAN  | R.AKDQNES#LDEEM*FYK.L           | S666:      | 2 | 2,1679 | 0,341 | 0,063  |
| 16 | P08237 K6PF_HUMAN   | K.NVLGHM*QQGGS#PTPFDR.N         | S667:      | 3 | 2,8415 | 0,214 | 0,189  |
| 16 | Q9C0D0 PHAR1_HUMAN  | R.SKS#DTPYLAEAR.I               | S67:       | 2 | 4,1573 | 0,471 | -0,43  |
| 16 | Q96FS4 SIPA1_HUMAN  | R.SGSDAGEARPPTPAS#PR.A          | S67:       | 3 | 3,5748 | 0,351 | 0      |
| 16 | Q86VM9 ZCH18_HUMAN  | R.GPSQEEEDNHS#DEEDRAS#EPK.S     | S67:S74:   | 3 | 3,0547 | 0,249 | -0,647 |

|    |                     |                                 |                 |   |        |       |        |
|----|---------------------|---------------------------------|-----------------|---|--------|-------|--------|
| 16 | O00267 SPT5H_HUMAN  | R.ISS#PM*HPSAGGQR.G             | S671:           | 3 | 2,7478 | 0,26  | 0,064  |
| 16 | Q9UEY8 ADDG_HUMAN   | K.SPEKIEEVLSPEGS#PSKS#PSK.K     | S677:S681:      | 3 | 5,5468 | 0,489 | -0,617 |
| 16 | Q9H0D6 XRN2_HUMAN   | R.RNS#LGGDVLVFGK.H              | S678:           | 2 | 4,4696 | 0,431 | 0,254  |
| 16 | Q9HCM7 AUT2L_HUMAN  | R.RPLEAGS#PGQDLEPACDGAR.K       | S68:            | 3 | 3,6431 | 0,215 | -0,252 |
| 16 | O94868 FCSD2_HUMAN  | R.SSLYFPRS#PSANEK.S             | S681:           | 2 | 3,6116 | 0,433 | 0,44   |
| 16 | Q9Y2W1 TR150_HUMAN  | R.IDIS#PSTFRK.H                 | S682:           | 2 | 2,3483 | 0,369 | 0,098  |
| 16 | Q63HJ5 Q63HJ5_HUMAN | R.KLANDFPLDLS#PVK.K             | S688:           | 2 | 4,7683 | 0,48  | -0,671 |
| 16 | Q63HJ5 Q63HJ5_HUMAN | R.KLANDFPLDLS#PVK.K             | S688:           | 3 | 3,3072 | 0,319 | -0,335 |
| 16 | O60303 K0556_HUMAN  | R.KDS#LSQLEEYLR.L               | S691:           | 2 | 4,4915 | 0,375 | -0,547 |
| 16 | O60303 K0556_HUMAN  | R.KDSLS#QLEEYLR.L               | S693:           | 3 | 4,0136 | 0,272 | -0,234 |
| 16 | Q9UKJ3 GPTC8_HUMAN  | R.KPS#VSEEVQATPNK.A             | S694:           | 2 | 4,744  | 0,58  | -0,23  |
| 16 | Q9UKJ3 GPTC8_HUMAN  | R.KPS#VSEEVQATPNK.A             | S694:           | 3 | 2,9596 | 0,12  | 0,115  |
| 16 | Q86YV5 SG223_HUMAN  | K.SAS#FAFEFPKDR.S               | S696:           | 2 | 2,0211 | 0,364 | -0,165 |
| 16 | O75382 TRIM3_HUMAN  | K.REDS#PGPEVQPM*DK.Q            | S7:             | 3 | 3,7256 | 0,204 | -0,109 |
| 16 | P06748 NPM_HUMAN    | K.DELHIVEAEAM*NYEGS#PIK.V       | S70:            | 3 | 3,5123 | 0,34  | -0,082 |
| 16 | P52272 HNRPM_HUMAN  | K.GCGVVKFES#PEVAER.A            | S701:           | 2 | 4,3622 | 0,174 | 0,28   |
| 16 | P52272 HNRPM_HUMAN  | K.GCGVVKFES#PEVAER.A            | S701:           | 3 | 3,7754 | 0,293 | -0,105 |
| 16 | O43150 DDEF2_HUMAN  | R.LLHEDLDES#DDDM*DEK.L          | S701:           | 3 | 3,2889 | 0,171 | -0,182 |
| 16 | O15534 PER1_HUMAN   | R.KEPVVGGLS#PLALANK.A           | S704:           | 2 | 4,2783 | 0,578 | -0,138 |
| 16 | O95425 SVIL_HUMAN   | R.EM*EKS#FDEQNVPK.R             | S707:           | 2 | 2,8431 | 0,425 | 0,364  |
| 16 | Q14671 PUM1_HUMAN   | R.RDS#LTGSSDLYK.R               | S709:           | 2 | 3,4112 | 0,448 | -0,343 |
| 16 | Q96KQ4 ASPP1_HUMAN  | K.RSS#ITEPEGPGPNQK.L            | S710:           | 3 | 3,3789 | 0,297 | 0,198  |
| 16 | P10636 TAU_HUMAN    | K.TDHGAEIVYKS#PVVSGDTS#PR.H     | S713:S721:      | 3 | 6,6755 | 0,44  | 0,077  |
| 16 | Q96RT1 LAP2_HUMAN   | K.IRQEDENFNLSLLQNGDILNSS#TEEK.F | S715:           | 3 | 5,8307 | 0,476 | -0,615 |
| 16 | Q15004 PAF_HUMAN    | K.GIGEFFRLS#PK.D                | S72:            | 2 | 2,0447 | 0,097 | -0,733 |
| 16 | Q9H869 YYAP1_HUMAN  | K.VEHS#PGPPPVDK.Q               | S724:           | 3 | 3,4622 | 0,157 | -0,137 |
| 16 | Q12888 TP53B_HUMAN  | K.KECSEAM*EVETSVISIDS#PQK.L     | S727:           | 3 | 4,1894 | 0,416 | -0,297 |
| 16 | Q8TEW0 PARD3_HUMAN  | R.ISHSLYSGIEGLDES#PSR.N         | S728:           | 3 | 3,3322 | 0,235 | -0,451 |
| 16 | P46100 ATRX_HUMAN   | K.SKQSETVDQNS#DSDEM*LAILK.G     | S729:           | 3 | 5,8842 | 0,406 | -0,15  |
| 16 | P46100 ATRX_HUMAN   | K.SKQSETVDQNS#DSDEMLAILK.G      | S729:           | 3 | 4,9448 | 0,44  | -0,076 |
| 16 | Q66K74 MAP1S_HUMAN  | R.S#AS#PHDVDLCLVS#PCEFEHRK.A    | S729:S731:S741: | 3 | 3,2897 | 0,367 | -0,336 |
| 16 | Q9UMY4 SNX12_HUMAN  | R.RYS#DFEWLK.N                  | S73:            | 2 | 2,7674 | 0,288 | -0,737 |
| 16 | Q9NZM1 MYOF_HUMAN   | R.SLS#QIHEAAVR.M                | S731:           | 2 | 2,5391 | 0,354 | -0,095 |

|    |                    |                                   |            |   |        |       |        |
|----|--------------------|-----------------------------------|------------|---|--------|-------|--------|
| 16 | Q13625 ASPP2_HUMAN | K.RS#SITEPEGPNGPNIQK.L            | S736:      | 3 | 3,5297 | 0,406 | 0,096  |
| 16 | Q13625 ASPP2_HUMAN | K.RSS#ITEPEGPNGPNIQK.L            | S737:      | 2 | 3,1885 | 0,292 | 0,32   |
| 16 | Q96C19 EFHD2_HUMAN | R.ADLNQGIGEPQS#PSRR.V             | S74:       | 3 | 3,9252 | 0,399 | -0,405 |
| 16 | Q6P0Q8 MAST2_HUMAN | R.KLS#NPDIFSSTGK.V                | S74:       | 2 | 3,3849 | 0,37  | 0,248  |
| 16 | Q96C19 EFHD2_HUMAN | R.ADLNQGIGEPQS#PSRR.V             | S74:       | 2 | 2,0354 | 0,279 | -0,879 |
| 16 | Q96T37 RBM15_HUMAN | R.TTAPTEGKS#PLK.K                 | S741:      | 2 | 2,9629 | 0,536 | -0,931 |
| 16 | Q9ULL5 PRR12_HUMAN | K.KQETAAVCGETDEEAGES#GGEGIFR.E    | S747:      | 3 | 6,257  | 0,532 | 0,541  |
| 16 | P28749 RBL1_HUMAN  | K.VKS#PVSLTAHSLIGAS#PK.Q          | S749:S762: | 3 | 4,176  | 0,419 | -0,281 |
| 16 | Q9H063 MAF1_HUMAN  | R.LSKS#QGGEELPLSDK.C              | S75:       | 2 | 3,8088 | 0,491 | -0,561 |
| 16 | Q03188 CENPC_HUMAN | K.DTCIQSPS#KECQK.S                | S75:       | 2 | 2,9826 | 0,362 | -0,808 |
| 16 | Q8N1F7 NUP93_HUMAN | R.GLDISHIS#QR.L                   | S75:       | 2 | 2,223  | 0,391 | -0,607 |
| 16 | P28749 RBL1_HUMAN  | K.VKSPVS#LTAHSLIGAS#PK.Q          | S752:S762: | 2 | 4,7292 | 0,546 | -0,563 |
| 16 | Q13443 ADAM9_HUMAN | R.HVS#PVT#PPREVPIYANR.F           | S758:T761: | 3 | 3,376  | 0,43  | -0,437 |
| 16 | Q66K74 MAP1S_HUMAN | R.KAVPM*APAPAS#PGSSNDSSAR.S       | S759:      | 3 | 3,9193 | 0,156 | -1,223 |
| 16 | Q53EL6 PDCD4_HUMAN | R.DSGRGDS#VSDSGSDALR.S            | S76:       | 3 | 4,6624 | 0,443 | -0,312 |
| 16 | Q9UKE5 TNIK_HUMAN  | R.ANS#KSEGS#PVLPHPAK.V            | S764:S769: | 3 | 3,767  | 0,229 | -0,288 |
| 16 | Q8NG31 CASC5_HUMAN | K.SLS#NPTPDYCHDK.M                | S767:      | 2 | 2,1576 | 0,446 | -0,907 |
| 16 | Q8IYB3 SRRM1_HUMAN | K.KPPAPPS#PVQS#QSPSTNWSPA VPVKK.A | S769:S773: | 3 | 2,9657 | 0,217 | 0,765  |
| 16 | Q8IYB3 SRRM1_HUMAN | K.KPPAPPS#PVQS#QSPSTNWSPA VPVKK.A | S769:S775: | 3 | 4,2236 | 1     | 0,51   |
| 16 | Q8N5P1 ZC3H8_HUMAN | R.SKDYDVYS#DNDICSQESEDNFAK.E      | S77:       | 3 | 4,0658 | 0,365 | -0,065 |
| 16 | Q8WW12 PCNP_HUMAN  | K.FGFAIGS#QTTKK.A                 | S77:       | 2 | 3,3936 | 0,324 | -0,179 |
| 16 | Q96N96 SPT13_HUMAN | R.FRPFTFSQS#TPIGLDR.V             | S78:       | 3 | 3,9815 | 0,174 | -0,469 |
| 16 | A2AJT9 CX023_HUMAN | R.GNIYYQSYEHR#PS#PNIR.N           | S78:S80:   | 3 | 3,2774 | 0,421 | 0,313  |
| 16 | Q99700 ATX2_HUMAN  | K.GIS#PVVSEHR.K                   | S783:      | 2 | 2,0943 | 0,222 | -0,525 |
| 16 | P19634 SL9A1_HUMAN | R.SKETSSPGTDDVFTAPSDS#PSSQR.I     | S785:      | 3 | 4,7343 | 0,444 | 0,481  |
| 16 | Q96GQ7 DDX27_HUMAN | K.NRS#ADFNPDFVFTEK.E              | S79:       | 2 | 4,2027 | 0,439 | -0,261 |
| 16 | P98175 RBM10_HUMAN | R.AHLS#ENELEALEK.N                | S796:      | 2 | 4,926  | 0,565 | -0,468 |
| 16 | Q9UMX3 BOK_HUMAN   | R.RSS#VFAAEIM*DAFDR.S             | S8:        | 3 | 3,3778 | 0,358 | -0,606 |
| 16 | Q13085 ACACA_HUMAN | R.SSM*S#GLHLVK.Q                  | S80:       | 2 | 3,1191 | 0,318 | -0,423 |
| 16 | Q9H410 DSN1_HUMAN  | K.SLHLS#PQEQSASYQDR.R             | S81:       | 2 | 5,2526 | 0,496 | 0,253  |
| 16 | P35869 AHR_HUMAN   | R.AKS#FFDVALK.S                   | S81:       | 2 | 2,8984 | 0,321 | 0,202  |
| 16 | P35869 AHR_HUMAN   | R.AKS#FFDVALK.S                   | S81:       | 3 | 2,6788 | 0,224 | 0,303  |
| 16 | P04792 HSPB1_HUMAN | R.ALSRQLS#SGVSEIR.H               | S82:       | 3 | 3,5137 | 0,447 | 0,347  |



|    |                    |                               |            |   |        |       |        |
|----|--------------------|-------------------------------|------------|---|--------|-------|--------|
| 16 | P04792 HSPB1_HUMAN | R.ALSRQLS#SGVSEIR.H           | S82:       | 2 | 2,0885 | 0,211 | 0,385  |
| 16 | Q2PPJ7 AS250_HUMAN | R.RSS#S#PAELDLKDDLQQTQGK.C    | S820:S821: | 3 | 3,9241 | 0,294 | -0,231 |
| 16 | Q12770 SCAP_HUMAN  | R.RDSGVGS#GLEAQESWER.L        | S826:      | 3 | 4,3093 | 0,316 | 0,565  |
| 16 | Q9Y4F5 K0284_HUMAN | R.KPLAAPGDGEGGLGQTAQPS#PPAR.D | S829:      | 3 | 2,9209 | 0,261 | 0,08   |
| 16 | Q96FS4 SIPA1_HUMAN | R.TEFLHSQNSLS#PR.S            | S839:      | 2 | 3,3775 | 0,473 | -0,076 |
| 16 | O60296 TRAK2_HUMAN | R.QHASDALS#PVLAEETFR.Y        | S84:       | 3 | 3,3818 | 0,271 | -0,188 |
| 16 | O60296 TRAK2_HUMAN | R.QHASDALS#PVLAEETFR.Y        | S84:       | 2 | 2,817  | 0,313 | -0,625 |
| 16 | Q5VUB5 CJ038_HUMAN | R.TADAPSEPAAS#PHQR.R          | S849:      | 2 | 3,539  | 0,524 | -0,68  |
| 16 | P49023 PAXI_HUMAN  | R.FIHQQPQSSS#PVYGSSAK.T       | S85:       | 3 | 4,7412 | 0,385 | -0,09  |
| 16 | Q9NXG2 THUM1_HUMAN | K.FTDKDDQPS#GS#EGEDDDAEALKK.E | S86:S88:   | 3 | 4,0989 | 0,428 | 0,067  |
| 16 | Q9UPN9 TRI33_HUMAN | K.QSGLSSLVNGKS#PIR.S          | S862:      | 3 | 3,216  | 0,374 | -0,113 |
| 16 | Q9UKV3 ACINU_HUMAN | K.KPS#ISITTESLK.S             | S863:      | 2 | 2,6805 | 0,372 | -0,088 |
| 16 | Q1MSJ5 CSPP1_HUMAN | K.LQRPPS#VDSIIR.S             | S866:      | 3 | 3,3524 | 0,385 | -0,25  |
| 16 | Q68CZ2 TENS3_HUMAN | R.HPPFS#PPEPPLS#SPASQHK.G     | S866:S873: | 3 | 3,4412 | 0,262 | -0,416 |
| 16 | Q68CZ2 TENS3_HUMAN | R.HPPFS#PPEPPLSS#PASQHK.G     | S866:S874: | 3 | 3,5967 | 0,376 | -0,333 |
| 16 | Q9UK76 HN1_HUMAN   | R.RNS#SEASSGDFLDLK.G          | S87:       | 2 | 5,042  | 0,429 | -0,358 |
| 16 | Q96RT1 LAP2_HUMAN  | K.SHS#ITNM*EIGGLK.I           | S872:      | 2 | 3,0642 | 0,52  | -0,494 |
| 16 | Q8IYB3 SRRM1_HUMAN | K.KETES#EAEDNLDDLEK.H         | S874:      | 2 | 6,5163 | 0,534 | 0,565  |
| 16 | Q8IYB3 SRRM1_HUMAN | K.KETES#EAEDNLDDLEK.H         | S874:      | 3 | 3,7327 | 0,309 | 0,47   |
| 16 | Q9UKL3 C8AP2_HUMAN | R.NES#PPQVPVYNNSHK.D          | S875:      | 3 | 2,9752 | 0,233 | -0,204 |
| 16 | Q5T200 ZC3HD_HUMAN | R.SLS#PSHLTEDR.Q              | S877:      | 2 | 2,8865 | 0,491 | -0,092 |
| 16 | Q9UK76 HN1_HUMAN   | R.RNSS#EASSGDFLDLK.G          | S88:       | 3 | 4,3717 | 0,354 | 0,214  |
| 16 | P38159 HNRPG_HUMAN | K.VEQATKPS#FESGR.R            | S88:       | 2 | 3,323  | 0,591 | -0,08  |
| 16 | Q02539 H11_HUMAN   | K.LGIKS#LVSK.G                | S89:       | 2 | 2,4504 | 0,121 | 0      |
| 16 | Q6ZRV2 FA83H_HUMAN | R.RGS#PTTGFIQKGS#PTSAYPER.R   | S892:S903: | 3 | 3,9296 | 1     | 0,507  |
| 16 | Q13428 TCOF_HUMAN  | R.AALAPAKES#PR.K              | S906:      | 2 | 2,5296 | 0,247 | -1,127 |
| 16 | P19838 NFKB1_HUMAN | K.TTSQAHSPLS#PASTR.Q          | S907:      | 2 | 3,4894 | 0,423 | 0,352  |
| 16 | P19838 NFKB1_HUMAN | K.TTSQAHSPLS#PASTR.Q          | S907:      | 3 | 3,2307 | 0,172 | -0,316 |
| 16 | Q96T88 UHRF1_HUMAN | K.ERDSELS#DTDSGCCLGQSESDK.S   | S91:       | 3 | 5,035  | 0,552 | 0,215  |
| 16 | Q08174 PCDH1_HUMAN | R.IHLPLNYPPGS#PDLGR.H         | S928:      | 3 | 3,5085 | 0,34  | -0,2   |
| 16 | Q6ZRV2 FA83H_HUMAN | R.RGS#LTLTISGESPK.A           | S936:      | 2 | 3,3135 | 0,466 | -0,16  |
| 16 | Q9P275 UBP36_HUMAN | R.HSCS#PM*GDGDPEAM*EESPR.K    | S939:      | 3 | 4,6874 | 0,454 | -0,998 |
| 16 | Q43847 NRDC_HUMAN  | R.RGS#LSNAGDPEIVK.S           | S94:       | 2 | 4,1067 | 0,433 | -0,481 |

|    |                     |                                |              |   |        |       |        |
|----|---------------------|--------------------------------|--------------|---|--------|-------|--------|
| 16 | Q01831 XPC_HUMAN    | K.VIKDEALS#DGDDL.R.D           | S94:         | 2 | 3,9564 | 0,562 | -0,3   |
| 16 | O43847 NRDC_HUMAN   | R.RGS#LSNAGDPEIVK.S            | S94:         | 3 | 3,7069 | 0,407 | -0,781 |
| 16 | Q01831 XPC_HUMAN    | K.VIKDEALS#DGDDL.R.D           | S94:         | 3 | 3,0753 | 0,242 | -0,45  |
| 16 | P35658 NU214_HUMAN  | K.VPAKLS#PM*K.Q                | S940:        | 2 | 2,9461 | 0,55  | -0,457 |
| 16 | P10721 KIT_HUMAN    | K.QISESTNHIYSNLANCS#PNR.Q      | S943:        | 3 | 4,8951 | 0,474 | 0,46   |
| 16 | Q96NY9 MUS81_HUMAN  | R.TSGGDHAPDS#PSGENSPAPQGR.L    | S95:         | 3 | 5,6724 | 0,435 | -0,083 |
| 16 | A7KAX9 A7KAX9_HUMAN | R.DATNRS#PTQIVK.M              | S952:        | 2 | 2,6077 | 0,092 | -0,173 |
| 16 | Q8IXM2 CQ049_HUMAN  | R.KVYEDSGIPLPAES#PK.K          | S96:         | 2 | 4,7933 | 0,513 | -0,607 |
| 16 | Q15154 PCM1_HUMAN   | K.NNCPFS#ADENYRPLAK.T          | S960:        | 2 | 3,3188 | 0,474 | -0,803 |
| 16 | Q5VZK9 LR16A_HUMAN  | K.RS#SGFISELPSEEGK.K           | S967:        | 3 | 3,6158 | 0,284 | -0,43  |
| 16 | Q5VZK9 LR16A_HUMAN  | K.RSS#GFISELPSEEGK.K           | S968:        | 2 | 4,5669 | 0,508 | -0,716 |
| 16 | Q15032 R3HD1_HUMAN  | K.KAAS#TDLGAGETVVGK.V          | S973:        | 2 | 3,4663 | 0,567 | 0,231  |
| 16 | Q69YH5 CDCA2_HUMAN  | R.KS#FCISTLANTK.A              | S978:        | 2 | 3,7062 | 0,547 | -0,421 |
| 16 | P05114 HMG1_HUMAN   | K.TEESPASDEAGEKEAKS#D.-        | S99:         | 2 | 3,4088 | 0,542 | -0,56  |
| 16 | A8MSX0 A8MSX0_HUMAN | R.S#HT#SLKDELSDVQGGSK.A        | S99:T101:    | 3 | 3,2445 | 0,265 | 0,18   |
| 16 | Q9P2D0 IBTK_HUMAN   | R.KRSDS#S#GGYNLSDIIQSPSTGLLK.S | S992:S993:   | 3 | 3,5208 | 0,265 | -0,33  |
| 16 | Q86V48 LUZP1_HUMAN  | R.RTQSS#LTVSEVLTR.R            | S996:        | 3 | 3,3627 | 0,332 | 0      |
| 16 | Q6ZRV2 FA83H_HUMAN  | R.RM#EDEGGFPVPQENGQPES#PR.R    | S998:        | 3 | 3,5808 | 0,156 | 0,373  |
| 16 | Q9UQ35 SRRM2_HUMAN  | K.VKAQT#PPGPSLSGSKS#PCPQEK.S   | T1003:S1014: | 3 | 4,3794 | 0,31  | -0,75  |
| 16 | Q7Z2Z1 CO042_HUMAN  | R.T#HSASFYSVSQPK.S             | T1024:       | 3 | 3,1934 | 0,186 | -0,06  |
| 16 | P19338 NUCL_HUMAN   | K.GAT#PGKALVAT#PGKK.G          | T113:T121:   | 3 | 4,4082 | 0,328 | 0      |
| 16 | Q13416 ORC2_HUMAN   | K.LASELAKT#PQK.S               | T116:        | 2 | 2,8014 | 0,102 | -0,193 |
| 16 | Q13416 ORC2_HUMAN   | K.LASELAKT#PQK.S               | T116:        | 3 | 2,6042 | 0,193 | -0,144 |
| 16 | P62241 RS8_HUMAN    | K.GAKLT#PEEEIILNK.K            | T130:        | 2 | 4,9535 | 0,479 | 0,591  |
| 16 | P62241 RS8_HUMAN    | K.GAKLT#PEEEIILNK.K            | T130:        | 3 | 4,4341 | 0,197 | 0      |
| 16 | O75976 CBPD_HUMAN   | K.SLLSHEFQDET#DT#EEETLYSSKH.-  | T1368:T1370: | 3 | 2,9273 | 0,425 | -0,317 |
| 16 | Q96MW1 CCD43_HUMAN  | R.KAALLAQYADVT#DEEDEADEK.D     | T139:        | 3 | 6,3686 | 0,538 | 0,304  |
| 16 | Q8WW12 PCNP_HUMAN   | K.NIGRDT#PTSAGPNSFNK.G         | T139:        | 2 | 4,3362 | 0,439 | 0,066  |
| 16 | Q8WW12 PCNP_HUMAN   | K.NIGRDT#PTSAGPNSFNK.G         | T139:        | 3 | 3,0848 | 0,306 | -0,197 |
| 16 | P25054 APC_HUMAN    | R.SKT#PPPPQTAQTK.R             | T1438:       | 3 | 4,5341 | 0,427 | 0,117  |
| 16 | P25054 APC_HUMAN    | R.SKT#PPPPQTAQTK.R             | T1438:       | 2 | 2,0126 | 0,237 | -0,313 |
| 16 | Q9UQ35 SRRM2_HUMAN  | R.DGSGT#PSRHSLSGSS#PGM*K.D     | T1453:S1463: | 3 | 3,105  | 0,344 | -0,272 |
| 16 | Q99547 MPH6_HUMAN   | R.DHANYEEDENGDIT#PIK.A         | T147:        | 2 | 4,1867 | 0,527 | 0      |

|    |                     |                                    |                    |   |        |       |        |
|----|---------------------|------------------------------------|--------------------|---|--------|-------|--------|
| 16 | P29966 MARCS_HUMAN  | K.AEDGATSPSPNET#PKK.K              | T150:              | 2 | 3,685  | 0,429 | -0,428 |
| 16 | P41162 ETV3_HUMAN   | R.FHFPPLDT#HS#PTNDVQPGR.F          | T157:S159:         | 3 | 3,4798 | 0,27  | -0,709 |
| 16 | O43166 SI1L1_HUMAN  | K.FHALSSPQSPFPST#PTSR.R            | T1573:             | 3 | 3,7024 | 0,303 | 0      |
| 16 | P11137 MAP2_HUMAN   | K.VAIIRT#PPKS#PATPK.Q              | T1649:S1653:       | 3 | 2,7339 | 0,132 | -0,211 |
| 16 | P16157 ANK1_HUMAN   | R.ITHSPT#VSVQVTER.S                | T1688:             | 3 | 3,6994 | 0,263 | 0,238  |
| 16 | A8MQ02 A8MQ02_HUMAN | R.KLT#ELENELNTK.-                  | T1815:             | 2 | 3,441  | 0,463 | 0      |
| 16 | P28482 MK01_HUMAN   | R.VADPDHDHTGFLT#EY#VATR.W          | T185:Y187:         | 3 | 5,0597 | 0,491 | -0,635 |
| 16 | Q8N6T3 ARFG1_HUMAN  | R.YVGFNGT#PPPQKK.E                 | T189:              | 2 | 3,611  | 0,469 | 0      |
| 16 | Q9NVW2 RNF12_HUMAN  | R.SERNST#EALTEVPPTR.G              | T196:              | 3 | 3,2347 | 0,19  | -0,196 |
| 16 | P27361 MK03_HUMAN   | R.IADPEHDHTGFLT#EY#VATR.W          | T202:Y204:         | 3 | 5,4715 | 0,554 | 0,078  |
| 16 | Q2NL66 Q2NL66_HUMAN | R.GPST#PKKPLEQSC.-                 | T226:              | 2 | 3,5917 | 0,436 | -0,728 |
| 16 | P63313 TYB10_HUMAN  | K.TET#QEKNTLPTK.E                  | T23:               | 2 | 3,7978 | 0,414 | -0,498 |
| 16 | P63313 TYB10_HUMAN  | K.TET#QEKNTLPTK.E                  | T23:               | 3 | 3,7402 | 0,29  | 0,187  |
| 16 | P21333 FLNA_HUMAN   | R.RLT#VSSLQESGLK.V                 | T2336:             | 3 | 3,2014 | 0,159 | 0,183  |
| 16 | Q9GZY8 CB033_HUMAN  | R.GILSLIQSST#RR.A                  | T235:              | 3 | 2,6975 | 0,39  | -0,065 |
| 16 | P49792 RBP2_HUMAN   | K.DSLIT#PHVS#RSSTPRES#PCGK.I       | T2450:S2454:S2462: | 3 | 3,8549 | 1     | 0,215  |
| 16 | P17275 JUNB_HUMAN   | R.SRDAT#PPVSPINM*EDQER.I           | T255:              | 3 | 4,7536 | 0,38  | -0,342 |
| 16 | Q5T200 ZC3HD_HUMAN  | K.KGPRT#PS#PPPIPEDIALGK.K          | T263:S265:         | 3 | 5,1213 | 0,407 | 0,082  |
| 16 | A8K1N6 A8K1N6_HUMAN | K.KM*LGQKAT#PPPS#PLSELLK.K         | T264:S268:         | 3 | 3,9774 | 0,191 | -0,472 |
| 16 | Q13501 SQSTM_HUMAN  | R.SRLT#PVSPESSTEELK.S              | T269:              | 2 | 3,8024 | 0,288 | -0,404 |
| 16 | Q15054 DPOD3_HUMAN  | K.LAT#PAGLKK.S                     | T277:              | 2 | 2,4635 | 0,117 | -0,062 |
| 16 | Q8NDI1 EHBP1_HUMAN  | R.KT#EDSFYNNSYNPFK.E               | T299:              | 3 | 3,7968 | 0,271 | 0      |
| 16 | Q13428 TCOF_HUMAN   | R.AASAPAKGT#PGKGAT#PAPPGK.A        | T310:T316:         | 3 | 3,2493 | 0,244 | -0,367 |
| 16 | Q9UQ35 SRRM2_HUMAN  | R.RGEGDAPFSEPGT#TSTQRPSP#SPETATK.Q | T315:S322:         | 3 | 3,3056 | 1     | 0,558  |
| 16 | P33981 TTK_HUMAN    | K.FKNEDLT#DELSLNK.I                | T33:               | 3 | 2,6113 | 0,159 | -0,21  |
| 16 | O00418 EF2K_HUMAN   | K.LLQSAKT#ILR.G                    | T348:              | 2 | 3,1945 | 0,422 | 0,1    |
| 16 | O00418 EF2K_HUMAN   | K.LLQSAKT#ILR.G                    | T348:              | 3 | 3,1839 | 0,364 | 0,224  |
| 16 | O00418 EF2K_HUMAN   | K.LLQSAKT#ILRGT#EEK.C              | T348:T353:         | 2 | 3,3734 | 0,549 | 0,528  |
| 16 | P30622 CLIP1_HUMAN  | R.KISGTT#ALQEALK.E                 | T351:              | 3 | 3,4354 | 0,118 | -0,063 |
| 16 | Q9UQB8 BAIP2_HUMAN  | K.NSYATTENKT#LPR.S                 | T360:              | 2 | 2,7968 | 0,312 | -0,775 |
| 16 | Q8IXJ6 SIRT2_HUMAN  | R.EHASIDAQSGAGVNPST#SASPK.K        | T365:              | 3 | 2,9278 | 0,111 | 0,16   |
| 16 | Q9Y3P9 RBGP1_HUMAN  | R.QGDETPST#NNGSDDEKTGLK.I          | T38:               | 3 | 2,8891 | 0,152 | -0,084 |
| 16 | Q9NVE7 PANK4_HUMAN  | R.ARSGT#FDLLEM*DR.L                | T406:              | 3 | 2,6117 | 0,177 | 0,455  |

|    |                     |                              |            |   |        |       |        |
|----|---------------------|------------------------------|------------|---|--------|-------|--------|
| 16 | Q16181 SEPT7_HUMAN  | R.ILEQQNSSRT#LEK.N           | T426:      | 2 | 2,6683 | 0,254 | -0,6   |
| 16 | ##Q9NNW5 WDR6_HUMAN | R.T#CGGLARY#LM*VDGDK.L       | T433:Y440: | 2 | 2,4928 | 0,153 | -1,665 |
| 16 | O14974 MYPT1_HUMAN  | R.KT#GSYGALAEITASK.E         | T443:      | 3 | 3,6824 | 0,301 | 0,116  |
| 16 | Q9H6S0 YTDC2_HUMAN  | R.KSSADT#EFSDECTTAER.V       | T446:      | 3 | 4,4646 | 0,396 | -0,363 |
| 16 | Q8N3X1 FNBP4_HUMAN  | K.TGRDT#PENGETAIGAENSEK.I    | T479:      | 3 | 5,7364 | 0,431 | -0,255 |
| 16 | P08670 VIME_HUMAN   | R.TYSLGSALRPST#SR.S          | T48:       | 2 | 2,5326 | 0,181 | 0,387  |
| 16 | O00567 NOL5A_HUMAN  | K.SFSKEELMSSDLEET#AGSTSIPK.R | T525:      | 3 | 2,9161 | 0,165 | 0,573  |
| 16 | P35222 CTNB1_HUMAN  | R.RT#SM*GGTQQQFVEGVR.M       | T551:      | 3 | 2,7061 | 0,173 | 0,097  |
| 16 | Q15021 CND1_HUMAN   | K.NPREST#GNM*VTGQTVCK.N      | T586:      | 3 | 4,2119 | 0,279 | -0,185 |
| 16 | Q86TV6 TTC7B_HUMAN  | K.LPISSST#SNLHVDR.E          | T59:       | 3 | 3,2304 | 0,29  | 0,342  |
| 16 | O75362 ZN217_HUMAN  | R.TKADVT#PPPDGSTTHNLEVS#PK.E | T648:S662: | 3 | 5,4392 | 0,417 | 0,075  |
| 16 | Q6P0N0 CN106_HUMAN  | K.KAYILVT#PLK.S              | T653:      | 2 | 2,5967 | 0,345 | 0      |
| 16 | O14974 MYPT1_HUMAN  | R.RST#QGVTLTDLQEAEK.T        | T696:      | 3 | 4,6618 | 0,425 | 0,296  |
| 16 | Q5VT52 K0460_HUMAN  | R.GPTSTSIDNIDGT#PVRDER.S     | T723:      | 3 | 3,0923 | 0,321 | -0,347 |
| 16 | P68431 H31_HUMAN    | R.EIAQDFKT#DLR.F             | T81:       | 2 | 2,4998 | 0,455 | 0,172  |
| 16 | P49006 MRP_HUMAN    | K.GEVPPKET#PK.K              | T85:       | 2 | 2,3516 | 0,276 | -0,315 |
| 16 | Q92547 TOPB1_HUMAN  | R.KPST#PLSEVIVK.N            | T861:      | 2 | 2,9573 | 0,332 | 0,177  |
| 16 | Q9UQ35 SRRM2_HUMAN  | R.QGSITSPQANEQSVT#PQRR.S     | T866:      | 3 | 3,0723 | 0,395 | 0,169  |
| 16 | O60716 CTND1_HUMAN  | R.SQSSHSYDDST#LPLIDR.N       | T869:      | 3 | 4,4428 | 0,121 | -0,457 |
| 16 | O60716 CTND1_HUMAN  | R.SQSSHSYDDST#LPLIDR.N       | T869:      | 2 | 3,7928 | 0,458 | -0,549 |
| 16 | Q8IYB3 SRRM1_HUMAN  | K.KET#ESEAEDNLDDLEK.H        | T872:      | 2 | 5,903  | 0,627 | -0,502 |
| 16 | Q8IYB3 SRRM1_HUMAN  | K.KET#ESEAEDNLDDLEK.H        | T872:      | 3 | 4,3601 | 0,354 | -0,282 |
| 16 | Q9NYV4 CD2L7_HUMAN  | R.LYNSEESRPYT#NK.V           | T893:      | 2 | 2,7968 | 0,352 | -0,581 |
| 16 | Q6PD62 CTR9_HUMAN   | K.KGGEFDEFVNDT#DDDLPISK.K    | T925:      | 3 | 4,4015 | 0,335 | -0,225 |
| 16 | P30044 PRDX5_HUMAN  | K.KGVLFVPGAFT#PGCSK.T        | T97:       | 3 | 3,6643 | 0,346 | -0,406 |
| 16 | Q15032 R3HD1_HUMAN  | K.KAAST#DLGAGETVVGK.V        | T974:      | 3 | 3,3865 | 0,226 | 0      |
| 16 | P68104 EF1A1_HUMAN  | R.EHALLAY#TLGVK.Q            | Y141:      | 3 | 3,3376 | 0,307 | 0      |
| 16 | P68104 EF1A1_HUMAN  | R.EHALLAY#TLGVK.Q            | Y141:      | 2 | 2,6002 | 0,447 | -0,262 |
| 16 | Q14011 CIRBP_HUMAN  | R.SSGGSY#RDSYDSYATHNE.-      | Y160:      | 3 | 3,7965 | 0,335 | -0,352 |
| 16 | O95248 MTMR5_HUMAN  | R.RSTSTLY#SQFQTAESNR.S       | Y1751:     | 3 | 4,0676 | 0,322 | -0,251 |
| 16 | Q8NDI1 EHBP1_HUMAN  | R.KTEDSFYNNYSY#NPFK.E        | Y308:      | 2 | 2,2335 | 0,268 | 0,883  |
| 16 | P37198 NUP62_HUMAN  | K.DIIHLNTSGAPADTSDPLQQICK.I  |            | 3 | 5,3656 | 0,458 | -0,558 |
| 16 | P82664 RT10_HUMAN   | K.DLTKPVVTISDEPDILYK.R       |            | 3 | 4,5918 | 0,42  | -0,268 |

|    |                    |                                   |   |        |       |        |
|----|--------------------|-----------------------------------|---|--------|-------|--------|
| 16 | P68104 EF1A1_HUMAN | R.VETGVLKPGM*VVTFAPVNVTTTEVK.S    | 3 | 4,4768 | 0,379 | 0      |
| 16 | P08621 RU17_HUMAN  | R.GGGGGQDNGLEGLGNDNR.D            | 2 | 4,3923 | 0,588 | -0,147 |
| 16 | Q9HB71 CYBP_HUMAN  | K.AELLDNEKPAAVVAPITTYGTVK.I       | 3 | 4,3534 | 0,328 | 0,457  |
| 16 | P48147 PPCE_HUMAN  | K.LPEADDIQYPSM*LLLTADHDDR.V       | 3 | 3,9791 | 0,387 | -0,503 |
| 16 | P61163 ACTZ_HUMAN  | K.DQLQTFSEEHPVLLTEAPLNPR.K        | 3 | 3,9785 | 0,407 | -0,433 |
| 16 | P30041 PRDX6_HUMAN | K.DINAYNCEEPTKLPFIIDDR.N          | 3 | 3,9499 | 0,382 | -0,276 |
| 16 | P49327 FAS_HUMAN   | R.CVLLSNLSSTSHVPEVDPGSAELQK.V     | 3 | 3,9001 | 0,378 | -0,343 |
| 16 | P14618 KPYM_HUMAN  | R.TATESFASDPILYRPVAVALDTK.G       | 3 | 3,8588 | 0,432 | -0,445 |
| 16 | P05556 ITB1_HUMAN  | K.FCECDNFNCDR.S                   | 2 | 3,7817 | 0,483 | 0,397  |
| 16 | Q86XA9 HTR5A_HUMAN | K.DVEGDSVPKPLPPALSVISSASK.L       | 3 | 3,7813 | 0,374 | -0,239 |
| 16 | Q8IWS0 PHF6_HUMAN  | R.GKVEIDQQQLTQQQLNGN.-            | 2 | 3,7266 | 0,418 | 0,897  |
| 16 | Q9UBS4 DJB11_HUMAN | R.DGM*EYPPFIGEGEPHVDGEPGDLR.F     | 3 | 3,5997 | 0,369 | -0,289 |
| 16 | P08670 VIME_HUMAN  | K.FADLSEAANR.N                    | 2 | 3,599  | 0,401 | -0,669 |
| 16 | Q08J23 NSUN2_HUMAN | R.NNSGEEFDCAFR.L                  | 2 | 3,5664 | 0,499 | 0,084  |
| 16 | P60174 TPIS_HUMAN  | K.SNVSDAVAQSTR.I                  | 2 | 3,5605 | 0,438 | -0,395 |
| 16 | Q9UPN3 MACF1_HUMAN | K.DTQDIVHDLSPGIDPSIIK.Q           | 3 | 3,56   | 0,137 | -0,417 |
| 16 | Q9BT25 NYS48_HUMAN | R.SFAQVLELSAEASK.E                | 2 | 3,5578 | 0,465 | -0,659 |
| 16 | P35998 PRS7_HUMAN  | R.FDDGAGGDNEVQR.T                 | 2 | 3,4989 | 0,433 | -0,796 |
| 16 | P01889 1B07_HUMAN  | R.DGEDQTQDTELVETRPAGDR.T          | 3 | 3,4706 | 0,287 | 0      |
| 16 | Q07157 ZO1_HUMAN   | K.GGPAEGQLQENDR.V                 | 2 | 3,4582 | 0,489 | -0,178 |
| 16 | P49411 EFTU_HUMAN  | R.DLEKPFLLPVEAVYSVPGR.G           | 3 | 3,4507 | 0,362 | -0,344 |
| 16 | P07814 SYEP_HUMAN  | K.NQGGGLSSSGAGEGQGPK.K            | 2 | 3,4039 | 0,229 | -1,306 |
| 16 | P37802 TAGL2_HUMAN | R.NFSDNQLQEGK.N                   | 2 | 3,3853 | 0,453 | -0,477 |
| 16 | O00299 CLIC1_HUMAN | K.NSNPALNDNLEK.G                  | 2 | 3,3757 | 0,467 | -0,275 |
| 16 | P42765 THIM_HUMAN  | K.DGTVTAGNASGVADGAGAVIIASEDAVKK.H | 3 | 3,3646 | 0,37  | -0,484 |
| 16 | P39023 RL3_HUMAN   | K.NNASTDYDLSDK.S                  | 2 | 3,3104 | 0,56  | -0,182 |
| 16 | P61088 UBE2N_HUMAN | K.TNEAQAIETAR.A                   | 2 | 3,2958 | 0,473 | 0,101  |
| 16 | P11940 PABP1_HUMAN | K.NLDDGIDDER.L                    | 2 | 3,2296 | 0,479 | 0      |
| 16 | P07355 ANXA2_HUMAN | R.TNQELQEINR.V                    | 2 | 3,1947 | 0,327 | -0,196 |
| 16 | P61081 UBC12_HUMAN | K.EAAEVLQNNR.R                    | 2 | 3,1705 | 0,383 | 0      |
| 16 | P06733 ENOA_HUMAN  | K.DATNVGDEGGFAPNILENKEGLELLK.T    | 3 | 3,1513 | 0,458 | -0,6   |
| 16 | P80723 BASP_HUMAN  | K.AQGAASAEEPKEVPAANSQDQTVTVKE.-   | 3 | 3,0752 | 0,384 | 0,443  |
| 16 | P14625 ENPL_HUMAN  | K.FAFQAEVNR.M                     | 2 | 3,064  | 0,416 | 0      |

|    |                     |                               |   |        |       |        |
|----|---------------------|-------------------------------|---|--------|-------|--------|
| 16 | O75531 BAF_HUMAN    | R.DFVAEPM*GEKPVGSLAGIGEVLGK.K | 3 | 3,0289 | 0,287 | -0,606 |
| 16 | P16949 STMN1_HUMAN  | K.ESKDADETEAD.-               | 2 | 3,0237 | 0,626 | -0,28  |
| 16 | P62937 PIIA_HUMAN   | K.KITIADCGQLE.-               | 2 | 3,0223 | 0,418 | -0,196 |
| 16 | P27816 MAP4_HUMAN   | K.DM*AQLPETEIAPAKDVAPSTVK.E   | 3 | 3,012  | 0,428 | 0,708  |
| 16 | P43246 MESH2_HUMAN  | K.NNSFVNEIISR.I               | 2 | 3,0074 | 0,46  | -0,189 |
| 16 | Q58FF8 H90B2_HUMAN  | K.YIDQEELNK.T                 | 2 | 3,0061 | 0,272 | -0,53  |
| 16 | P08758 ANXA5_HUMAN  | K.KALLLLCGEDD.-               | 2 | 3,0026 | 0,409 | -0,391 |
| 16 | P05787 K2C8_HUMAN   | K.WSLLQQQK.T                  | 2 | 2,9118 | 0,109 | 0,237  |
| 16 | P40925 MDHC_HUMAN   | K.ELTEEKESAFEFLLSSA.-         | 2 | 2,8839 | 0,365 | -0,201 |
| 16 | P17661 DESM_HUMAN   | K.VELQELNDR.F                 | 2 | 2,8737 | 0,323 | -0,765 |
| 16 | Q9H3S7 PTN23_HUMAN  | K.DNDFIYHEAVPALDTLQPVK.G      | 3 | 2,8689 | 0,291 | -0,4   |
| 16 | P19105 MLRM_HUMAN   | K.EAFNM*IDQNR.D               | 2 | 2,8421 | 0,422 | 0      |
| 16 | P61978 HNRPK_HUMAN  | R.GGDLM*AYDR.R                | 2 | 2,8376 | 0,362 | 0,12   |
| 16 | Q96Q11 TRNT1_HUMAN  | R.DLLNGVKPQDIDFATTATPTQM*K.E  | 3 | 2,8351 | 0,23  | -0,653 |
| 16 | P08621 RU17_HUMAN   | R.GGGGGQDNGLEGLGNSR.D         | 3 | 2,8309 | 0,254 | 0      |
| 16 | P49773 HINT1_HUMAN  | K.CAADLGLNK.G                 | 2 | 2,8245 | 0,356 | -0,127 |
| 16 | Q9UN86 G3BP2_HUMAN  | K.NLEEEEEK.S                  | 2 | 2,8229 | 0,226 | -0,304 |
| 16 | O95678 K2C75_HUMAN  | K.AQYEDIANR.S                 | 2 | 2,8163 | 0,376 | -0,791 |
| 16 | Q15149 PLEC1_HUMAN  | R.NLVDNITGQR.L                | 2 | 2,8118 | 0,394 | 0,324  |
| 16 | A9CQZ4 A9CQZ4_HUMAN | K.EALQNINDQSDR.L              | 2 | 2,8017 | 0,376 | -0,435 |
| 16 | Q6S8J3 A26CA_HUMAN  | K.AGFAGDDAPR.A                | 2 | 2,7961 | 0,334 | -1,186 |
| 16 | Q15366 PCBP2_HUMAN  | K.IANPVEGSTDR.Q               | 2 | 2,7592 | 0,504 | -0,316 |
| 16 | P00367 DHE3_HUMAN   | K.M*VEGFFDR.G                 | 2 | 2,7555 | 0,243 | -0,18  |
| 16 | P61978 HNRPK_HUMAN  | K.GSDFDCELR.L                 | 2 | 2,7417 | 0,359 | -0,222 |
| 16 | P84098 RL19_HUMAN   | K.LLADQAEAR.R                 | 2 | 2,7337 | 0,371 | -0,185 |
| 16 | P08670 VIME_HUMAN   | R.FANYIDK.V                   | 2 | 2,7105 | 0,247 | 0      |
| 16 | P31948 STIP1_HUMAN  | K.ALDLDSSCK.E                 | 2 | 2,7094 | 0,38  | -0,121 |
| 16 | P22314 UBA1_HUMAN   | R.AENYDIPSADR.H               | 2 | 2,7065 | 0,447 | 0      |
| 16 | P37802 TAGL2_HUMAN  | R.DDGLFSGDPNWFPPK.S           | 3 | 2,6986 | 0,216 | -0,425 |
| 16 | Q02790 FKBP4_HUMAN  | K.ALELDSNNEK.G                | 2 | 2,6921 | 0,288 | -0,538 |
| 16 | Q9NRS6 SNX15_HUMAN  | R.DLHILPPPLIPTPPDDPR.L        | 3 | 2,6811 | 0,228 | -0,61  |
| 16 | O76094 SRP72_HUMAN  | K.DQNVFDSK.K                  | 2 | 2,677  | 0,186 | 0      |
| 16 | P22234 PUR6_HUMAN   | K.NFEWVAER.V                  | 2 | 2,6686 | 0,295 | -0,232 |

|    |                    |                   |   |        |       |        |
|----|--------------------|-------------------|---|--------|-------|--------|
| 16 | Q99729 ROAA_HUMAN  | K.EVYQQQQYGSGGR.G | 2 | 2,6652 | 0,507 | 0,325  |
| 16 | O95433 AHSA1_HUMAN | K.NGETELCM*EGR.G  | 2 | 2,6572 | 0,566 | -0,093 |
| 16 | P00338 LDHA_HUMAN  | K.VTLTSEEEAR.L    | 2 | 2,6449 | 0,361 | -0,215 |
| 16 | Q99623 PHB2_HUMAN  | R.LGLDYEER.V      | 2 | 2,6276 | 0,383 | -0,245 |
| 16 | P61978 HNRPK_HUMAN | R.NTDEM*VELR.I    | 2 | 2,6232 | 0,369 | -0,217 |
| 16 | Q00839 HNRPU_HUMAN | K.NGQDLGVAFK.I    | 2 | 2,6205 | 0,377 | 0,233  |
| 16 | P54577 SYYC_HUMAN  | K.NSVEVALNK.L     | 2 | 2,6151 | 0,396 | 0,564  |
| 16 | Q9Y262 IF3EI_HUMAN | R.VSSDVIDQK.V     | 2 | 2,6135 | 0,229 | 0,062  |
| 16 | Q13620 CUL4B_HUMAN | R.DKENPNQYNYIA.-  | 2 | 2,6036 | 0,416 | 0,166  |
| 16 | P13797 PLST_HUMAN  | K.INNFSADIK.D     | 2 | 2,6013 | 0,206 | -0,358 |
| 16 | P10809 CH60_HUMAN  | R.VTDALNATR.A     | 2 | 2,5926 | 0,422 | 0,317  |
| 16 | Q13620 CUL4B_HUMAN | K.GLNNLLDENR.I    | 2 | 2,5881 | 0,315 | -0,421 |
| 16 | Q13813 SPTA2_HUMAN | R.SLQQLAEER.S     | 2 | 2,5649 | 0,121 | -0,114 |
| 16 | Q9UNH7 SNX6_HUMAN  | R.SLVDYENANK.A    | 2 | 2,564  | 0,361 | 0,106  |
| 16 | Q16891 IMMT_HUMAN  | K.SEFEQNLSEK.L    | 2 | 2,5607 | 0,261 | -0,202 |
| 16 | Q14247 SRC8_HUMAN  | K.SAVGFYQGK.T     | 2 | 2,5559 | 0,405 | -0,112 |
| 16 | Q99598 TSNAX_HUMAN | K.SFQQELDAR.H     | 2 | 2,5361 | 0,404 | -0,446 |
| 16 | P07195 LDHB_HUMAN  | R.GLTSVINQK.L     | 2 | 2,5328 | 0,38  | -0,127 |
| 16 | Q15149 PLEC1_HUMAN | K.SLAAEEEAAR.Q    | 2 | 2,5234 | 0,262 | 0,117  |
| 16 | Q15393 SF3B3_HUMAN | K.NFGDQPDIR.C     | 2 | 2,5156 | 0,346 | -0,23  |
| 16 | Q00610 CLH1_HUMAN  | K.IYIDSNNNPER.F   | 2 | 2,5008 | 0,29  | -1,005 |
| 16 | P10599 THIO_HUMAN  | K.EKLEATINELV.-   | 2 | 2,4953 | 0,402 | -0,291 |
| 16 | P02765 FETUA_HUMAN | K.CDSSPDSAEDVR.K  | 2 | 2,4899 | 0,404 | -0,821 |
| 16 | P04792 HSPB1_HUMAN | R.QLSSGVSEIR.H    | 2 | 2,4433 | 0,158 | 0      |
| 16 | Q15398 DLG7_HUMAN  | K.ISQSELDNK.S     | 2 | 2,4401 | 0,321 | 0,103  |
| 16 | P14927 QCR7_HUMAN  | R.LPENLYNDR.M     | 2 | 2,4375 | 0,319 | -0,753 |
| 16 | Q92905 CSN5_HUMAN  | K.DKLFNQINIS.-    | 2 | 2,43   | 0,402 | 0,102  |
| 16 | Q8WVJ2 NUDC2_HUMAN | K.GGPDFSNLEK.-    | 2 | 2,4222 | 0,212 | 0,115  |
| 16 | O75694 NU155_HUMAN | K.GLQEFLDR.N      | 2 | 2,4178 | 0,336 | 0      |
| 16 | Q9UQ80 PA2G4_HUMAN | K.SDQDYILK.E      | 2 | 2,4164 | 0,241 | -0,435 |
| 16 | P62269 RS18_HUMAN  | R.VLNTNIDGR.R     | 2 | 2,4128 | 0,352 | -0,061 |
| 16 | P23526 SAHH_HUMAN  | K.WLNENAVEK.V     | 2 | 2,3939 | 0,204 | -0,442 |
| 16 | P08670 VIME_HUMAN  | R.QDVDNASLAR.L    | 2 | 2,3905 | 0,389 | -0,56  |

|    |                    |                 |   |        |       |        |
|----|--------------------|-----------------|---|--------|-------|--------|
| 16 | P16949 STMN1_HUMAN | K.AIEENNNFSK.M  | 2 | 2,3891 | 0,308 | -0,105 |
| 16 | Q16891 IMMT_HUMAN  | R.GVYSEETLR.A   | 2 | 2,3835 | 0,253 | 0,116  |
| 16 | O00231 PSD11_HUMAN | R.AQSLSTDR.E    | 2 | 2,3811 | 0,291 | 0,062  |
| 16 | P00338 LDHA_HUMAN  | K.DYNVTANSK.L   | 2 | 2,3696 | 0,395 | -0,241 |
| 16 | Q15084 PDIA6_HUMAN | K.GESPVVDYGGR.T | 2 | 2,3691 | 0,314 | -0,212 |
| 16 | P06703 S10A6_HUMAN | K.LQDAEIAR.L    | 2 | 2,3691 | 0,223 | -0,133 |
| 16 | Q9NX63 CHCH3_HUMAN | R.LSENVDR.M     | 2 | 2,352  | 0,246 | 0      |
| 16 | P07900 HS90A_HUMAN | K.FYEQFSK.N     | 2 | 2,3426 | 0,271 | 0,064  |
| 16 | P05783 K1C18_HUMAN | K.ETM*QSLNDR.L  | 2 | 2,3395 | 0,311 | -0,33  |
| 16 | Q9BXP5 ARS2_HUMAN  | R.ESLSEEEAQK.M  | 2 | 2,3358 | 0,277 | -0,849 |
| 16 | P26038 MOES_HUMAN  | R.ALELEQER.K    | 2 | 2,3283 | 0,215 | 0      |
| 16 | P00367 DHE3_HUMAN  | K.YNLGLDLR.T    | 2 | 2,3181 | 0,365 | 0      |
| 16 | P48643 TCPE_HUMAN  | R.TSLGPNGLDK.M  | 2 | 2,3097 | 0,406 | -0,122 |
| 16 | P46781 RS9_HUMAN   | K.IEDFLER.R     | 2 | 2,3038 | 0,27  | 0,066  |
| 16 | O75347 TBCA_HUMAN  | K.QAEILQESR.M   | 2 | 2,2997 | 0,311 | 0      |
| 16 | P83881 RL36A_HUMAN | R.LECVEPNCR.S   | 2 | 2,2944 | 0,284 | -0,829 |
| 16 | P07355 ANXA2_HUMAN | K.AYTNFDAER.D   | 2 | 2,2943 | 0,348 | -0,112 |
| 16 | P36873 PP1G_HUMAN  | K.NVQLQENEIR.G  | 2 | 2,2793 | 0,195 | 0,294  |
| 16 | P49916 DNL3_HUMAN  | R.NLQDVVER.V    | 2 | 2,2763 | 0,208 | -0,439 |
| 16 | P18206 VINC_HUMAN  | R.TNLLQVCER.I   | 2 | 2,2641 | 0,174 | -0,108 |
| 16 | P11388 TOP2A_HUMAN | K.FLYDDNQR.V    | 2 | 2,2547 | 0,118 | -0,114 |
| 16 | P38646 GRP75_HUMAN | R.YDDPEVQK.D    | 2 | 2,2463 | 0,247 | -0,123 |
| 16 | P08754 GNAI3_HUMAN | K.IDFGAAR.A     | 2 | 2,2417 | 0,254 | 0,069  |
| 16 | P05783 K1C18_HUMAN | K.VIDDTNITR.L   | 2 | 2,2417 | 0,295 | -0,117 |
| 16 | P63104 1433Z_HUMAN | R.YDDM*AACM*K.S | 2 | 2,236  | 0,333 | -0,322 |
| 16 | P62906 RL10A_HUMAN | R.ILGPGLNK.A    | 2 | 2,2283 | 0,18  | 0,15   |
| 16 | P58107 EPIPL_HUMAN | R.GYFDEEM*NR.V  | 2 | 2,2092 | 0,403 | -0,311 |
| 16 | Q9BUL8 PDC10_HUMAN | K.IPDEINDR.V    | 2 | 2,2091 | 0,176 | 0      |
| 16 | Q9Y266 NUDC_HUMAN  | K.ELTDEEAER.L   | 2 | 2,2031 | 0,294 | -0,112 |
| 16 | P06733 ENOA_HUMAN  | K.SCNCLLLK.V    | 2 | 2,1971 | 0,255 | 1,634  |
| 16 | P67936 TPM4_HUMAN  | K.TIDDLEEK.L    | 2 | 2,1936 | 0,216 | -0,063 |
| 16 | P08670 VIME_HUMAN  | K.LQEEM*LQR.E   | 2 | 2,1791 | 0,118 | 0      |
| 16 | P09382 LEG1_HUMAN  | K.LPDGYEFK.F    | 2 | 2,1773 | 0,291 | -0,189 |



|    |                     |                |   |        |       |        |
|----|---------------------|----------------|---|--------|-------|--------|
| 16 | Q06830 PRDX1_HUMAN  | K.ADEGISFR.G   | 2 | 2,1751 | 0,306 | 0,341  |
| 16 | P11021 GRP78_HUMAN  | K.ITITNDQNR.L  | 2 | 2,1749 | 0,193 | -0,113 |
| 16 | P26641 EF1G_HUMAN   | R.TFLVGER.V    | 2 | 2,1726 | 0,16  | 0      |
| 16 | P46777 RL5_HUMAN    | R.FPGYDSESK.E  | 2 | 2,1655 | 0,291 | 0      |
| 16 | P07919 QCR6_HUMAN   | R.LELCDER.V    | 2 | 2,1615 | 0,16  | 0,065  |
| 16 | B1AK87 B1AK87_HUMAN | R.SVQTFADK.S   | 2 | 2,1615 | 0,271 | 0,068  |
| 16 | P50395 GDIB_HUMAN   | R.TFEGIDPK.K   | 2 | 2,1599 | 0,181 | 0,135  |
| 16 | P61254 RL26_HUMAN   | K.FNPFVTSDR.S  | 2 | 2,1328 | 0,302 | -0,901 |
| 16 | P09382 LEG1_HUMAN   | K.DGGAWGTEQR.E | 2 | 2,1288 | 0,113 | 0      |
| 16 | Q8N1F7 NUP93_HUMAN  | R.AFDIER.L     | 2 | 2,1228 | 0,296 | -0,141 |
| 16 | P21333 FLNA_HUMAN   | K.AEISFEDR.K   | 2 | 2,114  | 0,303 | -0,252 |
| 16 | P08238 HS90B_HUMAN  | K.FYEAFSK.N    | 2 | 2,1134 | 0,223 | -0,068 |
| 16 | O00571 DDX3X_HUMAN  | R.GLDISNVK.H   | 2 | 2,098  | 0,297 | 0      |
| 16 | Q9H0H5 RGAP1_HUMAN  | K.DFEDFR.K     | 2 | 2,0968 | 0,181 | 0,074  |
| 16 | P60660 MYL6_HUMAN   | K.EAFQLFDR.T   | 2 | 2,0939 | 0,291 | -0,238 |
| 16 | P34931 HS71L_HUMAN  | K.DNNLLGR.F    | 2 | 2,0928 | 0,091 | -1,141 |
| 16 | Q9UQ80 PA2G4_HUMAN  | R.AFFSEVER.R   | 2 | 2,0747 | 0,356 | -0,124 |
| 16 | P62988 UBIQ_HUMAN   | R.TLSDYNIQK.E  | 2 | 2,0676 | 0,138 | -0,113 |
| 16 | P04083 ANXA1_HUMAN  | R.SEIDM*NDIK.A | 2 | 2,0661 | 0,466 | -0,113 |
| 16 | P43246 MSH2_HUMAN   | K.NFSTVDIQK.N  | 2 | 2,0576 | 0,205 | 0      |
| 16 | Q14019 COTL1_HUMAN  | K.EFVISDR.K    | 2 | 2,0518 | 0,276 | 0      |
| 16 | P49591 SYSC_HUMAN   | R.DVTLENR.L    | 2 | 2,0504 | 0,103 | 0      |
| 16 | P05141 ADT2_HUMAN   | R.GLGDCLVK.I   | 2 | 2,0443 | 0,14  | 0,142  |
| 16 | O15294 OGT1_HUMAN   | R.SDLGNLLK.A   | 2 | 2,0403 | 0,159 | -0,071 |
| 16 | Q01082 SPTB2_HUMAN  | K.SLLDACESR.R  | 2 | 2,0352 | 0,223 | -0,116 |
| 16 | Q01082 SPTB2_HUMAN  | R.IDDIFER.S    | 2 | 2,0348 | 0,128 | 0      |
| 16 | Q03252 LMNB2_HUMAN  | R.ALELENDR.L   | 2 | 2,0303 | 0,157 | -0,127 |
| 16 | P27824 CALX_HUMAN   | K.AEEDEILNR.S  | 2 | 2,0238 | 0,173 | -0,112 |
| 16 | Q96KB5 TOPK_HUMAN   | K.SLNDLIEER.Y  | 2 | 2,023  | 0,174 | -0,224 |
| 16 | P08107 HSP71_HUMAN  | K.SAVEDEGLK.G  | 2 | 2,022  | 0,334 | -0,386 |
| 16 | Q9BR76 COR1B_HUMAN  | R.LEEQLGR.M    | 2 | 2,0126 | 0,148 | 0,072  |
| 16 | P63241 IF5A1_HUMAN  | R.LPEGDLGK.E   | 2 | 2,008  | 0,159 | -0,074 |
| 16 | P07237 PDIA1_HUMAN  | R.TVIDYNGER.T  | 2 | 2,0062 | 0,343 | -0,114 |

|    |                    |                              |              |   |        |       |        |
|----|--------------------|------------------------------|--------------|---|--------|-------|--------|
| 16 | P39687 AN32A_HUMAN | K.ELVLDNSR.S                 |              | 2 | 2,0031 | 0,301 | -0,193 |
| 16 | Q9Y224 CN166_HUMAN | R.DVNCPF.K                   |              | 2 | 2,0001 | 0,205 | 0,277  |
| 17 | Q9NVD7 PARVA_HUMAN | K.SPS#VPKSPT#PKSPPSR.K       | S10:T16:     | 2 | 3,005  | 1     | -0,337 |
| 17 | Q9UKV3 ACINU_HUMAN | R.TAQVPS#PPRGK.I             | S1004:       | 2 | 2,242  | 0,272 | 0,1    |
| 17 | P05386 RLA1_HUMAN  | K.KEES#EES#DDDM*GFGLFD.-     | S101:S104:   | 2 | 2,9873 | 0,503 | -0,23  |
| 17 | P54259 ATN1_HUMAN  | K.TKTEQELPRPQS#PSDLDS#LDGR.S | S101:S107:   | 3 | 4,2795 | 0,293 | -0,278 |
| 17 | Q9BTC0 DIDO1_HUMAN | K.SILAKPSSS#PDPR.Y           | S1019:       | 2 | 2,4281 | 0,292 | -0,425 |
| 17 | Q52LW3 RHG29_HUMAN | K.IRPVS#LPVDR.L              | S1019:       | 2 | 2,2596 | 0,095 | -0,792 |
| 17 | Q15013 MD2BP_HUMAN | R.KPS#PQAEEM*LK.K            | S102:        | 2 | 2,9521 | 0,354 | -0,451 |
| 17 | P17096 HMGA1_HUMAN | K.KLEKEEEEGISQES#S#EEEEQ.-   | S102:S103:   | 3 | 4,107  | 0,301 | -0,305 |
| 17 | O75122 CLAP2_HUMAN | R.SRDYNPNYSDSIS#PFNK.S       | S1029:       | 3 | 4,7967 | 0,456 | 0,244  |
| 17 | Q562F6 SGOL2_HUMAN | K.HITSEADS#DPGNPVELCK.T      | S1032:       | 2 | 3,6129 | 0,653 | -0,596 |
| 17 | Q6P0Q8 MAST2_HUMAN | R.LLS#GDSTEKR.T              | S1032:       | 2 | 2,0804 | 0,405 | -0,412 |
| 17 | P31943 HNRH1_HUMAN | K.HTGPNS#PDTANDGFVR.L        | S104:        | 3 | 4,2853 | 0,195 | 0,104  |
| 17 | P31943 HNRH1_HUMAN | K.HTGPNS#PDTANDGFVR.L        | S104:        | 2 | 4,0041 | 0,574 | 0      |
| 17 | P25054 APC_HUMAN   | K.YSDEQLNSGRQS#PSQNER.W      | S1042:       | 3 | 2,8272 | 0,099 | -0,421 |
| 17 | P09496 CLCA_HUMAN  | R.LQS#EPESIRK.W              | S105:        | 2 | 2,1751 | 0,323 | -0,578 |
| 17 | Q96KR1 ZFR_HUMAN   | R.RDS#DGVDFEAEKG.K           | S1054:       | 2 | 4,4535 | 0,472 | 0,547  |
| 17 | Q8NDI1 EHBP1_HUMAN | R.KPS#EDEVLNK.G              | S1058:       | 2 | 4,0128 | 0,442 | -0,788 |
| 17 | P24534 EF1B_HUMAN  | K.DDDDDIDLFGS#DDEEESEEAKR.L  | S106:        | 3 | 3,9316 | 0,437 | -0,146 |
| 17 | Q12789 TF3C1_HUMAN | R.KNSS#TDQGSDEEGSLQK.E       | S1063:       | 3 | 3,7483 | 0,266 | -0,387 |
| 17 | Q5VZK9 LR16A_HUMAN | R.KSS#GFLNLIK.S              | S1068:       | 2 | 3,3638 | 0,233 | -0,308 |
| 17 | Q02539 H11_HUMAN   | K.GTGASGS#FKLNK.K            | S107:        | 2 | 2,5912 | 0,151 | -0,391 |
| 17 | Q9NX02 NALP2_HUMAN | R.KPLS#LGITR.K               | S107:        | 2 | 2,058  | 0,243 | -0,458 |
| 17 | O60841 IF2P_HUMAN  | K.KQS#FDDNDS#EELEDKDSK.S     | S107:S113:   | 3 | 4,6239 | 0,511 | -0,32  |
| 17 | Q6ZUT9 RA61L_HUMAN | R.RLS#ITSLTGK.N              | S1076:       | 2 | 2,7795 | 0,299 | 0,106  |
| 17 | P30414 NKTR_HUMAN  | K.HDTVTVSS#DLDQFTK.D         | S1077:       | 2 | 4,9128 | 0,581 | -0,344 |
| 17 | Q9NX40 OCAD1_HUMAN | K.KLENS#PLGEALR.S            | S108:        | 2 | 4,3189 | 0,455 | 0,434  |
| 17 | P48634 BAT2_HUMAN  | R.TAS#ETRS#EGSEYEEIPKR.R     | S1085:S1089: | 3 | 2,6284 | 0,163 | -0,41  |
| 17 | Q9BYG5 PAR6B_HUMAN | R.HGAGS#GCLGTM*EVK.S         | S11:         | 2 | 3,5016 | 0,493 | 0,081  |
| 17 | P18754 RCC1_HUMAN  | R.RS#PPADAIPK.S              | S11:         | 2 | 3,042  | 0,297 | -0,216 |
| 17 | Q9BQF6 SEN7_HUMAN  | R.RPS#SSEITEGK.R             | S11:         | 2 | 2,8534 | 0,415 | -0,529 |
| 17 | Q14966 ZN638_HUMAN | K.IDLPEVQIEHDPELEKES#PGLK.N  | S1100:       | 3 | 3,9081 | 0,137 | -0,493 |

|    |                    |                           |              |   |        |       |        |
|----|--------------------|---------------------------|--------------|---|--------|-------|--------|
| 17 | Q5VZK9 LR16A_HUMAN | K.GAVRS#PPVDCPR.K         | S1101:       | 3 | 3,4384 | 0,286 | 0,394  |
| 17 | Q8IZT6 ASPM_HUMAN  | K.RDS#GSFEQYSENIK.L       | S1103:       | 2 | 4,5167 | 0,517 | 0,351  |
| 17 | Q6P0N0 CN106_HUMAN | R.KTPFNTDLGENS#GIGK.L     | S1104:       | 2 | 3,0551 | 0,145 | 0,486  |
| 17 | P11388 TOP2A_HUMAN | K.EAQQKVPDEEENEES#DNEK.E  | S1106:       | 3 | 3,822  | 0,132 | -0,079 |
| 17 | P50479 PDLI4_HUMAN | R.IHIDPEIQDGS#PTTSR.R     | S112:        | 3 | 4,8465 | 0,436 | -0,198 |
| 17 | P50479 PDLI4_HUMAN | R.IHIDPEIQDGS#PTTSR.R     | S112:        | 2 | 3,993  | 0,569 | -0,595 |
| 17 | Q9BX95 SGPP1_HUMAN | R.RNS#LTGEEQLAR.V         | S112:        | 2 | 2,9674 | 0,258 | -0,242 |
| 17 | Q13136 LIPA1_HUMAN | R.FEEDDDKS#FR.R           | S1133:       | 3 | 2,9969 | 0,236 | 0,135  |
| 17 | Q8N4C6 NIN_HUMAN   | R.HVLS#DLEDDEVR.D         | S1145:       | 2 | 4,6535 | 0,581 | 0,567  |
| 17 | Q8N4C6 NIN_HUMAN   | R.HVLS#DLEDDEVR.D         | S1145:       | 3 | 3,6559 | 0,278 | 0,303  |
| 17 | P62906 RL10A_HUMAN | K.KYDAFLASES#LIK.Q        | S115:        | 2 | 2,9847 | 0,453 | -0,156 |
| 17 | Q7Z309 F122B_HUMAN | K.RIDFTPVS#PAPS#PTRGFGK.M | S115:S119:   | 3 | 2,6412 | 0,305 | 0,334  |
| 17 | Q5T8A7 K0649_HUMAN | R.RSS#GSEESILDLR.Y        | S1161:       | 2 | 3,0375 | 0,191 | 0      |
| 17 | Q86VM9 ZCH18_HUMAN | R.TSDLRDEAS#SVTR.E        | S117:        | 3 | 2,8463 | 0,341 | 0      |
| 17 | Q6R327 RICTR_HUMAN | K.HIEDTGSTPS#IGENDLK.F    | S1177:       | 2 | 3,1612 | 0,5   | -0,451 |
| 17 | Q92934 BAD_HUMAN   | R.RM*S#DEFVDSFK.K         | S118:        | 2 | 3,7024 | 0,362 | 0,335  |
| 17 | Q04637 IF4G1_HUMAN | R.SFS#KEVEER.S            | S1188:       | 2 | 2,6313 | 0,224 | -0,307 |
| 17 | Q00536 PCTK1_HUMAN | K.RLS#LPADIR.L            | S119:        | 2 | 2,4151 | 0,262 | -0,109 |
| 17 | P61254 RL26_HUMAN  | K.FNPFVTSDRS#K.N          | S12:         | 2 | 2,15   | 0,317 | -0,177 |
| 17 | O95218 ZRAB2_HUMAN | R.ENVEYIEREES#DGEYDEFGR.K | S120:        | 3 | 5,7166 | 0,518 | -0,216 |
| 17 | P15531 NDKA_HUMAN  | R.NIIHGS#DSVESAEK.E       | S120:        | 2 | 4,4254 | 0,411 | 0,234  |
| 17 | Q96MU7 YTDC1_HUMAN | R.LSSS#ASREPYK.N          | S120:        | 2 | 2,4253 | 0,312 | -0,094 |
| 17 | P42858 HD_HUMAN    | K.EKEPGEQASVPLS#PK.K      | S1201:       | 2 | 2,8281 | 0,438 | 0,218  |
| 17 | Q5SW79 CE170_HUMAN | R.ANS#ISRLS#DSKVK.S       | S1205:S1210: | 3 | 2,919  | 0,458 | 0,117  |
| 17 | Q8IWI9 MGAP_HUMAN  | K.LLTGIKS#PR.S            | S1208:       | 2 | 2,3979 | 0,246 | -0,115 |
| 17 | Q14814 MEF2D_HUMAN | R.RAS#EELDGLFR.R          | S121:        | 3 | 3,845  | 0,286 | -0,266 |
| 17 | Q9H7D7 WDR26_HUMAN | K.RLS#QSDEDVIR.L          | S121:        | 2 | 3,2272 | 0,521 | -0,349 |
| 17 | Q14814 MEF2D_HUMAN | R.RAS#EELDGLFR.R          | S121:        | 2 | 3,0719 | 0,391 | -0,622 |
| 17 | Q9Y388 RBMX2_HUMAN | R.APKDS#EEIDDVTR.Q        | S121:        | 3 | 3,068  | 0,255 | -0,118 |
| 17 | P15531 NDKA_HUMAN  | R.NIIHGS#VESAEK.E         | S122:        | 2 | 4,0714 | 0,388 | -0,156 |
| 17 | Q02543 RL18A_HUMAN | R.AHS#IQIM*K.V            | S123:        | 2 | 3,2929 | 0,339 | 0      |
| 17 | Q9ULR3 PPM1H_HUMAN | R.RSS#LPNGEGLQK.E         | S124:        | 2 | 3,1548 | 0,304 | -0,33  |
| 17 | Q9BQG0 MBB1A_HUMAN | K.SPAPGAPTRS#PST#PAKSPK.L | S1241:T1244: | 2 | 2,5666 | 0,291 | -0,122 |

|    |                     |                              |              |   |        |       |        |
|----|---------------------|------------------------------|--------------|---|--------|-------|--------|
| 17 | P11388 TOP2A_HUMAN  | K.IKNENTEGS#PQEDGVELEGLK.Q   | S1247:       | 3 | 4,4086 | 0,287 | 0,232  |
| 17 | P42345 FRAP_HUMAN   | K.LHVS#TINLQK.A              | S1261:       | 2 | 3,1835 | 0,3   | 0,297  |
| 17 | O95155 UBE4B_HUMAN  | R.HLLNS#PTDPFNR.Q            | S1265:       | 2 | 3,2164 | 0,308 | 0,491  |
| 17 | Q9BQG0 MBB1A_HUMAN  | K.NQKPSQVNGAPGS#PTEPAGQK.Q   | S1267:       | 3 | 3,7105 | 0,282 | 0,337  |
| 17 | Q3ZTR8 Q3ZTR8_HUMAN | K.GHTNAGDAIYEVVS#LQR.E       | S127:        | 3 | 3,8651 | 0,209 | -0,575 |
| 17 | Q8WWQ0 PHIP_HUMAN   | K.KVLS#DS#EDEEKDADVPGTSTR.K  | S1281:S1283: | 3 | 4,3415 | 0,463 | 0,3    |
| 17 | Q9NTI5 PDS5B_HUMAN  | R.LKEDILENEDEQNS#PPK.K       | S1283:       | 3 | 6,235  | 0,483 | 0,264  |
| 17 | O15400 STX7_HUMAN   | R.ASSRVS#GSFPEDSSK.E         | S129:        | 2 | 2,5753 | 0,352 | -0,301 |
| 17 | Q92844 TANK_HUMAN   | R.SLGS#PLLHER.G              | S129:        | 2 | 2,2694 | 0,321 | -0,103 |
| 17 | Q9UPU5 UBP24_HUMAN  | R.VSDQNS#PVLPPK.S            | S1297:       | 3 | 3,3792 | 0,275 | 0,066  |
| 17 | Q9UPU5 UBP24_HUMAN  | R.VSDQNS#PVLPPK.S            | S1297:       | 2 | 2,9607 | 0,266 | -0,526 |
| 17 | Q5SSD1 Q5SSD1_HUMAN | R.LS#ET#IPVKRLAR.G           | S13:T15:     | 3 | 2,6368 | 0,267 | -0,948 |
| 17 | Q07002 PCTK3_HUMAN  | R.RAS#LSDIGFGK.L             | S130:        | 2 | 3,9261 | 0,521 | -0,099 |
| 17 | O60293 CC131_HUMAN  | R.KPISDNSFS#SDEEQSTGPIK.Y    | S1303:       | 3 | 3,6427 | 0,172 | -0,489 |
| 17 | Q9UHB6 LIMA1_HUMAN  | R.LRS#PPEALVQGR.Y            | S132:        | 3 | 4,9004 | 0,163 | 0,065  |
| 17 | P51858 HDGF_HUMAN   | K.KGNAEGS#S#DEEGKLVIDEPAK.E  | S132:S133:   | 3 | 4,9785 | 0,418 | 0,471  |
| 17 | P51858 HDGF_HUMAN   | K.GNAEGS#S#DEEGKLVIDEPAKEK.N | S132:S133:   | 3 | 3,439  | 0,293 | 0      |
| 17 | Q96HC4 PDLI5_HUMAN  | K.APRPFGS#VSSPK.V            | S134:        | 2 | 2,2663 | 0,128 | -0,186 |
| 17 | Q9H7D0 DOCK5_HUMAN  | K.RAS#FYENIIK.A              | S1347:       | 2 | 3,8734 | 0,427 | -0,277 |
| 17 | Q03468 ERCC6_HUMAN  | R.NSNFSVQHPSSTS#PTEK.C       | S1348:       | 2 | 3,3326 | 0,491 | -0,19  |
| 17 | Q9UKM9 RALY_HUMAN   | R.GRLS#PVPVPR.A              | S135:        | 2 | 2,2652 | 0,309 | -0,316 |
| 17 | O60841 IF2P_HUMAN   | K.VEM*YS#GS#DDDDDFNKLPKK.A   | S135:S137:   | 3 | 4,1763 | 0,459 | 0,154  |
| 17 | P55327 TPD52_HUMAN  | K.NSPTFKS#FEEK.V             | S136:        | 2 | 2,7514 | 0,311 | 0,438  |
| 17 | Q5VUA4 ZN318_HUMAN  | R.RS#PGLCSDSLEK.S            | S136:        | 2 | 2,7379 | 0,324 | 0      |
| 17 | P52701 MSH6_HUMAN   | R.VHVQFFDDS#PTR.G            | S137:        | 3 | 4,6234 | 0,418 | 0,06   |
| 17 | P52701 MSH6_HUMAN   | R.VHVQFFDDS#PTR.G            | S137:        | 2 | 4,3713 | 0,624 | -0,16  |
| 17 | Q8WWA1 TMM40_HUMAN  | R.RGS#DPASGEVEASQLR.R        | S137:        | 2 | 4,0851 | 0,557 | -0,07  |
| 17 | Q8WWA1 TMM40_HUMAN  | R.RGS#DPASGEVEASQLR.R        | S137:        | 3 | 4,0435 | 0,369 | 0,21   |
| 17 | Q96HC4 PDLI5_HUMAN  | K.APRPFGSVSS#PK.V            | S137:        | 3 | 3,6728 | 0,169 | 0,14   |
| 17 | Q96HC4 PDLI5_HUMAN  | K.APRPFGSVSS#PK.V            | S137:        | 2 | 2,6329 | 0,255 | -0,466 |
| 17 | P11388 TOP2A_HUMAN  | K.ELKPQKS#VVS#DLEADDVK.G     | S1374:S1377: | 3 | 3,2867 | 0,377 | -0,339 |
| 17 | Q13428 TCOF_HUMAN   | K.KLGAGEGGEASVS#PEK.T        | S1378:       | 2 | 4,0074 | 0,45  | -0,535 |
| 17 | P02765 FETUA_HUMAN  | K.CDSSPDS#AEDVRK.V           | S138:        | 2 | 3,3745 | 0,462 | -0,237 |

|    |                    |                              |              |   |        |       |        |
|----|--------------------|------------------------------|--------------|---|--------|-------|--------|
| 17 | Q6P0Q8 MAST2_HUMAN | K.LHLS#PPLGR.Q               | S1381:       | 2 | 2,1055 | 0,169 | -0,114 |
| 17 | Q96N67 DOCK7_HUMAN | R.M*NS#LTFKK.S               | S1383:       | 2 | 2,7655 | 0,184 | -0,229 |
| 17 | Q9UQ35 SRRM2_HUMAN | R.SSGHSSSELS#PDAVEK.A        | S1387:       | 2 | 3,662  | 0,331 | -0,503 |
| 17 | Q9UQ35 SRRM2_HUMAN | R.SSGHSSSELS#PDAVEK.A        | S1387:       | 3 | 3,353  | 0,181 | 0      |
| 17 | P50914 RL14_HUMAN  | K.AALLKAS#PK.K               | S139:        | 2 | 2,5698 | 0,403 | -1,495 |
| 17 | Q9NV7 PARVA_HUMAN  | K.SPSVPKS#PTPKS#PPSR.K       | S14:S19:     | 3 | 3,1385 | 0,241 | -0,101 |
| 17 | Q06587 RING1_HUMAN | R.LHNQQALSSS#IEEGLR.M        | S140:        | 3 | 4,9684 | 0,275 | 0,393  |
| 17 | Q9NRL2 BAZ1A_HUMAN | K.RQS#PEPSPVTLGR.R           | S1413:       | 2 | 2,7367 | 0,455 | 0      |
| 17 | Q8N9T8 KRI1_HUMAN  | K.YVDEENS#DGGETSNHR.L        | S142:        | 2 | 3,2919 | 0,476 | -0,533 |
| 17 | P30622 CLIP1_HUMAN | R.KVQAEDEANGLQTPAS#R.A       | S143:        | 2 | 4,6811 | 0,503 | -0,428 |
| 17 | P30622 CLIP1_HUMAN | R.KVQAEDEANGLQTPAS#R.A       | S143:        | 3 | 3,0511 | 0,319 | -0,367 |
| 17 | O95602 RPA1_HUMAN  | K.EKQEEEVVDYES#EEEEER.E      | S1430:       | 3 | 5,7855 | 0,393 | -0,727 |
| 17 | P49792 RBP2_HUMAN  | K.SGSSFVHQAS#FK.F            | S1456:       | 2 | 3,0579 | 0,254 | 0      |
| 17 | Q9UQ35 SRRM2_HUMAN | R.DGSGTPSRHS#LSGSS#PGM*K.D   | S1458:S1463: | 3 | 3,0633 | 0,304 | -0,362 |
| 17 | P46783 RS10_HUMAN  | K.KAEAGAGS#ATEFQFR.G         | S146:        | 2 | 4,6085 | 0,557 | 0,666  |
| 17 | P46783 RS10_HUMAN  | K.KAEAGAGS#ATEFQFR.G         | S146:        | 3 | 3,6293 | 0,167 | 0,333  |
| 17 | O60307 MAST3_HUMAN | R.SSENVLDEEGRS#PR.L          | S146:        | 2 | 3,4319 | 0,507 | 0,143  |
| 17 | Q14160 LAP4_HUMAN  | R.LRVQS#PEPPAPER.A           | S1475:       | 2 | 3,0125 | 0,344 | -0,392 |
| 17 | Q9UPT6 JIP3_HUMAN  | K.NYADQIS#RLEER.E            | S148:        | 2 | 2,2927 | 0,24  | 0,465  |
| 17 | Q16890 TPD53_HUMAN | R.NSPTFKS#FEER.V             | S149:        | 2 | 2,0019 | 0,194 | -0,343 |
| 17 | Q02952 AKA12_HUMAN | K.KGLS#SDLEGEK.T             | S1497:       | 2 | 2,5733 | 0,187 | -0,785 |
| 17 | Q8TEP8 CE192_HUMAN | K.HGGNVS#LDVLPVK.G           | S1502:       | 2 | 3,4449 | 0,41  | 0,086  |
| 17 | Q14160 LAP4_HUMAN  | R.M*KS#LEQDALR.A             | S1508:       | 3 | 3,2428 | 0,173 | 0,142  |
| 17 | P18583 SON_HUMAN   | K.SHDDGNIDLES#DSFLK.F        | S152:        | 2 | 5,1864 | 0,603 | -0,456 |
| 17 | Q00536 PCTK1_HUMAN | R.RVS#LSEIGFGK.L             | S153:        | 3 | 3,7815 | 0,357 | 0,431  |
| 17 | Q8NFC6 FA44A_HUMAN | K.DKDVTL#PVK.A               | S1531:       | 2 | 3,5526 | 0,295 | -0,31  |
| 17 | P18583 SON_HUMAN   | K.SHDDGNIDLES#FLK.F          | S154:        | 2 | 5,6697 | 0,621 | -0,391 |
| 17 | P18583 SON_HUMAN   | K.SHDDGNIDLES#FLK.F          | S154:        | 3 | 4,5346 | 0,332 | 0,195  |
| 17 | Q92733 PRCC_HUMAN  | K.IAAPELHKGDS#DS#EEDEPTK.K   | S157:S159:   | 3 | 3,3189 | 0,441 | -0,157 |
| 17 | O75376 NCOR1_HUMAN | K.HEAPSS#PISGQPCGDDQNASPSK.L | S158:        | 3 | 3,7826 | 0,446 | 0,374  |
| 17 | P05023 AT1A1_HUMAN | R.DKYEPAAVS#EQGDK.K          | S16:         | 2 | 3,3806 | 0,333 | 0,075  |
| 17 | P05023 AT1A1_HUMAN | R.DKYEPAAVS#EQGDK.K          | S16:         | 3 | 3,304  | 0,342 | -0,226 |
| 17 | Q96QF0 RAB3I_HUMAN | R.LRS#PSVLEVR.E              | S163:        | 3 | 3,3444 | 0,19  | -0,074 |

|    |                    |                                 |            |   |        |       |        |
|----|--------------------|---------------------------------|------------|---|--------|-------|--------|
| 17 | Q96QF0 RAB3I_HUMAN | R.LRS#PSVLEVR.E                 | S163:      | 2 | 2,444  | 0,152 | -0,395 |
| 17 | Q13523 PRP4B_HUMAN | R.S#SS#TKGKLELVDNK.I            | S164:S166: | 2 | 3,1333 | 0,345 | -0,879 |
| 17 | Q9NW68 BSDC1_HUMAN | K.KGEISELLVGS#PSIR.A            | S166:      | 2 | 3,5271 | 0,481 | -0,659 |
| 17 | O43399 TPD54_HUMAN | R.NSATFKS#FEDR.V                | S166:      | 2 | 3,2501 | 0,295 | -0,618 |
| 17 | Q6NZI2 PTRF_HUMAN  | K.LPAKLS#ISK.S                  | S167:      | 2 | 2,9858 | 0,391 | -0,353 |
| 17 | P29966 MARCS_HUMAN | K.SFKLS#GFSFK.K                 | S167:      | 2 | 2,9365 | 0,466 | -0,596 |
| 17 | P32519 ELF1_HUMAN  | K.YADSPGASS#PEQPKR.K            | S168:      | 3 | 2,6428 | 0,331 | -0,11  |
| 17 | Q5UIP0 RIF1_HUMAN  | K.RDS#FDNCSLGESSK.I             | S1688:     | 2 | 4,3087 | 0,52  | 0,435  |
| 17 | Q5UIP0 RIF1_HUMAN  | K.RDS#FDNCSLGESSK.I             | S1688:     | 3 | 3,9194 | 0,374 | 0,109  |
| 17 | Q02952 AKA12_HUMAN | R.IEKS#LVEPK.E                  | S1691:     | 2 | 2,4583 | 0,143 | -0,109 |
| 17 | P09493 TPM1_HUMAN  | R.KLVIIES#DLER.A                | S174:      | 2 | 3,9325 | 0,296 | -0,087 |
| 17 | Q99627 CSN8_HUMAN  | R.KPVAGALDVS#FNK.F              | S175:      | 2 | 3,4259 | 0,461 | -0,257 |
| 17 | Q99627 CSN8_HUMAN  | R.KPVAGALDVS#FNK.F              | S175:      | 3 | 3,3035 | 0,238 | 0,256  |
| 17 | Q9UIF9 BAZ2A_HUMAN | R.YSEEGLS#PSKR.R                | S1756:     | 2 | 2,3278 | 0,372 | -0,366 |
| 17 | Q58FF8 H90B2_HUMAN | K.IEDVGS#DEEDDSGKDK.K           | S177:      | 2 | 4,8922 | 0,545 | 0,067  |
| 17 | Q9NYF8 BCLF1_HUMAN | K.KAEGEPQEES#PLK.S              | S177:      | 2 | 4,1593 | 0,44  | -0,641 |
| 17 | Q58FF8 H90B2_HUMAN | K.IEDVGS#DEEDDSGKDK.K           | S177:      | 3 | 3,3623 | 0,347 | -0,101 |
| 17 | Q9NYF8 BCLF1_HUMAN | K.KAEGEPQEES#PLK.S              | S177:      | 3 | 2,7759 | 0,221 | 0      |
| 17 | Q58FF8 H90B2_HUMAN | K.IEDVGS#DEEDDS#GKDKK.K         | S177:S183: | 3 | 4,4478 | 0,428 | -0,181 |
| 17 | P11137 MAP2_HUMAN  | R.VDHGAEIITQS#PGR.S             | S1782:     | 2 | 4,1016 | 0,529 | -0,626 |
| 17 | Q86WR7 CJ047_HUMAN | R.APS#PPVEHPR.L                 | S179:      | 2 | 2,1899 | 0,326 | -0,209 |
| 17 | P51636 CAV2_HUMAN  | K.ADVQLFM*DDDS#YSHHSGLEYADPEK.F | S18:       | 3 | 4,6435 | 0,537 | -0,432 |
| 17 | O00221 IKBE_HUMAN  | R.KGPDEAEESQYDS#GIESLR.S        | S18:       | 3 | 4,3393 | 0,297 | 0,167  |
| 17 | Q8N3X1 FNBP4_HUMAN | R.RPILQLS#PPGPR.G               | S18:       | 3 | 2,7963 | 0,193 | -0,194 |
| 17 | O60336 MABP1_HUMAN | K.NLLRS#PSIK.L                  | S18:       | 2 | 2,4609 | 0,27  | -0,11  |
| 17 | Q00537 PCTK2_HUMAN | R.RAS#LSEIGFGK.M                | S180:      | 2 | 4,322  | 0,626 | -0,294 |
| 17 | Q9H1E3 NUCKS_HUMAN | K.ATVTPS#PVKKG.G                | S181:      | 2 | 2,8068 | 0,496 | -0,628 |
| 17 | Q9H4L4 SEN3_HUMAN  | K.NHLSPPQQGGATPVPS#PCCR.F       | S181:      | 3 | 2,6844 | 0,145 | 0,081  |
| 17 | Q9H1E3 NUCKS_HUMAN | R.LKATVTPS#PVK.G                | S181:      | 2 | 2,33   | 0,246 | 0      |
| 17 | Q14980 NUMA1_HUMAN | K.KLDVEEPDSANSS#FYSTR.S         | S1834:     | 3 | 3,9784 | 0,382 | 0,258  |
| 17 | Q14980 NUMA1_HUMAN | K.KLDVEEPDSANSS#FYSTR.S         | S1834:     | 2 | 2,0191 | 0,39  | 0,804  |
| 17 | Q9NQC3 RTN4_HUMAN  | K.RRGSSGS#VDET#LFALPAASEPVIR.S  | S184:T188: | 3 | 3,0181 | 0,373 | -0,684 |
| 17 | P49750 YLPM1_HUMAN | K.KDAEEEEES#ELGYIPK.S           | S1840:     | 2 | 3,9897 | 0,439 | -0,134 |

|    |                     |                                 |              |   |        |       |        |
|----|---------------------|---------------------------------|--------------|---|--------|-------|--------|
| 17 | P62070 RRAS2_HUMAN  | K.FQEQCPS#PEPTRK.E              | S186:        | 3 | 3,3598 | 0,237 | -0,096 |
| 17 | B2RTT5 B2RTT5_HUMAN | K.LRPEPPGS#VQLEEK.S             | S187:        | 3 | 4,7286 | 0,355 | 0,11   |
| 17 | O95218 ZRAB2_HUMAN  | K.YNLDS#EEEDSNKK.K              | S188:        | 2 | 4,3151 | 0,576 | -0,567 |
| 17 | Q53SC7 Q53SC7_HUMAN | R.SNM*HFTSSSTGGLSSSQSSYS#PSNR.E | S189:        | 3 | 4,274  | 0,301 | -0,34  |
| 17 | Q9NYD6 HXC10_HUMAN  | R.AEHLES#PQLGGK.V               | S189:        | 2 | 3,707  | 0,419 | 0      |
| 17 | Q9NYD6 HXC10_HUMAN  | R.AEHLES#PQLGGK.V               | S189:        | 3 | 2,8323 | 0,262 | 0,136  |
| 17 | Q9BVC5 ASHWN_HUMAN  | R.KSPSGPVKS#PPLS#PVGTTPVK.L     | S189:S193:   | 3 | 4,5939 | 1     | 0,494  |
| 17 | Q9BVC5 ASHWN_HUMAN  | R.KSPSGPVKS#PPLSPVGT#PVK.L      | S189:T198:   | 3 | 4,9862 | 1     | 0,577  |
| 17 | Q9H1E3 NUCKS_HUMAN  | R.KVVDYSQFQES#DDADEDYGR.D       | S19:         | 3 | 5,7094 | 0,47  | 0,673  |
| 17 | O94915 FRYL_HUMAN   | R.SNSLRLS#LIGDR.R               | S1945:       | 3 | 3,1347 | 0,384 | 0,259  |
| 17 | O94915 FRYL_HUMAN   | R.SNSLRLS#LIGDR.R               | S1945:       | 2 | 2,0675 | 0,086 | -0,086 |
| 17 | P35580 MYH10_HUMAN  | R.QLHLEGASLELS#DDDTESK.T        | S1956:       | 3 | 3,7265 | 0,315 | -0,253 |
| 17 | O94915 FRYL_HUMAN   | R.RS#NTLDIM*DGR.I               | S1957:       | 2 | 3,0512 | 0,344 | 0,089  |
| 17 | Q9BVG4 CX026_HUMAN  | K.GADS#GEEKEGINR.E              | S197:        | 3 | 3,8496 | 0,348 | -0,349 |
| 17 | P35908 K22E_HUMAN   | K.FAS#FIDKVR.F                  | S197:        | 2 | 2,498  | 0,126 | -0,42  |
| 17 | Q9BVG4 CX026_HUMAN  | K.GADS#GEEKEGINR.E              | S197:        | 2 | 2,4469 | 0,393 | -0,621 |
| 17 | Q92614 MY18A_HUMAN  | K.NKLEGDS#DVDS#ELEDVDR.V        | S1970:       | 2 | 3,6907 | 0,614 | -0,257 |
| 17 | Q92614 MY18A_HUMAN  | K.NKLEGDS#DVDS#ELEDVDR.V        | S1970:S1974: | 3 | 4,6707 | 0,334 | 0,369  |
| 17 | Q9NW13 RBM28_HUMAN  | K.YKDTQS#VSAIGEEK.S             | S200:        | 2 | 3,6886 | 0,437 | 0,448  |
| 17 | P30622 CLIP1_HUMAN  | K.TASESISNLS#EAGS#IKKGER.E      | S200:S204:   | 3 | 3,5034 | 0,364 | 0,411  |
| 17 | Q52LD0 Q52LD0_HUMAN | K.AGGSPASYHGSTS#PR.V            | S201:        | 2 | 2,964  | 0,13  | -0,323 |
| 17 | Q09666 AHNK_HUMAN   | R.HELTEISNVDVETQS#GK.T          | S201:        | 3 | 2,7146 | 0,138 | 0,093  |
| 17 | Q8NCD3 HJURP_HUMAN  | R.ISGKS#PGDPAKPASS#PR.E         | S201:S211:   | 3 | 3,8368 | 0,281 | 0      |
| 17 | Q8NCD3 HJURP_HUMAN  | R.ISGKS#PGDPAKPASS#PR.E         | S201:S211:   | 2 | 3,1927 | 0,455 | -0,202 |
| 17 | Q92614 MY18A_HUMAN  | R.YSHSYLS#DSDTEAK.L             | S2041:       | 2 | 5,061  | 0,526 | 0,218  |
| 17 | Q14980 NUMA1_HUMAN  | R.RQS#M*AFSILNT#PKK.L           | S2047:T2055: | 3 | 4,5999 | 0,31  | 0,305  |
| 17 | Q6ZN18 AEBP2_HUMAN  | R.RGS#LEM*SSDGEPLSR.M           | S206:        | 2 | 2,9769 | 0,419 | 0,284  |
| 17 | Q05519 SFR11_HUMAN  | K.LNHVAAGLV#PSLK.S              | S207:        | 3 | 3,2209 | 0,27  | -0,246 |
| 17 | Q9UKV3 ACINU_HUMAN  | K.SS#SISEEKGDS#DDEKPR.K         | S207:S216:   | 3 | 3,5613 | 0,316 | -0,271 |
| 17 | Q01130 SFRS2_HUMAN  | R.SKS#PPKSPEEGAVSS.-            | S208:        | 2 | 2,8071 | 0,181 | 0,072  |
| 17 | P60174 TPIS_HUMAN   | R.KQS#LGELIGTLNAAK.V            | S21:         | 2 | 4,626  | 0,547 | -0,601 |
| 17 | Q6R327 RICTR_HUMAN  | R.GRND#GEENVPLDLTR.E            | S21:         | 2 | 3,3439 | 0,487 | -0,198 |
| 17 | P83369 LSM11_HUMAN  | R.SAGAGSPARPPS#PR.L             | S21:         | 3 | 2,8112 | 0,257 | 0,066  |

|    |                    |                                |              |   |        |       |        |
|----|--------------------|--------------------------------|--------------|---|--------|-------|--------|
| 17 | Q13242 SFRS9_HUMAN | R.GS#PHYFSPFRPY.-              | S211:        | 2 | 2,467  | 0,471 | -0,477 |
| 17 | Q9UQ35 SRRM2_HUMAN | R.CRS#PGM*LEPLGSSR.T           | S2132:       | 3 | 3,4796 | 0,135 | -0,223 |
| 17 | Q9UQ35 SRRM2_HUMAN | R.CRS#PGM*LEPLGSSR.T           | S2132:       | 2 | 2,9792 | 0,462 | 0,074  |
| 17 | O60841 IF2P_HUMAN  | K.NKPGPNIES#GNEDDDASFK.I       | S214:        | 3 | 5,0422 | 0,518 | 0,865  |
| 17 | O60841 IF2P_HUMAN  | K.NKPGPNIES#GNEDDDASFK.I       | S214:        | 2 | 3,5651 | 0,549 | 0,462  |
| 17 | Q9Y6Q9 NCOA3_HUMAN | K.TPHDILEDINAS#PEM*R.Q         | S214:        | 3 | 3,2349 | 0,281 | 0,284  |
| 17 | Q9H792 SG269_HUMAN | K.HVILSGS#TEVISNEGGR.F         | S214:        | 2 | 2,9851 | 0,465 | 0,465  |
| 17 | Q9H1E3 NUCKS_HUMAN | K.TPSPKEEDEEPES#PPEK.K         | S214:        | 3 | 2,8863 | 0,095 | -0,365 |
| 17 | Q9H1E3 NUCKS_HUMAN | K.EEDEEPES#PPEK.K              | S214:        | 2 | 2,5529 | 0,141 | -0,376 |
| 17 | Q9H1E3 NUCKS_HUMAN | K.TPSPKEEDEEPES#PPEK.K         | S214:        | 2 | 2,3437 | 0,308 | -0,426 |
| 17 | Q9H6K1 CF106_HUMAN | R.KVEGNFNPFAS#PQK.N            | S215:        | 2 | 4,7825 | 0,504 | 0,297  |
| 17 | Q9Y618 NCOR2_HUMAN | K.QQQLLEEEAAKPPPEKPV#PPPIESK.H | S215:        | 3 | 3,2268 | 0,217 | -0,309 |
| 17 | Q01082 SPTB2_HUMAN | R.TSS#KESSPIPS#PTSDRK.A        | S2161:S2169: | 2 | 4,0231 | 1     | 0,497  |
| 17 | O95297 MPZL1_HUMAN | R.KS#PSDTEGLVK.S               | S219:        | 2 | 2,9576 | 0,303 | -0,393 |
| 17 | Q6ZS17 FA65A_HUMAN | R.SQS#FAGVLGSHER.G             | S22:         | 3 | 3,4622 | 0,413 | 0,063  |
| 17 | Q6ZS17 FA65A_HUMAN | R.SQS#FAGVLGSHER.G             | S22:         | 2 | 2,9095 | 0,396 | 0      |
| 17 | Q7Z5K2 WAPL_HUMAN  | K.RPES#PSEISPIK.G              | S221:        | 3 | 2,7011 | 0,098 | 0,193  |
| 17 | Q7Z5K2 WAPL_HUMAN  | K.RPES#PSEISPIK.G              | S221:        | 2 | 2,6305 | 0,5   | 0,258  |
| 17 | Q99618 CDCA3_HUMAN | K.RPS#PLSENVSELK.E             | S222:        | 2 | 2,9723 | 0,288 | 0,079  |
| 17 | O75376 NCOR1_HUMAN | K.QQQLLEEEAAKPPPEKPV#PPPVEQK.H | S224:        | 3 | 3,9748 | 0,355 | 0,428  |
| 17 | Q13573 SNW1_HUMAN  | R.GPPS#PPAPVM*HS#PSRK.M        | S224:S232:   | 2 | 2,7036 | 0,215 | 0,47   |
| 17 | Q5JSZ5 K0515_HUMAN | R.HIISATSLSTS#PTELGSR.N        | S226:        | 2 | 5,5608 | 0,678 | -0,378 |
| 17 | P08238 HS90B_HUMAN | R.EKEIS#DDEAEEEEK.G            | S226:        | 2 | 4,2324 | 0,565 | -0,075 |
| 17 | P08238 HS90B_HUMAN | R.EKEIS#DDEAEEEEK.G            | S226:        | 3 | 2,7531 | 0,399 | 0      |
| 17 | Q9BW71 HIRP3_HUMAN | K.SLKESEQES#EEEILAQK.K         | S227:        | 3 | 3,5381 | 0,165 | 0      |
| 17 | P51636 CAV2_HUMAN  | K.ADVQLFM*DDDSYSHHS#GLEADPEK.F | S23:         | 3 | 5,0818 | 0,473 | 0,37   |
| 17 | P50990 TCPQ_HUMAN  | K.HFS#GLEEAVYR.N               | S23:         | 2 | 4,0137 | 0,548 | -0,176 |
| 17 | O75494 FUSIP_HUMAN | R.NVADDTRS#EDLR.R              | S23:         | 2 | 2,7436 | 0,252 | 0,083  |
| 17 | O60716 CTND1_HUMAN | R.HYEDGYPGGSDNYGS#LSR.V        | S230:        | 3 | 5,6164 | 0,446 | -0,178 |
| 17 | P07900 HS90A_HUMAN | R.DKEVS#DDEAEEEEK.E            | S231:        | 2 | 4,155  | 0,348 | -0,579 |
| 17 | Q96KQ7 EHMT2_HUMAN | R.KLNS#GGGLSEELGSAR.R          | S232:        | 2 | 4,0971 | 0,596 | 0,147  |
| 17 | O60716 CTND1_HUMAN | R.HYEDGYPGGSDNYGSLS#R.V        | S232:        | 2 | 2,4077 | 0,419 | -0,356 |
| 17 | O15231 ZN185_HUMAN | R.RES#CGSSVLTDFEGK.D           | S233:        | 2 | 4,1174 | 0,482 | -0,557 |



|    |                     |                              |              |   |        |       |        |
|----|---------------------|------------------------------|--------------|---|--------|-------|--------|
| 17 | Q96FF7 YS003_HUMAN  | R.ARS#PPQPLGELK.R            | S233:        | 3 | 2,9737 | 0,235 | 0,067  |
| 17 | P62753 RS6_HUMAN    | R.LS#SLRAS#TSKSESSQK.-       | S235:S240:   | 2 | 2,9465 | 1     | -0,986 |
| 17 | P61247 RS3A_HUMAN   | K.LM*ELHGEGS#SSGK.A          | S236:        | 2 | 2,4165 | 0,307 | 0,256  |
| 17 | Q9Y2W2 WBP11_HUMAN  | R.RDEDM*LYS#PELAQR.G         | S237:        | 2 | 4,4785 | 0,501 | 0,47   |
| 17 | Q9Y2W2 WBP11_HUMAN  | R.RDEDM*LYS#PELAQR.G         | S237:        | 3 | 4,1164 | 0,361 | 0,302  |
| 17 | Q86Y04 Q86Y04_HUMAN | K.KVDLTLLS#PK.S              | S239:        | 2 | 3,7641 | 0,374 | -0,307 |
| 17 | Q13136 LIPA1_HUMAN  | K.RSS#DGS#LSHEEDLAK.V        | S239:S242:   | 2 | 4,225  | 0,497 | 0,068  |
| 17 | Q9UQ35 SRRM2_HUMAN  | R.VSGRTS#PPLDR.A             | S2398:       | 3 | 2,7103 | 0,295 | -0,531 |
| 17 | Q9UQ35 SRRM2_HUMAN  | R.VSGRTS#PPLDR.A             | S2398:       | 2 | 2,6606 | 0,228 | 0      |
| 17 | Q9UFC0 LRWD1_HUMAN  | K.RPDDVPLS#LSPSK.R           | S241:        | 2 | 3,6779 | 0,407 | 0,573  |
| 17 | Q5T200 ZC3HD_HUMAN  | R.KTSAVSS#PLLDQQR.N          | S242:        | 2 | 4,2908 | 0,45  | 0,303  |
| 17 | Q6NUK4 REEP3_HUMAN  | R.YGS#LKYK.V                 | S242:        | 2 | 2,521  | 0,329 | 0,26   |
| 17 | Q56NI9 ESCO2_HUMAN  | K.SKSEVIEDS#DVETVSEK.K       | S244:        | 2 | 4,9786 | 0,569 | -0,249 |
| 17 | Q8WW11 LMO7_HUMAN   | K.REDS#FESLDSLGSR.S          | S246:        | 2 | 3,3156 | 0,439 | -0,8   |
| 17 | P25054 APC_HUMAN    | R.KLEESASFESLSPSS#RPASPT#R.S | S2469:T2475: | 3 | 4,762  | 1     | -0,145 |
| 17 | Q9H3N1 TXND1_HUMAN  | K.KVEEQEAEEDVS#EEEEASK.E     | S247:        | 3 | 5,3831 | 0,44  | -0,218 |
| 17 | Q9UNF1 MAGD2_HUMAN  | R.ALLSLRS#PK.A               | S247:        | 2 | 3,2227 | 0,388 | 0      |
| 17 | Q9BZD4 NUF2_HUMAN   | K.IVDS#PEKLN                 | S247:        | 2 | 2,6466 | 0,297 | 0,55   |
| 17 | Q9Y2W1 TR150_HUMAN  | R.ERS#PALKS#PLQSVVVR.R       | S248:S253:   | 2 | 2,2583 | 0,381 | -0,697 |
| 17 | P30305 MPIP2_HUMAN  | R.KM*EVEELS#PLALGR.F         | S249:        | 3 | 3,2264 | 0,228 | 0,768  |
| 17 | P16949 STMN1_HUMAN  | K.RASGQAFELILS#PR.S          | S25:         | 3 | 3,3089 | 0,156 | -0,225 |
| 17 | P46100 ATRX_HUMAN   | K.LHDFLAHS#SEESEETSS#PPR.L   | S25:S34:     | 3 | 5,1881 | 1     | 0,227  |
| 17 | P52701 MSH6_HUMAN   | R.RVIS#DSESDIGGS#DVEFKPDTK.E | S252:S261:   | 3 | 5,7402 | 0,524 | -0,216 |
| 17 | Q9BYG9 Q9BYG9_HUMAN | K.M*QAS#IEKAH.-              | S254:        | 2 | 2,4876 | 0,195 | -0,439 |
| 17 | P52701 MSH6_HUMAN   | R.RVISDS#ESDIGGS#DVEFKPDTK.E | S254:S261:   | 3 | 5,7207 | 0,496 | 0,288  |
| 17 | Q9UQ35 SRRM2_HUMAN  | K.RVPS#PTPAPK.E              | S2581:       | 2 | 2,2528 | 0,217 | -0,324 |
| 17 | Q92466 DDB2_HUMAN   | R.SRS#PLELEPEAK.K            | S26:         | 3 | 3,7975 | 0,383 | -0,7   |
| 17 | Q4G0J3 LARP7_HUMAN  | R.SRPTSEGS#DIESTEPQK.Q       | S261:        | 3 | 3,646  | 0,294 | -0,19  |
| 17 | Q9Y5B6 GCFE_HUMAN   | R.LVREDENDAS#DDEDDDEK.R      | S262:        | 3 | 4,4291 | 0,499 | -0,669 |
| 17 | Q8TC05 MDM1_HUMAN   | R.NLETVS#PERK.S              | S263:        | 2 | 2,5593 | 0,354 | -0,195 |
| 17 | Q9HC52 CBX8_HUMAN   | R.RQSDSLVQCGVTS#PSSAEATGK.L  | S265:        | 3 | 4,5462 | 0,344 | 0,385  |
| 17 | Q8NG27 PJA1_HUMAN   | R.NLAS#PNCVKPK.I             | S265:        | 2 | 2,5428 | 0,239 | -0,373 |
| 17 | O60716 CTND1_HUMAN  | R.VGGSS#VDLHR.F              | S269:        | 2 | 2,8576 | 0,281 | 0,331  |

|    |                     |                                |            |   |        |       |        |
|----|---------------------|--------------------------------|------------|---|--------|-------|--------|
| 17 | P22234 PUR6_HUMAN   | K.TKEVYELLD#PGK.V              | S27:       | 2 | 4,8703 | 0,527 | -0,548 |
| 17 | Q6IAA8 CK059_HUMAN  | R.KLLDPSS#PPTK.A               | S27:       | 2 | 4,0261 | 0,283 | 0,266  |
| 17 | Q7Z478 DHX29_HUMAN  | R.AKS#AEAGIAGEAQS.K            | S27:       | 3 | 3,133  | 0,22  | -0,061 |
| 17 | Q9H3N1 TXND1_HUMAN  | R.QRS#LGPSLATDKS.-             | S270:      | 3 | 3,8326 | 0,398 | 0,191  |
| 17 | Q5BKZ1 ZN326_HUMAN  | K.ISLSKS#PTK.T                 | S270:      | 2 | 2,636  | 0,225 | 0,117  |
| 17 | P23246 SFPQ_HUMAN   | R.SEEKIS#DSEGFK.A              | S273:      | 2 | 4,4477 | 0,572 | 0      |
| 17 | Q9NY61 AATF_HUMAN   | K.DKGGPEFSS#ALK.N              | S273:      | 2 | 3,392  | 0,082 | 0,371  |
| 17 | P23246 SFPQ_HUMAN   | R.SEEKIS#DSEGFK.A              | S273:      | 3 | 3,2381 | 0,301 | -0,191 |
| 17 | Q9NYV4 CD2L7_HUMAN  | R.RQS#VS#PPYKEPSAYQSSTR.S      | S274:S276: | 3 | 3,1498 | 0,305 | 0,157  |
| 17 | O00203 AP3B1_HUMAN  | K.NFYES#DDQKEK.T               | S276:      | 2 | 4,0186 | 0,432 | 0      |
| 17 | Q8IXT5 RB12B_HUMAN  | R.S#RS#PLGFYVHLK.N             | S278:S280: | 3 | 2,9487 | 0,303 | -0,468 |
| 17 | Q8IXT5 RB12B_HUMAN  | R.S#RS#PLGFYVHLK.N             | S278:S280: | 2 | 2,7928 | 0,497 | -0,546 |
| 17 | Q9NTJ3 SMC4_HUMAN   | R.REEGPPPPSPDGASS#DAEPEPPSGR.T | S28:       | 3 | 6,1053 | 0,467 | 0,141  |
| 17 | Q9Y2K7 JHD1A_HUMAN  | R.RYEDDGIS#DDEIEGK.R           | S28:       | 2 | 4,3584 | 0,599 | -0,335 |
| 17 | Q3KR37 GRM1B_HUMAN  | R.S#RSPTPQNQDGMT*VEK.G         | S28:       | 2 | 2,6867 | 0,361 | -0,492 |
| 17 | Q8TAQ2 SMRC2_HUMAN  | K.TLTDEVNS#PDSRR.D             | S283:      | 2 | 2,7261 | 0,274 | 0      |
| 17 | Q92576 PHF3_HUMAN   | K.AKPVGS#PLFK.F                | S283:      | 2 | 2,2549 | 0,292 | -0,217 |
| 17 | Q6IBW4 CNDH2_HUMAN  | K.ESRS#PQQAALPR.R              | S284:      | 3 | 2,7469 | 0,266 | 0,121  |
| 17 | Q6P4F7 RHGBA_HUMAN  | R.RQS#VGDFVSGALNK.F            | S285:      | 2 | 4,6864 | 0,456 | -0,392 |
| 17 | P18827 SDC1_HUMAN   | K.KDEGS#YSLEPK.Q               | S285:      | 2 | 3,1632 | 0,258 | 0,167  |
| 17 | Q9NYF8 BCLF1_HUMAN  | R.YS#PSQNS#PIHHIPSR.R          | S285:S290: | 2 | 2,6134 | 0,39  | 0      |
| 17 | O43166 SI1L1_HUMAN  | R.SKS#ETGDSSIFR.K              | S288:      | 2 | 3,439  | 0,484 | 0,088  |
| 17 | Q641Q2 FA21A_HUMAN  | R.SRPTS#FADELAAR.I             | S288:      | 2 | 3,1877 | 0,438 | 0      |
| 17 | Q5T069 Q5T069_HUMAN | K.SVPGYKVEKS#P.-               | S288:      | 2 | 2,3786 | 0,393 | 0,087  |
| 17 | O75170 SAPS2_HUMAN  | R.RVGTEGLVDS#FSQGLER.S         | S289:      | 3 | 4,1648 | 0,321 | 0,095  |
| 17 | O95817 BAG3_HUMAN   | R.SSTPLHS#PSPIR.V              | S289:      | 2 | 2,5693 | 0,193 | 1,347  |
| 17 | P51648 AL3A2_HUMAN  | K.RILS#LLEGQK.I                | S293:      | 2 | 2,3813 | 0,308 | -0,099 |
| 17 | P36578 RL4_HUMAN    | R.ILKS#PEIQR.A                 | S295:      | 2 | 2,4613 | 0,155 | -0,419 |
| 17 | Q3KR37 GRM1B_HUMAN  | R.SRS#PTPQNQDGMT*VEK.G         | S30:       | 3 | 5,167  | 0,442 | -0,276 |
| 17 | O14757 CHK1_HUMAN   | K.HIQSNLDFS#PVNSASSEENVK.Y     | S301:      | 3 | 4,0531 | 0,29  | 0,461  |
| 17 | Q6ICG6 CV009_HUMAN  | R.NNRPAFFS#PSLK.R              | S304:      | 2 | 2,3283 | 0,102 | 0      |
| 17 | Q9Y2K1 ZBTB1_HUMAN  | R.KSS#TVESEIASEEK.S            | S305:      | 2 | 4,2076 | 0,418 | 0      |
| 17 | Q06265 EXOS9_HUMAN  | K.M*EKAPIDTS#DVEEK.A           | S306:      | 2 | 3,8113 | 0,402 | 0,072  |

|    |                    |                                   |            |   |        |       |        |
|----|--------------------|-----------------------------------|------------|---|--------|-------|--------|
| 17 | Q6ICG6 CV009_HUMAN | R.NNRPAFFSPS#LK.R                 | S306:      | 3 | 3,5984 | 0,39  | 0,125  |
| 17 | Q9NXR1 NDE1_HUMAN  | R.RPS#STSVPLGDK.G                 | S306:      | 2 | 2,9198 | 0,202 | -0,092 |
| 17 | P08107 HSP71_HUMAN | R.ARFEELCS#DLFR.S                 | S307:      | 3 | 3,1757 | 0,258 | -0,451 |
| 17 | Q96MU7 YTDC1_HUMAN | R.ARGIS#PIVFDR.S                  | S308:      | 3 | 2,6953 | 0,081 | 0,279  |
| 17 | Q01518 CAP1_HUMAN  | R.SGPKPFSAKPKQTS#PS#PK.R          | S308:S310: | 2 | 4,9594 | 0,444 | 0,244  |
| 17 | Q9Y2K1 ZBTB1_HUMAN | R.KSSTVES#EIASEEK.S               | S309:      | 3 | 3,0073 | 0,256 | 0,114  |
| 17 | Q7L9B9 EEPD1_HUMAN | R.KFSAACNFS#NILVNQER.L            | S31:       | 3 | 3,409  | 0,182 | -0,176 |
| 17 | Q92522 H1X_HUMAN   | K.AGGSAAALS#PSKK.R                | S31:       | 2 | 2,8282 | 0,362 | -0,529 |
| 17 | Q96HC4 PDLI5_HUMAN | K.KANNSQEPS#PQLASSVASTR.S         | S313:      | 3 | 3,1205 | 0,159 | -0,255 |
| 17 | Q8IX01 SFR14_HUMAN | R.KM*S#FDIIDK.S                   | S315:      | 2 | 3,4403 | 0,256 | 0,205  |
| 17 | Q8N350 DOS_HUMAN   | R.HAS#LDGASPYFK.V                 | S319:      | 2 | 4,3795 | 0,446 | 0,267  |
| 17 | Q9UQ35 SRRM2_HUMAN | R.RGEGDAPFSEPGTTSTQRPS#S#PETATK.Q | S322:S323: | 3 | 4,0714 | 1     | 0,062  |
| 17 | Q9BRD0 BUD13_HUMAN | K.NSKYEYDPDIS#PPR.K               | S325:      | 2 | 4,6107 | 0,504 | 0,554  |
| 17 | Q9BRD0 BUD13_HUMAN | K.NSKYEYDPDIS#PPR.K               | S325:      | 3 | 3,8384 | 0,32  | 0,104  |
| 17 | Q9UKJ3 GPTC8_HUMAN | R.GPKPEPPGS#GSPAPPR.R             | S325:      | 2 | 3,3522 | 0,489 | 0,228  |
| 17 | O75122 CLAP2_HUMAN | R.SSSS#SQESLNRPFSSK.W             | S326:      | 2 | 2,3321 | 0,279 | 0,135  |
| 17 | Q9UKJ3 GPTC8_HUMAN | R.GPKPEPPGSGS#PAPPR.R             | S327:      | 3 | 4,5237 | 0,324 | 0,341  |
| 17 | Q9UKJ3 GPTC8_HUMAN | R.GPKPEPPGSGS#PAPPR.R             | S327:      | 2 | 3,4048 | 0,494 | -0,607 |
| 17 | O15033 K0317_HUMAN | R.RPS#TAVDEEDED#PSECHTPEK.V       | S327:S337: | 3 | 4,2267 | 0,404 | 0,684  |
| 17 | Q9UGV2 NDRG3_HUMAN | R.THS#TSSSLGSGESPFSR.S            | S331:      | 2 | 4,3876 | 0,542 | 0,541  |
| 17 | Q8NEM0 MCPH1_HUMAN | K.YRLS#PTLSSTK.G                  | S333:      | 2 | 2,8388 | 0,422 | -0,366 |
| 17 | P49790 NU153_HUMAN | K.RIPSIVSS#PLNSPLDR.S             | S334:      | 2 | 3,6067 | 0,359 | -0,267 |
| 17 | P49790 NU153_HUMAN | K.RIPSIVSS#PLNSPLDR.S             | S334:      | 3 | 3,0162 | 0,195 | -0,3   |
| 17 | Q2TB10 ZN800_HUMAN | R.DSITPDIATKPGQPLFLDSIS#PKK.S     | S336:      | 3 | 3,1624 | 0,238 | -0,553 |
| 17 | Q99759 M3K3_HUMAN  | R.LRS#ADSENALSQER.N               | S337:      | 2 | 4,0252 | 0,528 | -0,556 |
| 17 | P49790 NU153_HUMAN | K.RIPSIVSSPLNS#PLDR.S             | S338:      | 3 | 4,0912 | 0,408 | -0,2   |
| 17 | Q9NVH2 INT7_HUMAN  | K.HYFSIVPGNVSSS#PR.S              | S338:      | 2 | 3,1677 | 0,41  | 0,495  |
| 17 | P49790 NU153_HUMAN | K.RIPSIVSSPLNS#PLDR.S             | S338:      | 2 | 2,9426 | 0,43  | -0,466 |
| 17 | Q96S94 CCNL2_HUMAN | K.LVES#PKEGK.G                    | S338:      | 2 | 2,2911 | 0,287 | -0,457 |
| 17 | Q86X53 ERIC1_HUMAN | K.AHS#ILNFLK.S                    | S339:      | 2 | 2,6679 | 0,454 | -0,435 |
| 17 | Q09666 AHNK_HUMAN  | K.FKM*PFLSIS#SPK.V                | S3411:     | 3 | 2,974  | 0,195 | 0      |
| 17 | Q9HC62 SEN2_HUMAN  | R.KVS#IIETK.E                     | S344:      | 2 | 2,74   | 0,369 | 0      |
| 17 | Q96S94 CCNL2_HUMAN | K.GSKPS#PLSVK.N                   | S348:      | 2 | 2,388  | 0,436 | -0,226 |

|    |                     |                             |            |   |        |       |        |
|----|---------------------|-----------------------------|------------|---|--------|-------|--------|
| 17 | Q8WVV9 HNRL_HUMAN   | R.LKTEEGEIDYS#AEEGENR.R     | S35:       | 3 | 3,8349 | 0,445 | -0,681 |
| 17 | Q8WVV9 HNRL_HUMAN   | R.LKTEEGEIDYS#AEEGENR.R     | S35:       | 2 | 2,3196 | 0,481 | 0,454  |
| 17 | O95149 SPN1_HUMAN   | K.GSSHS#PDHPGCLM*EN.-       | S350:      | 2 | 3,0823 | 0,226 | 0,425  |
| 17 | Q4G0J3 LARP7_HUMAN  | R.DIEISTEEKDTGDLKDSS#LLK.T  | S351:      | 3 | 3,5147 | 0,341 | 0,647  |
| 17 | Q9UK58 CCNL1_HUMAN  | K.AEEKS#PISINVK.T           | S352:      | 2 | 2,9706 | 0,403 | 0,175  |
| 17 | Q07157 ZO1_HUMAN    | R.ISKPGAVS#TPVK.H           | S353:      | 3 | 2,8275 | 0,292 | 0,362  |
| 17 | Q07157 ZO1_HUMAN    | R.ISKPGAVS#TPVK.H           | S353:      | 2 | 2,3191 | 0,184 | -0,483 |
| 17 | Q9P0K7 RAI14_HUMAN  | K.VAS#LTLHNK.E              | S358:      | 2 | 2,5023 | 0,445 | 0      |
| 17 | P01892 1A02_HUMAN   | R.KGGSYSQAASSDSAQGS#LTACK.V | S359:      | 3 | 5,6966 | 0,504 | 0,504  |
| 17 | Q9NQ55 SSF1_HUMAN   | K.ARVGGS#DEEASGIPSR.T       | S359:      | 2 | 3,0486 | 0,586 | -0,146 |
| 17 | P17096 HMGA1_HUMAN  | R.KQPPVS#PGTALVGSQK.E       | S36:       | 2 | 4,093  | 0,52  | 0,219  |
| 17 | P17096 HMGA1_HUMAN  | R.KQPPVS#PGTALVGSQK.E       | S36:       | 3 | 3,1398 | 0,247 | -0,109 |
| 17 | Q96RY7 IF140_HUMAN  | R.KVPDFLGS#PGAEGK.D         | S360:      | 2 | 2,1561 | 0,355 | 0,329  |
| 17 | P35613 BASI_HUMAN   | R.KPEDVLDDDDAGS#APLK.S      | S362:      | 2 | 6,0925 | 0,55  | 0,458  |
| 17 | P35613 BASI_HUMAN   | R.KPEDVLDDDDAGS#APLK.S      | S362:      | 3 | 3,2797 | 0,247 | 0,49   |
| 17 | Q9UHB6 LIMA1_HUMAN  | K.SEVQQPVHPKPLS#PDS#R.A     | S362:S365: | 3 | 2,7093 | 0,098 | 0,266  |
| 17 | Q15910 EZH2_HUMAN   | R.GRLPNNSS#RPST#PTINVLESK.D | S363:T367: | 3 | 3,3273 | 0,399 | -0,151 |
| 17 | Q76FK4 NOL8_HUMAN   | R.VSCHDS#DDDIM*R.N          | S365:      | 3 | 4,5718 | 0,445 | -0,118 |
| 17 | Q76FK4 NOL8_HUMAN   | R.VSCHDS#DDDIM*R.N          | S365:      | 2 | 3,9291 | 0,446 | -0,631 |
| 17 | Q6P0N0 CN106_HUMAN  | R.NISKLS#PPR.I              | S365:      | 2 | 2,8208 | 0,372 | -0,112 |
| 17 | P20749 BCL3_HUMAN   | K.ATRPASTSQPDPS#PDR.S       | S366:      | 3 | 3,3324 | 0,132 | -0,311 |
| 17 | P20749 BCL3_HUMAN   | K.ATRPASTSQPDPS#PDR.S       | S366:      | 2 | 2,2861 | 0,27  | -0,554 |
| 17 | Q6T4R5 NHS_HUMAN    | R.CSLVHSQS#VLQR.R           | S367:      | 3 | 3,8389 | 0,391 | 0,061  |
| 17 | Q8N6H7 ARFG2_HUMAN  | K.YKDNPFSLGES#FGSR.W        | S368:      | 2 | 3,926  | 0,477 | -0,479 |
| 17 | Q8N6H7 ARFG2_HUMAN  | K.YKDNPFSLGES#FGSR.W        | S368:      | 3 | 3,8958 | 0,317 | -0,308 |
| 17 | Q9NYB9 ABI2_HUMAN   | R.HTPPTIGGS#LPYR.R          | S368:      | 3 | 3,2767 | 0,206 | -0,186 |
| 17 | Q96S94 CCNL2_HUMAN  | K.AKADS#PVNGLPK.G           | S369:      | 2 | 3,6727 | 0,503 | -0,573 |
| 17 | O75122 CLAP2_HUMAN  | R.SRS#DIDVNAAGAK.A          | S370:      | 3 | 4,0473 | 0,203 | -0,503 |
| 17 | Q9Y2K6 UBP20_HUMAN  | R.S#SSPCRT#PEPDNDAHLR.S     | S371:T377: | 3 | 4,0172 | 0,212 | -0,436 |
| 17 | O75717 WDHD1_HUMAN  | R.QRS#HILEDDENS#VDISM*LK.T  | S374:S383: | 3 | 3,2581 | 0,42  | 0,38   |
| 17 | Q5RGS4 Q5RGS4_HUMAN | R.SRLS#LQENQLPK.-           | S375:      | 2 | 2,6603 | 0,215 | 0      |
| 17 | P42167 LAP2B_HUMAN  | K.GAAGRPLELS#DFR.M          | S378:      | 3 | 2,7659 | 0,466 | -0,125 |
| 17 | P42167 LAP2B_HUMAN  | K.GAAGRPLELS#DFR.M          | S378:      | 2 | 2,1739 | 0,446 | -0,332 |

|    |                     |                               |            |   |        |       |        |
|----|---------------------|-------------------------------|------------|---|--------|-------|--------|
| 17 | P16949 STMN1_HUMAN  | R.SKESVPEFPLS#PPK.K           | S38:       | 3 | 3,7279 | 0,404 | -0,113 |
| 17 | P16949 STMN1_HUMAN  | R.SKESVPEFPLS#PPK.K           | S38:       | 2 | 2,9631 | 0,434 | -0,075 |
| 17 | Q8WU90 ZC3HF_HUMAN  | R.AENGRS#DLEEDNER.E           | S381:      | 3 | 3,9812 | 0,304 | 0,099  |
| 17 | Q8WU90 ZC3HF_HUMAN  | R.AENGRS#DLEEDNER.E           | S381:      | 2 | 3,4288 | 0,373 | 0,066  |
| 17 | Q8IU81 I2BP1_HUMAN  | R.KAS#PEPEGEAAGK.M            | S384:      | 2 | 3,7044 | 0,389 | -0,723 |
| 17 | Q01813 K6PP_HUMAN   | R.GRS#FAGNLNTYK.R             | S386:      | 2 | 4,9339 | 0,462 | -0,173 |
| 17 | Q15464 SHB_HUMAN    | K.HGS#PEFCGILGER.V            | S388:      | 2 | 4,3839 | 0,506 | -0,476 |
| 17 | Q15464 SHB_HUMAN    | K.HGS#PEFCGILGER.V            | S388:      | 3 | 3,2217 | 0,337 | 0,119  |
| 17 | O43318 M3K7_HUMAN   | K.RM*S#ADM*SEIEAR.I           | S389:      | 2 | 3,7693 | 0,488 | -0,243 |
| 17 | O43318 M3K7_HUMAN   | K.RM*S#ADM*SEIEAR.I           | S389:      | 3 | 2,6033 | 0,102 | -0,061 |
| 17 | Q7Z422 CA144_HUMAN  | K.SKS#PPKVPIVQDDSLPAGPPPQIR.I | S39:       | 3 | 5,6204 | 0,446 | -0,674 |
| 17 | P62807 H2B1C_HUMAN  | R.KESYS#VYVYK.V               | S39:       | 3 | 2,9476 | 0,281 | -0,068 |
| 17 | Q92738 US6NL_HUMAN  | R.SVGRPS#PLASGR.R             | S396:      | 2 | 2,0745 | 0,276 | 0,676  |
| 17 | Q8N1F8 S11IP_HUMAN  | R.RAS#ISEPSDTPPEPR.T          | S398:      | 2 | 3,9539 | 0,496 | -0,281 |
| 17 | Q96ST2 IWS1_HUMAN   | K.AAVLS#DS#EDEEKASAKK.S       | S398:S400: | 3 | 3,0056 | 0,256 | -0,189 |
| 17 | Q3YEC7 PARF_HUMAN   | R.LDRS#FLEDTT#PARDEK.K        | S402:T408: | 3 | 3,7586 | 0,307 | 0,089  |
| 17 | Q9Y6M7 S4A7_HUMAN   | K.GNGSGGS#RENSTVDFSK.V        | S403:      | 3 | 3,7264 | 0,481 | 0      |
| 17 | Q8NDI1 EHBP1_HUMAN  | R.KAPAPPVLS#PK.T              | S408:      | 2 | 2,5802 | 0,251 | 0,309  |
| 17 | P51114 FXR1_HUMAN   | R.RGPNYTSYGTNSELSNPS#ETESER.K | S409:      | 3 | 5,5671 | 0,405 | -0,195 |
| 17 | B2RA80 B2RA80_HUMAN | R.KQDYQEILDS#PIK.-            | S409:      | 2 | 4,1099 | 0,475 | -0,147 |
| 17 | Q9BRS8 LARP6_HUMAN  | R.LNCSTS#PEIFRK.C             | S409:      | 2 | 3,8492 | 0,54  | 0,398  |
| 17 | Q9BRS8 LARP6_HUMAN  | R.LNCSTS#PEIFRK.C             | S409:      | 3 | 3,1048 | 0,256 | 0,179  |
| 17 | Q6W2J9 BCOR_HUMAN   | R.KDGS#SPPLEK.Q               | S422:      | 2 | 2,9005 | 0,139 | -0,39  |
| 17 | Q96S38 KS6C1_HUMAN  | K.FLNRS#PEES#FDIKEVK.K        | S423:S427: | 3 | 2,8247 | 0,202 | 0      |
| 17 | Q9C0B5 ZDHC5_HUMAN  | K.SFHFDPLSS#GSRSSS#LK.S       | S423:S429: | 2 | 2,8463 | 1     | -0,061 |
| 17 | Q9C0B5 ZDHC5_HUMAN  | K.SFHFDPLSSGS#R.S             | S425:      | 2 | 3,3467 | 0,428 | -0,258 |
| 17 | Q9C0B5 ZDHC5_HUMAN  | K.SFHFDPLSSGS#R.S             | S425:      | 3 | 2,9009 | 0,229 | 0,323  |
| 17 | Q8TB61 S35B2_HUMAN  | K.KAVPVES#PVQKV.-             | S427:      | 2 | 3,7619 | 0,424 | 0,09   |
| 17 | Q96JM3 ZN828_HUMAN  | R.KPGPPLS#PEIR.S              | S427:      | 3 | 3,4021 | 0,295 | 0      |
| 17 | Q99700 ATX2_HUMAN   | R.DNS#EEFLKR.E                | S430:      | 2 | 2,0382 | 0,429 | 0      |
| 17 | O95232 CROP_HUMAN   | K.ESDTKNEVNGTSEDIKSEGDTQS#N.- | S431:      | 3 | 5,5083 | 0,495 | 0,275  |
| 17 | Q96JM3 ZN828_HUMAN  | R.KPGPPLSPEIRS#PAGS#PELR.K    | S432:S436: | 3 | 3,1666 | 0,213 | 0,244  |
| 17 | Q8N1G0 ZN687_HUMAN  | R.KAVVLPGGTATS#PK.M           | S433:      | 2 | 3,7478 | 0,422 | 0,087  |

|    |                    |                              |            |   |        |       |        |
|----|--------------------|------------------------------|------------|---|--------|-------|--------|
| 17 | P35269 T2FA_HUMAN  | R.LRLDTGPQSL#GK.S            | S433:      | 3 | 2,8222 | 0,289 | 0,126  |
| 17 | P35269 T2FA_HUMAN  | R.LRLDTGPQSL#GK.S            | S433:      | 2 | 2,3848 | 0,345 | 0,504  |
| 17 | P26599 PTBP1_HUMAN | K.DYGN#PLHR.F                | S433:      | 2 | 2,119  | 0,262 | -0,107 |
| 17 | Q6WKZ4 RFIP1_HUMAN | R.RSS#LLSLM*TGK.K            | S435:      | 2 | 2,8595 | 0,449 | -0,473 |
| 17 | Q14004 CD2L5_HUMAN | R.HSSIS#PSTLTK.S             | S439:      | 2 | 2,5917 | 0,292 | -0,452 |
| 17 | Q92609 TBCD5_HUMAN | R.RTSS#TLDSEGFNSYR.K         | S44:       | 2 | 2,9228 | 0,388 | -0,513 |
| 17 | O14974 MYPT1_HUMAN | R.KTGS#YGALAEITASK.E         | S445:      | 2 | 4,7553 | 0,55  | 0,155  |
| 17 | P18887 XRCC1_HUMAN | K.TKPTQAAGPSS#PQKPPT#PEETK.A | S447:T453: | 3 | 4,0804 | 0,278 | 0,225  |
| 17 | Q70EL2 UBP45_HUMAN | R.KLSS#GETVTYQK.N            | S451:      | 2 | 2,2855 | 0,247 | -0,086 |
| 17 | O60832 DKC1_HUMAN  | R.KRES#ES#ESDETPPAAPQLIK.K   | S451:S453: | 3 | 4,5018 | 0,245 | -0,617 |
| 17 | P48634 BAT2_HUMAN  | R.KQS#SSEISLAVER.A           | S456:      | 2 | 4,0815 | 0,261 | -0,484 |
| 17 | O60658 PDE8A_HUMAN | R.RLS#GNEYVLSTK.N            | S457:      | 2 | 3,7636 | 0,566 | 0,422  |
| 17 | O60658 PDE8A_HUMAN | R.RLS#GNEYVLSTK.N            | S457:      | 3 | 2,6115 | 0,192 | 0,253  |
| 17 | P11274 BCR_HUMAN   | R.HQDGLPYIDDS#PSSS#PHLSSK.G  | S459:S463: | 3 | 4,9911 | 1     | -0,678 |
| 17 | Q96JM3 ZN828_HUMAN | R.KTS#PASLDFPESQKS#SR.G      | S459:S471: | 3 | 2,6174 | 0,159 | 0,181  |
| 17 | O95544 NADK_HUMAN  | K.SRS#LSASPALGSTK.E          | S46:       | 2 | 4,1061 | 0,589 | 0,423  |
| 17 | O95544 NADK_HUMAN  | K.SRS#LSASPALGSTK.E          | S46:       | 3 | 3,3297 | 0,297 | 0,127  |
| 17 | P55201 BRPF1_HUMAN | R.RLPALS#HS#EGEEDEDEEEDGK.G  | S460:S462: | 3 | 5,0505 | 0,529 | 0,619  |
| 17 | P11274 BCR_HUMAN   | R.HQDGLPYIDDS#SS#PHLSSK.G    | S461:S463: | 3 | 4,1628 | 1     | -0,377 |
| 17 | Q9UPZ3 HP55_HUMAN  | R.RGS#QS#DEDSCSLHSQTLSEDER.F | S461:S463: | 3 | 3,7962 | 1     | 0,136  |
| 17 | O60825 F262_HUMAN  | R.RNS#FTPLSSNTIR.R           | S466:      | 2 | 2,8795 | 0,349 | 0,221  |
| 17 | Q86TL0 ATG4D_HUMAN | R.AKRPS#SEDFVFL.-            | S467:      | 2 | 2,2113 | 0,154 | -0,496 |
| 17 | O76021 RL1D1_HUMAN | K.FFTTPSKS#VR.K              | S469:      | 3 | 2,6819 | 0,247 | 0,073  |
| 17 | Q9BTU6 P4K2A_HUMAN | R.VAAAAGSGPS#PPGS#PGHDRER.Q  | S47:S51:   | 3 | 3,5239 | 0,423 | 0,086  |
| 17 | Q07960 RHG01_HUMAN | K.SDDS#KSSS#PELVTHLK.W       | S47:S51:   | 3 | 2,9606 | 1     | 0,29   |
| 17 | Q13263 TIF1B_HUMAN | R.SRS#GEGEVSGLM*R.K          | S473:      | 2 | 3,2627 | 0,337 | -0,251 |
| 17 | P62805 H4_HUMAN    | K.RIS#GLIYEETR.G             | S48:       | 2 | 2,8964 | 0,447 | 0      |
| 17 | P53396 ACLY_HUMAN  | K.AKPAM*PQDSVPS#PR.S         | S481:      | 2 | 3,3306 | 0,474 | 0,155  |
| 17 | P53396 ACLY_HUMAN  | K.AKPAM*PQDSVPS#PR.S         | S481:      | 3 | 2,9706 | 0,38  | -0,116 |
| 17 | P11169 GTR3_HUMAN  | R.SGKDGVM*EM*NS#IEPAK.E      | S485:      | 2 | 4,3481 | 0,371 | -0,135 |
| 17 | Q9BVI0 PHF20_HUMAN | K.SLEPEES#PGKR.H             | S488:      | 2 | 2,5377 | 0,26  | -0,093 |
| 17 | O95400 CD2B2_HUMAN | K.HSLDS#DEEEDDDGGSSK.Y       | S49:       | 2 | 6,1586 | 0,564 | 0,302  |
| 17 | O43379 WDR62_HUMAN | R.TRLS#TASEETVQNR.V          | S49:       | 2 | 2,9807 | 0,657 | -0,511 |

|    |                    |                                 |            |   |        |       |        |
|----|--------------------|---------------------------------|------------|---|--------|-------|--------|
| 17 | Q6UN15 FIP1_HUMAN  | R.DHS#PTPSVFNS#DEERYR.Y         | S492:S500: | 3 | 4,0309 | 0,592 | 0,583  |
| 17 | O60832 DKC1_HUMAN  | K.AKAGLESGAEPGDGDS#DTTK.K       | S494:      | 3 | 2,7075 | 0,224 | -0,553 |
| 17 | O60832 DKC1_HUMAN  | K.AKAGLESGAEPGDGDS#DTTK.K       | S494:      | 2 | 2,6387 | 0,572 | -0,492 |
| 17 | Q8IVF2 AHNK2_HUMAN | K.IKLPS#FR.W                    | S4962:     | 2 | 2,2419 | 0,249 | 0,065  |
| 17 | Q9H7N4 SFR19_HUMAN | R.QRS#PS#PAPAPAPAAAAGPPTRK.K    | S498:S500: | 3 | 3,1459 | 0,269 | -0,243 |
| 17 | Q52LW3 RHG29_HUMAN | K.HLNSSQPSGFGPANS#LEDVVR.L      | S499:      | 3 | 4,6391 | 0,438 | -0,639 |
| 17 | Q9H0D6 XRN2_HUMAN  | R.KAEDS#DSEPEPEDNVR.L           | S499:      | 2 | 4,5854 | 0,415 | -0,579 |
| 17 | Q96AT1 K1143_HUMAN | R.IQPQPPDEDGDHS#DKEDEQPQVVVLK.K | S50:       | 3 | 2,7055 | 0,266 | 0,424  |
| 17 | Q14160 LAP4_HUMAN  | R.RSEACPCQPDSGS#PLPAEEEK.R      | S504:      | 3 | 6,2998 | 0,512 | 0,075  |
| 17 | O14974 MYPT1_HUMAN | R.LAS#TSDIEEKENR.D              | S507:      | 2 | 3,1427 | 0,525 | -0,31  |
| 17 | Q07960 RHG01_HUMAN | K.SSS#PELVTHLK.W                | S51:       | 3 | 3,8147 | 0,273 | -0,072 |
| 17 | Q07960 RHG01_HUMAN | K.SSS#PELVTHLK.W                | S51:       | 2 | 2,5396 | 0,208 | -0,095 |
| 17 | Q09666 AHNK_HUMAN  | K.FKAEAPLPS#PK.L                | S5110:     | 2 | 3,4036 | 0,272 | -0,289 |
| 17 | Q15742 NAB2_HUMAN  | R.SS#VKVEAEASRQ.-               | S515:      | 3 | 4,0925 | 0,393 | 0,133  |
| 17 | Q15742 NAB2_HUMAN  | R.SS#VKVEAEASR.Q                | S515:      | 3 | 3,7351 | 0,461 | 0,147  |
| 17 | Q07866 KLC1_HUMAN  | R.S#RESLNVDVVK.Y                | S517:      | 2 | 2,344  | 0,256 | 0,092  |
| 17 | Q86UU1 PHLB1_HUMAN | R.TRS#PS#PTLGESLAPHK.G          | S518:S520: | 3 | 3,8818 | 0,484 | -0,1   |
| 17 | Q86UU1 PHLB1_HUMAN | R.TRS#PS#PTLGESLAPHK.G          | S518:S520: | 2 | 3,484  | 1     | -0,332 |
| 17 | O00567 NOL5A_HUMAN | K.SFSKEELM*S#SDLEETAGSTSIPK.R   | S519:      | 3 | 3,1259 | 0,26  | -0,356 |
| 17 | P30086 PEBP1_HUMAN | K.NRPTS#ISWDGLDSGK.L            | S52:       | 2 | 4,0456 | 0,43  | 0      |
| 17 | P55081 MFAP1_HUMAN | K.RPDYAPM*ES#S#DEEDEFQFIKK.A    | S52:S53:   | 3 | 4,7685 | 0,525 | -0,192 |
| 17 | P12956 KU70_HUMAN  | K.RLGS#LVDEFK.E                 | S520:      | 2 | 3,1246 | 0,104 | 0,588  |
| 17 | Q9BWT3 PAPOG_HUMAN | K.RLS#LDSSCLDSSR.D              | S525:      | 3 | 3,3381 | 0,316 | 0      |
| 17 | Q9BWT3 PAPOG_HUMAN | K.RLS#LDSSCLDSSR.D              | S525:      | 2 | 2,8818 | 0,493 | 0,155  |
| 17 | O15355 PPM1G_HUMAN | R.KLEEVLS#TEGAEENGNSDK.K        | S527:      | 2 | 3,2781 | 0,552 | -0,573 |
| 17 | Q5VUA4 ZN318_HUMAN | R.RS#FPDIEDEEK.F                | S527:      | 3 | 2,9987 | 0,146 | 0,19   |
| 17 | O60504 VINEX_HUMAN | R.LRLCDDGPQLPTS#PR.L            | S530:      | 2 | 3,1217 | 0,381 | 0      |
| 17 | Q9UHI6 DDX20_HUMAN | K.ATS#PKELGCDR.Q                | S532:      | 3 | 3,6659 | 0,292 | 0      |
| 17 | Q8N2M8 SFR16_HUMAN | K.LTRPAAS#PAVGEK.L              | S532:      | 2 | 3,6214 | 0,442 | -0,62  |
| 17 | Q09666 AHNK_HUMAN  | K.VHAPGLNLS#GVGGK.M             | S5332:     | 3 | 3,5669 | 0,191 | 0,066  |
| 17 | Q09666 AHNK_HUMAN  | K.VHAPGLNLS#GVGGK.M             | S5332:     | 2 | 2,8695 | 0,505 | -0,088 |
| 17 | Q9UJX6 ANC2_HUMAN  | R.LLHQFSFS#PER.E                | S534:      | 3 | 4,1969 | 0,275 | 0,063  |
| 17 | Q9UJX6 ANC2_HUMAN  | R.LLHQFSFS#PER.E                | S534:      | 2 | 2,8318 | 0,442 | 0,423  |

|    |                     |                             |            |   |        |       |        |
|----|---------------------|-----------------------------|------------|---|--------|-------|--------|
| 17 | Q02040 SF17A_HUMAN  | R.VVPEDGS#PEKR.C            | S537:      | 2 | 2,2688 | 0,239 | -0,189 |
| 17 | P17987 TCPA_HUMAN   | K.HGS#YEDAVHSGALND.-        | S544:      | 2 | 4,7169 | 0,607 | -0,222 |
| 17 | P35222 CTNB1_HUMAN  | R.RTS#M*GGTQQQFVEGV.R.M     | S552:      | 3 | 4,3129 | 0,308 | 0,487  |
| 17 | Q9NPH3 IL1AP_HUMAN  | R.RSSS#DEQGLSYSSLK.N        | S557:      | 2 | 3,3805 | 0,402 | -0,425 |
| 17 | Q9Y5S9 RBM8A_HUMAN  | R.M*REDYDS#VEQDGDEPGPQR.S   | S56:       | 3 | 5,3786 | 0,465 | -0,079 |
| 17 | Q14149 MORC3_HUMAN  | R.RLS#SQFENSVMYK.G          | S560:      | 2 | 3,829  | 0,442 | 0      |
| 17 | Q14149 MORC3_HUMAN  | R.RLSS#QFENSVMYK.G          | S561:      | 3 | 4,2855 | 0,323 | 0,119  |
| 17 | P19338 NUCL_HUMAN   | R.LELQGRGS#PNAR.S           | S563:      | 2 | 2,0198 | 0,319 | 0,083  |
| 17 | P23193 TCEA1_HUMAN  | R.KQS#TDEEVTSLAK.S          | S57:       | 2 | 4,1829 | 0,452 | -0,483 |
| 17 | P29317 EPHA2_HUMAN  | R.ARQS#PEDVYFSK.S           | S570:      | 2 | 3,217  | 0,443 | -0,243 |
| 17 | Q9H6U6 BCAS3_HUMAN  | K.VKPPPQIS#PSK.S            | S570:      | 2 | 2,1073 | 0,284 | -0,194 |
| 17 | Q7Z7F0 K0907_HUMAN  | K.GFGLVAYAADS#S#DEEEHGGHK.N | S571:S572: | 3 | 3,9221 | 0,274 | -0,074 |
| 17 | Q7Z417 NUFP2_HUMAN  | K.RTS#PQVLGSILK.S           | S572:      | 2 | 3,0031 | 0,332 | -0,177 |
| 17 | Q9Y485 DMXL1_HUMAN  | R.STS#M*LISSGHNK.S          | S574:      | 2 | 2,263  | 0,322 | -0,359 |
| 17 | P57059 SN1L1_HUMAN  | R.RAS#DTSLTQGLK.A           | S575:      | 2 | 2,7304 | 0,319 | -0,629 |
| 17 | Q9H1E3 NUCKS_HUMAN  | K.NSQEDS#EDSEDKDVK.T        | S58:       | 2 | 4,2524 | 0,482 | -0,811 |
| 17 | P68431 H31_HUMAN    | R.YQKS#TELLIR.K             | S58:       | 3 | 2,6951 | 0,174 | -0,069 |
| 17 | P68431 H31_HUMAN    | R.YQKS#TELLIR.K             | S58:       | 2 | 2,3303 | 0,208 | -0,275 |
| 17 | Q8TD16 BICD2_HUMAN  | R.RS#PILLPK.G               | S582:      | 2 | 2,5888 | 0,111 | 0,122  |
| 17 | Q9UNN5 FAF1_HUMAN   | R.IRTPS#GEFLER.R            | S582:      | 2 | 2,2564 | 0,344 | 0,264  |
| 17 | Q09666 AHNK_HUMAN   | K.LKFGTFGGLGS#K.S           | S5830:     | 3 | 2,8786 | 0,274 | 0,354  |
| 17 | Q8TB72 PUM2_HUMAN   | R.RES#LSTSSDLYK.R           | S587:      | 2 | 3,3054 | 0,245 | -0,832 |
| 17 | P52756 RBM5_HUMAN   | R.YDDYRDYDS#PER.E           | S59:       | 3 | 3,0011 | 0,398 | 0      |
| 17 | P52756 RBM5_HUMAN   | R.YDDYRDYDS#PER.E           | S59:       | 2 | 2,4779 | 0,323 | 0,219  |
| 17 | Q16825 PTN21_HUMAN  | R.HLYISS#NPDILTR.R          | S590:      | 2 | 4,4544 | 0,571 | 0,072  |
| 17 | Q8NE71 ABCF1_HUMAN  | R.KNQDEES#QEAPELLK.R        | S595:      | 2 | 4,9819 | 0,353 | 0,996  |
| 17 | Q7RTP8 Q7RTP8_HUMAN | K.RAS#SLNVLNVGGK.A          | S595:      | 3 | 3,7797 | 0,327 | 0,131  |
| 17 | Q7RTP8 Q7RTP8_HUMAN | K.RASS#LNVLNVGGK.A          | S596:      | 2 | 3,3491 | 0,351 | 0,087  |
| 17 | Q12873 CHD3_HUMAN   | R.KNDM*DEPPPLYDGS#GEDDGK.S  | S597:      | 3 | 3,4888 | 0,274 | -0,161 |
| 17 | P43243 MATR3_HUMAN  | R.SYS#PDGKESPSDK.K          | S598:      | 3 | 2,7173 | 0,171 | 0,248  |
| 17 | Q7Z2Z1 CO042_HUMAN  | K.LHPDGS#PDVAGEK.G          | S599:      | 2 | 3,1979 | 0,421 | -0,522 |
| 17 | POC7M2 RA1L3_HUMAN  | K.SES#PKEPEQLR.K            | S6:        | 3 | 3,4233 | 0,38  | -0,663 |
| 17 | POC7M2 RA1L3_HUMAN  | K.SES#PKEPEQLR.K            | S6:        | 2 | 2,3369 | 0,411 | -0,177 |



|    |                     |                                 |            |   |        |       |        |
|----|---------------------|---------------------------------|------------|---|--------|-------|--------|
| 17 | Q70L73 Q70L73_HUMAN | R.RVS#RS#SFSSDPDESEGIPLK.R      | S60:S62:   | 3 | 3,9094 | 0,301 | 0,544  |
| 17 | Q7Z460 CLAP1_HUMAN  | R.SRS#DIDVNAAASAK.S             | S600:      | 2 | 5,7431 | 0,59  | -0,164 |
| 17 | Q9UHB6 LIMA1_HUMAN  | R.SRPFTVAASFQSTS#VK.S           | S601:      | 2 | 3,6289 | 0,463 | 0,68   |
| 17 | Q9UHB6 LIMA1_HUMAN  | R.SRPFTVAASFQSTS#VKS#PK.T       | S601:S604: | 3 | 3,5448 | 0,182 | -0,502 |
| 17 | Q15424 SAFB1_HUMAN  | R.S#VVVS#FDKVKPR.K              | S601:S604: | 2 | 2,0984 | 0,303 | 0,315  |
| 17 | Q12872 SFRS8_HUMAN  | R.VKLDDDS#DDDEESK.E             | S604:      | 2 | 5,4021 | 0,581 | 0,072  |
| 17 | Q15424 SAFB1_HUMAN  | R.SVVS#FDKVK.E                  | S604:      | 2 | 3,1737 | 0,317 | -0,56  |
| 17 | Q6ZV73 FGD6_HUMAN   | R.AKS#LSAM*DVEK.C               | S605:      | 2 | 3,4131 | 0,564 | -0,67  |
| 17 | Q6ZV73 FGD6_HUMAN   | R.AKS#LSAM*DVEK.C               | S605:      | 3 | 3,2263 | 0,181 | 0,215  |
| 17 | Q8IZT6 ASPM_HUMAN   | R.IHFS#PSEPK.T                  | S605:      | 2 | 2,1298 | 0,339 | 0      |
| 17 | P50395 GDIB_HUMAN   | R.FKIPGS#PPESM*GR.G             | S61:       | 2 | 3,2661 | 0,387 | -0,163 |
| 17 | Q3L8U1 CHD9_HUMAN   | R.KNESS#DEIS#DAEQM*PQHTLK.D     | S612:S616: | 3 | 3,092  | 0,096 | -0,594 |
| 17 | Q96JM3 ZN828_HUMAN  | K.KLEEDTLFPS#SK.K               | S615:      | 2 | 2,4419 | 0,227 | -0,586 |
| 17 | O00429 DNM1L_HUMAN  | K.SKPIPIM*PAS#PQK.G             | S616:      | 2 | 2,5904 | 0,393 | 0      |
| 17 | P49756 RBM25_HUMAN  | K.LGASNS#PGQPNSVKR.K            | S618:      | 2 | 2,7061 | 0,373 | -0,46  |
| 17 | O95453 PARN_HUMAN   | K.KELS#PAGSISK.N                | S619:      | 2 | 3,8226 | 0,343 | -0,713 |
| 17 | Q9NVM9 CL011_HUMAN  | K.DS#PDSPEPPNKKPLVEM*DETPQVEK.S | S623:      | 3 | 4,0843 | 0,368 | 0,504  |
| 17 | Q99700 ATX2_HUMAN   | R.M*SSEGPPRM*S#PK.A             | S623:      | 2 | 3,4407 | 0,365 | -0,517 |
| 17 | Q96JM3 ZN828_HUMAN  | K.KDNQESS#DAELSSSEYIK.T         | S627:      | 2 | 2,2704 | 0,523 | 0,925  |
| 17 | Q13442 HAP28_HUMAN  | K.KSLDSDES#EDEEDDYQQK.R         | S63:       | 3 | 5,4323 | 0,456 | 0,245  |
| 17 | P23763 VAMP1_HUMAN  | R.DQKLS#ELDDR.A                 | S63:       | 2 | 3,1336 | 0,353 | -0,658 |
| 17 | Q7Z4V5 HDGR2_HUMAN  | R.CGS#SEDLHDSVR.E               | S633:      | 3 | 2,6183 | 0,313 | 0,19   |
| 17 | Q7Z4V5 HDGR2_HUMAN  | R.CGS#SEDLHDSVR.E               | S633:      | 2 | 2,109  | 0,249 | -0,254 |
| 17 | Q9P2N2 RHG28_HUMAN  | R.RM*S#DVPEGVIR.V               | S636:      | 2 | 3,2962 | 0,315 | 0,18   |
| 17 | Q93074 MED12_HUMAN  | R.GDLAFGAPGPRPPS#PFDDPADDPEHK.E | S637:      | 3 | 3,7659 | 0,448 | -0,46  |
| 17 | O95819 M4K4_HUMAN   | R.RDS#PLQGSQQNSQAGQR.N          | S639:      | 3 | 4,236  | 0,304 | -0,642 |
| 17 | Q05682 CALD1_HUMAN  | K.GS#SLKIEER.A                  | S642:      | 2 | 2,0503 | 0,119 | -0,111 |
| 17 | Q6AI08 HEAT6_HUMAN  | K.KAPAGPSLEETS#PK.G             | S643:      | 2 | 4,6151 | 0,506 | -0,691 |
| 17 | Q92625 ANS1A_HUMAN  | R.SES#LSNCSIGKK.R               | S647:      | 2 | 2,7109 | 0,376 | 0,088  |
| 17 | P26374 RAE2_HUMAN   | K.NLES#PEKHLQN.-                | S649:      | 2 | 2,7186 | 0,184 | -0,176 |
| 17 | Q9ULU4 PKCB1_HUMAN  | K.STS#PAS#EKADPGAVKDK.A         | S652:S655: | 3 | 3,2891 | 0,3   | -0,297 |
| 17 | O43683 BUB1_HUMAN   | R.DGKFS#PIQEK#PK.Q              | S655:S661: | 3 | 2,938  | 0,215 | 0,226  |
| 17 | Q05682 CALD1_HUMAN  | R.AEFLNKS#VQK.S                 | S656:      | 2 | 3,1673 | 0,365 | -0,098 |

|    |                     |                               |            |   |        |       |        |
|----|---------------------|-------------------------------|------------|---|--------|-------|--------|
| 17 | Q6NZY4 ZCHC8_HUMAN  | K.IHS#PIPDM*SK.F              | S658:      | 2 | 2,7136 | 0,405 | -0,2   |
| 17 | Q86YS7 K0528_HUMAN  | R.SQS#ESS#DEVTELDLSHGKK.D     | S659:S662: | 3 | 3,2096 | 0,216 | 0,655  |
| 17 | Q9ULH7 MKL2_HUMAN   | R.EQLVDQGIM*PPLKS#PAAFHEQIK.S | S66:       | 3 | 2,73   | 0,361 | -0,342 |
| 17 | Q9H6F5 CCD86_HUMAN  | R.AGLGSPERPPKTS#PGS#PR.L      | S66:S69:   | 2 | 3,6947 | 0,311 | 0,5    |
| 17 | O43683 BUB1_HUMAN   | K.FSPIQEKS#PK.Q               | S661:      | 2 | 2,3559 | 0,168 | -0,492 |
| 17 | Q92615 LARP5_HUMAN  | R.TSKEPPSS#PLQPQK.E           | S664:      | 3 | 3,4127 | 0,338 | -0,114 |
| 17 | Q92615 LARP5_HUMAN  | R.TSKEPPSS#PLQPQK.E           | S664:      | 2 | 2,746  | 0,406 | 0      |
| 17 | Q16659 MK06_HUMAN   | R.GHEEGFLNNS#GEFLFNK.Q        | S665:      | 3 | 4,2219 | 0,325 | -0,544 |
| 17 | Q96AC1 FERM2_HUMAN  | R.AKDQNES#LDEEM*FYK.L         | S666:      | 3 | 4,0056 | 0,386 | -0,094 |
| 17 | Q9C0D0 PHAR1_HUMAN  | R.SKS#DTPYLAEAR.I             | S67:       | 2 | 4,0618 | 0,45  | -0,516 |
| 17 | Q6UB98 ANR12_HUMAN  | R.KLPFTIS#PSR.N               | S67:       | 2 | 2,5034 | 0,235 | -0,398 |
| 17 | O60566 BUB1B_HUMAN  | K.KLS#PIIEDSR.E               | S670:      | 3 | 2,767  | 0,145 | 0,369  |
| 17 | O60566 BUB1B_HUMAN  | K.KLS#PIIEDSR.E               | S670:      | 2 | 2,7447 | 0,377 | -0,296 |
| 17 | Q9BPX3 CND3_HUMAN   | K.TLHCEGTEINS#DDEQESK.E       | S674:      | 3 | 4,5484 | 0,204 | -0,505 |
| 17 | P46100 ATRX_HUMAN   | R.RPTETNPVTSNS#DEECNETVK.E    | S677:      | 3 | 5,9967 | 0,417 | -0,368 |
| 17 | Q9Y2W1 TR150_HUMAN  | R.IDIS#PSTFRK.H               | S682:      | 2 | 2,1683 | 0,242 | 0      |
| 17 | P49790 NU153_HUMAN  | K.CIACQAAKLS#PR.D             | S687:      | 2 | 3,3279 | 0,392 | 0,168  |
| 17 | Q9Y2K7 JHD1A_HUMAN  | R.KM*EES#DEEAVQAK.V           | S692:      | 2 | 3,9098 | 0,404 | -0,46  |
| 17 | Q9Y2K7 JHD1A_HUMAN  | R.KM*EES#DEEAVQAK.V           | S692:      | 3 | 3,4129 | 0,204 | 0      |
| 17 | Q9UKJ3 GPTC8_HUMAN  | R.KPS#VSEEVQATPNK.A           | S694:      | 2 | 4,8338 | 0,507 | 0,077  |
| 17 | P38398 BRCA1_HUMAN  | R.HDS#DTFPELK.L               | S694:      | 2 | 4,1797 | 0,395 | 0,288  |
| 17 | Q9UKJ3 GPTC8_HUMAN  | R.KPSVS#EEVQATPNK.A           | S696:      | 3 | 3,2959 | 0,207 | -0,803 |
| 17 | O75382 TRIM3_HUMAN  | K.REDS#PGPEVQPM*DK.Q          | S7:        | 2 | 3,9127 | 0,529 | 0      |
| 17 | P06748 NPM_HUMAN    | K.DELHIVEAEAM*NYEGS#PIK.V     | S70:       | 3 | 3,9957 | 0,291 | -0,408 |
| 17 | Q8WUM3 Q8WUM3_HUMAN | R.SKS#ESLM*GTLK.R             | S70:       | 2 | 3,2814 | 0,335 | -0,573 |
| 17 | O60890 OPHN1_HUMAN  | K.TPS#FHIK.R                  | S703:      | 2 | 2,3999 | 0,141 | 0,067  |
| 17 | Q8WY36 BBX_HUMAN    | K.KFNSLPQYS#PVTFDR.K          | S704:      | 2 | 3,7942 | 0,439 | -0,325 |
| 17 | Q8WY36 BBX_HUMAN    | K.KFNSLPQYS#PVTFDR.K          | S704:      | 3 | 3,0397 | 0,387 | -0,292 |
| 17 | Q9P2D6 F135A_HUMAN  | K.SKS#IEITFEK.E               | S707:      | 2 | 2,8568 | 0,316 | 0,097  |
| 17 | Q14671 PUM1_HUMAN   | R.RDS#LTGSSDLYK.R             | S709:      | 2 | 3,832  | 0,426 | -0,343 |
| 17 | Q9NYL9 TMOD3_HUMAN  | R.EHLLS#YLEK.E                | S71:       | 2 | 2,1215 | 0,177 | -0,201 |
| 17 | P10636 TAU_HUMAN    | K.TDHGAEIVYKS#PVVSGDT#SPR.H   | S713:T720: | 3 | 5,5274 | 0,459 | -0,462 |
| 17 | Q9NZJ5 E2AK3_HUMAN  | K.EHIEIIAPS#PQR.S             | S714:      | 2 | 3,4115 | 0,472 | 0,166  |

|    |                     |                                |            |   |        |       |        |
|----|---------------------|--------------------------------|------------|---|--------|-------|--------|
| 17 | Q8TEW0 PARD3_HUMAN  | R.RISHS#LYSGIEGLDES#PSR.N      | S717:S728: | 3 | 5,573  | 0,443 | -0,243 |
| 17 | Q71RC2 LARP4_HUMAN  | K.EQYVPPRS#PK.-                | S722:      | 2 | 2,1864 | 0,145 | 0      |
| 17 | Q9Y6X9 MORC2_HUMAN  | K.KTES#PIKLSPAT#PSR.K          | S725:T733: | 3 | 4,3138 | 0,369 | -0,206 |
| 17 | Q9UMY4 SNX12_HUMAN  | R.RYS#DFEWLK.N                 | S73:       | 2 | 3,4281 | 0,365 | -0,737 |
| 17 | Q8NA72 CE037_HUMAN  | R.ISTIHDILHS#QGNNS#EVR.E       | S73:S78:   | 3 | 3,9925 | 0,392 | -0,42  |
| 17 | Q7Z3C6 ATG9A_HUMAN  | R.RES#DESGESAPDEGGEGAR.A       | S735:      | 2 | 5,5137 | 0,604 | -0,363 |
| 17 | P26038 MOES_HUMAN   | R.KES#PLLFK.F                  | S74:       | 2 | 2,8762 | 0,191 | 0,117  |
| 17 | Q6IN85 SMEK1_HUMAN  | K.TNLSGRQS#PSFK.L              | S741:      | 2 | 2,6146 | 0,148 | -0,348 |
| 17 | A1L390 PKHG3_HUMAN  | R.RES#LSYIPK.G                 | S741:      | 2 | 2,1215 | 0,175 | 0      |
| 17 | O15042 SR140_HUMAN  | K.SLDDDLGDVPLDATEDS#KKNEPIFK.V | S747:      | 3 | 4,2778 | 0,417 | -0,258 |
| 17 | Q9BY89 K1671_HUMAN  | R.VHSEAIS#PAPEEK.A             | S749:      | 2 | 2,5593 | 0,321 | -0,579 |
| 17 | P09874 PARP1_HUMAN  | R.HPDVEVDGFS#ELR.W             | S75:       | 3 | 3,2189 | 0,262 | 0,116  |
| 17 | P09874 PARP1_HUMAN  | R.HPDVEVDGFS#ELR.W             | S75:       | 2 | 3,0477 | 0,544 | -0,386 |
| 17 | P50502 F10A1_HUMAN  | K.KVEEDLKADEPS#\$#EESDLEIDK.E  | S75:S76:   | 3 | 6,3926 | 0,432 | 0,481  |
| 17 | Q66K74 MAP1S_HUMAN  | R.KAVPM*APAPAS#PGSSNDSSAR.S    | S759:      | 3 | 3,7059 | 0,327 | -0,349 |
| 17 | Q96E09 F122A_HUMAN  | R.HGLLLPAS#PVR.M               | S76:       | 2 | 3,2855 | 0,366 | 0,197  |
| 17 | Q9Y4B5 K0802_HUMAN  | K.REGPVGGES#DSEEM*FEK.T        | S767:      | 2 | 2,3466 | 0,226 | -0,062 |
| 17 | Q96EV2 RBM33_HUMAN  | K.VKPAS#PVAQPK.E               | S775:      | 2 | 2,8715 | 0,387 | -0,305 |
| 17 | Q6NUP7 K1622_HUMAN  | R.SQS#FNNQAFHAK.Y              | S775:      | 2 | 2,8023 | 0,276 | -0,084 |
| 17 | P15822 ZEP1_HUMAN   | R.RGS#IDS#PKSYIFK.D            | S778:S781: | 3 | 2,7824 | 0,403 | 0      |
| 17 | Q7LBC6 JHD2B_HUMAN  | R.HSGGFLSS#PADFSQENK.A         | S779:      | 2 | 4,4347 | 0,489 | -0,517 |
| 17 | Q96FT9 CN179_HUMAN  | R.KAS#EEIEDFR.L                | S78:       | 2 | 3,3634 | 0,432 | 0,187  |
| 17 | Q8TDD1 DDX54_HUMAN  | K.IDDRDS#DEEGASDR.R            | S782:      | 3 | 4,306  | 0,288 | 0      |
| 17 | Q8TDD1 DDX54_HUMAN  | K.IDDRDS#DEEGASDR.R            | S782:      | 2 | 3,6184 | 0,516 | -0,221 |
| 17 | Q5T5C0 STXB5_HUMAN  | R.SSVTS#IDKESR.E               | S785:      | 2 | 2,9362 | 0,191 | 0,266  |
| 17 | O75665 OFD1_HUMAN   | R.HSLSIPPVSS#PPEQK.V           | S789:      | 2 | 3,8185 | 0,376 | -0,362 |
| 17 | Q9NQW6 ANLN_HUMAN   | K.NKAS#PQSEFM*PSK.G            | S792:      | 2 | 3,3523 | 0,23  | -0,158 |
| 17 | Q9NQW6 ANLN_HUMAN   | K.NKAS#PQSEFM*PSK.G            | S792:      | 3 | 2,853  | 0,173 | -0,118 |
| 17 | P06400 RB_HUMAN     | R.SPYKFPSS#PLR.I               | S795:      | 2 | 2,5972 | 0,395 | -0,359 |
| 17 | P42566 EP15_HUMAN   | R.SINKLDS#PDPFK.L              | S796:      | 2 | 2,214  | 0,196 | -0,677 |
| 17 | Q9Y520 Q9Y520_HUMAN | R.DHAIS#LSEPR.M                | S799:      | 2 | 3,3346 | 0,227 | 0,709  |
| 17 | Q8NHG8 ZNR2_HUMAN   | R.S#RSLGGAVGSVASGAR.A          | S80:       | 3 | 3,3336 | 0,313 | 0,181  |
| 17 | Q13085 ACACA_HUMAN  | R.SSM*S#GLHLVK.Q               | S80:       | 2 | 2,3464 | 0,137 | -0,211 |

|    |                     |                                |            |   |        |       |        |
|----|---------------------|--------------------------------|------------|---|--------|-------|--------|
| 17 | O15534 PER1_HUMAN   | R.LRGLDSS#STAPSALGER.G         | S810:      | 2 | 3,5967 | 0,481 | -0,611 |
| 17 | Q13563 PKD2_HUMAN   | R.SLDDS#EEDDDSGHSSR.R          | S812:      | 3 | 4,4481 | 0,369 | -0,441 |
| 17 | Q9P1Y6 K1542_HUMAN  | R.KENPS#PLFSIK.K               | S814:      | 2 | 3,3157 | 0,25  | -0,091 |
| 17 | O15534 PER1_HUMAN   | R.LRGLDSS#STAPS#ALGER.G        | S815:      | 3 | 2,898  | 0,123 | -0,713 |
| 17 | Q92547 TOPB1_HUMAN  | R.QVAASPAVGQPLQKEPS#LHLDTPSK.F | S817:      | 3 | 2,9409 | 0,324 | 0,82   |
| 17 | Q8TB72 PUM2_HUMAN   | R.SGQGFHGNSEVNAILS#PR.S        | S82:       | 2 | 4,0575 | 0,466 | -0,375 |
| 17 | Q8NHG8 ZNR2_HUMAN   | R.SRS#LGGAVGSVASGAR.A          | S82:       | 2 | 3,9069 | 0,519 | 0,242  |
| 17 | Q8TB72 PUM2_HUMAN   | R.SGQGFHGNSEVNAILS#PR.S        | S82:       | 3 | 3,7897 | 0,281 | 0,188  |
| 17 | Q13206 DDX10_HUMAN  | R.SNS#EVEDVGPTSHNR.K           | S831:      | 2 | 4,6855 | 0,462 | -0,071 |
| 17 | Q13206 DDX10_HUMAN  | R.SNS#EVEDVGPTSHNR.K           | S831:      | 3 | 3,3558 | 0,356 | -0,75  |
| 17 | Q9UKV3 ACINU_HUMAN  | K.GVPAGNS#DTEGGQPGRK.R         | S838:      | 2 | 2,7745 | 0,337 | -0,357 |
| 17 | Q96FS4 SIPA1_HUMAN  | R.TEFLHSQNSLS#PR.S             | S839:      | 2 | 4,0223 | 0,558 | 0,229  |
| 17 | Q96FS4 SIPA1_HUMAN  | R.TEFLHSQNSLS#PR.S             | S839:      | 3 | 3,6844 | 0,27  | 0,344  |
| 17 | P49023 PAXI_HUMAN   | R.FIHQQPQSSS#PVYGSSAK.T        | S85:       | 3 | 5,001  | 0,445 | -0,09  |
| 17 | P49023 PAXI_HUMAN   | R.FIHQQPQSSS#PVYGSSAK.T        | S85:       | 2 | 2,6761 | 0,572 | 0,18   |
| 17 | Q5H9R7 SAPS3_HUMAN  | K.CAAPRPPSSS#PEQR.T            | S853:      | 2 | 2,5501 | 0,151 | 0,075  |
| 17 | Q9BWF3 RBM4_HUMAN   | K.LHVGNIS#PTCTNK.E             | S86:       | 2 | 3,6982 | 0,35  | 0,321  |
| 17 | Q9NXG2 THUM1_HUMAN  | K.FTDKDDQPS#GS#EGEDDDAEALKK.E  | S86:S88:   | 3 | 4,4231 | 0,408 | 0,401  |
| 17 | Q6GYQ0 GRIPE_HUMAN  | R.RGS#SPGSLEIPK.D              | S860:      | 2 | 2,8936 | 0,419 | -0,28  |
| 17 | P29374 ARI4A_HUMAN  | K.ILGQSS#PEKK.I                | S864:      | 2 | 2,6915 | 0,149 | -0,209 |
| 17 | Q68CZ2 TENS3_HUMAN  | R.HPPFS#PPEPPLS#SPASQHK.G      | S866:S873: | 3 | 3,3282 | 0,302 | -0,167 |
| 17 | Q68CZ2 TENS3_HUMAN  | R.HPPFS#PPEPPLSS#PASQHK.G      | S866:S874: | 3 | 4,1456 | 0,447 | 0      |
| 17 | O60716 CTND1_HUMAN  | R.SQSSHSYDDS#TLPLIDR.N         | S868:      | 2 | 2,0236 | 0,154 | -0,366 |
| 17 | Q9UK76 HN1_HUMAN    | R.RNS#SEASSGDFLDL.K.G          | S87:       | 2 | 4,8472 | 0,472 | -0,072 |
| 17 | Q9UK76 HN1_HUMAN    | R.RNS#SEASSGDFLDL.K.G          | S87:       | 3 | 4,0228 | 0,396 | 0,322  |
| 17 | Q8IYB3 SRRM1_HUMAN  | K.KETES#EAEDNLDDLEK.H          | S874:      | 3 | 4,7722 | 0,411 | 0,47   |
| 17 | Q6ZU35 K1211_HUMAN  | R.HSS#TGDSADAGPPAAGSAR.G       | S874:      | 2 | 4,539  | 0,503 | -0,272 |
| 17 | Q8IYB3 SRRM1_HUMAN  | K.KETES#EAEDNLDDLEK.H          | S874:      | 2 | 3,3563 | 0,427 | 0,753  |
| 17 | P38159 HNRPG_HUMAN  | K.VEQATKPS#FESGR.R             | S88:       | 2 | 3,1472 | 0,521 | -0,161 |
| 17 | Q2VIN3 Q2VIN3_HUMAN | K.VEQATKPS#FER.G               | S88:       | 2 | 2,15   | 0,378 | -0,178 |
| 17 | P06400 RB_HUMAN     | K.LRFDIEGS#DEADGSK.H           | S882:      | 3 | 3,2896 | 0,123 | -0,106 |
| 17 | Q8WUA4 TF3C2_HUMAN  | R.AHFNAM*FQPSS#PTR.R           | S893:      | 2 | 4,4525 | 0,462 | -0,217 |
| 17 | Q8WUA4 TF3C2_HUMAN  | R.AHFNAM*FQPSS#PTR.R           | S893:      | 3 | 3,9205 | 0,382 | 0      |

|    |                    |                                   |            |   |        |       |        |
|----|--------------------|-----------------------------------|------------|---|--------|-------|--------|
| 17 | Q7L7X3 TAOK1_HUMAN | R.AGS#LKDPEIAELFFKEDPEK.L         | S9:        | 3 | 2,7164 | 0,159 | -0,39  |
| 17 | Q86V48 LUZP1_HUMAN | K.SHS#APSEVGFSDAR.H               | S905:      | 2 | 3,5935 | 0,466 | -0,719 |
| 17 | Q12872 SFRS8_HUMAN | R.GVS#QEKEAQISSAIVSSVQSK.I        | S909:      | 3 | 2,7357 | 0,235 | 0,163  |
| 17 | Q96T88 UHRF1_HUMAN | K.ERDSELS#DTDSGCCLGQSESDK.S       | S91:       | 3 | 5,7571 | 0,523 | -0,358 |
| 17 | Q8WWQ0 PHIP_HUMAN  | K.VNEEKDGPIS#PK.K                 | S911:      | 3 | 3,1789 | 0,495 | 0,328  |
| 17 | Q6KC79 NIPBL_HUMAN | K.LGFKS#PTSK.D                    | S912:      | 2 | 3,2716 | 0,282 | 0      |
| 17 | Q6ZRV2 FA83H_HUMAN | R.RGS#PVPPVPER.R                  | S914:      | 2 | 2,7765 | 0,361 | -0,384 |
| 17 | Q6ZRV2 FA83H_HUMAN | R.RSS#PVPPVPER.R                  | S925:      | 2 | 2,7007 | 0,229 | -0,281 |
| 17 | Q8N4C8 MINK1_HUMAN | K.GQS#PPSKDGSQDYQSR.G             | S927:      | 3 | 2,9812 | 0,334 | -0,105 |
| 17 | Q9C0H9 SNIP_HUMAN  | R.AVS#EVARPASTPPIM*ASAIKDEDED.R.I | S932:      | 3 | 2,6723 | 0,3   | 1,049  |
| 17 | Q9Y4E6 WDR7_HUMAN  | K.ARGS#PPTSSNIVQGQIK.Q            | S935:      | 2 | 3,3402 | 0,49  | 0,737  |
| 17 | O43847 NRDC_HUMAN  | R.RGS#LSNAGDPEIVK.S               | S94:       | 2 | 3,8433 | 0,468 | -0,401 |
| 17 | O43847 NRDC_HUMAN  | R.RGS#LSNAGDPEIVK.S               | S94:       | 3 | 2,9858 | 0,289 | -0,06  |
| 17 | Q14669 TRIPC_HUMAN | K.HLAESESLTS#PPK.A                | S942:      | 2 | 4,4083 | 0,549 | 0,614  |
| 17 | Q15029 U5S1_HUMAN  | R.KGLS#EDVSISK.F                  | S944:      | 2 | 3,2076 | 0,462 | 0,098  |
| 17 | Q9P275 UBP36_HUMAN | R.HSCSPM*GDGDPEAM*EES#PR.K        | S952:      | 3 | 3,591  | 0,225 | -0,582 |
| 17 | Q15648 MED1_HUMAN  | K.ALAPADLM*EHHSGS#QGPLLTGDLGK.E   | S953:      | 3 | 3,7357 | 0,313 | -0,472 |
| 17 | Q5SW79 CE170_HUMAN | R.KS#FTSLYK.D                     | S958:      | 2 | 2,0262 | 0,259 | 0      |
| 17 | Q5JSH3 WDR44_HUMAN | K.GKELSDQATAS#PIVAR.T             | S96:       | 2 | 5,494  | 0,377 | -0,779 |
| 17 | Q5JSH3 WDR44_HUMAN | K.GKELSDQATAS#PIVAR.T             | S96:       | 3 | 3,8055 | 0,371 | -0,212 |
| 17 | Q07002 PCTK3_HUMAN | K.RLS#LPM*DIR.L                   | S96:       | 2 | 2,6566 | 0,095 | 0      |
| 17 | Q8TER5 SOLO_HUMAN  | R.IQQHLGEEAS#PR.G                 | S961:      | 3 | 2,7053 | 0,217 | 0      |
| 17 | Q5SW79 CE170_HUMAN | K.SFTS#LYKDR.C                    | S961:      | 2 | 2,0787 | 0,168 | -0,204 |
| 17 | P46100 ATRX_HUMAN  | K.KVQDGLS#DIAEK.F                 | S962:      | 2 | 3,3388 | 0,354 | 0      |
| 17 | Q6PD62 CTR9_HUMAN  | K.GEEGS#DDDETENGPKPK.K            | S970:      | 2 | 3,5437 | 0,469 | -0,842 |
| 17 | P46020 KPB1_HUMAN  | R.S#VRPTDSNVSPAISIHEIGAVGATK.T    | S972:      | 3 | 4,6846 | 0,537 | 0,141  |
| 17 | Q9BPX3 CND3_HUMAN  | R.RCQTAEADS#ES#DHEVPEPESEM*K.M    | S973:S975: | 3 | 3,1557 | 0,383 | 0,516  |
| 17 | P49815 TSC2_HUMAN  | R.SIS#VSEHVVR.S                   | S981:      | 2 | 2,2118 | 0,141 | 0      |
| 17 | Q9NS91 RAD18_HUMAN | R.NHLLQFALES#PAK.S                | S99:       | 2 | 4,4151 | 0,467 | -0,394 |
| 17 | Q9NS91 RAD18_HUMAN | R.NHLLQFALES#PAK.S                | S99:       | 3 | 3,8538 | 0,36  | 0      |
| 17 | O14579 COPE_HUMAN  | R.RDS#IVAELDR.E                   | S99:       | 3 | 3,2881 | 0,157 | 0,437  |
| 17 | O14579 COPE_HUMAN  | R.RDS#IVAELDR.E                   | S99:       | 2 | 2,8255 | 0,32  | 0,486  |
| 17 | Q8N488 RYBP_HUMAN  | K.DKEIS#PSVTK.K                   | S99:       | 2 | 2,6232 | 0,308 | -0,515 |

|    |                    |                                |                 |   |        |       |        |
|----|--------------------|--------------------------------|-----------------|---|--------|-------|--------|
| 17 | Q14739 LBR_HUMAN   | R.SAS#ASHQADIK.E               | S99:            | 2 | 2,4377 | 0,143 | -0,408 |
| 17 | Q9HD64 GAGD2_HUMAN | K.VGILHLGS#R.Q                 | S99:            | 2 | 2,2197 | 0,399 | 0,118  |
| 17 | Q9NS91 RAD18_HUMAN | R.NHLLQFALES#PAKS#PASSSSK.N    | S99:S103:       | 3 | 3,6583 | 0,491 | -0,388 |
| 17 | Q9P2D0 IBTK_HUMAN  | R.KRS#DSSGGYNLSDIQS#PSSTGLLK.S | S990:S1004:     | 3 | 5,3413 | 1     | -0,528 |
| 17 | O14974 MYPT1_HUMAN | R.RIS#EM*EEELK.M               | S995:           | 2 | 2,4961 | 0,147 | -0,359 |
| 17 | Q6XZF7 DNMBP_HUMAN | K.LNIHS#IIK.K                  | S996:           | 2 | 3,4171 | 0,263 | 0,12   |
| 17 | O95785 WIZ_HUMAN   | K.KTPLALAGS#PTPK.N             | S996:           | 2 | 2,3397 | 0,226 | -0,179 |
| 17 | Q9UQ35 SRRM2_HUMAN | K.VKAQT#PPGPSLSGSK.S           | T1003:          | 3 | 3,0406 | 0,36  | -0,119 |
| 17 | Q9UQ35 SRRM2_HUMAN | K.VKAQT#PPGPSLSGSK.S           | T1003:          | 2 | 2,8959 | 0,442 | -0,08  |
| 17 | Q9NTI5 PDS5B_HUMAN | K.SFFT#PGKPK.T                 | T1121:          | 2 | 2,5375 | 0,318 | 0      |
| 17 | Q9BX95 SGPP1_HUMAN | R.RNSLT#GEEGQLAR.V             | T114:           | 3 | 4,7129 | 0,349 | 0      |
| 17 | Q9HCM1 CL035_HUMAN | K.SLVNNPKT#PPDGK.S             | T1240:          | 2 | 3,0862 | 0,277 | -0,084 |
| 17 | Q9Y4B4 ARIP4_HUMAN | R.KLAT#PPAAQESSR.R             | T1260:          | 3 | 3,2484 | 0,276 | -0,255 |
| 17 | Q9Y4B4 ARIP4_HUMAN | R.KLAT#PPAAQESSR.R             | T1260:          | 2 | 2,9548 | 0,339 | -0,51  |
| 17 | Q8NI27 THOC2_HUMAN | K.GGEKT#PVSGSLKS#PVPR.S        | T1270:S1278:    | 3 | 4,4418 | 0,315 | -0,493 |
| 17 | O75367 H2AY_HUMAN  | K.GKLEAIT#PPPAK.K              | T129:           | 2 | 3,4963 | 0,469 | 0,517  |
| 17 | Q9H9C1 CN133_HUMAN | R.TRPGSFQSLSDALSDT#PAK.S       | T132:           | 3 | 4,2405 | 0,436 | 0,089  |
| 17 | Q9NR31 SAR1A_HUMAN | K.IDRT#DAISEEK.L               | T139:           | 2 | 3,2075 | 0,308 | -0,18  |
| 17 | Q8WW12 PCNP_HUMAN  | K.NIGRDT#PTSAGPNSFNK.G         | T139:           | 3 | 2,8129 | 0,279 | 0      |
| 17 | Q05655 KPCD_HUMAN  | R.SEDEAKFPT#M*NR.R             | T141:           | 2 | 2,0674 | 0,146 | 0,08   |
| 17 | Q9UQ35 SRRM2_HUMAN | K.TVART#PLGQR.S                | T1531:          | 2 | 2,1482 | 0,374 | -0,103 |
| 17 | O43166 SI1L1_HUMAN | K.KLIDLESPT#PESQK.S            | T1551:          | 2 | 3,7516 | 0,437 | 0,586  |
| 17 | P41162 ETV3_HUMAN  | R.FHFPLDT#HS#PTNDVQPGR.F       | T157:S159:      | 3 | 3,3137 | 0,303 | 0      |
| 17 | Q8TBN0 R3GEF_HUMAN | K.TLVITST#PASPNRELHPQLLSPTK.A  | T165:           | 3 | 3,4385 | 0,27  | -0,341 |
| 17 | Q12888 TP53B_HUMAN | K.LIT#SEEERS#PAKR.G            | T1672:S1678:    | 3 | 4,0563 | 0,462 | -0,327 |
| 17 | P50613 CDK7_HUMAN  | R.AYT#HQVVTR.W                 | T170:           | 2 | 2,384  | 0,441 | -0,106 |
| 17 | Q86TB9 PATL1_HUMAN | R.RST#SPIIGSPPVR.A             | T178:           | 2 | 2,3625 | 0,321 | -0,169 |
| 17 | Q15527 SURF2_HUMAN | R.KDLGSTEDGDGT#DDFLT#DKEDEK.A  | T190:T195:      | 3 | 6,3876 | 0,469 | -0,408 |
| 17 | Q9H1E3 NUCKS_HUMAN | K.EKT#PS#PKEEDEEPES#PPEKK.T    | T202:S204:S214: | 3 | 3,5259 | 0,323 | 0      |
| 17 | P53350 PLK1_HUMAN  | R.KKT#LCGT#PNYIAPEVLSK.K       | T210:T214:      | 3 | 3,4278 | 0,433 | -0,168 |
| 17 | Q63HQ0 CD016_HUMAN | R.SKT#EEDILR.A                 | T228:           | 2 | 3,0477 | 0,335 | 0,104  |
| 17 | P49792 RBP2_HUMAN  | K.TAQEKDSLIT#PHVS#R.S          | T2450:S2454:    | 2 | 3,3948 | 0,186 | 0,397  |
| 17 | Q96A49 SYAP1_HUMAN | R.EQDLPLAEAVRPKT#PPVVIK.S      | T248:           | 3 | 2,715  | 0,213 | 0,08   |

|    |                    |                            |            |   |        |       |        |
|----|--------------------|----------------------------|------------|---|--------|-------|--------|
| 17 | Q9H0G5 CCD55_HUMAN | R.EKVIET#PENDFK.H          | T275:      | 2 | 2,6192 | 0,258 | 0,16   |
| 17 | Q641Q2 FA21A_HUMAN | R.SRPT#SFADELAAR.I         | T287:      | 3 | 3,6439 | 0,315 | 0,183  |
| 17 | Q01518 CAP1_HUMAN  | R.SGPKPFSAPKQQT#SPS#PK.R   | T307:S310: | 3 | 3,1537 | 0,111 | 0      |
| 17 | Q6T4R5 NHS_HUMAN   | K.NPIHNIPST#LDK.Q          | T311:      | 2 | 3,302  | 0,442 | -0,598 |
| 17 | Q92597 NDRG1_HUMAN | R.SRT#ASGSSVSLDGTR.S       | T328:      | 2 | 3,5912 | 0,552 | -0,514 |
| 17 | Q13769 THOC5_HUMAN | R.RPT#LGVQLDDK.R           | T328:      | 2 | 3,419  | 0,472 | -0,369 |
| 17 | Q13769 THOC5_HUMAN | R.RPT#LGVQLDDK.R           | T328:      | 3 | 3,0804 | 0,264 | 0,346  |
| 17 | Q641Q2 FA21A_HUMAN | K.ERRT#PS#DDEEDNLFAPPK.L   | T331:S333: | 3 | 3,4469 | 0,278 | -0,322 |
| 17 | Q9UQB8 BAIP2_HUMAN | K.LSDSYSNT#LPVRK.S         | T340:      | 3 | 3,1705 | 0,305 | 0      |
| 17 | Q9UQB8 BAIP2_HUMAN | K.LSDSYSNT#LPVRK.S         | T340:      | 2 | 2,7792 | 0,36  | 0,156  |
| 17 | Q9ULW0 TPX2_HUMAN  | K.ICRDPQT#PVLQTK.H         | T369:      | 2 | 3,2952 | 0,369 | -0,373 |
| 17 | Q9ULW0 TPX2_HUMAN  | K.ICRDPQT#PVLQTK.H         | T369:      | 3 | 3,1639 | 0,26  | 0,112  |
| 17 | Q00610 CLH1_HUMAN  | K.GILRT#PDTIR.R            | T394:      | 2 | 2,5705 | 0,151 | 0,2    |
| 17 | Q15149 PLEC1_HUMAN | R.KQIT#M*EELVR.S           | T4030:     | 2 | 3,3037 | 0,24  | -0,454 |
| 17 | Q9BTX1 NDC1_HUMAN  | K.KLNSPEETAFAQT#PK.S       | T414:      | 2 | 4,4979 | 0,442 | 0,219  |
| 17 | P13639 EF2_HUMAN   | R.IM*GPNYT#PGKK.E          | T435:      | 2 | 2,8216 | 0,253 | -0,469 |
| 17 | Q9H7P9 PKHG2_HUMAN | K.SKPVLEPLT#PPLGS#PRPR.D   | T445:S450: | 3 | 3,8103 | 0,365 | -0,348 |
| 17 | Q8TBZ3 WDR20_HUMAN | K.FAT#LSLHDR.K             | T463:      | 2 | 2,5521 | 0,197 | -0,428 |
| 17 | Q9Y3E5 PTH2_HUMAN  | K.THT#DTESEASILGDSGEYK.M   | T50:       | 3 | 2,663  | 0,266 | -0,086 |
| 17 | Q9BZL4 PP12C_HUMAN | R.RST#QGVTLTDLK.E          | T560:      | 2 | 4,1457 | 0,384 | -0,262 |
| 17 | O76094 SRP72_HUMAN | K.NYDPKVT#PDPER.W          | T571:      | 2 | 3,2984 | 0,393 | -0,162 |
| 17 | P01106 MYC_HUMAN   | K.KFELLPT#PPLS#PSRR.S      | T58:S62:   | 3 | 3,1723 | 0,232 | -0,386 |
| 17 | P01106 MYC_HUMAN   | K.KFELLPT#PPLSPS#RR.S      | T58:S64:   | 2 | 2,7978 | 0,328 | -0,514 |
| 17 | Q09666 AHNK_HUMAN  | K.LKFGT#FGGLGSK.S          | T5824:     | 2 | 3,573  | 0,4   | -0,094 |
| 17 | Q13017 RHG05_HUMAN | R.LYHDST#NIDK.V            | T591:      | 3 | 2,7613 | 0,15  | -0,213 |
| 17 | Q12888 TP53B_HUMAN | K.TKGDDT#DTRDDIS#ILATGCK.G | T591:S598: | 3 | 3,0478 | 0,302 | -0,391 |
| 17 | O15439 MRP4_HUMAN  | K.KDNEESEQPPVPGT#PTLR.N    | T646:      | 3 | 2,9163 | 0,269 | 0,088  |
| 17 | Q6P0N0 CN106_HUMAN | K.KAYILVT#PLK.S            | T653:      | 2 | 3,5418 | 0,252 | -0,498 |
| 17 | P35658 NU214_HUMAN | K.SPRIT#PPAAKPGS#PQAK.S    | T670:S678: | 3 | 3,1064 | 0,246 | -0,196 |
| 17 | P19338 NUCL_HUMAN  | K.VVVSPT#KK.V              | T69:       | 2 | 2,1569 | 0,269 | -1,691 |
| 17 | Q12834 CDC20_HUMAN | K.VQTT#PSKPGGDR.Y          | T70:       | 3 | 2,9934 | 0,196 | 0,069  |
| 17 | Q12834 CDC20_HUMAN | K.VQTT#PSKPGGDR.Y          | T70:       | 2 | 2,0872 | 0,318 | -0,553 |
| 17 | Q9Y6X9 MORC2_HUMAN | K.KT#ESPIKLSPAT#PSR.K      | T723:T733: | 2 | 3,2288 | 0,317 | -0,413 |

|    |                    |                                  |                 |   |        |       |        |
|----|--------------------|----------------------------------|-----------------|---|--------|-------|--------|
| 17 | Q13443 ADAM9_HUMAN | R.HVSPVT#PPREVIY#ANR.F           | T761:Y769:      | 3 | 2,9292 | 0,254 | 0      |
| 17 | Q99700 ATX2_HUMAN  | K.ENIKPNET#SPSFSK.A              | T770:           | 2 | 2,1448 | 0,192 | 0,147  |
| 17 | Q68DN6 RGPD1_HUMAN | R.NADSEIKHST#PS#PTKYSL#PSK.S     | T770:S772:S779: | 3 | 4,0384 | 1     | 0,84   |
| 17 | P18084 ITB5_HUMAN  | R.KPIST#HT#VDFTFNK.F             | T780:T782:      | 3 | 3,0048 | 0,328 | -0,102 |
| 17 | Q15020 SART3_HUMAN | K.VFRYST#SLEK.H                  | T796:           | 3 | 2,7572 | 0,269 | 0      |
| 17 | P49006 MRP_HUMAN   | K.GEVPPKET#PK.K                  | T85:            | 2 | 2,3161 | 0,263 | -0,63  |
| 17 | O60716 CTND1_HUMAN | R.SQSSHSDST#LPLIDR.N             | T869:           | 3 | 2,8041 | 0,179 | -0,091 |
| 17 | Q9NYV4 CD2L7_HUMAN | R.LYNSEESRPT#NK.V                | T893:           | 2 | 3,014  | 0,417 | -0,363 |
| 17 | Q6PD62 CTR9_HUMAN  | K.KGGEFDEFVNDT#DDDLPIK.K         | T925:           | 3 | 3,1114 | 0,312 | -0,526 |
| 17 | Q01081 U2AF1_HUMAN | K.DKVNCSFY#FK.I                  | Y21:            | 2 | 2,6916 | 0,102 | -0,791 |
| 17 | P35232 PHB_HUMAN   | R.KLEAAEDIAY#QLSR.S              | Y249:           | 2 | 4,7624 | 0,419 | -0,145 |
| 17 | P35232 PHB_HUMAN   | R.KLEAAEDIAY#QLSR.S              | Y249:           | 3 | 3,2582 | 0,14  | -0,217 |
| 17 | P38159 HNRPG_HUMAN | R.DGYGGSRSY#SSSR.S               | Y327:           | 3 | 2,8758 | 0,399 | 0      |
| 17 | P42166 LAP2A_HUMAN | K.GPPDFSSDEEREPTVLGSGAAAAGR.S    |                 | 3 | 5,5327 | 0,427 | -0,142 |
| 17 | P09972 ALDOC_HUMAN | K.VDKGVVPLAGTDGETTQGLDGLSER.C    |                 | 3 | 5,5035 | 0,591 | 0,42   |
| 17 | Q13435 SF3B2_HUMAN | K.IEEAM*DGSETPQLFTVLPEKR.T       |                 | 3 | 4,8201 | 0,497 | -0,836 |
| 17 | P20020 AT2B1_HUMAN | R.IEDSEPHIPLIDTDAEDDAPTK.R       |                 | 3 | 4,6866 | 0,413 | -0,433 |
| 17 | Q15459 SF3A1_HUMAN | K.ASKPLPPAPAPDEYLVSPITGEK.I      |                 | 3 | 4,6627 | 0,52  | -0,154 |
| 17 | Q9HCN8 SDF2L_HUMAN | K.AM*EGIFIKPSVEPSAGHDEL.-        |                 | 3 | 4,6393 | 0,448 | 0,085  |
| 17 | P06748 NPM_HUMAN   | K.DELHIVEAEAM*NYEGSPIK.V         |                 | 3 | 4,5008 | 0,281 | -0,339 |
| 17 | P09651 ROA1_HUMAN  | R.NQGGYGGSSSSSYGSGR.R            |                 | 2 | 4,4538 | 0,565 | -0,504 |
| 17 | Q9Y3A4 ZG14_HUMAN  | R.DPEDRIPSPLGYAAPIK.F            |                 | 3 | 4,319  | 0,457 | -0,094 |
| 17 | O60506 HNRPQ_HUMAN | K.DLEGENIEIVFAKPPDQK.R           |                 | 3 | 4,2913 | 0,453 | -0,269 |
| 17 | P35580 MYH10_HUMAN | K.VEDM*AELTCLNEASVLHNLK.D        |                 | 3 | 4,2821 | 0,392 | -0,397 |
| 17 | P04083 ANXA1_HUMAN | K.GPGSAVSPYPTFNPSDVAALHK.A       |                 | 3 | 4,244  | 0,412 | -0,078 |
| 17 | O75153 EIF3X_HUMAN | K.DCM*EHAVLPVDGATLAEVM*R.Q       |                 | 3 | 4,2383 | 0,41  | -0,407 |
| 17 | P08195 4F2_HUMAN   | K.ADLLLSTQPGREEGSPLELER.L        |                 | 3 | 4,1987 | 0,406 | -0,396 |
| 17 | P60709 ACTB_HUMAN  | R.VAPEEHPVLLTEAPLNPK.A           |                 | 2 | 4,1714 | 0,52  | -0,687 |
| 17 | Q9Y696 CLIC4_HUMAN | R.DEFTNTCPDKEVEIAYSVDVAK.R       |                 | 3 | 4,116  | 0,417 | -0,218 |
| 17 | Q15003 CND2_HUMAN  | K.DAPSLEEVEGHVADGSATEM*GTTK.K    |                 | 3 | 4,0824 | 0,456 | 0,299  |
| 17 | O75153 EIF3X_HUMAN | R.DRAEPM*ATEPAPAGAPGDLGSQPPAAK.D |                 | 3 | 4,0717 | 0,425 | 0,599  |
| 17 | P43897 EFTS_HUMAN  | R.LGQHVVGM*APLSVGLDDEPGGEAETK.M  |                 | 3 | 4,0471 | 0,373 | -0,068 |
| 17 | P08670 VIME_HUMAN  | R.DGQVINETSQHDDLE.-              |                 | 2 | 3,9855 | 0,429 | -0,863 |



|    |                    |                                 |   |        |       |        |
|----|--------------------|---------------------------------|---|--------|-------|--------|
| 17 | Q8IY81 RRMJ3_HUMAN | K.ASEIM*VDDEELAQHPATTEDIR.V     | 3 | 3,9846 | 0,454 | -0,368 |
| 17 | Q2TAA2 IAH1_HUMAN  | R.DVAEAKPELSLLGDGDH.-           | 2 | 3,9397 | 0,52  | 0,207  |
| 17 | O95372 LYPA2_HUMAN | K.DLAILQCHGELDPM*VPVR.F         | 3 | 3,9045 | 0,18  | -0,44  |
| 17 | Q09666 AHNK_HUMAN  | K.VEAPSLDVHM*DSPDINIEGPDVK.I    | 3 | 3,8416 | 0,166 | -0,514 |
| 17 | Q15527 SURF2_HUMAN | K.DLGSTEDGDGTDDFLTDKEDEK.A      | 3 | 3,8395 | 0,412 | -0,457 |
| 17 | P25788 PSA3_HUMAN  | K.ESLKEEDESDDDNM*.-             | 2 | 3,7952 | 0,531 | -0,438 |
| 17 | P30443 1A01_HUMAN  | R.DGEDQTQDTELVETRPAGDGTQK.W     | 3 | 3,771  | 0,496 | -0,416 |
| 17 | P49841 GSK3B_HUMAN | R.DIKPQNLLDPDTAVLK.L            | 3 | 3,7704 | 0,333 | -0,483 |
| 17 | Q13043 STK4_HUMAN  | R.DETM*QPAKPSFLEYFEQK.E         | 3 | 3,6723 | 0,309 | -0,581 |
| 17 | Q9NZM1 MYOF_HUMAN  | R.DIVIEM*EDTKPLLASK.L           | 2 | 3,6486 | 0,412 | 0,738  |
| 17 | P60709 ACTB_HUMAN  | R.VAPEEHPVLLTEAPLNPK.A          | 3 | 3,6319 | 0,442 | 0,281  |
| 17 | P37802 TAGL2_HUMAN | R.NFSDNQLQEGK.N                 | 2 | 3,5676 | 0,448 | 0      |
| 17 | P61158 ARP3_HUMAN  | R.AEPEDHYFLLTEPPLNTPENR.E       | 3 | 3,5444 | 0,256 | -0,369 |
| 17 | Q9BT25 NYS48_HUMAN | R.SFAQVLELSAEASK.E              | 2 | 3,4612 | 0,438 | -0,989 |
| 17 | Q9BX68 HINT2_HUMAN | R.DVAPQAPVHFLVIPK.K             | 2 | 3,4574 | 0,318 | -0,449 |
| 17 | O75400 PR40A_HUMAN | R.RTLLEQLDDQ.-                  | 2 | 3,4197 | 0,331 | -0,363 |
| 17 | P06576 ATPB_HUMAN  | K.VLDSGAPIKIPVGPETLGR.I         | 3 | 3,4163 | 0,299 | -0,667 |
| 17 | P30041 PRDX6_HUMAN | K.DGDSVM*VLPTIPEEEAKK.L         | 3 | 3,3849 | 0,403 | 0      |
| 17 | Q01780 EXOSX_HUMAN | K.DPEPPEKEFTPYDYSQSDFK.A        | 3 | 3,3648 | 0,308 | 0,605  |
| 17 | P13639 EF2_HUMAN   | K.GEGQLGPAER.A                  | 2 | 3,3312 | 0,371 | 0,06   |
| 17 | P49840 GSK3A_HUMAN | R.DIKPQNLLVDPDTAVLK.L           | 3 | 3,2408 | 0,173 | -0,195 |
| 17 | P31150 GDIA_HUMAN  | R.KQNDVFGEAEQ.-                 | 2 | 3,229  | 0,423 | -0,482 |
| 17 | Q04917 1433F_HUMAN | K.NCNDFAQYESK.V                 | 2 | 3,1833 | 0,308 | -0,468 |
| 17 | Q92598 HS105_HUMAN | K.LM*SSNSTDLPLNIECFM*NDKDVSGK.M | 3 | 3,1806 | 0,416 | -0,514 |
| 17 | Q9BR76 COR1B_HUMAN | K.NDQCYEDIR.V                   | 2 | 3,1332 | 0,41  | 0,101  |
| 17 | P62937 PIIA_HUMAN  | K.KITIADCQLE.-                  | 2 | 3,1104 | 0,414 | -0,196 |
| 17 | O76094 SRP72_HUMAN | K.AIELLQEFSDQHPENAAEIK.L        | 3 | 3,1046 | 0,309 | -0,481 |
| 17 | Q2TAA2 IAH1_HUMAN  | R.DVAEAKPELSLLGDGDH.-           | 3 | 3,0846 | 0,288 | 0,414  |
| 17 | P06396 GELS_HUMAN  | R.DPDQTDGLGLSYLSSHIANVER.V      | 3 | 3,0686 | 0,252 | -0,536 |
| 17 | Q99460 PSMD1_HUMAN | K.DTSEDIEELVEPVAAHGPK.I         | 3 | 3,0075 | 0,292 | -0,27  |
| 17 | Q05682 CALD1_HUMAN | R.NDDDEEEAAR.E                  | 2 | 3,0013 | 0,379 | -0,419 |
| 17 | P62851 RS25_HUMAN  | R.DKLNLLVLFDK.A                 | 2 | 2,966  | 0,166 | -0,185 |
| 17 | P07355 ANXA2_HUMAN | R.TNQELQEINR.V                  | 2 | 2,9565 | 0,304 | 0      |

|    |                     |                               |   |        |       |        |
|----|---------------------|-------------------------------|---|--------|-------|--------|
| 17 | Q13409 DC1I2_HUMAN  | K.EDEEEDDDVVAPKPIEPEEEK.T     | 3 | 2,9097 | 0,276 | 0,36   |
| 17 | P55884 EIF3B_HUMAN  | K.DRPQEADGIDSVIVVDNVPQVGPDR.L | 3 | 2,8874 | 0,347 | -0,612 |
| 17 | P22626 ROA2_HUMAN   | R.GGNFGFGDSR.G                | 2 | 2,8249 | 0,165 | -0,06  |
| 17 | P55884 EIF3B_HUMAN  | R.M*TLDTLSIYETPSM*GLLDKK.S    | 3 | 2,8025 | 0,359 | -0,32  |
| 17 | Q13451 FKBP5_HUMAN  | R.DVAFTVGEGEDHDIPIGIDK.A      | 3 | 2,7801 | 0,191 | -0,344 |
| 17 | O75164 JHD3A_HUMAN  | K.DNTVIDHTLPTPEAAEFLK.E       | 3 | 2,7799 | 0,305 | -0,867 |
| 17 | Q0D2N1 Q0D2N1_HUMAN | K.DM*VTELFDPVQGEVQHR.V        | 3 | 2,7733 | 0,184 | -0,172 |
| 17 | Q9Y2W2 WBP11_HUMAN  | R.DM*EKLDDEM*EFNPVQQPQLNEK.V  | 3 | 2,7701 | 0,212 | 0,987  |
| 17 | O95163 ELP1_HUMAN   | K.DFEPILQIQHDDFGESK.F         | 3 | 2,7193 | 0,357 | -0,161 |
| 17 | P55209 NP1L1_HUMAN  | K.NVDLLSDM*VQEHDEPILK.H       | 3 | 2,63   | 0,175 | -0,173 |
| 17 | O43252 PAPS1_HUMAN  | K.GFTGIDSEYEKPEAPELVLK.T      | 3 | 2,6253 | 0,347 | -0,576 |
| 17 | Q92769 HDAC2_HUMAN  | R.DGIDDESYGQIFKPIISK.V        | 2 | 2,6077 | 0,509 | -0,844 |
| 17 | P13667 PDIA4_HUMAN  | K.DLGLSESGEDVNAAILDESGKK.F    | 3 | 2,6024 | 0,393 | 0      |
| 17 | P23381 SYWC_HUMAN   | R.KLSFDQ.-                    | 2 | 2,576  | 0,274 | 0      |
| 17 | P08670 VIME_HUMAN   | R.FANYIDK.V                   | 2 | 2,4334 | 0,26  | -0,07  |
| 17 | Q9UBV8 PEF1_HUMAN   | K.NLFQYDR.D                   | 2 | 2,3817 | 0,328 | -0,225 |
| 17 | P54136 SYRC_HUMAN   | R.GESFYQDR.M                  | 2 | 2,3377 | 0,322 | 0,061  |
| 17 | O43920 NDUS5_HUMAN  | R.FGLNDR.W                    | 2 | 2,2819 | 0,2   | -0,073 |
| 17 | P21333 FLNA_HUMAN   | R.NDNDTFTVK.Y                 | 2 | 2,2715 | 0,468 | -0,695 |
| 17 | P61313 RL15_HUMAN   | R.SLQSVAEER.A                 | 2 | 2,2019 | 0,125 | -0,12  |
| 17 | P61221 ABCE1_HUMAN  | K.KSGNYFFLDD.-                | 2 | 2,1861 | 0,435 | -0,304 |
| 17 | P13645 K1C10_HUMAN  | R.LAADDFR.L                   | 2 | 2,1408 | 0,404 | 0,227  |
| 17 | Q00610 CLH1_HUMAN   | R.AYEFAER.C                   | 2 | 2,1364 | 0,345 | 0,069  |
| 17 | P04406 G3P_HUMAN    | K.VGVNGFGR.I                  | 2 | 2,095  | 0,273 | 0,076  |
| 17 | P55209 NP1L1_HUMAN  | K.NVDLLSDM*VQEHDEPILK.H       | 2 | 2,0869 | 0,225 | -0,578 |
| 17 | Q9ULV4 COR1C_HUMAN  | K.NDQCYDDIR.V                 | 2 | 2,0855 | 0,253 | -0,102 |
| 17 | P02545 LMNA_HUMAN   | K.NIYSEELR.E                  | 2 | 2,0677 | 0,261 | 0      |
| 17 | Q15365 PCBP1_HUMAN  | R.QGANINEIR.Q                 | 2 | 2,0636 | 0,163 | 0,12   |
| 17 | Q14204 DYHC1_HUMAN  | R.SFDSEFK.L                   | 2 | 2,0429 | 0,219 | 0,071  |
| 17 | P62917 RL8_HUMAN    | R.AVDFAER.H                   | 2 | 2,0324 | 0,126 | 0,377  |
| 17 | Q12906 ILF3_HUMAN   | R.IFVNDDR.H                   | 2 | 2,0324 | 0,117 | 0,069  |
| 17 | P27695 APEX1_HUMAN  | K.NAGFTPQER.Q                 | 2 | 2,0186 | 0,362 | 0,359  |
| 17 | P00558 PGK1_HUMAN   | K.FCLDNGAK.S                  | 2 | 2,0103 | 0,412 | 0,198  |

|    |                     |                                     |              |   |        |       |        |
|----|---------------------|-------------------------------------|--------------|---|--------|-------|--------|
| 18 | Q13619 CUL4A_HUMAN  | R.KGS#FSALVGR.T                     | S10:         | 2 | 3,3045 | 0,501 | 0,111  |
| 18 | P23193 TCEA1_HUMAN  | K.KEPAITSQNS#PEAR.E                 | S100:        | 3 | 3,4856 | 0,221 | -0,227 |
| 18 | Q96RR4 KKCC2_HUMAN  | R.KLS#LQER.S                        | S100:        | 2 | 2,2215 | 0,134 | -0,192 |
| 18 | P05386 RLA1_HUMAN   | K.KEES#EES#DDDM*GFGLFD.-            | S101:S104:   | 2 | 2,4573 | 0,513 | -0,115 |
| 18 | P17096 HMGA1_HUMAN  | K.KLEKEEEEGISQES#S#EEEQ.-           | S102:S103:   | 3 | 3,7892 | 0,361 | -0,382 |
| 18 | P05387 RLA2_HUMAN   | K.KDEKKEES#EES#DDDM*GFGLFD.-        | S102:S105:   | 3 | 2,7807 | 0,297 | -0,557 |
| 18 | A8MSX0 A8MSX0_HUMAN | R.SHTS#LKDELSDV#QGGSK.A             | S102:S111:   | 3 | 4,7693 | 0,456 | -0,27  |
| 18 | Q01804 OTUD4_HUMAN  | R.VQRPKEES#S#EDENEVSNILR.S          | S1023:S1024: | 3 | 3,7393 | 0,295 | -0,509 |
| 18 | P78332 RBM6_HUMAN   | R.EKLQSFDS#PER.K                    | S1025:       | 3 | 3,023  | 0,175 | 0,065  |
| 18 | P78332 RBM6_HUMAN   | R.EKLQSFDS#PER.K                    | S1025:       | 2 | 2,2779 | 0,134 | 0,259  |
| 18 | Q9ULH1 DDEF1_HUMAN  | K.SHPLDLS#PNVQSR.D                  | S1027:       | 2 | 3,4121 | 0,538 | -0,159 |
| 18 | Q12888 TP53B_HUMAN  | R.KNGSTAVAESVAS#PQK.T               | S1028:       | 2 | 5,0083 | 0,564 | -0,59  |
| 18 | Q12888 TP53B_HUMAN  | R.KNGSTAVAESVAS#PQK.T               | S1028:       | 3 | 2,9822 | 0,26  | -0,221 |
| 18 | P31943 HNRH1_HUMAN  | K.HTGPNS#PDTANDGFVR.L               | S104:        | 2 | 4,0142 | 0,485 | -0,415 |
| 18 | P31943 HNRH1_HUMAN  | K.HTGPNS#PDTANDGFVR.L               | S104:        | 3 | 3,989  | 0,249 | 0,104  |
| 18 | P52597 HNRPF_HUMAN  | K.HSGPNS#ADSANDGFVR.L               | S104:        | 2 | 3,8424 | 0,391 | -0,713 |
| 18 | Q70E73 RAPH1_HUMAN  | K.RPS#VDSLVS.K                      | S1048:       | 2 | 2,0591 | 0,149 | -0,209 |
| 18 | Q8IXQ4 K1704_HUMAN  | K.KQDDS#PPRPIIGPALPPGFIK.S          | S105:        | 3 | 3,5937 | 0,328 | -0,315 |
| 18 | O60361 NDK8_HUMAN   | R.NIIHGS#DSVK.S                     | S105:        | 2 | 2,7441 | 0,255 | 0,53   |
| 18 | Q8NDI1 EHBP1_HUMAN  | R.KPS#EDEVLNK.G                     | S1058:       | 2 | 4,0846 | 0,445 | -0,394 |
| 18 | Q8IXM2 CQ049_HUMAN  | K.KVAS#GVLSPPPAAPPSSSSVPEAGGPPIKK.Q | S106:        | 3 | 4,938  | 0,458 | 0,796  |
| 18 | P26373 RL13_HUMAN   | R.NKS#TESLQANVQR.L                  | S106:        | 2 | 3,5005 | 0,528 | -0,471 |
| 18 | P24534 EF1B_HUMAN   | K.DDDDIDLFGS#DDEESEEAKR.L           | S106:        | 3 | 3,495  | 0,36  | -0,146 |
| 18 | P46100 ATRX_HUMAN   | K.KDELS#DYAEK.S                     | S1061:       | 2 | 3,6703 | 0,412 | -0,095 |
| 18 | Q70E73 RAPH1_HUMAN  | K.FTPPAES#GSPSKETLPPPAAPPKPGK.L     | S1062:       | 3 | 2,8503 | 0,306 | -0,275 |
| 18 | Q70E73 RAPH1_HUMAN  | K.FTPPAESGS#PSKETLPPPAAPPKPGK.L     | S1064:       | 3 | 2,6157 | 0,128 | -0,412 |
| 18 | Q9UQE7 SMC3_HUMAN   | K.KGDVEGSQS#QDEGEGSGESER.G          | S1067:       | 3 | 5,4827 | 0,546 | -0,326 |
| 18 | Q9UQ35 SRRM2_HUMAN  | K.GQSQTSPDHRS#DTS#SPEVR.Q           | S1069:S1072: | 3 | 4,6716 | 1     | -0,574 |
| 18 | Q5VV41 ARHGG_HUMAN  | R.HQS#FGAAVLSR.E                    | S107:        | 2 | 2,759  | 0,523 | 0,097  |
| 18 | O60361 NDK8_HUMAN   | R.NIIHGS#DSVK.S                     | S107:        | 2 | 2,3884 | 0,204 | -0,53  |
| 18 | Q9P1Y5 K1543_HUMAN  | K.RPTS#RAPS#PSGLM*SPSR.L            | S1070:S1074: | 3 | 2,8899 | 0,085 | -0,56  |
| 18 | Q6ZUT9 RA61L_HUMAN  | R.RLS#ITSLTGK.N                     | S1076:       | 2 | 2,5972 | 0,258 | -0,317 |
| 18 | P48634 BAT2_HUMAN   | R.TASETRS#EGS#EYEEIPKR.R            | S1089:S1092: | 3 | 3,2146 | 0,265 | 0,082  |

|    |                    |                              |              |   |        |       |        |
|----|--------------------|------------------------------|--------------|---|--------|-------|--------|
| 18 | Q8WYQ5 DGCR8_HUMAN | R.KFS#PDLK.L                 | S109:        | 2 | 2,658  | 0,166 | -0,2   |
| 18 | Q12772 SRBP2_HUMAN | R.HLPLSFLSS#PGQR.A           | S1098:       | 2 | 2,7337 | 0,512 | -0,482 |
| 18 | P18754 RCC1_HUMAN  | R.RS#PPADAIPK.S              | S11:         | 2 | 2,9243 | 0,335 | -0,97  |
| 18 | Q9BQF6 SENP7_HUMAN | R.RPS#SSEIITEGK.R            | S11:         | 2 | 2,8473 | 0,472 | -0,529 |
| 18 | Q96RQ1 ERGI2_HUMAN | K.KTLS#LVK.E                 | S11:         | 2 | 2,6077 | 0,155 | -0,14  |
| 18 | Q13425 SNTB2_HUMAN | R.GPAGEAGAS#PPVRR.V          | S110:        | 3 | 2,7011 | 0,389 | 0,261  |
| 18 | Q14966 ZN638_HUMAN | K.IDLPEVQIEHDPELEKES#PGLK.N  | S1100:       | 3 | 3,5741 | 0,21  | -0,282 |
| 18 | P35568 IRS1_HUMAN  | R.HSS#ETFSSTPSATR.V          | S1101:       | 2 | 3,3981 | 0,467 | -0,31  |
| 18 | Q6P0N0 CN106_HUMAN | R.KTPFNLDLGENS#GIGK.L        | S1104:       | 2 | 3,1108 | 0,394 | -0,069 |
| 18 | P11388 TOP2A_HUMAN | K.VPDEEENEES#DNEKETEK.S      | S1106:       | 3 | 2,7029 | 0,303 | -0,738 |
| 18 | Q70EL4 UBP43_HUMAN | K.YHTLS#LGR.K                | S1112:       | 2 | 2,0144 | 0,287 | 0      |
| 18 | O95490 LPHN2_HUMAN | R.HSYCCGGLPTES#PHSS#VK.A     | S1112:S1116: | 3 | 4,1242 | 0,353 | 0,169  |
| 18 | Q9BX95 SGPP1_HUMAN | R.RNS#LTGEEGQLAR.V           | S112:        | 2 | 2,9562 | 0,367 | -0,727 |
| 18 | Q9UQ35 SRRM2_HUMAN | R.QDRGEFSAS#PM*LK.S          | S1124:       | 3 | 3,2204 | 0,115 | -0,117 |
| 18 | O60841 IF2P_HUMAN  | K.KQSFDDNDS#EELEDK.D         | S113:        | 2 | 6,2137 | 0,512 | 0,195  |
| 18 | O60841 IF2P_HUMAN  | K.KQSFDDNDS#EELEDK.D         | S113:        | 3 | 4,2174 | 0,373 | 0,097  |
| 18 | Q9UPN4 AZI1_HUMAN  | K.RPAS#LSTAPSEK.G            | S114:        | 2 | 3,1597 | 0,492 | -0,829 |
| 18 | Q86VM9 ZCH18_HUMAN | R.TSDLRDEASS#VTR.E           | S118:        | 3 | 3,7299 | 0,391 | 0,241  |
| 18 | P18669 PGAM1_HUMAN | R.RS#YDVPPPPM*EPDHPFYSNISK.D | S118:        | 3 | 3,1313 | 0,31  | -0,685 |
| 18 | O15061 DMN_HUMAN   | R.HVTLPGQS#PLSR.E            | S1181:       | 2 | 3,3724 | 0,378 | -0,427 |
| 18 | Q04637 IF4G1_HUMAN | R.SFS#KEVEER.S               | S1188:       | 2 | 2,3088 | 0,087 | -0,102 |
| 18 | Q04637 IF4G1_HUMAN | R.SFS#KEVEERS#R.E            | S1188:S1195: | 2 | 2,0762 | 0,335 | -0,322 |
| 18 | Q00536 PCTK1_HUMAN | K.RLS#LPADIR.L               | S119:        | 2 | 2,2014 | 0,259 | -0,218 |
| 18 | P20020 AT2B1_HUMAN | R.IEDS#EPHIPLIDDDAEDDAPTZR.N | S1193:       | 3 | 5,6557 | 0,553 | -0,528 |
| 18 | Q29RF7 PDS5A_HUMAN | R.SREQSSEAETGVS#ENEENPVR.I   | S1195:       | 3 | 4,045  | 0,456 | -0,442 |
| 18 | Q9NZN5 ARHGC_HUMAN | R.DLGLESTLISSKQSHLS#TSGK.S   | S1198:       | 3 | 3,6991 | 0,28  | -0,597 |
| 18 | Q9BQF6 SENP7_HUMAN | R.RPSS#SEIITEGK.R            | S12:         | 2 | 2,3035 | 0,217 | -0,441 |
| 18 | O95218 ZRAB2_HUMAN | R.ENVEYIEREES#DGEYDEFGR.K    | S120:        | 3 | 4,9209 | 0,49  | -0,288 |
| 18 | Q9H7D7 WDR26_HUMAN | K.RLS#QSDDEDVIR.L            | S121:        | 2 | 3,1591 | 0,531 | -0,611 |
| 18 | Q9H7D7 WDR26_HUMAN | K.RLS#QSDDEDVIR.L            | S121:        | 3 | 2,9591 | 0,288 | 0      |
| 18 | P11388 TOP2A_HUMAN | K.KTQM*AEVLPS#PR.G           | S1213:       | 2 | 2,5572 | 0,213 | -0,588 |
| 18 | Q5VZK9 LR16A_HUMAN | R.KIFPGLS#PVR.I              | S122:        | 2 | 2,963  | 0,282 | -0,204 |
| 18 | Q7Z4S6 KI21A_HUMAN | K.KIPEPS#PVTR.R              | S1239:       | 2 | 2,6727 | 0,341 | -0,304 |

|    |                    |                                   |              |   |        |       |        |
|----|--------------------|-----------------------------------|--------------|---|--------|-------|--------|
| 18 | Q5T200 ZC3HD_HUMAN | K.TKS#LEITGER.K                   | S1240:       | 3 | 2,8928 | 0,082 | -0,527 |
| 18 | Q92797 SYMPK_HUMAN | K.ETAAGGLTLKEERS#PQTLAPVGEDAM*K.T | S1243:       | 3 | 3,8797 | 0,391 | -0,506 |
| 18 | P11388 TOP2A_HUMAN | K.IKNENTEGS#PQEDGVELEGLK.Q        | S1247:       | 3 | 4,9756 | 0,531 | -0,387 |
| 18 | Q9BQG0 MBB1A_HUMAN | K.NQKPSQVNGAPGS#PTEPAGQK.Q        | S1267:       | 3 | 3,5806 | 0,313 | -0,337 |
| 18 | Q96T58 MINT_HUMAN  | R.HGS#FHEDEDPIGS#PR.L             | S1268:S1278: | 3 | 4,9904 | 0,296 | 0,099  |
| 18 | Q96T58 MINT_HUMAN  | R.HGS#FHEDEDPIGS#PR.L             | S1268:S1278: | 2 | 4,785  | 0,536 | -0,597 |
| 18 | Q9H2Y7 ZF106_HUMAN | R.NRENS#PSSQSAGLSSINK.E           | S1279:       | 2 | 3,81   | 0,555 | -0,374 |
| 18 | Q9H2Y7 ZF106_HUMAN | R.NRENS#PSSQSAGLSSINK.E           | S1279:       | 3 | 3,6432 | 0,31  | -0,281 |
| 18 | P10586 PTPRF_HUMAN | K.DEQS#IGLKDSLLAHSSDPVEM*R.R      | S1289:       | 3 | 3,8518 | 0,387 | -0,725 |
| 18 | O75533 SF3B1_HUMAN | R.TM*IIS#PERLDPFADGGKTPDPK.M      | S129:        | 3 | 3,5087 | 0,341 | -0,59  |
| 18 | Q8NHQ8 RASF8_HUMAN | R.KS#LTFTGGAK.G                   | S129:        | 2 | 2,7001 | 0,267 | -0,336 |
| 18 | Q9BQG0 MBB1A_HUMAN | K.KGVLGKS#PLS#ALAR.K              | S1290:S1293: | 3 | 4,844  | 0,406 | -0,117 |
| 18 | Q9BQG0 MBB1A_HUMAN | K.KGVLGKS#PLS#ALAR.K              | S1290:S1293: | 2 | 3,1789 | 0,441 | -0,47  |
| 18 | Q8WYP5 AHTF1_HUMAN | R.TTSFFLNS#PEKEHQEM*DEGSQSLEK.L   | S1292:       | 3 | 4,5578 | 0,542 | -0,489 |
| 18 | Q9NR30 DDX21_HUMAN | K.LRSDAGLES#DTAM*K.K              | S13:         | 2 | 3,8818 | 0,542 | -0,537 |
| 18 | Q9BRQ6 CHCH6_HUMAN | R.RVS#FGVDEEER.V                  | S13:         | 2 | 3,7614 | 0,464 | 0,522  |
| 18 | P35240 MERL_HUMAN  | R.M*SFSS#LKR.K                    | S13:         | 2 | 2,0172 | 0,331 | 0      |
| 18 | Q8N4S0 CCD82_HUMAN | K.HLS#QEDNDLNK.Q                  | S131:        | 2 | 4,4793 | 0,467 | -0,701 |
| 18 | Q9BSJ6 FA64A_HUMAN | K.GSGS#PTHSLSQK.S                 | S131:        | 2 | 2,5495 | 0,359 | 0      |
| 18 | O60499 STX10_HUMAN | R.EILAGKPAAQKS#PSDLLDASAVSATS.R   | S132:        | 3 | 4,831  | 0,444 | -0,662 |
| 18 | Q5VYS8 ZCHC6_HUMAN | R.KDS#FQENEDGYR.W                 | S132:        | 2 | 4,4569 | 0,528 | -0,467 |
| 18 | P51858 HDGF_HUMAN  | K.KGNAEGS#S#DEEGKLVIDEPAK.E       | S132:S133:   | 3 | 3,8    | 0,32  | -0,157 |
| 18 | P51858 HDGF_HUMAN  | K.GNAEGS#S#DEEGKLVIDEPAKEK.N      | S132:S133:   | 3 | 3,6394 | 0,184 | -0,594 |
| 18 | Q92545 TM131_HUMAN | K.DFDHHDSPALEVFTEQPPS#PLPK.S      | S1326:       | 3 | 3,4375 | 0,254 | -0,409 |
| 18 | Q9UGY1 NOL12_HUMAN | R.LLGLTPPEGGAGDRS#EEEASSTEKPTK.A  | S134:        | 3 | 3,2818 | 0,171 | -0,323 |
| 18 | Q09666 AHNK_HUMAN  | R.LKS#EDGVEGDLGETQSR.T            | S135:        | 2 | 3,4009 | 0,468 | -0,706 |
| 18 | Q13428 TCOF_HUMAN  | R.KLS#GDQPAART#PR.S               | S1350:T1358: | 3 | 2,6614 | 0,121 | -0,235 |
| 18 | Q13459 MYO9B_HUMAN | R.RTS#FSTSDVSK.L                  | S1354:       | 2 | 2,9639 | 0,318 | -0,942 |
| 18 | Q8TB72 PUM2_HUMAN  | K.GKAS#PFEEDQNR.D                 | S136:        | 3 | 4,6627 | 0,328 | 0      |
| 18 | Q8TB72 PUM2_HUMAN  | K.GKAS#PFEEDQNR.D                 | S136:        | 2 | 3,2269 | 0,563 | -0,335 |
| 18 | Q5VUA4 ZN318_HUMAN | R.RS#PGLCSDSLEK.S                 | S136:        | 2 | 2,9693 | 0,265 | -0,427 |
| 18 | P52701 MSH6_HUMAN  | R.VHVQFFDDS#PTR.G                 | S137:        | 2 | 4,6335 | 0,619 | -0,479 |
| 18 | P52701 MSH6_HUMAN  | R.VHVQFFDDS#PTR.G                 | S137:        | 3 | 4,2655 | 0,378 | -0,299 |

|    |                    |                                |                    |   |        |       |        |
|----|--------------------|--------------------------------|--------------------|---|--------|-------|--------|
| 18 | Q00537 PCTK2_HUMAN | R.RIS#M*EDLNK.R                | S137:              | 2 | 3,0857 | 0,228 | -0,203 |
| 18 | Q96HC4 PDLI5_HUMAN | K.APRPFGSVSS#PK.V              | S137:              | 2 | 2,2158 | 0,206 | -0,186 |
| 18 | Q13428 TCOF_HUMAN  | K.KLGAGEGGEASVS#PEK.T          | S1378:             | 2 | 4,4923 | 0,479 | -0,688 |
| 18 | Q13428 TCOF_HUMAN  | K.KLGAGEGGEASVS#PEK.T          | S1378:             | 3 | 3,8854 | 0,189 | -0,229 |
| 18 | Q69YN4 VIR_HUMAN   | R.VISHDRDS#PPPPPPPPPPQPQPSLK.R | S138:              | 3 | 6,2007 | 0,232 | -0,064 |
| 18 | P02765 FETUA_HUMAN | K.CDSSPDS#AEDVRK.V             | S138:              | 2 | 3,5869 | 0,481 | -0,316 |
| 18 | Q8NC56 LEMD2_HUMAN | R.ASVRGS#S#EEDEDARTPDR.A       | S138:S139:         | 3 | 3,06   | 0,267 | -0,428 |
| 18 | Q9H3Q1 BORG4_HUMAN | K.LPKS#LSS#SPVKK.A             | S138:S141:         | 2 | 2,5275 | 0,329 | -0,512 |
| 18 | Q6F5E8 LR16C_HUMAN | R.LQRS#PVLK.R                  | S1381:             | 2 | 2,6219 | 0,171 | -0,179 |
| 18 | Q9C0C2 TB182_HUMAN | R.HNGSLS#PGLEAR.D              | S1385:             | 2 | 3,521  | 0,438 | 0,833  |
| 18 | Q9UQ35 SRRM2_HUMAN | R.SSGHSSSELS#PDAVEK.A          | S1387:             | 2 | 4,8195 | 0,407 | -0,647 |
| 18 | Q9UQ35 SRRM2_HUMAN | R.SSGHSSSELS#PDAVEK.A          | S1387:             | 3 | 3,2692 | 0,148 | -0,323 |
| 18 | P27708 PYR1_HUMAN  | R.RLS#SFVTK.G                  | S1406:             | 2 | 2,3718 | 0,307 | -0,18  |
| 18 | P18858 DNL1_HUMAN  | K.RTIQEVLEEQS#EDED.R.E         | S141:              | 3 | 4,7338 | 0,348 | -0,089 |
| 18 | Q8N9T8 KRI1_HUMAN  | K.YVDEENS#DGETSNHR.L           | S142:              | 2 | 3,4016 | 0,463 | -0,666 |
| 18 | O95602 RPA1_HUMAN  | K.EKQEEEVDYES#EEEEER.E         | S1430:             | 3 | 6,0478 | 0,46  | 0      |
| 18 | Q02952 AKA12_HUMAN | K.KGLSS#DLEGEK.T               | S1498:             | 2 | 3,4554 | 0,366 | -0,196 |
| 18 | Q9BSQ5 CCM2_HUMAN  | K.KPGIVS#PFK.R                 | S15:               | 2 | 2,719  | 0,31  | 0      |
| 18 | Q14160 LAP4_HUMAN  | R.M*KS#LEQDALR.A               | S1508:             | 2 | 2,1951 | 0,252 | -0,474 |
| 18 | Q8WWI1 LMO7_HUMAN  | R.RGES#LDNLDSPR.S              | S1510:             | 2 | 2,878  | 0,384 | -0,678 |
| 18 | Q9Y6D5 BIG2_HUMAN  | K.HLDVDLDRQS#LSS#IDKNPS#ER.G   | S1511:S1514:S1520: | 3 | 3,4702 | 0,428 | -0,481 |
| 18 | Q9H6H4 REEP4_HUMAN | R.LRSFS#M*QDLR.S               | S152:              | 2 | 2,1191 | 0,311 | -0,362 |
| 18 | P11388 TOP2A_HUMAN | K.KPIKYLEES#DEDDL.F.-          | S1525:             | 2 | 2,1872 | 0,367 | -0,381 |
| 18 | Q9H501 ESF1_HUMAN  | K.FKIDSNIS#PK.K                | S153:              | 2 | 3,1927 | 0,322 | -0,298 |
| 18 | Q9H501 ESF1_HUMAN  | K.FKIDSNIS#PK.K                | S153:              | 3 | 2,7973 | 0,143 | -0,446 |
| 18 | Q9UQ35 SRRM2_HUMAN | R.SRSGS#S#QELDVKPSASPQER.S     | S1541:S1542:       | 3 | 3,4453 | 0,264 | -0,556 |
| 18 | Q9UQ35 SRRM2_HUMAN | R.SRSGSS#QELDVKPSAS#PQER.S     | S1542:S1552:       | 3 | 2,9199 | 0,213 | -0,476 |
| 18 | Q96I25 SPF45_HUMAN | R.RPDPDS#DEDEDYER.E            | S155:              | 3 | 5,6592 | 0,42  | -0,302 |
| 18 | Q96I25 SPF45_HUMAN | R.RPDPDS#DEDEDYER.E            | S155:              | 2 | 4,4387 | 0,454 | -0,805 |
| 18 | Q02880 TOP2B_HUMAN | R.KAS#GSENEGDYNPGR.K           | S1550:             | 2 | 3,7568 | 0,512 | -0,367 |
| 18 | Q02880 TOP2B_HUMAN | K.ASGS#ENEGDYNPGRK.T           | S1552:             | 3 | 3,2231 | 0,443 | -0,33  |
| 18 | O95684 FR1OP_HUMAN | K.GPTTGEGALDLSDVHS#PPKSPEGK.T  | S156:              | 3 | 5,7867 | 0,548 | -0,745 |
| 18 | Q13428 TCOF_HUMAN  | K.TVANLLSGKS#PR.K              | S156:              | 2 | 3,652  | 0,322 | -0,277 |

|    |                     |                                      |            |   |        |       |        |
|----|---------------------|--------------------------------------|------------|---|--------|-------|--------|
| 18 | Q92733 PRCC_HUMAN   | K.IAAPELHKGDS#DS#EEDEPTK.K           | S157:S159: | 3 | 3,9259 | 0,501 | 0,393  |
| 18 | Q9NS91 RAD18_HUMAN  | K.SKFS#PQKEAS#PAAK.T                 | S158:S164: | 3 | 2,9248 | 0,321 | -0,335 |
| 18 | P42166 LAP2A_HUMAN  | K.LREQGTESRSS#T#PLPTISSAENTR.Q       | S159:T160: | 3 | 3,2021 | 1     | -0,83  |
| 18 | Q1KMD3 HNRL2_HUMAN  | K.REEDEPEERS#GDETPGS#EVPGDK.A        | S161:S168: | 3 | 3,5326 | 0,386 | -0,541 |
| 18 | Q9P0K8 FOXJ2_HUMAN  | R.HPPDDDL#QDSPEQEASKS#PR.G           | S161:S172: | 3 | 4,0147 | 0,417 | 0,293  |
| 18 | O43166 SI1L1_HUMAN  | R.RPS#YTLGM*K.S                      | S1632:     | 2 | 2,0105 | 0,371 | -0,85  |
| 18 | O60841 IF2P_HUMAN   | K.WDGS#EEDEDNSKK.I                   | S164:      | 2 | 3,5167 | 0,467 | -0,678 |
| 18 | Q9P0K8 FOXJ2_HUMAN  | R.HPPDDDL#QDS#PEQEASKS#PR.G          | S164:S172: | 3 | 3,5068 | 0,359 | -0,587 |
| 18 | P51858 HDGF_HUMAN   | R.RAGDLLEDS#PK.R                     | S165:      | 2 | 3,3674 | 0,198 | 0,095  |
| 18 | O43399 TPD54_HUMAN  | R.NSATFKS#FEDR.V                     | S166:      | 2 | 3,5293 | 0,46  | -0,441 |
| 18 | O95482 UB6L1_HUMAN  | R.LRLPQIGS#K.N                       | S166:      | 2 | 2,5448 | 0,319 | 0,112  |
| 18 | Q9C0C2 TB182_HUMAN  | R.NRS#AEEGELAESK.S                   | S1666:     | 3 | 5,0762 | 0,427 | -0,183 |
| 18 | Q9C0D5 TANC1_HUMAN  | R.HPASLTSSGSSGS#PSSSIK.M             | S1668:     | 2 | 3,9047 | 1     | -0,592 |
| 18 | Q6NZI2 PTRF_HUMAN   | K.VM*IYQDEVKLPKLS#ISK.S              | S167:      | 3 | 3,7416 | 0,351 | -0,339 |
| 18 | Q5UIP0 RIF1_HUMAN   | K.RDS#FDNCSLGESSK.I                  | S1688:     | 2 | 3,9532 | 0,504 | 0,218  |
| 18 | O43303 CE110_HUMAN  | R.DSEGFNS#PKQCDSSNISHVENEAFPK.T      | S170:      | 3 | 3,1785 | 0,38  | -0,244 |
| 18 | P29966 MARCS_HUMAN  | K.LSGFS#FKK.N                        | S170:      | 2 | 2,0228 | 0,172 | -0,061 |
| 18 | Q9BTC0 DIDO1_HUMAN  | R.SSS#PAGETEGDREPQARPGEGTAPLPPPGQK.V | S1714:     | 3 | 2,6117 | 0,314 | -0,46  |
| 18 | P53621 COPA_HUMAN   | K.KNLS#PGAVESDVR.G                   | S173:      | 3 | 3,0487 | 0,199 | 0,063  |
| 18 | P16383 GCF_HUMAN    | K.RES#EDDPES#EPDDHEK.R               | S174:S180: | 3 | 3,1281 | 0,275 | -0,441 |
| 18 | Q58FF8 H90B2_HUMAN  | K.IEDVGS#DEEDDSGKDK.K                | S177:      | 2 | 5,3034 | 0,524 | -0,537 |
| 18 | Q9NYF8 BCLF1_HUMAN  | K.KAEGEPQEE#PLK.S                    | S177:      | 2 | 4,2657 | 0,432 | -0,802 |
| 18 | Q9HB21 PKHA1_HUMAN  | R.SQS#HLPYFTPKPPQDSAVIK.A            | S177:      | 3 | 4,1343 | 0,466 | -0,552 |
| 18 | Q9NYF8 BCLF1_HUMAN  | K.KAEGEPQEE#PLK.S                    | S177:      | 3 | 3,0413 | 0,349 | -0,12  |
| 18 | Q58FF8 H90B2_HUMAN  | K.IEDVGS#DEEDDSGKDK.K                | S177:      | 3 | 2,9536 | 0,313 | -0,201 |
| 18 | Q58FF8 H90B2_HUMAN  | K.IEDVGS#DEEDDS#GKDKK.K              | S177:S183: | 3 | 4,6945 | 0,406 | -0,271 |
| 18 | Q8N5I9 CLO45_HUMAN  | K.GKIEVLDS#PASK.K                    | S178:      | 3 | 3,0266 | 0,152 | 0,414  |
| 18 | Q14676 MDC1_HUMAN   | R.S#RFTPELQPK.A                      | S1797:     | 3 | 2,6813 | 0,179 | 0,285  |
| 18 | A8MQ02 A8MQ02_HUMAN | R.QRLFS#QGQDVSNK.V                   | S1799:     | 3 | 3,1776 | 0,43  | 0      |
| 18 | P51636 CAV2_HUMAN   | K.ADVQLFM*DDDS#YSHHSGLLEYADPEK.F     | S18:       | 3 | 3,9329 | 0,46  | -0,185 |
| 18 | Q8N3X1 FNBP4_HUMAN  | R.RPILQLS#PPGPR.G                    | S18:       | 3 | 3,1159 | 0,223 | 0      |
| 18 | O60336 MABP1_HUMAN  | K.NLLRS#PSIK.L                       | S18:       | 2 | 2,6361 | 0,295 | 0,11   |
| 18 | Q8N3X1 FNBP4_HUMAN  | R.RPILQLS#PPGPR.G                    | S18:       | 2 | 2,0173 | 0,438 | -0,778 |

|    |                    |                                  |                 |   |        |       |        |
|----|--------------------|----------------------------------|-----------------|---|--------|-------|--------|
| 18 | Q00537 PCTK2_HUMAN | R.RAS#LSEIGFGK.M                 | S180:           | 2 | 4,0756 | 0,501 | 0      |
| 18 | Q9NYF8 BCLF1_HUMAN | K.S#QEEPKDTFEHDPSEIDFNK.S        | S183:           | 3 | 3,8543 | 0,346 | -0,204 |
| 18 | P49792 RBP2_HUMAN  | K.LHDSSGS#QVGTGFK.S              | S1835:          | 2 | 3,6096 | 0,495 | -0,081 |
| 18 | Q8TEM1 PO210_HUMAN | R.ASPGHS#PHYFAASSPTSPNALPPAR.K   | S1852:          | 3 | 4,3522 | 0,332 | -0,282 |
| 18 | Q15785 TOM34_HUMAN | K.NRVPS#AGDVEK.A                 | S186:           | 2 | 2,3344 | 0,31  | -0,487 |
| 18 | Q9Y388 RBMX2_HUMAN | K.ADREVQAEQPSSSS#PR.R            | S188:           | 3 | 3,3403 | 0,139 | -0,301 |
| 18 | Q9Y388 RBMX2_HUMAN | K.ADREVQAEQPSSSS#PR.R            | S188:           | 2 | 2,5846 | 0,333 | -0,669 |
| 18 | Q16659 MK06_HUMAN  | K.GHLS#EGLVTK.W                  | S189:           | 2 | 3,5186 | 0,568 | -0,109 |
| 18 | Q9BVC5 ASHWN_HUMAN | R.KSPSGPVKS#PPLS#PVGTTTPVK.L     | S189:S193:      | 3 | 4,4285 | 1     | -0,247 |
| 18 | Q9BVC5 ASHWN_HUMAN | R.KSPSGPVKS#PPLS#PVGTT#PVKLK.R   | S189:S193:T198: | 3 | 3,8088 | 0,232 | 0,576  |
| 18 | Q9H1E3 NUCKS_HUMAN | R.KVVDYSQFQES#DDADEDYGR.D        | S19:            | 3 | 5,9145 | 0,463 | 0,374  |
| 18 | Q8N0T1 CH059_HUMAN | R.NVFHIAS#QK.N                   | S19:            | 2 | 2,8286 | 0,391 | -0,217 |
| 18 | Q9UNF1 MAGD2_HUMAN | K.HLDGEEDGSS#DQSQASGTTGGR.R      | S191:           | 3 | 4,994  | 0,466 | -0,483 |
| 18 | Q96C19 EFHD2_HUMAN | K.GAKS#FFEAK.V                   | S192:           | 2 | 2,606  | 0,156 | -0,115 |
| 18 | Q9P260 K1468_HUMAN | R.AGSISTLDSLDFARYS#DDGNRETDEK.V  | S193:           | 3 | 3,5346 | 0,282 | -0,311 |
| 18 | P35579 MYH9_HUMAN  | R.KGAGDGS#DEEVDGK.A              | S1943:          | 2 | 4,5872 | 0,5   | -0,423 |
| 18 | P35580 MYH10_HUMAN | R.QLHLEGASLELS#DDDDTESK.T        | S1956:          | 3 | 4,0783 | 0,359 | 0      |
| 18 | O94915 FRYL_HUMAN  | R.RS#NTLDIM*DGR.I                | S1957:          | 3 | 3,0777 | 0,26  | 0      |
| 18 | Q9BZL6 KPCD2_HUMAN | R.RLS#STSLASGHS#VR.L             | S197:S206:      | 3 | 4,0821 | 0,296 | -0,113 |
| 18 | Q08752 PPID_HUMAN  | K.DGS#GDSHPDFPEDADIDLKDVVK.I     | S198:           | 3 | 5,677  | 0,478 | -0,57  |
| 18 | Q5T200 ZC3HD_HUMAN | K.KEVS#PEVVR.S                   | S198:           | 2 | 3,1092 | 0,334 | -0,217 |
| 18 | Q32P44 EMAL3_HUMAN | R.GGKDPLSS#PGGPGSR.R             | S198:           | 2 | 2,7313 | 0,278 | -0,758 |
| 18 | Q92785 REQU_HUMAN  | K.KLDAS#ILED.R.D                 | S200:           | 2 | 3,9374 | 0,489 | -0,098 |
| 18 | P30622 CLIP1_HUMAN | K.TASESISNLS#EAGS#IKKGER.E       | S200:S204:      | 3 | 3,4566 | 0,497 | 0      |
| 18 | Q15003 CND2_HUMAN  | K.DAPSLLEEVEGHVADGS#ATEM*GTTKK.A | S201:           | 3 | 3,7118 | 0,206 | -0,482 |
| 18 | Q8NEF9 SRFB1_HUMAN | K.AVTIANS#PSKPSEKDSVVSLESQK.T    | S203:           | 3 | 3,9967 | 0,434 | -0,213 |
| 18 | O95049 ZO3_HUMAN   | R.RDS#EEFGVK.L                   | S203:           | 2 | 2,9399 | 0,433 | -0,638 |
| 18 | Q01130 SFRS2_HUMAN | K.SRS#RS#KS#PPKSPEEEGAVSS.-      | S204:S206:S208: | 3 | 2,6969 | 0,253 | -0,391 |
| 18 | P60174 TPIS_HUMAN  | R.KQS#LGELIGTLNAAK.V             | S21:            | 2 | 3,7024 | 0,358 | -0,526 |
| 18 | P60174 TPIS_HUMAN  | R.KQS#LGELIGTLNAAK.V             | S21:            | 3 | 2,701  | 0,208 | -0,113 |
| 18 | Q9UQ35 SRRM2_HUMAN | R.NHS#GS#RTPPVALNSSR.M           | S2100:S2102:    | 3 | 2,7384 | 0,087 | -0,398 |
| 18 | Q01082 SPTB2_HUMAN | R.RPPS#PEPSTK.V                  | S2102:          | 2 | 3,0095 | 0,369 | -0,104 |
| 18 | Q9Y320 TXD14_HUMAN | R.YKVSTS#PLTK.Q                  | S211:           | 2 | 3,0114 | 0,417 | -0,101 |



|    |                    |                                      |                 |   |        |       |        |
|----|--------------------|--------------------------------------|-----------------|---|--------|-------|--------|
| 18 | Q96T58 MINT_HUMAN  | R.ESGVVAVS#PEKSESPQKEDGLSSQLK.S      | S2120:          | 3 | 3,2112 | 0,432 | -0,393 |
| 18 | Q9UQ35 SRRM2_HUMAN | R.CRS#PGM*LEPLGSSR.T                 | S2132:          | 2 | 2,1949 | 0,338 | -0,446 |
| 18 | O60841 IF2P_HUMAN  | K.NKPGPNIES#GNEDDDASFK.I             | S214:           | 2 | 3,403  | 0,506 | -0,462 |
| 18 | O60841 IF2P_HUMAN  | K.NKPGPNIES#GNEDDDAS#FKIK.T          | S214:S222:      | 3 | 3,0185 | 0,353 | -0,676 |
| 18 | Q9H6K1 CF106_HUMAN | R.KVEGNFNPFAS#PQK.N                  | S215:           | 2 | 4,2565 | 0,448 | -0,446 |
| 18 | Q9H6K1 CF106_HUMAN | R.KVEGNFNPFAS#PQK.N                  | S215:           | 3 | 2,658  | 0,193 | -0,111 |
| 18 | Q01082 SPTB2_HUMAN | R.TSS#KESS#PIPSPTSDRK.A              | S2161:S2165:    | 3 | 3,3229 | 1     | -0,652 |
| 18 | Q9P2B7 K1430_HUMAN | K.HVSGITLLS#PK.H                     | S218:           | 2 | 3,4535 | 0,48  | -0,198 |
| 18 | P23588 IF4B_HUMAN  | R.GDDS#FGDKYR.D                      | S219:           | 2 | 2,0382 | 0,239 | -0,394 |
| 18 | Q9UBN7 HDAC6_HUMAN | R.SRQNPQS#PPQDSSVTSK.R               | S22:            | 3 | 3,0887 | 0,192 | -0,476 |
| 18 | Q86V48 LUZP1_HUMAN | R.FKLQS#LSR.R                        | S22:            | 2 | 2,5594 | 0,216 | -0,346 |
| 18 | Q7Z5K2 WAPL_HUMAN  | K.RPES#PSEIS#PIKGSVR.T               | S221:S226:      | 3 | 3,5541 | 0,475 | 0      |
| 18 | Q7Z5K2 WAPL_HUMAN  | K.RPES#PSEIS#PIKGSVR.T               | S221:S226:      | 2 | 3,0718 | 0,331 | -0,578 |
| 18 | Q9NY27 PP4R2_HUMAN | K.NHSDSSTSESEVSSVS#PLK.N             | S226:           | 3 | 5,0839 | 0,441 | -0,178 |
| 18 | P08238 HS90B_HUMAN | R.EKEIS#DDEAEEEK.G                   | S226:           | 2 | 4,6946 | 0,544 | -0,224 |
| 18 | Q9NY27 PP4R2_HUMAN | K.NHSDSSTSESEVSSVS#PLK.N             | S226:           | 2 | 3,5659 | 0,525 | -0,949 |
| 18 | Q9Y6D5 BIG2_HUMAN  | R.ELEKPIQSKQSPVIQAAAVS#PK.F          | S227:           | 3 | 5,0388 | 0,455 | -0,217 |
| 18 | P13051 UNG_HUMAN   | R.HAPS#PEPAVQGTGVAGVPEESGDAAAIPAKK.A | S23:            | 3 | 4,2181 | 0,395 | -0,182 |
| 18 | P07910 HNRPC_HUMAN | K.NDKS#EEEQSSSVK.K                   | S233:           | 2 | 2,7082 | 0,372 | -0,448 |
| 18 | P62753 RS6_HUMAN   | R.RLS#S#LRAS#SKSESSQK.-              | S235:S236:T241: | 3 | 2,7649 | 0,339 | -0,787 |
| 18 | Q01082 SPTB2_HUMAN | K.RFS#LFGK.K                         | S2358:          | 2 | 2,4074 | 0,412 | -0,326 |
| 18 | O14686 MLL2_HUMAN  | R.SGITS#PVEKR.E                      | S2365:          | 2 | 2,0195 | 0,118 | -0,423 |
| 18 | Q6U841 S4A10_HUMAN | R.S#FADIGKK.Q                        | S238:           | 2 | 2,0547 | 0,162 | 0,064  |
| 18 | Q13136 LIPA1_HUMAN | K.RSS#DGS#LSHEEDLAK.V                | S239:S242:      | 2 | 4,8829 | 0,486 | -0,613 |
| 18 | Q13136 LIPA1_HUMAN | K.RSS#DGSLS#HEEDLAK.V                | S239:S244:      | 2 | 4,1246 | 0,464 | 0,273  |
| 18 | Q5T200 ZC3HD_HUMAN | R.KTSAVSS#PLLDQQR.N                  | S242:           | 2 | 3,9139 | 0,373 | -0,455 |
| 18 | Q5T200 ZC3HD_HUMAN | R.KTSAVSS#PLLDQQR.N                  | S242:           | 3 | 3,0881 | 0,093 | -0,227 |
| 18 | P62753 RS6_HUMAN   | R.LSSLRASTS#KSESS#QK.-               | S242:S247:      | 2 | 2,1331 | 0,292 | -0,46  |
| 18 | Q9UDY2 ZO2_HUMAN   | R.GRS#IDQDYER.A                      | S244:           | 2 | 2,6867 | 0,212 | -0,555 |
| 18 | Q9UFC0 LRWD1_HUMAN | K.RPDDVPLSLSPS#K.R                   | S245:           | 2 | 3,461  | 0,435 | 0,245  |
| 18 | Q9H3N1 TXND1_HUMAN | K.KVEEQEAEEDVS#EEEEASK.E             | S247:           | 3 | 4,9793 | 0,513 | -0,581 |
| 18 | P16949 STMN1_HUMAN | K.RASGQAFELILS#PR.S                  | S25:            | 3 | 3,798  | 0,296 | -0,225 |
| 18 | Q8IWI9 MGAP_HUMAN  | K.KM*GSDEFDIS#PR.I                   | S2502:          | 3 | 2,7395 | 0,208 | 0      |

|    |                     |                                        |              |   |        |       |        |
|----|---------------------|----------------------------------------|--------------|---|--------|-------|--------|
| 18 | Q9P266 K1462_HUMAN  | R.VLSPESLSCTEIPILNERHS#PK.M            | S255:        | 3 | 2,7975 | 0,194 | -0,136 |
| 18 | Q8IWZ2 Q8IWZ2_HUMAN | R.IGRPM*VAS#PNQR.H                     | S2556:       | 3 | 2,807  | 0,249 | 0,386  |
| 18 | P52701 MSH6_HUMAN   | R.RVISDES#DIGGS#DVEFKPDTK.E            | S256:S261:   | 3 | 5,5068 | 0,588 | 0      |
| 18 | Q4G0J3 LARP7_HUMAN  | R.SRPTS#EGS#DIESTEPQKQCSK.K            | S258:S261:   | 3 | 3,3914 | 0,282 | -0,656 |
| 18 | Q9UQ35 SRRM2_HUMAN  | K.RVPS#PTPAPK.E                        | S2581:       | 2 | 2,1694 | 0,197 | -0,324 |
| 18 | Q8IWZ2 Q8IWZ2_HUMAN | R.GHNS#SNSPSLQAGGAEGAGDR.G             | S2595:       | 3 | 3,1235 | 0,179 | -0,357 |
| 18 | Q92466 DDB2_HUMAN   | R.SRS#PLELEPEAK.K                      | S26:         | 3 | 2,8593 | 0,194 | -0,127 |
| 18 | Q4G0J3 LARP7_HUMAN  | R.SRPTSEGS#DIESTEPQK.Q                 | S261:        | 2 | 3,8681 | 0,418 | -0,696 |
| 18 | Q8TDN6 BXDC2_HUMAN  | K.IFQGSFGGPTLYENPHYQS#PNM*HR.R         | S261:        | 3 | 2,9586 | 0,359 | 0      |
| 18 | Q4G0J3 LARP7_HUMAN  | R.SRPTSEGS#DIESTEPQK.Q                 | S261:        | 3 | 2,6091 | 0,176 | -0,38  |
| 18 | Q9Y6R0 NUMBL_HUMAN  | K.KAEAAAAPTVPAGPAQPGHVS#PTPATTSPGEEK.G | S263:        | 3 | 4,5065 | 0,522 | -0,476 |
| 18 | A9CQZ4 A9CQZ4_HUMAN | K.NLGSQS#PKPR.Q                        | S27:         | 2 | 2,2453 | 0,245 | -0,223 |
| 18 | Q9BRD0 BUD13_HUMAN  | R.ARHDS#PDLAPNVTY#SLPR.T               | S271:Y280:   | 3 | 5,059  | 0,409 | -0,59  |
| 18 | Q6ZRS2 SRCAP_HUMAN  | R.RTS#ADVEIR.G                         | S2725:       | 2 | 2,9655 | 0,143 | -0,217 |
| 18 | P17480 UBF1_HUMAN   | K.HPELNIS#EEGITK.S                     | S273:        | 2 | 2,5904 | 0,416 | 0,394  |
| 18 | Q9NYF3 FA53C_HUMAN  | R.SRS#QPCDLAR.K                        | S273:        | 2 | 2,4112 | 0,303 | -0,617 |
| 18 | Q9Y624 JAM1_HUMAN   | K.KVIYSQPS#ARS#EGEFK.Q                 | S284:S287:   | 2 | 2,2544 | 0,372 | -0,492 |
| 18 | B2RDU1 B2RDU1_HUMAN | R.DTSS#DKDLDDALDKLSDSLGQR.Q            | S285:        | 3 | 3,3122 | 0,36  | -0,37  |
| 18 | O43166 SI1L1_HUMAN  | R.SKS#ETGDSSIFR.K                      | S288:        | 2 | 3,7767 | 0,452 | -0,263 |
| 18 | P55040 GEM_HUMAN    | K.SKS#CHDLSVL.-                        | S289:        | 2 | 2,8047 | 0,293 | -0,398 |
| 18 | A1X283 SPD2B_HUMAN  | K.NSGEPLPPKPGPGS#PSHPGALDLDGVSQR.Q     | S291:        | 3 | 4,1273 | 0,39  | -0,39  |
| 18 | Q96EQ0 SGTB_HUMAN   | R.SRS#FSSSAEEHS.-                      | S295:        | 2 | 3,1859 | 0,252 | -0,702 |
| 18 | Q96EQ0 SGTB_HUMAN   | R.SRS#FSSSAEEHS.-                      | S295:        | 3 | 2,6577 | 0,122 | -0,066 |
| 18 | P36578 RL4_HUMAN    | R.ILKS#PEIQR.A                         | S295:        | 2 | 2,413  | 0,279 | -0,734 |
| 18 | Q9C0B5 ZDHC5_HUMAN  | K.S#KGSLEITESQSADAEP PPPPKPDLR.Y       | S296:        | 3 | 2,8548 | 0,348 | 0,816  |
| 18 | Q4G0J3 LARP7_HUMAN  | K.RS#SSEDAESLAPR.S                     | S298:        | 2 | 2,663  | 0,346 | -0,493 |
| 18 | Q9Y2V2 CHSP1_HUMAN  | R.ERS#PS#PLRGNVPS#PLPTRR.T             | S30:S32:S41: | 3 | 2,6702 | 0,33  | 0,224  |
| 18 | P35659 DEK_HUMAN    | K.KES#ESED#SDDEPLIKK.L                 | S301:S306:   | 3 | 4,4247 | 0,482 | -0,436 |
| 18 | Q8NFC6 FA44A_HUMAN  | K.TQLS#PSIKR.K                         | S3019:       | 2 | 2,3162 | 0,253 | 0,11   |
| 18 | Q00613 HSF1_HUMAN   | R.VKKEPPS#PPQSPR.V                     | S303:        | 2 | 3,5181 | 0,243 | -0,399 |
| 18 | Q00613 HSF1_HUMAN   | R.VKKEPPS#PPQSPR.V                     | S303:        | 3 | 2,8046 | 0,177 | 0,12   |
| 18 | Q6ICG6 CV009_HUMAN  | R.NNRPAFFS#PSLK.R                      | S304:        | 2 | 2,7297 | 0,146 | -0,167 |
| 18 | Q6ICG6 CV009_HUMAN  | R.NNRPAFFS#PSLK.R                      | S306:        | 3 | 4,5232 | 0,465 | -0,376 |

|    |                     |                                  |            |   |        |       |        |
|----|---------------------|----------------------------------|------------|---|--------|-------|--------|
| 18 | P35659 DEK_HUMAN    | K.KESESEDS#SDDEPLIK.K            | S306:      | 2 | 3,9581 | 0,455 | -0,517 |
| 18 | Q6ICG6 CV009_HUMAN  | R.NNRPAFFSPS#LK.R                | S306:      | 2 | 2,801  | 0,172 | -0,586 |
| 18 | Q9NXR1 NDE1_HUMAN   | R.RPS#STSVPLGDK.G                | S306:      | 2 | 2,7113 | 0,472 | -0,737 |
| 18 | Q01518 CAP1_HUMAN   | R.SGPKPFSAPKPQTS#PS#PK.R         | S308:S310: | 2 | 4,7316 | 0,364 | 0,061  |
| 18 | Q9NWW5 CLN6_HUMAN   | R.HGS#VSADEAAR.T                 | S31:       | 2 | 2,789  | 0,627 | -0,62  |
| 18 | P35251 RFC1_HUMAN   | K.SSADKIGEVS#PK.A                | S312:      | 2 | 3,9311 | 0,392 | -0,088 |
| 18 | Q8WUF5 IASPP_HUMAN  | R.NYKVS#PLASDR.R                 | S316:      | 2 | 2,2639 | 0,338 | -0,734 |
| 18 | Q2TB10 ZN800_HUMAN  | R.RDS#ITPDIATKPGQPLFLDSISPK.K    | S317:      | 3 | 3,7527 | 0,219 | -0,479 |
| 18 | B1ALC7 B1ALC7_HUMAN | K.AGTPIRDHS#PDLQLPTPEVIPSSGSK.L  | S317:      | 3 | 3,59   | 0,212 | -0,255 |
| 18 | P05783 K1C18_HUMAN  | R.NLKAS#LENSLR.E                 | S319:      | 3 | 3,231  | 0,233 | -0,276 |
| 18 | Q6VY07 PACS1_HUMAN  | R.KLTS#TSAITR.Q                  | S320:      | 2 | 3,1654 | 0,2   | -0,316 |
| 18 | Q6PJT7 ZC3HE_HUMAN  | K.FNHGEEEEEDDDYGS#R.T            | S323:      | 3 | 3,5419 | 0,437 | -0,689 |
| 18 | Q9BRD0 BUD13_HUMAN  | K.NSKYEYDPDIS#PPR.K              | S325:      | 2 | 4,4101 | 0,521 | 0,485  |
| 18 | Q9UKV3 ACINU_HUMAN  | K.TRS#QEQEVLER.G                 | S328:      | 2 | 3,3681 | 0,368 | -0,252 |
| 18 | Q92922 SMRC1_HUMAN  | R.KHS#PS#PPPPTPTESR.K            | S328:S330: | 3 | 5,1248 | 0,4   | -0,412 |
| 18 | Q92922 SMRC1_HUMAN  | R.KHS#PS#PPPPTPTESR.K            | S328:S330: | 2 | 2,8359 | 0,548 | -0,481 |
| 18 | Q15459 SF3A1_HUMAN  | K.FGESEEVEM*EVES#DEEDDKQEK.A     | S329:      | 3 | 5,4131 | 0,468 | -0,27  |
| 18 | Q9UIG0 BAZ1B_HUMAN  | K.SKTDNSSLSS#PLNPK.L             | S330:      | 2 | 3,3159 | 0,421 | 0,442  |
| 18 | O15075 DCLK1_HUMAN  | R.SGKS#PSPSPTS#PGSLRK.Q          | S330:S337: | 3 | 4,4977 | 1     | -0,5   |
| 18 | O15075 DCLK1_HUMAN  | R.SGKS#PSPSPTS#PGSLRK.Q          | S330:S337: | 2 | 2,7247 | 1     | -0,8   |
| 18 | Q9NQV6 PRD10_HUMAN  | R.LEITS#ENGEKSDDGTDLLHFPTK.E     | S332:      | 3 | 4,5043 | 0,342 | -0,797 |
| 18 | O15075 DCLK1_HUMAN  | R.SGKSPS#PSPTS#PGSLRK.Q          | S332:S337: | 3 | 2,7251 | 0,22  | -0,3   |
| 18 | Q8NEM0 MCPH1_HUMAN  | K.YRLS#PTLSSTK.G                 | S333:      | 2 | 2,3088 | 0,419 | -0,183 |
| 18 | Q6AI08 HEAT6_HUMAN  | K.KIQQGEEEEKES#S#GEIEAAPVTGTGR.V | S336:S337: | 3 | 2,8567 | 0,362 | -0,689 |
| 18 | O95365 ZBT7A_HUMAN  | R.AGAAAGDS#DEESRADDKGVM*DYYLK.Y  | S337:      | 3 | 3,963  | 0,213 | -0,402 |
| 18 | Q4G0J3 LARP7_HUMAN  | R.DIEIS#TEEEKDTGDLKDSLLK.T       | S337:      | 3 | 3,6717 | 0,296 | -0,647 |
| 18 | Q9NXE8 CCD49_HUMAN  | R.KLS#AEELER.K                   | S337:      | 2 | 3,0314 | 0,183 | -0,528 |
| 18 | Q9UGV2 NDRG3_HUMAN  | R.THSTSSSLGS#GESPFGR.S           | S338:      | 2 | 4,2449 | 0,594 | 0,338  |
| 18 | P49589 SYCC_HUMAN   | R.LHLYNS#LTR.N                   | S34:       | 2 | 2,233  | 0,204 | -0,612 |
| 18 | O95684 FR1OP_HUMAN  | K.IGSLGLGTGEDDDYVDDFNSTSHRS#EK.S | S348:      | 3 | 2,7253 | 0,204 | -1,039 |
| 18 | Q08499 PDE4D_HUMAN  | K.QHEVEIPS#PTQK.E                | S348:      | 2 | 2,018  | 0,39  | 0      |
| 18 | Q96G23 LASS2_HUMAN  | R.SDREETESS#EGEEAAAGGGAK.S       | S349:      | 3 | 3,6575 | 0,38  | -0,511 |
| 18 | P09429 HMGB1_HUMAN  | K.HPDAS#VNFSEFSK.K               | S35:       | 2 | 2,6076 | 0,323 | -0,474 |

|    |                    |                                |            |   |        |       |        |
|----|--------------------|--------------------------------|------------|---|--------|-------|--------|
| 18 | Q8IZQ1 WDFY3_HUMAN | R.LKISS#PVR.V                  | S3501:     | 2 | 2,7391 | 0,155 | -0,062 |
| 18 | Q4G0J3 LARP7_HUMAN | R.DIEISTEEKDTGDLKDSS#LLK.T     | S351:      | 3 | 3,7324 | 0,257 | -0,431 |
| 18 | Q9UK58 CCNL1_HUMAN | R.EVKAEKES#PIS#INVK.T          | S352:S355: | 3 | 3,5597 | 0,252 | 0,1    |
| 18 | Q9UK58 CCNL1_HUMAN | R.EVKAEKES#PIS#INVK.T          | S352:S355: | 2 | 3,0933 | 0,42  | 0,4    |
| 18 | O95376 ARI2_HUMAN  | R.YKENPDIWNQS#QQAQAR.E         | S353:      | 3 | 3,0671 | 0,189 | -0,265 |
| 18 | P46013 KI67_HUMAN  | K.M*KTPVQYSQQNS#PQK.H          | S357:      | 3 | 3,1379 | 0,258 | -0,552 |
| 18 | P26045 PTN3_HUMAN  | R.RS#LS#VEHLETK.S              | S357:S359: | 2 | 2,1485 | 0,219 | -0,502 |
| 18 | P35611 ADDA_HUMAN  | K.SRSPGS#PVGEGTGSPPK.W         | S358:      | 2 | 3,0829 | 0,171 | -0,291 |
| 18 | P35611 ADDA_HUMAN  | K.SRSPGS#PVGEGTGSPPK.W         | S358:      | 3 | 3,0238 | 0,236 | -0,109 |
| 18 | Q00613 HSF1_HUMAN  | R.GHTDTEGRPPS#PPPTST#PEK.C     | S363:T369: | 3 | 3,6669 | 0,22  | -0,407 |
| 18 | Q6P0N0 CN106_HUMAN | R.NISKLS#PPR.I                 | S365:      | 2 | 2,9036 | 0,42  | -0,223 |
| 18 | P20749 BCL3_HUMAN  | K.ATRPASTSQPDPS#PDR.S          | S366:      | 3 | 3,2162 | 0,18  | -0,208 |
| 18 | Q9NYB9 ABI2_HUMAN  | R.HTPPTIGGS#LPYR.R             | S368:      | 3 | 4,718  | 0,422 | 0,31   |
| 18 | O95714 HERC2_HUMAN | K.DAPHSEGDM*HLLSGPLS#PNESFLR.Y | S368:      | 3 | 4,4669 | 0,297 | -0,339 |
| 18 | Q9P1Y5 K1543_HUMAN | R.HPLLSSGGPQS#PLR.G            | S368:      | 3 | 3,8667 | 0,409 | 0,12   |
| 18 | Q9P1Y5 K1543_HUMAN | R.HPLLSSGGPQS#PLR.G            | S368:      | 2 | 3,6748 | 0,501 | -0,32  |
| 18 | Q9NYB9 ABI2_HUMAN  | R.HTPPTIGGS#LPYR.R             | S368:      | 2 | 2,8929 | 0,343 | 0      |
| 18 | Q8WU90 ZC3HF_HUMAN | R.FSTYTSKDKENKLS#EAS#GGR.A     | S368:S371: | 3 | 3,3315 | 0,381 | 0,233  |
| 18 | Q2PPJ7 AS250_HUMAN | R.RLS#NSS#LCSIEEHR.M           | S373:S376: | 3 | 3,8688 | 0,37  | -0,093 |
| 18 | Q2PPJ7 AS250_HUMAN | R.RLS#NSS#LCSIEEHR.M           | S373:S376: | 2 | 3,6947 | 0,441 | -0,123 |
| 18 | A6NDB9 PALM3_HUMAN | R.ERGDDES#PLGAEGAK.T           | S375:      | 2 | 2,0341 | 0,314 | -0,408 |
| 18 | Q9H1A4 APC1_HUMAN  | R.FNISSHNQS#PK.R               | S377:      | 2 | 3,7148 | 0,44  | -0,82  |
| 18 | Q76FK4 NOL8_HUMAN  | R.NDREYDS#GDT#DEIIAM*KK.N      | S378:T381: | 3 | 3,3293 | 0,46  | -0,804 |
| 18 | Q9Y2W1 TR150_HUMAN | K.EKGSFS#DTGLGDGK.M            | S379:      | 2 | 2,8207 | 0,54  | 0      |
| 18 | P16949 STMN1_HUMAN | R.SKESVPEFPLS#PPK.K            | S38:       | 3 | 3,2117 | 0,238 | -0,113 |
| 18 | P16949 STMN1_HUMAN | R.SKESVPEFPLS#PPK.K            | S38:       | 2 | 2,6801 | 0,374 | -0,376 |
| 18 | P48634 BAT2_HUMAN  | K.KGNS#PNSEPPTPK.T             | S380:      | 2 | 3,2802 | 0,366 | -0,426 |
| 18 | P48634 BAT2_HUMAN  | K.KGNS#PNSEPPTPK.T             | S380:      | 3 | 2,7429 | 0,224 | -0,128 |
| 18 | Q13428 TCOF_HUMAN  | K.TSQVGAASAPAKES#PR.K          | S381:      | 3 | 2,9722 | 0,355 | -0,112 |
| 18 | O75717 WDHD1_HUMAN | R.SHILEDDENS#VDISM*LK.T        | S383:      | 3 | 4,3346 | 0,364 | -0,627 |
| 18 | Q9Y383 LC7L2_HUMAN | R.SEDRRS#S#EEREAGEI.-          | S383:S384: | 3 | 2,8832 | 0,302 | -0,096 |
| 18 | Q8IU81 I2BP1_HUMAN | R.KAS#PEPEGEAAGK.M             | S384:      | 2 | 3,3509 | 0,367 | -0,181 |
| 18 | Q9UKV3 ACINU_HUMAN | K.S#KSPS#PPRLTEDR.K            | S384:S388: | 2 | 2,5164 | 0,457 | -0,374 |

|    |                     |                                 |            |   |        |       |        |
|----|---------------------|---------------------------------|------------|---|--------|-------|--------|
| 18 | Q9UKV3 ACINU_HUMAN  | K.S#KSPSPRLT#EDR.K              | S384:T393: | 2 | 2,3605 | 0,24  | -0,449 |
| 18 | Q01813 K6PP_HUMAN   | R.GRS#FAGNLNTYK.R               | S386:      | 3 | 4,6536 | 0,331 | -0,649 |
| 18 | Q01813 K6PP_HUMAN   | R.GRS#FAGNLNTYK.R               | S386:      | 2 | 4,5483 | 0,52  | -0,26  |
| 18 | Q9H0E9 BRD8_HUMAN   | R.SGVAEAPVGSKAPS#IDGKEELDLAEK.M | S387:      | 3 | 4,9619 | 0,377 | -0,547 |
| 18 | Q7Z422 CA144_HUMAN  | K.SKS#PPKVPIVQDDSLPAGPPPQIR.I   | S39:       | 3 | 4,9906 | 0,506 | -0,202 |
| 18 | Q9Y5A9 YTHD2_HUMAN  | K.LRS#INNYNPK.D                 | S394:      | 2 | 2,278  | 0,164 | -0,376 |
| 18 | O60504 VINEX_HUMAN  | R.LKFDFQAQS#PK.E                | S395:      | 3 | 3,2031 | 0,224 | 0,066  |
| 18 | P20700 LMNB1_HUMAN  | R.LKLSPPSS#R.V                  | S396:      | 2 | 2,209  | 0,09  | -0,318 |
| 18 | Q96ST2 IWS1_HUMAN   | K.AAVLS#DS#EDEEKASAKK.S         | S398:S400: | 3 | 2,8738 | 0,315 | -0,566 |
| 18 | Q7Z4V5 HDGR2_HUMAN  | R.GRGPSSSDS#EPEAELER.E          | S399:      | 3 | 2,7663 | 0,16  | -0,462 |
| 18 | P0C7M2 RA1L3_HUMAN  | K.S#ESPKEPEQLR.K                | S4:        | 2 | 2,378  | 0,359 | -0,707 |
| 18 | Q96ST8 CC123_HUMAN  | R.TPPPRS#PNPS#PERPR.S           | S40:S44:   | 3 | 2,8279 | 0,346 | -0,496 |
| 18 | Q9Y2U8 MAN1_HUMAN   | K.TNNHIGGGAFSVDS#PR.I           | S402:      | 2 | 4,2987 | 0,457 | -0,286 |
| 18 | Q9Y2U8 MAN1_HUMAN   | K.TNNHIGGGAFSVDS#PR.I           | S402:      | 3 | 2,8759 | 0,222 | -0,107 |
| 18 | Q5JSH3 WDR44_HUMAN  | R.TKEYVSNDAAQSD#DDEEK.L         | S403:      | 3 | 4,4509 | 0,397 | -0,728 |
| 18 | Q5JSH3 WDR44_HUMAN  | R.TKEYVSNDAAQSD#DDEEK.L         | S403:      | 2 | 2,488  | 0,391 | -0,547 |
| 18 | Q6UWZ7 CCD98_HUMAN  | K.M*KGFGYSRS#PTF.-              | S406:      | 2 | 2,9963 | 0,275 | -0,304 |
| 18 | Q6UWZ7 CCD98_HUMAN  | K.M*KGFGYSRS#PTF.-              | S406:      | 3 | 2,8264 | 0,243 | 0,114  |
| 18 | Q9Y6M7 S4A7_HUMAN   | K.GNGSGSRENS#TVDFSK.V           | S407:      | 2 | 3,2316 | 0,425 | -0,412 |
| 18 | P51114 FXR1_HUMAN   | R.RGPNYTSGYGTNSELSNPS#ETESER.K  | S409:      | 3 | 5,8042 | 0,494 | 0,586  |
| 18 | Q8TBE7 TMM22_HUMAN  | R.RQDYQEILDS#PIK.-              | S409:      | 2 | 4,2061 | 0,457 | -0,797 |
| 18 | B2RA80 B2RA80_HUMAN | R.KQDYQEILDS#PIK.-              | S409:      | 2 | 4,1201 | 0,494 | -0,515 |
| 18 | B2RA80 B2RA80_HUMAN | R.KQDYQEILDS#PIK.-              | S409:      | 3 | 3,0774 | 0,226 | 0      |
| 18 | Q8TBE7 TMM22_HUMAN  | R.RQDYQEILDS#PIK.-              | S409:      | 3 | 2,9516 | 0,126 | -0,217 |
| 18 | Q8WWM7 ATX2L_HUMAN  | R.GINGGPRM*S#PK.A               | S409:      | 2 | 2,2188 | 0,209 | -0,376 |
| 18 | Q13547 HDAC1_HUMAN  | R.ISICSS#DKR.I                  | S410:      | 2 | 2,4164 | 0,107 | -0,532 |
| 18 | Q12756 KIF1A_HUMAN  | R.AAS#VSSLHER.I                 | S416:      | 2 | 2,5456 | 0,366 | -0,322 |
| 18 | Q9GZR2 REXO4_HUMAN  | R.RPLLTAPDHCS#DDA.-             | S419:      | 2 | 2,0592 | 0,208 | -0,37  |
| 18 | Q14CB8 RHG19_HUMAN  | R.SRS#FSGLIK.R                  | S422:      | 2 | 2,9236 | 0,298 | -0,681 |
| 18 | Q9C0B5 ZDHC5_HUMAN  | K.SFHFDPLSS#GSR.S               | S423:      | 3 | 3,3069 | 0,279 | 0      |
| 18 | P16591 FER_HUMAN    | R.LSKFES#IR.H                   | S423:      | 2 | 2,0742 | 0,244 | -0,115 |
| 18 | Q9ULU4 PKCB1_HUMAN  | R.RIS#LSDM*PR.S                 | S425:      | 2 | 2,325  | 0,248 | -0,104 |
| 18 | Q96JM3 ZN828_HUMAN  | R.KPGPPLS#PEIR.S                | S427:      | 3 | 3,5918 | 0,238 | 0,072  |

|    |                    |                               |            |   |        |       |        |
|----|--------------------|-------------------------------|------------|---|--------|-------|--------|
| 18 | Q8TB61 S35B2_HUMAN | K.KAVPVES#PVQKV.-             | S427:      | 2 | 3,0672 | 0,379 | -0,09  |
| 18 | Q96JM3 ZN828_HUMAN | R.KPGPPLS#PEIR.S              | S427:      | 2 | 2,8919 | 0,408 | 0      |
| 18 | Q9Y3R0 GRIP1_HUMAN | R.RQS#IPEEFK.G                | S43:       | 2 | 2,7234 | 0,326 | -0,201 |
| 18 | Q96D71 REPS1_HUMAN | R.TGSDHTNPTS#PLLVKPSDLLEENK.I | S430:      | 3 | 5,5287 | 0,234 | -0,411 |
| 18 | Q15061 WDR43_HUMAN | R.KS#GGNEVSIEER.L             | S431:      | 2 | 2,8996 | 0,263 | -0,529 |
| 18 | Q08170 SFRS4_HUMAN | R.EGRGES#ENAGTNQETR.S         | S431:      | 3 | 2,7609 | 0,162 | -0,302 |
| 18 | Q92804 RBP56_HUMAN | R.SGGGYGGDRSS#GGGYSGDR.S      | S433:      | 3 | 3,055  | 0,368 | -0,6   |
| 18 | P35269 T2FA_HUMAN  | R.LRLDTGPQSL#GK.S             | S433:      | 3 | 2,6441 | 0,286 | -0,126 |
| 18 | Q13535 ATR_HUMAN   | R.RLS#SSLNPSK.R               | S435:      | 2 | 3,0999 | 0,293 | -1,252 |
| 18 | O43318 M3K7_HUMAN  | R.RRS#IQDLTVTGTEPGQVSS#R.S    | S439:S455: | 3 | 4,7815 | 0,335 | -0,468 |
| 18 | P52926 HMGA2_HUMAN | R.KQQQEPTGEP#PK.R             | S44:       | 2 | 2,9822 | 0,157 | -0,477 |
| 18 | Q15435 PP1R7_HUMAN | K.HSSGIVADLS#EQS#LKDGEER.G    | S44:S47:   | 3 | 4,7671 | 0,433 | -0,711 |
| 18 | P23588 IF4B_HUMAN  | R.RES#EKS#LENETLNK.E          | S442:S445: | 3 | 2,7801 | 0,132 | -0,199 |
| 18 | O14974 MYPT1_HUMAN | R.KTGS#YGALAEITASK.E          | S445:      | 3 | 3,2595 | 0,381 | -0,232 |
| 18 | Q9BVJ6 UT14A_HUMAN | K.RSELSQDAEPAGS#QETK.D        | S445:      | 2 | 2,5705 | 0,465 | -0,51  |
| 18 | P08238 HS90B_HUMAN | K.LGIHEDS#TNR.R               | S445:      | 2 | 2,1281 | 0,388 | -0,3   |
| 18 | Q96JM3 ZN828_HUMAN | R.KPSGS#PDLWKL#PDQR.K         | S445:S452: | 3 | 3,8965 | 0,371 | -0,186 |
| 18 | Q8WWM7 ATX2L_HUMAN | R.M*YPPRS#PK.S                | S449:      | 2 | 2,2477 | 0,115 | -0,228 |
| 18 | Q96BH1 RNF25_HUMAN | R.RES#LGLESK.D                | S450:      | 2 | 2,6951 | 0,352 | -0,444 |
| 18 | O60832 DKC1_HUMAN  | R.KRES#ES#ESDETPPAAPQLIK.K    | S451:S453: | 3 | 4,0817 | 0,26  | 0      |
| 18 | Q9ULU4 PKCB1_HUMAN | K.KATSSHFS#AS#EESM*DFLDK.S    | S460:S462: | 3 | 3,6197 | 1     | -0,239 |
| 18 | Q9ULU4 PKCB1_HUMAN | K.KATSSHFS#ASEES#M*DFLDK.S    | S460:S465: | 3 | 5,076  | 0,372 | 0,319  |
| 18 | A1L020 MEX3A_HUMAN | K.LGGGGLRS#PGGGR.D            | S462:      | 3 | 2,6353 | 0,301 | 0,374  |
| 18 | Q5SRE5 NU188_HUMAN | K.KVYS#FLDK.M                 | S466:      | 2 | 2,0199 | 0,084 | 0,113  |
| 18 | Q9H8N7 ZN395_HUMAN | K.SHLIVTS#PPR.A               | S468:      | 2 | 2,9364 | 0,561 | -0,206 |
| 18 | Q9BTU6 P4K2A_HUMAN | R.VAAAAGSGPS#PPGS#PGHDRER.Q   | S47:S51:   | 3 | 3,9588 | 0,447 | -0,686 |
| 18 | Q13263 TIF1B_HUMAN | R.SRS#GEGEVSGLM*R.K           | S473:      | 3 | 3,3085 | 0,221 | -0,376 |
| 18 | Q5T6F2 UBAP2_HUMAN | K.LRESTPGDS#PSTVVK.L          | S473:      | 2 | 2,7218 | 0,369 | 0,219  |
| 18 | O60832 DKC1_HUMAN  | K.AGLES#GAEPGDGSDTT#KKK.K     | S485:T497: | 3 | 4,5621 | 0,367 | -0,259 |
| 18 | O60832 DKC1_HUMAN  | K.AKAGLES#GAEPGDGSDTT#KK.K    | S485:T497: | 3 | 3,5281 | 0,215 | -0,75  |
| 18 | Q8NCD3 HJURP_HUMAN | R.RLS#LPSSK.A                 | S486:      | 2 | 2,3995 | 0,33  | -0,126 |
| 18 | O43379 WDR62_HUMAN | R.TRLS#TASEETVQNR.V           | S49:       | 2 | 2,9165 | 0,594 | -0,73  |
| 18 | Q07960 RHG01_HUMAN | K.SDDSKS#SS#PELVTHLK.W        | S49:S51:   | 2 | 3,9173 | 0,443 | 0,516  |

|    |                    |                                 |            |   |        |       |        |
|----|--------------------|---------------------------------|------------|---|--------|-------|--------|
| 18 | Q96ST2 IWS1_HUMAN  | R.HS#ENETS#DREDGLPK.G           | S49:S54:   | 2 | 2,4685 | 0,389 | -0,586 |
| 18 | O60271 JIP4_HUMAN  | K.AKDDDD#DIPTAQR.K              | S493:      | 2 | 3,7059 | 0,511 | -0,6   |
| 18 | Q96RK0 CIC_HUMAN   | R.KVFS#PVIR.S                   | S496:      | 2 | 3,0632 | 0,146 | -0,119 |
| 18 | Q09666 AHNK_HUMAN  | K.FGFGAKS#PK.A                  | S4986:     | 2 | 3,1704 | 0,375 | -0,718 |
| 18 | Q8NC56 LEMD2_HUMAN | R.WTKPSSFS#DSER.-               | S499:      | 3 | 3,0943 | 0,301 | 0,121  |
| 18 | Q8NC56 LEMD2_HUMAN | R.WTKPSSFS#DSER.-               | S499:      | 2 | 2,204  | 0,303 | -0,162 |
| 18 | Q5T5Y3 CAMP1_HUMAN | R.SIS#KDSLASNIVNLTPQNQPHPTATK.S | S500:      | 3 | 5,3691 | 0,536 | -0,258 |
| 18 | Q9H0D6 XRN2_HUMAN  | R.KAEDSDS#EPEPEDNVR.L           | S501:      | 2 | 4,1427 | 0,424 | -0,965 |
| 18 | Q9Y2X3 NOL5_HUMAN  | K.HIKEEPLS#EEEPCTSTAIAS#PEK.K   | S502:S514: | 3 | 5,2524 | 0,431 | -0,4   |
| 18 | O14974 MYPT1_HUMAN | R.RLAS#TSDIEEK.E                | S507:      | 2 | 3,4503 | 0,457 | -0,826 |
| 18 | Q9Y5K6 CD2AP_HUMAN | R.FNGGHS#PTHS#PEK.I             | S510:S514: | 2 | 2,2809 | 0,202 | -0,235 |
| 18 | Q09666 AHNK_HUMAN  | K.FKAEAPLPS#PK.L                | S5110:     | 2 | 3,1814 | 0,253 | -0,096 |
| 18 | Q14149 MORC3_HUMAN | R.HLS#EGTNSYATR.L               | S514:      | 2 | 2,6421 | 0,28  | 0,172  |
| 18 | Q02952 AKA12_HUMAN | K.VQGS#PLKK.L                   | S514:      | 2 | 2,3008 | 0,263 | -0,26  |
| 18 | P40222 TXLNA_HUMAN | R.RPEGPGAQAPSS#PR.V             | S515:      | 3 | 3,4365 | 0,291 | 0,062  |
| 18 | P35240 MERL_HUMAN  | K.RLS#M*EIEK.E                  | S518:      | 2 | 2,6599 | 0,289 | -0,443 |
| 18 | Q86UU1 PHLB1_HUMAN | R.TR#PS#PTLGEGLAPHK.G           | S518:S520: | 3 | 3,9897 | 0,458 | 0,199  |
| 18 | O00567 NOL5A_HUMAN | K.SFSKEELM*S#SDLEETAGSTSIPK.R   | S519:      | 3 | 3,5547 | 0,374 | -0,712 |
| 18 | Q9BTC8 MTA3_HUMAN  | R.HAELSGS#PLK.S                 | S519:      | 2 | 2,9078 | 0,335 | -0,218 |
| 18 | P55081 MFAP1_HUMAN | K.RPDYAPM*ES#S#DEEDEEFQFIKK.A   | S52:S53:   | 3 | 4,6592 | 0,341 | -0,383 |
| 18 | Q07866 KLC1_HUMAN  | R.SRES#LNVDVVK.Y                | S520:      | 2 | 3,7687 | 0,321 | -0,184 |
| 18 | Q07866 KLC1_HUMAN  | R.SRES#LNVDVVK.Y                | S520:      | 3 | 3,6519 | 0,161 | 0,207  |
| 18 | Q9C0E2 XPO4_HUMAN  | R.HQQQLLAS#PGSSTVDNK.M          | S521:      | 3 | 2,8291 | 0,155 | -0,194 |
| 18 | Q02952 AKA12_HUMAN | K.KLFTS#TGLK.K                  | S522:      | 2 | 2,9607 | 0,346 | 0      |
| 18 | O95235 KI20A_HUMAN | K.EHSLQVS#PSLEK.G               | S532:      | 2 | 2,1129 | 0,37  | -0,34  |
| 18 | Q8WWK9 CKAP2_HUMAN | K.EEVKEVS#IEDTGVDVDPEKLEM*ESK.L | S534:      | 3 | 3,4396 | 0,338 | -0,437 |
| 18 | Q9NQW6 ANLN_HUMAN  | R.ARQPLSEASNQQPLS#GGEEK.S       | S54:       | 3 | 4,8709 | 0,373 | -0,166 |
| 18 | Q07352 TISB_HUMAN  | R.HS#VTLPSSK.F                  | S54:       | 2 | 3,0372 | 0,35  | -0,353 |
| 18 | Q96NE9 FRMD6_HUMAN | R.HLSL#LDDIR.L                  | S544:      | 2 | 3,0682 | 0,293 | 0      |
| 18 | O94909 K0819_HUMAN | R.LGLPKPEGEPLSLPTPRS#PSDR.E     | S546:      | 3 | 2,7092 | 0,12  | -0,227 |
| 18 | Q9H1B7 EAP1_HUMAN  | R.KAS#PEPPDSAEGALK.L            | S547:      | 2 | 3,4301 | 0,532 | -0,464 |
| 18 | O14777 NDC80_HUMAN | R.KVS#LFGK.R                    | S55:       | 2 | 2,6422 | 0,23  | 0,142  |
| 18 | O60504 VINEX_HUMAN | R.HPSSPSALRS#PADPTDLGGQT#SPR.R  | S551:T562: | 3 | 3,2377 | 1     | 0,424  |

|    |                     |                                 |            |   |        |       |        |
|----|---------------------|---------------------------------|------------|---|--------|-------|--------|
| 18 | Q9Y6A5 TACC3_HUMAN  | R.KQS#LYLK.F                    | S558:      | 2 | 3,1653 | 0,241 | 0,191  |
| 18 | Q9Y4H2 IRS2_HUMAN   | R.RVS#GDAAQDLDR.G               | S560:      | 2 | 3,1403 | 0,453 | -1,059 |
| 18 | P51957 NEK4_HUMAN   | R.RDLFAFQES#PPR.F               | S563:      | 3 | 2,7679 | 0,202 | -0,119 |
| 18 | Q9UKL3 C8AP2_HUMAN  | K.KLNLTLS#PAK.K                 | S567:      | 2 | 3,238  | 0,453 | 0      |
| 18 | Q7Z417 NUFP2_HUMAN  | K.RTS#PQVLGSILK.S               | S572:      | 2 | 3,4649 | 0,395 | -0,354 |
| 18 | Q59FH2 Q59FH2_HUMAN | K.RLEDEQPSTLS#PK.K              | S572:      | 2 | 3,2598 | 0,427 | -0,541 |
| 18 | P22455 FGFR4_HUMAN  | R.RPPGPDLS#PDGPR.S              | S573:      | 2 | 2,9414 | 0,363 | -0,677 |
| 18 | Q09666 AHNK_HUMAN   | K.GKGGVTGS#PEASISGSK.G          | S5731:     | 2 | 5,4474 | 0,617 | -0,992 |
| 18 | Q09666 AHNK_HUMAN   | K.GKGGVTGS#PEASISGSK.G          | S5731:     | 3 | 3,6408 | 0,434 | -0,343 |
| 18 | Q13586 STIM1_HUMAN  | R.LIEGVHPGSLVEKLPDS#PALAK.K     | S575:      | 3 | 6,1519 | 0,415 | -0,389 |
| 18 | Q9H0B6 KLC2_HUMAN   | K.RASS#LNFLNK.S                 | S582:      | 2 | 3,3434 | 0,308 | -0,298 |
| 18 | Q9UNN5 FAF1_HUMAN   | R.IRTPS#GEFLER.R                | S582:      | 2 | 3,1385 | 0,392 | 0,088  |
| 18 | Q53TX8 Q53TX8_HUMAN | R.SHS#FSDPSPK.F                 | S583:      | 2 | 2,2473 | 0,299 | -0,209 |
| 18 | Q09666 AHNK_HUMAN   | K.GHYEVTGS#DDETGK.L             | S5841:     | 2 | 4,4589 | 0,613 | -0,465 |
| 18 | Q09666 AHNK_HUMAN   | K.GHYEVTGS#DDETGK.L             | S5841:     | 3 | 3,145  | 0,26  | 0,116  |
| 18 | Q9NVU7 SDA1_HUMAN   | R.KYIEIDS#DEEPR.G               | S585:      | 2 | 4,936  | 0,61  | -0,31  |
| 18 | Q9NVU7 SDA1_HUMAN   | R.KYIEIDS#DEEPR.G               | S585:      | 3 | 3,727  | 0,339 | 0,232  |
| 18 | O60343 TBCD4_HUMAN  | R.GRLGS#VDSFER.S                | S588:      | 3 | 2,7959 | 0,262 | -0,211 |
| 18 | Q9NRY4 GRLF1_HUMAN  | R.NQKNS#LSDPNIDR.I              | S589:      | 2 | 4,5338 | 0,45  | -0,54  |
| 18 | Q9NRY4 GRLF1_HUMAN  | R.NQKNS#LSDPNIDR.I              | S589:      | 3 | 3,6174 | 0,295 | -0,231 |
| 18 | Q9P2R6 RERE_HUMAN   | K.KQPAS#PDGRTS#PINEDIR.S        | S594:S600: | 3 | 4,121  | 0,338 | 0      |
| 18 | Q7RTP8 Q7RTP8_HUMAN | K.RAS#SLNVLNVGGK.A              | S595:      | 2 | 3,8002 | 0,41  | -0,087 |
| 18 | Q7RTP8 Q7RTP8_HUMAN | K.RAS#SLNVLNVGGK.A              | S595:      | 3 | 3,3583 | 0,191 | 0      |
| 18 | O43683 BUB1_HUMAN   | K.TLAPSPKS#PGDFTSAAQLASTPFHK.L  | S596:      | 3 | 5,2262 | 0,408 | -0,486 |
| 18 | A4LAA3 A4LAA3_HUMAN | K.LTPVLSLNS#PIKGADCQEVQDKDGYK.S | S598:      | 3 | 3,06   | 0,367 | -0,484 |
| 18 | P43243 MATR3_HUMAN  | R.SYS#PDGKES#PSDKK.S            | S598:S604: | 2 | 3,2868 | 0,374 | -0,434 |
| 18 | P43243 MATR3_HUMAN  | R.SYS#PDGKES#PSDKK.S            | S598:S604: | 3 | 3,0329 | 0,406 | -0,217 |
| 18 | Q13442 HAP28_HUMAN  | K.KSLDS#DES#EEDEDDYQQKR.K       | S60:S63:   | 3 | 3,7896 | 0,449 | -0,296 |
| 18 | O60885 BRD4_HUMAN   | K.SKPPPTYES#EEEDK.C             | S601:      | 2 | 3,7777 | 0,527 | -0,427 |
| 18 | Q15424 SAFB1_HUMAN  | R.SVVS#FDKVK.E                  | S604:      | 2 | 3,2235 | 0,249 | -0,224 |
| 18 | Q8IZT6 ASPM_HUMAN   | R.IHFS#PSEPK.T                  | S605:      | 2 | 2,3138 | 0,17  | -0,217 |
| 18 | Q5PRF9 SAM4B_HUMAN  | R.HALTS#PSLGGQGR.Q              | S607:      | 2 | 3,1538 | 0,512 | -0,448 |
| 18 | O00203 AP3B1_HUMAN  | K.IFLAQKPAPLLES#PFKDR.D         | S609:      | 3 | 3,1601 | 0,234 | 0,51   |



|    |                    |                                 |                 |   |        |       |        |
|----|--------------------|---------------------------------|-----------------|---|--------|-------|--------|
| 18 | O95453 PARN_HUMAN  | K.KELS#PAGSISK.N                | S619:           | 2 | 3,6909 | 0,326 | -0,815 |
| 18 | P52292 IMA2_HUMAN  | R.RNVSSFPDDATS#PLQENR.N         | S62:            | 3 | 2,9766 | 0,159 | 0,087  |
| 18 | Q53ET0 CRTC2_HUMAN | R.HGSGPNIILTDSS#PGFSK.E         | S624:           | 2 | 4,5616 | 0,57  | -0,563 |
| 18 | Q53ET0 CRTC2_HUMAN | R.HGSGPNIILTDSS#PGFSK.E         | S624:           | 3 | 3,824  | 0,294 | -0,375 |
| 18 | Q02952 AKA12_HUMAN | R.RPS#ES#DKEDELDK.V             | S627:S629:      | 2 | 3,7625 | 0,38  | -0,857 |
| 18 | P07197 NFM_HUMAN   | K.GKS#PVPKS#PVEEK.G             | S628:S633:      | 3 | 3,6204 | 0,377 | 0      |
| 18 | Q5QP82 WDR32_HUMAN | R.RPGAPSL#PAPR.S                | S63:            | 2 | 2,2548 | 0,206 | -0,379 |
| 18 | O43719 HTSF1_HUMAN | K.VFDDDES#DEKEDEEYADEKGLEAADK.K | S642:           | 3 | 6,1218 | 0,497 | -0,495 |
| 18 | Q14978 NOLC1_HUMAN | R.VADNS#FDAKR.G                 | S643:           | 2 | 3,4055 | 0,415 | -0,101 |
| 18 | Q8NI35 INADL_HUMAN | R.RLFDDEAS#VDEPR.R              | S645:           | 3 | 4,1086 | 0,254 | 0,112  |
| 18 | Q8NI35 INADL_HUMAN | R.RLFDDEAS#VDEPR.R              | S645:           | 2 | 3,3161 | 0,293 | -0,449 |
| 18 | Q7Z460 CLAP1_HUMAN | R.RQS#SGSATNVASTPDNR.G          | S646:           | 2 | 4,5438 | 0,583 | -0,534 |
| 18 | Q96S55 WRIP1_HUMAN | R.AKGPS#PPGAK.R                 | S65:            | 2 | 2,3748 | 0,246 | -0,062 |
| 18 | Q86YS7 K0528_HUMAN | R.SQS#ESS#DEVTELDLSHGKK.D       | S659:S662:      | 3 | 4,0192 | 0,341 | 0,164  |
| 18 | Q9ULH7 MKL2_HUMAN  | R.EQLVDQGIM*PPLKS#PAAFHEQIK.S   | S66:            | 3 | 3,3094 | 0,247 | -0,411 |
| 18 | Q9H307 PININ_HUMAN | R.RGFS#DSGGGPPAK.Q              | S66:            | 2 | 2,5596 | 0,444 | -0,558 |
| 18 | Q9H6F5 CCD86_HUMAN | R.AGLGSPERPPKTS#PGS#PR.L        | S66:S69:        | 2 | 3,738  | 0,412 | -0,563 |
| 18 | Q96B23 CR025_HUMAN | R.RDS#SES#QLASTESDKPTTGR.V      | S66:S69:        | 3 | 2,8483 | 0,372 | -0,554 |
| 18 | Q13586 STIM1_HUMAN | K.KAVAEEDNGS#IGEETDSSPGR.K      | S660:           | 3 | 3,2367 | 0,357 | -0,575 |
| 18 | P51957 NEK4_HUMAN  | R.RLS#SDCSVTQER.K               | S661:           | 2 | 2,1731 | 0,375 | 0,161  |
| 18 | P25205 MCM3_HUMAN  | R.SEDES#ET#EDEEEKSQEDQEQR.K     | S672:T674:      | 3 | 4,548  | 0,34  | -0,643 |
| 18 | Q9UEY8 ADDG_HUMAN  | K.SPEKIEEVL#PEGS#PSKS#PSKK.K    | S673:S677:S681: | 3 | 4,0711 | 1     | -0,284 |
| 18 | Q9BPX3 CND3_HUMAN  | K.TLHCEGTEINS#DDEQESK.E         | S674:           | 3 | 4,9466 | 0,341 | -0,59  |
| 18 | O43719 HTSF1_HUMAN | K.LFEES#DDKEDEADAGKEVEDADEK.L   | S676:           | 3 | 6,883  | 0,402 | 0,322  |
| 18 | P46100 ATRX_HUMAN  | R.RPTETNPVTSNS#DEECNETVK.E      | S677:           | 3 | 6,2566 | 0,403 | -0,662 |
| 18 | Q6P3W7 SCYL2_HUMAN | K.RAS#LTLEEK.Q                  | S677:           | 2 | 2,5749 | 0,221 | 0,108  |
| 18 | P33993 MCM7_HUMAN  | R.SVRFS#EAEQR.C                 | S678:           | 3 | 2,8705 | 0,324 | 0,071  |
| 18 | Q9Y2K7 JHD1A_HUMAN | R.KM*EES#DEEAVQAK.V             | S692:           | 2 | 5,0425 | 0,538 | -0,691 |
| 18 | Q96T83 SL9A7_HUMAN | R.TKS#SSEEVLER.D                | S693:           | 3 | 3,9469 | 0,132 | 0      |
| 18 | Q96T83 SL9A7_HUMAN | R.TKS#SSEEVLER.D                | S693:           | 2 | 3,3268 | 0,386 | -0,635 |
| 18 | Q14155 ARHG7_HUMAN | R.KPS#DEEFASR.K                 | S694:           | 3 | 3,4338 | 0,332 | 0,22   |
| 18 | Q14155 ARHG7_HUMAN | R.KPS#DEEFASR.K                 | S694:           | 2 | 3,2706 | 0,383 | 0,098  |
| 18 | Q9UPZ3 HPS5_HUMAN  | K.RDS#LGNESVVK.T                | S695:           | 2 | 3,3344 | 0,249 | -0,598 |

|    |                    |                                |            |   |        |       |        |
|----|--------------------|--------------------------------|------------|---|--------|-------|--------|
| 18 | Q14978 NOLC1_HUMAN | R.GGSISVQVNSIKFDS#E.-          | S698:      | 2 | 2,1868 | 0,147 | -0,698 |
| 18 | Q01105 SET_HUMAN   | K.RQS#PLPPQK.K                 | S7:        | 2 | 2,6283 | 0,21  | -0,324 |
| 18 | P06748 NPM_HUMAN   | K.DELHIVEAEAM*NYEGS#PIK.V      | S70:       | 3 | 3,8828 | 0,323 | -0,327 |
| 18 | Q6UXH1 CREL2_HUMAN | K.TLSKYES#SEIR.L               | S70:       | 2 | 3,0515 | 0,249 | -0,438 |
| 18 | O60890 OPHN1_HUMAN | K.TPS#FHIK.R                   | S703:      | 2 | 2,291  | 0,162 | 0      |
| 18 | O75151 PHF2_HUMAN  | K.RDLS#FLLDK.K                 | S705:      | 2 | 2,8741 | 0,343 | -0,514 |
| 18 | Q9NR30 DDX21_HUMAN | K.KAEPSEVDM*NS#PK.S            | S71:       | 2 | 3,4865 | 0,339 | -0,719 |
| 18 | Q9NR30 DDX21_HUMAN | K.KAEPSEVDM*NS#PK.S            | S71:       | 3 | 3,2556 | 0,167 | -0,12  |
| 18 | O00571 DDX3X_HUMAN | K.DKDAYSS#FGSR.S               | S71:       | 2 | 2,7558 | 0,359 | -0,372 |
| 18 | Q9ULJ3 ZN295_HUMAN | K.EHAPLAS#PVENK.E              | S714:      | 2 | 2,6369 | 0,265 | -0,534 |
| 18 | Q8TEW0 PARD3_HUMAN | R.RIS#HSLYSIGIEGLDES#PSR.N     | S715:S728: | 3 | 5,0902 | 0,394 | -0,647 |
| 18 | Q9UPQ0 LIMC1_HUMAN | K.VVKPKS#PEPEATLTFPFLDK.M      | S718:      | 3 | 2,8443 | 0,247 | -0,551 |
| 18 | Q9H7N4 SFR19_HUMAN | K.SDPRGPS#PAPASS#PKR.E         | S719:S725: | 3 | 2,9559 | 0,308 | -0,311 |
| 18 | P18206 VINC_HUMAN  | K.M*TGLVDEAIDTKS#LLDASEEAIKK.D | S721:      | 3 | 3,7765 | 0,259 | -0,548 |
| 18 | P35611 ADDA_HUMAN  | R.TPS#FLKK.S                   | S726:      | 2 | 2,2439 | 0,184 | -1,286 |
| 18 | Q12888 TP53B_HUMAN | K.KECSEAM*EVETSVISIDS#PQK.L    | S727:      | 3 | 3,2029 | 0,177 | -0,371 |
| 18 | Q86SQ0 PHLB2_HUMAN | K.RSPS#PLGTSVR.S               | S73:       | 2 | 2,6207 | 0,266 | 0,197  |
| 18 | Q66K74 MAP1S_HUMAN | R.SAS#PHDVDLCLVSPCFEHR.K       | S731:      | 3 | 2,945  | 0,123 | -0,526 |
| 18 | Q15139 KPCD1_HUMAN | R.IIGEKs#FR.R                  | S738:      | 2 | 2,1313 | 0,252 | -0,237 |
| 18 | Q96C19 EFHD2_HUMAN | R.RADLNQIGEPQS#PSR.R           | S74:       | 2 | 2,8832 | 0,377 | -0,608 |
| 18 | A1L390 PKHG3_HUMAN | R.RES#LSYIPK.G                 | S741:      | 2 | 2,4281 | 0,311 | -0,208 |
| 18 | Q03164 HRX_HUMAN   | R.KVFS#PIR.S                   | S742:      | 2 | 2,3049 | 0,138 | -0,066 |
| 18 | Q9NWH9 SLTM_HUMAN  | K.KLS#LDTDAR.F                 | S748:      | 2 | 3,0252 | 0,262 | -0,111 |
| 18 | Q9BY89 K1671_HUMAN | R.VHSEAIS#PAPEEK.A             | S749:      | 2 | 2,9782 | 0,304 | -0,248 |
| 18 | Q96S55 WRIP1_HUMAN | R.RLS#ESSALK.Q                 | S75:       | 2 | 2,2983 | 0,295 | -0,684 |
| 18 | P50502 F10A1_HUMAN | K.KVEEDLKADEPS#S#EESDLEIDK.E   | S75:S76:   | 3 | 5,7555 | 0,388 | 0,275  |
| 18 | Q8WWI1 LMO7_HUMAN  | R.KS#YTSDLQK.K                 | S751:      | 2 | 2,4993 | 0,1   | -0,424 |
| 18 | Q9NXE4 NSMA3_HUMAN | R.HLLS#PVGR.R                  | S753:      | 2 | 2,2015 | 0,312 | -0,064 |
| 18 | Q13443 ADAM9_HUMAN | R.HVS#PVTPPR.E                 | S758:      | 2 | 2,4745 | 0,368 | -0,342 |
| 18 | O14828 SCAM3_HUMAN | R.KLS#PTEPK.N                  | S76:       | 2 | 2,8508 | 0,213 | 0      |
| 18 | Q6P0N0 CN106_HUMAN | K.KIENQVAM*S#FYK.H             | S761:      | 2 | 3,5481 | 0,206 | -0,157 |
| 18 | Q6P0N0 CN106_HUMAN | K.KIENQVAM*S#FYK.H             | S761:      | 3 | 3,036  | 0,246 | 0      |
| 18 | Q15061 WDR43_HUMAN | R.LQAKES#PQR.K                 | S77:       | 2 | 3,0354 | 0,321 | -0,537 |

|    |                     |                                   |            |   |        |       |        |
|----|---------------------|-----------------------------------|------------|---|--------|-------|--------|
| 18 | Q68DN6 RGPD1_HUMAN  | K.HSTPS#PTKYSL#PSK.S              | S772:S779: | 2 | 4,4754 | 1     | -0,961 |
| 18 | P49792 RBP2_HUMAN   | R.NADSEIKHS#TPS#PTR.Y             | S778:S781: | 2 | 2,3784 | 0,195 | -0,542 |
| 18 | Q96FT9 CN179_HUMAN  | R.KAS#EEIEDFR.L                   | S78:       | 2 | 3,4169 | 0,444 | -0,094 |
| 18 | Q5HYE4 Q5HYE4_HUMAN | R.HIEALLGS#PCGK.G                 | S79:       | 2 | 3,2498 | 0,396 | -0,09  |
| 18 | Q9H4L7 SMRCD_HUMAN  | R.KAS#ISYFK.N                     | S79:       | 2 | 3,08   | 0,299 | -0,238 |
| 18 | Q9UK76 HN1_HUMAN    | K.SSGGREDLES#SGLQR.R              | S79:       | 2 | 2,307  | 0,272 | -0,368 |
| 18 | Q96FF9 CDCA5_HUMAN  | R.RS#PRIS#FFLEK.E                 | S79:S83:   | 3 | 3,3674 | 0,36  | -0,238 |
| 18 | Q4LE39 ARI4B_HUMAN  | R.KDIEVLS#EDT#DYEEDVTKK.R         | S790:T793: | 3 | 2,7356 | 0,219 | -0,503 |
| 18 | Q9NQW6 ANLN_HUMAN   | K.NKAS#PQSEFM*PSK.G               | S792:      | 3 | 2,6569 | 0,09  | 0      |
| 18 | Q9UK76 HN1_HUMAN    | K.SSGGREDLESS#GLQR.R              | S80:       | 3 | 3,5178 | 0,365 | 0      |
| 18 | Q14103 HNRPD_HUMAN  | K.IDASKNEEDEGHS#NSS#PR.H          | S80:S83:   | 3 | 2,6828 | 0,103 | -0,515 |
| 18 | Q9H8V3 ECT2_HUMAN   | R.AFS#FSKT#PKR.A                  | S811:T815: | 3 | 2,6237 | 0,242 | 0,069  |
| 18 | Q9GZR7 DDX24_HUMAN  | R.KAQAVS#EEEEEEEGK.S              | S82:       | 2 | 4,2665 | 0,569 | -0,62  |
| 18 | P55081 MFAP1_HUMAN  | K.AKEQAEPEEQEEDSS#DPR.L           | S82:       | 3 | 3,3477 | 0,304 | -0,463 |
| 18 | O00571 DDX3X_HUMAN  | R.GKS#SFFSDR.G                    | S82:       | 2 | 3,1389 | 0,225 | -0,769 |
| 18 | Q9BWU0 NADAP_HUMAN  | K.KPALPVS#PAAR.S                  | S82:       | 2 | 2,7514 | 0,458 | 0,103  |
| 18 | O15392 BIRC5_HUMAN  | K.HSS#GCAFLSVK.K                  | S82:       | 2 | 2,0248 | 0,143 | -0,479 |
| 18 | Q9NX31 CT111_HUMAN  | R.S#KS#PVLHPPK.F                  | S82:S84:   | 2 | 2,2019 | 0,192 | -0,586 |
| 18 | Q9GZR7 DDX24_HUMAN  | R.KAQAVS#EEEEEEEGKSS#SPK.K        | S82:S93:   | 3 | 3,7937 | 0,293 | -0,626 |
| 18 | Q9UKV3 ACINU_HUMAN  | R.KIS#VVSATK.G                    | S825:      | 2 | 2,659  | 0,262 | -0,12  |
| 18 | B2RTT4 B2RTT4_HUMAN | R.KIS#VVSTK.G                     | S825:      | 2 | 2,543  | 0,278 | -0,194 |
| 18 | Q8N8A6 DDX51_HUMAN  | R.RVNDAEPGS#PEAPQGK.R             | S83:       | 2 | 3,5294 | 0,5   | -0,775 |
| 18 | P04406 G3P_HUMAN    | K.LVINGNPITIFQERDPS#KIK.W         | S83:       | 3 | 3,0295 | 0,288 | -0,542 |
| 18 | P40189 IL6RB_HUMAN  | R.SKQVSS#VNEEDFVR.L               | S839:      | 3 | 3,5848 | 0,389 | -0,215 |
| 18 | P49023 PAXI_HUMAN   | R.FIHQQPQSS#PVYGSSAK.T            | S85:       | 3 | 3,7546 | 0,284 | -0,812 |
| 18 | P16333 NCK1_HUMAN   | K.RKPS#VPDSAS#PADDSFVDPGER.L      | S85:S91:   | 3 | 3,4175 | 0,244 | 0      |
| 18 | P16333 NCK1_HUMAN   | K.RKPS#VPDSASPADDS#FVDPGER.L      | S85:S96:   | 3 | 5,2591 | 0,408 | -0,662 |
| 18 | Q9UMZ2 SYNG_HUMAN   | K.HVM*S#DSSLDLPTVSGQHPPAADIEDLK.Y | S852:      | 3 | 3,8101 | 0,347 | -0,371 |
| 18 | Q5H9R7 SAPS3_HUMAN  | K.CAAPRPSSS#PEQR.T                | S853:      | 2 | 2,5538 | 0,082 | -0,075 |
| 18 | Q00653 NFKB2_HUMAN  | R.DKLPS#TAEVKEDSAYGSQSVEQAEK.L    | S858:      | 3 | 5,3522 | 0,446 | 0,378  |
| 18 | P35606 COPB2_HUMAN  | R.STAQQELDGPAS#PTPVIVASHTANK.E    | S859:      | 3 | 5,2959 | 0,424 | -0,201 |
| 18 | Q9C0H9 SNIP_HUMAN   | R.RGS#DELTVP.R.Y                  | S859:      | 3 | 2,7008 | 0,084 | 0,302  |
| 18 | Q9C0H9 SNIP_HUMAN   | R.RGS#DELTVP.R.Y                  | S859:      | 2 | 2,6784 | 0,485 | -0,303 |

|    |                    |                                  |            |   |        |       |        |
|----|--------------------|----------------------------------|------------|---|--------|-------|--------|
| 18 | Q9UK76 HN1_HUMAN   | R.RNS#SEASSGDFLDLK.G             | S87:       | 2 | 4,8477 | 0,493 | -0,572 |
| 18 | P50402 EMD_HUMAN   | K.KEDALLYQS#K.G                  | S87:       | 2 | 3,5728 | 0,335 | -0,67  |
| 18 | P50402 EMD_HUMAN   | K.KEDALLYQS#K.G                  | S87:       | 3 | 3,0339 | 0,145 | 0,143  |
| 18 | Q13523 PRP4B_HUMAN | R.KEVIDAS#DKEGM*S#PAK.R          | S87:S93:   | 2 | 4,367  | 0,433 | -0,454 |
| 18 | Q8IYB3 SRRM1_HUMAN | K.KETES#EAEDNLDDLEK.H            | S874:      | 3 | 5,1192 | 0,488 | 0,376  |
| 18 | Q8N122 RPTOR_HUMAN | K.GVHIHQAGGS#PPASSTSS#SLTNDVAK.Q | S877:S886: | 3 | 6,2264 | 1     | -0,066 |
| 18 | O95235 KI20A_HUMAN | R.RS#PLLKS#GPF GK.K              | S878:S883: | 3 | 2,7078 | 0,099 | -0,19  |
| 18 | Q9UK76 HN1_HUMAN   | R.RNSS#EASSGDFLDLK.G             | S88:       | 3 | 4,2171 | 0,521 | -0,322 |
| 18 | Q8WUA4 TF3C2_HUMAN | R.AHFNAM*FQPS#PTR.R              | S893:      | 3 | 3,804  | 0,31  | -0,867 |
| 18 | O75665 OFD1_HUMAN  | R.RQS#NLQEVLER.E                 | S899:      | 3 | 4,5479 | 0,159 | 0,063  |
| 18 | O75665 OFD1_HUMAN  | R.RQS#NLQEVLER.E                 | S899:      | 2 | 3,575  | 0,482 | 0,168  |
| 18 | Q7L7X3 TAOK1_HUMAN | R.AGS#LKDPEIAELFFKEDPEK.L        | S9:        | 3 | 2,8942 | 0,245 | -0,234 |
| 18 | Q9UL54 TAOK2_HUMAN | R.AGS#LKDPDVAELFFKDDPEK.L        | S9:        | 3 | 2,6562 | 0,139 | -0,795 |
| 18 | P09543 CN37_HUMAN  | K.S#HTFLPK.I                     | S9:        | 2 | 2,3589 | 0,174 | -0,201 |
| 18 | Q14C86 GAPD1_HUMAN | R.S#RSSDIVSSVR.R                 | S900:      | 3 | 2,8333 | 0,176 | 0,072  |
| 18 | Q14C86 GAPD1_HUMAN | R.SRS#SDIVSSVR.R                 | S902:      | 2 | 3,4591 | 0,408 | -0,096 |
| 18 | Q8NFC6 FA44A_HUMAN | R.TKS#LLEEK.L                    | S902:      | 2 | 2,4077 | 0,107 | -0,356 |
| 18 | O75044 FNBP2_HUMAN | K.CSISGHGSLNSIS#R.H              | S905:      | 2 | 2,9204 | 0,375 | 0,235  |
| 18 | Q6ZRV2 FA83H_HUMAN | R.RGS#PVPPVPER.R                 | S914:      | 2 | 2,1014 | 0,238 | -0,672 |
| 18 | Q9GZR1 SENP6_HUMAN | K.IRLNYSDES#PEAGK.M              | S919:      | 3 | 3,769  | 0,393 | 0      |
| 18 | P45973 CBX5_HUMAN  | R.KS#NFSNSADDIK.S                | S92:       | 2 | 2,7774 | 0,204 | -0,434 |
| 18 | Q9Y2W1 TR150_HUMAN | K.WAHDKFS#GEEGEIEDDES#GTENR.E    | S928:S939: | 3 | 5,6779 | 0,548 | -0,131 |
| 18 | Q6POQ8 MAST2_HUMAN | R.RCS#GLLDAPR.F                  | S931:      | 2 | 2,8042 | 0,376 | -0,398 |
| 18 | P82094 TMF1_HUMAN  | R.KPFSVSSTPTM*S#R.S              | S933:      | 2 | 2,8002 | 0,198 | -0,321 |
| 18 | A0JNW5 UH1BL_HUMAN | R.SM*S#VDLSHIPLKDLLFK.S          | S935:      | 3 | 3,0367 | 0,244 | -0,514 |
| 18 | Q5VZ89 DEN4C_HUMAN | K.RSS#LYGIAK.V                   | S948:      | 2 | 2,8243 | 0,346 | -0,794 |
| 18 | Q9P275 UBP36_HUMAN | R.HSCSPM*GDGDPEAM*EES#PR.K       | S952:      | 3 | 4,0006 | 0,414 | -0,416 |
| 18 | O75064 DEN4B_HUMAN | R.SLRDPAS#PPGR.L                 | S953:      | 2 | 2,2995 | 0,215 | -0,297 |
| 18 | P28749 RBL1_HUMAN  | K.YDLANQDHM*M*DAPPLS#PFPHIK.Q    | S964:      | 3 | 3,4056 | 0,421 | -0,622 |
| 18 | Q86UU1 PHLB1_HUMAN | R.SKM*DGEATS#PLPR.T              | S971:      | 3 | 3,4536 | 0,297 | -0,123 |
| 18 | Q86UU1 PHLB1_HUMAN | R.SKM*DGEATS#PLPR.T              | S971:      | 2 | 3,2608 | 0,353 | -1,561 |
| 18 | Q9BPX3 CND3_HUMAN  | R.RCQTAEADS#ES#DHEVPEPESEM*K.M   | S973:S975: | 3 | 3,6235 | 0,26  | -0,387 |
| 18 | P26358 DNMT1_HUMAN | R.KYS#DYIK.G                     | S977:      | 2 | 2,0297 | 0,178 | -0,306 |

|    |                     |                                  |                 |   |        |       |        |
|----|---------------------|----------------------------------|-----------------|---|--------|-------|--------|
| 18 | Q6WCQ1 MRIP_HUMAN   | K.SKS#NPDFLK.K                   | S992:           | 2 | 3,1639 | 0,29  | -0,109 |
| 18 | Q14669 TRIPC_HUMAN  | R.DDSLDSLSPQGRS#DVLKR.K          | S997:           | 3 | 2,8384 | 0,175 | -0,699 |
| 18 | Q9BVC3 DCC1_HUMAN   | K.IADTSNM*LLFIPGCKT#PDQLKK.E     | T100:           | 3 | 4,7567 | 0,406 | -0,141 |
| 18 | Q5SW79 CE170_HUMAN  | R.TPLT#S#ADEHVHVK.L              | T1058:S1059:    | 3 | 2,6907 | 0,365 | -0,116 |
| 18 | P26373 RL13_HUMAN   | R.NKST#ESLQANVQR.L               | T107:           | 3 | 3,1358 | 0,202 | -0,118 |
| 18 | Q8NE71 ABCF1_HUMAN  | K.KLSVPT#S#DEEDEVPAKPR.G         | T108:S109:      | 3 | 4,4653 | 0,304 | -0,162 |
| 18 | Q9BX95 SGPP1_HUMAN  | R.RNSLT#GEEGQLAR.V               | T114:           | 3 | 4,5918 | 0,31  | -0,484 |
| 18 | Q6PGN9 PSRC1_HUMAN  | R.RET#FVLK.D                     | T116:           | 2 | 2,8725 | 0,243 | -0,564 |
| 18 | P38432 P80C_HUMAN   | K.RAFQLEEGEET#EPDCK.Y            | T122:           | 3 | 2,8992 | 0,2   | 0      |
| 18 | Q7L576 CYFP1_HUMAN  | K.SGDGEGT#PVEHVR.C               | T1234:          | 2 | 2,888  | 0,386 | -0,516 |
| 18 | Q02952 AKA12_HUMAN  | K.M*EDT#LEHTDKEVSVETVSILSK.T     | T1242:          | 3 | 4,0279 | 0,476 | -0,424 |
| 18 | Q7L9B9 EPPD1_HUMAN  | R.DLLAEQQPHHLATAVPLT#PR.V        | T134:           | 3 | 4,3673 | 0,401 | -0,88  |
| 18 | O75376 NCOR1_HUMAN  | R.KT#PEVVQSTRPIIEGSIQGTPIK.F     | T1367:          | 3 | 3,3616 | 0,477 | -0,553 |
| 18 | Q9UQ35 SRRM2_HUMAN  | K.TVART#PLGQR.S                  | T1531:          | 2 | 2,4462 | 0,285 | -0,414 |
| 18 | O43166 SI1L1_HUMAN  | R.ALHRT#LS#DESIYNSQR.E           | T1583:S1585:    | 3 | 2,9709 | 0,127 | 0      |
| 18 | Q13838 UAP56_HUMAN  | K.NCPHIVVGT#PGR.I                | T172:           | 3 | 3,8407 | 0,326 | 0,132  |
| 18 | Q13838 UAP56_HUMAN  | K.NCPHIVVGT#PGR.I                | T172:           | 2 | 3,4717 | 0,43  | 0      |
| 18 | Q9H1E3 NUCKS_HUMAN  | R.LKATVT#PS#PVKKGK.G             | T179:S181:      | 2 | 3,961  | 0,571 | -0,657 |
| 18 | Q9H1E3 NUCKS_HUMAN  | R.LKATVT#PS#PVKKGK.G             | T179:S181:      | 3 | 2,8563 | 0,218 | -0,615 |
| 18 | Q16539 MK14_HUMAN   | R.HTDDEM*T#GYVATR.W              | T180:           | 2 | 4,5029 | 0,533 | -0,766 |
| 18 | Q14676 MDC1_HUMAN   | R.SRFT#PELQPK.A                  | T1800:          | 2 | 2,1651 | 0,116 | 0      |
| 18 | A0JLT2 MED19_HUMAN  | R.TQDPVPPET#PSDS#DHKK.K          | T192:S196:      | 3 | 2,9678 | 0,118 | -0,449 |
| 18 | O94915 FRYL_HUMAN   | R.RSNT#LDIM*DGR.I                | T1959:          | 2 | 3,1163 | 0,453 | -0,266 |
| 18 | Q9H1E3 NUCKS_HUMAN  | K.EKT#PS#PKEEDEEPES#PPEKK.T      | T202:S204:S214: | 3 | 3,5106 | 0,344 | -0,646 |
| 18 | Q15003 CND2_HUMAN   | K.DAPSLLEEVEGHVADGSATEM*GT#TKK.A | T207:           | 3 | 3,422  | 0,248 | -0,413 |
| 18 | Q63HQ0 CD016_HUMAN  | R.SKT#EEDILR.A                   | T228:           | 2 | 3,2823 | 0,413 | -0,208 |
| 18 | O94906 PRP6_HUMAN   | K.GYLT#DLNSM*IPTHGGDINDIKK.A     | T275:           | 3 | 3,977  | 0,305 | -0,439 |
| 18 | A8K1N6 A8K1N6_HUMAN | K.KGSLLP#SPR.L                   | T283:           | 2 | 2,894  | 0,268 | -0,322 |
| 18 | O43166 SI1L1_HUMAN  | R.SKSET#GDSSIFR.K                | T290:           | 3 | 3,8337 | 0,212 | 0,066  |
| 18 | Q01518 CAP1_HUMAN   | R.SGPKPFSAPKQ#SPS#PK.R           | T307:S310:      | 3 | 3,081  | 0,242 | 0,366  |
| 18 | Q9UGV2 NDRG3_HUMAN  | R.SRT#HST#SSSLGSGESPF#SR.S       | T329:T332:      | 3 | 5,4088 | 1     | 0,172  |
| 18 | Q641Q2 FA21A_HUMAN  | K.ERRT#PS#DDEEDNLFAPPK.L         | T331:S333:      | 3 | 4,3193 | 0,424 | -0,161 |
| 18 | Q4G0J3 LARP7_HUMAN  | R.DIEIST#EEEKDTGDLKDSLLK.T       | T338:           | 3 | 5,5981 | 0,365 | -0,503 |

|    |                     |                                  |                 |   |        |       |        |
|----|---------------------|----------------------------------|-----------------|---|--------|-------|--------|
| 18 | Q7L9L4 MOL1A_HUMAN  | K.HAEAT#LGSGNLR.M                | T35:            | 2 | 2,4894 | 0,382 | -0,374 |
| 18 | Q6T4R5 NHS_HUMAN    | R.KT#ISGIPR.R                    | T380:           | 2 | 2,4249 | 0,34  | -0,064 |
| 18 | P08238 HS90B_HUMAN  | K.LGIHEDST#NR.R                  | T446:           | 3 | 2,7041 | 0,407 | 0,449  |
| 18 | P53985 MOT1_HUMAN   | K.ESKEEET#S#IDVAGKPNEVTK.A       | T466:S467:      | 3 | 2,95   | 0,296 | 0,389  |
| 18 | Q05209 PTN12_HUMAN  | K.VSVTPPEESQNSDT#PPRPDRPLPLDEK.G | T519:           | 3 | 2,9663 | 0,215 | -0,491 |
| 18 | Q02952 AKA12_HUMAN  | K.KLFT#STGLK.K                   | T521:           | 2 | 2,9519 | 0,216 | -0,113 |
| 18 | P13639 EF2_HUMAN    | R.AGET#RFT#DT#RKDEQER.C          | T54:T57:T59:    | 3 | 2,6398 | 0,218 | -0,336 |
| 18 | Q9Y6M7 S4A7_HUMAN   | R.KIPVFHNGST#PT#LGETPK.E         | T557:T559:      | 3 | 3,6876 | 0,304 | 0,088  |
| 18 | P13639 EF2_HUMAN    | R.AGETRFT#DTR.K                  | T57:            | 2 | 2,2306 | 0,229 | -0,593 |
| 18 | Q59FH2 Q59FH2_HUMAN | K.RLEDEQST#LSPK.K                | T570:           | 3 | 2,994  | 0,087 | -0,116 |
| 18 | Q09666 AHNK_HUMAN   | K.GKGGVT#GSPEAS#ISGSKGDLK.S      | T5729:S5735:    | 3 | 2,6065 | 0,307 | -1,399 |
| 18 | Q7KZ17 MARK2_HUMAN  | R.LLKT#IGK.G                     | T58:            | 2 | 2,3489 | 0,138 | 0,143  |
| 18 | P01106 MYC_HUMAN    | K.KFELLPT#PPLS#PSRR.S            | T58:S62:        | 3 | 2,833  | 0,224 | -0,578 |
| 18 | Q66K74 MAP1S_HUMAN  | K.ALELPLAASSIPRPT#PS#PESHR.S     | T638:S640:      | 3 | 4,2488 | 1     | -0,623 |
| 18 | Q9H6F5 CCD86_HUMAN  | R.AGLGSPERPPKT#SPGS#PR.L         | T65:S69:        | 3 | 3,0236 | 0,355 | -0,75  |
| 18 | Q7Z422 CA144_HUMAN  | K.RPT#SNGVVSSPNSTS#RPTLPVK.S     | T67:S79:        | 3 | 3,0991 | 1     | -0,225 |
| 18 | O43818 U3IP2_HUMAN  | R.KPEEEEEEELEET#AQEK.K           | T74:            | 3 | 4,0648 | 0,325 | -0,679 |
| 18 | Q13427 PPIG_HUMAN   | K.FDHESPGT#DEDKSG.-              | T748:           | 3 | 3,3595 | 0,417 | -0,108 |
| 18 | P49792 RBP2_HUMAN   | R.NADSEIKHST#PS#PTR.Y            | T779:S781:      | 3 | 3,9617 | 0,218 | -0,407 |
| 18 | Q6PKG0 LARP1_HUMAN  | R.TPRT#PQLK.D                    | T788:           | 2 | 2,6641 | 0,186 | -0,179 |
| 18 | O95239 KIF4A_HUMAN  | R.RT#FSLTEVR.G                   | T799:           | 2 | 2,9527 | 0,408 | -0,205 |
| 18 | Q14721 KCNB1_HUMAN  | K.NHFESSPLPT#SPK.F               | T804:           | 2 | 3,7459 | 0,568 | -0,241 |
| 18 | Q9BW71 HIRP3_HUMAN  | K.RPPT#PCSDPER.K                 | T84:            | 3 | 3,1779 | 0,427 | -0,131 |
| 18 | Q76176 SSH2_HUMAN   | R.RAT#LEFEER.L                   | T870:           | 2 | 2,6371 | 0,114 | -0,991 |
| 18 | Q9BWF3 RBM4_HUMAN   | K.LHVGNISPT#CTNK.E               | T88:            | 2 | 4,3788 | 0,48  | -0,562 |
| 18 | Q6DN90 IQEC1_HUMAN  | K.LQHST#SILR.K                   | T88:            | 2 | 2,6816 | 0,251 | 0,215  |
| 18 | Q3KQU3 MA7D1_HUMAN  | K.SRGPT#PPAM*GPR.D               | T97:            | 3 | 2,9761 | 0,258 | 0,208  |
| 18 | Q3KQU3 MA7D1_HUMAN  | K.SRGPT#PPAM*GPR.D               | T97:            | 2 | 2,4502 | 0,295 | -0,462 |
| 18 | Q6NUQ4 U535_HUMAN   | K.KVAT#PPNQNQK.Q                 | T97:            | 2 | 2,1289 | 0,383 | -0,187 |
| 18 | Q9UQ35 SRRM2_HUMAN  | K.VKPET#PPRQSHS#GSIS#PYPK.V      | T983:S990:S994: | 3 | 3,5723 | 1     | -0,15  |
| 18 | Q16539 MK14_HUMAN   | R.HTDDEM*TGYS#VATR.W             | Y182:           | 3 | 3,1364 | 0,232 | -0,115 |
| 18 | Q9NX40 OCAD1_HUMAN  | K.NRESY#EVSLTQK.T                | Y210:           | 3 | 3,6981 | 0,251 | 0,596  |
| 18 | O60716 CTND1_HUMAN  | R.HYEDGYPGSDNY#GSLSR.V           | Y228:           | 2 | 2,1835 | 0,38  | 0,238  |

|    |                    |                                    |            |   |        |       |        |
|----|--------------------|------------------------------------|------------|---|--------|-------|--------|
| 18 | O60841 IF2P_HUMAN  | K.EM*SSDSEY#DS#DDDRTKKEER.A        | Y593:S595: | 3 | 3,053  | 0,417 | -0,074 |
| 18 | Q9NZM3 ITSN2_HUMAN | K.REEPEALY#AAVVK.K                 | Y967:      | 3 | 3,0976 | 0,207 | 0,117  |
| 18 | Q8WU90 ZC3HF_HUMAN | R.EVFEPPELVNDDDEEADDTR.Y           |            | 3 | 5,7591 | 0,453 | -0,432 |
| 18 | Q02952 AKA12_HUMAN | K.EDEKGGDDVDDPENQNSALADTDASGGLTK.E |            | 3 | 5,5203 | 0,564 | -0,487 |
| 18 | Q9NS69 TOM22_HUMAN | K.GDAEKPEEELEEDDDEELDETLSE.L       |            | 3 | 5,2622 | 0,503 | -0,626 |
| 18 | P00338 LDHA_HUMAN  | K.DQLIYNLLKEEQTPQNK.I              |            | 3 | 5,1539 | 0,335 | 0      |
| 18 | P63027 VAMP2_HUMAN | K.LSELDDRADALQAGASQFETSAK.L        |            | 3 | 4,9759 | 0,396 | -0,587 |
| 18 | P09972 ALDOC_HUMAN | K.VDKGVVPLAGTDGETTTQGLDGLSER.C     |            | 3 | 4,959  | 0,558 | -0,42  |
| 18 | O95336 6PGL_HUMAN  | R.ILEDQEENPLPAALVQPHTGK.L          |            | 3 | 4,8758 | 0,349 | -0,477 |
| 18 | P31323 KAP3_HUMAN  | K.DGEHVIDQGDDGDNFYVIDR.G           |            | 3 | 4,8013 | 0,559 | -0,241 |
| 18 | P53396 ACLY_HUMAN  | R.DEPSVAAM*VYPFTGDHK.Q             |            | 2 | 4,7327 | 0,494 | -0,714 |
| 18 | P17980 PRS6A_HUMAN | K.AM*EVDERPTEQYSDIGGLDK.Q          |            | 3 | 4,7303 | 0,53  | -0,081 |
| 18 | P78527 PRKDC_HUMAN | R.DPTVHDDVLEEM*DELNR.H             |            | 3 | 4,5707 | 0,249 | -0,255 |
| 18 | Q07812 BAX_HUMAN   | R.M*GGEAPELALDPVPQDASTKK.L         |            | 3 | 4,4369 | 0,387 | 0      |
| 18 | P35580 MYH10_HUMAN | K.VEDM*AELTCLNEASVLHNLK.D          |            | 3 | 4,4209 | 0,502 | -0,318 |
| 18 | P51812 KS6A3_HUMAN | R.DLKPSNILYVDESGNPESIR.I           |            | 3 | 4,3964 | 0,386 | -0,407 |
| 18 | P06748 NPM_HUMAN   | K.DELHIVEAEAM*NYEGSPIK.V           |            | 3 | 4,3367 | 0,348 | -0,508 |
| 18 | Q99873 ANM1_HUMAN  | K.DVAIKEPLVDVDPK.Q                 |            | 3 | 4,2431 | 0,329 | -0,112 |
| 18 | Q7KZ85 SPT6H_HUMAN | R.VAPYRPDQQVEEDDDFM*DENQGK.G       |            | 3 | 4,2213 | 0,319 | -0,4   |
| 18 | P60709 ACTB_HUMAN  | R.VAPEEHPVLLTEAPLNPK.A             |            | 2 | 4,168  | 0,571 | -1,186 |
| 18 | P32004 L1CAM_HUMAN | R.DLQELGSDSKYFIEDGR.L              |            | 3 | 4,1471 | 0,38  | -0,457 |
| 18 | Q9BRJ6 CG050_HUMAN | K.GEAVLRPGLDAEPELSPEEQR.V          |            | 3 | 4,1461 | 0,316 | -0,319 |
| 18 | Q9Y2W2 WBP11_HUMAN | R.DM*EKLDDEM*EFNPVQQPQLNEK.V       |            | 3 | 4,1386 | 0,316 | 0,282  |
| 18 | P08195 4F2_HUMAN   | K.ADLLLSTQPGREEGSPLELER.L          |            | 3 | 4,1225 | 0,363 | -0,238 |
| 18 | Q15424 SAFB1_HUMAN | K.SEPVKEESSELEQPFAQDTSSVGPDR.K     |            | 3 | 4,1111 | 0,309 | -1,478 |
| 18 | O75369 FLNB_HUMAN  | K.DLDIIDNYDYSHTVK.Y                |            | 2 | 4,1092 | 0,413 | -0,472 |
| 18 | Q08752 PPID_HUMAN  | K.DGSGDShPDFPEDADIDLK.D            |            | 3 | 4,0943 | 0,441 | -0,36  |
| 18 | P52597 HNRPF_HUMAN | R.VTGEADVEFATHEEAVAAM*SK.D         |            | 3 | 4,0834 | 0,501 | -0,166 |
| 18 | Q86UP2 KTN1_HUMAN  | R.EVIDLLKPDQVEGIQK.S               |            | 2 | 4,0713 | 0,444 | -0,268 |
| 18 | O60506 HNRPQ_HUMAN | K.VTEGLTDVILYHQDDK.K               |            | 3 | 4,0172 | 0,415 | -0,094 |
| 18 | P42166 LAP2A_HUMAN | K.GPPDFSSDEEREPTPVLGSGAAAAGR.S     |            | 3 | 4,0109 | 0,378 | -0,641 |
| 18 | P00558 PGK1_HUMAN  | K.DVLFLKDCVGPEVEK.A                |            | 2 | 4,0072 | 0,465 | -0,14  |
| 18 | Q14697 GANAB_HUMAN | R.VVIIGAGKPAAVVLQTK.G              |            | 3 | 3,9926 | 0,46  | -0,659 |

|    |                    |                               |   |        |       |        |
|----|--------------------|-------------------------------|---|--------|-------|--------|
| 18 | P14868 SYDC_HUMAN  | R.LPLQLDDAVRPEAEGER.A         | 3 | 3,982  | 0,452 | -0,329 |
| 18 | P49720 PSB3_HUMAN  | R.DAVSGM*GVIVHIEK.D           | 2 | 3,9505 | 0,424 | -0,308 |
| 18 | Q8NB37 PDDC1_HUMAN | K.DSGACFSASEPDAVHVLDLDR.H     | 3 | 3,9257 | 0,427 | -0,172 |
| 18 | Q14690 RRP5_HUMAN  | R.IEEALM*DPGRQPESADDFDR.L     | 3 | 3,9176 | 0,483 | -0,238 |
| 18 | P09211 GSTP1_HUMAN | K.ALPGQLKPFETLLSQNQGGK.T      | 3 | 3,8951 | 0,346 | -0,688 |
| 18 | P80723 BASP_HUMAN  | K.AEPPKAPEQEQAAPGPAAGGEAPK.A  | 3 | 3,8819 | 0,289 | -0,955 |
| 18 | P20810 ICAL_HUMAN  | K.DLDDALDKLSDSLGQR.Q          | 3 | 3,8722 | 0,289 | -0,312 |
| 18 | Q02818 NUCB1_HUMAN | K.M*DAEQDPNVQVDHLNLLK.Q       | 3 | 3,8712 | 0,366 | -0,437 |
| 18 | O94925 GLSK_HUMAN  | K.DGPGETDAFGNSEGKELVASGENK.I  | 3 | 3,8568 | 0,564 | 0,532  |
| 18 | P46777 RL5_HUMAN   | R.IEGDM*IVCAAYAHLPK.Y         | 3 | 3,8561 | 0,41  | -0,284 |
| 18 | O75909 CCNK_HUMAN  | K.DLAHTPSQLEGLDPATEAR.Y       | 3 | 3,845  | 0,384 | -0,362 |
| 18 | Q2TAA2 IAH1_HUMAN  | R.DVAEAKPELSLLGDGDH.-         | 2 | 3,8338 | 0,44  | -0,967 |
| 18 | P60709 ACTB_HUMAN  | R.VAPEEHPVLLTEAPLNPK.A        | 3 | 3,8295 | 0,42  | 0,468  |
| 18 | P12004 PCNA_HUMAN  | R.DLSHIGDAVVISCAK.D           | 2 | 3,8209 | 0,566 | -0,616 |
| 18 | Q9NY12 NOLA1_HUMAN | K.CTTDENKVPYFNAPVYLENK.E      | 3 | 3,819  | 0,448 | -0,228 |
| 18 | Q9Y490 TLN1_HUMAN  | R.M*VAAATNNLCEAANAQVGHASQEK.L | 3 | 3,799  | 0,445 | -0,64  |
| 18 | P49454 CENPF_HUMAN | R.DANSSFFDNSSSPHLLDQLK.A      | 3 | 3,7953 | 0,481 | -0,494 |
| 18 | Q7L2H7 EIF3M_HUMAN | K.DFIDSLGILLHEQNM*AK.M        | 2 | 3,782  | 0,538 | -0,595 |
| 18 | P14324 FPPS_HUMAN  | R.VLTEDEM*GHPEIGDAIAR.L       | 2 | 3,7502 | 0,534 | -0,434 |
| 18 | P18669 PGAM1_HUMAN | R.YADLTEDQLPSCESLKDTIAR.A     | 3 | 3,7458 | 0,413 | -0,226 |
| 18 | O43390 HNRPR_HUMAN | K.VTEGLVDVILYHQPDDK.K         | 3 | 3,7337 | 0,446 | -0,471 |
| 18 | P04792 HSPB1_HUMAN | R.VSLDVNHFAPDELTVK.T          | 2 | 3,7274 | 0,487 | -0,479 |
| 18 | Q9H3K6 BOLA2_HUMAN | R.DLEAEHVEVEDTTLNR.C          | 3 | 3,7114 | 0,35  | 0,196  |
| 18 | P26196 DDX6_HUMAN  | K.SIEEQLGTEIKPIPSNIDK.S       | 3 | 3,6678 | 0,331 | -0,607 |
| 18 | Q15642 CIP4_HUMAN  | R.DQAHFYFSQM*PQIFDK.L         | 3 | 3,6508 | 0,343 | -0,091 |
| 18 | Q2TAA2 IAH1_HUMAN  | R.DVAEAKPELSLLGDGDH.-         | 3 | 3,6502 | 0,399 | 0,207  |
| 18 | Q9NTK5 OLA1_HUMAN  | R.AFEDDDITHVEGSVDPIR.D        | 3 | 3,6389 | 0,383 | -0,091 |
| 18 | P00367 DHE3_HUMAN  | K.IIAEGANGPTTPEADKIFLER.N     | 3 | 3,59   | 0,337 | -0,408 |
| 18 | Q8TAT6 NPL4_HUMAN  | R.DECLLPCKDAPELGYAK.E         | 3 | 3,5624 | 0,458 | -0,555 |
| 18 | Q8IYB7 DI3L2_HUMAN | R.DLDDALSCKPLADGNFK.V         | 2 | 3,5526 | 0,472 | 0,39   |
| 18 | O14965 STK6_HUMAN  | R.DIKPENLLLGSAGELK.I          | 2 | 3,5461 | 0,427 | -0,359 |
| 18 | Q15149 PLEC1_HUMAN | R.LEDLLQDAQDEKEQLNEYK.G       | 3 | 3,5458 | 0,111 | -0,473 |
| 18 | Q9Y3A5 SBDS_HUMAN  | K.DLDEVLQTHSVFVNVSK.G         | 3 | 3,5413 | 0,322 | -0,379 |



|    |                    |                                |   |        |       |        |
|----|--------------------|--------------------------------|---|--------|-------|--------|
| 18 | Q9ULX6 AKP8L_HUMAN | R.DQDLTQEIAM*EHFVK.K           | 2 | 3,5396 | 0,364 | -0,469 |
| 18 | P50990 TCPQ_HUMAN  | K.TAEELM*NFSKGEENLM*DAQVK.A    | 3 | 3,5307 | 0,263 | -0,227 |
| 18 | P49841 GSK3B_HUMAN | R.DIKPQNLLLDPTAVLK.L           | 3 | 3,5185 | 0,264 | 0      |
| 18 | Q9BWH6 RPAP1_HUMAN | R.DKLEPEAPALALPVTQK.E          | 3 | 3,5153 | 0,23  | -0,191 |
| 18 | Q13151 ROAO_HUMAN  | K.GDVAEGDLIEHFSQFGTVEK.A       | 3 | 3,4984 | 0,436 | -0,672 |
| 18 | Q9BXJ9 NARG1_HUMAN | K.DDDDEEIGGPKKEELIPEK.L        | 3 | 3,4944 | 0,432 | -0,18  |
| 18 | P46060 RAGP1_HUMAN | R.DAALAVAEAM*ADKAELEK.L        | 2 | 3,483  | 0,575 | -0,328 |
| 18 | P30041 PRDX6_HUMAN | K.DGDSVM*VLPTIPEEEAKK.L        | 2 | 3,4789 | 0,384 | -0,494 |
| 18 | Q6DD88 ATLA3_HUMAN | R.GADDAM*ESSKPGPVQVVLVQK.D     | 3 | 3,473  | 0,374 | 0,253  |
| 18 | Q8IU8 MINA_HUMAN   | K.DHIVLTVLPDQDQSDAEQEK.M       | 3 | 3,4592 | 0,333 | -0,562 |
| 18 | A6NHR9 SMHD1_HUMAN | K.LLFDQKQKPAVAVIDNGR.G         | 3 | 3,4544 | 0,413 | -0,448 |
| 18 | P51858 HDGF_HUMAN  | R.GPPQEEEEEEDEEEATKEDAEAPGIR.D | 3 | 3,4513 | 0,475 | -0,301 |
| 18 | P21333 FLNA_HUMAN  | K.DAGEGLLAVQITDPEGKPK.K        | 2 | 3,4225 | 0,443 | -0,755 |
| 18 | P50991 TCPD_HUMAN  | R.DALSDLALHFLNK.M              | 2 | 3,4177 | 0,395 | -0,335 |
| 18 | P24534 EF1B_HUMAN  | K.DDDDIDLFGSDDEEESEEAKR.L      | 3 | 3,4107 | 0,266 | -0,226 |
| 18 | Q6NYC1 JMJD6_HUMAN | R.DDSPLYIFDSSYGEHPK.R          | 2 | 3,4066 | 0,41  | -0,434 |
| 18 | P21333 FLNA_HUMAN  | R.SAGQGEVLVYVEDPAGHQEEAK.V     | 3 | 3,3778 | 0,411 | -0,475 |
| 18 | Q8IYB7 DI3L2_HUMAN | R.DLDDALSCKPLADGNFK.V          | 3 | 3,3705 | 0,525 | -0,292 |
| 18 | P31153 METK2_HUMAN | K.ICDQISDAVLDAHLQDDPDAK.V      | 3 | 3,3681 | 0,311 | -0,311 |
| 18 | O14744 ANM5_HUMAN  | R.DDIENAPTTHTTEYSGEEK.T        | 3 | 3,353  | 0,382 | 0,241  |
| 18 | Q8TD26 CHD6_HUMAN  | R.DDHLSLPDVTCENFISK.V          | 3 | 3,3361 | 0,173 | -0,46  |
| 18 | P17980 PRS6A_HUMAN | R.GATELTHEDYM*EGILEVQAK.K      | 3 | 3,3257 | 0,41  | -0,488 |
| 18 | P10809 CH60_HUMAN  | K.VGEVIVTKDDAM*LLK.G           | 3 | 3,2981 | 0,376 | 0,111  |
| 18 | Q9HC07 TM165_HUMAN | R.NKEPPAPAQQLQPQVAVQGPEPAR.V   | 3 | 3,2975 | 0,245 | -0,484 |
| 18 | O14965 STK6_HUMAN  | R.DIKPENLLLSGAGELK.I           | 3 | 3,2909 | 0,37  | -0,216 |
| 18 | Q92621 NU205_HUMAN | R.DDM*IHQLPLLTEK.Q             | 3 | 3,2867 | 0,294 | -0,35  |
| 18 | Q99460 PSMD1_HUMAN | K.DTSEDIEELVEPVAAHGPK.I        | 3 | 3,286  | 0,311 | -0,18  |
| 18 | P30041 PRDX6_HUMAN | R.ELAILLGM*LDPAEKDEK.G         | 2 | 3,2812 | 0,472 | -0,578 |
| 18 | P13693 TCTP_HUMAN  | R.DLISHDEM*FSDIYK.I            | 3 | 3,28   | 0,35  | -0,106 |
| 18 | Q5TDH0 DDI2_HUMAN  | R.DM*LLANPHELSELLK.E           | 3 | 3,2793 | 0,171 | -0,227 |
| 18 | P10809 CH60_HUMAN  | K.VGEVIVTKDDAM*LLK.G           | 2 | 3,2723 | 0,444 | -0,296 |
| 18 | Q9Y490 TLN1_HUMAN  | K.DHFGLEGDEESTM*LEDSVSPK.K     | 3 | 3,2622 | 0,381 | -0,548 |
| 18 | Q9UL26 RB22A_HUMAN | K.DYADSIHAIFVETSAK.N           | 3 | 3,2541 | 0,347 | -0,414 |

|    |                    |                                   |   |        |       |        |
|----|--------------------|-----------------------------------|---|--------|-------|--------|
| 18 | O96017 CHK2_HUMAN  | R.DLKPENVLSSQEEDCLIK.I            | 3 | 3,2445 | 0,288 | -0,328 |
| 18 | P35606 COPB2_HUMAN | K.GVNCIDYYSGGDKPYLISGADDR.L       | 3 | 3,2415 | 0,342 | 0,289  |
| 18 | P49411 EFTU_HUMAN  | R.IILPPEKELAM*PGEDLK.F            | 3 | 3,2334 | 0,24  | -0,287 |
| 18 | P11166 GTR1_HUMAN  | R.QGGASQSDKTPEELFHPLGADSQV.-      | 3 | 3,2262 | 0,263 | -0,293 |
| 18 | O75369 FLNB_HUMAN  | R.DAGEGLLAVQITDQEGKPK.R           | 3 | 3,1881 | 0,281 | 0,093  |
| 18 | P11387 TOP1_HUMAN  | K.NLQLFM*ENKQPEDDLFDR.L           | 3 | 3,1858 | 0,267 | -0,484 |
| 18 | Q86UP2 KTN1_HUMAN  | R.EVIDLLKPDQVEGIQK.S              | 3 | 3,1805 | 0,219 | -0,201 |
| 18 | P37802 TAGL2_HUMAN | R.NFSDNQLQEGK.N                   | 2 | 3,1743 | 0,45  | 0,286  |
| 18 | P55884 EIF3B_HUMAN | K.DRPQEADGIDSVIVVDNVPQVGPDR.L     | 3 | 3,1594 | 0,247 | -0,68  |
| 18 | Q9H4M9 EHD1_HUMAN  | K.DKPTYDEIFYTLSPVNGK.I            | 3 | 3,1544 | 0,237 | -0,351 |
| 18 | Q96I99 SUCB2_HUMAN | K.DIFAM*DDKSENEPIEENAAK.Y         | 3 | 3,1438 | 0,288 | 0,561  |
| 18 | P35658 NU214_HUMAN | K.DSDPVM*AGIGEEIAHFQK.E           | 2 | 3,1397 | 0,493 | -0,498 |
| 18 | Q00610 CLH1_HUMAN  | R.LAELEEFINGPNNAHIQVGDRC          | 3 | 3,1387 | 0,325 | -0,371 |
| 18 | Q9P2I0 CPSF2_HUMAN | K.DGEEEIVYAVDFNHK.R               | 3 | 3,1379 | 0,289 | -0,207 |
| 18 | P12004 PCNA_HUMAN  | R.DLSHIGDAVVISCAK.D               | 3 | 3,1047 | 0,181 | -0,115 |
| 18 | Q8WXH0 SYNE2_HUMAN | K.DAERGDDTSCENLLDAFSIK.L          | 3 | 3,0992 | 0,443 | -0,487 |
| 18 | Q99816 TS101_HUMAN | K.DLKPVLDSYVFNDGSSR.E             | 3 | 3,0852 | 0,133 | -0,096 |
| 18 | O43399 TPD54_HUMAN | K.VVGDRENGSDNLPSSAGSGDKPLSDPAPF.- | 3 | 3,0825 | 0,199 | -0,507 |
| 18 | Q6PL24 TMED8_HUMAN | R.DVQAGSHDYPGEGIYLLK.F            | 3 | 3,0574 | 0,219 | -0,28  |
| 18 | P54577 SYYC_HUMAN  | R.QVEPLDPPAGSAPGEHVFK.G           | 3 | 3,0569 | 0,287 | -0,088 |
| 18 | Q99873 ANM1_HUMAN  | K.DVAIKEPLVDVDPK.Q                | 2 | 3,0237 | 0,335 | -0,522 |
| 18 | Q9NV06 SOF1_HUMAN  | K.M*DGPGYGDEEPLHTILGK.T           | 3 | 3,0195 | 0,384 | -0,265 |
| 18 | Q9P2J5 SYLC_HUMAN  | K.EDKGTGVVTSVPSDPPDIAALR.D        | 3 | 3,0144 | 0,182 | -0,707 |
| 18 | P62280 RS11_HUMAN  | R.DVQIGDIVTVGECRPLSK.T            | 3 | 3,013  | 0,331 | -0,276 |
| 18 | Q92621 NU205_HUMAN | R.DDM*IHQLPLLTEK.Q                | 2 | 3,0032 | 0,253 | -0,544 |
| 18 | P10809 CH60_HUMAN  | R.IQEIIQLDVTTSEYEKEK.L            | 3 | 2,9901 | 0,151 | -0,159 |
| 18 | P62280 RS11_HUMAN  | R.DVQIGDIVTVGECRPLSK.T            | 2 | 2,9874 | 0,47  | -0,491 |
| 18 | P31150 GDIA_HUMAN  | R.KQNDVFGAEQ.-                    | 2 | 2,9865 | 0,468 | -0,675 |
| 18 | Q02952 AKA12_HUMAN | R.TEETATEM*LTSELQTAHVVIK.A        | 3 | 2,9821 | 0,176 | -0,385 |
| 18 | P23634 AT2B4_HUMAN | K.DAEGLEIDHAEM*ELR.R              | 2 | 2,9798 | 0,377 | -0,263 |
| 18 | O75534 CSDE1_HUMAN | K.DVEGSTSPQIGDKVEFSISDK.Q         | 3 | 2,9778 | 0,273 | -0,49  |
| 18 | P78371 TCPB_HUMAN  | K.LGGSLADSYLDEGFLLDKK.I           | 3 | 2,9701 | 0,367 | -0,448 |
| 18 | Q14966 ZN638_HUMAN | K.DVTVLSVAEEQDLLKQER.L            | 3 | 2,9645 | 0,319 | -0,177 |

|    |                    |                              |   |        |       |        |
|----|--------------------|------------------------------|---|--------|-------|--------|
| 18 | Q9NQ57 INCE_HUMAN  | K.QAVSELDEEQHLEDEELQPPR.S    | 3 | 2,9619 | 0,199 | 0,294  |
| 18 | Q86UP2 KTN1_HUMAN  | K.LQTLVSEQPNKDVEEQM*EK.C     | 3 | 2,9568 | 0,202 | 0,246  |
| 18 | P28482 MK01_HUMAN  | R.DLKPSNLLLNTTCDLK.I         | 3 | 2,9391 | 0,182 | -0,297 |
| 18 | Q99460 PSMD1_HUMAN | K.DTSEDIEELVEPVAAHGPK.I      | 2 | 2,9247 | 0,496 | -0,24  |
| 18 | Q92597 NDRG1_HUMAN | R.EM*QDVDLAEVKPLVEK.G        | 3 | 2,9123 | 0,442 | -0,787 |
| 18 | Q9BT25 NYS48_HUMAN | R.SFAQVLELSAEASK.E           | 2 | 2,8882 | 0,419 | -0,824 |
| 18 | Q9Y490 TLN1_HUMAN  | K.LLAALLEDEGGSGRPLLQAAK.G    | 3 | 2,8826 | 0,18  | -0,345 |
| 18 | P31942 HNRH3_HUMAN | R.ATGEADVEFVTHEDAVAAM*SK.D   | 3 | 2,8799 | 0,416 | 0      |
| 18 | P00558 PGK1_HUMAN  | K.ALESPERPFLAILGGAK.V        | 2 | 2,8772 | 0,372 | -0,414 |
| 18 | Q08752 PPID_HUMAN  | K.DGSGDShPDFADIDLK.D         | 2 | 2,8697 | 0,441 | -0,421 |
| 18 | Q5VT52 K0460_HUMAN | R.DAPTHLPSVDLSNPFTK.E        | 3 | 2,8564 | 0,151 | -0,497 |
| 18 | P30443 1A01_HUMAN  | R.DGEDQTQDTELVETRPAGDGTQK.W  | 3 | 2,8396 | 0,141 | 0,069  |
| 18 | P50991 TCPD_HUMAN  | K.GIEILTD*SRPVESDR.E         | 3 | 2,8311 | 0,359 | -0,188 |
| 18 | P49840 GSK3A_HUMAN | R.DIKPQNLLVDPDTAVLK.L        | 2 | 2,8233 | 0,141 | -0,325 |
| 18 | Q9BVV6 K0586_HUMAN | K.DVAVQVPLDKIEENK.Q          | 3 | 2,8126 | 0,154 | 0      |
| 18 | Q13263 TIF1B_HUMAN | K.DHQYQFLEDAVR.N             | 3 | 2,8122 | 0,123 | -0,12  |
| 18 | P60903 S10AA_HUMAN | K.EFPGFLENQKDPLAVDK.I        | 2 | 2,794  | 0,346 | -0,376 |
| 18 | P00558 PGK1_HUMAN  | K.DVLFLKDCVGPEVEK.A          | 3 | 2,759  | 0,343 | 0      |
| 18 | Q12904 MCA1_HUMAN  | R.ITFDAFPGEPDKELNPK.K        | 3 | 2,7458 | 0,36  | 0,191  |
| 18 | P54578 UBP14_HUMAN | K.LEAIEDDSVKETDSSSASAATPSK.K | 3 | 2,7337 | 0,223 | -0,825 |
| 18 | Q15181 IPYR_HUMAN  | K.VIAINVDDPDAANYNDINDVKR.L   | 3 | 2,7195 | 0,163 | -1,347 |
| 18 | P04792 HSPB1_HUMAN | R.VSLDVNHFAPELTVK.T          | 3 | 2,699  | 0,353 | -0,205 |
| 18 | P22626 ROA2_HUMAN  | R.GGNFGFGDSR.G               | 2 | 2,6942 | 0,151 | 0      |
| 18 | P23634 AT2B4_HUMAN | K.DAEGLEIDHAEM*ELR.R         | 3 | 2,6921 | 0,332 | -0,394 |
| 18 | P13984 T2FB_HUMAN  | K.DLVDITKQPVVYLK.E           | 3 | 2,6751 | 0,123 | -0,336 |
| 18 | P38646 GRP75_HUMAN | R.EQQIVIQSSGGLSKDDIENM*VK.N  | 3 | 2,6663 | 0,347 | -0,451 |
| 18 | P00558 PGK1_HUMAN  | K.ALESPERPFLAILGGAK.V        | 3 | 2,663  | 0,405 | -0,517 |
| 18 | P31943 HNRH1_HUMAN | R.VTGEADVEFATHEDAVAAM*SK.D   | 3 | 2,6543 | 0,124 | 0,584  |
| 18 | O75369 FLNB_HUMAN  | R.DAGEGLLAVQITDQEGKPK.R      | 2 | 2,6532 | 0,464 | -0,434 |
| 18 | Q13823 NOG2_HUMAN  | R.DLVTEDTGVRNEAQEEIYK.K      | 3 | 2,6325 | 0,21  | -0,166 |
| 18 | Q15398 DLG7_HUMAN  | R.SSIEDAQCPGLPLIEENHVVNK.T   | 3 | 2,6228 | 0,192 | -0,071 |
| 18 | P09211 GSTP1_HUMAN | K.YISLIYTYEAGKDDYVK.A        | 3 | 2,6225 | 0,131 | -0,594 |
| 18 | Q6S8J3 A26CA_HUMAN | K.AGFAGDDAPR.A               | 2 | 2,5814 | 0,354 | 0,062  |

|    |                     |                                 |              |   |        |       |        |
|----|---------------------|---------------------------------|--------------|---|--------|-------|--------|
| 18 | P16152 CBR1_HUMAN   | R.DVCTELLPLIKPQGR.V             |              | 2 | 2,5601 | 0,251 | -0,631 |
| 18 | P00558 PGK1_HUMAN   | K.ITLPVDFVTADKFDENAK.T          |              | 2 | 2,5268 | 0,396 | -0,543 |
| 18 | O43390 HNRPR_HUMAN  | K.VTEGLVDVILYHQPD DK.K          |              | 2 | 2,5102 | 0,463 | -0,251 |
| 18 | P20810 ICAL_HUMAN   | K.DLDDALDKLSDSLGQR.Q            |              | 2 | 2,4984 | 0,44  | -0,416 |
| 18 | P51858 HDGF_HUMAN   | K.EAATLEVERPLPM*EVEK.N          |              | 2 | 2,4549 | 0,335 | 0,312  |
| 18 | P13984 T2FB_HUMAN   | K.DLVDITKQPVVYLK.E              |              | 2 | 2,4227 | 0,209 | -0,374 |
| 18 | ##Q9BXP5 ARS2_HUMAN | R.DDLTHILK.A                    |              | 2 | 2,3956 | 0,146 | -0,192 |
| 18 | Q562M5 Q562M5_HUMAN | R.VTPEEHPVLLTEAPLNPK.A          |              | 2 | 2,3842 | 0,336 | -0,738 |
| 18 | Q9H3K6 BOLA2_HUMAN  | R.DLEAEHVEVEDTTLNR.C            |              | 2 | 2,3119 | 0,147 | 0,652  |
| 18 | P23381 SYWC_HUMAN   | R.KLSFDFQ.-                     |              | 2 | 2,3102 | 0,198 | 0,069  |
| 18 | Q9H6W3 NO66_HUMAN   | K.DFIHDSLPPVLTDR.E              |              | 2 | 2,2065 | 0,207 | -0,526 |
| 18 | POC0S8 H2A1_HUMAN   | R.NDEELNK.L                     |              | 2 | 2,1376 | 0,17  | 0,142  |
| 18 | P10809 CH60_HUMAN   | K.APGFGDNR.K                    |              | 2 | 2,1282 | 0,386 | 0,219  |
| 18 | P08195 4F2_HUMAN    | K.DLLLTSSYLSDSGSTGEHTK.S        |              | 2 | 2,064  | 0,451 | 0,231  |
| 18 | P60709 ACTB_HUMAN   | R.GYSFTTTAER.E                  |              | 2 | 2,0448 | 0,362 | -0,108 |
| 18 | P20042 IF2B_HUMAN   | K.DASDDLDDLNFFNQKK.K            |              | 2 | 2,0447 | 0,299 | -0,388 |
| 19 | Q7Z2Z1 CO042_HUMAN  | R.SSDPGPDIGVVEES#PEKGD EISLRR.S | S1001:       | 3 | 3,8512 | 0,344 | 0,399  |
| 19 | P15407 FOSL1_HUMAN  | R.RPCEQIS#PEEEER.R              | S101:        | 2 | 2,937  | 0,383 | 0,491  |
| 19 | P49006 MRP_HUMAN    | K.KPFKLS#GLS#FK.R               | S101:S104:   | 2 | 2,4432 | 0,24  | -0,259 |
| 19 | Q96PY5 FMNL2_HUMAN  | K.LLEQEALM*EQQDPKS#PSHK.S       | S1017:       | 3 | 4,4913 | 0,316 | 0,238  |
| 19 | P05387 RLA2_HUMAN   | K.KDEKKEES#EES#DDDM*GFGLFD.-    | S102:S105:   | 3 | 4,0981 | 0,509 | -0,209 |
| 19 | Q01804 OTUD4_HUMAN  | R.VQRPKEES#S#EDENEVSNILR.S      | S1023:S1024: | 3 | 3,5466 | 0,366 | 0,872  |
| 19 | Q5VWN6 CJ018_HUMAN  | K.TGTLQDLIQHGS#PINNECHPSLER.K   | S1025:       | 3 | 5,0267 | 0,44  | -0,327 |
| 19 | O95466 FMNL_HUMAN   | K.EAAAQEAGADTPGKGEPPAPKS#PPK.A  | S1031:       | 3 | 5,0888 | 0,283 | -0,369 |
| 19 | O15164 TIF1A_HUMAN  | R.LKS#IEER.Q                    | S1042:       | 2 | 2,4677 | 0,161 | 0      |
| 19 | Q8IXQ4 K1704_HUMAN  | K.KQDDS#PPRPIIGPALPPGFIK.S      | S105:        | 3 | 5,032  | 0,467 | -0,551 |
| 19 | Q8ND82 Z280C_HUMAN  | R.CRDPPSNPVAAS#PR.F             | S105:        | 3 | 3,0028 | 0,198 | 0,114  |
| 19 | Q8N1G0 ZN687_HUMAN  | R.HGLQLGAQS#PGR.G               | S1057:       | 3 | 4,0756 | 0,361 | -0,562 |
| 19 | Q8N1G0 ZN687_HUMAN  | R.HGLQLGAQS#PGR.G               | S1057:       | 2 | 3,6117 | 0,569 | -0,094 |
| 19 | Q08999 RBL2_HUMAN   | R.IQLSQNHVPVYIS#PHKNETM*LS#PR.E | S1059:S1068: | 3 | 3,5833 | 0,295 | 0,128  |
| 19 | O15504 NUPL2_HUMAN  | K.EGFGLSENPFASLS#PDEQKDEKK.L    | S106:        | 3 | 2,9685 | 0,287 | -0,139 |
| 19 | Q9BST9 RTKN_HUMAN   | R.RPS#DSGPPAERS#PCR.G           | S106:S115:   | 2 | 3,3342 | 0,446 | -0,467 |
| 19 | Q9UQE7 SMC3_HUMAN   | K.KGDVEGSQS#QDEGEGSGESER.G      | S1067:       | 3 | 5,5746 | 0,52  | 0      |

|    |                     |                                     |              |   |        |       |        |
|----|---------------------|-------------------------------------|--------------|---|--------|-------|--------|
| 19 | Q12789 TF3C1_HUMAN  | R.KNSSTDQGS#DEEGLQK.E               | S1068:       | 2 | 3,1407 | 0,46  | -0,775 |
| 19 | Q7Z422 CA144_HUMAN  | R.ILGSAS#PEEEQEKPIILDRPTR.I         | S107:        | 3 | 3,1511 | 0,329 | 0,075  |
| 19 | O75808 CAN15_HUMAN  | K.GTHS#PPLTPEVAGLHGPRPL.-           | S1070:       | 3 | 3,1399 | 0,349 | 0      |
| 19 | Q8WYQ5 DGCR8_HUMAN  | R.KFS#PDLK.L                        | S109:        | 2 | 2,5855 | 0,144 | -0,467 |
| 19 | P53999 TCP4_HUMAN   | K.SKELVSSS#SSGSDS#DSEVDKK.L         | S11:S17:     | 3 | 2,6005 | 0,11  | -0,237 |
| 19 | Q8IXM2 CQ049_HUMAN  | K.KVASGVLS#PPPAAPPPSSSVPEAGGPPIKK.Q | S110:        | 3 | 4,8394 | 0,38  | -0,245 |
| 19 | Q99661 KIF2C_HUMAN  | R.SRS#TRM*S#TVSELR.I                | S111:S115:   | 3 | 2,7075 | 0,274 | -0,217 |
| 19 | Q99661 KIF2C_HUMAN  | R.SRS#TRM*STVS#ELR.I                | S111:S118:   | 2 | 2,3864 | 0,125 | -0,434 |
| 19 | Q70EL4 UBP43_HUMAN  | K.YHTLS#LGR.K                       | S1112:       | 2 | 2,1874 | 0,323 | 0,119  |
| 19 | Q9NVM6 DJC17_HUMAN  | R.ERQAQAES#EEEEESR.S                | S112:        | 3 | 5,6574 | 0,413 | -0,363 |
| 19 | Q9ULU4 PKCB1_HUMAN  | K.SKESGSTLDLS#GSR.E                 | S1124:       | 3 | 3,0487 | 0,21  | 0,122  |
| 19 | Q9P1Y6 K1542_HUMAN  | R.GRECS#PTSSLER.L                   | S1124:       | 2 | 2,8341 | 0,491 | -0,084 |
| 19 | O60244 MED14_HUMAN  | R.M*PGM*SPANPSLHS#PVPDASHSPR.A      | S1136:       | 3 | 3,587  | 0,364 | -0,074 |
| 19 | Q4VXC3 Q4VXC3_HUMAN | R.RQFS#APNLK.A                      | S1141:       | 2 | 2,345  | 0,349 | -0,107 |
| 19 | O60244 MED14_HUMAN  | R.M*PGM*SPANPSLHSPVPDASHSPR.A       | S1144:       | 3 | 5,6821 | 0,445 | -0,885 |
| 19 | Q08AD1 CA1L1_HUMAN  | K.ADVPVEKYDGES#DKEQFDDQK.V          | S1148:       | 3 | 2,8578 | 0,149 | 0,763  |
| 19 | O15027 SC16A_HUMAN  | R.FTGS#FDDDPDPHRDPYGEVDR.R          | S1149:       | 3 | 4,3486 | 0,334 | -0,346 |
| 19 | Q9NW75 GPTC2_HUMAN  | K.KDHS#DS#DDQM*LVAK.R               | S115:S117:   | 3 | 5,1609 | 0,332 | -0,726 |
| 19 | Q9NW75 GPTC2_HUMAN  | K.KDHS#DS#DDQM*LVAK.R               | S115:S117:   | 2 | 2,4869 | 0,307 | -0,346 |
| 19 | P55196 AFAD_HUMAN   | R.ADHRS#SPNVANQPPS#PGGK.S           | S1155:S1165: | 3 | 4,7806 | 0,344 | -0,352 |
| 19 | P55196 AFAD_HUMAN   | R.ADHRS#PNVANQPPS#PGGK.S            | S1156:S1165: | 3 | 3,7149 | 0,25  | -0,352 |
| 19 | Q9NTI5 PDS5B_HUMAN  | R.LDS#SEM*DHS#ENEDYTM*SSPLPGKK.S    | S1176:       | 3 | 4,5131 | 0,38  | -0,521 |
| 19 | Q9NTI5 PDS5B_HUMAN  | K.GRLDSS#EM*DHS#ENEDYTM*SSPLPGK.K   | S1177:       | 3 | 3,8613 | 0,434 | 0,126  |
| 19 | P18669 PGAM1_HUMAN  | R.RS#YDVPPPPM*EPDHPFYSNISK.D        | S118:        | 3 | 3,6026 | 0,393 | 0,137  |
| 19 | Q641Q2 FA21A_HUMAN  | K.SPM*FPALGEASS#DDDLFQSAKPKPAK.K    | S1180:       | 3 | 4,8303 | 0,453 | -0,582 |
| 19 | Q86SQ4 GP126_HUMAN  | K.SKSS#STTYFK.R                     | S1180:       | 2 | 3,0034 | 0,267 | -0,201 |
| 19 | Q9NTI5 PDS5B_HUMAN  | R.LDSSEM*DHS#ENEDYTM*SSPLPGKK.S     | S1182:       | 3 | 6,0072 | 0,408 | -0,521 |
| 19 | Q9UQ35 SRRM2_HUMAN  | K.DKFS#PFVQDRPESSLVFK.D             | S1188:       | 3 | 3,4393 | 0,219 | -0,318 |
| 19 | Q9UQ35 SRRM2_HUMAN  | K.DKFSPFPVQDRPES#SLVFK.D            | S1198:       | 3 | 4,598  | 0,243 | -0,238 |
| 19 | P49207 RL34_HUMAN   | R.RLS#YNTASNK.T                     | S12:         | 2 | 2,8292 | 0,541 | -0,692 |
| 19 | O95218 ZBRAB2_HUMAN | R.ENVEYIEREES#DGEYDEFGR.K           | S120:        | 3 | 4,7629 | 0,523 | -0,072 |
| 19 | P15408 FOSL2_HUMAN  | R.RDEQLS#PEEEK.R                    | S120:        | 2 | 3,7745 | 0,389 | -0,467 |
| 19 | Q9NZQ3 SPN90_HUMAN  | R.GPSASSVAVM*TSSTS#DHHLDAAAAAR.Q    | S122:        | 3 | 4,2288 | 0,436 | -0,653 |

|    |                     |                                 |                    |   |        |       |        |
|----|---------------------|---------------------------------|--------------------|---|--------|-------|--------|
| 19 | Q02952 AKA12_HUMAN  | K.M*EDTLEHTDKEVSVETVS#ILSK.T    | S1256:             | 3 | 3,988  | 0,476 | -0,141 |
| 19 | Q5SW79 CE170_HUMAN  | R.LRTS#PALK.T                   | S1260:             | 2 | 2,8682 | 0,168 | 0,063  |
| 19 | P05787 K2C8_HUMAN   | K.SYKVS#TSGPR.A                 | S13:               | 2 | 2,2843 | 0,289 | -0,63  |
| 19 | Q5JSC5 Q5JSC5_HUMAN | R.LHS#GS#PPRAPPPLLEALHSGEAGR.A  | S13:S15:           | 3 | 4,4124 | 0,43  | -0,353 |
| 19 | P15822 ZEP1_HUMAN   | K.SEEVS#PKKPLFLQQPSELR.R        | S130:              | 3 | 3,9736 | 0,323 | -0,077 |
| 19 | Q8WYP5 AHTF1_HUMAN  | R.TTSFFLNSPEKEHQEM*DEGS#QSLEK.L | S1304:             | 3 | 3,4805 | 0,343 | -0,428 |
| 19 | Q9H981 ARP8_HUMAN   | R.RIPVS#PEQAR.S                 | S132:              | 2 | 2,5656 | 0,269 | 0,297  |
| 19 | Q9Y5R8 TPPC1_HUMAN  | R.SRLDS#YVR.S                   | S132:              | 2 | 2,461  | 0,28  | -0,113 |
| 19 | O75494 FUSIP_HUMAN  | R.SRS#FDYNYR.R                  | S133:              | 3 | 3,3338 | 0,267 | 0,071  |
| 19 | O75494 FUSIP_HUMAN  | R.SRS#FDYNYR.R                  | S133:              | 2 | 2,3566 | 0,24  | 0,095  |
| 19 | Q13428 TCOF_HUMAN   | R.KLS#GDQPAART#PR.S             | S1350:T1358:       | 2 | 2,2156 | 0,353 | -0,627 |
| 19 | Q13459 MYO9B_HUMAN  | R.RTS#FSTSDVSK.L                | S1354:             | 2 | 3,0837 | 0,362 | -0,565 |
| 19 | Q9HCM1 CL035_HUMAN  | K.HSSLGQSL#PEK.I                | S1358:             | 2 | 3,3706 | 0,452 | -0,271 |
| 19 | Q7Z3K3 POGZ_HUMAN   | K.LS#GEHSESS#TPRPR.S            | S1360:S1367:       | 2 | 2,8755 | 0,294 | -0,359 |
| 19 | Q12888 TP53B_HUMAN  | R.GGPGKLS#PR.K                  | S1362:             | 2 | 2,0027 | 0,171 | 0,257  |
| 19 | O43294 TGFI1_HUMAN  | K.KRPS#LPSS#PSPGLPK.A           | S137:S141:         | 3 | 4,458  | 0,423 | 0,214  |
| 19 | O43294 TGFI1_HUMAN  | K.KRPS#LPSS#PSPGLPK.A           | S137:S141:         | 2 | 3,1705 | 0,351 | 0,214  |
| 19 | Q8IWS0 PHF6_HUMAN   | K.TAHNS#EADLEESFNEHELEPSSPK.S   | S138:              | 3 | 4,9119 | 0,566 | 0,659  |
| 19 | Q9C0C2 TB182_HUMAN  | R.HNGSLS#PGLEAR.D               | S1385:             | 2 | 3,9136 | 0,616 | -0,185 |
| 19 | P26373 RL13_HUMAN   | K.KGDSS#AEELKLATQLTGPMV*PVR.N   | S140:              | 3 | 4,0549 | 0,351 | 0,87   |
| 19 | P27708 PYR1_HUMAN   | R.RLSS#FVTK.G                   | S1407:             | 2 | 2,4421 | 0,26  | -0,12  |
| 19 | Q92974 ARHG2_HUMAN  | R.GRSS#LSLAK.S                  | S143:              | 2 | 2,7909 | 0,281 | -0,611 |
| 19 | Q8N9Q2 S12IP_HUMAN  | K.HSS#TPNSSEFSR.K               | S145:              | 3 | 3,0287 | 0,221 | -0,065 |
| 19 | P27815 PDE4A_HUMAN  | R.RES#FLYR.S                    | S145:              | 2 | 2,3866 | 0,305 | -0,116 |
| 19 | P78316 NOP14_HUMAN  | K.HNDIVDS#DSAEDR.G              | S146:              | 2 | 5,3844 | 0,567 | -0,293 |
| 19 | P11388 TOP2A_HUMAN  | R.KPSTSDDS#DSNFEK.I             | S1474:             | 2 | 4,0827 | 0,468 | -0,596 |
| 19 | O95785 WIZ_HUMAN    | R.DSDKRPS#LGLAPGGLAVVGR.S       | S1480:             | 3 | 3,4482 | 0,375 | -0,268 |
| 19 | Q9Y6D5 BIG2_HUMAN   | K.HLDVDLDRQS#LS#SIDKNPS#ER.G    | S1511:S1513:S1520: | 3 | 3,4266 | 0,387 | 0,824  |
| 19 | Q7L2J0 MEPCE_HUMAN  | R.RNS#CNVGGGGGFK.H              | S152:              | 2 | 3,7435 | 0,501 | -0,675 |
| 19 | Q9BTC0 DIDO1_HUMAN  | K.VKGGDDHDDTS#DS#DSDGLTLK.E     | S152:S154:         | 3 | 4,6946 | 1     | 0,157  |
| 19 | Q9H501 ESF1_HUMAN   | K.FKIDSNIS#PK.K                 | S153:              | 3 | 3,0083 | 0,228 | 0,149  |
| 19 | Q9H501 ESF1_HUMAN   | K.FKIDSNIS#PK.K                 | S153:              | 2 | 2,8306 | 0,213 | 0,298  |
| 19 | P30086 PEBP1_HUMAN  | K.FKVAS#FR.K                    | S153:              | 2 | 2,1121 | 0,19  | -0,065 |

|    |                    |                                  |                 |   |        |       |        |
|----|--------------------|----------------------------------|-----------------|---|--------|-------|--------|
| 19 | Q99959 PKP2_HUMAN  | R.RLEISPDS#SPER.A                | S154:           | 2 | 2,6846 | 0,293 | -0,166 |
| 19 | Q96I25 SPF45_HUMAN | R.RPDPDS#DEDEDYER.E              | S155:           | 3 | 5,6252 | 0,394 | -0,503 |
| 19 | Q96I25 SPF45_HUMAN | R.RPDPDS#DEDEDYER.E              | S155:           | 2 | 4,2801 | 0,465 | -0,336 |
| 19 | Q02880 TOP2B_HUMAN | R.KASGS#ENEGDYNPGR.K             | S1552:          | 2 | 3,7869 | 0,524 | -0,514 |
| 19 | Q96JC9 EAF1_HUMAN  | K.TS#PLKDNPSPEPQLDDIKR.E         | S158:           | 3 | 3,5581 | 0,44  | 0,656  |
| 19 | O95684 FR1OP_HUMAN | K.GPTTGEGALDLSDVHSPPKS#PEGK.T    | S160:           | 3 | 3,8547 | 0,271 | -0,074 |
| 19 | Q03164 HRX_HUMAN   | R.VRS#PTRS#PSVKTS#PR.K           | S161:S165:S171: | 3 | 3,2059 | 0,2   | 0      |
| 19 | O60841 IF2P_HUMAN  | K.KWDGS#EEEDNSK.K                | S164:           | 2 | 4,902  | 0,512 | -0,603 |
| 19 | P51608 MECP2_HUMAN | K.VGDTSLDPNDFDFTVTGRGS#PSRR.E    | S164:           | 3 | 2,6084 | 0,155 | 0,273  |
| 19 | P51858 HDGF_HUMAN  | R.RAGDLLEDS#PK.R                 | S165:           | 2 | 3,38   | 0,266 | -0,095 |
| 19 | O43399 TPD54_HUMAN | R.NSATFKS#FEDR.V                 | S166:           | 2 | 3,3387 | 0,396 | 0,353  |
| 19 | Q99759 M3K3_HUMAN  | R.HLS#VSSQNPGR.S                 | S166:           | 2 | 2,5345 | 0,238 | -0,483 |
| 19 | Q9C0C2 TB182_HUMAN | R.NRS#AEEGELAESK.S               | S1666:          | 3 | 3,1553 | 0,296 | -0,549 |
| 19 | Q12888 TP53B_HUMAN | R.KLITS#EEER.S                   | S1673:          | 2 | 2,7051 | 0,193 | -0,618 |
| 19 | Q9Y5S2 MRCKB_HUMAN | K.HSTPSNSSNPSGPPS#PNS#PHR.S      | S1690:S1693:    | 3 | 4,0035 | 0,468 | -0,398 |
| 19 | P20020 AT2B1_HUMAN | K.NS#LKEANHDGDFGITLAELR.A        | S17:            | 3 | 3,6482 | 0,32  | -0,481 |
| 19 | O75379 VAMP4_HUMAN | R.HLNDDDVTS#VK.S                 | S17:            | 2 | 2,9998 | 0,502 | -0,265 |
| 19 | Q8IUD2 RB6I2_HUMAN | R.SVGKVEPSSQS#PGRS#PR.L          | S17:S21:        | 3 | 3,0007 | 0,283 | -0,287 |
| 19 | Q8IUD2 RB6I2_HUMAN | R.SVGKVEPSSQS#PGRS#PR.L          | S17:S21:        | 2 | 2,531  | 0,446 | -0,573 |
| 19 | P35579 MYH9_HUMAN  | R.DELADEIANSS#GKGALALEEK.R       | S1714:          | 3 | 6,1394 | 0,447 | -0,305 |
| 19 | P16383 GCF_HUMAN   | K.RES#EDDPES#EPDDHEK.R           | S174:S180:      | 3 | 4,8042 | 0,399 | -0,088 |
| 19 | Q58FF8 H90B2_HUMAN | K.IEDVGS#DEEDDSGKDK.K            | S177:           | 2 | 4,8081 | 0,535 | -0,537 |
| 19 | Q8WWQ0 PHIP_HUMAN  | R.RTAFYNEDDS#EEEQR.Q             | S1783:          | 3 | 5,041  | 0,537 | -0,279 |
| 19 | Q8WWQ0 PHIP_HUMAN  | R.RTAFYNEDDS#EEEQR.Q             | S1783:          | 2 | 4,6825 | 0,547 | -0,248 |
| 19 | O00264 PGRC1_HUMAN | K.LLKEGEPTVYS#DEECPKDESAR.K      | S181:           | 3 | 5,7813 | 0,504 | 0,067  |
| 19 | Q9Y478 AAKB1_HUMAN | K.CSDVSELSS#SPPGPYHQEPYVCKPEER.F | S181:           | 3 | 3,6169 | 0,415 | -0,569 |
| 19 | Q8WUB8 PHF10_HUMAN | K.RYS#PDEL.R.Y                   | S182:           | 2 | 2,9958 | 0,152 | -0,109 |
| 19 | Q9NYF8 BCLF1_HUMAN | K.S#QEEPKDTFEHDPSESIDEFNK.S      | S183:           | 3 | 3,5069 | 0,319 | -0,068 |
| 19 | O60271 JIP4_HUMAN  | K.LHQLS#GS#DQLESTAHSR.I          | S183:S185:      | 2 | 2,2844 | 0,445 | 0,361  |
| 19 | Q8TEM1 PO210_HUMAN | R.AS#PGHSPHYFAASPTSPNALPPAR.K    | S1848:          | 3 | 5,0829 | 0,41  | 0,634  |
| 19 | Q8IXM6 NRM_HUMAN   | K.QVYYHVLGLGEPLALKS#PR.A         | S185:           | 3 | 2,895  | 0,243 | -0,165 |
| 19 | Q13111 CAF1A_HUMAN | R.RGDSQECS#PRS#CPELTSGPR.M       | S185:S188:      | 3 | 3,2772 | 0,156 | -0,751 |
| 19 | Q15785 TOM34_HUMAN | K.NRVPS#AGDVEK.A                 | S186:           | 2 | 2,4148 | 0,43  | -0,292 |

|    |                     |                                  |              |   |        |       |        |
|----|---------------------|----------------------------------|--------------|---|--------|-------|--------|
| 19 | Q5T5U3 RHG21_HUMAN  | R.LRTS#TSDLSR.G                  | S1860:       | 2 | 2,054  | 0,283 | -0,1   |
| 19 | O95218 ZRAB2_HUMAN  | K.YNLDA#EEEDS#NKKK.S             | S188:S193:   | 3 | 2,6866 | 0,387 | -0,569 |
| 19 | Q15366 PCBP2_HUMAN  | K.GVTIPYRKPSSS#PVIFAGGQDR.Y      | S189:        | 3 | 3,953  | 0,462 | -0,219 |
| 19 | P38159 HNRPG_HUMAN  | R.GRDS#YGGPPR.R                  | S189:        | 2 | 2,4244 | 0,146 | 0,641  |
| 19 | Q9H1E3 NUCKS_HUMAN  | R.KVVDYSQFQES#DDADEDYGR.D        | S19:         | 3 | 5,8294 | 0,496 | -0,299 |
| 19 | Q9Y3Q8 T22D4_HUMAN  | K.AEKPPLSASS#PQQRPEPETGESAGTSR.A | S190:        | 3 | 3,1282 | 0,358 | -0,185 |
| 19 | Q01433 AMPD2_HUMAN  | K.QDFLKTDS#DSDLQLYKEQGEGQGDR.S   | S190:        | 3 | 2,7208 | 0,238 | -0,372 |
| 19 | O15027 SC16A_HUMAN  | R.ADSGPTQPPLSL#PAPETKRPQAAK.K    | S1905:       | 3 | 3,0132 | 0,347 | -0,546 |
| 19 | Q9P260 K1468_HUMAN  | R.AGSISTLDSLDFARYS#DDGNRETDEK.V  | S193:        | 3 | 4,99   | 0,432 | 0,435  |
| 19 | P35579 MYH9_HUMAN   | R.KGAGDGS#DEEVDGK.A              | S1943:       | 2 | 4,8631 | 0,47  | -0,423 |
| 19 | P43243 MATR3_HUMAN  | R.DSFDDRGPS#LNPVLDYDHGSR.S       | S195:        | 3 | 4,5655 | 0,433 | -0,375 |
| 19 | Q8WYP5 AHTF1_HUMAN  | R.GREVS#PSDVR.E                  | S1953:       | 2 | 2,7577 | 0,275 | -0,619 |
| 19 | Q9BZL6 KPCD2_HUMAN  | R.RLS#S#TSLASGHSVR.L             | S197:S198:   | 2 | 3,0716 | 1     | 0      |
| 19 | Q9BZL6 KPCD2_HUMAN  | R.RLS#STS#LASGHSVR.L             | S197:S200:   | 3 | 2,753  | 0,268 | 0,113  |
| 19 | Q07955 SFRS1_HUMAN  | R.VKVDGPRS#PS#YGR.S              | S199:S201:   | 3 | 2,8153 | 0,266 | -0,348 |
| 19 | Q07955 SFRS1_HUMAN  | R.VKVDGPRS#PS#YGR.S              | S199:S201:   | 2 | 2,1297 | 0,357 | -0,309 |
| 19 | Q9NRL3 STRN4_HUMAN  | R.VRS#LLGR.S                     | S201:        | 2 | 2,1075 | 0,148 | -0,138 |
| 19 | Q9Y3X0 CCDC9_HUMAN  | R.RS#GPLEESER.D                  | S202:        | 2 | 2,227  | 0,28  | -0,59  |
| 19 | Q8NEF9 SRFB1_HUMAN  | K.AVTIANS#PSKPEKDSVVSLESQK.T     | S203:        | 3 | 4,3939 | 0,527 | -0,142 |
| 19 | Q04726 TLE3_HUMAN   | R.ERESSANNSVS#PSESLR.A           | S203:        | 3 | 2,8185 | 0,087 | -0,474 |
| 19 | Q00653 NFKB2_HUMAN  | R.ASDGS#FSLPLKPVISQPIHDSK.S      | S204:        | 3 | 4,4407 | 0,338 | -0,076 |
| 19 | P43243 MATR3_HUMAN  | R.GPSLNPVLDYDHGS#RSQESGYDR.M     | S206:        | 3 | 4,3454 | 0,353 | -0,131 |
| 19 | P43243 MATR3_HUMAN  | R.DSFDDRGPSLNPVLDYDHGS#R.S       | S206:        | 3 | 2,7904 | 0,331 | -0,225 |
| 19 | Q5T200 ZC3HD_HUMAN  | R.SKLS#PS#PSLRK.S                | S207:S209:   | 2 | 3,4791 | 0,479 | -0,628 |
| 19 | Q8WXV6 Q8WXV6_HUMAN | R.TSS#EDNLYLAVLR.A               | S21:         | 2 | 2,9512 | 0,278 | -0,625 |
| 19 | Q6P1L5 AL2SC_HUMAN  | K.TRQPSSS#PSSIIR.R               | S210:        | 3 | 3,1514 | 0,095 | 0,061  |
| 19 | Q6P1L5 AL2SC_HUMAN  | K.TRQPSSS#PSSIIR.R               | S210:        | 2 | 2,3372 | 0,246 | -0,163 |
| 19 | Q9UQ35 SRRM2_HUMAN  | R.NHS#GSRT#PPVALN SSR.M          | S2100:T2104: | 2 | 3,1489 | 0,51  | -0,531 |
| 19 | Q9UQ35 SRRM2_HUMAN  | R.NHS#GSRT#PPVALN SSR.M          | S2100:T2104: | 3 | 3,1324 | 0,089 | -0,298 |
| 19 | Q8TF01 SFR18_HUMAN  | R.QRS#PIALPVKQEPQIDAVK.R         | S211:        | 3 | 3,5005 | 0,362 | 0,718  |
| 19 | P78549 NTHL1_HUMAN  | R.SRS#LGPAGPR.G                  | S22:         | 2 | 3,1878 | 0,4   | -0,43  |
| 19 | Q9Y2I8 WDR37_HUMAN  | K.SHS#LSIR.R                     | S22:         | 2 | 2,1484 | 0,171 | -0,139 |
| 19 | Q8N350 DOS_HUMAN    | K.IVTIHECDSGEASSATTPHPATS#PK.A   | S220:        | 3 | 5,8067 | 0,468 | -0,342 |



|    |                    |                                     |                 |   |        |       |        |
|----|--------------------|-------------------------------------|-----------------|---|--------|-------|--------|
| 19 | P46821 MAP1B_HUMAN | K.HM*DPPPAPVQDRS#PS#PR.H            | S2209:S2211:    | 3 | 2,958  | 0,327 | -0,266 |
| 19 | Q9BUB5 MKNK1_HUMAN | R.DLKPENILCES#PEKVSPVK.I            | S221:           | 3 | 3,2815 | 0,37  | 0,243  |
| 19 | P46013 KI67_HUMAN  | K.IACRS#PQPDPVGTPTIFKPQSK.R         | S2223:          | 3 | 4,6411 | 0,303 | -0,365 |
| 19 | Q9BW71 HIRP3_HUMAN | K.SLKES#EQES#EEEILAQKK.E            | S223:S227:      | 3 | 2,9321 | 0,131 | 0,565  |
| 19 | P49792 RBP2_HUMAN  | R.EDALDDSVSSSSVHASPLASS#PVRK.N      | S2251:          | 3 | 4,3495 | 0,418 | 0,279  |
| 19 | Q08495 DEMA_HUMAN  | R.RGAEEEEEEDDD#GEEM*K.A             | S226:           | 3 | 5,0678 | 0,397 | -0,317 |
| 19 | Q9Y6D5 BIG2_HUMAN  | R.ELEKPIQSKPQSPVIQAAAVS#PK.F        | S227:           | 3 | 4,9605 | 0,381 | 0,58   |
| 19 | P35659 DEK_HUMAN   | R.TKCEILSDES#S#SDEDEKK.N            | S230:S231:      | 3 | 4,1202 | 0,401 | -0,466 |
| 19 | Q13283 G3BP1_HUMAN | K.SSS#PAPADIAQTVQEDLR.T             | S232:           | 3 | 2,8313 | 0,262 | -0,652 |
| 19 | Q13283 G3BP1_HUMAN | K.SSS#PAPADIAQTVQEDLR.T             | S232:           | 2 | 2,622  | 0,301 | -0,497 |
| 19 | Q7Z4V5 HDGR2_HUMAN | K.APSASDS#DSKADSDGAKPEPVAM*AR.S     | S234:           | 3 | 4,9349 | 0,463 | -0,573 |
| 19 | Q8NDT2 RB15B_HUMAN | R.RNS#LEGYSR.S                      | S235:           | 2 | 3,4201 | 0,369 | -0,84  |
| 19 | P62753 RS6_HUMAN   | R.RLS#S#LRAS#TSKSESSQK.-            | S235:S236:S240: | 3 | 3,3122 | 1     | -0,262 |
| 19 | P62753 RS6_HUMAN   | R.RLS#S#LRAST#SKSESSQK.-            | S235:S236:T241: | 3 | 2,8591 | 0,358 | -0,612 |
| 19 | Q96ST2 IWS1_HUMAN  | R.HQAS#DS#ENEELPKPR.I               | S235:S237:      | 2 | 4,9498 | 0,513 | 0      |
| 19 | Q96ST2 IWS1_HUMAN  | R.HQAS#DS#ENEELPKPR.I               | S235:S237:      | 3 | 3,946  | 0,509 | -0,386 |
| 19 | Q8IV50 LYSM2_HUMAN | R.APRPSAPS#PPPRS#R.S                | S24:S29:        | 2 | 2,601  | 0,437 | -0,822 |
| 19 | Q8IY37 DHX37_HUMAN | R.ALAKPAVFIPVNR#PEM*QEER.L          | S242:           | 3 | 2,9801 | 0,293 | -0,148 |
| 19 | Q9HB58 SP110_HUMAN | R.DKEDPQEM*PHS#PLGSM*PEIR.D         | S244:           | 3 | 4,6997 | 0,36  | 0,304  |
| 19 | Q9HB20 PKHA3_HUMAN | R.TYS#DTDSCSDIPLDPDRPVHCSK.N        | S244:           | 3 | 3,6012 | 0,341 | 0,382  |
| 19 | Q9UDY2 ZO2_HUMAN   | R.GRS#IDQDYER.A                     | S244:           | 2 | 3,3796 | 0,397 | 1,388  |
| 19 | Q8TCU4 ALMS1_HUMAN | K.TSITDSREEEGVS#ESEDGGSSVDSLAAHVK.N | S2465:          | 3 | 3,4417 | 0,502 | 0      |
| 19 | Q9BYG3 MK67I_HUMAN | R.KS#QVAELNDDDKDEIVFK.Q             | S247:           | 3 | 4,4835 | 0,476 | -0,24  |
| 19 | Q9H3N1 TXND1_HUMAN | K.KVEEQEADEEDVS#EEEAESK.E           | S247:           | 3 | 4,2038 | 0,345 | -0,291 |
| 19 | P16949 STMN1_HUMAN | R.ASGQAFELILS#PR.S                  | S25:            | 2 | 3,4213 | 0,239 | -0,415 |
| 19 | P57682 KLF3_HUMAN  | K.RLPVES#PDTQR.K                    | S250:           | 3 | 3,3135 | 0,297 | 0,062  |
| 19 | Q70Z53 F10C1_HUMAN | K.SRLS#SAEEASK.K                    | S251:           | 2 | 3,2629 | 0,567 | -0,686 |
| 19 | Q5QJE6 TDIF2_HUMAN | R.SLS#EINKPNFYNNDFDDDFSHR.S         | S253:           | 3 | 2,8764 | 0,336 | -0,531 |
| 19 | P85299 PTOR1_HUMAN | R.SKS#YNTPLLNPVQEHEAEGAAAGGTSIR.R   | S254:           | 3 | 4,5419 | 0,426 | -0,246 |
| 19 | Q4G0J3 LARP7_HUMAN | R.SRPTS#EGS#DIESTEPQKQCSK.K         | S258:S261:      | 3 | 3,1043 | 0,109 | -0,801 |
| 19 | Q96A00 PP14A_HUMAN | R.ARGPGGS#PGGLQK.R                  | S26:            | 2 | 4,0464 | 0,375 | -0,387 |
| 19 | P15880 RS2_HUMAN   | K.ETVFTKS#PYQEFTDHLVK.T             | S264:           | 3 | 3,8032 | 0,314 | -0,163 |
| 19 | P49736 MCM2_HUMAN  | R.RGNDPLTSS#PGR.S                   | S27:            | 2 | 2,5352 | 0,277 | -0,091 |

|    |                     |                                    |              |   |        |       |        |
|----|---------------------|------------------------------------|--------------|---|--------|-------|--------|
| 19 | A9CQZ4 A9CQZ4_HUMAN | K.NLGS#PKPR.Q                      | S27:         | 2 | 2,1845 | 0,233 | -0,112 |
| 19 | Q9UQ35 SRRM2_HUMAN  | R.RPS#PQPSR.D                      | S2702:       | 2 | 2,0878 | 0,21  | -0,332 |
| 19 | Q5T4S7 UBR4_HUMAN   | R.HVTLPSS#PR.S                     | S2719:       | 2 | 2,7725 | 0,442 | -0,454 |
| 19 | Q6ZRS2 SRCAP_HUMAN  | R.RTS#ADVEIR.G                     | S2725:       | 2 | 3,2017 | 0,213 | -0,433 |
| 19 | Q8TF44 NLF3_HUMAN   | R.HGSLADDSTPDAS#PGSR.R             | S273:        | 2 | 5,6132 | 0,645 | 0,399  |
| 19 | Q9C0H5 K1688_HUMAN  | R.RPS#PFLK.R                       | S273:        | 2 | 2,5177 | 0,138 | -0,132 |
| 19 | O75475 PSIP1_HUMAN  | K.TGVTSTS#DS#EEEGDDQEGEKK.R        | S273:S275:   | 3 | 2,8416 | 0,223 | -0,288 |
| 19 | Q96ST3 SIN3A_HUMAN  | K.VSKPSQLQAHTPASQQTPLPPYAS#PR.S    | S274:        | 3 | 3,2528 | 0,307 | -0,123 |
| 19 | Q8NFC6 FA44A_HUMAN  | R.KQHYLS#S#EDEPDDNPDVLSR.I         | S2779:S2780: | 3 | 4,627  | 0,341 | -0,489 |
| 19 | Q9H410 DSN1_HUMAN   | K.THDHQLESS#LS#PVEVFAK.T           | S28:S30:     | 3 | 4,0611 | 0,37  | -0,084 |
| 19 | Q96JM3 ZN828_HUMAN  | R.KPS#PSESPEPWKFPVAVSPEPR.R        | S282:        | 3 | 4,2214 | 0,318 | -0,29  |
| 19 | Q9Y624 JAM1_HUMAN   | K.KVIYSQPS#AR.S                    | S284:        | 2 | 3,0837 | 0,364 | -0,695 |
| 19 | A8K1N6 A8K1N6_HUMAN | K.KGSLPTS#PR.L                     | S284:        | 2 | 3,039  | 0,331 | -0,107 |
| 19 | Q92674 CENPI_HUMAN  | R.NRGPS#PEPLK.L                    | S284:        | 2 | 2,1803 | 0,231 | -0,415 |
| 19 | Q96QF0 RAB3I_HUMAN  | R.NKS#TSSAM*SGSHQDLSVIQIVK.D       | S288:        | 3 | 5,2681 | 0,414 | -0,073 |
| 19 | Q9Y320 TXD14_HUMAN  | K.AGDNIPEEQPVASTPTTVS#DGENKKDK.-   | S288:        | 3 | 2,9233 | 0,334 | 0,692  |
| 19 | Q9NWW8 CS062_HUMAN  | R.TRS#NPEGAEDR.A                   | S29:         | 2 | 2,2669 | 0,454 | -0,372 |
| 19 | P08559 ODPA_HUMAN   | R.YHGHS#M*SDPGVS#YR.T              | S293:S300:   | 2 | 4,1168 | 0,512 | 0      |
| 19 | P08559 ODPA_HUMAN   | R.YHGHS#MSDPGVS#YR.T               | S293:S300:   | 3 | 3,977  | 0,343 | 0,104  |
| 19 | P08559 ODPA_HUMAN   | R.YHGHS#M*SDPGVS#YR.T              | S293:S300:   | 3 | 2,8478 | 0,287 | -0,414 |
| 19 | Q9UQ35 SRRM2_HUMAN  | K.THTTALAGRS#PS#PASGR.R            | S295:S297:   | 3 | 3,3836 | 0,362 | -0,2   |
| 19 | Q9UQ35 SRRM2_HUMAN  | K.THTTALAGRS#PS#PASGR.R            | S295:S297:   | 2 | 3,2818 | 1     | -1,336 |
| 19 | B2RDU1 B2RDU1_HUMAN | R.DTSSDKLDDALDKLS#DSLGR.Q          | S297:        | 3 | 3,8041 | 0,34  | 0,148  |
| 19 | Q96EQ0 SGTB_HUMAN   | R.SRSFS#SSAEHS.-                   | S297:        | 2 | 3,7908 | 0,489 | -0,79  |
| 19 | O43493 TGON2_HUMAN  | K.LSPHAFKTES#GEETDLISPPQEEVK.S     | S298:        | 3 | 4,4848 | 0,294 | 0,064  |
| 19 | P25440 BRD2_HUMAN   | K.RKADTTTPTTAILAGRS#PAS#PPGSLEPK.A | S298:S301:   | 3 | 4,1568 | 0,395 | -0,121 |
| 19 | B2RDU1 B2RDU1_HUMAN | R.DTSSDKLDDALDKLSDS#LGQR.Q         | S299:        | 3 | 4,2285 | 0,454 | -0,074 |
| 19 | Q9H4Z3 PCIF1_HUMAN  | R.EEASLLSHSPGTSNQSQPCS#PKPIR.L     | S30:         | 3 | 5,218  | 0,475 | 0,328  |
| 19 | Q9Y2V2 CHSP1_HUMAN  | R.SRERS#PS#PLRGNVPSPLPT#R.R        | S30:S32:T45: | 3 | 2,6894 | 0,087 | 0,432  |
| 19 | Q8NCF5 NF2IP_HUMAN  | R.M*SEPLQSVVDHM*ATHLGV#PSR.I       | S300:        | 3 | 3,6393 | 0,169 | -0,073 |
| 19 | Q7Z2W4 ZCCHV_HUMAN  | R.KFTYLGS#QDR.A                    | S302:        | 2 | 2,9543 | 0,161 | 0      |
| 19 | Q9NQ57 INCE_HUMAN   | R.TDSQSVRHS#PIAPSSPSPQVLAQK.Y      | S306:        | 3 | 4,1083 | 0,402 | 0,564  |
| 19 | Q5H9R7 SAPS3_HUMAN  | R.LGS#FHELLLEPPKK.S                | S315:        | 3 | 4,2456 | 0,235 | 0,108  |

|    |                     |                                  |            |   |        |       |        |
|----|---------------------|----------------------------------|------------|---|--------|-------|--------|
| 19 | P04637 P53_HUMAN    | K.RALPNNTSSS#PQPK.K              | S315:      | 2 | 3,3026 | 0,281 | -0,619 |
| 19 | O76024 WFS1_HUMAN   | R.SRLNATAS#LEQER.S               | S32:       | 3 | 3,9287 | 0,281 | 0,118  |
| 19 | Q7L4I2 RSRC2_HUMAN  | K.KEQSEVSVS#PR.A                 | S32:       | 3 | 3,206  | 0,269 | -0,069 |
| 19 | Q7L4I2 RSRC2_HUMAN  | K.KEQSEVSVS#PR.A                 | S32:       | 2 | 3,1813 | 0,415 | -0,736 |
| 19 | P49792 RBP2_HUMAN   | K.KIESFGS#PK.G                   | S3207:     | 2 | 2,6754 | 0,274 | -0,569 |
| 19 | P23511 NFYA_HUMAN   | K.EKDS#PHM*QDPNQADEEAM*TQIIR.V   | S326:      | 3 | 3,9063 | 0,436 | -0,524 |
| 19 | B2RMQ4 B2RMQ4_HUMAN | R.SIASEVVARPAS#LSNDKLM*EK.S      | S327:      | 3 | 4,8303 | 0,399 | 0      |
| 19 | Q92922 SMRC1_HUMAN  | R.KHS#PS#PPPPTPTESR.K            | S328:S330: | 3 | 4,9266 | 0,461 | -0,515 |
| 19 | Q92922 SMRC1_HUMAN  | R.KHS#PS#PPPPTPTESR.K            | S328:S330: | 2 | 3,0043 | 0,405 | -0,894 |
| 19 | Q15459 SF3A1_HUMAN  | K.FGESEEVEM*EVES#DEEDDKQEK.A     | S329:      | 3 | 4,6401 | 0,419 | -0,337 |
| 19 | Q8TED9 AF1L1_HUMAN  | R.EVSKPVGGAEGVEVPRS#PVLCK.L      | S329:      | 3 | 3,6434 | 0,311 | 0,736  |
| 19 | P46013 KI67_HUMAN   | K.GRDVESVQTPS#K.A                | S330:      | 3 | 2,7453 | 0,251 | -0,198 |
| 19 | Q9BSI4 TINF2_HUMAN  | K.SKS#PCQTLGGR.A                 | S330:      | 2 | 2,5356 | 0,409 | -0,192 |
| 19 | O00499 BIN1_HUMAN   | R.VNHEPEPAGGATPGATLPKS#PSQLR.K   | S331:      | 3 | 3,6953 | 0,311 | 0,353  |
| 19 | Q9Y2U5 M3K2_HUMAN   | R.RRGS#DIDNPTLTVM*DIS#PPSR.S     | S331:S344: | 3 | 4,5781 | 0,382 | 0,585  |
| 19 | P08651 NFIC_HUMAN   | K.KTEM*DKS#PFNSPS#PQDSPR.L       | S333:S339: | 3 | 3,6597 | 0,148 | -0,079 |
| 19 | Q9Y4K4 M4K5_HUMAN   | R.TAS#EINFDKLQFEPPLRK.E          | S335:      | 3 | 3,4121 | 0,185 | -0,413 |
| 19 | O95365 ZBT7A_HUMAN  | R.AGAAAGDS#DEESRADDKGVM*DYYLK.Y  | S337:      | 3 | 4,1492 | 0,42  | -0,402 |
| 19 | P49759 CLK1_HUMAN   | K.VVDFGSATYDDEHHSTLVS#TR.H       | S341:      | 3 | 4,0776 | 0,424 | -0,379 |
| 19 | Q9UGV2 NDRG3_HUMAN  | R.THSTSSSLGSGES#PFSR.S           | S341:      | 2 | 2,8041 | 0,315 | 0,609  |
| 19 | Q9UMX1 SUFU_HUMAN   | R.APS#RKDSLES#DSSTAIIPHELIR.T    | S342:S349: | 3 | 4,0883 | 0,265 | -0,341 |
| 19 | O75592 MYCB2_HUMAN  | R.SYS#VVASEYDKQHSILPAR.V         | S3440:     | 3 | 3,0204 | 0,279 | 0,738  |
| 19 | O75427 LRCH4_HUMAN  | R.KEDGS#ADGDPVQIDFIDSHVPGEDEER.G | S346:      | 3 | 4,4827 | 0,405 | -0,663 |
| 19 | Q9Y383 LC7L2_HUMAN  | R.FRDQDLAS#CDR.D                 | S347:      | 3 | 3,3652 | 0,195 | -0,688 |
| 19 | Q8IZT6 ASPM_HUMAN   | K.DNS#QPVHLESTIAHEIYQK.I         | S348:      | 3 | 2,8926 | 0,25  | -0,4   |
| 19 | P42166 LAP2A_HUMAN  | R.SHISDQS#PLSSK.R                | S351:      | 2 | 3,5925 | 0,475 | -0,089 |
| 19 | O14639 ABLM1_HUMAN  | R.TSS#ESIYSRPGSSIPGSPGHTIYAK.V   | S353:      | 3 | 4,0765 | 0,415 | -0,344 |
| 19 | Q09028 RBBP4_HUMAN  | K.IGEEQS#PEDAEDGPPELLFIHGGHTAK.I | S355:      | 3 | 4,1552 | 0,295 | -0,62  |
| 19 | Q96N21 CQ056_HUMAN  | R.HFEASCQQLS#PAR.G               | S356:      | 2 | 3,9113 | 0,393 | -0,475 |
| 19 | P17096 HMGA1_HUMAN  | R.KQPPVS#PGTALVGSQKEPSEVPTPK.R   | S36:       | 3 | 3,658  | 0,327 | -0,277 |
| 19 | Q9NQ29 LUC7L_HUMAN  | R.RS#EEKEAGEI.-                  | S363:      | 2 | 2,766  | 0,397 | -0,596 |
| 19 | Q00613 HSF1_HUMAN   | R.GHTDTEGRPPS#PPPTST#PEK.C       | S363:T369: | 3 | 3,2771 | 0,226 | -0,651 |
| 19 | P17302 CXA1_HUMAN   | K.LAAGHELQPLAIVDQRPSS#R.A        | S365:      | 3 | 3,5766 | 0,385 | -0,163 |

|    |                     |                                 |                 |   |        |       |        |
|----|---------------------|---------------------------------|-----------------|---|--------|-------|--------|
| 19 | P05455 LA_HUMAN     | K.FAS#DDEHDEHDENGATGPVK.R       | S366:           | 3 | 3,3348 | 0,39  | -0,488 |
| 19 | O14639 ABLM1_HUMAN  | R.TSSEIYSRPGSSIPGS#PGHTIYAK.V   | S367:           | 3 | 4,8683 | 0,434 | -0,482 |
| 19 | Q01167 FOXK2_HUMAN  | R.S#APASPNHAGVLSAHSSTAQTPELSR.E | S369:           | 3 | 3,9951 | 0,411 | 0,068  |
| 19 | P46013 KI67_HUMAN   | R.RES#VNLGK.S                   | S374:           | 2 | 2,8921 | 0,268 | -0,186 |
| 19 | Q76FK4 NOL8_HUMAN   | R.NDREYDS#GDT#DEIIAM*KK.N       | S378:T381:      | 3 | 2,7782 | 0,353 | 0,08   |
| 19 | Q9Y383 LC7L2_HUMAN  | R.RSS#EEREAGEI.-                | S384:           | 2 | 2,0752 | 0,329 | -0,363 |
| 19 | Q9UKV3 ACINU_HUMAN  | K.EKS#KS#PS#PPRLTEDR.K          | S384:S386:S388: | 2 | 2,5611 | 0,25  | 0,186  |
| 19 | Q9UKV3 ACINU_HUMAN  | K.KKS#PS#PPRLTEDR.K             | S386:S388:      | 2 | 2,1493 | 0,297 | -0,299 |
| 19 | P02545 LMNA_HUMAN   | R.LRLS#PSPTSQRS#R.G             | S390:S398:      | 2 | 2,6703 | 0,36  | -0,297 |
| 19 | O43660 PLRG1_HUMAN  | R.HYTFASGS#PDNIK.Q              | S391:           | 2 | 3,0664 | 0,362 | 0,563  |
| 19 | Q9Y5A9 YTHD2_HUMAN  | K.LRS#INNYNPK.D                 | S394:           | 3 | 3,5087 | 0,296 | 0,141  |
| 19 | Q9Y5A9 YTHD2_HUMAN  | K.LRS#INNYNPK.D                 | S394:           | 2 | 3,2843 | 0,356 | -0,282 |
| 19 | Q9Y6X4 K0888_HUMAN  | R.GIEFEDES#SDRDARPALETQPQKEK.Q  | S398:           | 3 | 2,9049 | 0,257 | -0,062 |
| 19 | Q3KQU3 MA7D1_HUMAN  | R.KPNAGGS#PAPVR.R               | S399:           | 2 | 3,1597 | 0,298 | -0,595 |
| 19 | P49736 MCM2_HUMAN   | R.RTDALTS#SPGR.D                | S40:            | 2 | 2,6989 | 0,321 | -1,18  |
| 19 | Q9UKV3 ACINU_HUMAN  | R.KKAS#LVALPEQTASEEETPPPLTK.E   | S400:           | 3 | 3,5993 | 0,419 | -0,332 |
| 19 | P29590 PML_HUMAN    | K.KAS#PEAASTPRPIDVDLPEEAER.V    | S403:           | 3 | 3,898  | 0,374 | -0,821 |
| 19 | Q9Y2W1 TR150_HUMAN  | K.TDSEKPFGRS#QS#PK.R            | S406:S408:      | 2 | 2,4869 | 0,21  | -0,637 |
| 19 | Q9H981 ARP8_HUMAN   | R.S#QGDPEDPHDEHYLLATQSK.Q       | S412:           | 3 | 2,789  | 0,484 | 0,39   |
| 19 | A0AVK6 E2F8_HUMAN   | R.KINS#APSS#PIKTNK.A            | S413:S417:      | 2 | 2,4452 | 0,287 | -0,074 |
| 19 | Q86SQ0 PHLB2_HUMAN  | R.KSS#ISSISGR.D                 | S415:           | 2 | 2,8298 | 0,321 | -0,664 |
| 19 | B2RMZ9 B2RMZ9_HUMAN | R.RLNS#SPRAPVS#PLK.F            | S416:S423:      | 3 | 2,64   | 0,173 | -0,109 |
| 19 | Q99741 CDC6_HUMAN   | K.SQTILKPLSECKS#PSEPLIPK.R      | S419:           | 3 | 3,182  | 0,188 | 0      |
| 19 | Q14CB8 RHG19_HUMAN  | R.SRS#FSGLIK.R                  | S422:           | 2 | 2,9864 | 0,222 | -0,227 |
| 19 | P55198 AF17_HUMAN   | R.ARAPS#PGDYK.S                 | S423:           | 2 | 2,6433 | 0,285 | -0,107 |
| 19 | Q9Y490 TLN1_HUMAN   | K.DHFGLEGDEESTM*LEDSVS#PKK.S    | S425:           | 3 | 4,4474 | 0,464 | -0,144 |
| 19 | P62750 RL23A_HUMAN  | K.IRTS#PTFR.R                   | S43:            | 2 | 2,7036 | 0,16  | -0,692 |
| 19 | Q96D71 REPS1_HUMAN  | R.TGSDHTNPTS#PLLVKPSDLLEENK.I   | S430:           | 3 | 6,6149 | 0,365 | -0,616 |
| 19 | Q96I34 PP16A_HUMAN  | R.SVS#YQLSPLDSTTPHTLVHDK.A      | S433:           | 3 | 2,7359 | 0,439 | 0      |
| 19 | Q13535 ATR_HUMAN    | R.RLS#SSLNPSK.R                 | S435:           | 2 | 2,9384 | 0,209 | -0,313 |
| 19 | O94887 FARP2_HUMAN  | K.DSSSLTDPQVSVYK#PAAERR.S       | S439:           | 3 | 4,655  | 0,512 | 0,595  |
| 19 | O43318 M3K7_HUMAN   | R.RRS#IQDLTVTGTEPGQVSS#R.S      | S439:S455:      | 3 | 5,4007 | 0,459 | 0,468  |
| 19 | P17096 HMGA1_HUMAN  | R.KQPPVSPGTALVGS#QKEPSEVPTPK.R  | S44:            | 3 | 3,573  | 0,364 | -0,347 |

|    |                     |                                     |                 |   |        |       |        |
|----|---------------------|-------------------------------------|-----------------|---|--------|-------|--------|
| 19 | P52926 HMGA2_HUMAN  | R.KQQQEPTGEPs#PK.R                  | S44:            | 2 | 3,4074 | 0,351 | -0,557 |
| 19 | Q7Z2Z1 CO042_HUMAN  | R.HVLQTAVADS#PR.D                   | S441:           | 2 | 3,2608 | 0,54  | 0      |
| 19 | P55199 ELL_HUMAN    | R.LGLPLLTDCAQPSRPHGS#PSR.S          | S442:           | 3 | 2,6026 | 0,464 | -0,078 |
| 19 | O43290 SNUT1_HUMAN  | R.RVS#EVEEEKEPVPQPLPSDDTR.V         | S448:           | 3 | 4,5368 | 0,373 | -0,14  |
| 19 | P49321 NASP_HUMAN   | K.VAQGATEKS#PEDKVQIAANEETQER.E      | S451:           | 3 | 4,6198 | 0,405 | -0,456 |
| 19 | Q6ZUM4 RHG27_HUMAN  | R.SIHKSS#QDGDTPAQAS#PPEEK.V         | S456:S466:      | 3 | 5,1719 | 0,343 | -0,309 |
| 19 | Q14684 RRP1B_HUMAN  | R.VAEPGAEATSSTGEES#GSEHPPAVPM*HNK.R | S458:           | 3 | 3,6437 | 0,543 | -0,427 |
| 19 | Q14684 RRP1B_HUMAN  | R.VAEPGAEATSSTGEESGS#EHPPAVPM*HNK.R | S460:           | 3 | 2,726  | 0,372 | 0,244  |
| 19 | P53985 MOT1_HUMAN   | K.KES#KEEET#S#IDVAGKPNEVTK.A        | S461:T466:S467: | 3 | 5,3524 | 0,432 | -0,572 |
| 19 | Q12830 BPTF_HUMAN   | K.NREEFEDQS#LEK.D                   | S462:           | 2 | 2,8553 | 0,178 | -0,989 |
| 19 | Q96K21 ZFY19_HUMAN  | K.EHQTSAYS#PPR.A                    | S463:           | 2 | 2,4942 | 0,326 | -0,361 |
| 19 | Q8IYB3 SRRM1_HUMAN  | R.KVELS#ES#EEDKGGK.M                | S463:S465:      | 2 | 3,6853 | 0,421 | -0,648 |
| 19 | O00244 ATOX1_HUMAN  | K.VCIESEHS#M*DTLLATLKK.T            | S47:            | 3 | 3,1333 | 0,319 | 0,421  |
| 19 | Q13433 S39A6_HUMAN  | K.YESQLS#TNEEKVDTDDRTEGYLR.A        | S472:           | 3 | 3,4169 | 0,283 | -0,194 |
| 19 | O00418 EF2K_HUMAN   | R.KYSEDEDS#LGSSGR.V                 | S474:           | 2 | 4,2704 | 0,635 | -0,682 |
| 19 | Q13625 ASPP2_HUMAN  | R.KNQS#SEDILR.D                     | S480:           | 2 | 3,7081 | 0,328 | -0,192 |
| 19 | Q13625 ASPP2_HUMAN  | R.KNQS#SEDILR.D                     | S480:           | 3 | 3,2747 | 0,223 | 0,216  |
| 19 | Q13428 TCOF_HUMAN   | R.SSSEESDS#DREALAAM*NAAQVKPLGK.S    | S484:           | 3 | 5,5849 | 0,473 | 0,656  |
| 19 | Q7KZ17 MARK2_HUMAN  | R.SRNS#PLLER.A                      | S486:           | 2 | 3,1517 | 0,281 | -0,318 |
| 19 | Q8NCD3 HJURP_HUMAN  | R.RLS#LPSSK.A                       | S486:           | 2 | 2,4445 | 0,304 | -0,252 |
| 19 | Q96PU5 NED4L_HUMAN  | K.DTLNQPSPQSPYNS#PKPQHK.V           | S487:           | 3 | 4,9727 | 0,464 | 0,434  |
| 19 | Q9BXP5 ARS2_HUMAN   | R.LRECELS#PGVNR.D                   | S493:           | 3 | 3,0201 | 0,17  | 0,061  |
| 19 | P10243 MYBA_HUMAN   | R.S#RSEDEDDLQYADHDYEVPPQK.G         | S5:             | 3 | 5,4873 | 0,395 | -0,128 |
| 19 | Q9UPW6 SATB2_HUMAN  | R.S#ESPCLRDS#PDRR.S                 | S5:S13:         | 3 | 2,6945 | 0,268 | -0,422 |
| 19 | Q6ZSP1 Q6ZSP1_HUMAN | R.S#LSGTVVSEREEAPVSSHFDSSNVR.K      | S501:           | 3 | 3,7081 | 0,442 | -0,45  |
| 19 | Q8IY92 BTBDC_HUMAN  | K.KALEIS#PR.S                       | S502:           | 2 | 2,2951 | 0,119 | -0,921 |
| 19 | Q9Y2X3 NOL5_HUMAN   | K.HIKEEPLS#EEEPCTSTAIAS#PEK.K       | S502:S514:      | 3 | 5,0625 | 0,264 | 0,267  |
| 19 | Q96JM3 ZN828_HUMAN  | R.KPGPSGPSES#PK.A                   | S507:           | 2 | 2,8949 | 0,272 | -0,587 |
| 19 | Q9H4G0 E41L1_HUMAN  | K.HQAS#INELK.R                      | S510:           | 2 | 3,0636 | 0,458 | -0,545 |
| 19 | Q9BPZ7 SIN1_HUMAN   | R.RTS#FSFQK.E                       | S510:           | 2 | 2,3614 | 0,179 | 0      |
| 19 | P40222 TXLNA_HUMAN  | R.RPEGPGAQAPS#SPR.V                 | S514:           | 3 | 2,9135 | 0,223 | -0,062 |
| 19 | O00567 NOL5A_HUMAN  | K.SFSKEELM*S#SDLEETAGSTSIPK.R       | S519:           | 3 | 3,8204 | 0,405 | -0,071 |
| 19 | Q9BTC8 MTA3_HUMAN   | R.HAELSGS#PLK.S                     | S519:           | 2 | 2,5227 | 0,45  | -0,327 |

|    |                     |                                      |            |   |        |       |        |
|----|---------------------|--------------------------------------|------------|---|--------|-------|--------|
| 19 | O00567 NOL5A_HUMAN  | K.KSFSKEELM*S#S#DLEETAGSTSIPK.R      | S519:S520: | 3 | 3,9108 | 1     | -0,264 |
| 19 | Q9Y2V2 CHSP1_HUMAN  | R.RTRFS#ATVR.A                       | S52:       | 2 | 2,1109 | 0,332 | -0,327 |
| 19 | Q5H9R7 SAPS3_HUMAN  | R.NTVDLVTTCHHS#SSDDEIDFK.E           | S523:      | 3 | 4,4238 | 0,312 | 0      |
| 19 | Q5H9R7 SAPS3_HUMAN  | R.NTVDLVTTCHHSS#SDDEIDFK.E           | S524:      | 3 | 3,9378 | 0,204 | -0,28  |
| 19 | Q9NYJ8 TAB2_HUMAN   | R.KLS#M*GSDDAAYTQALLVHQQ.A           | S524:      | 3 | 2,89   | 0,255 | -0,081 |
| 19 | O75122 CLAP2_HUMAN  | R.IPRPSVSQGC#R.E                     | S529:      | 3 | 3,8241 | 0,405 | 0,128  |
| 19 | Q6NYC8 PHTNS_HUMAN  | R.SCLAKGS#PER.H                      | S530:      | 2 | 2,9004 | 0,315 | -0,618 |
| 19 | Q09019 DMWD_HUMAN   | R.YHS#LGNISR.G                       | S530:      | 2 | 2,3789 | 0,213 | 0      |
| 19 | Q9BPU6 DPYL5_HUMAN  | R.DLHESS#FSLSGSQIDHVPK.R             | S532:      | 3 | 4,7659 | 0,439 | -1,124 |
| 19 | Q86VM9 ZCH18_HUMAN  | K.KLGV#VSPSR.A                       | S532:      | 2 | 3,1152 | 0,425 | -0,44  |
| 19 | Q9H1E3 NUCKS_HUMAN  | R.SGKNS#QEDS#EDSEDKDVK.T             | S54:S58:   | 3 | 3,8713 | 0,406 | -0,339 |
| 19 | O94909 K0819_HUMAN  | R.LGLPKPEGEPLSLPTPRS#PSDR.E          | S546:      | 3 | 3,7098 | 0,349 | -0,453 |
| 19 | Q14694 UBP10_HUMAN  | K.KLLS#PSNEK.L                       | S547:      | 2 | 2,8503 | 0,201 | 0      |
| 19 | P17987 TCPA_HUMAN   | K.HGSYEDAVHS#GALND.-                 | S551:      | 2 | 4,2564 | 0,618 | -0,074 |
| 19 | Q86UU1 PHLB1_HUMAN  | R.KLS#SGDLR.V                        | S563:      | 2 | 2,4292 | 0,254 | -0,957 |
| 19 | Q6IMN6 CAPR2_HUMAN  | K.HSLTSQSQIS#PK.S                    | S566:      | 2 | 3,8412 | 0,463 | -0,088 |
| 19 | P20810 ICAL_HUMAN   | R.DTSQSDKDLDDALDKLS#DSLQQR.Q         | S575:      | 3 | 5,8871 | 0,424 | -0,703 |
| 19 | Q8WYL5 SSH1_HUMAN   | K.KLEFGS#PK.G                        | S576:      | 2 | 3,1245 | 0,281 | -0,247 |
| 19 | O95340 PAPS2_HUMAN  | R.HNEFDIS#GTR.M                      | S577:      | 2 | 3,7406 | 0,551 | -0,261 |
| 19 | Q92619 HMHA1_HUMAN  | R.KSS#FNVSDVARPEAAGSPPEEGGCTEGTPAK.D | S578:      | 3 | 2,6799 | 0,4   | 0,797  |
| 19 | Q9Y5K6 CD2AP_HUMAN  | K.KNS#LDEL.R.A                       | S582:      | 2 | 3,4769 | 0,213 | 0      |
| 19 | Q13428 TCOF_HUMAN   | K.SLGNILQAKPTSS#PAKGPPQK.A           | S583:      | 3 | 5,2749 | 0,468 | 0,499  |
| 19 | Q09666 AHNK_HUMAN   | K.GHYEVTGS#DDET.GK.L                 | S5841:     | 2 | 4,6025 | 0,62  | -0,62  |
| 19 | Q09666 AHNK_HUMAN   | K.GHYEVTGS#DDET.GK.L                 | S5841:     | 3 | 3,9437 | 0,407 | -0,348 |
| 19 | Q6PJZ5 Q6PJZ5_HUMAN | R.RTS#VPSPEQNTIATPATLHILQK.S         | S587:      | 3 | 4,6333 | 0,355 | -0,354 |
| 19 | Q9UBB9 TFP11_HUMAN  | K.EEATYGVWAERDS#DDERPSFGGK.R         | S59:       | 3 | 3,7575 | 0,372 | 0,205  |
| 19 | Q96T23 RSF1_HUMAN   | K.TFLDKDAQRLS#PIPEEVPK.S             | S594:      | 3 | 5,3492 | 0,379 | -0,081 |
| 19 | Q8IYB3 SRRM1_HUMAN  | R.RYS#PIQR.R                         | S597:      | 2 | 2,5066 | 0,295 | -0,222 |
| 19 | P43243 MATR3_HUMAN  | R.SYS#PDGKES#PSDKK.S                 | S598:S604: | 2 | 2,6523 | 0,351 | -0,434 |
| 19 | Q96RT1 LAP2_HUMAN   | K.HIVNHDDVFESEELS#S#DEEM*K.M         | S602:S603: | 3 | 3,5645 | 0,258 | -0,262 |
| 19 | O00203 AP3B1_HUMAN  | K.IFLAQKPAPLLES#PFKDR.D              | S609:      | 3 | 5,949  | 0,468 | -0,596 |
| 19 | Q14157 UBP2L_HUMAN  | R.RYPSSISS#PQK.D                     | S609:      | 2 | 2,1622 | 0,254 | -0,172 |
| 19 | Q9HCG8 NCM_HUMAN    | R.GRS#YDSSM*ESR.N                    | S61:       | 2 | 2,2282 | 0,423 | -0,356 |

|    |                     |                                         |            |   |        |       |        |
|----|---------------------|-----------------------------------------|------------|---|--------|-------|--------|
| 19 | B1ALK7 B1ALK7_HUMAN | R.KES#APQVLLPEEEKIIVEETK.S              | S619:      | 3 | 3,6029 | 0,395 | -0,441 |
| 19 | Q86U16 Q86U16_HUMAN | R.AVVVS#PKEENKAAEPPPK.I                 | S62:       | 3 | 4,0835 | 0,255 | -0,796 |
| 19 | Q96T58 MINT_HUMAN   | R.RAS#YDYNQDR.T                         | S623:      | 2 | 2,1108 | 0,22  | -0,357 |
| 19 | P27448 MARK3_HUMAN  | R.SRGS#TNLFSK.L                         | S624:      | 2 | 3,0913 | 0,273 | 0      |
| 19 | Q9ULM3 YETS2_HUMAN  | K.GGHM*IAVS#PQKQVITPGEGIAQSAK.V         | S627:      | 3 | 3,9633 | 0,257 | -0,211 |
| 19 | Q5QP82 WDR32_HUMAN  | R.RPGAPSL#PAPR.S                        | S63:       | 3 | 3,4534 | 0,238 | -0,213 |
| 19 | Q14978 NOLC1_HUMAN  | R.VREEIEVDS#R.V                         | S637:      | 2 | 2,3176 | 0,306 | 0,254  |
| 19 | A8MYB5 A8MYB5_HUMAN | R.RS#PTEDFR.Q                           | S638:      | 2 | 2,0664 | 0,183 | -0,785 |
| 19 | Q5T200 ZC3HD_HUMAN  | R.FVHGPS#PR.G                           | S64:       | 2 | 2,8658 | 0,384 | -0,312 |
| 19 | Q3YEC7 PARF_HUMAN   | K.NSDLFGLGLEEAGPKES#SEEGKEGK.T          | S640:      | 3 | 5,3617 | 0,534 | -0,522 |
| 19 | O43719 HTSF1_HUMAN  | K.VFDDDES#DEKEDEEYADEKLEAADK.K          | S642:      | 3 | 5,8403 | 0,458 | -0,805 |
| 19 | Q86TC9 MYPN_HUMAN   | K.TPEPS#SPVKEPPPVLAKPK.L                | S643:      | 3 | 4,5737 | 0,312 | 0,088  |
| 19 | Q86TC9 MYPN_HUMAN   | K.TPEPSS#PVKEPPPVLAKPK.L                | S644:      | 3 | 4,8999 | 0,366 | 0,088  |
| 19 | Q13615 MTMR3_HUMAN  | R.RS#LELSSLAGPGEDPLSADSLGKPTR.V         | S647:      | 3 | 4,8831 | 0,483 | -0,402 |
| 19 | O43491 E41L2_HUMAN  | K.HQAS#ISELK.R                          | S647:      | 2 | 3,3373 | 0,338 | 0,335  |
| 19 | Q5TKA1 LIN9_HUMAN   | R.SRLFS#DEDDR.Q                         | S65:       | 2 | 3,0617 | 0,302 | 0,185  |
| 19 | P13807 GYS1_HUMAN   | R.HSS#PHQS#EDEEDPR.N                    | S653:S675: | 2 | 2,4729 | 0,34  | -0,135 |
| 19 | Q9NYF8 BCLF1_HUMAN  | R.RIDIS#PSTLR.K                         | S658:      | 2 | 2,1711 | 0,144 | -0,099 |
| 19 | Q9H307 PININ_HUMAN  | R.RGFS#DSGGGPPAK.Q                      | S66:       | 2 | 2,3235 | 0,333 | -0,743 |
| 19 | Q96KM6 Z512B_HUMAN  | R.SEHTAPPPEEPTDKS#PEAEDPLGVER.T         | S665:      | 3 | 3,8916 | 0,427 | -0,063 |
| 19 | Q9P275 UBP36_HUMAN  | K.LKS#PVLSNTTTEPASTM*SPPPAKK.L          | S667:      | 3 | 3,6402 | 0,35  | 0,071  |
| 19 | O75665 OFD1_HUMAN   | K.SPLAAKS#PPSLHLLEAFK.N                 | S669:      | 3 | 5,1479 | 0,59  | -0,645 |
| 19 | P22681 CBL_HUMAN    | K.IKPSSS#ANAIYSLAARPLPVPK.L             | S669:      | 3 | 2,6846 | 0,265 | -0,388 |
| 19 | P19338 NUCL_HUMAN   | K.KVVVS#PTK.K                           | S67:       | 2 | 2,6223 | 0,18  | -0,065 |
| 19 | Q96T37 RBM15_HUMAN  | R.HCAPS#PDRS#PELSSSR.D                  | S670:S674: | 3 | 3,3275 | 0,322 | -0,094 |
| 19 | Q08945 SSRP1_HUMAN  | K.SKEFVSSDESS#SGENK.S                   | S672:      | 2 | 5,8089 | 0,625 | -0,543 |
| 19 | O43719 HTSF1_HUMAN  | K.LFEES#DDKEDEDADGKEVEDADEK.L           | S676:      | 3 | 6,6064 | 0,443 | 0,387  |
| 19 | O43719 HTSF1_HUMAN  | K.AEEGDADEKLFEES#DDKEDEDADGK.E          | S676:      | 3 | 5,6056 | 0,509 | 0,511  |
| 19 | Q8TF72 SHRM3_HUMAN  | R.HSS#LELGR.G                           | S676:      | 2 | 2,8146 | 0,308 | -0,312 |
| 19 | P48681 NEST_HUMAN   | K.ENQEPLRS#PEVGDEEALRPLTK.E             | S680:      | 3 | 3,6525 | 0,362 | -0,141 |
| 19 | Q13427 PPIG_HUMAN   | K.ADRDQS#PFSK.I                         | S687:      | 2 | 2,3964 | 0,096 | -0,892 |
| 19 | Q6P0N0 CN106_HUMAN  | K.AVTDFVIPECQKKS#PISK.S                 | S690:      | 3 | 3,6512 | 0,322 | 0,086  |
| 19 | A0FGR8 ESYT2_HUMAN  | K.SHM*S#GSPGPGGSNTAPSTPVIGGSDKPGM*EEK.A | S691:      | 3 | 4,1438 | 0,473 | -0,462 |

|    |                    |                                   |            |   |        |       |        |
|----|--------------------|-----------------------------------|------------|---|--------|-------|--------|
| 19 | Q6NZY4 ZCHC8_HUMAN | R.SLLKNS#PR.N                     | S695:      | 2 | 2,2516 | 0,252 | 0,061  |
| 19 | P16070 CD44_HUMAN  | K.LVINSNGNAVEDRKP#GLNGEASK.S      | S697:      | 3 | 3,6729 | 0,352 | 0,367  |
| 19 | Q01105 SET_HUMAN   | K.RQS#PLPPQK.K                    | S7:        | 2 | 2,123  | 0,162 | -0,431 |
| 19 | Q9Y6X9 MORC2_HUMAN | K.TASRPAPLVQQLSPSLLPNSKS#PR.E     | S705:      | 3 | 6,5606 | 0,478 | -0,418 |
| 19 | Q9UKV3 ACINU_HUMAN | R.RLS#QPESA.EK.H                  | S710:      | 2 | 2,9354 | 0,361 | -0,498 |
| 19 | Q8N9B5 JMY_HUMAN   | R.KGAAS#PVLQEDHCDLSPVLQVEEK.T     | S713:      | 3 | 5,6342 | 0,444 | -0,65  |
| 19 | Q9P275 UBP36_HUMAN | R.ATGNDLRPPPPS#PSSDLTHPM*K.T      | S713:      | 3 | 3,012  | 0,178 | 0,531  |
| 19 | Q9UPQ0 LIMC1_HUMAN | K.VVKPKS#PEPEATLTFPFLDK.M         | S718:      | 3 | 4,5113 | 0,346 | -0,709 |
| 19 | O43583 DENR_HUMAN  | K.LTVENS#PKQEAGISEGQGTAGEEEEEKK.K | S73:       | 3 | 5,5532 | 0,248 | -0,438 |
| 19 | Q66K74 MAP1S_HUMAN | R.SAS#PHDVDLCLVSPCFEHR.K          | S731:      | 3 | 4,365  | 0,33  | -0,075 |
| 19 | P46087 NOL1_HUMAN  | K.GTDTQTPAVLS#PSKTQATLKP.K.D      | S732:      | 3 | 3,6531 | 0,296 | 0      |
| 19 | Q9Y6X9 MORC2_HUMAN | R.KRS#VAVS#DEEEVEEEAER.R          | S739:S743: | 3 | 5,7008 | 0,449 | 0,325  |
| 19 | Q9UNZ2 NSF1C_HUMAN | R.VTS#FRDLIHDQDEDEEEEEGQR.F       | S74:       | 3 | 4,8132 | 0,499 | 0,266  |
| 19 | Q96C19 EFHD2_HUMAN | R.RADLNQGIGEPQS#PSR.R             | S74:       | 2 | 4,0905 | 0,439 | -0,27  |
| 19 | Q9BXP5 ARS2_HUMAN  | R.HEL#PPQK.R                      | S74:       | 2 | 2,9302 | 0,372 | -0,3   |
| 19 | Q03164 HRX_HUMAN   | R.KVFS#PIR.S                      | S742:      | 2 | 2,0099 | 0,108 | -0,132 |
| 19 | O60307 MAST3_HUMAN | R.RLS#ADIR.L                      | S747:      | 2 | 2,1214 | 0,117 | -0,335 |
| 19 | Q9NXE4 NSMA3_HUMAN | R.HLLS#PVGR.R                     | S753:      | 2 | 2,2358 | 0,321 | -0,064 |
| 19 | P48634 BAT2_HUMAN  | R.ERSDS#GGSSSEPFDR.H              | S761:      | 2 | 2,9653 | 0,407 | -0,649 |
| 19 | Q68DN6 RGPD1_HUMAN | K.HSTPS#PTKYS#LSPSK.S             | S772:S777: | 3 | 3,0391 | 1     | 0,103  |
| 19 | Q68DN6 RGPD1_HUMAN | K.HSTPS#PTKYS#LSPSK.S             | S772:S779: | 2 | 4,222  | 1     | -0,481 |
| 19 | Q9Y6X9 MORC2_HUMAN | K.KDSNELS#DS#AGEEDSADLKR.A        | S777:S779: | 3 | 3,2126 | 0,519 | -0,393 |
| 19 | O75362 ZN217_HUMAN | K.GKQS#PPGPGKAPLTSGIDSSTLAPSNLK.S | S795:      | 3 | 5,9662 | 0,468 | 0,591  |
| 19 | P49792 RBP2_HUMAN  | K.SYKYS#PKT#PPR.W                 | S796:T799: | 2 | 2,627  | 0,153 | -0,082 |
| 19 | Q9UK76 HN1_HUMAN   | K.SSGGREDLESS#GLQR.R              | S80:       | 3 | 3,1173 | 0,134 | -0,441 |
| 19 | Q9UK76 HN1_HUMAN   | K.SSGGREDLESS#GLQR.R              | S80:       | 2 | 2,2492 | 0,409 | -0,294 |
| 19 | Q9Y5K6 CD2AP_HUMAN | R.HGNVAS#LVQR.I                   | S80:       | 2 | 2,1417 | 0,192 | 0      |
| 19 | O95696 BRD1_HUMAN  | R.SRS#TCGDSEVEEES#PGKR.L          | S803:S814: | 3 | 3,6074 | 0,331 | -0,59  |
| 19 | Q53GS9 SNUT2_HUMAN | R.EREVEDEDS#EPER.E                | S82:       | 3 | 4,1425 | 0,274 | -0,35  |
| 19 | Q53GS9 SNUT2_HUMAN | R.EREVEDEDS#EPER.E                | S82:       | 2 | 3,0674 | 0,297 | -0,544 |
| 19 | Q14103 HNRPD_HUMAN | K.IDASKNEEDEGHSNS#S#PR.H          | S82:S83:   | 3 | 2,9709 | 0,236 | -0,343 |
| 19 | Q01082 SPTB2_HUMAN | R.GRLS#GIEER.Y                    | S825:      | 2 | 2,26   | 0,174 | -0,556 |
| 19 | Q8N8A6 DDX51_HUMAN | R.RVNDAEPGS#PEAPQGGK.R            | S83:       | 2 | 3,8238 | 0,487 | -0,423 |



|    |                       |                                  |                 |   |        |       |        |
|----|-----------------------|----------------------------------|-----------------|---|--------|-------|--------|
| 19 | Q8N3R9 MPP5_HUMAN     | K.KQELDLNS#SM*R.L                | S83:            | 2 | 3,337  | 0,418 | -0,517 |
| 19 | Q8N8A6 DDX51_HUMAN    | R.RVNDAEPGS#PEAPQ GK.R           | S83:            | 3 | 3,1417 | 0,289 | 0      |
| 19 | O00571 DDX3X_HUMAN    | R.GKSS#FFSDR.G                   | S83:            | 2 | 2,9977 | 0,258 | 0      |
| 19 | Q9ULJ8 NEB1_HUMAN     | R.RTS#LGEVSK.G                   | S840:           | 2 | 2,7734 | 0,316 | 0,462  |
| 19 | O95819 M4K4_HUMAN     | K.HKS#SS#SFTPFIDPR.L             | S852:S854:      | 2 | 2,8217 | 0,376 | 0      |
| 19 | O95819 M4K4_HUMAN     | K.HKS#SSS#FTPFIDPR.L             | S852:S855:      | 3 | 2,819  | 0,197 | -0,104 |
| 19 | Q00653 NFKB2_HUMAN    | R.DKLPS#TAEVKEDSAYGSQSVEQAEK.L   | S858:           | 3 | 5,9244 | 0,524 | -0,378 |
| 19 | A8K9D9 A8K9D9_HUMAN   | R.DKLPS#TEVKEDSAYGSQSVEQAEK.L    | S858:           | 3 | 5,1089 | 0,385 | -0,323 |
| 19 | P35606 COPB2_HUMAN    | R.STAQQELDGKPAS#PTPVIVASHTANK.E  | S859:           | 3 | 6,2122 | 0,47  | 0,335  |
| 19 | Q9UPU5 UBP24_HUMAN    | R.IILNSHS#PAGSAAISQQDFHPK.C      | S862:           | 3 | 5,1473 | 0,402 | -0,153 |
| 19 | Q9BW71 HIRP3_HUMAN    | K.RPPTPCS#DPER.K                 | S87:            | 3 | 2,8817 | 0,344 | 0,131  |
| 19 | Q9BW71 HIRP3_HUMAN    | K.RPPTPCS#DPER.K                 | S87:            | 2 | 2,2757 | 0,139 | -0,614 |
| 19 | Q9C0C2 TB182_HUMAN    | R.DAELQDQEFGRDS#LGTYS SR.D       | S872:           | 3 | 3,4014 | 0,29  | -0,074 |
| 19 | Q2NKX8 ERC6L_HUMAN    | K.S#TKADIGPNLDQLKDDEILR.H        | S872:           | 3 | 2,6364 | 0,288 | -0,158 |
| 19 | Q9C0C2 TB182_HUMAN    | K.RDS#LGTYS SR.D                 | S872:           | 2 | 2,3146 | 0,191 | 0,1    |
| 19 | Q8IYB3 SRRM1_HUMAN    | K.KETES#EAEDNLDDLEK.H            | S874:           | 2 | 3,7408 | 0,502 | 0,125  |
| 19 | Q9UK76 HN1_HUMAN      | R.RNSS#EASSGDFLDLKG              | S88:            | 2 | 3,5035 | 0,323 | 0,072  |
| 19 | B2RTT4 B2RTT4_HUMAN   | K.EAVVDLHADD SRIS#EETER.N        | S885:           | 3 | 4,4542 | 0,416 | 0,309  |
| 19 | Q9NR30 DDX21_HUMAN    | K.KEEPSQNDIS#PK.T                | S89:            | 2 | 4,1405 | 0,396 | -0,504 |
| 19 | Q9NR30 DDX21_HUMAN    | K.KEEPSQNDIS#PK.T                | S89:            | 3 | 2,8765 | 0,209 | -0,063 |
| 19 | ##Q8IZV9 Q8IZV9_HUMAN | -.KGPLLGGPS#HS#SSAKR.K           | S9:S11:         | 2 | 2,0022 | 0,144 | 1,614  |
| 19 | Q14C86 GAPD1_HUMAN    | R.S#RSSDIVSSVR.R                 | S900:           | 3 | 2,7212 | 0,179 | 0,862  |
| 19 | Q7Z4H7 FA29A_HUMAN    | R.KRS#LS#PLIKFS#PVEQR.L          | S906:S908:S914: | 3 | 2,7991 | 0,141 | 0,861  |
| 19 | Q9Y2H2 SAC2_HUMAN     | R.SQS#LSSTDSSVHAPSEITVAHGSGLGK.G | S907:           | 3 | 5,0091 | 0,567 | -0,538 |
| 19 | O75044 FNBP2_HUMAN    | K.NRLDS#PQIR.K                   | S916:           | 2 | 2,1358 | 0,351 | -0,207 |
| 19 | P05455 LA_HUMAN       | R.S#PSKPLPEVTDEYKNDVK.N          | S92:            | 3 | 3,1117 | 0,31  | 0,516  |
| 19 | P98171 RHG04_HUMAN    | R.GPGAPAS#PSASHPQGLDTPKPH.-      | S930:           | 3 | 4,2163 | 0,316 | 0,08   |
| 19 | Q5VY92 Q5VY92_HUMAN   | R.ERQELGS#PEER.L                 | S932:           | 2 | 2,01   | 0,157 | -0,952 |
| 19 | O94827 PKHG5_HUMAN    | K.SKS#EASLLQLLAGAGTHGTPSAPSR.S   | S934:           | 3 | 4,2707 | 0,319 | -0,582 |
| 19 | Q01831 XPC_HUMAN      | K.VIKDEALS#DGDDLRFPSDLK.K        | S94:            | 3 | 3,9566 | 0,377 | 0,301  |
| 19 | Q01831 XPC_HUMAN      | K.DEALS#DGDDLRFPSDLK.A           | S94:            | 3 | 3,0733 | 0,169 | -0,165 |
| 19 | P78317 RNF4_HUMAN     | R.RLPQDHADSCVVS#S#DDEELSR.D      | S94:S95:        | 3 | 4,8922 | 0,44  | 0      |
| 19 | Q5VZ89 DEN4C_HUMAN    | K.RSS#LYGIAK.V                   | S948:           | 2 | 2,9728 | 0,439 | -0,114 |

|    |                    |                                 |                 |   |        |       |        |
|----|--------------------|---------------------------------|-----------------|---|--------|-------|--------|
| 19 | Q9Y4G8 RPGF2_HUMAN | R.RSS#FLNAK.K                   | S960:           | 2 | 2,8372 | 0,244 | -0,304 |
| 19 | Q92834 RPGR_HUMAN  | K.RVPS#INQK.I                   | S961:           | 2 | 2,0016 | 0,278 | -0,239 |
| 19 | Q14498 RBM39_HUMAN | R.YRS#PYSGPK.F                  | S97:            | 2 | 2,6756 | 0,329 | -0,538 |
| 19 | Q9UPQ0 LIMC1_HUMAN | K.SINHQIES#PSER.R               | S973:           | 3 | 2,6155 | 0,134 | -0,062 |
| 19 | Q9UBB9 TFP11_HUMAN | K.GAAEEAELEDS#DDEEKPVKQDDFPK.D  | S98:            | 3 | 5,2858 | 0,434 | 0,446  |
| 19 | Q9H2P0 ADNP_HUMAN  | R.NVHS#EDFENR.I                 | S98:            | 2 | 2,8138 | 0,321 | -0,368 |
| 19 | P46020 KPB1_HUMAN  | R.SVRPTDSNVSPAIS#IHEIGAVGATK.T  | S985:           | 3 | 5,4583 | 0,422 | -0,071 |
| 19 | Q9H4Z2 ZN335_HUMAN | K.THCVGDSQSSASS#PPATSK.A        | S992:           | 3 | 3,995  | 0,474 | -0,645 |
| 19 | Q14669 TRIPC_HUMAN | R.DDSLDSLSPQGRLS#DVLKR.K        | S997:           | 3 | 3,0447 | 0,231 | -0,087 |
| 19 | Q8NE71 ABCF1_HUMAN | K.KLSVPT#S#DEEDEVPAPKPR.G       | T108:S109:      | 3 | 5,4271 | 0,348 | 0,162  |
| 19 | Q9BX63 FANCI_HUMAN | R.HFNYPST#PPSER.N               | T113:           | 2 | 3,0755 | 0,309 | 0,404  |
| 19 | P20020 AT2B1_HUMAN | R.IEDSEPHIPLIDDT#DAEDDAPTKR.N   | T1203:          | 3 | 7,8783 | 0,53  | -0,264 |
| 19 | Q9NYV4 CD2L7_HUMAN | R.RT#PTM*PQEEAACPPHILPPEK.R     | T1244:          | 3 | 3,9234 | 0,401 | 0,57   |
| 19 | Q8NFA0 UBP32_HUMAN | R.DPALCQHKLPT#PQGDELSEPR.I      | T1326:          | 3 | 2,9743 | 0,198 | 0,593  |
| 19 | Q8N9Q2 S12IP_HUMAN | K.HSST#PNSSEFSR.K               | T146:           | 2 | 2,788  | 0,262 | -0,603 |
| 19 | Q8WTV1 THAP3_HUMAN | R.T#PNKQPSDHSYALLDLSLK.K        | T170:           | 3 | 3,2926 | 0,315 | 0      |
| 19 | Q9H1E3 NUCKS_HUMAN | R.LKATVT#PS#PVKGGK.G            | T179:S181:      | 3 | 3,0019 | 0,252 | -0,431 |
| 19 | Q1ED39 TS118_HUMAN | R.DVGDT#CSVGKKDEEQAALGQK.R      | T183:           | 3 | 3,6779 | 0,41  | -0,316 |
| 19 | P27361 MK03_HUMAN  | R.IADPEHDHTGFLT#EYVATR.W        | T202:           | 3 | 4,3749 | 0,458 | 0,65   |
| 19 | Q9H1E3 NUCKS_HUMAN | K.EKT#PS#PKEEDEEPES#PPEKK.T     | T202:S204:S214: | 3 | 3,0101 | 0,158 | -0,646 |
| 19 | Q9BYG3 MK67I_HUMAN | K.KVSGTLDT#PEK.T                | T223:           | 2 | 4,0855 | 0,311 | -0,681 |
| 19 | Q9Y3Y2 CA077_HUMAN | K.TKGHLDAELDAYM*AQT#DPETND.-    | T242:           | 3 | 4,7213 | 0,472 | -0,361 |
| 19 | Q8TE23 TS1R2_HUMAN | R.QRLVT#IVDK.L                  | T259:           | 2 | 2,0774 | 0,167 | 0,212  |
| 19 | O94906 PRP6_HUMAN  | K.GYLT#DLNSM*IPTHGGDINDIKK.A    | T275:           | 3 | 3,0174 | 0,231 | -0,732 |
| 19 | Q96CP6 GRM1A_HUMAN | R.GHVT#PNLSR.A                  | T277:           | 2 | 2,4263 | 0,273 | -0,46  |
| 19 | Q9NZM5 GSCR2_HUMAN | K.SDADSGFLGLRPT#SVPALRR.R       | T28:            | 3 | 3,3507 | 0,392 | -0,792 |
| 19 | P49915 GUAA_HUMAN  | K.VINAAHSFYNGTTTLPISDEDRT#PR.K  | T318:           | 3 | 3,9829 | 0,351 | -0,513 |
| 19 | Q8TAQ2 SMRC2_HUMAN | K.KGPST#PYTK.S                  | T322:           | 2 | 2,1287 | 0,18  | -0,23  |
| 19 | P46013 KI67_HUMAN  | K.GRDVESVQT#PSK.A               | T328:           | 2 | 3,4205 | 0,39  | -0,618 |
| 19 | Q9BVL2 NUPL1_HUMAN | R.TQKT#PPGLQHEYAAPADYFR.I       | T331:           | 3 | 3,1249 | 0,152 | 0,077  |
| 19 | Q7L9L4 MOL1A_HUMAN | K.HAEAT#LGSGNLR.M               | T35:            | 2 | 3,4318 | 0,539 | 0,187  |
| 19 | Q92692 PVRL2_HUMAN | R.KEQTLQGAEEDEDLEGPPSYKPPT#PK.A | T410:           | 3 | 5,2327 | 0,277 | -0,309 |
| 19 | Q2TB10 ZN800_HUMAN | K.VKVEPADSVESPPSIT#HSPQNELK.G   | T424:           | 3 | 5,5202 | 0,534 | -0,199 |

|    |                    |                               |            |   |        |       |        |
|----|--------------------|-------------------------------|------------|---|--------|-------|--------|
| 19 | Q9H0S4 DDX47_HUMAN | R.SREDAGDNDT#EGAIGVR.N        | T434:      | 2 | 4,0421 | 0,528 | 0,873  |
| 19 | P08238 HS90B_HUMAN | K.LGIHEDST#NR.R               | T446:      | 3 | 3,0974 | 0,345 | 0,524  |
| 19 | Q05209 PTN12_HUMAN | K.VSVT#PPEESQNSDTPRPDRPLDEK.G | T509:      | 3 | 3,2846 | 0,378 | -0,368 |
| 19 | P13639 EF2_HUMAN   | R.FT#DT#RKDEQER.C             | T57:T59:   | 2 | 2,0121 | 0,175 | -0,539 |
| 19 | O95340 PAPS2_HUMAN | R.HNEFDIFISGT#R.M             | T579:      | 2 | 3,5268 | 0,528 | -0,174 |
| 19 | Q9Y3Z3 SAMH1_HUMAN | R.NFTKPQDGDVIAPLIT#PQKK.E     | T592:      | 3 | 4,449  | 0,308 | 0,559  |
| 19 | Q66K74 MAP1S_HUMAN | K.ALELPLAASSIPRPT#PS#PESHR.S  | T638:S640: | 3 | 3,8053 | 1     | 0,069  |
| 19 | Q66K74 MAP1S_HUMAN | K.ALELPLAASSIPRPT#PSPES#HR.S  | T638:S643: | 3 | 3,104  | 0,298 | 0,623  |
| 19 | Q16531 DDB1_HUMAN  | R.SLST#TNVFACSDRPTVIYSSNHK.L  | T646:      | 3 | 4,0314 | 0,338 | -0,343 |
| 19 | Q13615 MTMR3_HUMAN | R.KT#PEASAIGHLHQDPELGDAAALR.S | T731:      | 3 | 3,7096 | 0,317 | 1,236  |
| 19 | Q6PKG0 LARP1_HUMAN | R.TPRT#PRT#PQLK.D             | T785:T788: | 3 | 2,9355 | 0,159 | 0      |
| 19 | Q9Y2W1 TR150_HUMAN | R.NREEWDPEYT#PK.S             | T874:      | 3 | 2,925  | 0,214 | 0,206  |
| 19 | Q13428 TCOF_HUMAN  | R.KGAAPT#PPGK.T               | T914:      | 2 | 2,4431 | 0,237 | -0,182 |
| 19 | Q71F23 CENPU_HUMAN | K.HCGLSLSST#PPGK.E            | T98:       | 2 | 3,2629 | 0,362 | -0,515 |
| 19 | P18669 PGAM1_HUMAN | R.HY#GGLTGLNK.A               | Y92:       | 2 | 2,8152 | 0,166 | -0,107 |
| 19 | P60709 ACTB_HUMAN  | R.KDLYANTVLSGGTTM*YPGIADR.M   |            | 3 | 6,1966 | 0,554 | 0      |
| 19 | P20042 IF2B_HUMAN  | K.FPDEDEILEKDEALEDEDNK.K      |            | 3 | 6,1838 | 0,342 | -0,153 |
| 19 | Q09666 AHNK_HUMAN  | K.IKGDVPSVGLGPDVDLQGPEAK.I    |            | 3 | 6,1153 | 0,422 | -0,315 |
| 19 | P12268 IMDH2_HUMAN | K.DKYPNLQVIGGNVVTAAQAK.N      |            | 3 | 5,5341 | 0,431 | -0,175 |
| 19 | Q9P0M6 H2AW_HUMAN  | K.DSDKEGTSNSTSEDGPGDGFILSSK.S |            | 3 | 5,5064 | 0,458 | 0,278  |
| 19 | P48506 GSH1_HUMAN  | K.DKNTSPFIETFTEDDEASR.A       |            | 3 | 5,4666 | 0,477 | -0,239 |
| 19 | P13861 KAP2_HUMAN  | K.ADEHVIDQGDGDNFYVIER.G       |            | 3 | 5,3999 | 0,456 | -0,159 |
| 19 | P13489 RINI_HUMAN  | K.DSPCQLEALKLESCGVTSNCR.D     |            | 3 | 5,3986 | 0,557 | -0,216 |
| 19 | P00338 LDHA_HUMAN  | K.DQLIYNLLKEEQTPQNK.I         |            | 3 | 5,2089 | 0,327 | 0,353  |
| 19 | P28066 PSA5_HUMAN  | K.GPQLFHM*DPSGTFVQCDAR.A      |            | 3 | 5,1782 | 0,434 | 0,504  |
| 19 | P0C7M2 RA1L3_HUMAN | R.GFAFVTDDHDSVDK.I            |            | 2 | 5,1075 | 0,465 | -0,574 |
| 19 | P50579 AMPM2_HUMAN | K.GPSAAGEQEPDKESGASVDEVAR.Q   |            | 3 | 5,0876 | 0,544 | -0,16  |
| 19 | Q9UNZ2 NSF1C_HUMAN | R.DLIHDQDEDEEEEGQR.F          |            | 3 | 5,0063 | 0,296 | -0,263 |
| 19 | Q02952 AKA12_HUMAN | K.VKEESQLPGTGGPEDVLQPVQR.A    |            | 3 | 4,9742 | 0,388 | 0,155  |
| 19 | P07355 ANXA2_HUMAN | K.LSLEGDHSTPPSAYGSVK.A        |            | 2 | 4,9064 | 0,516 | -0,463 |
| 19 | Q9UJN8 MCD2L_HUMAN | R.DDDKNNDGYIDYAEFAK.S         |            | 2 | 4,8987 | 0,587 | -0,673 |
| 19 | P67809 YBOX1_HUMAN | R.EDGNEEDKENQGDETQGGQPPQR.R   |            | 3 | 4,789  | 0,415 | -0,139 |
| 19 | P62158 CALM_HUMAN  | K.EAFSLFDKDGDTITTK.E          |            | 2 | 4,7343 | 0,529 | -0,463 |

|    |                     |                                  |   |        |       |        |
|----|---------------------|----------------------------------|---|--------|-------|--------|
| 19 | Q9UJZ1 STML2_HUMAN  | R.DVQGTDASLDEELDRVK.M            | 2 | 4,7328 | 0,489 | -0,387 |
| 19 | P49736 MCM2_HUMAN   | R.FGAQQDTIEVPEKDLVDK.A           | 3 | 4,7067 | 0,316 | 0,63   |
| 19 | Q9Y2L1 RRP44_HUMAN  | K.DKPNPQLIYDDEIPSLK.I            | 3 | 4,7003 | 0,529 | -0,092 |
| 19 | Q00341 VIGLN_HUMAN  | R.DKFPEVIINFDPDAQK.S             | 3 | 4,6408 | 0,225 | -0,394 |
| 19 | P22234 PUR6_HUMAN   | R.DLKEVTPEGLQM*VK.K              | 3 | 4,6272 | 0,432 | 0,114  |
| 19 | P20042 IF2B_HUMAN   | K.DASDDLDDLNFFNQKK.K             | 2 | 4,6217 | 0,384 | -0,583 |
| 19 | Q9Y5B9 SP16H_HUMAN  | K.NEDEEEEEEEKDEAEDLLGR.G         | 3 | 4,616  | 0,41  | -0,228 |
| 19 | P26641 EF1G_HUMAN   | K.KAAAPAPEEEM*DECEQALAAEPK.A     | 3 | 4,5887 | 0,354 | 0,585  |
| 19 | P08133 ANXA6_HUMAN  | R.DLEADIIGDTSGHFQK.M             | 2 | 4,5754 | 0,505 | -0,489 |
| 19 | P11766 ADHX_HUMAN   | K.VDEFVTHNLSFDEINK.A             | 3 | 4,5371 | 0,395 | -0,384 |
| 19 | Q9NY12 NOLA1_HUMAN  | K.CTTDENKVPYFNAPVYLENK.E         | 3 | 4,5264 | 0,359 | -0,076 |
| 19 | P13639 EF2_HUMAN    | K.YRCELLYEGPPDDEAAM*GIK.S        | 3 | 4,4962 | 0,425 | -0,312 |
| 19 | P20042 IF2B_HUMAN   | K.IFDIDEAEEGVKDLK.I              | 2 | 4,4884 | 0,358 | -0,496 |
| 19 | O60763 USO1_HUMAN   | R.DSEQVAELKQELATLK.S             | 2 | 4,4827 | 0,445 | -0,677 |
| 19 | Q9Y4P1 ATG4B_HUMAN  | K.DSYYSIHQIAQM*GVGEGK.S          | 3 | 4,4674 | 0,471 | 0,092  |
| 19 | P08865 RSSA_HUMAN   | R.DPEEIEKEEQAAAEK.A              | 3 | 4,4527 | 0,494 | 0,32   |
| 19 | Q99816 TS101_HUMAN  | R.LDQEVAEVDKNIELLK.K             | 3 | 4,4525 | 0,418 | -0,394 |
| 19 | P27361 MK03_HUMAN   | R.DLKPSNLLINTTCDLK.I             | 2 | 4,4371 | 0,378 | -0,529 |
| 19 | P34932 HSP74_HUMAN  | K.M*QVDQEEPHVEEQQQTPAENK.A       | 3 | 4,4233 | 0,336 | 0,624  |
| 19 | Q9UGV2 NDRG3_HUMAN  | R.DLEIERPILGQNDNK.S              | 2 | 4,4225 | 0,444 | 0,835  |
| 19 | Q9H4M9 EHD1_HUMAN   | K.DKPTYDEIFYTLSPVNGK.I           | 3 | 4,3987 | 0,278 | -0,438 |
| 19 | P22626 ROA2_HUMAN   | R.GFGFVTFDHDPVVK.I               | 2 | 4,3975 | 0,514 | -0,719 |
| 19 | P31939 PUR9_HUMAN   | K.NGNYCVLQM*DQSYKPDENEVR.T       | 3 | 4,3214 | 0,465 | 0,142  |
| 19 | Q9HB71 CYBP_HUMAN   | K.EKPSYDTETDPSEGLM*NVLK.K        | 3 | 4,3182 | 0,441 | -0,242 |
| 19 | Q6AW89 Q6AW89_HUMAN | K.DGPHGSVLEEGDDYLTR.L            | 3 | 4,3024 | 0,418 | -0,649 |
| 19 | Q9UJN8 MCD2L_HUMAN  | R.DDDKNNDGYIDYAEFAK.S            | 3 | 4,2855 | 0,381 | 0,275  |
| 19 | P52907 CAZA1_HUMAN  | K.FITHAPPGEFNEVFNDVR.L           | 3 | 4,2751 | 0,228 | -0,438 |
| 19 | O60664 M6PBP_HUMAN  | R.GLDKLEENLPILQQPTEK.V           | 3 | 4,2645 | 0,368 | -0,089 |
| 19 | Q14254 FLOT2_HUMAN  | K.DVYDKVDYSSLGK.T                | 2 | 4,2495 | 0,522 | 0,381  |
| 19 | Q9NYL9 TMOD3_HUMAN  | K.YKDLDEDELLGNLSETELK.Q          | 3 | 4,2464 | 0,327 | -0,411 |
| 19 | P62937 PPIA_HUMAN   | K.HTGPGILSM*ANAGPNTNGSQFFICTAK.T | 3 | 4,2446 | 0,52  | 0,978  |
| 19 | Q71U36 TBA1A_HUMAN  | R.IHFPLATYAPVISA EK.A            | 2 | 4,2418 | 0,518 | -0,486 |
| 19 | P10586 PTPRF_HUMAN  | R.DHPPIPITDLADNIER.L             | 3 | 4,2378 | 0,397 | -0,201 |

|    |                    |                          |   |        |       |        |
|----|--------------------|--------------------------|---|--------|-------|--------|
| 19 | P13639 EF2_HUMAN   | K.DLEEDHACIPIK.K         | 2 | 4,2119 | 0,36  | -0,339 |
| 19 | Q9H3K6 BOLA2_HUMAN | R.DLEAEHVEVEDTTLNR.C     | 2 | 4,204  | 0,509 | -0,587 |
| 19 | Q71U36 TBA1A_HUMAN | R.IHFPLATYAPVISA EK.A    | 3 | 4,1843 | 0,427 | -0,104 |
| 19 | P15559 NQO1_HUMAN  | K.LKDPANFQYPAESVLAYK.E   | 3 | 4,1689 | 0,297 | -0,445 |
| 19 | Q9Y295 DRG1_HUMAN  | K.DHTLEDEDVIQIVK.K       | 3 | 4,1605 | 0,255 | 0,111  |
| 19 | P51991 ROA3_HUMAN  | R.GFAFVTFDHDTVDK.I       | 2 | 4,1562 | 0,535 | -0,57  |
| 19 | P13010 KU86_HUMAN  | K.DEKDTLEDLFP TTK.I      | 2 | 4,1449 | 0,394 | -0,418 |
| 19 | P00505 AATM_HUMAN  | K.NLDKEYLPIGG LAEFCK.A   | 3 | 4,1416 | 0,39  | -0,465 |
| 19 | Q14008 CKAP5_HUMAN | R.DALRPPLQ NINSVQLK.E    | 3 | 4,1321 | 0,487 | -0,203 |
| 19 | P48643 TCPE_HUMAN  | R.DVDFELIKVEGK.V         | 2 | 4,1124 | 0,538 | 0,088  |
| 19 | Q9Y2L1 RRP44_HUMAN | K.DKPNPQLIYDDEIPSLK.I    | 2 | 4,105  | 0,39  | -0,492 |
| 19 | Q99733 NP1L4_HUMAN | R.LDNVPHTPSSYIETLPK.A    | 3 | 4,0975 | 0,434 | 0,574  |
| 19 | Q12789 TF3C1_HUMAN | R.DILHATFEESLDK.T        | 3 | 4,0951 | 0,452 | 0      |
| 19 | P14866 HNRPL_HUMAN | K.SDALETGLFLNHYQM*K.N    | 2 | 4,0756 | 0,521 | -0,454 |
| 19 | O94906 PRP6_HUMAN  | K.DDEEADAIYAALDKR.M      | 2 | 4,053  | 0,374 | -0,432 |
| 19 | Q9H4A4 AMPB_HUMAN  | R.VKIEPGVDPDDTYNETPYEK.G | 3 | 3,9827 | 0,377 | 0      |
| 19 | P12814 ACTN1_HUMAN | K.M*LDAEDIVGTARPDEK.A    | 2 | 3,9782 | 0,419 | -0,069 |
| 19 | Q9H9Y2 RPF1_HUMAN  | R.DFTDLIVINEDRK.T        | 2 | 3,9774 | 0,444 | -0,696 |
| 19 | P12004 PCNA_HUMAN  | R.DLSHIGDAVVISCAK.D      | 2 | 3,9768 | 0,545 | -0,077 |
| 19 | Q9H0A0 NAT10_HUMAN | K.TLSDDLDEAAKEFQEK.H     | 2 | 3,9529 | 0,463 | -0,398 |
| 19 | O75369 FLNB_HUMAN  | K.DLDIIDNYDYSHTVK.Y      | 2 | 3,952  | 0,391 | -0,135 |
| 19 | Q99497 PARK7_HUMAN | R.DVVICPDASLEDAKK.E      | 2 | 3,9321 | 0,346 | -0,221 |
| 19 | O43395 PRPF3_HUMAN | K.DQTKPTPLILDEQGR.T      | 3 | 3,9317 | 0,29  | 0,214  |
| 19 | P08865 RSSA_HUMAN  | R.DPEEIEKEEQAAA EK.A     | 2 | 3,9158 | 0,474 | 0,64   |
| 19 | P35606 COPB2_HUMAN | K.DM*GSCEIYPQTIQHNPNGR.F | 3 | 3,9014 | 0,383 | -0,246 |
| 19 | O00487 PSDE_HUMAN  | K.AVEEEDKM*TPEQLAIK.N    | 2 | 3,8864 | 0,441 | -0,595 |
| 19 | Q9Y230 RUVB2_HUMAN | R.GTSYQSPHGIPIDLLDR.L    | 2 | 3,8784 | 0,523 | -0,588 |
| 19 | P14927 QCR7_HUMAN  | R.DDTIYEDEDVKEAIR.R      | 2 | 3,8726 | 0,45  | -0,404 |
| 19 | Q92499 DDX1_HUMAN  | K.IDCDNLEQYFIQQGGGPDKK.G | 3 | 3,8665 | 0,365 | -0,472 |
| 19 | P13693 TCTP_HUMAN  | R.DLISHDEM*FSDIYK.I      | 2 | 3,8604 | 0,469 | -0,423 |
| 19 | Q9Y295 DRG1_HUMAN  | K.DHTLEDEDVIQIVK.K       | 2 | 3,8561 | 0,511 | -0,369 |
| 19 | Q07021 C1QBP_HUMAN | K.AFVDFLSDEIKEER.K       | 2 | 3,8529 | 0,349 | -0,503 |
| 19 | P46821 MAP1B_HUMAN | K.DIKPQLELIEDEEK.L       | 3 | 3,849  | 0,316 | 0,646  |

|    |                    |                             |   |        |       |        |
|----|--------------------|-----------------------------|---|--------|-------|--------|
| 19 | Q8WYA6 CTBL1_HUMAN | R.DGEEEEEEEEPLDESSVKK.M     | 3 | 3,8477 | 0,335 | 0      |
| 19 | Q9H4A3 WNK1_HUMAN  | K.DLLNHAFQEEETGVR.V         | 3 | 3,8275 | 0,396 | -0,618 |
| 19 | P14625 ENPL_HUMAN  | R.VFITDDFHDM*M*PK.Y         | 2 | 3,8063 | 0,368 | -0,45  |
| 19 | P54578 UBP14_HUMAN | K.EKFEGVELNTDEPPM*VFK.A     | 3 | 3,8028 | 0,097 | 0,344  |
| 19 | P62736 ACTA_HUMAN  | K.YPIEHGIITNWDDM*EK.I       | 2 | 3,8    | 0,391 | -0,432 |
| 19 | P04792 HSPB1_HUMAN | R.VSLDVNHAFDELTVK.T         | 2 | 3,7931 | 0,505 | -0,752 |
| 19 | O95163 ELP1_HUMAN  | K.VHELQGNAPSDPDVAESAEEALK.Y | 3 | 3,7817 | 0,203 | 0      |
| 19 | P06748 NPM_HUMAN   | K.DELHIVEAEAM*NYEGSPIK.V    | 3 | 3,7777 | 0,169 | -0,508 |
| 19 | P13693 TCTP_HUMAN  | R.DLISHDEM*FSDIYK.I         | 3 | 3,7689 | 0,454 | 0,212  |
| 19 | O14965 STK6_HUMAN  | R.DIKPENLLLGSAGELK.I        | 2 | 3,7588 | 0,42  | -0,719 |
| 19 | P19525 E2AK2_HUMAN | R.DLKPSNIFLVDTK.Q           | 3 | 3,7508 | 0,46  | 0,061  |
| 19 | Q8N766 K0090_HUMAN | K.DKESGM*SSLYVFNPIFGK.W     | 3 | 3,739  | 0,343 | -0,539 |
| 19 | Q06203 PUR1_HUMAN  | K.CELENCQPFVVETLHGK.I       | 3 | 3,7274 | 0,394 | -0,089 |
| 19 | P54652 HSP72_HUMAN | R.IINEPTAAAIAYGLDKK.G       | 2 | 3,7116 | 0,41  | -0,409 |
| 19 | O75534 CSDE1_HUMAN | K.DQFGFINYEVGDSKK.L         | 2 | 3,7062 | 0,458 | 0,419  |
| 19 | O14965 STK6_HUMAN  | R.DIKPENLLLGSAGELK.I        | 3 | 3,7002 | 0,342 | -0,216 |
| 19 | P48507 GSH0_HUMAN  | R.EFPDVLECTVSHAVEK.I        | 2 | 3,6996 | 0,479 | -0,656 |
| 19 | P27348 1433T_HUMAN | K.QTIDNSQGAYQEAFDISKK.E     | 3 | 3,6959 | 0,474 | 0      |
| 19 | P13797 PLST_HUMAN  | R.VYALPEDLVEVKPK.M          | 2 | 3,686  | 0,377 | -0,305 |
| 19 | Q01780 EXOSX_HUMAN | R.DDTHYLLIYDK.M             | 2 | 3,6801 | 0,476 | -0,313 |
| 19 | Q9NVD7 PARVA_HUMAN | R.DAFDTLFDHAPDK.L           | 2 | 3,6793 | 0,458 | -0,654 |
| 19 | P31350 RIR2_HUMAN  | R.DEGLHCDFACLM*FK.H         | 3 | 3,6784 | 0,351 | -0,416 |
| 19 | P50395 GDIB_HUMAN  | K.EIRPALELLEPIEQK.F         | 3 | 3,6783 | 0,315 | -0,411 |
| 19 | P13667 PDIA4_HUMAN | R.YKVEGFPTIYFAPSGDK.K       | 3 | 3,6776 | 0,241 | -0,381 |
| 19 | O14561 ACPM_HUMAN  | K.LM*CPQEIVDYIADKK.D        | 3 | 3,6758 | 0,368 | -0,497 |
| 19 | Q9NYF8 BCLF1_HUMAN | K.DTFEHDPSSEIDFNK.S         | 3 | 3,6717 | 0,257 | 0,192  |
| 19 | P49427 UB2R1_HUMAN | R.DGVKVPPTLAEYCVK.T         | 3 | 3,671  | 0,328 | -0,109 |
| 19 | P62736 ACTA_HUMAN  | K.YPIEHGIITNWDDM*EK.I       | 3 | 3,6695 | 0,282 | 0      |
| 19 | P05387 RLA2_HUMAN  | K.ILDSVGIEADDDRLNK.V        | 2 | 3,6681 | 0,367 | -0,482 |
| 19 | P01889 1B07_HUMAN  | R.DGEDQTQDTELVETRPAGDR.T    | 3 | 3,6576 | 0,311 | 0,246  |
| 19 | P00505 AATM_HUMAN  | K.NLDKEYLPIGGLAEFCK.A       | 2 | 3,6491 | 0,473 | -0,558 |
| 19 | P50395 GDIB_HUMAN  | K.EIRPALELLEPIEQK.F         | 2 | 3,6457 | 0,29  | -0,549 |
| 19 | P27361 MK03_HUMAN  | R.DLKPSNLLINTTCDLK.I        | 3 | 3,6352 | 0,256 | 0,099  |

|    |                    |                                 |   |        |       |        |
|----|--------------------|---------------------------------|---|--------|-------|--------|
| 19 | Q09666 AHNK_HUMAN  | K.VESDLKGPEVDIEGPEGK.L          | 3 | 3,6299 | 0,265 | 0      |
| 19 | P50991 TCPD_HUMAN  | R.DALSDLALHFLNK.M               | 2 | 3,6185 | 0,488 | -0,502 |
| 19 | P55072 TERA_HUMAN  | R.ELQELVQYPVEHPDK.F             | 2 | 3,6027 | 0,465 | 0,334  |
| 19 | P00367 DHE3_HUMAN  | R.DSNYHLLM*SVQESLER.K           | 3 | 3,5935 | 0,133 | -0,567 |
| 19 | P19338 NUCL_HUMAN  | K.VTQDELKEVFEDAAEIR.L           | 3 | 3,5844 | 0,377 | -0,367 |
| 19 | O60763 USO1_HUMAN  | R.DSEQVAELKQELATLK.S            | 3 | 3,5637 | 0,272 | -0,304 |
| 19 | P31350 RIR2_HUMAN  | R.DEGLHCDFACLM*FK.H             | 2 | 3,5601 | 0,38  | -0,277 |
| 19 | O43395 PRPF3_HUMAN | K.DQTKPTPLILDEQGR.T             | 2 | 3,5349 | 0,444 | -0,143 |
| 19 | Q96T23 RSF1_HUMAN  | K.DADSSISVLEIHSQK.A             | 2 | 3,5331 | 0,355 | -0,374 |
| 19 | Q6ZXV5 TMTC3_HUMAN | R.DKISSSSFIEPIFPTSK.I           | 3 | 3,5255 | 0,2   | -0,194 |
| 19 | P05783 K1C18_HUMAN | R.RLLEDGEDFNLGDALDSSNSM*QTIQK.T | 3 | 3,5197 | 0,36  | -0,503 |
| 19 | O95766 CG028_HUMAN | K.DGKPVIEYQEEELDK.V             | 3 | 3,5106 | 0,217 | 0      |
| 19 | P10809 CH60_HUMAN  | K.VGEVIVTKDDAM*LLK.G            | 3 | 3,4803 | 0,43  | 0      |
| 19 | Q9BQA1 MEP50_HUMAN | K.YEHDDIVSTVSVLSSGTQAVSGSK.D    | 3 | 3,4748 | 0,359 | -0,223 |
| 19 | Q9BRT6 CL031_HUMAN | K.DVQEIATVVVPPKPK.H             | 2 | 3,4707 | 0,28  | -0,32  |
| 19 | O95766 CG028_HUMAN | K.DGKPVIEYQEEELDK.V             | 2 | 3,4672 | 0,35  | -0,576 |
| 19 | Q9Y223 GLCNE_HUMAN | K.DEAVGALHLIQAAL.L              | 2 | 3,4623 | 0,387 | -0,255 |
| 19 | O43290 SNUT1_HUMAN | R.DLQGLTVEHAIDSFR.E             | 2 | 3,4608 | 0,512 | -0,43  |
| 19 | P38117 ETFB_HUMAN  | K.IEVIKPGDLGVDLTSK.L            | 3 | 3,46   | 0,485 | 0      |
| 19 | Q9UPN3 MACF1_HUMAN | K.DCDVQGLEHDM*EEINAR.W          | 3 | 3,4547 | 0,421 | 0,268  |
| 19 | Q00610 CLH1_HUMAN  | R.LASTLVHLGEYQAAVDGAR.K         | 3 | 3,4532 | 0,409 | 0,093  |
| 19 | P05787 K2C8_HUMAN  | K.DVDEAYM*NKVELESR.L            | 2 | 3,4516 | 0,419 | 0,202  |
| 19 | Q9H0S4 DDX47_HUMAN | K.KLPGFPTQDDEVMM*MLTER.V        | 3 | 3,4508 | 0,272 | -0,086 |
| 19 | Q9H3K6 BOLA2_HUMAN | R.DLEAEHVEVEDTTLNR.C            | 3 | 3,4496 | 0,319 | 0      |
| 19 | Q13085 ACACA_HUMAN | R.DEPIHILNVAIK.T                | 2 | 3,4373 | 0,218 | -0,537 |
| 19 | Q9UGP8 SEC63_HUMAN | K.SPILLQLPHIEEDNLR.R            | 3 | 3,4372 | 0,359 | -0,412 |
| 19 | P20810 ICAL_HUMAN  | K.DLDDALDKLSDSLGQR.Q            | 3 | 3,4117 | 0,329 | -0,312 |
| 19 | Q99816 TS101_HUMAN | K.DLKPVLDYVFNDSR.E              | 3 | 3,4113 | 0,302 | 0      |
| 19 | Q9UBB9 TFP11_HUMAN | R.DM*VVNLFHELEK.M               | 2 | 3,4045 | 0,363 | -0,491 |
| 19 | P46821 MAP1B_HUMAN | K.DFEELKAEVDVTK.D               | 3 | 3,3997 | 0,505 | 0,111  |
| 19 | P26599 PTBP1_HUMAN | K.NNQFQALLQYADPVSAQHAK.L        | 3 | 3,3899 | 0,351 | -0,571 |
| 19 | O00165 HAX1_HUMAN  | R.TREDNDLDSQVSEQGLGPVLQPQPK.S   | 3 | 3,3874 | 0,361 | -0,067 |
| 19 | P08670 VIME_HUMAN  | R.QVQSLTCEVDALKGTTNESLER.Q      | 3 | 3,3818 | 0,405 | -0,231 |

|    |                     |                                |   |        |       |        |
|----|---------------------|--------------------------------|---|--------|-------|--------|
| 19 | P52948 NUP98_HUMAN  | K.SHLFDGLDDDEPSLANGAFM*PK.K    | 3 | 3,3808 | 0,3   | -0,382 |
| 19 | Q07666 KHDR1_HUMAN  | K.DDEENYLDFSHK.N               | 2 | 3,362  | 0,396 | -0,601 |
| 19 | P00558 PGK1_HUMAN   | K.ALESPERPFLAILGGAK.V          | 3 | 3,354  | 0,427 | -0,62  |
| 19 | Q9H993 CF211_HUMAN  | R.TIEDLDENQLKDEFFK.L           | 2 | 3,3462 | 0,395 | -0,861 |
| 19 | P55060 XPO2_HUMAN   | K.ANIVHLM*LSSPEQIQK.Q          | 3 | 3,3298 | 0,348 | 0,1    |
| 19 | P19338 NUCL_HUMAN   | K.GLSEDTTEETLKESFDGSVR.A       | 3 | 3,3292 | 0,504 | 0,083  |
| 19 | O15111 IKKA_HUMAN   | R.DLKPENIVLQDVGGK.I            | 3 | 3,3235 | 0,305 | 0,113  |
| 19 | P49642 PRI1_HUMAN   | R.ELDAISTNEEKEEENEAESDVK.H     | 3 | 3,3227 | 0,398 | -0,365 |
| 19 | P12004 PCNA_HUMAN   | R.DLSHIGDAVVISCAK.D            | 3 | 3,318  | 0,269 | 0,115  |
| 19 | P35579 MYH9_HUMAN   | K.NM*DPLNDNIATLLHQSSDK.F       | 3 | 3,3066 | 0,171 | -0,256 |
| 19 | P37802 TAGL2_HUMAN  | R.DDGLFSGDPNWFPPK.S            | 2 | 3,3014 | 0,326 | -0,354 |
| 19 | P06576 ATPB_HUMAN   | R.EGNDLYHEM*IESGVINLK.D        | 3 | 3,3001 | 0,181 | 0      |
| 19 | Q5VSL9 FA40A_HUMAN  | K.ADDSREEEEEENDDNSLEGETFPLER.D | 3 | 3,2986 | 0,421 | -0,12  |
| 19 | Q9Y265 RUVB1_HUMAN  | R.GTEDITSPHGIPLDLLDR.V         | 3 | 3,2984 | 0,125 | -0,375 |
| 19 | P20810 ICAL_HUMAN   | K.DLDDALDKLSDSLGQR.Q           | 2 | 3,2883 | 0,487 | -0,624 |
| 19 | Q86X76 NIT1_HUMAN   | R.DPAETLHLEPLGGK.L             | 3 | 3,2845 | 0,387 | 0,351  |
| 19 | P09936 UCHL1_HUMAN  | K.QTIGNSCGTIGLIHAVANNQDK.L     | 3 | 3,2782 | 0,423 | 0,158  |
| 19 | Q06323 PSME1_HUMAN  | K.APLDIPVPDPVKEK.E             | 3 | 3,2699 | 0,459 | 0,06   |
| 19 | Q8NFC6 FA44A_HUMAN  | K.DGIAVDHVVLNTEK.Y             | 3 | 3,2589 | 0,346 | 0,233  |
| 19 | P10809 CH60_HUMAN   | K.VGEVIVTKDDAM*LLK.G           | 2 | 3,2536 | 0,441 | -0,222 |
| 19 | Q6NZI2 PTRF_HUMAN   | K.VM*IYQDEVKLPK.L              | 3 | 3,2528 | 0,287 | 0      |
| 19 | P53621 COPA_HUMAN   | K.DM*SGHYQNALYLGDVSER.V        | 3 | 3,2525 | 0,223 | 0,265  |
| 19 | P06576 ATPB_HUMAN   | R.IM*DPNIVGSEHYDVAR.G          | 3 | 3,2437 | 0,279 | -0,1   |
| 19 | Q01780 EXOSX_HUMAN  | R.DDTHYLLIYDK.M                | 3 | 3,2371 | 0,324 | 0      |
| 19 | P13010 KU86_HUMAN   | K.DEKTDLTLEDFPTTK.I            | 3 | 3,2301 | 0,239 | -0,209 |
| 19 | Q16531 DDB1_HUMAN   | R.IGRPSETGIIGIIDPECR.M         | 3 | 3,2259 | 0,278 | 0      |
| 19 | P12956 KU70_HUMAN   | R.DTGIFLDM*HLK.K               | 2 | 3,2127 | 0,389 | -0,774 |
| 19 | Q92621 NU205_HUMAN  | R.DDM*IHQPLLTEK.Q              | 3 | 3,1967 | 0,302 | 0,117  |
| 19 | Q9UDG1 Q9UDG1_HUMAN | -.FGYVDFESAEDLEKK.G            | 3 | 3,1882 | 0,399 | 0      |
| 19 | P22234 PUR6_HUMAN   | R.DLKEVTEPLQM*VK.K             | 2 | 3,1882 | 0,283 | -0,304 |
| 19 | Q86UL3 PLCF_HUMAN   | K.DPTSLEEEIKEIR.R              | 3 | 3,185  | 0,309 | -0,235 |
| 19 | P18583 SON_HUMAN    | K.DIHLDLPSNNNLVSK.D            | 2 | 3,1844 | 0,392 | -0,218 |
| 19 | P08670 VIME_HUMAN   | R.DGQVINETSQHDDLE.-            | 2 | 3,1712 | 0,36  | -0,199 |



|    |                    |                                  |   |        |       |        |
|----|--------------------|----------------------------------|---|--------|-------|--------|
| 19 | Q15293 RCN1_HUMAN  | K.IVDRIDNDGDGFVTEELK.T           | 3 | 3,1627 | 0,266 | -0,257 |
| 19 | Q9UJH6 SHPK_HUMAN  | R.DTHLTITPTVLGER.H               | 3 | 3,1493 | 0,343 | 0,118  |
| 19 | Q13813 SPTA2_HUMAN | R.DLAALGDKVNSLGETAER.L           | 2 | 3,1475 | 0,508 | -0,459 |
| 19 | Q09666 AHNK_HUMAN  | K.APSLDIKGPEVDVSGPK.L            | 3 | 3,1343 | 0,399 | 0      |
| 19 | Q9P287 BCCIP_HUMAN | K.FLNDTTKPVGLLSER.F              | 3 | 3,1306 | 0,352 | -0,101 |
| 19 | Q9UL26 RB22A_HUMAN | K.DYADSIHAIFVETSAK.N             | 3 | 3,1174 | 0,471 | -0,414 |
| 19 | P54578 UBP14_HUMAN | K.FDDDKVSIVTPEDILR.L             | 3 | 3,1156 | 0,277 | -0,295 |
| 19 | Q15691 MARE1_HUMAN | R.KNPGVGVNGDDEAAELM*QQVNVLK.L    | 3 | 3,1127 | 0,21  | -0,449 |
| 19 | O14656 TOR1A_HUMAN | K.DIEHALSVSVFNNK.N               | 3 | 3,1041 | 0,206 | -0,116 |
| 19 | P04406 G3P_HUMAN   | R.GALQNIIPASTGAAKAVGK.V          | 3 | 3,1016 | 0,286 | -0,104 |
| 19 | P08133 ANXA6_HUMAN | R.DLM*TDLKSEISGLAR.L             | 3 | 3,0944 | 0,091 | -0,411 |
| 19 | Q13151 ROA0_HUMAN  | K.GDVAEGDLIEHFSQFGTVEK.A         | 3 | 3,0792 | 0,152 | -0,672 |
| 19 | Q05086 UBE3A_HUMAN | R.DLGDSHPVLYQSLK.D               | 2 | 3,0665 | 0,458 | 0      |
| 19 | Q14571 ITPR2_HUMAN | K.EDKEAFAIVSVPLSEVR.D            | 3 | 3,0615 | 0,244 | -0,29  |
| 19 | Q86UL3 PLCF_HUMAN  | K.DPTSLEEEIKEIR.R                | 2 | 3,0578 | 0,239 | -0,235 |
| 19 | Q13620 CUL4B_HUMAN | K.DM*ELSKDIM*IQFK.Q              | 3 | 3,0575 | 0,27  | -0,112 |
| 19 | P50613 CDK7_HUMAN  | R.DLKPNNLLLDENGVLK.L             | 3 | 3,0522 | 0,179 | -0,509 |
| 19 | Q7KZI7 MARK2_HUMAN | R.DLKAENLLLDADM*NIK.I            | 3 | 3,0503 | 0,081 | -0,599 |
| 19 | Q5TC12 ATPF1_HUMAN | K.DKTLSSIFNIEM*VK.E              | 3 | 3,0376 | 0,271 | -0,111 |
| 19 | P08758 ANXA5_HUMAN | R.DLLDDLKSELTGK.F                | 2 | 3,0332 | 0,372 | -0,59  |
| 19 | O14980 XPO1_HUMAN  | R.ETLVYLTHLDYVDTER.I             | 3 | 3,033  | 0,305 | -0,093 |
| 19 | O43815 STRN_HUMAN  | K.EALKEFDLVTSEEGDNESR.S          | 3 | 3,0314 | 0,422 | -0,711 |
| 19 | P53618 COPB_HUMAN  | K.EAGELKPEEEITVGPVQK.L           | 2 | 3,025  | 0,166 | -0,312 |
| 19 | Q9BXS5 AP1M1_HUMAN | R.STANNVEIHIPVNDADSPK.F          | 3 | 3,0242 | 0,159 | 0,086  |
| 19 | O96019 ACL6A_HUMAN | R.DDGSTLM*EIDGDKGK.Q             | 3 | 3,0225 | 0,37  | 0,115  |
| 19 | Q9BUQ8 DDX23_HUMAN | K.DSSLPPHILEVIDK.C               | 2 | 3,0212 | 0,429 | -0,468 |
| 19 | Q15154 PCM1_HUMAN  | K.SDEEDFVKVEDLPLK.L              | 3 | 3,0155 | 0,437 | -0,207 |
| 19 | Q14008 CKAP5_HUMAN | K.HSTSGTDEGEDGDEPDDGSNDVVDLLPR.T | 3 | 2,9982 | 0,179 | 0,312  |
| 19 | P22626 ROA2_HUMAN  | R.GFGFVTDDHDPVVK.I               | 3 | 2,9888 | 0,298 | -0,108 |
| 19 | P31946 1433B_HUMAN | K.QTTVSNSQQAYQEAFAEISKK.E        | 3 | 2,9767 | 0,31  | 0      |
| 19 | Q9UBE0 SAE1_HUMAN  | R.DPPHNNFFFDGM*K.G               | 3 | 2,972  | 0,319 | -0,317 |
| 19 | P55010 IF5_HUMAN   | K.EEGVIDSSDKEIVAEAER.L           | 3 | 2,9672 | 0,151 | 0,648  |
| 19 | P07355 ANXA2_HUMAN | K.LSLEGDHSTPPSAYGSVK.A           | 3 | 2,9616 | 0,332 | 0,198  |

|    |                     |                            |   |        |       |        |
|----|---------------------|----------------------------|---|--------|-------|--------|
| 19 | P19525 E2AK2_HUMAN  | R.DLKPSNIFLVDTK.Q          | 2 | 2,9533 | 0,438 | -0,164 |
| 19 | Q96FK6 WDR89_HUMAN  | K.DSLGAYSETHSDDVTQVR.F     | 3 | 2,9523 | 0,351 | 0,277  |
| 19 | P14735 IDE_HUMAN    | K.DELKEALDDVTLPR.L         | 3 | 2,9474 | 0,223 | -0,227 |
| 19 | Q99986 VRK1_HUMAN   | K.DDGKLDLSVVENGGLK.A       | 2 | 2,9472 | 0,341 | 0,074  |
| 19 | Q16539 MK14_HUMAN   | R.DLKPSNLAVNEDCELK.I       | 3 | 2,9404 | 0,175 | 0,297  |
| 19 | P18754 RCC1_HUMAN   | R.DNNGVIGLLEPM*KK.S        | 2 | 2,9377 | 0,222 | -0,237 |
| 19 | P28066 PSA5_HUMAN   | R.AIGSASEGAQSSLQEVYHK.S    | 3 | 2,9341 | 0,373 | 0,093  |
| 19 | P04792 HSPB1_HUMAN  | R.VSLDVNHFAPDELTVK.T       | 3 | 2,9268 | 0,276 | 0      |
| 19 | Q13084 RM28_HUMAN   | R.LLEEKDPVPLFK.I           | 3 | 2,9245 | 0,191 | 0      |
| 19 | Q07021 C1QBP_HUMAN  | K.AFVDFLSDEIKEER.K         | 3 | 2,9129 | 0,41  | -0,539 |
| 19 | Q9UBS4 DJB11_HUMAN  | K.FQDLGAAEVLSDSEKR.K       | 3 | 2,9105 | 0,256 | 0,19   |
| 19 | P18754 RCC1_HUMAN   | R.DNNGVIGLLEPM*KK.S        | 3 | 2,9084 | 0,25  | 0      |
| 19 | P09936 UCHL1_HUMAN  | -.M*QLKPM*EINPEM*LNK.V     | 3 | 2,9027 | 0,115 | 0,294  |
| 19 | Q9Y2W1 TR150_HUMAN  | R.M*DSFDEDLARPSGLLAQER.K   | 3 | 2,8894 | 0,348 | 0,338  |
| 19 | B2RDE1 B2RDE1_HUMAN | R.M*LDQTLDDLNEM*.-         | 2 | 2,8858 | 0,393 | -0,665 |
| 19 | P0C7M2 RA1L3_HUMAN  | R.GFAFVTFDHDSVVK.I         | 3 | 2,8843 | 0,443 | 0      |
| 19 | Q96N67 DOCK7_HUMAN  | R.FGEDVVEVIKDSNPVVK.C      | 3 | 2,8753 | 0,225 | -0,29  |
| 19 | P11766 ADHX_HUMAN   | K.VDEFVTHNLSFDEINK.A       | 2 | 2,8701 | 0,483 | -1,408 |
| 19 | P27816 MAP4_HUMAN   | K.DM*ESPTKLDVTLAK.D        | 3 | 2,8673 | 0,394 | 0,117  |
| 19 | Q99816 TS101_HUMAN  | K.DLKPVLDVYVFNDSR.E        | 2 | 2,8616 | 0,443 | -0,383 |
| 19 | P24941 CDK2_HUMAN   | R.DLKPNLLINTEGAIK.L        | 2 | 2,8587 | 0,328 | -0,621 |
| 19 | Q9Y490 TLN1_HUMAN   | K.DHFGLEGDEESTM*LEDSVSPK.K | 3 | 2,8577 | 0,219 | -0,235 |
| 19 | Q8TCD5 NT5C_HUMAN   | R.DKTVVLGDLIDDK.D          | 3 | 2,8553 | 0,348 | -0,118 |
| 19 | P06737 PYGL_HUMAN   | K.TFAYTNHTVLPALER.W        | 3 | 2,8547 | 0,254 | -0,098 |
| 19 | P13010 KU86_HUMAN   | K.DQVTAQEIQDNHEDGPTAK.K    | 3 | 2,8514 | 0,271 | 0,082  |
| 19 | Q07866 KLC1_HUMAN   | K.DHPAVAATLNNLAVLYGK.R     | 3 | 2,8494 | 0,17  | -0,196 |
| 19 | P09211 GSTP1_HUMAN  | K.ALPGQLKPFETLLSQNGGK.T    | 3 | 2,847  | 0,251 | -0,688 |
| 19 | P13667 PDIA4_HUMAN  | K.GESDPAYQQYQDAANNLREDYK.F | 3 | 2,845  | 0,177 | -0,213 |
| 19 | P43686 PRS6B_HUMAN  | K.M*NLSEEVLEDYVARPDK.I     | 3 | 2,8426 | 0,272 | 0,257  |
| 19 | Q96A33 CCD47_HUMAN  | K.IM*QEEGQPLKLPDTK.R       | 3 | 2,8415 | 0,118 | 0,315  |
| 19 | P06744 G6PI_HUMAN   | R.SNTPILVDGKDVM*PEVVK.V    | 2 | 2,8409 | 0,35  | -0,062 |
| 19 | P20042 IF2B_HUMAN   | K.IFDIDEAEEGVKDLK.I        | 3 | 2,8374 | 0,206 | 0,319  |
| 19 | P05787 K2C8_HUMAN   | R.ASLEAAIADAEQRGELAIK.D    | 3 | 2,8273 | 0,395 | -0,468 |

|    |                    |                              |   |        |       |        |
|----|--------------------|------------------------------|---|--------|-------|--------|
| 19 | P18859 ATP5J_HUMAN | K.FEDPKFEVIEKPQA.-           | 3 | 2,8257 | 0,147 | 0,218  |
| 19 | P32004 L1CAM_HUMAN | R.DLQELGSDSKYFIEDGR.L        | 2 | 2,8024 | 0,493 | 0,244  |
| 19 | P11216 PYGB_HUMAN  | K.IGEEFLTDLSQLKK.L           | 2 | 2,7973 | 0,327 | -0,376 |
| 19 | O75643 U520_HUMAN  | R.LDLVHTAALM*LDK.N           | 3 | 2,7891 | 0,438 | -0,251 |
| 19 | Q16537 2A5E_HUMAN  | R.SQGKPIELTPLLLK.D           | 3 | 2,7806 | 0,091 | -0,112 |
| 19 | P00558 PGK1_HUMAN  | K.ALESPERPFLAILGGAK.V        | 2 | 2,7604 | 0,242 | -0,483 |
| 19 | Q9UBB9 TFP11_HUMAN | R.DM*VVNLFHELEK.M            | 3 | 2,7495 | 0,167 | 0,061  |
| 19 | Q96SI9 STRBP_HUMAN | K.DGENVSM*KDPPDLLDR.Q        | 3 | 2,7376 | 0,199 | -0,201 |
| 19 | P30048 PRDX3_HUMAN | K.GTAVVNGEFKDSLDDFK.G        | 3 | 2,7356 | 0,181 | -0,281 |
| 19 | P12955 PEPD_HUMAN  | K.FEVNNTILHPEIVECR.V         | 3 | 2,7287 | 0,146 | 0,093  |
| 19 | Q92616 GCN1L_HUMAN | K.LDAGNQLALIEELHK.E          | 3 | 2,7192 | 0,164 | -0,11  |
| 19 | Q29RF7 PDS5A_HUMAN | K.IFAQYLVPHNLETEER.M         | 3 | 2,703  | 0,2   | -0,467 |
| 19 | O00487 PSDE_HUMAN  | K.AVEEEDKM*TPEQLAIK.N        | 3 | 2,6979 | 0,205 | -0,198 |
| 19 | P08238 HS90B_HUMAN | K.CLELSELAEDKENYK.K          | 3 | 2,6978 | 0,206 | -0,46  |
| 19 | Q09666 AHNK_HUMAN  | K.VGIDTPDIDIHGPEGK.L         | 3 | 2,6976 | 0,26  | 0,22   |
| 19 | Q00341 VIGLN_HUMAN | K.DQDLITIIGKEDAVR.E          | 3 | 2,6916 | 0,251 | 0,217  |
| 19 | P29692 EF1D_HUMAN  | K.SLAGSSGPGASSGTSGDHGELVVR.I | 3 | 2,6748 | 0,332 | 0,251  |
| 19 | P22314 UBA1_HUMAN  | R.ALPAVQQNNLDEDLIRK.L        | 2 | 2,6711 | 0,496 | -0,252 |
| 19 | O43809 CPSF5_HUMAN | K.LPGGELNPGEDEVEGLKR.L       | 3 | 2,6432 | 0,242 | -0,192 |
| 19 | P35813 PPM1A_HUMAN | K.GPTEQLVSPEPEVHDIER.S       | 3 | 2,637  | 0,132 | -0,27  |
| 19 | Q9Y4R8 TELO2_HUMAN | R.DSRDELLASM*M*AGVK.C        | 3 | 2,6328 | 0,107 | -0,332 |
| 19 | Q96GD4 AURKB_HUMAN | R.DIKPENLLLGLK.G             | 3 | 2,6296 | 0,144 | -0,068 |
| 19 | P63104 1433Z_HUMAN | K.GIVDQSQQAYQEAFAEISKK.E     | 3 | 2,6269 | 0,365 | -0,253 |
| 19 | O96000 NDUBA_HUMAN | R.DYKVDQEIINIM*QDR.L         | 2 | 2,6219 | 0,393 | -0,965 |
| 19 | P07195 LDHB_HUMAN  | K.GEM*M*DLQHGSFLQTPK.I       | 3 | 2,6181 | 0,269 | 0,279  |
| 19 | Q14974 IMB1_HUMAN  | K.YM*EAFKPFGLGILK.N          | 3 | 2,6178 | 0,221 | -0,337 |
| 19 | Q96FK6 WDR89_HUMAN | K.DSLGAYSETHSDDVTQVR.F       | 2 | 2,6159 | 0,464 | 0,37   |
| 19 | Q8IXI2 MIRO1_HUMAN | R.DCALSPDELKDLFK.V           | 2 | 2,5406 | 0,2   | -0,591 |
| 19 | O75312 ZPR1_HUMAN  | K.DATAERIDEFIVK.L            | 2 | 2,5159 | 0,122 | 0,081  |
| 19 | P98179 RBM3_HUMAN  | R.YSGGNYRDNYDN.-             | 2 | 2,4888 | 0,357 | 0,679  |
| 19 | P20810 ICAL_HUMAN  | K.GTVPDDAVEALADSLGKK.E       | 2 | 2,47   | 0,413 | -0,478 |
| 19 | P08238 HS90B_HUMAN | K.CLELSELAEDKENYK.K          | 2 | 2,4645 | 0,359 | -0,246 |
| 19 | Q14204 DYHC1_HUMAN | K.EDLDKVEPAVIEAQNVAVK.S      | 2 | 2,4378 | 0,477 | -0,062 |

|    |                     |                                |              |   |        |       |        |
|----|---------------------|--------------------------------|--------------|---|--------|-------|--------|
| 19 | O14983 AT2A1_HUMAN  | R.NAENAIEALKEYEPEN*GK.V        |              | 2 | 2,4329 | 0,497 | 0,119  |
| 19 | P07814 SYEP_HUMAN   | K.EAPCVLIYPDGHTK.E             |              | 2 | 2,4246 | 0,199 | -0,926 |
| 19 | P29353 SHC1_HUMAN   | R.DLFDM*KPFEDALR.V             |              | 2 | 2,3237 | 0,275 | -0,529 |
| 19 | P10586 PTPRF_HUMAN  | R.DHPPITDLADNIER.L             |              | 2 | 2,3029 | 0,298 | -0,537 |
| 19 | Q16537 2A5E_HUMAN   | K.DVPSSEQPELFLKK.L             |              | 2 | 2,2936 | 0,405 | -0,226 |
| 19 | P12814 ACTN1_HUMAN  | K.AGTQIENIEEDFRDGLK.L          |              | 2 | 2,2881 | 0,424 | -0,757 |
| 19 | Q4ZG52 Q4ZG52_HUMAN | K.DGAIEDIITALKK.N              |              | 2 | 2,284  | 0,285 | -0,528 |
| 19 | P60903 S10AA_HUMAN  | K.EFPGFLENQKDPLAVDK.I          |              | 2 | 2,282  | 0,396 | -0,376 |
| 19 | P09104 ENOG_HUMAN   | R.DGKYDLDFK.S                  |              | 2 | 2,2631 | 0,324 | -0,222 |
| 19 | P61599 NAT5_HUMAN   | K.SIIPLPHVVRPEDIE.-            |              | 2 | 2,2499 | 0,277 | 0,214  |
| 19 | P26640 SYVC_HUMAN   | K.GFVPSPTSQPGGHESLVDR.W        |              | 2 | 2,2107 | 0,225 | -0,248 |
| 19 | Q9UJH6 SHPK_HUMAN   | R.DTHLTITPTVLGER.H             |              | 2 | 2,2034 | 0,274 | -0,079 |
| 19 | O75971 SNPC5_HUMAN  | K.SHVTEEEEEEEEEESDS.-          |              | 2 | 2,1114 | 0,417 | -0,362 |
| 19 | Q9UL26 RB22A_HUMAN  | K.DYADSIHAIFVETSAK.N           |              | 2 | 2,1    | 0,322 | -0,414 |
| 19 | P00558 PGK1_HUMAN   | K.VLPGVDALSNI.-                |              | 2 | 2,0596 | 0,378 | -0,333 |
| 19 | P00338 LDHA_HUMAN   | K.DQLIYNLLKEEQTPQNK.I          |              | 2 | 2,0559 | 0,348 | -0,706 |
| 19 | O95352 ATG7_HUMAN   | R.DVAHSIIFEVK.L                |              | 2 | 2,0525 | 0,193 | 0,291  |
| 20 | Q9Y5B9 SP16H_HUMAN  | R.ES#RYEEEEEQSR.S              | S1004:       | 3 | 2,9796 | 0,087 | -0,222 |
| 20 | Q14669 TRIPC_HUMAN  | K.YS#PPRDDDQVDNQAQS#PTTTQSPK.S | S1016:S1030: | 3 | 2,8937 | 1     | 0      |
| 20 | O95785 WIZ_HUMAN    | K.NPEDKSPQLSLSRPAS#PK.A        | S1017:       | 3 | 5,5476 | 0,506 | 0,258  |
| 20 | O75351 VPS4B_HUMAN  | K.EGQSPAPEKGNDS#DGEGESDDPEKK.K | S102:        | 3 | 4,6422 | 0,528 | -0,785 |
| 20 | Q9H6F5 CCD86_HUMAN  | R.QQDLHLES#PQRQPEYSPESPR.C     | S102:        | 3 | 2,9077 | 0,166 | 0,985  |
| 20 | P17096 HMGA1_HUMAN  | K.KLEKEEEEGISQES#S#EEEEQ.-     | S102:S103:   | 3 | 4,49   | 0,376 | -0,229 |
| 20 | P05387 RLA2_HUMAN   | K.KDEKKEES#EES#DDDM*GFGLFD.-   | S102:S105:   | 3 | 4,1751 | 0,527 | -0,418 |
| 20 | P52948 NUP98_HUMAN  | K.ADTSQEICS#PRLPISASHSSK.T     | S1028:       | 3 | 2,6039 | 0,124 | -0,233 |
| 20 | P17096 HMGA1_HUMAN  | K.KLEKEEEEGISQESS#EEEEQ.-      | S103:        | 3 | 4,1418 | 0,383 | 0,079  |
| 20 | Q01658 NC2B_HUMAN   | R.KAS#SRLENLGIPEEELLR.Q        | S105:        | 3 | 4,1848 | 0,212 | 0      |
| 20 | Q8NDI1 EHBP1_HUMAN  | K.AAITETQRKPS#EDEVLNK.G        | S1058:       | 3 | 3,8049 | 0,268 | -0,087 |
| 20 | Q12789 TF3C1_HUMAN  | R.VRKNs#STDQGSDEEGS#LQK.E      | S1062:S1073: | 3 | 3,2899 | 0,33  | -0,576 |
| 20 | P06744 G6PI_HUMAN   | R.NRS#NTPILVDGKDVm*PEVnk.V     | S107:        | 3 | 4,9071 | 0,407 | 0,788  |
| 20 | Q7Z422 CA144_HUMAN  | R.ILGSAS#PEEEQEKPIldRptr.I     | S107:        | 3 | 3,7568 | 0,33  | 0,599  |
| 20 | O75808 CAN15_HUMAN  | K.GTHS#PPLTPEVAGLHGPRPL.-      | S1070:       | 3 | 3,4285 | 0,316 | -0,173 |
| 20 | P30414 NKTR_HUMAN   | K.SSEEDLSGKHDTVTVS#SDLDQFTK.D  | S1076:       | 3 | 5,4905 | 0,397 | -0,744 |

|    |                     |                                      |              |   |        |       |        |
|----|---------------------|--------------------------------------|--------------|---|--------|-------|--------|
| 20 | Q5JVS0 HABP4_HUMAN  | R.KSLPAPVAQRPDS#PGGGLQAPGQK.R        | S108:        | 3 | 4,9145 | 0,301 | 0,3    |
| 20 | Q9Y478 AAKB1_HUMAN  | R.S#HNNFVAILDLPEGEHQYK.F             | S108:        | 3 | 4,0165 | 0,402 | 0,16   |
| 20 | O43741 AAKB2_HUMAN  | K.S#HNDFVAILDLPEGEHQYK.F             | S108:        | 3 | 3,4886 | 0,191 | -1,517 |
| 20 | Q9NYV4 CD2L7_HUMAN  | R.KETTSGTSTEPVKNSS#PAPPQPAPGK.V      | S1083:       | 3 | 4,596  | 0,365 | 0,684  |
| 20 | Q8IX90 CM003_HUMAN  | K.KNS#VHEQEAINSDPELNCENFQK.T         | S110:        | 3 | 4,1764 | 0,466 | 0,126  |
| 20 | P48634 BAT2_HUMAN   | R.GSETGS#ETHESDLAPSDKEATPK.E         | S1110:       | 3 | 3,6889 | 0,295 | 0,359  |
| 20 | B2CI53 B2CI53_HUMAN | R.SNM*SPDKPVSVKIS#FEDEPR.K           | S1115:       | 3 | 3,4117 | 0,264 | 0,233  |
| 20 | P48634 BAT2_HUMAN   | R.GSETGSETHESDLAPS#DKEATPK.E         | S1120:       | 3 | 3,4916 | 0,214 | 0,215  |
| 20 | Q6VMQ6 MCAF1_HUMAN  | K.NKQDDDLNCEPLS#PHNITPEPVSK.L        | S113:        | 3 | 5,6948 | 0,487 | 0,388  |
| 20 | Q3KQU3 MA7D1_HUMAN  | R.RSS#QPSPTAVPASDSPPTKQEVK.K         | S113:        | 3 | 4,338  | 0,395 | 0,074  |
| 20 | P46379 BAT3_HUMAN   | R.APPQTHLPSGASSGTGSASATHGGGS#PPGTR.G | S113:        | 3 | 3,6691 | 0,443 | 0,319  |
| 20 | O15417 TNC18_HUMAN  | R.LALSPEDKPIRLS#PSK.I                | S1136:       | 3 | 3,1764 | 0,297 | -0,3   |
| 20 | Q9Y4H2 IRS2_HUMAN   | R.HSS#ETFSSTTTVPVSPSFAHNP.K          | S1149:       | 3 | 4,8779 | 0,435 | -0,139 |
| 20 | O15027 SC16A_HUMAN  | R.FTGS#FDDDDPDPHRDPYGEEVDR.R         | S1149:       | 3 | 4,7531 | 0,397 | 0,484  |
| 20 | P55196 AFAD_HUMAN   | R.ADHRS#SPNVANQPPS#PGGK.S            | S1155:S1165: | 3 | 3,7622 | 0,235 | -0,352 |
| 20 | Q8TBA6 GOGA5_HUMAN  | R.KKS#EPDDELLDFLNSSQK.E              | S116:        | 3 | 4,4659 | 0,355 | 0,158  |
| 20 | Q13017 RHG05_HUMAN  | R.RTHS#DAS#DDEAFTTSK.T               | S1173:S1176: | 2 | 5,7828 | 0,593 | -0,063 |
| 20 | Q7Z6E9 RBBP6_HUMAN  | K.ISKLEVTEIVKPS#PK.R                 | S1179:       | 3 | 3,5712 | 0,271 | -0,209 |
| 20 | Q9NTI5 PDS5B_HUMAN  | K.GRLDSSEM*DHS#ENEDYTM*SSPLPGK.K     | S1182:       | 3 | 4,9285 | 0,566 | 0,506  |
| 20 | Q9NTI5 PDS5B_HUMAN  | R.LDSSEM*DHS#ENEDYTM*SSPLPGK.K       | S1182:       | 3 | 3,6569 | 0,204 | -0,065 |
| 20 | Q99856 ARI3A_HUMAN  | R.EGPGEEHFEDM*AS#DEDMKPK.W           | S119:        | 3 | 2,8806 | 0,209 | -0,154 |
| 20 | P19484 TFEB_HUMAN   | K.FAAHISPAQSGPKPPAAS#PGVR.A          | S122:        | 3 | 3,5698 | 0,312 | 0,237  |
| 20 | O95487 SC24B_HUMAN  | R.DSRPLS#PILHIVK.D                   | S1224:       | 3 | 2,7435 | 0,208 | -0,118 |
| 20 | P46013 KI67_HUMAN   | R.RVS#RSS#FSSDPDEK.A                 | S125:S128:   | 3 | 3,0425 | 0,344 | 0      |
| 20 | Q13428 TCOF_HUMAN   | K.DDPDGKQEAQPQAAGM*LS#PK.T           | S1257:       | 3 | 3,122  | 0,103 | -0,238 |
| 20 | P46013 KI67_HUMAN   | R.RVSRSS#FSSDPDEK.A                  | S127:S128:   | 2 | 2,4383 | 1     | 0,208  |
| 20 | Q9HAW4 CLSPN_HUMAN  | R.NFVFHTLS#PVKAEAAK.E                | S1289:       | 2 | 4,8051 | 0,472 | -0,265 |
| 20 | Q5T310 GPTC4_HUMAN  | K.M*ATLTSGGKPNKDLESCS#DDDNQGSK.S     | S130:        | 3 | 5,2121 | 0,566 | 0,307  |
| 20 | P51858 HDGF_HUMAN   | K.GNAEGS#SDEEGKLVIDEPAKEK.N          | S132:        | 3 | 3,0824 | 0,261 | 0,384  |
| 20 | P51858 HDGF_HUMAN   | K.GNAEGSS#DEEGKLVIDEPAKEK.N          | S133:        | 3 | 4,2559 | 0,347 | -0,23  |
| 20 | P98174 FGD1_HUMAN   | R.LRS#DPGPPTETPSQRPSPLK.R            | S135:        | 3 | 3,8242 | 0,423 | 0,327  |
| 20 | Q14498 RBM39_HUMAN  | K.DKS#PVREPIDNLTPEER.D               | S136:        | 3 | 4,9585 | 0,475 | 0,882  |
| 20 | Q9Y314 NOSIP_HUMAN  | K.ALSGTS#PDDVQPGPSVGGPPSKDKK.V       | S138:        | 3 | 3,9871 | 0,446 | -0,429 |

|    |                     |                                  |              |   |        |       |        |
|----|---------------------|----------------------------------|--------------|---|--------|-------|--------|
| 20 | Q9Y266 NUDC_HUMAN   | K.NGSLDS#PGKQDTEEEDEEKDK.G       | S139:        | 3 | 5,0915 | 0,376 | -0,547 |
| 20 | O14686 MLL2_HUMAN   | K.LEGPVS#PDVEPGKEETEESKK.R       | S1396:       | 3 | 3,9887 | 0,309 | -0,31  |
| 20 | Q8NI27 THOC2_HUMAN  | K.HKS#ES#PCESPYPNEK.D            | S1399:S1401: | 3 | 5,3613 | 0,383 | -0,188 |
| 20 | P26373 RL13_HUMAN   | K.KGDSS#AEELKQLTGPVM*PVR.N       | S140:        | 3 | 3,7709 | 0,322 | -0,29  |
| 20 | Q6P0Q8 MAST2_HUMAN  | R.VQS#AEKLAALAAASEKK.L           | S1407:       | 3 | 2,7095 | 0,423 | -0,611 |
| 20 | Q9NRL2 BAZ1A_HUMAN  | R.KRQS#PEPS#PVTLGR.R             | S1413:S1417: | 3 | 3,4059 | 0,266 | -0,107 |
| 20 | Q8TEW0 PARD3_HUMAN  | R.RSS#DPALIGLSTSVSDSNFSSEEPSRK.N | S144:        | 3 | 4,4769 | 0,472 | -0,624 |
| 20 | Q8IWS0 PHF6_HUMAN   | K.TAHNSEADLEES#FNEHELEPSSPK.S    | S145:        | 3 | 4,4079 | 0,492 | -0,791 |
| 20 | P13010 KU86_HUMAN   | R.FSKS#QLDIIHSLK.K               | S145:        | 3 | 2,8598 | 0,099 | -0,321 |
| 20 | Q00537 PCTK2_HUMAN  | K.RLS#LPADIRIPDGYLEK.L           | S146:        | 3 | 2,6504 | 0,213 | -0,27  |
| 20 | P29375 JAD1A_HUMAN  | R.FLHIM*EDDS#M*EEKPLK.V          | S1493:       | 3 | 2,7339 | 0,295 | 0,353  |
| 20 | Q9NZ63 CI078_HUMAN  | R.RRGDS#ES#EEDEQDSEEV.R.L        | S15:S17:     | 3 | 4,8443 | 0,37  | -0,317 |
| 20 | Q9HCD5 NCOA5_HUMAN  | R.YRDS#FDGR.G                    | S151:        | 2 | 2,1783 | 0,357 | 0      |
| 20 | Q9BUH6 CI142_HUMAN  | R.KS#PRPAGPQLFLPDPDPQR.G         | S152:        | 3 | 4,5715 | 0,304 | 0,25   |
| 20 | P46100 ATRX_HUMAN   | K.LREVEIEDAS#PTKCPITTK.L         | S1527:       | 3 | 2,9263 | 0,489 | 0,231  |
| 20 | Q8NFC6 FA44A_HUMAN  | K.DKDVTLS#PVKAGPATTTSSETR.Q      | S1531:       | 3 | 6,0171 | 0,455 | -0,469 |
| 20 | Q8IWS0 PHF6_HUMAN   | K.TAHNSEADLEESFNEHELEPSS#PK.S    | S155:        | 3 | 4,2852 | 0,396 | 0,527  |
| 20 | Q02880 TOP2B_HUMAN  | R.KAS#GS#ENEGDYNPGRK.T           | S1550:S1552: | 3 | 3,6492 | 0,292 | 0      |
| 20 | Q5JRC6 Q5JRC6_HUMAN | K.TAHNSEAADLEESFNEHELEPSS#PK.S   | S156:        | 3 | 4,7309 | 0,434 | 0,514  |
| 20 | O95684 FR1OP_HUMAN  | K.EKGPTTGEGALDLSDVHS#PPKS#PEGK.T | S156:S160:   | 3 | 4,0882 | 0,442 | 0,524  |
| 20 | Q92733 PRCC_HUMAN   | K.IAAPELHKGDS#DSEDEPTK.K         | S157:        | 3 | 4,0716 | 0,442 | -0,326 |
| 20 | Q14839 CHD4_HUMAN   | K.IEENS#LKEEESIEGEKEVK.S         | S1570:       | 3 | 5,4625 | 0,415 | -0,159 |
| 20 | Q9HCD6 TANC2_HUMAN  | R.YQQETSVSQLPGRPKS#PLSK.M        | S1579:       | 3 | 4,2159 | 0,292 | 0,396  |
| 20 | Q9ULH0 ARMS_HUMAN   | R.S#SESSPNHSLHNEVADDSQLEK.A      | S1590:       | 3 | 3,4276 | 0,188 | -0,441 |
| 20 | Q9UJF2 NGAP_HUMAN   | R.RS#ISGTSTSEKPNM*DTANTSPFK.V    | S16:         | 3 | 2,6392 | 0,163 | 0,624  |
| 20 | Q9Y2U5 M3K2_HUMAN   | R.DRS#SPPPGYIPDELHQVAR.N         | S163:        | 3 | 4,9569 | 0,414 | 0,496  |
| 20 | Q9Y2U5 M3K2_HUMAN   | R.DRSS#PPPGYIPDELHQVAR.N         | S164:        | 3 | 4,9563 | 0,445 | 0,578  |
| 20 | Q96G03 PGM2_HUMAN   | K.LCAGIM*ITAS#HNPKQDNGYK.V       | S165:        | 3 | 2,9089 | 0,337 | 0,791  |
| 20 | Q9Y5S2 MRCKB_HUMAN  | K.HSTPSNSSNPSGPPS#PNS#PHR.S      | S1690:S1693: | 3 | 4,8669 | 0,588 | -0,477 |
| 20 | P20020 AT2B1_HUMAN  | K.NS#LKEANHDGDFGITLAELR.A        | S17:         | 3 | 3,5928 | 0,377 | -0,08  |
| 20 | Q9H4A3 WNK1_HUMAN   | K.DRPVSQPS#LVGSKEEPPPAR.S        | S170:        | 3 | 3,5563 | 0,387 | -0,411 |
| 20 | Q9H4A3 WNK1_HUMAN   | K.DRPVSQPSLVGS#KEEPPPAR.S        | S174:        | 3 | 3,3086 | 0,348 | -0,329 |
| 20 | Q8IWW6 RHG12_HUMAN  | R.TRS#FGHFPGPEFLDVEK.T           | S176:        | 3 | 2,838  | 0,148 | -0,269 |

|    |                    |                                |                 |   |        |       |        |
|----|--------------------|--------------------------------|-----------------|---|--------|-------|--------|
| 20 | Q58FF8 H90B2_HUMAN | K.IEDVGS#DEEDDSGKDKK.K         | S177:           | 3 | 3,986  | 0,404 | -0,376 |
| 20 | Q9Y6K0 CEPT1_HUMAN | R.CGDSHPES#PVGFGHM*STTGCVLNK.L | S18:            | 3 | 3,6363 | 0,374 | 0,959  |
| 20 | O00264 PGRC1_HUMAN | K.LLKEGEEPTVYS#DEEEPKDESAR.K   | S181:           | 3 | 4,9398 | 0,468 | -0,536 |
| 20 | O96013 PAK4_HUMAN  | R.DKRPLS#GPDVGTQPAGLASGAK.L    | S181:           | 3 | 4,1244 | 0,295 | 0,318  |
| 20 | O00264 PGRC1_HUMAN | K.EGEEPTVYS#DEEEPKDESARK.N     | S181:           | 3 | 3,5913 | 0,386 | 0,219  |
| 20 | Q15366 PCBP2_HUMAN | K.GVTIPYRPKPSS#SPVIFAGGQDR.Y   | S188:           | 3 | 4,0302 | 0,39  | 0,292  |
| 20 | P43487 RANG_HUMAN  | K.LEALS#VKEETKEDAEEKQ.-        | S188:           | 3 | 2,8262 | 0,2   | -0,424 |
| 20 | P43243 MATR3_HUMAN | R.RDS#FDDR.G                   | S188:           | 2 | 2,3852 | 0,123 | -0,369 |
| 20 | Q9P2W9 STX18_HUMAN | K.VSQS#PSKDSEENPATEERPEK.I     | S189:           | 3 | 4,4709 | 0,249 | 0,151  |
| 20 | Q9H1E3 NUCKS_HUMAN | R.KVVDYSQFQES#DDADEDYGR.D      | S19:            | 3 | 6,1435 | 0,5   | 0,449  |
| 20 | Q5VV41 ARHGG_HUMAN | K.LQALAEEPSQPHTRS#PAK.N        | S191:           | 3 | 3,1447 | 0,229 | -1,166 |
| 20 | P35579 MYH9_HUMAN  | R.KGAGDGS#DEEVDGKADGAEAKPAE.-  | S1943:          | 3 | 5,5174 | 0,456 | 0,23   |
| 20 | Q9NYF8 BCLF1_HUMAN | K.SQEEPKDTFEHDPS#ESIDEFNK.S    | S196:           | 3 | 2,6549 | 0,209 | -0,272 |
| 20 | Q9BRD0 BUD13_HUMAN | R.HDS#PDPS#PPRR.A              | S197:S201:      | 2 | 2,4835 | 0,257 | -0,429 |
| 20 | Q9UQ35 SRRM2_HUMAN | R.SRTS#PITR.R                  | S1975:          | 2 | 2,2306 | 0,304 | -0,306 |
| 20 | Q9NYF8 BCLF1_HUMAN | K.SQEEPKDTFEHDPS#IDEFNK.S      | S198:           | 3 | 4,2891 | 0,401 | 0,136  |
| 20 | Q8NCF5 NF2IP_HUMAN | K.KKTEFLDLDNS#PLSPPS#PR.T      | S198:S204:      | 3 | 5,3387 | 0,431 | -0,159 |
| 20 | Q07955 SFRS1_HUMAN | R.VKVDGPRS#PS#YGRS#R.S         | S199:S201:S205: | 3 | 2,7259 | 0,117 | 0,289  |
| 20 | Q8NCF5 NF2IP_HUMAN | K.KKTEFLDLDNSPLS#PPS#PR.T      | S201:S204:      | 3 | 5,4955 | 0,489 | -0,08  |
| 20 | Q9H4A3 WNK1_HUMAN  | K.EKPELSEPSHLNGPSS#DPEAAFLSR.D | S2012:          | 3 | 3,9306 | 0,366 | 0,528  |
| 20 | Q96B36 AKTS1_HUMAN | K.RTEARS#SDEENGPPS#SPDLDR.I    | S202:S211:      | 3 | 4,8828 | 0,416 | 0,222  |
| 20 | Q5VWN6 CJ018_HUMAN | R.SRS#PLLVTVVESDPRPQGQPR.R     | S2037:          | 3 | 3,2872 | 0,234 | 0,076  |
| 20 | Q13242 SFRS9_HUMAN | R.GRDS#PYQSR.G                 | S204:           | 2 | 2,4996 | 0,26  | -0,532 |
| 20 | Q3T8J9 GON4L_HUMAN | R.TCPVHESPSGIDTSETS#PKAPR.G    | S2107:          | 3 | 3,5173 | 0,281 | -0,15  |
| 20 | Q8TF01 SFR18_HUMAN | R.QRS#PIALPVKQEPQIDAVK.R       | S211:           | 3 | 3,5333 | 0,356 | 0,399  |
| 20 | Q8IZ40 RCOR2_HUMAN | K.DKEDSDELEEGRGVS#EGEPDPADPK.R | S213:           | 3 | 3,2324 | 0,241 | 0,451  |
| 20 | O75376 NCOR1_HUMAN | R.SHVSSEPYEPIS#PPQVPVVHEK.Q    | S2151:          | 3 | 5,7182 | 0,539 | 0,145  |
| 20 | Q9BU76 MMTA2_HUMAN | R.RPAEATS#SPTS#PERPR.H         | S216:S220:      | 2 | 2,7699 | 1     | -0,835 |
| 20 | Q15019 SEPT2_HUMAN | K.IYHLPDAES#DEDEDKFKEQTR.L     | S218:           | 3 | 5,6148 | 0,475 | 0,073  |
| 20 | Q09161 NCBP1_HUMAN | R.KTS#DANETEDHLES LICK.V       | S22:            | 3 | 4,2912 | 0,505 | 0,59   |
| 20 | Q8IWB9 TEX2_HUMAN  | K.S#LSTDTSRQESDTSYKPPDSK.L     | S220:           | 3 | 2,6495 | 0,391 | -0,438 |
| 20 | Q5UIP0 RIF1_HUMAN  | R.RVS#FADPIYQAGLADDIDRR.C      | S2205:          | 3 | 3,2772 | 0,28  | -0,233 |
| 20 | Q99618 CDCA3_HUMAN | K.RPS#PLSENVSELKEGAILGTGR.L    | S222:           | 3 | 4,2411 | 0,392 | -0,153 |

|    |                     |                                  |              |   |        |       |        |
|----|---------------------|----------------------------------|--------------|---|--------|-------|--------|
| 20 | Q8TDY2 RBCC1_HUMAN  | R.LDS#LPEHEDSEKAEM*K.R           | S222:        | 3 | 3,0861 | 0,16  | 0,094  |
| 20 | Q96QD9 FYTD1_HUMAN  | K.ARS#NENLDKIDM*SLDDIIK.L        | S23:         | 3 | 4,1651 | 0,428 | -0,4   |
| 20 | Q9NVR2 INT10_HUMAN  | R.STQIENQHQGAQDTSGLM*S#PSKR.S    | S231:        | 3 | 5,1496 | 0,453 | 0,138  |
| 20 | Q13283 G3BP1_HUMAN  | K.SSS#PAPADIAQTVQEDLR.T          | S232:        | 2 | 3,7294 | 0,279 | -0,373 |
| 20 | Q13283 G3BP1_HUMAN  | K.SSS#PAPADIAQTVQEDLR.T          | S232:        | 3 | 2,961  | 0,215 | -0,372 |
| 20 | Q9H7L9 SDS3_HUMAN   | K.RPAS#PSSPEHLPATPAESPAQR.F      | S234:        | 3 | 3,7127 | 0,227 | 0      |
| 20 | Q8NDT2 RB15B_HUMAN  | R.RNS#LEGYSR.S                   | S235:        | 2 | 2,0733 | 0,252 | -0,525 |
| 20 | Q96ST2 IWS1_HUMAN   | R.HQAS#DS#ENEELPKPR.I            | S235:S237:   | 2 | 4,261  | 0,504 | 0,193  |
| 20 | Q96ST2 IWS1_HUMAN   | R.HQAS#DS#ENEELPKPR.I            | S235:S237:   | 3 | 3,6098 | 0,509 | 0,096  |
| 20 | Q3V6T2 GRDN_HUMAN   | R.DGLHFLPHASSSAQSPCGS#PGM*K.R    | S237:        | 3 | 4,706  | 0,242 | 0,446  |
| 20 | P61247 RS3A_HUMAN   | K.LM*ELHGEHSS#GKATGDETGAK.V      | S238:        | 3 | 3,8685 | 0,374 | 0      |
| 20 | Q96L14 C170L_HUMAN  | K.SSPVNNHHS#PGQTPTLGQPEAR.A      | S238:        | 3 | 2,8225 | 0,182 | 0      |
| 20 | Q09666 AHNK_HUMAN   | K.ISM*PDLDLHLKS#PK.A             | S2397:       | 2 | 3,9791 | 0,485 | -0,65  |
| 20 | Q09666 AHNK_HUMAN   | K.ISM*PDLDLHLKS#PK.A             | S2397:       | 3 | 3,0231 | 0,323 | 0      |
| 20 | B2RTR1 B2RTR1_HUMAN | K.DKS#FDDEESVDGNRPSSAASAFK.V     | S241:        | 3 | 3,3415 | 0,344 | -0,072 |
| 20 | Q9HB20 PKHA3_HUMAN  | R.TYS#DTDSCSDIPLDPDRPVHCSK.N     | S244:        | 3 | 4,1351 | 0,423 | 0,509  |
| 20 | Q8N6T3 ARFG1_HUMAN  | K.ASELGHS#LNENVLKPAQEK.V         | S246:        | 3 | 5,0282 | 0,453 | 0,341  |
| 20 | Q9H3N1 TXND1_HUMAN  | K.KVEEQEADEEDVS#EEEEASK.E        | S247:        | 3 | 5,3495 | 0,513 | -0,581 |
| 20 | Q9BYG3 MK67I_HUMAN  | R.KS#QVAELNDDDKDDEIVFK.Q         | S247:        | 3 | 3,9883 | 0,481 | 0,32   |
| 20 | P16949 STMN1_HUMAN  | R.ASGQAFELILS#PR.S               | S25:         | 2 | 2,7487 | 0,269 | -0,415 |
| 20 | Q8NFC6 FA44A_HUMAN  | R.GLEGNANS#PAHLRGPQTSGQTAK.D     | S2501:       | 3 | 3,0124 | 0,212 | 0,22   |
| 20 | P46013 KI67_HUMAN   | K.AFKES#PKQILDPAASVTGSR.R        | S2528:       | 3 | 4,2694 | 0,228 | 0,335  |
| 20 | Q14155 ARHG7_HUMAN  | K.SGTLKS#PPKGFDTTAINK.S          | S257:        | 3 | 5,0556 | 0,326 | 0,377  |
| 20 | Q14155 ARHG7_HUMAN  | K.SGTLKS#PPKGFDTTAINK.S          | S257:        | 2 | 2,0497 | 0,247 | 0,691  |
| 20 | Q96T37 RBM15_HUMAN  | R.SRS#PLDKDITY#PPSASVVGASVGGHR.H | S259:Y266:   | 3 | 4,2356 | 0,326 | 0,339  |
| 20 | Q8IYB3 SRRM1_HUMAN  | K.VPKPEPIPEPKEPS#PEK.N           | S260:        | 3 | 3,9097 | 0,143 | 0,555  |
| 20 | Q8IYB3 SRRM1_HUMAN  | K.VPKPEPIPEPKEPS#PEK.N           | S260:        | 2 | 3,8861 | 0,495 | -0,308 |
| 20 | P15880 RS2_HUMAN    | K.ETVFTKS#PYQEFTDHLVK.T          | S264:        | 3 | 3,1155 | 0,295 | -0,244 |
| 20 | Q9UQ35 SRRM2_HUMAN  | R.KPIDS#LRDS#R.S                 | S2684:S2688: | 2 | 2,8354 | 0,283 | -0,091 |
| 20 | P22234 PUR6_HUMAN   | K.TKEVYELLS#PGKVLLQSK.D          | S27:         | 3 | 5,2923 | 0,508 | 0      |
| 20 | P49736 MCM2_HUMAN   | R.RGNDPLTSS#PGR.S                | S27:         | 3 | 3,0927 | 0,292 | 0      |
| 20 | P49736 MCM2_HUMAN   | R.RGNDPLTSS#PGR.S                | S27:         | 2 | 2,6322 | 0,356 | 0,091  |
| 20 | Q5T4S7 UBR4_HUMAN   | R.HVTLPSS#PR.S                   | S2719:       | 2 | 2,877  | 0,361 | -0,341 |



|    |                    |                                 |            |   |        |       |        |
|----|--------------------|---------------------------------|------------|---|--------|-------|--------|
| 20 | Q8N655 CJ012_HUMAN | R.EDNPEEPSKEITSHEEGGDVS#PR.K    | S273:      | 3 | 3,9061 | 0,395 | -0,479 |
| 20 | O00203 AP3B1_HUMAN | K.EGDELEDNGKNFYES#DDDQKEK.T     | S276:      | 3 | 5,0586 | 0,525 | 0      |
| 20 | O95793 STAU1_HUMAN | K.TKPIVKPQTS#PEYQGGINPISR.L     | S278:      | 3 | 4,0317 | 0,287 | 0,294  |
| 20 | Q14677 EPN4_HUMAN  | R.TANPS#KTIDLGAAAHYTGDK.A       | S282:      | 3 | 4,2485 | 0,428 | 0,433  |
| 20 | P61978 HNRPK_HUMAN | R.RDYDDM*S#PR.R                 | S284:      | 2 | 2,2742 | 0,185 | -0,585 |
| 20 | O15446 RPA34_HUMAN | K.TVKQEQUINTEPLEDTVLS#PTKK.R    | S285:      | 3 | 3,8536 | 0,301 | 0,568  |
| 20 | Q96QF0 RAB3I_HUMAN | R.NKS#TSSAM*SGSHQDLSVIQPIVK.D   | S288:      | 3 | 4,9265 | 0,464 | -0,292 |
| 20 | P08559 ODPA_HUMAN  | R.YHGHS#MSDPGVS#YR.T            | S293:S300: | 2 | 4,6205 | 0,514 | 0,07   |
| 20 | P08559 ODPA_HUMAN  | R.YHGHS#M*SDPGVS#YR.T           | S293:S300: | 2 | 3,7461 | 0,591 | -0,069 |
| 20 | Q9UQ35 SRRM2_HUMAN | K.THTTALAGRS#PS#PASGR.R         | S295:S297: | 3 | 3,131  | 0,289 | -1,101 |
| 20 | Q9UQ35 SRRM2_HUMAN | K.THTTALAGRS#PS#PASGR.R         | S295:S297: | 2 | 3,0119 | 0,353 | -0,935 |
| 20 | Q9BU64 CENPO_HUMAN | R.KGEKLDLDM*S#LVS.-             | S297:      | 2 | 2,2202 | 0,356 | -0,281 |
| 20 | Q6P4R8 NFRKB_HUMAN | R.KGS#LAALYDLAVLKK.K            | S298:      | 3 | 4,9698 | 0,515 | 0      |
| 20 | Q4G0J3 LARP7_HUMAN | R.KRS#SS#EDAESLAPR.S            | S298:S300: | 2 | 4,6539 | 0,529 | 0      |
| 20 | Q4G0J3 LARP7_HUMAN | R.KRS#SS#EDAESLAPR.S            | S298:S300: | 3 | 4,1145 | 0,413 | 0,108  |
| 20 | Q8TAQ2 SMRC2_HUMAN | R.KRS#PSPSPT#PEAK.K             | S302:T308: | 2 | 3,2841 | 0,368 | -0,712 |
| 20 | Q13428 TCOF_HUMAN  | R.AAS#APAKGTPGKGATPAPPKG.A      | S304:      | 3 | 2,9808 | 0,365 | -0,765 |
| 20 | Q9BX67 JAM3_HUMAN  | R.HKS#SFVI.-                    | S306:      | 2 | 2,0926 | 0,345 | -0,068 |
| 20 | Q96HR8 NAF1_HUMAN  | K.NDQEPPPEALDFS#DDEKEKEAK.Q     | S315:      | 3 | 2,7169 | 0,32  | 0,35   |
| 20 | Q9NQW6 ANLN_HUMAN  | K.TPIS#PLKTGVSKPIVK.S           | S323:      | 3 | 4,4244 | 0,434 | 0,21   |
| 20 | Q9UQ35 SRRM2_HUMAN | R.RGEGDAPFSEPGTTSTQRPS#PETATK.Q | S323:      | 3 | 3,8886 | 0,38  | -0,574 |
| 20 | Q9NQW6 ANLN_HUMAN  | K.TPIS#PLKTGVSKPIVK.S           | S323:      | 2 | 2,6827 | 0,445 | 0,21   |
| 20 | P62136 PP1A_HUMAN  | K.YGQFSLNPGGRPITPPRNS#AK.A      | S325:      | 3 | 4,2509 | 0,434 | 0,611  |
| 20 | P50548 ERF_HUMAN   | R.YLQAHTQSVYNYHLS#PR.A          | S327:      | 3 | 3,8881 | 0,24  | 0,424  |
| 20 | Q6PJF5 RHDF2_HUMAN | R.GIPHSASPV#PDGVQIPLKEYGR.A     | S328:      | 3 | 4,2042 | 0,422 | 0,221  |
| 20 | Q92922 SMRC1_HUMAN | R.KHS#PS#PPPPTPTESR.K           | S328:S330: | 3 | 4,6564 | 0,459 | -0,412 |
| 20 | O00712 NFIB_HUMAN  | K.KPEKPLFSSAS#PQDSS#PR.L        | S328:S333: | 3 | 4,1936 | 0,256 | 0      |
| 20 | Q15459 SF3A1_HUMAN | K.FGESEEVEM*EVES#DEEDDKQEK.A    | S329:      | 3 | 5,1628 | 0,433 | -0,405 |
| 20 | Q9Y4K4 M4K5_HUMAN  | R.TAS#EINFDKLQFEPPLRK.E         | S335:      | 3 | 3,1335 | 0,189 | -0,083 |
| 20 | O14662 STX16_HUMAN | R.QLLAEQVSSHITS#SPLHSR.S        | S34:       | 3 | 3,3194 | 0,228 | 0,169  |
| 20 | Q96G23 LASS2_HUMAN | K.LVEDERS#DREETESSEGEAAAGGGAK.S | S341:      | 3 | 3,3489 | 0,389 | -0,19  |
| 20 | Q9UMX1 SUFU_HUMAN  | R.APS#RKDS#LESDSSTAIIPHELIR.T   | S342:S346: | 3 | 4,2697 | 0,348 | -0,341 |
| 20 | Q9HCI7 MSL2_HUMAN  | R.SRS#ESDSEKVVQLPISTIIR.G       | S345:      | 3 | 5,6796 | 0,469 | -0,158 |

|    |                    |                                   |                 |   |        |       |        |
|----|--------------------|-----------------------------------|-----------------|---|--------|-------|--------|
| 20 | Q9UMX1 SUFU_HUMAN  | R.KDS#LESDSSTAIIPHELIR.T          | S346:           | 3 | 3,8282 | 0,231 | -0,334 |
| 20 | Q9Y383 LC7L2_HUMAN | R.FRQDLAS#CDR.D                   | S347:           | 3 | 3,5852 | 0,145 | 0,063  |
| 20 | Q9H307 PININ_HUMAN | K.EIAIVHS#DAEKEQEEEEQK.Q          | S347:           | 3 | 3,1865 | 0,321 | -0,315 |
| 20 | Q9Y383 LC7L2_HUMAN | R.FRQDLAS#CDR.D                   | S347:           | 2 | 2,7554 | 0,44  | -0,5   |
| 20 | Q13636 RAB31_HUMAN | R.FVQDHFHDHNS#PTIGASFM*TK.T       | S35:            | 3 | 3,7456 | 0,433 | 0,809  |
| 20 | P55072 TERA_HUMAN  | R.AHVIVM*AATNRPN#IDPALR.R         | S352:           | 3 | 2,822  | 0,279 | 0,082  |
| 20 | Q99856 ARI3A_HUMAN | R.RQS#FGGSLFAYSPGGAHGM*LSSPK.L    | S353:           | 3 | 4,7309 | 0,438 | 0,433  |
| 20 | Q02952 AKA12_HUMAN | K.LTAS#EQAHPQEPAESAEPR.L          | S353:           | 3 | 3,6459 | 0,255 | 0      |
| 20 | Q5SW79 CE170_HUMAN | R.TEEDS#KSIKSDVPVYLK.R            | S354:           | 3 | 3,5043 | 0,268 | 0      |
| 20 | Q14004 CD2L5_HUMAN | R.RLPRS#PS#PYSR.R                 | S358:S360:      | 3 | 2,9258 | 0,086 | -0,743 |
| 20 | P17096 HMGA1_HUMAN | R.KQPPVS#PGTALVGSQKEPSEVPTPK.R    | S36:            | 3 | 4,7405 | 0,498 | 0,347  |
| 20 | Q9NYB0 TE2IP_HUMAN | R.DDGSSM*SFYVRPS#PAKR.R           | S36:            | 3 | 2,8788 | 0,263 | -0,275 |
| 20 | Q9UHB6 LIMA1_HUMAN | K.SEVQQPVHPKPLS#PDSR.A            | S362:           | 2 | 2,3233 | 0,234 | -0,431 |
| 20 | P17302 CXA1_HUMAN  | K.LAAGHELQPLAIVDQRPS#SR.A         | S364:           | 3 | 2,8323 | 0,254 | 0,163  |
| 20 | P36578 RL4_HUMAN   | K.AAAAAALQAKS#DEKAAVAGK.K         | S365:           | 3 | 3,428  | 0,445 | -0,184 |
| 20 | Q7Z4V5 HDGR2_HUMAN | R.ADRGEAERGS#GGS#S#GDELREDDEPVK.K | S366:S369:S370: | 3 | 2,7745 | 0,282 | -0,309 |
| 20 | Q9ULM3 YETS2_HUMAN | K.ASS#PIKQSHEPVPDTSVEK.G          | S367:           | 3 | 4,0354 | 0,216 | -0,086 |
| 20 | Q92903 CDS1_HUMAN  | R.EGEEAAGGDHETESTS#DKETDIDDR.Y    | S37:            | 3 | 3,9113 | 0,341 | 0,069  |
| 20 | Q03135 CAV1_HUMAN  | K.AM*ADELS#EKQVYDAHTK.E           | S37:            | 3 | 3,3599 | 0,458 | 0      |
| 20 | Q01484 ANK2_HUMAN  | R.GGSPIIQEPEEPSEHREES#SPR.K       | S3806:          | 3 | 3,5639 | 0,403 | -0,362 |
| 20 | O94876 TMCC1_HUMAN | R.NKFGS#ADNIPNLKDSLEEGQVDDAGK.A   | S382:           | 3 | 3,7657 | 0,442 | -0,322 |
| 20 | Q9NYV4 CD2L7_HUMAN | R.HSSIS#PVRLPLNSSLGAELSR.K        | S385:           | 3 | 4,3197 | 0,497 | 0,08   |
| 20 | Q7Z2K8 GRIN1_HUMAN | K.M*DPASSGEGRPVS#GHTDITASAK.T     | S389:           | 3 | 3,1101 | 0,188 | -0,855 |
| 20 | Q8IYB3 SRRM1_HUMAN | R.RLS#PS#ASPPRR.R                 | S389:S391:      | 2 | 2,7084 | 0,337 | -0,353 |
| 20 | P53367 ARFP1_HUMAN | K.HSLPS#GLGLSETQITSHGFDNTK.E      | S39:            | 3 | 3,259  | 0,418 | 0      |
| 20 | Q9NWL6 ASND1_HUMAN | K.DVAAAAADS#PNKHVSVDPDR.I         | S396:           | 3 | 4,4286 | 0,392 | -1,006 |
| 20 | Q5QJ74 TBCEL_HUMAN | R.GPGM*GVHVPATPQGS#PM*KDR.L       | S41:            | 3 | 3,5419 | 0,23  | -0,515 |
| 20 | P49736 MCM2_HUMAN  | R.RTDALTSS#PGR.D                  | S41:            | 2 | 2,7378 | 0,367 | -0,787 |
| 20 | Q9H307 PININ_HUMAN | K.HVIADQEV#ETNRVES#VEPSENEASK.E   | S413:           | 3 | 3,1523 | 0,16  | 0,424  |
| 20 | Q14566 MCM6_HUMAN  | K.HVEEFS#PR.A                     | S413:           | 2 | 2,6347 | 0,421 | 0      |
| 20 | Q9P287 BCCIP_HUMAN | R.DEEEEKEVENEDEDDDD#DKEK.D        | S42:            | 3 | 5,3722 | 0,432 | -0,399 |
| 20 | Q15223 PVRL1_HUMAN | K.AGIPQHHPM*AQNQLQYPDDS#DDEK.K    | S422:           | 3 | 5,9515 | 0,483 | 0,458  |
| 20 | Q9Y490 TLN1_HUMAN  | K.DHFGLEGDEESTM*LEDSVS#PKK.S      | S425:           | 3 | 3,349  | 0,411 | 0,431  |

|    |                    |                                   |            |   |        |       |        |
|----|--------------------|-----------------------------------|------------|---|--------|-------|--------|
| 20 | Q8IWC1 MA7D3_HUMAN | K.ESVKGSPKESM*EASPEAM*VK.A        | S433:      | 3 | 3,6239 | 0,432 | -0,082 |
| 20 | P33981 TTK_HUMAN   | K.HTTFEQPVFVSVKQS#PPISTSK.W       | S436:      | 3 | 5,4566 | 0,405 | 0,655  |
| 20 | Q8IU81 I2BP1_HUMAN | K.NVAEALGHS#PKDPGGGGGPVR.A        | S436:      | 3 | 3,0669 | 0,158 | 0,713  |
| 20 | O94887 FARP2_HUMAN | K.DSSSLTDPQVSVVKS#PAAERR.S        | S439:      | 3 | 3,8278 | 0,473 | 0,521  |
| 20 | P17096 HMGA1_HUMAN | R.KQPPVSPGTALVGS#QKEPSEVPTPK.R    | S44:       | 3 | 3,458  | 0,346 | 0,416  |
| 20 | P27448 MARK3_HUMAN | R.RYS#DHAGPAIPSVVAYPK.R           | S442:      | 3 | 3,5417 | 0,163 | 0,273  |
| 20 | O94854 K0754_HUMAN | R.DTSTVSKEECEKVPFS#PR.T           | S442:      | 3 | 2,7339 | 0,174 | 0      |
| 20 | P18887 XRCC1_HUMAN | K.TKPTQAAGPSS#PQKPPTPEETK.A       | S447:      | 3 | 4,3196 | 0,478 | 0,078  |
| 20 | P51116 FXR2_HUMAN  | R.TGGPAYGPSSDVSTAS#ETESEKREEPNR.A | S453:      | 3 | 2,8801 | 0,464 | -0,546 |
| 20 | Q08170 SFRS4_HUMAN | K.SKPNLPS#ESRS#R.S                | S456:S460: | 2 | 2,0323 | 0,297 | -0,723 |
| 20 | P08670 VIME_HUMAN  | K.TVETRDGQVINETS#QHDDLE.-         | S459:      | 3 | 2,8294 | 0,197 | -0,658 |
| 20 | O95685 PPR3D_HUMAN | R.ACRPPGS#PGRAPPPTAPSGCDPR.L      | S46:       | 3 | 2,9097 | 0,091 | 0,289  |
| 20 | Q8IYB3 SRRM1_HUMAN | R.KVELS#ES#EEDKGGK.M              | S463:S465: | 2 | 4,1149 | 0,448 | 0,072  |
| 20 | Q99700 ATX2_HUMAN  | R.VALENDDRS#EEEKYTAVQR.N          | S465:      | 3 | 3,5374 | 0,107 | 0,235  |
| 20 | Q9NZN4 EHD2_HUMAN  | K.SKYDEIFYNLAPADGKLS#GSK.A        | S468:      | 3 | 5,4212 | 0,483 | 0,384  |
| 20 | Q13433 S39A6_HUMAN | K.YESQLS#TNEEKVDTDDRTEGYLR.A      | S472:      | 3 | 3,4744 | 0,347 | 0,647  |
| 20 | Q2TBE0 C19L2_HUMAN | K.STFAGS#PERESIHILSVDEK.N         | S475:      | 3 | 3,6082 | 0,397 | -0,24  |
| 20 | Q96PU5 NED4L_HUMAN | K.DTLS#NPQSPQSPYNPKPQHK.V         | S475:      | 3 | 3,2608 | 0,327 | -0,362 |
| 20 | Q9Y4E1 FA21C_HUMAN | R.KVQS#TADIFGDEEGDLFKEK.A         | S478:      | 3 | 6,3691 | 0,429 | -0,157 |
| 20 | Q96KC8 DNJC1_HUMAN | R.QKDFDIAEQNES#S#DEESLRK.E        | S479:S480: | 3 | 3,601  | 0,449 | 0,579  |
| 20 | Q96PU5 NED4L_HUMAN | K.DTLNQPSPQPS#PYNPKPQHK.V         | S483:      | 3 | 3,9646 | 0,308 | 0      |
| 20 | Q658P3 STEA3_HUMAN | K.FTLPTDHAEKTS#HV.-               | S486:      | 2 | 3,836  | 0,565 | 1,189  |
| 20 | Q9ULW0 TPX2_HUMAN  | K.KVLPITVPKS#PAFALK.N             | S486:      | 3 | 2,7216 | 0,146 | 0,102  |
| 20 | Q658P3 STEA3_HUMAN | K.FTLPTDHAEKTS#HV.-               | S486:      | 3 | 2,6242 | 0,377 | 0,396  |
| 20 | O94913 PCF11_HUMAN | K.S#RSPIHS#PK.R                   | S487:S494: | 2 | 2,43   | 0,16  | -0,666 |
| 20 | Q8TAD8 SNIP1_HUMAN | R.RPDHS#GGSPS#PPTSEPAR.S          | S49:S54:   | 3 | 3,3806 | 0,325 | -0,643 |
| 20 | Q6UN15 FIP1_HUMAN  | R.ERDHS#PTPSVFNS#DEER.Y           | S492:S500: | 3 | 3,5834 | 0,384 | 0,423  |
| 20 | Q96JG6 CC132_HUMAN | K.FM*EQSRS#PSVSPKQPVSTSSK.T       | S494:      | 3 | 4,7184 | 0,273 | -0,222 |
| 20 | Q14676 MDC1_HUMAN  | R.AHSEKDQPPFGDS#DDS#VEADK.S       | S495:S498: | 3 | 4,6651 | 0,518 | -0,601 |
| 20 | Q8TCJ2 STT3B_HUMAN | R.ENPPVEDSS#DEDDKRNQGNLYDK.A      | S499:      | 3 | 3,4494 | 0,19  | 0,267  |
| 20 | Q9BXW6 OSBL1_HUMAN | R.LEAVTARS#FEEEGEHLGSR.K          | S499:      | 3 | 3,1954 | 0,111 | 1,082  |
| 20 | O60502 NCOAT_HUMAN | K.M*AEELKPM*DTDKES#IAESK.S        | S505:      | 3 | 3,4521 | 0,352 | 0      |
| 20 | Q8N108 MIER1_HUMAN | R.VNS#NGKESPGSSEFFQEAVSHGK.F      | S507:      | 3 | 4,1073 | 0,241 | 0,292  |

|    |                    |                                    |            |   |        |       |        |
|----|--------------------|------------------------------------|------------|---|--------|-------|--------|
| 20 | O14974 MYPT1_HUMAN | R.RLAS#T#SDIEEKENR.D               | S507:T508: | 3 | 3,2443 | 0,318 | -0,101 |
| 20 | Q03164 HRX_HUMAN   | R.SDTPEVHPPLPISQS#PENESNDRR.S      | S518:      | 3 | 3,9113 | 0,44  | -0,263 |
| 20 | Q8TAD8 SNIP1_HUMAN | R.RPDHSGGS#PS#PPTSEPAR.S           | S52:S54:   | 2 | 3,1312 | 1     | -0,674 |
| 20 | O60318 MCM3A_HUMAN | K.KPGDGEVS#PSTEDAPFQHSPLGK.A       | S527:      | 3 | 4,0371 | 0,362 | -0,297 |
| 20 | Q15042 RB3GP_HUMAN | R.DEGKKT#ASDVTNIYPGDAGK.A          | S537:      | 3 | 4,3164 | 0,388 | 0,246  |
| 20 | O60318 MCM3A_HUMAN | K.KPGDGEVSPSTEDAPFQHS#PLGK.A       | S538:      | 3 | 4,4296 | 0,328 | 0,297  |
| 20 | Q9H1B7 EAP1_HUMAN  | R.KAS#PEPPDSAEGALKLGEQQR.Q         | S547:      | 3 | 5,3094 | 0,485 | 0,227  |
| 20 | Q9NWH9 SLTM_HUMAN  | R.ISSKS#PGHM*VILDQTK.G             | S553:      | 2 | 3,6473 | 0,427 | -0,598 |
| 20 | O15085 ARHGB_HUMAN | K.SSSQSTFHIPLS#PVEVKPGNVR.N        | S556:      | 3 | 3,1596 | 0,547 | -0,075 |
| 20 | Q7Z7F0 K0907_HUMAN | K.GFGLVAYAADS#SDEEEHGGHK.N         | S571:      | 3 | 3,8211 | 0,238 | 0,614  |
| 20 | Q86UU1 PHLB1_HUMAN | R.KNS#ITEISDNEDDLLEYHR.R           | S578:      | 3 | 5,7981 | 0,585 | 0,463  |
| 20 | Q3KR37 GRM1B_HUMAN | R.VPHLEEV#S#PVTTPTDEDVGH.R         | S581:      | 3 | 4,1634 | 0,359 | 0,216  |
| 20 | Q13428 TCOF_HUMAN  | K.SLGNILQAKPTS#SPAKGPPQK.A         | S582:      | 3 | 4,5895 | 0,522 | -0,083 |
| 20 | Q09666 AHNK_HUMAN  | K.GHYEVTGS#DDETGKLGSGVSLASK.K      | S5841:     | 3 | 4,8582 | 0,489 | 0,492  |
| 20 | Q9Y289 SC5A6_HUMAN | R.S#YGQDHLDTGLFPEKPR.N             | S585:      | 3 | 2,8754 | 0,364 | 0,269  |
| 20 | Q9Y2X7 GIT1_HUMAN  | R.HGS#GADSDYENTQSGDPLLGLGKR.F      | S592:      | 3 | 6,2113 | 0,577 | 0,273  |
| 20 | Q96T23 RSF1_HUMAN  | K.TFLDKDAQRLS#PIPEVVK.S            | S594:      | 3 | 3,9998 | 0,292 | -0,243 |
| 20 | O75122 CLAP2_HUMAN | R.VLNTGS#DVEEAVADALKKPAR.R         | S596:      | 3 | 2,9947 | 0,278 | 0      |
| 20 | Q3B726 RPA43_HUMAN | R.HIALS#PR.Y                       | S60:       | 2 | 2,4506 | 0,35  | 0      |
| 20 | Q9Y2W2 WBP11_HUMAN | K.GATAAPQRKS#EDDSAVPLAK.A          | S600:      | 3 | 3,6233 | 0,273 | 0,35   |
| 20 | Q92615 LARP5_HUMAN | R.SPS#PAHLPDDPKVAEK.Q              | S601:      | 3 | 4,0747 | 0,34  | 0,103  |
| 20 | O60583 CCNT2_HUMAN | K.HSADGIPPTVLR#PVGSLSSDGISSSSSSR.K | S601:      | 3 | 3,2643 | 0,346 | 1,151  |
| 20 | Q92615 LARP5_HUMAN | R.SPS#PAHLPDDPKVAEK.Q              | S601:      | 2 | 2,9603 | 0,466 | 0,138  |
| 20 | Q96RT1 LAP2_HUMAN  | K.HIVNHDDVFESEELS#S#DEEM*K.M       | S602:S603: | 3 | 4,9355 | 0,465 | 0,393  |
| 20 | Q8IYB3 SRRM1_HUMAN | R.RYS#PS#PPPKR.R                   | S605:S607: | 2 | 2,4479 | 0,315 | -0,726 |
| 20 | Q9H2P0 ADNP_HUMAN  | K.ADIPVKS#SPQAAVPYK.D              | S607:      | 2 | 2,2236 | 0,141 | -0,39  |
| 20 | Q13586 STIM1_HUMAN | K.AHSLM*ELSPSAPPGGS#PHLDSSR.S      | S608:      | 3 | 5,2169 | 0,524 | 0,452  |
| 20 | Q9NUW8 TYDP1_HUMAN | R.KIS#PVKFSNTDSVLPPK.R             | S61:       | 3 | 3,9281 | 0,304 | 0,189  |
| 20 | Q9NUW8 TYDP1_HUMAN | R.KIS#PVKFSNTDSVLPPK.R             | S61:       | 2 | 2,9022 | 0,432 | 0,63   |
| 20 | Q9Y4B5 K0802_HUMAN | R.DHAPSIPTS#PFGDSLESSTELRR.H       | S613:      | 3 | 2,998  | 0,299 | 0,071  |
| 20 | Q96T58 MINT_HUMAN  | R.RAS#YDYNQDR.T                    | S623:      | 2 | 3,05   | 0,319 | -0,178 |
| 20 | P42684 ABL2_HUMAN  | R.DKS#PSSLLEDAKETCFTR.D            | S631:      | 3 | 4,2428 | 0,429 | -0,085 |
| 20 | Q2M218 AAK1_HUMAN  | R.RILS#DVTHSAVFGVPASK.S            | S637:      | 3 | 3,5653 | 0,453 | 0,279  |

|    |                    |                                  |                 |   |        |       |        |
|----|--------------------|----------------------------------|-----------------|---|--------|-------|--------|
| 20 | Q2M2I8 AAK1_HUMAN  | R.RILS#DVTHSAVFGVPASK.S          | S637:           | 2 | 3,4    | 0,461 | 0,497  |
| 20 | O14776 TCRG1_HUMAN | R.DDNKDIDS#EKEAAM*EAEIK.A        | S638:           | 3 | 3,888  | 0,335 | -0,244 |
| 20 | Q3YEC7 PARF_HUMAN  | R.LKNDSLDFGLGLEEAGPKES#SEEGK.E   | S640:           | 3 | 6,0098 | 0,464 | 0,402  |
| 20 | Q92738 US6NL_HUMAN | R.GLAHPPSYSNPPVYHGNS#PK.H        | S642:           | 3 | 3,7177 | 0,387 | 0,25   |
| 20 | Q86TC9 MYPN_HUMAN  | K.TPEPS#SPVKEPPPVLAKPK.L         | S643:           | 3 | 3,703  | 0,188 | 0,088  |
| 20 | P78364 PHC1_HUMAN  | R.KADS#EEERDDVSTLGSML*LPK.A      | S645:           | 3 | 4,7921 | 0,38  | 0,462  |
| 20 | Q9BZF1 OSBL8_HUMAN | K.DLHQPSLS#PASPHSQGFER.G         | S65:            | 3 | 3,1356 | 0,105 | -0,253 |
| 20 | Q9H5Y7 SLIK6_HUMAN | R.DNS#PVHLQYSM*YGHK.T            | S652:           | 3 | 2,8739 | 0,308 | 0,098  |
| 20 | Q9C0D2 K1731_HUMAN | R.LKLS#PNKYQPIQPIQTSK.L          | S654:           | 3 | 5,0467 | 0,352 | 0,338  |
| 20 | O75362 ZN217_HUMAN | R.TKADVTPPPDPGSTTHNLEVS#PK.E     | S662:           | 3 | 5,7924 | 0,411 | -0,463 |
| 20 | O75665 OFD1_HUMAN  | K.NSAKS#PLAASK#PPSLHLLEAFK.N     | S663:S669:      | 3 | 4,0431 | 0,407 | -0,148 |
| 20 | Q08945 SSRP1_HUMAN | K.SKEFVSSDESS#S#GENKSK.K         | S672:S673:      | 3 | 3,1588 | 0,268 | -0,525 |
| 20 | Q9H2J7 S6A15_HUMAN | R.VLKEPVNLEGDDTS#LIHGK.I         | S675:           | 3 | 5,9513 | 0,433 | 0,597  |
| 20 | Q6AI39 K0240_HUMAN | K.VVGSS#PGHPAVQVESHSGGQK.R       | S675:           | 3 | 2,6534 | 0,375 | -0,345 |
| 20 | Q58EX7 PKHG4_HUMAN | R.KAYS#FDR.N                     | S677:           | 2 | 2,3093 | 0,28  | 0,126  |
| 20 | Q9UEY8 ADDG_HUMAN  | K.SPEKIEEVLSPGSPSKS#PSK.K        | S681:           | 3 | 5,4183 | 0,334 | 0,479  |
| 20 | Q12959 DLG1_HUMAN  | K.HVTSNAS#DSESSYR.G              | S687:           | 2 | 3,7563 | 0,402 | -0,678 |
| 20 | P19634 SL9A1_HUMAN | K.INNYLTVPAHKLDS#PTM*SR.A        | S693:           | 3 | 3,7638 | 0,177 | -0,244 |
| 20 | P10243 MYBA_HUMAN  | R.SRS#EDEDDDLQYADHDYEVPPQQK.G    | S7:             | 3 | 4,8218 | 0,436 | 0,575  |
| 20 | Q8N111 CEND_HUMAN  | K.S#ASSPKPDTKVPQVTTEAK.V         | S7:             | 3 | 3,3936 | 0,263 | -0,268 |
| 20 | Q8NG27 PJA1_HUMAN  | R.SRS#PFSTTR.R                   | S70:            | 2 | 2,5908 | 0,39  | -0,763 |
| 20 | Q8NE01 CNNM3_HUMAN | K.TTTAAGSSHSRPGVPVEGS#PGRNPGV.-  | S700:           | 3 | 5,7215 | 0,537 | 0,286  |
| 20 | P35612 ADDB_HUMAN  | K.DKTESVTSGPM*SPEGSPSKS#PSK.K    | S701:           | 3 | 3,3614 | 0,347 | 0,303  |
| 20 | Q9BWT3 PAPOG_HUMAN | K.RLPS#KELPDSSSPVANNIR.V         | S708:           | 3 | 4,1819 | 0,398 | 0,811  |
| 20 | O43493 TGON2_HUMAN | K.DSPSKSS#AEAQTPEDTPNKSGAEAK.T   | S71:            | 3 | 4,2539 | 0,367 | -0,63  |
| 20 | Q9P275 UBP36_HUMAN | R.ATGNDLRPPPPS#PSSDLTHPM*K.T     | S713:           | 3 | 4,1338 | 0,328 | 0,455  |
| 20 | P10636 TAU_HUMAN   | K.AKTDHGAEIVYKS#PVVS#GDTS#PR.H   | S713:S717:S721: | 3 | 4,1723 | 0,397 | 0,138  |
| 20 | Q8IYB3 SRRM1_HUMAN | R.RQS#PSPST#RPIR.R               | S713:T718:      | 2 | 2,9784 | 0,324 | -0,791 |
| 20 | Q12888 TP53B_HUMAN | K.EM*PKKECSEAM*EVETSVISIDS#PQK.L | S727:           | 3 | 3,1866 | 0,239 | 1,049  |
| 20 | O60271 JIP4_HUMAN  | R.SASQSS#LDKLDQELKEQQK.E         | S733:           | 3 | 4,2068 | 0,368 | 0,734  |
| 20 | Q9BYW2 SETD2_HUMAN | K.SES#PFRETEPLVSPHQDK.L          | S744:           | 3 | 3,54   | 0,144 | -0,592 |
| 20 | P28749 RBL1_HUMAN  | K.VKS#PVSLTAHSLIGASPK.Q          | S749:           | 3 | 4,161  | 0,388 | 0,293  |
| 20 | P28749 RBL1_HUMAN  | K.VKS#PVSLTAHSLIGASPK.Q          | S749:           | 2 | 4,1333 | 0,388 | 0,587  |

|    |                     |                                |        |   |        |       |        |
|----|---------------------|--------------------------------|--------|---|--------|-------|--------|
| 20 | O75152 ZC11A_HUMAN  | R.RLS#SASTGKPLSVEDDFEK.L       | S758:  | 3 | 4,4998 | 0,28  | 0,489  |
| 20 | Q5T5C0 STXB5_HUMAN  | R.KLS#LPTDLKPDLDVK.D           | S759:  | 3 | 3,4995 | 0,181 | 0,208  |
| 20 | Q8N4C8 MINK1_HUMAN  | R.SDSVLPASHGHLPQAGS#LER.N      | S763:  | 3 | 4,2181 | 0,256 | 0,428  |
| 20 | Q13017 RHG05_HUMAN  | K.HNLDVVS#PIPANKDLSEADLR.I     | S765:  | 3 | 3,9508 | 0,312 | 0,307  |
| 20 | Q5VT52 K0460_HUMAN  | K.IISPGSSTPSSTRS#PPPGRDESYPR.E | S769:  | 3 | 3,2092 | 0,198 | -0,608 |
| 20 | A8MVW0 U560A_HUMAN  | R.RDS#LTSPEDELGAEVGDEAGDKK.S   | S789:  | 3 | 6,1732 | 0,449 | 0,659  |
| 20 | A3KN83 SBNO1_HUMAN  | K.KKS#IDPDSIQSALLASGLGSK.R     | S794:  | 3 | 4,5503 | 0,557 | 0,083  |
| 20 | P98175 RBM10_HUMAN  | R.AHLS#ENELEALEKNDM*EQM*K.Y    | S796:  | 3 | 4,506  | 0,433 | 1,037  |
| 20 | O94979 SC31A_HUMAN  | R.AQGEPVAGHES#PKIPYEK.Q        | S799:  | 2 | 3,0218 | 0,416 | -0,605 |
| 20 | O94979 SC31A_HUMAN  | R.AQGEPVAGHES#PKIPYEK.Q        | S799:  | 3 | 2,6051 | 0,284 | -0,272 |
| 20 | Q53GS9 SNUT2_HUMAN  | R.EREVEDS#EPER.E               | S82:   | 3 | 4,3306 | 0,295 | -0,117 |
| 20 | Q2KHM9 K0753_HUMAN  | K.ISAISEKPLS#PHPIR.I           | S826:  | 3 | 3,1089 | 0,359 | 0,318  |
| 20 | O14617 AP3D1_HUMAN  | R.NTETSKS#PEKDVPM*VEK.K        | S829:  | 3 | 3,0249 | 0,199 | 0,182  |
| 20 | Q9HCG8 NCM_HUMAN    | R.RNS#FSENEK.H                 | S829:  | 2 | 2,8198 | 0,152 | -0,102 |
| 20 | Q6NWW9 PR40B_HUMAN  | R.ELQQAELPNRS#PGFGIKK.E        | S832:  | 3 | 2,8323 | 0,173 | 0,35   |
| 20 | Q13435 SF3B2_HUMAN  | R.EQQAQVEKEDFS#DM*VAEHAAK.Q    | S838:  | 3 | 3,5872 | 0,224 | 0,368  |
| 20 | Q8TEW0 PARD3_HUMAN  | K.SKS#M*DLGIADETKLNTVDDQK.A    | S852:  | 3 | 3,106  | 0,149 | 0,381  |
| 20 | Q09666 AHNK_HUMAN   | K.VESEIKVPDVELKS#AK.M          | S856:  | 3 | 3,4966 | 0,238 | 0,099  |
| 20 | Q5T5U3 RHG21_HUMAN  | R.QLS#HDHESVGGPSLDAQPNK.T      | S856:  | 3 | 3,1535 | 0,288 | 0,394  |
| 20 | Q8N2M8 SFR16_HUMAN  | R.AHLDHIPDYTPLLTTIS#PEQESDER.K | S86:   | 3 | 3,1027 | 0,462 | -0,419 |
| 20 | Q9NXG2 THUM1_HUMAN  | K.FTDKQQPS#GSEGEDDDAEALKK.E    | S86:   | 3 | 2,6567 | 0,22  | 0,344  |
| 20 | Q6GYQ0 GRIPE_HUMAN  | R.RGS#SPGSLEIPKDLDPDILNK.Q     | S860:  | 3 | 4,6332 | 0,454 | 0,248  |
| 20 | Q8TD19 NEK9_HUMAN   | K.VASEAPLEHKPQVEASS#PR.L       | S869:  | 3 | 3,3236 | 0,42  | -0,346 |
| 20 | Q9C0C2 TB182_HUMAN  | R.DAELQDQEFGRDS#LGTYSR.D       | S872:  | 3 | 3,235  | 0,28  | 0,221  |
| 20 | Q69YQ0 CYTSA_HUMAN  | R.HS#ISGPISTKPLTALSDK.R        | S887:  | 3 | 3,0399 | 0,398 | 0,091  |
| 20 | O95819 M4K4_HUMAN   | R.KGS#VVNVNPTNTRPQSDTPEIR.K    | S900:  | 3 | 3,1926 | 0,35  | 0,294  |
| 20 | P05455 LA_HUMAN     | R.S#PSKPLPEVTDEYKNDVK.N        | S92:   | 3 | 2,6832 | 0,197 | 0,086  |
| 20 | Q5VY92 Q5VY92_HUMAN | R.ERQELGS#PEER.L               | S932:  | 2 | 2,0462 | 0,333 | -1,385 |
| 20 | Q01831 XPC_HUMAN    | K.VIKDEALS#DGDDLRFPSDLK.K      | S94:   | 3 | 3,5648 | 0,369 | -0,301 |
| 20 | Q8IXM2 CQ049_HUMAN  | K.VYEDSGIPLPAES#PKKGPK.K       | S96:   | 3 | 3,2418 | 0,338 | -0,437 |
| 20 | Q9UBB9 TFP11_HUMAN  | K.GAAEEAELEDS#DDEEKPVKQDDFPK.D | S98:   | 3 | 5,9708 | 0,403 | 0,446  |
| 20 | Q13765 NACA_HUMAN   | K.S#KNILFVITKPDVYK.S           | S99:   | 2 | 2,5649 | 0,343 | -0,661 |
| 20 | Q5T200 ZC3HD_HUMAN  | R.GPRT#PPITTKELVEM*CNGK.N      | T1033: | 3 | 4,2175 | 0,523 | -0,155 |

|    |                    |                                    |              |   |        |       |        |
|----|--------------------|------------------------------------|--------------|---|--------|-------|--------|
| 20 | O00512 BCL9_HUMAN  | R.DPGT#PNDDSDIKECNSADHIK.S         | T115:        | 3 | 3,8774 | 0,345 | 0,38   |
| 20 | P46013 KI67_HUMAN  | R.RPQT#PKEEAQALEDLTGFK.E           | T1335:       | 3 | 3,2996 | 0,404 | -0,082 |
| 20 | Q86UP2 KTN1_HUMAN  | K.KVEVPVTKQPT#PPSEAAASK.K          | T153:        | 3 | 5,4183 | 0,357 | 0      |
| 20 | P54727 RD23B_HUMAN | K.QEKPAEKPAETPVAT#SPTATDSTSGDSSR.S | T159:        | 3 | 3,9052 | 1     | 0,06   |
| 20 | Q9BRD0 BUD13_HUMAN | R.ARHDT#PDPS#PLR.G                 | T159:S163:   | 2 | 3,0241 | 0,377 | -0,08  |
| 20 | Q8IWW6 RHG12_HUMAN | R.T#RSFGHFPGPEFLDVEK.T             | T174:        | 3 | 3,0629 | 0,109 | -0,09  |
| 20 | P46013 KI67_HUMAN  | K.AM*HT#PKPAVGEEKDINTFLGT#PVQK.L   | T1784:T1801: | 3 | 4,3631 | 0,453 | 0,571  |
| 20 | P28482 MK01_HUMAN  | R.VADPDHDHTGFLT#EYVATR.W           | T185:        | 3 | 4,1349 | 0,497 | 0,247  |
| 20 | P27361 MK03_HUMAN  | R.IADPEHDHTGFLT#EYVATR.W           | T202:        | 3 | 5,1447 | 0,442 | -0,162 |
| 20 | Q7Z589 EMSY_HUMAN  | R.RRT#NS#SSSPVVLK.E                | T207:S209:   | 2 | 3,5685 | 1     | 0,145  |
| 20 | Q7Z589 EMSY_HUMAN  | R.RRT#NS#SSSPVVLK.E                | T207:S209:   | 3 | 3,3011 | 0,311 | 0,109  |
| 20 | P29084 T2EB_HUMAN  | R.SVT#VDSM*DEEKIEEYLKR.Q           | T224:        | 3 | 2,9745 | 0,337 | -0,403 |
| 20 | Q08EQ4 TMSL1_HUMAN | K.TET#QEKNPLPSKETIEQEK.Q           | T23:         | 3 | 3,5977 | 0,241 | -0,158 |
| 20 | Q13416 ORC2_HUMAN  | R.DKT#SDLVEEYFEAHSSSK.V            | T236:        | 3 | 3,8597 | 0,224 | 0,255  |
| 20 | P28715 ERCC5_HUMAN | K.LKTEKPDAT#PPS#PR.T               | T338:S341:   | 3 | 3,1096 | 0,285 | 0      |
| 20 | P49759 CLK1_HUMAN  | K.VVDFGSATYDDEHHSTLVST#R.H         | T342:        | 3 | 2,9109 | 0,338 | -0,379 |
| 20 | P80723 BASP_HUMAN  | K.KAEGAATEEEGT#PKESEPQAAAEPAAEK.E  | T36:         | 3 | 5,8613 | 0,58  | 0,252  |
| 20 | Q92597 NDRG1_HUMAN | R.SHT#SEGAHLDITPNSGAAGNSAGPK.S     | T366:        | 3 | 5,2205 | 0,425 | -0,149 |
| 20 | Q5T5X7 K1553_HUMAN | R.T#SEKHSVDSVLTAQDSSK.R            | T38:         | 3 | 3,2461 | 0,252 | -0,26  |
| 20 | Q13043 STK4_HUMAN  | R.RDET#M*QPAKPSFLEYFEQK.E          | T387:        | 3 | 3,6463 | 0,309 | 0,15   |
| 20 | Q9UQ49 NEUR3_HUMAN | R.EILSHLQGDCT#SPGRNPSQFK.S         | T416:        | 3 | 2,8872 | 0,224 | 0,522  |
| 20 | Q9NQ84 GPC5C_HUMAN | R.AEDM*YSAQSHQAAT#PPKDGK.N         | T423:        | 3 | 3,438  | 0,251 | 0,328  |
| 20 | O75533 SF3B1_HUMAN | R.KLTAT#PTPLGGM*TGFHM*QTEDR.T      | T434:        | 3 | 2,9588 | 0,251 | 0,439  |
| 20 | P35611 ADDA_HUMAN  | K.EDGHRT#STSAVPNLFLVPLNTNPK.E      | T480:        | 3 | 3,3623 | 0,157 | 0,711  |
| 20 | Q15003 CND2_HUMAN  | R.KAPLNIPGT#PVLEDFPQNDDEKER.L      | T49:         | 3 | 5,6114 | 0,501 | 0,522  |
| 20 | P17096 HMGA1_HUMAN | R.KQPPVSPGTALVGSQKEPSEVPT#PK.R     | T53:         | 3 | 3,4076 | 0,222 | 0,277  |
| 20 | Q9H792 SG269_HUMAN | K.NCHKSAPT#S#PTATNISSK.T           | T571:S572:   | 3 | 3,0415 | 0,292 | 0      |
| 20 | Q3KR37 GRM1B_HUMAN | R.VPHLEEVN*SPVTT#PTDEDVGHR.I       | T585:        | 3 | 4,4086 | 0,222 | 0,432  |
| 20 | Q3KR37 GRM1B_HUMAN | R.VPHLEEVN*SPVTTPT#DEDVGHR.I       | T587:        | 3 | 4,8054 | 0,281 | 0,288  |
| 20 | Q9Y3Z3 SAMH1_HUMAN | R.NFTKPDGDVIAPLIT#PQKK.E           | T592:        | 3 | 5,7985 | 0,444 | 0,08   |
| 20 | Q8IYB3 SRRM1_HUMAN | K.RRT#AS#PPPPK.R                   | T614:S616:   | 3 | 3,4001 | 0,162 | -0,067 |
| 20 | Q8IYB3 SRRM1_HUMAN | K.RRT#AS#PPPPK.R                   | T614:S616:   | 2 | 2,3854 | 0,322 | -0,447 |
| 20 | Q8WVCO LEO1_HUMAN  | K.KLT#S#DEEGEPSGKR.K               | T629:S630:   | 3 | 4,363  | 0,433 | -0,54  |

|    |                    |                                 |            |   |        |       |        |
|----|--------------------|---------------------------------|------------|---|--------|-------|--------|
| 20 | Q8WVC0 LEO1_HUMAN  | K.KLT#S#DEEGEPSGKR.K            | T629:S630: | 2 | 3,1981 | 0,407 | -0,721 |
| 20 | Q9P275 UBP36_HUMAN | K.LKSPVLSNTTTEPAST#M*SPPPAKK.L  | T680:      | 3 | 4,1071 | 0,385 | -0,213 |
| 20 | Q99653 CHP1_HUMAN  | R.AST#LLRDEELEEIKK.E            | T7:        | 3 | 5,0244 | 0,271 | 0      |
| 20 | Q9NRL2 BAZ1A_HUMAN | K.DTEQKELDQDM*VT#EDEDDPGSHK.R   | T731:      | 3 | 4,7551 | 0,44  | -0,465 |
| 20 | Q13435 SF3B2_HUMAN | K.KIEEAM*DGSET#PQLFTVLPEKR.T    | T757:      | 3 | 5,4304 | 0,509 | -0,35  |
| 20 | O95239 KIF4A_HUMAN | R.RRT#FS#LTEVR.G                | T799:S801: | 3 | 2,9014 | 0,346 | -0,064 |
| 20 | P60866 RS20_HUMAN  | K.DTGKT#PVEPEVAIHR.I            | T9:        | 3 | 3,7185 | 0,141 | 0,106  |
| 20 | Q16513 PKN2_HUMAN  | R.GREDVSNFDFEFTSEAPILT#PPREPR.I | T958:      | 3 | 2,6251 | 0,491 | 0,12   |
| 20 | O43379 WDR62_HUMAN | R.AGTGY#ASPDRTHTVLAAGK.A        | Y1142:     | 3 | 2,6331 | 0,386 | -0,198 |
| 20 | P28482 MK01_HUMAN  | R.VADPDHDHTGFLTEY#VATR.W        | Y187:      | 3 | 4,9861 | 0,397 | 0,74   |
| 20 | P27361 MK03_HUMAN  | R.IADPEHDHTGFLTEY#VATR.W        | Y204:      | 3 | 4,2591 | 0,438 | 0,569  |
| 20 | Q02790 FKBP4_HUMAN | K.GEHSIVY#LKPSYAFGSVGK.E        | Y220:      | 3 | 3,3542 | 0,401 | -0,691 |
| 20 | P14921 ETS1_HUMAN  | R.VPSY#DSFDSEDYPAALPNHKPK.G     | Y283:      | 3 | 5,5241 | 0,474 | 1,073  |
| 20 | P08559 ODPA_HUMAN  | R.Y#HGHSM*SDPGVSY#R.T           | Y289:Y301: | 3 | 2,7069 | 0,19  | -0,414 |
| 20 | Q8TBB6 S7A14_HUMAN | K.KLIGPHY#Y#TM*R.I              | Y541:Y542: | 2 | 2,091  | 0,181 | 0,392  |
| 20 | Q01844 EWS_HUMAN   | R.QDHPSSM*GVYQESGGFSGPGENR.S    |            | 3 | 5,9752 | 0,48  | -0,22  |
| 20 | P29401 TKT_HUMAN   | R.TSRPENAIYNNNEDFQVGQAK.V       |            | 3 | 5,8142 | 0,391 | 0,146  |
| 20 | O75533 SF3B1_HUMAN | R.NRPLSDEELDAM*FPEGYK.V         |            | 3 | 5,5054 | 0,355 | 0,172  |
| 20 | P13639 EF2_HUMAN   | R.GHVFEESQVAGTPM*FVVK.A         |            | 2 | 5,3464 | 0,496 | 0,493  |
| 20 | Q9NYL9 TMOD3_HUMAN | K.YKDLDEDELLGNLSETLK.Q          |            | 3 | 5,3239 | 0,378 | -0,082 |
| 20 | P67809 YBOX1_HUMAN | R.EDGNEEDKENQGDETQGQPPQR.R      |            | 3 | 5,1298 | 0,485 | -0,348 |
| 20 | P05198 IF2A_HUMAN  | K.HAVSDPSILDSLNLNEDER.E         |            | 3 | 5,0613 | 0,45  | -0,172 |
| 20 | P35237 SPB6_HUMAN  | K.SGGGGDIHQGFQSLLETVNK.T        |            | 3 | 5,0312 | 0,451 | -0,268 |
| 20 | Q96ER3 SAAL1_HUMAN | R.DKEEEEEVAGGDCIGSTVYSK.H       |            | 3 | 5,0103 | 0,455 | 0,238  |
| 20 | Q9Y5B9 SP16H_HUMAN | K.NEDEEEEEKDEAEDLLGR.G          |            | 3 | 4,9495 | 0,492 | 0,456  |
| 20 | Q9UNZ2 NSF1C_HUMAN | R.DLIHDQDEDEEEEGQR.F            |            | 3 | 4,8765 | 0,328 | 0      |
| 20 | P62491 RB11A_HUMAN | R.DHADSNIVIM*LVGNK.S            |            | 2 | 4,8535 | 0,621 | -0,149 |
| 20 | P07951 TPM2_HUMAN  | K.CGDLEELKIVTNNLK.S             |            | 3 | 4,8529 | 0,423 | -0,39  |
| 20 | O14920 IKKB_HUMAN  | R.DLKPENIVLQQGEQR.L             |            | 3 | 4,8138 | 0,261 | -0,311 |
| 20 | Q14697 GANAB_HUMAN | R.VSQGSKDPAEGDGAQPEETPR.D       |            | 3 | 4,7604 | 0,321 | -1,104 |
| 20 | Q9H0A0 NAT10_HUMAN | K.TLSDDLDEAAKEFQEK.H            |            | 2 | 4,7212 | 0,464 | -0,398 |
| 20 | O43617 TPPC3_HUMAN | K.DYENDEVDNKQLDK.M              |            | 2 | 4,7109 | 0,399 | -0,283 |
| 20 | Q9UPN3 MACF1_HUMAN | K.DKNSVFSVLDEEIAK.A             |            | 2 | 4,7067 | 0,48  | 0,144  |



|    |                    |                            |   |        |       |        |
|----|--------------------|----------------------------|---|--------|-------|--------|
| 20 | P10809 CH60_HUMAN  | K.CEFQDAYVLLSEKK.I         | 3 | 4,6956 | 0,345 | 0      |
| 20 | P49257 LMAN1_HUMAN | K.GHPDLQGGPAEEIFESVGDR.E   | 3 | 4,6664 | 0,355 | -0,252 |
| 20 | P27694 RFA1_HUMAN  | K.DKNEQAFEEVFQANFR.S       | 3 | 4,6509 | 0,227 | 0      |
| 20 | P00338 LDHA_HUMAN  | K.DQLIYNLLKEEQTPQNK.I      | 3 | 4,6473 | 0,324 | -0,265 |
| 20 | P62258 1433E_HUMAN | K.LAEQAERYDEM*VESM*K.K     | 3 | 4,6277 | 0,463 | 0,187  |
| 20 | P61158 ARP3_HUMAN  | R.DREVGIPPEQSLETAK.A       | 2 | 4,6118 | 0,506 | -0,207 |
| 20 | P0C7M2 RA1L3_HUMAN | R.GFAFVTFDHDSVVK.I         | 2 | 4,6053 | 0,474 | 0,646  |
| 20 | P08195 4F2_HUMAN   | K.NQKDDVAQTDLLQIDPNFGSK.E  | 3 | 4,5118 | 0,4   | 0,234  |
| 20 | P07910 HNRPC_HUMAN | K.DDEKEAEEGEDDRDSANGEDDS.- | 3 | 4,5054 | 0,569 | -0,678 |
| 20 | P06396 GELS_HUMAN  | K.DSQEEEKTEALSAK.R         | 3 | 4,5002 | 0,399 | -0,11  |
| 20 | P21333 FLNA_HUMAN  | K.TGVAVNKPAAFTVDAK.H       | 2 | 4,4809 | 0,534 | 0,593  |
| 20 | Q12874 SF3A3_HUMAN | R.KEELNAISGPNEFAEFYNR.L    | 3 | 4,4708 | 0,414 | -0,164 |
| 20 | Q96FV9 THOC1_HUMAN | R.DKPVTGEQIEVFANK.L        | 2 | 4,466  | 0,521 | -0,146 |
| 20 | P21333 FLNA_HUMAN  | K.SPFEVYVDKSGDASK.V        | 3 | 4,4385 | 0,328 | 0,104  |
| 20 | P19338 NUCL_HUMAN  | R.KFGYVDFESAEDLEK.A        | 2 | 4,4277 | 0,415 | -0,549 |
| 20 | Q9UBF2 COPG2_HUMAN | K.HPSAVTACNLDLENLITDSNR.S  | 3 | 4,4244 | 0,256 | -0,078 |
| 20 | P62491 RB11A_HUMAN | R.DHADSNIVIM*LVGNK.S       | 3 | 4,417  | 0,394 | 0,111  |
| 20 | P07195 LDHB_HUMAN  | K.EKLIAPVAEEEATVPNNK.I     | 2 | 4,4153 | 0,509 | 1      |
| 20 | P62158 CALM_HUMAN  | K.EAFSLFDKGDGTITTK.E       | 2 | 4,3706 | 0,544 | -0,397 |
| 20 | P67936 TPM4_HUMAN  | K.CGDLEELKNVTNNLK.S        | 2 | 4,3601 | 0,445 | -0,39  |
| 20 | Q86U44 MTA70_HUMAN | K.DHTPSQELALTQSVGGDSSADR.L | 3 | 4,3556 | 0,193 | 0,322  |
| 20 | Q96AG4 LRC59_HUMAN | R.LVNLQHLLLNK.L            | 2 | 4,3483 | 0,412 | 0,557  |
| 20 | Q9BXF6 RFIP5_HUMAN | R.DEHVQELESYDR.L           | 2 | 4,3007 | 0,455 | -0,149 |
| 20 | P00558 PGK1_HUMAN  | K.VADKIQLINNM*LDK.V        | 3 | 4,2861 | 0,289 | 0      |
| 20 | Q9NR28 DBLOH_HUMAN | K.TQEEGEERAESEQEAYLRED.-   | 3 | 4,2829 | 0,51  | 0,687  |
| 20 | O43815 STRN_HUMAN  | K.EALKEFDLVTSEEGDNESR.S    | 3 | 4,2781 | 0,449 | -0,079 |
| 20 | Q01105 SET_HUMAN   | K.EQQEAIEHIDEVQNEIDR.L     | 3 | 4,2205 | 0,3   | 0,5    |
| 20 | P62316 SMD2_HUMAN  | K.REEEEFNTGPLSVLTQSVK.N    | 3 | 4,2168 | 0,431 | -0,085 |
| 20 | Q13885 TBB2A_HUMAN | R.EIVHIQAGQCGNQIGAK.F      | 3 | 4,2091 | 0,386 | 0,401  |
| 20 | P51114 FXR1_HUMAN  | R.KVPGVTAILEDDEDTGTFR.I    | 3 | 4,2066 | 0,324 | 0,188  |
| 20 | P13639 EF2_HUMAN   | K.YRCELLYEGPPDDEAAM*GIK.S  | 3 | 4,2005 | 0,353 | 0,703  |
| 20 | P78371 TCPB_HUMAN  | R.EALLSSAVDHGSDEVK.F       | 2 | 4,1998 | 0,474 | 0,295  |
| 20 | O94855 SC24D_HUMAN | K.KLDPDSIPSPIQVIENDR.A     | 3 | 4,1951 | 0,32  | 0      |

|    |                    |                              |   |        |       |        |
|----|--------------------|------------------------------|---|--------|-------|--------|
| 20 | Q9BYG3 MK67I_HUMAN | K.KGIDYDFPSLILQK.T           | 2 | 4,1915 | 0,335 | 0      |
| 20 | Q5H9R7 SAPS3_HUMAN | R.YKYPNISCELLTSDV SQM*NDR.L  | 3 | 4,1675 | 0,315 | -0,718 |
| 20 | P67936 TPM4_HUMAN  | K.DEEKM*EIQEM*QLK.E          | 3 | 4,1422 | 0,2   | 0      |
| 20 | P06737 PYGL_HUMAN  | K.IGEDYVKDLSQLTK.L           | 2 | 4,1372 | 0,391 | -0,076 |
| 20 | P61106 RAB14_HUMAN | K.TGENVEDAFLEAAKK.I          | 3 | 4,1291 | 0,442 | 0      |
| 20 | Q8TCS8 PNPT1_HUMAN | R.KENGPVVETVQVPLSK.R         | 3 | 4,1268 | 0,306 | -0,318 |
| 20 | P13639 EF2_HUMAN   | R.GHVFEESQVAGTPM*FVVK.A      | 3 | 4,1241 | 0,318 | 0,462  |
| 20 | Q14839 CHD4_HUMAN  | K.FGTEELFKDEATDGGGDNK.E      | 3 | 4,124  | 0,373 | 0,27   |
| 20 | Q8IU18 CRLF3_HUMAN | R.DSIGVCAEKQDGYDSLQR.D       | 3 | 4,1226 | 0,427 | 0,269  |
| 20 | Q8N4Q1 MIA40_HUMAN | K.KPAEQAEETAPIEATATKEEEGSS.- | 3 | 4,0897 | 0,55  | 0,585  |
| 20 | Q13526 PIN1_HUMAN  | K.IKSGEEDFESLASQFSDCSSAK.A   | 3 | 4,0831 | 0,451 | 0,68   |
| 20 | P10301 RRAS_HUMAN  | K.DRDDFPVVLVGNK.A            | 2 | 4,0791 | 0,401 | 0,414  |
| 20 | P35080 PROF2_HUMAN | K.DREGFFTNGTLGAK.K           | 2 | 4,0622 | 0,334 | 0,45   |
| 20 | P05387 RLA2_HUMAN  | K.ILDSVGIEADDDRLNK.V         | 2 | 4,0547 | 0,466 | -0,344 |
| 20 | Q16891 IMMT_HUMAN  | R.GIEQAVQSHAVAEER.K          | 2 | 4,0502 | 0,472 | -0,401 |
| 20 | P06737 PYGL_HUMAN  | K.DFSELEPKFQNK.T             | 2 | 4,0487 | 0,444 | 0,382  |
| 20 | O75794 CD123_HUMAN | K.DFVDLSTGEDAHK.L            | 2 | 4,0464 | 0,452 | 0,17   |
| 20 | P54709 AT1B3_HUMAN | R.SDPTSYAGYIEDLKK.F          | 2 | 4,0427 | 0,439 | -0,145 |
| 20 | Q9UQ80 PA2G4_HUMAN | K.HELLQPFNVLYEK.E            | 3 | 4,0411 | 0,416 | -0,112 |
| 20 | P67936 TPM4_HUMAN  | K.CGDLEELKNVTNNLK.S          | 3 | 4,0236 | 0,492 | -0,098 |
| 20 | P02545 LMNA_HUMAN  | R.VAVEEVDEEGKFVR.L           | 2 | 4,0234 | 0,473 | 0,152  |
| 20 | P06396 GELS_HUMAN  | K.DSQEEKTEALTSK.R            | 2 | 4,016  | 0,477 | 0      |
| 20 | Q9UJN8 MCD2L_HUMAN | R.DDDKNNDGYIDYAEFAK.S        | 2 | 4,0077 | 0,581 | 0,612  |
| 20 | P62937 PPIA_HUMAN  | K.SIYGKFEFENFILK.H           | 2 | 4,0042 | 0,454 | 0,266  |
| 20 | Q01433 AMPD2_HUMAN | K.TSDSDLQLYKEQGEGQDR.S       | 3 | 3,9981 | 0,459 | -0,327 |
| 20 | Q8TDN6 BXDC2_HUMAN | K.DKLFVINEVCEM*K.N           | 3 | 3,9836 | 0,216 | 0,111  |
| 20 | P62906 RL10A_HUMAN | K.FSVCVLGDQQHCDEAK.A         | 3 | 3,9704 | 0,437 | 0,387  |
| 20 | P06493 CDC2_HUMAN  | K.M*ALNHPYFNDLDNQIK.K        | 3 | 3,9589 | 0,294 | 0,188  |
| 20 | O75347 TBCA_HUMAN  | R.ILENEKDLEEAEEYK.E          | 2 | 3,9388 | 0,408 | 0,198  |
| 20 | Q9Y4L1 HYOU1_HUMAN | R.EKAANSLEAFIFETQDK.L        | 3 | 3,9373 | 0,226 | -0,283 |
| 20 | P08237 K6PF_HUMAN  | R.DLQANVEHLVQK.M             | 2 | 3,9189 | 0,404 | 0      |
| 20 | Q9Y295 DRG1_HUMAN  | K.DHTLEDEDVIQIVK.K           | 2 | 3,9066 | 0,527 | -0,148 |
| 20 | Q9UQE7 SMC3_HUMAN  | R.SEDLDNSIDKTEAGIK.E         | 2 | 3,8995 | 0,461 | -0,563 |

|    |                     |                            |   |        |       |        |
|----|---------------------|----------------------------|---|--------|-------|--------|
| 20 | Q00839 HNRPU_HUMAN  | K.KDCEVVM*M*IGLPGAGK.T     | 2 | 3,8876 | 0,474 | 0,351  |
| 20 | P36776 LONM_HUMAN   | K.GDKDGSLEVTGQLGEVM*K.E    | 3 | 3,8835 | 0,372 | 0,292  |
| 20 | P13639 EF2_HUMAN    | K.GLKEGIPALDNFLDK.L        | 3 | 3,8766 | 0,411 | -0,112 |
| 20 | P48643 TCPE_HUMAN   | R.DVDFELIKVEGK.V           | 2 | 3,8753 | 0,526 | -0,351 |
| 20 | Q96T88 UHRF1_HUMAN  | K.DRPASGSPFQLFLSK.V        | 3 | 3,8722 | 0,279 | -0,111 |
| 20 | Q00610 CLH1_HUMAN   | R.ALEHFTDLYDIK.R           | 3 | 3,8701 | 0,277 | 0,25   |
| 20 | P00491 PNPH_HUMAN   | R.DHINLPGFSGQNPLR.G        | 3 | 3,861  | 0,329 | -0,11  |
| 20 | P68400 CSK21_HUMAN  | R.TPALVFEHVNNTDFK.Q        | 3 | 3,8338 | 0,194 | -0,528 |
| 20 | Q01105 SET_HUMAN    | R.LNEQASEEILKVEQK.Y        | 2 | 3,8189 | 0,365 | -0,208 |
| 20 | Q13885 TBB2A_HUMAN  | R.EIVHIQAGQCGNQIGAK.F      | 2 | 3,8182 | 0,353 | 0,402  |
| 20 | Q8NBU5 ATAD1_HUMAN  | R.HVDLLEVAQETDGFSGSDLK.E   | 3 | 3,8179 | 0,314 | -0,085 |
| 20 | Q9UK45 LSM7_HUMAN   | R.DPDDQYKLTEDTR.Q          | 3 | 3,794  | 0,253 | 0,229  |
| 20 | P33176 KINH_HUMAN   | K.QLDDKDEEINQSQLVEK.L      | 3 | 3,7816 | 0,301 | 0,763  |
| 20 | Q9Y265 RUVB1_HUMAN  | K.EHVEEISELFYDAK.S         | 2 | 3,7802 | 0,49  | 0,5    |
| 20 | P07355 ANXA2_HUMAN  | K.TDLEKDIISDTSGDFR.K       | 2 | 3,7789 | 0,551 | -0,808 |
| 20 | Q8IXM3 RM41_HUMAN   | K.DFKDGTDPDNLEK.Y          | 2 | 3,7568 | 0,39  | 0,744  |
| 20 | A8MZB9 A8MZB9_HUMAN | K.LFVGGIKEDTEEYNLR.D       | 3 | 3,7533 | 0,427 | 0,389  |
| 20 | P62195 PRS8_HUMAN   | R.EHAPSIIFM*DEIDSIGSSR.L   | 3 | 3,7427 | 0,4   | 0      |
| 20 | P08670 VIME_HUMAN   | R.ETNLDLPLVDTHSK.R         | 2 | 3,7414 | 0,472 | 0,439  |
| 20 | Q01813 K6PP_HUMAN   | R.DLQSNVEHLTEK.M           | 2 | 3,7378 | 0,389 | -0,345 |
| 20 | Q00610 CLH1_HUMAN   | K.DSLYKDAM*QYASESK.D       | 2 | 3,7377 | 0,458 | 0,627  |
| 20 | Q14696 MESD2_HUMAN  | K.DDDIEEGDLPEHK.R          | 2 | 3,7338 | 0,548 | -0,484 |
| 20 | P42166 LAP2A_HUMAN  | K.LKSELVANNVTLPAGEQR.K     | 3 | 3,7295 | 0,196 | 0,189  |
| 20 | Q9UQE7 SMC3_HUMAN   | K.NLEQYNKLDQDLNEVK.A       | 3 | 3,7258 | 0,336 | 0,28   |
| 20 | P60174 TPIS_HUMAN   | K.DCGATWVVLGHSER.R         | 2 | 3,7172 | 0,343 | 0,308  |
| 20 | O75821 EIF3G_HUMAN  | K.EKLPGELEPVQATQNK.T       | 3 | 3,7127 | 0,424 | -0,205 |
| 20 | Q9Y490 TLN1_HUMAN   | R.DDILNGSHPVSFDK.A         | 2 | 3,7098 | 0,385 | -0,316 |
| 20 | P04083 ANXA1_HUMAN  | R.DLAKDITSDTSGDFR.N        | 2 | 3,7075 | 0,558 | 0      |
| 20 | Q2QD06 Q2QD06_HUMAN | K.DEEKM*ELQELQLK.E         | 3 | 3,7054 | 0,268 | -0,222 |
| 20 | Q06124 PTN11_HUMAN  | R.FDSLTDLVEHYK.K           | 2 | 3,7016 | 0,497 | -0,416 |
| 20 | Q9HOW9 CK054_HUMAN  | K.SHIM*PAEFSSCPLNSDEEVNK.W | 3 | 3,6911 | 0,206 | 0,608  |
| 20 | Q00325 MPCP_HUMAN   | R.LPRPPPEM*PESLK.K         | 3 | 3,6818 | 0,392 | 0,228  |
| 20 | Q9Y295 DRG1_HUMAN   | K.DHTLEDEDVIQIVK.K         | 3 | 3,6798 | 0,186 | 0,221  |

|    |                    |                                |   |        |       |        |
|----|--------------------|--------------------------------|---|--------|-------|--------|
| 20 | Q9Y217 MTMR6_HUMAN | R.DCHDIYNLLQLSK.Q              | 3 | 3,67   | 0,393 | -0,75  |
| 20 | Q8NE71 ABCF1_HUMAN | K.DVDDDGEEKELM*ER.L            | 2 | 3,6629 | 0,366 | -0,504 |
| 20 | Q9UNM6 PSD13_HUMAN | K.LYENFISEFEHR.V               | 2 | 3,6484 | 0,437 | 0      |
| 20 | O75531 BAF_HUMAN   | R.DFVAEPM*GEKPVGSLAGIGEVLGKK.L | 3 | 3,6425 | 0,376 | -0,288 |
| 20 | P31946 1433B_HUMAN | K.LAEQAERYDDM*AAAM*K.A         | 3 | 3,6418 | 0,328 | 0,099  |
| 20 | P00492 HPRT_HUMAN  | R.DLNHVCVISETGK.A              | 3 | 3,6385 | 0,3   | 0,124  |
| 20 | Q70UQ0 IKIP_HUMAN  | K.DIKDEIAHISDM*N.-             | 2 | 3,6176 | 0,511 | 0,483  |
| 20 | P08865 RSSA_HUMAN  | R.DPEEIEKEEQAAAEK.A            | 2 | 3,6166 | 0,478 | 0,284  |
| 20 | Q96FV9 THOC1_HUMAN | R.DKPVTGEQIEVFANK.L            | 3 | 3,6161 | 0,384 | 0,109  |
| 20 | P08670 VIME_HUMAN  | R.DGQVINETSQHDDLE.-            | 2 | 3,6032 | 0,395 | 0,332  |
| 20 | P61224 RAP1B_HUMAN | R.VKDTPDDVPM*ILVGNK.C          | 2 | 3,5968 | 0,376 | -0,294 |
| 20 | O94826 TOM70_HUMAN | K.CIDLEPDNATTYVHK.G            | 3 | 3,5946 | 0,304 | 0,206  |
| 20 | P34932 HSP74_HUMAN | K.SEENEPEM*ETDQNAKEEEK.M       | 3 | 3,5844 | 0,314 | -0,321 |
| 20 | Q86UL3 PLCF_HUMAN  | K.DPTSLEEEIKEIR.R              | 2 | 3,581  | 0,324 | 0,313  |
| 20 | P43243 MATR3_HUMAN | R.DLDELSRYPEDK.I               | 2 | 3,5789 | 0,231 | 0,577  |
| 20 | O75937 DNJC8_HUMAN | K.EGKPTIVEEDDPELKF.Q           | 3 | 3,5644 | 0,304 | -0,198 |
| 20 | Q7Z3T8 ZFY16_HUMAN | K.DHGGFLFITPTFQK.L             | 2 | 3,5617 | 0,491 | 0,076  |
| 20 | Q9UBK8 MTRR_HUMAN  | K.DVHDALVQISK.E                | 2 | 3,5605 | 0,393 | -0,365 |
| 20 | Q9P0L0 VAPA_HUMAN  | K.HEQILVLDPPDLDK.F             | 3 | 3,5604 | 0,224 | 0,113  |
| 20 | O60763 USO1_HUMAN  | K.KEQDILLVLLADQDQK.I           | 3 | 3,5587 | 0,291 | -0,098 |
| 20 | Q13813 SPTA2_HUMAN | R.LIQSHPESAEDLQEK.C            | 3 | 3,545  | 0,335 | 0,106  |
| 20 | P07355 ANXA2_HUMAN | K.TDLEKDIISDTSGDFR.K           | 3 | 3,5388 | 0,389 | 0,101  |
| 20 | Q9NTJ3 SMC4_HUMAN  | K.DTEKEVDDLTAEK.S              | 2 | 3,533  | 0,404 | 0,076  |
| 20 | O95340 PAPS2_HUMAN | K.DIHFLVPENK.L                 | 2 | 3,5199 | 0,347 | -0,091 |
| 20 | Q9UQE7 SMC3_HUMAN  | R.LFYHIVDSDEVSTK.I             | 3 | 3,5194 | 0,364 | 0,443  |
| 20 | P50454 SERPH_HUMAN | R.DEEVHAGLGELLR.S              | 3 | 3,5164 | 0,247 | 0,127  |
| 20 | Q07021 C1QBP_HUMAN | K.AFVDFLSDEIKEER.K             | 2 | 3,5163 | 0,378 | 0,144  |
| 20 | P33993 MCM7_HUMAN  | R.M*VDVVEKEDVNEAIR.L           | 3 | 3,5093 | 0,282 | -0,311 |
| 20 | Q7L014 DDX46_HUMAN | K.DAGNFDQNKLEEM*R.K            | 3 | 3,5033 | 0,363 | 0,202  |
| 20 | P25205 MCM3_HUMAN  | R.ALKDFVASIDATYAK.Q            | 3 | 3,4779 | 0,421 | 0,113  |
| 20 | O00303 EIF3F_HUMAN | R.LHPVILASIVDSYER.R            | 3 | 3,4558 | 0,261 | -0,107 |
| 20 | P05388 RLA0_HUMAN  | K.EDLTEIRDM*LLANK.V            | 2 | 3,4445 | 0,32  | 0,291  |
| 20 | Q9NUU7 DD19A_HUMAN | K.EGHQVALLSGEM*M*VEQR.A        | 3 | 3,4427 | 0,247 | 0      |

|    |                    |                            |   |        |       |        |
|----|--------------------|----------------------------|---|--------|-------|--------|
| 20 | P14625 ENPL_HUMAN  | R.ELISNASDALDKIR.L         | 2 | 3,4399 | 0,493 | 0,316  |
| 20 | Q13619 CUL4A_HUMAN | K.DKDM*VQDLLDFK.D          | 3 | 3,4342 | 0,196 | -0,123 |
| 20 | P35080 PROF2_HUMAN | K.DREGFFTNGLTLGAK.K        | 3 | 3,4316 | 0,262 | 0,337  |
| 20 | Q15843 NEDD8_HUMAN | K.EIEIDIEPTDKVER.I         | 2 | 3,4316 | 0,392 | 0,579  |
| 20 | P22626 ROA2_HUMAN  | R.GFGFVTFDDHDPVVK.I        | 2 | 3,4299 | 0,381 | 0,432  |
| 20 | Q9UQ80 PA2G4_HUMAN | K.SDQDYILKEGDLVK.I         | 2 | 3,4253 | 0,376 | 0,827  |
| 20 | Q00839 HNRPU_HUMAN | K.KDCEVVM*M*IGLPGAGK.T     | 3 | 3,4212 | 0,429 | 0,105  |
| 20 | O95571 ETHE1_HUMAN | R.LSGAQADLHIEDGDSIR.F      | 3 | 3,421  | 0,331 | 0,204  |
| 20 | O60499 STX10_HUMAN | K.DHM*VSPTAVAFLE.N         | 3 | 3,416  | 0,231 | 0,23   |
| 20 | Q9BXF6 RFIP5_HUMAN | R.DEHVQELESYDR.L           | 3 | 3,4107 | 0,21  | 0      |
| 20 | P68104 EF1A1_HUMAN | K.YYVTIIDAPGHR.D           | 3 | 3,4093 | 0,307 | 0,13   |
| 20 | P48729 KC1A_HUMAN  | R.DIKPDNFLM*GIGR.H         | 3 | 3,4071 | 0,324 | 0      |
| 20 | Q8WUM4 PDC6I_HUMAN | R.DELLKDLQQSIAR.E          | 2 | 3,402  | 0,266 | -0,08  |
| 20 | P46821 MAP1B_HUMAN | K.DIKPQLELIEDEEK.L         | 3 | 3,3968 | 0,228 | -0,323 |
| 20 | P35580 MYH10_HUMAN | K.LDPHLVLDQLR.C            | 3 | 3,3904 | 0,282 | 0,139  |
| 20 | Q02952 AKA12_HUMAN | K.LKETCVSGEDPTQGADLSPDEK.V | 3 | 3,3881 | 0,286 | 0,616  |
| 20 | Q96RP9 EFG1_HUMAN  | R.DNSHPFVGLAFK.L           | 3 | 3,387  | 0,39  | 0,069  |
| 20 | O43768 ENSA_HUMAN  | K.QEEENPAEETGEEKQDTQEK.E   | 3 | 3,383  | 0,423 | 0,078  |
| 20 | Q8IWW6 RHG12_HUMAN | R.SFGHFPGPEFLDVEK.T        | 3 | 3,3795 | 0,312 | 1,608  |
| 20 | O00267 SPT5H_HUMAN | R.DQREEELGEYIM*K.K         | 3 | 3,3653 | 0,324 | 0,107  |
| 20 | Q58FF8 H90B2_HUMAN | R.YESLTDPSKLD SGK.E        | 2 | 3,3515 | 0,505 | 0,238  |
| 20 | Q00610 CLH1_HUMAN  | K.DSLYKDAM*QYASESK.D       | 3 | 3,3405 | 0,356 | 0,209  |
| 20 | P62937 PPIA_HUMAN  | R.VSFELFADKVPK.T           | 2 | 3,3402 | 0,52  | -0,177 |
| 20 | P68104 EF1A1_HUMAN | R.YEEIVKEVSTYIK.K          | 3 | 3,3362 | 0,485 | -0,228 |
| 20 | Q09666 AHNK_HUMAN  | K.ISM*PDVDLHLK.G           | 3 | 3,3319 | 0,379 | -0,214 |
| 20 | P60842 IF4A1_HUMAN | R.DFTVSAM*HGDM*DQK.E       | 2 | 3,3279 | 0,515 | -0,302 |
| 20 | Q12905 ILF2_HUMAN  | R.VKPAPDETSFSEALLK.R       | 3 | 3,3141 | 0,178 | -0,211 |
| 20 | O75642 IF1AH_HUMAN | R.DYQDNKADVILK.Y           | 2 | 3,3133 | 0,375 | -0,086 |
| 20 | Q16555 DPYL2_HUMAN | K.DHGVNSFLVYM*AFK.D        | 3 | 3,3121 | 0,21  | -0,223 |
| 20 | P07237 PDIA1_HUMAN | R.NNFEGEVTKENLLDFIK.H      | 3 | 3,29   | 0,262 | -0,091 |
| 20 | P50991 TCPD_HUMAN  | K.DIEREDIEFICK.T           | 2 | 3,2873 | 0,342 | 0,078  |
| 20 | P06737 PYGL_HUMAN  | K.DIINM*LFYHDR.F           | 2 | 3,2849 | 0,327 | -0,168 |
| 20 | Q99873 ANM1_HUMAN  | R.DKWLAPDGLIFPDR.A         | 3 | 3,2789 | 0,193 | -0,334 |

|    |                     |                           |   |        |       |        |
|----|---------------------|---------------------------|---|--------|-------|--------|
| 20 | Q09666 AHNK_HUMAN   | K.GPHVDVSGPDIDIEGPEGK.L   | 3 | 3,264  | 0,135 | -0,286 |
| 20 | Q53F17 Q53F17_HUMAN | R.FVFHQEQVYCPDCAK.K       | 3 | 3,2559 | 0,102 | 0,285  |
| 20 | O75439 MPPB_HUMAN   | K.DLVDYITTHYK.G           | 2 | 3,2549 | 0,408 | -0,357 |
| 20 | P13639 EF2_HUMAN    | K.DLEEDHACIPIK.K          | 2 | 3,254  | 0,368 | 0,254  |
| 20 | P61158 ARP3_HUMAN   | R.DREVGIPPEQSLETAK.A      | 3 | 3,2507 | 0,215 | 0,31   |
| 20 | P05787 K2C8_HUMAN   | K.DVDEAYM*NKVELESR.L      | 2 | 3,2501 | 0,454 | 0,807  |
| 20 | P45974 UBP5_HUMAN   | R.DRVTSAVEALLSADSASR.K    | 2 | 3,2448 | 0,418 | -0,66  |
| 20 | Q9P258 RCC2_HUMAN   | R.NHTLALTETGVSFAFGENK.M   | 3 | 3,2434 | 0,397 | 0      |
| 20 | P01130 LDLR_HUMAN   | R.LAHPFSLAVFEDK.V         | 3 | 3,2415 | 0,209 | -0,31  |
| 20 | Q96T88 UHRF1_HUMAN  | K.DRPASGSPFQLFLSK.V       | 2 | 3,2316 | 0,264 | 0,148  |
| 20 | P35613 BASI_HUMAN   | R.KPEDVLDDDDAGSAPLK.S     | 3 | 3,2313 | 0,254 | 0,307  |
| 20 | P50552 VASP_HUMAN   | K.VKEEIEAFVQELR.K         | 3 | 3,2161 | 0,194 | -0,215 |
| 20 | Q9Y265 RUVB1_HUMAN  | K.EHVVEISELFYDAK.S        | 3 | 3,1921 | 0,266 | 0,107  |
| 20 | P00367 DHE3_HUMAN   | R.DSNYHLLM*SVQESLER.K     | 2 | 3,1882 | 0,45  | -0,189 |
| 20 | P27144 KAD4_HUMAN   | K.DVAKPVIELYK.S           | 2 | 3,1763 | 0,327 | 0,191  |
| 20 | P14618 KPYM_HUMAN   | K.KGVNLPGAADVLPVSEK.D     | 3 | 3,1759 | 0,296 | 0,207  |
| 20 | P62070 RRAS2_HUMAN  | K.DRDEFPM*ILIGNK.A        | 3 | 3,1661 | 0,23  | -0,117 |
| 20 | Q14566 MCM6_HUMAN   | K.YLQLAEELIRPER.N         | 2 | 3,1574 | 0,443 | -0,374 |
| 20 | P35237 SPB6_HUMAN   | K.SGGGGDIHQGFQSLLEVNK.T   | 2 | 3,151  | 0,535 | -0,478 |
| 20 | Q9BY44 EIF2A_HUMAN  | R.NVNNEVHFFENNNFNNTIANK.L | 3 | 3,1482 | 0,328 | -0,154 |
| 20 | Q9UGV2 NDRG3_HUMAN  | R.DLEIERPILGQNDNK.S       | 3 | 3,144  | 0,402 | 0,209  |
| 20 | O43707 ACTN4_HUMAN  | K.M*LDAEDIVNTARPDEK.A     | 2 | 3,1439 | 0,408 | 0,266  |
| 20 | A4D118 A4D118_HUMAN | R.DEPLHALYDNVEK.L         | 2 | 3,1376 | 0,323 | 0,079  |
| 20 | P46736 BRCC3_HUMAN  | K.DRVEISPEQLSAASTEAEER.L  | 3 | 3,1373 | 0,364 | 0,088  |
| 20 | P62158 CALM_HUMAN   | K.EAFSLFDKGDGTITTK.E      | 3 | 3,1364 | 0,352 | 0      |
| 20 | Q13685 AAMP_HUMAN   | K.DASLVVTTSGDHK.A         | 2 | 3,1312 | 0,472 | 0,092  |
| 20 | Q10713 MPPA_HUMAN   | R.FDSKDEILLTLEK.H         | 3 | 3,1301 | 0,267 | -0,118 |
| 20 | Q9UPN3 MACF1_HUMAN  | K.DKNSVFSVLDEEIAK.A       | 3 | 3,1275 | 0,24  | -0,54  |
| 20 | P21333 FLNA_HUMAN   | K.TGVAVNKPAAFTVDAK.H      | 3 | 3,1222 | 0,435 | 0,222  |
| 20 | P05787 K2C8_HUMAN   | R.TEM*ENEFLIKK.D          | 2 | 3,1174 | 0,297 | 0,244  |
| 20 | Q14738 2A5D_HUMAN   | K.DSPTQEREELFIQK.L        | 2 | 3,1165 | 0,237 | 0,426  |
| 20 | Q00610 CLH1_HUMAN   | R.ALEHFTDLYDIK.R          | 2 | 3,0985 | 0,446 | 0,167  |
| 20 | P27348 1433T_HUMAN  | K.QTIDNSQGAYQEAQFDISKK.E  | 3 | 3,0975 | 0,202 | 0,427  |

|    |                     |                              |   |        |       |        |
|----|---------------------|------------------------------|---|--------|-------|--------|
| 20 | P52789 HXK2_HUMAN   | K.DISDIEGEKDGIR.K            | 2 | 3,0915 | 0,337 | 0,59   |
| 20 | O75475 PSIP1_HUMAN  | R.DFKPGDLIFAK.M              | 3 | 3,0863 | 0,329 | 0,292  |
| 20 | P0C7M2 RA1L3_HUMAN  | R.KLFIGGLSFETTDESLR.S        | 3 | 3,0846 | 0,335 | 0,096  |
| 20 | P61011 SRP54_HUMAN  | K.DKVVDVASVIVTK.L            | 2 | 3,0811 | 0,376 | 0,192  |
| 20 | P12814 ACTN1_HUMAN  | K.M*LDAEDIVGTARPDEK.A        | 2 | 3,073  | 0,323 | -0,893 |
| 20 | P00492 HPRT_HUMAN   | R.DLNHVCVISETGK.A            | 2 | 3,0718 | 0,473 | 0,083  |
| 20 | P21333 FLNA_HUMAN   | K.ATCAPQHGAPGPGPADASK.V      | 3 | 3,0605 | 0,308 | -0,307 |
| 20 | Q13885 TBB2A_HUMAN  | R.LHFFM*PGFAPLTSR.G          | 3 | 3,0456 | 0,244 | 0,112  |
| 20 | Q96T23 RSF1_HUMAN   | K.DADSSISVLEIHSQK.A          | 2 | 3,0451 | 0,426 | 0,15   |
| 20 | Q13523 PRP4B_HUMAN  | R.TKLDDLALLEDEK.Q            | 3 | 3,042  | 0,132 | -0,113 |
| 20 | O75419 CC45L_HUMAN  | K.DGSGTDHFQALDLSLR.S         | 3 | 3,038  | 0,424 | -0,302 |
| 20 | P46063 RECQ1_HUMAN  | K.DILQNVFKLEK.F              | 2 | 3,0362 | 0,205 | -0,362 |
| 20 | P05787 K2C8_HUMAN   | R.TEM*ENEFVLIKK.D            | 3 | 3,0316 | 0,361 | 0,061  |
| 20 | P61247 RS3A_HUMAN   | K.ACQSIYPLHDVFR.K            | 3 | 3,0074 | 0,308 | -0,429 |
| 20 | P62736 ACTA_HUMAN   | R.LDLAGRDLTDYLM*K.I          | 3 | 3,0021 | 0,289 | -0,335 |
| 20 | P10301 RRAS_HUMAN   | K.DRDDFPVVLVGNK.A            | 3 | 3,002  | 0,144 | 0      |
| 20 | O96000 NDUBA_HUMAN  | R.DYKVDQEIIINIM*QDR.L        | 2 | 2,9993 | 0,461 | -0,515 |
| 20 | Q8WUM4 PDC6I_HUMAN  | R.VPDLKDLPIGK.A              | 3 | 2,9866 | 0,314 | -0,209 |
| 20 | P12814 ACTN1_HUMAN  | R.KDDPLTNLNTAFDVAEK.Y        | 3 | 2,9859 | 0,237 | 0      |
| 20 | A4D186 A4D186_HUMAN | K.IQVLQQQADDAEERAER.L        | 3 | 2,9821 | 0,22  | 0,366  |
| 20 | O95352 ATG7_HUMAN   | R.DVAHSIIFEVK.L              | 3 | 2,9787 | 0,294 | 0,073  |
| 20 | Q9UQ80 PA2G4_HUMAN  | K.HELLQPFNVLYEK.E            | 2 | 2,9762 | 0,425 | -0,15  |
| 20 | Q15459 SF3A1_HUMAN  | R.EKQSDDEVYAPGLDIESSLK.Q     | 3 | 2,9756 | 0,236 | -0,247 |
| 20 | P11169 GTR3_HUMAN   | R.SGKDGVM*EM*NSIEPAKETTTNV.- | 3 | 2,9751 | 0,105 | 0,154  |
| 20 | Q8WUM4 PDC6I_HUMAN  | K.DAFDKGSLFGGSVK.L           | 2 | 2,968  | 0,208 | 0,342  |
| 20 | P62424 RL7A_HUMAN   | R.LKVPPAINQFTQALDR.Q         | 3 | 2,9555 | 0,111 | 0      |
| 20 | P21291 CSR1_HUMAN   | K.GLESTTLADKGEIYCK.G         | 3 | 2,9517 | 0,413 | 0,193  |
| 20 | Q86UL3 PLCF_HUMAN   | K.DPTSLEEEIKEIR.R            | 3 | 2,9461 | 0,267 | 0      |
| 20 | P12814 ACTN1_HUMAN  | R.KDDPLTNLNTAFDVAEK.Y        | 2 | 2,946  | 0,392 | -0,258 |
| 20 | Q99873 ANM1_HUMAN   | R.DKWLAPDGLIFPDR.A           | 2 | 2,9455 | 0,312 | 0,371  |
| 20 | P31943 HNRH1_HUMAN  | R.EGRPSGEAFVELESEDEVK.L      | 2 | 2,943  | 0,444 | 0,927  |
| 20 | P30044 PRDX5_HUMAN  | K.KGVLFVPGAFTPGCSK.T         | 3 | 2,9415 | 0,176 | 0,744  |
| 20 | Q8WUM4 PDC6I_HUMAN  | R.DELLKDLQQSIAR.E            | 3 | 2,9391 | 0,216 | 0,06   |

|    |                    |                         |   |        |       |        |
|----|--------------------|-------------------------|---|--------|-------|--------|
| 20 | Q969H8 CS010_HUMAN | R.ESDVPLKTEEFVTK.T      | 2 | 2,9344 | 0,438 | -0,279 |
| 20 | Q8TAQ2 SMRC2_HUMAN | K.EGQEEVLKEVVESEGER.K   | 3 | 2,9341 | 0,294 | 0,564  |
| 20 | Q9UBK8 MTRR_HUMAN  | K.DVHDALVQISK.E         | 3 | 2,9327 | 0,155 | 0,137  |
| 20 | O96019 ACL6A_HUMAN | R.DDGSTLM*EIDGDKGK.Q    | 2 | 2,9326 | 0,428 | -0,229 |
| 20 | Q9NX58 LYAR_HUMAN  | R.SEEELLVIFNKK.I        | 3 | 2,9267 | 0,294 | -0,252 |
| 20 | O14979 HNRDL_HUMAN | K.DAASVDKVLK.E          | 3 | 2,9147 | 0,16  | 0,213  |
| 20 | P50454 SERPH_HUMAN | R.DEEVHAGLGELLR.S       | 2 | 2,9086 | 0,357 | -0,255 |
| 20 | P18621 RL17_HUMAN  | K.EQIVPKPEEEVAQK.K      | 2 | 2,9076 | 0,358 | -0,075 |
| 20 | O75369 FLNB_HUMAN  | K.FADEHVPGPSFTVK.I      | 3 | 2,9042 | 0,288 | 0,239  |
| 20 | Q9H8Y5 ANKZ1_HUMAN | K.DKPLLSALDFEK.Q        | 3 | 2,9004 | 0,139 | 0      |
| 20 | Q14696 MESD2_HUMAN | K.DDDIEEGDLPEHK.R       | 3 | 2,8882 | 0,344 | 0,181  |
| 20 | P78527 PRKDC_HUMAN | K.FYQGFLFSEKPEK.N       | 3 | 2,8844 | 0,378 | -0,226 |
| 20 | P06493 CDC2_HUMAN  | R.DLKPQNLLIDDK.G        | 2 | 2,8685 | 0,342 | -0,173 |
| 20 | O43719 HTSF1_HUMAN | K.DNQGNLKGDGLCCYLK.R    | 3 | 2,8654 | 0,327 | 0,099  |
| 20 | O60499 STX10_HUMAN | K.DHM*VSPTAVAFLE.N      | 2 | 2,8646 | 0,32  | 0,614  |
| 20 | Q13263 TIF1B_HUMAN | K.M*IVDPVEPHGEM*K.F     | 3 | 2,8594 | 0,203 | 0,06   |
| 20 | P19525 E2AK2_HUMAN | R.DGIISDIFDKK.E         | 2 | 2,8591 | 0,328 | -0,195 |
| 20 | P04406 G3P_HUMAN   | R.VVDLM*AHM*ASKE.-      | 2 | 2,8581 | 0,495 | -1,074 |
| 20 | P23368 MAOM_HUMAN  | R.DRTQQYDDLIDEFM*K.A    | 3 | 2,8497 | 0,184 | 0      |
| 20 | P12814 ACTN1_HUMAN | K.M*LDAEDIVGTARPDEK.A   | 3 | 2,8464 | 0,449 | 0      |
| 20 | Q09666 AHNK_HUMAN  | K.VESEIKVPDVELK.S       | 3 | 2,8349 | 0,26  | -0,308 |
| 20 | P26038 MOES_HUMAN  | R.GM*LREDAVLEYLK.I      | 3 | 2,8343 | 0,193 | -0,118 |
| 20 | P43490 NAMPT_HUMAN | K.NAQLNIELEAAHH.-       | 3 | 2,8336 | 0,268 | 0      |
| 20 | O60716 CTND1_HUMAN | K.ALSAIADLLTNEHER.V     | 2 | 2,8273 | 0,355 | 0,295  |
| 20 | P31153 METK2_HUMAN | K.YLDEDTIYHLQPSGR.F     | 3 | 2,8233 | 0,311 | -0,405 |
| 20 | P52272 HNRPM_HUMAN | K.EKVGEVTYVELLM*DAEGK.S | 3 | 2,8202 | 0,181 | -0,451 |
| 20 | P11177 ODPB_HUMAN  | R.DAINQGM*DEELERDEK.V   | 2 | 2,8192 | 0,423 | 0,064  |
| 20 | Q9UKM7 MA1B1_HUMAN | R.DKM*ESFFLGETLK.Y      | 3 | 2,8085 | 0,084 | -0,234 |
| 20 | Q8WUM4 PDC6I_HUMAN | K.DAFDKGSLFGGSVK.L      | 3 | 2,8072 | 0,265 | 0,064  |
| 20 | Q7L5N1 CSN6_HUMAN  | R.SQEGRPVQVIGALIGK.Q    | 3 | 2,8061 | 0,223 | 0,332  |
| 20 | P41091 IF2G_HUMAN  | K.VGQEIEVRPGIVSK.D      | 3 | 2,8032 | 0,323 | 0,061  |
| 20 | P53985 MOT1_HUMAN  | K.DLHDANTDLIGR.H        | 2 | 2,801  | 0,458 | 0,364  |
| 20 | P00367 DHE3_HUMAN  | R.DSNYHLLM*SVQESLER.K   | 3 | 2,8006 | 0,154 | -0,189 |



|    |                    |                          |   |        |       |        |
|----|--------------------|--------------------------|---|--------|-------|--------|
| 20 | P12270 TPR_HUMAN   | K.YLDEIVKEVEAK.A         | 3 | 2,7942 | 0,378 | 0,064  |
| 20 | P06737 PYGL_HUMAN  | K.IGEDYVKDLSQLTK.L       | 3 | 2,7942 | 0,478 | 0      |
| 20 | Q13200 PSMD2_HUMAN | K.DTSLYRPALEELR.R        | 3 | 2,7865 | 0,459 | 0,117  |
| 20 | P20810 ICAL_HUMAN  | R.DTSQSDKDLDDALDK.L      | 2 | 2,7851 | 0,353 | 0,073  |
| 20 | O60888 CUTA_HUMAN  | K.GKIEEDSEVLM*M*IK.T     | 3 | 2,7804 | 0,18  | 0      |
| 20 | P61011 SRP54_HUMAN | K.DKVDVASVIVTK.L         | 3 | 2,7754 | 0,151 | 0,144  |
| 20 | P07355 ANXA2_HUMAN | R.RAEDGSVIDYELIDQDAR.D   | 3 | 2,7697 | 0,161 | 0,177  |
| 20 | Q9GZR7 DDX24_HUMAN | R.DKLDILGAAETGSGK.T      | 3 | 2,7657 | 0,259 | 0,31   |
| 20 | Q9NYY8 FAKD2_HUMAN | R.KLSEECNSLSDVLDAFSK.A   | 3 | 2,764  | 0,232 | -0,269 |
| 20 | P46013 KI67_HUMAN  | K.FTQTSGETTDADKEPAGEDK.G | 3 | 2,7476 | 0,163 | 0,172  |
| 20 | Q01105 SET_HUMAN   | R.LNEQASEEILKVEQK.Y      | 3 | 2,7446 | 0,187 | 0      |
| 20 | Q09666 AHNK_HUMAN  | K.ISM*PDLDLNLKGP.K.M     | 3 | 2,7396 | 0,37  | 0,352  |
| 20 | P55145 ARMET_HUMAN | K.DRDVTFSPATIENELIK.F    | 3 | 2,7371 | 0,321 | -0,376 |
| 20 | P46777 RL5_HUMAN   | R.YLM*EEDEDAYKK.Q        | 3 | 2,7303 | 0,22  | 0,472  |
| 20 | Q96AG4 LRC59_HUMAN | R.LVNLQHLLDNLNNK.L       | 3 | 2,727  | 0,388 | 0,119  |
| 20 | P02786 TFR1_HUMAN  | R.VEYHFLSPYVSPK.E        | 3 | 2,7239 | 0,085 | 0,234  |
| 20 | P61224 RAP1B_HUMAN | R.VKDTRDDVPM*ILVGNK.C    | 3 | 2,7188 | 0,18  | -0,441 |
| 20 | Q7KZF4 SND1_HUMAN  | R.DYVAPTANLDQKDK.Q       | 2 | 2,7166 | 0,324 | 0,696  |
| 20 | O00410 IMB3_HUMAN  | K.VSDILHSIFSSYK.E        | 2 | 2,7119 | 0,361 | -0,245 |
| 20 | Q8IUD2 RB6I2_HUMAN | K.DDRIEELEELR.E          | 2 | 2,7027 | 0,237 | 0      |
| 20 | O00231 PSD11_HUMAN | R.DDPIISTHLAK.L          | 2 | 2,6999 | 0,277 | 0,101  |
| 20 | P42704 LPPRC_HUMAN | K.LFECDRDQM*YYNLLK.L     | 3 | 2,6988 | 0,183 | -0,09  |
| 20 | P27695 APEX1_HUMAN | K.GAVAEDGDELRTPEAK.K     | 3 | 2,6944 | 0,213 | 0      |
| 20 | P04083 ANXA1_HUMAN | K.VLDLELKGDIK.C          | 2 | 2,6941 | 0,236 | 1,245  |
| 20 | Q15149 PLEC1_HUMAN | R.SLESLSHFVAAATK.E       | 3 | 2,6898 | 0,379 | -0,25  |
| 20 | Q9UQM7 KCC2A_HUMAN | R.DLKPENLLLASK.L         | 3 | 2,6792 | 0,312 | 0      |
| 20 | P11216 PYGB_HUMAN  | K.DFYELEPEKFQNK.T        | 2 | 2,6783 | 0,233 | 0,94   |
| 20 | O43776 SYNC_HUMAN  | K.KEDGTFYFEGEDIPEAPER.L  | 3 | 2,6775 | 0,173 | -0,082 |
| 20 | P20020 AT2B1_HUMAN | K.CGILHPGEDFLCLEGK.D     | 3 | 2,6771 | 0,262 | -1,289 |
| 20 | P49903 SPS1_HUMAN  | R.DKVM*PLIIQGFK.D        | 3 | 2,6742 | 0,246 | 0,195  |
| 20 | P30101 PDIA3_HUMAN | R.EATNPPVIQEEKPK.K       | 2 | 2,6726 | 0,358 | 0,232  |
| 20 | P18754 RCC1_HUMAN  | R.DNNGVIGLLEPM*KK.S      | 2 | 2,6717 | 0,229 | -0,395 |
| 20 | P33993 MCM7_HUMAN  | K.DVLDVYIEHR.L           | 2 | 2,6691 | 0,26  | 0,097  |

|    |                     |                           |   |        |       |        |
|----|---------------------|---------------------------|---|--------|-------|--------|
| 20 | P07237 PDIA1_HUMAN  | R.NNFEGEVTKENLLDFIK.H     | 2 | 2,6611 | 0,435 | 0,061  |
| 20 | P48730 KC1D_HUMAN   | R.DVKPDNFLM*GLGK.K        | 3 | 2,66   | 0,297 | 0,063  |
| 20 | P05387 RLA2_HUMAN   | K.DEKKEESEESDDDM*GFGLFD.- | 3 | 2,6523 | 0,26  | 0      |
| 20 | P07237 PDIA1_HUMAN  | K.YQLDKDGVVLFK.K          | 3 | 2,651  | 0,336 | 0      |
| 20 | Q9Y3A5 SBDS_HUMAN   | K.KEDLISAFGTDDQTEICK.Q    | 3 | 2,6486 | 0,264 | 0,53   |
| 20 | O75475 PSIP1_HUMAN  | R.DFKPGDLIFAK.M           | 2 | 2,642  | 0,321 | -0,195 |
| 20 | Q49AR2 CE022_HUMAN  | K.KPGTNLTEEDLVDIVDTR.I    | 3 | 2,64   | 0,237 | -0,091 |
| 20 | O60716 CTND1_HUMAN  | K.ALSAIADLLTNEHER.V       | 3 | 2,6381 | 0,37  | 0,221  |
| 20 | P13667 PDIA4_HUMAN  | R.YKVEGFPTIYFAPSGDK.K     | 3 | 2,6345 | 0,17  | -0,095 |
| 20 | P06748 NPM_HUMAN    | K.DELHIVEAEAM*NYEGSPIK.V  | 3 | 2,6339 | 0,31  | -0,169 |
| 20 | P27695 APEX1_HUMAN  | K.GAVAEDGDELRTPEAK.K      | 2 | 2,6267 | 0,24  | -0,41  |
| 20 | P27707 DCK_HUMAN    | K.DAEKPVLFER.S            | 3 | 2,6264 | 0,206 | 0,135  |
| 20 | O60934 NBN_HUMAN    | K.DTKPELEIDVK.V           | 3 | 2,6227 | 0,137 | 0,142  |
| 20 | Q15181 IPYR_HUMAN   | K.DPLNPIKQDVK.K           | 3 | 2,6203 | 0,222 | -0,361 |
| 20 | P16949 STMN1_HUMAN  | K.DLSLEEQKK.L             | 2 | 2,6019 | 0,254 | 0,203  |
| 20 | P06733 ENOA_HUMAN   | K.YDLDFKSPDDPSR.Y         | 3 | 2,6004 | 0,22  | 0      |
| 20 | Q96RP9 EFG1_HUMAN   | R.DNSHPFVGLAFK.L          | 2 | 2,5891 | 0,359 | -0,183 |
| 20 | O14818 PSA7_HUMAN   | R.DIVVLGVEKK.S            | 2 | 2,5458 | 0,366 | -0,111 |
| 20 | P63279 UBC9_HUMAN   | K.DHPFGFVAVPTK.N          | 2 | 2,5189 | 0,455 | 0,186  |
| 20 | P31948 STIP1_HUMAN  | K.AAALEFLNRFEEAK.R        | 2 | 2,4911 | 0,144 | 0,152  |
| 20 | P62258 1433E_HUMAN  | K.LAEQAERYDEM*VESM*K.K    | 2 | 2,4738 | 0,387 | -0,498 |
| 20 | A8MZB9 A8MZB9_HUMAN | K.LFVGGIKEDTEEYNLR.D      | 2 | 2,4387 | 0,491 | -0,389 |
| 20 | P52565 GDIR1_HUMAN  | K.SIQEIQELDKDDESLR.K      | 2 | 2,4229 | 0,245 | 0,509  |
| 20 | O15160 RPAC1_HUMAN  | K.DSSDPNELVYVNHK.V        | 2 | 2,3911 | 0,291 | -0,08  |
| 20 | P29401 TKT_HUMAN    | R.VLDPFTIKPLDR.K          | 2 | 2,3764 | 0,327 | -0,086 |
| 20 | Q5TC12 ATPF1_HUMAN  | K.DKTLSSIFNIEM*VK.E       | 2 | 2,3711 | 0,208 | 0,223  |
| 20 | P55084 ECHB_HUMAN   | K.DNGIRPSSLEQM*AK.L       | 2 | 2,362  | 0,278 | 0,469  |
| 20 | P68104 EF1A1_HUMAN  | K.YYVTIIDAPGHR.D          | 2 | 2,3182 | 0,246 | 0,695  |
| 20 | Q71UM5 RS27L_HUMAN  | R.DLLHPSLEEEK.K           | 2 | 2,2171 | 0,327 | -0,279 |
| 20 | O60313 OPA1_HUMAN   | R.EFDLTKEEDLAALR.H        | 2 | 2,1994 | 0,242 | 0,961  |
| 20 | P23368 MAOM_HUMAN   | R.DRTQQYDDLIDEFM*K.A      | 2 | 2,1897 | 0,44  | -0,316 |
| 20 | P54577 SYYC_HUMAN   | K.DFAAEVVHPPGDLK.N        | 2 | 2,1716 | 0,299 | 0,087  |
| 20 | Q9H8Y5 ANKZ1_HUMAN  | K.DKPLLSALDFEK.Q          | 2 | 2,0234 | 0,144 | -0,355 |

|    |                    |                                 |                    |   |        |       |        |
|----|--------------------|---------------------------------|--------------------|---|--------|-------|--------|
| 21 | Q9P265 DIP2B_HUMAN | R.YRS#DIHTEAVQAALAK.H           | S100:              | 2 | 4,2241 | 0,511 | 0,198  |
| 21 | Q9P265 DIP2B_HUMAN | R.YRS#DIHTEAVQAALAK.H           | S100:              | 3 | 4,1524 | 0,45  | 0,395  |
| 21 | Q5T200 ZC3HD_HUMAN | R.KKS#KGDSDIS#DEEAAQQSK.K       | S1010:S1014:S1017: | 3 | 4,4603 | 0,506 | -0,639 |
| 21 | P46019 KP2B_HUMAN  | R.RFS#ADEQFFSVGQAASSSAHSSK.S    | S1015:             | 3 | 6,4546 | 0,569 | -0,073 |
| 21 | Q8NDI1 EHBP1_HUMAN | R.KTQLQS#FSQYIENRPEM*K.R        | S1019:             | 3 | 3,9278 | 0,196 | 0,394  |
| 21 | O75351 VPS4B_HUMAN | K.EGQPSPADEKGNDS#DGEGESDDPEKK.K | S102:              | 3 | 4,4846 | 0,452 | -0,916 |
| 21 | Q96E15 TCAL4_HUMAN | R.EGKPEIEGKPES#EGEPGSETR.A      | S102:              | 3 | 2,9034 | 0,28  | 0,394  |
| 21 | A0AVK6 E2F8_HUMAN  | K.DCIHEHLS#GDEFEK.S             | S102:              | 3 | 2,7036 | 0,092 | -0,102 |
| 21 | Q9Y618 NCOR2_HUMAN | K.S#RSPAPPADKEAFAAEAQK.L        | S1023:             | 3 | 4,6986 | 0,334 | 0,357  |
| 21 | Q9NS91 RAD18_HUMAN | R.NHLLQFALESPAKS#PASSSSK.N      | S103:              | 3 | 4,679  | 0,475 | -0,562 |
| 21 | Q5VZ89 DEN4C_HUMAN | R.RSS#LPLDHGSPAQENPESEK.S       | S1042:             | 3 | 4,9332 | 0,451 | 0,081  |
| 21 | O60293 CC131_HUMAN | R.RS#FLESNYFTKPNLK.H            | S1046:             | 3 | 4,6129 | 0,427 | 0,19   |
| 21 | Q01658 NC2B_HUMAN  | R.KAS#SRLENLGIPEEELLR.Q         | S105:              | 3 | 3,8776 | 0,253 | -0,171 |
| 21 | Q01658 NC2B_HUMAN  | R.KASS#RLENLGIPEEELLR.Q         | S106:              | 3 | 3,6052 | 0,221 | -0,514 |
| 21 | Q12888 TP53B_HUMAN | R.GNLLHFPS#SQGEEKEK.L           | S1067:             | 2 | 3,0166 | 0,467 | 0,121  |
| 21 | P51858 HDGF_HUMAN  | K.KS#CVEEPEPEPEAAEGDGDKK.G      | S107:              | 3 | 3,2365 | 0,178 | -0,692 |
| 21 | Q9UKY7 CDV3_HUMAN  | R.VQAM*QISS#EKEEDDNEKR.Q        | S107:              | 3 | 2,7329 | 0,245 | -1,229 |
| 21 | P02545 LMNA_HUMAN  | R.LQLELS#KVREEFK.E              | S107:              | 2 | 2,457  | 0,372 | -0,431 |
| 21 | Q5VZL5 ZMYM4_HUMAN | K.KTLSQGSEQTS#EHELFLDTK.I       | S1071:             | 3 | 4,0362 | 0,363 | 0      |
| 21 | P46013 KI67_HUMAN  | R.TFKES#PKQILDPAAR.V            | S1071:             | 3 | 3,6191 | 0,434 | 0,103  |
| 21 | P46013 KI67_HUMAN  | R.TFKES#PKQILDPAAR.V            | S1071:             | 2 | 2,991  | 0,401 | 0,48   |
| 21 | Q9H6Z4 RANB3_HUMAN | R.SAGGSSPEGGEDS#DREDGNYCPPVKR.E | S108:              | 3 | 3,7648 | 0,367 | 0,718  |
| 21 | Q5JVS0 HABP4_HUMAN | R.KSLPAPVAQRPS#PGGGLQAPGQK.R    | S108:              | 3 | 3,3015 | 0,268 | 0,601  |
| 21 | Q96JM3 ZN828_HUMAN | K.ETDPVKS#PPLPEHQK.I            | S108:              | 3 | 2,8132 | 0,228 | 0,308  |
| 21 | Q9NYV4 CD2L7_HUMAN | R.KETTSGTSTEPVKNSS#PAPPQPAPGK.V | S1083:             | 3 | 4,4616 | 0,297 | 0,411  |
| 21 | Q562F6 SGOL2_HUMAN | R.KTS#IDSPESHEVM*ER.I           | S1085:             | 3 | 4,7533 | 0,278 | 0      |
| 21 | P48634 BAT2_HUMAN  | R.TAS#ETRSEGSEYEEIPKR.R         | S1085:             | 3 | 2,9714 | 0,476 | 0,085  |
| 21 | P42677 RS27_HUMAN  | K.DLLHPS#PEEEKR.K               | S11:               | 3 | 4,2241 | 0,322 | 0,418  |
| 21 | Q5VVJ2 MYSM1_HUMAN | K.IM*VHS#PTKPASYSVK.W           | S110:              | 2 | 3,5443 | 0,429 | 0,42   |
| 21 | P11388 TOP2A_HUMAN | K.EAQQKVPDEEENEES#DNEKETEK.S    | S1106:             | 3 | 5,6711 | 0,423 | -0,78  |
| 21 | Q8IVL0 NAV3_HUMAN  | R.KTS#LDGSQNDVVLHVSSK.T         | S1113:             | 3 | 6,129  | 0,458 | -0,082 |
| 21 | Q13459 MYO9B_HUMAN | R.SPLEHS#SPEKEAPSPEK.T          | S1114:             | 3 | 4,0658 | 0,301 | 0,19   |
| 21 | Q9HBD1 RC3H2_HUMAN | K.KQS#LGEDHVILEEQK.T            | S1119:             | 3 | 3,8061 | 0,27  | 0,2    |

|    |                     |                                   |            |   |        |       |        |
|----|---------------------|-----------------------------------|------------|---|--------|-------|--------|
| 21 | Q9UNS1 TIM_HUMAN    | K.KAGLAS#PEEEDAVGKEPLK.A          | S1149:     | 3 | 5,8805 | 0,457 | 0,268  |
| 21 | Q14207 NPAT_HUMAN   | K.KVS#PTEIVLESFHK.A               | S1151:     | 2 | 4,194  | 0,5   | -0,36  |
| 21 | Q14207 NPAT_HUMAN   | K.KVS#PTEIVLESFHK.A               | S1151:     | 3 | 3,4525 | 0,261 | -0,108 |
| 21 | Q8TBA6 GOGA5_HUMAN  | R.KKS#EPDDELLFDLFLNSSQK.E         | S116:      | 3 | 4,0769 | 0,347 | -0,158 |
| 21 | Q9HAN9 NMNA1_HUMAN  | K.LEASDCDHQQNS#PTLERPGR.K         | S117:      | 3 | 2,9164 | 0,239 | 0,306  |
| 21 | Q07889 SOS1_HUMAN   | K.HLDS#PPAIPPRQPTSK.A             | S1178:     | 3 | 3,3652 | 0,179 | 0      |
| 21 | Q7Z6E9 RBBP6_HUMAN  | K.ISKLEVTEIVKPS#PK.R              | S1179:     | 3 | 5,3879 | 0,451 | 0,209  |
| 21 | Q7Z6E9 RBBP6_HUMAN  | K.ISKLEVTEIVKPS#PK.R              | S1179:     | 2 | 3,4722 | 0,408 | 0,558  |
| 21 | Q8WYH8 ING5_HUMAN   | R.FEADLKDKM*EGS#DFESSGGR.G        | S118:      | 3 | 2,789  | 0,12  | 0,239  |
| 21 | Q9NTI5 PDS5B_HUMAN  | K.GRLDSSEM*DHS#ENEDYTM*SSPLPGK.K  | S1182:     | 3 | 4,1259 | 0,539 | 0,443  |
| 21 | Q9Y6M7 S4A7_HUMAN   | K.ALKYS#PDKPVSVK.I                | S1188:     | 3 | 3,8238 | 0,219 | 0,181  |
| 21 | O75376 NCOR1_HUMAN  | R.M*PIEDS#SPEKGREEAASK.G          | S1195:     | 3 | 2,8994 | 0,18  | -0,356 |
| 21 | O95218 ZRAB2_HUMAN  | R.ENVEYIEREES#DGEYDEFGRK.K        | S120:      | 3 | 5,2079 | 0,34  | 0,137  |
| 21 | O95218 ZRAB2_HUMAN  | R.ENVEYIEREES#DGEYDEFGRK.K        | S120:      | 3 | 4,7128 | 0,46  | 0,072  |
| 21 | Q9NR30 DDX21_HUMAN  | K.VTKNEEPS#EEEIDAPKPK.K           | S121:      | 3 | 4,136  | 0,436 | -0,173 |
| 21 | Q9NR30 DDX21_HUMAN  | K.VTKNEEPS#EEEIDAPKPK.K           | S121:      | 2 | 2,06   | 0,417 | -0,46  |
| 21 | Q9H792 SG269_HUMAN  | K.GLDIESYDS#LERPLRK.E             | S1217:     | 3 | 3,7301 | 0,396 | -0,093 |
| 21 | Q96T58 MINT_HUMAN   | R.SLVHEVGKPPQDVTDDS#PPSK.K        | S1222:     | 3 | 4,2384 | 0,433 | 0,158  |
| 21 | Q86TC9 MYPN_HUMAN   | K.HSPNLSFEPNFCQDNPRS#PTSSK.E      | S124:      | 3 | 4,2427 | 0,475 | 0,604  |
| 21 | A6NDB9 PALM3_HUMAN  | R.QGHRPLS#QSIVEAGSVGQTDLNK.R      | S124:      | 3 | 3,8612 | 0,225 | 0,512  |
| 21 | Q8WYP5 AHTF1_HUMAN  | K.ETRIS#FVEEDVHPK.W               | S1241:     | 2 | 3,0392 | 0,442 | 0,484  |
| 21 | Q5VUA4 ZN318_HUMAN  | K.LEDQLSEGRNS#PEKAENK.R           | S1243:     | 3 | 4,2013 | 0,129 | -0,345 |
| 21 | O75970 MPDZ_HUMAN   | R.KS#PLPSLLHNLYPK.Y               | S1249:     | 3 | 2,6464 | 0,12  | 0,759  |
| 21 | Q15149 PLEC1_HUMAN  | R.TPHVQAVQGPLGS#PPKR.G            | S125:      | 3 | 3,9358 | 0,502 | 0      |
| 21 | Q7KZ85 SPT6H_HUMAN  | K.M*S#DDEDDDEEYGKEEHEK.E          | S125:      | 3 | 3,4038 | 0,387 | -0,075 |
| 21 | Q5QPG4 Q5QPG4_HUMAN | K.RKLS#SIGIQVDCIQVPK.E            | S126:      | 3 | 4,5484 | 0,34  | 0      |
| 21 | P14618 KPYM_HUMAN   | R.TGLIKGS#GTAEVELKK.G             | S127:      | 3 | 4,3153 | 0,498 | 0      |
| 21 | P26358 DNMT1_HUMAN  | R.VGM*ADANS#PPKPLSKPRT#PR.R       | S127:T137: | 3 | 2,9042 | 0,479 | 0,08   |
| 21 | Q9BZ29 DOCK9_HUMAN  | K.SNS#LDKHQQSSTLGNSVVR.C          | S1275:     | 3 | 3,7034 | 0,301 | 0,086  |
| 21 | Q7Z6E9 RBBP6_HUMAN  | R.KVTGTGESSSTLVDTSTSTGGS#PVRK.S   | S1277:     | 3 | 5,5182 | 0,49  | 0,446  |
| 21 | O15013 ARHGA_HUMAN  | K.SDLSSSSGS#LSLSHGSSSLEHR.S       | S1287:     | 3 | 3,7527 | 0,388 | 0,398  |
| 21 | O60573 IF4E2_HUMAN  | K.FDALKDDDS#GDHDQNEENSTQK.D       | S13:       | 3 | 3,993  | 0,554 | -0,566 |
| 21 | Q5T3I0 GPTC4_HUMAN  | K.M*ATLTSGGEKPNKDLESCS#DDDNQGSK.S | S130:      | 3 | 6,2513 | 0,492 | 0,553  |

|    |                     |                                  |            |   |        |       |        |
|----|---------------------|----------------------------------|------------|---|--------|-------|--------|
| 21 | Q9NVI1 FANCI_HUMAN  | R.EDGEDENEEGTAS#EHGGQNKEPAK.K    | S1312:     | 3 | 3,1918 | 0,418 | -0,624 |
| 21 | P51858 HDGF_HUMAN   | K.GNAEGS#SDEEGKLVIDEPAKEK.N      | S132:      | 3 | 4,8931 | 0,395 | 0,154  |
| 21 | P51858 HDGF_HUMAN   | K.KGNAEGS#SDEEGKLVIDEPAK.E       | S132:      | 3 | 3,4976 | 0,373 | 0,406  |
| 21 | Q9UMY1 NOL7_HUMAN   | K.LTTASQTNIKKS#PGK.V             | S133:      | 2 | 3,1331 | 0,425 | -0,959 |
| 21 | Q9NQG5 CT077_HUMAN  | K.LSM*EDSKS#PPPKATEEK.K          | S134:      | 2 | 2,0547 | 0,382 | -0,495 |
| 21 | Q8IYH5 ZZZ3_HUMAN   | R.SEAPNSSEEDS#PIKSDKESVEQR.S     | S135:      | 3 | 3,937  | 0,406 | 0,766  |
| 21 | Q14498 RBM39_HUMAN  | K.DKS#PVREPIDNLTPER.D            | S136:      | 3 | 5,6112 | 0,438 | 0,529  |
| 21 | P55327 TPD52_HUMAN  | K.NSPTFKS#FEKVENLK.S             | S136:      | 2 | 3,5    | 0,517 | -0,555 |
| 21 | P11388 TOP2A_HUMAN  | K.ELKPQKS#VVDLEADDVK.G           | S1374:     | 3 | 2,9582 | 0,266 | -0,264 |
| 21 | Q13428 TCOF_HUMAN   | K.KLGAGEGGEASVS#PEKTSTTSK.G      | S1378:     | 3 | 3,8148 | 0,141 | 0,166  |
| 21 | Q0VF46 Q0VF46_HUMAN | R.SSVDTPPRLS#T#PQKGPSTHPK.E      | S138:T139: | 3 | 2,9549 | 0,15  | 1,693  |
| 21 | Q9Y266 NUDC_HUMAN   | K.NGSLDS#PGKQDTEDEEEDEKDK.G      | S139:      | 3 | 5,7527 | 0,483 | 0,205  |
| 21 | P49736 MCM2_HUMAN   | R.GLLYDS#DEEDEERPARK.R           | S139:      | 3 | 3,0233 | 0,338 | 0,348  |
| 21 | Q5T200 ZC3HD_HUMAN  | R.DLESTSRDS#LALDKER.M            | S1409:     | 3 | 3,2298 | 0,26  | -0,191 |
| 21 | P18858 DNL1_HUMAN   | R.TIQEVLEEQS#EDEDREAKR.K         | S141:      | 3 | 4,1913 | 0,298 | 0,537  |
| 21 | P18583 SON_HUMAN    | K.TKS#HDDGNIDLESDSFLK.F          | S142:      | 3 | 4,5015 | 0,356 | -0,348 |
| 21 | Q8IWS0 PHF6_HUMAN   | K.TAHNSEADLEES#FNEHELEPSSPK.S    | S145:      | 3 | 4,1055 | 0,434 | 1,054  |
| 21 | P29375 JAD1A_HUMAN  | R.FLHIM*EDDS#M*EEKPLK.V          | S1493:     | 3 | 3,2411 | 0,346 | 0,176  |
| 21 | P11388 TOP2A_HUMAN  | K.SKGES#DDFHM*DFDSAVAPR.A        | S1495:     | 3 | 4,4349 | 0,484 | -0,332 |
| 21 | A2AJT9 CX023_HUMAN  | K.HRS#LS#PVPR.N                  | S15:S17:   | 2 | 2,0584 | 0,269 | -0,101 |
| 21 | Q8TEP8 CE192_HUMAN  | K.HGGNVSLDVLVPKGPQGS#PLLSR.A     | S1514:     | 3 | 5,4639 | 0,378 | -0,228 |
| 21 | Q9H4L7 SMRCD_HUMAN  | R.RNDDISELEDLS#ELEDLKDAK.L       | S152:      | 3 | 3,6698 | 0,267 | -0,29  |
| 21 | Q53RE8 ANR39_HUMAN  | R.GHGDI CSLLLQHS#PALK.A          | S153:      | 2 | 3,4549 | 0,36  | 0,507  |
| 21 | Q53RE8 ANR39_HUMAN  | R.GHGDI CSLLLQHS#PALK.A          | S153:      | 3 | 3,0086 | 0,374 | 0      |
| 21 | P46781 RS9_HUMAN    | R.LDS#QKHIDFSLR.S                | S153:      | 3 | 2,8134 | 0,395 | -0,594 |
| 21 | Q5UIP0 RIF1_HUMAN   | R.RAS#QGLLSIENSESDSSEAKEEGSR.K   | S1542:     | 3 | 6,2912 | 0,627 | -0,065 |
| 21 | Q8IWS0 PHF6_HUMAN   | K.TAHNSEADLEESFNEHELEPSS#PK.S    | S155:      | 3 | 4,425  | 0,471 | 0,659  |
| 21 | Q5JRC6 Q5JRC6_HUMAN | K.TAHNSEAADLEESFNEHELEPSS#PK.S   | S156:      | 3 | 5,0003 | 0,541 | -0,193 |
| 21 | O95684 FR1OP_HUMAN  | K.EKGPTTGEGALDLSVDHS#PPKS#PEGK.T | S156:S160: | 3 | 4,8709 | 0,521 | 0,459  |
| 21 | Q92733 PRCC_HUMAN   | K.IAAPELHKGDS#DSEDEPTK.K         | S157:      | 3 | 4,1469 | 0,393 | 0,326  |
| 21 | Q14839 CHD4_HUMAN   | K.IEENSLKEES#IEGEKEVK.S          | S1576:     | 3 | 4,9379 | 0,364 | 0,398  |
| 21 | P41162 ETV3_HUMAN   | R.FHFPPLDTHS#PTNDVQPGR.F         | S159:      | 3 | 5,1318 | 0,504 | 0,082  |
| 21 | Q92733 PRCC_HUMAN   | K.IAAPELHKGDS#DSEDEPTK.K         | S159:      | 3 | 3,6107 | 0,437 | 0,163  |

|    |                    |                               |                    |   |        |       |        |
|----|--------------------|-------------------------------|--------------------|---|--------|-------|--------|
| 21 | Q9UIG0 BAZ1B_HUMAN | K.SDGACDSPS#SDKENSSQIAQDHQK.K | S160:              | 3 | 4,2823 | 0,434 | -0,479 |
| 21 | O14497 ARI1A_HUMAN | R.TSPS#KSPFLHSGM*K.M          | S1602:             | 2 | 2,2747 | 0,487 | -0,458 |
| 21 | Q14320 FA50A_HUMAN | K.NPDVDTS#FLPDRDREEEENR.L     | S165:              | 3 | 2,8973 | 0,349 | -0,073 |
| 21 | Q96JC9 EAF1_HUMAN  | K.TSPLKDNPS#PEPQLDDIKR.E      | S165:              | 3 | 2,8523 | 0,35  | 0,082  |
| 21 | O43399 TPD54_HUMAN | R.NSATFKS#FEDRVGTIK.S         | S166:              | 2 | 2,7068 | 0,352 | -0,26  |
| 21 | Q7Z7L9 ZSCA2_HUMAN | R.KIFSEM*PEGESAQHS#DGESDFER.D | S171:              | 3 | 5,284  | 0,457 | 0,338  |
| 21 | O15498 YKT6_HUMAN  | R.GEKLLDLVS#KSEVLGTQSK.A      | S172:              | 3 | 2,8379 | 0,249 | -0,087 |
| 21 | Q8IWW6 RHG12_HUMAN | R.TRS#FGHFPGPFLDVEK.T         | S176:              | 3 | 3,9991 | 0,33  | -0,448 |
| 21 | Q58FF8 H90B2_HUMAN | K.IEDVGS#DEEDDSGKDKK.K        | S177:              | 3 | 3,7499 | 0,356 | -0,376 |
| 21 | Q8TF44 NLF3_HUMAN  | K.ESLFHSEHGALAQVGS#PGAGR.R    | S178:              | 3 | 3,3934 | 0,162 | 0,167  |
| 21 | O96013 PAK4_HUMAN  | R.DKRPLS#GPDVGTQPAGLASGAK.L   | S181:              | 3 | 3,8911 | 0,242 | 0,08   |
| 21 | O00264 PGRC1_HUMAN | K.EGEEPTVYS#DEEPPKDESARK.N    | S181:              | 3 | 3,2995 | 0,414 | -0,073 |
| 21 | Q9H2G4 TSYL2_HUMAN | K.SKEEAIIVEDEDEDERES#M*R.S    | S182:              | 3 | 5,2342 | 0,53  | 0,349  |
| 21 | Q6FI81 CPIN1_HUMAN | K.KS#SPSVKPAVDPAAAK.L         | S182:              | 2 | 3,0364 | 0,389 | 0,149  |
| 21 | Q6FI81 CPIN1_HUMAN | K.KSS#PSVKPAVDPAAAK.L         | S183:              | 3 | 4,3951 | 0,426 | -0,112 |
| 21 | Q8ND56 LS14A_HUMAN | K.TQLSQGRSS#PQLDPLRK.S        | S183:              | 3 | 3,6984 | 0,227 | 0,184  |
| 21 | Q9H7D0 DOCK5_HUMAN | K.SKPYEGSQRNS#TELAPPLPVR.R    | S1834:             | 3 | 3,4262 | 0,243 | 0      |
| 21 | P46777 RL5_HUMAN   | R.FPGYDS#ESKEFNAEVHR.K        | S185:              | 3 | 4,1476 | 0,41  | 0,35   |
| 21 | Q1KMD3 HNRL2_HUMAN | K.AAEEQGDDQDS#EKSKPAGSDGER.R  | S185:              | 3 | 3,5398 | 0,375 | -0,589 |
| 21 | P43243 MATR3_HUMAN | R.RDS#FDDRGPNSLPVLDYDHGS#R.S  | S188:S206:         | 3 | 3,2519 | 0,306 | 0,478  |
| 21 | Q9BVC5 ASHWN_HUMAN | R.KSPSGPVKS#PPLSPVGTTPVK.L    | S189:              | 3 | 5,6321 | 0,485 | 0,085  |
| 21 | Q9H1E3 NUCKS_HUMAN | R.KVVDYSQFQES#DDADEDYGR.D     | S19:               | 3 | 6,1139 | 0,491 | -0,374 |
| 21 | Q01433 AMPD2_HUMAN | R.AKQDFLKTDS#DSDLQLYK.E       | S190:              | 3 | 4,6912 | 0,456 | 0,083  |
| 21 | Q9P2W9 STX18_HUMAN | K.VSQSPS#KDSEENPATEERPEK.I    | S191:              | 3 | 4,3792 | 0,229 | -1,283 |
| 21 | Q00059 TFAM_HUMAN  | K.NLS#DSEKELYIQHAK.E          | S193:              | 3 | 3,4375 | 0,394 | 0,099  |
| 21 | Q00059 TFAM_HUMAN  | K.NLS#DSEKELYIQHAK.E          | S193:              | 2 | 2,6585 | 0,234 | 0,46   |
| 21 | O43237 DC1L2_HUMAN | K.FVKDFQDYM*EPEEGCQGS#PQRR.G  | S194:              | 3 | 3,8393 | 0,088 | 0,458  |
| 21 | P35579 MYH9_HUMAN  | R.KGAGDGS#DEEVDGKADGAEAKPAE.- | S1943:             | 3 | 5,7983 | 0,43  | 0,307  |
| 21 | Q13459 MYO9B_HUMAN | R.IQS#IKEEKEDITYR.L           | S1973:             | 3 | 3,9531 | 0,451 | 0,1    |
| 21 | Q13459 MYO9B_HUMAN | R.IQS#IKEEKEDITYR.L           | S1973:             | 2 | 2,7791 | 0,367 | 0,2    |
| 21 | Q07955 SFRS1_HUMAN | R.VKVDGPRS#PS#YGRS#R.S        | S199:S201:S205:    | 3 | 2,7805 | 0,132 | -0,192 |
| 21 | Q15717 ELAV1_HUMAN | K.NVALLSQLYHS#PARR.F          | S202:              | 2 | 2,1267 | 0,235 | 0,27   |
| 21 | Q9UQ35 SRRM2_HUMAN | R.GKRS#LT#RS#PPAIR.R          | S2067:T2069:S2071: | 2 | 2,4902 | 0,173 | -0,073 |

|    |                    |                                   |              |   |        |       |        |
|----|--------------------|-----------------------------------|--------------|---|--------|-------|--------|
| 21 | Q9BQ52 RNZ2_HUMAN  | R.LS#PERSS#DSESNENEPHLPHGVSQR.R   | S208:S213:   | 3 | 3,3695 | 1     | 0,745  |
| 21 | O95674 CDS2_HUMAN  | R.VAHEPVAPPEDKES#ESEAK.V          | S21:         | 3 | 5,2323 | 0,394 | 0      |
| 21 | P60174 TPIS_HUMAN  | R.KQS#LGLIGTLNAAK.V               | S21:         | 2 | 4,0488 | 0,587 | -0,15  |
| 21 | Q6R327 RICTR_HUMAN | R.GRND#GEENVPLDLTREPSDNL.R.E      | S21:         | 3 | 3,6447 | 0,326 | 0,344  |
| 21 | Q9NR00 CH004_HUMAN | R.VSPS#IHGYHFDTASR.K              | S21:         | 2 | 2,681  | 0,439 | 0,348  |
| 21 | Q5VT06 CE350_HUMAN | K.KTEAELSQDLETS#PTAKPQIK.T        | S2115:       | 3 | 4,1997 | 0,434 | 0,382  |
| 21 | O75376 NCOR1_HUMAN | R.SHVSSEPEYEPIS#PPQVPVVHEK.Q      | S2151:       | 3 | 6,3554 | 0,522 | 0,363  |
| 21 | P21333 FLNA_HUMAN  | R.RAPS#VANVGSHCDLSLK.I            | S2152:       | 3 | 3,8691 | 0,424 | 0,193  |
| 21 | P21333 FLNA_HUMAN  | R.RAPS#VANVGSHCDLSLK.I            | S2152:       | 2 | 2,7906 | 0,485 | -0,258 |
| 21 | P51608 MECP2_HUMAN | R.VLEKS#PGKLLVK.M                 | S216:        | 3 | 3,3545 | 0,417 | 0,197  |
| 21 | Q15019 SEPT2_HUMAN | K.IYHLPDAES#DEDEDFKEQTR.L         | S218:        | 3 | 4,4486 | 0,365 | 0,291  |
| 21 | P49006 MRP_HUMAN   | R.GDVTAEAAAGAS#PAKANGQENGHV.K.S   | S22:         | 3 | 5,3137 | 0,426 | 0,294  |
| 21 | Q09161 NCBP1_HUMAN | R.KTS#DANETEDHLES LICK.V          | S22:         | 3 | 4,5576 | 0,494 | -0,337 |
| 21 | Q9H9L7 CA108_HUMAN | K.RPM*EFEAALLSPGS#PKR.R           | S22:         | 3 | 3,5778 | 0,246 | 0,277  |
| 21 | Q9NTJ3 SMC4_HUMAN  | R.RREGPPPPS#PDGASS#DAEPEPPSGR.T   | S22:S28:     | 3 | 4,7338 | 0,328 | 0,582  |
| 21 | Q9BRD0 BUD13_HUMAN | R.VRHDS#PDPS#PPR.R                | S222:S226:   | 2 | 2,8039 | 0,479 | -0,883 |
| 21 | P08670 VIME_HUMAN  | R.KVES#LQEEIAFLKK.L               | S226:        | 3 | 5,128  | 0,346 | -0,105 |
| 21 | Q7L804 RFIP2_HUMAN | R.LSSAHS#M*SDLSGSHM*SSEK.L        | S227:        | 3 | 4,0404 | 0,39  | -0,525 |
| 21 | Q3V6T2 GRDN_HUMAN  | R.DGLHFLPHAS#SSAQSPCGS#PGM*KR.T   | S228:S237:   | 3 | 3,3447 | 0,314 | 0,136  |
| 21 | Q9UNE7 STUB1_HUMAN | R.LGAGGGSPEKS#PSAQLKEQG.NR.L      | S23:         | 3 | 4,1827 | 0,344 | 1,616  |
| 21 | Q9NVR2 INT10_HUMAN | R.STQIENQHQAQDTS DLM*S#PSKR.S     | S231:        | 3 | 5,2547 | 0,487 | 0,276  |
| 21 | O95359 TACC2_HUMAN | K.KTPEKLDNTPAS#PPRS#PAEPNDIPIAK.G | S2317:S2321: | 3 | 3,2068 | 0,165 | 1,383  |
| 21 | Q13283 G3BP1_HUMAN | K.SSS#PAPADIAQTVQEDLR.T           | S232:        | 2 | 3,6954 | 0,403 | -0,248 |
| 21 | Q13283 G3BP1_HUMAN | K.SSS#PAPADIAQTVQEDLR.T           | S232:        | 3 | 2,827  | 0,253 | -0,186 |
| 21 | O15231 ZN185_HUMAN | R.RES#CGSSVLTDFEGKDVATK.V         | S233:        | 3 | 5,734  | 0,448 | 0,565  |
| 21 | Q9Y6M7 S4A7_HUMAN  | R.IPLVRS#FADIGKK.H                | S233:        | 3 | 3,0125 | 0,168 | -0,18  |
| 21 | P12956 KU70_HUMAN  | R.VHFEESS#KLEDLLR.K               | S237:        | 2 | 2,9377 | 0,2   | -0,753 |
| 21 | P61247 RS3A_HUMAN  | K.LM*ELHGE GSSS#GKATGDETGAK.V     | S238:        | 3 | 3,797  | 0,305 | 0,648  |
| 21 | Q96L14 C170L_HUMAN | K.SSPVNNHHS#PGQTP TLGQPEAR.A      | S238:        | 3 | 3,5818 | 0,208 | 0,077  |
| 21 | Q8WXE1 ATRIP_HUMAN | R.KNPSVVIKPEACS#PQFGK.T           | S239:        | 3 | 3,5777 | 0,31  | 0      |
| 21 | Q09666 AHNK_HUMAN  | K.ISM*PDL DLHLKS#PK.A             | S2397:       | 2 | 3,2974 | 0,367 | -0,361 |
| 21 | Q09666 AHNK_HUMAN  | K.ISM*PDL DLHLKS#PK.A             | S2397:       | 3 | 2,9931 | 0,276 | -0,108 |
| 21 | Q9ULU4 PKCB1_HUMAN | R.KFPS#PPHS#SNGHSPQDTSTSPIK.K     | S24:S28:     | 3 | 3,2803 | 0,118 | 0,706  |

|    |                     |                                   |            |   |        |       |        |
|----|---------------------|-----------------------------------|------------|---|--------|-------|--------|
| 21 | Q6PJ61 FBX46_HUMAN  | R.VAEAVAHFEAQRDS#PPTK.G           | S240:      | 3 | 3,2034 | 0,19  | -0,09  |
| 21 | Q8WY36 BBX_HUMAN    | R.QKS#PLFQFAEISSSTSHSDASTK.Q      | S243:      | 3 | 2,8061 | 0,24  | 0,642  |
| 21 | Q14684 RRP1B_HUMAN  | K.TKVGDDGLS#AEEIPENEVSLRR.A       | S245:      | 3 | 3,309  | 0,319 | 0,073  |
| 21 | Q92890 UFD1_HUMAN   | K.GVEPSPS#PIKPGDIKR.G             | S247:      | 2 | 2,3921 | 0,276 | -0,139 |
| 21 | P25054 APC_HUMAN    | R.KLEESASFESLSPSSRPAS#PTR.S       | S2473:     | 3 | 3,2744 | 0,124 | 0,15   |
| 21 | Q9Y2W1 TR150_HUMAN  | R.ERS#PALKSPLQSVVVR.R             | S248:      | 3 | 2,8574 | 0,457 | 0,099  |
| 21 | Q9Y2W1 TR150_HUMAN  | R.ERS#PALKSPLQSVVVR.R             | S248:      | 2 | 2,1382 | 0,282 | -0,463 |
| 21 | Q13416 ORC2_HUMAN   | R.DKTSDLVEEYFEAHSS#SK.V           | S249:      | 3 | 3,0662 | 0,135 | -0,425 |
| 21 | Q9NWK9 CA181_HUMAN  | K.SGGGLHSVAEGVRLS#PEPGR.E         | S25:       | 3 | 3,0191 | 0,42  | 0,358  |
| 21 | P16949 STMN1_HUMAN  | R.ASGQAFELILS#PR.S                | S25:       | 2 | 2,4721 | 0,176 | -0,498 |
| 21 | P46013 KI67_HUMAN   | K.LTRTS#GETTQHTHEPTGDSK.S         | S2505:     | 3 | 3,3798 | 0,461 | -0,411 |
| 21 | Q86X53 ERIC1_HUMAN  | R.ARQEEGADAS#EEDPTPAGEEDVKDAR.E   | S254:      | 3 | 4,0641 | 0,243 | 0,898  |
| 21 | P06733 ENOA_HUMAN   | R.S#GKYDLDFKSPDDPSR.Y             | S254:      | 3 | 3,205  | 0,335 | 0,48   |
| 21 | P55198 AF17_HUMAN   | K.KRPES#PPSILTPPVVPTADK.V         | S258:      | 3 | 4,3021 | 0,368 | -0,331 |
| 21 | Q01130 SFRS2_HUMAN  | K.VDNLYRRTS#PDTLRR.V              | S26:       | 3 | 2,8428 | 0,376 | -0,194 |
| 21 | Q8IYB3 SRRM1_HUMAN  | K.VPKPEPIPEKPS#PEK.N              | S260:      | 3 | 3,7723 | 0,265 | 0,37   |
| 21 | P07900 HS90A_HUMAN  | K.ESEDKPEIEDVGS#DEEEK.K           | S263:      | 3 | 4,4768 | 0,356 | 0      |
| 21 | P07900 HS90A_HUMAN  | K.EEKESDKPEIEDVGS#DEEEK.K         | S263:      | 3 | 3,8359 | 0,352 | 0,344  |
| 21 | Q15365 PCBP1_HUMAN  | R.QQSHFAM*M*HGGTGAFAGIDSS#SPEVK.G | S263:      | 3 | 2,7584 | 0,175 | 0,673  |
| 21 | P78559 MAP1A_HUMAN  | R.STTSQVTPAEEDKGHSPM*S#K.G        | S2667:     | 3 | 2,9903 | 0,263 | -0,744 |
| 21 | P49792 RBP2_HUMAN   | K.NRPDYVS#EEEEDEDFETAVKK.L        | S2668:     | 3 | 4,2237 | 0,568 | -0,47  |
| 21 | P58107 EPIPL_HUMAN  | R.RQVS#ASELHTSGILGPETLR.D         | S2691:     | 3 | 3,2653 | 0,216 | -0,574 |
| 21 | P29966 MARCS_HUMAN  | K.TAAKGEAAAERPGEAAVASS#PSK.A      | S27:       | 3 | 3,0622 | 0,132 | -0,327 |
| 21 | Q8N655 CJ012_HUMAN  | R.EDNPEEPSKEITSHEEGGDVS#PR.K      | S273:      | 3 | 3,9461 | 0,402 | -0,137 |
| 21 | Q3KR37 GRM1B_HUMAN  | K.SSIETKPDAS#PQLPKK.S             | S274:      | 3 | 2,6244 | 0,345 | 0,304  |
| 21 | O00273 DFFA_HUMAN   | R.NYS#REQHGVAASCLEDLR.S           | S28:       | 3 | 3,7289 | 0,291 | -0,419 |
| 21 | Q5W189 Q5W189_HUMAN | R.RREPES#PPASAPIPLFGADTIGQR.S     | S28:       | 3 | 2,8817 | 0,219 | -0,069 |
| 21 | P01106 MYC_HUMAN    | R.SESGS#PSAGGHSKPPHS#PLVLK.R      | S281:S293: | 3 | 4,1513 | 0,325 | 0,395  |
| 21 | Q9UIS9 MBD1_HUMAN   | R.RPGAQLPLPPPSQS#PEPTEPHPR.A      | S297:      | 3 | 5,8755 | 0,449 | 0,207  |
| 21 | Q03989 ARI5A_HUMAN  | R.HGAEPQASPAVHLPES#PQSPK.G        | S297:      | 3 | 3,7224 | 0,428 | 0,408  |
| 21 | Q68DK2 ZFY26_HUMAN  | R.ATASGKVS#PDHLDPER.A             | S297:      | 3 | 2,8232 | 0,286 | 0,208  |
| 21 | O14974 MYPT1_HUMAN  | R.DKKS#PLIESTANM*DNNQSQK.T        | S299:      | 3 | 4,9877 | 0,383 | 0      |
| 21 | P09382 LEG1_HUMAN   | R.VRGEVAPDAKS#FVLNLGK.D           | S30:       | 3 | 3,8807 | 0,309 | 0      |



|    |                    |                                    |            |   |        |       |        |
|----|--------------------|------------------------------------|------------|---|--------|-------|--------|
| 21 | P09382 LEG1_HUMAN  | R.VRGEVAPDAKS#FVLNLGK.D            | S30:       | 2 | 3,5332 | 0,469 | -0,308 |
| 21 | P41229 JAD1C_HUMAN | K.TFLESKEELSHS#PEPCTK.M            | S301:      | 3 | 3,4858 | 0,273 | 0,083  |
| 21 | Q3B726 RPA43_HUMAN | K.HQEVQDQDPVFQGS DSSGYQS#DHK.K     | S304:      | 3 | 6,9892 | 0,587 | 0,458  |
| 21 | P17706 PTN2_HUMAN  | K.ELSKEDLSPAFDHS#PNK.I             | S304:      | 3 | 4,004  | 0,363 | 0,092  |
| 21 | Q9BX67 JAM3_HUMAN  | R.HKS#SFVI.-                       | S306:      | 2 | 2,0571 | 0,33  | 0      |
| 21 | P46013 KI67_HUMAN  | K.SGGS GHAVAEPAS#PEQELDQNKGGK.G    | S308:      | 3 | 3,2964 | 0,449 | -0,592 |
| 21 | Q01518 CAP1_HUMAN  | R.SGPKPFSAPKPQTS#PSPK.R            | S308:      | 3 | 2,8657 | 0,341 | -0,572 |
| 21 | Q01518 CAP1_HUMAN  | R.SGPKPFSAPKPQTS#PK.R              | S310:      | 2 | 4,941  | 0,484 | 0      |
| 21 | Q01518 CAP1_HUMAN  | R.SGPKPFSAPKPQTS#PK.R              | S310:      | 3 | 2,7705 | 0,285 | -0,286 |
| 21 | Q96QC0 PP1RA_HUMAN | K.KVLS#PTAAKPSPFEGK.T              | S313:      | 3 | 3,8142 | 0,286 | 0,105  |
| 21 | Q8IX01 SFR14_HUMAN | R.KM*S#FDIIDKSDVFSR.F              | S315:      | 3 | 3,8602 | 0,328 | -0,291 |
| 21 | Q70CQ2 UBP34_HUMAN | R.RVS#SDEEHTVDSCISDM*K.T           | S3207:     | 3 | 3,4421 | 0,391 | 0,334  |
| 21 | Q9UQ35 SRRM2_HUMAN | R.RGEGDAPFSEPGTTSTQRPS#PETATK.Q    | S323:      | 3 | 4,5737 | 0,455 | -0,51  |
| 21 | O15033 K0317_HUMAN | R.RPS#TAVDEEDEDSPSECHTPEK.V        | S327:      | 3 | 6,6797 | 0,472 | 0,423  |
| 21 | P50548 ERF_HUMAN   | R.YLQAHTQSVYNYHLS#PR.A             | S327:      | 3 | 4,4161 | 0,225 | -0,509 |
| 21 | Q15459 SF3A1_HUMAN | K.FGESEEVEM*EVES#DEEDDKQEK.A       | S329:      | 3 | 4,9363 | 0,416 | 0,54   |
| 21 | Q09666 AHNK_HUMAN  | K.AGLRV#APEVSVGHK.G                | S332:      | 3 | 3,8267 | 0,282 | 0,23   |
| 21 | Q9NYV4 CD2L7_HUMAN | R.RRS#SS#PFLSK.R                   | S332:S334: | 2 | 3,049  | 0,153 | 0,092  |
| 21 | Q16181 SEPT7_HUMAN | K.GQLTKS#PLAQM*EEERR.E             | S334:      | 3 | 2,8674 | 0,218 | -1,486 |
| 21 | Q6AI08 HEAT6_HUMAN | K.KIQQGE EEEKES#SGEIEAAPVTGTGR.V   | S336:      | 3 | 4,3168 | 0,43  | 0,516  |
| 21 | Q9H832 UBE2Z_HUMAN | R.LHNENAEM*DSDSSSS#GTETDLHGSLRV.-  | S342:      | 3 | 4,8887 | 0,531 | 0,613  |
| 21 | P30622 CLIP1_HUMAN | R.KIS#GTTALQEALKEK.Q               | S348:      | 3 | 3,9132 | 0,451 | 0,216  |
| 21 | P40855 PEX19_HUMAN | K.AKPS#PAPPSTTTAPDASGPQKR.S        | S35:       | 3 | 3,0741 | 0,319 | 0,653  |
| 21 | Q9UHB6 LIMA1_HUMAN | K.SEVQQPVHPKPLS#PDSR.A             | S362:      | 3 | 4,1778 | 0,391 | 0,369  |
| 21 | Q9UHB6 LIMA1_HUMAN | K.SEVQQPVHPKPLS#PDSR.A             | S362:      | 2 | 3,4571 | 0,433 | 0,431  |
| 21 | Q92597 NDRG1_HUMAN | R.S#RSHT#SEGAHLDTPN SGAAGNSAGPK.S  | S362:T366: | 3 | 4,3469 | 0,327 | -0,066 |
| 21 | Q00613 HSF1_HUMAN  | R.GHTDTEGRPPS#PPPTSTPEK.C          | S363:      | 3 | 3,2459 | 0,195 | -0,253 |
| 21 | P05455 LA_HUMAN    | K.FAS#DDEHDEHDENGATGPVK.R          | S366:      | 3 | 2,7546 | 0,316 | 0,244  |
| 21 | O15042 SR140_HUMAN | R.SSDVHSSGSSDAHM*DASGPS#DSDM*PSR.T | S37:       | 3 | 5,628  | 0,51  | -0,519 |
| 21 | Q03135 CAV1_HUMAN  | K.AM*ADELS#EKQVYDAHTK.E            | S37:       | 3 | 4,1623 | 0,401 | 0      |
| 21 | Q15435 PP1R7_HUMAN | K.HSS#GIVADLSEQLKDGEER.G           | S37:       | 3 | 3,8489 | 0,474 | 0,409  |
| 21 | Q03135 CAV1_HUMAN  | K.AM*ADELS#EKQVYDAHTK.E            | S37:       | 2 | 3,5897 | 0,632 | 0,6    |
| 21 | Q96ST2 IWS1_HUMAN  | K.M*DS#DEDEKEGEEKVAK.R             | S377:      | 3 | 3,0572 | 0,359 | -0,975 |

|    |                    |                               |            |   |        |       |        |
|----|--------------------|-------------------------------|------------|---|--------|-------|--------|
| 21 | Q9NZT2 OGFR_HUMAN  | R.SQGDEAGGHGEDRPEPLS#PK.E     | S378:      | 3 | 3,6228 | 0,273 | -0,085 |
| 21 | P16949 STMN1_HUMAN | R.SKESVPEFPLS#PPKK.K          | S38:       | 3 | 4,1471 | 0,304 | 0      |
| 21 | P16949 STMN1_HUMAN | K.ESVPEFPLS#PPKKK.D           | S38:       | 2 | 2,1014 | 0,393 | 0,44   |
| 21 | Q13428 TCOF_HUMAN  | K.TSQVGAASAPAKES#PRK.G        | S381:      | 3 | 2,7442 | 0,295 | -0,311 |
| 21 | Q13428 TCOF_HUMAN  | K.TSQVGAASAPAKES#PRK.G        | S381:      | 2 | 2,1715 | 0,252 | -0,484 |
| 21 | Q15424 SAFB1_HUMAN | K.ESSTSEGADQKM*S#SPEDDSDTKR.L | S383:      | 3 | 3,9089 | 0,381 | -0,567 |
| 21 | Q9NYF8 BCLF1_HUMAN | K.GRAEGEWEDQEALDYFS#DKESGK.Q  | S385:      | 3 | 6,1791 | 0,475 | -0,403 |
| 21 | O95793 STAU1_HUMAN | R.KVTFEPGS#GDENGTSNKEDEFR.M   | S390:      | 3 | 4,4419 | 0,257 | 0,685  |
| 21 | Q8IYB3 SRRM1_HUMAN | R.HRPS#PPAT#PPPK.T            | S402:T406: | 3 | 3,1797 | 0,137 | -0,507 |
| 21 | Q8IYB3 SRRM1_HUMAN | R.HRPS#PPAT#PPPK.T            | S402:T406: | 2 | 3,1398 | 0,401 | -1,1   |
| 21 | Q9Y5T5 UBP16_HUMAN | K.TVEDEDQDS#EEEKDNDSEYKER.S   | S415:      | 3 | 4,0492 | 0,495 | 0,399  |
| 21 | Q9Y5T5 UBP16_HUMAN | K.KTVEDEDQDS#EEEKDNDSEYK.E    | S415:      | 3 | 3,7204 | 0,41  | 0,07   |
| 21 | Q8WUX9 CHMP7_HUMAN | R.HFTNSVNPRI#DAELEAELEK.L     | S417:      | 3 | 2,7649 | 0,085 | 0,568  |
| 21 | O14974 MYPT1_HUMAN | K.FPTTATKIS#PKEER.K           | S422:      | 2 | 3,8155 | 0,493 | 0      |
| 21 | O14974 MYPT1_HUMAN | K.FPTTATKIS#PKEER.K           | S422:      | 3 | 3,6021 | 0,322 | 0      |
| 21 | Q1MSJ5 CSPP1_HUMAN | R.VAASGAQDPEKS#PDRLK.Q        | S424:      | 3 | 3,2459 | 0,244 | -0,692 |
| 21 | Q9Y490 TLN1_HUMAN  | K.SKDHFGLEGDEESTM*LEDSVS#PK.K | S425:      | 3 | 6,1792 | 0,561 | 0,556  |
| 21 | Q9Y4F1 FARP1_HUMAN | K.VSAGEPGSHPS#PAPRRS#PAGNK.Q  | S427:S433: | 3 | 3,2281 | 0,258 | -0,553 |
| 21 | O60934 NBN_HUMAN   | K.M*RIPIYQLS#PTKLPSINK.S      | S432:      | 3 | 3,5054 | 0,094 | -0,25  |
| 21 | Q9UKA4 AKA11_HUMAN | R.KPESPYGNLCDAPDS#PRPVK.A     | S433:      | 3 | 4,0244 | 0,272 | 0,238  |
| 21 | Q05519 SFR11_HUMAN | R.DYDEEEQGYDS#EKEKK.E         | S434:      | 3 | 2,8562 | 0,382 | 0,088  |
| 21 | P33981 TTK_HUMAN   | K.HTTFEQPVFSVKQS#PPISTSK.W    | S436:      | 3 | 4,0145 | 0,411 | 0,655  |
| 21 | P08670 VIME_HUMAN  | R.ETNLDSLPLVDTHS#KR.T         | S438:      | 2 | 3,0313 | 0,315 | 0,64   |
| 21 | Q9ULU4 PKCB1_HUMAN | R.SPM*STNSSVHTGS#DVEQDAEKK.A  | S444:      | 3 | 4,0116 | 0,405 | 0,301  |
| 21 | P18887 XRCC1_HUMAN | K.TKPTQAAGPSS#PQKPPTPEETK.A   | S447:      | 3 | 4,7938 | 0,424 | 0,31   |
| 21 | Q9UKL0 RCOR1_HUMAN | K.EETNGPSNQKPVKS#PDNSIK.M     | S457:      | 3 | 3,1806 | 0,084 | -0,325 |
| 21 | P53396 ACLY_HUMAN  | R.TASF#ESRADEVAPAKK.A         | S457:      | 2 | 2,1401 | 0,201 | 0,13   |
| 21 | P11274 BCR_HUMAN   | R.HQDGLPYIDDS#PSSPHLSSK.G     | S459:      | 3 | 4,6117 | 0,463 | -0,156 |
| 21 | Q9UJM3 ERRFI_HUMAN | R.KHLSYVVS#P.-                | S461:      | 2 | 3,3319 | 0,416 | -0,11  |
| 21 | P53985 MOT1_HUMAN  | K.ESKEETS#IDVAGKPNEVTK.A      | S467:      | 3 | 2,9296 | 0,242 | 0,403  |
| 21 | Q9NZN4 EHD2_HUMAN  | K.SKYDEIFYNLAPADGKLS#GSK.A    | S468:      | 3 | 4,1368 | 0,296 | -0,307 |
| 21 | Q9UPV0 CE164_HUMAN | K.GLEERLS#PPLPHEER.A          | S472:      | 3 | 3,5255 | 0,189 | -0,099 |
| 21 | O96013 PAK4_HUMAN  | R.RKS#LVGTPTYWM*APELISR.L     | S474:      | 3 | 2,9794 | 0,258 | 0,083  |

|    |                     |                                |            |   |        |       |        |
|----|---------------------|--------------------------------|------------|---|--------|-------|--------|
| 21 | P78344 IF4G2_HUMAN  | K.KGQLNADEISLRPAQS#FLM*NK.N    | S479:      | 3 | 3,0341 | 0,183 | -0,298 |
| 21 | Q92945 FUBP2_HUMAN  | K.LFIIRGS#PQQIDHAK.Q           | S480:      | 3 | 3,2943 | 0,264 | 0,101  |
| 21 | Q96L73 NSD1_HUMAN   | K.SLAFDS#EHS#ADEKEKPCAK.S      | S483:S486: | 3 | 3,4493 | 0,405 | -0,317 |
| 21 | Q14676 MDC1_HUMAN   | R.AHS#EKDQPPFGSDSDSVEADK.S     | S485:      | 3 | 5,8808 | 0,453 | 0,544  |
| 21 | Q96D71 REPS1_HUMAN  | R.SHS#GTSPDNTAPPPPPRPQPSHS#R.S | S485:S506: | 3 | 3,4991 | 1     | 0,133  |
| 21 | Q8TAD8 SNIP1_HUMAN  | R.RPDHS#GGSPS#PPTSEPAR.S       | S49:S54:   | 3 | 3,661  | 0,31  | -0,459 |
| 21 | Q9Y2K2 QSK_HUMAN    | R.RAS#DGGANIQLHAQQLL.R         | S493:      | 3 | 5,0518 | 0,268 | 0,183  |
| 21 | O60825 F262_HUMAN   | R.NYSVGSRPLKPLS#PLR.A          | S493:      | 3 | 3,0079 | 0,342 | 0,294  |
| 21 | O60832 DKC1_HUMAN   | K.AGLES GAEPGDGDS#DTTKKK.K     | S494:      | 3 | 4,523  | 0,342 | -0,179 |
| 21 | Q6VY07 PACS1_HUMAN  | K.TDLQGSAS#PSKVEGVHTPR.Q       | S495:      | 3 | 4,287  | 0,421 | -0,179 |
| 21 | Q59EW8 Q59EW8_HUMAN | R.TSS#FTEQLDEGTPNRENASTHASK.S  | S50:       | 3 | 3,2722 | 0,37  | 0,409  |
| 21 | Q9Y6J9 TAF6L_HUMAN  | R.KM*PQLTASAIVSPHGDES#PR.G     | S501:      | 3 | 2,9328 | 0,243 | 0,248  |
| 21 | Q9Y2X3 NOL5_HUMAN   | K.HIKEEPLS#EEEPCTSTAIASPEK.K   | S502:      | 3 | 4,5985 | 0,303 | 0,344  |
| 21 | Q14680 MELK_HUMAN   | R.CRS#VELDLNQAHM*EETPK.R       | S505:      | 3 | 3,0729 | 0,257 | 0      |
| 21 | Q9UBF8 PI4KB_HUMAN  | R.RLS#EQLAHTPTAFK.R            | S511:      | 3 | 4,1733 | 0,402 | 0,327  |
| 21 | Q9UBF8 PI4KB_HUMAN  | R.RLS#EQLAHTPTAFK.R            | S511:      | 2 | 2,8443 | 0,52  | 0,363  |
| 21 | Q9NYF8 BCLF1_HUMAN  | K.LKDLDYS#PPLHK.N              | S512:      | 2 | 4,1322 | 0,541 | -0,443 |
| 21 | Q9NYF8 BCLF1_HUMAN  | K.LKDLDYS#PPLHK.N              | S512:      | 3 | 3,3454 | 0,411 | -0,111 |
| 21 | Q12767 K0195_HUMAN  | R.SKHPS#GSNVS#FSR.D            | S513:S518: | 2 | 3,6236 | 0,45  | 0,079  |
| 21 | Q13586 STIM1_HUMAN  | R.DLTHS#DSESSLHM*SDR.Q         | S519:      | 3 | 3,7038 | 0,321 | -0,765 |
| 21 | Q8TAD8 SNIP1_HUMAN  | R.RPDHSGGS#PS#PPTSEPAR.S       | S52:S54:   | 2 | 2,2111 | 1     | -0,735 |
| 21 | O00567 NOL5A_HUMAN  | K.SFSKEELM*SS#DLEETAGSTSIPKR.K | S520:      | 3 | 5,6265 | 0,53  | 0,403  |
| 21 | O00567 NOL5A_HUMAN  | K.KSFSKEELM*SS#DLEETAGSTSIPK.R | S520:      | 3 | 4,4462 | 0,487 | 0,407  |
| 21 | Q15057 CENB2_HUMAN  | K.FVDKYSISLS#PPEQQKK.F         | S521:      | 3 | 3,8218 | 0,179 | -0,088 |
| 21 | Q13586 STIM1_HUMAN  | R.DLTHSDS#ESSLHM*SDR.Q         | S521:      | 3 | 3,5861 | 0,366 | 0,191  |
| 21 | Q5H9R7 SAPS3_HUMAN  | R.NTVDLVTTCHIHSS#SDDEIDFK.E    | S524:      | 3 | 4,7171 | 0,403 | -0,21  |
| 21 | Q8WUF5 IASPP_HUMAN  | R.RGS#M*EQAPAVALPPTHK.K        | S526:      | 3 | 5,0633 | 0,428 | -0,194 |
| 21 | P55081 MFAP1_HUMAN  | K.RPDYAPM*ESS#DEEDEFQFIKK.A    | S53:       | 3 | 5,1543 | 0,403 | -0,197 |
| 21 | Q7Z3D4 LYSM3_HUMAN  | R.S#TSRDRLLDDIIVLTK.D          | S53:       | 2 | 3,1628 | 0,44  | 0,135  |
| 21 | P62736 ACTA_HUMAN   | R.HQGVM*VGM*GQKDS#YVGDEAQS.R   | S54:       | 3 | 4,5455 | 0,525 | 0      |
| 21 | P17987 TCPA_HUMAN   | K.DDKHGS#YEDAVHSGALND.-        | S544:      | 2 | 2,9863 | 0,29  | 0,607  |
| 21 | Q8WYA6 CTBL1_HUMAN  | K.EYAENIGDGRS#PEFRENEQK.R      | S545:      | 3 | 3,0537 | 0,277 | 0,299  |
| 21 | Q01804 OTUD4_HUMAN  | K.RPEPSTLENITDDKYATVSS#PSK.S   | S546:      | 3 | 5,0785 | 0,442 | 0,35   |

|    |                    |                                 |              |   |        |       |        |
|----|--------------------|---------------------------------|--------------|---|--------|-------|--------|
| 21 | Q96SN8 CK5P2_HUMAN | K.KQS#SDYEELIQVLKK.E            | S547:        | 3 | 4,5723 | 0,33  | -0,388 |
| 21 | Q8N350 DOS_HUMAN   | R.GAGDDTEPPAAPARPRS#PR.A        | S548:        | 3 | 3,6834 | 0,275 | 0      |
| 21 | Q9Y6M7 S4A7_HUMAN  | R.AVYIGVHVPFKES#R.R             | S55:         | 2 | 2,4694 | 0,264 | 0,276  |
| 21 | Q9NWH9 SLTM_HUMAN  | R.ISSKS#PGHM*VILDQTK.G          | S553:        | 3 | 3,6579 | 0,468 | 0      |
| 21 | Q96T23 RSF1_HUMAN  | K.TALSSSTESCTM*KGEEKS#PK.T      | S560:        | 3 | 3,7976 | 0,271 | -0,507 |
| 21 | Q9Y4W2 LAS1L_HUMAN | K.AQQQEEQGS#VNDVKEEEEKEE.E      | S560:        | 3 | 2,9926 | 0,22  | 0,216  |
| 21 | O75167 PHAR2_HUMAN | R.KLS#LRPTVAELQAR.R             | S560:        | 3 | 2,9017 | 0,516 | -0,11  |
| 21 | Q9Y217 MTMR6_HUMAN | K.ELLHSVHPES#PNLK.T             | S561:        | 3 | 3,3657 | 0,281 | 0      |
| 21 | P27824 CALX_HUMAN  | K.SDAEEDGGTVS#QEEEDRKP.K.A      | S564:        | 3 | 5,4486 | 0,324 | 0,48   |
| 21 | Q92613 JADE3_HUMAN | R.NSSTETDQQPHS#PDSSTSVHSIR.N    | S566:        | 3 | 5,4653 | 0,492 | 0,357  |
| 21 | Q8IXT5 RB12B_HUMAN | R.FPPEDFRHS#PEDFR.R             | S575:        | 3 | 3,1649 | 0,257 | -0,099 |
| 21 | Q6XZF7 DNMBP_HUMAN | R.HFS#IM*DFNSEKDIVR.G           | S578:        | 3 | 3,4882 | 0,373 | 0,284  |
| 21 | Q86UU1 PHLB1_HUMAN | R.KNS#ITEISDNEDDLLEYHR.R        | S578:        | 3 | 3,2398 | 0,331 | 0,231  |
| 21 | O43719 HTSF1_HUMAN | K.DLDEEGS#EKELHENVLDK.E         | S579:        | 3 | 2,7404 | 0,18  | -0,252 |
| 21 | Q86UU1 PHLB1_HUMAN | R.KNSITEIS#DNEDDLLEYHR.R        | S583:        | 3 | 3,955  | 0,28  | -0,231 |
| 21 | Q09666 AHNK_HUMAN  | K.GHYEVTGS#DDETGKLGSGVSLASK.K   | S5841:       | 3 | 5,4029 | 0,491 | 0,914  |
| 21 | Q09666 AHNK_HUMAN  | K.GHYEVTGS#DDETGKLGSGVSLAS#KK.S | S5841:S5857: | 3 | 4,1996 | 1     | 0,26   |
| 21 | Q9Y2X7 GIT1_HUMAN  | R.HGS#GADSDYENTQSGDPLLGLGK.R.F  | S592:        | 3 | 5,463  | 0,52  | 0,409  |
| 21 | P35612 ADDB_HUMAN  | K.KLELDGKETAPEEPGS#PAK.S        | S592:        | 3 | 4,0665 | 0,321 | 0,166  |
| 21 | Q02952 AKA12_HUMAN | K.GLAEVQQDGEAEEGATS#DGEKKR.E    | S598:        | 3 | 5,0566 | 0,456 | 0      |
| 21 | Q92615 LARP5_HUMAN | R.SPS#PAHLPDDPKVAEK.Q           | S601:        | 3 | 3,8781 | 0,341 | 0      |
| 21 | Q92615 LARP5_HUMAN | R.SPS#PAHLPDDPKVAEK.Q           | S601:        | 2 | 2,6561 | 0,306 | 0,345  |
| 21 | Q9UHB6 LIMA1_HUMAN | R.SRPFTVAASFQSTSVKS#PK.T        | S604:        | 3 | 6,6224 | 0,474 | 0,087  |
| 21 | Q8IYB3 SRRM1_HUMAN | R.RYS#PS#PPPKR.R                | S605:S607:   | 2 | 2,1397 | 0,148 | -1,179 |
| 21 | Q9H2P0 ADNP_HUMAN  | K.ADIPVKSS#PQAAVPYKK.D          | S608:        | 3 | 2,6236 | 0,13  | 0,195  |
| 21 | Q9NUW8 TYDP1_HUMAN | R.KIS#PVKFSNTDSVLPK.R           | S61:         | 3 | 3,2448 | 0,251 | -0,283 |
| 21 | Q3B820 YB032_HUMAN | K.SVTEDKES#FNEEKIEER.E          | S613:        | 3 | 3,237  | 0,322 | 0      |
| 21 | Q9P2E9 RRBP1_HUMAN | R.NTDVAQS#PEAPKQEAPEAKK.K       | S615:        | 3 | 3,5444 | 0,297 | -0,876 |
| 21 | O43395 PRPF3_HUMAN | K.WDEQTSNTKGGDDDEES#DEEAVKK.T   | S619:        | 3 | 6,63   | 0,52  | 0,201  |
| 21 | P01106 MYC_HUMAN   | K.KFELLTPPLS#PSRR.S             | S62:         | 3 | 3,5137 | 0,221 | 0,201  |
| 21 | P01106 MYC_HUMAN   | K.KFELLTPPLS#PSRR.S             | S62:         | 2 | 2,3959 | 0,234 | 0,47   |
| 21 | Q9NVM9 CL011_HUMAN | R.GKEELAEAEIHKDSPDS#PEPPNK.K    | S626:        | 3 | 4,7636 | 0,479 | 0,569  |
| 21 | Q16825 PTN21_HUMAN | K.RNS#IEVAGLSHGLEG.L            | S637:        | 3 | 4,3294 | 0,522 | -0,194 |

|    |                     |                               |            |   |        |       |        |
|----|---------------------|-------------------------------|------------|---|--------|-------|--------|
| 21 | Q2M2I8 AAK1_HUMAN   | R.RILS#DVTHSAVFGVPASK.S       | S637:      | 2 | 4,3228 | 0,57  | -0,435 |
| 21 | Q2M2I8 AAK1_HUMAN   | R.RILS#DVTHSAVFGVPASK.S       | S637:      | 3 | 3,2331 | 0,364 | 0      |
| 21 | Q6P6C2 ALKB5_HUMAN  | R.KYQEDS#DPERSDYEEQLQK.E      | S64:       | 3 | 3,4511 | 0,256 | 0,353  |
| 21 | Q8IY81 RRMJ3_HUMAN  | R.SRGPKS#DDDGFIVPIEDPAK.H     | S644:      | 3 | 6,2899 | 0,397 | -0,233 |
| 21 | P49756 RBM25_HUMAN  | K.KLPVDSVFNKFEDEDS#DDVPR.K    | S644:      | 3 | 4,0167 | 0,447 | -0,217 |
| 21 | Q9H5Y7 SLIK6_HUMAN  | R.DNS#PVHLQYSM*YGHK.T         | S652:      | 2 | 2,6692 | 0,505 | 0,717  |
| 21 | Q6NV74 CB055_HUMAN  | R.AASPAGPRKS#PQEAAPGTR.E      | S653:      | 3 | 3,7284 | 0,313 | -0,795 |
| 21 | O75362 ZN217_HUMAN  | R.TKADVTTPPDGSTHNLVSV#PK.E    | S662:      | 3 | 3,3745 | 0,321 | 0,077  |
| 21 | Q5SW79 CE170_HUMAN  | K.VVTQRS#EIGEKQDTELQEK.E      | S667:      | 3 | 3,7507 | 0,303 | 0,159  |
| 21 | Q86VM9 ZCH18_HUMAN  | R.GPSQEEEDNHS#DEEDRASEPK.S    | S67:       | 3 | 3,6345 | 0,322 | -1,039 |
| 21 | P20042 IF2B_HUMAN   | K.KDAS#DDLDDLNFNQKK.K         | S67:       | 3 | 2,6769 | 0,111 | -0,087 |
| 21 | P25205 MCM3_HUMAN   | R.SEDES#ETEDEEEKSQEDQEQR.K    | S672:      | 3 | 4,068  | 0,502 | -0,596 |
| 21 | Q9UEY8 ADDG_HUMAN   | K.SPEKIEEVLSPGSPSKS#PSK.K     | S681:      | 3 | 5,2921 | 0,379 | 0,16   |
| 21 | O14617 AP3D1_HUMAN  | R.KQEQANNPFYIKS#SPSPQK.R      | S685:      | 3 | 4,0092 | 0,211 | 0,161  |
| 21 | Q63HJ5 Q63HJ5_HUMAN | R.KLANDFPLDLS#PVKK.R          | S688:      | 3 | 5,0167 | 0,42  | -0,104 |
| 21 | Q63HJ5 Q63HJ5_HUMAN | R.KLANDFPLDLS#PVKK.R          | S688:      | 2 | 2,5096 | 0,102 | 0,138  |
| 21 | Q9P246 STIM2_HUMAN  | R.HTS#CSSAGNDSKPVQEAPSVAR.I   | S697:      | 3 | 3,9081 | 0,283 | 0,155  |
| 21 | A9CQZ4 A9CQZ4_HUMAN | R.KQS#GKAAEDEVPAFFK.N         | S7:        | 3 | 3,0392 | 0,179 | 0,093  |
| 21 | P40763 STAT3_HUMAN  | K.YCRPESQEHPADPGS#AAPYLK.T    | S701:      | 3 | 4,0565 | 0,41  | 0,425  |
| 21 | A7KAX9 A7KAX9_HUMAN | R.SAKS#EESLTSLHAVDGDGSK.L     | S706:      | 3 | 3,7924 | 0,289 | 0,179  |
| 21 | Q02543 RL18A_HUMAN  | K.KSSGEIVYCGQVFEKS#PLR.V      | S71:       | 3 | 4,8377 | 0,428 | -0,242 |
| 21 | Q8TEW0 PARD3_HUMAN  | R.RISHS#LYSGIEGLDESPSR.N      | S717:      | 3 | 6,0158 | 0,44  | -0,084 |
| 21 | O94762 RECO5_HUMAN  | R.GEVPGGSAHYGGPS#PEKK.A       | S727:      | 2 | 3,3645 | 0,397 | 0,399  |
| 21 | Q66K74 MAP1S_HUMAN  | R.RSAS#PHDVDLCLVS#PCEFEHR.K   | S731:S741: | 3 | 4,2639 | 0,276 | 0,274  |
| 21 | Q66K74 MAP1S_HUMAN  | R.SAS#PHDVDLCLVS#PCEFEHRK.A   | S731:S741: | 3 | 3,7614 | 0,365 | 0,277  |
| 21 | O60271 JIP4_HUMAN   | R.SASQSS#LDKLDQELKEQQK.E      | S733:      | 3 | 3,8895 | 0,331 | -0,245 |
| 21 | Q96T23 RSF1_HUMAN   | K.KPDS#PPKVLEPENK.Q           | S738:      | 3 | 5,1414 | 0,453 | 0,221  |
| 21 | Q13427 PIG1_HUMAN   | K.KFDHESS#PGT#DEDKSG.-        | S745:T748: | 3 | 4,3292 | 0,351 | -1,061 |
| 21 | Q8TDD1 DDX54_HUMAN  | R.KLGPGRPLPTFTSECTS#DVEPDTR.E | S75:       | 3 | 4,0558 | 0,312 | 0,258  |
| 21 | Q96FF9 CDCA5_HUMAN  | R.IVAHAVEVPAVQS#PRRS#PR.I     | S75:S79:   | 3 | 3,3325 | 0,305 | 0      |
| 21 | O75152 ZC11A_HUMAN  | R.RLS#SASTGKPLSVEDDFEK.L      | S758:      | 3 | 3,6993 | 0,379 | 0,489  |
| 21 | P50502 F10A1_HUMAN  | K.KVEEDLKADEPSS#EESDLEIDK.E   | S76:       | 3 | 6,6877 | 0,478 | 0,708  |
| 21 | P28749 RBL1_HUMAN   | K.VKSPVSLTAHSLIGAS#PK.Q       | S762:      | 3 | 3,4566 | 0,286 | 0,293  |

|    |                    |                                  |          |   |        |       |        |
|----|--------------------|----------------------------------|----------|---|--------|-------|--------|
| 21 | Q8N4C8 MINK1_HUMAN | R.SDSVLPASHGHLPQAGS#LER.N        | S763:    | 3 | 4,102  | 0,243 | 0,257  |
| 21 | Q96T37 RBM15_HUMAN | K.LKS#PSQKQDGGTAPVASASPK.L       | S765:    | 3 | 3,8866 | 0,169 | -0,343 |
| 21 | Q96EV2 RBM33_HUMAN | K.VKPAS#PVAQPKEEAK.T             | S775:    | 2 | 2,6266 | 0,395 | -0,883 |
| 21 | Q7Z628 ARHG8_HUMAN | R.EKDDDDVVS#LSSLDLKEPSNK.R       | S78:     | 3 | 4,299  | 0,379 | -0,557 |
| 21 | Q02790 FKBP4_HUMAN | K.DKFS#FDLGKGEVIK.A              | S78:     | 3 | 3,7826 | 0,408 | -0,22  |
| 21 | Q02790 FKBP4_HUMAN | K.DKFS#FDLGKGEVIK.A              | S78:     | 2 | 3,6727 | 0,426 | 0,44   |
| 21 | Q49MG5 MAP9_HUMAN  | K.M*NDFHIS#DDEEKNPSK.L           | S79:     | 3 | 2,9501 | 0,373 | -0,091 |
| 21 | A3KN83 SBNO1_HUMAN | K.KKS#IDPDSIQSALLASGLGSK.R       | S794:    | 3 | 5,0762 | 0,614 | -0,167 |
| 21 | Q9UHB7 AFF4_HUMAN  | K.EKDLLPS#PAGPVPSKDPK.T          | S814:    | 2 | 2,8231 | 0,219 | 0,562  |
| 21 | Q2PPJ7 AS250_HUMAN | R.RSS#SPAELDLKDDLQQTQGK.C        | S820:    | 3 | 3,4538 | 0,327 | 0,478  |
| 21 | Q6PKG0 LARP1_HUMAN | R.HSS#NPPLESHVGVVM*DSR.E         | S824:    | 3 | 3,9772 | 0,385 | -0,172 |
| 21 | O14617 AP3D1_HUMAN | R.NTETS#KSPEKDVPMVEK.K           | S827:    | 3 | 2,9696 | 0,182 | 0,366  |
| 21 | Q7Z3C6 ATG9A_HUMAN | R.HPEPVPEEGS#EDELPPQVHKV.-       | S828:    | 3 | 5,2113 | 0,413 | -0,151 |
| 21 | Q7Z3C6 ATG9A_HUMAN | R.HPEPVPEEGS#EDELPPQVHK.V        | S828:    | 3 | 5,2107 | 0,422 | 0,393  |
| 21 | O14617 AP3D1_HUMAN | R.NTETSKS#PEKDVPM*VEK.K          | S829:    | 3 | 3,6094 | 0,277 | -0,182 |
| 21 | O14617 AP3D1_HUMAN | R.NTETSKS#PEKDVPM*VEK.K          | S829:    | 2 | 2,9357 | 0,387 | 0,727  |
| 21 | Q96JP5 ZFP91_HUMAN | R.RSS#PSARPPDVPGQQPQAAS.S        | S83:     | 3 | 3,4209 | 0,342 | 0,17   |
| 21 | O60524 SDCG1_HUMAN | K.KLPS#DSGDLEALEGKDK.E           | S831:    | 3 | 4,1544 | 0,458 | 0,097  |
| 21 | Q9Y2K7 JHD1A_HUMAN | K.LQAITASSANLRHS#PR.V            | S832:    | 2 | 2,2545 | 0,196 | -0,339 |
| 21 | P52948 NUP98_HUMAN | R.CLIKS#PDRLADINYEGR.L           | S839:    | 3 | 4,3687 | 0,297 | 0,348  |
| 21 | Q9ULJ8 NEB1_HUMAN  | R.RTS#LGEVSKGDTM*ENLDGK.Q        | S840:    | 3 | 3,5576 | 0,494 | 0,086  |
| 21 | Q8WY36 BBX_HUMAN   | R.TADGRVS#PAGGTLDKPK.E           | S844:    | 2 | 2,452  | 0,164 | 0,523  |
| 21 | P16333 NCK1_HUMAN  | K.RKPS#VPDSASPADDSFVDPGER.L      | S85:     | 3 | 4,7987 | 0,454 | 0,38   |
| 21 | Q8TD19 NEK9_HUMAN  | K.VASEAPLEHKPQVEAS#SPR.L         | S868:    | 3 | 3,4913 | 0,136 | 0,087  |
| 21 | Q8TEW0 PARD3_HUMAN | K.AGS#PSRDVGPSSLGK.S             | S873:    | 3 | 3,0638 | 0,349 | 0      |
| 21 | Q68CZ2 TENS3_HUMAN | R.HPPFSPPEPLSS#PASQHK.G          | S874:    | 3 | 3,3904 | 0,104 | 0,173  |
| 21 | Q6POQ8 MAST2_HUMAN | R.SLS#EEKEDHSDGLAGLK.G           | S876:    | 2 | 2,3751 | 0,267 | 0,451  |
| 21 | Q8N122 RPTOR_HUMAN | K.GVHIHQAGGS#PPASSTSSSSLTNDVAK.Q | S877:    | 3 | 6,8373 | 0,51  | 0,411  |
| 21 | Q6NV74 CB055_HUMAN | R.SKS#FLITPVKPAVDR.K             | S881:    | 3 | 3,1588 | 0,3   | 0      |
| 21 | Q14738 2A5D_HUMAN  | R.RQSS#S#RFNLSK.N                | S89:S90: | 2 | 3,5972 | 0,485 | -0,415 |
| 21 | Q9C0C2 TB182_HUMAN | K.RDS#LGAYASQDANEQGDGK.R         | S893:    | 3 | 5,0476 | 0,466 | 0,372  |
| 21 | Q9BTE7 DCNL5_HUMAN | R.KS#PGVAAVAEDGGLKK.C            | S9:      | 3 | 5,7783 | 0,495 | 0,109  |
| 21 | Q9BTE7 DCNL5_HUMAN | R.KS#PGVAAVAEDGGLKK.C            | S9:      | 2 | 2,5382 | 0,367 | 0,073  |

|    |                     |                                    |             |   |        |       |        |
|----|---------------------|------------------------------------|-------------|---|--------|-------|--------|
| 21 | P42696 RBM34_HUMAN  | R.NEEEE#TSQIERPLSQEPAKK.V          | S90:        | 3 | 3,8611 | 0,399 | 0,365  |
| 21 | Q12872 SFRS8_HUMAN  | R.SRGVS#QEKEAQISSAIVSSVQSK.I       | S909:       | 3 | 6,1628 | 0,488 | 0,515  |
| 21 | Q9UDT6 CLIP2_HUMAN  | R.VLLLEANRHS#PGPER.D               | S923:       | 3 | 3,4099 | 0,152 | -0,207 |
| 21 | Q13523 PRP4B_HUMAN  | K.EVIDASDKEGM*S#PAKR.T             | S93:        | 3 | 2,8229 | 0,266 | -0,5   |
| 21 | Q13523 PRP4B_HUMAN  | K.EVIDASDKEGM*S#PAKR.T             | S93:        | 2 | 2,218  | 0,217 | -0,667 |
| 21 | Q7Z2Z1 CO042_HUMAN  | R.SHS#VSAVDGLEDKLDNFK.K            | S938:       | 3 | 5,7704 | 0,479 | -0,359 |
| 21 | Q5VT06 CE350_HUMAN  | R.VRS#PGPKPEGLLAQLCK.R             | S939:       | 3 | 3,7845 | 0,45  | -0,19  |
| 21 | Q14689 DIP2A_HUMAN  | R.FRS#DVHTEAVQAALAK.Y              | S94:        | 2 | 4,8261 | 0,495 | 0,736  |
| 21 | Q14689 DIP2A_HUMAN  | R.FRS#DVHTEAVQAALAK.Y              | S94:        | 3 | 4,3274 | 0,464 | 0,201  |
| 21 | Q6PD62 CTR9_HUMAN   | R.RKGS#GS#EQEGEDEEGGER.K           | S941:S943:  | 3 | 4,03   | 0,369 | -0,524 |
| 21 | Q96N67 DOCK7_HUMAN  | R.SCNRM*S#SHTETSFLQTLTGR.L         | S963:       | 3 | 4,8395 | 0,521 | -0,513 |
| 21 | Q9NS91 RAD18_HUMAN  | R.NHLLQFALES#PAKSPASSSSK.N         | S99:        | 3 | 4,2228 | 0,469 | -0,161 |
| 21 | Q0VF46 Q0VF46_HUMAN | K.HS#PIKEEPCGSLSETVCK.R            | S99:        | 3 | 3,6934 | 0,312 | 0,171  |
| 21 | P55011 S12A2_HUMAN  | K.KES#KGPIVPLNVADQK.L              | S994:       | 2 | 3,3161 | 0,412 | 0,338  |
| 21 | P55011 S12A2_HUMAN  | K.KES#KGPIVPLNVADQK.L              | S994:       | 3 | 2,9939 | 0,119 | 0      |
| 21 | Q7Z7G8 VP13B_HUMAN  | R.RKEDEV#IGS#APLAK.Q               | S999:S1002: | 3 | 2,6943 | 0,173 | 0,104  |
| 21 | Q8NE71 ABCF1_HUMAN  | K.KLSVPT#SDEEDEVPAKPR.G            | T108:       | 3 | 4,3065 | 0,365 | 0,168  |
| 21 | O43379 WDR62_HUMAN  | R.AGT#GYASPDRTHVLAAGK.A            | T1140:      | 2 | 3,17   | 0,406 | 0,593  |
| 21 | Q14207 NPAT_HUMAN   | K.KVSPT#EIVLESFHK.A                | T1153:      | 3 | 5,1456 | 0,417 | -0,216 |
| 21 | P35580 MYH10_HUMAN  | R.HAT#ALEELSEQLEQAKR.F             | T1203:      | 3 | 3,7955 | 0,311 | -0,18  |
| 21 | P11388 TOP2A_HUMAN  | K.IKNENT#EGSPQEDGVELEGLKQR.L       | T1244:      | 3 | 4,8473 | 0,472 | 0,69   |
| 21 | P46013 KI67_HUMAN   | R.RPQT#PKEEAQALEDLTGFK.E           | T1335:      | 3 | 3,3664 | 0,418 | -0,082 |
| 21 | Q9UHD8 SEPT9_HUMAN  | R.AEVLGHKT#PEPAPR.R                | T142:       | 3 | 3,5033 | 0,398 | 0,231  |
| 21 | Q9UHD8 SEPT9_HUMAN  | R.AEVLGHKT#PEPAPR.R                | T142:       | 2 | 2,8943 | 0,317 | 0,386  |
| 21 | Q9ULW0 TPX2_HUMAN   | K.RCAT#PVIIDEILPSKK.M              | T147:       | 3 | 4,7269 | 0,357 | -0,191 |
| 21 | Q86UP2 KTN1_HUMAN   | K.KVEPVVTKQPT#PPSEAAASK.K          | T153:       | 3 | 3,5836 | 0,174 | 0,245  |
| 21 | P54727 RD23B_HUMAN  | K.QEKPAEKPAETPVAT#SPTATDSTSGDSSR.S | T159:       | 3 | 4,0676 | 1     | 0,302  |
| 21 | Q7L4I2 RSRC2_HUMAN  | R.DGLAPEKT#SPDRDK.K                | T16:        | 2 | 2,2102 | 0,409 | -0,607 |
| 21 | Q9UPY8 MARE3_HUMAN  | K.KLIGTAVPQRT#SPTGPK.N             | T161:       | 3 | 3,9391 | 0,385 | 0,1    |
| 21 | Q15527 SURF2_HUMAN  | R.KDLGSTEDGDGTDFFLT#DKEDEK.A       | T195:       | 3 | 4,9053 | 0,29  | 0,701  |
| 21 | Q02952 AKA12_HUMAN  | K.DKTEKPDVTQLLT#VK.K               | T200:       | 3 | 3,5428 | 0,231 | 0,102  |
| 21 | Q9H1E3 NUCKS_HUMAN  | K.EKT#PS#PKEEDEEPESPEKK.T          | T202:S204:  | 3 | 3,2821 | 0,296 | -0,889 |
| 21 | P18583 SON_HUMAN    | K.RLT#DLDKAQLLEIAK.A               | T2051:      | 3 | 3,0385 | 0,176 | -0,405 |

|    |                    |                                  |                 |   |        |       |        |
|----|--------------------|----------------------------------|-----------------|---|--------|-------|--------|
| 21 | P53350 PLK1_HUMAN  | R.KKT#LCGTPNYIAPEVLSK.K          | T210:           | 3 | 6,607  | 0,45  | 0,349  |
| 21 | Q9Y450 HBS1L_HUMAN | K.SANPPHTIQASEEQSST#PAPVKK.S     | T231:           | 3 | 4,6529 | 0,351 | 0,368  |
| 21 | P61247 RS3A_HUMAN  | K.LM*ELHGEGSSSGKAT#GDETGAK.V     | T242:           | 3 | 4,1392 | 0,441 | -0,567 |
| 21 | Q5T200 ZC3HD_HUMAN | K.KGPRT#PS#PPPIPEDIALGKK.Y       | T263:S265:      | 3 | 4,4082 | 0,393 | 0,155  |
| 21 | P49792 RBP2_HUMAN  | K.KKPEDSPSDDDLVIVYELT#PTAEQK.A   | T2639:          | 3 | 3,2478 | 0,213 | -0,253 |
| 21 | Q01518 CAP1_HUMAN  | R.SGPKPFSAPKQT#SPSPK.R           | T307:           | 2 | 4,7522 | 0,475 | 0,064  |
| 21 | Q96QC0 PP1RA_HUMAN | K.KVLSPT#AAKPSPFEGK.T            | T315:           | 2 | 3,3169 | 0,494 | 0,421  |
| 21 | P62136 PP1A_HUMAN  | K.GKYGQFSGLNPGGRPIT#PPR.N        | T320:           | 3 | 3,528  | 0,323 | -0,168 |
| 21 | Q8WU90 ZC3HF_HUMAN | R.FSTYT#SDKDENKLSEASGGR.A        | T359:           | 3 | 5,5269 | 0,426 | 0,483  |
| 21 | Q92597 NDRG1_HUMAN | R.SHT#SEGAHLDITPNSGAAGNSAGPK.S   | T366:           | 3 | 5,8539 | 0,47  | 0,223  |
| 21 | P06400 RB_HUMAN    | R.KSNLDEEVNVIPT#PVR.T            | T373:           | 3 | 4,4843 | 0,3   | 0,431  |
| 21 | Q96T23 RSF1_HUMAN  | K.SVT#PTKEFLKDEIK.Q              | T398:           | 3 | 3,8122 | 0,356 | -0,533 |
| 21 | O95817 BAG3_HUMAN  | R.AAPSTAPAEAT#PPKPGAEAPPKHGVLK.V | T406:           | 3 | 3,9389 | 0,431 | 0,316  |
| 21 | O43379 WDR62_HUMAN | R.RT#RLST#ASEETVQNR.V            | T46:T50:        | 3 | 3,2232 | 0,284 | 0,575  |
| 21 | Q09666 AHNK_HUMAN  | K.VKT#PEM*IIQKPK.I               | T490:           | 3 | 3,6342 | 0,235 | -0,121 |
| 21 | Q09666 AHNK_HUMAN  | K.VKT#PEM*IIQKPK.I               | T490:           | 2 | 2,6149 | 0,293 | -0,081 |
| 21 | P10636 TAU_HUMAN   | K.TPPAPKT#PPSSGEPKSGDR.S         | T498:           | 3 | 3,6102 | 0,176 | -0,527 |
| 21 | Q9NYV4 CD2L7_HUMAN | R.DSKPIALKEEIVT#PK.E             | T514:           | 2 | 3,8076 | 0,276 | 0,558  |
| 21 | O75151 PHF2_HUMAN  | K.SRESASPT#IPNLDLLEAHTK.E        | T541:           | 3 | 4,6277 | 0,381 | -0,243 |
| 21 | Q12888 TP53B_HUMAN | K.TKGDDT#DTRDDISILATGCK.G        | T591:           | 3 | 3,5196 | 0,329 | 0,324  |
| 21 | Q8IYB3 SRRM1_HUMAN | K.RRT#AS#PPPPPK.R                | T614:S616:      | 3 | 3,2446 | 0,177 | 0,067  |
| 21 | P35658 NU214_HUMAN | K.SPRIT#PPAAKPGSPQAK.S           | T670:           | 3 | 3,6927 | 0,369 | 0      |
| 21 | Q14684 RRP1B_HUMAN | K.SSTATHPGPAVQLNKT#PSS#SKK.V     | T677:S680:      | 3 | 3,0064 | 0,115 | 0,148  |
| 21 | Q13892 BT3L3_HUMAN | R.TAT#ADDKKLQFSLK.K              | T68:            | 3 | 2,7817 | 0,456 | 0,667  |
| 21 | Q13435 SF3B2_HUMAN | K.KIEEAM*DGSET#PQLFTVLPEKR.T     | T757:           | 3 | 5,638  | 0,459 | 0,35   |
| 21 | Q13435 SF3B2_HUMAN | K.KKIEEAM*DGSET#PQLFTVLPEK.R     | T757:           | 3 | 4,8023 | 0,348 | -0,071 |
| 21 | O43148 MCES_HUMAN  | K.EFEDDLVKESSSCGKDT#PSK.K        | T77:            | 3 | 2,9943 | 0,278 | 0,704  |
| 21 | O14617 AP3D1_HUMAN | R.NTET#SKSPEKDVPM*VEK.K          | T826:           | 3 | 3,7922 | 0,248 | -0,182 |
| 21 | Q9BW71 HIRP3_HUMAN | K.GKRPT#PCS#DPER.K               | T84:S87:        | 3 | 3,4269 | 0,183 | -0,552 |
| 21 | Q562F6 SGOL2_HUMAN | K.GVHDLEKDNFFSLT#PK.D            | T845:           | 3 | 3,5175 | 0,315 | -0,38  |
| 21 | Q9UQ35 SRRM2_HUMAN | K.SRT#PSRHS#CSGS#SPPR.V          | T885:S890:S894: | 2 | 2,3734 | 1     | -0,611 |
| 21 | Q6PD62 CTR9_HUMAN  | K.KGGFDEFVNDT#DDDLPISSK.K        | T925:           | 3 | 6,9118 | 0,542 | 0,143  |
| 21 | Q9UQ35 SRRM2_HUMAN | K.VKPET#PPRQS#HSGSISYPK.V        | T983:S988:      | 3 | 3,1192 | 0,219 | 0,233  |



|    |                      |                                 |             |   |        |       |        |
|----|----------------------|---------------------------------|-------------|---|--------|-------|--------|
| 21 | Q9UQ35 SRRM2_HUMAN   | K.VKPET#PPRQSHS#GSISPYPK.V      | T983:S990:  | 3 | 2,8897 | 0,209 | -0,233 |
| 21 | Q6P0N0 CN106_HUMAN   | K.DDHDDFFSTT#PLQHQR.I           | T993:       | 3 | 3,3505 | 0,355 | -0,269 |
| 21 | ##Q9H9B1 EHMT1_HUMAN | K.T#KKKPVLSYT#GM*R.R            | T995:T1004: | 2 | 2,4012 | 0,319 | -1,086 |
| 21 | Q8IVF4 DYH10_HUMAN   | R.Y#RTM*AM*YNLFPPDAEK.E         | Y1133:      | 3 | 2,8405 | 0,177 | -0,533 |
| 21 | P28482 MK01_HUMAN    | R.VADPDHDHTGFLTEY#VATR.W        | Y187:       | 3 | 2,9851 | 0,265 | 0,658  |
| 21 | O15173 PGRC2_HUMAN   | R.LLKPGEEPSEY#T#DEEDTKDHNKQD.-  | Y210:T211:  | 3 | 3,6257 | 0,398 | -0,246 |
| 21 | Q13671 RIN1_HUMAN    | R.EKPAQDPLY#DVPNASGGQAGGPQRPR.V | Y36:        | 3 | 2,8809 | 0,246 | 0,515  |
| 21 | Q9NYF8 BCLF1_HUMAN   | K.LKDLFDY#SPPLHK.N              | Y511:       | 2 | 3,5988 | 0,48  | 0,517  |
| 21 | P40763 STAT3_HUMAN   | K.YCRPESQEHPADPGSAAPY#LK.T      | Y705:       | 3 | 3,8314 | 0,461 | 0,567  |
| 21 | O60216 RAD21_HUMAN   | K.EKEDDEEEDEEDASGGDQDQEER.R     |             | 3 | 6,8948 | 0,579 | -0,409 |
| 21 | P35579 MYH9_HUMAN    | K.KLEEEQIILEDQNCK.L             |             | 2 | 5,7831 | 0,503 | 0,323  |
| 21 | P35613 BASI_HUMAN    | R.KPEDVLDDDDAGSAPLK.S           |             | 2 | 5,7564 | 0,511 | 0,615  |
| 21 | Q9BTT0 AN32E_HUMAN   | K.IKDLSTVEALQNLK.N              |             | 2 | 5,5026 | 0,517 | 0,466  |
| 21 | Q01844 EWS_HUMAN     | R.QDHPSSM*GVYQEGSGGFSGPGENR.S   |             | 3 | 5,3925 | 0,524 | 0,293  |
| 21 | P19338 NUCL_HUMAN    | R.KFGYVDFESAEDLEK.A             |             | 2 | 5,3382 | 0,512 | -0,618 |
| 21 | P21796 VDAC1_HUMAN   | K.TKSENGLEFTSSGSANTETTK.V       |             | 3 | 5,296  | 0,469 | -0,167 |
| 21 | Q13885 TBB2A_HUMAN   | R.EIVHIQAGQCGNQIGAK.F           |             | 2 | 5,2411 | 0,402 | 0,335  |
| 21 | P35232 PHB_HUMAN     | R.KLEAAEDIAYQLSR.S              |             | 2 | 5,1858 | 0,368 | 0,152  |
| 21 | P40227 TCPZ_HUMAN    | K.DGNVLLHEM*QIQHPTASLIAK.V      |             | 3 | 5,1058 | 0,434 | 0,314  |
| 21 | P08670 VIME_HUMAN    | R.KVESLQEEIAFLK.K               |             | 2 | 5,0181 | 0,166 | -0,398 |
| 21 | P09874 PARP1_HUMAN   | R.GGSDDSSKDPIDVNYEK.L           |             | 2 | 4,9858 | 0,483 | -0,134 |
| 21 | P04083 ANXA1_HUMAN   | K.GDRSEDFGVNEDLADSDAR.A         |             | 3 | 4,8704 | 0,445 | -0,088 |
| 21 | Q15084 PDIA6_HUMAN   | K.KDVIELTDDSDFK.N               |             | 2 | 4,8633 | 0,483 | 0,16   |
| 21 | O95218 ZRAB2_HUMAN   | K.YKLDEDEDEDADLSK.Y             |             | 3 | 4,8602 | 0,365 | 0      |
| 21 | P60174 TPIS_HUMAN    | R.KQSLGELIGTLNAAK.V             |             | 2 | 4,8534 | 0,423 | -0,474 |
| 21 | O43617 TPPC3_HUMAN   | K.DYENDEVDNKQLDK.M              |             | 2 | 4,8149 | 0,465 | 0,283  |
| 21 | P54578 UBP14_HUMAN   | K.GKENQLQLSCFINQEVK.Y           |             | 3 | 4,7206 | 0,42  | -0,719 |
| 21 | P35080 PROF2_HUMAN   | K.DREGFFTNGTLGAK.K              |             | 2 | 4,633  | 0,373 | -0,3   |
| 21 | O95232 CROP_HUMAN    | K.ESDTKNEVNGTSEDIKSEGDTQSN.-    |             | 3 | 4,6266 | 0,432 | 0,637  |
| 21 | P67809 YBOX1_HUMAN   | R.EDGNEEDKENQGDETQGQPPQR.R      |             | 3 | 4,5958 | 0,424 | -0,627 |
| 21 | P14618 KPYM_HUMAN    | K.QKGADFLVTEVENGGSLGSK.K        |             | 3 | 4,5946 | 0,36  | -0,09  |
| 21 | P08670 VIME_HUMAN    | R.KVESLQEEIAFLK.K               |             | 3 | 4,5869 | 0,104 | -0,238 |
| 21 | Q9Y265 RUVB1_HUMAN   | K.EHVVEISELFYDAK.S              |             | 2 | 4,5829 | 0,479 | -0,286 |

|    |                     |                           |   |        |       |        |
|----|---------------------|---------------------------|---|--------|-------|--------|
| 21 | P62136 PP1A_HUMAN   | R.AHQVVEDGYEFFAK.R        | 3 | 4,5814 | 0,487 | -0,223 |
| 21 | P06396 GELS_HUMAN   | K.DSQEEEKTEALTSK.R        | 3 | 4,5645 | 0,434 | 0,329  |
| 21 | P32929 CGL_HUMAN    | K.NDRDVLGISDTLIR.L        | 3 | 4,5643 | 0,378 | 0,23   |
| 21 | Q9Y678 COPG_HUMAN   | K.HPSAVTACNLDLENLVTDNSR.S | 3 | 4,5619 | 0,431 | -0,393 |
| 21 | Q9NZM1 MYOF_HUMAN   | R.FKGFPPQPILSEDGSR.I      | 3 | 4,5345 | 0,34  | -0,436 |
| 21 | P25786 PSA1_HUMAN   | R.HM*SEFM*ECNLNELVK.H     | 3 | 4,5315 | 0,239 | 0,287  |
| 21 | P11021 GRP78_HUMAN  | K.KSDIDEIVLVGGSTR.I       | 2 | 4,5168 | 0,507 | 0,23   |
| 21 | P35637 FUS_HUMAN    | K.LKGEATVSFDDPPSAK.A      | 3 | 4,4882 | 0,351 | 0,33   |
| 21 | P10301 RRAS_HUMAN   | K.DRDDFPVVLVGNK.A         | 2 | 4,4721 | 0,473 | -0,083 |
| 21 | Q9BR76 COR1B_HUMAN  | R.AGEAGKLEEV*QELR.A       | 3 | 4,4611 | 0,405 | 0,109  |
| 21 | O75534 CSDE1_HUMAN  | K.EKEAEDGIIAYDDCGVK.L     | 2 | 4,4398 | 0,551 | 0,128  |
| 21 | O75694 NU155_HUMAN  | K.HGPEEDIVGLQAFQER.L      | 3 | 4,439  | 0,401 | 0      |
| 21 | O43707 ACTN4_HUMAN  | R.KDDPVTNLNNAFEVAEK.Y     | 3 | 4,4368 | 0,42  | -0,384 |
| 21 | P27348 1433T_HUMAN  | R.KQTIDNSQGAYQEAFDISK.K   | 3 | 4,4328 | 0,358 | 0,427  |
| 21 | P34931 HS71L_HUMAN  | K.ATAGDTHLGGEDFDNR.L      | 2 | 4,4285 | 0,525 | 0,073  |
| 21 | P16152 CBR1_HUMAN   | R.FHQLDIDDLQSIR.A         | 3 | 4,421  | 0,291 | -0,572 |
| 21 | O75694 NU155_HUMAN  | K.HGPEEDIVGLQAFQER.L      | 2 | 4,4179 | 0,513 | 0,312  |
| 21 | Q9UJX4 APC5_HUMAN   | K.KAEALEAAIENLNEAK.N      | 3 | 4,4159 | 0,395 | -0,32  |
| 21 | P35579 MYH9_HUMAN   | R.QAQQERDELADEIANSSGK.G   | 3 | 4,4157 | 0,383 | 0,35   |
| 21 | Q9Y2D5 AKAP2_HUMAN  | K.DDDHGILDQFSR.S          | 3 | 4,4007 | 0,119 | 0,258  |
| 21 | Q15149 PLEC1_HUMAN  | K.AKLEQLFQDEVAK.A         | 2 | 4,3982 | 0,453 | 0,08   |
| 21 | P63220 RS21_HUMAN   | K.DHASIQM*NVAEVDK.V       | 2 | 4,3948 | 0,434 | 0,233  |
| 21 | P62495 ERF1_HUMAN   | K.FHTEALTALLSDDSK.F       | 2 | 4,3909 | 0,585 | -0,444 |
| 21 | P11142 HSP7C_HUMAN  | K.SQIHDIVLVGGSTR.I        | 2 | 4,3897 | 0,545 | 0,082  |
| 21 | Q86UA1 PRP39_HUMAN  | R.KVEFLEDFGSDVVK.L        | 3 | 4,3893 | 0,282 | 0,112  |
| 21 | Q13547 HDAC1_HUMAN  | K.LHISPSNM*TNQNTNEYLEK.I  | 3 | 4,3817 | 0,34  | 0,325  |
| 21 | P02545 LMNA_HUMAN   | R.NSNLVGAAHEELQQR.I       | 2 | 4,3663 | 0,561 | 0,278  |
| 21 | P19387 RPB3_HUMAN   | R.NRDNDPNDYVEQDDILIVK.L   | 3 | 4,3588 | 0,17  | -0,804 |
| 21 | Q9NR30 DDX21_HUMAN  | K.SDKTEEIAEEEETVFPK.A     | 2 | 4,3562 | 0,525 | 0,062  |
| 21 | P84077 ARF1_HUMAN   | R.HYFQNTQGLIFVVDNSDR.E    | 3 | 4,3558 | 0,302 | -0,595 |
| 21 | P06493 CDC2_HUMAN   | R.HPNIVSLQDVLM*QDSR.L     | 3 | 4,3143 | 0,414 | -0,294 |
| 21 | B2RDE1 B2RDE1_HUMAN | R.KIQVLQQADDAEER.A        | 3 | 4,307  | 0,362 | 0,103  |
| 21 | P25325 THTM_HUMAN   | R.HIPGAAFFDIDQCSDR.T      | 3 | 4,3019 | 0,324 | -0,297 |

|    |                    |                              |   |        |       |        |
|----|--------------------|------------------------------|---|--------|-------|--------|
| 21 | P35613 BASI_HUMAN  | R.KPEDVLDDDDAGSAPLK.S        | 3 | 4,3001 | 0,356 | 0,205  |
| 21 | Q99613 EIF3C_HUMAN | K.DAHNALLDIQSSGR.A           | 2 | 4,2955 | 0,608 | 0      |
| 21 | P02545 LMNA_HUMAN  | R.LQEKEDLQELNDR.L            | 3 | 4,2625 | 0,215 | -0,112 |
| 21 | P42704 LPPRC_HUMAN | R.KVIEEQLEPAVEK.I            | 2 | 4,2493 | 0,431 | 0,242  |
| 21 | P16152 CBR1_HUMAN  | R.FHQLDIDDLQSIR.A            | 2 | 4,2443 | 0,423 | -0,686 |
| 21 | P36543 VATE1_HUMAN | R.ARDDLITDLLNEAK.Q           | 3 | 4,2258 | 0,357 | -0,461 |
| 21 | P16401 H15_HUMAN   | R.KATGPPVSELITK.A            | 3 | 4,2116 | 0,328 | 0,205  |
| 21 | P11021 GRP78_HUMAN | R.AKFEELNM*DLFR.S            | 3 | 4,2096 | 0,443 | -0,239 |
| 21 | P09622 DLDH_HUMAN  | K.SEEQLKEEGIEYK.V            | 3 | 4,1955 | 0,513 | 0      |
| 21 | P27635 RL10_HUMAN  | K.FNADEFEDM*VAEKR.L          | 2 | 4,1895 | 0,467 | 0,497  |
| 21 | P27824 CALX_HUMAN  | K.TPELNLDQFHDK.T             | 3 | 4,1823 | 0,212 | 0      |
| 21 | P08238 HS90B_HUMAN | R.YHTSQSGDEM*TSLSEYVSR.M     | 3 | 4,1666 | 0,395 | 0      |
| 21 | P15880 RS2_HUMAN   | K.SPYQEFTDHLVK.T             | 3 | 4,1631 | 0,351 | 0,25   |
| 21 | P07951 TPM2_HUMAN  | K.GTEDEVEKYSESVK.E           | 2 | 4,162  | 0,467 | 0,305  |
| 21 | P14324 FPPS_HUMAN  | R.LKEVLEYNAIGGK.Y            | 3 | 4,1595 | 0,405 | 0,191  |
| 21 | Q58FF8 H90B2_HUMAN | K.IEDVGSDEEDDSGKDK.K         | 2 | 4,1542 | 0,461 | -0,702 |
| 21 | P06733 ENOA_HUMAN  | K.IDKLM*IEM*DG TENK.S        | 3 | 4,1375 | 0,171 | 0,548  |
| 21 | P58546 MTPN_HUMAN  | K.NGDLDEVKDYVAK.G            | 2 | 4,1373 | 0,47  | -0,166 |
| 21 | P07355 ANXA2_HUMAN | R.RAEDGSVIDYELIDQDAR.D       | 3 | 4,1063 | 0,28  | 0,532  |
| 21 | P60866 RS20_HUMAN  | K.TPVEPEVAIHR.I              | 3 | 4,1022 | 0,317 | 0      |
| 21 | P00491 PNPH_HUMAN  | R.DHINLPGFSGQNPLR.G          | 3 | 4,0991 | 0,366 | -0,33  |
| 21 | P35998 PRS7_HUMAN  | R.KIEFSLPDLEGR.T             | 2 | 4,0981 | 0,375 | -0,348 |
| 21 | Q14789 GOGB1_HUMAN | K.SLKDQLTDLNSLEK.C           | 3 | 4,091  | 0,443 | -0,433 |
| 21 | O00629 IMA4_HUMAN  | R.NVPHE DICEDSDIDGDYR.V      | 3 | 4,0909 | 0,311 | -0,341 |
| 21 | Q9BQG0 MBB1A_HUMAN | R.KALVDILSEVSK.A             | 2 | 4,0897 | 0,445 | -0,281 |
| 21 | Q13526 PIN1_HUMAN  | R.TKEEALELINGYIQK.I          | 3 | 4,0879 | 0,327 | -0,523 |
| 21 | P26038 MOES_HUMAN  | K.KTQEQLALEM*AELTAR.I        | 3 | 4,0852 | 0,324 | 0,297  |
| 21 | P06733 ENOA_HUMAN  | K.IDKLM*IEM*DG TENK.S        | 2 | 4,0796 | 0,382 | 0,219  |
| 21 | Q02790 FKBP4_HUMAN | R.GEAHLAVNDFELAR.A           | 3 | 4,078  | 0,285 | 0,119  |
| 21 | P31939 PUR9_HUMAN  | K.HVSPAGAAVGIPLSEDEAK.V      | 2 | 4,0444 | 0,559 | 0,33   |
| 21 | P07195 LDHB_HUMAN  | K.IVADKDYSVTANSK.I           | 2 | 4,033  | 0,579 | 0,323  |
| 21 | Q15149 PLEC1_HUMAN | R.EQLRQE QALLEEIER.H         | 3 | 4,0325 | 0,297 | -0,097 |
| 21 | Q9Y3Y2 CA077_HUMAN | K.TKGHLDAELDAYM*AQ TDPETND.- | 3 | 4,0228 | 0,413 | -0,149 |

|    |                    |                          |   |        |       |        |
|----|--------------------|--------------------------|---|--------|-------|--------|
| 21 | Q01813 K6PP_HUMAN  | R.DLQSNVEHLTEK.M         | 2 | 4,0208 | 0,437 | -0,259 |
| 21 | P60842 IF4A1_HUMAN | R.GFKDQIYDIFQK.L         | 3 | 4,0194 | 0,409 | -0,122 |
| 21 | P07900 HS90A_HUMAN | K.SLTNDWEDHLAVK.H        | 2 | 4,0132 | 0,459 | -0,24  |
| 21 | P28838 AMPL_HUMAN  | K.EKEDDVPQFTSAGENFDK.L   | 3 | 4,0034 | 0,288 | 0,267  |
| 21 | Q02952 AKA12_HUMAN | K.EESESTAVGQAHS DISK.D   | 2 | 3,9937 | 0,511 | 0,481  |
| 21 | Q9GZR7 DDX24_HUMAN | R.DKLDILGAAETGSGK.T      | 2 | 3,9924 | 0,494 | 0,331  |
| 21 | Q02952 AKA12_HUMAN | K.LEHETAVTVSEEVSK.Q      | 3 | 3,9856 | 0,334 | 0,221  |
| 21 | P16401 H15_HUMAN   | R.KATGPPVSELITK.A        | 2 | 3,9756 | 0,435 | -0,091 |
| 21 | P27824 CALX_HUMAN  | K.TPELNLDQFHDK.T         | 2 | 3,9677 | 0,394 | 0,167  |
| 21 | P16403 H12_HUMAN   | R.KASGPPVSELITK.A        | 2 | 3,9625 | 0,482 | 0,092  |
| 21 | O43402 CX4NB_HUMAN | K.DHSYVIAGYYQANER.V      | 3 | 3,9548 | 0,291 | -0,307 |
| 21 | P20042 IF2B_HUMAN  | K.KDASDDLDDLNFFNQK.K     | 2 | 3,9527 | 0,432 | -0,518 |
| 21 | O43395 PRPF3_HUMAN | R.FVDKLFEEVEEGR.S        | 2 | 3,9478 | 0,449 | -0,396 |
| 21 | Q9NYH9 UTP6_HUMAN  | R.IEDRLPELEQLER.I        | 3 | 3,94   | 0,301 | 0,446  |
| 21 | P26639 SYTC_HUMAN  | R.FNLTYVSHDGD DK.K       | 2 | 3,9379 | 0,49  | 0,162  |
| 21 | Q9Y265 RUVB1_HUMAN | K.EHVVEISELFYDAK.S       | 3 | 3,9343 | 0,196 | -0,107 |
| 21 | P62136 PP1A_HUMAN  | R.AHQVVEDGYEFFAK.R       | 2 | 3,9198 | 0,572 | -0,298 |
| 21 | P08670 VIME_HUMAN  | R.VEVERDNLAEDIM*R.L      | 3 | 3,9169 | 0,241 | 0,107  |
| 21 | P62805 H4_HUMAN    | R.KTVTAM*DVVYALK.R       | 3 | 3,9165 | 0,377 | -0,126 |
| 21 | P62851 RS25_HUMAN  | R.DKLNNLVLFDK.A          | 2 | 3,9074 | 0,347 | 0,277  |
| 21 | Q13263 TIF1B_HUMAN | K.DHQYQFLEDAVR.N         | 2 | 3,8987 | 0,515 | 0,241  |
| 21 | O75376 NCOR1_HUMAN | R.SEHEISEIIDGLSEQENNEK.Q | 3 | 3,8969 | 0,264 | -0,239 |
| 21 | P54652 HSP72_HUMAN | K.STAGDTHLGGEDFDNR.M     | 2 | 3,8951 | 0,532 | 0,072  |
| 21 | Q00610 CLH1_HUMAN  | R.KFNALFAQGNYSEAAK.V     | 3 | 3,8877 | 0,353 | 0,208  |
| 21 | O95831 AIFM1_HUMAN | K.DGEQHEDLNEVAK.L        | 3 | 3,8721 | 0,368 | -0,062 |
| 21 | P00338 LDHA_HUMAN  | K.DQLIYNLLKEEQTPQNK.I    | 3 | 3,863  | 0,173 | -0,265 |
| 21 | Q9GZT3 SLIRP_HUMAN | R.NALQQENHIIDGVK.V       | 2 | 3,8616 | 0,506 | 0,386  |
| 21 | P00558 PGK1_HUMAN  | K.VSHVSTGGGASLELLEGK.V   | 3 | 3,8552 | 0,271 | 0,105  |
| 21 | P42224 STAT1_HUMAN | R.FHDLLSQLDDQYSR.F       | 3 | 3,8498 | 0,152 | -0,421 |
| 21 | P06396 GELS_HUMAN  | K.DSQEEEKTEALTS AK.R     | 2 | 3,8482 | 0,47  | -0,513 |
| 21 | Q7Z6B7 SRGP1_HUMAN | K.DKEIIAYESQVK.E         | 3 | 3,8436 | 0,314 | 0,354  |
| 21 | P08195 4F2_HUMAN   | K.IKVAEDEAEAAAAAK.F      | 3 | 3,8411 | 0,233 | 0,246  |
| 21 | P48556 PSMD8_HUMAN | K.HPVSLEQYLM*EGSYNK.V    | 2 | 3,8364 | 0,543 | 0,255  |

|    |                    |                                  |   |        |       |        |
|----|--------------------|----------------------------------|---|--------|-------|--------|
| 21 | P05198 IF2A_HUMAN  | K.HAVSDPSILDSLNLNEDER.E          | 3 | 3,8325 | 0,483 | -0,517 |
| 21 | P49257 LMAN1_HUMAN | K.YQEEFEHFQQELDK.K               | 2 | 3,8259 | 0,344 | 1,109  |
| 21 | Q9BXF6 RFIP5_HUMAN | R.DEHVQELESYIDR.L                | 3 | 3,8232 | 0,245 | -0,224 |
| 21 | O75347 TBCA_HUMAN  | K.DLEEAEEYKEAR.L                 | 2 | 3,8225 | 0,483 | -0,165 |
| 21 | Q9BTT0 AN32E_HUMAN | K.IKDLSTVEALQNLK.N               | 3 | 3,8197 | 0,355 | 0,116  |
| 21 | P46013 KI67_HUMAN  | K.VGVKEELLAVGK.F                 | 3 | 3,8146 | 0,283 | -0,147 |
| 21 | P62333 PRS10_HUMAN | R.ADHDFVQEDFM*K.A                | 2 | 3,8137 | 0,402 | 0,229  |
| 21 | P63220 RS21_HUMAN  | K.DHASIQM*NVAEVDK.V              | 3 | 3,8058 | 0,469 | -0,233 |
| 21 | Q09028 RBBP4_HUMAN | K.IGEEQSPEDAEDGPPPELLFIHGGHTAK.I | 3 | 3,8029 | 0,361 | 0,382  |
| 21 | P27694 RFA1_HUMAN  | K.DKNEQAFEEVFQANFR.S             | 3 | 3,7955 | 0,211 | -0,088 |
| 21 | P50454 SERPH_HUMAN | K.GVVEVTHDLQK.H                  | 2 | 3,7953 | 0,416 | -0,398 |
| 21 | Q9ULW0 TPX2_HUMAN  | K.NQEEYKEVNFTSELR.K              | 3 | 3,7946 | 0,269 | -0,776 |
| 21 | P49588 SYAC_HUMAN  | K.KAEEIANEM*IEAAK.A              | 2 | 3,7934 | 0,357 | 0,078  |
| 21 | P22234 PUR6_HUMAN  | K.TKEVYELLDSPGK.V                | 2 | 3,7773 | 0,379 | 0      |
| 21 | P30044 PRDX5_HUMAN | K.THLPGFVEQAEALK.A               | 3 | 3,7611 | 0,315 | 0,238  |
| 21 | P18031 PTN1_HUMAN  | K.LHQEDNDYINASLIK.M              | 2 | 3,7609 | 0,551 | 0,551  |
| 21 | P07237 PDIA1_HUMAN | K.YQLDKDGVVLFK.K                 | 2 | 3,7576 | 0,346 | -0,086 |
| 21 | P60842 IF4A1_HUMAN | R.GFKDQIYDIFQK.L                 | 2 | 3,7534 | 0,405 | -0,325 |
| 21 | Q8IWS0 PHF6_HUMAN  | R.DKECGQLLISENQK.V               | 2 | 3,7433 | 0,304 | 0,514  |
| 21 | O15347 HMGB3_HUMAN | K.KNPEVPVNFAEFSK.K               | 3 | 3,7421 | 0,312 | 0,114  |
| 21 | P49257 LMAN1_HUMAN | K.GHPDLQGQPAEEIFESVGDR.E         | 3 | 3,7314 | 0,422 | 0,084  |
| 21 | P52907 CAZA1_HUMAN | K.DHYSNGFCTVYAK.T                | 2 | 3,7263 | 0,591 | 0,234  |
| 21 | P39023 RL3_HUMAN   | K.TVFAEHISDECK.R                 | 2 | 3,7242 | 0,546 | 0,51   |
| 21 | P50454 SERPH_HUMAN | R.TGLYNYDDEKEK.L                 | 2 | 3,724  | 0,478 | 0,149  |
| 21 | Q14683 SMC1A_HUMAN | R.DKFQETSDEFEAAR.K               | 2 | 3,7208 | 0,41  | -0,146 |
| 21 | P62979 RS27A_HUMAN | K.CCLTYCFNKPEDK.-                | 2 | 3,7089 | 0,461 | -0,211 |
| 21 | P67936 TPM4_HUMAN  | K.CGDLEEELKNVTNNLK.S             | 3 | 3,6927 | 0,441 | -0,39  |
| 21 | Q16851 UGPA_HUMAN  | K.IQRPPEDSIQPYEK.I               | 3 | 3,6919 | 0,272 | -0,108 |
| 21 | P26641 EF1G_HUMAN  | R.KLDPGSEETQTLVR.E               | 3 | 3,6904 | 0,249 | 0      |
| 21 | P25398 RS12_HUMAN  | K.ESQAKDVIEEYFK.C                | 2 | 3,6903 | 0,49  | -0,308 |
| 21 | Q15149 PLEC1_HUMAN | K.DTHDQLSEPSEVR.S                | 2 | 3,6894 | 0,484 | -0,161 |
| 21 | P63104 1433Z_HUMAN | R.YLAEVAAGDDKK.G                 | 2 | 3,6857 | 0,368 | 0,191  |
| 21 | Q9Y230 RUVB2_HUMAN | K.DKVQAGDVITIDK.A                | 2 | 3,6819 | 0,383 | 0,174  |

|    |                    |                          |   |        |       |        |
|----|--------------------|--------------------------|---|--------|-------|--------|
| 21 | P14625 ENPL_HUMAN  | R.ELISNASDALDKIR.L       | 2 | 3,6775 | 0,356 | -0,632 |
| 21 | Q9NZ45 CISD1_HUMAN | K.IVHAFDM*EDLGDK.A       | 3 | 3,6736 | 0,372 | 0,121  |
| 21 | P35232 PHB_HUMAN   | R.KLEAAEDIAYQLSR.S       | 3 | 3,6669 | 0,274 | 0,114  |
| 21 | P26641 EF1G_HUMAN  | R.KLDPGSEETQTLVR.E       | 2 | 3,6526 | 0,446 | 0,31   |
| 21 | P62495 ERF1_HUMAN  | R.KVAETAVQLFISGDK.V      | 3 | 3,6509 | 0,177 | 0,114  |
| 21 | P55060 XPO2_HUMAN  | R.IVEDEPNKICEADR.V       | 2 | 3,6456 | 0,311 | -0,145 |
| 21 | Q14651 PLSI_HUMAN  | R.AYFHLLNQIAPK.G         | 3 | 3,6435 | 0,32  | -0,065 |
| 21 | P49023 PAXI_HUMAN  | R.VGEEEHVYSFPNK.Q        | 3 | 3,6424 | 0,438 | -0,238 |
| 21 | P62277 RS13_HUMAN  | K.LTSDDVKEQIYK.L         | 2 | 3,6384 | 0,481 | 0,17   |
| 21 | P06733 ENOA_HUMAN  | K.YDLDFKSPDDPSR.Y        | 2 | 3,6356 | 0,455 | -0,314 |
| 21 | P35579 MYH9_HUMAN  | K.DLEAHIDSANK.N          | 2 | 3,6313 | 0,486 | 0,201  |
| 21 | P35998 PRS7_HUMAN  | K.IATEKDFLEAVNK.V        | 2 | 3,631  | 0,296 | -0,165 |
| 21 | P06753 TPM3_HUMAN  | R.KLVIIEGDLER.T          | 3 | 3,623  | 0,348 | -0,854 |
| 21 | O43847 NRDC_HUMAN  | K.YPDENGFD AFLK.H        | 3 | 3,6227 | 0,275 | -0,118 |
| 21 | P12081 SYHC_HUMAN  | R.HGAEVIDTPVFELK.E       | 2 | 3,6202 | 0,414 | -0,471 |
| 21 | Q99873 ANM1_HUMAN  | K.GKVEEVELPVEK.V         | 3 | 3,6152 | 0,18  | 0,135  |
| 21 | P49591 SYSC_HUMAN  | K.IEQFVYSSPHDNK.S        | 2 | 3,6118 | 0,26  | 0,312  |
| 21 | P46063 RECQ1_HUMAN | R.QKPSNTEDFIEDIVK.L      | 3 | 3,6111 | 0,209 | -0,415 |
| 21 | P62873 GBB1_HUMAN  | R.KACADATLSQITNNIDPVGR.I | 3 | 3,6102 | 0,225 | 0,171  |
| 21 | Q14974 IMB1_HUMAN  | K.TVSPDRLELEAAQK.F       | 2 | 3,6099 | 0,248 | 0,313  |
| 21 | O14980 XPO1_HUMAN  | K.NVDILKDPETVK.Q         | 2 | 3,6088 | 0,376 | 0,623  |
| 21 | Q96EK9 KTI12_HUMAN | R.HDVVILDSLNYIK.G        | 3 | 3,6042 | 0,286 | 0,06   |
| 21 | Q08EQ4 TMSL1_HUMAN | K.NPLPSKETIEQEQAGES.-    | 2 | 3,5941 | 0,389 | 0,553  |
| 21 | Q16352 AINX_HUMAN  | R.HSAEVAGYQDSIGQLENDLR.N | 3 | 3,5935 | 0,205 | -0,332 |
| 21 | Q9NR30 DDX21_HUMAN | K.SDKTEEIAEEEEIVFPK.A    | 3 | 3,5778 | 0,198 | 0,277  |
| 21 | Q9H583 HEAT1_HUMAN | K.ITKPFFAAISDEK.V        | 3 | 3,5664 | 0,308 | 0,623  |
| 21 | Q08EQ4 TMSL1_HUMAN | K.NPLPSKETIEQEQAGES.-    | 3 | 3,5618 | 0,427 | 0,092  |
| 21 | Q9HAU5 RENT2_HUMAN | K.HVPCVEDEDFIQALDK.M     | 3 | 3,557  | 0,232 | -0,382 |
| 21 | P19338 NUCL_HUMAN  | K.TEADAECTFEK.Q          | 2 | 3,5541 | 0,426 | 0,175  |
| 21 | P42704 LPPRC_HUMAN | K.LVEKGETDLIQK.A         | 2 | 3,548  | 0,39  | -0,267 |
| 21 | P07737 PROF1_HUMAN | K.TDKTLVLLM*GK.E         | 2 | 3,5458 | 0,447 | 0,198  |
| 21 | P50991 TCPD_HUMAN  | K.GIHPTIISESFQK.A        | 3 | 3,5422 | 0,311 | 0,188  |
| 21 | O95218 ZRAB2_HUMAN | K.YKLEDEDEDEDADLSK.Y     | 2 | 3,5391 | 0,386 | 0,257  |

|    |                     |                           |   |        |       |        |
|----|---------------------|---------------------------|---|--------|-------|--------|
| 21 | Q96ER9 CCD51_HUMAN  | R.DRDVDVLSAALK.E          | 2 | 3,5389 | 0,351 | 0,094  |
| 21 | P38646 GRP75_HUMAN  | K.M*EEFKDQLPADECNK.L      | 2 | 3,5269 | 0,444 | 0,131  |
| 21 | P46777 RL5_HUMAN    | R.YLM*EEDEDAYKK.Q         | 2 | 3,523  | 0,386 | -0,236 |
| 21 | O75832 PSD10_HUMAN  | K.LEELKESILADK.S          | 3 | 3,5218 | 0,332 | 0      |
| 21 | O95793 STAU1_HUMAN  | K.NAAIAVLEELKK.L          | 2 | 3,5164 | 0,401 | -0,47  |
| 21 | P23526 SAHH_HUMAN   | R.GISEETTTGVHNLK.M        | 2 | 3,5102 | 0,391 | 0,37   |
| 21 | P46734 MP2K3_HUMAN  | R.DVKPSNVLINK.E           | 3 | 3,5081 | 0,239 | 0,447  |
| 21 | Q9NR30 DDX21_HUMAN  | K.ELKEQLGEEIDSK.V         | 2 | 3,5023 | 0,43  | 0,321  |
| 21 | Q08J23 NSUN2_HUMAN  | R.LQQQRPEDAEDGAEGGGK.R    | 3 | 3,4973 | 0,395 | -1,09  |
| 21 | Q99873 ANM1_HUMAN   | K.GKVEEVELPVEK.V          | 2 | 3,4941 | 0,388 | 0,18   |
| 21 | Q9UBF2 COPG2_HUMAN  | K.HPSAVTACNLDLENLITDSNR.S | 3 | 3,4939 | 0,351 | -0,156 |
| 21 | P54577 SYYC_HUMAN   | K.M*SSSEEEKIDLLDR.K       | 2 | 3,4829 | 0,365 | 0,278  |
| 21 | P52565 GDIR1_HUMAN  | K.IDKTDYM*VGSYGPR.A       | 3 | 3,4738 | 0,299 | 0,339  |
| 21 | P51572 BAP31_HUMAN  | K.LQAAVDGPM*DKKEE.-       | 2 | 3,4682 | 0,412 | 0,631  |
| 21 | Q15459 SF3A1_HUMAN  | K.IGEEEIQKPEEK.V          | 2 | 3,4676 | 0,265 | 0,171  |
| 21 | P14866 HNRPL_HUMAN  | K.SKPGAAM*VEM*ADGYAVDR.A  | 3 | 3,4586 | 0,478 | 0,193  |
| 21 | P49642 PRI1_HUMAN   | K.VFEHFLENLDK.S           | 2 | 3,4402 | 0,337 | -0,351 |
| 21 | P42704 LPPRC_HUMAN  | K.EKNVQGIIEILK.G          | 2 | 3,4334 | 0,304 | 0,088  |
| 21 | P61247 RS3A_HUMAN   | R.EVQTNDLKEVVK.L          | 2 | 3,4292 | 0,339 | 0,08   |
| 21 | Q96NC0 ZMAT2_HUMAN  | K.DSINFLDHINGK.K          | 2 | 3,428  | 0,29  | -0,444 |
| 21 | Q9UQ80 PA2G4_HUMAN  | K.HELLQPFNVLYEK.E         | 2 | 3,4274 | 0,504 | -0,449 |
| 21 | Q9Y2L1 RRP44_HUMAN  | K.IEDTVFHVFDK.V           | 2 | 3,4272 | 0,391 | -0,542 |
| 21 | P61011 SRP54_HUMAN  | K.DKVDVASVIVTK.L          | 2 | 3,4236 | 0,299 | -0,096 |
| 21 | Q8IWS0 PHF6_HUMAN   | R.DKECGQLLISENQK.V        | 3 | 3,4212 | 0,255 | 0,33   |
| 21 | P35080 PROF2_HUMAN  | K.DREGFFTNGLTGAK.K        | 3 | 3,421  | 0,305 | -0,112 |
| 21 | P07951 TPM2_HUMAN   | R.KLVILEGELER.S           | 3 | 3,4186 | 0,369 | 0,211  |
| 21 | Q9UBD5 ORC3_HUMAN   | R.KISLPIEDYFNK.G          | 3 | 3,4181 | 0,119 | 0      |
| 21 | P55145 ARME_T_HUMAN | K.DSQICELKYDK.Q           | 2 | 3,4166 | 0,354 | 0,262  |
| 21 | Q08211 DHX9_HUMAN   | R.TPLHEIALSIK.L           | 3 | 3,4144 | 0,411 | -0,075 |
| 21 | Q13642 FHL1_HUMAN   | K.GEDFYCVTCHETK.F         | 2 | 3,4137 | 0,451 | 0,89   |
| 21 | O60506 HNRPO_HUMAN  | R.GFCFLEYEDHK.T           | 2 | 3,4127 | 0,379 | -0,084 |
| 21 | P00558 PGK1_HUMAN   | K.VADKIQLINNM*LDK.V       | 3 | 3,4047 | 0,142 | 0,224  |
| 21 | P22234 PUR6_HUMAN   | K.TKEVYELLDSPGK.V         | 3 | 3,4043 | 0,206 | 0,185  |

|    |                    |                       |   |        |       |        |
|----|--------------------|-----------------------|---|--------|-------|--------|
| 21 | P00367 DHE3_HUMAN  | K.HGGTIPIVPTAEFQDR.I  | 2 | 3,4017 | 0,537 | -0,14  |
| 21 | Q8N3U4 STAG2_HUMAN | R.SQLIDELADKFN.R      | 2 | 3,4016 | 0,385 | -0,158 |
| 21 | Q9UQ80 PA2G4_HUMAN | K.HELLQPFNVLYEK.E     | 3 | 3,3927 | 0,323 | -0,224 |
| 21 | P08670 VIME_HUMAN  | R.DGQVINETSQHDDLE.-   | 2 | 3,3924 | 0,196 | -0,066 |
| 21 | P05023 AT1A1_HUMAN | R.DKYEPAAVSEQGDK.K    | 3 | 3,3904 | 0,222 | 0,238  |
| 21 | Q70UQ0 IKIP_HUMAN  | K.DIKDEIAHISDM*N.-    | 2 | 3,39   | 0,433 | 0,08   |
| 21 | Q96MW1 CCD43_HUMAN | K.KEDEVQAIATLIEK.Q    | 3 | 3,3897 | 0,1   | -0,461 |
| 21 | Q9Y3T9 NOC2L_HUMAN | K.ERLEDLNFEIK.R       | 2 | 3,3876 | 0,383 | -0,406 |
| 21 | Q96AE4 FUBP1_HUMAN | R.IQFKPDDGTTPER.I     | 2 | 3,3814 | 0,351 | 0,324  |
| 21 | P20042 IF2B_HUMAN  | K.KDASDDLDDLNFFNQK.K  | 3 | 3,3768 | 0,129 | -0,388 |
| 21 | O75153 EIF3X_HUMAN | K.VKELAETIAADDGTDPR.S | 3 | 3,3752 | 0,246 | 0      |
| 21 | Q06587 RING1_HUMAN | R.SLRPDPNFDALISK.I    | 3 | 3,3751 | 0,372 | 0,233  |
| 21 | P08670 VIME_HUMAN  | R.LQDEIQNM*KEEM*AR.H  | 2 | 3,3716 | 0,515 | -0,691 |
| 21 | P06748 NPM_HUMAN   | K.VDNDENEHQLSLR.T     | 2 | 3,371  | 0,361 | 0,467  |
| 21 | O94776 MTA2_HUMAN  | R.EFEEESKQPGVSEQQR.H  | 3 | 3,3702 | 0,349 | 0      |
| 21 | P22061 PIMT_HUMAN  | K.TDKVFEVM*LATDR.S    | 3 | 3,3641 | 0,25  | 1,543  |
| 21 | P26038 MOES_HUMAN  | R.GM*LREDAVLEYLK.I    | 3 | 3,3555 | 0,341 | 0,118  |
| 21 | P63104 1433Z_HUMAN | R.YLAEVAAGDDKK.G      | 3 | 3,3542 | 0,41  | -0,571 |
| 21 | Q9BV57 MTND_HUMAN  | K.LDADKYENDPELEK.I    | 3 | 3,3477 | 0,362 | 0,327  |
| 21 | P78371 TCPB_HUMAN  | R.SLHDALCVLAQTVK.D    | 2 | 3,3465 | 0,491 | -0,392 |
| 21 | P10301 RRAS_HUMAN  | K.DRDDFPVVLVGNK.A     | 3 | 3,3255 | 0,215 | -0,062 |
| 21 | Q9BZI7 REN3B_HUMAN | R.DRFDGYVFLDNK.G      | 2 | 3,3252 | 0,267 | 0,164  |
| 21 | O15347 HMGB3_HUMAN | K.KNPEVPVNFAEFSK.K    | 2 | 3,3242 | 0,35  | 0,076  |
| 21 | P08195 4F2_HUMAN   | K.FTGLSKEELLK.V       | 2 | 3,322  | 0,263 | 0,096  |
| 21 | Q8WWM7 ATX2L_HUMAN | K.DKFTDSAIAM*NSK.V    | 2 | 3,3216 | 0,483 | -0,085 |
| 21 | Q9NYJ1 CHCH8_HUMAN | K.KDDEEEDPLDQLISR.S   | 3 | 3,3166 | 0,171 | -0,203 |
| 21 | P49721 PSB2_HUMAN  | K.NGIHDLDNISFPK.Q     | 3 | 3,3148 | 0,137 | -0,684 |
| 21 | Q15019 SEPT2_HUMAN | R.ILDEIEEHNIK.I       | 2 | 3,3136 | 0,296 | -0,09  |
| 21 | Q86V48 LUZP1_HUMAN | R.M*AEELEKLEEAFSR.S   | 3 | 3,313  | 0,314 | -0,117 |
| 21 | Q8NFV4 ABHDB_HUMAN | R.VNLDALTQHLDK.I      | 3 | 3,3098 | 0,414 | 0,134  |
| 21 | P25705 ATPA_HUMAN  | K.HALIIYDDLK.Q        | 2 | 3,3069 | 0,346 | 0,095  |
| 21 | Q5TFE4 NT5D1_HUMAN | K.DIVAAIQHNYK.M       | 2 | 3,3052 | 0,264 | 0,096  |
| 21 | O75494 FUSIP_HUMAN | R.DAEDALHNLDK.K       | 2 | 3,302  | 0,318 | 0      |



|    |                    |                         |   |        |       |        |
|----|--------------------|-------------------------|---|--------|-------|--------|
| 21 | P62805 H4_HUMAN    | R.KVTAM*DVVYALK.R       | 2 | 3,2896 | 0,442 | 0,084  |
| 21 | O95292 VAPB_HUMAN  | K.SLSSSLDDTEVKK.V       | 2 | 3,2864 | 0,439 | -0,26  |
| 21 | P35580 MYH10_HUMAN | K.ADFCIIHYAGK.V         | 2 | 3,2863 | 0,406 | 0,377  |
| 21 | Q12874 SF3A3_HUMAN | R.VKPLQDQNELFGK.I       | 3 | 3,2857 | 0,213 | 0,06   |
| 21 | P67936 TPM4_HUMAN  | K.CGDLEELKKNVTNNLK.S    | 2 | 3,2834 | 0,435 | -0,39  |
| 21 | Q13310 PABP4_HUMAN | K.NLDDTIDDEKLR.K        | 2 | 3,2807 | 0,443 | 0,169  |
| 21 | P27635 RL10_HUMAN  | K.FNADEFEDMVAEKR.L      | 3 | 3,2743 | 0,387 | -0,215 |
| 21 | P23258 TBG1_HUMAN  | K.IHEDIFDIIDR.E         | 2 | 3,273  | 0,433 | -0,44  |
| 21 | Q9UNH7 SNX6_HUMAN  | K.DVDDFFEHER.T          | 2 | 3,2668 | 0,49  | 0,093  |
| 21 | P78417 GSTO1_HUMAN | K.EFTKLEEVLTNK.K        | 2 | 3,2641 | 0,43  | -0,336 |
| 21 | Q13185 CBX3_HUMAN  | K.KVEEAPEEFVVEK.V       | 3 | 3,2613 | 0,415 | -0,44  |
| 21 | P62993 GRB2_HUMAN  | K.FNSLNELVDYHR.S        | 3 | 3,2576 | 0,11  | 0,182  |
| 21 | P42704 LPPRC_HUMAN | K.LVEKGETDLIQK.A        | 3 | 3,2491 | 0,314 | -0,133 |
| 21 | Q03701 CEBPZ_HUMAN | K.DKQNIFFER.Q           | 2 | 3,249  | 0,249 | -0,414 |
| 21 | P09936 UCHL1_HUMAN | K.QIEELKGQEVSPK.V       | 2 | 3,2411 | 0,403 | 0      |
| 21 | P63241 IF5A1_HUMAN | K.VHLVGIDIFTGK.K        | 2 | 3,2368 | 0,529 | -0,376 |
| 21 | P62495 ERF1_HUMAN  | K.FHTEALTALLSDDSK.F     | 3 | 3,2324 | 0,324 | 0      |
| 21 | P62256 UBE2H_HUMAN | R.VDLDPKYPFK.S          | 3 | 3,2311 | 0,341 | 0,15   |
| 21 | P11142 HSP7C_HUMAN | K.SQIHDIVLVGGSTR.I      | 3 | 3,231  | 0,122 | 0,185  |
| 21 | O43390 HNRPR_HUMAN | K.DYAFVHFEDR.G          | 2 | 3,2299 | 0,455 | 0,094  |
| 21 | P16949 STMN1_HUMAN | R.SKESVPEFPLSPPK.K      | 3 | 3,2277 | 0,393 | 0,119  |
| 21 | Q9P0L0 VAPA_HUMAN  | K.HEQILVLDPPDLDK.F      | 3 | 3,2239 | 0,169 | 0,226  |
| 21 | P11021 GRP78_HUMAN | R.AKFEELNM*DLFR.S       | 2 | 3,2189 | 0,418 | -0,399 |
| 21 | O43818 U3IP2_HUMAN | R.KPEEEEEEEETAQEK.K     | 3 | 3,2089 | 0,341 | 0,088  |
| 21 | P07355 ANXA2_HUMAN | K.DIISDTSGDFRK.L        | 2 | 3,2084 | 0,442 | -0,09  |
| 21 | P63313 TYB10_HUMAN | K.NTLPTKETIEQEK.R       | 2 | 3,2053 | 0,165 | 0,159  |
| 21 | O43707 ACTN4_HUMAN | R.KDDPVTNLNNAFEVAEK.Y   | 2 | 3,202  | 0,567 | -0,384 |
| 21 | Q7Z2W4 ZCCHV_HUMAN | R.EHGLNPDVVQNIQDICNSK.H | 3 | 3,2009 | 0,201 | -0,252 |
| 21 | Q92598 HS105_HUMAN | K.EKENLSYDLVPLK.N       | 2 | 3,2004 | 0,362 | -0,631 |
| 21 | P42704 LPPRC_HUMAN | R.KVIEEQLEPAVEK.I       | 3 | 3,1956 | 0,147 | 0,121  |
| 21 | Q12874 SF3A3_HUMAN | R.VKPLQDQNELFGK.I       | 2 | 3,1929 | 0,352 | 0,08   |
| 21 | P19784 CSK22_HUMAN | R.HLVSPEALDLLDK.L       | 2 | 3,1888 | 0,322 | -0,337 |
| 21 | P11940 PABP1_HUMAN | R.SKGFVFCVSSPEEATK.A    | 3 | 3,1709 | 0,422 | 0      |

|    |                    |                         |   |        |       |        |
|----|--------------------|-------------------------|---|--------|-------|--------|
| 21 | P21926 CD9_HUMAN   | K.EVQEFYKDTYNK.L        | 2 | 3,1693 | 0,335 | 0,858  |
| 21 | Q68CQ4 DEF_HUMAN   | R.DFGEEHPFYDR.V         | 2 | 3,1669 | 0,528 | -0,432 |
| 21 | Q8IWZ8 SF04_HUMAN  | K.DNPFAFALHDK.N         | 2 | 3,1659 | 0,452 | -0,096 |
| 21 | Q9H910 HN1L_HUMAN  | K.DHVFLCEGEEP.K.S       | 3 | 3,1602 | 0,32  | -0,063 |
| 21 | O00186 STXB3_HUMAN | K.SVDCFLHDFASK.S        | 2 | 3,1576 | 0,305 | -1,283 |
| 21 | Q96DE0 NUD16_HUMAN | K.DHGLEVLGLVR.V         | 2 | 3,1472 | 0,522 | -0,303 |
| 21 | Q15050 RRS1_HUMAN  | R.KFQPLFGDFAAEK.K       | 3 | 3,1468 | 0,215 | -0,183 |
| 21 | Q14320 FA50A_HUMAN | K.FSAHYDAVEAEK.S        | 3 | 3,1431 | 0,251 | -0,185 |
| 21 | Q92541 RTF1_HUMAN  | K.FNDQDIEEIVKEK.E       | 3 | 3,1391 | 0,192 | -0,114 |
| 21 | Q86UA1 PRP39_HUMAN | R.KVEFLEDFGSDVVK.L      | 2 | 3,1373 | 0,328 | 0,525  |
| 21 | P14868 SYDC_HUMAN  | K.EKYDTDFYILDK.Y        | 2 | 3,1348 | 0,477 | -0,551 |
| 21 | P29144 TPP2_HUMAN  | K.DLKEEFTEALR.D         | 3 | 3,1325 | 0,274 | 0,135  |
| 21 | O14737 PDCD5_HUMAN | R.LSNLALVKPEK.T         | 3 | 3,1185 | 0,269 | -0,226 |
| 21 | Q99613 EIF3C_HUMAN | K.DAHNALLDIQSSGR.A      | 3 | 3,1184 | 0,271 | -0,183 |
| 21 | Q9NZM1 MYOF_HUMAN  | R.GKSDENEDPSVVGFEK.G    | 3 | 3,1162 | 0,3   | 0,421  |
| 21 | Q9Y2Q3 GSTK1_HUMAN | R.M*ELLAHLLGEK.W        | 2 | 3,1118 | 0,368 | -0,576 |
| 21 | P00367 DHE3_HUMAN  | K.HGGTIPIVPTAEFQDR.I    | 3 | 3,1073 | 0,176 | 0,105  |
| 21 | Q8IV38 ANKY2_HUMAN | K.DGENKLDTLIK.S         | 3 | 3,1067 | 0,224 | 0,44   |
| 21 | P43034 LIS1_HUMAN  | K.LNEAKEEFTSGGPLGQK.R   | 3 | 3,1062 | 0,337 | 0,203  |
| 21 | P60174 TPIS_HUMAN  | K.DCGATWVVLGHSER.R      | 2 | 3,1058 | 0,36  | 0,384  |
| 21 | Q9NZM3 ITSN2_HUMAN | R.NHDEM*SFNSGDIIQVDEK.T | 3 | 3,1046 | 0,171 | 0,087  |
| 21 | P62888 RL30_HUMAN  | R.KSEIEYYAM*LAK.T       | 2 | 3,0991 | 0,334 | -0,25  |
| 21 | Q13347 EIF3I_HUMAN | K.LFDSTTLEHQK.T         | 2 | 3,0942 | 0,275 | 0      |
| 21 | Q14683 SMC1A_HUMAN | R.IEKLEEYITTSK.Q        | 3 | 3,0884 | 0,24  | 0,314  |
| 21 | Q6S8J3 A26CA_HUMAN | K.QEYDESGPSIVHR.K       | 3 | 3,0883 | 0,433 | 0      |
| 21 | P15559 NQO1_HUMAN  | K.EGHLSPDIVAEQK.K       | 3 | 3,0844 | 0,11  | 0,129  |
| 21 | Q9NR30 DDX21_HUMAN | K.NEEPSEEEIDAPKPK.K     | 2 | 3,0824 | 0,242 | 0,143  |
| 21 | P49591 SYSC_HUMAN  | K.IEQFVYSSPHDNK.S       | 3 | 3,0798 | 0,261 | -0,234 |
| 21 | Q09666 AHNK_HUMAN  | K.VTAPDVDLHLK.A         | 3 | 3,0795 | 0,276 | 0      |
| 21 | P29375 JAD1A_HUMAN | K.NLLDDVEEFHER.A        | 2 | 3,0785 | 0,363 | -0,563 |
| 21 | Q9NYL9 TMOD3_HUMAN | K.ENDAHLVEVNLNLIK.N     | 3 | 3,0584 | 0,174 | 0,106  |
| 21 | P02786 TFR1_HUMAN  | K.DSAQNSVIIVDKNGR.L     | 3 | 3,0579 | 0,215 | 0,226  |
| 21 | P22087 FBRL_HUMAN  | R.VSISEGDDKIEYR.A       | 2 | 3,0557 | 0,417 | 0,162  |

|    |                     |                           |   |        |       |        |
|----|---------------------|---------------------------|---|--------|-------|--------|
| 21 | P53985 MOT1_HUMAN   | K.DLHDANTDLIGR.H          | 3 | 3,0536 | 0,289 | -0,136 |
| 21 | Q9BT25 NYS48_HUMAN  | R.SFAQVLELSAEASK.E        | 2 | 3,0534 | 0,289 | -0,412 |
| 21 | P32929 CGL_HUMAN    | K.NDRDVLGISDTLIR.L        | 2 | 3,0438 | 0,259 | -0,077 |
| 21 | Q9Y312 CT004_HUMAN  | K.HSM*DLSYALETVLNK.Q      | 3 | 3,042  | 0,238 | -0,421 |
| 21 | P43034 LIS1_HUMAN   | K.EAELDVNEELDKK.Y         | 2 | 3,0412 | 0,408 | 0,319  |
| 21 | P14324 FPPS_HUMAN   | K.QDFVQHFSQIVR.V          | 3 | 3,0408 | 0,308 | -0,061 |
| 21 | Q8TDY2 RBCC1_HUMAN  | R.DKDLIESLSEDR.A          | 2 | 3,0366 | 0,224 | -0,516 |
| 21 | P50991 TCPD_HUMAN   | K.GIHPTIISESFQK.A         | 2 | 3,0335 | 0,308 | 0,251  |
| 21 | O15144 ARPC2_HUMAN  | K.YFQFQEEGKEGENR.A        | 3 | 3,0322 | 0,407 | -0,104 |
| 21 | Q58FF8 H90B2_HUMAN  | R.YESLTDPSKLD SGK.E       | 2 | 3,0235 | 0,534 | 0,158  |
| 21 | P31943 HNRH1_HUMAN  | R.DLNYCFSGM*SDHR.Y        | 2 | 3,0205 | 0,401 | 0,377  |
| 21 | Q86VS8 HOOK3_HUMAN  | R.DSLKETIEELR.C           | 3 | 3,0191 | 0,081 | 0,206  |
| 21 | O95347 SMC2_HUMAN   | K.DQEALEAVKR.L            | 2 | 3,0186 | 0,248 | -0,105 |
| 21 | Q13813 SPTA2_HUMAN  | R.KVEDLFLTFK.K            | 2 | 3,012  | 0,343 | -0,465 |
| 21 | Q96AG4 LRC59_HUMAN  | R.LVNLQHLLDNK.L           | 3 | 3,0067 | 0,368 | 0,06   |
| 21 | O75821 EIF3G_HUMAN  | K.EKLPGELEPVQATQNK.T      | 3 | 3,0042 | 0,174 | 0,308  |
| 21 | Q8IX12 CCAR1_HUMAN  | K.TDEDEKTI LNLENSNK.S     | 3 | 3,0005 | 0,183 | 0      |
| 21 | Q9BQG0 MBB1A_HUMAN  | K.NQKPSQVNGAPGSPTEPAGQK.Q | 3 | 3      | 0,143 | -0,7   |
| 21 | Q15811 ITSN1_HUMAN  | R.DQLDEVEKETR.S           | 2 | 2,9988 | 0,182 | 0,09   |
| 21 | P49327 FAS_HUMAN    | R.FDASFFGVHPK.Q           | 3 | 2,9963 | 0,351 | 0,365  |
| 21 | P54577 SYYC_HUMAN   | K.M*SSSEEEKIDLLDR.K       | 3 | 2,9942 | 0,369 | 0,208  |
| 21 | Q14240 IF4A2_HUMAN  | R.GFKDQIYEIFQK.L          | 2 | 2,9934 | 0,398 | -0,241 |
| 21 | P20618 PSB1_HUMAN   | K.NM*QNVEHVPLSLDR.A       | 3 | 2,9872 | 0,112 | -0,11  |
| 21 | B0AZS1 B0AZS1_HUMAN | K.FVSEDDRNSFTLK.L         | 2 | 2,9808 | 0,311 | 0,47   |
| 21 | Q86VS8 HOOK3_HUMAN  | R.DSLKETIEELR.C           | 2 | 2,9785 | 0,394 | 0,183  |
| 21 | Q9HAU5 RENT2_HUMAN  | R.DSLSHDFNGLNLSK.Y        | 3 | 2,9775 | 0,373 | 0,473  |
| 21 | Q01082 SPTB2_HUMAN  | K.HLLGVEDLLQK.H           | 2 | 2,9727 | 0,449 | -0,386 |
| 21 | P46013 KI67_HUMAN   | K.EKAEALDLVGFK.E          | 3 | 2,9692 | 0,316 | 0      |
| 21 | O60506 HNRPO_HUMAN  | K.DYAFIHFDER.D            | 2 | 2,968  | 0,452 | -0,372 |
| 21 | P62244 RS15A_HUMAN  | R.FDVQLKDLEK.W            | 3 | 2,9623 | 0,272 | 0,148  |
| 21 | Q9BZI7 REN3B_HUMAN  | R.DRFDGYVFLDNK.G          | 3 | 2,9607 | 0,285 | 0,061  |
| 21 | P49327 FAS_HUMAN    | R.SDEAVKPFGLK.V           | 2 | 2,9563 | 0,293 | -0,205 |
| 21 | Q00610 CLH1_HUMAN   | K.EDKLECSEELGDLVK.S       | 2 | 2,9522 | 0,432 | 0,623  |

|    |                     |                      |   |        |       |        |
|----|---------------------|----------------------|---|--------|-------|--------|
| 21 | O60784 TOM1_HUMAN   | K.GVTSEEFDKFLEER.A   | 3 | 2,9501 | 0,291 | 0,108  |
| 21 | P43243 MATR3_HUMAN  | R.DLDELSRYPEDK.I     | 2 | 2,9496 | 0,102 | 0,247  |
| 21 | P49588 SYAC_HUMAN   | K.KAEIIANEM*IEAAK.A  | 3 | 2,9465 | 0,139 | -0,117 |
| 21 | P25440 BRD2_HUMAN   | R.DYRDAQEFAADV.R.L   | 3 | 2,9393 | 0,321 | 0,118  |
| 21 | Q8NI77 KI18A_HUMAN  | K.SSEEILHLLDNGNK.N   | 2 | 2,9339 | 0,283 | 0,156  |
| 21 | P82650 RT22_HUMAN   | K.KIDGLLIDQIQR.D     | 3 | 2,9321 | 0,159 | -0,194 |
| 21 | P19338 NUCL_HUMAN   | R.KFGYVDFESAEDLEK.A  | 3 | 2,9254 | 0,213 | -0,412 |
| 21 | Q9UNS2 CSN3_HUMAN   | K.DGM*VSFHDNPEK.Y    | 2 | 2,9205 | 0,273 | 0,088  |
| 21 | P57105 SYJ2B_HUMAN  | K.NLLHQDAVDLFR.N     | 3 | 2,9158 | 0,229 | 0,127  |
| 21 | Q92896 GSLG1_HUMAN  | R.VAELSSDDFHLD.R.H   | 3 | 2,906  | 0,317 | -0,061 |
| 21 | O15160 RPAC1_HUMAN  | K.DSSDPNELVYVNHK.V   | 2 | 2,9058 | 0,326 | -0,241 |
| 21 | P21333 FLNA_HUMAN   | K.VDVGKQDEFTVK.S     | 2 | 2,9034 | 0,349 | -0,268 |
| 21 | P68104 EF1A1_HUMAN  | R.EHALLAYTLGVK.Q     | 2 | 2,9024 | 0,355 | 0,278  |
| 21 | Q9Y2B0 CNPY2_HUMAN  | R.SEAHLTELLEEICDR.M  | 3 | 2,8998 | 0,094 | -0,403 |
| 21 | A6NJL0 A6NJL0_HUMAN | K.TIDDLK.LK.R        | 2 | 2,8969 | 0,299 | 0,103  |
| 21 | Q9H8Y8 GORS2_HUMAN  | K.DNDTLKDLLK.A       | 2 | 2,8962 | 0,227 | -0,312 |
| 21 | P12268 IMDH2_HUMAN  | K.REDLVVAPAGITLK.E   | 3 | 2,8947 | 0,212 | 0      |
| 21 | P23528 COF1_HUMAN   | K.AVLFCLSEDKK.N      | 2 | 2,8947 | 0,396 | 0      |
| 21 | Q9UMX0 UBQL1_HUMAN  | K.SHTDQLVLIFAGK.I    | 3 | 2,8876 | 0,18  | -0,064 |
| 21 | P62805 H4_HUMAN     | R.DAVTYTEHAK.R       | 2 | 2,8818 | 0,285 | -0,323 |
| 21 | P63241 IF5A1_HUMAN  | R.LPEGDLGKEIEQK.Y    | 3 | 2,8794 | 0,176 | 0,188  |
| 21 | P20618 PSB1_HUMAN   | K.NM*QNVEHVPLSLDR.A  | 2 | 2,8735 | 0,425 | 0,366  |
| 21 | P35580 MYH10_HUMAN  | R.HATALEELSEQLEQAK.R | 3 | 2,8696 | 0,318 | -0,407 |
| 21 | P26038 MOES_HUMAN   | R.GM*LREDAVLEYLK.I   | 2 | 2,8691 | 0,131 | -0,314 |
| 21 | P15559 NQO1_HUMAN   | K.EGHLSPDIVAEQK.K    | 2 | 2,8639 | 0,388 | 0,086  |
| 21 | P60174 TPIS_HUMAN   | K.DCGATWVVLGHSER.R   | 3 | 2,862  | 0,433 | 0,231  |
| 21 | O60361 NDK8_HUMAN   | K.DRPFPPGLVK.Y       | 2 | 2,8563 | 0,356 | -0,519 |
| 21 | P68104 EF1A1_HUMAN  | R.EHALLAYTLGVK.Q     | 3 | 2,8529 | 0,359 | -0,834 |
| 21 | Q58FF7 H90B3_HUMAN  | R.APFDFENKK.K        | 2 | 2,8527 | 0,413 | -0,303 |
| 21 | P23258 TBG1_HUMAN   | K.IHEDIFDIIDR.E      | 3 | 2,8469 | 0,256 | -0,066 |
| 21 | P51991 ROA3_HUMAN   | K.YGKIETIEVM*EDR.Q   | 2 | 2,8456 | 0,356 | 0,687  |
| 21 | Q99733 NP1L4_HUMAN  | R.KYAAALYQPLFDK.R    | 3 | 2,8361 | 0,266 | 0,063  |
| 21 | P68431 H31_HUMAN    | R.EIAQDFKTDLR.F      | 2 | 2,8317 | 0,348 | 0      |

|    |                     |                          |   |        |       |        |
|----|---------------------|--------------------------|---|--------|-------|--------|
| 21 | P07355 ANXA2_HUMAN  | K.TDLEKDIISDTSGDFR.K     | 3 | 2,8317 | 0,395 | 0      |
| 21 | O43852 CALU_HUMAN   | K.TFDQLTPESKER.L         | 2 | 2,8289 | 0,271 | 0,541  |
| 21 | P62937 PPIA_HUMAN   | K.VKEGM*NIVEAM*ER.F      | 3 | 2,8284 | 0,185 | 0,119  |
| 21 | Q96A49 SYAP1_HUMAN  | K.SVEEGKIDGIIDK.T        | 3 | 2,824  | 0,278 | 0,13   |
| 21 | Q9UBL3 ASH2L_HUMAN  | K.DKDIIPFIDK.Y           | 2 | 2,8237 | 0,198 | -0,101 |
| 21 | Q8IV38 ANKY2_HUMAN  | K.DGENKLDTLIK.S          | 2 | 2,8228 | 0,204 | 0,294  |
| 21 | Q13685 AAMP_HUMAN   | R.GHTAEILDFALSK.D        | 3 | 2,8212 | 0,215 | -0,196 |
| 21 | Q9H2U1 DHX36_HUMAN  | R.REEQIVQLLNSVQAK.N      | 3 | 2,8184 | 0,344 | -0,208 |
| 21 | P06733 ENOA_HUMAN   | K.YDLDFKSPDDPSR.Y        | 3 | 2,817  | 0,305 | -0,235 |
| 21 | P49588 SYAC_HUMAN   | R.EADGILKPLPK.K          | 2 | 2,8123 | 0,347 | -0,207 |
| 21 | P14625 ENPL_HUMAN   | K.DISTNYYASQKK.T         | 2 | 2,808  | 0,466 | -0,086 |
| 21 | P21266 GSTM3_HUMAN  | K.LKPQYLEELPGQLK.Q       | 3 | 2,8068 | 0,137 | 0      |
| 21 | P53985 MOT1_HUMAN   | K.DLHDANTDLIGR.H         | 2 | 2,8031 | 0,497 | 0,273  |
| 21 | P51572 BAP31_HUMAN  | K.LDVGNAEVKLEENR.S       | 3 | 2,7983 | 0,369 | -0,533 |
| 21 | Q9BTL3 F103A_HUMAN  | R.FTENDKEYQEYLR.R        | 3 | 2,7975 | 0,261 | -0,643 |
| 21 | P19338 NUCL_HUMAN   | K.GLSEDTTEETLKESFDGSVR.A | 3 | 2,7952 | 0,213 | -0,249 |
| 21 | O75874 IDHC_HUMAN   | R.FKDIFQEYDK.Q           | 2 | 2,7942 | 0,279 | -0,338 |
| 21 | P08133 ANXA6_HUMAN  | K.SLHQAIEGDTSGDFLK.A     | 2 | 2,7903 | 0,231 | 0,781  |
| 21 | P00558 PGK1_HUMAN   | K.SLLGKDVFLK.D           | 2 | 2,7887 | 0,136 | -0,495 |
| 21 | P60174 TPIS_HUMAN   | R.KQSLGELIGTLNAAK.V      | 3 | 2,7886 | 0,196 | -0,237 |
| 21 | Q09666 AHNK_HUMAN   | R.HELTEISNVDVETQSGK.T    | 3 | 2,784  | 0,238 | 0,291  |
| 21 | P68104 EF1A1_HUMAN  | K.YYVTIIDAPGHR.D         | 3 | 2,7838 | 0,312 | 0,13   |
| 21 | P11021 GRP78_HUMAN  | K.KSDIDEIVLVGGSTR.I      | 3 | 2,7792 | 0,393 | 0,115  |
| 21 | P17301 ITA2_HUMAN   | K.EKNPLM*YLTGVQTDK.A     | 2 | 2,7768 | 0,395 | 0,348  |
| 21 | Q9Y262 IF3EI_HUMAN  | R.LHSLLGDYYQAIK.V        | 3 | 2,7747 | 0,118 | -0,18  |
| 21 | P49642 PRI1_HUMAN   | K.VFEHFLENLDK.S          | 3 | 2,7724 | 0,258 | 0      |
| 21 | P62316 SMD2_HUMAN   | K.REEEEFNTGPLSVLTQSVK.N  | 3 | 2,772  | 0,242 | -0,085 |
| 21 | P16403 H12_HUMAN    | R.KASGPPVSELITK.A        | 3 | 2,7567 | 0,175 | 0,276  |
| 21 | P63313 TYB10_HUMAN  | K.NTLPTKETIEQEK.R        | 3 | 2,7503 | 0,206 | 0,299  |
| 21 | B2RP66 B2RP66_HUMAN | R.DRFSDFLLTK.L           | 2 | 2,7503 | 0,216 | -0,098 |
| 21 | P26641 EF1G_HUMAN   | K.STFVLDEFKR.K           | 2 | 2,7471 | 0,355 | -0,098 |
| 21 | Q9UNH7 SNX6_HUMAN   | K.LGEGEGSM*TKEEFTK.M     | 3 | 2,7336 | 0,252 | 0,11   |
| 21 | P09936 UCHL1_HUMAN  | K.NEAIQAAHDAVAQEGQCR.V   | 3 | 2,732  | 0,271 | 0,186  |

|    |                    |                         |   |        |       |        |
|----|--------------------|-------------------------|---|--------|-------|--------|
| 21 | Q9BSJ8 ESYT1_HUMAN | K.DLDKDDFLGR.C          | 2 | 2,7307 | 0,286 | -0,204 |
| 21 | P35270 SPRE_HUMAN  | R.NDEALRQLEAELGAER.S    | 3 | 2,7298 | 0,278 | -0,504 |
| 21 | Q13151 ROAO_HUMAN  | R.GFGFVYFQNHDAADK.A     | 2 | 2,7178 | 0,404 | 0,498  |
| 21 | P46013 KI67_HUMAN  | K.KADVEEEFLAFR.K        | 3 | 2,7171 | 0,144 | 0      |
| 21 | P29144 TPP2_HUMAN  | K.DLKEEFTEALR.D         | 2 | 2,7104 | 0,378 | -0,632 |
| 21 | Q9GZT8 NIF3L_HUMAN | R.DM*LDSHLENK.I         | 2 | 2,7099 | 0,335 | 0,2    |
| 21 | Q9GZT3 SLIRP_HUMAN | K.LPQTSDEKKDF.-         | 2 | 2,7082 | 0,313 | -0,171 |
| 21 | Q14257 RCN2_HUMAN  | R.QLHDDYFYHDEL.-        | 3 | 2,7063 | 0,094 | 0,459  |
| 21 | P39687 AN32A_HUMAN | K.IKDLSTIEPLK.K         | 3 | 2,7059 | 0,112 | 0,073  |
| 21 | O75794 CD123_HUMAN | R.DYTQYYDHISK.Q         | 2 | 2,7042 | 0,444 | 0,341  |
| 21 | P14625 ENPL_HUMAN  | K.EVEEDEYKAFYK.S        | 2 | 2,7005 | 0,275 | 0,157  |
| 21 | P47897 SYQ_HUMAN   | R.SHPLDPIDTVDFER.E      | 2 | 2,6921 | 0,38  | -0,149 |
| 21 | P31930 QCR1_HUMAN  | R.ADLTEYLSTHYK.A        | 3 | 2,6883 | 0,399 | 0,317  |
| 21 | P19105 MLRM_HUMAN  | R.DGFIDKEDLHDM*LASLGK.N | 3 | 2,6869 | 0,279 | 0      |
| 21 | P62249 RS16_HUMAN  | K.EIKDILIQYDR.T         | 3 | 2,6826 | 0,16  | -0,13  |
| 21 | P07237 PDIA1_HUMAN | K.YQLDKDGVVLFK.K        | 3 | 2,682  | 0,454 | -0,064 |
| 21 | Q58FF8 H90B2_HUMAN | K.IEDVGSDEEDDSGDK.K     | 3 | 2,6788 | 0,343 | -0,105 |
| 21 | Q8WUD4 CCD12_HUMAN | R.LKGQEDSLASAVDAATEQK.T | 3 | 2,6736 | 0,144 | -0,093 |
| 21 | P47897 SYQ_HUMAN   | R.TDFKEEPEPGFK.R        | 3 | 2,6734 | 0,228 | 0      |
| 21 | P13489 RINI_HUMAN  | K.ESLKELSLAGNELGDEGAR.L | 3 | 2,6688 | 0,178 | -0,368 |
| 21 | O75717 WDHD1_HUMAN | R.GHDAPVLSLSDPK.D       | 3 | 2,6544 | 0,156 | 0,185  |
| 21 | P08243 ASNS_HUMAN  | R.DTYGVRPLFK.A          | 2 | 2,6528 | 0,302 | -0,204 |
| 21 | P49327 FAS_HUMAN   | R.FDASFFGVHPK.Q         | 2 | 2,647  | 0,459 | 0,097  |
| 21 | O75153 EIF3X_HUMAN | R.QELVDAFVEHR.Y         | 3 | 2,6434 | 0,219 | -0,068 |
| 21 | Q96AE4 FUBP1_HUMAN | R.IQFKPDDGTTPER.I       | 3 | 2,6417 | 0,235 | 0,182  |
| 21 | Q14914 LTB4D_HUMAN | K.TVESLEETLKK.A         | 2 | 2,633  | 0,346 | 0,191  |
| 21 | Q96I25 SPF45_HUMAN | R.DFPYEEDSRPR.S         | 2 | 2,6328 | 0,174 | 0,173  |
| 21 | Q58FF7 H90B3_HUMAN | R.APFDLFENKK.K          | 3 | 2,6312 | 0,396 | -0,227 |
| 21 | Q9BSJ8 ESYT1_HUMAN | R.IHVLEAQDLIAK.D        | 3 | 2,6284 | 0,155 | -0,474 |
| 21 | P37198 NUP62_HUMAN | K.RLDQELDFILSQQK.E      | 3 | 2,6275 | 0,139 | -0,211 |
| 21 | Q96DE0 NUD16_HUMAN | K.DHGLEVLGLVR.V         | 3 | 2,6258 | 0,085 | 0,53   |
| 21 | P55084 ECHB_HUMAN  | K.KAQDEGLLSDVVPFK.V     | 3 | 2,6256 | 0,209 | -0,222 |
| 21 | P46013 KI67_HUMAN  | R.TPKEEAQSLDLAGFK.E     | 3 | 2,6237 | 0,191 | -0,207 |

|    |                    |                               |   |        |       |        |
|----|--------------------|-------------------------------|---|--------|-------|--------|
| 21 | P18206 VINC_HUMAN  | K.CDRVDQLTAQLADLAAR.G         | 3 | 2,6199 | 0,217 | -0,286 |
| 21 | Q14157 UBP2L_HUMAN | K.NQDECVIALHDCNGDVNR.A        | 3 | 2,6121 | 0,115 | 0,172  |
| 21 | P63241 IF5A1_HUMAN | K.VHLVGIDIFTGK.K              | 3 | 2,6084 | 0,172 | 0,211  |
| 21 | P36969 GPX4_HUMAN  | K.DIDGHM*VNLDK.Y              | 2 | 2,6055 | 0,165 | -0,383 |
| 21 | P54652 HSP72_HUMAN | K.STAGDTHLGGEDFDNR.M          | 3 | 2,6043 | 0,42  | 0      |
| 21 | P61289 PSME3_HUMAN | K.KLLELDSFLK.E                | 2 | 2,6027 | 0,236 | -0,303 |
| 21 | P22087 FBRL_HUMAN  | R.VSISEGDDKIEYR.A             | 3 | 2,6018 | 0,421 | 0,242  |
| 21 | P40227 TCPZ_HUMAN  | R.EM*DRETLIDVAR.T             | 3 | 2,6015 | 0,134 | 0,437  |
| 21 | Q9C0C2 TB182_HUMAN | R.DAELQDQEFGKR.D              | 2 | 2,5965 | 0,336 | 0      |
| 21 | Q71U36 TBA1A_HUMAN | R.NLDIERPTYTNLNR.L            | 2 | 2,5952 | 0,19  | 0,213  |
| 21 | Q99613 EIF3C_HUMAN | R.DFESHITSYK.Q                | 2 | 2,5876 | 0,431 | 0,099  |
| 21 | P55072 TERA_HUMAN  | R.FDREVDIGIPDATGR.L           | 2 | 2,5855 | 0,254 | 0,588  |
| 21 | P00558 PGK1_HUMAN  | K.LTLDKLDVK.G                 | 2 | 2,5773 | 0,304 | 0,35   |
| 21 | Q07065 CKAP4_HUMAN | K.DLSDDGIHVVK.D               | 2 | 2,5767 | 0,33  | 0      |
| 21 | Q7L5Y1 ENOF1_HUMAN | K.DLKDIVGDFR.G                | 2 | 2,5654 | 0,298 | -0,518 |
| 21 | P06756 ITAV_HUMAN  | R.DYAKDDPLEFK.S               | 2 | 2,5561 | 0,266 | -0,091 |
| 21 | Q14789 GGOB1_HUMAN | K.SLKDQLTDLNSLEK.C            | 2 | 2,5351 | 0,443 | -0,361 |
| 21 | Q15785 TOM34_HUMAN | K.DCTEALKLDGK.N               | 2 | 2,5282 | 0,222 | 0,195  |
| 21 | Q15181 IPYR_HUMAN  | K.DPLNPIKQDVK.K               | 2 | 2,5144 | 0,312 | 0      |
| 21 | P55209 NP1L1_HUMAN | K.FYEEVHDLER.K                | 2 | 2,5143 | 0,375 | 0,183  |
| 21 | Q86UP2 KTN1_HUMAN  | R.ELKDLLTELQK.K               | 2 | 2,5128 | 0,248 | -0,367 |
| 21 | Q14203 DCTN1_HUMAN | R.DLEEKLETLR.L                | 2 | 2,5045 | 0,199 | 0      |
| 21 | P51858 HDGF_HUMAN  | K.DLFPYEESEK.F                | 2 | 2,502  | 0,347 | -0,529 |
| 21 | Q7LOY3 RG9D1_HUMAN | R.EVPEHITEEELK.T              | 2 | 2,4949 | 0,133 | 0,168  |
| 21 | P09960 LKHA4_HUMAN | K.DFLYSYFKDK.V                | 2 | 2,4848 | 0,255 | -0,184 |
| 21 | Q02880 TOP2B_HUMAN | K.DKLDGVALK.V                 | 2 | 2,4774 | 0,14  | 0,103  |
| 21 | Q8WVY7 UBCP1_HUMAN | K.LDDFLDLNHK.Y                | 2 | 2,4767 | 0,308 | -1,091 |
| 21 | O14578 CTRO_HUMAN  | R.DIKPENILVDR.T               | 2 | 2,4705 | 0,294 | -0,093 |
| 21 | P55084 ECHB_HUMAN  | K.DNGIRPSSLEQM*AK.L           | 2 | 2,4684 | 0,153 | 0,234  |
| 21 | Q58FF7 H90B3_HUMAN | K.EGLELPEDEEEK.K              | 2 | 2,4581 | 0,27  | 0,158  |
| 21 | P07237 PDIA1_HUMAN | K.THILLFLPK.S                 | 2 | 2,4224 | 0,298 | -0,113 |
| 21 | Q9NYU2 UGGG1_HUMAN | R.DLHPDLEGQLK.E               | 2 | 2,4204 | 0,248 | 0,386  |
| 21 | O95340 PAPS2_HUMAN | K.QHA AVL E E G V L D P K . S | 2 | 2,3425 | 0,275 | 0,405  |

|    |                     |                                 |            |   |        |       |        |
|----|---------------------|---------------------------------|------------|---|--------|-------|--------|
| 21 | Q6FI81 CPIN1_HUMAN  | K.GLVDKLQALTGNEGR.V             |            | 2 | 2,3396 | 0,124 | 0,078  |
| 21 | O15144 ARPC2_HUMAN  | K.DSIVHQAGM*LK.R                |            | 2 | 2,305  | 0,203 | -0,402 |
| 21 | Q12874 SF3A3_HUMAN  | R.DLYDDKDGLR.K                  |            | 2 | 2,2837 | 0,398 | 0,303  |
| 21 | Q15050 RRS1_HUMAN   | R.KFQPLFGDFAAEK.K               |            | 2 | 2,2654 | 0,082 | 0,407  |
| 21 | Q92621 NU205_HUMAN  | R.DILQDVHDK.I                   |            | 2 | 2,2577 | 0,22  | -0,113 |
| 21 | P30048 PRDX3_HUMAN  | K.DLSLDDFKGK.Y                  |            | 2 | 2,2545 | 0,217 | -0,107 |
| 21 | P34932 HSP74_HUMAN  | K.QDLPALEEKPR.N                 |            | 2 | 2,2529 | 0,173 | 0,282  |
| 21 | P49756 RBM25_HUMAN  | K.EDINAIEM*EEDKR.D              |            | 2 | 2,2457 | 0,266 | 0,455  |
| 21 | Q99653 CHP1_HUMAN   | R.DEELEEIKK.E                   |            | 2 | 2,2381 | 0,13  | -0,108 |
| 21 | P14618 KPYM_HUMAN   | K.QKGADFLVTEVENGGSLGSK.K        |            | 2 | 2,2318 | 0,523 | 0,719  |
| 21 | Q8NC51 PAIRB_HUMAN  | K.EETQPPVALKK.E                 |            | 2 | 2,1907 | 0,282 | 0,295  |
| 21 | P30044 PRDX5_HUMAN  | K.THLPGFVEQAEALK.A              |            | 2 | 2,1867 | 0,395 | -0,238 |
| 21 | Q13619 CUL4A_HUMAN  | K.DVFEAFYKK.D                   |            | 2 | 2,1643 | 0,309 | 0      |
| 21 | P63241 IF5A1_HUMAN  | R.EDLRLPEGDLGK.E                |            | 2 | 2,1371 | 0,216 | -0,273 |
| 21 | P02786 TFR1_HUMAN   | K.DSAQNSVIIVDKNGR.L             |            | 2 | 2,1345 | 0,304 | 0,302  |
| 21 | P43490 NAMPT_HUMAN  | K.YDGHLPPIEK.A                  |            | 2 | 2,1192 | 0,121 | 0,412  |
| 21 | P13667 PDIA4_HUMAN  | K.DKDPPPIPAK.I                  |            | 2 | 2,1091 | 0,106 | 0      |
| 21 | Q14008 CKAP5_HUMAN  | K.DFYDKIEAK.K                   |            | 2 | 2,1005 | 0,204 | 0      |
| 21 | P08133 ANXA6_HUMAN  | K.EIKDAISGIGTDEK.C              |            | 2 | 2,0865 | 0,257 | 0,165  |
| 21 | Q14103 HNRPD_HUMAN  | K.DLKDYFSK.F                    |            | 2 | 2,0757 | 0,296 | -0,3   |
| 21 | O15144 ARPC2_HUMAN  | K.ELQAHGADELLK.R                |            | 2 | 2,0688 | 0,319 | 0,369  |
| 21 | P21333 FLNA_HUMAN   | K.DKGEYTLVVK.W                  |            | 2 | 2,0069 | 0,238 | -0,212 |
| 22 | Q86VX9 MON1A_HUMAN  | R.KRS#SECLDGTLPDGGQSM*ER.A      | S10:       | 3 | 3,9033 | 0,271 | -0,373 |
| 22 | Q9H3Z4 DNJC5_HUMAN  | R.SLS#TSGESLYHVLGLDKNATSDDIKK.S | S10:       | 3 | 3,2141 | 0,332 | -0,704 |
| 22 | Q9P265 DIP2B_HUMAN  | R.YRS#DIHTEAVQAALAK.H           | S100:      | 2 | 3,8461 | 0,501 | 0,593  |
| 22 | Q9P265 DIP2B_HUMAN  | R.YRS#DIHTEAVQAALAK.H           | S100:      | 3 | 3,3173 | 0,295 | 0,494  |
| 22 | Q69YH5 CDCA2_HUMAN  | R.RSS#LNGKGESLTALER.I           | S1001:     | 3 | 2,7689 | 0,342 | 0,097  |
| 22 | Q56D06 Q56D06_HUMAN | K.SRS#PAPPADKEAEKPVFFPAFAAEQK.L | S1007:     | 3 | 4,3236 | 0,41  | -0,432 |
| 22 | P05386 RLA1_HUMAN   | K.KEES#EES#DDDM*GFGLFD.-        | S101:S104: | 2 | 2,0502 | 0,386 | -0,23  |
| 22 | O75122 CLAP2_HUMAN  | K.ASLLHSMPTHS#SPR.S             | S1012:     | 3 | 3,478  | 0,334 | 0,114  |
| 22 | O75122 CLAP2_HUMAN  | K.ASLLHSM*PTHSS#PR.S            | S1013:     | 3 | 3,1029 | 0,236 | -0,566 |
| 22 | A8MSX0 A8MSX0_HUMAN | R.SHTS#LKDELSDVQGGSK.A          | S102:      | 2 | 5,2425 | 0,626 | -0,374 |
| 22 | A0AVK6 E2F8_HUMAN   | K.DCIHEHLS#GDEFEK.S             | S102:      | 3 | 3,3638 | 0,263 | -0,611 |



|    |                     |                                  |             |   |        |       |        |
|----|---------------------|----------------------------------|-------------|---|--------|-------|--------|
| 22 | P05387 RLA2_HUMAN   | K.KDEKKEES#EESDDDM*GFGLFD.-      | S102:       | 3 | 3,0364 | 0,274 | -0,216 |
| 22 | P05387 RLA2_HUMAN   | K.KDEKKEES#EES#DDDM*GFGLFD.-     | S102:S105:  | 3 | 3,2627 | 0,199 | -0,488 |
| 22 | Q05D32 CTSL2_HUMAN  | R.KS#QVNGEAGSYEM*TNQHVK.Q        | S104:       | 3 | 2,8419 | 0,281 | -0,249 |
| 22 | P35658 NU214_HUMAN  | K.SHLVHGSS#PGVM*GTSVATSASK.I     | S1045:      | 3 | 4,3901 | 0,566 | -0,667 |
| 22 | Q5VZK9 LR16A_HUMAN  | R.DSRKS#SGFLNLIK.S               | S1067:      | 3 | 2,7616 | 0,211 | 0,237  |
| 22 | O60841 IF2P_HUMAN   | K.KQS#FDDNDSEEDKDSK.S            | S107:       | 3 | 4,2027 | 0,369 | 0      |
| 22 | Q9UKY7 CDV3_HUMAN   | R.VQAM*QISS#EKEEDDNEKR.Q         | S107:       | 3 | 3,0882 | 0,39  | -0,328 |
| 22 | Q562F6 SGOL2_HUMAN  | R.KTS#IDPSPESHEVM*ER.I           | S1085:      | 3 | 2,9661 | 0,231 | -0,189 |
| 22 | Q9H6W3 NO66_HUMAN   | R.REPYGHLGPAELLEAS#PAAR.S        | S109:       | 3 | 3,6517 | 0,265 | -1,157 |
| 22 | Q9GZR2 REXO4_HUMAN  | K.KETS#PQVKGEEM*PAGK.D           | S111:       | 3 | 2,7259 | 0,194 | -1,009 |
| 22 | Q6ZQU7 Q6ZQU7_HUMAN | R.HRTPS#LRS#PDQPPCPQFM*AQ GK.T   | S111:S114:  | 3 | 3,6871 | 0,149 | -0,13  |
| 22 | Q12982 BNIP2_HUMAN  | R.KGS#ITEYTAAEEDGR.R             | S114:       | 3 | 4,6491 | 0,534 | -0,373 |
| 22 | Q9UNZ2 NSF1C_HUMAN  | R.KKS#PNELVDDLFK.G               | S114:       | 3 | 4,551  | 0,278 | -0,34  |
| 22 | Q9UNZ2 NSF1C_HUMAN  | R.KKS#PNELVDDLFK.G               | S114:       | 2 | 4,0321 | 0,472 | -0,605 |
| 22 | Q5CZB5 Q5CZB5_HUMAN | K.KDEGEAAGAGDHDQPS#LGAGEAASK.E   | S114:       | 3 | 3,7986 | 0,328 | -0,657 |
| 22 | P29374 ARI4A_HUMAN  | K.LARS#PARIS#PHIK.D              | S114:S1145: | 3 | 2,7472 | 0,157 | 0      |
| 22 | Q9NRA8 4ET_HUMAN    | R.VKEDDLVLS#PQRR.S               | S115:       | 3 | 3,0484 | 0,345 | -0,297 |
| 22 | Q15121 PEA15_HUMAN  | K.YKDIIRQPS#EEEEIK.L             | S116:       | 3 | 3,3736 | 0,266 | -0,094 |
| 22 | Q96RV3 PCX1_HUMAN   | R.RKDS#NGPSDPGGGIEM*SEFIR.E      | S117:       | 3 | 3,5387 | 0,319 | -0,078 |
| 22 | Q9NZN5 ARHGC_HUMAN  | K.LKEEQHGISVTGLQS#PDR.D          | S1176:      | 3 | 4,5395 | 0,382 | 0,265  |
| 22 | Q92934 BAD_HUMAN    | R.RM*S#DEFVDSFKK.G               | S118:       | 3 | 3,0256 | 0,268 | 0,115  |
| 22 | Q52LW3 RHG29_HUMAN  | R.GNEEKPASPS#AAVPPGTDHDPHGLVVK.S | S1187:      | 3 | 3,9224 | 0,245 | -0,394 |
| 22 | P29692 EF1D_HUMAN   | R.LNVLEKSS#PGHR.A                | S119:       | 2 | 3,3051 | 0,499 | -0,775 |
| 22 | P29692 EF1D_HUMAN   | R.LNVLEKSS#PGHR.A                | S119:       | 3 | 2,6879 | 0,222 | -0,387 |
| 22 | O95218 ZRAB2_HUMAN  | R.ENVEYIEREES#DGEYDEFGRK.K       | S120:       | 3 | 4,6156 | 0,38  | -0,274 |
| 22 | O95218 ZRAB2_HUMAN  | R.ENVEYIEREES#DGEYDEFGR.K        | S120:       | 3 | 3,9978 | 0,356 | 0      |
| 22 | Q9P266 K1462_HUMAN  | R.LRS#PSKVIESLQEK.L              | S1235:      | 3 | 3,8956 | 0,222 | 0,108  |
| 22 | Q86TC9 MYPN_HUMAN   | K.HSPNLSFEPNFCQDNPRS#PTSSK.E     | S124:       | 3 | 4,8943 | 0,521 | 0,604  |
| 22 | P22087 FBRL_HUMAN   | K.RVS#ISEGDDKIEYR.A              | S124:       | 3 | 3,7472 | 0,385 | 0,105  |
| 22 | P11388 TOP2A_HUMAN  | K.KIKNENTEGS#PQEDGVELEGLK.Q      | S1247:      | 3 | 5,2249 | 0,464 | -0,513 |
| 22 | Q15149 PLEC1_HUMAN  | R.TPHVQAVQGPLGS#PPKR.G           | S125:       | 3 | 3,6108 | 0,388 | 0      |
| 22 | Q8N3D4 EH1L1_HUMAN  | R.LRRPS#VNGEPGSVPPPR.A           | S1257:      | 3 | 3,8161 | 0,311 | 0      |
| 22 | Q96EE5 Q96EE5_HUMAN | R.S#KSLKEGLTVQER.L               | S126:       | 2 | 2,3844 | 0,283 | -0,157 |

|    |                     |                                 |              |   |        |       |        |
|----|---------------------|---------------------------------|--------------|---|--------|-------|--------|
| 22 | Q8IWF6 F116A_HUMAN  | R.RVS#LHCLLDQFDK.D              | S127:        | 3 | 2,9133 | 0,172 | -0,428 |
| 22 | Q96EE5 Q96EE5_HUMAN | R.SKS#LKEGLTVQER.L              | S128:        | 3 | 4,1805 | 0,282 | -0,353 |
| 22 | Q9NTI5 PDS5B_HUMAN  | R.LKEDILENEDEQNS#PPKK.G         | S1283:       | 3 | 5,1018 | 0,304 | -0,249 |
| 22 | O43426 SYNJ1_HUMAN  | R.SRS#SHSLPSEASSQPQVK.T         | S1292:       | 3 | 3,945  | 0,271 | -0,643 |
| 22 | Q8NI27 THOC2_HUMAN  | K.IDTHPS#PSHSSTVK.D             | S1302:       | 3 | 2,7709 | 0,165 | -0,581 |
| 22 | Q8NI27 THOC2_HUMAN  | K.IDTHPS#HSSTVK.D               | S1304:       | 2 | 2,3091 | 0,31  | -0,621 |
| 22 | Q92538 GBF1_HUMAN   | R.GYTS#DSEVYTDHGRPGK.I          | S1318:       | 3 | 2,7128 | 0,456 | 0,188  |
| 22 | P51858 HDGF_HUMAN   | K.KGNAEGS#SDEEGKLVIDEPAK.E      | S132:        | 3 | 5,1034 | 0,473 | -0,081 |
| 22 | P51858 HDGF_HUMAN   | K.KGNAEGS#S#DEEGKLVIDEPAKEK.N   | S132:S133:   | 3 | 5,1648 | 0,279 | -0,565 |
| 22 | O95490 LPHN2_HUMAN  | R.THS#LLYQPQKK.V                | S1334:       | 3 | 3,3847 | 0,408 | 0,193  |
| 22 | Q96T23 RSF1_HUMAN   | K.KPYRIES#DEEEDFENVGK.V         | S1335:       | 3 | 5,2809 | 0,481 | -0,162 |
| 22 | Q8IYW5 RN168_HUMAN  | R.RAS#EEEEKASEEYIQR.L           | S134:        | 3 | 4,0363 | 0,464 | -0,341 |
| 22 | P38398 BRCA1_HUMAN  | R.HQSESQGVGLSDKELVS#DDEER.G     | S1342:       | 3 | 3,3569 | 0,504 | 0,362  |
| 22 | P46100 ATRX_HUMAN   | R.HKLTVS#DGES#GEEK.K            | S1348:S1352: | 2 | 3,6498 | 0,432 | -0,437 |
| 22 | Q14498 RBM39_HUMAN  | K.DKS#PVREPIDNLTPER.D           | S136:        | 3 | 3,0062 | 0,314 | 0,353  |
| 22 | Q8NI27 THOC2_HUMAN  | R.DHS#NNDREVPPDLTK.R            | S1371:       | 3 | 3,1605 | 0,163 | -0,101 |
| 22 | Q13428 TCOF_HUMAN   | K.KLGAGEGGEASVS#PEKTSTTSK.G     | S1378:       | 3 | 2,9753 | 0,197 | -0,997 |
| 22 | P49736 MCM2_HUMAN   | R.GLLYDS#DEEDEERPAR.K           | S139:        | 3 | 2,7541 | 0,225 | 0      |
| 22 | P49736 MCM2_HUMAN   | R.RGLLYDS#DEEDEERPAR.K          | S139:        | 2 | 2,1056 | 0,324 | 0,573  |
| 22 | Q9Y266 NUDC_HUMAN   | K.NGSLDS#PGKQDT#EEDEEEDKDKGK.L  | S139:T145:   | 3 | 4,853  | 0,556 | 0,311  |
| 22 | Q13459 MYO9B_HUMAN  | K.KKPGDASSLPDAGLS#PGSQVDSK.S    | S1405:       | 3 | 5,1747 | 0,435 | 0,552  |
| 22 | P18858 DNL1_HUMAN   | R.TIQEVLEEQS#EDEDREAKR.K        | S141:        | 3 | 4,0994 | 0,419 | -0,307 |
| 22 | P18858 DNL1_HUMAN   | K.RTIQEVLEEQS#EDEDREAK.R        | S141:        | 3 | 2,9667 | 0,314 | -0,307 |
| 22 | P46940 IQGA1_HUMAN  | K.S#KSVKEDSNLTLQEK.K            | S1441:       | 2 | 3,8366 | 0,506 | -0,342 |
| 22 | P46940 IQGA1_HUMAN  | K.SKS#VKEDSNLTLQEK.K            | S1443:       | 3 | 4,4336 | 0,483 | -0,307 |
| 22 | Q8IWS0 PHF6_HUMAN   | K.KTAHNSEADLEES#FNEHELEPSS#PK.S | S145:S155:   | 3 | 3,0088 | 0,364 | -0,797 |
| 22 | Q07666 KHDR1_HUMAN  | K.KDDEENYLDLFS#HK.N             | S150:        | 3 | 3,4967 | 0,107 | -0,299 |
| 22 | P11388 TOP2A_HUMAN  | K.SKGESDDFHM*DFDS#AVAPR.A       | S1504:       | 3 | 4,0432 | 0,484 | -0,249 |
| 22 | Q9Y6D5 BIG2_HUMAN   | K.HLDVDLDRQS#LSS#IDKNPSE.G      | S1511:S1514: | 3 | 3,2989 | 0,32  | 0      |
| 22 | P49916 DNL3_HUMAN   | R.KFSGFSAKPNNSGEAPSS#PTPK.R     | S155:        | 3 | 3,9751 | 0,334 | -0,395 |
| 22 | Q5UIP0 RIF1_HUMAN   | R.RASQGLLSSIENSES#DSSEAKEEGSR.K | S1554:       | 3 | 4,8865 | 0,49  | -0,517 |
| 22 | Q9ULH0 ARMS_HUMAN   | R.VPKS#PEHSAEPIR.T              | S1555:       | 2 | 3,357  | 0,403 | 0      |
| 22 | Q9ULH0 ARMS_HUMAN   | R.VPKS#PEHSAEPIR.T              | S1555:       | 3 | 3,3234 | 0,386 | 0      |

|    |                     |                              |            |   |        |       |        |
|----|---------------------|------------------------------|------------|---|--------|-------|--------|
| 22 | Q13428 TCOF_HUMAN   | K.TVANLLSGKS#PRK.S           | S156:      | 2 | 2,1138 | 0,175 | 0,084  |
| 22 | P48200 IREB2_HUMAN  | K.AGKLS#PLKVQPK.K            | S157:      | 3 | 3,952  | 0,367 | -0,204 |
| 22 | P42575 CASP2_HUMAN  | K.LRLS#TDTVEHSLDNK.D         | S157:      | 3 | 2,8121 | 0,159 | 0,202  |
| 22 | Q92733 PRCC_HUMAN   | K.IAAPELHKGDS#DS#EEDEPTKK.K  | S157:S159: | 3 | 5,0659 | 0,474 | 0      |
| 22 | Q15154 PCM1_HUMAN   | K.SKDASTS#PPNRETIGSAQCK.E    | S159:      | 3 | 3,2195 | 0,204 | 0,083  |
| 22 | Q96CW6 S7A6O_HUMAN  | R.KRS#AEPAEALVLACK.R         | S16:       | 3 | 5,7817 | 0,491 | 0      |
| 22 | A8MTJ2 A8MTJ2_HUMAN | R.RPS#LPALHFIK.G             | S16:       | 3 | 3,8926 | 0,384 | -0,067 |
| 22 | P05023 AT1A1_HUMAN  | R.DKYEPAAVS#EQGDKK.G         | S16:       | 3 | 3,2409 | 0,28  | -0,21  |
| 22 | A8MTJ2 A8MTJ2_HUMAN | R.RPS#LPALHFIK.G             | S16:       | 2 | 2,7359 | 0,405 | 0,09   |
| 22 | P05023 AT1A1_HUMAN  | R.DKYEPAAVS#EQGDKK.G         | S16:       | 2 | 2,6897 | 0,243 | -0,07  |
| 22 | O14497 ARI1A_HUMAN  | R.TS#PSKSPFLHSGM*K.M         | S1600:     | 2 | 2,3938 | 0,465 | -0,61  |
| 22 | Q1KMD3 HNRL2_HUMAN  | K.REEDEPEERS#GDETPGSEVPGDK.A | S161:      | 3 | 4,7475 | 0,368 | -0,767 |
| 22 | Q9UPY8 MARE3_HUMAN  | K.KLIGTAVPQRTS#PTGPK.N       | S162:      | 3 | 3,7207 | 0,318 | 0      |
| 22 | Q9NYF3 FA53C_HUMAN  | R.GSGGGGGPQVPHQS#PPKR.V      | S162:      | 3 | 3,0808 | 0,243 | -0,719 |
| 22 | P51858 HDGF_HUMAN   | R.AGDLEDS#PKRPK.E            | S165:      | 2 | 3,289  | 0,353 | -0,567 |
| 22 | P51858 HDGF_HUMAN   | R.AGDLEDS#PKRPK.E            | S165:      | 3 | 2,8757 | 0,338 | -0,607 |
| 22 | O95613 PCNT_HUMAN   | R.RES#EVLDLKEQLEK.M          | S1653:     | 3 | 3,1606 | 0,387 | 0      |
| 22 | Q13523 PRP4B_HUMAN  | R.SSS#TKGKLELVDNK.I          | S166:      | 2 | 2,9694 | 0,161 | 0,077  |
| 22 | Q13523 PRP4B_HUMAN  | R.SSS#TKGKLELVDNK.I          | S166:      | 3 | 2,609  | 0,148 | 0,115  |
| 22 | Q9P0K8 FOXJ2_HUMAN  | R.HPPDDDLQDSPEQEASKS#PR.G    | S172:      | 3 | 5,3735 | 0,572 | 0      |
| 22 | Q9NYF8 BCLF1_HUMAN  | K.KAEGEPQEES#PLKSK.S         | S177:      | 3 | 4,7958 | 0,362 | -0,105 |
| 22 | Q58FF8 H90B2_HUMAN  | K.IEDVGS#DEEDDSGKDKK.K       | S177:      | 3 | 4,6139 | 0,414 | -0,376 |
| 22 | Q9NYF8 BCLF1_HUMAN  | K.KAEGEPQEES#PLKSK.S         | S177:      | 2 | 3,4485 | 0,364 | 0,281  |
| 22 | Q8TF44 NLF3_HUMAN   | K.ESLFHSEHGALAQVGS#PGAGR.R   | S178:      | 3 | 4,6497 | 0,396 | 0      |
| 22 | Q53ER8 Q53ER8_HUMAN | R.HRVS#SQAEDTSSSFDNLFIDR.L   | S178:      | 3 | 3,8557 | 0,396 | -0,514 |
| 22 | Q8TDM6 DLG5_HUMAN   | R.RS#GHFDVTTVASIK.E          | S1795:     | 3 | 3,5344 | 0,281 | -0,114 |
| 22 | O75907 DGAT1_HUMAN  | R.TGSRPSS#HGGGGPAAAEVEVR.D   | S18:       | 3 | 3,8028 | 0,265 | -0,438 |
| 22 | Q9H6F5 CCD86_HUMAN  | R.RLGGLRPES#PESLTSVSR.T      | S18:       | 3 | 2,6165 | 0,299 | -0,181 |
| 22 | Q9H1E3 NUCKS_HUMAN  | R.LKATVTPS#PVKKG.G           | S181:      | 2 | 4,5067 | 0,525 | -0,694 |
| 22 | Q9H1E3 NUCKS_HUMAN  | R.LKATVTPS#PVKKG.G           | S181:      | 3 | 3,7401 | 0,462 | -0,26  |
| 22 | Q6FI81 CPIN1_HUMAN  | K.KSS#PSVKPAVDPAAAK.L        | S183:      | 3 | 3,8068 | 0,291 | -0,112 |
| 22 | O60271 JIP4_HUMAN   | K.LHQLS#GSDQLESTAHSR.I       | S183:      | 3 | 3,4649 | 0,356 | -0,564 |
| 22 | Q05D20 Q05D20_HUMAN | K.SSS#KDSRPSQAAGDNQGDEVK.E   | S184:      | 3 | 2,8848 | 0,22  | -0,245 |

|    |                    |                                  |                 |   |        |       |        |
|----|--------------------|----------------------------------|-----------------|---|--------|-------|--------|
| 22 | O60749 SNX2_HUMAN  | R.RFS#DFLGLHSK.L                 | S185:           | 3 | 3,3445 | 0,29  | 0,066  |
| 22 | P27708 PYR1_HUMAN  | R.IHRAS#DPGLPAEEP.K              | S1859:          | 2 | 3,9121 | 0,486 | -0,359 |
| 22 | P27708 PYR1_HUMAN  | R.IHRAS#DPGLPAEEP.K              | S1859:          | 3 | 3,3309 | 0,325 | -0,97  |
| 22 | P10398 ARAF_HUMAN  | R.QHEAPSNRPLNELLPQGPS#PR.T       | S186:           | 3 | 3,0285 | 0,116 | 0,363  |
| 22 | Q9BXB4 OSB11_HUMAN | R.RPS#QNAISFFNVGHSK.L            | S189:           | 3 | 4,6306 | 0,547 | -0,196 |
| 22 | Q9BXB4 OSB11_HUMAN | R.RPS#QNAISFFNVGHSK.L            | S189:           | 2 | 4,0004 | 0,429 | -0,718 |
| 22 | P35222 CTNB1_HUMAN | R.HAIM*RS#PQM*VSAIVR.T           | S191:           | 3 | 3,0078 | 0,433 | 0      |
| 22 | P35579 MYH9_HUMAN  | R.KGAGDGS#DEEVDGKADGAEAKPAE.-    | S1943:          | 3 | 5,7736 | 0,421 | 0,154  |
| 22 | Q6PID6 TTC33_HUMAN | K.KSEAPAEVTHFS#PK.S              | S197:           | 2 | 5,4265 | 0,581 | -0,835 |
| 22 | Q6PID6 TTC33_HUMAN | K.KSEAPAEVTHFS#PK.S              | S197:           | 3 | 4,2207 | 0,428 | -0,114 |
| 22 | Q9BVG4 CX026_HUMAN | K.GADS#GEEKEEGINREDK.T           | S197:           | 3 | 3,0395 | 0,392 | -0,847 |
| 22 | Q07955 SFRS1_HUMAN | R.VKVDGPRS#PS#YGRS#R.S           | S199:S201:S205: | 3 | 2,6269 | 0,186 | -0,385 |
| 22 | Q9H4A3 WNK1_HUMAN  | K.KEKPELSEPSHLNGPS#S#DPEAAFLSR.D | S2011:S2012:    | 3 | 3,5067 | 0,333 | -0,184 |
| 22 | Q8NCF5 NF2IP_HUMAN | K.KKTEFLDLNSPLSPPS#PR.T          | S204:           | 3 | 5,8308 | 0,414 | -0,247 |
| 22 | P30622 CLIP1_HUMAN | K.TASESISNLSEAGS#IKKGER.E        | S204:           | 3 | 2,7928 | 0,101 | -0,341 |
| 22 | Q9H1E3 NUCKS_HUMAN | K.EKTPS#PKEEDEEPES#PPEKK.T       | S204:S214:      | 3 | 3,7569 | 0,138 | -0,222 |
| 22 | O75157 T22D2_HUMAN | R.SGDCIRHS#STFDQTAER.D           | S205:           | 3 | 3,3403 | 0,437 | -0,357 |
| 22 | Q14671 PUM1_HUMAN  | R.RPGQSFHVNSEVNSVLS#PR.S         | S209:           | 3 | 4,1665 | 0,348 | -0,084 |
| 22 | P60174 TPIS_HUMAN  | R.KQS#LGELIGTLNAAK.V             | S21:            | 2 | 3,2221 | 0,46  | -0,451 |
| 22 | P60174 TPIS_HUMAN  | R.KQS#LGELIGTLNAAK.V             | S21:            | 3 | 3,1083 | 0,235 | -0,225 |
| 22 | Q9H1E3 NUCKS_HUMAN | K.TPSPKEEDEEPES#PPEKK.T          | S214:           | 3 | 4,6503 | 0,342 | -0,429 |
| 22 | Q9H1E3 NUCKS_HUMAN | K.EKTPSPKEEDEEPES#PPEK.K         | S214:           | 3 | 3,2032 | 0,305 | 0,081  |
| 22 | P21333 FLNA_HUMAN  | R.RAPS#VANVGSCHCDLSLK.I          | S2152:          | 3 | 3,6037 | 0,351 | -0,193 |
| 22 | P21333 FLNA_HUMAN  | R.RAPS#VANVGSCHCDLSLK.I          | S2152:          | 2 | 3,1251 | 0,422 | -0,516 |
| 22 | Q9UKV3 ACINU_HUMAN | K.SSSISEEKGDS#DDEKPR.K           | S216:           | 3 | 3,7157 | 0,366 | -0,752 |
| 22 | Q9UKV3 ACINU_HUMAN | K.SSSISEEKGDS#DDEKPR.K           | S216:           | 2 | 2,0422 | 0,366 | -0,878 |
| 22 | Q01082 SPTB2_HUMAN | R.TSS#KESSPIPSPTSDRK.A           | S2161:          | 3 | 2,6003 | 0,24  | -0,097 |
| 22 | Q15019 SEPT2_HUMAN | K.IYHLPDAES#DEDEDFKEQTR.L        | S218:           | 3 | 3,731  | 0,424 | -0,363 |
| 22 | Q09161 NCBP1_HUMAN | R.KTS#DANETEDHLESICK.V           | S22:            | 3 | 5,0085 | 0,526 | -0,337 |
| 22 | Q9H9L7 CA108_HUMAN | K.RPM*EFEAALLSPGS#PKR.R          | S22:            | 3 | 4,2353 | 0,248 | -0,277 |
| 22 | Q9NTJ3 SMC4_HUMAN  | R.RREEGPPPPS#PDGASS#DAEPEPPSGR.T | S22:S28:        | 3 | 4,0769 | 0,318 | 0,517  |
| 22 | Q9GZR1 SENP6_HUMAN | R.HCSTYQPTPLS#PASKK.C            | S221:           | 3 | 2,8236 | 0,087 | 0      |
| 22 | Q6ZW31 SYDE1_HUMAN | R.YHLDSVVGPGPAAGPGGTRS#PR.A      | S224:           | 3 | 4,7055 | 0,455 | 0,322  |

|    |                     |                                  |            |   |        |       |        |
|----|---------------------|----------------------------------|------------|---|--------|-------|--------|
| 22 | P08621 RU17_HUMAN   | R.YDERPGPS#PLPHR.D               | S226:      | 3 | 4,1852 | 0,388 | -0,114 |
| 22 | P08621 RU17_HUMAN   | R.YDERPGPS#PLPHR.D               | S226:      | 2 | 2,3514 | 0,282 | -0,457 |
| 22 | Q9BW71 HIRP3_HUMAN  | K.SLKESEQES#EEEELAQKK.E          | S227:      | 3 | 2,8478 | 0,146 | 0,167  |
| 22 | Q9NVW2 RNF12_HUMAN  | R.SRS#PLHPM*SEIPR.R              | S230:      | 3 | 3,5414 | 0,314 | -0,342 |
| 22 | Q9NVW2 RNF12_HUMAN  | R.SRS#PLHPM*SEIPR.R              | S230:      | 2 | 2,9833 | 0,406 | 0,304  |
| 22 | Q8WU90 ZC3HF_HUMAN  | K.KEEKEDEIS#LEDLIER.E            | S231:      | 3 | 4,2292 | 0,198 | -0,267 |
| 22 | P07900 HS90A_HUMAN  | R.DKEVS#DDEAEKEDK.E              | S231:      | 3 | 3,6381 | 0,326 | -1,09  |
| 22 | Q9Y5K6 CD2AP_HUMAN  | R.TS#SSETEEEKKPEKPLILQSLGPK.T    | S232:      | 3 | 3,5297 | 0,506 | -0,562 |
| 22 | Q13283 G3BP1_HUMAN  | K.SSS#PAPADIAQTVQEDLR.T          | S232:      | 2 | 3,1055 | 0,49  | -0,435 |
| 22 | Q8NC51 PAIRB_HUMAN  | R.GSGSHNWGTVKDELTES#PK.Y         | S234:      | 3 | 3,1961 | 0,24  | 0,422  |
| 22 | Q9Y5K6 CD2AP_HUMAN  | R.TSSS#ETEEKKPEKPLILQSLGPK.T     | S234:      | 3 | 3,179  | 0,346 | -0,491 |
| 22 | P12956 KU70_HUMAN   | R.VHFEEES#SKLEDLLR.K             | S236:      | 2 | 4,1184 | 0,438 | -0,616 |
| 22 | Q8WXE1 ATRIP_HUMAN  | R.KNPSVVIKPEACS#PQFGK.T          | S239:      | 3 | 4,2215 | 0,332 | 0,089  |
| 22 | Q86TN4 TRPT1_HUMAN  | R.KPLSLAGDEETECQSS#PKHS#SR.E     | S240:S244: | 3 | 3,678  | 0,319 | 0,211  |
| 22 | Q9UFC0 LRWD1_HUMAN  | K.RPDDVPLSLS#PSKR.A              | S243:      | 3 | 5,9633 | 0,477 | 0      |
| 22 | Q9UFC0 LRWD1_HUMAN  | K.RPDDVPLSLS#PSKR.A              | S243:      | 2 | 3,5799 | 0,43  | 0      |
| 22 | Q56NI9 ESCO2_HUMAN  | K.SKSEVIEDS#DVETVSEKK.T          | S244:      | 3 | 4,3117 | 0,45  | 0,263  |
| 22 | O43149 ZZEF1_HUMAN  | R.GDREEEVERPVSS#PGDPEQK.K        | S2444:     | 3 | 3,5419 | 0,223 | -0,473 |
| 22 | Q8NB78 AOF1_HUMAN   | R.AAATGNAS#PGKLEHSK.A            | S247:      | 2 | 3,3168 | 0,455 | -0,226 |
| 22 | Q15139 KPCD1_HUMAN  | R.SNS#QSYIGRPIHLDK.I             | S249:      | 3 | 2,6516 | 0,228 | -0,51  |
| 22 | Q9Y2W1 TR150_HUMAN  | R.ERSPALKS#PLQSVVVR.R            | S253:      | 3 | 3,1691 | 0,163 | -0,198 |
| 22 | Q86X53 ERIC1_HUMAN  | R.ARQEEGADAS#EEDPTPAGEEDVKDAR.E  | S254:      | 3 | 4,3807 | 0,261 | 0,449  |
| 22 | Q8NAF6 Q8NAF6_HUMAN | R.SKS#TDNLAFLLK.S                | S254:      | 3 | 2,9937 | 0,362 | 0,766  |
| 22 | P21359 NF1_HUMAN    | R.KS#FDHLISDTK.A                 | S2543:     | 3 | 3,0359 | 0,234 | 0,067  |
| 22 | Q9UKL0 RCOR1_HUMAN  | K.REREES#EDELEEANGNNPIDIEVDQNK.E | S257:      | 3 | 3,3234 | 0,472 | 0,9    |
| 22 | Q92466 DDB2_HUMAN   | R.SRS#PLELEPEAKK.L               | S26:       | 3 | 3,8348 | 0,231 | -0,117 |
| 22 | Q92466 DDB2_HUMAN   | R.SRS#PLELEPEAKK.L               | S26:       | 2 | 2,4534 | 0,142 | 0,312  |
| 22 | Q9NZ63 CI078_HUMAN  | R.VGDTEKPEPERS#PPNR.K            | S261:      | 3 | 4,0521 | 0,397 | -0,194 |
| 22 | Q4G0J3 LARP7_HUMAN  | R.SRPTSEGS#DIESTEPQKQCSK.K       | S261:      | 3 | 3,3983 | 0,228 | 0,301  |
| 22 | Q8N707 Q8N707_HUMAN | K.LQLHES#QKDYSK.G                | S261:      | 2 | 2,9892 | 0,337 | -0,627 |
| 22 | P07900 HS90A_HUMAN  | K.EEKESEDKPEIEDVGS#DEEEEEK.K     | S263:      | 3 | 5,4103 | 0,361 | -0,482 |
| 22 | P06733 ENOA_HUMAN   | R.SGKYDLDFKS#PDDPSR.Y            | S263:      | 2 | 4,7115 | 0,414 | 1,152  |
| 22 | P07900 HS90A_HUMAN  | K.ESEDKPEIEDVGS#DEEEEEKK.D       | S263:      | 3 | 3,3596 | 0,38  | -0,305 |

|    |                     |                               |            |   |        |       |        |
|----|---------------------|-------------------------------|------------|---|--------|-------|--------|
| 22 | Q96IF1 JUB_HUMAN    | R.GAQPGRHS#VTGYGDCAVGAR.Y     | S263:      | 3 | 3,1872 | 0,322 | -0,436 |
| 22 | P06733 ENOA_HUMAN   | R.SGKYDLDFKS#PDDPSR.Y         | S263:      | 3 | 2,7768 | 0,316 | 0,384  |
| 22 | Q9Y385 UB2J1_HUMAN  | R.RLS#TSPDVIQGHQPR.D          | S266:      | 3 | 4,5167 | 0,319 | -0,31  |
| 22 | P18887 XRCC1_HUMAN  | K.KTPSKPPAQLS#PSVPK.R         | S266:      | 2 | 3,6906 | 0,305 | 0,14   |
| 22 | Q9Y385 UB2J1_HUMAN  | R.RLS#TSPDVIQGHQPR.D          | S266:      | 2 | 2,843  | 0,43  | -0,344 |
| 22 | Q5BKZ1 ZN326_HUMAN  | K.ISLSKS#PTKTDPK.N            | S270:      | 2 | 2,8584 | 0,234 | -0,988 |
| 22 | Q8NFC6 FA44A_HUMAN  | R.KQHLYSS#EDEPDDNPDVLSR.I     | S2780:     | 3 | 5,4327 | 0,524 | -0,649 |
| 22 | Q05D32 CTSL2_HUMAN  | R.KYS#EVDDSLPSGGEKPSK.N       | S28:       | 3 | 4,1137 | 0,367 | 0,183  |
| 22 | Q5W189 Q5W189_HUMAN | R.RREPES#PPASAPIPLFGADTIGQR.S | S28:       | 3 | 3,2584 | 0,294 | -0,415 |
| 22 | O00273 DFFA_HUMAN   | R.NYS#REQHGVAASCLEDLR.S       | S28:       | 3 | 3,1036 | 0,222 | 0,167  |
| 22 | Q8IXT5 RB12B_HUMAN  | R.SRS#PLGFYVHLK.N             | S280:      | 3 | 4,3862 | 0,477 | 0,123  |
| 22 | Q8IXT5 RB12B_HUMAN  | R.SRS#PLGFYVHLK.N             | S280:      | 2 | 2,889  | 0,31  | -0,247 |
| 22 | Q96S38 KS6C1_HUMAN  | R.KGVDLLLEGVQGESS#PTRR.E      | S282:      | 3 | 3,59   | 0,316 | 0,172  |
| 22 | O75592 MYCB2_HUMAN  | R.SKS#DSYTLDPDLRK.K           | S2833:     | 3 | 2,7577 | 0,193 | -0,203 |
| 22 | Q9Y624 JAM1_HUMAN   | K.KVIYSQPSARS#EGEFK.Q         | S287:      | 3 | 3,5472 | 0,336 | -0,576 |
| 22 | Q9H410 DSN1_HUMAN   | K.THDHQLESSLS#PVEVFAK.T       | S30:       | 3 | 6,3679 | 0,492 | 0,261  |
| 22 | Q15054 DPOD3_HUMAN  | R.VALS#DDETKETENM*RK.K        | S307:      | 2 | 2,1121 | 0,351 | -0,684 |
| 22 | Q01518 CAP1_HUMAN   | R.SGPKPFSAPKPQTS#PSPK.R       | S308:      | 3 | 2,891  | 0,233 | -0,095 |
| 22 | O15143 ARC1B_HUMAN  | K.KAS#SEGGAAGAGLDSLHK.N       | S310:      | 2 | 3,8721 | 0,562 | -0,332 |
| 22 | Q9BWU0 NADAP_HUMAN  | K.KM*LGEDS#DEEEEM*DTSERK.I    | S312:      | 3 | 4,5264 | 0,34  | 0,154  |
| 22 | Q9NZT2 OGFR_HUMAN   | R.KVEEEGS#PGDPDHEASTQGR.T     | S315:      | 3 | 3,8365 | 0,285 | -0,415 |
| 22 | O00273 DFFA_HUMAN   | R.SISASKAS#PPGDLQNPKR.A       | S315:      | 3 | 3,4911 | 0,333 | 0,189  |
| 22 | Q3B726 RPA43_HUMAN  | R.KHS#EEAEFTPPLKCS#PK.R       | S316:S328: | 3 | 4,0617 | 0,218 | 0,597  |
| 22 | Q9HC62 SEN2_HUMAN   | R.RRS#DSTLFSTVDTDEIPAK.R      | S32:       | 3 | 3,5129 | 0,257 | -0,082 |
| 22 | Q9Y2W1 TR150_HUMAN  | K.KSPVGKS#PPSTGTYGSSQK.E      | S320:      | 3 | 3,8355 | 0,323 | 0      |
| 22 | Q8IWE5 PKHM2_HUMAN  | K.S#RSDEEASPLHPACSQK.K        | S327:      | 3 | 4,042  | 0,361 | -0,647 |
| 22 | Q3B726 RPA43_HUMAN  | K.HSEEAFTPPLKCS#PK.R          | S328:      | 3 | 4,299  | 0,385 | 0,094  |
| 22 | Q3B726 RPA43_HUMAN  | K.HSEEAFTPPLKCS#PK.R          | S328:      | 2 | 2,692  | 0,289 | 0,63   |
| 22 | Q15459 SF3A1_HUMAN  | K.FGESEEVEM*EVES#DEEDDKQEK.A  | S329:      | 3 | 5,172  | 0,515 | -0,472 |
| 22 | Q9Y2U5 M3K2_HUMAN   | R.RRGS#DIDNPTLVMDISPPSR.S     | S331:      | 3 | 4,8967 | 0,478 | -0,302 |
| 22 | Q6ZV89 SH2D5_HUMAN  | R.TLRPLSHAKS#EAELQGLG.-       | S331:      | 3 | 3,4295 | 0,156 | -0,092 |
| 22 | Q9Y2U5 M3K2_HUMAN   | R.RRGS#DIDNPTLVMDISPPSR.S     | S331:      | 3 | 3,2547 | 0,345 | -0,38  |
| 22 | Q6ZV89 SH2D5_HUMAN  | R.TLRPLSHAKS#EAELQGLG.-       | S331:      | 2 | 2,3097 | 0,423 | -0,246 |

|    |                    |                                |            |   |        |       |        |
|----|--------------------|--------------------------------|------------|---|--------|-------|--------|
| 22 | P08651 NFIC_HUMAN  | K.KTEM*DKS#PFNSPSPQDSPR.L      | S333:      | 3 | 3,6698 | 0,271 | -0,245 |
| 22 | Q16181 SEPT7_HUMAN | K.GQLTKS#PLAQM*EEERR.E         | S334:      | 3 | 3,5641 | 0,263 | -0,929 |
| 22 | Q16181 SEPT7_HUMAN | K.GQLTKS#PLAQMEEERR.E          | S334:      | 3 | 3,3921 | 0,261 | -0,468 |
| 22 | P48634 BAT2_HUMAN  | K.LKFS#DEEDGRDS#DEEGAEGHR.D    | S342:S350: | 3 | 3,66   | 0,503 | 0,288  |
| 22 | Q9NVF7 FBX28_HUMAN | R.EVM*ESAVGNSSGSGQNEES#PRKR.K  | S344:      | 3 | 2,6067 | 0,208 | 0,723  |
| 22 | P30622 CLIP1_HUMAN | R.KIS#GTTALQEALKEK.Q           | S348:      | 3 | 4,5043 | 0,347 | 0,108  |
| 22 | Q8WVV9 HNRLL_HUMAN | R.LKTEEGEIDYS#AEEGENRR.E       | S35:       | 3 | 2,7471 | 0,324 | 0,079  |
| 22 | Q9UK58 CCNL1_HUMAN | R.EVKAEKS#PISINVK.T            | S352:      | 2 | 3,2757 | 0,415 | 0,209  |
| 22 | Q9UK58 CCNL1_HUMAN | R.EVKAEKS#PISINVK.T            | S352:      | 3 | 3,0808 | 0,158 | -0,104 |
| 22 | Q03164 HRX_HUMAN   | R.SAS#PSVPGPTKPKPK.T           | S3527:     | 2 | 2,6287 | 0,186 | -0,235 |
| 22 | P46013 KI67_HUMAN  | K.TPVQYSQQNS#PQKHK.N           | S357:      | 3 | 3,2565 | 0,177 | -0,647 |
| 22 | Q5J8M3 TMM85_HUMAN | R.GRSDRGS#GQGDSLVPVGYLDK.Q     | S36:       | 3 | 3,3017 | 0,301 | -0,317 |
| 22 | Q7Z5L9 I2BP2_HUMAN | K.RKPS#PEPEGEVPPK.I            | S360:      | 3 | 2,8167 | 0,163 | -0,543 |
| 22 | Q9UIG0 BAZ1B_HUMAN | K.NSKS#PEEHLEEM*M*K.M          | S361:      | 2 | 3,3621 | 0,479 | 0,339  |
| 22 | Q9UIG0 BAZ1B_HUMAN | K.NSKS#PEEHLEEM*M*K.M          | S361:      | 3 | 3,0114 | 0,406 | -0,305 |
| 22 | Q00613 HSF1_HUMAN  | R.GHTDTEGRPPS#PPPTSTPEK.C      | S363:      | 3 | 2,9942 | 0,174 | -0,169 |
| 22 | Q8NCF5 NF2IP_HUMAN | K.HQTLEVLSRDS#PLK.T            | S369:      | 2 | 3,8987 | 0,539 | -0,545 |
| 22 | Q8NCF5 NF2IP_HUMAN | K.HQTLEVLSRDS#PLK.T            | S369:      | 3 | 2,9951 | 0,372 | -0,307 |
| 22 | O94763 RMP_HUMAN   | R.KNS#TGSNGHSAQELPTIR.T        | S371:      | 3 | 3,9687 | 0,377 | -0,393 |
| 22 | O94763 RMP_HUMAN   | R.KNS#TGSNGHSAQELPTIR.T        | S371:      | 2 | 3,7072 | 0,35  | -0,655 |
| 22 | Q9Y2K6 UBP20_HUMAN | R.SS#SPCRTPEPDNDAHLR.S         | S372:      | 3 | 2,9795 | 0,326 | -0,272 |
| 22 | Q9NZT2 OGFR_HUMAN  | R.SQGDEAGGHGEDRPEPLS#PK.E      | S378:      | 3 | 3,5052 | 0,435 | -0,256 |
| 22 | P16949 STMN1_HUMAN | R.SKESVPEFPLS#PPKK.K           | S38:       | 3 | 4,5457 | 0,411 | -0,209 |
| 22 | P16949 STMN1_HUMAN | R.SKESVPEFPLS#PPKK.K           | S38:       | 2 | 3,3899 | 0,406 | -0,697 |
| 22 | Q9NRM7 LATS2_HUMAN | R.RDS#LQKPGLEAPPR.A            | S380:      | 3 | 3,405  | 0,166 | 0      |
| 22 | Q13428 TCOF_HUMAN  | K.TSQVGAASAPAKES#PRK.G         | S381:      | 3 | 2,9172 | 0,362 | -0,311 |
| 22 | Q92597 NDRG1_HUMAN | R.SHTSEGAHLDITPNSGAAGNS#AGPK.S | S384:      | 3 | 5,0842 | 0,476 | -0,521 |
| 22 | Q9NYF8 BCLF1_HUMAN | K.GRAEGEWEDQEALDYFS#DKESGK.Q   | S385:      | 3 | 5,9004 | 0,445 | 0,403  |
| 22 | Q8IYU2 HACE1_HUMAN | K.NKRDS#TEITSILLK.Q            | S385:      | 3 | 3,2946 | 0,237 | -0,108 |
| 22 | P31629 ZEP2_HUMAN  | K.KGQDSEPSLNLLS#PHSK.G         | S389:      | 3 | 4,3682 | 0,401 | -0,286 |
| 22 | Q7Z422 CA144_HUMAN | R.KSKS#PPKVPIVQDDSLPAGPPPQIR.I | S39:       | 3 | 3,7712 | 0,313 | -0,386 |
| 22 | Q9UPU5 UBP24_HUMAN | K.KTLLSESSSQSSKS#PSLSSK.Q      | S391:      | 3 | 4,1315 | 0,401 | 0,17   |
| 22 | Q13427 PIIG_HUMAN  | K.SELNEIKENQRS#PVR.V           | S397:      | 3 | 3,0178 | 0,353 | -0,097 |

|    |                    |                                 |            |   |        |       |        |
|----|--------------------|---------------------------------|------------|---|--------|-------|--------|
| 22 | P48551 INAR2_HUMAN | R.RKS#PLQDPFPEEDYSSTEGSGGR.I    | S400:      | 3 | 5,4104 | 0,407 | 0,21   |
| 22 | Q96ST2 IWS1_HUMAN  | R.KAAVLSDS#EDEEKASAK.K          | S400:      | 3 | 3,2932 | 0,403 | -0,492 |
| 22 | Q3YEC7 PARF_HUMAN  | R.LDRS#FLEDTPARDEK.K            | S402:      | 3 | 3,3323 | 0,304 | 0      |
| 22 | Q8IYB3 SRRM1_HUMAN | R.HRPS#PPAT#PPPK.T              | S402:T406: | 2 | 2,5878 | 0,322 | -0,592 |
| 22 | Q9BY89 K1671_HUMAN | K.AKLDPEPEKAAESPS#PR.L          | S404:      | 3 | 3,616  | 0,389 | -0,192 |
| 22 | Q9Y5T5 UBP16_HUMAN | K.KTVEDEDQDS#EEEKDNDSEYIK.E     | S415:      | 3 | 3,956  | 0,456 | 0,211  |
| 22 | Q86SQ0 PHLB2_HUMAN | R.KSS#IS#SISGRDDLMDYHR.R        | S415:S417: | 3 | 3,3544 | 0,31  | 0,326  |
| 22 | Q86SQ0 PHLB2_HUMAN | R.KSS#ISS#ISGRDDLMDYHR.R        | S415:S418: | 3 | 3,8877 | 1     | -0,164 |
| 22 | Q8NHZ8 CDC26_HUMAN | K.KQKEDVEVVGGS#DGEAIGLSSDPK.S   | S42:       | 3 | 6,078  | 0,396 | -0,284 |
| 22 | P61978 HNRPK_HUMAN | R.HESGAS#HKIDEPLEGSEDR.I        | S420:      | 3 | 3,7765 | 0,311 | -0,085 |
| 22 | Q9NTZ6 RBM12_HUMAN | R.SRS#PHEAGFCVYLK.G             | S424:      | 3 | 4,3096 | 0,531 | -0,211 |
| 22 | Q9NTZ6 RBM12_HUMAN | R.SRS#PHEAGFCVYLK.G             | S424:      | 2 | 3,9373 | 0,505 | -0,564 |
| 22 | Q9Y490 TLN1_HUMAN  | K.SKDHFGLEGDEESTM*LEDSVS#PK.K   | S425:      | 3 | 6,891  | 0,524 | -0,486 |
| 22 | Q9Y490 TLN1_HUMAN  | K.SKDHFGLEGDEESTMLEDSVS#PK.K    | S425:      | 3 | 6,5329 | 0,547 | -0,699 |
| 22 | Q9UBF8 PI4KB_HUMAN | R.IRS#TRS#VENLPECGITHEQR.A      | S425:S428: | 3 | 4,7132 | 0,524 | -0,432 |
| 22 | Q86UE4 LYRIC_HUMAN | K.SQEPIPDDQKVS#DDDKEKGEALPTGK.S | S426:      | 3 | 5,1999 | 0,428 | -1,05  |
| 22 | Q9UBF8 PI4KB_HUMAN | R.STRS#VENLPECGITHEQR.A         | S428:      | 3 | 4,4145 | 0,323 | -0,167 |
| 22 | Q96AQ6 PBIP1_HUMAN | R.ALQAPHS#PSKTDGK.E             | S43:       | 2 | 3,2976 | 0,527 | -0,483 |
| 22 | P08865 RSSA_HUMAN  | K.RKS#DGIYIINLK.R               | S43:       | 3 | 2,7297 | 0,254 | 0,122  |
| 22 | P08670 VIME_HUMAN  | R.ETNLDS#LPLVDTHSKR.T           | S430:      | 2 | 2,5143 | 0,431 | -0,448 |
| 22 | P51114 FXR1_HUMAN  | R.KDELSDWSLAGEDDRDS#R.H         | S432:      | 3 | 2,6676 | 0,085 | -0,168 |
| 22 | Q96ST2 IWS1_HUMAN  | K.TIAS#DS#EEEAGKELSDKKNEEK.D    | S438:S440: | 3 | 2,6974 | 0,25  | 0,282  |
| 22 | O43318 M3K7_HUMAN  | R.RRS#IQDLTVTGTEPGQVSSR.S       | S439:      | 3 | 5,1105 | 0,527 | 0,484  |
| 22 | Q96TC7 FA82C_HUMAN | R.HGRS#QSLPNSLDYTQTSDPGR.H      | S44:       | 3 | 4,3954 | 0,369 | -0,458 |
| 22 | Q8WWL2 SPIR2_HUMAN | R.DRSFS#EHDLAQLR.S              | S442:      | 3 | 2,8431 | 0,299 | 0      |
| 22 | Q9Y4C1 JHD2A_HUMAN | K.HLEHAPS#PSDVSNAPVK.A          | S445:      | 3 | 5,5838 | 0,42  | -0,092 |
| 22 | Q86W56 PARG_HUMAN  | K.YVPPHLS#PDKK.W                | S448:      | 2 | 2,3238 | 0,323 | 0      |
| 22 | Q96AQ6 PBIP1_HUMAN | R.ALQAPHS#PSKTDGK.E             | S45:       | 3 | 2,9761 | 0,317 | -0,181 |
| 22 | Q14BN4 SLMAP_HUMAN | R.AKESDFSDTLS#PSKEK.S           | S452:      | 3 | 2,8777 | 0,288 | -0,297 |
| 22 | O60832 DKC1_HUMAN  | R.KRESES#ESDETPPAAPQLIK.K       | S453:      | 3 | 4,5855 | 0,31  | -0,16  |
| 22 | P53396 ACLY_HUMAN  | R.TAS#FSESRADDEVAPAKK.A         | S455:      | 3 | 2,9441 | 0,461 | 0,195  |
| 22 | Q6ZUM4 RHG27_HUMAN | R.SIHKSS#QDGDTPAQASPPEEK.V      | S456:      | 3 | 5,0933 | 0,452 | -0,16  |
| 22 | P11274 BCR_HUMAN   | R.HQDGLPYIDDS#PSSSPHLSK.G       | S459:      | 3 | 3,9005 | 0,341 | -0,39  |



|    |                     |                                |            |   |        |       |        |
|----|---------------------|--------------------------------|------------|---|--------|-------|--------|
| 22 | Q96FX7 TRM61_HUMAN  | R.HS#VDLIGRPFVGSK.V            | S46:       | 3 | 3,224  | 0,363 | -0,123 |
| 22 | Q9ULU4 PKCB1_HUMAN  | K.KATSSHFS#ASEESM*DFLDK.S      | S460:      | 3 | 4,7794 | 0,45  | -0,331 |
| 22 | Q9UJM3 ERRFI_HUMAN  | R.KHLSYVVS#P.-                 | S461:      | 2 | 3,5703 | 0,447 | -0,22  |
| 22 | P53985 MOT1_HUMAN   | K.KES#KEEET#SIDVAGKPNEVTK.A    | S461:T466: | 3 | 4,907  | 0,461 | 0,517  |
| 22 | Q96T23 RSF1_HUMAN   | K.FYETKEESYS#PSKDR.N           | S463:      | 3 | 3,4447 | 0,199 | -0,47  |
| 22 | Q96T23 RSF1_HUMAN   | K.FYETKEESYS#PSKDR.N           | S463:      | 2 | 2,3942 | 0,21  | 0,564  |
| 22 | Q9ULU4 PKCB1_HUMAN  | K.KATSSHFSASEES#M*DFLDK.S      | S465:      | 3 | 4,5853 | 0,368 | -0,083 |
| 22 | Q96EP0 RNF31_HUMAN  | R.RLS#APLPSSCGDPEKQR.Q         | S466:      | 3 | 2,7224 | 0,339 | 0      |
| 22 | P53985 MOT1_HUMAN   | K.ESKEETS#IDVAGKPNEVTK.A       | S467:      | 3 | 2,7366 | 0,157 | 0,081  |
| 22 | Q07960 RHG01_HUMAN  | K.SDDS#KSSPELVTHLK.W           | S47:       | 3 | 2,8293 | 0,352 | -0,202 |
| 22 | Q8IZL8 PELP1_HUMAN  | K.LRS#PRGS#PDGSLQTGKPSAPK.K    | S477:S481: | 3 | 4,1197 | 0,348 | -0,478 |
| 22 | Q8IZL8 PELP1_HUMAN  | K.LRS#PRGSPDGS#LQTGKPSAPK.K    | S477:S485: | 3 | 3,6376 | 0,314 | -0,478 |
| 22 | Q9UHB7 AFF4_HUMAN   | K.VNPHKVS#PASSVDSNIPSSQGY#KK.E | S487:Y502: | 3 | 2,9799 | 0,102 | -0,613 |
| 22 | Q86WP2 GPBP1_HUMAN  | R.HNS#SDGFDSAIGRPNNGNFR.K      | S49:       | 3 | 3,6317 | 0,468 | -0,49  |
| 22 | Q7Z4V5 HDGR2_HUMAN  | K.FALKVDS#PDVKR.C              | S490:      | 3 | 3,554  | 0,51  | -0,126 |
| 22 | Q14432 PDE3A_HUMAN  | K.S#RSFTSSYAISAANHVK.A         | S490:      | 3 | 3,077  | 0,202 | -0,288 |
| 22 | O15014 ZN609_HUMAN  | R.NCPS#PVLIDCPHNCNKK.Y         | S491:      | 3 | 3,113  | 0,23  | 0,164  |
| 22 | O60832 DKC1_HUMAN   | K.AKAGLESGAEPGDGDS#DTTKK.K     | S494:      | 3 | 4,539  | 0,44  | 0      |
| 22 | O60832 DKC1_HUMAN   | K.AGLESGAEPGDGDS#DTTKK.K       | S494:      | 3 | 3,8818 | 0,289 | -0,09  |
| 22 | O43719 HTSF1_HUMAN  | K.ESEEGNPVRGS#EEDS#PKKESK.K    | S494:S498: | 3 | 2,7692 | 0,307 | -0,517 |
| 22 | Q8NCD3 HJURP_HUMAN  | K.AKS#LSEAFENLGKR.S            | S496:      | 3 | 3,5116 | 0,402 | -0,112 |
| 22 | Q9H0D6 XRN2_HUMAN   | K.RKAEDS#DS#EPEPEDNVR.L        | S499:S501: | 3 | 4,0605 | 0,302 | -0,086 |
| 22 | Q3KR37 GRM1B_HUMAN  | K.GSDHSS#DKSPSTPEQGVQR.S       | S50:       | 3 | 3,8872 | 0,342 | -0,44  |
| 22 | Q9Y2X3 NOL5_HUMAN   | K.HIKEEPLS#EEEPCTSTAIASPEK.K   | S502:      | 3 | 4,7702 | 0,422 | 0,412  |
| 22 | Q9Y2X3 NOL5_HUMAN   | K.HIKEEPLS#EEEPCTSTAIAS#PEKK.K | S502:S514: | 3 | 5,4793 | 0,385 | 0,446  |
| 22 | Q14160 LAP4_HUMAN   | R.RSEACPCQPDGSGS#PLPAEEEEKR.L  | S504:      | 3 | 5,5779 | 0,421 | 0      |
| 22 | Q5VZ89 DEN4C_HUMAN  | R.HPTGNSITKS#PPLM*AK.R         | S505:      | 3 | 3,0784 | 0,337 | -0,309 |
| 22 | Q8N108 MIER1_HUMAN  | R.RVNS#NGKES#PGSSEFFQEAVSHGK.F | S507:S512: | 3 | 4,926  | 0,537 | -0,601 |
| 22 | A8K2B4 A8K2B4_HUMAN | R.TNTM*NGSKS#PVISRPK.S         | S508:      | 3 | 2,9012 | 0,399 | -0,404 |
| 22 | A8K2B4 A8K2B4_HUMAN | R.TNTM*NGSKS#PVISRPK.S         | S508:      | 2 | 2,4889 | 0,247 | -0,404 |
| 22 | Q9UBF8 PI4KB_HUMAN  | R.RLS#EQLAHTPTAFK.R            | S511:      | 3 | 3,3269 | 0,343 | -0,109 |
| 22 | Q9UBF8 PI4KB_HUMAN  | R.RLS#EQLAHTPTAFK.R            | S511:      | 2 | 2,7166 | 0,497 | -0,581 |
| 22 | Q9NYF8 BCLF1_HUMAN  | K.LKDLFDYS#PPLHK.N             | S512:      | 2 | 4,2619 | 0,588 | -1,107 |

|    |                    |                                    |            |   |        |       |        |
|----|--------------------|------------------------------------|------------|---|--------|-------|--------|
| 22 | Q9NYF8 BCLF1_HUMAN | K.LKDLFDYS#PPLHK.N                 | S512:      | 3 | 3,5494 | 0,506 | -0,221 |
| 22 | Q9Y2X3 NOL5_HUMAN  | K.HIKEEPLSEEEPTSTAIAS#PEK.K        | S514:      | 3 | 4,6309 | 0,371 | 0,344  |
| 22 | Q08AE8 SPIR1_HUMAN | K.S#KSM*DKSDEELQFPK.E              | S517:      | 2 | 2,1879 | 0,287 | 0,654  |
| 22 | O60934 NBN_HUMAN   | K.NKEQHLSSENEPVDNTNS#DNNLFTDTDLK.S | S518:      | 3 | 2,9844 | 0,484 | -0,687 |
| 22 | Q08AE8 SPIR1_HUMAN | K.SKS#M*DKSDEELQFPK.E              | S519:      | 3 | 3,6054 | 0,426 | 0,098  |
| 22 | O00567 NOL5A_HUMAN | K.KSFSKEELM*SS#DLEETAGSTSIPK.R     | S520:      | 3 | 4,9448 | 0,569 | -0,543 |
| 22 | O00567 NOL5A_HUMAN | K.KSFSKEELMSS#DLEETAGSTSIPK.R      | S520:      | 3 | 3,9791 | 0,304 | -0,341 |
| 22 | Q92560 BAP1_HUMAN  | R.SANPTRPS#SPVTSHISK.V             | S520:      | 2 | 2,4946 | 0,383 | -0,33  |
| 22 | Q8NEN9 PDZD8_HUMAN | R.AQNEFKDEAQSLSHS#PK.R             | S521:      | 3 | 5,2115 | 0,48  | 0,183  |
| 22 | Q15057 CENB2_HUMAN | R.KFVDKYSISLS#PPEQQK.K             | S521:      | 3 | 3,9168 | 0,362 | 0,176  |
| 22 | Q5H9R7 SAPS3_HUMAN | R.NTVDLVTTCHIHSSS#DDEIDFK.E        | S525:      | 3 | 4,5842 | 0,199 | -0,14  |
| 22 | Q14004 CD2L5_HUMAN | K.IEHAPS#PSSGGTLKNDK.A             | S525:      | 3 | 3,7518 | 0,398 | 0,101  |
| 22 | A1X283 SPD2B_HUMAN | R.KES#IIKSEGELLER.E                | S528:      | 3 | 3,6288 | 0,459 | 0      |
| 22 | A1X283 SPD2B_HUMAN | R.KES#IIKSEGELLER.E                | S528:      | 2 | 2,6823 | 0,258 | -0,357 |
| 22 | Q86W92 LIPB1_HUMAN | R.TAS#APNLAETEKETAEHLDLAGASSRPK.D  | S540:      | 3 | 2,7696 | 0,413 | -0,308 |
| 22 | Q96NE9 FRMD6_HUMAN | K.TSTDRHS#LSLDDIR.L                | S542:      | 3 | 2,6138 | 0,365 | 0,216  |
| 22 | Q96NE9 FRMD6_HUMAN | K.TSTDRHS#LSLDDIR.L                | S542:      | 2 | 2,4573 | 0,232 | -0,719 |
| 22 | Q8NHQ9 DDX55_HUMAN | R.KREEGS#DIEDEDM*EELLNDTR.L        | S544:      | 3 | 6,4736 | 0,506 | -0,559 |
| 22 | Q8NHQ9 DDX55_HUMAN | R.KREEGS#DIEDEDMEELLNDTR.L         | S544:      | 3 | 5,5663 | 0,37  | -0,562 |
| 22 | Q3KR37 GRM1B_HUMAN | K.TESTYLAEM*HRQS#PK.E              | S550:      | 2 | 2,1584 | 0,223 | -0,586 |
| 22 | P17987 TCPA_HUMAN  | K.DDKHGSYEDAVHS#GALND.-            | S551:      | 3 | 2,873  | 0,25  | -0,455 |
| 22 | Q9NWH9 SLTM_HUMAN  | K.RISS#KS#PGHM*VILDQTK.G           | S551:S553: | 3 | 3,7725 | 0,321 | 0,176  |
| 22 | Q9Y4W2 LAS1L_HUMAN | K.AQQQEEQGS#VNDVKEEKEEK.E          | S560:      | 3 | 3,4601 | 0,257 | 0,072  |
| 22 | Q9Y217 MTMR6_HUMAN | K.ELLHSVHPES#PNLK.T                | S561:      | 2 | 2,5265 | 0,451 | 0      |
| 22 | P27824 CALX_HUMAN  | K.SDAEEDGGTVS#QEEEDRKPK.A          | S564:      | 3 | 3,8476 | 0,344 | 0,08   |
| 22 | Q9BVJ6 UT14A_HUMAN | K.KKEQM*IDLQNLTTQS#PSVK.S          | S569:      | 3 | 4,7304 | 0,5   | -0,534 |
| 22 | P15822 ZEP1_HUMAN  | K.VVVHHVTVS#PLRTDS#PK.A            | S571:S577: | 3 | 2,8657 | 0,4   | -0,45  |
| 22 | Q14738 2A5D_HUMAN  | R.RKS#ELPQDVYTIK.A                 | S573:      | 2 | 4,4681 | 0,53  | -0,295 |
| 22 | Q14738 2A5D_HUMAN  | R.RKS#ELPQDVYTIK.A                 | S573:      | 3 | 4,0809 | 0,332 | 0      |
| 22 | Q09666 AHNK_HUMAN  | K.GKGGVTGS#PEASISGSKGDLK.S         | S5731:     | 3 | 3,9147 | 0,364 | -0,091 |
| 22 | Q09666 AHNK_HUMAN  | K.GKGGVTGSPEASISGS#KGDLK.S         | S5739:     | 3 | 3,8577 | 0,253 | 0      |
| 22 | Q8IXT5 RB12B_HUMAN | R.FPPEDFRHS#PEDFR.R                | S575:      | 3 | 2,678  | 0,215 | -0,099 |
| 22 | Q8IZ21 PHAR4_HUMAN | R.RLS#QRPTPEEQR.N                  | S590:      | 2 | 2,2294 | 0,091 | -0,134 |

|    |                      |                                 |            |   |        |       |        |
|----|----------------------|---------------------------------|------------|---|--------|-------|--------|
| 22 | O60841 IF2P_HUMAN    | K.EM*SSDSEYDS#DDDRTKER.A        | S595:      | 3 | 3,1513 | 0,368 | -0,536 |
| 22 | Q12873 CHD3_HUMAN    | R.KNDM*DEPPPLDYGS#GEDDGKSDK.R   | S597:      | 3 | 5,5949 | 0,457 | 0,07   |
| 22 | Q6NZY4 ZCHC8_HUMAN   | K.KSEAGHASS#PDSEVTSLCQK.E       | S598:      | 3 | 4,991  | 0,359 | -1,332 |
| 22 | Q12888 TP53B_HUMAN   | K.TKGDDTDTRDDIS#ILATGCK.G       | S598:      | 3 | 3,1236 | 0,327 | -0,243 |
| 22 | Q96RT1 LAP2_HUMAN    | K.HIVNHDDVFESEELSS#DEEM*K.M     | S603:      | 3 | 5,7253 | 0,471 | -0,472 |
| 22 | Q9UHB6 LIMA1_HUMAN   | R.SRPFTVAASFQSTSVKS#PK.T        | S604:      | 3 | 5,6575 | 0,518 | -0,261 |
| 22 | Q15424 SAFB1_HUMAN   | R.SVVS#FDKVKEPR.K               | S604:      | 2 | 2,4427 | 0,29  | -0,829 |
| 22 | Q14157 UBP2L_HUMAN   | R.RYPSSISS#PQKDLTQAK.N          | S609:      | 3 | 2,7433 | 0,473 | -0,176 |
| 22 | Q6PL18 ATAD2_HUMAN   | K.AGDGSS#VKEVETYHR.T            | S61:       | 3 | 4,9239 | 0,486 | -0,427 |
| 22 | Q9NY61 AATF_HUMAN    | R.KLAS#ASLLDTRDKR.Y             | S61:       | 3 | 3,8064 | 0,244 | 0,122  |
| 22 | Q6PJT7 ZC3HE_HUMAN   | K.NGDECAYHHPIS#PCK.A            | S620:      | 3 | 2,741  | 0,107 | -0,392 |
| 22 | Q6UB98 ANR12_HUMAN   | K.IKDEDHS#PTFENSCTLK.K          | S630:      | 3 | 4,3663 | 0,443 | -0,33  |
| 22 | P78312 CD008_HUMAN   | K.RPPS#VGDVFGISK.E              | S642:      | 2 | 3,1453 | 0,359 | -0,542 |
| 22 | P78312 CD008_HUMAN   | K.RPPS#VGDVFGISK.E              | S642:      | 3 | 2,9754 | 0,494 | 0,116  |
| 22 | Q96B23 CR025_HUMAN   | R.RDS#SESQLASTESDKPTTGR.V       | S66:       | 3 | 4,3518 | 0,551 | -0,738 |
| 22 | Q8IU81 I2BP1_HUMAN   | R.SHVLPEGRS#PGPPALK.H           | S66:       | 3 | 3,499  | 0,361 | -0,212 |
| 22 | Q9ULH7 MKL2_HUMAN    | R.TREQLVDQGIM*PPLKS#PAAFHEQIK.S | S66:       | 3 | 3,3709 | 0,179 | -0,687 |
| 22 | Q9H6F5 CCD86_HUMAN   | R.AGLGSPERPPKTS#PGSPR.L         | S66:       | 3 | 2,8958 | 0,261 | -0,587 |
| 22 | Q9ULU4 PKCB1_HUMAN   | K.DKAS#PEPEKDFSEK.A             | S668:      | 3 | 3,4715 | 0,28  | -0,325 |
| 22 | Q9ULU4 PKCB1_HUMAN   | K.DKAS#PEPEKDFSEK.A             | S668:      | 2 | 3,302  | 0,372 | -0,579 |
| 22 | P20042 IF2B_HUMAN    | R.KKDas#DDLDDLNFNQK.K           | S67:       | 3 | 5,2461 | 0,362 | -0,262 |
| 22 | P46087 NOL1_HUMAN    | K.TNKS#PEAKPLPGK.L              | S67:       | 3 | 3,3851 | 0,294 | 0      |
| 22 | ##O14490 DLGP1_HUMAN | R.EQQCS#ESKVMAQDM*NVSAKQYVER.A  | S670:      | 3 | 2,7987 | 0,169 | 1,804  |
| 22 | P46100 ATRX_HUMAN    | R.RPTETNPVTSNS#DEECNETVKEK.Q    | S677:      | 3 | 5,8837 | 0,433 | -0,667 |
| 22 | O14617 AP3D1_HUMAN   | R.KQEQANNPFYIKS#SPSPQK.R        | S685:      | 3 | 4,448  | 0,403 | 0,322  |
| 22 | O75665 OFD1_HUMAN    | K.NITSSS#PERHIFGEDR.V           | S686:      | 3 | 2,9033 | 0,207 | -0,19  |
| 22 | Q63HJ5 Q63HJ5_HUMAN  | R.KLANDFPLDLS#PVKK.R            | S688:      | 3 | 4,5666 | 0,488 | -0,518 |
| 22 | Q96T37 RBM15_HUMAN   | R.LLLERPS#PIRDR.R               | S700:      | 3 | 2,6314 | 0,258 | 0      |
| 22 | Q8WY36 BBX_HUMAN     | K.KFNSLPQYS#PVTFDRK.C           | S704:      | 3 | 4,053  | 0,403 | -0,365 |
| 22 | P49321 NASP_HUMAN    | R.KPTDGASS#SNCVTDISHLVR.K       | S705:      | 3 | 4,1215 | 0,357 | -0,082 |
| 22 | P10636 TAU_HUMAN     | K.AKTDHGAEIVYKS#PVVSGDTS#PR.H   | S713:S721: | 3 | 4,5603 | 0,43  | 0,284  |
| 22 | Q8TEW0 PARD3_HUMAN   | R.RIS#HSLYSGIEGLDESPSR.N        | S715:      | 3 | 5,9873 | 0,458 | -0,084 |
| 22 | Q9P246 STIM2_HUMAN   | R.IS#SIPHDLCHNGEK.S             | S718:      | 2 | 2,1972 | 0,45  | 0,362  |

|    |                     |                                 |            |   |        |       |        |
|----|---------------------|---------------------------------|------------|---|--------|-------|--------|
| 22 | Q9P246 STIM2_HUMAN  | R.ISS#IPHDLCHNGEK.S             | S719:      | 3 | 3,4593 | 0,407 | 0,108  |
| 22 | Q9H4I2 ZHX3_HUMAN   | R.KVS#PIKINLK.N                 | S723:      | 3 | 2,8572 | 0,276 | 0,075  |
| 22 | Q08J23 NSUN2_HUMAN  | K.KKEGVILTNEAAS#TGQPDNDVTEGQR.A | S724:      | 3 | 4,541  | 0,445 | -0,501 |
| 22 | Q9NYL2 MLTK_HUMAN   | R.VSQSALNPHQS#PDFKRS#PR.D       | S727:S733: | 3 | 3,66   | 0,254 | 0,158  |
| 22 | Q8IWB9 TEX2_HUMAN   | K.SSGVSGGKPGLLPAHS#R.H          | S732:      | 3 | 4,0432 | 0,345 | -0,325 |
| 22 | Q96T23 RSF1_HUMAN   | K.KPDS#PPKVLEPENK.Q             | S738:      | 3 | 5,2707 | 0,428 | 0      |
| 22 | Q86UP2 KTN1_HUMAN   | K.KEIQNGNLHES#DSESVPR.D         | S75:       | 3 | 4,0802 | 0,367 | 0      |
| 22 | O15014 ZN609_HUMAN  | R.AEEGKS#PFRESSGDGM*K.M         | S758:      | 3 | 2,6812 | 0,321 | 0,192  |
| 22 | Q6NWWY9 PR40B_HUMAN | R.GSPSS#HLLGADHGLR.K            | S767:      | 2 | 2,602  | 0,346 | -0,539 |
| 22 | O60927 PP1RB_HUMAN  | R.AFGESSTES#DEEEEGCGHTHCVR.G    | S77:       | 3 | 3,6737 | 0,466 | 0,779  |
| 22 | Q68DN6 RGPD1_HUMAN  | K.HSTPS#PTKYLSPSK.S             | S772:      | 3 | 3,5282 | 0,392 | -0,108 |
| 22 | Q96EV2 RBM33_HUMAN  | K.VKPAS#PVAQPKEEAK.T            | S775:      | 3 | 2,8169 | 0,323 | -0,441 |
| 22 | Q9Y6X9 MORC2_HUMAN  | K.KDSNELS#DSAGEEDSADLKR.A       | S777:      | 3 | 3,8438 | 0,295 | -0,163 |
| 22 | Q8NA72 CE037_HUMAN  | R.ISTIHDLHSQGNNS#EVR.E          | S78:       | 3 | 3,7567 | 0,378 | -0,261 |
| 22 | Q92540 SMG7_HUMAN   | K.AVPALGKS#PPHHSGFQQYQQADASK.Q  | S781:      | 3 | 4,0613 | 0,354 | -0,536 |
| 22 | Q76I76 SSH2_HUMAN   | K.KNS#IHELLER.A                 | S784:      | 3 | 3,939  | 0,308 | -0,064 |
| 22 | Q76I76 SSH2_HUMAN   | K.KNS#IHELLER.A                 | S784:      | 2 | 2,2176 | 0,296 | 0,17   |
| 22 | Q9UGU5 HM2L1_HUMAN  | R.KHS#SDDYYGDISSLESSQK.K        | S79:       | 3 | 4,9012 | 0,481 | -0,23  |
| 22 | Q49MG5 MAP9_HUMAN   | K.M*NDFHIS#DDEEKNSPK.L          | S79:       | 3 | 3,1768 | 0,456 | -0,64  |
| 22 | Q9H0C8 ILKAP_HUMAN  | R.KTS#EEEEKNGSEELVEK.K          | S82:       | 3 | 4,3126 | 0,369 | -0,286 |
| 22 | Q9GZR7 DDX24_HUMAN  | R.KAQAVS#EEEEEGKSSSPK.K         | S82:       | 3 | 3,8669 | 0,418 | -1,053 |
| 22 | Q96JP5 ZFP91_HUMAN  | R.RSS#PSARPPDVPGQPQAAS.S        | S83:       | 3 | 3,3233 | 0,357 | 0,34   |
| 22 | Q14103 HNRPD_HUMAN  | K.IDASKNEEDEGHNSNS#PR.H         | S83:       | 3 | 2,694  | 0,138 | -0,535 |
| 22 | Q9Y5B0 CTDP1_HUMAN  | R.KRQPS#M*SETM*PLYTLCK.E        | S839:      | 3 | 3,7182 | 0,33  | 0,168  |
| 22 | Q9Y5B0 CTDP1_HUMAN  | R.KRQPS#M*SETMPLYTLCK.E         | S839:      | 3 | 3,6597 | 0,347 | -0,338 |
| 22 | O94880 PHF14_HUMAN  | K.VKEEQLKNS#AEVEVLSSEK.Q        | S84:       | 3 | 4,3523 | 0,32  | -0,811 |
| 22 | Q9Y5B0 CTDP1_HUMAN  | R.KRQPSM*S#ETM*PLYTLCK.E        | S841:      | 3 | 3,9875 | 0,285 | -0,755 |
| 22 | P16333 NCK1_HUMAN   | K.RKPS#VPDSASPADDVFDPGER.L      | S85:       | 3 | 4,3474 | 0,465 | -0,228 |
| 22 | Q5VZ89 DEN4C_HUMAN  | R.THS#FENVSCHLPDSR.T            | S863:      | 3 | 3,7862 | 0,421 | 0,196  |
| 22 | Q9H0E3 SP130_HUMAN  | R.KS#PPKEYIDEEGVR.Y             | S875:      | 3 | 3,7638 | 0,468 | -0,847 |
| 22 | Q9H0E3 SP130_HUMAN  | R.KS#PPKEYIDEEGVR.Y             | S875:      | 2 | 2,2549 | 0,332 | 0,283  |
| 22 | P38159 HNRPG_HUMAN  | K.AIKEVQATKPS#FESGR.R           | S88:       | 2 | 3,601  | 0,619 | -0,601 |
| 22 | Q2VIN3 Q2VIN3_HUMAN | K.AIKEVQATKPS#FER.G             | S88:       | 3 | 3,5321 | 0,411 | -0,326 |

|    |                    |                               |                    |   |        |       |        |
|----|--------------------|-------------------------------|--------------------|---|--------|-------|--------|
| 22 | Q5T5U3 RHG21_HUMAN | R.SKS#YDEGLDDYREDAK.L         | S880:              | 3 | 2,9274 | 0,304 | 0,186  |
| 22 | O75400 PR40A_HUMAN | R.HKS#DS#PES#DAERЕК.D         | S883:S885:S888:    | 3 | 2,6019 | 0,284 | -0,394 |
| 22 | Q99700 ATX2_HUMAN  | K.RGPEVTSQGVQTSS#PACKQEK.D    | S888:              | 3 | 3,6797 | 0,143 | -0,311 |
| 22 | Q9BTE7 DCNL5_HUMAN | R.KS#PGVAAAVAEDGGLKK.C        | S9:                | 3 | 4,7216 | 0,465 | 0      |
| 22 | P05787 K2C8_HUMAN  | R.VTQKS#YKVSTSGPR.A           | S9:                | 3 | 3,0203 | 0,311 | -0,226 |
| 22 | P38159 HNRPG_HUMAN | K.AIKVEQATKPSFES#GR.R         | S91:               | 3 | 3,3127 | 0,291 | -0,5   |
| 22 | Q9Y2K2 QSK_HUMAN   | R.HQQVPHILQGLLS#PR.H          | S916:              | 3 | 2,8022 | 0,173 | -0,609 |
| 22 | Q71F56 MD13L_HUMAN | K.M*EVEDGLGS#PKPEEIKDFSIVHK.V | S923:              | 3 | 4,369  | 0,307 | -0,737 |
| 22 | Q71F56 MD13L_HUMAN | K.MEVEDGLGS#PKPEEIKDFSIVHK.V  | S923:              | 3 | 3,3039 | 0,216 | -0,337 |
| 22 | Q9Y2W1 TR150_HUMAN | K.WAHDKFS#GEEGEIEDDESГTENR.E  | S928:              | 3 | 6,8554 | 0,492 | -0,404 |
| 22 | Q03188 CENPC_HUMAN | K.KKEAS#LQFVVEPSEATNR.S       | S96:               | 3 | 4,5361 | 0,262 | -0,26  |
| 22 | Q8TEW0 PARD3_HUMAN | R.SGRESVS#TASDQPSHSLER.Q      | S964:              | 3 | 3,1156 | 0,231 | 0      |
| 22 | Q5VZK9 LR16A_HUMAN | K.RSS#GFISELPSSEGGK.L         | S968:              | 3 | 4,1807 | 0,481 | 0,1    |
| 22 | P28749 RBL1_HUMAN  | R.ISQQHSIYIS#PHK.N            | S988:              | 3 | 2,7317 | 0,33  | -0,226 |
| 22 | Q5TAQ9 WD42A_HUMAN | R.VHDRS#EEEEEEEEEEEQPR.R      | S99:               | 3 | 5,1465 | 0,466 | -0,133 |
| 22 | Q6ZRV2 FA83H_HUMAN | R.RM*EDEGGFPVQENGQPES#PRR.L   | S998:              | 3 | 2,7    | 0,226 | -0,702 |
| 22 | Q5SW79 CE170_HUMAN | R.TPLT#SADEHVHSL.L            | T1058:             | 3 | 2,8982 | 0,301 | 0,122  |
| 22 | Q66GS9 CP135_HUMAN | R.HGLAT#PPLSSTLRS#PS#HSPEHR.N | T1121:S1130:S1132: | 3 | 2,6953 | 1     | -0,492 |
| 22 | O94986 CE152_HUMAN | K.NKLEELQTLCKT#PPR.S          | T1148:             | 3 | 4,3375 | 0,288 | -0,384 |
| 22 | O75116 ROCK2_HUMAN | K.LFHVRPVT#QTDVYR.A           | T1212:             | 3 | 3,4165 | 0,221 | 0      |
| 22 | O75367 H2AY_HUMAN  | K.GKLEAIT#PPPAKK.A            | T129:              | 3 | 3,2003 | 0,24  | 0,119  |
| 22 | Q9NR31 SAR1A_HUMAN | K.IDRT#DAISEEKLR.E            | T139:              | 3 | 3,3119 | 0,347 | -0,225 |
| 22 | P35251 RFC1_HUMAN  | R.STNSHLGTSNMKKNEENT#K.T      | T148:              | 3 | 2,6881 | 0,086 | 0      |
| 22 | P39687 AN32A_HUMAN | R.NRT#PSDVKELVLDNSR.S         | T15:               | 3 | 3,3992 | 0,317 | 0,095  |
| 22 | P39687 AN32A_HUMAN | R.NRT#PSDVKELVLDNSR.S         | T15:               | 2 | 2,9307 | 0,278 | -0,381 |
| 22 | P29966 MARC5_HUMAN | K.AEDGATSPSNET#PKKK.K         | T150:              | 2 | 2,2284 | 0,398 | -0,664 |
| 22 | Q02952 AKA12_HUMAN | K.KGLSSDLEGEKT#TSLK.W         | T1505:             | 2 | 3,0503 | 0,341 | 0,138  |
| 22 | Q92870 APBB2_HUMAN | R.RT#KSFNLNYADLETSAR.E        | T158:              | 3 | 3,4597 | 0,317 | -0,086 |
| 22 | Q86VM9 ZCH18_HUMAN | K.AGAEDDEEKGEГT#PREEGK.A      | T162:              | 3 | 3,7863 | 0,299 | -0,79  |
| 22 | Q9P206 K1522_HUMAN | R.RST#VLGLPQHVK.E             | T162:              | 3 | 3,6634 | 0,349 | -0,119 |
| 22 | P46013 KI67_HUMAN  | R.KADT#EEEEFLAFRK.Q           | T1764:             | 3 | 3,5085 | 0,266 | -0,11  |
| 22 | Q9H1E3 NUCKS_HUMAN | R.LKATVT#PSPVKGK.G            | T179:              | 2 | 4,4318 | 0,426 | -0,347 |
| 22 | Q9H1E3 NUCKS_HUMAN | K.EKT#PSPKEEDEEPES#PPEKK.T    | T202:S214:         | 3 | 3,6057 | 0,275 | 0,074  |

|    |                    |                                 |                 |   |        |       |        |
|----|--------------------|---------------------------------|-----------------|---|--------|-------|--------|
| 22 | Q8NDT2 RB15B_HUMAN | R.DRT#PPHLLYSR.D                | T205:           | 3 | 3,3546 | 0,32  | 0,118  |
| 22 | Q08EQ4 TMSL1_HUMAN | K.KT#ETQEKNLPSK.E               | T21:            | 3 | 3,2346 | 0,213 | 0      |
| 22 | Q09161 NCBP1_HUMAN | R.RKT#S#DANETEDHLESICK.V        | T21:S22:        | 3 | 3,6298 | 0,442 | -0,684 |
| 22 | Q8IYB3 SRRM1_HUMAN | K.KEKT#PELPEPSVK.V              | T220:           | 3 | 4,3134 | 0,371 | -0,351 |
| 22 | Q8IYB3 SRRM1_HUMAN | K.KEKT#PELPEPSVK.V              | T220:           | 2 | 3,4192 | 0,336 | -0,625 |
| 22 | P23396 RS3_HUMAN   | K.KPLPDHVSIVEPKDEILPTT#PISEQK.G | T221:           | 3 | 5,4127 | 0,59  | -0,489 |
| 22 | P06748 NPM_HUMAN   | K.TPKT#PKGSSVEDIK.A             | T237:           | 3 | 2,9639 | 0,201 | -0,22  |
| 22 | Q5T200 ZC3HD_HUMAN | K.KKGPRT#PS#PPPIPEDIALGK.K      | T263:S265:      | 3 | 4,8978 | 0,361 | 0,155  |
| 22 | Q01518 CAP1_HUMAN  | R.SGPKPFSAPKPQT#SPSPK.R         | T307:           | 2 | 2,0266 | 0,369 | 0,254  |
| 22 | Q01518 CAP1_HUMAN  | R.SGPKPFSAPKPQT#S#PSPKR.A       | T307:S308:      | 3 | 3,1488 | 0,293 | -0,425 |
| 22 | P63313 TYB10_HUMAN | K.NTLPT#KETIEQEK.R.S            | T31:            | 3 | 3,3121 | 0,272 | 0,207  |
| 22 | P46013 KI67_HUMAN  | K.KPM*KT#SPEM*DIQNPDDGAR.K      | T3127:          | 3 | 4,8203 | 0,385 | -0,571 |
| 22 | Q8TD16 BICD2_HUMAN | K.LPLDNKTST#PKK.E               | T319:           | 3 | 3,2921 | 0,186 | -0,129 |
| 22 | O75152 ZC11A_HUMAN | K.KVEAPETNIDKT#PK.K             | T321:           | 3 | 3,3192 | 0,227 | 0      |
| 22 | Q7Z4Q2 HEAT3_HUMAN | R.RKT#FVSDLLPPTDK.E             | T340:           | 3 | 4,3406 | 0,23  | 0      |
| 22 | Q15910 EZH2_HUMAN  | R.GRLPNSSRPST#PTINVLESK.D       | T367:           | 3 | 4,3163 | 0,431 | -0,39  |
| 22 | Q13029 PRDM2_HUMAN | K.RKPSQT#LQPSDLADGK.A           | T423:           | 3 | 3,9106 | 0,368 | -0,375 |
| 22 | Q8N108 MIER1_HUMAN | K.KPLHADM*DTNGYET#DNLTTDPK.L    | T472:           | 3 | 4,7422 | 0,489 | -0,427 |
| 22 | Q9UHD1 CHRD1_HUMAN | K.RRTT#DFSDFLSIVGCTK.G          | T48:            | 3 | 4,5087 | 0,348 | -0,439 |
| 22 | O95456 PSMG1_HUMAN | R.RQT#KTSLEVSLEK.Y              | T54:            | 3 | 3,3306 | 0,387 | 0      |
| 22 | P10636 TAU_HUMAN   | K.KVAVVRT#PPKSPSS#AK.S          | T548:S555:      | 3 | 3,5063 | 0,174 | -0,707 |
| 22 | Q9Y6M7 S4A7_HUMAN  | R.KIPVFHNGST#PTLGETPK.E         | T557:           | 3 | 4,5501 | 0,467 | -0,183 |
| 22 | Q9BZL4 PP12C_HUMAN | R.RST#QGVTLTDLKEAEK.A           | T560:           | 3 | 5,3269 | 0,449 | -0,788 |
| 22 | Q9Y6X9 MORC2_HUMAN | K.KT#ESPIKLSPATPSR.K            | T723:           | 3 | 3,3096 | 0,27  | 0,108  |
| 22 | Q13435 SF3B2_HUMAN | K.KKIEEAM*DGSET#PQLFTVLPEK.R    | T757:           | 3 | 3,808  | 0,166 | -0,424 |
| 22 | Q99700 ATX2_HUMAN  | R.QNSPAGNKENIKPNET#SPSFSK.A     | T770:           | 3 | 3,4    | 0,189 | -0,075 |
| 22 | Q14118 DAG1_HUMAN  | K.GKLTLEDQAT#FIKK.G             | T790:           | 3 | 3,8304 | 0,425 | -0,109 |
| 22 | Q14118 DAG1_HUMAN  | K.GKLTLEDQAT#FIKK.G             | T790:           | 2 | 3,1754 | 0,504 | -0,073 |
| 22 | Q562F6 SGOL2_HUMAN | K.GVHDLEKDNFFSLT#PK.D           | T845:           | 3 | 3,6836 | 0,458 | -0,57  |
| 22 | Q6PD62 CTR9_HUMAN  | K.KGGDEFVNDT#DDDLPISKK.K        | T925:           | 3 | 6,9373 | 0,527 | -0,285 |
| 22 | Q9HBD1 RC3H2_HUMAN | R.KHSST#GDLLSLELQQAK.S          | T984:           | 3 | 3,0809 | 0,215 | -0,189 |
| 22 | Q9NYF8 BCLF1_HUMAN | R.Y#SPSQNS#PIHHIPRRS#PAK.T      | Y284:S290:S300: | 3 | 2,7926 | 0,279 | 0,366  |
| 22 | P40818 UBP8_HUMAN  | K.RSY#SSPDITQAIQEEER.K          | Y717:           | 3 | 3,7157 | 0,4   | -0,413 |

|    |                     |                               |       |   |        |       |        |
|----|---------------------|-------------------------------|-------|---|--------|-------|--------|
| 22 | P52756 RBM5_HUMAN   | R.SEDGY#HSDGDYGEHDYR.H        | Y76:  | 3 | 3,2278 | 0,352 | -0,264 |
| 22 | P35658 NU214_HUMAN  | R.NRDSGY#LHLLYK.R             | Y794: | 3 | 2,7622 | 0,087 | 0      |
| 22 | Q6P0Q8 MAST2_HUMAN  | R.Y#HHM*DSEDEEEVSEDGCLDIR.Q   | Y820: | 3 | 4,01   | 0,266 | -0,342 |
| 22 | Q9Y2E4 DIP2C_HUMAN  | R.Y#RSDVHTEAVQAALAK.H         | Y87:  | 3 | 3,1567 | 0,271 | 0,099  |
| 22 | Q08752 PPID_HUMAN   | K.DGSGDSSHDPDFEDADIDLKDVVK.I  |       | 3 | 6,9615 | 0,552 | -0,368 |
| 22 | Q02790 FKBP4_HUMAN  | K.VGEVCHITCKPEYAYGSAGSPPK.I   |       | 3 | 6,1746 | 0,496 | 0      |
| 22 | Q02952 AKA12_HUMAN  | K.M*EDTLEHTDKEVSVETVSILSK.T   |       | 3 | 5,7541 | 0,542 | -0,511 |
| 22 | P49368 TCPG_HUMAN   | R.IVSRPEELREDDVGTGAGLLEIK.K   |       | 3 | 5,4084 | 0,419 | 0,293  |
| 22 | B2RDE1 B2RDE1_HUMAN | R.KIQVLQQQADDAEER.A           |       | 2 | 5,4039 | 0,567 | -0,964 |
| 22 | P14618 KPYM_HUMAN   | K.KGVNLPGAAVDLPVSEKDIQDLK.F   |       | 3 | 5,2658 | 0,424 | -0,369 |
| 22 | B2RDE1 B2RDE1_HUMAN | R.KIQVLQQQADDAEER.A           |       | 3 | 5,166  | 0,464 | -0,516 |
| 22 | P43243 MATR3_HUMAN  | R.DSFDDRGPVSLNPVLDYDHGSR.S    |       | 3 | 5,0836 | 0,229 | -0,62  |
| 22 | Q15717 ELAV1_HUMAN  | R.SEAEEAITSFNGHKPPGSSEPITVK.F |       | 3 | 5,0786 | 0,468 | -0,28  |
| 22 | Q9HB71 CYBP_HUMAN   | K.KAELLDNEKPAAVVAPITGTYVK.I   |       | 3 | 5,0328 | 0,42  | -0,362 |
| 22 | Q00653 NFKB2_HUMAN  | R.ASDGSFSLPLKPVISQPIHDSK.S    |       | 3 | 4,864  | 0,454 | -0,394 |
| 22 | P67936 TPM4_HUMAN   | R.KIQALQQQADEAEDR.A           |       | 2 | 4,7866 | 0,552 | 0,21   |
| 22 | Q9UQE7 SMC3_HUMAN   | K.AKDLQDELGNSEQR.K            |       | 2 | 4,7827 | 0,554 | -0,437 |
| 22 | Q9Y3Y2 CA077_HUMAN  | K.TKGHLDAELDAYM*AQTDPETND.-   |       | 3 | 4,6573 | 0,467 | -0,373 |
| 22 | P43246 MESH2_HUMAN  | K.NKTEYEEAQDAIVK.E            |       | 2 | 4,652  | 0,472 | -0,521 |
| 22 | P04083 ANXA1_HUMAN  | K.GDRSEDFGVNEDLADSDAR.A       |       | 3 | 4,642  | 0,454 | 0,177  |
| 22 | P62910 RL32_HUMAN   | K.SYCAEIAHNVSSK.N             |       | 2 | 4,6356 | 0,509 | -0,333 |
| 22 | P60660 MYL6_HUMAN   | K.NKDQGTIEDYVEGLR.V           |       | 3 | 4,6153 | 0,457 | 0,307  |
| 22 | P17661 DESM_HUMAN   | R.TNEKVELQELNDR.F             |       | 3 | 4,6061 | 0,353 | 0,23   |
| 22 | A8K9D9 A8K9D9_HUMAN | R.DKLPSTEVKEDSAYGSQSVEQAEK.L  |       | 3 | 4,6012 | 0,473 | -0,399 |
| 22 | P07951 TPM2_HUMAN   | R.CKQLEEEQQALQK.K             |       | 3 | 4,5856 | 0,301 | 0      |
| 22 | Q15185 TEBP_HUMAN   | K.SKLTFSCLGGSDNFK.H           |       | 2 | 4,5776 | 0,536 | 0,441  |
| 22 | B2RDU1 B2RDU1_HUMAN | R.DTSSDKDLDDALDKLSDSLGQR.Q    |       | 3 | 4,5584 | 0,427 | -0,458 |
| 22 | Q13442 HAP28_HUMAN  | R.KGVEGLIDIENPNR.V            |       | 2 | 4,5253 | 0,463 | -0,471 |
| 22 | P02545 LMNA_HUMAN   | R.LQEKEDLQELNDR.L             |       | 2 | 4,4524 | 0,427 | -0,15  |
| 22 | P24534 EF1B_HUMAN   | K.KLQIQCVVEDDK.V              |       | 2 | 4,4328 | 0,387 | 0,331  |
| 22 | P54652 HSP72_HUMAN  | K.STAGDTHLGGEDFDNR.M          |       | 2 | 4,4005 | 0,581 | -0,937 |
| 22 | P22234 PUR6_HUMAN   | K.TKEVYELLDSPGK.V             |       | 2 | 4,386  | 0,348 | -0,577 |
| 22 | O00170 AIP_HUMAN    | R.TLHSDDEGTVLDDSR.A           |       | 2 | 4,3421 | 0,519 | -0,441 |

|    |                    |                                 |   |        |       |        |
|----|--------------------|---------------------------------|---|--------|-------|--------|
| 22 | P20810 ICAL_HUMAN  | R.DTSQSDKLDDALDKLSDSLGQR.Q      | 3 | 4,3419 | 0,483 | -0,508 |
| 22 | Q15181 IPYR_HUMAN  | K.HTGCCGDNDPIDVCEIGSK.V         | 3 | 4,3361 | 0,47  | -0,171 |
| 22 | P47756 CAPZB_HUMAN | R.KLEVEANNAFDQYR.D              | 2 | 4,3264 | 0,426 | -0,288 |
| 22 | P00558 PGK1_HUMAN  | R.AHSSM*VGVNLPQK.A              | 3 | 4,3217 | 0,321 | 0,198  |
| 22 | P11717 MPRI_HUMAN  | R.HQDEAVVLSYVNGDR.C             | 3 | 4,3077 | 0,3   | -0,215 |
| 22 | O75643 U520_HUMAN  | K.HINM*DGTINVDDFK.I             | 2 | 4,2875 | 0,542 | -0,448 |
| 22 | Q9UQE7 SMC3_HUMAN  | R.KAEELGELEAK.L                 | 2 | 4,2706 | 0,374 | 0,272  |
| 22 | Q9UL26 RB22A_HUMAN | R.DAKDYADSIHAIFVETSAK.N         | 3 | 4,2663 | 0,491 | -0,264 |
| 22 | Q96PZ0 PUS7_HUMAN  | K.NKETSVAIEVIEDTK.E             | 3 | 4,2479 | 0,345 | 0,218  |
| 22 | Q9Y265 RUVB1_HUMAN | K.DSIEKEHVVEISELFYDAK.S         | 3 | 4,2331 | 0,424 | -0,642 |
| 22 | Q00653 NFKB2_HUMAN | R.DKLPSTAIEVKEDSAYGSQSVEQEAEL.L | 3 | 4,1992 | 0,414 | -0,389 |
| 22 | P69905 HBA_HUMAN   | K.VGAHAGEYGAEALER.M             | 3 | 4,1748 | 0,161 | 0      |
| 22 | P31946 1433B_HUMAN | K.AVTEQGHLSNEER.N               | 2 | 4,1682 | 0,454 | -0,076 |
| 22 | P35579 MYH9_HUMAN  | K.KLEEEQIILEDQNCK.L             | 3 | 4,1652 | 0,253 | -0,097 |
| 22 | P09493 TPM1_HUMAN  | R.SKQLEDELVSLQK.K               | 3 | 4,127  | 0,304 | 0,06   |
| 22 | P21333 FLNA_HUMAN  | K.DAGEGLLAVQITDPEGKPKK.T        | 3 | 4,1243 | 0,356 | -0,266 |
| 22 | P20645 MPRD_HUMAN  | R.HTLADNFPVSEER.G               | 2 | 4,1147 | 0,564 | -0,3   |
| 22 | P06748 NPM_HUMAN   | K.VDNDENEHQLSLR.T               | 2 | 4,1051 | 0,371 | 0,233  |
| 22 | P09493 TPM1_HUMAN  | K.LEEAEEKADESER.G               | 2 | 4,0993 | 0,49  | -0,496 |
| 22 | P11388 TOP2A_HUMAN | R.HVDYVADQIVTK.L                | 2 | 4,0986 | 0,571 | 0,088  |
| 22 | P16401 H15_HUMAN   | K.KALAAGGYDVEK.N                | 3 | 4,0971 | 0,423 | 0,299  |
| 22 | Q15366 PCBP2_HUMAN | K.GVTIPYRKPSSSPVIFAGGQDR.Y      | 3 | 4,0963 | 0,436 | 0,753  |
| 22 | P33176 KINH_HUMAN  | K.TKEYELLSDELNQK.S              | 3 | 4,0906 | 0,358 | 0,107  |
| 22 | P09874 PARP1_HUMAN | R.KGDEVDPVDEVAK.K               | 2 | 4,0532 | 0,512 | -0,269 |
| 22 | P30086 PEBP1_HUMAN | K.NRPTSISWDGLDSGK.L             | 2 | 4,0475 | 0,529 | -0,224 |
| 22 | Q02952 AKA12_HUMAN | K.EKEDAQEVELQEGK.V              | 3 | 4,0374 | 0,302 | -0,224 |
| 22 | P17661 DESM_HUMAN  | R.TNEKVELQELNDR.F               | 2 | 4,0373 | 0,493 | -0,691 |
| 22 | P02545 LMNA_HUMAN  | R.NSNLVGAAHEELQQR.I             | 2 | 4,0254 | 0,58  | -0,07  |
| 22 | Q14683 SMC1A_HUMAN | K.SKLESELANFGPR.I               | 3 | 4,0227 | 0,161 | 0,126  |
| 22 | P09382 LEG1_HUMAN  | R.FNAHGDANTIVCNSK.D             | 2 | 4,0188 | 0,544 | -0,222 |
| 22 | P55786 PSA_HUMAN   | R.KPYPDENLVEVK.F                | 3 | 4,0173 | 0,141 | 0,118  |
| 22 | Q13200 PSMD2_HUMAN | K.LKEIYENM*APGENK.R             | 3 | 4,0027 | 0,237 | -0,332 |
| 22 | P42224 STAT1_HUMAN | R.FHDLLSQLDDQYSR.F              | 3 | 3,9953 | 0,197 | -0,527 |



|    |                    |                             |   |        |       |        |
|----|--------------------|-----------------------------|---|--------|-------|--------|
| 22 | Q658Y4 F91A1_HUMAN | R.DHLM*LYPYHLSDIM*VK.G      | 3 | 3,9796 | 0,302 | -0,547 |
| 22 | Q12789 TF3C1_HUMAN | R.NDHDDDEEVEVISK.T          | 2 | 3,9721 | 0,538 | -0,147 |
| 22 | P17812 PYRG1_HUMAN | R.KLYGDADYLEER.H            | 2 | 3,9667 | 0,464 | -0,497 |
| 22 | P19256 LFA3_HUMAN  | K.DKVAELENSEFR.A            | 3 | 3,9652 | 0,293 | 0,127  |
| 22 | Q9H2J4 PDCL3_HUMAN | K.ESLKELEEEAEQQR.I          | 2 | 3,9563 | 0,562 | -0,528 |
| 22 | P07951 TPM2_HUMAN  | R.KLVILEGELER.S             | 3 | 3,9079 | 0,386 | 0,141  |
| 22 | Q13263 TIF1B_HUMAN | K.DHQYQFLEDAVR.N            | 2 | 3,9041 | 0,56  | -0,401 |
| 22 | Q12789 TF3C1_HUMAN | R.NDHDDDEEVEVISK.T          | 3 | 3,9005 | 0,352 | -0,441 |
| 22 | Q9Y5S9 RBM8A_HUMAN | R.MREDYDSVEQDGPQR.S         | 3 | 3,8957 | 0,409 | -0,329 |
| 22 | P09493 TPM1_HUMAN  | K.KATDAEADVASLNR.R          | 2 | 3,881  | 0,448 | -0,752 |
| 22 | P07951 TPM2_HUMAN  | R.CKQLEEEQALQK.K            | 2 | 3,8604 | 0,351 | 0      |
| 22 | P06753 TPM3_HUMAN  | R.KLVIEGDLER.T              | 3 | 3,8602 | 0,441 | -0,213 |
| 22 | P30101 PDIA3_HUMAN | K.IFRDGEEAGAYDGPR.T         | 3 | 3,857  | 0,241 | 0      |
| 22 | Q15149 PLEC1_HUMAN | R.ARQEELYSELQAR.E           | 3 | 3,8488 | 0,267 | -0,115 |
| 22 | P19256 LFA3_HUMAN  | K.DKVAELENSEFR.A            | 2 | 3,8461 | 0,409 | -0,255 |
| 22 | Q96CT7 CC124_HUMAN | K.SHLEVPLEENVNR.R           | 3 | 3,8429 | 0,125 | 0      |
| 22 | P54652 HSP72_HUMAN | R.ARFEELNADLFR.G            | 3 | 3,8416 | 0,231 | -0,062 |
| 22 | P09622 DLDH_HUMAN  | K.SEEQLKEEGIEYK.V           | 3 | 3,8294 | 0,471 | -0,116 |
| 22 | P20042 IF2B_HUMAN  | K.KIFDIDAEEGVK.D            | 3 | 3,8193 | 0,159 | -0,061 |
| 22 | P60174 TPIS_HUMAN  | R.HVFGESDELIGQK.V           | 3 | 3,7988 | 0,201 | -0,501 |
| 22 | P17096 HMGA1_HUMAN | K.KLEKEEEEGISQESSEEEQ.-     | 3 | 3,7829 | 0,451 | -0,654 |
| 22 | P09493 TPM1_HUMAN  | R.SKQLEDELVSLQK.K           | 2 | 3,7651 | 0,333 | 0,322  |
| 22 | Q13263 TIF1B_HUMAN | K.DHQYQFLEDAVR.N            | 3 | 3,7624 | 0,284 | -0,06  |
| 22 | O00273 DFFA_HUMAN  | R.EQHGVAASCLEDLR.S          | 3 | 3,7574 | 0,379 | 0,115  |
| 22 | O00165 HAX1_HUMAN  | R.FHDNFGFDDLVR.D            | 3 | 3,755  | 0,33  | -0,309 |
| 22 | Q8WWM7 ATX2L_HUMAN | K.DKFTDSAIAM*NSK.V          | 2 | 3,7358 | 0,474 | 0,085  |
| 22 | P11940 PABP1_HUMAN | R.AKEFTNVYIK.N              | 3 | 3,7282 | 0,246 | 0,301  |
| 22 | P15531 NDKA_HUMAN  | R.NIIHGSDSVESA EK.E         | 2 | 3,7276 | 0,486 | -0,739 |
| 22 | P61086 UBE2K_HUMAN | K.KIENLCAM*GFDR.N           | 3 | 3,7248 | 0,142 | 0,124  |
| 22 | P31947 1433S_HUMAN | K.GAVEKGEELSCEER.N          | 2 | 3,7199 | 0,501 | -0,536 |
| 22 | P39687 AN32A_HUMAN | K.CPNLTHLNLSGNK.I           | 3 | 3,7171 | 0,32  | 0,374  |
| 22 | Q15003 CND2_HUMAN  | R.KAPLNIPGTPVLEDFPQNDEKER.L | 3 | 3,7163 | 0,399 | -0,538 |
| 22 | Q07955 SFRS1_HUMAN | R.TKDIEDVFK.Y               | 3 | 3,7149 | 0,152 | 0,145  |

|    |                    |                                  |   |        |       |        |
|----|--------------------|----------------------------------|---|--------|-------|--------|
| 22 | P63104 1433Z_HUMAN | R.YLAEVAAGDDKK.G                 | 2 | 3,7097 | 0,354 | -0,286 |
| 22 | O60506 HNRPQ_HUMAN | K.TKEQILEEFSK.V                  | 2 | 3,707  | 0,418 | -0,722 |
| 22 | O15144 ARPC2_HUMAN | K.YFQFQEEGKEGENR.A               | 2 | 3,7021 | 0,493 | -0,208 |
| 22 | P62851 RS25_HUMAN  | R.DKLNNLVLFDK.A                  | 2 | 3,7019 | 0,333 | -0,462 |
| 22 | P43304 GPDM_HUMAN  | R.CKDVLGTGQEFDVR.A               | 3 | 3,701  | 0,335 | 0,233  |
| 22 | O00231 PSD11_HUMAN | K.YVRPFLNSISK.A                  | 3 | 3,6995 | 0,268 | 0,138  |
| 22 | P16403 H12_HUMAN   | R.KASGPPVSELTK.A                 | 3 | 3,6866 | 0,298 | 0,207  |
| 22 | O75874 IDHC_HUMAN  | R.FKDIFQEIYDK.Q                  | 2 | 3,682  | 0,2   | -0,422 |
| 22 | O60841 IF2P_HUMAN  | R.HFEATDILVSK.I                  | 3 | 3,6654 | 0,282 | 0,145  |
| 22 | Q02750 MP2K1_HUMAN | K.KLEELELDEQQR.K                 | 3 | 3,6619 | 0,202 | 0,478  |
| 22 | P06576 ATPB_HUMAN  | K.AHGGYSVFAGVGER.T               | 2 | 3,6609 | 0,55  | -0,347 |
| 22 | P62937 PPIA_HUMAN  | K.VKEGM*NIVEAM*ER.F              | 3 | 3,6504 | 0,286 | -0,119 |
| 22 | P62244 RS15A_HUMAN | R.FDVQLKDLEK.W                   | 3 | 3,6448 | 0,196 | 0,296  |
| 22 | P07951 TPM2_HUMAN  | R.KLVILEGELER.S                  | 2 | 3,6402 | 0,439 | -0,47  |
| 22 | Q16576 RBBP7_HUMAN | K.IGEEQSAEDAEDGPPPELLFIHGGHTAK.I | 3 | 3,6368 | 0,416 | -0,321 |
| 22 | O75643 U520_HUMAN  | K.KADEVLEILK.T                   | 2 | 3,6338 | 0,337 | -0,105 |
| 22 | Q14137 BOP1_HUMAN  | R.TRDELQFLDK.M                   | 2 | 3,6334 | 0,269 | -0,265 |
| 22 | Q969G3 SMCE1_HUMAN | R.KLEAELLQIEER.H                 | 3 | 3,6306 | 0,19  | 0,249  |
| 22 | P06733 ENOA_HUMAN  | K.LNVTEQEKIDK.L                  | 2 | 3,6283 | 0,353 | -0,648 |
| 22 | P11142 HSP7C_HUMAN | K.MKEIAEAYLGK.T                  | 3 | 3,6267 | 0,336 | 0,146  |
| 22 | Q15185 TEBP_HUMAN  | K.SKLTFSCLGGSDNFK.H              | 3 | 3,6146 | 0,407 | 0      |
| 22 | P35749 MYH11_HUMAN | K.KEEELQAALAR.L                  | 3 | 3,6011 | 0,306 | 0,218  |
| 22 | P61978 HNRPK_HUMAN | K.RPAEDM*EEEQAFK.R               | 3 | 3,5865 | 0,318 | 0      |
| 22 | P21333 FLNA_HUMAN  | K.GKLDVQFSGLTK.G                 | 3 | 3,5736 | 0,39  | 0,354  |
| 22 | P11940 PABP1_HUMAN | K.NFGEDM*DDERLK.D                | 2 | 3,5696 | 0,263 | 0,082  |
| 22 | O43390 HNRPR_HUMAN | K.TKENILEEFSK.V                  | 2 | 3,5683 | 0,447 | -0,274 |
| 22 | Q13185 CBX3_HUMAN  | K.WKDSDEADLVLAK.E                | 3 | 3,5638 | 0,246 | 0,061  |
| 22 | P25205 MCM3_HUMAN  | K.DHQTITIQEM*PEKAPAGQLPR.S       | 3 | 3,5623 | 0,412 | -0,462 |
| 22 | P09622 DLDH_HUMAN  | K.SEEQLKEEGIEYK.V                | 2 | 3,5544 | 0,45  | -0,077 |
| 22 | Q96E29 MTER1_HUMAN | K.NHAIFSEDLENLK.T                | 3 | 3,5518 | 0,302 | -0,12  |
| 22 | Q14137 BOP1_HUMAN  | R.TRDELQFLDK.M                   | 3 | 3,5469 | 0,088 | -0,066 |
| 22 | P30622 CLIP1_HUMAN | K.QQHIEQLLAER.D                  | 3 | 3,5448 | 0,145 | -0,268 |
| 22 | Q86WR0 CCD25_HUMAN | K.DKYENEDLIK.H                   | 3 | 3,5329 | 0,081 | 0      |

|    |                     |                        |   |        |       |        |
|----|---------------------|------------------------|---|--------|-------|--------|
| 22 | Q15370 ELOB_HUMAN   | R.LYKDDQLDDGK.T        | 3 | 3,5282 | 0,367 | 0,064  |
| 22 | P26641 EF1G_HUMAN   | R.KLDPGSEETQTLVR.E     | 3 | 3,5252 | 0,229 | 0,116  |
| 22 | P11021 GRP78_HUMAN  | K.M*KETAAYLGK.K        | 3 | 3,5216 | 0,303 | -0,073 |
| 22 | P19338 NUCL_HUMAN   | K.TEADAECTFEK.Q        | 2 | 3,5206 | 0,422 | -0,349 |
| 22 | Q15397 K0020_HUMAN  | R.HAEASAIVEYAYNDK.A    | 3 | 3,515  | 0,418 | 0      |
| 22 | Q02539 H11_HUMAN    | K.KALAAAGYDVEK.N       | 2 | 3,5109 | 0,551 | 0,296  |
| 22 | B2RDE1 B2RDE1_HUMAN | R.AREQAEAEVASLNR.R     | 3 | 3,5102 | 0,235 | 0,118  |
| 22 | P50750 CDK9_HUMAN   | K.HENVVNIEICR.T        | 3 | 3,5098 | 0,158 | -0,611 |
| 22 | P61978 HNRPK_HUMAN  | K.LFQECPPHSTDR.V       | 2 | 3,4937 | 0,423 | -0,787 |
| 22 | P31947 1433S_HUMAN  | K.GAVEKGEELSCEER.N     | 3 | 3,4896 | 0,334 | 0,344  |
| 22 | P09493 TPM1_HUMAN   | R.RIQLVEEELDR.A        | 2 | 3,4837 | 0,371 | -0,349 |
| 22 | P09493 TPM1_HUMAN   | R.RIQLVEEELDR.A        | 3 | 3,4761 | 0,252 | -0,131 |
| 22 | P35580 MYH10_HUMAN  | R.AGVLAHLEER.D         | 2 | 3,464  | 0,42  | -0,399 |
| 22 | Q14CX7 CL030_HUMAN  | R.LRPIYDYLNGNKK.M      | 3 | 3,4614 | 0,184 | 0,216  |
| 22 | P67936 TPM4_HUMAN   | R.KIQALQQADEAEDR.A     | 3 | 3,4589 | 0,343 | 0,105  |
| 22 | P30050 RL12_HUMAN   | R.HPHDIIDDINGAVECPAS.- | 3 | 3,4428 | 0,475 | 0,179  |
| 22 | P02545 LMNA_HUMAN   | R.LKDLEALLNSK.E        | 3 | 3,4405 | 0,173 | -0,441 |
| 22 | Q8N0Z6 TTC5_HUMAN   | R.QREQQLLEFLDR.L       | 3 | 3,44   | 0,239 | -0,464 |
| 22 | Q7KZF4 SND1_HUMAN   | R.SSHYDELLAAEAR.A      | 3 | 3,4396 | 0,13  | 0      |
| 22 | Q08945 SSRP1_HUMAN  | K.SDHPGISITDLSK.K      | 3 | 3,4371 | 0,213 | 0      |
| 22 | Q07955 SFRS1_HUMAN  | R.TKDIEDVFK.Y          | 2 | 3,4346 | 0,327 | 0      |
| 22 | Q14320 FA50A_HUMAN  | K.FSAHYDAVEAEK.S       | 3 | 3,4258 | 0,197 | -0,062 |
| 22 | P06753 TPM3_HUMAN   | R.KLVIEGDLER.T         | 2 | 3,4256 | 0,397 | 0      |
| 22 | Q9NY61 AATF_HUMAN   | K.DKGGPEFSSALK.N       | 3 | 3,4204 | 0,236 | 0,148  |
| 22 | P62736 ACTA_HUMAN   | K.DSYVGDEAQSQR.G       | 2 | 3,4155 | 0,529 | -0,81  |
| 22 | P60842 IF4A1_HUMAN  | R.GFKDQIYDIFQK.L       | 3 | 3,4124 | 0,2   | -0,183 |
| 22 | P37108 SRP14_HUMAN  | K.KGTVEGFEPADNK.C      | 2 | 3,412  | 0,358 | -0,614 |
| 22 | Q9UBB9 TFP11_HUMAN  | K.DKFNEALDIM*NR.A      | 3 | 3,4097 | 0,178 | -0,123 |
| 22 | Q12756 KIF1A_HUMAN  | R.EREEATYLLEQQR.L      | 3 | 3,4036 | 0,202 | 0      |
| 22 | Q9NZ01 GPSN2_HUMAN  | K.HYEVEILDAK.T         | 2 | 3,4011 | 0,406 | -0,201 |
| 22 | P62333 PRS10_HUMAN  | K.HGEIDYEAIVK.L        | 3 | 3,4002 | 0,417 | 0,144  |
| 22 | Q8TCD5 NT5C_HUMAN   | R.DKTVVLGDLIDDKDTRV.G  | 3 | 3,3916 | 0,354 | -0,545 |
| 22 | P35579 MYH9_HUMAN   | K.HSQAVEELAEQLEQTK.R   | 3 | 3,3906 | 0,299 | -0,298 |

|    |                    |                              |   |        |       |        |
|----|--------------------|------------------------------|---|--------|-------|--------|
| 22 | Q8NE71 ABCF1_HUMAN | K.KTFFEELAVEDK.Q             | 3 | 3,3892 | 0,165 | 0,063  |
| 22 | P54136 SYRC_HUMAN  | R.M*NDIVKEFEDR.G             | 2 | 3,3882 | 0,334 | -0,605 |
| 22 | O43148 MCES_HUMAN  | K.NLEEGHSSTVAAHYNELQEVGLEK.R | 3 | 3,3834 | 0,201 | -0,069 |
| 22 | P09874 PARP1_HUMAN | K.LQLLEDDKENR.Y              | 2 | 3,3824 | 0,374 | -0,444 |
| 22 | P16403 H12_HUMAN   | R.SGVSLAALKK.A               | 2 | 3,3773 | 0,197 | 0,063  |
| 22 | Q01082 SPTB2_HUMAN | R.EVVAGSHELGGQDYEHVTM*LQER.F | 3 | 3,3733 | 0,36  | -0,36  |
| 22 | Q9Y3T9 NOC2L_HUMAN | R.DREIQLEISGK.E              | 3 | 3,3707 | 0,199 | 0,284  |
| 22 | Q8IZT6 ASPM_HUMAN  | K.DNSQPVHLESTIAHEIYQK.I      | 3 | 3,3699 | 0,12  | -0,331 |
| 22 | P08621 RU17_HUMAN  | R.GYAFIEYEHER.D              | 2 | 3,3686 | 0,434 | -0,431 |
| 22 | P35579 MYH9_HUMAN  | K.KVEAQLQELQVK.F             | 3 | 3,3599 | 0,114 | 0,129  |
| 22 | P78527 PRKDC_HUMAN | R.HGDLPDIQIK.H               | 2 | 3,3588 | 0,348 | -0,107 |
| 22 | POC0S8 H2A1_HUMAN  | R.NDEELNKLLGK.V              | 2 | 3,3554 | 0,389 | -0,383 |
| 22 | P11586 C1TC_HUMAN  | R.IFHELTSQTDK.A              | 3 | 3,3515 | 0,338 | 0,074  |
| 22 | P19105 MLRM_HUMAN  | R.DGFIDKEDLHDM*LASLGK.N      | 3 | 3,3513 | 0,414 | -0,362 |
| 22 | P11142 HSP7C_HUMAN | K.MKEIAEAYLGK.T              | 2 | 3,3447 | 0,333 | -0,389 |
| 22 | Q04637 IF4G1_HUMAN | K.DKDDDEVFEK.K               | 2 | 3,3402 | 0,288 | -0,689 |
| 22 | P11142 HSP7C_HUMAN | K.M*KEIAEAYLGK.T             | 3 | 3,3385 | 0,319 | -0,576 |
| 22 | Q99871 UC5IP_HUMAN | K.SEEEEKLAELAR.Q             | 3 | 3,3315 | 0,256 | 0,195  |
| 22 | Q05524 ENO1B_HUMAN | R.IGAEVYHNLK.N               | 2 | 3,3303 | 0,301 | 0      |
| 22 | P08107 HSP71_HUMAN | R.ARFEELCSDLFR.S             | 2 | 3,3291 | 0,301 | -0,712 |
| 22 | Q1KMD3 HNRL2_HUMAN | K.SRDLLVQQASQCLSK.L          | 3 | 3,3262 | 0,266 | -0,106 |
| 22 | Q8TCS8 PNPT1_HUMAN | K.DKNFM*LHYEFPPYATNEIGK.V    | 3 | 3,3223 | 0,367 | 0      |
| 22 | Q08EQ4 TMSL1_HUMAN | K.TETQEKNPLPSK.E             | 3 | 3,3216 | 0,283 | -0,133 |
| 22 | O60841 IF2P_HUMAN  | K.KQDFEDDILK.E               | 2 | 3,3181 | 0,288 | -0,447 |
| 22 | Q5T9A4 ATD3B_HUMAN | K.LKEYEAAVEQLK.S             | 3 | 3,3171 | 0,164 | 0      |
| 22 | P60174 TPIS_HUMAN  | R.KQSLGELIGTLNAAK.V          | 2 | 3,3168 | 0,323 | 0,079  |
| 22 | P07237 PDIA1_HUMAN | K.YKPESEELTAER.I             | 3 | 3,3163 | 0,211 | 0,189  |
| 22 | Q9BQG0 MBB1A_HUMAN | K.HPFSFPLENQAR.E             | 3 | 3,3159 | 0,227 | -0,063 |
| 22 | P36507 MP2K2_HUMAN | K.VGELKDDDFER.I              | 3 | 3,3152 | 0,397 | -0,069 |
| 22 | Q7KZF4 SND1_HUMAN  | K.IHVFYIDYGNR.E              | 2 | 3,3142 | 0,537 | 0      |
| 22 | P26640 SYVC_HUMAN  | R.KVDEAIALFQK.M              | 3 | 3,3087 | 0,093 | 0,072  |
| 22 | Q96I25 SPF45_HUMAN | K.KSDSNPLTEILK.C             | 2 | 3,3072 | 0,394 | 0      |
| 22 | Q9Y490 TLN1_HUMAN  | K.LKPLPGETM*EK.C             | 3 | 3,3022 | 0,159 | -0,508 |

|    |                     |                       |   |        |       |        |
|----|---------------------|-----------------------|---|--------|-------|--------|
| 22 | Q99627 CSN8_HUMAN   | R.KPVAGALDVSNK.F      | 3 | 3,2982 | 0,191 | 0      |
| 22 | Q86UP2 KTN1_HUMAN   | R.TAEHEAAQQDLQSK.F    | 3 | 3,2957 | 0,337 | -0,47  |
| 22 | P62937 PPIA_HUMAN   | K.VKEGM*NIVEAM*ER.F   | 2 | 3,2952 | 0,485 | -1,349 |
| 22 | P30086 PEBP1_HUMAN  | K.NRPTSISWDGLDSGK.L   | 3 | 3,2914 | 0,384 | 0,224  |
| 22 | O43707 ACTN4_HUMAN  | K.DHGGALGPPEFK.A      | 3 | 3,2907 | 0,193 | 0,364  |
| 22 | O60841 IF2P_HUMAN   | R.HFEATDILVSK.I       | 2 | 3,284  | 0,525 | -0,097 |
| 22 | Q6DD88 ATLA3_HUMAN  | K.DQHSFELDEK.A        | 2 | 3,2829 | 0,272 | -0,684 |
| 22 | P04908 H2A1B_HUMAN  | R.NDEELNKLGR.V        | 2 | 3,2767 | 0,396 | -0,375 |
| 22 | P25705 ATPA_HUMAN   | K.HALIIYDDLK.Q        | 2 | 3,2753 | 0,44  | 0,189  |
| 22 | P05023 AT1A1_HUMAN  | R.DKYEPAAVSEQGDK.K    | 3 | 3,2686 | 0,082 | 0,238  |
| 22 | P13010 KU86_HUMAN   | R.HIEFTDLSSR.F        | 2 | 3,2639 | 0,53  | -0,093 |
| 22 | Q86TX2 ACOT1_HUMAN  | R.YRADTLGELDLER.A     | 3 | 3,2614 | 0,218 | 0      |
| 22 | Q9BT25 NYS48_HUMAN  | R.SFAQVLELSAEASK.E    | 2 | 3,2599 | 0,45  | -0,659 |
| 22 | Q9NRR5 UBQL4_HUMAN  | K.DKEEIVICDR.A        | 2 | 3,2592 | 0,34  | -0,478 |
| 22 | Q9NSD9 SYFB_HUMAN   | K.DRYDSFIELQEK.L      | 3 | 3,2567 | 0,109 | 0      |
| 22 | P05198 IF2A_HUMAN   | R.VSPEEAIKCEDK.F      | 2 | 3,256  | 0,394 | 0      |
| 22 | P16401 H15_HUMAN    | R.KATGPPVSELITK.A     | 3 | 3,2506 | 0,171 | 0,273  |
| 22 | P30085 KCY_HUMAN    | R.KNPDSQYGELIEK.Y     | 2 | 3,2471 | 0,334 | -0,08  |
| 22 | Q9NW13 RBM28_HUMAN  | K.RPIVEFSLEDR.R       | 3 | 3,2396 | 0,38  | 0      |
| 22 | P42704 LPPRC_HUMAN  | K.NTKLDDLFLK.R        | 2 | 3,2316 | 0,308 | 0,101  |
| 22 | P16403 H12_HUMAN    | R.KASGPPVSELITK.A     | 2 | 3,2267 | 0,301 | -0,368 |
| 22 | O60506 HNRPO_HUMAN  | K.TKEQILEEFSK.V       | 3 | 3,2253 | 0,151 | 0,068  |
| 22 | P46063 RECQ1_HUMAN  | K.VKDILQNVFK.L        | 3 | 3,2194 | 0,108 | 0,304  |
| 22 | P11940 PABP1_HUMAN  | R.KEFSPFGTITSAK.V     | 2 | 3,2151 | 0,399 | 0,259  |
| 22 | P63208 SKP1_HUMAN   | K.NDFTEEEEAQVRK.E     | 2 | 3,2105 | 0,41  | -0,612 |
| 22 | P16401 H15_HUMAN    | K.KALAAGGYDVEK.N      | 2 | 3,2072 | 0,467 | -0,399 |
| 22 | O14818 PSA7_HUMAN   | R.GRDIVVLGVEK.K       | 2 | 3,2039 | 0,394 | -0,103 |
| 22 | P24534 EF1B_HUMAN   | K.KLQIQCVVEDDK.V      | 3 | 3,198  | 0,302 | 0,372  |
| 22 | Q9Y5L4 TIM13_HUMAN  | K.CIGKPGGSLDNSEQK.C   | 3 | 3,1917 | 0,396 | -0,115 |
| 22 | Q05D20 Q05D20_HUMAN | K.DSRPSQAAGDNQGDEVK.E | 3 | 3,1857 | 0,308 | -0,103 |
| 22 | P48634 BAT2_HUMAN   | R.DGGGRGPDELEGPDSK.L  | 3 | 3,1816 | 0,345 | -0,577 |
| 22 | P61158 ARP3_HUMAN   | R.HGIVEDWDLM*ER.F     | 3 | 3,1796 | 0,083 | 0      |
| 22 | Q01518 CAP1_HUMAN   | K.KEPAVLELEGK.K       | 3 | 3,177  | 0,248 | 0,528  |

|    |                    |                         |   |        |       |        |
|----|--------------------|-------------------------|---|--------|-------|--------|
| 22 | O60841 IF2P_HUMAN  | K.KQDFEDDILK.E          | 3 | 3,1766 | 0,183 | 0,067  |
| 22 | P07384 CAN1_HUMAN  | K.IRLDETDDPDDYGDR.E     | 3 | 3,1722 | 0,281 | 0,204  |
| 22 | P07195 LDHB_HUMAN  | K.LKDDEVAQLK.K          | 2 | 3,1631 | 0,372 | -0,105 |
| 22 | O60812 HNRCL_HUMAN | K.QKVDSLLENLEK.I        | 3 | 3,1583 | 0,185 | -0,517 |
| 22 | P11142 HSP7C_HUMAN | K.M*KEIAEAYLGK.T        | 2 | 3,1581 | 0,424 | 0      |
| 22 | Q00839 HNRPU_HUMAN | K.LLEQYKEESK.K          | 2 | 3,1546 | 0,333 | -0,481 |
| 22 | Q9H1I8 ASCC2_HUMAN | R.HNVFQNEFDVFSR.D       | 3 | 3,1534 | 0,312 | 0,834  |
| 22 | Q9UBS4 DJB11_HUMAN | K.KGEGLPNFDNNDNIK.G     | 3 | 3,1527 | 0,248 | -0,117 |
| 22 | Q7Z406 MYH14_HUMAN | R.HGQALGELAEQLEQAR.R    | 3 | 3,1509 | 0,292 | -0,627 |
| 22 | P20645 MPRD_HUMAN  | R.HTLADNFNPVSEER.G      | 3 | 3,148  | 0,301 | 0,225  |
| 22 | P02545 LMNA_HUMAN  | R.TLEGELHDLR.G          | 2 | 3,1458 | 0,314 | -0,206 |
| 22 | P26583 HMGB2_HUMAN | K.SEHPGLSIGDTAK.K       | 3 | 3,1396 | 0,25  | 0,209  |
| 22 | O14787 TNPO2_HUMAN | R.SHAIACVNQFIM*DR.A     | 3 | 3,1334 | 0,366 | -0,327 |
| 22 | P62937 PPIA_HUMAN  | K.VKEGMNIVEAM*ER.F      | 3 | 3,1286 | 0,118 | -0,421 |
| 22 | O60841 IF2P_HUMAN  | K.NKPGPNIESGNEDDDASFK.I | 3 | 3,1262 | 0,294 | -0,54  |
| 22 | Q15276 RABE1_HUMAN | K.DKQELEDFIK.Q          | 3 | 3,1241 | 0,188 | 0      |
| 22 | Q14204 DYHC1_HUMAN | R.TSFLDDAFRK.N          | 2 | 3,1168 | 0,419 | 0      |
| 22 | Q8WWY3 PRP31_HUMAN | K.VGYELKDEIER.K         | 3 | 3,1128 | 0,383 | 0      |
| 22 | O15085 ARHGB_HUMAN | K.DQHGFQFTVSGDR.I       | 3 | 3,0968 | 0,279 | 0,193  |
| 22 | P07237 PDIA1_HUMAN | K.NFEDVAFDEKK.N         | 2 | 3,0939 | 0,356 | -0,455 |
| 22 | P61160 ARP2_HUMAN  | K.HLWDYTFGPEK.L         | 2 | 3,091  | 0,462 | -0,963 |
| 22 | P32969 RL9_HUMAN   | R.KFLDGIYVSEK.G         | 2 | 3,0853 | 0,184 | -0,376 |
| 22 | P56192 SYMC_HUMAN  | K.ADKNEVAEVAK.L         | 3 | 3,0797 | 0,177 | 0,073  |
| 22 | P52701 MSH6_HUMAN  | R.VHVQFFDDSPTR.G        | 3 | 3,0726 | 0,284 | 0,063  |
| 22 | P02545 LMNA_HUMAN  | K.AAYEAEELGDARK.T       | 2 | 3,0681 | 0,399 | 0,094  |
| 22 | P48643 TCPE_HUMAN  | K.IDDIRKPGSEEE.-        | 2 | 3,0681 | 0,396 | -0,879 |
| 22 | Q86VP6 CAND1_HUMAN | K.DSIKLDLDDSER.K        | 3 | 3,0653 | 0,44  | -0,071 |
| 22 | Q9UQE7 SMC3_HUMAN  | K.AKDLQDELGNSEQR.K      | 3 | 3,063  | 0,214 | -0,109 |
| 22 | Q96T23 RSF1_HUMAN  | R.NRNELAETLALLK.A       | 3 | 3,0579 | 0,181 | -0,554 |
| 22 | P63104 1433Z_HUMAN | R.YLAEVAAGDDKK.G        | 3 | 3,0539 | 0,354 | 0      |
| 22 | Q9H2J4 PDCL3_HUMAN | K.ESLKELEEEAEQQR.I      | 3 | 3,0509 | 0,275 | 0,099  |
| 22 | Q58FF8 H90B2_HUMAN | K.IRYESLTDPK.L          | 3 | 3,0478 | 0,203 | 0      |
| 22 | O43852 CALU_HUMAN  | K.M*ADKDGDLIATK.E       | 3 | 3,0431 | 0,311 | 0,141  |

|    |                    |                           |   |        |       |        |
|----|--------------------|---------------------------|---|--------|-------|--------|
| 22 | Q9Y394 DHRS7_HUMAN | K.EKDILVLPDLTDTGSHEAATK.A | 3 | 3,0387 | 0,2   | -0,619 |
| 22 | P62937 PPIA_HUMAN  | K.VKEGM*NIVEAMER.F        | 3 | 3,0364 | 0,249 | -0,12  |
| 22 | Q8WXX5 DNJC9_HUMAN | K.KISLEDIQAFEK.T          | 3 | 3,0329 | 0,297 | -0,193 |
| 22 | Q03701 CEBPZ_HUMAN | R.KGTDDDFDFAGSFQGPR.K     | 3 | 3,0329 | 0,34  | -0,21  |
| 22 | Q01082 SPTB2_HUMAN | K.HLLGVEDLLQK.H           | 2 | 3,0235 | 0,368 | -0,482 |
| 22 | P22234 PUR6_HUMAN  | K.TKEVYELLDSPGK.V         | 3 | 3,0187 | 0,177 | 0,433  |
| 22 | P09429 HMGB1_HUMAN | K.HPDASVNFSEFSK.K         | 3 | 3,0183 | 0,324 | 0,187  |
| 22 | O60333 KIF1B_HUMAN | K.EKEEADLLLEQQR.L         | 3 | 3,0165 | 0,11  | 0,343  |
| 22 | Q9BWF3 RBM4_HUMAN  | K.NYGFVHIEDK.T            | 2 | 3,015  | 0,409 | -0,599 |
| 22 | P33778 H2B1B_HUMAN | R.KESYSIYVYK.V            | 2 | 3,0115 | 0,403 | 0,191  |
| 22 | Q13442 HAP28_HUMAN | K.KVTQLDLGPK.E            | 3 | 3,0104 | 0,264 | 0,527  |
| 22 | P35579 MYH9_HUMAN  | K.DLEAHIDSANK.N           | 2 | 3,0099 | 0,466 | 0      |
| 22 | P62750 RL23A_HUMAN | K.KLYDIDVAK.V             | 2 | 3,0035 | 0,309 | 0,115  |
| 22 | P54136 SYRC_HUMAN  | R.MNDIVKEFEDR.G           | 3 | 2,9993 | 0,294 | 0,066  |
| 22 | P11142 HSP7C_HUMAN | R.RFDDAVVQSDM*K.H         | 2 | 2,9984 | 0,475 | 0      |
| 22 | Q7KZF4 SND1_HUMAN  | K.IHVFYIDYGNR.E           | 3 | 2,9969 | 0,184 | 0,065  |
| 22 | P62805 H4_HUMAN    | R.DAVTYTEHAK.R            | 2 | 2,9894 | 0,343 | -0,323 |
| 22 | P49023 PAXI_HUMAN  | R.KDYFDM*FAPK.C           | 3 | 2,9889 | 0,146 | 0,429  |
| 22 | Q13177 PAK2_HUMAN  | K.KNPQAVLDVLK.F           | 3 | 2,9873 | 0,304 | 0,373  |
| 22 | Q9Y3A3 MOBL3_HUMAN | R.HTLDGAACLLNSNK.Y        | 3 | 2,987  | 0,163 | 0,664  |
| 22 | P50395 GDIB_HUMAN  | K.EPEKEIRPALELLEPIEQK.F   | 3 | 2,9816 | 0,099 | -0,324 |
| 22 | Q96CT7 CC124_HUMAN | K.SHLEVPLEENVNR.R         | 2 | 2,9803 | 0,457 | -0,159 |
| 22 | Q8NE71 ABCF1_HUMAN | R.KNQDEESQEAPELLK.R       | 3 | 2,9778 | 0,159 | 0,416  |
| 22 | P62753 RS6_HUMAN   | K.LFNLSKEDDVR.Q           | 3 | 2,9776 | 0,202 | 0,137  |
| 22 | P12814 ACTN1_HUMAN | R.QKDYETATLSEIK.A         | 2 | 2,9746 | 0,431 | 0,32   |
| 22 | P08865 RSSA_HUMAN  | R.KSDGIYIINLK.R           | 3 | 2,9649 | 0,096 | 0,217  |
| 22 | P12814 ACTN1_HUMAN | R.QKDYETATLSEIK.A         | 3 | 2,9576 | 0,257 | 0,3    |
| 22 | P62807 H2B1C_HUMAN | R.KESYSVYVYK.V            | 2 | 2,956  | 0,425 | -0,289 |
| 22 | Q86WR0 CCD25_HUMAN | K.DKYENEDLIK.H            | 2 | 2,948  | 0,18  | -0,578 |
| 22 | Q9Y3T9 NOC2L_HUMAN | R.DREIQLEISGK.E           | 2 | 2,9475 | 0,251 | -0,568 |
| 22 | P46060 RAGP1_HUMAN | R.NRLENDGATALAEAFR.V      | 2 | 2,9374 | 0,432 | 0,628  |
| 22 | Q58FF7 H90B3_HUMAN | R.APFDLFENKK.K            | 2 | 2,9316 | 0,349 | -0,101 |
| 22 | P15531 NDKA_HUMAN  | K.DRPFFAGLVK.Y            | 2 | 2,9304 | 0,246 | -1,379 |

|    |                    |                             |   |        |       |        |
|----|--------------------|-----------------------------|---|--------|-------|--------|
| 22 | Q9Y224 CN166_HUMAN | R.HDDYLVM*LK.A              | 2 | 2,9261 | 0,396 | 0      |
| 22 | O43865 SAHH2_HUMAN | R.YKQDVYLLPK.K              | 3 | 2,9232 | 0,162 | 0      |
| 22 | Q9BUJ2 HNRL1_HUMAN | K.KYNILGTNAIM*DK.M          | 3 | 2,9204 | 0,31  | 0,183  |
| 22 | P61019 RAB2A_HUMAN | R.EHGLIFM*ETSAK.T           | 3 | 2,918  | 0,165 | -0,066 |
| 22 | P62244 RS15A_HUMAN | R.FDVQLKDLEK.W              | 2 | 2,9115 | 0,137 | -0,296 |
| 22 | Q03701 CEBPZ_HUMAN | K.DKQNIFFER.Q               | 3 | 2,9014 | 0,182 | -0,372 |
| 22 | P54136 SYRC_HUMAN  | R.M*NDIVKEFEDR.G            | 3 | 2,8998 | 0,366 | 0,065  |
| 22 | Q6S8J3 A26CA_HUMAN | K.QEYDESGPSIVHR.K           | 3 | 2,899  | 0,343 | -0,121 |
| 22 | P04179 SODM_HUMAN  | R.DFGSFDKFK.E               | 2 | 2,8981 | 0,429 | -0,224 |
| 22 | P07900 HS90A_HUMAN | R.APFDLFENRK.K              | 2 | 2,8976 | 0,307 | -0,296 |
| 22 | P28074 PSB5_HUMAN  | R.VSSDNVADLHEK.Y            | 3 | 2,8936 | 0,358 | 0,139  |
| 22 | Q8WTT2 NOC3L_HUMAN | K.LREFEEGLVSQYK.F           | 3 | 2,8868 | 0,128 | -0,229 |
| 22 | Q9Y5B9 SP16H_HUMAN | R.GDKVDILYNNIK.H            | 3 | 2,8829 | 0,203 | 0,131  |
| 22 | O43390 HNRPR_HUMAN | K.DYAFVHFEDR.G              | 2 | 2,88   | 0,435 | -0,282 |
| 22 | P38159 HNRPG_HUMAN | K.VEQATKPSFESGR.R           | 3 | 2,8795 | 0,42  | 0,191  |
| 22 | Q9Y2T3 GUAD_HUMAN  | R.DHLLGVSDSGK.I             | 2 | 2,8765 | 0,441 | -0,108 |
| 22 | P39023 RL3_HUMAN   | K.DDPSKPVHLTAFLGYK.A        | 3 | 2,8751 | 0,356 | -0,102 |
| 22 | P11142 HSP7C_HUMAN | R.M*VNHFAIEFK.R             | 3 | 2,8715 | 0,115 | 0,292  |
| 22 | Q58FF8 H90B2_HUMAN | K.EKYIDQEELNK.T             | 2 | 2,8665 | 0,285 | 0      |
| 22 | Q9UGV6 HMG1X_HUMAN | K.GEHPGLSIGDVAK.K           | 2 | 2,8603 | 0,388 | 0,095  |
| 22 | P13639 EF2_HUMAN   | K.DLEEDHACIPIKK.S           | 3 | 2,856  | 0,221 | -0,117 |
| 22 | P63151 2ABA_HUMAN  | R.DKRPEGYNLKEEDGR.Y         | 3 | 2,8513 | 0,241 | -0,101 |
| 22 | Q13813 SPTA2_HUMAN | R.EKEPIVGSTDYGKDEDSAEALLK.K | 3 | 2,85   | 0,341 | -0,22  |
| 22 | P33778 H2B1B_HUMAN | R.KESYSIYVK.V               | 3 | 2,8494 | 0,274 | 0,357  |
| 22 | P35580 MYH10_HUMAN | K.KFDQLLAEEK.S              | 3 | 2,849  | 0,15  | 0,225  |
| 22 | Q15056 IF4H_HUMAN  | R.GSNM*DFREPTEER.A          | 3 | 2,8487 | 0,266 | -0,427 |
| 22 | Q9UGV6 HMG1X_HUMAN | K.GEHPGLSIGDVAK.K           | 3 | 2,8484 | 0,169 | 0,214  |
| 22 | P31947 1433S_HUMAN | K.SNEEGSEEKGPEVR.E          | 3 | 2,8452 | 0,365 | 0      |
| 22 | O43143 DHX15_HUMAN | K.DRFTDILVR.H               | 2 | 2,8443 | 0,089 | -0,322 |
| 22 | P09429 HMGB1_HUMAN | K.HPDASVNFSEFSK.K           | 2 | 2,8433 | 0,326 | -0,75  |
| 22 | P61006 RAB8A_HUMAN | R.NIEEHASADVEK.M            | 2 | 2,8299 | 0,22  | -0,273 |
| 22 | P26640 SYVC_HUMAN  | R.KVDEAIALFQK.M             | 2 | 2,8227 | 0,452 | -0,29  |
| 22 | P49750 YLP1_HUMAN  | R.DKEVEFGGAPR.V             | 3 | 2,8224 | 0,255 | 0      |



|    |                    |                               |   |        |       |        |
|----|--------------------|-------------------------------|---|--------|-------|--------|
| 22 | Q9Y2R5 RT17_HUMAN  | K.HELAEIFVK.V                 | 2 | 2,7976 | 0,253 | 0,225  |
| 22 | Q9NZI8 IF2B1_HUMAN | K.LKEENFFGPK.E                | 3 | 2,7889 | 0,263 | 0      |
| 22 | P08107 HSP71_HUMAN | R.ARFEELCSDLFR.S              | 3 | 2,7839 | 0,329 | 0,237  |
| 22 | P50454 SERPH_HUMAN | K.HLAGLGLTEAIDK.N             | 3 | 2,7819 | 0,251 | 0,068  |
| 22 | P49915 GUAA_HUMAN  | R.ESQSVVEALKK.L               | 2 | 2,7811 | 0,247 | -0,489 |
| 22 | P07814 SYEP_HUMAN  | K.DEDFKQYVNK.N                | 3 | 2,773  | 0,197 | -0,142 |
| 22 | Q14683 SMC1A_HUMAN | K.ADQDRLDLEER.K               | 3 | 2,7728 | 0,269 | 0      |
| 22 | P07108 ACBP_HUMAN  | K.AYINKVEELK.K                | 2 | 2,7681 | 0,188 | -0,202 |
| 22 | P52948 NUP98_HUMAN | R.HYDLNQLLEPR.S               | 3 | 2,7602 | 0,16  | 0,065  |
| 22 | P20962 PTMS_HUMAN  | R.AAEEEEDEADPKR.Q             | 3 | 2,7597 | 0,294 | -0,202 |
| 22 | Q14554 PDIA5_HUMAN | K.DKNQDLCQQEAVK.G             | 3 | 2,7594 | 0,103 | -0,116 |
| 22 | P08754 GNAI3_HUMAN | K.IIHEDGYSEDECK.Q             | 3 | 2,7566 | 0,111 | -0,115 |
| 22 | Q8IWR0 Z3H7A_HUMAN | K.DHLIGPNDNDFGK.Y             | 3 | 2,7529 | 0,214 | -0,063 |
| 22 | P26641 EF1G_HUMAN  | K.STFVLDEFKR.K                | 2 | 2,7501 | 0,335 | -0,196 |
| 22 | P68104 EF1A1_HUMAN | K.STTTGHLIYK.C                | 2 | 2,7457 | 0,448 | -0,218 |
| 22 | P83731 RL24_HUMAN  | -.M*KVELCSFSGYK.I             | 3 | 2,7431 | 0,147 | -0,187 |
| 22 | P08107 HSP71_HUMAN | R.LVNHVVEEFK.R                | 3 | 2,742  | 0,26  | 0,362  |
| 22 | P52272 HNRPM_HUMAN | R.ADILEDKDGK.S                | 2 | 2,7368 | 0,331 | -0,221 |
| 22 | Q8TAQ2 SMRC2_HUMAN | R.HFEELETIM*DR.E              | 3 | 2,7343 | 0,261 | 0,127  |
| 22 | P16152 CBR1_HUMAN  | R.FHQLDIDDLQ SIR.A            | 3 | 2,731  | 0,236 | 0      |
| 22 | P60842 IF4A1_HUMAN | K.KEELTLEGIR.Q                | 2 | 2,7286 | 0,254 | -0,205 |
| 22 | Q9Y696 CLIC4_HUMAN | K.HPESNTAGM*DIFAK.F           | 3 | 2,7277 | 0,293 | 0,119  |
| 22 | P26373 RL13_HUMAN  | R.VITEEEKNFK.A                | 2 | 2,726  | 0,345 | -0,592 |
| 22 | P35749 MYH11_HUMAN | K.KEEELQAALAR.L               | 2 | 2,7206 | 0,269 | -0,291 |
| 22 | P62753 RS6_HUMAN   | K.LFNLSKEDDVR.Q               | 2 | 2,7193 | 0,232 | -0,274 |
| 22 | Q00839 HNRPU_HUMAN | K.DIDIHEVR.I                  | 2 | 2,7103 | 0,186 | -0,612 |
| 22 | P43246 MSH2_HUMAN  | K.NKTEYEEAQDAIVK.E            | 3 | 2,7074 | 0,161 | -0,223 |
| 22 | O95340 PAPS2_HUMAN | R.NLGFSPGDREENIR.R            | 2 | 2,706  | 0,214 | 0,532  |
| 22 | P16401 H15_HUMAN   | R.NGLSLAALKK.A                | 2 | 2,705  | 0,331 | 0,3    |
| 22 | Q8N1F7 NUP93_HUMAN | K.NADKVLELM*NK.L              | 3 | 2,6978 | 0,308 | 0      |
| 22 | P17096 HMGA1_HUMAN | R.KQPPVSPGTALVGSQKEPSEVPTPK.R | 3 | 2,6953 | 0,304 | -0,429 |
| 22 | Q86V48 LUZP1_HUMAN | K.HDITLQLAEAER.M              | 3 | 2,6939 | 0,281 | 0,066  |
| 22 | P25325 THTM_HUMAN  | R.HIPGAAFFDIDQCSDR.T          | 3 | 2,6929 | 0,17  | -0,297 |

|    |                    |                                |   |        |       |        |
|----|--------------------|--------------------------------|---|--------|-------|--------|
| 22 | O75947 ATP5H_HUMAN | K.AGLVDDFEKK.F                 | 2 | 2,6929 | 0,292 | 0,217  |
| 22 | Q15003 CND2_HUMAN  | K.DAPSLEEVEGHVADGSATEM*GTTKK.A | 3 | 2,6927 | 0,292 | 0,568  |
| 22 | Q13242 SFRS9_HUMAN | R.EKDLEDLFYK.Y                 | 3 | 2,6835 | 0,224 | -0,281 |
| 22 | P60660 MYL6_HUMAN  | K.NKDQGTIEDYVEGLR.V            | 2 | 2,6812 | 0,409 | 0,205  |
| 22 | Q58FF7 H90B3_HUMAN | R.APFDLFENKK.K                 | 3 | 2,681  | 0,394 | -0,454 |
| 22 | P07237 PDIA1_HUMAN | K.SNFAEALAAHK.Y                | 2 | 2,675  | 0,236 | 0,105  |
| 22 | P06576 ATPB_HUMAN  | K.AHGGYSVFAGVGER.T             | 3 | 2,6744 | 0,216 | -0,195 |
| 22 | Q1KMD3 HNRL2_HUMAN | K.DRYGGQPLFSEK.F               | 3 | 2,6727 | 0,204 | 0,065  |
| 22 | P29401 TKT_HUMAN   | K.NSTFSEIFKK.E                 | 2 | 2,666  | 0,359 | -0,305 |
| 22 | Q9NRY5 F1142_HUMAN | K.DITELFSQLHVSSKPEK.L          | 3 | 2,6586 | 0,083 | -0,374 |
| 22 | O95373 IPO7_HUMAN  | R.KQLQDIATLADQR.R              | 3 | 2,6472 | 0,314 | 0,122  |
| 22 | Q08257 QOR_HUMAN   | K.DLSLLSHGGR.V                 | 2 | 2,637  | 0,298 | -0,231 |
| 22 | P09874 PARP1_HUMAN | K.KPPLLNADSVQAK.V              | 3 | 2,6331 | 0,193 | 0,183  |
| 22 | P04792 HSPB1_HUMAN | K.TKDGVEITGK.H                 | 2 | 2,6317 | 0,337 | -0,638 |
| 22 | P06748 NPM_HUMAN   | K.DELHIVEAEAM*NYEGSPIK.V       | 3 | 2,6307 | 0,287 | -0,508 |
| 22 | P11586 C1TC_HUMAN  | R.IFHELTSQTDK.A                | 2 | 2,6303 | 0,297 | 0      |
| 22 | P11142 HSP7C_HUMAN | R.M*VNHFAIEFK.R                | 2 | 2,62   | 0,415 | -0,097 |
| 22 | Q9P289 MST4_HUMAN  | K.KTSYLTELIDR.F                | 2 | 2,6129 | 0,295 | -0,456 |
| 22 | P38919 IF4A3_HUMAN | K.RDELTLGKIQ                   | 2 | 2,6127 | 0,33  | -0,312 |
| 22 | Q7L2E3 DHX30_HUMAN | K.EHYLEDILAK.L                 | 3 | 2,6121 | 0,213 | 0      |
| 22 | P36871 PGM1_HUMAN  | K.SGEHDFGAAFDGDGDR.N           | 3 | 2,6095 | 0,261 | 0,111  |
| 22 | P49411 EFTU_HUMAN  | K.GDECELLGHSK.N                | 3 | 2,6062 | 0,25  | 0,22   |
| 22 | Q1KMD3 HNRL2_HUMAN | K.DRYGGQPLFSEK.F               | 2 | 2,6002 | 0,238 | -0,349 |
| 22 | Q05086 UBE3A_HUMAN | R.DHIIDDALVR.L                 | 2 | 2,5953 | 0,22  | -0,105 |
| 22 | P25205 MCM3_HUMAN  | R.SKDIFDQLAK.S                 | 2 | 2,5831 | 0,277 | -0,209 |
| 22 | P11940 PABP1_HUMAN | K.NLDDGIDDERLR.K               | 2 | 2,576  | 0,185 | -0,341 |
| 22 | P31689 DNJA1_HUMAN | K.ILEVHIDK.G                   | 2 | 2,5753 | 0,149 | 0,063  |
| 22 | Q99613 EIF3C_HUMAN | R.DFESHITSYK.Q                 | 2 | 2,564  | 0,468 | -0,298 |
| 22 | P31948 STIP1_HUMAN | K.DAIHFYNK.S                   | 2 | 2,5637 | 0,308 | 0,121  |
| 22 | P25705 ATPA_HUMAN  | R.GYLDKLEPSK.I                 | 2 | 2,544  | 0,392 | 0      |
| 22 | Q86V81 THOC4_HUMAN | R.SLGTADVHFER.K                | 2 | 2,5425 | 0,476 | 0,198  |
| 22 | Q58FF7 H90B3_HUMAN | K.EDQTEYLEERR.V                | 2 | 2,5409 | 0,255 | 0      |
| 22 | Q13242 SFRS9_HUMAN | R.EKDLEDLFYK.Y                 | 2 | 2,506  | 0,376 | -0,188 |

|    |                    |                         |   |        |       |        |
|----|--------------------|-------------------------|---|--------|-------|--------|
| 22 | Q8N5C6 SRBD1_HUMAN | K.DKDTLDFIR.N           | 2 | 2,5007 | 0,234 | -0,217 |
| 22 | Q00610 CLH1_HUMAN  | K.HDVVFLITK.Y           | 2 | 2,4912 | 0,398 | 0,114  |
| 22 | Q01081 U2AF1_HUMAN | K.DKVNCSFYFK.I          | 2 | 2,4889 | 0,164 | 0,187  |
| 22 | O14980 XPO1_HUMAN  | K.DFEEYPEHR.T           | 2 | 2,4691 | 0,341 | -0,2   |
| 22 | P04075 ALDOA_HUMAN | R.LQSIGTENTEENRR.F      | 2 | 2,4472 | 0,107 | -0,815 |
| 22 | Q15691 MARE1_HUMAN | K.LEHEYIQNFK.I          | 2 | 2,4348 | 0,331 | 0,277  |
| 22 | Q02790 FKBP4_HUMAN | K.DKFSFDLGK.G           | 2 | 2,4299 | 0,344 | -0,115 |
| 22 | P15559 NQO1_HUMAN  | K.EGHLSPDIVAEQK.K       | 2 | 2,4287 | 0,141 | 0,086  |
| 22 | Q01518 CAP1_HUMAN  | K.KEPAVLELEGK.K         | 2 | 2,4283 | 0,227 | 0      |
| 22 | P62280 RS11_HUMAN  | R.VLLGETGKEK.L          | 2 | 2,4154 | 0,33  | -0,114 |
| 22 | Q13206 DDX10_HUMAN | K.DKEVFDVSK.L           | 2 | 2,3974 | 0,304 | -0,229 |
| 22 | Q15181 IPYR_HUMAN  | K.HTGCCGDNDPIDVCEIGSK.V | 2 | 2,3902 | 0,515 | 0      |
| 22 | P26641 EF1G_HUMAN  | K.DPFAHLPK.S            | 2 | 2,38   | 0,237 | -0,066 |
| 22 | P09874 PARP1_HUMAN | R.HPDVEVDGFSELR.W       | 2 | 2,3738 | 0,382 | 0,488  |
| 22 | P56192 SYMC_HUMAN  | K.ADKNEVAEVAK.L         | 2 | 2,3692 | 0,36  | -0,392 |
| 22 | Q99729 ROAA_HUMAN  | K.DLKDYFTK.F            | 2 | 2,3554 | 0,133 | -0,592 |
| 22 | Q12906 ILF3_HUMAN  | K.EATDAIGHLDR.Q         | 2 | 2,3481 | 0,332 | -0,407 |
| 22 | P62280 RS11_HUMAN  | K.EAIEGTYIDKK.C         | 2 | 2,3203 | 0,268 | -0,193 |
| 22 | P21333 FLNA_HUMAN  | R.DAPQDFHPDR.V          | 2 | 2,309  | 0,249 | -0,509 |
| 22 | P17987 TCPA_HUMAN  | R.SLHDALCVVK.R          | 2 | 2,3033 | 0,371 | 0      |
| 22 | Q15286 RAB35_HUMAN | R.DYDHLFK.L             | 2 | 2,3027 | 0,315 | 0,065  |
| 22 | P46063 RECQ1_HUMAN | K.VKDILQNVFK.L          | 2 | 2,2972 | 0,107 | -0,203 |
| 22 | P54652 HSP72_HUMAN | K.VQVEYKGETK.T          | 2 | 2,2837 | 0,213 | -0,413 |
| 22 | Q9NPD3 EXOS4_HUMAN | R.DVHTLLDR.V            | 2 | 2,2784 | 0,457 | -0,063 |
| 22 | Q10567 AP1B1_HUMAN | K.DDREAQSICER.V         | 2 | 2,2759 | 0,23  | -0,708 |
| 22 | P62701 RS4X_HUMAN  | K.YALTGDEVKK.I          | 2 | 2,2596 | 0,418 | -0,76  |
| 22 | P17480 UBF1_HUMAN  | K.HPELNISEEGITK.S       | 2 | 2,224  | 0,237 | 0,25   |
| 22 | A3KN83 SBNO1_HUMAN | K.DLLDKLEK.L            | 2 | 2,2025 | 0,154 | 0      |
| 22 | P42704 LPPRC_HUMAN | K.DAHLLESK.N            | 2 | 2,1893 | 0,317 | -0,181 |
| 22 | P20962 PTMS_HUMAN  | R.AAEEDEADPKR.Q         | 2 | 2,1836 | 0,18  | -0,718 |
| 22 | P07602 SAP_HUMAN   | K.DGGFCEVCKK.L          | 2 | 2,1764 | 0,114 | 0      |
| 22 | P18124 RL7_HUMAN   | R.KAGNFYVPAEPK.L        | 2 | 2,1737 | 0,282 | -0,462 |
| 22 | Q14103 HNRPD_HUMAN | K.DLKDYFSK.F            | 2 | 2,1412 | 0,259 | -0,24  |

|    |                    |                                  |        |   |        |       |        |
|----|--------------------|----------------------------------|--------|---|--------|-------|--------|
| 22 | P62917 RL8_HUMAN   | K.DIIHDPGR.G                     |        | 2 | 2,0965 | 0,234 | -0,066 |
| 22 | Q9UHB6 LIMA1_HUMAN | K.ELSVEEQIKR.N                   |        | 2 | 2,0783 | 0,332 | -0,099 |
| 22 | P15121 ALDR_HUMAN  | K.REELFIVSK.L                    |        | 2 | 2,0717 | 0,196 | -0,109 |
| 22 | P21333 FLNA_HUMAN  | K.DKGEYTLVVK.W                   |        | 2 | 2,0576 | 0,272 | -0,424 |
| 22 | P11413 G6PD_HUMAN  | K.LKLEDFAR.N                     |        | 2 | 2,0301 | 0,085 | -0,428 |
| 22 | P09104 ENOG_HUMAN  | R.DGKYDLDFK.S                    |        | 2 | 2,0209 | 0,22  | -0,332 |
| 22 | O15372 EIF3H_HUMAN | K.DFSPEALKK.A                    |        | 2 | 2,0085 | 0,215 | 0      |
| 23 | Q9H307 PININ_HUMAN | R.ESRQES#DPEDDDVKKPALQSSVVATSK.E | S100:  | 3 | 3,1594 | 0,434 | -0,726 |
| 23 | Q69YH5 CDCA2_HUMAN | R.RSS#LNGKGESLTALER.I            | S1001: | 3 | 3,5456 | 0,396 | -0,291 |
| 23 | Q9UGU0 TCF20_HUMAN | R.GRS#PSQYHDFAEK.L               | S1005: | 3 | 2,9836 | 0,348 | -0,114 |
| 23 | Q5VUA4 ZN318_HUMAN | K.S#KSPEKVSSFSNSSNK.E            | S1008: | 2 | 3,648  | 0,49  | 0,584  |
| 23 | P49006 MRP_HUMAN   | K.KPFKLS#GLSFK.R                 | S101:  | 3 | 3,2052 | 0,128 | -0,275 |
| 23 | P49006 MRP_HUMAN   | K.KPFKLS#GLSFK.R                 | S101:  | 2 | 2,3864 | 0,123 | -0,824 |
| 23 | Q5VUA4 ZN318_HUMAN | K.SKS#PEKVSSFSNSSNK.E            | S1010: | 3 | 3,8026 | 0,4   | -0,097 |
| 23 | P05387 RLA2_HUMAN  | K.KDEKKEES#EESDDDM*GFGLFD.-      | S102:  | 3 | 3,8428 | 0,403 | -0,934 |
| 23 | P05387 RLA2_HUMAN  | K.KDEKKEESEES#DDDM*GFGLFD.-      | S105:  | 3 | 2,7715 | 0,299 | -0,719 |
| 23 | Q96KR1 ZFR_HUMAN   | R.RDS#DGVVGFEAEGKK.D             | S1054: | 2 | 4,0357 | 0,513 | 0      |
| 23 | Q96KR1 ZFR_HUMAN   | R.RDS#DGVVGFEAEGKK.D             | S1054: | 3 | 3,808  | 0,244 | 0      |
| 23 | Q5SW79 CE170_HUMAN | R.TPLTS#ADEHVHVK.L               | S1059: | 2 | 3,5676 | 0,475 | -0,894 |
| 23 | Q9BQF6 SENP7_HUMAN | R.RPS#SSEIITEGKR.K               | S11:   | 3 | 3,3078 | 0,385 | -0,356 |
| 23 | Q99547 MPH6_HUMAN  | K.HKAEVEDETVELDVS#DEEM*AR.R      | S110:  | 3 | 5,183  | 0,395 | -0,413 |
| 23 | Q8N7R7 CCYL1_HUMAN | K.SNHLNHVS#PGQLTK.K              | S112:  | 3 | 3,623  | 0,28  | -0,227 |
| 23 | O60885 BRD4_HUMAN  | R.SEPFS#PSLRPEPPKHPESIK.A        | S1126: | 3 | 2,6317 | 0,208 | -0,939 |
| 23 | O60841 IF2P_HUMAN  | K.KQSFDDNDS#EELEDKDSK.S          | S113:  | 3 | 4,3585 | 0,303 | -0,083 |
| 23 | Q9UNZ2 NSF1C_HUMAN | R.KKS#PNELVDDLK.G                | S114:  | 3 | 4,6464 | 0,341 | -0,113 |
| 23 | Q9UNZ2 NSF1C_HUMAN | R.KKS#PNELVDDLK.G                | S114:  | 2 | 4,195  | 0,469 | -1,135 |
| 23 | O60238 BNI3L_HUMAN | R.DHSS#QSEEEVVEGEKEVEALKK.S      | S118:  | 3 | 3,9166 | 0,356 | -0,57  |
| 23 | Q92934 BAD_HUMAN   | R.RM*S#DEFVDSFKK.G               | S118:  | 3 | 3,6594 | 0,392 | -0,231 |
| 23 | P29692 EF1D_HUMAN  | R.LNVLEKS#SPGHR.A                | S118:  | 2 | 3,4877 | 0,504 | -0,689 |
| 23 | Q01433 AMPD2_HUMAN | K.HFPLDLRRTS#M*DGK.C             | S118:  | 3 | 2,6183 | 0,206 | -0,227 |
| 23 | Q92934 BAD_HUMAN   | R.RM*S#DEFVDSFKK.G               | S118:  | 2 | 2,5878 | 0,357 | -0,616 |
| 23 | Q5VZL5 ZMYM4_HUMAN | R.KKS#IVAVEPR.S                  | S1181: | 3 | 3,025  | 0,168 | 0,53   |
| 23 | Q5VZL5 ZMYM4_HUMAN | R.KKS#IVAVEPR.S                  | S1181: | 2 | 2,212  | 0,359 | -0,101 |

|    |                     |                              |              |   |        |       |        |
|----|---------------------|------------------------------|--------------|---|--------|-------|--------|
| 23 | Q6P1X5 TAF2_HUMAN   | K.EKDKEPFTFSS#PASGR.S        | S1185:       | 3 | 3,5369 | 0,315 | -0,196 |
| 23 | Q6P1X5 TAF2_HUMAN   | K.EKDKEPFTFSS#PASGR.S        | S1185:       | 2 | 2,1619 | 0,283 | -0,458 |
| 23 | Q86SQ4 GP126_HUMAN  | R.NS#HTDNVSYEHSFNK.S         | S1189:       | 3 | 2,6608 | 0,189 | -0,098 |
| 23 | Q86SQ4 GP126_HUMAN  | R.NSHTDNVSYEHS#FNK.S         | S1199:       | 3 | 4,0688 | 0,414 | -0,394 |
| 23 | O60238 BNI3L_HUMAN  | R.DHSSQS#EEEVVEGEKEVEALKK.S  | S120:        | 3 | 5,3295 | 0,505 | -0,57  |
| 23 | O95218 ZRAB2_HUMAN  | R.ENVEYIEREES#DGEYDEFGR.K    | S120:        | 3 | 4,0105 | 0,399 | -0,575 |
| 23 | O95218 ZRAB2_HUMAN  | R.ENVEYIEREES#DGEYDEFGRK.K   | S120:        | 3 | 3,3411 | 0,233 | -0,479 |
| 23 | P42858 HD_HUMAN     | K.GKEKEPGEQASVPLS#PK.K       | S1201:       | 3 | 3,2967 | 0,422 | -0,197 |
| 23 | Q5VZL5 ZMYM4_HUMAN  | R.RVTQHES#DNENEIQIQNK.L      | S122:        | 3 | 6,0425 | 0,499 | -0,647 |
| 23 | Q14204 DYHC1_HUMAN  | R.RKDS#AIQQQVANLQM*K.I       | S1230:       | 3 | 3,3061 | 0,082 | -0,562 |
| 23 | P22087 FBRL_HUMAN   | K.RVS#ISEGDDKIEYR.A          | S124:        | 3 | 3,4743 | 0,38  | 0      |
| 23 | P22087 FBRL_HUMAN   | K.RVS#ISEGDDKIEYR.A          | S124:        | 2 | 2,3879 | 0,504 | -0,14  |
| 23 | P11388 TOP2A_HUMAN  | K.KIKNENTEGS#PQEDGVELEGLK.Q  | S1247:       | 3 | 5,0566 | 0,391 | -0,66  |
| 23 | Q15149 PLEC1_HUMAN  | R.RTPHVQAVQGPLGS#PPK.R       | S125:        | 3 | 4,2459 | 0,285 | 0,099  |
| 23 | Q15149 PLEC1_HUMAN  | R.RTPHVQAVQGPLGS#PPK.R       | S125:        | 2 | 3,3685 | 0,388 | -0,198 |
| 23 | O14514 BAI1_HUMAN   | K.RPS#LPREEK.L               | S1257:       | 3 | 3,1099 | 0,295 | 0,065  |
| 23 | Q9BQGO MBB1A_HUMAN  | K.KNQKPSQVNGAPGS#PTEPAGQK.Q  | S1267:       | 3 | 5,1421 | 0,44  | -0,398 |
| 23 | Q96EE5 Q96EE5_HUMAN | R.SKS#LKEGLTVQER.L           | S128:        | 3 | 4,3568 | 0,292 | -0,353 |
| 23 | Q96EE5 Q96EE5_HUMAN | R.SKS#LKEGLTVQER.L           | S128:        | 2 | 3,3998 | 0,453 | -0,078 |
| 23 | P10586 PTPRF_HUMAN  | R.THS#PSSKDEQSIGLK.D         | S1281:       | 3 | 3,3295 | 0,319 | -0,108 |
| 23 | Q8WWQ0 PHIP_HUMAN   | K.KKVLS#DS#EDEEKDADVPGTSTR.K | S1281:S1283: | 3 | 4,6163 | 0,506 | -0,499 |
| 23 | Q13496 MTM1_HUMAN   | K.YNSHS#LENESIKR.T           | S13:         | 3 | 4,058  | 0,27  | -0,221 |
| 23 | Q8N201 INT1_HUMAN   | R.RPS#AAAKPSGHPPPQDFIALGSK.G | S13:         | 3 | 3,7051 | 0,255 | -0,313 |
| 23 | Q8NI27 THOC2_HUMAN  | K.IDTHPS#PSHSSTVKDSLIELK.E   | S1302:       | 3 | 3,2837 | 0,285 | -0,386 |
| 23 | Q15648 MED1_HUMAN   | R.NKKPS#LTAVIDK.L            | S1302:       | 3 | 2,8939 | 0,106 | 0,066  |
| 23 | P55327 TPD52_HUMAN  | K.KLEDVKNS#PTFK.S            | S131:        | 2 | 3,8462 | 0,441 | -0,575 |
| 23 | P55327 TPD52_HUMAN  | K.KLEDVKNS#PTFK.S            | S131:        | 3 | 3,5292 | 0,242 | -0,554 |
| 23 | Q9Y5U2 TSSC4_HUMAN  | K.RPLAPSGRS#PVEGLGR.A        | S132:        | 3 | 2,7968 | 0,251 | 0      |
| 23 | Q02952 AKA12_HUMAN  | K.KDDALELQSHAKS#PPS#PVER.E   | S1328:S1331: | 3 | 3,122  | 0,279 | 0,155  |
| 23 | O95490 LPHN2_HUMAN  | R.THS#LLYQPQKK.V             | S1334:       | 3 | 3,5897 | 0,371 | 0,257  |
| 23 | Q96T23 RSF1_HUMAN   | K.KPYRIES#DEEEDFENVGK.V      | S1335:       | 3 | 5,0892 | 0,529 | -0,566 |
| 23 | Q9HCM1 CL035_HUMAN  | K.HSSLGQSL#PEKIK.L           | S1358:       | 3 | 4,8978 | 0,431 | 0,115  |
| 23 | Q9HCM1 CL035_HUMAN  | K.HSSLGQSL#PEKIK.L           | S1358:       | 2 | 3,6104 | 0,561 | 0,23   |

|    |                     |                                 |              |   |        |       |        |
|----|---------------------|---------------------------------|--------------|---|--------|-------|--------|
| 23 | Q9UPN3 MACF1_HUMAN  | K.AFVESQQKS#PGKR.R              | S1367:       | 3 | 2,9735 | 0,322 | -0,119 |
| 23 | Q9H2Y7 ZF106_HUMAN  | R.AAHVPENS#DT#EQDVLTVKPVVK.V    | S1370:T1372: | 3 | 4,1112 | 0,459 | -0,564 |
| 23 | Q14160 LAP4_HUMAN   | K.RVVS#LVGADDLRK.M              | S1378:       | 3 | 4,8382 | 0,487 | -0,26  |
| 23 | P49736 MCM2_HUMAN   | R.RGLLYDS#DEEDEERPAR.K          | S139:        | 3 | 3,1652 | 0,352 | -0,344 |
| 23 | Q02363 ID2_HUMAN    | R.KNS#LSDHSLGISR.S              | S14:         | 3 | 2,7667 | 0,175 | 0,49   |
| 23 | Q13459 MYO9B_HUMAN  | K.KKPGDASSLPDAGLS#PGSQVDSK.S    | S1405:       | 3 | 5,8818 | 0,425 | -0,394 |
| 23 | P18858 DNL1_HUMAN   | K.RTIQEVLEEQS#EDEDREAK.R        | S141:        | 3 | 3,2254 | 0,362 | -0,537 |
| 23 | Q86VI3 IQGA3_HUMAN  | R.HRS#LTAHS#LLPLAEK.Q           | S1424:S1429: | 3 | 3,5295 | 0,178 | -0,299 |
| 23 | Q9NP72 RAB18_HUMAN  | R.KHS#M*LFIEASAK.T              | S144:        | 3 | 2,8034 | 0,103 | 0,251  |
| 23 | Q8IWS0 PHF6_HUMAN   | K.KTAHNSEADLEES#FNEHELEPSS#PK.S | S145:S155:   | 3 | 3,1451 | 0,29  | -0,368 |
| 23 | Q9UQ35 SRRM2_HUMAN  | R.HSLSGSS#PGM*KDIPR.T           | S1463:       | 3 | 3,0528 | 0,48  | -0,879 |
| 23 | Q9UQ35 SRRM2_HUMAN  | R.HSLSGSS#PGM*KDIPRT#PSR.G      | S1463:T1472: | 3 | 4,1803 | 0,163 | -0,335 |
| 23 | Q0VG05 Q0VG05_HUMAN | R.KPTHS#QEPQGPEAM*ER.R          | S1489:       | 3 | 3,4206 | 0,38  | -0,286 |
| 23 | Q15149 PLEC1_HUMAN  | R.RKELEEVS#PETPVVPATTQR.T       | S149:        | 3 | 4,1421 | 0,22  | -0,702 |
| 23 | Q9BSQ5 CCM2_HUMAN   | K.GKKPGIVS#PFK.R                | S15:         | 3 | 2,7813 | 0,187 | 0,074  |
| 23 | Q9BWH2 FUND2_HUMAN  | K.IRKS#NQIPTEVR.S               | S151:        | 3 | 3,3511 | 0,175 | 0,06   |
| 23 | Q9BWH2 FUND2_HUMAN  | K.IRKS#NQIPTEVR.S               | S151:        | 2 | 2,4589 | 0,333 | -0,241 |
| 23 | Q96I25 SPF45_HUMAN  | R.RPDPDS#DEDEDYERER.R           | S155:        | 3 | 2,7789 | 0,245 | -0,348 |
| 23 | Q9NUQ6 SPS2L_HUMAN  | R.LLQQKLS#LDGNPKPIHGTTTER.S     | S159:        | 3 | 3,2825 | 0,331 | -0,83  |
| 23 | Q15154 PCM1_HUMAN   | K.SKDASTS#PPNRETIGSAQCK.E       | S159:        | 3 | 2,6636 | 0,224 | -0,248 |
| 23 | P05023 AT1A1_HUMAN  | R.DKYEPAAVS#EQGDKK.G            | S16:         | 3 | 3,353  | 0,327 | -0,21  |
| 23 | P05023 AT1A1_HUMAN  | R.DKYEPAAVS#EQGDKK.G            | S16:         | 2 | 3,2505 | 0,247 | -0,07  |
| 23 | O95684 FR1OP_HUMAN  | K.EKGPTTGEGALDLSDVHSPPKS#PEGK.T | S160:        | 3 | 3,863  | 0,356 | -0,472 |
| 23 | Q00653 NFKB2_HUMAN  | R.LRS#RPQGLTEAEQR.E             | S161:        | 2 | 2,2107 | 0,231 | -0,284 |
| 23 | O75179 ANR17_HUMAN  | R.KSDNHS#PAVVTTTVSSK.K          | S1639:       | 3 | 3,5082 | 0,359 | -0,398 |
| 23 | P51858 HDGF_HUMAN   | R.AGDILLED#PKRPK.E              | S165:        | 2 | 3,3996 | 0,292 | -0,243 |
| 23 | Q96GV9 CE030_HUMAN  | R.AHSKS#LDYLNLDK.M              | S167:        | 3 | 4,8027 | 0,404 | 0,115  |
| 23 | Q12888 TP53B_HUMAN  | R.KLITSEEERS#PAK.R              | S1678:       | 3 | 3,6682 | 0,369 | -1,4   |
| 23 | Q12888 TP53B_HUMAN  | R.KLITSEEERS#PAK.R              | S1678:       | 2 | 3,3674 | 0,448 | -0,389 |
| 23 | Q9Y5S2 MRCKB_HUMAN  | K.HSTPSNSSNPSGPPS#PNSPHR.S      | S1690:       | 3 | 4,8581 | 0,51  | -0,329 |
| 23 | P53999 TCP4_HUMAN   | K.SKELVSSSSGSDS#DSEVDKK.L       | S17:         | 3 | 5,2979 | 0,47  | 0,163  |
| 23 | P39687 AN32A_HUMAN  | R.NRTPS#DVKELVLDNSR.S           | S17:         | 3 | 2,7414 | 0,378 | -0,666 |
| 23 | Q9NYF8 BCLF1_HUMAN  | K.KAEGEPQEES#PLKSK.S            | S177:        | 2 | 3,6564 | 0,385 | 0,351  |

|    |                     |                               |              |   |        |       |        |
|----|---------------------|-------------------------------|--------------|---|--------|-------|--------|
| 23 | Q8N5I9 CL045_HUMAN  | K.GKIEVLDS#PASKK.K            | S178:        | 3 | 3,0205 | 0,303 | 0,063  |
| 23 | Q9NYF8 BCLF1_HUMAN  | K.S#KSQEEPKDTFEHDPSESIDFNK.S  | S181:        | 3 | 3,9528 | 0,537 | -0,567 |
| 23 | Q9H1E3 NUCKS_HUMAN  | R.LKATVTPS#PVKGG.K            | S181:        | 2 | 3,6849 | 0,445 | -0,26  |
| 23 | Q9NYF8 BCLF1_HUMAN  | K.SKS#QEEPKDTFEHDPSESIDFNK.S  | S183:        | 3 | 3,0635 | 0,491 | -0,504 |
| 23 | O15372 EIF3H_HUMAN  | K.EKDFS#PEALKK.A              | S183:        | 2 | 2,4097 | 0,173 | -0,534 |
| 23 | O60749 SNX2_HUMAN   | R.RFS#DFLGLHSK.L              | S185:        | 3 | 3,0875 | 0,381 | -0,923 |
| 23 | O60749 SNX2_HUMAN   | R.RFS#DFLGLHSK.L              | S185:        | 2 | 2,3998 | 0,331 | -0,88  |
| 23 | P27708 PYR1_HUMAN   | R.IHRAS#DPGLPAEEPK.E          | S1859:       | 2 | 3,4624 | 0,477 | -0,072 |
| 23 | P62070 RRAS2_HUMAN  | R.KFQEQCPPS#PEPTRK.E          | S186:        | 3 | 4,4827 | 0,306 | -0,359 |
| 23 | Q9UPN3 MACF1_HUMAN  | K.RQGS#FSEDVISHK.G            | S1860:       | 3 | 4,3683 | 0,352 | -0,117 |
| 23 | Q9UPN3 MACF1_HUMAN  | K.RQGS#FSEDVISHK.G            | S1860:       | 2 | 3,2554 | 0,476 | -0,311 |
| 23 | O95218 ZRAB2_HUMAN  | K.YNLDS#EEEDSNKKK.S           | S188:        | 2 | 3,0444 | 0,512 | -0,66  |
| 23 | Q9P219 DAPLE_HUMAN  | R.RFS#LAPPKEER.L              | S1887:       | 3 | 3,0684 | 0,203 | -0,195 |
| 23 | Q9BXB4 OSB11_HUMAN  | R.RPS#QNAISFFNVGHSK.L         | S189:        | 3 | 3,7706 | 0,443 | -0,685 |
| 23 | Q9H1E3 NUCKS_HUMAN  | R.KVVDYSQFQES#DDADEDYGR.D     | S19:         | 3 | 5,8251 | 0,465 | -0,449 |
| 23 | Q9NZM1 MYOF_HUMAN   | R.HTIIPAKS#PEK.C              | S1915:       | 2 | 2,881  | 0,484 | -0,188 |
| 23 | Q96T58 MINT_HUMAN   | R.SVYATM*GDHENRS#PVKEPVEQPR.V | S1918:       | 3 | 3,178  | 0,163 | -0,605 |
| 23 | P35580 MYH10_HUMAN  | R.RQLHLEGASLELS#DDDTESK.T     | S1956:       | 3 | 6,405  | 0,454 | -0,315 |
| 23 | Q6PJM5 Q6PJM5_HUMAN | K.RGS#IGENQIKDEK.I            | S196:        | 3 | 2,97   | 0,139 | -0,118 |
| 23 | Q6PJM5 Q6PJM5_HUMAN | K.RGS#IGENQIKDEK.I            | S196:        | 2 | 2,8342 | 0,38  | -0,079 |
| 23 | Q92614 MY18A_HUMAN  | R.KNKLEGDS#DVDS#ELEDRVDGVK.S  | S1970:S1974: | 3 | 3,5463 | 0,102 | -0,561 |
| 23 | Q8NCF5 NF2IP_HUMAN  | K.KKTEFLDLDNSPLS#PPSPR.T      | S201:        | 3 | 3,9991 | 0,129 | -0,577 |
| 23 | Q8NCF5 NF2IP_HUMAN  | K.KKTEFLDLDNSPLSPPS#PR.T      | S204:        | 3 | 5,5465 | 0,447 | -0,494 |
| 23 | Q14671 PUM1_HUMAN   | R.RPGQSFHVNSEVNSVLS#PR.S      | S209:        | 3 | 5,1056 | 0,418 | -0,585 |
| 23 | Q8IU2 RB6I2_HUMAN   | R.SVGKVEPSSQSPGRS#PR.L        | S21:         | 2 | 3,4777 | 0,337 | -0,731 |
| 23 | Q8IU2 RB6I2_HUMAN   | R.SVGKVEPSSQSPGRS#PR.L        | S21:         | 3 | 2,677  | 0,274 | -0,399 |
| 23 | Q7L9B9 EEP1_HUMAN   | R.SIPRDPDSLHS#R.K             | S21:         | 3 | 2,6098 | 0,235 | -0,118 |
| 23 | Q8TF01 SFR18_HUMAN  | R.DRQRS#PIALPVKQEPPIQIDAVK.R  | S211:        | 3 | 4,4347 | 0,454 | -0,357 |
| 23 | Q9P0L0 VAPA_HUMAN   | K.VAHSKPGS#TSTASFR.D          | S214:        | 2 | 3,1806 | 0,444 | -0,565 |
| 23 | Q9H1E3 NUCKS_HUMAN  | K.EKTPSPKEEDEEPES#PPEK.K      | S214:        | 3 | 3,0206 | 0,332 | -0,404 |
| 23 | Q9UKV3 ACINU_HUMAN  | K.SSSISEEKGDS#DDEKPR.K        | S216:        | 3 | 3,7815 | 0,425 | -0,564 |
| 23 | Q9BU76 MMTA2_HUMAN  | R.RPAEATS#SPTSPERPR.H         | S216:        | 2 | 3,3543 | 0,354 | -0,738 |
| 23 | Q15019 SEPT2_HUMAN  | K.IYHLPDAES#DEDEDKFQTR.L      | S218:        | 3 | 2,9888 | 0,269 | -0,073 |

|    |                     |                                  |            |   |        |       |        |
|----|---------------------|----------------------------------|------------|---|--------|-------|--------|
| 23 | Q09161 NCBP1_HUMAN  | R.KTS#DANETEDHLESICK.V           | S22:       | 3 | 3,4325 | 0,369 | -0,59  |
| 23 | O60610 DIAP1_HUMAN  | K.KGRS#PDELPASGGDGGK.S           | S22:       | 3 | 3,3523 | 0,299 | -0,107 |
| 23 | Q6NYC8 PHTNS_HUMAN  | R.KEVESRSL#PGESAYQK.L            | S224:      | 3 | 4,2939 | 0,282 | -0,291 |
| 23 | Q6NYC8 PHTNS_HUMAN  | R.KEVESRSL#PGESAYQK.L            | S224:      | 2 | 2,6954 | 0,429 | -0,194 |
| 23 | Q9NY27 PP4R2_HUMAN  | K.NHSDSSTSEVSSVS#PLKNK.H         | S226:      | 3 | 4,6745 | 0,471 | -0,239 |
| 23 | P08621 RU17_HUMAN   | R.YDERPGPS#PLPHR.D               | S226:      | 3 | 4,0742 | 0,363 | -0,343 |
| 23 | Q9NVW2 RNF12_HUMAN  | R.SRS#PLHPM*SEIPR.R              | S230:      | 3 | 3,814  | 0,389 | -0,456 |
| 23 | Q7Z417 NUFP2_HUMAN  | R.RNS#AKGCENLNIVQDK.I            | S230:      | 3 | 3,7789 | 0,363 | -0,475 |
| 23 | Q8WU90 ZC3HF_HUMAN  | K.KEEKEDEIS#LEDLIER.E            | S231:      | 3 | 3,9201 | 0,199 | -0,445 |
| 23 | Q9Y5K6 CD2AP_HUMAN  | R.TRTS#S#SETEEEKKPEKPLILQSLGPK.T | S232:S233: | 3 | 2,6859 | 0,237 | -0,249 |
| 23 | Q9Y5K6 CD2AP_HUMAN  | R.TSS#SETEEEKKPEKPLILQSLGPK.T    | S233:      | 3 | 4,2792 | 0,445 | -0,842 |
| 23 | Q96ST2 IWS1_HUMAN   | R.HQAS#DSENEELPKPR.I             | S235:      | 3 | 4,4745 | 0,322 | -0,403 |
| 23 | P62753 RS6_HUMAN    | R.RLSS#LRAS#TSKSESSQK.-          | S236:S240: | 3 | 2,9574 | 1     | -0,636 |
| 23 | Q9BSQ5 CCM2_HUMAN   | R.AIFDGAS#TPTHHLSLHSDSSTK.V      | S238:      | 3 | 4,517  | 0,363 | -0,511 |
| 23 | Q13136 LIPA1_HUMAN  | K.RSS#DGSLSHEDLAK.V              | S239:      | 2 | 3,715  | 0,45  | -0,357 |
| 23 | Q13136 LIPA1_HUMAN  | K.RSS#DGSLSHEDLAK.V              | S239:      | 3 | 3,4694 | 0,304 | -0,321 |
| 23 | P50552 VASP_HUMAN   | R.KVS#KQEEASGGPTAPK.A            | S239:      | 3 | 2,8932 | 0,188 | -0,54  |
| 23 | B1AM35 B1AM35_HUMAN | K.RPAS#VSSAAVEHEQR.E             | S240:      | 2 | 3,6867 | 0,535 | 0,409  |
| 23 | Q8N8E3 CCD46_HUMAN  | K.SSS#FHDDHFLSR.I                | S242:      | 3 | 2,816  | 0,323 | -0,06  |
| 23 | Q9UFC0 LRWD1_HUMAN  | K.RPDDVPLSLS#PSKR.A              | S243:      | 3 | 5,5482 | 0,512 | -0,333 |
| 23 | Q9UFC0 LRWD1_HUMAN  | K.RPDDVPLSLS#PSKR.A              | S243:      | 2 | 3,9841 | 0,385 | -0,741 |
| 23 | Q9H3N1 TXND1_HUMAN  | K.KVEEQEADEEDVS#EEEEESK.E        | S247:      | 3 | 3,8451 | 0,271 | -0,581 |
| 23 | Q9BZD4 NUF2_HUMAN   | K.TKIVDS#PEKLN.N                 | S247:      | 3 | 3,0467 | 0,166 | 0,273  |
| 23 | P38159 HNRPG_HUMAN  | R.DYGHS#SSRDDYPSR.G              | S249:      | 2 | 2,3968 | 0,228 | 0      |
| 23 | P78346 RPP30_HUMAN  | K.KPRPS#EGDEDCLPASK.K            | S251:      | 3 | 4,0756 | 0,36  | -0,098 |
| 23 | P78346 RPP30_HUMAN  | K.KPRPS#EGDEDCLPASK.K            | S251:      | 2 | 3,2985 | 0,384 | -0,327 |
| 23 | P21359 NF1_HUMAN    | R.KS#FDHLISDTK.A                 | S2543:     | 2 | 2,8492 | 0,413 | -0,356 |
| 23 | Q92466 DDB2_HUMAN   | R.SRS#PLELEPEAKK.L               | S26:       | 3 | 3,3259 | 0,194 | -0,117 |
| 23 | Q92466 DDB2_HUMAN   | R.SRS#PLELEPEAKK.L               | S26:       | 2 | 2,6671 | 0,277 | -0,468 |
| 23 | Q8IYB3 SRRM1_HUMAN  | K.VPKPEPIPEKPEPS#PEKNSK.K        | S260:      | 3 | 4,8324 | 0,409 | -0,555 |
| 23 | Q14247 SRC8_HUMAN   | K.LQLHES#QKDYK.T                 | S261:      | 2 | 3,1551 | 0,43  | -0,498 |
| 23 | Q5JSH3 WDR44_HUMAN  | K.RKS#ELEFETLK.T                 | S262:      | 3 | 3,8701 | 0,391 | -0,188 |
| 23 | Q5JSH3 WDR44_HUMAN  | K.RKS#ELEFETLK.T                 | S262:      | 2 | 3,3165 | 0,349 | -0,752 |



|    |                    |                                |            |   |        |       |        |
|----|--------------------|--------------------------------|------------|---|--------|-------|--------|
| 23 | P06733 ENOA_HUMAN  | R.SGKYDLDFKS#PDDPSR.Y          | S263:      | 3 | 2,815  | 0,391 | -0,192 |
| 23 | O95766 CG028_HUMAN | R.HIEPELAGRDS#PIR.A            | S266:      | 2 | 2,0373 | 0,294 | 0,511  |
| 23 | O94761 RECQ4_HUMAN | R.GRRPS#QDDVEAAPEETR.A         | S27:       | 3 | 3,4933 | 0,366 | -0,367 |
| 23 | Q9Y266 NUDC_HUMAN  | K.KINPENSKLS#DLDSETR.S         | S277:      | 3 | 3,5192 | 0,376 | -0,361 |
| 23 | Q8IXT5 RB12B_HUMAN | R.S#RSPLGFYVHLK.N              | S278:      | 2 | 2,8824 | 0,373 | -0,576 |
| 23 | Q9NTJ3 SMC4_HUMAN  | R.RREGPPPPSPDGASS#DAEPEPPSGR.T | S28:       | 3 | 3,6224 | 0,331 | 0,067  |
| 23 | Q9Y2K7 JHD1A_HUMAN | R.RYEDDGIS#DDEIEGKR.T          | S28:       | 2 | 2,7423 | 0,341 | 0,617  |
| 23 | Q8IXT5 RB12B_HUMAN | R.SRS#PLGFYVHLK.N              | S280:      | 3 | 4,1312 | 0,355 | -0,308 |
| 23 | P32418 NAC1_HUMAN  | R.GM*IIEHEGDRPS#SKTEIEM*DGK.V  | S284:      | 3 | 4,7923 | 0,458 | -0,427 |
| 23 | Q641Q2 FA21A_HUMAN | K.RS#RPTSFADLAAR.I             | S284:      | 2 | 2,4375 | 0,24  | -0,589 |
| 23 | O43166 SI1L1_HUMAN | R.SKS#ETGDSSIFRK.L             | S288:      | 3 | 3,0365 | 0,31  | -0,661 |
| 23 | O43166 SI1L1_HUMAN | R.SKS#ETGDSSIFRK.L             | S288:      | 2 | 2,0044 | 0,268 | -0,16  |
| 23 | Q08170 SFRS4_HUMAN | K.IQNNDNVGPKS#RS#PSR.H         | S288:S290: | 3 | 3,3452 | 0,378 | -0,445 |
| 23 | P08559 ODPA_HUMAN  | R.YHGHS#M*SDPGVSYR.T           | S293:      | 3 | 2,8286 | 0,18  | -0,217 |
| 23 | Q9UQ35 SRRM2_HUMAN | K.THTTALAGRS#PSPASGR.R         | S295:      | 3 | 3,0776 | 0,366 | -0,209 |
| 23 | Q96B01 R51A1_HUMAN | R.KPLEIRSPS#AESK.K             | S296:      | 2 | 3,1446 | 0,288 | -0,641 |
| 23 | Q9HCE3 ZN532_HUMAN | K.KAASDSCKEVPANSRES#S#PLPK.E   | S297:S298: | 3 | 3,3012 | 0,269 | -0,218 |
| 23 | Q9H410 DSN1_HUMAN  | K.THDHQLESSLS#PVEVFAK.T        | S30:       | 3 | 4,2719 | 0,447 | -0,696 |
| 23 | Q7L4I2 RSRC2_HUMAN | K.KKEQSEVS#VS#PR.A             | S30:S32:   | 3 | 3,0147 | 0,179 | -0,537 |
| 23 | Q5JXC2 IIP45_HUMAN | R.RKS#FDASDTLALPR.H            | S303:      | 3 | 4,254  | 0,353 | -0,221 |
| 23 | P17706 PTN2_HUMAN  | K.ELSKEDLSPAFDHS#PNKIM*TEK.Y   | S304:      | 3 | 3,6907 | 0,299 | -0,7   |
| 23 | P35659 DEK_HUMAN   | K.KESEEDS#SDDEPLIKK.L          | S306:      | 2 | 4,2203 | 0,577 | -0,182 |
| 23 | P35659 DEK_HUMAN   | K.KESEEDS#DDEPLIKK.L           | S307:      | 3 | 4,6693 | 0,455 | -0,635 |
| 23 | Q15054 DPOD3_HUMAN | K.RVALS#DDETKETENM*R.K         | S307:      | 2 | 2,0896 | 0,258 | -0,184 |
| 23 | O15143 ARC1B_HUMAN | R.FQNLDKKAS#SEGGTAAGAGLDSLHK.N | S310:      | 3 | 5,0385 | 0,387 | 0,071  |
| 23 | Q9NZT2 OGFR_HUMAN  | R.KVEEEGS#PGDPDHEASTQGR.T      | S315:      | 3 | 3,2081 | 0,223 | -0,332 |
| 23 | Q3B726 RPA43_HUMAN | R.KHS#EEAEFTPPLK.C             | S316:      | 3 | 4,029  | 0,282 | 0,344  |
| 23 | Q3B726 RPA43_HUMAN | R.KHS#EEAEFTPPLK.C             | S316:      | 2 | 3,5689 | 0,434 | -0,536 |
| 23 | P46100 ATRX_HUMAN  | K.VYEHTSRFS#PK.K               | S316:      | 2 | 3,3171 | 0,255 | -0,341 |
| 23 | Q3B726 RPA43_HUMAN | R.KHS#EEAEFTPPLKCS#PK.R        | S316:S328: | 3 | 4,0744 | 0,312 | 0,085  |
| 23 | Q15652 JHD2C_HUMAN | R.KGS#DSS#IPDEEKM*KEEK.Y       | S317:S320: | 3 | 3,7385 | 0,228 | -0,606 |
| 23 | O00712 NFIB_HUMAN  | K.KPEKPLFSSAS#PQDSSPR.L        | S328:      | 3 | 4,9172 | 0,457 | -0,269 |
| 23 | Q92922 SMRC1_HUMAN | R.KHS#SPSPPTPTESR.K            | S328:      | 3 | 4,4081 | 0,371 | -0,108 |

|    |                    |                                |        |   |        |       |        |
|----|--------------------|--------------------------------|--------|---|--------|-------|--------|
| 23 | Q15459 SF3A1_HUMAN | K.FGESEEVEM*EVES#DEEDDKQEK.A   | S329:  | 3 | 5,7043 | 0,455 | -0,607 |
| 23 | P46100 ATRX_HUMAN  | K.LHDFLAHSSESEETSS#PPR.L       | S34:   | 3 | 3,2798 | 0,36  | -0,548 |
| 23 | P54259 ATN1_HUMAN  | R.GRAS#PGGVSTSSSDGKAEK.S       | S34:   | 3 | 2,8584 | 0,416 | -0,591 |
| 23 | P28715 ERCC5_HUMAN | K.LKTEKEPDATPPS#PR.T           | S341:  | 3 | 3,8572 | 0,436 | -0,21  |
| 23 | O60343 TBCD4_HUMAN | R.HAS#APSHVQPSDSEK.N           | S341:  | 2 | 2,8612 | 0,467 | -0,589 |
| 23 | Q86X27 RGPS2_HUMAN | K.CHS#LGYNFIHK.M               | S343:  | 3 | 2,7521 | 0,166 | 0,063  |
| 23 | Q86X27 RGPS2_HUMAN | K.CHS#LGYNFIHK.M               | S343:  | 2 | 2,0527 | 0,12  | -0,335 |
| 23 | Q9P1Q0 VPS54_HUMAN | K.HIRPVPS#LPDVCPK.E            | S35:   | 3 | 4,198  | 0,369 | -0,647 |
| 23 | Q9P1Q0 VPS54_HUMAN | K.HIRPVPS#LPDVCPK.E            | S35:   | 2 | 3,3007 | 0,353 | -0,792 |
| 23 | Q8WVV9 HNRLL_HUMAN | R.LKTEEGEIDYS#AEEGENRR.E       | S35:   | 3 | 2,8771 | 0,182 | 0,079  |
| 23 | Q9BXF6 RFIP5_HUMAN | R.HRSS#ISGSLPSSGSLQAVSSR.F     | S357:  | 3 | 4,5837 | 0,347 | -0,252 |
| 23 | Q15435 PP1R7_HUMAN | K.KHS#SGIVADLSEQSLK.D          | S36:   | 3 | 3,6454 | 0,183 | -0,411 |
| 23 | Q7Z5L9 I2BP2_HUMAN | K.RKPS#PEPEGEVGPPI             | S360:  | 3 | 3,4368 | 0,224 | -0,326 |
| 23 | Q7Z5L9 I2BP2_HUMAN | K.RKPS#PEPEGEVGPPI             | S360:  | 2 | 3,2988 | 0,436 | -0,652 |
| 23 | Q96RY7 IF140_HUMAN | R.KVPDFLGS#PGAEGKDR.W          | S360:  | 3 | 3,0968 | 0,203 | -0,313 |
| 23 | Q2LD37 K1109_HUMAN | R.SKS#ISASGRPLK.R              | S3619: | 3 | 2,6576 | 0,156 | -0,13  |
| 23 | P35613 BASI_HUMAN  | R.RKPEDVLDDDDAGS#APLK.S        | S362:  | 3 | 4,2674 | 0,207 | -0,543 |
| 23 | P35613 BASI_HUMAN  | R.RKPEDVLDDDDAGS#APLK.S        | S362:  | 2 | 3,3091 | 0,425 | -0,483 |
| 23 | Q8NCF5 NF2IP_HUMAN | K.HQTLEVSLSRDS#PLK.T           | S369:  | 2 | 3,9073 | 0,529 | -0,477 |
| 23 | Q8NCF5 NF2IP_HUMAN | K.HQTLEVSLSRDS#PLK.T           | S369:  | 3 | 3,2913 | 0,418 | -0,409 |
| 23 | P16402 H13_HUMAN   | K.RKAS#GPPVSELITK.A            | S37:   | 3 | 3,186  | 0,303 | 0      |
| 23 | P16402 H13_HUMAN   | K.RKAS#GPPVSELITK.A            | S37:   | 2 | 2,5471 | 0,449 | -0,546 |
| 23 | Q2PPJ7 AS250_HUMAN | R.RLS#NSSLCSIEEHR.M            | S373:  | 3 | 4,3296 | 0,406 | -0,386 |
| 23 | Q9Y2W1 TR150_HUMAN | K.IKEKGS#FSDTGLGDGK.M          | S377:  | 3 | 3,7998 | 0,508 | -0,106 |
| 23 | Q9Y2W1 TR150_HUMAN | K.IKEKGS#FSDTGLGDGK.M          | S377:  | 2 | 3,6054 | 0,426 | -0,639 |
| 23 | Q15652 JHD2C_HUMAN | R.LRTDNVSDFSESS#DSENSNKR.I     | S379:  | 3 | 4,6976 | 0,488 | -0,445 |
| 23 | Q13428 TCOF_HUMAN  | K.TSQVGAASAPAKES#PRKGAAPPPGK.T | S381:  | 3 | 5,0907 | 0,457 | 0,437  |
| 23 | Q5QJE6 TDIF2_HUMAN | K.KS#PIKASDLTK.F               | S381:  | 3 | 3,6088 | 0,356 | 0,216  |
| 23 | Q69YQ0 CYTSA_HUMAN | R.SRKGSS#GNASEVSVACLTER.I      | S385:  | 3 | 4,9897 | 0,423 | -0,589 |
| 23 | Q8IYU2 HACE1_HUMAN | K.NKRDS#TEITSILLK.Q            | S385:  | 3 | 4,4149 | 0,366 | -0,646 |
| 23 | Q8IYU2 HACE1_HUMAN | K.NKRDS#TEITSILLK.Q            | S385:  | 2 | 2,8123 | 0,291 | -0,503 |
| 23 | Q9UKV3 ACINU_HUMAN | K.SKSPS#PPRLTEDR.K             | S388:  | 2 | 2,3859 | 0,255 | -0,472 |
| 23 | Q8N3F8 MILK1_HUMAN | K.KKPAPLPSS#SPGPPSQDSR.Q       | S390:  | 3 | 3,0947 | 0,23  | -0,52  |

|    |                     |                                |            |   |        |       |        |
|----|---------------------|--------------------------------|------------|---|--------|-------|--------|
| 23 | Q96ST2 IWS1_HUMAN   | R.KAAVLS#DS#EDEEKASAKK.S       | S398:S400: | 3 | 4,2757 | 0,368 | -0,089 |
| 23 | Q9UQ26 RIMS2_HUMAN  | R.RHS#DVSLANADLEDSR.I          | S400:      | 2 | 4,2824 | 0,427 | -1,047 |
| 23 | Q9ULE6 PALD_HUMAN   | K.KLEGIRPES#PAQGSGSR.H         | S406:      | 3 | 3,3273 | 0,277 | -0,495 |
| 23 | P49407 ARRB1_HUMAN  | K.GM*KDDKEEEEDGTGS#PQLNNR.-    | S412:      | 3 | 5,6888 | 0,341 | 0      |
| 23 | Q14157 UBP2L_HUMAN  | K.NPSDSAVHS#PFTKR.Q            | S416:      | 2 | 2,6897 | 0,467 | -0,526 |
| 23 | Q9GZR2 REXO4_HUMAN  | R.DRRPLLTAPDHCS#DDA.-          | S419:      | 2 | 2,2205 | 0,219 | 0,445  |
| 23 | Q9NTZ6 RBM12_HUMAN  | R.S#RSRS#PHEAGFCVYLK.G         | S420:S424: | 3 | 3,4122 | 0,288 | -0,534 |
| 23 | Q15223 PVRL1_HUMAN  | K.AGIPQHPPM*AQNQLYPDDS#DDEKK.A | S422:      | 3 | 4,4656 | 0,507 | -0,438 |
| 23 | O14974 MYPT1_HUMAN  | K.KFPTTATKIS#PK.E              | S422:      | 3 | 2,9664 | 0,262 | 0,065  |
| 23 | Q96MU7 YTDC1_HUMAN  | R.LSSESHHGGS#PIHWVLPAGM*SAK.M  | S424:      | 3 | 3,7257 | 0,32  | -0,442 |
| 23 | Q9Y490 TLN1_HUMAN   | K.SKDHFGLEGDEESTM*LEDSVS#PK.K  | S425:      | 3 | 4,5953 | 0,453 | -0,486 |
| 23 | Q92609 TBCD5_HUMAN  | R.RTS#STLDESEGTFSYRK.E         | S43:       | 3 | 4,1193 | 0,437 | -0,18  |
| 23 | P08865 RSSA_HUMAN   | K.RKS#DGIYIINLK.R              | S43:       | 2 | 3,947  | 0,268 | -0,569 |
| 23 | P08865 RSSA_HUMAN   | K.RKS#DGIYIINLK.R              | S43:       | 3 | 3,889  | 0,405 | -0,427 |
| 23 | O94776 MTA2_HUMAN   | R.GHLRPEAQSL#PYTTSANR.A        | S435:      | 3 | 4,6549 | 0,441 | -0,325 |
| 23 | Q6WKZ4 RFIP1_HUMAN  | R.RSS#LLSLM*TGKK.D             | S435:      | 3 | 3,3133 | 0,322 | 0,387  |
| 23 | P47712 PA24A_HUMAN  | K.HIVSNDSSD#DDESHEPK.G         | S437:      | 3 | 4,673  | 0,483 | -0,616 |
| 23 | Q96L34 MARK4_HUMAN  | K.RS#PTSTGEAELKEER.L           | S438:      | 3 | 3,9363 | 0,461 | -0,62  |
| 23 | O43318 M3K7_HUMAN   | R.RRS#IQDLTVTGTEPGQVSSR.S      | S439:      | 3 | 5,5871 | 0,5   | -0,242 |
| 23 | Q8WWL2 SPIR2_HUMAN  | R.DRS#FSEHDLAQLR.S             | S440:      | 3 | 3,2941 | 0,344 | -0,442 |
| 23 | Q8NI08 NCOA7_HUMAN  | K.KDTLKECLS#LDPEER.K           | S441:      | 3 | 2,9485 | 0,132 | -0,382 |
| 23 | Q9H307 PININ_HUMAN  | K.SLS#PGKENVSALDMEKESEEKEEK.E  | S443:      | 3 | 3,576  | 0,425 | -0,462 |
| 23 | Q9H307 PININ_HUMAN  | K.SLS#PGKENVSALDM*EKESEEKEEK.E | S443:      | 3 | 2,7535 | 0,157 | -0,918 |
| 23 | Q08170 SFRS4_HUMAN  | R.SNS#KSKPNLPSESR.S            | S448:      | 3 | 3,1726 | 0,34  | 0,227  |
| 23 | Q75T46 Q75T46_HUMAN | R.RFS#NVGLVHTSER.R             | S45:       | 3 | 4,1782 | 0,347 | -0,116 |
| 23 | O60832 DKC1_HUMAN   | R.KRES#ES#ESDETTPAAPQLIKK.E    | S451:S453: | 3 | 4,8372 | 0,248 | -0,22  |
| 23 | O60832 DKC1_HUMAN   | R.KRESESES#DETTPAAPQLIK.K      | S455:      | 3 | 3,8557 | 0,192 | -0,718 |
| 23 | Q8IYB3 SRRM1_HUMAN  | R.KVELSES#EEDKGGK.M            | S465:      | 2 | 3,0813 | 0,381 | 0      |
| 23 | Q9C0D0 PHAR1_HUMAN  | R.RLS#QRPTAELEQR.N             | S467:      | 3 | 2,6825 | 0,345 | -0,102 |
| 23 | P21127 CD2L1_HUMAN  | R.DSKRDS#LEEGELR.D             | S47:       | 3 | 3,5179 | 0,192 | -0,113 |
| 23 | Q96EB6 SIRT1_HUMAN  | R.RDGPGLERS#PGEPGGAAPER.E      | S47:       | 3 | 2,7578 | 0,199 | -0,263 |
| 23 | Q96PU5 NED4L_HUMAN  | R.AVKDTLS#NPQSPQSPYNPKPKQH.K.V | S475:      | 3 | 3,6514 | 0,364 | 0,777  |
| 23 | Q8IZL8 PELP1_HUMAN  | K.LRS#PRGSPDGS#LQGTGKPSAPK.K   | S477:S485: | 3 | 4,7544 | 0,339 | -0,398 |

|    |                    |                                |            |   |        |       |        |
|----|--------------------|--------------------------------|------------|---|--------|-------|--------|
| 23 | Q5T0N5 FBP1L_HUMAN | R.HS#SDINHVLVTQGR.E            | S488:      | 3 | 3,332  | 0,344 | 0      |
| 23 | Q6UN15 FIP1_HUMAN  | R.ERDHS#PTPSVFNSDEER.Y         | S492:      | 3 | 3,0398 | 0,406 | 0      |
| 23 | Q9Y2X3 NOL5_HUMAN  | K.HIKEEPLS#EEEEPTSTAIAS#PEKK.K | S502:S514: | 3 | 5,5968 | 0,346 | -0,765 |
| 23 | Q5VZ89 DEN4C_HUMAN | R.HPTGNSITKS#PPLM*AK.R         | S505:      | 3 | 3,6929 | 0,344 | -0,412 |
| 23 | Q15642 CIP4_HUMAN  | R.HARPPDPASAPPDSSNSAS#QDTK.E   | S506:      | 3 | 4,4927 | 0,432 | -0,141 |
| 23 | O14974 MYPT1_HUMAN | R.RLAS#TSDIEEKENR.D            | S507:      | 3 | 3,757  | 0,331 | -0,212 |
| 23 | O14974 MYPT1_HUMAN | R.RLAS#TSDIEEKENR.D            | S507:      | 2 | 2,8697 | 0,451 | 0      |
| 23 | Q9NYF8 BCLF1_HUMAN | K.LKDLFDYS#PPLHK.N             | S512:      | 3 | 2,9701 | 0,411 | -0,553 |
| 23 | Q9Y6D6 BIG1_HUMAN  | K.ACEVALEEIKAEQKS#PPHGEAK.A    | S52:       | 3 | 3,8161 | 0,263 | -0,402 |
| 23 | O00567 NOL5A_HUMAN | K.KSFSKEELM*SS#DLEETAGSTSIK.R  | S520:      | 3 | 3,2285 | 0,365 | -0,543 |
| 23 | Q9H9A5 CNOTA_HUMAN | K.SHDGDKFIPAPPS#SPLR.K         | S520:      | 3 | 3,0102 | 0,185 | -0,289 |
| 23 | Q8TDB6 DTX3L_HUMAN | K.LKEGHETPM*DIDS#DDSK.A        | S532:      | 3 | 3,2968 | 0,143 | -0,454 |
| 23 | Q8N2M8 SFR16_HUMAN | R.EKLTRPAAS#PAVGEK.L           | S532:      | 3 | 3,0317 | 0,303 | 0      |
| 23 | Q9H1E3 NUCKS_HUMAN | R.SGKNS#QEDSESEDKDKV.K         | S54:       | 3 | 3,5889 | 0,394 | -0,528 |
| 23 | Q5T5X7 K1553_HUMAN | K.HSVDSVLTALQDS#SKR.K          | S54:       | 3 | 3,5315 | 0,291 | -0,401 |
| 23 | Q8NHQ9 DDX55_HUMAN | R.KREEGS#DIEEDM*EELLNDTR.L     | S544:      | 3 | 5,6375 | 0,426 | -0,838 |
| 23 | Q96NE9 FRMD6_HUMAN | K.TSTDRHLS#LDDIR.L             | S544:      | 3 | 3,0876 | 0,278 | -0,108 |
| 23 | Q9P275 UBP36_HUMAN | K.KPAPPQHFS#PR.T               | S546:      | 3 | 2,7953 | 0,224 | 0,409  |
| 23 | Q9H1B7 EAP1_HUMAN  | K.RKAS#PEPPDSAEGALK.L          | S547:      | 2 | 3,4708 | 0,512 | -0,634 |
| 23 | Q9H1B7 EAP1_HUMAN  | K.RKAS#PEPPDSAEGALK.L          | S547:      | 3 | 2,7709 | 0,187 | -0,633 |
| 23 | O95365 ZBT7A_HUMAN | K.HFKDEDEDEDVAS#PDGLGR.L       | S549:      | 3 | 5,8016 | 0,459 | -0,248 |
| 23 | P10636 TAU_HUMAN   | K.KVAVVRTPPKS#PS#SAK.S         | S552:S554: | 2 | 2,2774 | 0,255 | -0,067 |
| 23 | Q14738 2A5D_HUMAN  | R.RKS#ELPQDVYTIK.A             | S573:      | 3 | 4,4672 | 0,345 | -0,442 |
| 23 | Q14738 2A5D_HUMAN  | R.RKS#ELPQDVYTIK.A             | S573:      | 2 | 4,205  | 0,549 | -0,81  |
| 23 | Q86UU1 PHLB1_HUMAN | R.KNS#ITEIS#DNEDDLLEYHRR.Q     | S578:S583: | 3 | 2,841  | 0,15  | -0,702 |
| 23 | O43719 HTSF1_HUMAN | K.DLDEEGS#EKELHENVLDK.E        | S579:      | 3 | 2,6017 | 0,131 | -0,168 |
| 23 | Q32MZ4 LRRF1_HUMAN | K.KKS#PVPVETLK.D               | S581:      | 2 | 2,9983 | 0,333 | -0,561 |
| 23 | O14639 ABLM1_HUMAN | R.RS#SGREEDDEELLR.R            | S586:      | 2 | 3,5077 | 0,219 | 0,344  |
| 23 | O14639 ABLM1_HUMAN | R.RSS#GREEDDEELLR.R            | S587:      | 3 | 2,6092 | 0,365 | 0,103  |
| 23 | Q8IZ21 PHAR4_HUMAN | R.RLS#QRPTPEEQR.N              | S590:      | 2 | 2,4261 | 0,191 | -0,671 |
| 23 | Q6NZY4 ZCHC8_HUMAN | K.KSEAGHASS#PDSEVTSQCQK.E      | S598:      | 3 | 4,9222 | 0,3   | -0,083 |
| 23 | P43243 MATR3_HUMAN | R.SYS#PDGKESPSDKK.S            | S598:      | 2 | 3,0469 | 0,434 | -0,456 |
| 23 | POC7M2 RA1L3_HUMAN | K.SES#PKEPEQLRK.L              | S6:        | 3 | 3,6545 | 0,329 | 0,061  |

|    |                     |                                  |            |   |        |       |        |
|----|---------------------|----------------------------------|------------|---|--------|-------|--------|
| 23 | P09543 CN37_HUMAN   | R.GFS#RKSHT#FLPK.I               | S6:T11:    | 2 | 2,3209 | 0,132 | -0,156 |
| 23 | O00629 IMA4_HUMAN   | R.RNVPHEDICEDS#DIDGDYR.V         | S60:       | 3 | 5,5789 | 0,539 | 0      |
| 23 | Q9UHB6 LIMA1_HUMAN  | R.SRPFTVAASFQSTSVKS#PK.T         | S604:      | 3 | 3,4611 | 0,361 | 0,174  |
| 23 | O14777 NDC80_HUMAN  | K.RTS#GHGSRNS#QLGIFSSSEK.I       | S62:S69:   | 3 | 3,0066 | 0,091 | -0,319 |
| 23 | Q9P246 STIM2_HUMAN  | R.KIS#RDEVSLDSSR.G               | S626:      | 3 | 2,8174 | 0,317 | 0      |
| 23 | Q02952 AKA12_HUMAN  | R.RPS#ESDKEDLDK.V                | S627:      | 2 | 3,4492 | 0,499 | -0,675 |
| 23 | Q02952 AKA12_HUMAN  | R.RPS#ES#DKEDLDKVK.S             | S627:S629: | 3 | 2,8568 | 0,249 | -0,378 |
| 23 | Q02952 AKA12_HUMAN  | R.RPS#ES#DKEDLDKVK.S             | S627:S629: | 2 | 2,3068 | 0,11  | -0,504 |
| 23 | Q9BPX5 ARP5L_HUMAN  | R.AFHAALRNS#PVNTK.N              | S64:       | 2 | 3,6301 | 0,409 | -0,684 |
| 23 | Q9HCE9 TM16H_HUMAN  | R.RRPGPSPEALLEEGS#PTM*VEK.G      | S641:      | 3 | 3,3157 | 0,252 | -0,539 |
| 23 | Q86Y91 KI18B_HUMAN  | R.RRPS#ALEADSPM*APK.R            | S645:      | 3 | 3,7569 | 0,394 | -0,425 |
| 23 | O14777 NDC80_HUMAN  | R.TSGHGS#RNSQLGIFSSSEK.I         | S66:       | 3 | 2,8641 | 0,314 | -0,089 |
| 23 | P14923 PLAK_HUMAN   | R.KRVS#VELTNSLFK.H               | S664:      | 3 | 3,0644 | 0,245 | -0,343 |
| 23 | P08237 K6PF_HUMAN   | R.KNVLGHM*QQGGS#PTPFDR.N         | S667:      | 3 | 4,1123 | 0,442 | -0,089 |
| 23 | P20042 IF2B_HUMAN   | R.KKDAS#DDLDDLNFNQK.K            | S67:       | 3 | 4,9709 | 0,222 | -0,437 |
| 23 | Q9Y618 NCOR2_HUMAN  | R.RRPS#LLSEFQPGNER.S             | S67:       | 3 | 4,5296 | 0,447 | -0,294 |
| 23 | P46087 NOL1_HUMAN   | K.TNKS#PEAKPLPGK.L               | S67:       | 3 | 3,3459 | 0,435 | 0,253  |
| 23 | P20042 IF2B_HUMAN   | R.KKDAS#DDLDDLNFNQK.K            | S67:       | 2 | 2,2569 | 0,379 | -0,583 |
| 23 | Q9BXP5 ARS2_HUMAN   | R.ERFS#PPRHLS#PPQK.R             | S67:S74:   | 2 | 3,2066 | 0,434 | -0,621 |
| 23 | P25098 ARBK1_HUMAN  | K.NKPRS#PVVELSK.V                | S670:      | 2 | 2,9566 | 0,318 | -0,596 |
| 23 | P46100 ATRX_HUMAN   | R.RPTETNPVTSNS#DEECNETVKEK.Q     | S677:      | 3 | 6,0251 | 0,521 | -0,2   |
| 23 | Q969R5 LMBL2_HUMAN  | R.VKEEHLDVAS#PDK.A               | S683:      | 3 | 3,1997 | 0,286 | -0,473 |
| 23 | O14617 AP3D1_HUMAN  | R.KQEQANNPFYIKS#SPS#PQKR.Y       | S685:S688: | 3 | 4,3452 | 0,322 | -0,365 |
| 23 | Q12996 CSTF3_HUMAN  | K.RPNEDS#DEDEEKGAVVPPVHDIYR.A    | S691:      | 3 | 3,2703 | 0,341 | -0,643 |
| 23 | P05114 HMGN1_HUMAN  | R.KVS#SAEGAAKEEPK.R              | S7:        | 3 | 3,7944 | 0,296 | -0,908 |
| 23 | Q5T3S6 Q5T3S6_HUMAN | R.KRS#FTFGAYGGVDK.S              | S7:        | 3 | 3,2961 | 0,316 | 0      |
| 23 | P05114 HMGN1_HUMAN  | R.KVS#SAEGAAKEEPK.R              | S7:        | 2 | 3,2506 | 0,279 | -0,646 |
| 23 | Q14671 PUM1_HUMAN   | R.RDS#LTGSSDLYKR.T               | S709:      | 3 | 3,7527 | 0,385 | 0      |
| 23 | Q7Z5L9 I2BP2_HUMAN  | R.AHGCFPEGRS#PPGAAASAAKPPPLSAK.D | S71:       | 3 | 3,9819 | 0,297 | -0,461 |
| 23 | O00418 EF2K_HUMAN   | K.SERYSS#SGSPANSFHFKE            | S71:       | 3 | 3,3177 | 0,215 | -0,651 |
| 23 | P53365 ARFP2_HUMAN  | R.HPS#HSTTPSGPGDEVAR.G           | S72:       | 3 | 2,9786 | 0,194 | -0,101 |
| 23 | Q9H4I2 ZH3_HUMAN    | R.KVS#PIKINLK.N                  | S723:      | 2 | 2,148  | 0,171 | -0,2   |
| 23 | Q9NZM1 MYOF_HUMAN   | R.SRS#LSQIHEAAVR.M               | S729:      | 3 | 3,3238 | 0,318 | 0      |

|    |                     |                                 |            |   |        |       |        |
|----|---------------------|---------------------------------|------------|---|--------|-------|--------|
| 23 | Q13625 ASPP2_HUMAN  | K.KRSS#ITEPEGPNGPNIQK.L         | S737:      | 3 | 5,7243 | 0,417 | 0,09   |
| 23 | Q96C19 EFHD2_HUMAN  | R.RADLNQGIGEPQS#PSRR.V          | S74:       | 3 | 2,9766 | 0,256 | -0,84  |
| 23 | Q9UHC1 MLH3_HUMAN   | R.KKLS#LSSQLGSLEK.F             | S746:      | 3 | 4,0986 | 0,27  | -0,343 |
| 23 | Q86UP2 KTN1_HUMAN   | K.KEIQNGNLHES#DSESVPR.D         | S75:       | 3 | 3,5742 | 0,431 | -0,345 |
| 23 | Q13309 SKP2_HUMAN   | K.SKGS#DKDFVIVR.R               | S75:       | 3 | 2,6998 | 0,342 | 0,639  |
| 23 | Q2NKX8 ERC6L_HUMAN  | K.LNKPQQPS#PLLSTHHTQEEDISSK.M   | S755:      | 3 | 4,1742 | 0,5   | -0,316 |
| 23 | Q9H8M5 CNNM2_HUMAN  | K.SPPRPCGLNHSDS#LSR.S           | S761:      | 3 | 3,3983 | 0,439 | -0,197 |
| 23 | Q13136 LIPA1_HUMAN  | K.GALHTVS#HEDIR.D               | S763:      | 2 | 3,0639 | 0,379 | -0,69  |
| 23 | P27540 ARNT_HUMAN   | R.FARS#DDEQSSADKER.L            | S77:       | 3 | 4,3354 | 0,378 | -0,502 |
| 23 | Q68DN6 RGPD1_HUMAN  | K.HSTPS#PTKYSLSPSK.S            | S772:      | 2 | 3,7678 | 0,446 | 0,216  |
| 23 | Q92540 SMG7_HUMAN   | K.AVPALGKS#PPHHSFGFQQYQQADASK.Q | S781:      | 3 | 3,1551 | 0,291 | -0,469 |
| 23 | Q86W92 LIPB1_HUMAN  | R.RRPS#DENTIAPSEVQK.W           | S794:      | 2 | 2,3348 | 0,343 | -0,64  |
| 23 | O95696 BRD1_HUMAN   | R.SRS#TCGDSEVEEESPGKR.L         | S803:      | 3 | 5,5748 | 0,419 | -0,088 |
| 23 | Q14721 KCNB1_HUMAN  | R.SEKNHFESSPLTS#PK.F            | S805:      | 3 | 3,1456 | 0,348 | -0,392 |
| 23 | Q9UMZ2 SYNG_HUMAN   | R.HTKEDSAS#VKS#LDLPSIGGSSVGK.E  | S809:S812: | 3 | 5,1835 | 0,537 | -0,643 |
| 23 | Q99590 SFRIP_HUMAN  | K.RKS#EQEFSFDTADR.S             | S812:      | 3 | 4,7394 | 0,43  | -0,097 |
| 23 | Q9H270 VPS11_HUMAN  | R.IRQEIQELKAS#PK.I              | S813:      | 3 | 3,5607 | 0,146 | -0,339 |
| 23 | Q9P1Y6 K1542_HUMAN  | R.KENPS#PLFSIKK.T               | S814:      | 2 | 3,7384 | 0,224 | -0,582 |
| 23 | Q96JP5 ZFP91_HUMAN  | R.RRS#S#PSARPPDVPGQQPQAAK.S     | S82:S83:   | 3 | 2,7559 | 0,196 | -0,612 |
| 23 | Q14103 HNRPD_HUMAN  | K.IDASKNEEDEGHSNSS#PR.H         | S83:       | 3 | 2,8958 | 0,135 | -0,178 |
| 23 | O60524 SDCG1_HUMAN  | K.KKLPS#DSGDLEALEGK.D           | S831:      | 3 | 4,1208 | 0,352 | 0,104  |
| 23 | Q13206 DDX10_HUMAN  | R.SNS#EVEDVGPTSHNRK.K           | S831:      | 3 | 3,1975 | 0,328 | -0,199 |
| 23 | O94880 PHF14_HUMAN  | R.S#FVPEEEKHEER.V               | S835:      | 2 | 2,7961 | 0,197 | -0,612 |
| 23 | Q9Y6M7 S4A7_HUMAN   | K.ESDKEDGRES#PSYDTPSQR.V        | S84:       | 3 | 2,6411 | 0,126 | -0,323 |
| 23 | O95819 M4K4_HUMAN   | K.HKS#SSSFTPFIDPR.L             | S852:      | 2 | 3,1595 | 0,416 | -0,579 |
| 23 | Q9H0E3 SP130_HUMAN  | R.KQQHVISTEEGDM*M*ETNS#TDDEK.S  | S855:      | 3 | 6,5184 | 0,561 | 0,199  |
| 23 | Q92547 TOPB1_HUMAN  | K.RKPS#TPLSEVIVK.N              | S860:      | 3 | 2,7859 | 0,17  | -0,119 |
| 23 | P09493 TPM1_HUMAN   | K.KATDAEADVAS#LNRR.I            | S87:       | 2 | 2,1887 | 0,24  | -0,431 |
| 23 | Q8IYB7 DI3L2_HUMAN  | K.RPGTQGHLGPEKEEES#DGEPEDSSTS.- | S875:      | 3 | 2,6293 | 0,192 | -0,741 |
| 23 | B2RTT4 B2RTT4_HUMAN | K.EAVVDLHADDS#RISEDETER.N       | S882:      | 3 | 2,981  | 0,281 | -0,387 |
| 23 | Q92625 ANS1A_HUMAN  | R.HDS#LHDPAAAPSR.A              | S887:      | 3 | 3,5376 | 0,3   | 0      |
| 23 | Q6DN90 IQEC1_HUMAN  | K.LQHSTS#ILRK.Q                 | S89:       | 2 | 2,3627 | 0,359 | -0,483 |
| 23 | Q13428 TCOF_HUMAN   | R.AALAPAKES#PRKGAAPTPPGK.T      | S906:      | 3 | 2,9329 | 0,164 | -0,349 |

|    |                     |                             |          |   |        |       |        |
|----|---------------------|-----------------------------|----------|---|--------|-------|--------|
| 23 | Q12872 SFRS8_HUMAN  | R.SRGS#QEKEAQISSAIVSSVQSK.I | S909:    | 3 | 4,9994 | 0,411 | -0,663 |
| 23 | Q8WWQ0 PHIP_HUMAN   | K.VNEEKDGPIS#PKK.K          | S911:    | 3 | 3,0261 | 0,341 | 0,12   |
| 23 | Q6ZRV2 FA83H_HUMAN  | R.RGS#PVPPVPERR.S           | S914:    | 3 | 3,0344 | 0,305 | 0,064  |
| 23 | P30876 RPB2_HUMAN   | R.VRS#VRIPIQIGDK.F          | S925:    | 3 | 3,1713 | 0,111 | 0,189  |
| 23 | Q9H2Y7 ZF106_HUMAN  | R.HS#AQLSSDHIIPLM*HLAK.D    | S937:    | 3 | 3,2201 | 0,362 | -0,437 |
| 23 | Q9HC35 EMAL4_HUMAN  | R.KPS#HTSAVSIAGK.E          | S94:     | 3 | 4,3212 | 0,498 | -0,201 |
| 23 | Q01831 XPC_HUMAN    | K.VIKDEALS#DGDDLRFPSDLKK.A  | S94:     | 3 | 3,8113 | 0,254 | -0,644 |
| 23 | Q92794 MYST3_HUMAN  | R.GQLKKS#PEALK.C            | S954:    | 3 | 4,1511 | 0,269 | 0,071  |
| 23 | P07814 SYEP_HUMAN   | K.SLIGVEYKPV#ATGAEDKDKK.K   | S954:    | 3 | 3,1796 | 0,165 | -0,237 |
| 23 | P16333 NCK1_HUMAN   | K.RKPSVPDSASPADD#FVDPGER.L  | S96:     | 3 | 4,835  | 0,384 | -0,532 |
| 23 | P53602 ERG19_HUMAN  | R.RNS#RDGDPLPSSLCK.V        | S96:     | 3 | 2,9389 | 0,342 | 0      |
| 23 | P16383 GCF_HUMAN    | R.TLDVS#T#DEEDKIHHSSESK.D   | S96:T97: | 3 | 2,6425 | 0,131 | -0,395 |
| 23 | Q9NWH9 SLTM_HUMAN   | K.KHEADELSGDAS#VEDDAFIK.D   | S97:     | 3 | 5,4114 | 0,368 | -0,487 |
| 23 | Q5TAQ9 WD42A_HUMAN  | R.VHDRS#EEEEEEEEEEQPR.R     | S99:     | 3 | 3,6775 | 0,309 | 0,399  |
| 23 | Q6WCQ1 MRIP_HUMAN   | K.SKS#NPDFLKK.D             | S992:    | 3 | 3,5115 | 0,285 | 0,367  |
| 23 | Q6WCQ1 MRIP_HUMAN   | K.SKS#NPDFLKK.D             | S992:    | 2 | 2,6872 | 0,242 | -0,49  |
| 23 | Q9BVC5 ASHWN_HUMAN  | R.KRPLIVFDGSST#STSIK.V      | T109:    | 3 | 4,6193 | 0,429 | -0,477 |
| 23 | Q9BY89 K1671_HUMAN  | R.RKT#DVISDTFPGK.I          | T1179:   | 3 | 3,6305 | 0,262 | -0,474 |
| 23 | P62241 RS8_HUMAN    | K.KGAKLT#PEEEIILNK.K        | T130:    | 3 | 4,0905 | 0,288 | -0,514 |
| 23 | Q86X02 CDR2L_HUMAN  | R.RT#IHTFPCLK.E             | T154:    | 3 | 3,2843 | 0,242 | 0      |
| 23 | ##Q8IZH2 XRN1_HUMAN | R.AETPLT#EGKEIAKK.I         | T1586:   | 2 | 2,5264 | 0,116 | -1,453 |
| 23 | P38919 IF4A3_HUMAN  | R.KLDYGQHVVAGT#PGR.V        | T163:    | 2 | 3,7359 | 0,489 | -0,727 |
| 23 | P38919 IF4A3_HUMAN  | R.KLDYGQHVVAGT#PGR.V        | T163:    | 3 | 3,6241 | 0,293 | 0,109  |
| 23 | Q14978 NOLC1_HUMAN  | K.NQKPKIT#PVTVK.A           | T188:    | 3 | 3,4888 | 0,213 | 0,064  |
| 23 | Q00765 REEP5_HUMAN  | K.KATVNLLGEEKST#.-          | T189:    | 3 | 3,635  | 0,492 | -0,114 |
| 23 | Q9HDC9 APMAP_HUMAN  | R.RPLRPQVVT#DDDQGQAPEAK.D   | T19:     | 3 | 3,0697 | 0,365 | 0,421  |
| 23 | Q9UHD1 CHRD1_HUMAN  | R.RKT#SDFNTFLAQEGCTK.G      | T199:    | 3 | 4,832  | 0,441 | -0,439 |
| 23 | Q8NDT2 RB15B_HUMAN  | R.DRT#PPHLLYSR.D            | T205:    | 3 | 3,1143 | 0,155 | -0,354 |
| 23 | Q8WU20 FRS2_HUMAN   | K.NRT#SVHVPLEAR.V           | T210:    | 3 | 2,6538 | 0,149 | -0,188 |
| 23 | Q86UD0 CI140_HUMAN  | R.RHT#IASGVDCGLLK.Q         | T219:    | 3 | 4,5322 | 0,451 | -0,341 |
| 23 | Q8IYB3 SRRM1_HUMAN  | K.KEKT#PELPEPSVK.V          | T220:    | 3 | 3,8049 | 0,392 | 0      |
| 23 | Q8IYB3 SRRM1_HUMAN  | K.KEKT#PELPEPSVK.V          | T220:    | 2 | 2,8204 | 0,379 | -0,469 |
| 23 | Q9H4A3 WNK1_HUMAN   | R.KGT#FTDDLHK.L             | T2245:   | 3 | 3,7885 | 0,257 | -0,147 |

|    |                     |                               |              |   |        |       |        |
|----|---------------------|-------------------------------|--------------|---|--------|-------|--------|
| 23 | Q9Y5K6 CD2AP_HUMAN  | R.T#SSSETEEEKKPEKLILQSLGPK.T  | T231:        | 3 | 3,9289 | 0,485 | -0,562 |
| 23 | Q5T200 ZC3HD_HUMAN  | K.KKGPRTPS#PPPIPEDIALGK.K     | T263:S265:   | 3 | 3,7714 | 0,266 | -0,621 |
| 23 | Q5VWC0 Q5VWC0_HUMAN | K.RT#ASNPKVENEDEPVR.L         | T292:        | 3 | 2,7761 | 0,291 | 0,381  |
| 23 | Q01518 CAP1_HUMAN   | R.SGPKPFSAPKPQT#SPS#PKR.A     | T307:S310:   | 3 | 3,1918 | 0,258 | -0,425 |
| 23 | Q8NFH5 NUP53_HUMAN  | K.ASTSDYQVISDRQT#PKKDESLVSK.A | T308:        | 3 | 4,0799 | 0,393 | -0,464 |
| 23 | Q075152 ZC11A_HUMAN | K.KVEAPETNIDKT#PK.K           | T321:        | 3 | 4,3328 | 0,251 | -0,554 |
| 23 | Q075152 ZC11A_HUMAN | K.KVEAPETNIDKT#PK.K           | T321:        | 2 | 3,9671 | 0,206 | -0,518 |
| 23 | Q13769 THOC5_HUMAN  | R.RPT#LGVQLDDKR.K             | T328:        | 2 | 3,3513 | 0,37  | -0,495 |
| 23 | Q9UGV2 NDRG3_HUMAN  | R.SRT#HSTSSSLGSGESPFSSR.S     | T329:        | 3 | 4,7256 | 0,357 | 0,089  |
| 23 | Q7Z5H3 RHG22_HUMAN  | R.KHSQLFTAPVPEGPT#SPR.G       | T358:        | 3 | 4,0027 | 0,15  | -0,27  |
| 23 | Q5T6U8 Q5T6U8_HUMAN | R.KQPPKEPSEVPT#PK.R           | T42:         | 3 | 3,3341 | 0,39  | 0      |
| 23 | Q13029 PRDM2_HUMAN  | K.RKPSQT#LQPSDLADGK.A         | T423:        | 3 | 4,1453 | 0,363 | -0,563 |
| 23 | Q8TBZ3 WDR20_HUMAN  | K.FAT#LSLHDKR.E               | T463:        | 3 | 2,6104 | 0,265 | 0,072  |
| 23 | P36915 GNL1_HUMAN   | R.REEQT#DT#S#DGESVTHHIR.R     | T48:T50:S51: | 3 | 4,2523 | 0,468 | -0,391 |
| 23 | Q8TF01 SFR18_HUMAN  | K.KRT#PNETTSVLEPK.K           | T485:        | 3 | 3,6621 | 0,411 | -0,435 |
| 23 | Q9Y2W1 TR150_HUMAN  | K.QRKT#EELEEEFPER.S           | T487:        | 3 | 3,0359 | 0,366 | -1,381 |
| 23 | Q92558 WASF1_HUMAN  | K.RHPST#LPVISDAR.S            | T490:        | 3 | 3,908  | 0,132 | -0,06  |
| 23 | P36915 GNL1_HUMAN   | R.EEQTDT#SDGESVTHHIR.R        | T50:         | 2 | 2,2045 | 0,341 | -0,725 |
| 23 | Q9Y4J8 DTNA_HUMAN   | R.LRLEHEQASQPT#PEK.A          | T504:        | 3 | 3,3878 | 0,219 | -0,298 |
| 23 | Q9NYV4 CD2L7_HUMAN  | R.DSKPIALKEEIVT#PKETETSEK.E   | T514:        | 3 | 3,4585 | 0,38  | -0,717 |
| 23 | P10636 TAU_HUMAN    | K.KVAVVRT#PPKS#PSSAK.S        | T548:S552:   | 3 | 3,2127 | 0,219 | 0,202  |
| 23 | Q8WVC0 LEO1_HUMAN   | K.KLT#SDEEGEPSGKR.K           | T629:        | 3 | 3,9049 | 0,27  | -0,34  |
| 23 | Q96B01 R51A1_HUMAN  | R.KEEIPVQEKT#PK.K             | T66:         | 3 | 4,2235 | 0,272 | 0      |
| 23 | Q96B01 R51A1_HUMAN  | R.KEEIPVQEKT#PK.K             | T66:         | 2 | 3,3824 | 0,313 | -0,486 |
| 23 | Q9P2K8 E2AK4_HUMAN  | R.HERPAGPGT#PPPSGPLAK.D       | T667:        | 3 | 2,7889 | 0,32  | -0,84  |
| 23 | P19338 NUCL_HUMAN   | K.KVVVSP#KK.V                 | T69:         | 2 | 2,6686 | 0,208 | -0,458 |
| 23 | Q9H3T3 SEM6B_HUMAN  | R.ASHGDFPLT#PHAS#PDRR.R       | T790:S794:   | 3 | 2,7098 | 0,171 | -0,362 |
| 23 | Q14008 CKAP5_HUMAN  | K.KKY#SDADIEPFLK.N            | Y1860:       | 3 | 3,7043 | 0,169 | 0      |
| 23 | Q15173 PGRC2_HUMAN  | R.LLKPGEEPSEY#TDEEDTKDHNKQD.- | Y210:        | 3 | 5,2401 | 0,483 | -0,695 |
| 23 | Q8NFC6 FA44A_HUMAN  | R.KQHY#LSSSEPDNDPDLVLSR.I     | Y2777:       | 3 | 4,7412 | 0,34  | -0,649 |
| 23 | Q9NQS7 INCE_HUMAN   | R.RISY#VQDENRDPPIR.R          | Y73:         | 2 | 2,4345 | 0,265 | -0,464 |
| 23 | Q43491 E41L2_HUMAN  | K.KQKSY#TLVVAK.D              | Y88:         | 3 | 2,9389 | 0,331 | -0,068 |
| 23 | Q9Y490 TLN1_HUMAN   | R.LASEAKPAAVAANEIEGSHIK.H     |              | 3 | 6,9573 | 0,488 | -0,573 |



|    |                     |                               |   |        |       |        |
|----|---------------------|-------------------------------|---|--------|-------|--------|
| 23 | A8K9D9 A8K9D9_HUMAN | R.DKLPSTEVKEDSAYGSQSVEQEAEK.L | 3 | 6,4494 | 0,508 | -1,129 |
| 23 | P57740 NU107_HUMAN  | K.DNGEFSHHDLAPALDTGTTEEDR.L   | 3 | 6,3024 | 0,322 | -0,579 |
| 23 | P46940 IQGA1_HUMAN  | K.DSLHEKFPDAGEDELLK.I         | 3 | 5,4366 | 0,426 | -0,377 |
| 23 | O75347 TBCA_HUMAN   | R.ILENEKDLEEAEYKEAR.L         | 3 | 5,4262 | 0,393 | -0,249 |
| 23 | P49915 GUAA_HUMAN   | R.GLQKEEVLLTHGDSVDK.V         | 3 | 5,331  | 0,465 | -0,558 |
| 23 | P61353 RL27_HUMAN   | K.NIDDGTSDRPYSHALVAGIDR.Y     | 3 | 5,2795 | 0,535 | -0,483 |
| 23 | P13639 EF2_HUMAN    | K.ARPFPDGLAEDIDKGEVSAR.Q      | 3 | 5,2448 | 0,432 | -0,427 |
| 23 | Q6P3X3 TTC27_HUMAN  | R.NKEFQECVECFER.S             | 3 | 5,1729 | 0,34  | -0,206 |
| 23 | P43243 MATR3_HUMAN  | R.DSFDDRGPSLNPVLDYDHGSR.S     | 3 | 5,0561 | 0,186 | -0,62  |
| 23 | P17661 DESM_HUMAN   | R.TNEKVELQELNDR.F             | 3 | 4,9551 | 0,353 | 0,115  |
| 23 | P17480 UBF1_HUMAN   | R.DYIQKHPELNISEEGITK.S        | 3 | 4,9548 | 0,474 | -0,433 |
| 23 | Q02952 AKA12_HUMAN  | K.ERPPAPSSFVFQEETKEQSK.M      | 3 | 4,774  | 0,359 | -0,709 |
| 23 | P08670 VIME_HUMAN   | K.TVETRDGQVINETSQHDDLE.-      | 3 | 4,7551 | 0,271 | -0,302 |
| 23 | O15347 HMGB3_HUMAN  | R.KKVEEEDEEEEEEEEEEEEDE.-     | 3 | 4,69   | 0,523 | -0,75  |
| 23 | Q9UQ35 SRRM2_HUMAN  | K.EETPGQRPAVTETHQLAELNEK.K    | 3 | 4,6096 | 0,462 | -0,369 |
| 23 | Q9UPN9 TRI33_HUMAN  | R.DIGKPEVEYDCDNLQHSK.K        | 3 | 4,5148 | 0,46  | -0,426 |
| 23 | Q99996 AKAP9_HUMAN  | K.DKTDEVHLLNDTLASEQK.K        | 3 | 4,4817 | 0,384 | -0,534 |
| 23 | P07951 TPM2_HUMAN   | R.CKQLEEEQQALQK.K             | 2 | 4,4095 | 0,453 | 0,15   |
| 23 | P31948 STIP1_HUMAN  | K.DPQALSEHLKNPVIAQK.I         | 2 | 4,364  | 0,519 | -0,646 |
| 23 | P07195 LDHB_HUMAN   | K.LKGEM*M*DLQHGSFLQTPK.I      | 3 | 4,3574 | 0,368 | -0,581 |
| 23 | Q8IY17 PLPL6_HUMAN  | R.DTELAKLPEGTLGHIK.R          | 3 | 4,3551 | 0,464 | -0,531 |
| 23 | Q08EQ4 TMSL1_HUMAN  | K.TETQEKNPLPSKETIEQEK.Q       | 3 | 4,3403 | 0,353 | -0,328 |
| 23 | P13667 PDIA4_HUMAN  | R.SHM*M*DVGQSTQDSAIDFVLK.Y    | 3 | 4,3175 | 0,544 | -0,386 |
| 23 | P09493 TPM1_HUMAN   | K.GTEDELDKYSEALKDAQEK.L       | 3 | 4,3114 | 0,458 | -0,506 |
| 23 | Q15149 PLEC1_HUMAN  | R.KQEELQLEQQR.R               | 3 | 4,3109 | 0,084 | -0,352 |
| 23 | Q14137 BOP1_HUMAN   | R.TRDELQFLDK.M                | 3 | 4,2966 | 0,145 | -0,066 |
| 23 | Q03701 CEBPZ_HUMAN  | R.ALTVAHELLCNKPEEEK.A         | 3 | 4,2962 | 0,443 | -0,462 |
| 23 | Q15717 ELAV1_HUMAN  | R.DKVAGHSLGYGFVNYVTAK.D       | 3 | 4,2803 | 0,41  | -0,542 |
| 23 | P17661 DESM_HUMAN   | R.TNEKVELQELNDR.F             | 2 | 4,2735 | 0,441 | -0,845 |
| 23 | P63220 RS21_HUMAN   | K.DHASIQM*NVAEVDKVTGR.F       | 3 | 4,2488 | 0,637 | -0,737 |
| 23 | Q15149 PLEC1_HUMAN  | R.KQEELQLEQQR.R               | 2 | 4,228  | 0,166 | -0,705 |
| 23 | P06454 PTMA_HUMAN   | K.KEVVEEAENGR.D               | 3 | 4,2162 | 0,261 | 0,363  |
| 23 | B2RTR1 B2RTR1_HUMAN | K.DKSFDDVESVDGNRPSSAASAFK.V   | 3 | 4,2102 | 0,487 | -0,521 |

|    |                    |                                 |   |        |       |        |
|----|--------------------|---------------------------------|---|--------|-------|--------|
| 23 | P07951 TPM2_HUMAN  | R.CKQLEEEQALQK.K                | 3 | 4,1413 | 0,199 | 0,336  |
| 23 | P06493 CDC2_HUMAN  | R.DLKPNLLIDDKGTIK.L             | 3 | 4,1148 | 0,29  | -0,909 |
| 23 | Q15181 IPYR_HUMAN  | K.M*EIATKDPLNPIKQDVK.K          | 3 | 4,1088 | 0,443 | -0,561 |
| 23 | P63241 IF5A1_HUMAN | R.EDLRLPEGLDGKEIEQK.Y           | 3 | 4,0845 | 0,328 | -0,65  |
| 23 | P11021 GRP78_HUMAN | K.NGRVEIHANDQGMR.I              | 2 | 4,0589 | 0,322 | -0,392 |
| 23 | P27797 CALR_HUMAN  | K.HEQNIDCGGGYVK.L               | 2 | 4,033  | 0,477 | -0,578 |
| 23 | Q13416 ORC2_HUMAN  | R.DKTSDLVEEYFEAHSSK.V           | 3 | 4,0271 | 0,476 | -0,706 |
| 23 | Q9NRF9 DPOE3_HUMAN | K.SRDEDNDEDEERLEEEEQNEEEVEVDN.- | 3 | 4,0248 | 0,456 | -0,114 |
| 23 | Q7KZF4 SND1_HUMAN  | R.SSHYDELLAAEAR.A               | 2 | 4,0115 | 0,458 | -0,501 |
| 23 | Q14789 GOGB1_HUMAN | K.DLEITKENLAQAVEHR.K            | 3 | 3,9713 | 0,428 | -0,294 |
| 23 | P17252 KPCA_HUMAN  | R.DLKLDNVM*LDSEGHK.I            | 3 | 3,9631 | 0,383 | -0,496 |
| 23 | P62269 RS18_HUMAN  | K.RAGELTEDEVER.V                | 2 | 3,9558 | 0,434 | -0,608 |
| 23 | O60493 SNX3_HUMAN  | R.KQGLEQFINK.V                  | 3 | 3,9328 | 0,241 | 0,835  |
| 23 | Q08EQ4 TMSL1_HUMAN | K.TETQEKNPLPSKETIEQEQAGES.-     | 3 | 3,9326 | 0,361 | -0,542 |
| 23 | P63241 IF5A1_HUMAN | R.EDLRLPEGLDGKEIEQK.Y           | 2 | 3,9309 | 0,488 | -0,62  |
| 23 | Q9UHR5 S30BP_HUMAN | K.DNTEAEKRDPQELVASFSE.R         | 3 | 3,8547 | 0,337 | -0,709 |
| 23 | P17096 HMGA1_HUMAN | K.KLEKEEEEGISQESSEEEQ.-         | 3 | 3,825  | 0,425 | -0,491 |
| 23 | Q9UQE7 SMC3_HUMAN  | R.SEDLDNSIDKTEAGIKELQK.S        | 3 | 3,8209 | 0,363 | -0,737 |
| 23 | Q9Y676 RT18B_HUMAN | R.DHGLLIYHIPQVEPR.D             | 3 | 3,8098 | 0,337 | -0,614 |
| 23 | O75369 FLNB_HUMAN  | R.AIVHDNKGDTYAVTYIPDK.T         | 3 | 3,8091 | 0,344 | -0,173 |
| 23 | Q15418 KS6A1_HUMAN | R.DLKPENILLDEEGHIK.L            | 3 | 3,8085 | 0,224 | -0,589 |
| 23 | O95340 PAPS2_HUMAN | R.HNEFDIFSGTR.M                 | 2 | 3,7552 | 0,555 | -0,646 |
| 23 | P15531 NDKA_HUMAN  | K.FM*QASEDLLKEHYVDLK.D          | 3 | 3,7409 | 0,375 | -0,615 |
| 23 | Q96R05 RET7_HUMAN  | K.FKVGEEFDEDNR.G                | 3 | 3,724  | 0,348 | 0,185  |
| 23 | P41227 ARD1A_HUMAN | K.M*EEDPDDVPHGHITSLAVK.R        | 3 | 3,7174 | 0,353 | -0,434 |
| 23 | O14776 TCRG1_HUMAN | R.DDNKDIDSEKAAM*EAEIK.A         | 3 | 3,7018 | 0,253 | -0,084 |
| 23 | P68104 EF1A1_HUMAN | K.SVEM*HHEALSEALPGDNVGFNVK.N    | 3 | 3,6928 | 0,249 | -0,293 |
| 23 | Q96RR4 KKCC2_HUMAN | R.DIKPSNLLVGEDGHIK.I            | 3 | 3,6741 | 0,312 | -0,527 |
| 23 | P17987 TCPA_HUMAN  | K.HGSYEDAVHSGALND.-             | 2 | 3,6664 | 0,49  | -0,31  |
| 23 | Q02952 AKA12_HUMAN | K.EQEPEKVDTEEDGKAEVASEK.L       | 3 | 3,6643 | 0,362 | -0,468 |
| 23 | Q9NYF8 BCLF1_HUMAN | K.SQEEPKDTFEHDPSESIDEFNK.S      | 3 | 3,652  | 0,369 | -0,07  |
| 23 | P62269 RS18_HUMAN  | K.RAGELTEDEVER.V                | 3 | 3,6519 | 0,333 | -0,065 |
| 23 | P50402 EMD_HUMAN   | R.GDADM*YDLPKKEDALLYQSK.G       | 3 | 3,6506 | 0,293 | -0,474 |

|    |                    |                                 |   |        |       |        |
|----|--------------------|---------------------------------|---|--------|-------|--------|
| 23 | P05787 K2C8_HUMAN  | K.LLEGEESRLESGM*QNM*SIHTK.T     | 3 | 3,6465 | 0,326 | -0,151 |
| 23 | P09493 TPM1_HUMAN  | R.RIQLVEEELDR.A                 | 2 | 3,6327 | 0,371 | -0,61  |
| 23 | P20020 AT2B1_HUMAN | K.SLDKDPILLSGTHVM*EGSGR.M       | 3 | 3,6316 | 0,381 | -0,516 |
| 23 | O95239 KIF4A_HUMAN | K.NKPIVNIDPQTAELNHLK.Q          | 3 | 3,6241 | 0,285 | -0,716 |
| 23 | Q8WUM4 PDC6I_HUMAN | K.DNDFIYHDR.V                   | 2 | 3,6023 | 0,378 | -0,102 |
| 23 | P04083 ANXA1_HUMAN | K.AAYLQETGKPLDETLKK.A           | 2 | 3,5799 | 0,565 | -0,576 |
| 23 | Q15365 PCBP1_HUMAN | R.QQSHFAM*M*HGGTGFAGIDSSSPEVK.G | 3 | 3,572  | 0,401 | -0,416 |
| 23 | P00387 NB5R3_HUMAN | K.DPDDHTVCHLLFANQTEK.D          | 3 | 3,5705 | 0,342 | -0,769 |
| 23 | O15355 PPM1G_HUMAN | K.ALDM*SYDHKPEDEVELAR.I         | 3 | 3,5638 | 0,237 | -0,343 |
| 23 | Q9UHD1 CHRD1_HUMAN | K.FQEHIQAPKPVEAIK.R             | 3 | 3,544  | 0,372 | 0      |
| 23 | P62736 ACTA_HUMAN  | R.HQGVM*VGM*GQK.D               | 3 | 3,5434 | 0,233 | 0,532  |
| 23 | P78527 PRKDC_HUMAN | R.HGDLPDIQIK.H                  | 2 | 3,529  | 0,39  | -0,107 |
| 23 | P09493 TPM1_HUMAN  | R.RIQLVEEELDR.A                 | 3 | 3,5239 | 0,277 | 0,065  |
| 23 | P08670 VIME_HUMAN  | K.SRLGDLYEEM*R.E                | 3 | 3,519  | 0,243 | 0      |
| 23 | O43390 HNRPR_HUMAN | K.TKENILEEFSK.V                 | 2 | 3,5172 | 0,386 | -0,547 |
| 23 | P42704 LPPRC_HUMAN | K.EKDIQEESTFSSR.K               | 2 | 3,5172 | 0,457 | -0,078 |
| 23 | Q8WU90 ZC3HF_HUMAN | K.HFLEAIENNK.Y                  | 2 | 3,5047 | 0,344 | -0,603 |
| 23 | Q58FF8 H90B2_HUMAN | K.EKYIDQEELNK.T                 | 2 | 3,4976 | 0,3   | -0,26  |
| 23 | Q13435 SF3B2_HUMAN | R.EQQAQVEKEDFSDM*VAEHAAK.Q      | 3 | 3,4915 | 0,228 | -0,456 |
| 23 | P06576 ATPB_HUMAN  | K.AHGGYSVFAGVGER.T              | 2 | 3,4914 | 0,598 | -0,434 |
| 23 | P61221 ABCE1_HUMAN | R.LKPDEGGEVPLNVSYPKPK.I         | 3 | 3,491  | 0,287 | -0,583 |
| 23 | Q9BZE4 NOG1_HUMAN  | R.DDKERPPPIPEGVVAR.R            | 3 | 3,4824 | 0,112 | -0,802 |
| 23 | P41743 KPCI_HUMAN  | R.DLKLDNVLDDSEGHK.L             | 3 | 3,4781 | 0,143 | -0,708 |
| 23 | Q13131 AAPK1_HUMAN | R.DLKPENVLLDAH*NAK.I            | 3 | 3,4713 | 0,246 | -0,401 |
| 23 | P14625 ENPL_HUMAN  | K.LGVIEDHSNR.T                  | 2 | 3,469  | 0,309 | -0,535 |
| 23 | Q15418 KS6A1_HUMAN | K.DKLPQSQLSHQDLQLVK.G           | 3 | 3,462  | 0,178 | -0,37  |
| 23 | Q99436 PSB7_HUMAN  | K.FRPDM*EEEEAK.N                | 3 | 3,4576 | 0,398 | 0      |
| 23 | Q9NV70 EXOC1_HUMAN | K.DAIKENPEFDLHFEK.I             | 2 | 3,4433 | 0,423 | -0,599 |
| 23 | Q9HAV7 GRPE1_HUMAN | K.FDPYEHEALFHTPVEGK.E           | 3 | 3,4427 | 0,394 | -0,998 |
| 23 | P49756 RBM25_HUMAN | R.DREEDEEDAYER.R                | 2 | 3,4416 | 0,388 | -0,706 |
| 23 | Q9NZ01 GPSN2_HUMAN | K.HYEVEILDAK.T                  | 2 | 3,4415 | 0,391 | -0,201 |
| 23 | O60812 HNRCL_HUMAN | K.KSDVEAIFSK.Y                  | 2 | 3,4377 | 0,361 | -0,217 |
| 23 | Q9UM54 MYO6_HUMAN  | R.NIRDDEGFIR.H                  | 3 | 3,4282 | 0,178 | 0      |

|    |                     |                            |   |        |       |        |
|----|---------------------|----------------------------|---|--------|-------|--------|
| 23 | P09429 HMGB1_HUMAN  | K.HPDASVNFSEFSK.K          | 3 | 3,4271 | 0,299 | 0,187  |
| 23 | P11021 GRP78_HUMAN  | K.M*KETAAYLGK.K            | 3 | 3,4241 | 0,205 | 0,218  |
| 23 | P04843 RPN1_HUMAN   | R.LKTEGSDLCDR.V            | 3 | 3,4188 | 0,289 | 0,636  |
| 23 | Q9UHB9 SRP68_HUMAN  | K.KVTEELLTDNR.Y            | 2 | 3,4085 | 0,363 | -0,278 |
| 23 | Q07065 CKAP4_HUMAN  | R.HSEAFEALQQK.S            | 3 | 3,4025 | 0,157 | 0,071  |
| 23 | P35749 MYH11_HUMAN  | K.KEEELQAALAR.L            | 3 | 3,3923 | 0,313 | 0,145  |
| 23 | Q8NE71 ABCF1_HUMAN  | K.FAALDNEEDKEEIIEK.E       | 3 | 3,3882 | 0,284 | -0,562 |
| 23 | P61026 RAB10_HUMAN  | R.NIDEHANEDVER.M           | 2 | 3,3663 | 0,526 | -0,169 |
| 23 | P30050 RL12_HUMAN   | R.HPHDIIDDINGAVECPAS.-     | 3 | 3,3617 | 0,357 | -0,357 |
| 23 | P61289 PSME3_HUMAN  | R.RLDECEEFQGTK.V           | 2 | 3,3612 | 0,366 | -0,771 |
| 23 | Q63HN8 RN213_HUMAN  | R.NDELNHLEEEGR.F           | 2 | 3,3496 | 0,254 | -1,006 |
| 23 | P61289 PSME3_HUMAN  | R.RLDECEEFQGTK.V           | 3 | 3,3363 | 0,379 | 0,116  |
| 23 | P11142 HSP7C_HUMAN  | R.RFDDAVVQSDM*K.H          | 2 | 3,3324 | 0,543 | -0,257 |
| 23 | P39023 RL3_HUMAN    | K.DDPSKPVHLTAFLGYK.A       | 3 | 3,3257 | 0,289 | -0,511 |
| 23 | Q02952 AKA12_HUMAN  | K.DKTEKPTVQLLTVK.K         | 3 | 3,3226 | 0,306 | 0      |
| 23 | P35579 MYH9_HUMAN   | R.ASREEILAQAK.E            | 2 | 3,3184 | 0,19  | -0,602 |
| 23 | Q99714 HCD2_HUMAN   | K.GQTHTLEDFQR.V            | 3 | 3,3173 | 0,245 | 0,069  |
| 23 | Q02878 RL6_HUMAN    | R.HQEGEIFDTEK.E            | 2 | 3,316  | 0,449 | -0,549 |
| 23 | B2RDE1 B2RDE1_HUMAN | R.AREQAEAEVASLNR.R         | 3 | 3,3063 | 0,32  | 0,118  |
| 23 | P52597 HNRPF_HUMAN  | K.HSGPNSADSANDGFVR.L       | 2 | 3,304  | 0,536 | -0,524 |
| 23 | P06576 ATPB_HUMAN   | K.AHGGYSVFAGVGER.T         | 3 | 3,2924 | 0,292 | 0,065  |
| 23 | P52565 GDIR1_HUMAN  | K.SIQEIQLDKDDESLR.Y        | 3 | 3,2876 | 0,184 | -0,268 |
| 23 | P11021 GRP78_HUMAN  | K.NGRVEIANDQGNR.I          | 3 | 3,2766 | 0,179 | -0,235 |
| 23 | O94833 BPAAE_HUMAN  | K.DAYKPITDADKIEDEVTR.Q     | 3 | 3,2717 | 0,436 | -0,704 |
| 23 | O60493 SNX3_HUMAN   | R.KQGLEQFINK.V             | 2 | 3,2646 | 0,248 | -0,304 |
| 23 | Q8N5S9 KKCC1_HUMAN  | R.DIKPSNLLGDDGHVK.I        | 3 | 3,2501 | 0,187 | -0,319 |
| 23 | Q9NQP4 PFD4_HUMAN   | K.KNLQEEIDALESR.V          | 2 | 3,2497 | 0,433 | -0,474 |
| 23 | Q00839 HNRPU_HUMAN  | K.GPEEKDCEVVM*M*IGLPGAGK.T | 3 | 3,2438 | 0,157 | -0,402 |
| 23 | O15075 DCLK1_HUMAN  | R.DIKPENLLVYEHQDGSK.S      | 3 | 3,2408 | 0,319 | -0,922 |
| 23 | P38919 IF4A3_HUMAN  | K.RDELTLEGIK.Q             | 2 | 3,2406 | 0,33  | -0,104 |
| 23 | Q13951 PEBB_HUMAN   | R.SKFEENEFFR.K             | 3 | 3,2266 | 0,294 | 0,206  |
| 23 | P35580 MYH10_HUMAN  | K.KFDQLLAEEK.S             | 3 | 3,2169 | 0,142 | 0      |
| 23 | Q9Y6B6 SAR1B_HUMAN  | K.IDRPEAISEER.L            | 3 | 3,2091 | 0,19  | 0,278  |

|    |                     |                            |   |        |       |        |
|----|---------------------|----------------------------|---|--------|-------|--------|
| 23 | P33778 H2B1B_HUMAN  | R.KESYSIYVYK.V             | 3 | 3,2089 | 0,265 | 0,143  |
| 23 | P62258 1433E_HUMAN  | K.LAEQAERYDEM*VESM*KK.V    | 3 | 3,2039 | 0,217 | -0,088 |
| 23 | Q99613 EIF3C_HUMAN  | K.TCHSFIINEK.M             | 3 | 3,2015 | 0,138 | 0,366  |
| 23 | O60506 HNRPO_HUMAN  | K.TKEQILEEFSK.V            | 3 | 3,1981 | 0,137 | 0,068  |
| 23 | Q9HB71 CYBP_HUMAN   | K.EKPSYDTETDPSEGLM*NVLKK.I | 3 | 3,1916 | 0,286 | -0,84  |
| 23 | P22830 HEMH_HUMAN   | K.ALADLVHSHIQSNELCSK.Q     | 3 | 3,185  | 0,377 | -0,362 |
| 23 | Q9BPU6 DPYL5_HUMAN  | R.DLHESSFSLSGSQIDDHVPK.R   | 3 | 3,1762 | 0,35  | -1,332 |
| 23 | O95573 ACSL3_HUMAN  | K.TKADFFEDENGQR.W          | 3 | 3,1756 | 0,168 | -0,352 |
| 23 | Q9H0D6 XRN2_HUMAN   | K.NKFDVDAADEK.F            | 2 | 3,1754 | 0,346 | -0,097 |
| 23 | P05787 K2C8_HUMAN   | R.SRAEAESM*YQIK.Y          | 2 | 3,1692 | 0,368 | -0,427 |
| 23 | P46940 IQGA1_HUMAN  | K.NKYQELINDIAR.D           | 3 | 3,1684 | 0,272 | -0,186 |
| 23 | A6NHR9 SMHD1_HUMAN  | K.IAHLAQIEDDR.A            | 3 | 3,1664 | 0,085 | 0,214  |
| 23 | P53396 ACLY_HUMAN   | R.EGDYVLFHHEGGVDVGDVDAK.A  | 3 | 3,166  | 0,174 | -0,486 |
| 23 | Q58FF7 H90B3_HUMAN  | R.RAPFDLFENK.K             | 2 | 3,1593 | 0,204 | -0,789 |
| 23 | Q9Y696 CLIC4_HUMAN  | K.NSRPEANEALER.G           | 2 | 3,1541 | 0,247 | -0,44  |
| 23 | P15170 ERF3A_HUMAN  | R.KGEFETGFEK.G             | 2 | 3,1477 | 0,472 | -0,312 |
| 23 | A7XZE4 A7XZE4_HUMAN | K.SLM*ASEEEYSTKEDKYEEEIK.L | 3 | 3,1438 | 0,317 | -0,645 |
| 23 | Q02880 TOP2B_HUMAN  | K.HLTYNDFINK.E             | 3 | 3,1398 | 0,228 | 0,217  |
| 23 | O95292 VAPB_HUMAN   | R.CVFELPAENDKPHDVEINK.I    | 3 | 3,1338 | 0,151 | -0,325 |
| 23 | O14641 DVL2_HUMAN   | R.DIVHKPGPIVLTVAK.C        | 3 | 3,1273 | 0,274 | -0,23  |
| 23 | P28074 PSB5_HUMAN   | K.RGPGLYYVDSEGNR.I         | 3 | 3,1254 | 0,285 | 0      |
| 23 | P62736 ACTA_HUMAN   | K.DSYVGDEAQSKR.G           | 2 | 3,112  | 0,371 | -0,09  |
| 23 | P08195 4F2_HUMAN    | K.GRLDYLSSLK.V             | 2 | 3,1066 | 0,208 | -0,741 |
| 23 | P04792 HSPB1_HUMAN  | K.TKDGVEITGK.H             | 2 | 3,0993 | 0,464 | -0,213 |
| 23 | Q9Y262 IF3EI_HUMAN  | K.KSEEEIDFLR.S             | 2 | 3,0988 | 0,453 | -0,482 |
| 23 | Q13435 SF3B2_HUMAN  | K.KPGDLSDEL.R.I            | 2 | 3,0938 | 0,351 | -0,216 |
| 23 | P37108 SRP14_HUMAN  | K.KGTVEGFEPADNK.C          | 2 | 3,0923 | 0,382 | -0,526 |
| 23 | Q9H3K6 BOLA2_HUMAN  | R.DLEAEHVEVEDTTLNR.C       | 3 | 3,0891 | 0,291 | -0,196 |
| 23 | P49411 EFTU_HUMAN   | K.KYEEIDNAPEER.A           | 3 | 3,0666 | 0,25  | -0,061 |
| 23 | O75347 TBCA_HUMAN   | K.KQAEILQESR.M             | 3 | 3,0626 | 0,299 | 0,076  |
| 23 | P05787 K2C8_HUMAN   | R.SRAEAESM*YQIK.Y          | 3 | 3,0563 | 0,126 | 0      |
| 23 | Q86UP2 KTN1_HUMAN   | R.LTSKEEELKDIQNM*NFLK.A    | 3 | 3,0501 | 0,194 | -0,555 |
| 23 | Q02952 AKA12_HUMAN  | K.DKTEKPDTVQLLTVK.K        | 2 | 3,0485 | 0,356 | -0,498 |

|    |                    |                                 |   |        |       |        |
|----|--------------------|---------------------------------|---|--------|-------|--------|
| 23 | Q13813 SPTA2_HUMAN | K.QKLDILDQER.A                  | 3 | 3,0438 | 0,155 | 0,145  |
| 23 | P25205 MCM3_HUMAN  | R.SKDIFDQLAK.S                  | 2 | 3,0321 | 0,298 | -0,524 |
| 23 | P46940 IQGA1_HUMAN | K.DSLHEKFPDAGEDELLK.I           | 2 | 3,0293 | 0,331 | -0,502 |
| 23 | P36542 ATPG_HUMAN  | K.HLLIGVSSDR.G                  | 2 | 3,008  | 0,384 | -0,445 |
| 23 | P30626 SORCN_HUMAN | R.QHFISFDTDR.S                  | 3 | 2,9958 | 0,23  | -0,433 |
| 23 | Q06210 GFPT1_HUMAN | K.HGPLALVDK.L                   | 2 | 2,977  | 0,394 | -0,064 |
| 23 | Q92878 RAD50_HUMAN | R.NEELKEVEEER.K                 | 3 | 2,9717 | 0,192 | -0,13  |
| 23 | Q9Y3I0 CV028_HUMAN | R.RNLDFQDVLDK.L                 | 3 | 2,9673 | 0,158 | -0,067 |
| 23 | P18669 PGAM1_HUMAN | K.NLKPIKPM*QFLGDEETVR.K         | 3 | 2,9655 | 0,338 | -0,773 |
| 23 | Q8WZA0 LZIC_HUMAN  | K.LKQNLQQLDR.L                  | 3 | 2,9649 | 0,17  | -0,066 |
| 23 | P60174 TPIS_HUMAN  | R.HVFGESDELIGQK.V               | 3 | 2,9548 | 0,106 | 0,125  |
| 23 | O60508 PRP17_HUMAN | K.DVAKPSEEEQKELDEITAK.R         | 3 | 2,9386 | 0,192 | -0,424 |
| 23 | P25788 PSA3_HUMAN  | R.CKDGVVFGVEK.L                 | 3 | 2,9317 | 0,18  | 0,074  |
| 23 | P49756 RBM25_HUMAN | R.DREEDEEDAYER.R                | 3 | 2,9283 | 0,194 | -0,235 |
| 23 | P62807 H2B1C_HUMAN | R.KESYSVYVYK.V                  | 3 | 2,9104 | 0,256 | 0      |
| 23 | P61254 RL26_HUMAN  | R.KDDEVQVVR.G                   | 2 | 2,8987 | 0,206 | 0      |
| 23 | P12270 TPR_HUMAN   | K.NKELEIAQDR.N                  | 3 | 2,8906 | 0,169 | 0,226  |
| 23 | Q86XP3 DDX42_HUMAN | K.KANAEELANLQ.Q                 | 3 | 2,8829 | 0,131 | -0,07  |
| 23 | Q9H0D6 XRN2_HUMAN  | K.NKFDVDADEK.F                  | 3 | 2,8698 | 0,228 | 0,292  |
| 23 | P62807 H2B1C_HUMAN | R.KESYSVYVYK.V                  | 2 | 2,8695 | 0,307 | -0,193 |
| 23 | P05787 K2C8_HUMAN  | R.TKTEISEM*NR.N                 | 3 | 2,8687 | 0,286 | 0,299  |
| 23 | P62805 H4_HUMAN    | K.RISGLIYEETR.G                 | 3 | 2,8668 | 0,268 | -0,068 |
| 23 | Q9Y490 TLN1_HUMAN  | R.KFFYSDQNVDSR.D                | 3 | 2,8664 | 0,233 | 0,243  |
| 23 | Q9Y262 IF3E1_HUMAN | K.KSEEEIDFLR.S                  | 3 | 2,8624 | 0,114 | 0,361  |
| 23 | P63244 GBLP_HUMAN  | K.TNHIGHTGYLNTVTVSPDGSLCASGGK.D | 3 | 2,8597 | 0,289 | -0,2   |
| 23 | Q16594 TAF9_HUMAN  | R.KREDDDDDDDDDDYDNL.-           | 3 | 2,8528 | 0,31  | -0,166 |
| 23 | Q02790 FKBP4_HUMAN | K.GEHSIVYLKPSYAFGSVGK.E         | 3 | 2,8422 | 0,157 | -0,718 |
| 23 | P19105 MLRM_HUMAN  | R.DGFIDKEDLHDM*LASLGK.N         | 3 | 2,8397 | 0,269 | -0,815 |
| 23 | Q13951 PEBB_HUMAN  | R.SKFEENEFFR.K                  | 2 | 2,8276 | 0,302 | -0,549 |
| 23 | P30050 RL12_HUMAN  | R.HPHDIIDDINSGAVECPAS.-         | 2 | 2,8256 | 0,426 | -0,417 |
| 23 | O15320 CTGE5_HUMAN | R.AKDLEEEELER.T                 | 2 | 2,8234 | 0,192 | -0,396 |
| 23 | P62750 RL23A_HUMAN | K.KLYDIDVAK.V                   | 2 | 2,8017 | 0,26  | -0,229 |
| 23 | P62316 SMD2_HUMAN  | R.HCNM*VLENVK.E                 | 2 | 2,7986 | 0,286 | -0,678 |

|    |                     |                           |   |        |       |        |
|----|---------------------|---------------------------|---|--------|-------|--------|
| 23 | Q96TA2 YMEL1_HUMAN  | R.DRGSDVESLDK.L           | 2 | 2,7945 | 0,318 | -0,4   |
| 23 | P60900 PSA6_HUMAN   | R.HITIFSPEGR.L            | 2 | 2,7901 | 0,507 | -0,105 |
| 23 | Q96A26 E2IG5_HUMAN  | R.FKKEDEIPETVSLEM*LDAAK.N | 3 | 2,7897 | 0,129 | -0,951 |
| 23 | O76094 SRP72_HUMAN  | K.KQLQAIEFNK.A            | 3 | 2,7859 | 0,16  | 0,225  |
| 23 | Q02952 AKA12_HUMAN  | K.KGLSSDLEGEK.T           | 2 | 2,7746 | 0,368 | -0,629 |
| 23 | P08670 VIME_HUMAN   | R.EKLQEEM*LQR.E           | 2 | 2,7629 | 0,312 | -0,739 |
| 23 | Q9HCG8 NCM_HUMAN    | R.DRDYFDYSR.S             | 3 | 2,7572 | 0,084 | 0,222  |
| 23 | P06493 CDC2_HUMAN   | R.DLKPQNLLIDDKGTIK.L      | 2 | 2,7527 | 0,384 | -0,943 |
| 23 | P50990 TCPQ_HUMAN   | K.HFSGLEAVYR.N            | 2 | 2,7489 | 0,459 | -0,746 |
| 23 | P09429 HMGB1_HUMAN  | K.HPDASVNFSEFSK.K         | 2 | 2,7456 | 0,38  | -0,416 |
| 23 | P31949 S10AB_HUMAN  | K.NQKDPGVLDR.M            | 2 | 2,7409 | 0,312 | 0      |
| 23 | P31943 HNRH1_HUMAN  | R.VHIEIGPDGR.V            | 2 | 2,7329 | 0,452 | 0      |
| 23 | P27694 RFA1_HUMAN   | R.VKVETYNDESR.I           | 3 | 2,7309 | 0,143 | -0,068 |
| 23 | Q14258 TRI25_HUMAN  | K.RDEFEFLEK.A             | 2 | 2,7208 | 0,226 | -0,503 |
| 23 | Q2QD06 Q2QD06_HUMAN | R.ALKDEEKM*ELQELQLK.E     | 3 | 2,7197 | 0,295 | -0,746 |
| 23 | Q99436 PSB7_HUMAN   | K.FRPDM*EEEEAK.N          | 2 | 2,7183 | 0,45  | 0,087  |
| 23 | Q14697 GANAB_HUMAN  | R.FRIDELEPR.R             | 2 | 2,7089 | 0,204 | -0,519 |
| 23 | Q9H993 CF211_HUMAN  | K.LRNELQTDKPFIPLVEK.F     | 3 | 2,7068 | 0,247 | -1,166 |
| 23 | Q58FF7 H90B3_HUMAN  | R.RAPFDLFENK.K            | 3 | 2,6902 | 0,224 | 0,443  |
| 23 | P30048 PRDX3_HUMAN  | K.HLSVNDLPVGR.S           | 2 | 2,6848 | 0,414 | -0,606 |
| 23 | P08243 ASNS_HUMAN   | K.APSPEKAEESER.L          | 3 | 2,6839 | 0,192 | 0      |
| 23 | Q9BSH4 CCD44_HUMAN  | K.SKDTYLLYEGR.G           | 3 | 2,6737 | 0,231 | -0,068 |
| 23 | Q8WUM4 PDC6I_HUMAN  | R.NREILDESLR.L            | 3 | 2,6724 | 0,085 | 0,22   |
| 23 | P55884 EIF3B_HUMAN  | K.NNGKIELIK.M             | 2 | 2,6723 | 0,208 | 0      |
| 23 | P08238 HS90B_HUMAN  | K.CLELFSELAEDKENYKK.F     | 3 | 2,6614 | 0,197 | -0,692 |
| 23 | P05388 RLA0_HUMAN   | R.GHLENNPALEK.L           | 2 | 2,6552 | 0,395 | -0,1   |
| 23 | P13987 CD59_HUMAN   | K.FEHCNFDVTR.L            | 3 | 2,653  | 0,165 | 0,119  |
| 23 | P48643 TCPE_HUMAN   | R.VAIEHLDK.I              | 2 | 2,6416 | 0,268 | 0      |
| 23 | P14314 GLU2B_HUMAN  | R.SLKDM*EESIR.N           | 3 | 2,6301 | 0,219 | 0,448  |
| 23 | Q6P1N9 TATD1_HUMAN  | K.HQDDLQDVIGR.A           | 3 | 2,6282 | 0,216 | 0,353  |
| 23 | P30048 PRDX3_HUMAN  | K.HLSVNDLPVGR.S           | 3 | 2,6248 | 0,134 | 0,454  |
| 23 | P62805 H4_HUMAN     | K.RISGLIYEETR.G           | 2 | 2,6215 | 0,096 | -0,456 |
| 23 | P06733 ENOA_HUMAN   | R.SGKYDLDFK.S             | 2 | 2,6191 | 0,291 | -0,227 |

|    |                    |                         |   |        |       |        |
|----|--------------------|-------------------------|---|--------|-------|--------|
| 23 | P48643 TCPE_HUMAN  | R.RDVDFELIK.V           | 2 | 2,6137 | 0,188 | -0,537 |
| 23 | P50990 TCPQ_HUMAN  | K.HFSGLEAVYR.N          | 3 | 2,605  | 0,257 | 0,07   |
| 23 | P15924 DESP_HUMAN  | R.NKYETEINITK.T         | 3 | 2,6032 | 0,217 | 0,135  |
| 23 | O75691 UTP20_HUMAN | R.HLDDINFDVR.F          | 2 | 2,603  | 0,36  | -0,687 |
| 23 | Q8WUM4 PDC6I_HUMAN | R.NREILDESLR.L          | 2 | 2,5737 | 0,152 | -0,098 |
| 23 | Q9UNF0 PACN2_HUMAN | K.HLDLSNVAGYK.A         | 2 | 2,5475 | 0,361 | 0,1    |
| 23 | P13010 KU86_HUMAN  | R.AFREEAIK.F            | 2 | 2,5398 | 0,144 | -0,127 |
| 23 | O75533 SF3B1_HUMAN | K.THEDIEAQIR.E          | 2 | 2,5084 | 0,249 | 0,503  |
| 23 | Q7Z6Z7 HUWE1_HUMAN | R.DHVFEDSYR.E           | 2 | 2,4871 | 0,449 | 0,104  |
| 23 | P04843 RPN1_HUMAN  | R.LKTEGSDLCDR.V         | 2 | 2,4798 | 0,29  | 0      |
| 23 | O95340 PAPS2_HUMAN | R.DAEFYEHR.K            | 2 | 2,4407 | 0,246 | 0      |
| 23 | P08133 ANXA6_HUMAN | K.NKPLFFADK.L           | 2 | 2,4227 | 0,399 | 0,113  |
| 23 | Q99439 CNN2_HUMAN  | K.YDPQKEAELR.T          | 2 | 2,4138 | 0,35  | 0,488  |
| 23 | P23396 RS3_HUMAN   | R.KFVADGIFK.A           | 2 | 2,4133 | 0,264 | 0,238  |
| 23 | P04908 H2A1B_HUMAN | R.NDEELNKLGR.V          | 2 | 2,408  | 0,266 | -1,032 |
| 23 | P21333 FLNA_HUMAN  | K.AEISFDRK.D            | 2 | 2,4063 | 0,171 | -0,111 |
| 23 | Q02790 FKBP4_HUMAN | K.DKFSFDLGK.G           | 2 | 2,4035 | 0,424 | -0,231 |
| 23 | Q96RS6 NUDC1_HUMAN | K.DHQFLEGK.L            | 2 | 2,4004 | 0,247 | -0,063 |
| 23 | Q96A26 E2IG5_HUMAN | R.HETLTSLNLEK.K         | 2 | 2,392  | 0,468 | -0,57  |
| 23 | P46940 IQGA1_HUMAN | R.DHINDIIK.I            | 2 | 2,3812 | 0,252 | -0,378 |
| 23 | P19105 MLRM_HUMAN  | R.DGFIDKEDLHDM*LASLGK.N | 2 | 2,3531 | 0,495 | -0,725 |
| 23 | Q13838 UAP56_HUMAN | K.HFILDECDK.M           | 2 | 2,333  | 0,255 | -0,415 |
| 23 | Q86VP6 CAND1_HUMAN | K.HTVDDGLDIR.K          | 2 | 2,3312 | 0,309 | 0      |
| 23 | Q02878 RL6_HUMAN   | K.EKYEITEQR.K           | 2 | 2,3154 | 0,29  | -0,612 |
| 23 | P52209 6PGD_HUMAN  | K.SFLEDIRK.A            | 2 | 2,3079 | 0,164 | 0,061  |
| 23 | P15121 ALDR_HUMAN  | K.REELFIVSK.L           | 2 | 2,2926 | 0,201 | 0      |
| 23 | P68104 EF1A1_HUMAN | K.STTTGHLIYK.C          | 2 | 2,2796 | 0,375 | -0,327 |
| 23 | P14625 ENPL_HUMAN  | K.EGVKFESEK.T           | 2 | 2,2748 | 0,432 | -0,418 |
| 23 | P11172 PYR5_HUMAN  | K.CHEFLIFEDR.K          | 2 | 2,2728 | 0,371 | -0,357 |
| 23 | P49756 RBM25_HUMAN | R.EKEELEIR.Q            | 2 | 2,2531 | 0,202 | -0,623 |
| 23 | Q99459 CDC5L_HUMAN | K.DRIESLEK.R            | 2 | 2,2489 | 0,111 | -0,493 |
| 23 | P31948 STIP1_HUMAN | R.IGNSYFKEEK.Y          | 2 | 2,2188 | 0,197 | -0,402 |
| 23 | Q14247 SRC8_HUMAN  | K.YGVQADRVDK.S          | 2 | 2,2166 | 0,234 | -0,212 |



|    |                     |                                 |        |   |        |       |        |
|----|---------------------|---------------------------------|--------|---|--------|-------|--------|
| 23 | Q15418 KS6A1_HUMAN  | K.DKLPQSQLSHQDLQLVK.G           |        | 2 | 2,1933 | 0,165 | -0,185 |
| 23 | P61158 ARP3_HUMAN   | R.LKLSEELSGGR.L                 |        | 2 | 2,1898 | 0,279 | -0,308 |
| 23 | P62424 RL7A_HUMAN   | K.KVVNPLFEK.R                   |        | 2 | 2,1537 | 0,155 | 0      |
| 23 | Q9Y224 CN166_HUMAN  | R.HDDYLVM*LK.A                  |        | 2 | 2,1534 | 0,289 | -0,212 |
| 23 | O00148 DDX39_HUMAN  | K.HFVLDECDK.M                   |        | 2 | 2,1421 | 0,268 | 0      |
| 23 | O43324 MCA3_HUMAN   | K.NDIHTLLK.D                    |        | 2 | 2,1198 | 0,106 | 0,256  |
| 23 | P49427 UB2R1_HUMAN  | K.DREYTDIIR.K                   |        | 2 | 2,1166 | 0,096 | -0,31  |
| 23 | P07900 HS90A_HUMAN  | R.RAPFDLFENR.K                  |        | 2 | 2,115  | 0,194 | -0,772 |
| 23 | P62917 RL8_HUMAN    | K.DIIHDPGR.G                    |        | 2 | 2,1021 | 0,194 | -0,066 |
| 23 | Q9BXJ9 NARG1_HUMAN  | K.KEEAYELVR.R                   |        | 2 | 2,0903 | 0,114 | -0,322 |
| 23 | Q8NBZ0 CCD95_HUMAN  | R.DKSFLDR.L                     |        | 2 | 2,0813 | 0,135 | -0,307 |
| 23 | Q15149 PLEC1_HUMAN  | K.RQELEAELAK.V                  |        | 2 | 2,0585 | 0,214 | -0,411 |
| 23 | P62736 ACTA_HUMAN   | R.HQGVM*VGM*GQK.D               |        | 2 | 2,0583 | 0,093 | -0,405 |
| 23 | Q14204 DYHC1_HUMAN  | K.KYEFGESDLR.S                  |        | 2 | 2,0364 | 0,264 | -0,785 |
| 23 | P15170 ERF3A_HUMAN  | K.HLIVLINK.M                    |        | 2 | 2,0218 | 0,273 | -0,064 |
| 23 | Q13045 FLII_HUMAN   | K.KFESLFP GK.L                  |        | 2 | 2,0142 | 0,388 | -0,232 |
| 23 | Q92598 HS105_HUMAN  | R.DKLCGPYEK.F                   |        | 2 | 2,0125 | 0,096 | -0,55  |
| 23 | P29401 TKT_HUMAN    | R.SGKPAELLK.M                   |        | 2 | 2,0103 | 0,104 | -0,065 |
| 24 | P23193 TCEA1_HUMAN  | K.KKEPAITSQNS#PEAR.E            | S100:  | 3 | 5,6865 | 0,328 | -0,316 |
| 24 | Q9HC35 EMAL4_HUMAN  | R.KPSHTSAVS#IAGK.E              | S100:  | 3 | 3,1437 | 0,219 | -0,201 |
| 24 | Q9UGU0 TCF20_HUMAN  | R.GRS#PSQYHDFAEK.L              | S1005: | 3 | 3,7272 | 0,318 | -0,228 |
| 24 | P05387 RLA2_HUMAN   | K.KDEKKEESEES#DDDM*GFGLFD.-     | S105:  | 3 | 3,186  | 0,474 | -0,575 |
| 24 | Q96KR1 ZFR_HUMAN    | R.RRDS#DGVDGF EAEGK.K           | S1054: | 3 | 3,7654 | 0,289 | 0      |
| 24 | Q96KR1 ZFR_HUMAN    | R.RRDS#DGVDGF EAEGK.K           | S1054: | 2 | 2,9099 | 0,418 | 0,213  |
| 24 | P46100 ATRX_HUMAN   | K.KKDELS#DYAEK.S                | S1061: | 2 | 4,3208 | 0,486 | -0,434 |
| 24 | Q96HN2 SAHH3_HUMAN  | R.HRDGGEALVS#PDGTVTEAPR.T       | S107:  | 3 | 4,5433 | 0,304 | -0,256 |
| 24 | A9CQZ4 A9CQZ4_HUMAN | R.RAS#GKEALQNINDQSDR.L          | S107:  | 3 | 4,3287 | 0,289 | -0,646 |
| 24 | A8MSX0 A8MSX0_HUMAN | R.SHTSLKDELS#DVSQGGSK.A         | S108:  | 3 | 3,0124 | 0,454 | -0,561 |
| 24 | Q5T5Y3 CAMP1_HUMAN  | K.VKAPVHFVEPLS#PTGVAGHR.K       | S1080: | 3 | 3,8603 | 0,341 | -1,764 |
| 24 | Q5VZK9 LR16A_HUMAN  | R.SKSERPPTILM*TEEPSS#PKGAVR.S   | S1094: | 3 | 4,0685 | 0,334 | -0,141 |
| 24 | Q9BQF6 SEN7_HUMAN   | R.RPS#SSEIITEGKR.K              | S11:   | 3 | 3,4113 | 0,35  | -0,238 |
| 24 | P18754 RCC1_HUMAN   | K.RRS#PPADAIPK.S                | S11:   | 3 | 2,9113 | 0,134 | 0,213  |
| 24 | P48634 BAT2_HUMAN   | R.QRGS#ETGSETHESDLAPSDKEAPTPK.E | S1106: | 3 | 3,0779 | 0,128 | -0,646 |

|    |                     |                                   |              |   |        |       |        |
|----|---------------------|-----------------------------------|--------------|---|--------|-------|--------|
| 24 | A8MSX0 A8MSX0_HUMAN | R.SHTSLKDELSDVS#QGGSK.A           | S111:        | 3 | 3,2954 | 0,529 | -0,561 |
| 24 | O60841 IF2P_HUMAN   | K.KQSFDDNDS#EELEDKDSK.S           | S113:        | 3 | 4,1842 | 0,367 | -0,663 |
| 24 | Q5VU97 CAHD1_HUMAN  | R.SHQHM*SPLAAQEM*S#VR.M           | S1138:       | 3 | 4,5202 | 0,409 | -1,048 |
| 24 | Q9UPN4 AZI1_HUMAN   | K.KRPAS#LSTAPSEK.G                | S114:        | 3 | 3,3072 | 0,357 | 0,252  |
| 24 | Q9UNZ2 NSF1C_HUMAN  | R.KKS#PNELVDDLK.G                 | S114:        | 3 | 3,0962 | 0,269 | -0,68  |
| 24 | A8MSX0 A8MSX0_HUMAN | R.SHTSLKDELSDVSQGG#K.A            | S115:        | 3 | 3,6218 | 0,305 | -0,936 |
| 24 | Q14596 NBR1_HUMAN   | K.KPLAHYSS#LVR.V                  | S116:        | 3 | 2,6783 | 0,234 | 0      |
| 24 | O60238 BNI3L_HUMAN  | R.DHS#SQSEEEVEGEKEVEALKK.S        | S117:        | 3 | 3,1872 | 0,28  | -0,285 |
| 24 | Q9Y4H2 IRS2_HUMAN   | R.HNS#ASVENVSLRK.S                | S1174:       | 3 | 3,8314 | 0,398 | -0,12  |
| 24 | Q5VZL5 ZMYM4_HUMAN  | R.KKS#IIVAVEPR.S                  | S1181:       | 2 | 3,4377 | 0,411 | -0,505 |
| 24 | Q5VZL5 ZMYM4_HUMAN  | R.KKS#IIVAVEPR.S                  | S1181:       | 3 | 3,2488 | 0,212 | 0,076  |
| 24 | Q9NTI5 PDS5B_HUMAN  | K.GRLDSSEM*DHS#ENEDYTM*SSPLPGKK.S | S1182:       | 3 | 3,196  | 0,285 | -0,242 |
| 24 | Q6P1X5 TAF2_HUMAN   | K.EKDKEPFTFSS#PASGR.S             | S1185:       | 3 | 2,8119 | 0,295 | -0,098 |
| 24 | Q8TER5 SOLO_HUMAN   | R.HKLENGLAALS#PSSK.G              | S1187:       | 3 | 2,8648 | 0,15  | 0      |
| 24 | Q86SQ4 GP126_HUMAN  | K.RNS#HTDNVS#YEHSFNK.S            | S1189:S1195: | 3 | 3,6624 | 0,242 | -0,437 |
| 24 | Q86SQ4 GP126_HUMAN  | R.NSHTDNVSYEHS#FNK.S              | S1199:       | 2 | 4,0898 | 0,59  | -0,459 |
| 24 | Q86SQ4 GP126_HUMAN  | R.NSHTDNVSYEHS#FNK.S              | S1199:       | 3 | 3,3963 | 0,373 | -0,394 |
| 24 | Q13286 CLN3_HUMAN   | R.RRFS#DSEGEETVPEPR.L             | S12:         | 3 | 3,7064 | 0,472 | -0,65  |
| 24 | Q96T58 MINT_HUMAN   | R.SLVHEVGKPPQDVTDDS#PPSKK.K       | S1222:       | 3 | 4,543  | 0,4   | -0,6   |
| 24 | Q96T58 MINT_HUMAN   | R.SLVHEVGKPPQDVTDDS#PPSKK.K       | S1225:       | 3 | 4,3429 | 0,413 | -0,675 |
| 24 | Q9H7D7 WDR26_HUMAN  | K.KRLSQS#DEDVIR.L                 | S123:        | 2 | 2,9558 | 0,448 | -0,72  |
| 24 | Q96T58 MINT_HUMAN   | R.HGSFHEDEDPIGS#PR.L              | S1278:       | 3 | 4,3408 | 0,47  | -0,416 |
| 24 | Q9NTI5 PDS5B_HUMAN  | K.RLKEDILENEDEQNS#PPK.K           | S1283:       | 3 | 4,5006 | 0,343 | -0,573 |
| 24 | Q8N201 INT1_HUMAN   | R.RPS#AAAKPSGHPPPFDIALGSK.G       | S13:         | 3 | 3,1988 | 0,257 | -0,782 |
| 24 | P07948 LYN_HUMAN    | K.SKGKDSL#DDGVDLK.T               | S13:         | 3 | 2,7758 | 0,254 | -0,445 |
| 24 | P51858 HDGF_HUMAN   | K.KGNAEGSS#DEEGKLVIDEPAKEK.N      | S133:        | 3 | 4,3557 | 0,246 | -0,802 |
| 24 | Q9Y3M8 STA13_HUMAN  | R.KKGDDS#DEEDLCISNK.W             | S133:        | 3 | 4,06   | 0,409 | -0,095 |
| 24 | Q9Y3M8 STA13_HUMAN  | R.KKGDDS#DEEDLCISNK.W             | S133:        | 2 | 2,6795 | 0,577 | -0,568 |
| 24 | Q8NI27 THOC2_HUMAN  | K.LYINHTPPPLSKS#KER.E             | S1335:       | 3 | 5,5388 | 0,445 | -0,56  |
| 24 | Q9H7D0 DOCK5_HUMAN  | K.KRAS#FYENIIK.A                  | S1347:       | 2 | 3,6225 | 0,233 | -0,842 |
| 24 | Q9H7D0 DOCK5_HUMAN  | K.KRAS#FYENIIK.A                  | S1347:       | 3 | 3,5185 | 0,168 | -0,379 |
| 24 | Q5VUA4 ZN318_HUMAN  | R.RRS#PGLCSDSLEK.S                | S136:        | 3 | 3,0971 | 0,187 | -0,462 |
| 24 | Q7Z333 SETX_HUMAN   | R.RLS#DCESTDVKR.A                 | S1366:       | 3 | 4,0071 | 0,452 | -0,355 |

|    |                     |                                |                 |   |        |       |        |
|----|---------------------|--------------------------------|-----------------|---|--------|-------|--------|
| 24 | Q8WWA1 TMM40_HUMAN  | R.RRGS#DPASGEVEASQLR.R         | S137:           | 3 | 3,6383 | 0,374 | -0,386 |
| 24 | Q9H2Y7 ZF106_HUMAN  | R.AAHVPENS#DTEQDVLTVKPVK.V     | S1370:          | 3 | 4,3762 | 0,419 | -0,51  |
| 24 | Q14789 GOGB1_HUMAN  | K.HDKS#STEEEM*EIEK.I           | S138:           | 3 | 2,6714 | 0,288 | -0,512 |
| 24 | Q9Y266 NUDC_HUMAN   | K.NGSLDS#PGKQDTEEEDEKDKGK.L    | S139:           | 3 | 4,9789 | 0,473 | -0,896 |
| 24 | P49736 MCM2_HUMAN   | R.GLLYDS#DEEDEERPARK.R         | S139:           | 3 | 2,7118 | 0,344 | -0,522 |
| 24 | P42696 RBM34_HUMAN  | R.KRS#VQEGENPDDGVR.G           | S14:            | 3 | 4,8942 | 0,341 | -0,311 |
| 24 | P42696 RBM34_HUMAN  | R.KRS#VQEGENPDDGVR.G           | S14:            | 2 | 2,9967 | 0,452 | -0,484 |
| 24 | Q8NI27 THOC2_HUMAN  | K.HKSES#PCESPYPNEK.D           | S1401:          | 3 | 4,8094 | 0,265 | -0,685 |
| 24 | Q9NRL2 BAZ1A_HUMAN  | R.KRQS#PEPSPVTLGR.R            | S1413:          | 3 | 3,3169 | 0,259 | -0,112 |
| 24 | P11388 TOP2A_HUMAN  | K.RKPS#TSDSDSNFEK.I            | S1469:          | 3 | 3,5034 | 0,325 | -0,612 |
| 24 | Q14247 SRC8_HUMAN   | K.HAS#QKDYSSGFGGK.Y            | S150:           | 2 | 3,3143 | 0,441 | -0,315 |
| 24 | Q12986 NFX1_HUMAN   | R.SESGTDLREHS#PSESEKEVVGADPR.G | S150:           | 3 | 3,01   | 0,274 | -0,263 |
| 24 | Q96F86 EDC3_HUMAN   | R.HM*ESLSQSKS#FR.R             | S154:           | 3 | 2,8797 | 0,412 | -0,298 |
| 24 | Q96I25 SPF45_HUMAN  | R.RPDPS#DEDEDYERER.R           | S155:           | 3 | 2,7722 | 0,365 | -0,522 |
| 24 | P29966 MARCS_HUMAN  | K.RFS#FKKS#FK.L                | S159:S163:      | 2 | 2,5213 | 0,362 | -0,731 |
| 24 | P51858 HDGF_HUMAN   | R.AGDLEDS#PKRPK.E              | S165:           | 2 | 2,7781 | 0,377 | -0,648 |
| 24 | Q9Y5S2 MRCKB_HUMAN  | K.HSTPSNSSNPSGPPS#PNSPHR.S     | S1690:          | 3 | 4,8549 | 0,404 | -0,247 |
| 24 | Q9UIF9 BAZ2A_HUMAN  | K.RKS#GYSLNFSEGDGR.R           | S1720:          | 3 | 4,6128 | 0,432 | -0,417 |
| 24 | Q58FF8 H90B2_HUMAN  | K.DDEEKPKIEDVGS#DEEDDSGKDK.K   | S177:           | 3 | 4,5297 | 0,366 | -0,55  |
| 24 | Q58FF8 H90B2_HUMAN  | K.IEDVGS#DEEDDSGKDK.K          | S177:           | 3 | 4,4872 | 0,415 | -0,658 |
| 24 | O00264 PGRC1_HUMAN  | K.LLKEGEEPTVYS#DEEEPKDESARK.N  | S181:           | 3 | 4,6618 | 0,565 | -0,64  |
| 24 | Q8NFZ5 TNIP2_HUMAN  | R.NVGERS#PDQSEHTDGHTSVQSVIEK.L | S186:           | 3 | 4,3575 | 0,354 | -0,91  |
| 24 | P43243 MATR3_HUMAN  | R.RDS#FDDRGPVLDYDHGSR.S        | S188:           | 3 | 2,9019 | 0,265 | -0,986 |
| 24 | Q9H1E3 NUCKS_HUMAN  | R.KVVDYSQFQES#DDADEYGR.D       | S19:            | 3 | 5,2247 | 0,444 | -0,673 |
| 24 | Q9NZM1 MYOF_HUMAN   | R.HTIIPAKS#PEK.C               | S1915:          | 3 | 3,763  | 0,301 | 0,141  |
| 24 | P35580 MYH10_HUMAN  | R.RQLHLEGASLELS#DDDTESK.T      | S1956:          | 3 | 2,9921 | 0,234 | -0,394 |
| 24 | O94915 FRYL_HUMAN   | R.RRS#NTLDIM*DGR.I             | S1957:          | 3 | 2,9344 | 0,188 | -0,12  |
| 24 | Q6PJM5 Q6PJM5_HUMAN | K.RGS#IGENQIKDEK.I             | S196:           | 2 | 2,5769 | 0,259 | -0,864 |
| 24 | Q92622 K0226_HUMAN  | R.KHES#PLLVT.K.S               | S197:           | 3 | 5,0359 | 0,328 | 0,371  |
| 24 | Q5PSV4 BRM1L_HUMAN  | R.KDPFS#PDKK.K                 | S197:           | 2 | 2,7138 | 0,183 | 0      |
| 24 | Q9BRD0 BUD13_HUMAN  | R.HDS#PDPS#PPRRPQHNSGAS#PR.R   | S197:S201:S214: | 3 | 2,888  | 0,366 | -0,699 |
| 24 | Q07955 SFRS1_HUMAN  | R.VKVDGPRS#PSY#GRSR.S          | S199:Y202:      | 3 | 2,6261 | 0,158 | -0,603 |
| 24 | Q14980 NUMA1_HUMAN  | R.KRVS#LEPHQGGT#PESK.K         | S1991:T2000:    | 3 | 3,3346 | 0,278 | -0,365 |

|    |                     |                                 |            |   |        |       |        |
|----|---------------------|---------------------------------|------------|---|--------|-------|--------|
| 24 | Q92614 MY18A_HUMAN  | K.SLAPDRS#DDEHDPLDNTSRPR.Y      | S2020:     | 3 | 3,5434 | 0,287 | -0,444 |
| 24 | Q9P2B7 K1430_HUMAN  | K.KHVSGITLLS#PK.H               | S218:      | 3 | 3,7511 | 0,155 | -0,067 |
| 24 | Q9P2B7 K1430_HUMAN  | K.KHVSGITLLS#PK.H               | S218:      | 2 | 2,8492 | 0,463 | -0,628 |
| 24 | O60610 DIAP1_HUMAN  | K.KGRS#PDELPSAGGDGGK.S          | S22:       | 3 | 3,7408 | 0,287 | -0,75  |
| 24 | Q09161 NCBP1_HUMAN  | R.KTS#DANETEDHLESICK.V          | S22:       | 3 | 3,0276 | 0,195 | -0,759 |
| 24 | Q9BU76 MMTA2_HUMAN  | R.RPAEATSSPTS#PERPR.H           | S220:      | 3 | 3,3235 | 0,184 | -0,503 |
| 24 | Q08AE8 SPIR1_HUMAN  | R.KLRPVS#PEEIR.R                | S228:      | 3 | 4,0353 | 0,327 | 0,195  |
| 24 | P62753 RS6_HUMAN    | R.RLSS#LRAS#TSKSESSQK.-         | S236:S240: | 2 | 2,1074 | 0,314 | -0,485 |
| 24 | Q9Y2W2 WBP11_HUMAN  | R.RRDEDM*LYS#PELAQR.G           | S237:      | 3 | 3,1736 | 0,37  | -0,463 |
| 24 | Q9Y2W2 WBP11_HUMAN  | R.RRDEDM*LYS#PELAQR.G           | S237:      | 2 | 2,346  | 0,312 | -0,556 |
| 24 | Q86Y04 Q86Y04_HUMAN | K.KVDLTLLS#PKSENDKLLK.E         | S239:      | 3 | 3,3232 | 0,213 | -0,547 |
| 24 | Q3B726 RPA43_HUMAN  | K.KKDPETYEVD#GTTK.L             | S242:      | 3 | 3,7034 | 0,388 | -0,206 |
| 24 | Q9Y6M7 S4A7_HUMAN   | K.HS#DPHLLER.N                  | S242:      | 2 | 2,1844 | 0,373 | -0,618 |
| 24 | Q9UFC0 LRWD1_HUMAN  | K.RPDDVPLSLS#PSKR.A             | S243:      | 3 | 3,2323 | 0,334 | -0,222 |
| 24 | P35659 DEK_HUMAN    | K.NKEES#SDEDEDKES#EEEEPKK.T     | S243:S251: | 3 | 2,7863 | 0,119 | -0,51  |
| 24 | Q9BYG3 MK67I_HUMAN  | R.RKS#QVAELNDDDKDDEIVFK.Q       | S247:      | 3 | 5,5553 | 0,262 | -0,374 |
| 24 | Q6IFS5 HSN2_HUMAN   | K.FHPVFPVPHS#APAVLTHNNESR.S     | S249:      | 3 | 3,1084 | 0,397 | -0,676 |
| 24 | Q9NWK9 CA181_HUMAN  | K.SGGGLHVAEGVRLS#PEPGREGVR.D    | S25:       | 3 | 3,0054 | 0,302 | -0,074 |
| 24 | Q96T37 RBM15_HUMAN  | R.SRS#PLDKDTPPSASVVGASVGGHR.H   | S259:      | 3 | 2,8061 | 0,154 | 0      |
| 24 | Q92466 DDB2_HUMAN   | K.RRSR#PLELEPEAK.K              | S26:       | 3 | 3,9596 | 0,406 | -0,115 |
| 24 | Q5JSH3 WDR44_HUMAN  | K.RKS#ELEFETLK.T                | S262:      | 3 | 3,0091 | 0,212 | -0,188 |
| 24 | Q5JSH3 WDR44_HUMAN  | K.RKS#ELEFETLK.T                | S262:      | 2 | 2,3611 | 0,231 | -0,669 |
| 24 | P07900 HS90A_HUMAN  | K.EEKESDKPEIEDVGS#DEEEK.D       | S263:      | 3 | 4,393  | 0,452 | -0,394 |
| 24 | P07900 HS90A_HUMAN  | K.ESEDKPEIEDVGS#DEEEKDKDGDK.K   | S263:      | 3 | 3,9651 | 0,346 | -0,65  |
| 24 | P46013 KI67_HUMAN   | R.LTQTSGQSTHHEKAS#GDEGIK.V      | S2638:     | 3 | 3,096  | 0,195 | -0,515 |
| 24 | Q8IYB3 SRRM1_HUMAN  | K.VPKPEPIPEKPEPSPEKNS#K.K       | S265:      | 3 | 3,2068 | 0,133 | -0,714 |
| 24 | Q99996 AKAP9_HUMAN  | K.KRS#PQDVEVLK.T                | S2677:     | 3 | 3,4327 | 0,213 | 0,398  |
| 24 | Q9UQ35 SRRM2_HUMAN  | R.KPIDSLRDS#R.S                 | S2688:     | 2 | 2,3284 | 0,085 | -0,963 |
| 24 | Q9Y2K7 JHD1A_HUMAN  | R.RYEDDGIS#DDEIEGKR.T           | S28:       | 2 | 3,9056 | 0,407 | -0,494 |
| 24 | Q9NTJ3 SMC4_HUMAN   | R.RREEGPPPPSPDGASS#DAEPEPPSGR.T | S28:       | 3 | 3,2729 | 0,269 | -0,333 |
| 24 | Q3KR37 GRM1B_HUMAN  | R.KRS#RS#PTPQNQDGMT*VEK.G       | S28:S30:   | 3 | 3,2046 | 0,104 | -0,701 |
| 24 | Q08170 SFRS4_HUMAN  | K.IQNNDNVGKPKS#RS#PSR.H         | S288:S290: | 3 | 2,8336 | 0,221 | -0,267 |
| 24 | P01106 MYC_HUMAN    | R.SEGSPSAGGHSKPPHS#PLVLK.R      | S293:      | 3 | 3,5439 | 0,258 | -0,573 |

|    |                    |                                 |            |   |        |       |        |
|----|--------------------|---------------------------------|------------|---|--------|-------|--------|
| 24 | P08559 ODPA_HUMAN  | R.YHGHS#M*SDPGVSYR.T            | S293:      | 2 | 3,3436 | 0,486 | -0,506 |
| 24 | P08559 ODPA_HUMAN  | R.YHGHS#M*SDPGVSYR.T            | S293:      | 3 | 3,1771 | 0,324 | -0,433 |
| 24 | Q9UQ35 SRRM2_HUMAN | K.THTTALAGRS#PS#PASGRR.G        | S295:S297: | 3 | 2,8382 | 0,43  | -0,646 |
| 24 | Q9UQ35 SRRM2_HUMAN | K.THTTALAGRS#PS#PASGRR.G        | S295:S297: | 2 | 2,0502 | 0,228 | -0,984 |
| 24 | Q4G0J3 LARP7_HUMAN | R.KRS#SEDAESLAPR.S              | S298:      | 2 | 3,0915 | 0,307 | -0,53  |
| 24 | Q4G0J3 LARP7_HUMAN | R.KRSS#SEDAESLAPR.S             | S299:      | 3 | 4,311  | 0,322 | -0,34  |
| 24 | Q9UMX1 SUFU_HUMAN  | R.RLS#GKDTEQIR.E                | S301:      | 3 | 2,9739 | 0,395 | -0,066 |
| 24 | Q8NAP3 ZBT38_HUMAN | R.S#KSPNNEGDVHFSR.E             | S307:      | 3 | 3,2014 | 0,31  | -0,221 |
| 24 | O43164 PJA2_HUMAN  | K.NHGSS#PEQVVRPK.V              | S309:      | 3 | 3,5315 | 0,406 | 0,06   |
| 24 | Q92922 SMRC1_HUMAN | K.NEEPVR#PERR.D                 | S310:      | 3 | 2,9666 | 0,215 | 0      |
| 24 | Q14669 TRIPC_HUMAN | K.KRSES#PPAELPSLR.R             | S312:      | 3 | 2,8288 | 0,168 | -0,666 |
| 24 | Q8NDX5 PHC3_HUMAN  | K.HQQIPLHS#PPSK.V               | S315:      | 3 | 4,0666 | 0,29  | 0      |
| 24 | P46100 ATRX_HUMAN  | K.VYEHTSRFS#PK.K                | S316:      | 2 | 2,4821 | 0,343 | -0,426 |
| 24 | Q8N350 DOS_HUMAN   | R.RHAS#LDGASPYFK.V              | S319:      | 3 | 3,1683 | 0,34  | -0,478 |
| 24 | Q9UGV2 NDRG3_HUMAN | R.S#RTHSTSSSLGSGESPF SR.S       | S327:      | 3 | 4,6693 | 0,45  | -0,626 |
| 24 | Q92922 SMRC1_HUMAN | R.KHS#PS#PPPPTPTESRK.K          | S328:S330: | 3 | 4,3188 | 0,277 | -0,577 |
| 24 | Q15459 SF3A1_HUMAN | K.FGESEEVEM*EVES#DEEDDKQEK.A    | S329:      | 3 | 4,1613 | 0,368 | -0,337 |
| 24 | P26583 HMGB2_HUMAN | K.KHPDS#SVNFAEFSK.K             | S34:       | 3 | 3,0991 | 0,298 | -0,328 |
| 24 | Q8N4X5 AF1L2_HUMAN | R.KKSTS#LEPVER.S                | S346:      | 3 | 3,4171 | 0,155 | -0,068 |
| 24 | P09429 HMGB1_HUMAN | K.KHPDAS#VNFSEFSK.K             | S35:       | 2 | 3,7763 | 0,337 | -0,583 |
| 24 | P09429 HMGB1_HUMAN | K.KHPDAS#VNFSEFSK.K             | S35:       | 3 | 3,424  | 0,375 | -0,328 |
| 24 | Q14451 GRB7_HUMAN  | R.HLHPSCLGS#PPLR.S              | S361:      | 3 | 4,8484 | 0,498 | -0,118 |
| 24 | P35613 BASI_HUMAN  | R.RKPEDVLDDDDAGS#APLK.S         | S362:      | 2 | 4,0512 | 0,502 | -0,543 |
| 24 | P35613 BASI_HUMAN  | R.RKPEDVLDDDDAGS#APLK.S         | S362:      | 3 | 4,028  | 0,273 | -0,543 |
| 24 | P05455 LA_HUMAN    | K.TKFAS#DDEHDEHDENGATGPVK.R     | S366:      | 3 | 3,5691 | 0,458 | -0,221 |
| 24 | P35613 BASI_HUMAN  | R.KPEDVLDDDDAGSAPLKS#SGQHQNDK.G | S367:      | 3 | 4,3781 | 0,494 | -0,579 |
| 24 | O15013 ARHGA_HUMAN | R.TKS#LIAQDHR.S                 | S379:      | 2 | 2,3533 | 0,406 | -0,391 |
| 24 | P16949 STMN1_HUMAN | R.SKESVPEFPLS#PPKKK.D           | S38:       | 3 | 3,469  | 0,339 | -0,877 |
| 24 | Q15154 PCM1_HUMAN  | R.KPS#ASERLPDEKVELFSK.M         | S384:      | 3 | 4,648  | 0,425 | -0,513 |
| 24 | Q5JSZ5 K0515_HUMAN | K.LKFS#DDEEEEEVVKDGRPK.W        | S388:      | 3 | 4,8585 | 0,326 | -0,55  |
| 24 | P09429 HMGB1_HUMAN | K.KHPDASVNFS#EFSK.K             | S39:       | 3 | 4,0399 | 0,347 | -0,656 |
| 24 | Q8WWM7 ATX2L_HUMAN | R.GPHHLDNS#SPGPGSEAR.G          | S390:      | 2 | 3,5524 | 0,536 | -0,476 |
| 24 | Q14978 NOLC1_HUMAN | K.NSSNKPAVTTKS#PAVKPAAAPK.Q     | S397:      | 3 | 4,3853 | 0,496 | -0,652 |

|    |                    |                                |            |   |        |       |        |
|----|--------------------|--------------------------------|------------|---|--------|-------|--------|
| 24 | Q96ST2 IWS1_HUMAN  | R.KAAVLS#DS#EDEEKASAKK.S       | S398:S400: | 3 | 3,7152 | 0,419 | -0,708 |
| 24 | Q9UQ26 RIMS2_HUMAN | R.RHS#DVSLANADLEDSR.I          | S400:      | 3 | 4,6279 | 0,501 | -0,196 |
| 24 | Q8IYB3 SRRM1_HUMAN | R.HRPS#PPATPPP.K.T             | S402:      | 3 | 3,5505 | 0,223 | -0,067 |
| 24 | Q6PJT7 ZC3HE_HUMAN | R.TPRIS#PPIKEEETKGDVSVEK.N     | S409:      | 3 | 2,7143 | 0,262 | -0,71  |
| 24 | Q9Y490 TLN1_HUMAN  | K.SKDHFGLEGDEESTM*LEDSVS#PK.K  | S425:      | 3 | 4,7702 | 0,444 | -0,486 |
| 24 | Q9Y490 TLN1_HUMAN  | K.SKDHFGLEGDEESTM*LEDSVS#PKK.S | S425:      | 3 | 3,5538 | 0,432 | -0,596 |
| 24 | O15427 MOT4_HUMAN  | K.LHKPPADS#GVDLR.E             | S436:      | 3 | 2,8071 | 0,338 | 0,123  |
| 24 | P47712 PA24A_HUMAN | K.HIVSNDSSDS#DDESHEPK.G        | S437:      | 3 | 3,4994 | 0,369 | -0,44  |
| 24 | Q9BVJ6 UT14A_HUMAN | R.KRSELS#QDAEPAGSQETK.D        | S437:      | 3 | 3,2332 | 0,169 | -0,269 |
| 24 | Q9H3H1 MOD5_HUMAN  | R.RLSDAVANTIESQSVS#PDHNKEPK.E  | S443:      | 3 | 4,967  | 0,491 | -0,666 |
| 24 | Q9BVJ6 UT14A_HUMAN | R.KRSELSQDAEPAGS#QETK.D        | S445:      | 3 | 2,9184 | 0,213 | -0,538 |
| 24 | O43290 SNUT1_HUMAN | R.RRVS#EVEEKEPVPQPLPSDDTR.V    | S448:      | 3 | 4,1753 | 0,328 | -0,594 |
| 24 | Q13098 CSN1_HUMAN  | R.NQIHVKS#PPREGSQGELTPANSQSR.M | S448:      | 3 | 2,8091 | 0,337 | -0,458 |
| 24 | O60832 DKC1_HUMAN  | K.RKRES#ES#ESDETPPAAPQLIK.K    | S451:S453: | 3 | 3,2513 | 0,253 | -0,724 |
| 24 | P48634 BAT2_HUMAN  | R.RKQS#SSEISLAVER.A            | S456:      | 3 | 4,6158 | 0,382 | -0,219 |
| 24 | P11274 BCR_HUMAN   | R.RHQDGLPYIDDS#PSSS#PHLSSK.G   | S459:S463: | 3 | 3,2432 | 0,251 | -0,637 |
| 24 | P53985 MOT1_HUMAN  | K.KES#KEEETSIDVAGKPNEVTK.A     | S461:      | 3 | 5,7792 | 0,405 | -0,687 |
| 24 | Q8IYB3 SRRM1_HUMAN | R.KVELSES#EEDKGGK.M            | S465:      | 2 | 3,2803 | 0,339 | -0,604 |
| 24 | P35368 ADA1B_HUMAN | R.GRHDS#GPLFTFK.L              | S470:      | 2 | 3,1974 | 0,444 | -0,592 |
| 24 | P40692 MLH1_HUMAN  | R.HREDS#DVEM*VEDDSR.K          | S477:      | 3 | 5,0625 | 0,41  | -0,478 |
| 24 | Q8TF61 FBX41_HUMAN | R.RHS#TEGEEGDVSDVGSR.T         | S478:      | 3 | 3,8105 | 0,397 | -0,386 |
| 24 | Q9H6S3 ES8L2_HUMAN | K.HSPTSEPTPPGDALPPVS#SPHTHR.G  | S479:      | 3 | 2,6078 | 0,169 | -0,354 |
| 24 | Q9P2B4 CT2NL_HUMAN | R.HKFQSQADQDQQASGLQS#PPSR.D    | S481:      | 3 | 3,8866 | 0,408 | -0,581 |
| 24 | O95400 CD2B2_HUMAN | K.GKHSlds#DEEEDDDGGSSK.Y       | S49:       | 3 | 4,9707 | 0,439 | -0,665 |
| 24 | Q9UHB7 AFF4_HUMAN  | K.VNPHKVSPAS#SVDSNIPSSQGYKK.E  | S490:      | 3 | 4,8016 | 0,39  | -0,211 |
| 24 | Q9Y2X3 NOL5_HUMAN  | K.KHIKEEPLS#EEEPCTSTAIAS#PEK.K | S502:S514: | 3 | 6,6313 | 0,399 | -0,446 |
| 24 | O14974 MYPT1_HUMAN | R.RLAS#TSDIEEKENR.D            | S507:      | 2 | 3,8776 | 0,509 | -0,635 |
| 24 | O14974 MYPT1_HUMAN | R.RLAS#TSDIEEKENR.D            | S507:      | 3 | 3,3885 | 0,31  | -0,423 |
| 24 | Q9H4G0 E41L1_HUMAN | K.HQAS#INELKR.T                | S510:      | 2 | 2,6334 | 0,303 | -1,243 |
| 24 | Q9Y2X3 NOL5_HUMAN  | K.HIKEEPLSEEPCTSTAIAS#PEKK.K   | S514:      | 3 | 4,6477 | 0,406 | -0,131 |
| 24 | Q9C0C9 UBE2O_HUMAN | R.KKS#IPLSIK.N                 | S515:      | 2 | 3,0383 | 0,224 | -0,335 |
| 24 | Q15742 NAB2_HUMAN  | R.RSS#VKVEAEASRQ.-             | S515:      | 2 | 2,7679 | 0,367 | -1,119 |
| 24 | O00567 NOL5A_HUMAN | K.KSFSKEELM*S#SDLEETAGSTSIPK.R | S519:      | 3 | 3,3218 | 0,272 | -0,678 |

|    |                     |                                 |            |   |        |       |        |
|----|---------------------|---------------------------------|------------|---|--------|-------|--------|
| 24 | Q5VUA4 ZN318_HUMAN  | R.RRS#FPDIEDEEK.F               | S527:      | 3 | 4,039  | 0,23  | -0,114 |
| 24 | P50548 ERF_HUMAN    | R.RVS#SDLQHATAQLSLEHR.D         | S531:      | 3 | 5,032  | 0,4   | -0,602 |
| 24 | P46821 MAP1B_HUMAN  | R.ADS#RESLKPAAKPLPSK.S          | S541:      | 3 | 2,775  | 0,21  | -0,78  |
| 24 | Q6UB98 ANR12_HUMAN  | K.DDTSLHLFHISTGKS#PK.H          | S543:      | 3 | 4,6468 | 0,395 | -0,652 |
| 24 | O95365 ZBT7A_HUMAN  | K.HFKDEDEDEDVAS#PDGLGR.L        | S549:      | 3 | 6,1942 | 0,453 | -0,331 |
| 24 | O75385 ULK1_HUMAN   | R.LHS#APNLSDLHVVRPK.L           | S556:      | 3 | 3,1003 | 0,343 | -0,687 |
| 24 | Q8NCD3 HJURP_HUMAN  | K.SVS#PSKTLSPDKEVPGHGR.N        | S557:      | 3 | 3,6602 | 0,358 | -0,509 |
| 24 | Q7Z478 DHX29_HUMAN  | K.HRDS#IVETLK.R                 | S580:      | 3 | 3,4008 | 0,206 | -0,143 |
| 24 | Q8TD16 BICD2_HUMAN  | R.GRRS#PILLPK.G                 | S582:      | 3 | 3,2678 | 0,088 | -1,052 |
| 24 | Q09666 AHNK_HUMAN   | K.GHYEVTGS#DDETGKLGSGVSLASKK.S  | S5841:     | 3 | 5,1301 | 0,449 | -0,804 |
| 24 | Q09666 AHNK_HUMAN   | K.SKGHYEVTGS#DDETGKLGSGVSLASK.K | S5841:     | 3 | 5,012  | 0,526 | -0,585 |
| 24 | Q9UPN7 SAPS1_HUMAN  | K.NM*VDLVNTHHLHSS#S#DDEDDR.LK.E | S592:S593: | 3 | 3,803  | 0,472 | -0,385 |
| 24 | Q96T23 RSF1_HUMAN   | K.KTFLDKDAQRLS#PIPEEVPK.S       | S594:      | 3 | 4,6567 | 0,346 | -0,765 |
| 24 | Q9P2R6 RERE_HUMAN   | R.KKQPAS#PDGRTS#PINEDIR.S       | S594:S600: | 3 | 3,3286 | 0,31  | -0,645 |
| 24 | POC7M2 RA1L3_HUMAN  | K.SES#PKEPEQLRK.L               | S6:        | 3 | 3,2918 | 0,448 | -0,182 |
| 24 | Q02952 AKA12_HUMAN  | R.RPS#ESDKDELDK.V               | S627:      | 2 | 3,168  | 0,469 | -0,75  |
| 24 | Q02952 AKA12_HUMAN  | R.VRRPS#ES#DKDELDK.V            | S627:S629: | 2 | 2,126  | 0,168 | -0,746 |
| 24 | Q8WVC0 LEO1_HUMAN   | K.KLTS#DEEGEPSGKR.K             | S630:      | 3 | 3,7009 | 0,212 | -0,34  |
| 24 | Q9NSM8 Q9NSM8_HUMAN | K.LPDL#PVENKEHKPGPIGK.E         | S652:      | 3 | 2,8706 | 0,247 | -0,257 |
| 24 | Q92541 RTF1_HUMAN   | R.RS#LNLEDYKK.R                 | S657:      | 3 | 4,4826 | 0,261 | 0,068  |
| 24 | O14617 AP3D1_HUMAN  | K.HRPS#EADEEELAR.R              | S658:      | 3 | 4,6584 | 0,409 | -0,113 |
| 24 | Q9Y618 NCOR2_HUMAN  | R.RRPS#LLSEFQPGNER.S            | S67:       | 3 | 4,3861 | 0,458 | -0,588 |
| 24 | P46087 NOL1_HUMAN   | K.TNKS#PEAKPLPGKLPK.G           | S67:       | 3 | 4,1562 | 0,323 | -0,615 |
| 24 | P19338 NUCL_HUMAN   | K.KVVVS#PTKK.V                  | S67:       | 2 | 2,5298 | 0,227 | -0,458 |
| 24 | Q9BXP5 ARS2_HUMAN   | R.ERFS#PPRHLS#PPQK.R            | S67:S74:   | 3 | 2,6979 | 0,169 | -0,465 |
| 24 | P25098 ARBK1_HUMAN  | K.NKPRS#PVVELSK.V               | S670:      | 3 | 2,6852 | 0,113 | 0      |
| 24 | Q9UK61 CC063_HUMAN  | R.SSHS#LDYDKDR.V                | S673:      | 3 | 3,6664 | 0,349 | 0      |
| 24 | Q92738 US6NL_HUMAN  | R.RPHGSTLSVSAS#PEK.S            | S680:      | 3 | 3,7092 | 0,461 | -0,224 |
| 24 | Q9UEY8 ADDG_HUMAN   | K.SPEKIEEVLSPEGSPSKS#PSKK.K     | S681:      | 3 | 5,8423 | 0,444 | -0,605 |
| 24 | Q9Y2W1 TR150_HUMAN  | R.RIDISPS#TFRK.H                | S684:      | 2 | 2,6298 | 0,286 | -0,523 |
| 24 | Q12996 CSTF3_HUMAN  | K.RPNEDS#DEDEEKGAVVPPVHDIYR.A   | S691:      | 3 | 4,5922 | 0,358 | -0,707 |
| 24 | P38398 BRCA1_HUMAN  | K.RHDS#DTFPELK.L                | S694:      | 3 | 3,4037 | 0,274 | -0,385 |
| 24 | Q5T3S6 Q5T3S6_HUMAN | R.KRS#FTFGAYGGVVK.S             | S7:        | 3 | 2,7429 | 0,265 | -0,567 |

|    |                     |                                 |            |   |        |       |        |
|----|---------------------|---------------------------------|------------|---|--------|-------|--------|
| 24 | Q9NR30 DDX21_HUMAN  | K.KKAEPSEVDM*NS#PK.S            | S71:       | 3 | 4,2878 | 0,242 | -0,11  |
| 24 | Q96T23 RSF1_HUMAN   | K.KPDS#PPKVLPEPKQEK.T           | S738:      | 3 | 3,3449 | 0,265 | -0,627 |
| 24 | Q96C19 EFHD2_HUMAN  | R.RADLNQGIGEPQS#PSRR.V          | S74:       | 3 | 2,6047 | 0,2   | -0,56  |
| 24 | Q05682 CALD1_HUMAN  | K.TPDGNKS#PAPKPSDLRPGDVSSK.R    | S759:      | 3 | 4,0455 | 0,369 | -0,602 |
| 24 | Q14980 NUMA1_HUMAN  | R.KHPS#SPECLVSAQK.V             | S76:       | 3 | 3,6119 | 0,32  | -0,222 |
| 24 | Q5T200 ZC3HD_HUMAN  | R.RS#PERPTGDLR.E                | S77:       | 2 | 2,036  | 0,136 | -0,895 |
| 24 | Q4LE39 ARI4B_HUMAN  | K.VHADLVISKPVSKS#PER.L          | S778:      | 3 | 3,8179 | 0,419 | -0,565 |
| 24 | Q8TDD1 DDX54_HUMAN  | K.QKIDDRDS#DEEGASDR.R           | S782:      | 2 | 2,0867 | 0,323 | -0,701 |
| 24 | Q99700 ATX2_HUMAN   | K.GIS#PVVSEHRK.Q                | S783:      | 2 | 2,4429 | 0,298 | -0,757 |
| 24 | O14617 AP3D1_HUMAN  | R.NTETSKS#PEKDVPDPM*VEKK.S      | S829:      | 3 | 4,7008 | 0,351 | -0,598 |
| 24 | O60524 SDCG1_HUMAN  | K.KLPS#DSGDLEALEGKDKKEK.E       | S831:      | 3 | 3,6561 | 0,429 | -0,599 |
| 24 | P11137 MAP2_HUMAN   | R.RKS#VPSETVVEDSR.T             | S833:      | 3 | 3,0114 | 0,326 | -0,11  |
| 24 | P46100 ATRX_HUMAN   | R.IPNTKDFDS#S#EDEKHSK.K         | S849:S850: | 3 | 2,7263 | 0,2   | -0,685 |
| 24 | Q9HCM7 AUT2L_HUMAN  | R.DREPHGYS#PER.L                | S864:      | 3 | 3,3698 | 0,375 | 0      |
| 24 | Q9Y520 Q9Y520_HUMAN | R.S#VEDVRPHHTDANNQSACFEAPDQK.T  | S878:      | 3 | 4,3392 | 0,451 | -0,25  |
| 24 | Q6NV74 CB055_HUMAN  | R.SKS#FLITPVKPAVDRK.Q           | S881:      | 3 | 3,3429 | 0,185 | -0,294 |
| 24 | Q9H8G2 CI082_HUMAN  | K.RRS#TDSSSVSGSLQQETK.Y         | S89:       | 3 | 4,2005 | 0,404 | -0,81  |
| 24 | Q9P2M4 TBC14_HUMAN  | R.RKQS#DSDLIPER.A               | S91:       | 3 | 3,5988 | 0,218 | 0,06   |
| 24 | Q8WWQ0 PHIP_HUMAN   | K.KVNEEKDGPIS#PK.K              | S911:      | 2 | 3,2279 | 0,365 | -0,722 |
| 24 | Q6PJG2 CN043_HUMAN  | R.RES#PSEERLEPK.R               | S923:      | 2 | 2,2814 | 0,369 | -0,635 |
| 24 | Q9H2Y7 ZF106_HUMAN  | R.HS#AQLSSDHIIPLM*HLAK.D        | S937:      | 3 | 3,1091 | 0,206 | -0,524 |
| 24 | Q7Z2Z1 CO042_HUMAN  | R.SHS#VSAVDGLEDKLDNFKK.N        | S938:      | 3 | 3,7616 | 0,301 | -0,59  |
| 24 | P05455 LA_HUMAN     | R.RSPS#KPLPEVTDEYKNDVK.N        | S94:       | 3 | 5,0737 | 0,319 | -0,721 |
| 24 | Q8IXM2 CQ049_HUMAN  | R.KVYEDSGIPLAES#PKKGPK.K        | S96:       | 3 | 6,066  | 0,361 | -0,494 |
| 24 | P23193 TCEA1_HUMAN  | K.KKEPAITS#QNSPEAR.E            | S97:       | 2 | 4,0447 | 0,476 | -0,773 |
| 24 | Q9UBB9 TFP11_HUMAN  | K.KGAAEEAELEDS#DDEEKPVKQDDFPK.D | S98:       | 3 | 4,8368 | 0,34  | -0,366 |
| 24 | Q6WCQ1 MRIP_HUMAN   | K.SKS#NPDFLKK.D                 | S992:      | 3 | 3,2922 | 0,264 | -0,294 |
| 24 | Q9Y3B9 RRP15_HUMAN  | K.VLNKKT#PESKPTILVK.N           | T104:      | 3 | 3,3742 | 0,272 | -0,39  |
| 24 | Q5VUA4 ZN318_HUMAN  | K.LQLKEEVKESPT#SSSFGK.F         | T1269:     | 3 | 3,4442 | 0,267 | -0,582 |
| 24 | Q9Y266 NUDC_HUMAN   | K.NGSLDSPGKQDT#EEDEEEDEKDKGK.L  | T145:      | 3 | 4,5104 | 0,457 | -0,512 |
| 24 | Q9H0S4 DDX47_HUMAN  | K.KPHIIIAT#PGR.L                | T149:      | 3 | 5,0272 | 0,464 | -0,071 |
| 24 | Q8N0Y4 CV027_HUMAN  | K.IQQRPLSLT#LRS#.-              | T157:S160: | 3 | 2,7488 | 0,108 | -0,651 |
| 24 | Q96T58 MINT_HUMAN   | K.EVEKQEDTENHPKT#PESAPENK.D     | T1619:     | 3 | 4,0587 | 0,194 | -0,629 |



|    |                    |                                       |            |   |        |       |        |
|----|--------------------|---------------------------------------|------------|---|--------|-------|--------|
| 24 | Q13595 TRA2A_HUMAN | R.AHT#PTPGIYM*GRPTHSGGGGGGGGGGGGGGR.R | T202:      | 3 | 2,9855 | 0,336 | -0,317 |
| 24 | O15173 PGRC2_HUMAN | R.LLKPGEEPSEYT#DEEDTKDHNKQD.-         | T211:      | 3 | 5,6958 | 0,458 | -0,568 |
| 24 | O15173 PGRC2_HUMAN | R.LLKPGEEPSEYT#DEEDTKDHNK.Q           | T211:      | 3 | 4,04   | 0,258 | 0,345  |
| 24 | Q08EQ4 TMSL1_HUMAN | K.KTET#QEKNPLPSKETIEQEK.Q             | T23:       | 3 | 4,1738 | 0,301 | 0,976  |
| 24 | Q9UKX7 NUP50_HUMAN | K.LQQESTFLFHGNKTEDT#PDKK.M            | T246:      | 3 | 3,9238 | 0,178 | -0,288 |
| 24 | P18887 XRCC1_HUMAN | R.KLDLNQEEKKT#PSKPPAQLS#PSVPK.R       | T257:S266: | 3 | 3,1283 | 0,329 | -0,627 |
| 24 | Q5BKZ1 ZN326_HUMAN | K.ISLSKSPT#KTDPKNEEEK.R               | T272:      | 3 | 3,0847 | 0,204 | -0,653 |
| 24 | Q01518 CAP1_HUMAN  | R.SGPKPFSAPKPQT#SPSPKR.A              | T307:      | 3 | 3,0899 | 0,247 | -0,265 |
| 24 | Q13769 THOC5_HUMAN | R.RRPT#LGVQLDDK.R                     | T328:      | 2 | 2,1456 | 0,248 | -0,578 |
| 24 | P46013 KI67_HUMAN  | R.NRT#PAKVEDAADSATKPENLSSK.T          | T401:      | 3 | 3,4782 | 0,351 | -0,729 |
| 24 | P53985 MOT1_HUMAN  | K.KESKEET#S#IDVAGKPNEVTK.A            | T466:S467: | 3 | 6,1705 | 0,367 | -0,591 |
| 24 | Q15910 EZH2_HUMAN  | R.VKESSIAPAPAEDVDT#PPRKK.K            | T487:      | 3 | 5,4924 | 0,514 | -0,226 |
| 24 | Q8WWK9 CKAP2_HUMAN | K.TKDPTHDVKT#PNT#ETR.T                | T579:T582: | 3 | 5,1032 | 0,355 | -0,915 |
| 24 | O60271 JIP4_HUMAN  | K.KRSST#LSQLPGDK.S                    | T595:      | 3 | 4,2298 | 0,391 | 0,061  |
| 24 | Q02952 AKA12_HUMAN | K.GLAEVQQDGEAEEGAT#SDGEKKR.E          | T597:      | 3 | 4,2762 | 0,353 | 0,147  |
| 24 | Q8WVC0 LEO1_HUMAN  | K.KLT#SDEEGPSGKR.K                    | T629:      | 2 | 3,1102 | 0,433 | -0,605 |
| 24 | P19338 NUCL_HUMAN  | K.KVVVSP#KK.V                         | T69:       | 2 | 3,2503 | 0,277 | -0,572 |
| 24 | Q13615 MTMR3_HUMAN | R.RKT#PEASAIGHLQDPELGDAALR.S          | T731:      | 3 | 4,2599 | 0,515 | -0,435 |
| 24 | P12036 NFH_HUMAN   | K.KVPT#PEKEAPAKVEVK.E                 | T911:      | 3 | 4,0215 | 0,339 | -0,8   |
| 24 | O75347 TBCA_HUMAN  | R.ILENEKDLEEAEEYKEAR.L                |            | 3 | 6,1099 | 0,385 | -0,663 |
| 24 | P27348 1433T_HUMAN | R.KQTIDNSQGAYQEAFDISKK.E              |            | 3 | 6,0892 | 0,485 | -0,564 |
| 24 | Q9Y295 DRG1_HUMAN  | K.DHTLEDEDVIQIVKK.-                   |            | 2 | 6,0795 | 0,492 | -0,479 |
| 24 | P13639 EF2_HUMAN   | K.ARPFPDGLAEDIDKGEVSAR.Q              |            | 3 | 6,0521 | 0,497 | -0,598 |
| 24 | O00232 PSD12_HUMAN | R.KGSLESPATDVFSTEEGEKR.W              |            | 3 | 5,7435 | 0,445 | -0,658 |
| 24 | Q13206 DDX10_HUMAN | K.SAIKDAEEDDDTGGINLHK.A               |            | 3 | 5,7175 | 0,509 | -0,271 |
| 24 | Q9Y6Y8 S23IP_HUMAN | K.VANQIKEEEEKQVVEAEK.V                |            | 3 | 5,601  | 0,407 | -0,261 |
| 24 | O00193 SMAP_HUMAN  | R.TGEEDKKINEELESQYQQSM*DSK.L          |            | 3 | 5,4023 | 0,502 | -0,603 |
| 24 | O43684 BUB3_HUMAN  | K.M*HDLNTDQENLVGTHDAPIR.C             |            | 3 | 5,3832 | 0,46  | -0,559 |
| 24 | P62263 RS14_HUMAN  | K.VKADRDESSPYAAM*LAAQDVAQR.C          |            | 3 | 5,3761 | 0,489 | -0,729 |
| 24 | Q02952 AKA12_HUMAN | K.ERPPAPSSFVFQEETKEQSK.M              |            | 3 | 5,3415 | 0,444 | -0,867 |
| 24 | P58546 MTPN_HUMAN  | K.NGDLDEVKDYVAKGEDVNR.T               |            | 3 | 5,2632 | 0,509 | -0,771 |
| 24 | P14625 ENPL_HUMAN  | R.FQSSHPTDITSLDQYVER.M                |            | 3 | 5,1822 | 0,383 | -0,809 |
| 24 | P07355 ANXA2_HUMAN | K.TDLEKDIISDTSGDFRK.L                 |            | 3 | 5,0911 | 0,494 | -0,66  |

|    |                     |                                |   |        |       |        |
|----|---------------------|--------------------------------|---|--------|-------|--------|
| 24 | P49915 GUAA_HUMAN   | R.GLQKEEVLLTHGDSVDK.V          | 3 | 5,0719 | 0,419 | -0,744 |
| 24 | O60573 IF4E2_HUMAN  | K.FDALKDDDDSGDHDQNEENSTQK.D    | 3 | 5,0493 | 0,44  | -0,146 |
| 24 | Q08J23 NSUN2_HUMAN  | K.KKEGVILTNEAASTGQPDNDVTEGQR.A | 3 | 5,0196 | 0,438 | -0,193 |
| 24 | P43487 RANG_HUMAN   | K.LEALSVKEETKEDAEKQ.-          | 3 | 5,0006 | 0,441 | 0      |
| 24 | P08670 VIME_HUMAN   | K.TVETRDGQVINETSQHHDDLE.-      | 3 | 4,9499 | 0,411 | -0,453 |
| 24 | P42166 LAP2A_HUMAN  | K.DKLKSELVANNVTLPAGEQR.K       | 3 | 4,9242 | 0,268 | -0,587 |
| 24 | P60866 RS20_HUMAN   | K.DTGKTPVEPEVAIHR.I            | 3 | 4,9129 | 0,448 | 0      |
| 24 | Q9Y2X3 NOL5_HUMAN   | K.VKVEEEEEKVAEEETSVK.K         | 3 | 4,8892 | 0,43  | -0,701 |
| 24 | P05387 RLA2_HUMAN   | K.KILDSVGIEADDDRLNK.V          | 3 | 4,8883 | 0,471 | -0,289 |
| 24 | O15027 SC16A_HUMAN  | K.DDTHKVDVINFAQNK.A            | 3 | 4,8458 | 0,404 | -0,21  |
| 24 | P63220 RS21_HUMAN   | K.DHASIQM*NVAEVDKVTGR.F        | 3 | 4,773  | 0,631 | -0,461 |
| 24 | P52565 GDIR1_HUMAN  | K.SIQEIQLDKDDESLRK.Y           | 3 | 4,7513 | 0,329 | -0,626 |
| 24 | Q02952 AKA12_HUMAN  | R.AEAERPEEQAEASGLKK.E          | 3 | 4,6845 | 0,411 | -0,595 |
| 24 | P56537 IF6_HUMAN    | R.HGLLVPNNTDQELQHIR.N          | 3 | 4,6514 | 0,465 | -0,702 |
| 24 | P11940 PABP1_HUMAN  | R.SKVDEAVAVLQAHQAK.E           | 3 | 4,5547 | 0,492 | -0,432 |
| 24 | P63241 IF5A1_HUMAN  | K.KYEDICPSTHNM*DVPNIK.R        | 3 | 4,5494 | 0,318 | -0,504 |
| 24 | P22087 FBRL_HUMAN   | R.DHAVVVGYYRPPPK.V             | 2 | 4,4514 | 0,586 | -0,557 |
| 24 | P38646 GRP75_HUMAN  | K.ERVEAVNM*AEGIIHDTETK.M       | 3 | 4,4264 | 0,268 | -0,763 |
| 24 | Q02790 FKBP4_HUMAN  | K.DKFSFDLGKGEVIK.A             | 2 | 4,3358 | 0,417 | -0,848 |
| 24 | Q8TAQ2 SMRC2_HUMAN  | K.EGQEEVLKEVVESEGERK.T         | 3 | 4,3327 | 0,352 | -0,529 |
| 24 | O76021 RL1D1_HUMAN  | R.KTASVLSKDDVAPESGDTTVK.K      | 3 | 4,31   | 0,395 | -0,17  |
| 24 | P20042 IF2B_HUMAN   | K.KKPFM*LDEEGDTQTEETQPSETK.E   | 3 | 4,2967 | 0,36  | -0,545 |
| 24 | Q00610 CLH1_HUMAN   | R.ALEHFTDLYDIKR.A              | 3 | 4,292  | 0,377 | -0,338 |
| 24 | Q9BYG3 MK67I_HUMAN  | R.KSQVAELNDDDKDDEIVFK.Q        | 3 | 4,2853 | 0,322 | -0,497 |
| 24 | Q9BRQ6 CHCH6_HUMAN  | R.DRPHEVLLCSDLVK.A             | 3 | 4,2601 | 0,141 | -0,326 |
| 24 | Q9Y448 T4AF1_HUMAN  | K.SEEELKDKNQLLEAVNK.Q          | 3 | 4,2428 | 0,445 | -0,552 |
| 24 | P08238 HS90B_HUMAN  | K.HLEINPDHPIVETLR.Q            | 3 | 4,2415 | 0,518 | -0,615 |
| 24 | Q2QD06 Q2QD06_HUMAN | R.ALKDEEKM*ELQELQLK.E          | 2 | 4,2354 | 0,25  | -0,622 |
| 24 | P63241 IF5A1_HUMAN  | R.EDLRLPEGLDGKEIEQK.Y          | 2 | 4,1965 | 0,417 | -0,62  |
| 24 | P05387 RLA2_HUMAN   | K.KILDSVGIEADDDRLNK.V          | 2 | 4,1921 | 0,544 | -0,578 |
| 24 | P11142 HSP7C_HUMAN  | K.LDKSQIHDIVLVGGSTR.I          | 3 | 4,1694 | 0,347 | -0,498 |
| 24 | P07951 TPM2_HUMAN   | K.GTEDEVEKYSVKEAQEK.L          | 3 | 4,1428 | 0,433 | -0,502 |
| 24 | Q15185 TEBP_HUMAN   | K.HLNEIDLFCIDPNDSK.H           | 3 | 4,119  | 0,347 | -0,531 |

|    |                     |                               |   |        |       |        |
|----|---------------------|-------------------------------|---|--------|-------|--------|
| 24 | Q02952 AKA12_HUMAN  | K.DKTEKPDTVQLLTVK.K           | 2 | 4,1033 | 0,492 | -0,64  |
| 24 | P22087 FBRL_HUMAN   | R.DHAVVGVYRPPPK.V             | 3 | 4,0818 | 0,41  | -0,238 |
| 24 | Q6NVY1 HIBCH_HUMAN  | K.SPSKENIASVLENYHTESK.I       | 3 | 4,0759 | 0,291 | -0,172 |
| 24 | O75937 DNJC8_HUMAN  | K.KEGKPTIVEEDDPELFK.Q         | 3 | 4,0401 | 0,327 | -0,463 |
| 24 | Q8N328 PGBD3_HUMAN  | K.DHIDKVPLESDVALK.K           | 3 | 4,0273 | 0,391 | 0      |
| 24 | P09493 TPM1_HUMAN   | K.GTEDELDKYSEALKDAQEK.L       | 3 | 4,026  | 0,452 | -0,675 |
| 24 | Q13283 G3BP1_HUMAN  | K.NSSYVHGGLDSNGKPADAVYGQK.E   | 3 | 3,9866 | 0,269 | -0,387 |
| 24 | Q8NAV1 PR38A_HUMAN  | K.DAHSIHGTNPQYLVEK.I          | 3 | 3,9826 | 0,382 | -0,506 |
| 24 | P05556 ITB1_HUMAN   | R.DKLPQPVQDPVSHCK.E           | 3 | 3,9762 | 0,296 | -0,397 |
| 24 | Q2QD06 Q2QD06_HUMAN | R.ALKDEEKM*ELQELQLK.E         | 3 | 3,9443 | 0,315 | -0,56  |
| 24 | Q6PJT7 ZC3HE_HUMAN  | R.HEAAVPLAIP SARPEK.R         | 3 | 3,9414 | 0,303 | -0,513 |
| 24 | P08238 HS90B_HUMAN  | K.HLEINPDHPIVETLR.Q           | 2 | 3,9406 | 0,351 | -0,753 |
| 24 | A8MZB9 A8MZB9_HUMAN | K.KLFVGGIKEDTEEYNLR.D         | 3 | 3,9339 | 0,307 | -0,546 |
| 24 | P62258 1433E_HUMAN  | K.LAEQAERYDEM*VESM*KK.V       | 3 | 3,9217 | 0,304 | 0,263  |
| 24 | P17661 DESM_HUMAN   | R.TNEKVELQELNDR.F             | 3 | 3,908  | 0,415 | 0,115  |
| 24 | Q3MI39 Q3MI39_HUMAN | -.DDHDSVDKIVIQK.Y             | 3 | 3,8968 | 0,387 | 0      |
| 24 | Q13619 CUL4A_HUMAN  | K.DKDM*VQDLLDFDK.V            | 3 | 3,893  | 0,143 | -0,53  |
| 24 | P09493 TPM1_HUMAN   | R.AQKDEEKM*EIQEIQLK.E         | 3 | 3,8772 | 0,238 | -0,463 |
| 24 | Q06830 PRDX1_HUMAN  | K.KQGGLGPM*NIPLVSDPKR.T       | 3 | 3,8727 | 0,301 | -0,476 |
| 24 | P04181 OAT_HUMAN    | R.DNGLLAKPTHGDIIR.F           | 2 | 3,8654 | 0,412 | -0,602 |
| 24 | P08670 VIME_HUMAN   | R.KVESLQEEIAFLKK.L            | 2 | 3,851  | 0,13  | -0,587 |
| 24 | P35998 PRS7_HUMAN   | K.LREVVETPLLHPER.F            | 3 | 3,8351 | 0,123 | -0,433 |
| 24 | Q9H900 ZWILC_HUMAN  | K.DTEVETLKHDTAAVDR.S          | 3 | 3,8349 | 0,454 | -0,508 |
| 24 | P13010 KU86_HUMAN   | K.KDEKDTLEDLFPPTK.I           | 3 | 3,8181 | 0,316 | -0,583 |
| 24 | P52272 HNRPM_HUMAN  | K.DKFNECGHVLYADIK.M           | 2 | 3,8164 | 0,485 | -0,674 |
| 24 | Q13464 ROCK1_HUMAN  | K.AEEYKLEKEEEEISNLK.A         | 3 | 3,8055 | 0,506 | 0,088  |
| 24 | Q9UPN3 MACF1_HUMAN  | K.DAYRPTDADKIEDEVTR.Q         | 3 | 3,7994 | 0,253 | -0,524 |
| 24 | Q00688 FKBP3_HUMAN  | K.DHLVTAYNHLFETK.R            | 2 | 3,7729 | 0,452 | -0,651 |
| 24 | Q15019 SEPT2_HUMAN  | R.KVENEDM*NKDQILLEK.E         | 3 | 3,7626 | 0,246 | -0,559 |
| 24 | P50579 AMPM2_HUMAN  | K.SKGPSAAGEQEPDKESGASVDEVAR.Q | 3 | 3,756  | 0,427 | -0,658 |
| 24 | Q00839 HNRPU_HUMAN  | K.HAAENPGKYNILGTNTIM*DK.M     | 3 | 3,7398 | 0,321 | -0,664 |
| 24 | Q00688 FKBP3_HUMAN  | K.DHLVTAYNHLFETK.R            | 3 | 3,7265 | 0,322 | -0,542 |
| 24 | P05455 LA_HUMAN     | R.SPSKPLPEVTDEYKNDVK.N        | 3 | 3,7228 | 0,381 | -0,447 |

|    |                    |                              |   |        |       |        |
|----|--------------------|------------------------------|---|--------|-------|--------|
| 24 | Q00688 FKBP3_HUMAN | K.FLQEHGSDSFLAEHK.L          | 3 | 3,7216 | 0,255 | -0,524 |
| 24 | P09874 PARP1_HUMAN | K.GFSLLATEDKEALKK.Q          | 2 | 3,7208 | 0,458 | -0,592 |
| 24 | Q9H910 HN1L_HUMAN  | K.DHVFLCEGEEPKSDLK.A         | 3 | 3,6941 | 0,399 | -0,577 |
| 24 | O75955 FLOT1_HUMAN | K.DIHDDQDYLHSLGK.A           | 2 | 3,6918 | 0,574 | -0,589 |
| 24 | Q86UP2 KTN1_HUMAN  | K.DKLLAAVKEDAAATK.D          | 2 | 3,6873 | 0,468 | -1,185 |
| 24 | P67936 TPM4_HUMAN  | R.AM*KDEEKM*EIQEM*QLK.E      | 3 | 3,6738 | 0,465 | -0,541 |
| 24 | P43490 NAMPT_HUMAN | K.DVYKEHFQDDVFNEK.G          | 3 | 3,669  | 0,302 | -0,382 |
| 24 | Q9BUJ2 HNRL1_HUMAN | R.KAIVICPTDEDLKDR.T          | 3 | 3,6556 | 0,357 | -0,206 |
| 24 | Q8N8S7 ENAH_HUMAN  | K.GSTIETEQQEKDGEDSEPVTSK.A   | 3 | 3,6536 | 0,231 | -0,535 |
| 24 | Q9P258 RCC2_HUMAN  | R.DVACGANHTLVLDSQKR.V        | 3 | 3,6189 | 0,439 | -0,583 |
| 24 | Q9BPW8 NIPS1_HUMAN | K.NNKEYLEFR.R                | 3 | 3,6031 | 0,271 | -0,151 |
| 24 | Q00610 CLH1_HUMAN  | R.KVSQPIEGHAASFAQFK.M        | 3 | 3,5707 | 0,35  | -0,694 |
| 24 | Q9ULV4 COR1C_HUMAN | K.KTTDTASVQNEAKLDEILK.E      | 3 | 3,5666 | 0,243 | -0,696 |
| 24 | Q9H9Y6 RPA2_HUMAN  | R.DALLAHGTSFLLHDR.L          | 3 | 3,5605 | 0,501 | -0,549 |
| 24 | Q9Y696 CLIC4_HUMAN | K.NSRPEANEALER.G             | 3 | 3,5537 | 0,239 | 0      |
| 24 | Q8IZP0 ABI1_HUMAN  | R.KPIDYTVLDDVGHGVK.W         | 3 | 3,5498 | 0,381 | -0,521 |
| 24 | O15269 SPTC1_HUMAN | K.DHPALNYNIVSGPPSHK.T        | 3 | 3,5362 | 0,342 | -0,793 |
| 24 | Q14839 CHD4_HUMAN  | K.IEENSLKEEESIEGEKEVK.S      | 3 | 3,5313 | 0,164 | 0      |
| 24 | Q9P2T1 GMPR2_HUMAN | K.TVEVPFKGDVEHTIR.D          | 3 | 3,5272 | 0,258 | -0,318 |
| 24 | Q9BUJ2 HNRL1_HUMAN | R.TDEEGKDVDPHAVLEM*K.A       | 3 | 3,5177 | 0,395 | 0,095  |
| 24 | P12956 KU70_HUMAN  | R.QIILEKEETEELKR.F           | 3 | 3,4996 | 0,368 | -0,312 |
| 24 | P61353 RL27_HUMAN  | K.NIDDGTSDRPYSHALVAGIDR.Y    | 3 | 3,4973 | 0,267 | -0,644 |
| 24 | Q8N3C0 HELC1_HUMAN | K.DHVFSSM*VESELHAAK.T        | 3 | 3,497  | 0,278 | -0,507 |
| 24 | O15027 SC16A_HUMAN | K.DDTHKVDVINFAQNK.A          | 2 | 3,4892 | 0,47  | -0,35  |
| 24 | Q9NV70 EXOC1_HUMAN | K.DAIKENPEFDLHFEK.I          | 3 | 3,4805 | 0,317 | -0,699 |
| 24 | P35579 MYH9_HUMAN  | K.TLEEEAKTHEAQIQEM*R.Q       | 3 | 3,479  | 0,259 | -0,444 |
| 24 | Q9Y295 DRG1_HUMAN  | K.DHTLEDEDVIQIVKK.-          | 3 | 3,4708 | 0,384 | -0,411 |
| 24 | P12956 KU70_HUMAN  | K.VEYSEELKTHISK.G            | 2 | 3,4541 | 0,438 | -0,361 |
| 24 | O43395 PRPF3_HUMAN | K.AADHLKPFLLDSTLR.F          | 3 | 3,4138 | 0,362 | -0,431 |
| 24 | Q9Y490 TLN1_HUMAN  | K.SKDHFGLEGDEESTM*LEDSVSPK.K | 3 | 3,4019 | 0,311 | -0,573 |
| 24 | Q9P0L0 VAPA_HUMAN  | K.QDGPM*PKPHSVSLNDTETR.K     | 3 | 3,3985 | 0,447 | -0,344 |
| 24 | P23919 KTHY_HUMAN  | K.SDVEDHSVHLLFSANR.W         | 3 | 3,3935 | 0,465 | -0,301 |
| 24 | Q86UP2 KTN1_HUMAN  | K.NGSDDQDKKVETLM*VPSK.R      | 3 | 3,3748 | 0,307 | 0,091  |

|    |                    |                           |   |        |       |        |
|----|--------------------|---------------------------|---|--------|-------|--------|
| 24 | Q00610 CLH1_HUMAN  | R.ALEHFTDLYDIKR.A         | 2 | 3,3709 | 0,372 | -0,828 |
| 24 | P43490 NAMPT_HUMAN | K.DVYKEHFQDDVFNK.G        | 2 | 3,3658 | 0,369 | -0,51  |
| 24 | Q16643 DREB_HUMAN  | K.KSESEVEEAAAIIAQRPDNPR.E | 3 | 3,3558 | 0,431 | -0,792 |
| 24 | Q13098 CSN1_HUMAN  | R.GHDDLGDHYLDCGDLNALK.C   | 3 | 3,3508 | 0,286 | -0,743 |
| 24 | P43304 GPDM_HUMAN  | K.DKLVGAIVVYDQGHNDA.R.M   | 3 | 3,3453 | 0,285 | -0,54  |
| 24 | Q15833 STXB2_HUMAN | R.KGPEDTAQLAHAVLAK.L      | 3 | 3,3341 | 0,269 | -0,333 |
| 24 | Q15019 SEPT2_HUMAN | R.YLHDESGLNR.R            | 3 | 3,3265 | 0,223 | 0,152  |
| 24 | P23284 PIIB_HUMAN  | R.DKPLKDVIIADCGK.I        | 3 | 3,3061 | 0,207 | -0,116 |
| 24 | O15355 PPM1G_HUMAN | K.ELAQIAGRPTEDEDEKEK.V    | 3 | 3,2873 | 0,274 | -0,444 |
| 24 | Q13200 PSMD2_HUMAN | K.DTSLYRPALEELRR.Q        | 3 | 3,2773 | 0,293 | -0,426 |
| 24 | P11234 RALB_HUMAN  | R.VKAEEDKIPLLVVGNK.S      | 3 | 3,2713 | 0,236 | -0,418 |
| 24 | P20042 IF2B_HUMAN  | K.KIFDIDEAEEGVKDLK.I      | 3 | 3,2584 | 0,268 | -0,495 |
| 24 | P08670 VIME_HUMAN  | R.KVESLQEEIAFLKK.L        | 3 | 3,2541 | 0,196 | -0,44  |
| 24 | O15269 SPTC1_HUMAN | K.DHPALNYNIVSGPPSHK.T     | 2 | 3,25   | 0,488 | -1,124 |
| 24 | Q92922 SMRC1_HUMAN | R.VREEVPLELVEAHVK.K       | 3 | 3,2388 | 0,119 | -0,628 |
| 24 | Q10567 AP1B1_HUMAN | R.VDKITEYLCEPLRK.C        | 3 | 3,236  | 0,276 | -0,933 |
| 24 | P13639 EF2_HUMAN   | K.DLEEDHACIPIKK.S         | 2 | 3,2317 | 0,298 | -0,7   |
| 24 | P05198 IF2A_HUMAN  | R.VSPEEAIKCEDKFTK.S       | 2 | 3,2198 | 0,34  | -0,685 |
| 24 | Q969G3 SMCE1_HUMAN | K.SRAEAALEEEESR.Q         | 3 | 3,2112 | 0,237 | 0,475  |
| 24 | P42677 RS27_HUMAN  | K.DLLHPSPEEEKR.K          | 3 | 3,2007 | 0,321 | -0,378 |
| 24 | Q9H814 RNUXA_HUMAN | K.DLDKELDEYM*HGGK.K       | 3 | 3,1894 | 0,394 | -0,329 |
| 24 | P21333 FLNA_HUMAN  | R.TGVELGKPTHFTVNAK.A      | 3 | 3,1699 | 0,342 | -0,108 |
| 24 | Q5VUA4 ZN318_HUMAN | K.DIAELRQEAEAEKK.Q        | 3 | 3,1623 | 0,338 | 0      |
| 24 | P04181 OAT_HUMAN   | R.DNGLLAKPTHGDIIR.F       | 3 | 3,1575 | 0,33  | -0,452 |
| 24 | P21333 FLNA_HUMAN  | R.DVDIIDHHDNTYTVK.Y       | 2 | 3,1293 | 0,452 | -1,162 |
| 24 | Q86XP3 DDX42_HUMAN | R.ERPGLGSENM*DR.G         | 3 | 3,1153 | 0,267 | -0,133 |
| 24 | P06753 TPM3_HUMAN  | R.KLVIIEGDLERTEER.A       | 3 | 3,1124 | 0,337 | -0,61  |
| 24 | O75351 VPS4B_HUMAN | R.SLSNTKPTVNEHDLK.L       | 3 | 3,1121 | 0,211 | -0,204 |
| 24 | Q99961 SH3G1_HUMAN | K.VGGAEGTKLDDDFKEM*EK.K   | 3 | 3,1115 | 0,276 | -0,184 |
| 24 | Q8TB72 PUM2_HUMAN  | R.DLIGHIVEFSQDQHGSR.F     | 3 | 3,0895 | 0,357 | -0,661 |
| 24 | O95239 KIF4A_HUMAN | R.HLNDLLEDK.R             | 2 | 3,0858 | 0,406 | -0,542 |
| 24 | P02545 LMNA_HUMAN  | R.KLLEGEER.L              | 2 | 3,08   | 0,24  | -0,332 |
| 24 | P34931 HS71L_HUMAN | K.YKAEDEVQR.E             | 2 | 3,0776 | 0,387 | -0,536 |

|    |                    |                          |   |        |       |        |
|----|--------------------|--------------------------|---|--------|-------|--------|
| 24 | P21283 VATC1_HUMAN | R.DFQYNEEEM*KADKEEM*NR.L | 3 | 3,0746 | 0,245 | -0,704 |
| 24 | P53985 MOT1_HUMAN  | K.ESKEEETSIDVAGKPNEVTK.A | 3 | 3,0705 | 0,296 | -0,418 |
| 24 | O95486 SC24A_HUMAN | K.DIHM*TPSTDFYKK.L       | 3 | 3,0378 | 0,302 | 0,343  |
| 24 | Q92688 AN32B_HUMAN | K.KLELSENR.I             | 2 | 3,0346 | 0,099 | 0,247  |
| 24 | Q14019 COTL1_HUMAN | K.ELEEDFIKSELKK.A        | 2 | 3,0343 | 0,236 | -0,455 |
| 24 | Q5JRA6 MIA3_HUMAN  | K.DSDYLKNDNPEEHLK.T      | 3 | 3,0283 | 0,19  | -0,201 |
| 24 | P16949 STMN1_HUMAN | K.NKESKDPADETEAD.-       | 2 | 3,0256 | 0,4   | -0,473 |
| 24 | Q8WU90 ZC3HF_HUMAN | K.HFLEAIENNK.Y           | 2 | 3,0076 | 0,278 | -0,402 |
| 24 | P12270 TPR_HUMAN   | K.NKELEIAQDR.N           | 2 | 3,0045 | 0,262 | -0,702 |
| 24 | Q02790 FKBP4_HUMAN | K.AEASSGDHPTDTEM*KEEQK.S | 3 | 2,9914 | 0,456 | -0,608 |
| 24 | Q9Y608 LRRF2_HUMAN | K.TAAENAEKVEDELKAEK.R    | 3 | 2,9817 | 0,26  | -0,683 |
| 24 | O00567 NOL5A_HUMAN | R.ELNEDKLEKLEELTM*DGAK.A | 3 | 2,976  | 0,301 | -0,659 |
| 24 | Q07666 KHDR1_HUMAN | K.KDDEENYLDLFSHK.N       | 3 | 2,9757 | 0,229 | -0,522 |
| 24 | P63220 RS21_HUMAN  | K.DHASIQM*NVAEVDKVTGR.F  | 2 | 2,9708 | 0,526 | -0,553 |
| 24 | Q2M2I8 AAK1_HUMAN  | R.DLKVENILLHDR.G         | 3 | 2,9703 | 0,332 | -0,374 |
| 24 | P38117 ETFB_HUMAN  | K.KIEVIKPGDLGVDLTSK.L    | 3 | 2,9685 | 0,172 | -0,505 |
| 24 | Q02952 AKA12_HUMAN | K.DKTEKPTVQLLTVK.K       | 3 | 2,9659 | 0,204 | -0,213 |
| 24 | Q86UE4 LYRIC_HUMAN | R.KREEAAVPAAPDDLALLK.N   | 3 | 2,9272 | 0,11  | -0,625 |
| 24 | Q9H910 HN1L_HUMAN  | K.DHVFLCEGEEPKSDLK.A     | 2 | 2,913  | 0,372 | -0,577 |
| 24 | Q2PZI1 D19L1_HUMAN | K.DSKPHFTTVFQNSVYK.V     | 3 | 2,8978 | 0,325 | 0,385  |
| 24 | Q12996 CSTF3_HUMAN | R.DYNKYEEGINIHLAK.K      | 3 | 2,8934 | 0,25  | -0,405 |
| 24 | O95487 SC24B_HUMAN | R.DSRPLSPILHIVK.D        | 3 | 2,8736 | 0,255 | -0,372 |
| 24 | P26639 SYTC_HUMAN  | K.DSKPIKVTLPDGK.Q        | 3 | 2,859  | 0,285 | 0,065  |
| 24 | POC0S8 H2A1_HUMAN  | R.NDEELNKLLGK.V          | 2 | 2,8324 | 0,327 | -0,671 |
| 24 | P12956 KU70_HUMAN  | R.QIILEKEETEELKR.F       | 2 | 2,8303 | 0,381 | -0,486 |
| 24 | P05787 K2C8_HUMAN  | R.TKTEISEM*NR.N          | 3 | 2,8232 | 0,267 | 0,075  |
| 24 | P07951 TPM2_HUMAN  | R.AM*KDEEKM*ELQEM*QLK.E  | 3 | 2,8173 | 0,383 | -0,631 |
| 24 | P60842 IF4A1_HUMAN | R.DFTVSAM*HGDM*DQKER.D   | 2 | 2,8045 | 0,334 | -0,45  |
| 24 | Q02790 FKBP4_HUMAN | K.DKFSFDLGKGEVIK.A       | 3 | 2,7862 | 0,311 | -0,693 |
| 24 | Q9Y512 SAM50_HUMAN | K.DVVVQHVFHFDGLGR.T      | 3 | 2,7829 | 0,328 | -0,348 |
| 24 | P78406 RAE1L_HUMAN | K.DKQNKPTGFALGSIAGR.V    | 3 | 2,7675 | 0,226 | -0,604 |
| 24 | Q8IY18 SMC5_HUMAN  | K.DKHIEELQALIVK.Q        | 3 | 2,7664 | 0,184 | -0,44  |
| 24 | P83881 RL36A_HUMAN | K.HFELGGDK.K             | 2 | 2,7597 | 0,249 | 0,068  |

|    |                    |                        |   |        |       |        |
|----|--------------------|------------------------|---|--------|-------|--------|
| 24 | Q13838 UAP56_HUMAN | K.HFILDECDK.M          | 2 | 2,7511 | 0,285 | -0,415 |
| 24 | P35580 MYH10_HUMAN | K.DKADFCIIHYAGK.V      | 3 | 2,7416 | 0,26  | -0,119 |
| 24 | P13010 KU86_HUMAN  | K.KDEKTDLTLEDLFPPTK.I  | 2 | 2,7401 | 0,441 | -0,584 |
| 24 | Q71UM5 RS27L_HUMAN | R.DLLHPSLEEEKK.K       | 3 | 2,7322 | 0,351 | -0,064 |
| 24 | Q58FF7 H90B3_HUMAN | K.EGLELPEDEEEKKK.M     | 2 | 2,7316 | 0,342 | -0,365 |
| 24 | P78527 PRKDC_HUMAN | R.HNLEIHK.T            | 2 | 2,7307 | 0,211 | -0,352 |
| 24 | Q6NUK1 SCMC1_HUMAN | K.HEGLGAFYK.G          | 2 | 2,7273 | 0,398 | -0,358 |
| 24 | O95049 ZO3_HUMAN   | K.DKHALLDVTPSAIER.L    | 3 | 2,7145 | 0,124 | -0,659 |
| 24 | O75531 BAF_HUMAN   | K.KDEDLFR.E            | 2 | 2,713  | 0,27  | -0,198 |
| 24 | P60842 IF4A1_HUMAN | R.DFTVSAM*HGDM*DQKER.D | 3 | 2,7019 | 0,342 | -0,771 |
| 24 | P60981 DEST_HUMAN  | K.HECQANGPEDLNR.A      | 3 | 2,6998 | 0,182 | 0      |
| 24 | O75937 DNJC8_HUMAN | R.QLSILVHPDKNQDDADR.A  | 3 | 2,6958 | 0,241 | -0,373 |
| 24 | P62805 H4_HUMAN    | R.DAVTYTEHAK.R         | 2 | 2,6899 | 0,274 | -0,215 |
| 24 | Q92600 RCD1_HUMAN  | K.DTTFAQVLKDDTTTKR.W   | 3 | 2,6845 | 0,305 | -0,696 |
| 24 | O75582 KS6A5_HUMAN | R.DADEIKEHLFFQK.I      | 3 | 2,6642 | 0,283 | -1,016 |
| 24 | P62736 ACTA_HUMAN  | K.DSYVGDEAQSQR.G       | 2 | 2,6565 | 0,357 | -0,72  |
| 24 | P17987 TCPA_HUMAN  | K.DDKHGSYEDAVHSGALND.- | 2 | 2,655  | 0,405 | -0,19  |
| 24 | P61916 NPC2_HUMAN  | K.DKTYSYLNKLPVK.S      | 3 | 2,6503 | 0,138 | 0      |
| 24 | P34931 HS71L_HUMAN | R.LSKEEIER.M           | 2 | 2,6495 | 0,112 | -0,547 |
| 24 | Q13619 CUL4A_HUMAN | K.DM*ELSKDIM*VHFK.Q    | 3 | 2,6356 | 0,271 | -0,45  |
| 24 | P21333 FLNA_HUMAN  | R.DVDIIDHHDNTYTVK.Y    | 3 | 2,6128 | 0,182 | -0,717 |
| 24 | P0C0S8 H2A1_HUMAN  | R.HLQLAIR.N            | 2 | 2,6125 | 0,138 | 0,143  |
| 24 | P07900 HS90A_HUMAN | K.LGIHEDSQNR.K         | 2 | 2,6071 | 0,238 | -0,626 |
| 24 | Q02878 RL6_HUMAN   | K.HLTDAYFK.K           | 2 | 2,5961 | 0,384 | -0,184 |
| 24 | Q15785 TOM34_HUMAN | K.NRVPSAGDVEK.A        | 2 | 2,5597 | 0,263 | -0,729 |
| 24 | P31949 S10AB_HUMAN | K.NQKDPGVLDR.M         | 2 | 2,5469 | 0,242 | -0,427 |
| 24 | Q00610 CLH1_HUMAN  | K.HELIEFR.R            | 2 | 2,5364 | 0,31  | -0,065 |
| 24 | Q9Y3D7 TIM16_HUMAN | K.NYEHLFK.V            | 2 | 2,5277 | 0,174 | -0,064 |
| 24 | P52565 GDIR1_HUMAN | K.SIQEIQELDKDDESLRK.Y  | 2 | 2,5079 | 0,291 | -0,477 |
| 24 | P62136 PP1A_HUMAN  | K.HDLDLICR.A           | 2 | 2,5006 | 0,409 | -0,234 |
| 24 | P21127 CD2L1_HUMAN | R.DRLEQLER.K           | 2 | 2,482  | 0,113 | -0,115 |
| 24 | P37235 HPCL1_HUMAN | K.DCPTGHLTVDEFKK.I     | 2 | 2,4696 | 0,132 | -0,741 |
| 24 | Q14764 MVP_HUMAN   | R.HADLEIR.L            | 2 | 2,4636 | 0,227 | -0,214 |

|    |                    |                         |   |        |       |        |
|----|--------------------|-------------------------|---|--------|-------|--------|
| 24 | P60866 RS20_HUMAN  | K.DTGKTPVEPEVAIHR.I     | 2 | 2,4533 | 0,353 | -0,518 |
| 24 | Q13813 SPTA2_HUMAN | K.KFDDFQK.D             | 2 | 2,453  | 0,211 | 0      |
| 24 | Q58FF8 H90B2_HUMAN | K.AKFENLCK.F            | 2 | 2,3959 | 0,277 | 0,06   |
| 24 | P58546 MTPN_HUMAN  | K.NGDLDEVKDYVAKGEDVNR.T | 2 | 2,3922 | 0,245 | -0,457 |
| 24 | P07355 ANXA2_HUMAN | K.TDLEKDIISDTSGDFRK.L   | 2 | 2,3143 | 0,463 | -0,692 |
| 24 | Q92878 RAD50_HUMAN | K.DIENYIQDGKDDYKK.Q     | 2 | 2,3131 | 0,243 | -0,529 |
| 24 | Q9BRQ6 CHCH6_HUMAN | R.DRPHEVLLCSDLVK.A      | 2 | 2,2595 | 0,224 | -0,653 |
| 24 | Q96A65 EXOC4_HUMAN | K.REEEEDFIR.A           | 2 | 2,2345 | 0,234 | 0,2    |
| 24 | P62906 RL10A_HUMAN | K.AVDIPHM*DIEALKK.L     | 2 | 2,2334 | 0,15  | -0,229 |
| 24 | P62826 RAN_HUMAN   | R.HLTGEFEK.K            | 2 | 2,1357 | 0,221 | -0,254 |
| 24 | P12268 IMDH2_HUMAN | R.VRDVFEAK.A            | 2 | 2,1281 | 0,136 | -0,127 |
| 24 | P08670 VIME_HUMAN  | R.ETNLDSLPLVDTHSKR.T    | 2 | 2,0645 | 0,309 | -0,602 |
| 24 | Q14152 EIF3A_HUMAN | R.NADDDRIPR.R           | 2 | 2,046  | 0,142 | -0,114 |
| 24 | Q9Y5S9 RBM8A_HUMAN | K.NIHLNLDR.R            | 2 | 2,0201 | 0,235 | 0,184  |
